# Supplementary material
Source: PubMed Central journal article supplement (PMC7196578)

## Supplemental Data

“Phosphotyrosine-based phosphoproteomics for target identification and drug response prediction in AML cell lines”

*Carolien van Alphen, Jacqueline Cloos, Robin Beekhof, David G.J. Cucchi, Sander R. Piersma, Jaco C. Knol, Alex Henneman, Thang V. Pham, Johan van Meerloo, Gert J. Ossenkoppele, Henk M.W. Verheul, Jeroen J.W.M. Janssen, and Connie R. Jimenez*

### **Supplemental Figures (pages)**

- Figure S1 (S-2): Overall levels of phosphotyrosine (pY) detected on western blot and numbers of pY phosphopeptides identified by phosphoproteomics show a general correlation.
- Figure S2 (S-3): Clustering and outlier analysis of phosphoproteomic data on protein kinases in an AML cell line panel.
- Figure S3 (S-4-20): Summaries of phosphoproteomic and pharmacological analyses of a panel of AML cell lines.
- Figure S4 (S-21): Drug response curves for quizartinib, ponatinib, and ibrutinib.
- Figure S5 (S-22): Comparison of cell line sensitivity to KIs targeting INKA-identified drivers and those with other targets.
- Figure S6 (S-23-24): Summary of phosphoproteomic analysis of blood sample from AML patients.
- Figure S7 (S-25): Comparison between FLT3-ITD mutant cell line data and FLT3-ITD mutant patient data.
- Figure S8 (S-26-1684): Annotated MS/MS spectra of phosphopeptides identified in AML cell lines.
- Figure S9 (S-1685-1949): Annotated MS/MS spectra of phosphopeptides identified in AML patient samples.

### **Supplemental Tables (separate Excel files)**

- Supplemental Table S1: (Phospho)peptide and protein identification data.
- Supplemental Table S2: Kinase inhibitor target space analysis.
- Supplemental Table S3: List of AML signaling associated genes.
- Supplemental Table S4: Supporting information for EC50 comparison of KIs targeting identified cell line drivers and those with other targets.
- Supplemental Table S5: Summary of AML cell line analysis results.
- Supplemental Table S6: Overview of AML cell line aberrations.
- Supplemental Table S7: Overview of AML patient sample aberrations.
- Supplemental Table S8: Summary of AML patient analysis results.

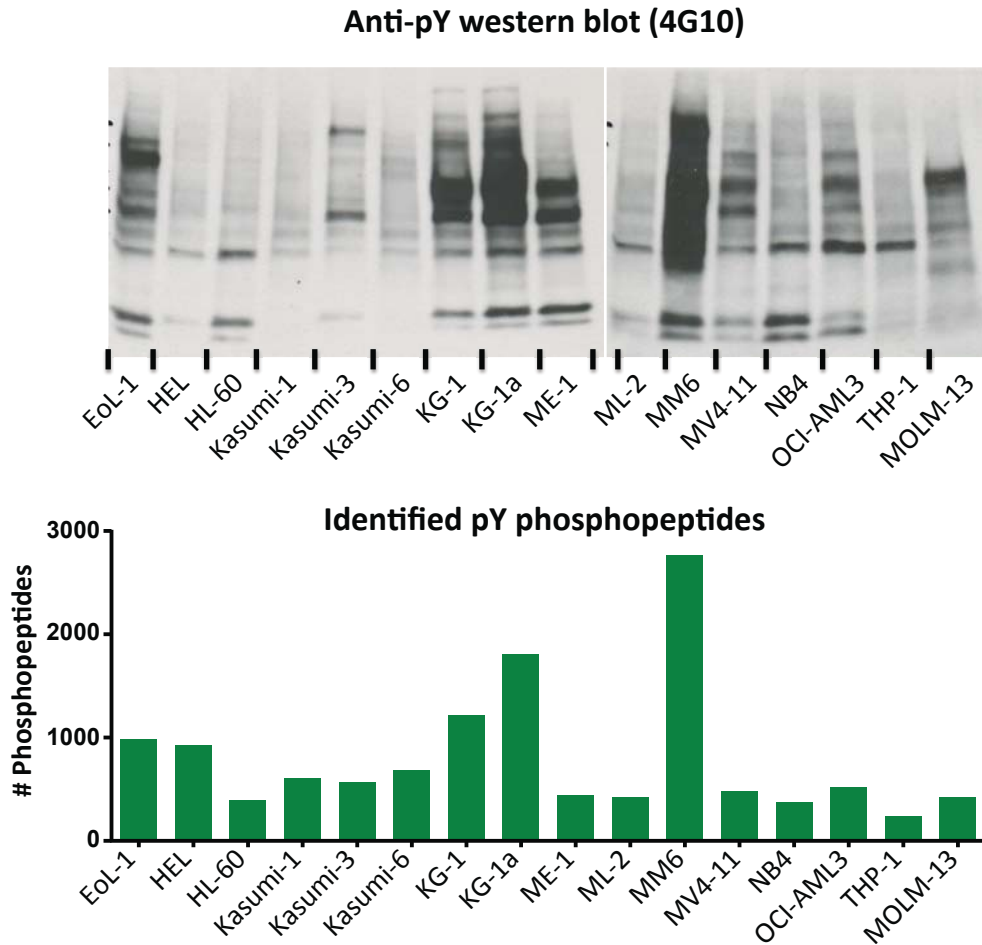

**Supplemental Figure S1. Overall levels of phosphotyrosine (pY) detected on western blot and numbers of pY phosphopeptides identified by phosphoproteomics show a general correlation.**

*Upper.* Western blotting for global phosphotyrosine levels (4G10 anti-pY antibody) in the cell line lysates.

*Lower.* Bar graph depicting the number of pY phosphopeptides immunoprecipitated and identified by mass spectrometry. There is a correlation between global phosphotyrosine levels and the number of identified pY phosphopeptides per cell line. The data confirm signaling heterogeneity in this panel of AML cell lines.

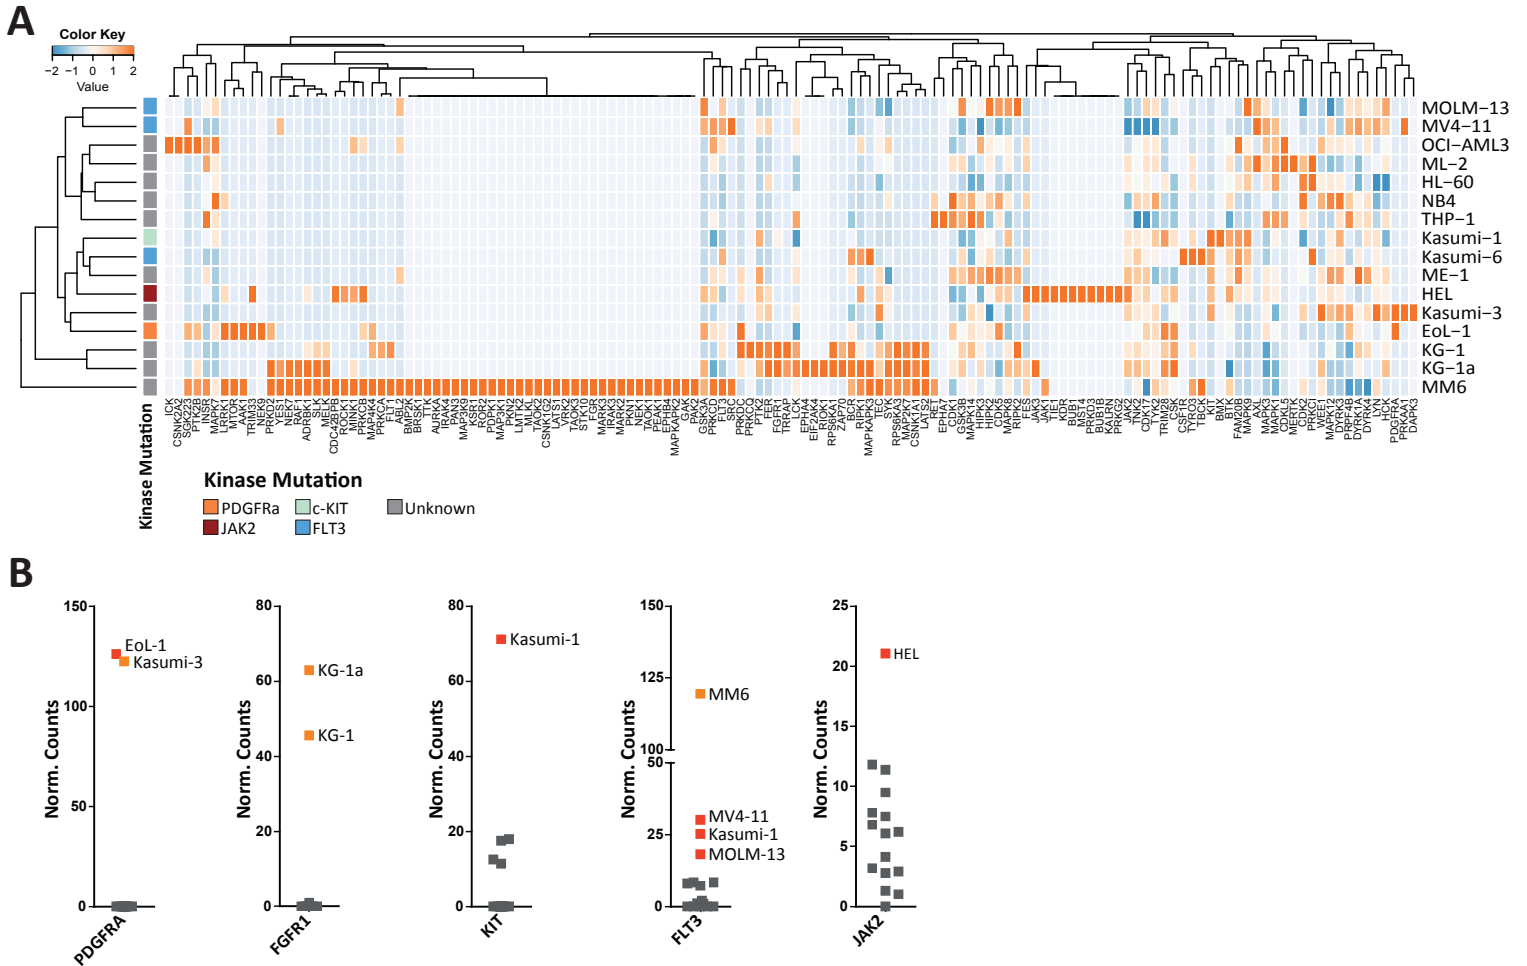

**Supplemental Figure S2. Clustering and outlier analysis of phosphoproteomic data on protein kinases in an AML cell line panel.**

**A.** Hierarchical clustering of the phosphokinome of the 16 AML cell lines. Unsupervised clustering is based on normalized phosphokinase counts. Similar to phosphopeptide based clustering, samples clustered roughly based on high or low levels of phosphorylation. Kinase mutations are indicated as found by standard diagnostic mutational analysis.

**B.** Outlier analysis of known AML driver kinases shows that kinase phosphorylation levels in TK mutant cell lines (red) are outliers compared to non-mutant cell lines. Additionally, the KG-1, KG-1a, MM6, and Kasumi-3 cell lines (orange) show similar outlier behavior, indicating potential TK driver activity.

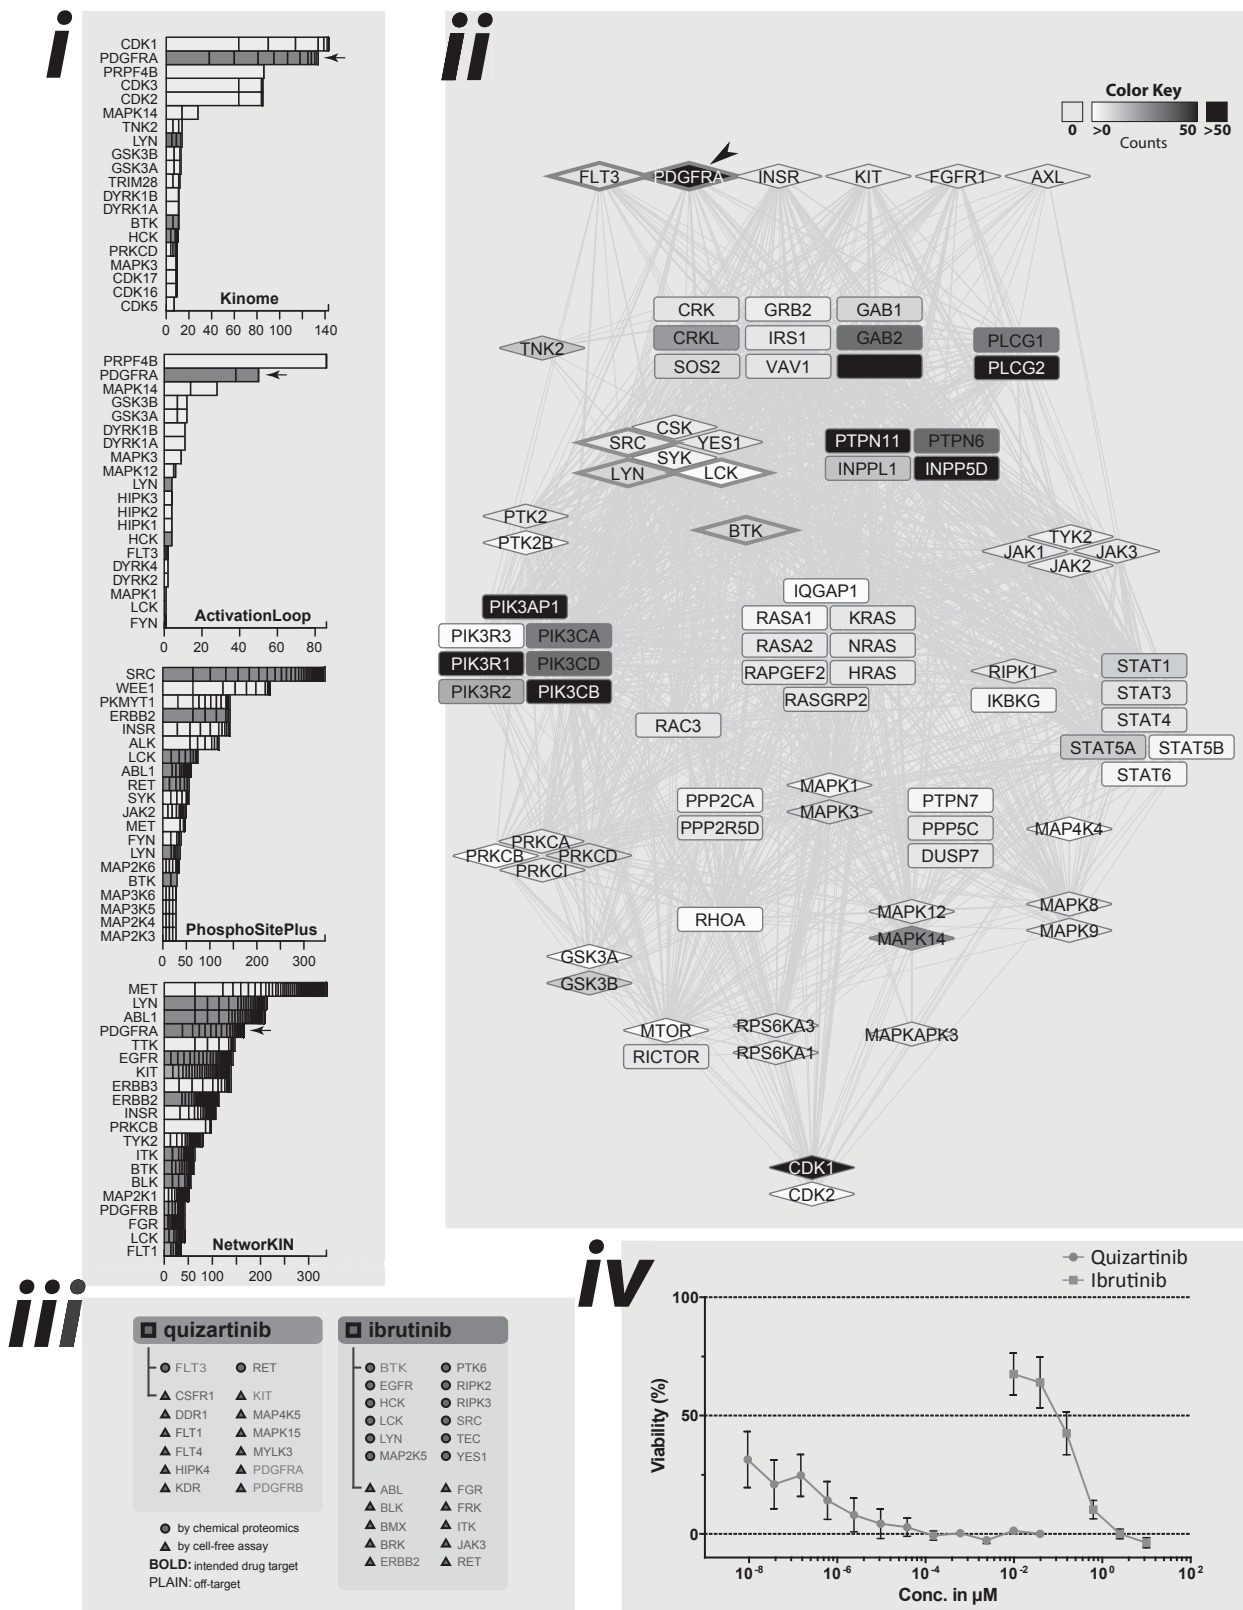

### Supplemental Figure S3 General Legend. Summaries of phosphoproteomic and pharmacological analyses of a panel of AML cell lines.

Each sheet contains (i) an overview of bar graphs ranking kinases according to their phosphorylation (*kinome*, phosphorylation anywhere on the protein; *activation loop*, phosphorylation of the activation segment) and according to the phosphorylation of their substrates (*PhosphoSitePlus*, known substrates cataloged in the PhosphoSitePlus database; *NetworkKIN*, predicted substrates assigned by the NetworkKIN algorithm), (ii) a graph of inferred kinase 'activities' mapped onto (primarily) PI3K/RAS-MAPK/JAK-STAT pathways in a signaling network (edges from the STRING database); node fill colors indicate spectral counts as a proxy of activity, (iii) a panel of relevant drugs with intended targets and off-targets (affinity below 500 nM) as determined through chemical proteomics (43) or cell-free assays (42,56,57); and (iv) drug response curves. Kinases from panel iii with a top 20 kinome/activation loop ranking are indicated with corresponding bar fill or node border colors in the different panels. In the following, summary sheets are presented for (A) EoL-1, (B) Kasumi-1, (C) MV4-11, (D) MOLM-13, (E) Kasumi-6, (F) HEL, (G) KG-1, (H) KG-1a, (I) MM6, (J) Kasumi-3, (K) HL-60, (L) ML-2, (M) OCI-AML3, (N) THP-1, (O) NB4, and (P) ME-1.

# EoL-1

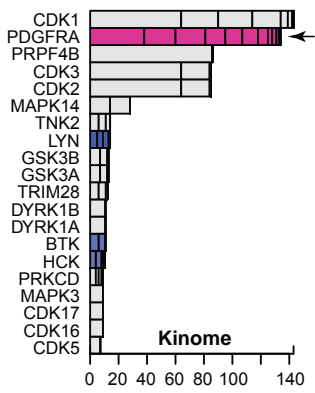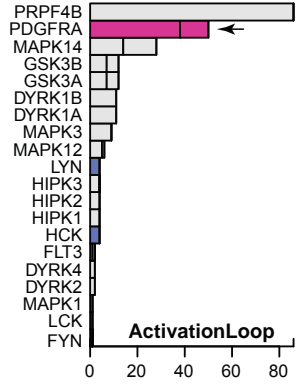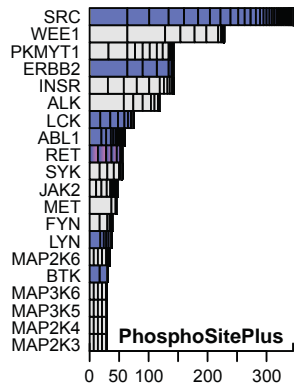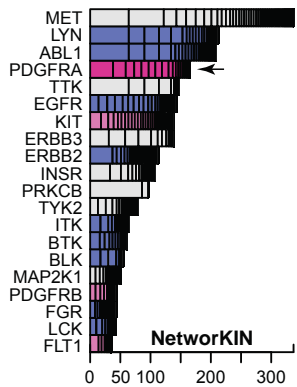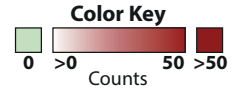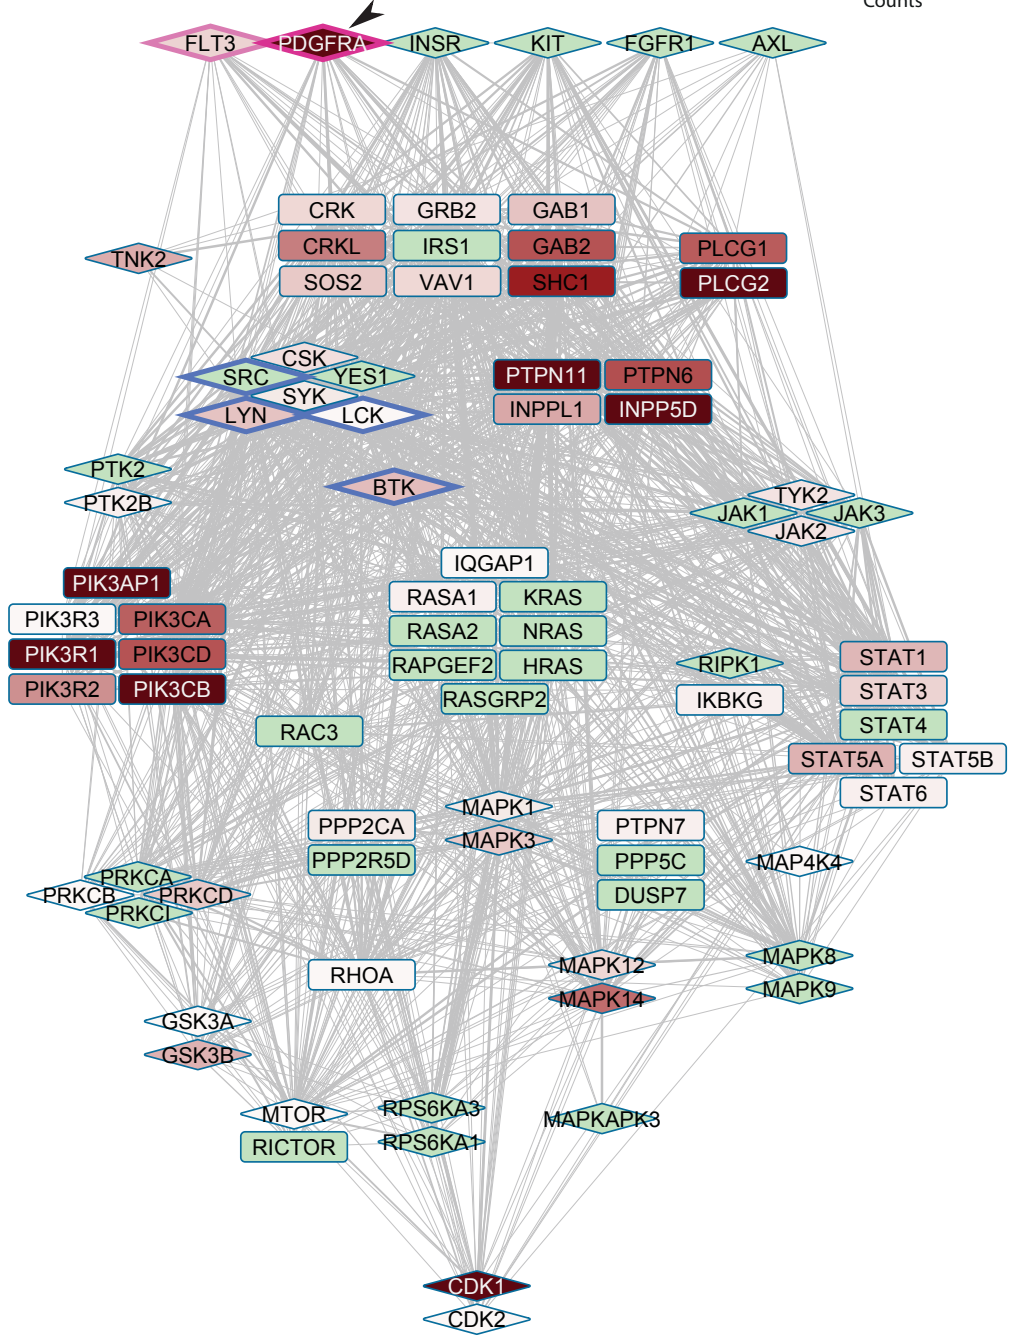

● Quizartinib  
■ Ibrutinib

| ■ quizartinib                     |          | ■ ibrutinib |         |
|-----------------------------------|----------|-------------|---------|
| ● FLT3                            | ● RET    | ● BTK       | ● PTK6  |
| ▲ CSFR1                           | ▲ KIT    | ● EGFR      | ● RIPK2 |
| ▲ DDR1                            | ▲ MAP4K5 | ● HCK       | ● RIPK3 |
| ▲ FLT1                            | ▲ MAPK15 | ● LCK       | ● SRC   |
| ▲ FLT4                            | ▲ MYLK3  | ● LYN       | ● TEC   |
| ▲ HIPK4                           | ▲ PDGFRA | ● MAP2K5    | ● YES1  |
| ▲ KDR                             | ▲ PDGFRB |             |         |
| ● by chemical proteomics          |          | ▲ ABL       | ▲ FGR   |
| ▲ by cell-free assay              |          | ▲ BLK       | ▲ FRK   |
| <b>BOLD:</b> intended drug target |          | ▲ BMX       | ▲ ITK   |
| <b>PLAIN:</b> off-target          |          | ▲ BRK       | ▲ JAK3  |
|                                   |          | ▲ ERBB2     | ▲ RET   |

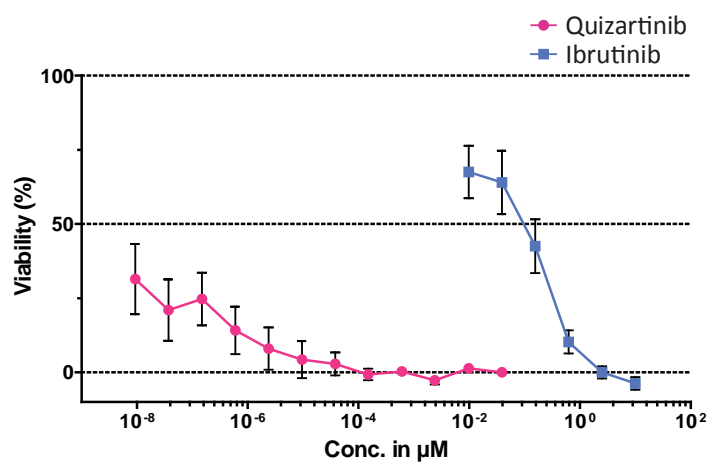

**Supplemental Figure S3A. Analysis of AML cell line EoL-1 carrying a *FIP1L1-PDGFR* fusion.** Arrows (bar graphs) and arrow head (network) indicate the implicated *PDGFRA* kinase.

# Kasumi-1

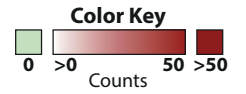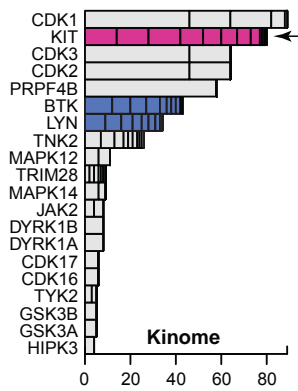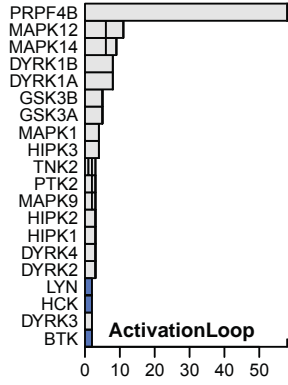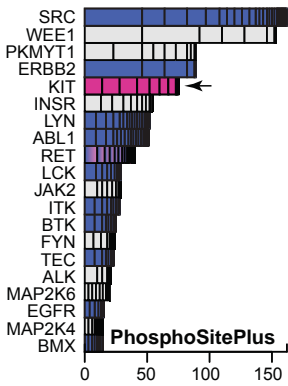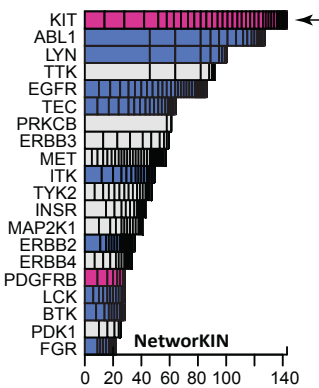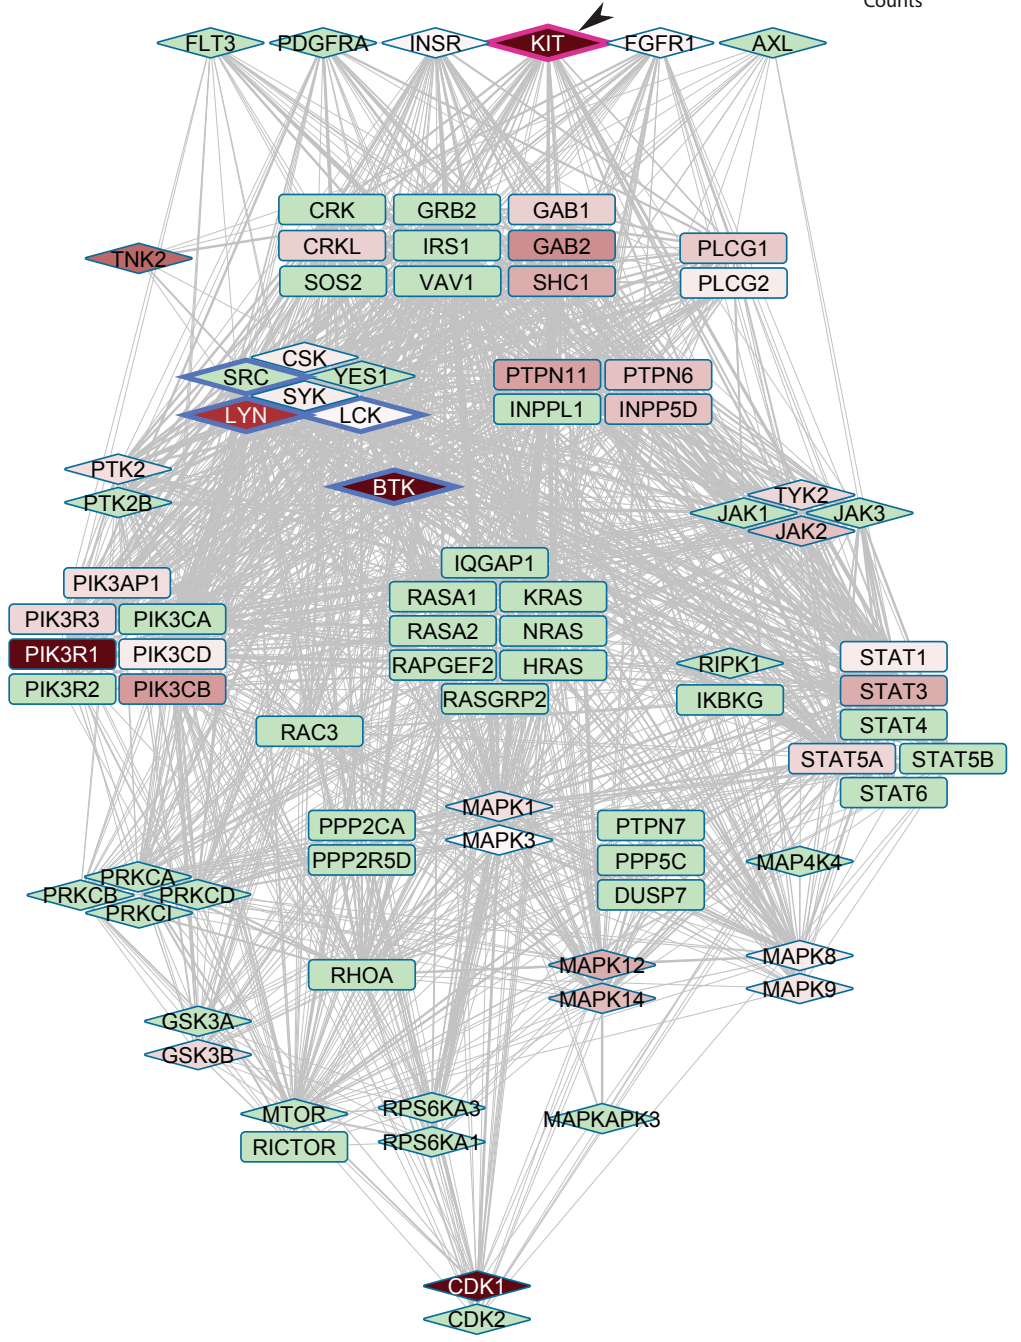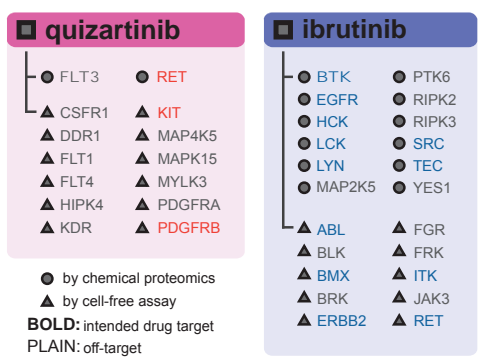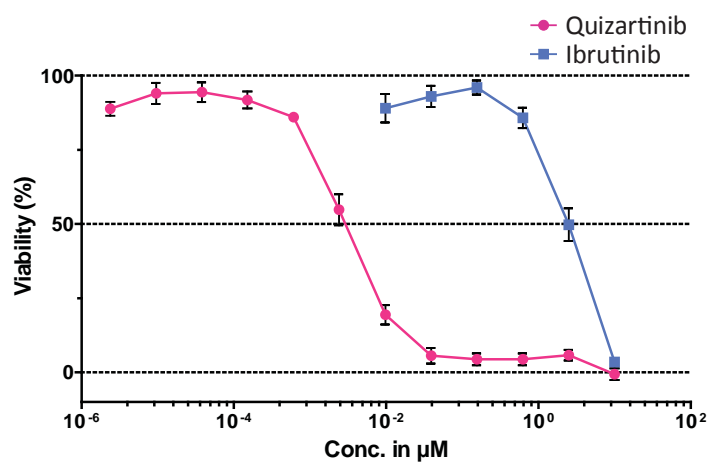

**Supplemental Figure S3B. Analysis of AML cell line Kasumi-1 carrying an N822K KIT point mutation.** Arrows (bar graphs) and arrow head (network) indicate the implicated KIT kinase.

# MV4-11

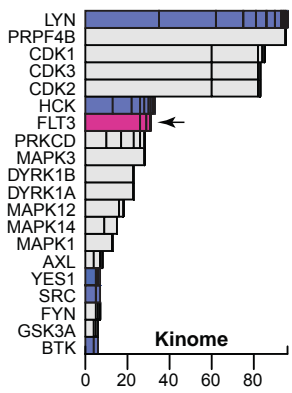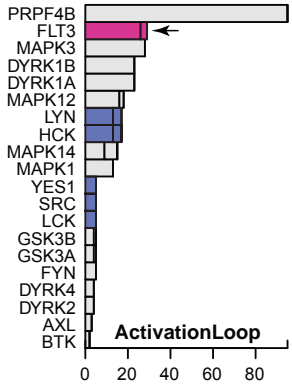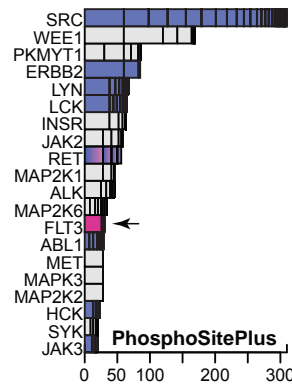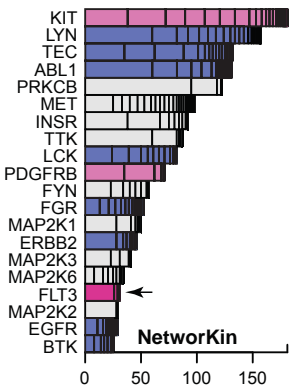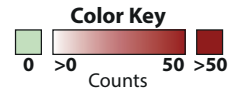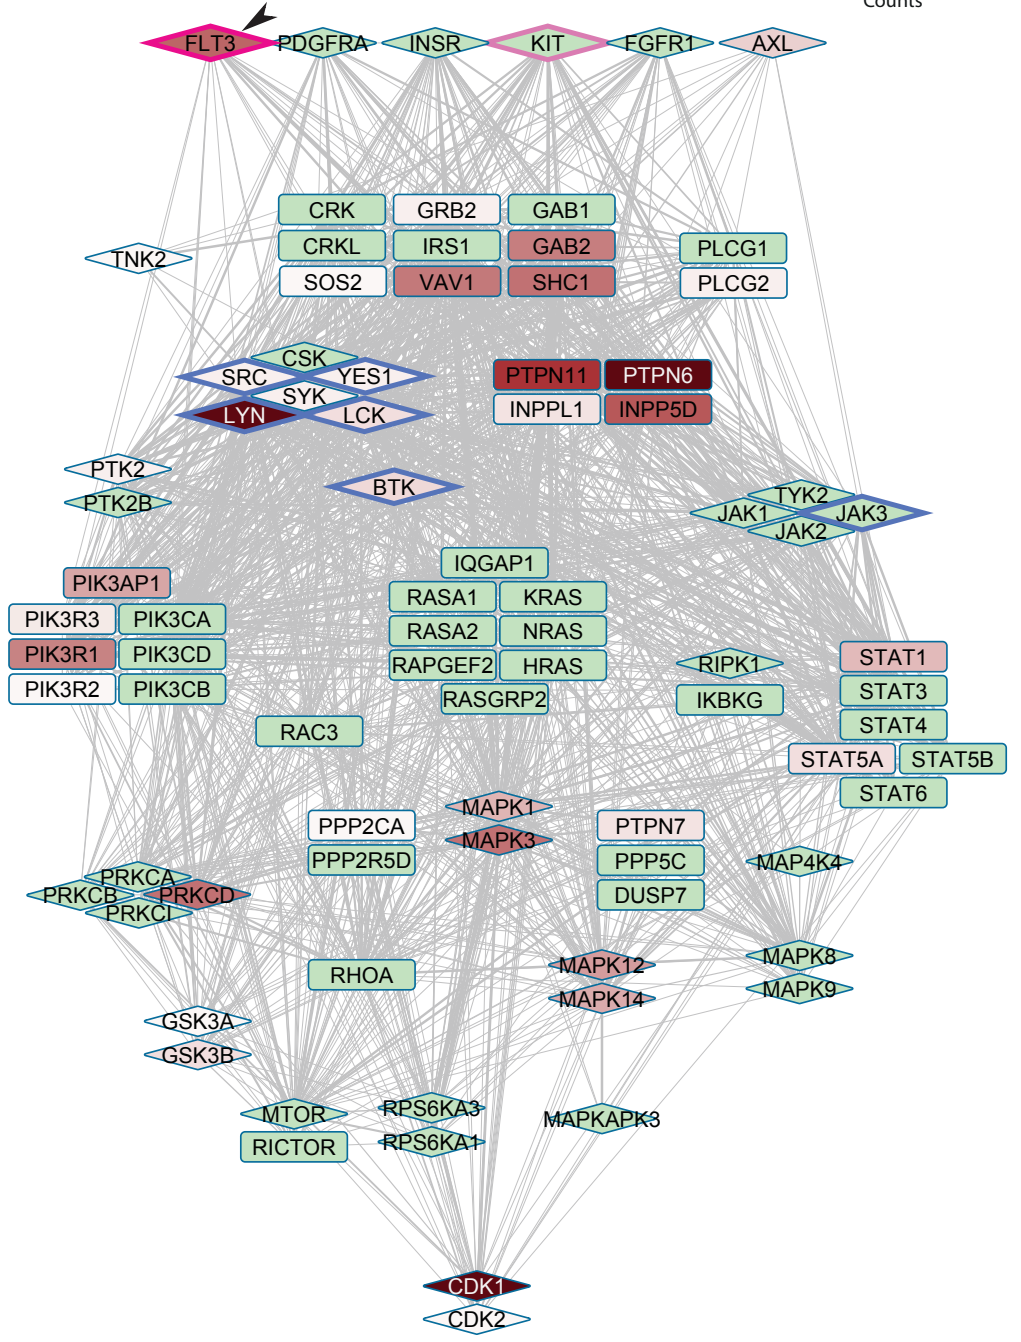

| quizartinib                       |          | ibrutinib |         |
|-----------------------------------|----------|-----------|---------|
| ● FLT3                            | ● RET    | ● BTK     | ● PTK6  |
| ▲ CSFR1                           | ▲ KIT    | ● EGFR    | ● RIPK2 |
| ▲ DDR1                            | ▲ MAP4K5 | ● HCK     | ● RIPK3 |
| ▲ FLT1                            | ▲ MAPK15 | ● LCK     | ● SRC   |
| ▲ FLT4                            | ▲ MYLK3  | ● LYN     | ● TEC   |
| ▲ HIPK4                           | ▲ PDGFRA | ● MAP2K5  | ● YES1  |
| ▲ KDR                             | ▲ PDGFRB |           |         |
| ● by chemical proteomics          |          | ▲ ABL     | ▲ FGR   |
| ▲ by cell-free assay              |          | ▲ BLK     | ▲ FRK   |
| <b>BOLD:</b> intended drug target |          | ▲ BMX     | ▲ ITK   |
| <b>PLAIN:</b> off-target          |          | ▲ BRK     | ▲ JAK3  |
|                                   |          | ▲ ERBB2   | ▲ RET   |

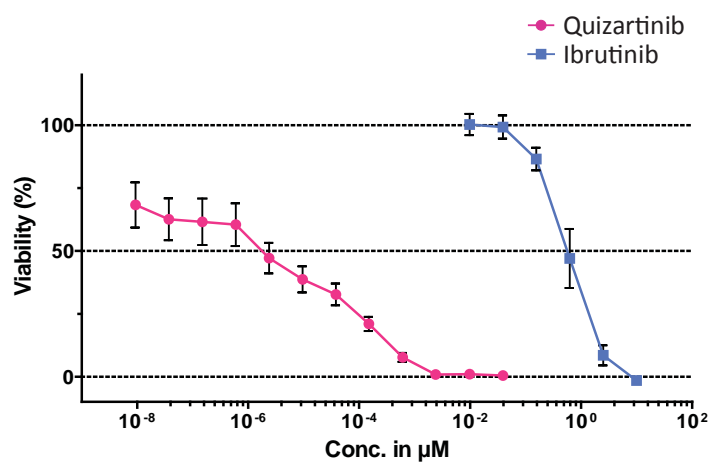

**Supplemental Figure S3C. Analysis of AML cell line MV4-11 carrying a FLT3-ITD point mutation.**  
 Arrows (bar graphs) and arrow head (network) indicate the implicated FLT3 kinase.

# MOLM-13

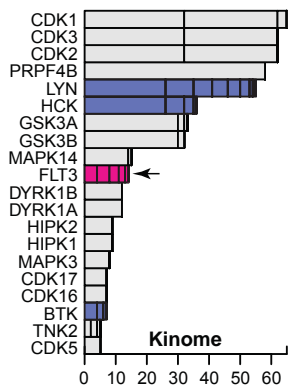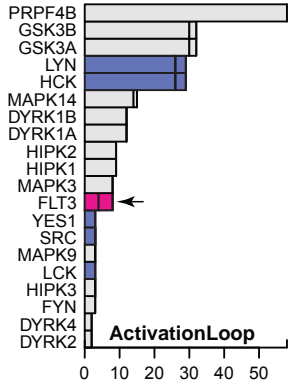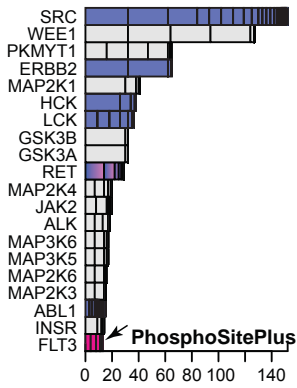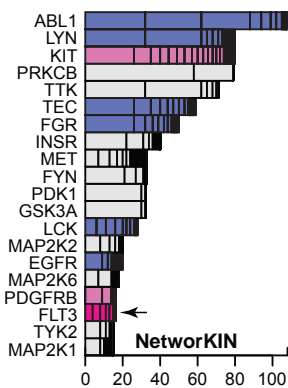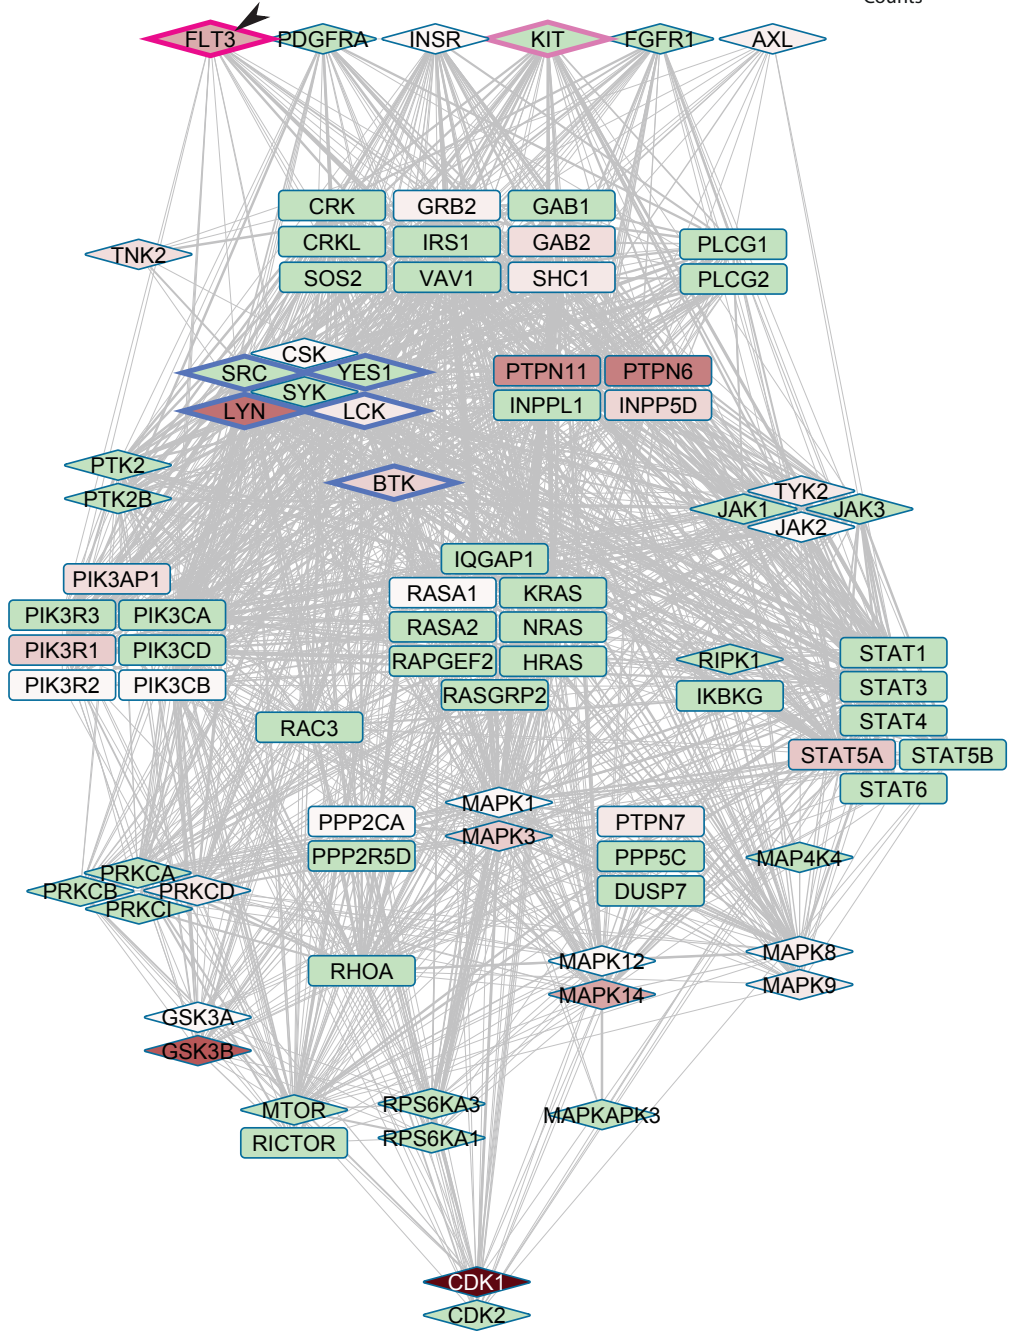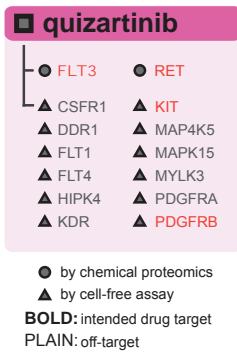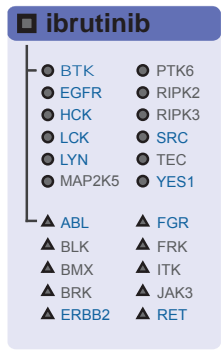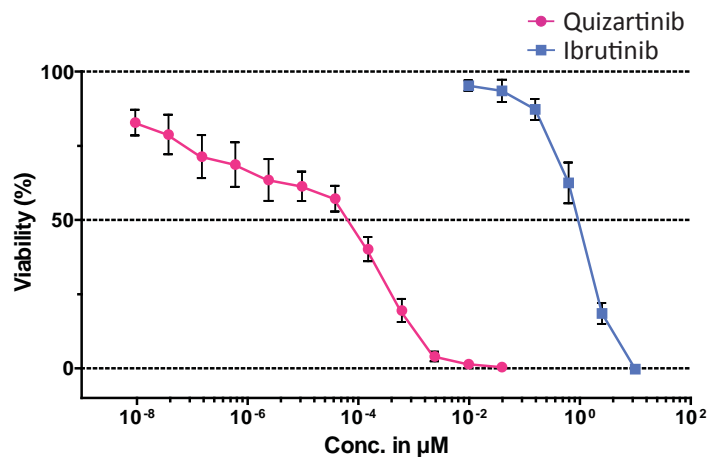

**Supplemental Figure S3D. Analysis of AML cell line MOLM-13 carrying a FLT3-ITD point mutation.** Arrows (bar graphs) and arrow head (network) indicate the implicated FLT3 kinase.



# Kasumi-6

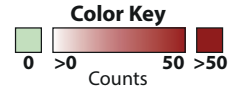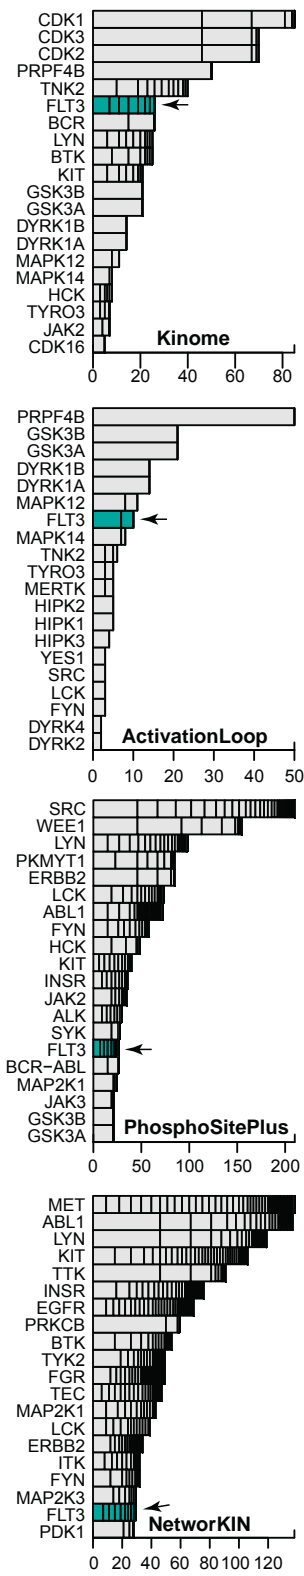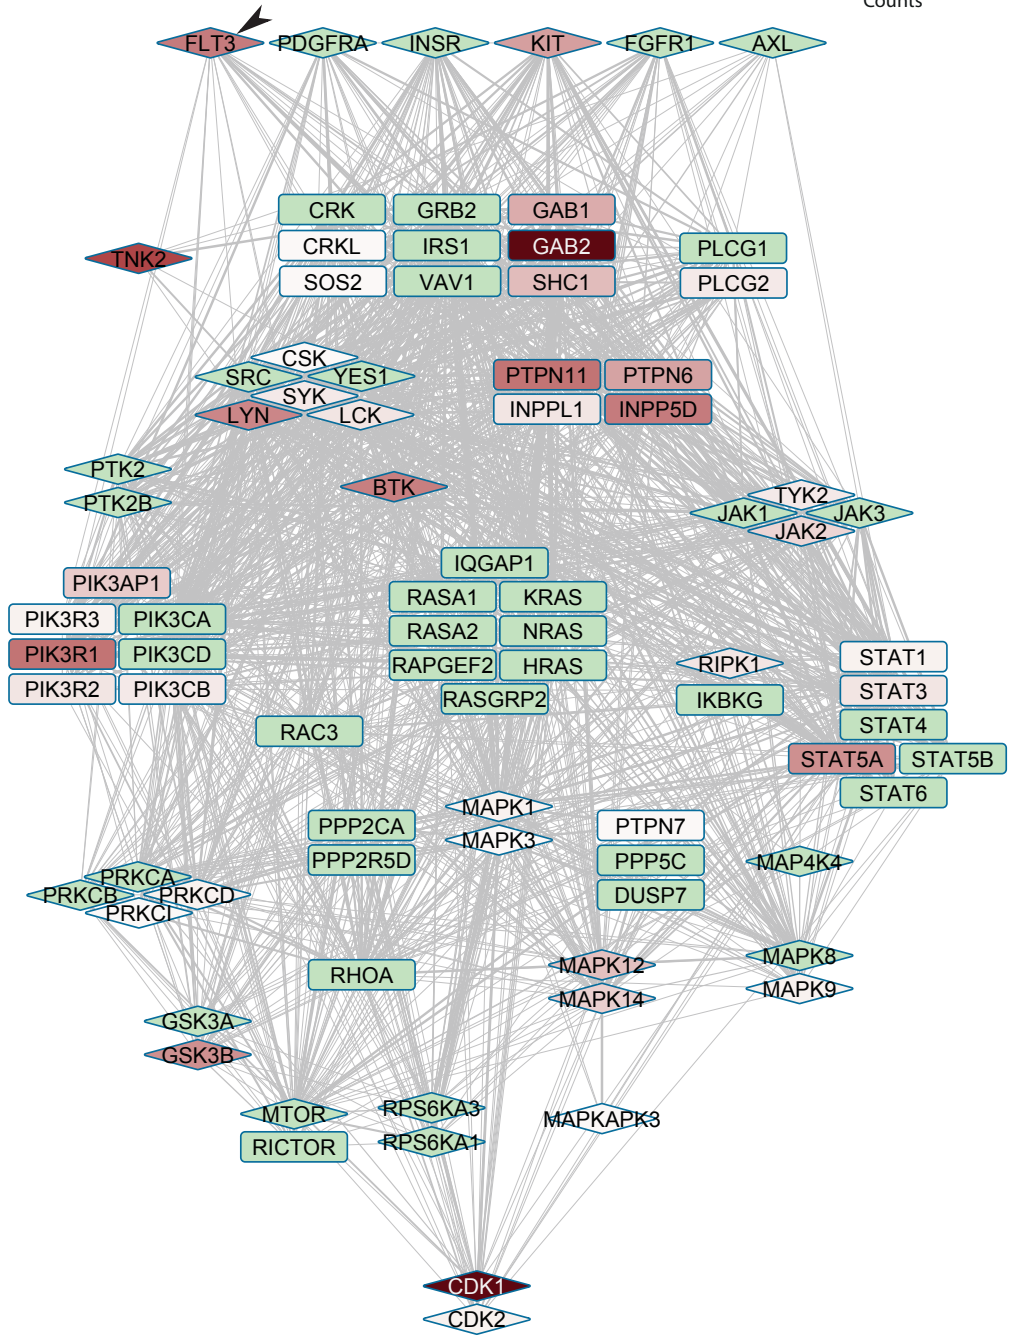

**Supplemental Figure S3E. Analysis of AML cell line Kasumi-6 carrying a *FLT3*-ITD point mutation.** Arrows (bar graphs) and arrow head (network) indicate the implicated *FLT3* kinase.

# HEL

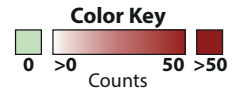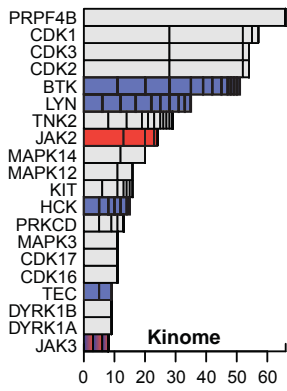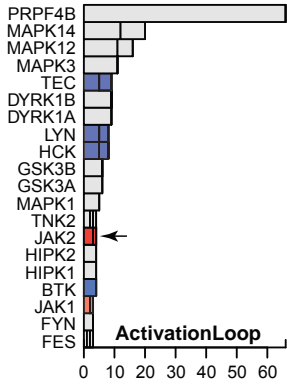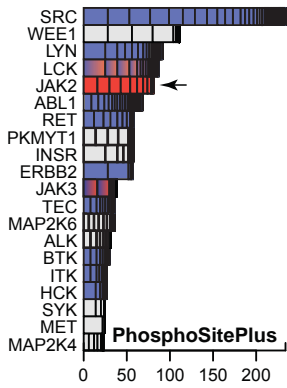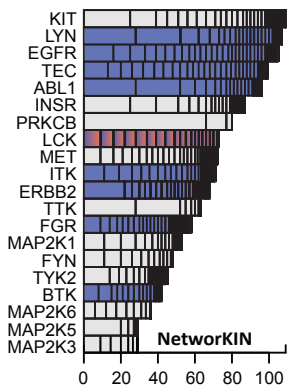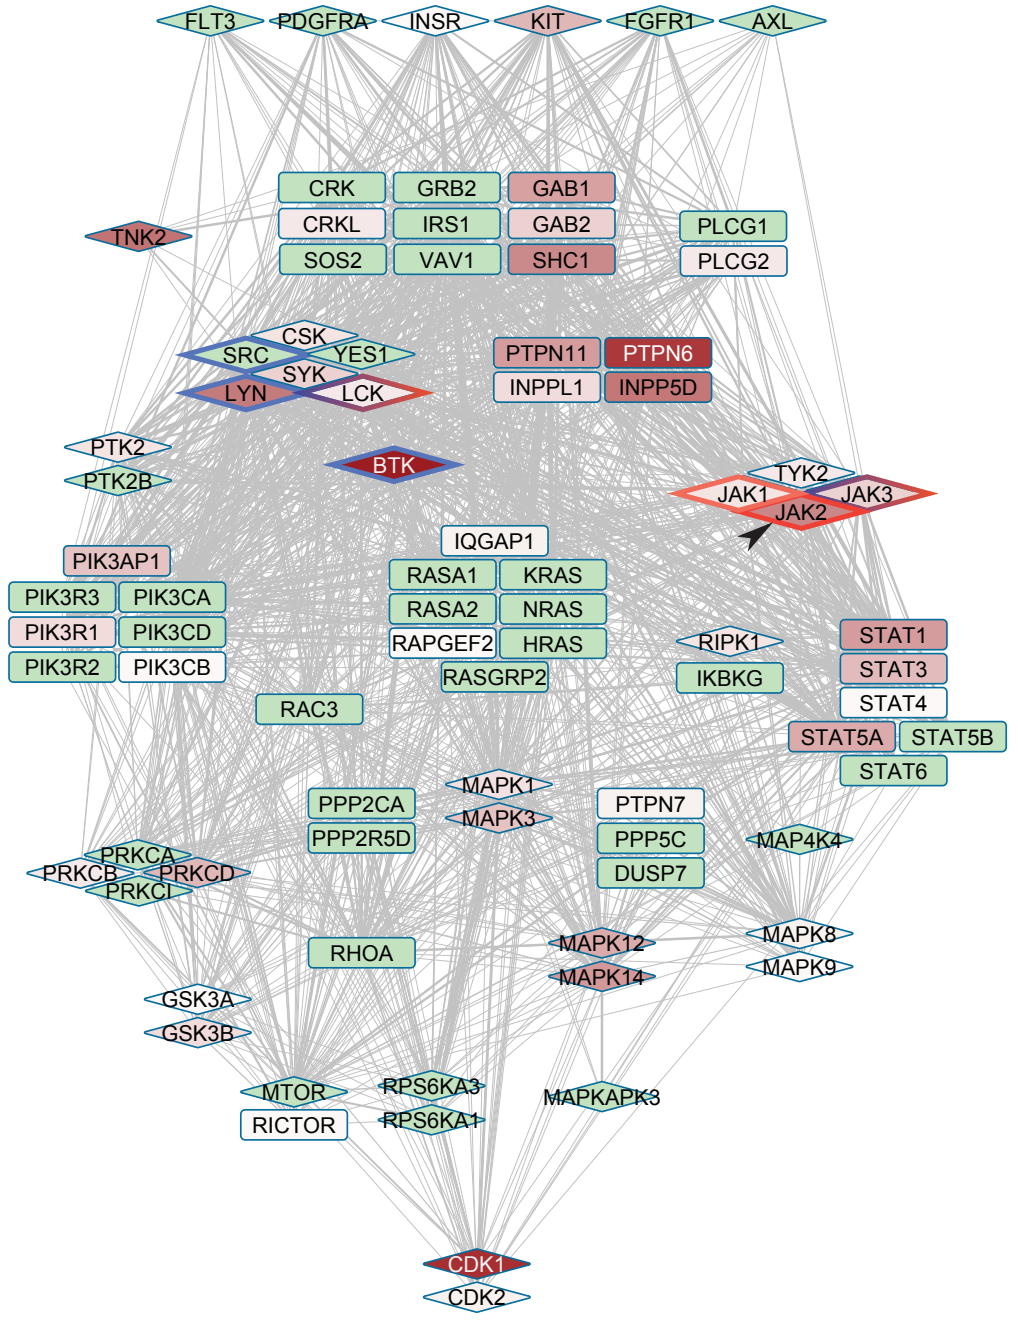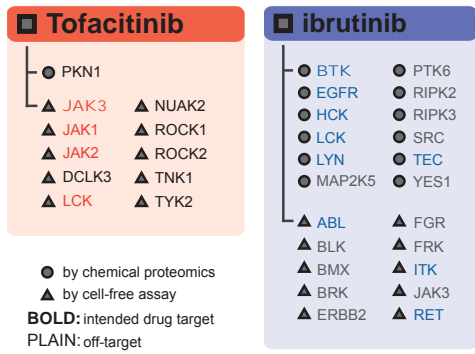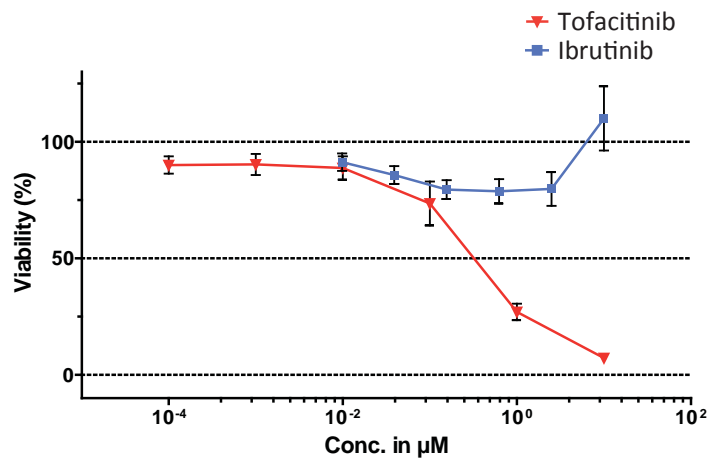

**Supplemental Figure S3F. Analysis of AML cell line HEL carrying a V617F JAK2 mutation.**  
 Arrows (bar graphs) and arrow heads (network) indicate the implicated JAK2 kinase.

# KG-1

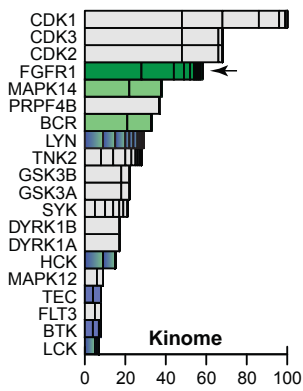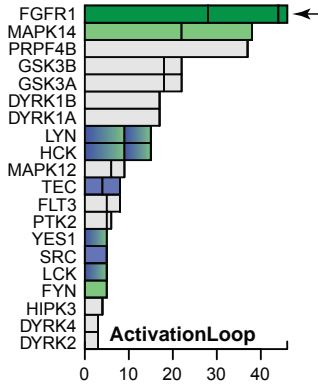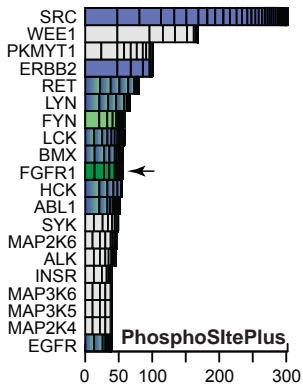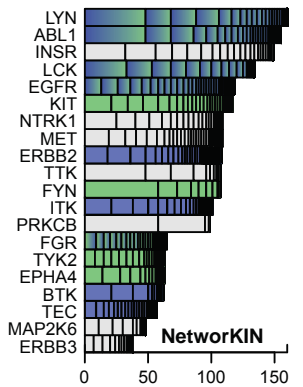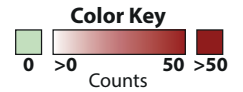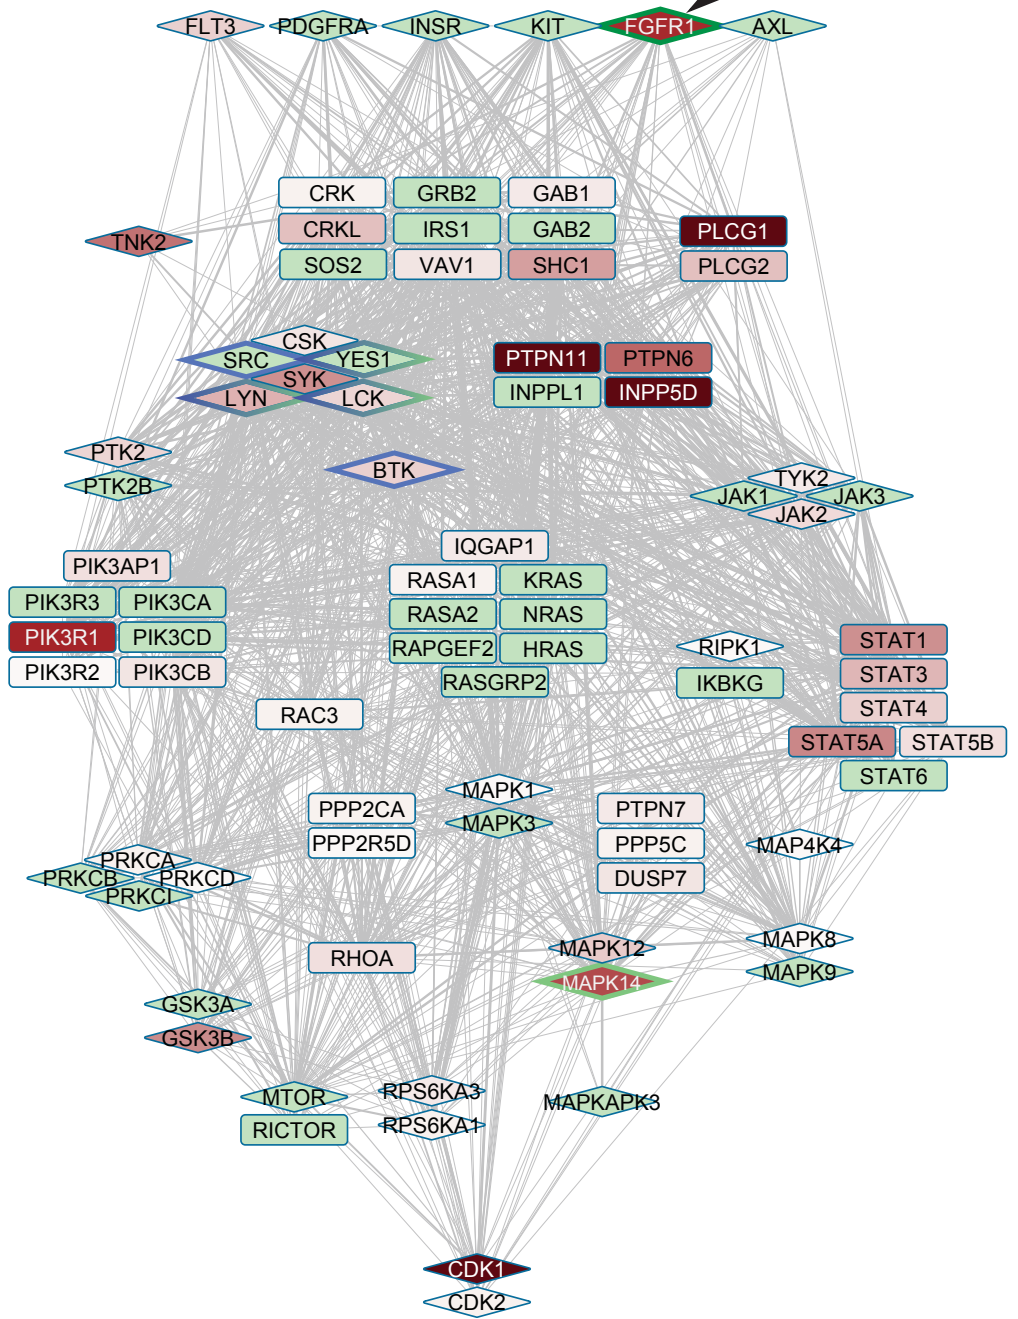

- ponatinib**
- ABL1
  - BCR
  - ABL2
  - CDK17
  - DDR1
  - DDR2
  - EPHA2
  - EPHA5
  - FRK
  - FYN
  - GRB2
  - HCK
  - LCK
  - LYN
  - MAP4K2
  - MAP14
  - MLTK
  - MYLK
  - RET
  - RIPK2
  - TNK1
  - ▲ ARG
  - ▲ ERBB4
  - ▲ LYNB
  - ▲ VEGFR1-3
  - ▲ BLK
  - ▲ FGFR1
  - ▲ MER
  - ▲ YES1
  - ▲ BMX
  - ▲ FGFR2-4
  - ▲ FMS
  - ▲ TIE2
  - ▲ BRK
  - ▲ FGR
  - ▲ PDGFRA
  - ▲ TRKA-C
  - ▲ EGFR
  - ▲ FMS
  - ▲ PDGFRB
  - ▲ EPHA1-8
  - ▲ JAK1-4
  - ▲ PYK2
  - ▲ EPHB1-4
  - ▲ KIT
  - ▲ TYK2

- ibrutinib**
- BTK
  - EGFR
  - HCK
  - LCK
  - LYN
  - MAP2K5
  - PTK6
  - RIPK2
  - RIPK3
  - SRC
  - TEC
  - YES1
  - ▲ ABL
  - ▲ FGR
  - ▲ BLK
  - ▲ FRK
  - ▲ BMX
  - ▲ ITK
  - ▲ BRK
  - ▲ JAK3
  - ▲ ERBB2
  - ▲ RET

● by chemical proteomics  
▲ by cell-free assay  
BOLD: intended drug target  
PLAIN: off-target

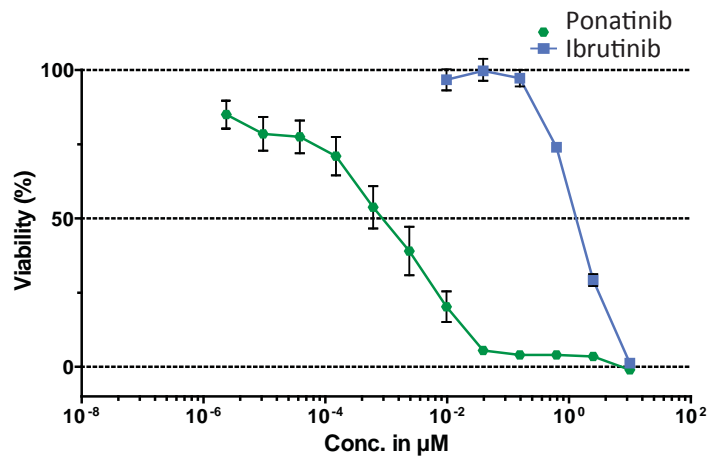

**Supplemental Figure S3G. Analysis of AML cell line KG-1 lacking a known driver mutation.**

Arrows (bar graphs) and arrow head (network) indicate the FGFR1 kinase as a potential driver in this cell line.

# KG-1a

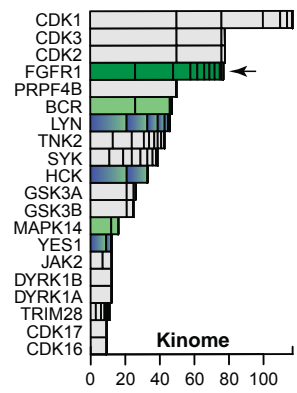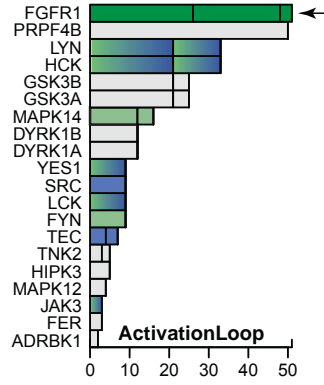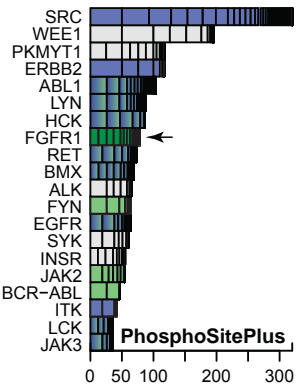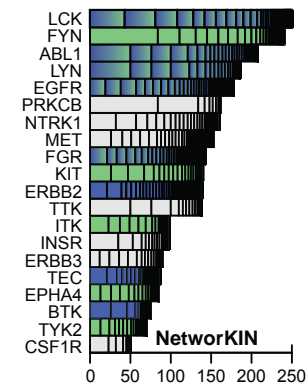

| ponatinib |           |          |            |
|-----------|-----------|----------|------------|
| ● ABL1    | ● EPHA2   | ● LCK    | ● MYLK     |
| ● BCR     | ● EPHA5   | ● LYN    | ● RET      |
| ● ABL2    | ● FRK     | ● MAP4K2 | ● RIPK2    |
| ● CDK17   | ● FYN     | ● MAP4K4 | ● TNK1     |
| ● DDR1    | ● GRB2    | ● MAPK14 | ● TNK1     |
| ● DDR2    | ● HCK     | ● MLTK   |            |
| ▲ ARG     | ▲ ERBB4   | ▲ LYNB   | ▲ VEGFR1-3 |
| ▲ BLK     | ▲ FGFR1   | ▲ MER    | ▲ YES1     |
| ▲ BMX     | ▲ FGFR2-4 | ▲ FMS    | ▲ TIE2     |
| ▲ BRK     | ▲ FGR     | ▲ PDGFRA | ▲ TRKA-C   |
| ▲ EGFR    | ▲ FMS     | ▲ PDGFRB |            |
| ▲ EPHA1-8 | ▲ JAK1-4  | ▲ PYK2   |            |
| ▲ EPHB1-4 | ▲ KIT     | ▲ TYK2   |            |

| ibrutinib |         |
|-----------|---------|
| ● BTK     | ● PTK6  |
| ● EGFR    | ● RIPK2 |
| ● HCK     | ● RIPK3 |
| ● LCK     | ● SRC   |
| ● LYN     | ● TEC   |
| ● MAP2K5  | ● YES1  |
| ▲ ABL     | ▲ FGR   |
| ▲ BLK     | ▲ FRK   |
| ▲ BMX     | ▲ ITK   |
| ▲ BRK     | ▲ JAK3  |
| ▲ ERBB2   | ▲ RET   |

● by chemical proteomics  
▲ by cell-free assay  
BOLD: intended drug target  
PLAIN: off-target

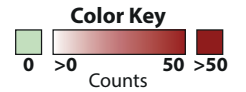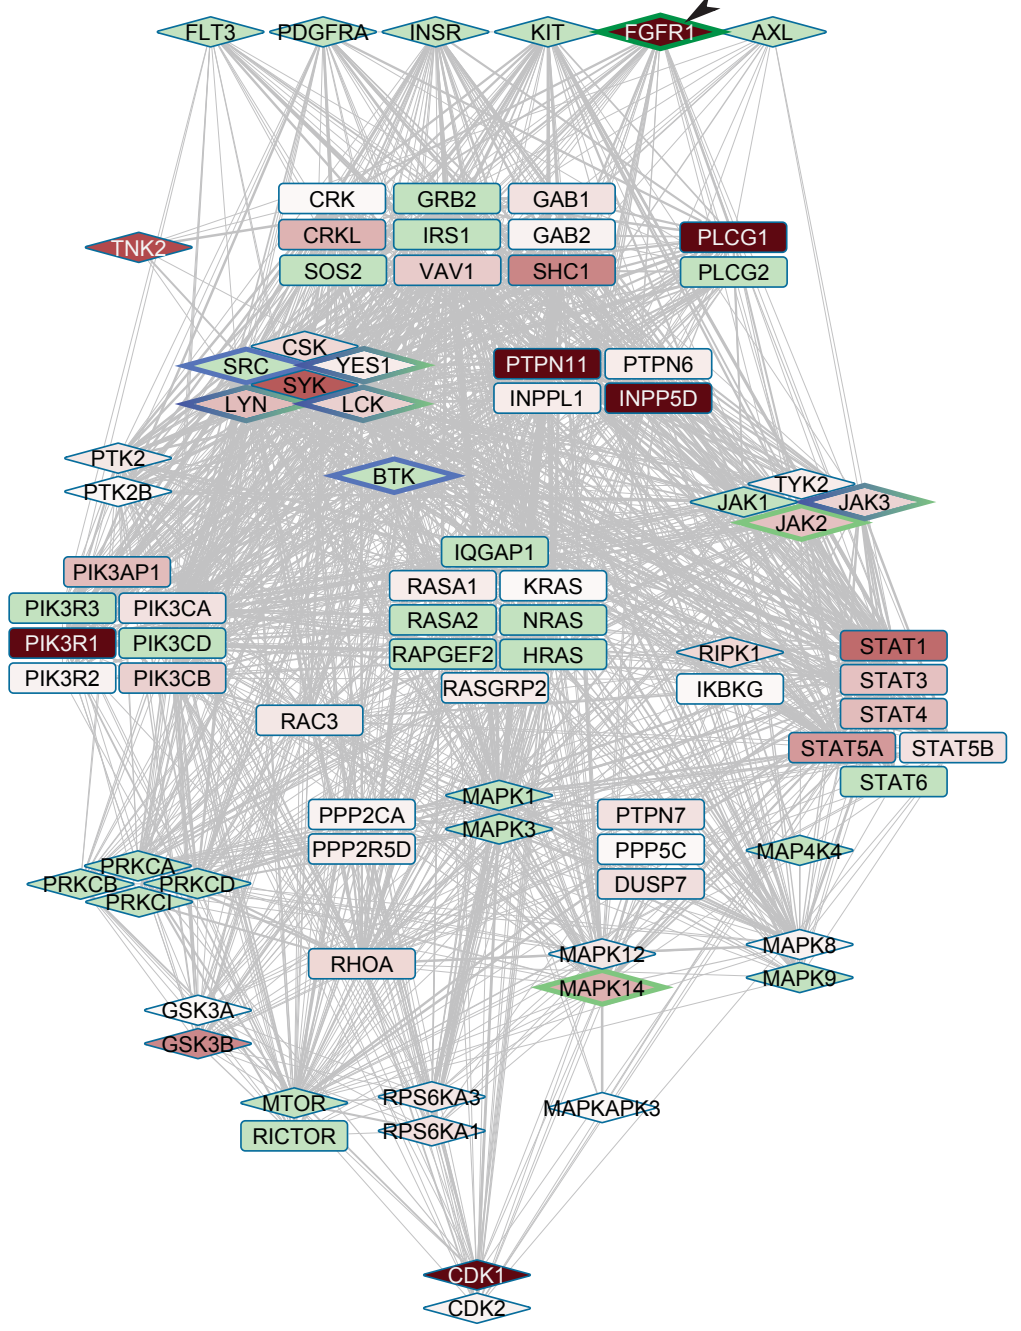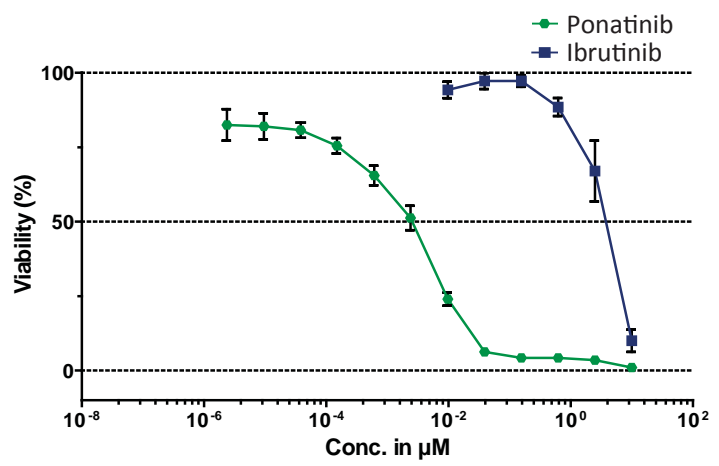

**Supplemental Figure S3H. Analysis of AML cell line KG-1a lacking a known driver mutation.**  
Arrows (bar graphs) and arrow head (network) indicate the FGFR1 kinase as a potential driver in this cell line.

## MM6

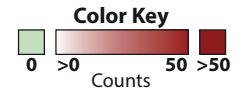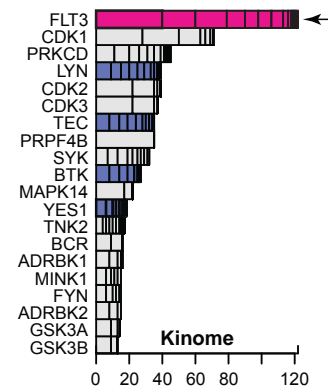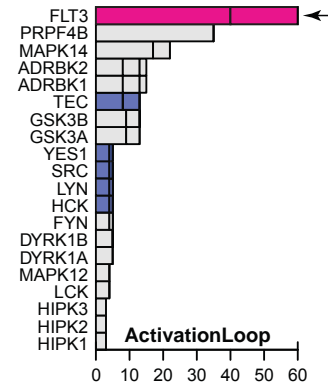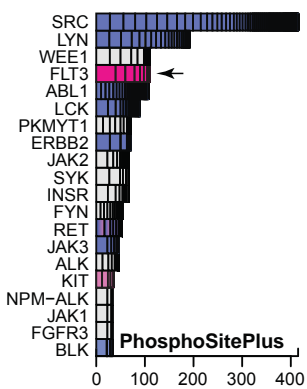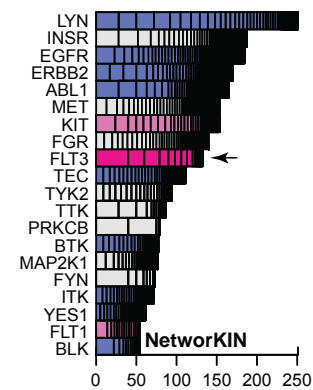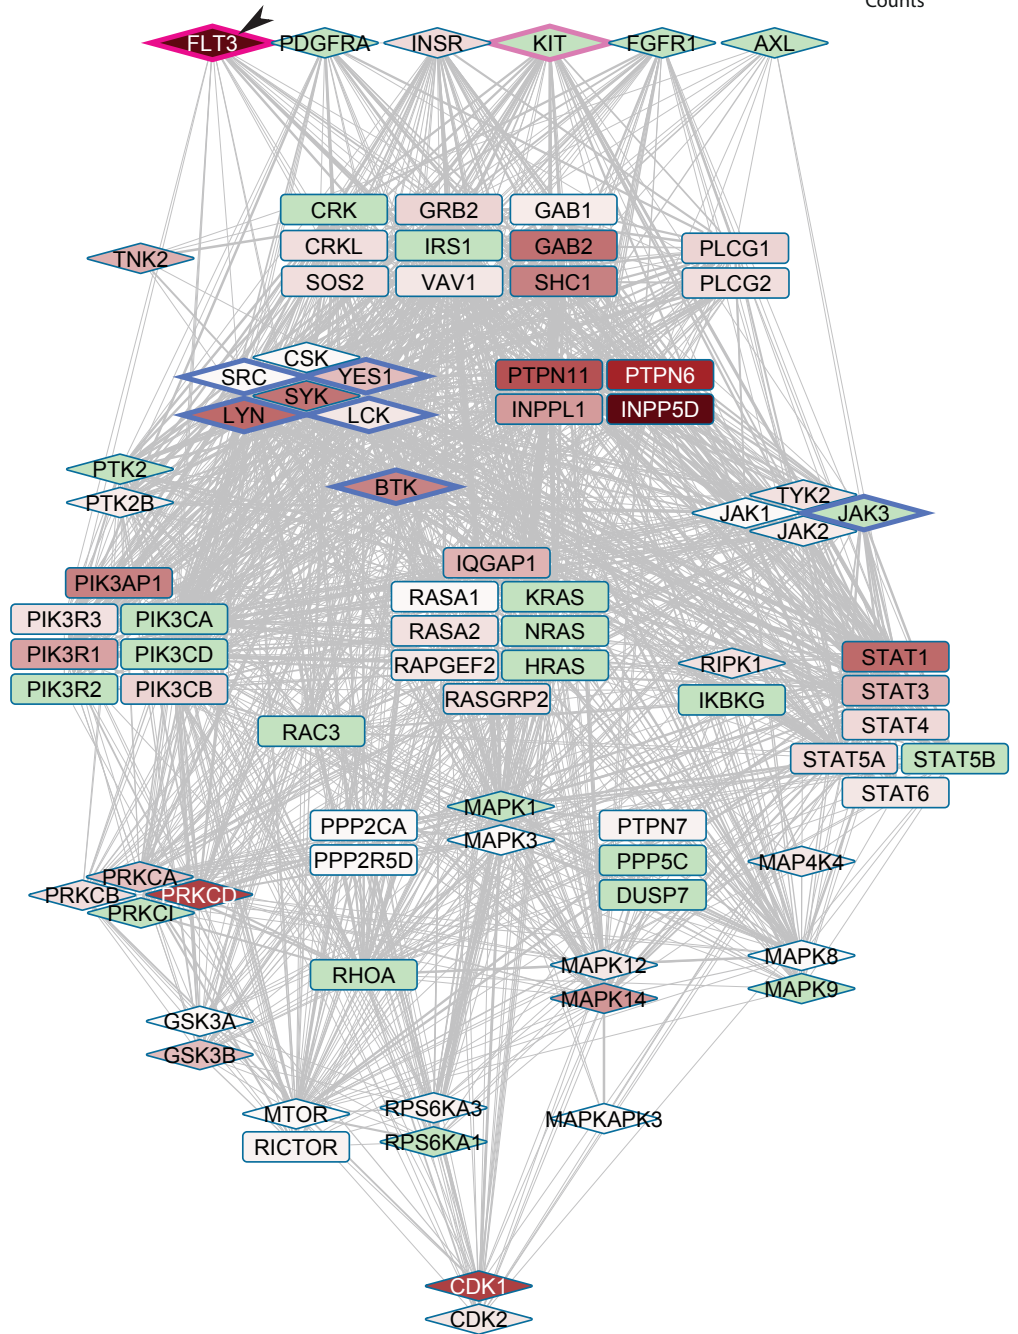

**quizartinib**

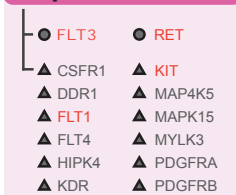

● by chemical proteomics

▲ by cell-free assay

**BOLD:** intended drug target

**PLAIN:** off-target

**ibrutinib**

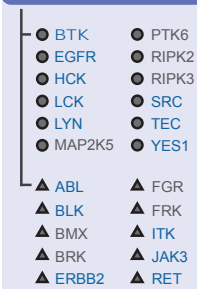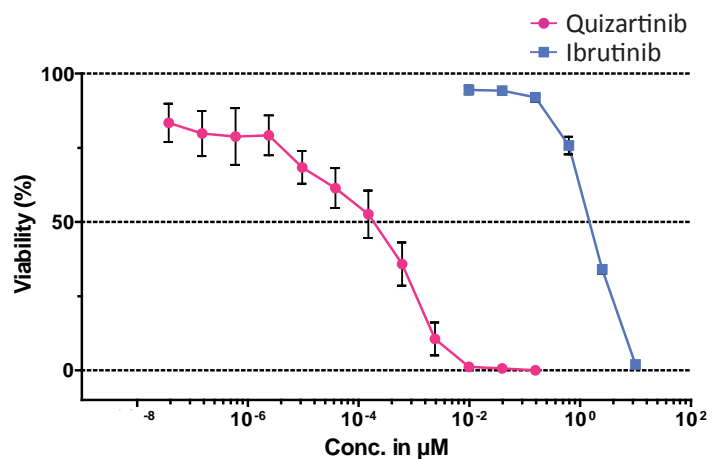

**Supplemental Figure S3I. Analysis of AML cell line MM6 (Mono-Mac-6) lacking a known driver mutation.** Arrows (bar graphs) and arrow head (network) indicate the FLT3 kinase as a potential driver in this cell line.

# Kasumi-3

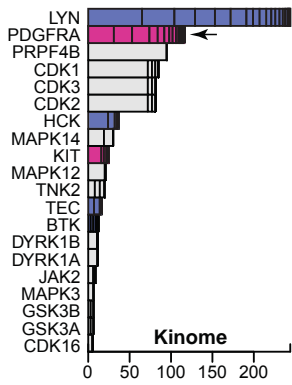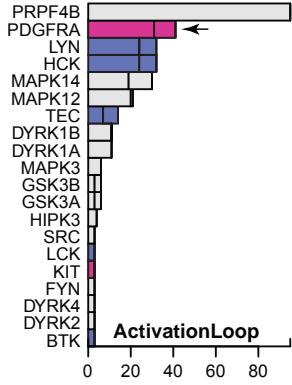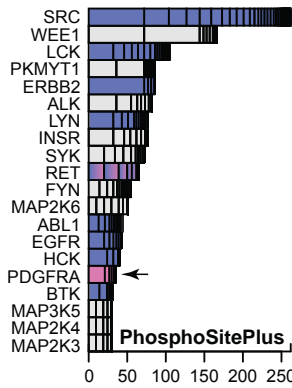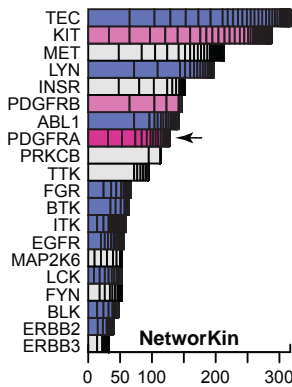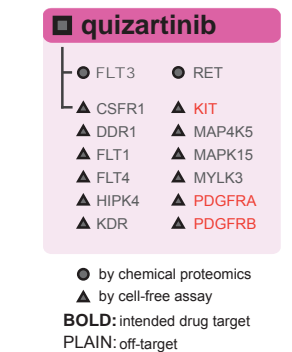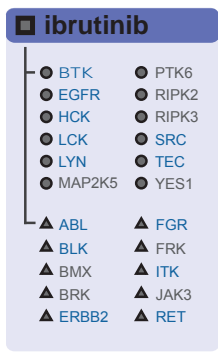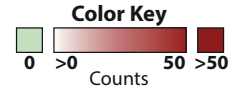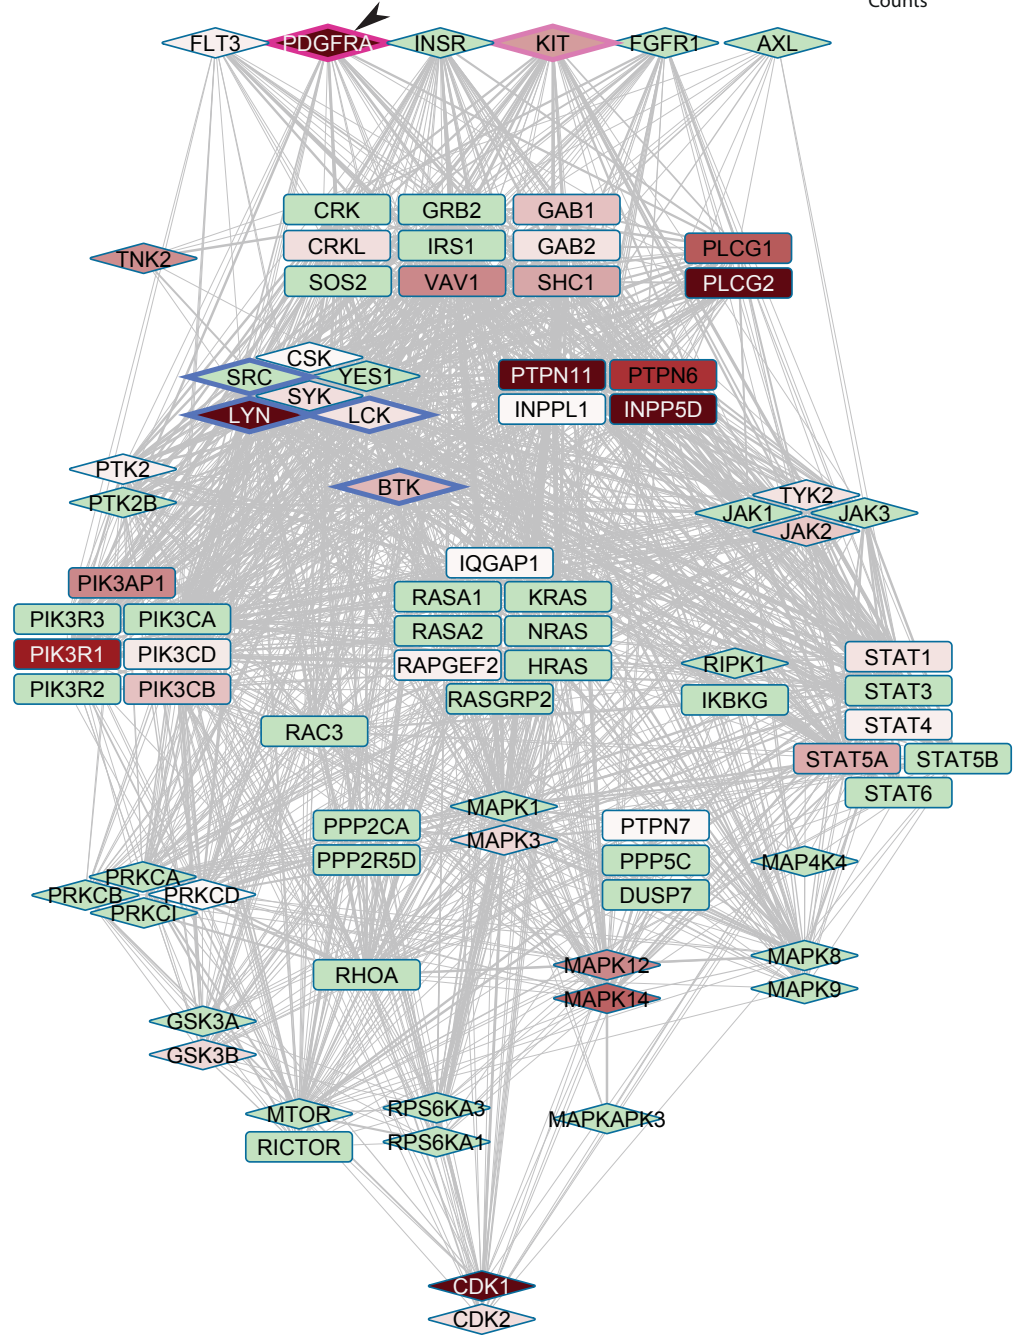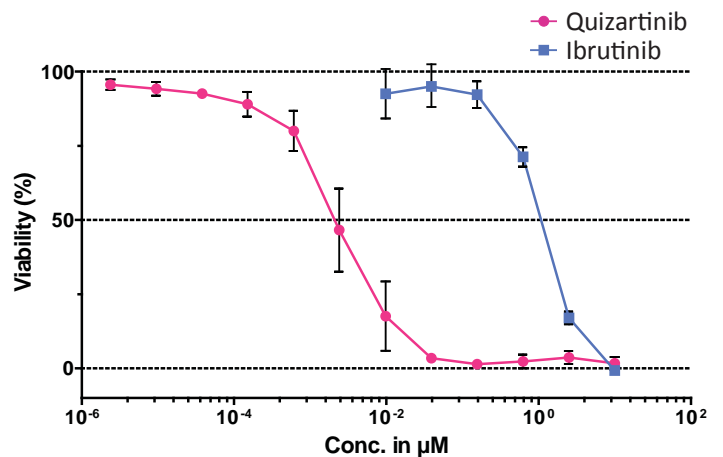

**Supplemental Figure S3J. Analysis of AML cell line Kasumi-3 lacking a known driver mutation.**

Arrows (bar graphs) and arrow head (network) indicate the PDGFRA kinase as a potential driver in this cell line.



# ML-2

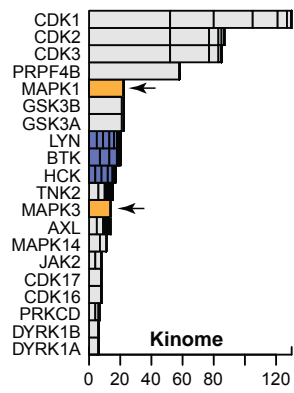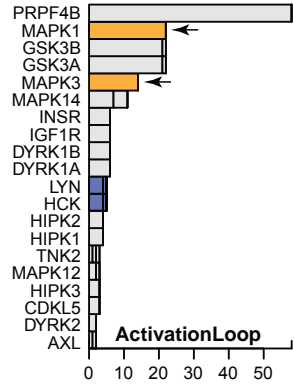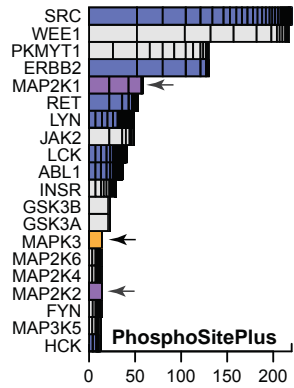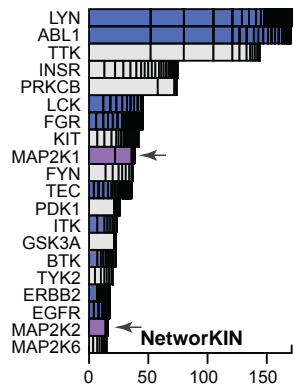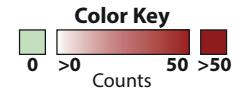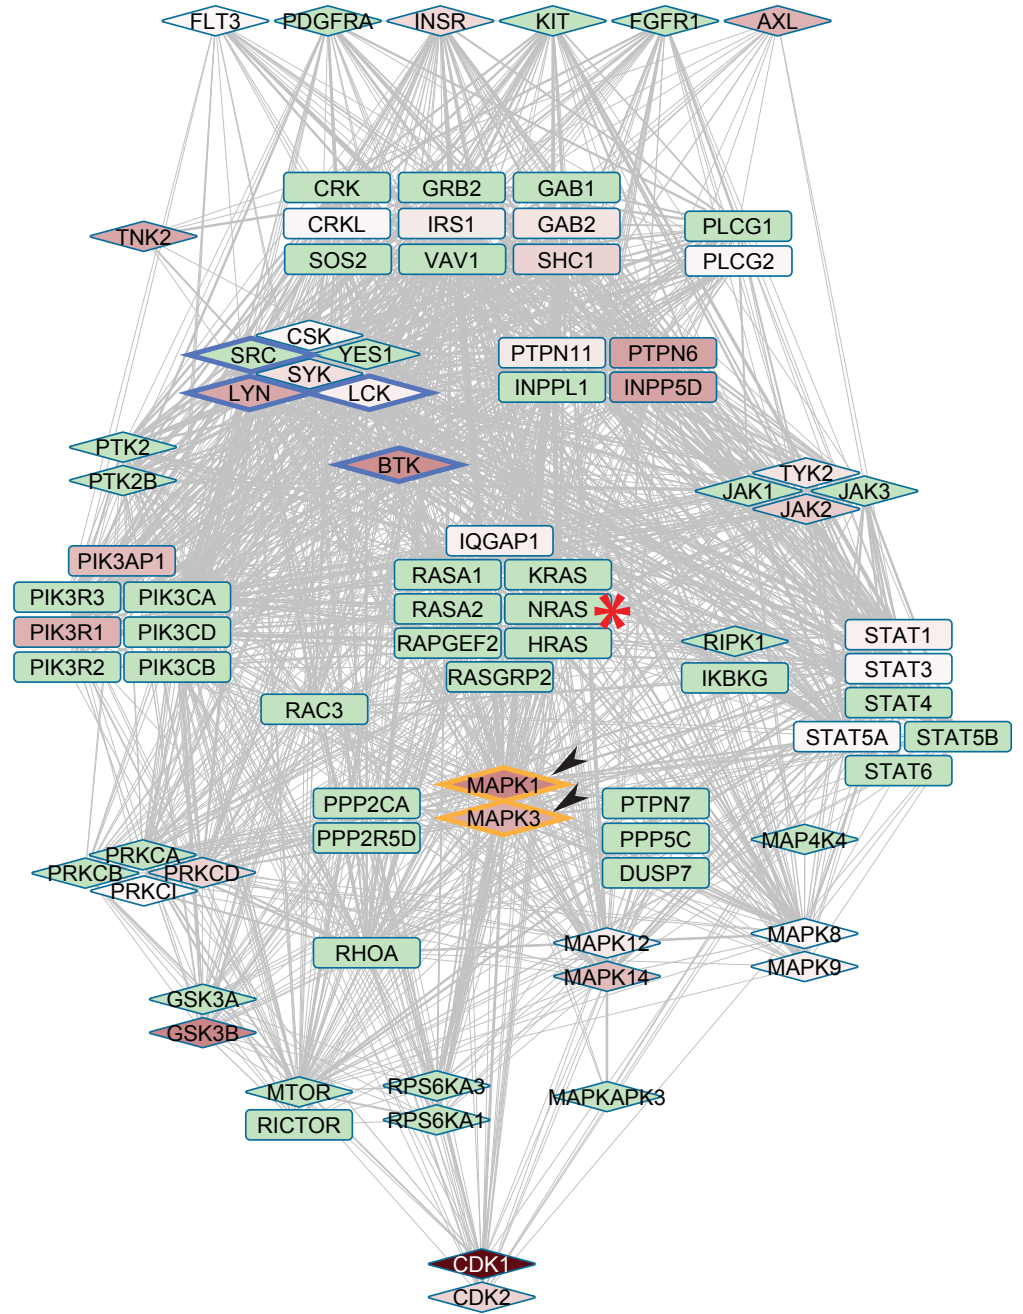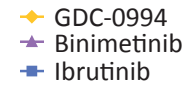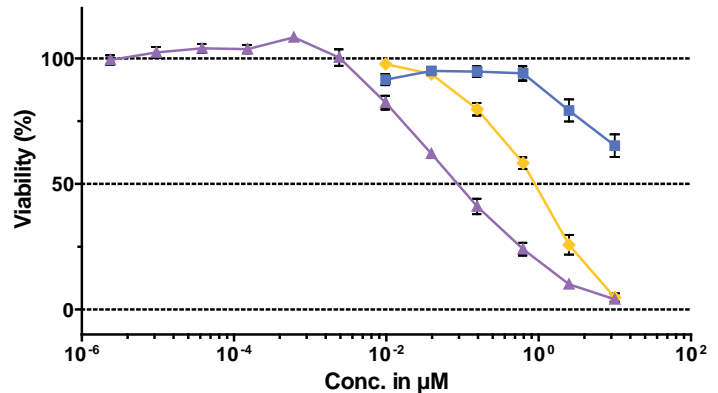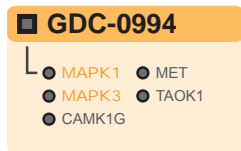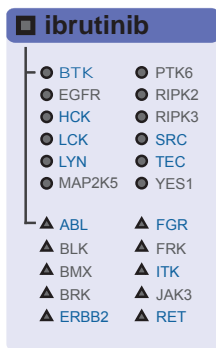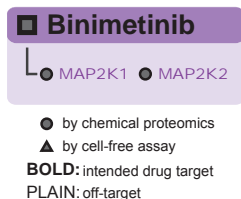

**Supplemental Figure S3L. Analysis of AML cell line ML-2 lacking a known driver mutation.**

Arrows/arrow heads indicate high-ranking kinases of the MAPK1/3 pathway; red asterisk: NRAS mutated.



# OCI-AML3

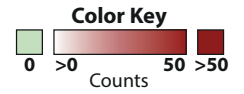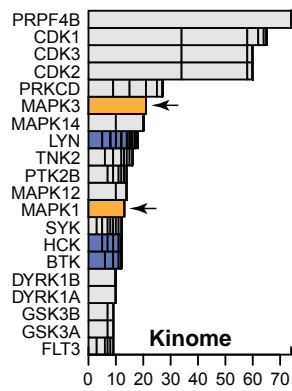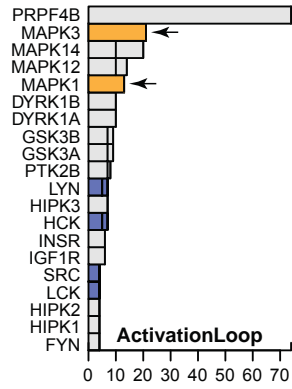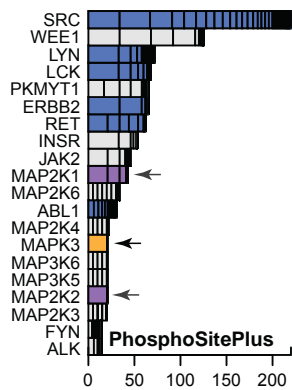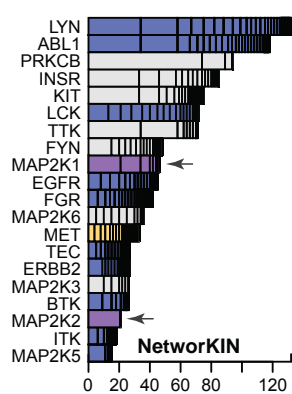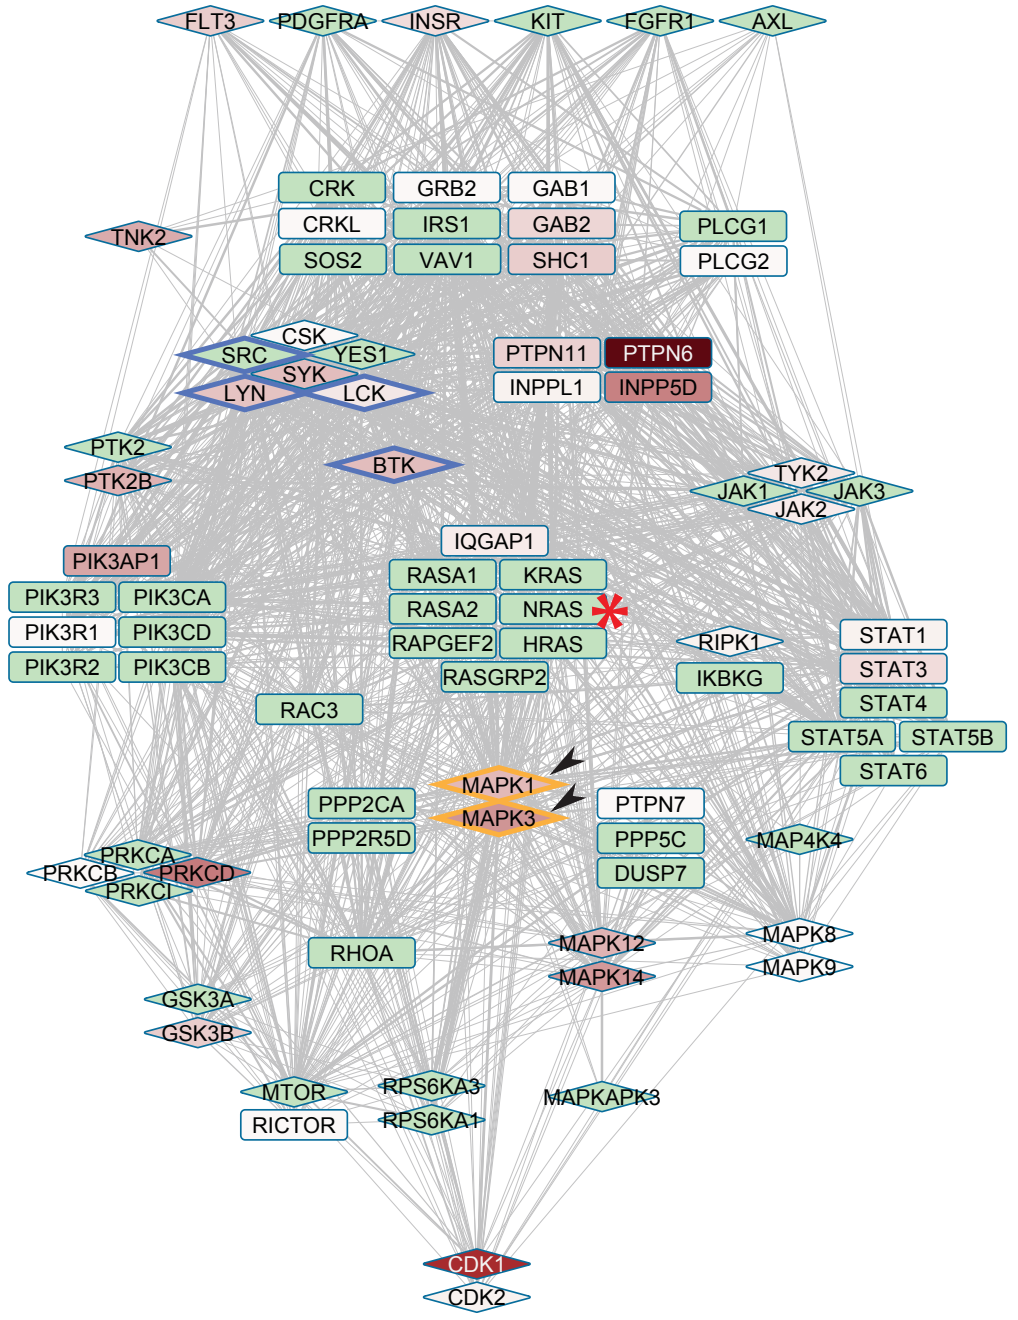

- ◆ GDC-0994
- ▲ Binimetinib
- Ibrutinib

**GDC-0994**

- MAPK1
- MET
- MAPK3
- TAOK1
- CAMK1G

**Binimetinib**

- MAP2K1
- MAP2K2

● by chemical proteomics  
▲ by cell-free assay  
BOLD: intended drug target  
PLAIN: off-target

**ibrutinib**

- BTK
- EGFR
- HCK
- LCK
- LYN
- MAP2K5
- PTK6
- RIPK2
- RIPK3
- SRC
- TEC
- YES1
- ▲ ABL
- ▲ BLK
- ▲ BMX
- ▲ BRK
- ▲ ERBB2
- ▲ FGR
- ▲ FRK
- ▲ ITK
- ▲ JAK3
- ▲ RET

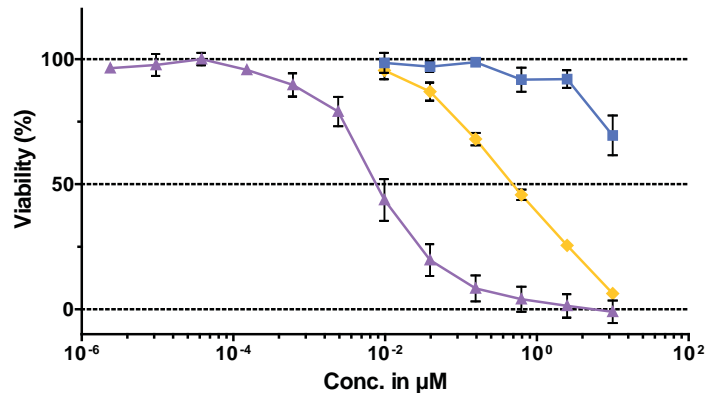

**Supplemental Figure S3M. Analysis of AML cell line OCI-AML3 lacking a known driver mutation.**  
Arrows/arrow heads indicate high-ranking kinases of the MAPK1/3 pathway; red asterisk: NRAS mutated.

# THP-1

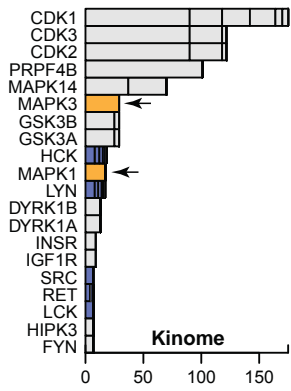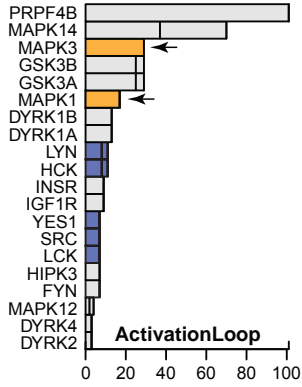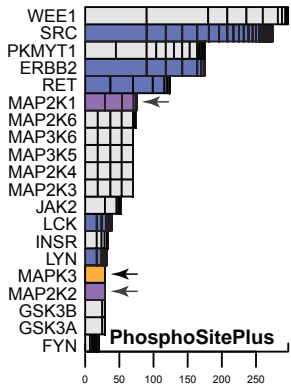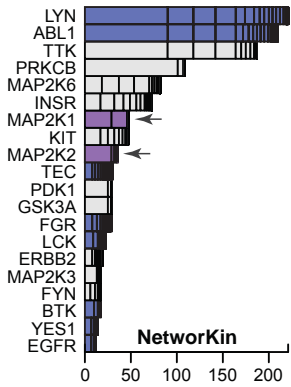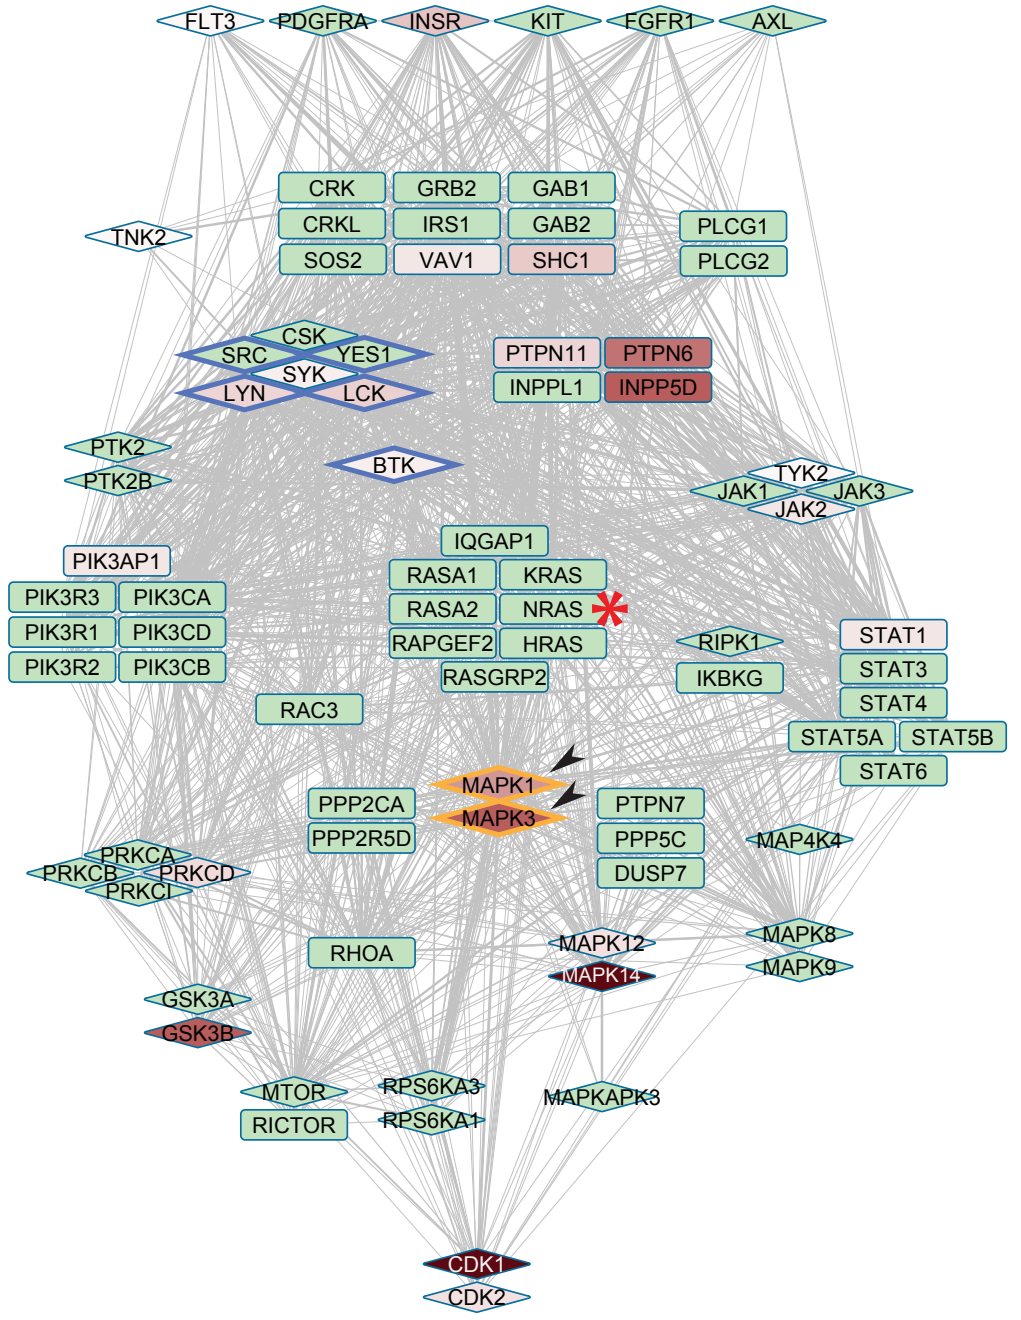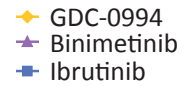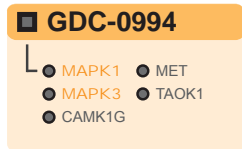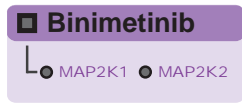

● by chemical proteomics  
▲ by cell-free assay  
**BOLD**: intended drug target  
**PLAIN**: off-target

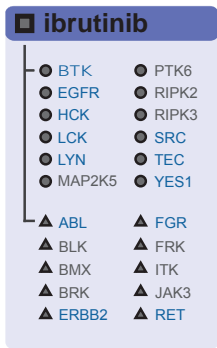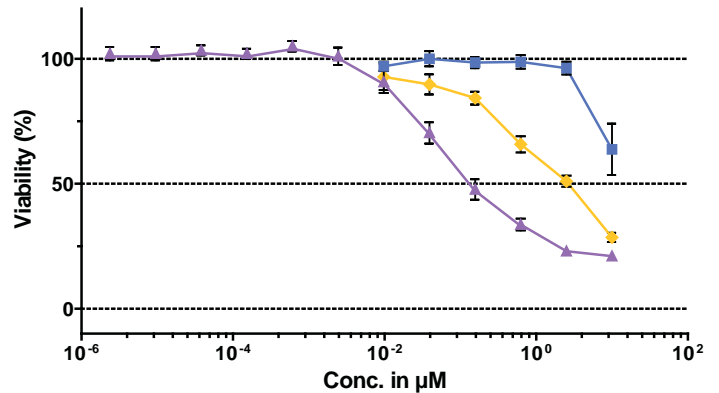

**Supplemental Figure S3N. Analysis of AML cell line THP-1 lacking a known driver mutation.**

Arrows/arrow heads indicate high-ranking kinases of the MAPK1/3 pathway; red asterisk: NRAS mutated.

# NB4

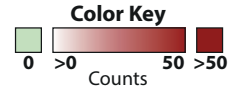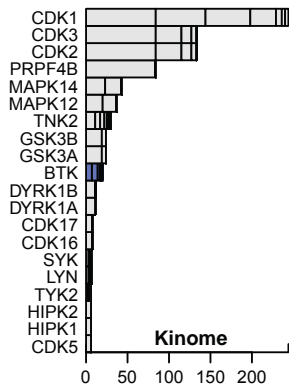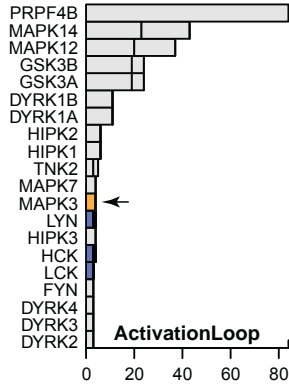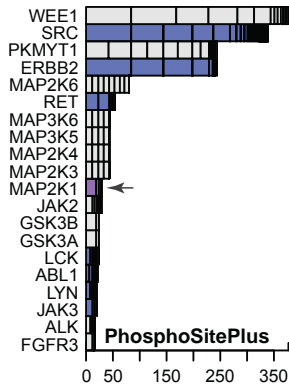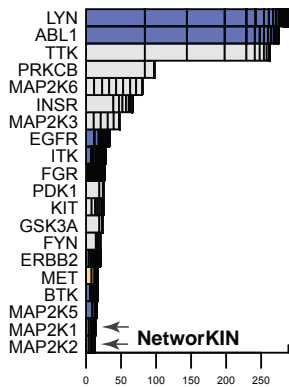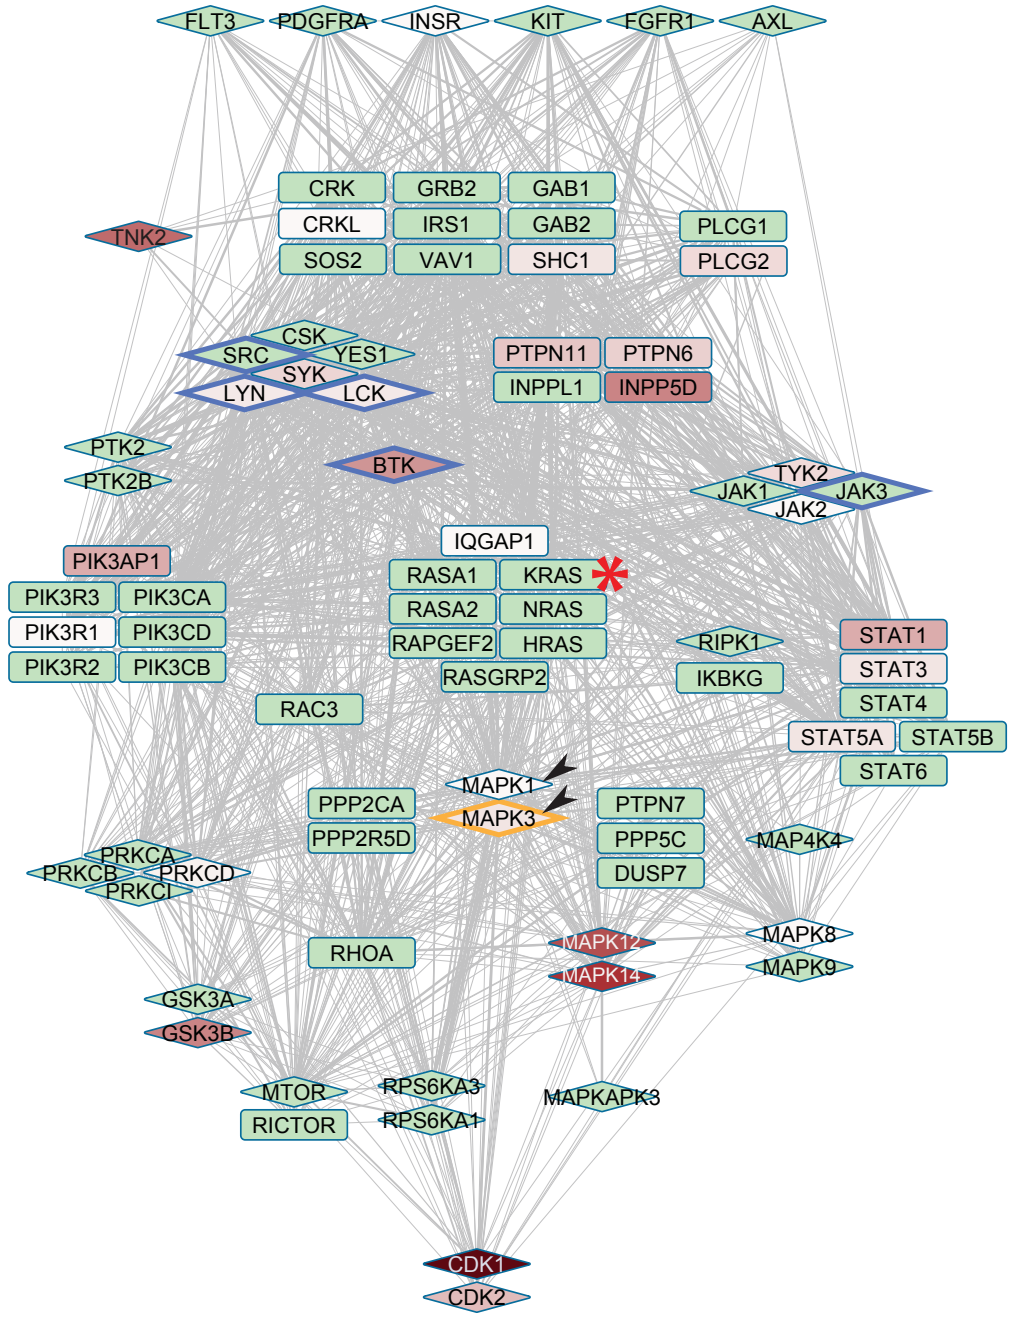

**GDC-0994**

- MAPK1 ● MET
- MAPK3 ● TAOK1
- CAMK1G

**Binimetinib**

- MAP2K1 ● MAP2K2

● by chemical proteomics  
▲ by cell-free assay  
BOLD: intended drug target  
PLAIN: off-target

**ibrutinib**

- BTK ● PTK6
- EGFR ● RIPK2
- HCK ● RIPK3
- LCK ● SRC
- LYN ● TEC
- MAP2K5 ● YES1
- ▲ ABL ▲ FGR
- ▲ BLK ▲ FRK
- ▲ BMX ▲ ITK
- ▲ BRK ▲ JAK3
- ▲ ERBB2 ▲ RET

◆ GDC-0994  
▲ Binimetinib  
■ Ibrutinib

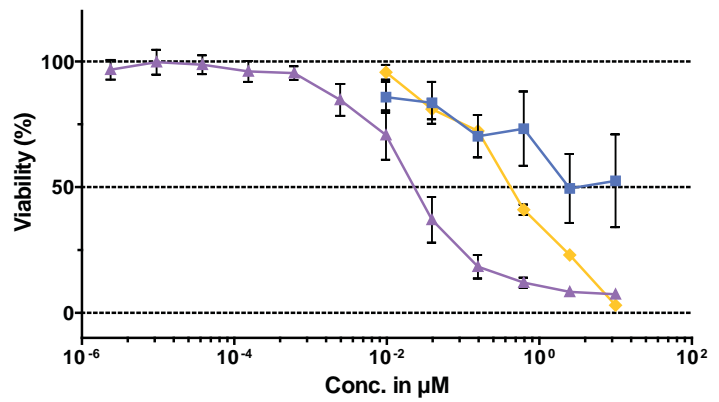

**Supplemental Figure S30. Analysis of AML cell line NB4 lacking a known driver mutation.**

Arrows/arrow heads indicate high-ranking kinases of the MAPK1/3 pathway; red asterisk: KRAS mutated.

# ME-1

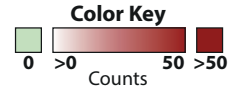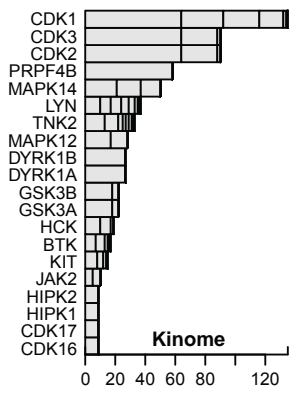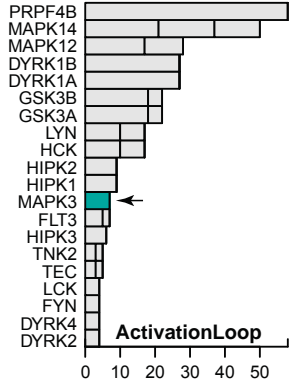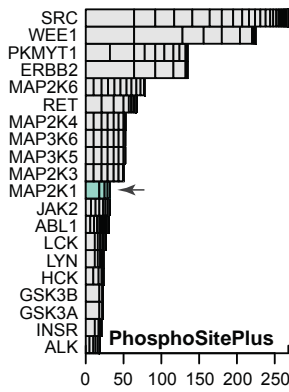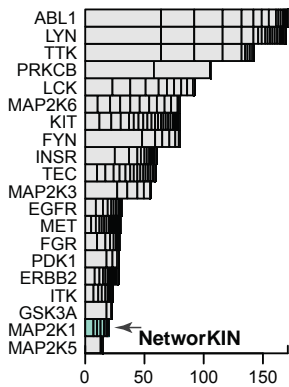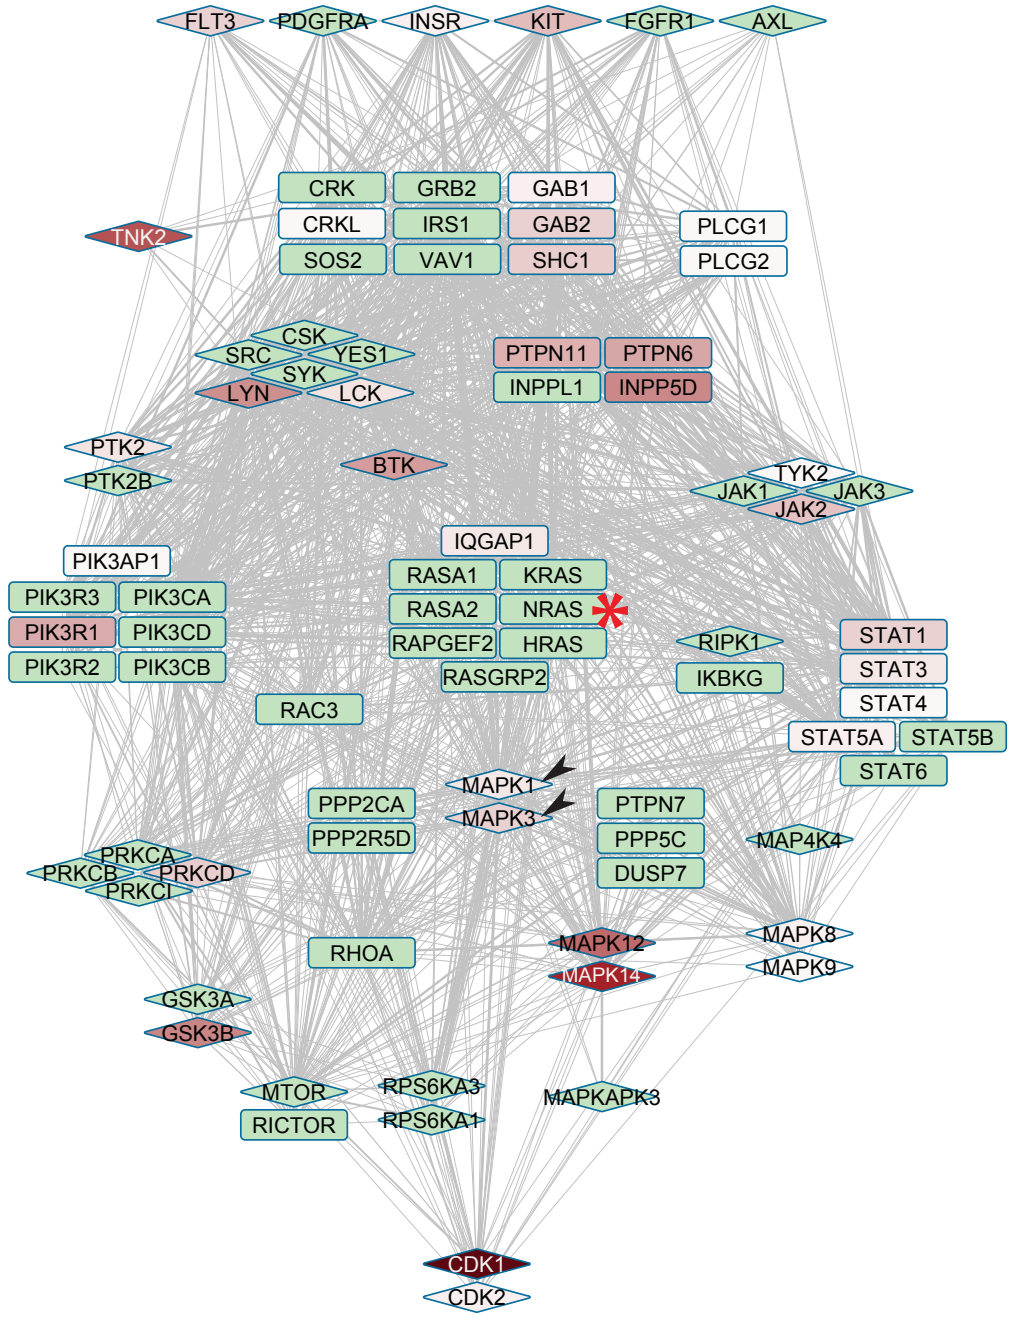

**Supplemental Figure S3P. Analysis of AML cell line ME-1 lacking a known driver mutation.**  
 Arrows/arrow heads indicate high-ranking kinases of the MAPK1/3 pathway; red asterisk: NRAS mutated.

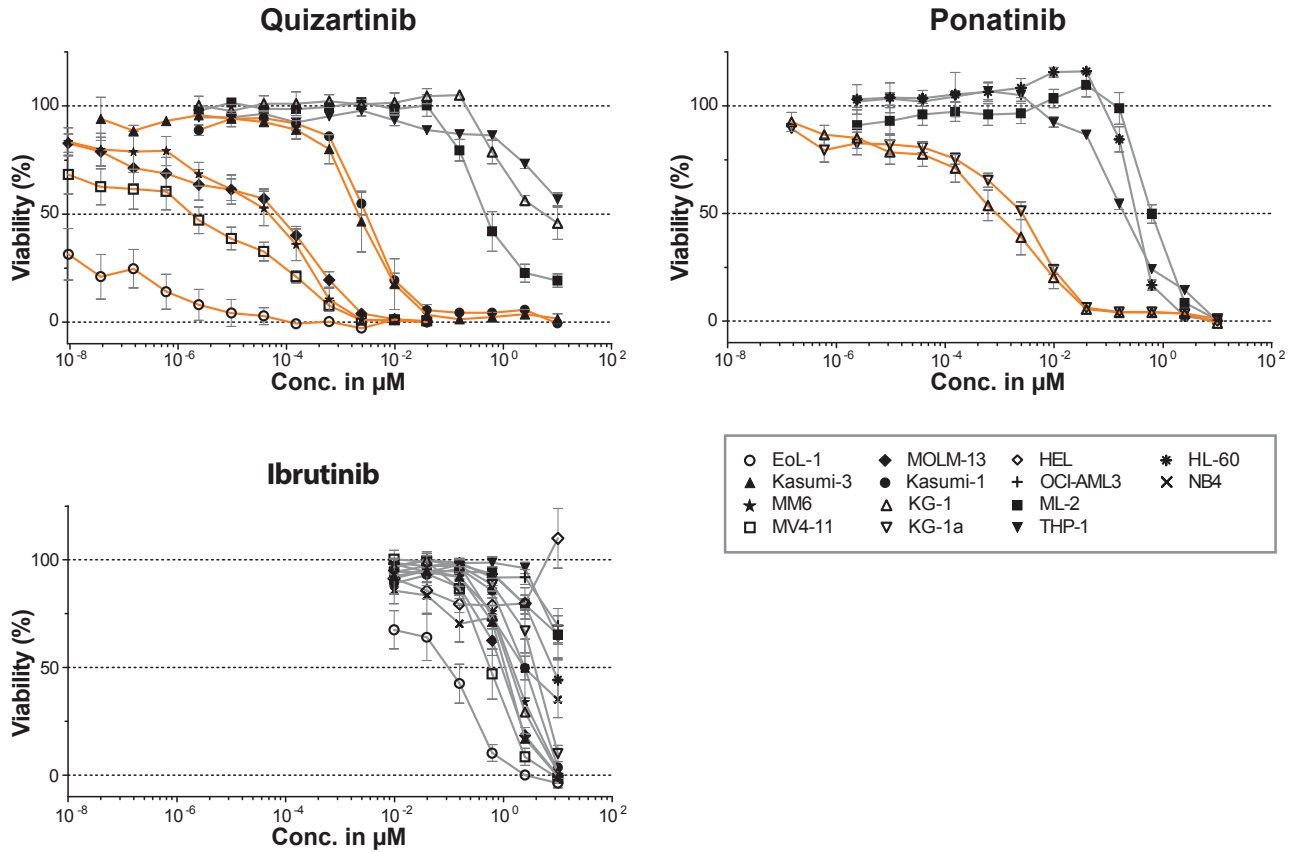

**Supplemental Figure S4. Drug response curves for quizartinib, ponatinib, and ibrutinib.**

Graphs show the drug response curves of cell lines for a drug. Cell lines with an indicated driver kinase targeted by a drug (orange line) show drug responses at lower drug concentrations, compared to control cell lines without a target kinase (grey line). The drug ibrutinib was used as a control, with similar responses for all cell lines.

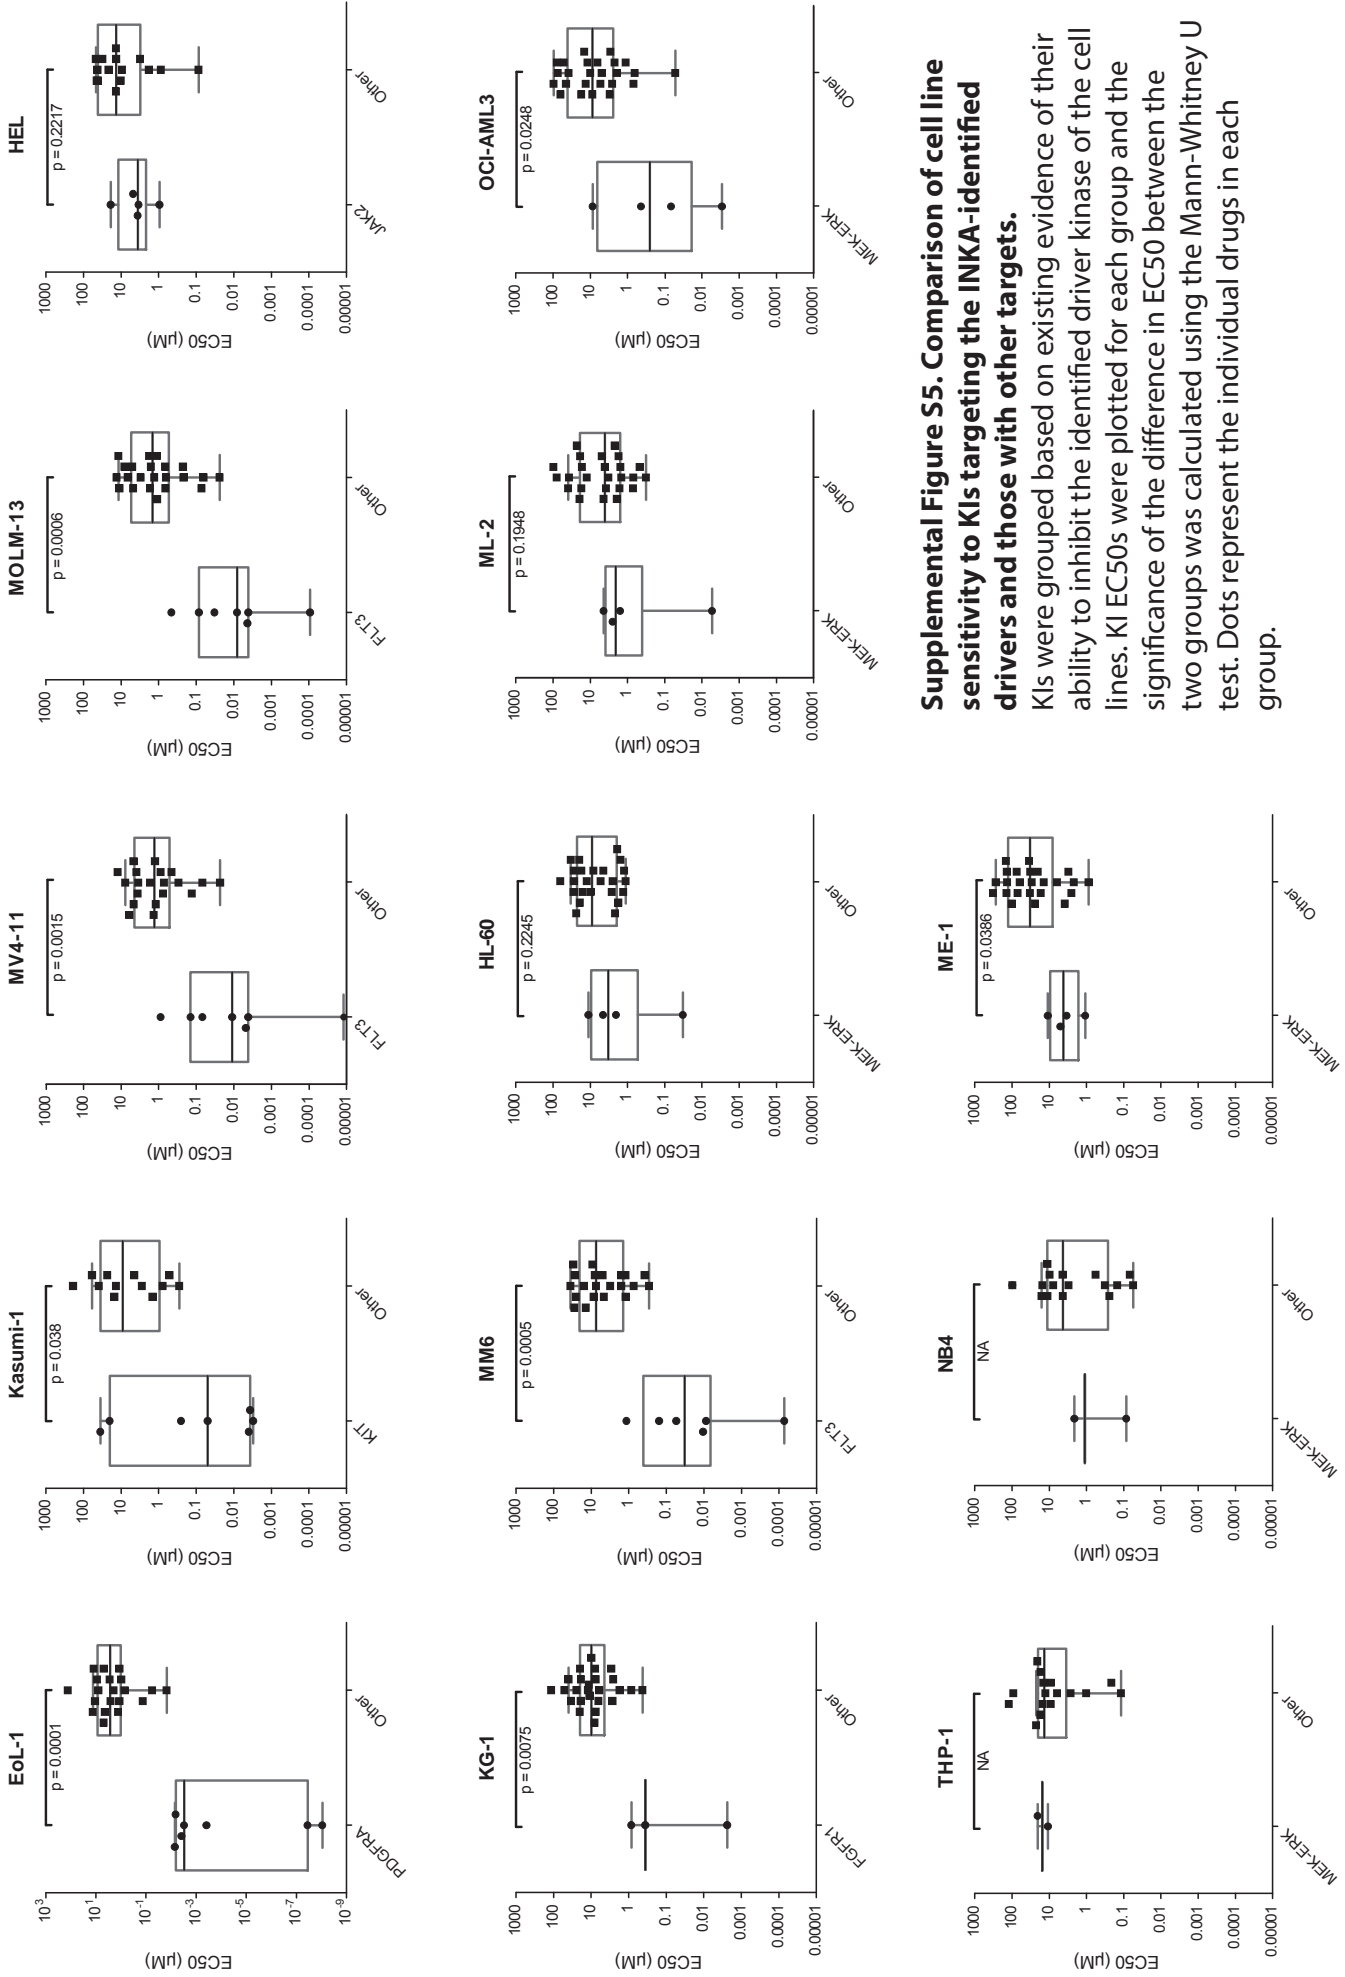

**Supplemental Figure S5. Comparison of cell line sensitivity to KIs targeting the INKA-identified drivers and those with other targets.** KIs were grouped based on existing evidence of their ability to inhibit the identified driver kinase of the cell lines. KI EC50s were plotted for each group and the significance of the difference in EC50 between the two groups was calculated using the Mann-Whitney U test. Dots represent the individual drugs in each group.

# Patient 1

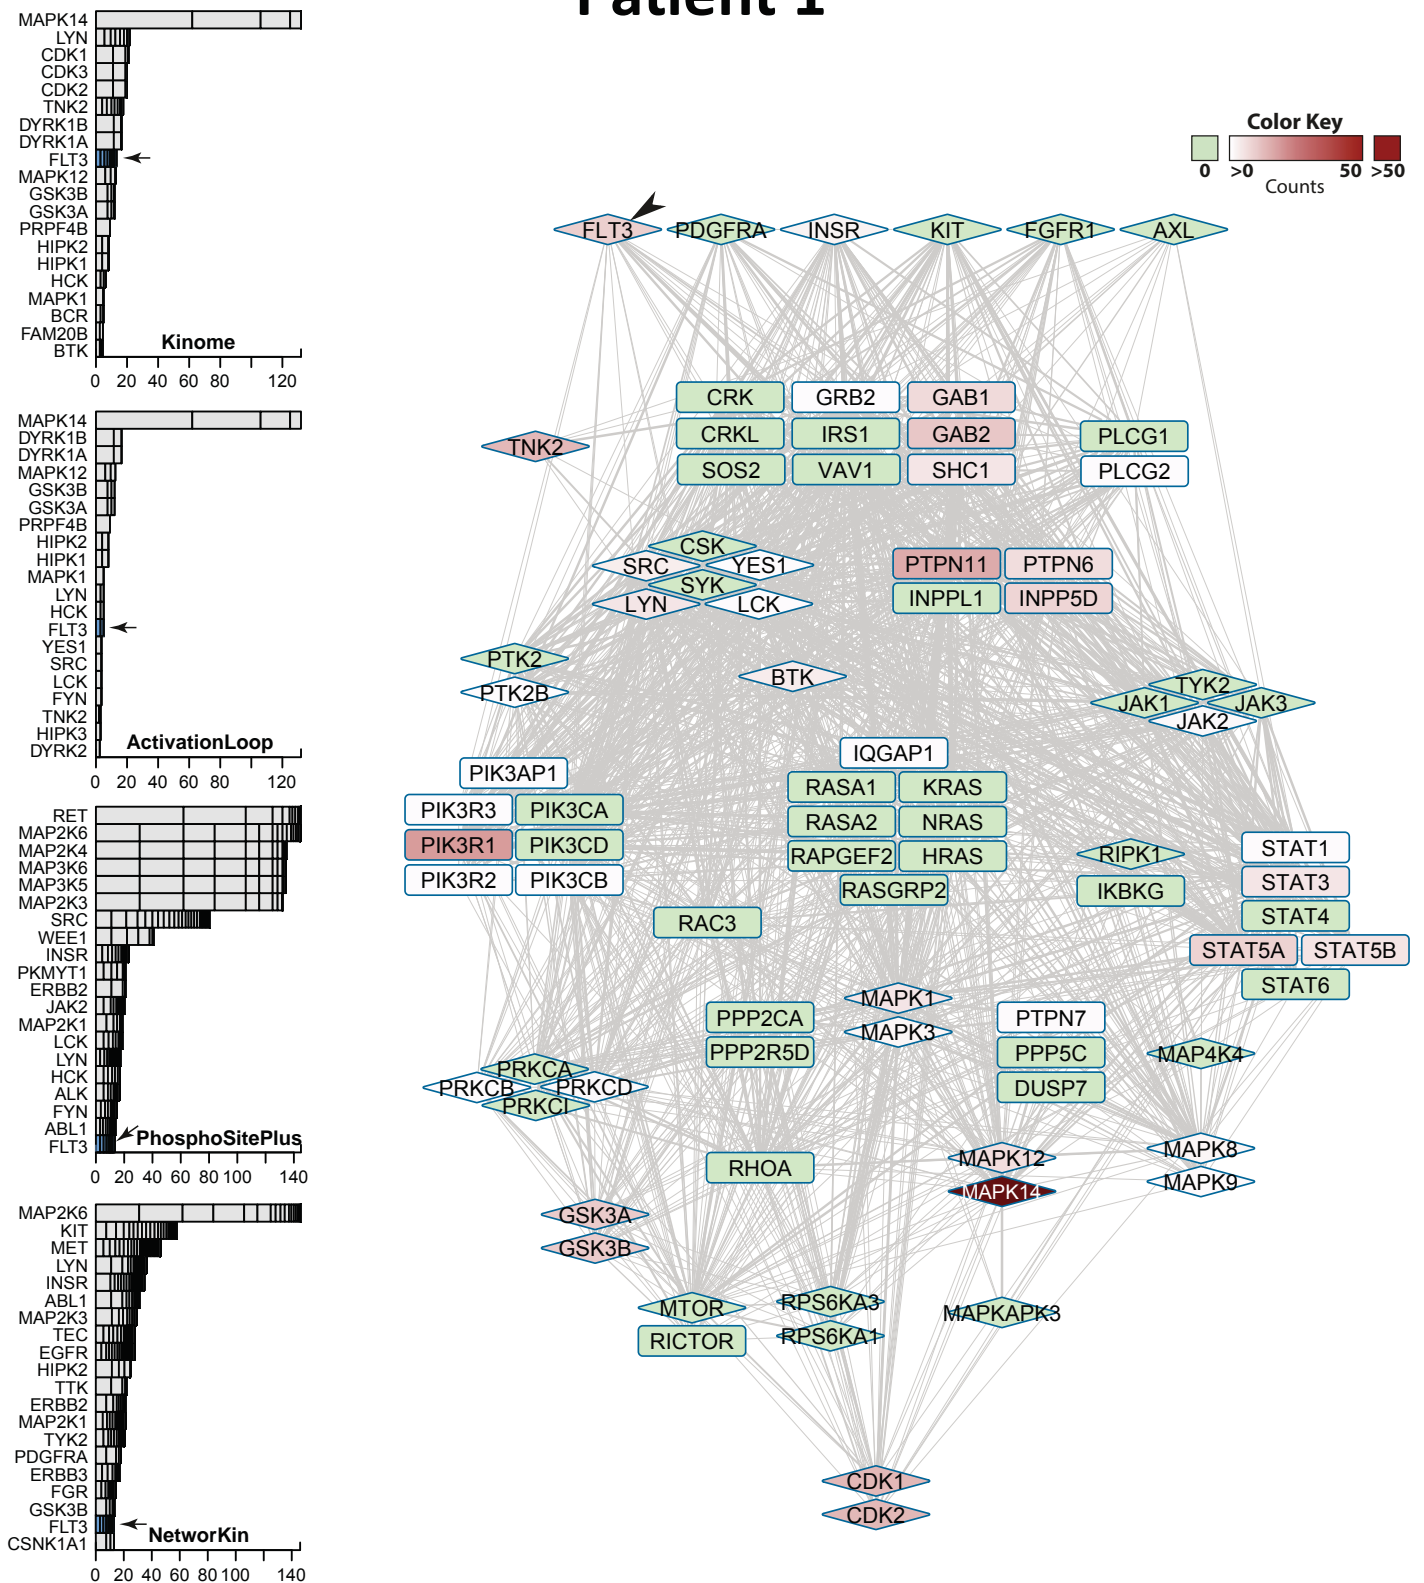

## Supplementary Figure S6A. Summary of phosphoproteomic analysis of blood sample from patient 1.

*Left.* Overview of bar graphs ranking kinases according to their own phosphorylation (*kinome*, phosphorylation anywhere on the protein; *activation loop*, phosphorylation of the activation segment) and according to the phosphorylation of their substrates (*PhosphoSitePlus*, known substrates cataloged in the PhosphoSitePlus database; *NetworKin*, predicted substrates assigned by the NetworKin algorithm). Arrows and blue highlighting indicate the FLT3 kinase.

*Right.* Kinases inferred to be active were mapped in Cytoscape onto pathways in a signaling network (edges from the STRING knowledge base). Node fill colors were rendered according to spectral counts as a proxy of activity. Arrow head indicates the FLT3 kinase.

## Patient 2

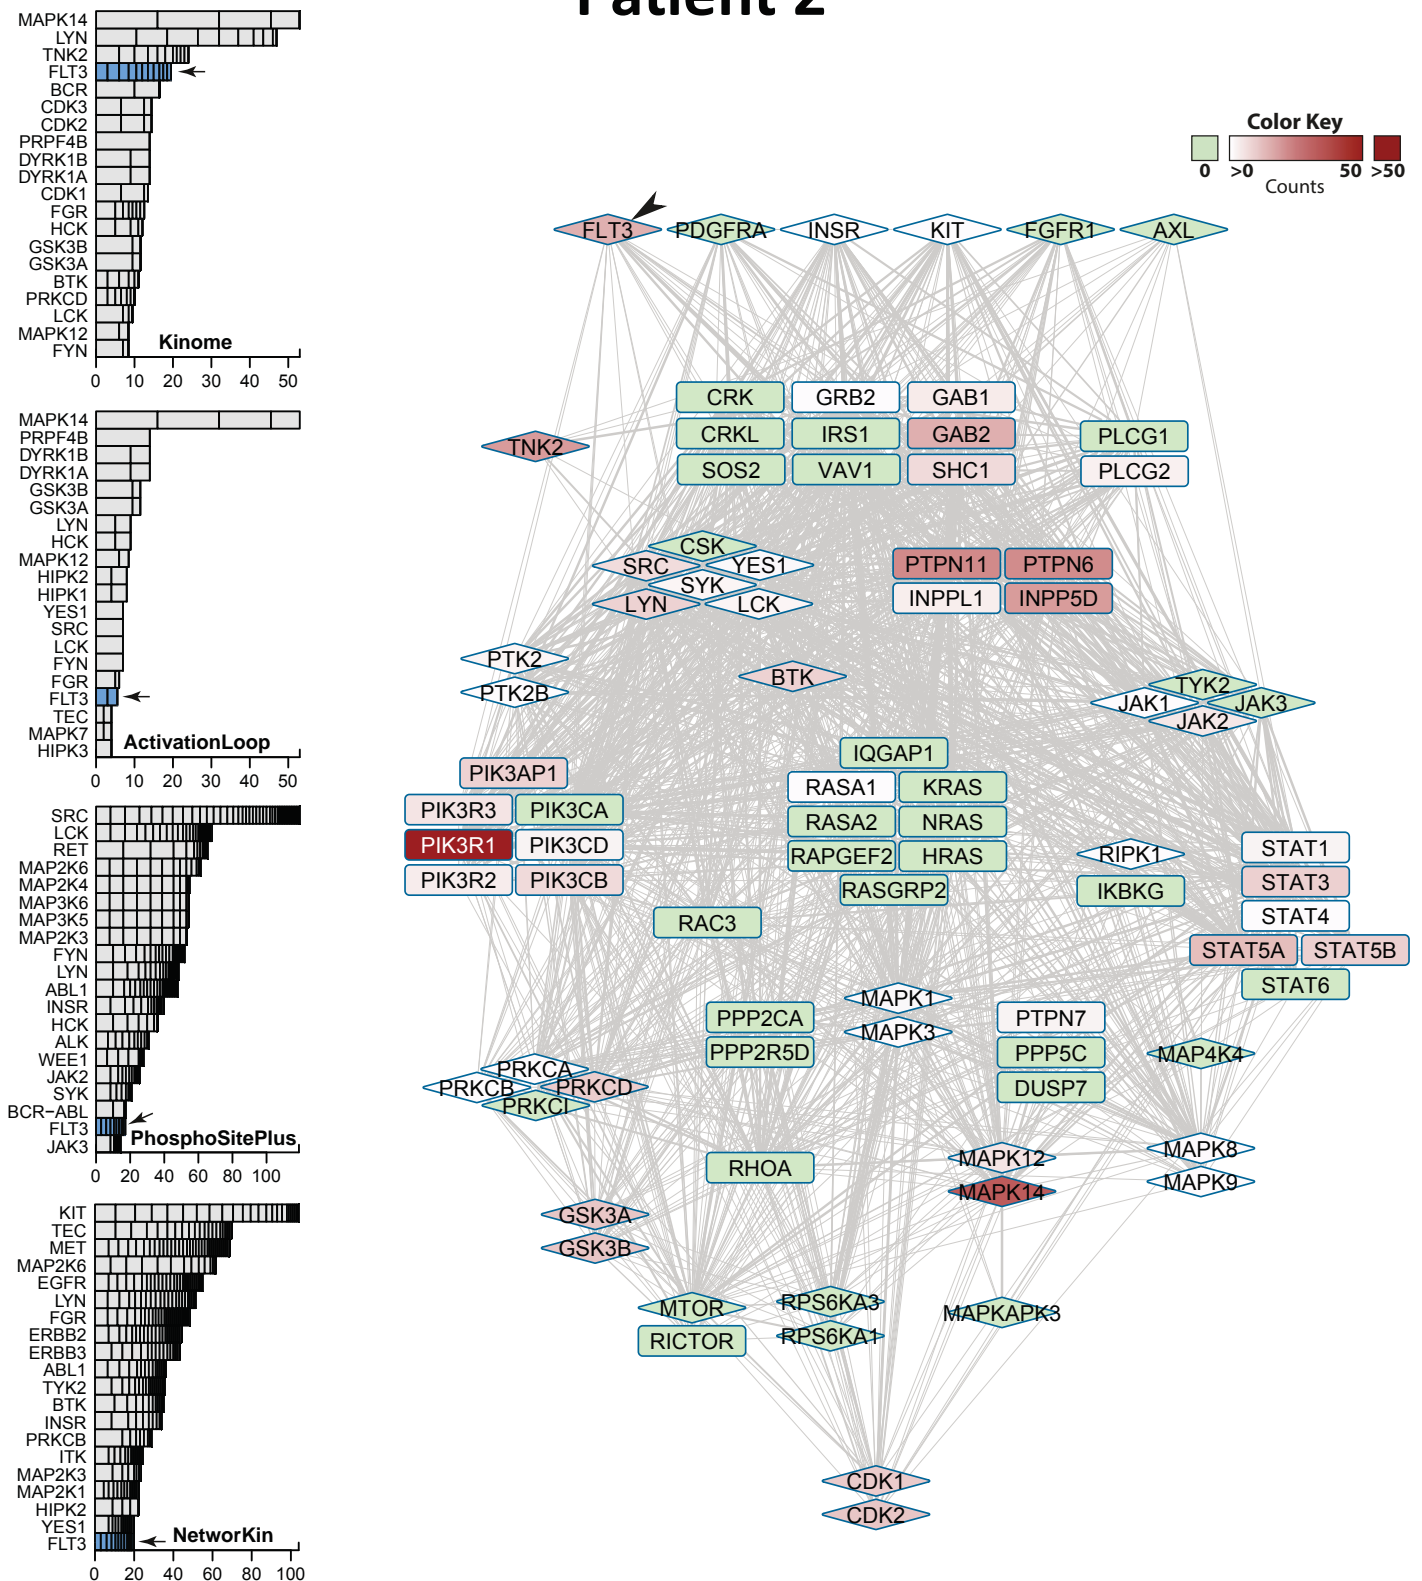

### Supplementary Figure S6B. Summary of phosphoproteomic analysis of blood sample from patient 2.

*Left.* Overview of bar graphs ranking kinases according to their own phosphorylation (*kinome*, phosphorylation anywhere on the protein; *activation loop*, phosphorylation of the activation segment) and according to the phosphorylation of their substrates (*PhosphoSitePlus*, known substrates cataloged in the PhosphoSitePlus database; *NetworkKin*, predicted substrates assigned by the NetworkKin algorithm). Arrows and blue highlighting indicate the FLT3 kinase.

*Right.* Kinases inferred to be active were mapped in Cytoscape onto pathways in a signaling network (edges from the STRING knowledge base). Node fill colors were rendered according to spectral counts as a proxy of activity. Arrow head indicates the FLT3 kinase.



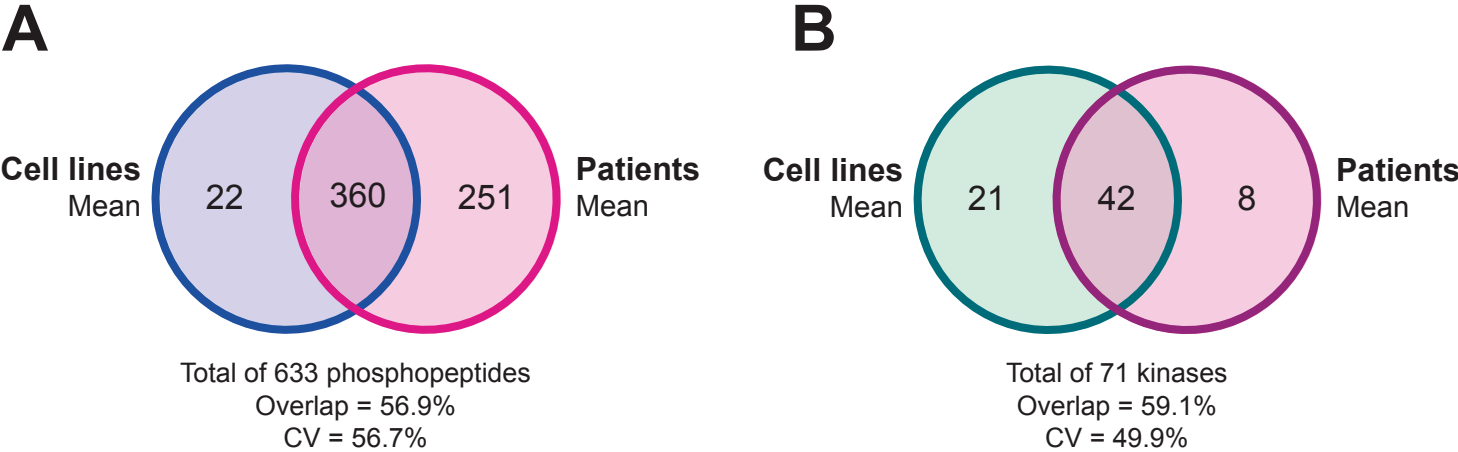

**Supplemental Figure S7. Comparison between FLT3-ITD mutant cell line data and FLT3-ITD mutant patient data.**

A. Overlap of phosphopeptides found in the three FLT3-ITD positive cell lines MV4-11, MOLM-13, and Kasumi-6 (blue) and those found in two FLT3-ITD positive patient samples (red).  
B. Overlap of phosphokinases found in FLT3-ITD positive cell lines and those found in FLT3-ITD positive patient samples.

# Supplemental Figure 8

Annotated MS/MS spectra of phosphopeptides  
identified in AML cell lines

NTY(ph)NQTALDIVNQFTTSQASR-2+

Source : QE1\_140908\_OPL1013\_CVA\_pTyrIP\_AML\_HEL Scan : 46990

Andromeda score : 405.37

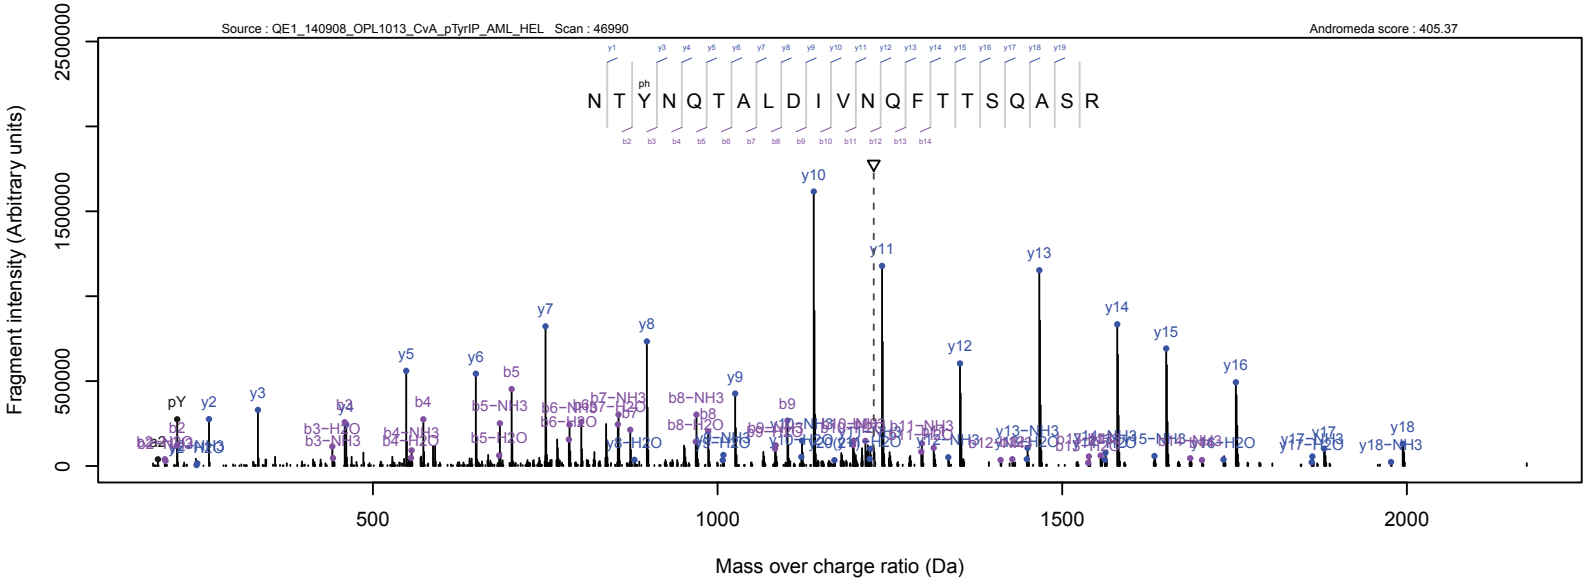

SPSSCNDLY(ph)ATVKDFEK-2+

Source : QE1\_140612\_OPL1013\_CVA\_phosphoproteomic\_landscape\_AML\_A Scan : 33734

Andromeda score : 357.37

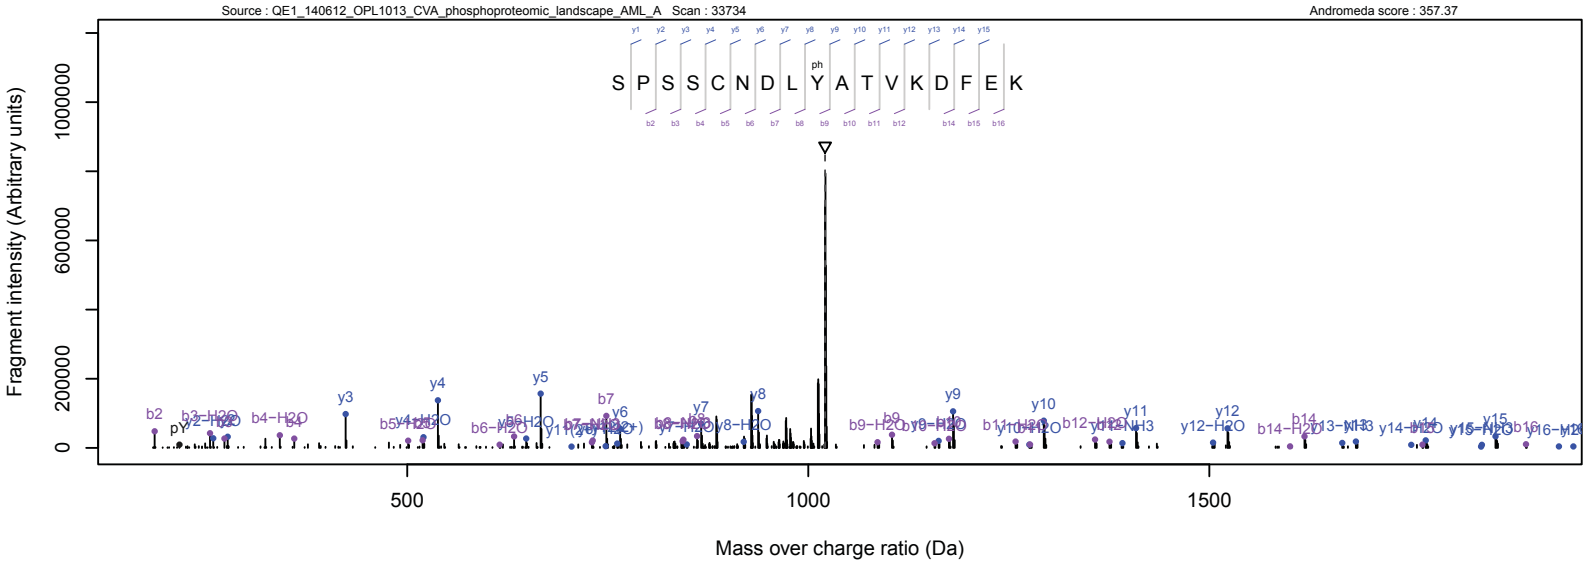

DKYGNEGY(ph)IPSNYVTGK-2+

Source : QE1\_140612\_OPL1013\_CVA\_phosphoproteomic\_landscape\_AML\_C Scan : 21672

Andromeda score : 344.03

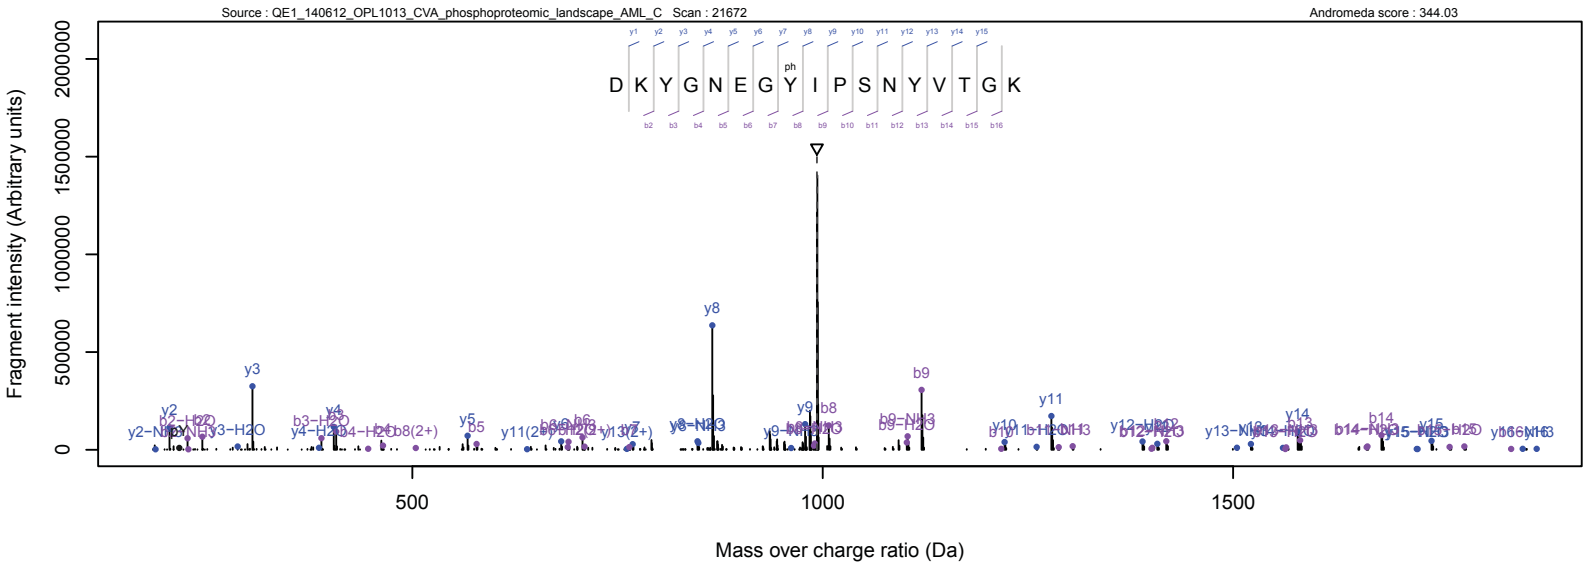

AGISEAQLTDAETSKLIY(ph)DFIEDQGGLEAVR-3+

Source : QE1\_140822\_OPL1013\_CVA\_pTyrIP\_AML\_cell\_lines\_part2\_B Scan : 45402

Andromeda score : 340.95

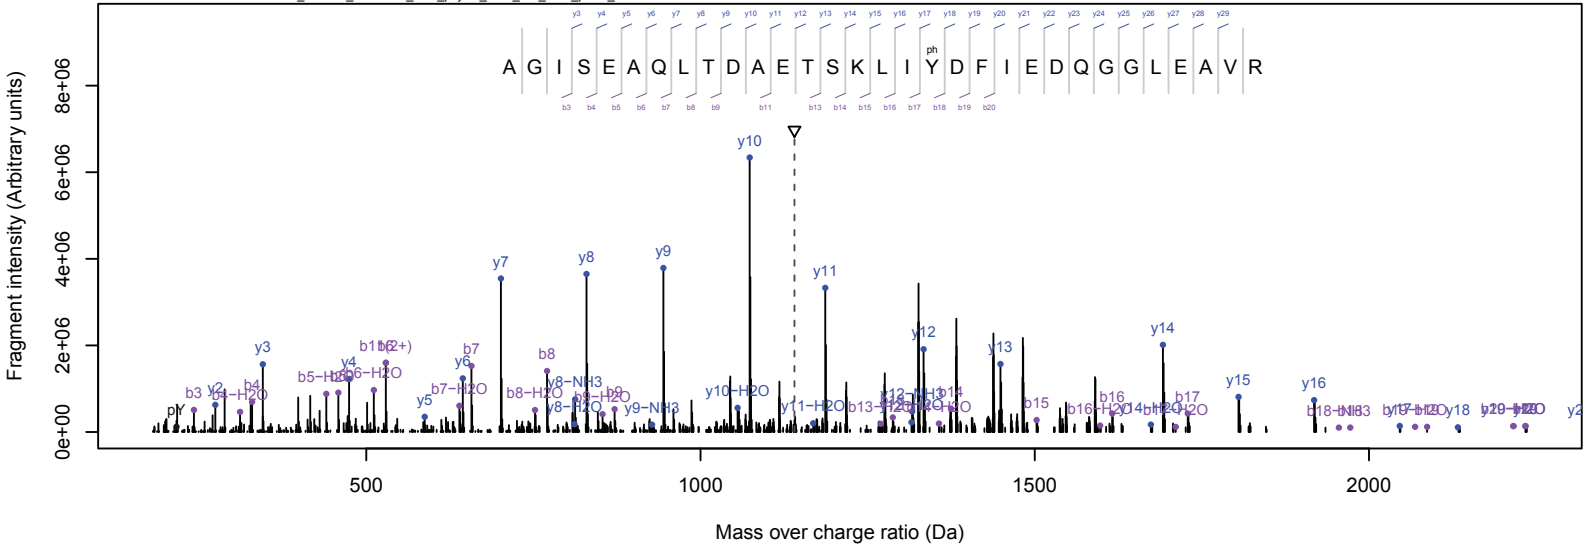

HFTVVGDDY(ph)HAWNINYK-2+

Source : QE1\_140612\_OPL1013\_CVA\_phosphoproteomic\_landscape\_AML\_C Scan : 32192

Andromeda score : 335.62

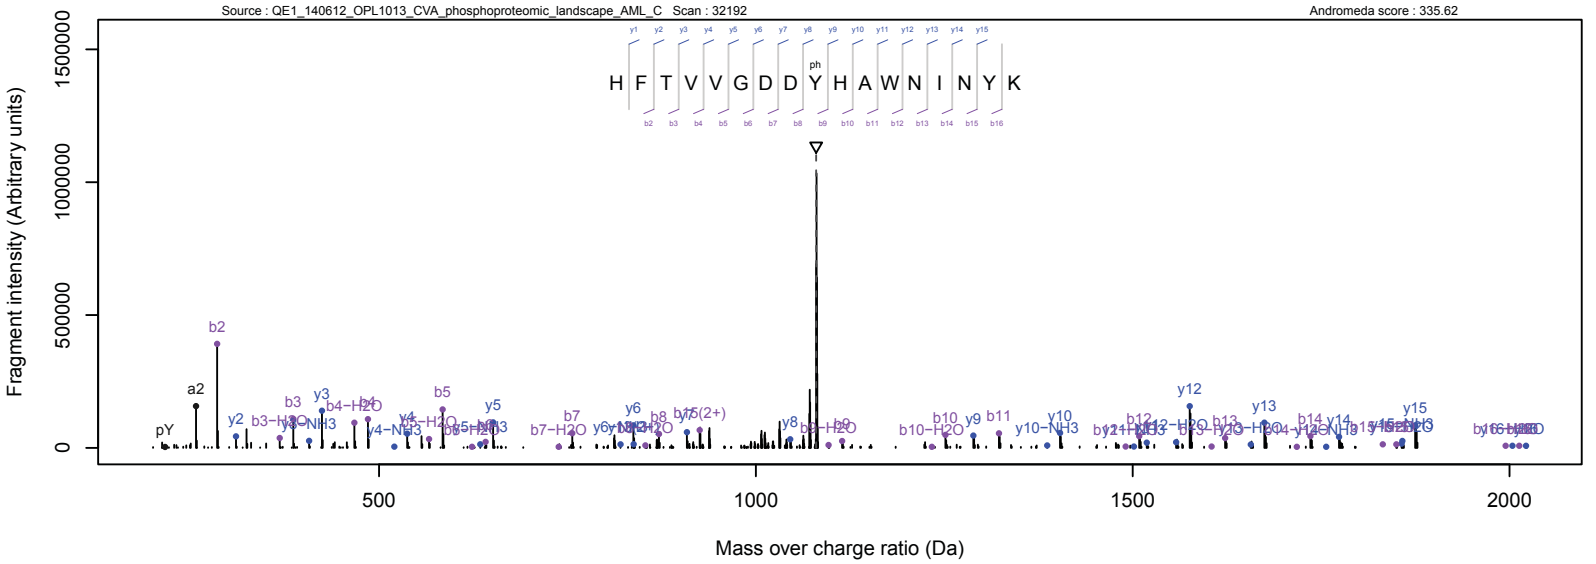

Y(ph)AGSALQYEDVSTAVQNLQK-2+

Source : QE1\_140612\_OPL1013\_CVA\_phosphoproteomic\_landscape\_AML\_F Scan : 37695

Andromeda score : 324.12

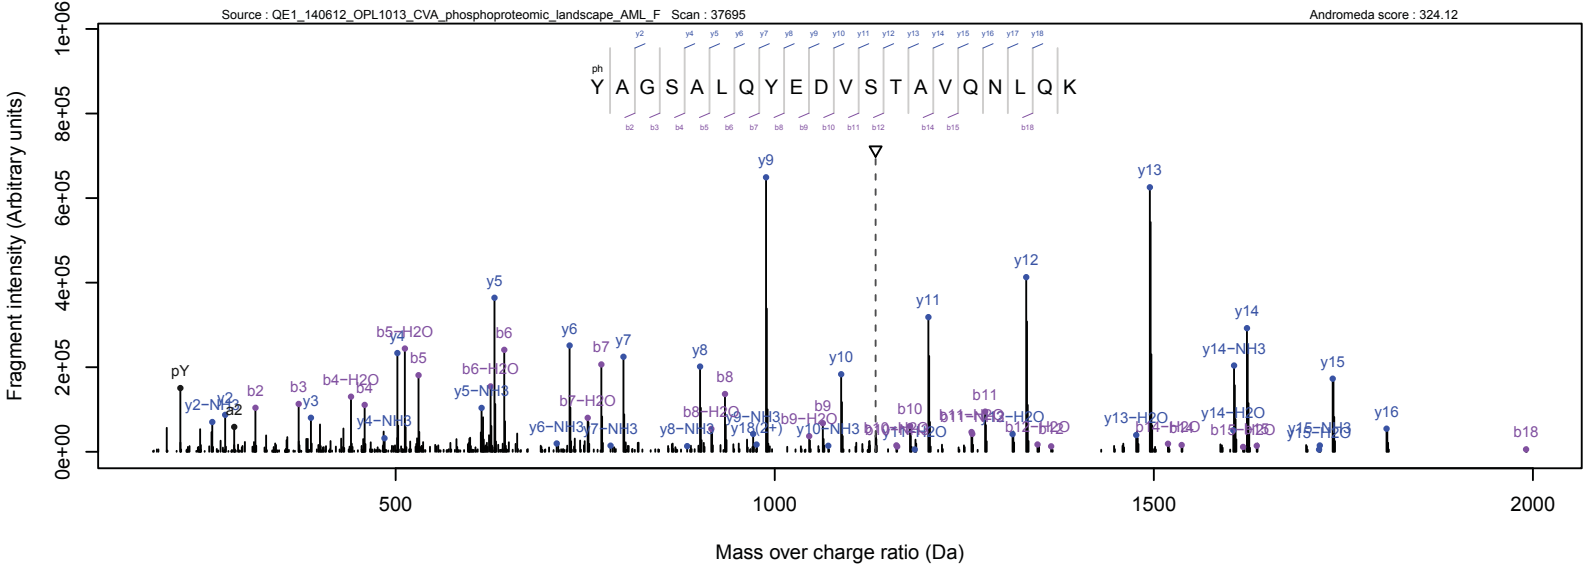

GTGY(ph)IKTELISVSEVHPSR-2+

Source : QE1\_140612\_OPL1013\_CVA\_phosphoproteomic\_landscape\_AML\_C Scan : 28218

Andromeda score : 323.14

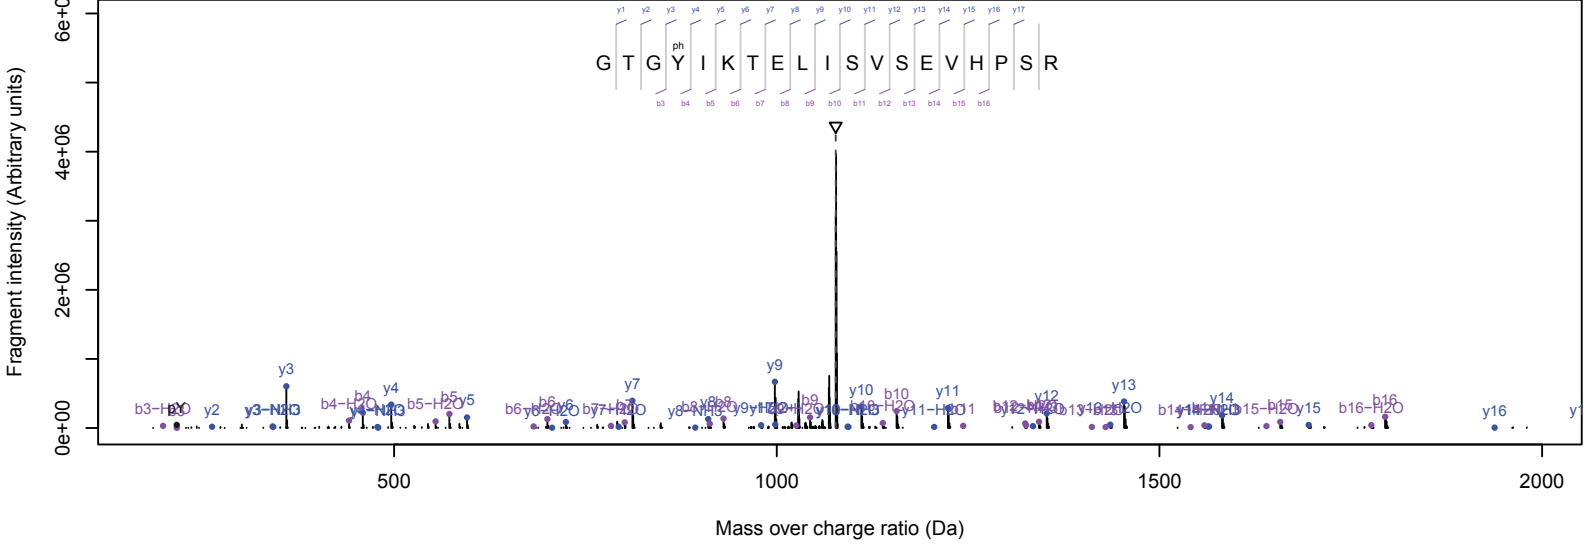

EEDPTLTEEISAMY(ph)SSVKNKPGQLVNK-3+

Source : QE1\_140612\_OPL1013\_CVA\_phosphoproteomic\_landscape\_AML\_B Scan : 38611

Andromeda score : 323.04

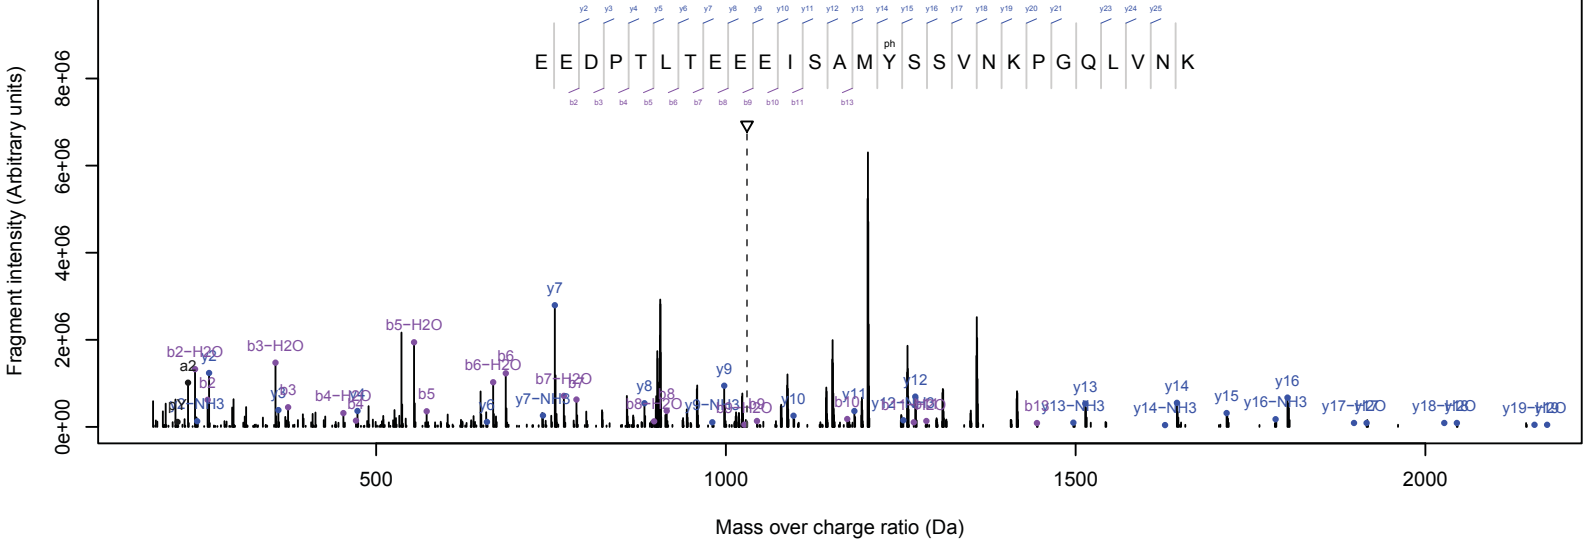

LCDFGSASHVADNDITPYLVS R-2+

Source : QE1\_140612\_OPL1013\_CVA\_phosphoproteomic\_landscape\_AML\_A Scan : 35089

Andromeda score : 320.88

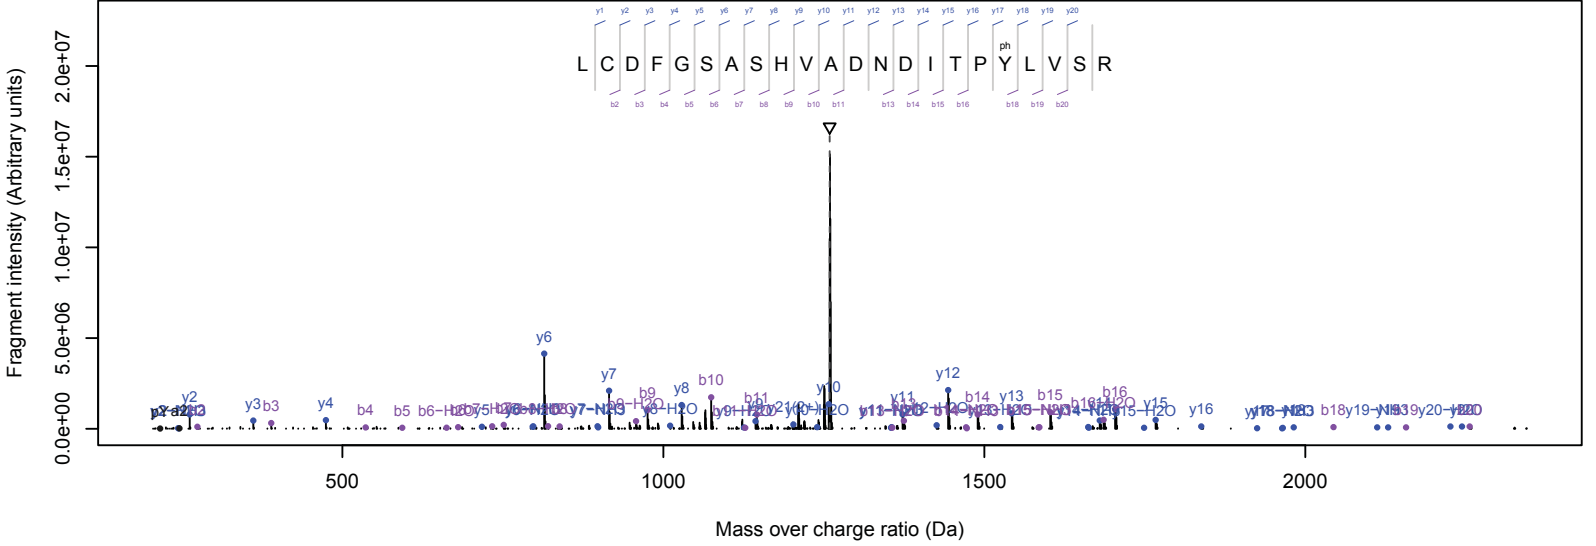

**TWTEIFKEHNFSFY(ph)PTFQSHPNSSMPGSR-3+**

Source : QE1\_140612\_OPL1013\_CVA\_phosphoproteomic\_landscape\_AML\_C Scan : 43699

Andromeda score : 318.57

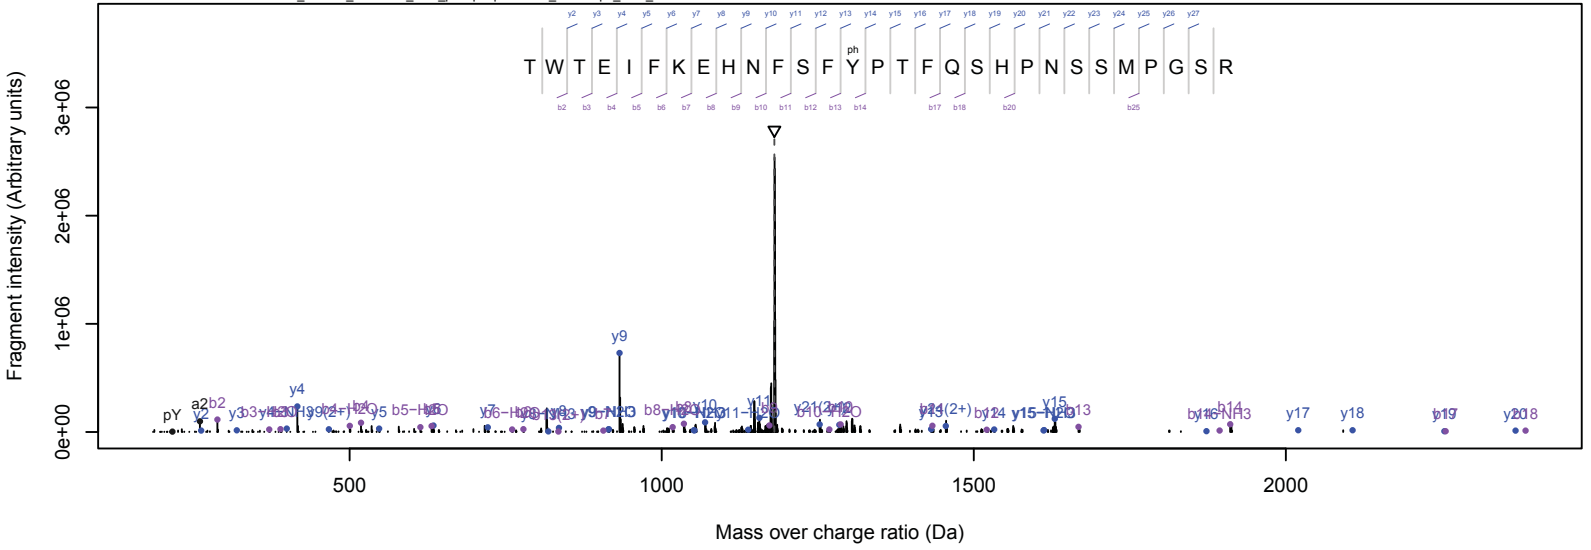

**GSLTGSETDNEDVY(ph)TFK-2+**

Source : QE1\_140908\_OPL1013\_CvA\_pTyrIP\_AML\_Kasumi6 Scan : 24626

Andromeda score : 318.32

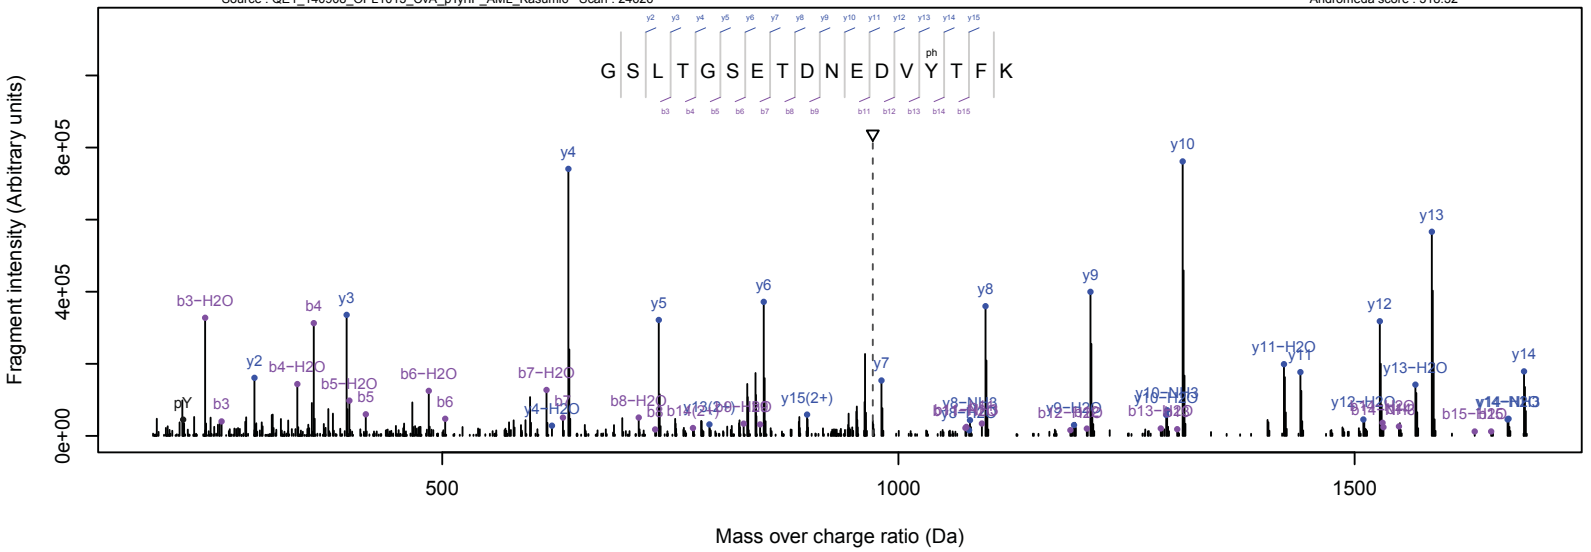

**QY(ph)TSPEEIDAQLQAEK-2+**

Source : QE1\_140612\_OPL1013\_CVA\_phosphoproteomic\_landscape\_AML\_C Scan : 25982

Andromeda score : 316.97

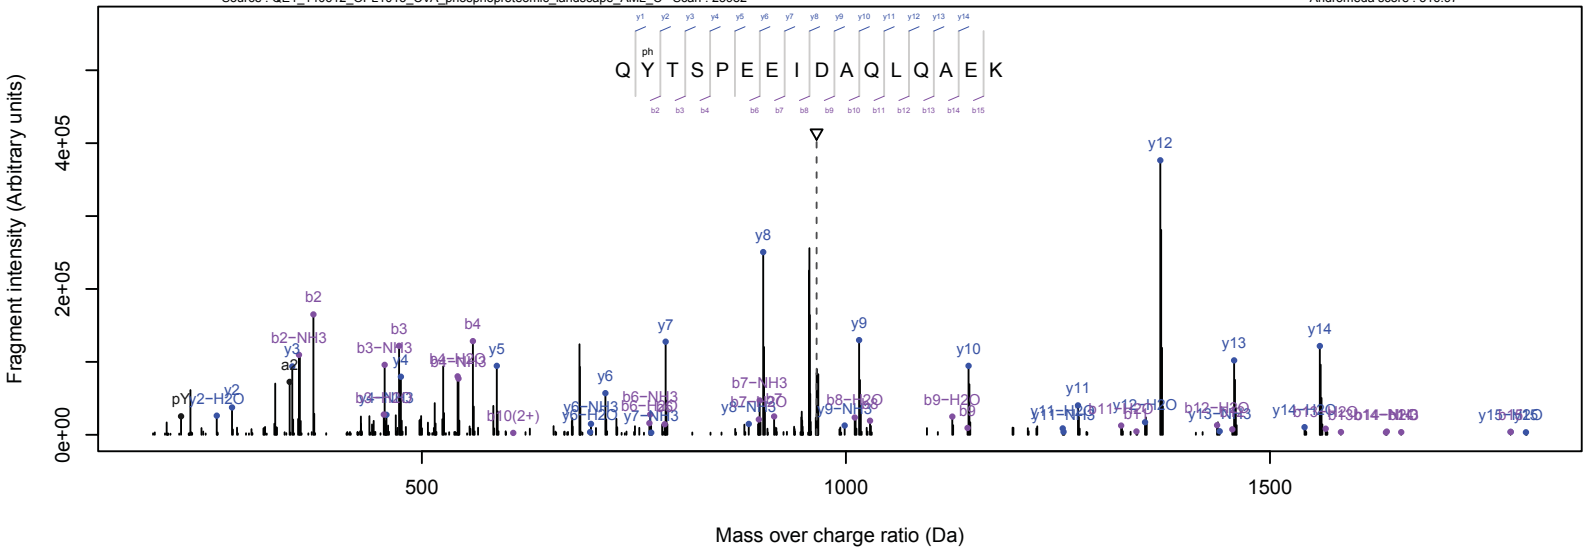

(ac)AQQAADKYL(ph)VDKNFINNPLAQADWAAK-3+

Source : QE1\_140822\_OPL1013\_CvA\_pTyrIP\_AML\_cell\_lines\_part2\_B Scan : 41777

Andromeda score : 314.57

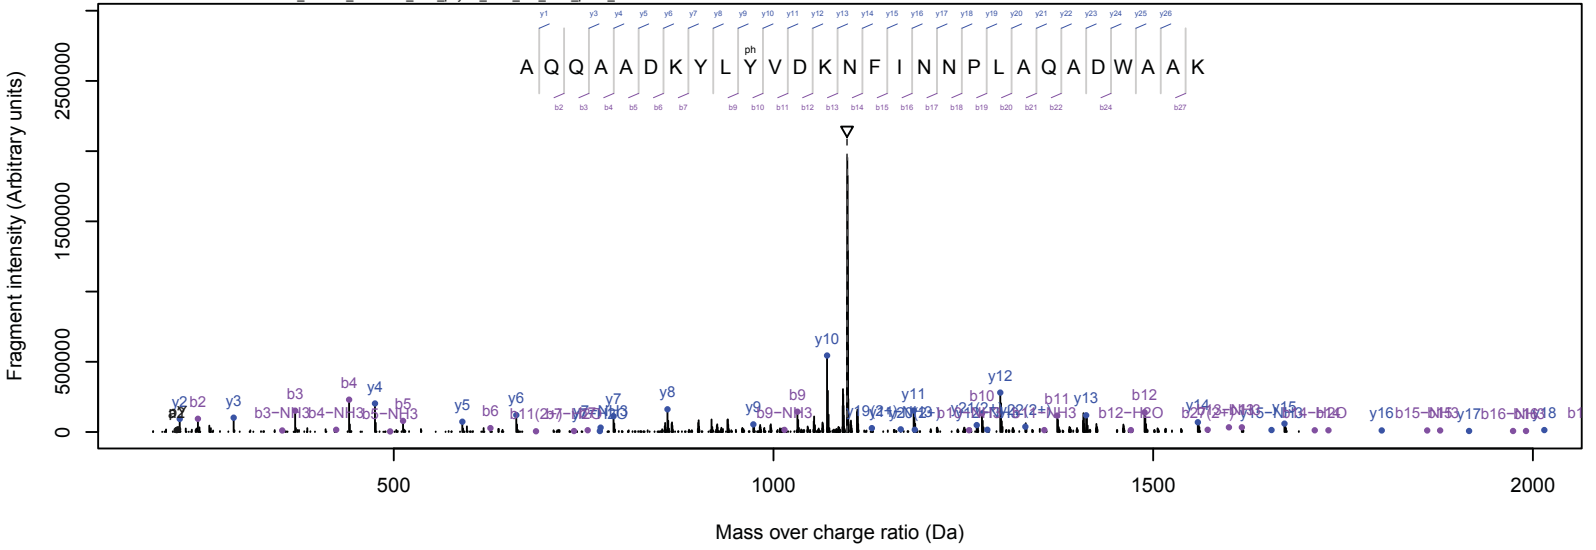

VTGVTNYVMQY(ph)VTVPLRK-2+

Source : QE1\_140612\_OPL1013\_CVA\_phosphoproteomic\_landscape\_AML\_C Scan : 42257

Andromeda score : 313.76

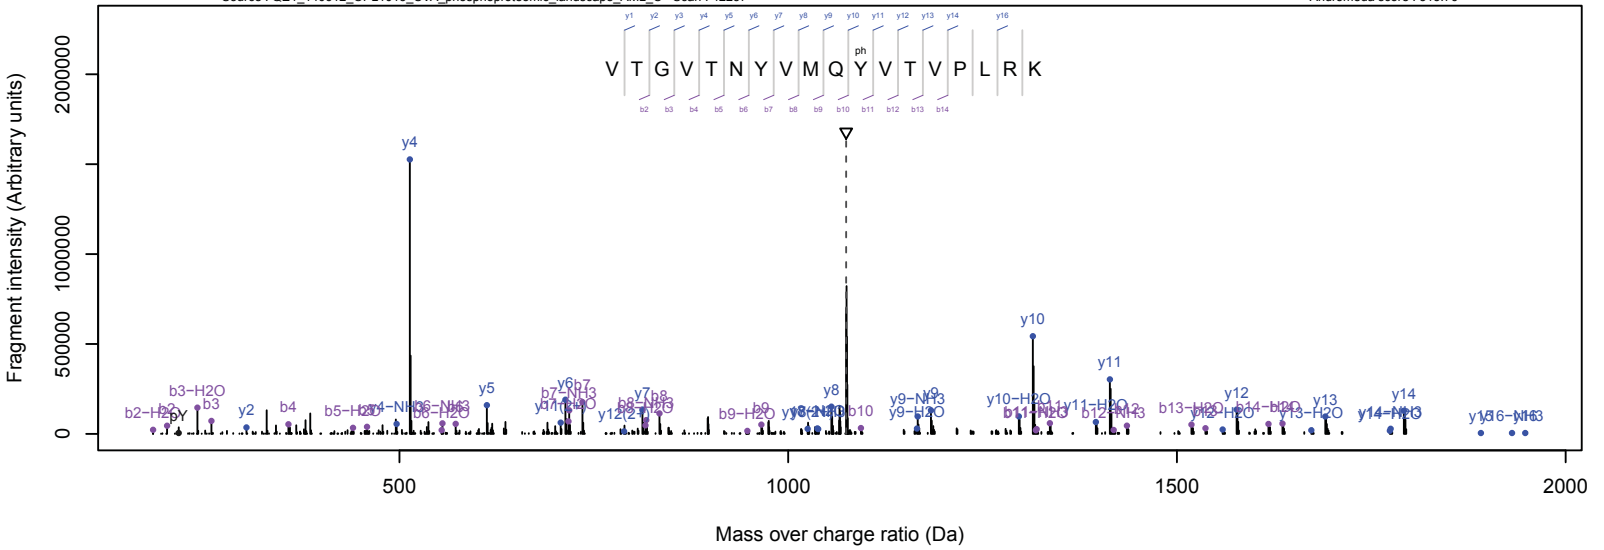

NLEGY(ph)VGfanLPNQVYR-2+

Source : QE1\_140612\_OPL1013\_CVA\_phosphoproteomic\_landscape\_AML\_C Scan : 42356

Andromeda score : 310.74

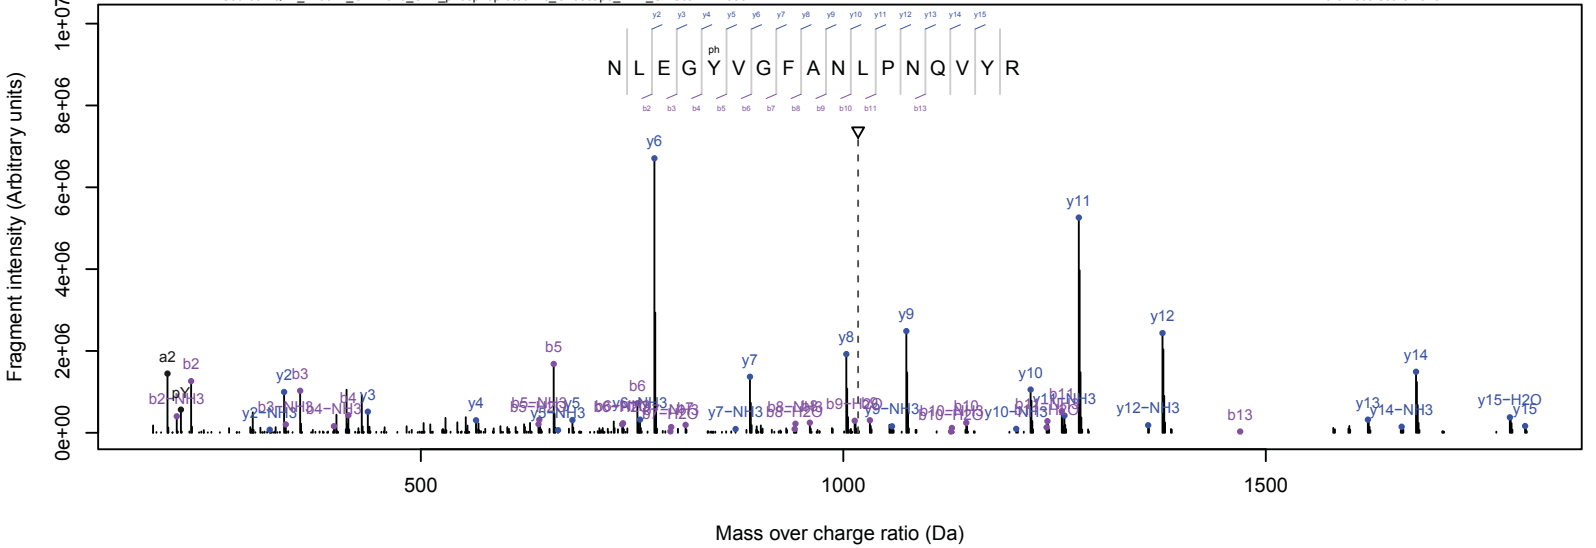

**KLSLGQY(ph)DNDAGGQLPFSK-2+**

Source : QE1\_140612\_OPL1013\_CVA\_phosphoproteomic\_landscape\_AML\_B Scan : 30150

Andromeda score : 309.77

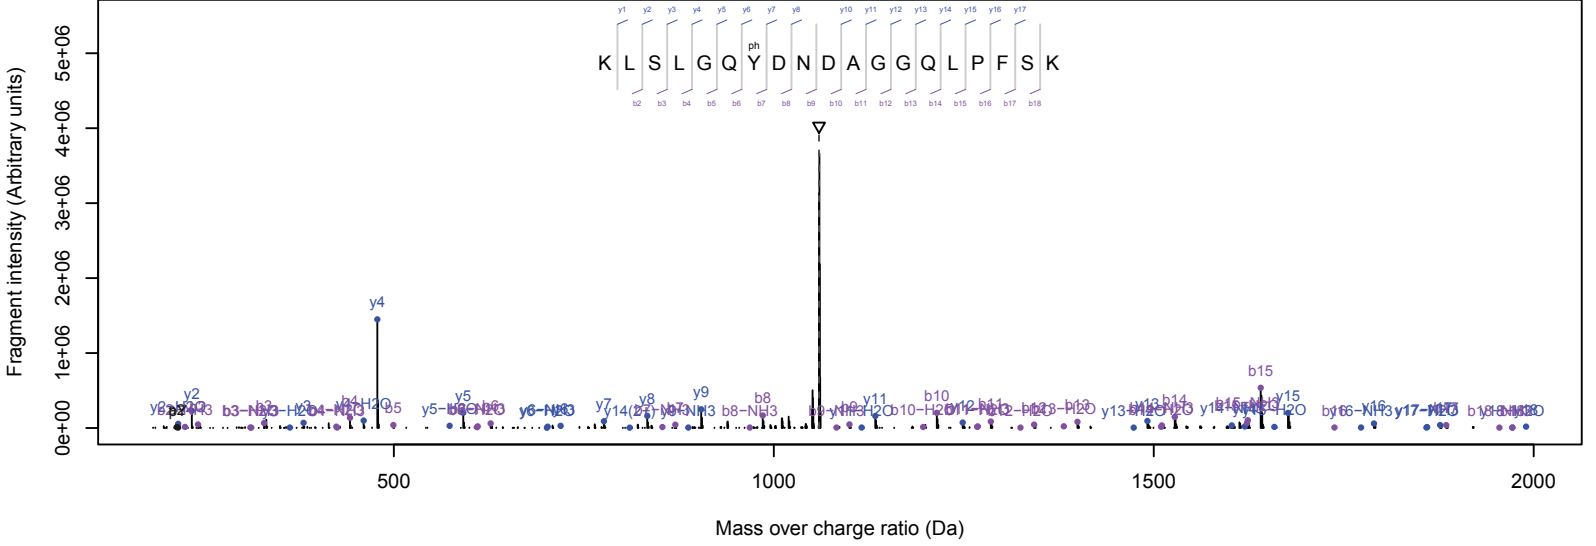

**GDDY(ph)FNYNVQQTSTNPLPEPGYFTKPPIAAHSR-3+**

Source : QE1\_140612\_OPL1013\_CVA\_phosphoproteomic\_landscape\_AML\_B Scan : 39738

Andromeda score : 307.16

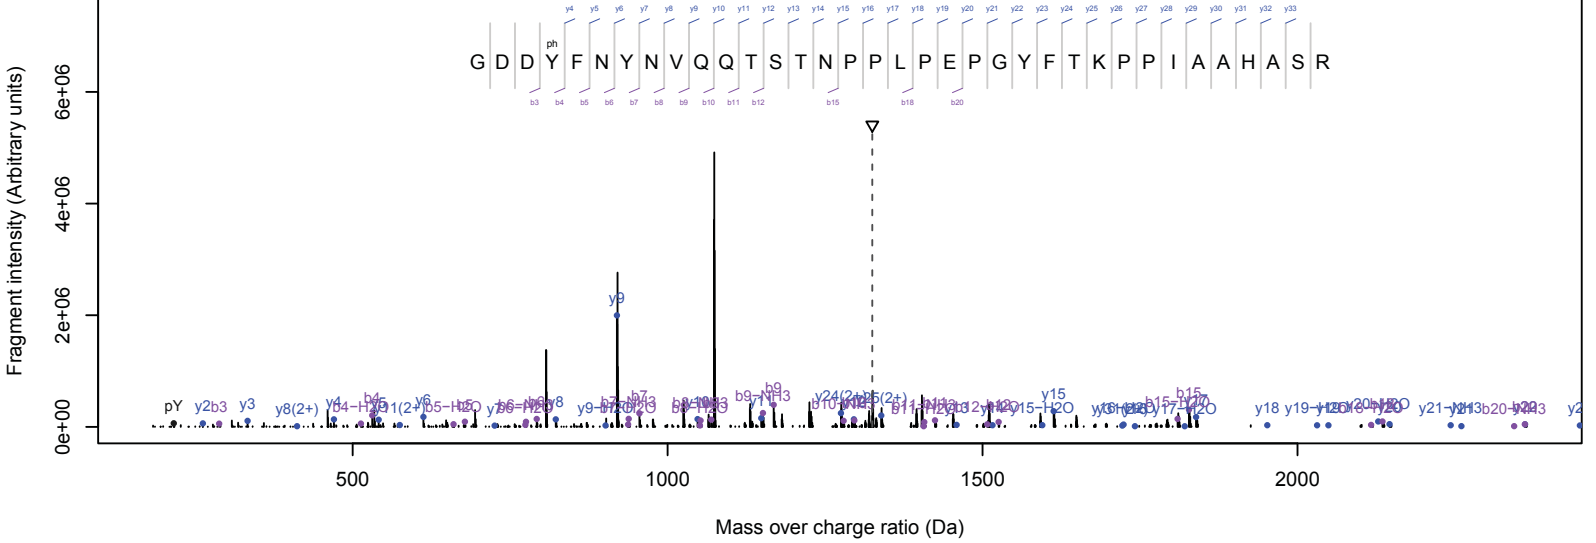

**LHGLNINYNCEICGNYPYRGPK-3+**

Source : QE1\_140612\_OPL1013\_CVA\_phosphoproteomic\_landscape\_AML\_A Scan : 27996

Andromeda score : 306.69

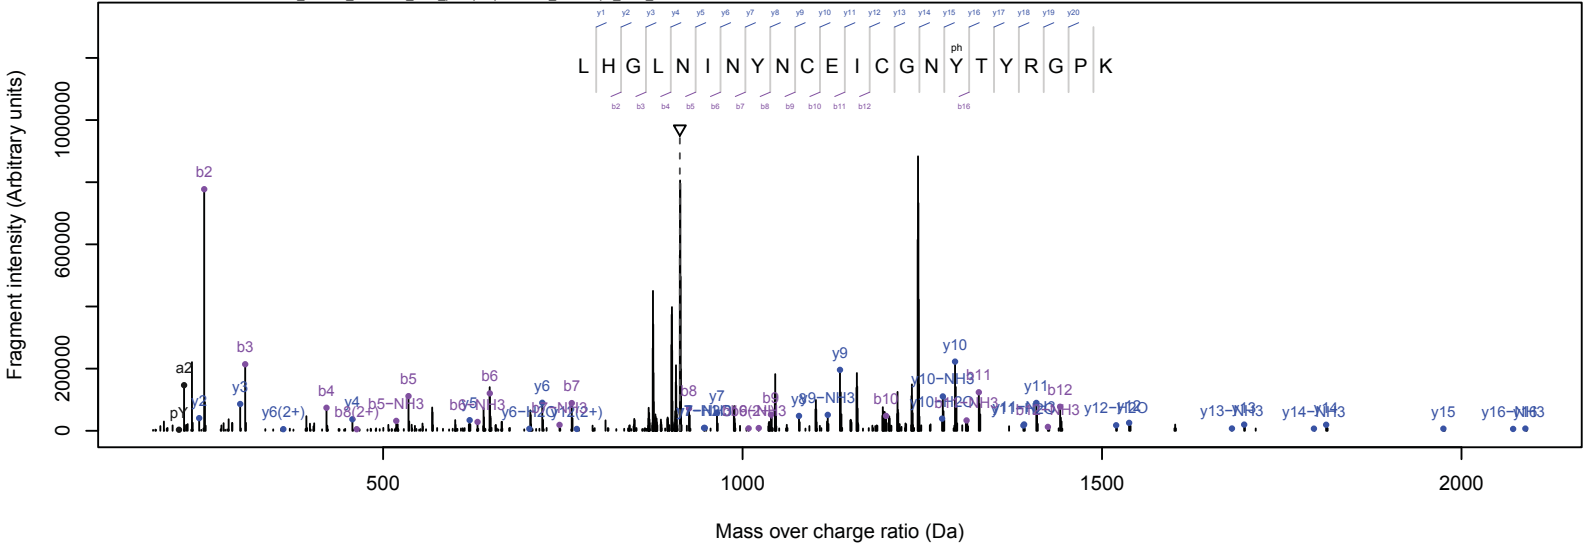





SPSSCNDLY(ph)ATVK-2+

Source : QE1\_140612\_OPL1013\_CVA\_phosphoproteomic\_landscape\_AML\_D Scan : 14231

Andromeda score : 299.25

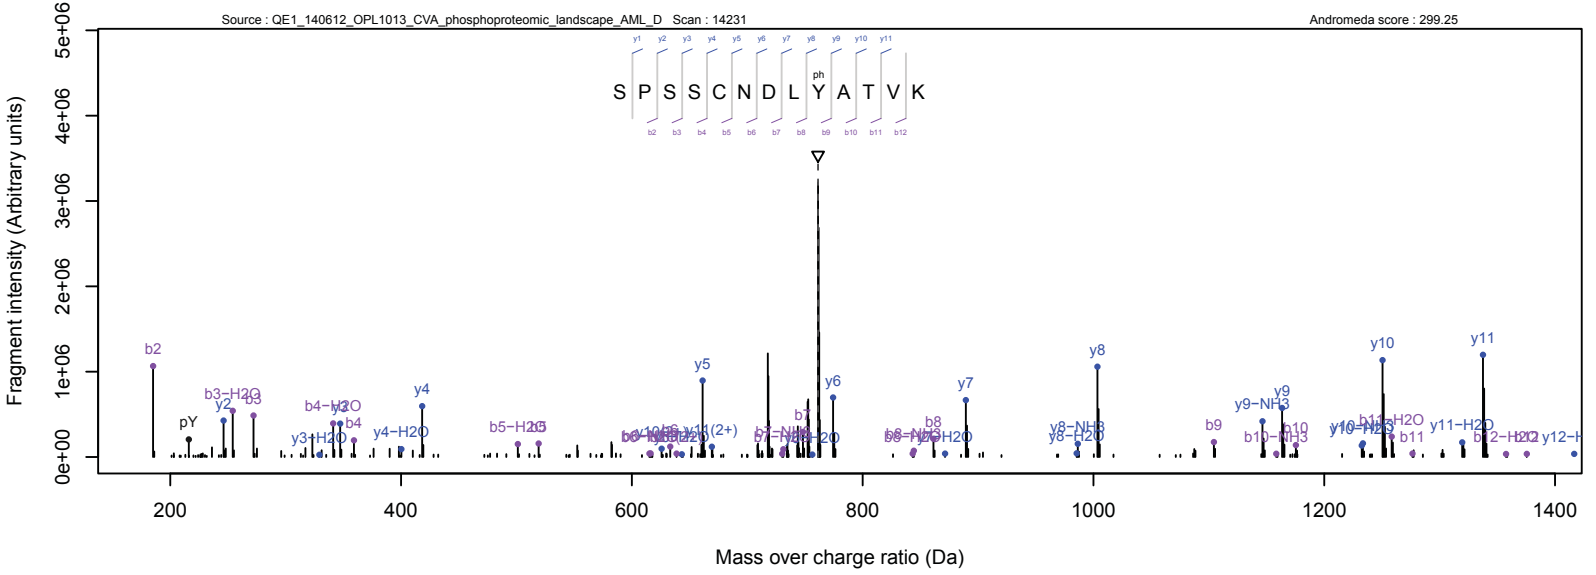

SREEDPTLTEEEISAMY(ph)SSVNKPGQLVNVK-3+

Source : QE1\_140612\_OPL1013\_CVA\_phosphoproteomic\_landscape\_AML\_C Scan : 35216

Andromeda score : 296.35

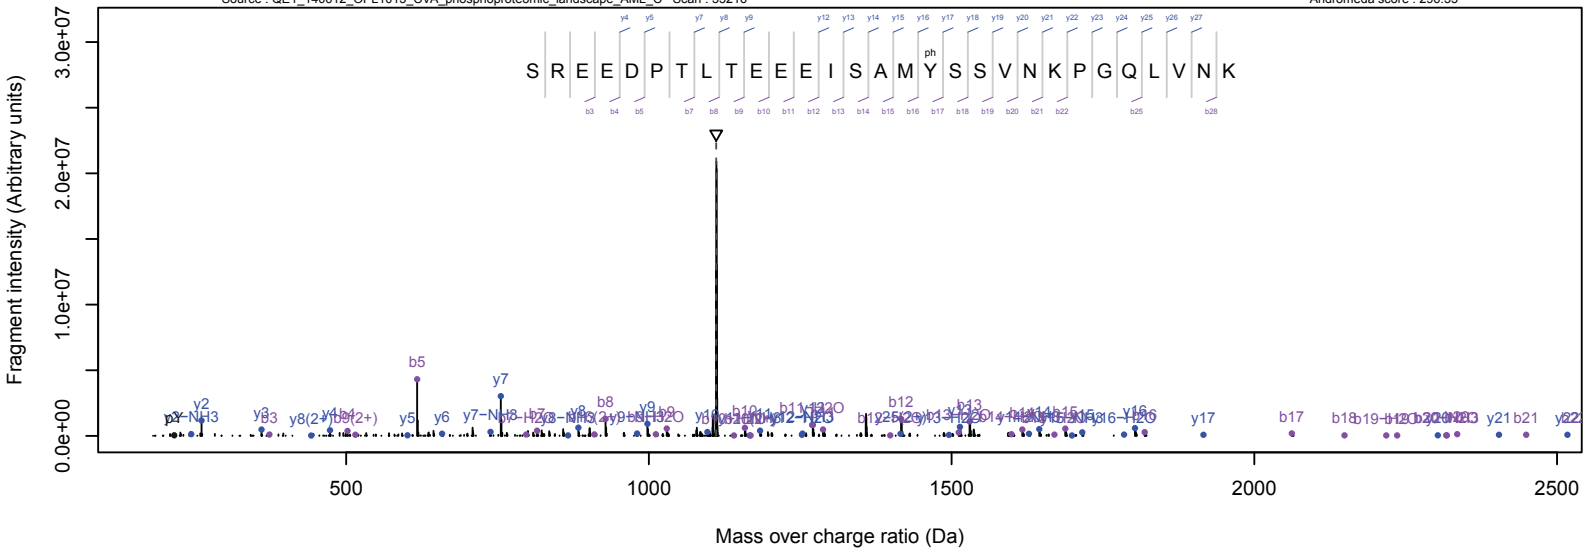

TGASY(ph)YGEQLTHYIATNGESAVVQLPK-3+

Source : QE1\_140908\_OPL1013\_CvA\_pTyrIP\_AML\_Kasumi1 Scan : 44857

Andromeda score : 293.2

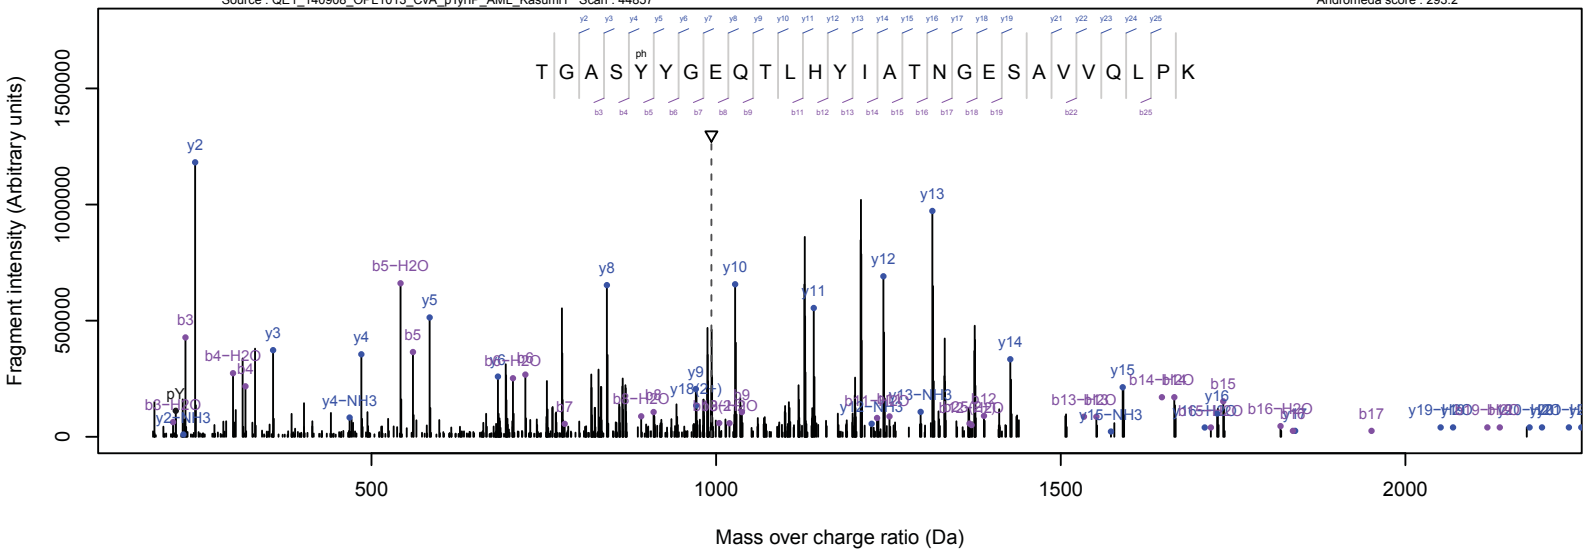

**SQGLS<sup>ph</sup>QLYHNQSQGLLSQLQGQSK-3+**

Source : QE1\_140612\_OPL1013\_CVA\_phosphoproteomic\_landscape\_AML\_C Scan : 34393

Andromeda score : 292.26

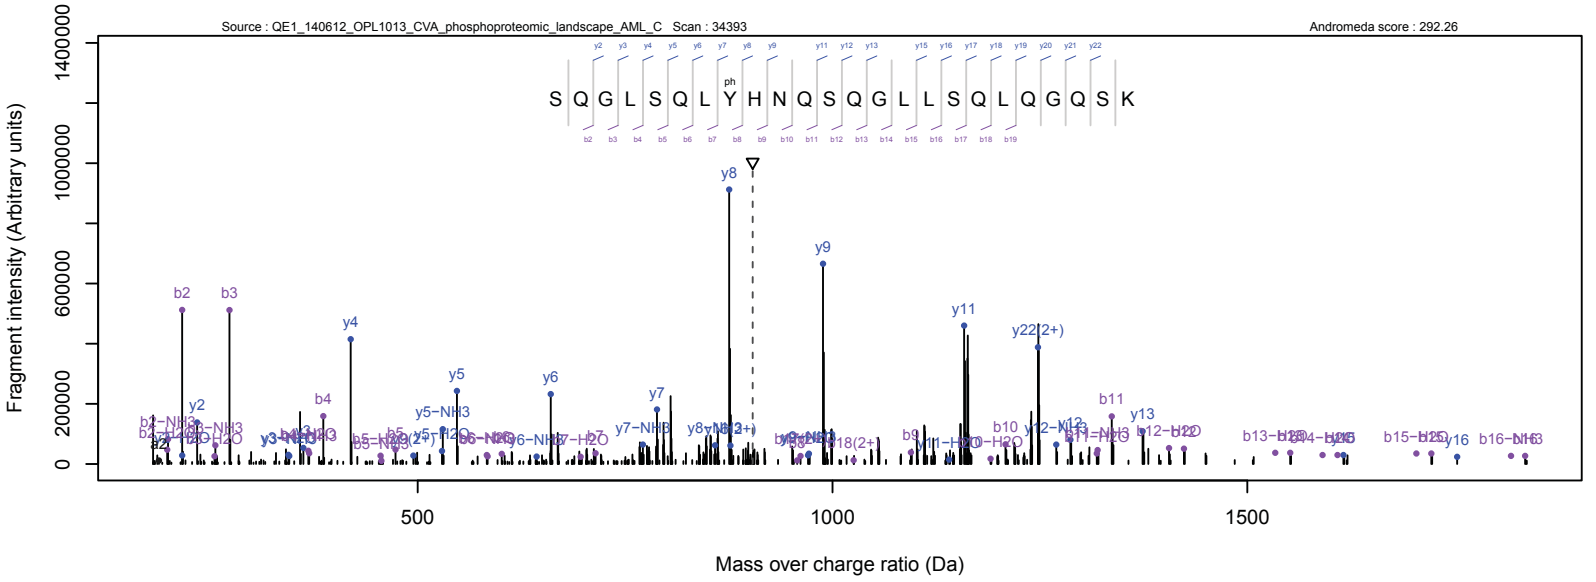

**ATLGTNGHHGLV<sup>ph</sup>PKENDYESISDLQQGR-3+**

Source : QE1\_140612\_OPL1013\_CVA\_phosphoproteomic\_landscape\_AML\_D Scan : 23458

Andromeda score : 292.25

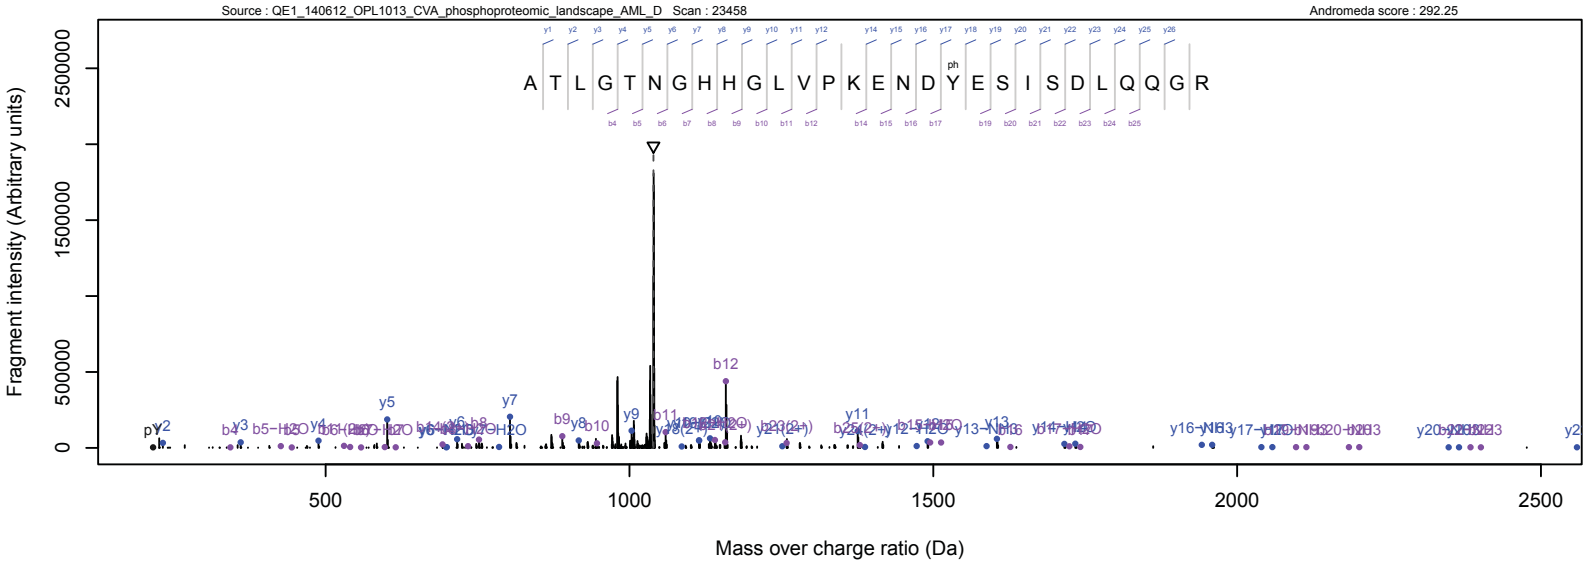

**LY<sup>ph</sup>AHVYNGQSEKPDENEK-3+**

Source : QE1\_140612\_OPL1013\_CVA\_phosphoproteomic\_landscape\_AML\_D Scan : 9617

Andromeda score : 291.7

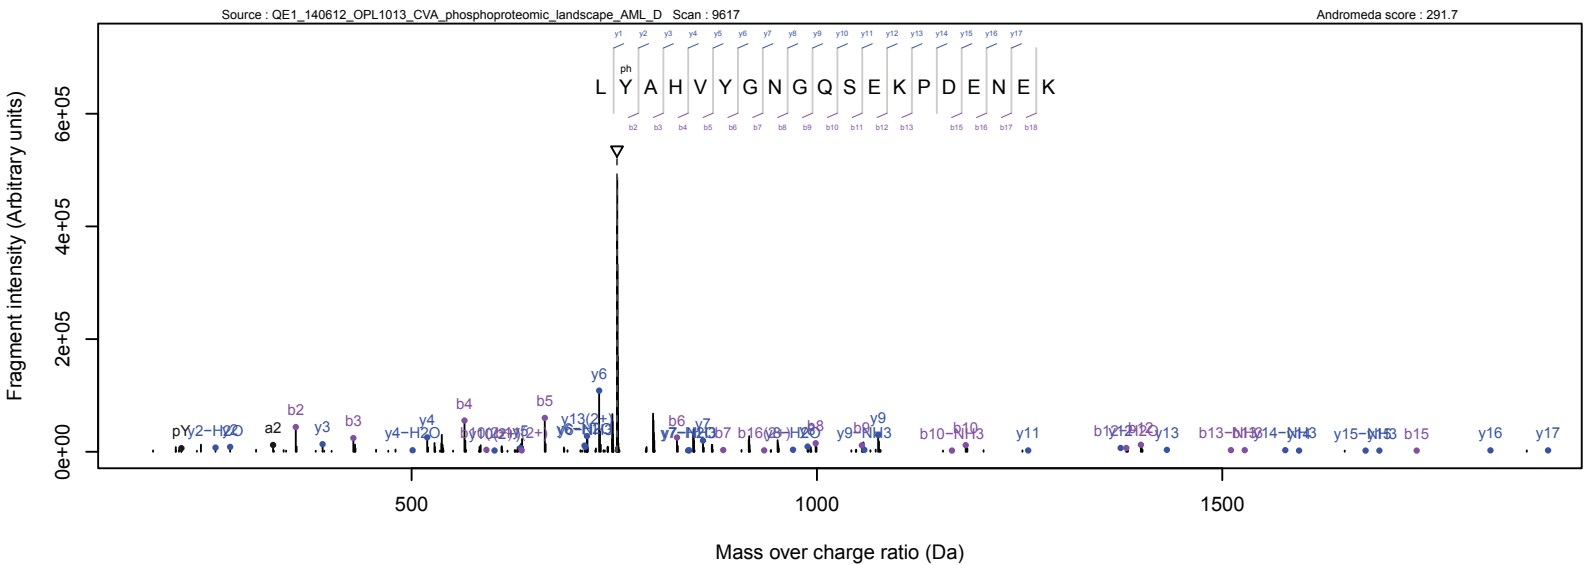

LVSSPCCIVTSTY(ph)GWTANMER-2+

Source : QE1\_140612\_OPL1013\_CVA\_phosphoproteomic\_landscape\_AML\_B Scan : 39909

Andromeda score : 290.94

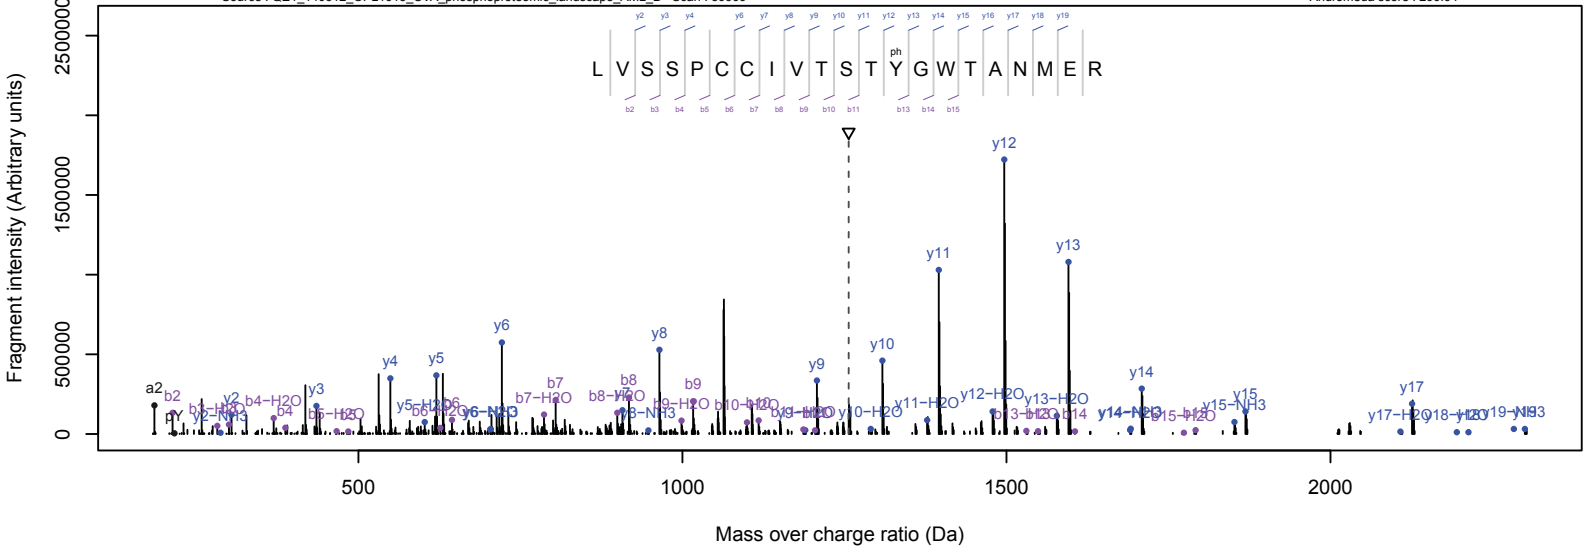

EAGFSY(ph)SHAGLSNR-2+

Source : QE1\_140612\_OPL1013\_CVA\_phosphoproteomic\_landscape\_AML\_A Scan : 12334

Andromeda score : 289.75

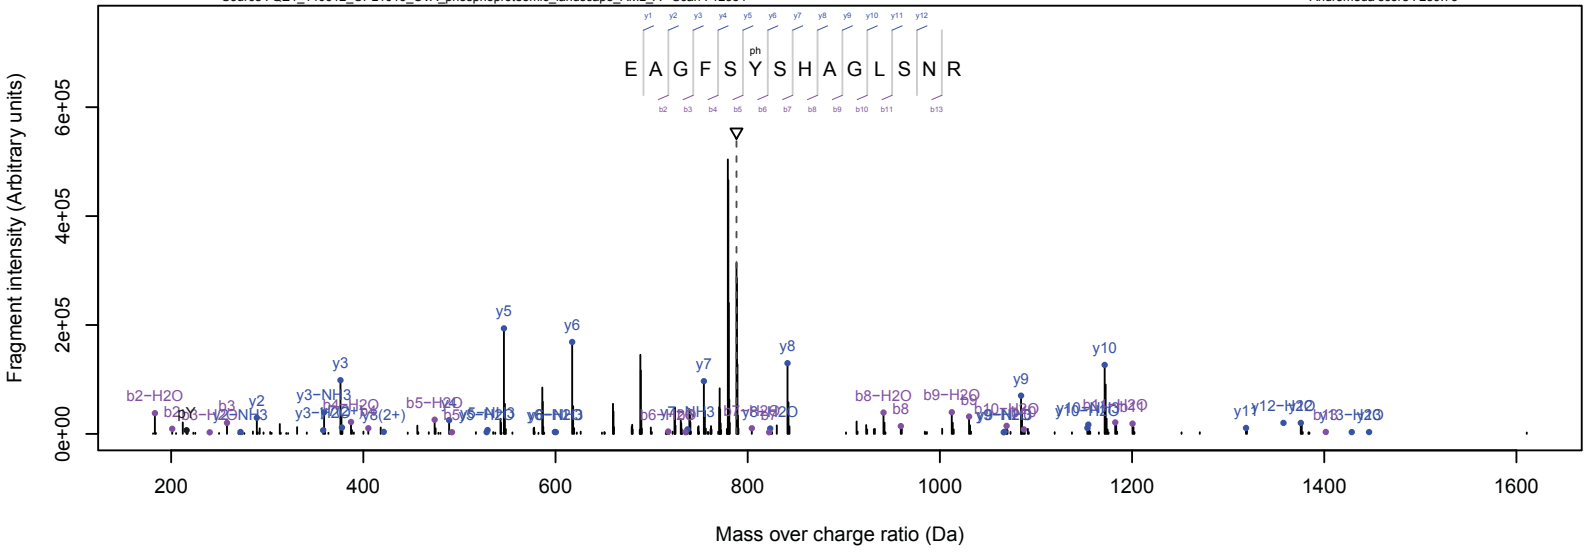

KTNNPQFDEVFY(ph)FEVTRPCSYSK-3+

Source : QE1\_140612\_OPL1013\_CVA\_phosphoproteomic\_landscape\_AML\_C Scan : 39475

Andromeda score : 288.58

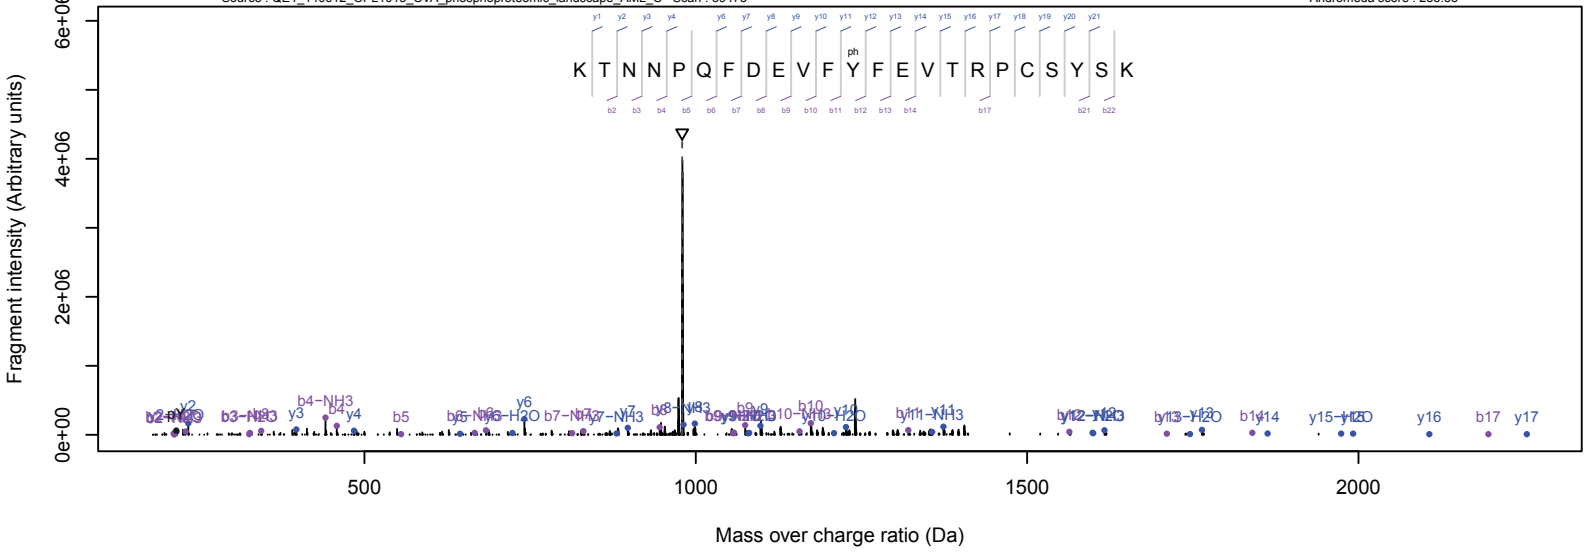

NEEENIY(ph)SVPHDSTQGK-2+

Source: QE1\_140908\_OPL1013\_CVA\_pTyrIP\_AML\_HEL Scan: 12978

Andromeda score: 286.14

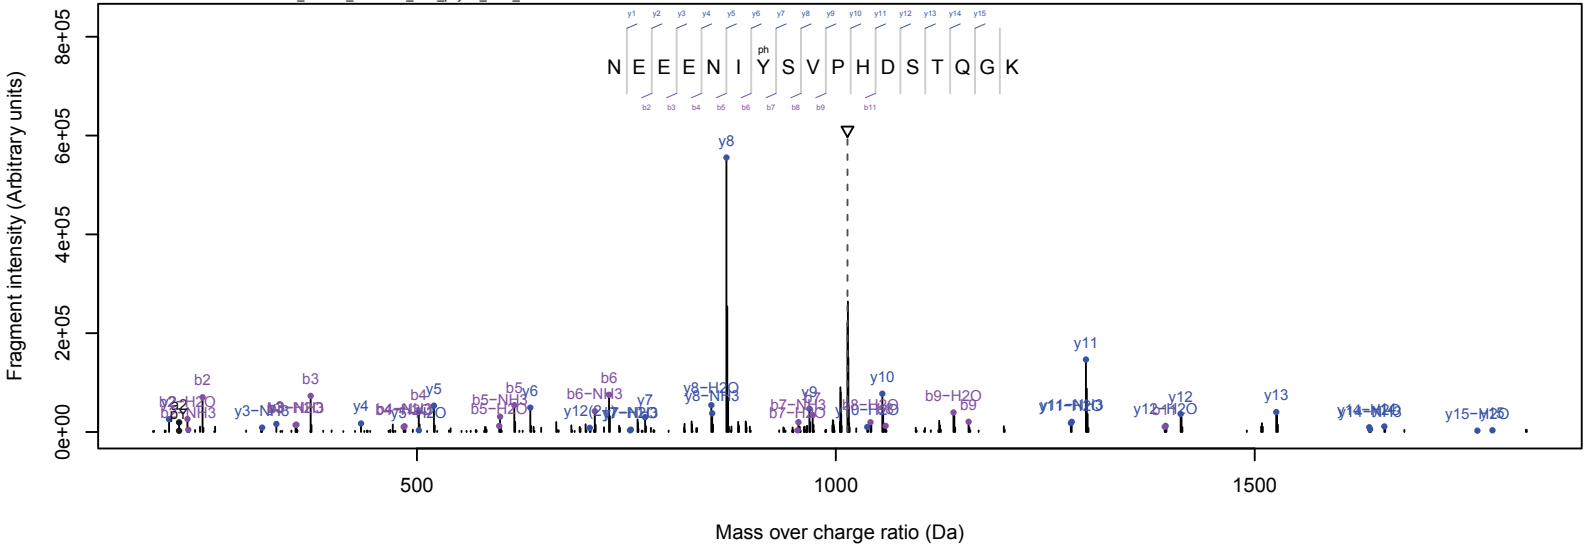

TTDGVY(ph)EGVAIGDRYPGSTFMDHVL R-3+

Source: QE1\_140612\_OPL1013\_CVA\_phosphoproteomic\_landscape\_AML\_D Scan: 41337

Andromeda score: 285.95

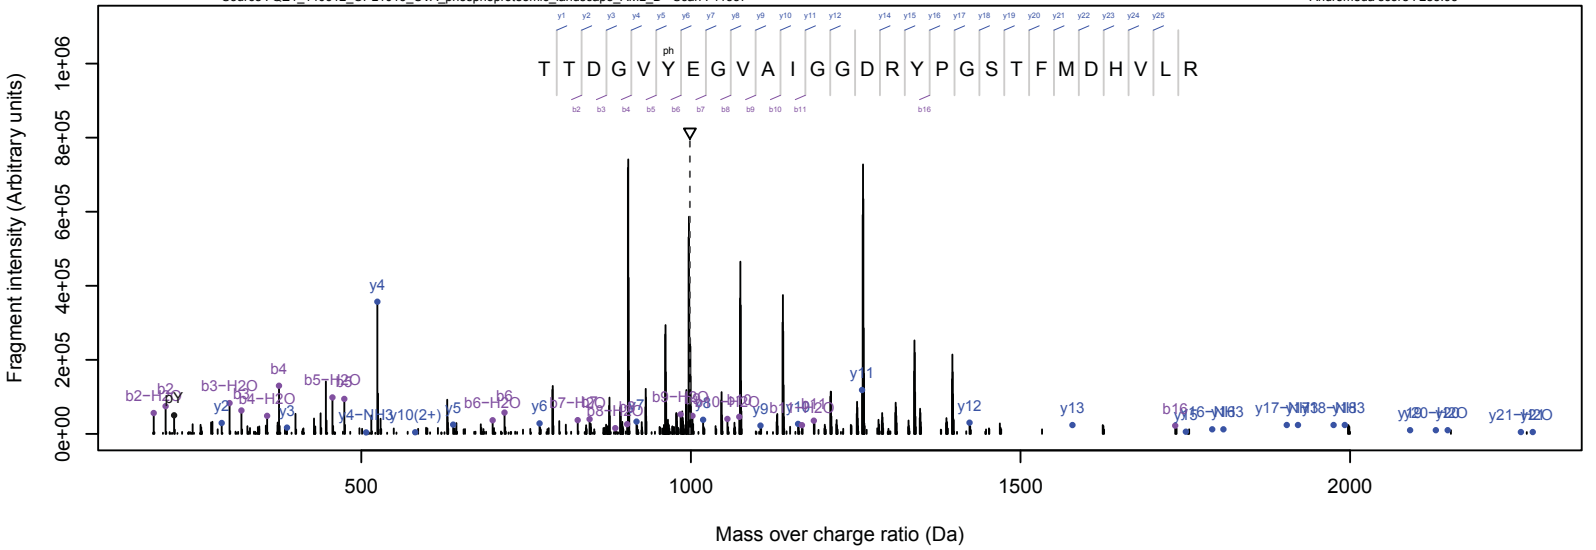

TFNLTAGSLESTEPIYVYK-2+

Source: QE1\_140612\_OPL1013\_CVA\_phosphoproteomic\_landscape\_AML\_C Scan: 43522

Andromeda score: 285.5

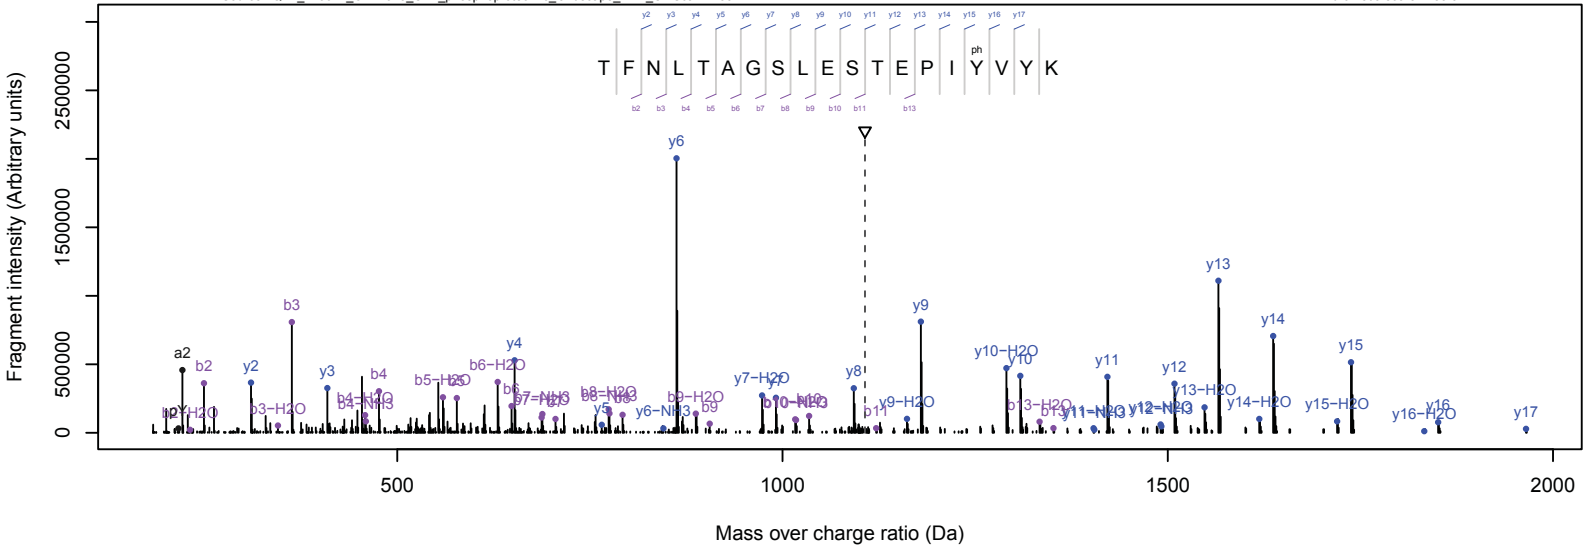

QY(ph)ATLDVYNPFETR-2+

Source : QE1\_140612\_OPL1013\_CVA\_phosphoproteomic\_landscape\_AML\_C Scan : 42434

Andromeda score : 283.45

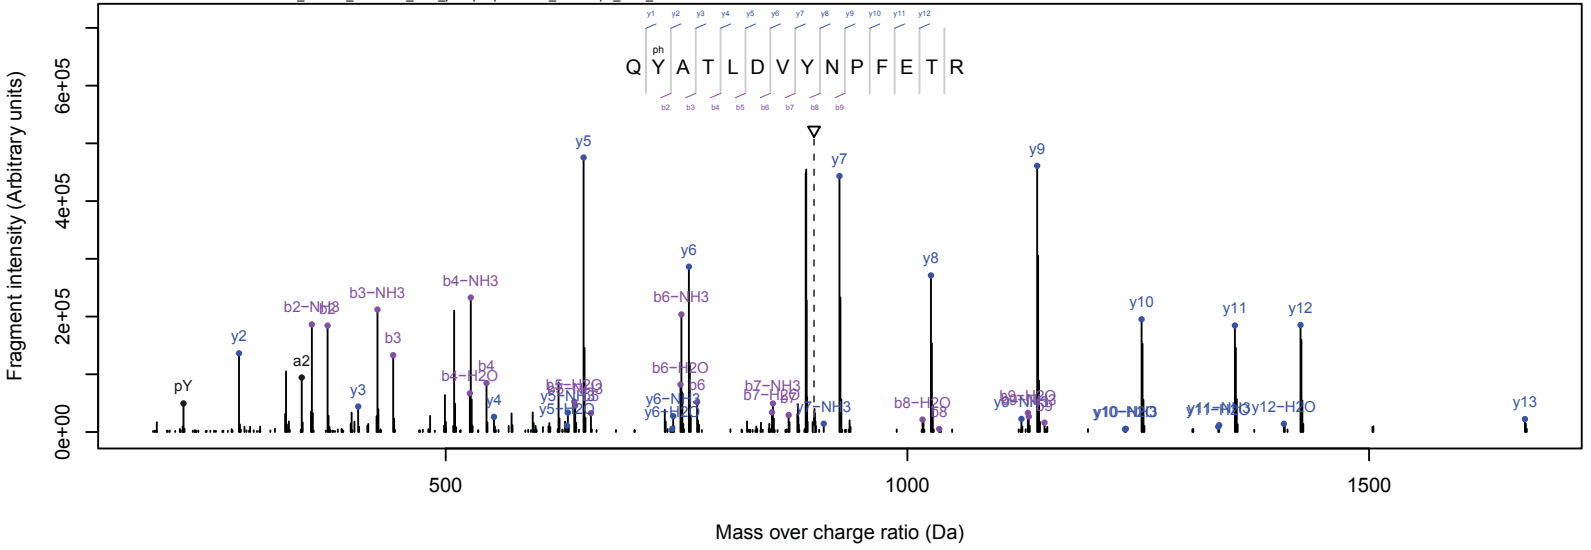

ELFDDPSY(ph)VNVQLDK-2+

Source : QE1\_140908\_OPL1013\_Cva\_pTyrIP\_AML\_HEL Scan : 39884

Andromeda score : 283.1

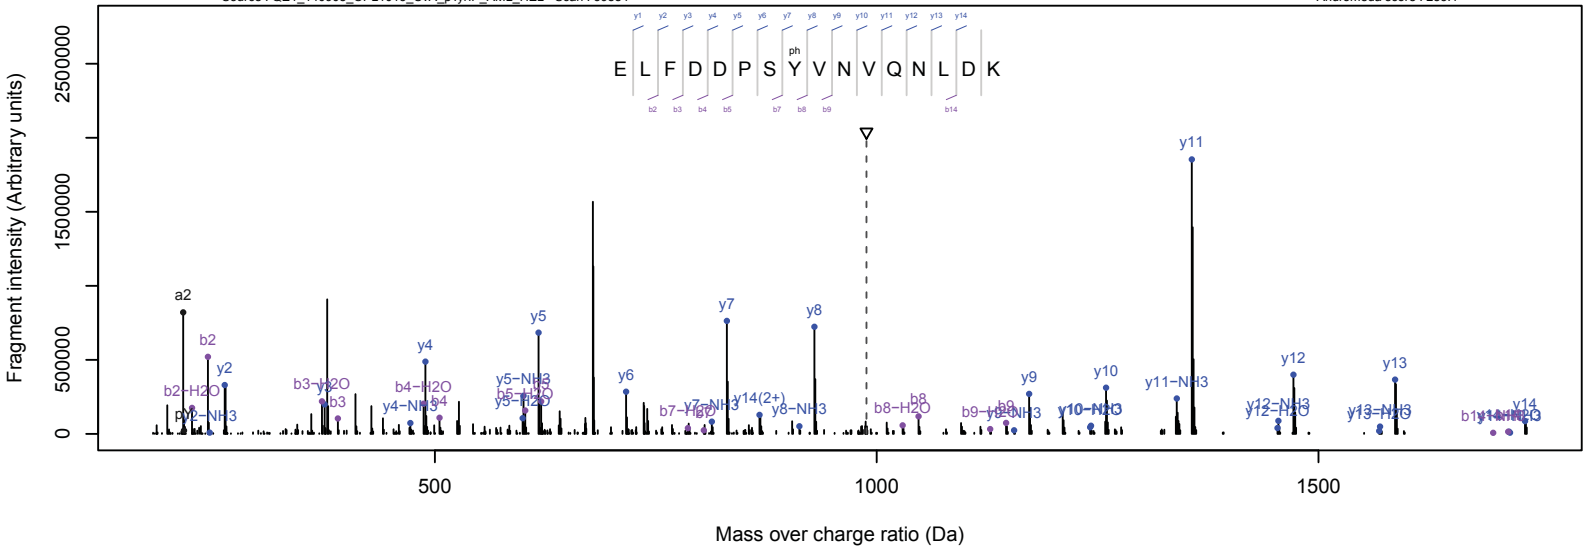

LPDMLKDHY(ph)PCVSSLEQLTELGR-3+

Source : QE1\_140612\_OPL1013\_CVA\_phosphoproteomic\_landscape\_AML\_C Scan : 46687

Andromeda score : 280.66

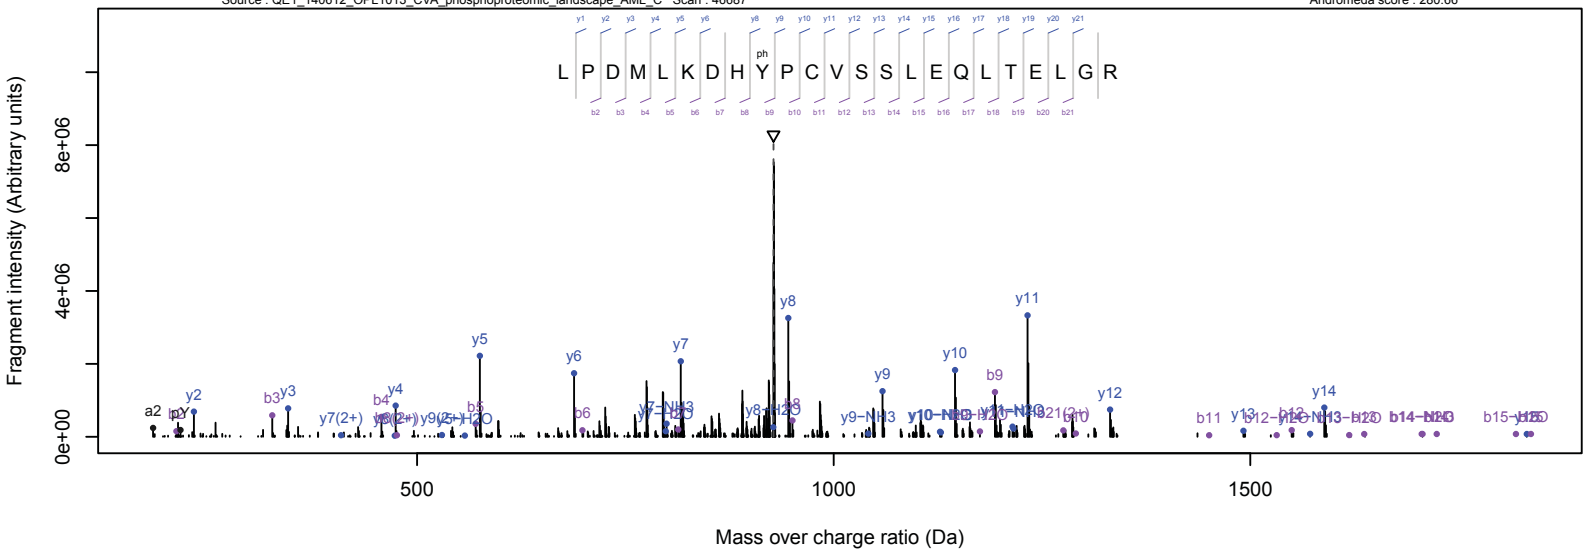

SVTDY(ph)AQQNPAQIPAR-2+

Source : QE1\_140612\_OPL1013\_CVA\_phosphoproteomic\_landscape\_AML\_C Scan : 21821

Andromeda score : 280.4

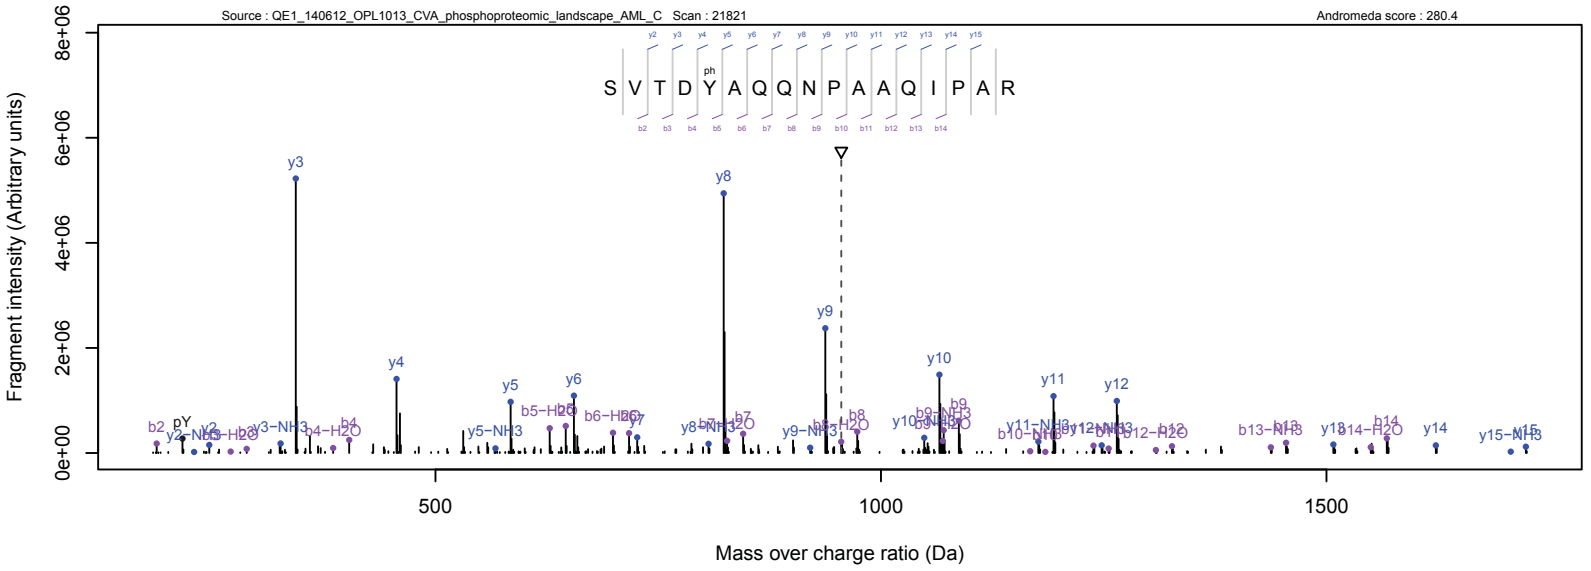

LSLEGDHSTPPSAY(ph)GSVK-2+

Source : QE1\_140612\_OPL1013\_CVA\_phosphoproteomic\_landscape\_AML\_C Scan : 17449

Andromeda score : 278.27

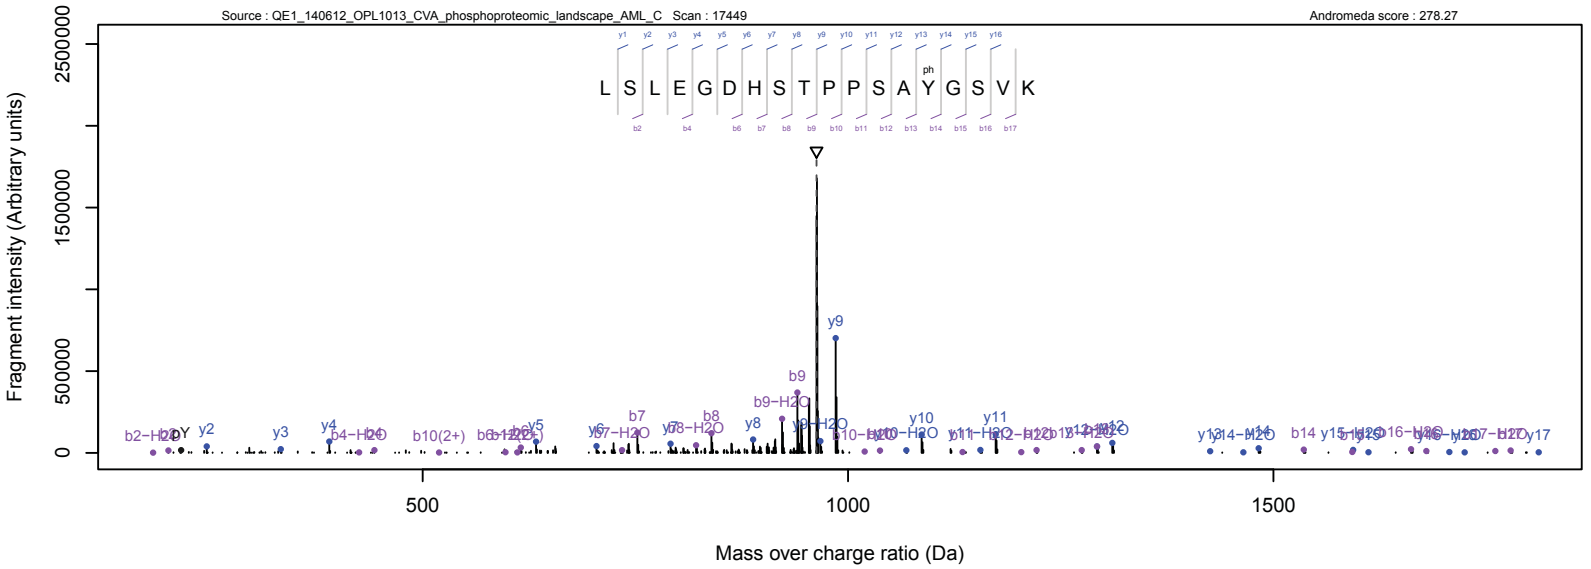

SAVGFNEMEAPTAY(ph)KK-2+

Source : QE1\_140612\_OPL1013\_CVA\_phosphoproteomic\_landscape\_AML\_C Scan : 20989

Andromeda score : 277.34

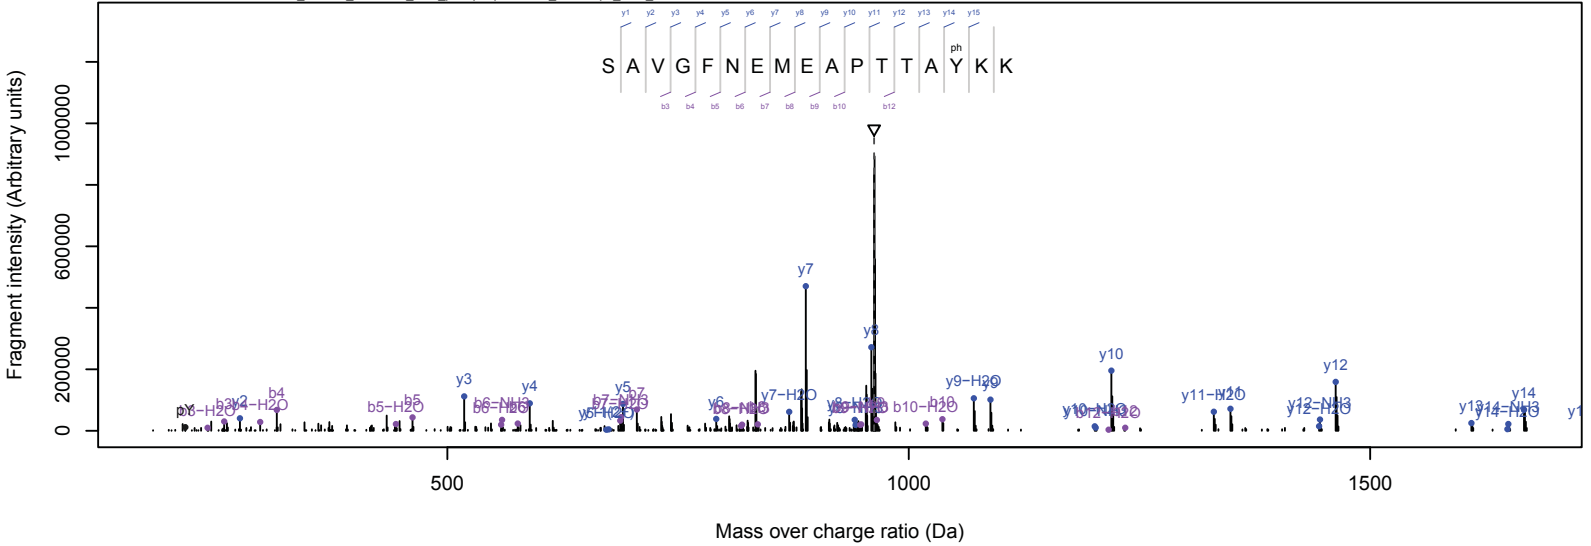

QNGRDPPY(ph)VLLLLPKNR-3+

Source: QE1\_140612\_OPL1013\_CVA\_phosphoproteomic\_landscape\_AML\_B Scan: 36446

Andromeda score: 277.03

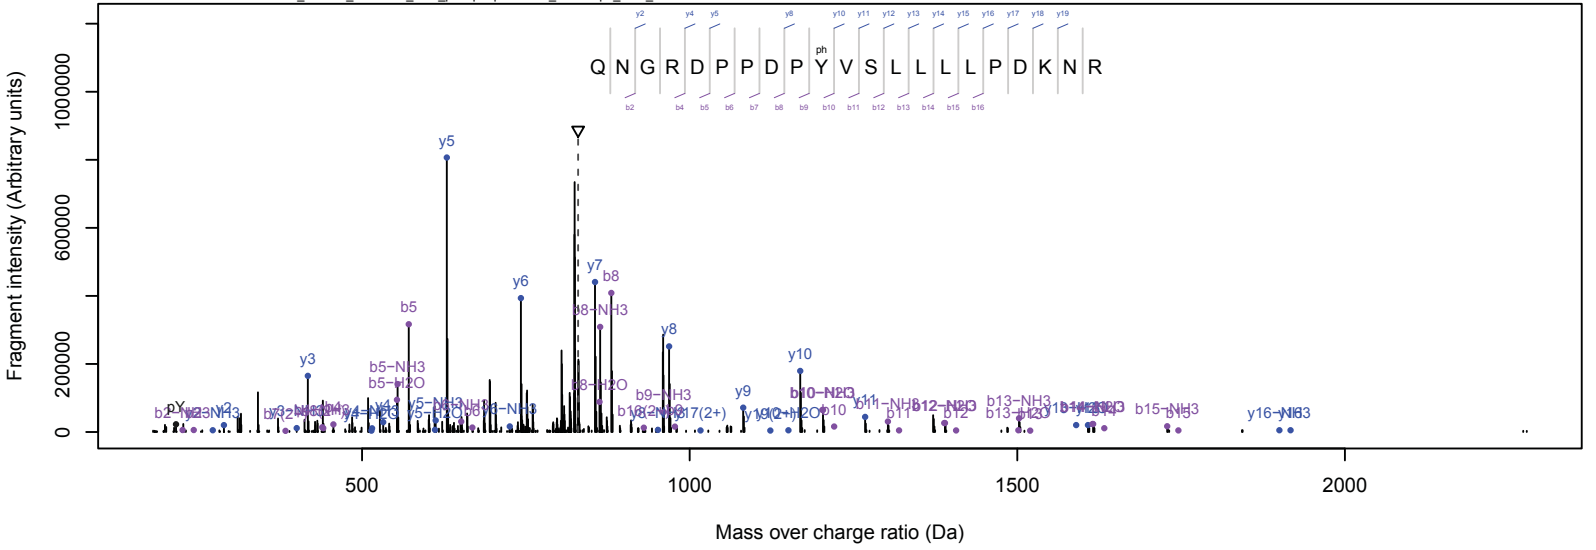

NYGSY(ph)STQASAAAATAELLK-2+

Source: QE1\_140612\_OPL1013\_CVA\_phosphoproteomic\_landscape\_AML\_C Scan: 35711

Andromeda score: 276.88

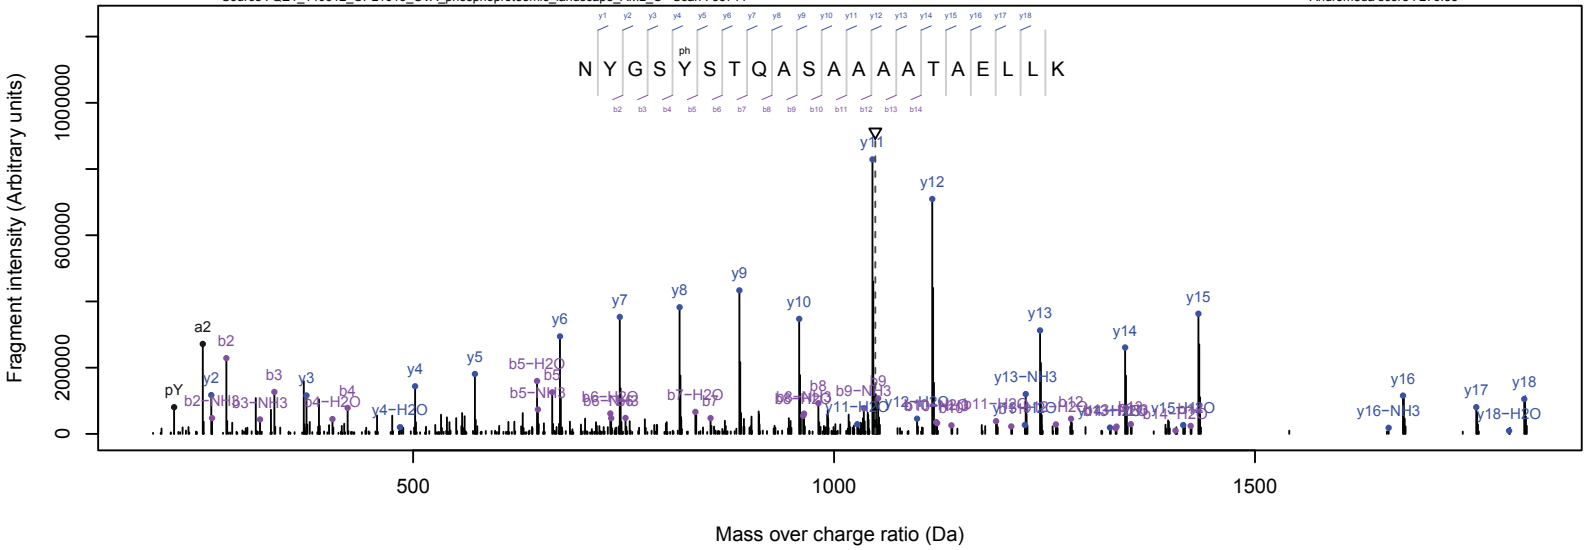

TINLY(ph)PLTNYTFGKELYEK-2+

Source: QE1\_140612\_OPL1013\_CVA\_phosphoproteomic\_landscape\_AML\_B Scan: 44706

Andromeda score: 275.41

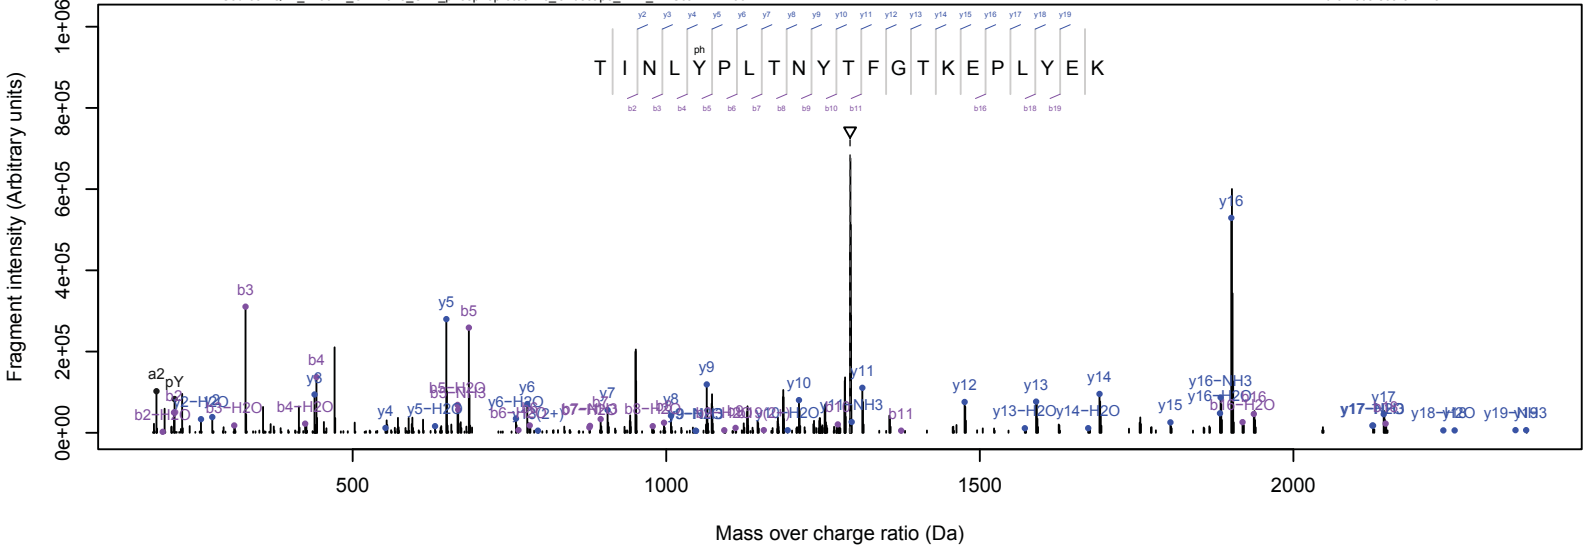



**EGICAIGGTSEQSSVGTQHSYSEEEKY(ph)AFVNWINK-4+**

Source : QE1\_140908\_OPL1013\_CvA\_pTyrIP\_AML\_HL60 Scan : 43737

Andromeda score : 274.96

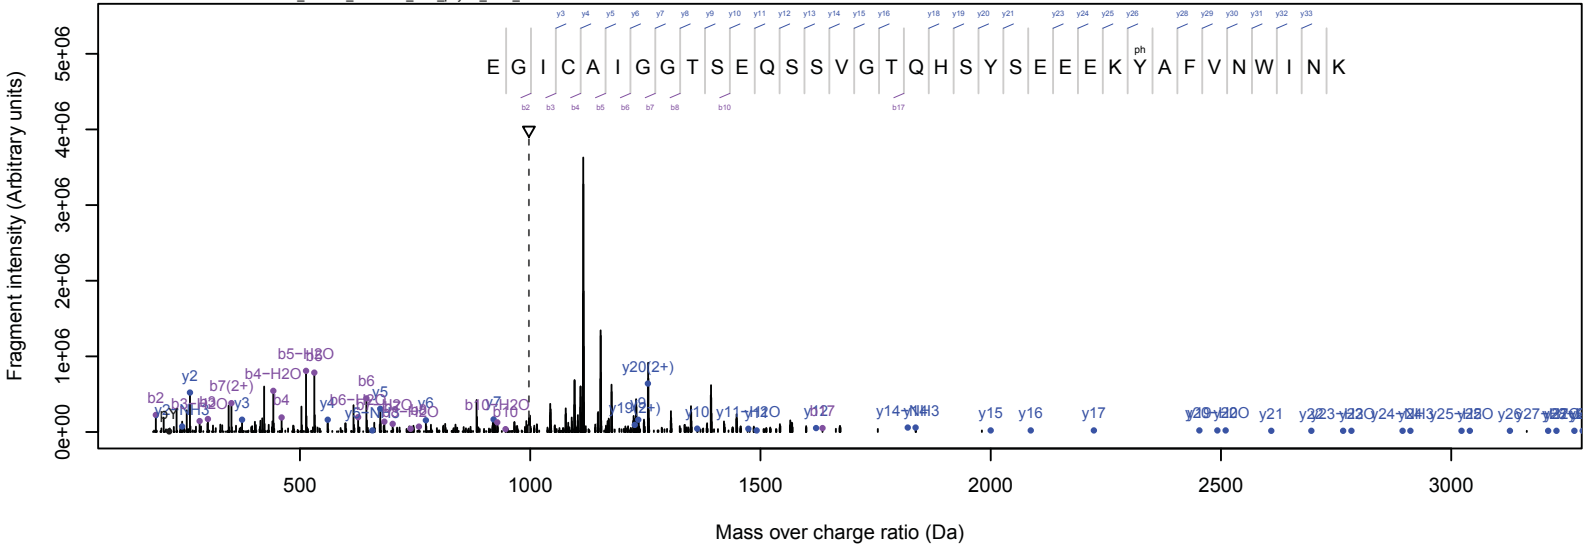

**HY(ph)SVLPTVSHSGFLYK-2+**

Source : QE1\_140612\_OPL1013\_CVA\_phosphoproteomic\_landscape\_AML\_A Scan : 33080

Andromeda score : 274.17

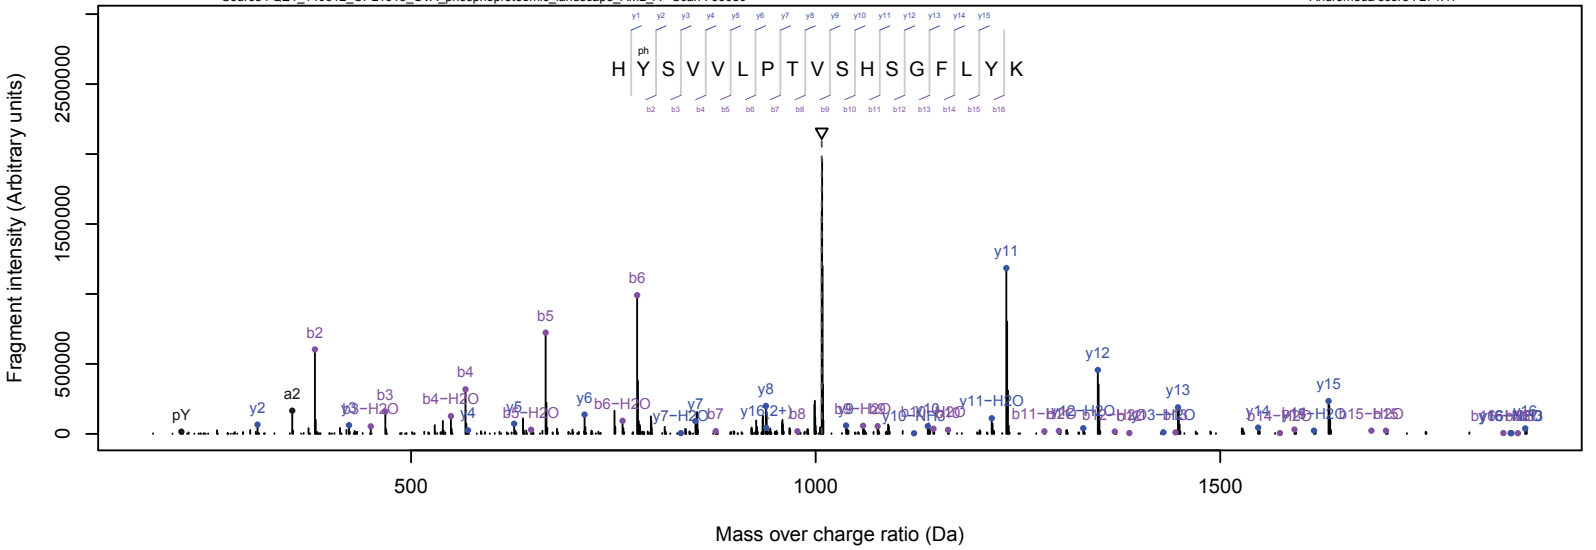

**HSSVY(ph)PTQEELEAVQNMVSHTER-3+**

Source : QE1\_140612\_OPL1013\_CVA\_phosphoproteomic\_landscape\_AML\_B Scan : 39249

Andromeda score : 273.66

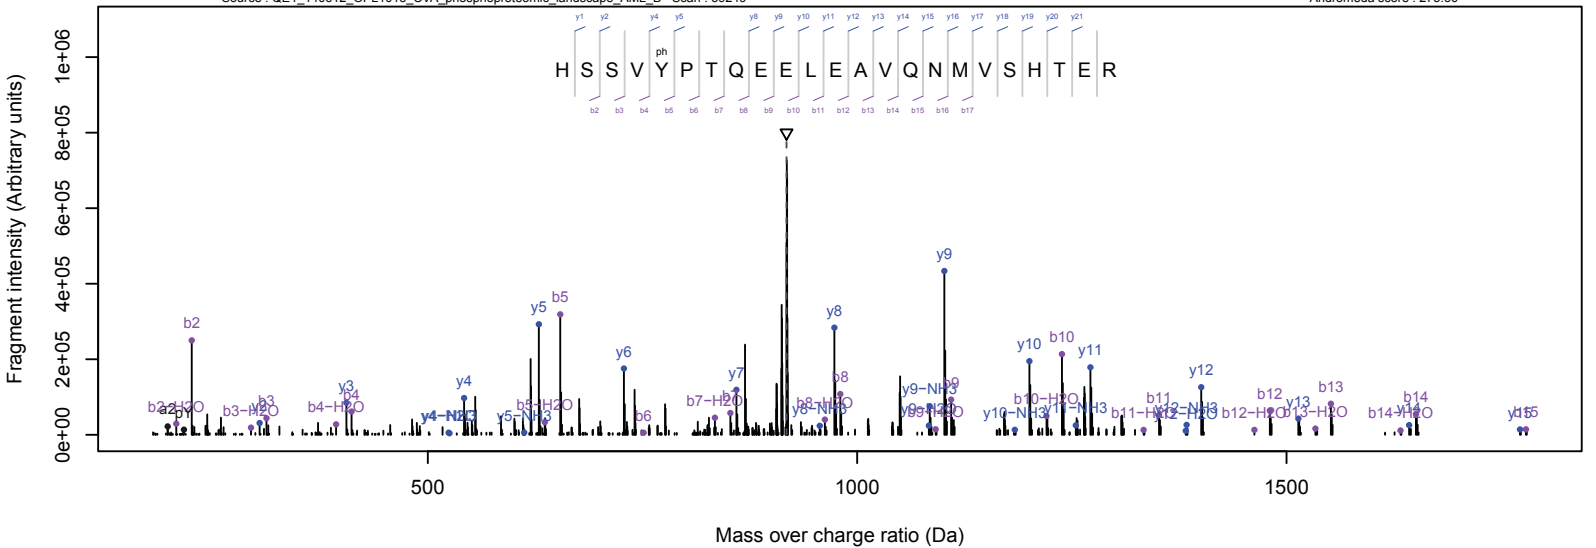

**LDSMKPLEKHY(ph)SVVLP TVSHSGFLYK-4+**

Source : QE1\_140612\_OPL1013\_CVA\_phosphoproteomic\_landscape\_AML\_A Scan : 34548

Andromeda score : 272.18

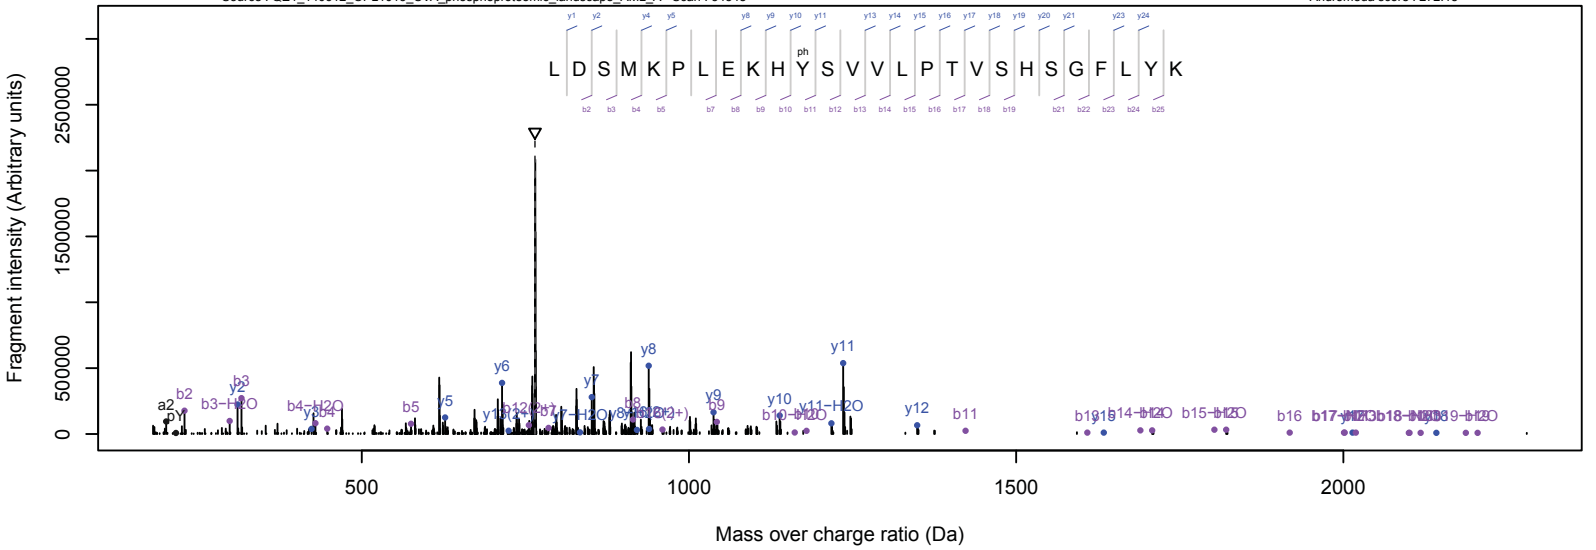

**PQAVGSSNY(ph)ASTSAGLKYPGSGADLPPQR-3+**

Source : QE1\_140612\_OPL1013\_CVA\_phosphoproteomic\_landscape\_AML\_B Scan : 24855

Andromeda score : 271.18

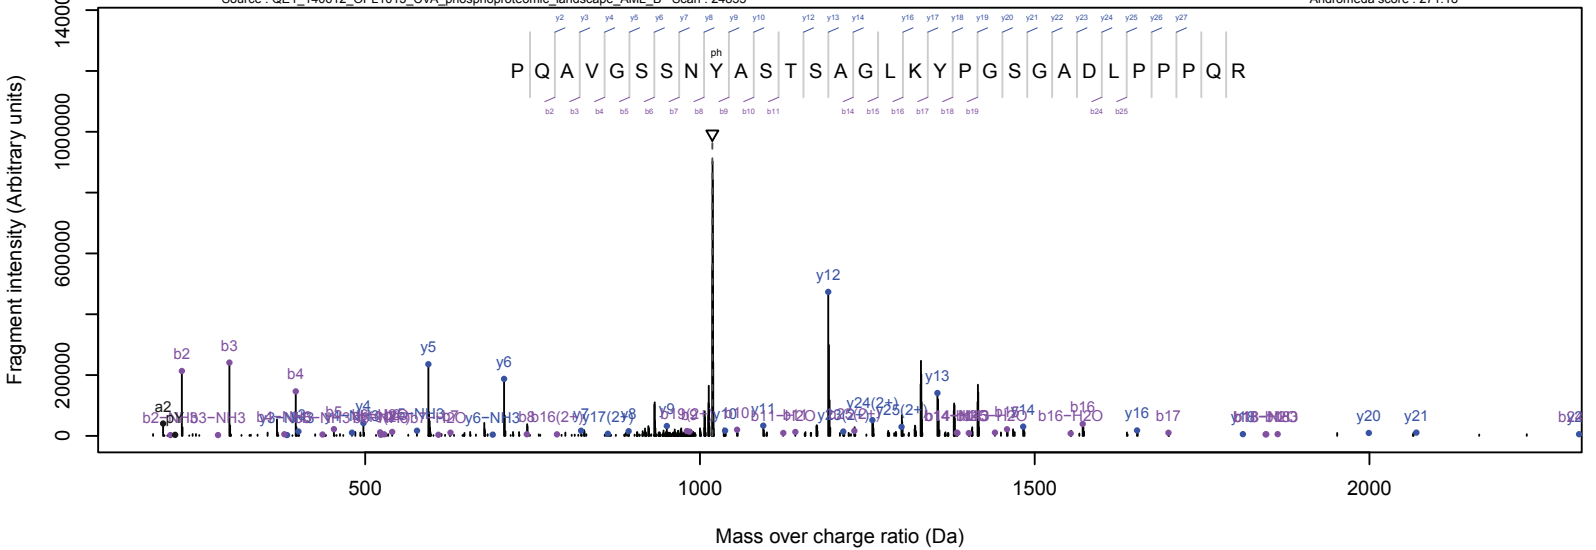

**Y(ph)YKETSGMLLDVGPYMK-2+**

Source : QE1\_140612\_OPL1013\_CVA\_phosphoproteomic\_landscape\_AML\_B Scan : 37997

Andromeda score : 270.42

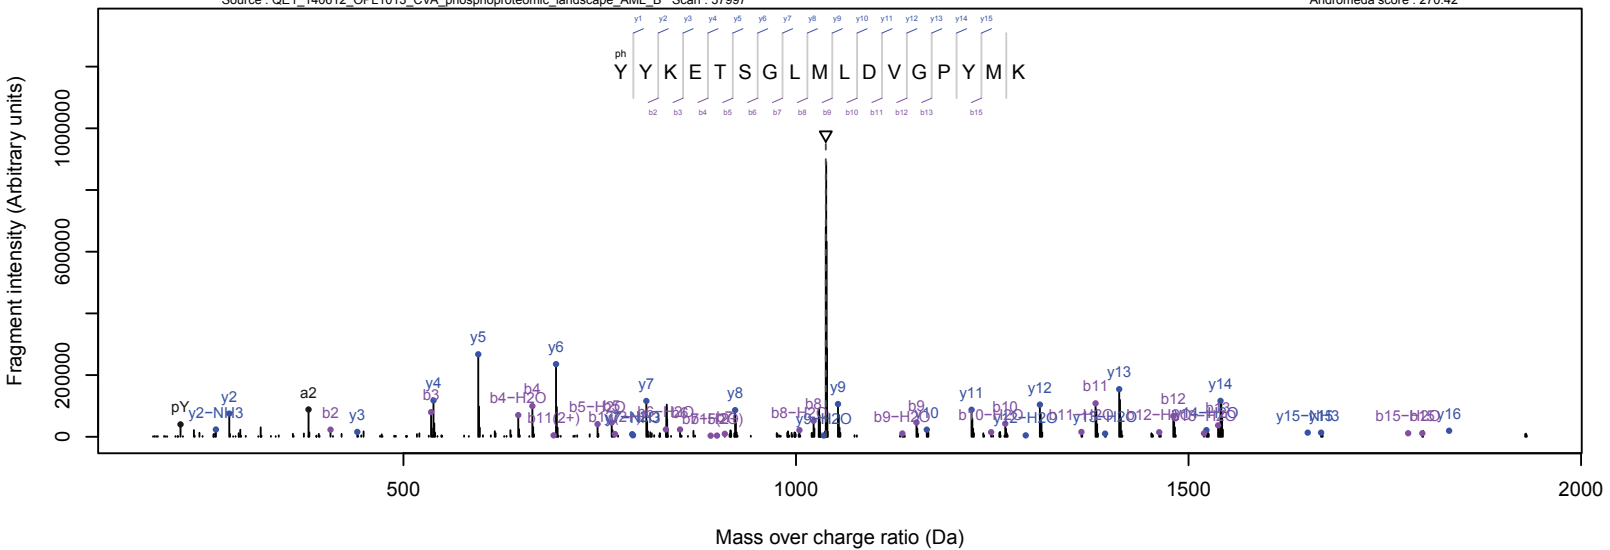

HTDDEMTGY(ph)VATR-2+

Source : QE1\_140612\_OPL1013\_CVA\_phosphoproteomic\_landscape\_AML\_E Scan : 9859

Andromeda score : 270.21

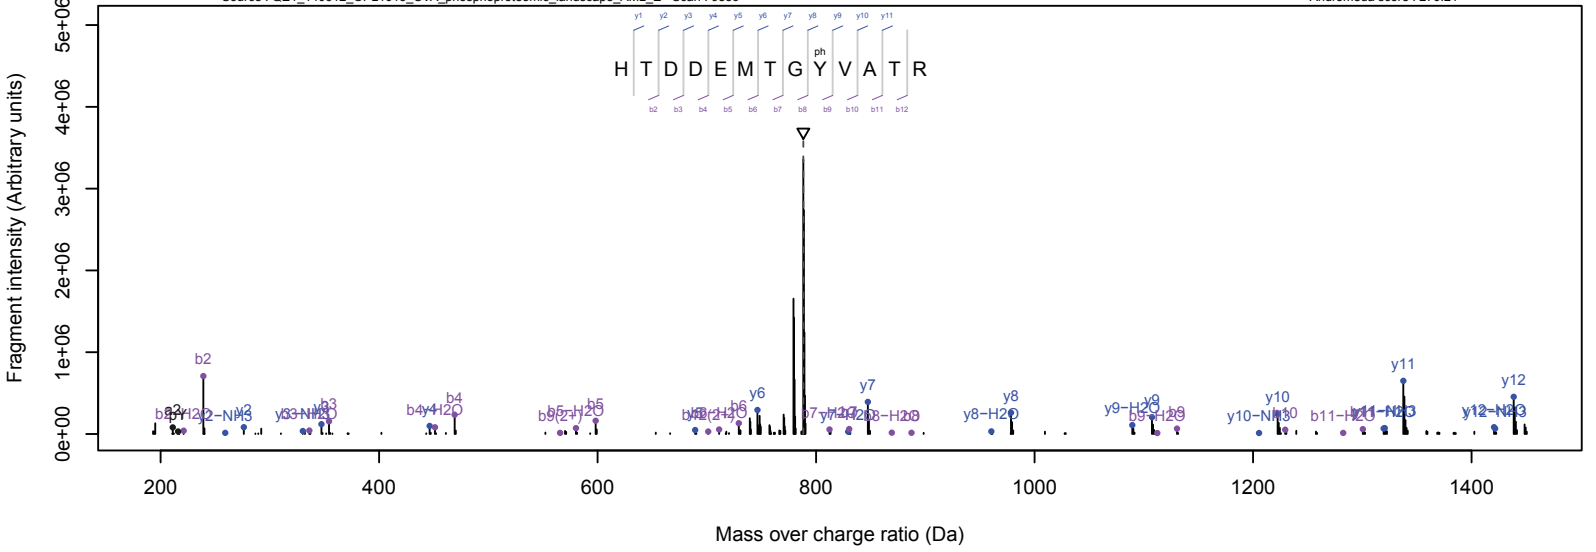

Y(ph)KVCNYGLTFTQK-2+

Source : QE1\_140612\_OPL1013\_CVA\_phosphoproteomic\_landscape\_AML\_C Scan : 23216

Andromeda score : 269.95

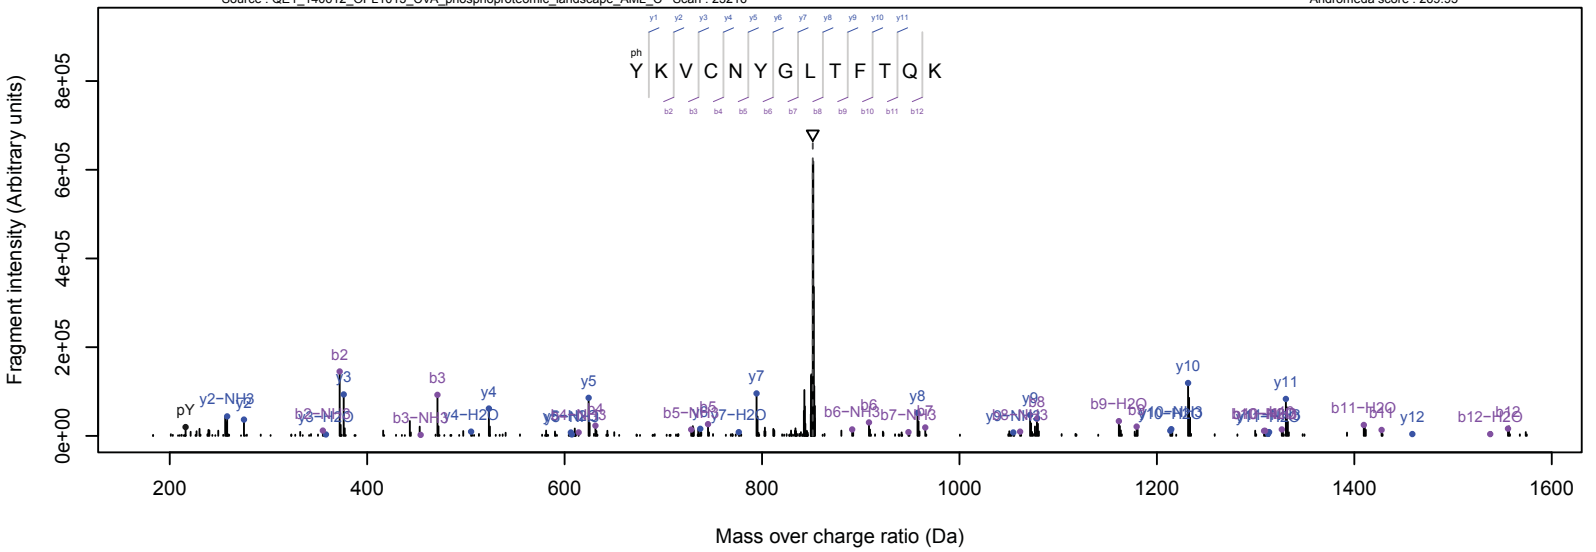

LGAGQFGEVWMGYYNNSTK-2+

Source : QE1\_140822\_OPL1013\_CvA\_pTyrIP\_AML\_cell\_lines\_part2\_B Scan : 45344

Andromeda score : 268.65

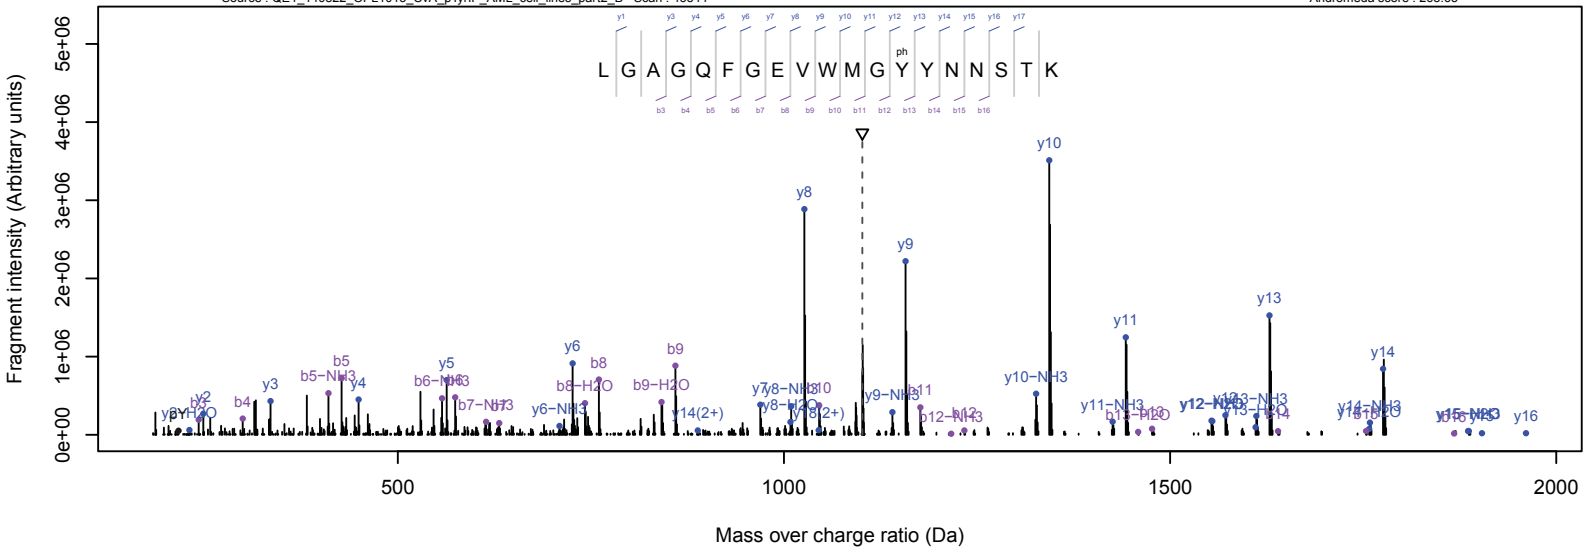

NRPEERPTFEYIQSVLDDDFYTATESQY(ph)QQQP-3+

Source : QE1\_140822\_OPL1013\_CVA\_pTyrIP\_AML\_cell\_lines\_part2\_F Scan : 46188

Andromeda score : 268.27

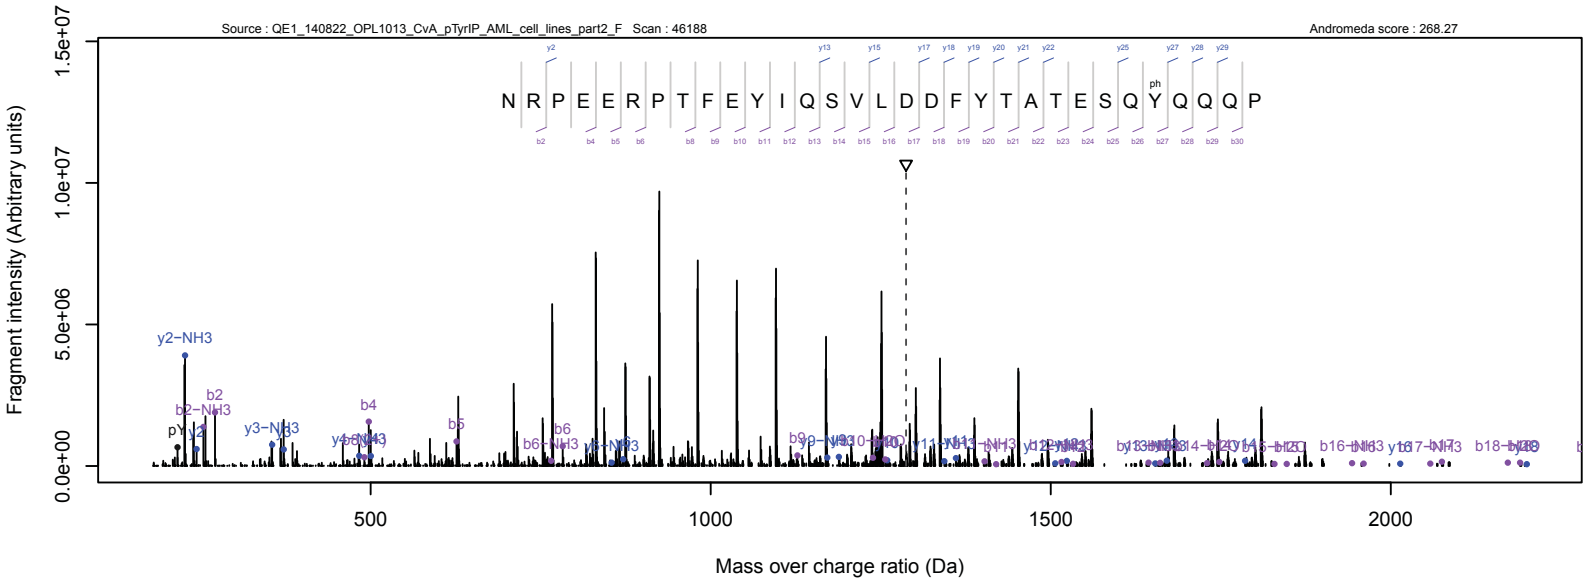

AY(ph)TNFDAERDALNIETAIK-2+

Source : QE1\_140612\_OPL1013\_CVA\_phosphoproteomic\_landscape\_AML\_C Scan : 38408

Andromeda score : 267.78

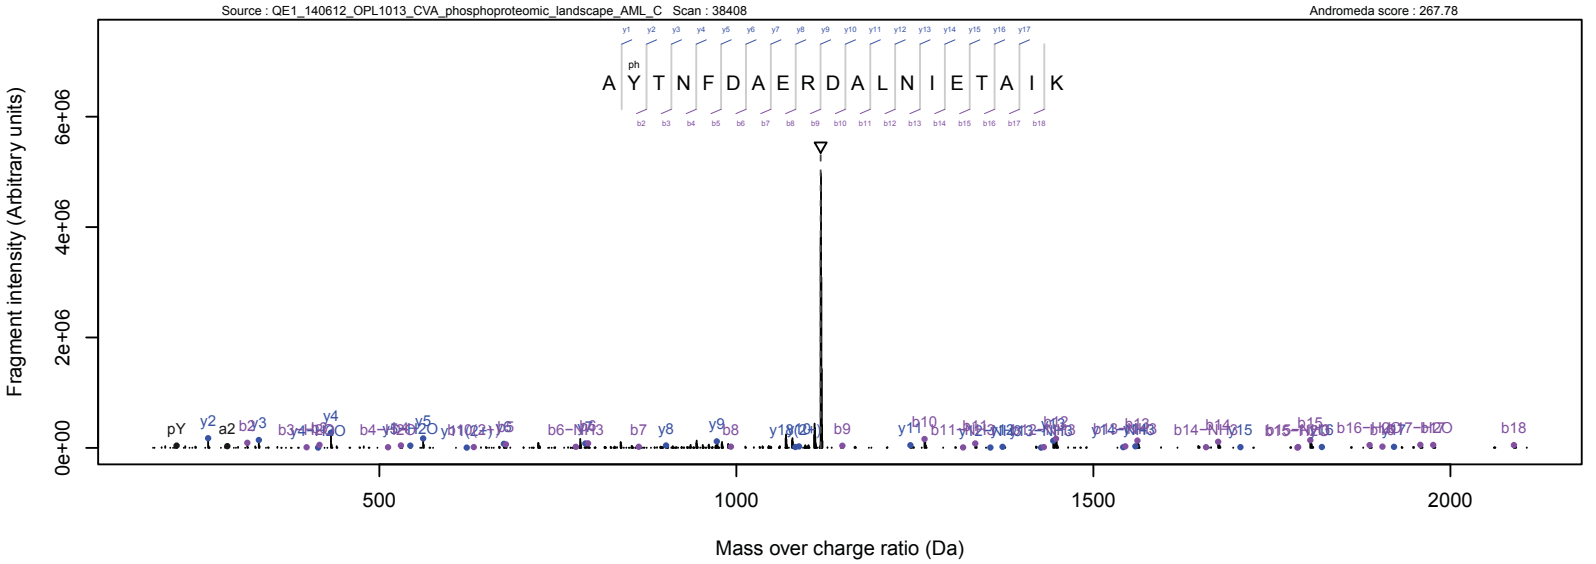

NQSQGYNQWQQGQFWGQK PWSQH Y(ph)HQGY-3+

Source : QE1\_140612\_OPL1013\_CVA\_phosphoproteomic\_landscape\_AML\_C Scan : 34864

Andromeda score : 267.5

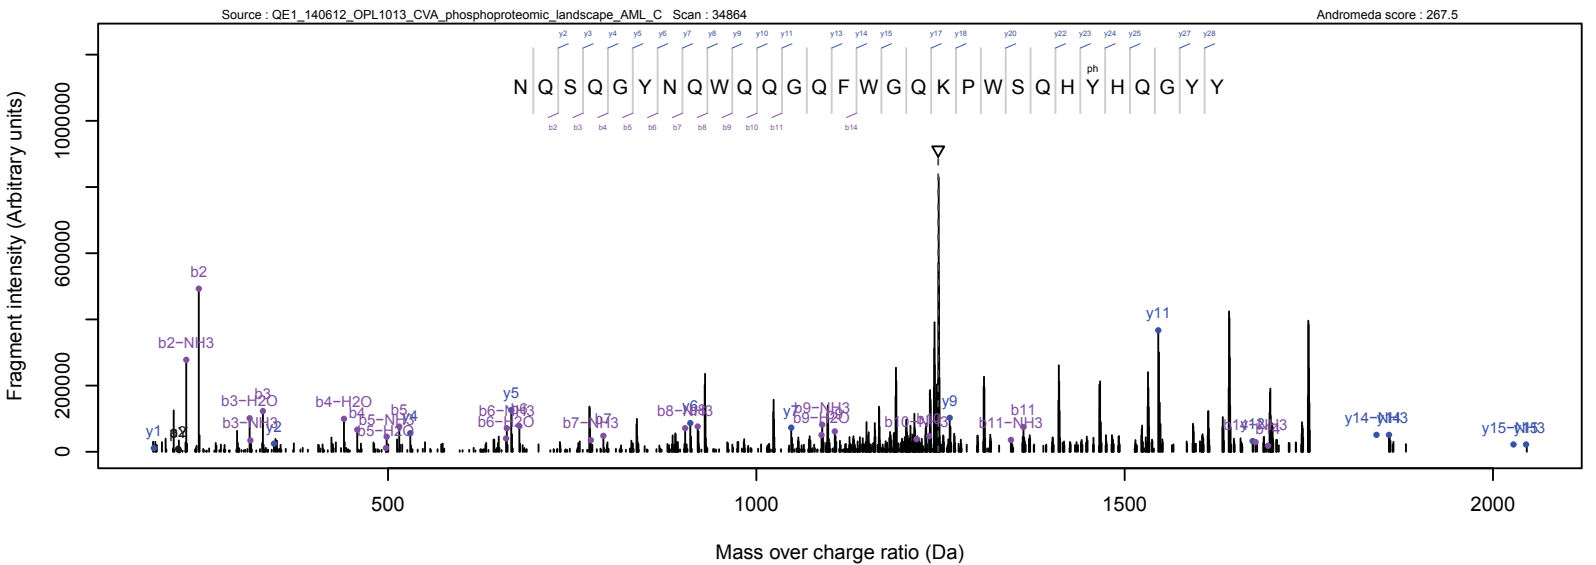

**EQLQEHLQPMPEHDY(ph)FEFFSNDTSLYPHMYAR-4+**

Source : QE1\_140612\_OPL1013\_CVA\_phosphoproteomic\_landscape\_AML\_C Scan : 45852

Andromeda score : 266.57

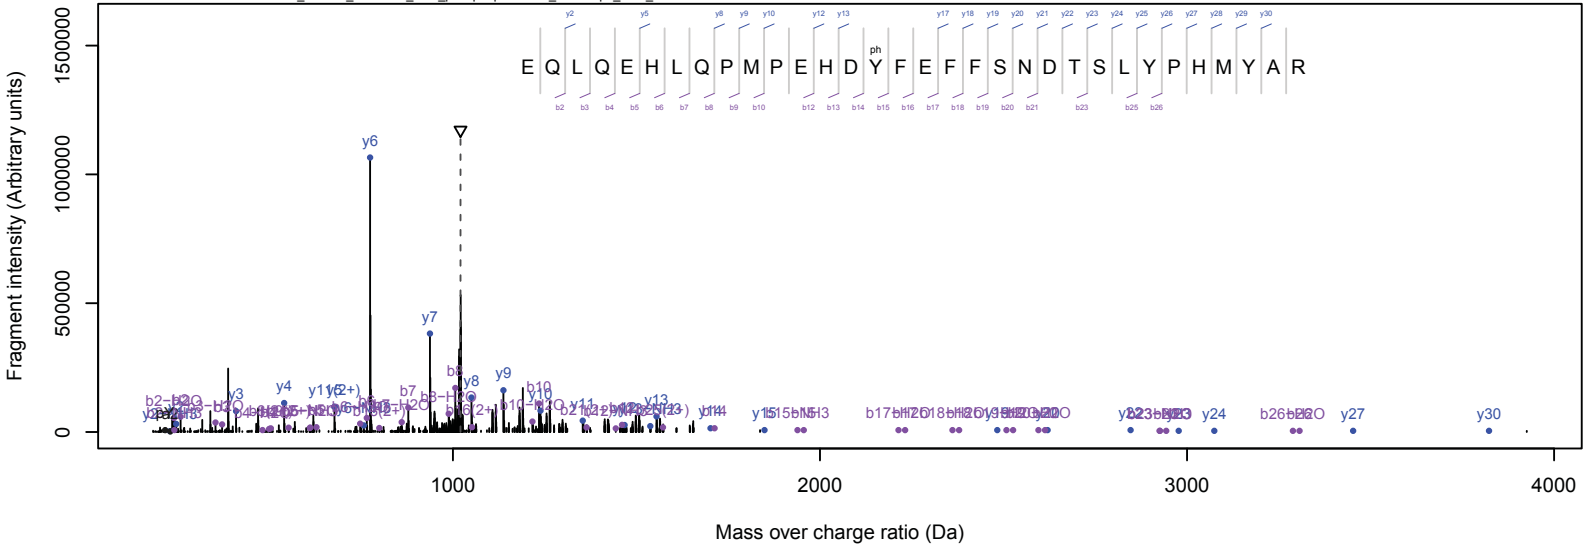

**LQLDNQY(ph)AVLENQK-2+**

Source : QE1\_140612\_OPL1013\_CVA\_phosphoproteomic\_landscape\_AML\_B Scan : 25317

Andromeda score : 266.2

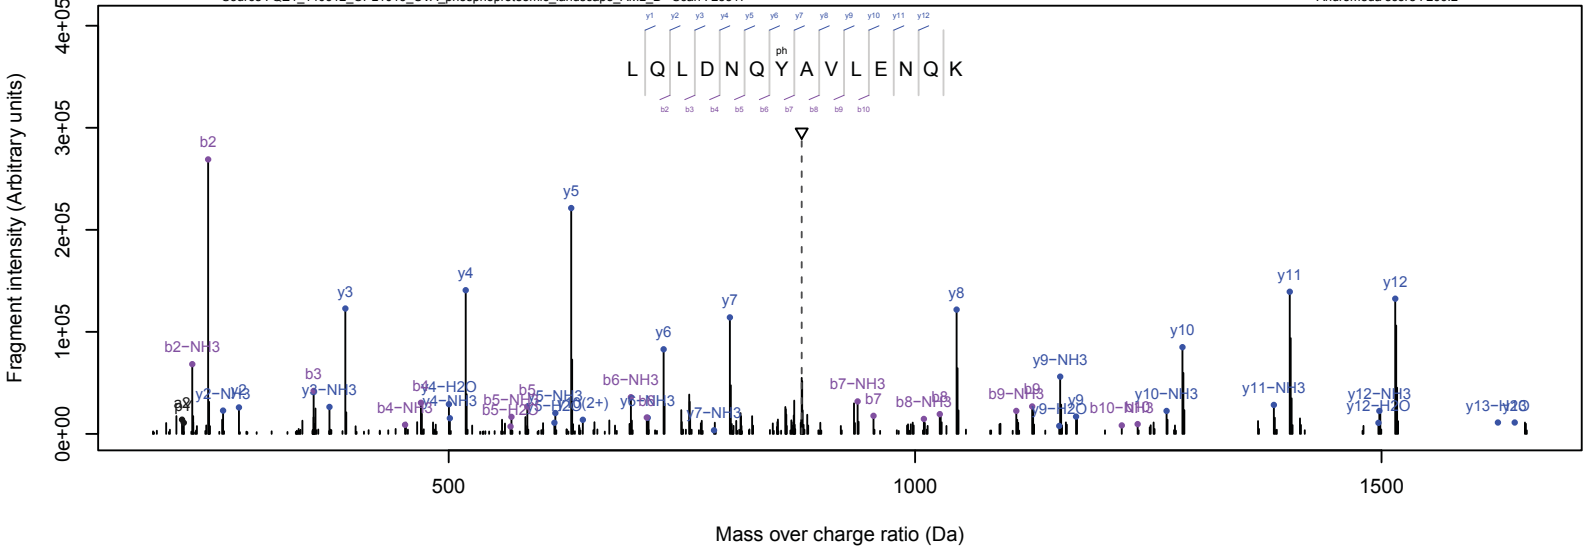

**LGAGQFGEVWMG(ph)YNNSTK-2+**

Source : QE1\_140822\_OPL1013\_CvA\_pTyrIP\_AML\_cell\_lines\_part2\_B Scan : 32153

Andromeda score : 264.69

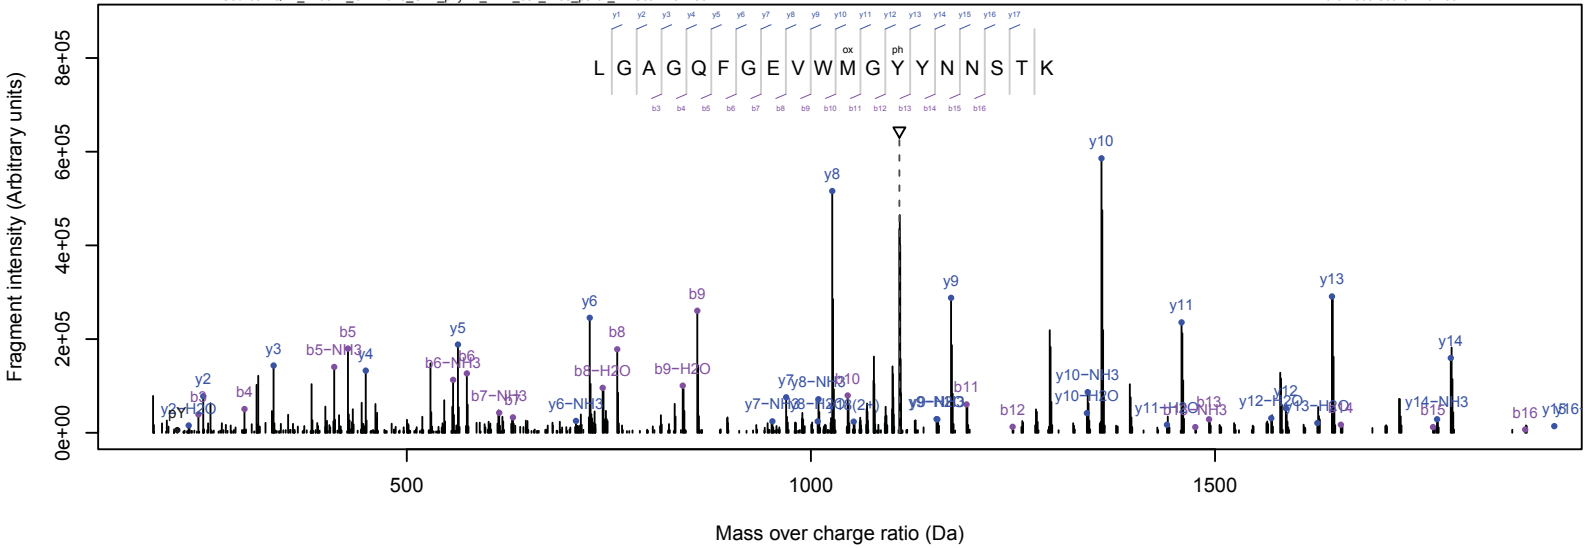

TTEDEVHICHNQDGY(ph)SYPSR-3+

Source : QE1\_140612\_OPL1013\_CVA\_phosphoproteomic\_landscape\_AML\_C Scan : 12537

Andromeda score : 264.67

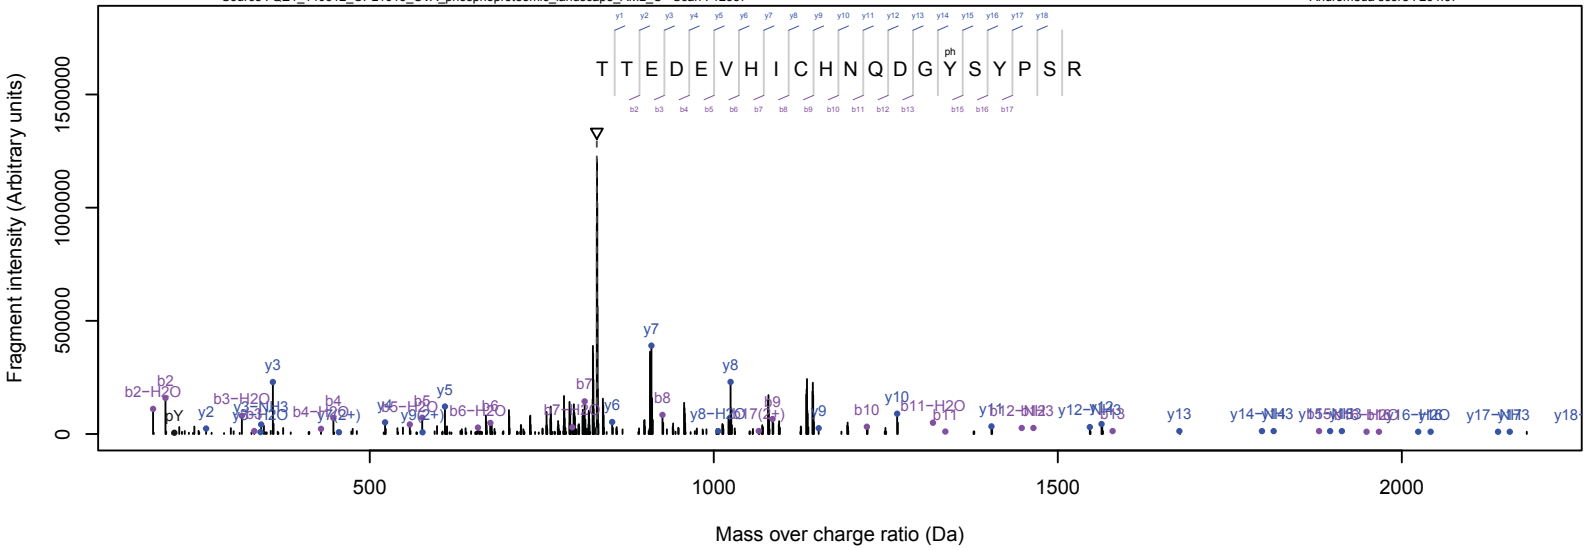

EHNFSFY(ph)PTFQSHPNSSMPGSR-3+

Source : QE1\_140612\_OPL1013\_CVA\_phosphoproteomic\_landscape\_AML\_C Scan : 29496

Andromeda score : 264.64

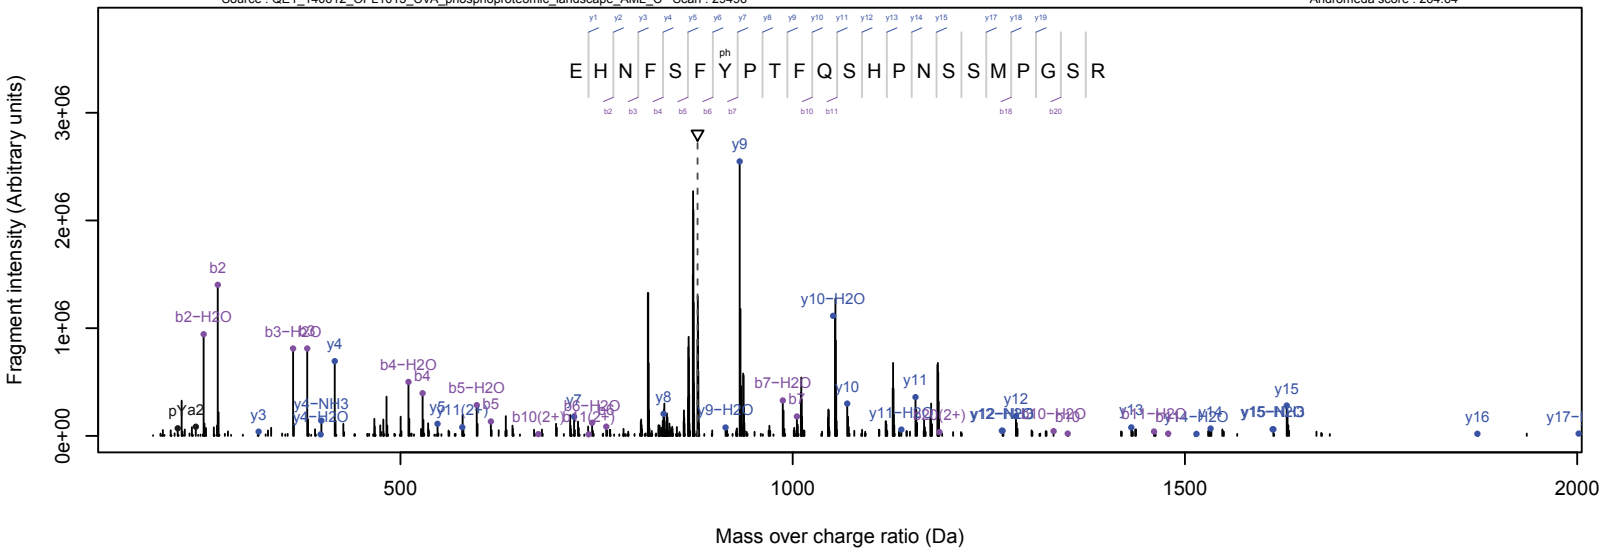

NYVTVMQNNPLTSLGLEPSPQCDY(ph)IRPSLTGK-3+

Source : QE1\_140612\_OPL1013\_CVA\_phosphoproteomic\_landscape\_AML\_C Scan : 44158

Andromeda score : 264.19

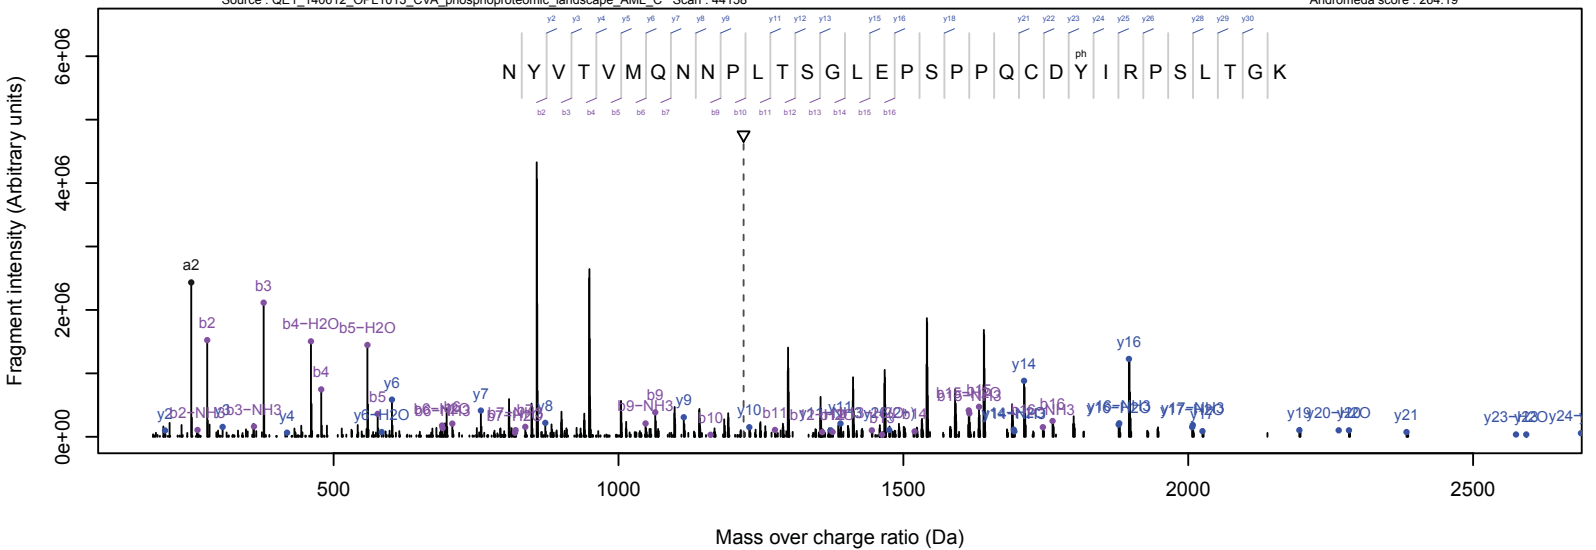

**YFEITDESPY(ph)VHYLNTFSSK-2+**

Source : QE1\_140612\_OPL1013\_CVA\_phosphoproteomic\_landscape\_AML\_C Scan : 41578

Andromeda score : 263.92

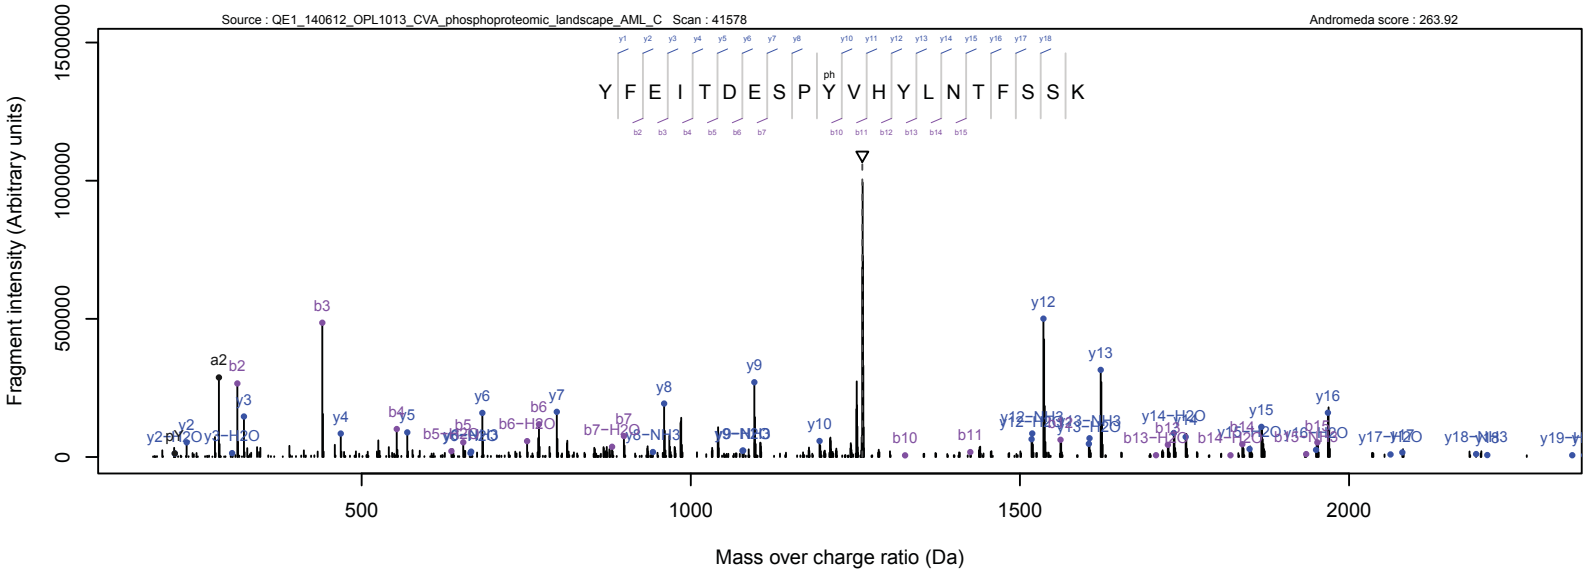

**LVTSPPCCIVTST(ph)YGWTANMER-2+**

Source : QE1\_140612\_OPL1013\_CVA\_phosphoproteomic\_landscape\_AML\_C Scan : 41740

Andromeda score : 263.09

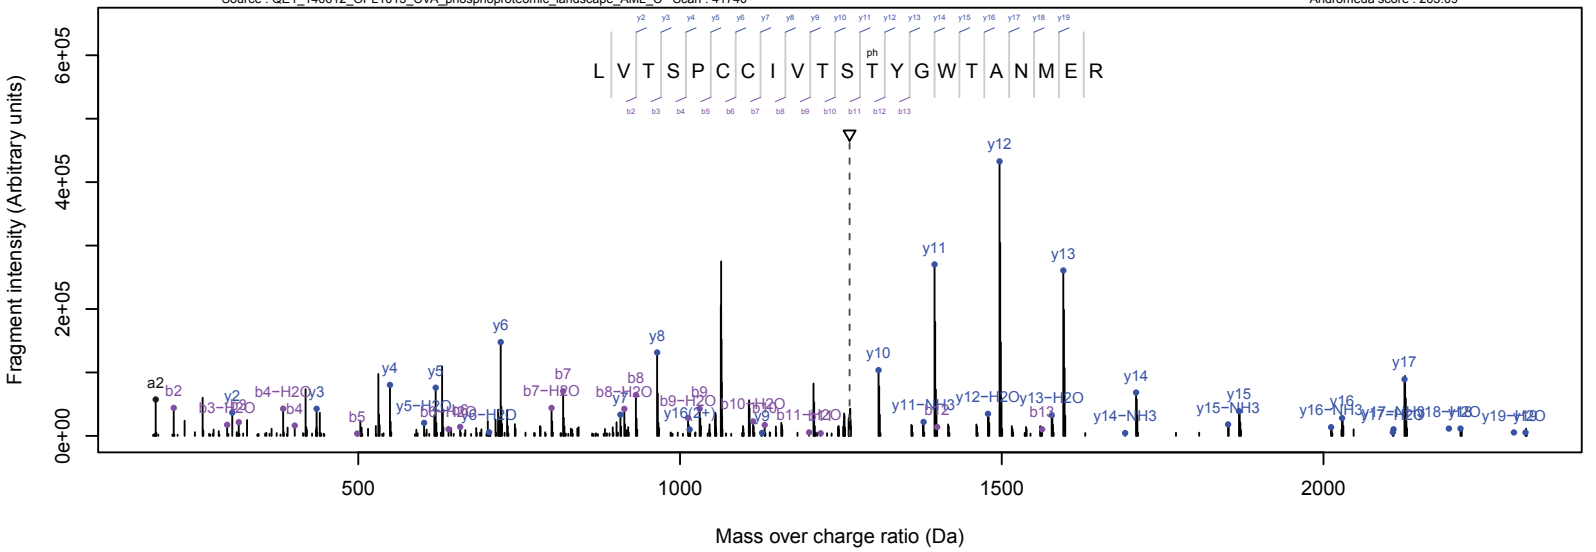

**ATFYGEQVDY(ph)YKSYIK-2+**

Source : QE1\_140612\_OPL1013\_CVA\_phosphoproteomic\_landscape\_AML\_C Scan : 32512

Andromeda score : 262.36

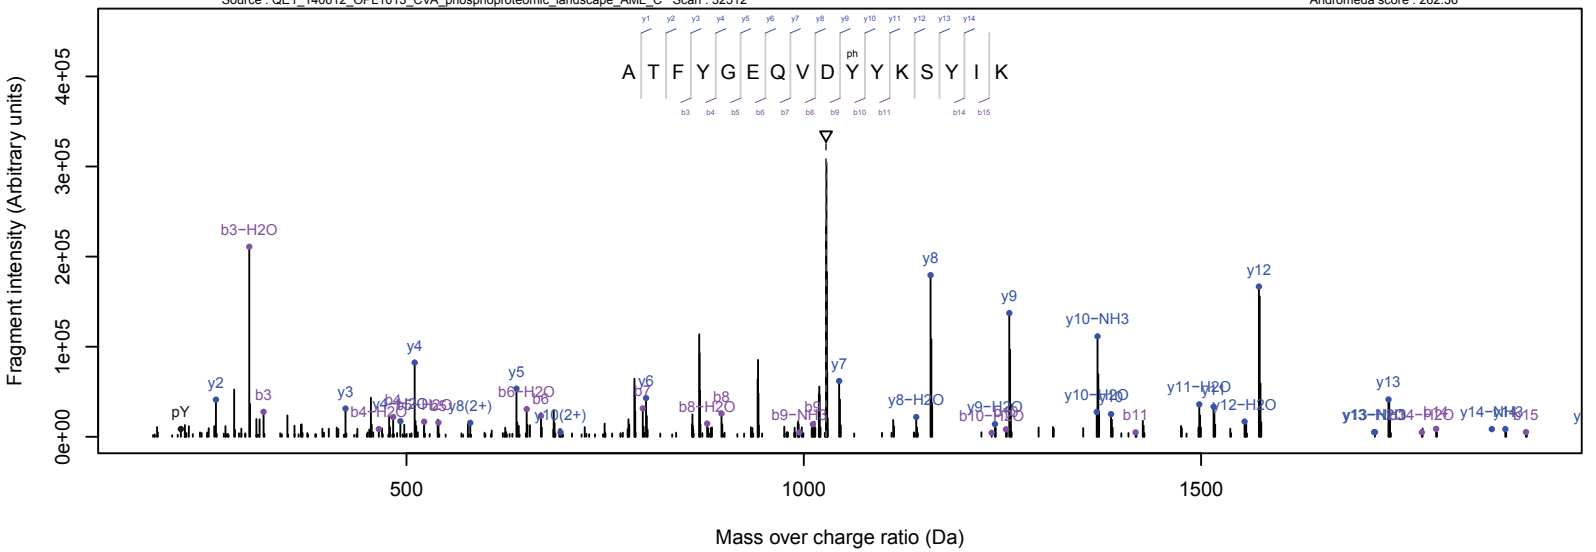

NLAMEATY(ph)INHNSQQCLR-2+

Source : QE1\_140612\_OPL1013\_CVA\_phosphoproteomic\_landscape\_AML\_A Scan : 33163

Andromeda score : 262.21

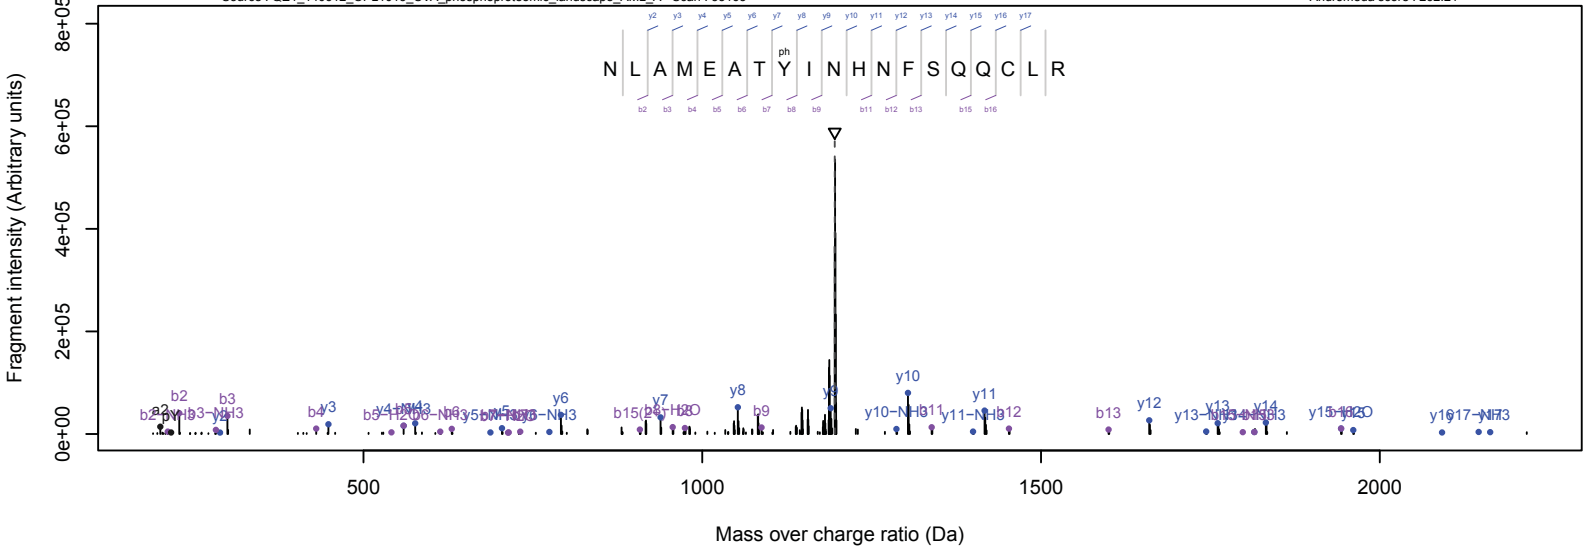

Y(ph)ICTYINVQERDPK-2+

Source : QE1\_140612\_OPL1013\_CVA\_phosphoproteomic\_landscape\_AML\_B Scan : 22967

Andromeda score : 261.67

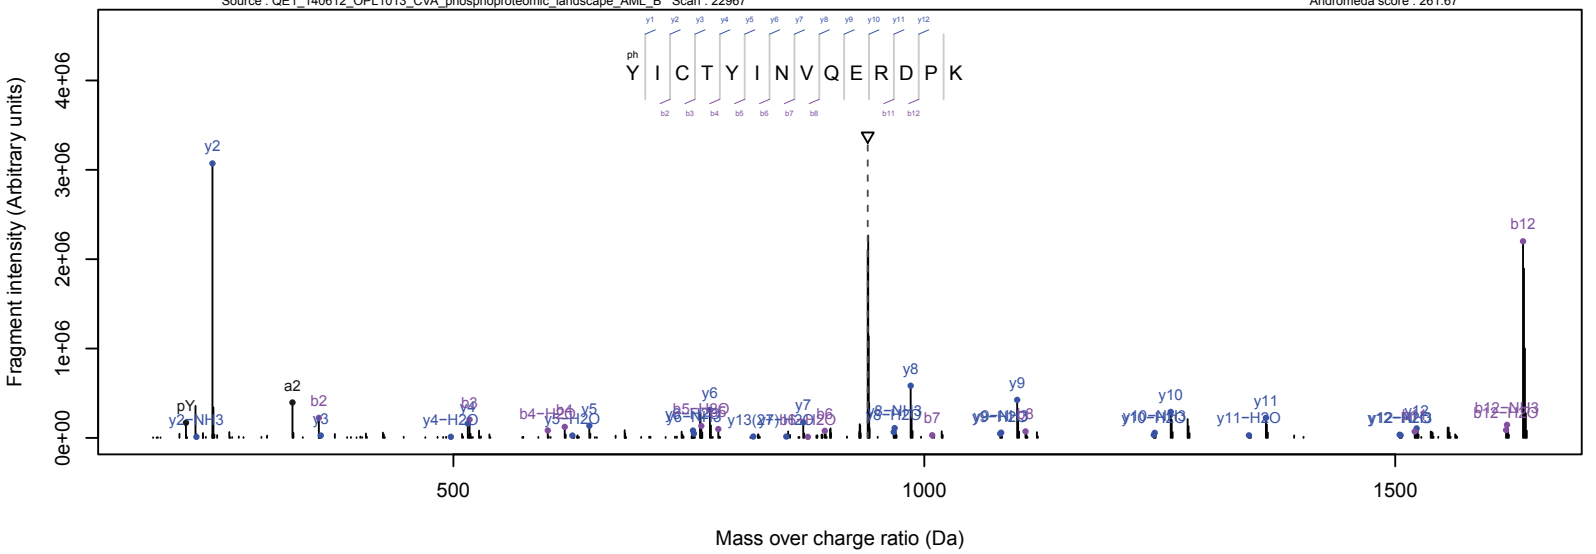

AAEAAASAY(ph)YNPGNPHNVYMPPTSQPPPPYPPEDK-3+

Source : QE1\_140612\_OPL1013\_CVA\_phosphoproteomic\_landscape\_AML\_C Scan : 34270

Andromeda score : 259.74

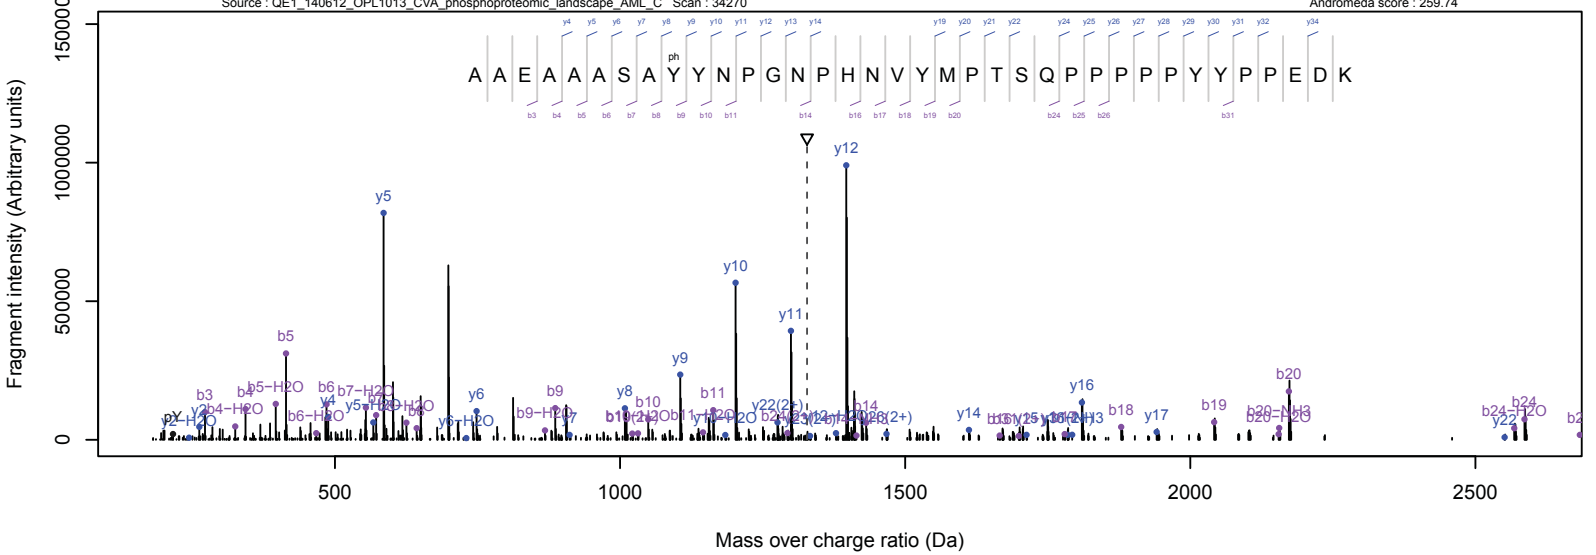



LGHVVMGNNAVSPYQQVIEK-2+

Source : QE1\_140612\_OPL1013\_CVA\_phosphoproteomic\_landscape\_AML\_C Scan : 24882

Andromeda score : 259.18

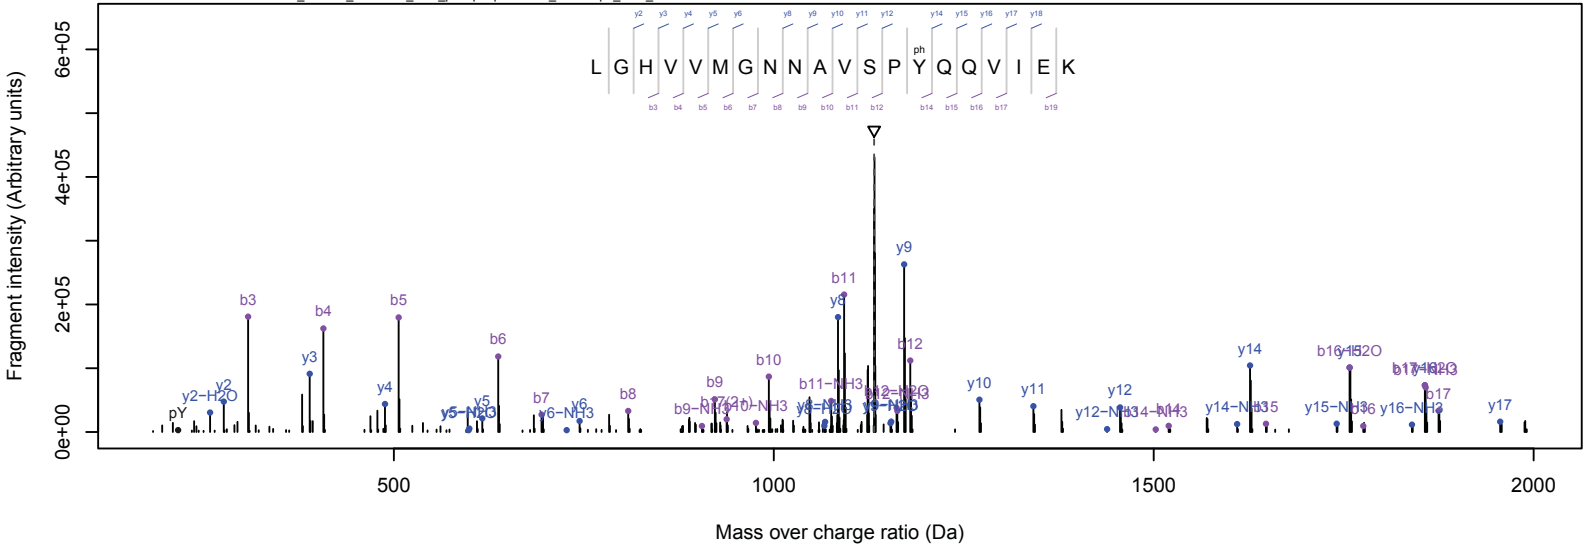

M(ox)QQNGYENPT(ph)YKFFEQM(ox)QN-2+

Source : QE1\_140908\_OPL1013\_CvA\_pTyrIP\_AML\_Kasumi1 Scan : 32404

Andromeda score : 259.14

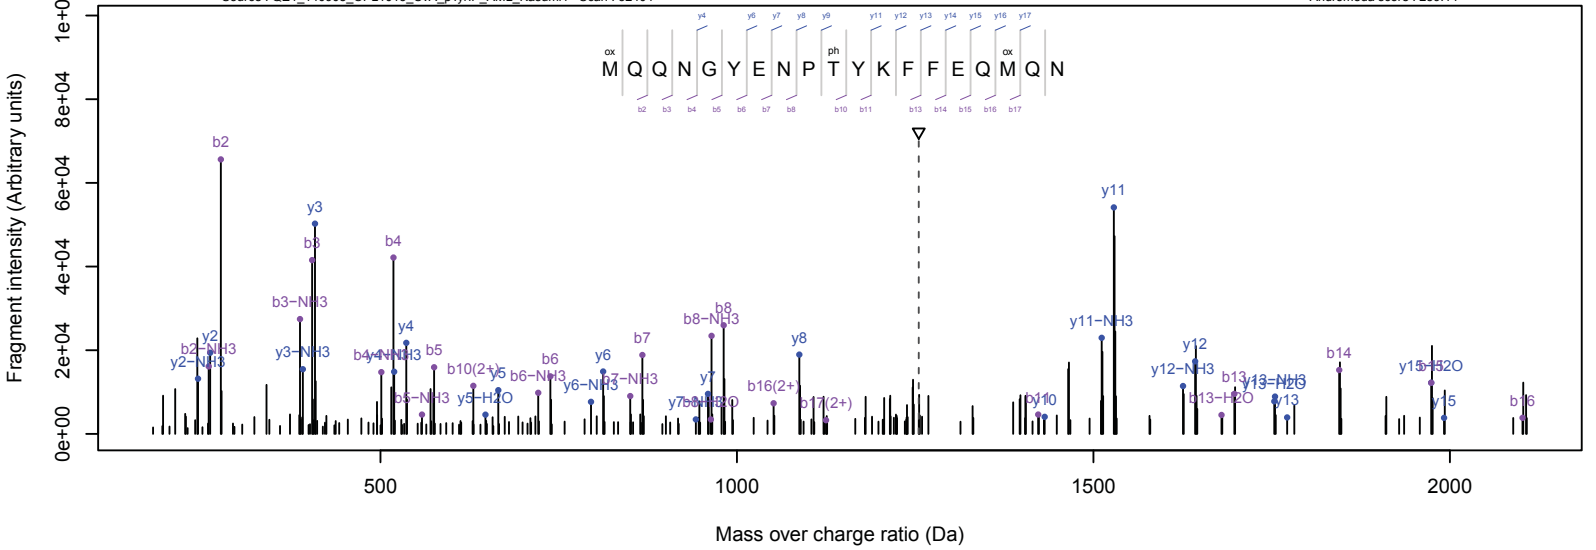

SPLSDY(ph)MNLDFSSPK-2+

Source : QE1\_140612\_OPL1013\_CVA\_phosphoproteomic\_landscape\_AML\_D Scan : 41094

Andromeda score : 259.08

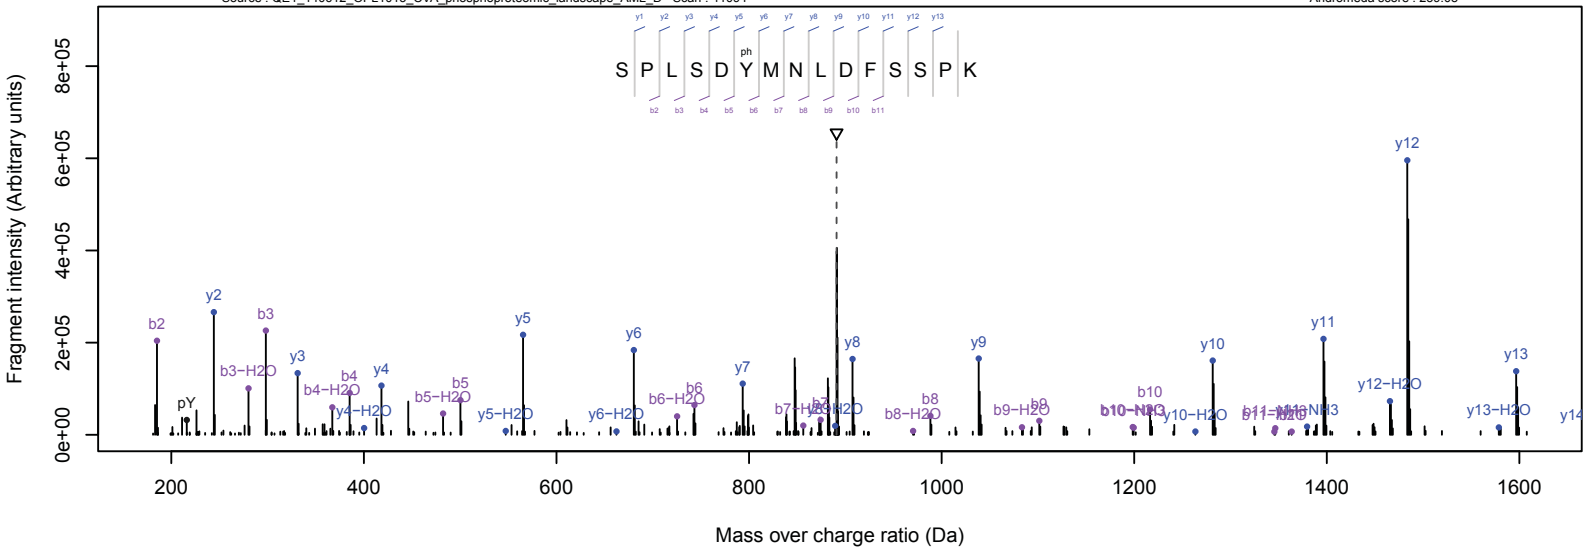

VHTDFTSPY(ph)DTSLK-2+

Source : QE1\_140908\_OPL1013\_CvA\_pTyrIP\_AML\_HEL Scan : 23341

Andromeda score : 258.41

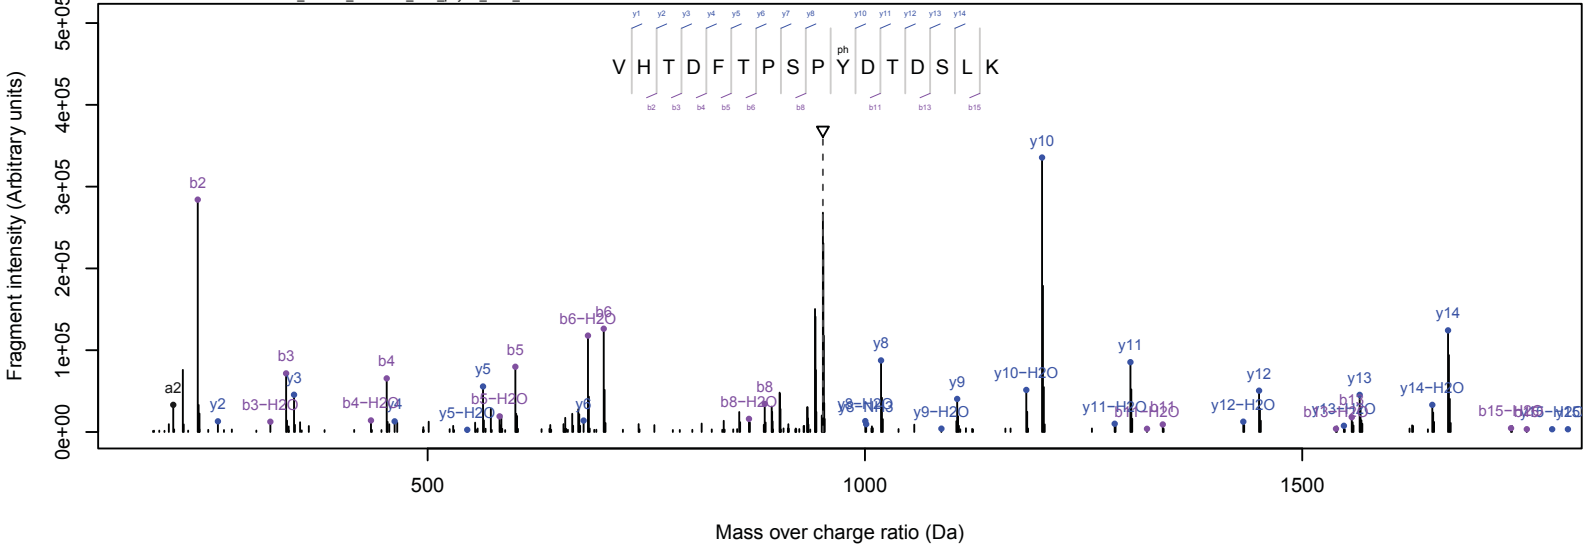

EDSARVY(ph)ENVGLMQQK-2+

Source : QE1\_140612\_OPL1013\_CVA\_phosphoproteomic\_landscape\_AML\_A Scan : 18854

Andromeda score : 258.14

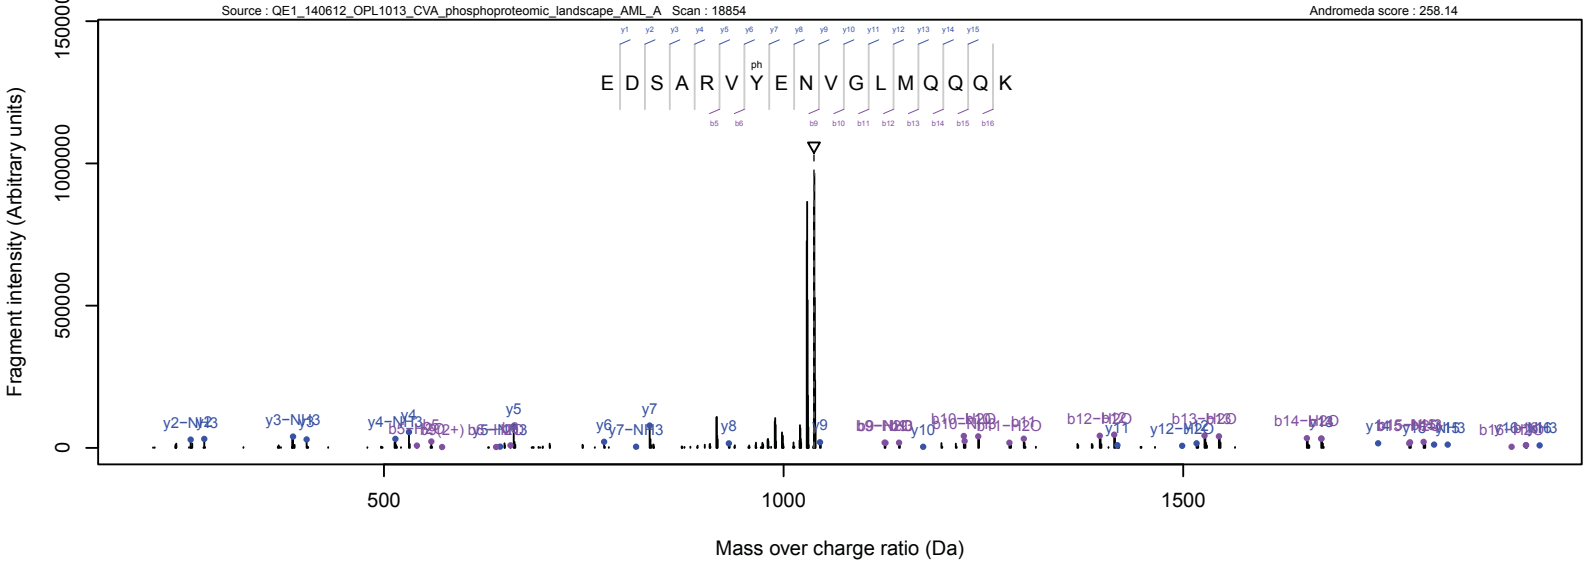

VY(ph)ENVGLMQQK-2+

Source : QE1\_140612\_OPL1013\_CVA\_phosphoproteomic\_landscape\_AML\_A Scan : 16991

Andromeda score : 257.54

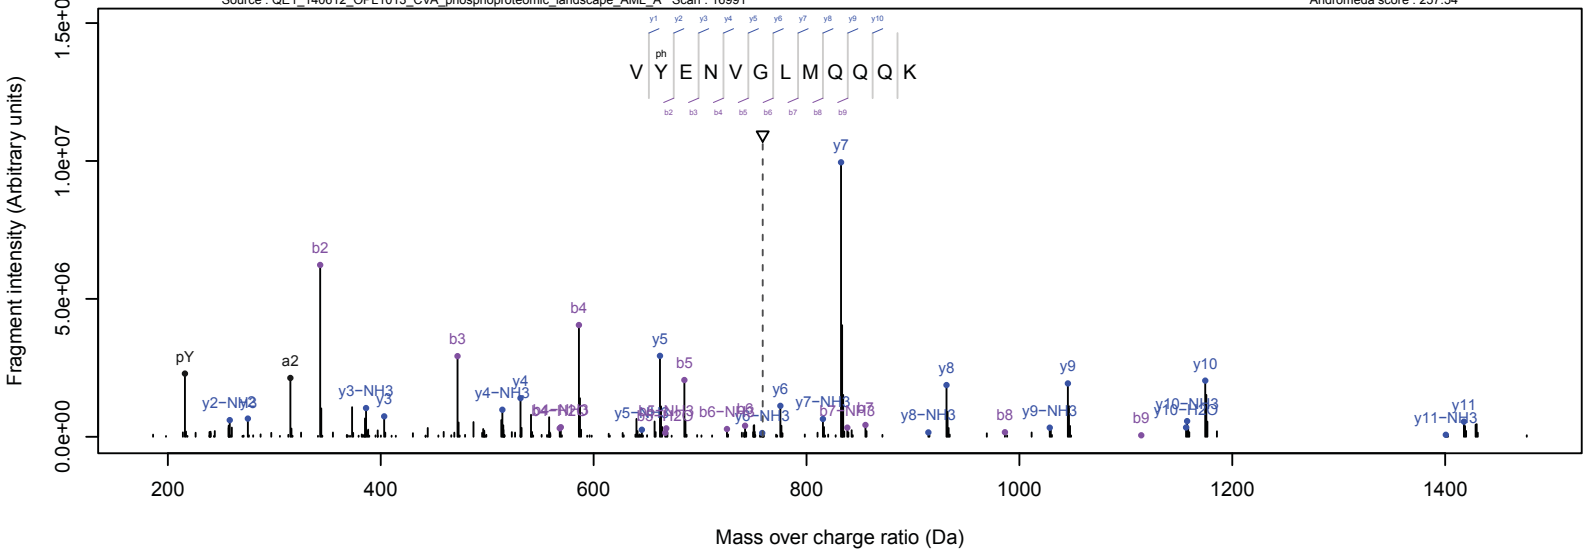

AHDGGIY(ph)AISWSPDSTHLLSASGDK-3+

Source : QE1\_140908\_OPL1013\_CVA\_pTyrIP\_AML\_HEL Scan : 38533

Andromeda score : 257.51

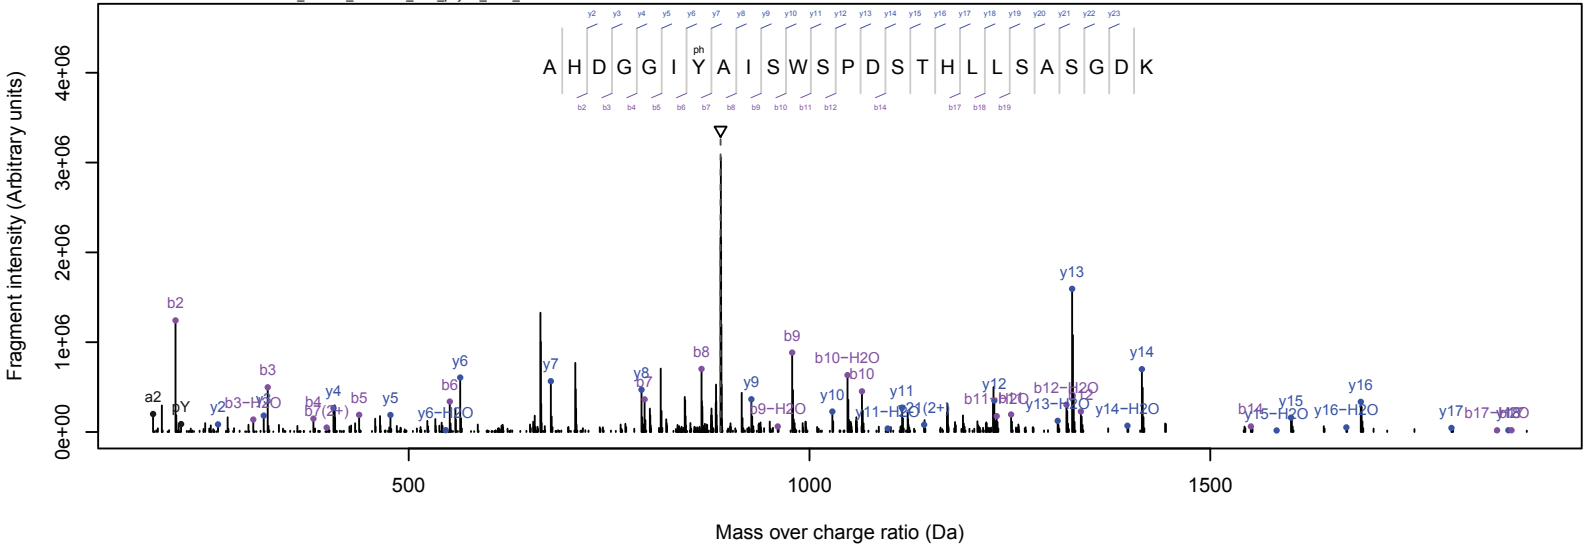

AVY(ph)TSVQAQYSTAGFVQQSNLLSHSVQAADHLDSISPR-4+

Source : QE1\_140612\_OPL1013\_CVA\_phosphoproteomic\_landscape\_AML\_C Scan : 44533

Andromeda score : 254.81

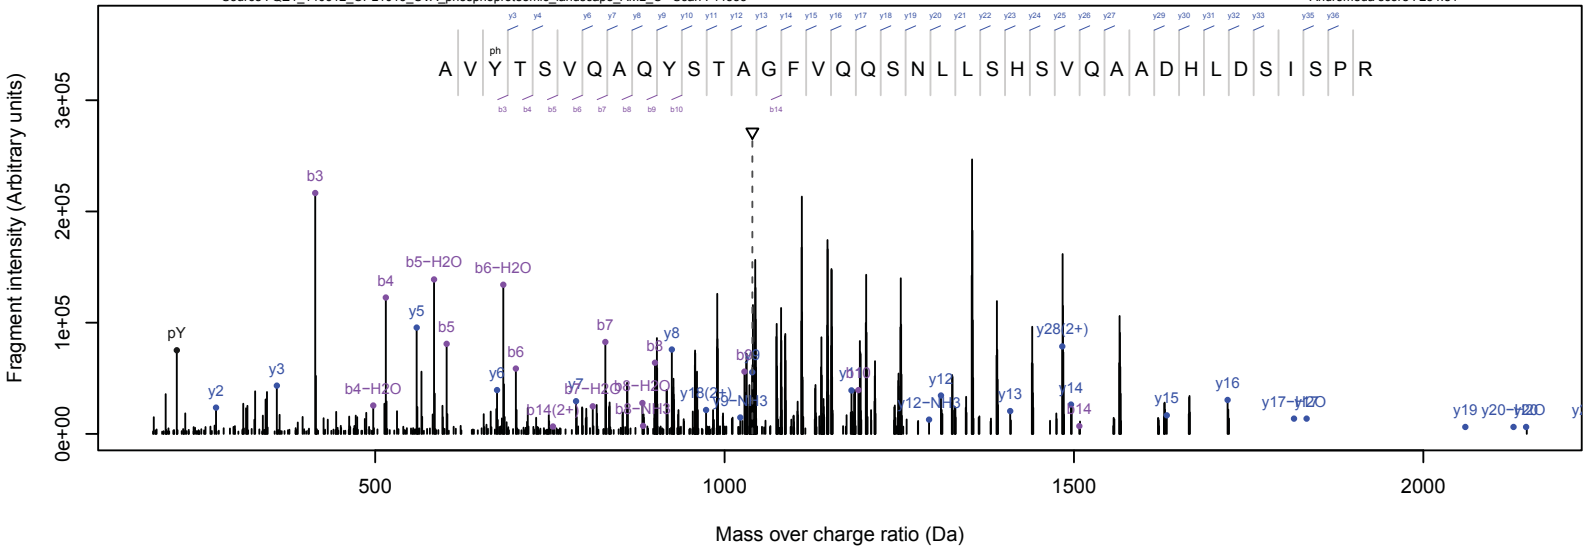

TQTCTEGGDY(ph)CLIPR-2+

Source : QE1\_140612\_OPL1013\_CVA\_phosphoproteomic\_landscape\_AML\_C Scan : 22530

Andromeda score : 251.87

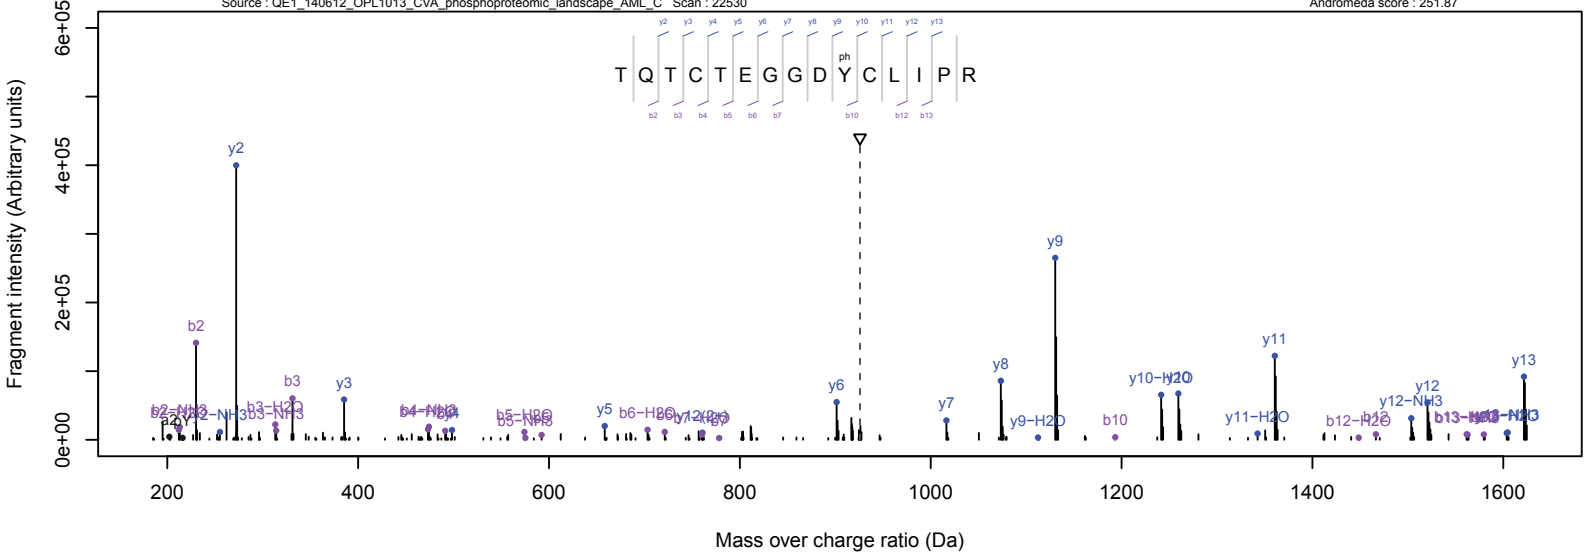

SLGY(ph)AYVNFQPPADAER-2+

Source : QE1\_140612\_OPL1013\_CVA\_phosphoproteomic\_landscape\_AML\_B Scan : 31119

Andromeda score : 251.02

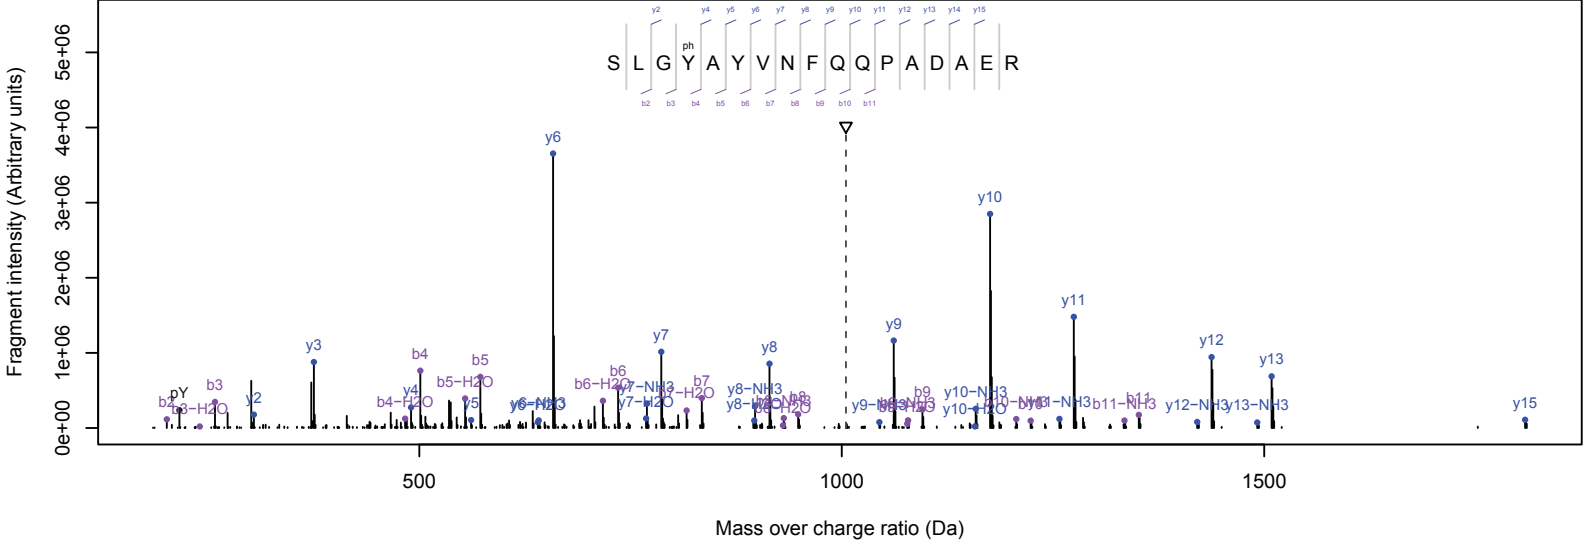

LQAYHTQTTPLEIYR-2+

Source : QE1\_140612\_OPL1013\_CVA\_phosphoproteomic\_landscape\_AML\_C Scan : 28140

Andromeda score : 250.27

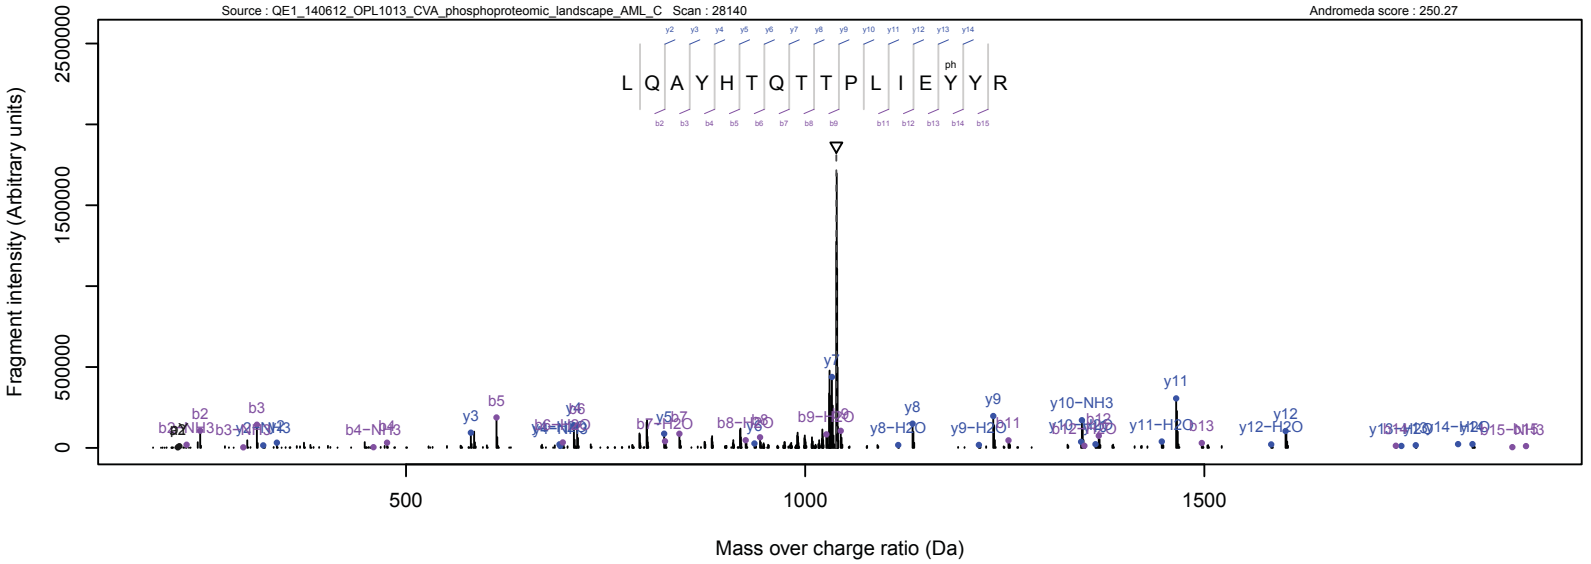

ERPSSAIYPSDSFR-2+

Source : QE1\_140612\_OPL1013\_CVA\_phosphoproteomic\_landscape\_AML\_C Scan : 17314

Andromeda score : 249.82

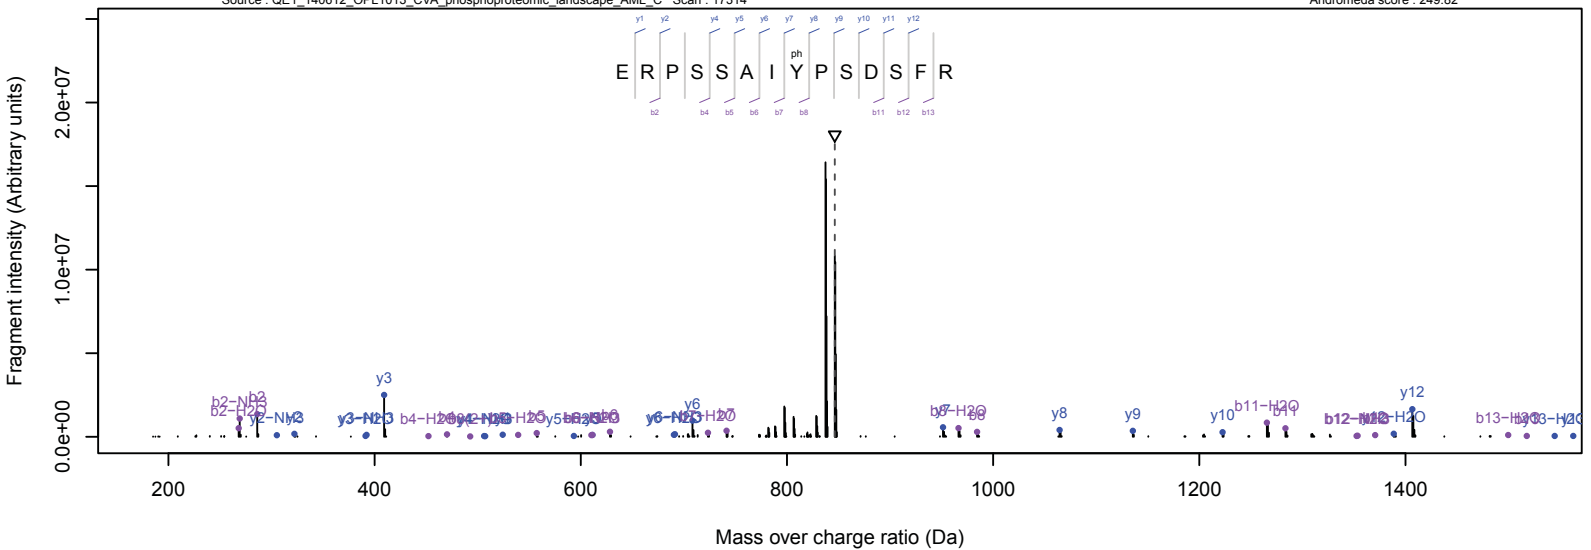

**KTTTNPY(ph)VLMVLYK-2+**

Source : QE1\_140612\_OPL1013\_CVA\_phosphoproteomic\_landscape\_AML\_B Scan : 36139

Andromeda score : 249.82

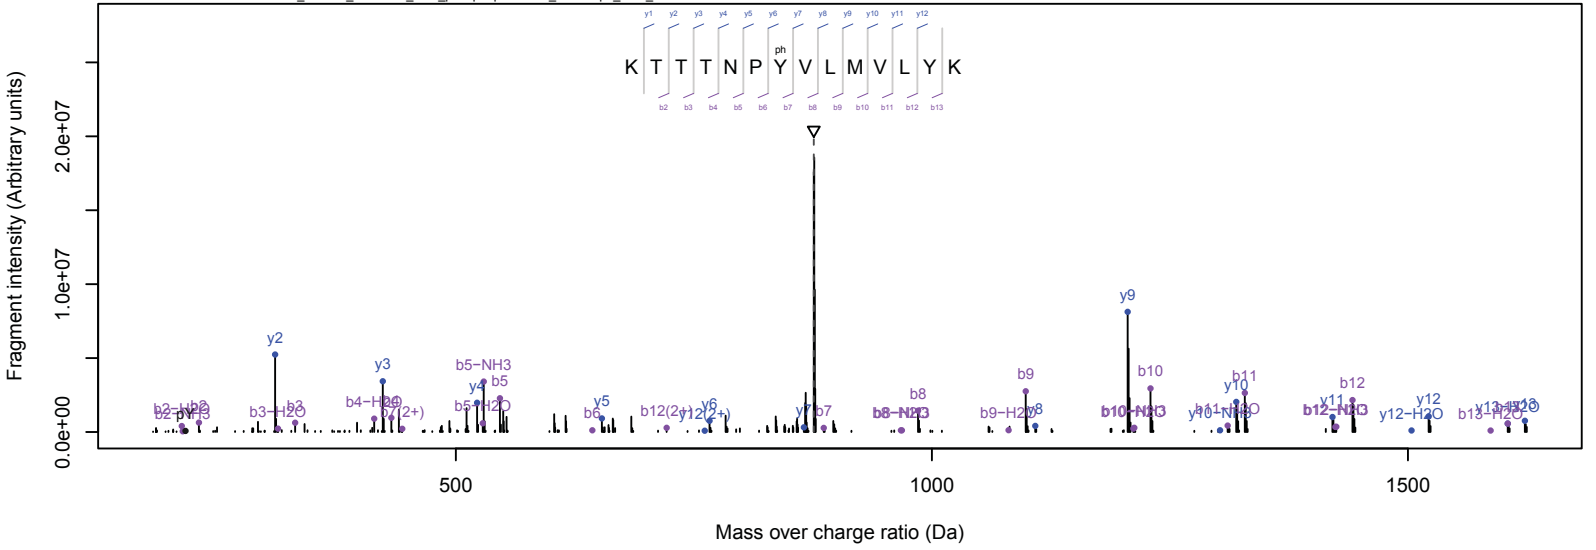

**EY(ph)VNVSQELHPGAAK-2+**

Source : QE1\_140908\_OPL1013\_CvA\_pTyrIP\_AML\_HEL Scan : 20030

Andromeda score : 249.41

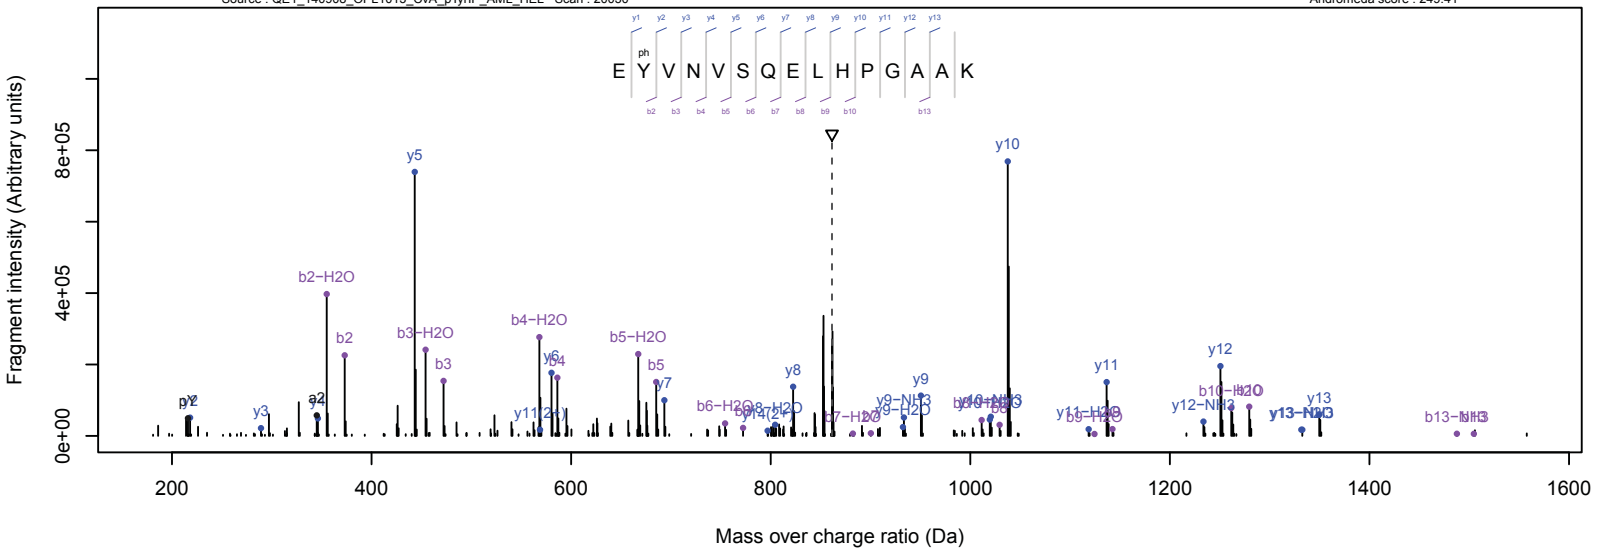

**ITETESPY(ph)QELGQR-2+**

Source : QE1\_140908\_OPL1013\_CvA\_pTyrIP\_AML\_OCI\_AML3 Scan : 19653

Andromeda score : 249.41

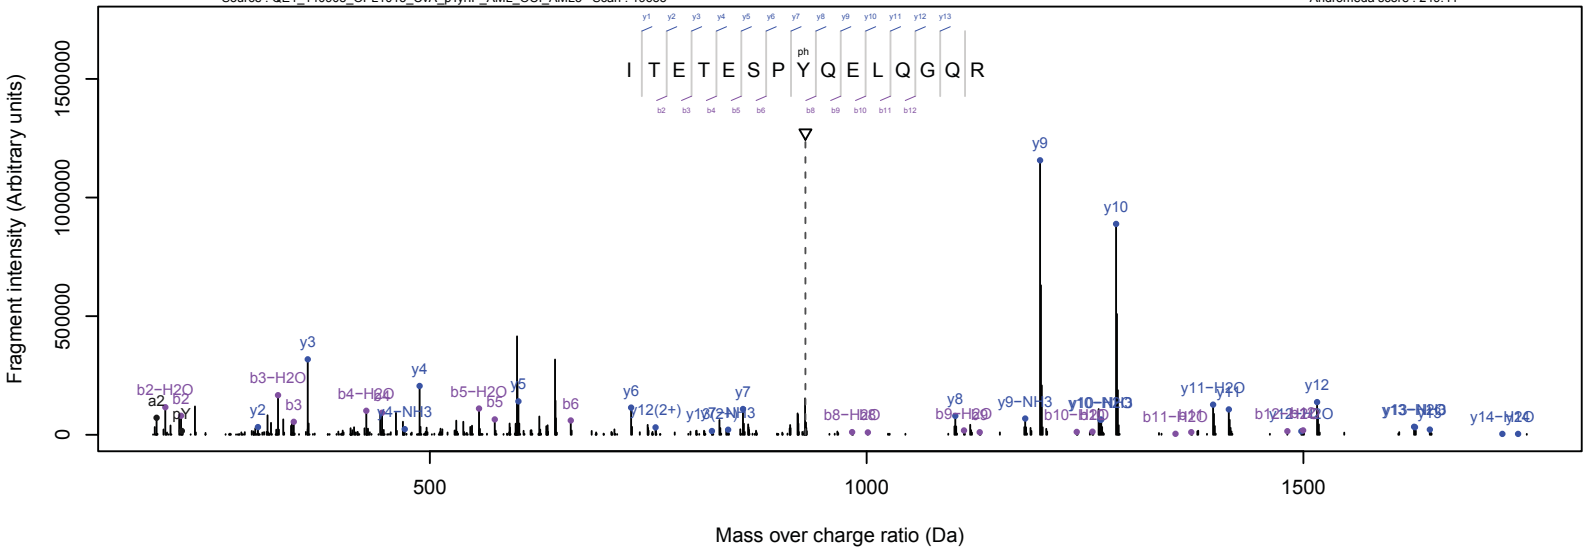

VIQAQTAFSANPANPAILSEASAPIPHDGNLYR-3+

Source : QE1\_140612\_OPL1013\_CVA\_phosphoproteomic\_landscape\_AML\_D Scan : 43240

Andromeda score : 248.82

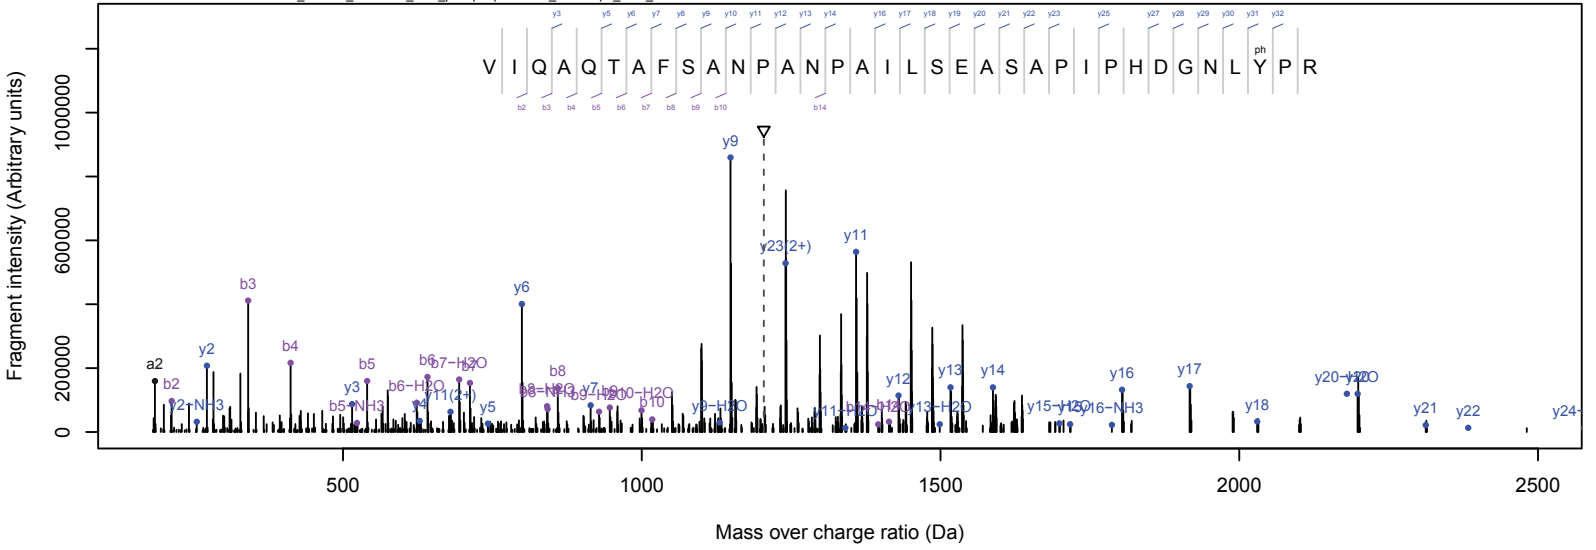

MY(ph)VDPSEINPSPMPQR-2+

Source : QE1\_140612\_OPL1013\_CVA\_phosphoproteomic\_landscape\_AML\_A Scan : 29443

Andromeda score : 247.93

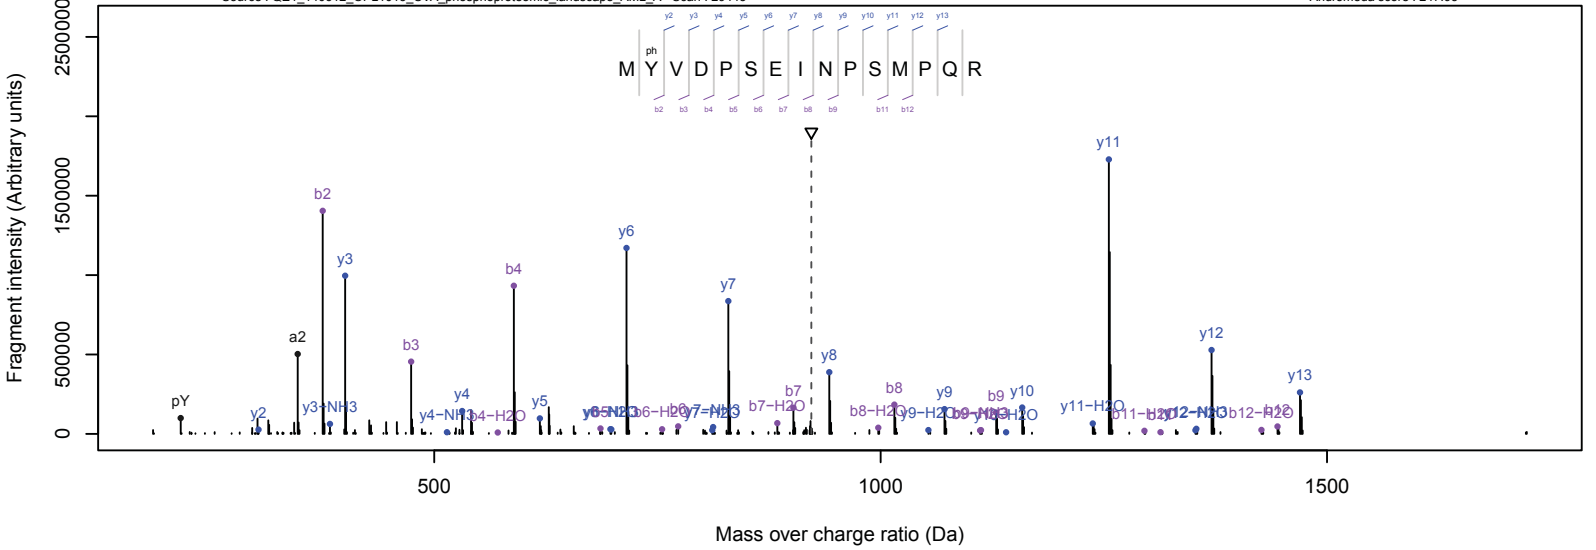

IATCNGETQNRPEESPY(ph)GQR-3+

Source : QE1\_140908\_OPL1013\_CvA\_pTyrIP\_AML\_HL60 Scan : 8553

Andromeda score : 247.89

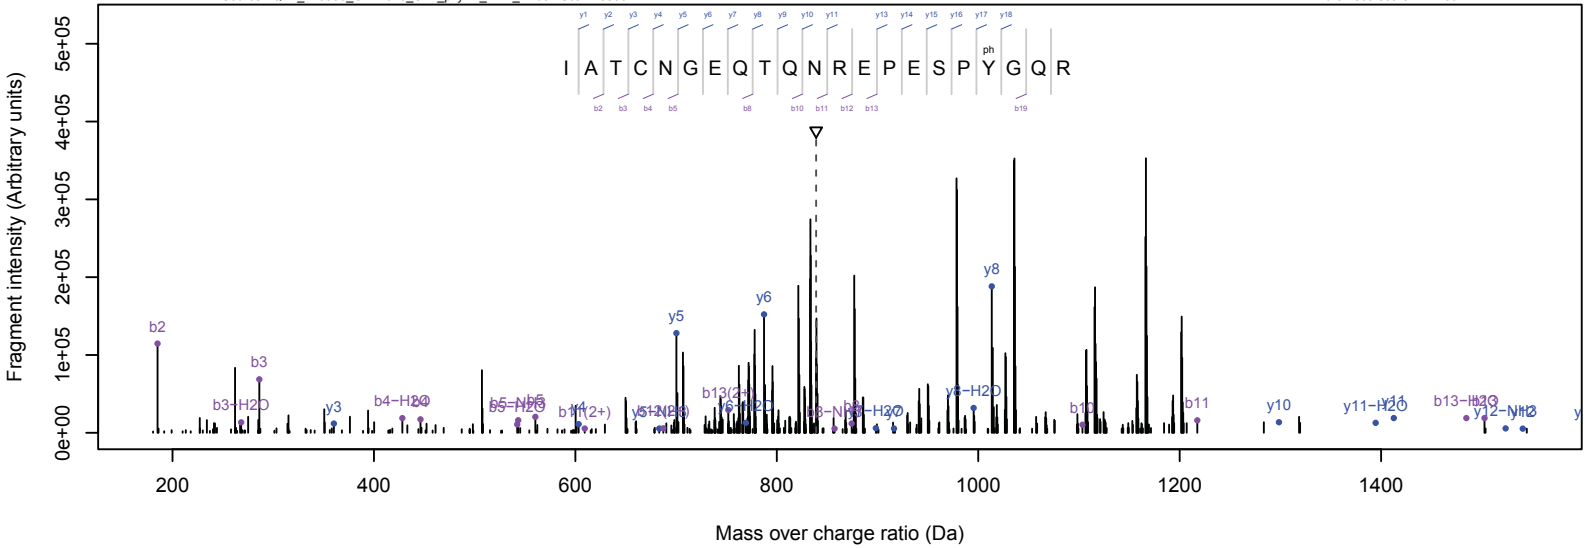

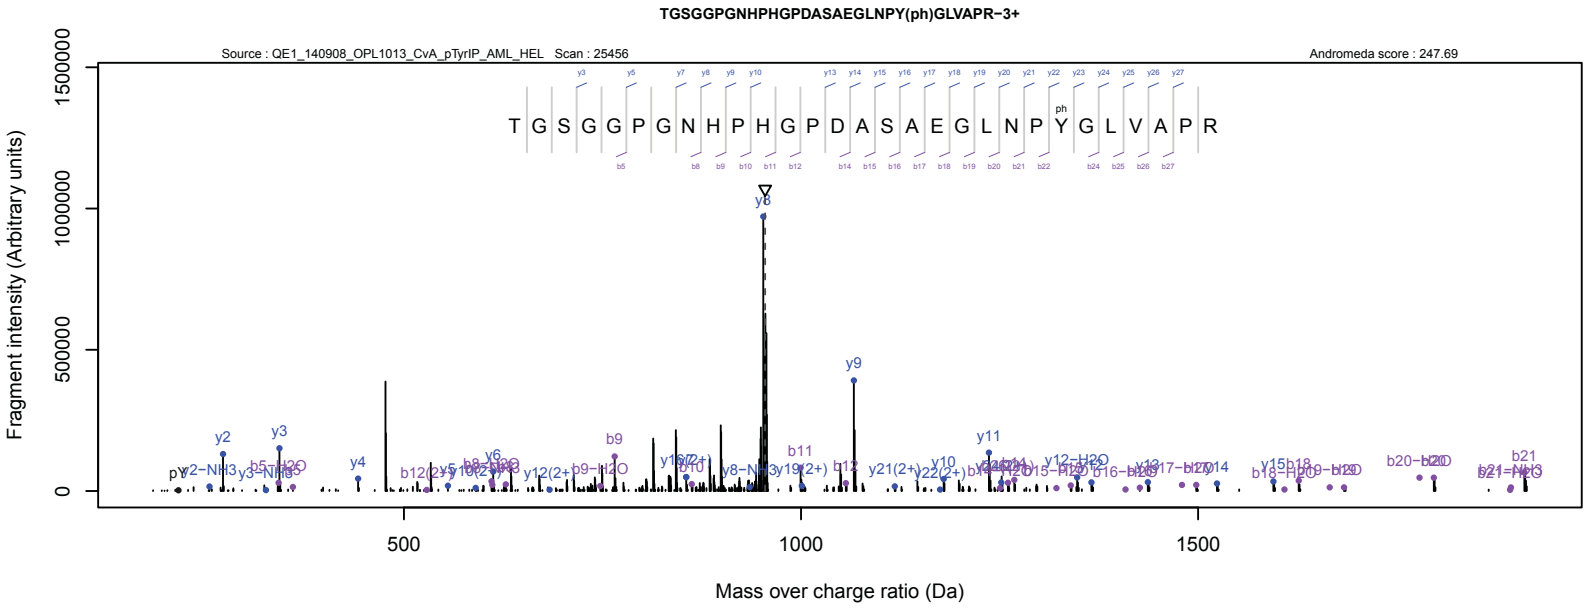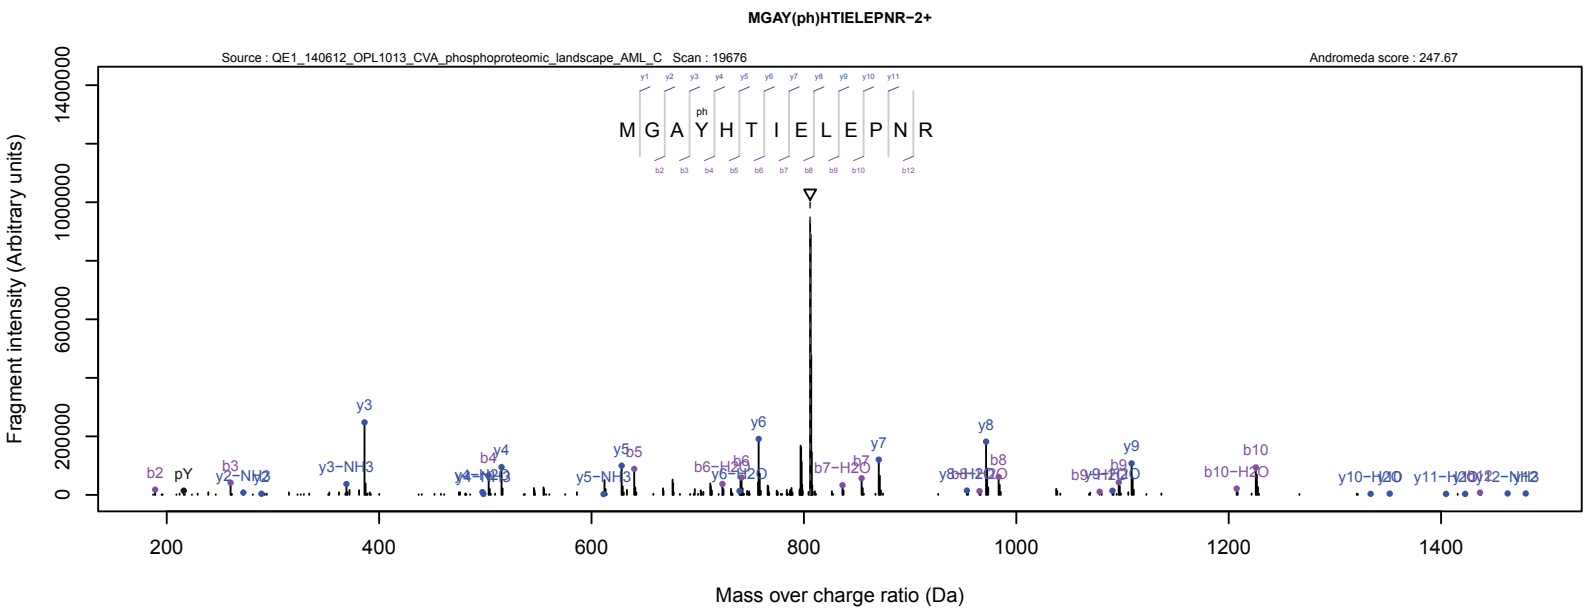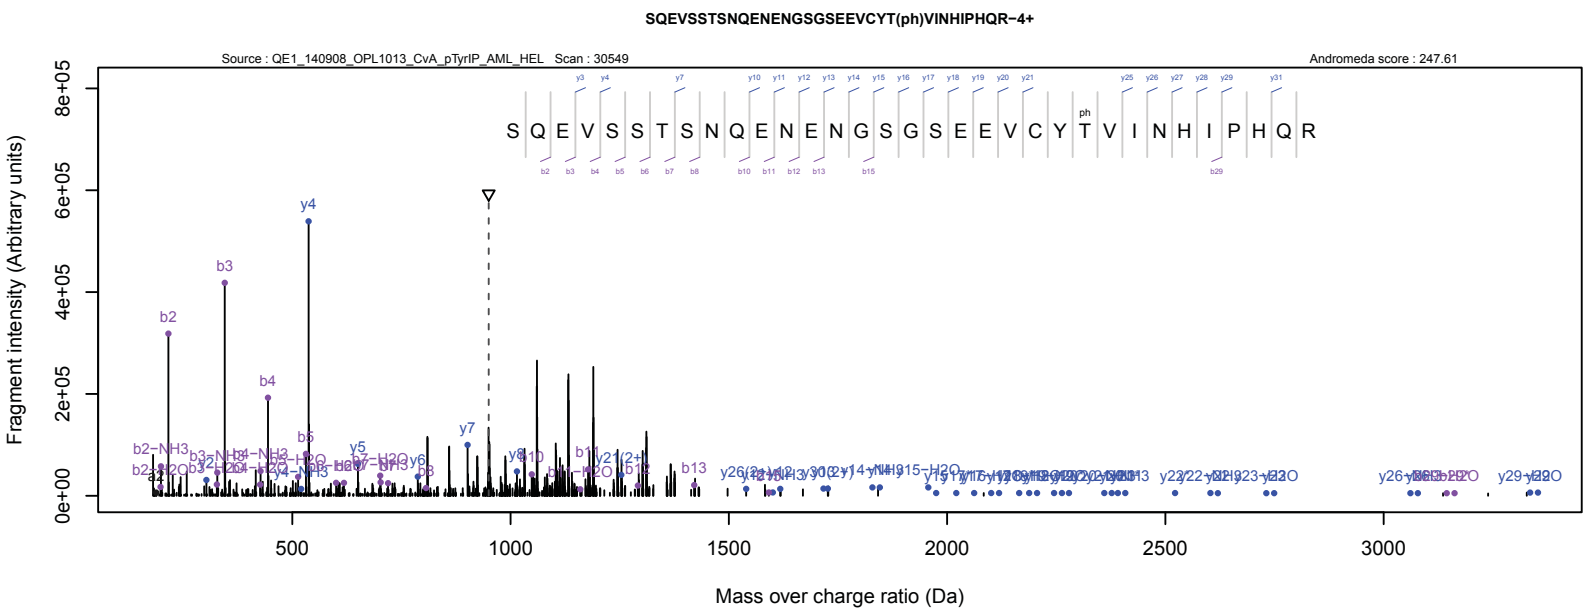





HELQANCY(ph)EEVKDR-3+

Source: QE1\_140612\_OPL1013\_CVA\_phosphoproteomic\_landscape\_AML\_D Scan: 8577

Andromeda score: 246.18

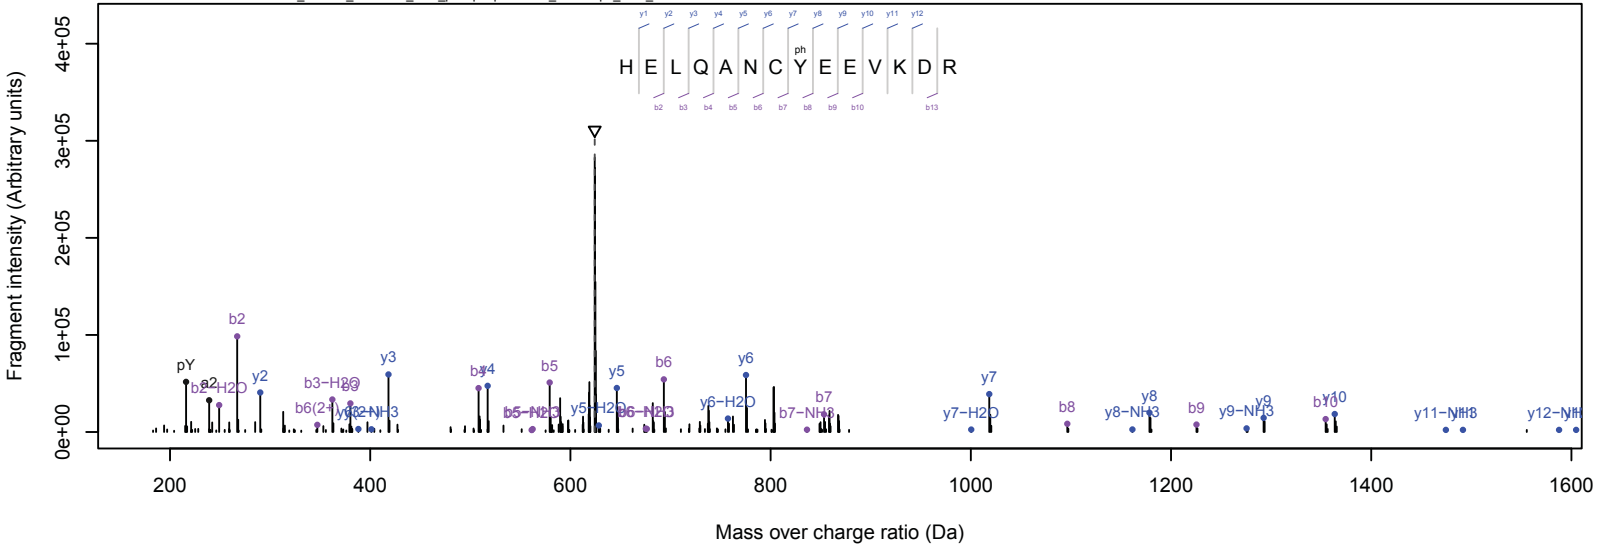

NLEGY(ph)VGFLNPQVYRK-2+

Source: QE1\_140612\_OPL1013\_CVA\_phosphoproteomic\_landscape\_AML\_C Scan: 37131

Andromeda score: 246.03

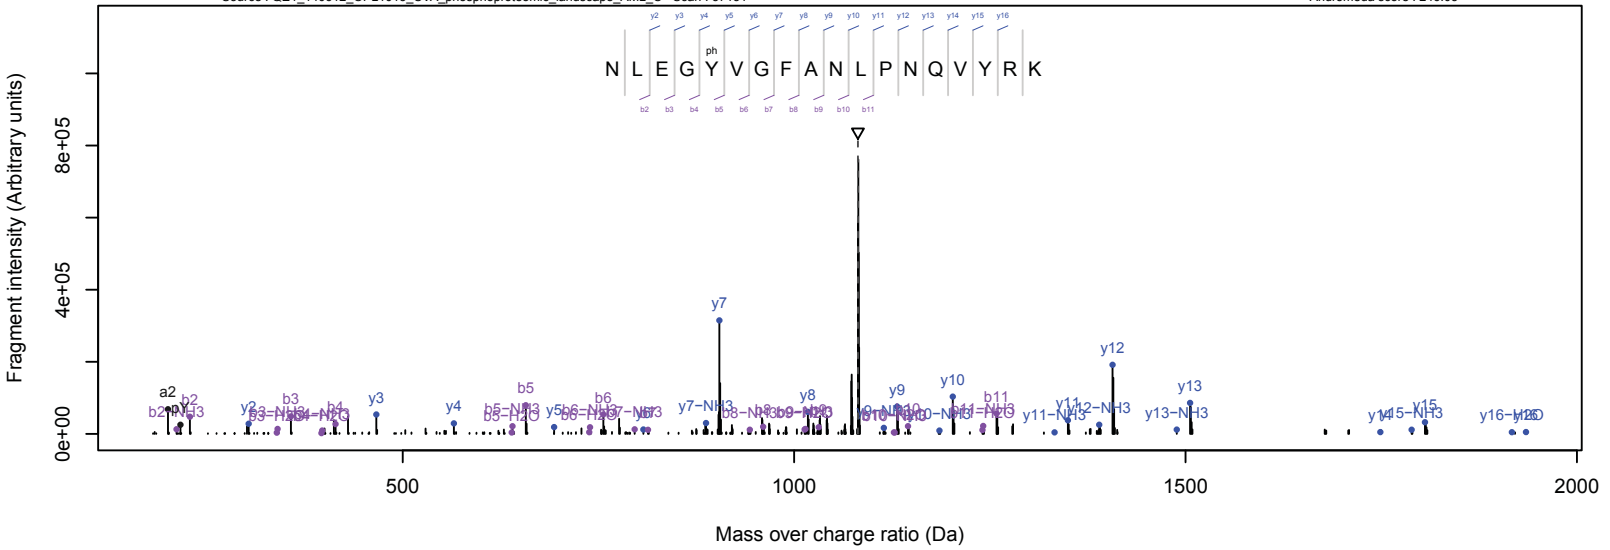

ESSSPLSNQSEPGSIALNSY(ph)HSR-3+

Source: QE1\_140908\_OPL1013\_CvA\_pTyrIP\_AML\_HEL Scan: 23597

Andromeda score: 245.36

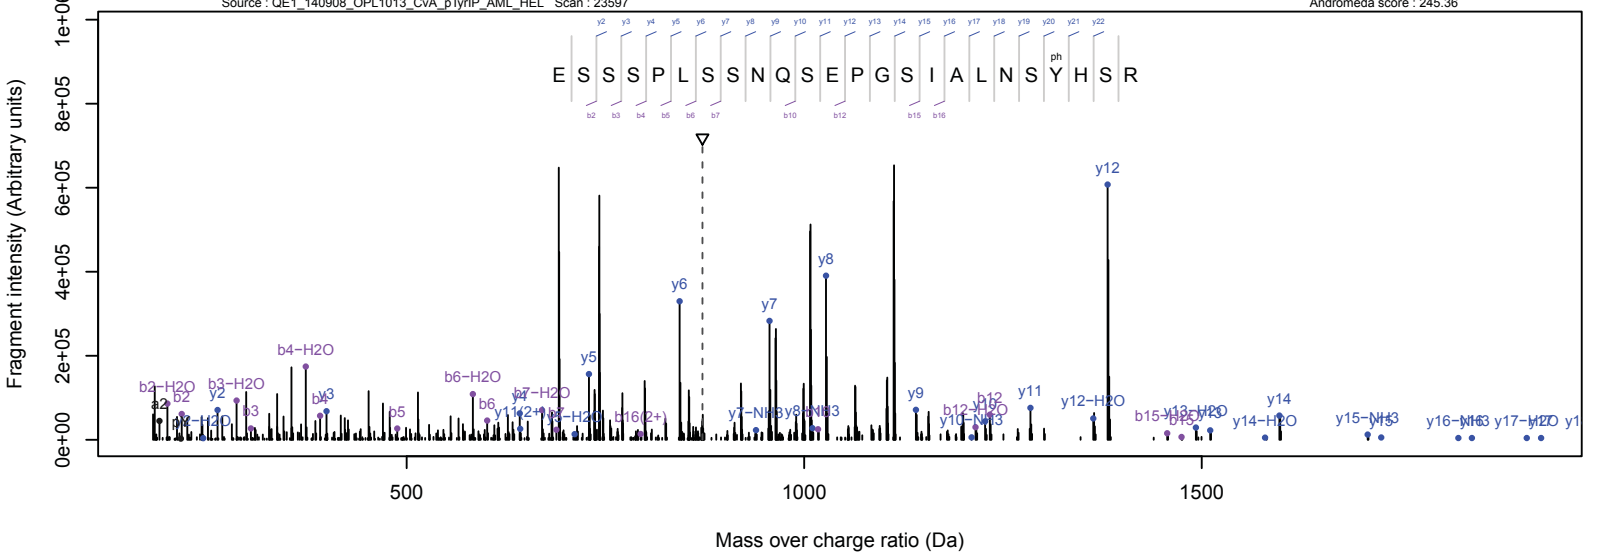

SLTIY(ph)AQVQKPGPLQK-2+

Source : QE1\_140612\_OPL1013\_CVA\_phosphoproteomic\_landscape\_AML\_C Scan : 25302

Andromeda score : 245.19

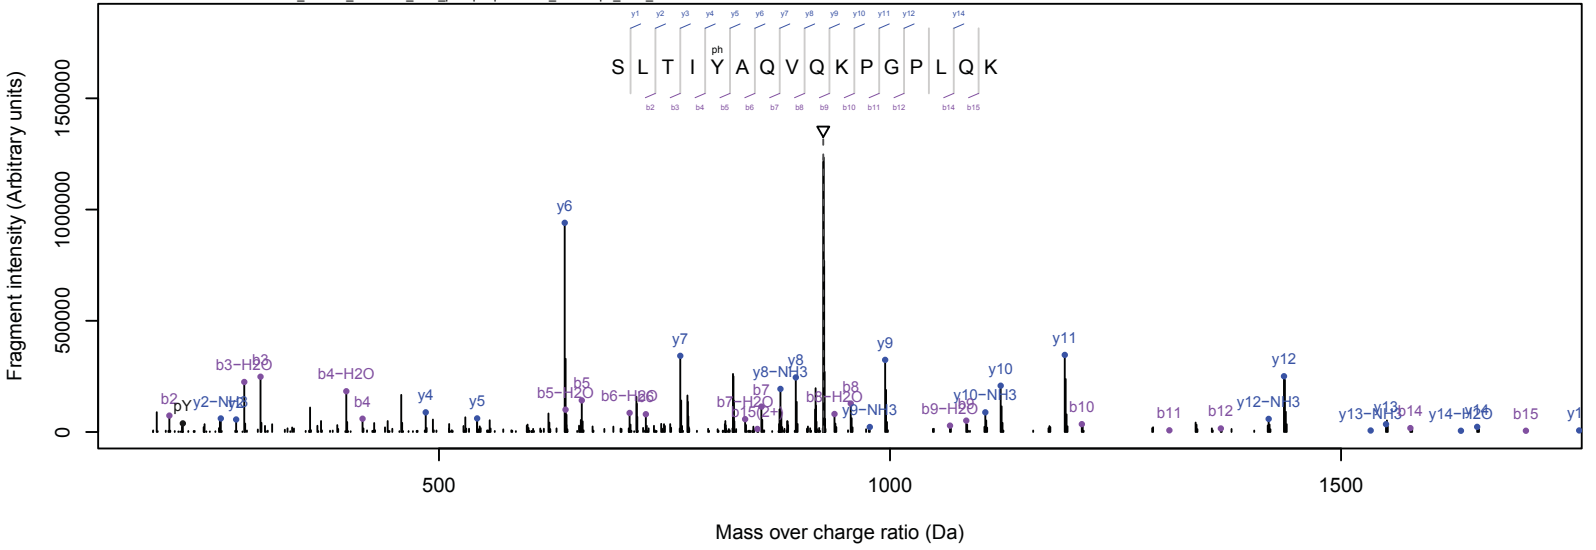

RSDSASSEPVGIYQGFEEK-2+

Source : QE1\_140908\_OPL1013\_CvA\_pTyrIP\_AML\_OCI\_AML3 Scan : 22664

Andromeda score : 244.73

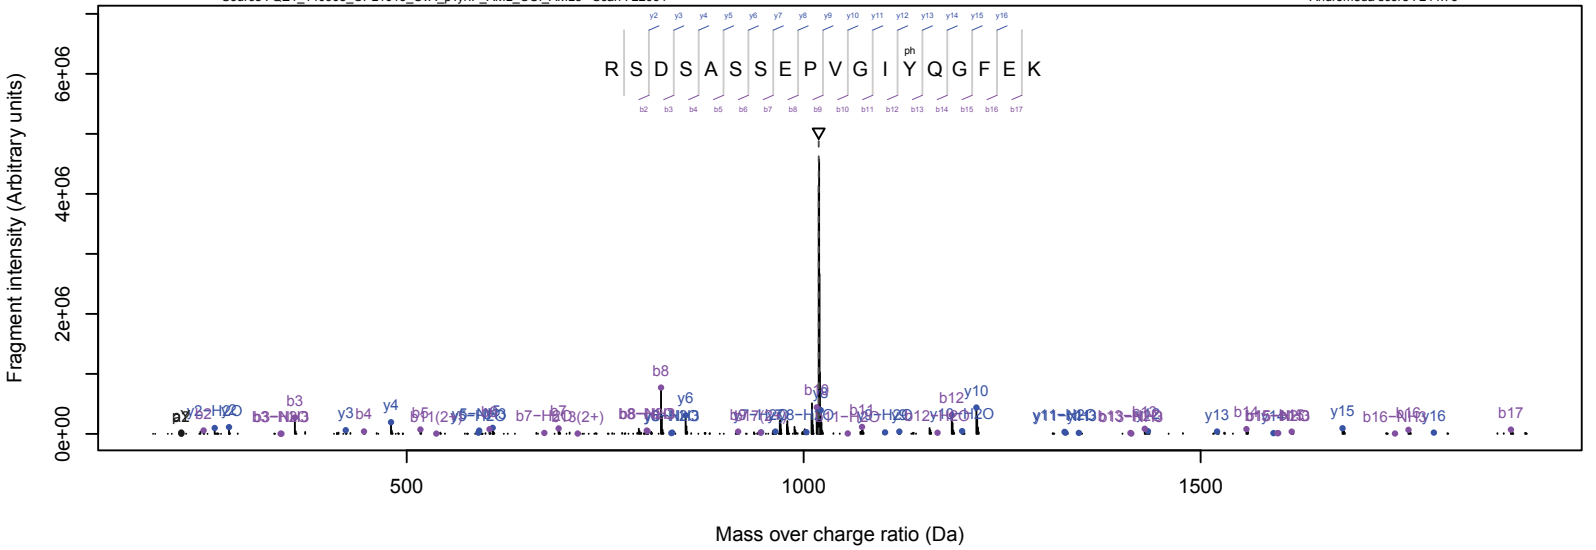

AEGSDVANAVLDGADCIMLSGETAKGDYPLEAVR-3+

Source : QE1\_140612\_OPL1013\_CVA\_phosphoproteomic\_landscape\_AML\_D Scan : 45143

Andromeda score : 244.1

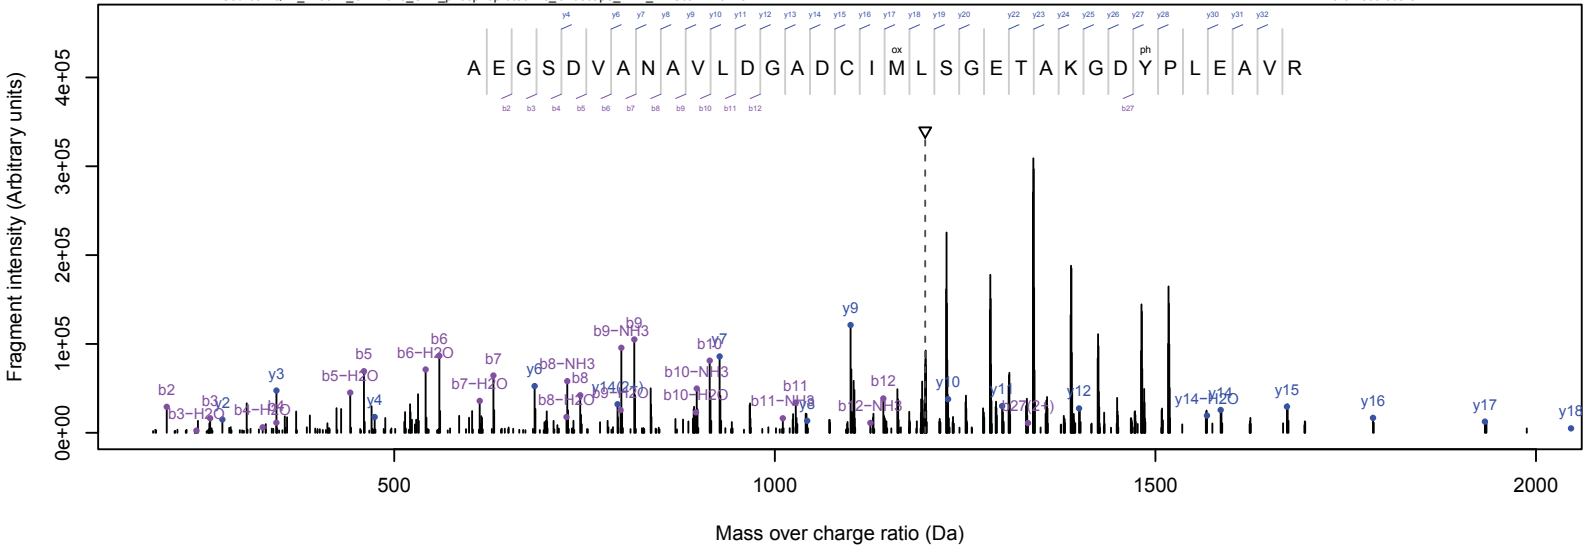

IADPEHDHTGFLTEY(ph)VATR-3+

Source : QE1\_140908\_OPL1013\_CVA\_pTyrIP\_AML\_HEL Scan : 28691

Andromeda score : 244.1

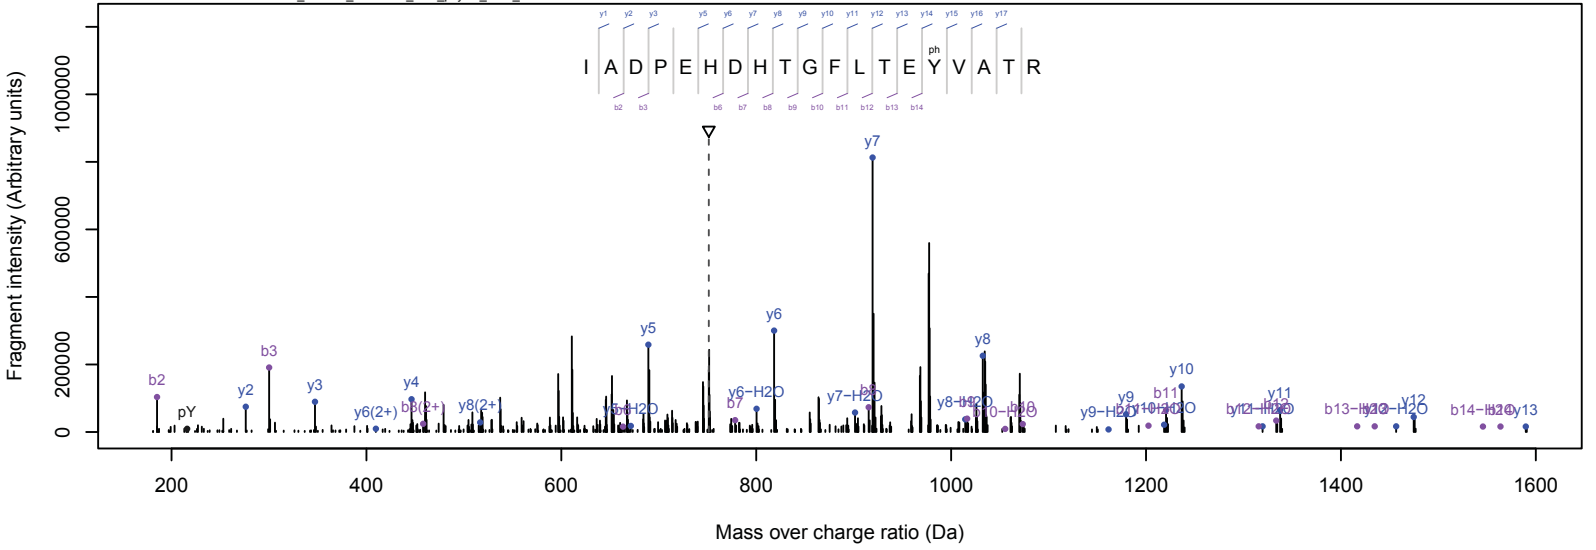

NLDKEY(ph)LPIGGLAEFC-2+

Source : QE1\_140612\_OPL1013\_CVA\_phosphoproteomic\_landscape\_AML\_B Scan : 41427

Andromeda score : 243.97

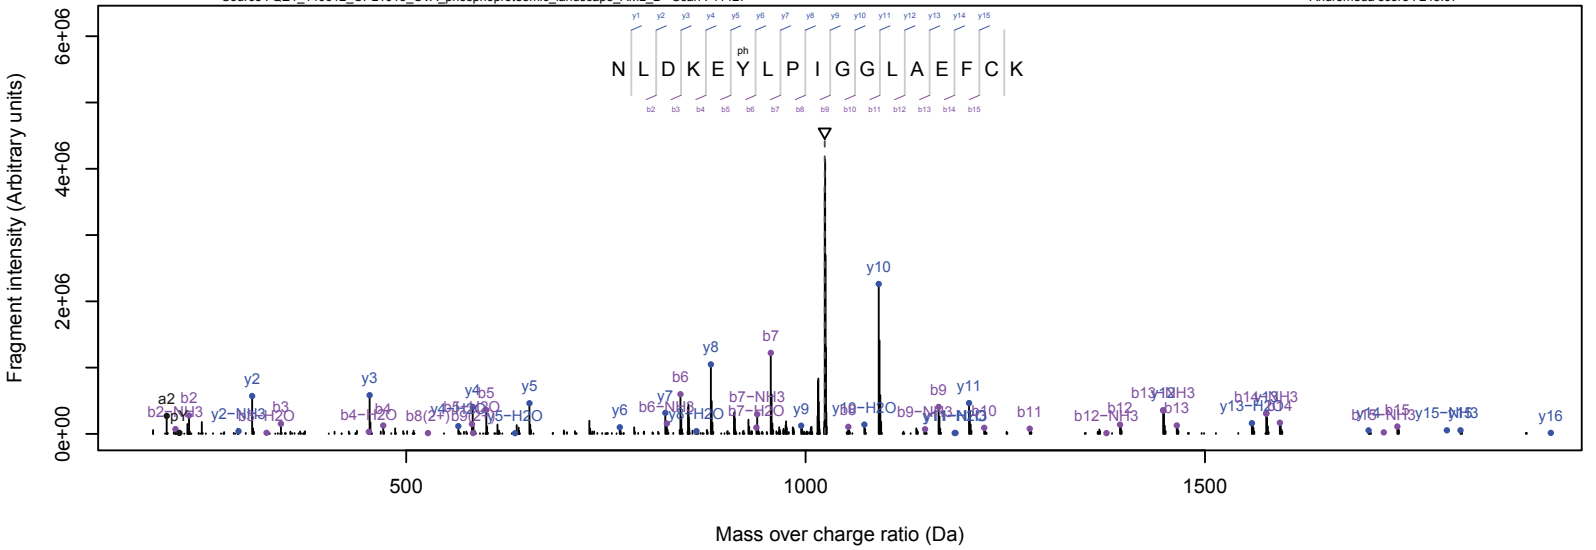

NSQAEVSCPFIDNTY(ph)SCSGK-2+

Source : QE1\_140612\_OPL1013\_CVA\_phosphoproteomic\_landscape\_AML\_A Scan : 24793

Andromeda score : 243.87

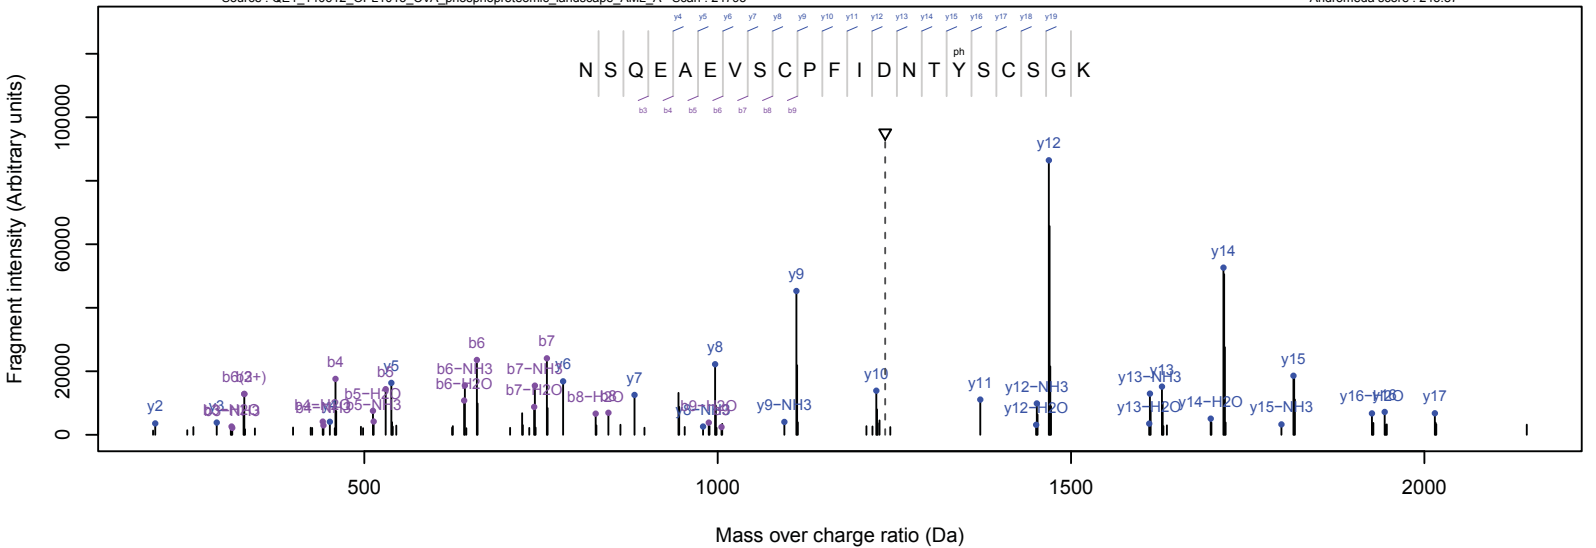

**EQAAYHLHIY(ph)PQLSTTESQASCR-3+**

Source : QE1\_140612\_OPL1013\_CVA\_phosphoproteomic\_landscape\_AML\_B Scan : 27156

Andromeda score : 243.76

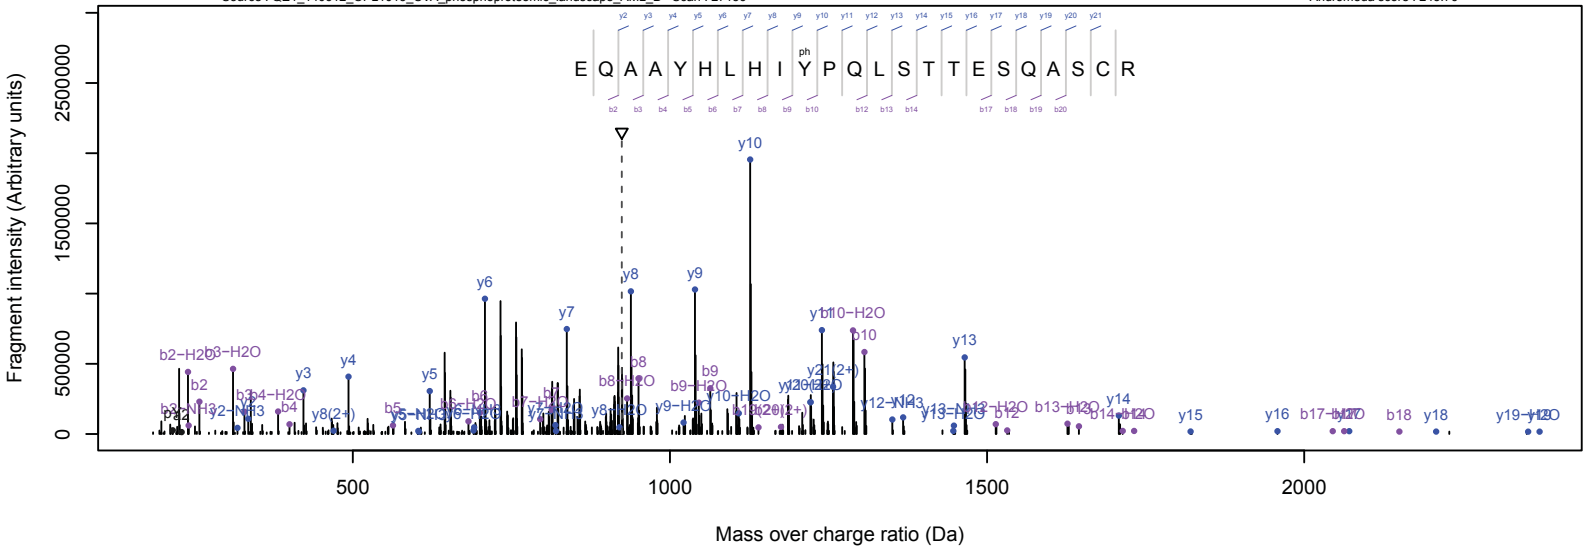

**Y(ph)YRPTEVDFLQGDCTK-2+**

Source : QE1\_140612\_OPL1013\_CVA\_phosphoproteomic\_landscape\_AML\_B Scan : 29583

Andromeda score : 243.63

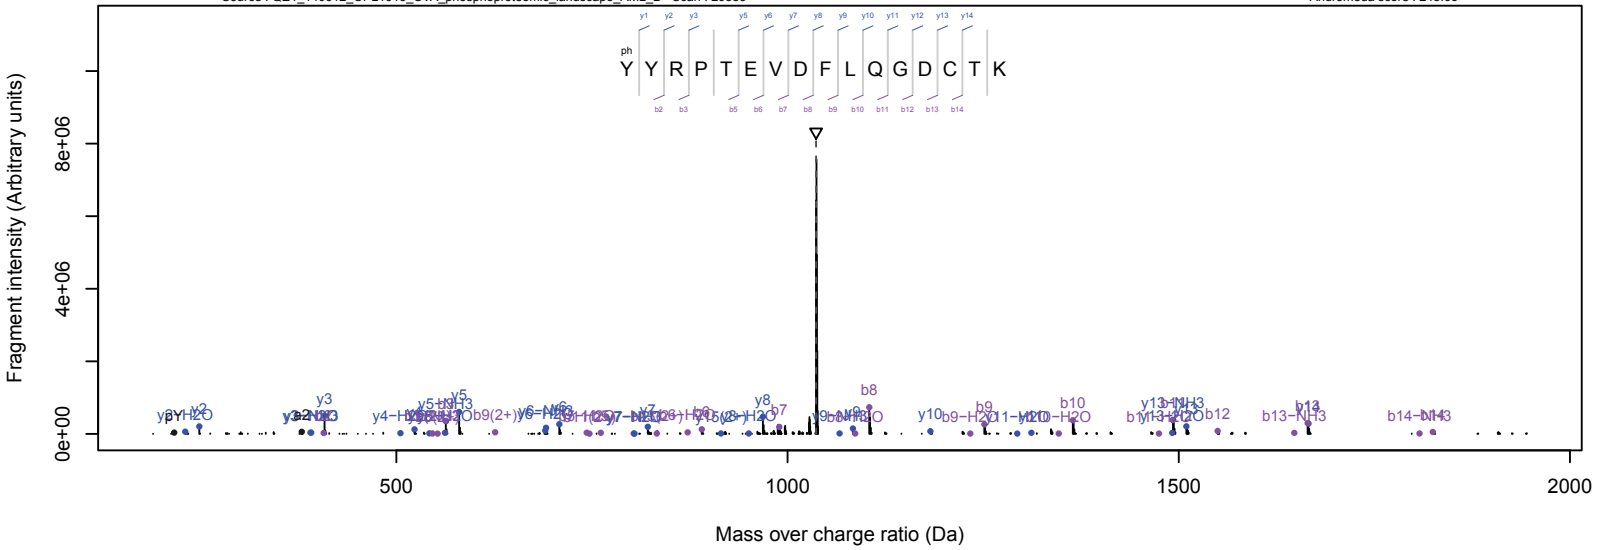

**LTGIKHELQANCY(ph)EEVKDR-4+**

Source : QE1\_140908\_OPL1013\_CvA\_pTyrIP\_AML\_Kasumi1 Scan : 14453

Andromeda score : 243.41

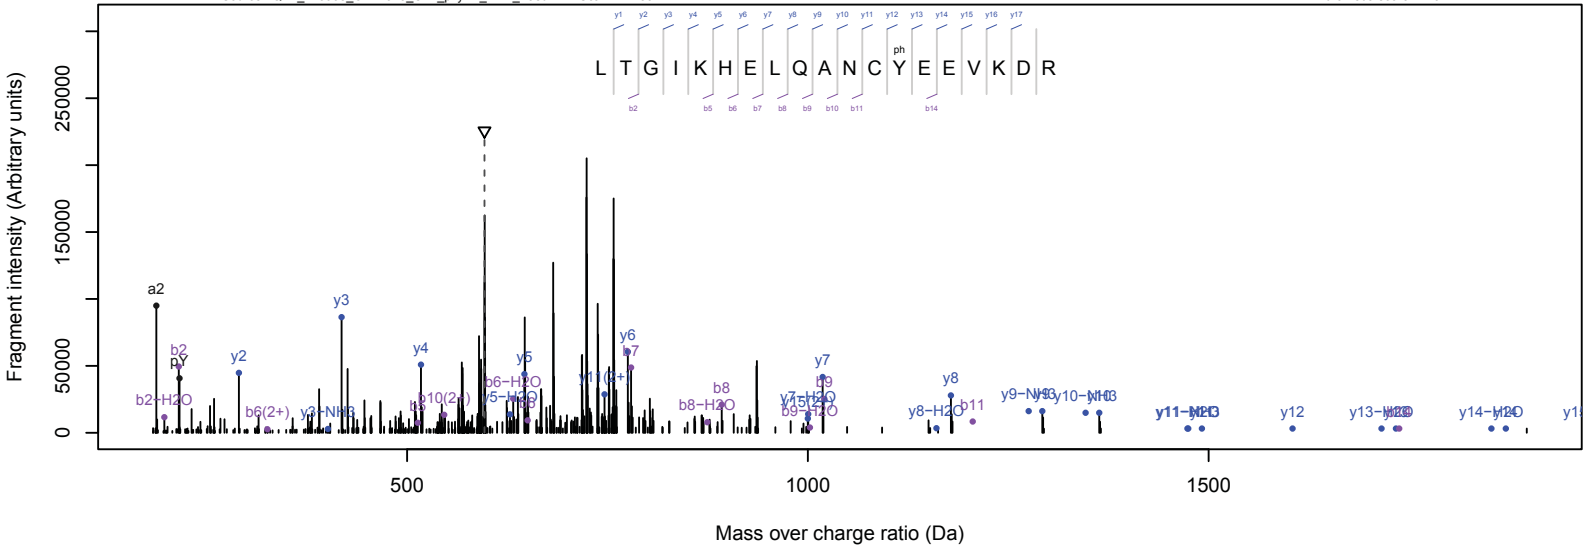

LHEY(ph)NTQFQEK-2+

Source : QE1\_140612\_OPL1013\_CVA\_phosphoproteomic\_landscape\_AML\_A Scan : 8228

Andromeda score : 243.4

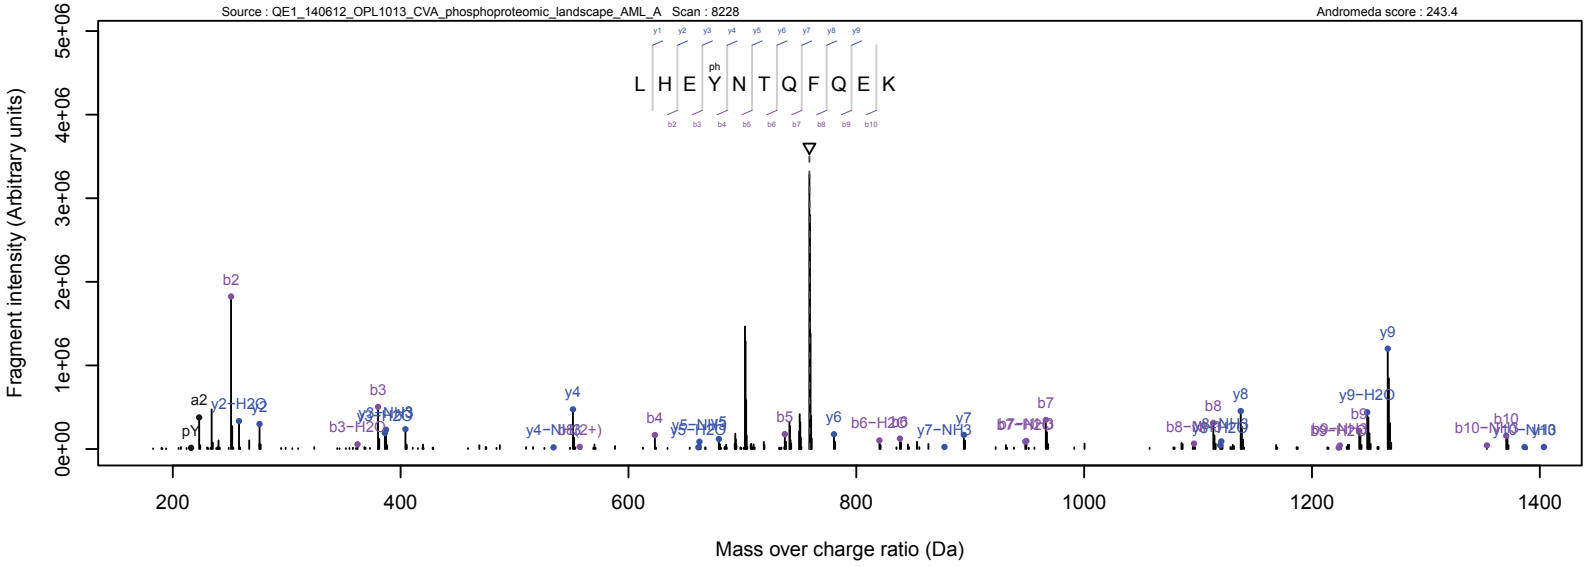

QADTTQY(ph)VPM(ox)LER-2+

Source : QE1\_140822\_OPL1013\_CvA\_pTyrIP\_AML\_cell\_lines\_part2\_B Scan : 16757

Andromeda score : 243.3

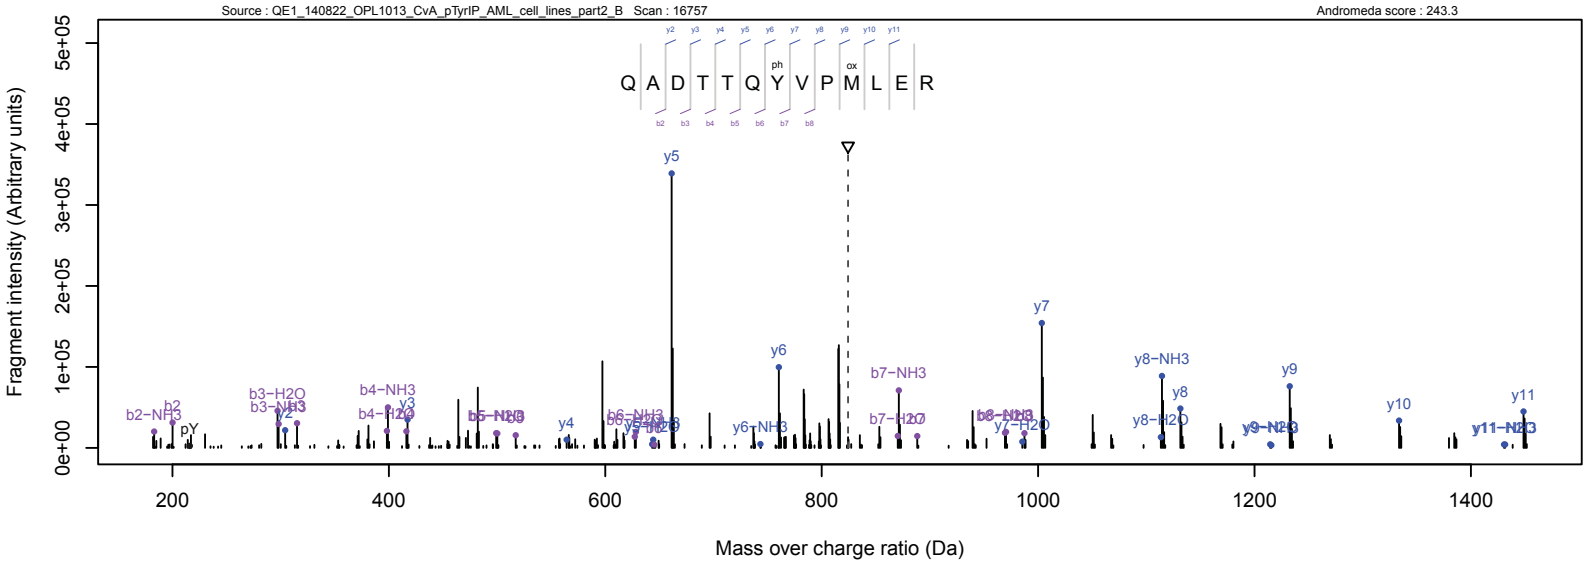

KPLY(ph)WDLYEHAQQQLLK-3+

Source : QE1\_140612\_OPL1013\_CVA\_phosphoproteomic\_landscape\_AML\_C Scan : 39090

Andromeda score : 243.09

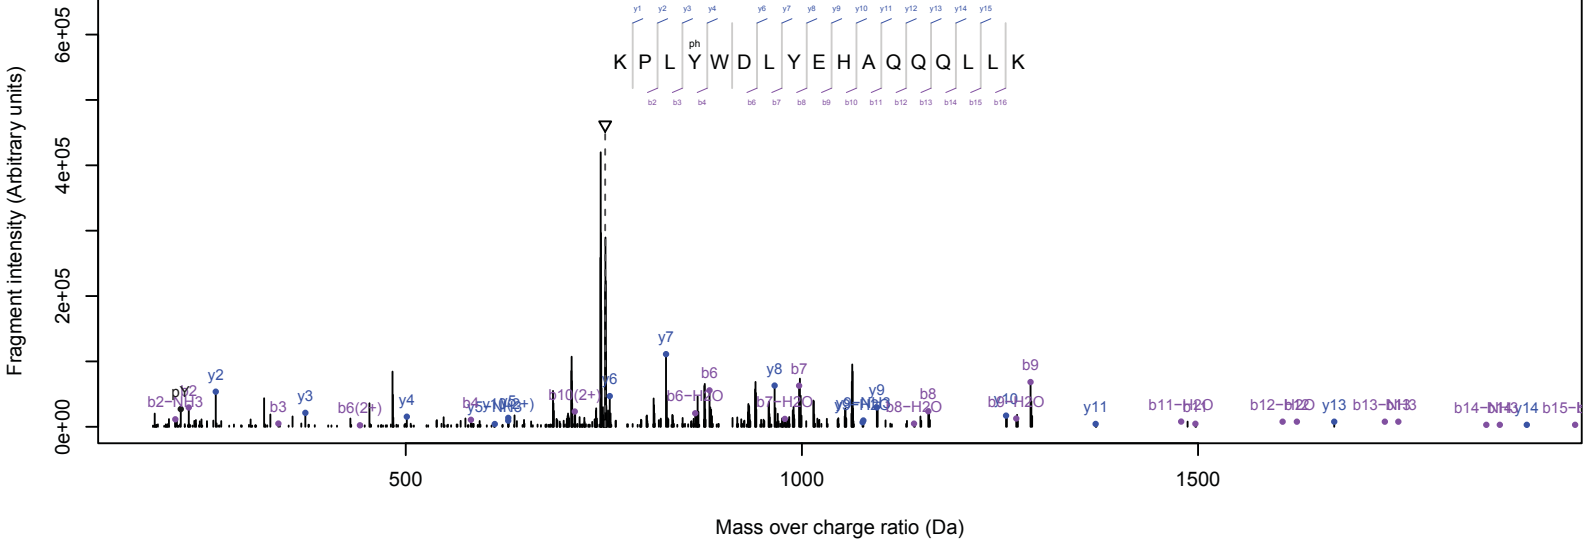

MSY(ph)YCSGSSDAPSSPAAPRPASK-3+

Source : QE1\_140612\_OPL1013\_CVA\_phosphoproteomic\_landscape\_AML\_C Scan : 13171

Andromeda score : 242.71

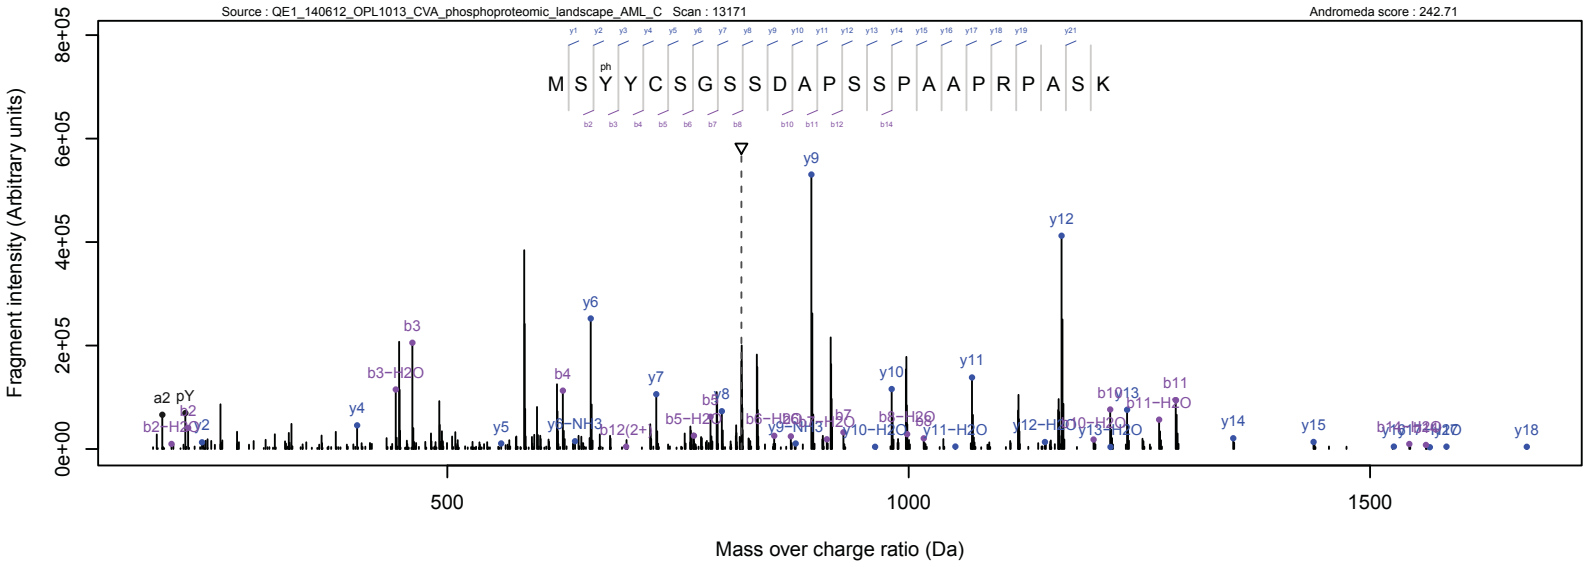

VADPDHDHTGFLTEY(ph)VATR-3+

Source : QE1\_140908\_OPL1013\_CvA\_pTyrIP\_AML\_ML2 Scan : 26079

Andromeda score : 242.26

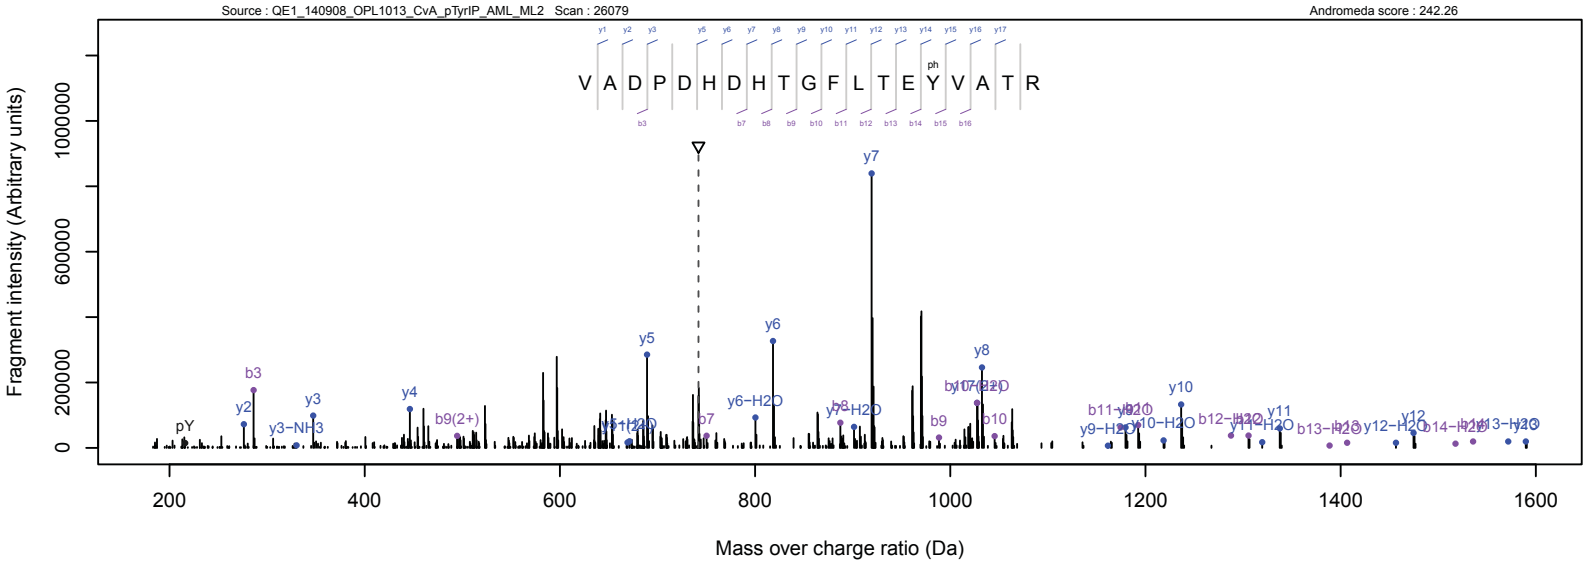

VFDKDGNGY(ph)ISAAELR-2+

Source : QE1\_140612\_OPL1013\_CVA\_phosphoproteomic\_landscape\_AML\_C Scan : 25391

Andromeda score : 240.78

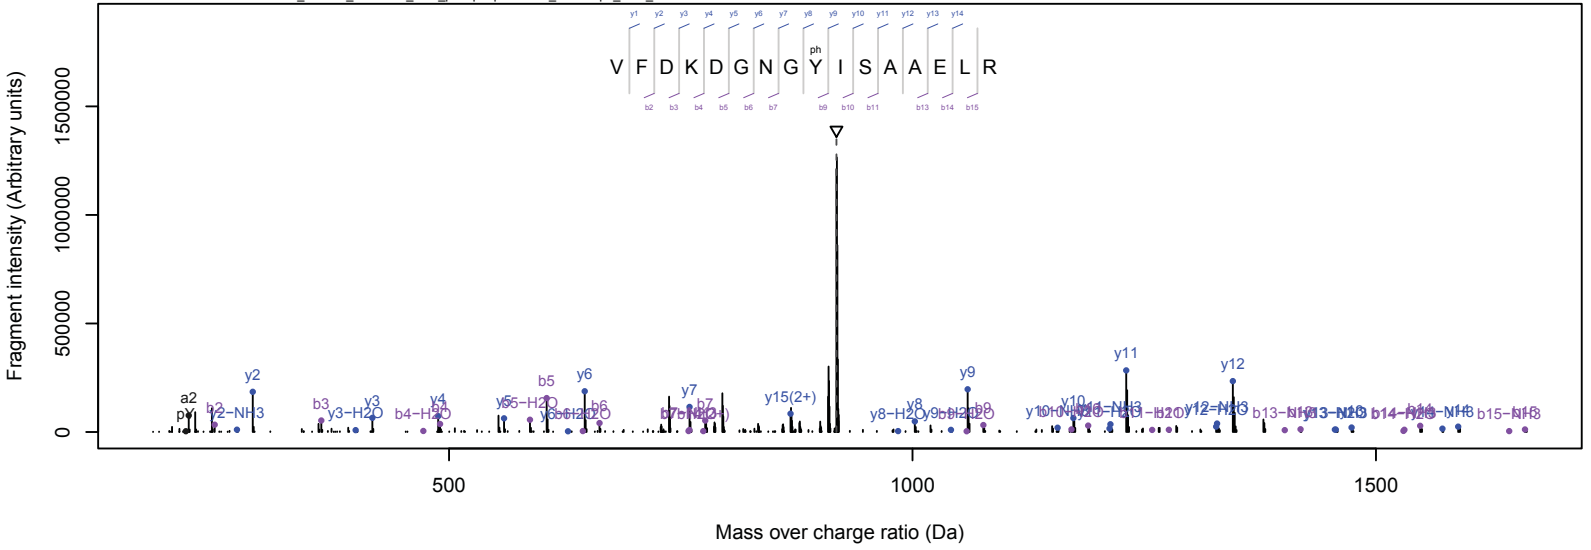

DSSSQENMVEDCLY(ETVK)-2+

Source : QE1\_140612\_OPL1013\_CVA\_phosphoproteomic\_landscape\_AML\_B Scan : 37572

Andromeda score : 239.58

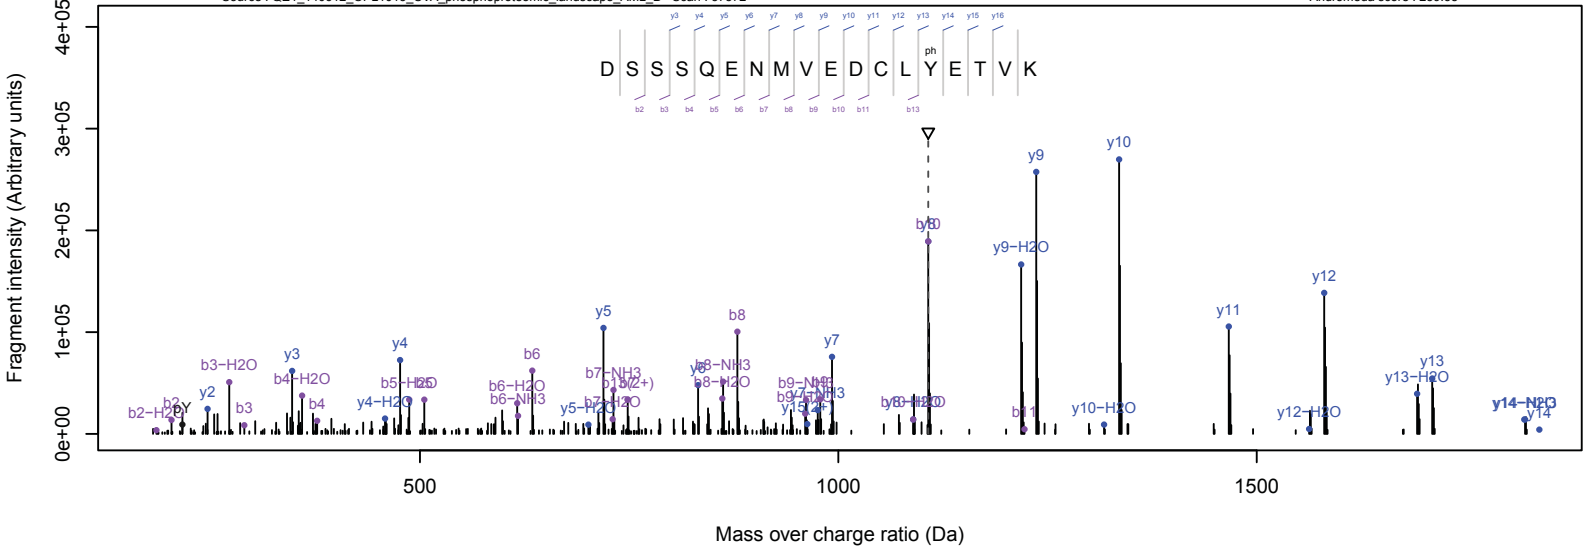

SSLSSNDGYP(h)ENIDSLTR-2+

Source : QE1\_140908\_OPL1013\_CvA\_pTyrIP\_AML\_Kasumi6 Scan : 27461

Andromeda score : 239.58

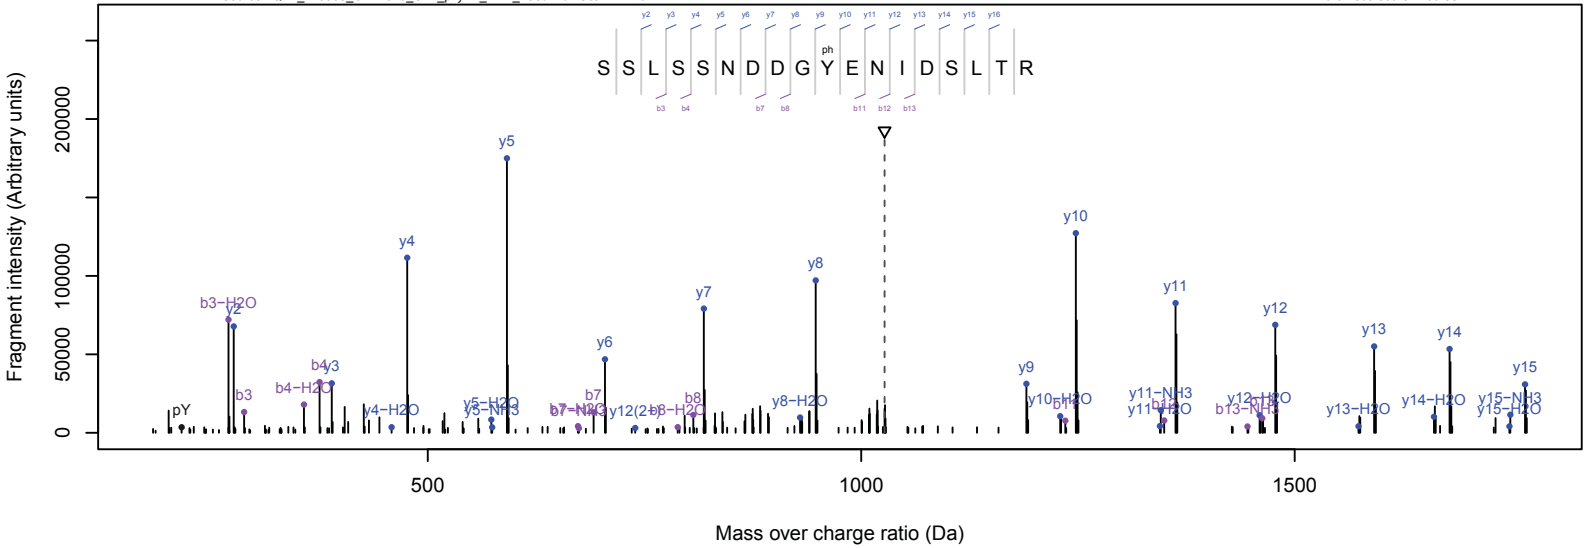

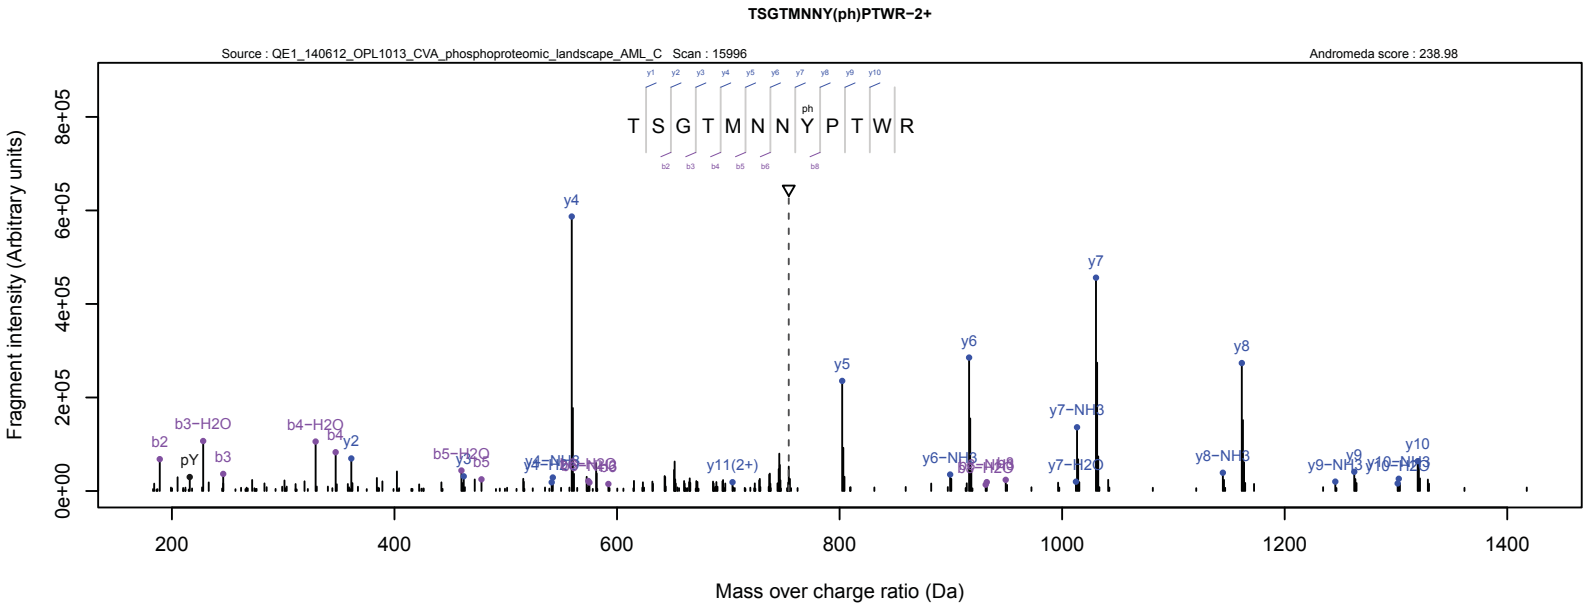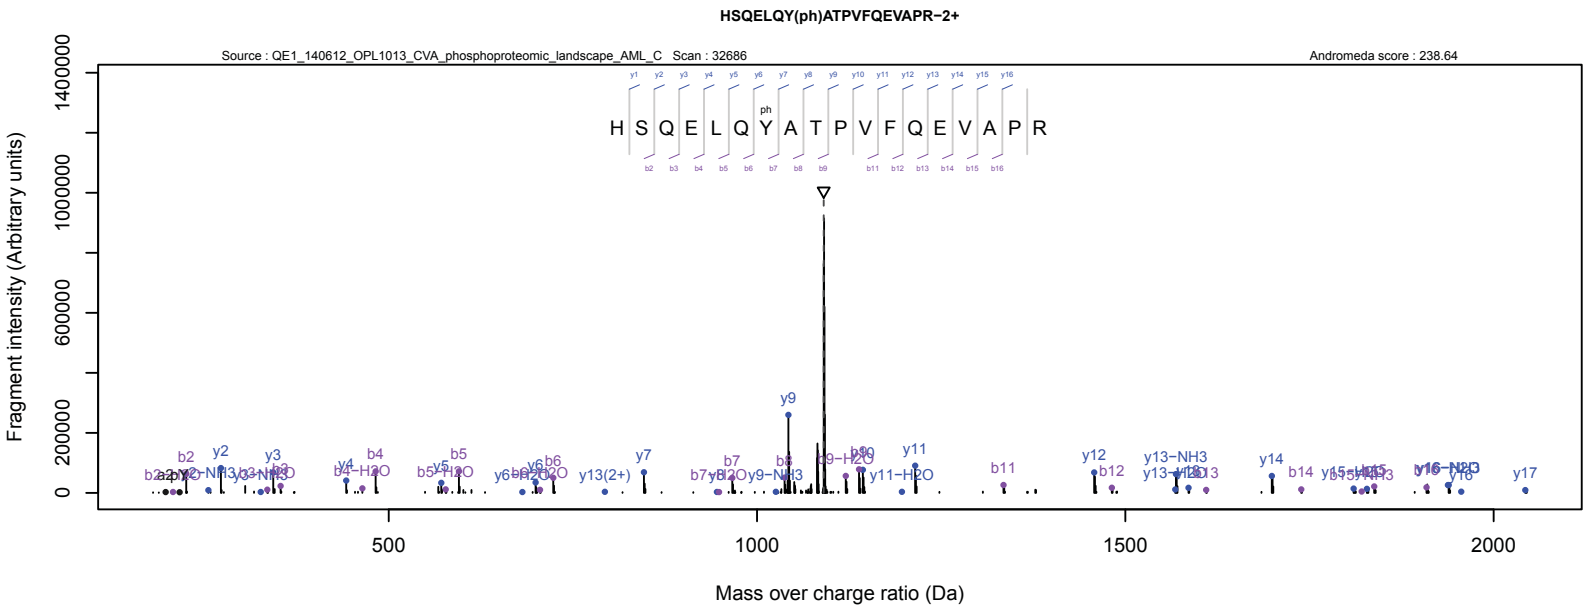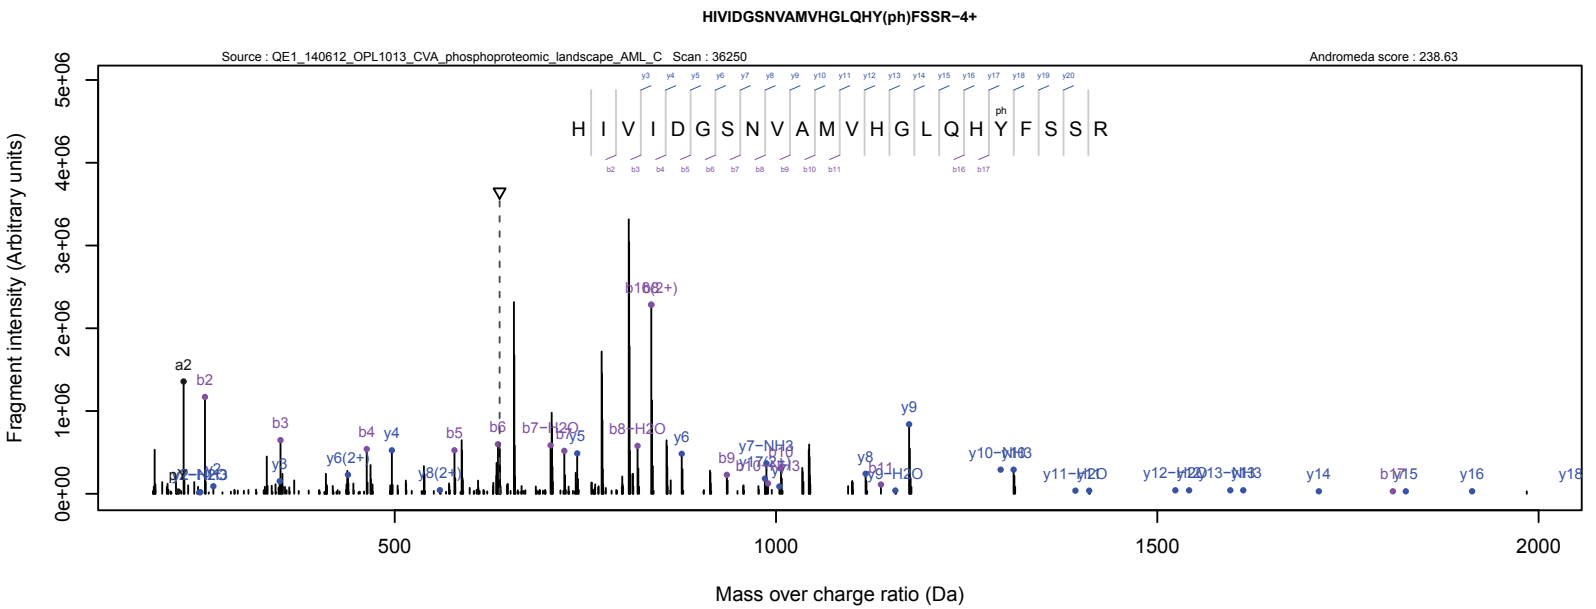



TGAPQYGSY(ph)GTAPVNLNIK-2+

Source : QE1\_140612\_OPL1013\_CVA\_phosphoproteomic\_landscape\_AML\_A Scan : 29322

Andromeda score : 238.19

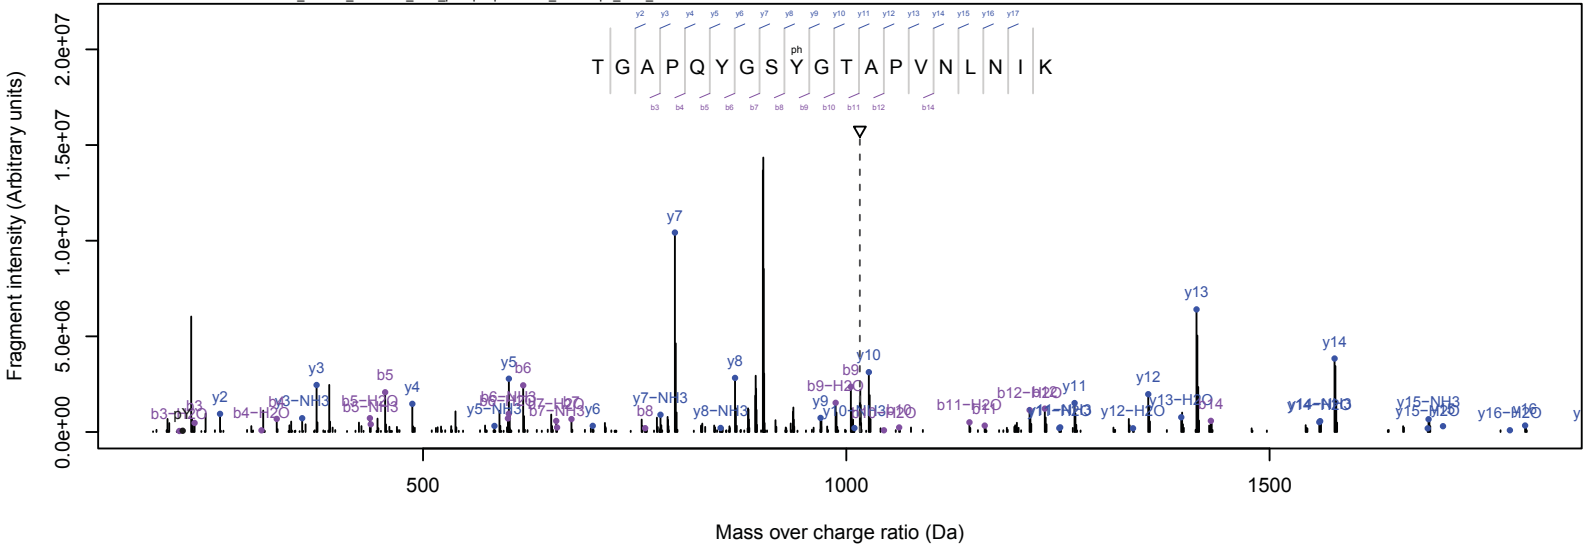

HFTVVGDDY(ph)HAWNINYKK-3+

Source : QE1\_140612\_OPL1013\_CVA\_phosphoproteomic\_landscape\_AML\_C Scan : 27877

Andromeda score : 237.46

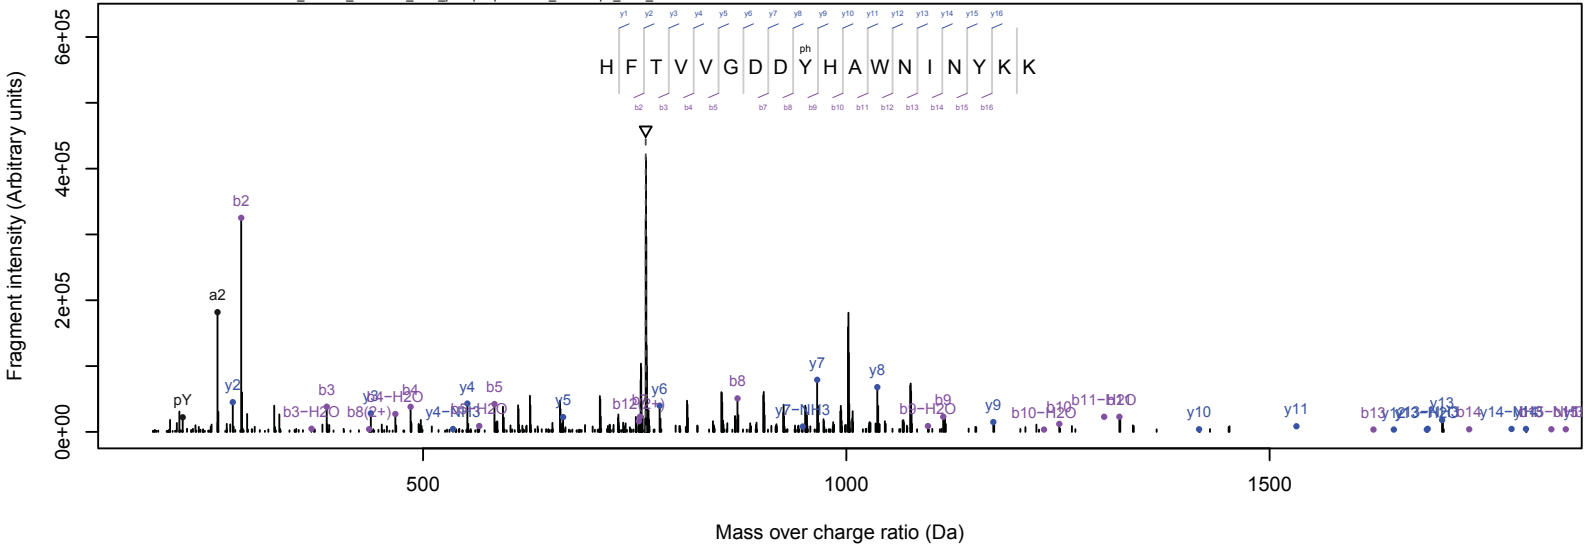

SPY(ph)QEFTDHLVK-2+

Source : QE1\_140612\_OPL1013\_CVA\_phosphoproteomic\_landscape\_AML\_C Scan : 25368

Andromeda score : 237.41

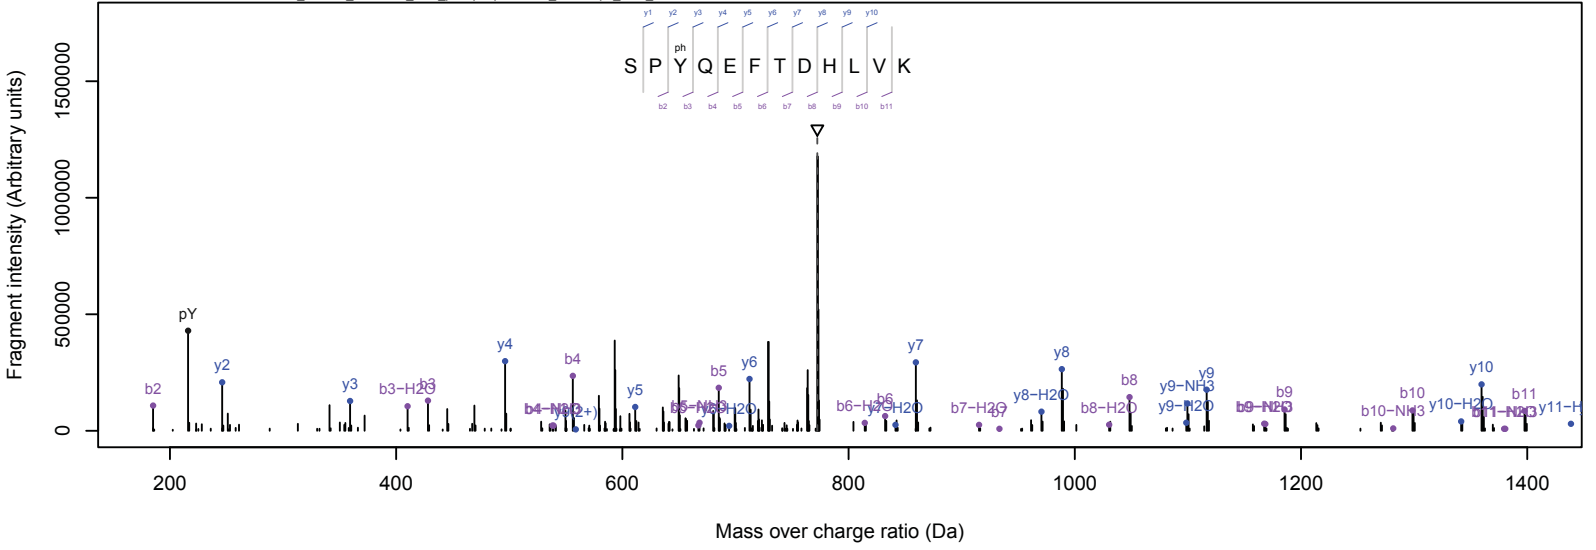

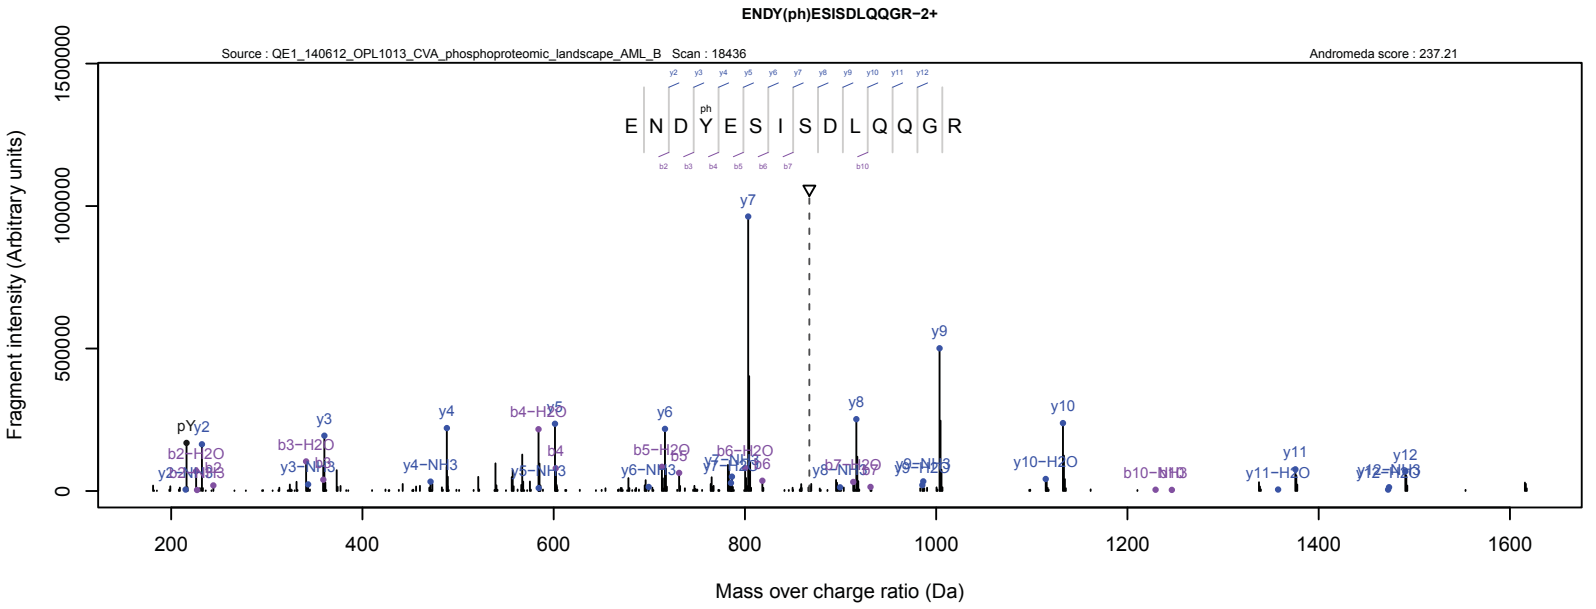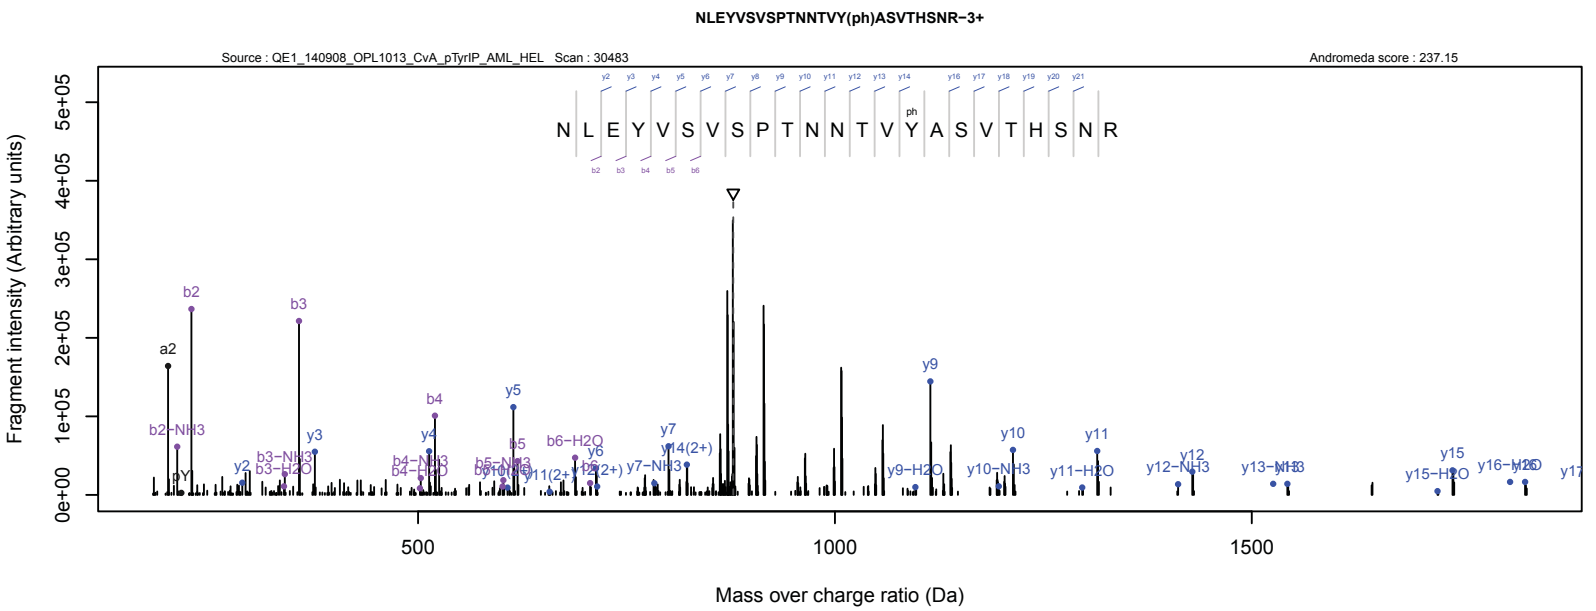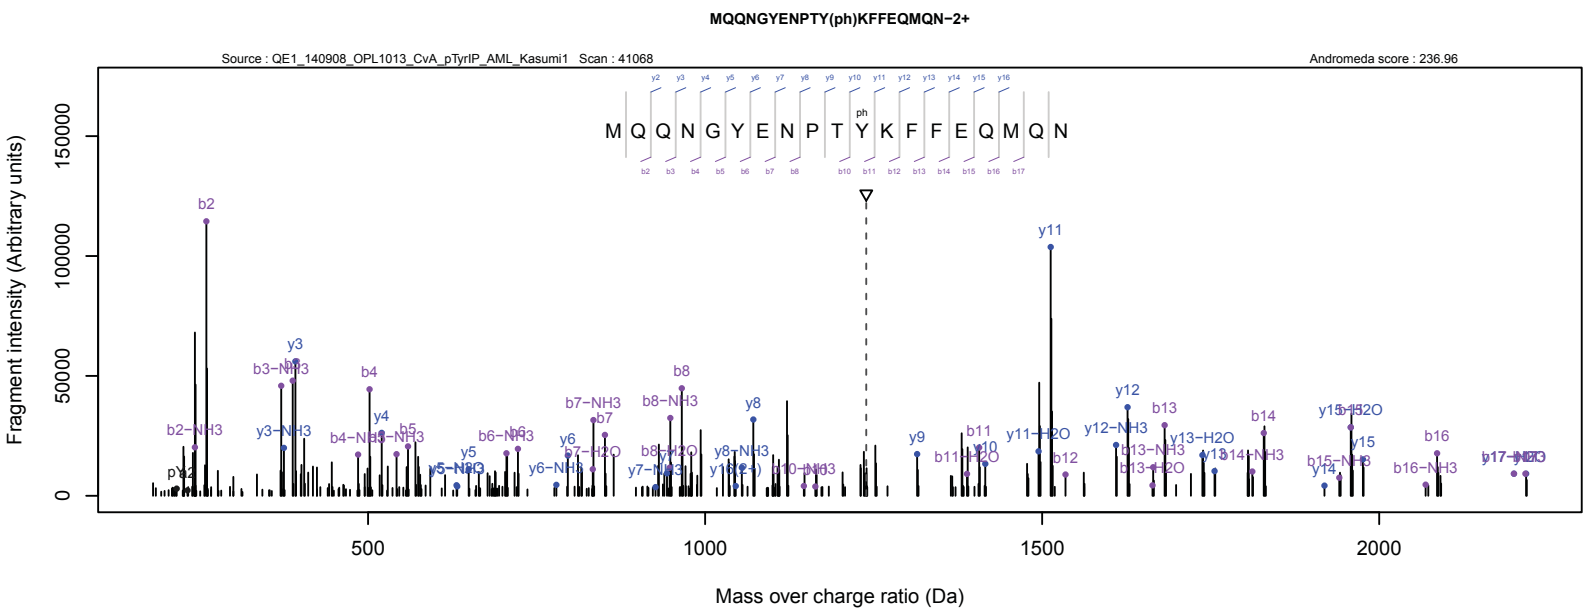

**SREEDPTLTEEEISAM(ox)Y(ph)SSVNKPGQLVNK-3+**

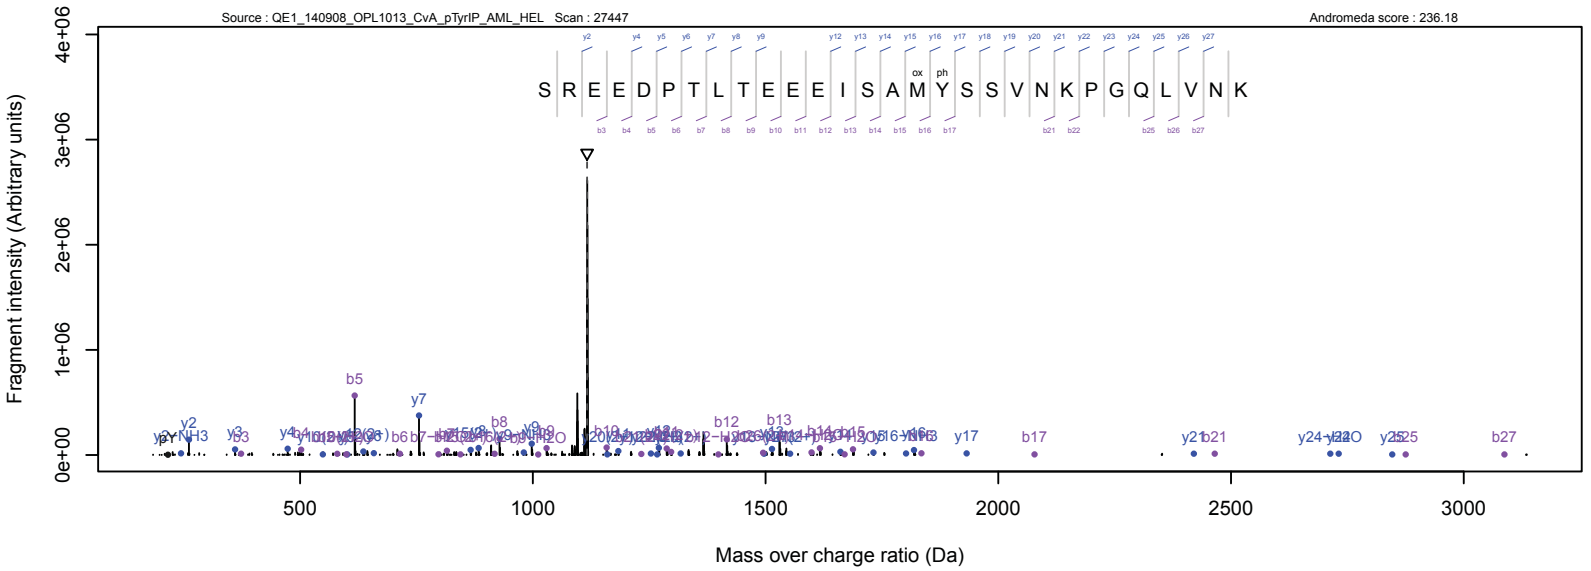

**Y(ph)QQDQVVKEDNIEAVGKK-3+**

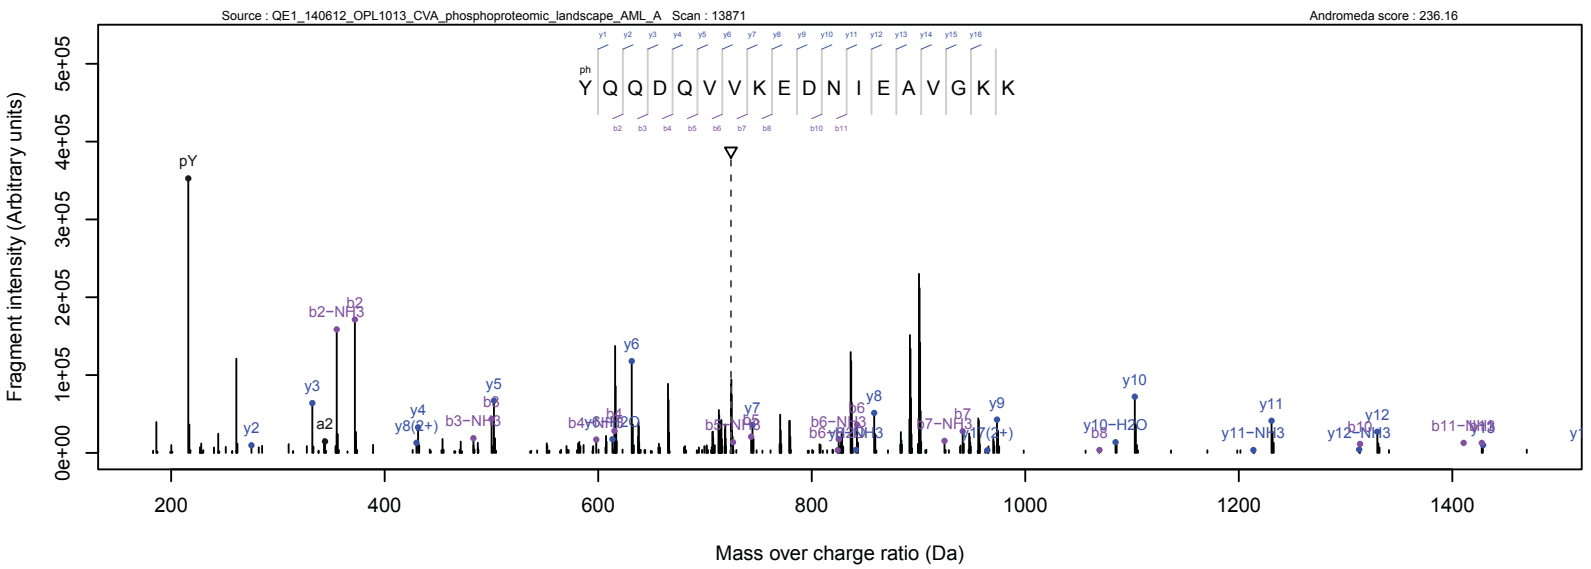

**HY(ph)GGLTGLNKAETAAK-3+**

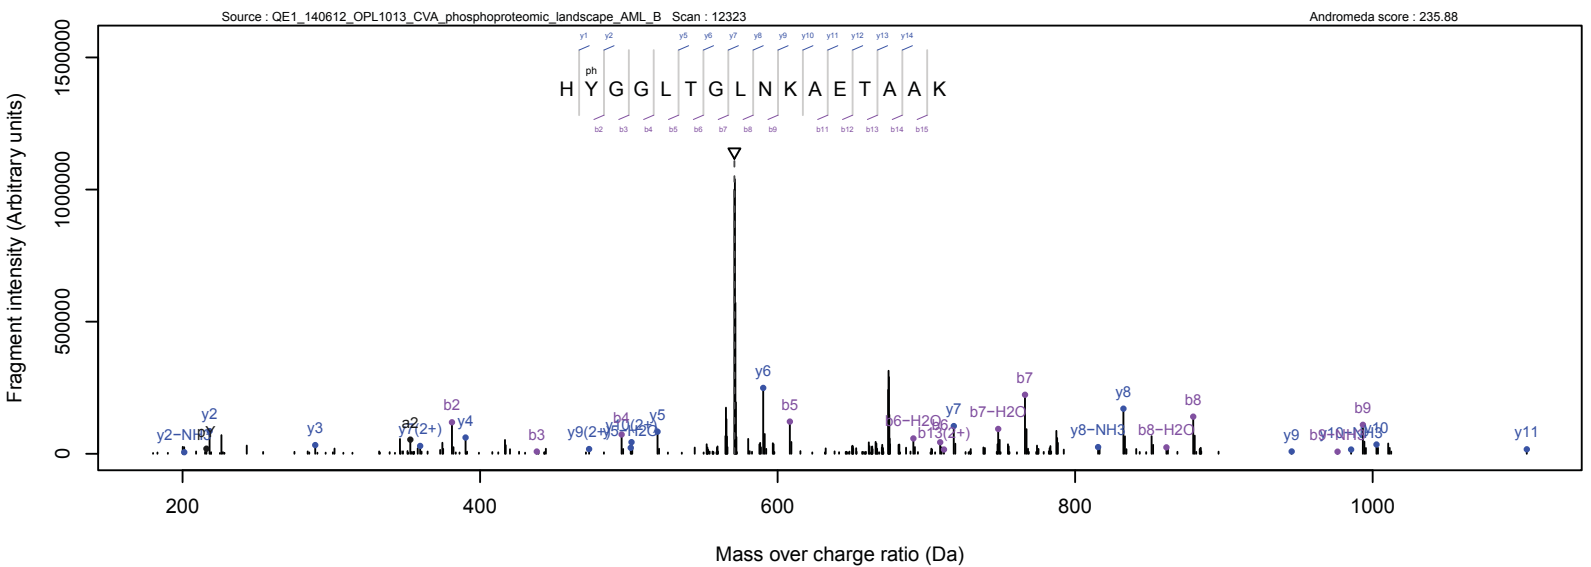

EYMESLQLKPGEVY(ph)KCPK-3+

Source: QE1\_140908\_OPL1013\_CvA\_pTyrIP\_AML\_Kasumi1 Scan: 28954

Andromeda score: 235.75

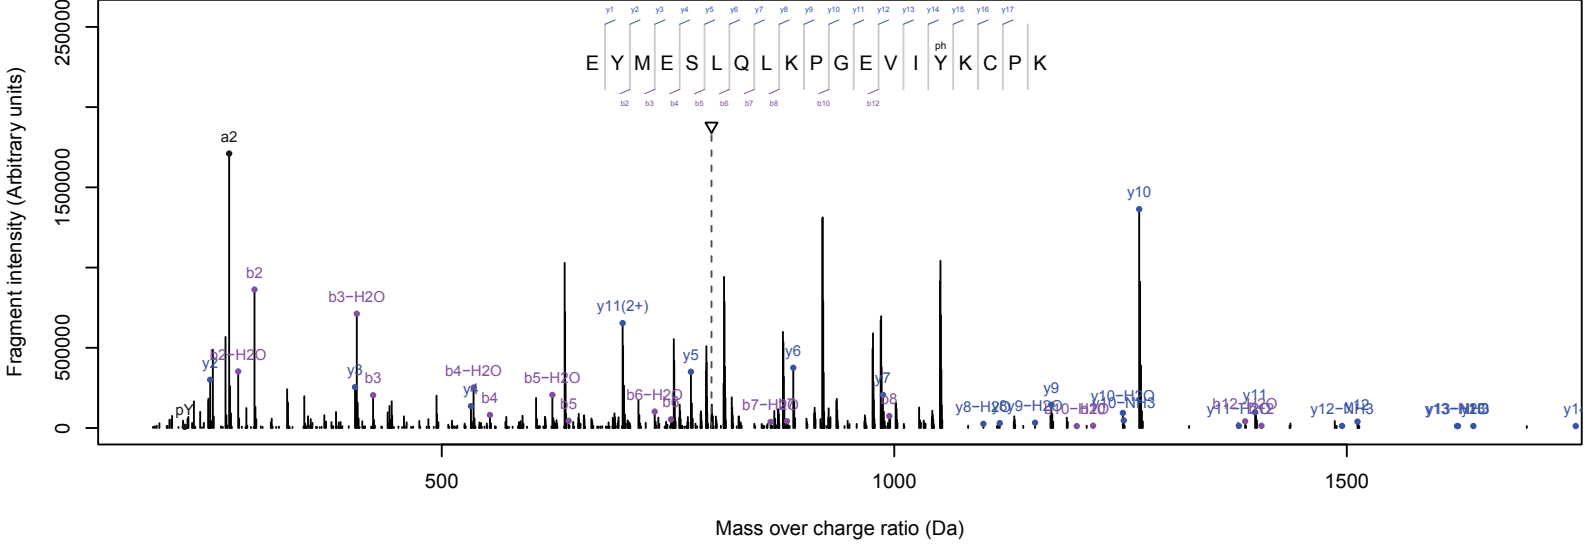

GPAVGIDLTTY(ph)SCVGVFQHGK-3+

Source: QE1\_140908\_OPL1013\_CvA\_pTyrIP\_AML\_HEL Scan: 38247

Andromeda score: 235.7

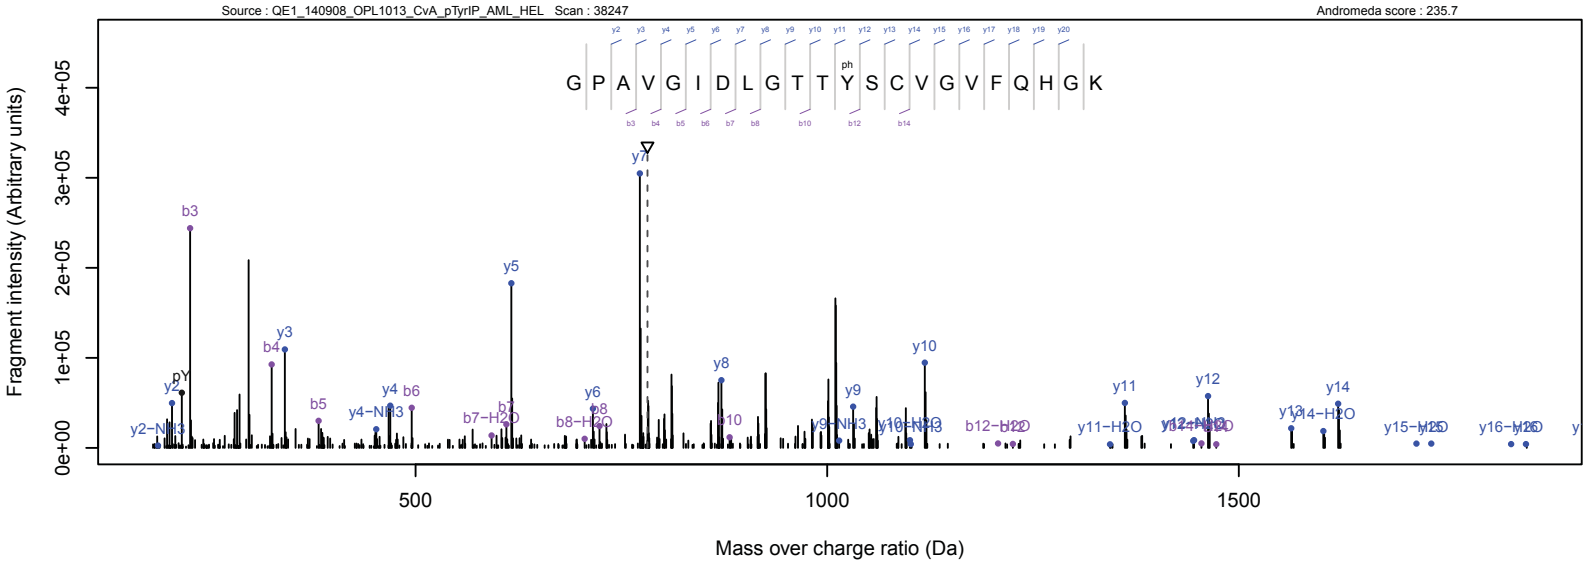

KS(ph)TGSVDYLALDFQPSSPSPHR-3+

Source: QE1\_140612\_OPL1013\_CVA\_phosphoproteomic\_landscape\_AML\_A Scan: 30727

Andromeda score: 235.7

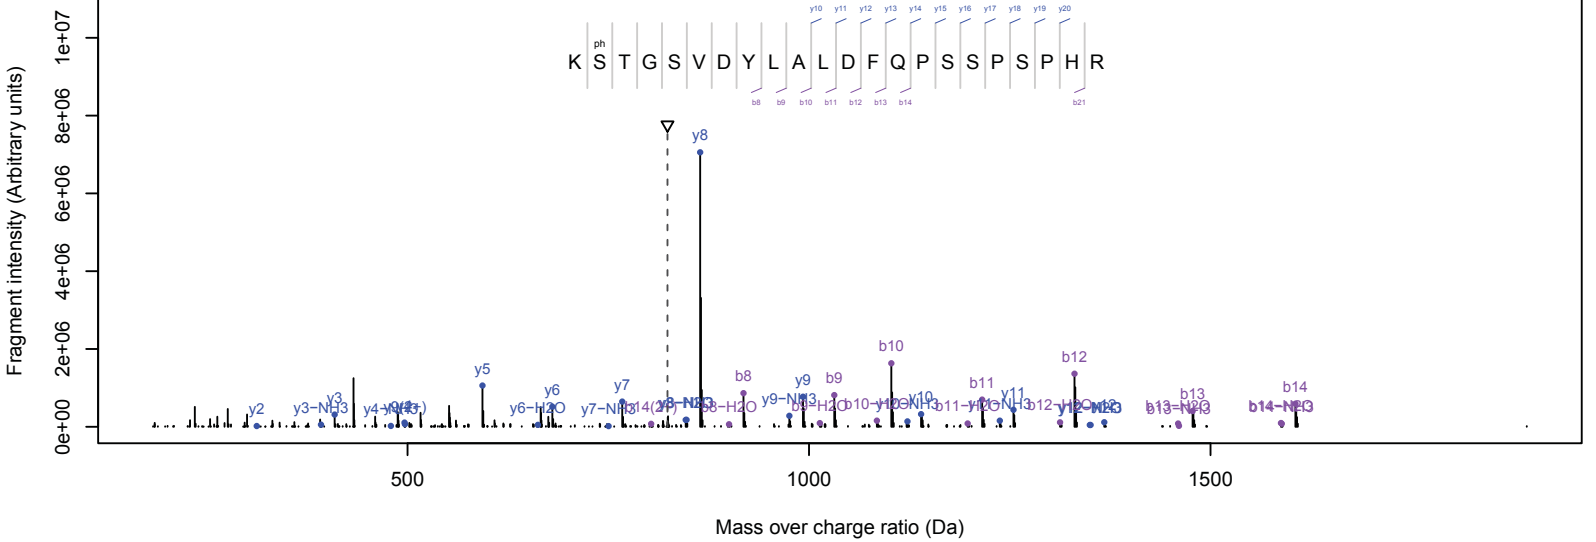

ETDTSALAAGSSQEVTY(ph)AQLDHWALTQR-3+

Source : QE1\_140612\_OPL1013\_CVA\_phosphoproteomic\_landscape\_AML\_C Scan : 39156

Andromeda score : 235.69

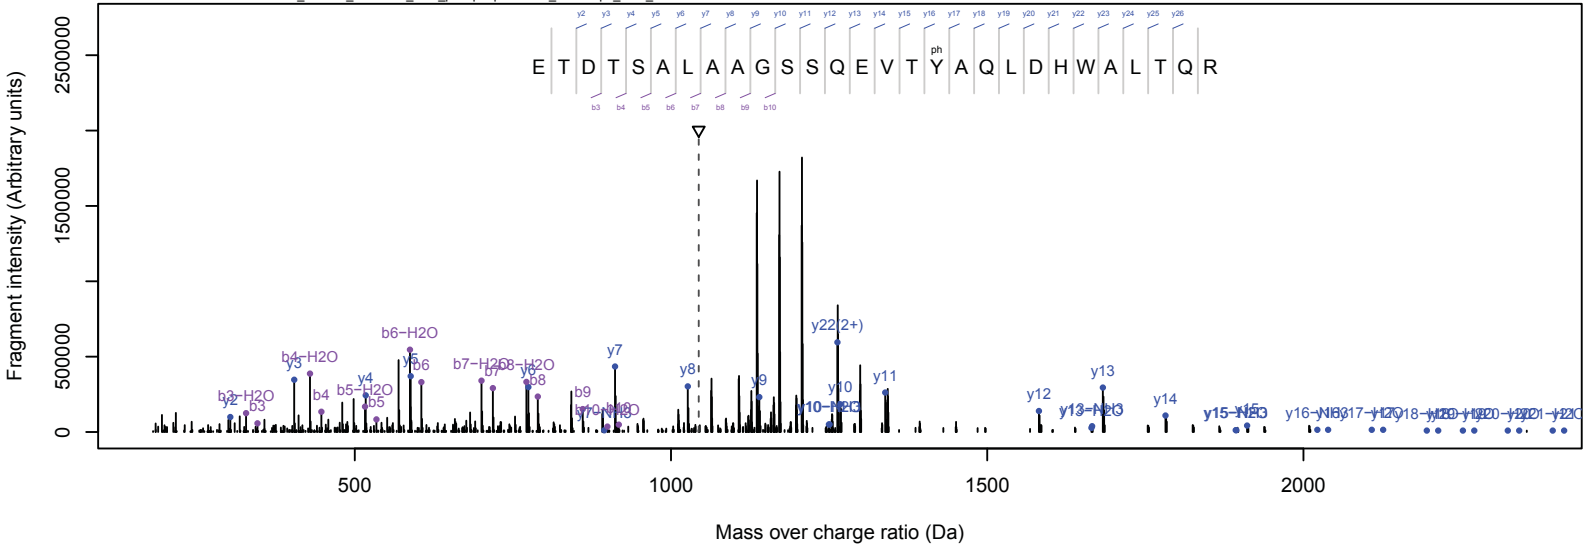

RVEAMKQY(ph)QEEIQELNEVAR-3+

Source : QE1\_140612\_OPL1013\_CVA\_phosphoproteomic\_landscape\_AML\_D Scan : 28492

Andromeda score : 235.68

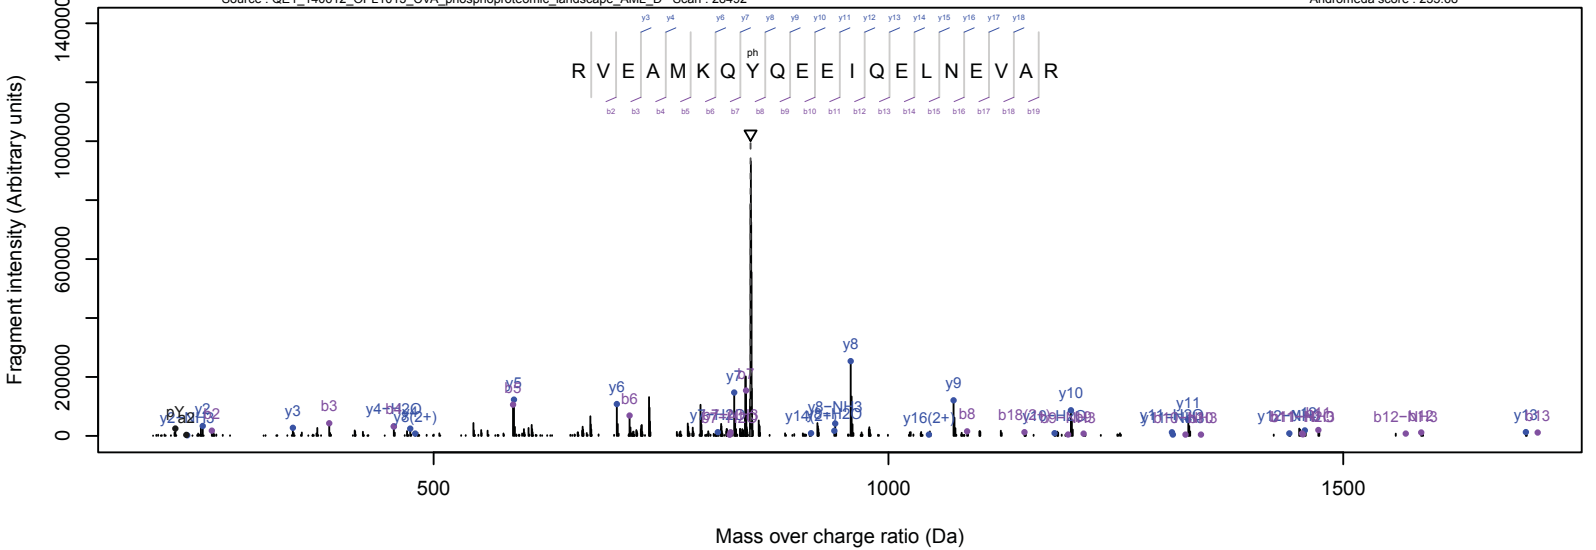

EVGDY(ph)GQLHETEVLLK-2+

Source : QE1\_140908\_OPL1013\_CvA\_pTyrIP\_AML\_HEL Scan : 31443

Andromeda score : 235.24

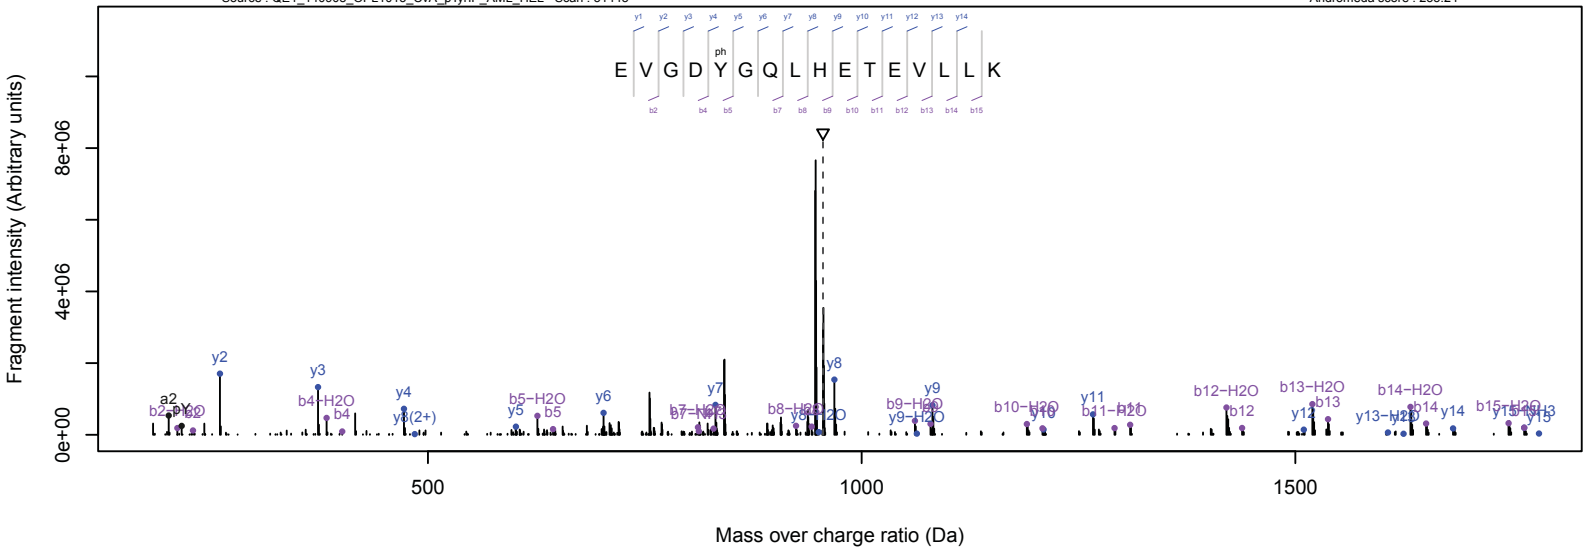

EDSARVY(ph)ENVGLM(ox)QQQK-3+

Source : QE1\_140822\_OPL1013\_CVA\_pTyrIP\_AML\_cell\_lines\_part2\_B Scan : 13008

Andromeda score : 235.22

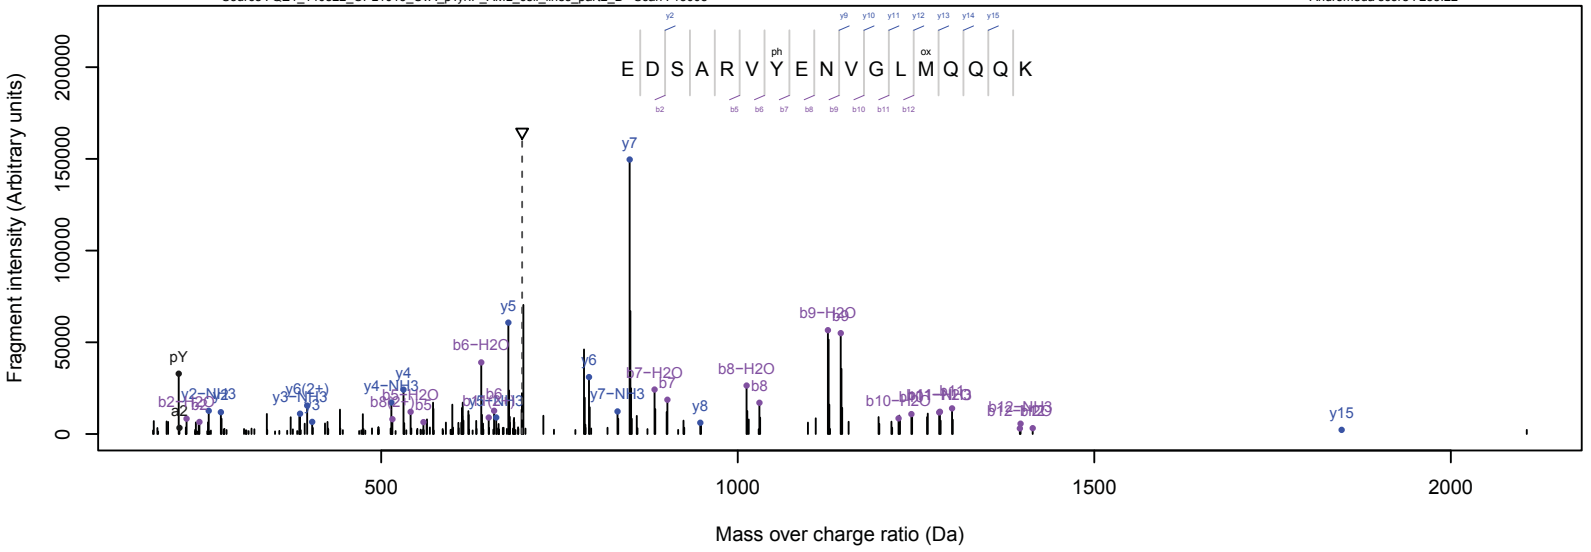

QFY(ph)INVEREEWK-2+

Source : QE1\_140612\_OPL1013\_CVA\_phosphoproteomic\_landscape\_AML\_A Scan : 32204

Andromeda score : 234.79

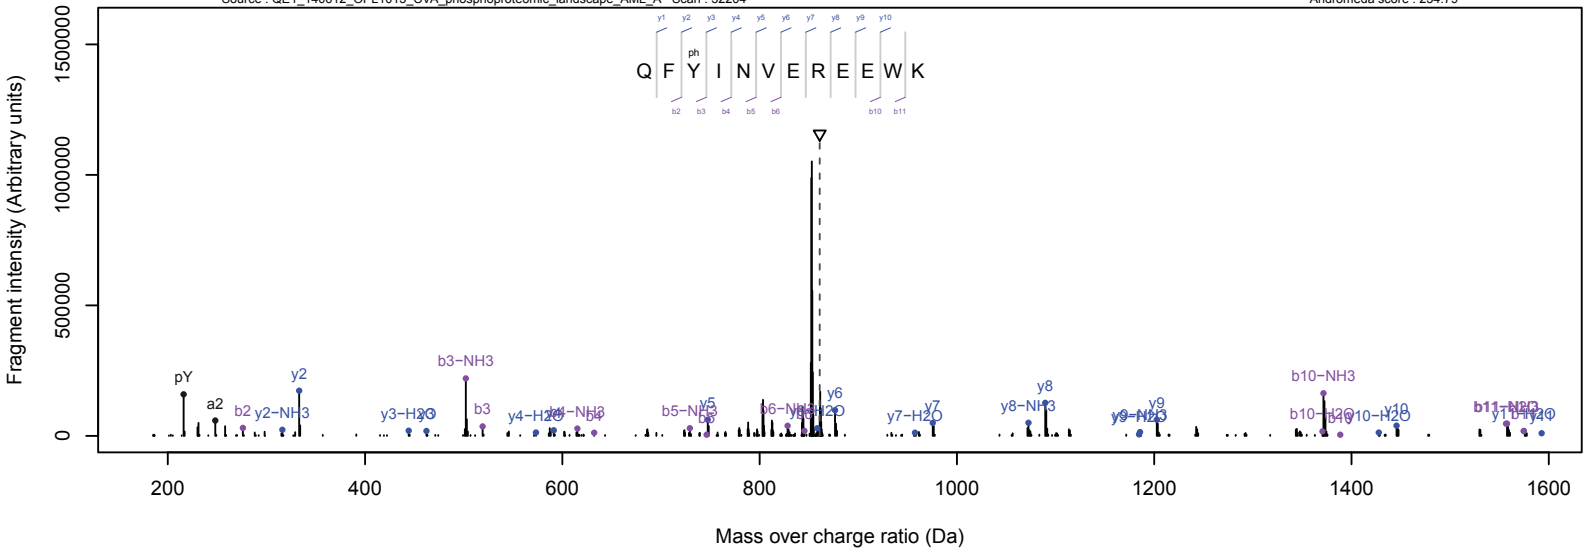

IQNTGDY(ph)YDLYGGEK-2+

Source : QE1\_140612\_OPL1013\_CVA\_phosphoproteomic\_landscape\_AML\_A Scan : 22638

Andromeda score : 234.78

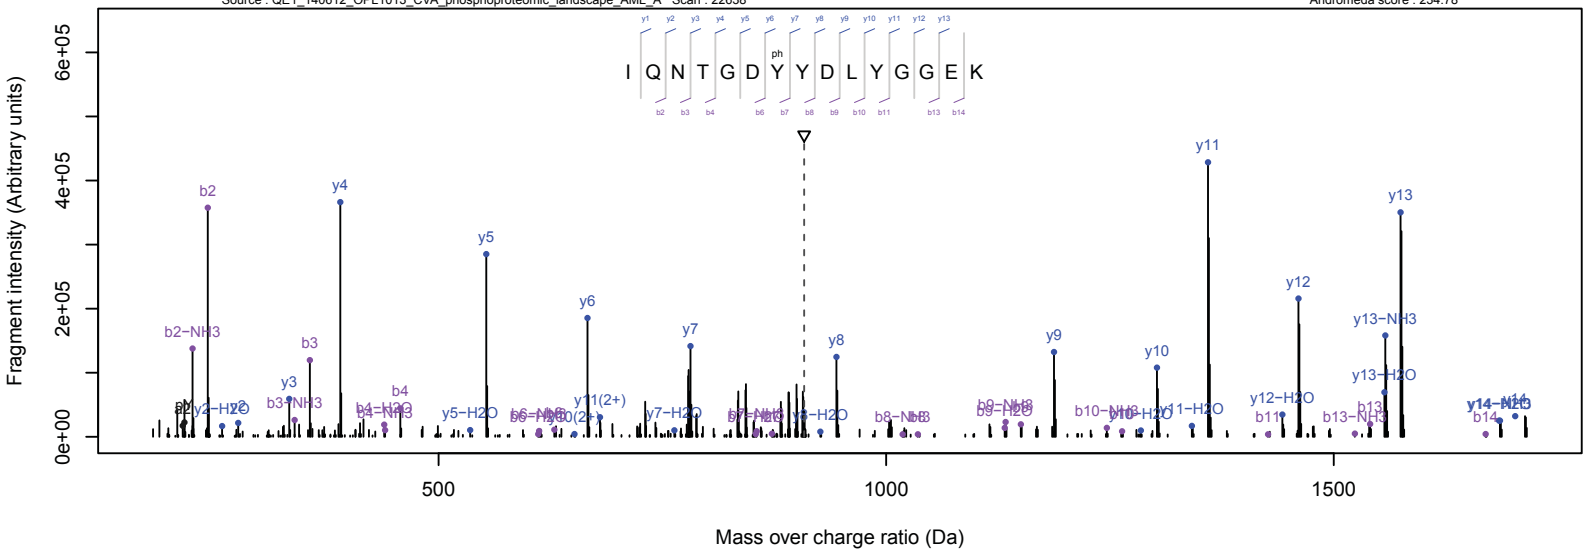



SSGGSGGPLSHFYSGSPTSY(ph)FTSGLQAGLK-3+

Source : QE1\_140612\_OPL1013\_CVA\_phosphoproteomic\_landscape\_AML\_C Scan : 44303

Andromeda score : 233.79

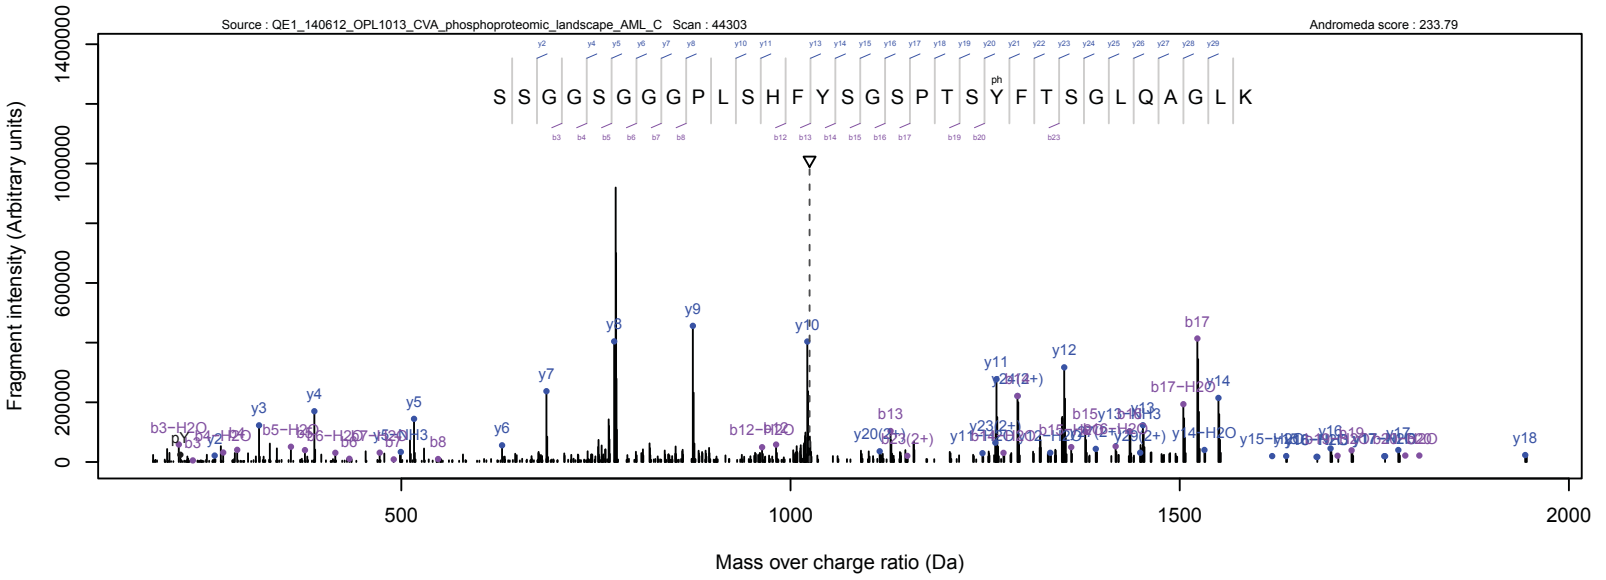

NLSASFTEESSINYT(ph)FK-2+

Source : QE1\_140612\_OPL1013\_CVA\_phosphoproteomic\_landscape\_AML\_B Scan : 36688

Andromeda score : 233.49

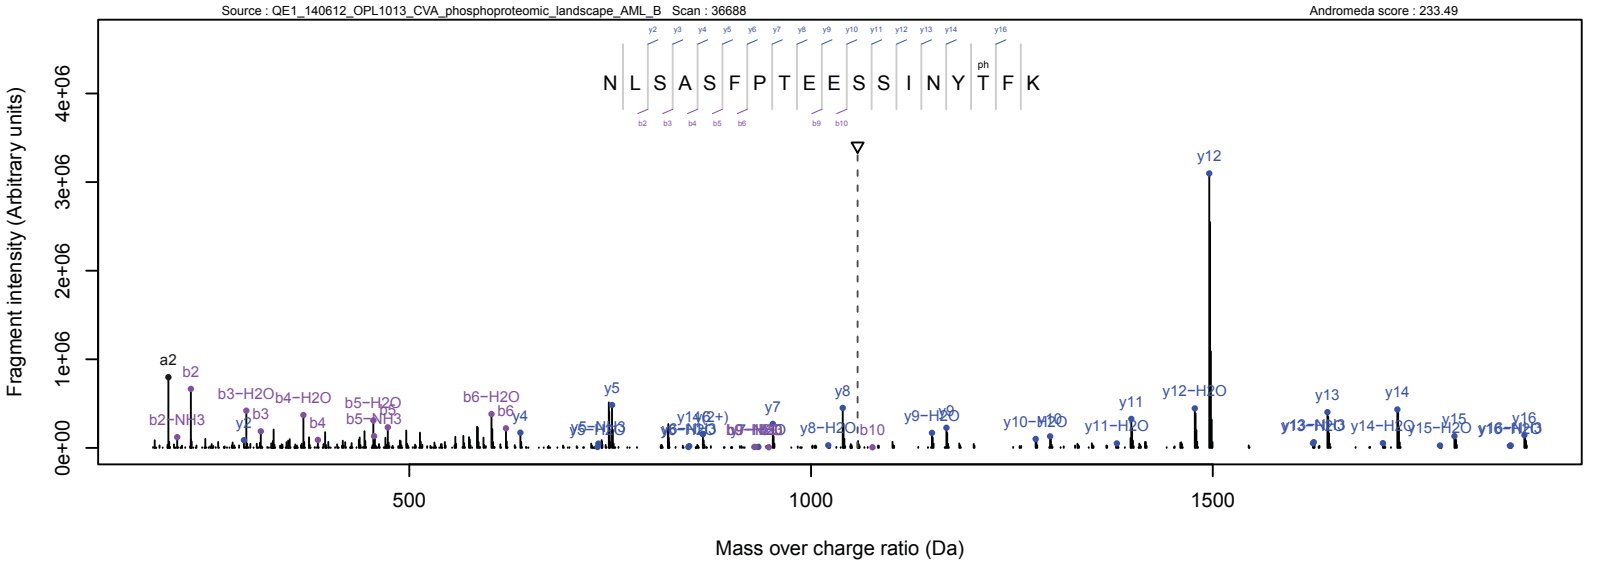

VVEEINGNYYVVIDPTQLPYDHK-3+

Source : QE1\_140908\_OPL1013\_CvA\_pTyrIP\_AML\_Kasumi1 Scan : 36510

Andromeda score : 233.26

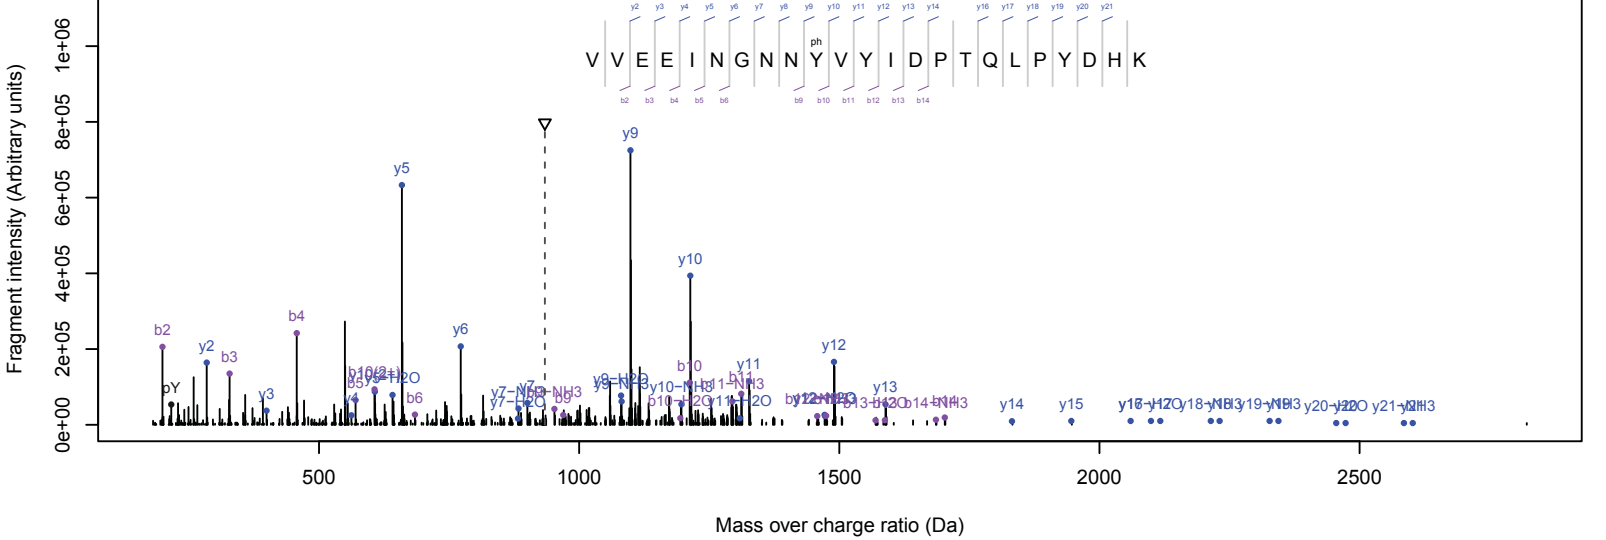





DSSSQENM(ox)VEDCLY(ph)ETVKEIK-3+

Source : QE1\_140612\_OPL1013\_CVA\_phosphoproteomic\_landscape\_AML\_B Scan : 44914

Andromeda score : 232.54

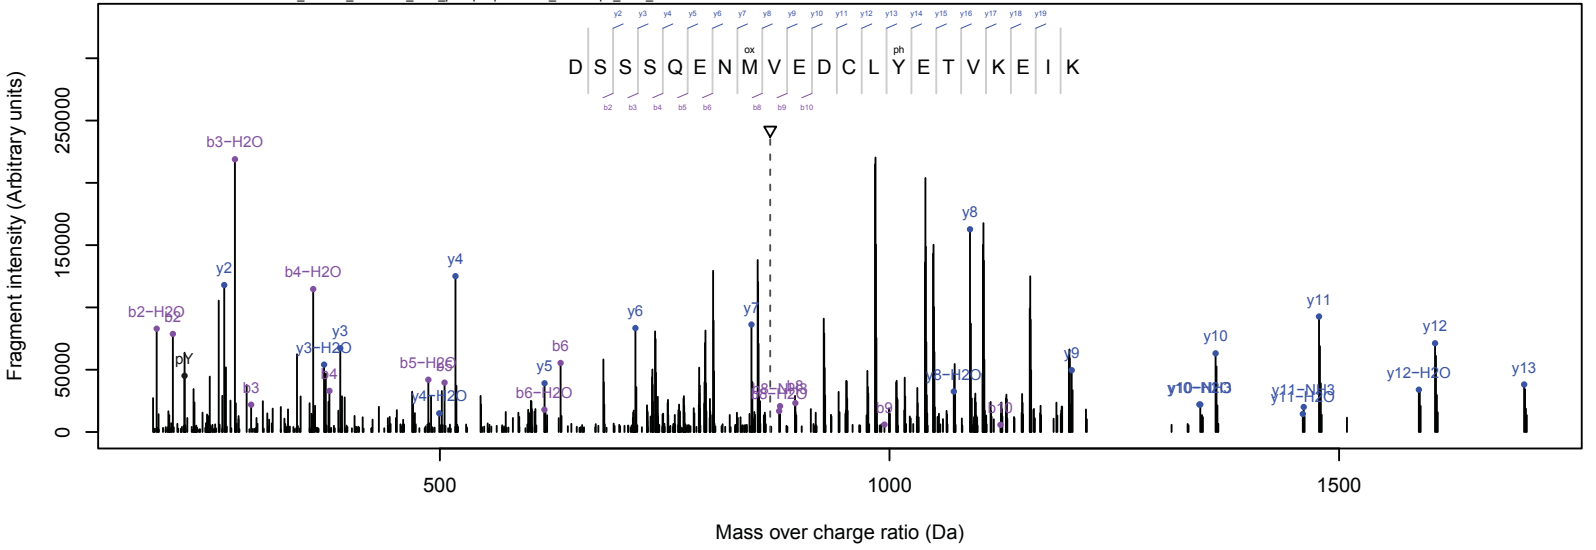

LPACVVDCTG(ph)TK-2+

Source : QE1\_140612\_OPL1013\_CVA\_phosphoproteomic\_landscape\_AML\_B Scan : 17711

Andromeda score : 232.37

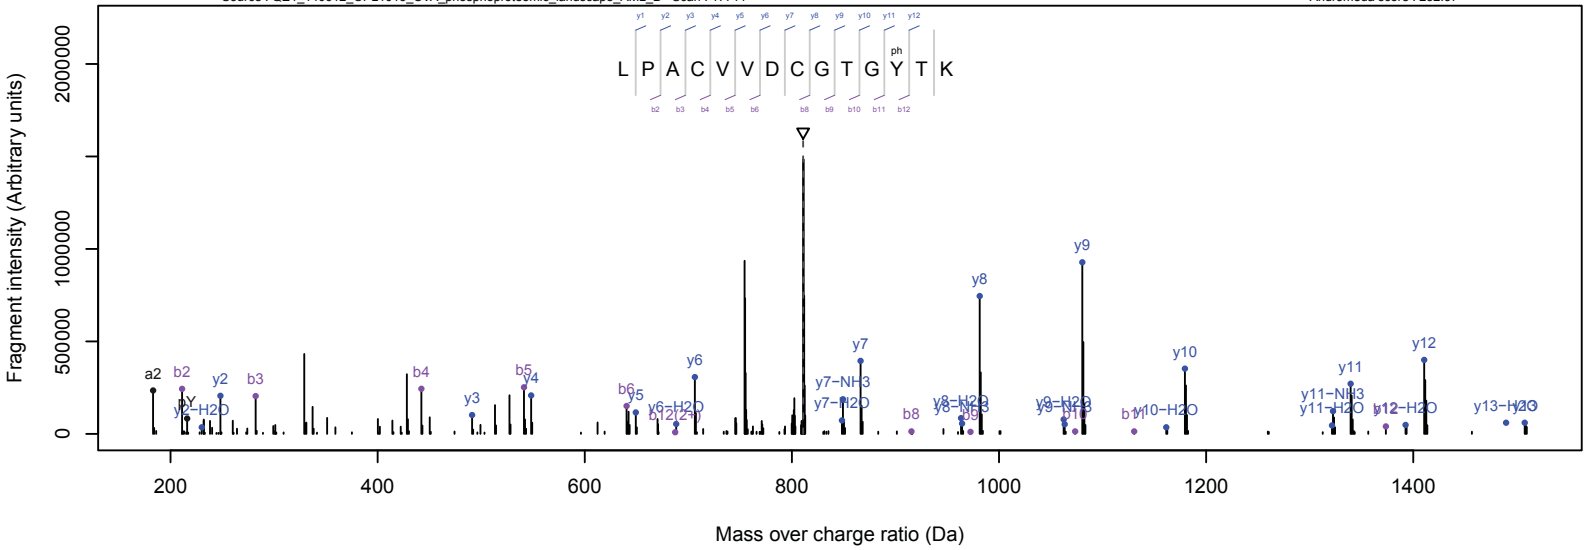

VPY(ph)AKPIPAQFQQAWMQNK-3+

Source : QE1\_140612\_OPL1013\_CVA\_phosphoproteomic\_landscape\_AML\_A Scan : 36153

Andromeda score : 232.28

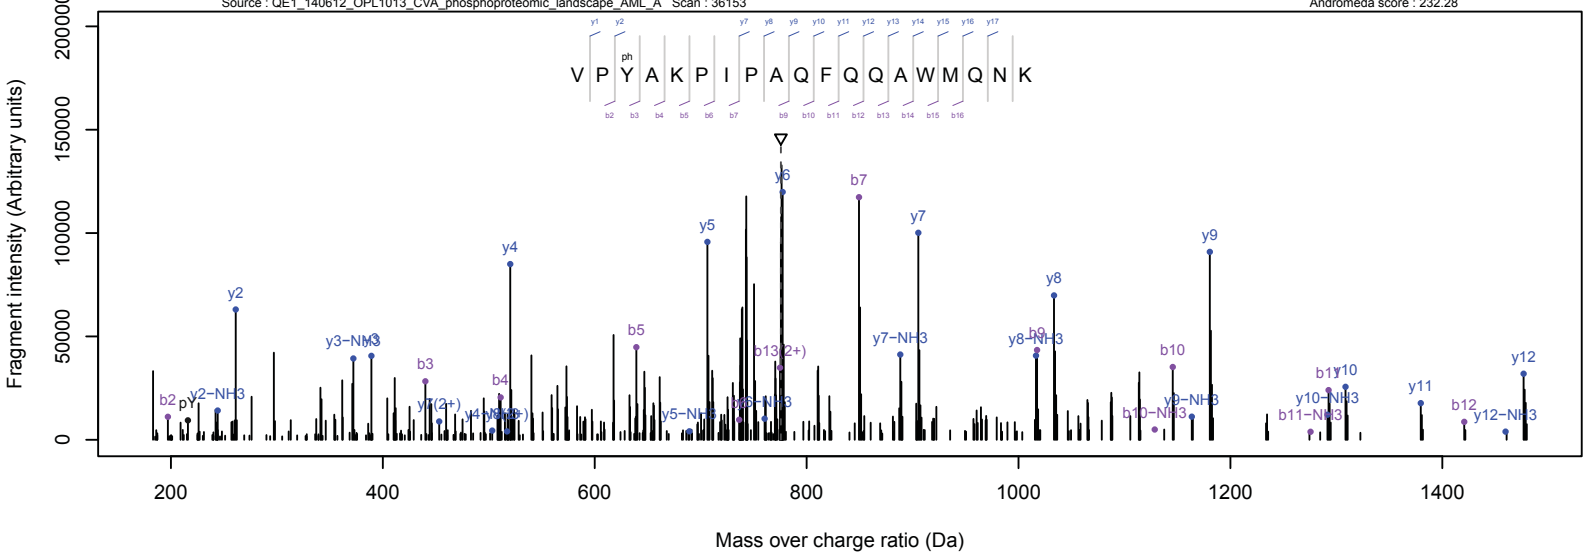



GEHSIVY(ph)LKPSYAFGSVGK-3+

Source : QE1\_140908\_OPL1013\_CvA\_pTyrIP\_AML\_Kasumi1 Scan : 32311

Andromeda score : 231.77

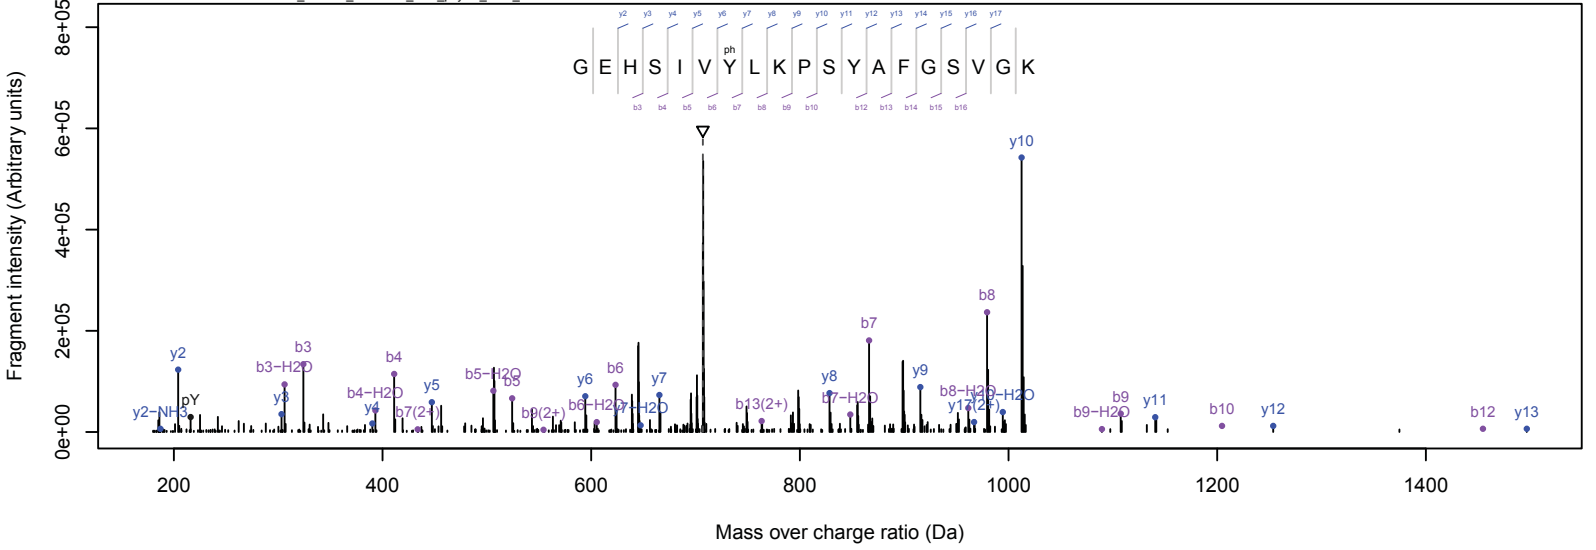

KTPQGPEIY(ph)SDTQFPSLQSTAK-3+

Source : QE1\_140908\_OPL1013\_CvA\_pTyrIP\_AML\_HL60 Scan : 33697

Andromeda score : 231.49

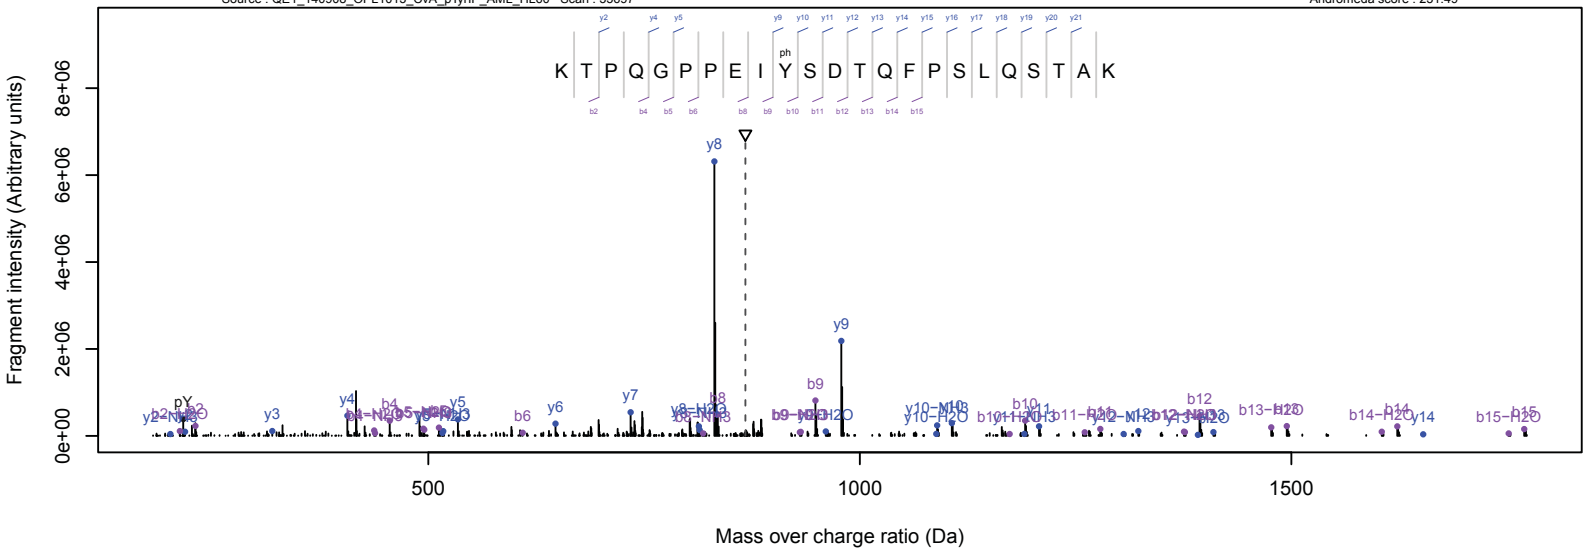

ATVNGLPEKDR(ETD)TSALAAGSSQEVY(ph)AQLDHWALTQR-4+

Source : QE1\_140612\_OPL1013\_CVA\_phosphoproteomic\_landscape\_AML\_C Scan : 36262

Andromeda score : 231.19

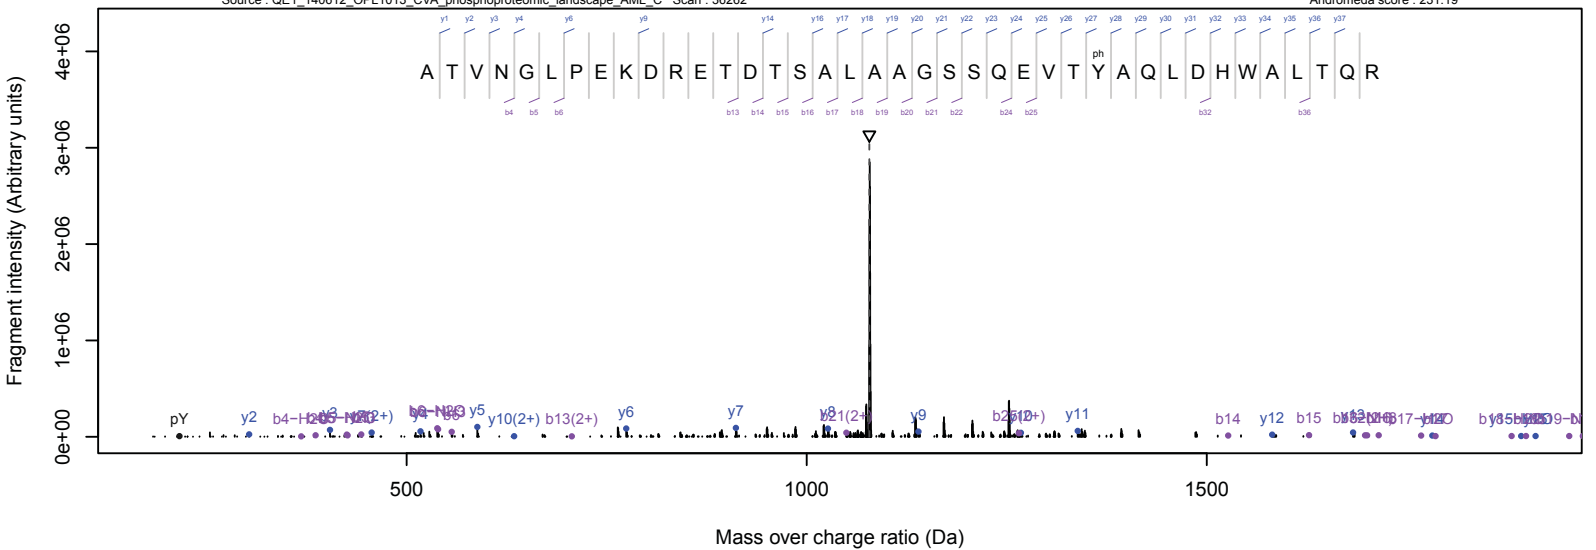

**NPGFY(ph)VEANPMP TFK-2+**

Source : QE1\_140612\_OPL1013\_CVA\_phosphoproteomic\_landscape\_AML\_B Scan : 39689

Andromeda score : 231.17

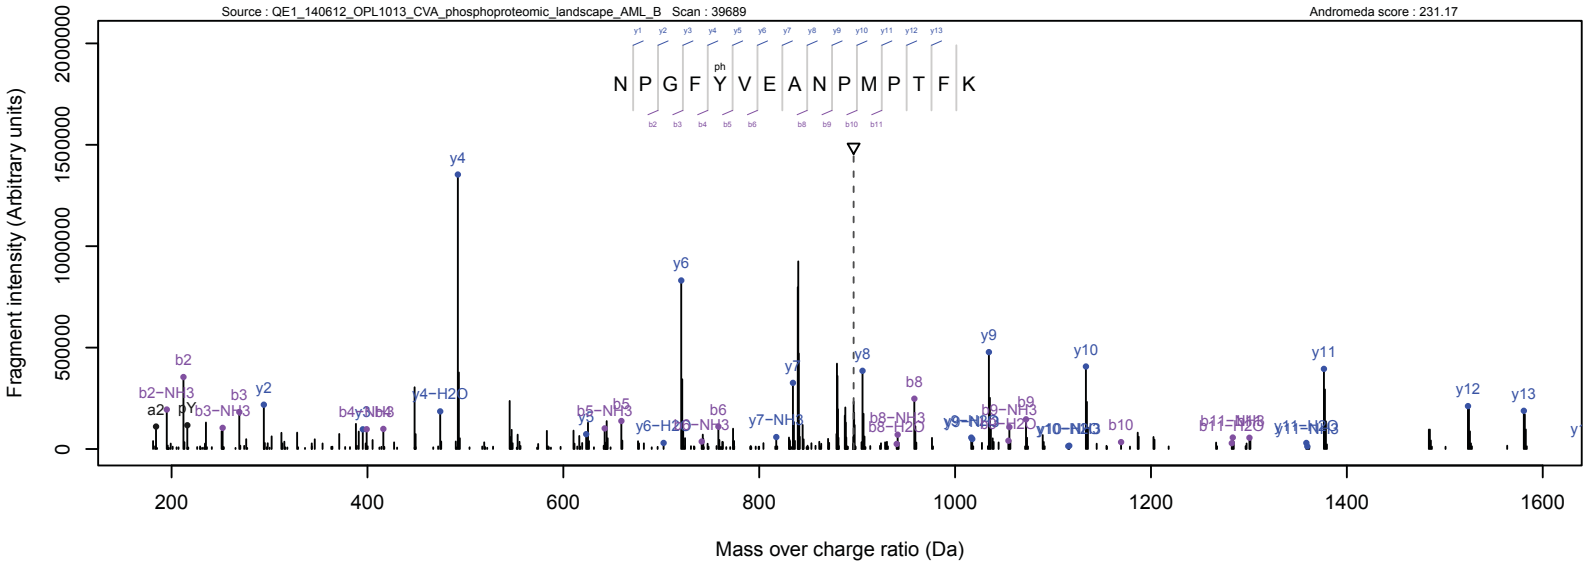

**CHDY(ph)YTTEFLYNLYSSE GK-2+**

Source : QE1\_140612\_OPL1013\_CVA\_phosphoproteomic\_landscape\_AML\_D Scan : 44771

Andromeda score : 229.96

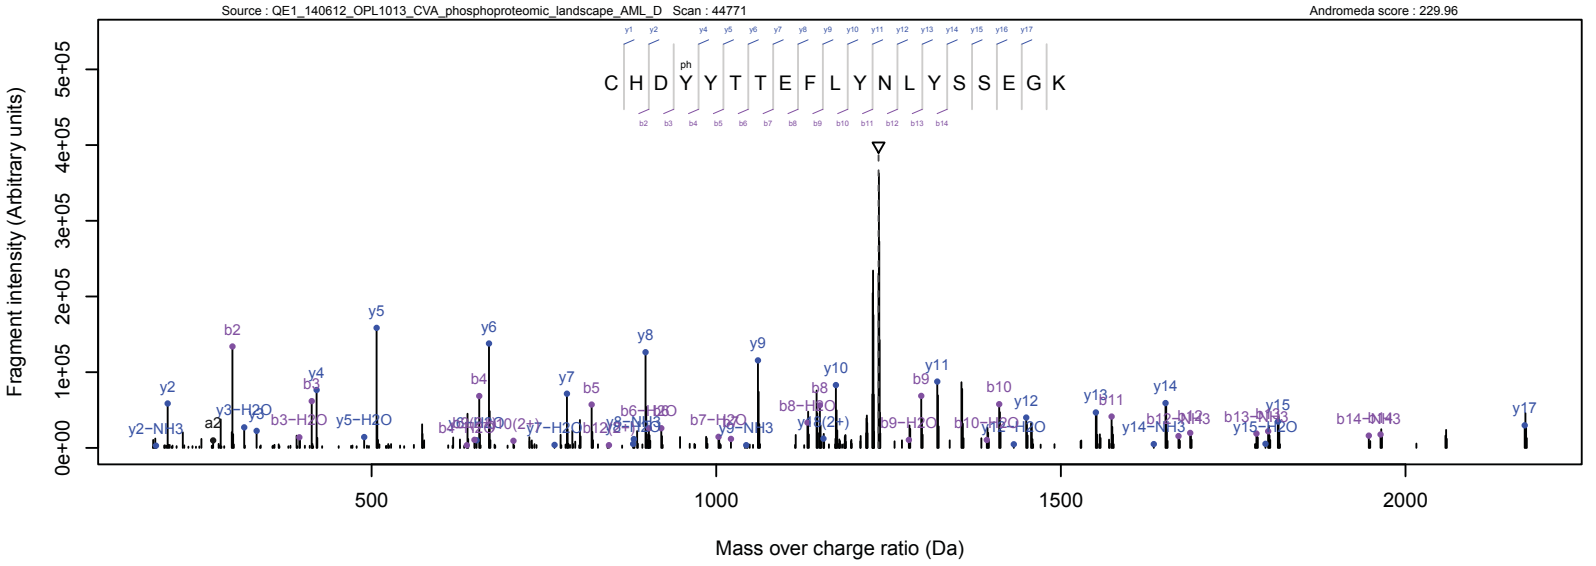

**IPLNPY(ph)LNLHSLLPASNL AGK-3+**

Source : QE1\_140822\_OPL1013\_CvA\_pTyrIP\_AML\_cell\_lines\_part2\_E Scan : 41855

Andromeda score : 229.46

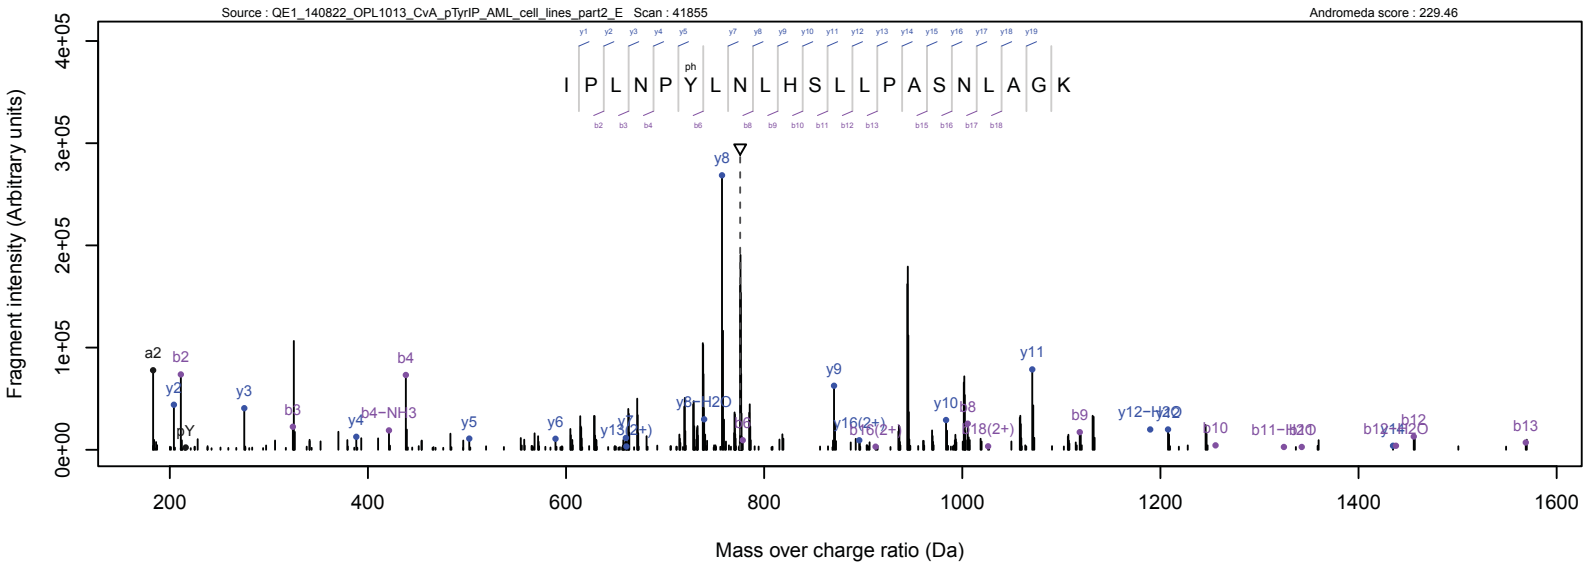

GGPLNKEY(ph)TNWEAK-2+

Source : QE1\_140612\_OPL1013\_CVA\_phosphoproteomic\_landscape\_AML\_B Scan : 16224

Andromeda score : 229.23

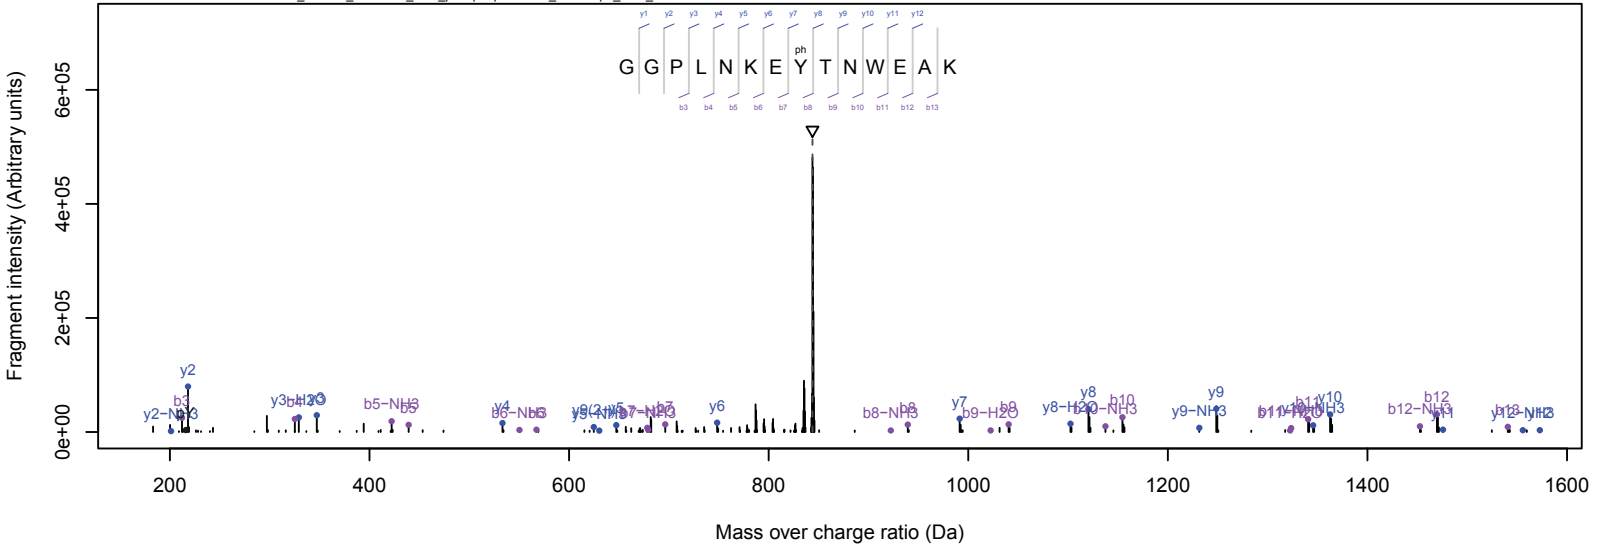

SGPLEACY(ph)GELGQSR-2+

Source : QE1\_140908\_OPL1013\_CvA\_pTyrIP\_AML\_OCI\_AML3 Scan : 23307

Andromeda score : 228.97

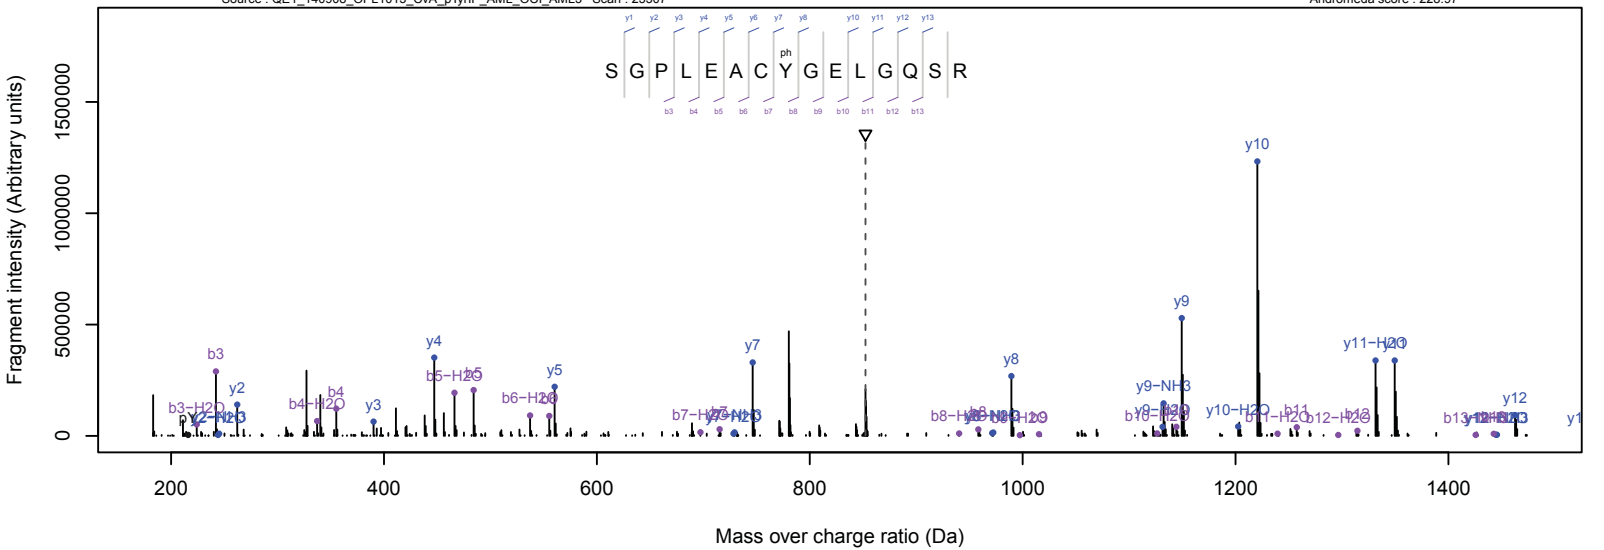

VGEEEHVY(ph)SFPNK-2+

Source : QE1\_140612\_OPL1013\_CVA\_phosphoproteomic\_landscape\_AML\_E Scan : 13914

Andromeda score : 228.62

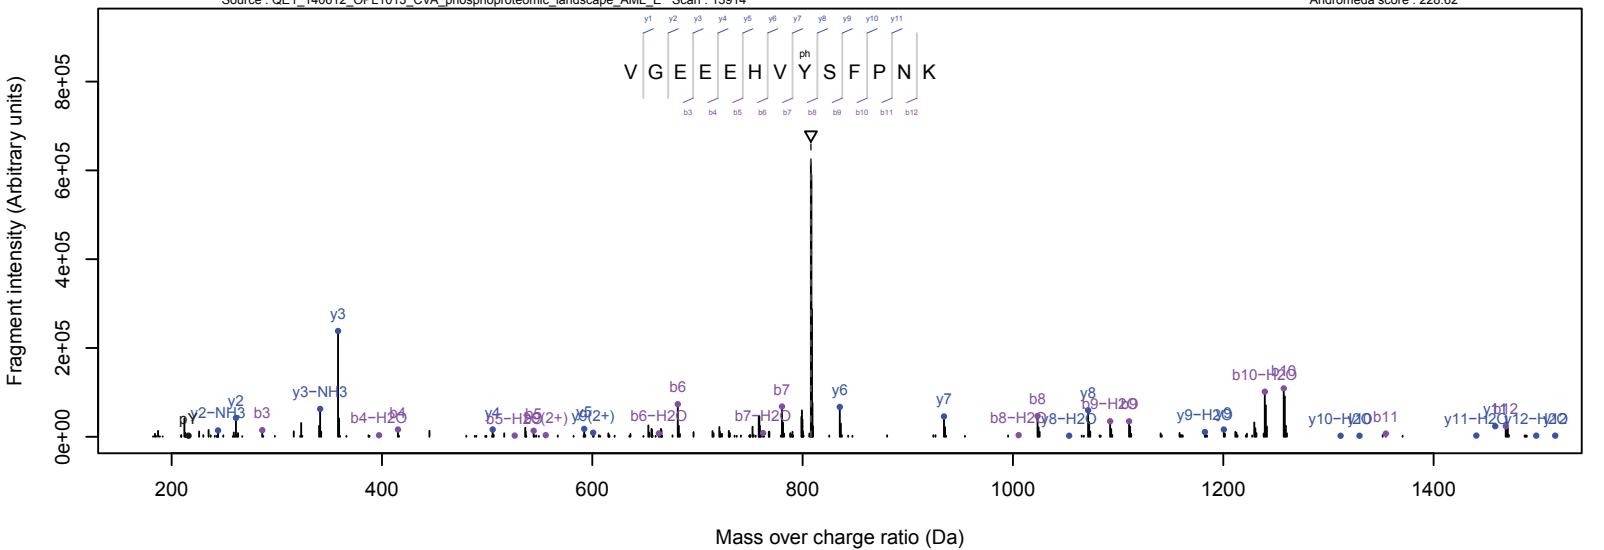

SVDGDQLGMEGPY(ph)EVLK-2+

Source : QE1\_140612\_OPL1013\_CVA\_phosphoproteomic\_landscape\_AML\_B Scan : 35118

Andromeda score : 228.46

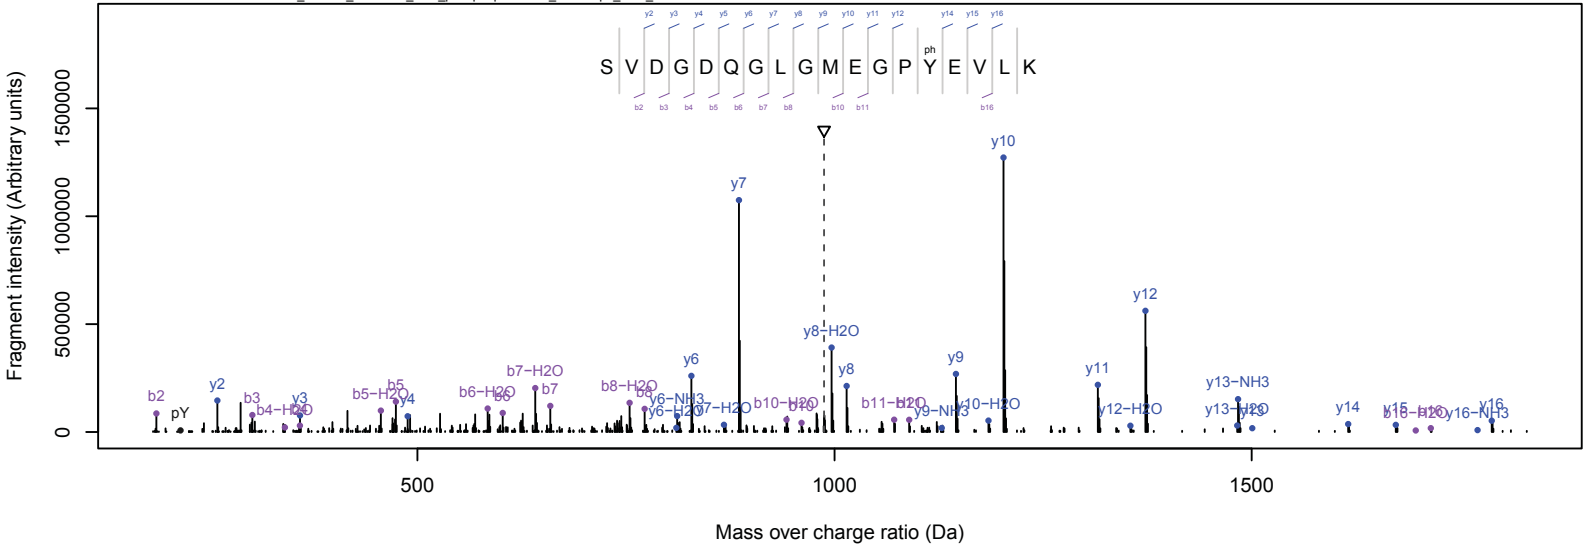

NMGGPYGGNYGPGSSGS(ph)GGYGR-2+

Source : QE1\_140612\_OPL1013\_CVA\_phosphoproteomic\_landscape\_AML\_B Scan : 15713

Andromeda score : 227.66

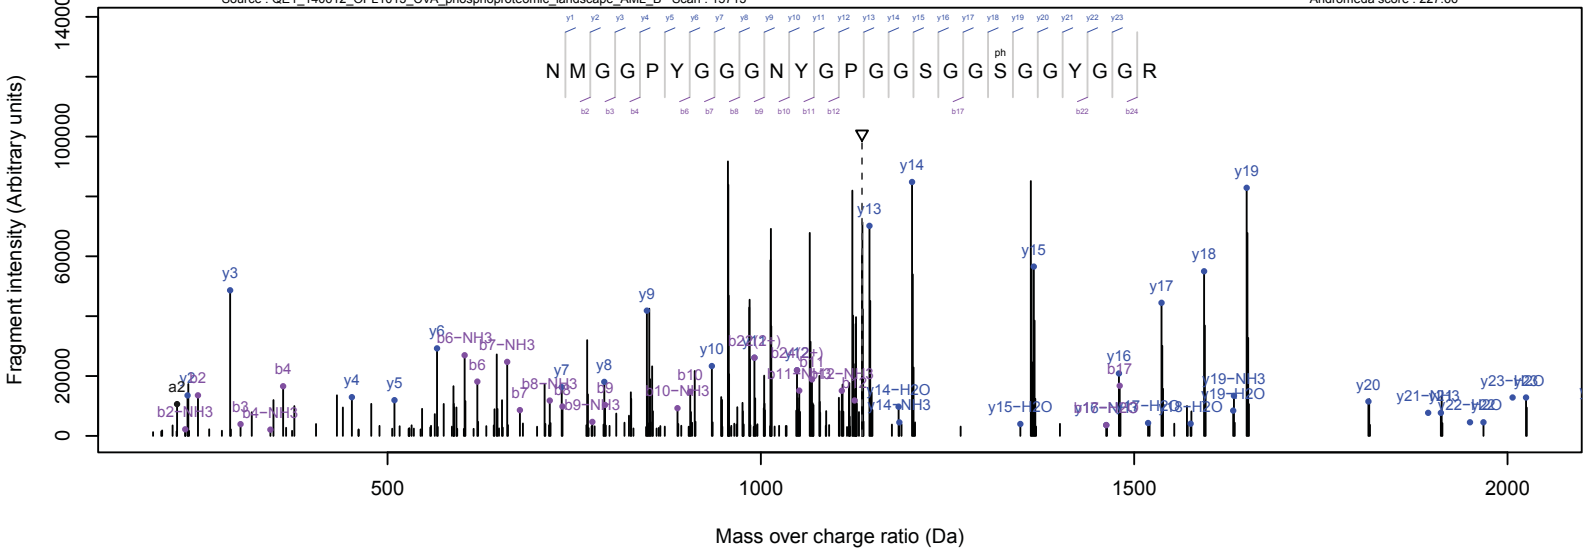

SSGSSVADERVDY(ph)VVDQK-3+

Source : QE1\_140908\_OPL1013\_CvA\_pTyrIP\_AML\_HEL Scan : 21218

Andromeda score : 227.66

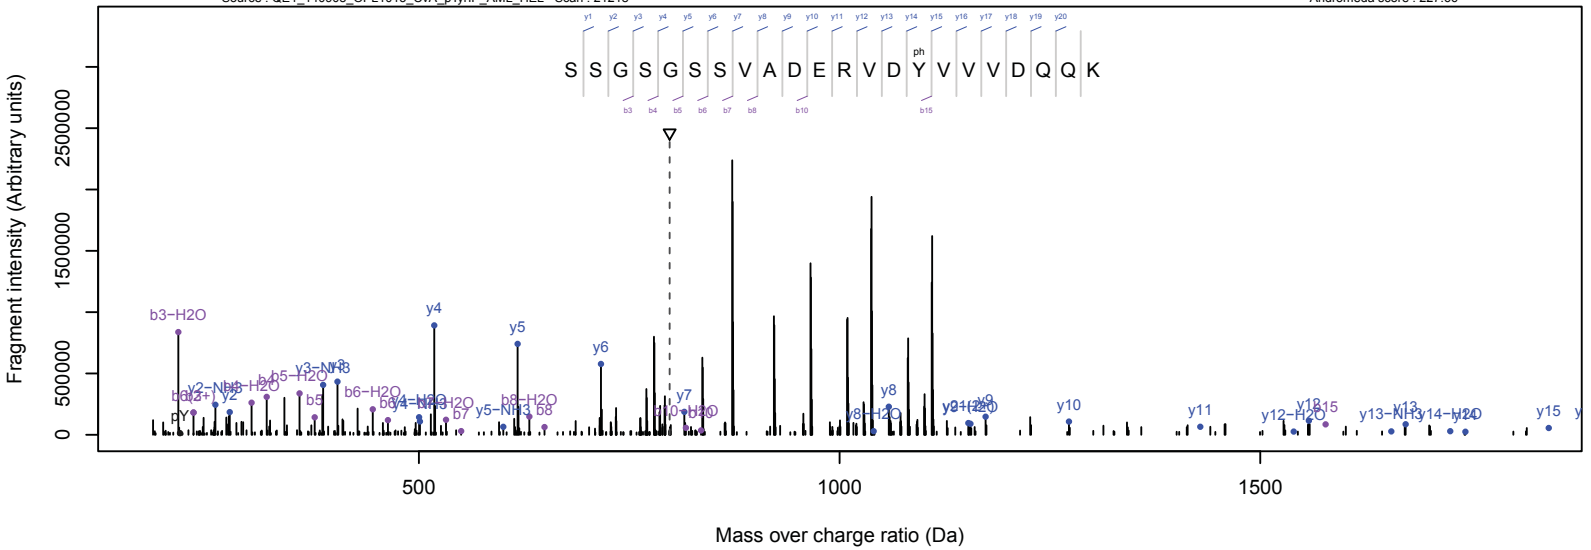





VY(ph)YFNHITNASQWERPSGNSSSGGK-4+

Source : QE1\_140612\_OPL1013\_CVA\_phosphoproteomic\_landscape\_AML\_C Scan : 27218

Andromeda score : 226.56

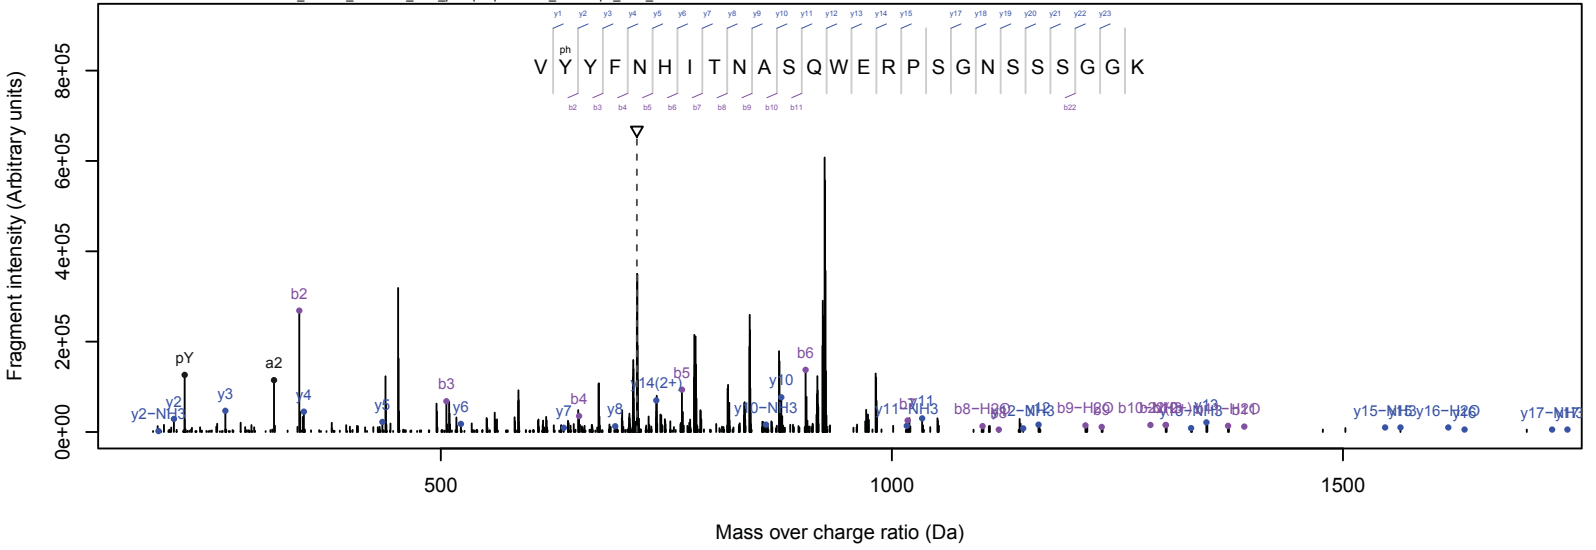

YIANLGHGLY(ph)PDMDPEHVGFVDAVHK-3+

Source : QE1\_140612\_OPL1013\_CVA\_phosphoproteomic\_landscape\_AML\_B Scan : 42209

Andromeda score : 226.07

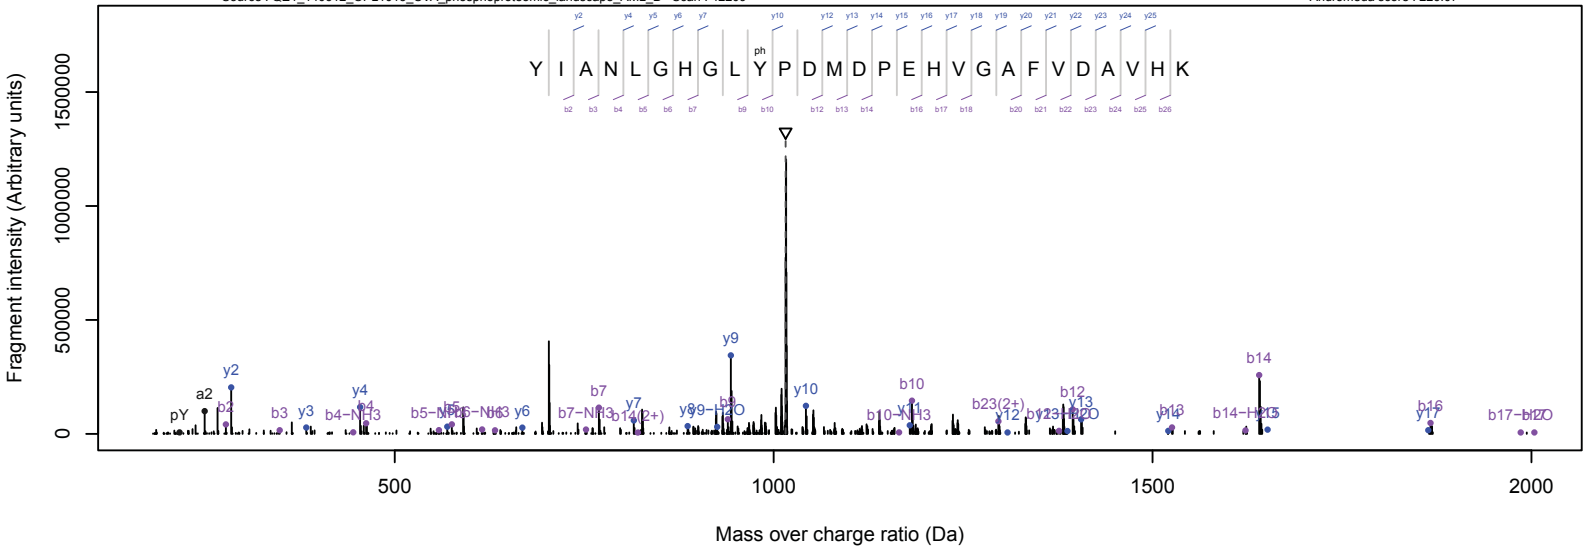

SAFSNLFGGELPSY(ph)TR-2+

Source : QE1\_140908\_OPL1013\_CvA\_pTyrIP\_AML\_Kasumi6 Scan : 47855

Andromeda score : 225.7

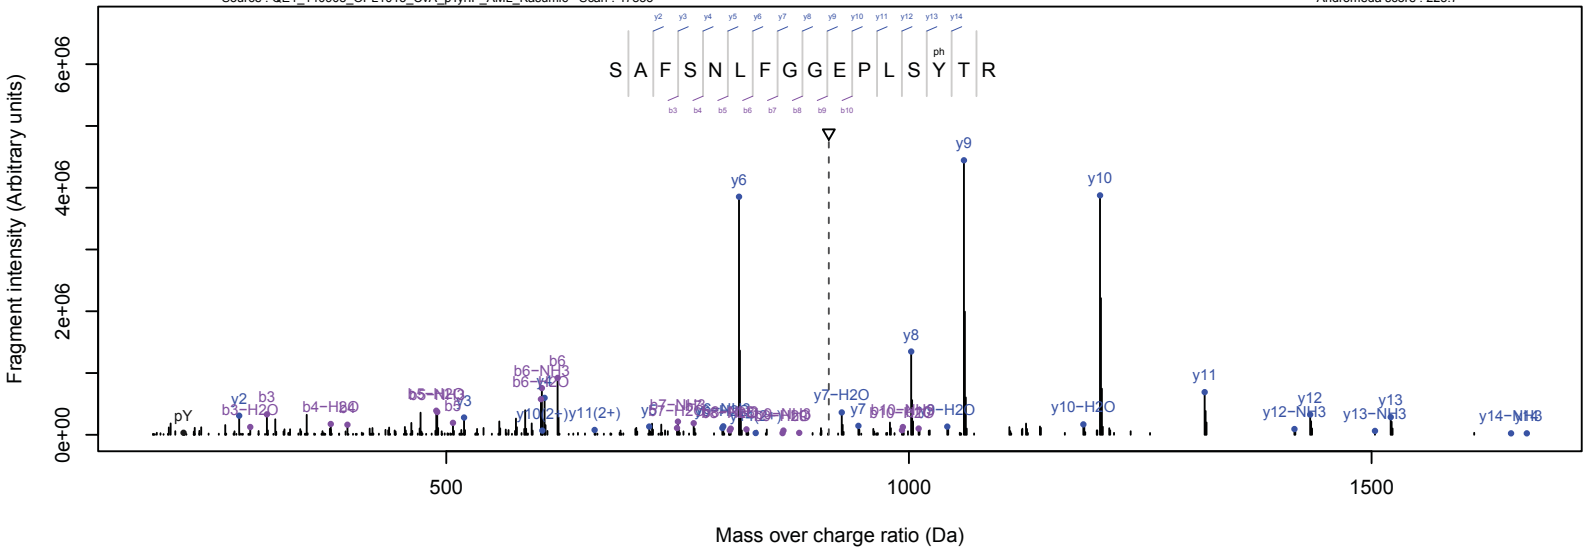

SAVKNEEY(ph)FMFPEPK-2+

Source : QE1\_140612\_OPL1013\_CVA\_phosphoproteomic\_landscape\_AML\_C Scan : 31265

Andromeda score : 225.7

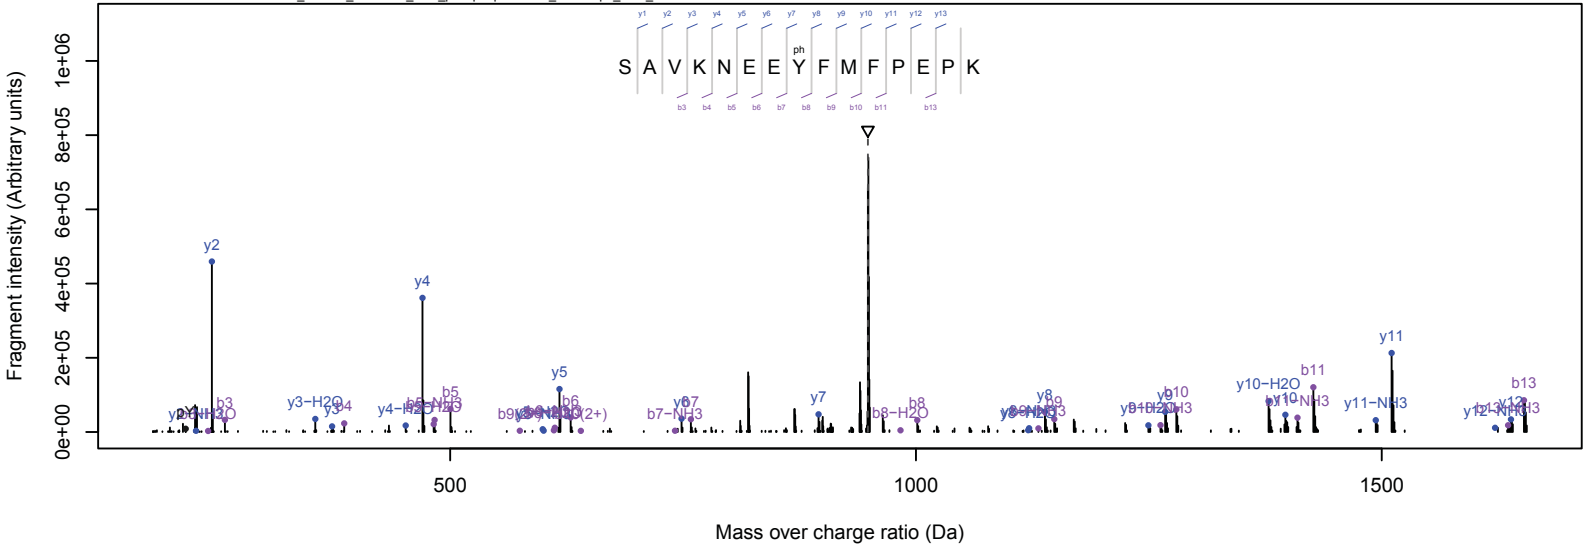

CSDAAGY(ph)PHATHDLEGPPLDAYSIQGQHTISPLDLAK-4+

Source : QE1\_140612\_OPL1013\_CVA\_phosphoproteomic\_landscape\_AML\_C Scan : 39904

Andromeda score : 225.51

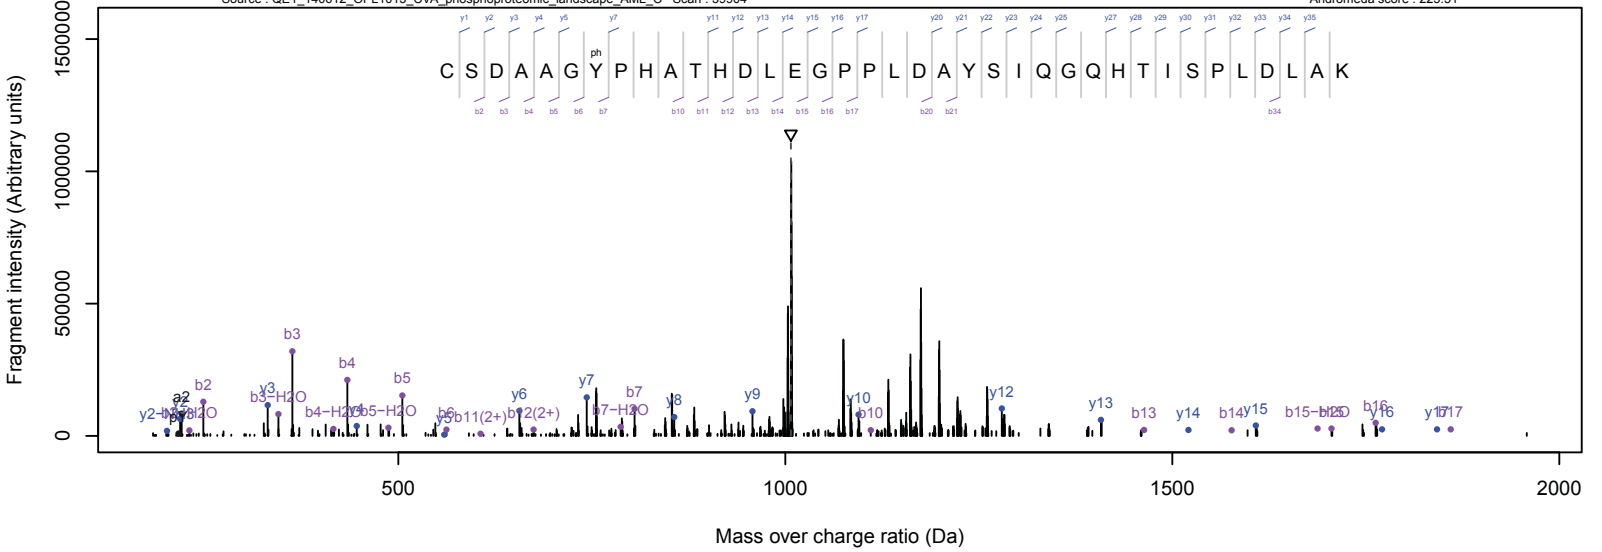

LISKPVASDSTY(ph)FAWC PDGEHILTATCAPR-3+

Source : QE1\_140612\_OPL1013\_CVA\_phosphoproteomic\_landscape\_AML\_B Scan : 39691

Andromeda score : 225.44

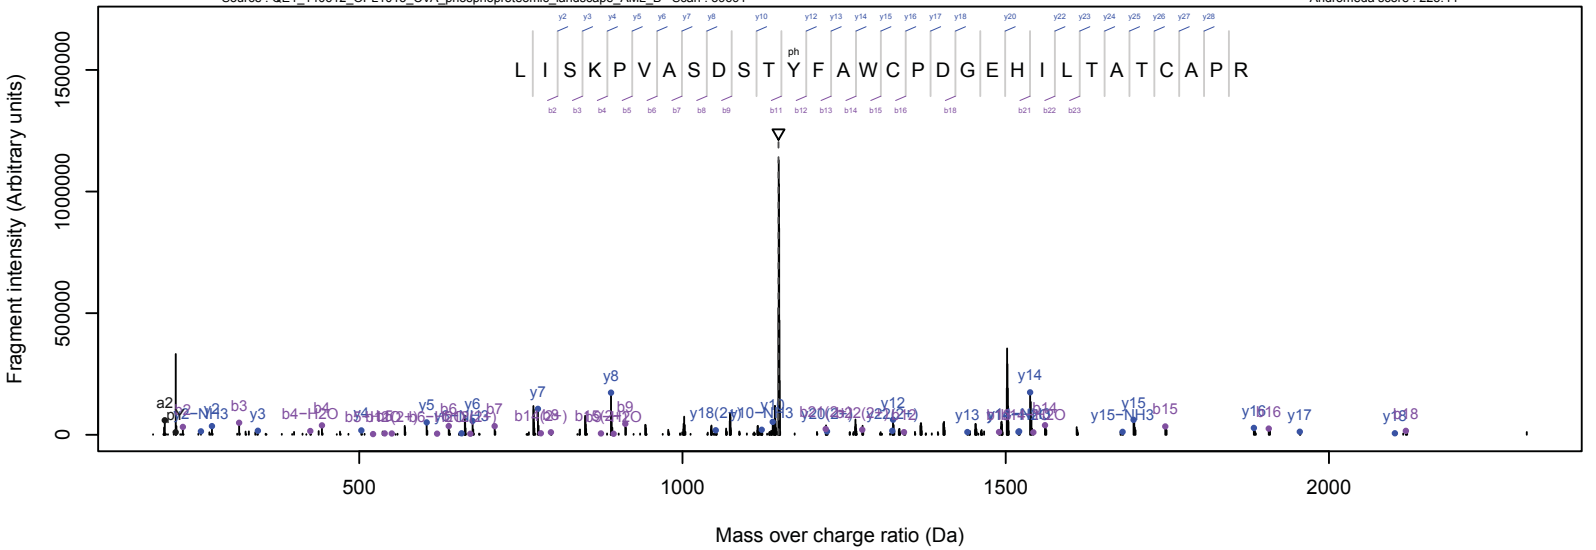

RPPGLELY(ph)CYNP SHNP EEQLSSK-3+

Source: QE1\_140612\_OPL1013\_CVA\_phosphoproteomic\_landscape\_AML\_D Scan: 21889

Andromeda score: 225.39

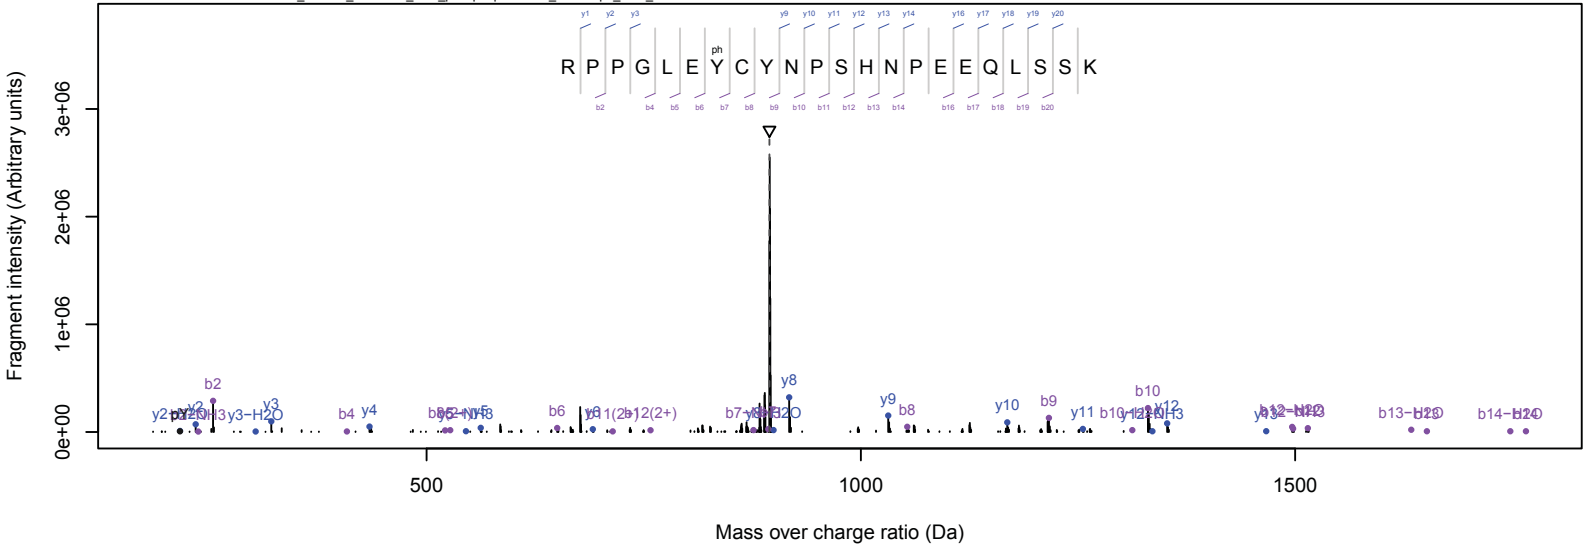

GSLTGSETDNEDVY(ph)TFKTPSNTLCR-3+

Source: QE1\_140908\_OPL1013\_CvA\_pTyrIP\_AML\_Kasumi6 Scan: 29334

Andromeda score: 225.34

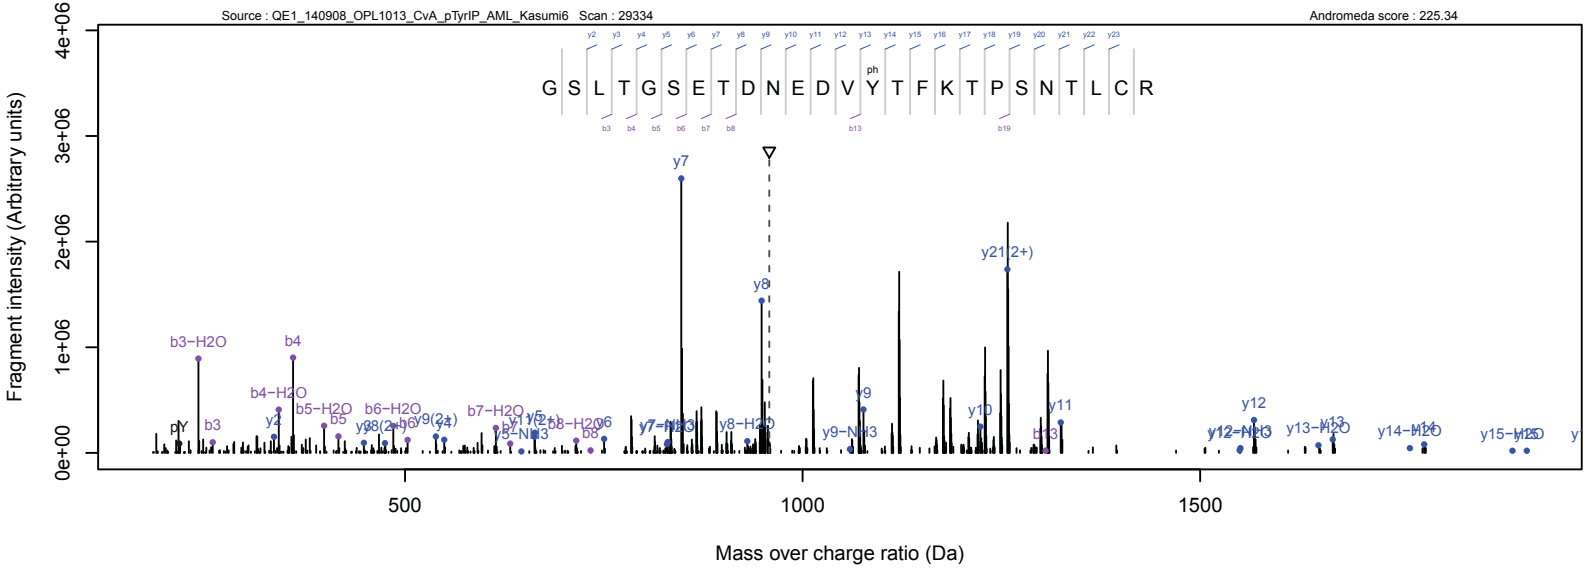

NSSY(ph)FVEWIPNNVK-2+

Source: QE1\_140612\_OPL1013\_CVA\_phosphoproteomic\_landscape\_AML\_B Scan: 42043

Andromeda score: 225.32

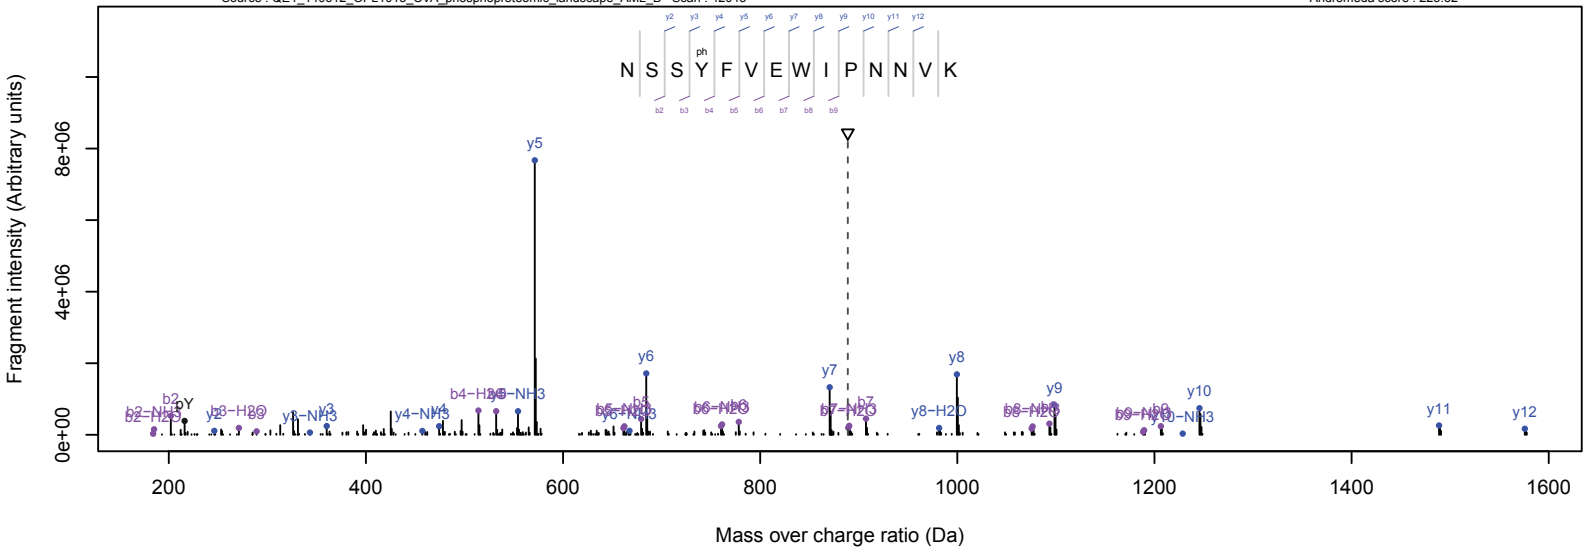

SSGPYGGGGQY(ph)FAKPR-2+

Source : QE1\_140612\_OPL1013\_CVA\_phosphoproteomic\_landscape\_AML\_A Scan : 13123

Andromeda score : 225.29

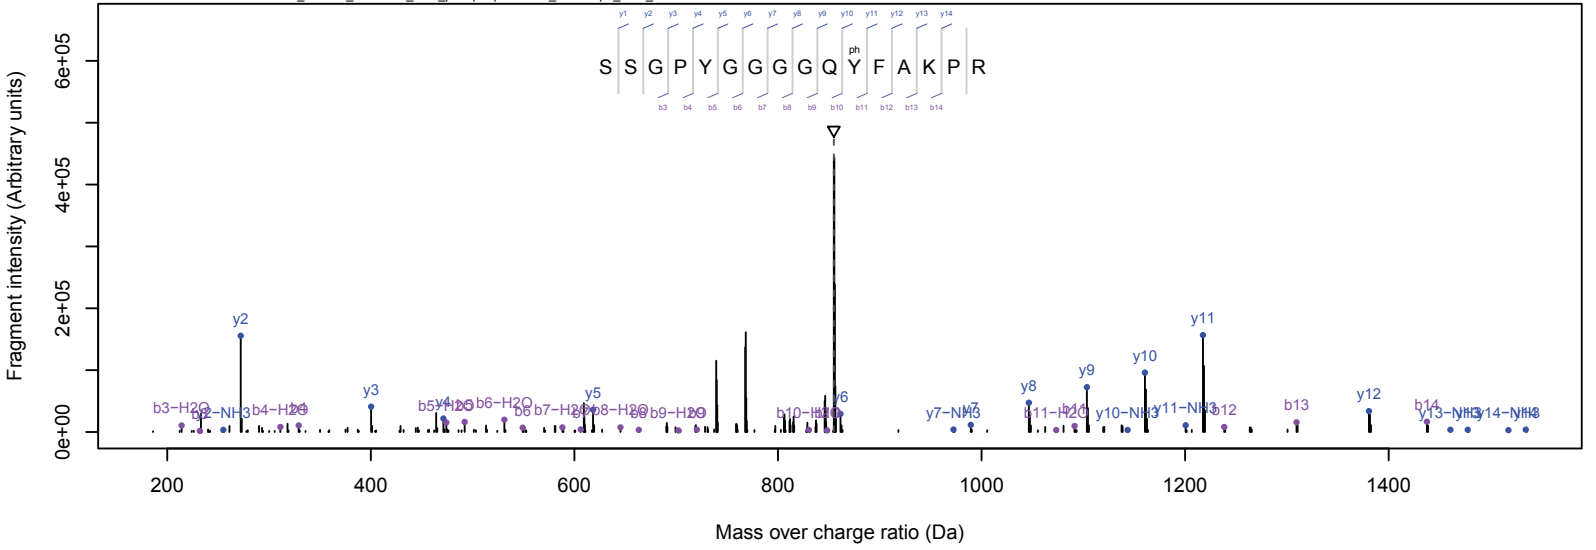

AIMTYVSSFY(ph)HAFSGAQK-2+

Source : QE1\_140612\_OPL1013\_CVA\_phosphoproteomic\_landscape\_AML\_B Scan : 45267

Andromeda score : 225.13

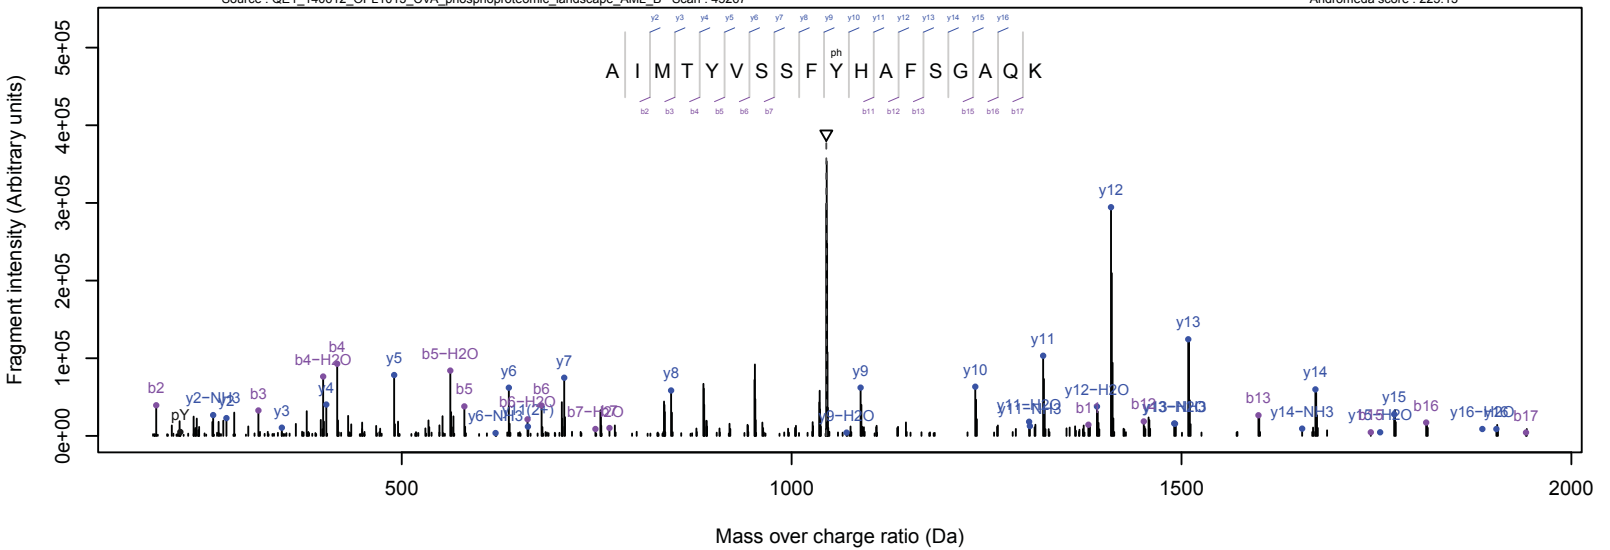

Y(ph)FPLTASEVLSMRPR-2+

Source : QE1\_140612\_OPL1013\_CVA\_phosphoproteomic\_landscape\_AML\_C Scan : 43161

Andromeda score : 224.34

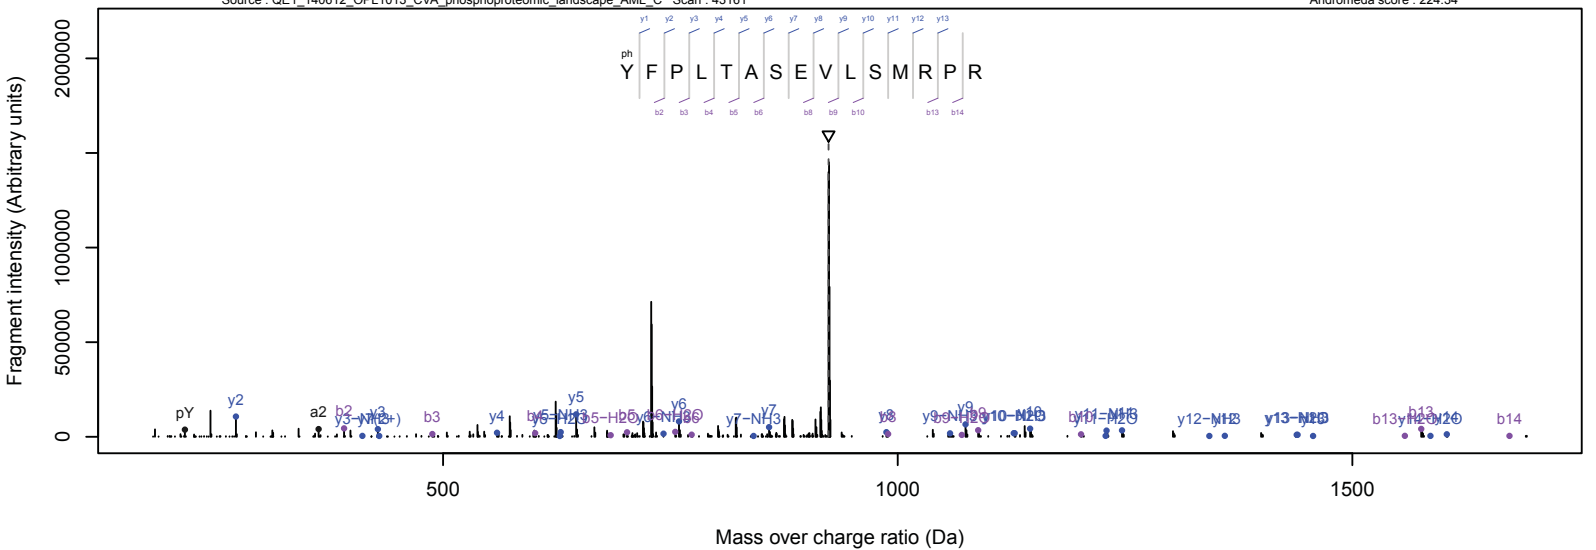

**QITNFQLSIENLDQSLAHY(ph)GRPK-3+**

Source : QE1\_140612\_OPL1013\_CVA\_phosphoproteomic\_landscape\_AML\_A Scan : 43687

Andromeda score : 223.51

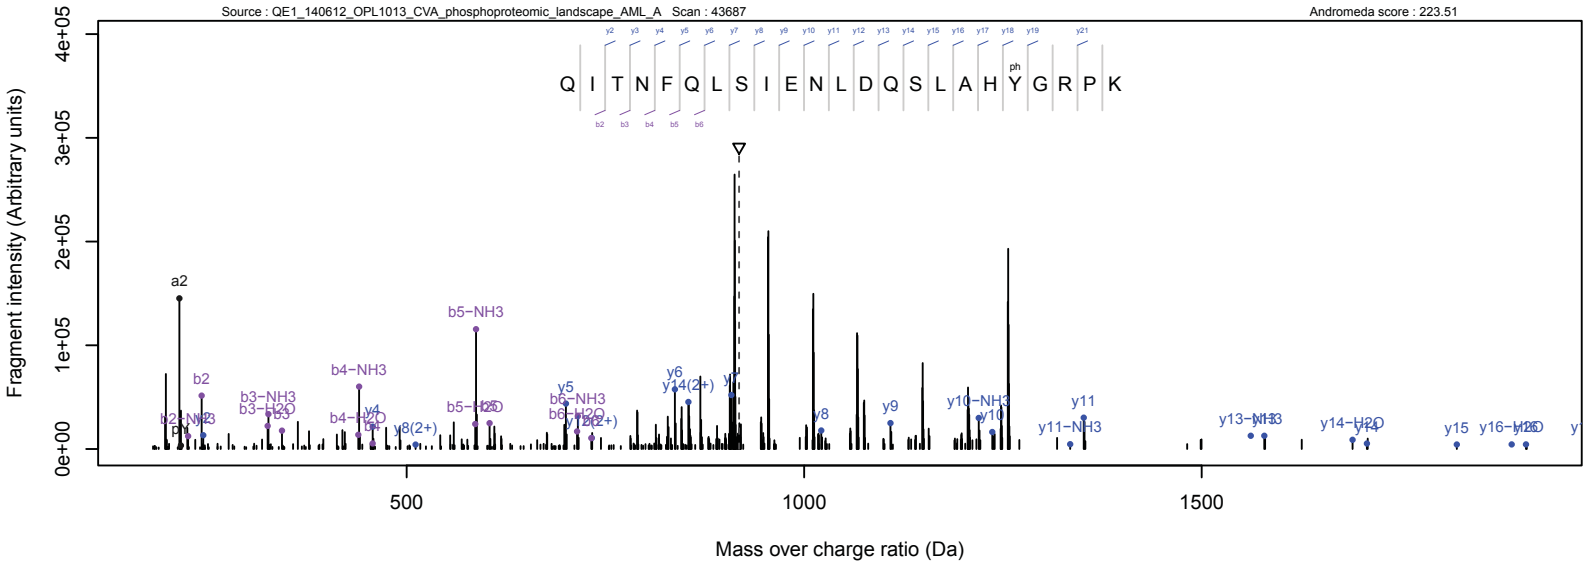

**TETSASPHCPVY(ph)VPDPTSTIKPGPNSHNSNTPGIR-4+**

Source : Qe1\_141024\_OPL1013\_CvA\_AML\_pTyrIP\_MOLM13 Scan : 23985

Andromeda score : 223.42

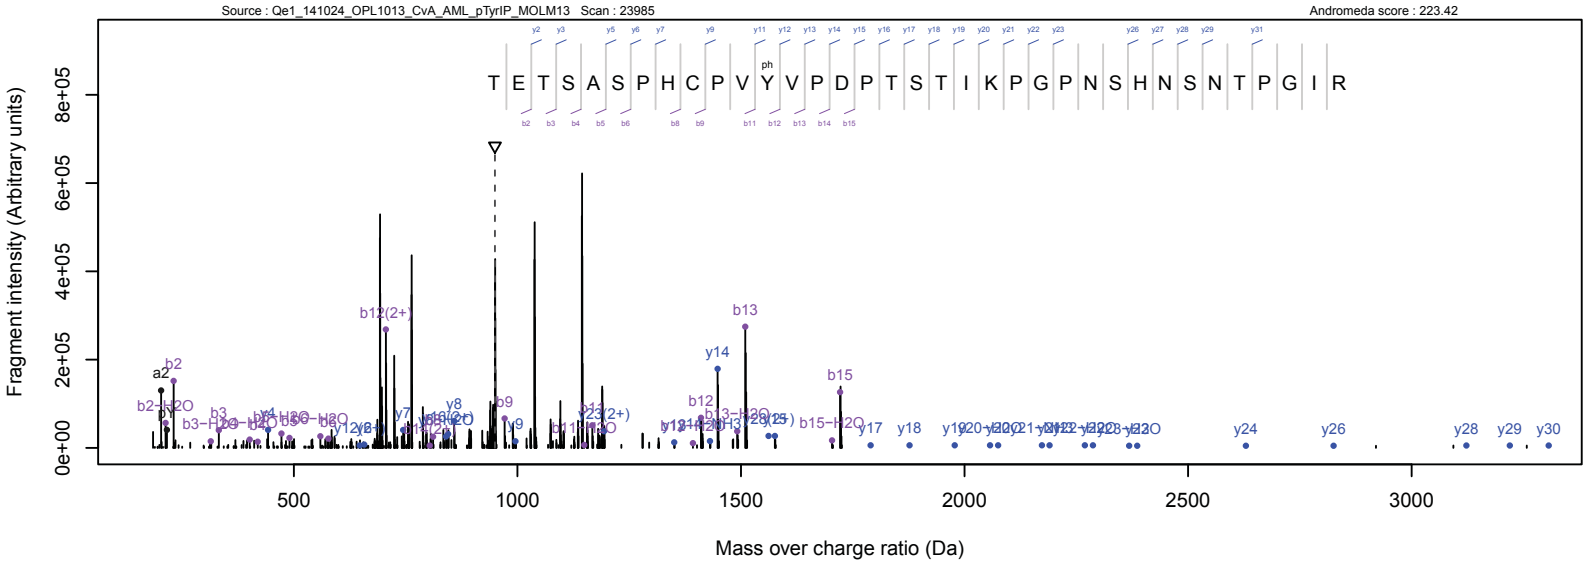

**RFTAQGLPDLNHSQVYA V K-3+**

Source : QE1\_140908\_OPL1013\_CvA\_pTyrIP\_AML\_Kasumi1 Scan : 26362

Andromeda score : 223.36

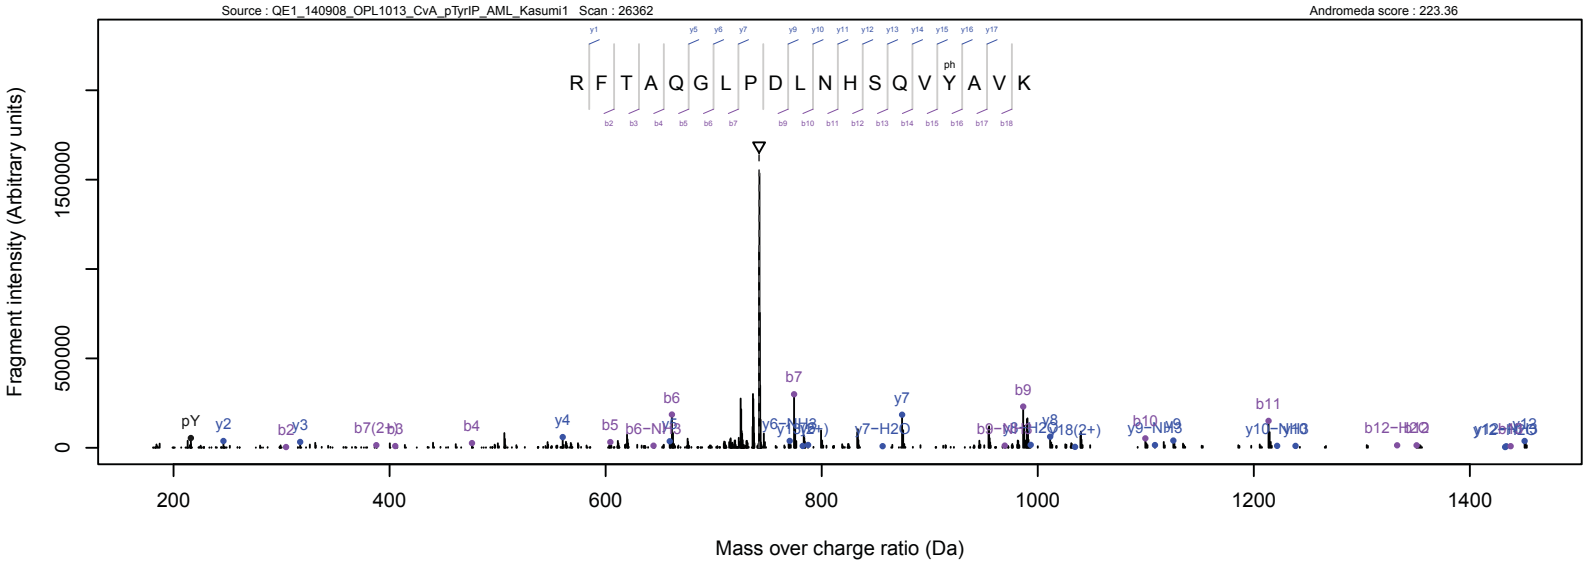

SQY(ph)EALKEDWR-2+

Source : QE1\_140612\_OPL1013\_CVA\_phosphoproteomic\_landscape\_AML\_B Scan : 17667

Andromeda score : 223.22

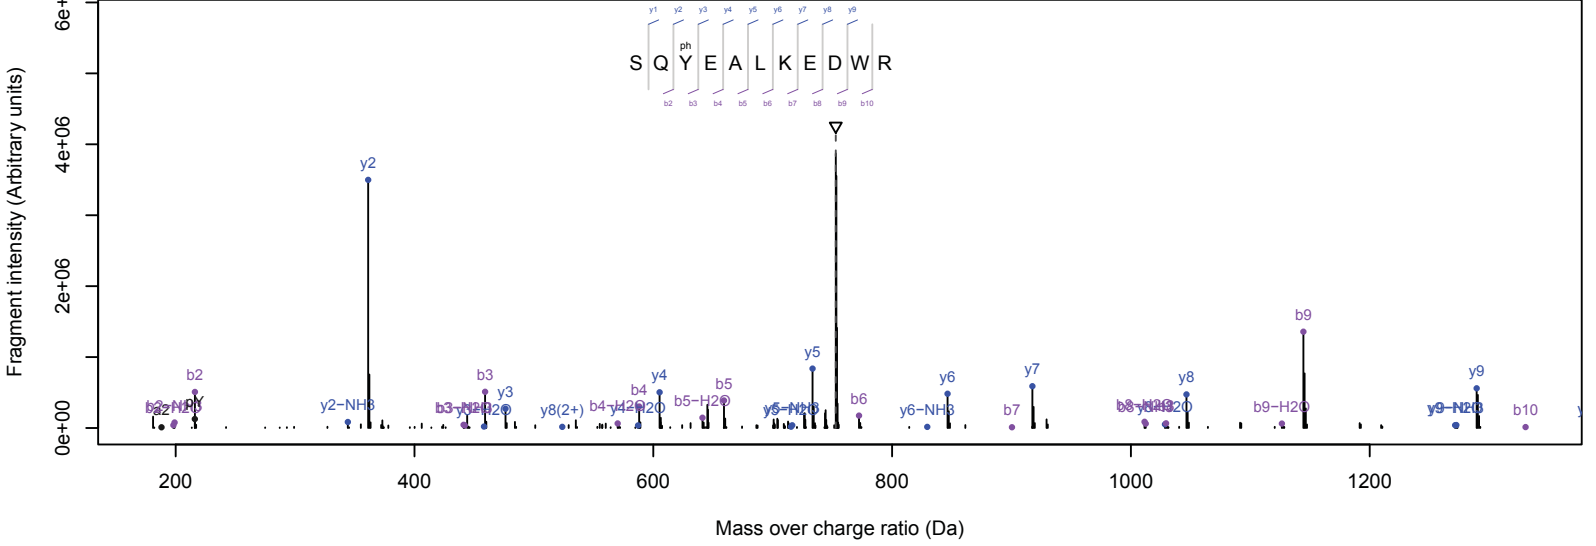

EY(ph)VKQTNLQGGALEQAISQKPQLEK-3+

Source : QE1\_140612\_OPL1013\_CVA\_phosphoproteomic\_landscape\_AML\_B Scan : 41031

Andromeda score : 223.15

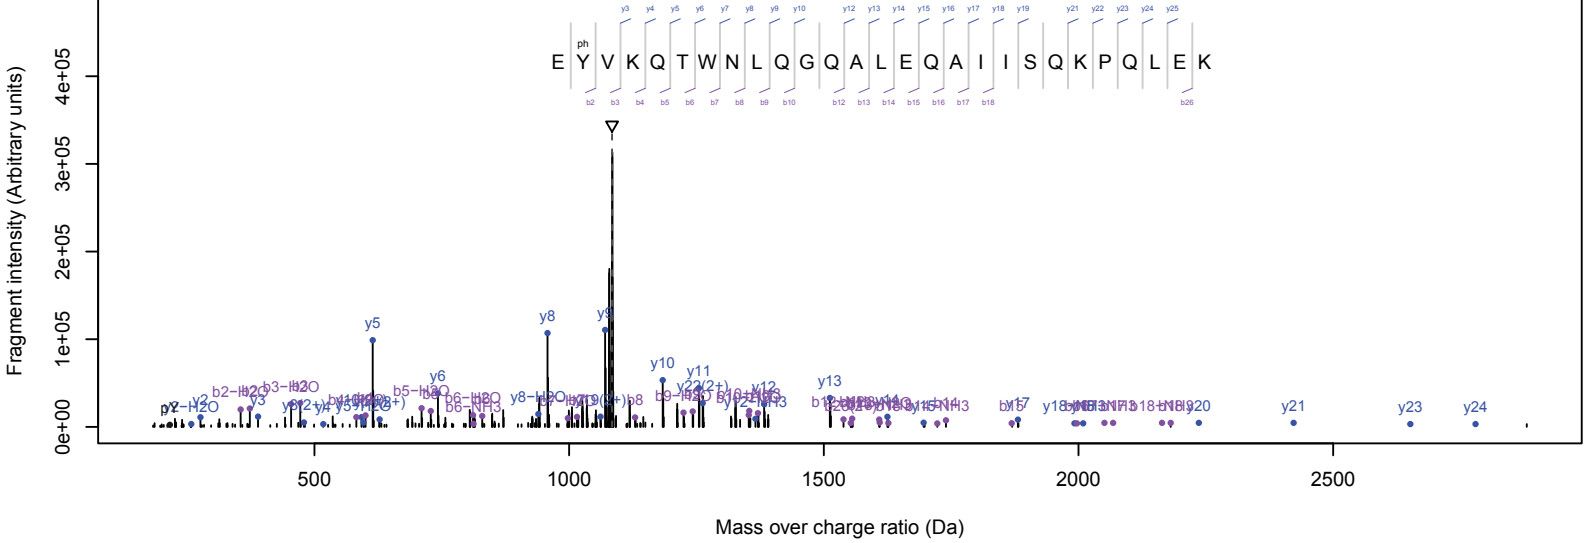

FETSKYY(ph)VTIIDAPGHR-2+

Source : QE1\_140612\_OPL1013\_CVA\_phosphoproteomic\_landscape\_AML\_B Scan : 28237

Andromeda score : 223.06

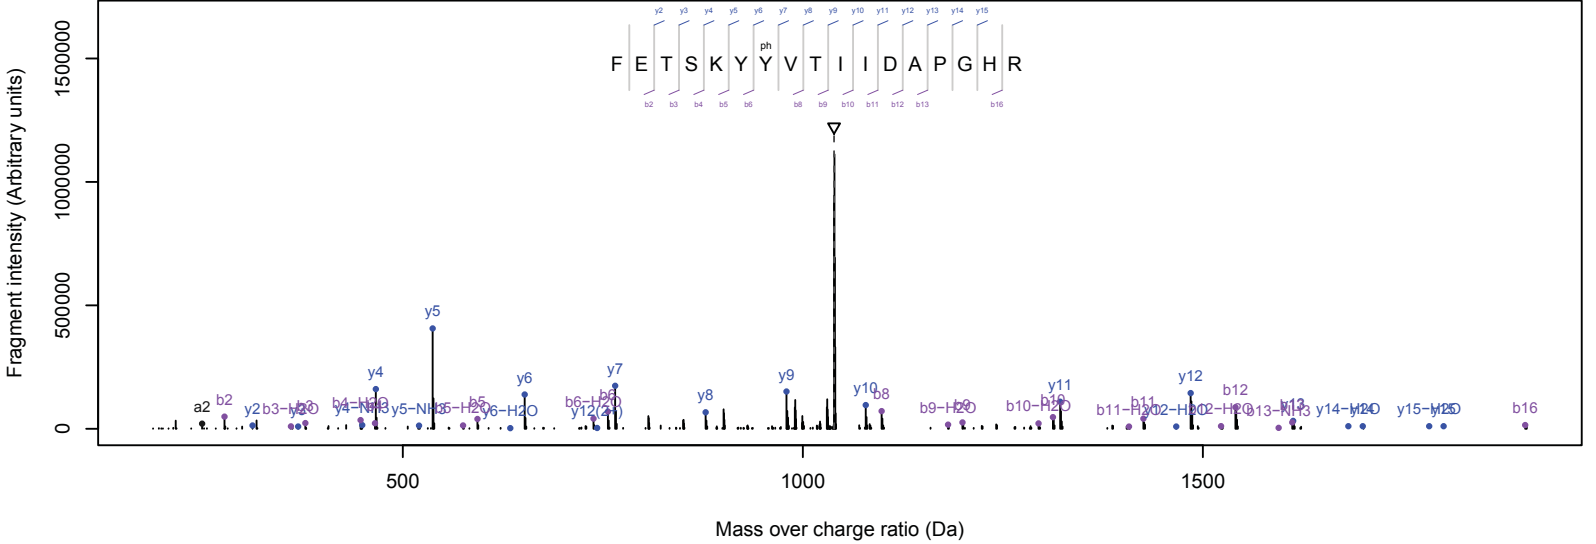

ISKFY(ph)PIPSLHSTGS-2+

Source: QE1\_140612\_OPL1013\_CVA\_phosphoproteomic\_landscape\_AML\_C Scan: 30475

Andromeda score: 222.75

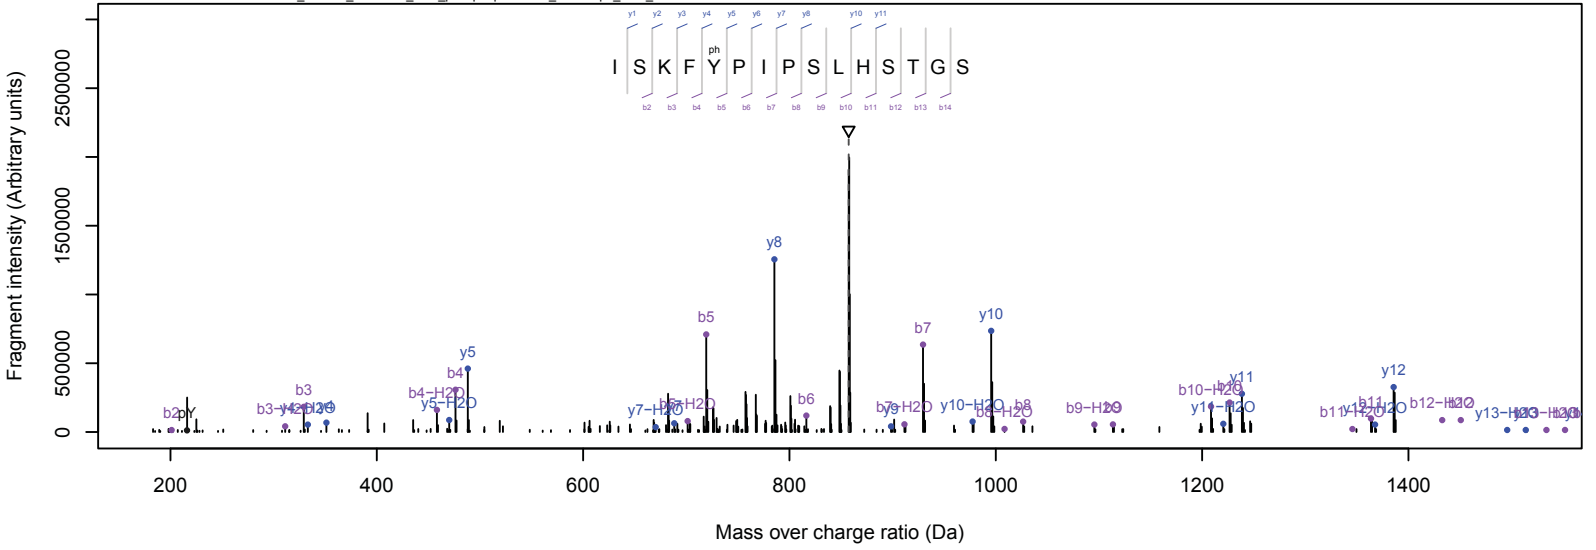

LPPQHHIY(ph)AYPQQMHTPPVQSSSACMFSEQEMYGPPALR-4+

Source: QE1\_140612\_OPL1013\_CVA\_phosphoproteomic\_landscape\_AML\_B Scan: 40064

Andromeda score: 222.34

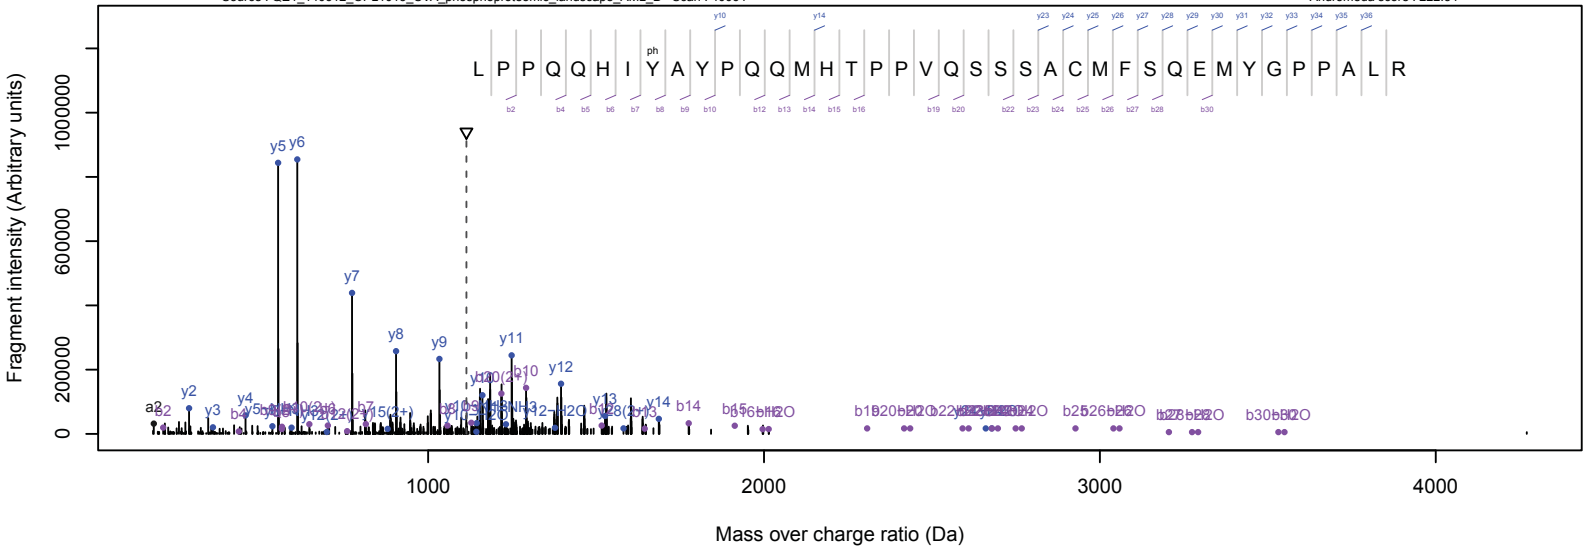

SLENQLY(ph)TCTQK-2+

Source: QE1\_140612\_OPL1013\_CVA\_phosphoproteomic\_landscape\_AML\_D Scan: 16975

Andromeda score: 222.25

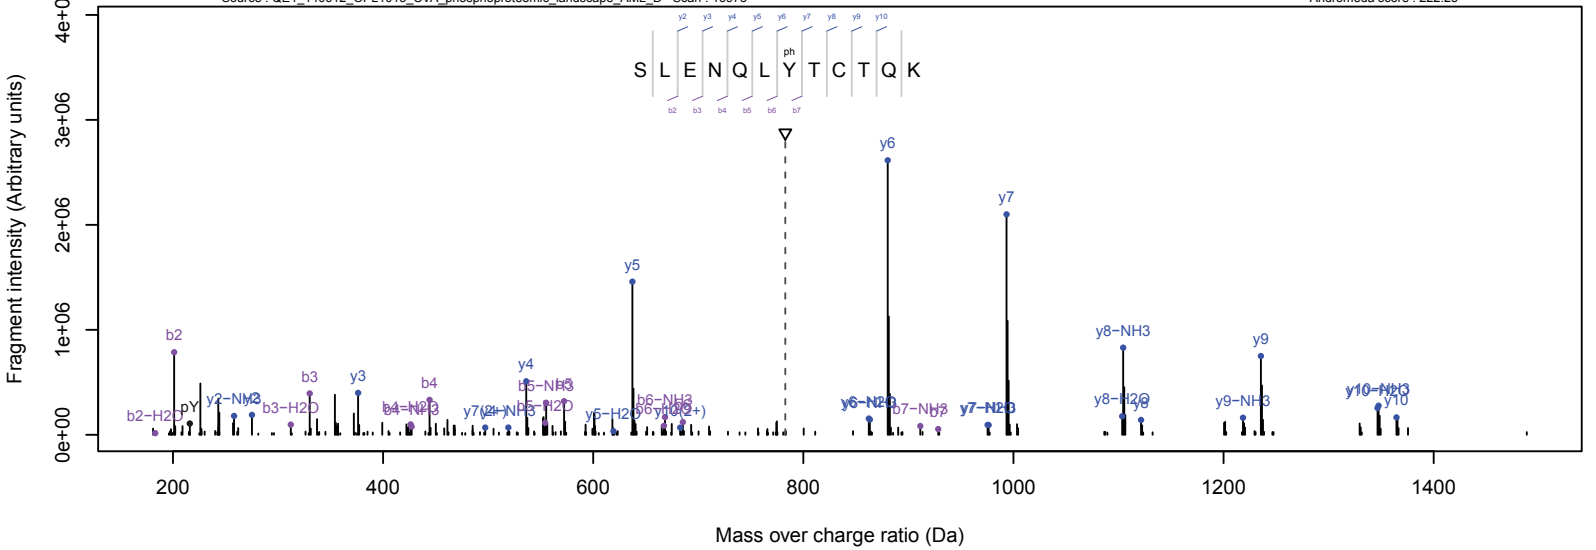

TIY(ph)VRDPTS<sup>2+</sup>

Source: QE1\_140612\_OPL1013\_CVA\_phosphoproteomic\_landscape\_AML\_C Scan: 10585

Andromeda score: 222.2

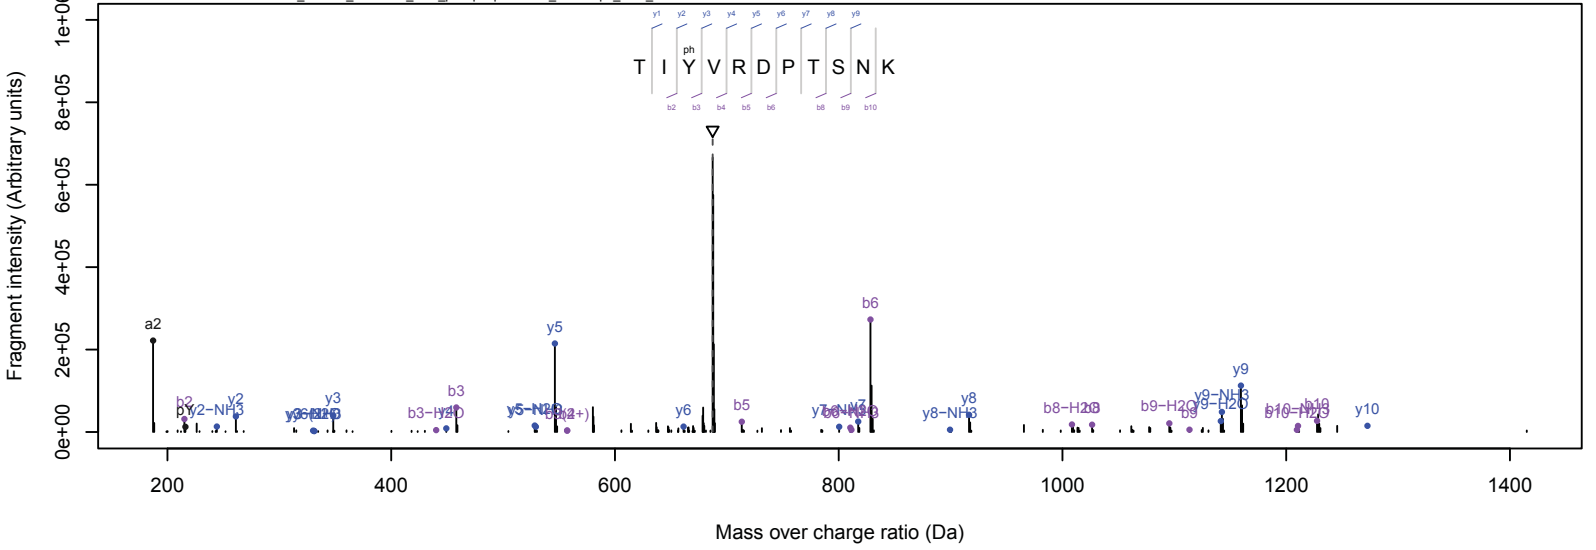

ETHADLWPAKQY(ph)PLVTPNEER-3+

Source: QE1\_140612\_OPL1013\_CVA\_phosphoproteomic\_landscape\_AML\_B Scan: 29120

Andromeda score: 222.06

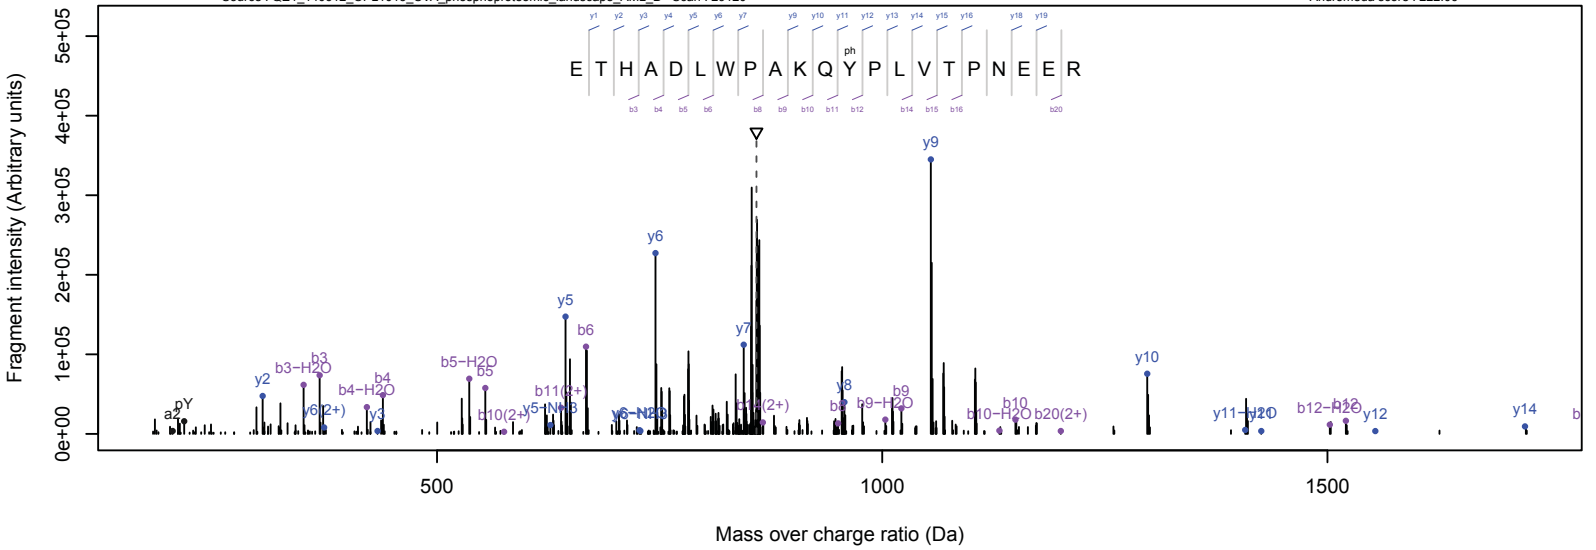

VFLHFEETITFAPTYRFER-3+

Source: QE1\_140612\_OPL1013\_CVA\_phosphoproteomic\_landscape\_AML\_C Scan: 44300

Andromeda score: 221.91

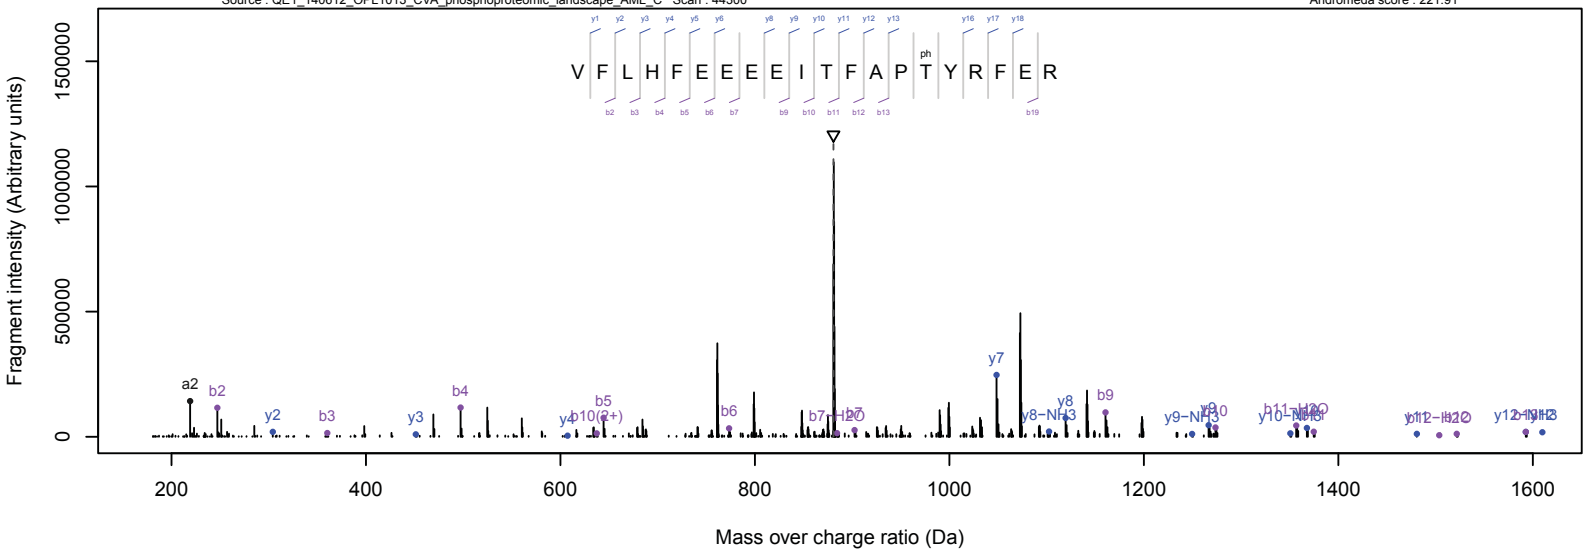



M(ox)QQNGYENPTYKFFEQMQN-2+

Source: QE1\_140908\_OPL1013\_CvA\_pTyrIP\_AML\_Kasumi6 Scan: 43126

Andromeda score: 221.79

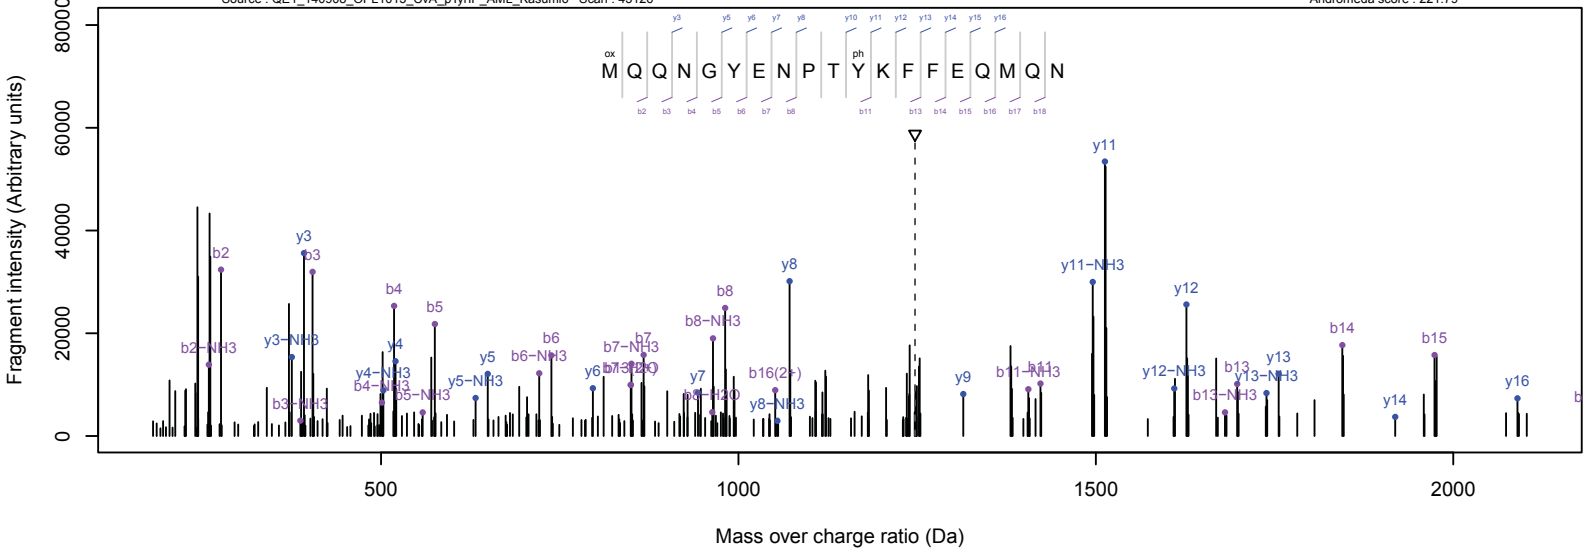

PY(ph)QYPALTPQK-2+

Source: QE1\_140822\_OPL1013\_CvA\_pTyrIP\_AML\_cell\_lines\_part2\_E Scan: 14578

Andromeda score: 221.09

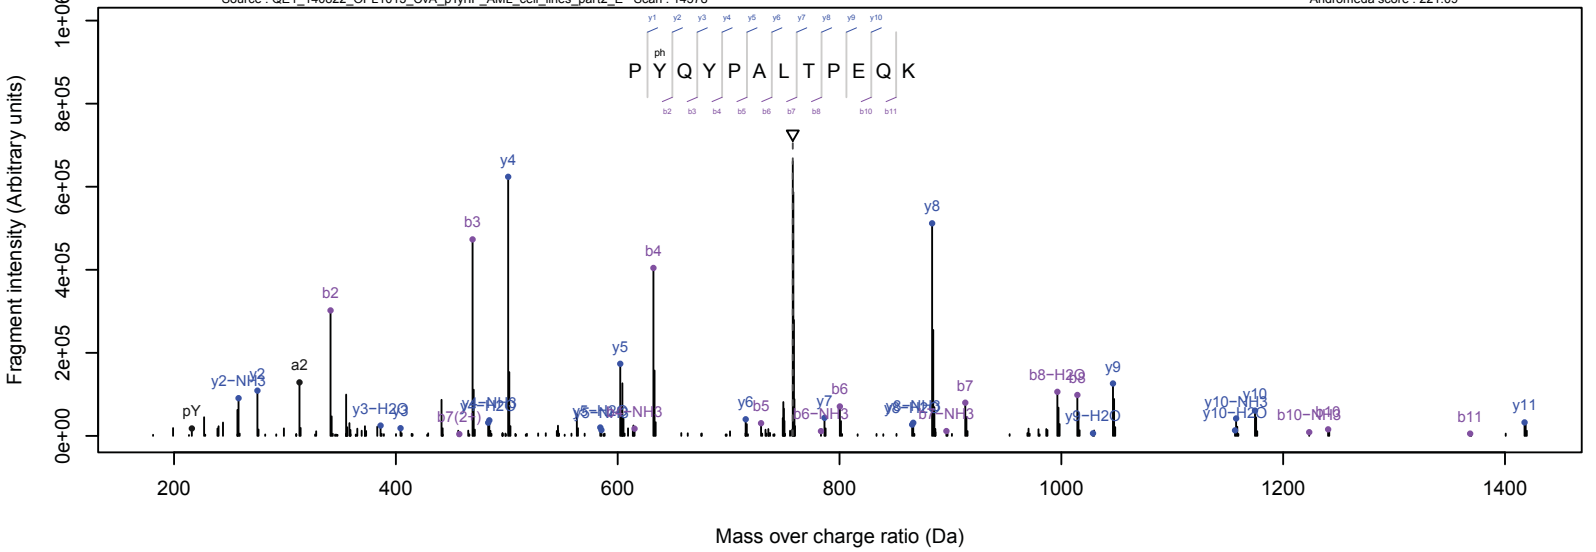

QAIELSPDNQYVK-2+

Source: QE1\_140822\_OPL1013\_CvA\_pTyrIP\_AML\_cell\_lines\_part2\_E Scan: 15710

Andromeda score: 221.09

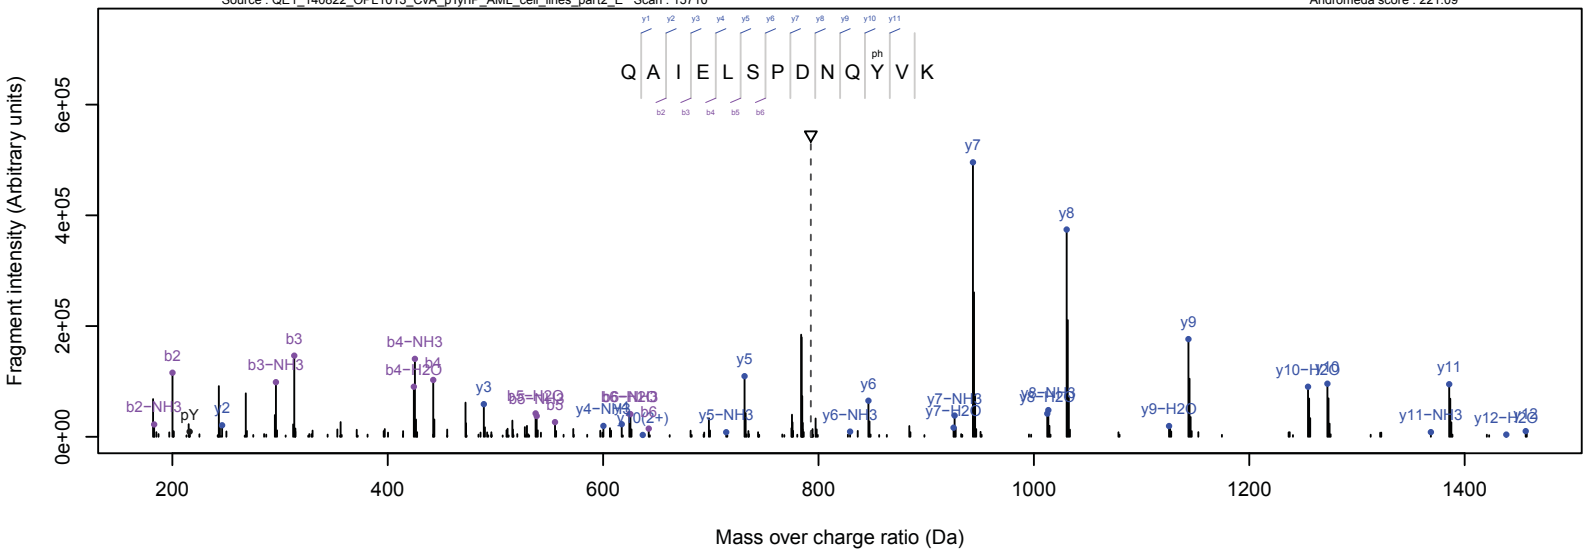

**GHGQPGADAEKPFY(ph)VNVEFHER-4+**

Source : QE1\_140908\_OPL1013\_CvA\_pTyrIP\_AML\_Kasumi6 Scan : 23450

Andromeda score : 221.04

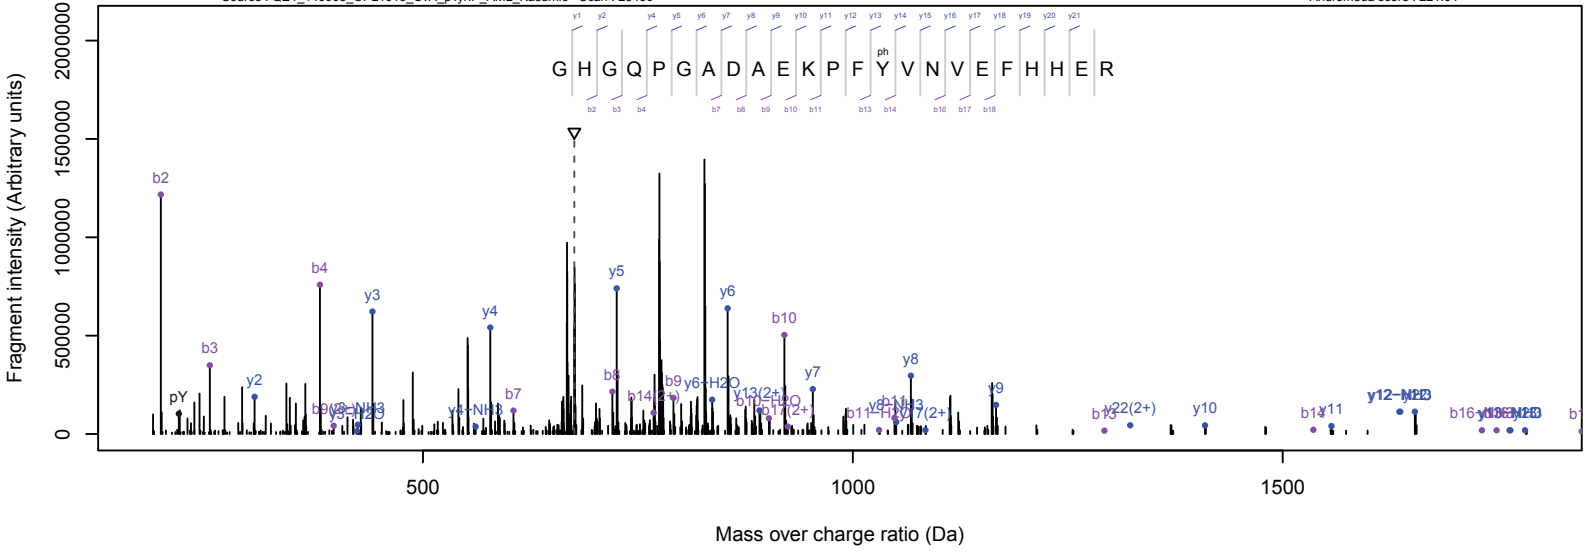

**LTSDDVKEIQY(ph)K-2+**

Source : QE1\_140612\_OPL1013\_CVA\_phosphoproteomic\_landscape\_AML\_C Scan : 14273

Andromeda score : 220.66

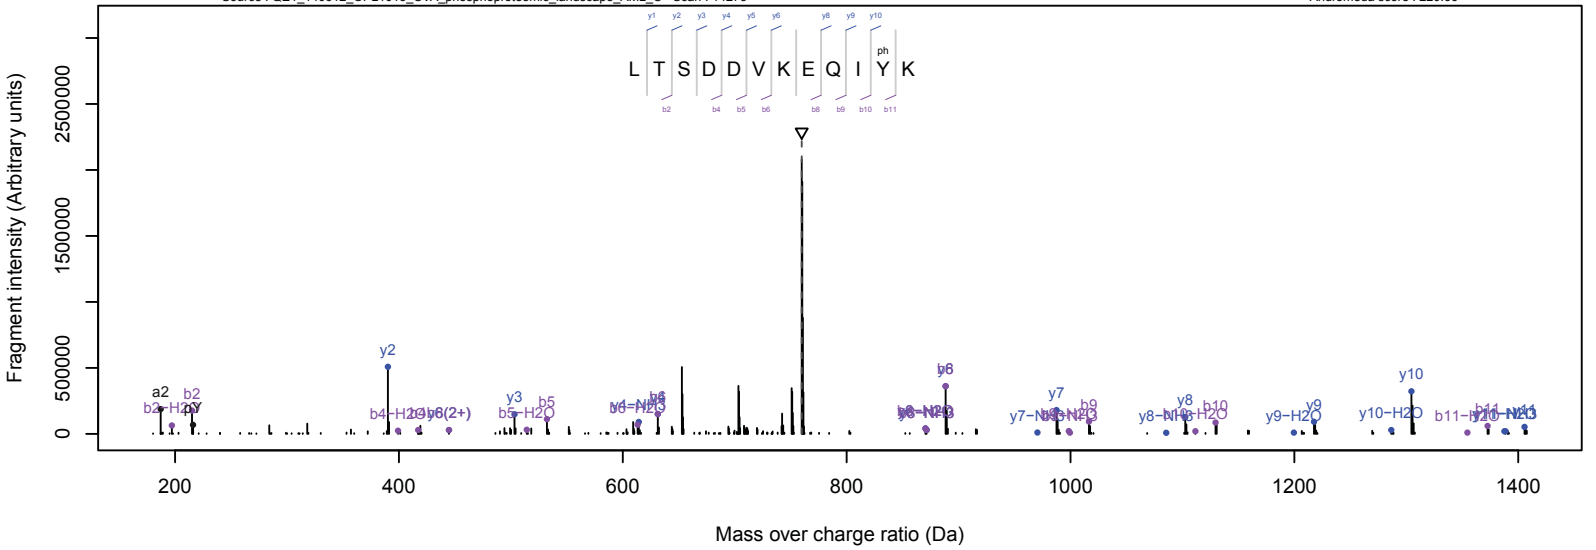

QEDHAEALYK<sup>ph</sup>NLLHSK-3+

Source : QE1\_140908\_OPL1013\_CvA\_pTyrIP\_AML\_Kasumi1 Scan : 18894

Andromeda score : 220.64

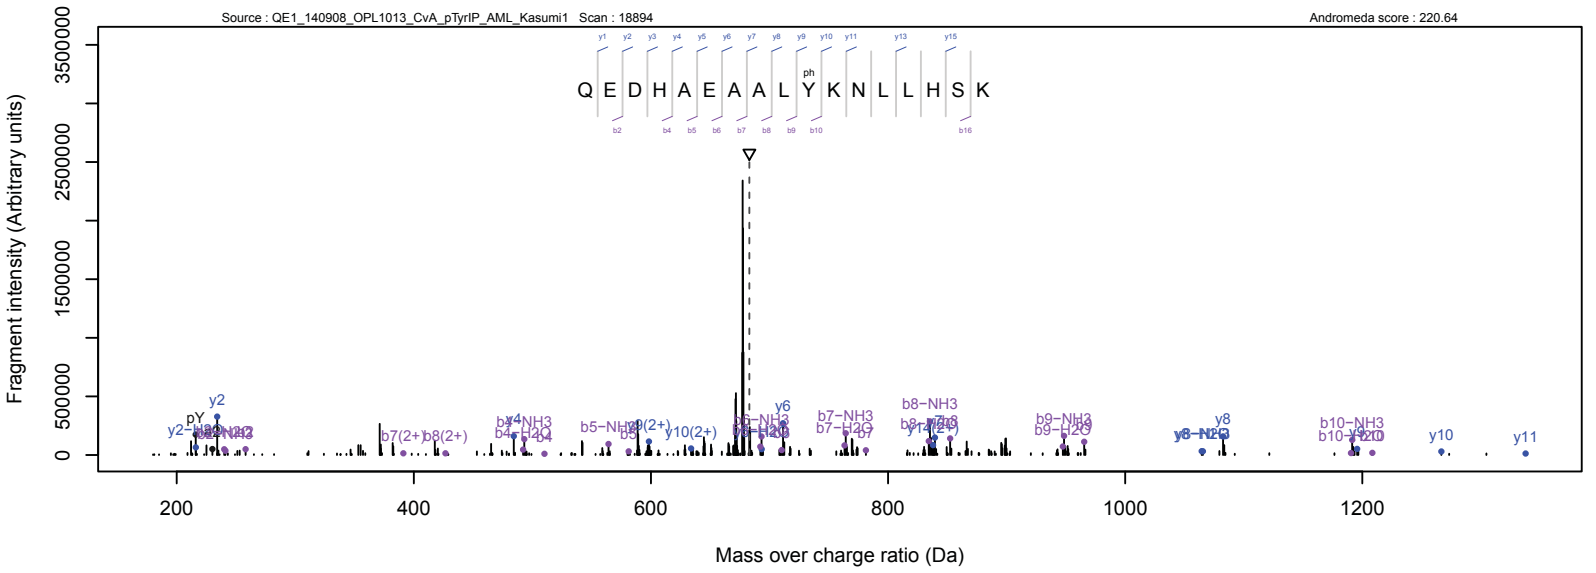

LIY<sup>ph</sup>DFIEDQGGLEAVR-2+

Source : QE1\_140908\_OPL1013\_CvA\_pTyrIP\_AML\_Kasumi1 Scan : 44769

Andromeda score : 220.6

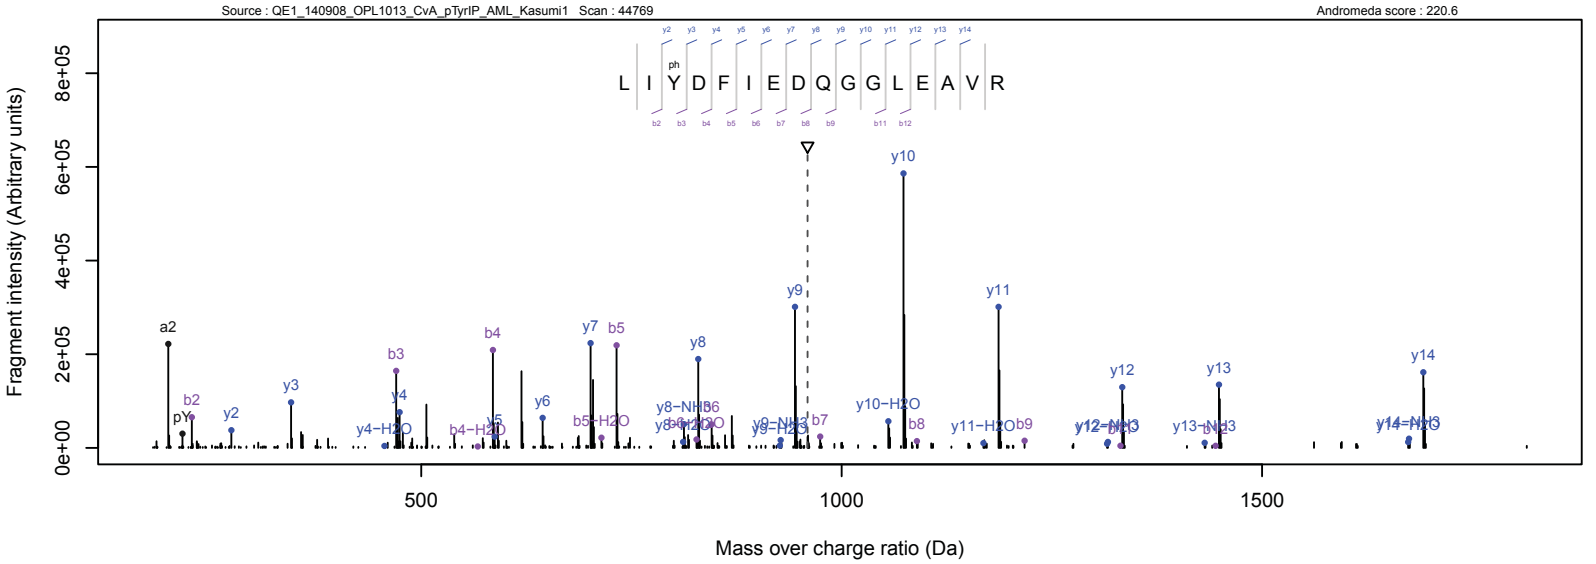

WDTGENPIY<sup>ph</sup>KSAVTTVVNPK-3+

Source : QE1\_140612\_OPL1013\_CVA\_phosphoproteomic\_landscape\_AML\_C Scan : 31951

Andromeda score : 220.36

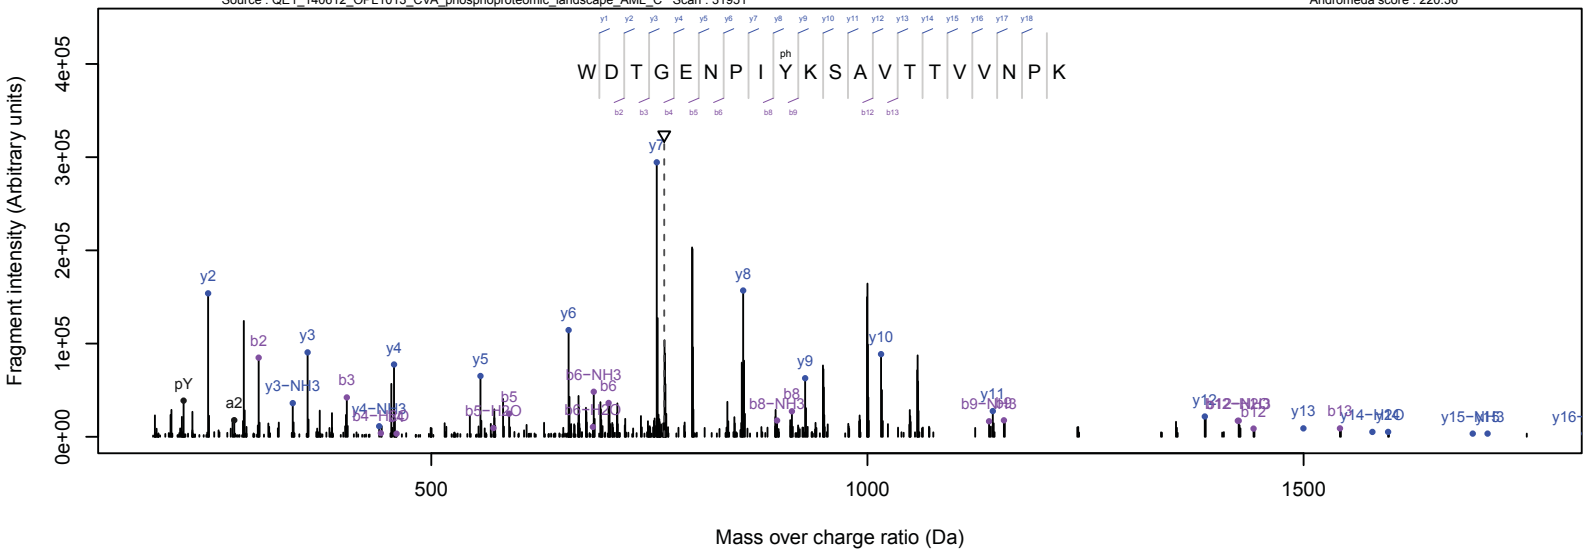

VY(ph)ENGLM(ox)QQK-2+

Source : QE1\_140822\_OPL1013\_CvA\_pTyrIP\_AML\_cell\_lines\_part2\_B Scan : 10002

Andromeda score : 219.92

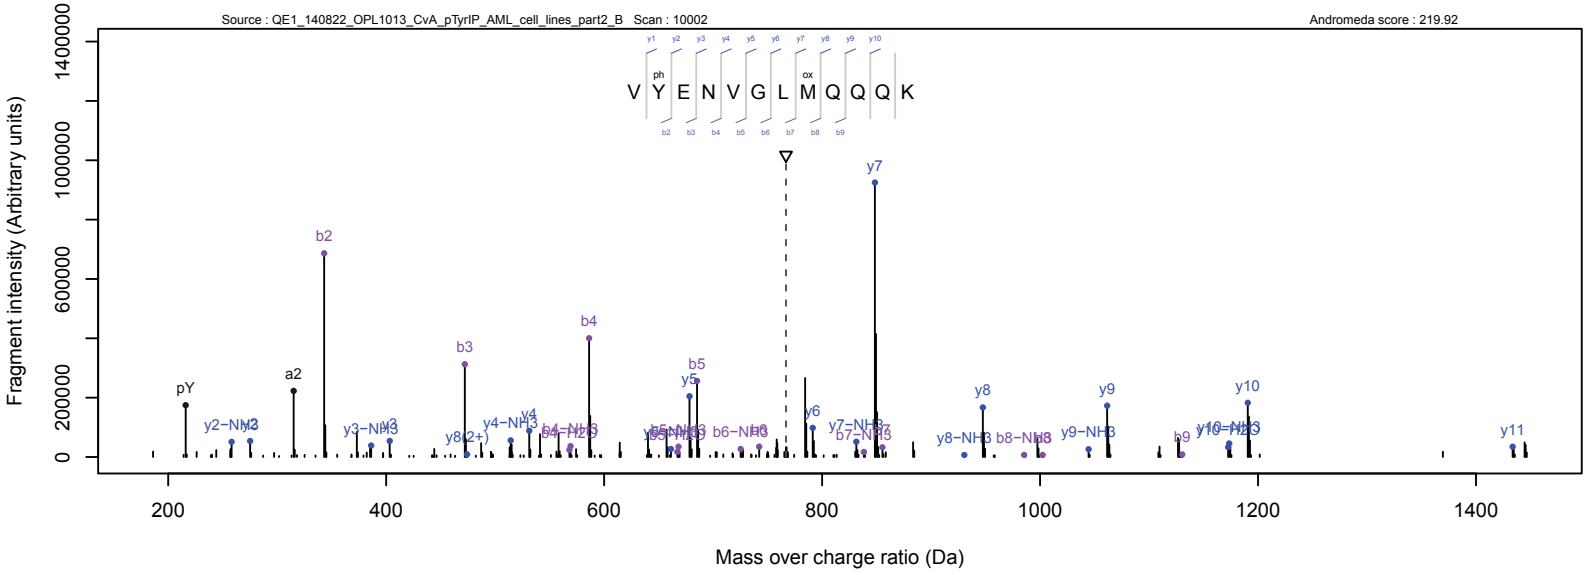

NVALLSQLY(ph)HSPAR-2+

Source : QE1\_140612\_OPL1013\_CVA\_phosphoproteomic\_landscape\_AML\_C Scan : 32070

Andromeda score : 219.52

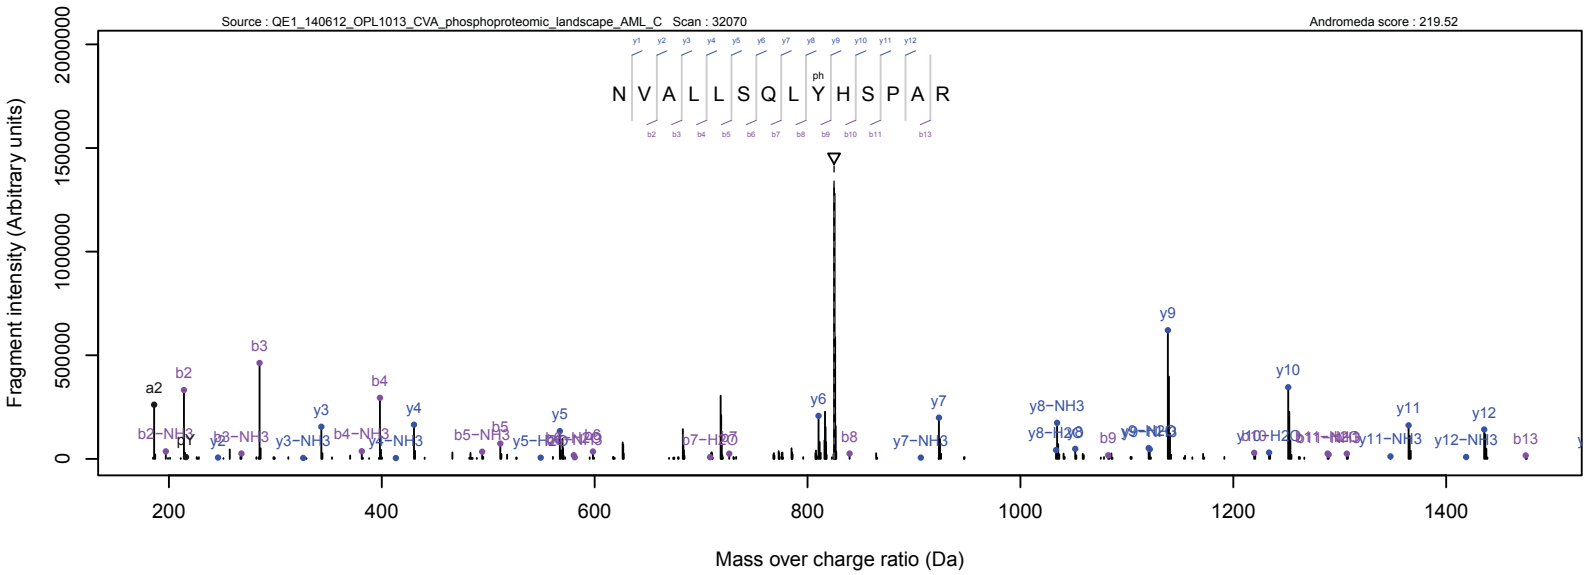

TNNPQFDEVF(ph)FEVTRPCSYSK-3+

Source : QE1\_140612\_OPL1013\_CVA\_phosphoproteomic\_landscape\_AML\_C Scan : 43533

Andromeda score : 219.35

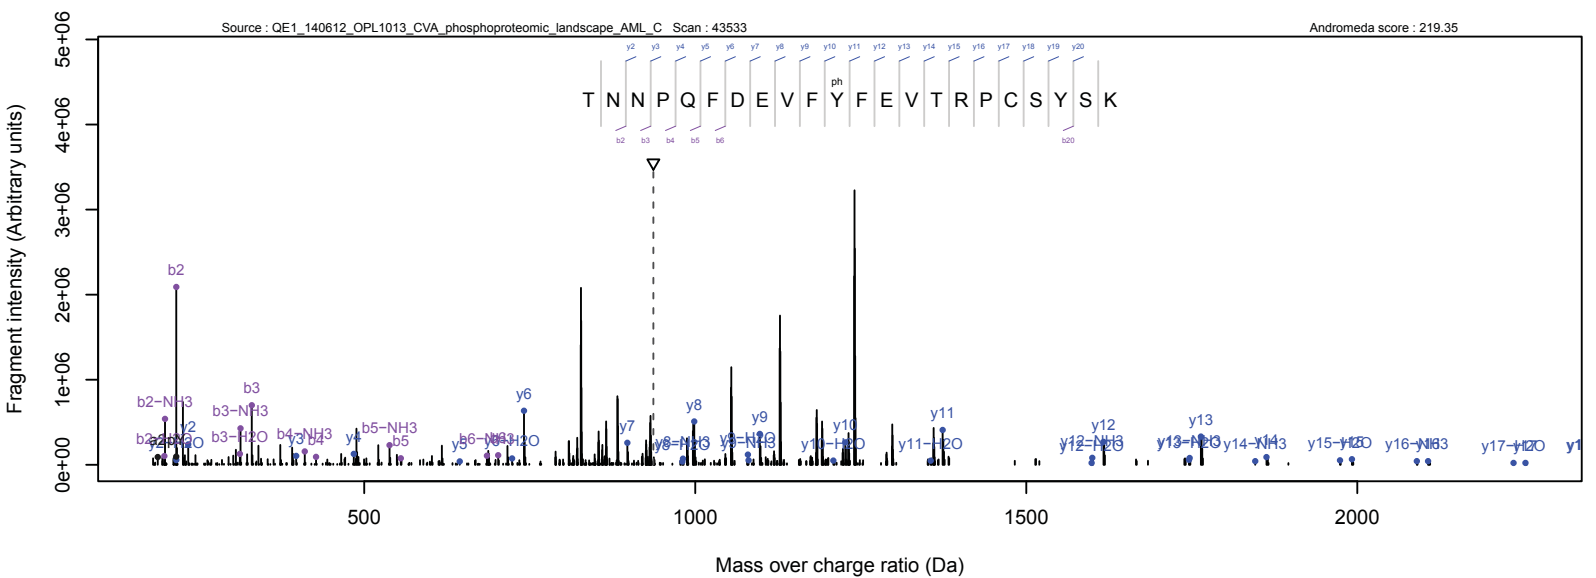

SVKEY(ph)VDPNNIFGNR-2+

Source : QE1\_140612\_OPL1013\_CVA\_phosphoproteomic\_landscape\_AML\_D Scan : 29973

Andromeda score : 218.78

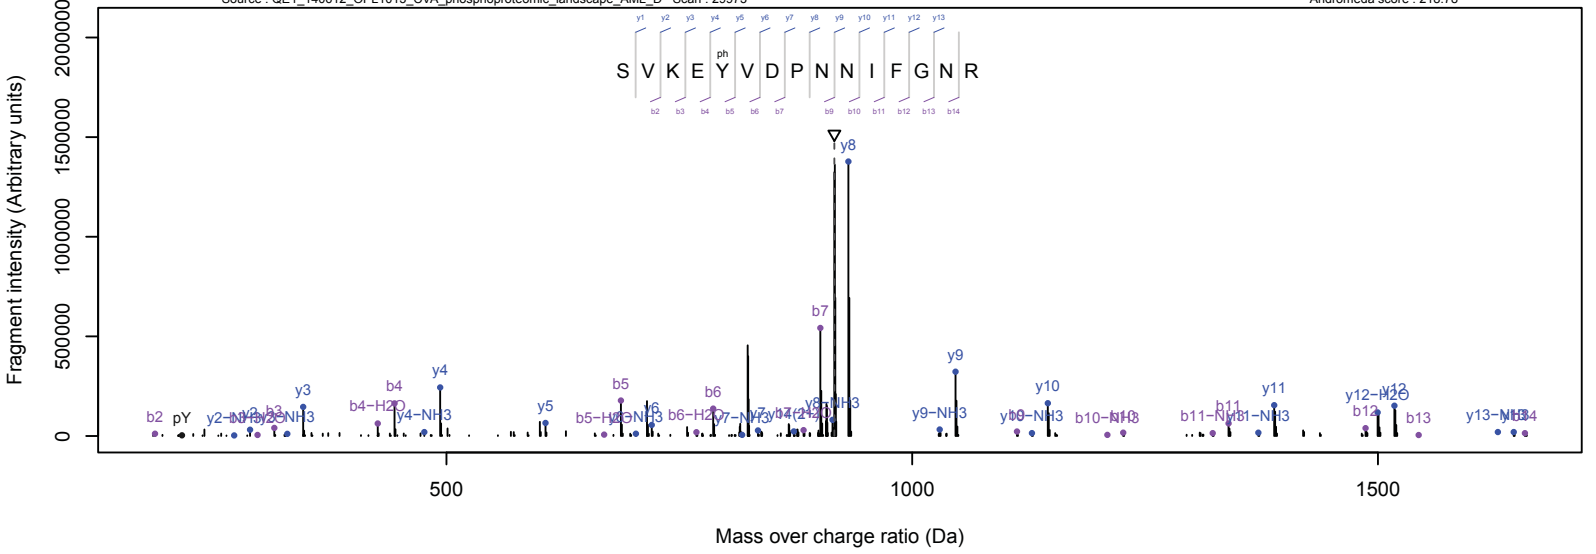

NLHDALSGHTSNNI(ph)EAVK-3+

Source : QE1\_140908\_OPL1013\_CvA\_pTyrIP\_AML\_Kasumi1 Scan : 22235

Andromeda score : 218.42

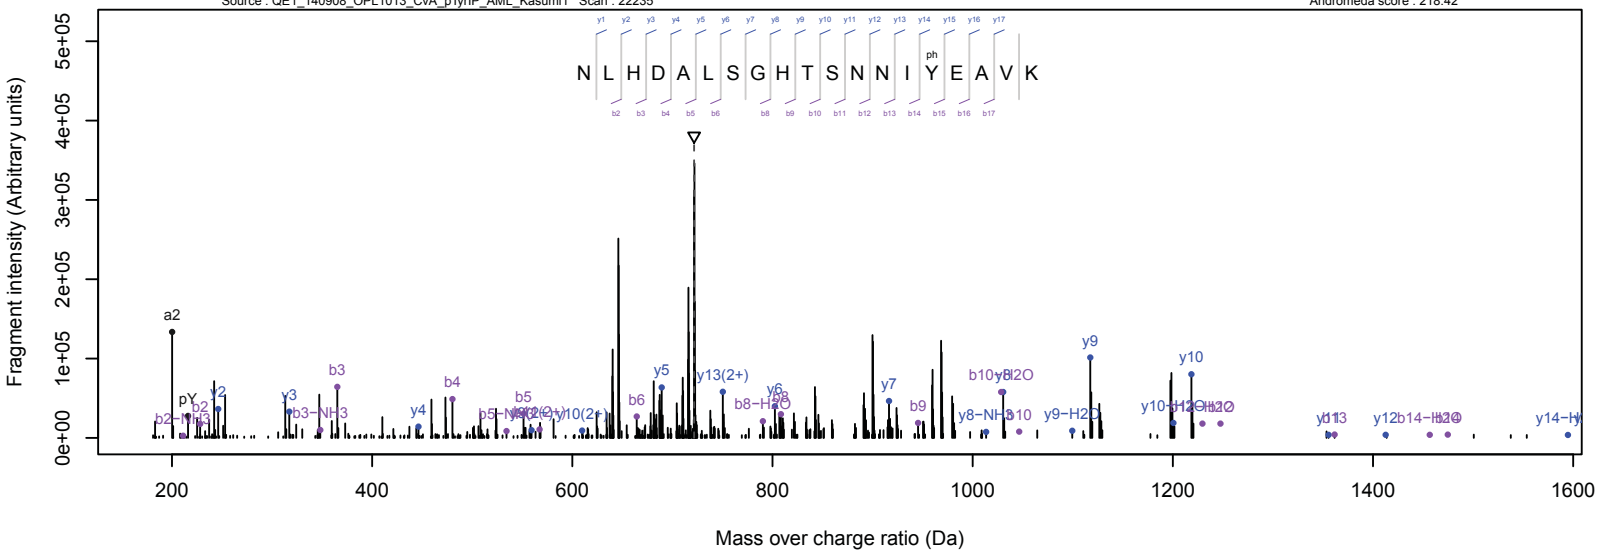

SQERPGNFYVSSESISIR-2+

Source : QE1\_140612\_OPL1013\_CVA\_phosphoproteomic\_landscape\_AML\_C Scan : 20585

Andromeda score : 218.36

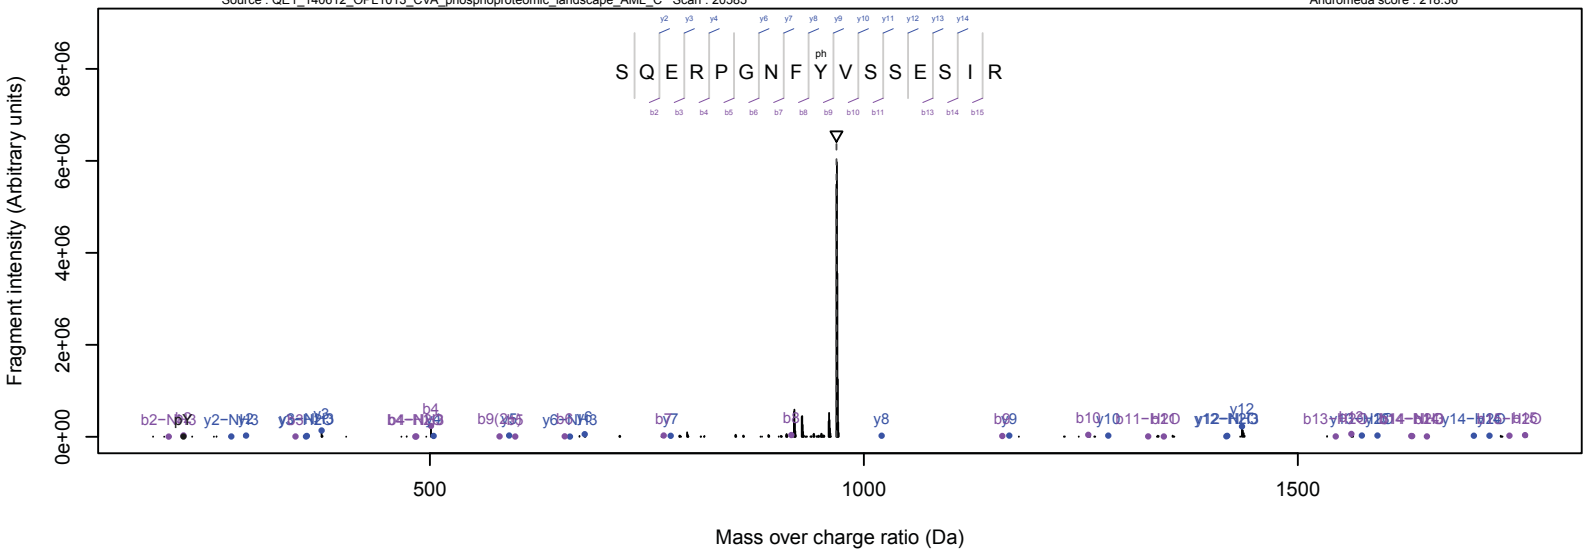

**EELY(ph)SKVTPR-2+**

Source: QE1\_140612\_OPL1013\_CVA\_phosphoproteomic\_landscape\_AML\_C Scan: 9671

Andromeda score: 218.11

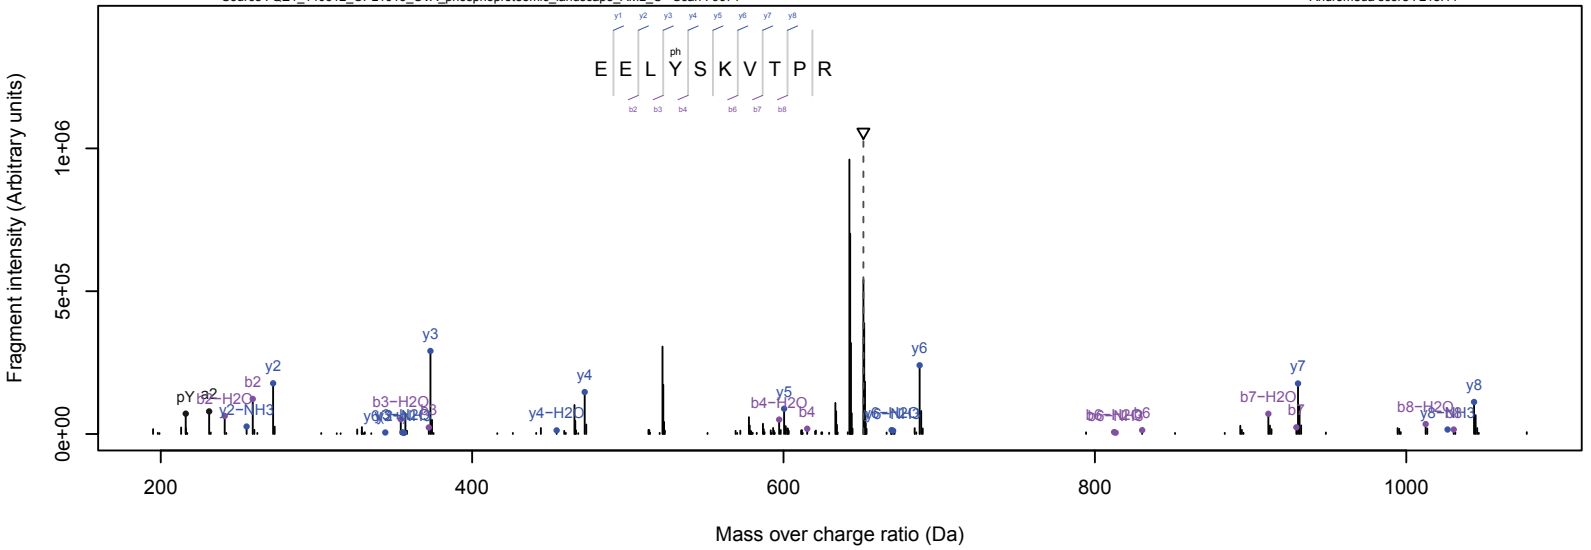

**LKEESRDEESPY(ph)ATSLYHS-3+**

Source: QE1\_140612\_OPL1013\_CVA\_phosphoproteomic\_landscape\_AML\_C Scan: 13865

Andromeda score: 217.97

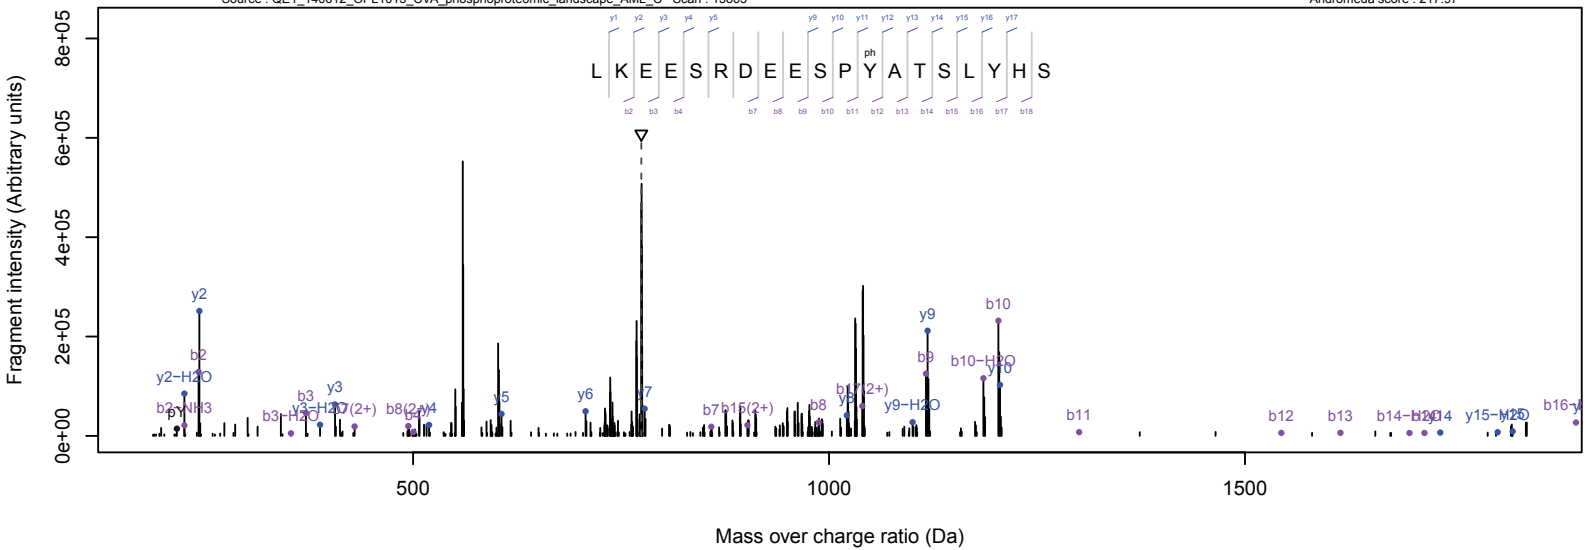

**EIQISPSKPHASLPPLPPLY(ph)DQPPSSPYSPDKR-4+**

Source: QE1\_140908\_OPL1013\_CvA\_pTyrIP\_AML\_HEL Scan: 37786

Andromeda score: 217.93

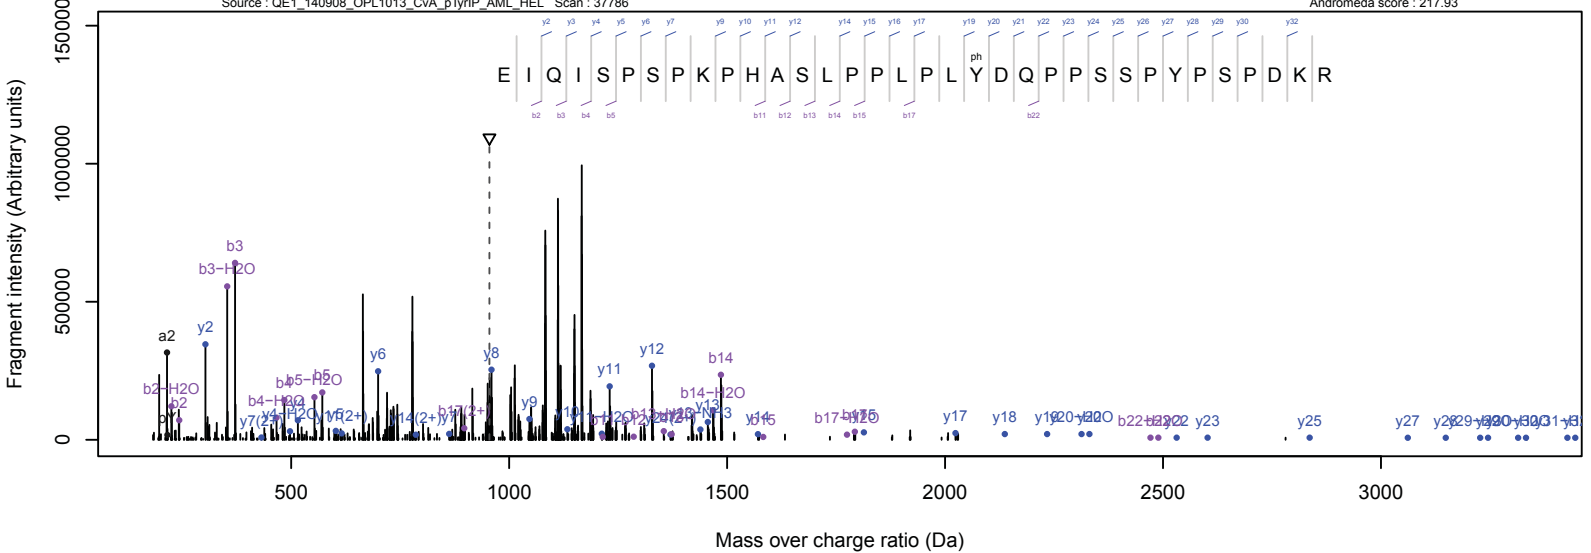

(ac)SETAPAETATPAPVEK(ph)PAK-2+

Source : QE1\_140908\_OPL1013\_CVA\_pTyrIP\_AML\_ML2 Scan : 16927

Andromeda score : 217.89

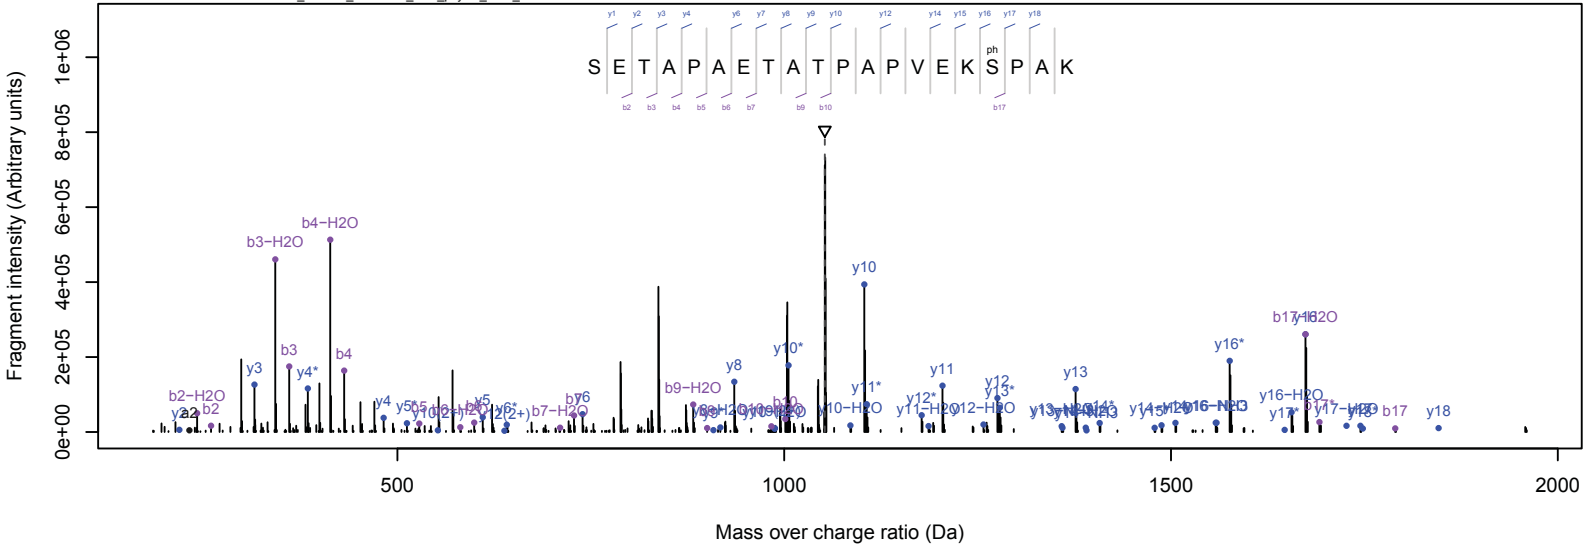

Y(ph)HTINGHNAEVRK-3+

Source : QE1\_140612\_OPL1013\_CVA\_phosphoproteomic\_landscape\_AML\_C Scan : 3596

Andromeda score : 217.68

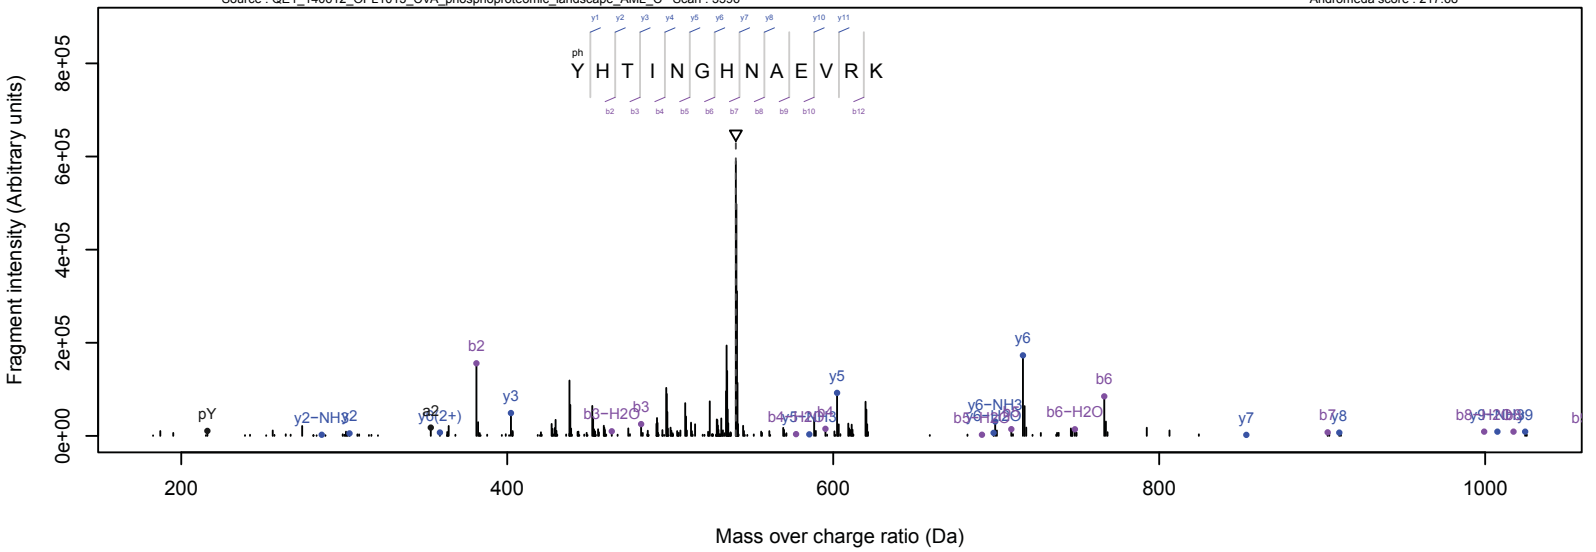

VEAMKQY(ph)QEEIQELNEVAR-3+

Source : QE1\_140612\_OPL1013\_CVA\_phosphoproteomic\_landscape\_AML\_B Scan : 30617

Andromeda score : 217.26

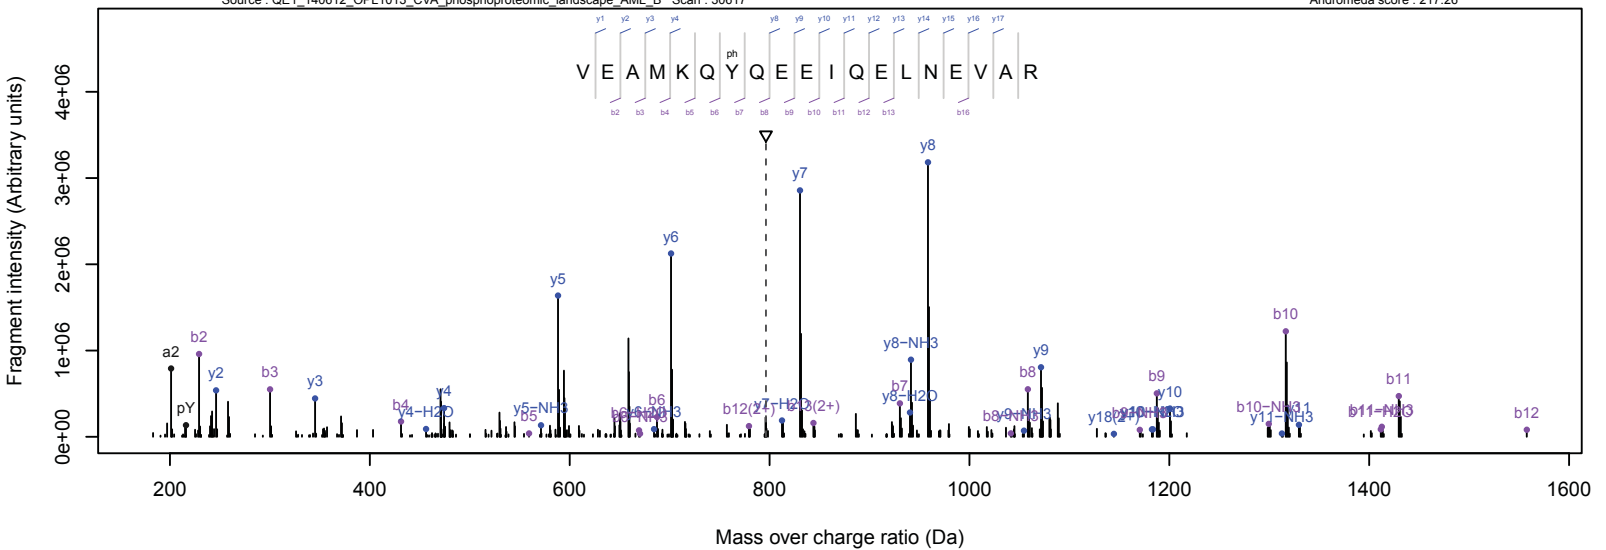

EDPAYLHY(ph)YDPAGAEDPLGAIHLR-3+

Source : QE1\_140612\_OPL1013\_CVA\_phosphoproteomic\_landscape\_AML\_C Scan : 43838

Andromeda score : 216.75

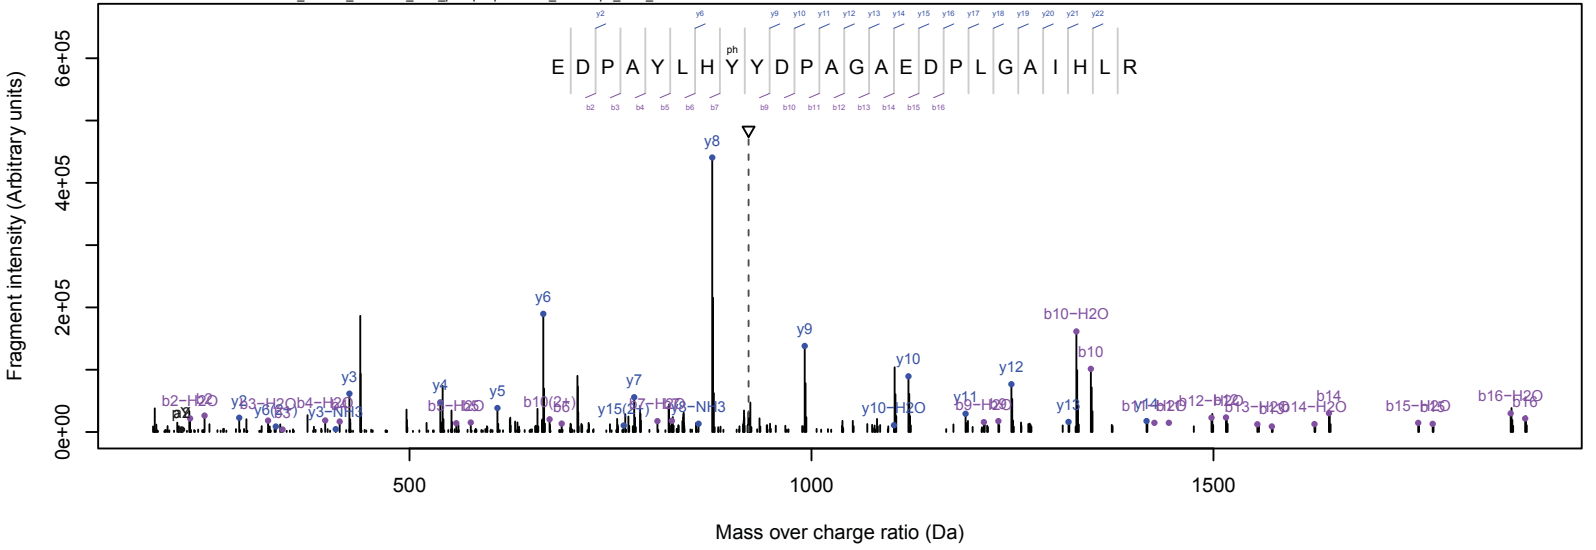

EQLLFSGQSLVPDHLCEEGAPNPY(ph)LK-3+

Source : QE1\_140908\_OPL1013\_CvA\_pTyrIP\_AML\_ML2 Scan : 45946

Andromeda score : 216.48

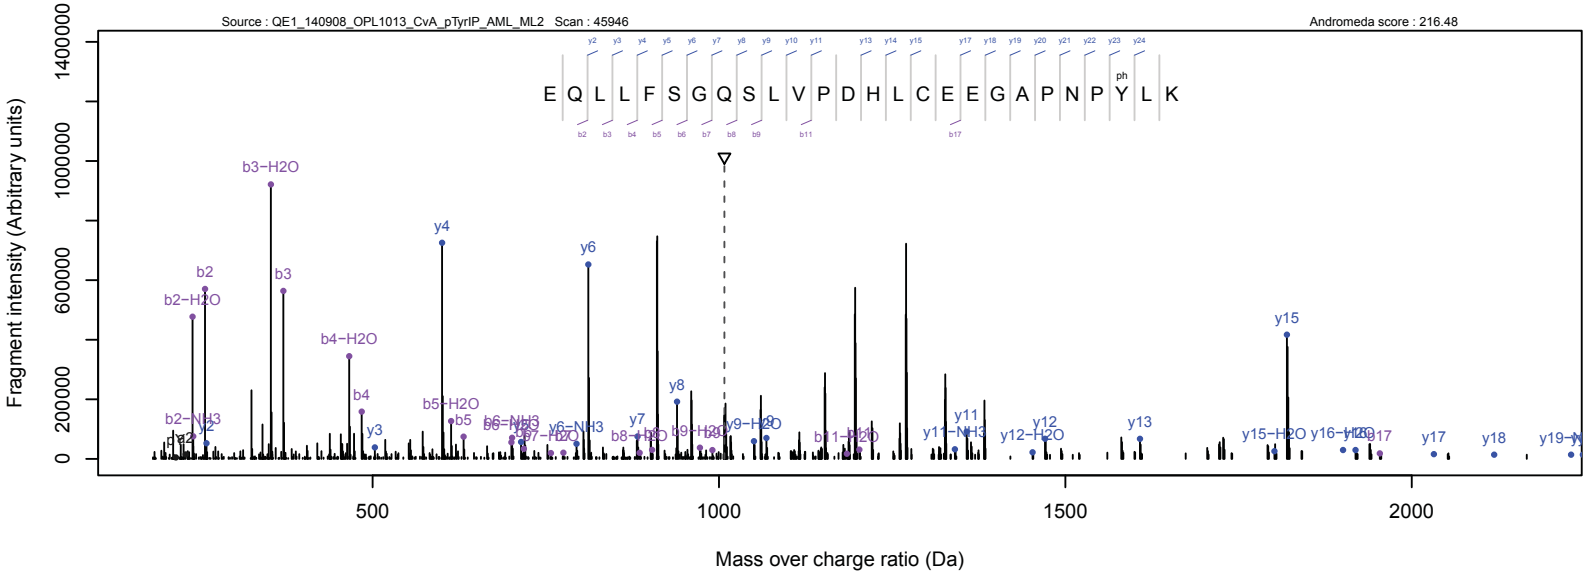

HNY(ph)YFINYR-2+

Source : QE1\_140612\_OPL1013\_CVA\_phosphoproteomic\_landscape\_AML\_D Scan : 25240

Andromeda score : 215.88

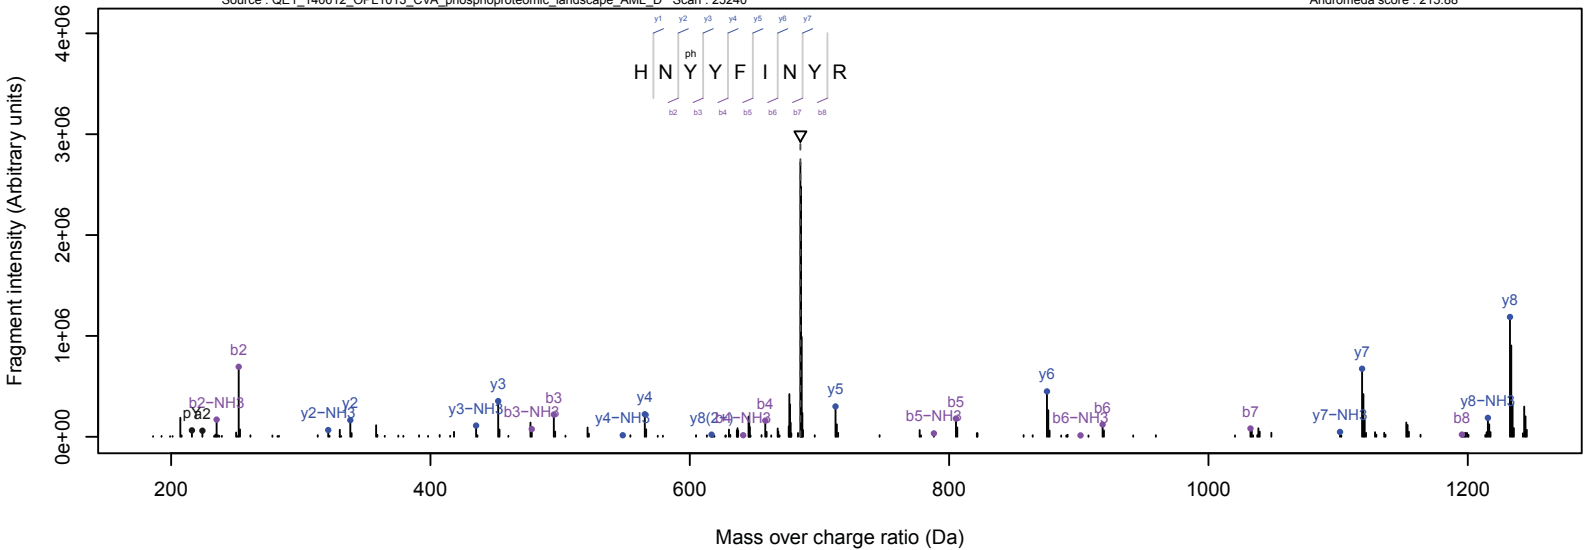



HLSPY(ph)ATLTVGDSSHK-2+

Source : QE1\_140612\_OPL1013\_CVA\_phosphoproteomic\_landscape\_AML\_B Scan : 17436

Andromeda score : 215.48

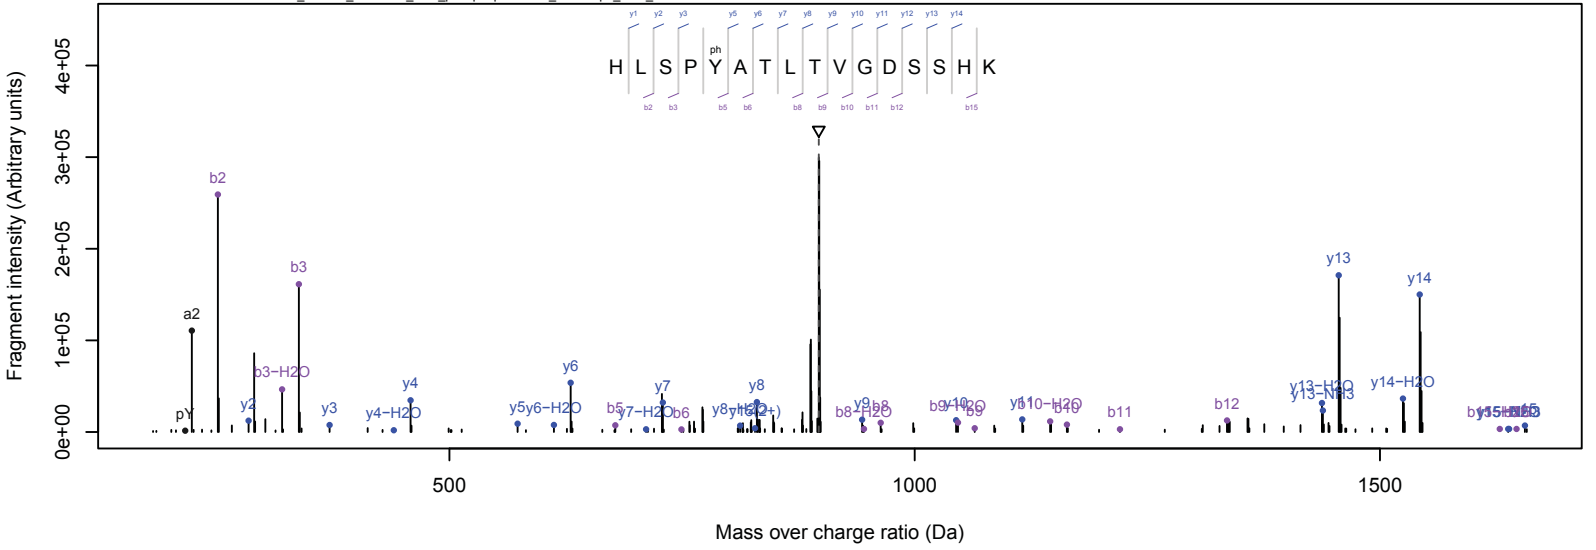

Y(ph)PSLGQKPGSDFLMK-2+

Source : QE1\_140612\_OPL1013\_CVA\_phosphoproteomic\_landscape\_AML\_C Scan : 27768

Andromeda score : 215.23

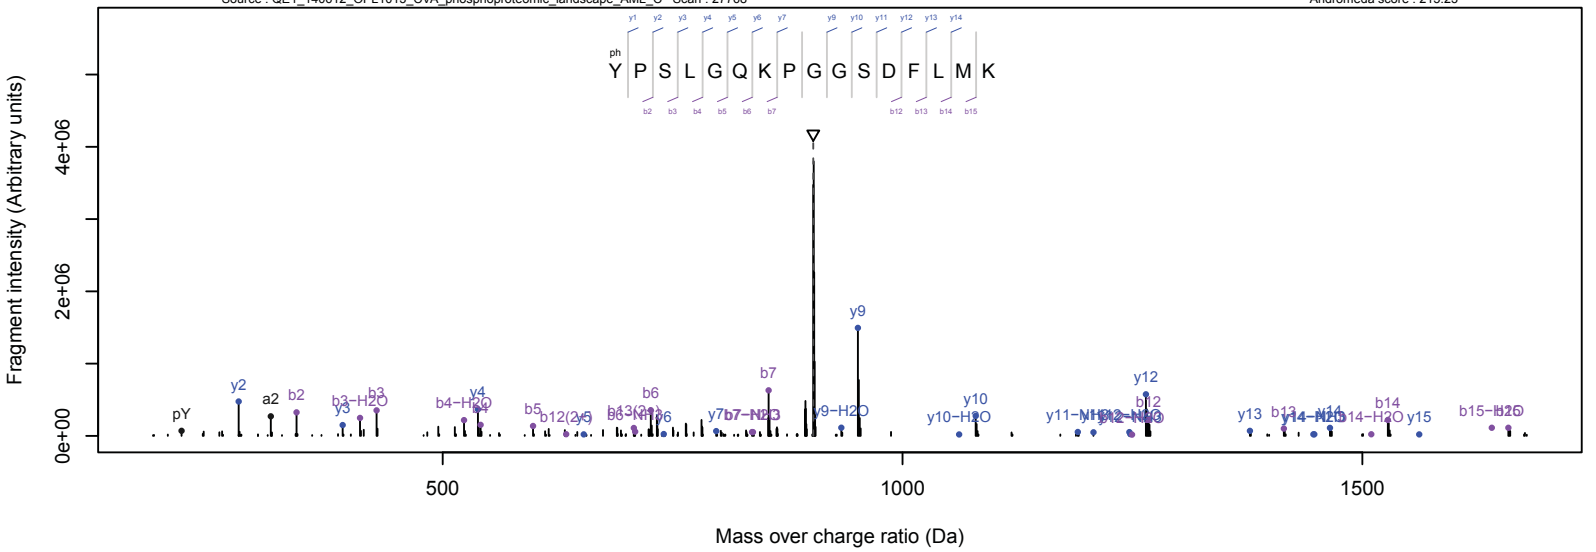

HKEDVY(ph)ENLHTK-3+

Source : QE1\_140908\_OPL1013\_CvA\_pTyrIP\_AML\_OCI\_AML3 Scan : 5515

Andromeda score : 215.09

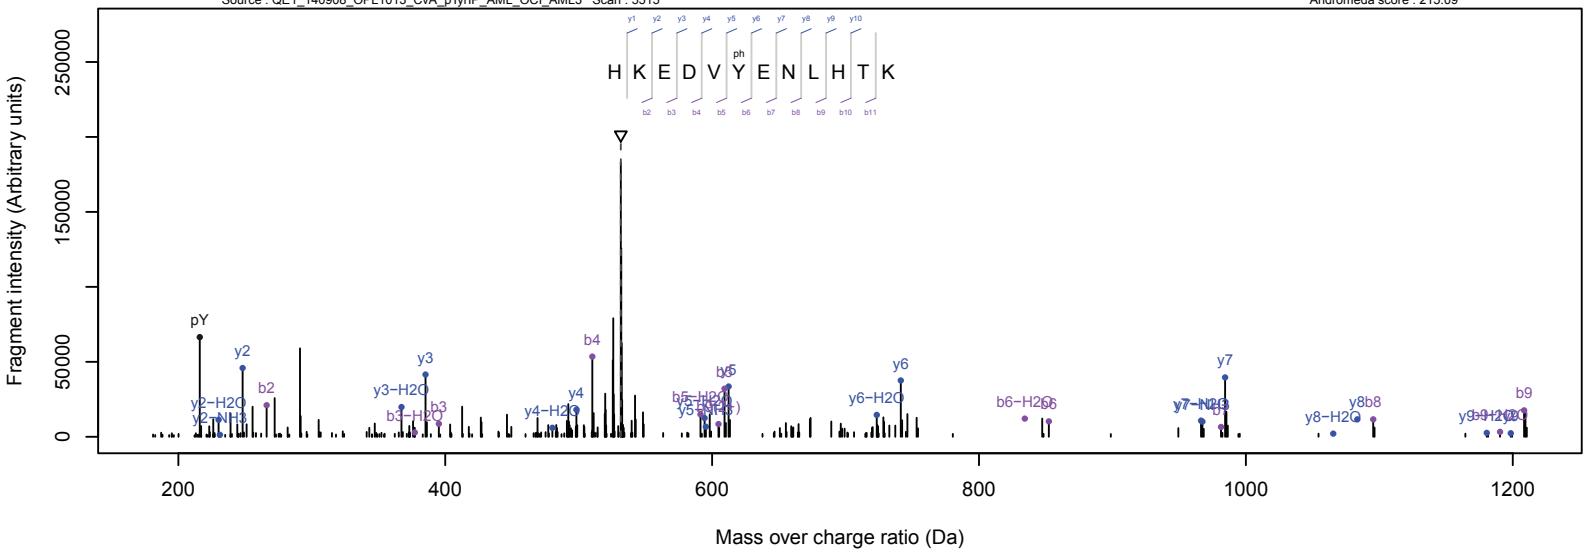



SHNSALY(ph)SQVQK-2+

Source : QE1\_140822\_OPL1013\_CvA\_pTyrIP\_AML\_cell\_lines\_part2\_B Scan : 4296

Andromeda score : 214.61

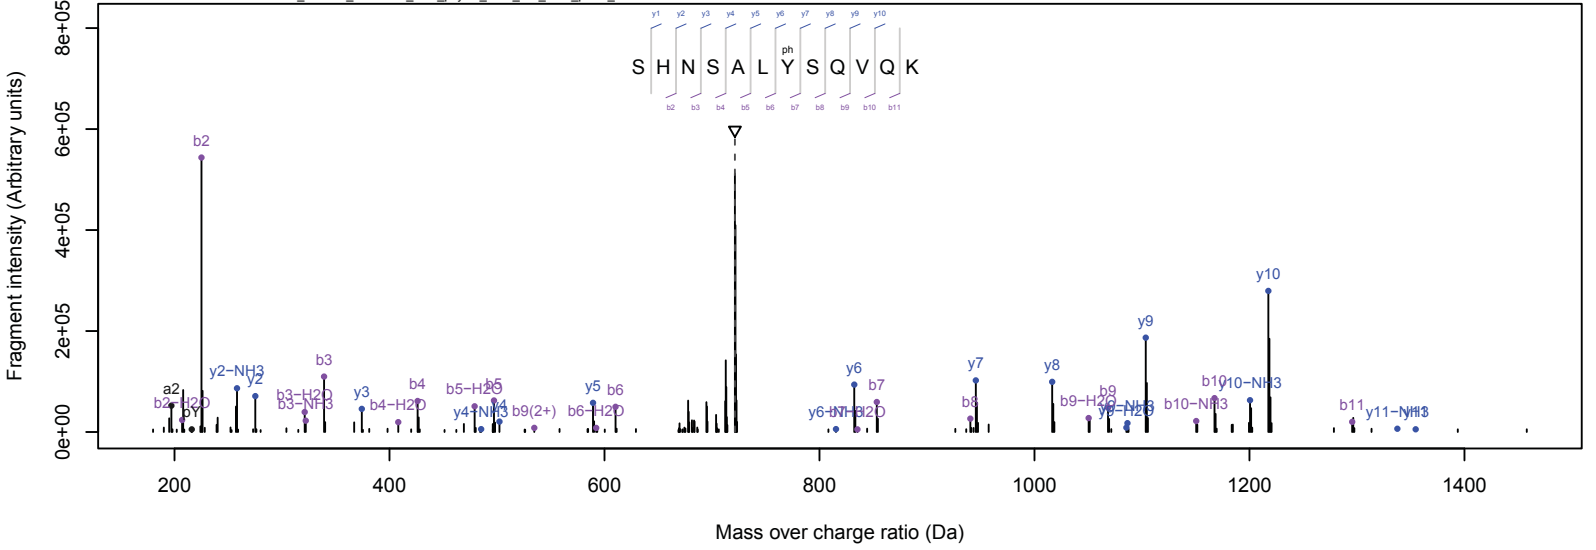

ESMCSTPAFPVSPETPY(ph)VK-2+

Source : QE1\_140612\_OPL1013\_CVA\_phosphoproteomic\_landscape\_AML\_A Scan : 34846

Andromeda score : 214.5

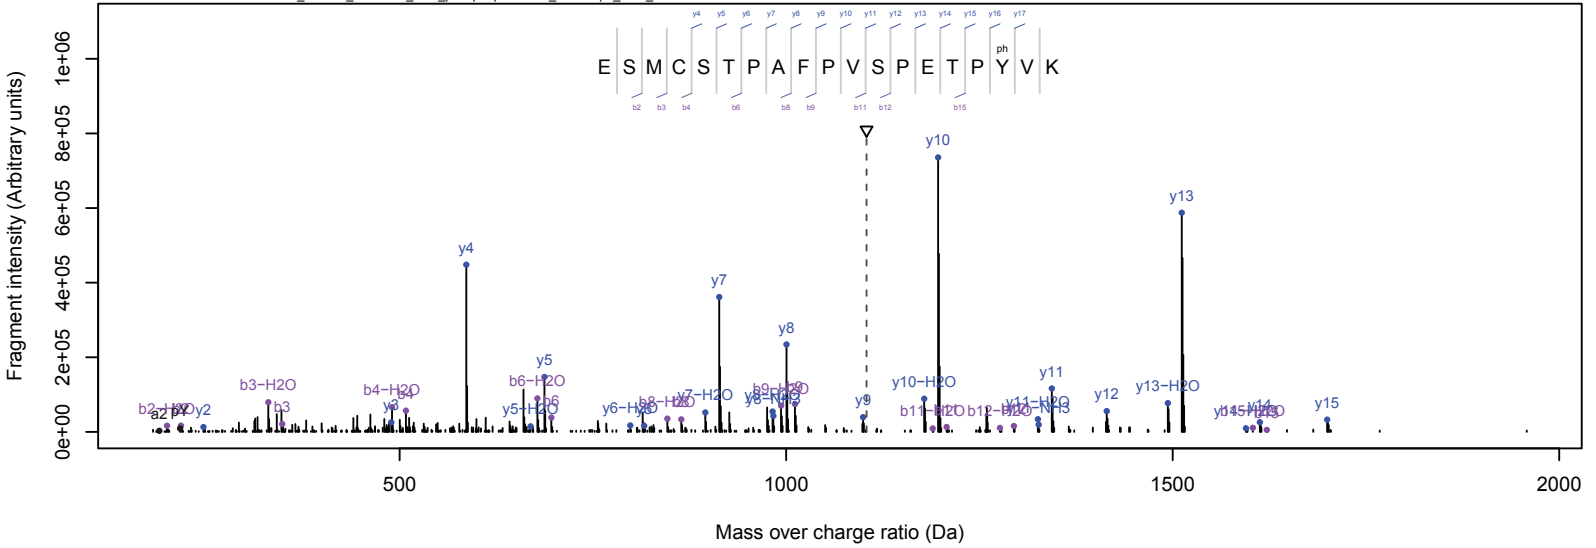

KKPLY(ph)WDLYEHAQQQLLK-4+

Source : QE1\_140612\_OPL1013\_CVA\_phosphoproteomic\_landscape\_AML\_C Scan : 35128

Andromeda score : 214.46

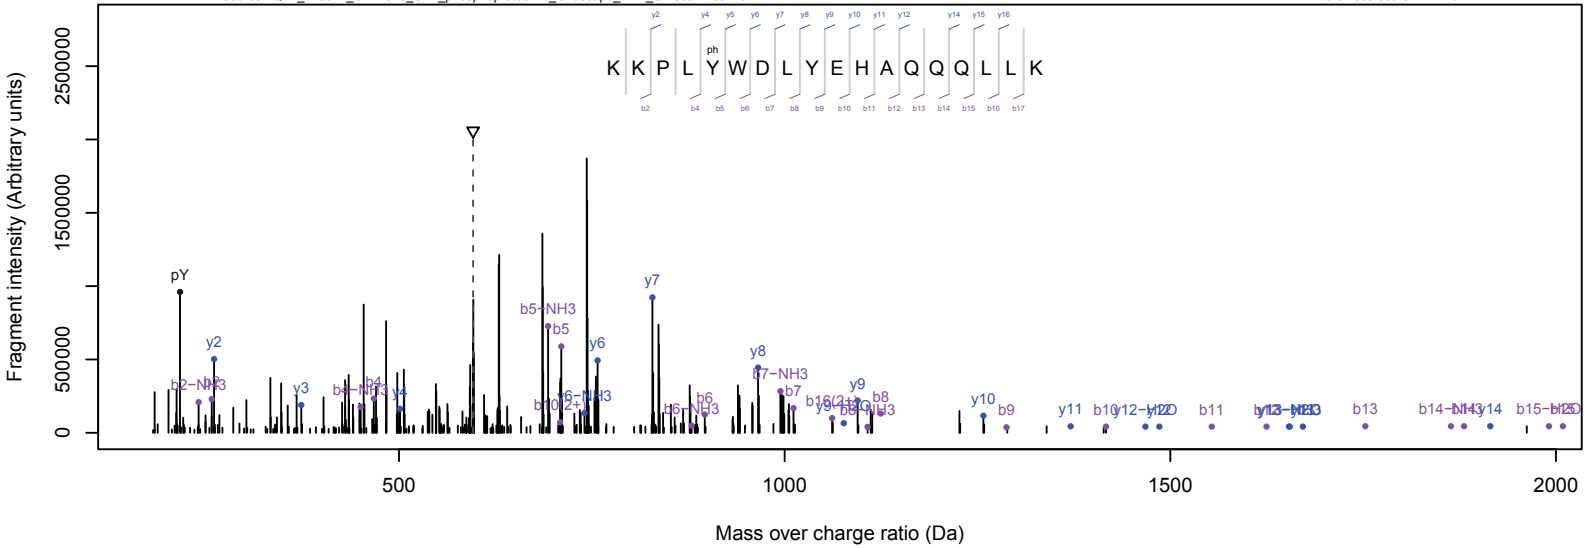

DTETVY(ph)SEVRK-2+

Source : QE1\_140908\_OPL1013\_CVA\_pTyrIP\_AML\_Kasumi6 Scan : 9741

Andromeda score : 214.26

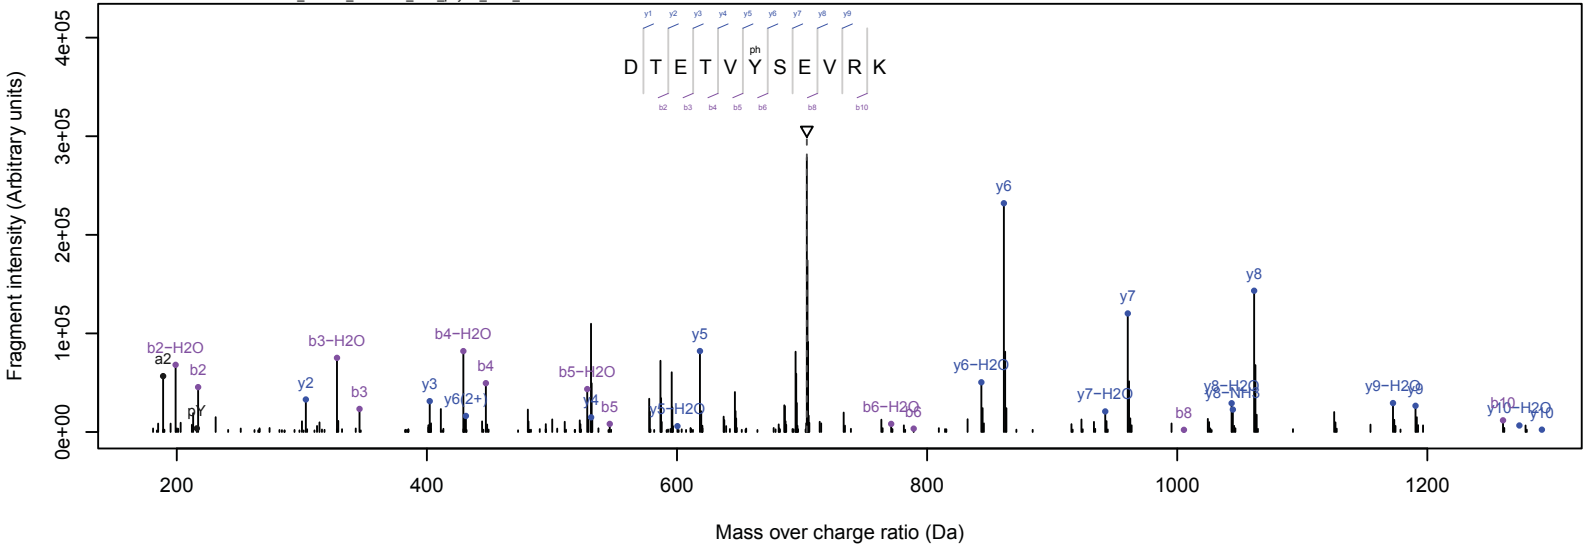

FSKPPEDDANSY(ph)ENVLICK-3+

Source : QE1\_140612\_OPL1013\_CVA\_phosphoproteomic\_landscape\_AML\_C Scan : 25172

Andromeda score : 214.24

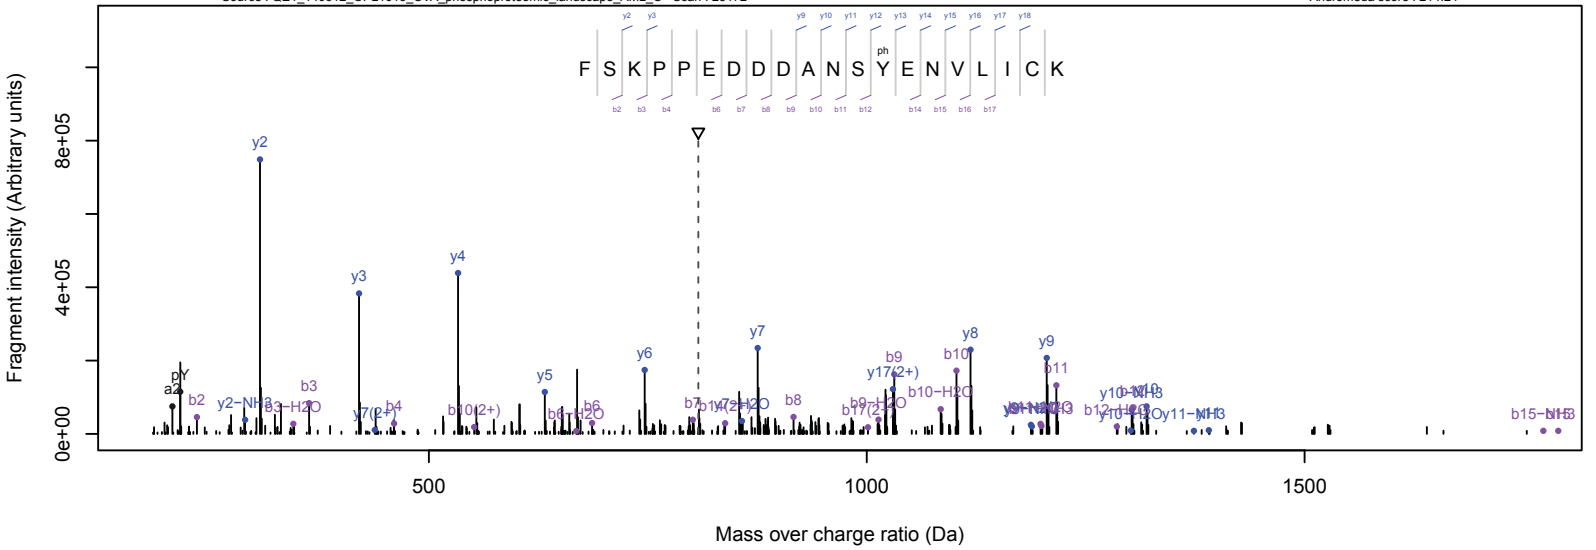

YFEITDES(ph)PYVHYLNTFSSKEPQR-3+

Source : QE1\_140612\_OPL1013\_CVA\_phosphoproteomic\_landscape\_AML\_C Scan : 38066

Andromeda score : 214.19

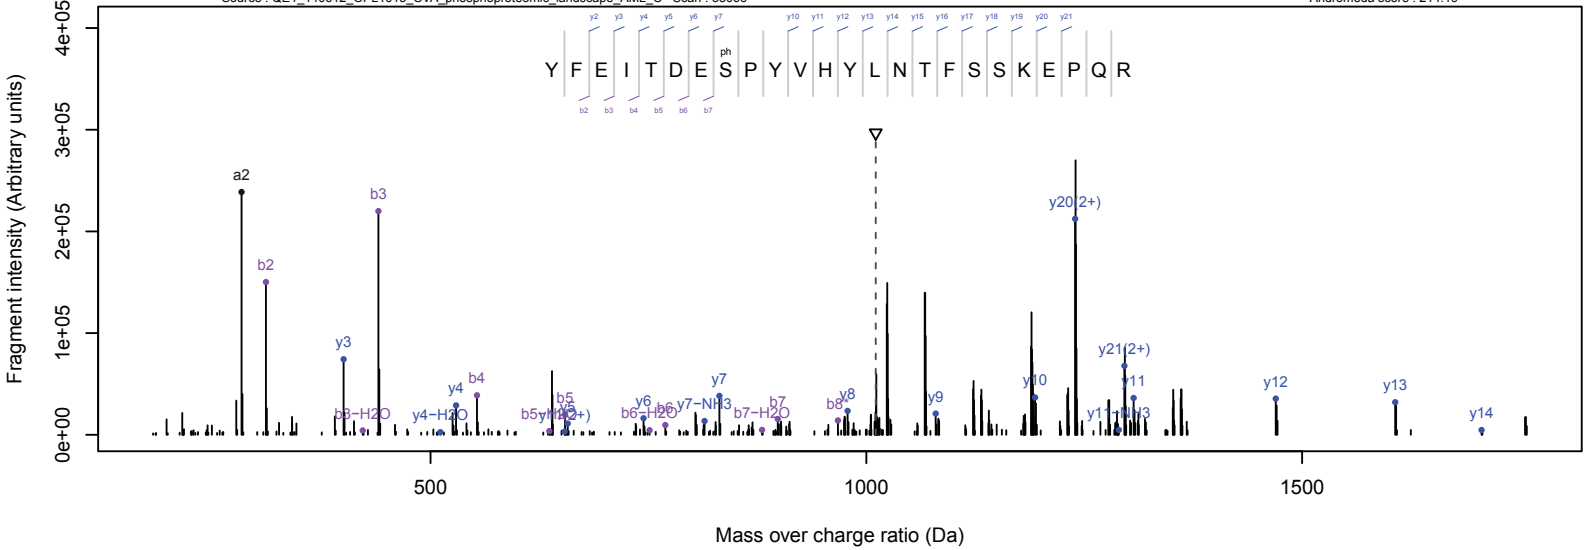

QMDTEAAASEAPQDVTY(ph)AQLHSFTLR-3+

Source : Qe1\_141024\_OPL1013\_CvA\_AML\_pTyrIP\_MOLM13 Scan : 37050

Andromeda score : 214.05

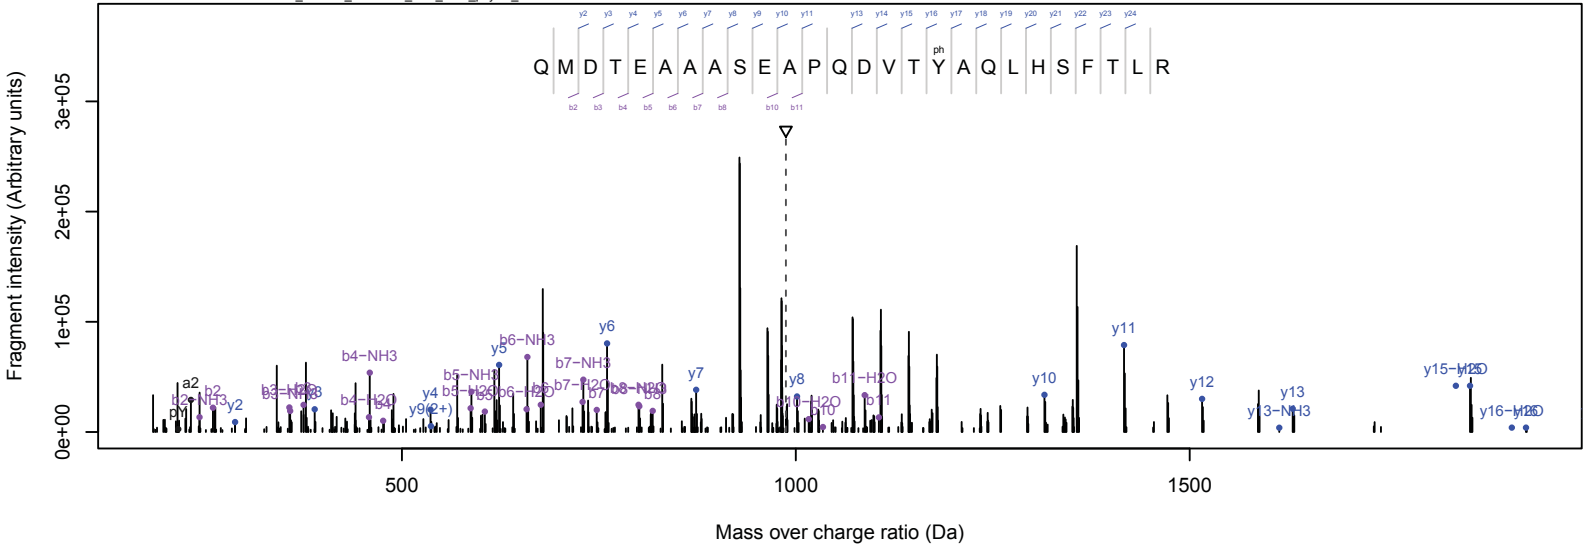

MQY(ph)FQPTIQEK-2+

Source : QE1\_140612\_OPL1013\_CVA\_phosphoproteomic\_landscape\_AML\_C Scan : 22712

Andromeda score : 212.89

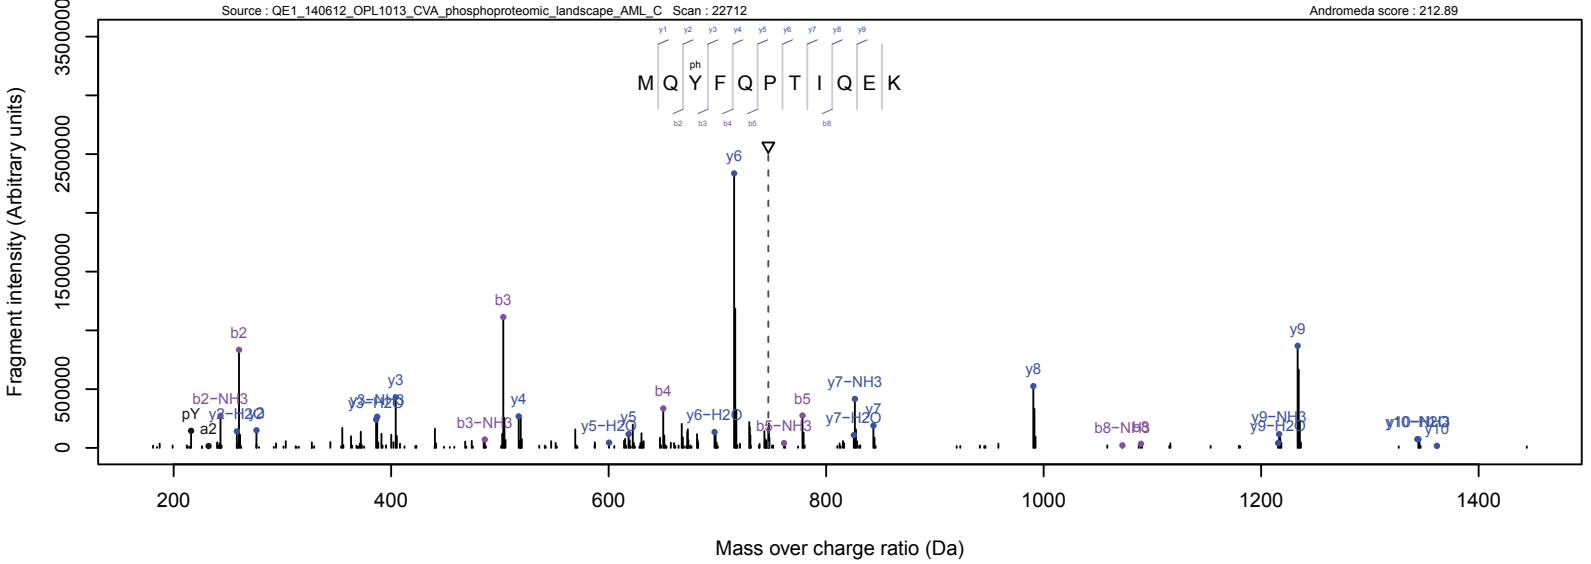

QIESTNHIY(ph)SNLANCSPNR-3+

Source : QE1\_140908\_OPL1013\_CvA\_pTyrIP\_AML\_Kasumi6 Scan : 19701

Andromeda score : 212.79

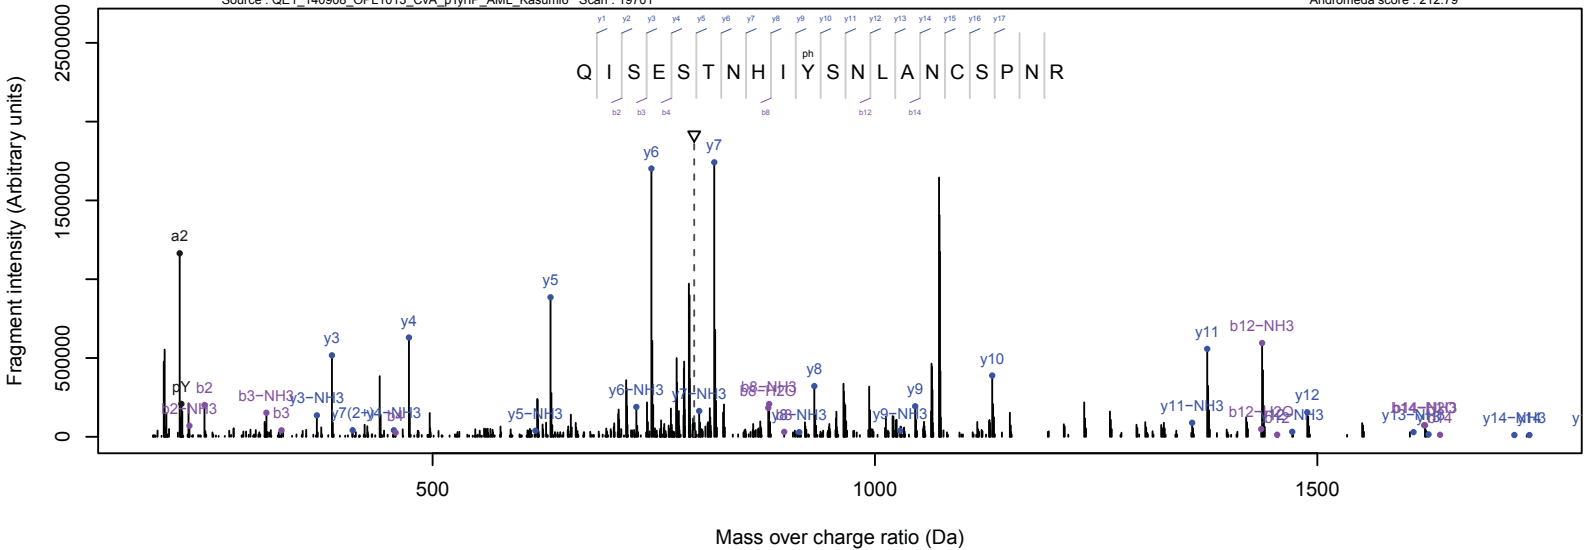

TPVSQKEESSATIY(ph)CSIR-3+

Source: QE1\_140612\_OPL1013\_CVA\_phosphoproteomic\_landscape\_AML\_C Scan: 16029

Andromeda score: 212.76

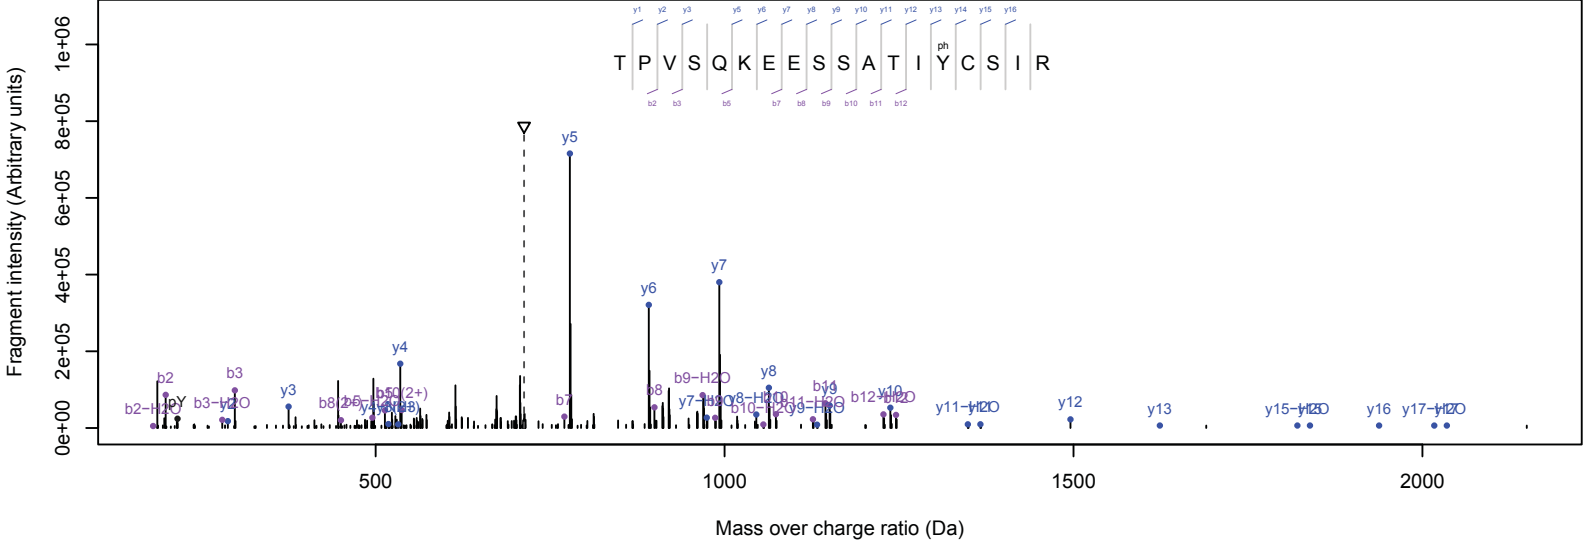

EITDY(ph)VNVNPER-2+

Source: QE1\_140908\_OPL1013\_CvA\_pTyrIP\_AML\_Kasumi1 Scan: 25252

Andromeda score: 212.68

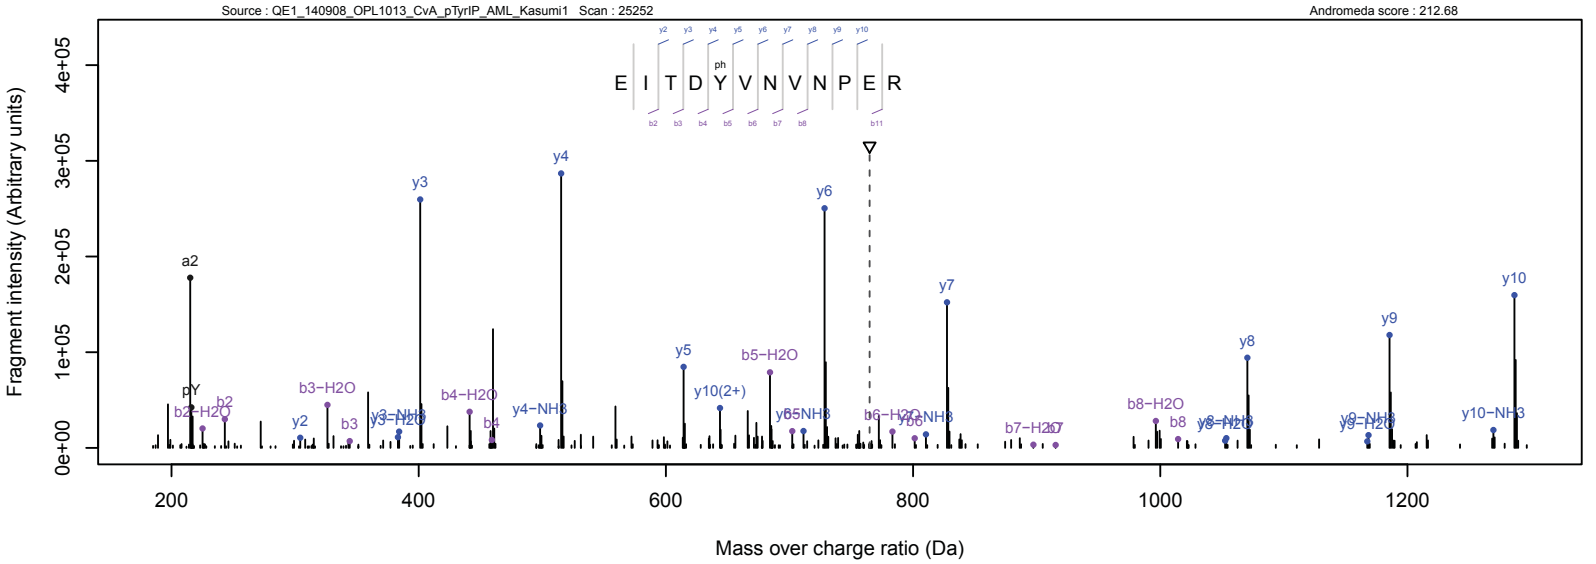

SQASKPAYGNSPY(ph)WTN-2+

Source: QE1\_140612\_OPL1013\_CVA\_phosphoproteomic\_landscape\_AML\_F Scan: 16732

Andromeda score: 212.35

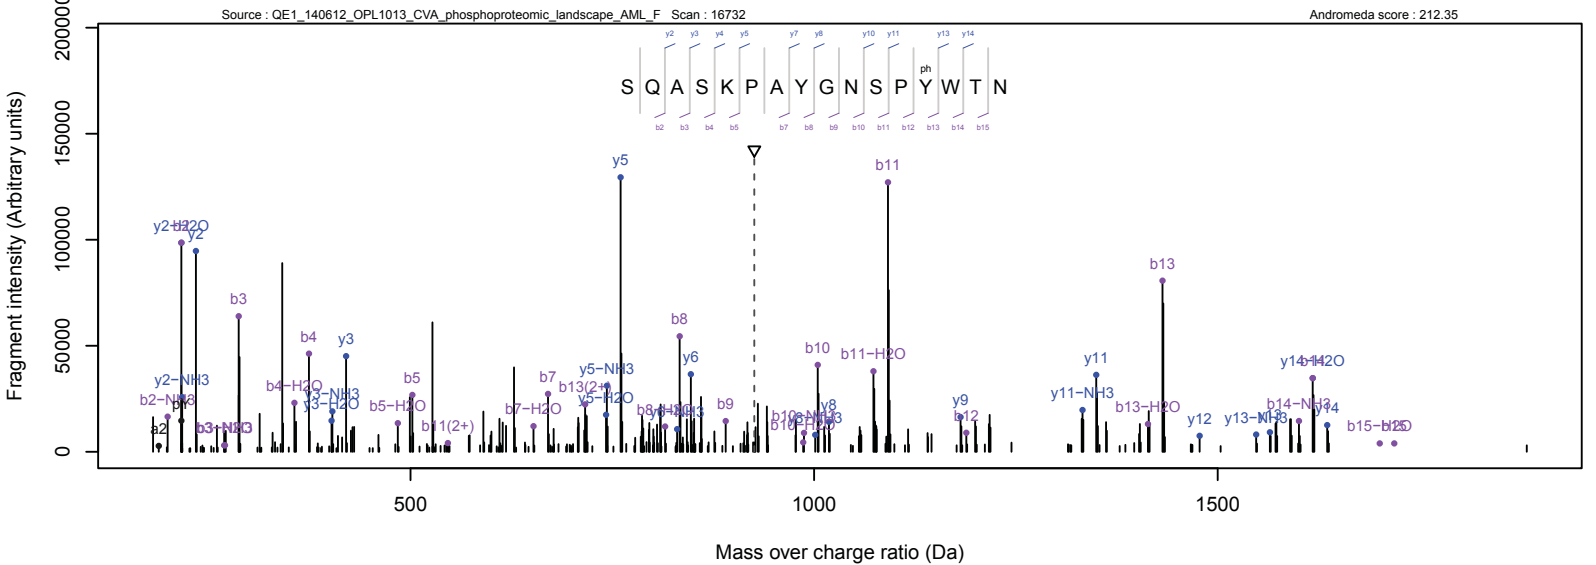



**QQPTQFINPETPGYVGFANLPNQVHR-3+**

Source : QE1\_140612\_OPL1013\_CVA\_phosphoproteomic\_landscape\_AML\_C Scan : 40025

Andromeda score : 210.64

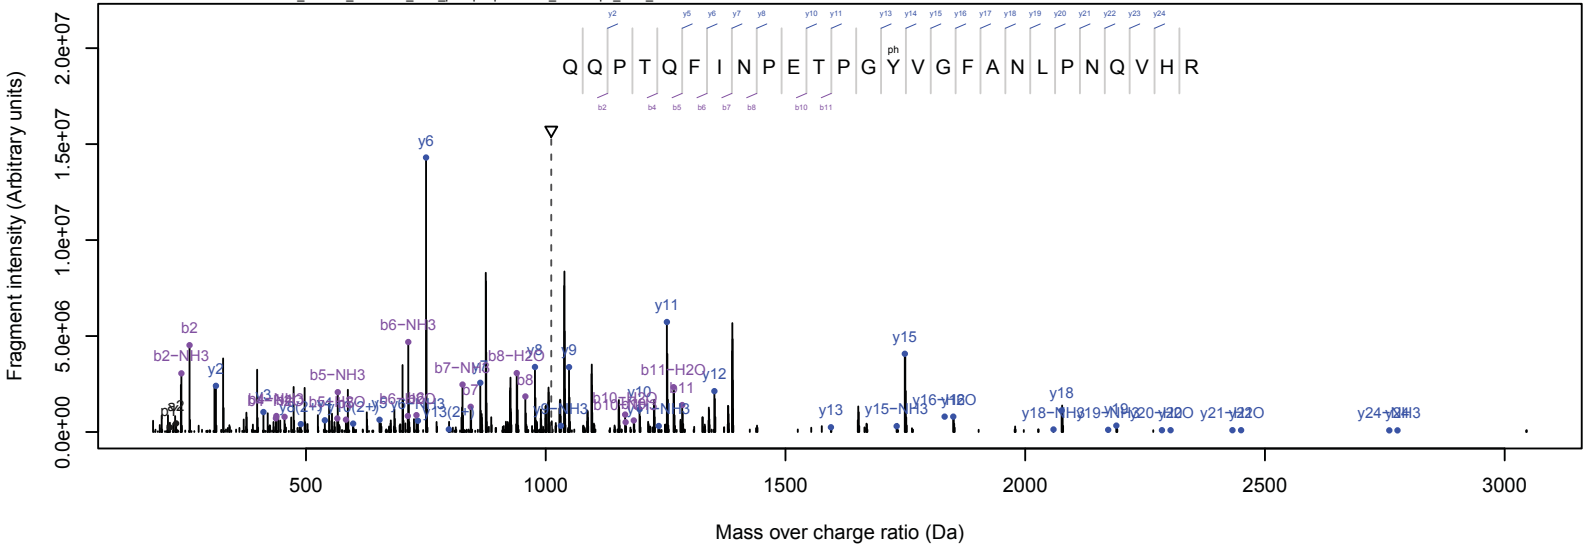

**GNQLVDLAPLGYNYTVNYTTHTQTNK-3+**

Source : QE1\_140612\_OPL1013\_CVA\_phosphoproteomic\_landscape\_AML\_C Scan : 39695

Andromeda score : 210.5

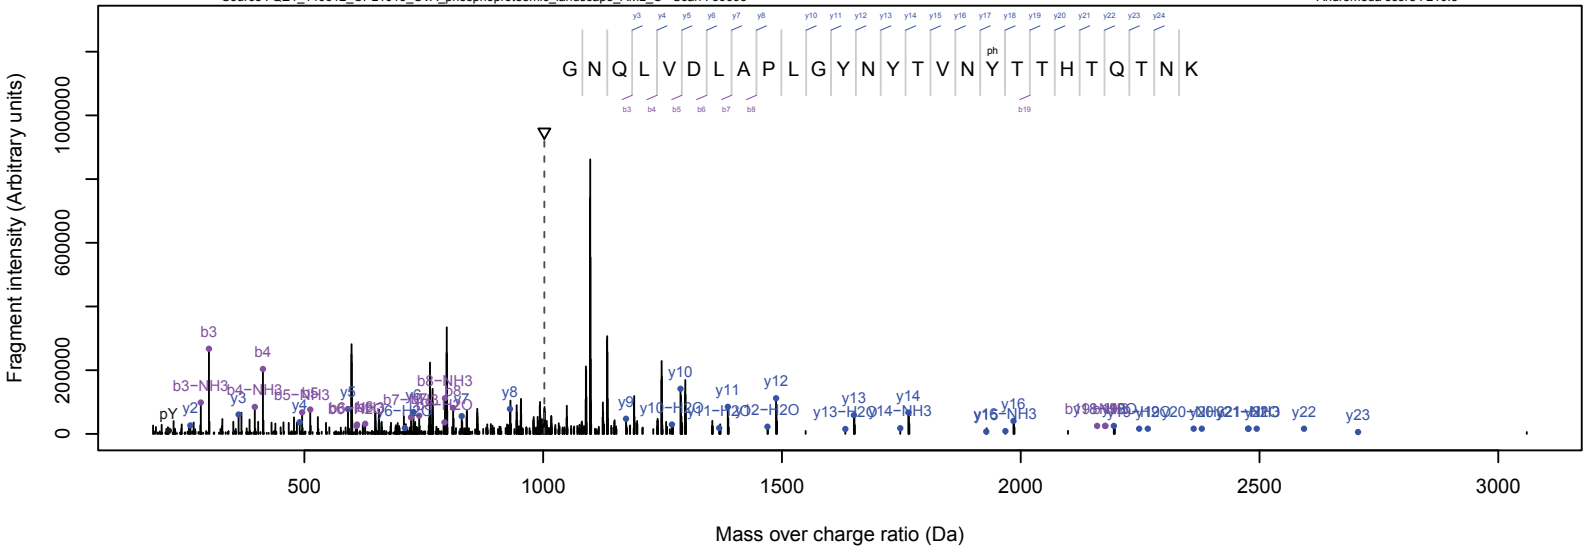

**Y(ph)ATPQVIQAPGPR-2+**

Source : QE1\_140612\_OPL1013\_CVA\_phosphoproteomic\_landscape\_AML\_B Scan : 20829

Andromeda score : 210.44

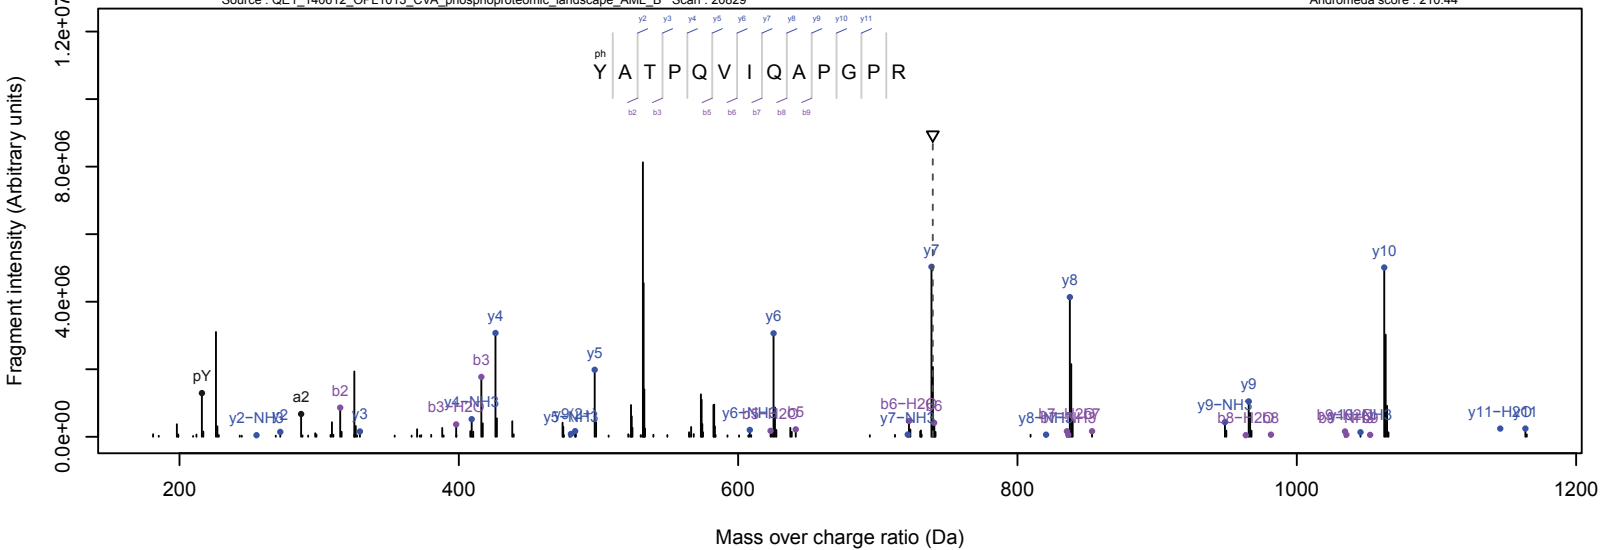



STAYEDYY(ph)YHPPPR-2+

Source : QE1\_140612\_OPL1013\_CVA\_phosphoproteomic\_landscape\_AML\_C Scan : 17648

Andromeda score : 210.41

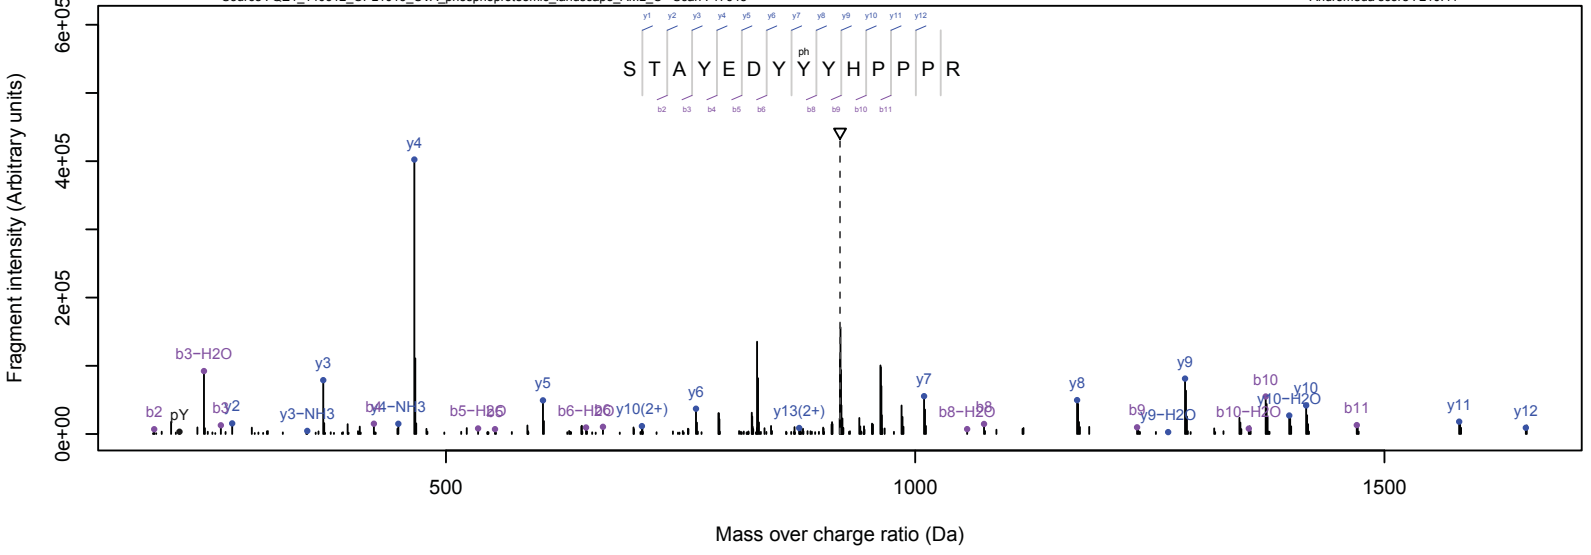

T(ph)YSLVGQAWPGPLADMAPTRK-2+

Source : QE1\_140612\_OPL1013\_CVA\_phosphoproteomic\_landscape\_AML\_C Scan : 43883

Andromeda score : 210.38

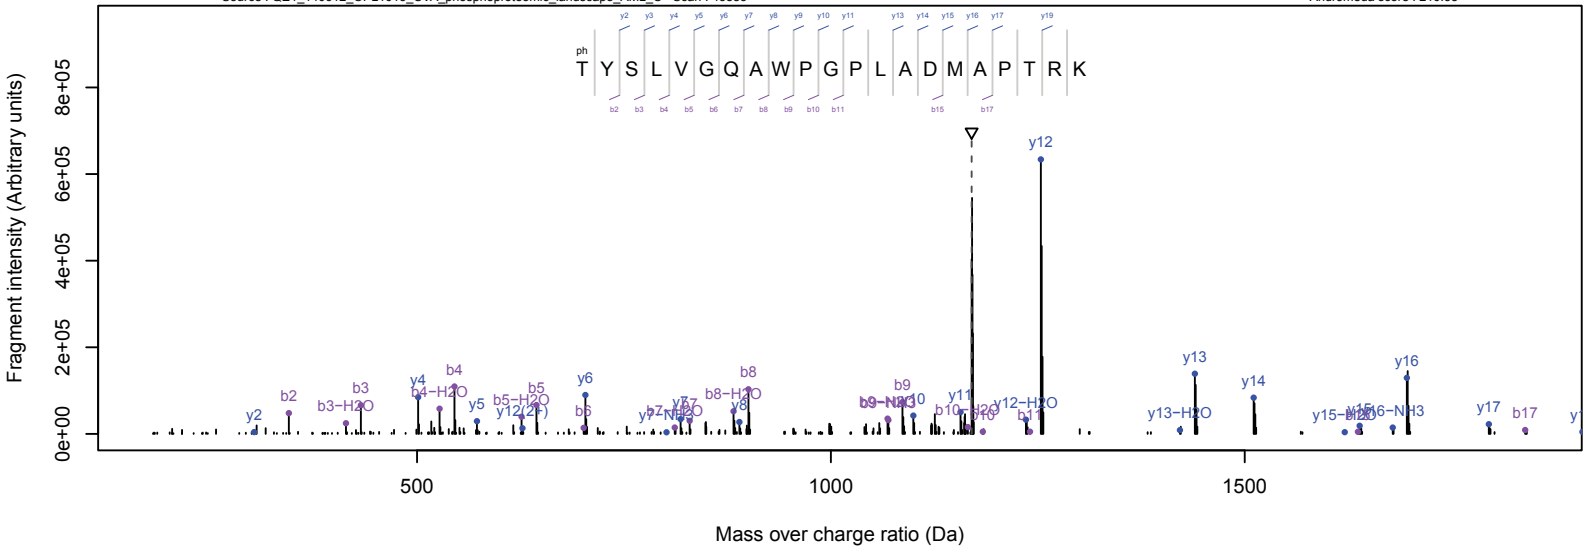

SGDSEVYQLGDVSQK-2+

Source : QE1\_140822\_OPL1013\_CvA\_pTyrIP\_AML\_cell\_lines\_part2\_F Scan : 14649

Andromeda score : 210.34

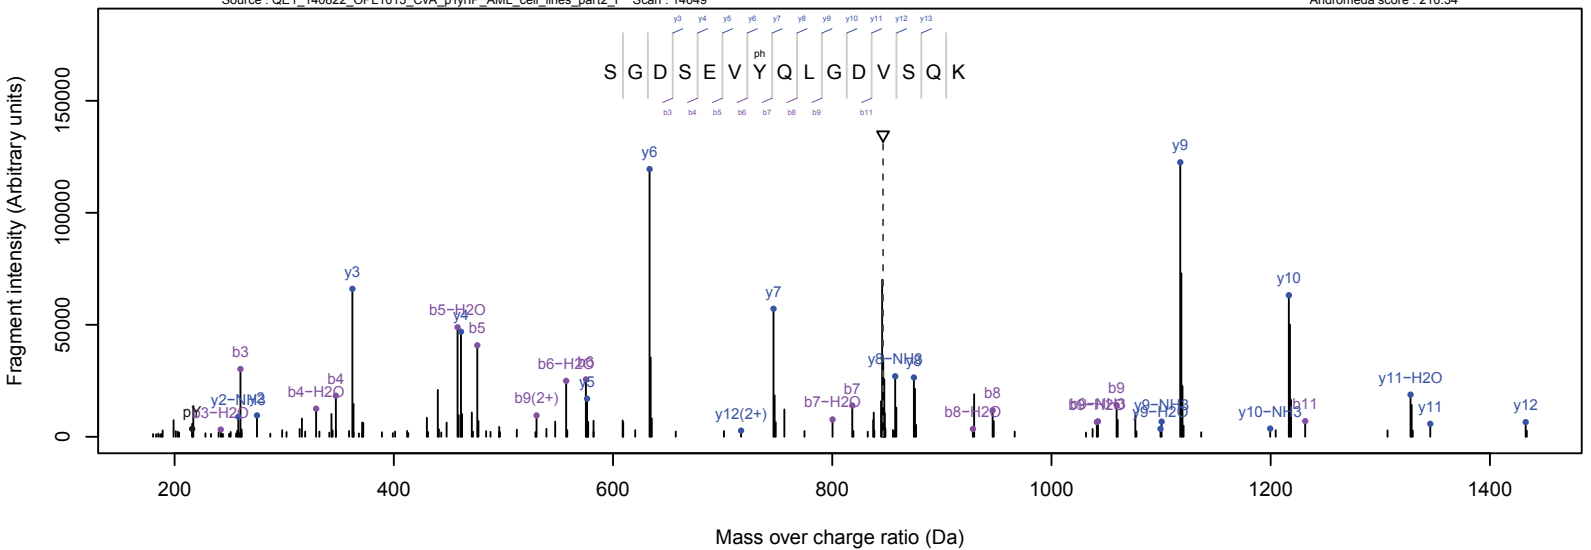

DIMHDSNY(ph)VSK-2+

Source : QE1\_140822\_OPL1013\_CvA\_pTyrIP\_AML\_cell\_lines\_part2\_B Scan : 8198

Andromeda score : 210.15

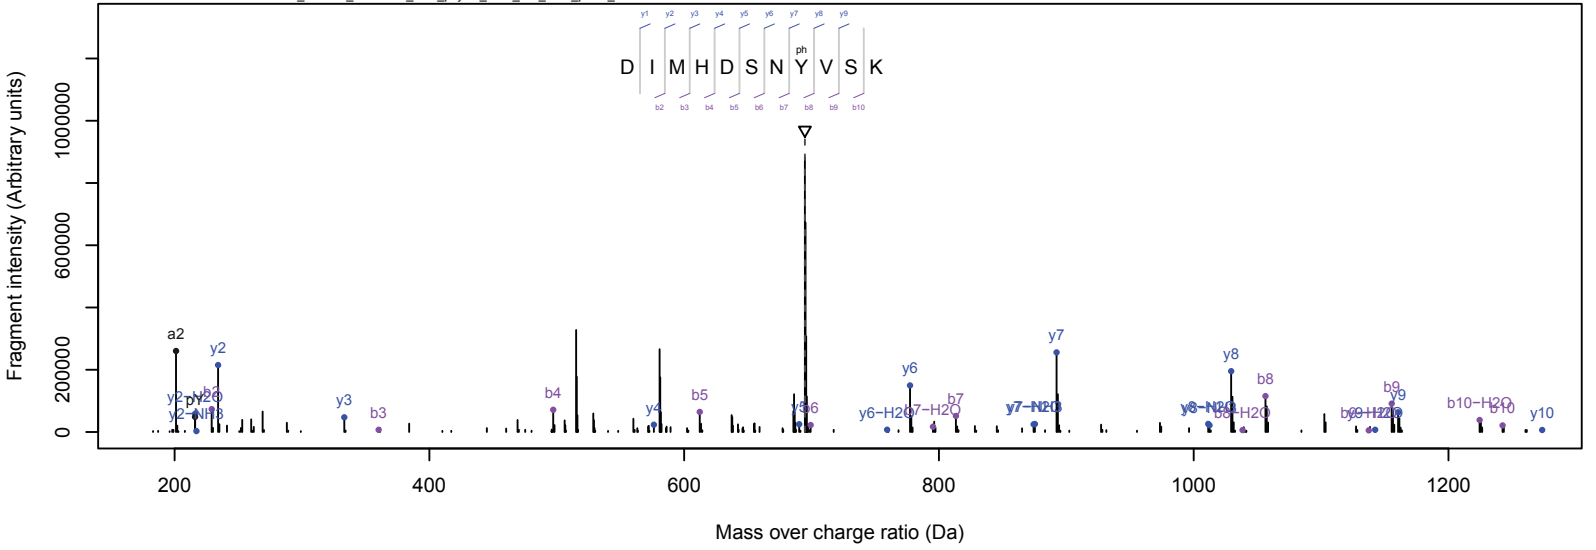

QHSLPSEHLGADGGLYQIIPPQR-3+

Source : QE1\_140908\_OPL1013\_CvA\_pTyrIP\_AML\_Kasumi6 Scan : 26208

Andromeda score : 209.71

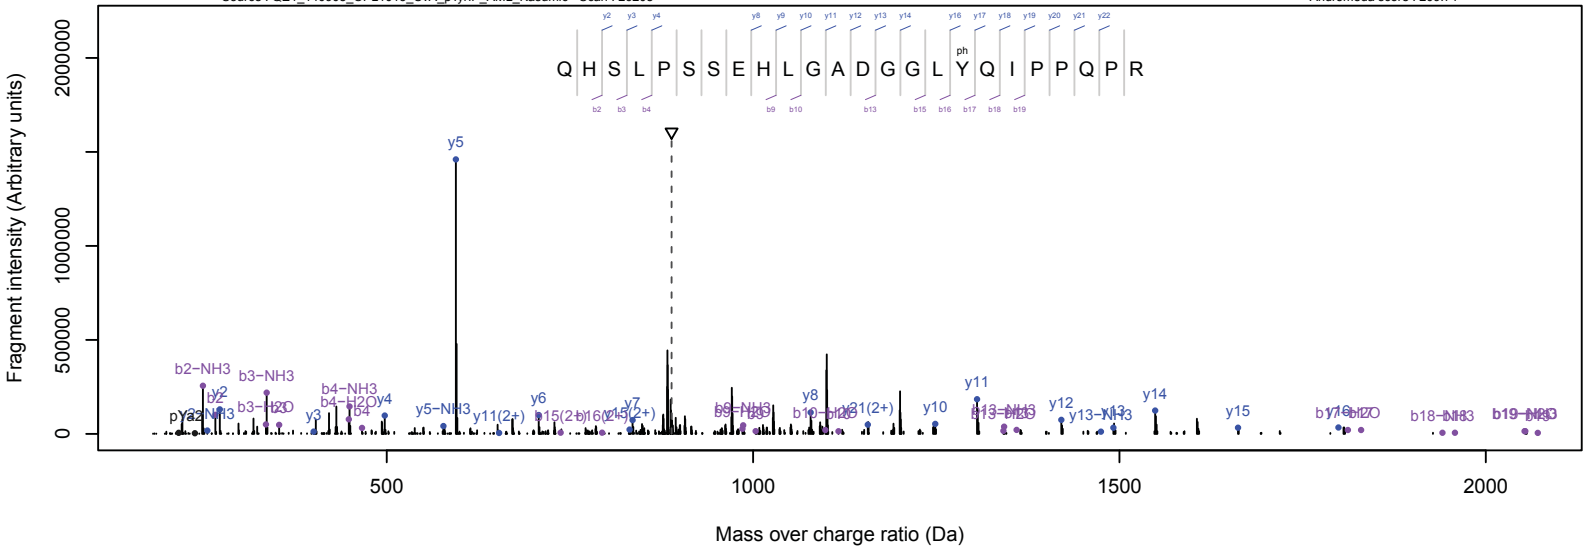

NDSLICGTLHSVDQYLNLIK-3+

Source : QE1\_140612\_OPL1013\_CVA\_phosphoproteomic\_landscape\_AML\_C Scan : 43894

Andromeda score : 209.7

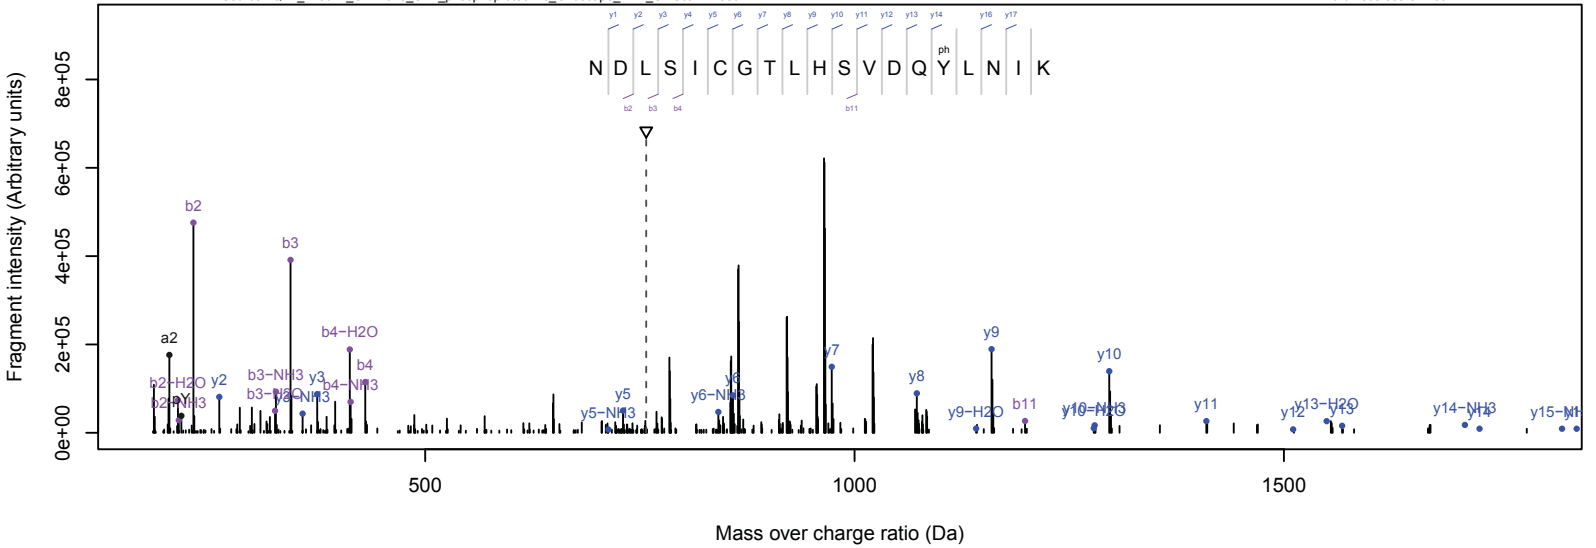

VNNSTMLGASG DY ADFQYLK-2+

Source : QE1\_140612\_OPL1013\_CVA\_phosphoproteomic\_landscape\_AML\_D Scan : 37949

Andromeda score : 209.23

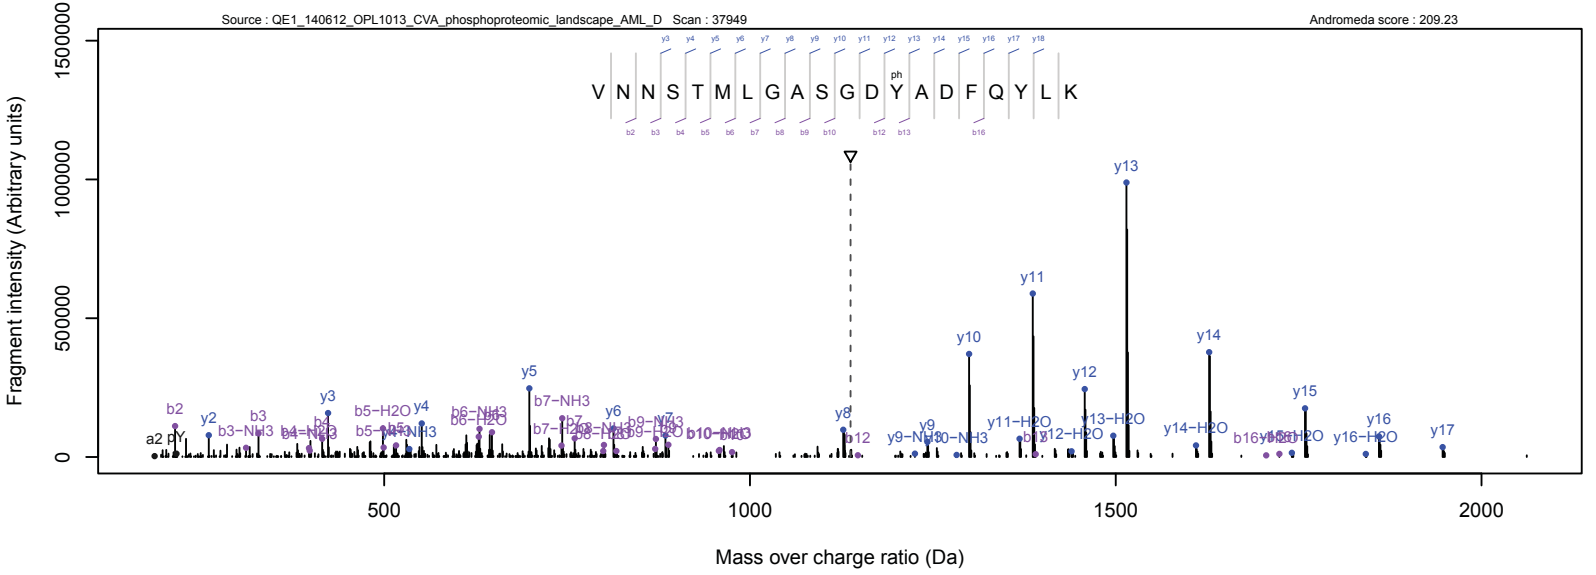

TNHIVSSDDIK-2+

Source : QE1\_140612\_OPL1013\_CVA\_phosphoproteomic\_landscape\_AML\_B Scan : 14422

Andromeda score : 209.19

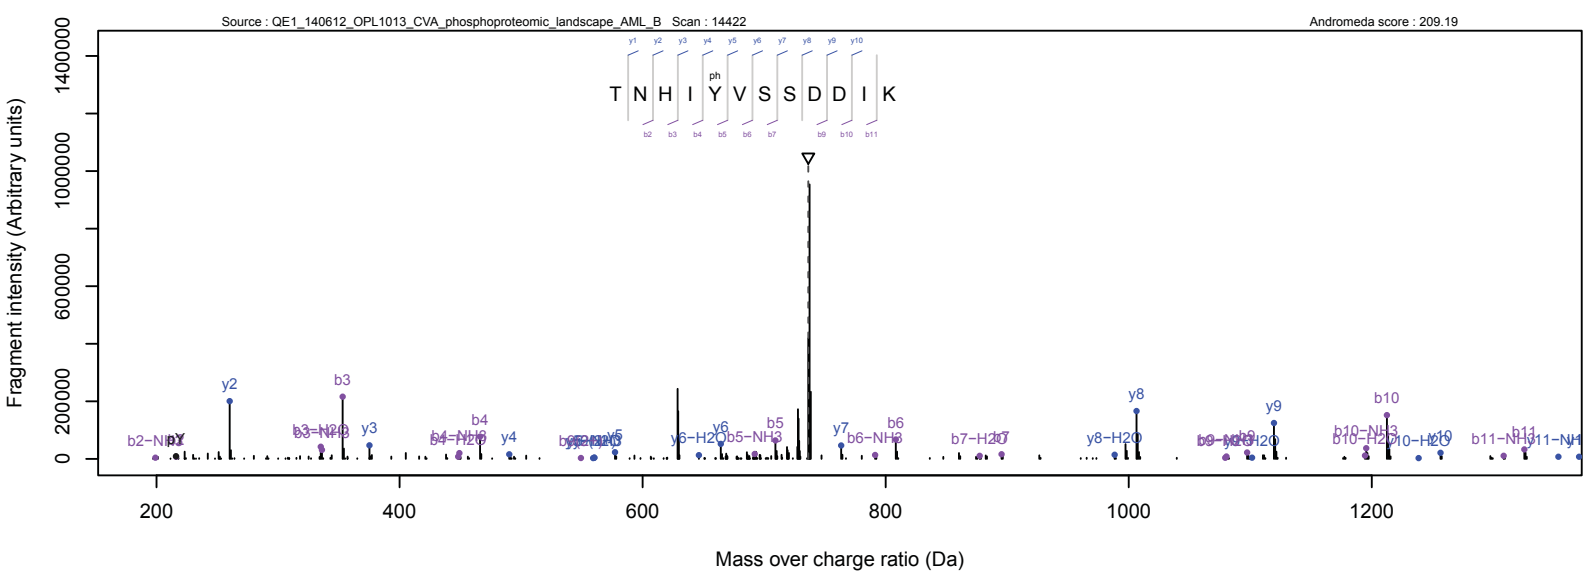

VSAQYLSEIEMAK-2+

Source : QE1\_140612\_OPL1013\_CVA\_phosphoproteomic\_landscape\_AML\_C Scan : 31014

Andromeda score : 208.68

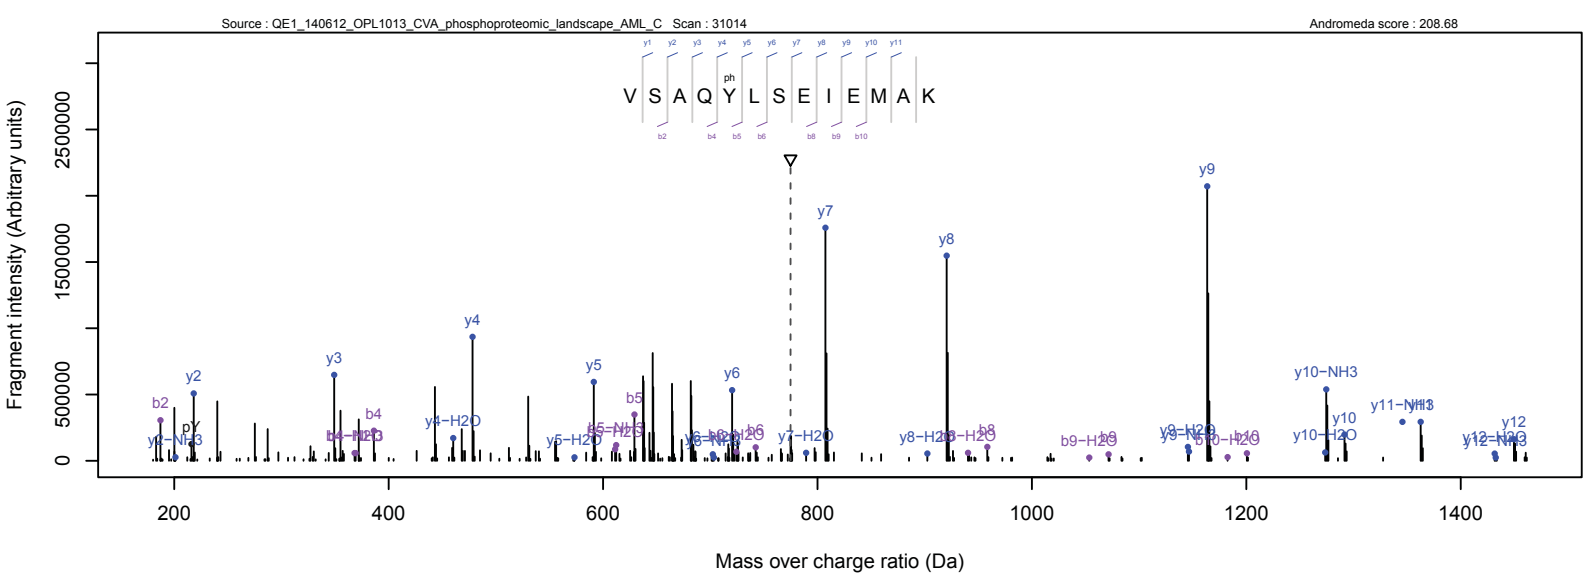

ASGPPGNEHLY(ph)ENLCVLEASPTLHGGEPEPEHEGPGSR-4+

Source : QE1\_140908\_OPL1013\_CvA\_pTyrIP\_AML\_Kasumi6 Scan : 33993

Andromeda score : 208.52

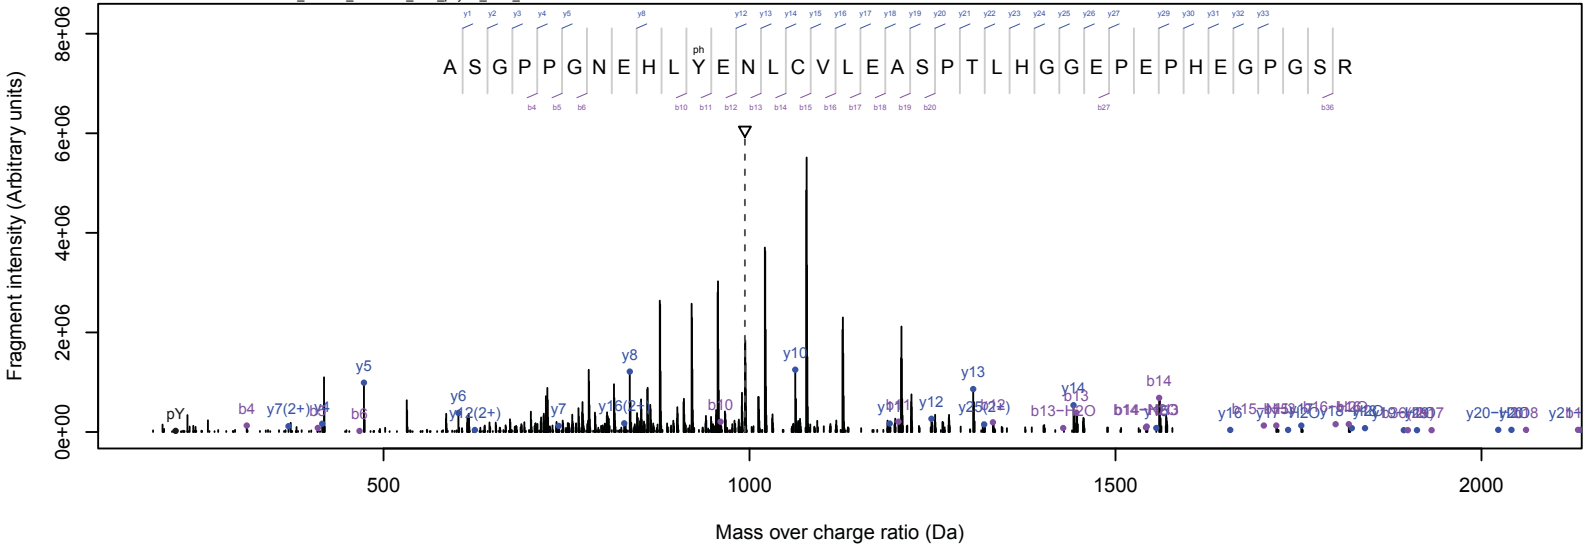

SHY(ph)ADVDPENQNFLLLESNLGK-3+

Source : QE1\_140908\_OPL1013\_CvA\_pTyrIP\_AML\_Kasumi1 Scan : 34198

Andromeda score : 208.47

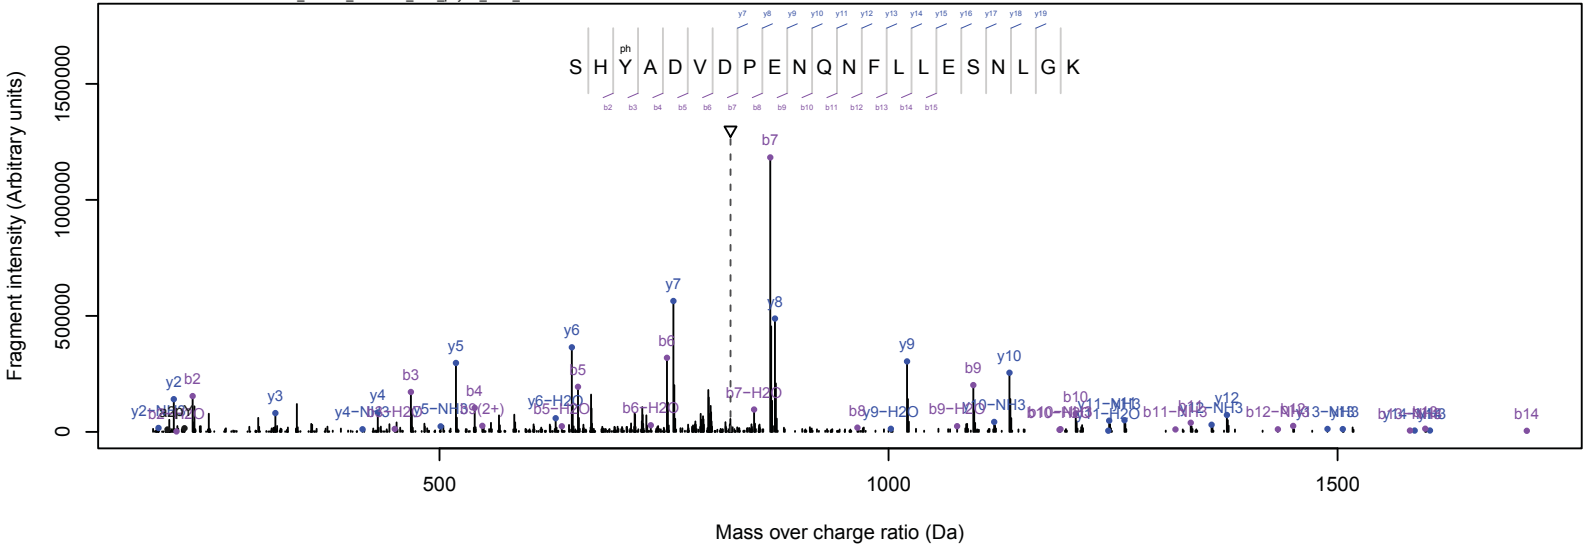

YKVVQDTY(ph)QIMK-2+

Source : QE1\_140908\_OPL1013\_CvA\_pTyrIP\_AML\_Kasumi1 Scan : 20516

Andromeda score : 208.28

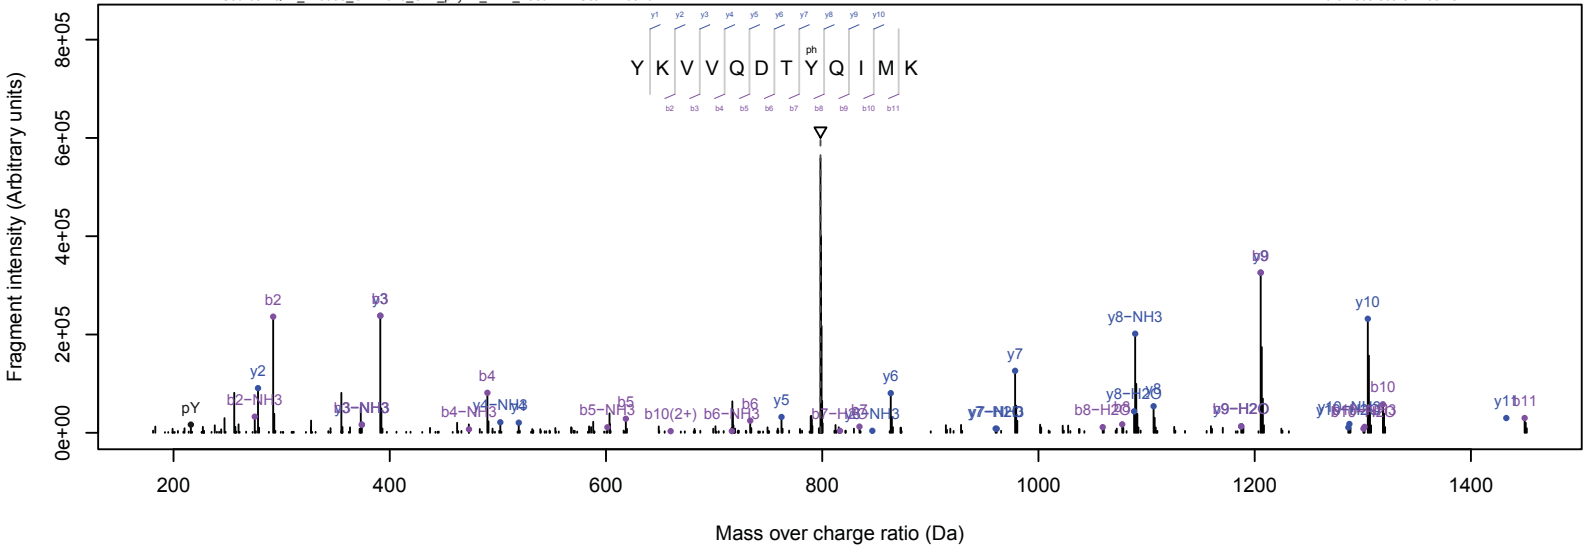

AY(ph)HEQLTVAEITNACFEPANQMVK-3+

Source: QE1\_140612\_OPL1013\_CVA\_phosphoproteomic\_landscape\_AML\_C Scan: 39211

Andromeda score: 208.27

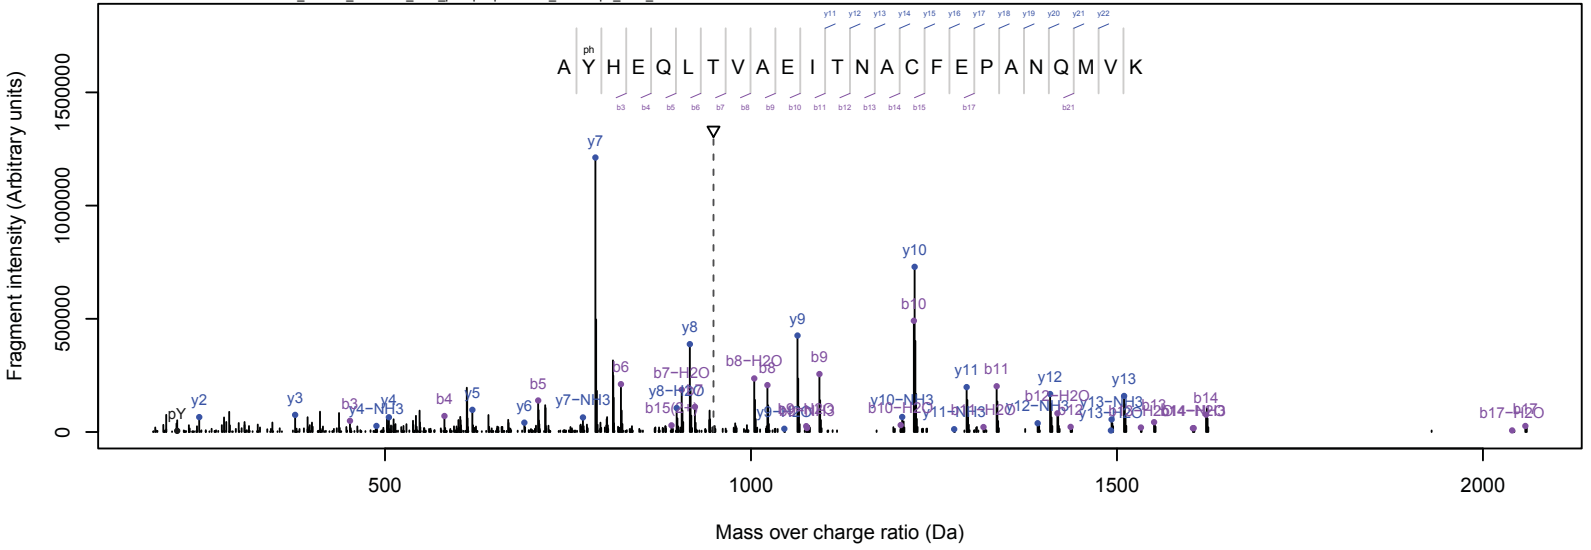

AKFEEYGPVIECDIVKDY(ph)AFVHMER-4+

Source: QE1\_140612\_OPL1013\_CVA\_phosphoproteomic\_landscape\_AML\_B Scan: 41746

Andromeda score: 208.26

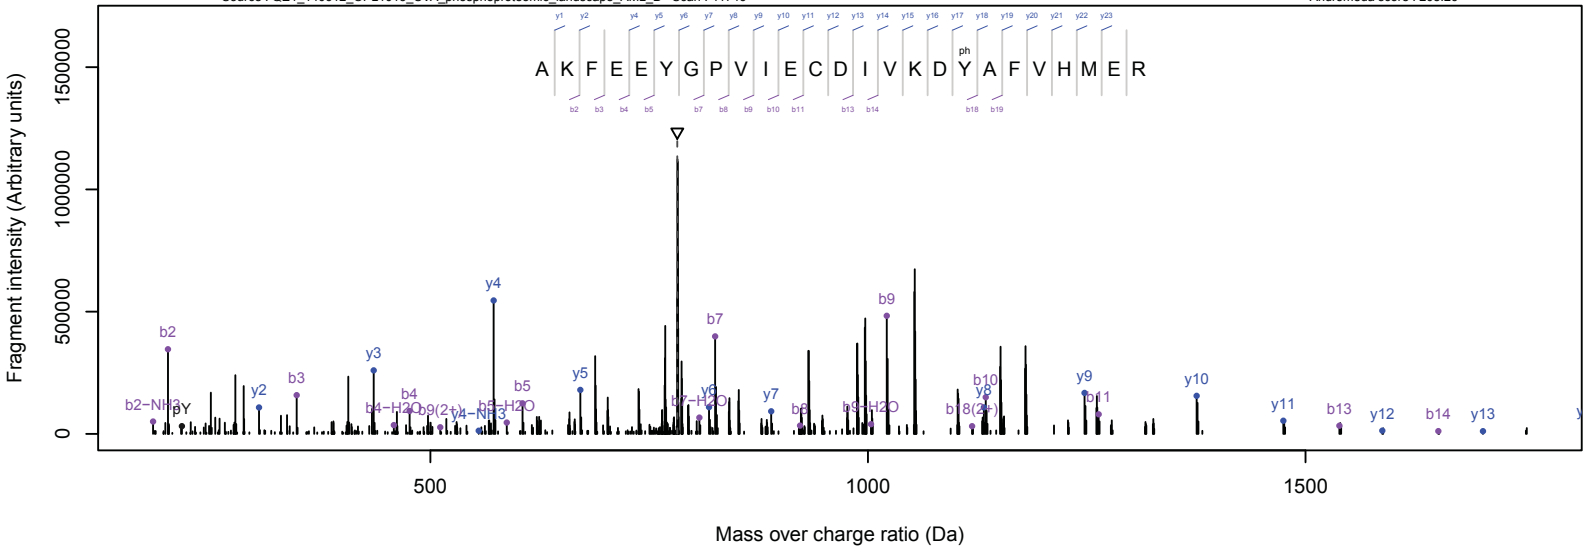

QADSEM(ox)TGY(ph)VVTR-2+

Source: QE1\_140908\_OPL1013\_CvA\_pTyrIP\_AML\_Kasumi1 Scan: 7925

Andromeda score: 208.23

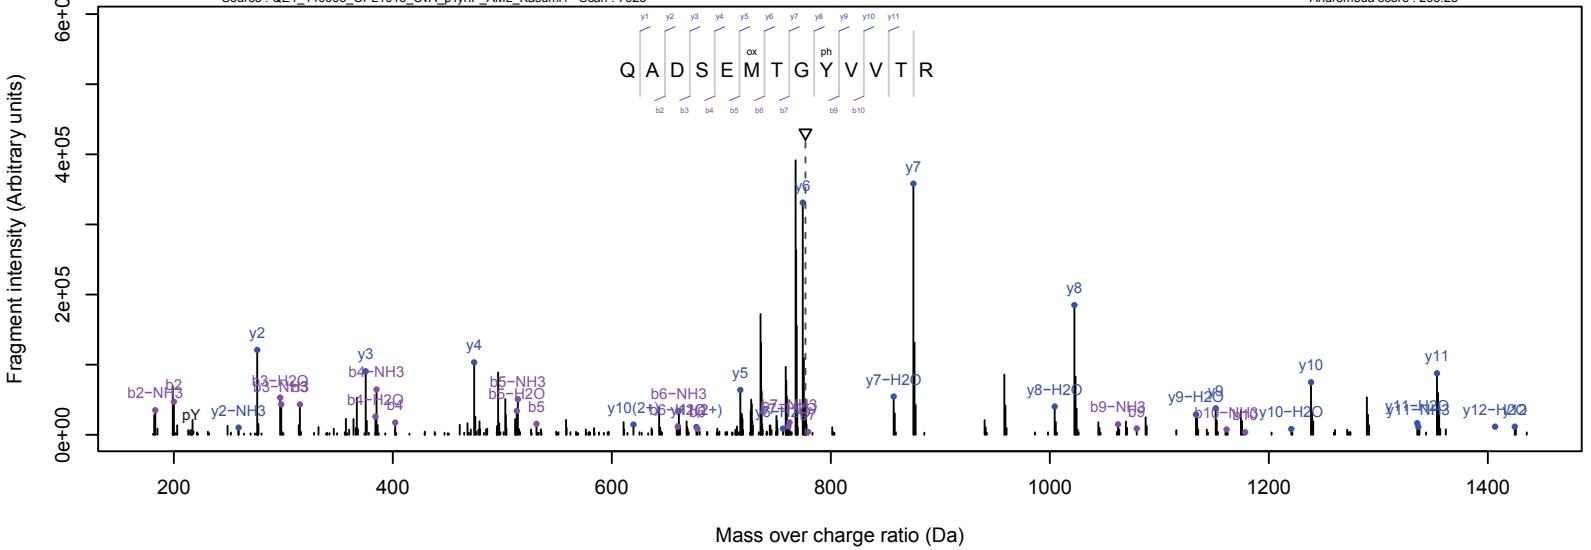

**SPY(ph)TFKIPEIHFPLESK-3+**

Source : QE1\_140612\_OPL1013\_CVA\_phosphoproteomic\_landscape\_AML\_C Scan : 45378

Andromeda score : 208.17

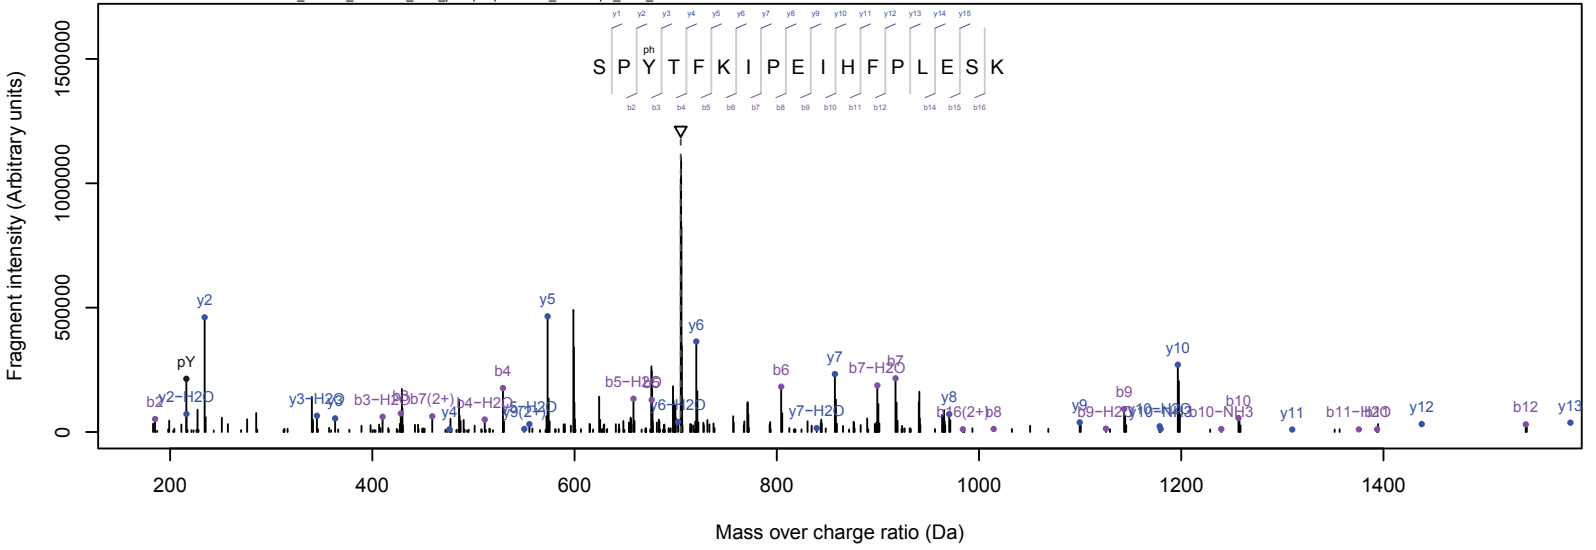

**KSDIY(ph)VCMI SFAHNVAAGK-3+**

Source : QE1\_140612\_OPL1013\_CVA\_phosphoproteomic\_landscape\_AML\_A Scan : 38125

Andromeda score : 207.67

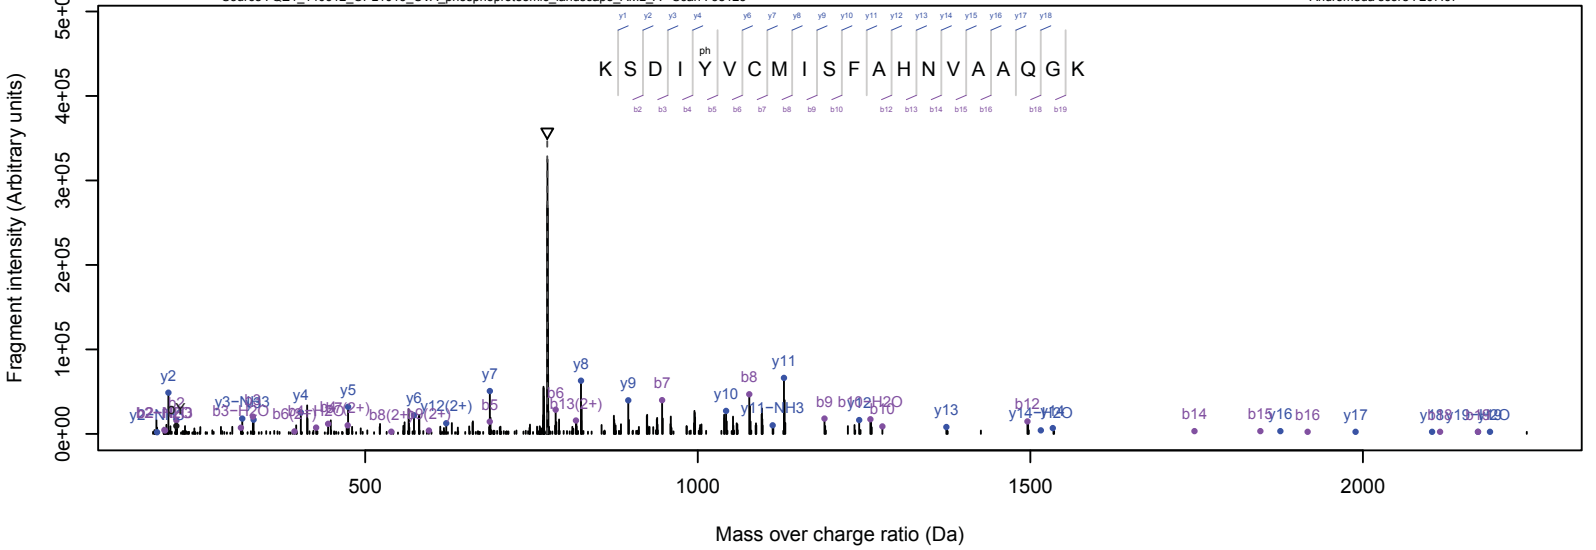

**SDSASSEVGIY(ph)QGFEKK-2+**

Source : QE1\_140612\_OPL1013\_CVA\_phosphoproteomic\_landscape\_AML\_C Scan : 20415

Andromeda score : 207.53

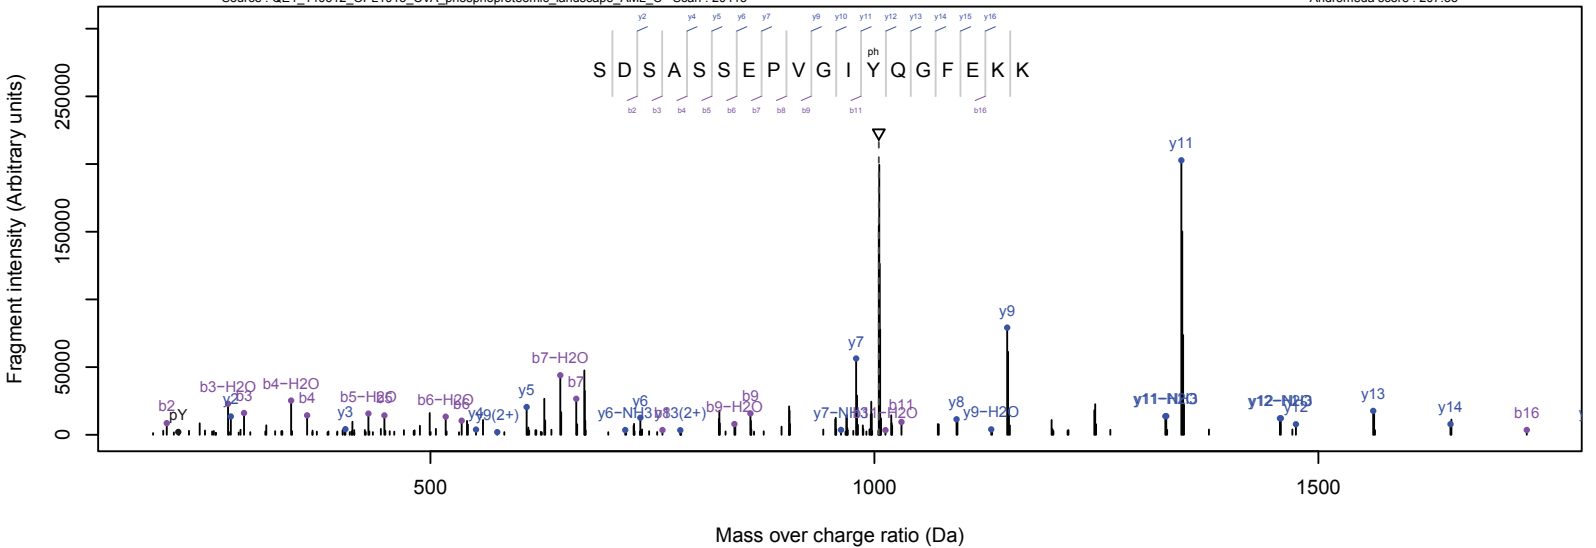

FAQHGTFEY(ph)EYSQR-3+

Source : QE1\_140612\_OPL1013\_CVA\_phosphoproteomic\_landscape\_AML\_B Scan : 16695

Andromeda score : 207.52

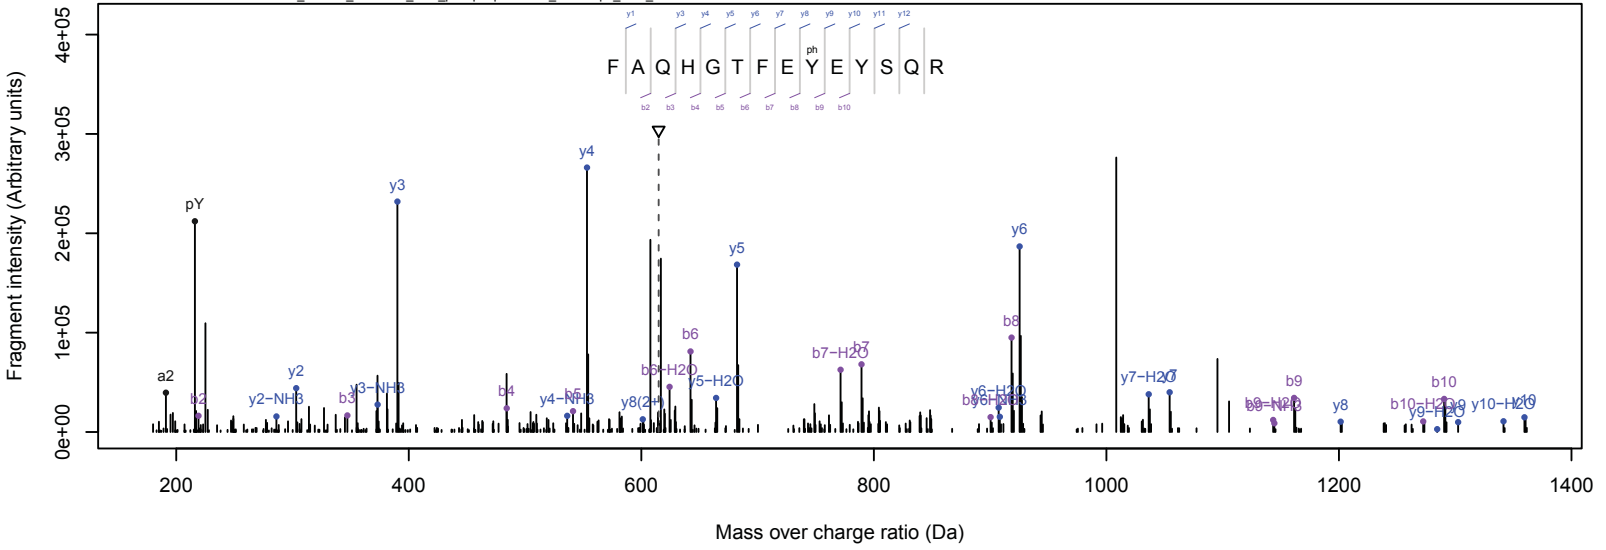

RPQY(ph)SNPPVQGEVMEGADNQGAGEQGRPVR-4+

Source : QE1\_140612\_OPL1013\_CVA\_phosphoproteomic\_landscape\_AML\_C Scan : 16686

Andromeda score : 207.48

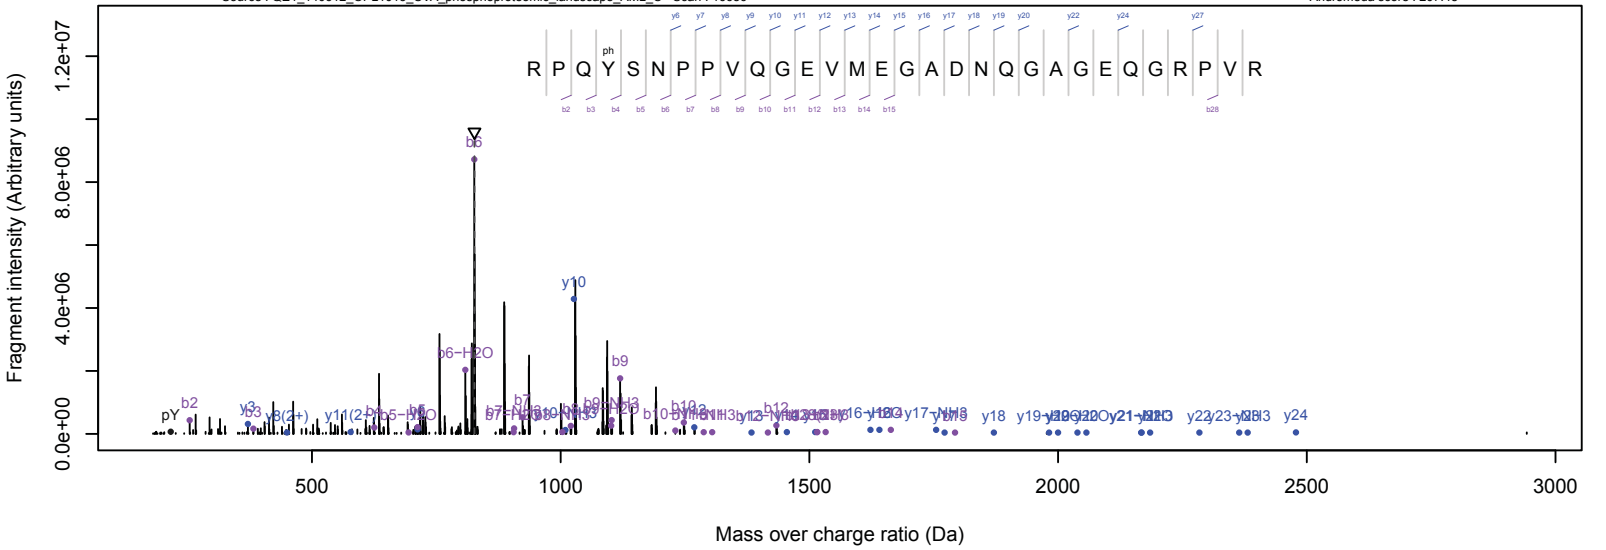

GQESEY(ph)GNITYPPAM(ox)K-2+

Source : QE1\_140908\_OPL1013\_CvA\_pTyrIP\_AML\_OCI\_AML3 Scan : 17462

Andromeda score : 207.21

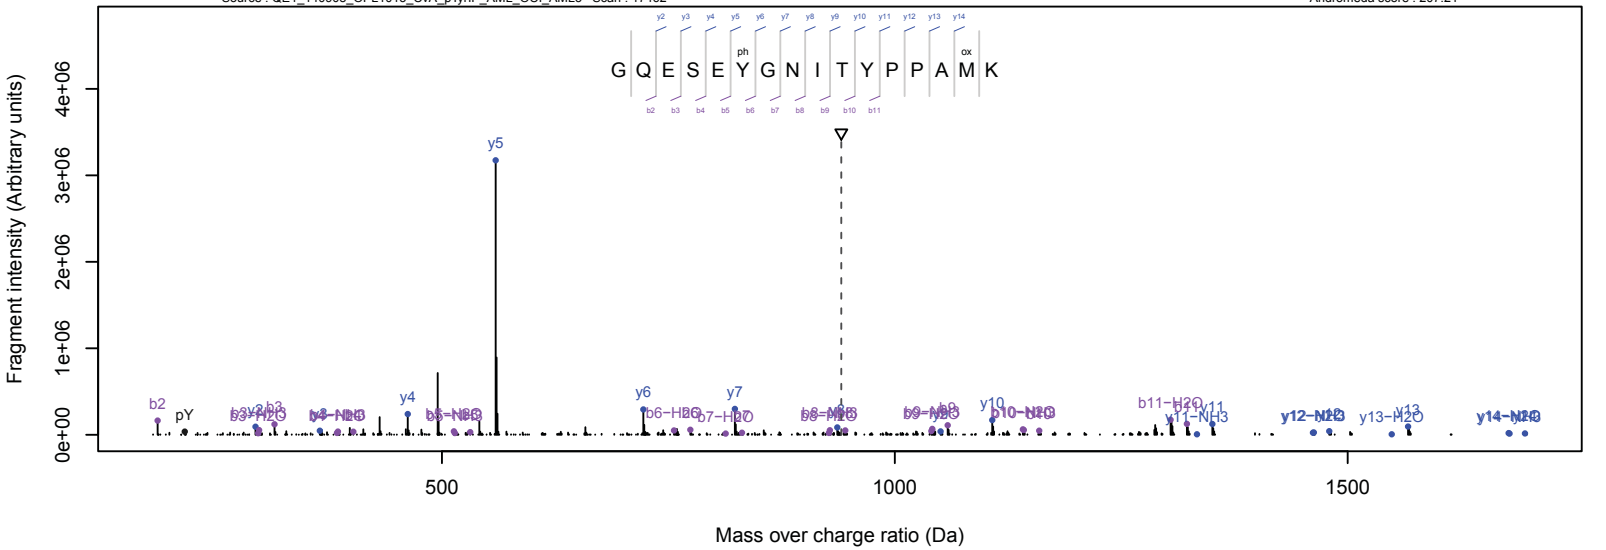

**IVDNGY(ph)GYVSNNGSVYFDTAK-2+**

Source : QE1\_140612\_OPL1013\_CVA\_phosphoproteomic\_landscape\_AML\_B Scan : 31483

Andromeda score : 207.07

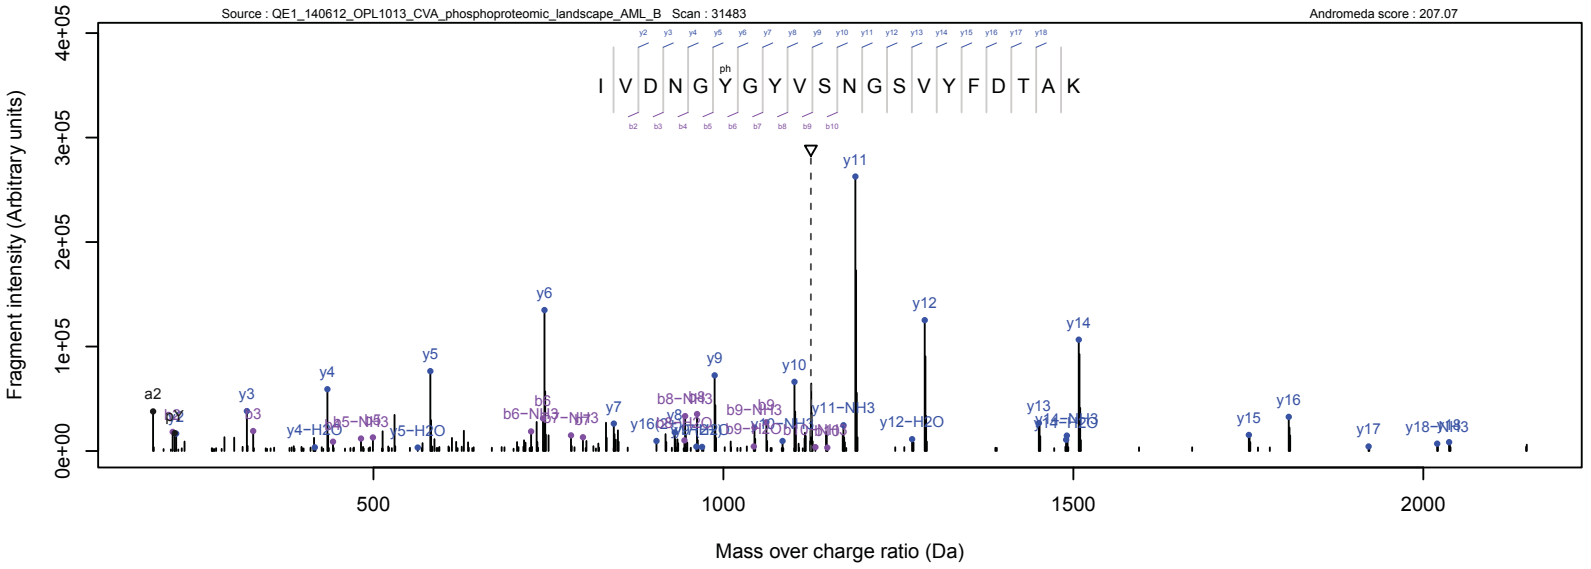

**GGPGSAVSPY(ph)PTFNPSSDVAALHK-3+**

Source : QE1\_140612\_OPL1013\_CVA\_phosphoproteomic\_landscape\_AML\_B Scan : 31075

Andromeda score : 205.96

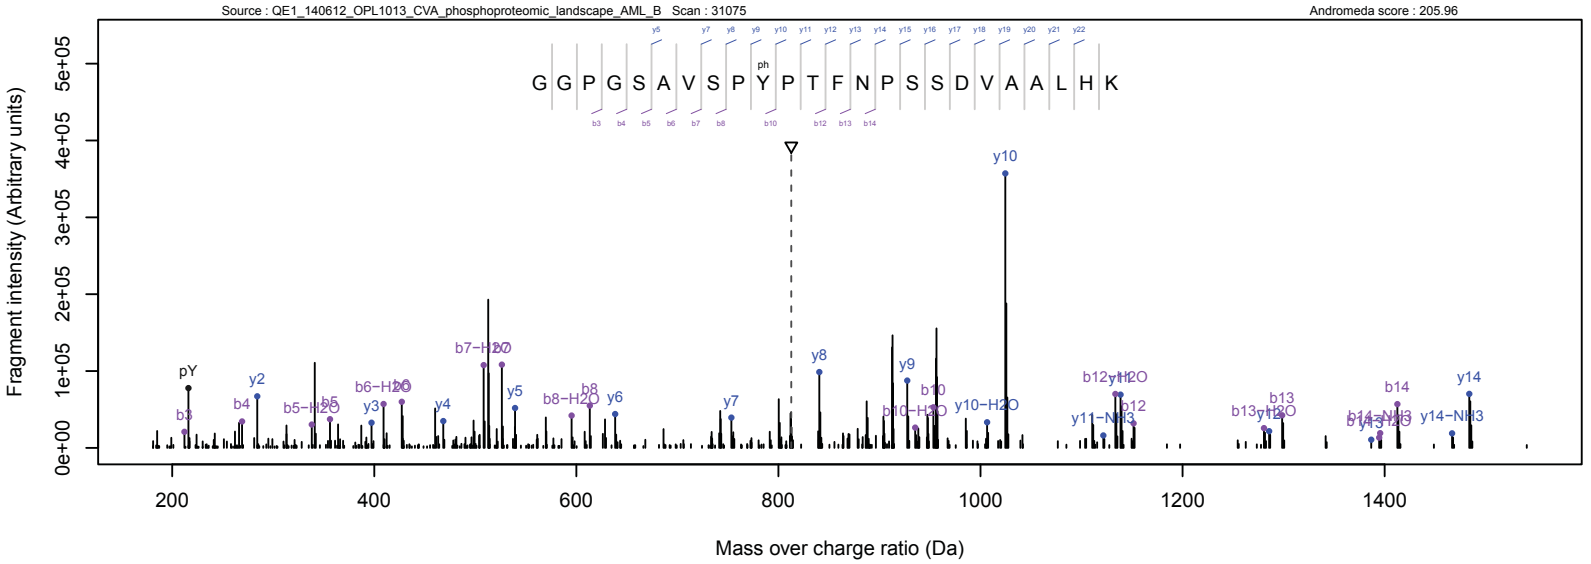

**(ac)MY(ph)HSLSETRHPLQPEEQEVGIDPLSSYSNK-3+**

Source : QE1\_140612\_OPL1013\_CVA\_phosphoproteomic\_landscape\_AML\_C Scan : 36680

Andromeda score : 205.89

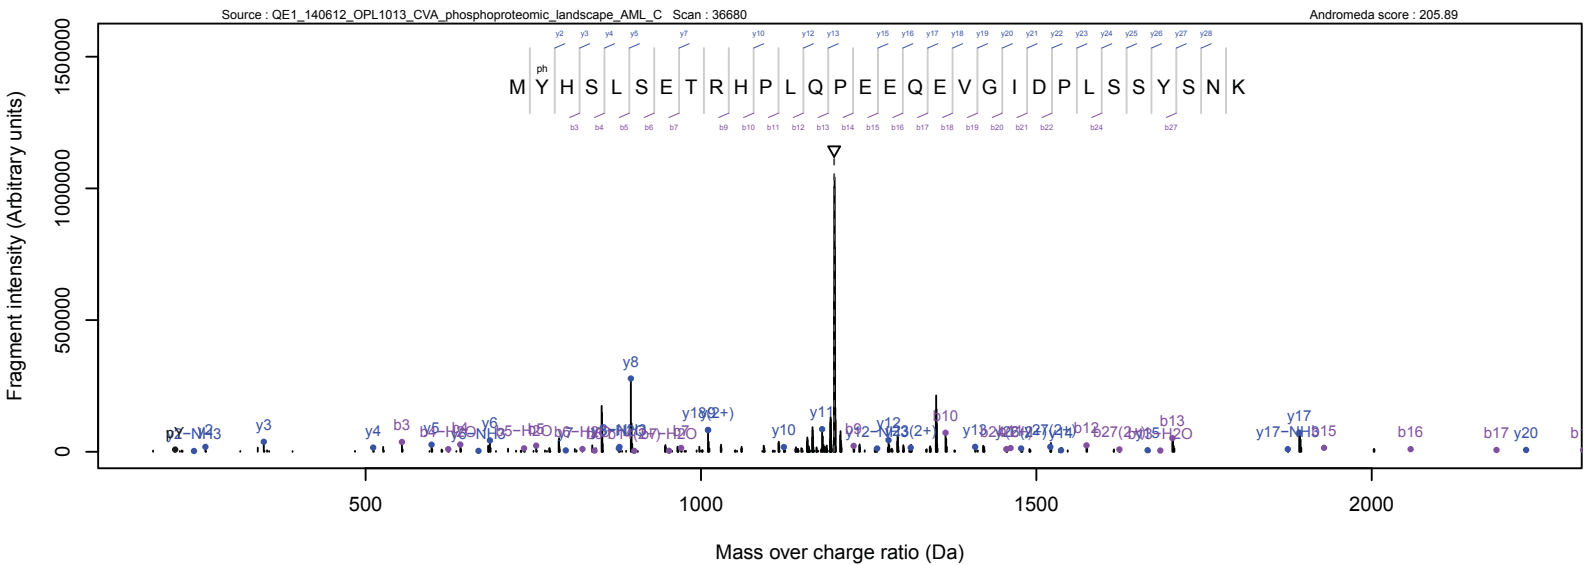



EYM(ox)ESLQLKPGEVY(ph)KCPK-3+

Source : QE1\_140908\_OPL1013\_CVA\_pTyrIP\_AML\_Kasumi1 Scan : 24689

Andromeda score : 205.88

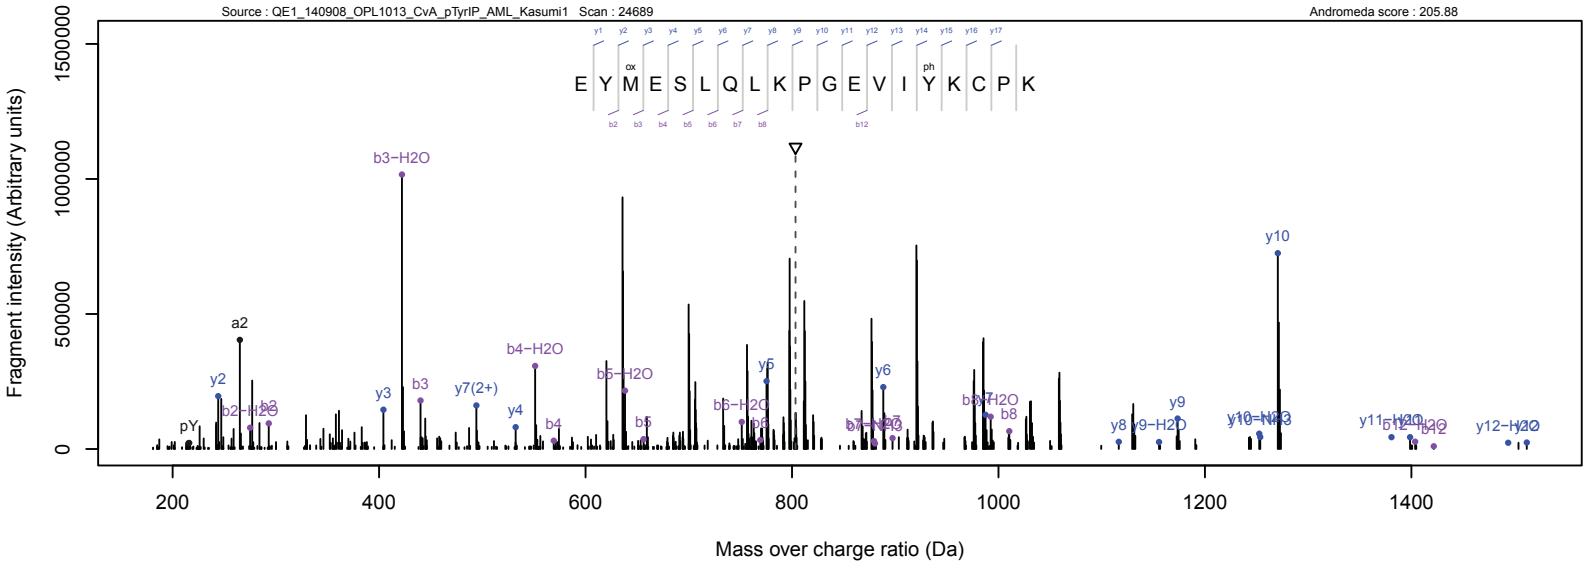

AKADALY(ph)PVVSAASICK-2+

Source : QE1\_140612\_OPL1013\_CVA\_phosphoproteomic\_landscape\_AML\_D Scan : 31321

Andromeda score : 205.68

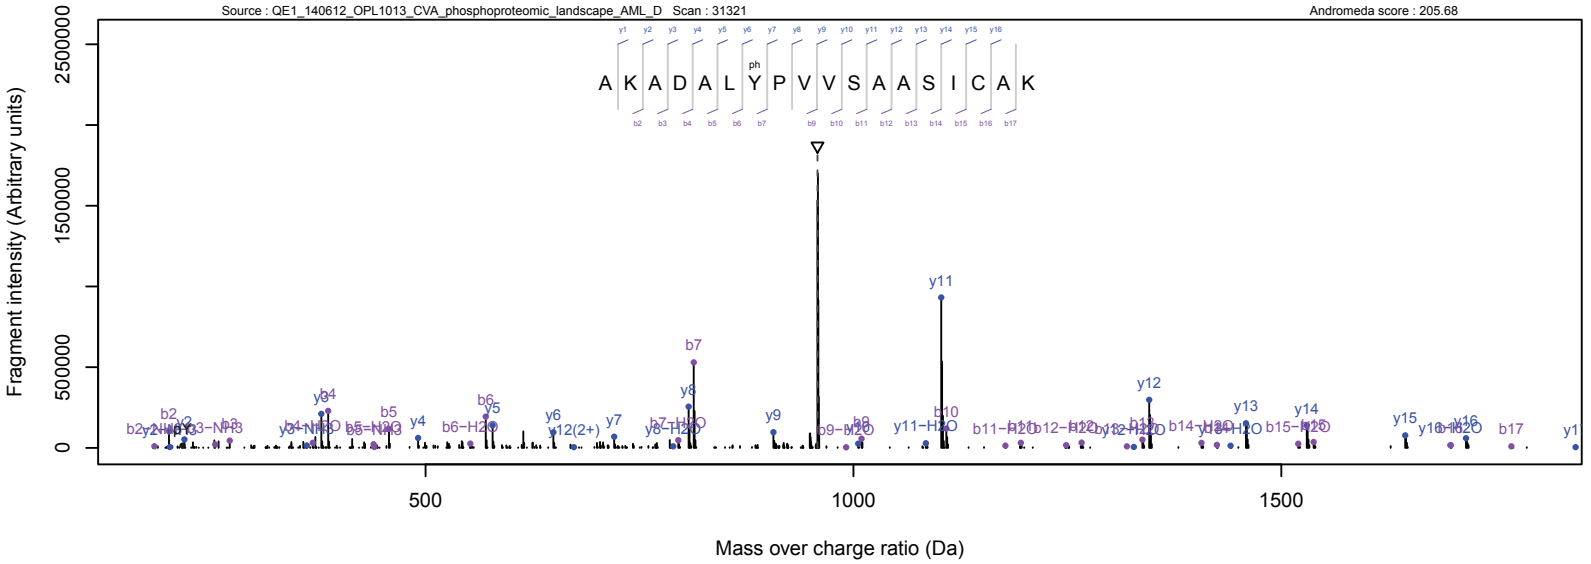

MQNHGYENPTY(ph)KYLEQMQL-3+

Source : QE1\_140612\_OPL1013\_CVA\_phosphoproteomic\_landscape\_AML\_C Scan : 38010

Andromeda score : 205.65

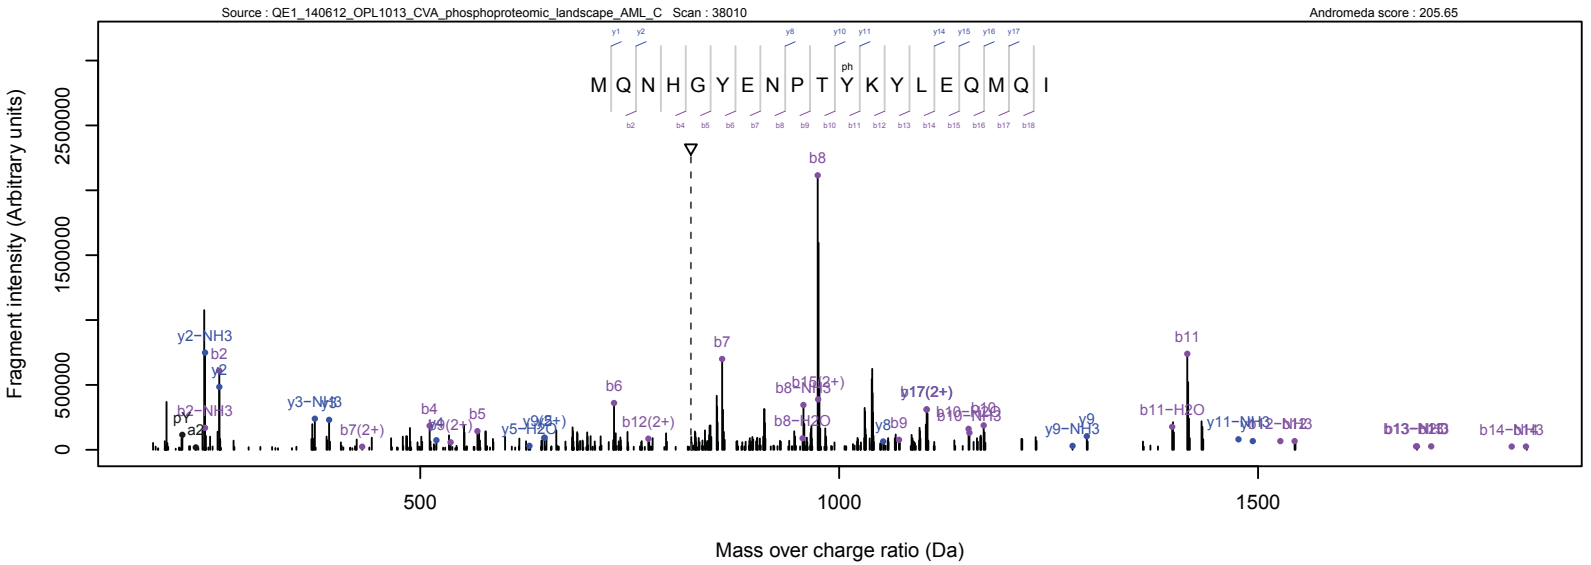

**SREYDRLY(ph)EEYTR-3+**

Source : QE1\_140908\_OPL1013\_CvA\_pTyrIP\_AML\_Kasumi1 Scan : 16654

Andromeda score : 205.27

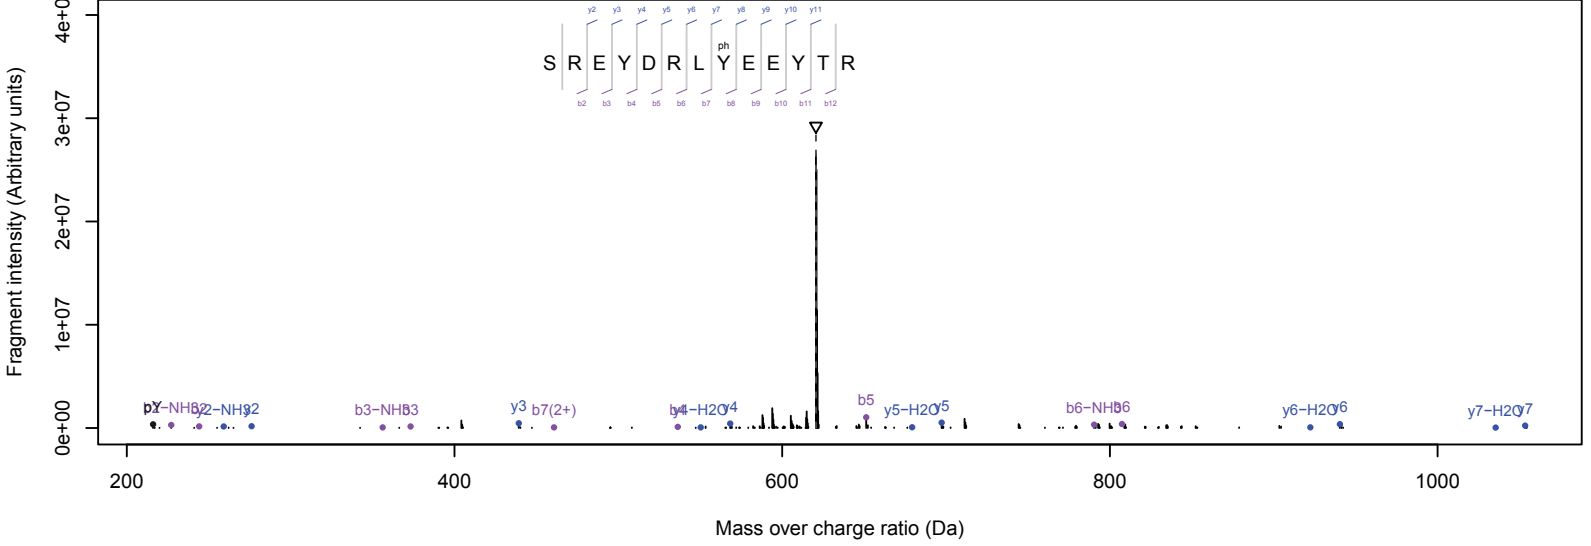

**LQAYHTQTTPLIEY(ph)YRK-3+**

Source : QE1\_140612\_OPL1013\_CVA\_phosphoproteomic\_landscape\_AML\_C Scan : 23487

Andromeda score : 205.18

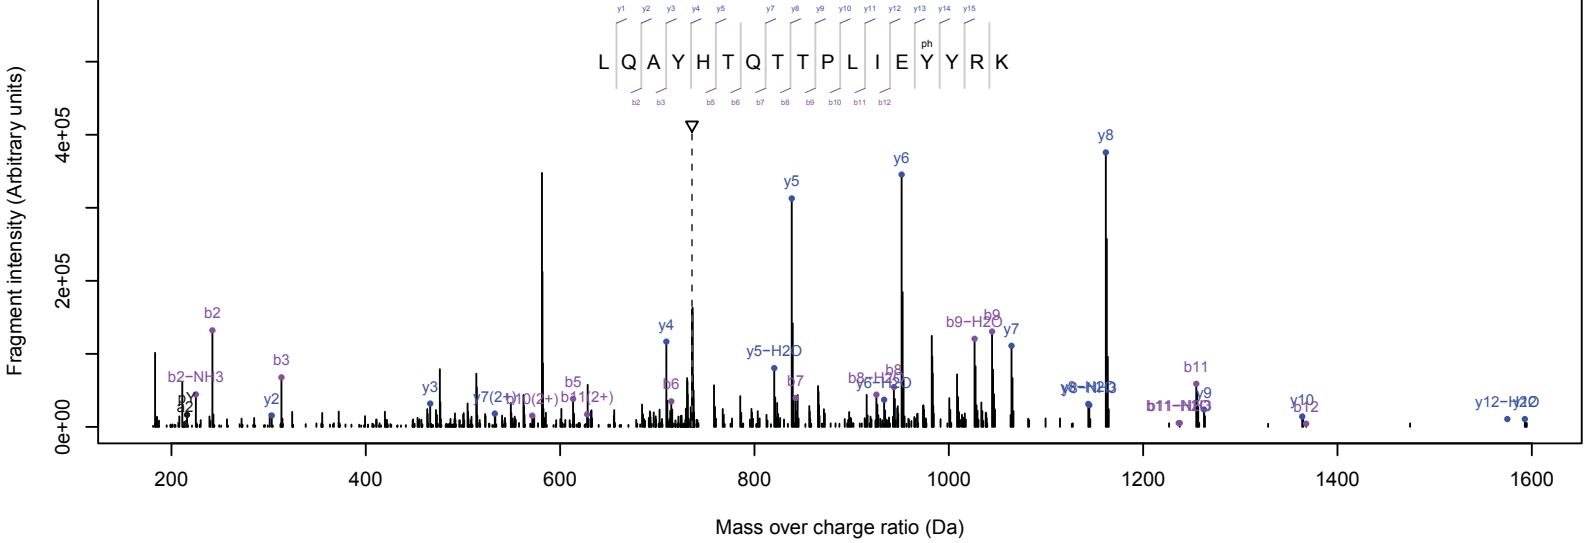

**KGTLSSDY(ph)R-2+**

Source : QE1\_140612\_OPL1013\_CVA\_phosphoproteomic\_landscape\_AML\_C Scan : 11171

Andromeda score : 205.02

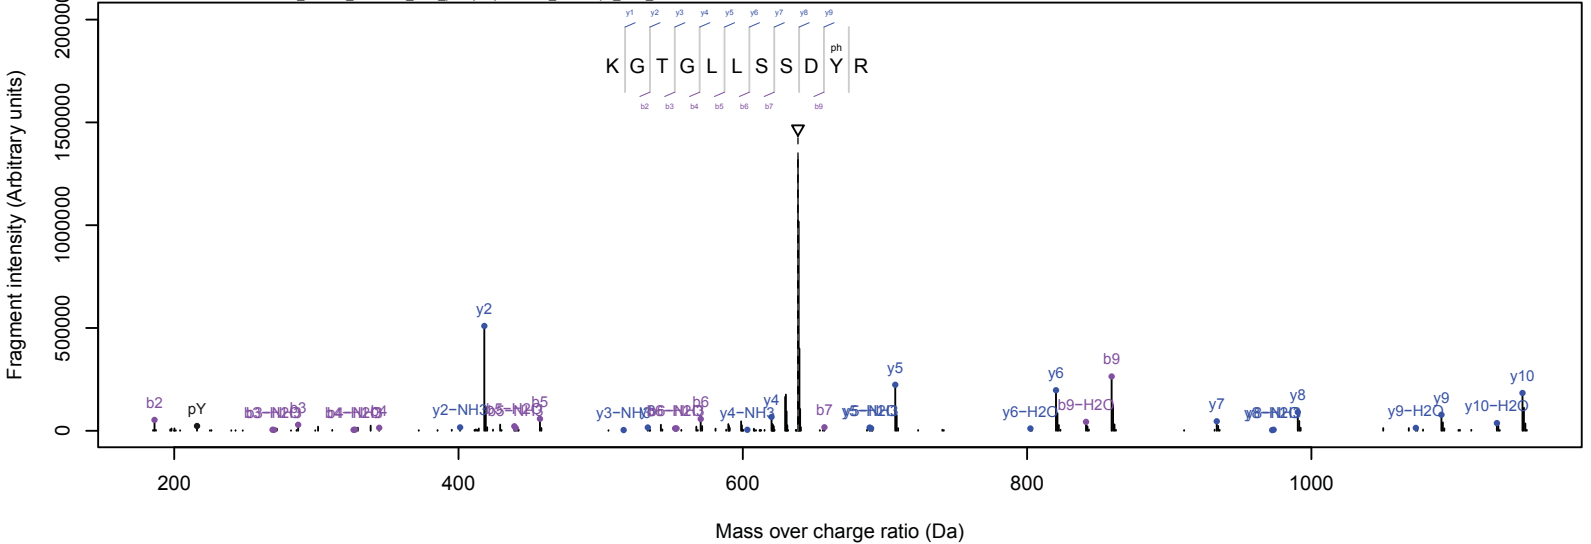

Y(ph)KNILPFDHTR-2+

Source : QE1\_140908\_OPL1013\_CvA\_pTyrIP\_AML\_Kasumi6 Scan : 22922

Andromeda score : 205.02

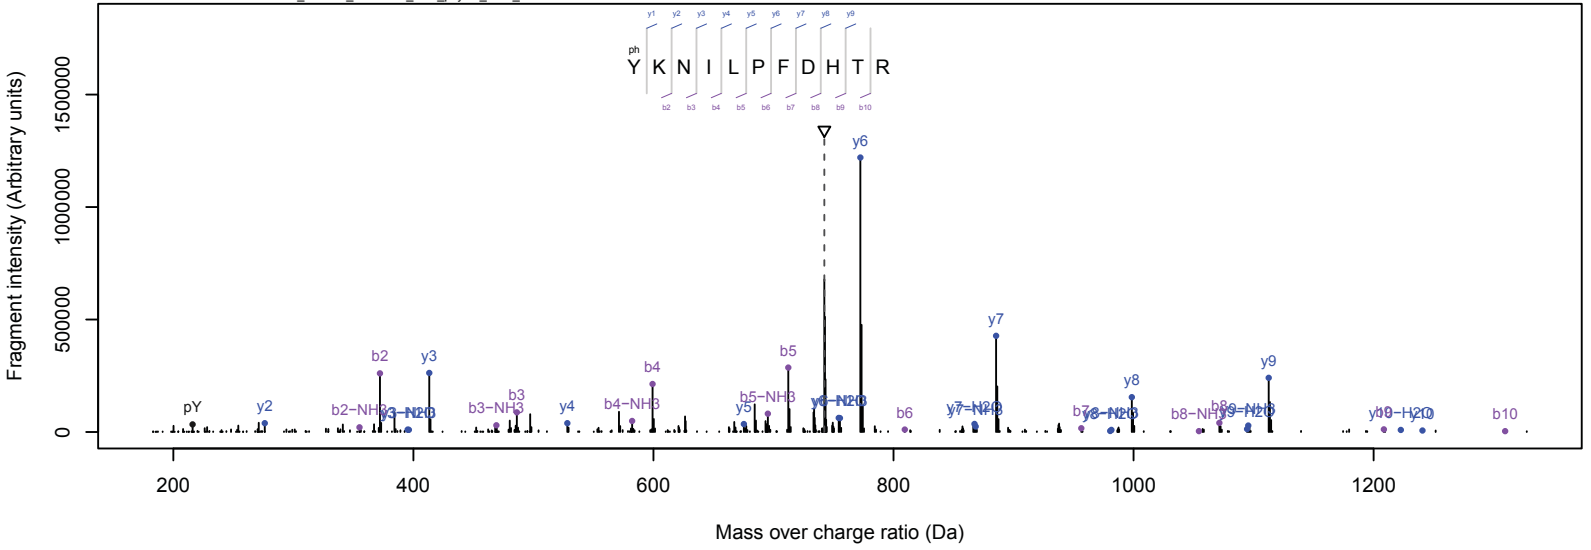

GGALGEGPGASPCNQHSFY(ph)WAPPCYTLKPET-3+

Source : QE1\_140908\_OPL1013\_CvA\_pTyrIP\_AML\_Kasumi6 Scan : 37009

Andromeda score : 204.48

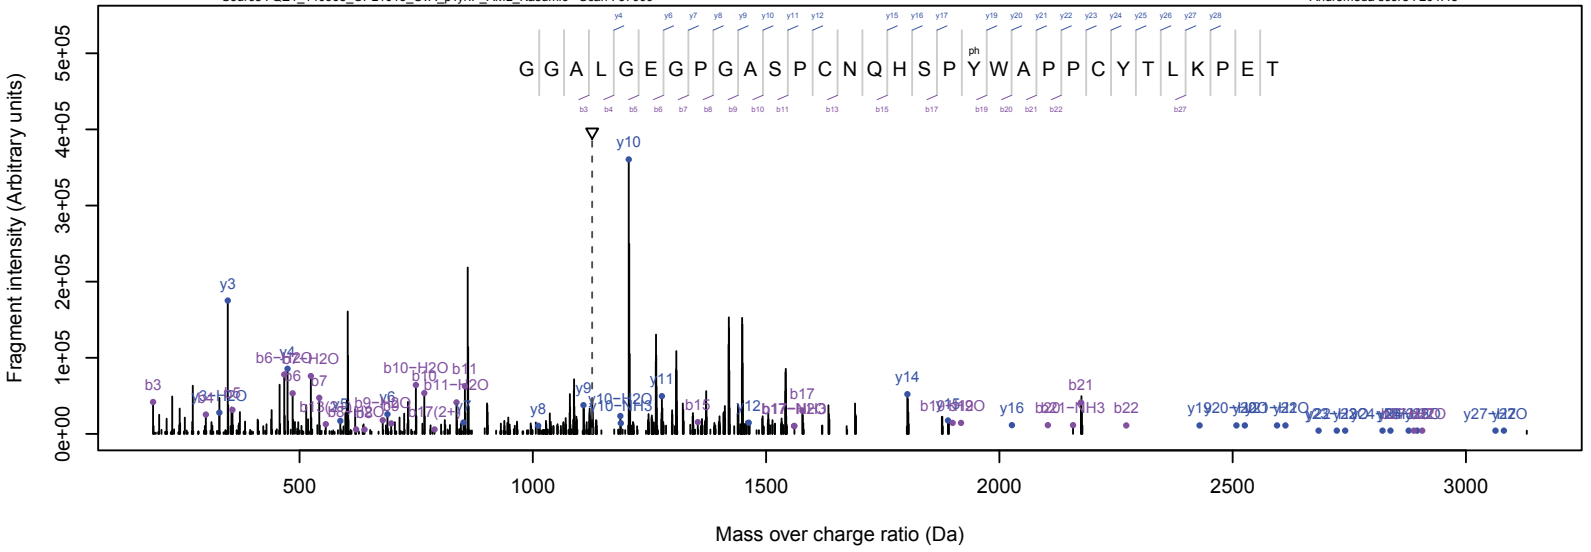

SCQGMYPETMEQLR-2+

Source : QE1\_140612\_OPL1013\_CvA\_phosphoproteomic\_landscape\_AML\_C Scan : 26004

Andromeda score : 204.18

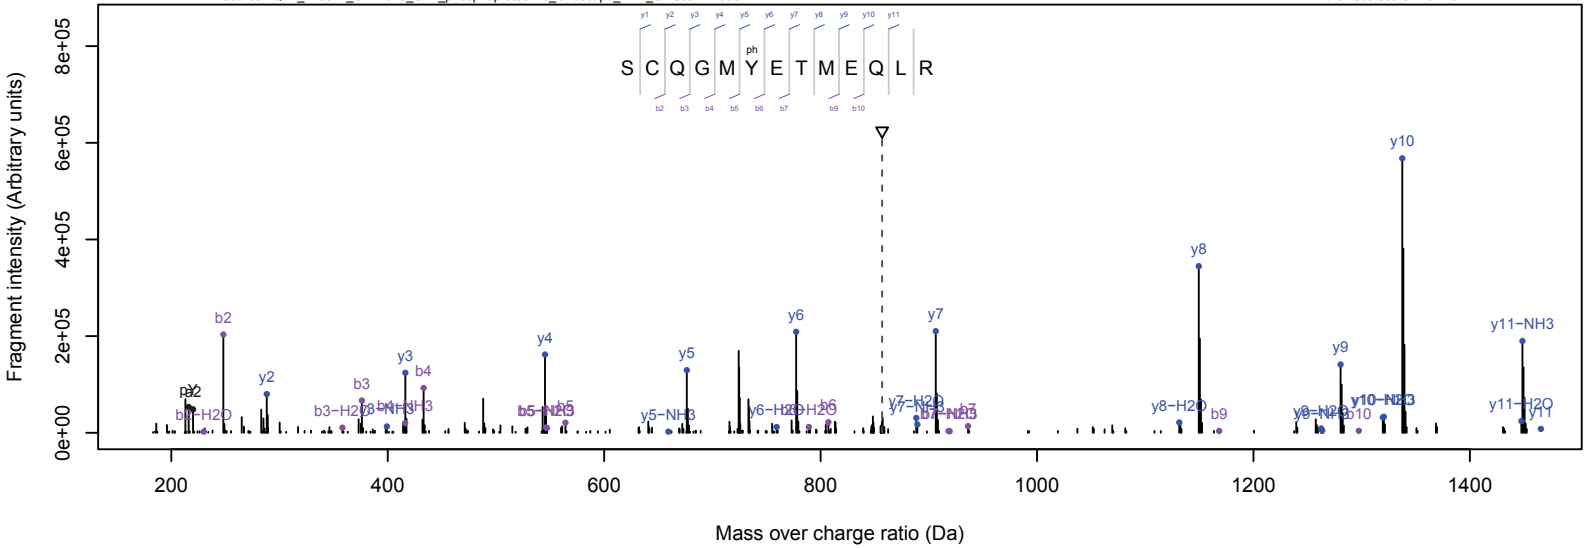

**EVCDGWSLPNPEY(ph)YTLR-2+**

Source : QE1\_140612\_OPL1013\_CVA\_phosphoproteomic\_landscape\_AML\_C Scan : 47754

Andromeda score : 203.53

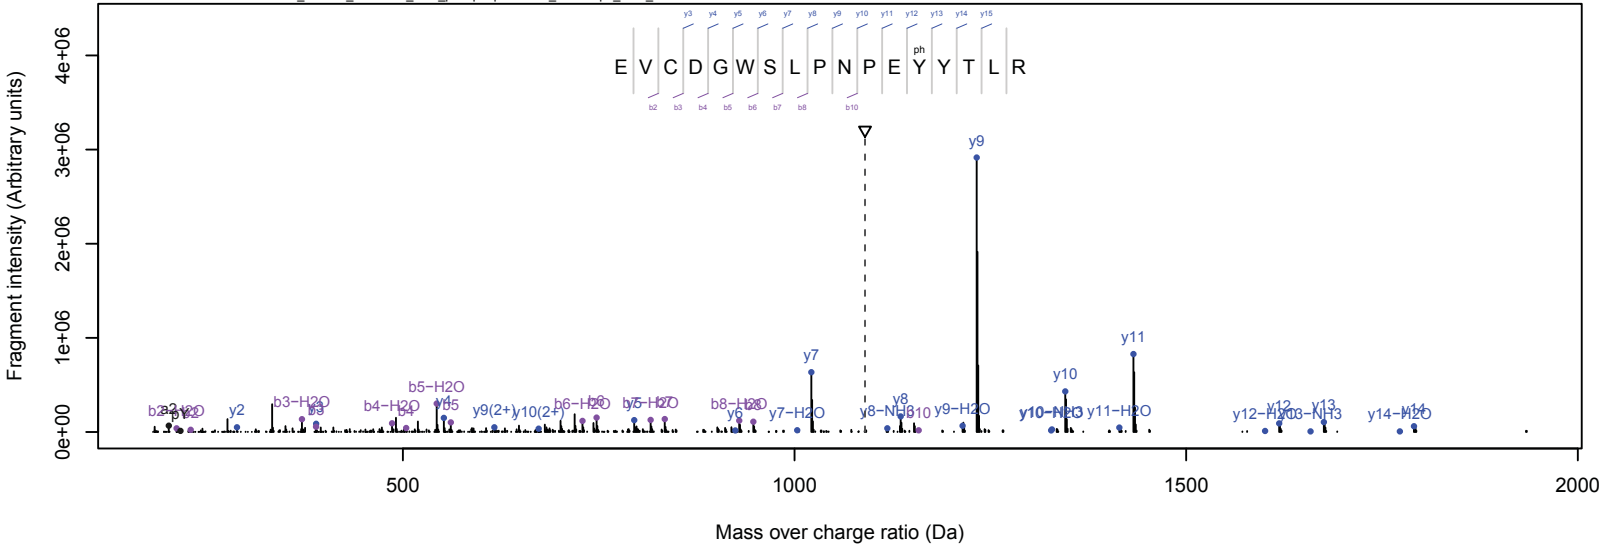

**Y(ph)IASVQGSTPSR-2+**

Source : QE1\_140612\_OPL1013\_CVA\_phosphoproteomic\_landscape\_AML\_D Scan : 13216

Andromeda score : 203.39

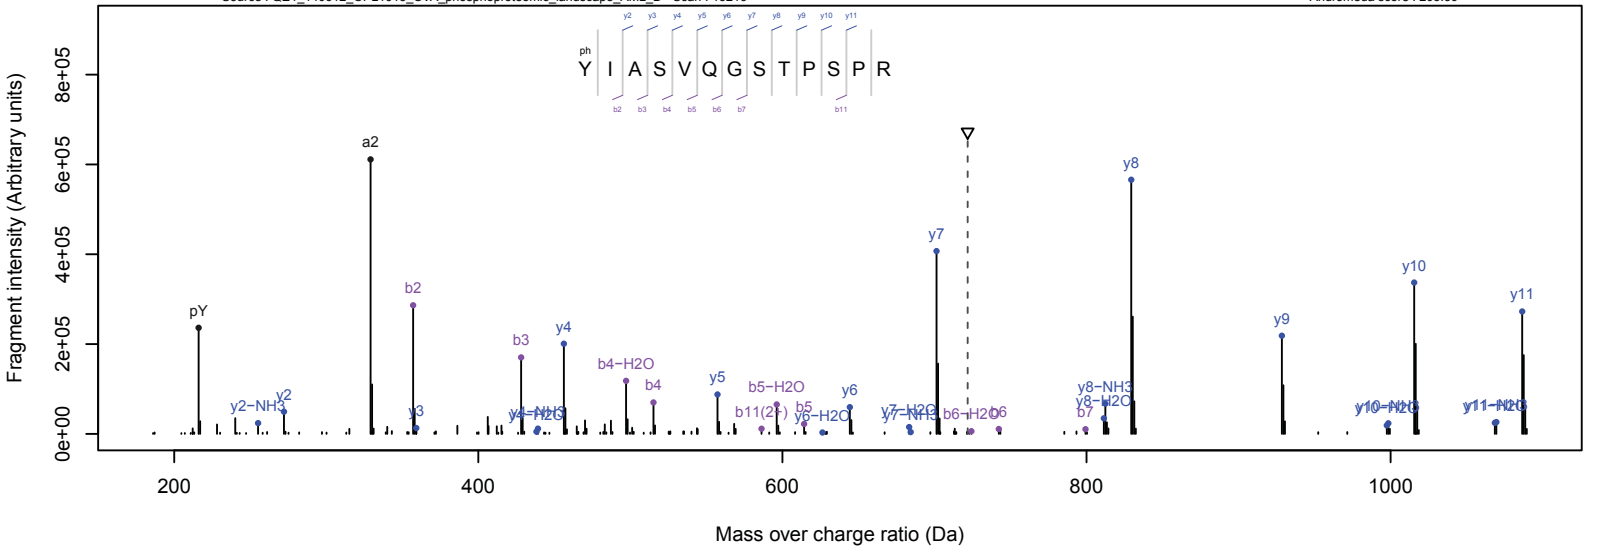

**KPSSAAYQKAPT-3+**

Source : QE1\_140822\_OPL1013\_CvA\_pTyrIP\_AML\_cell\_lines\_part2\_E Scan : 2626

Andromeda score : 203.27

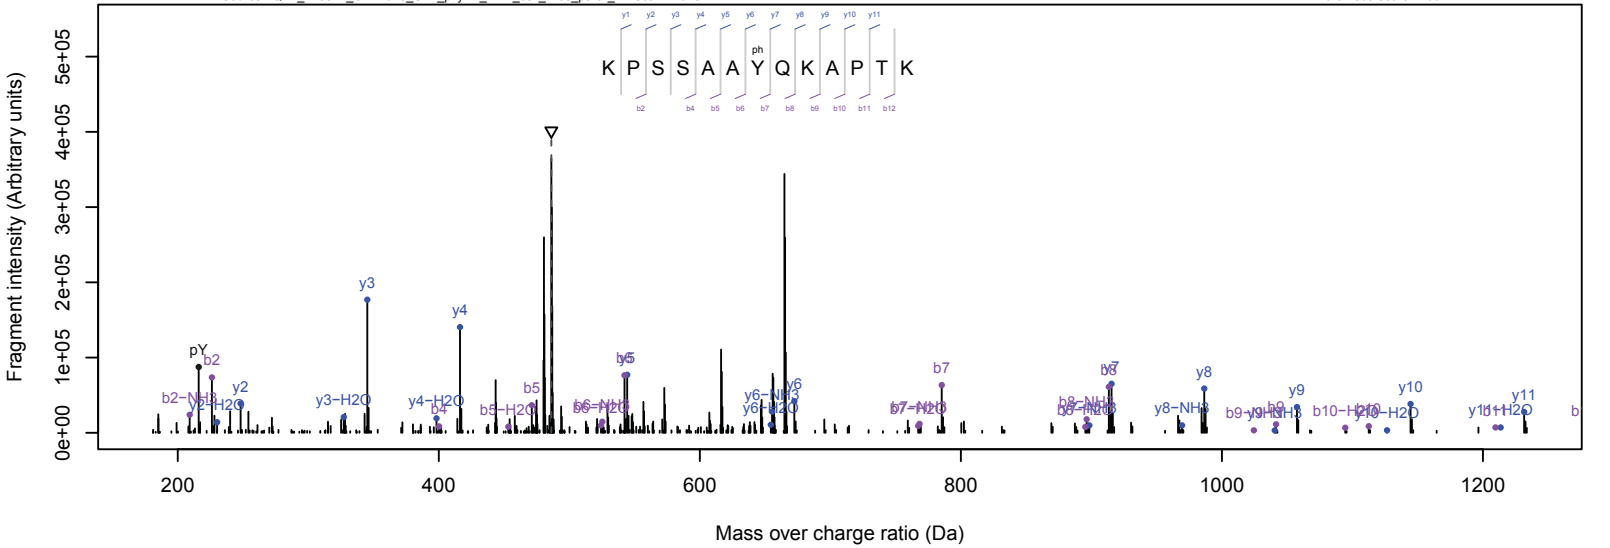

ALSSEGKPY(ph)VTKEELYQLTR-3+

Source : QE1\_140908\_OPL1013\_CvA\_pTyrIP\_AML\_Kasumi1 Scan : 26103

Andromeda score : 203.2

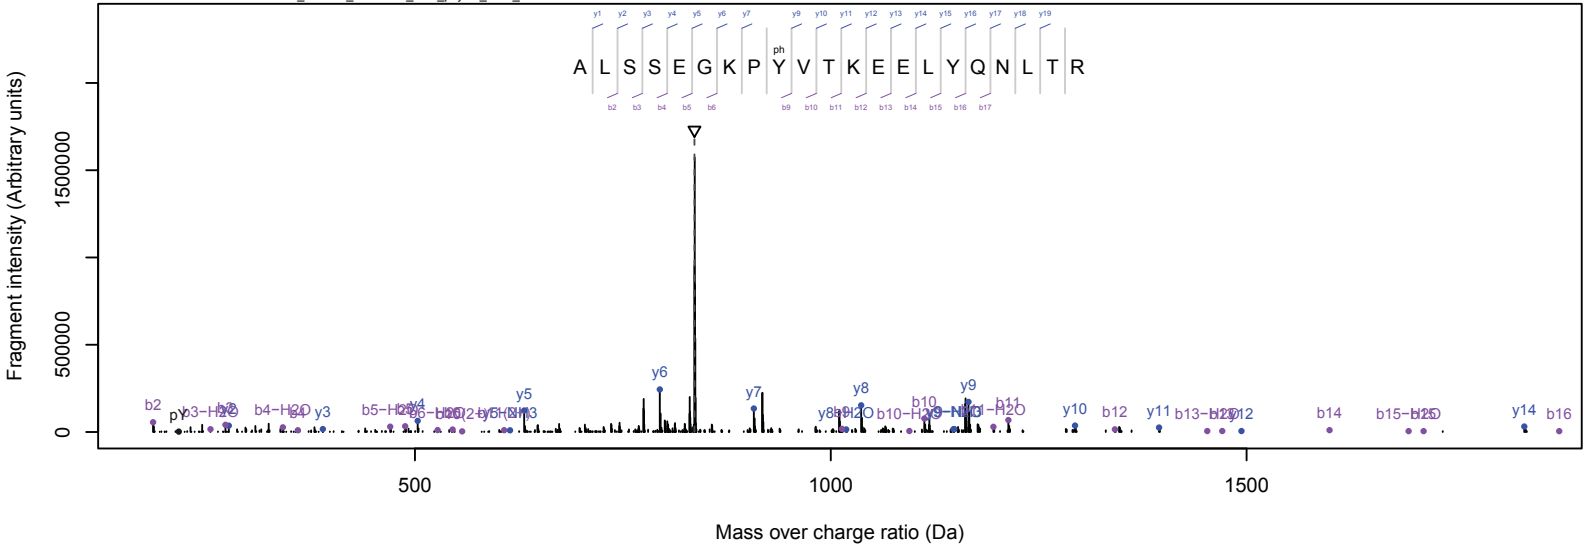

VITNQYNNPAGLY(ph)SSEENISNFNNALESK-3+

Source : QE1\_140908\_OPL1013\_CvA\_pTyrIP\_AML\_HEL Scan : 39105

Andromeda score : 203.06

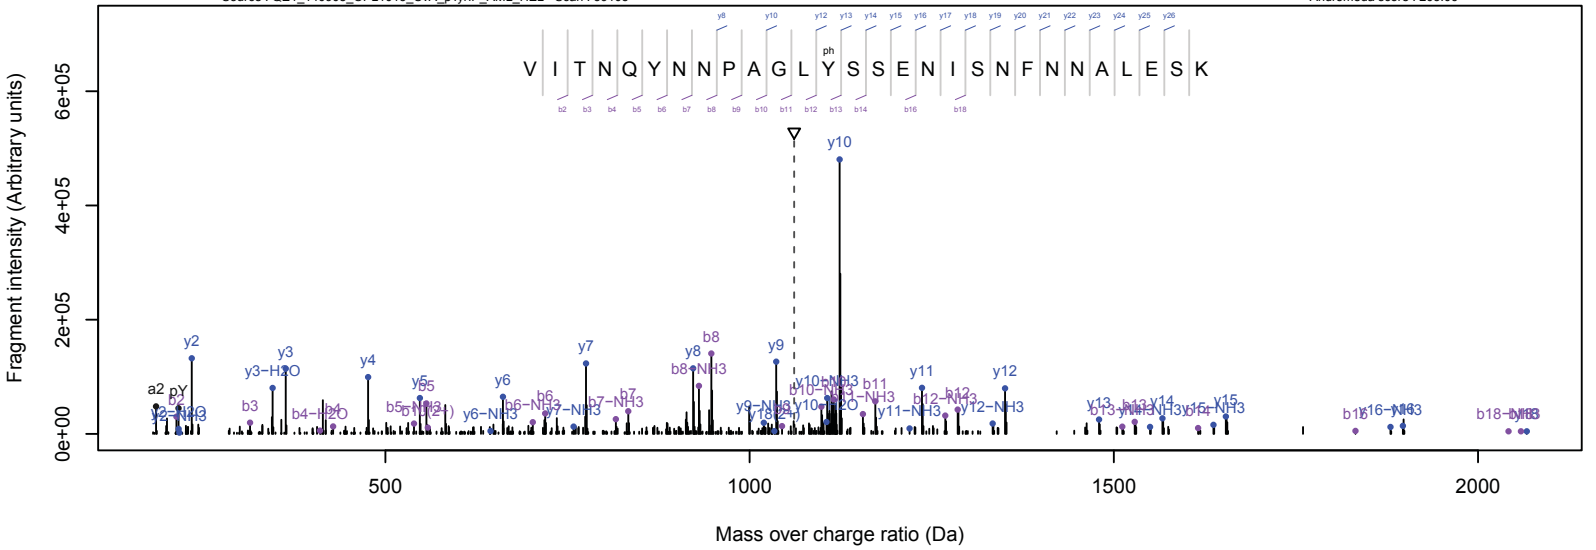

RPEEENVY(ph)NKLTIVHHPGGK-4+

Source : QE1\_140612\_OPL1013\_CVA\_phosphoproteomic\_landscape\_AML\_B Scan : 15793

Andromeda score : 202.86

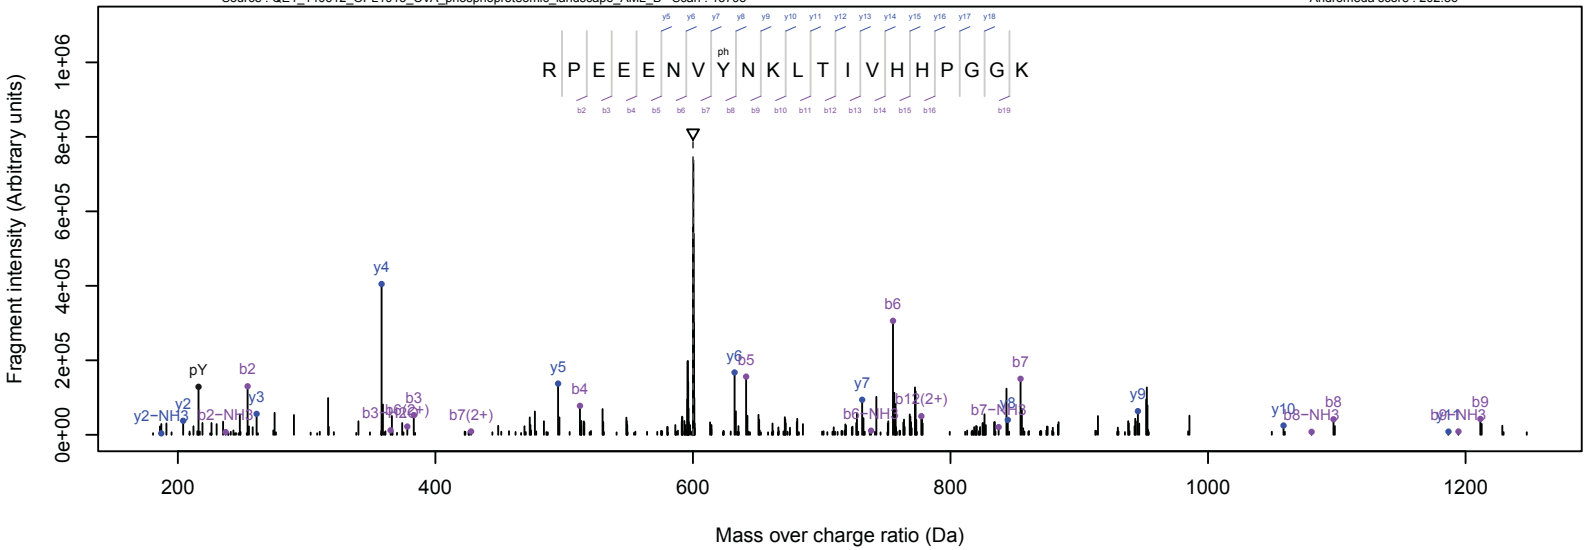

QQPTQFINPETPGYVGFANLPNQVHRK-3+

Source: QE1\_140612\_OPL1013\_CVA\_phosphoproteomic\_landscape\_AML\_C Scan: 36261

Andromeda score: 202.81

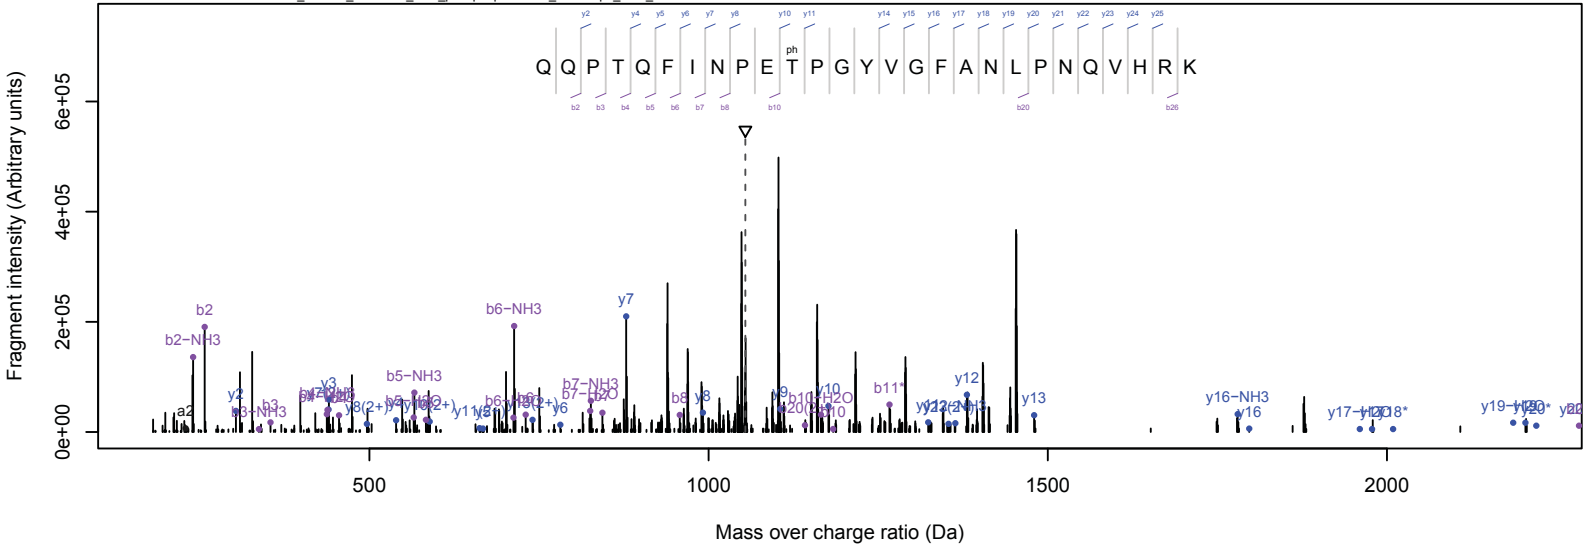

EPGRPTPTYHLVPNTSQQSQVEEDVSSPPQR-3+

Source: QE1\_140612\_OPL1013\_CVA\_phosphoproteomic\_landscape\_AML\_C Scan: 24630

Andromeda score: 202.62

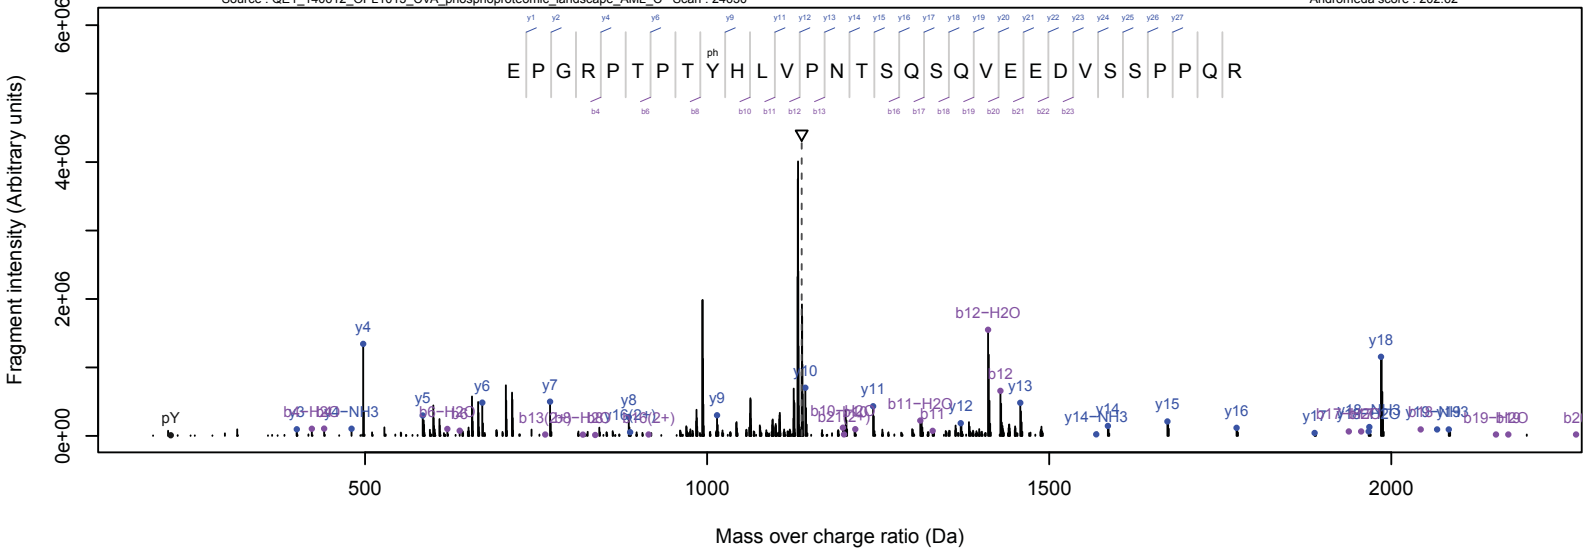

IKLGHYATQLQNTYDRCPMELVR-4+

Source: QE1\_140612\_OPL1013\_CVA\_phosphoproteomic\_landscape\_AML\_B Scan: 32920

Andromeda score: 202.62

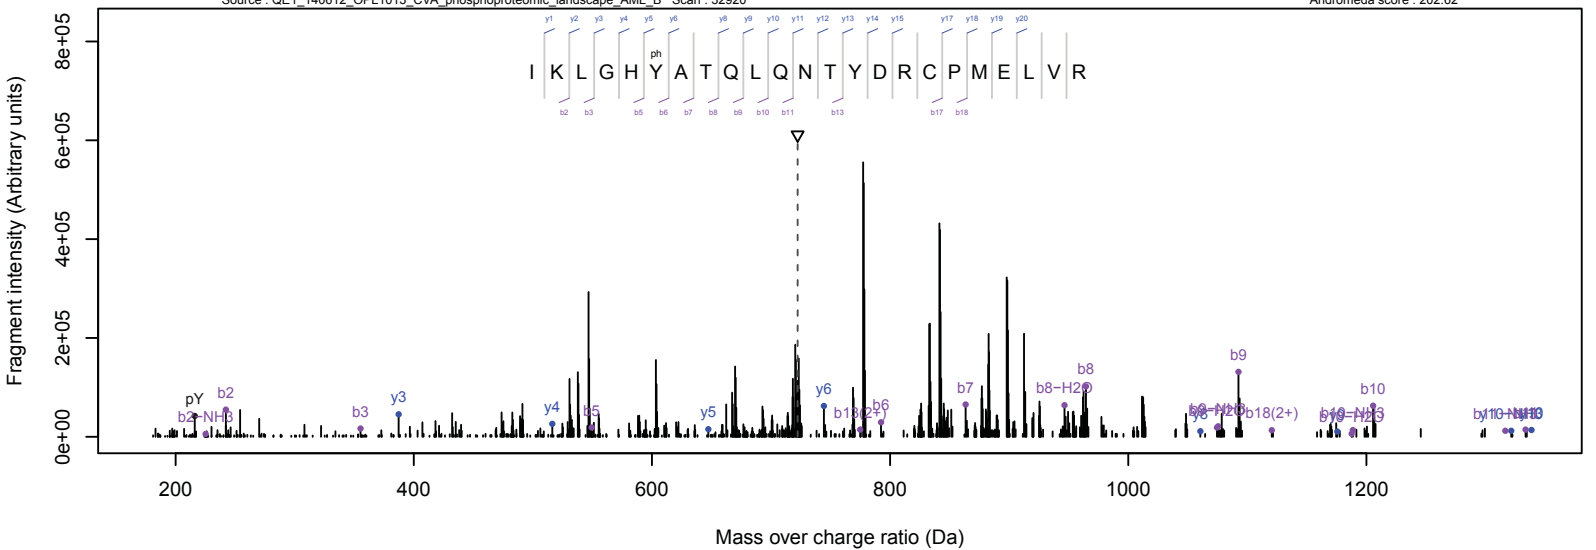

DQY(ph)LMWLTQK-2+

Source : QE1\_140612\_OPL1013\_CVA\_phosphoproteomic\_landscape\_AML\_A Scan : 40307

Andromeda score : 202.03

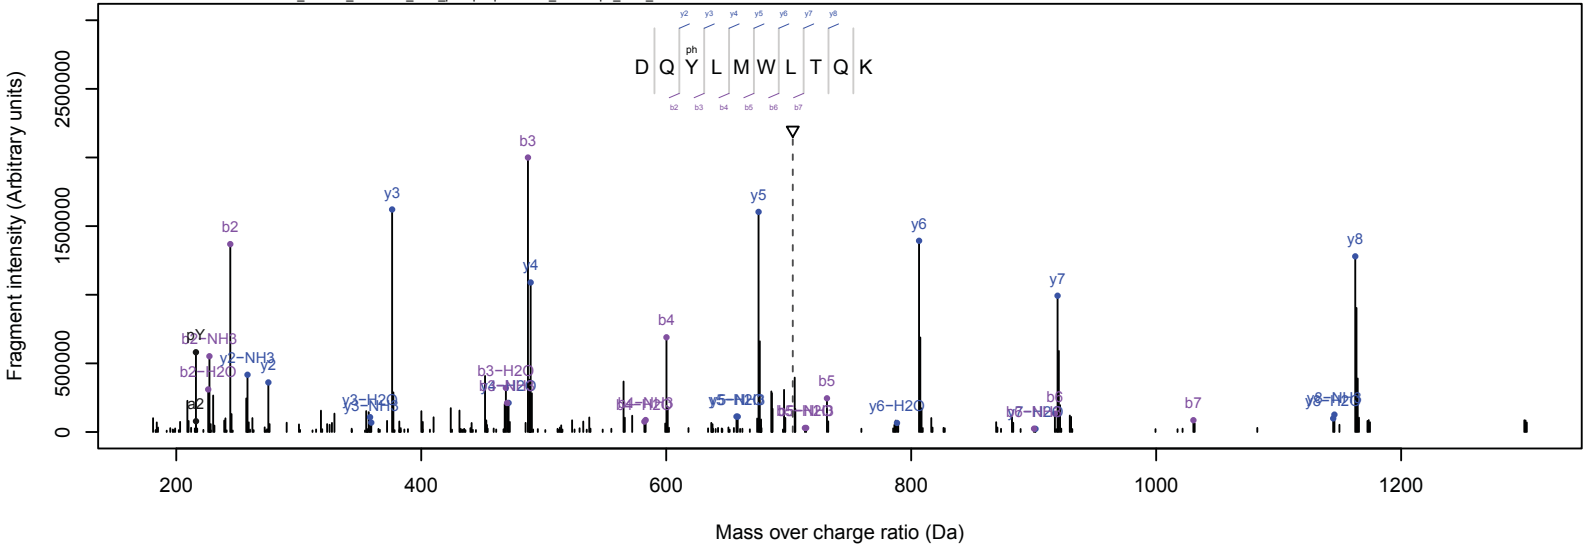

SDDRPNALLSSPATETVHHSPAY(ph)SFPAAIQR-4+

Source : QE1\_140612\_OPL1013\_CVA\_phosphoproteomic\_landscape\_AML\_C Scan : 32631

Andromeda score : 201.8

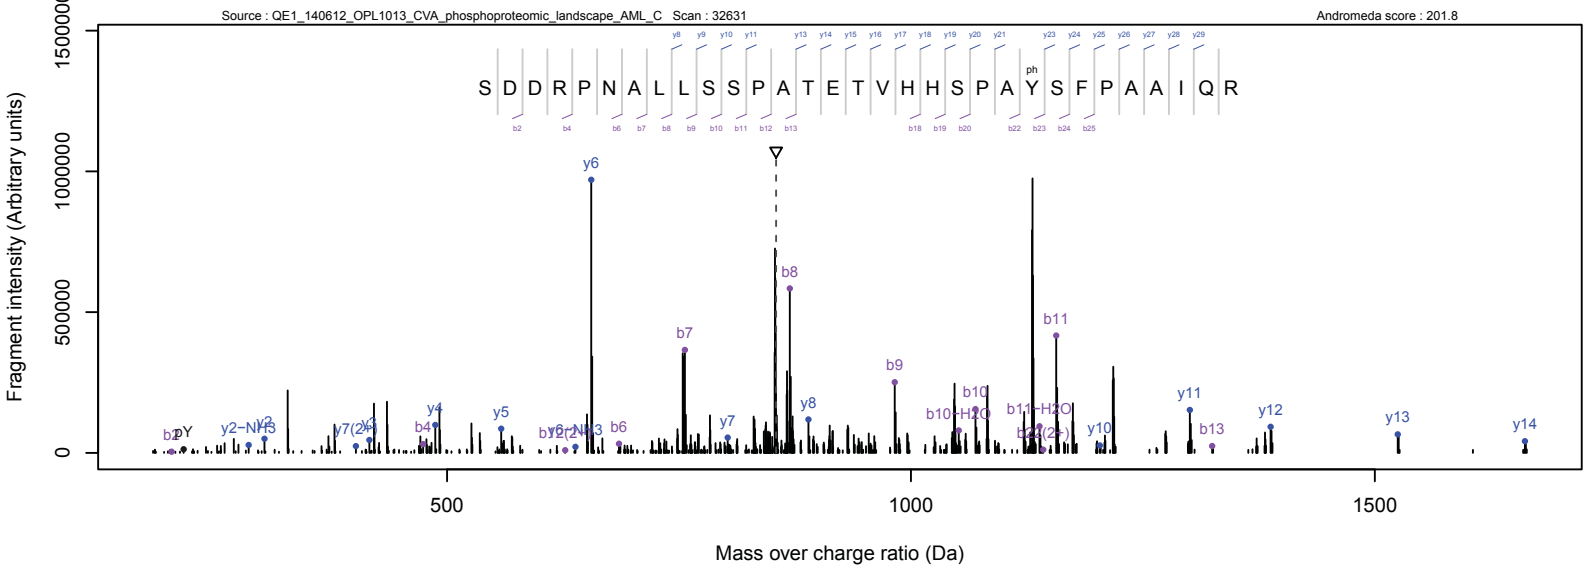

ASLY(ph)NAVTIEDVQK-2+

Source : QE1\_140612\_OPL1013\_CVA\_phosphoproteomic\_landscape\_AML\_C Scan : 28884

Andromeda score : 201.76

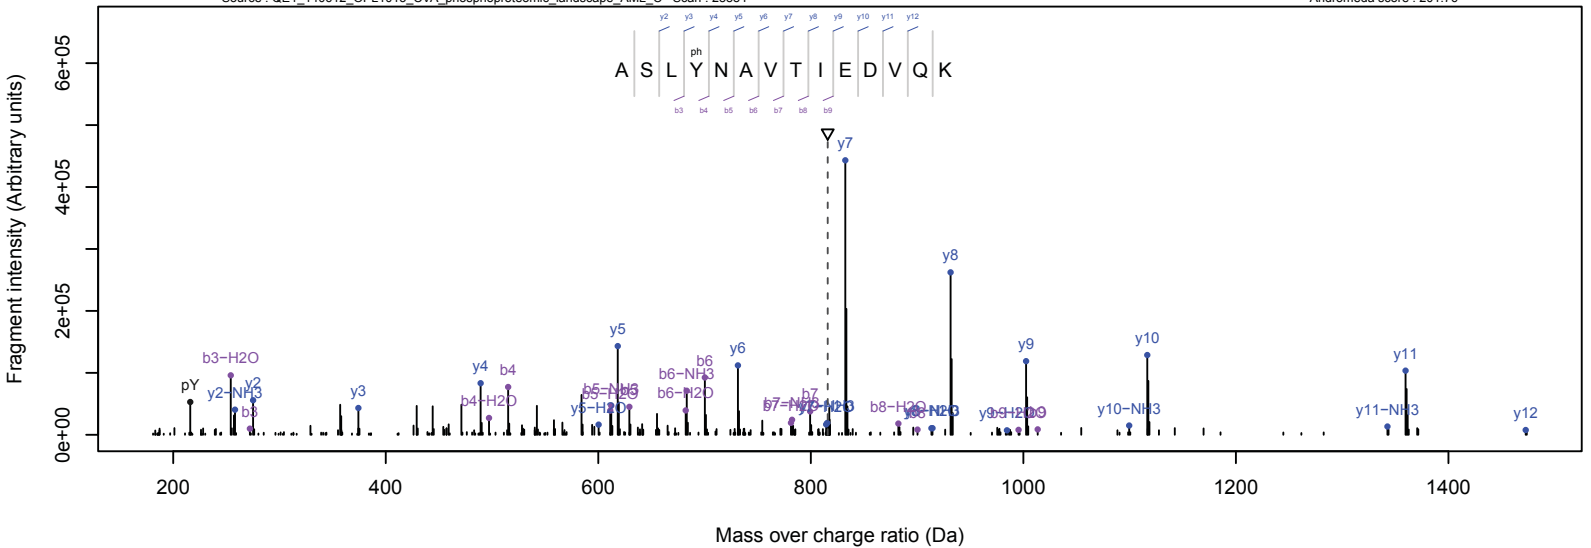

LETNYSFTHSEPLSTIKNEETIEPDKT(ph)YENVLSSR-4+

Source : QE1\_140908\_OPL1013\_CvA\_pTyrIP\_AML\_ML2 Scan : 36246

Andromeda score : 201.62

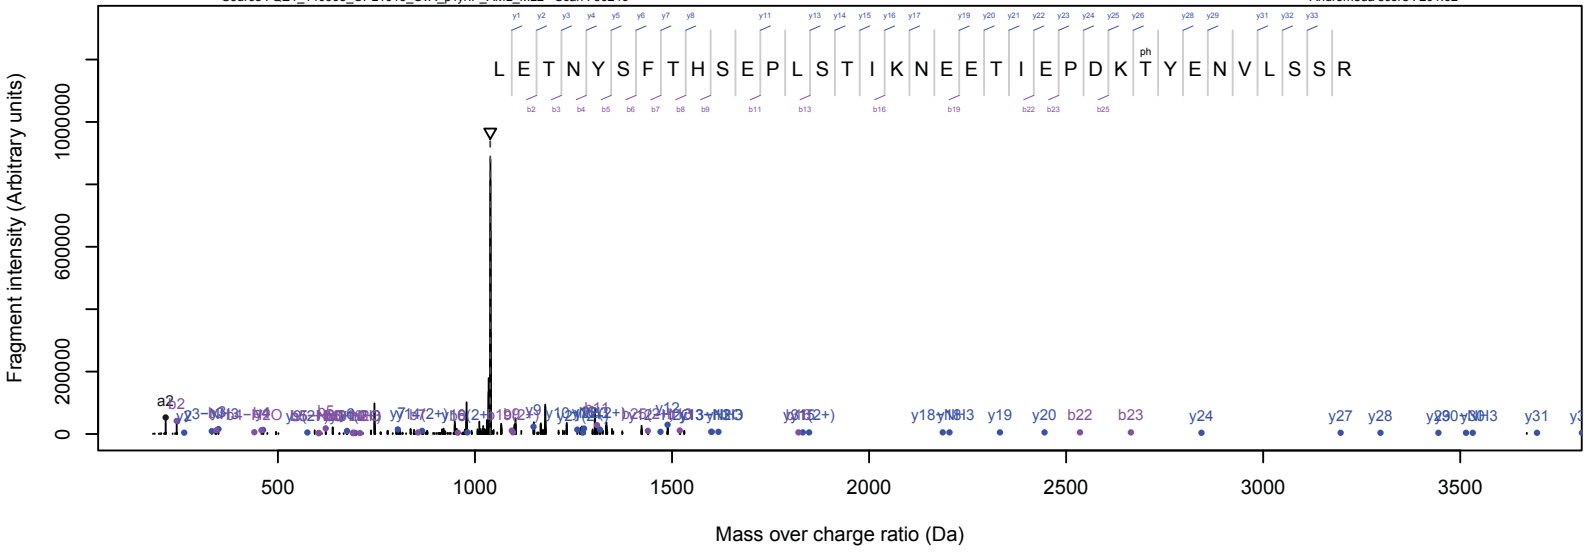

QADTTQ(ph)VPMLER-2+

Source : QE1\_140612\_OPL1013\_CVA\_phosphoproteomic\_landscape\_AML\_A Scan : 25176

Andromeda score : 201.48

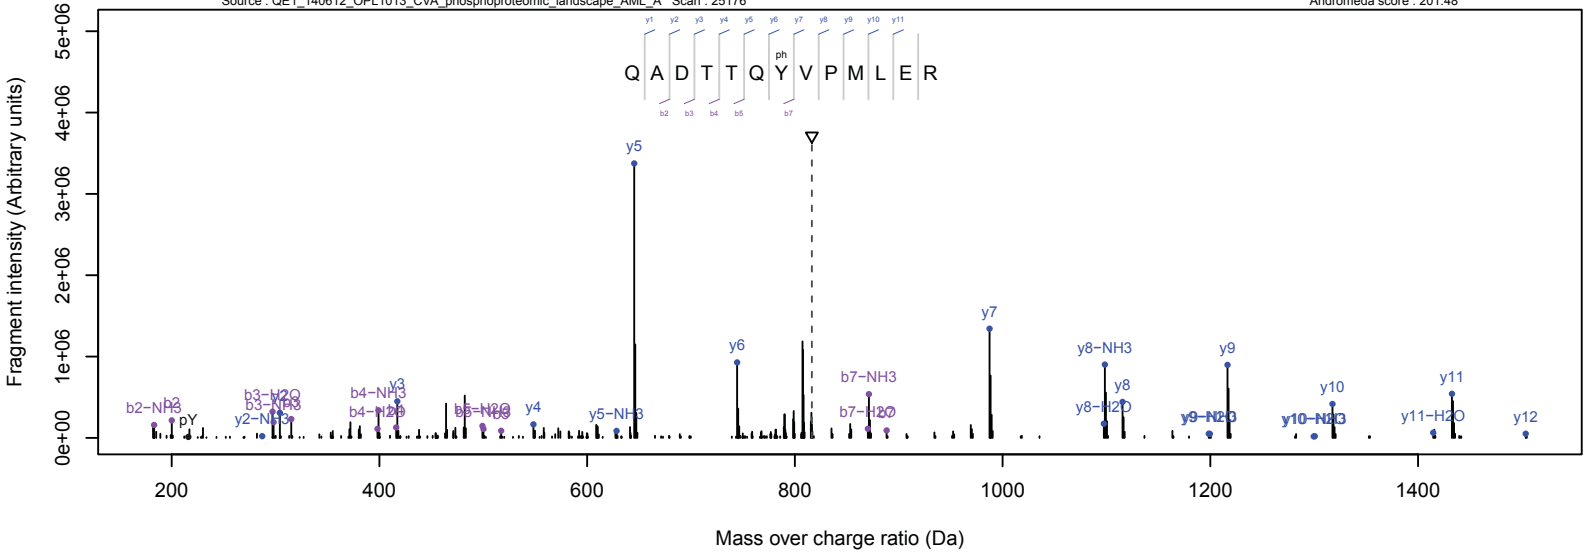

Y(ph)GEGHQAWIIGIVEK-2+

Source : QE1\_140612\_OPL1013\_CVA\_phosphoproteomic\_landscape\_AML\_A Scan : 39132

Andromeda score : 201.04

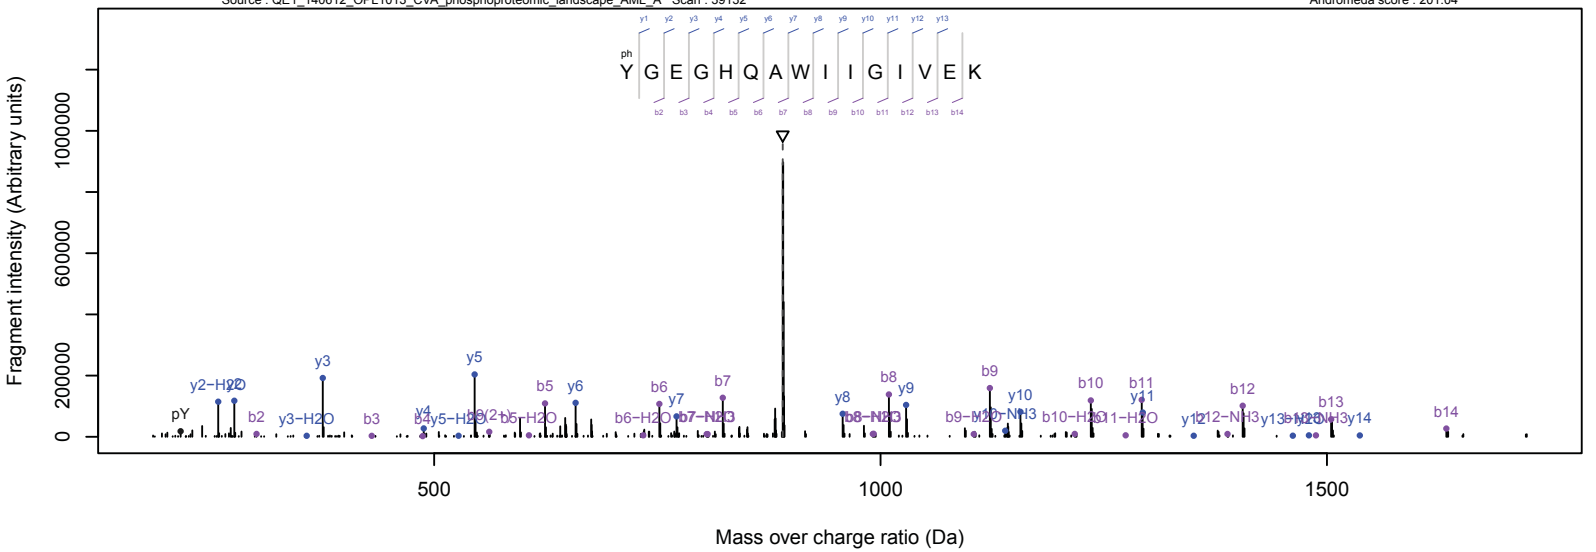



Y(ph)GQFSGLNPGGRIPPR-2+

Source : QE1\_140612\_OPL1013\_CVA\_phosphoproteomic\_landscape\_AML\_B Scan : 25738

Andromeda score : 200.67

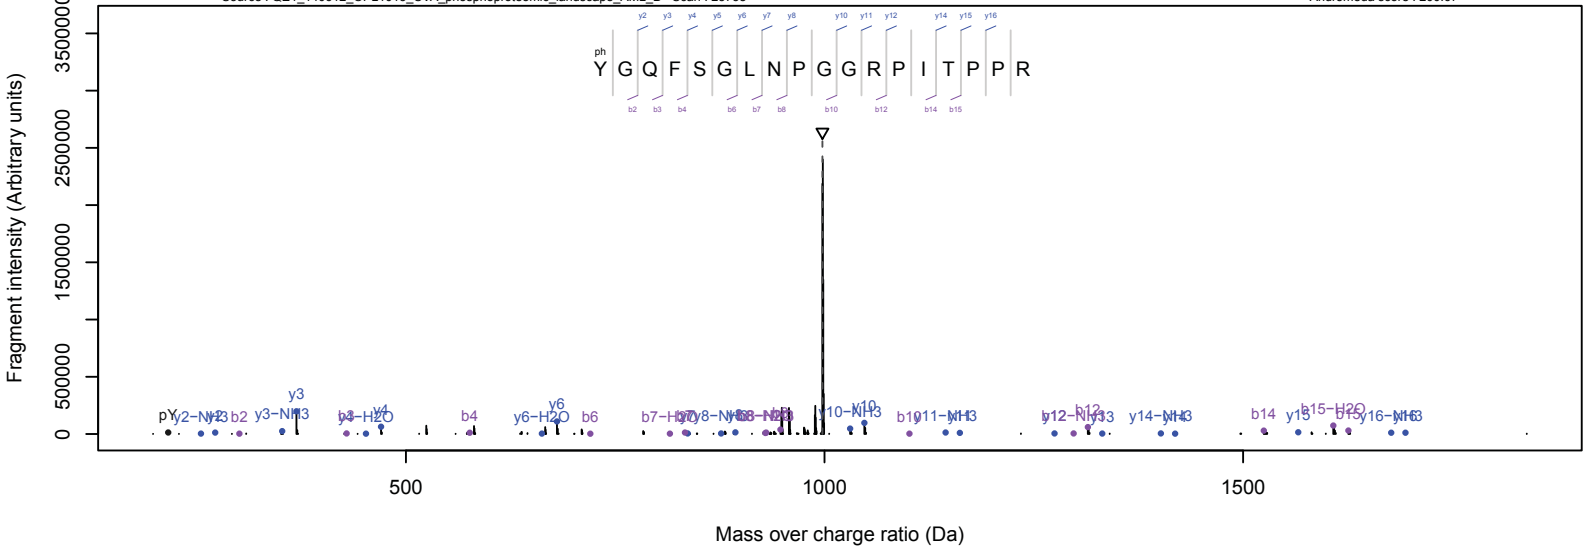

RPQY(ph)SNPPVQGEVM(ox)EGADNQGAGEQGRPVR-4+

Source : QE1\_140908\_OPL1013\_CvA\_pTyrIP\_AML\_HL60 Scan : 14730

Andromeda score : 200.48

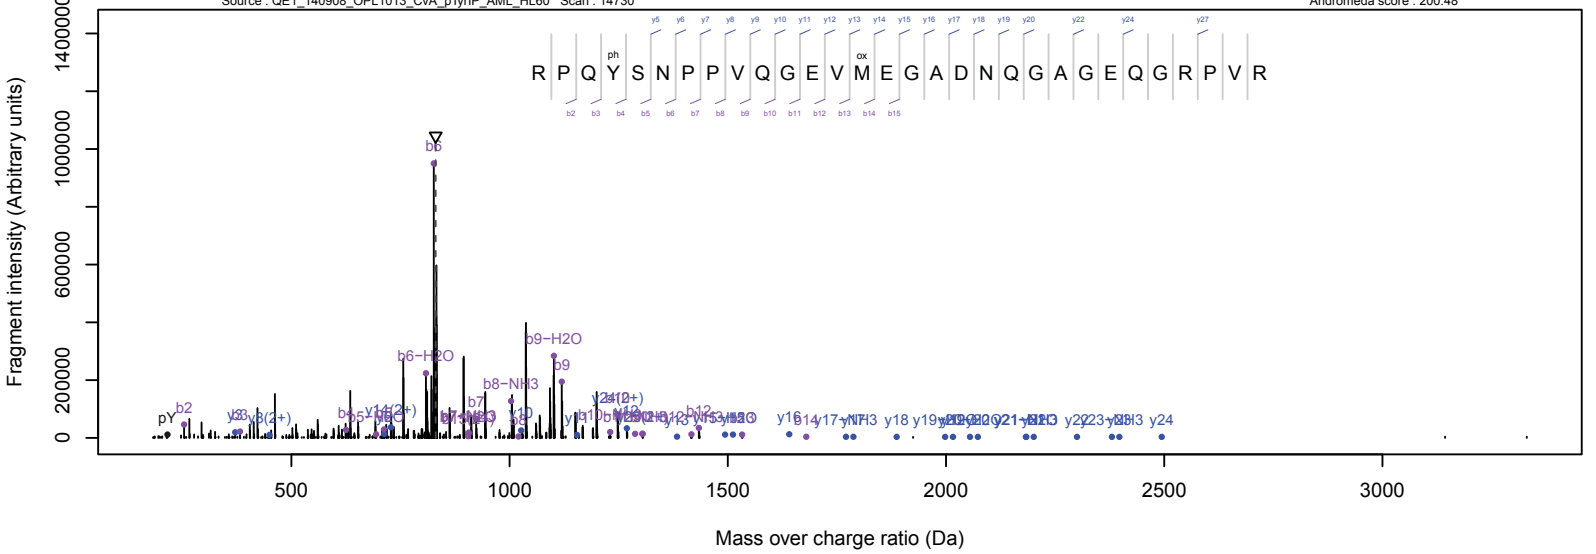

SGY(ph)AFVDYPDQNWAI R-2+

Source : QE1\_140612\_OPL1013\_CVA\_phosphoproteomic\_landscape\_AML\_D Scan : 41083

Andromeda score : 200.19

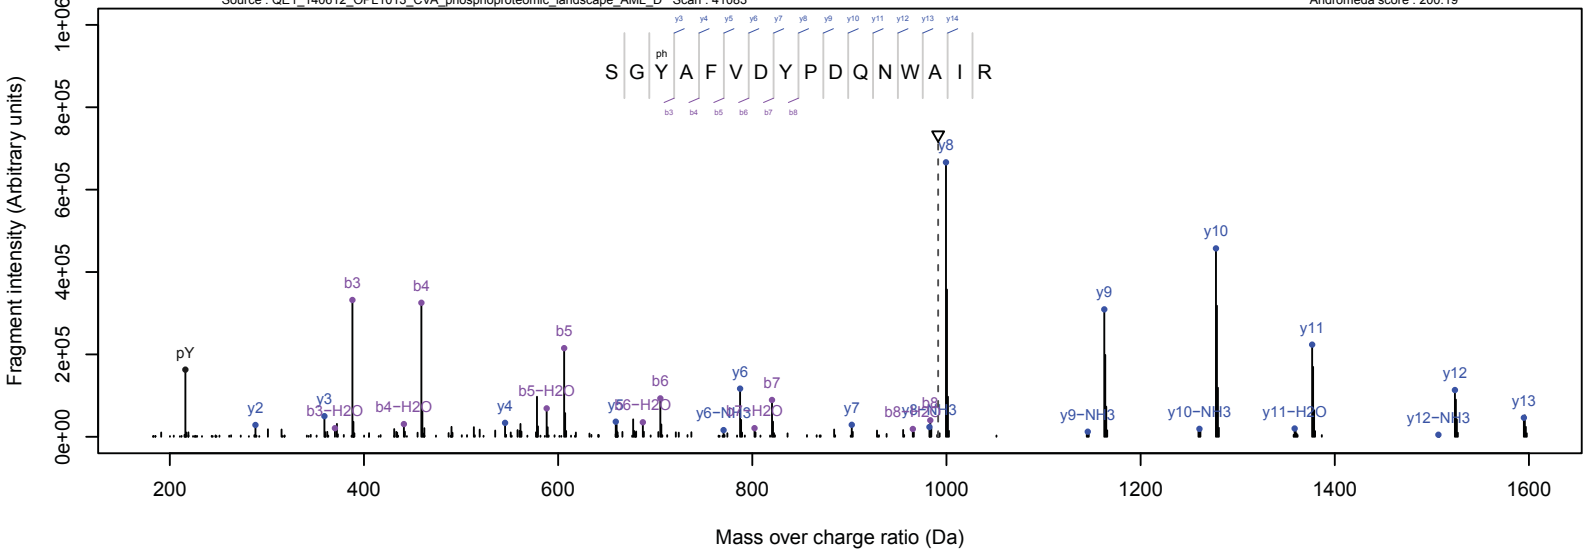

SWHDVQVSSAY(ph)VK-2+

Source : QE1\_140612\_OPL1013\_CVA\_phosphoproteomic\_landscape\_AML\_C Scan : 19063

Andromeda score : 200.19

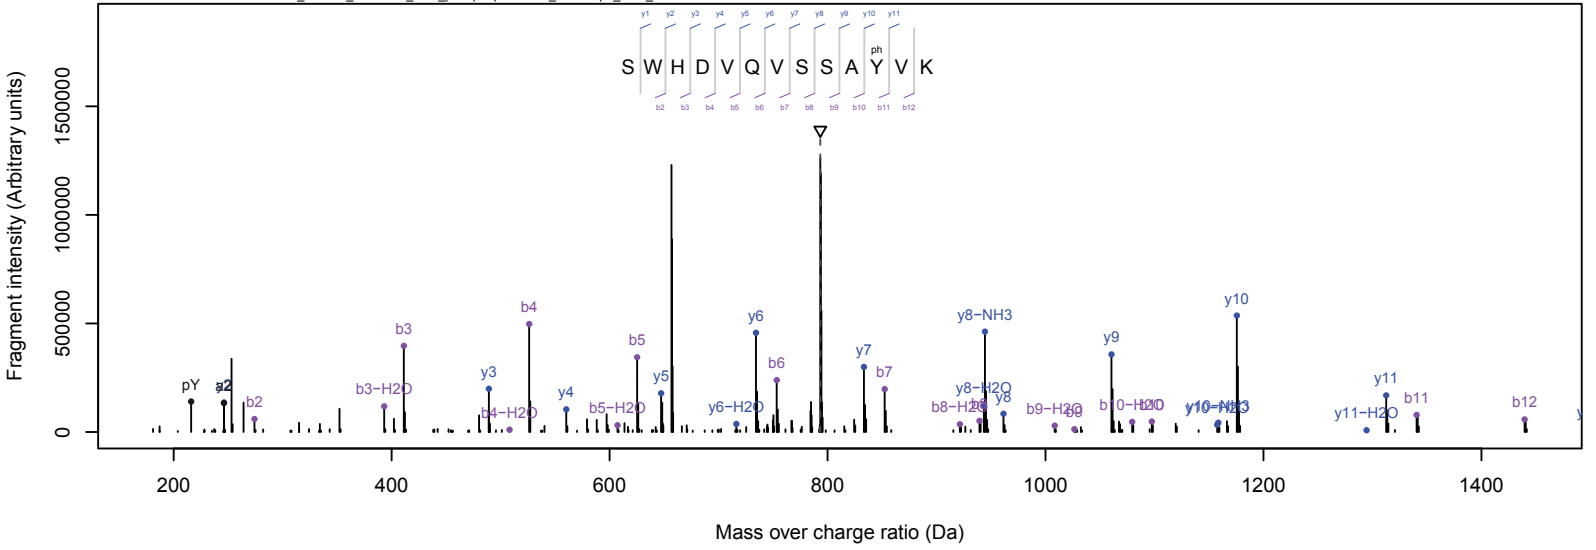

IKEKY(ph)IDQEELNK-3+

Source : QE1\_140612\_OPL1013\_CVA\_phosphoproteomic\_landscape\_AML\_C Scan : 10557

Andromeda score : 200.16

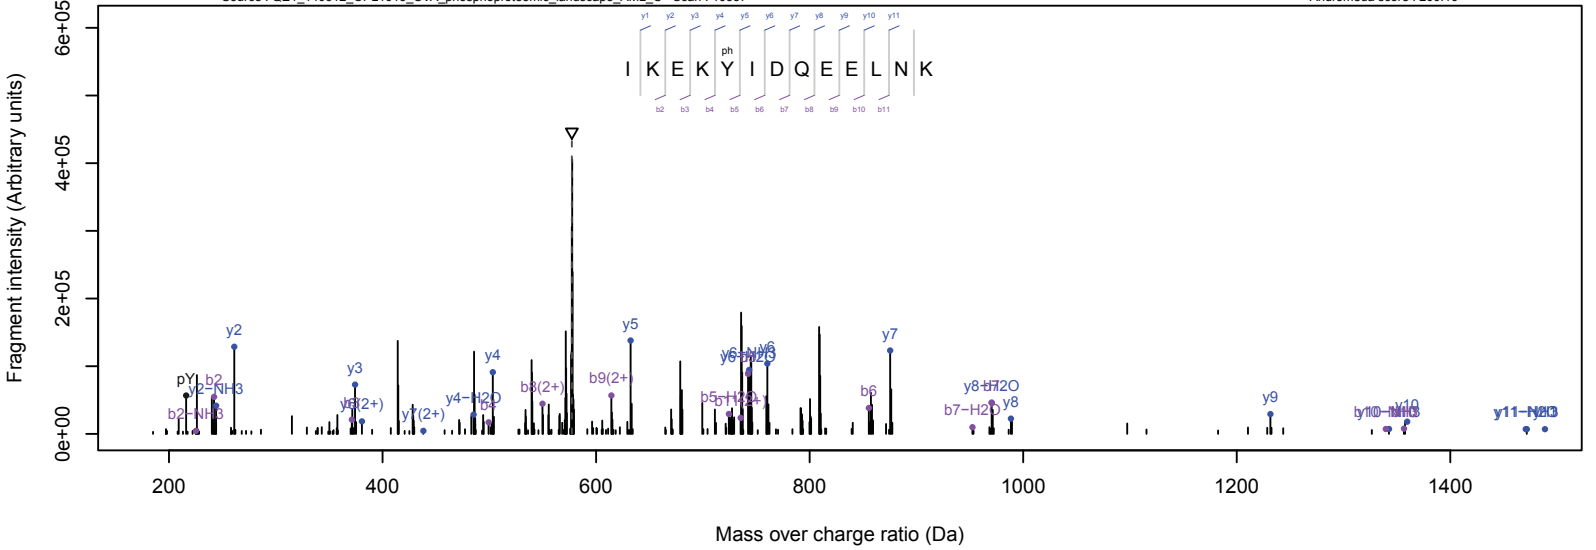

QADSEMTGY(ph)VVTR-2+

Source : QE1\_140612\_OPL1013\_CVA\_phosphoproteomic\_landscape\_AML\_E Scan : 15794

Andromeda score : 200.16

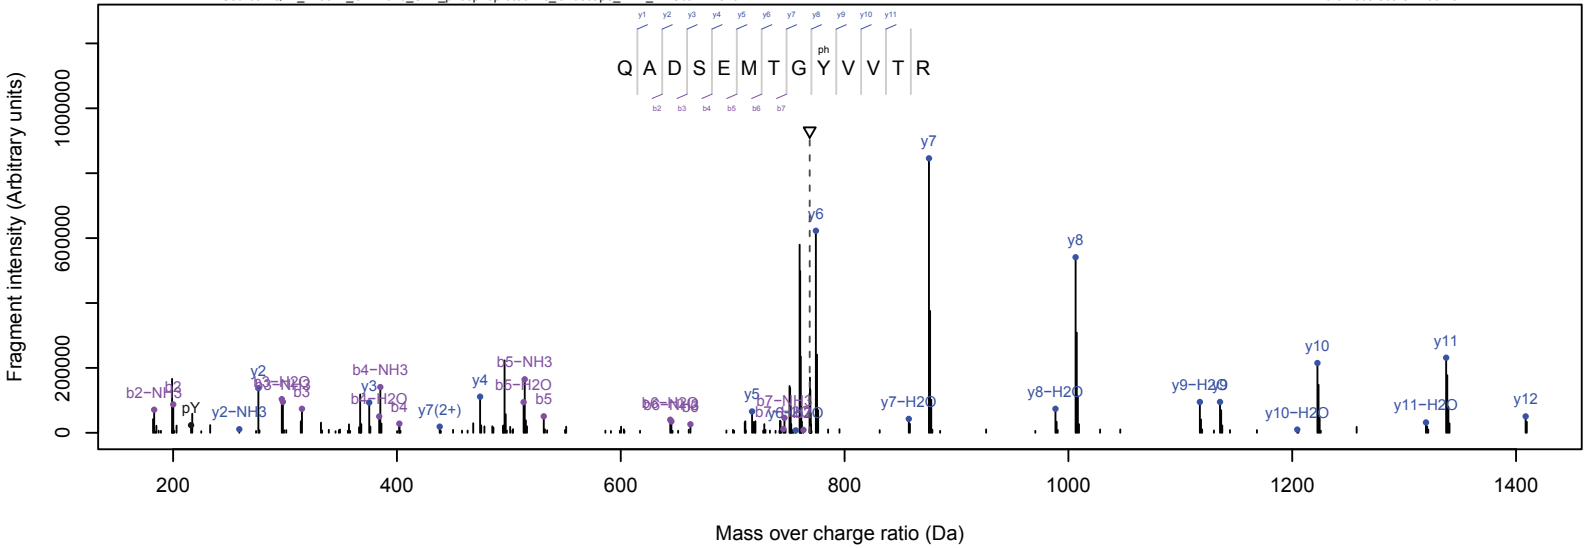

SPYDISNTDY(ph)FFPR-2+

Source : QE1\_140822\_OPL1013\_CVA\_pTyrIP\_AML\_cell\_lines\_part2\_F Scan : 34184

Andromeda score : 200.16

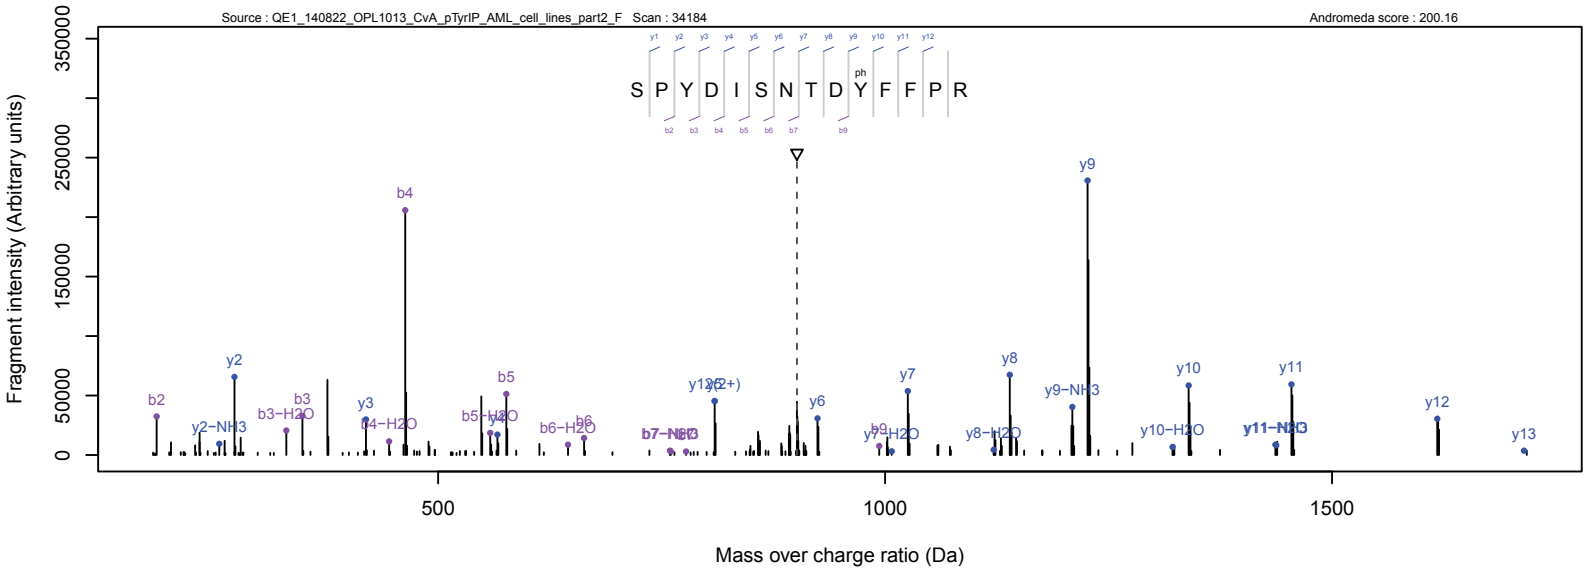

Y(ph)FSLKPEEKDEK-2+

Source : QE1\_140612\_OPL1013\_CVA\_phosphoproteomic\_landscape\_AML\_C Scan : 13522

Andromeda score : 199.96

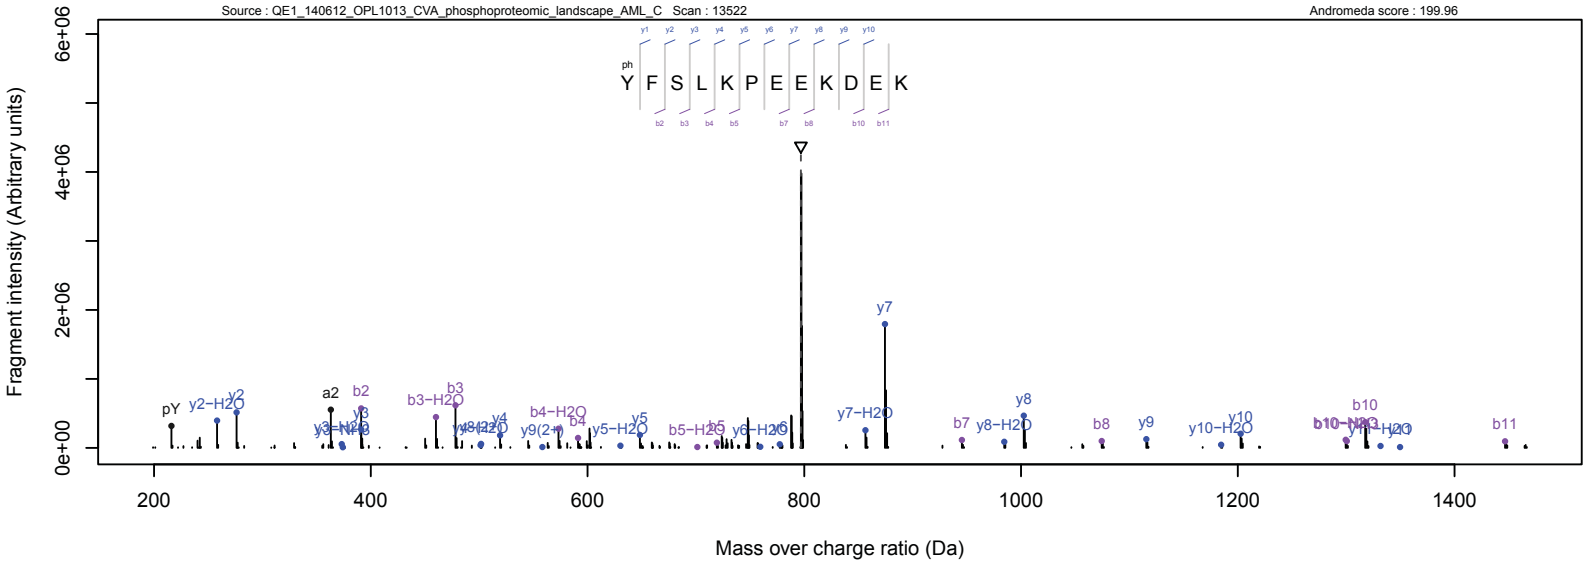

YY(ph)VTIIDAPGHR-2+

Source : QE1\_140612\_OPL1013\_CVA\_phosphoproteomic\_landscape\_AML\_B Scan : 26011

Andromeda score : 199.82

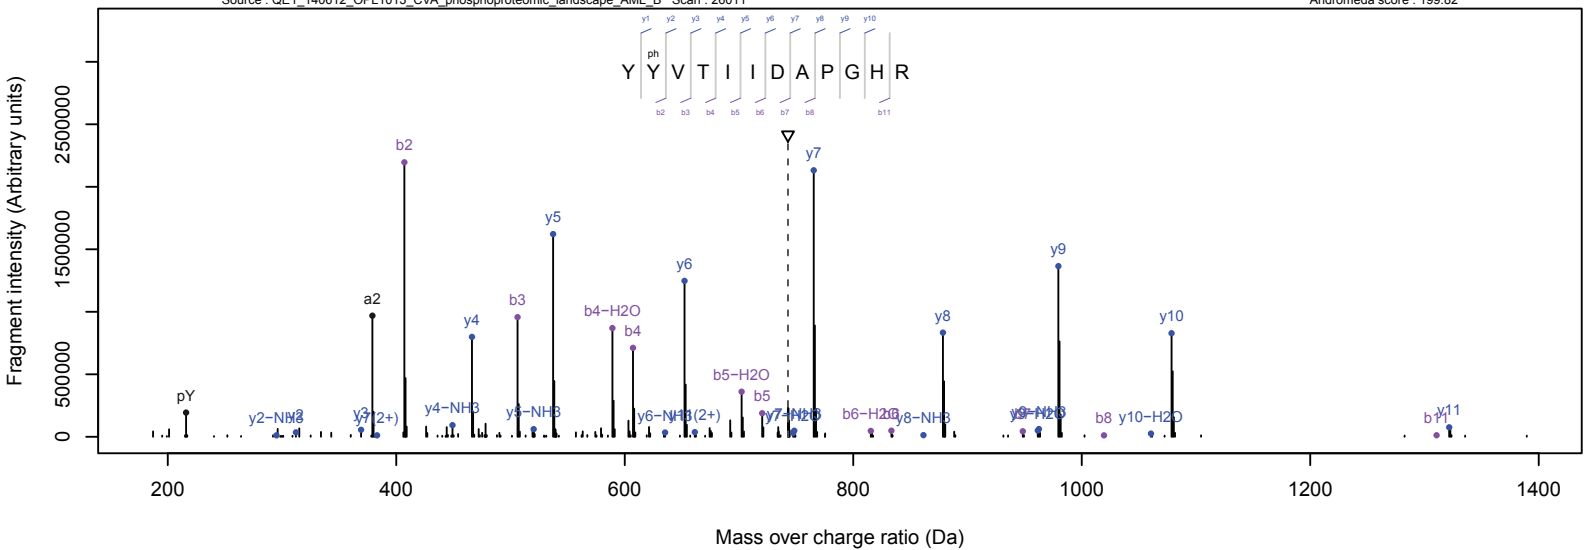

**KVIGIECSSISDY(ph)AVK-2+**

Source : QE1\_140612\_OPL1013\_CVA\_phosphoproteomic\_landscape\_AML\_A Scan : 25495

Andromeda score : 199.01

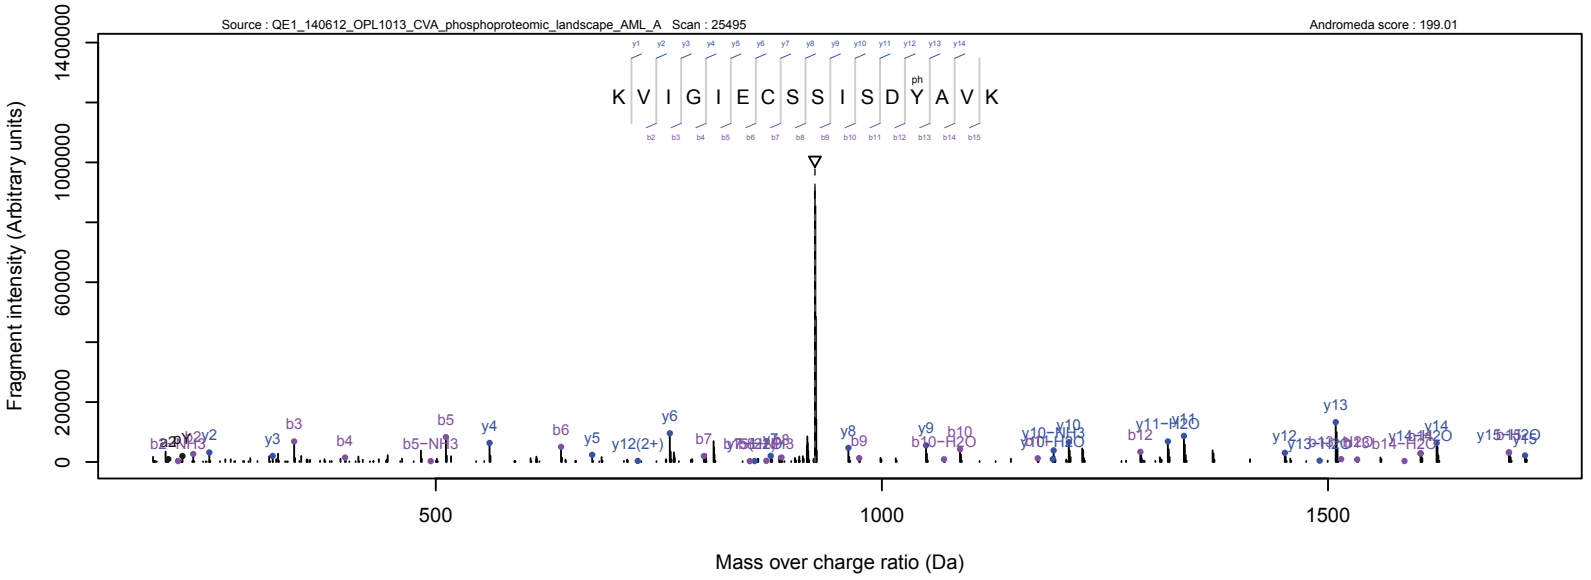

**NFHIIYQLLEGASQEQR-2+**

Source : QE1\_140612\_OPL1013\_CVA\_phosphoproteomic\_landscape\_AML\_C Scan : 38692

Andromeda score : 199.01

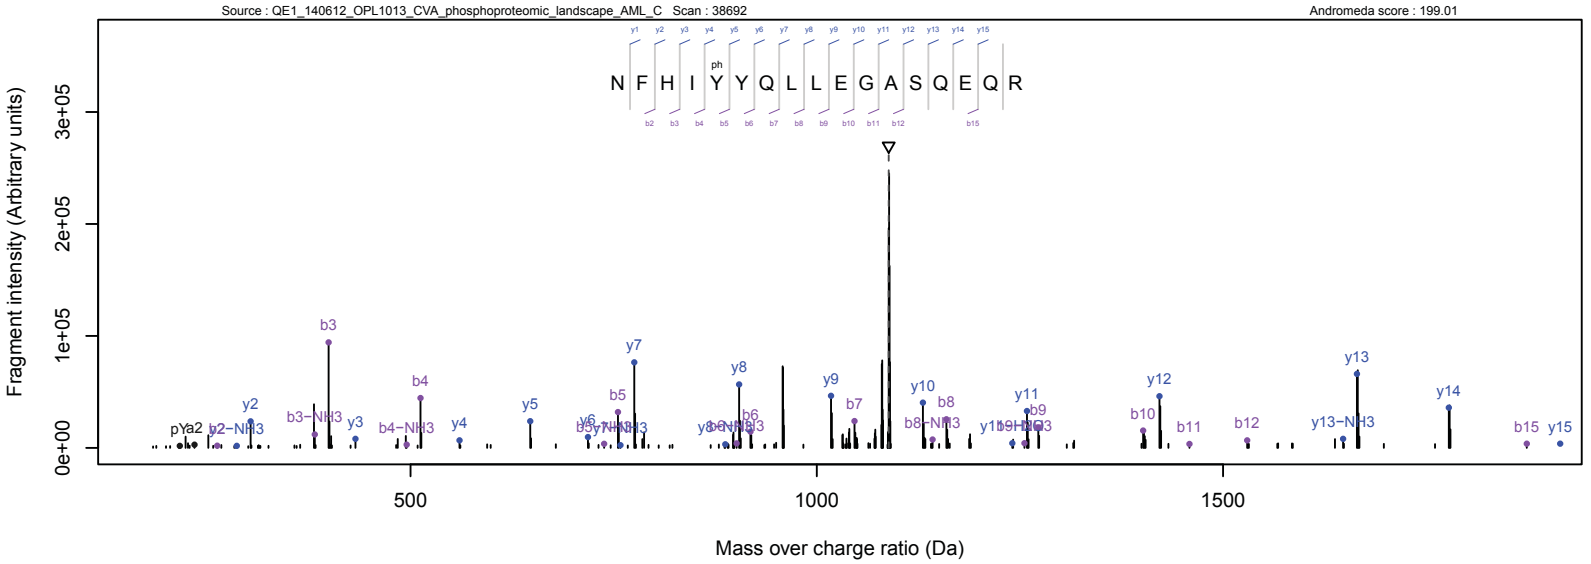

**SVQLY(ph)GPTNFAPVINHVAR-3+**

Source : QE1\_140908\_OPL1013\_CvA\_pTyrIP\_AML\_OCI\_AML3 Scan : 41467

Andromeda score : 199.01

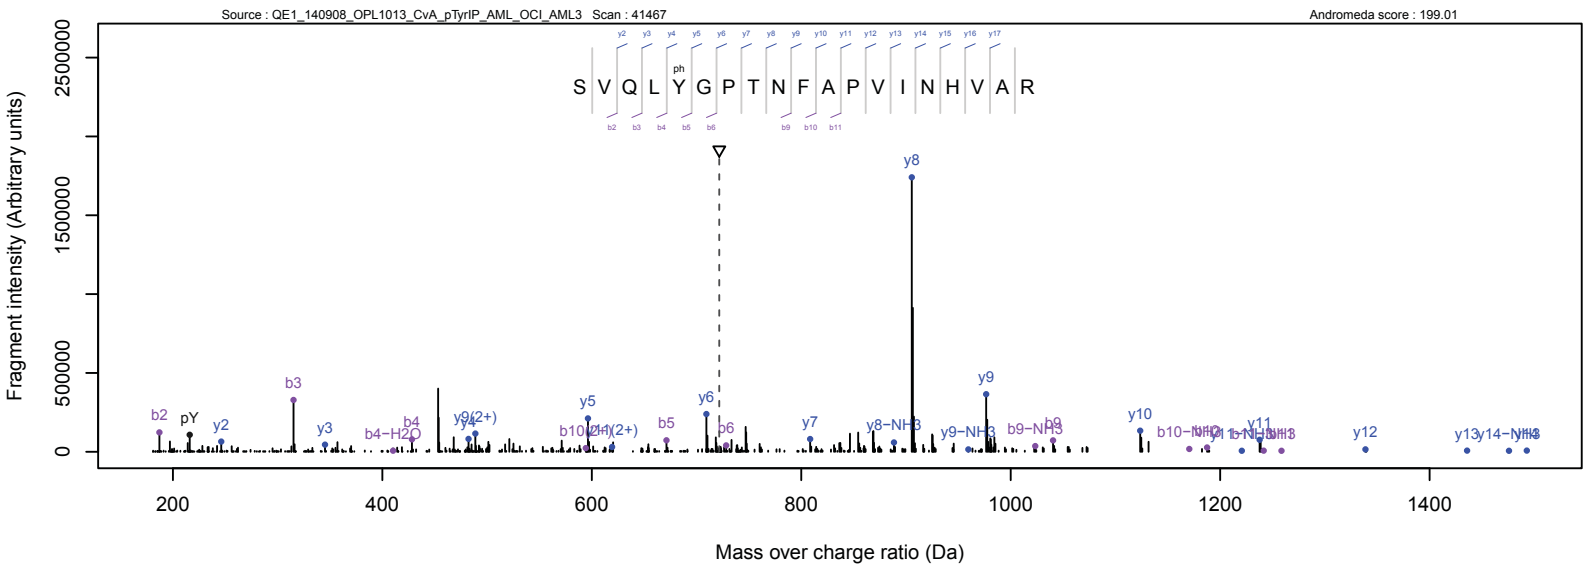

KGEQTSSGTLSAFASY(ph)FNSK-2+

Source : QE1\_140908\_OPL1013\_CVA\_pTyrIP\_AML\_HEL Scan : 35594

Andromeda score : 198.84

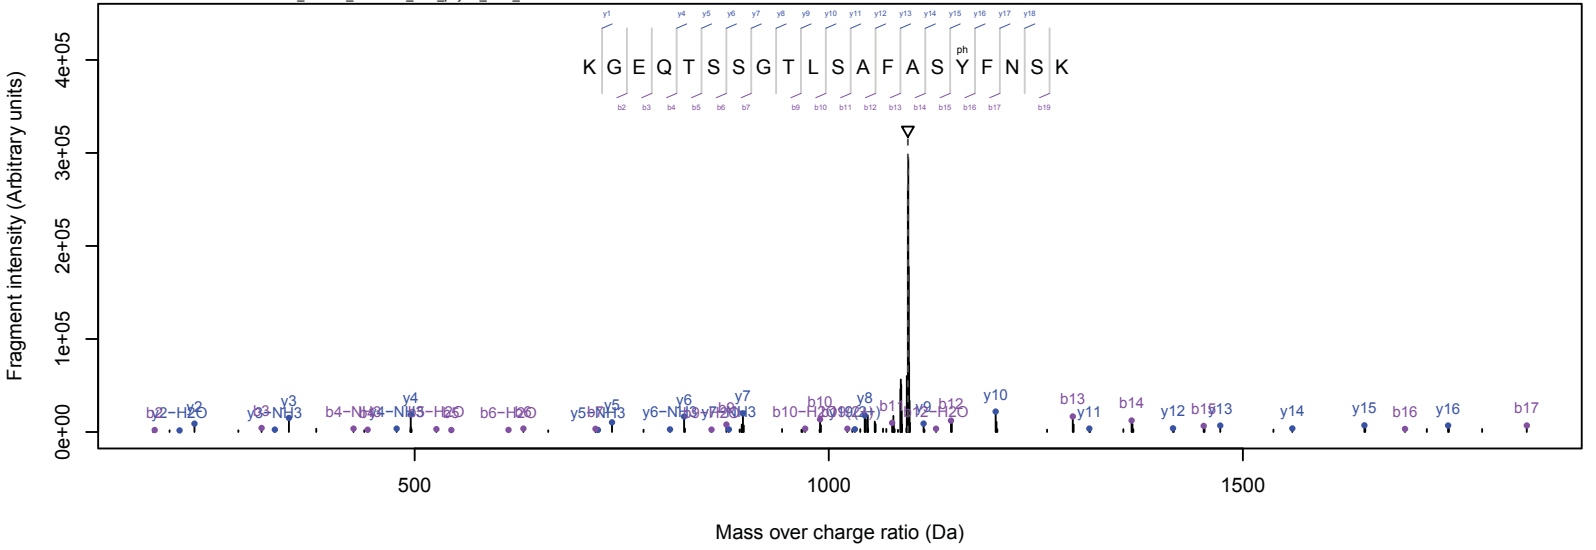

KRPSFPNLTSLGCLADAEEM(ox)Y(ph)QNV DGR-3+

Source : QE1\_140612\_OPL1013\_CVA\_phosphoproteomic\_landscape\_AML\_C Scan : 47459

Andromeda score : 198.81

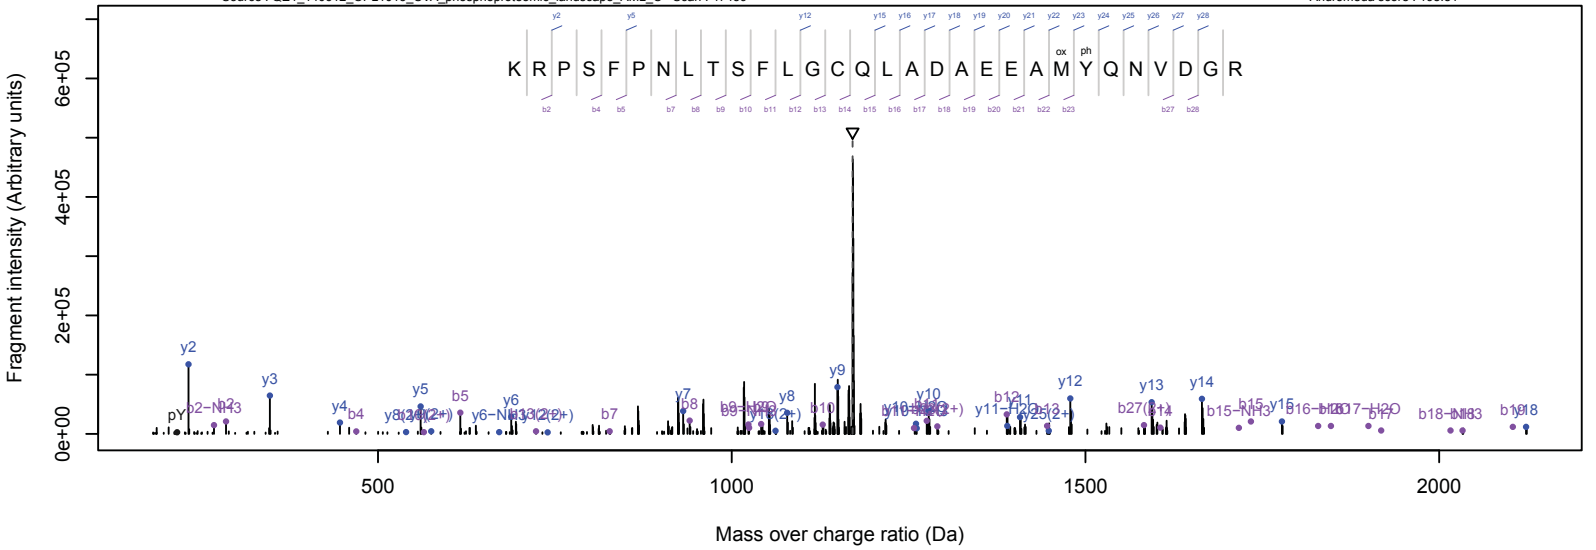

DLQY(ph)ITVSKEELSSGDSLSPDWKR-3+

Source : QE1\_140612\_OPL1013\_CVA\_phosphoproteomic\_landscape\_AML\_C Scan : 37339

Andromeda score : 198.67

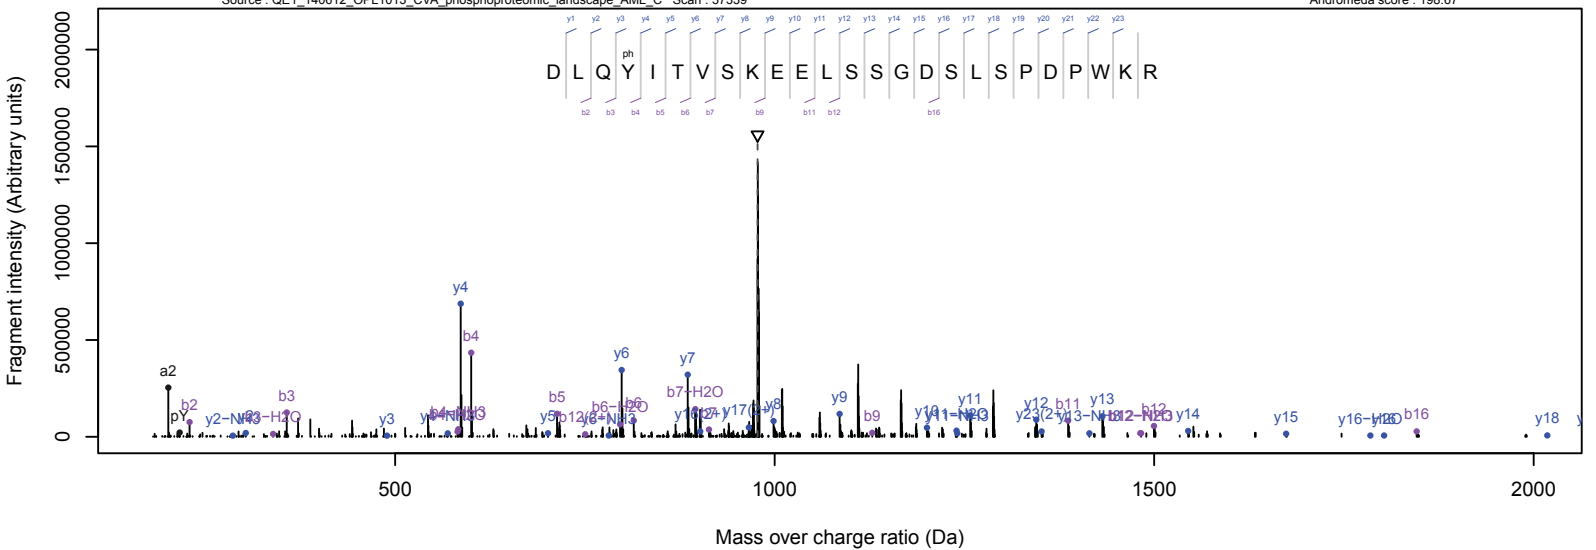

KLHEY(ph)NTQFQEK-3+

Source : QE1\_140612\_OPL1013\_CVA\_phosphoproteomic\_landscape\_AML\_A Scan : 7277

Andromeda score : 198.57

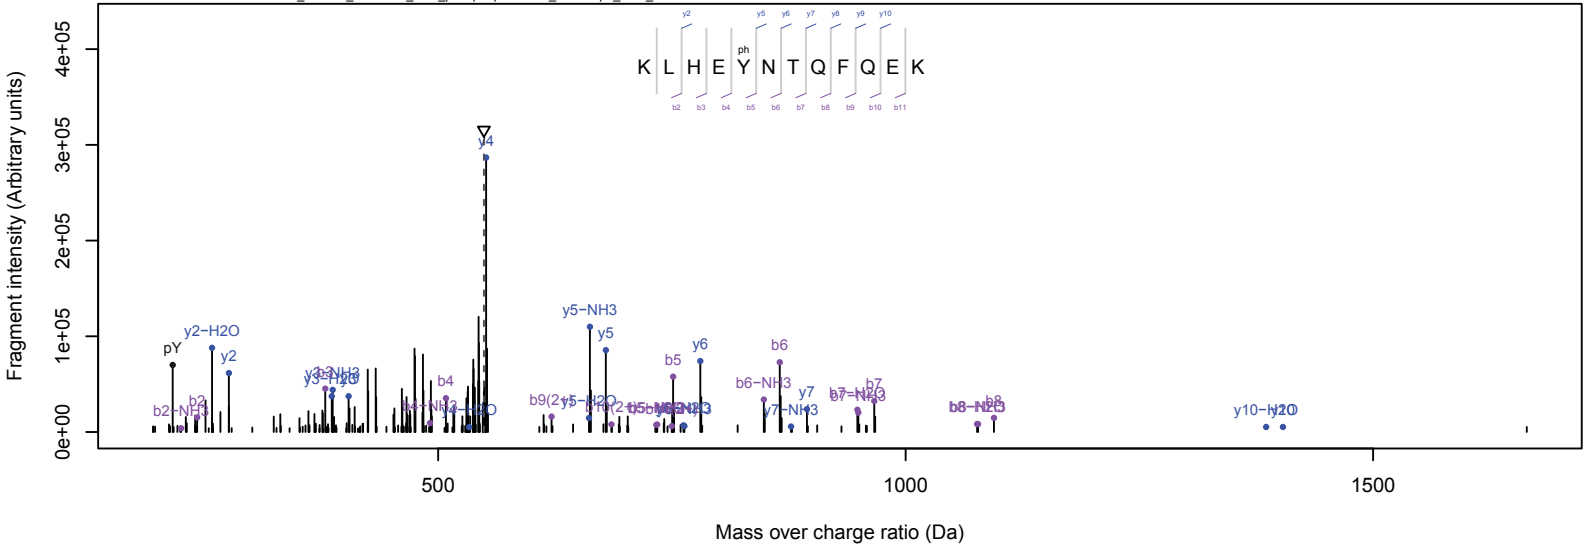

FLRENPY(ph)YDSR-2+

Source : QE1\_140612\_OPL1013\_CVA\_phosphoproteomic\_landscape\_AML\_C Scan : 12875

Andromeda score : 198.32

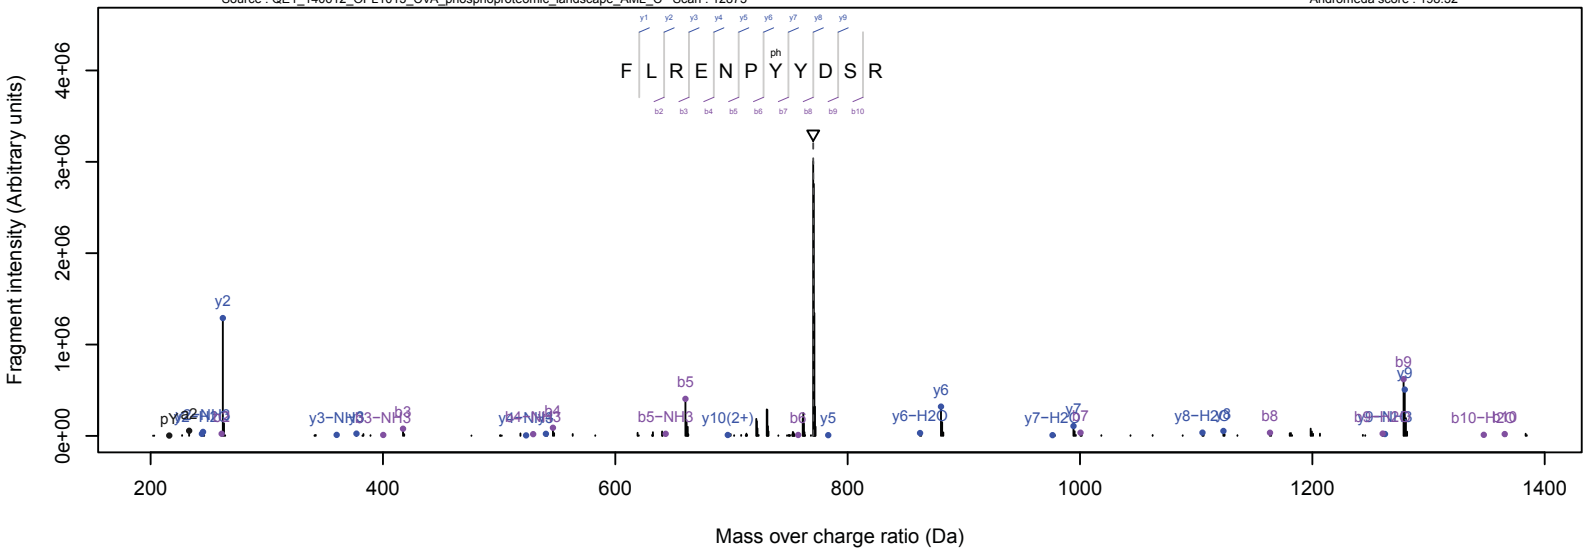

ARQY(ph)TSPEIDAQLQAEK-2+

Source : QE1\_140612\_OPL1013\_CVA\_phosphoproteomic\_landscape\_AML\_C Scan : 22354

Andromeda score : 198.24

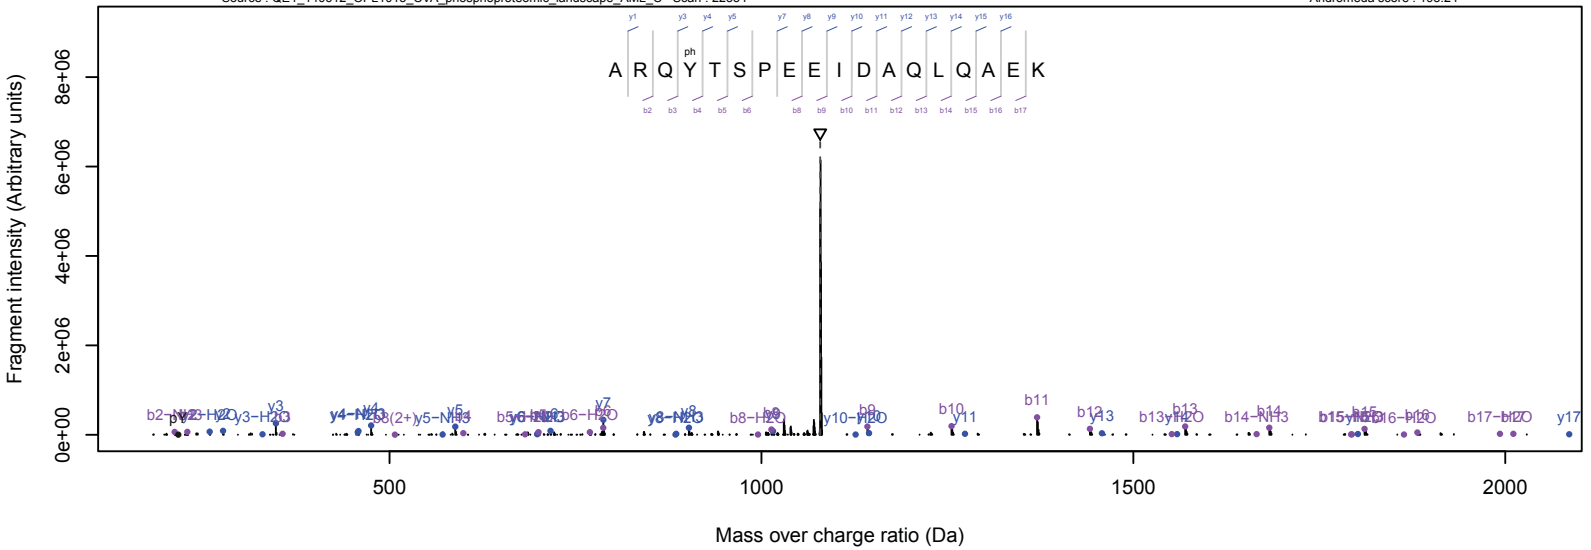

HQVAY(ph)LGLLENVR-2+

Source : QE1\_140612\_OPL1013\_CVA\_phosphoproteomic\_landscape\_AML\_C Scan : 35744

Andromeda score : 198.23

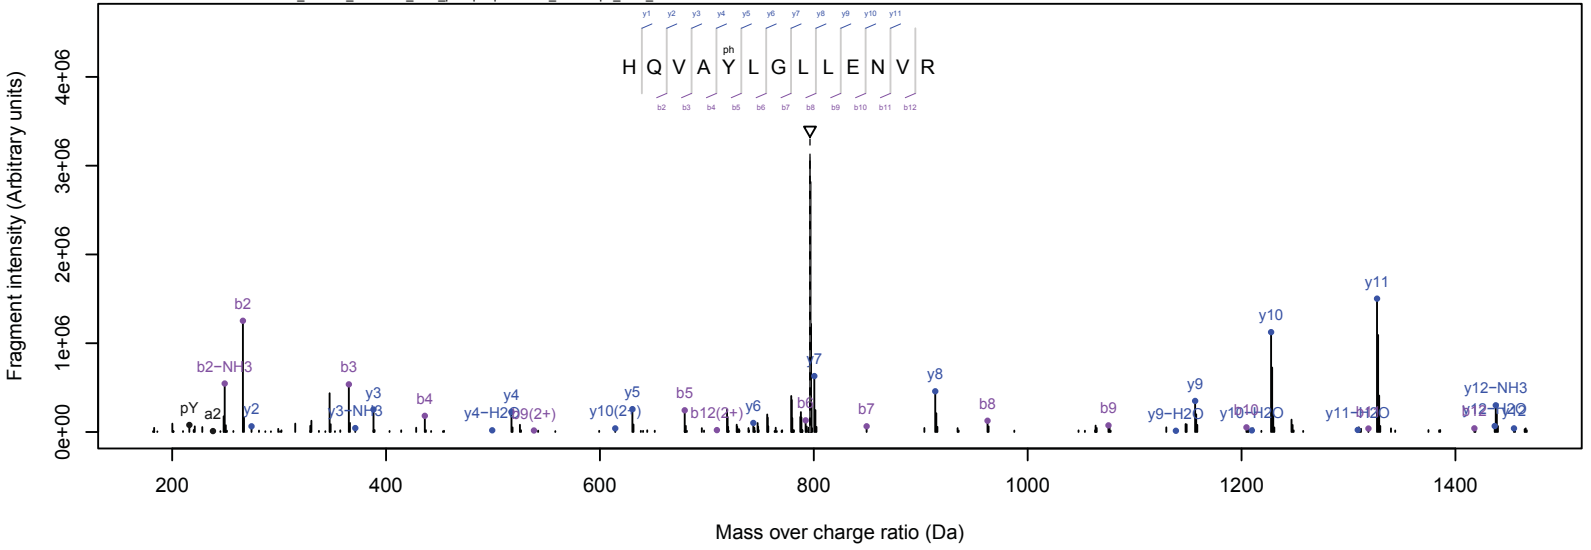

VKEQKDY(ph)WETELLQLK-3+

Source : QE1\_140612\_OPL1013\_CVA\_phosphoproteomic\_landscape\_AML\_B Scan : 35887

Andromeda score : 197.75

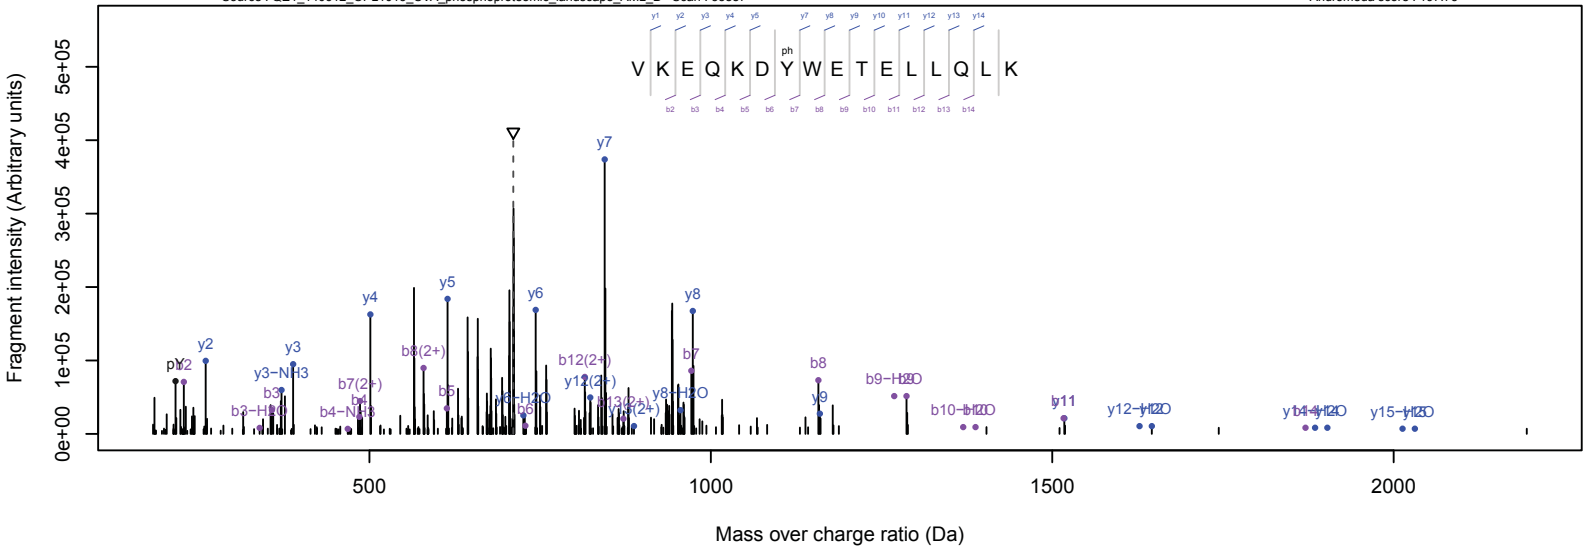

Y(ph)PYWPHQPIENL-2+

Source : QE1\_140612\_OPL1013\_CVA\_phosphoproteomic\_landscape\_AML\_B Scan : 38842

Andromeda score : 197.73

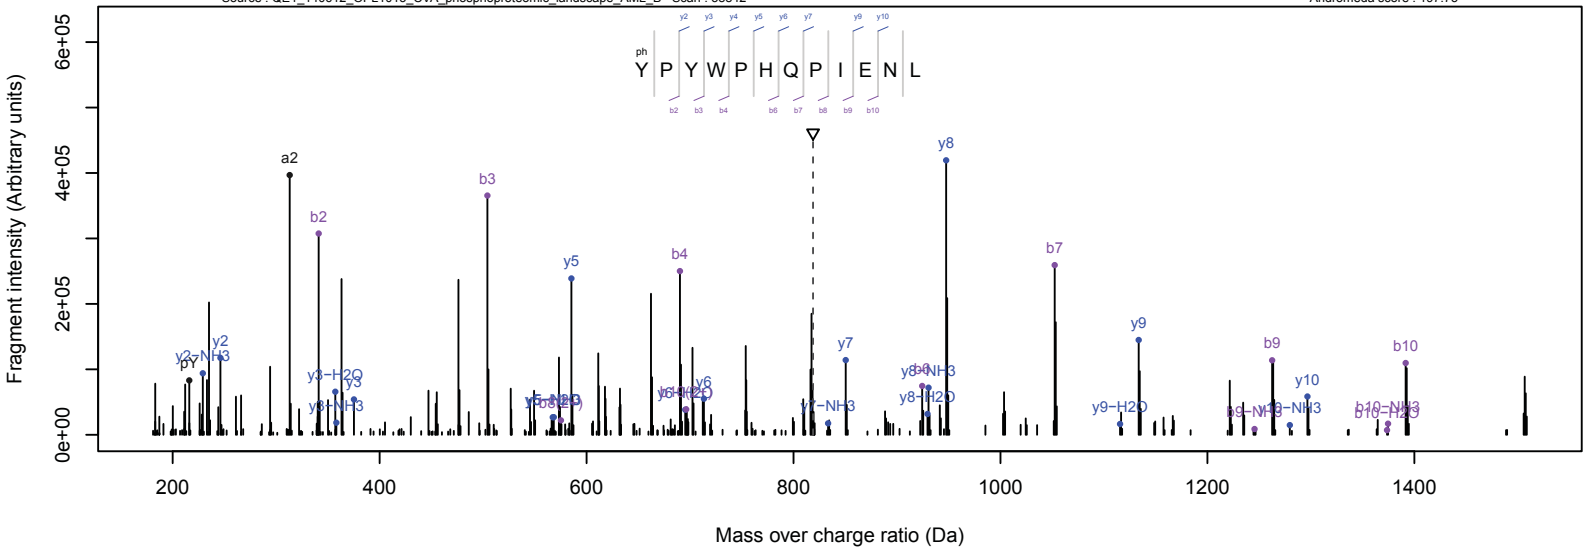

**TSGIVLSSLPYKQ(ph)NMLNADTTR-3+**

Source : QE1\_140612\_OPL1013\_CVA\_phosphoproteomic\_landscape\_AML\_C Scan : 38232

Andromeda score : 197.68

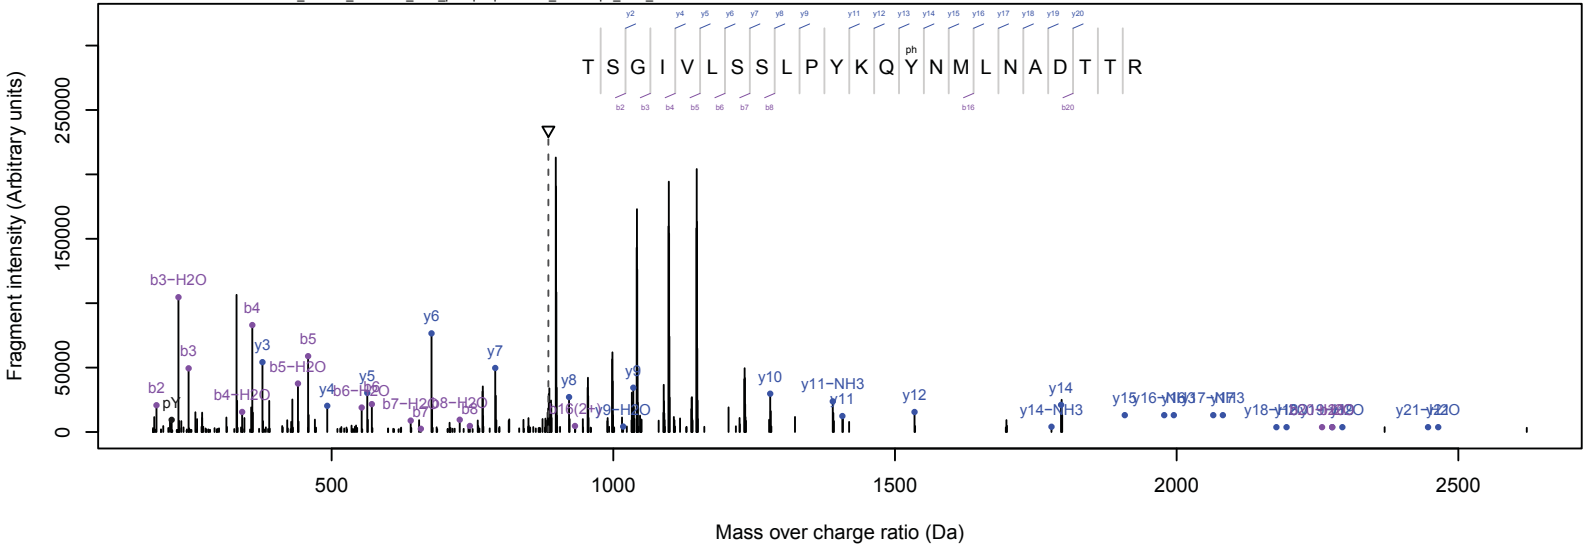

**NYGGVY(ph)VGLPSEAVNMVSSQTK-2+**

Source : QE1\_140612\_OPL1013\_CVA\_phosphoproteomic\_landscape\_AML\_B Scan : 43167

Andromeda score : 197.46

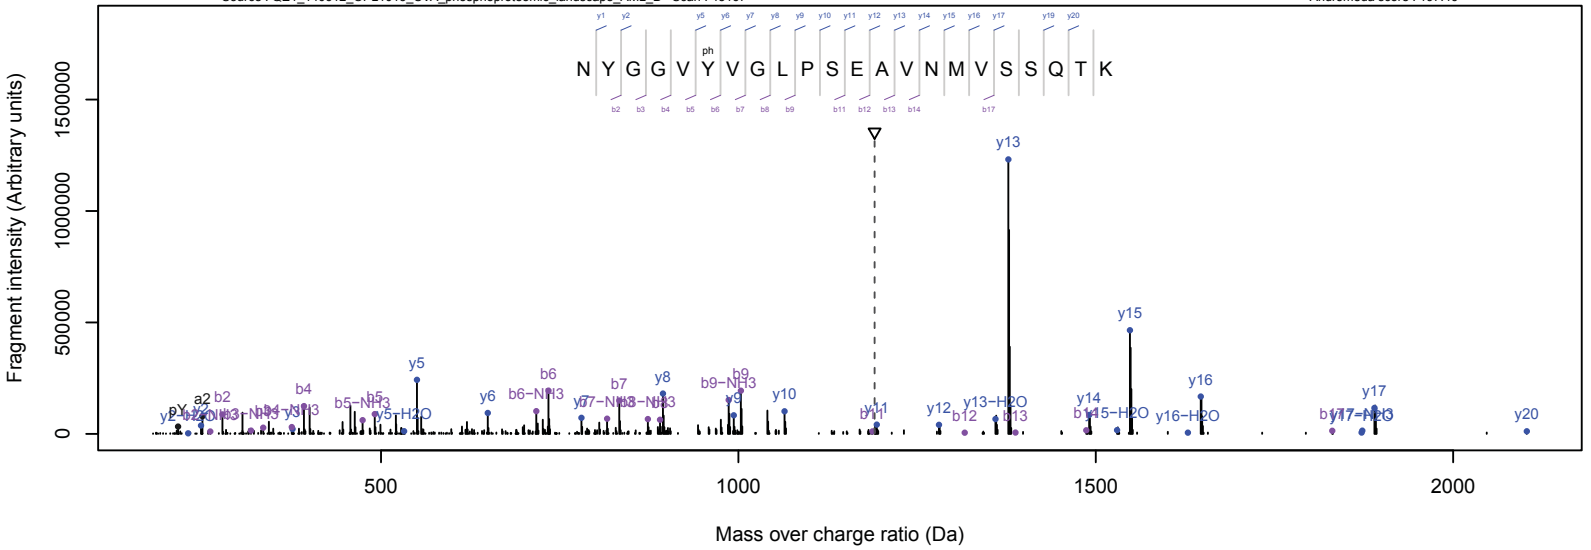

**HEY(ph)LPKMPTQSEVDNVFD TGLR-3+**

Source : QE1\_140612\_OPL1013\_CVA\_phosphoproteomic\_landscape\_AML\_A Scan : 39101

Andromeda score : 197.28

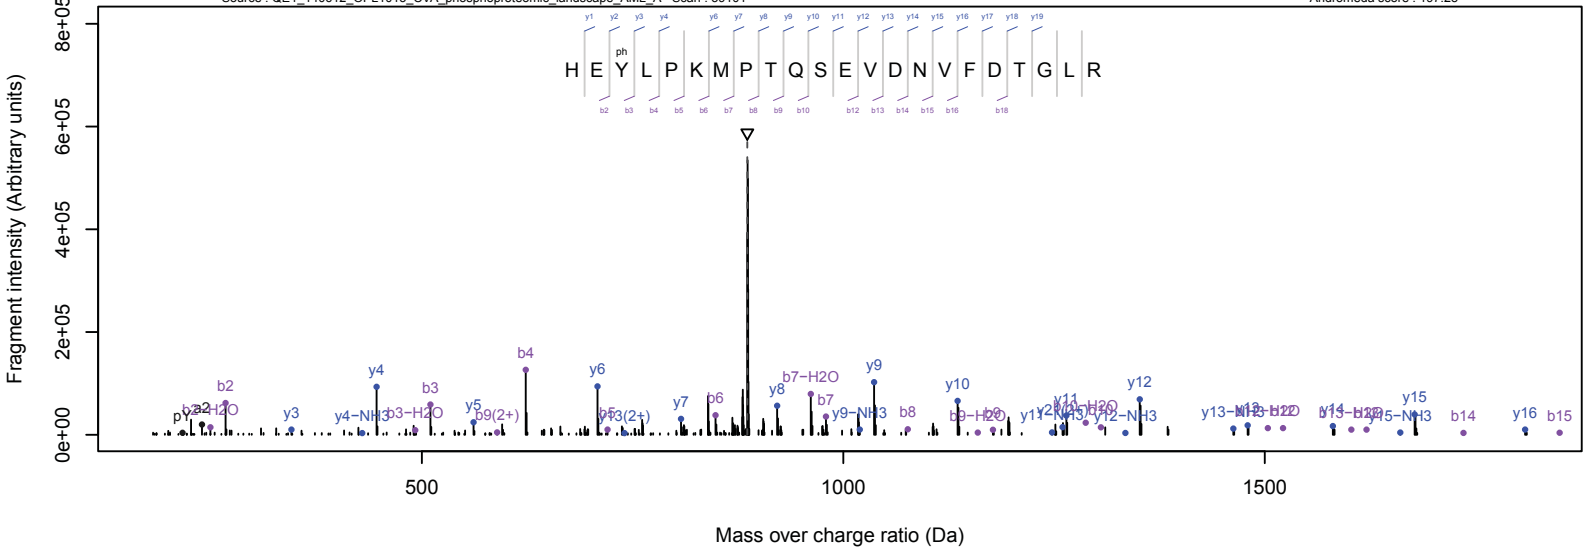



HY(ph)GGLTGLNK-2+

Source : QE1\_140612\_OPL1013\_CVA\_phosphoproteomic\_landscape\_AML\_B Scan : 9802

Andromeda score : 197.27

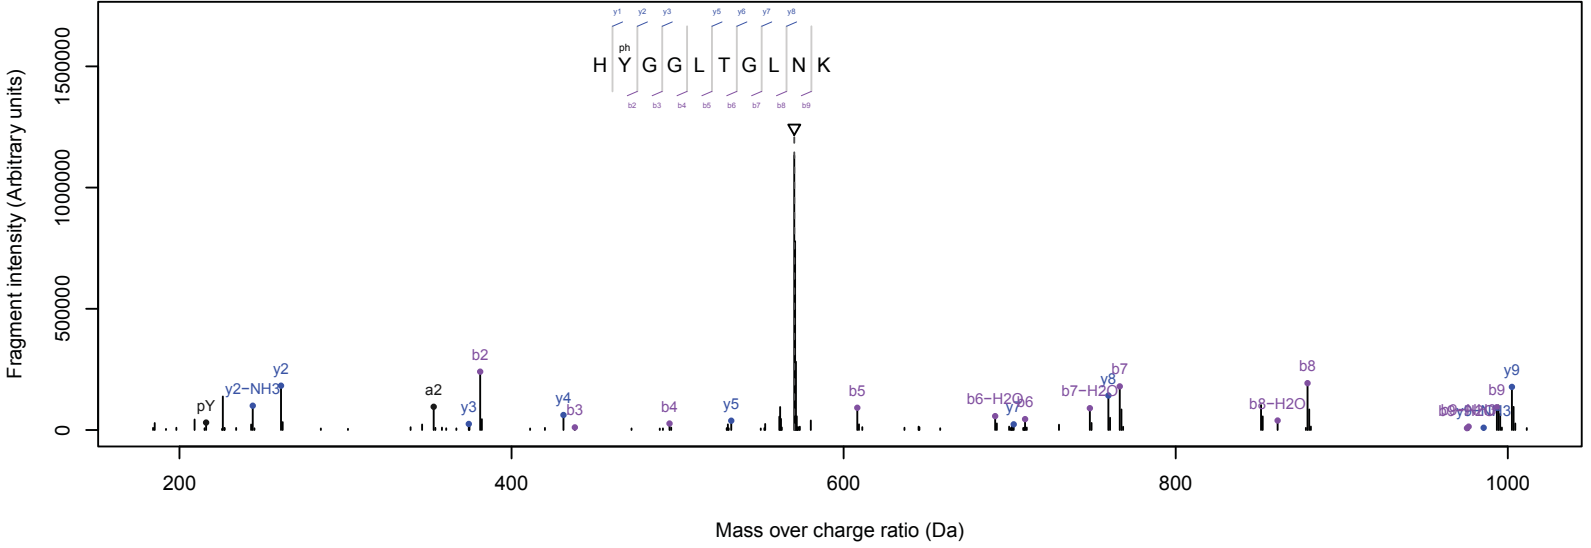

Y(ph)QQDQIVKEDSVEAVGAQLK-3+

Source : QE1\_140612\_OPL1013\_CVA\_phosphoproteomic\_landscape\_AML\_A Scan : 27809

Andromeda score : 197.1

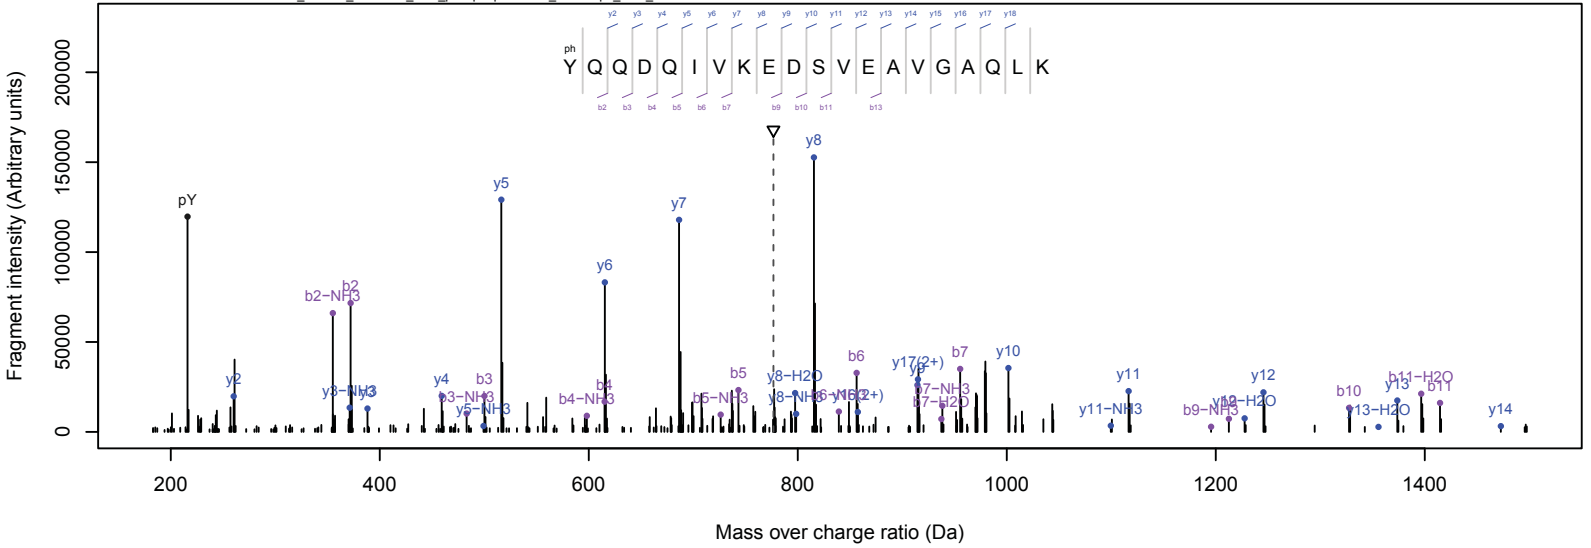

Y(ph)KWCEYGLTFTEK-2+

Source : QE1\_140612\_OPL1013\_CVA\_phosphoproteomic\_landscape\_AML\_D Scan : 32850

Andromeda score : 196.95

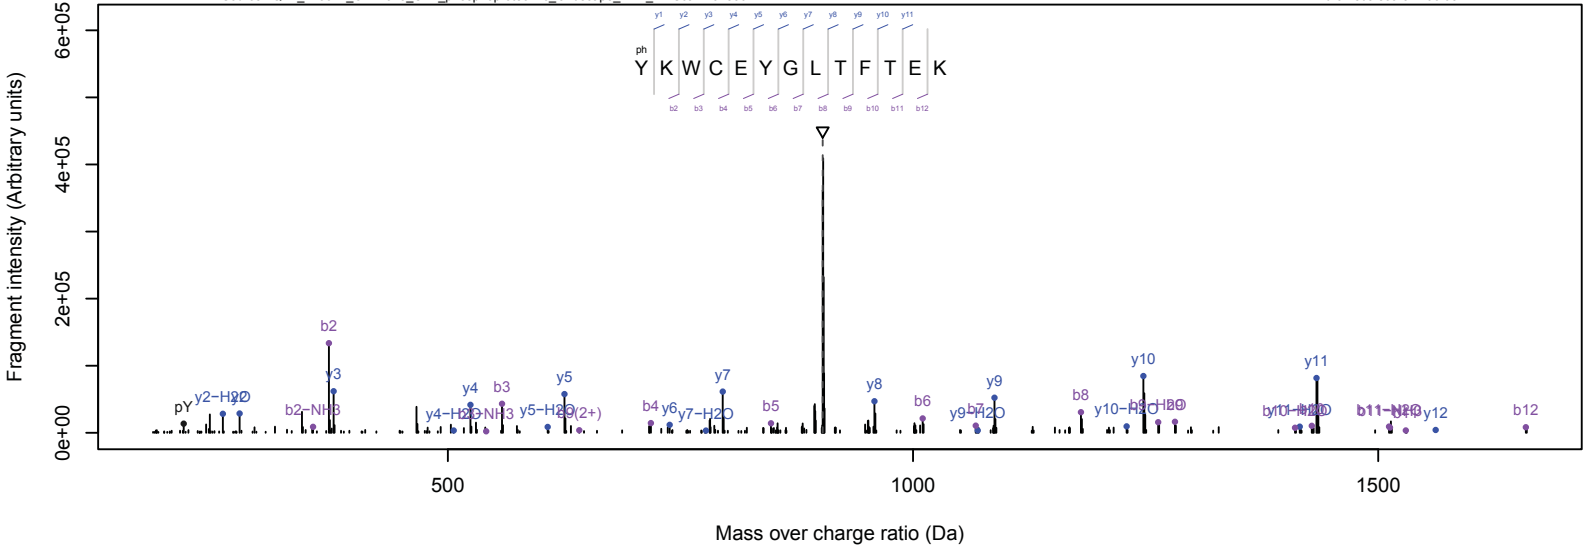

**GSLSTDKTAY(ph)GSFQNGHGIK-3+**

Source : QE1\_140908\_OPL1013\_CvA\_pTyrIP\_AML\_HL60 Scan : 15754

Andromeda score : 196.89

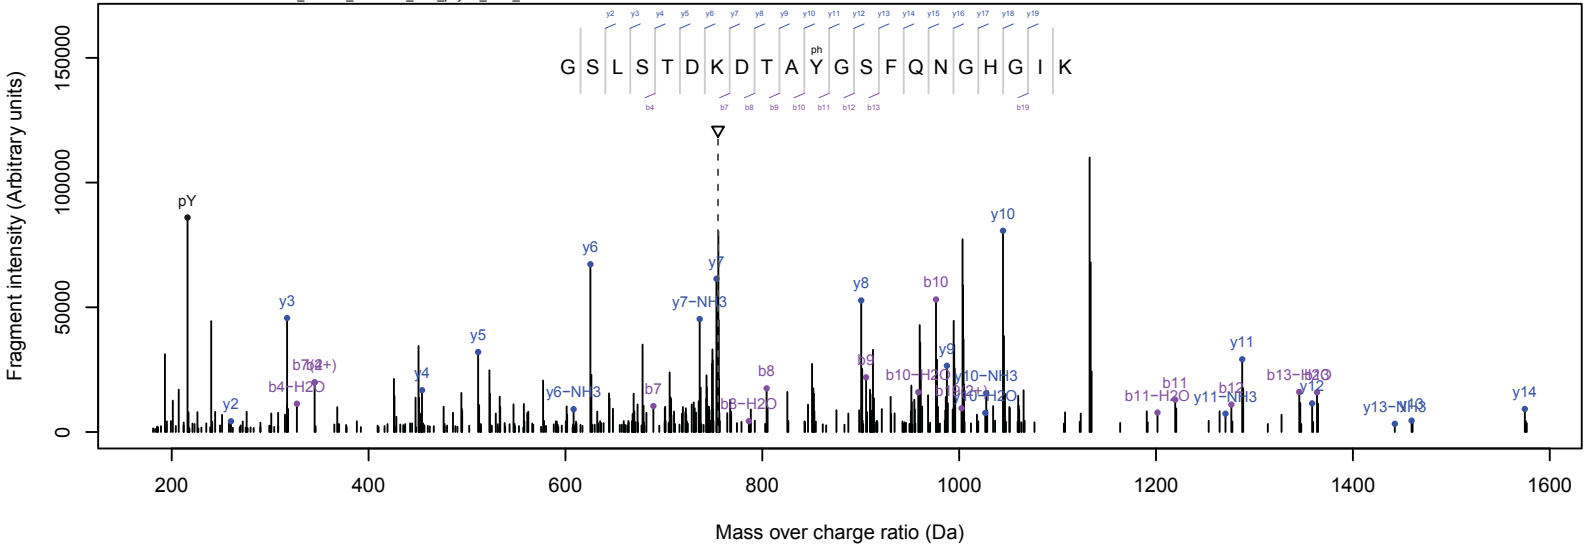

**NSTEDIMSLSTQGDY(ph)INLQTK-2+**

Source : QE1\_140908\_OPL1013\_CvA\_pTyrIP\_AML\_Kasumi1 Scan : 38351

Andromeda score : 196.89

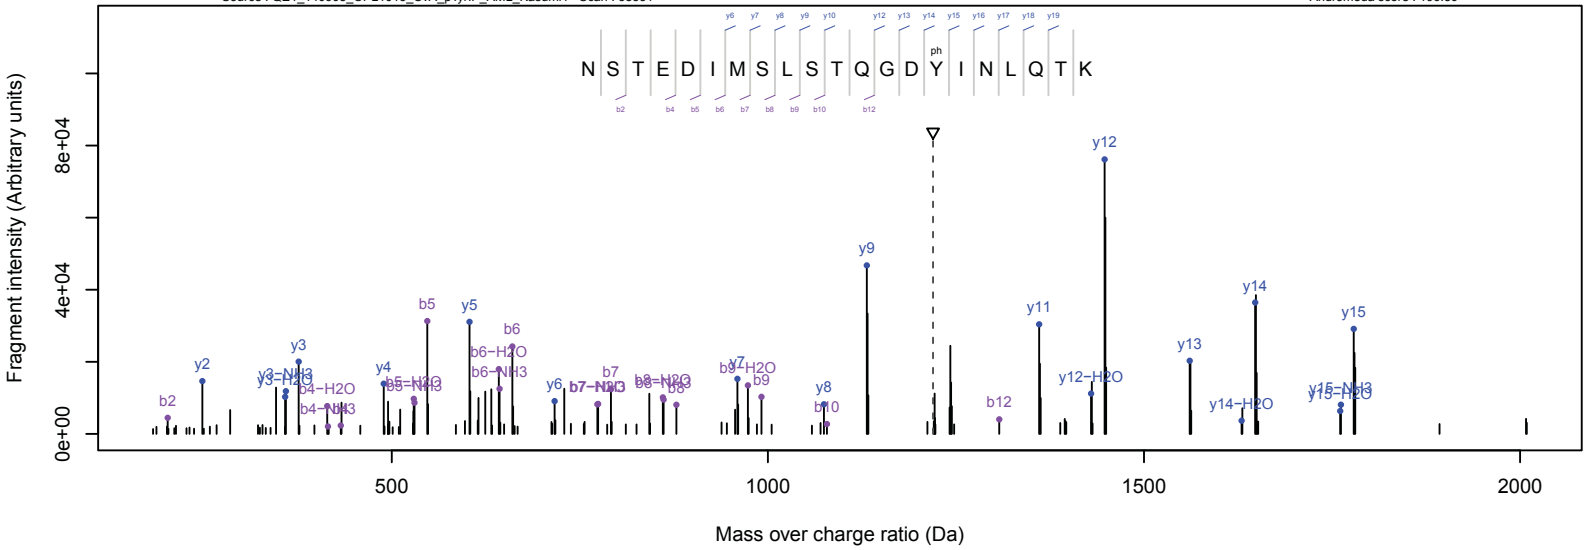

**EHALLAY(ph)TLGVK-2+**

Source : QE1\_140612\_OPL1013\_CVA\_phosphoproteomic\_landscape\_AML\_C Scan : 33689

Andromeda score : 196.38

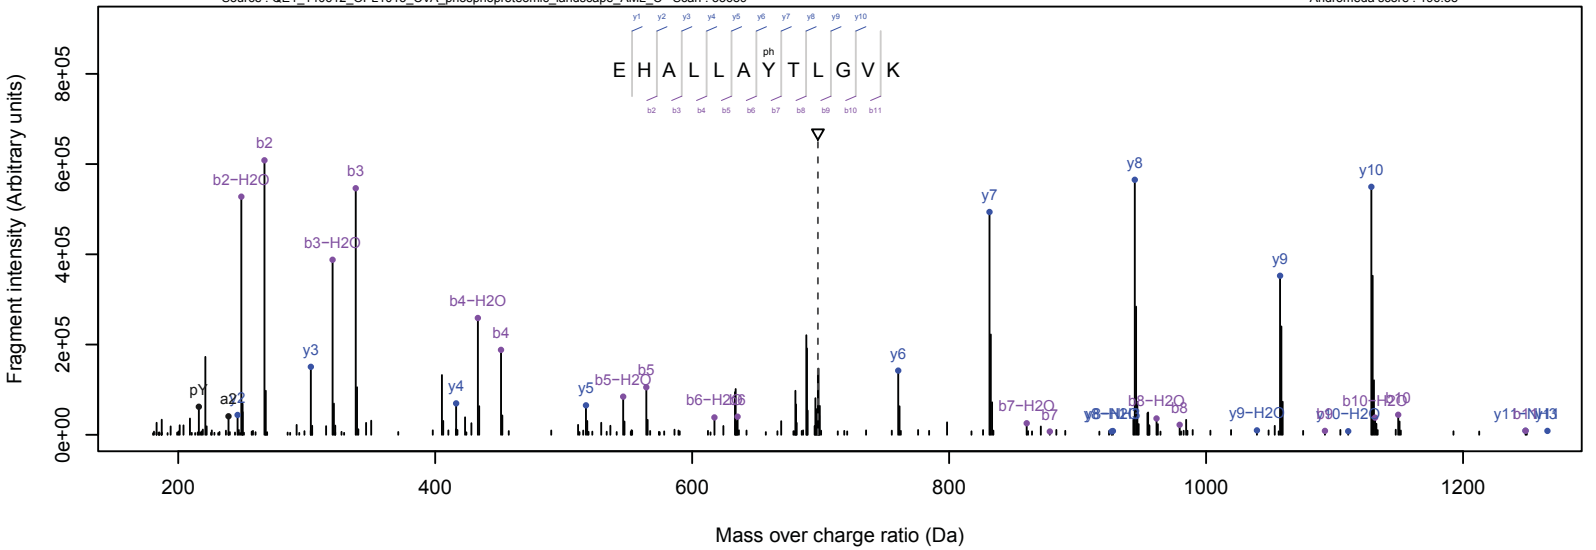

YGLFKEENPY(ph)AR-2+

Source: QE1\_140822\_OPL1013\_CVA\_pTyrIP\_AML\_cell\_lines\_part2\_F Scan: 14420

Andromeda score: 196.38

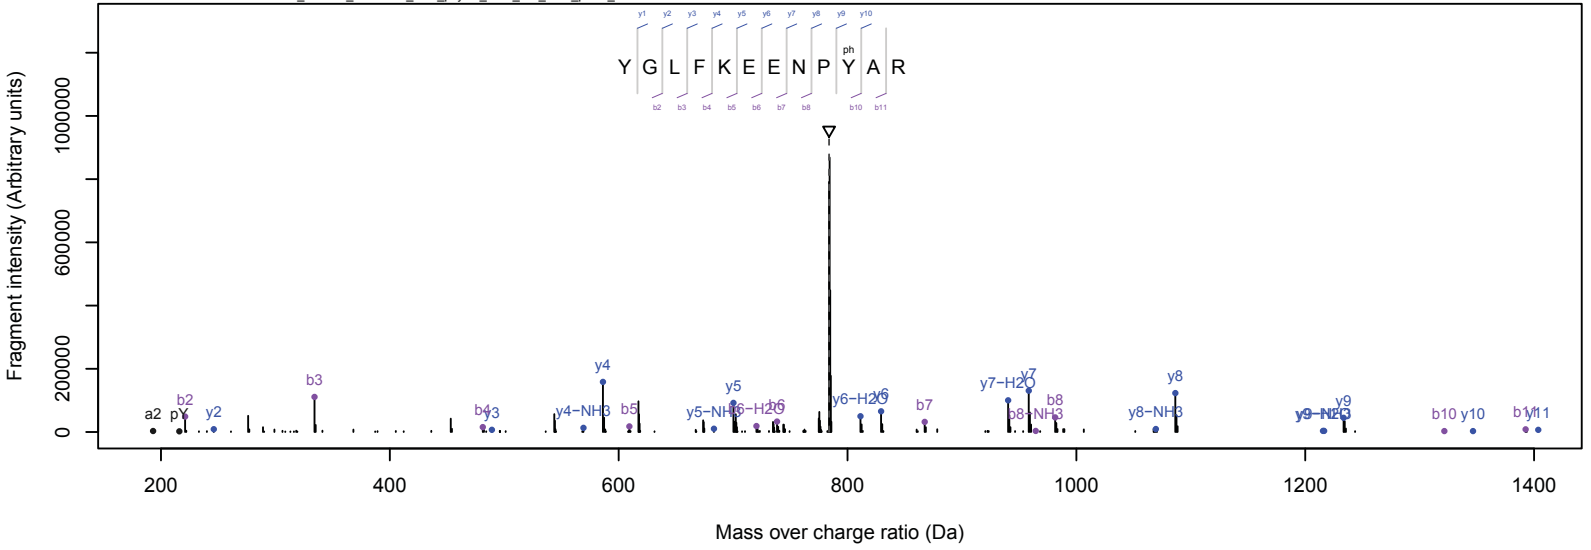

VIGIECSSISD(ph)AVK-2+

Source: QE1\_140612\_OPL1013\_CVA\_phosphoproteomic\_landscape\_AML\_A Scan: 30046

Andromeda score: 196.33

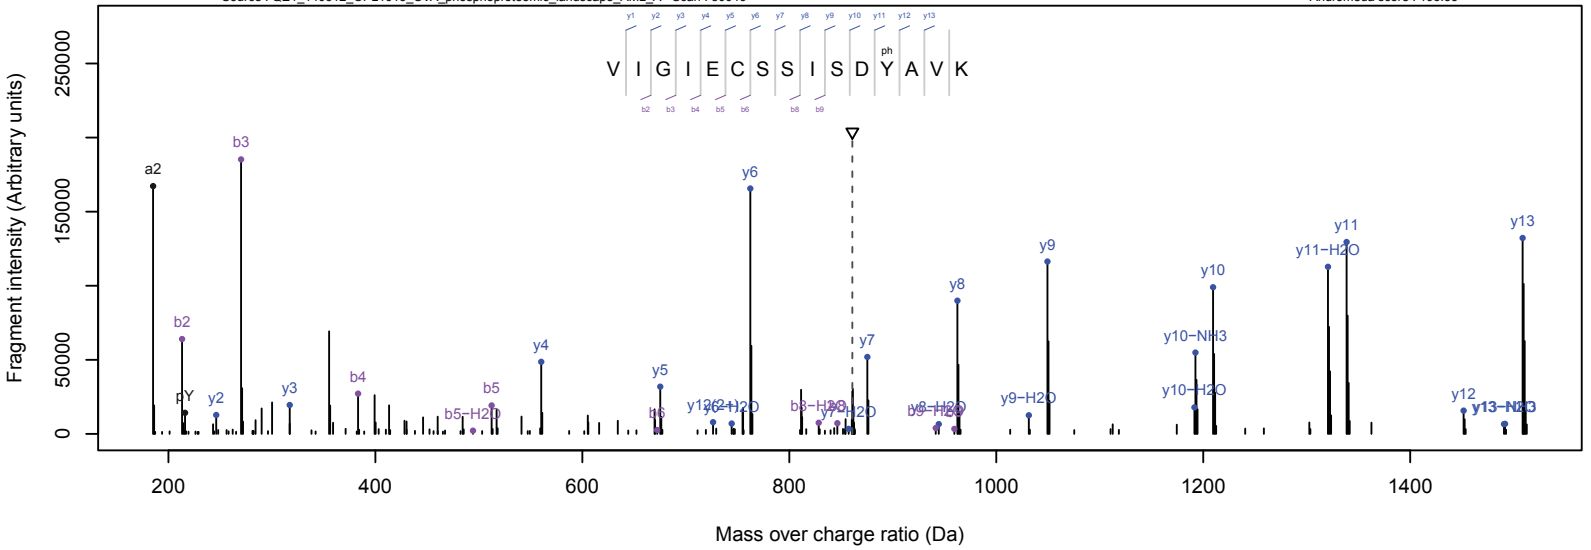

NEKCHDY(ph)YTTEFLYNLYSSEGK-3+

Source: QE1\_140612\_OPL1013\_CVA\_phosphoproteomic\_landscape\_AML\_B Scan: 39669

Andromeda score: 196.1

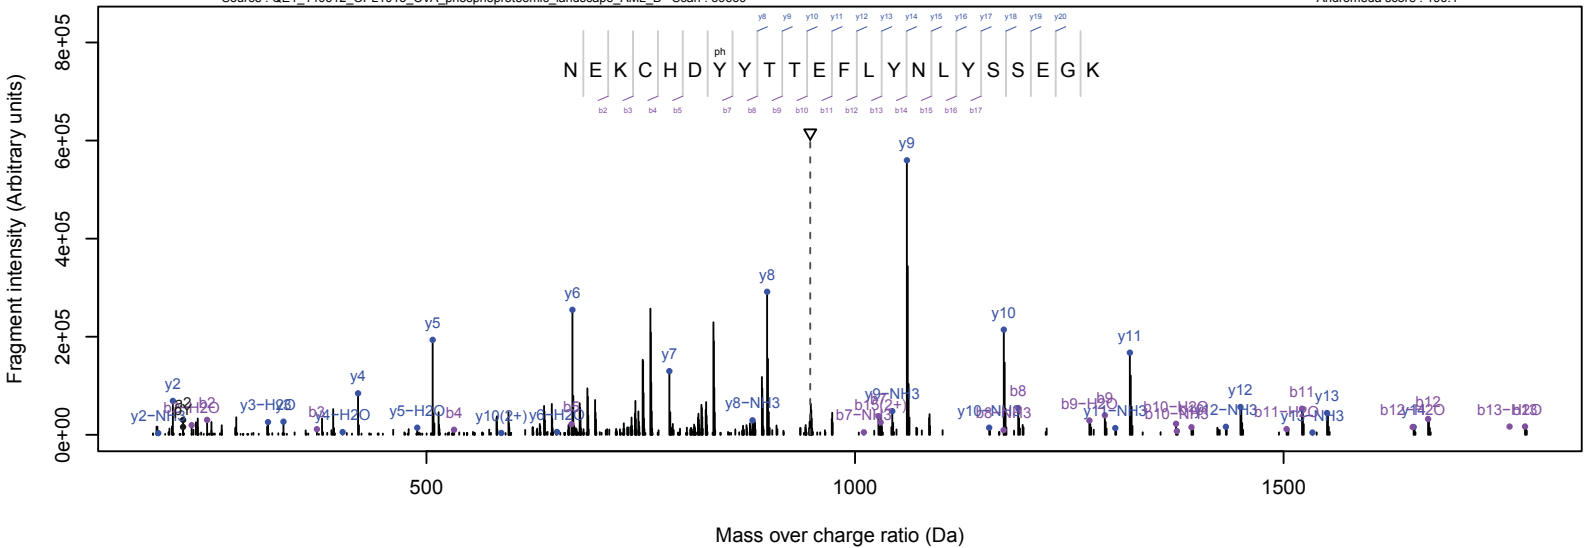

Y(ph)KILDATDQESLELKPTR-3+

Source : QE1\_140612\_OPL1013\_CVA\_phosphoproteomic\_landscape\_AML\_C Scan : 25560

Andromeda score : 195.56

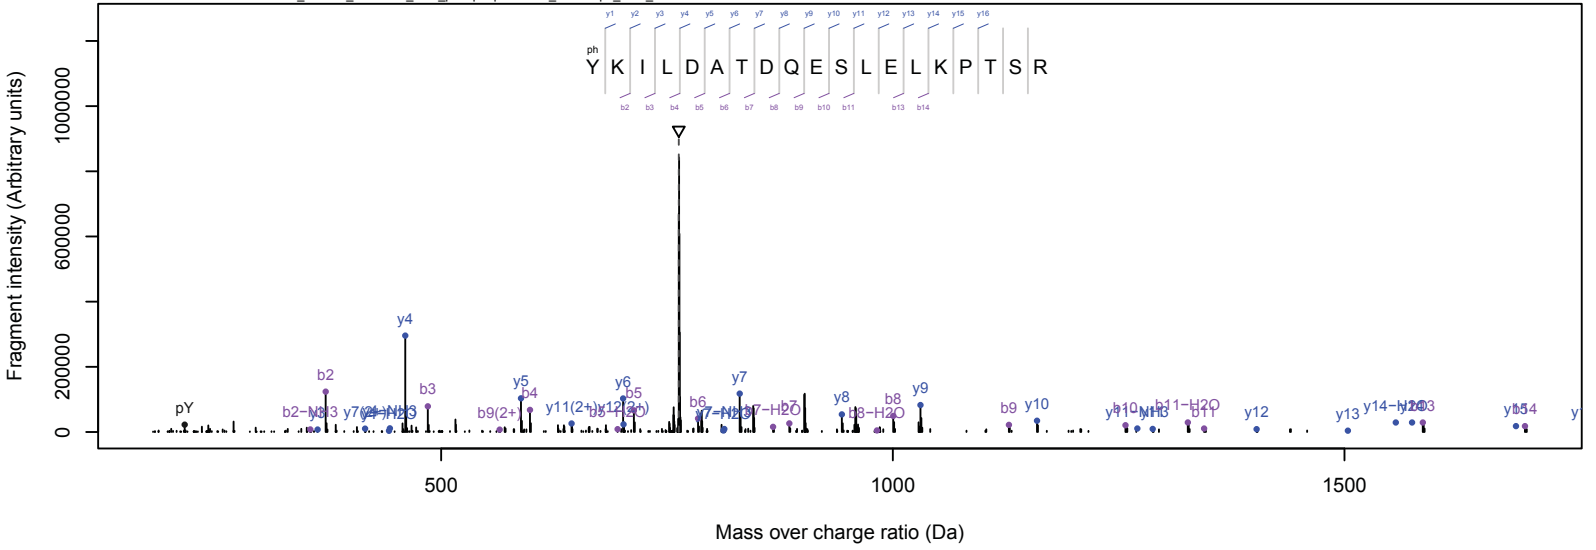

HVDY(ph)VADQIVTK-2+

Source : QE1\_140612\_OPL1013\_CVA\_phosphoproteomic\_landscape\_AML\_B Scan : 16888

Andromeda score : 195.16

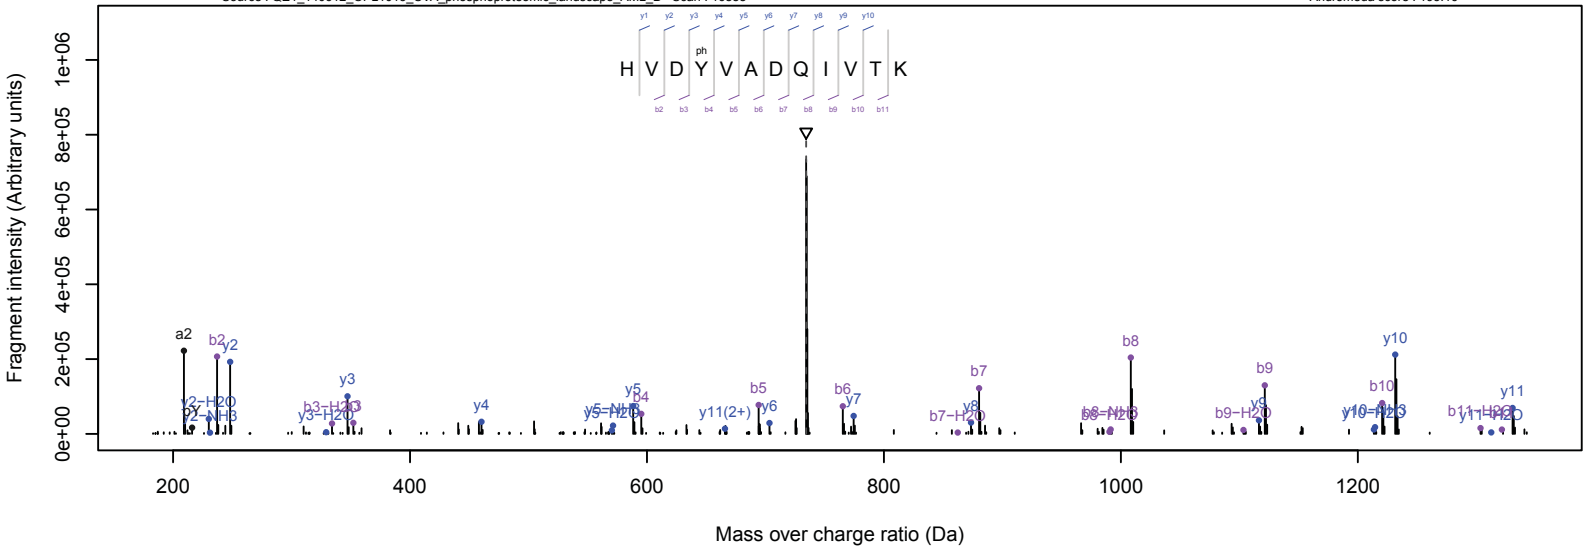

TLDGIFSEQVAMGY(ph)SHSLVIAR-3+

Source : QE1\_140612\_OPL1013\_CVA\_phosphoproteomic\_landscape\_AML\_C Scan : 44610

Andromeda score : 194.24

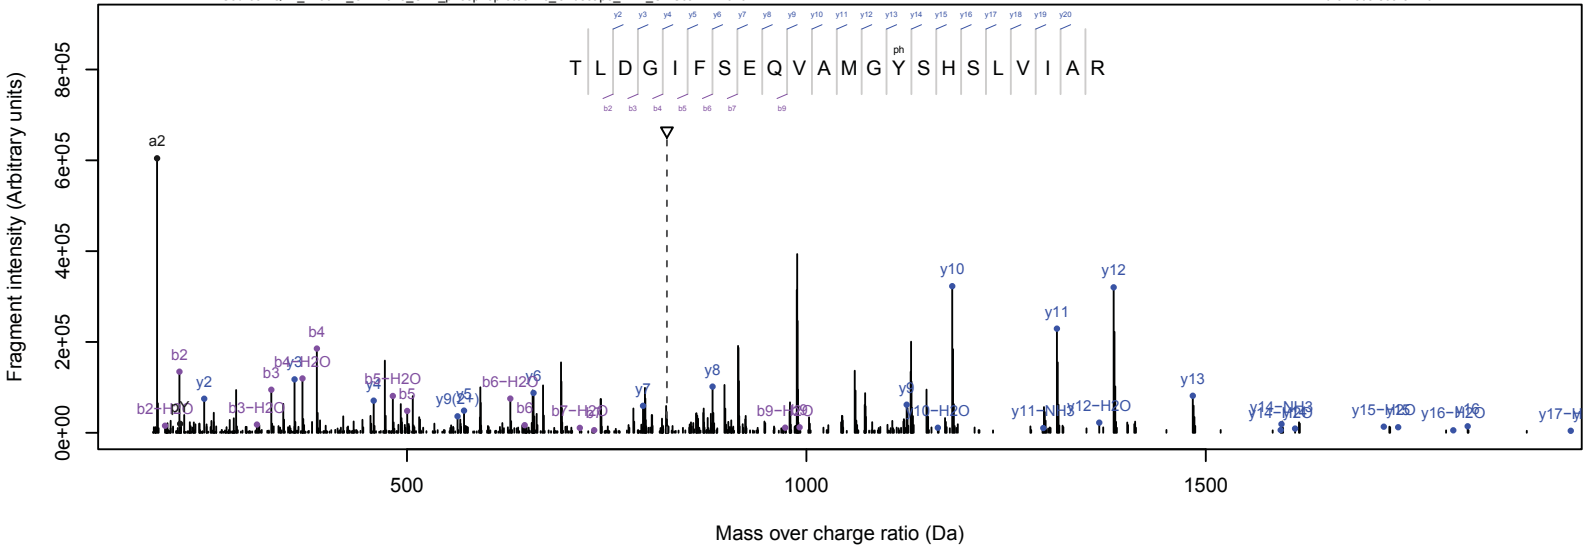

**Y(ph)TNGHLFTTISVSGMTMICYACNK-3+**

Source : QE1\_140612\_OPL1013\_CVA\_phosphoproteomic\_landscape\_AML\_C Scan : 41542

Andromeda score : 194.24

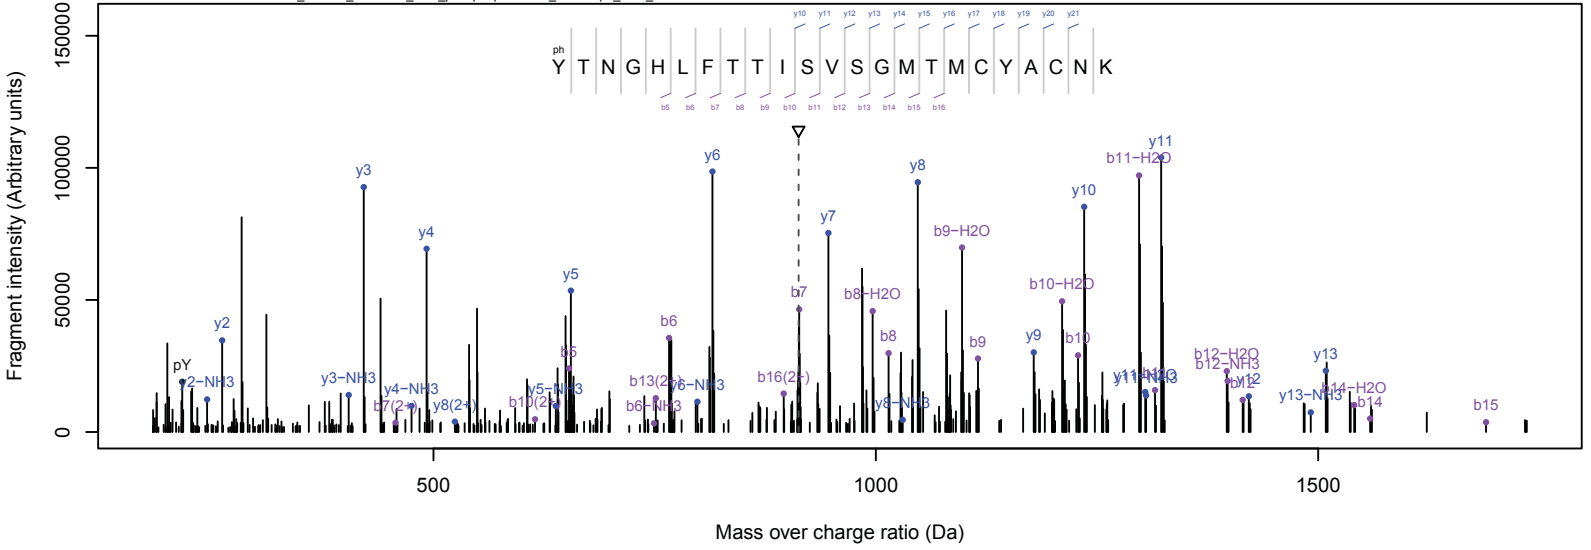

**LQPFHSTELEDDAIY(ph)SVHVPAAGLYR-3+**

Source : QE1\_140908\_OPL1013\_CvA\_pTyrIP\_AML\_HL60 Scan : 46586

Andromeda score : 194.19

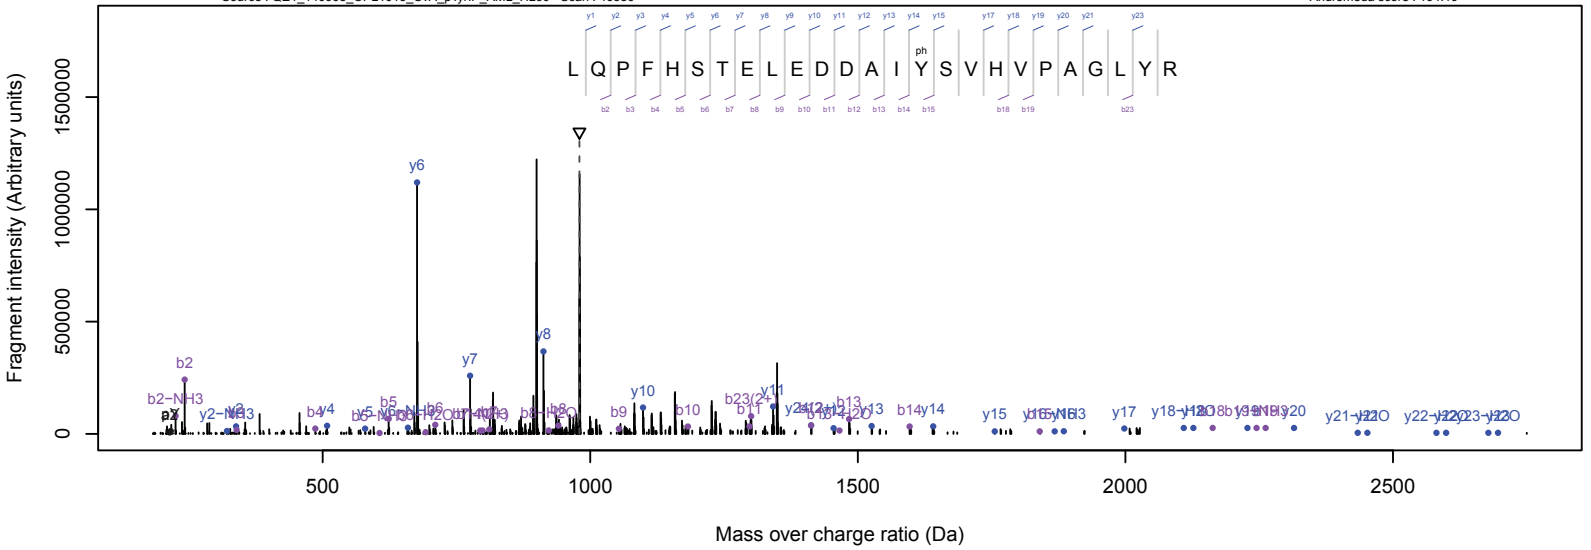

**DTCYSPKSPV(ph)LSTPSSASK-3+**

Source : QE1\_140612\_OPL1013\_CVA\_phosphoproteomic\_landscape\_AML\_C Scan : 22627

Andromeda score : 194.15

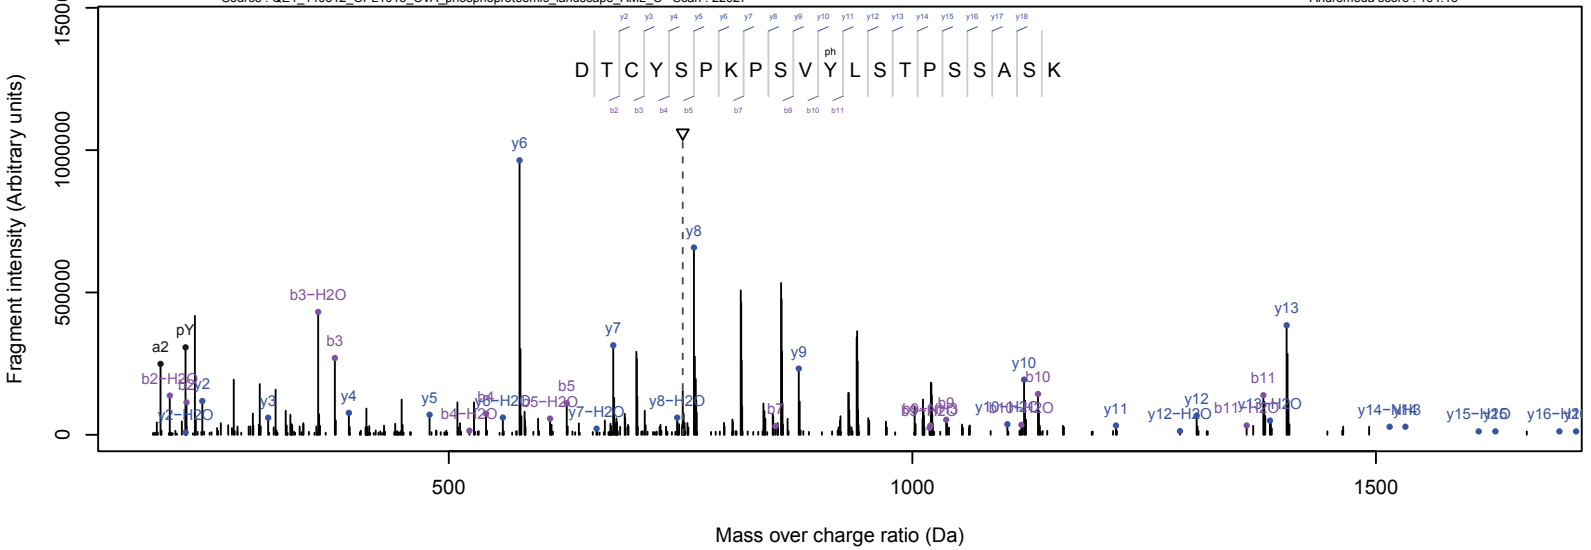

EHAHVASEY(ph)PVILSIEDHCSIAQQR-4+

Source: QE1\_140612\_OPL1013\_CVA\_phosphoproteomic\_landscape\_AML\_D Scan: 40390

Andromeda score: 193.87

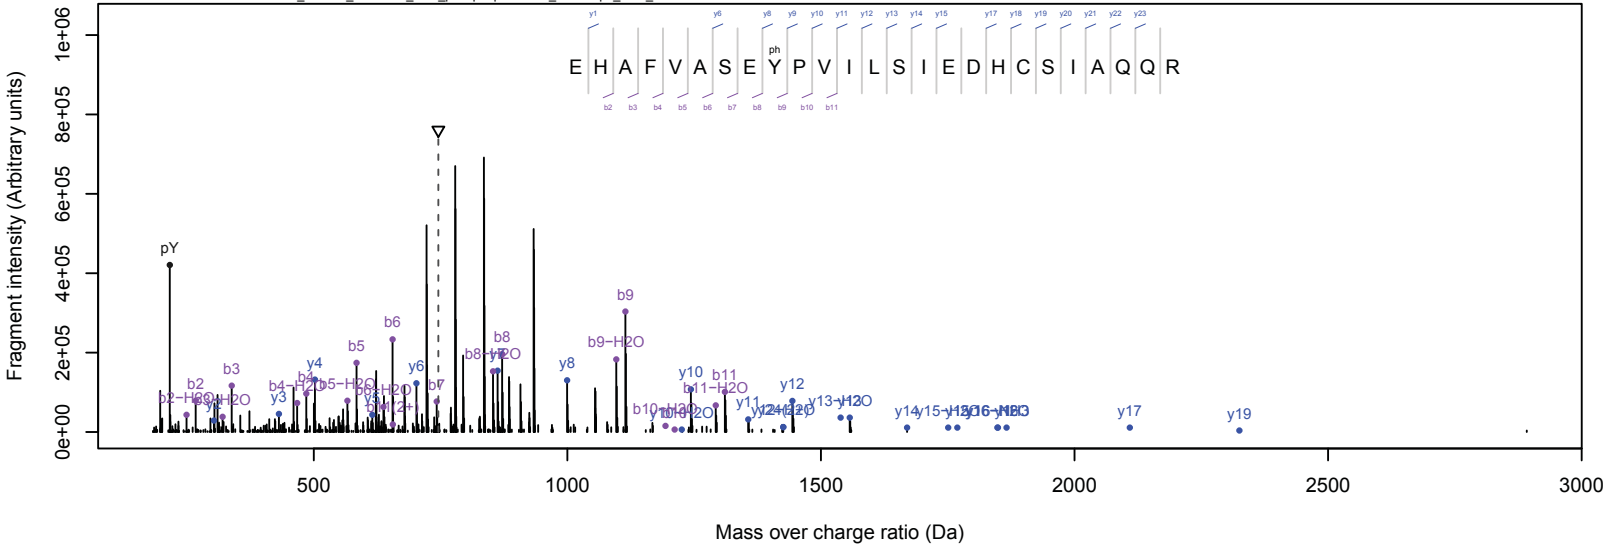

KNLQY(ph)YDISAK-2+

Source: QE1\_140612\_OPL1013\_CVA\_phosphoproteomic\_landscape\_AML\_B Scan: 14700

Andromeda score: 193.49

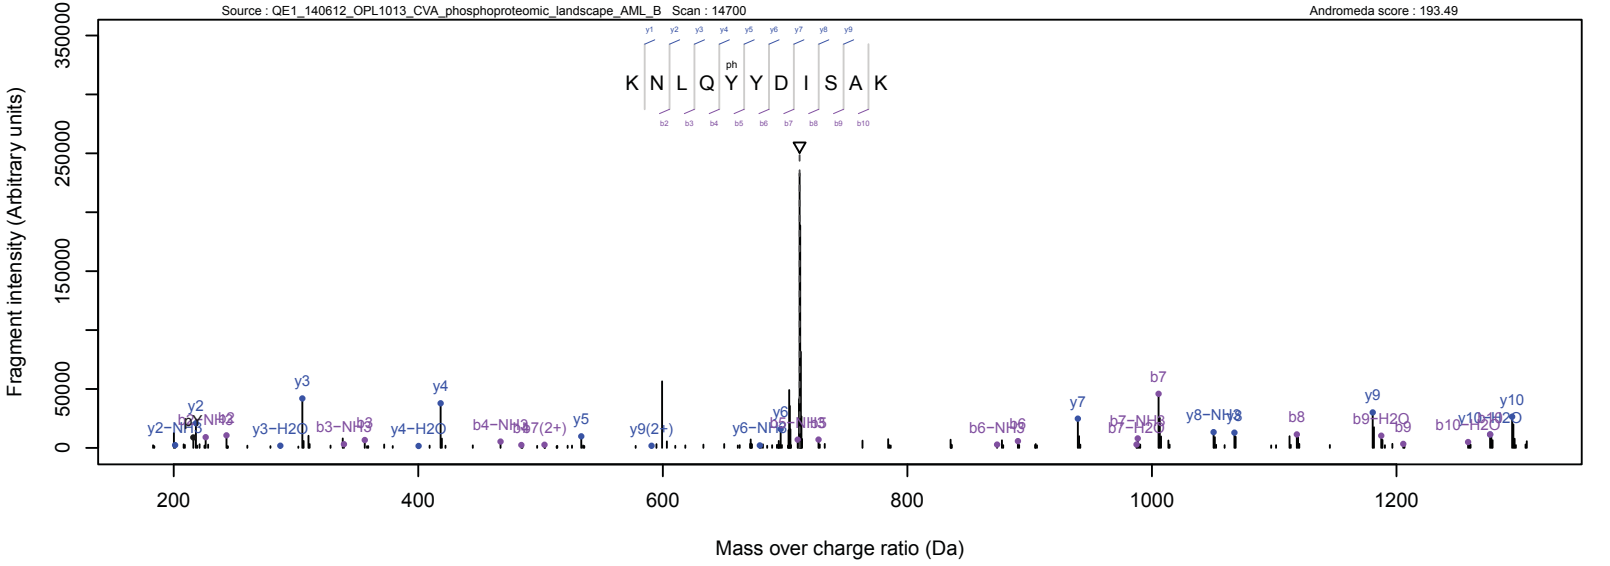

DSMSAAEVGT(ph)GYATTK-2+

Source: QE1\_140612\_OPL1013\_CVA\_phosphoproteomic\_landscape\_AML\_C Scan: 12679

Andromeda score: 193.47

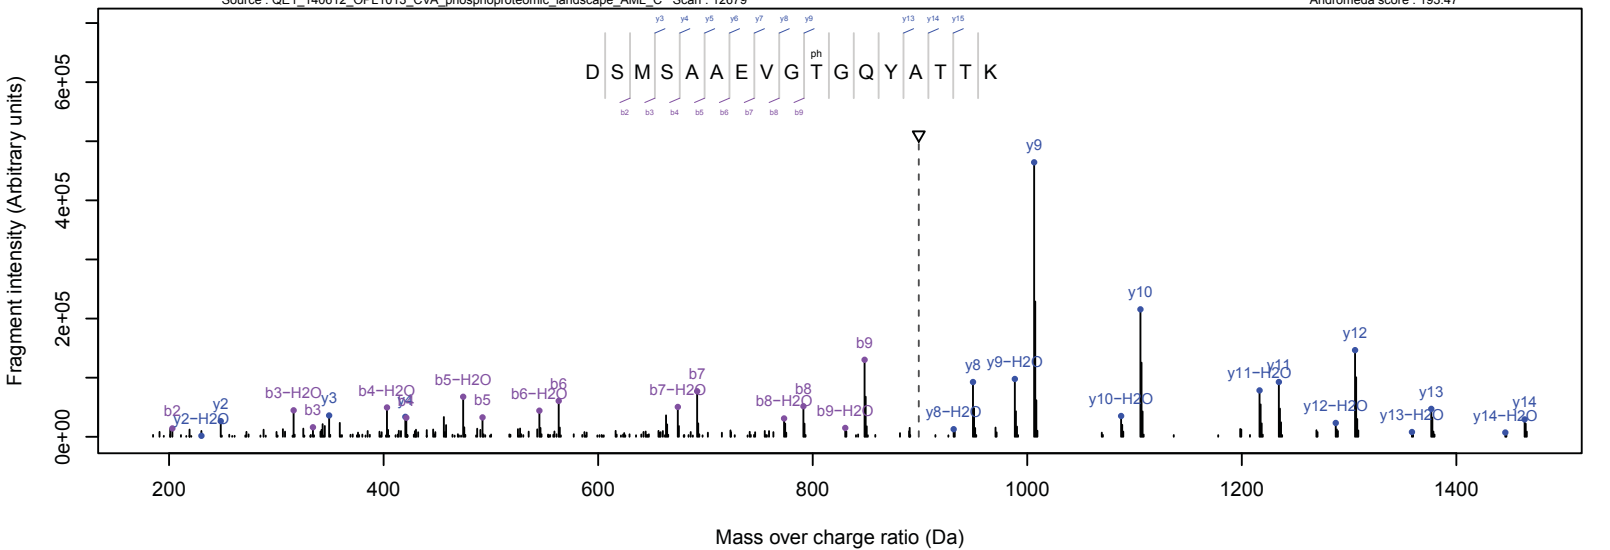

**EYM(ox)ESLQLKPGEVIYK-2+**

Source : QE1\_140908\_OPL1013\_CvA\_pTyrIP\_AML\_Kasumi1 Scan : 27726

Andromeda score : 193.32

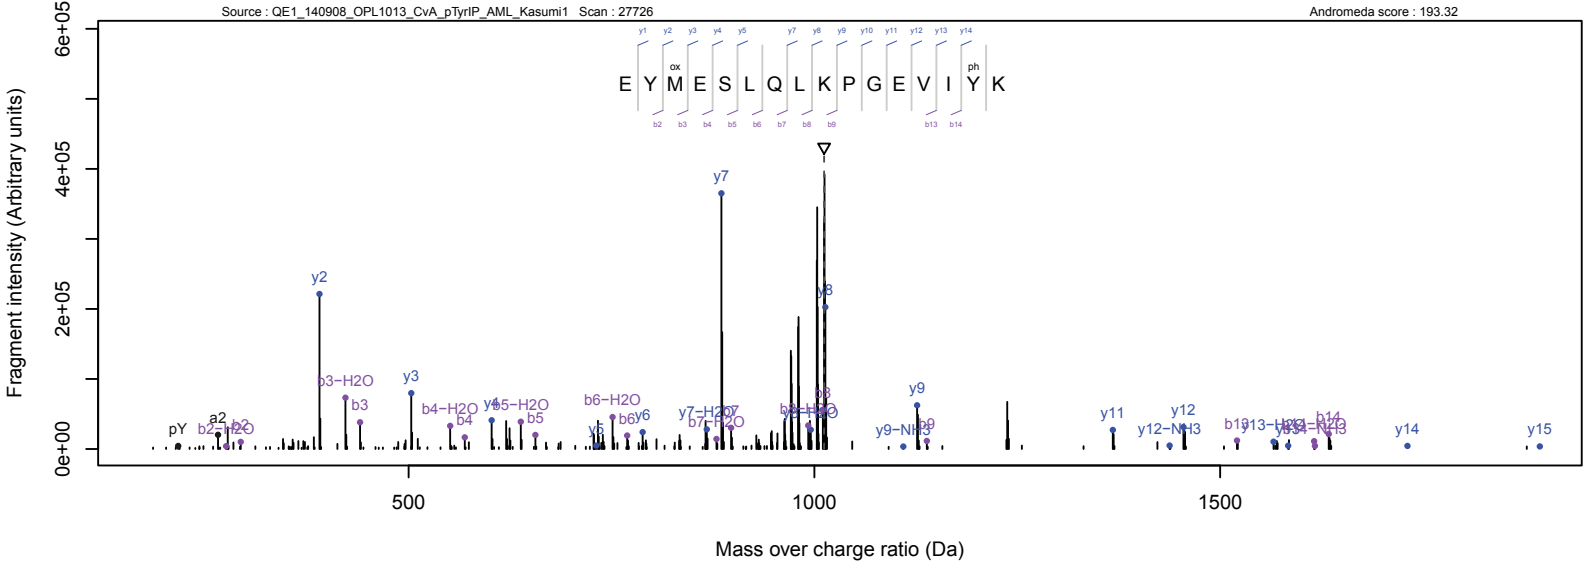

**GSY(ph)GDLGGPIITTQVTIPK-2+**

Source : QE1\_140612\_OPL1013\_CVA\_phosphoproteomic\_landscape\_AML\_B Scan : 40096

Andromeda score : 193.06

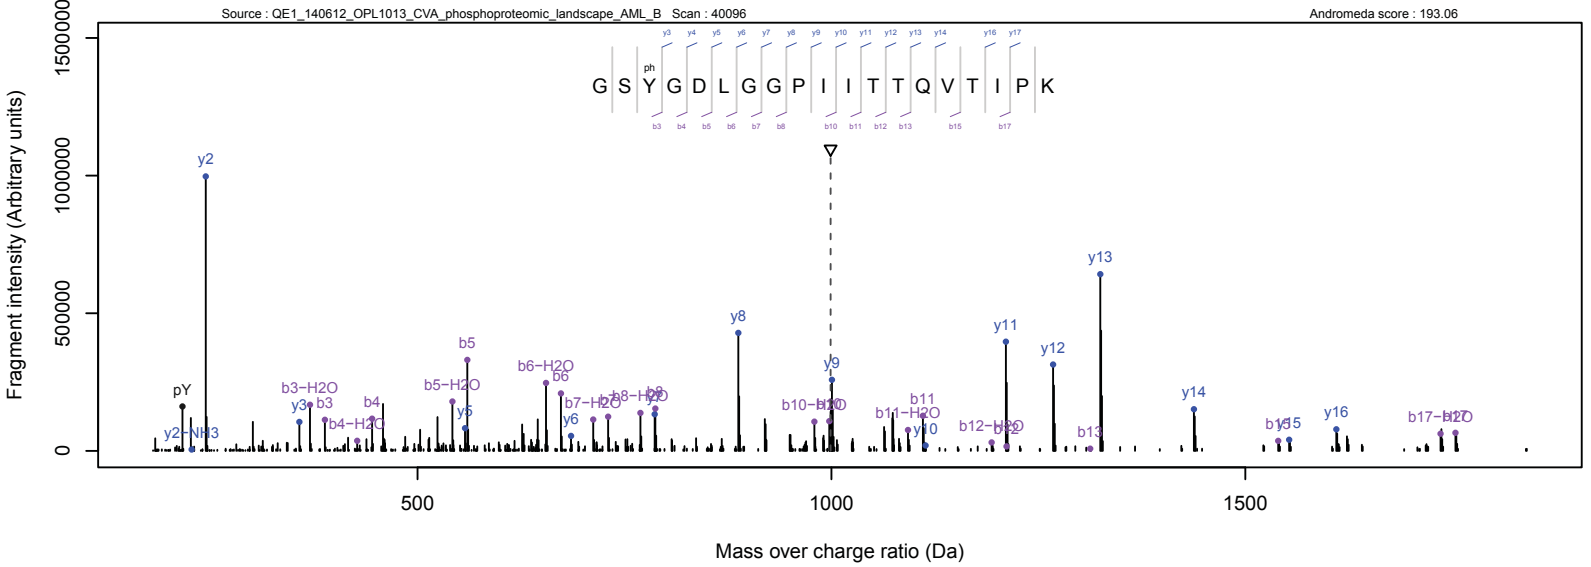

**LPEGSSGLSSYPK-2+**

Source : QE1\_140612\_OPL1013\_CVA\_phosphoproteomic\_landscape\_AML\_C Scan : 16567

Andromeda score : 193.06

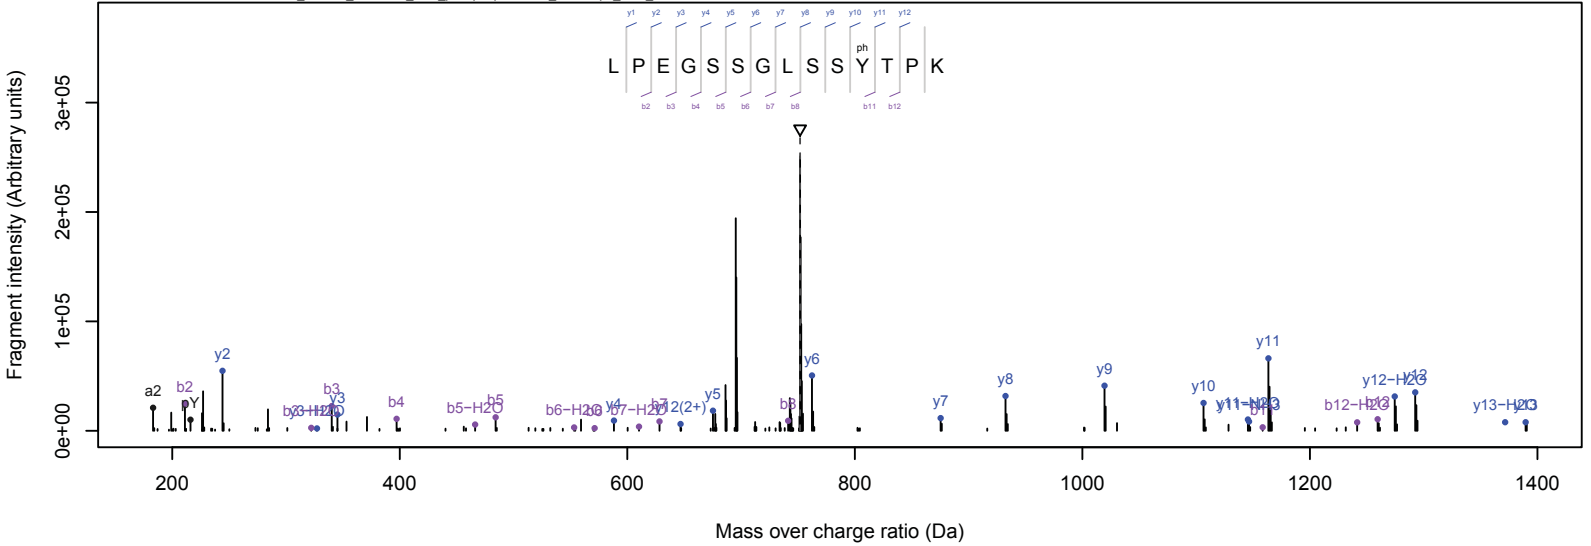

PKFYCDYCDT(ph)YLTHDPSVR-3+

Source : QE1\_140612\_OPL1013\_CVA\_phosphoproteomic\_landscape\_AML\_C Scan : 25346

Andromeda score : 192.94

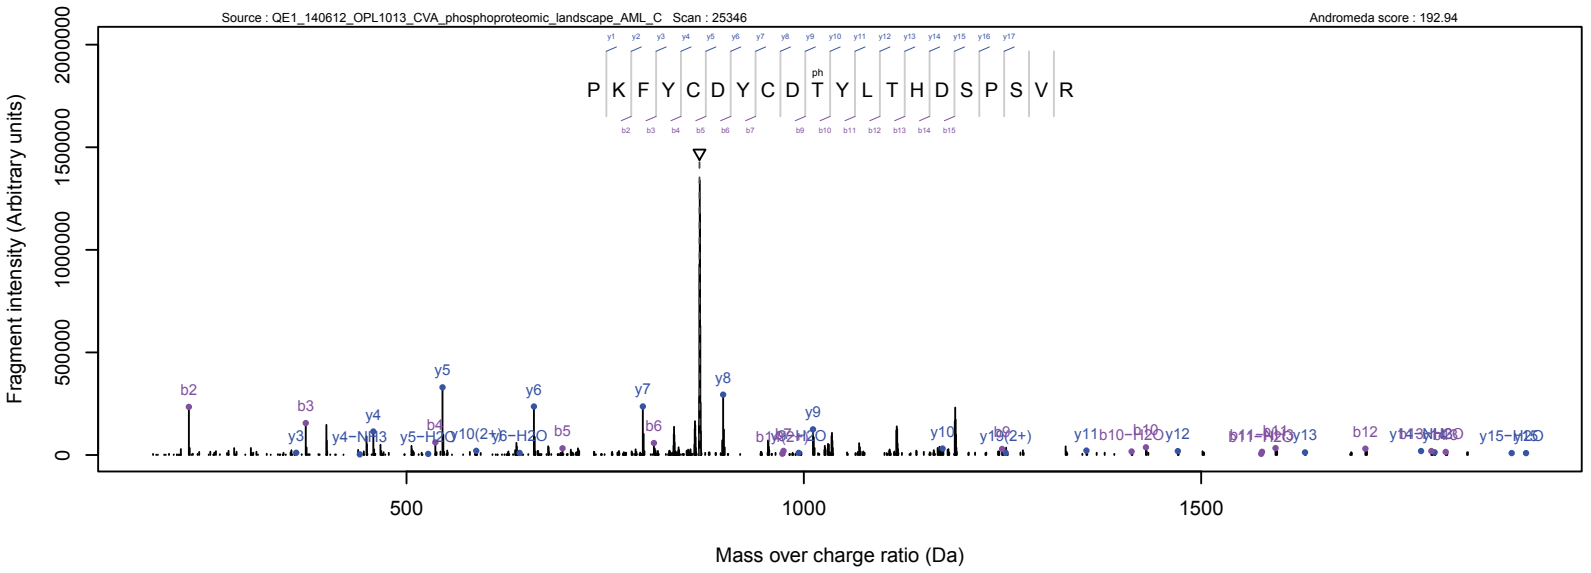

LY(ph)GPTNFAPINHVAR-3+

Source : QE1\_140908\_OPL1013\_Cva\_pTyrIP\_AML\_HEL Scan : 40236

Andromeda score : 192.65

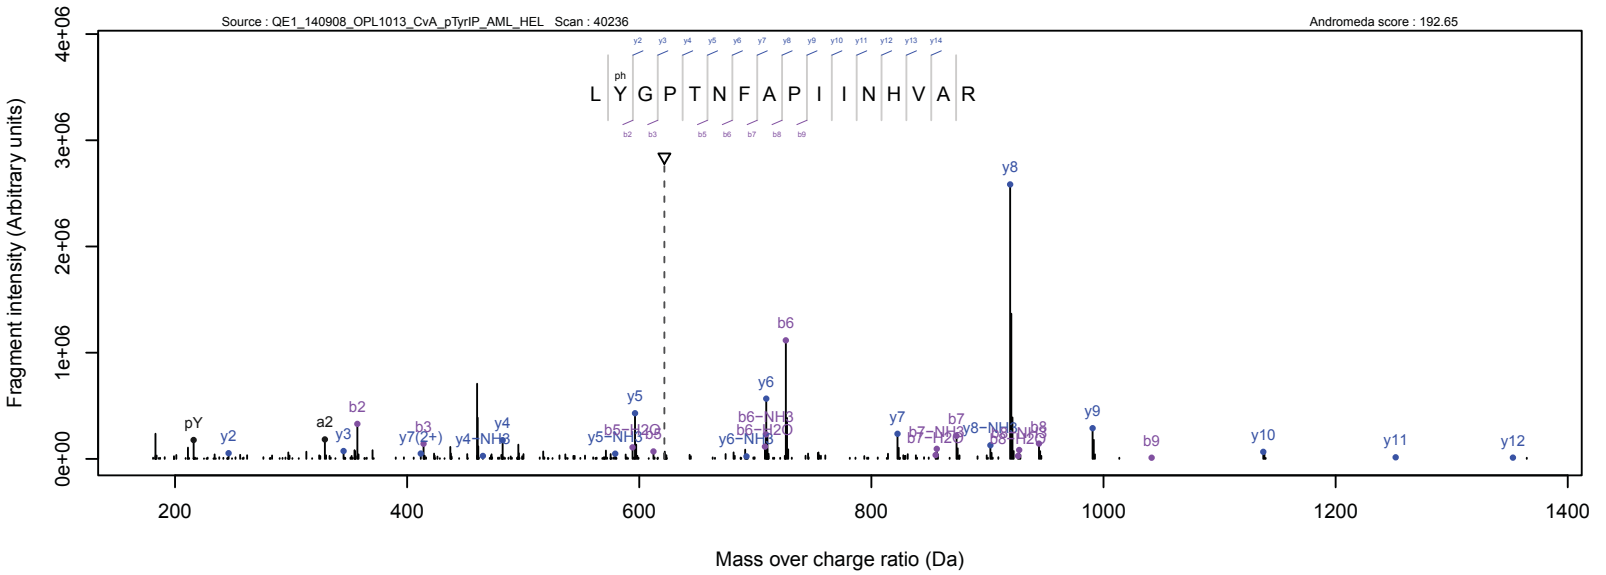

YSEEGVY(ph)NVQYSFIK-2+

Source : QE1\_140612\_OPL1013\_CVA\_phosphoproteomic\_landscape\_AML\_E Scan : 34430

Andromeda score : 192.65

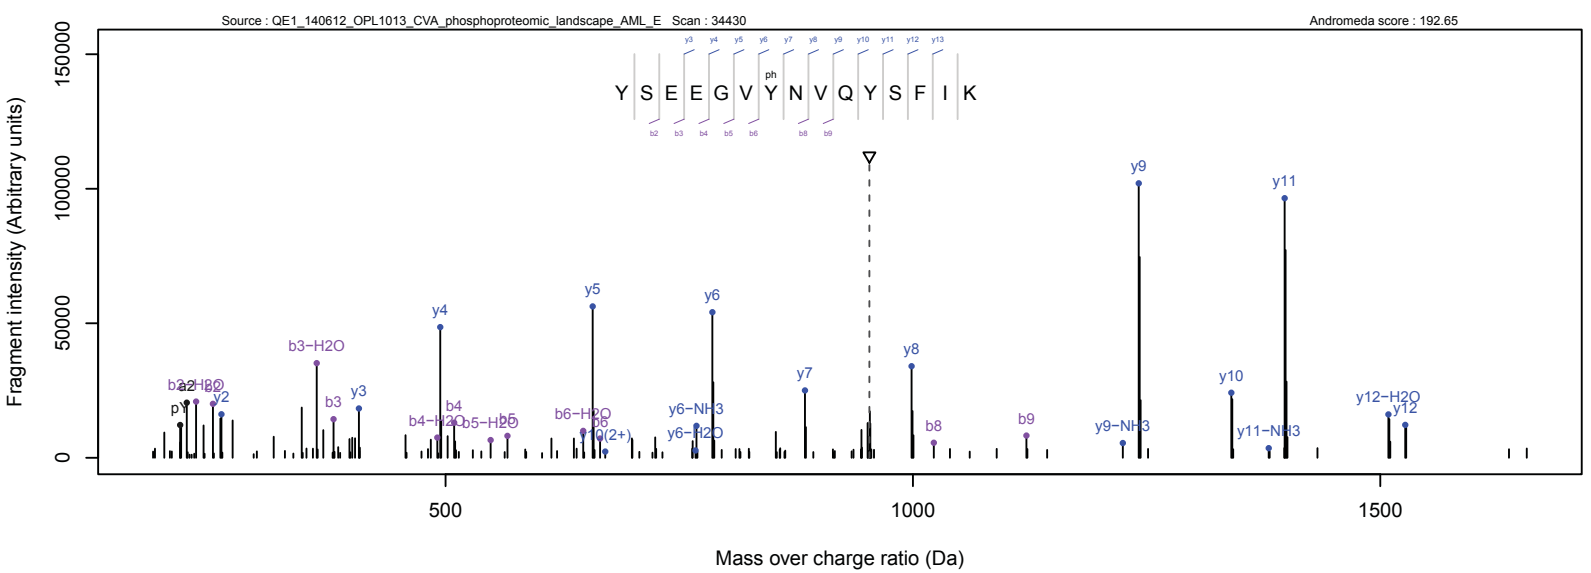



YCGHLY(ph)GLGSGSSVQNGTGNAYEEEANKQS-3+

Source: QE1\_140908\_OPL1013\_CvA\_pTyrIP\_AML\_OCI\_AML3 Scan: 29420

Andromeda score: 192.24

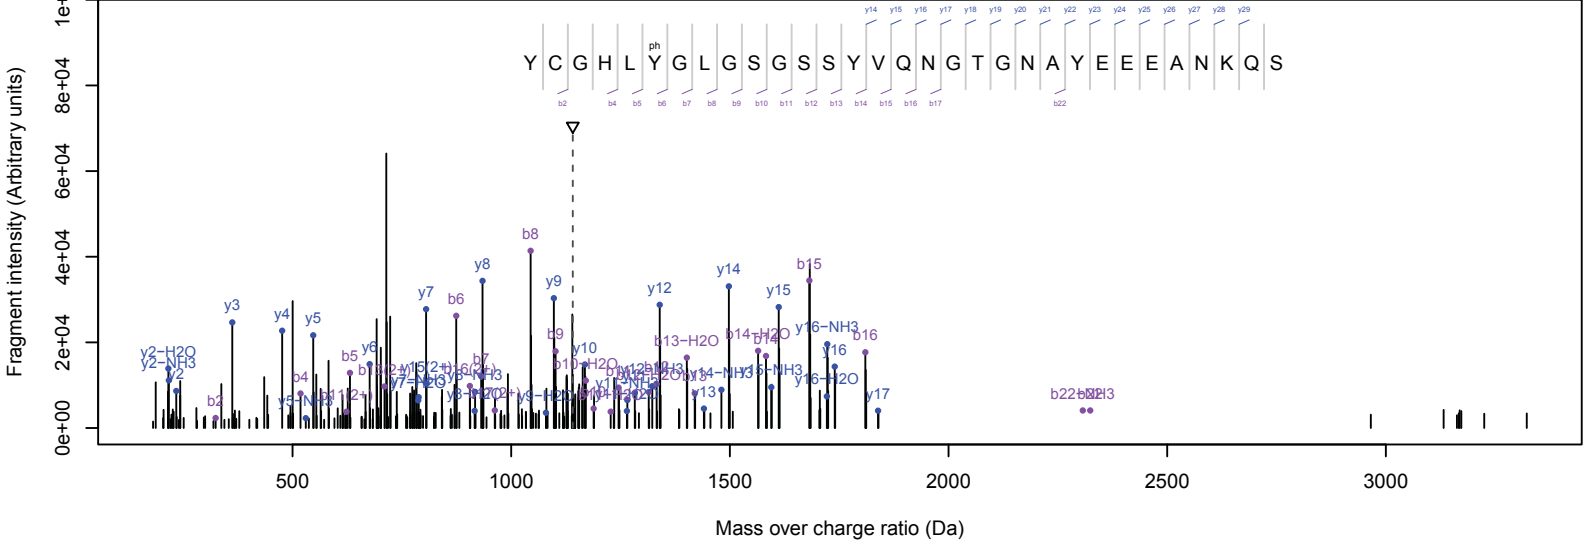

GASQAGMTG(ph)GMPR-2+

Source: QE1\_140612\_OPL1013\_CVA\_phosphoproteomic\_landscape\_AML\_C Scan: 12783

Andromeda score: 192.14

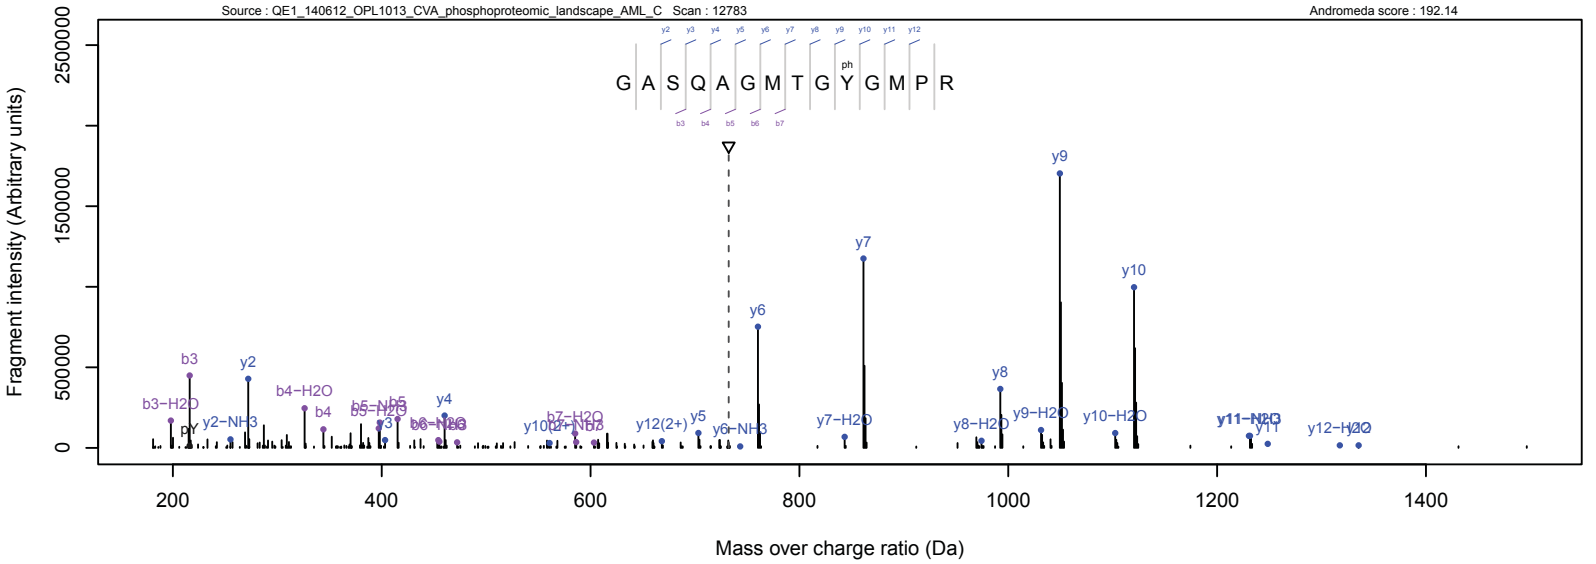

TSQDY(ph)DQLPSCDGSQAPARPPKPR-3+

Source: QE1\_140908\_OPL1013\_CvA\_pTyrIP\_AML\_Kasumi6 Scan: 15502

Andromeda score: 192.1

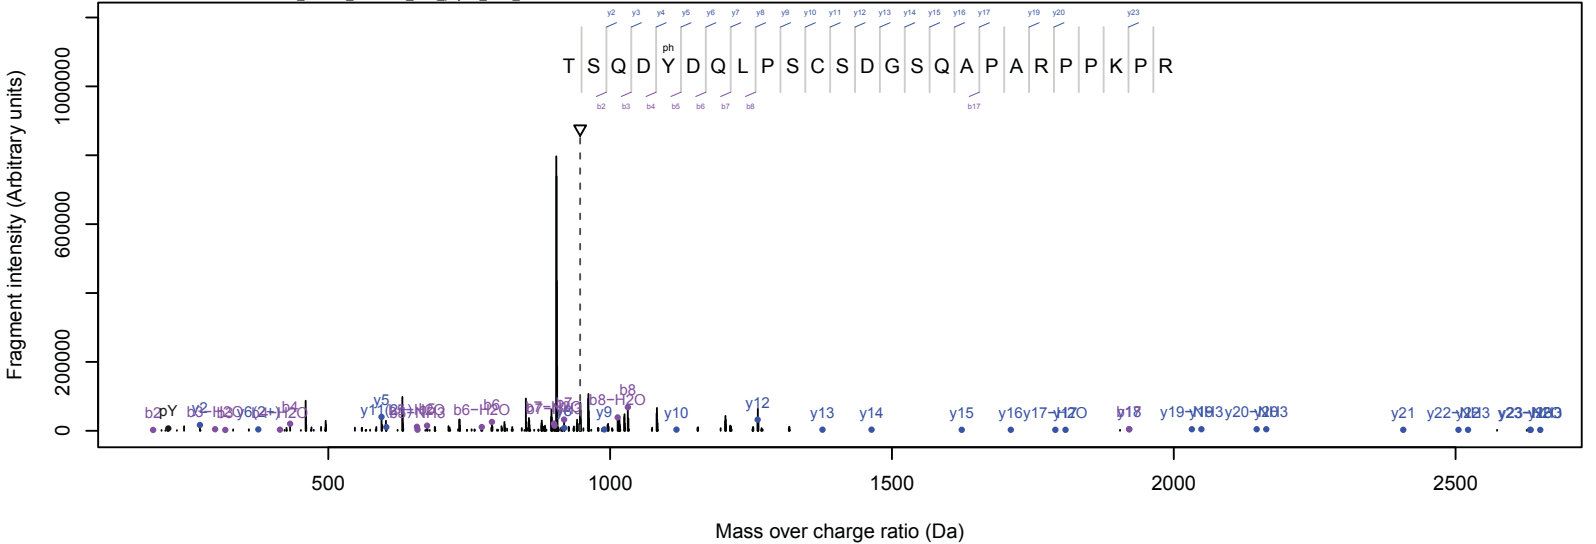

GGHMDGGY(ph)SMNFMSSSR-3+

Source : QE1\_140612\_OPL1013\_CVA\_phosphoproteomic\_landscape\_AML\_C Scan : 21441

Andromeda score : 191.93

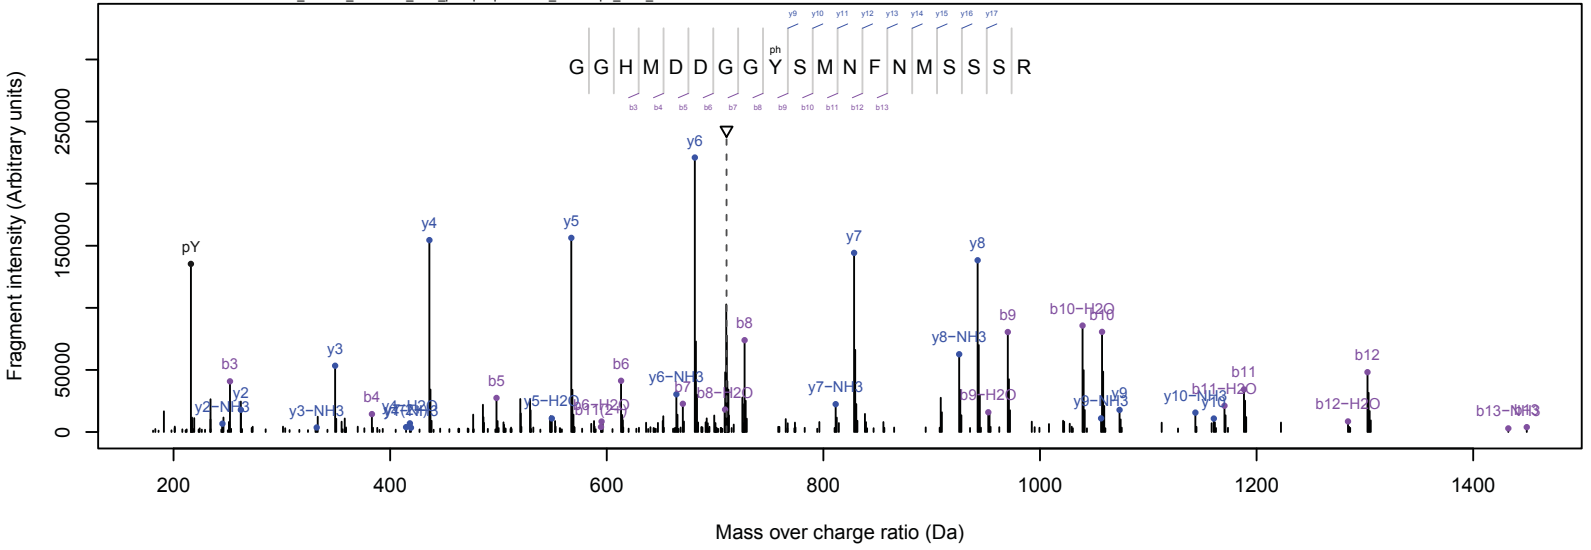

QLEETNNDYETADGGY(ph)MTLNPR-2+

Source : QE1\_140612\_OPL1013\_CVA\_phosphoproteomic\_landscape\_AML\_C Scan : 26693

Andromeda score : 191.65

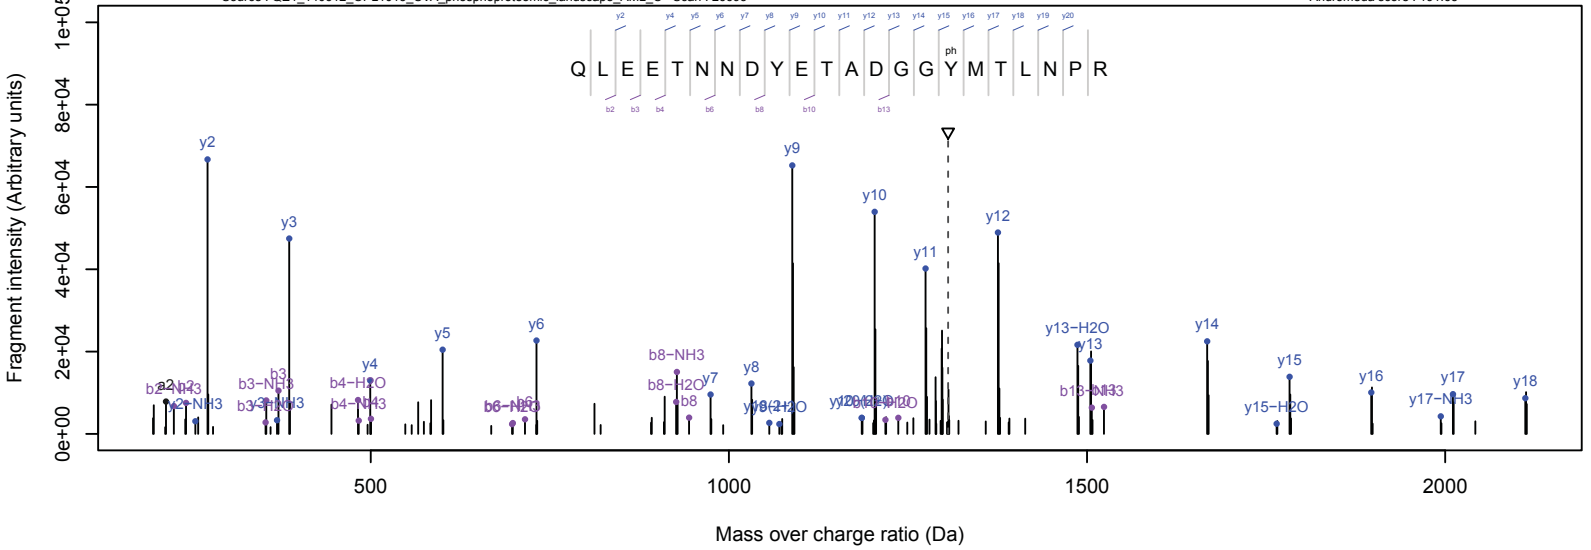

ICANHYP(h)SPDMK-2+

Source : QE1\_140612\_OPL1013\_CVA\_phosphoproteomic\_landscape\_AML\_B Scan : 17980

Andromeda score : 191.53

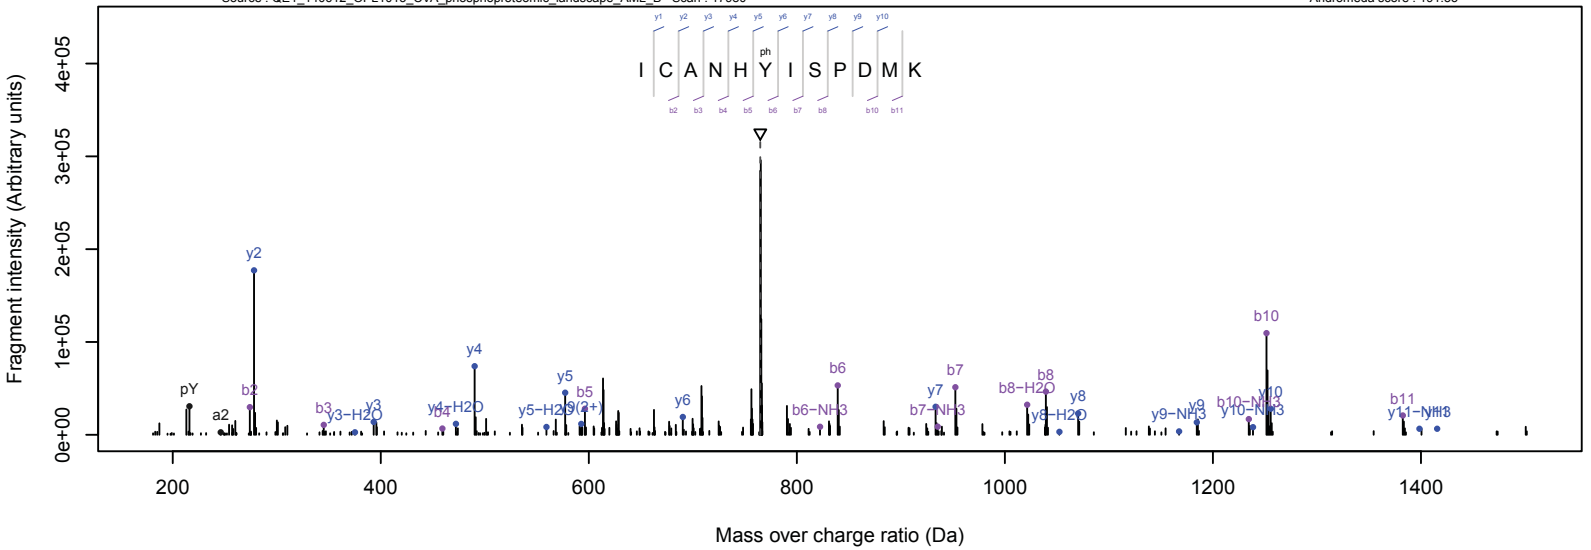

QQSTTLSTLY(ph)PSTSSLLTNHQHEGR-3+

Source : QE1\_140908\_OPL1013\_CvA\_pTyrIP\_AML\_Kasumi1 Scan : 27745

Andromeda score : 191.2

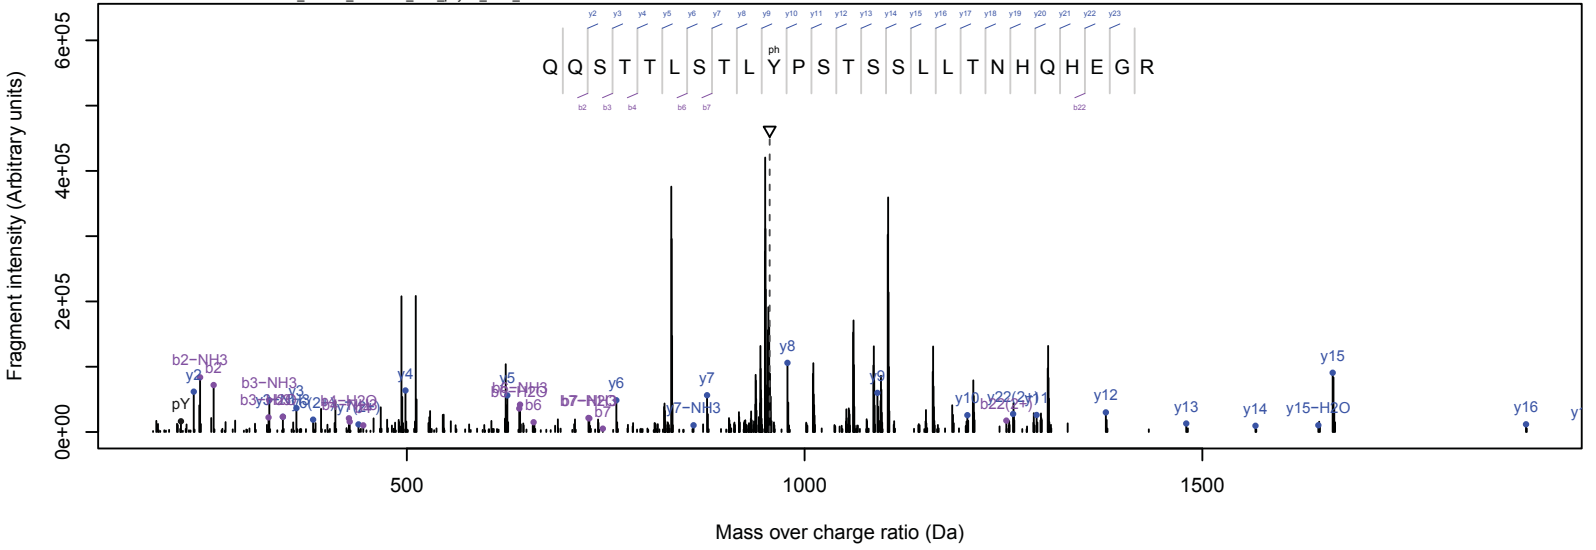

NTPY(ph)KTLEPVKPPPTVPNDYMTSPAR-3+

Source : QE1\_140612\_OPL1013\_CVA\_phosphoproteomic\_landscape\_AML\_C Scan : 29836

Andromeda score : 191.09

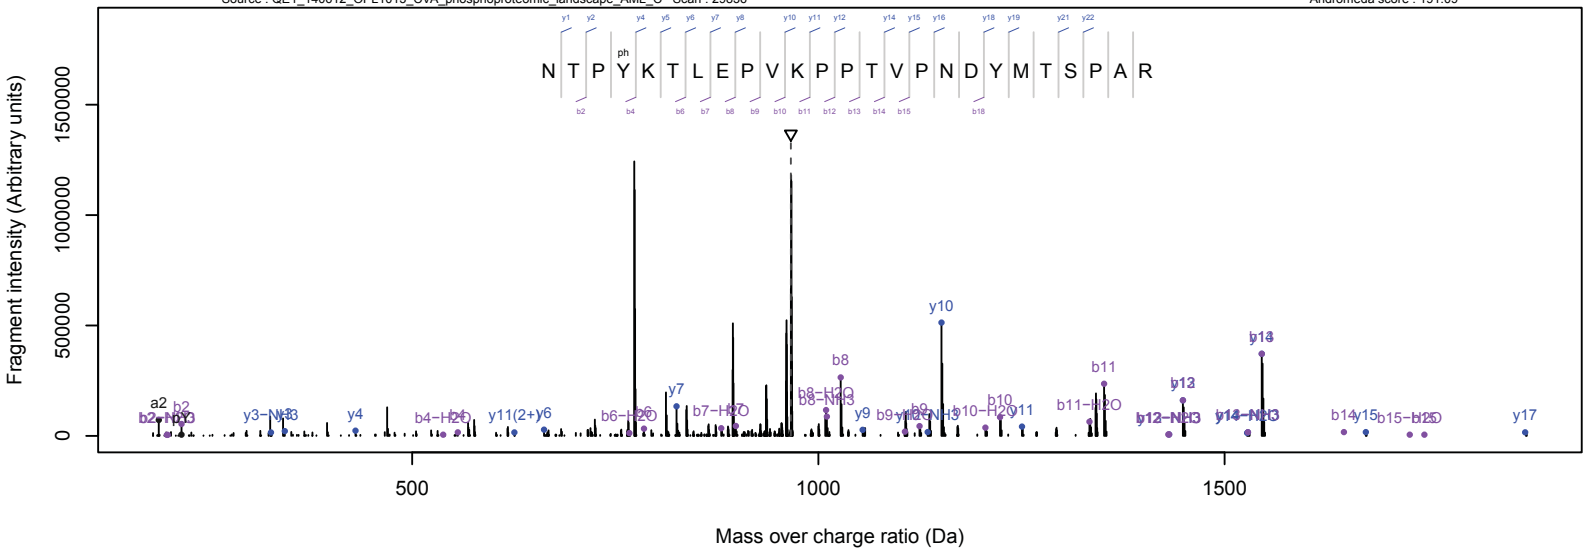

LISQDIHSNTYNYK-2+

Source : QE1\_140908\_OPL1013\_CvA\_pTyrIP\_AML\_HEL Scan : 15312

Andromeda score : 191.06

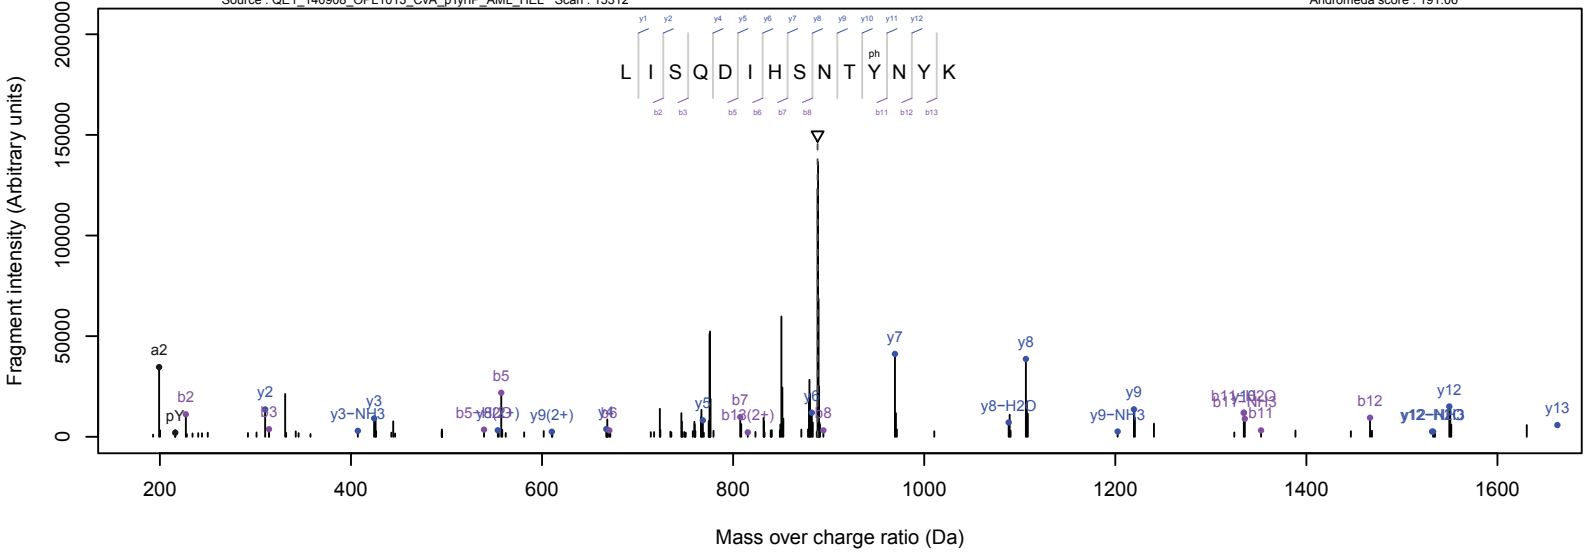

IHY(ph)LDTTTLIEPAPR-2+

Source : QE1\_140612\_OPL1013\_CVA\_phosphoproteomic\_landscape\_AML\_D Scan : 32285

Andromeda score : 190.86

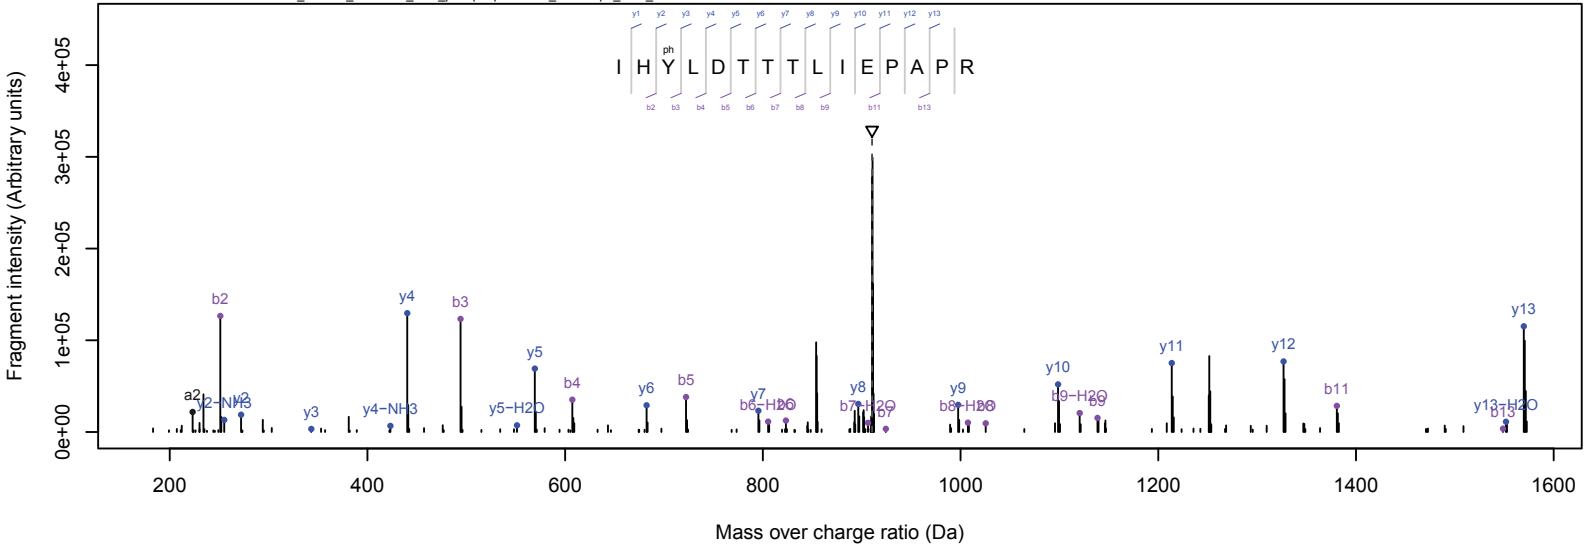

GSASQGLIESPADDSPPHAPPALATPSPEEGEIYQ(ph)ASLSFHK-4+

Source : QE1\_140908\_OPL1013\_CvA\_pTyrIP\_AML\_Kasumi6 Scan : 38150

Andromeda score : 190.76

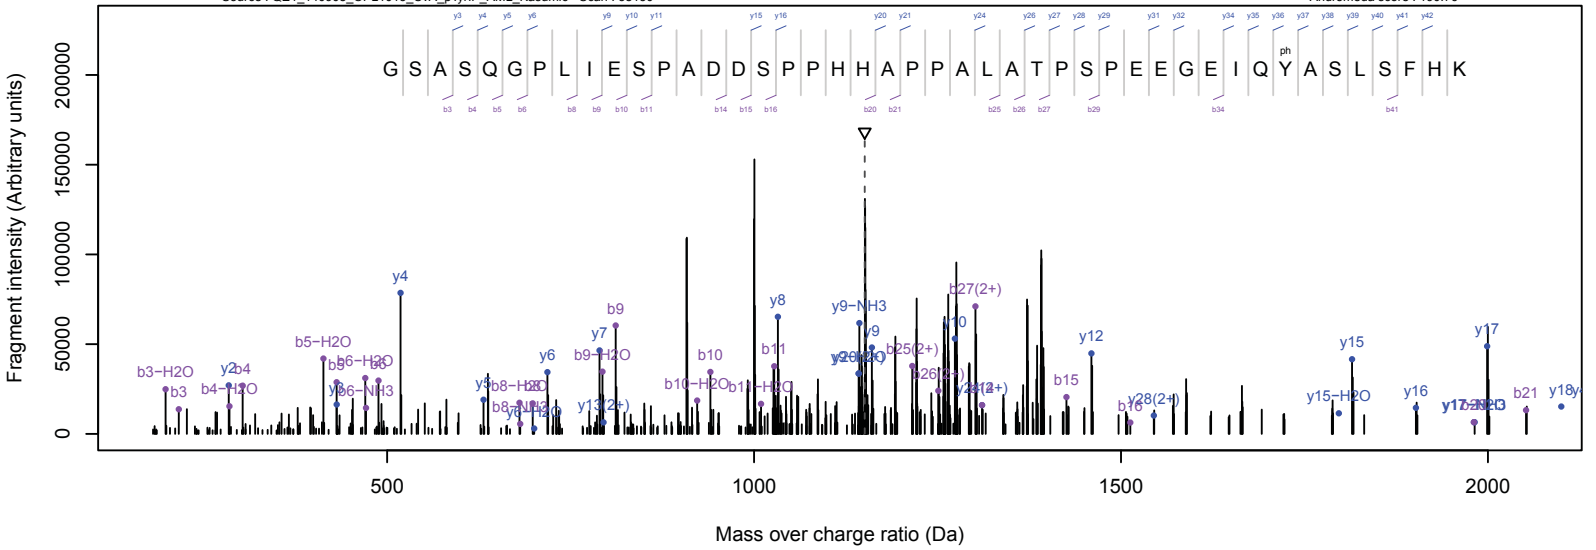

NARPELDMNQHCNLLCLPENYQMK-3+

Source : QE1\_140612\_OPL1013\_CVA\_phosphoproteomic\_landscape\_AML\_A Scan : 39427

Andromeda score : 190.5

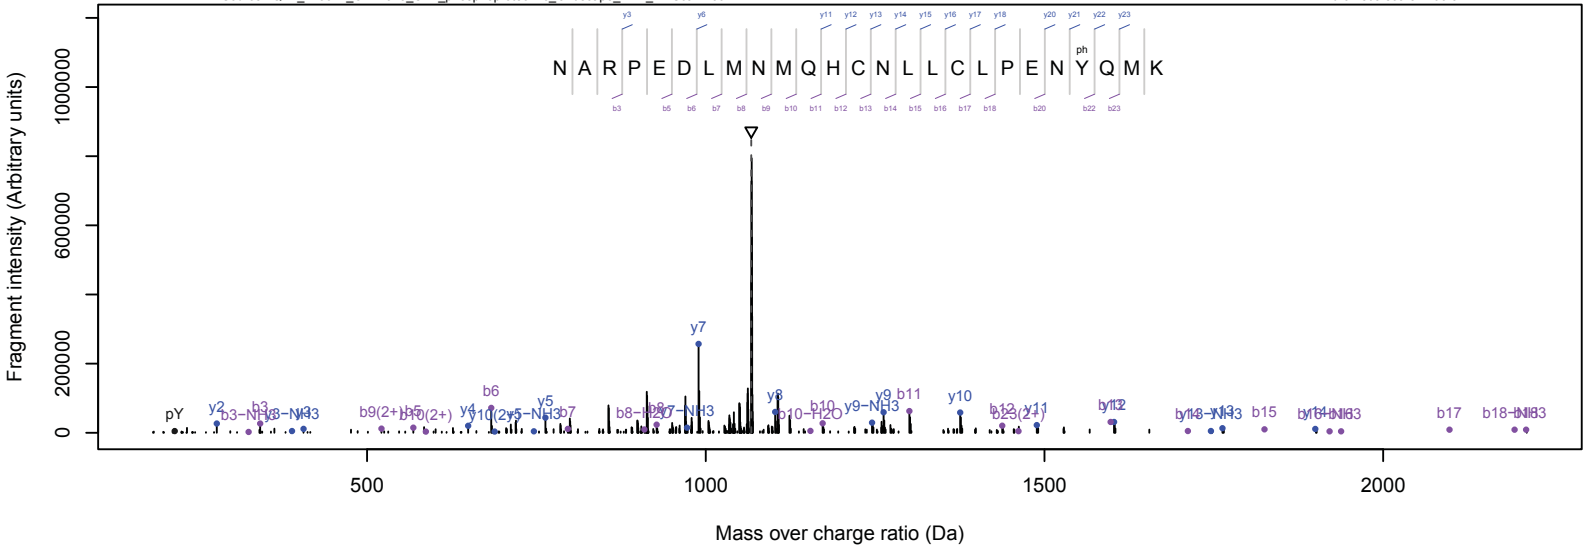

NLIAFSEGDSPY(ph)VR-2+

Source: QE1\_140822\_OPL1013\_CvA\_pTyrIP\_AML\_cell\_lines\_part2\_E Scan: 25701

Andromeda score: 190.41

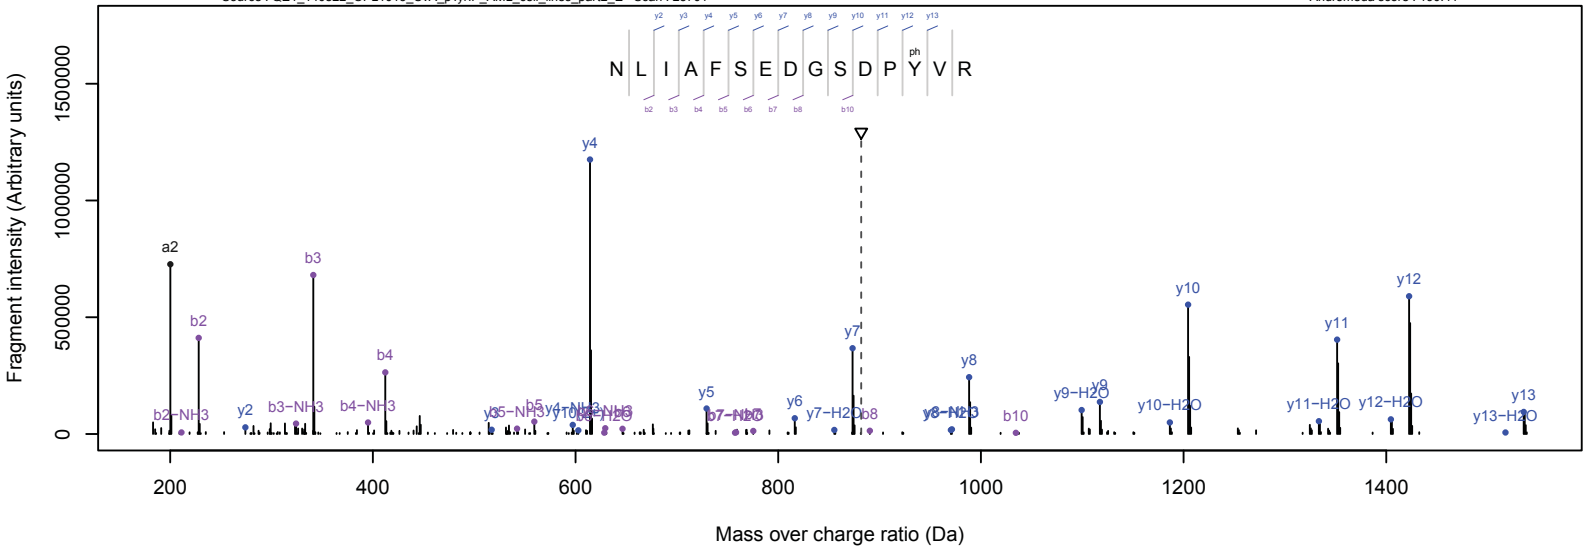

YVLDDQY(ph)TSSSGAK-2+

Source: QE1\_140822\_OPL1013\_CvA\_pTyrIP\_AML\_cell\_lines\_part2\_B Scan: 9280

Andromeda score: 190.27

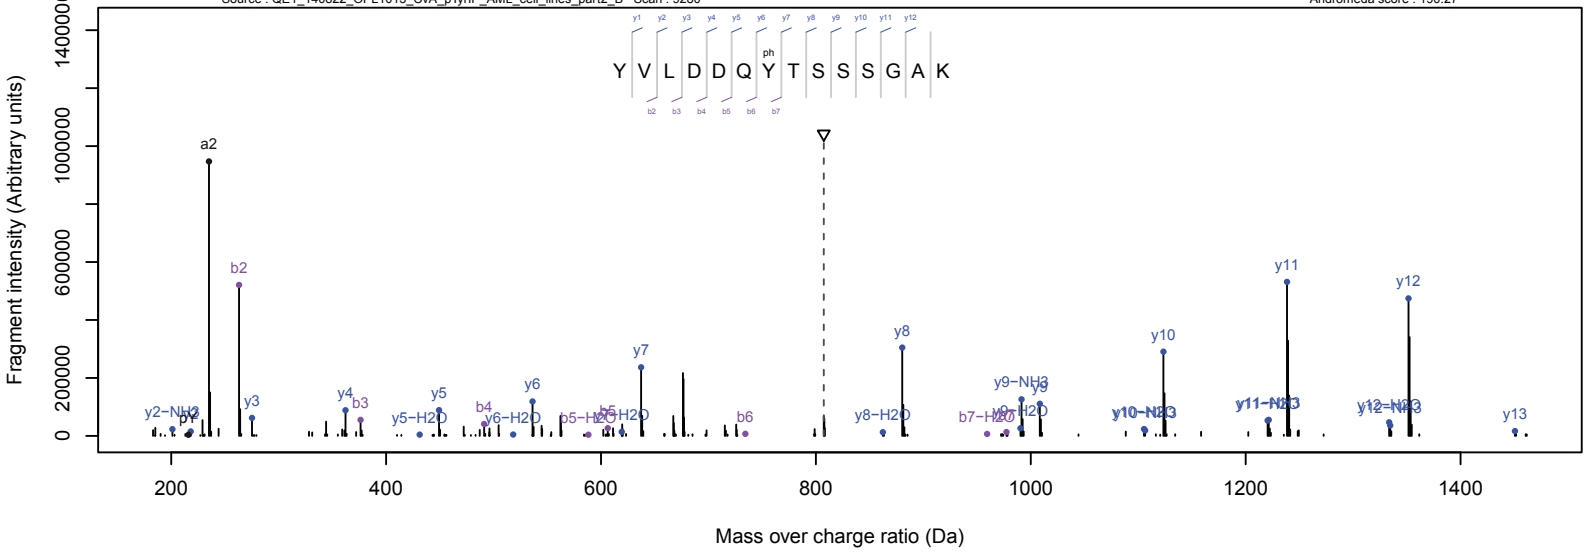

HTDDEM(ox)TGY(ph)VATR-2+

Source: QE1\_140822\_OPL1013\_CvA\_pTyrIP\_AML\_cell\_lines\_part2\_F Scan: 5533

Andromeda score: 190.03

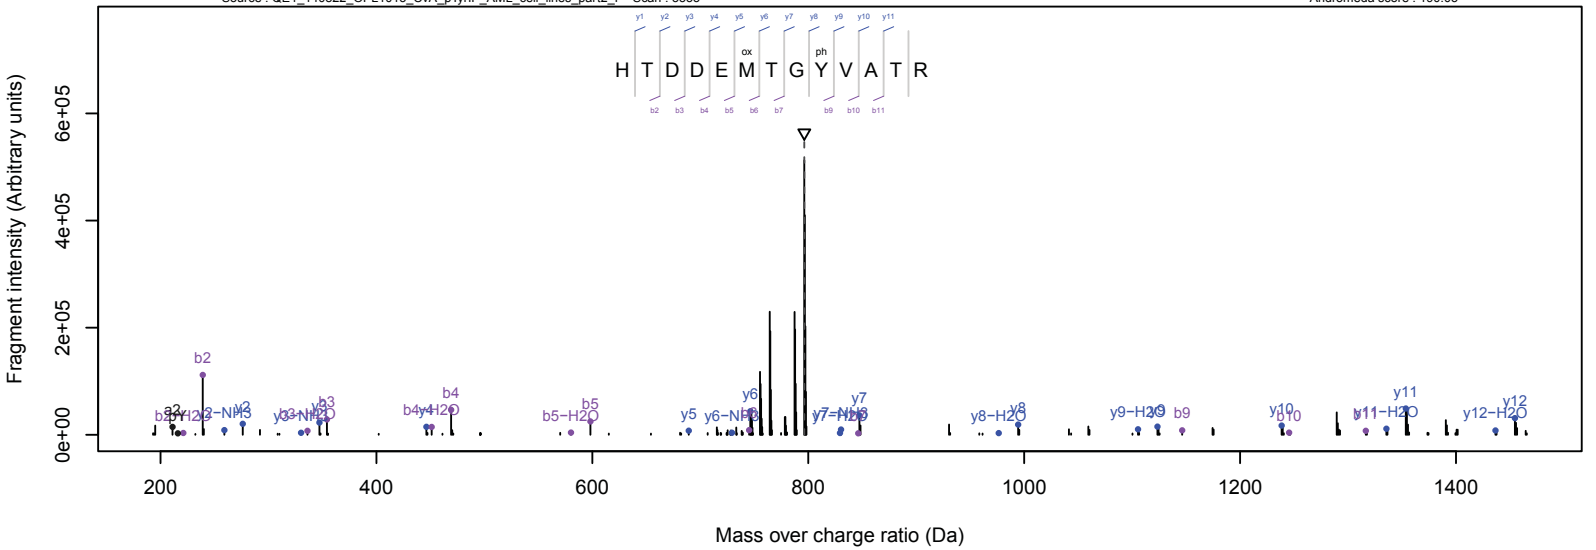

**HLFSTIPELINY(ph)HQHNSAGLISR-4+**

Source : QE1\_140908\_OPL1013\_CVA\_pTyrIP\_AML\_Kasumi1 Scan : 39122

Andromeda score : 189.82

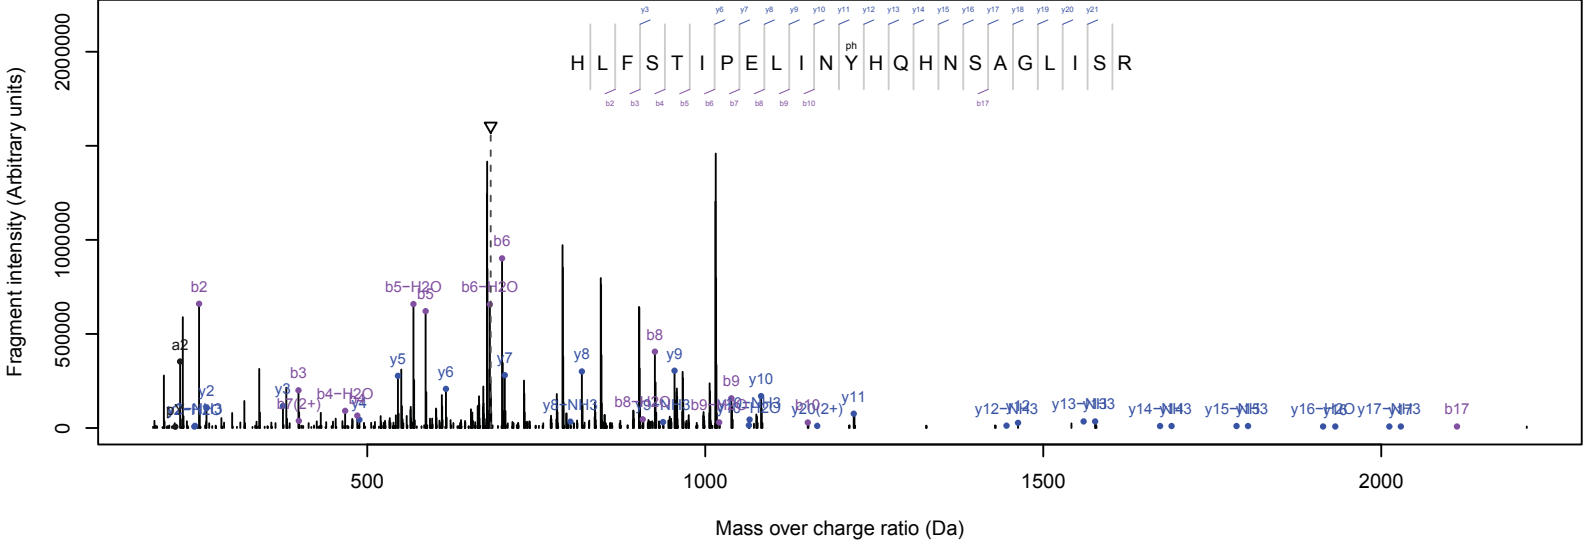

**HTLDGAACLLNSNKY(ph)FPSR-3+**

Source : QE1\_140612\_OPL1013\_CVA\_phosphoproteomic\_landscape\_AML\_C Scan : 30321

Andromeda score : 189.77

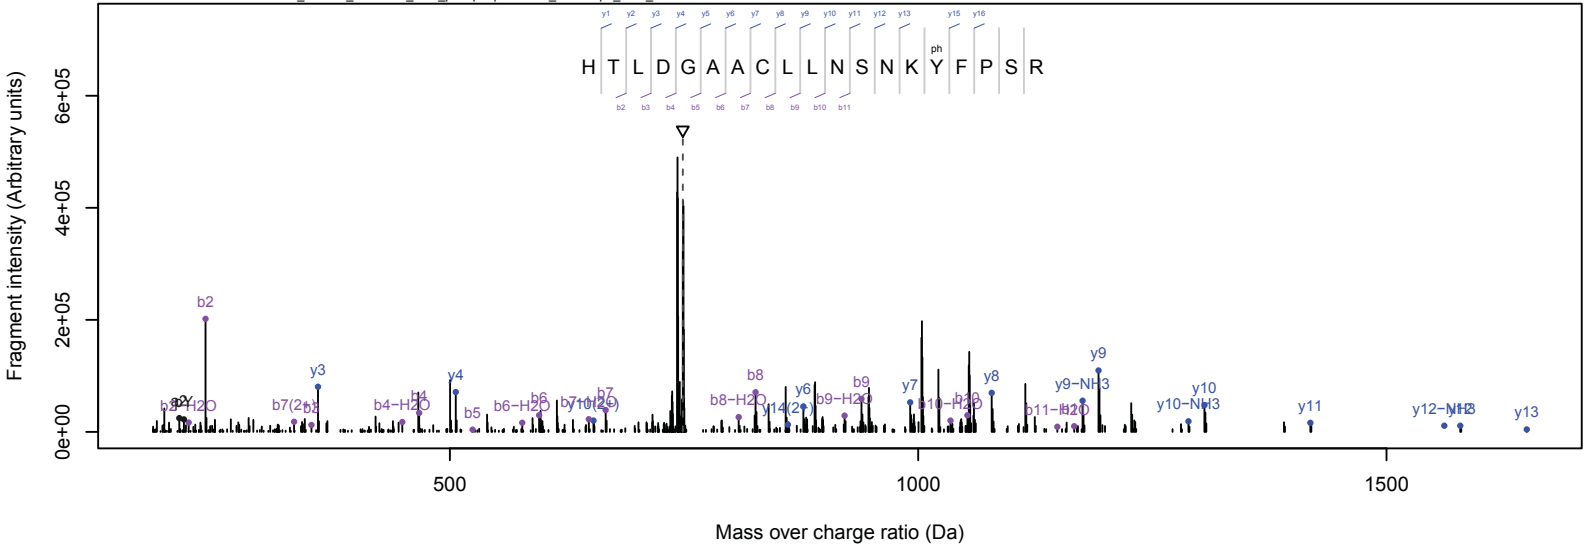

**SNETNGY(ph)LDSAQAGPAAGPGTAAGR-3+**

Source : QE1\_140612\_OPL1013\_CVA\_phosphoproteomic\_landscape\_AML\_C Scan : 18365

Andromeda score : 189.75

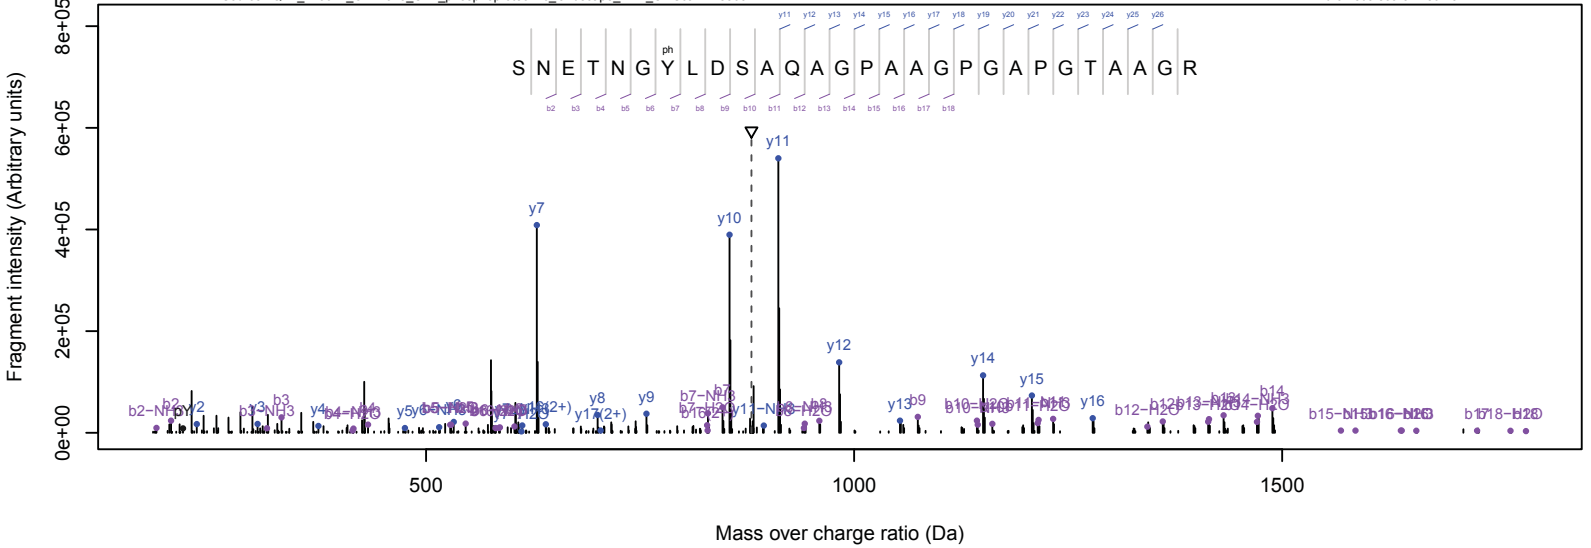

VDY(ph)VQVDEQK-2+

Source: QE1\_140908\_OPL1013\_CvA\_pTyrIP\_AML\_Kasumi6 Scan: 11639

Andromeda score: 189.17

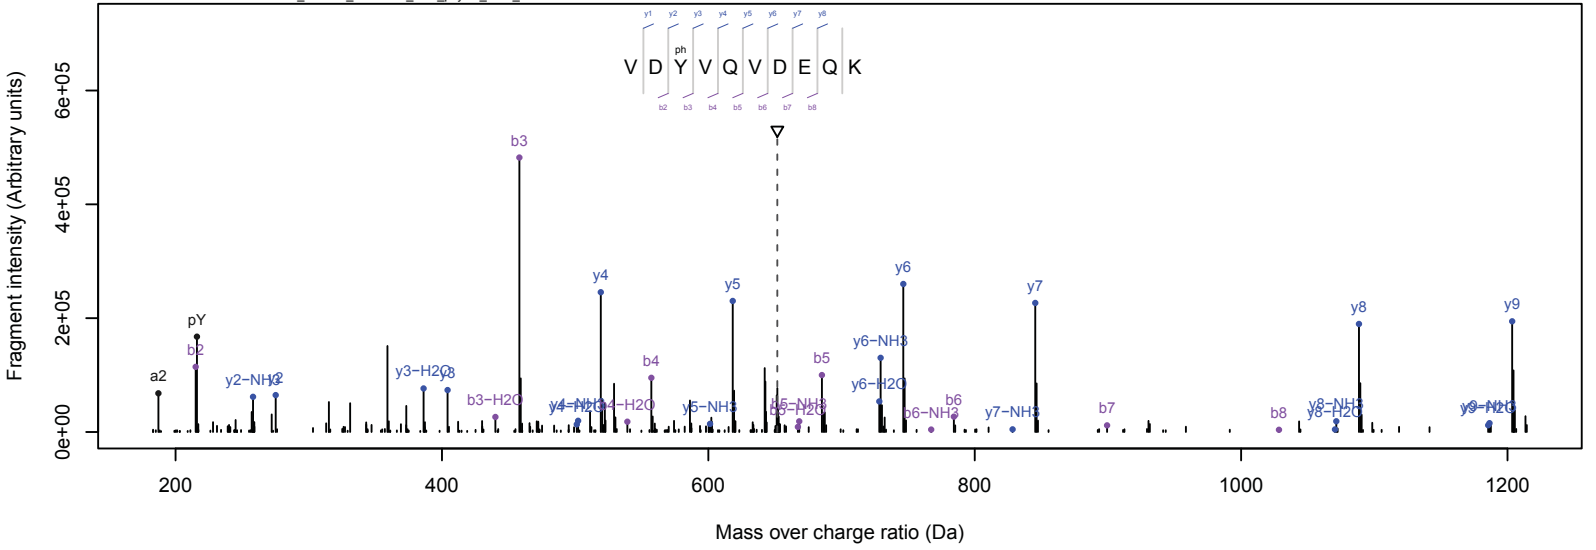

AKYPDY(ph)EVTWANDGY-2+

Source: QE1\_140612\_OPL1013\_CVA\_phosphoproteomic\_landscape\_AML\_B Scan: 30624

Andromeda score: 189.1

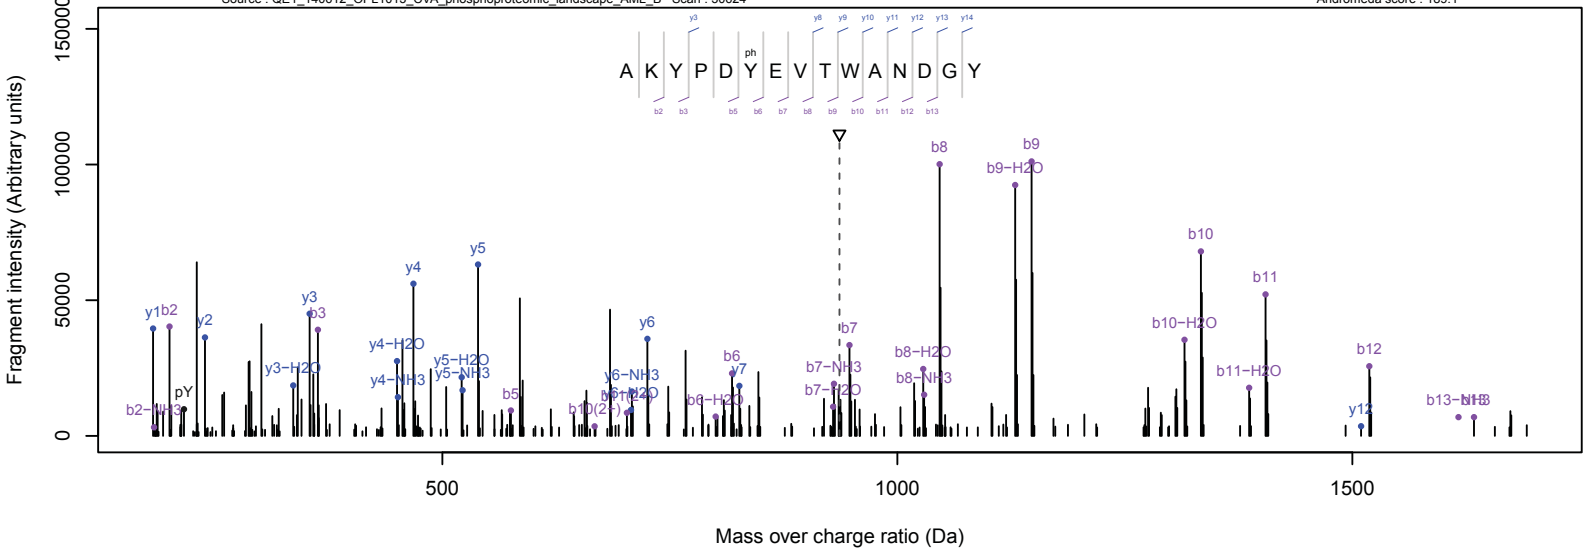

M(ox)QNHGYENPTY(ph)KYLEQMQL-3+

Source: QE1\_140908\_OPL1013\_CvA\_pTyrIP\_AML\_Kasumi1 Scan: 37400

Andromeda score: 188.96

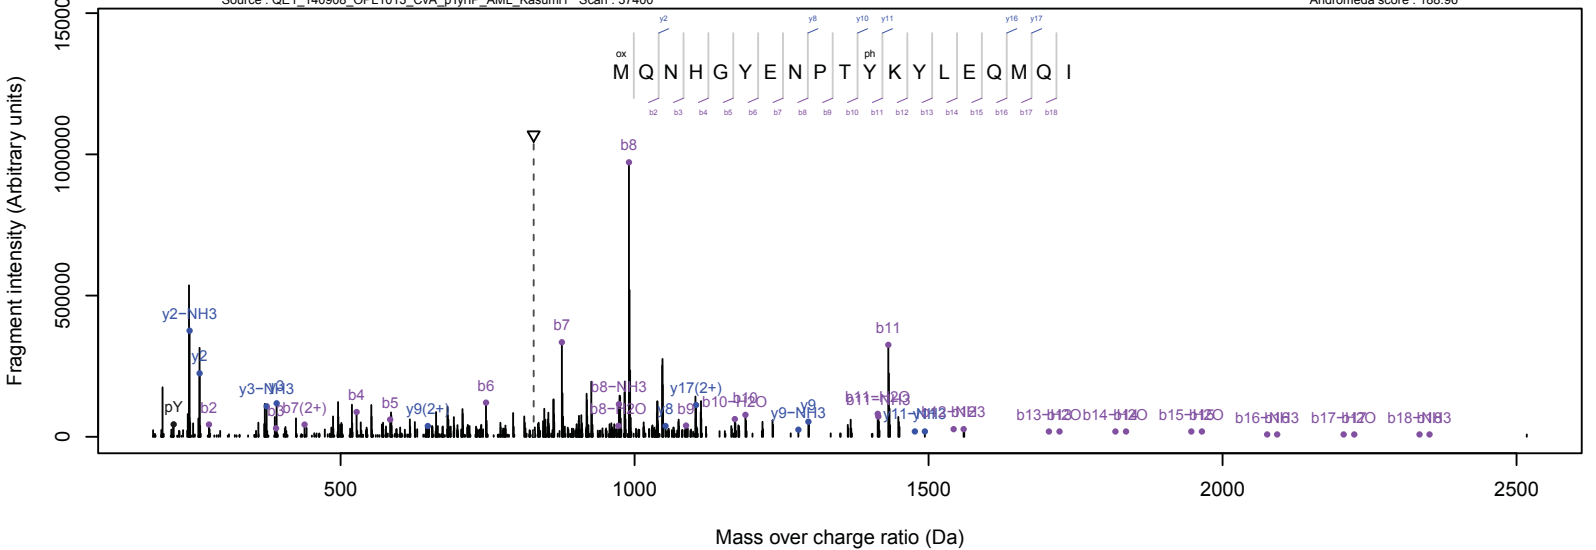

TTTNPY(ph)VLMVLYKDK-2+

Source : QE1\_140612\_OPL1013\_CVA\_phosphoproteomic\_landscape\_AML\_D Scan : 38169

Andromeda score : 188.85

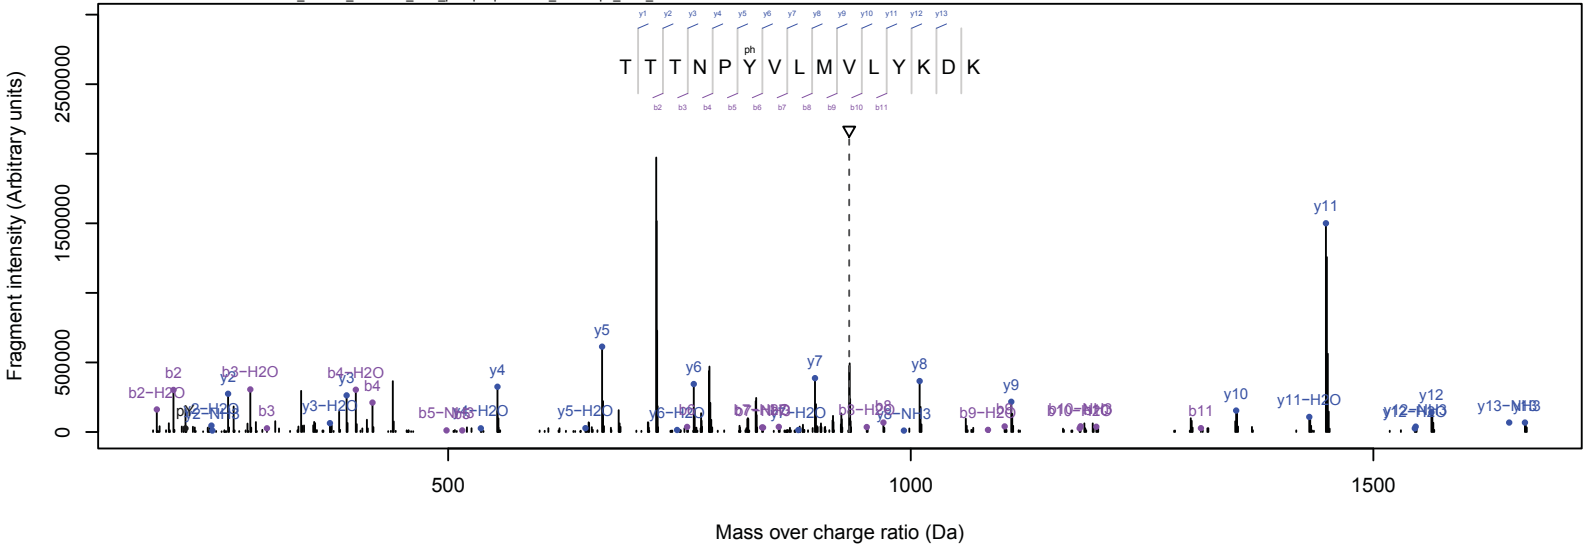

LLGFHTHADY(ph)VLENNMAK-3+

Source : QE1\_140612\_OPL1013\_CVA\_phosphoproteomic\_landscape\_AML\_B Scan : 39645

Andromeda score : 188.58

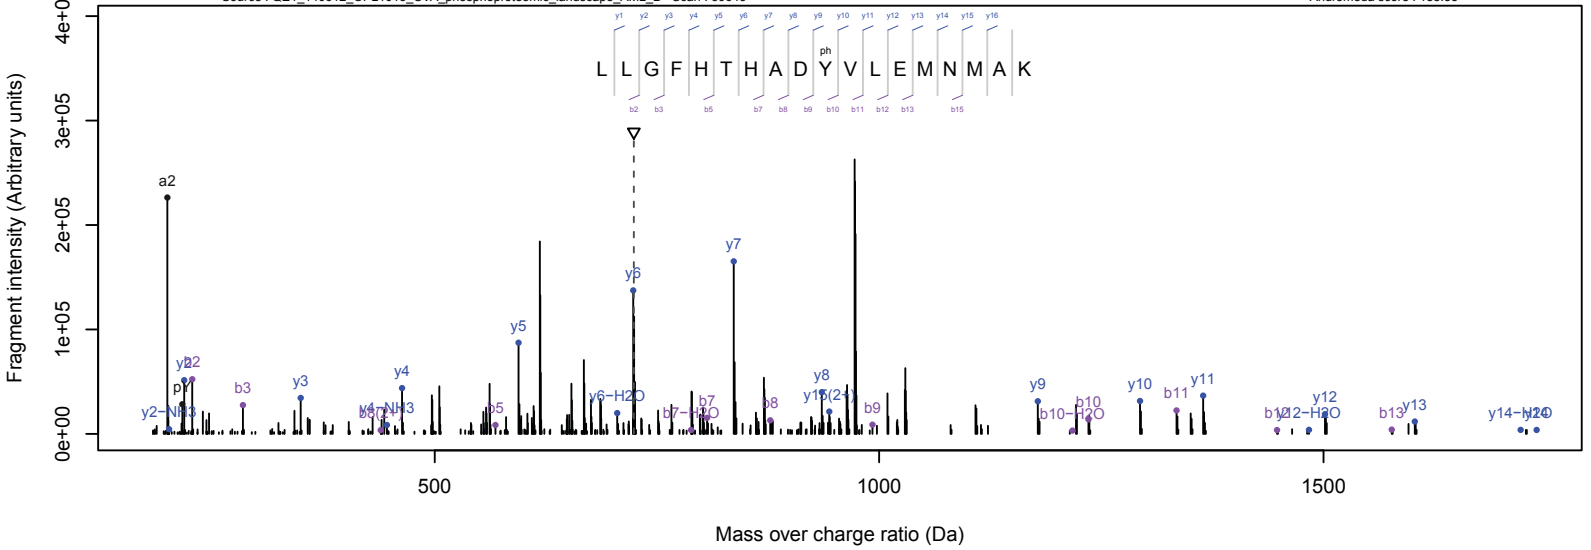

ESSCSDSTNEY(ph)MDM(ox)KPGVSYVPTK-3+

Source : QE1\_140908\_OPL1013\_CvA\_pTyrIP\_AML\_Kasumi1 Scan : 22494

Andromeda score : 188.39

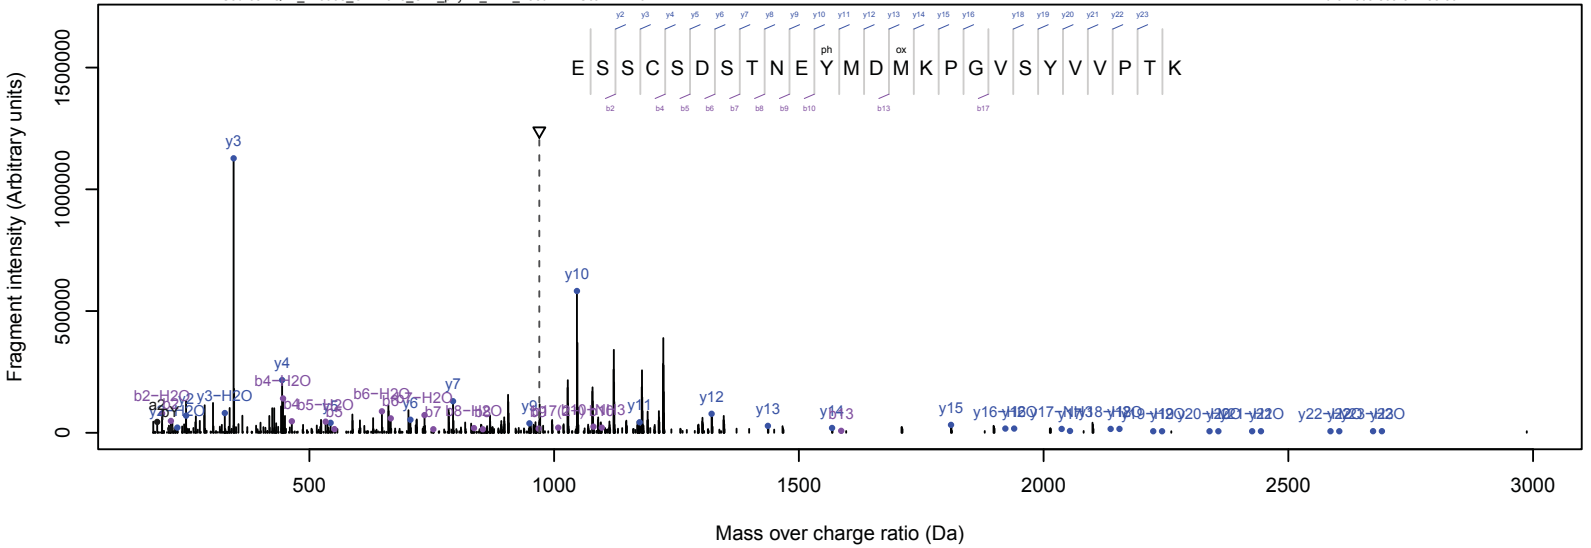



**SVFMPRPQAVGSSNYASTSAGLKYPGSGADLPPQR-4+**

Source : QE1\_140612\_OPL1013\_CVA\_phosphoproteomic\_landscape\_AML\_B Scan : 32428

Andromeda score : 188.2

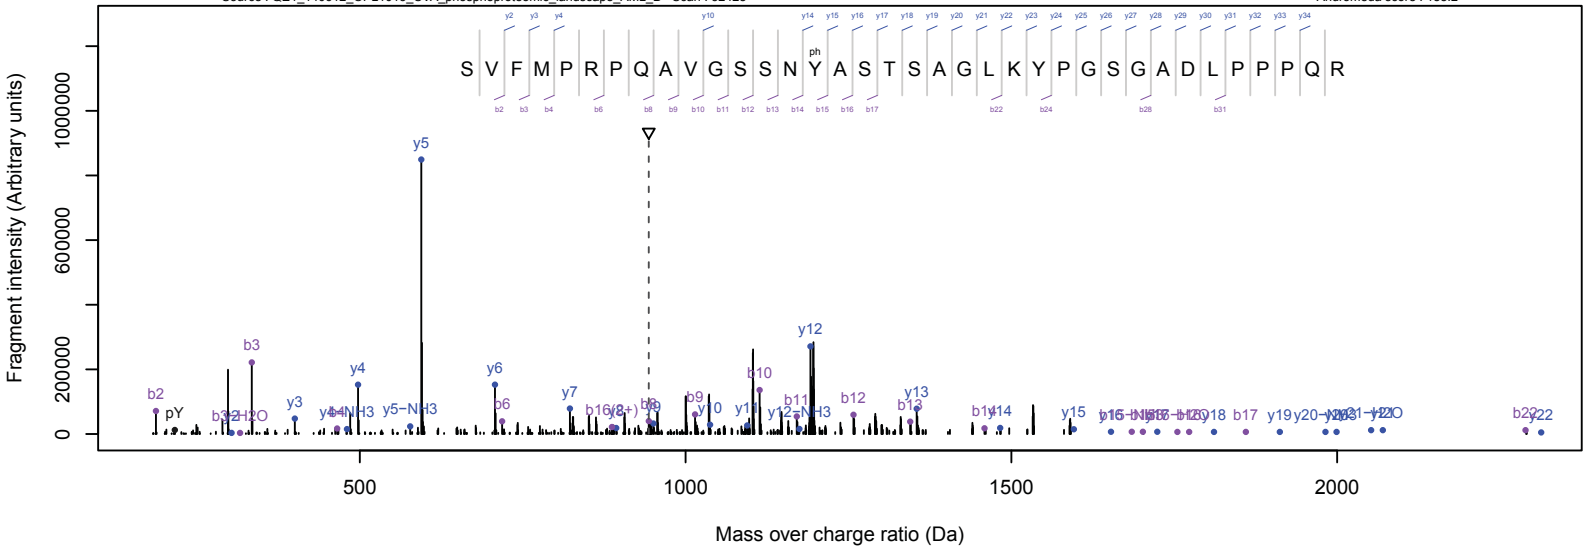

**KY(ph)PYWPHQPIENL-2+**

Source : QE1\_140612\_OPL1013\_CVA\_phosphoproteomic\_landscape\_AML\_D Scan : 33121

Andromeda score : 187.97

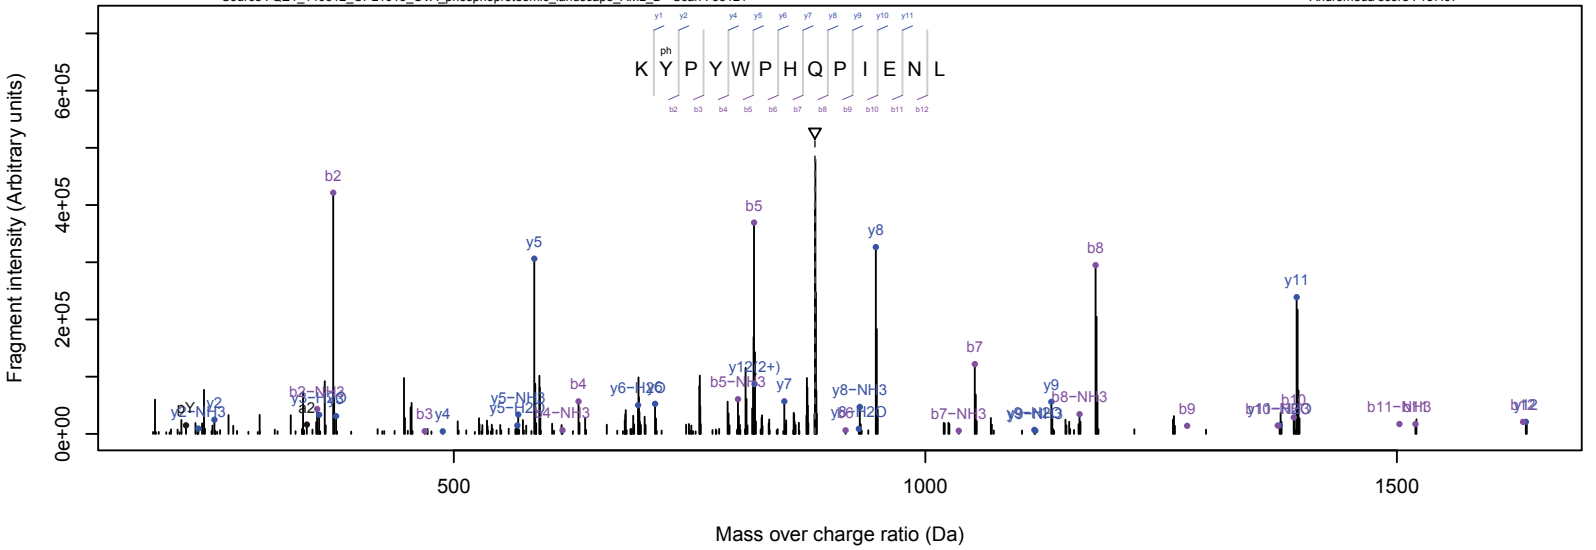

**QGVY(ph)VTSPLVNNTMHSDLGK-3+**

Source : QE1\_140612\_OPL1013\_CVA\_phosphoproteomic\_landscape\_AML\_C Scan : 41378

Andromeda score : 187.57

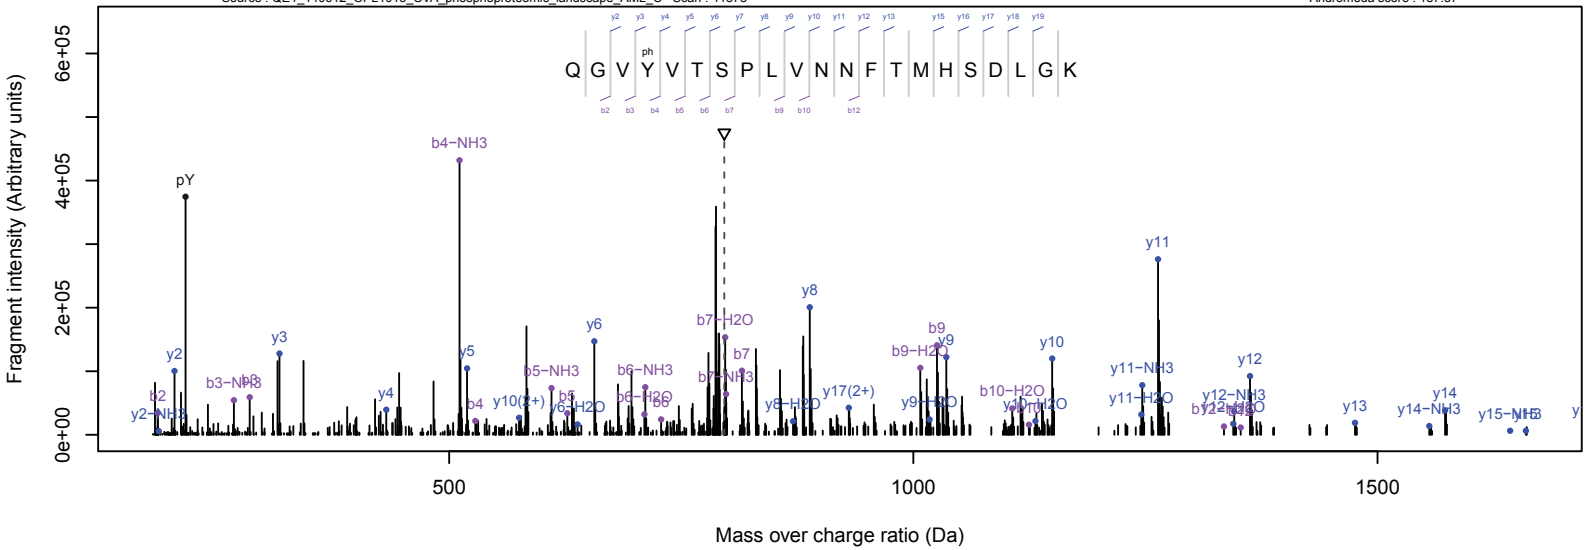

SDSASSEPVGIY(ph)QGFEK-2+

Source : QE1\_140908\_OPL1013\_CvA\_pTyrIP\_AML\_OCI\_AML3 Scan : 26645

Andromeda score : 187.56

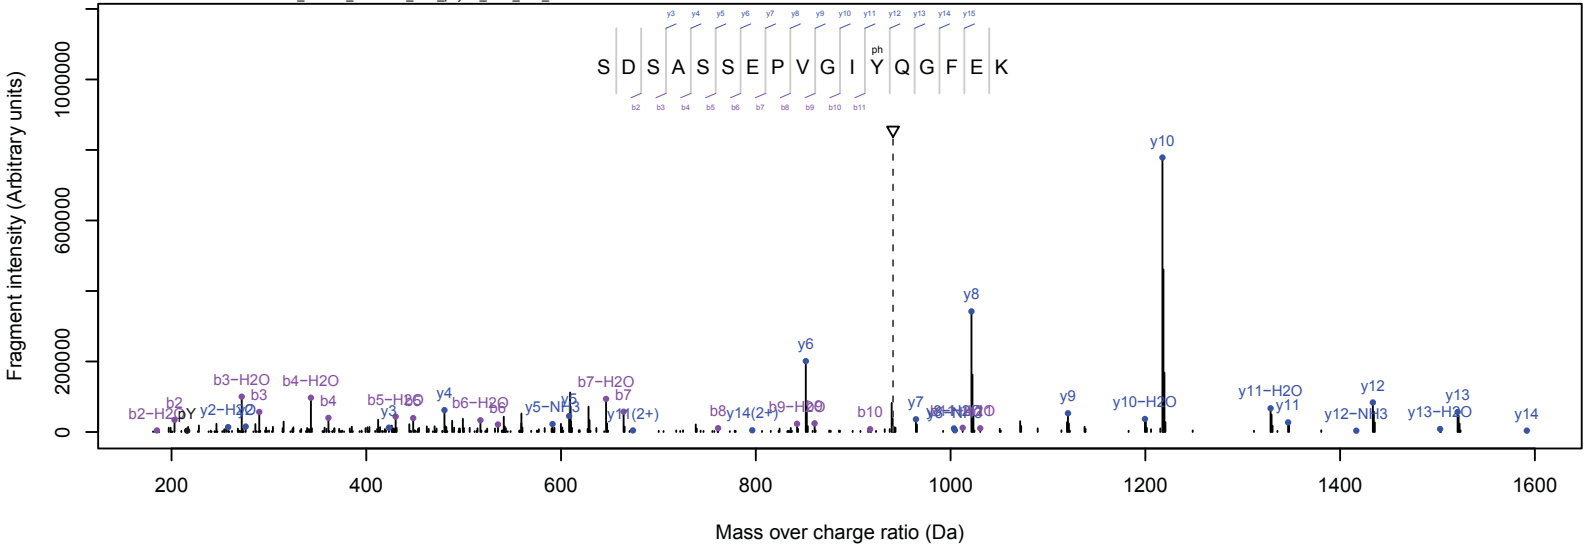

ADHQLTEASY(ph)VNLPTIALCNTDSPLR-3+

Source : QE1\_140908\_OPL1013\_CvA\_pTyrIP\_AML\_ML2 Scan : 47068

Andromeda score : 187.51

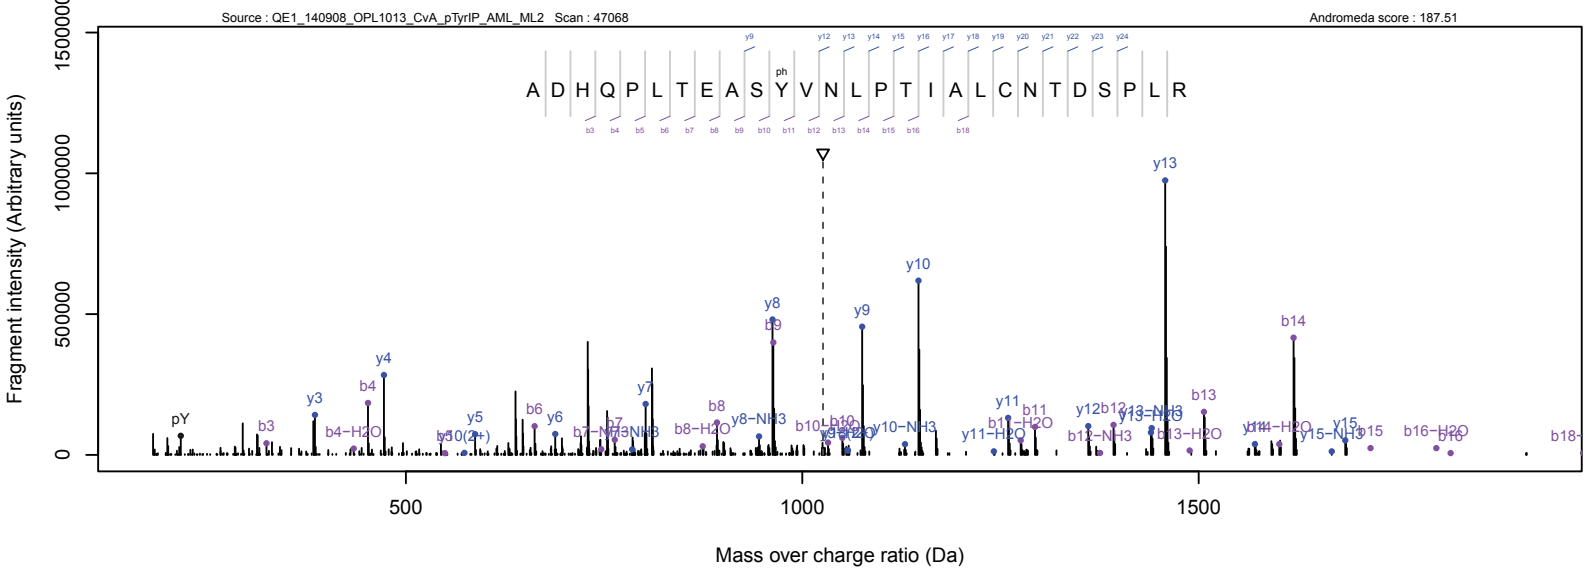

DSGNAFY(ph)SNVLYRPR-2+

Source : QE1\_140612\_OPL1013\_CvA\_phosphoproteomic\_landscape\_AML\_C Scan : 27865

Andromeda score : 187.08

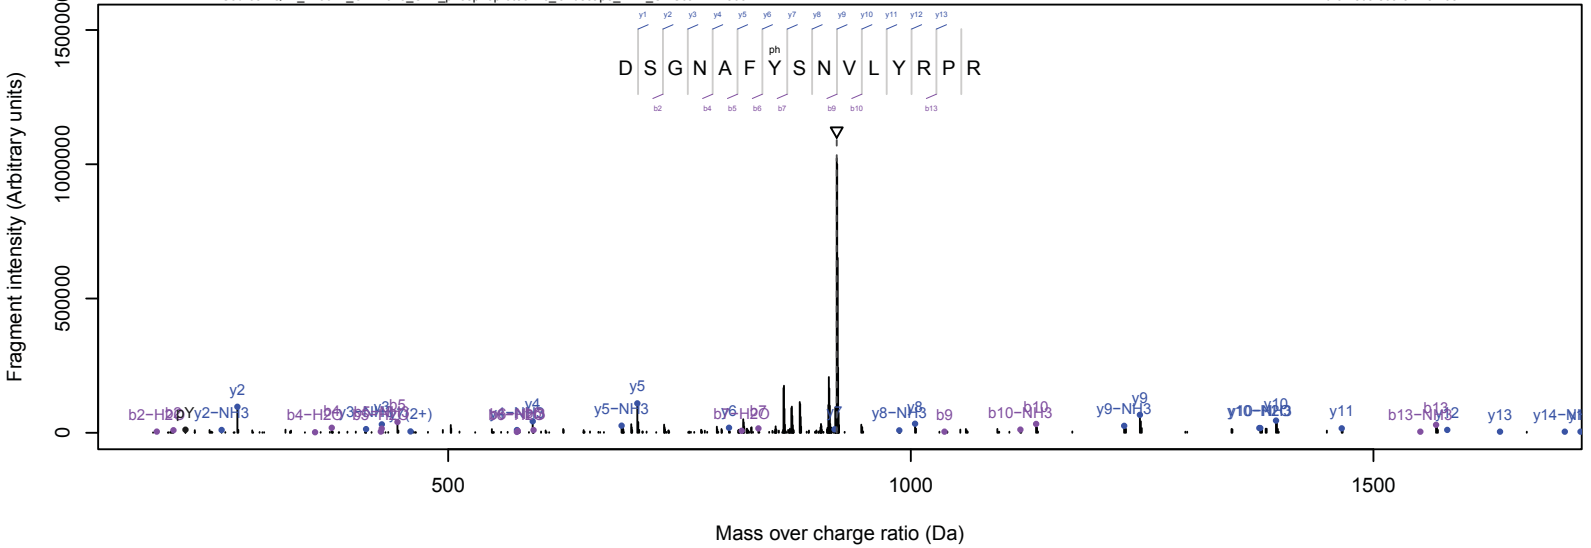

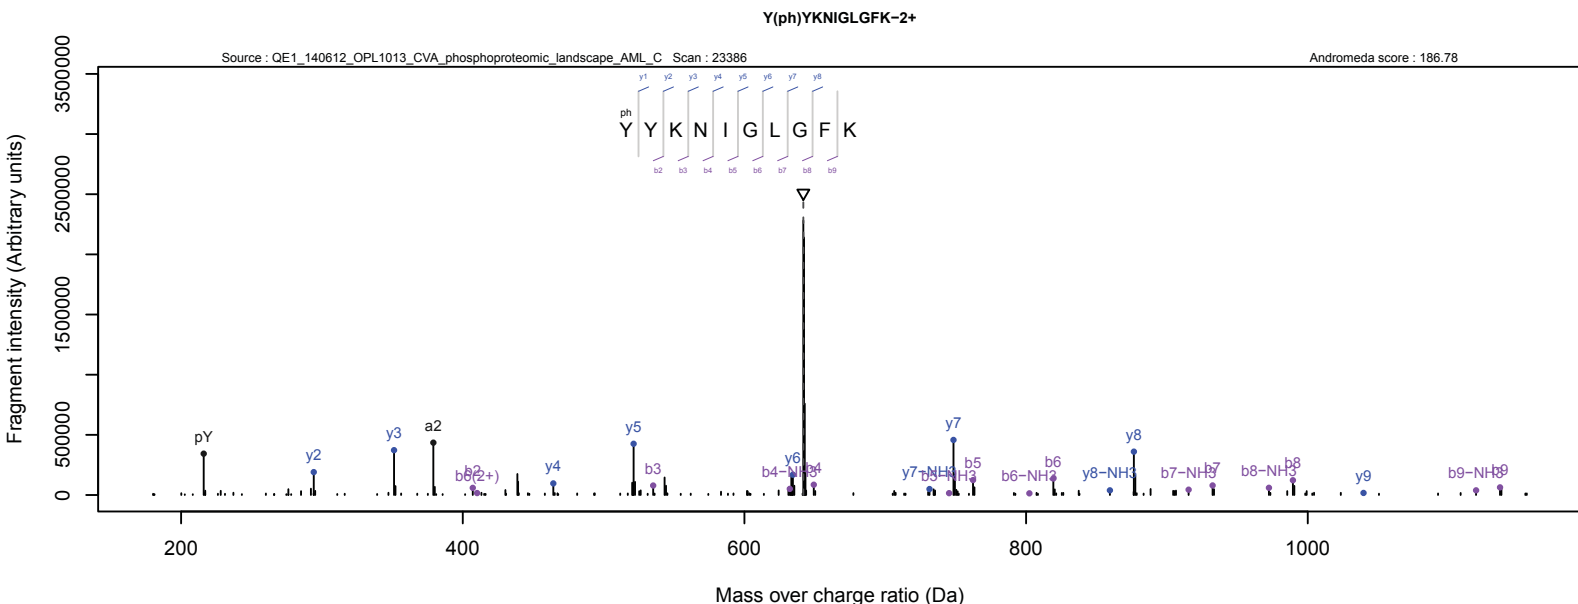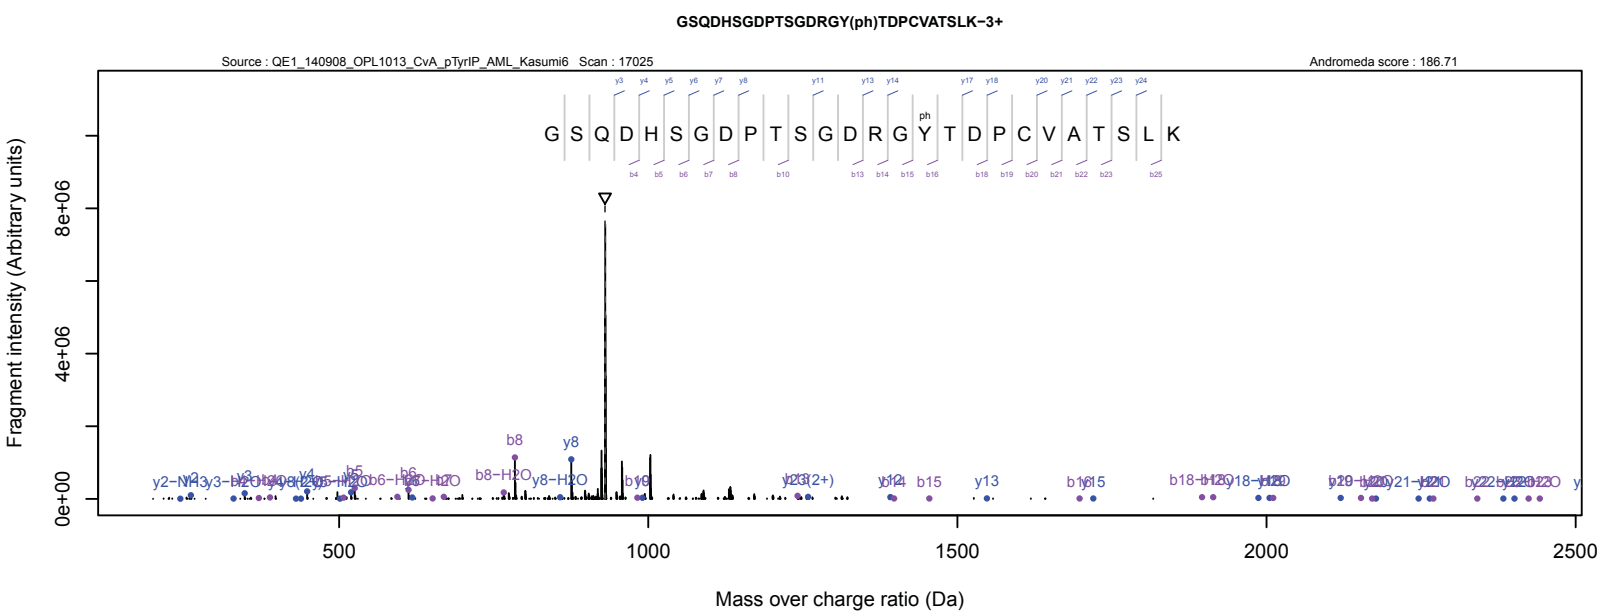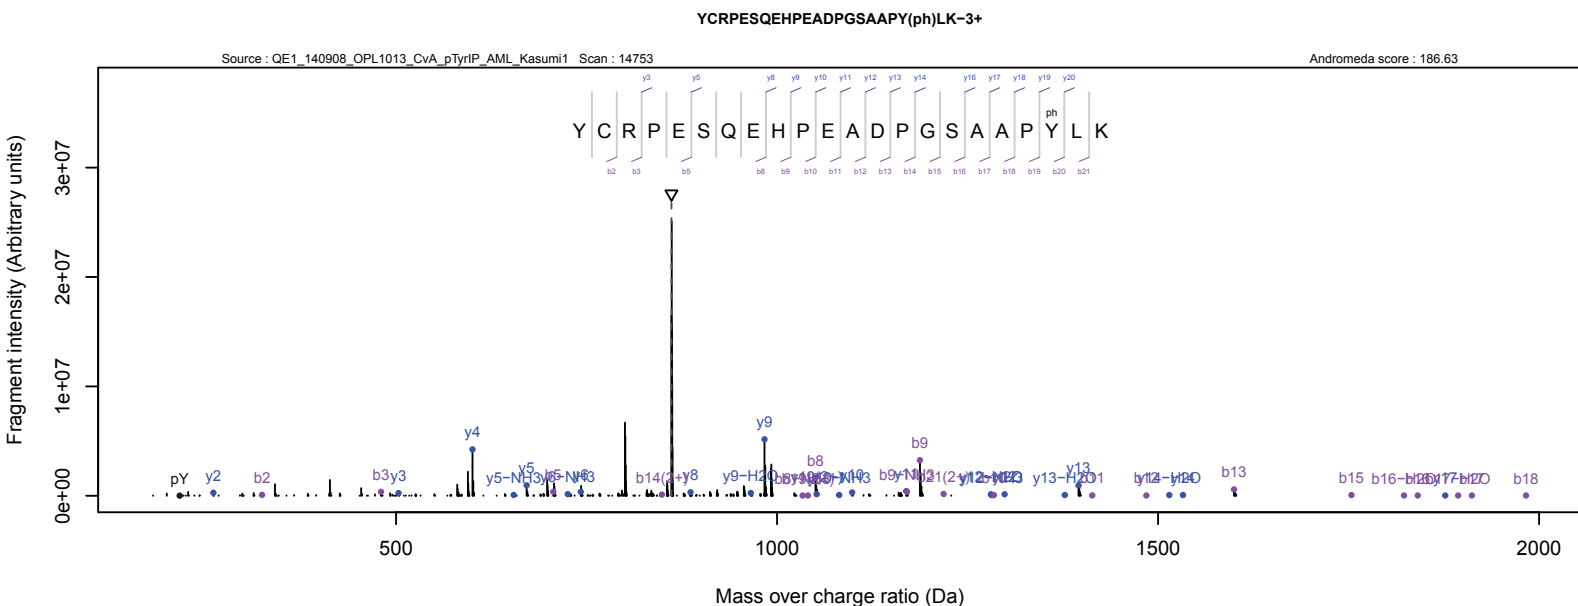

**NGY(ph)VTCPFRPDCPLGK-2+**

Source : QE1\_140908\_OPL1013\_CvA\_pTyrIP\_AML\_ML2 Scan : 27815

Andromeda score : 186.42

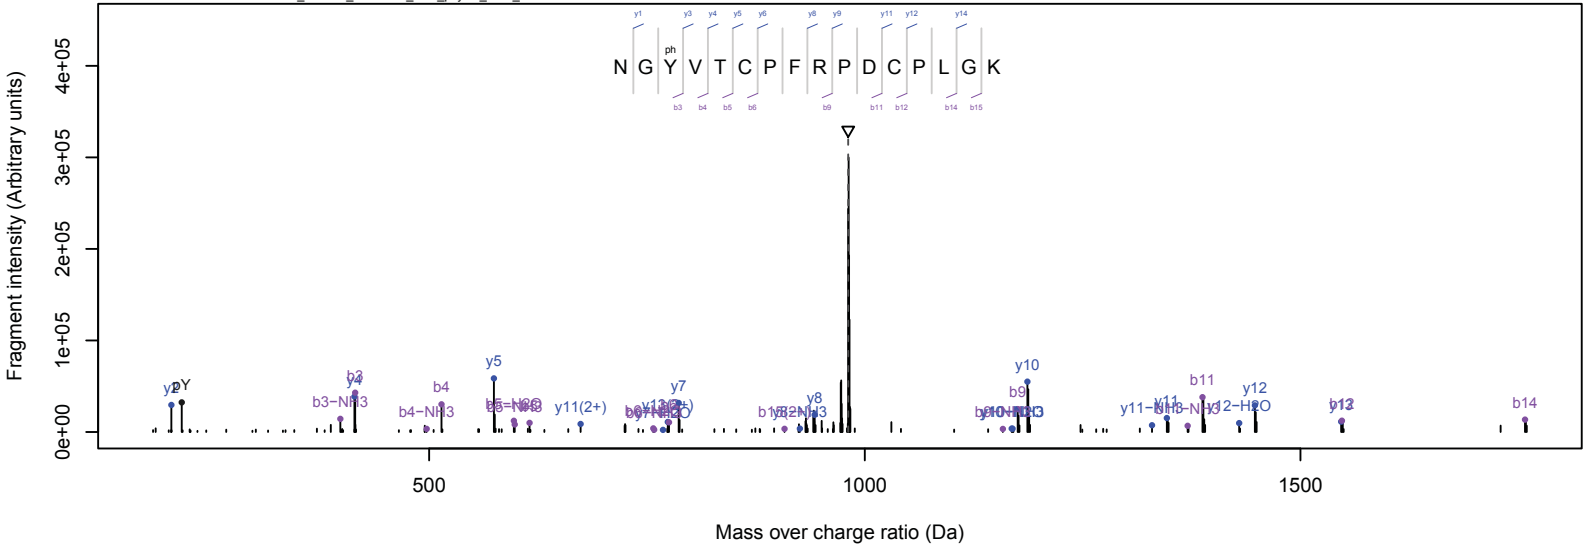

**ASPGHSPHY(ph)FAASSPTSPNALPPAR-3+**

Source : QE1\_140612\_OPL1013\_CVA\_phosphoproteomic\_landscape\_AML\_C Scan : 20391

Andromeda score : 186.13

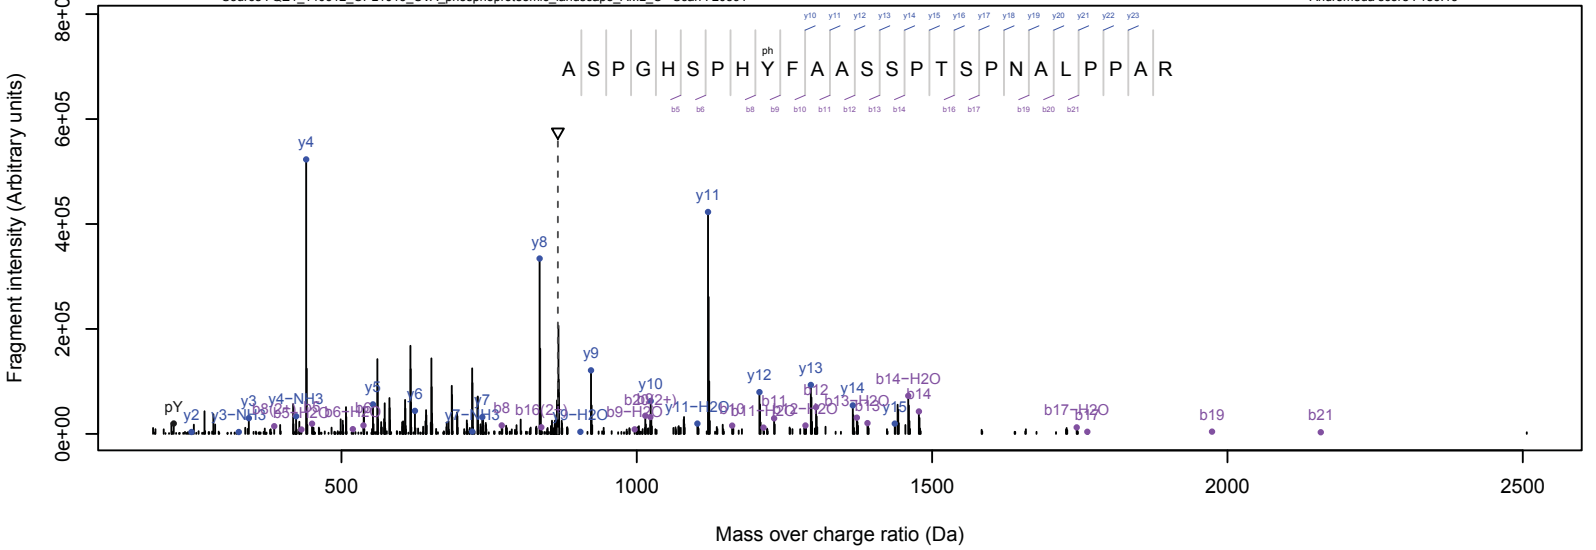

**IEKIGEGT(ph)Y(ph)GVVYK-2+**

Source : QE1\_140908\_OPL1013\_CvA\_pTyrIP\_AML\_HL60 Scan : 23822

Andromeda score : 186.06

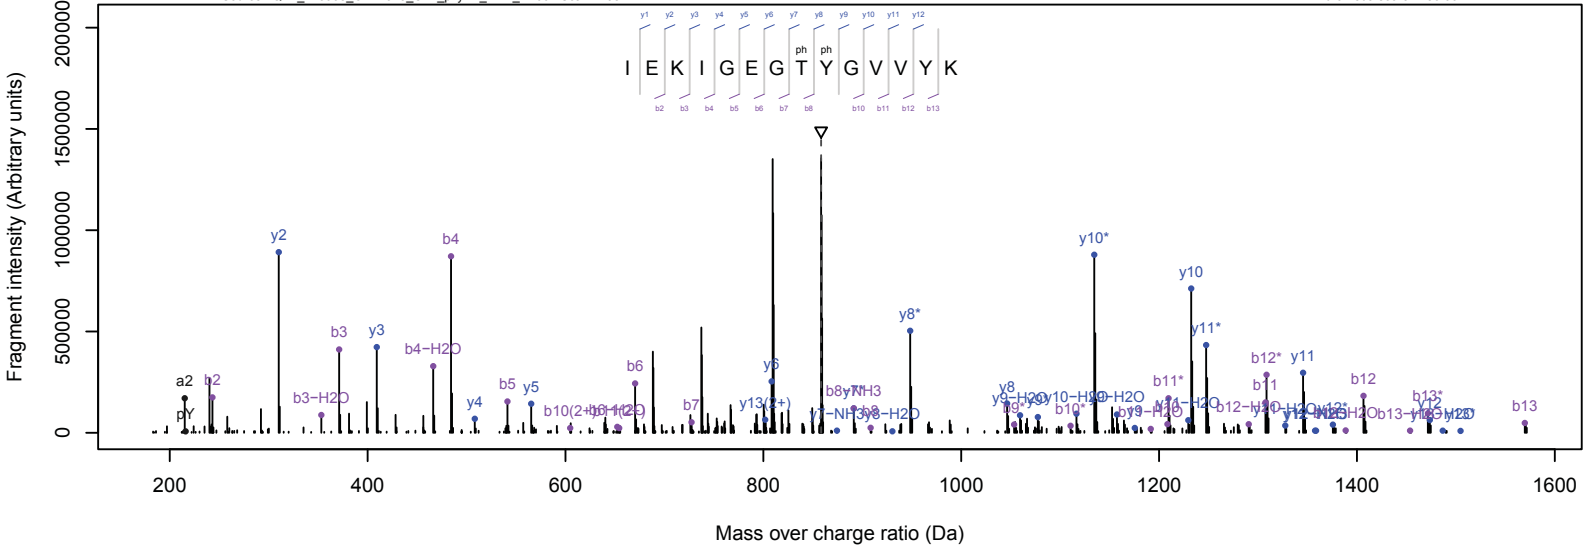

NLFASFPTEESSINY(ph)TFKTPEK

Source : QE1\_140612\_OPL1013\_CVA\_phosphoproteomic\_landscape\_AML\_D Scan : 43031

Andromeda score : 185.61

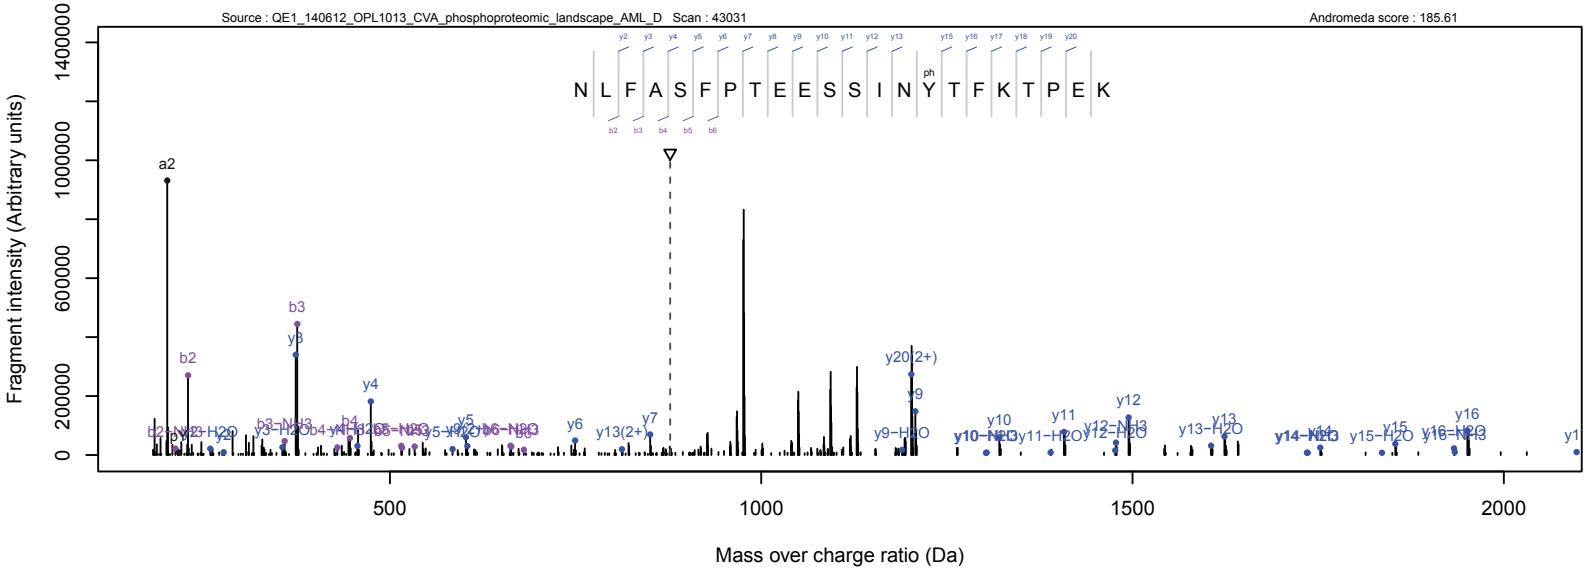

QAHLCLVLANCDEPMY(ph)VK

Source : QE1\_140612\_OPL1013\_CVA\_phosphoproteomic\_landscape\_AML\_C Scan : 27802

Andromeda score : 185.02

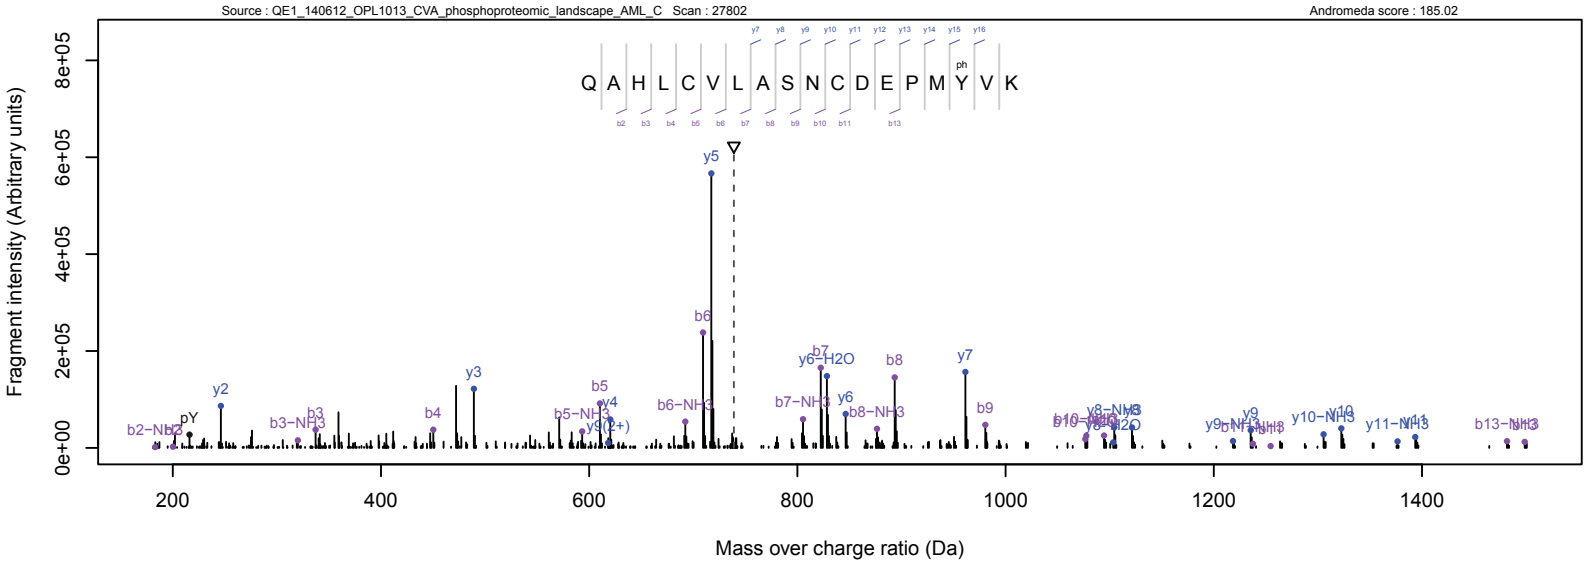

IEKIGEGTY(ph)GVVYK

Source : QE1\_140612\_OPL1013\_CVA\_phosphoproteomic\_landscape\_AML\_F Scan : 19648

Andromeda score : 184.87

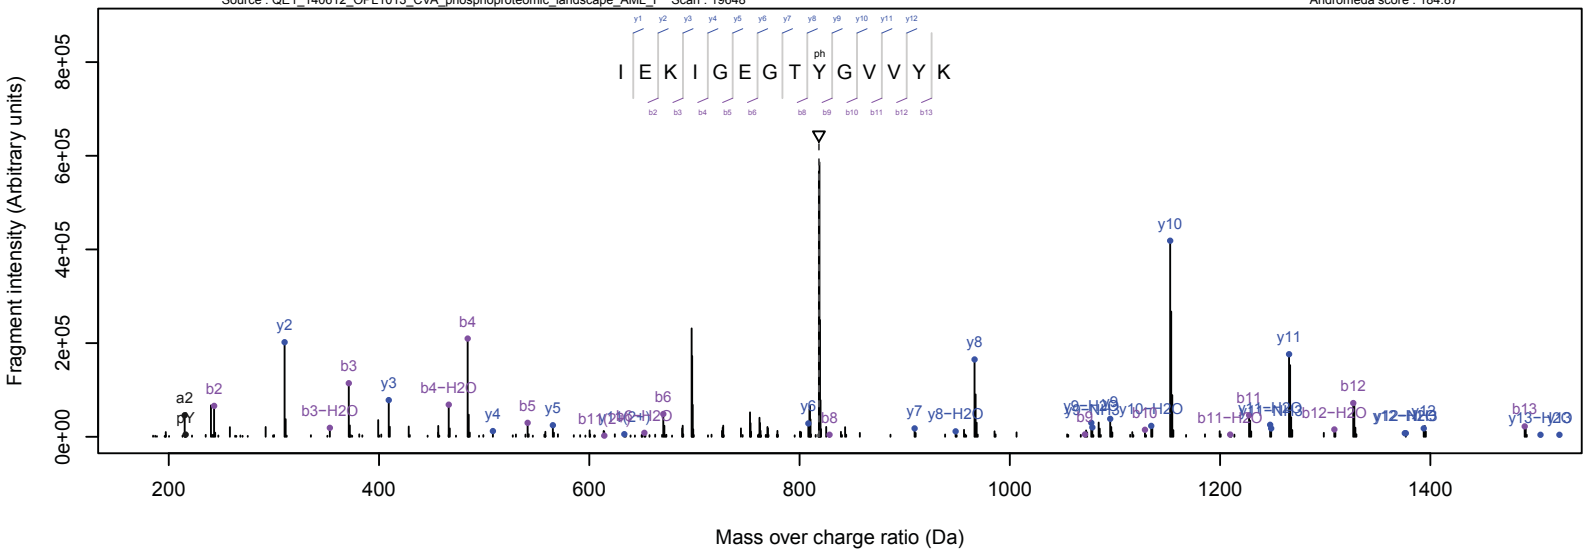

**AQHTLPQDPAIVQSSLSGSASASPFQPHVPYS(ph)PFR-4+**

Source : QE1\_140612\_OPL1013\_CVA\_phosphoproteomic\_landscape\_AML\_C Scan : 42103

Andromeda score : 184.82

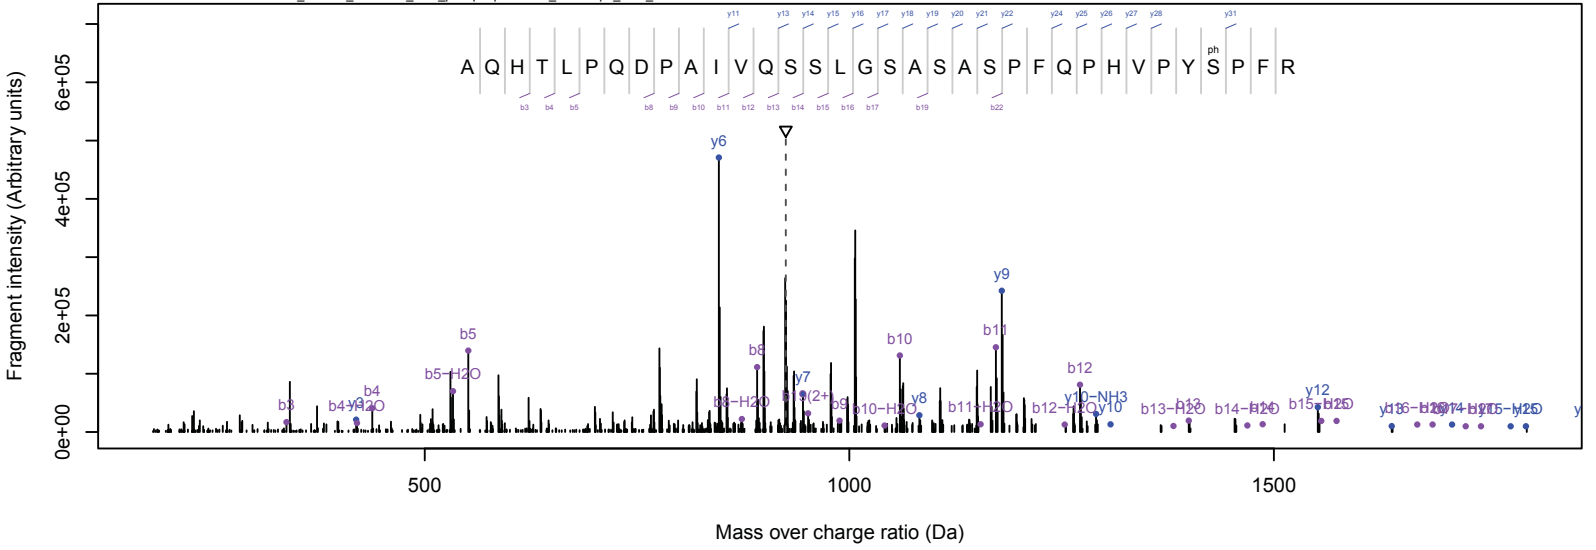

**APPCSGSSITEIINPNYMGVGFPPM(ox)PLHVK-3+**

Source : QE1\_140822\_OPL1013\_Cva\_pTyrIP\_AML\_cell\_lines\_part2\_B Scan : 45078

Andromeda score : 184.66

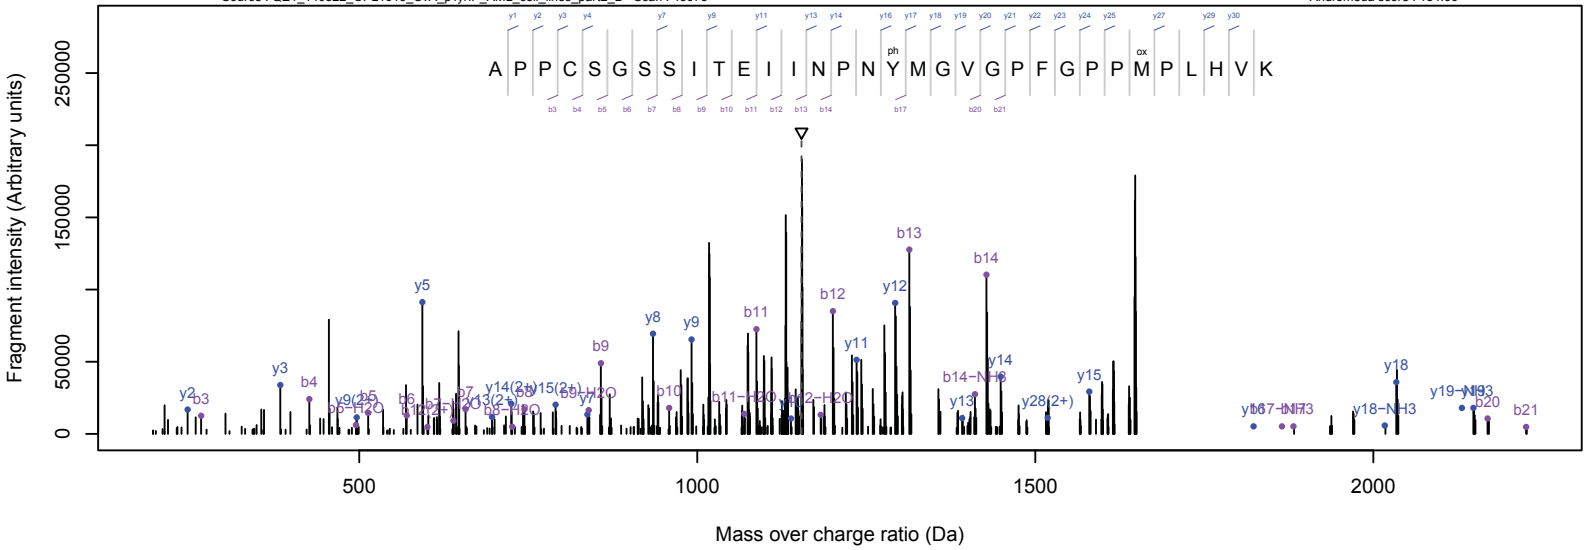

**YLY(ph)VDKFINNPLAQADWAAK-3+**

Source : QE1\_140612\_OPL1013\_CVA\_phosphoproteomic\_landscape\_AML\_C Scan : 46412

Andromeda score : 184.6

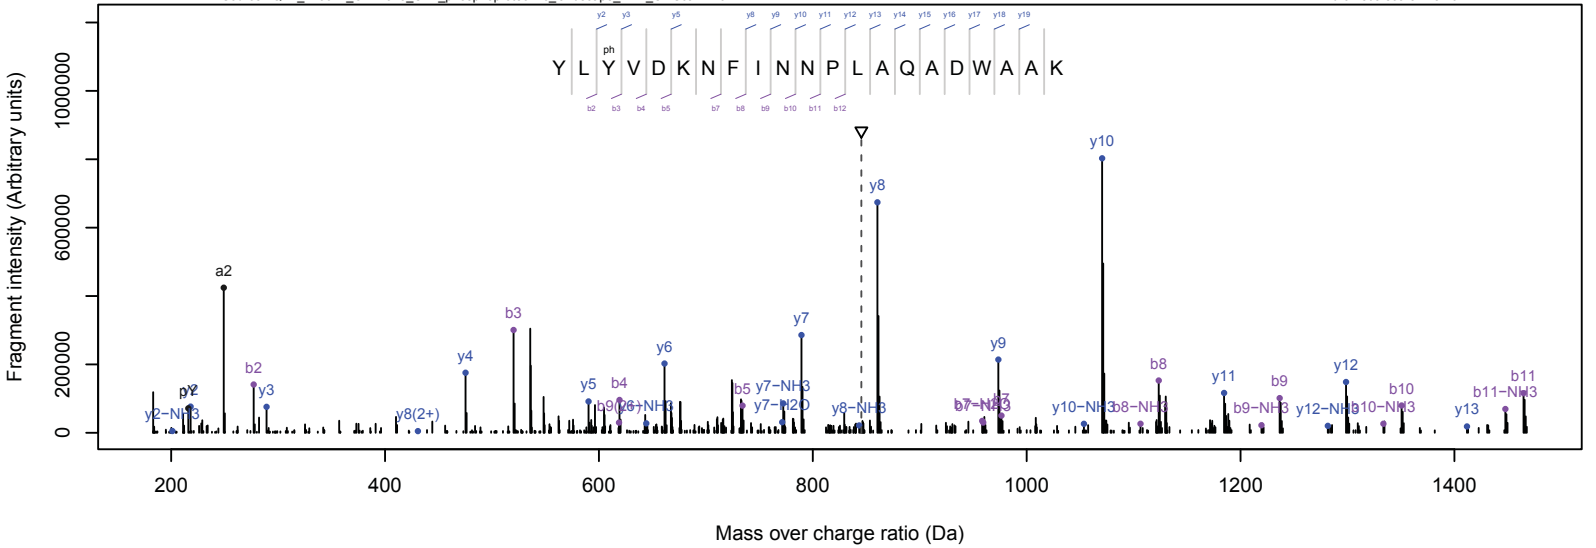



**GQY(ph)EHYHAIFDQMQQQR-3+**

Source : QE1\_140612\_OPL1013\_CVA\_phosphoproteomic\_landscape\_AML\_C Scan : 23845

Andromeda score : 184.21

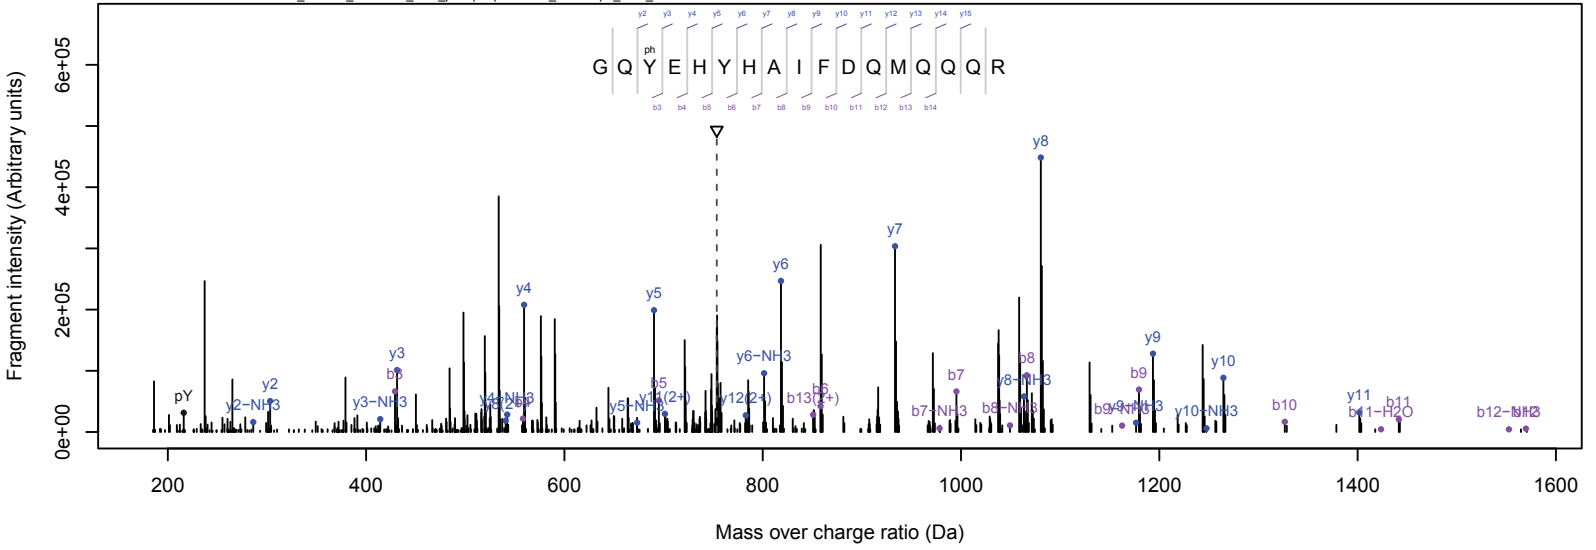

**ADKDY(ph)HFKVDNENEHQLSLR-4+**

Source : QE1\_140612\_OPL1013\_CVA\_phosphoproteomic\_landscape\_AML\_B Scan : 17224

Andromeda score : 184.2

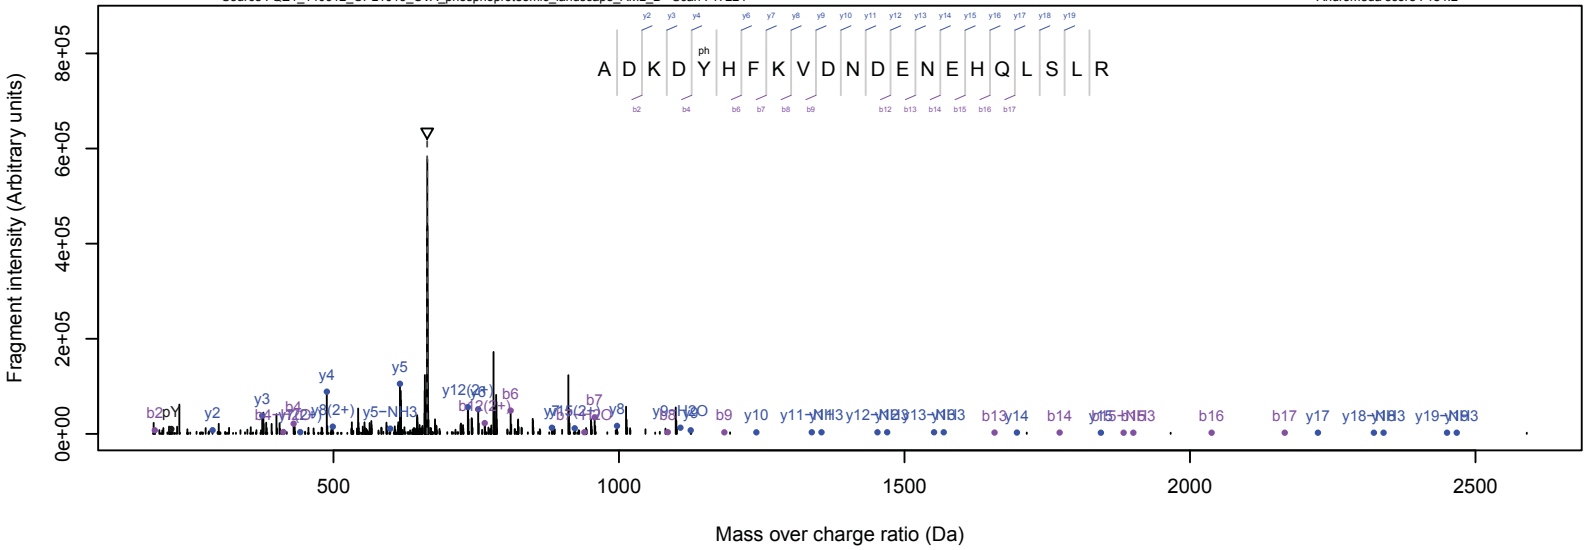

**TVTAMDVVY(ph)ALKR-2+**

Source : QE1\_140612\_OPL1013\_CVA\_phosphoproteomic\_landscape\_AML\_A Scan : 39812

Andromeda score : 184.1

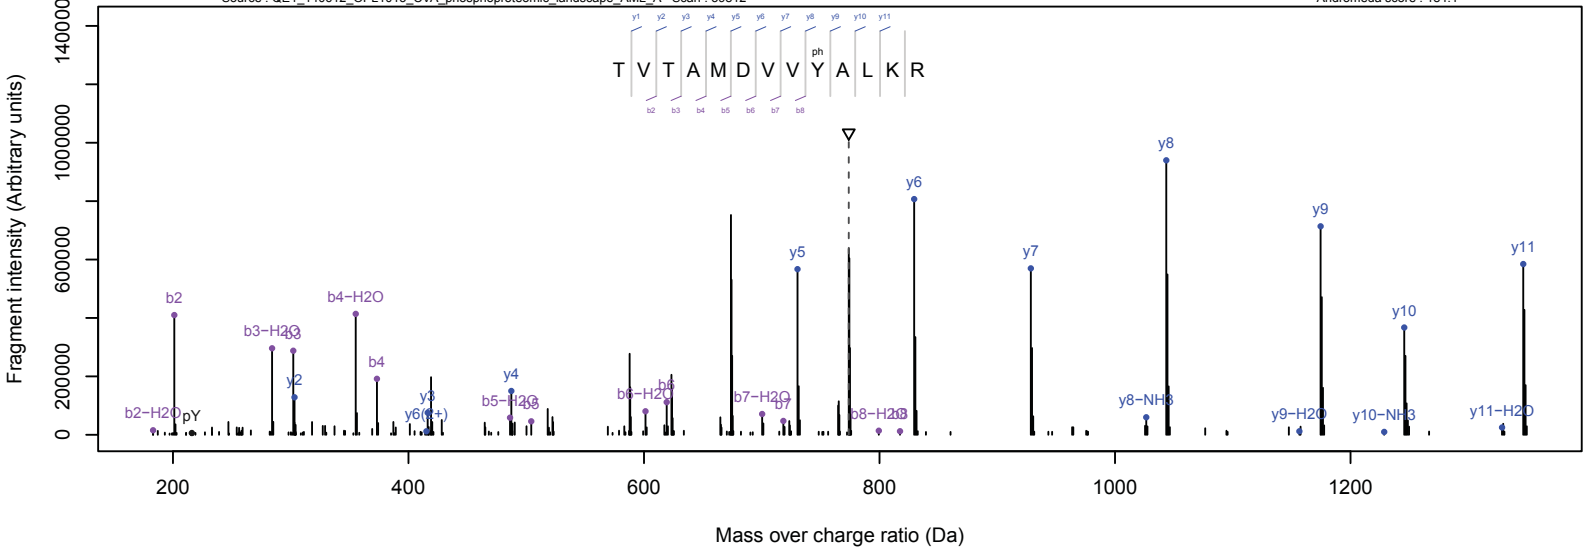



LY(ph)FLQCETCHSR-3+

Source : QE1\_140612\_OPL1013\_CVA\_phosphoproteomic\_landscape\_AML\_C Scan : 23661

Andromeda score : 184.03

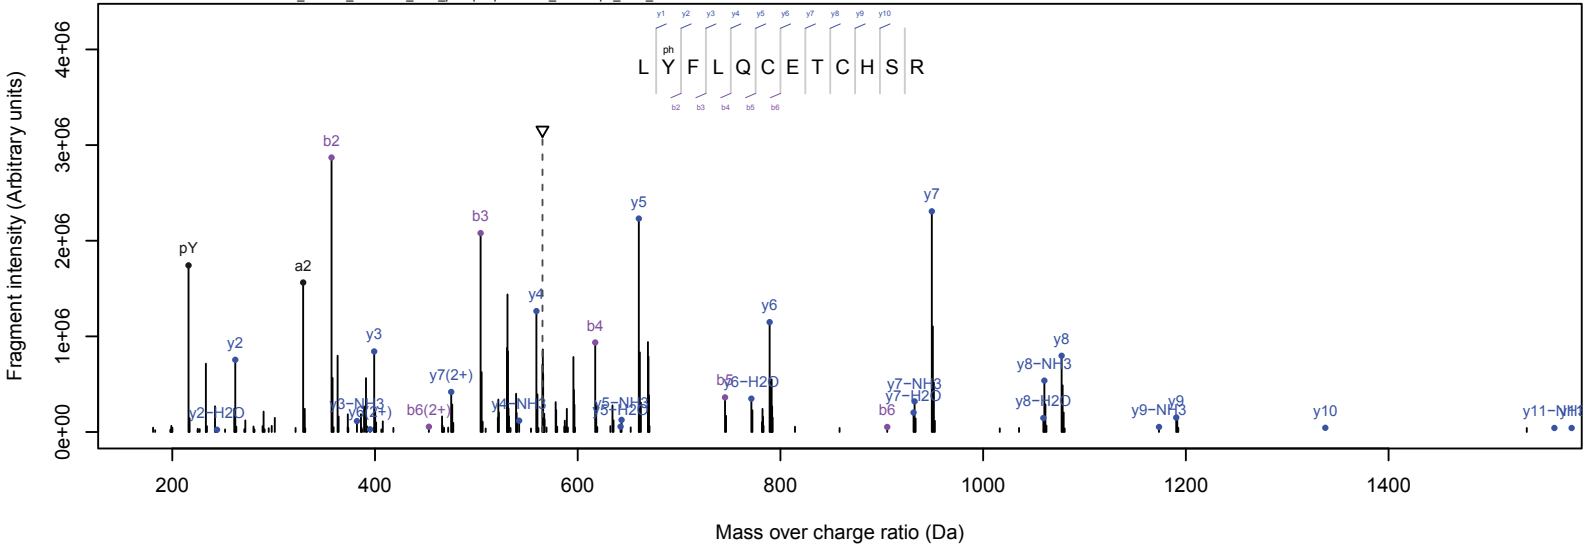

DGGGGGEFYGYM(ph)MDRPLSHCGR-3+

Source : QE1\_140612\_OPL1013\_CVA\_phosphoproteomic\_landscape\_AML\_C Scan : 29891

Andromeda score : 184

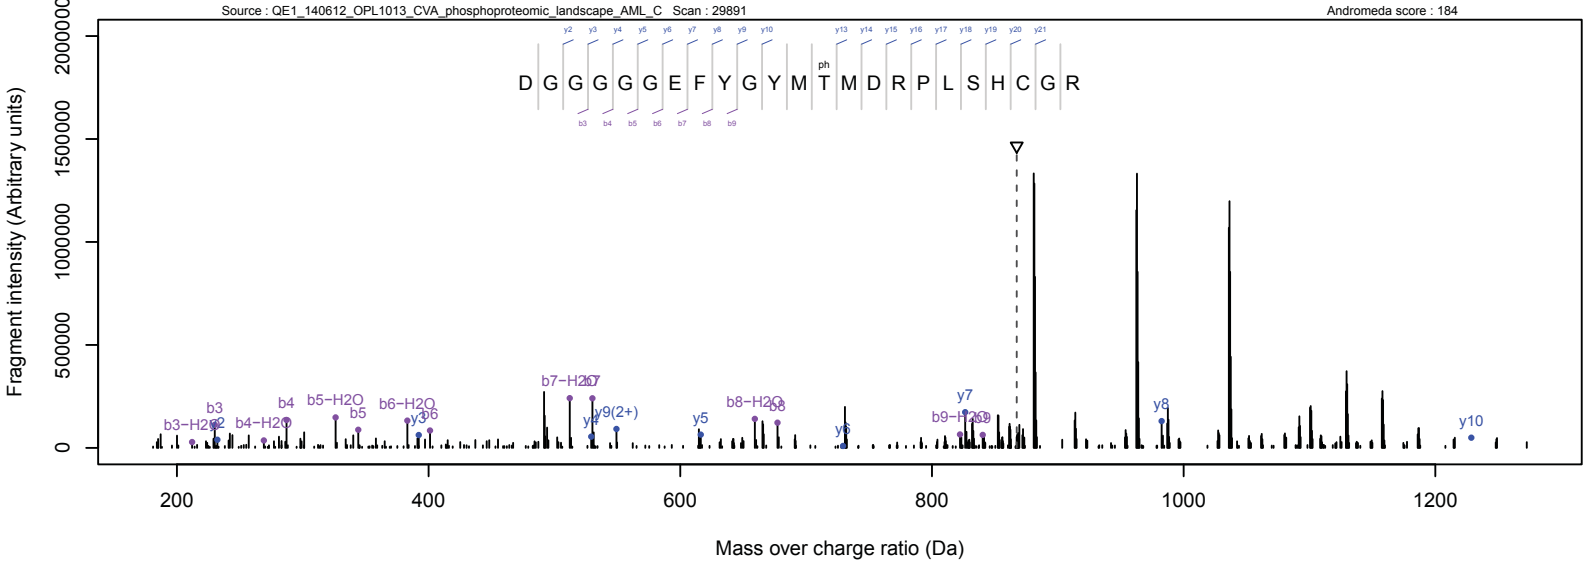

GY(ph)GFCEYQDQETALSAMR-2+

Source : QE1\_140612\_OPL1013\_CVA\_phosphoproteomic\_landscape\_AML\_B Scan : 33479

Andromeda score : 183.77

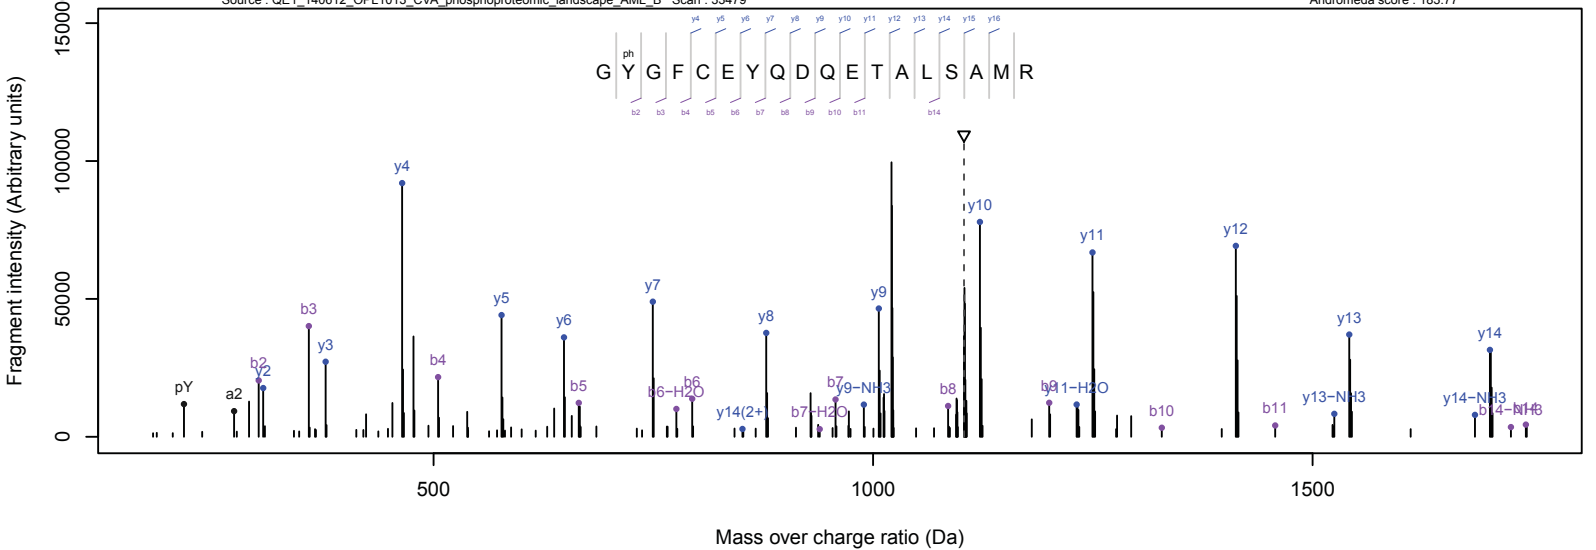

**EKAERPTFDYLSVLDDFYTATEGQYQQP-3+**

Source: QE1\_140822\_OPL1013\_CVA\_pTyrIP\_AML\_cell\_lines\_part2\_B Scan: 45436

Andromeda score: 183.49

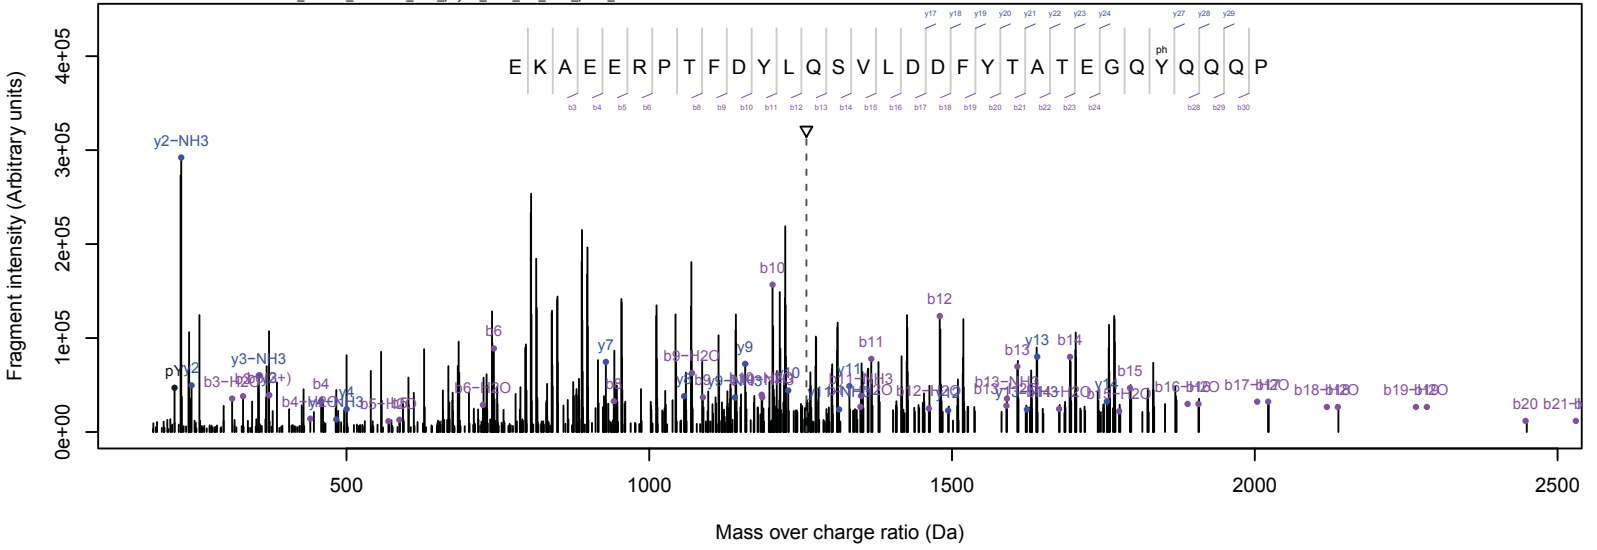

**VVEVGSKIYVDDGLISLQVK-3+**

Source: QE1\_140612\_OPL1013\_CVA\_phosphoproteomic\_landscape\_AML\_B Scan: 47486

Andromeda score: 183.45

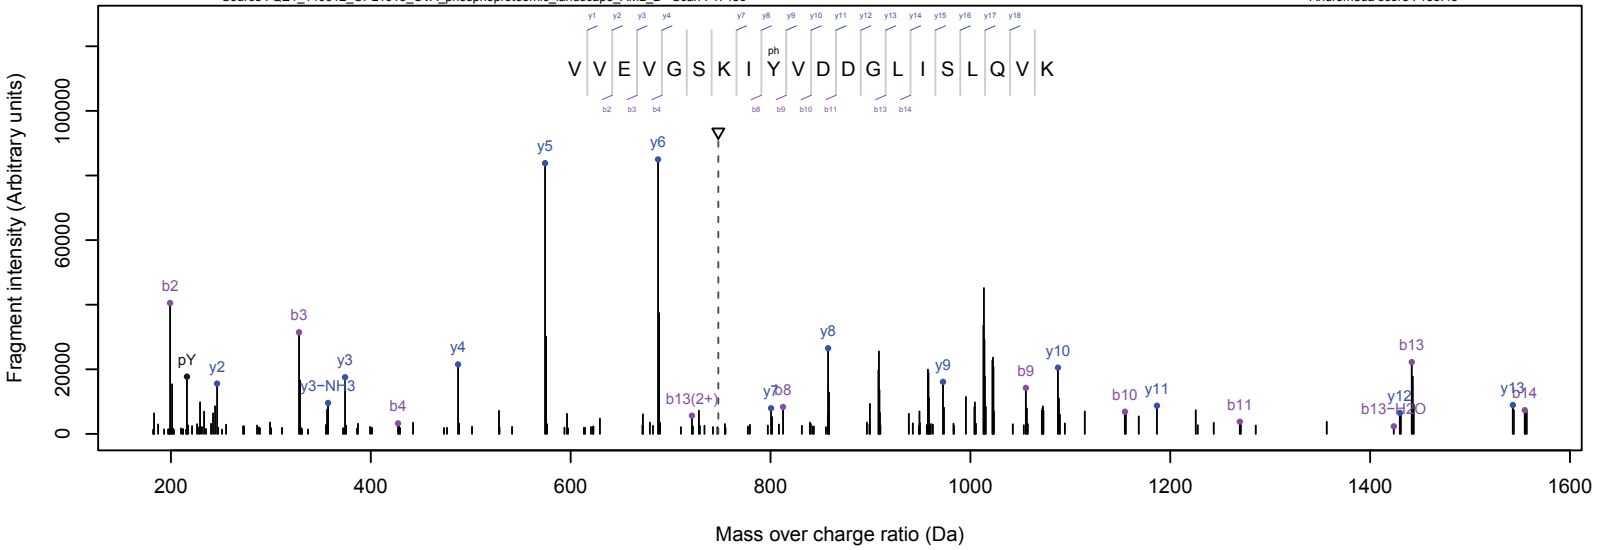

**RLGAGQFGEVWGYNNSTK-2+**

Source: QE1\_140612\_OPL1013\_CVA\_phosphoproteomic\_landscape\_AML\_C Scan: 36517

Andromeda score: 183.09

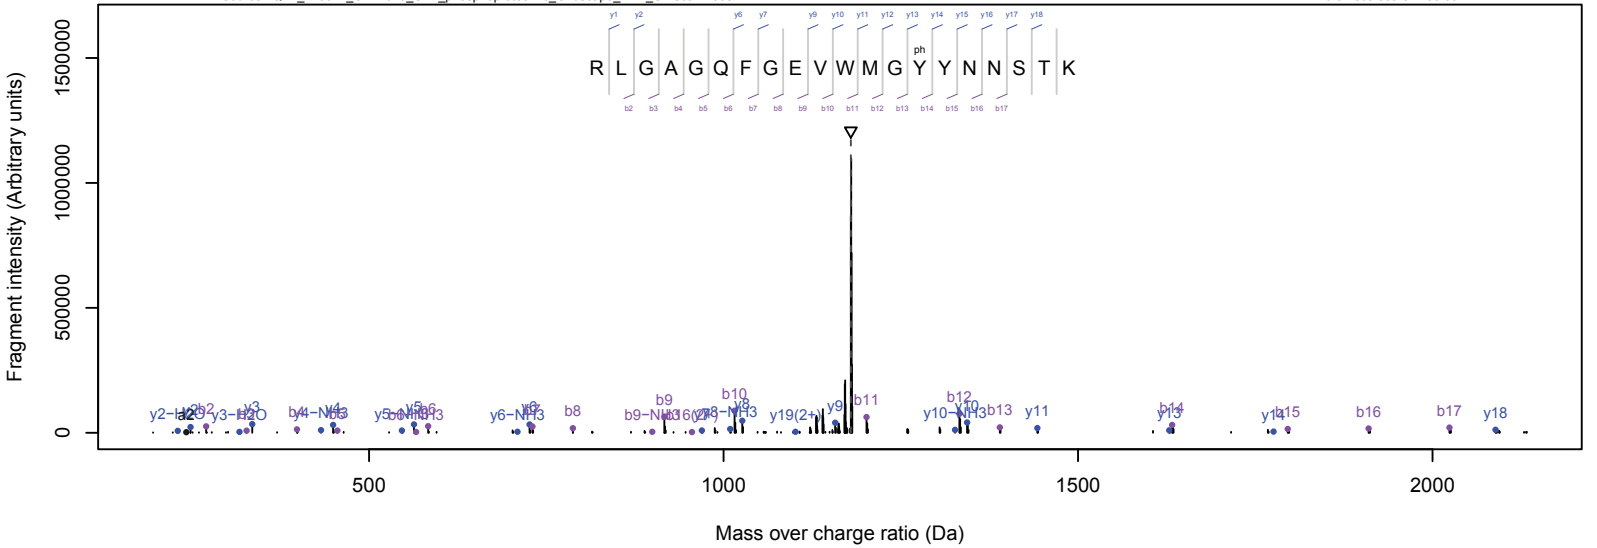

ACY(ph)RDMSSFPETK-2+

Source : QE1\_140612\_OPL1013\_CVA\_phosphoproteomic\_landscape\_AML\_D Scan : 15210

Andromeda score : 183.06

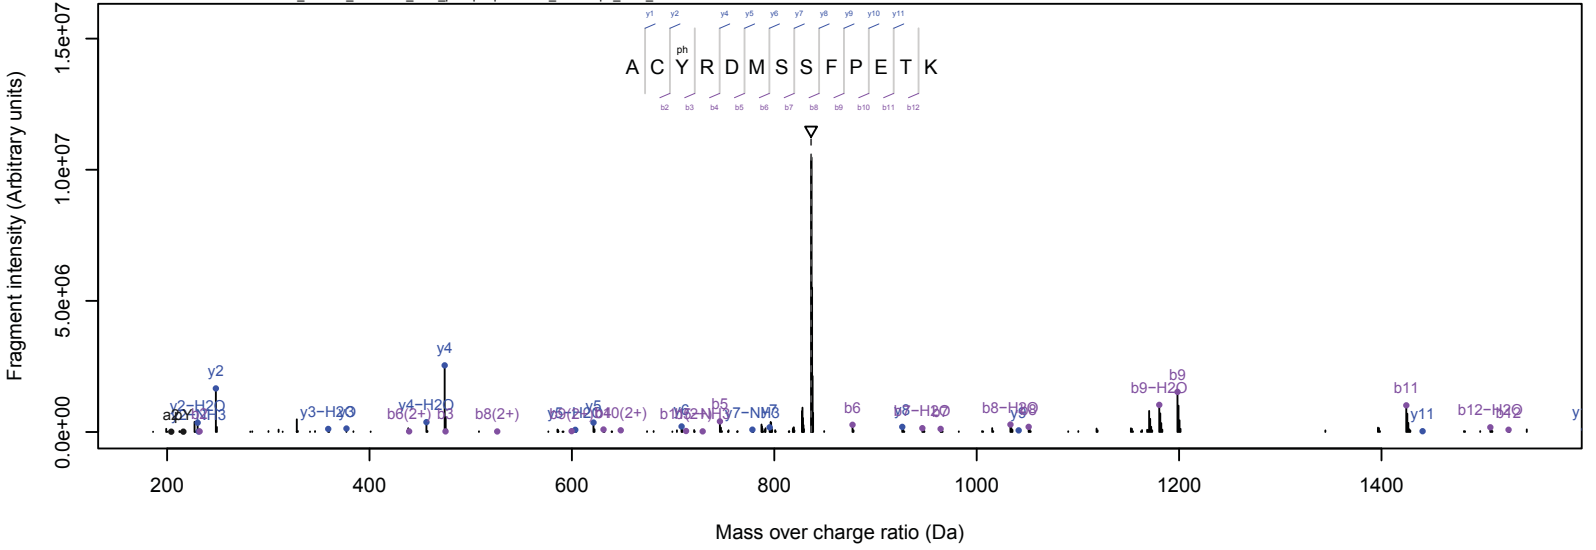

LLAQAEGPCY(ph)IR-2+

Source : QE1\_140908\_OPL1013\_CvA\_pTyrIP\_AML\_Kasumi1 Scan : 21611

Andromeda score : 183.06

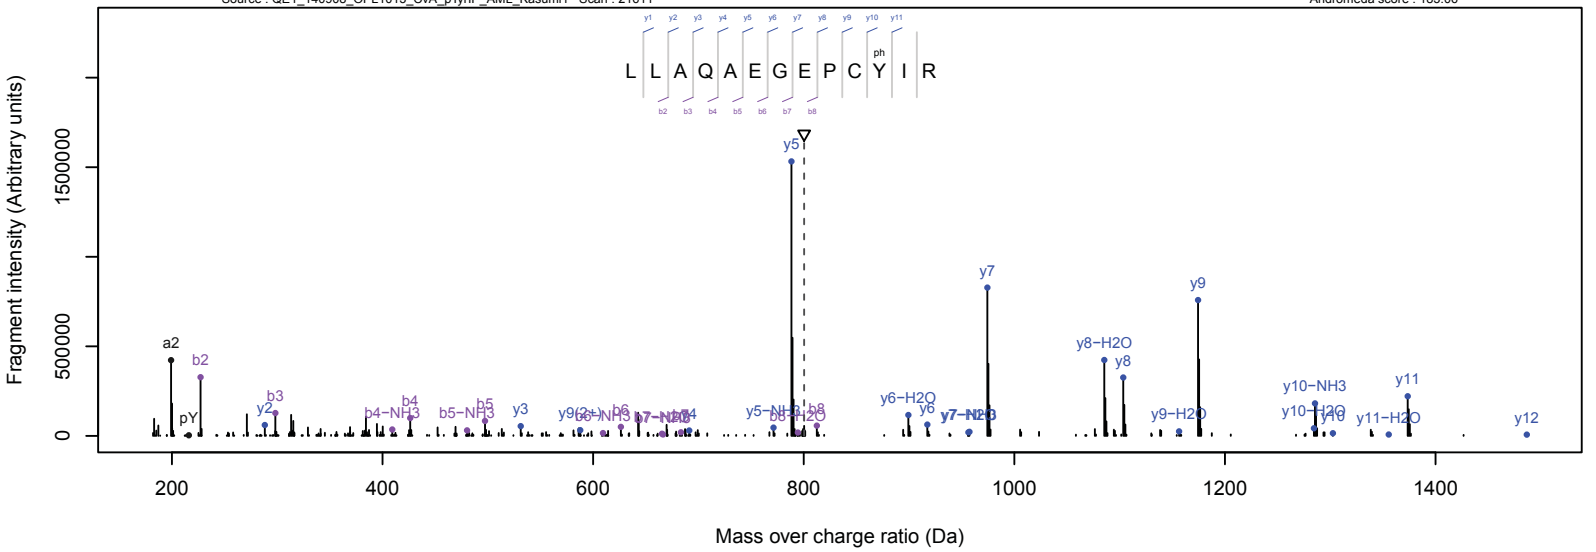

RNQNY(ph)MNILR-2+

Source : QE1\_140612\_OPL1013\_CVA\_phosphoproteomic\_landscape\_AML\_C Scan : 18299

Andromeda score : 182.39

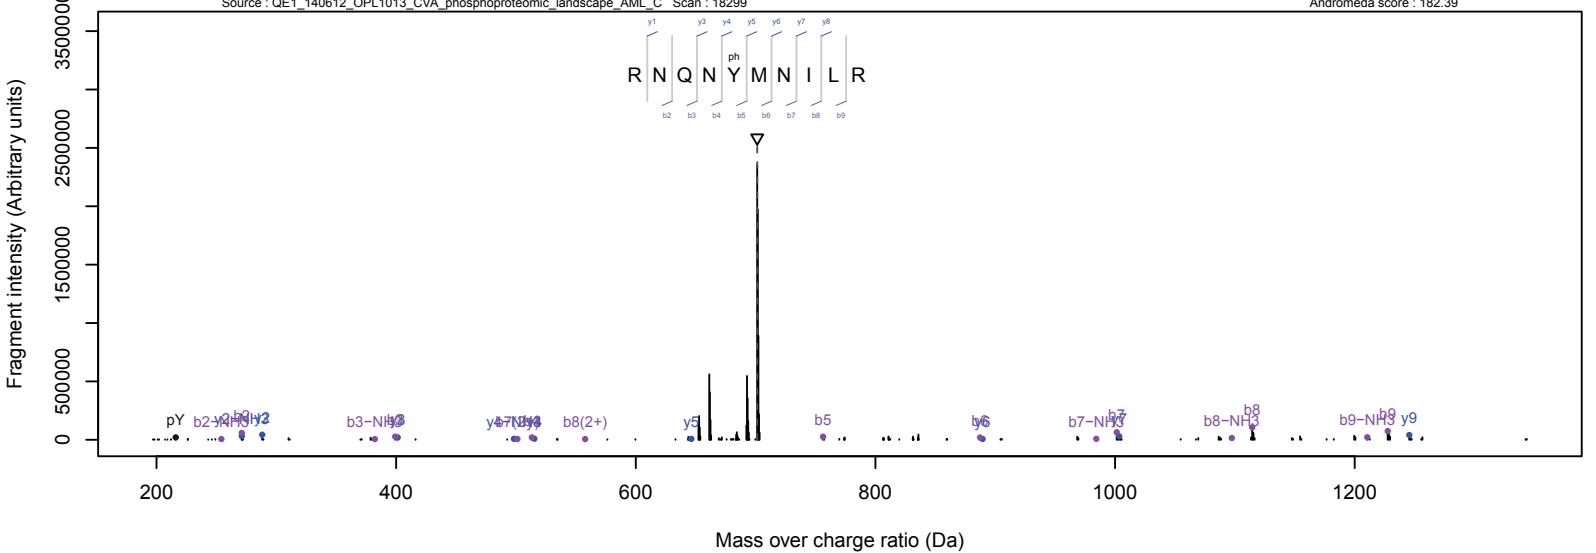

LY(ph)DFVKTERDESSGPK-3+

Source : QE1\_140612\_OPL1013\_CVA\_phosphoproteomic\_landscape\_AML\_C Scan : 16449

Andromeda score : 182.35

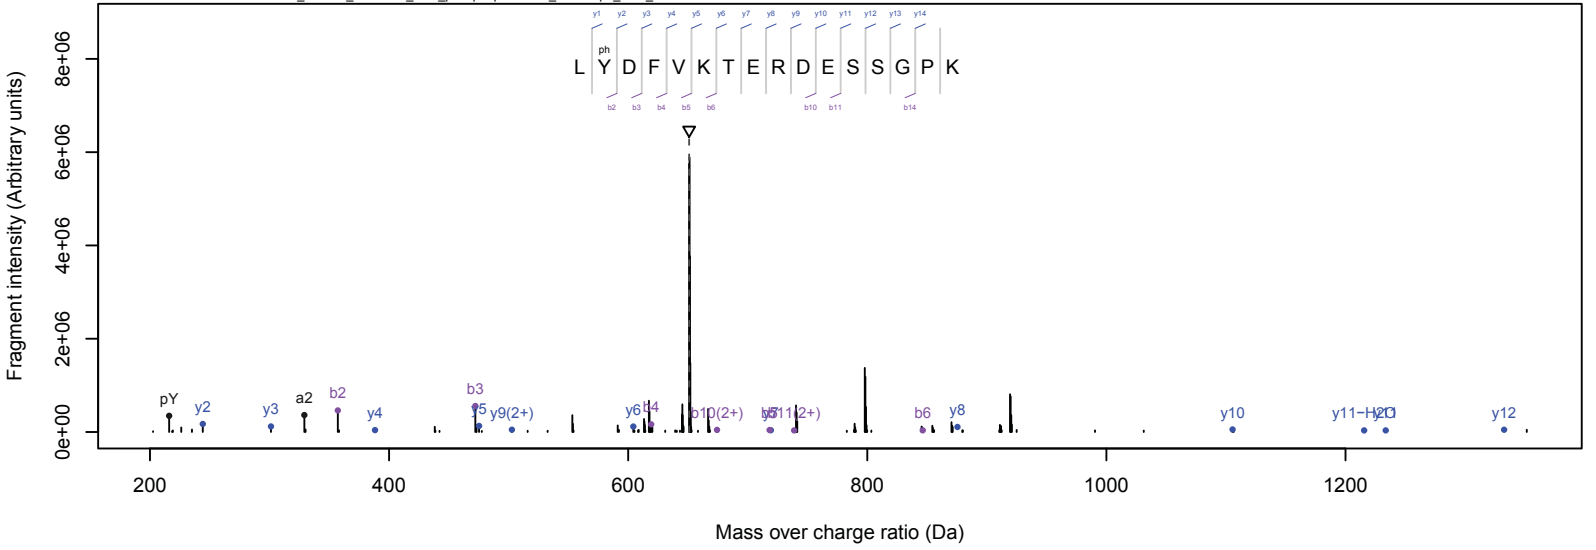

EYDRLY(ph)EEYTR-2+

Source : QE1\_140908\_OPL1013\_CvA\_pTyrIP\_AML\_Kasumi1 Scan : 17988

Andromeda score : 182.23

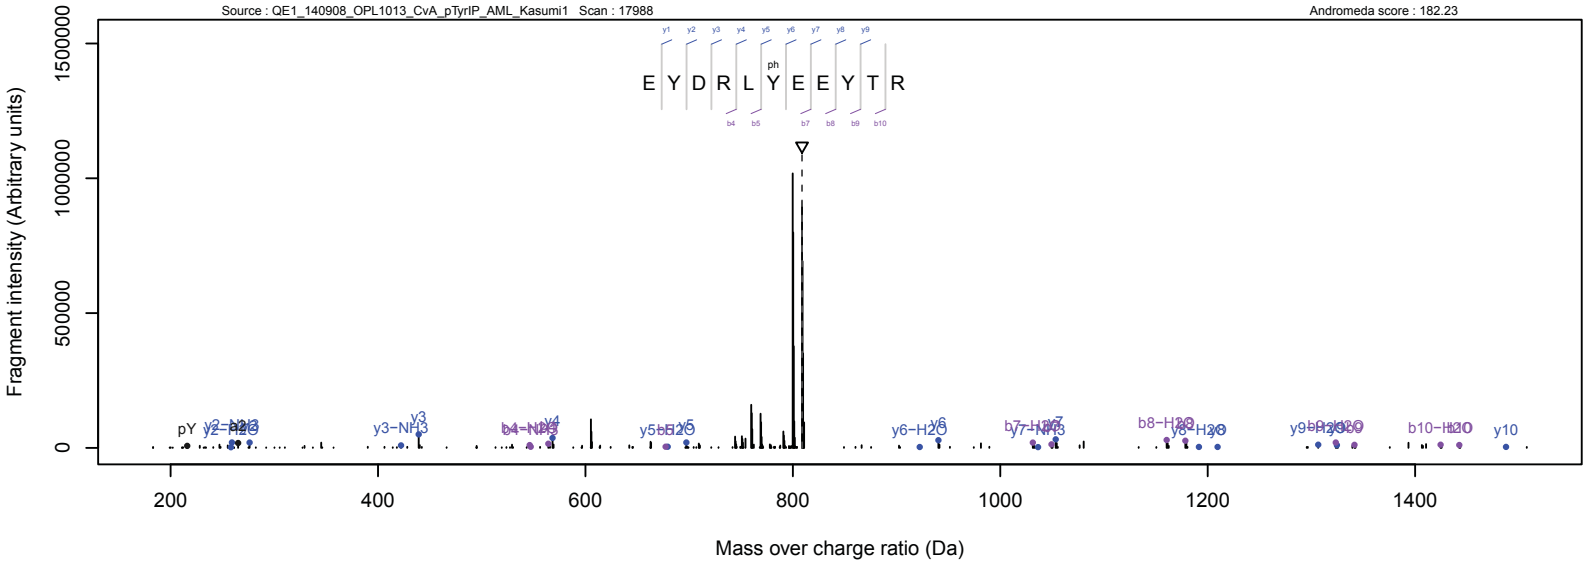

PQAVGSSNY(ph)ASTSAGLK-2+

Source : QE1\_140612\_OPL1013\_CVA\_phosphoproteomic\_landscape\_AML\_B Scan : 10812

Andromeda score : 182.17

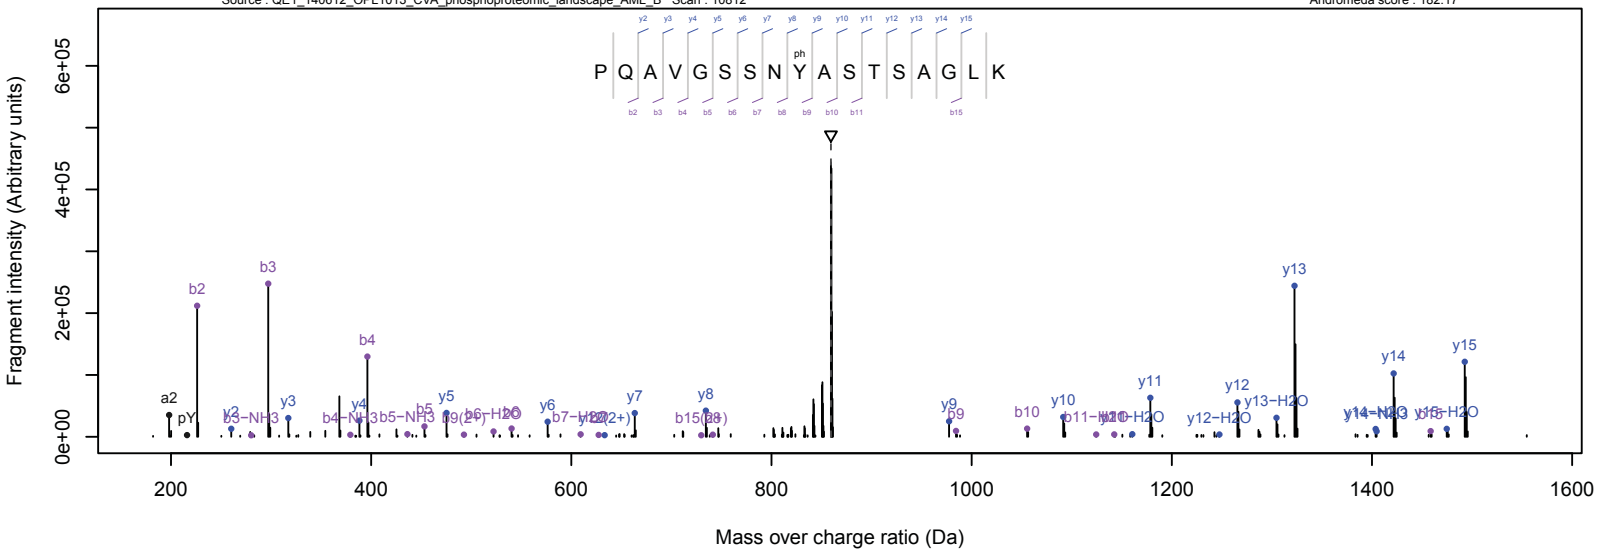

LNGPQDHSLLY(ph)STIPR-3+

Source : QE1\_140822\_OPL1013\_CVA\_pTyrIP\_AML\_cell\_lines\_part2\_B Scan : 18729

Andromeda score : 182.15

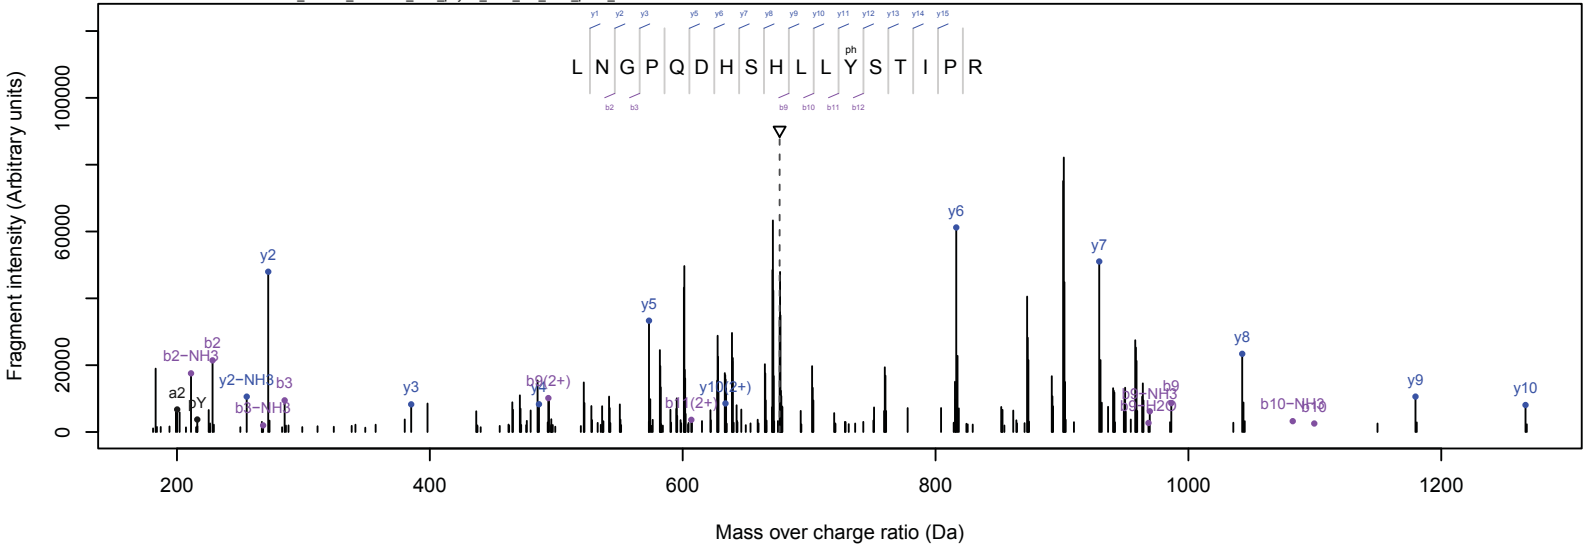

EKLY(ph)DFVKTER-2+

Source : QE1\_140612\_OPL1013\_CVA\_phosphoproteomic\_landscape\_AML\_C Scan : 20796

Andromeda score : 182.1

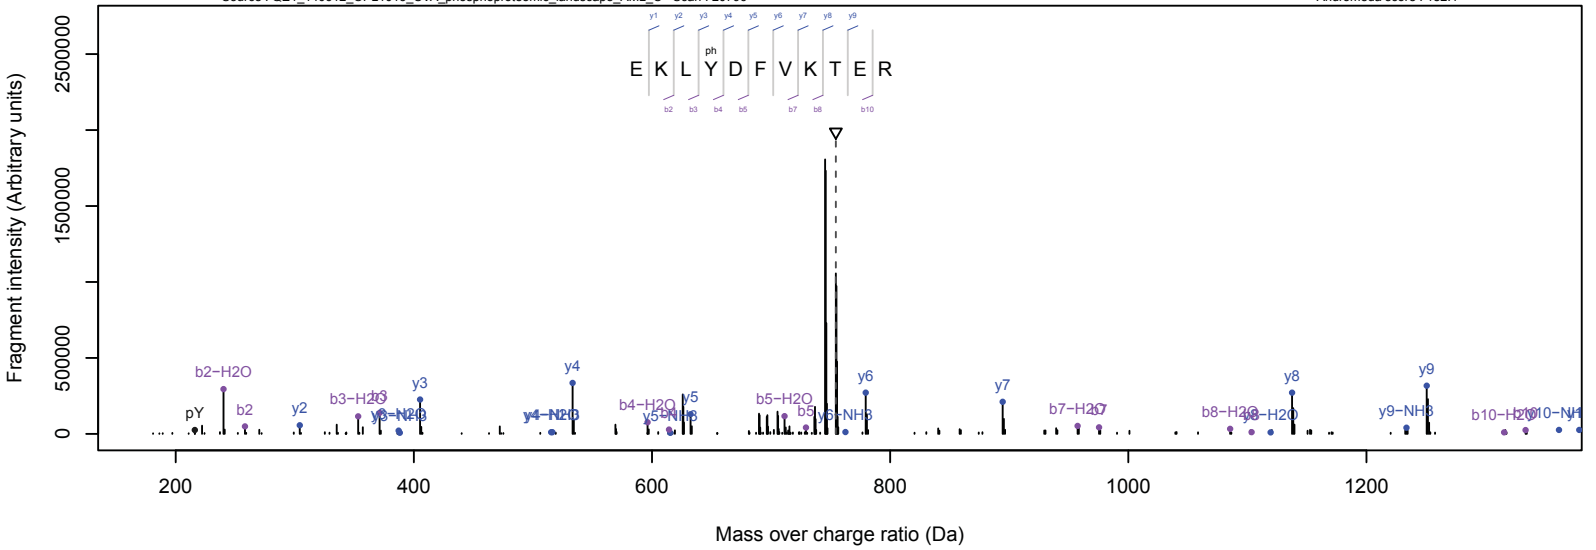

NY(ph)PATFWNPQFK-2+

Source : QE1\_140612\_OPL1013\_CVA\_phosphoproteomic\_landscape\_AML\_B Scan : 40756

Andromeda score : 182.1

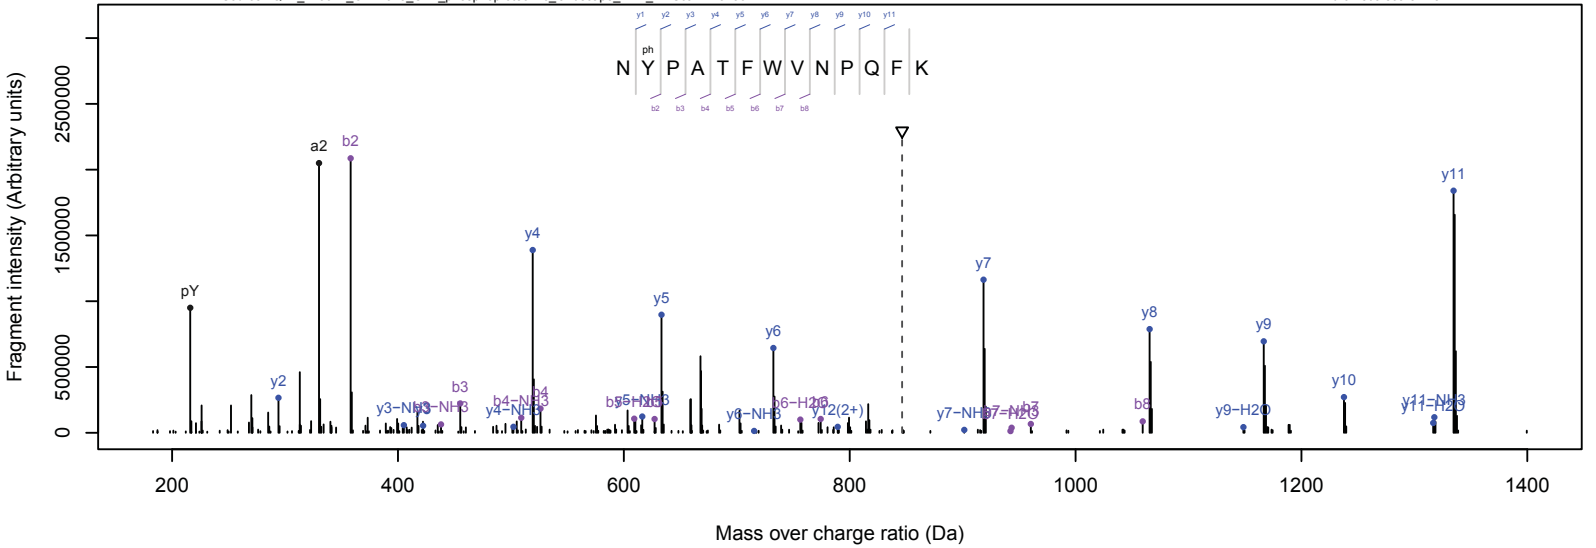

**ISIEMNGTLEDQLSHLKQY(ph)ER-4+**

Source : QE1\_140908\_OPL1013\_CvA\_pTyrIP\_AML\_HEL Scan : 41047

Andromeda score : 181.87

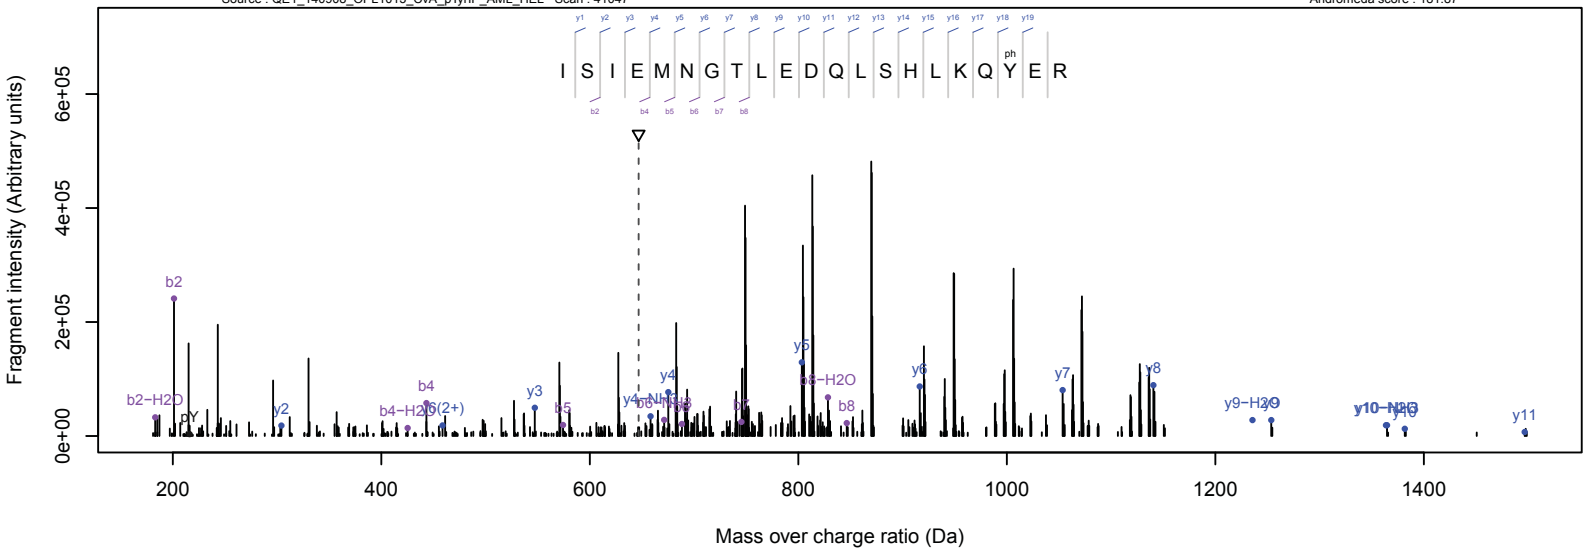

**GVTIPYRKPSSSPVIFAGGQAYTIQQQY(ph)AIPQPDLTk-4+**

Source : QE1\_140612\_OPL1013\_CvA\_phosphoproteomic\_landscape\_AML\_C Scan : 41731

Andromeda score : 181.8

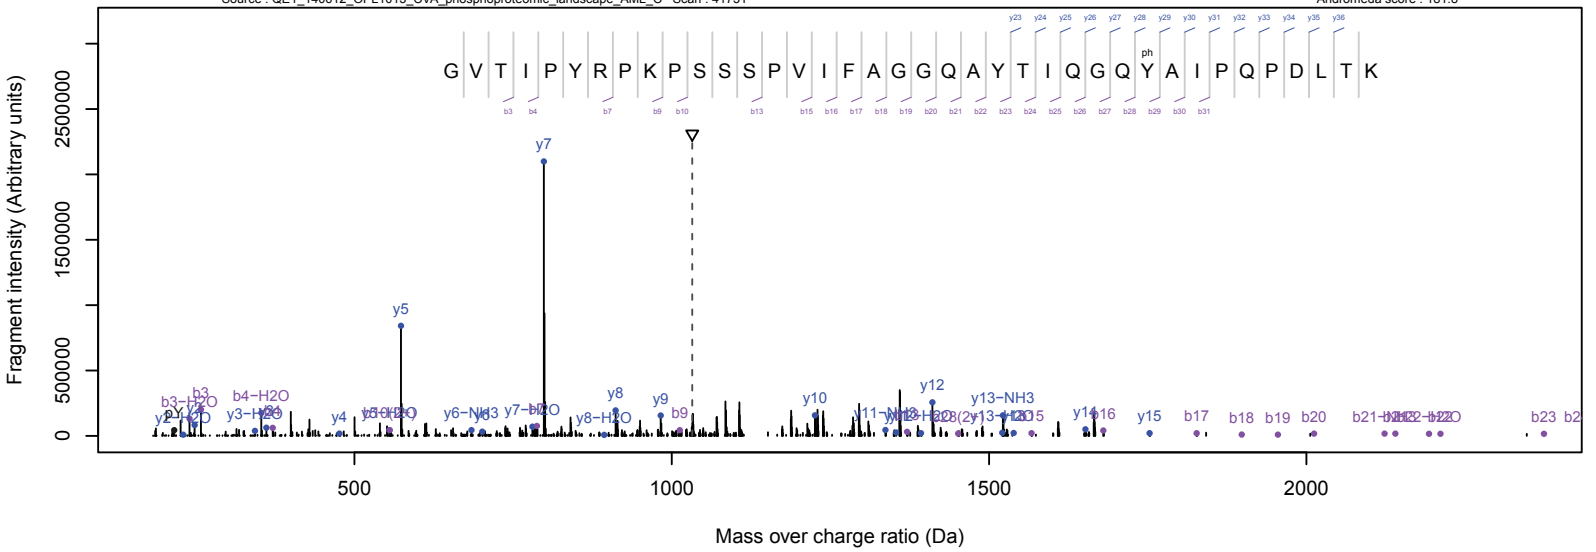

**AGDNSQSVY(ph)IPMSPGAHHFDSLGYPSTTLPVHR-4+**

Source : QE1\_140908\_OPL1013\_CvA\_pTyrIP\_AML\_Kasumi6 Scan : 39232

Andromeda score : 181.72

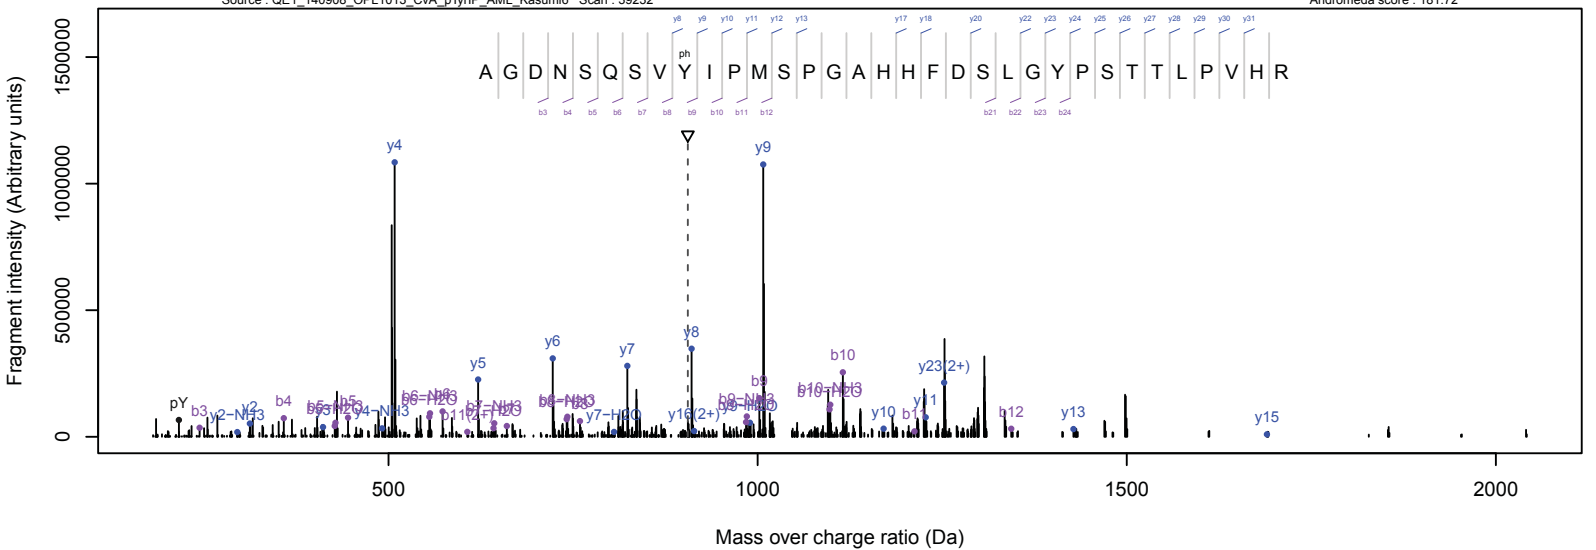

HGSEEA(ph)IDPIAMEYYNWGR-2+

Source : QE1\_140612\_OPL1013\_CVA\_phosphoproteomic\_landscape\_AML\_C Scan : 44576

Andromeda score : 181.4

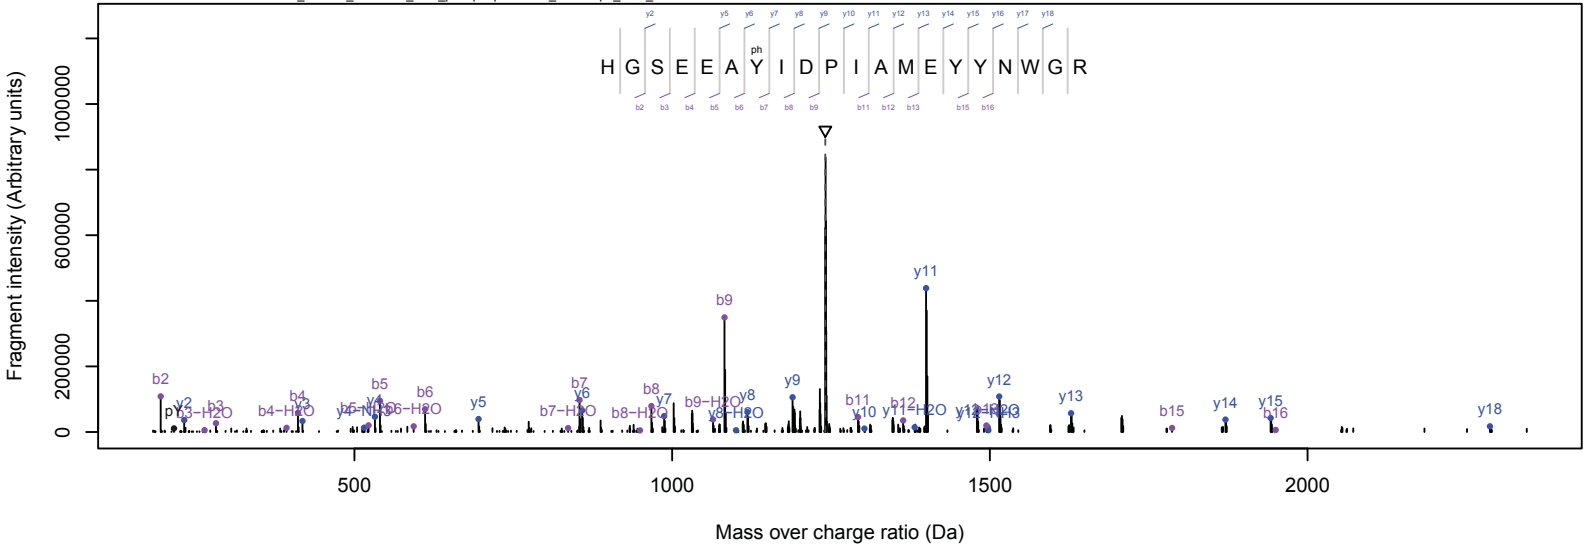

NNYALNTTATYAEPY(ph)RPIQYR-3+

Source : QE1\_140612\_OPL1013\_CVA\_phosphoproteomic\_landscape\_AML\_C Scan : 27068

Andromeda score : 181.4

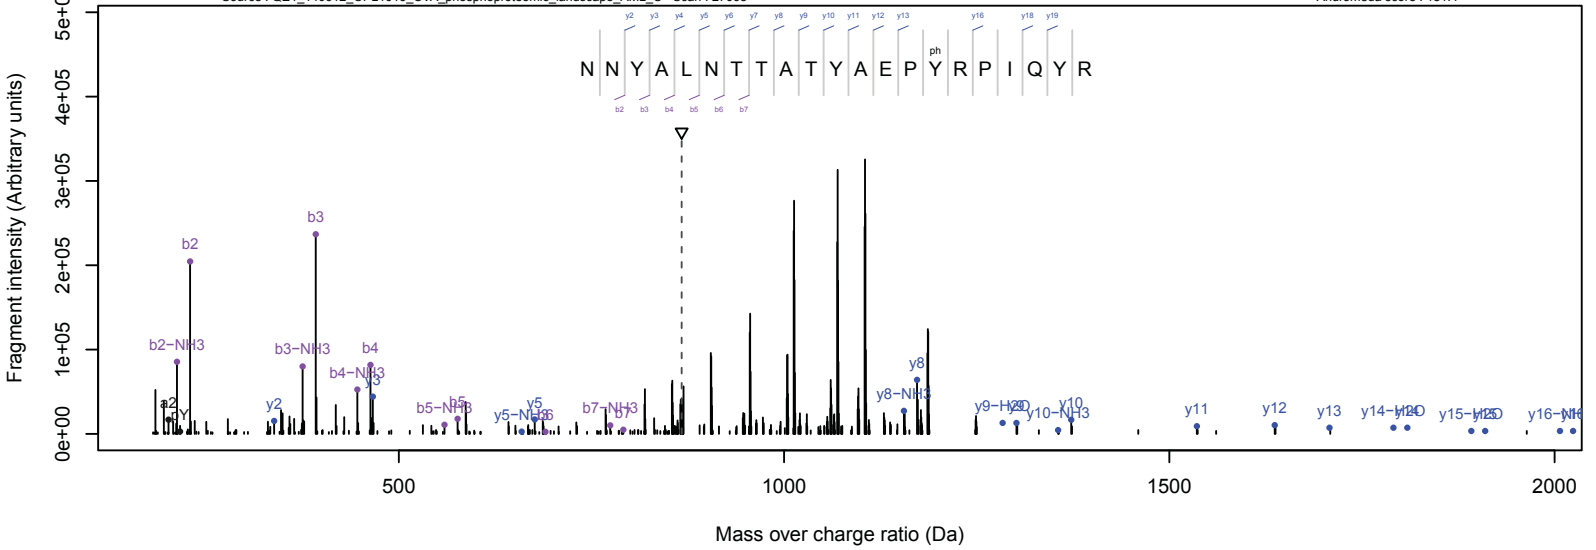

Y(ph)GM(ox)NPHQTPAQLYTLQPK-3+

Source : QE1\_140908\_OPL1013\_CvA\_pTyrIP\_AML\_HEL Scan : 24403

Andromeda score : 180.88

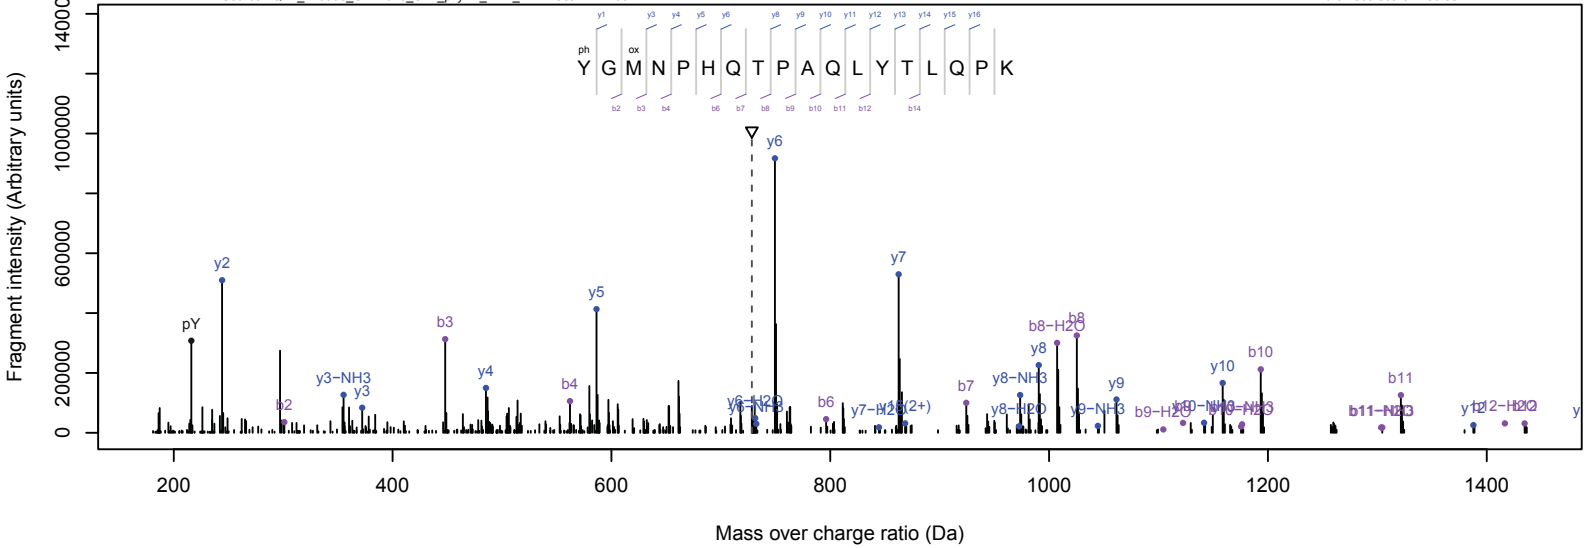

**SELPLDPLVPTEEGNPLLKHYPH-4+**

Source: QE1\_140612\_OPL1013\_CVA\_phosphoproteomic\_landscape\_AML\_C Scan: 43753

Andromeda score: 180.86

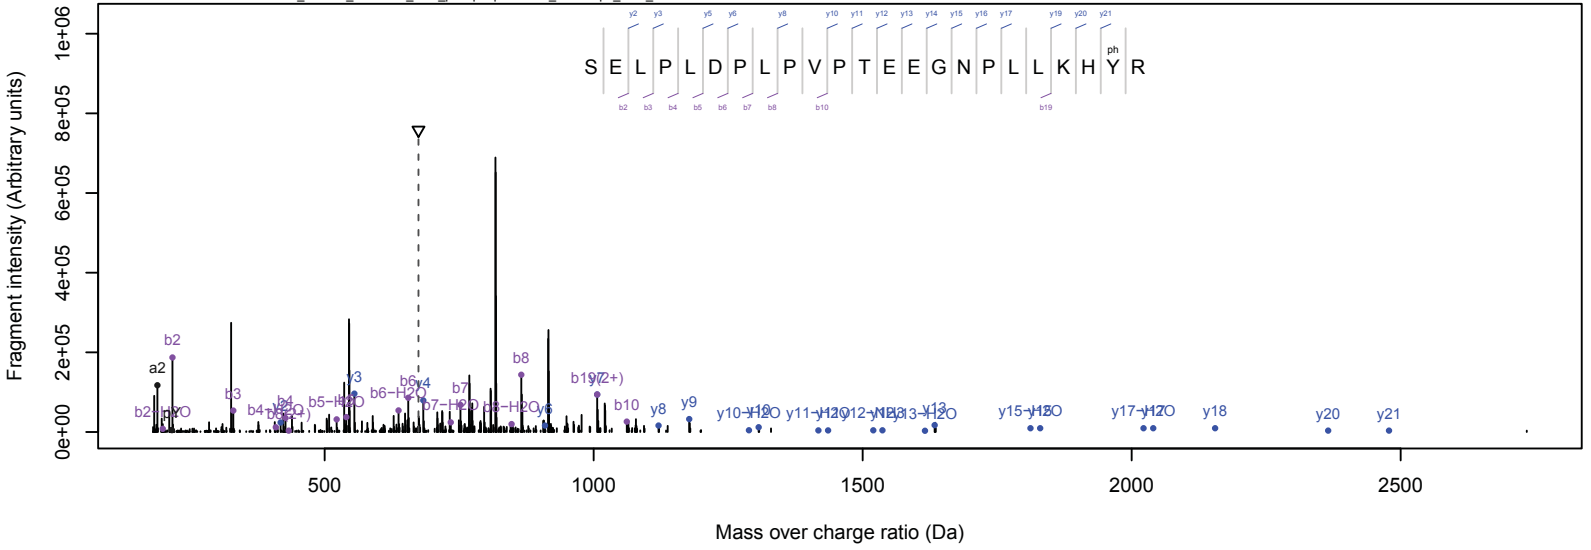

**NVIIWGNHSSSTQYHPD VN HAK-3+**

Source: QE1\_140612\_OPL1013\_CVA\_phosphoproteomic\_landscape\_AML\_D Scan: 22659

Andromeda score: 180.76

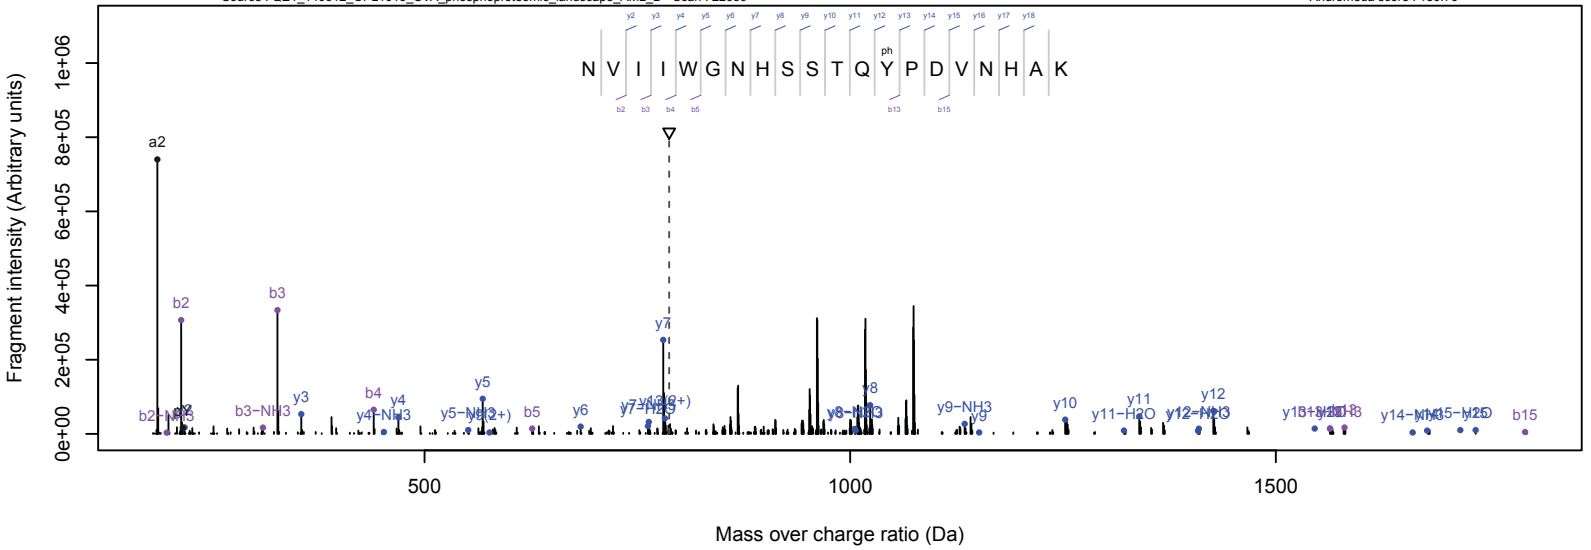

**RVPCAYDKTALALEVGDIVK-3+**

Source: QE1\_140612\_OPL1013\_CVA\_phosphoproteomic\_landscape\_AML\_B Scan: 35528

Andromeda score: 180.63

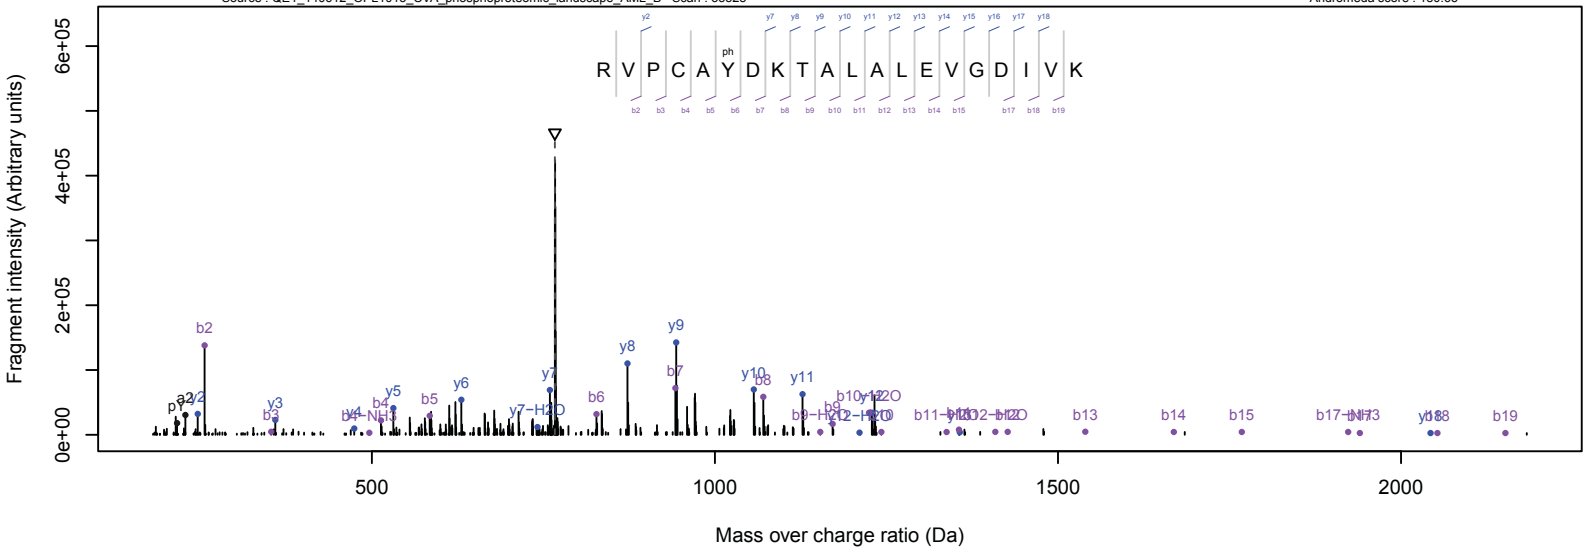



IKEEMSKDPDYAMYR-3+

Source : QE1\_140612\_OPL1013\_CVA\_phosphoproteomic\_landscape\_AML\_B Scan : 13252

Andromeda score : 180.62

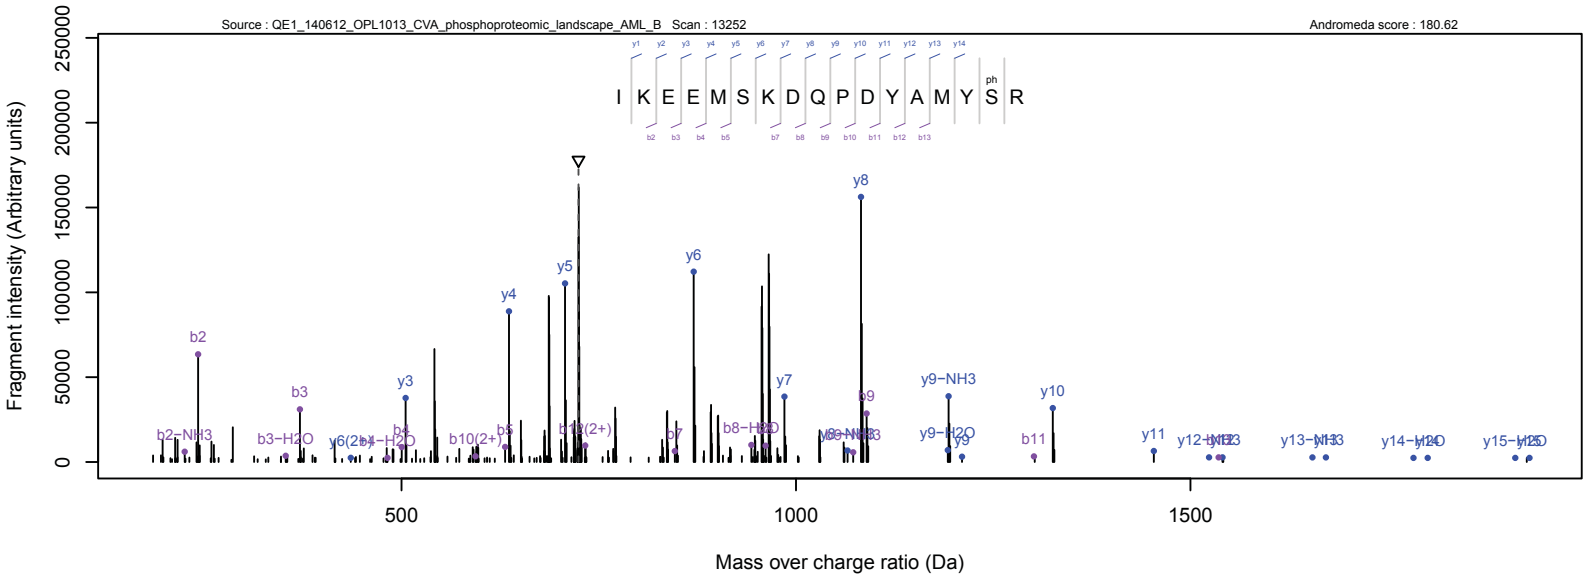

VELQELNDRFANYIDKVR-3+

Source : QE1\_140612\_OPL1013\_CVA\_phosphoproteomic\_landscape\_AML\_C Scan : 39564

Andromeda score : 180.62

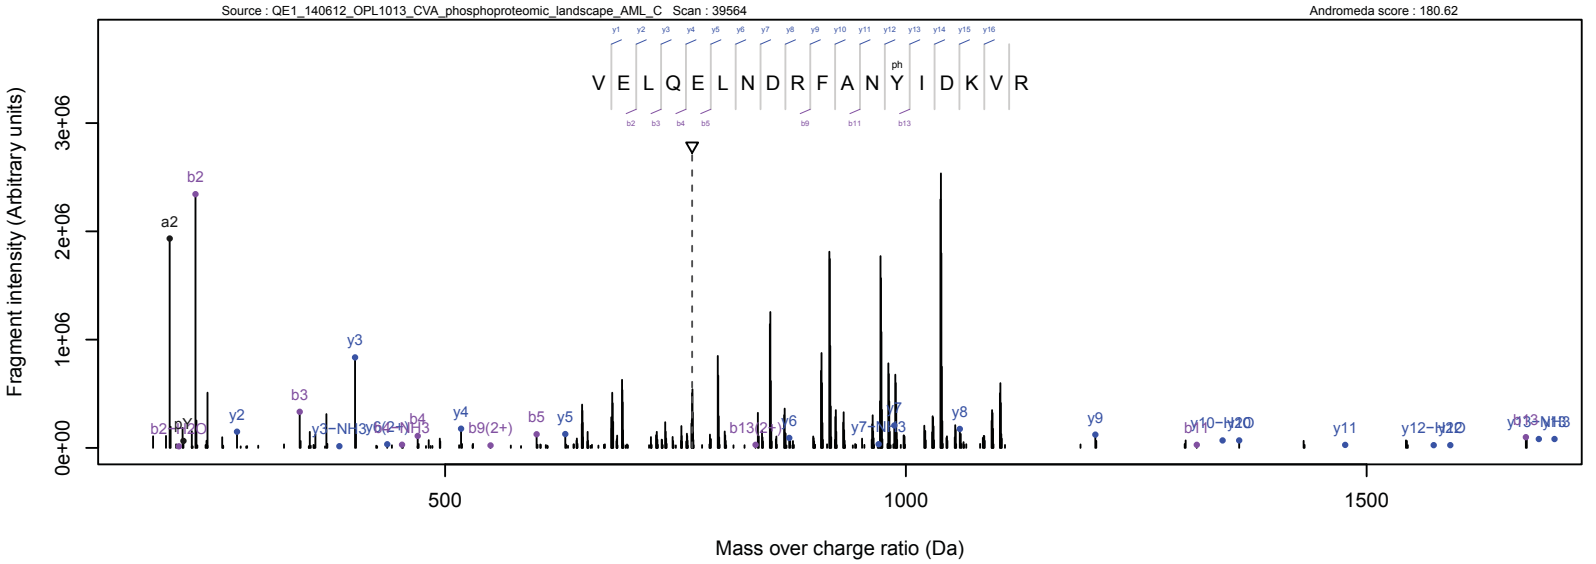

YVLDQY(ph)TSSGAKFPVK-2+

Source : QE1\_140612\_OPL1013\_CVA\_phosphoproteomic\_landscape\_AML\_C Scan : 25226

Andromeda score : 180.62

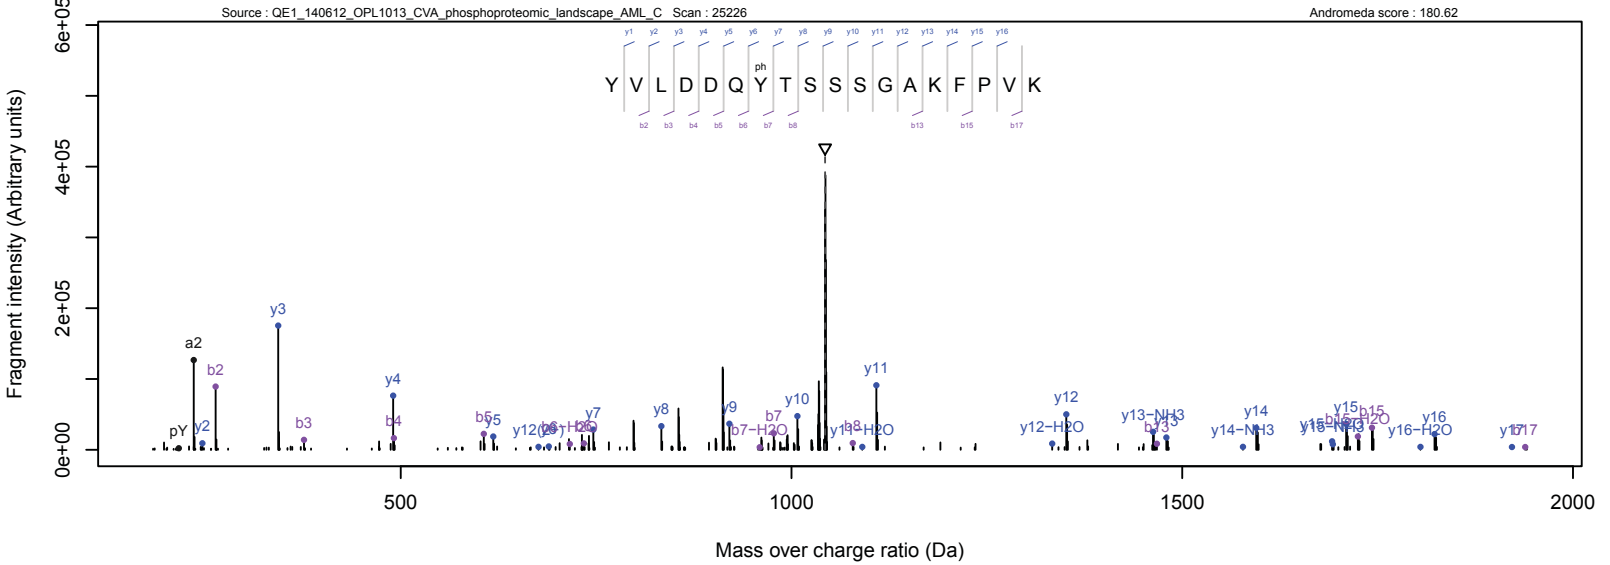

TGFSTSPESPYT<sup>ph</sup>HWK-2+

Source : QE1\_140612\_OPL1013\_CVA\_phosphoproteomic\_landscape\_AML\_B Scan : 20613

Andromeda score : 180.48

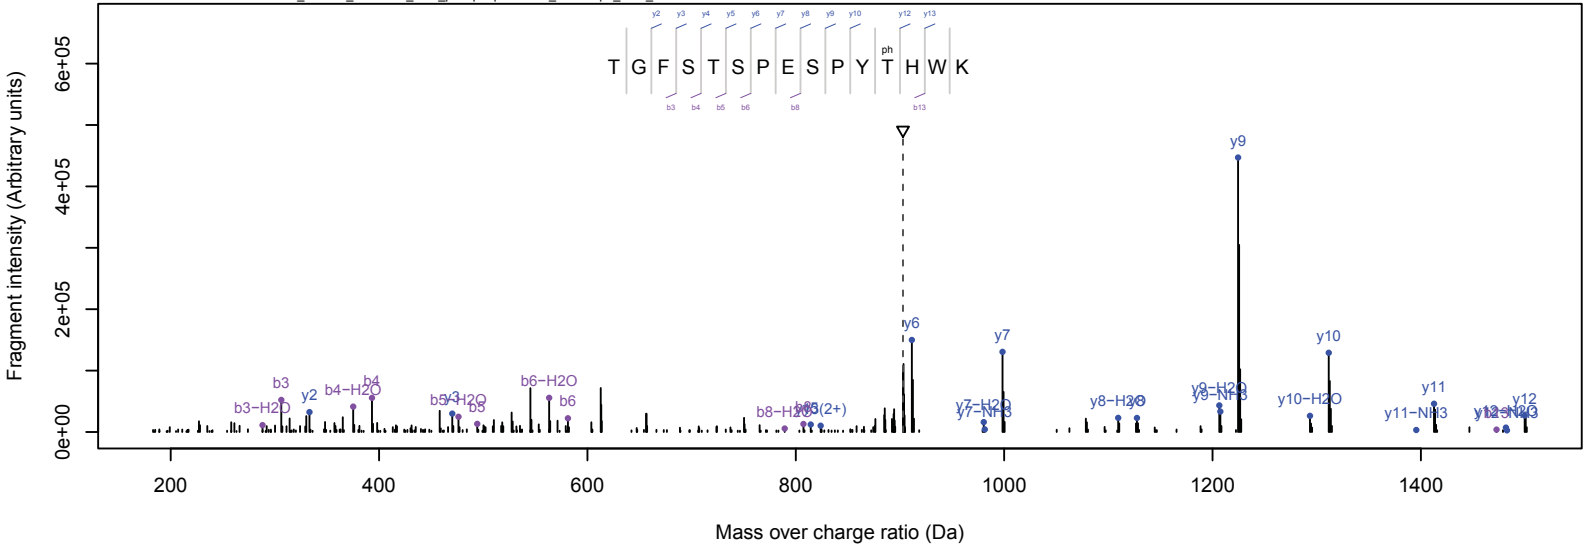

VDKEKGY<sup>ph</sup>IDLSK-2+

Source : QE1\_140612\_OPL1013\_CVA\_phosphoproteomic\_landscape\_AML\_B Scan : 9428

Andromeda score : 180.48

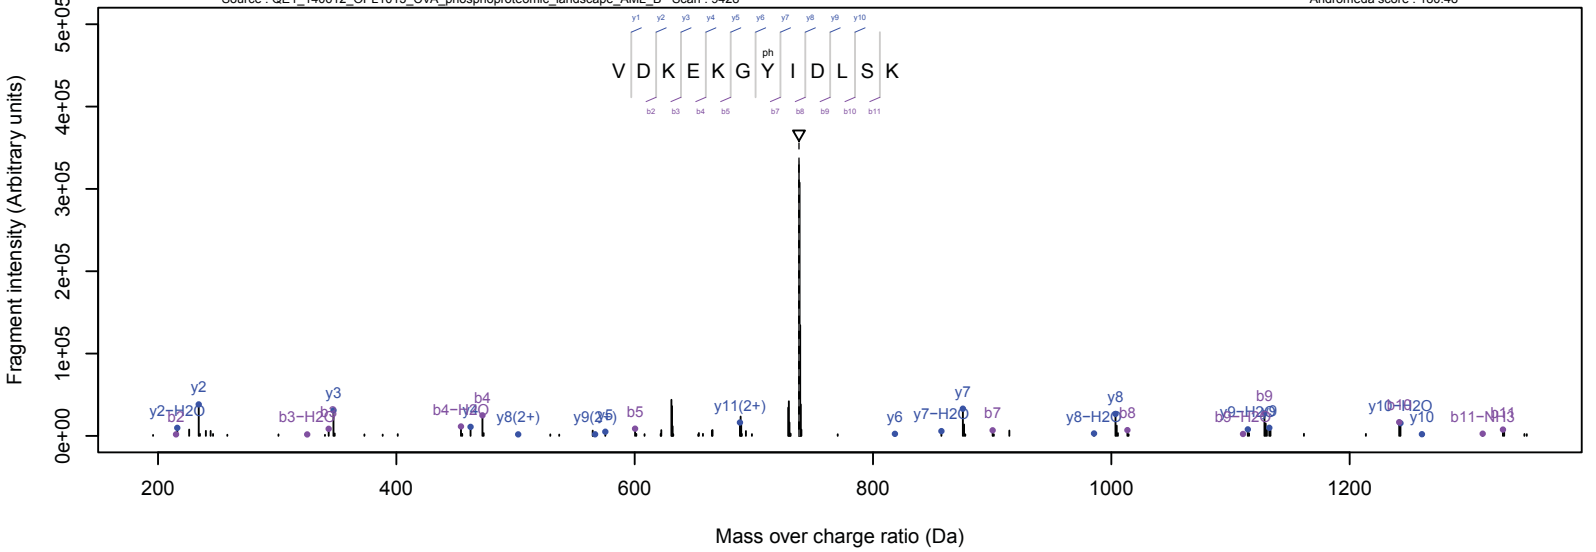

NPGFY<sup>ph</sup>VEANP<sup>ox</sup>MPTFK-2+

Source : QE1\_140612\_OPL1013\_CVA\_phosphoproteomic\_landscape\_AML\_B Scan : 31176

Andromeda score : 180.11

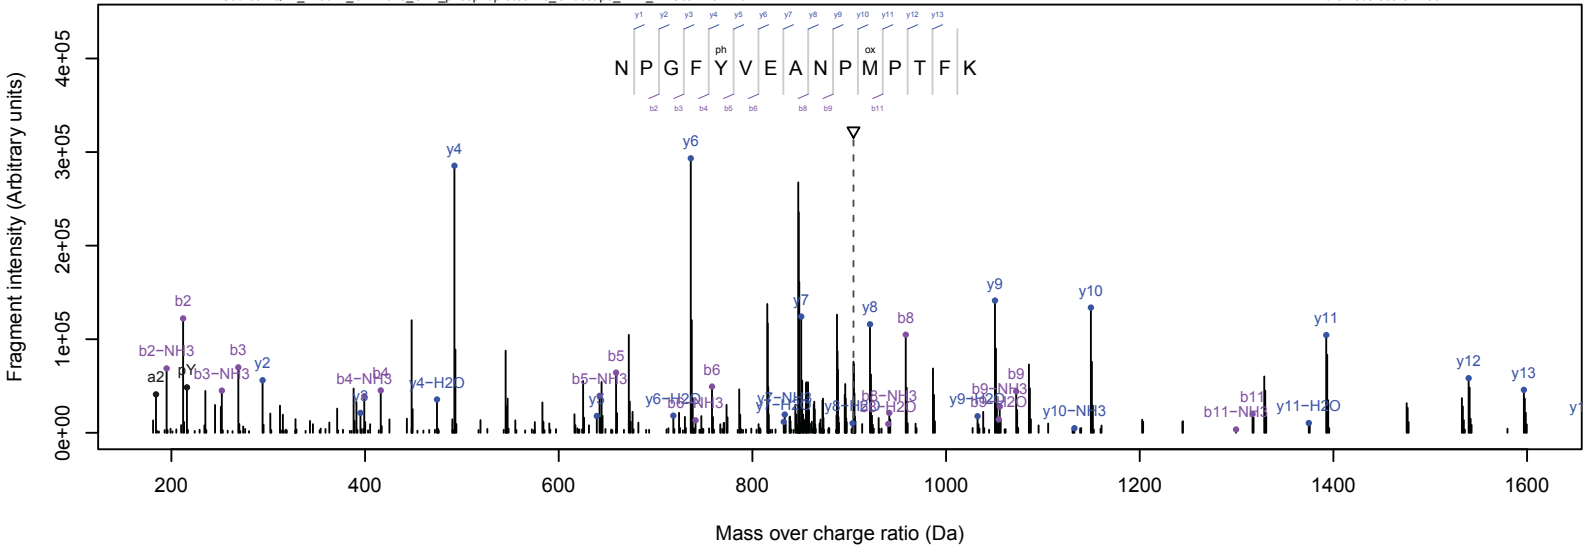



**EAEAAIYHLQFEELRR-3+**

Source : QE1\_140612\_OPL1013\_CVA\_phosphoproteomic\_landscape\_AML\_C Scan : 41894

Andromeda score : 179.81

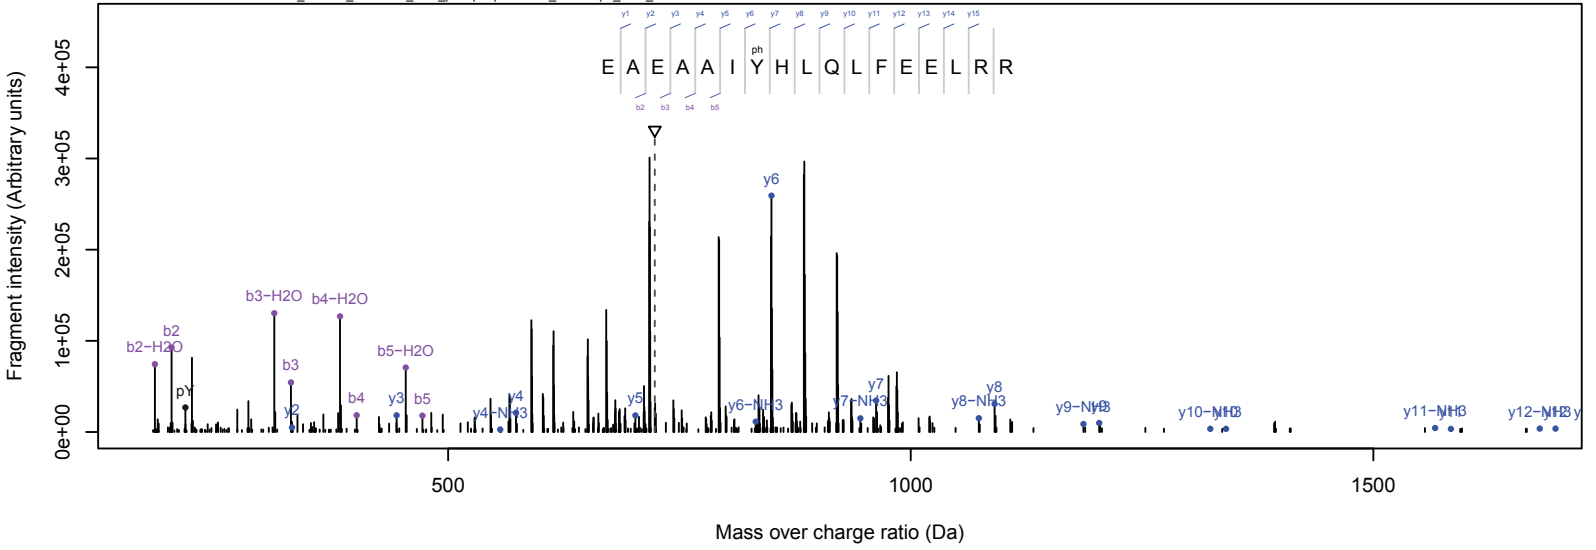

**LTSDDVKEIQIKLAK-2+**

Source : QE1\_140612\_OPL1013\_CVA\_phosphoproteomic\_landscape\_AML\_C Scan : 34570

Andromeda score : 179.81

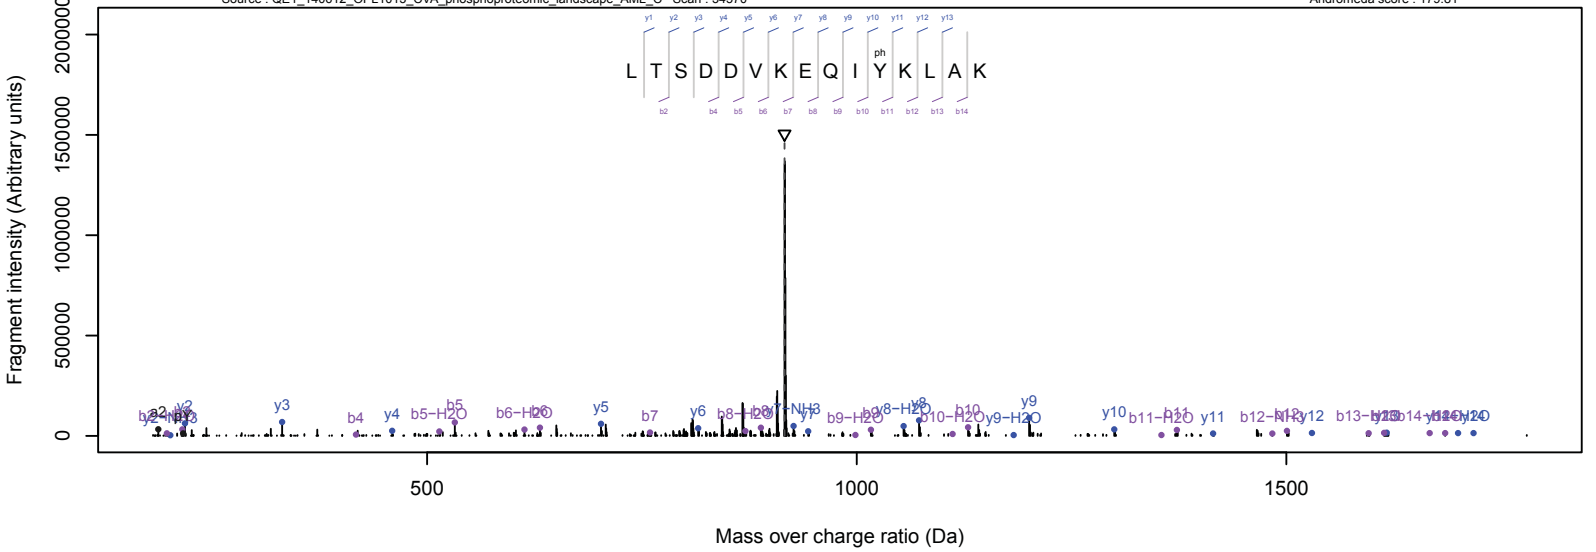

**ESSCSDSTNEYM(ox)DMKPGVSYVVPVK-3+**

Source : QE1\_140908\_OPL1013\_CvA\_pTyrIP\_AML\_Kasumi1 Scan : 18659

Andromeda score : 179.64

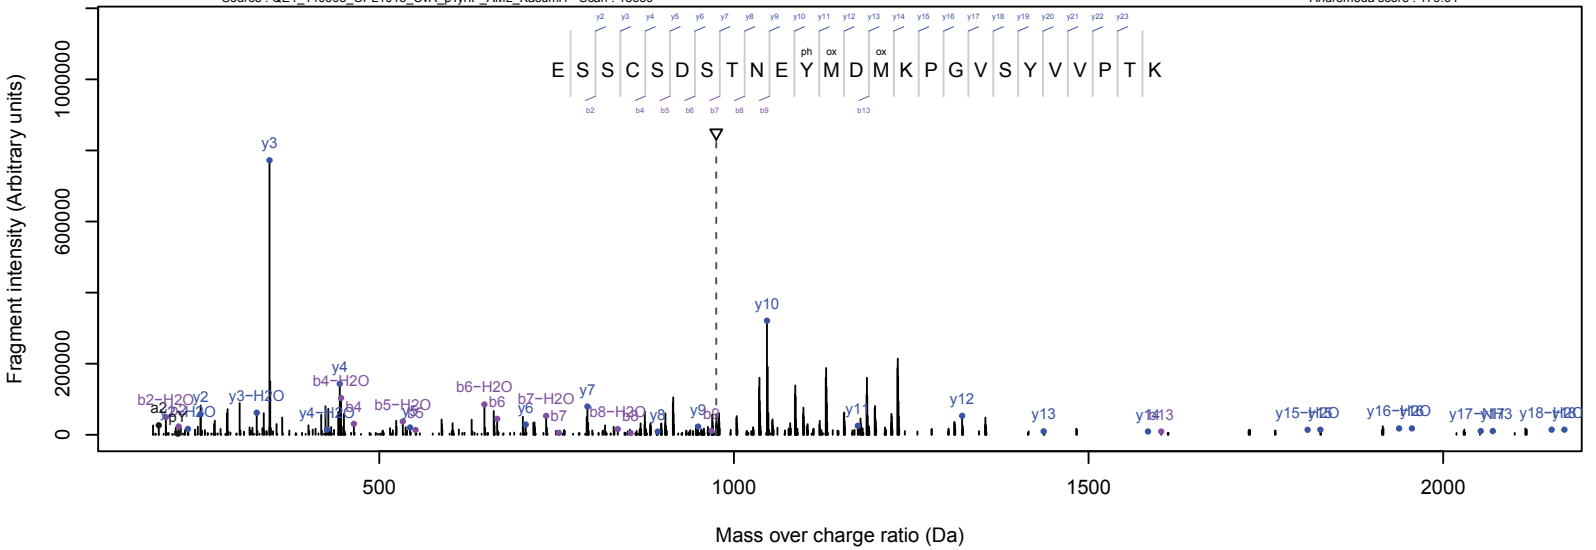

QM(ox)DTEAAASEAPQDVTY(ph)AQLHSFTLR-3+

Source : QE1\_140908\_OPL1013\_CVA\_pTyrIP\_AML\_OCI\_AML3 Scan : 39133

Andromeda score : 179.64

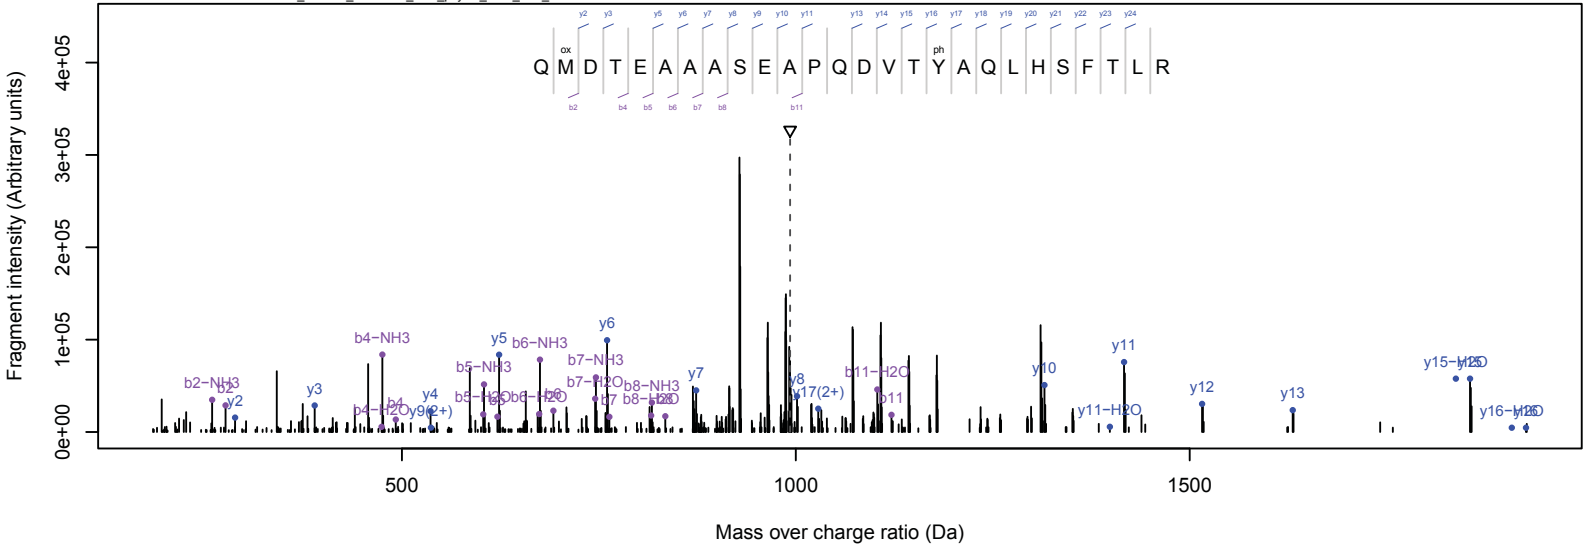

NKLDHY(ph)AIKFLTTESAMK-4+

Source : QE1\_140612\_OPL1013\_CVA\_phosphoproteomic\_landscape\_AML\_C Scan : 36525

Andromeda score : 179.58

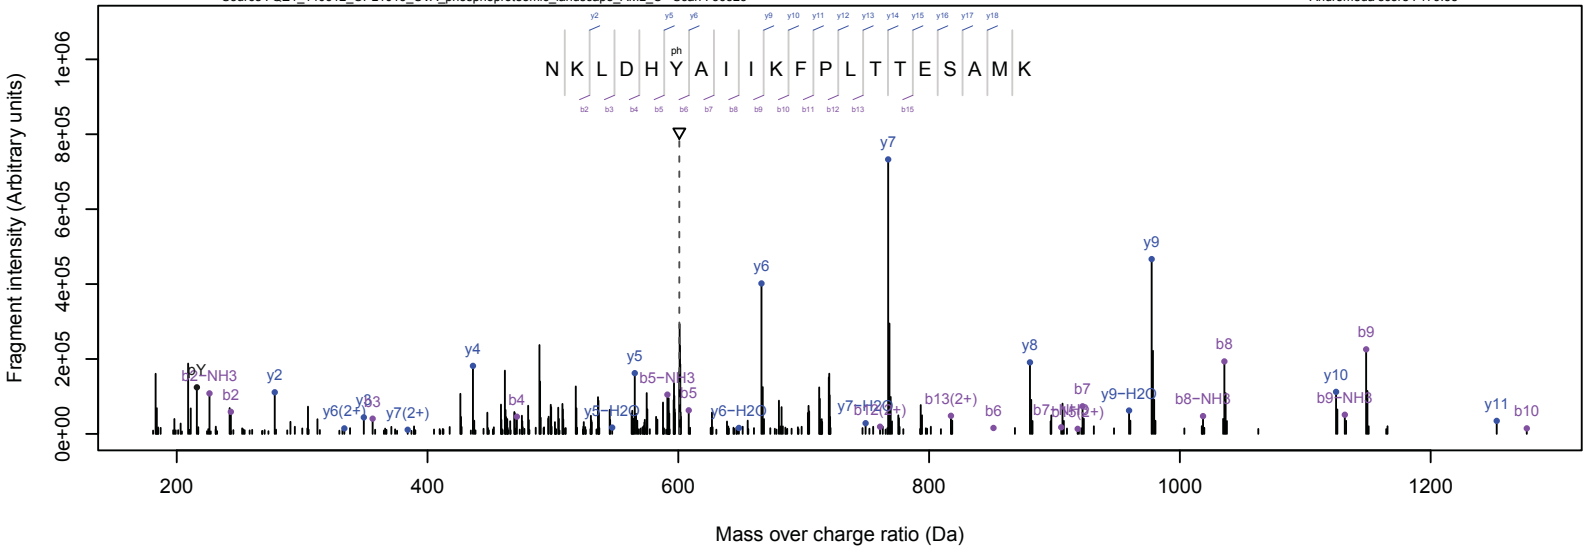

PPYTVVY(ph)FPVR-2+

Source : QE1\_140612\_OPL1013\_CVA\_phosphoproteomic\_landscape\_AML\_C Scan : 40104

Andromeda score : 179.57

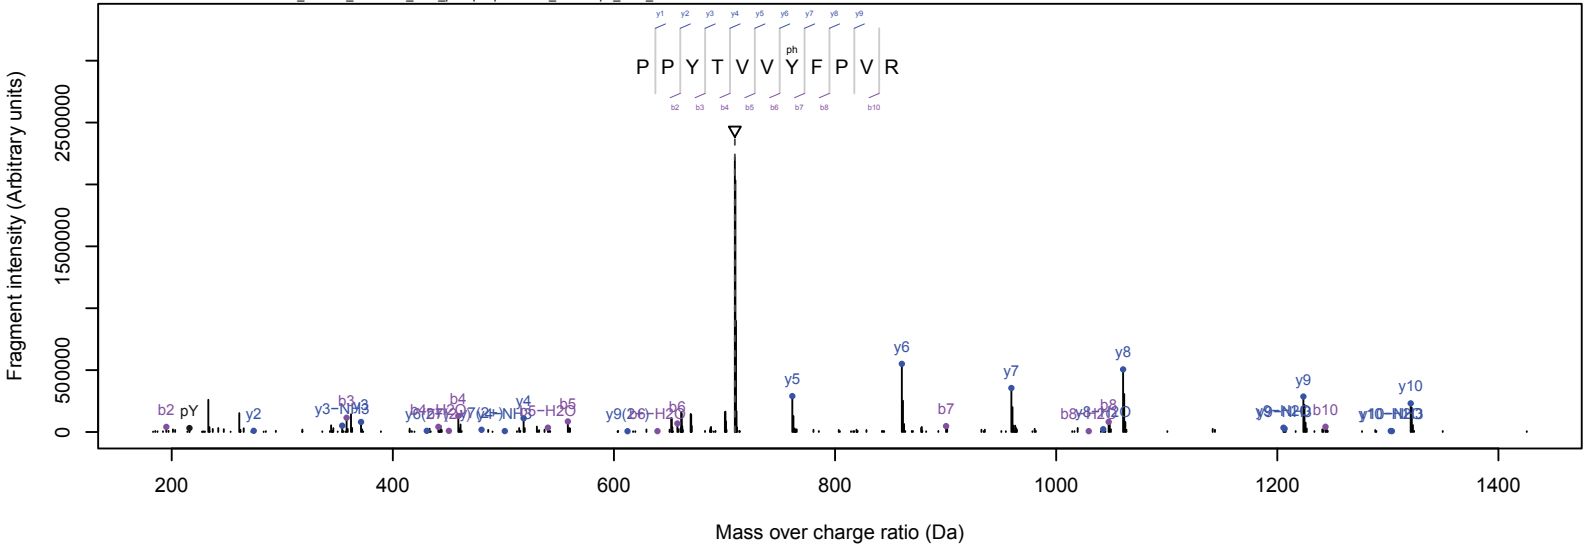

SAEEAPLY(ph)SKVTPR-2+

Source : QE1\_140822\_OPL1013\_CvA\_pTyrIP\_AML\_cell\_lines\_part2\_B Scan : 10857

Andromeda score : 179.56

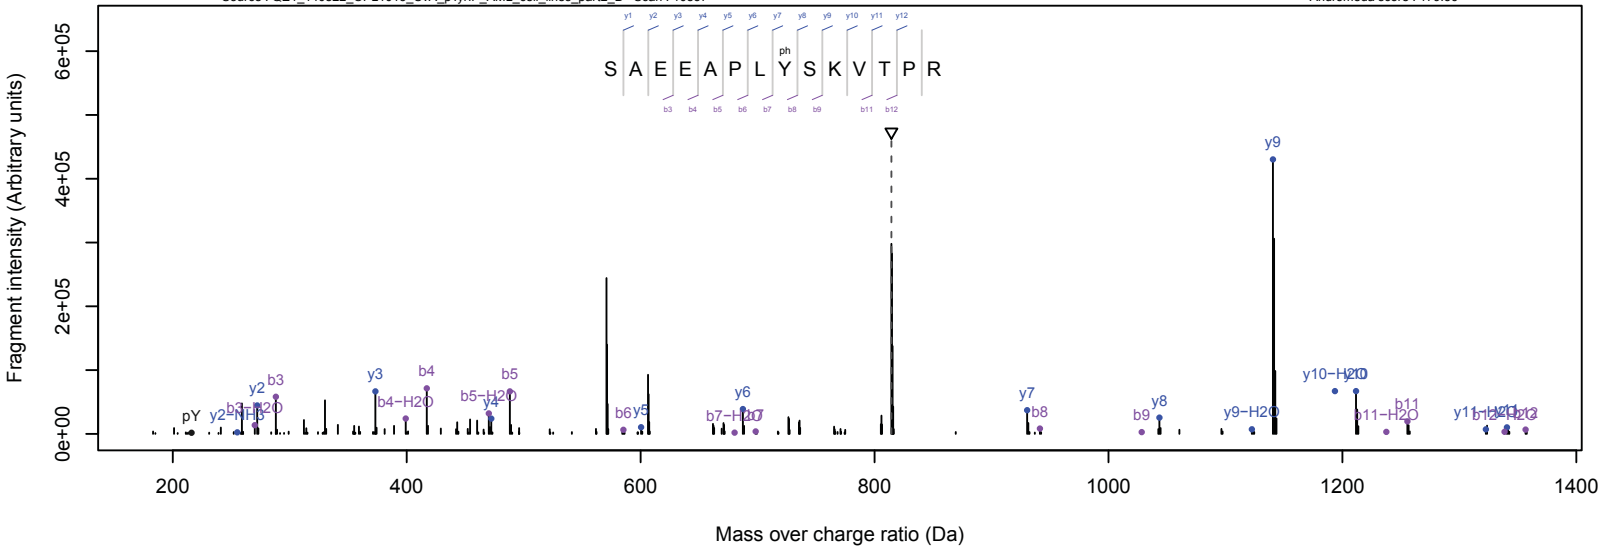

PMAESIT(ph)YAAVAR-2+

Source : QE1\_140612\_OPL1013\_CVA\_phosphoproteomic\_landscape\_AML\_C Scan : 25028

Andromeda score : 179.35

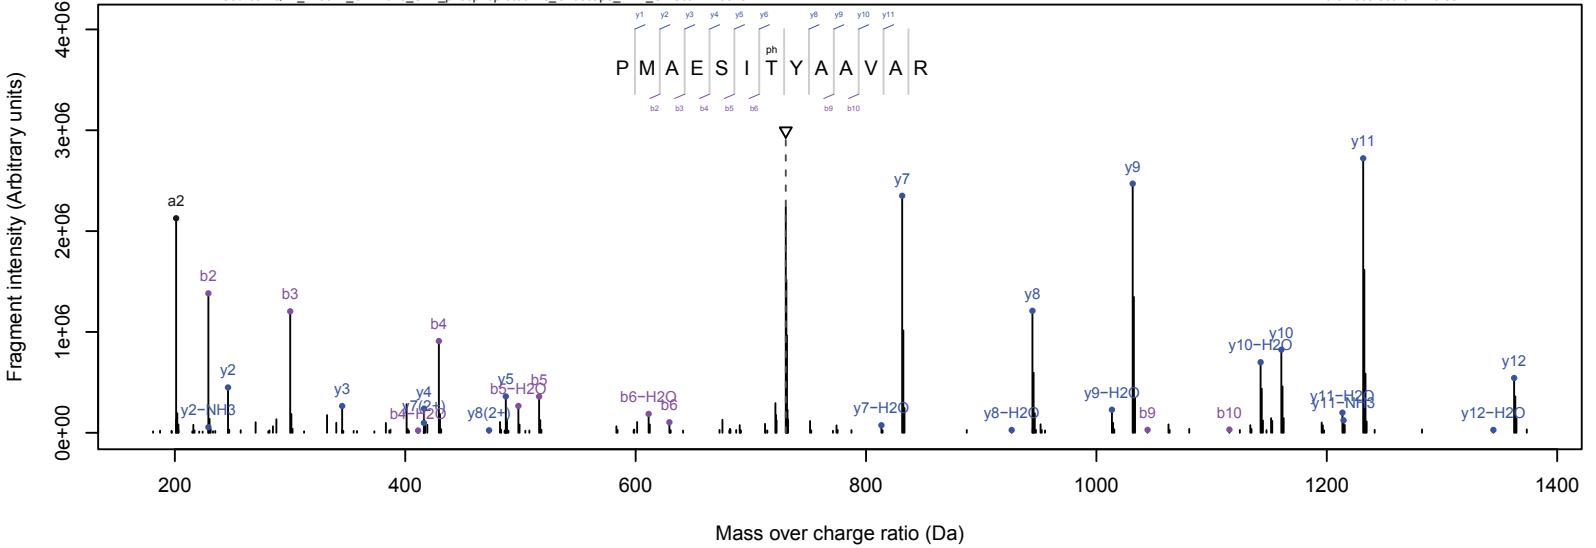



SVYDGP<sup>ph</sup>EQE<sup>ph</sup>EYSTFVIDDPQETYKTLK-3+

Source: QE1\_140612\_OPL1013\_CVA\_phosphoproteomic\_landscape\_AML\_C Scan: 37889

Andromeda score: 178.95

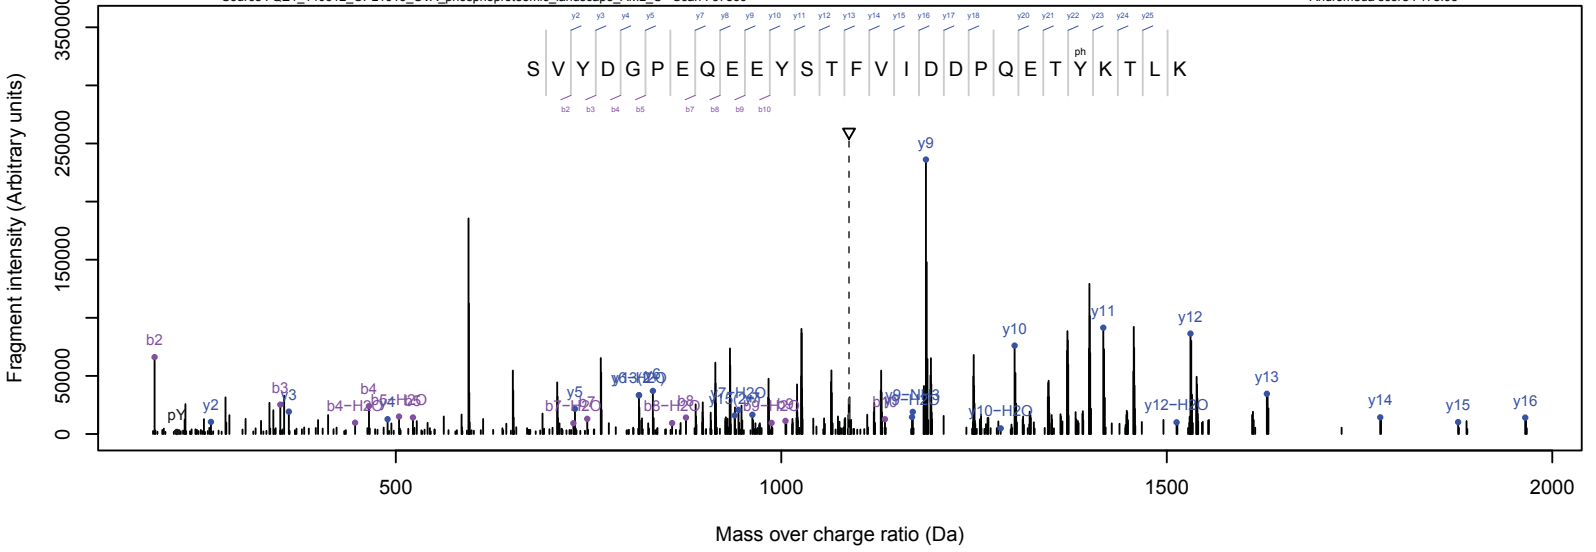

LPDM<sup>ox</sup>LKDHY<sup>ph</sup>PCVSSLEQLTELGR-3+

Source: QE1\_140612\_OPL1013\_CVA\_phosphoproteomic\_landscape\_AML\_C Scan: 41906

Andromeda score: 178.69

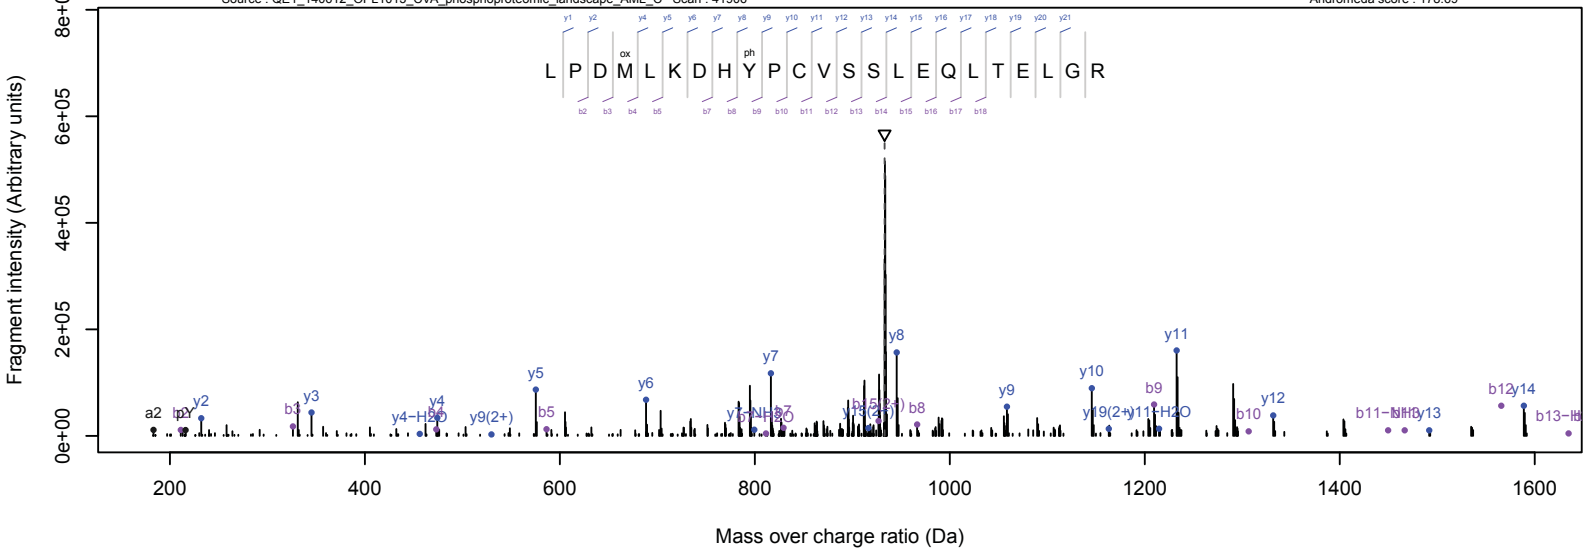



AGDNSQSVY(ph)IPMSPGAHHFDSLGYPSTTLPVHR-4+

Source: QE1\_140908\_OPL1013\_CvA\_pTyrIP\_AML\_Kasumi1 Scan: 32114

Andromeda score: 178.44

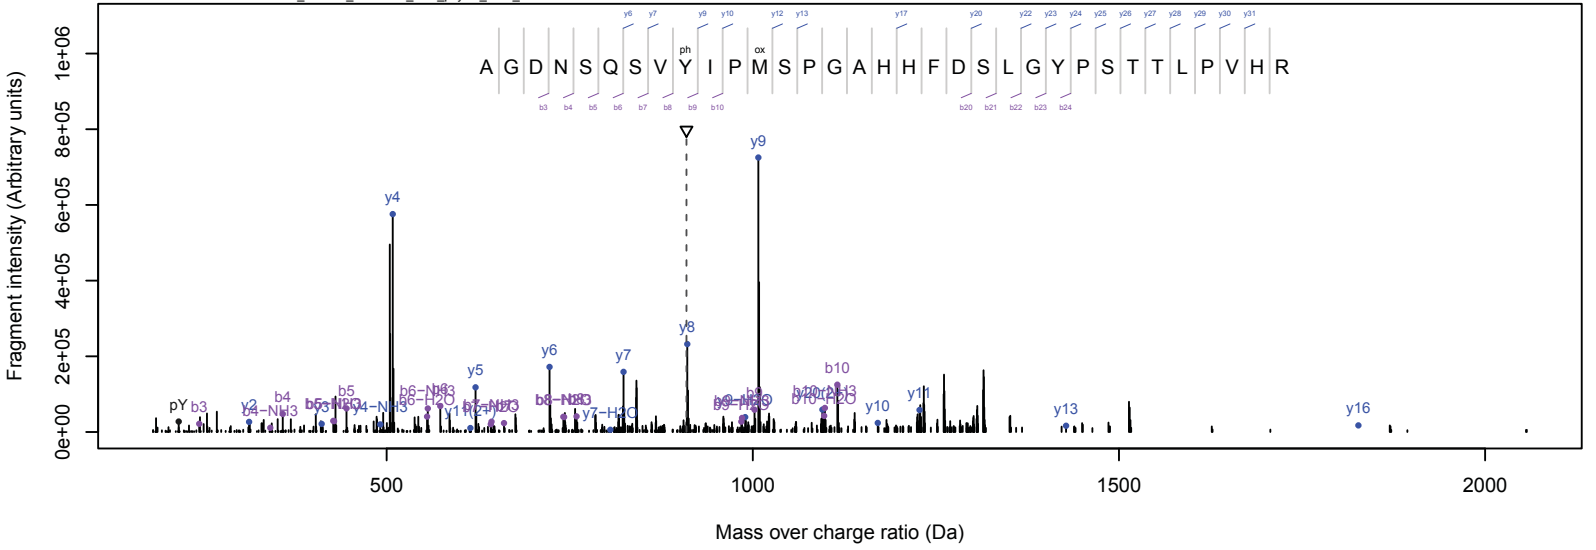

LNFSHGTHEY(ph)HAETIK-3+

Source: QE1\_140612\_OPL1013\_CVA\_phosphoproteomic\_landscape\_AML\_B Scan: 12037

Andromeda score: 178.14

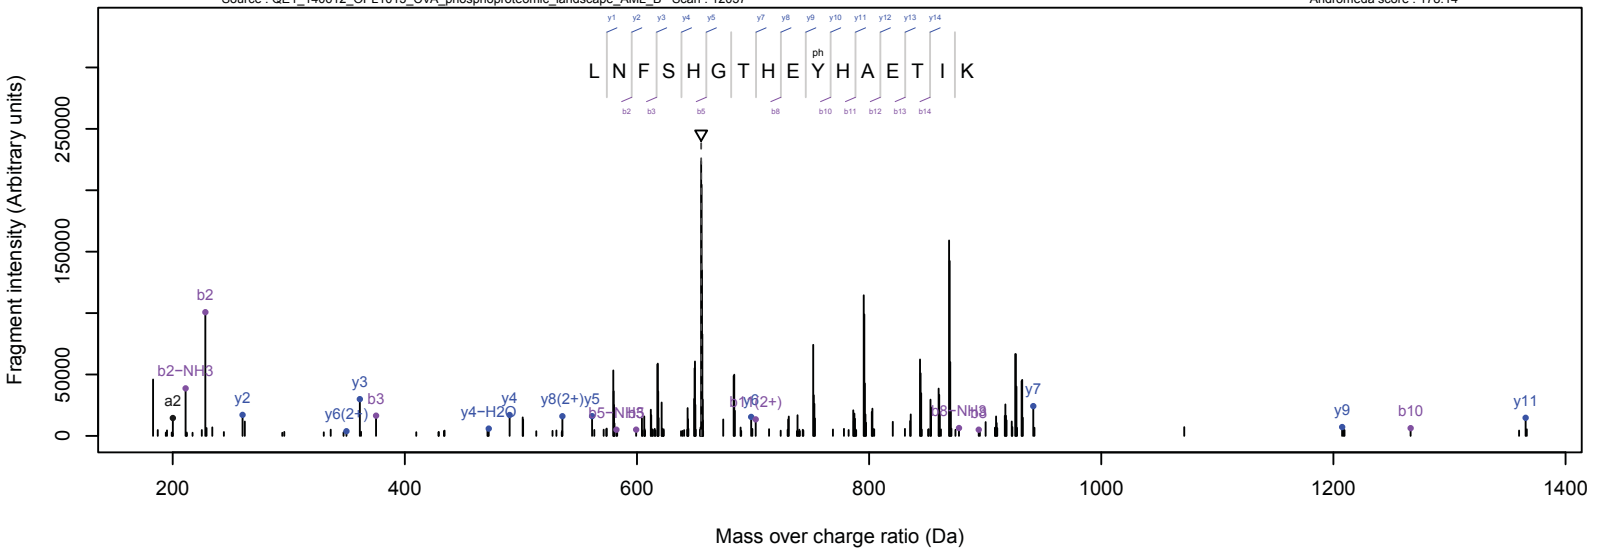

DASPTPSTDAEYPANGSGADRIY(ph)DLNIPAFVK-3+

Source: QE1\_140908\_OPL1013\_CvA\_pTyrIP\_AML\_HL60 Scan: 48084

Andromeda score: 178.11

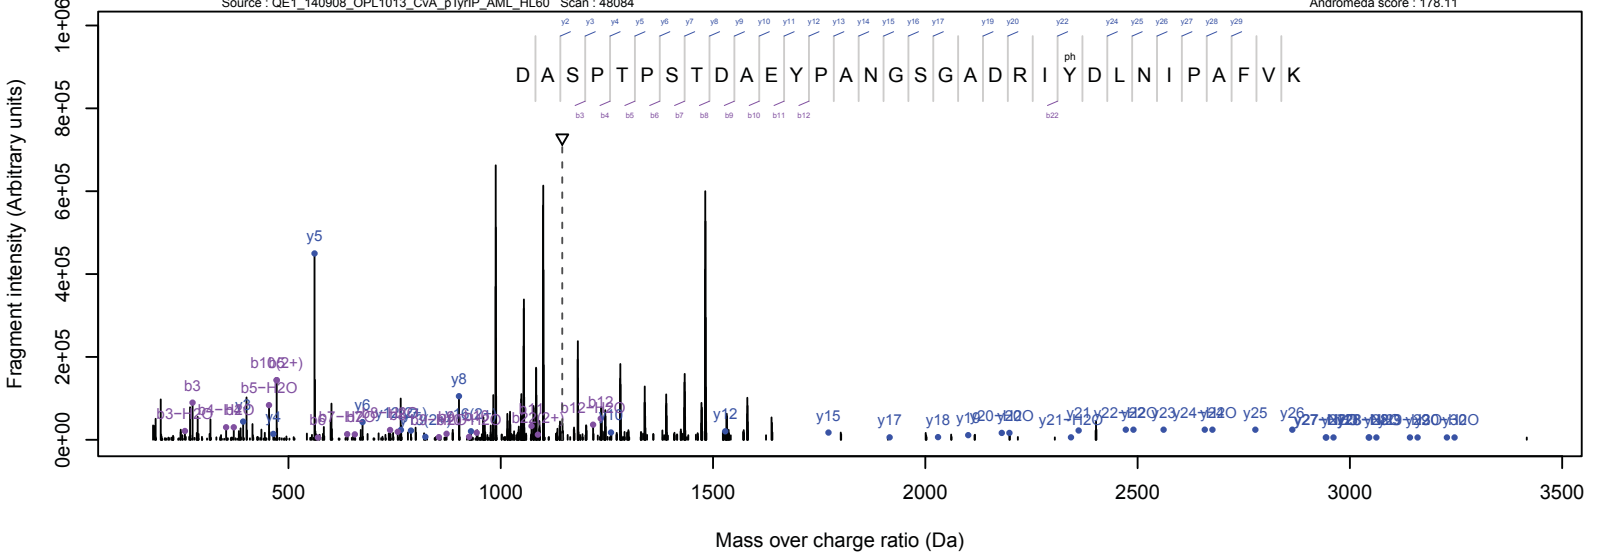

SAVGFNEMEAPTAYK-2+

Source : QE1\_140612\_OPL1013\_CVA\_phosphoproteomic\_landscape\_AML\_C Scan : 26465

Andromeda score : 178.03

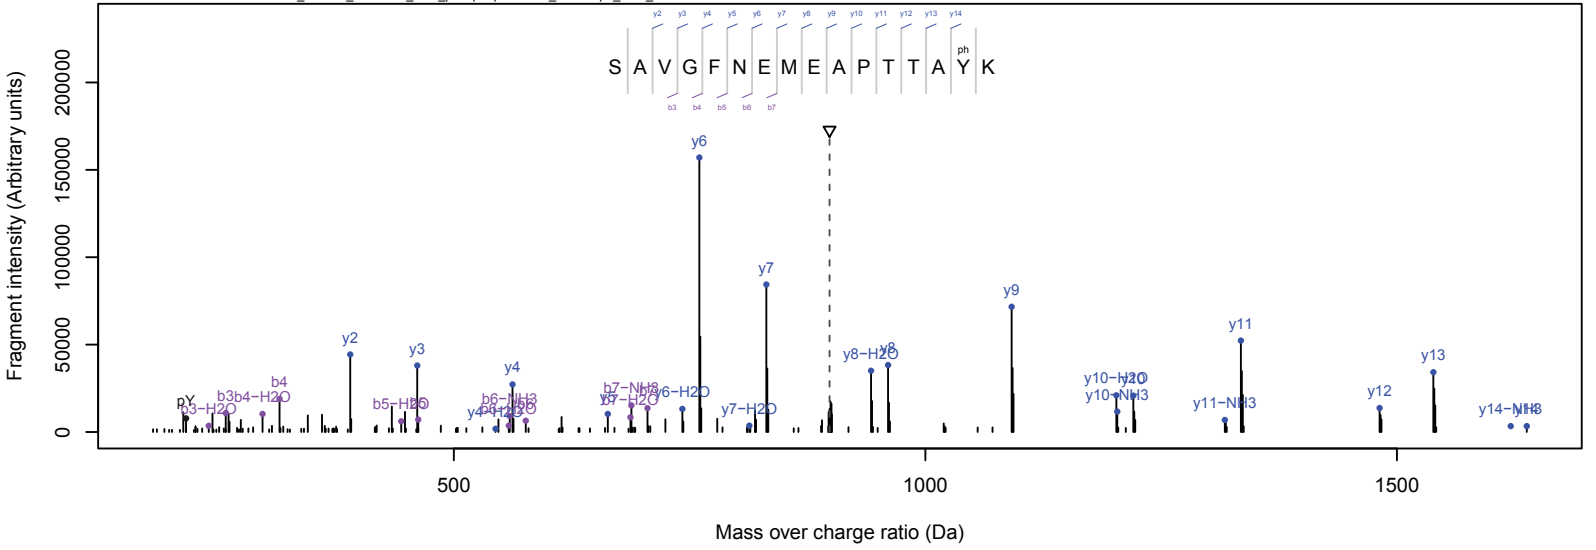

ARDNNGSYALCLLHEGK-3+

Source : QE1\_140612\_OPL1013\_CVA\_phosphoproteomic\_landscape\_AML\_C Scan : 22441

Andromeda score : 177.6

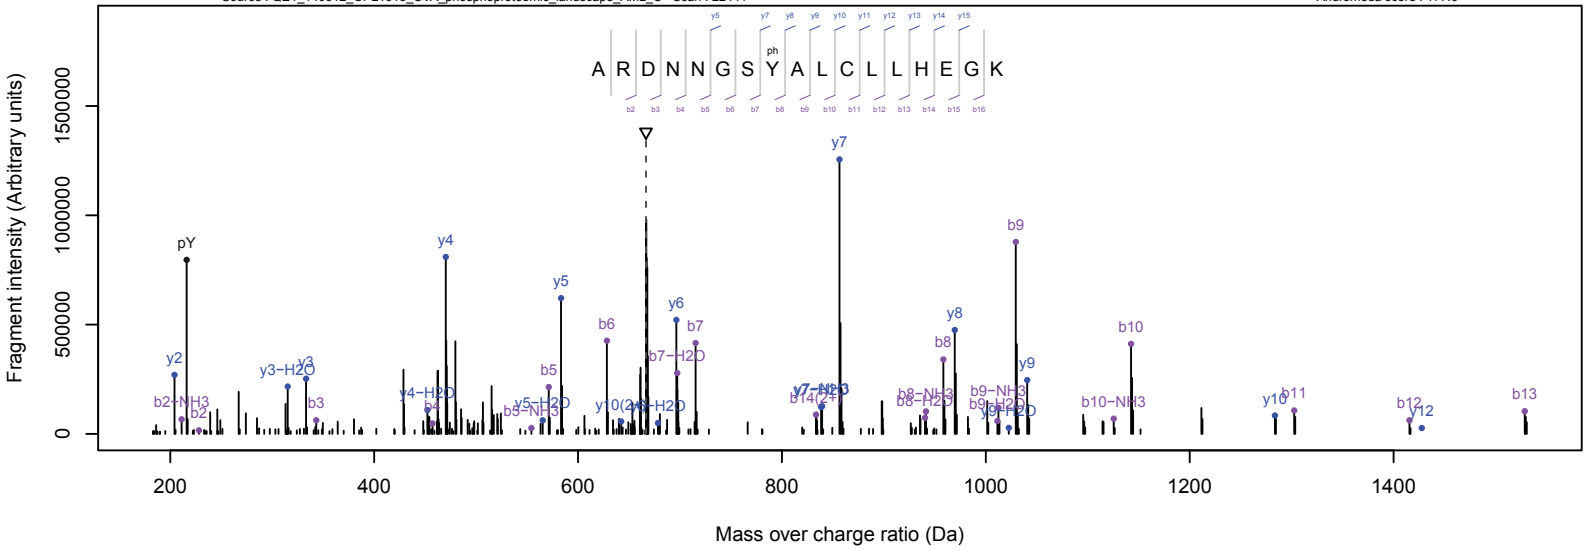

IKKDPYTATMIGFSK-3+

Source : QE1\_140612\_OPL1013\_CVA\_phosphoproteomic\_landscape\_AML\_B Scan : 19823

Andromeda score : 177.58

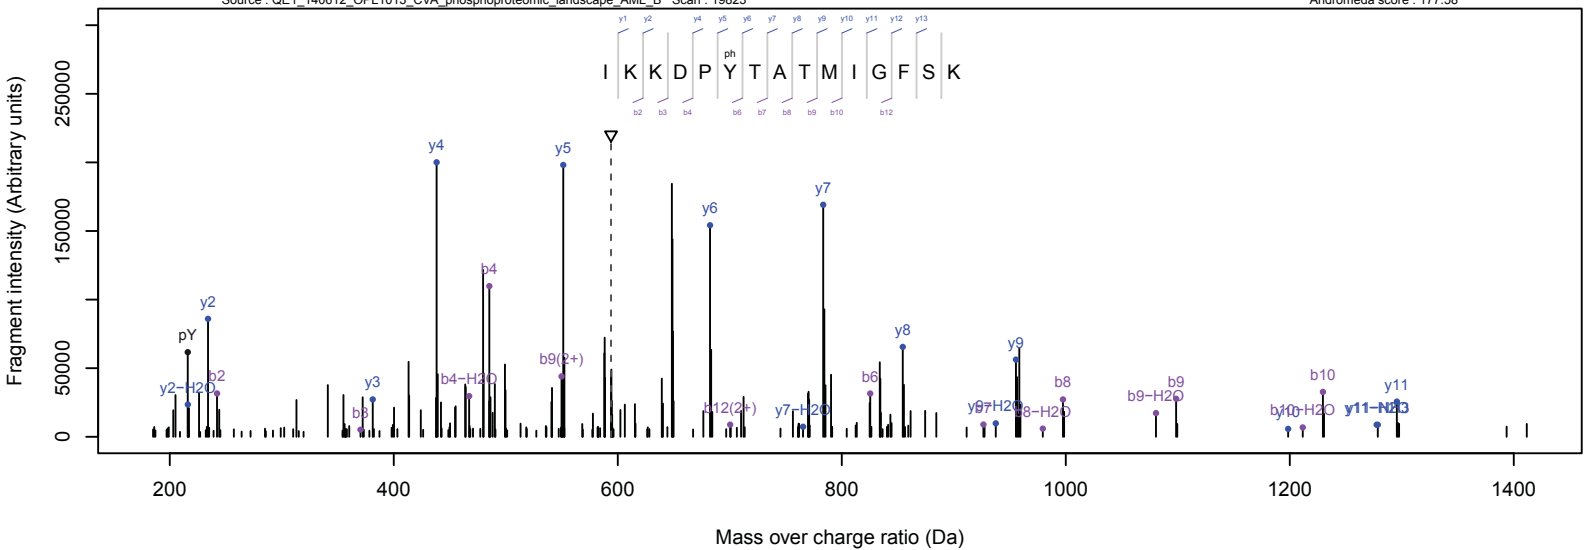

TRTY(ph)ENFQYLENK-3+

Source: QE1\_140822\_OPL1013\_CVA\_pTyrIP\_AML\_cell\_lines\_part2\_E Scan: 13499

Andromeda score: 177.42

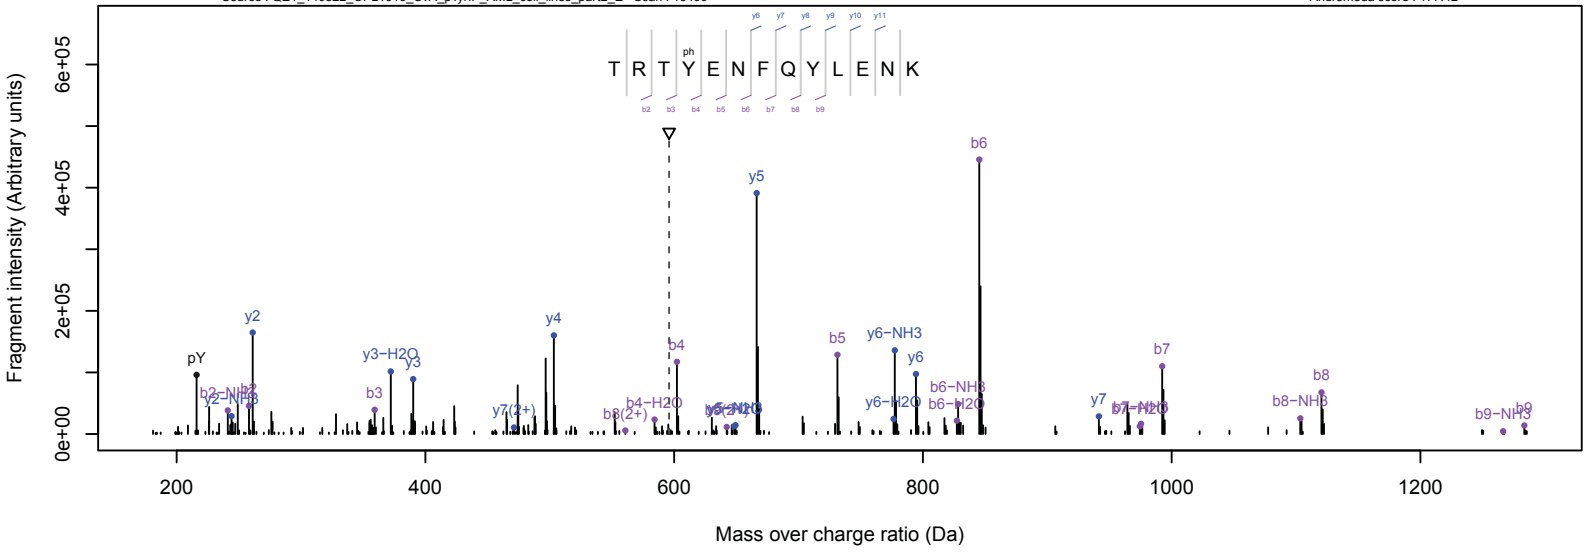

HYSPEDEPSPEAQPIAAYKIVSQTNK-3+

Source: QE1\_140612\_OPL1013\_CVA\_phosphoproteomic\_landscape\_AML\_C Scan: 26522

Andromeda score: 177.3

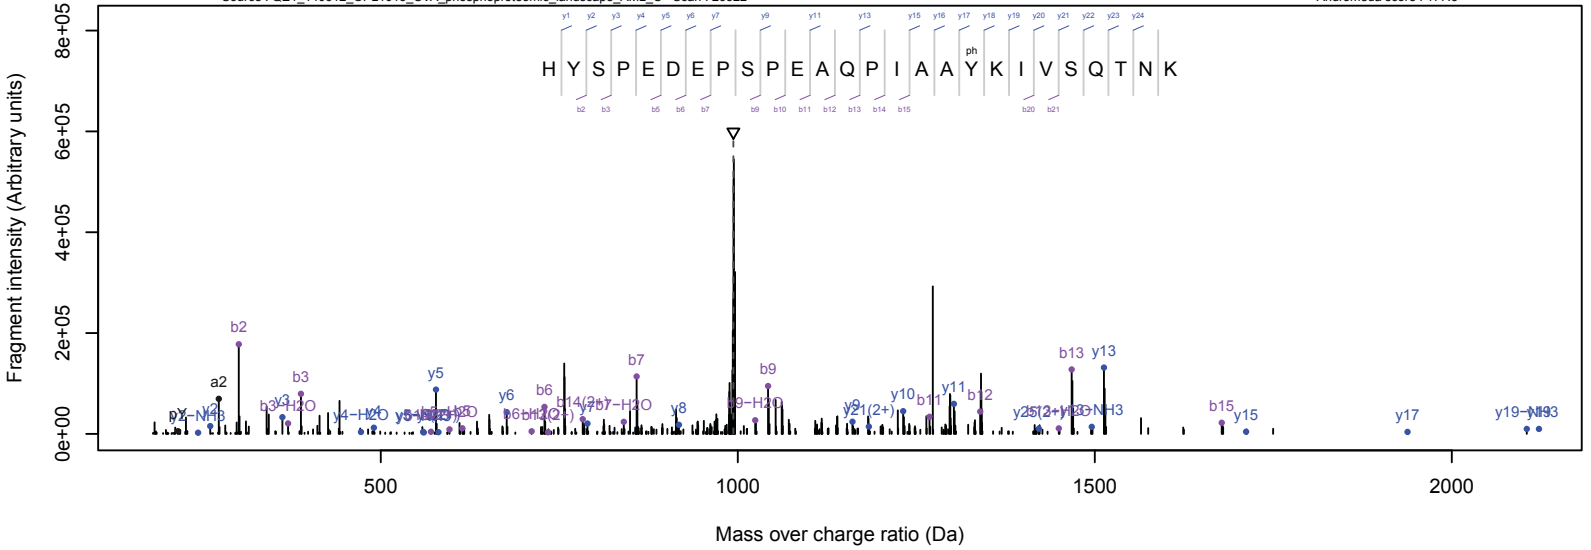

PYQY(ph)PALTPEQKK-2+

Source: QE1\_140612\_OPL1013\_CVA\_phosphoproteomic\_landscape\_AML\_B Scan: 13751

Andromeda score: 177.21

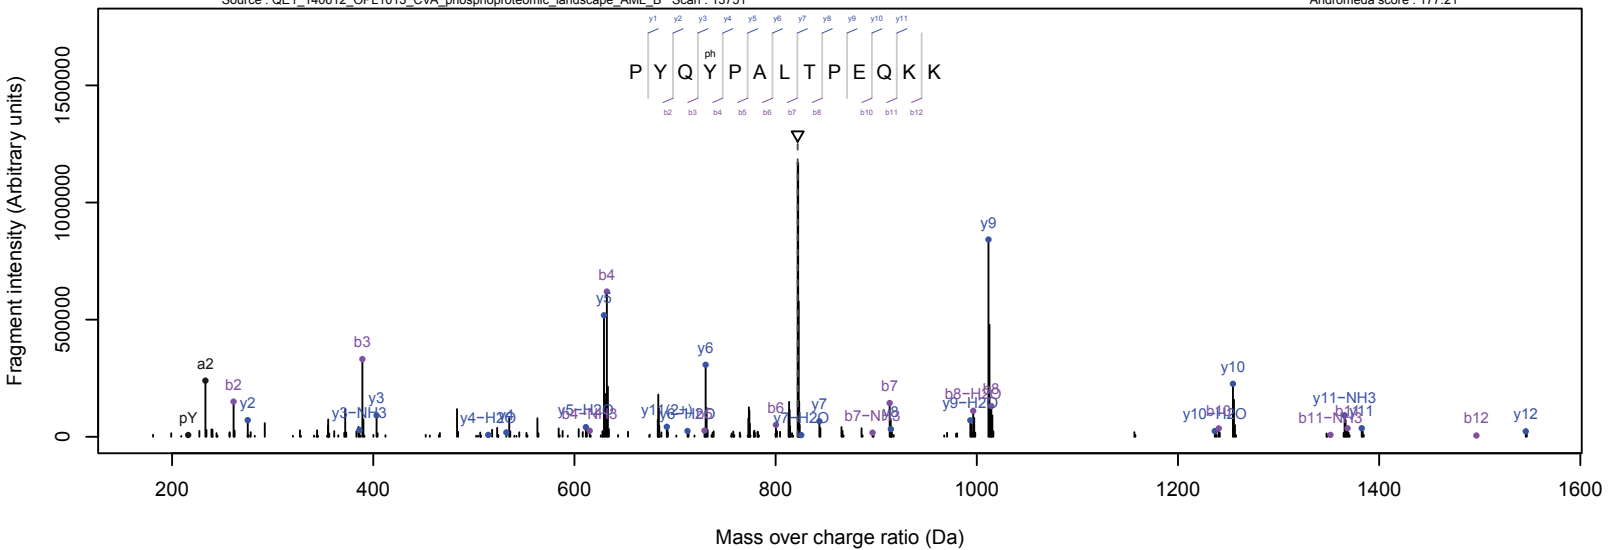



**NY(ph)GSYSTQASAAATAELLKK-3+**

Source : QE1\_140612\_OPL1013\_CVA\_phosphoproteomic\_landscape\_AML\_C Scan : 31254

Andromeda score : 177.03

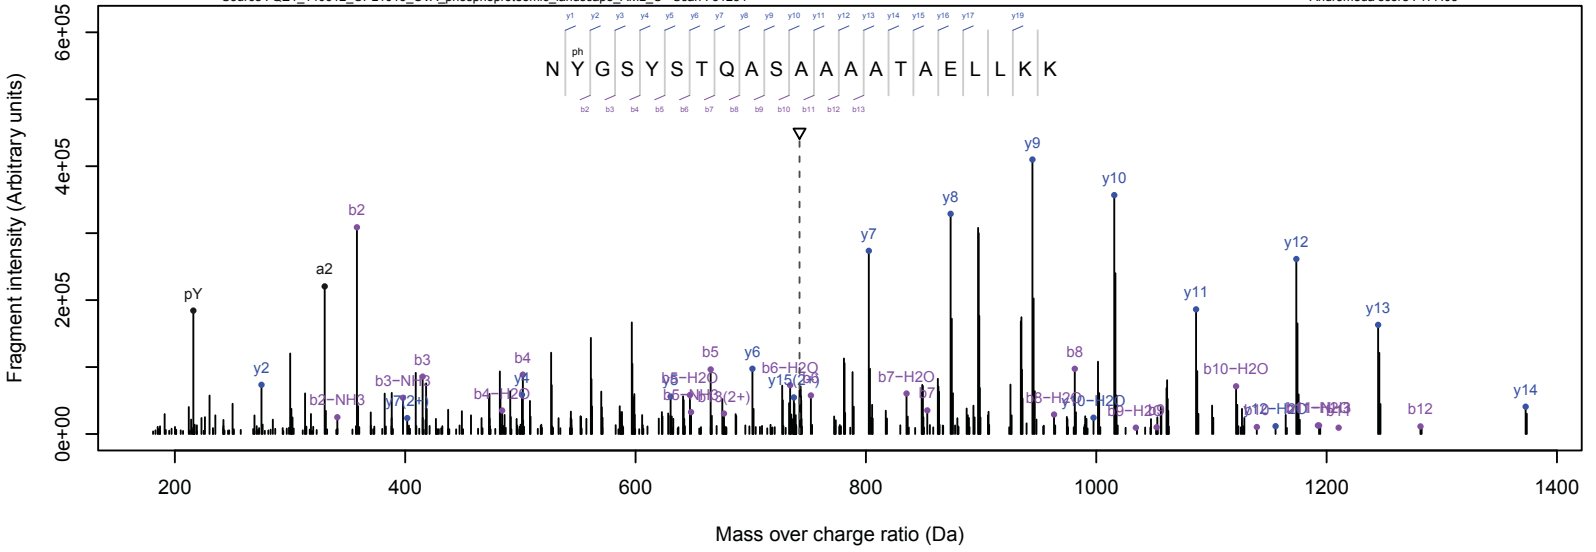

**TATGY(ph)GFAEPYNLYSSLK-2+**

Source : QE1\_140612\_OPL1013\_CVA\_phosphoproteomic\_landscape\_AML\_D Scan : 41899

Andromeda score : 176.94

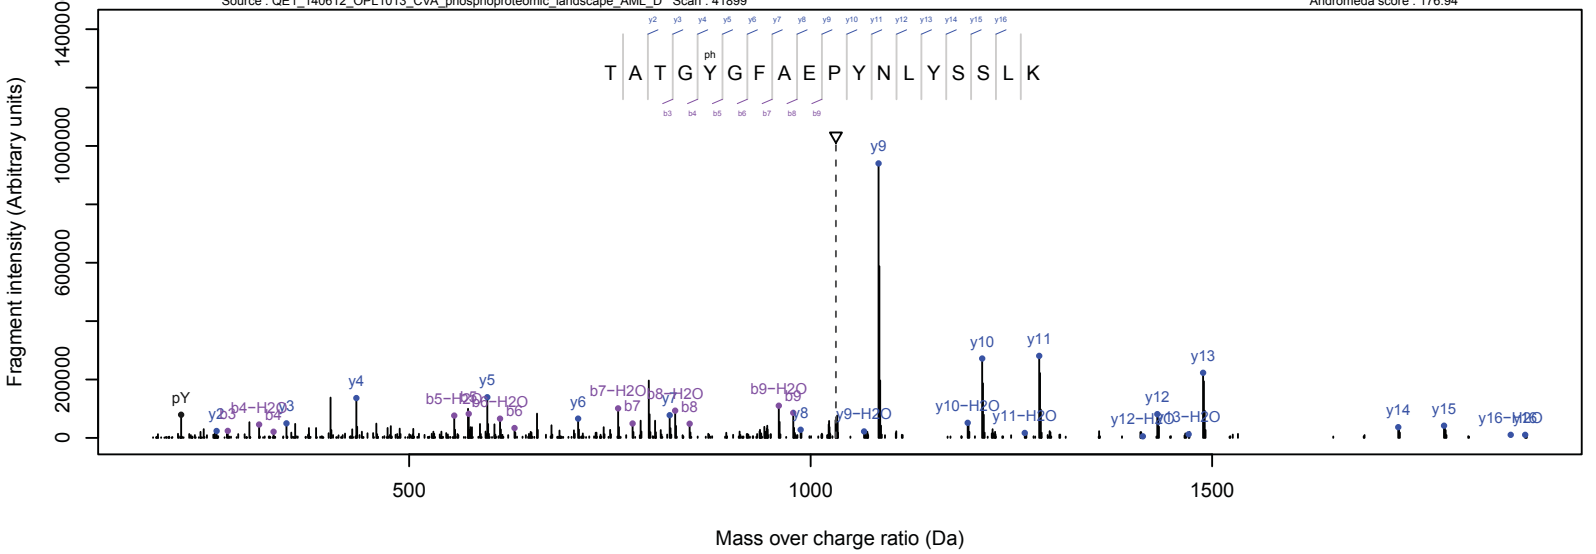

**REVG DY(ph)GQLHETEVLLK-3+**

Source : QE1\_140908\_OPL1013\_CvA\_pTyrIP\_AML\_HEL Scan : 27295

Andromeda score : 176.69

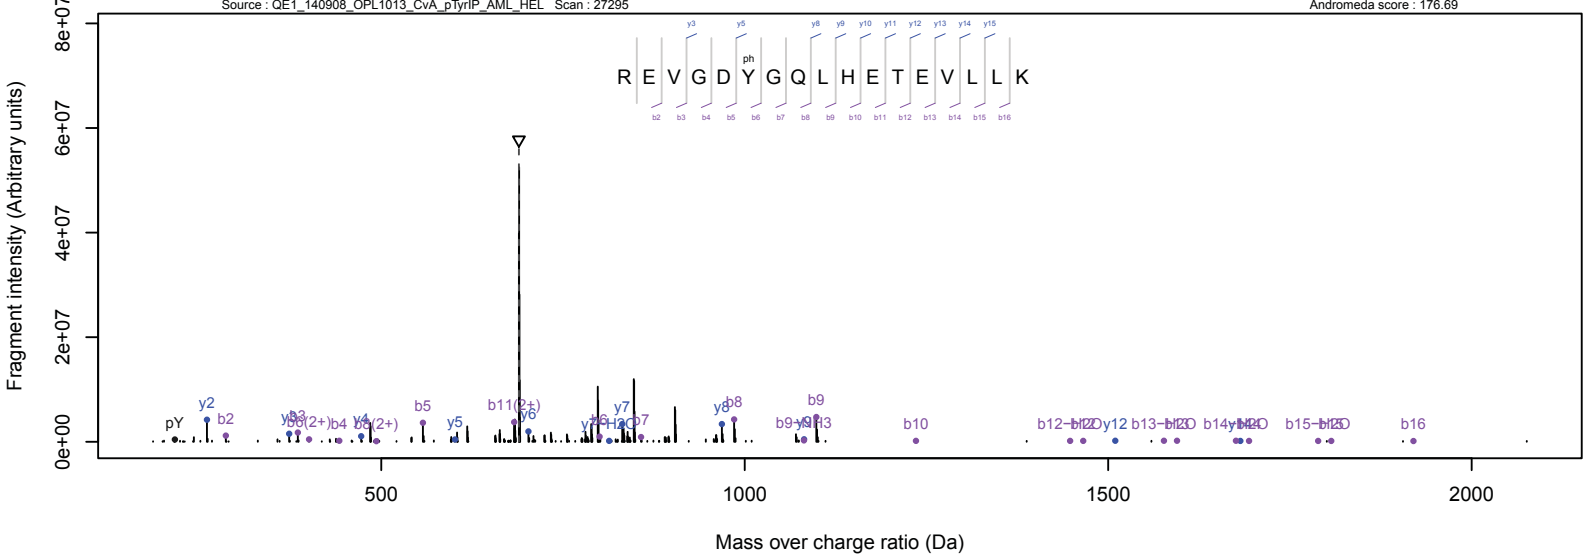

**EYMESLQLKPGEVY(ph)K-2+**

Source : QE1\_140908\_OPL1013\_CvA\_pTyrIP\_AML\_Kasumi1 Scan : 32479

Andromeda score : 176.49

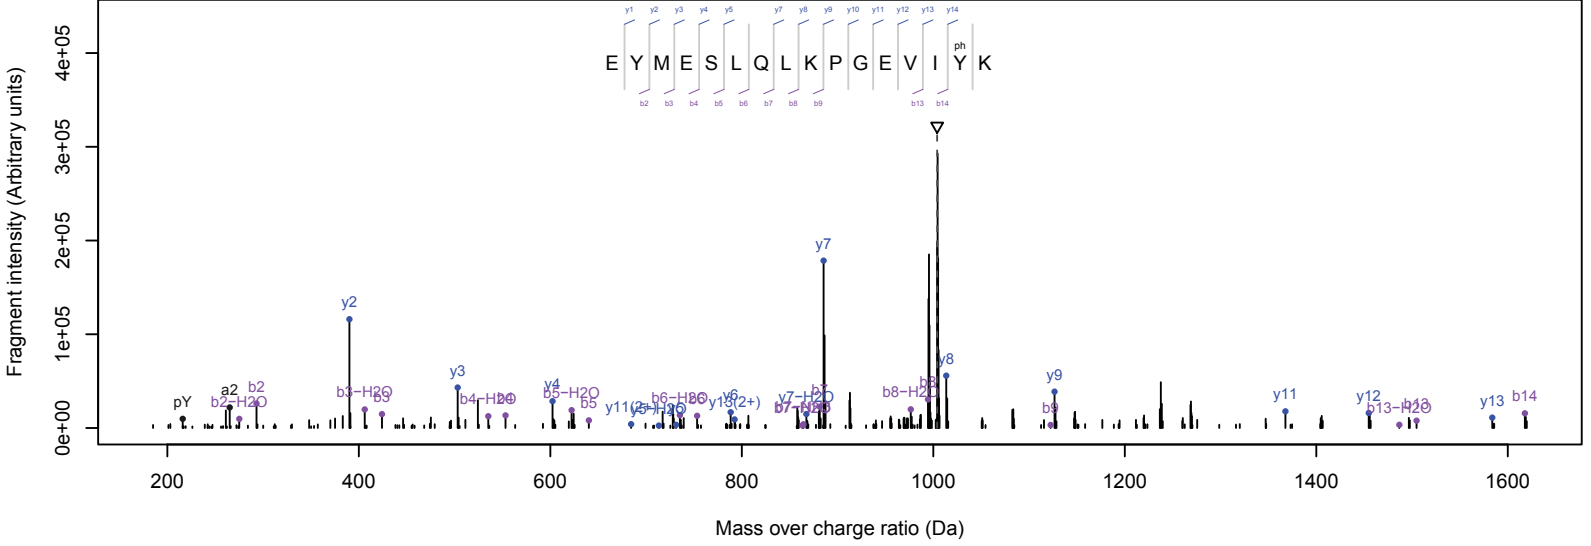

**TSGSVY(ph)ITLKK-2+**

Source : QE1\_140908\_OPL1013\_CvA\_pTyrIP\_AML\_Kasumi6 Scan : 17369

Andromeda score : 176.42

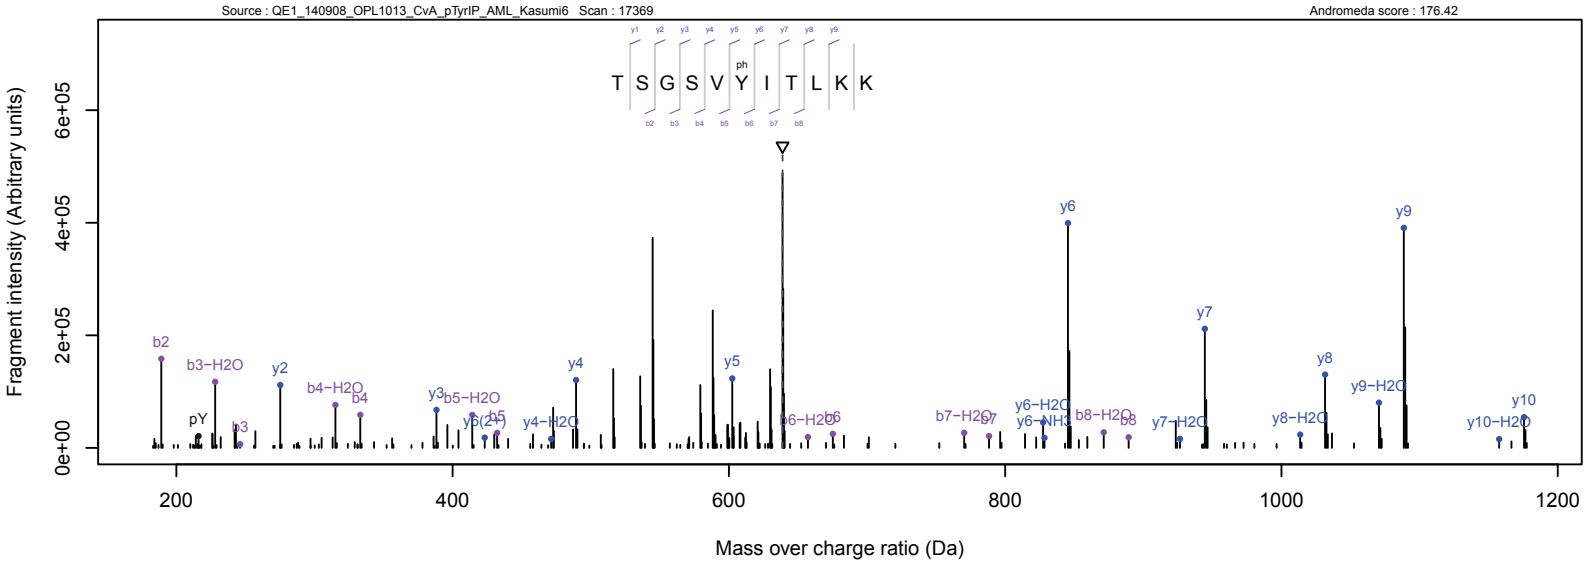

**VGWFpanyveedysey(ph)C-2+**

Source : QE1\_140822\_OPL1013\_CvA\_pTyrIP\_AML\_cell\_lines\_part2\_B Scan : 42939

Andromeda score : 176.4

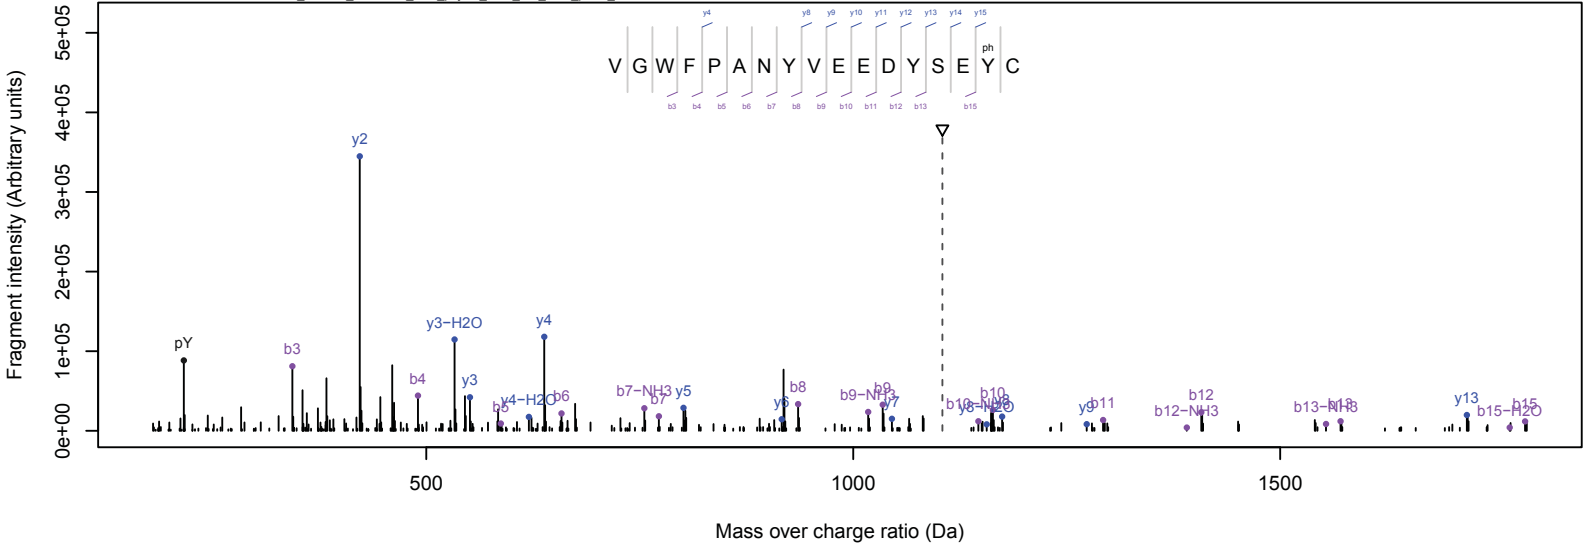

**Y(ph)VSLITSYQPFSLK-2+**

Source: QE1\_140822\_OPL1013\_CVA\_pTyrIP\_AML\_cell\_lines\_part2\_F Scan: 38995

Andromeda score: 176.4

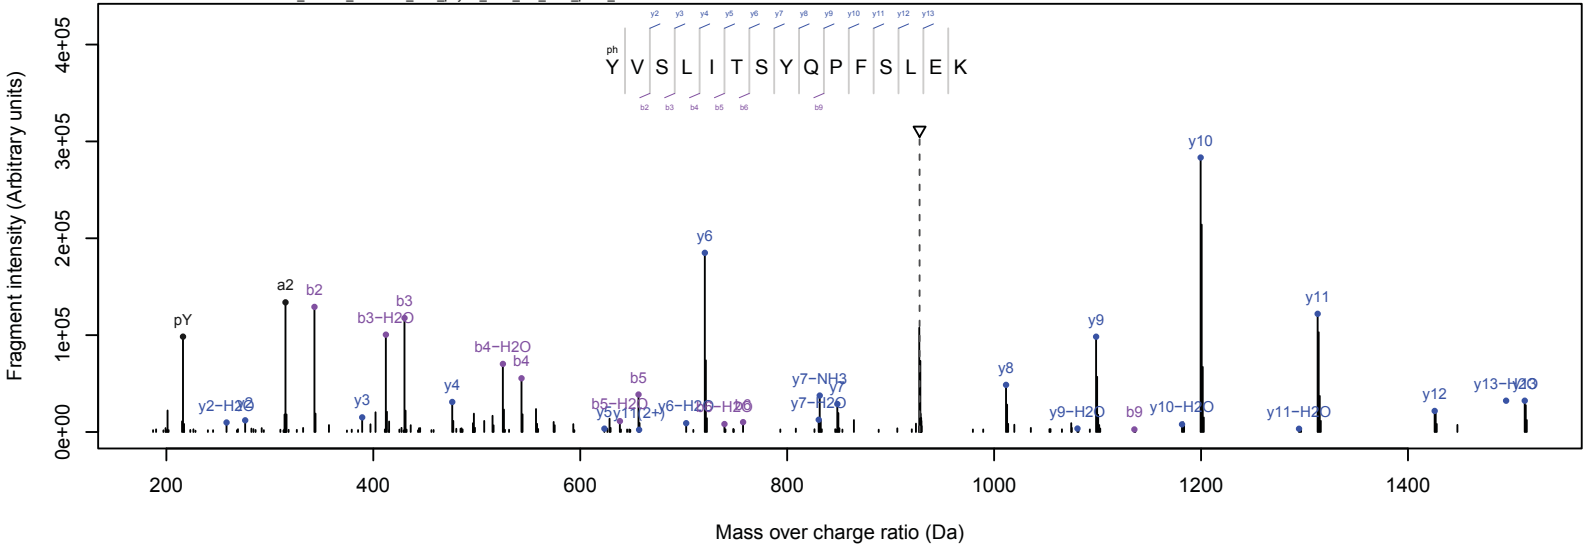

**KGQQIY(ph)YHKF-2+**

Source: QE1\_140612\_OPL1013\_CVA\_phosphoproteomic\_landscape\_AML\_B Scan: 11643

Andromeda score: 176.33

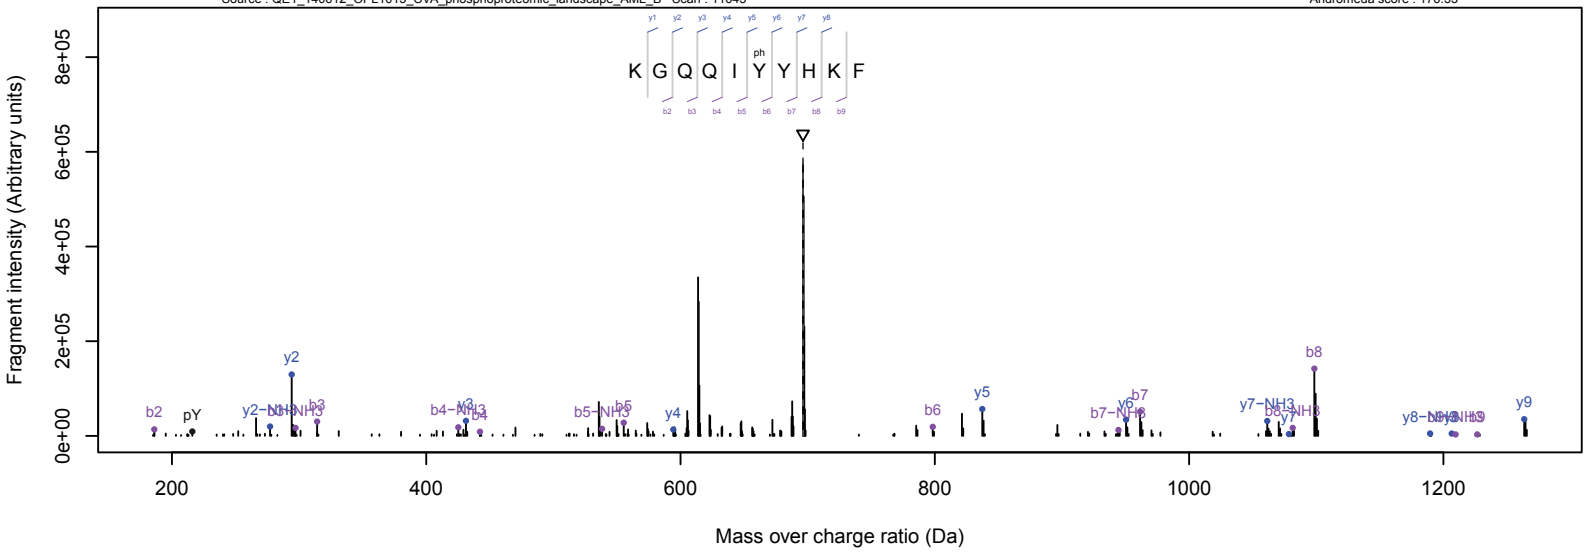

**KGGS(ph)YTQAASSDSAQGS DVSLTACKV-3+**

Source: QE1\_140612\_OPL1013\_CVA\_phosphoproteomic\_landscape\_AML\_C Scan: 18430

Andromeda score: 176.14

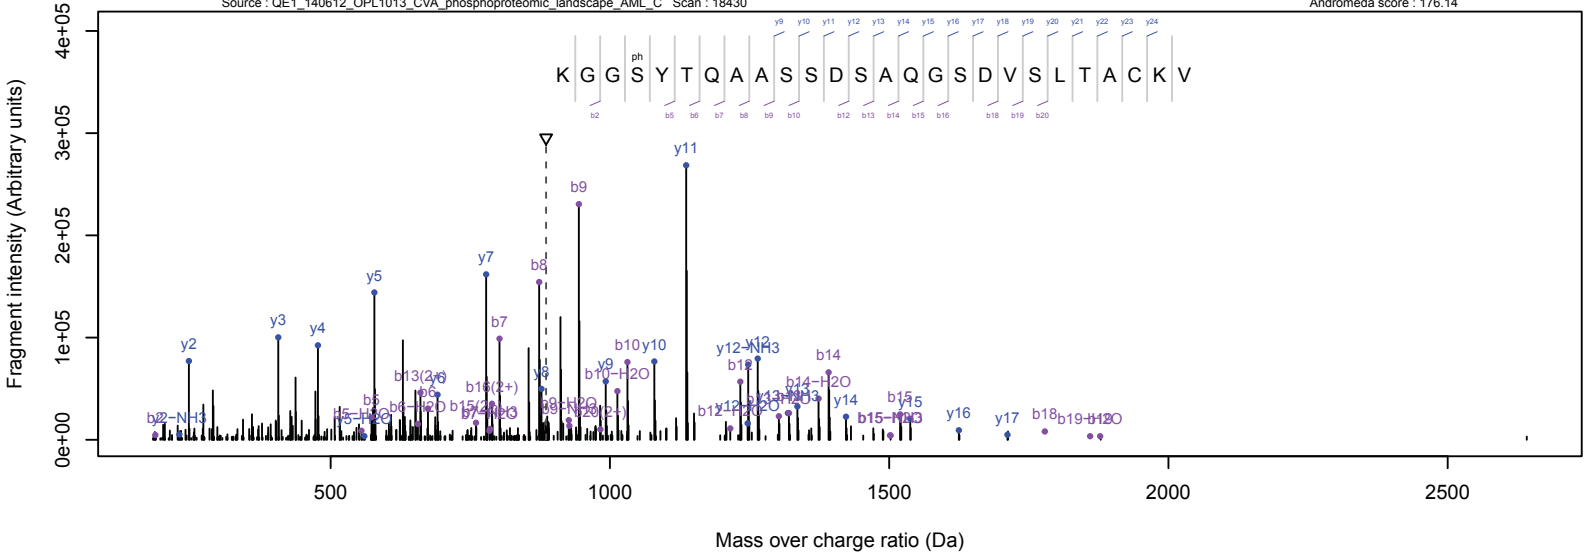

FQDGDLTLY(ph)QSNTILR-2+

Source : QE1\_140908\_OPL1013\_CvA\_pTyrIP\_AML\_Kasumi1 Scan : 36304

Andromeda score : 176.04

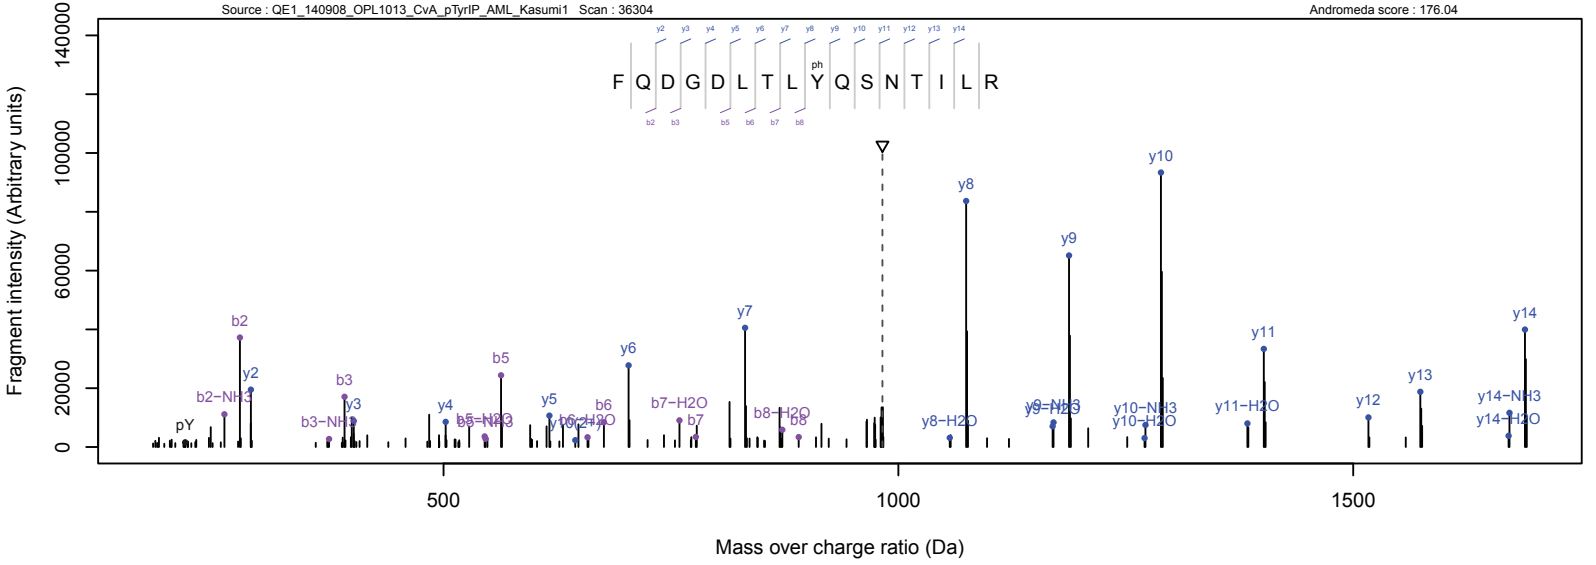

KPQNAADSY(ph)SWVPER-2+

Source : QE1\_140612\_OPL1013\_CvA\_phosphoproteomic\_landscape\_AML\_C Scan : 17222

Andromeda score : 176.04

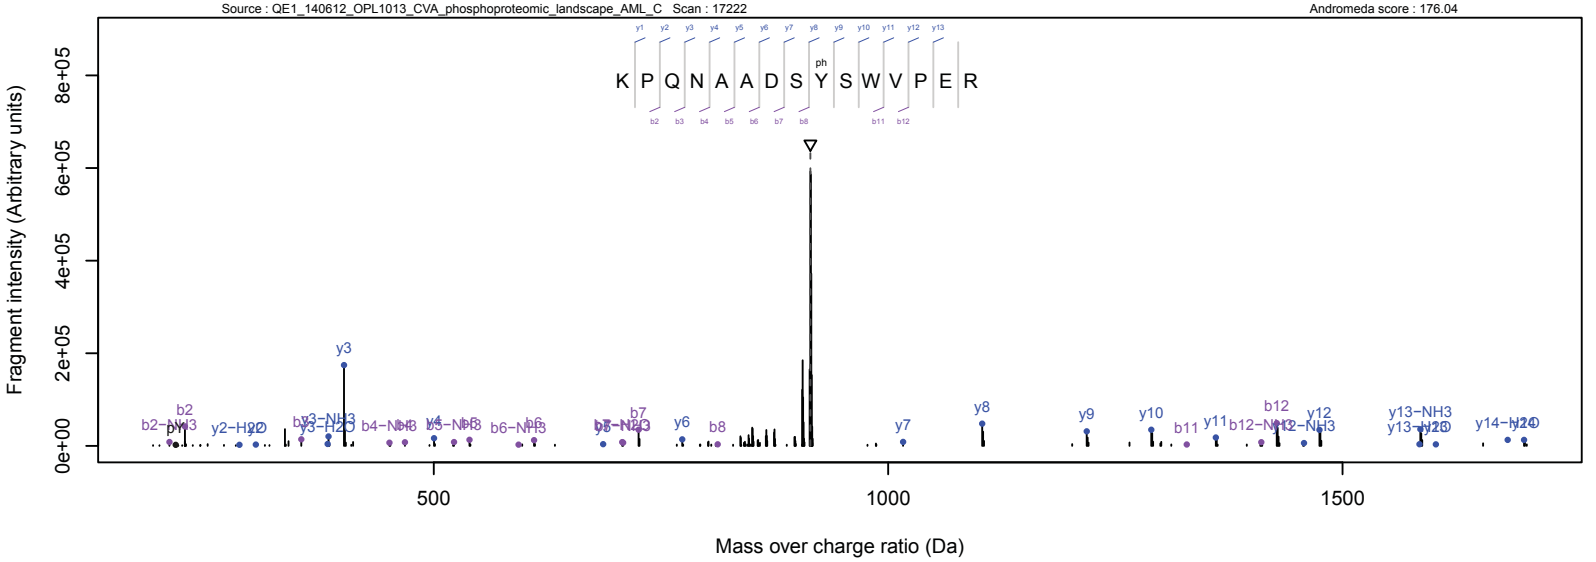

M(ox)QNHGYLENPTY(ph)KYLEQM(ox)QI-3+

Source : QE1\_140908\_OPL1013\_CvA\_pTyrIP\_AML\_Kasumi1 Scan : 27924

Andromeda score : 175.91

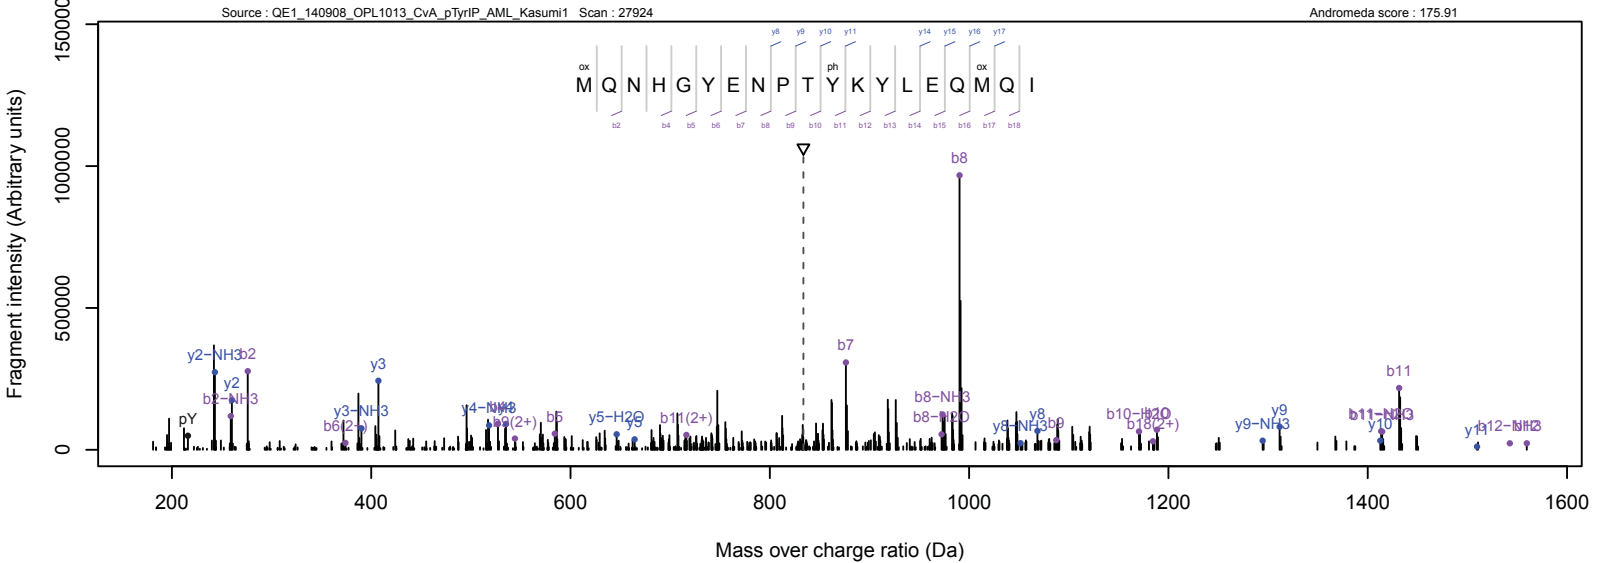



FQNDRTEDQFNDEKTY(ph)LVK-3+

Source : QE1\_140612\_OPL1013\_CVA\_phosphoproteomic\_landscape\_AML\_C Scan : 19868

Andromeda score : 175.77

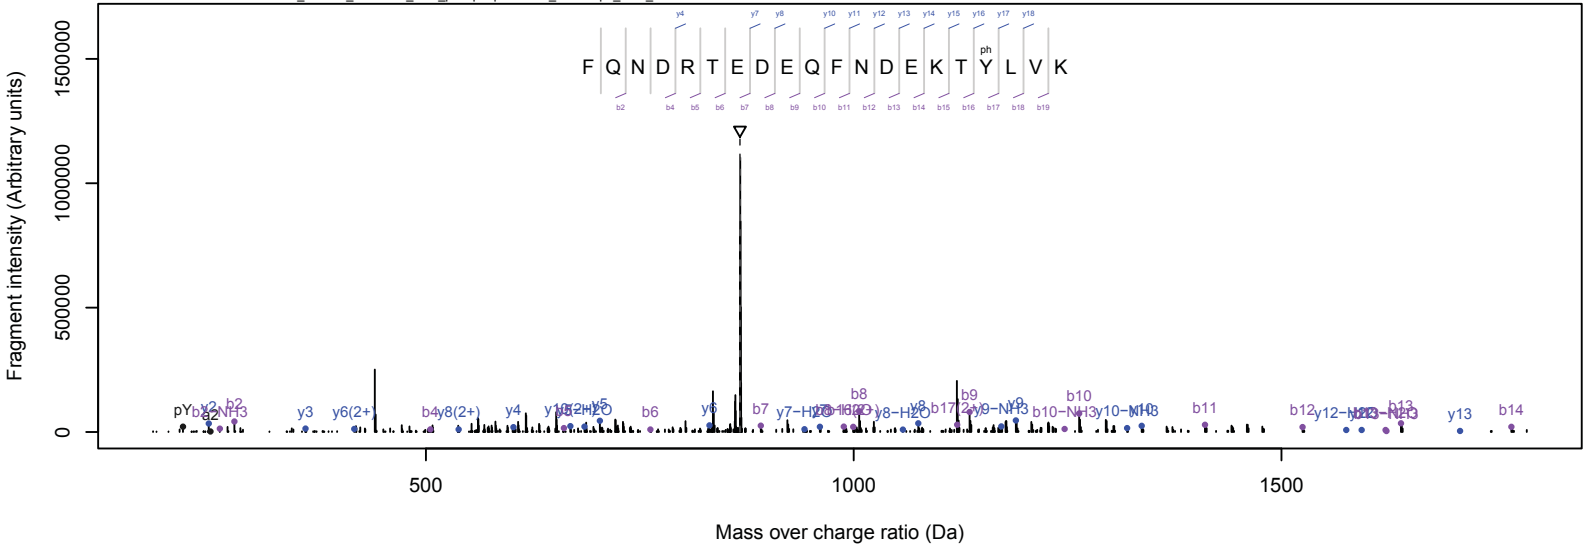

ESLATSEMSAFHQGPCEDPSCSLTHGDYY(ph)DNLSLSPK-4+

Source : QE1\_140612\_OPL1013\_CVA\_phosphoproteomic\_landscape\_AML\_B Scan : 38688

Andromeda score : 175.75

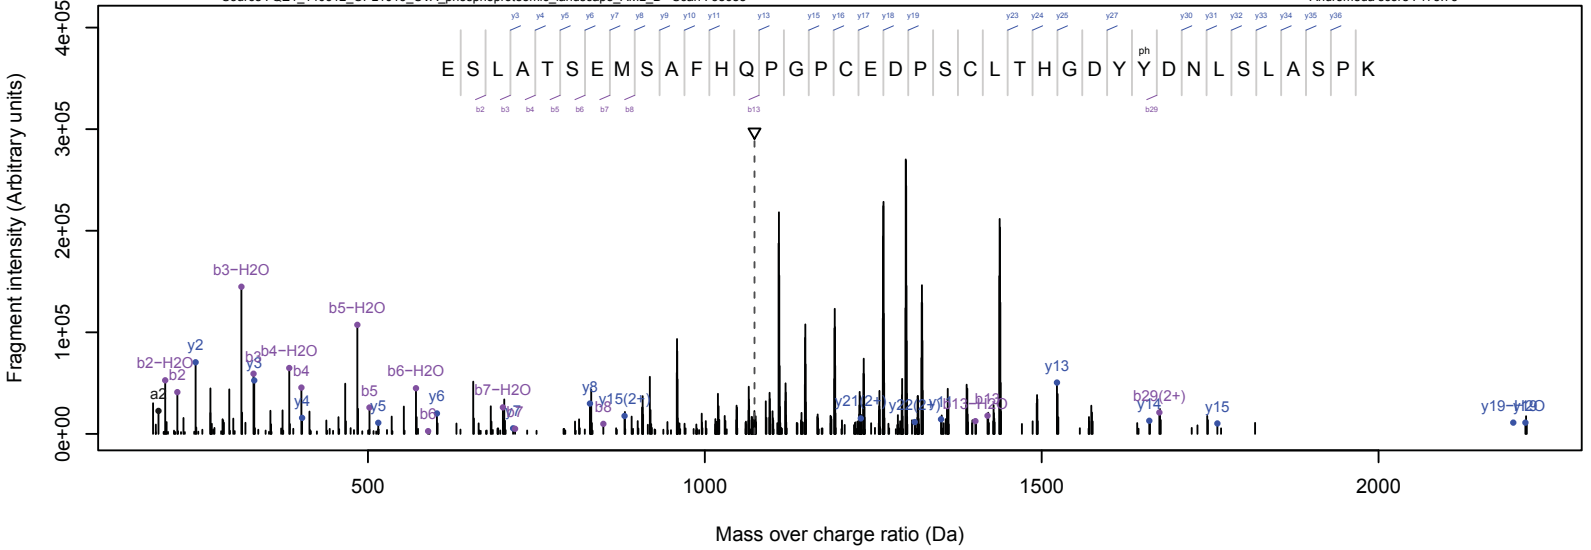

SRGDNVY(ph)VVTEVLQTQKEVETR-3+

Source : QE1\_140612\_OPL1013\_CVA\_phosphoproteomic\_landscape\_AML\_D Scan : 37324

Andromeda score : 175.71

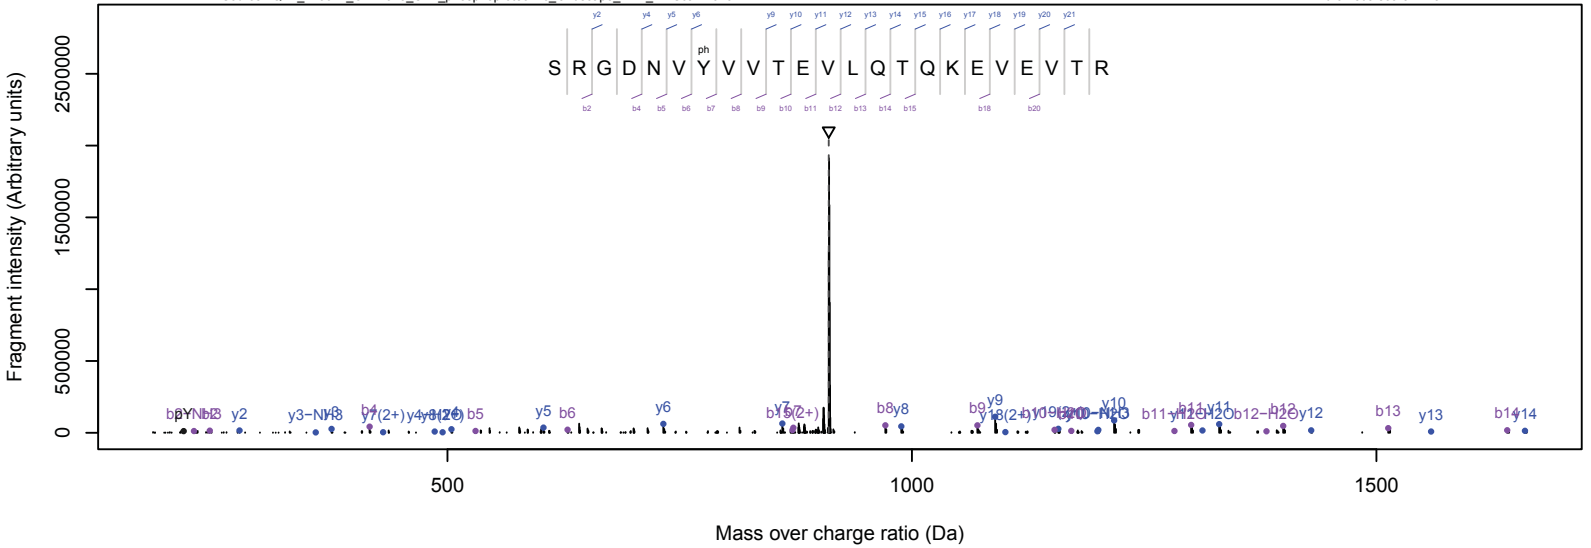

IHVYGY(ph)SM(ox)AYGPAQHAISTEK-3+

Source : QE1\_140908\_OPL1013\_CvA\_pTyrIP\_AML\_HEL Scan : 23100

Andromeda score : 175.65

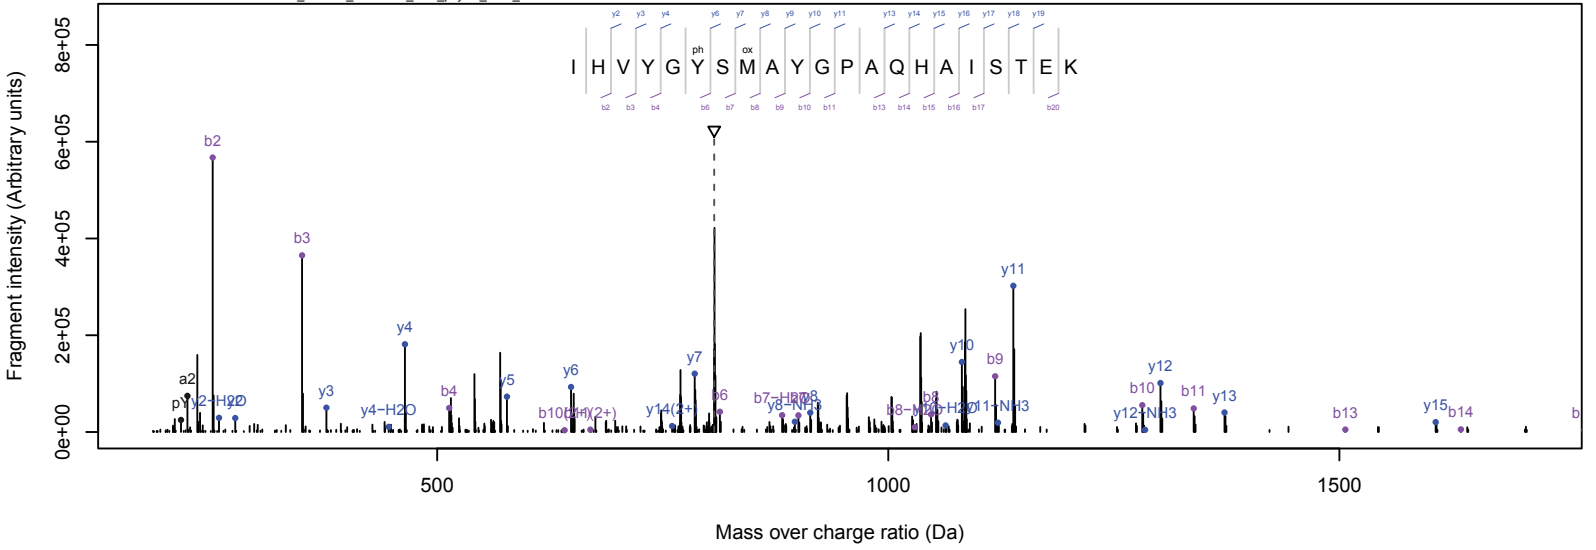

Y(ph)YKETSGLM(ox)LDVGPYM(ox)K-2+

Source : QE1\_140908\_OPL1013\_CvA\_pTyrIP\_AML\_HEL Scan : 30797

Andromeda score : 175.33

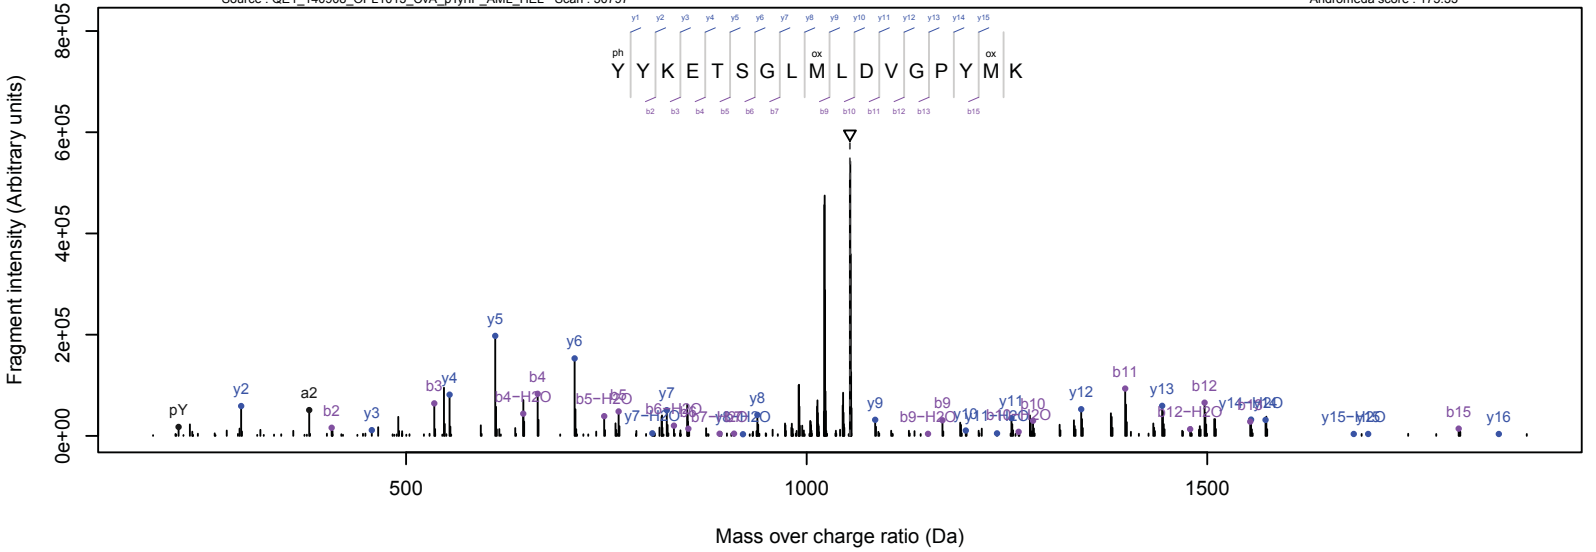

EIGHGSFGAVY(ph)FAR-2+

Source : QE1\_140612\_OPL1013\_CVA\_phosphoproteomic\_landscape\_AML\_C Scan : 29782

Andromeda score : 175.21

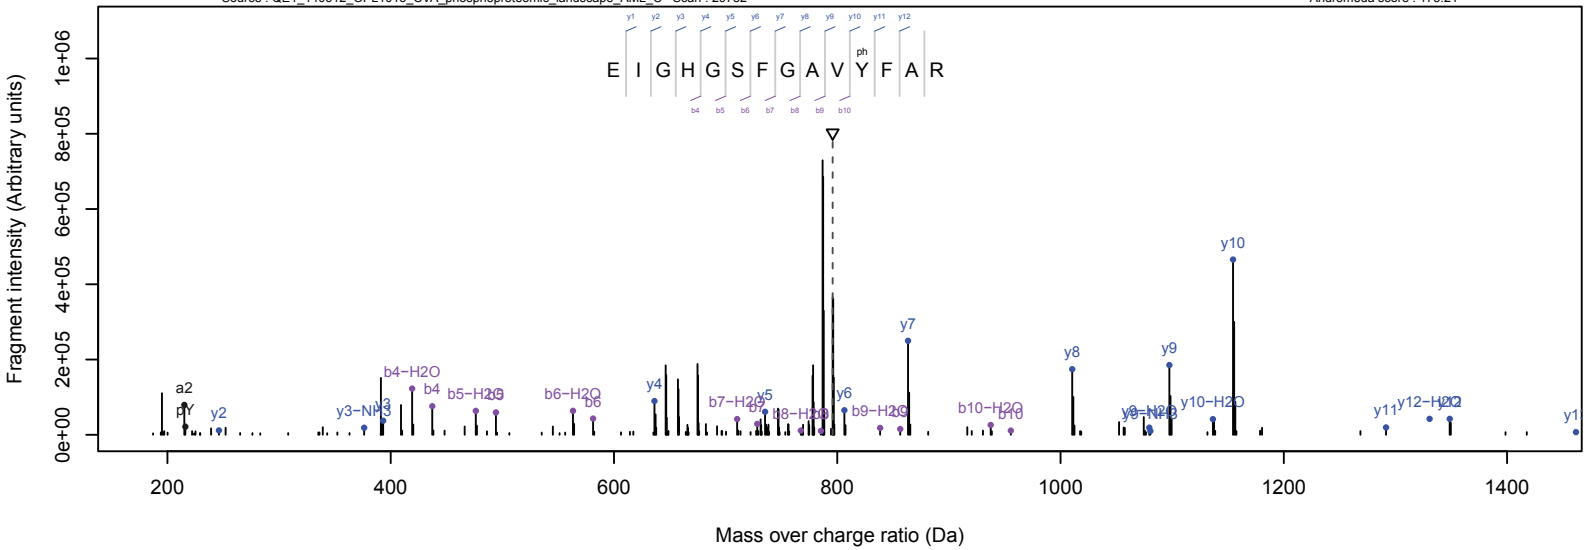

GIHPY(ph)HLSYTSYSGDTATDSPVHVGR-4+

Source: QE1\_140612\_OPL1013\_CVA\_phosphoproteomic\_landscape\_AML\_C Scan: 20607

Andromeda score: 174.7

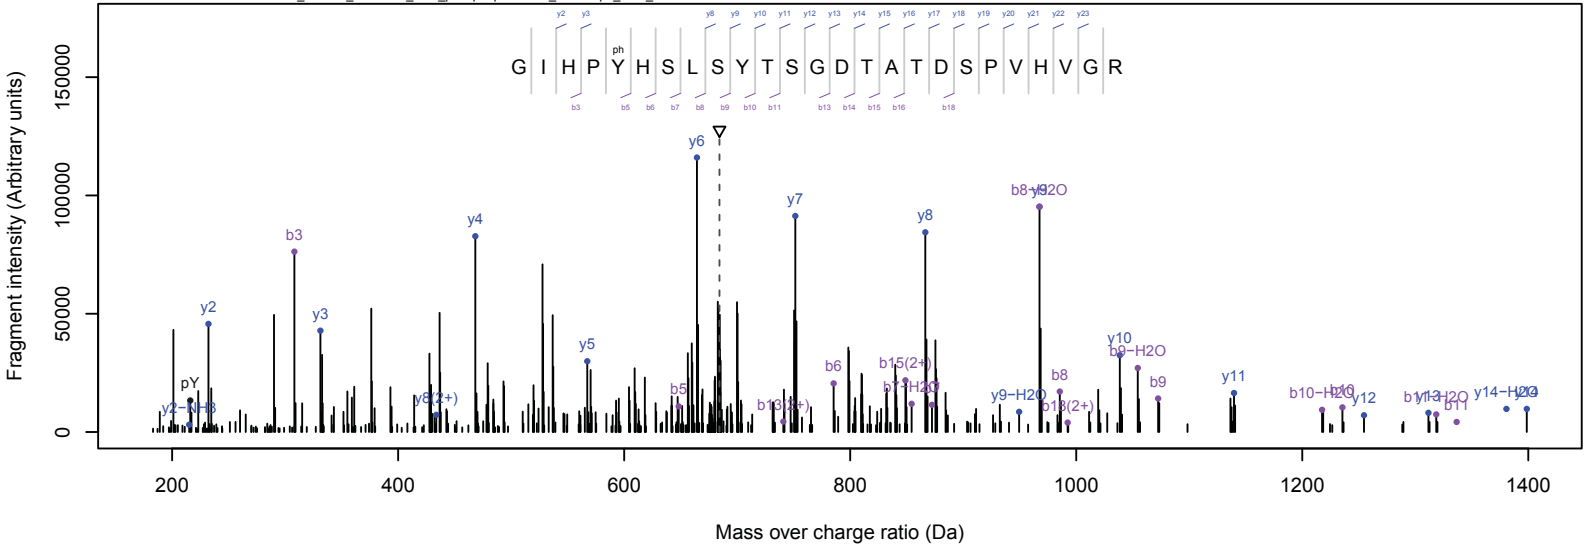

LKKEDIY(ph)AVEIVGGATR-2+

Source: QE1\_140908\_OPL1013\_Cva\_pTyrIP\_AML\_HEL Scan: 28297

Andromeda score: 174.65

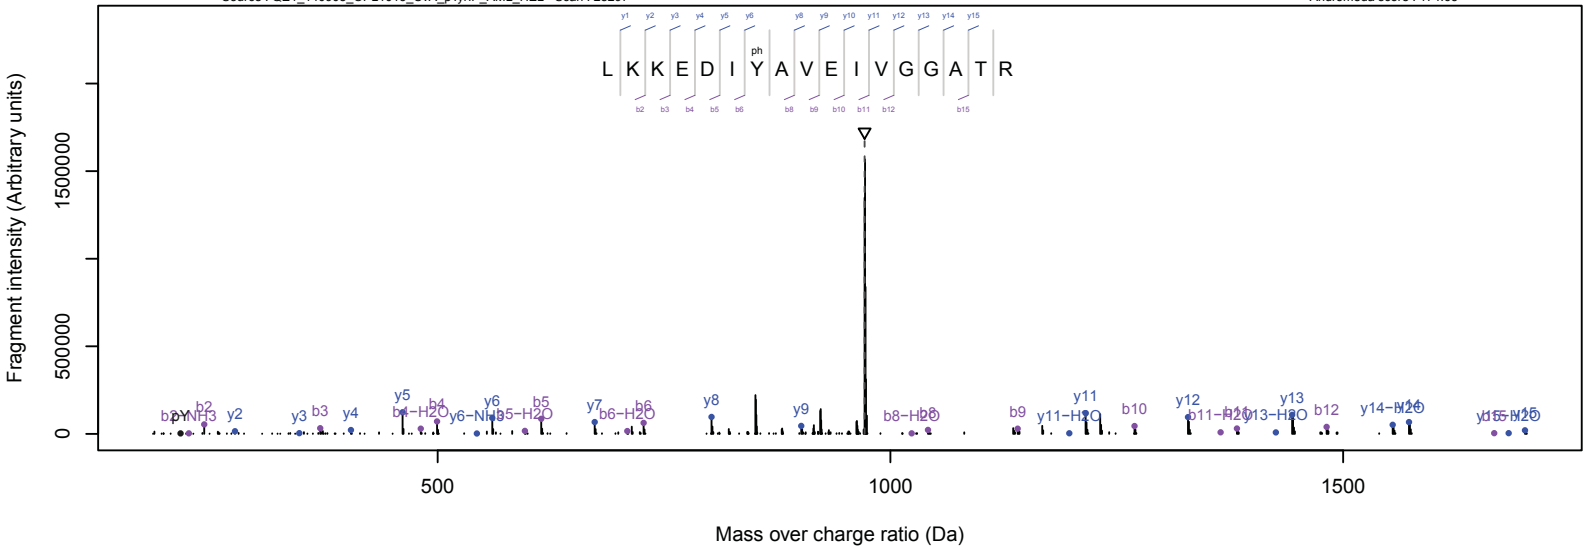

GSGELY(ph)EHEKDLVWK-2+

Source: QE1\_140612\_OPL1013\_CVA\_phosphoproteomic\_landscape\_AML\_A Scan: 24238

Andromeda score: 174.59

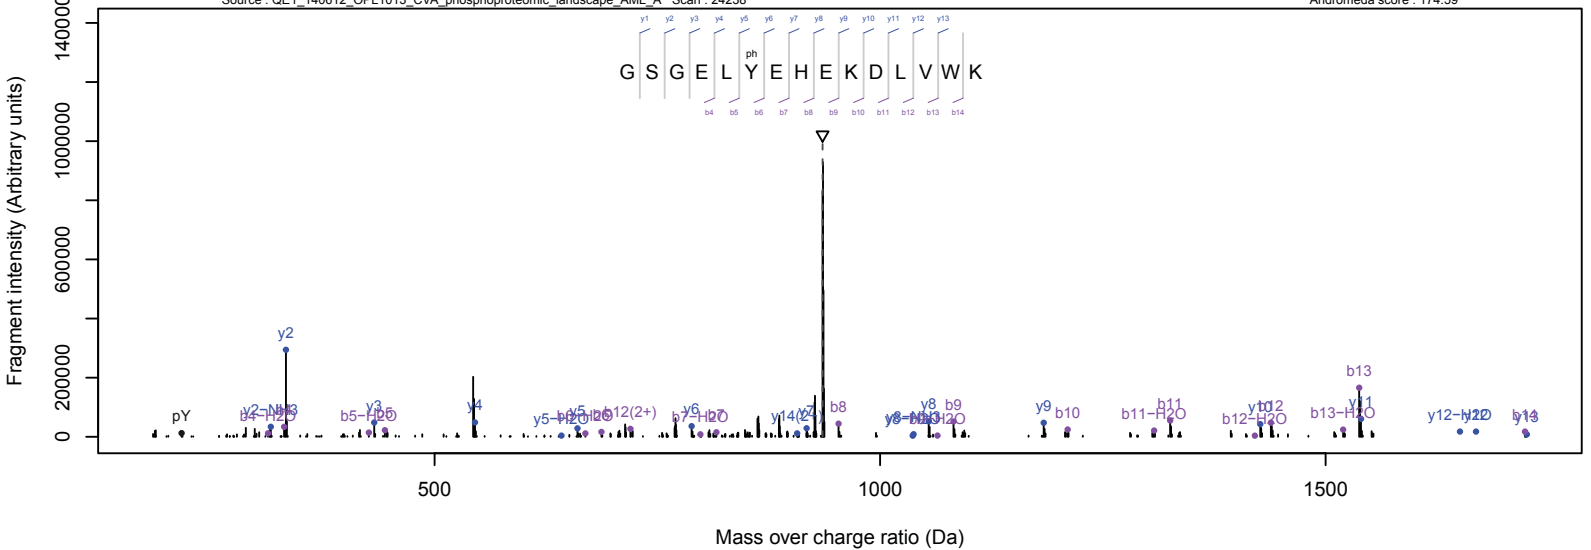

TKEY(ph)TACELMNIYK-2+

Source : QE1\_140612\_OPL1013\_CVA\_phosphoproteomic\_landscape\_AML\_B Scan : 29859

Andromeda score : 174.59

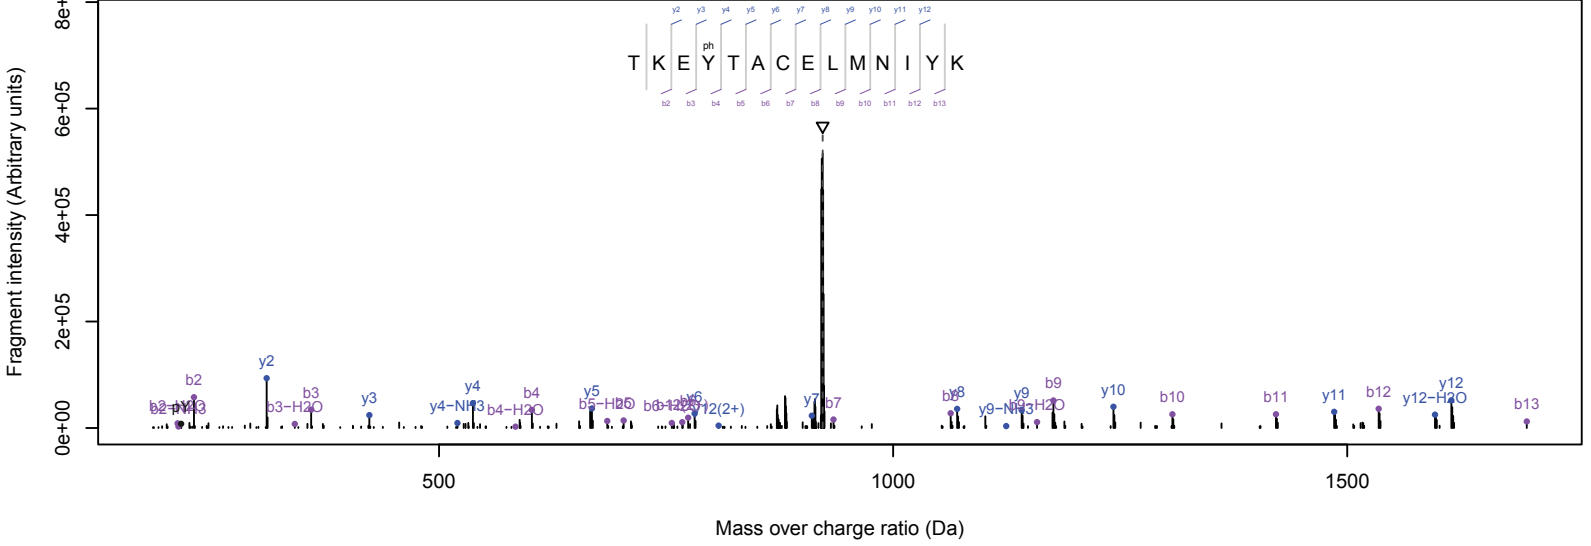

MEEFVY(ph)K VWEGR-2+

Source : QE1\_140612\_OPL1013\_CVA\_phosphoproteomic\_landscape\_AML\_C Scan : 35745

Andromeda score : 174.39

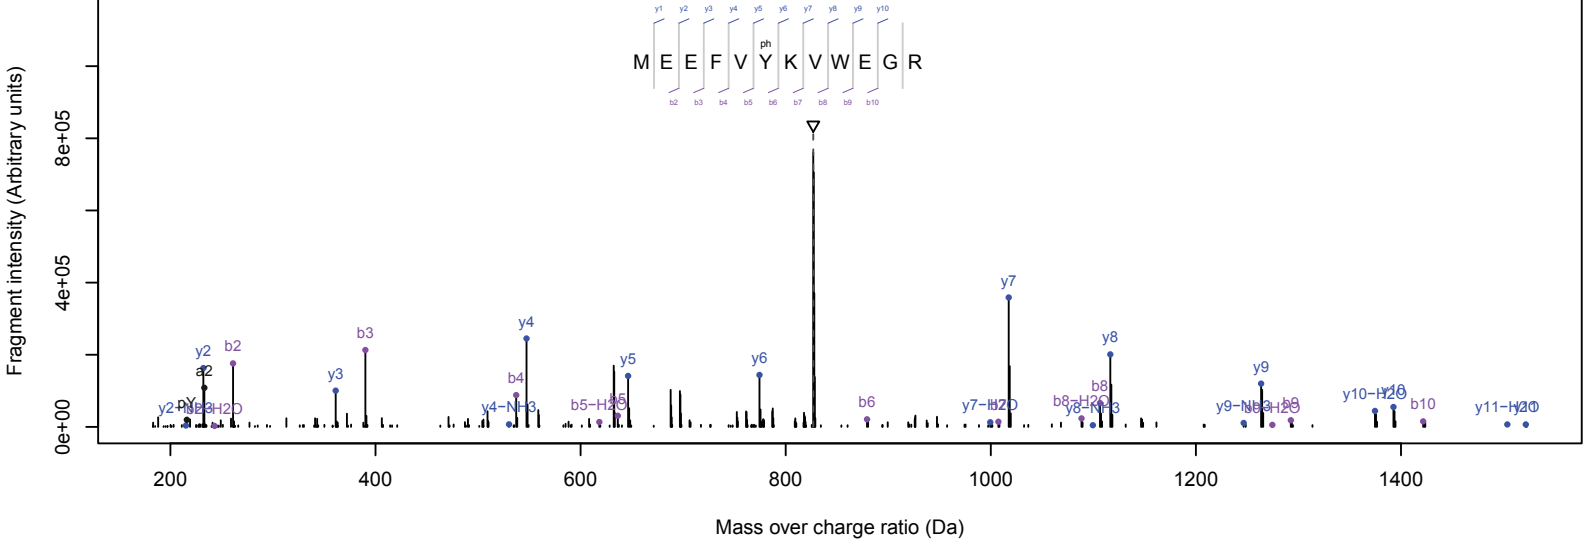

QARPTY(ph)ATAMLSLLK-3+

Source : QE1\_140612\_OPL1013\_CVA\_phosphoproteomic\_landscape\_AML\_C Scan : 43159

Andromeda score : 174.39

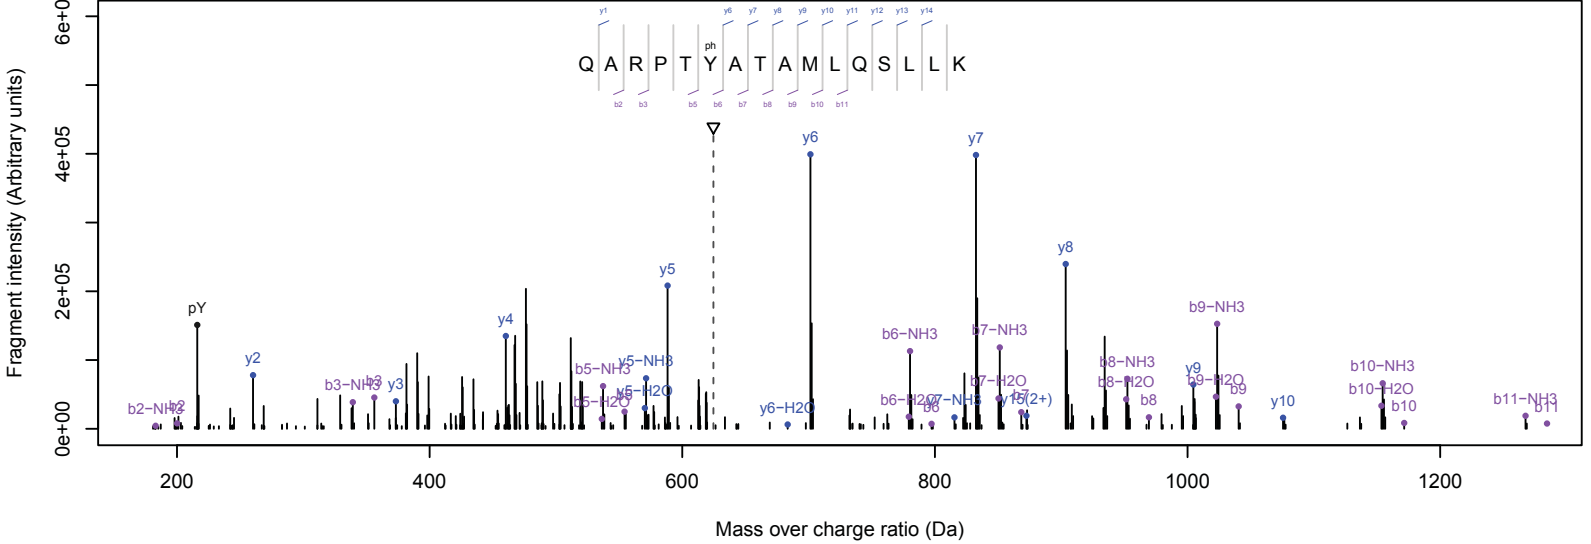

SSSSNLGADDGY(ph)MPMTPGAALAGSGSGSCR-3+

Source : QE1\_140908\_OPL1013\_CvA\_pTyrIP\_AML\_ML2 Scan : 34401

Andromeda score : 174.36

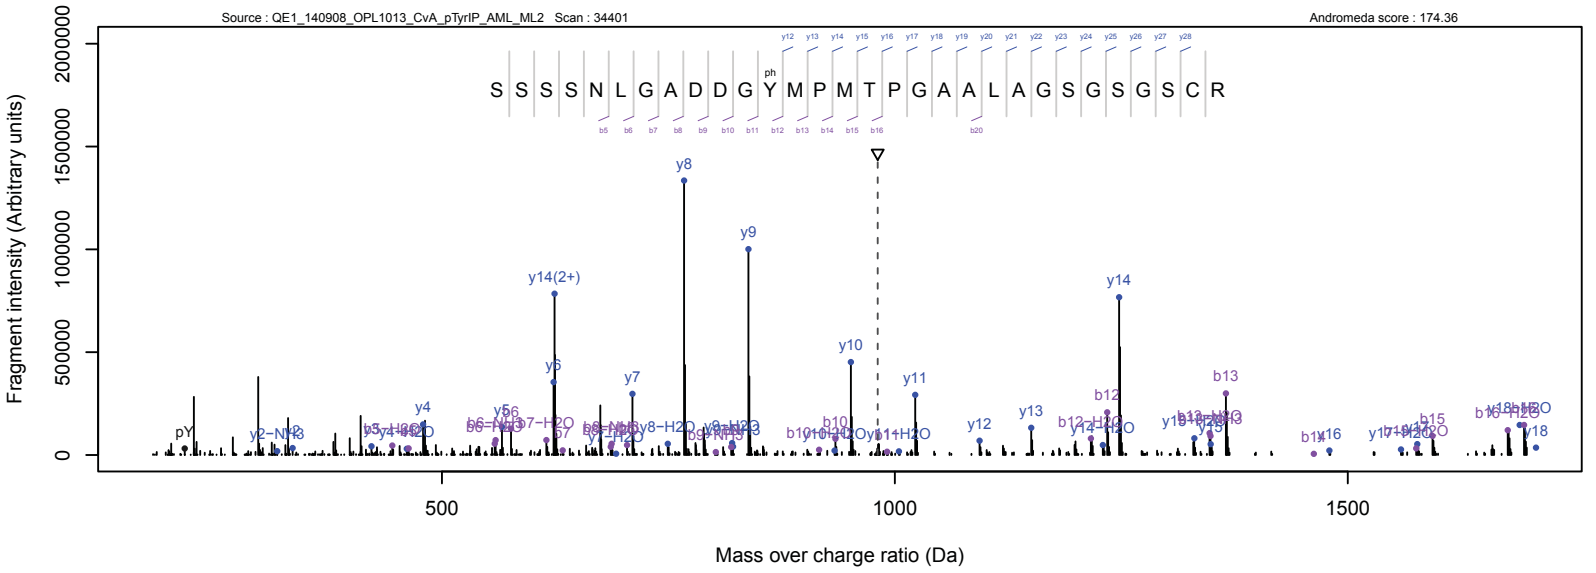

AAVPSGASTGIY(ph)EALELR-2+

Source : QE1\_140612\_OPL1013\_CVA\_phosphoproteomic\_landscape\_AML\_E Scan : 39906

Andromeda score : 174.35

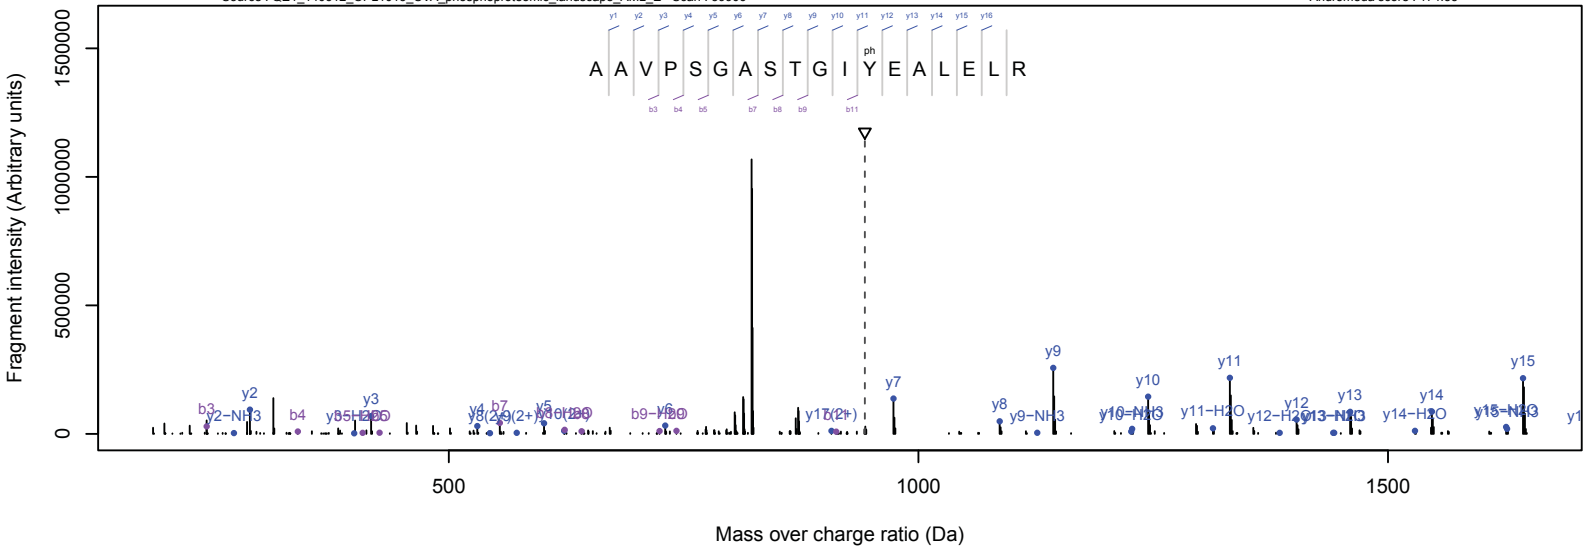

SPTTSPYIYHNGQDLSWPGPANDSTLEAQYR-3+

Source : QE1\_140908\_OPL1013\_CvA\_pTyrIP\_AML\_Kasumi6 Scan : 37763

Andromeda score : 174.15

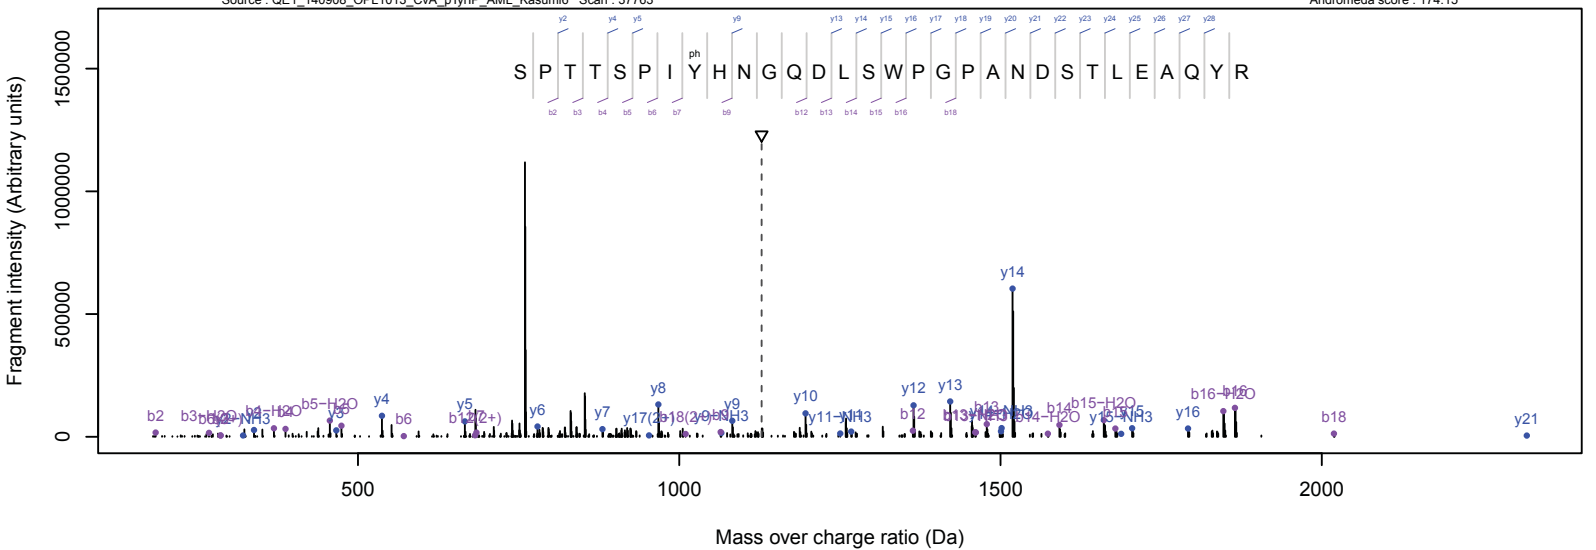

VKEEGY(ph)ELPYNPATDDYAVPPR-3+

Source: QE1\_140612\_OPL1013\_CVA\_phosphoproteomic\_landscape\_AML\_C Scan: 31210

Andromeda score: 174.01

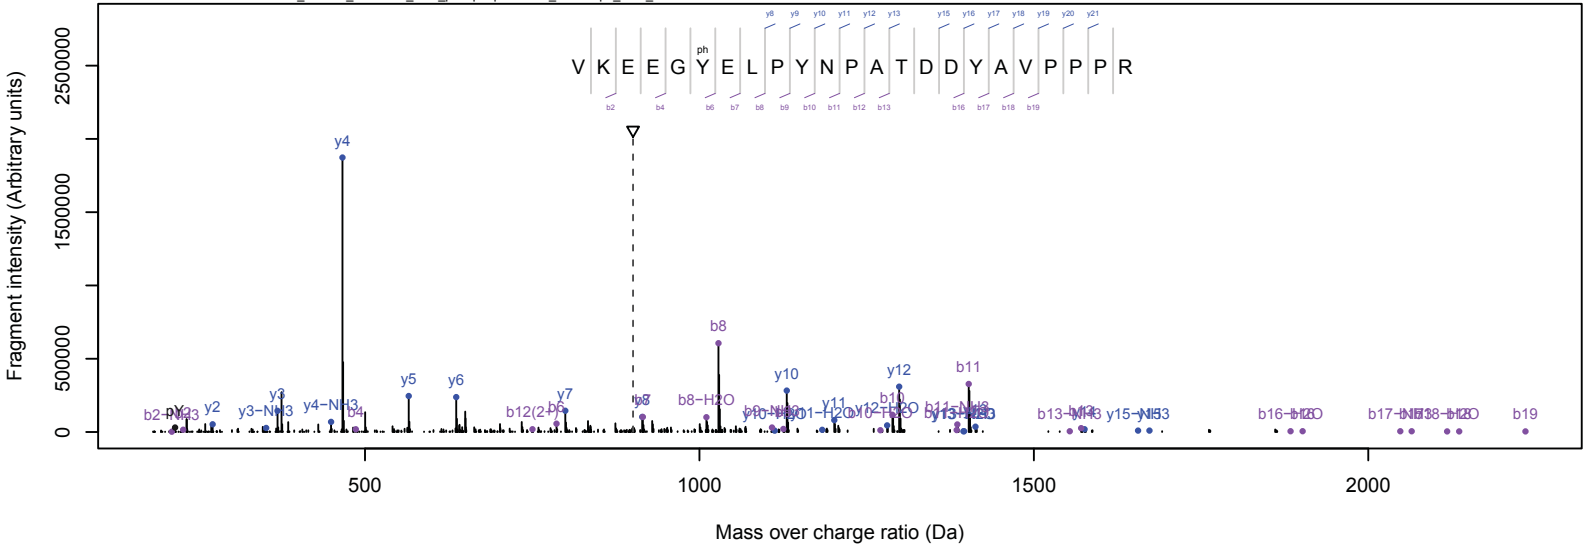

YKVVQDTY(ph)QIM(ox)K-2+

Source: QE1\_140908\_OPL1013\_CvA\_pTyrIP\_AML\_Kasumi1 Scan: 13060

Andromeda score: 173.72

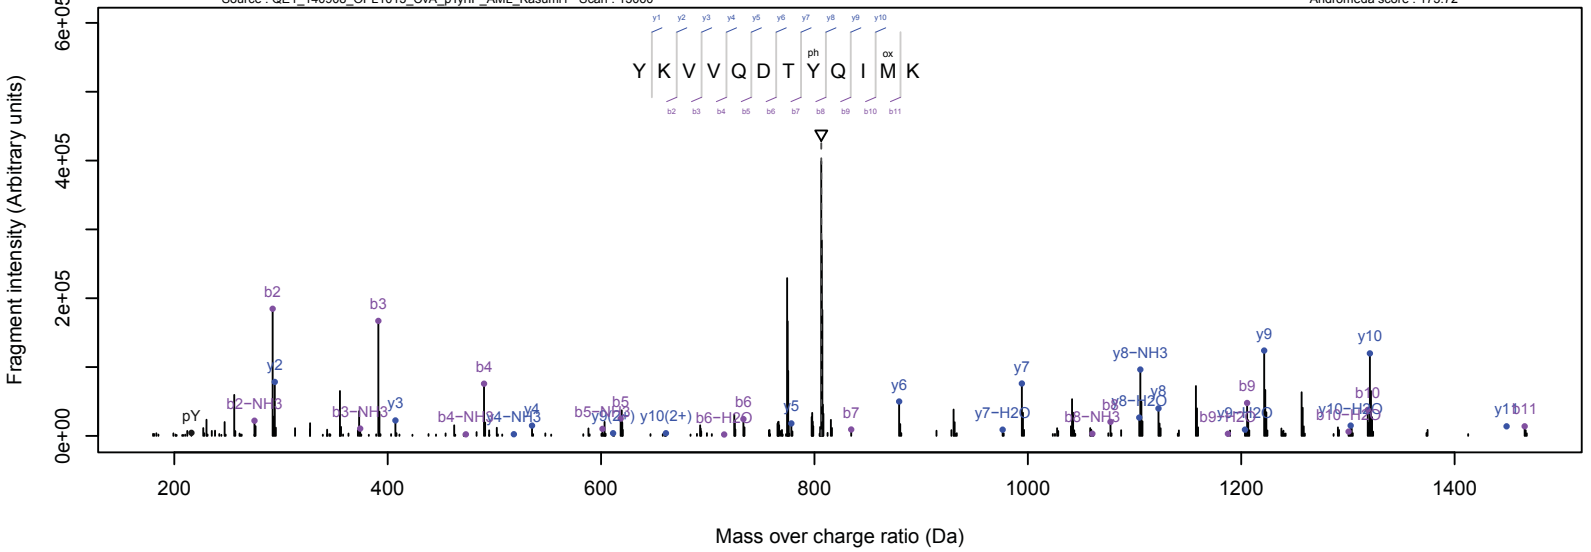

AKS(ph)PQPVEEEDHFD DTVVCLDTYNCDLHFK-4+

Source: QE1\_140908\_OPL1013\_CvA\_pTyrIP\_AML\_HL60 Scan: 42526

Andromeda score: 173.7

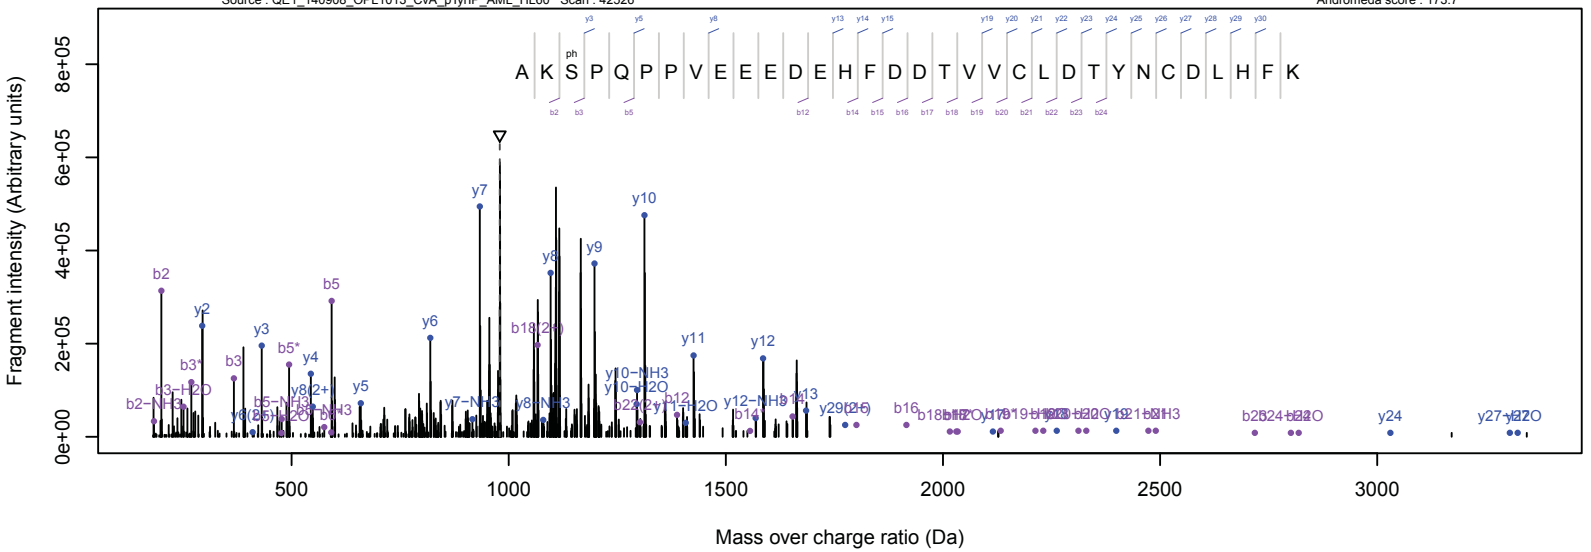

IPLNKFPGFAPGTEQY(ph)LLAK-3+

Source : QE1\_140612\_OPL1013\_CVA\_phosphoproteomic\_landscape\_AML\_C Scan : 37097

Andromeda score : 173.56

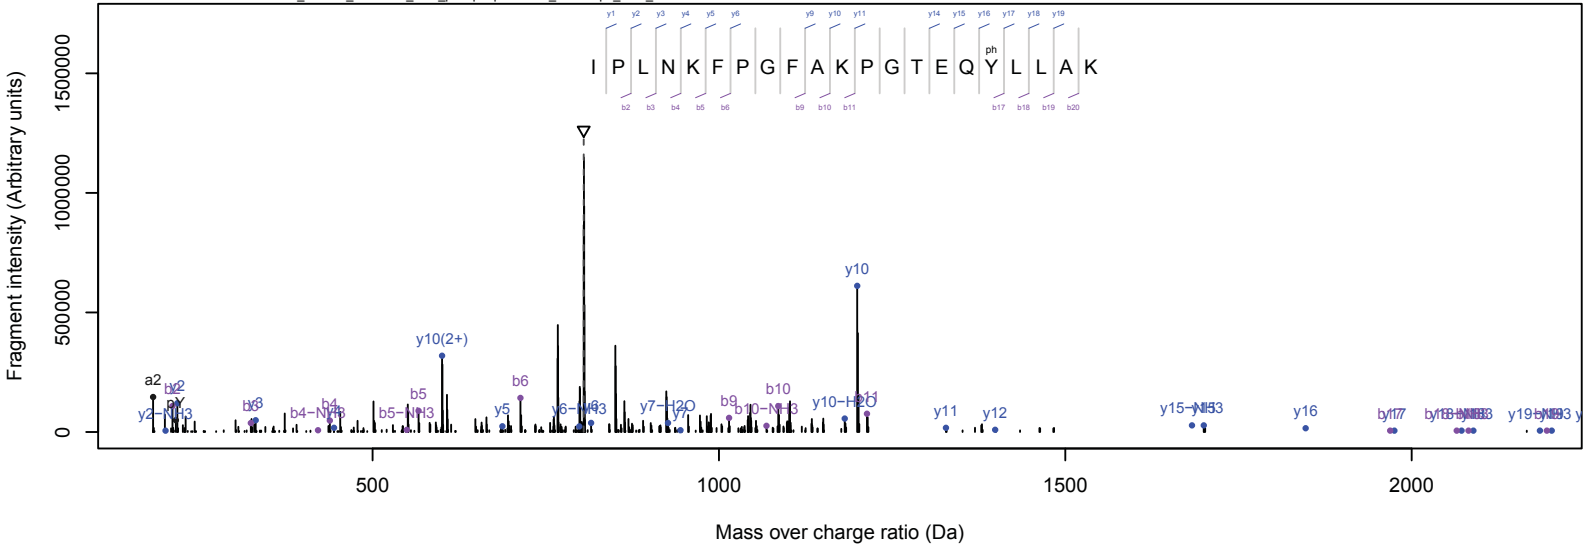

QLVRGEPNVSYP(h)ICSR-3+

Source : QE1\_140822\_OPL1013\_CvA\_pTyrIP\_AML\_cell\_lines\_part2\_F Scan : 16114

Andromeda score : 173.44

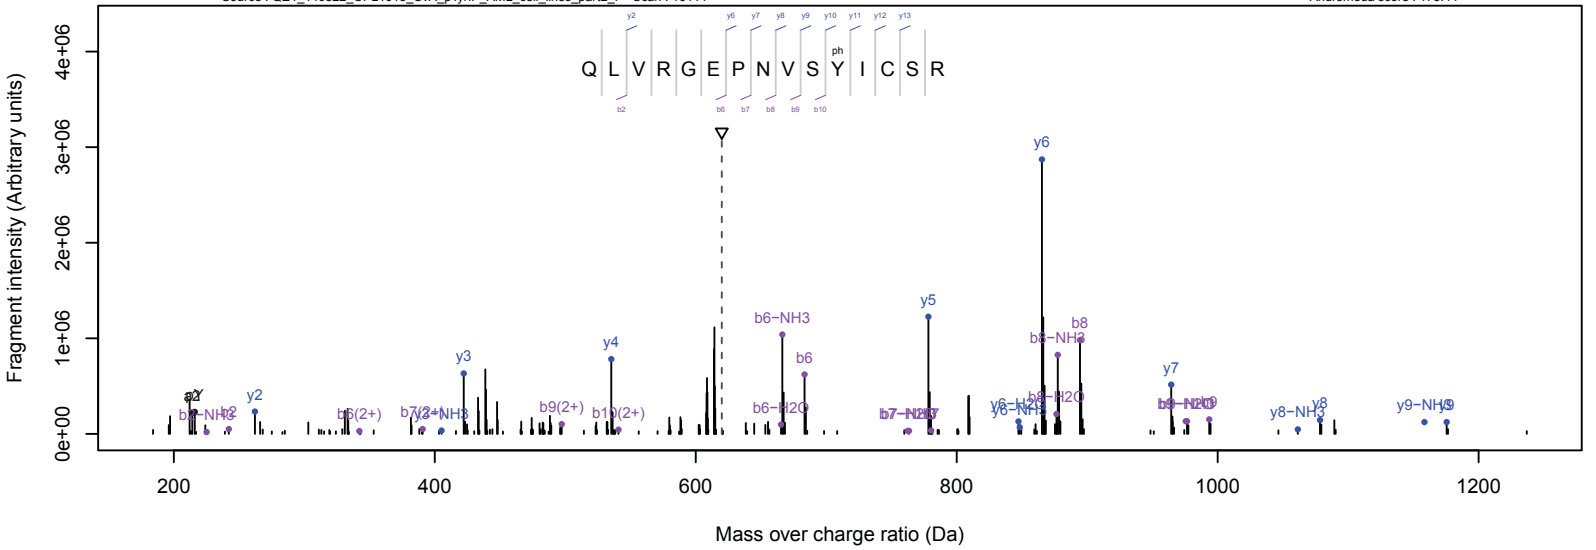

APYTCGGDSQY(ph)VLMSSPVGGR-2+

Source : QE1\_140908\_OPL1013\_CvA\_pTyrIP\_AML\_ML2 Scan : 27375

Andromeda score : 173.43

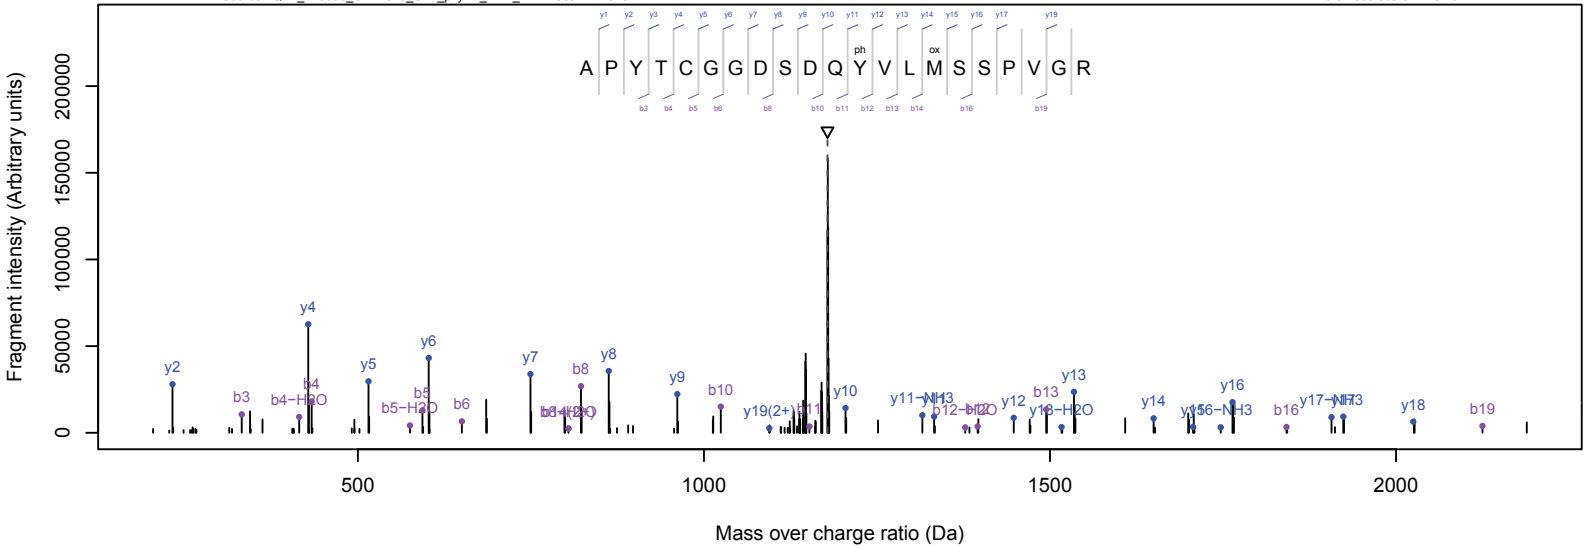

SAY(ph)LHPQQFDCPEPGLGSK-3+

Source : QE1\_140612\_OPL1013\_CVA\_phosphoproteomic\_landscape\_AML\_A Scan : 28348

Andromeda score : 172.99

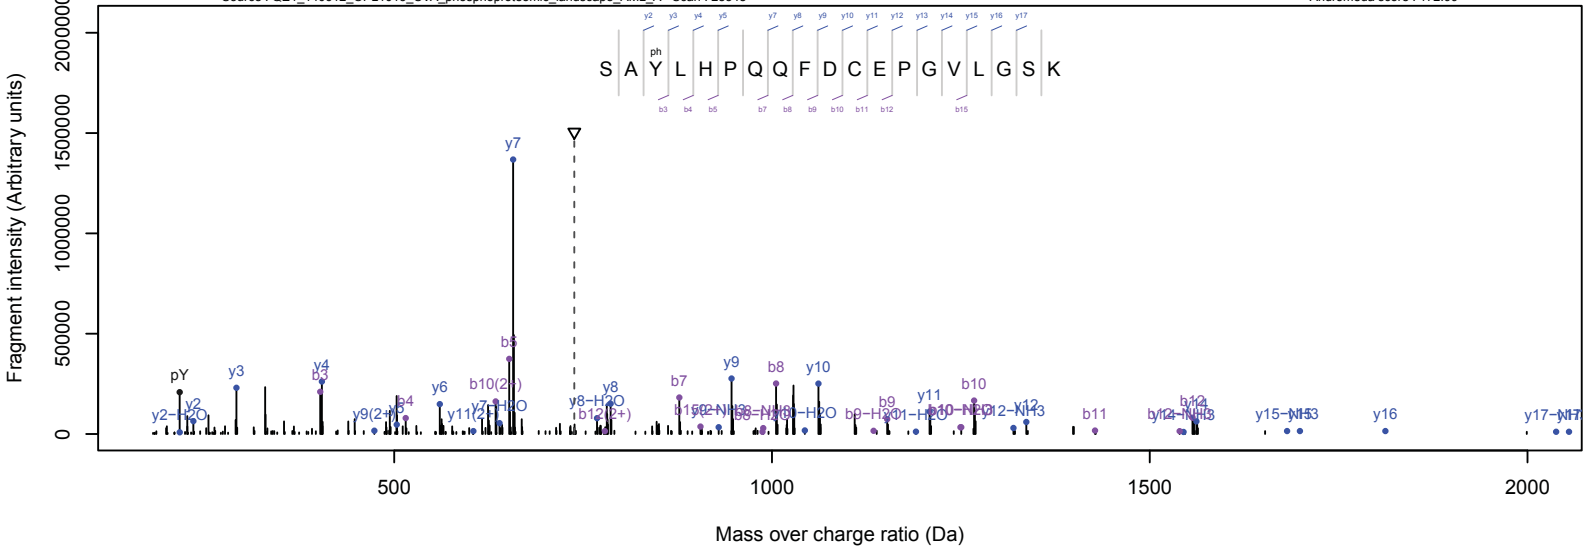

NLASEGVFFPSDAVKPCVCPKVDY(ph)SCQPWYAGAMER-4+

Source : QE1\_140612\_OPL1013\_CVA\_phosphoproteomic\_landscape\_AML\_C Scan : 45829

Andromeda score : 172.97

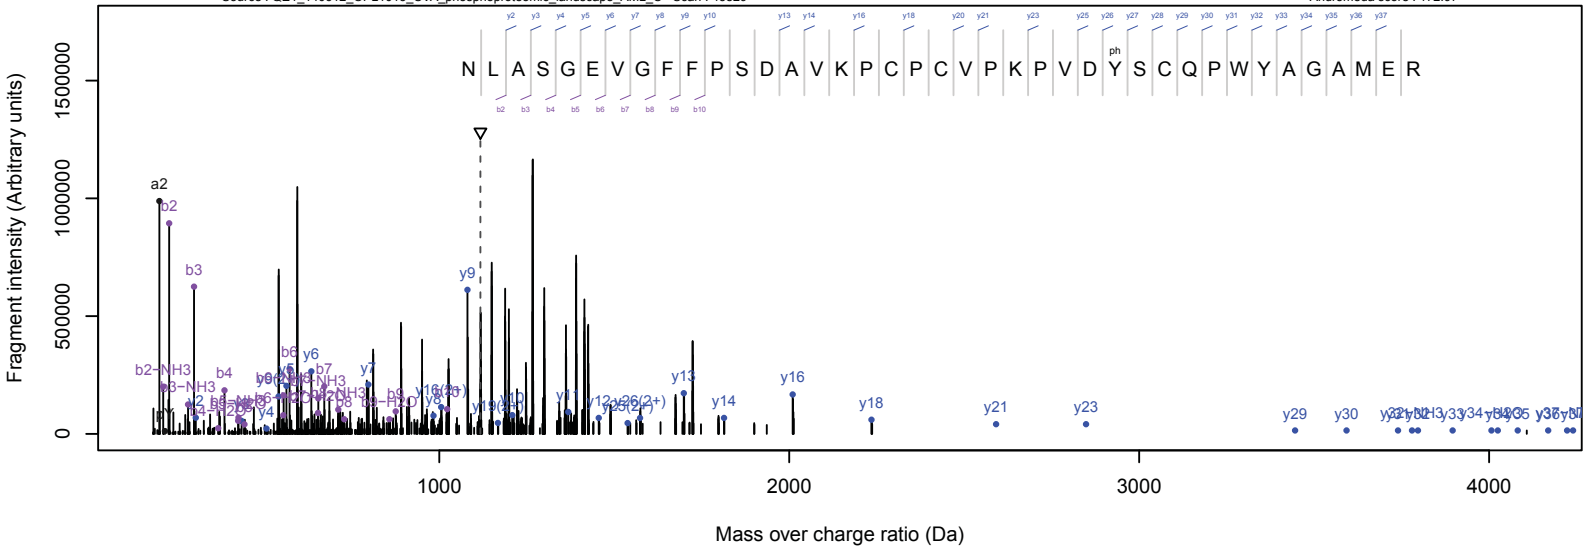

MNGALPSDAVGYRQER-2+

Source : QE1\_140612\_OPL1013\_CVA\_phosphoproteomic\_landscape\_AML\_C Scan : 15301

Andromeda score : 172.91

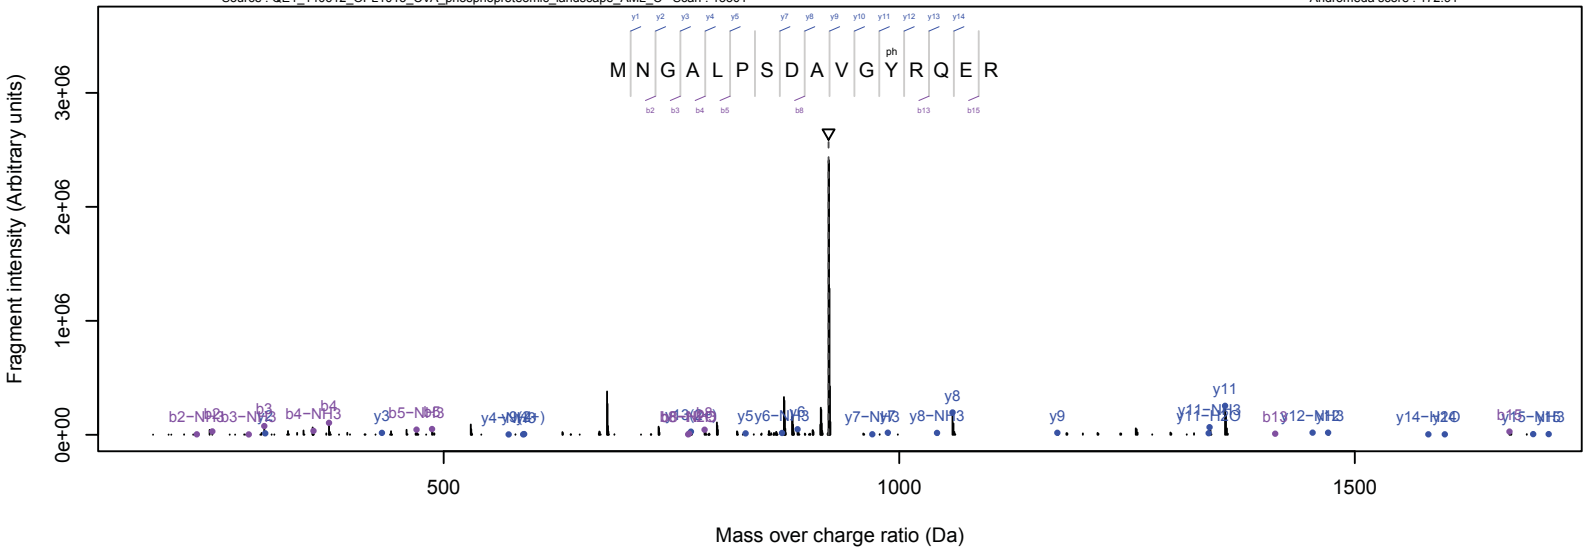



QLEETNNDYETADGGY(ph)M(ox)TLNPR-3+

Source : QE1\_140908\_OPL1013\_CvA\_pTyrIP\_AML\_HEL Scan : 22042

Andromeda score : 172.57

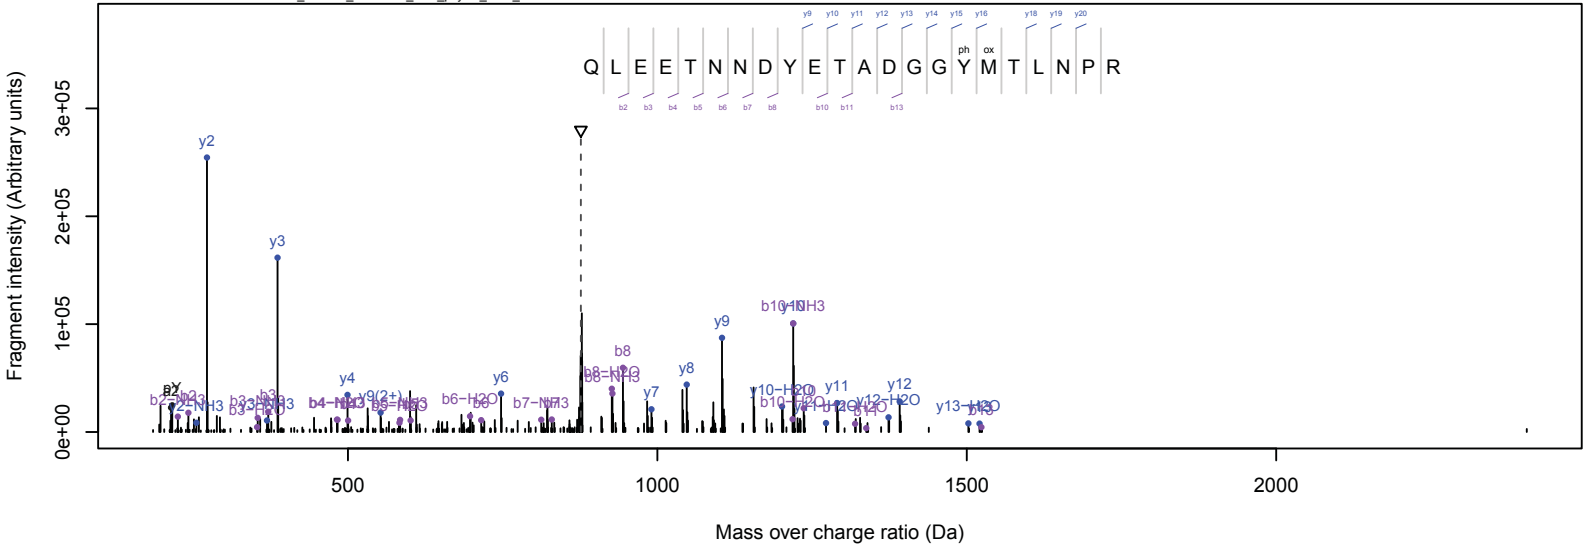

TRDQY(p)LMWLTQK-2+

Source : QE1\_140908\_OPL1013\_CvA\_pTyrIP\_AML\_Kasumi1 Scan : 33548

Andromeda score : 172.57

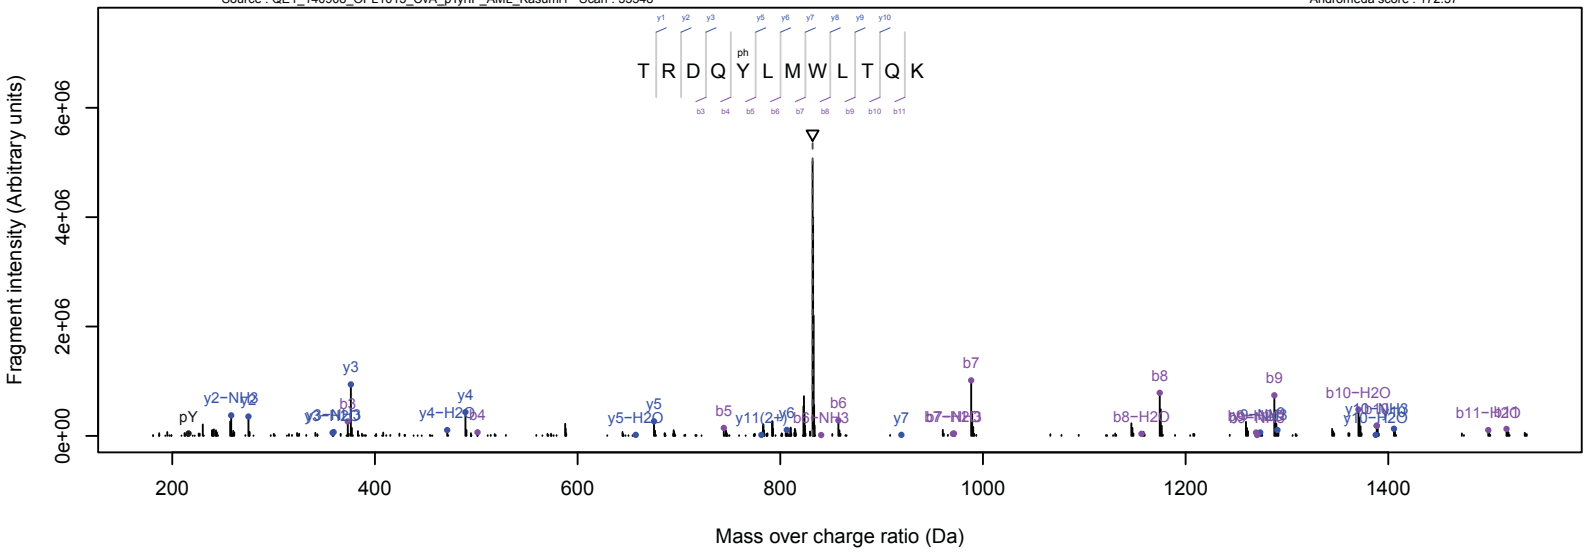

TKGY(p)IFLEYASPAHAVDAVK-3+

Source : QE1\_140612\_OPL1013\_CVA\_phosphoproteomic\_landscape\_AML\_B Scan : 35435

Andromeda score : 172.42

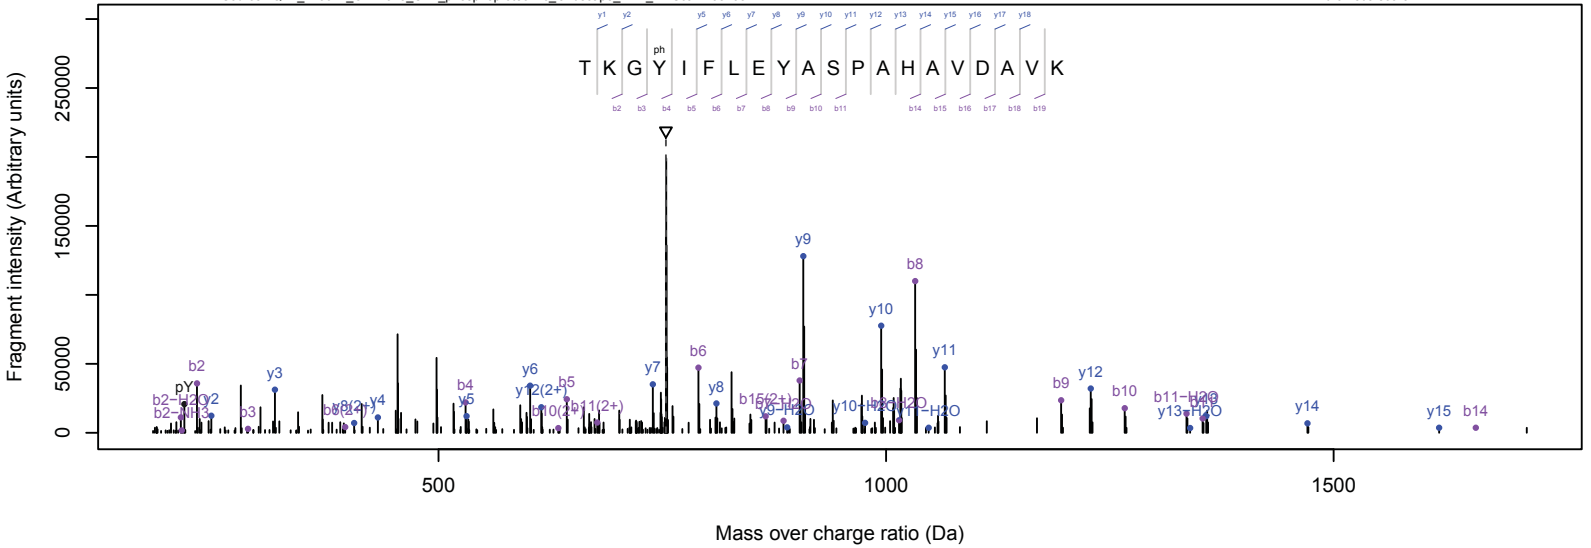

**Y(ph)FSLKPEEK-2+**

Source : QE1\_140612\_OPL1013\_CVA\_phosphoproteomic\_landscape\_AML\_C Scan : 16543

Andromeda score : 172.27

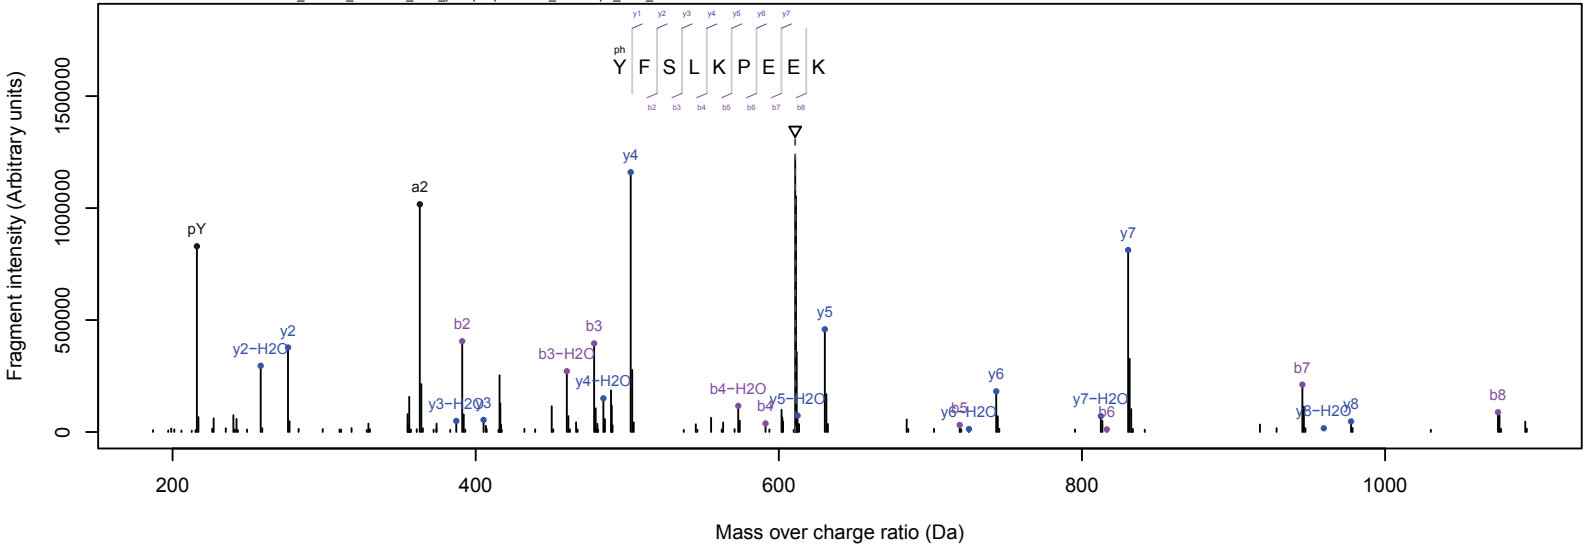

**VHTTAADGLY(ph)PR-2+**

Source : QE1\_140612\_OPL1013\_CVA\_phosphoproteomic\_landscape\_AML\_C Scan : 10275

Andromeda score : 172.13

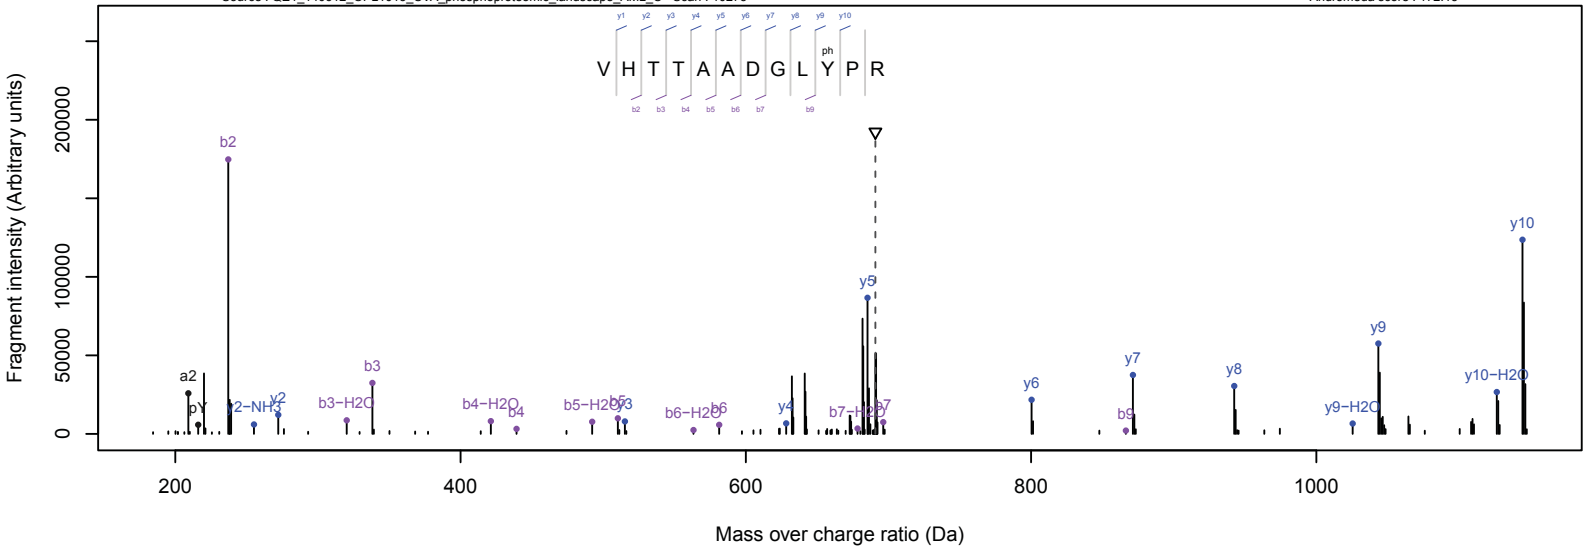

**GDKAAY(ph)DILRR-2+**

Source : QE1\_140612\_OPL1013\_CVA\_phosphoproteomic\_landscape\_AML\_C Scan : 13810

Andromeda score : 172.09

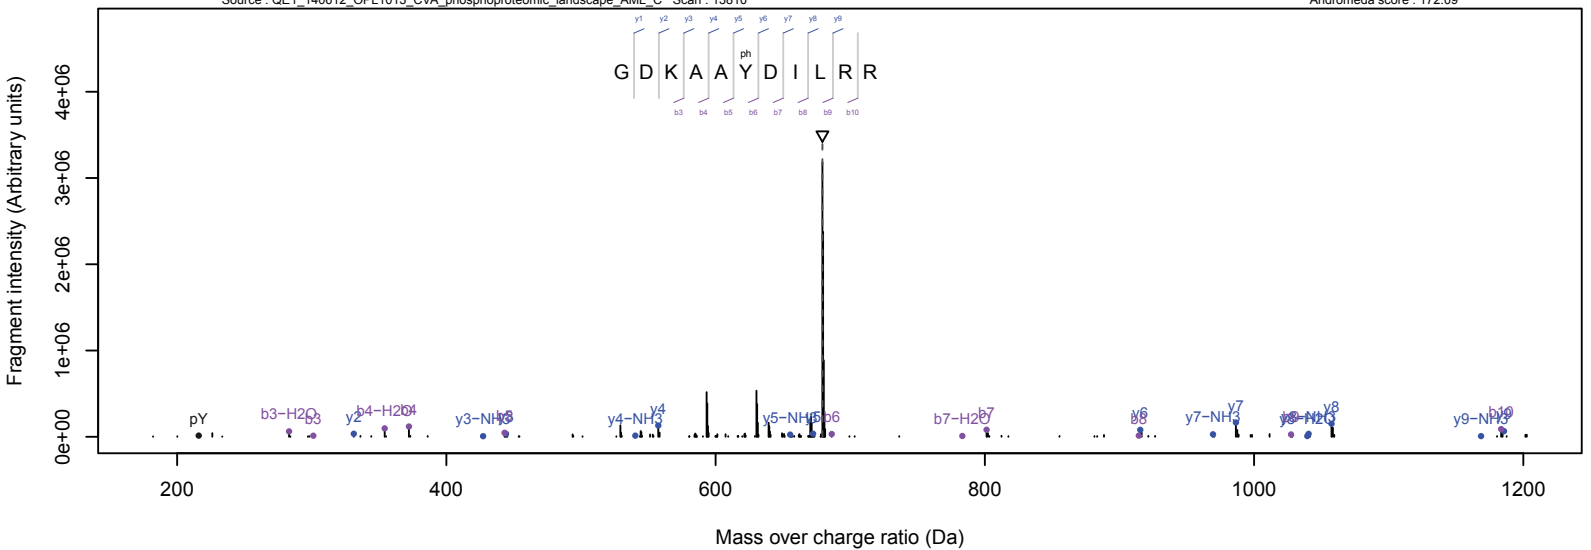

REEPEAL(ph)AAVNK-2+

Source : QE1\_140908\_OPL1013\_CVA\_pTyrIP\_AML\_HEL Scan : 19406

Andromeda score : 172.09

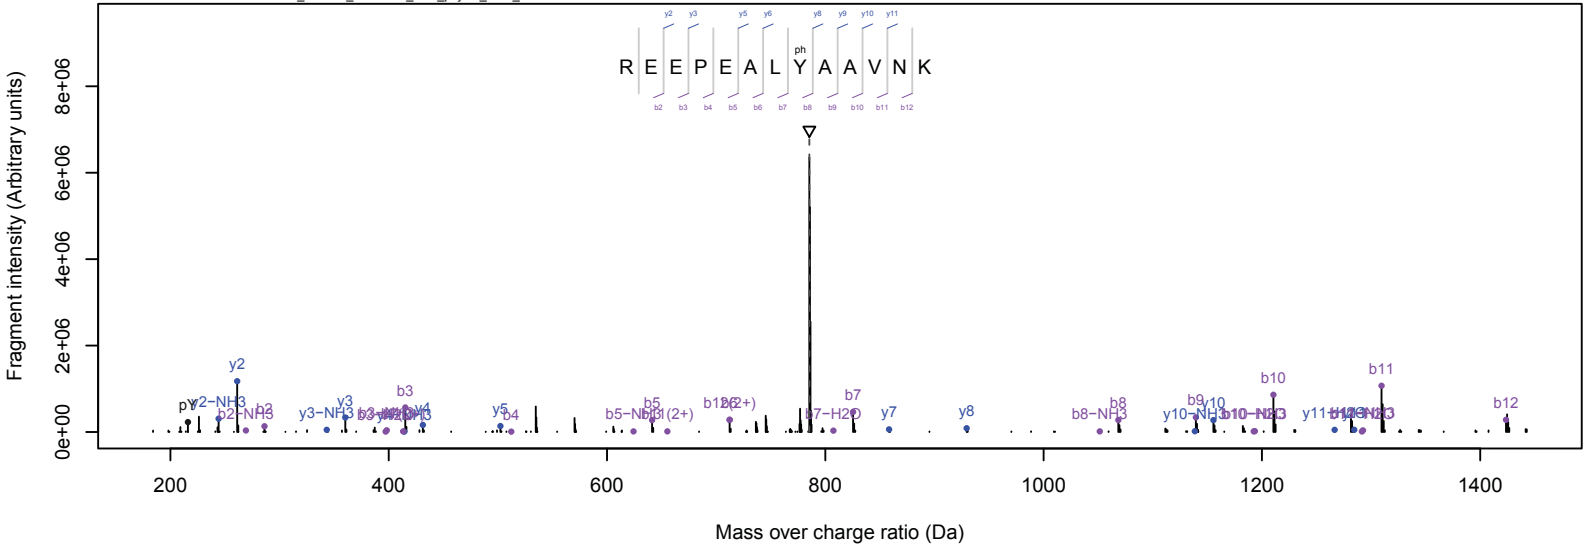

ETVFTKSPY(ph)QEFTDHLVK-3+

Source : QE1\_140612\_OPL1013\_CVA\_phosphoproteomic\_landscape\_AML\_C Scan : 31410

Andromeda score : 171.98

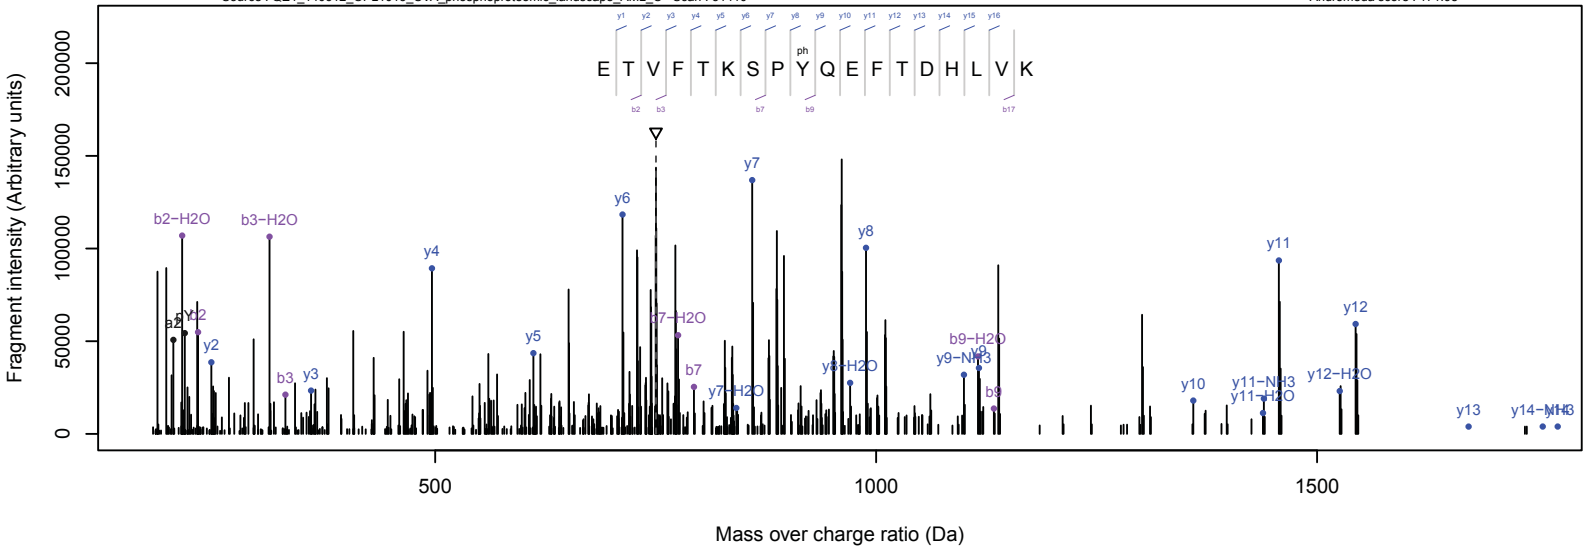

NPRPGEENGKDY(ph)YFVTR-3+

Source : QE1\_140612\_OPL1013\_CVA\_phosphoproteomic\_landscape\_AML\_C Scan : 15097

Andromeda score : 171.98

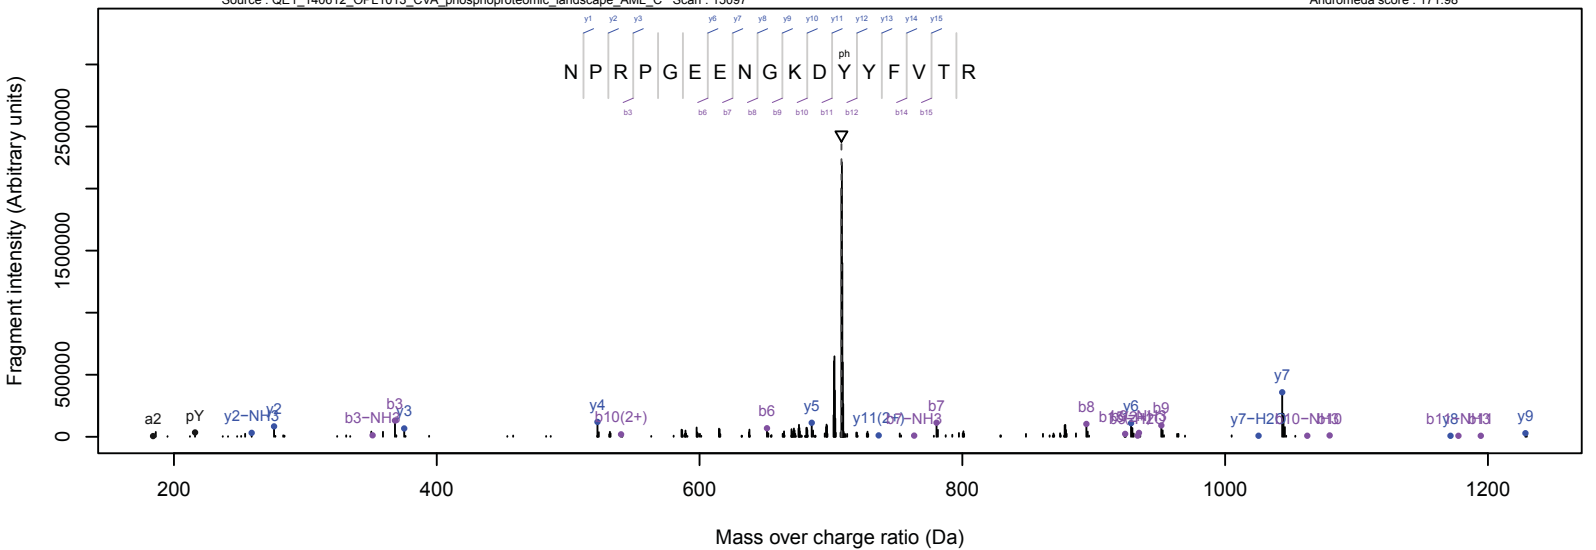

**GQKY(ph)FDSGDYNMAK-2+**

Source : QE1\_140612\_OPL1013\_CVA\_phosphoproteomic\_landscape\_AML\_C Scan : 14890

Andromeda score : 171.81

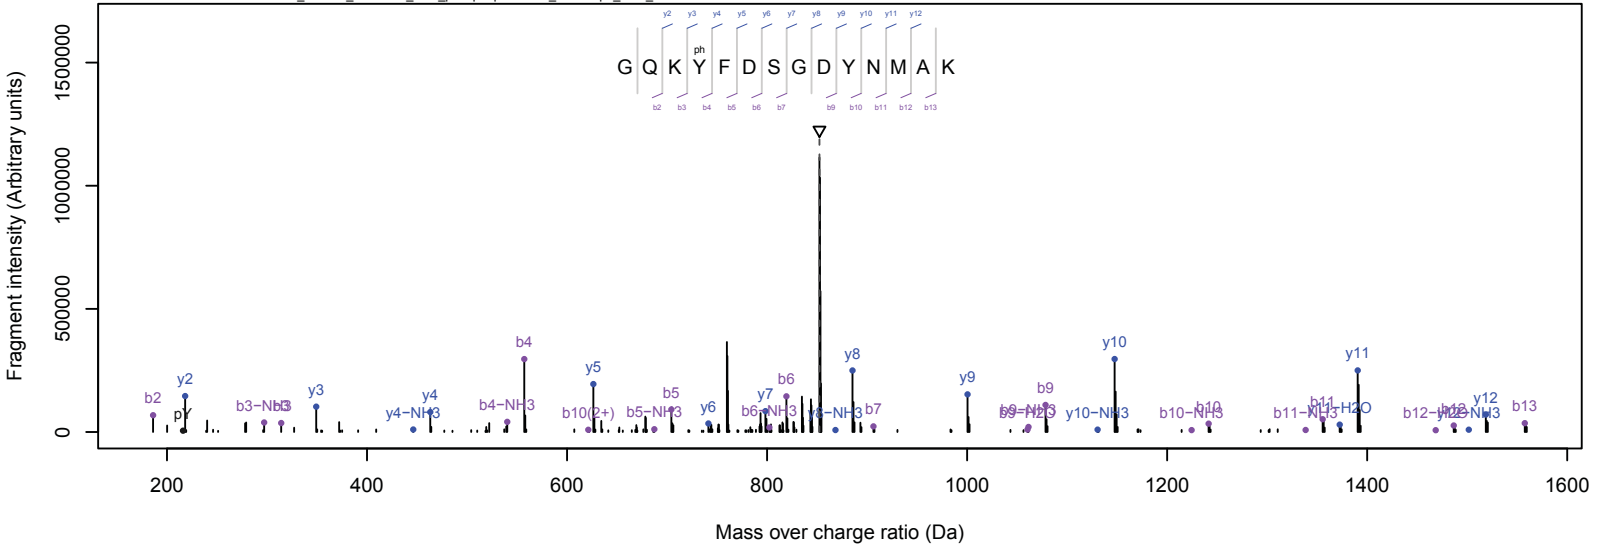

**APSASVDSLLY(ph)NLPR-2+**

Source : QE1\_140908\_OPL1013\_CvA\_pTyrIP\_AML\_HEL Scan : 28989

Andromeda score : 171.76

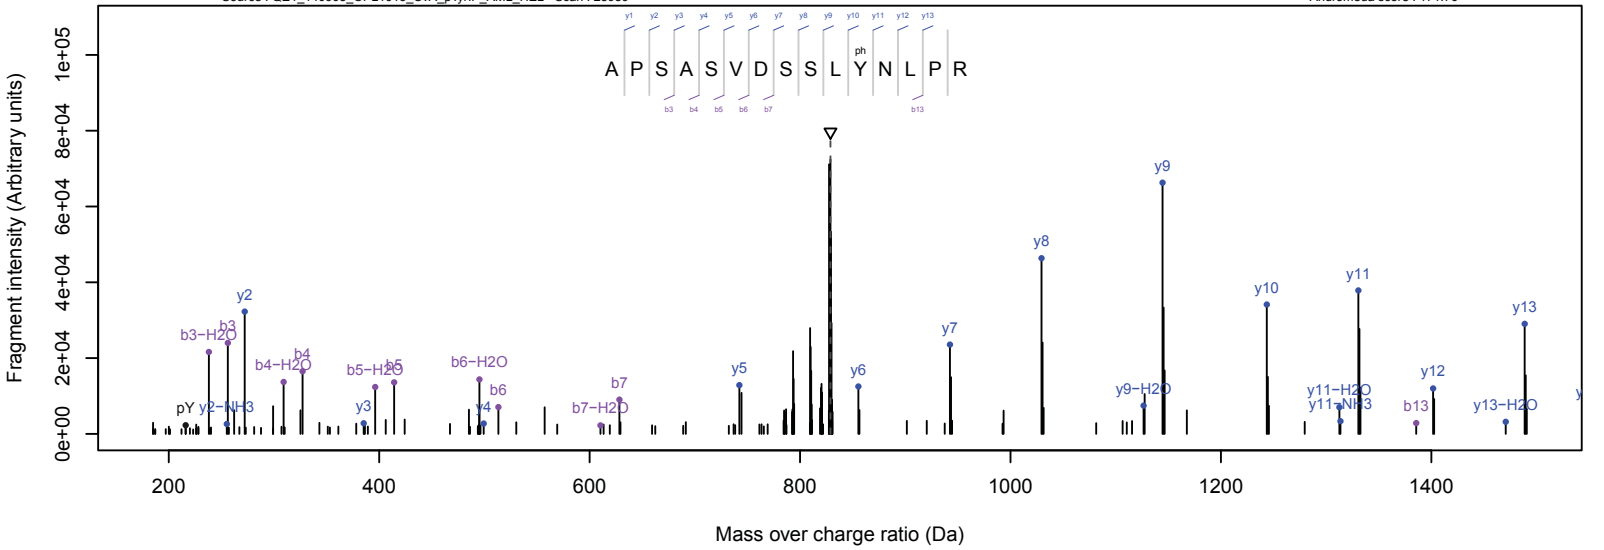

**HFSGLEEAVY(ph)R-2+**

Source : QE1\_140612\_OPL1013\_CVA\_phosphoproteomic\_landscape\_AML\_B Scan : 21136

Andromeda score : 171.74

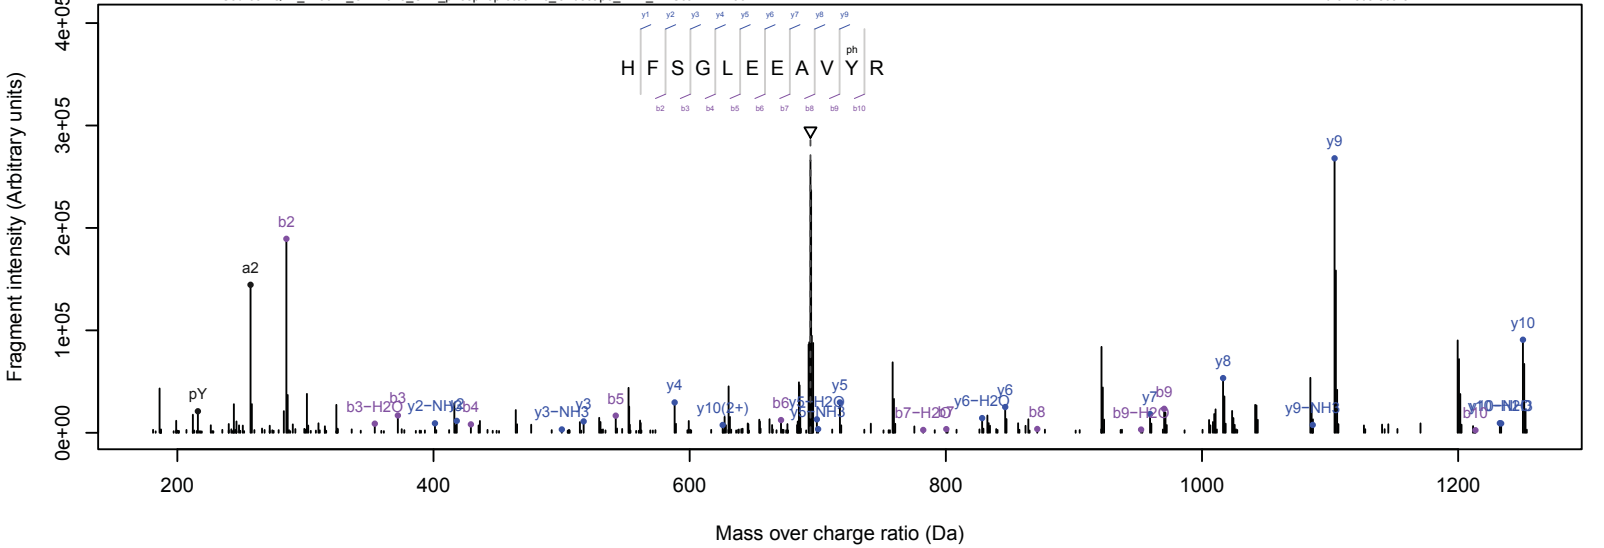

**HVSISYDIPPTPGNTY(ph)QIPR-3+**

Source : QE1\_140908\_OPL1013\_CvA\_pTyrIP\_AML\_HEL Scan : 32705

Andromeda score : 171.71

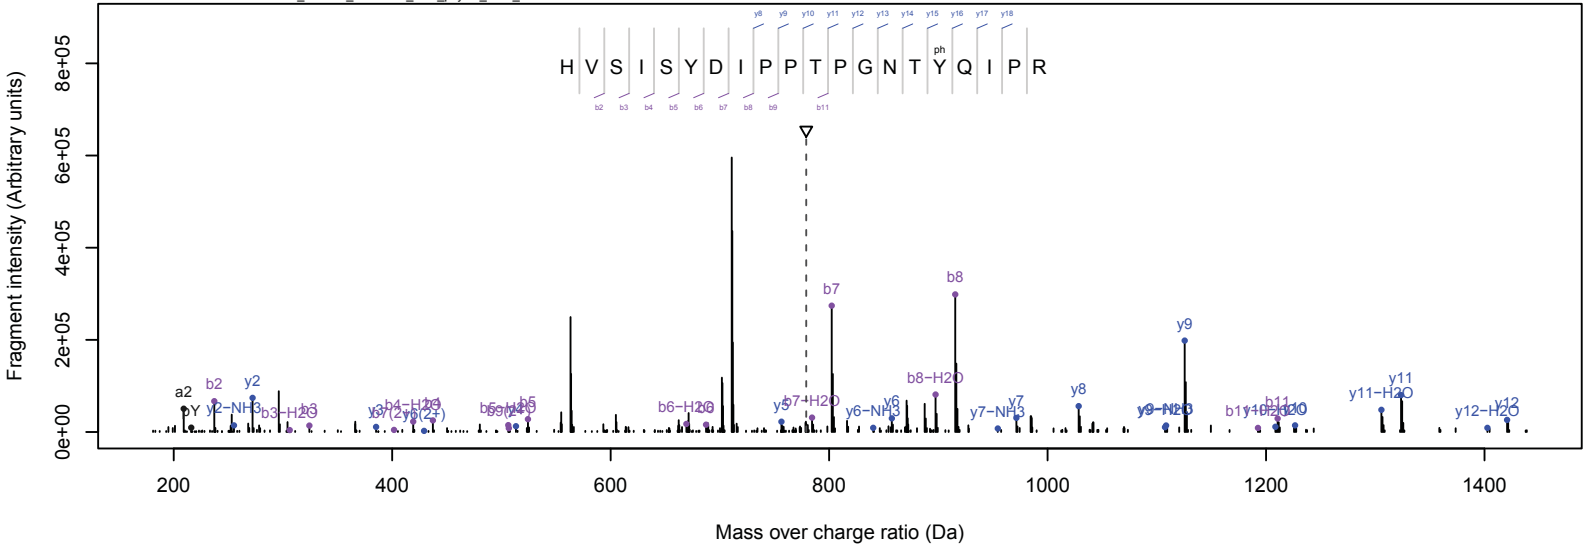

**EHC GAVCFVKDNPQKSY(ph)FIR-4+**

Source : QE1\_140612\_OPL1013\_CVA\_phosphoproteomic\_landscape\_AML\_C Scan : 23045

Andromeda score : 171.35

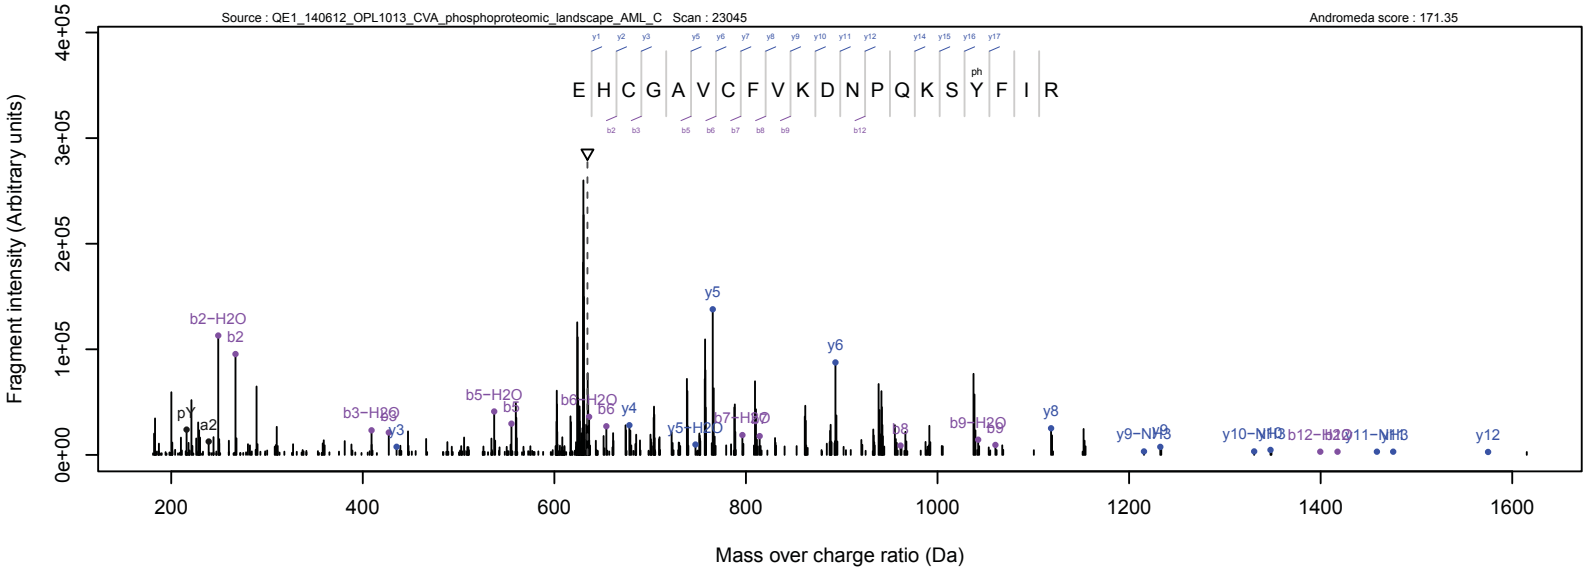

**NLSEGNANYTEY(ph)VATR-2+**

Source : QE1\_140908\_OPL1013\_CvA\_pTyrIP\_AML\_ML2 Scan : 21048

Andromeda score : 171.25

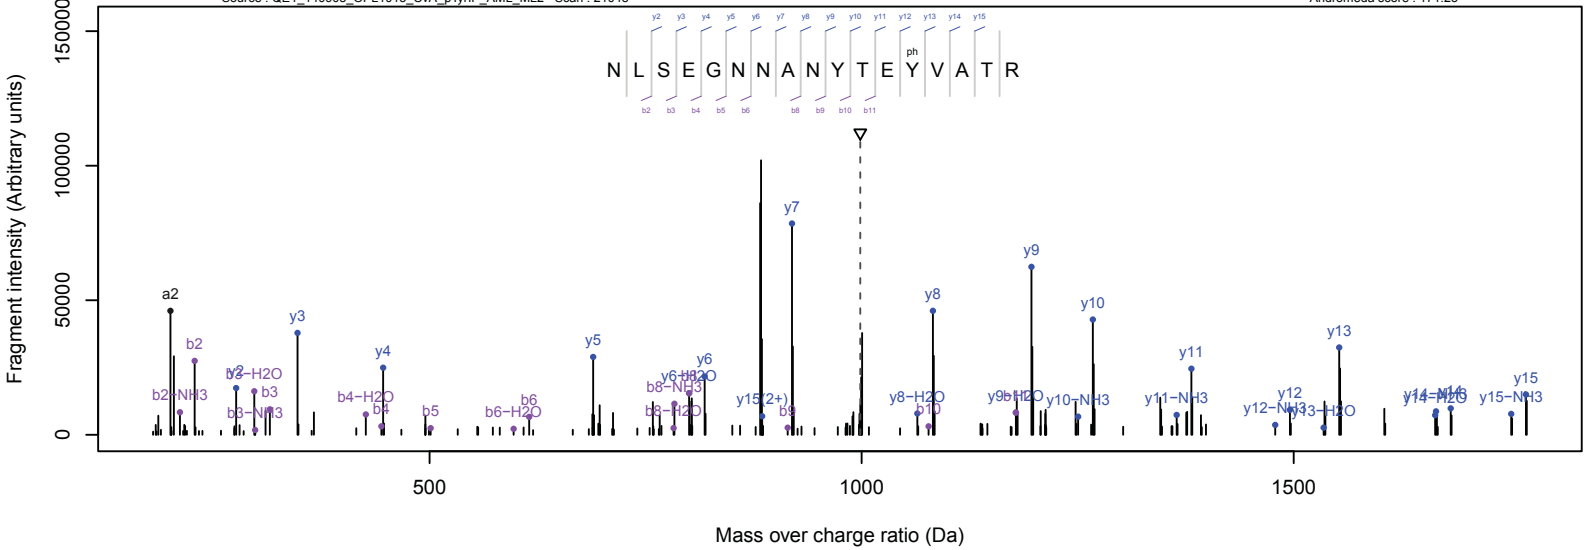

**ASSPAESSPEDSGY<sup>ph</sup>MR-2+**

Source : QE1\_140612\_OPL1013\_CVA\_phosphoproteomic\_landscape\_AML\_D Scan : 8965

Andromeda score : 171.08

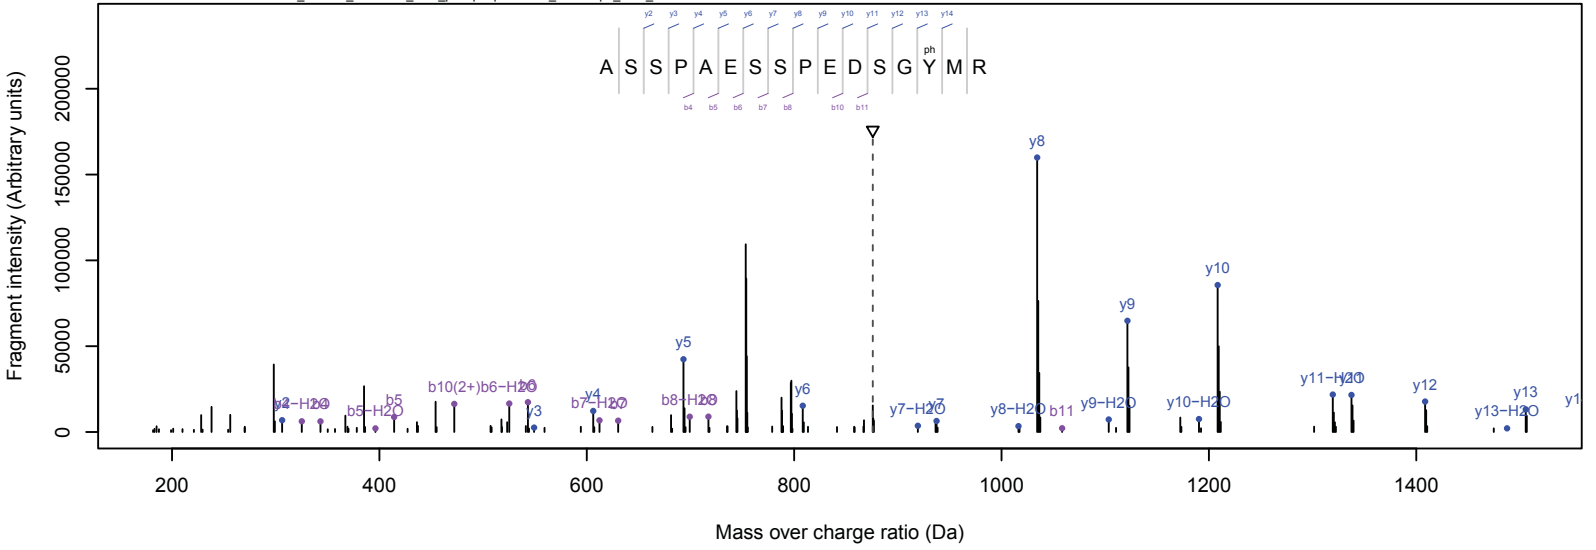

**LAQGNHCVNGISGVHGFYS<sup>ph</sup>LPKPSR-4+**

Source : QE1\_140908\_OPL1013\_CvA\_pTyrIP\_AML\_Kasumi6 Scan : 26219

Andromeda score : 171.08

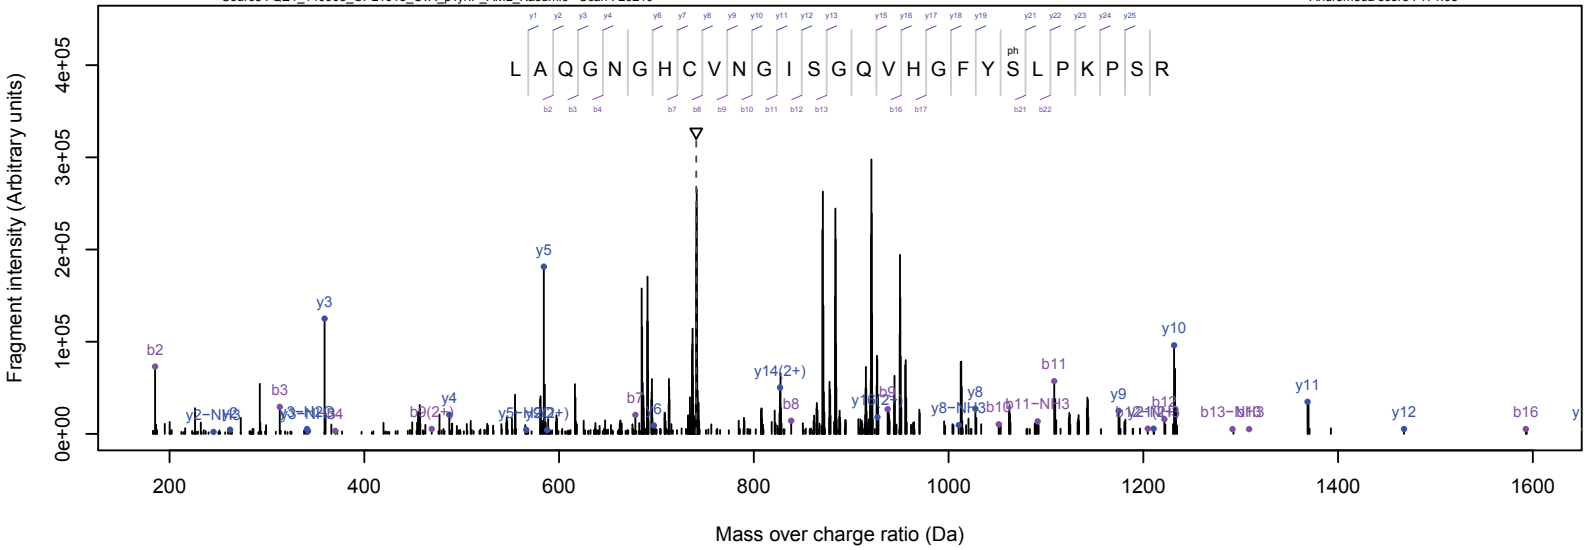

**Y<sup>ph</sup>LLHGLECVVAMHQAQLISK-3+**

Source : QE1\_140612\_OPL1013\_CVA\_phosphoproteomic\_landscape\_AML\_B Scan : 42025

Andromeda score : 171.07

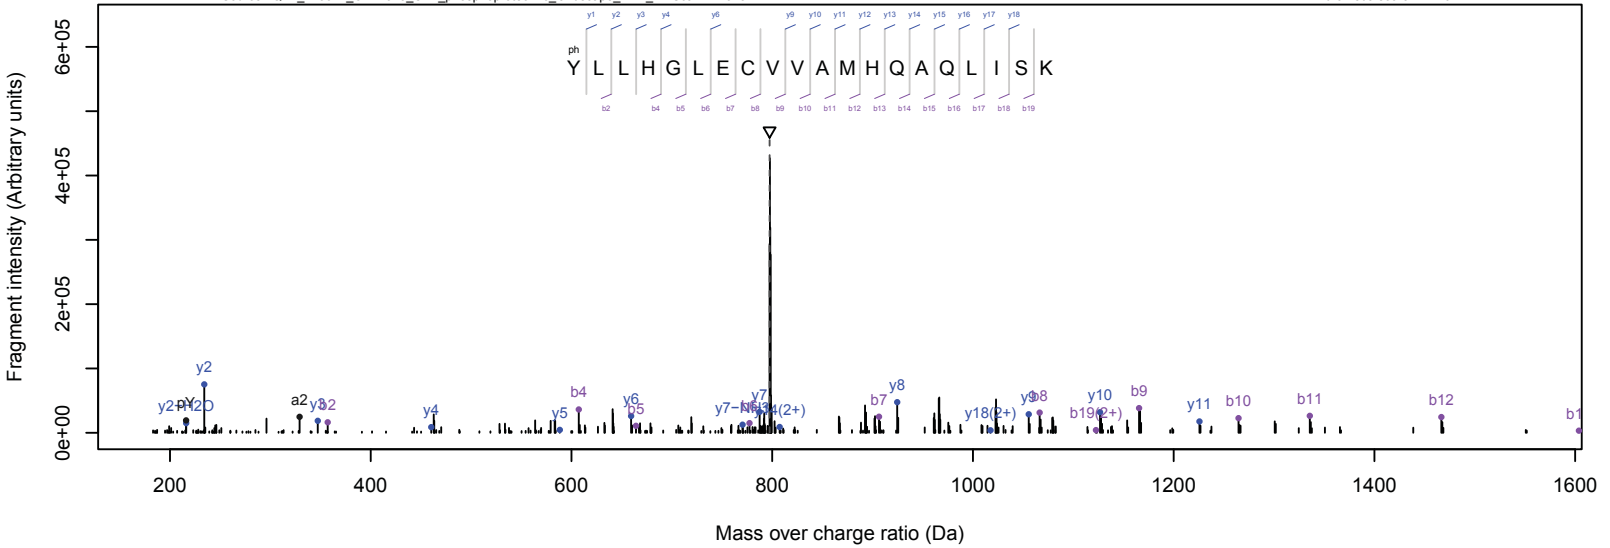

**GY(ph)SFLTTFSPGK-2+**

Source: QE1\_140612\_OPL1013\_CVA\_phosphoproteomic\_landscape\_AML\_C Scan: 36767

Andromeda score: 170.95

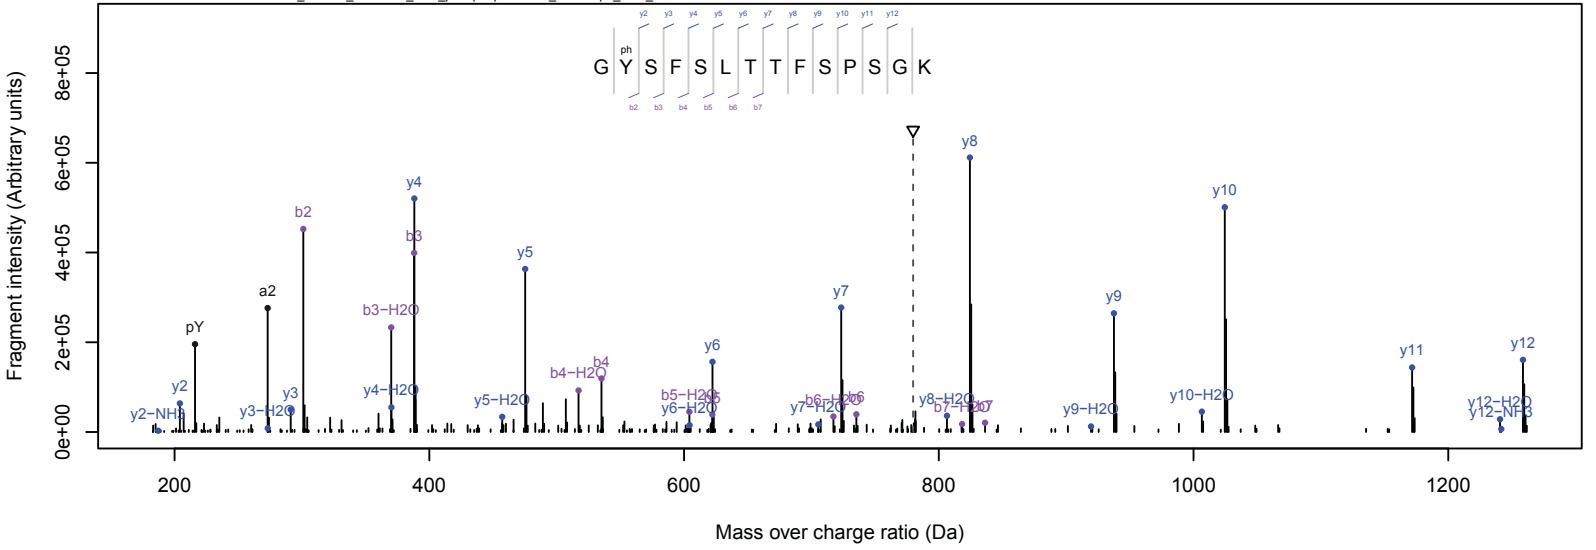

**HVDY(ph)VVDQVVGK-2+**

Source: QE1\_140612\_OPL1013\_CVA\_phosphoproteomic\_landscape\_AML\_B Scan: 21304

Andromeda score: 170.95

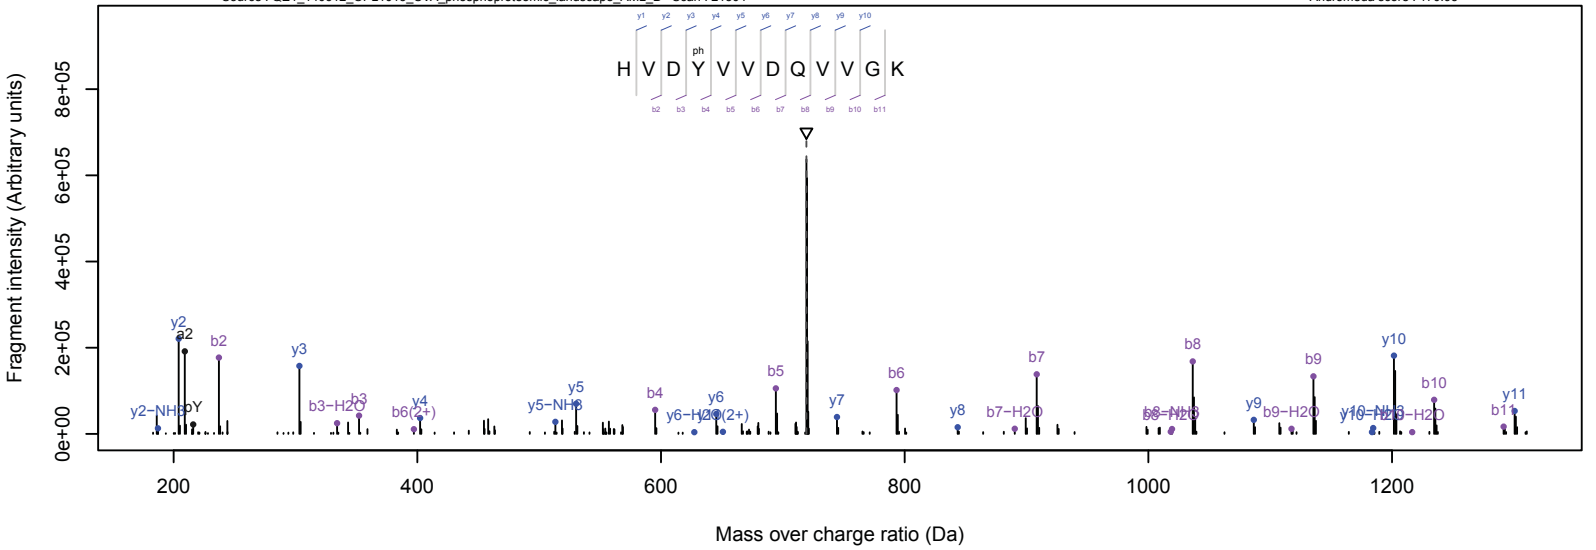

**MEKGEHSIVY(ph)LKPSYAFGSVVGK-4+**

Source: QE1\_140612\_OPL1013\_CVA\_phosphoproteomic\_landscape\_AML\_B Scan: 30716

Andromeda score: 170.92

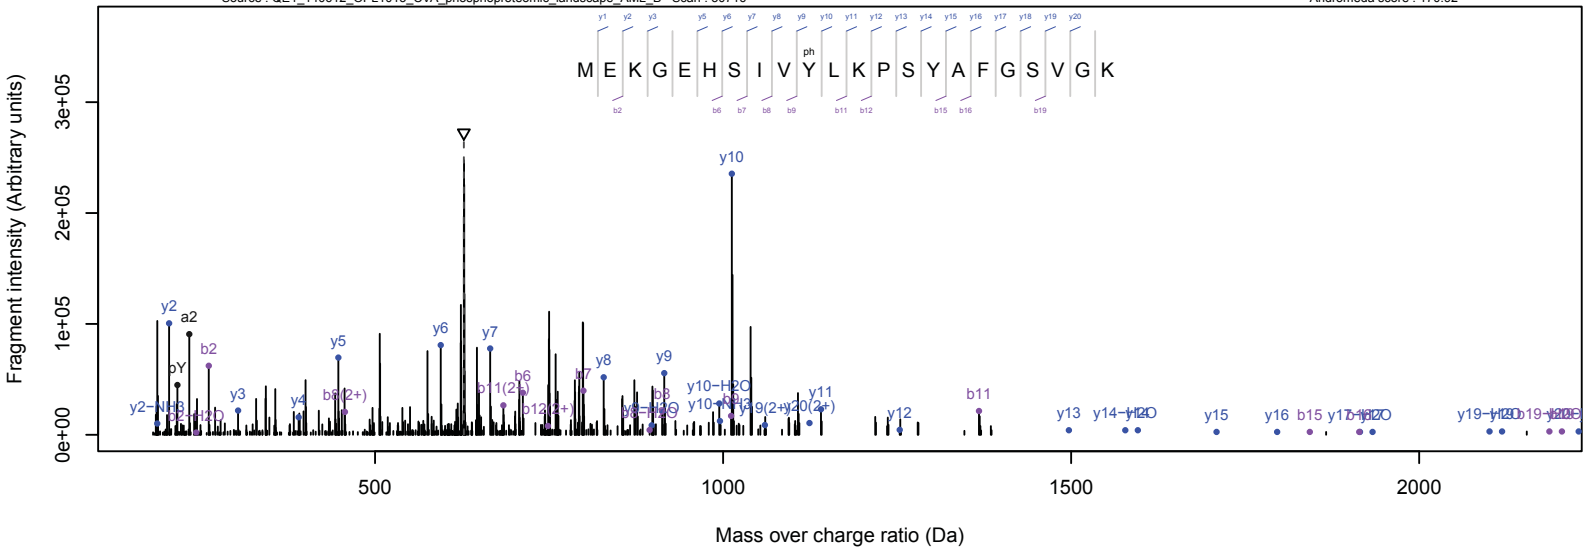

LLLSEEQRDY(ph)VQVDEQK-3+

Source: QE1\_140908\_OPL1013\_CVA\_pTyrIP\_AML\_HEL Scan: 28559

Andromeda score: 170.89

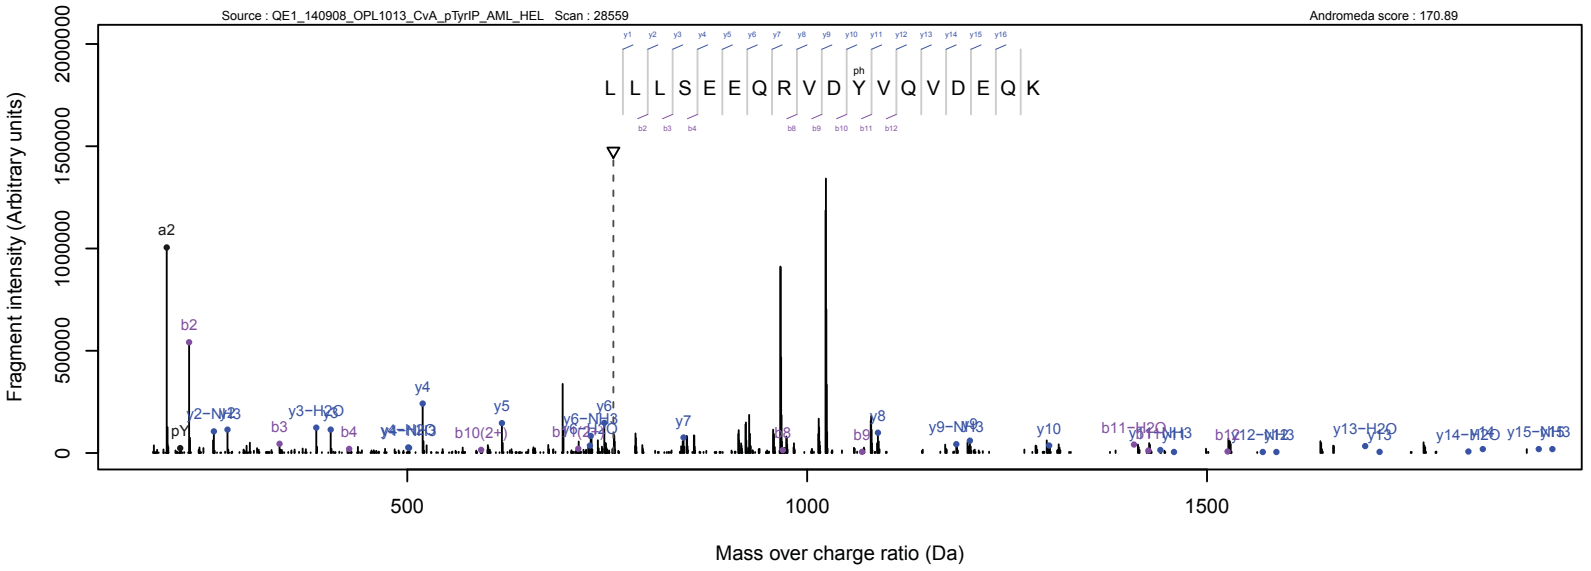

LQTTY(ph)AALNSK-2+

Source: QE1\_140612\_OPL1013\_CVA\_phosphoproteomic\_landscape\_AML\_C Scan: 9195

Andromeda score: 170.4

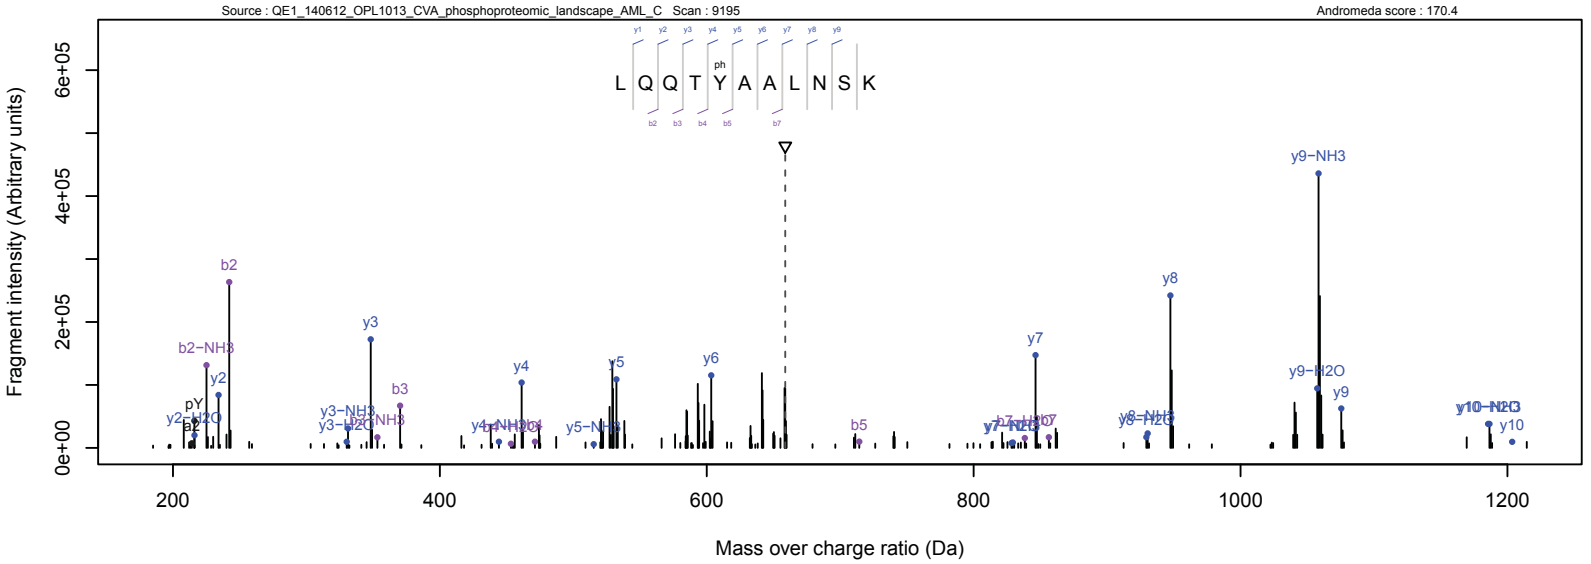

RSDSASSEPVGIYQGFEEK-3+

Source: QE1\_140612\_OPL1013\_CVA\_phosphoproteomic\_landscape\_AML\_C Scan: 17022

Andromeda score: 170.38

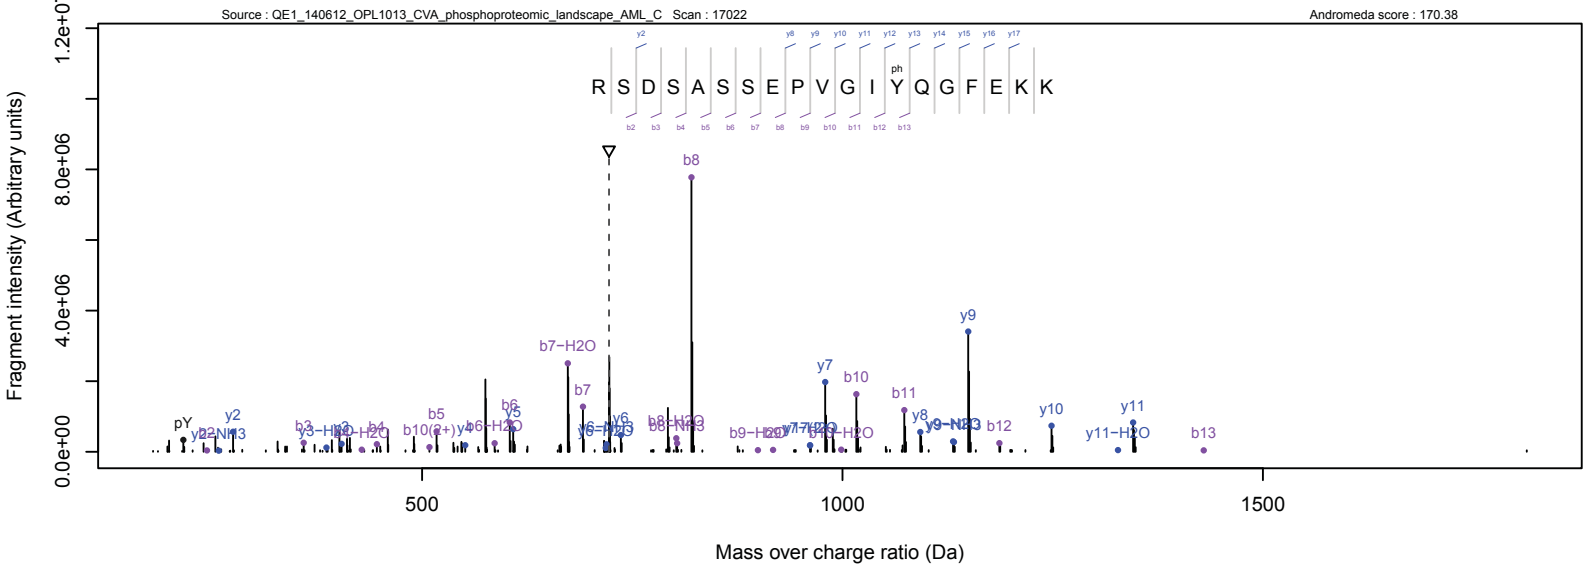





NVSAGTQDVPPSPDY(ph)VERVDSPMAYSSNGK-3+

Source : QE1\_140612\_OPL1013\_CVA\_phosphoproteomic\_landscape\_AML\_C Scan : 30666

Andromeda score : 170.11

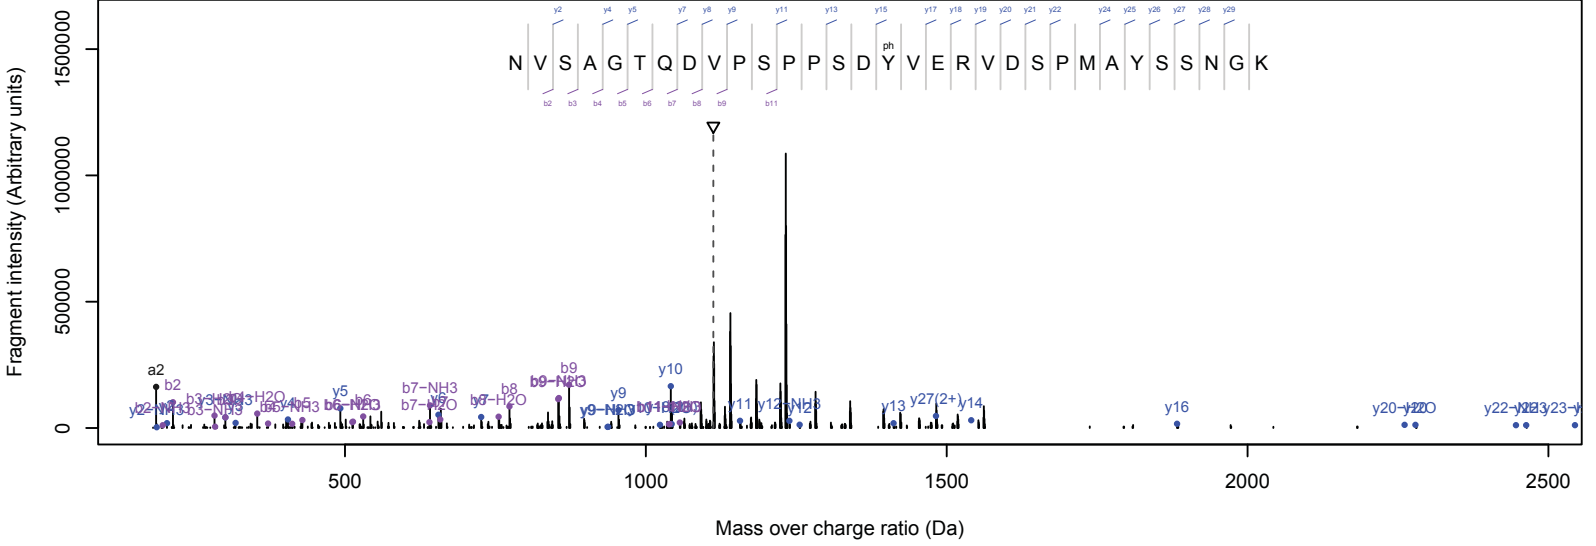

AVSQSTKPMASIT(ph)YAAVAR-2+

Source : QE1\_140612\_OPL1013\_CVA\_phosphoproteomic\_landscape\_AML\_C Scan : 26991

Andromeda score : 170.04

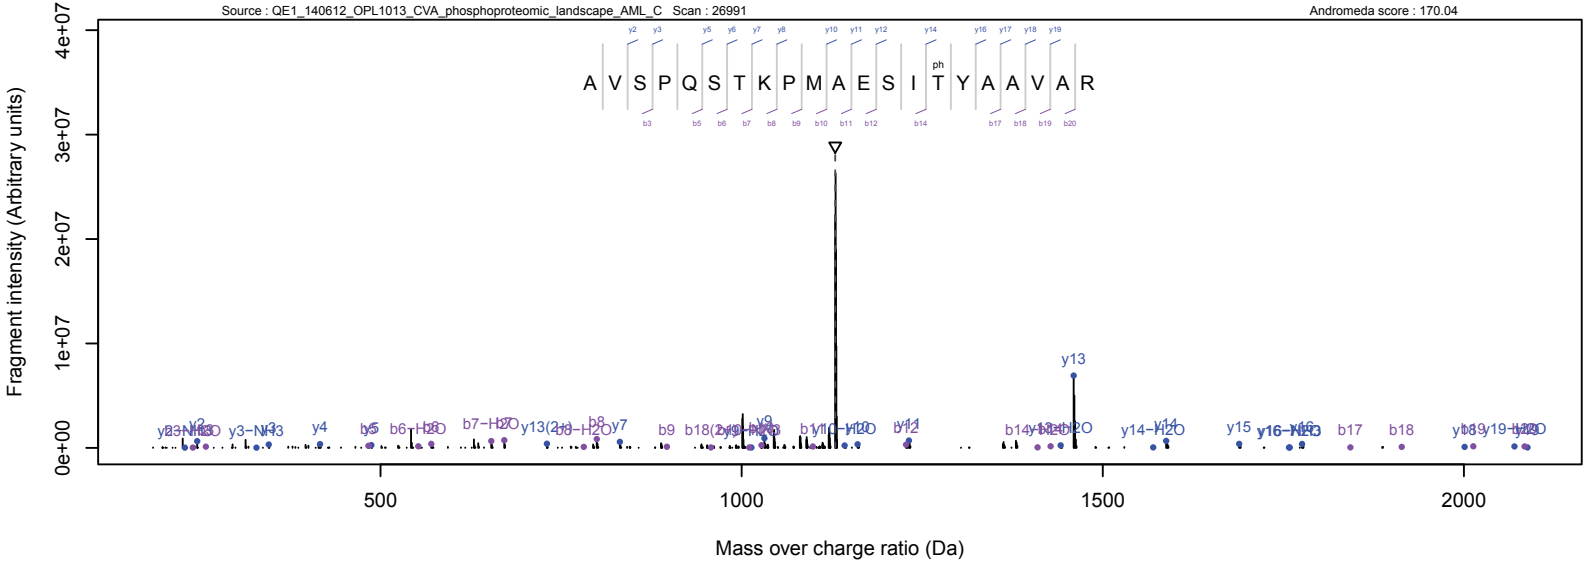

FQNSDNPYYYP(ph)R-2+

Source : QE1\_140612\_OPL1013\_CVA\_phosphoproteomic\_landscape\_AML\_C Scan : 17412

Andromeda score : 170.04

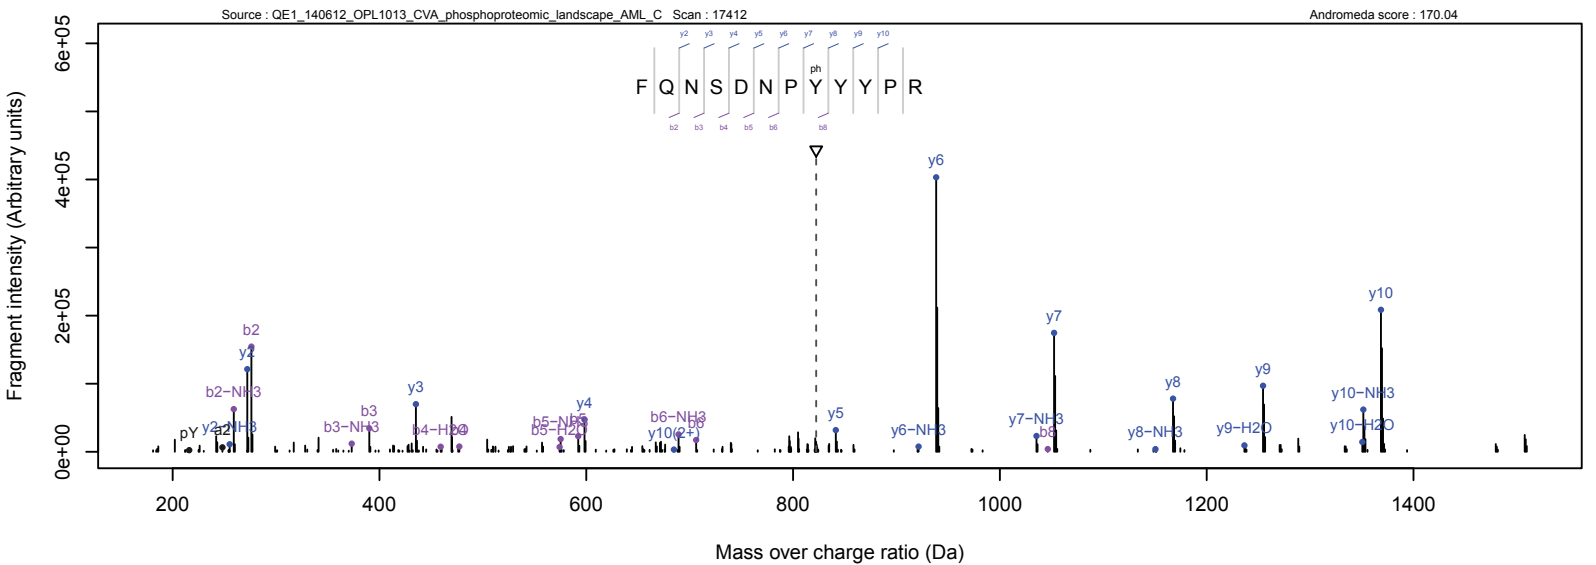

KSEEDGKEY(ph)HFISTEEMTR-3+

Source : QE1\_140612\_OPL1013\_CVA\_phosphoproteomic\_landscape\_AML\_B Scan : 16570

Andromeda score : 169.9

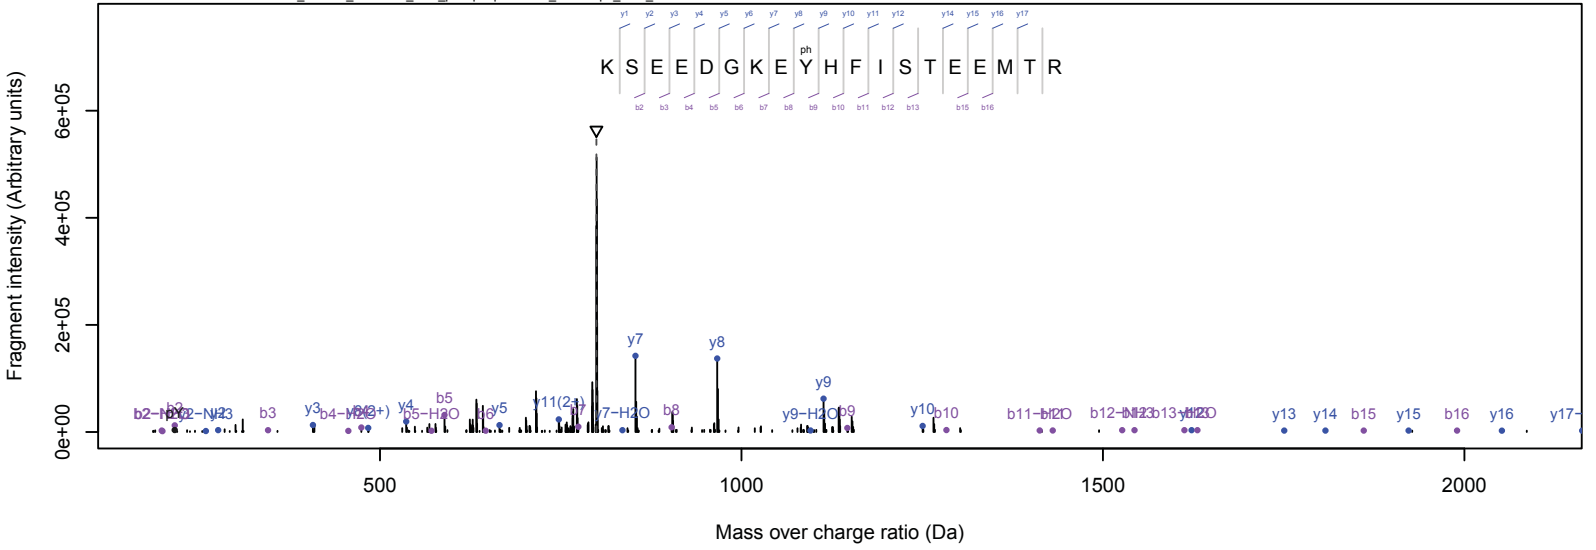

GQSIY(ph)STSFQPAPR-2+

Source : QE1\_140612\_OPL1013\_CVA\_phosphoproteomic\_landscape\_AML\_C Scan : 23343

Andromeda score : 169.8

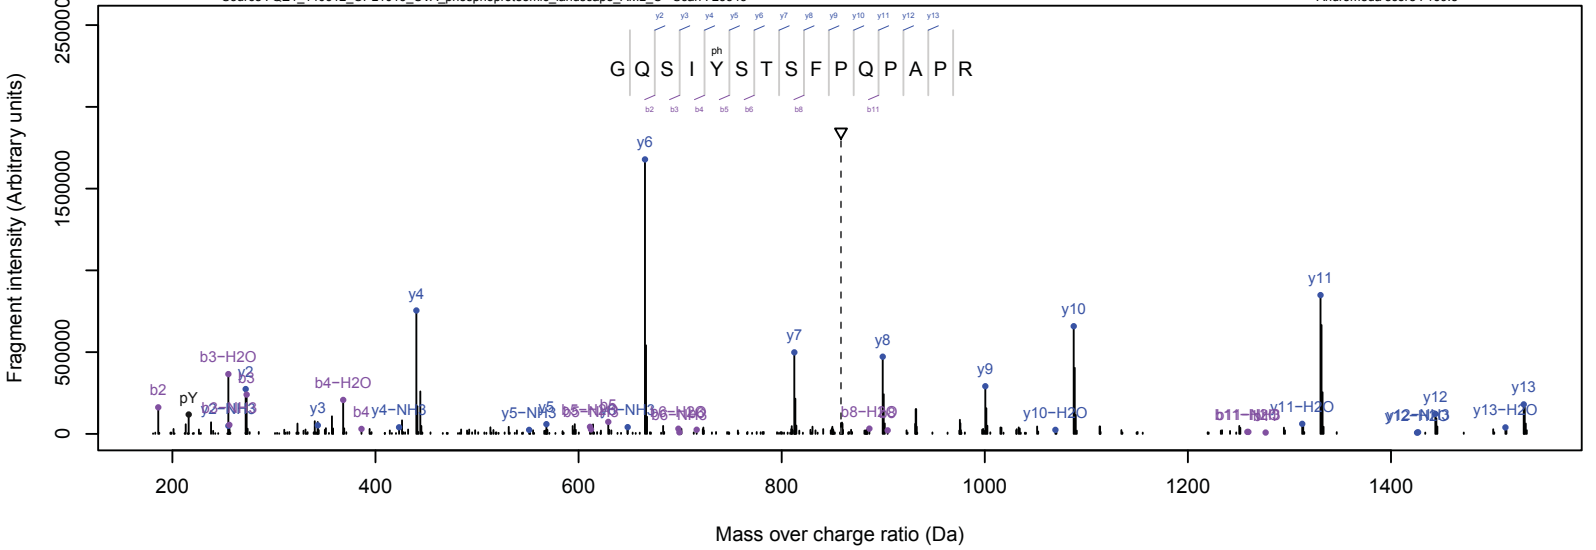

LAEGSAY(ph)EEVPTSMMYSENDISNSIK-3+

Source : QE1\_140612\_OPL1013\_CVA\_phosphoproteomic\_landscape\_AML\_B Scan : 38886

Andromeda score : 169.8

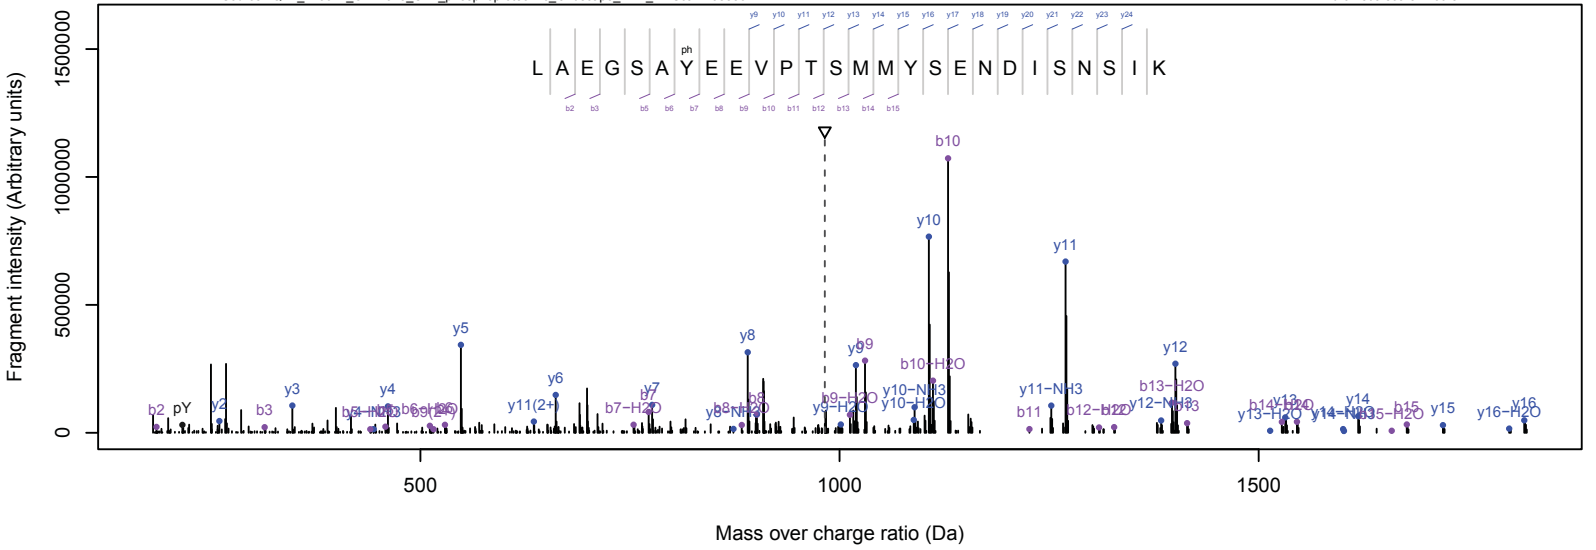

SSFSHY(ph)SGLK-2+

Source : QE1\_140612\_OPL1013\_CVA\_phosphoproteomic\_landscape\_AML\_C Scan : 10215

Andromeda score : 169.65

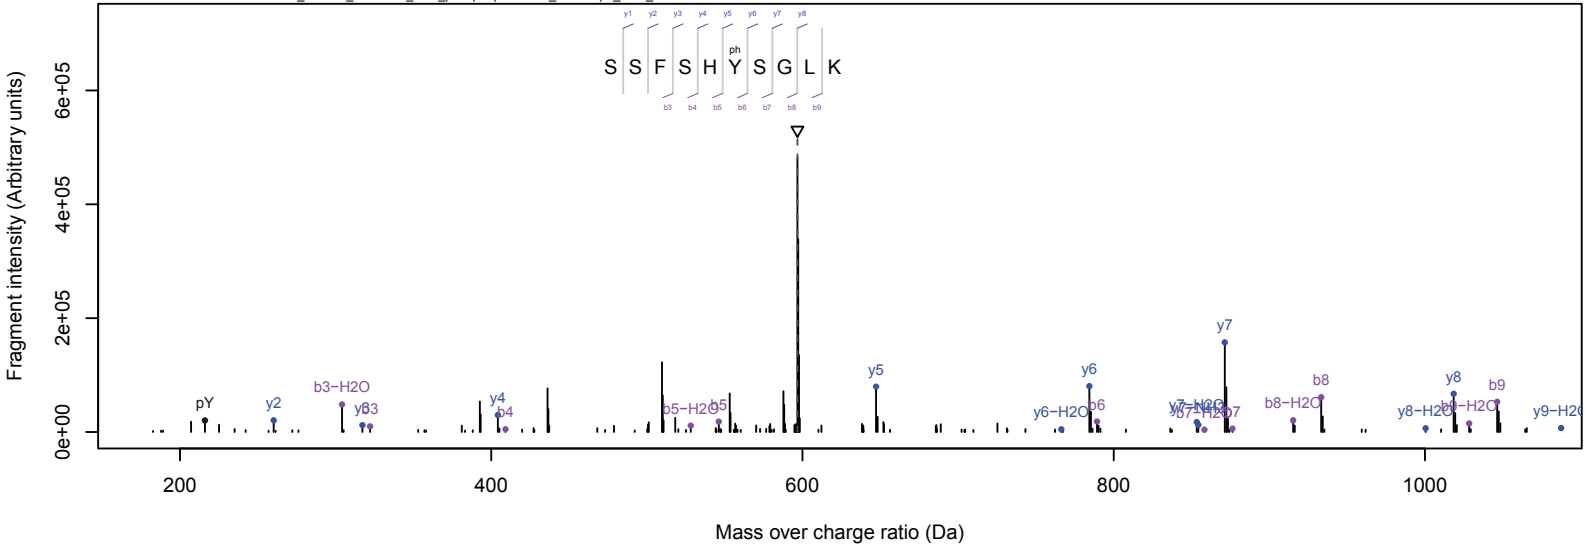

VTSEELHY(ph)FVQNHTSAR-3+

Source : QE1\_140612\_OPL1013\_CVA\_phosphoproteomic\_landscape\_AML\_C Scan : 34260

Andromeda score : 169.49

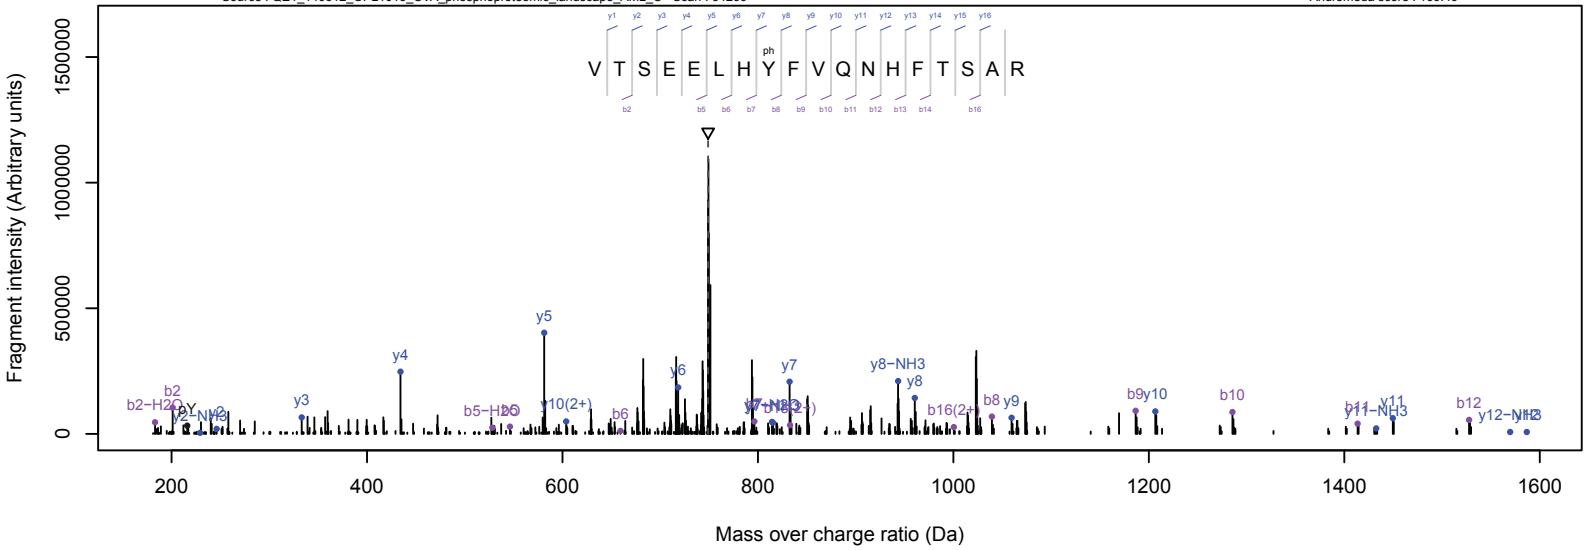

SHPSLSTTNQQMSP(i)IQSGSSKPSPIY(i)ISSYSSPAR-4+

Source : QE1\_140612\_OPL1013\_CVA\_phosphoproteomic\_landscape\_AML\_C Scan : 32724

Andromeda score : 169.26

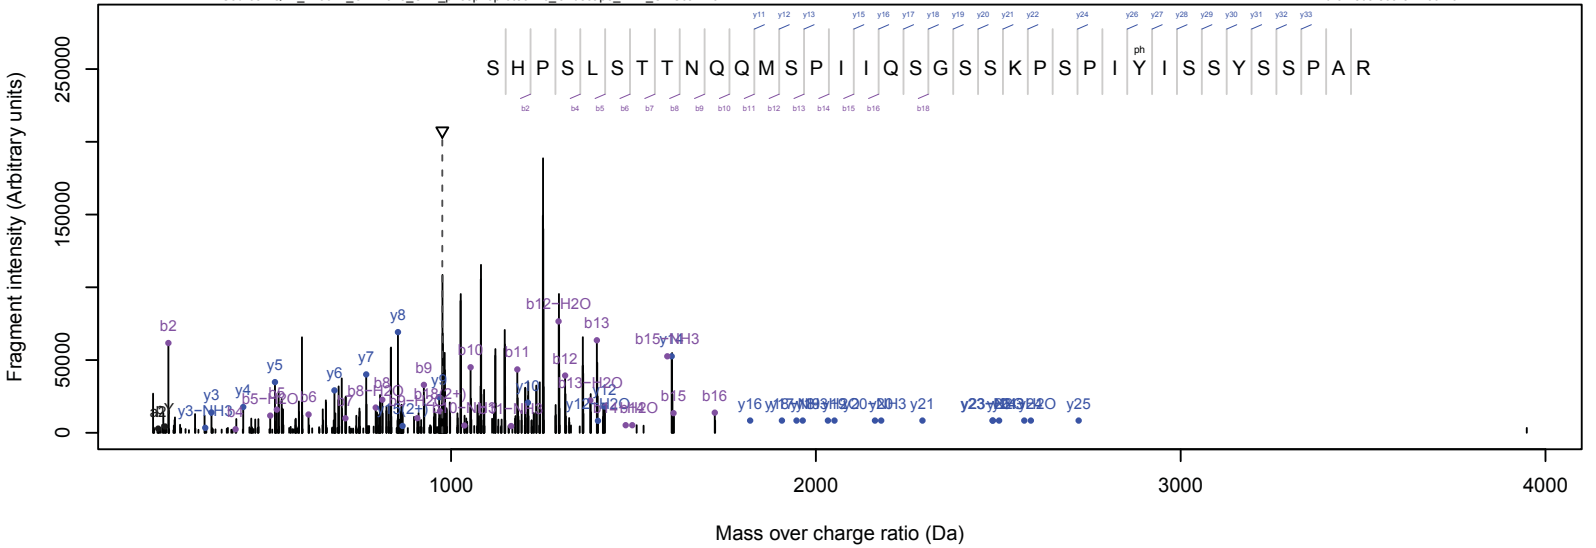

KGHGQPGADA EKPFYVNV E F H H E R

Source : QE1\_140612\_OPL1013\_CVA\_phosphoproteomic\_landscape\_AML\_D Scan : 20743

Andromeda score : 169.08

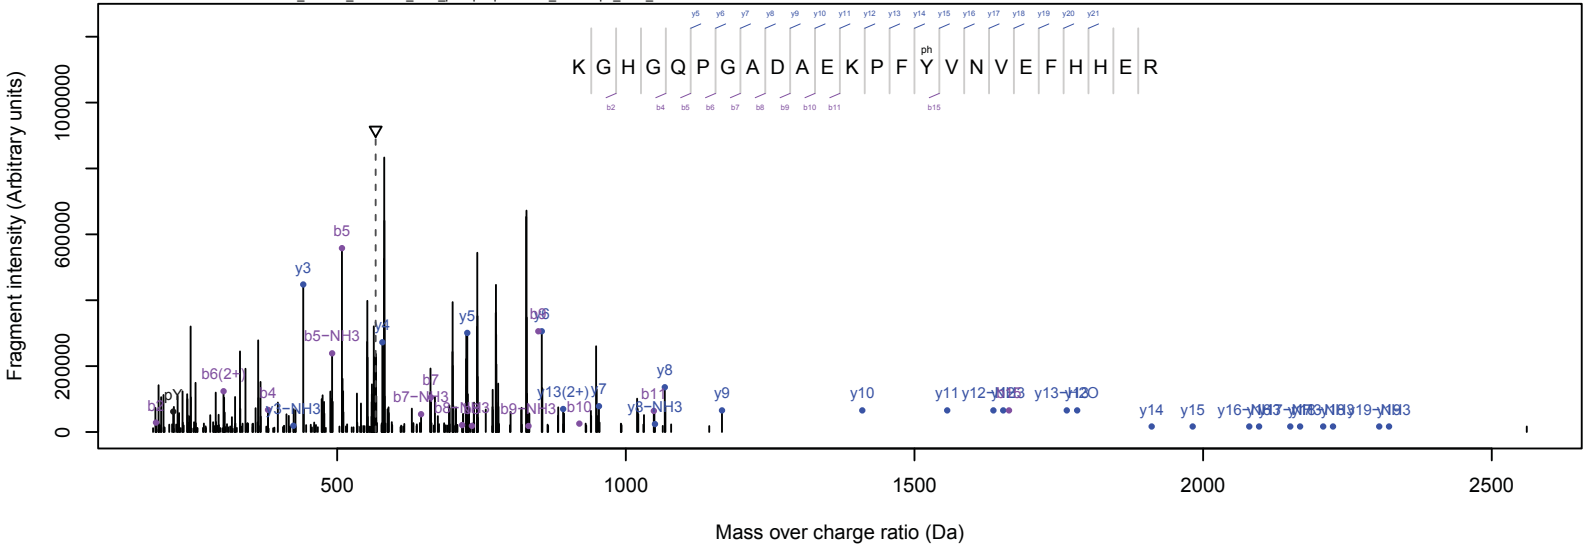

Y(ph)RGLPAPGPS PADK

Source : QE1\_140612\_OPL1013\_CVA\_phosphoproteomic\_landscape\_AML\_C Scan : 12947

Andromeda score : 168.93

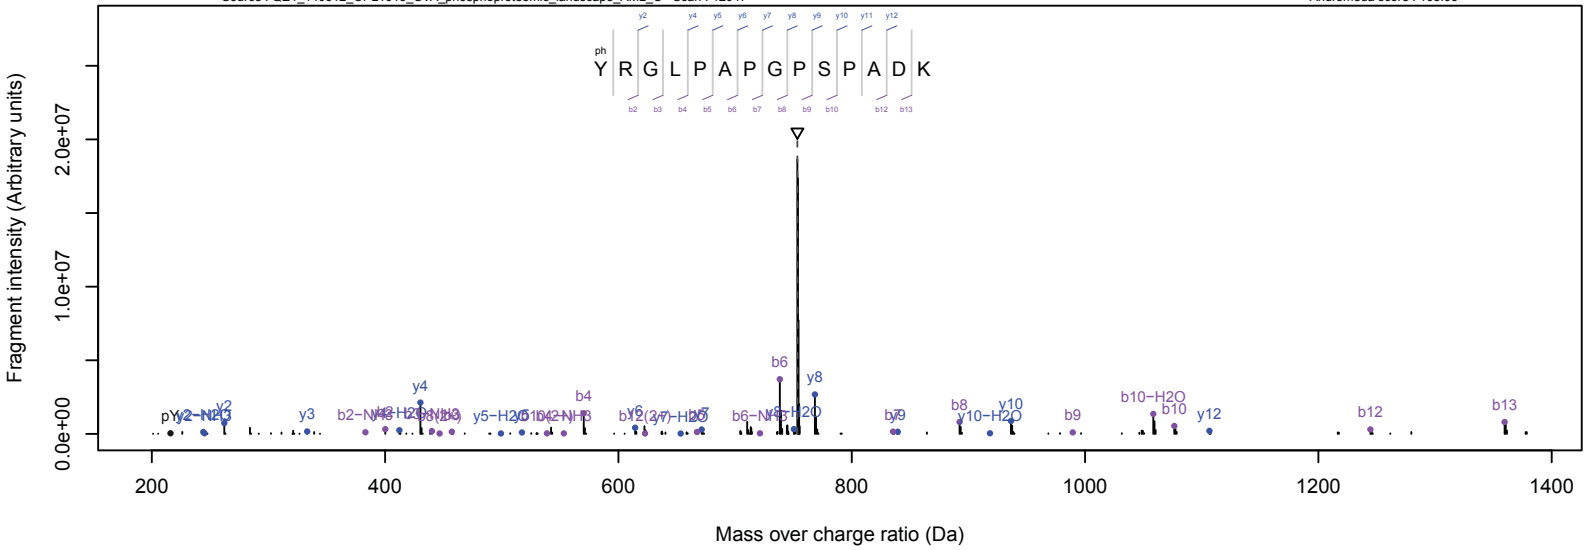

CTTDENKVPYFNAPVYLENK

Source : QE1\_140612\_OPL1013\_CVA\_phosphoproteomic\_landscape\_AML\_C Scan : 34292

Andromeda score : 168.81

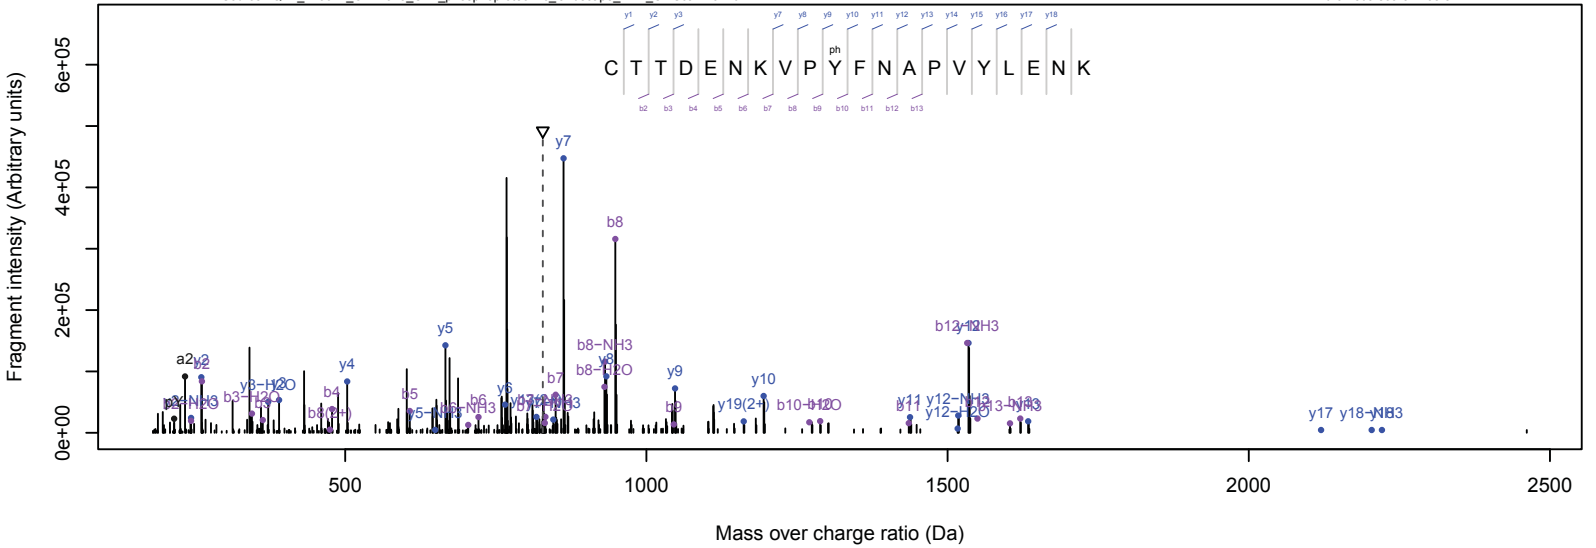

ERVTPPEGY(ph)EVVTVFPK-2+

Source : QE1\_140612\_OPL1013\_CVA\_phosphoproteomic\_landscape\_AML\_A Scan : 33965

Andromeda score : 168.64

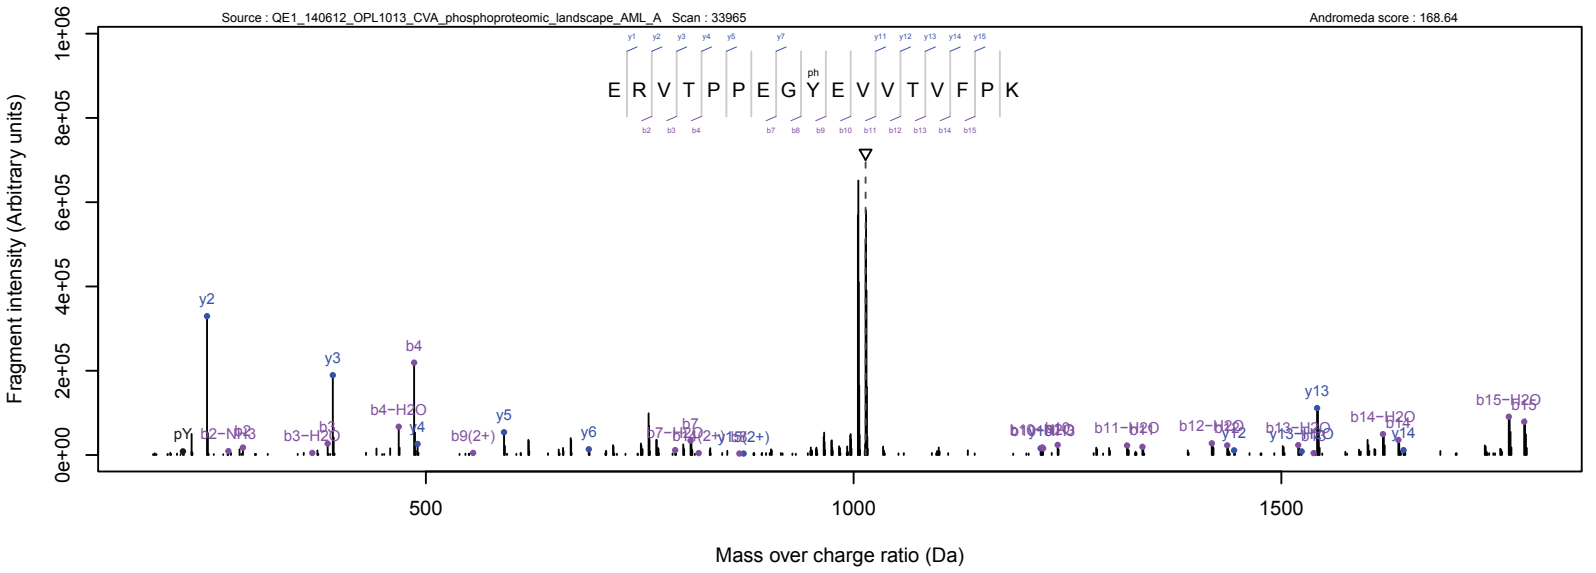

ALPAQVDDPPEV(ph)ANIER-2+

Source : QE1\_140822\_OPL1013\_CvA\_pTyrIP\_AML\_cell\_lines\_part2\_B Scan : 25556

Andromeda score : 168.62

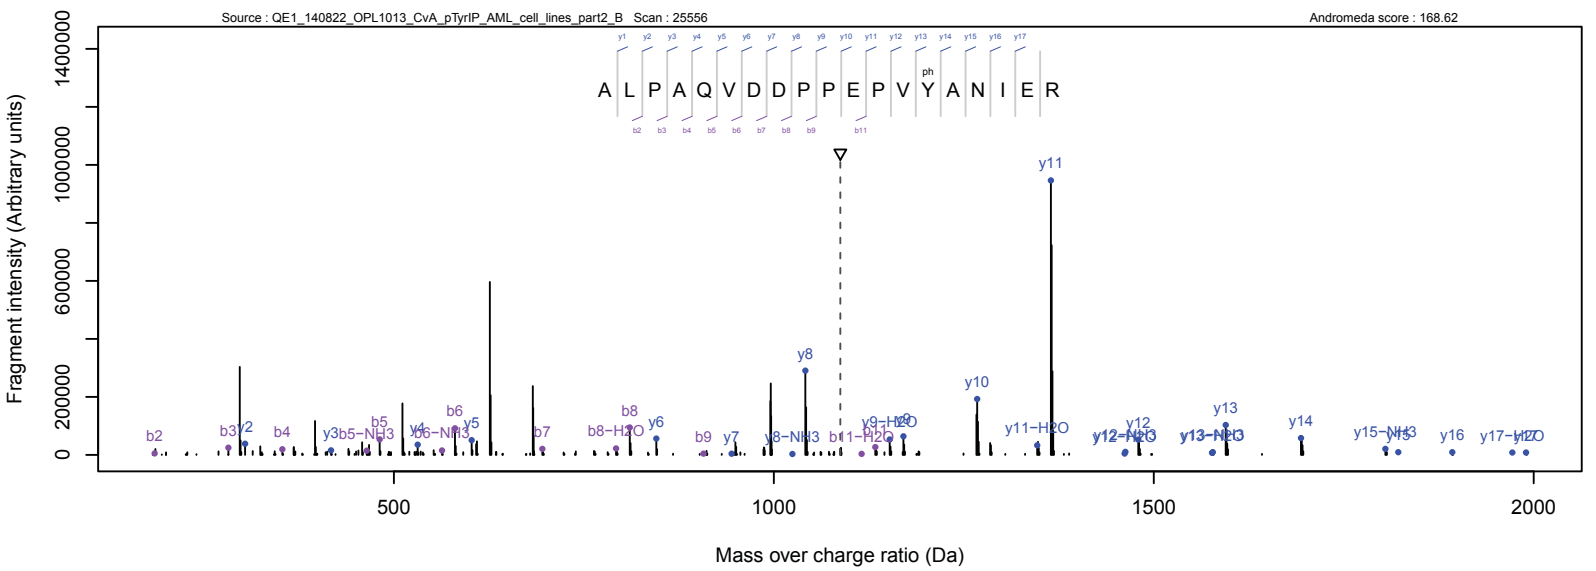

DQY(ph)LMWLTQK-2+

Source : QE1\_140908\_OPL1013\_CvA\_pTyrIP\_AML\_Kasumi1 Scan : 35576

Andromeda score : 168.59

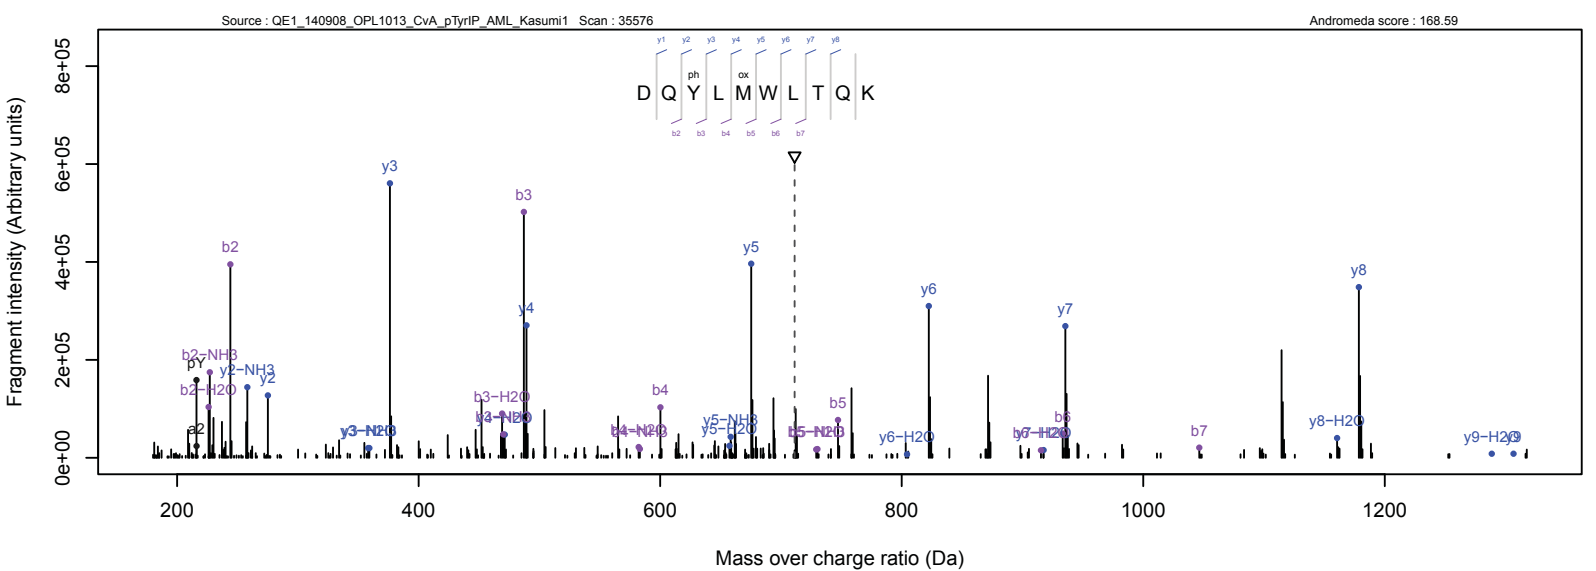

LHGLNINYNCEICGN<sup>ph</sup>TYR-3+

Source: QE1\_140612\_OPL1013\_CVA\_phosphoproteomic\_landscape\_AML\_B Scan: 29720

Andromeda score: 168.42

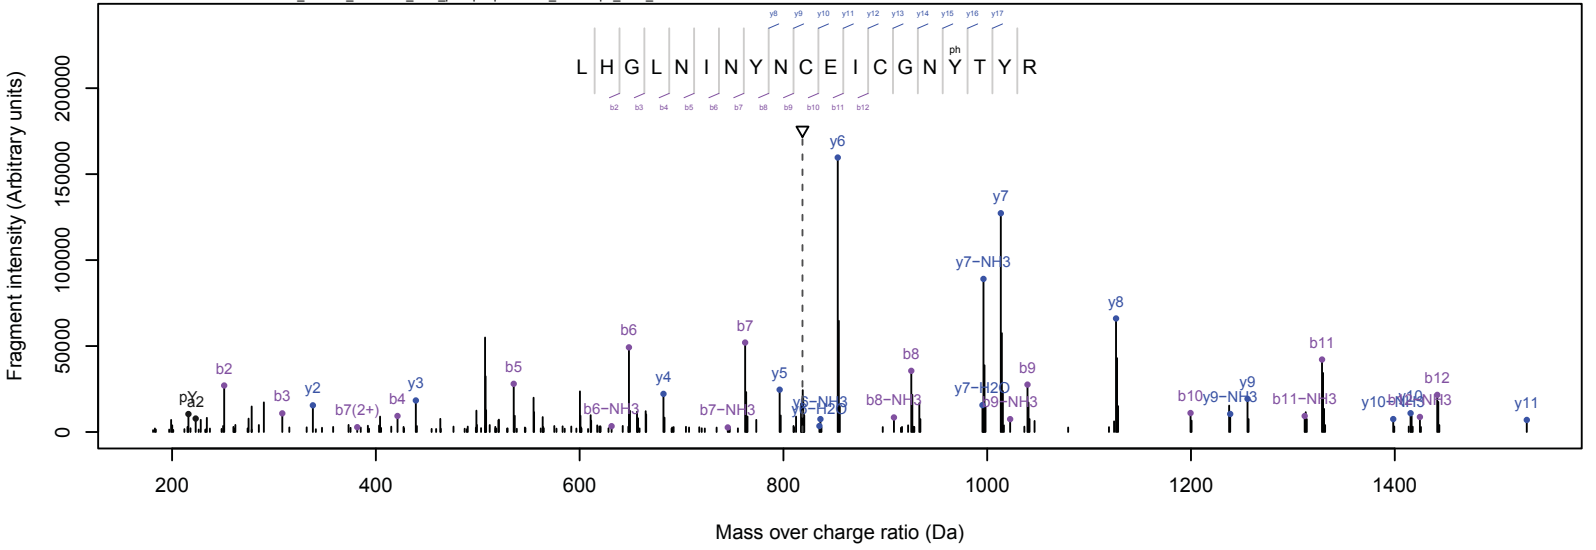

VG DY<sup>ph</sup> V Y F E N S S S N P Y L I R-2+

Source: QE1\_140612\_OPL1013\_CVA\_phosphoproteomic\_landscape\_AML\_B Scan: 39340

Andromeda score: 168.42

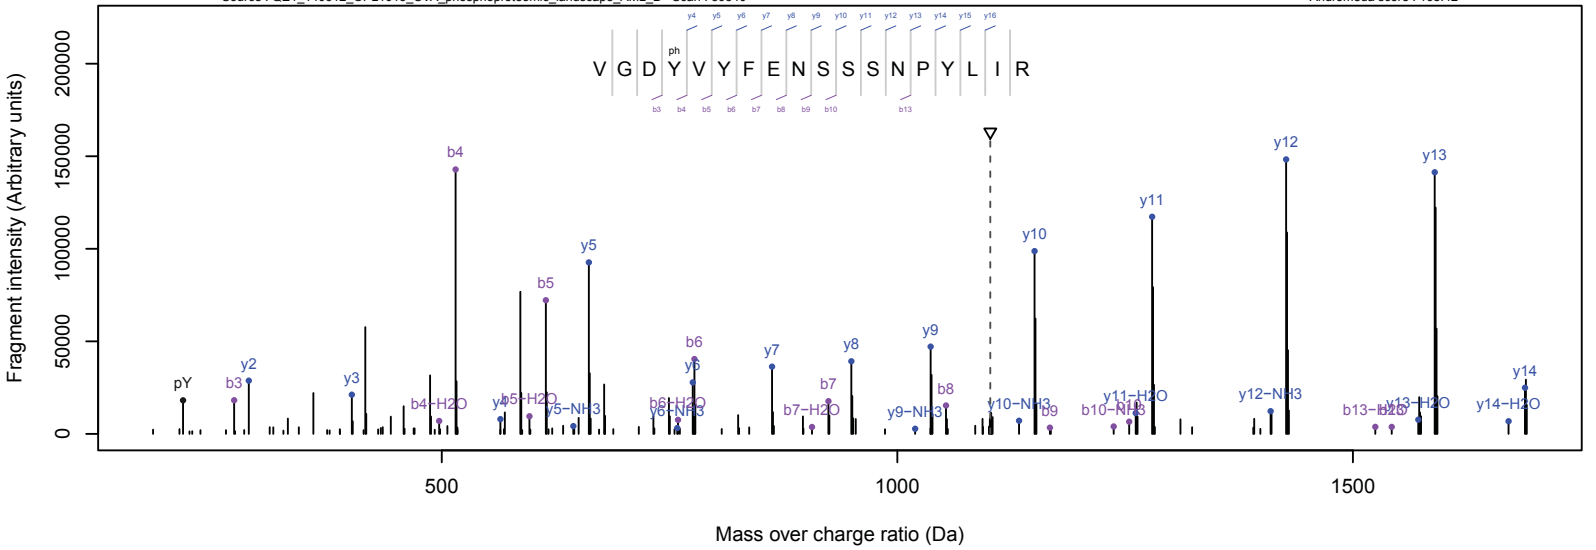

KA E L L D N E K P A A V V A P I T T G Y T V K-3+

Source: QE1\_140612\_OPL1013\_CVA\_phosphoproteomic\_landscape\_AML\_C Scan: 30882

Andromeda score: 168.26

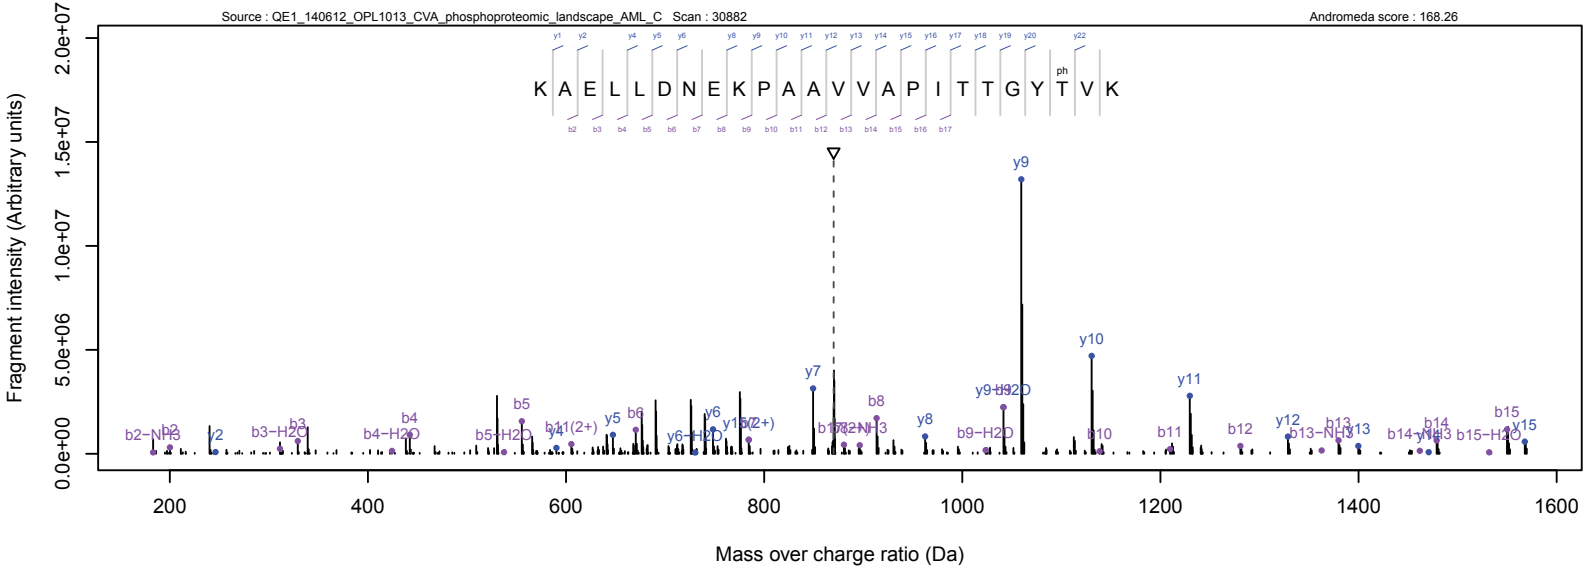

**IIQLDDY(ph)PKCFIVGADNVGSK-2+**

Source : QE1\_140612\_OPL1013\_CVA\_phosphoproteomic\_landscape\_AML\_B Scan : 44529

Andromeda score : 168.25

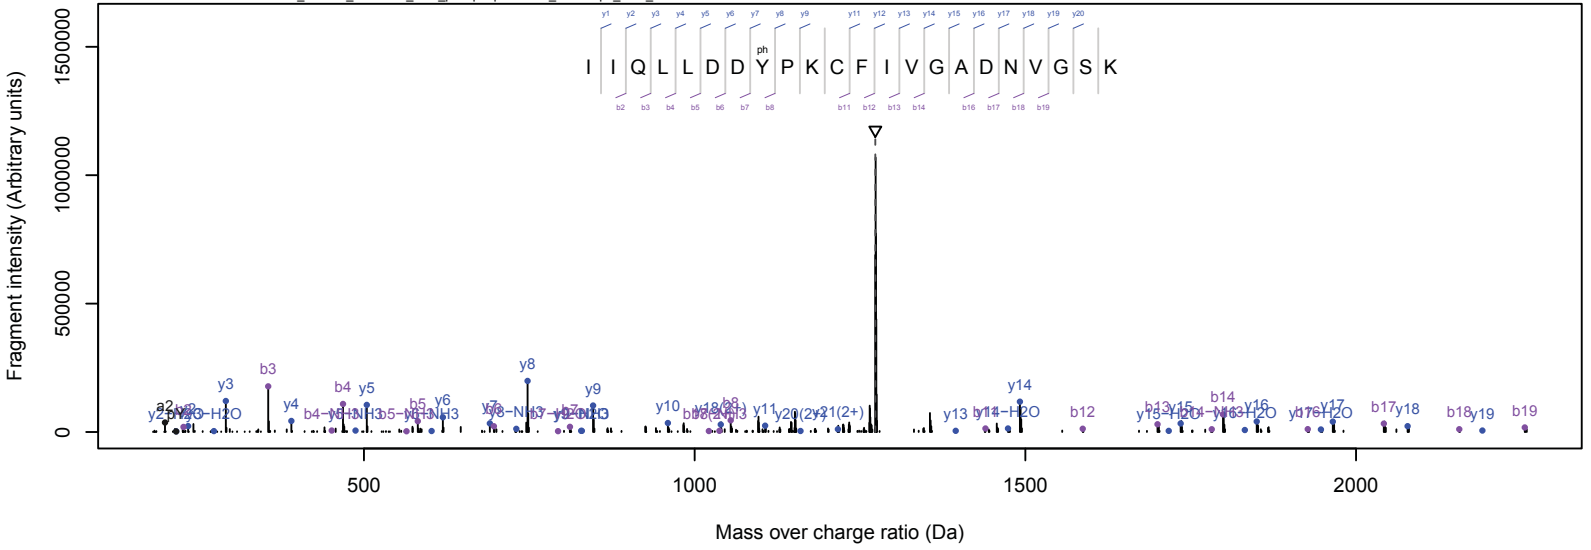

**QTLSPDQQPTAWSY(ph)DQPPKDSPLGPCR-3+**

Source : QE1\_140612\_OPL1013\_CVA\_phosphoproteomic\_landscape\_AML\_A Scan : 30037

Andromeda score : 168.25

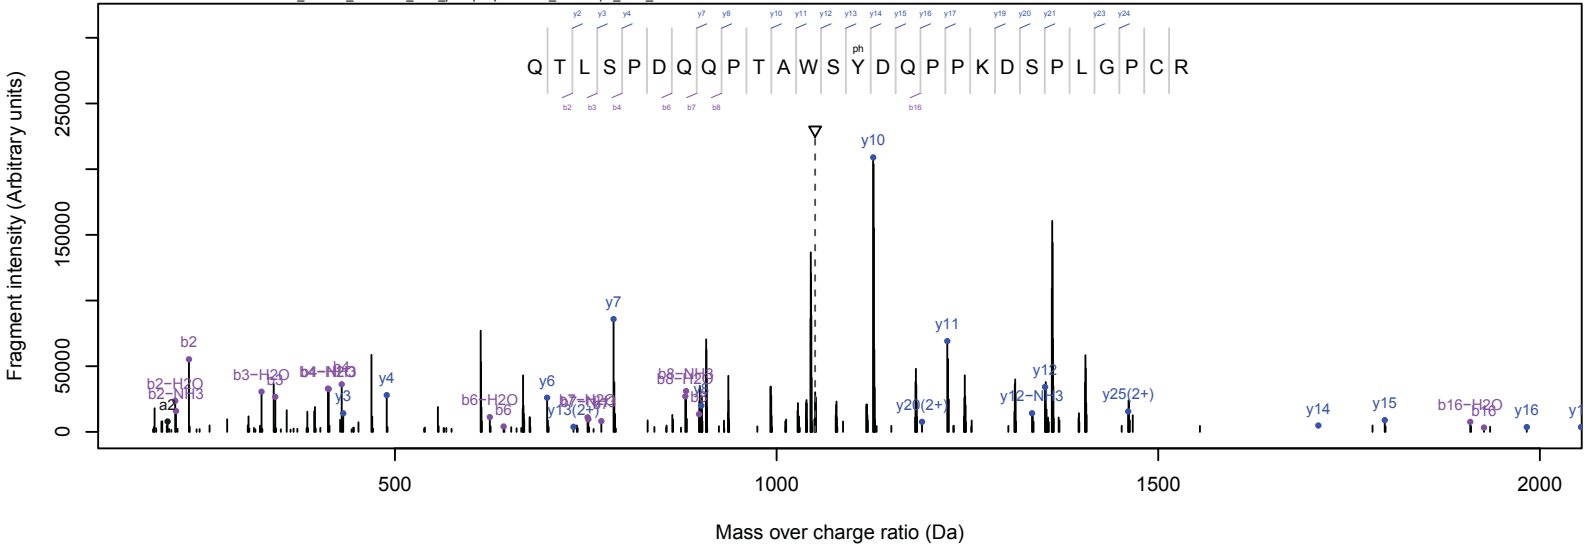

**KLAEGSAY(ph)EEVPTSMMYSENDISNSIK-3+**

Source : QE1\_140612\_OPL1013\_CVA\_phosphoproteomic\_landscape\_AML\_B Scan : 35400

Andromeda score : 168.2

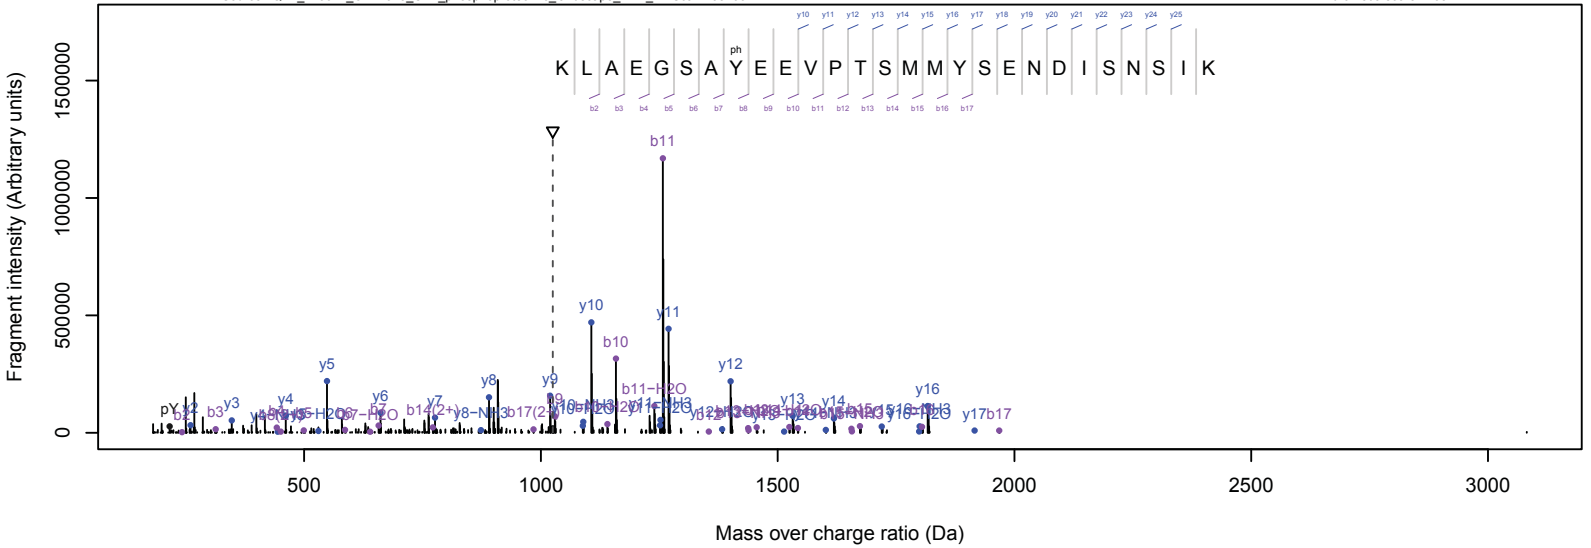



GQEGEY(ph)AVPFDVAR-2+

Source : QE1\_140908\_OPL1013\_CvA\_pTyrIP\_AML\_HEL Scan : 31267

Andromeda score : 168.1

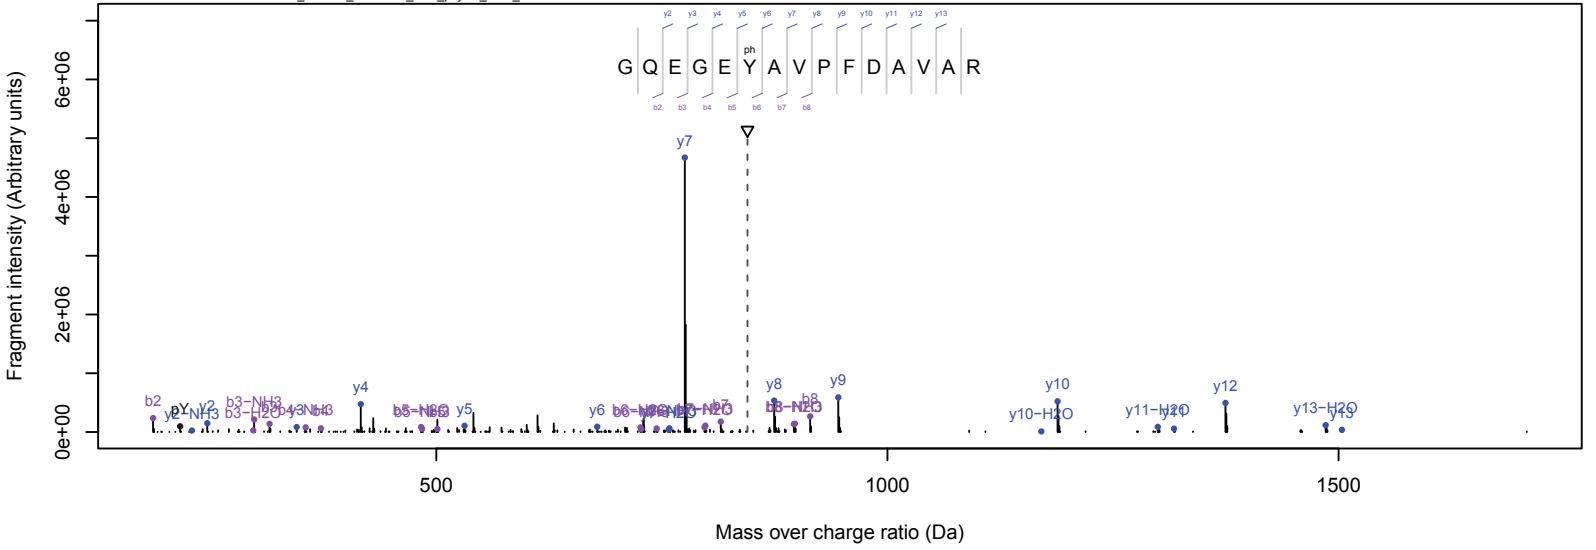

TY(ph)ENFQYLENK-2+

Source : QE1\_140822\_OPL1013\_CvA\_pTyrIP\_AML\_cell\_lines\_part2\_E Scan : 16810

Andromeda score : 168.02

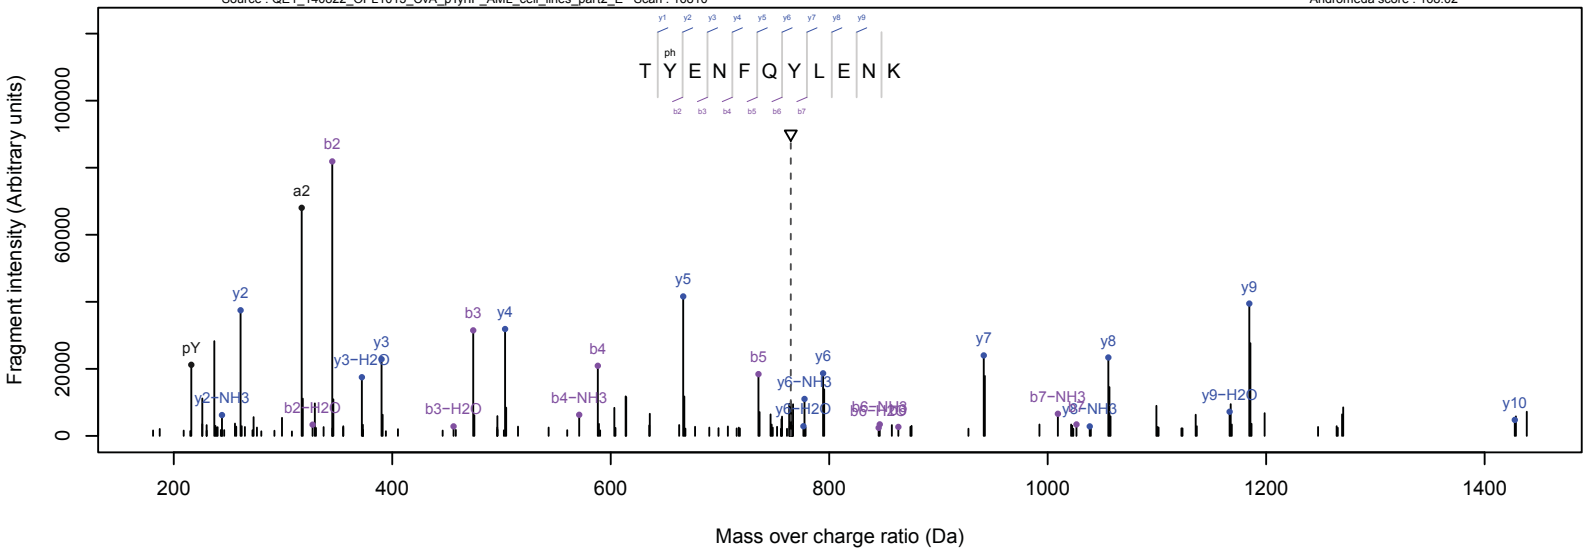

FAELVY(ph)TGFWHSPECFVR-3+

Source : QE1\_140612\_OPL1013\_CvA\_phosphoproteomic\_landscape\_AML\_C Scan : 47688

Andromeda score : 167.92

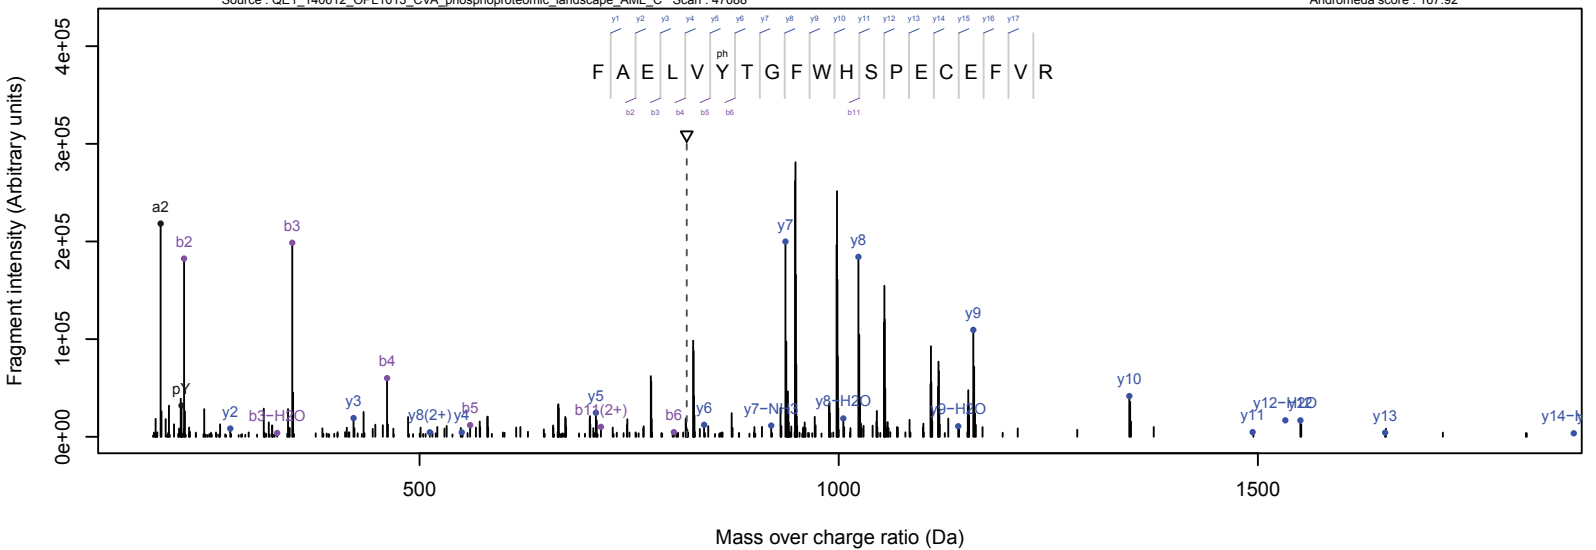

ISVY(ph)YNEATGGK-2+

Source : QE1\_140612\_OPL1013\_CVA\_phosphoproteomic\_landscape\_AML\_B Scan : 16232

Andromeda score : 167.84

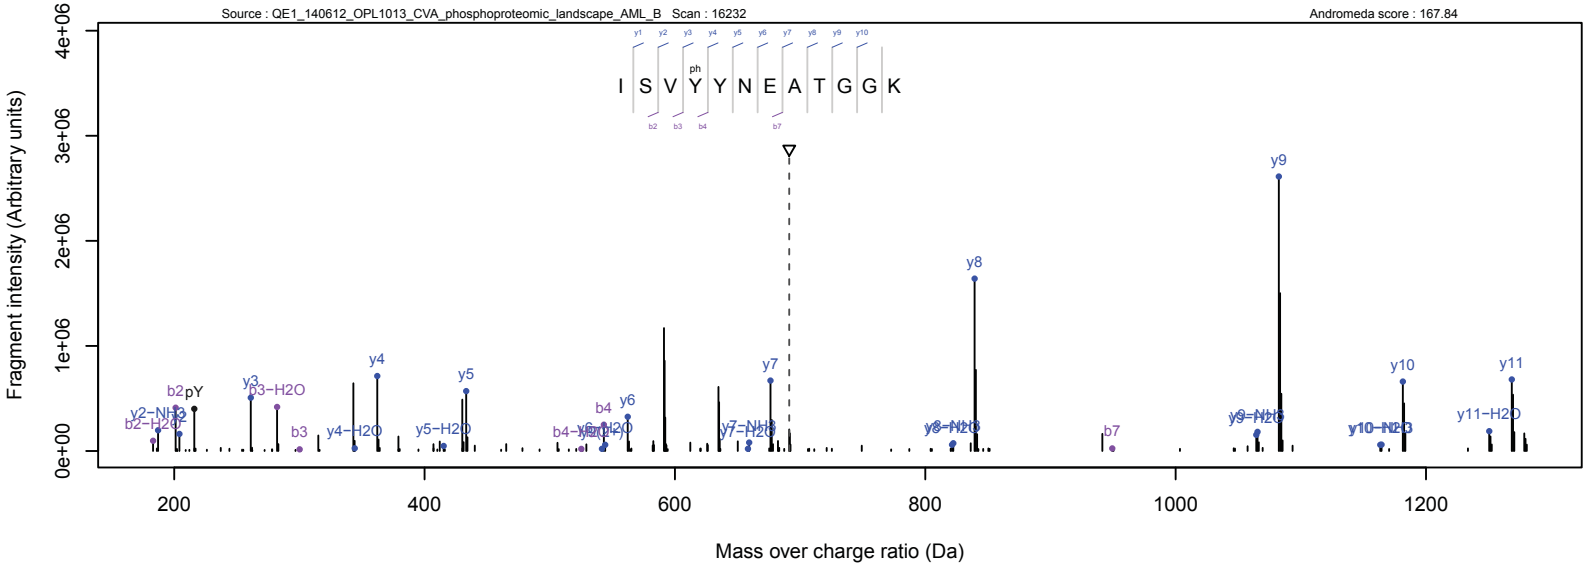

NAGDTLPQEDLPLTKPEM(ox)FENPLY(ph)GSLSSFPKPAPR-4+

Source : QE1\_140822\_OPL1013\_CvA\_pTyrIP\_AML\_cell\_lines\_part2\_B Scan : 40205

Andromeda score : 167.7

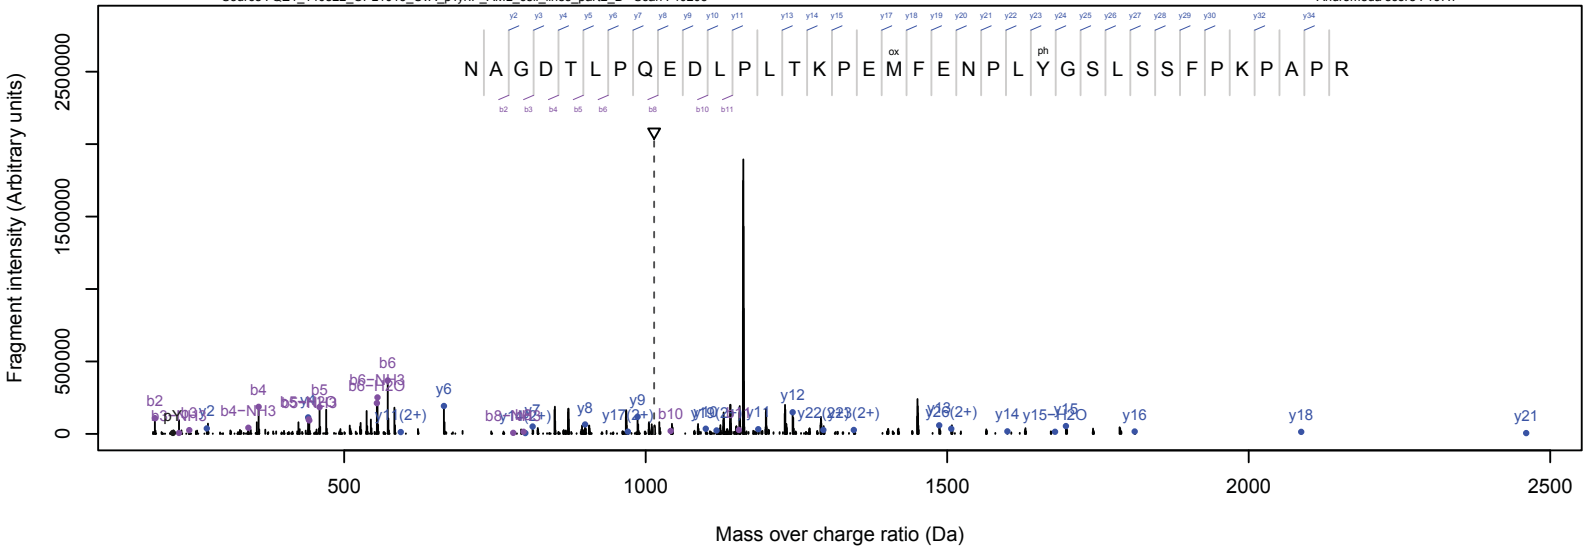

AAEDSPY(ph)WVSPAYSK-2+

Source : QE1\_140612\_OPL1013\_CVA\_phosphoproteomic\_landscape\_AML\_C Scan : 25487

Andromeda score : 167.61

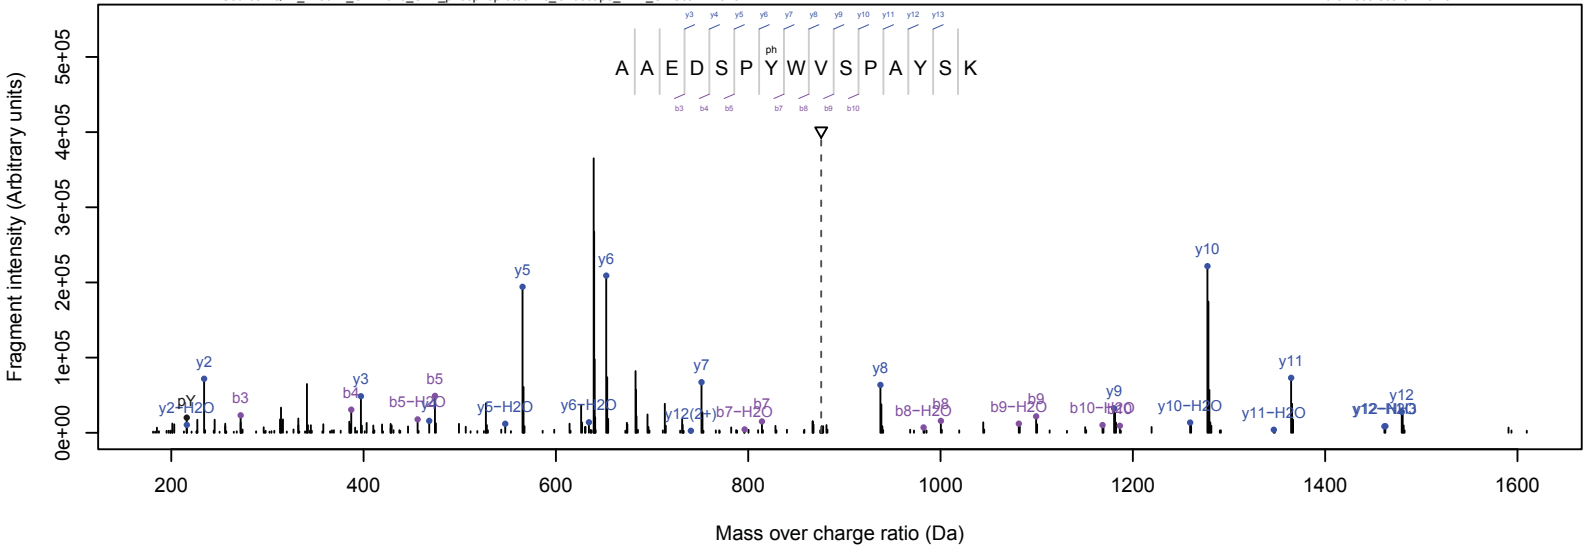

TVEY(ph)HRLDQNVNEAMP<sup>SLK</sup>-3+

Source : QE1\_140908\_OPL1013\_CvA\_pTyrIP\_AML\_Kasumi1 Scan : 23761

Andromeda score : 167.53

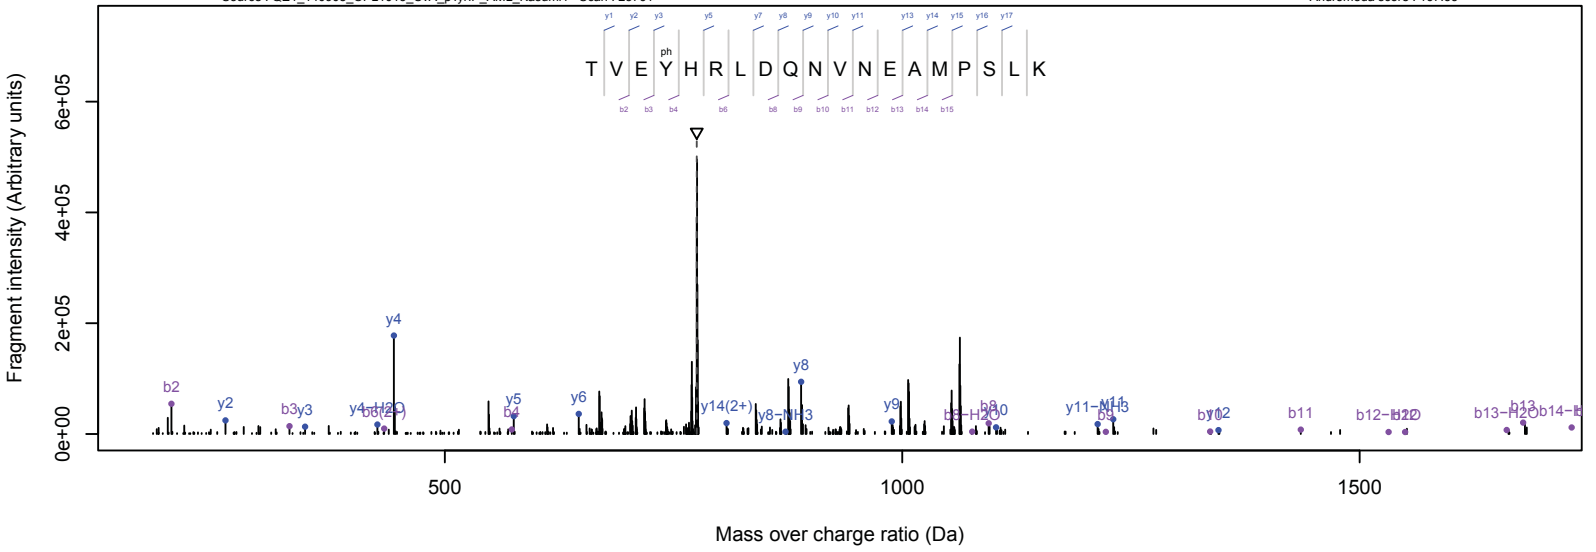

APPCSGSSITEIINP<sup>NYM</sup>(ox)GVGVPFGPP<sup>ox</sup>MPLHVK-3+

Source : QE1\_140908\_OPL1013\_CvA\_pTyrIP\_AML\_HEL Scan : 46890

Andromeda score : 167.22

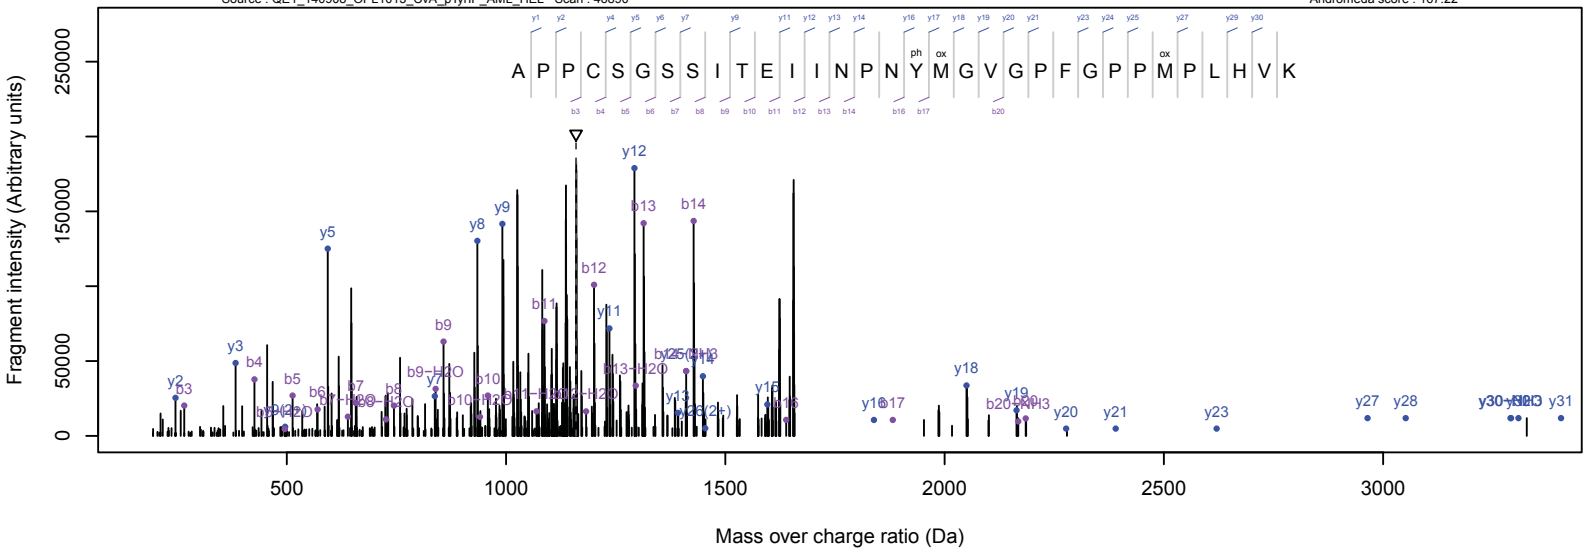

ESSCSDSTNEY(ph)MDMKPGVSYVPTK-3+

Source : QE1\_140908\_OPL1013\_CvA\_pTyrIP\_AML\_Kasumi1 Scan : 27756

Andromeda score : 166.49

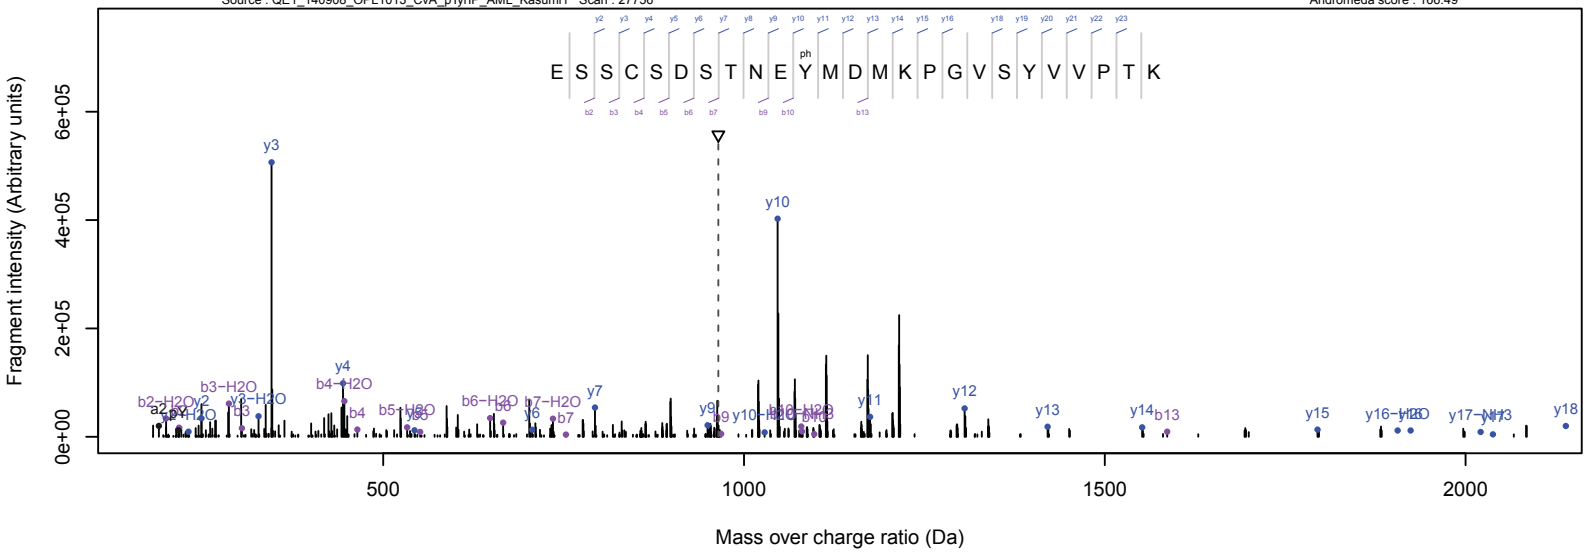

TEY(ph)M(ox)AFPKPFESSSSIGAEKPR-3+

Source : QE1\_140908\_OPL1013\_CVA\_pTyrIP\_AML\_HEL Scan : 26978

Andromeda score : 166.49

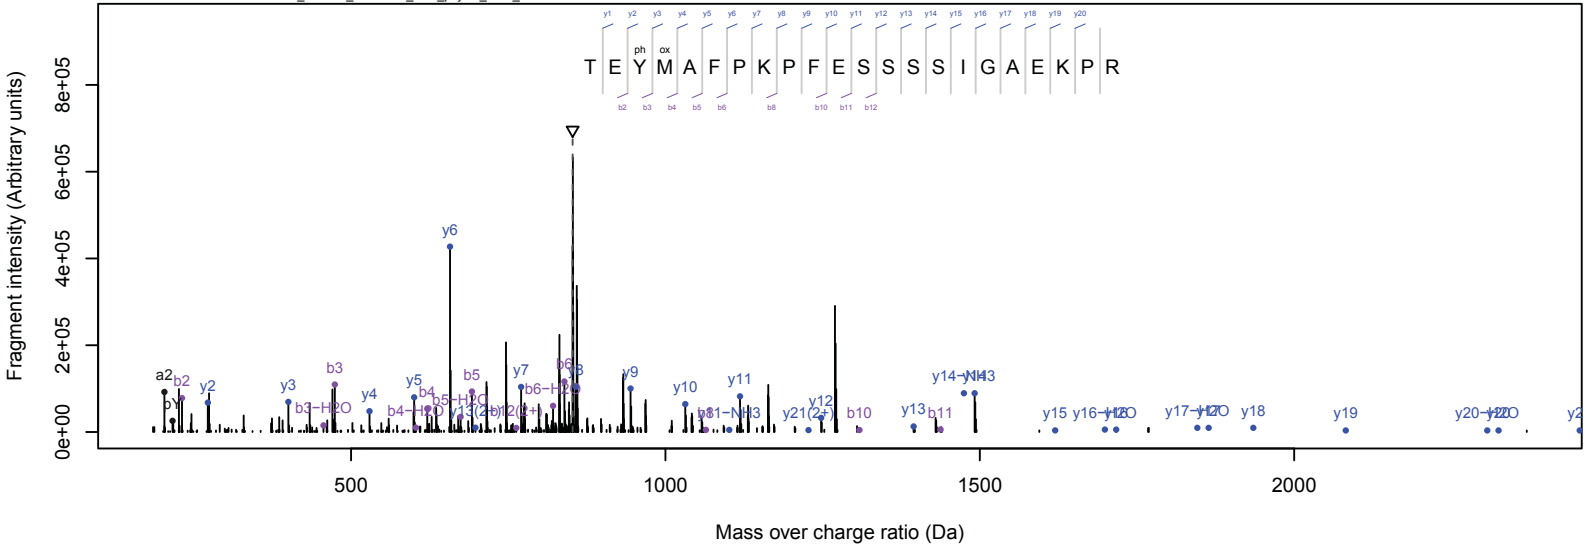

ERLDGENIY(ph)IR-2+

Source : QE1\_140612\_OPL1013\_CVA\_phosphoproteomic\_landscape\_AML\_C Scan : 20513

Andromeda score : 166.45

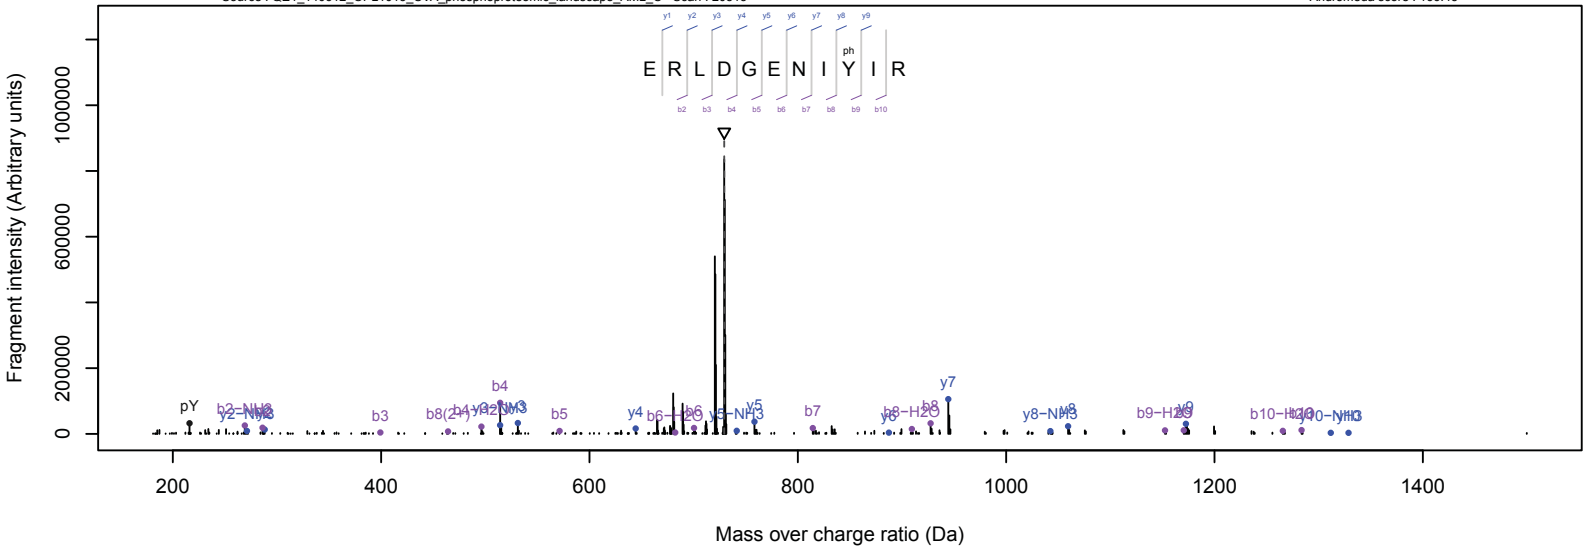

RCY(ph)VLSSSQNNLAHPPAPPVPPR-4+

Source : QE1\_140612\_OPL1013\_CVA\_phosphoproteomic\_landscape\_AML\_A Scan : 26175

Andromeda score : 166.27

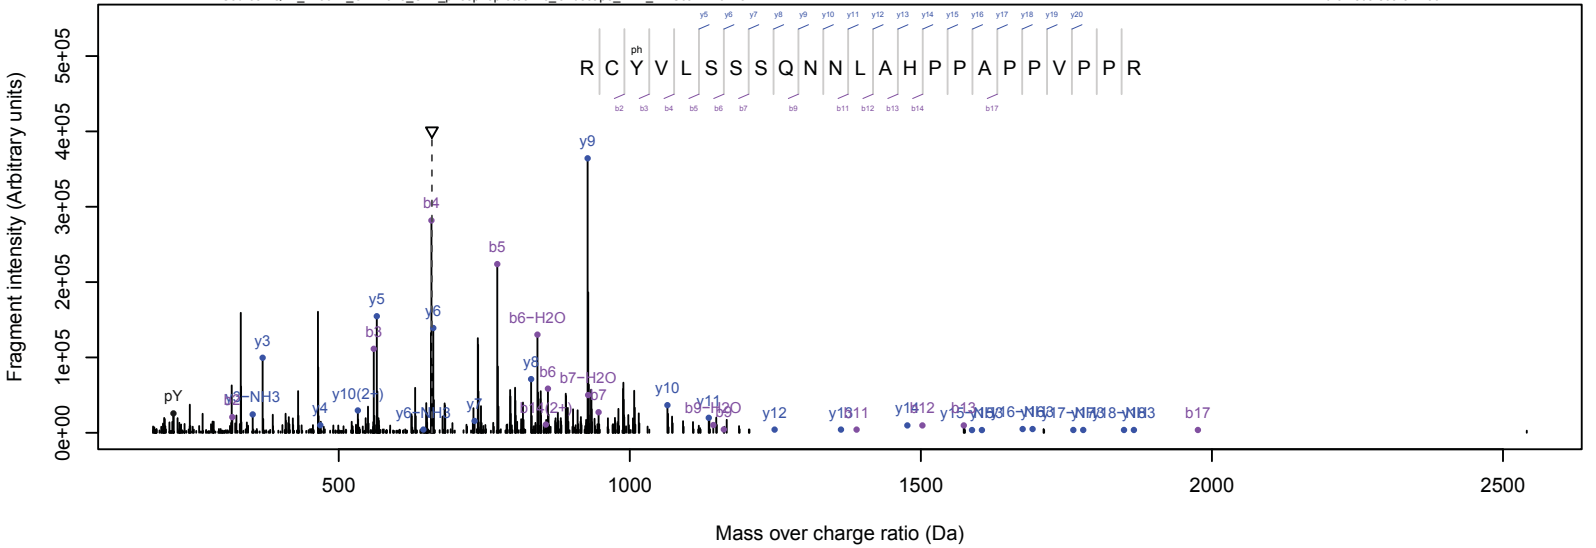

(ac)MY(ph)HSLSETR-2+

Source: QE1\_140612\_OPL1013\_CVA\_phosphoproteomic\_landscape\_AML\_C Scan: 15585

Andromeda score: 166.19

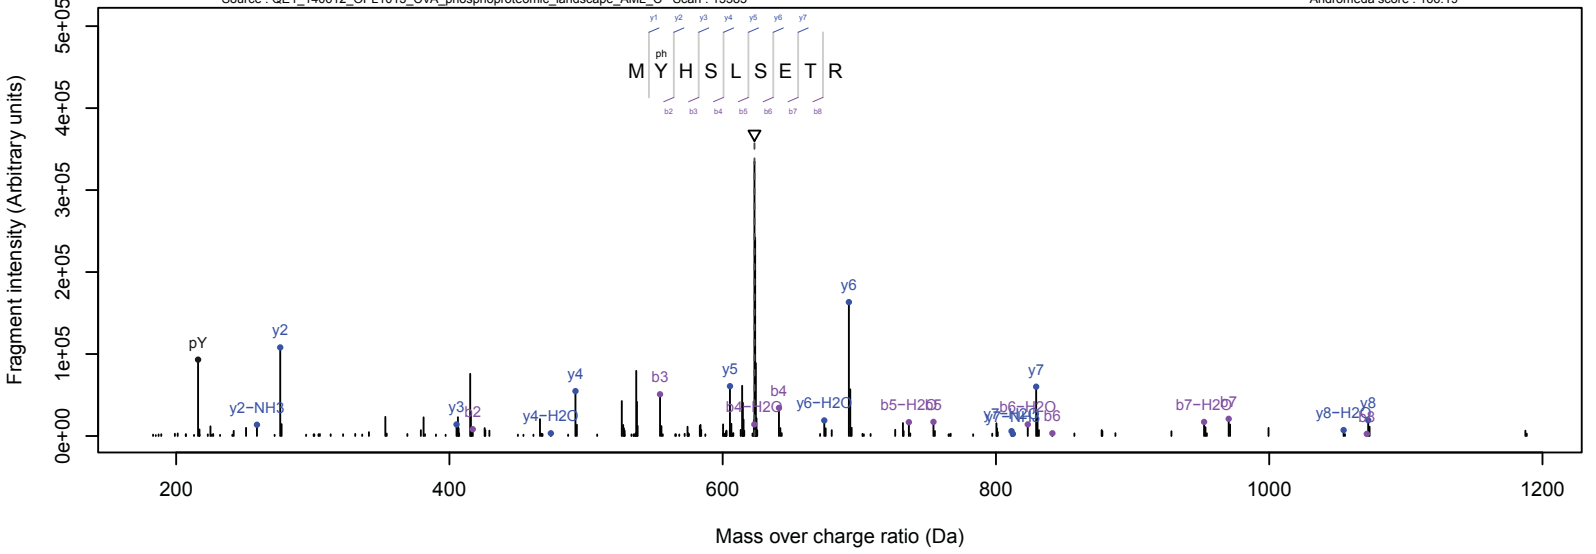

GQPIY(ph)IQFSNHK-2+

Source: QE1\_140612\_OPL1013\_CVA\_phosphoproteomic\_landscape\_AML\_A Scan: 23389

Andromeda score: 166.11

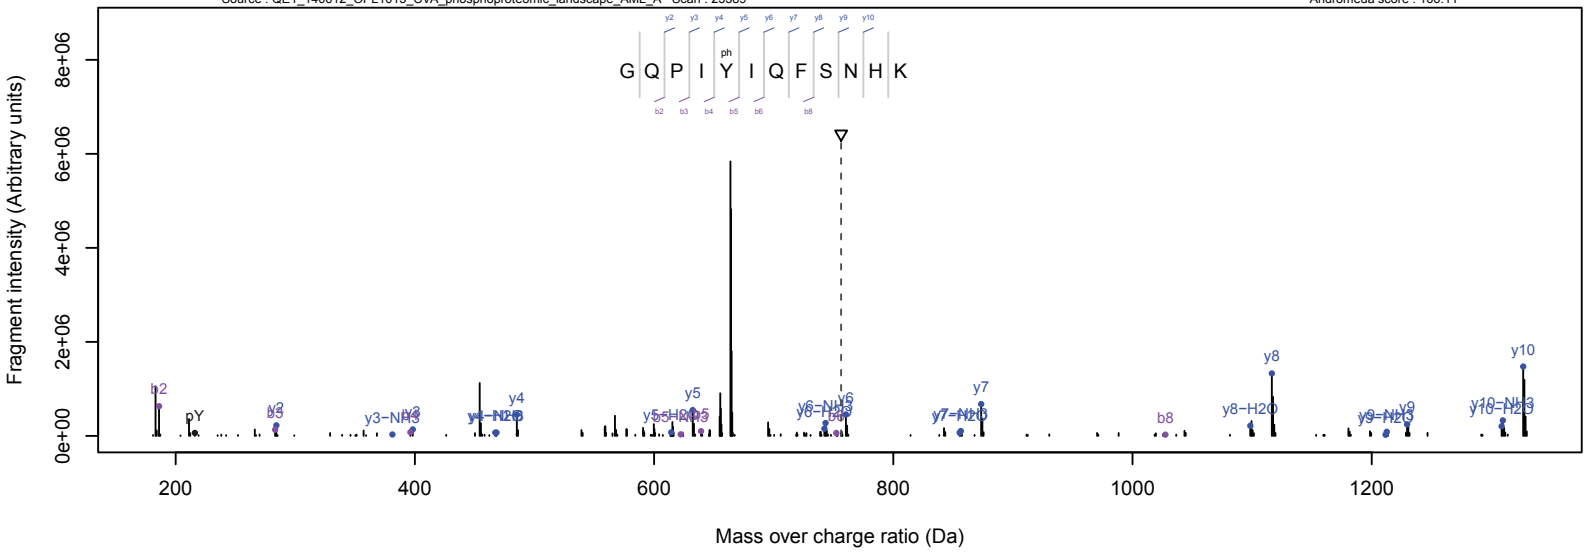

VSECPHTY(ph)QNR-2+

Source: QE1\_140822\_OPL1013\_CvA\_pTyrIP\_AML\_cell\_lines\_part2\_E Scan: 2743

Andromeda score: 165.78

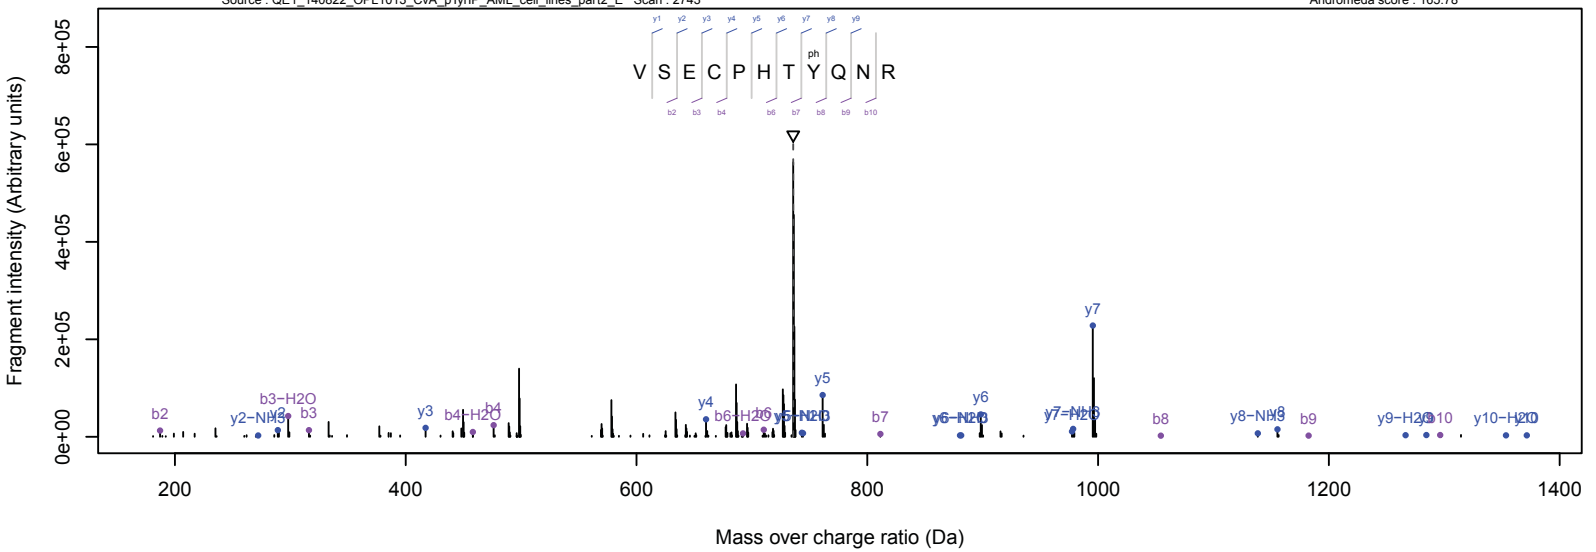

**MDTCSSNLNSIY(ph)KK-3+**

Source : QE1\_140822\_OPL1013\_CVA\_pTyrIP\_AML\_cell\_lines\_part2\_B Scan : 7172

Andromeda score : 165.64

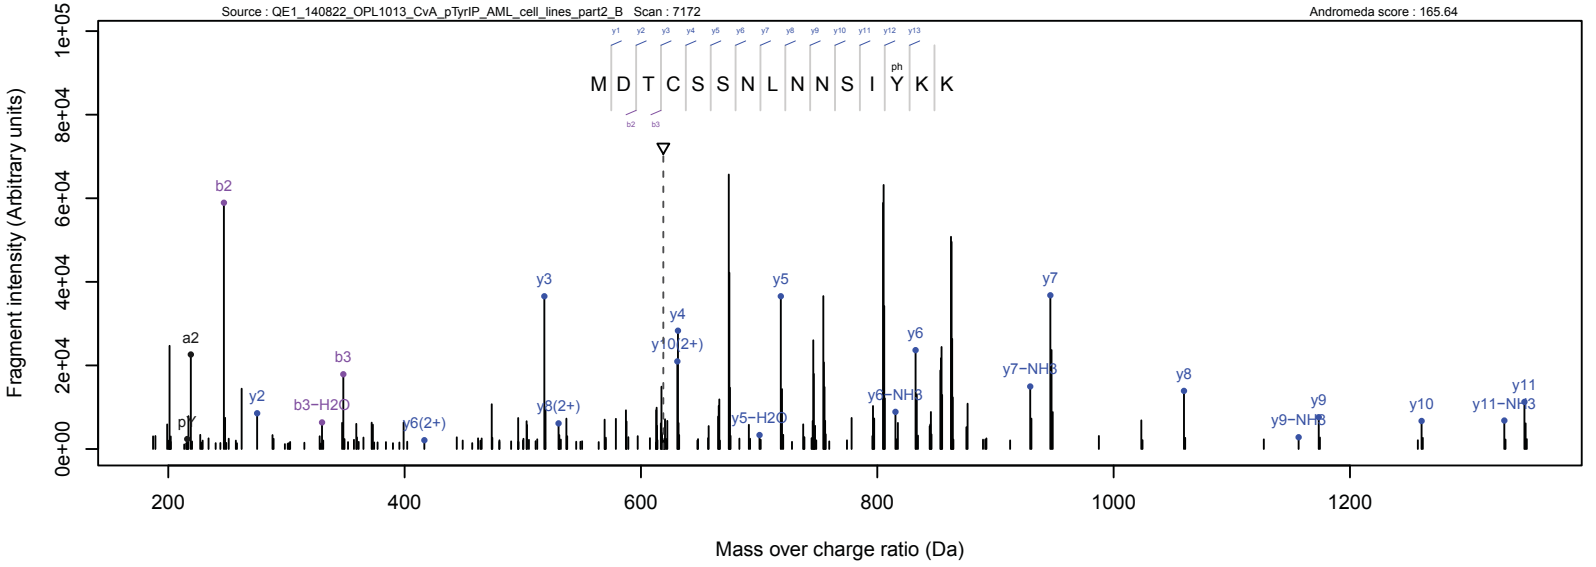

**YLY(ph)PNIDKDHAFGK-2+**

Source : QE1\_140612\_OPL1013\_CVA\_phosphoproteomic\_landscape\_AML\_B Scan : 22750

Andromeda score : 165.64

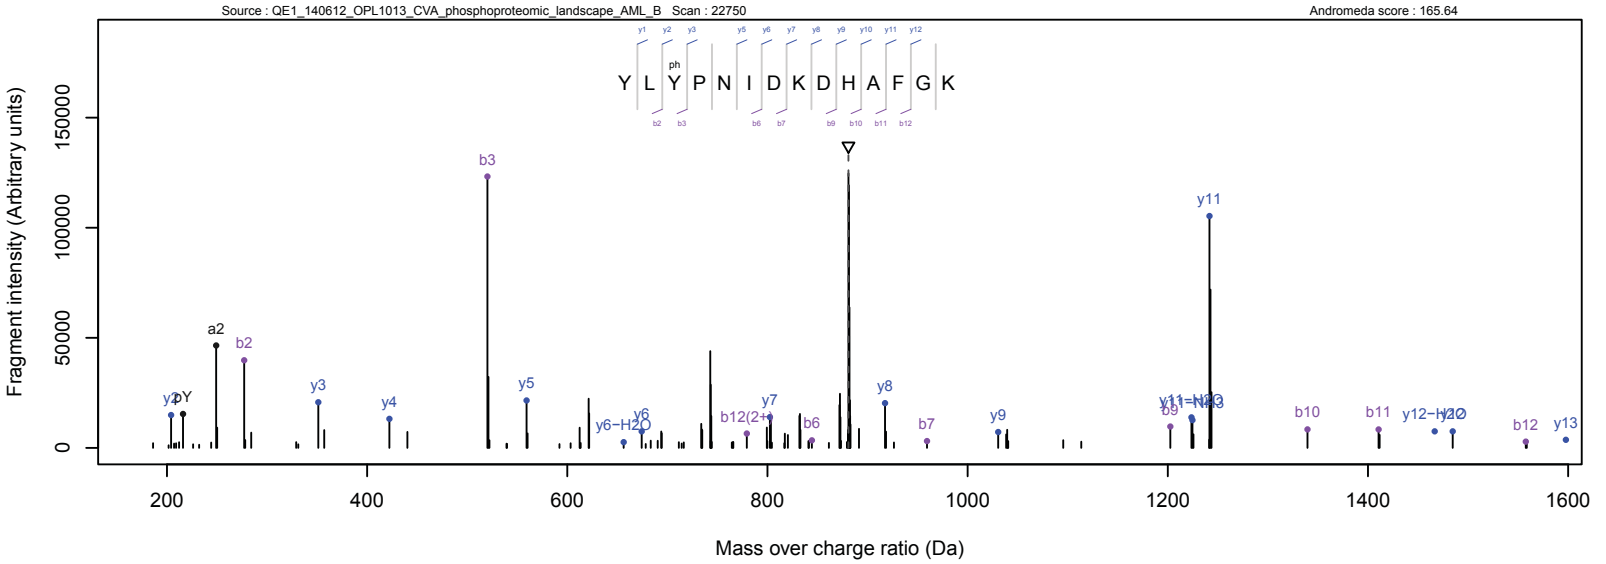

**YYADGEDAY(ph)AMKR-2+**

Source : QE1\_140612\_OPL1013\_CVA\_phosphoproteomic\_landscape\_AML\_C Scan : 10691

Andromeda score : 165.58

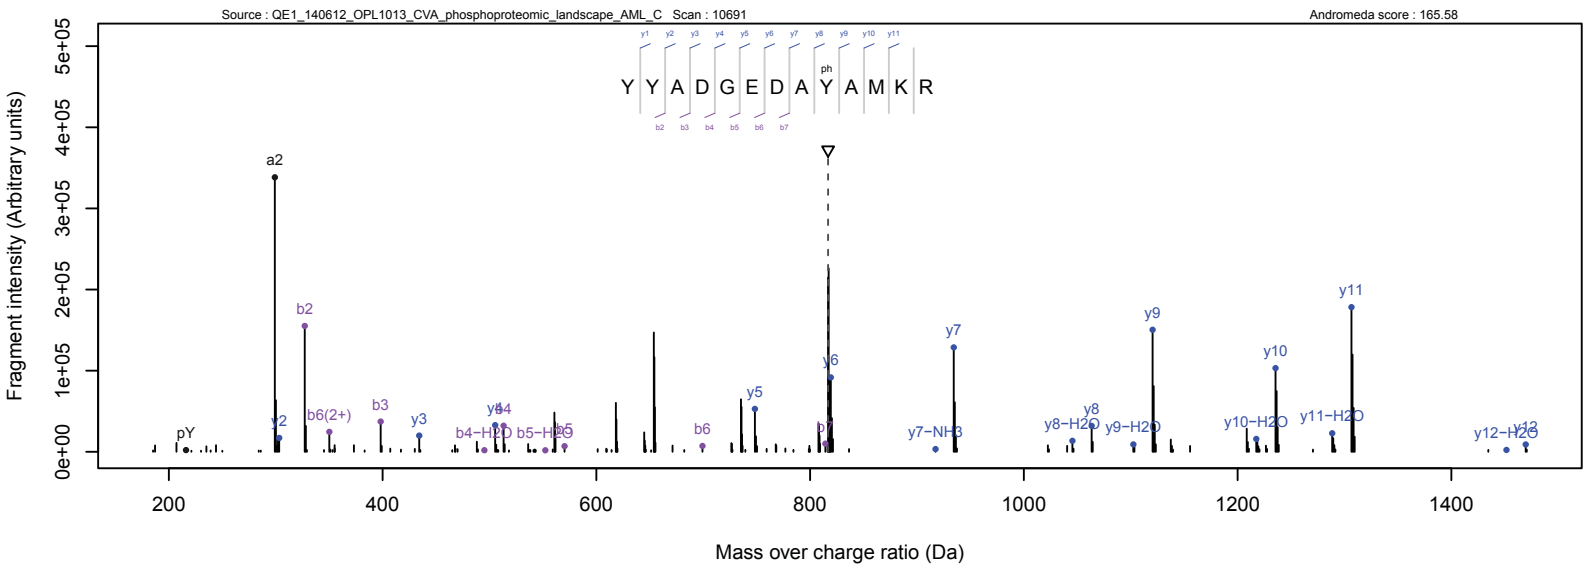

Y(ph)HTINGHNCEVK-3+

Source: QE1\_140612\_OPL1013\_CVA\_phosphoproteomic\_landscape\_AML\_D Scan: 3897

Andromeda score: 165.51

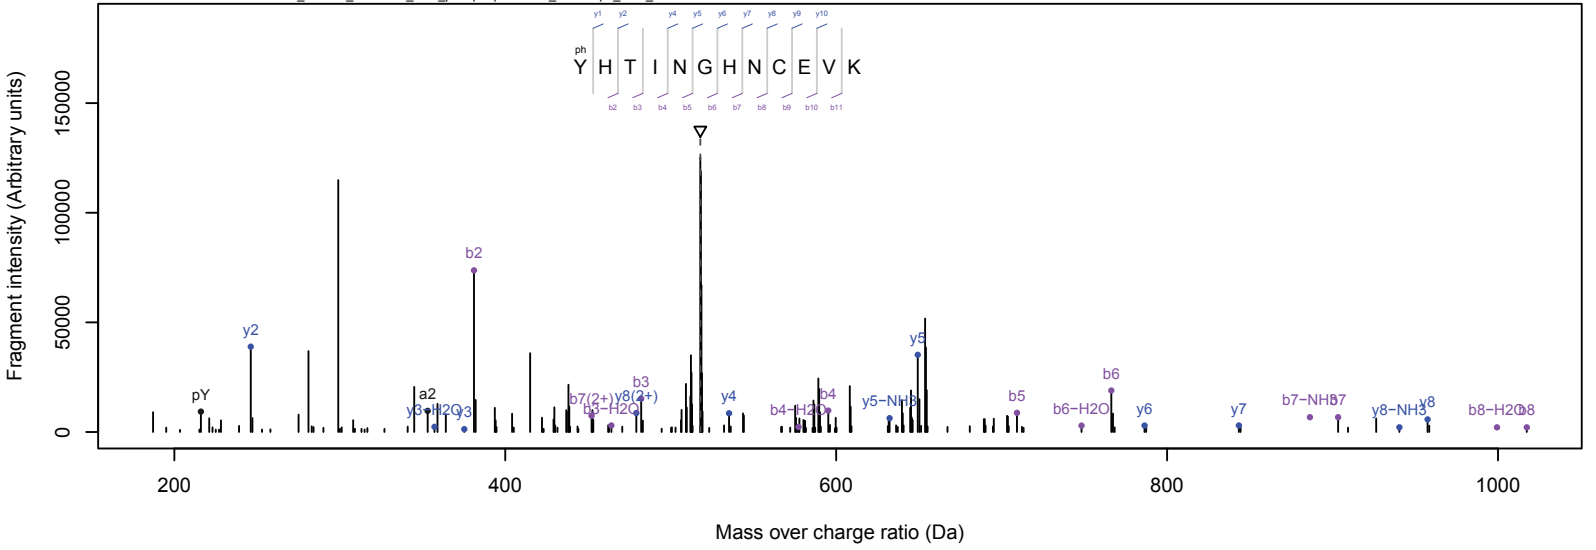

AVSPQSTKPMAESITY(ph)AAVARH-3+

Source: QE1\_140612\_OPL1013\_CVA\_phosphoproteomic\_landscape\_AML\_C Scan: 25443

Andromeda score: 165.38

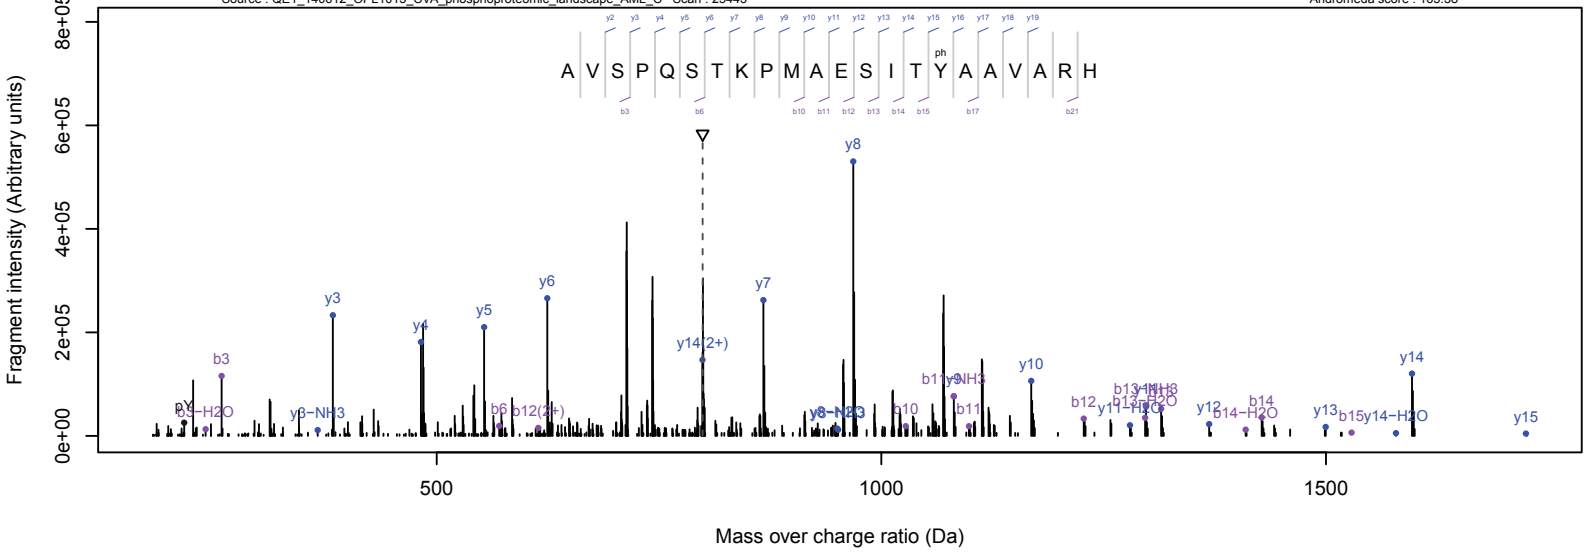

LPPKVESLESLY(ph)FTPIPAR-3+

Source: QE1\_140612\_OPL1013\_CVA\_phosphoproteomic\_landscape\_AML\_C Scan: 43293

Andromeda score: 165.17

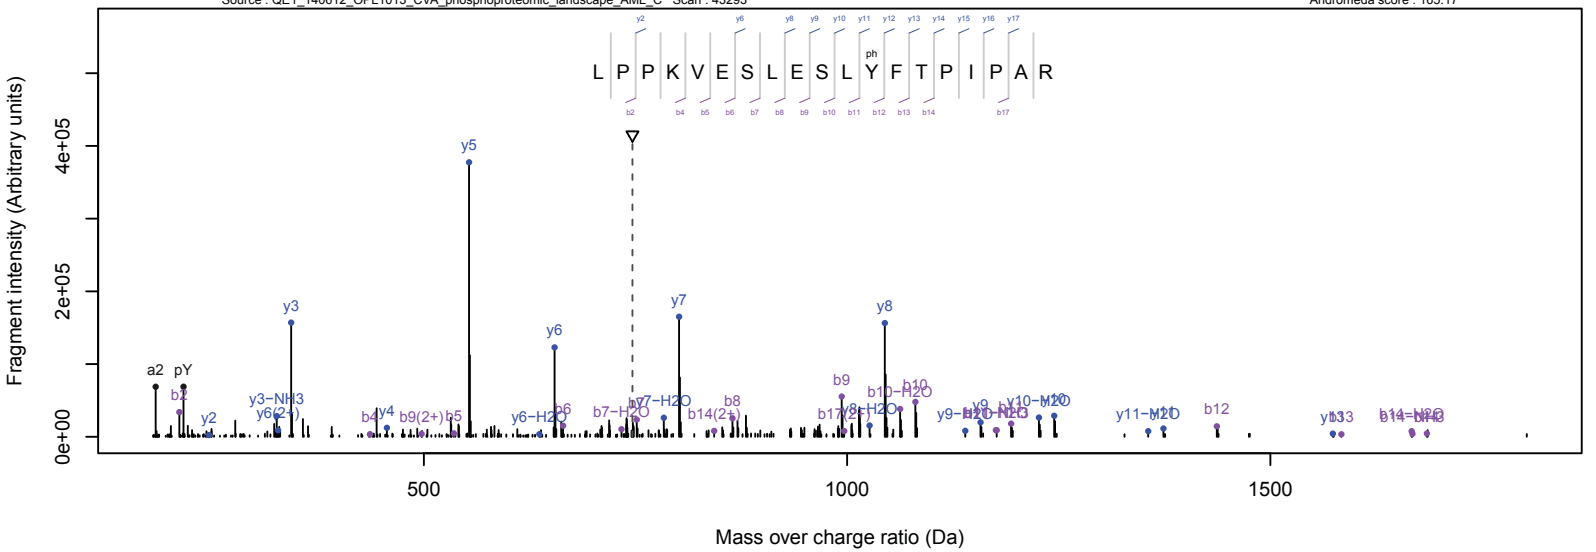

**DMGSCEIY(ph)PQTIQHNPNGR-3+**

Source: QE1\_140612\_OPL1013\_CVA\_phosphoproteomic\_landscape\_AML\_B Scan: 18488

Andromeda score: 165.16

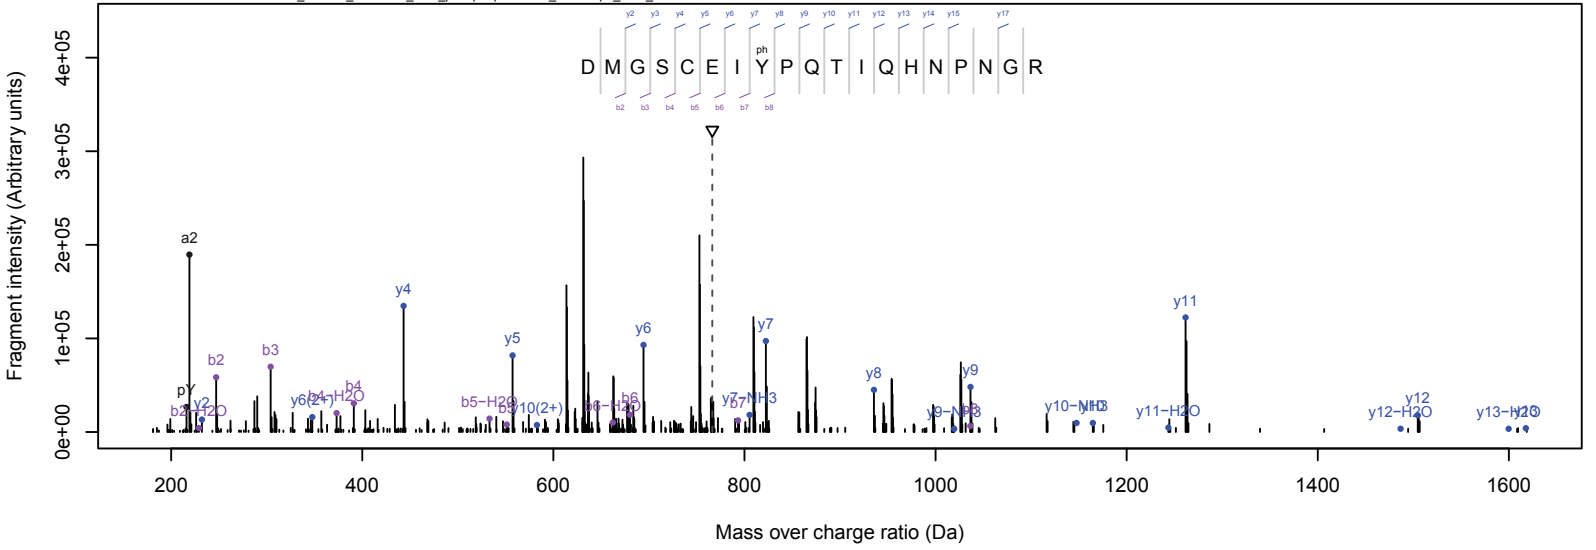

**ISIEM(ox)NGTLEDQLSHLKQY(ph)ER-4+**

Source: QE1\_140908\_OPL1013\_CvA\_pTyrIP\_AML\_HEL Scan: 35997

Andromeda score: 165.1

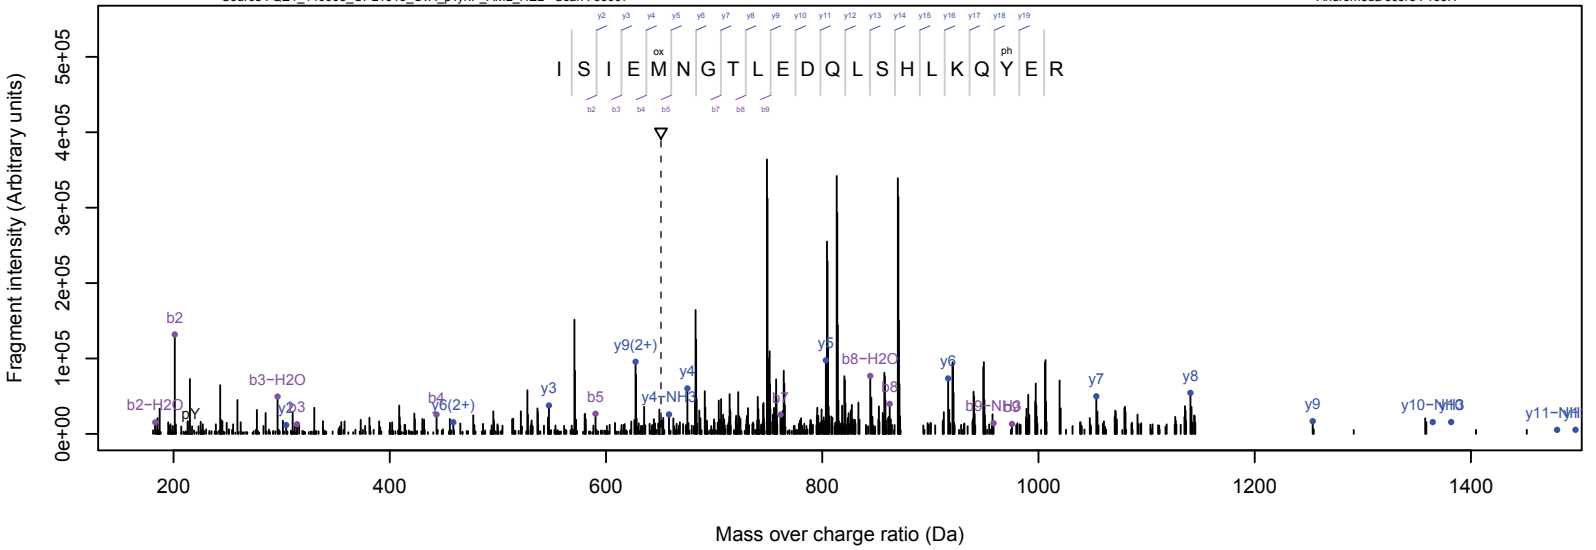

**IGEGT(ph)Y(ph)GVVYK-2+**

Source: QE1\_140612\_OPL1013\_CVA\_phosphoproteomic\_landscape\_AML\_F Scan: 20412

Andromeda score: 165.02

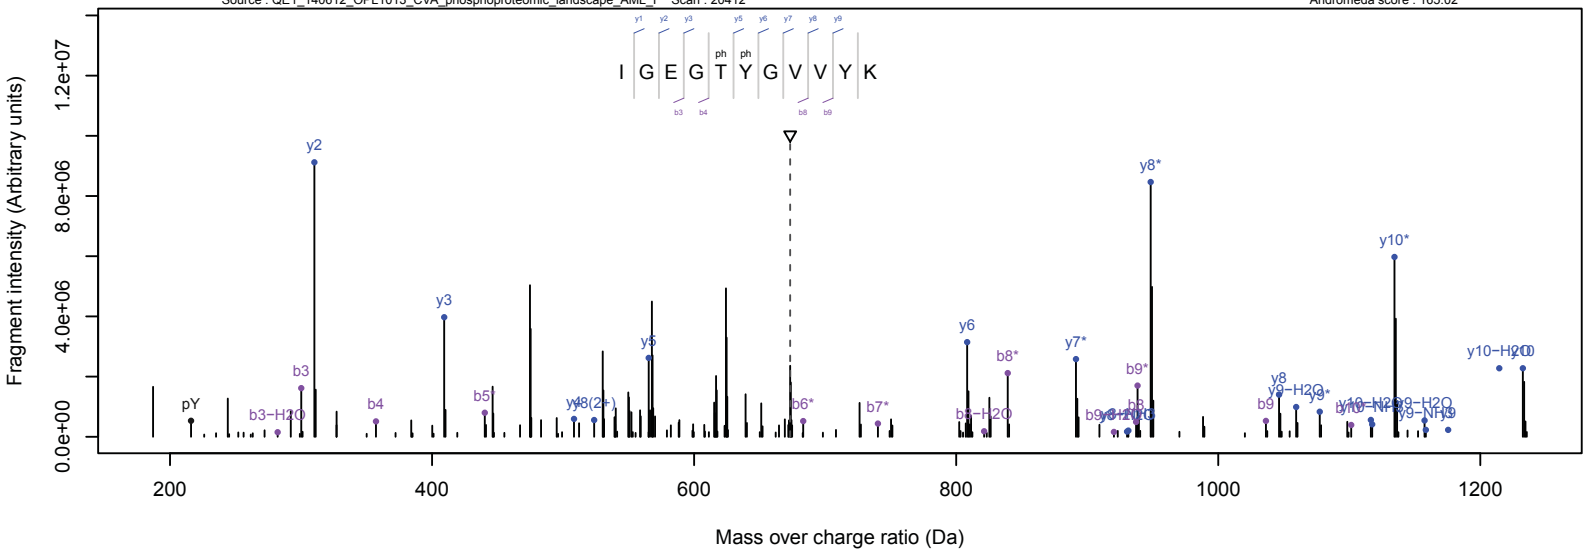



Y(ph)PTNFGNCTGCSATFSVLK-2+

Source : QE1\_140612\_OPL1013\_CVA\_phosphoproteomic\_landscape\_AML\_C Scan : 34076

Andromeda score : 164.94

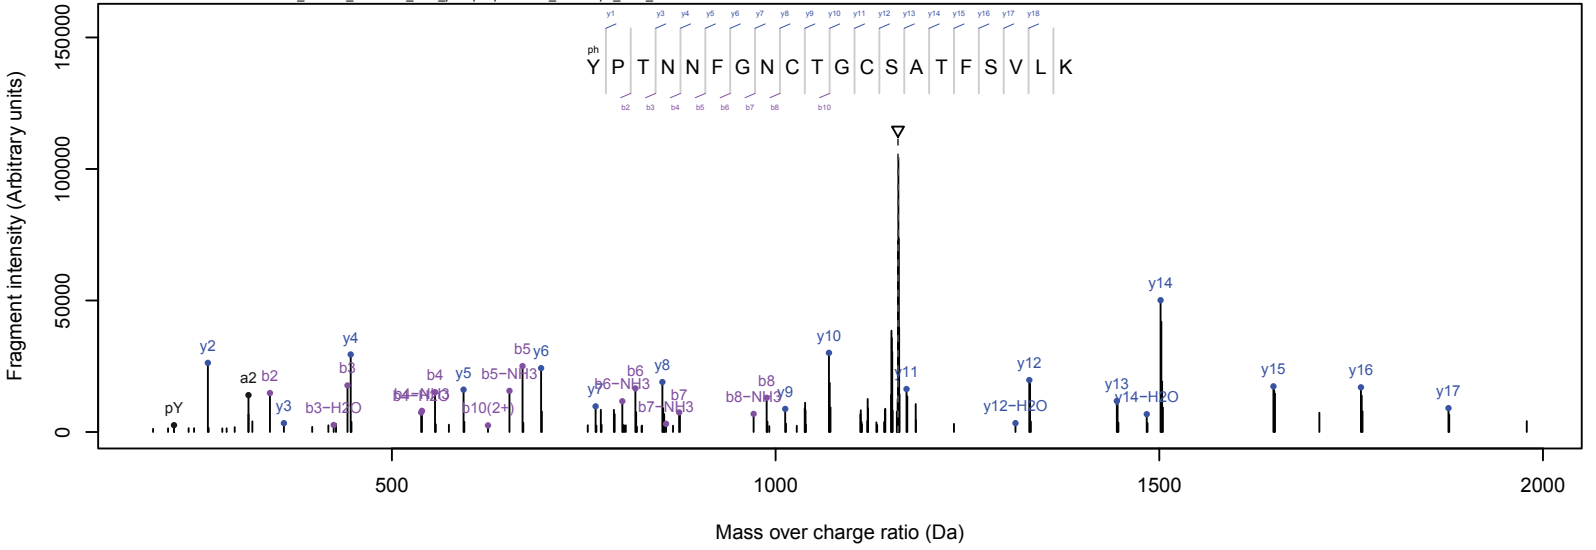

VM(ox)HVSSAELNY(ph)SLPYDSK-3+

Source : QE1\_140908\_OPL1013\_CvA\_pTyrIP\_AML\_HEL Scan : 25380

Andromeda score : 164.93

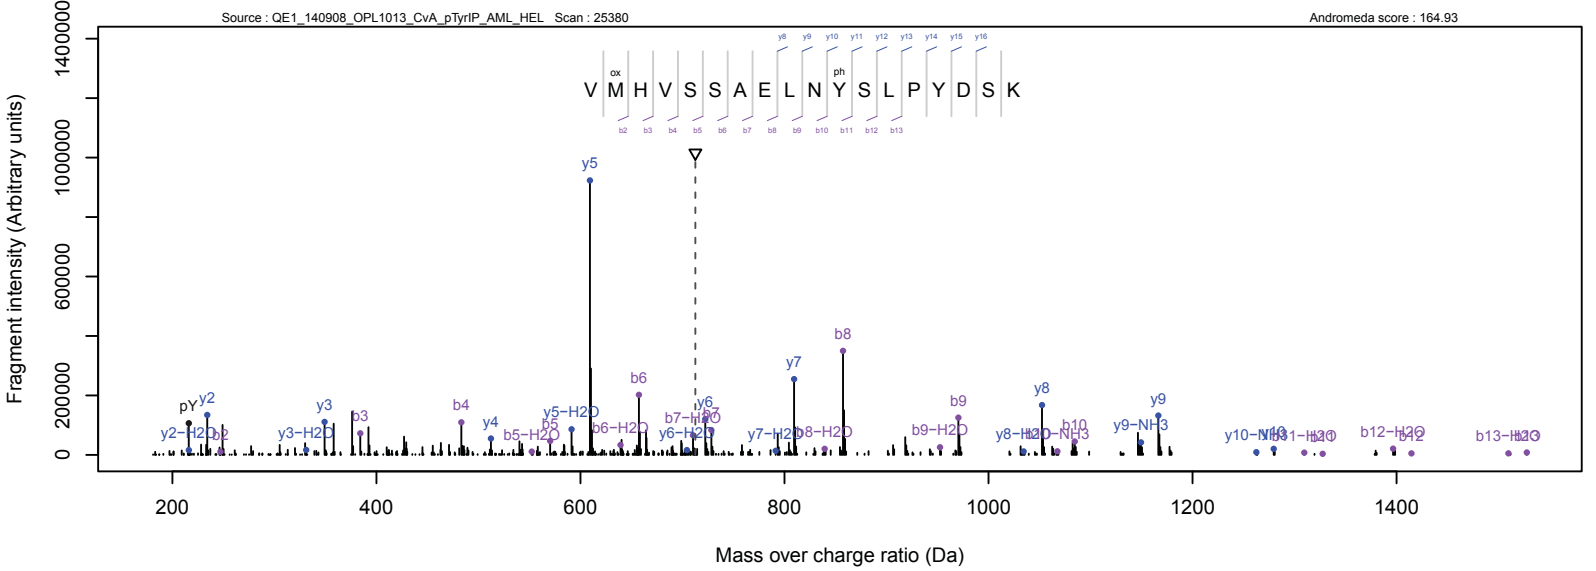

TRDQY(ph)LM(ox)WLTQK-2+

Source : QE1\_140612\_OPL1013\_CVA\_phosphoproteomic\_landscape\_AML\_A Scan : 29774

Andromeda score : 164.68

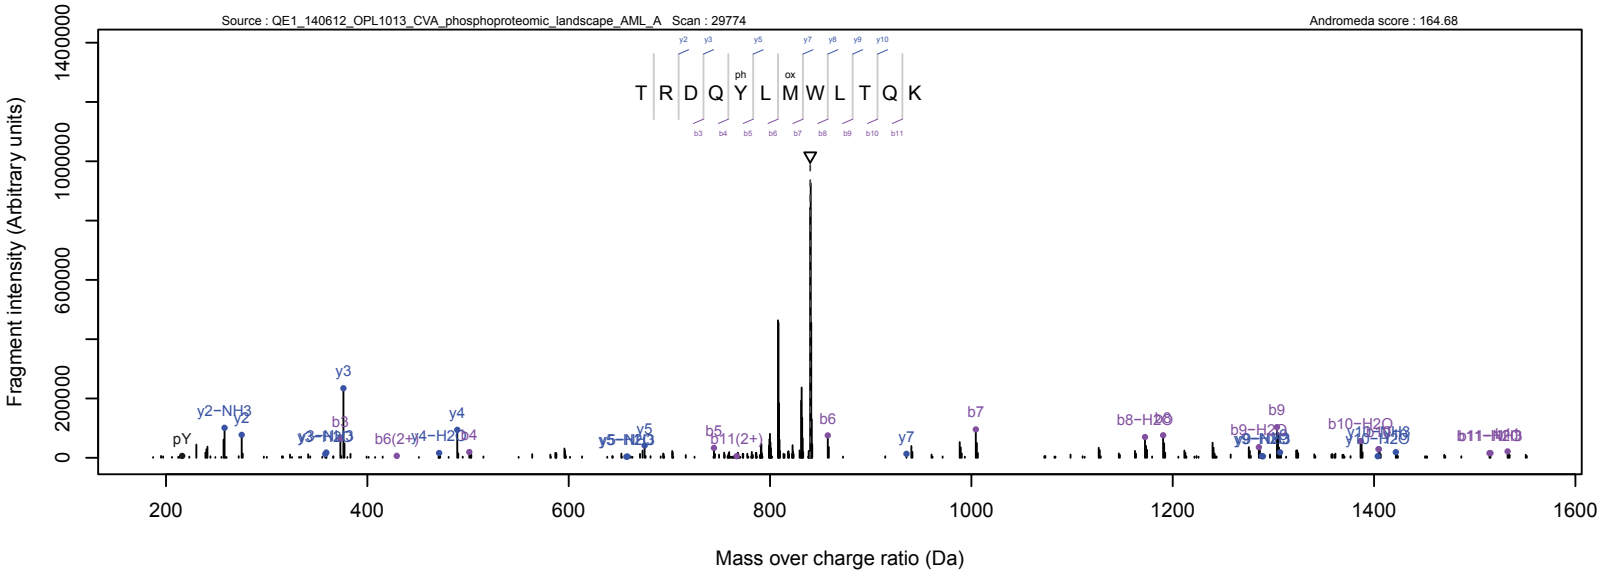

VY(ph)ISNGQLDSR-2+

Source : QE1\_140612\_OPL1013\_CVA\_phosphoproteomic\_landscape\_AML\_C Scan : 20136

Andromeda score : 164.68

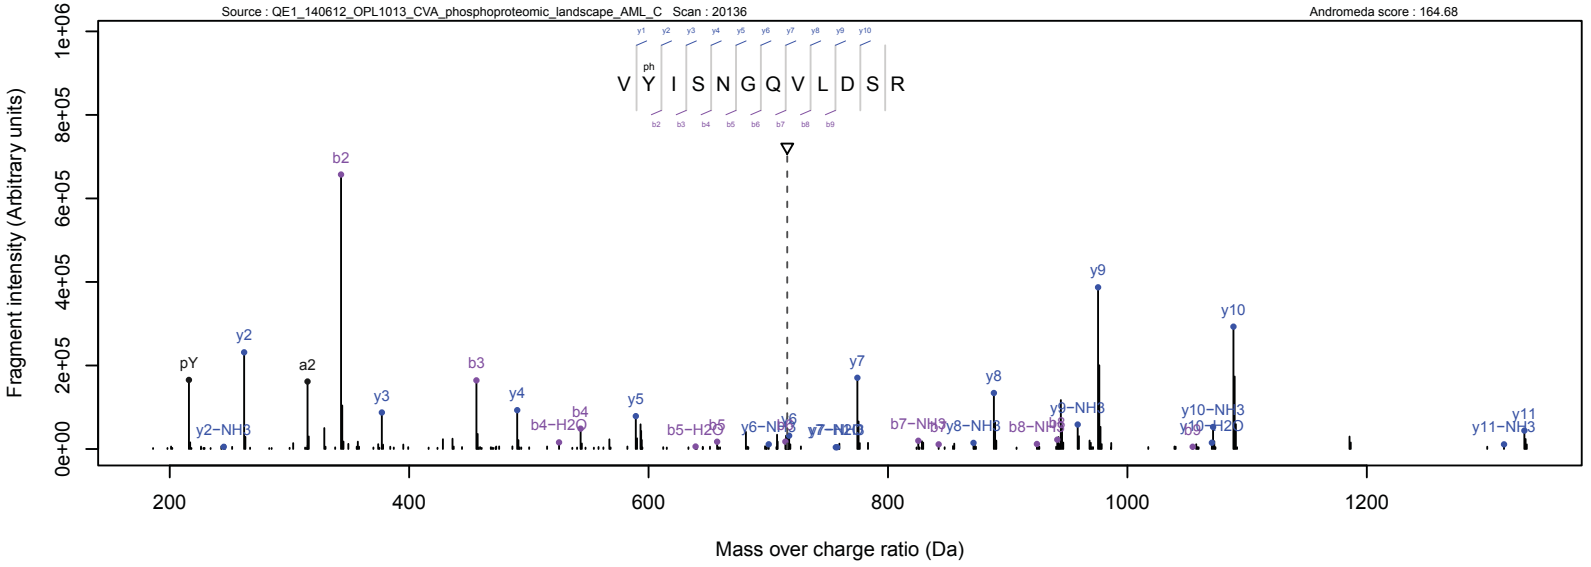

DIHHIDY(ph)YKK-2+

Source : QE1\_140612\_OPL1013\_CVA\_phosphoproteomic\_landscape\_AML\_B Scan : 7304

Andromeda score : 164.64

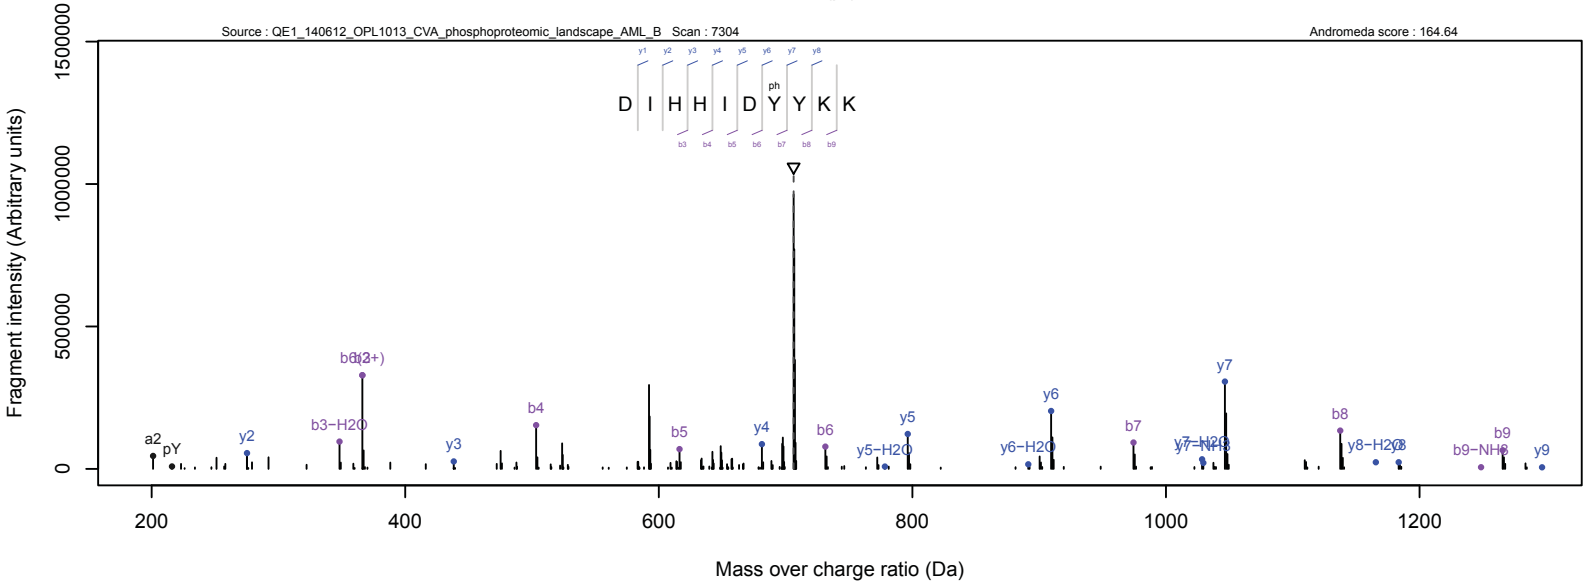

DIM(ox)HDSNY(ph)VSK-2+

Source : QE1\_140612\_OPL1013\_CVA\_phosphoproteomic\_landscape\_AML\_A Scan : 10442

Andromeda score : 164.48

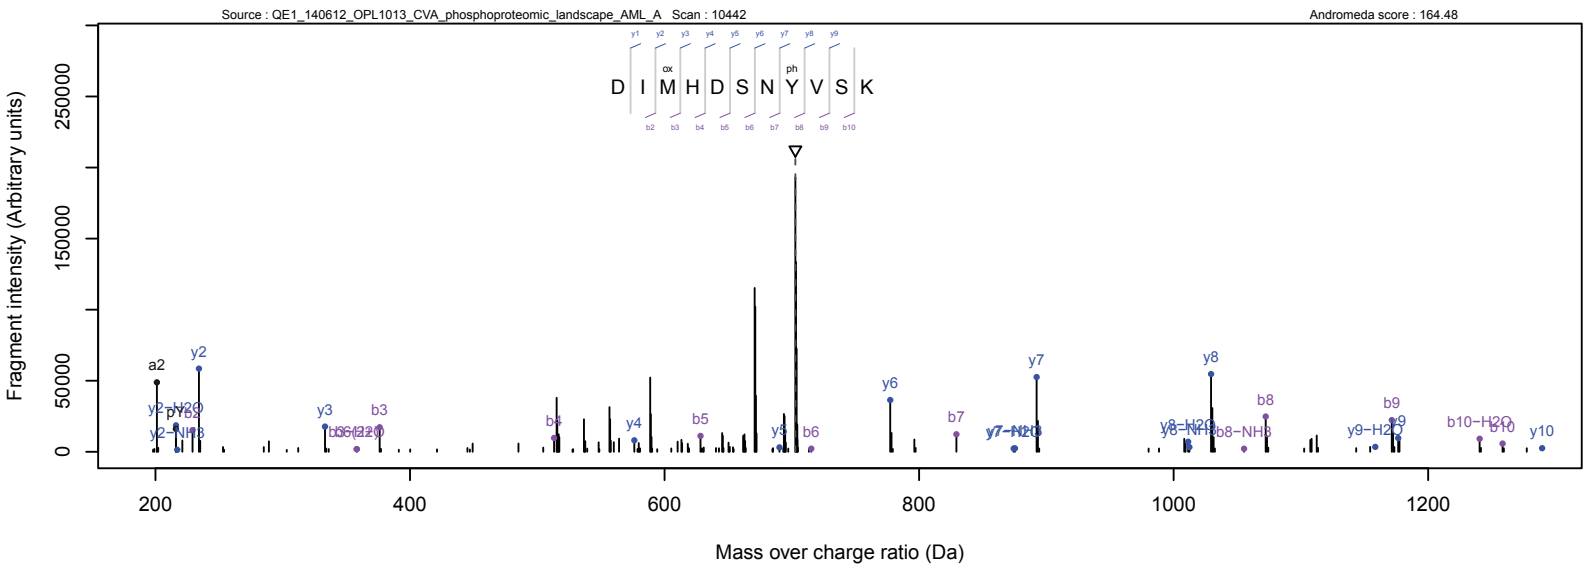

**GNNTHDNY(ph)ENVEAGPPK-3+**

Source : QE1\_140908\_OPL1013\_CVA\_pTyrIP\_AML\_Kasumi6 Scan : 8694

Andromeda score : 164.41

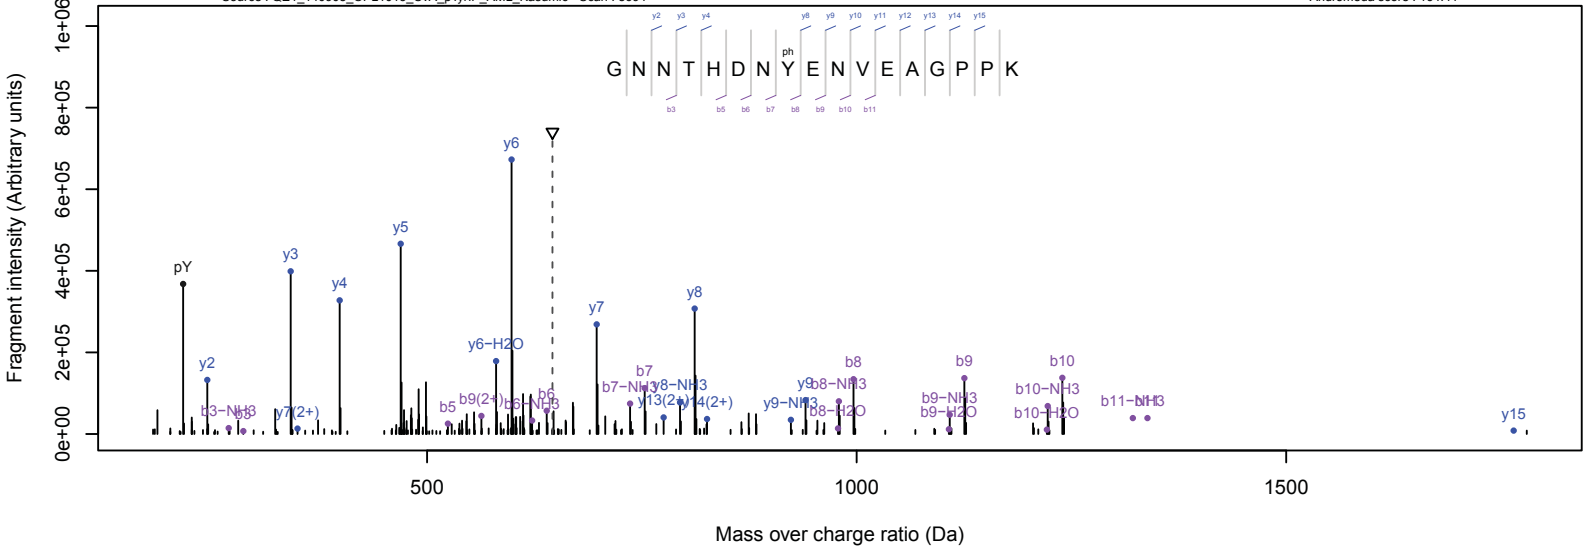

**SLY(ph)HDISGDTSGDYRK-3+**

Source : QE1\_140612\_OPL1013\_CVA\_phosphoproteomic\_landscape\_AML\_B Scan : 13808

Andromeda score : 164.41

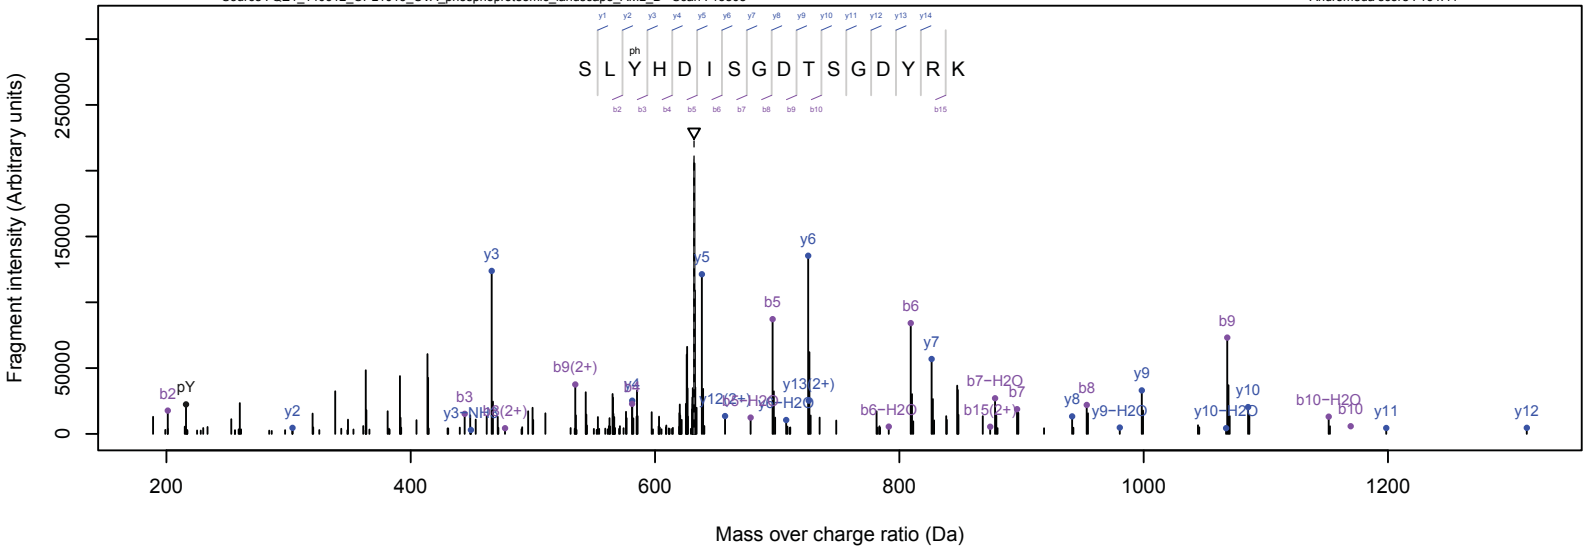

**MLGEALSKNP GYIK-2+**

Source : QE1\_140612\_OPL1013\_CVA\_phosphoproteomic\_landscape\_AML\_A Scan : 22365

Andromeda score : 164.2

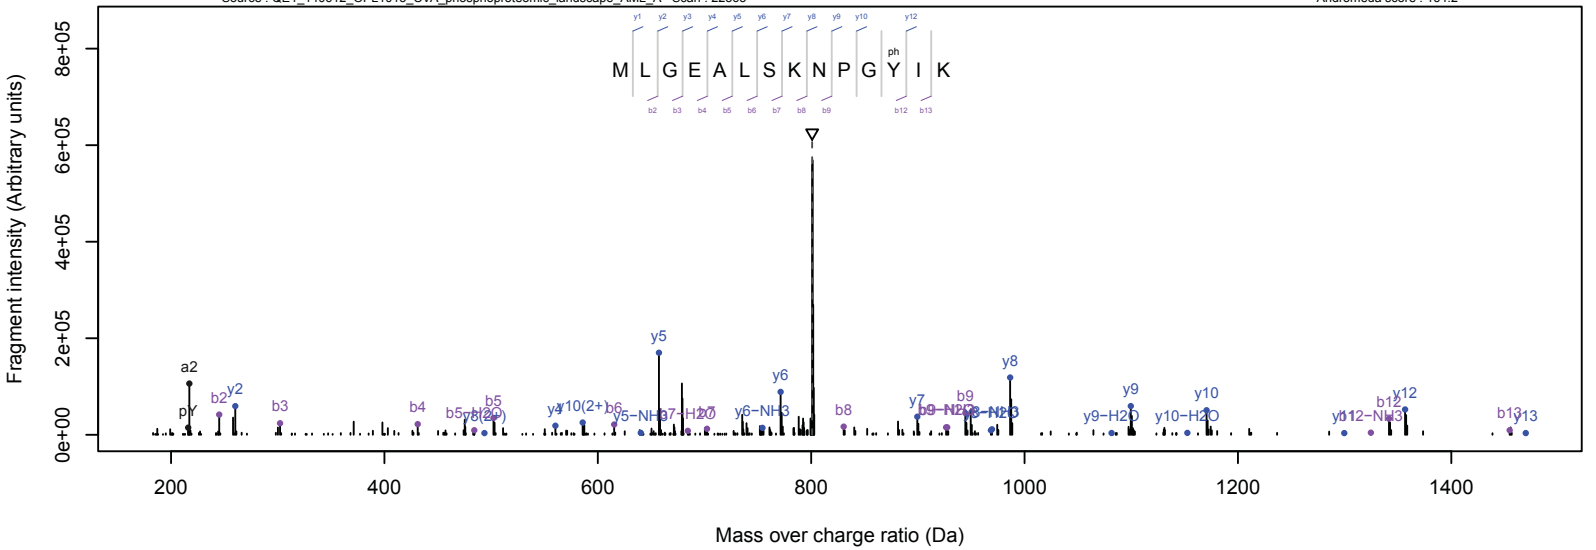

TASGDY(ph)IDSSWELR-2+

Source : QE1\_140908\_OPL1013\_CvA\_pTyrIP\_AML\_HEL Scan : 33163

Andromeda score : 164.2

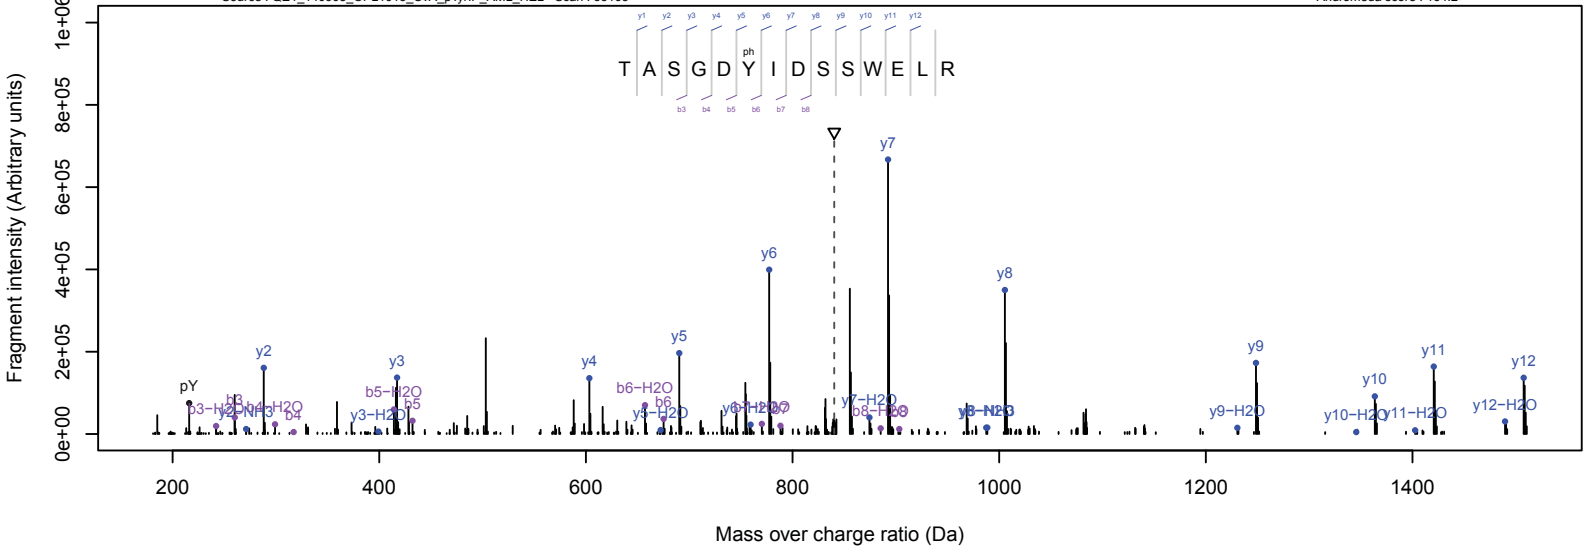

Y(ph)YDSRPGGYGYGR-3+

Source : QE1\_140612\_OPL1013\_CvA\_phosphoproteomic\_landscape\_AML\_C Scan : 14090

Andromeda score : 164.2

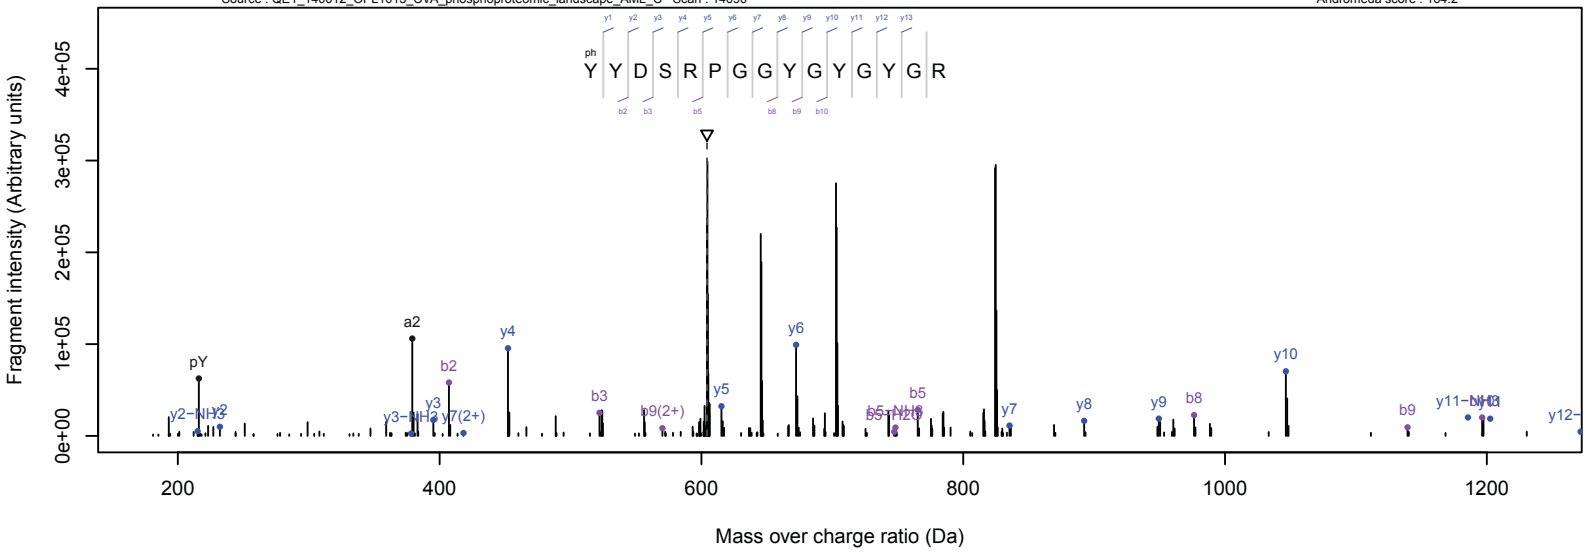

Y(ph)YKETSGLMLDVGPYMK-2+

Source : QE1\_140908\_OPL1013\_CvA\_pTyrIP\_AML\_HEL Scan : 34352

Andromeda score : 164.2

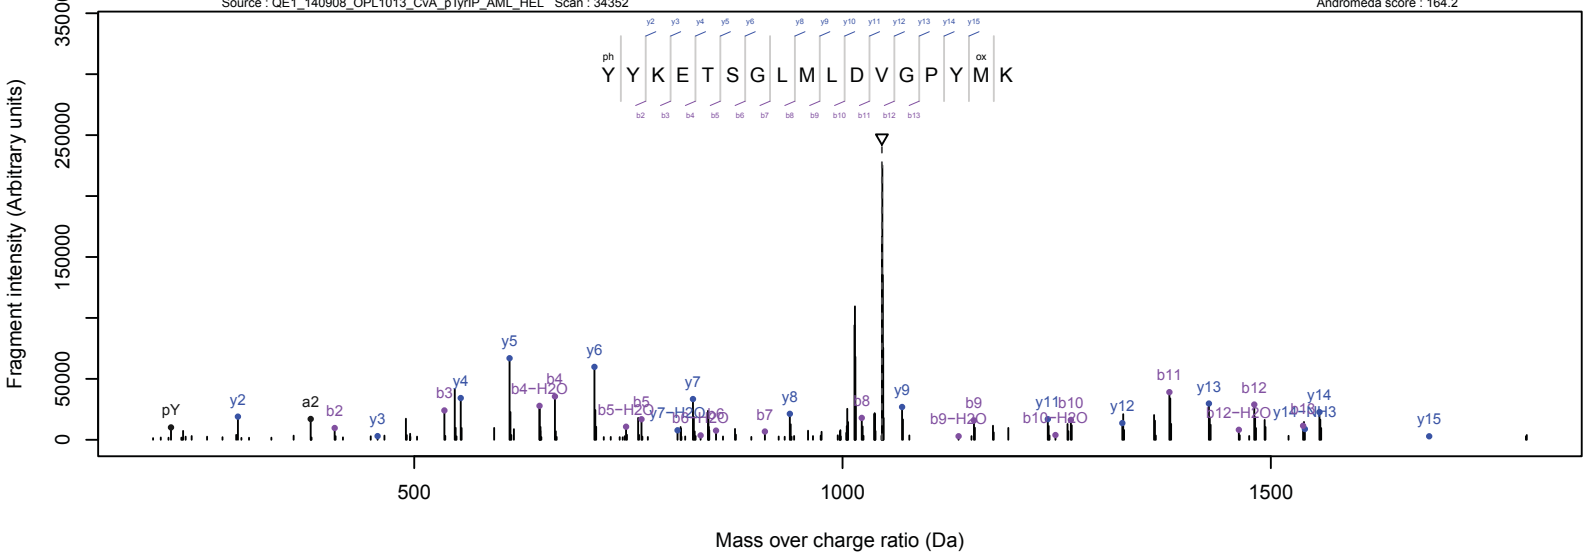

SMGFIGHY(ph)LDQK-2+

Source : QE1\_140612\_OPL1013\_CVA\_phosphoproteomic\_landscape\_AML\_B Scan : 29586

Andromeda score : 164.13

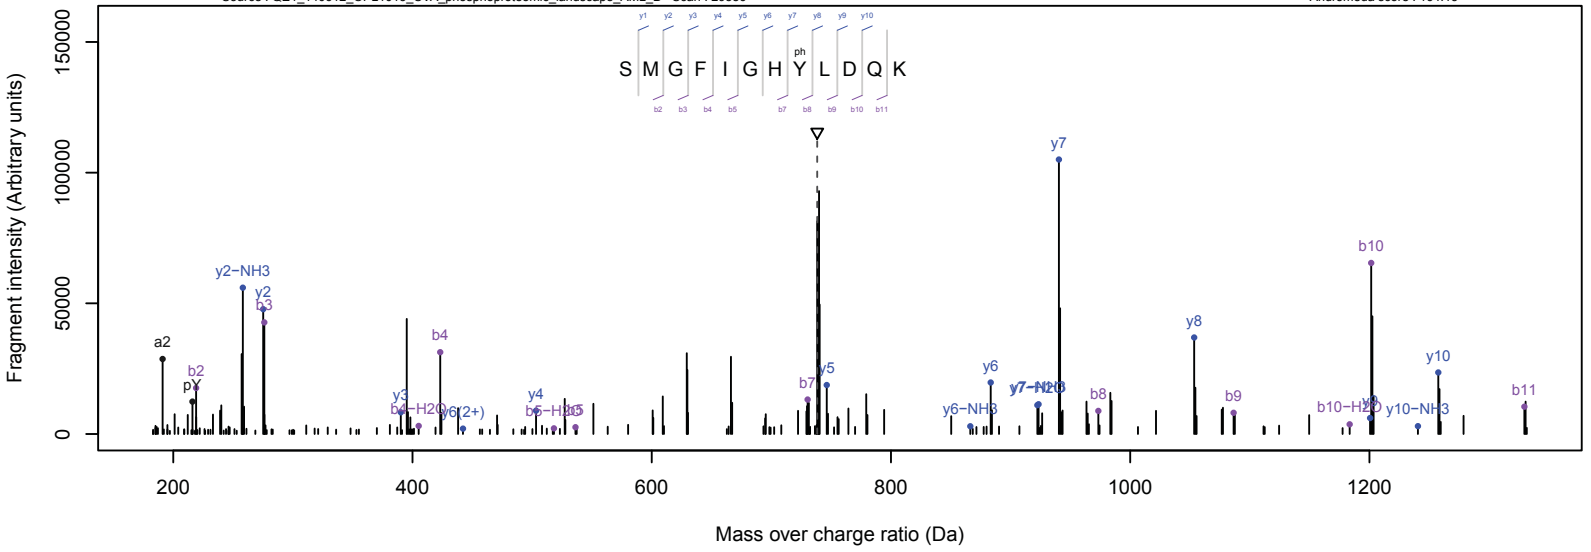

FITSSASDFSDPVY(ph)KEIAITNGCINR-3+

Source : QE1\_140612\_OPL1013\_CVA\_phosphoproteomic\_landscape\_AML\_C Scan : 41399

Andromeda score : 164.05

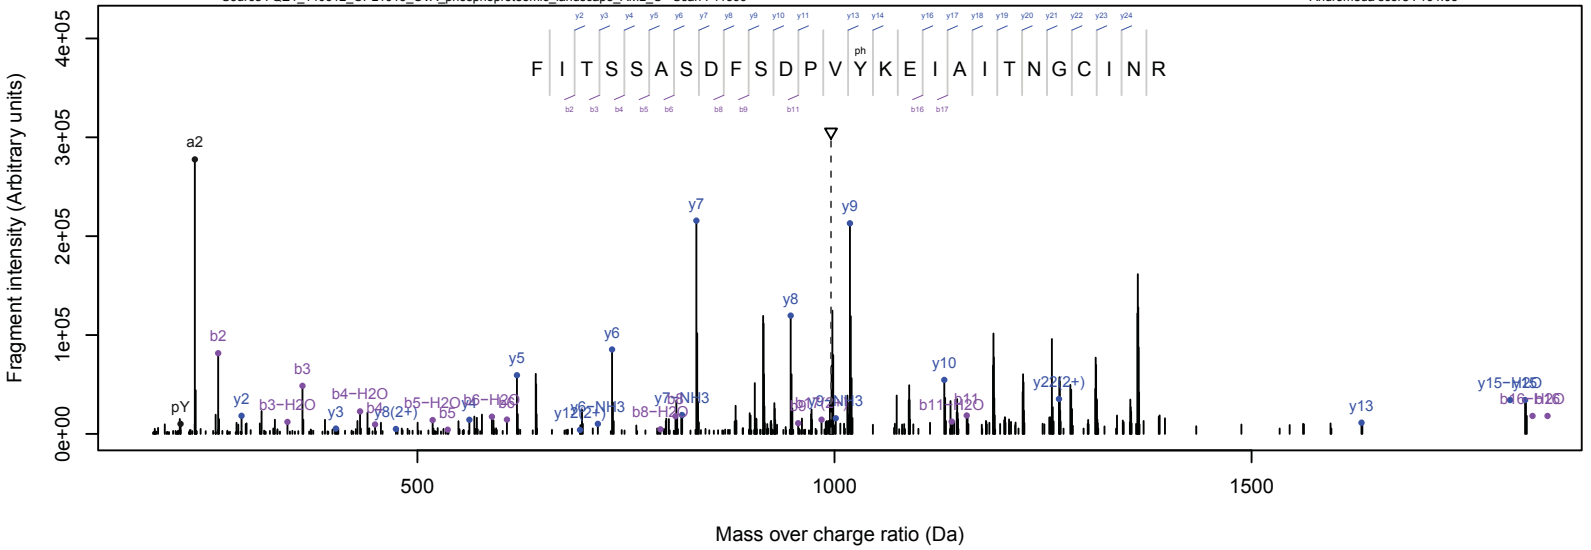

IKPSSANAIY(ph)SLAARPLVPK-2+

Source : QE1\_140612\_OPL1013\_CVA\_phosphoproteomic\_landscape\_AML\_A Scan : 33257

Andromeda score : 164.05

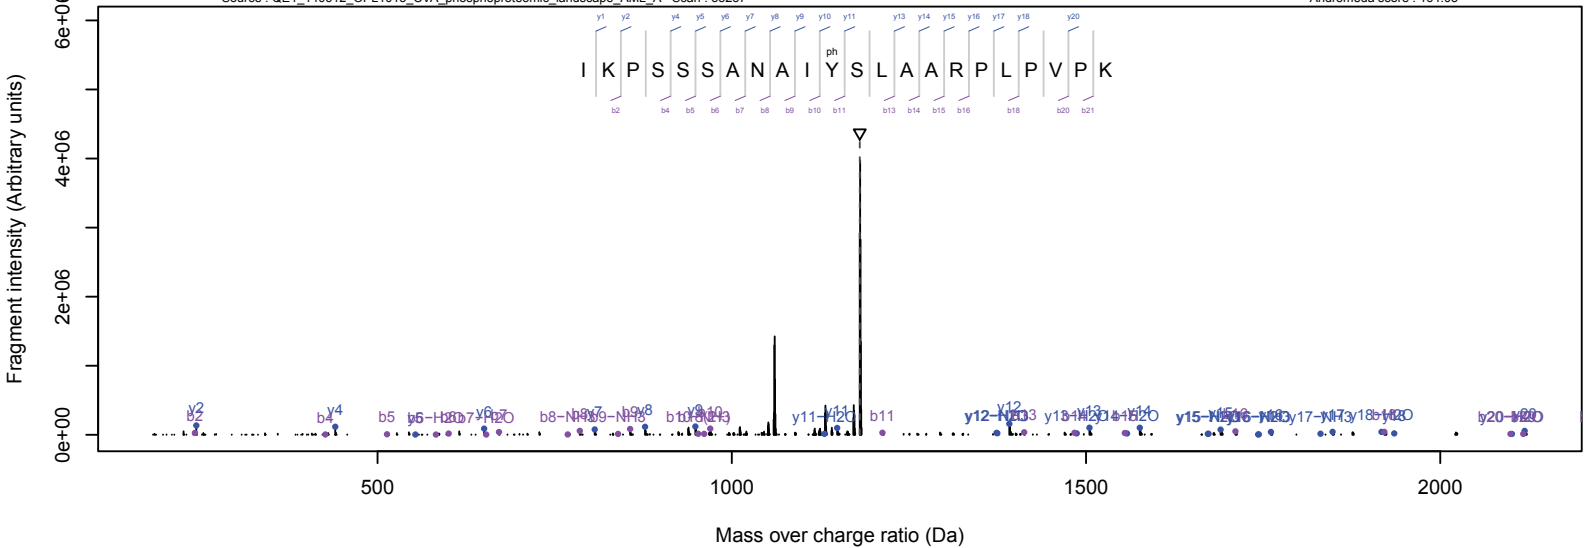

**SY(ph)VILSFENNGDYMDMK-2+**

Source : QE1\_140612\_OPL1013\_CVA\_phosphoproteomic\_landscape\_AML\_A Scan : 46026

Andromeda score : 164.01

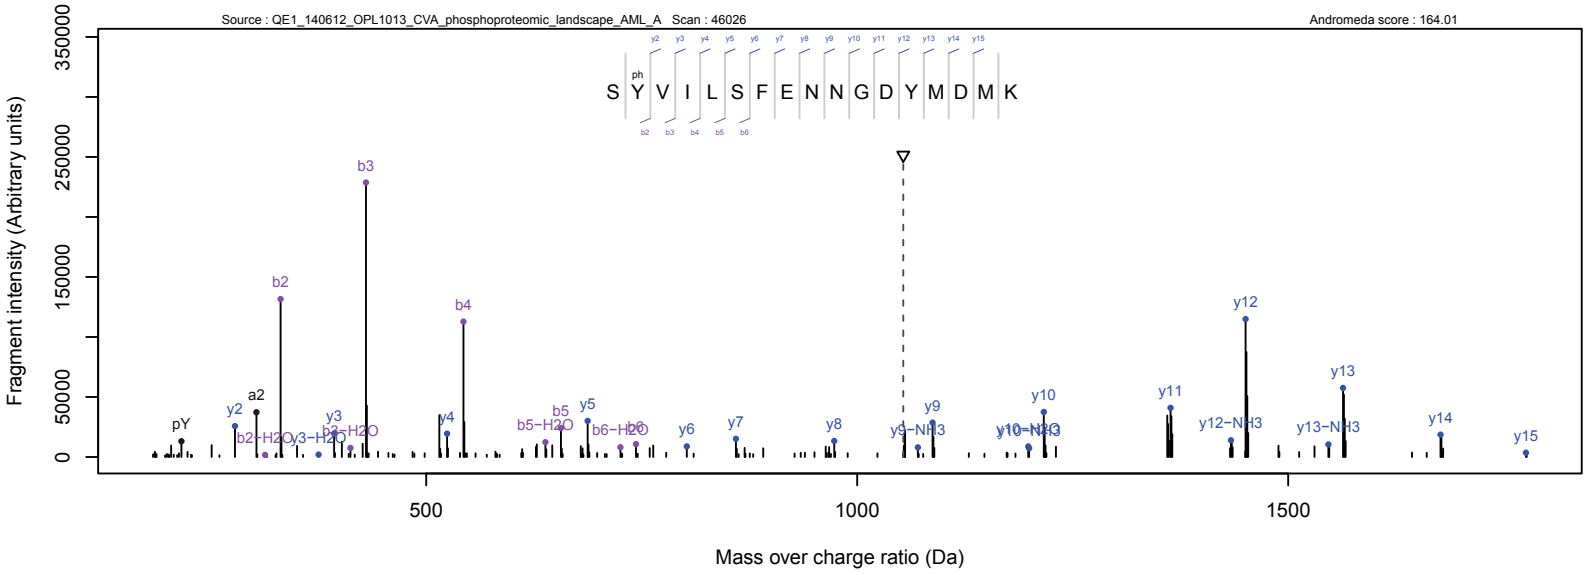

**NKPY(ph)ISWPSSGGSEPSVTVPLR-3+**

Source : QE1\_140612\_OPL1013\_CVA\_phosphoproteomic\_landscape\_AML\_C Scan : 37669

Andromeda score : 163.95

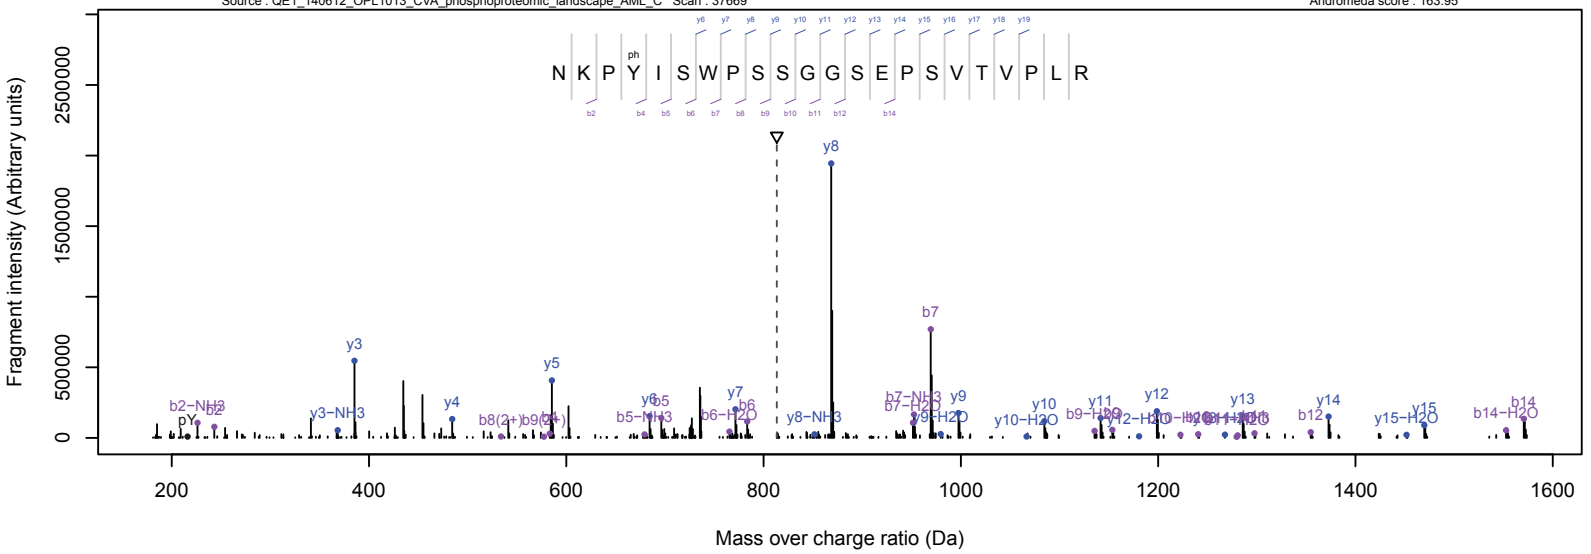

**VLPKEEPVNTVY(ph)SEVQFADK-3+**

Source : QE1\_140908\_OPL1013\_CvA\_pTyrIP\_AML\_HEL Scan : 31759

Andromeda score : 163.62

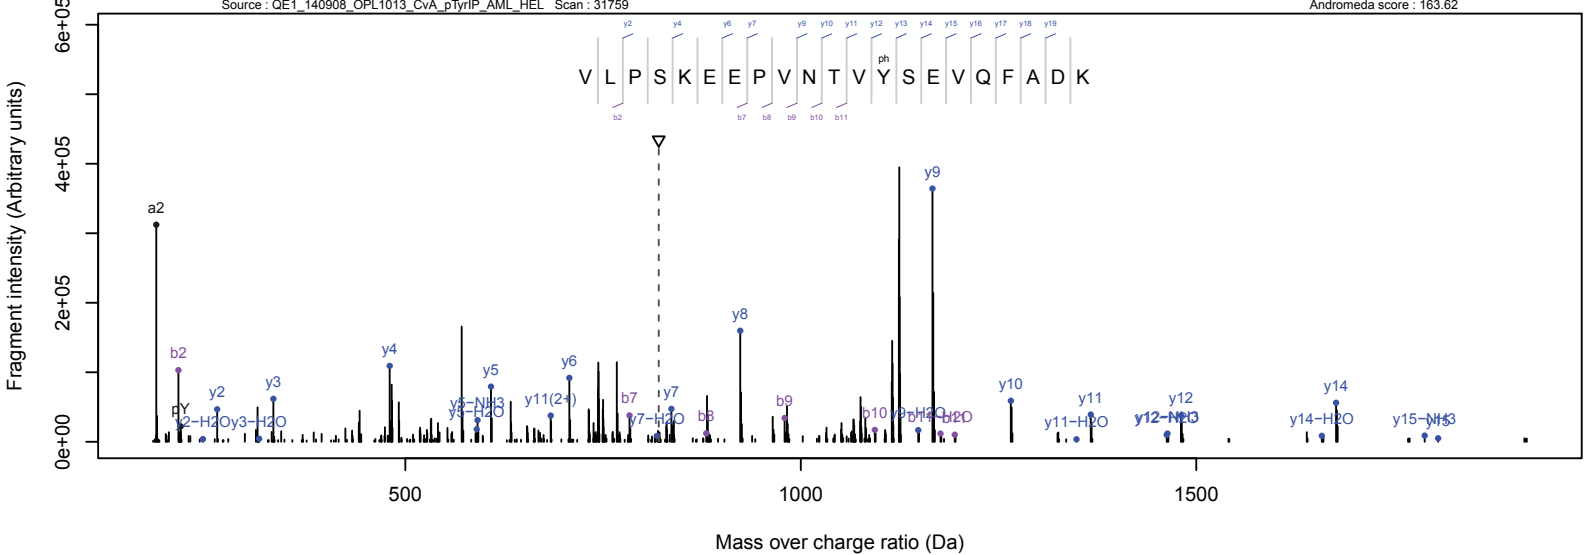

**KTEDTY(ph)FISSAGKPTPGTGK-3+**

Source : QE1\_140612\_OPL1013\_CVA\_phosphoproteomic\_landscape\_AML\_C Scan : 15489

Andromeda score : 163.49

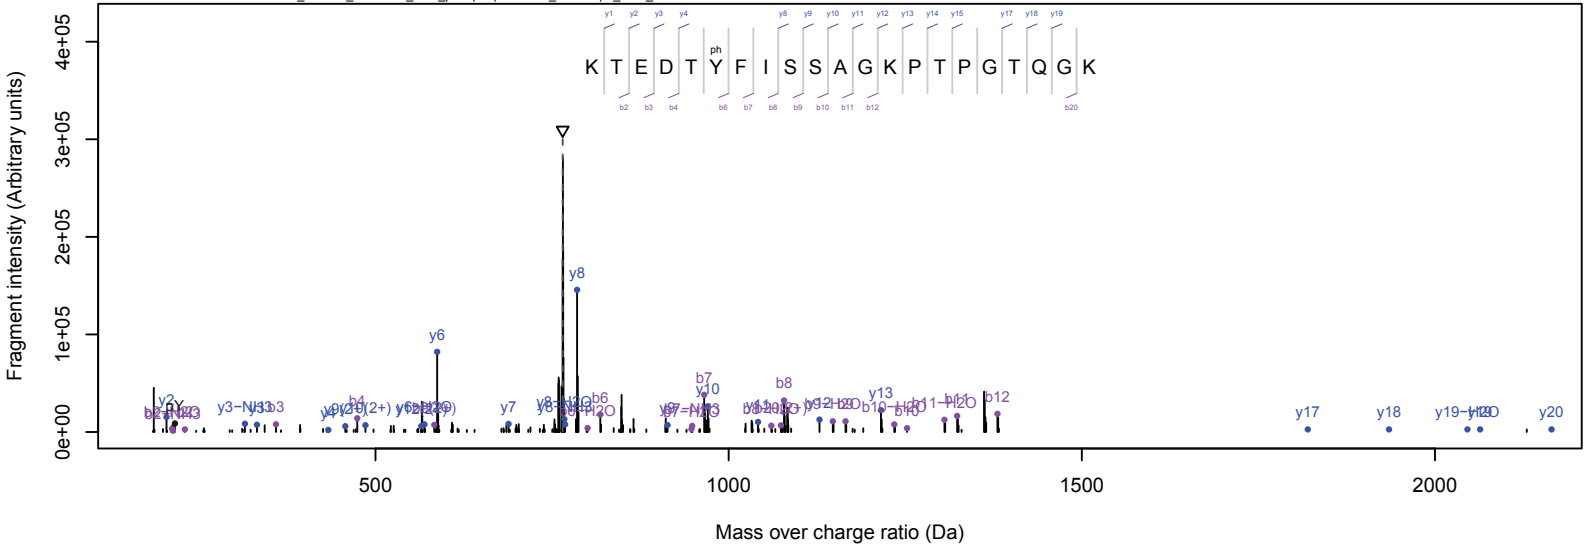

**RVTAY(ph)TVDTVTR-2+**

Source : QE1\_140612\_OPL1013\_CVA\_phosphoproteomic\_landscape\_AML\_C Scan : 12749

Andromeda score : 163.33

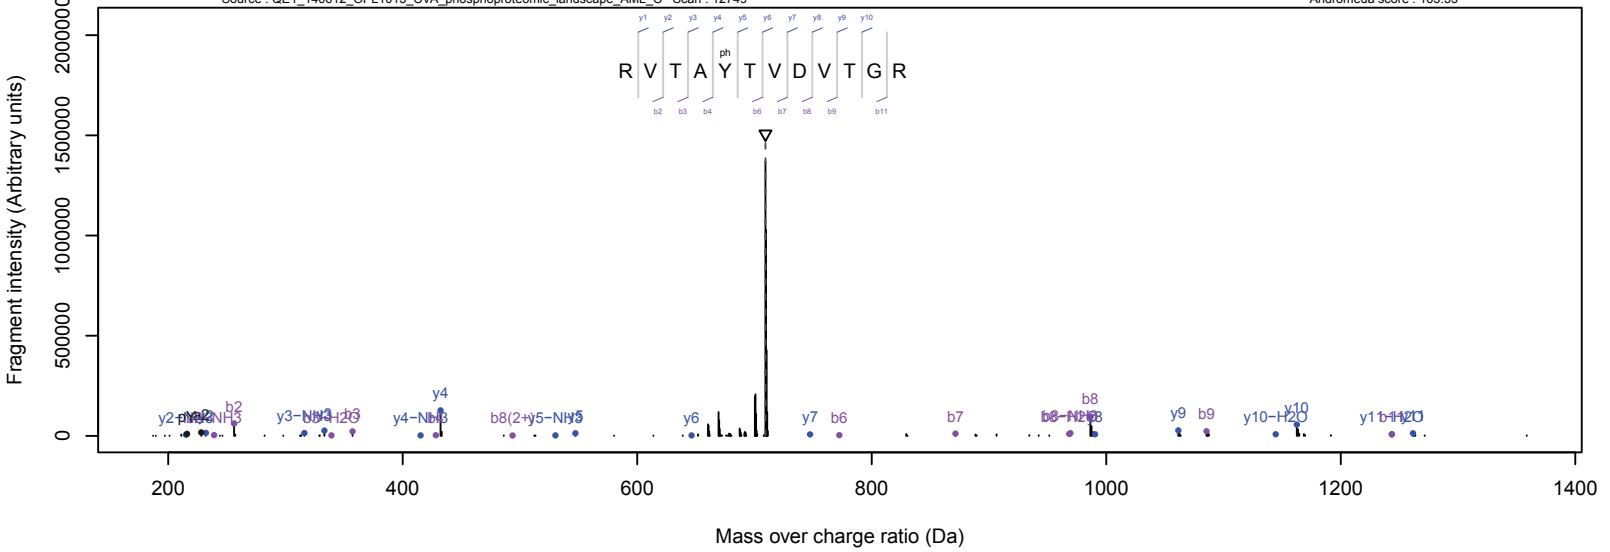

**LGEDPY(ph)YTENGGQGYS SGP GTSPEA QGK-3+**

Source : QE1\_140612\_OPL1013\_CVA\_phosphoproteomic\_landscape\_AML\_B Scan : 18250

Andromeda score : 163.32

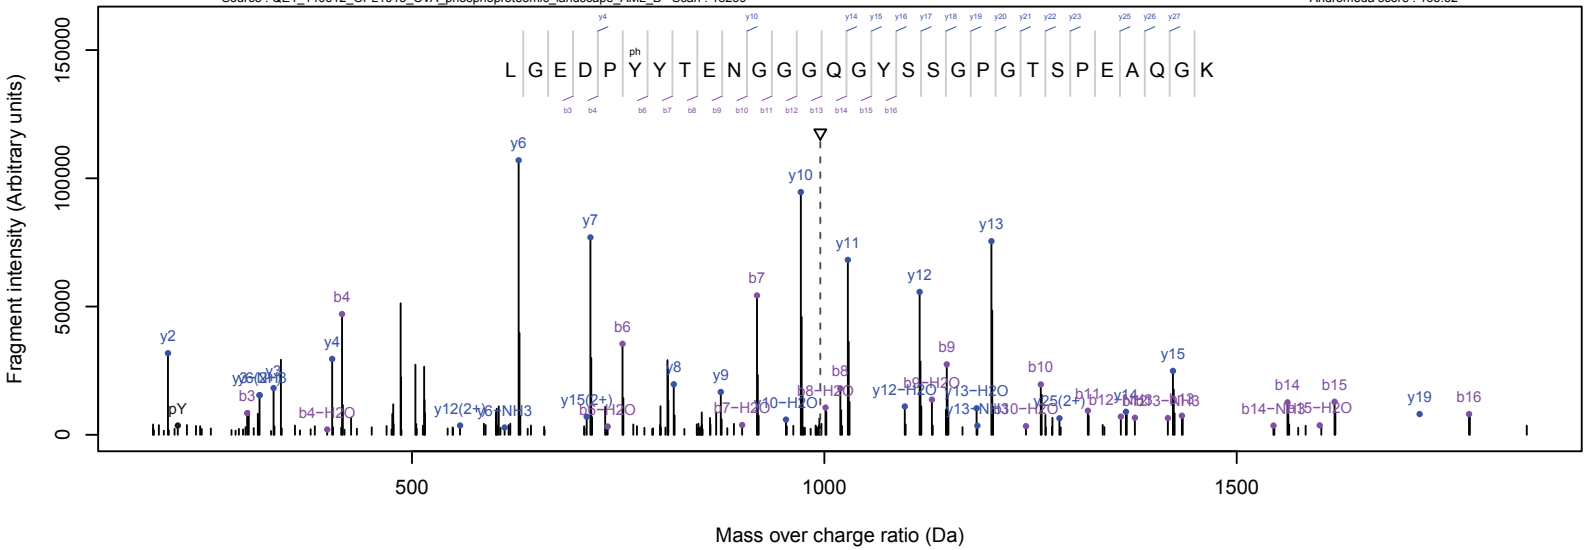

SLPAGDALY(ph)LSFNPPQPSR-2+

Source: QE1\_140612\_OPL1013\_CVA\_phosphoproteomic\_landscape\_AML\_C Scan: 43724

Andromeda score: 163.15

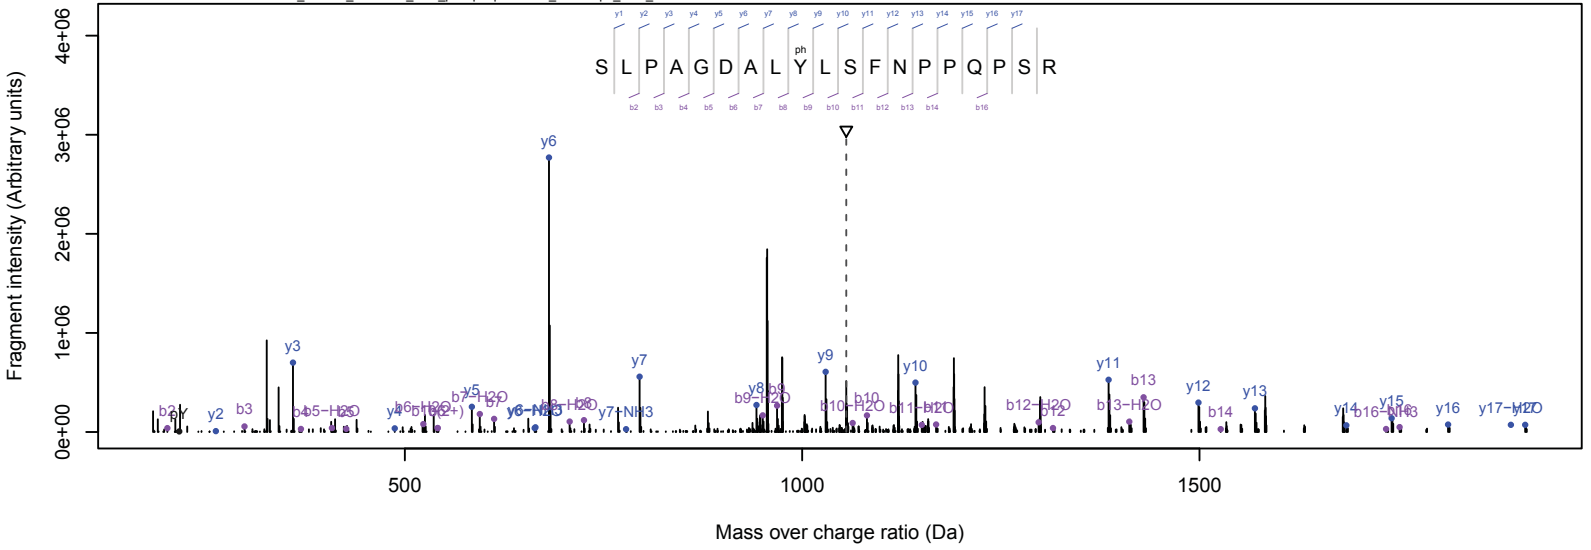

NSLQNLQY(ph)PMMR-2+

Source: QE1\_140612\_OPL1013\_CVA\_phosphoproteomic\_landscape\_AML\_B Scan: 27006

Andromeda score: 163.09

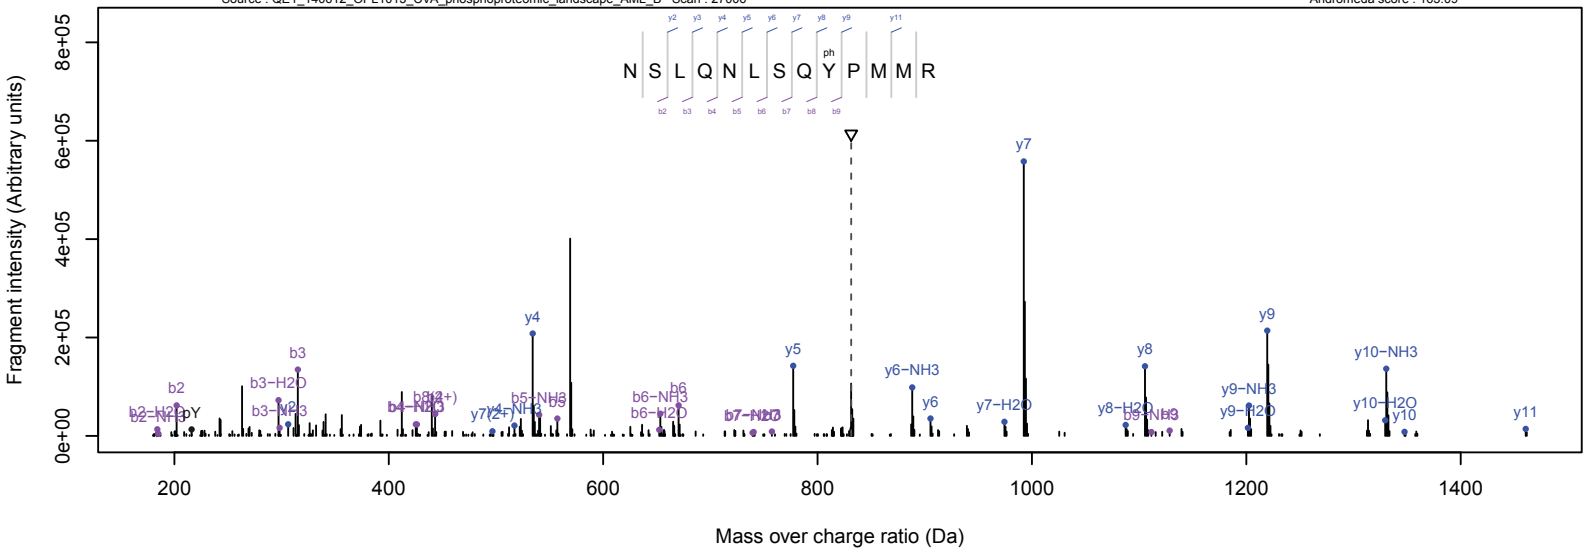

QSFHEGALGVETPGYQAPEIRP-3+

Source: QE1\_140612\_OPL1013\_CVA\_phosphoproteomic\_landscape\_AML\_C Scan: 25075

Andromeda score: 162.98

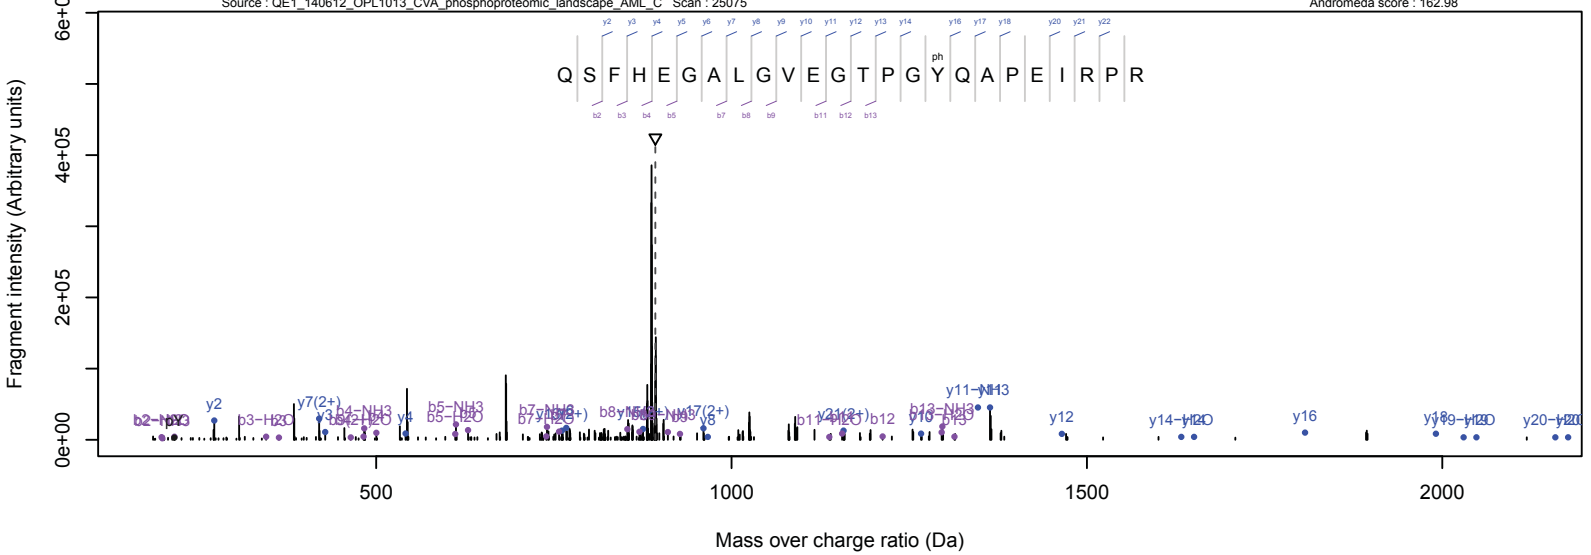



DISEASVFDAYVLPK-2+

Source: QE1\_140612\_OPL1013\_CVA\_phosphoproteomic\_landscape\_AML\_C Scan: 45676

Andromeda score: 162.94

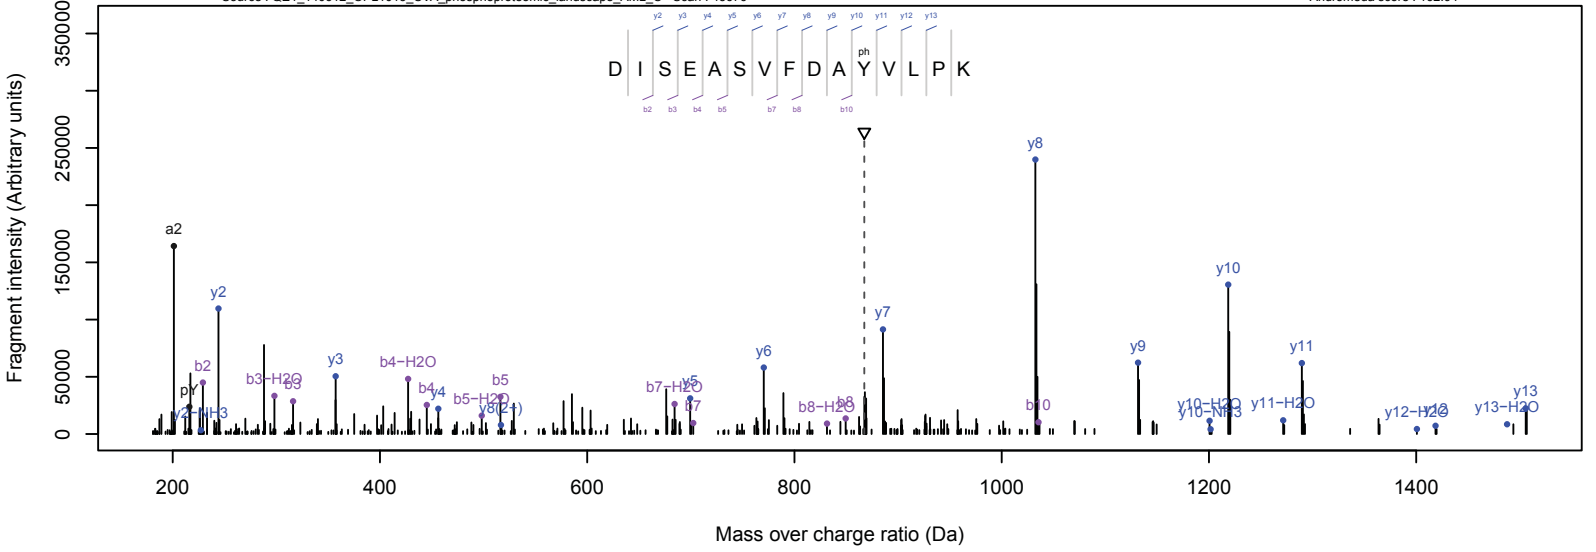

VDKVIQAQTAFSANPANPAILSEASAPIPHDGNLYPR-4+

Source: QE1\_140908\_OPL1013\_CvA\_pTyrIP\_AML\_ML2 Scan: 42381

Andromeda score: 162.87

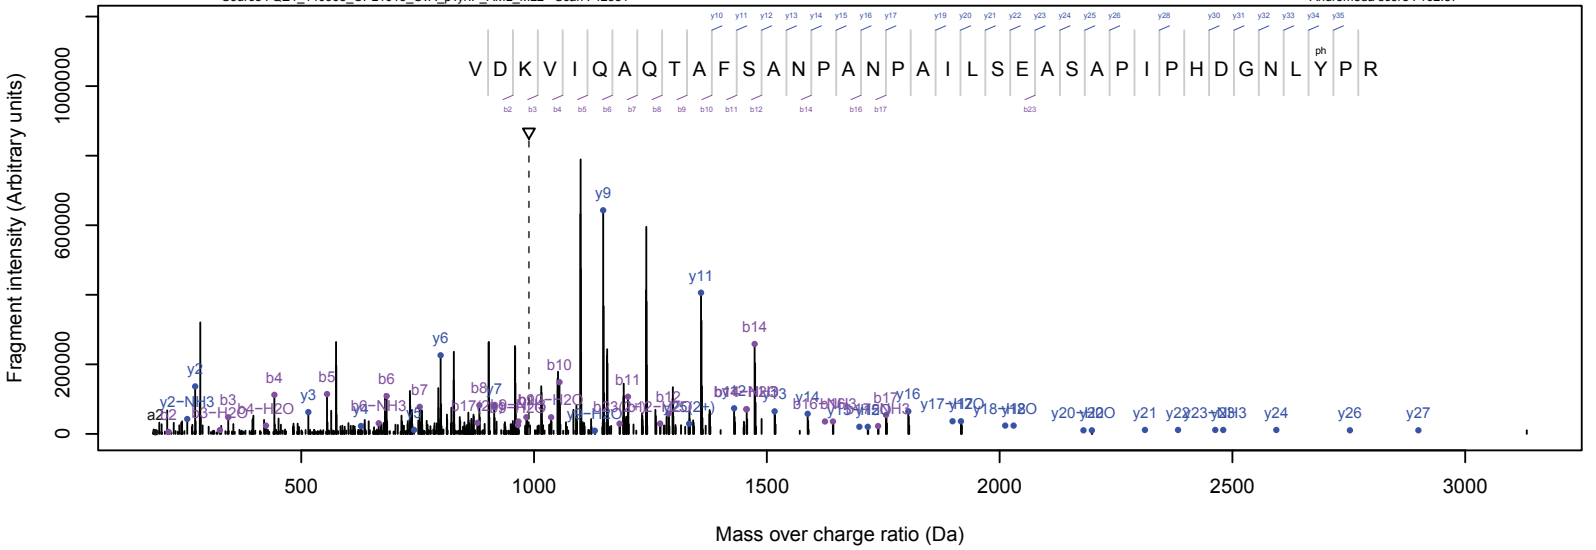

KTTTNPYVLMVLYK-2+

Source: QE1\_140612\_OPL1013\_CVA\_phosphoproteomic\_landscape\_AML\_B Scan: 31438

Andromeda score: 162.7

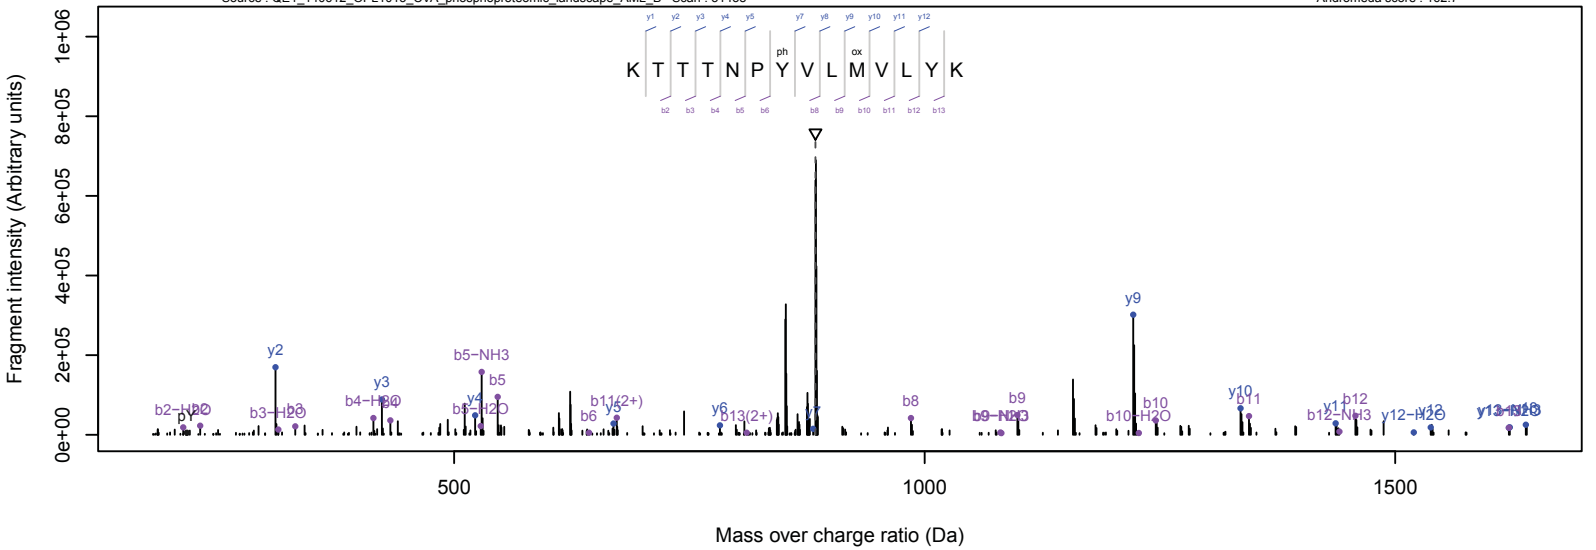

**NSTEDIM(ox)SLSTQGDY(ph)INLQTK-2+**

Source : QE1\_140908\_OPL1013\_CvA\_pTyrIP\_AML\_Kasumi1 Scan : 30682

Andromeda score : 162.65

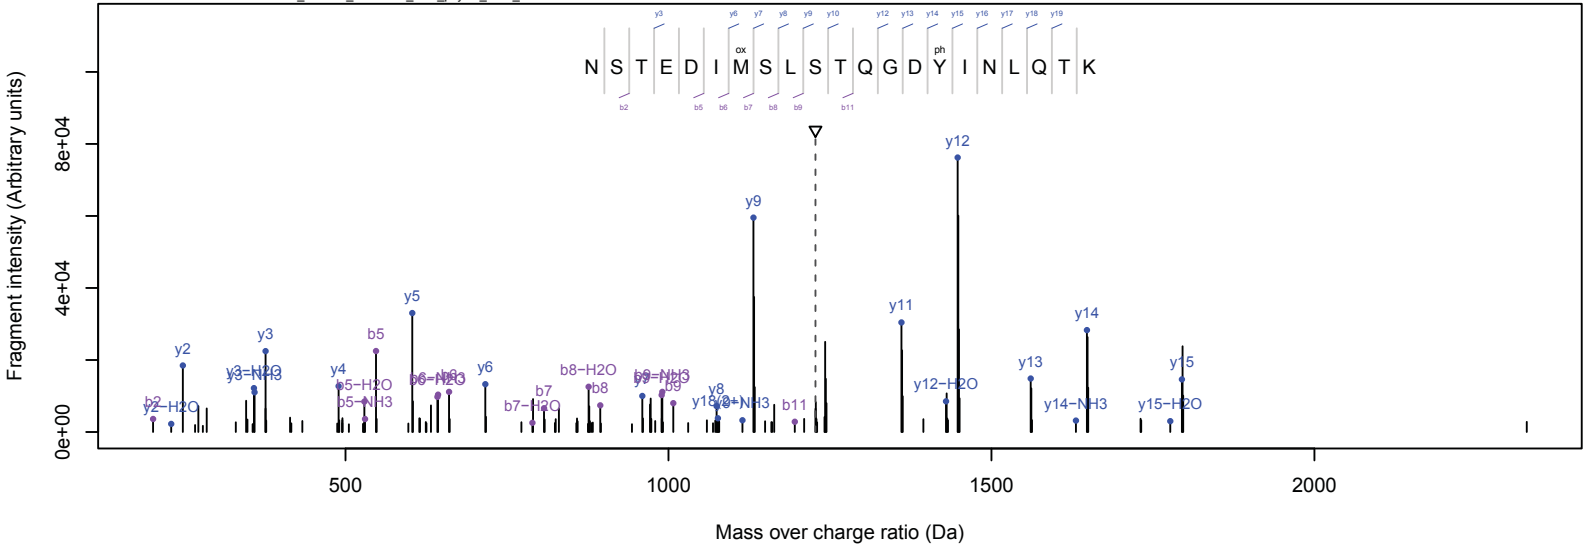

**AAVHTY(ph)GIASVNPQLKK-2+**

Source : QE1\_140908\_OPL1013\_CvA\_pTyrIP\_AML\_HEL Scan : 19830

Andromeda score : 162.59

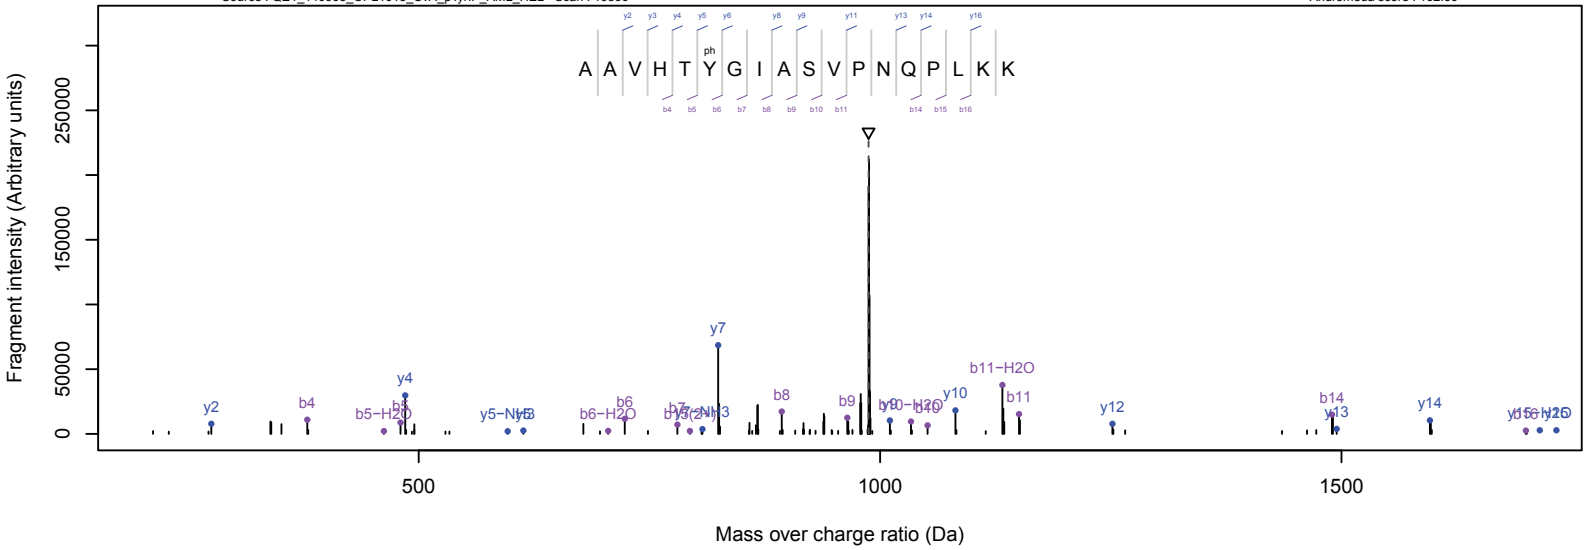

**SSSNLGADDGY(ph)M(ox)PMTPGAALAGSGSGSCR-3+**

Source : QE1\_140908\_OPL1013\_CvA\_pTyrIP\_AML\_ML2 Scan : 27576

Andromeda score : 162.52

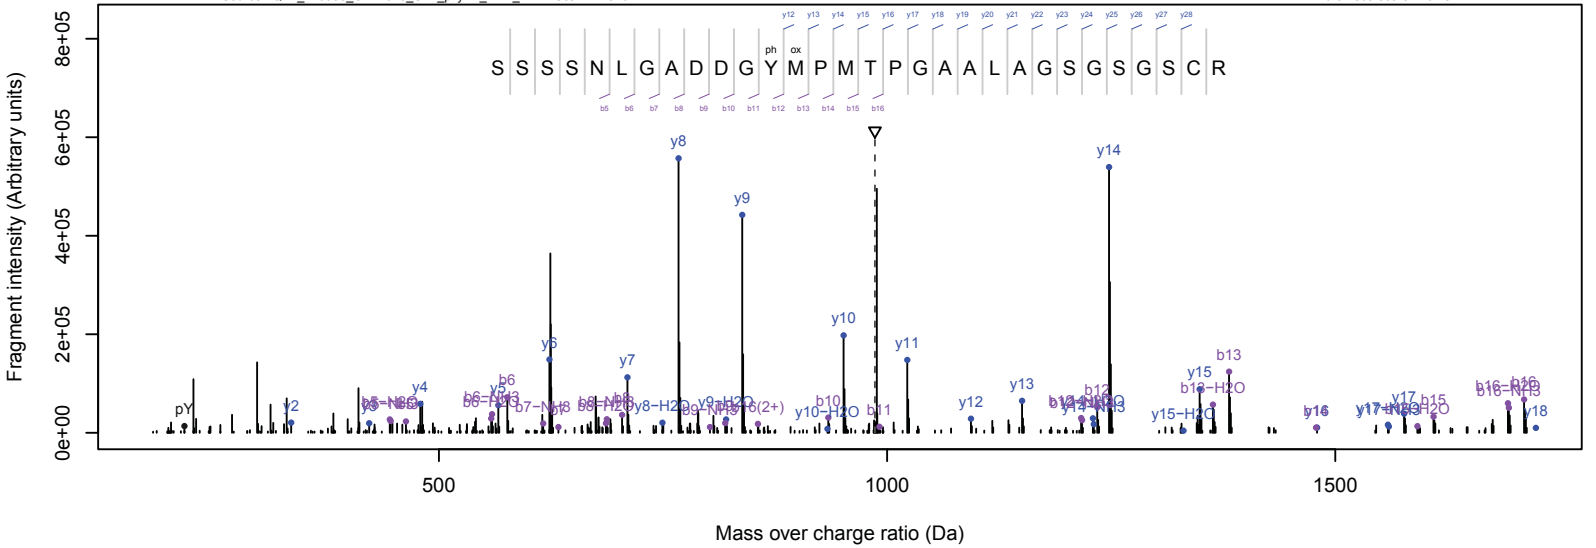

FELAQEEY(ph)QLHK-3+

Source: QE1\_140612\_OPL1013\_CVA\_phosphoproteomic\_landscape\_AML\_D Scan: 23336

Andromeda score: 162.49

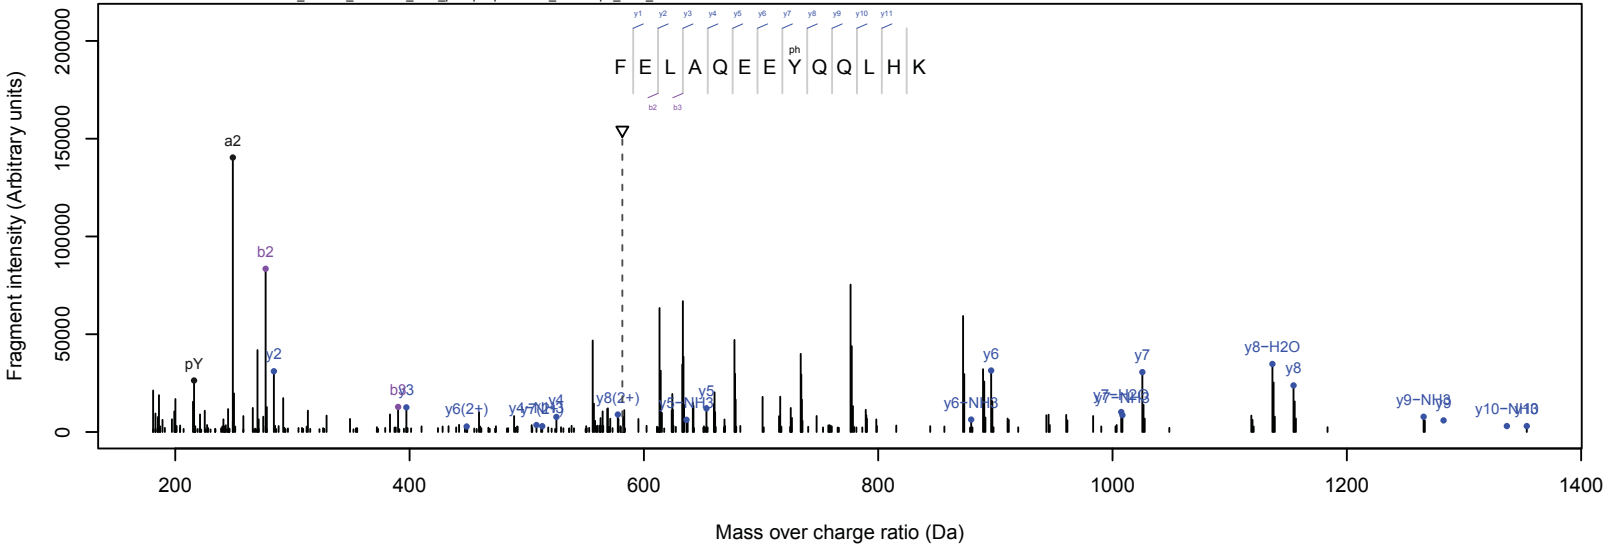

PSSINY(ph)M(ox)VAPVTGNDVGIR-2+

Source: QE1\_140908\_OPL1013\_CvA\_pTyrIP\_AML\_ML2 Scan: 30431

Andromeda score: 162.42

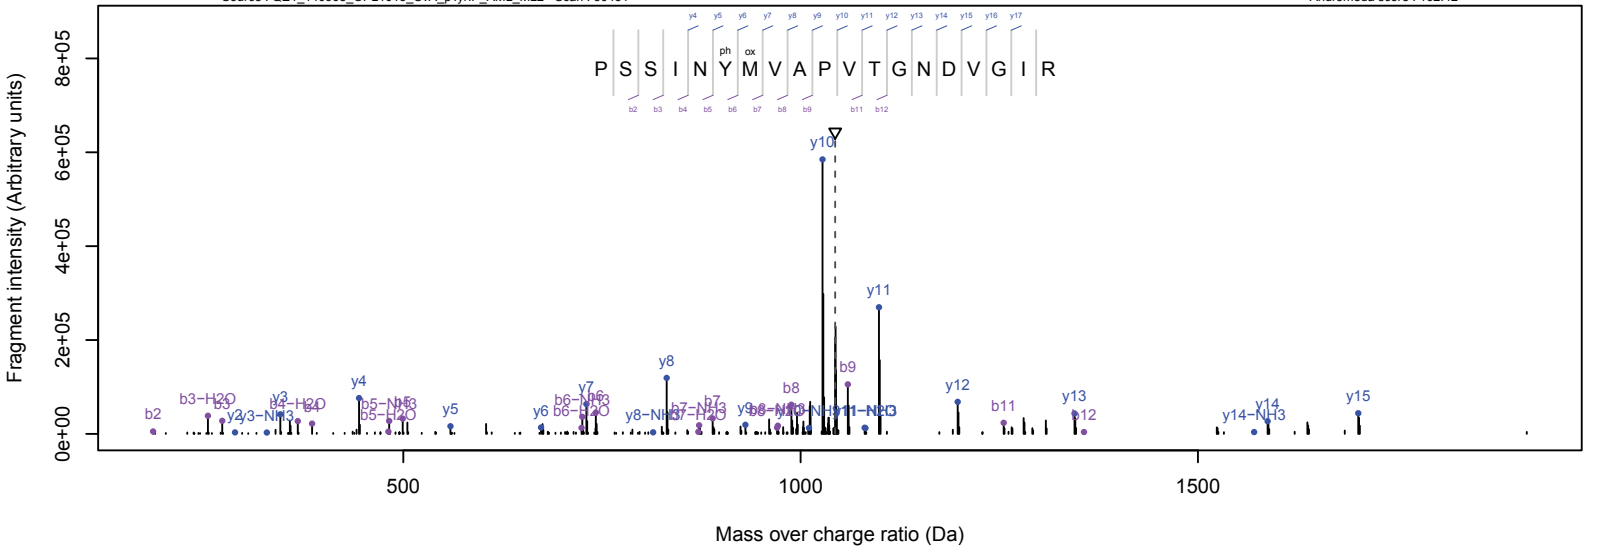

TPPETGGY(ph)ASLPTK-2+

Source: QE1\_140612\_OPL1013\_CVA\_phosphoproteomic\_landscape\_AML\_B Scan: 14180

Andromeda score: 162.41

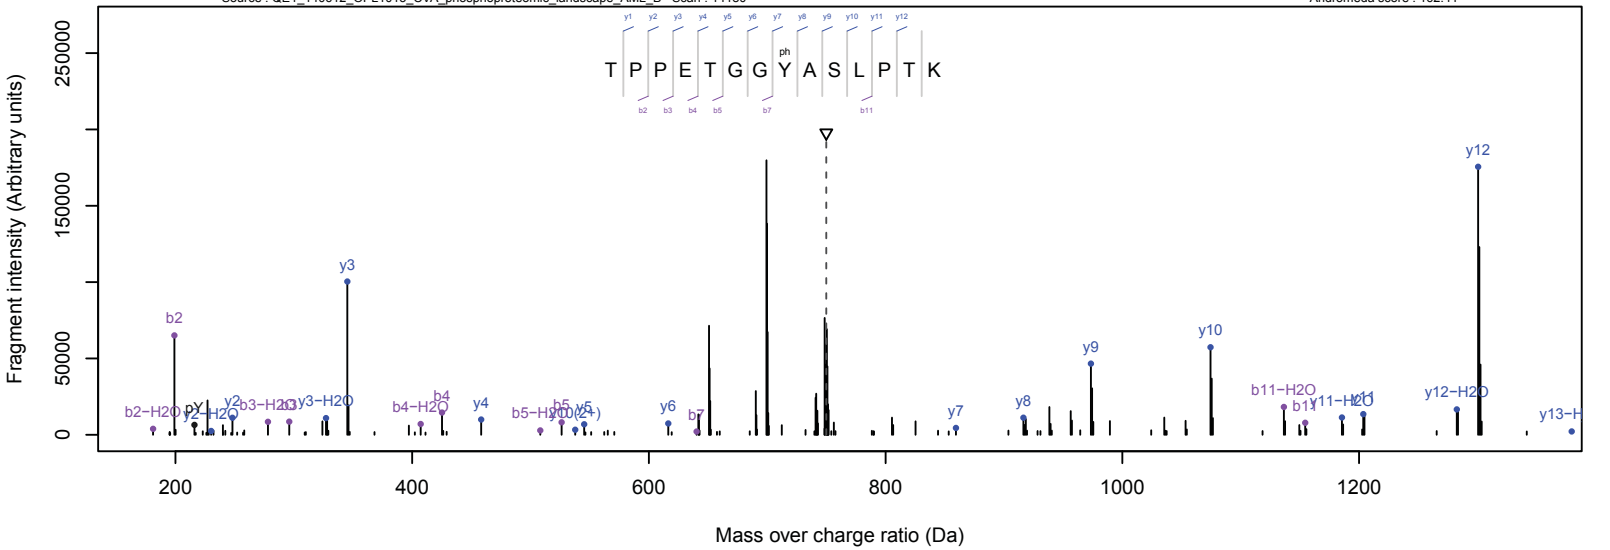

DDGMEEVVGHTQGPLDGSLYAK-3+

Source : QE1\_140908\_OPL1013\_CvA\_pTyrIP\_AML\_HEL Scan : 35179

Andromeda score : 162.39

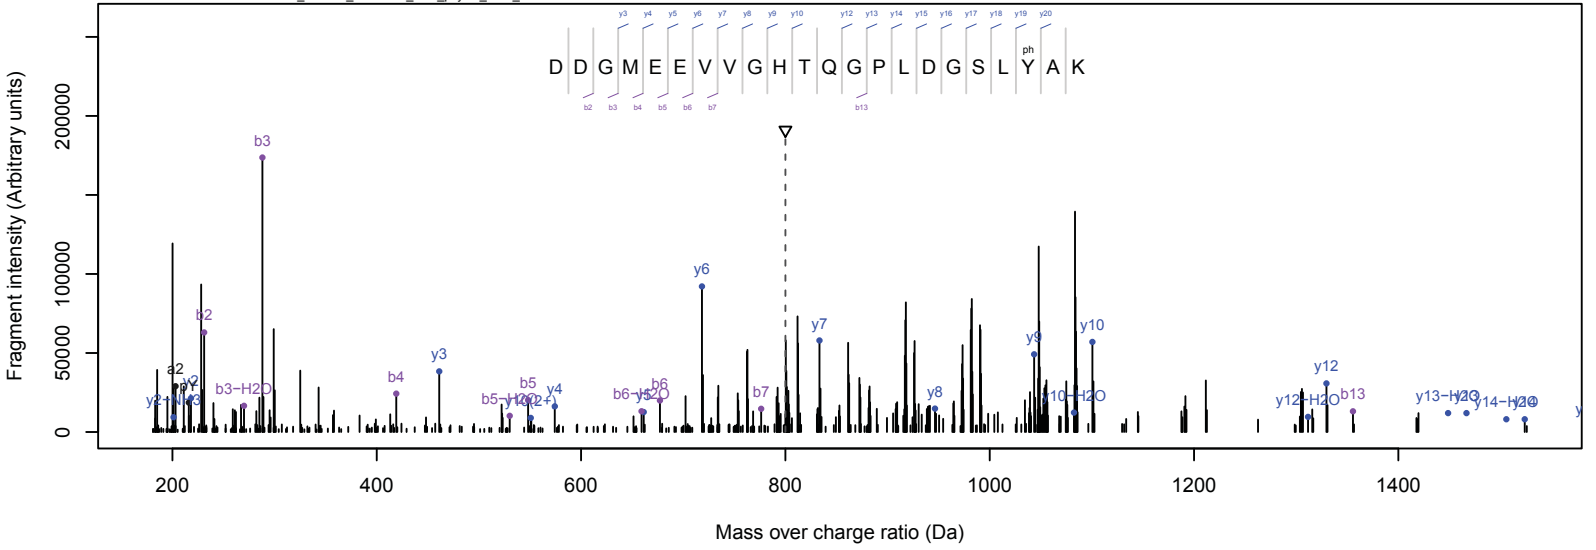

MDY(ph)VEINIDHK-2+

Source : QE1\_140612\_OPL1013\_CvA\_phosphoproteomic\_landscape\_AML\_D Scan : 23841

Andromeda score : 162.38

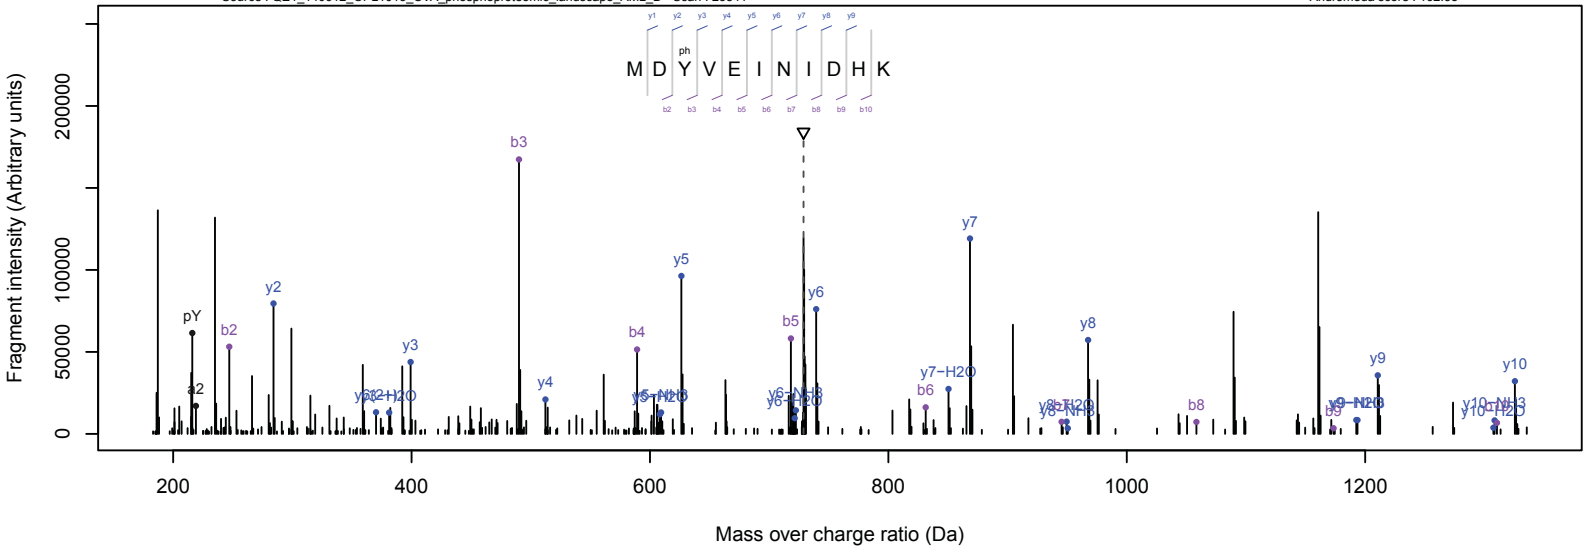

GHALY(ph)VEPHGHGPSLSVQGLSR-4+

Source : QE1\_140908\_OPL1013\_CvA\_pTyrIP\_AML\_Kasumi6 Scan : 25361

Andromeda score : 162.32

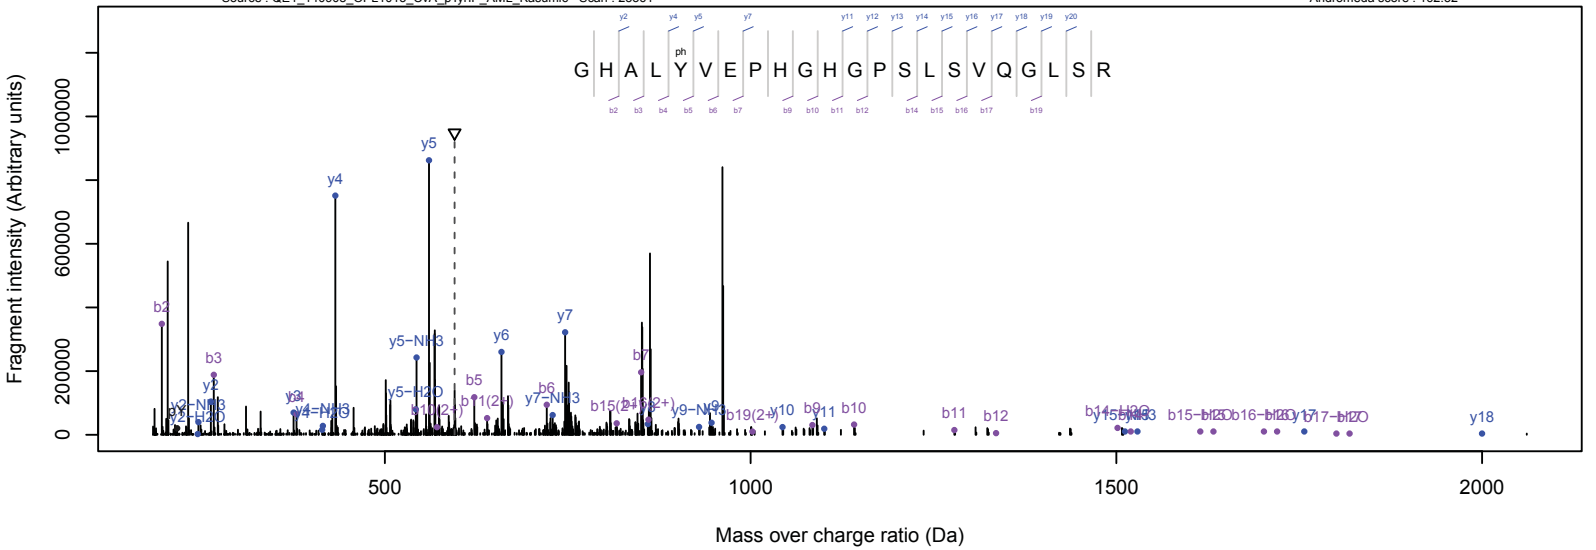

IEHY(ph)FSPVSK-2+

Source : QE1\_140612\_OPL1013\_CVA\_phosphoproteomic\_landscape\_AML\_C Scan : 14509

Andromeda score : 162.26

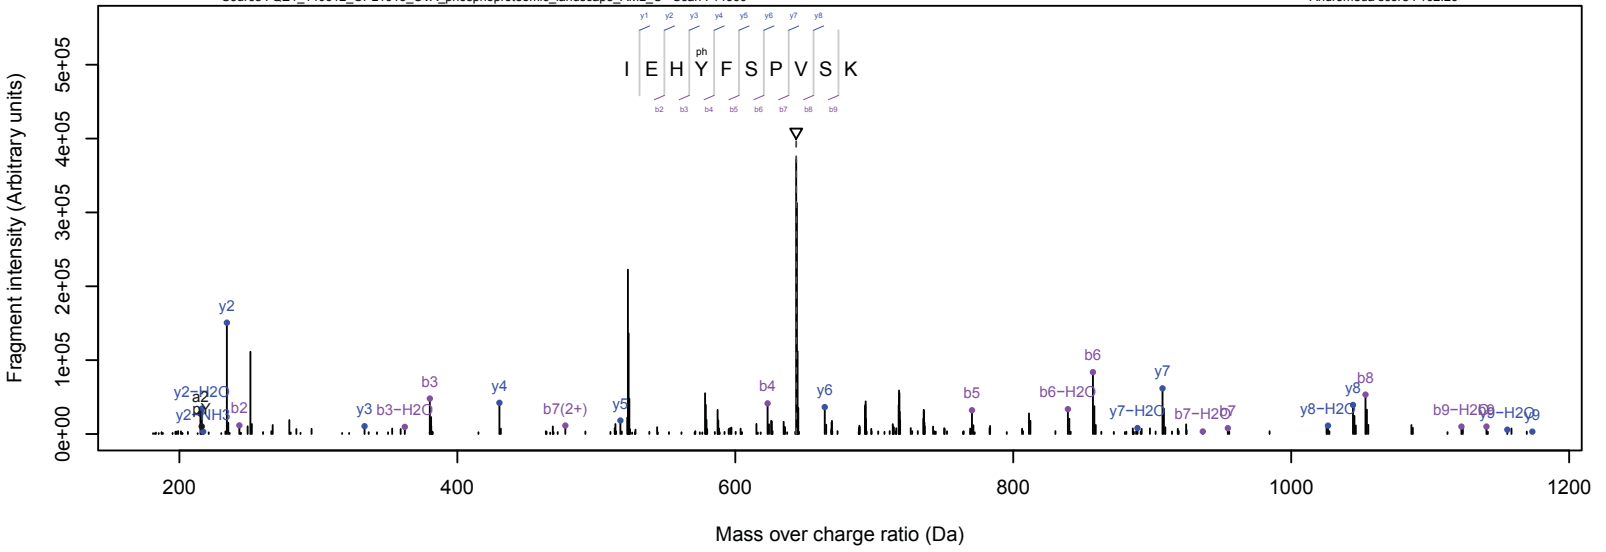

QLALETIDINKDPY(ph)FMK-2+

Source : QE1\_140612\_OPL1013\_CVA\_phosphoproteomic\_landscape\_AML\_C Scan : 40796

Andromeda score : 162.26

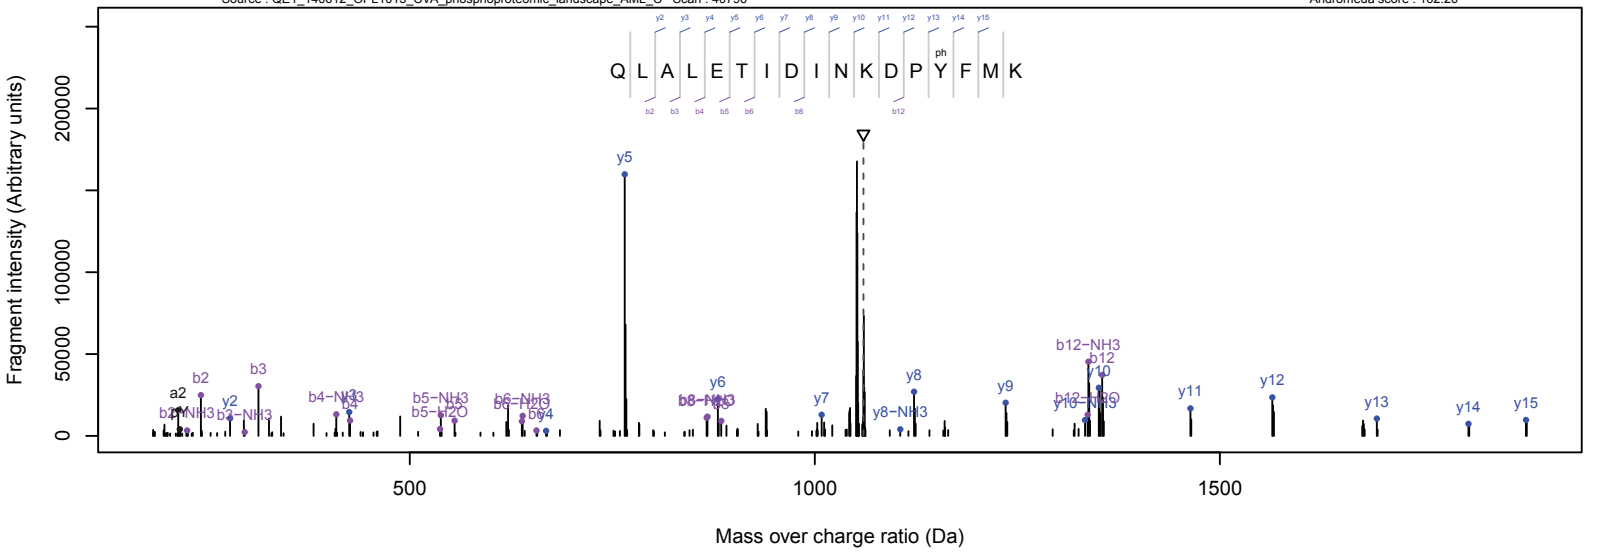

Y(ph)ATLSLFNTYK-2+

Source : QE1\_140612\_OPL1013\_CVA\_phosphoproteomic\_landscape\_AML\_B Scan : 37460

Andromeda score : 162.26

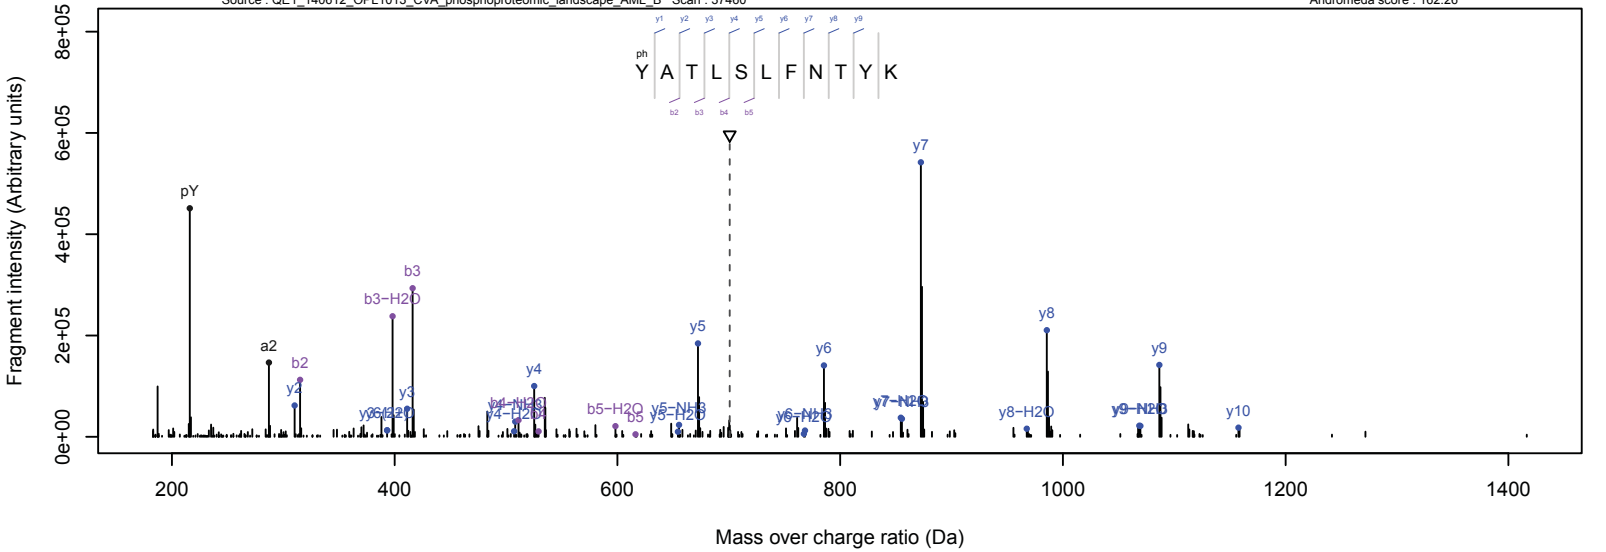



HVHSEDY(ph)SKVPK-3+

Source : QE1\_140612\_OPL1013\_CVA\_phosphoproteomic\_landscape\_AML\_B Scan : 3627

Andromeda score : 161.99

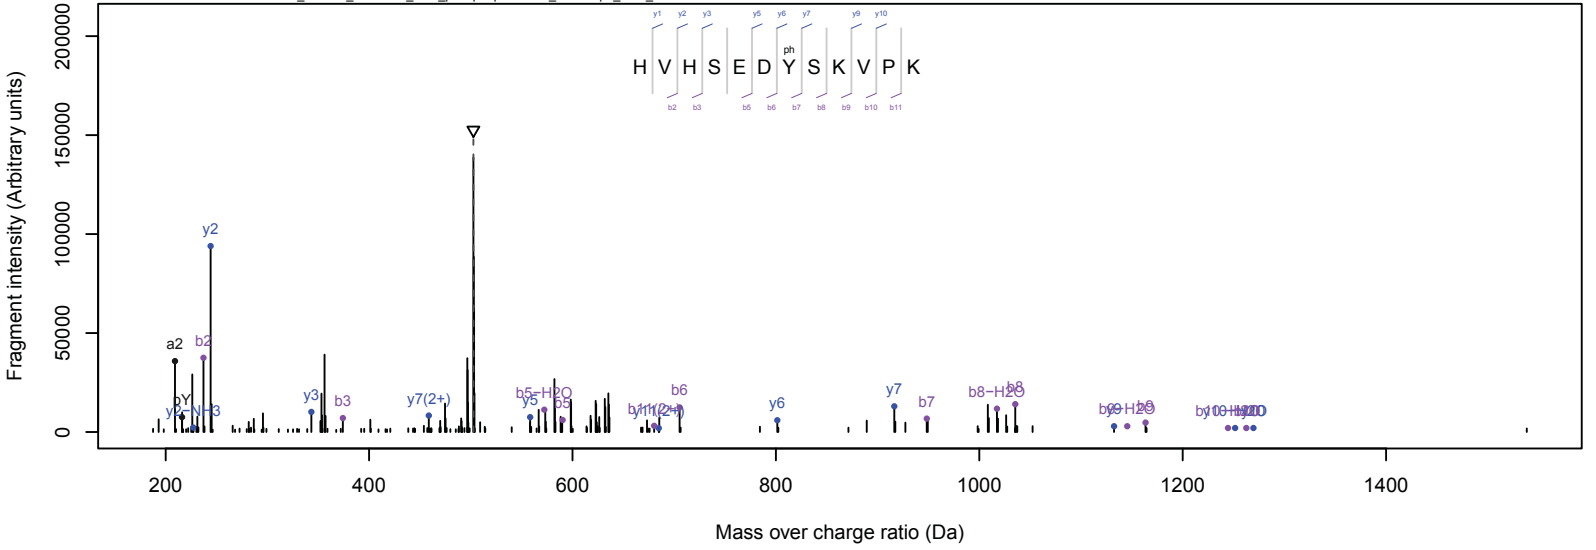

KESYSVYVY(ph)K-2+

Source : QE1\_140612\_OPL1013\_CVA\_phosphoproteomic\_landscape\_AML\_C Scan : 13704

Andromeda score : 161.99

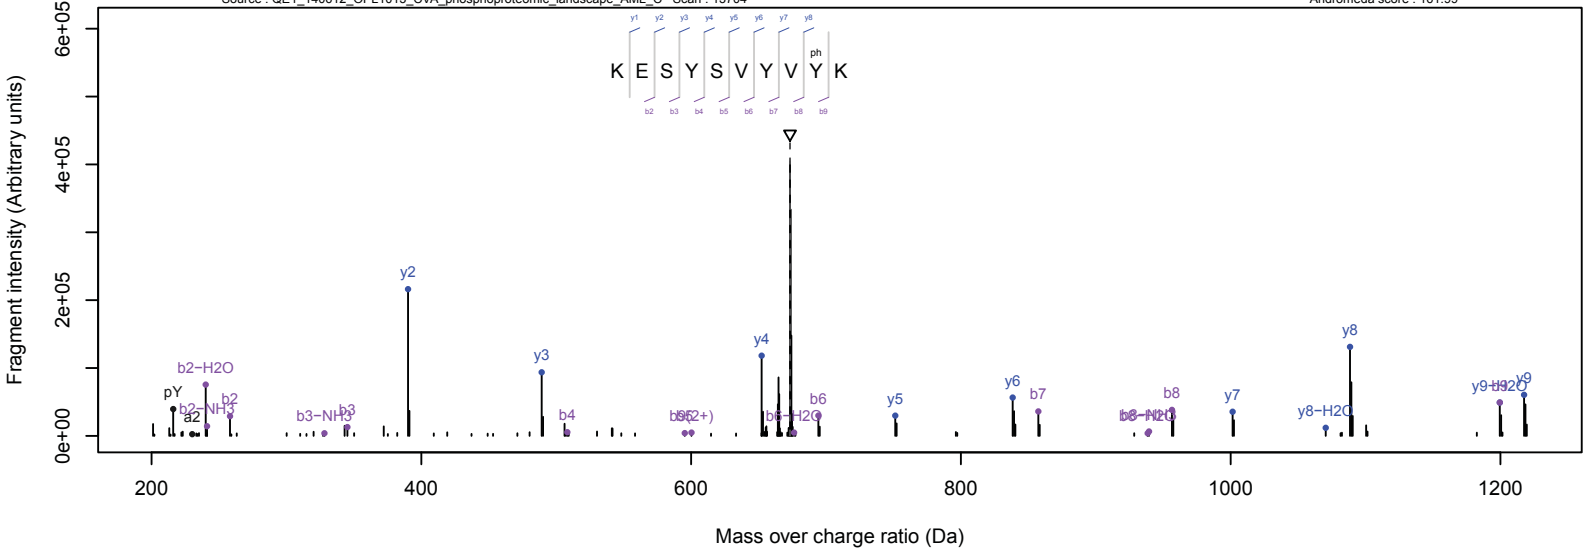

LPSAQTPTNGTDY(ph)VASGK-2+

Source : QE1\_140612\_OPL1013\_CVA\_phosphoproteomic\_landscape\_AML\_B Scan : 14915

Andromeda score : 161.86

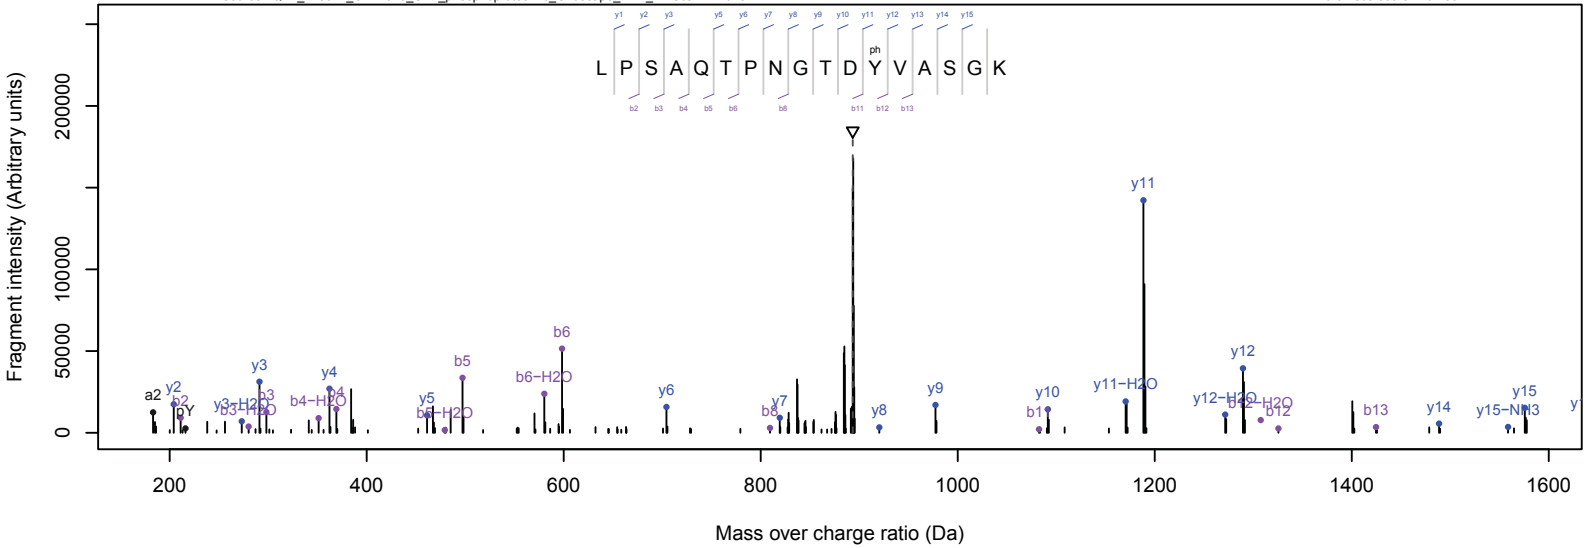

**TSSAQVEGGVHSLHSY(ph)EK-3+**

Source : QE1\_140612\_OPL1013\_CVA\_phosphoproteomic\_landscape\_AML\_A Scan : 9434

Andromeda score : 161.86

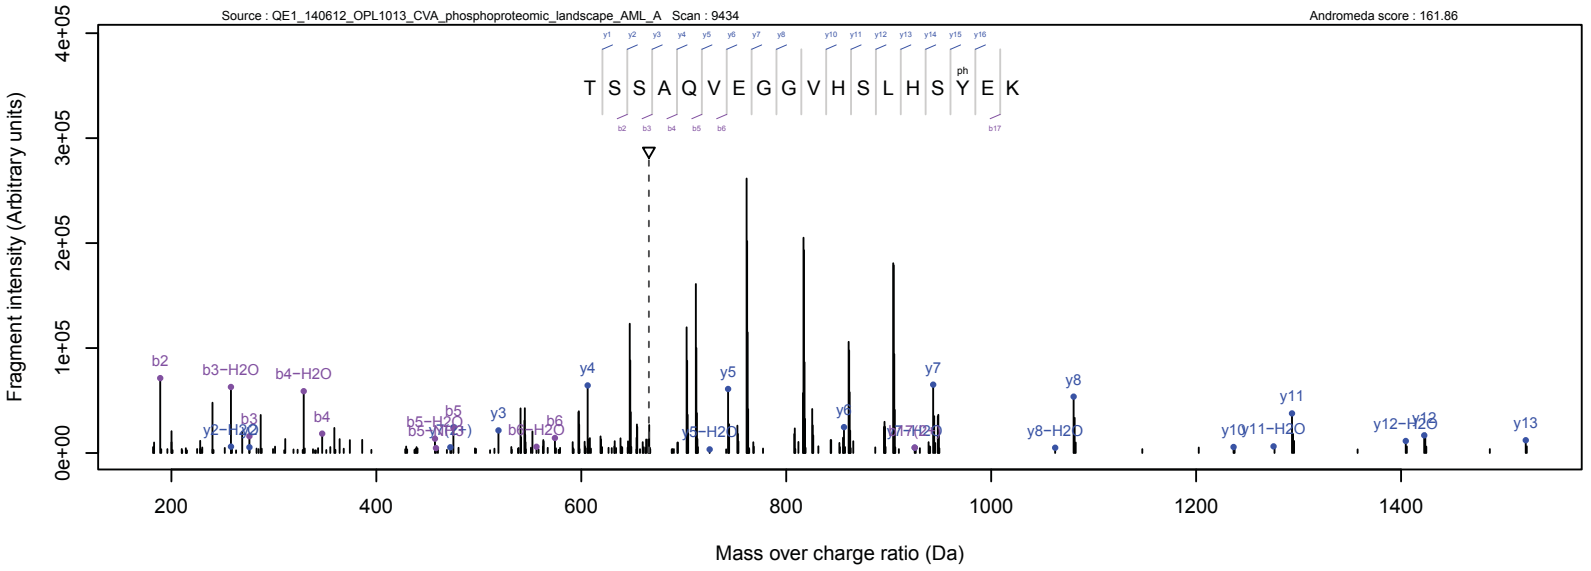

**APYTCGGDSDQY(ph)VLMSSPVG R-2+**

Source : QE1\_140908\_OPL1013\_CvA\_pTyrIP\_AML\_ML2 Scan : 32689

Andromeda score : 161.68

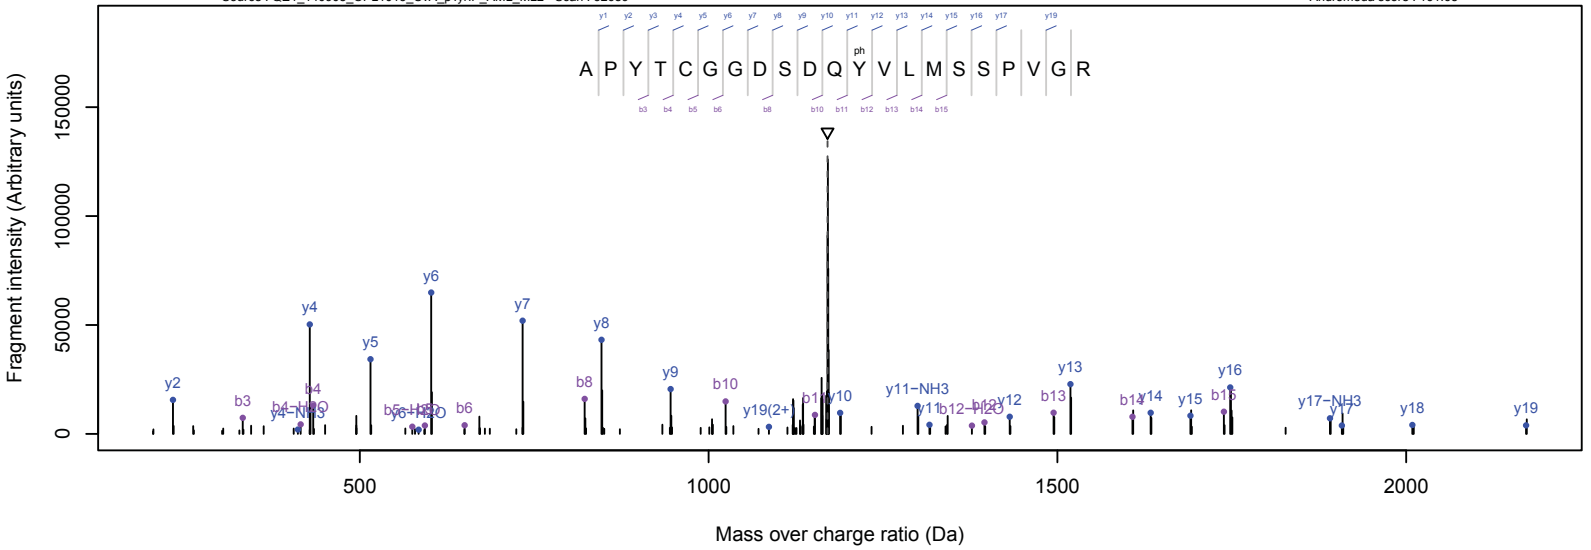

**SAY(ph)SSFVNLFR-2+**

Source : QE1\_140612\_OPL1013\_CVA\_phosphoproteomic\_landscape\_AML\_C Scan : 45884

Andromeda score : 161.67

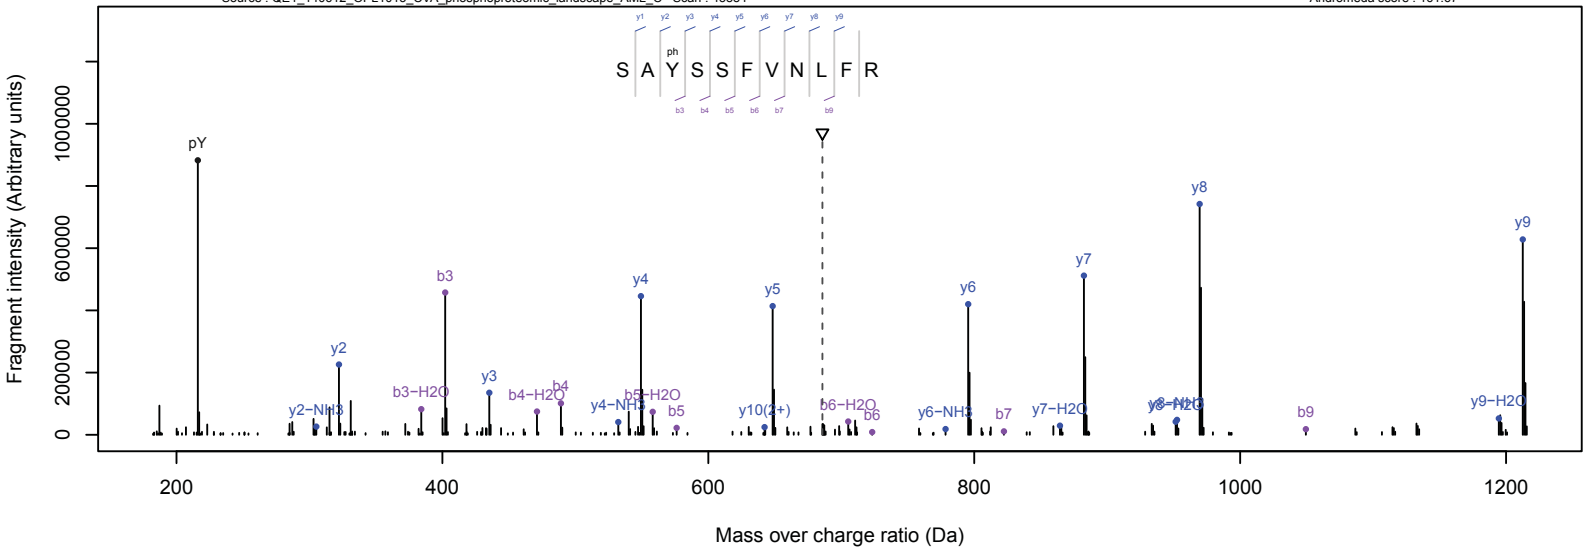



SHLSESCSI ESDIY A E I P D E T L R-3+

Source : QE1\_140908\_OPL1013\_CVA\_pTyrIP\_AML\_OCI\_AML3 Scan : 48846

Andromeda score : 161.47

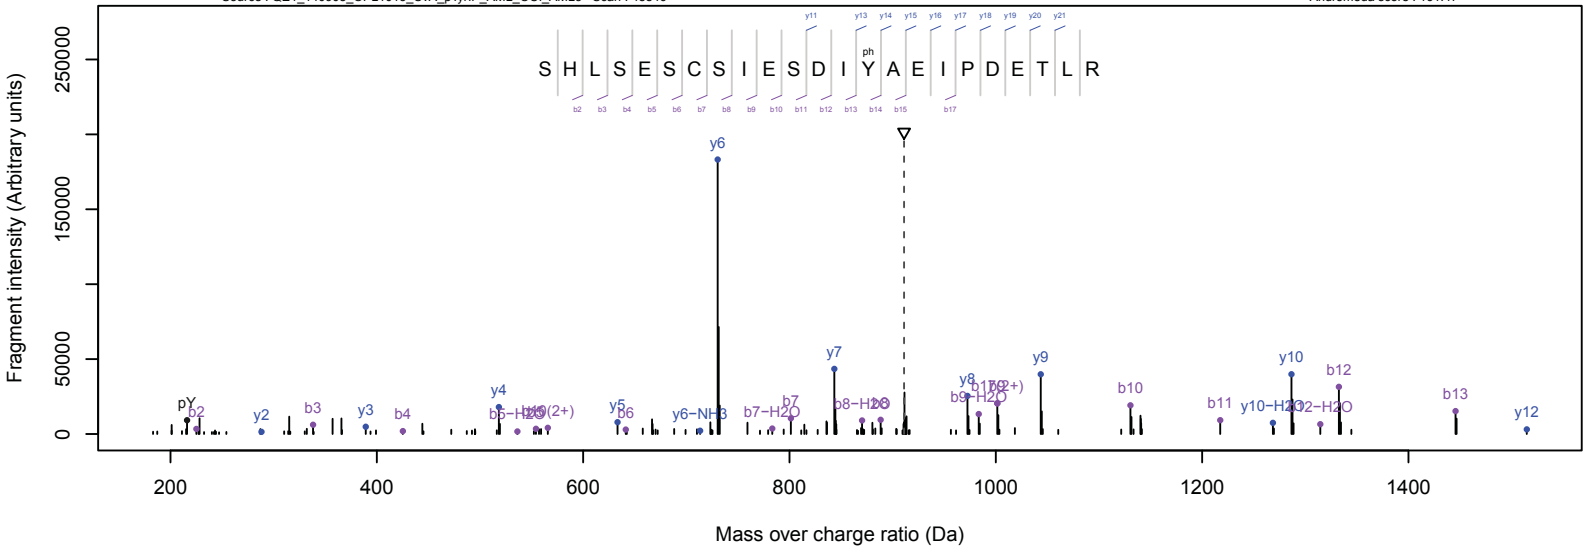

GDKGY(ph) VPSVFIPISTIR-2+

Source : QE1\_140612\_OPL1013\_CVA\_phosphoproteomic\_landscape\_AML\_B Scan : 44067

Andromeda score : 161.08

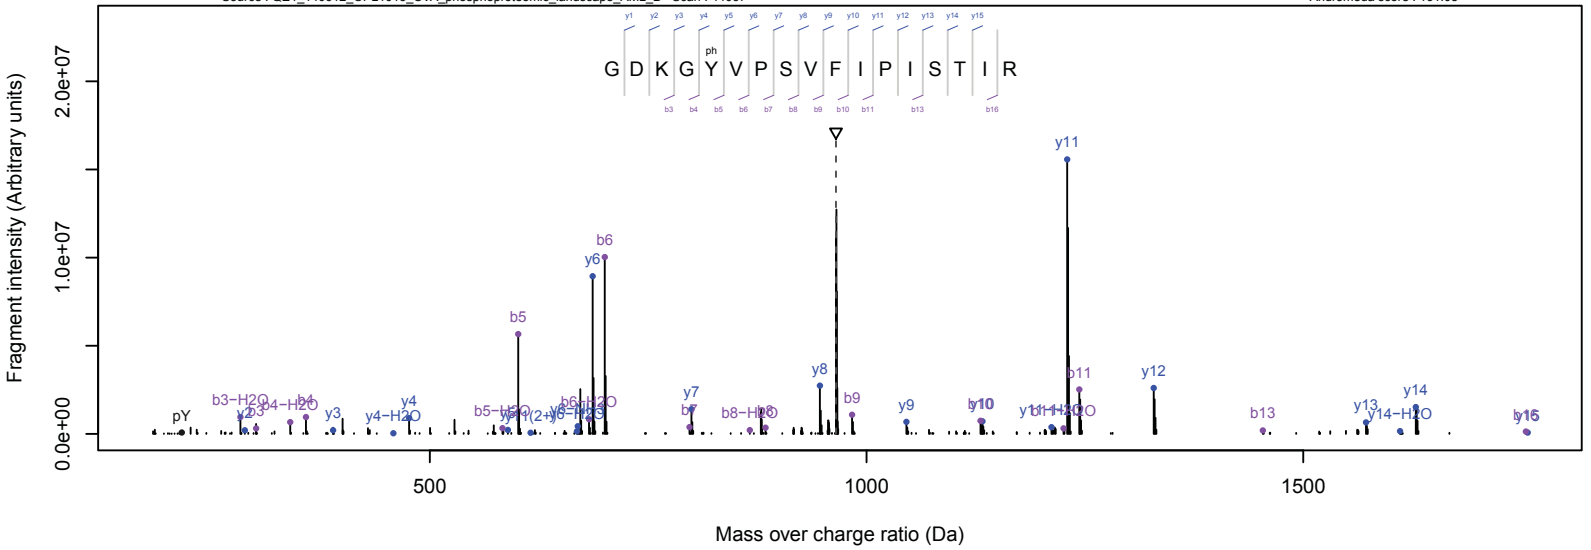

KPGADLSDY(ph) FNYGFNEDTWK-3+

Source : QE1\_140612\_OPL1013\_CVA\_phosphoproteomic\_landscape\_AML\_A Scan : 41517

Andromeda score : 161.08

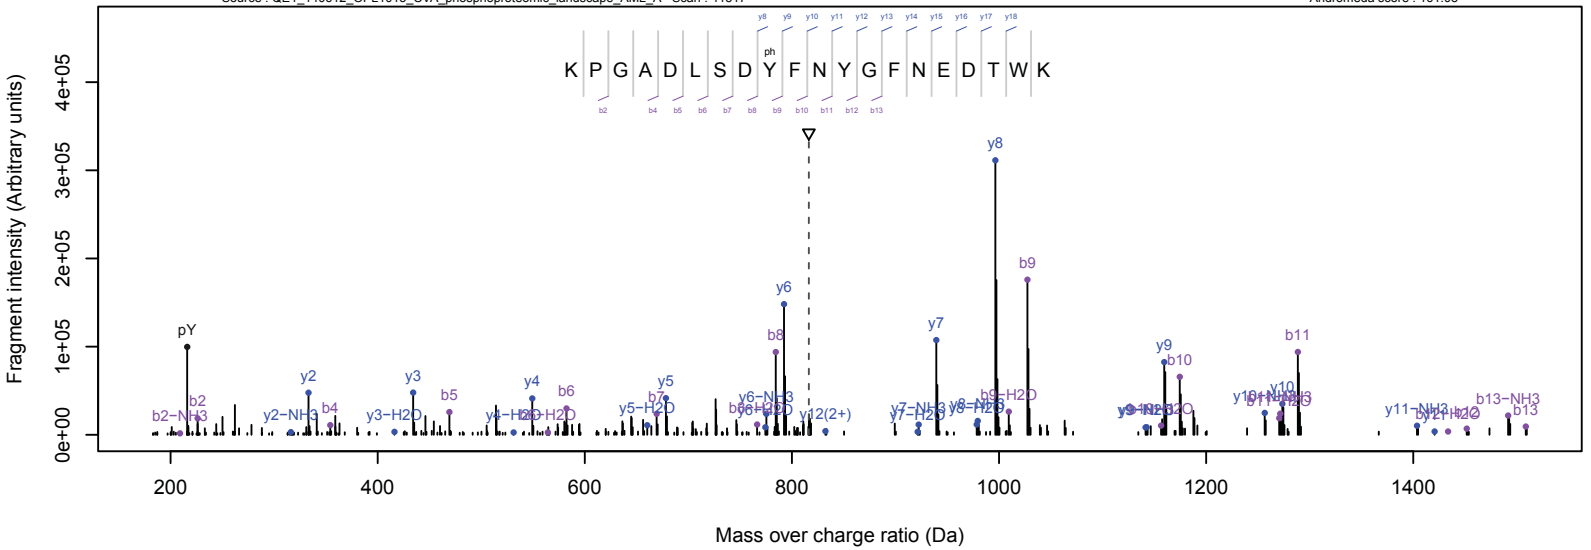

VAGPNGY(ph)AILLAVPGSSDSR-2+

Source : QE1\_140612\_OPL1013\_CVA\_phosphoproteomic\_landscape\_AML\_B Scan : 40250

Andromeda score : 161.08

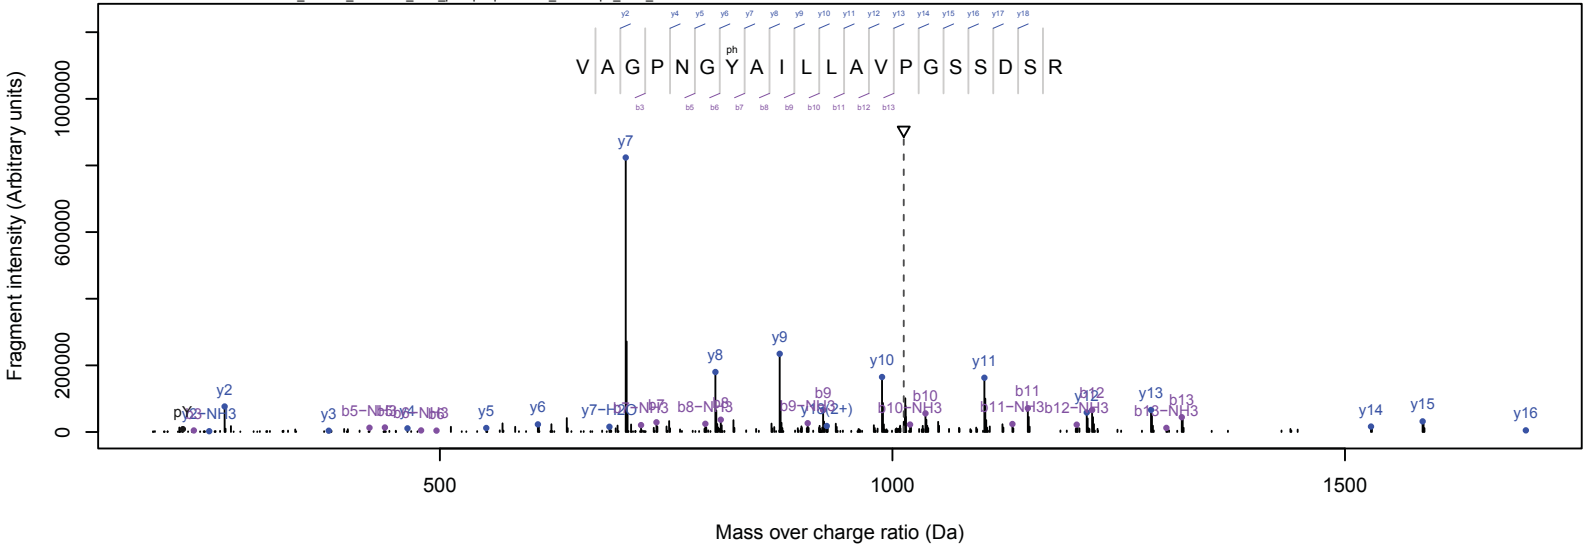

Y(ph)PSPPMGVSAPNLPPTAEDNLEYVR-2+

Source : QE1\_140612\_OPL1013\_CVA\_phosphoproteomic\_landscape\_AML\_A Scan : 40278

Andromeda score : 161.04

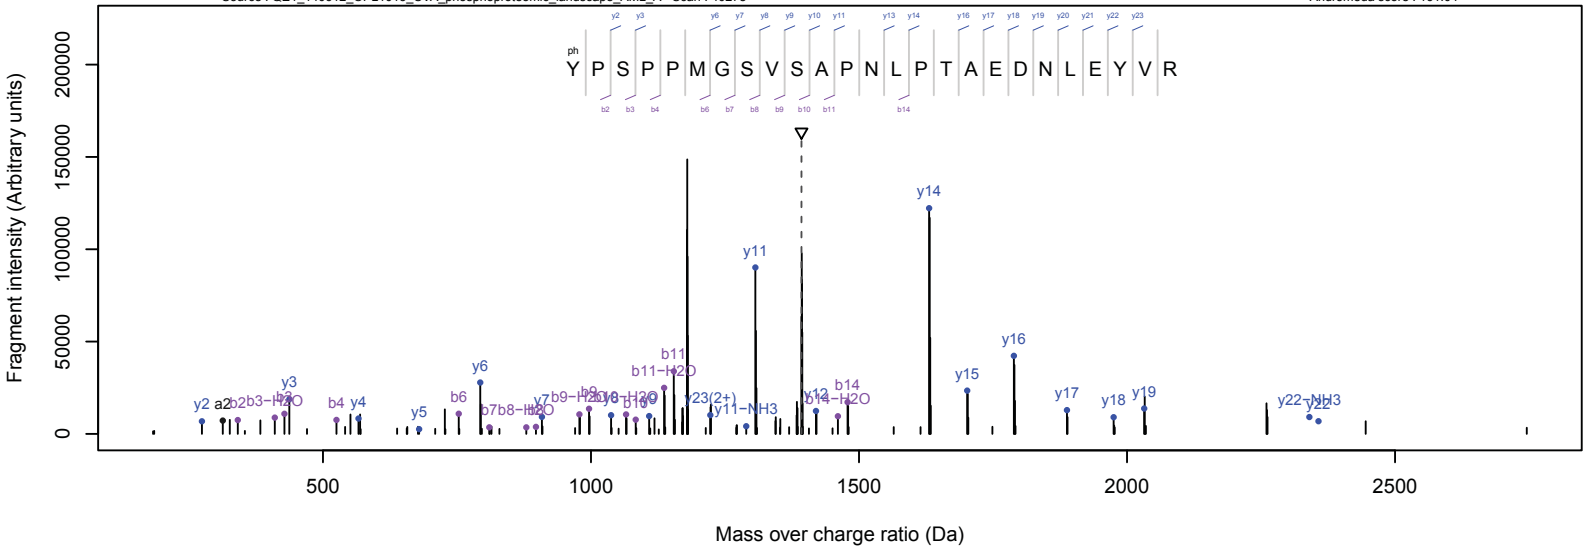

SKFDNLY(ph)GCR-2+

Source : QE1\_140908\_OPL1013\_CvA\_pTyrIP\_AML\_HEL Scan : 12382

Andromeda score : 160.98

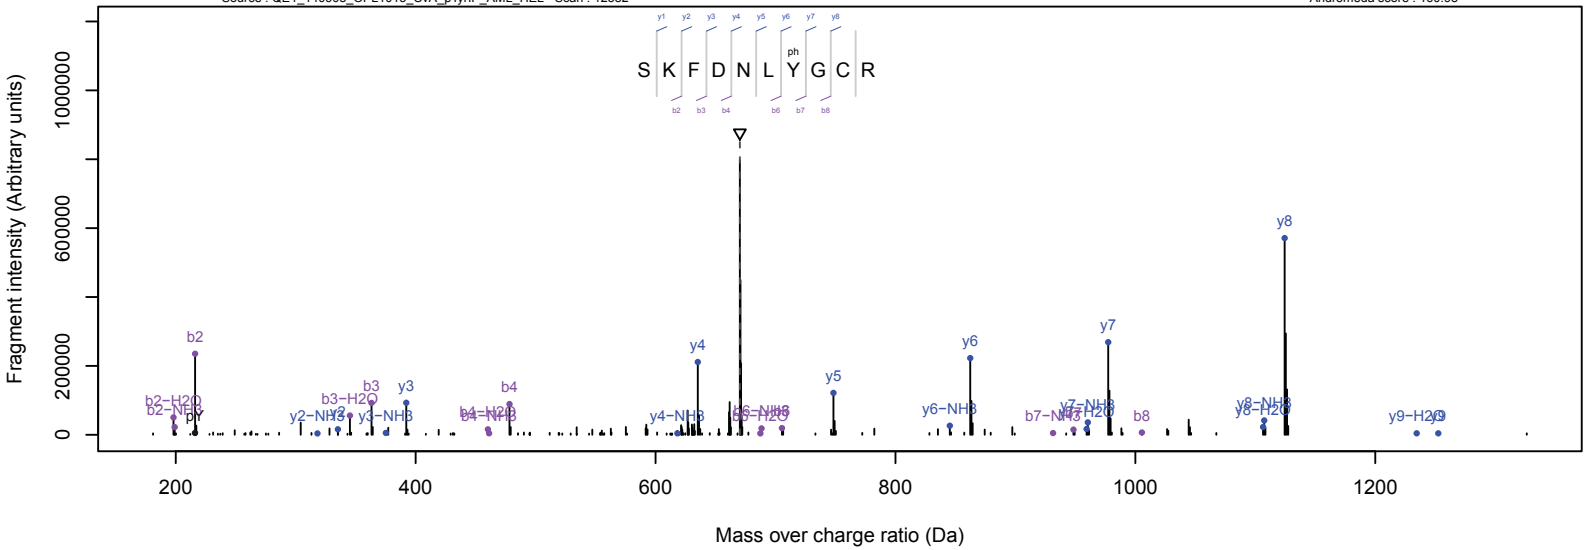

Y(ph)HTINGHNAEVR-3+

Source: QE1\_140612\_OPL1013\_CVA\_phosphoproteomic\_landscape\_AML\_D Scan: 4654

Andromeda score: 160.84

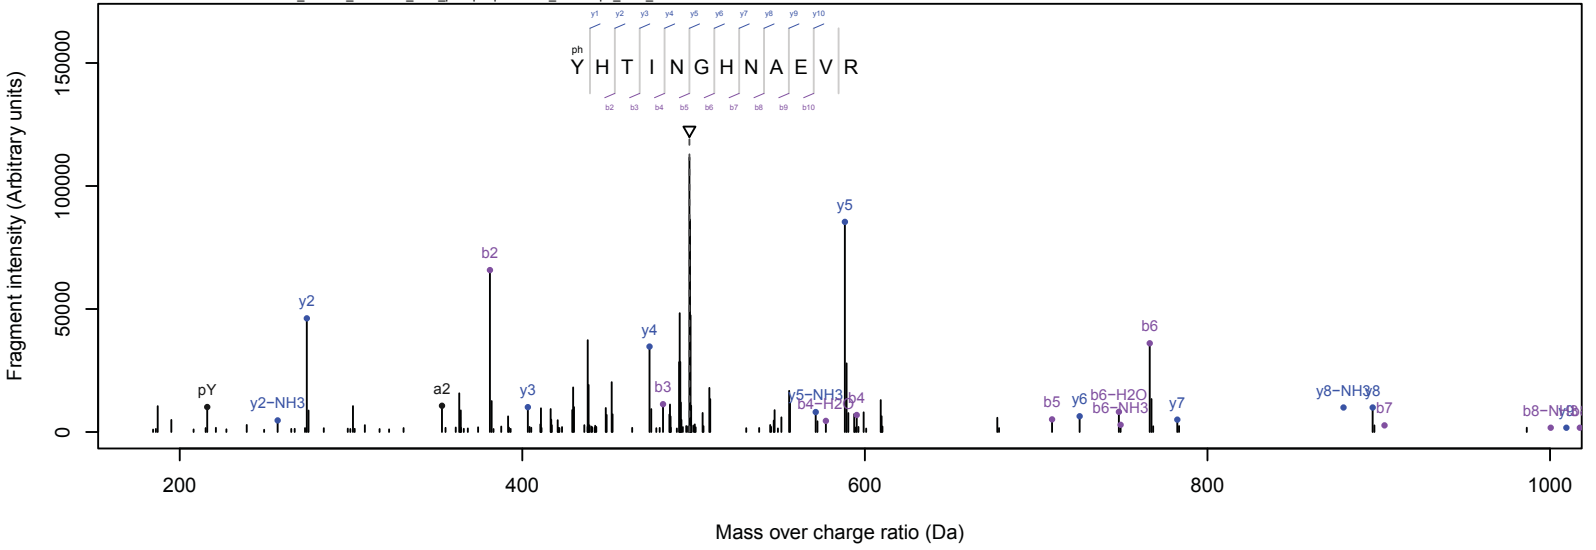

LVNANGEAVY(ph)CK-2+

Source: QE1\_140908\_OPL1013\_CvA\_pTyrIP\_AML\_Kasumi6 Scan: 11130

Andromeda score: 160.72

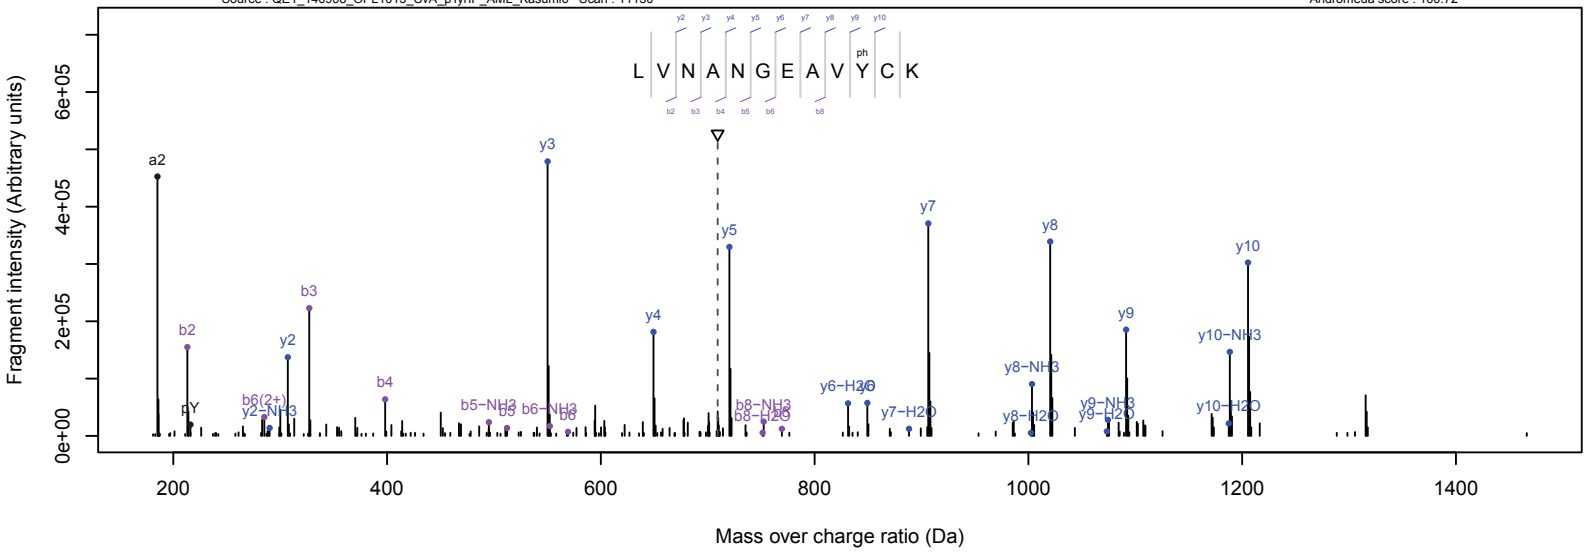

FIY(ph)MAVQHYIETLQR-3+

Source: QE1\_140612\_OPL1013\_CVA\_phosphoproteomic\_landscape\_AML\_A Scan: 46728

Andromeda score: 160.65

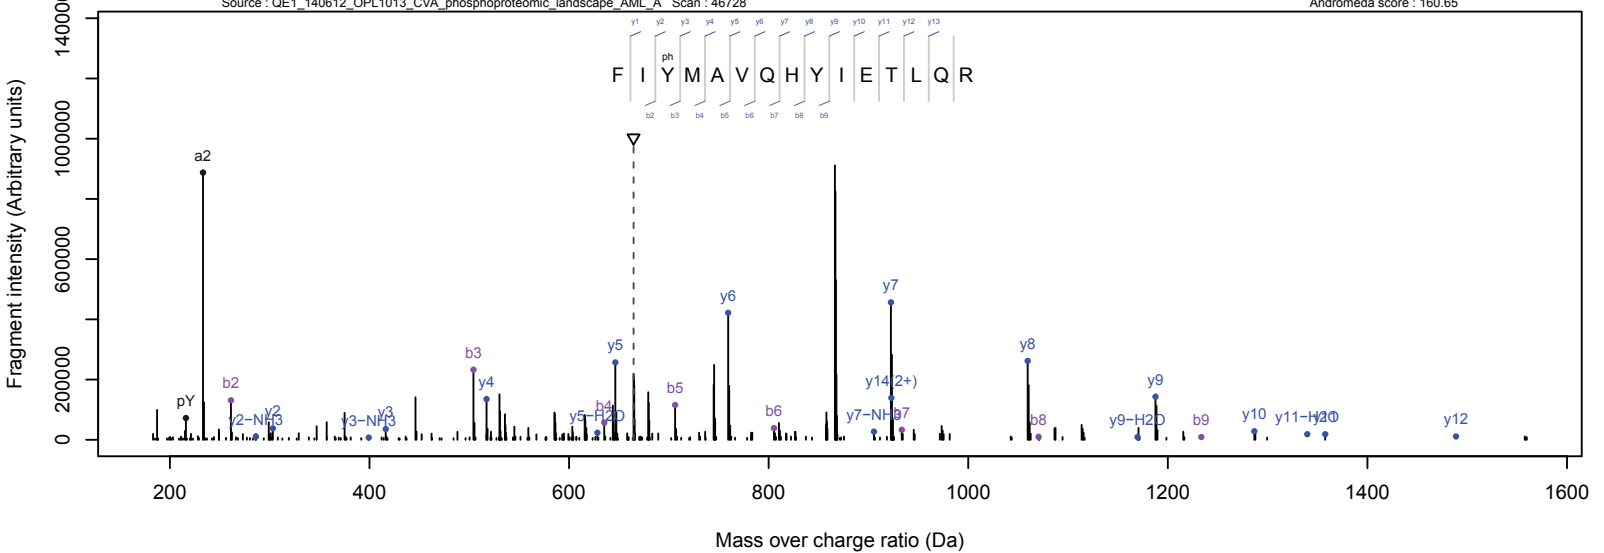

**SQY(ph)YSTVGGSHPHSEQYPDLLPLEAR-3+**

Source : QE1\_140612\_OPL1013\_CVA\_phosphoproteomic\_landscape\_AML\_C Scan : 33864

Andromeda score : 160.57

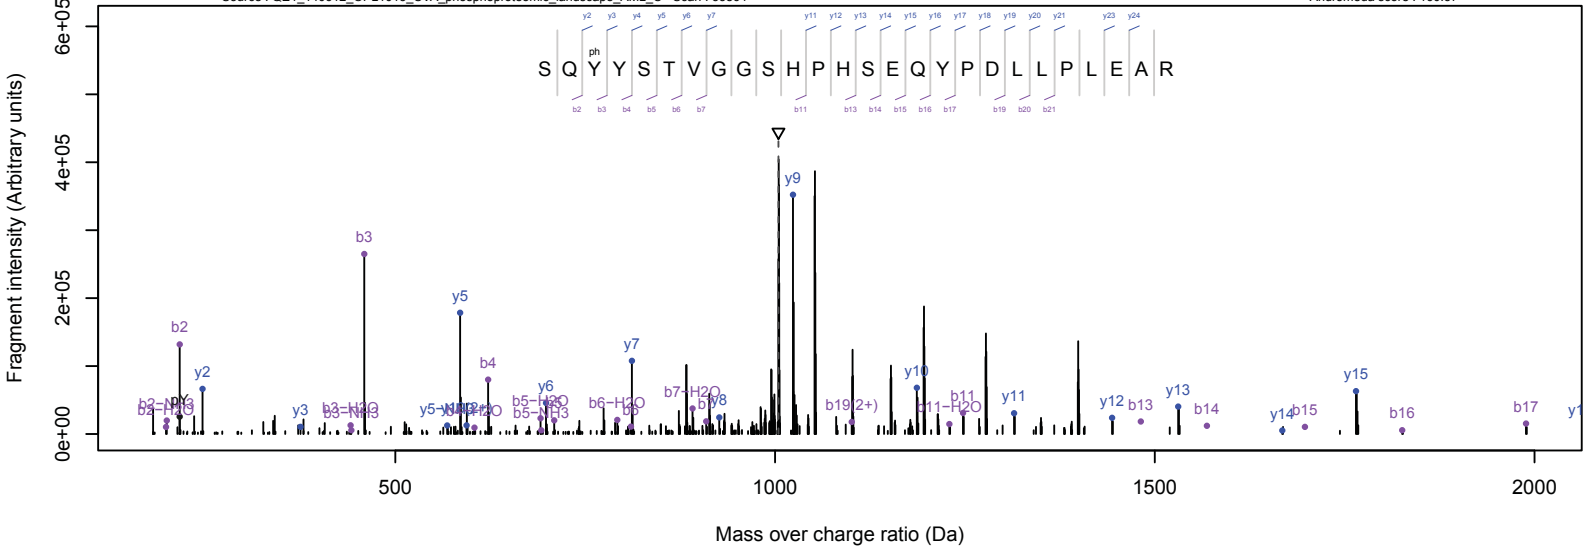

**AAVKY(ph)LGPEQLPDCLK-2+**

Source : QE1\_140612\_OPL1013\_CVA\_phosphoproteomic\_landscape\_AML\_C Scan : 29740

Andromeda score : 160.55

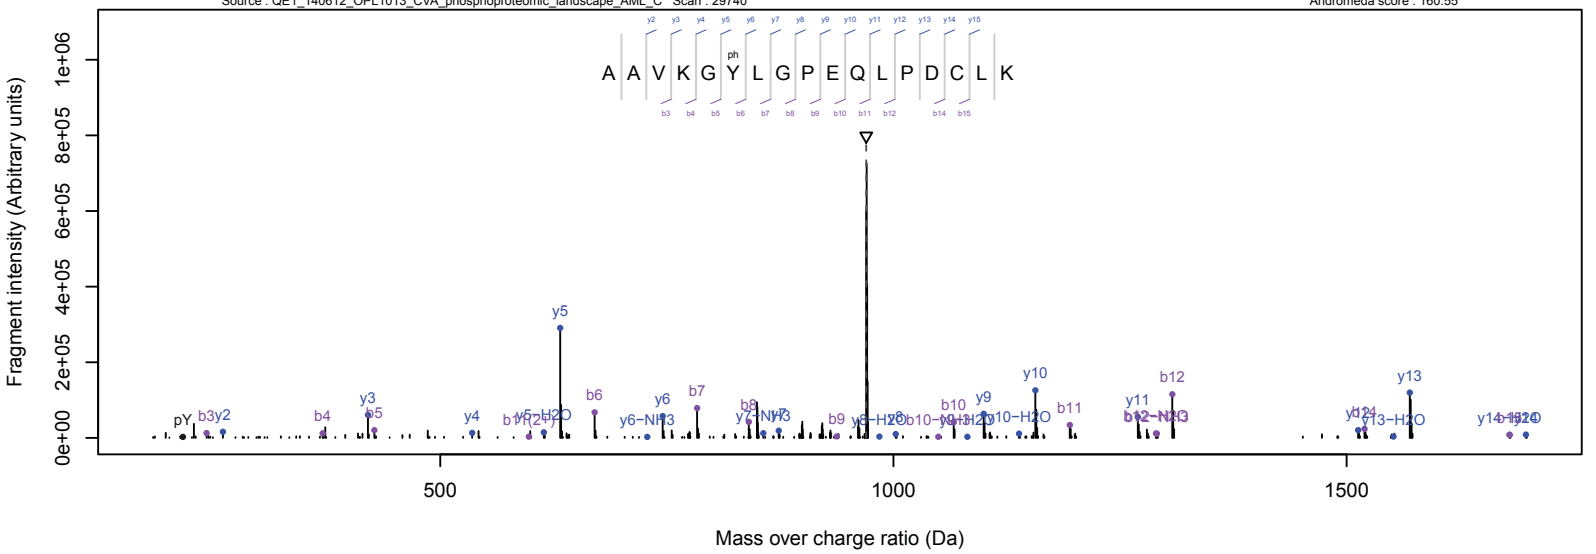

**NLFASFPTTEESSIN(ph)YTFK-2+**

Source : QE1\_140612\_OPL1013\_CVA\_phosphoproteomic\_landscape\_AML\_B Scan : 46752

Andromeda score : 160.55

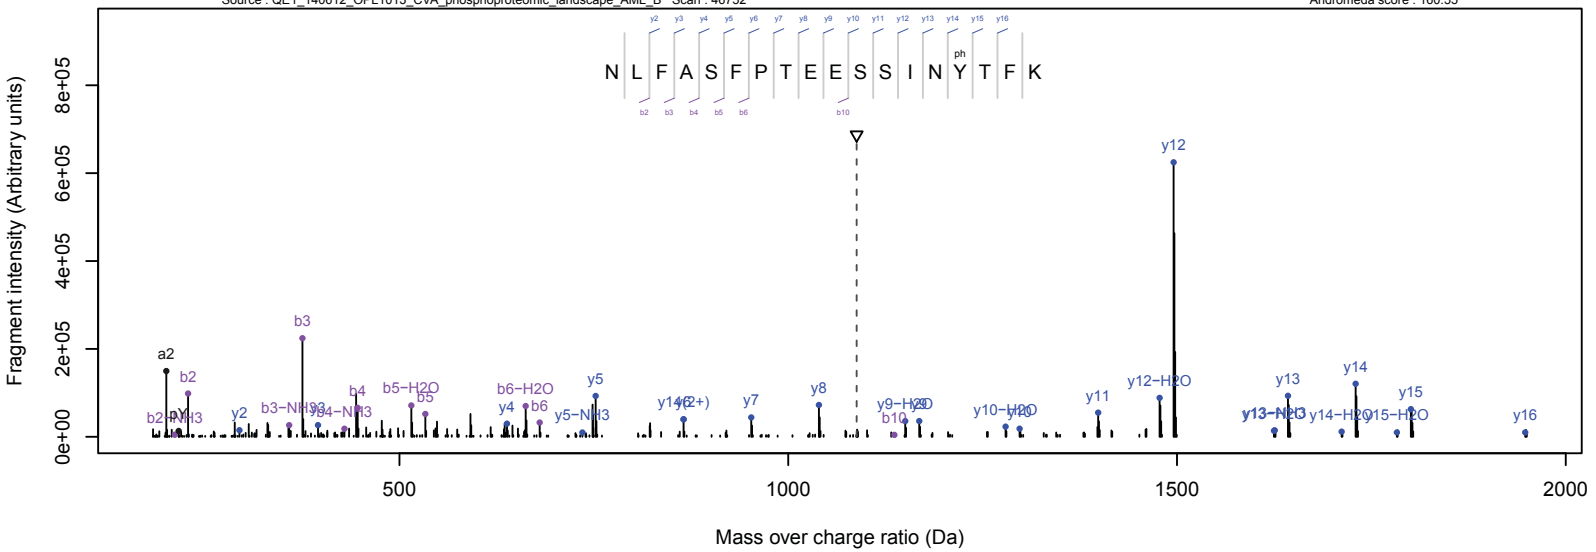

SASPY(ph)HGFTIVNR-2+

Source : QE1\_140612\_OPL1013\_CVA\_phosphoproteomic\_landscape\_AML\_B Scan : 19758

Andromeda score : 160.48

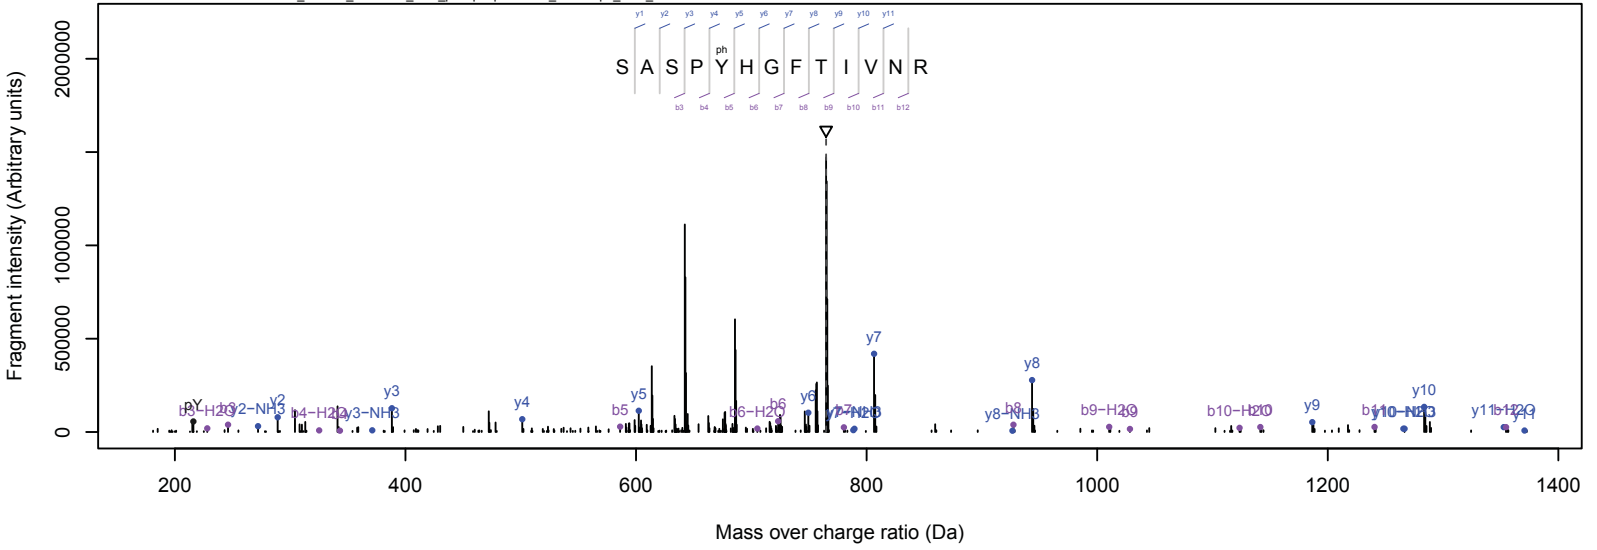

RSY(ph)DVPPPPMEPDHPFYSNISK-3+

Source : QE1\_140612\_OPL1013\_CVA\_phosphoproteomic\_landscape\_AML\_C Scan : 29431

Andromeda score : 160.36

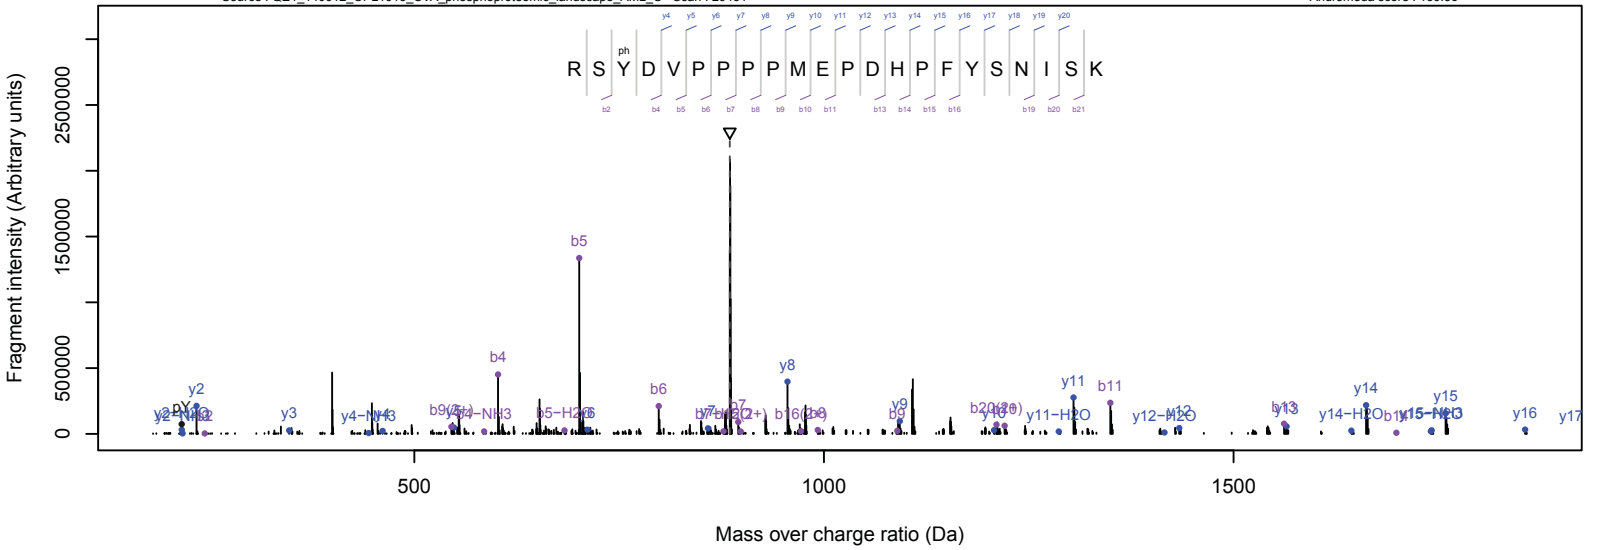

NTDYTELHQNTDLIY(ph)QTGPK-3+

Source : QE1\_140612\_OPL1013\_CVA\_phosphoproteomic\_landscape\_AML\_C Scan : 24127

Andromeda score : 160.3

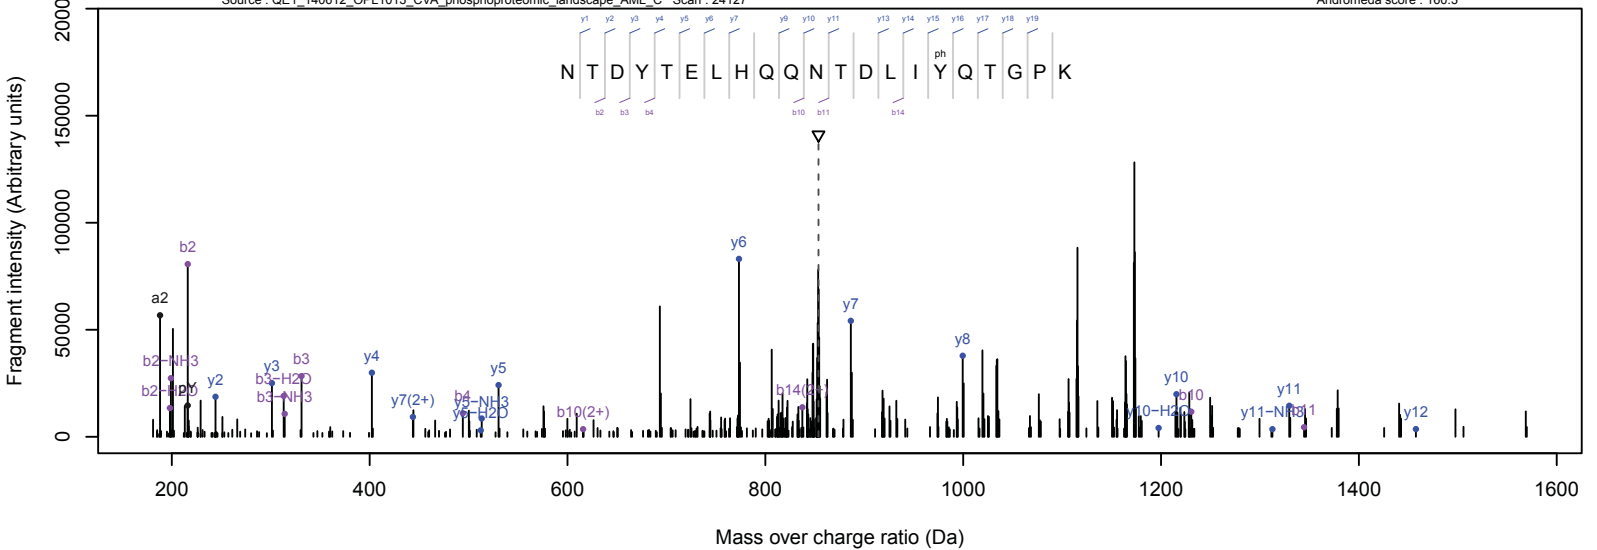

NLAM(ox)EATY(ph)INHNSQCLR-3+

Source : QE1\_140908\_OPL1013\_CvA\_pTyrIP\_AML\_HEL Scan : 33991

Andromeda score : 159.95

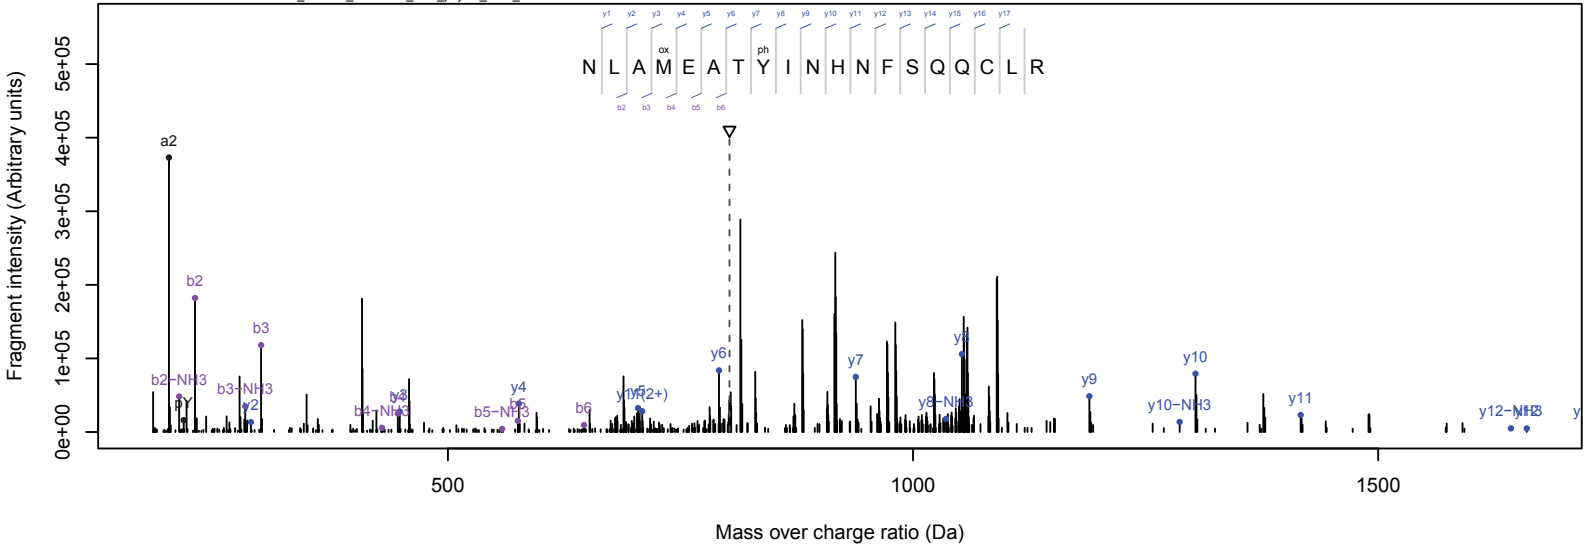

LY(ph)DLNMPAYVK-2+

Source : QE1\_140612\_OPL1013\_CVA\_phosphoproteomic\_landscape\_AML\_E Scan : 33073

Andromeda score : 159.94

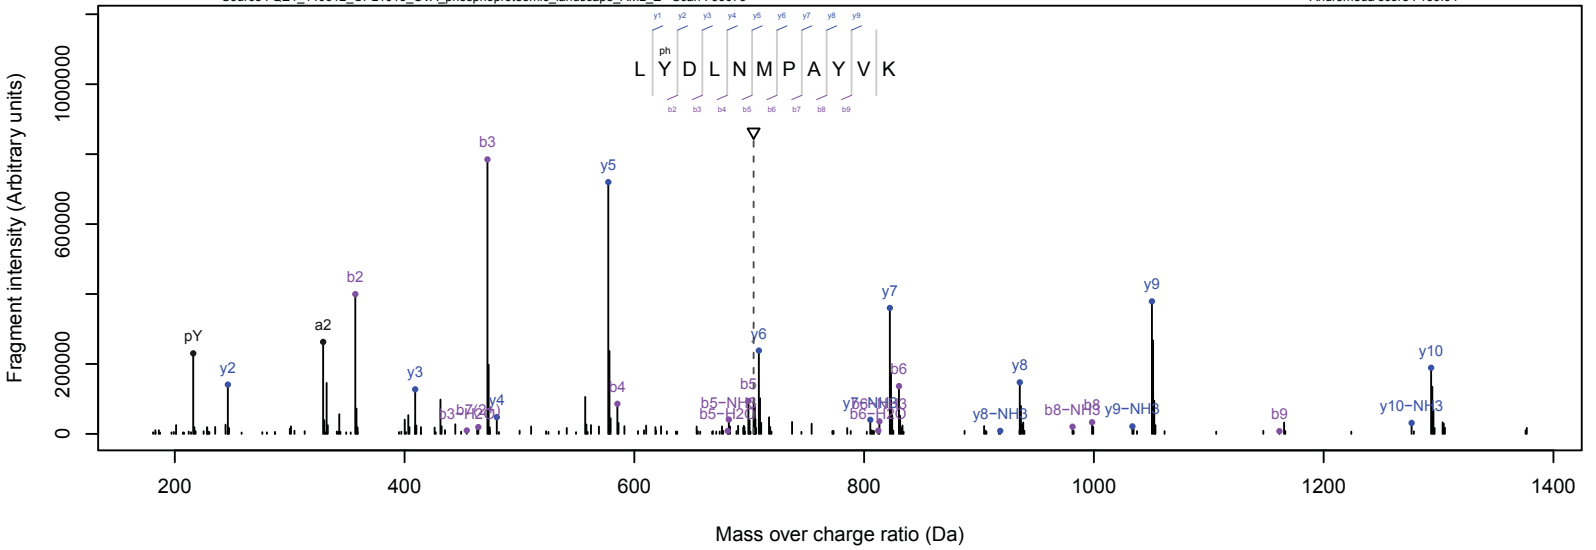

VMHVSSAELNYSLPYDSK-3+

Source : QE1\_140908\_OPL1013\_CvA\_pTyrIP\_AML\_HEL Scan : 30029

Andromeda score : 159.81

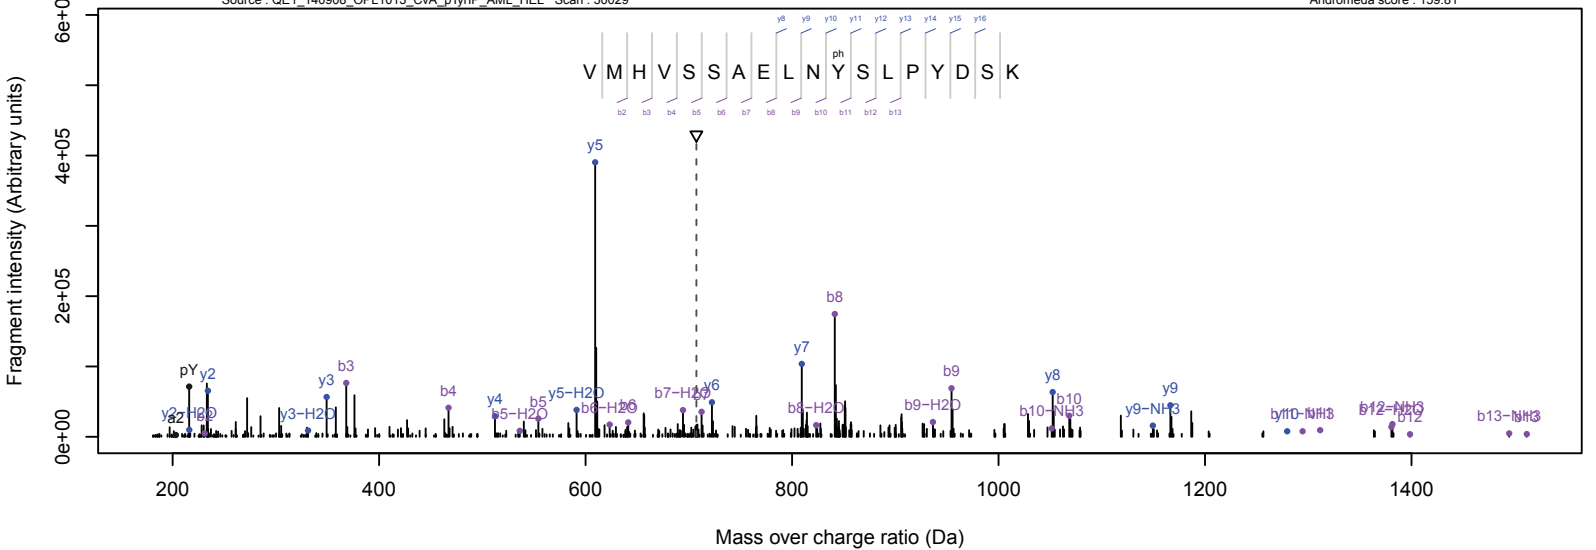

SAY(ph)QTIDSAEAPADPFVPEGR-2+

Source : QE1\_140612\_OPL1013\_CVA\_phosphoproteomic\_landscape\_AML\_C Scan : 36500

Andromeda score : 159.59

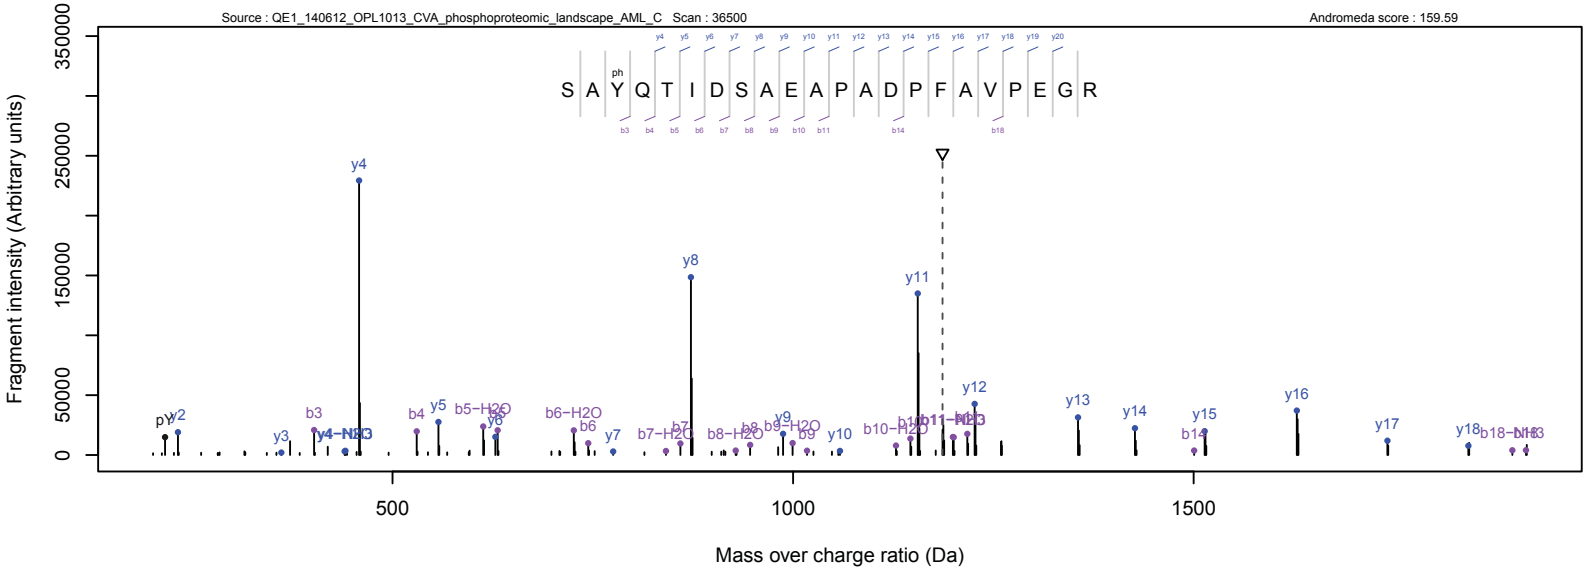

CTNSEVTVQSPY(ph)LSYR-2+

Source : QE1\_140612\_OPL1013\_CVA\_phosphoproteomic\_landscape\_AML\_B Scan : 25478

Andromeda score : 159.54

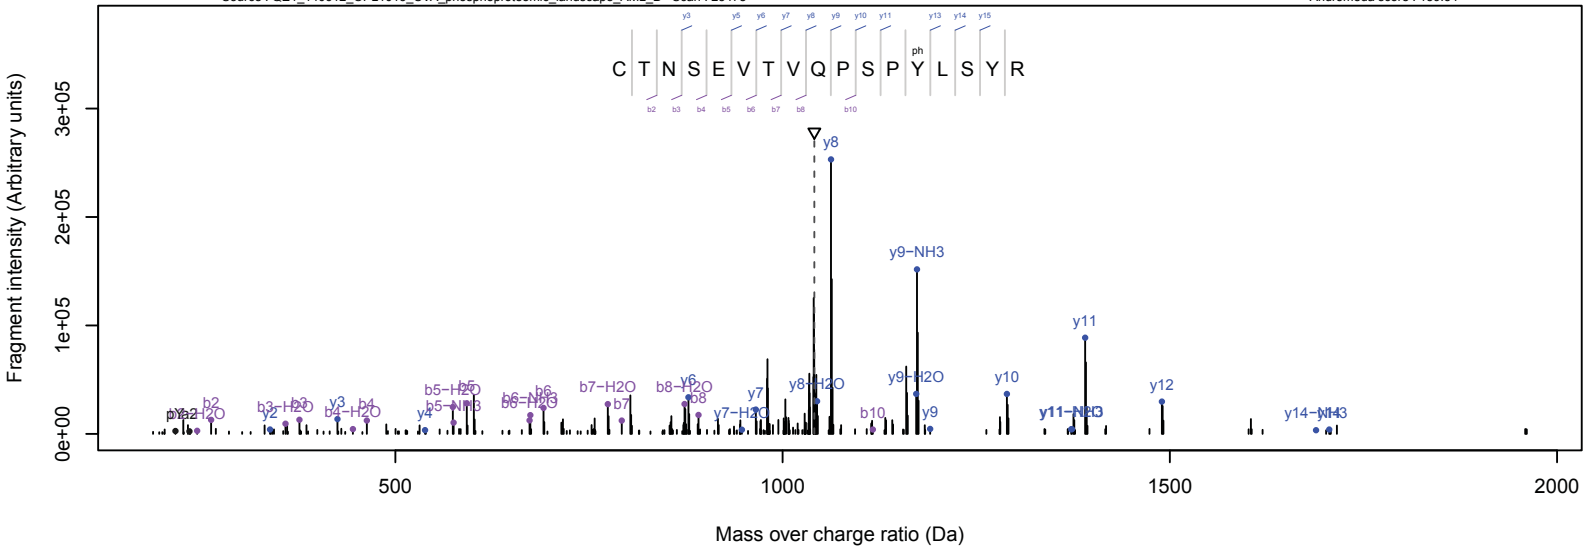

Y(ph)IQQTKPLTLER-2+

Source : QE1\_140612\_OPL1013\_CVA\_phosphoproteomic\_landscape\_AML\_A Scan : 17365

Andromeda score : 159.5

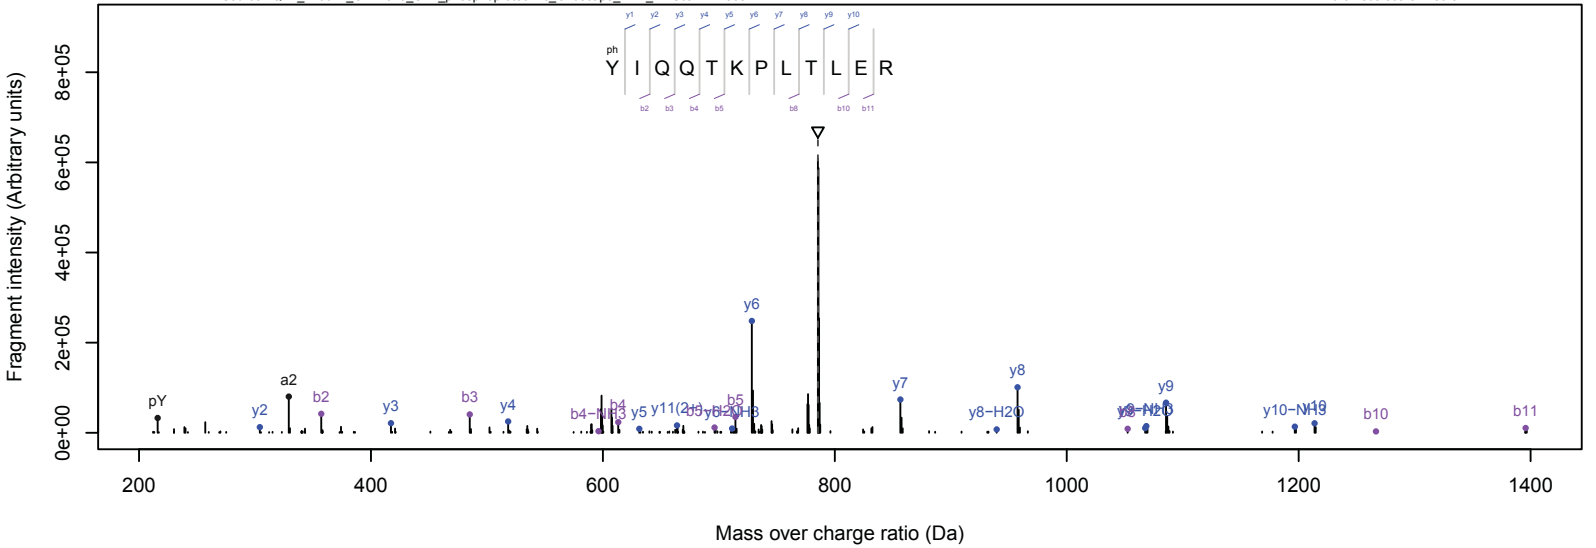





IVATKPLY(ph)VALAQR-2+

Source : QE1\_140612\_OPL1013\_CVA\_phosphoproteomic\_landscape\_AML\_B Scan : 30375

Andromeda score : 159.18

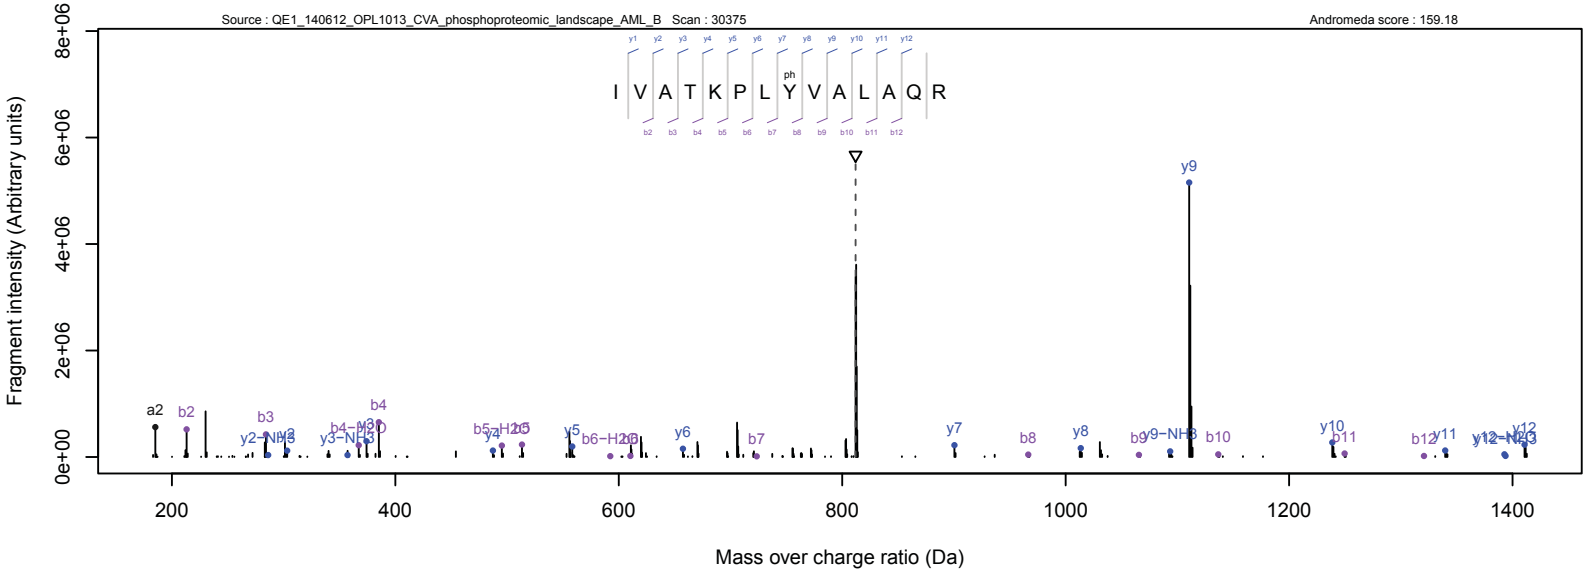

SLSTTNVFACSDRPT(ph)VIYSSNHK-3+

Source : QE1\_140908\_OPL1013\_CvA\_pTyrIP\_AML\_OCI\_AML3 Scan : 29142

Andromeda score : 159.14

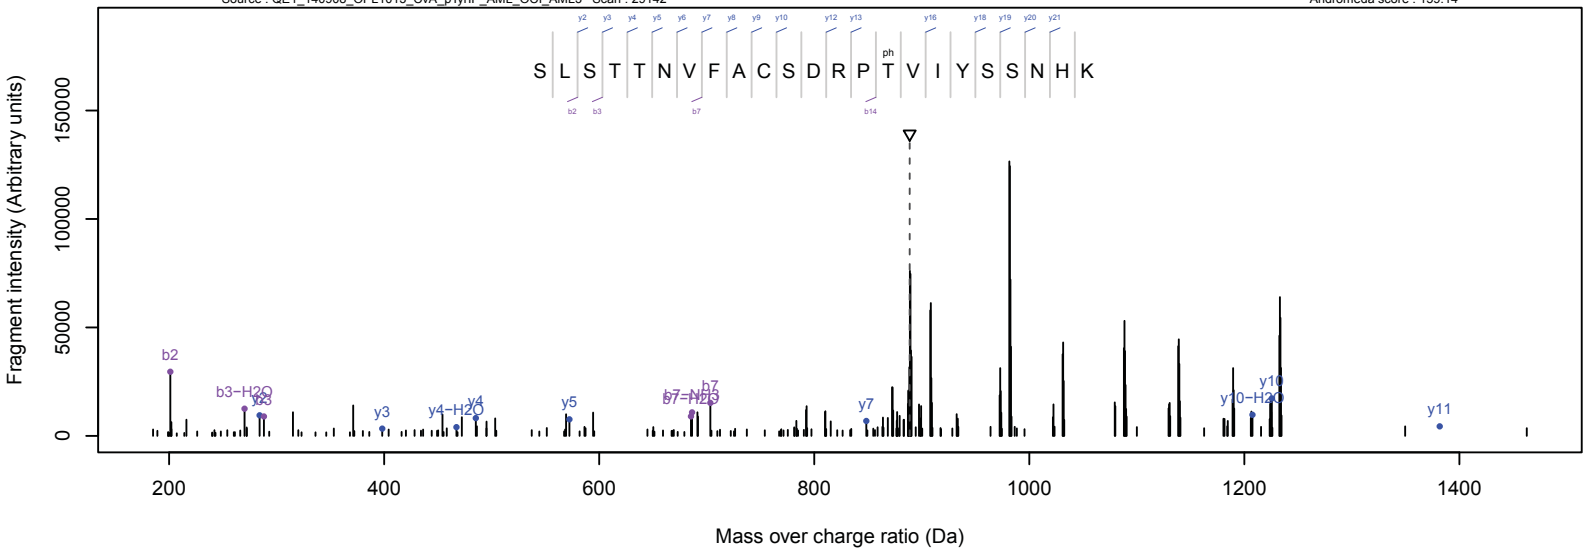

TY(ph)SLVGQAWPGLADM(ox)APTRK-3+

Source : QE1\_140612\_OPL1013\_CVA\_phosphoproteomic\_landscape\_AML\_B Scan : 36798

Andromeda score : 159.14

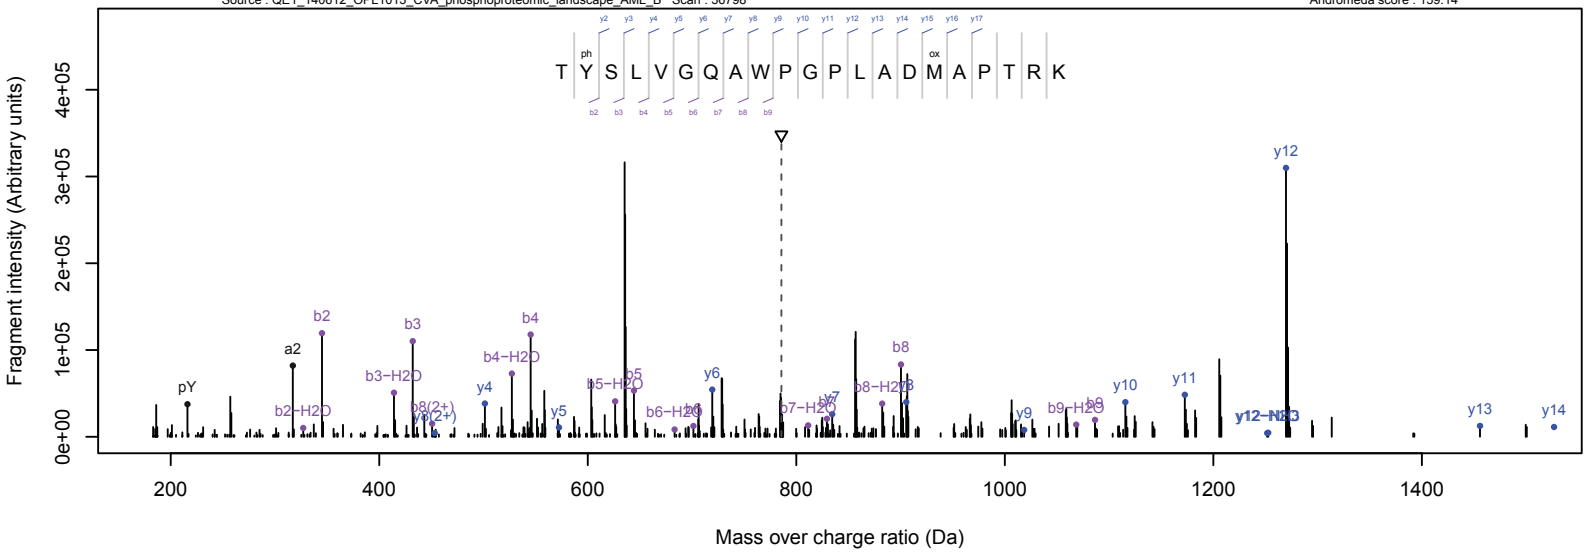

RNDSIY(ph)EASSLYGISAMDGVPTFLHPR-3+

Source : QE1\_140612\_OPL1013\_CVA\_phosphoproteomic\_landscape\_AML\_B Scan : 47071

Andromeda score : 159.13

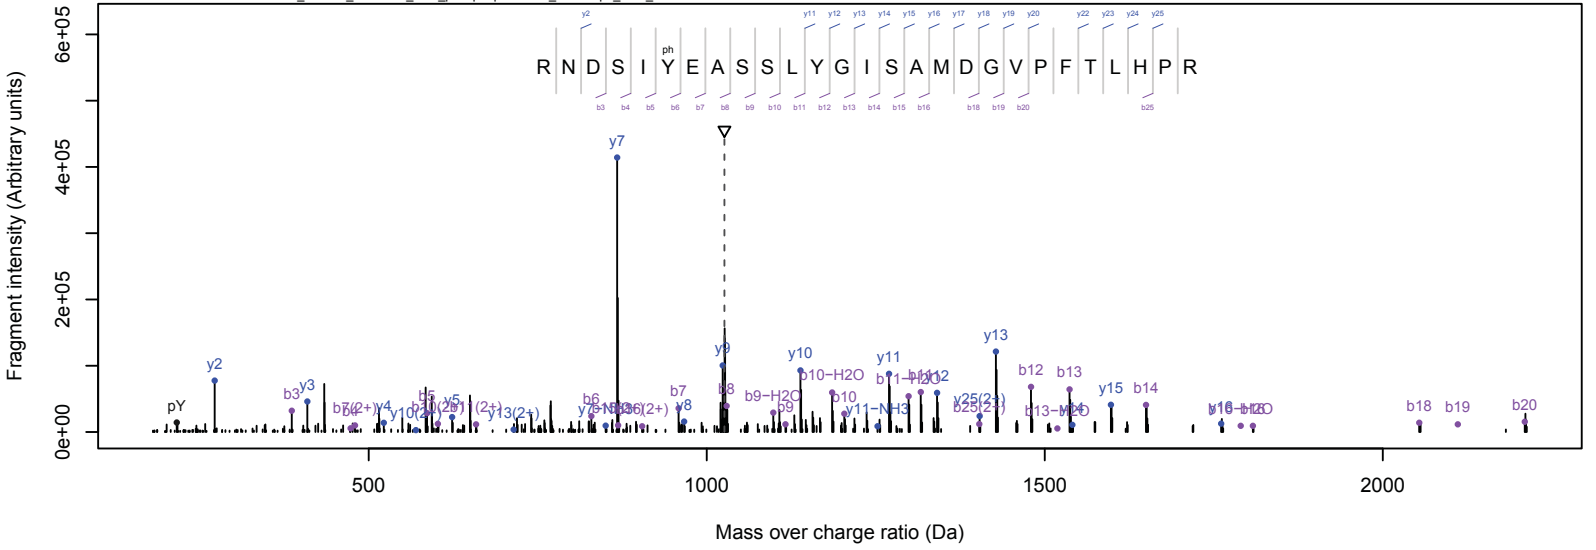

KPT(ph)YDPVSEDDQLSPSSDFK-2+

Source : QE1\_140908\_OPL1013\_CvA\_pTyrIP\_AML\_Kasumi6 Scan : 29257

Andromeda score : 159.06

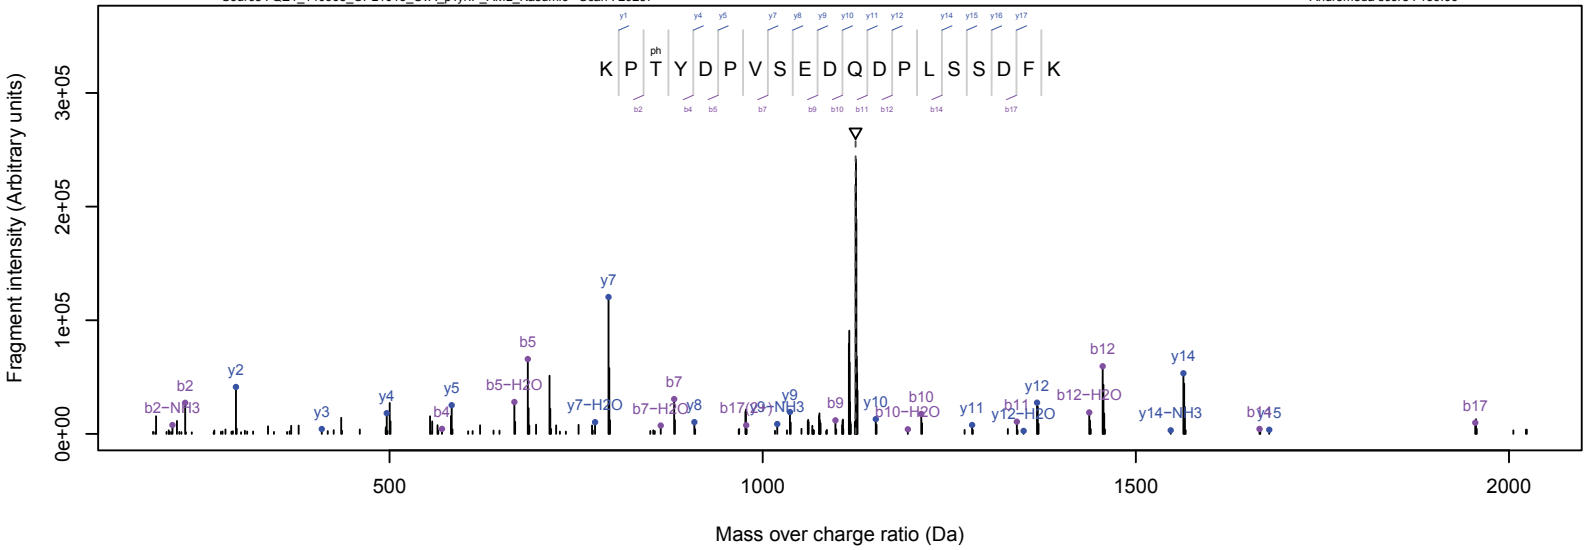

AY(ph)ALCVLYR-2+

Source : QE1\_140612\_OPL1013\_CVA\_phosphoproteomic\_landscape\_AML\_B Scan : 30618

Andromeda score : 159.04

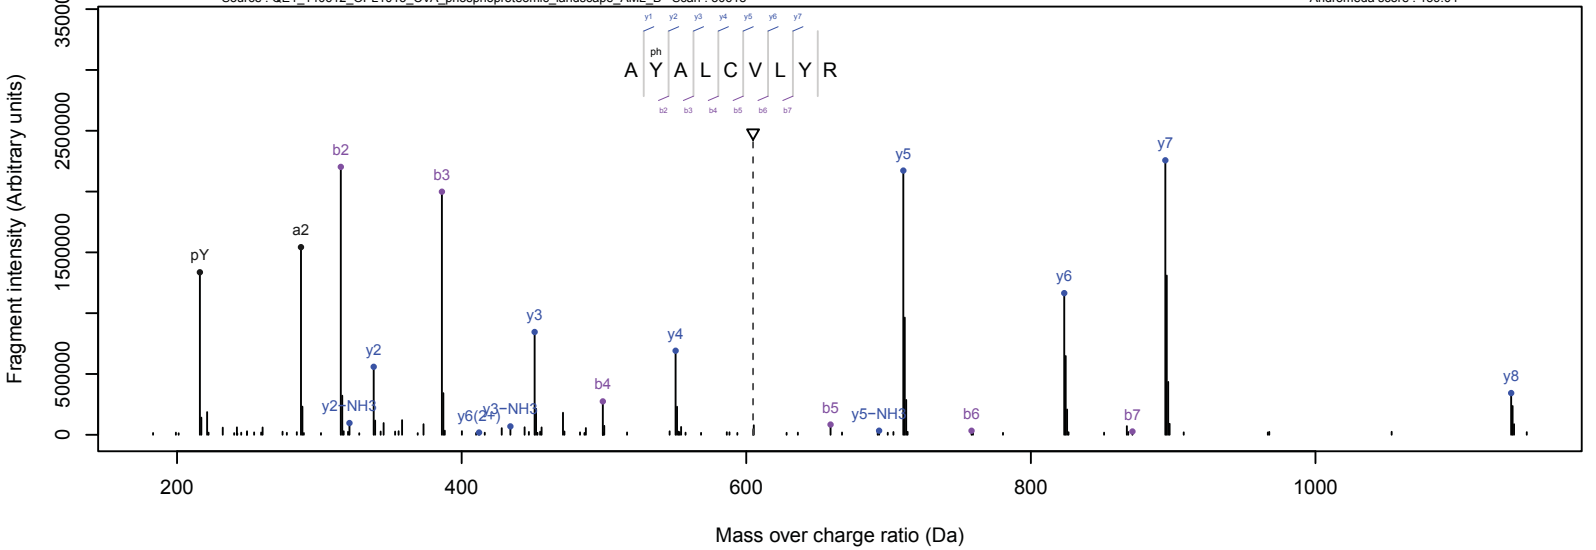

EEDPTLLEEISAM(ox)YS(ph)SVNKPQLVNK-3+

Source : QE1\_140908\_OPL1013\_CVA\_pTyrIP\_AML\_ML2 Scan : 30781

Andromeda score : 158.94

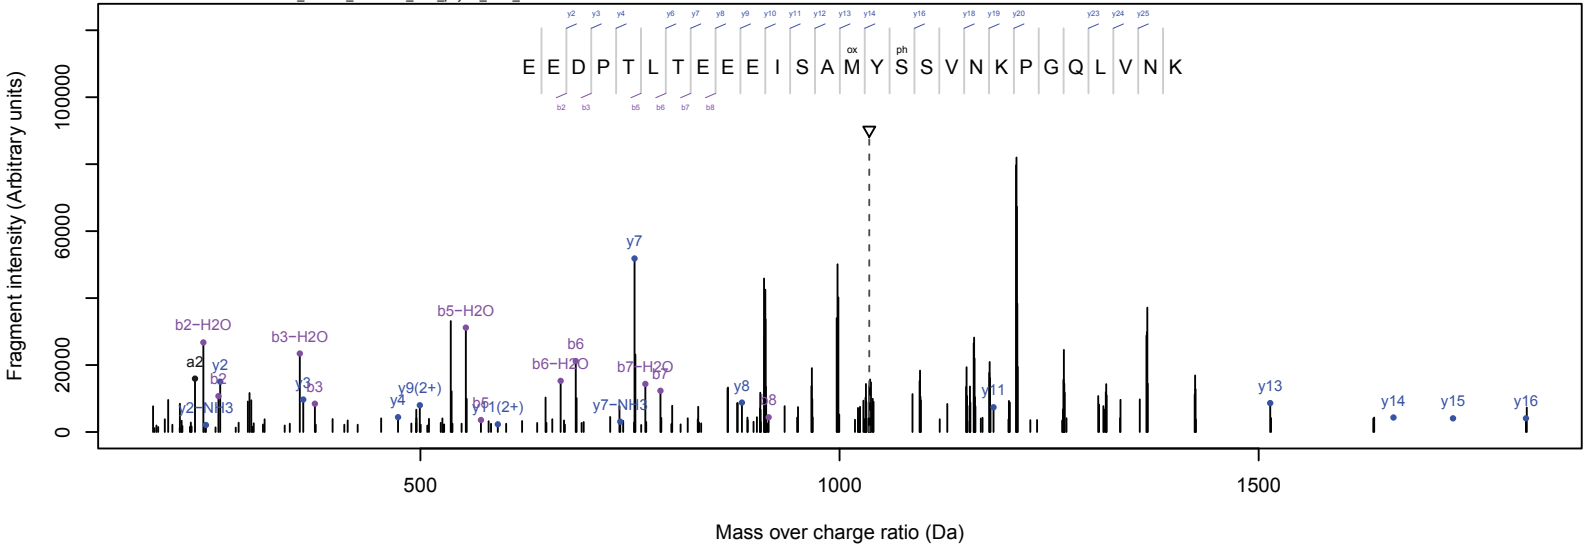

DGSLASNPY(ph)SGDLTK-2+

Source : QE1\_140612\_OPL1013\_CVA\_phosphoproteomic\_landscape\_AML\_D Scan : 15844

Andromeda score : 158.93

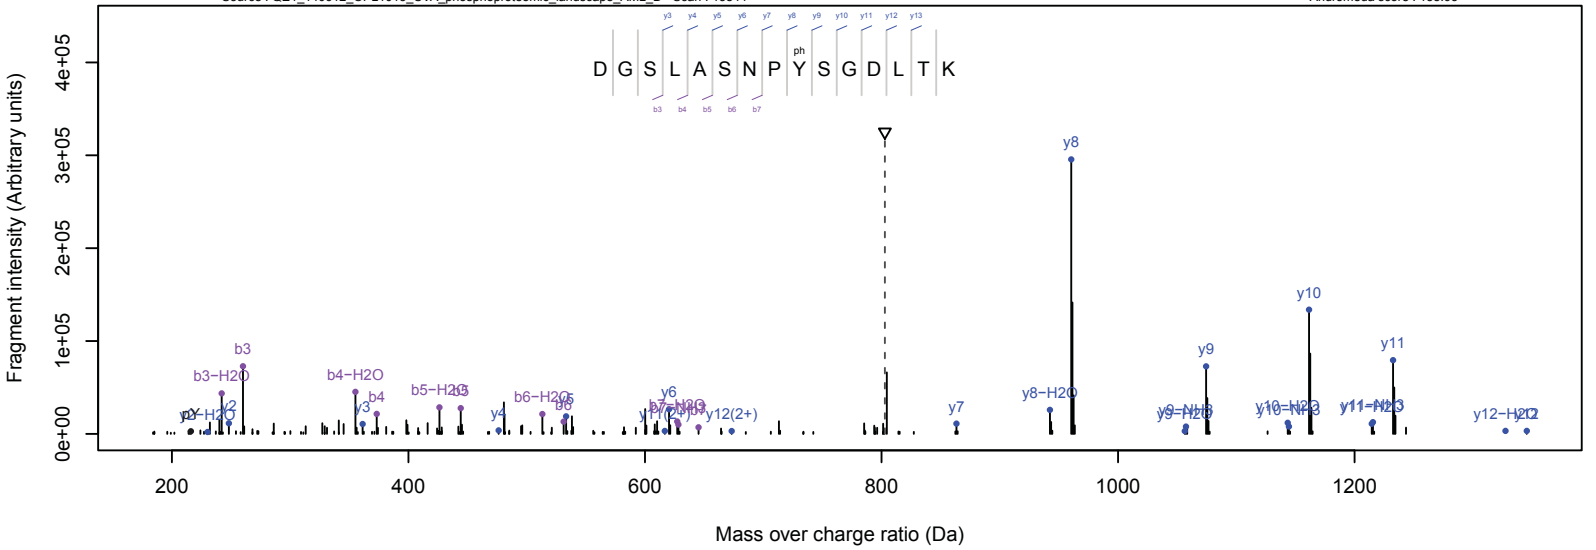

GVTQY(ph)YAYVTER-2+

Source : QE1\_140612\_OPL1013\_CVA\_phosphoproteomic\_landscape\_AML\_B Scan : 26339

Andromeda score : 158.86

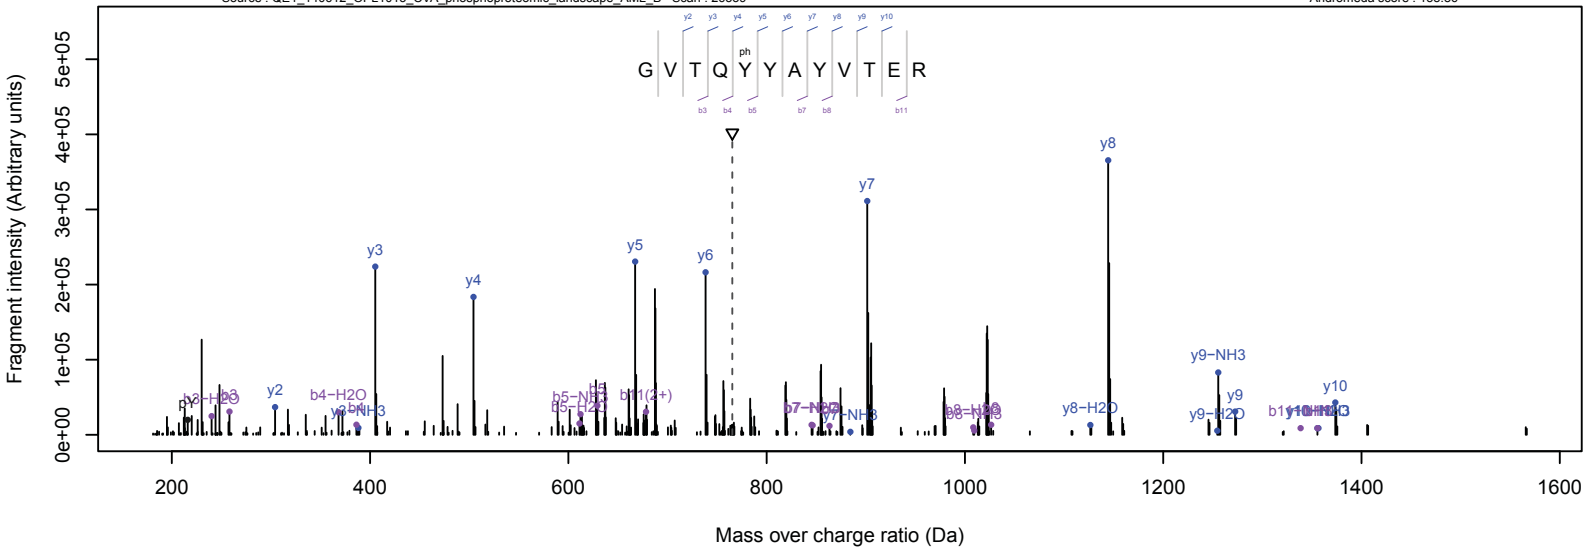

GPGAGGDEATAGGGSAPQPPRLEYESEKK-4+

Source: QE1\_140612\_OPL1013\_CVA\_phosphoproteomic\_landscape\_AML\_C Scan: 20442

Andromeda score: 158.67

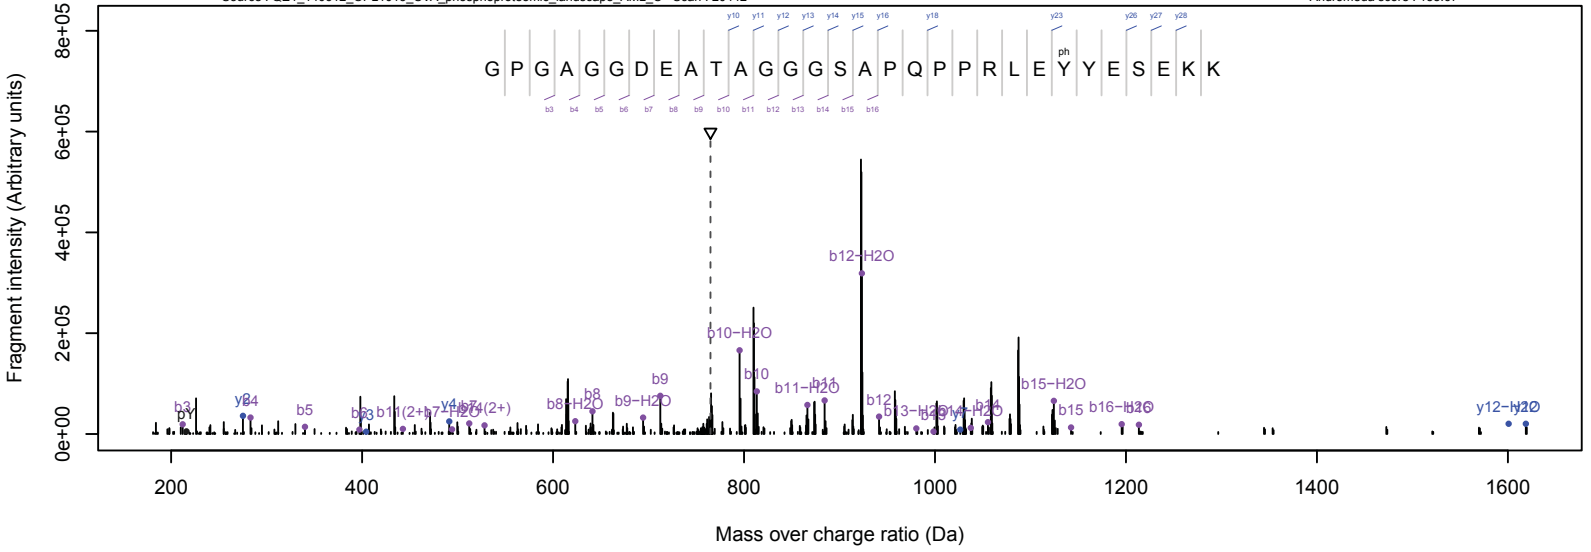

TSPYSSNGTSVY(Y)YTVTSGDPPLLK-2+

Source: QE1\_140612\_OPL1013\_CVA\_phosphoproteomic\_landscape\_AML\_C Scan: 37084

Andromeda score: 158.65

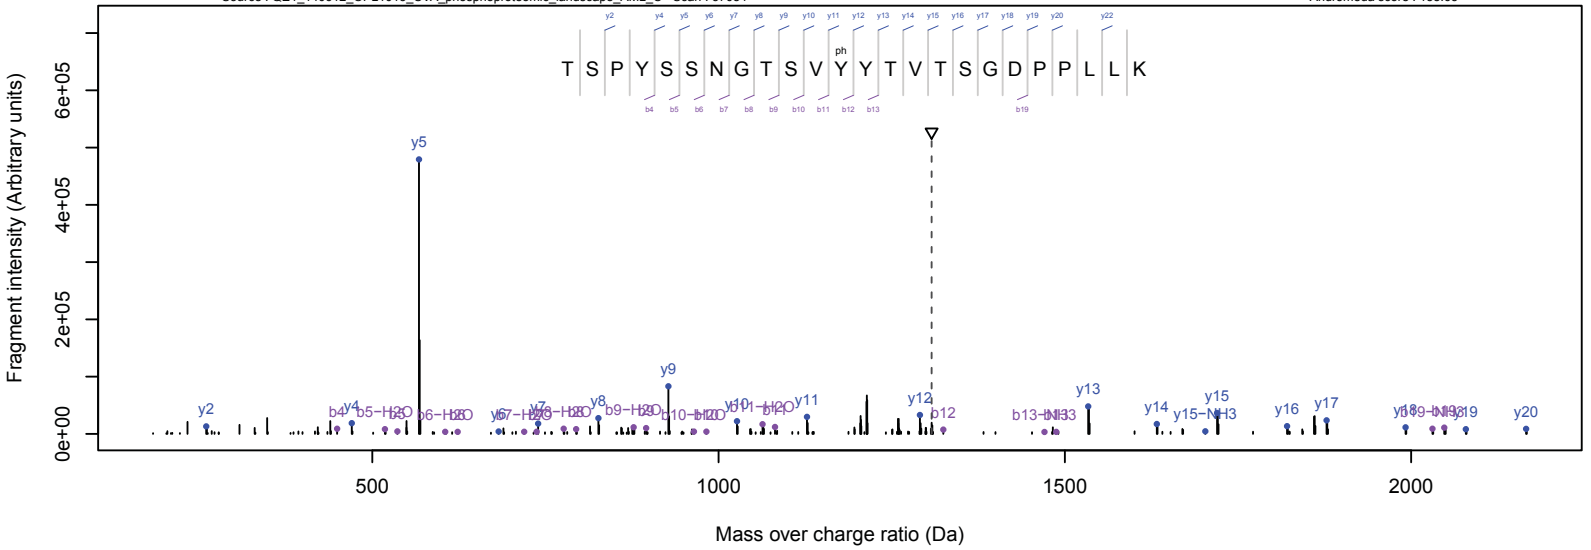

IAETFGLQENY(I)K-2+

Source: QE1\_140612\_OPL1013\_CVA\_phosphoproteomic\_landscape\_AML\_C Scan: 31431

Andromeda score: 158.58

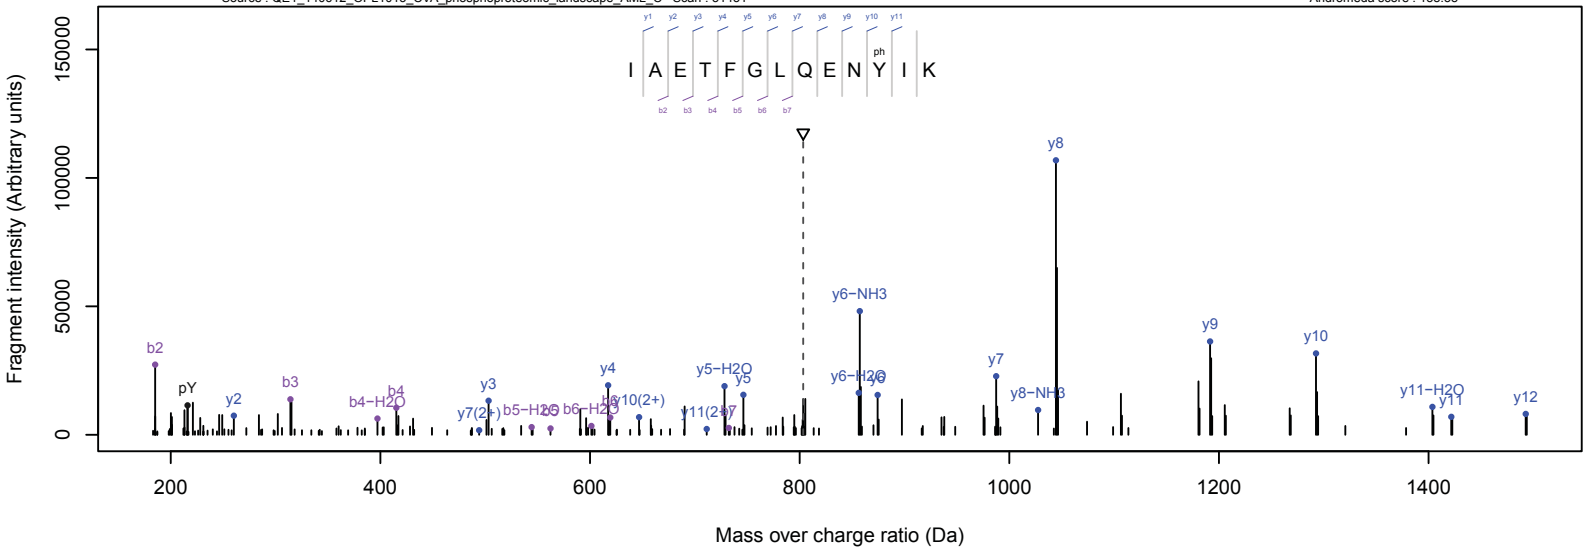

HSYPLSSTSGNADSSAVSSQAISPY(ph)ACFYGASAK-3+

Source: QE1\_140908\_OPL1013\_CVA\_pTyrIP\_AML\_HL60 Scan: 34422

Andromeda score: 158.57

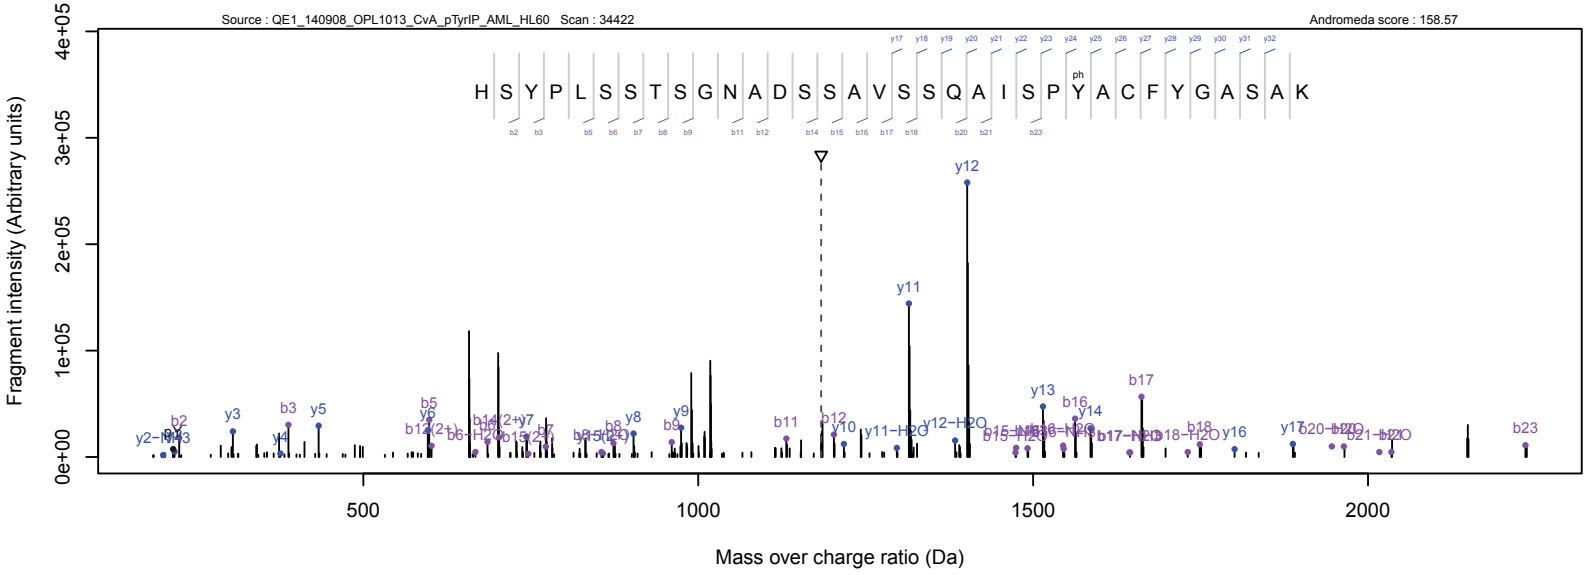

HAFGSIPEIIEY(ph)HKHNAAGLVTR-4+

Source: QE1\_140612\_OPL1013\_CVA\_phosphoproteomic\_landscape\_AML\_C Scan: 33204

Andromeda score: 158.52

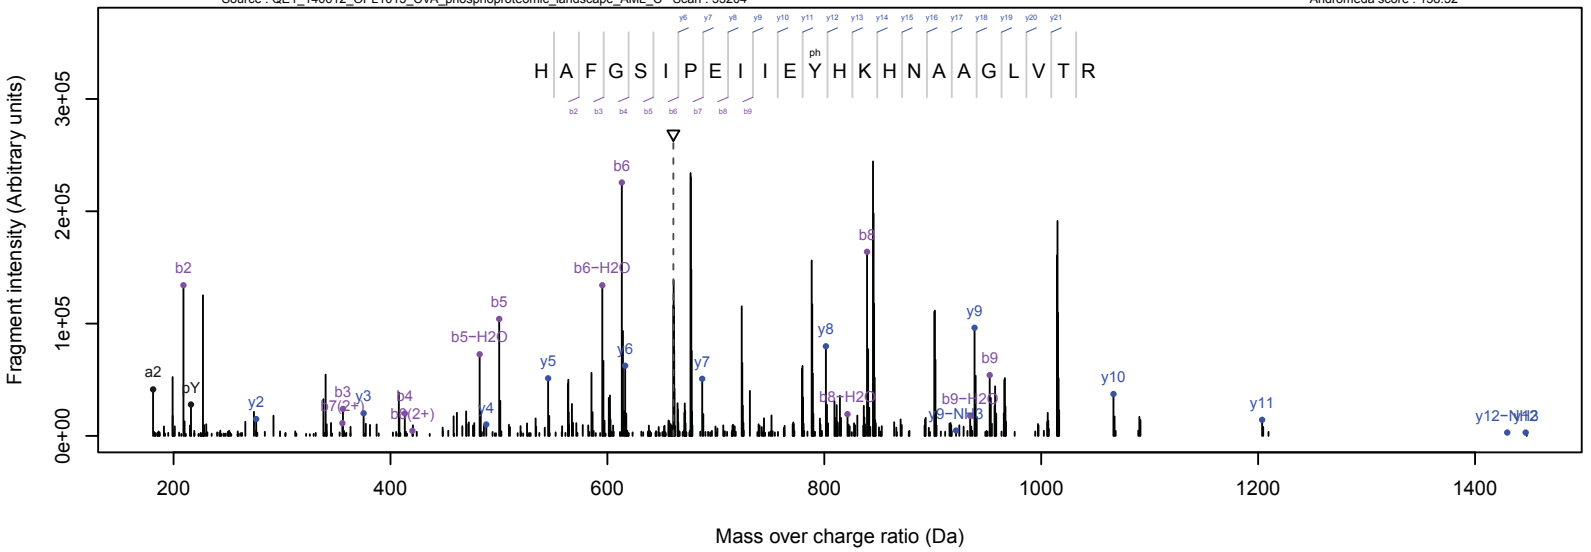

NIY(ph)QEFLSSQALSPVNIDR-2+

Source: QE1\_140612\_OPL1013\_CVA\_phosphoproteomic\_landscape\_AML\_C Scan: 45713

Andromeda score: 158.44

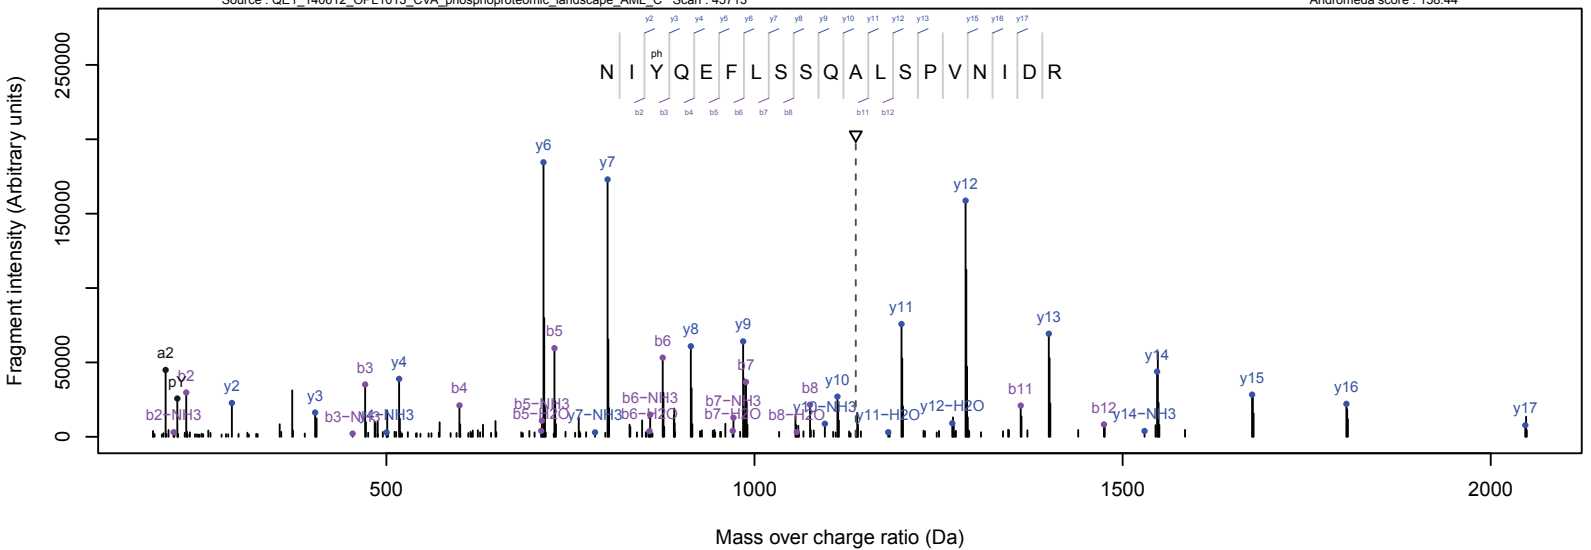

DSGLY(ph)KDLLHK-2+

Source : QE1\_140612\_OPL1013\_CVA\_phosphoproteomic\_landscape\_AML\_C Scan : 19289

Andromeda score : 158.34

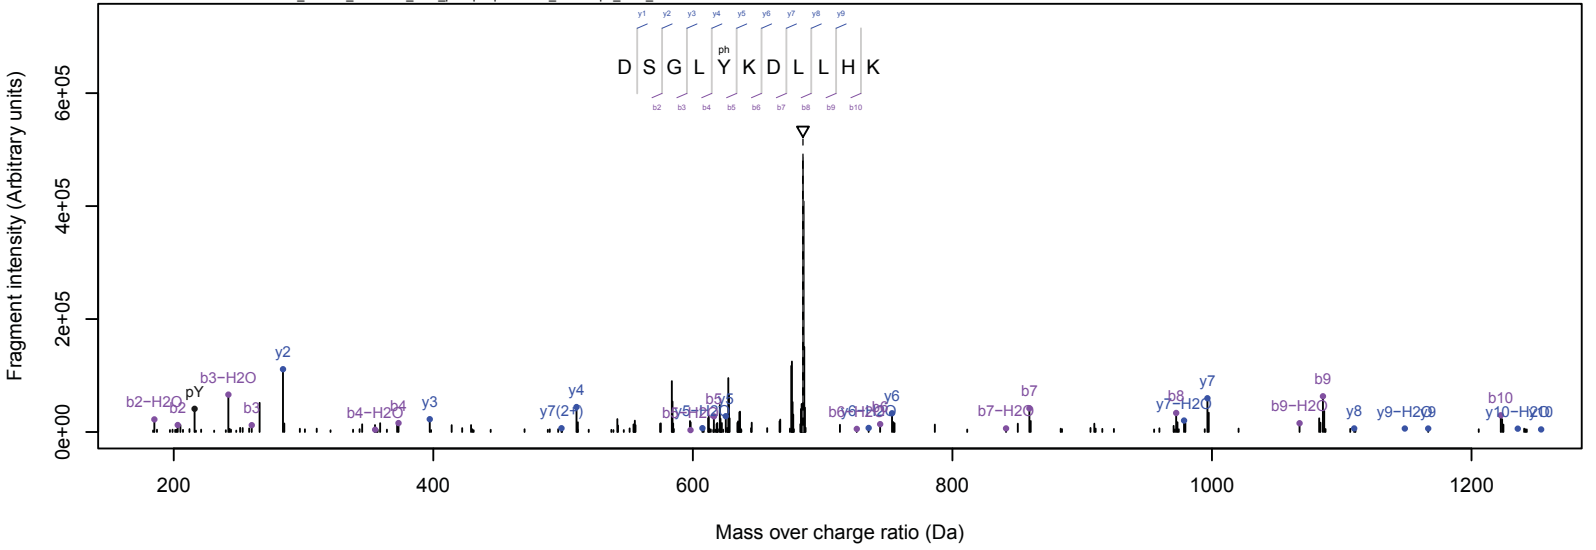

VRHPLSY(ph)VAQR-3+

Source : QE1\_140612\_OPL1013\_CVA\_phosphoproteomic\_landscape\_AML\_C Scan : 12267

Andromeda score : 158.3

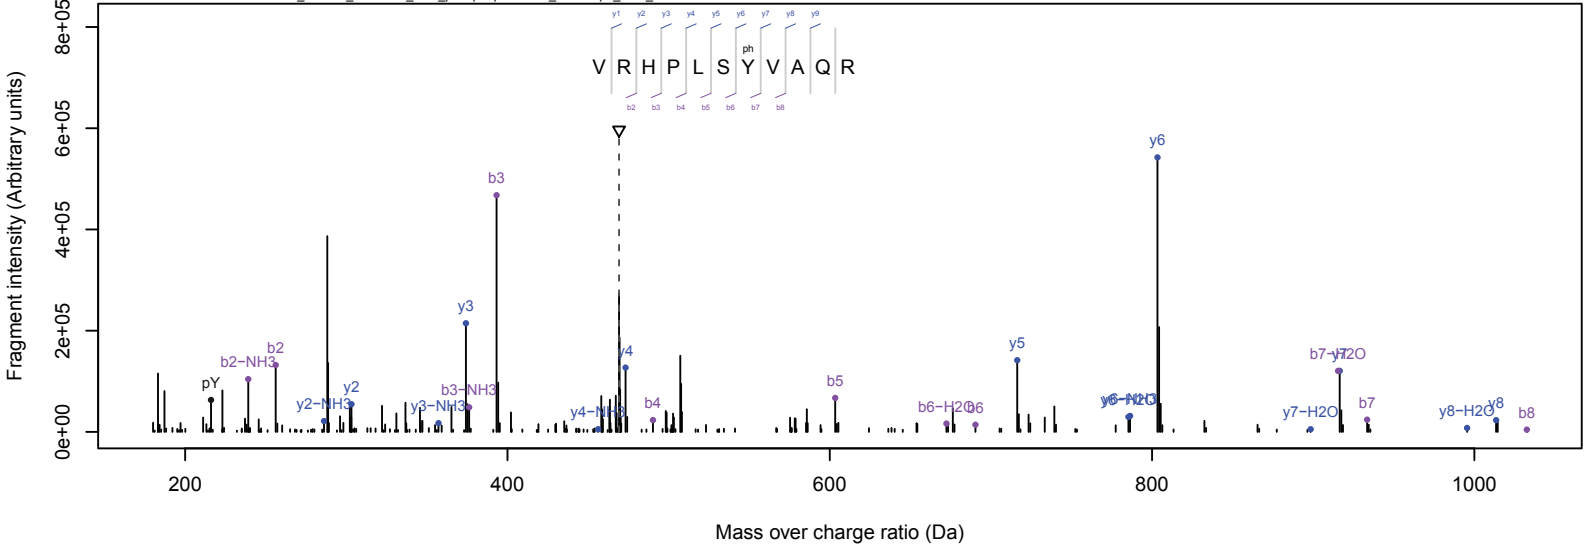

IGEGTYGVVYKGR-2+

Source : QE1\_140612\_OPL1013\_CVA\_phosphoproteomic\_landscape\_AML\_A Scan : 14020

Andromeda score : 158.25

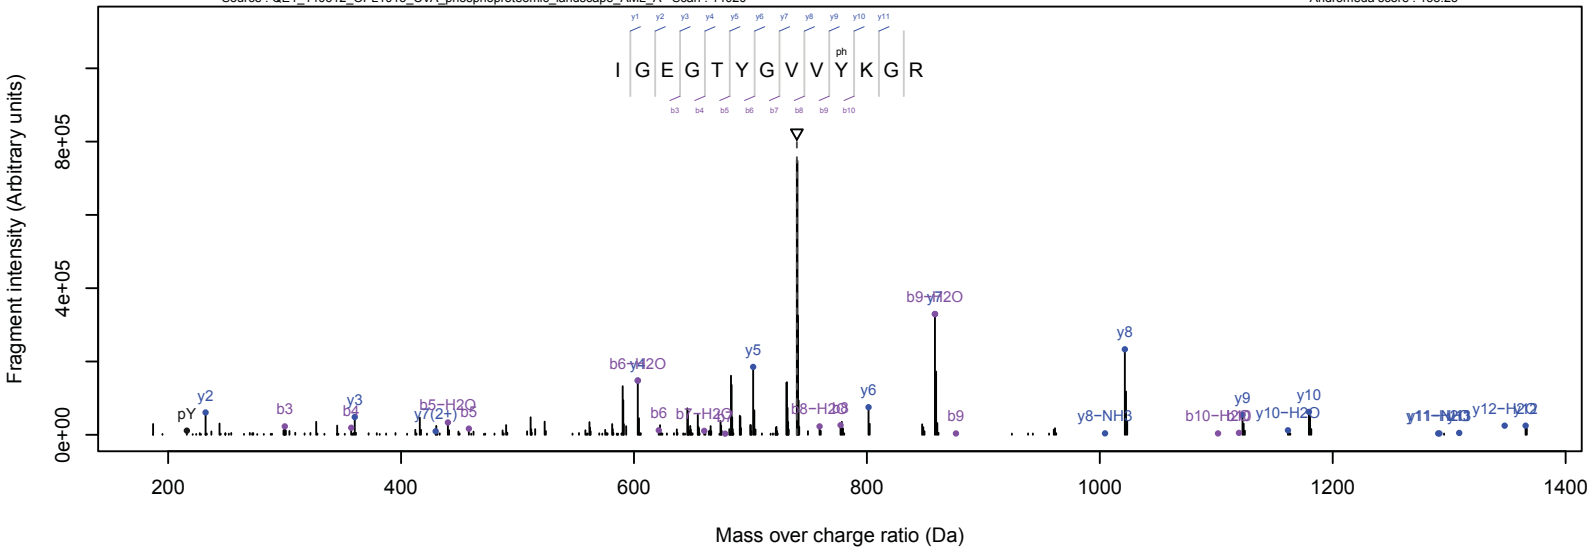

IHYLDTTTLIEPAPRY(ph)PSPPMGVSAPSAPNLPTAEDNLEYVR-4+

Source : QE1\_140612\_OPL1013\_CVA\_phosphoproteomic\_landscape\_AML\_A Scan : 45827

Andromeda score : 158.2

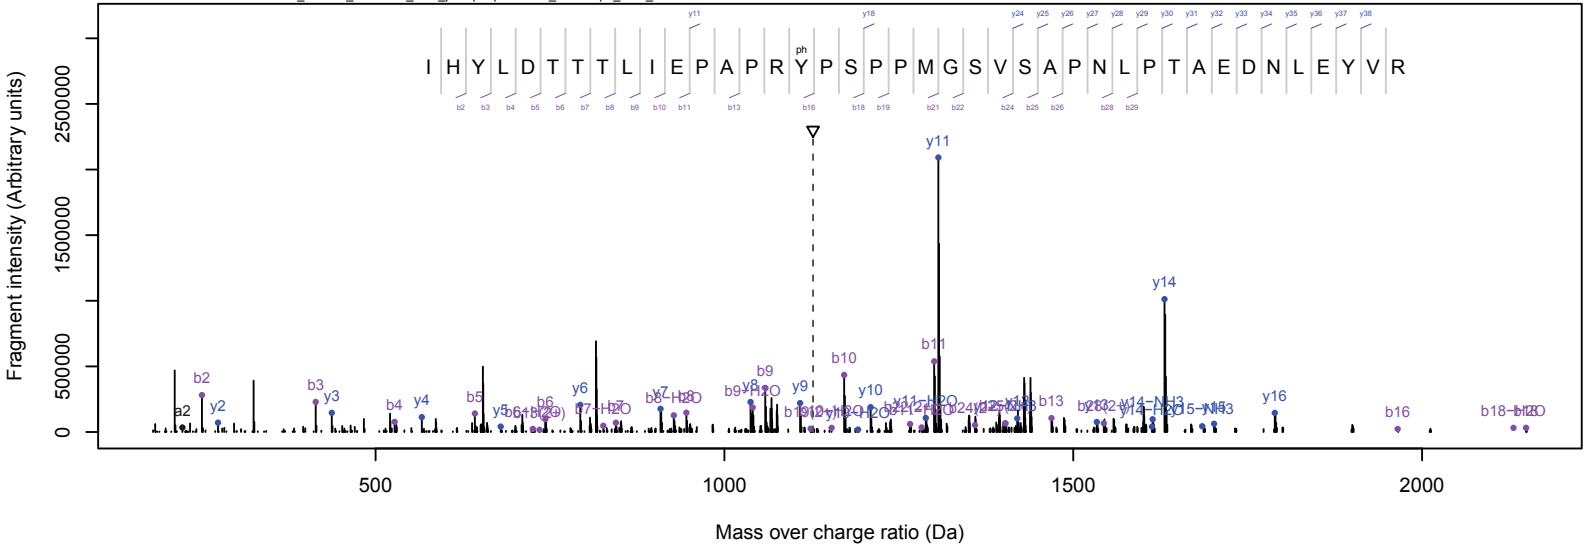

VEKIGEGT(ph)Y(ph)GVVYK-2+

Source : QE1\_140908\_OPL1013\_CvA\_pTyrIP\_AML\_HL60 Scan : 21581

Andromeda score : 158.15

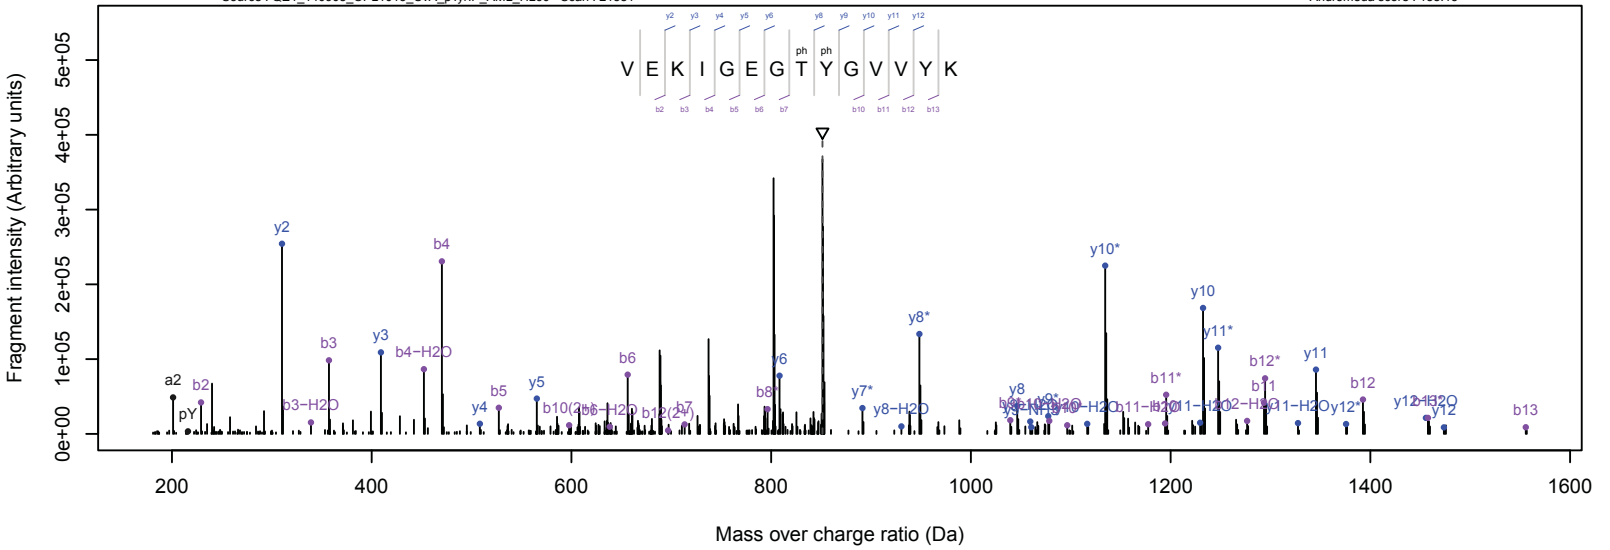

SPTDEIANLVPSVQY(ph)VDKTSLGSDSSSTQAK-3+

Source : QE1\_140612\_OPL1013\_CVA\_phosphoproteomic\_landscape\_AML\_C Scan : 42830

Andromeda score : 158.06

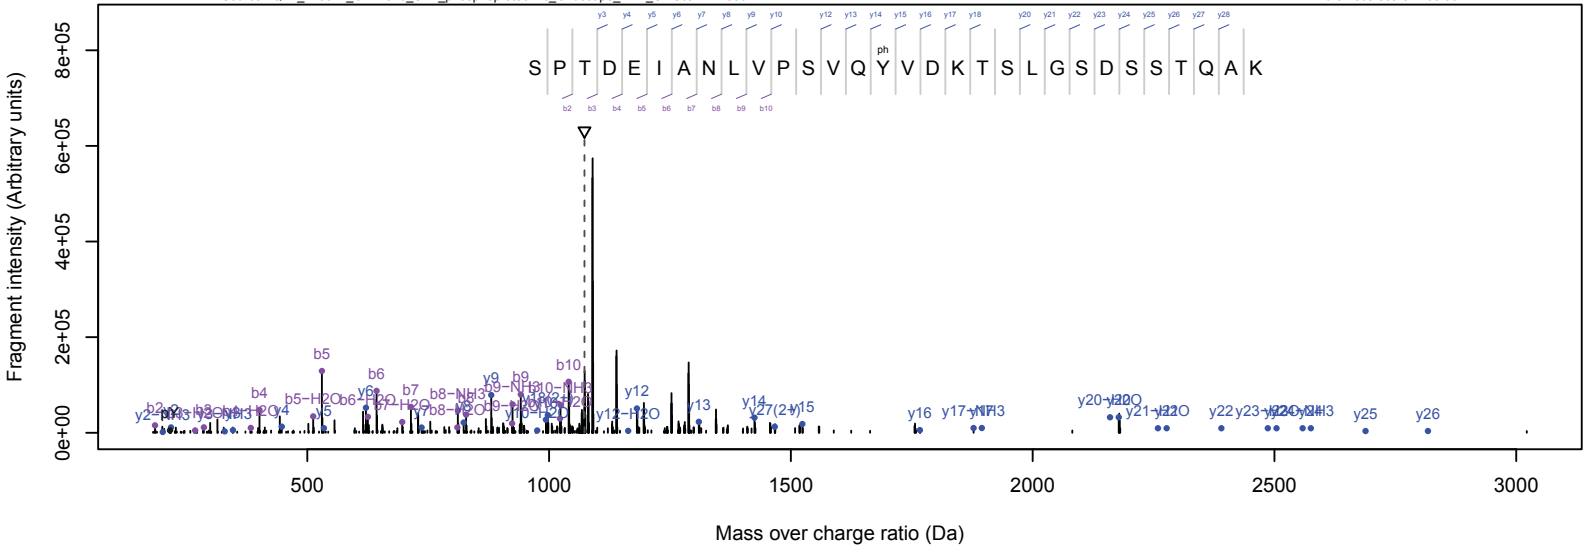

**Y(ph)ICTYINVQER-2+**

Source : QE1\_140612\_OPL1013\_CVA\_phosphoproteomic\_landscape\_AML\_B Scan : 26981

Andromeda score : 158.05

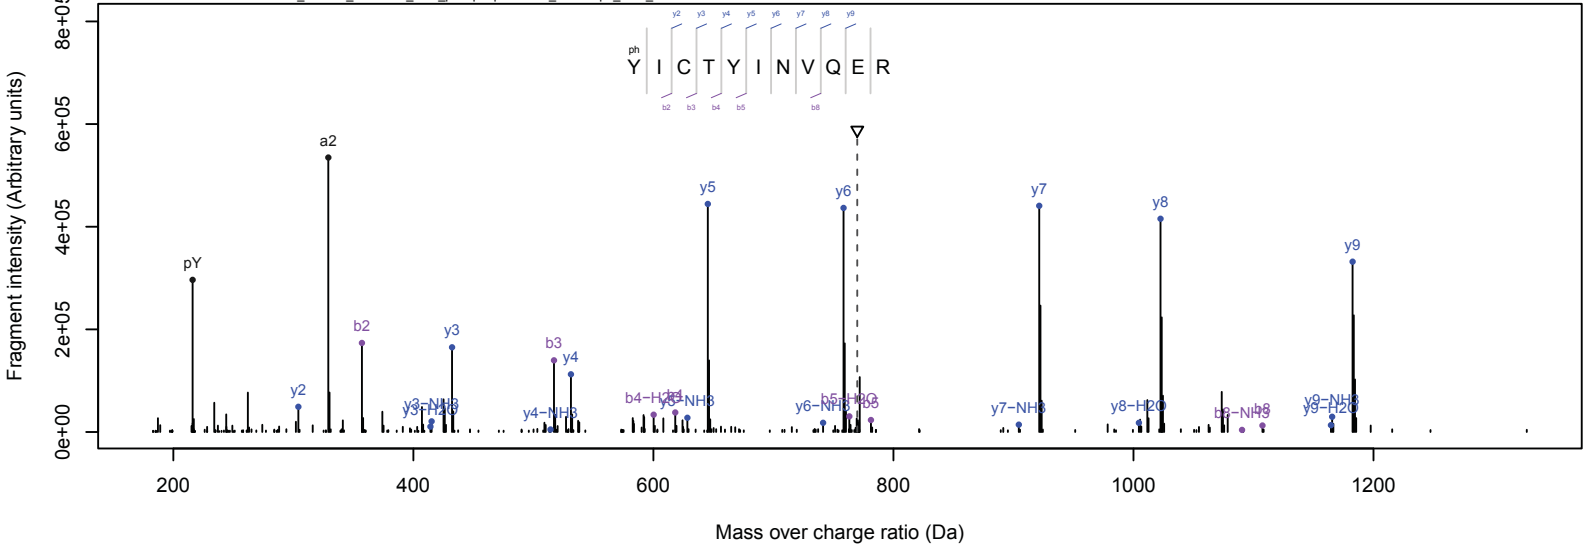

**Y(ph)SSLNLFDTYK-2+**

Source : QE1\_140612\_OPL1013\_CVA\_phosphoproteomic\_landscape\_AML\_C Scan : 36773

Andromeda score : 158.04

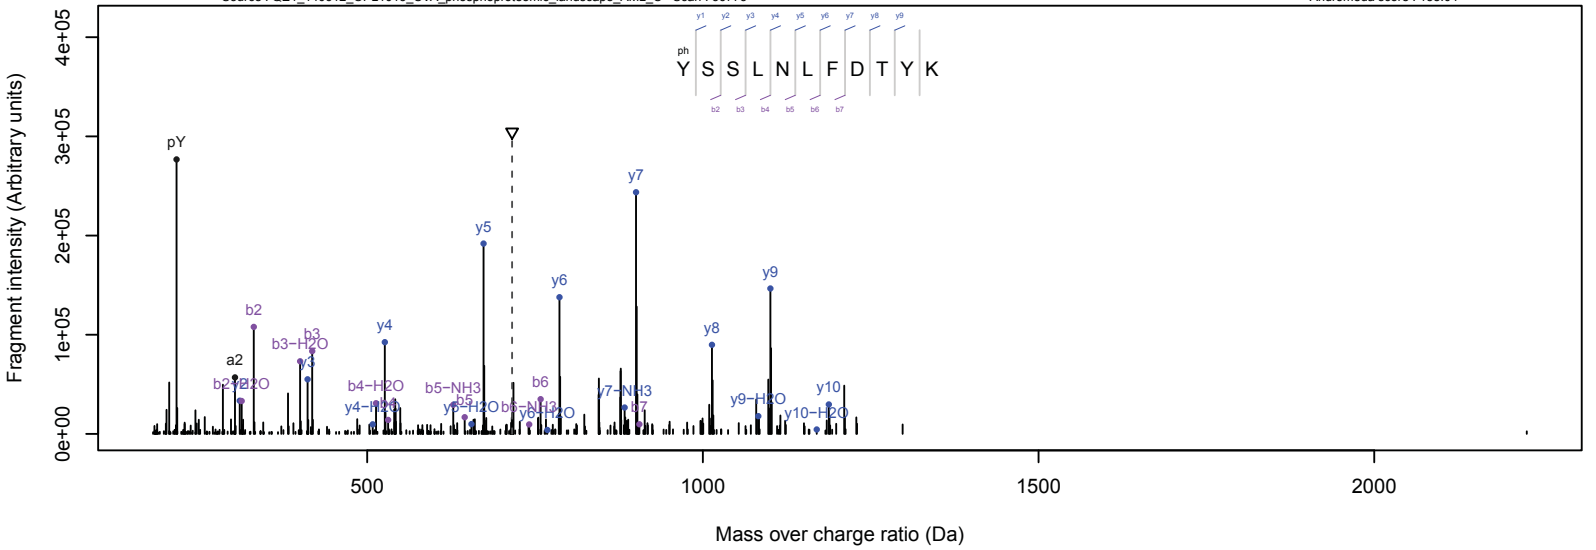

**SDY(ph)HVTQLQPYFENGR-2+**

Source : QE1\_140612\_OPL1013\_CVA\_phosphoproteomic\_landscape\_AML\_C Scan : 27606

Andromeda score : 157.91

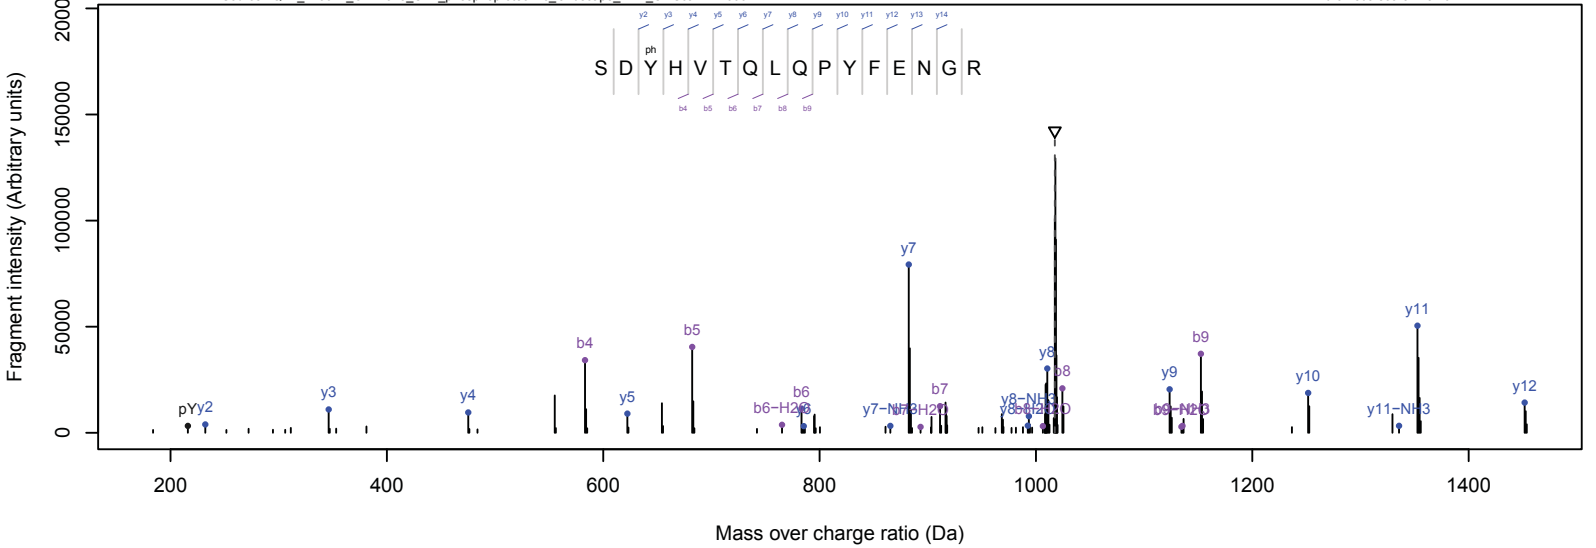



TINLY(ph)PLTNYTFGTK-2+

Source : QE1\_140612\_OPL1013\_CVA\_phosphoproteomic\_landscape\_AML\_B Scan : 44892

Andromeda score : 157.58

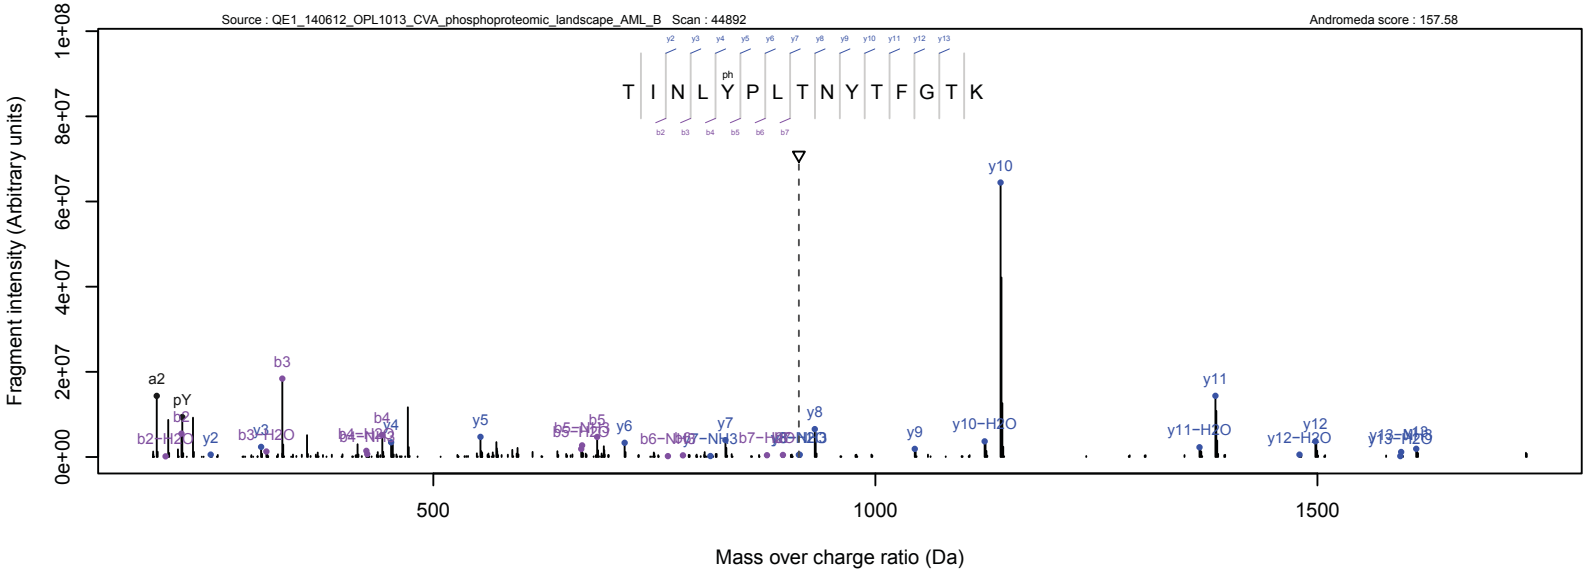

TGSLKPNPASPLPASPY(ph)GGPTASYYTASTPAGPAFPVQVK-3+

Source : QE1\_140612\_OPL1013\_CVA\_phosphoproteomic\_landscape\_AML\_C Scan : 40349

Andromeda score : 157.4

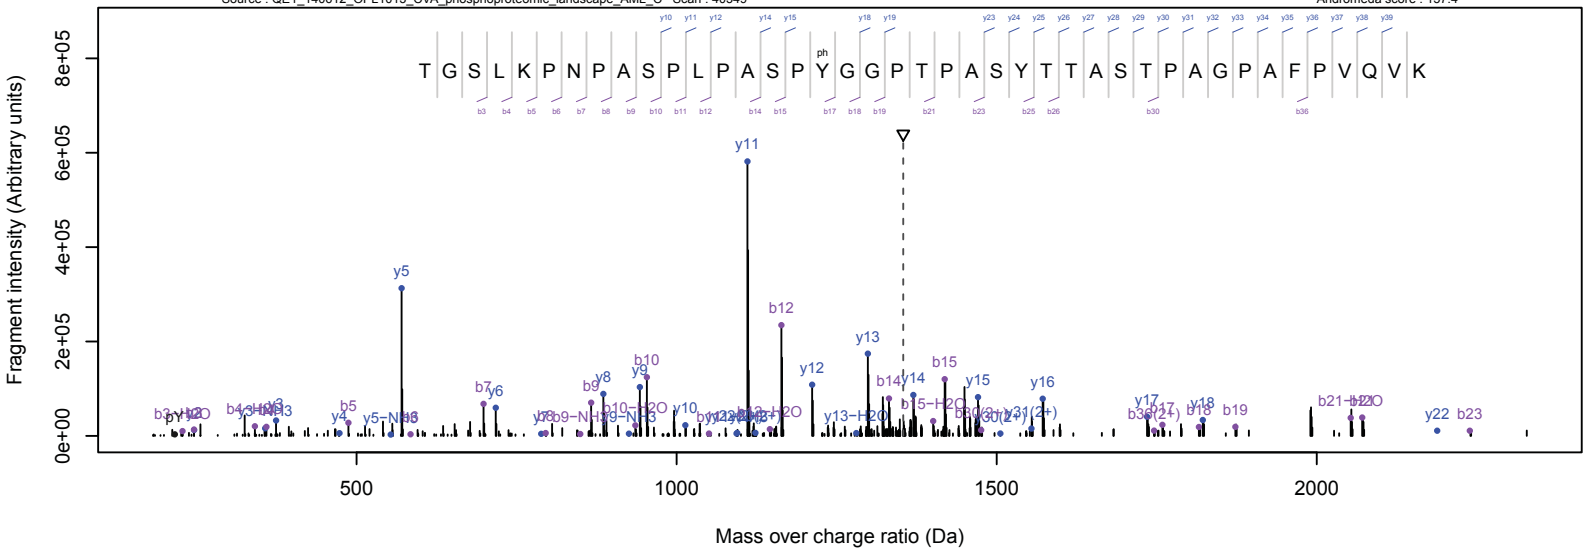

YAGKDGYNYSK-2+

Source : QE1\_140612\_OPL1013\_CVA\_phosphoproteomic\_landscape\_AML\_C Scan : 9618

Andromeda score : 157.35

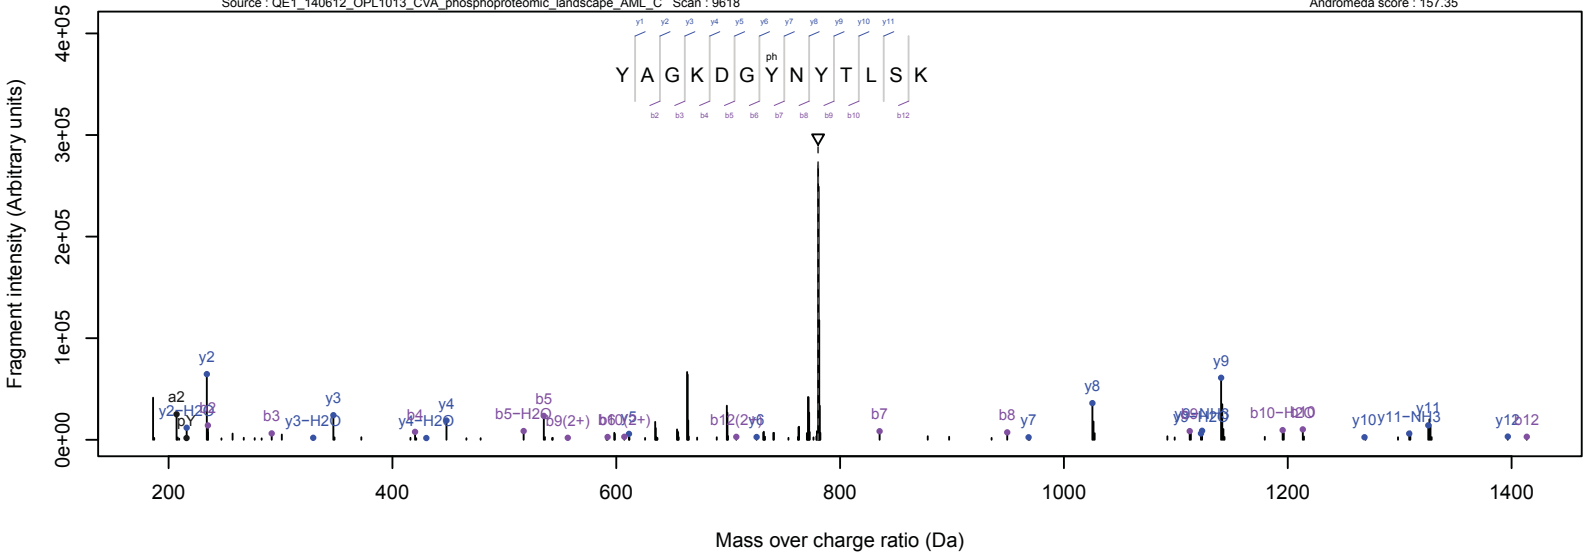

TASVFGTHQAFAPY<sup>ph</sup>NKPSLSGAR-3+

Source : QE1\_140612\_OPL1013\_CVA\_phosphoproteomic\_landscape\_AML\_C Scan : 25635

Andromeda score : 157.3

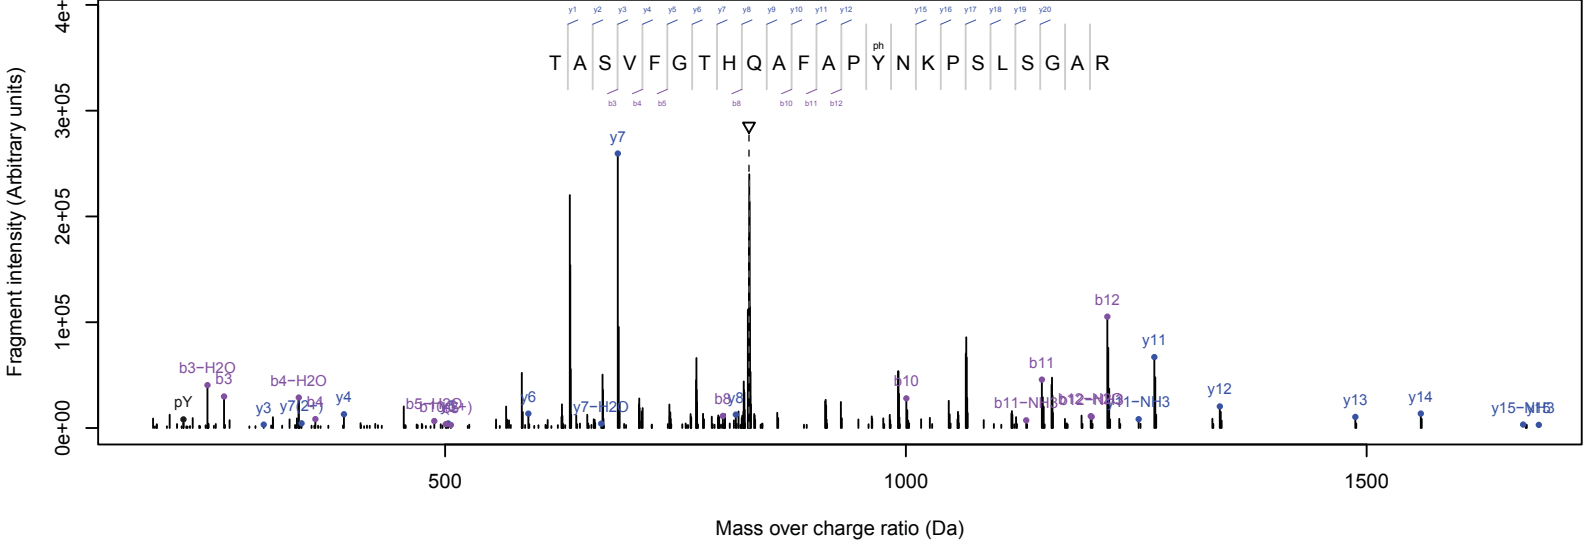

GY<sup>ph</sup>AYVEFENPDEAEK-2+

Source : QE1\_140612\_OPL1013\_CVA\_phosphoproteomic\_landscape\_AML\_B Scan : 26805

Andromeda score : 157.23

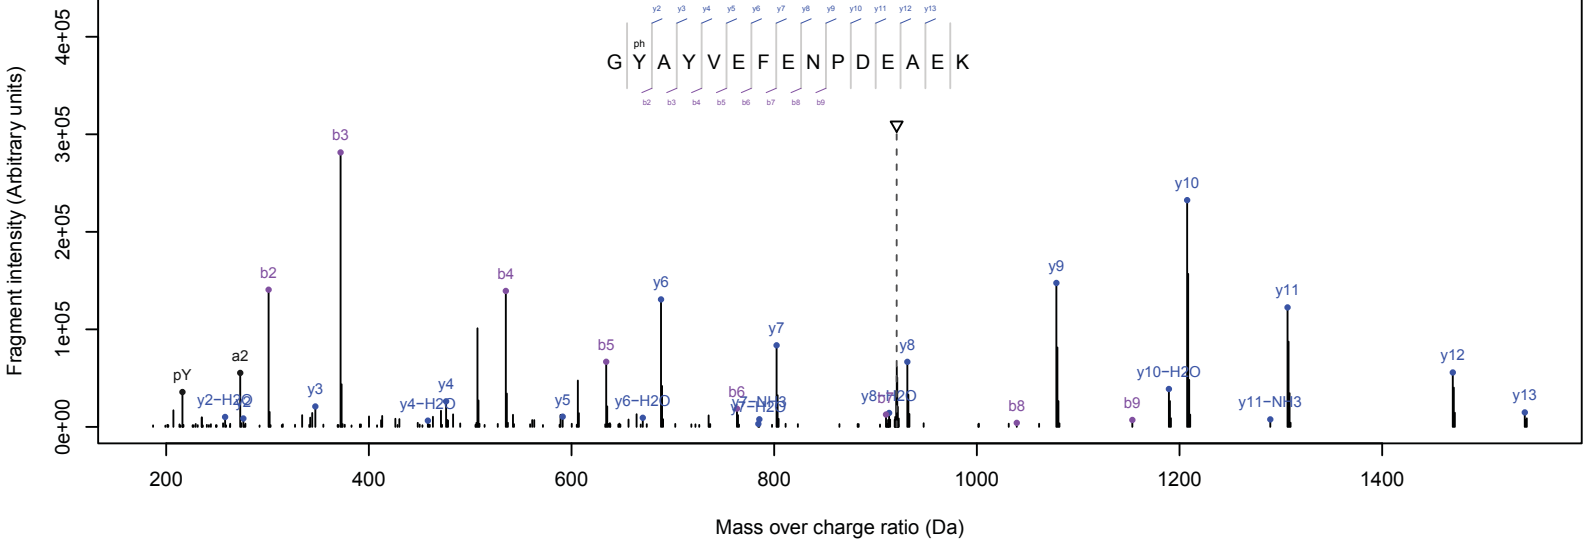

AKEIY<sup>ph</sup>MTFLSSK-2+

Source : QE1\_140612\_OPL1013\_CVA\_phosphoproteomic\_landscape\_AML\_B Scan : 30289

Andromeda score : 157.2

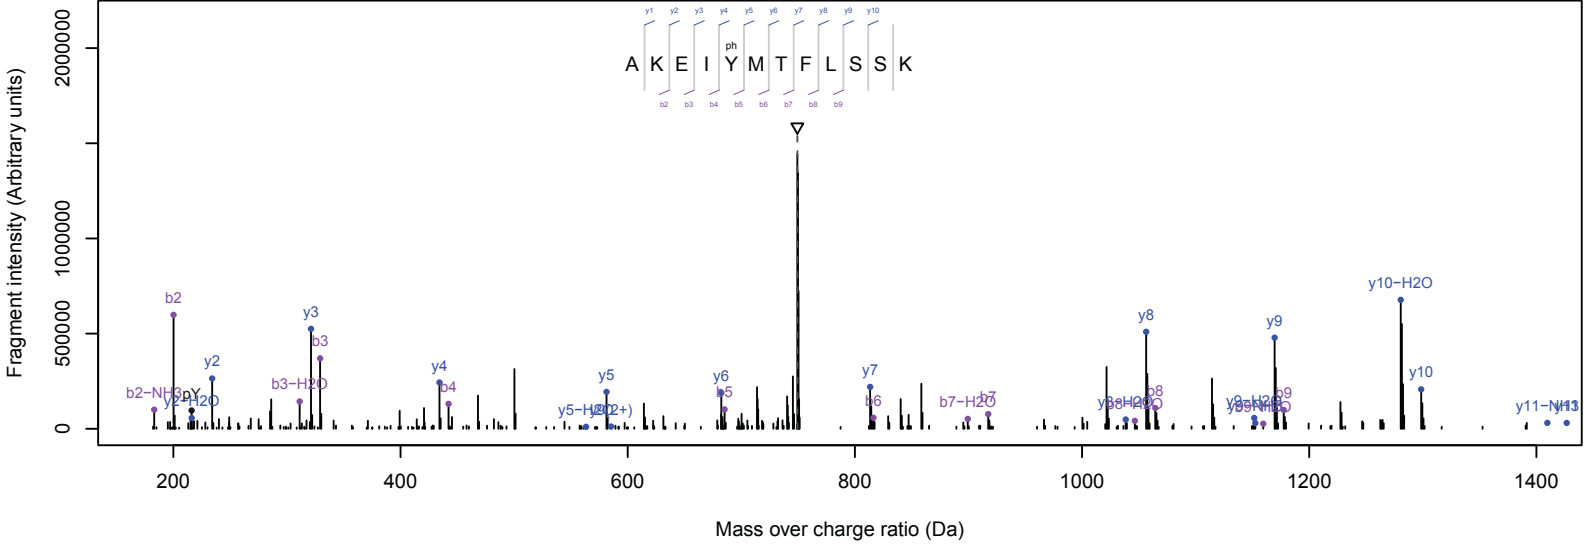

ESM(ox)CSTPAFPVSPETPYVK-2+

Source : QE1\_140612\_OPL1013\_CVA\_phosphoproteomic\_landscape\_AML\_C Scan : 33475

Andromeda score : 157.11

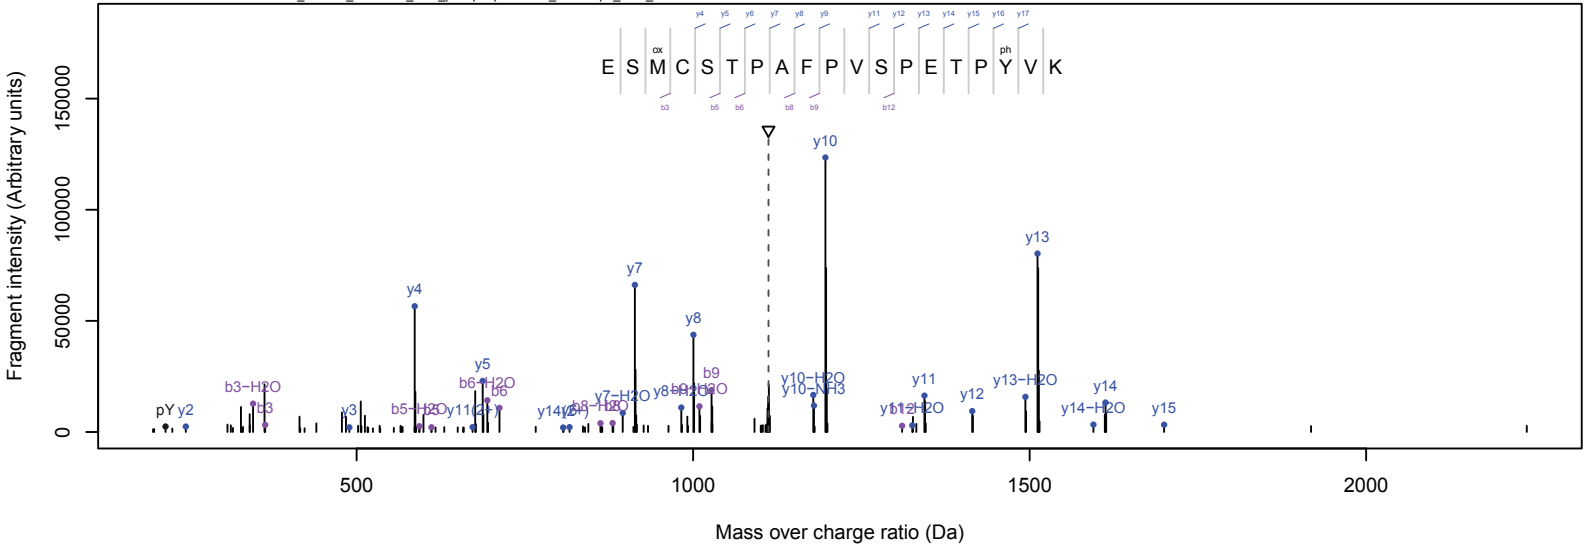

STSSPY(H)HAGNLLQR-2+

Source : QE1\_140612\_OPL1013\_CVA\_phosphoproteomic\_landscape\_AML\_C Scan : 13906

Andromeda score : 157.09

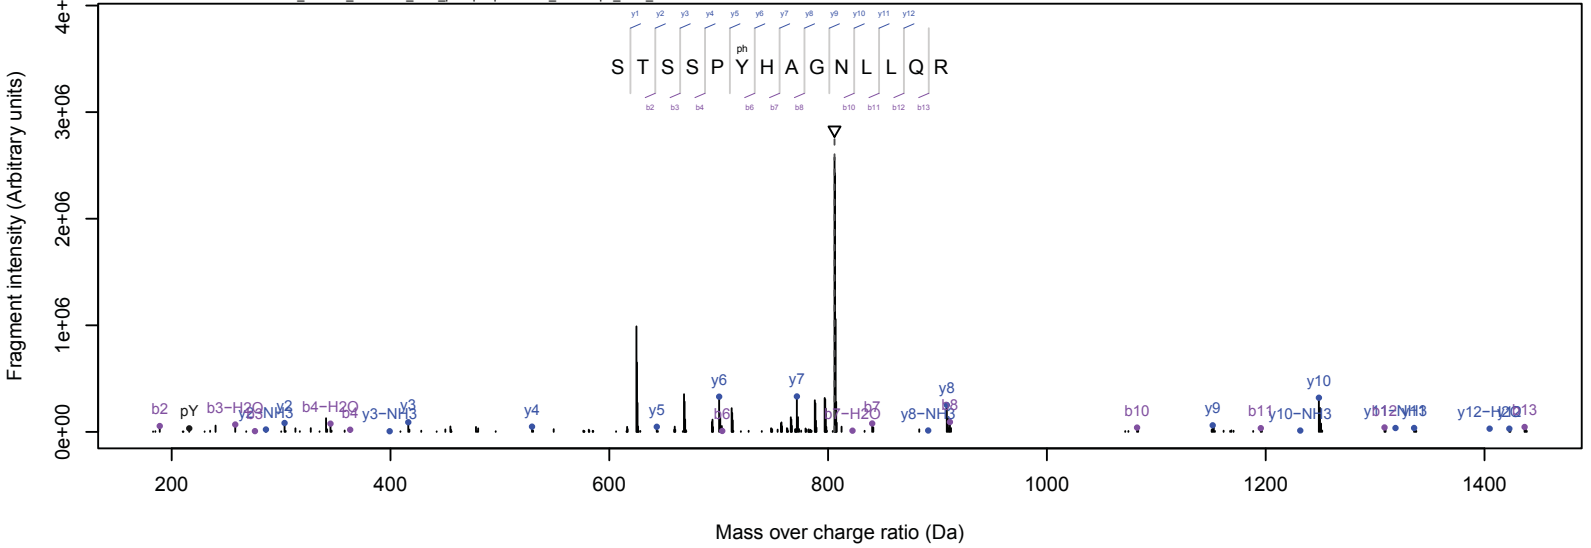

DSGLY(ph)KELLHK-2+

Source : QE1\_140612\_OPL1013\_CVA\_phosphoproteomic\_landscape\_AML\_C Scan : 19833

Andromeda score : 157.03

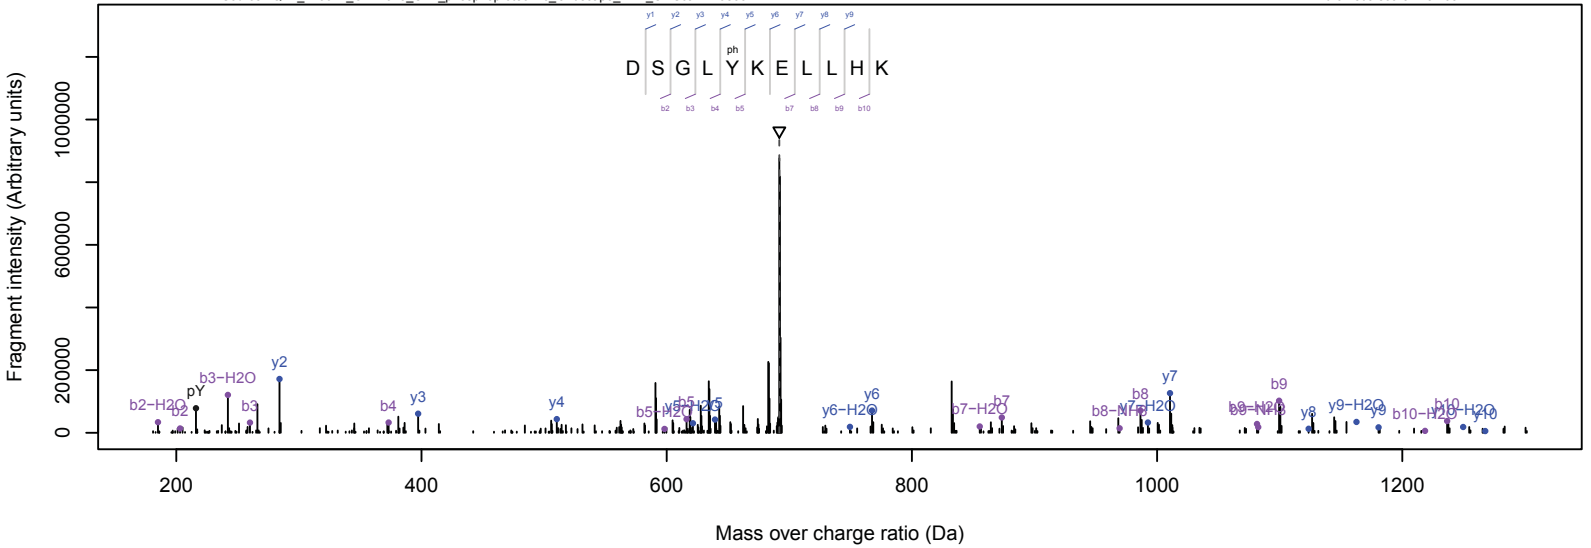

**SLCPFYGEDFY(ph)CEIPR-2+**

Source : QE1\_140612\_OPL1013\_CVA\_phosphoproteomic\_landscape\_AML\_C Scan : 43960

Andromeda score : 156.98

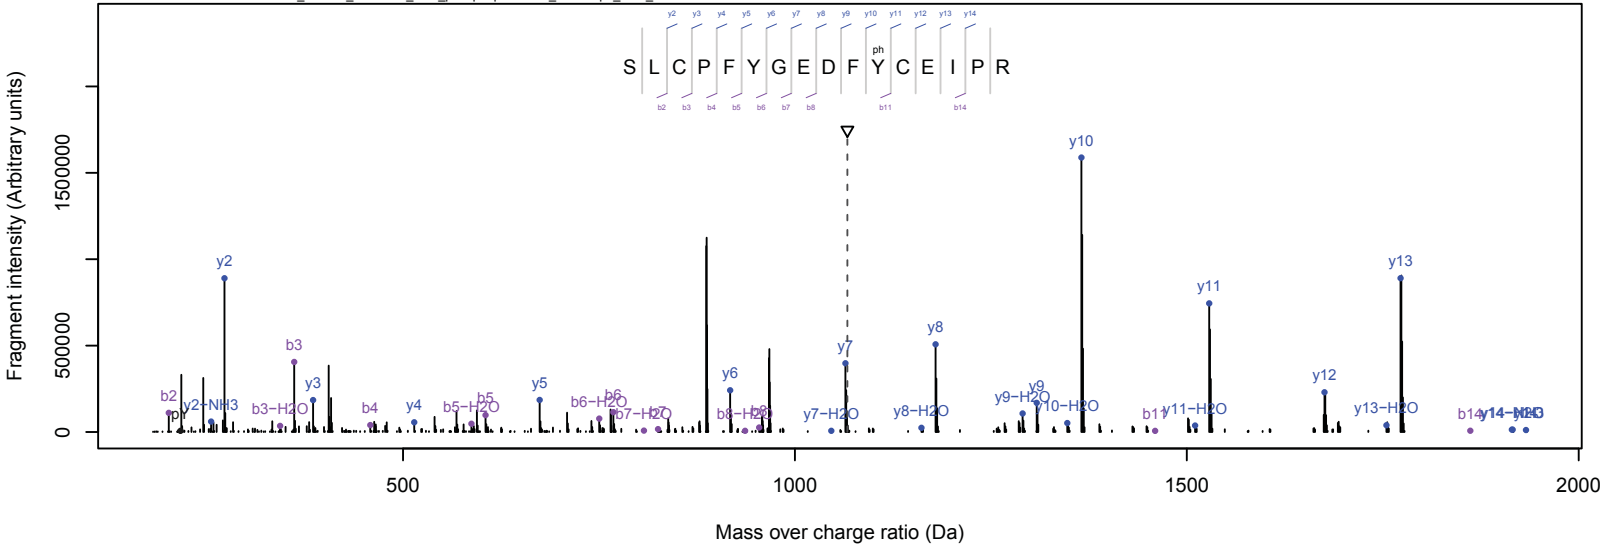

**DAHSTPYY(ph)YARPQTLPLSYQDR-3+**

Source : QE1\_140612\_OPL1013\_CVA\_phosphoproteomic\_landscape\_AML\_C Scan : 31607

Andromeda score : 156.87

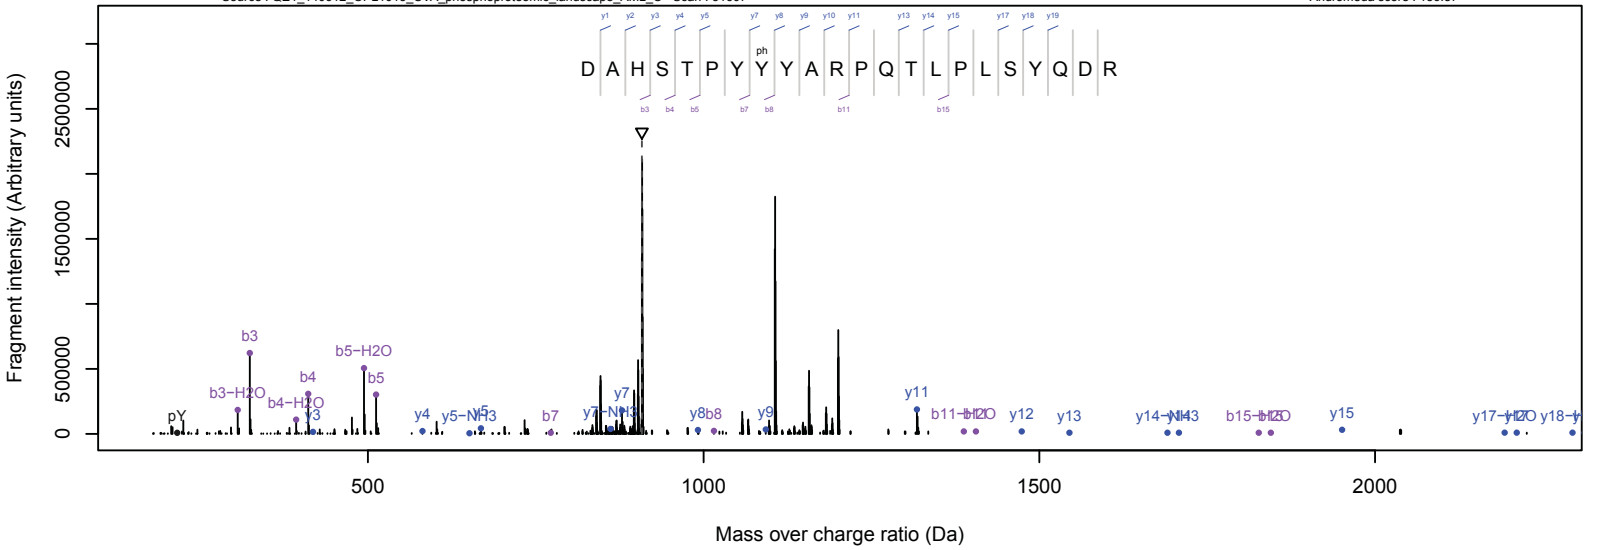

**FQDVGPQAPVGSVY(ph)QK-2+**

Source : Qe1\_141024\_OPL1013\_CvA\_AML\_pTyrIP\_MOLM13 Scan : 21813

Andromeda score : 156.86

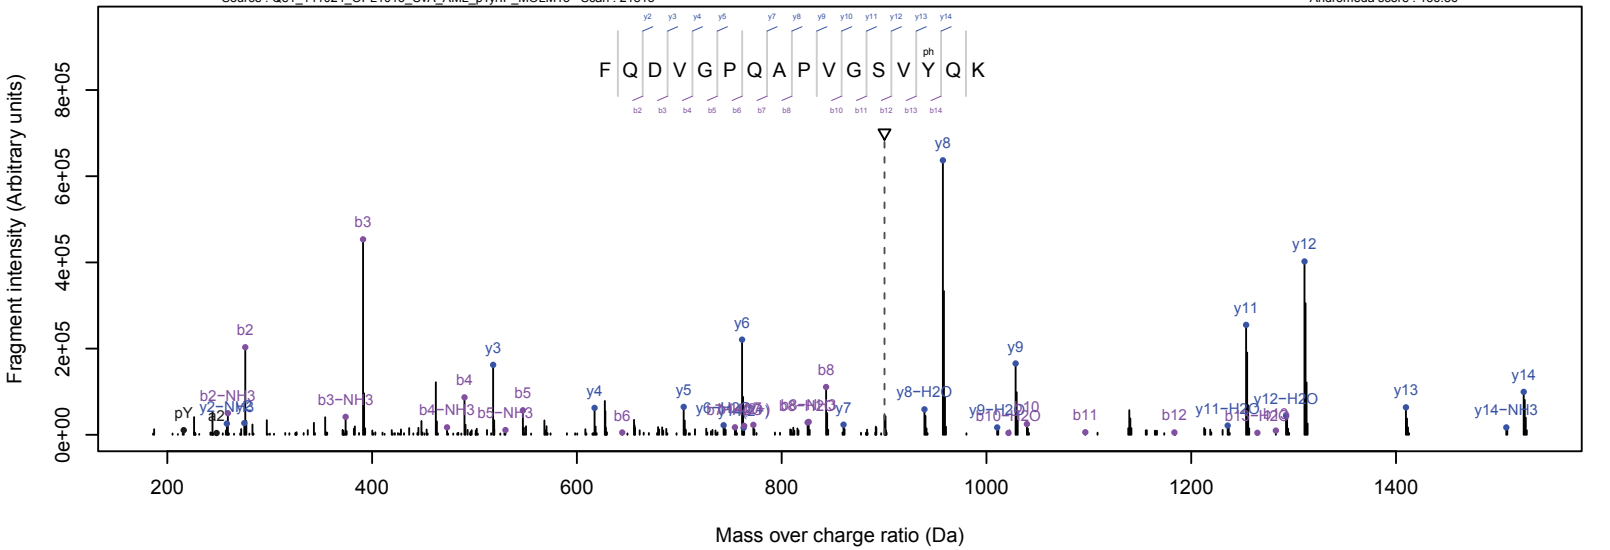

PSPAISVSVSAPAFY(ph)APQKK-3+

Source : QE1\_140612\_OPL1013\_CVA\_phosphoproteomic\_landscape\_AML\_C Scan : 32675

Andromeda score : 156.73

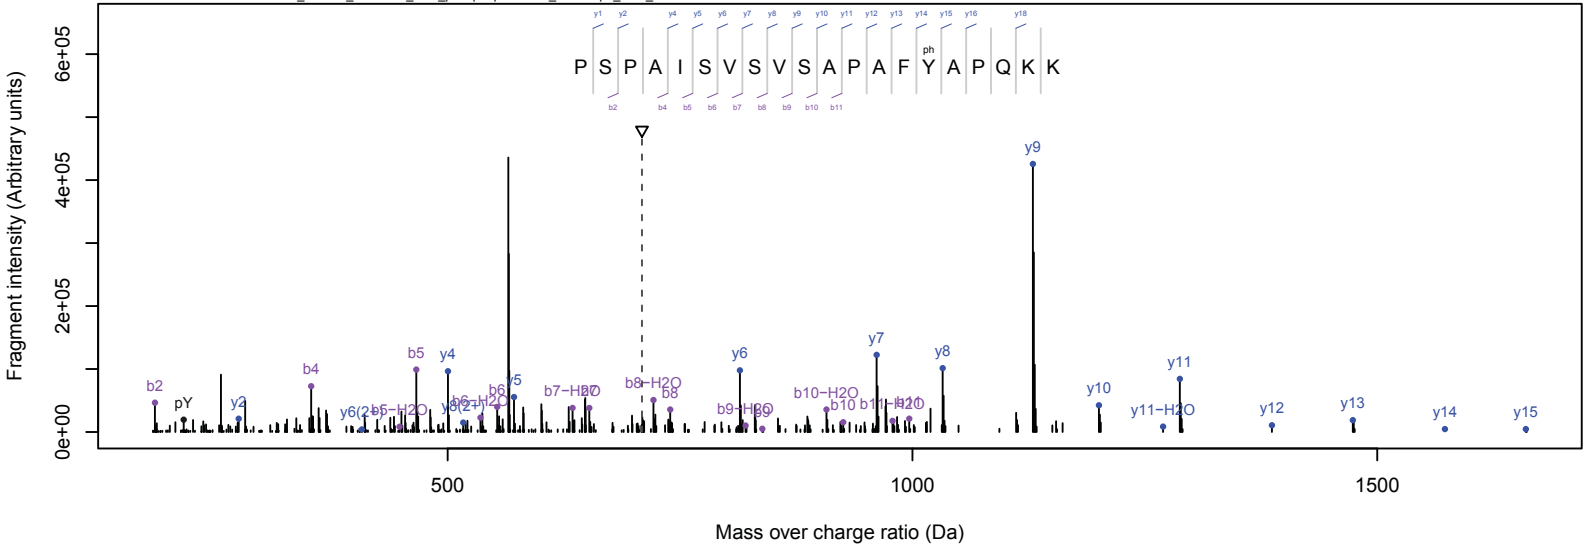

ESSMERNPY(ph)FDKNGNPSMFGVGNNTAAQPR-4+

Source : QE1\_140612\_OPL1013\_CVA\_phosphoproteomic\_landscape\_AML\_C Scan : 27396

Andromeda score : 156.7

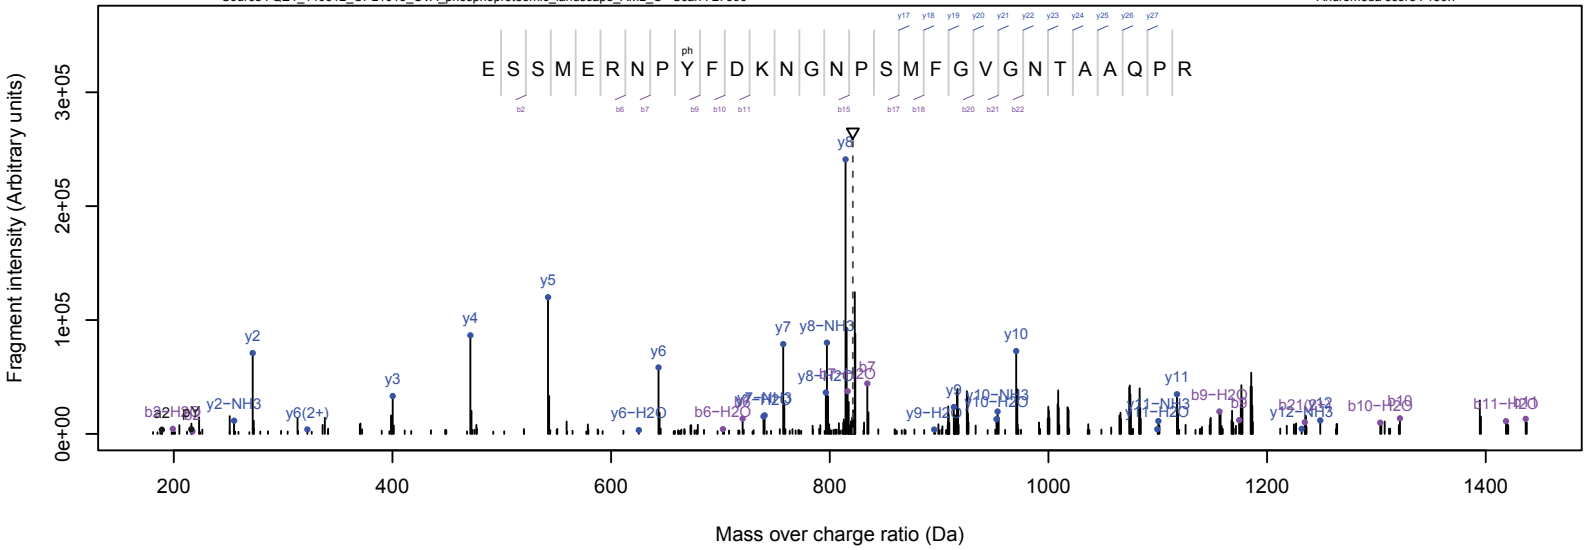

NLLHADSNGY(ph)TNLPDVVQPSHSPTENSK-3+

Source : QE1\_140908\_OPL1013\_CvA\_pTyrIP\_AML\_HEL Scan : 29620

Andromeda score : 156.69

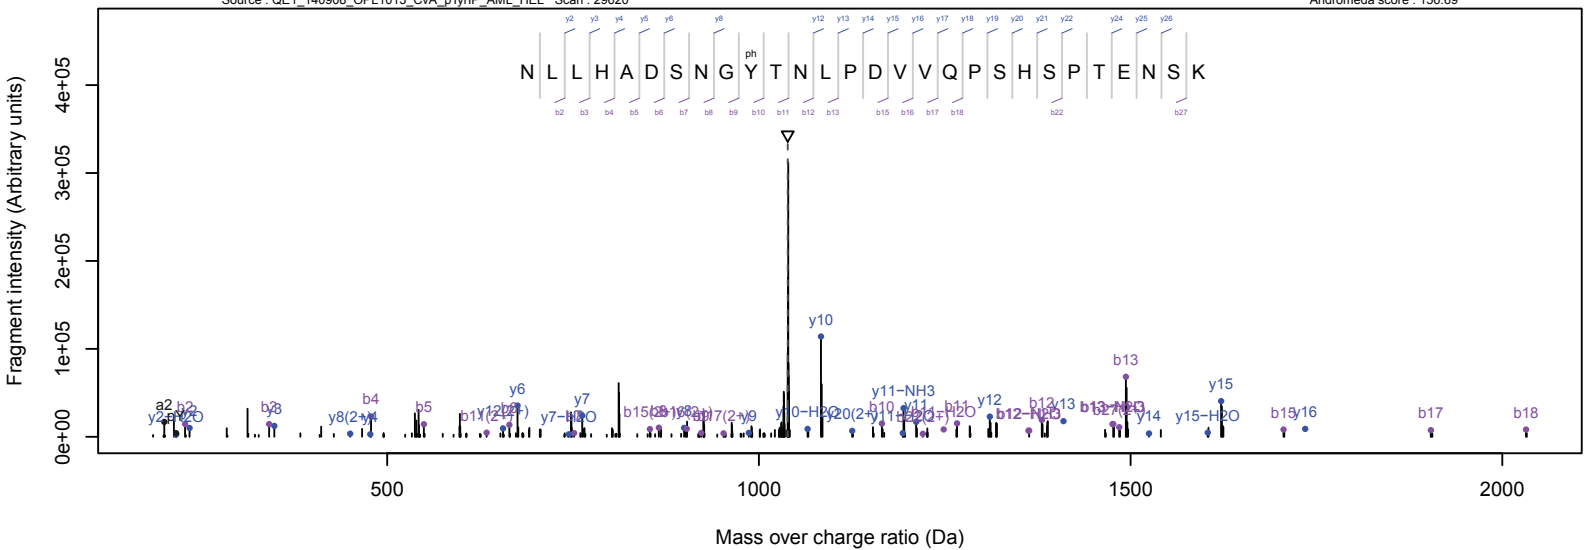

QY(ph)EQQTYQVIPEVIK-2+

Source : QE1\_140908\_OPL1013\_CvA\_pTyrIP\_AML\_HEL Scan : 37723

Andromeda score : 156.57

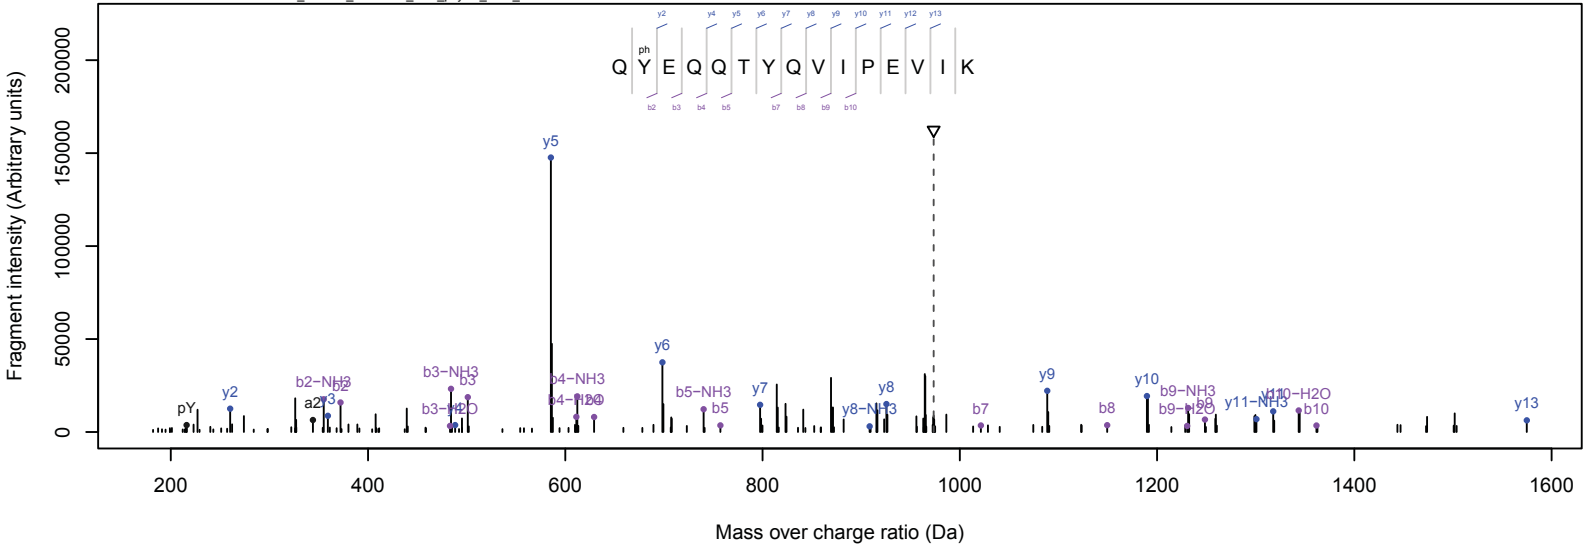

KEIADY(ph)LAAGKDER-3+

Source : QE1\_140612\_OPL1013\_CVA\_phosphoproteomic\_landscape\_AML\_B Scan : 17887

Andromeda score : 156.49

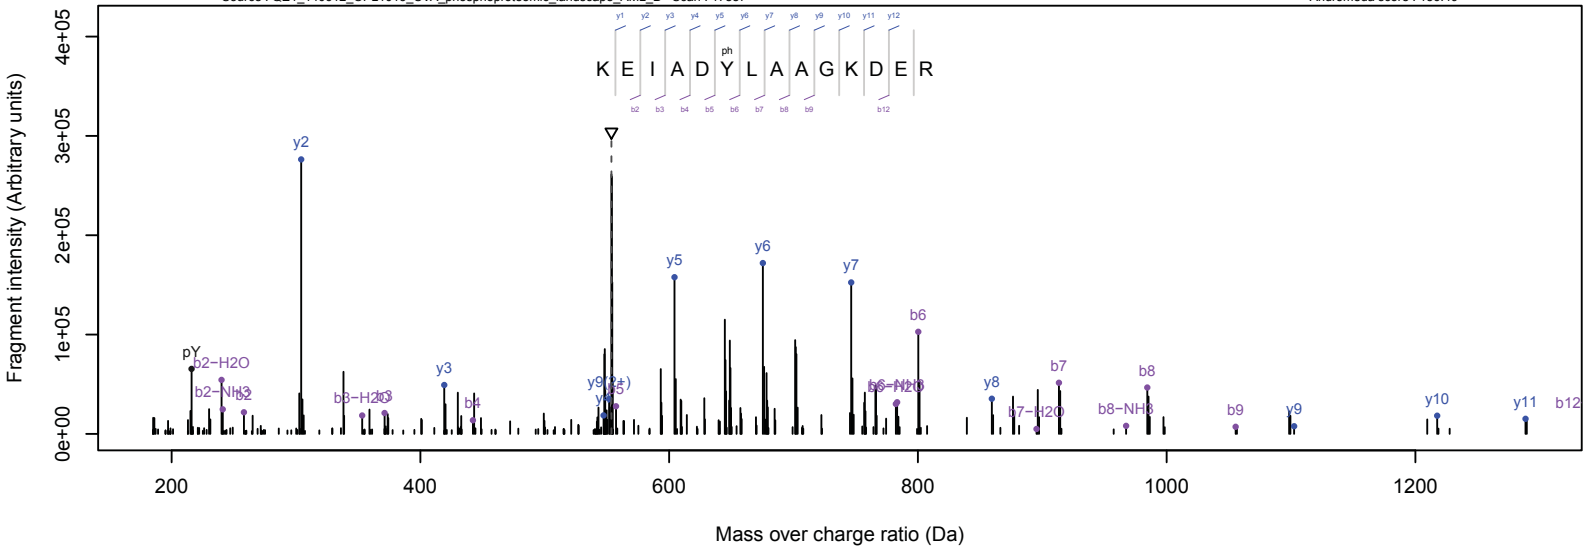

Y(ph)AILTPEWPR-2+

Source : QE1\_140612\_OPL1013\_CVA\_phosphoproteomic\_landscape\_AML\_C Scan : 36361

Andromeda score : 156.48

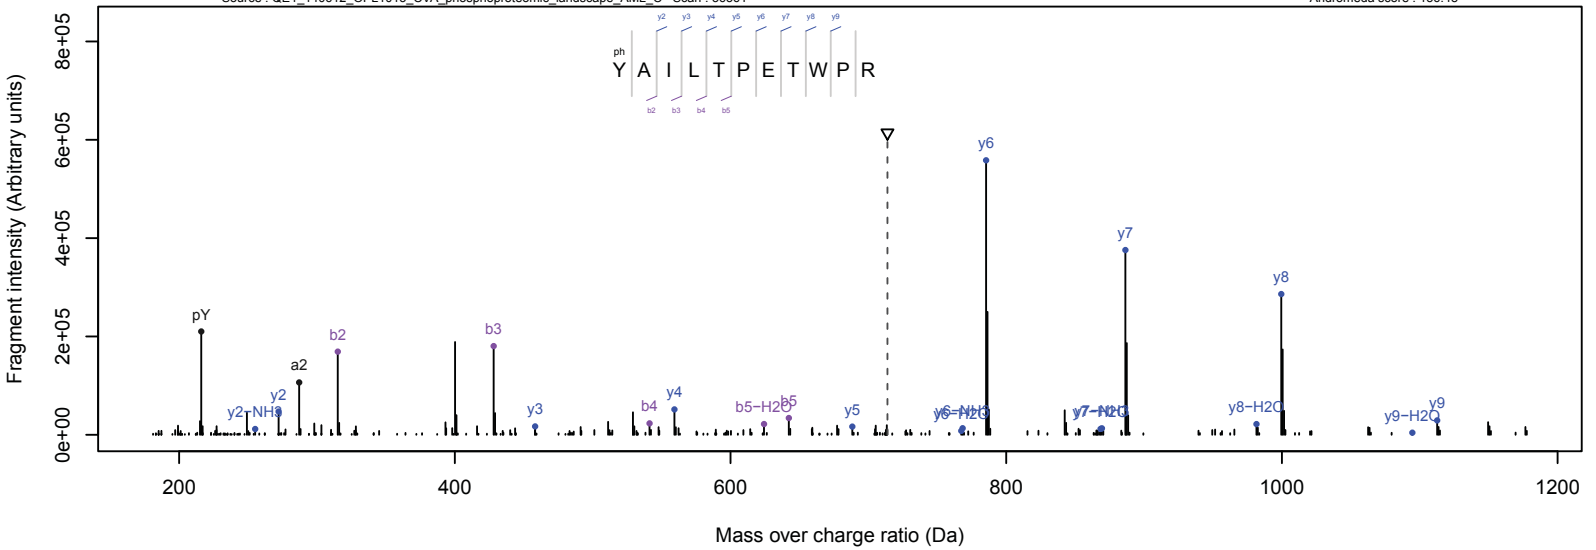

**IKLGHY(ph)ATQLQK-3+**

Source : QE1\_140612\_OPL1013\_CVA\_phosphoproteomic\_landscape\_AML\_B Scan : 15156

Andromeda score : 156.36

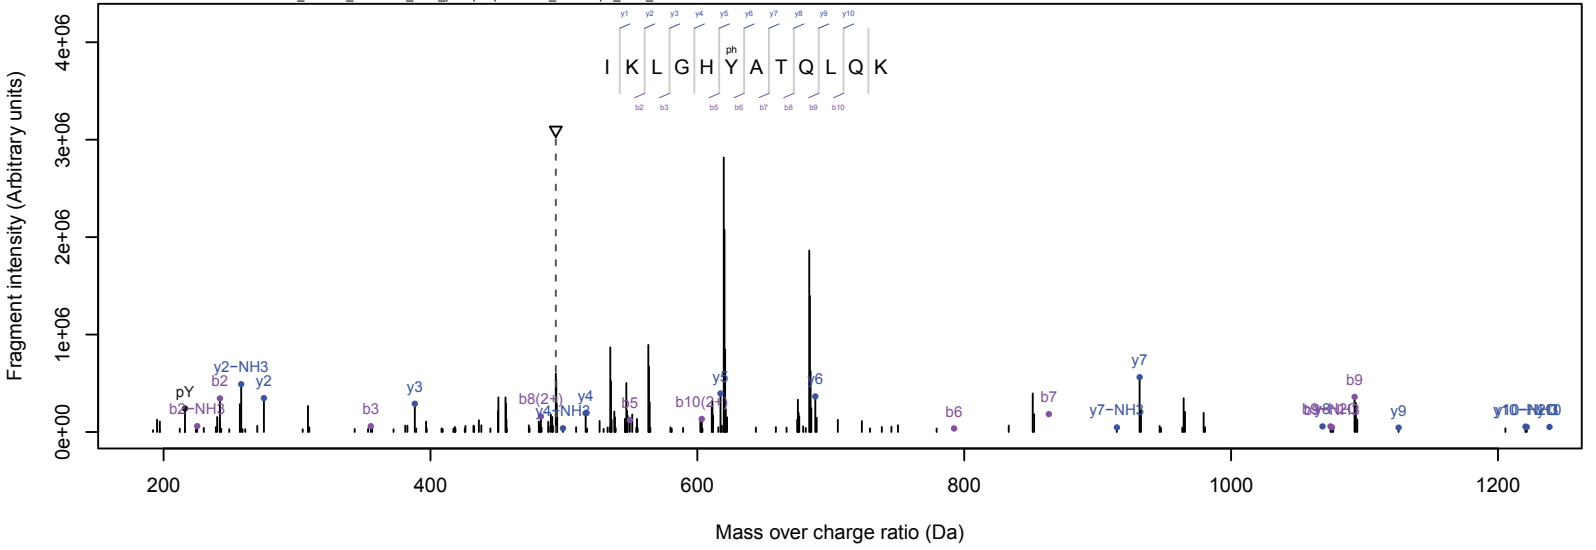

**Y(ph)HTVNGHNCEVR-3+**

Source : QE1\_140612\_OPL1013\_CVA\_phosphoproteomic\_landscape\_AML\_D Scan : 3679

Andromeda score : 156.36

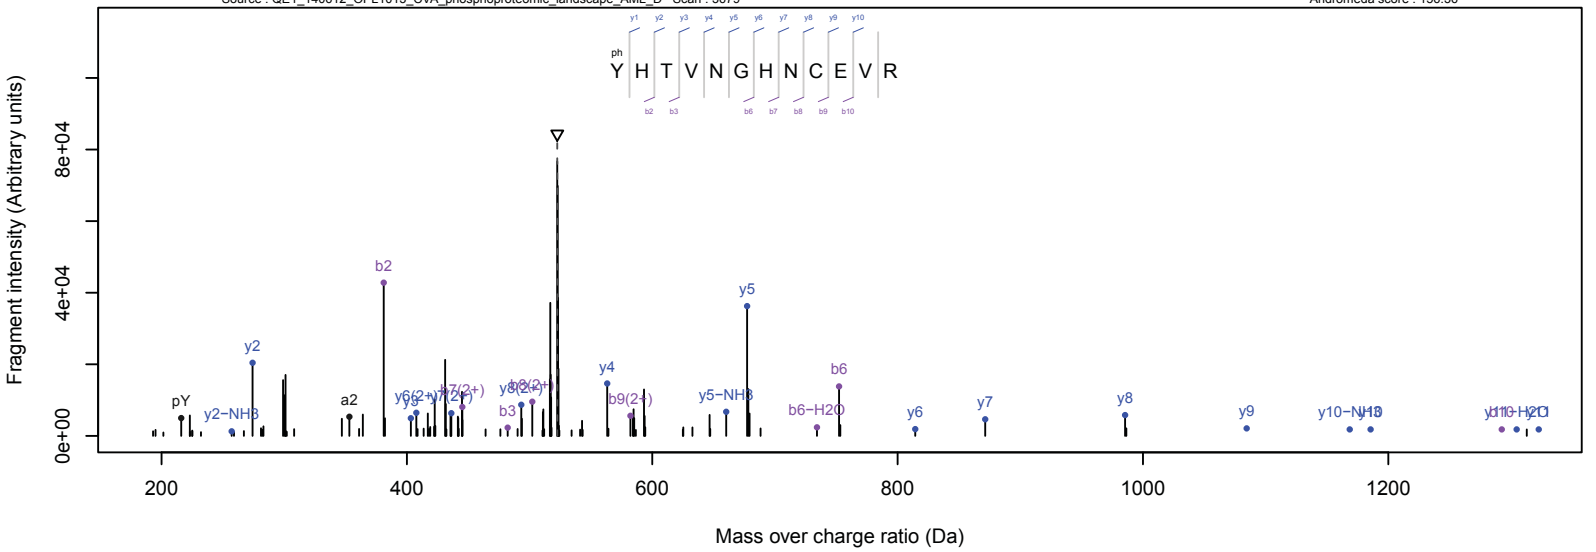

**TLEPVKPTVPNDY(ph)M(ox)TSPAR-3+**

Source : QE1\_140908\_OPL1013\_CvA\_pTyrIP\_AML\_HEL Scan : 24860

Andromeda score : 156.29

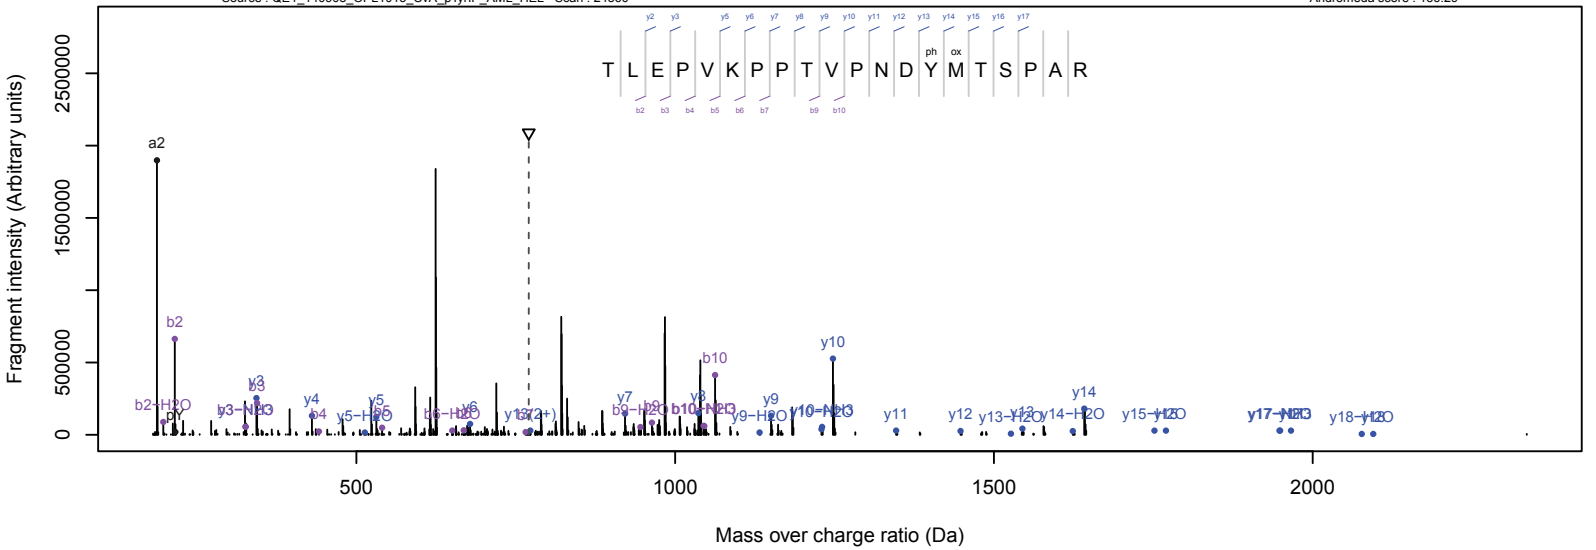

**Y(ph)PHLGQKPGGSDFLR-3+**

Source : QE1\_140612\_OPL1013\_CVA\_phosphoproteomic\_landscape\_AML\_C Scan : 21576

Andromeda score : 156.24

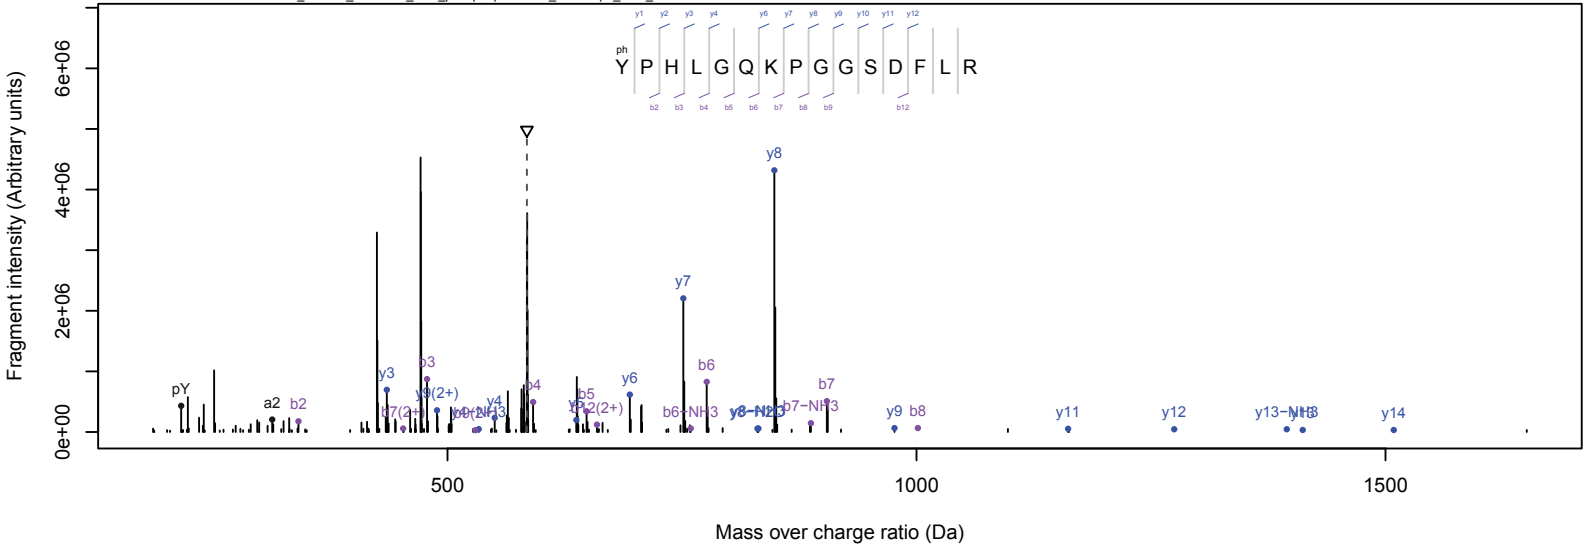

**KLY(ph)ANMFER-2+**

Source : QE1\_140612\_OPL1013\_CVA\_phosphoproteomic\_landscape\_AML\_C Scan : 20835

Andromeda score : 156.16

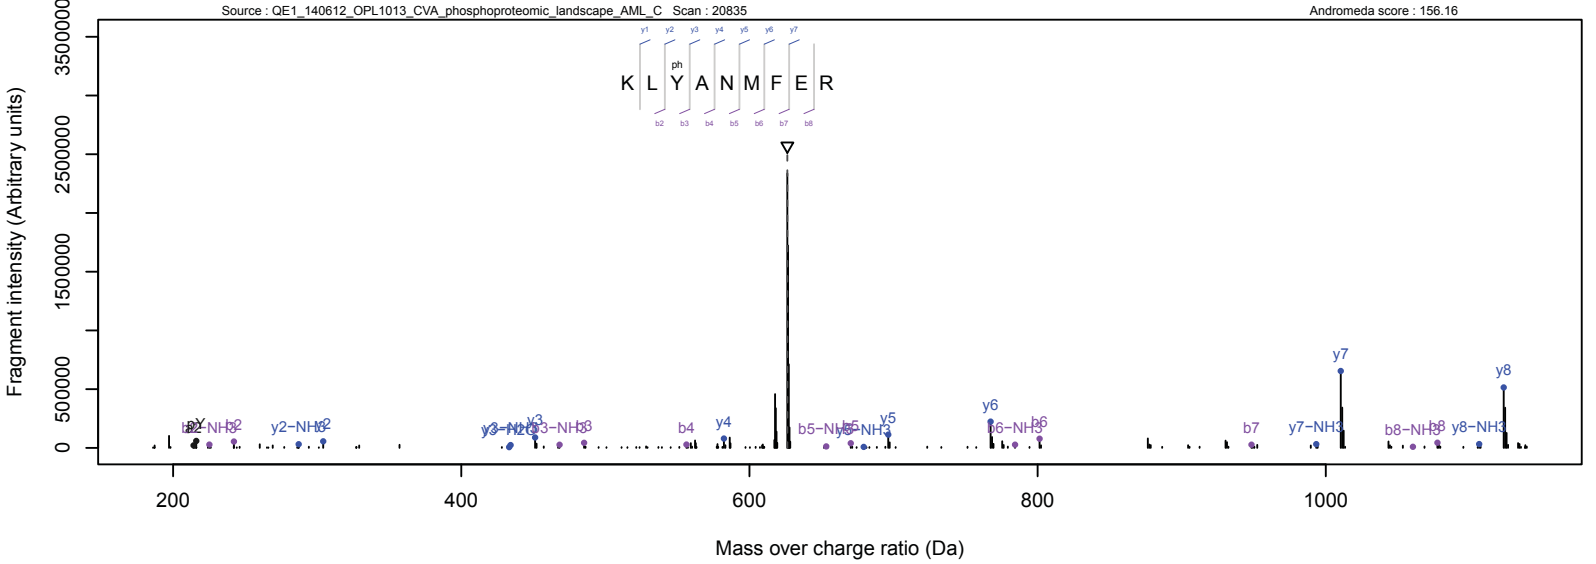

**SNSAWQIY(ph)LQR-2+**

Source : QE1\_140612\_OPL1013\_CVA\_phosphoproteomic\_landscape\_AML\_C Scan : 31419

Andromeda score : 155.98

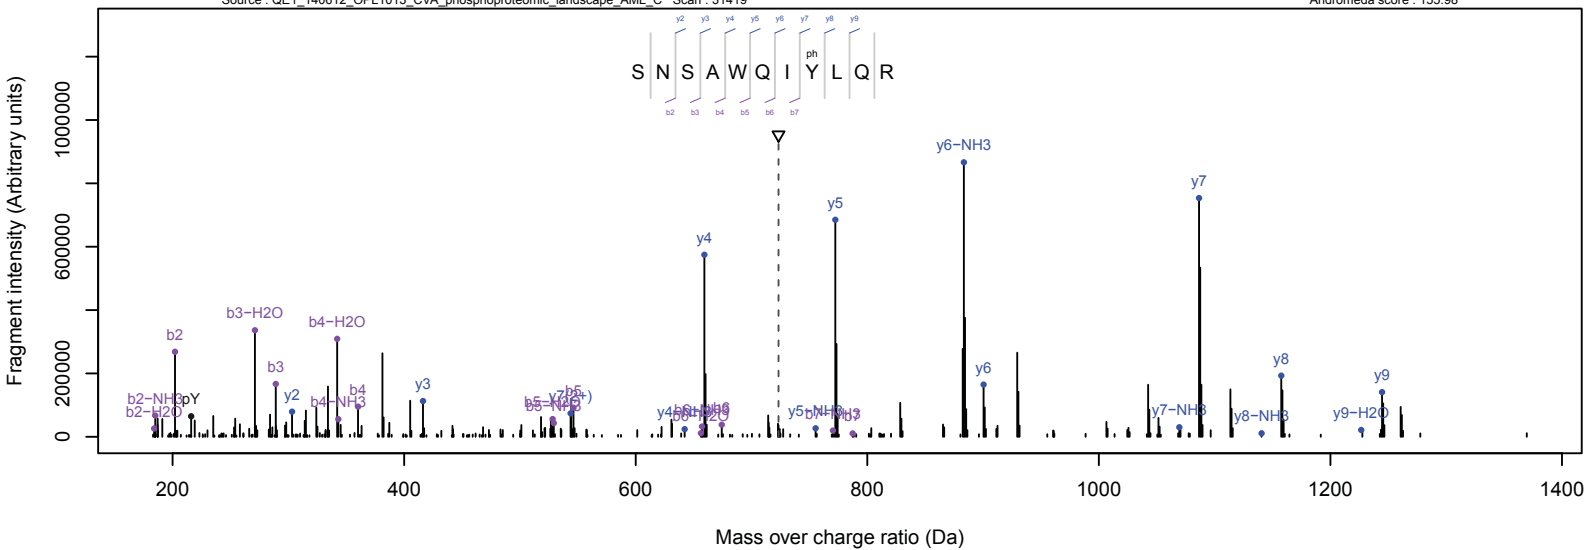



VTQEYELY(ph)CEMGSTFQLCK-3+

Source : QE1\_140908\_OPL1013\_CvA\_pTyrIP\_AML\_Kasumi6 Scan : 43720

Andromeda score : 155.94

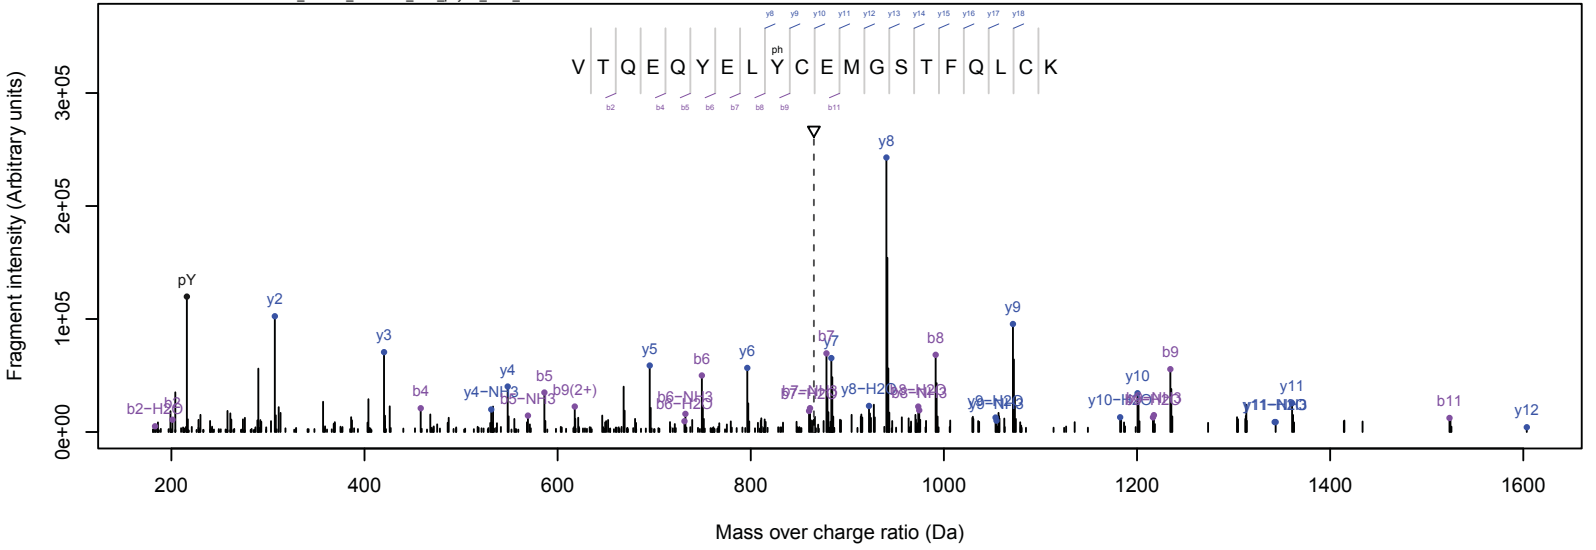

KQMPPPPPCGRELFDDPSY(ph)VNVQLDK-4+

Source : QE1\_140612\_OPL1013\_CvA\_phosphoproteomic\_landscape\_AML\_C Scan : 34590

Andromeda score : 155.73

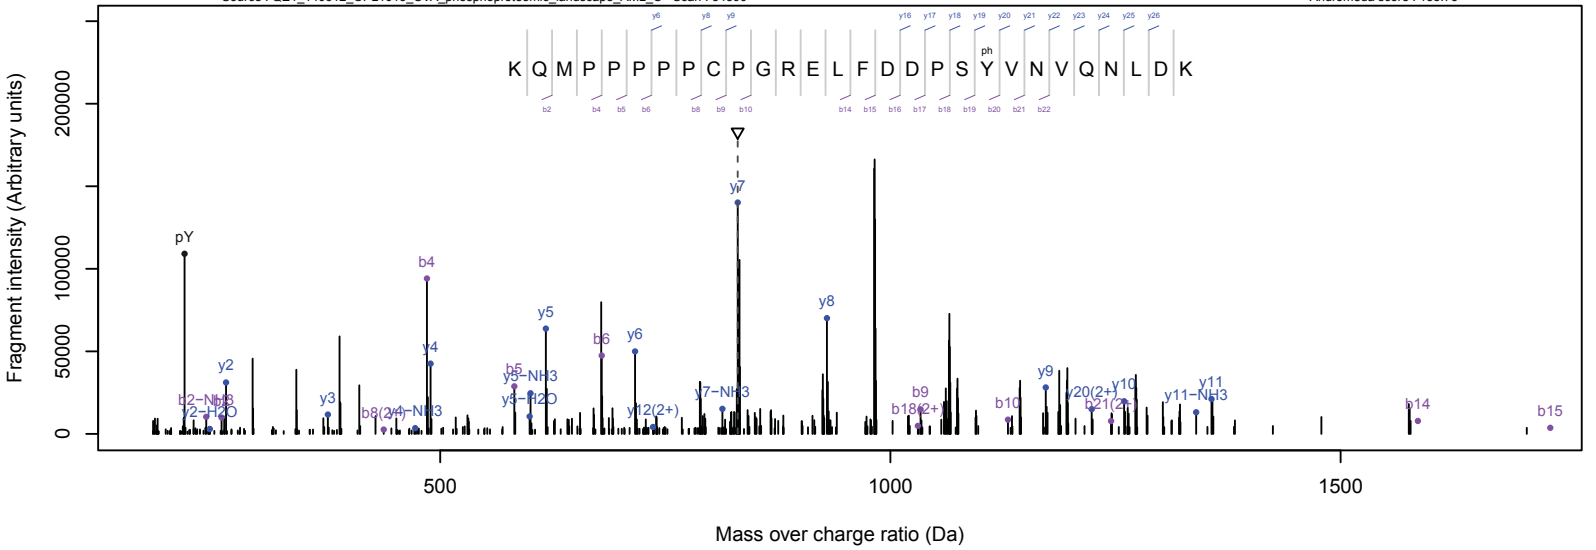

SKIEDY(ph)FPEFAR-2+

Source : QE1\_140612\_OPL1013\_CvA\_phosphoproteomic\_landscape\_AML\_D Scan : 38357

Andromeda score : 155.43

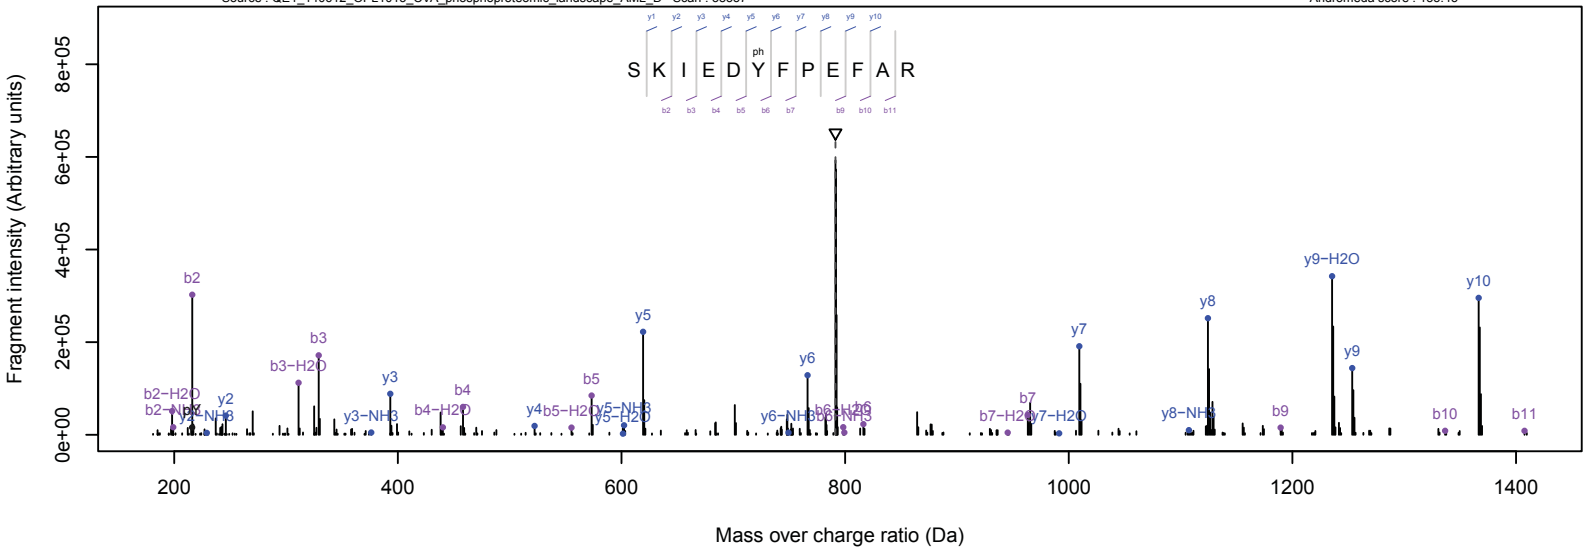

Y(ph)GEVFPTVER-2+

Source: QE1\_140908\_OPL1013\_CvA\_pTyrIP\_AML\_ML2 Scan: 24869

Andromeda score: 155.33

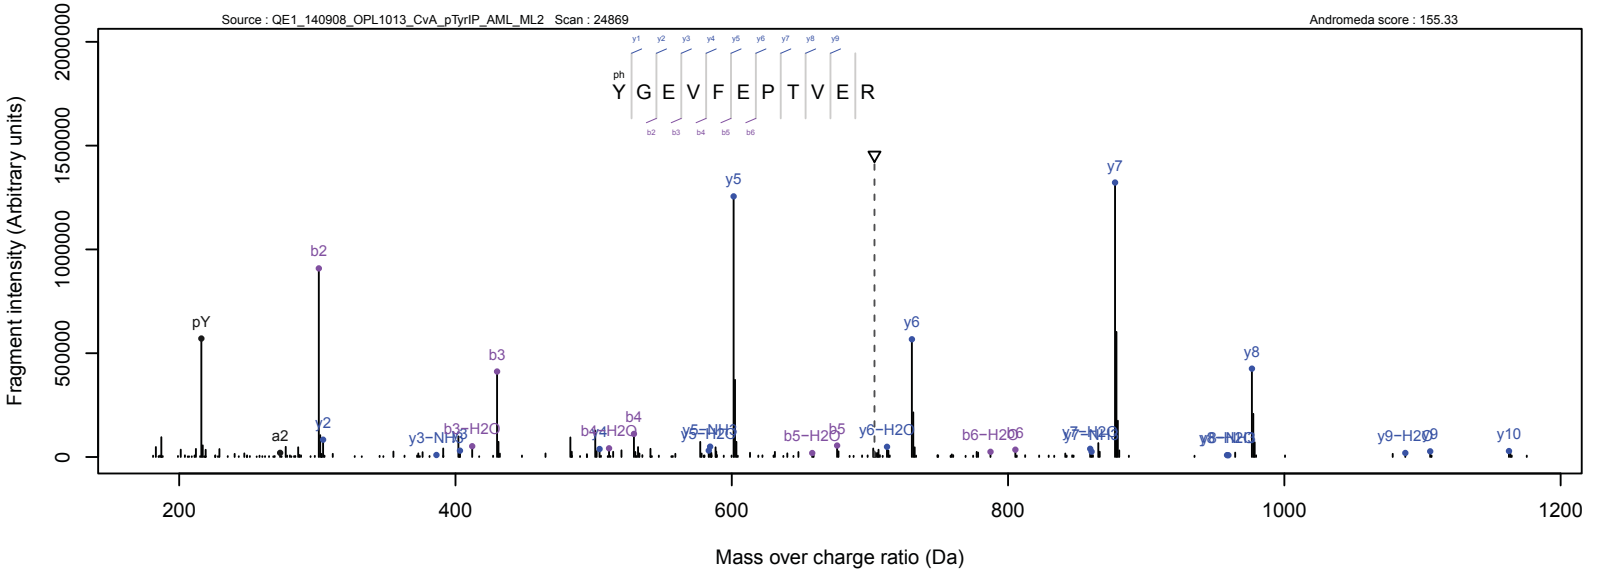

(ac)TDSKY(ph)FTTNK-2+

Source: QE1\_140612\_OPL1013\_CVA\_phosphoproteomic\_landscape\_AML\_C Scan: 10826

Andromeda score: 155.24

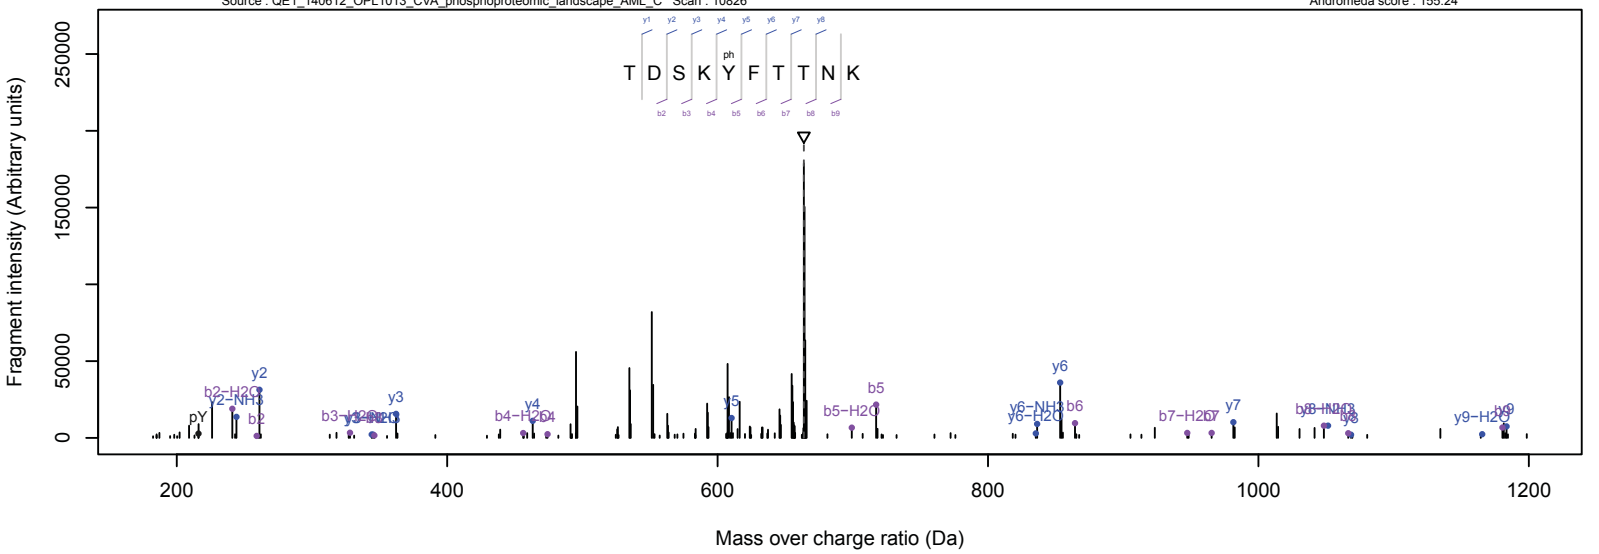

KVPY(ph)AKPIPAQFQQAWMQNK-3+

Source: QE1\_140612\_OPL1013\_CVA\_phosphoproteomic\_landscape\_AML\_A Scan: 32494

Andromeda score: 155.2

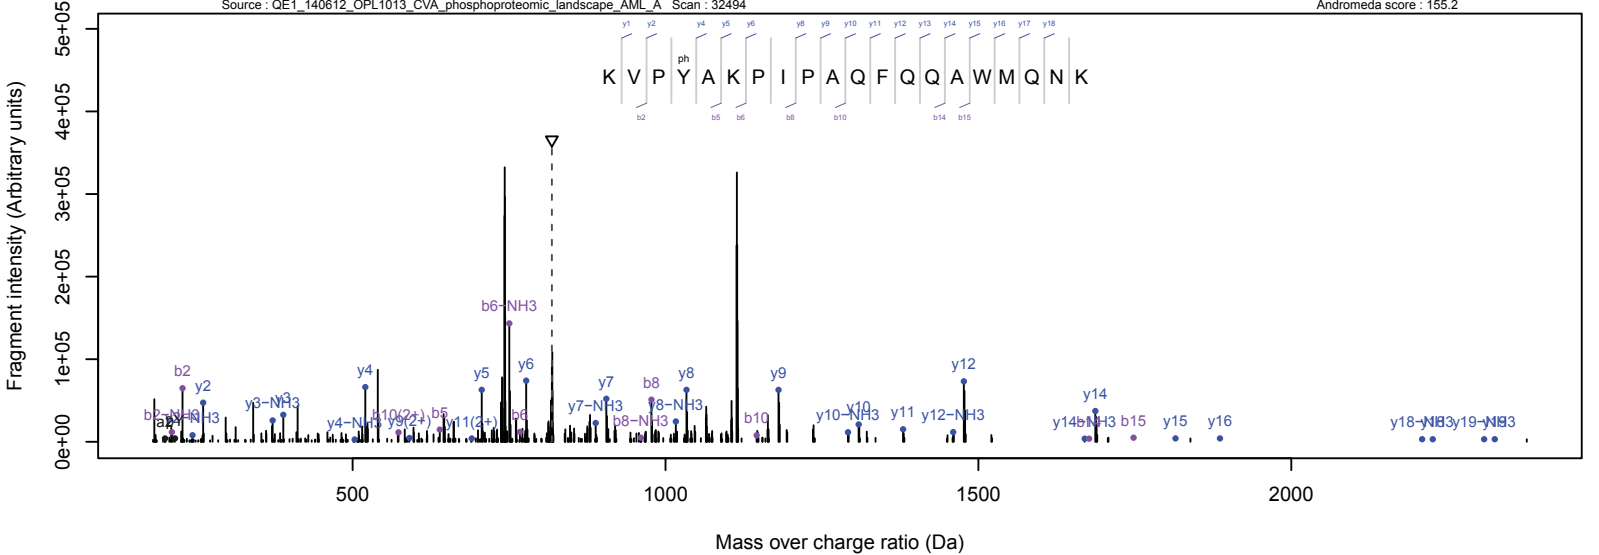

SENLGQGDKPDY(ph)FSSVATVVYLR-3+

Source : QE1\_140612\_OPL1013\_CVA\_phosphoproteomic\_landscape\_AML\_D Scan : 41116

Andromeda score : 155.17

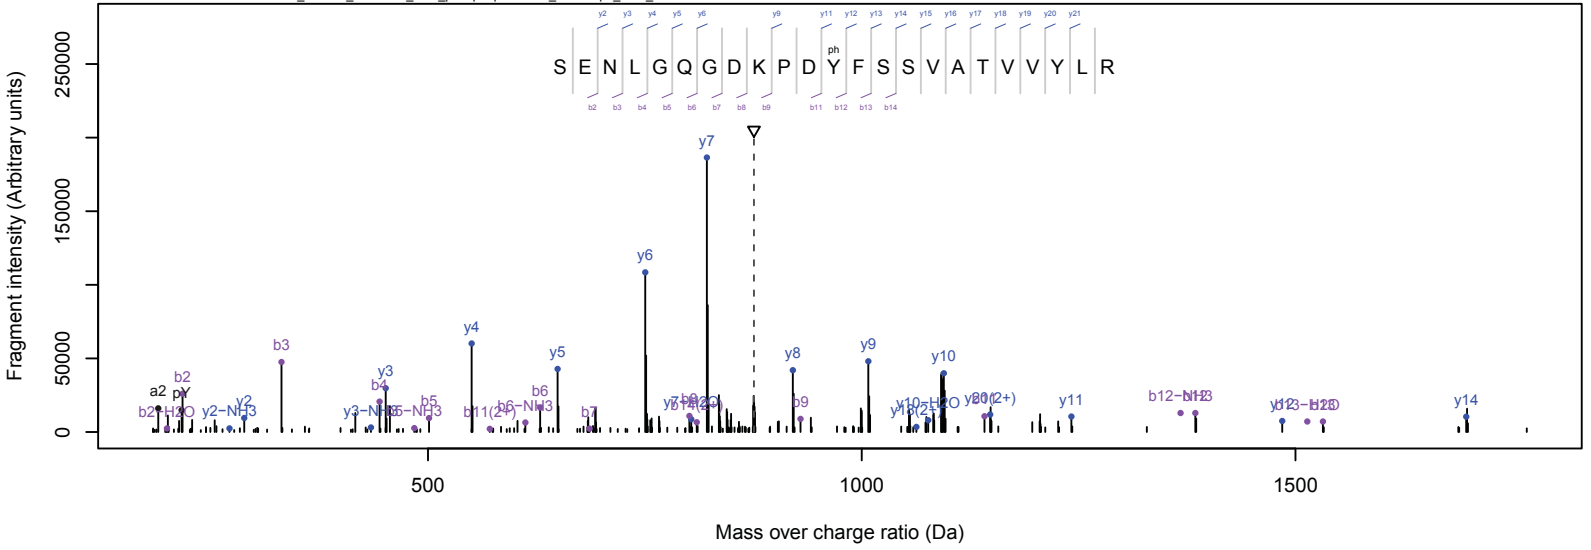

VIDNEY(ph)TAREGAK-3+

Source : QE1\_140612\_OPL1013\_CVA\_phosphoproteomic\_landscape\_AML\_B Scan : 5241

Andromeda score : 155.08

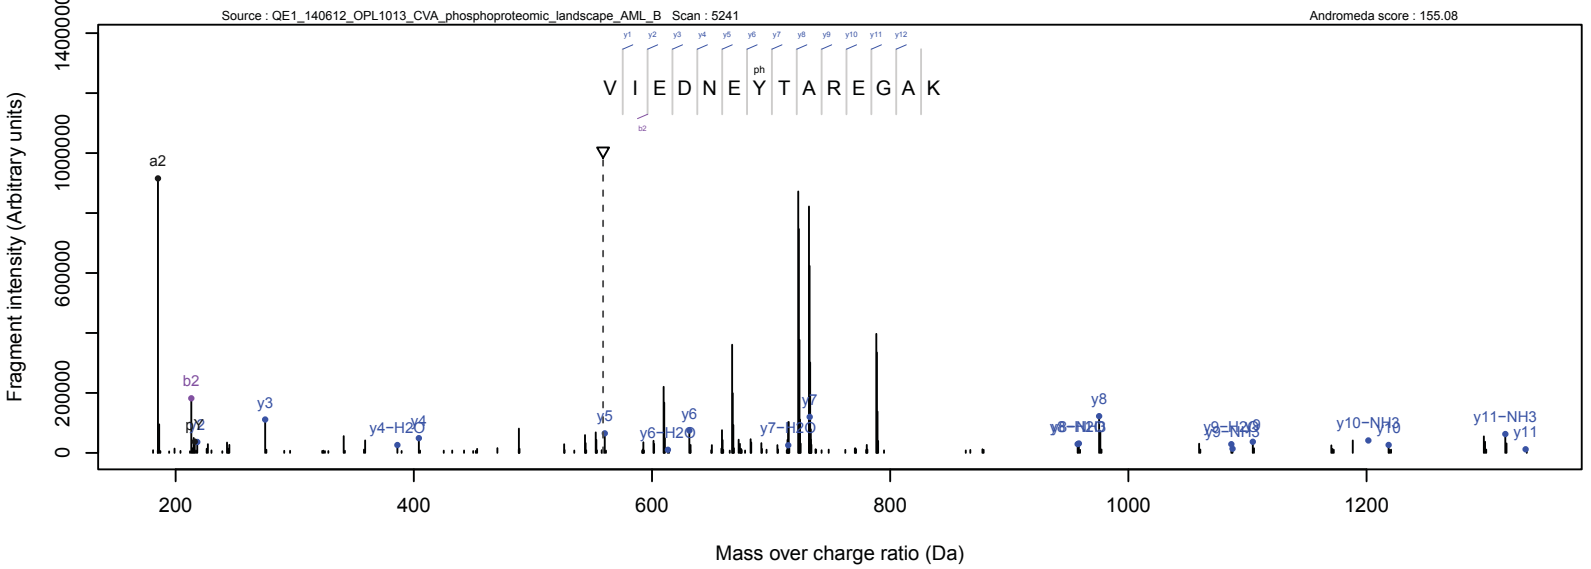

TGVAGEDMQDMSGTY(ph)GIWEGSSK-3+

Source : QE1\_140612\_OPL1013\_CVA\_phosphoproteomic\_landscape\_AML\_C Scan : 22183

Andromeda score : 154.86

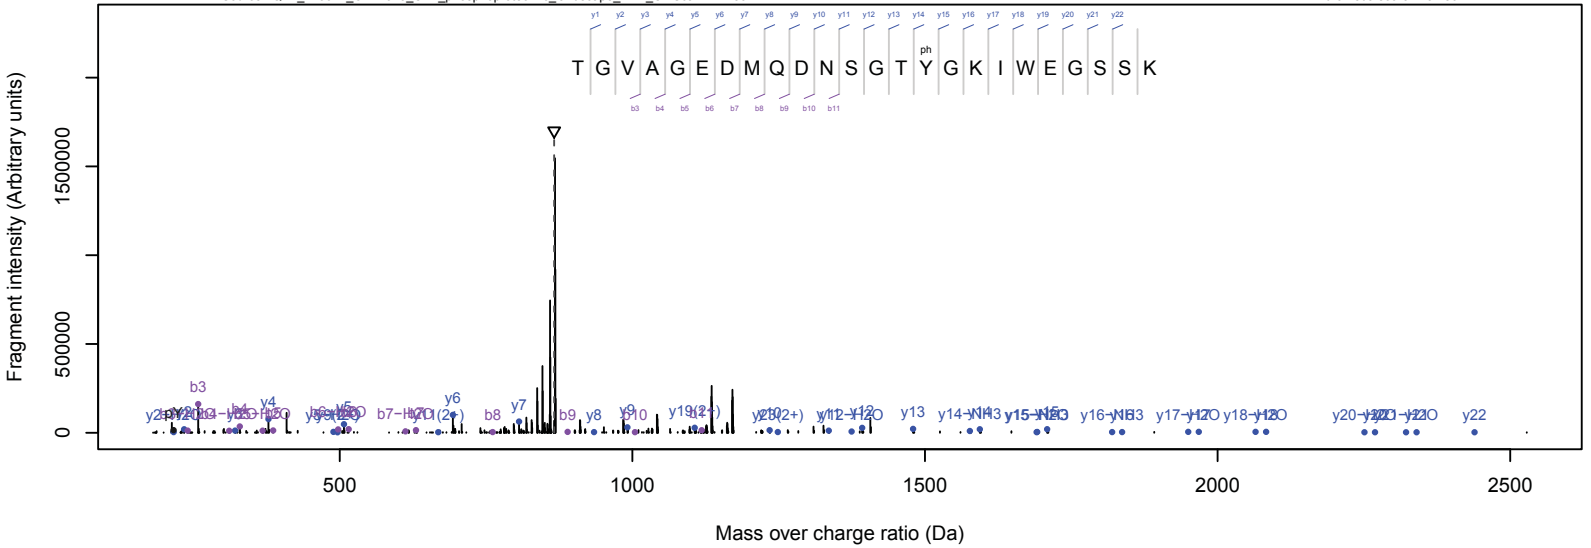

LGHY(ph)ATQLQK-2+

Source : QE1\_140612\_OPL1013\_CVA\_phosphoproteomic\_landscape\_AML\_B Scan : 7378

Andromeda score : 154.84

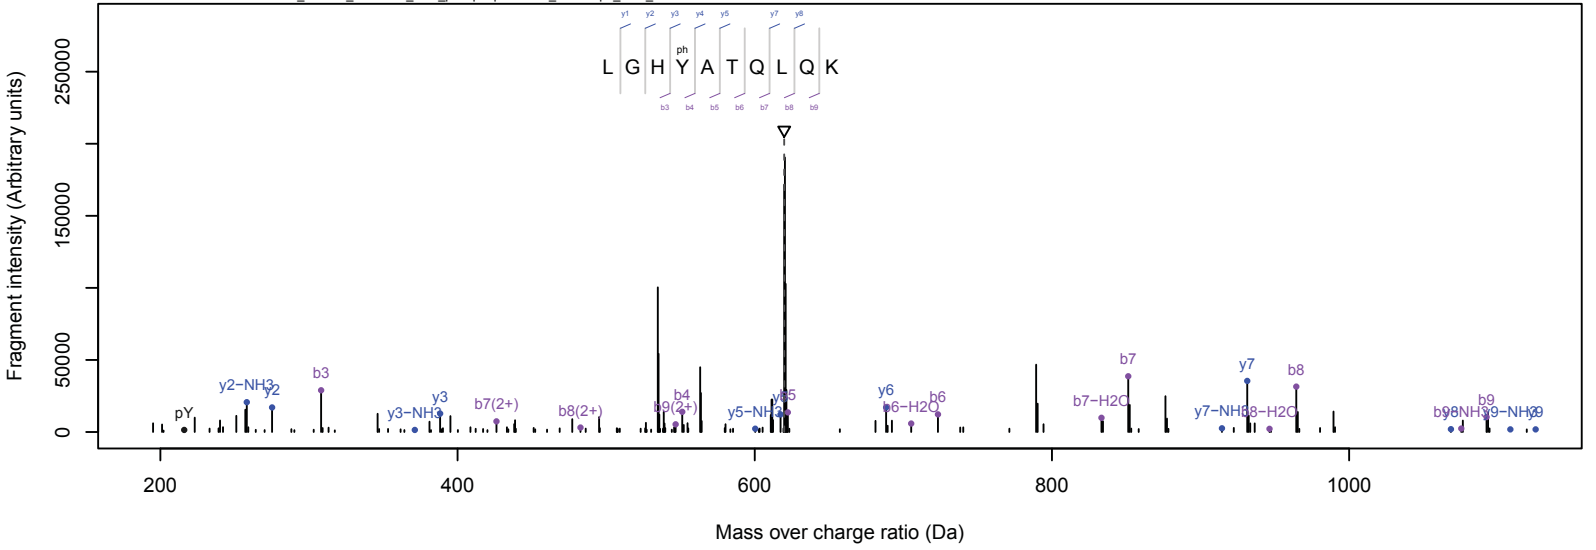

YCRPESQEHPEADPGAAPY(ph)LK-3+

Source : QE1\_140612\_OPL1013\_CVA\_phosphoproteomic\_landscape\_AML\_D Scan : 15177

Andromeda score : 154.84

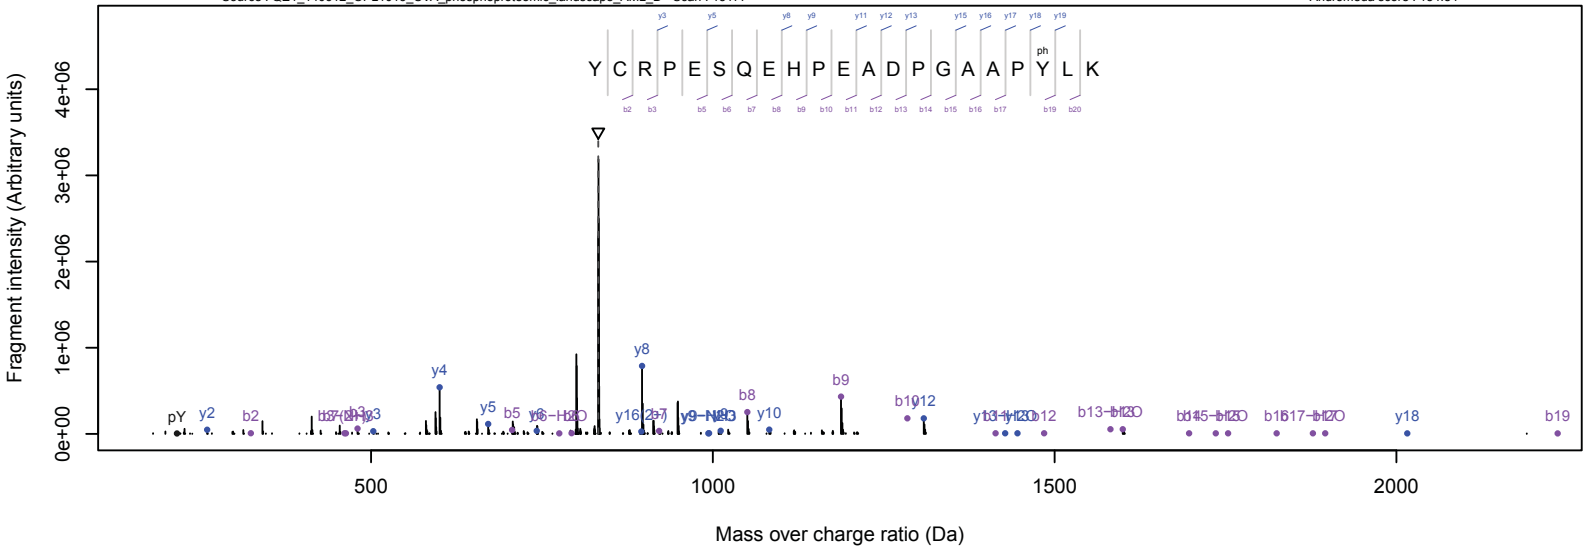

NRQEGLMIASSLLNEGY(ph)LQPAGDMSK-3+

Source : QE1\_140612\_OPL1013\_CVA\_phosphoproteomic\_landscape\_AML\_C Scan : 45214

Andromeda score : 154.77

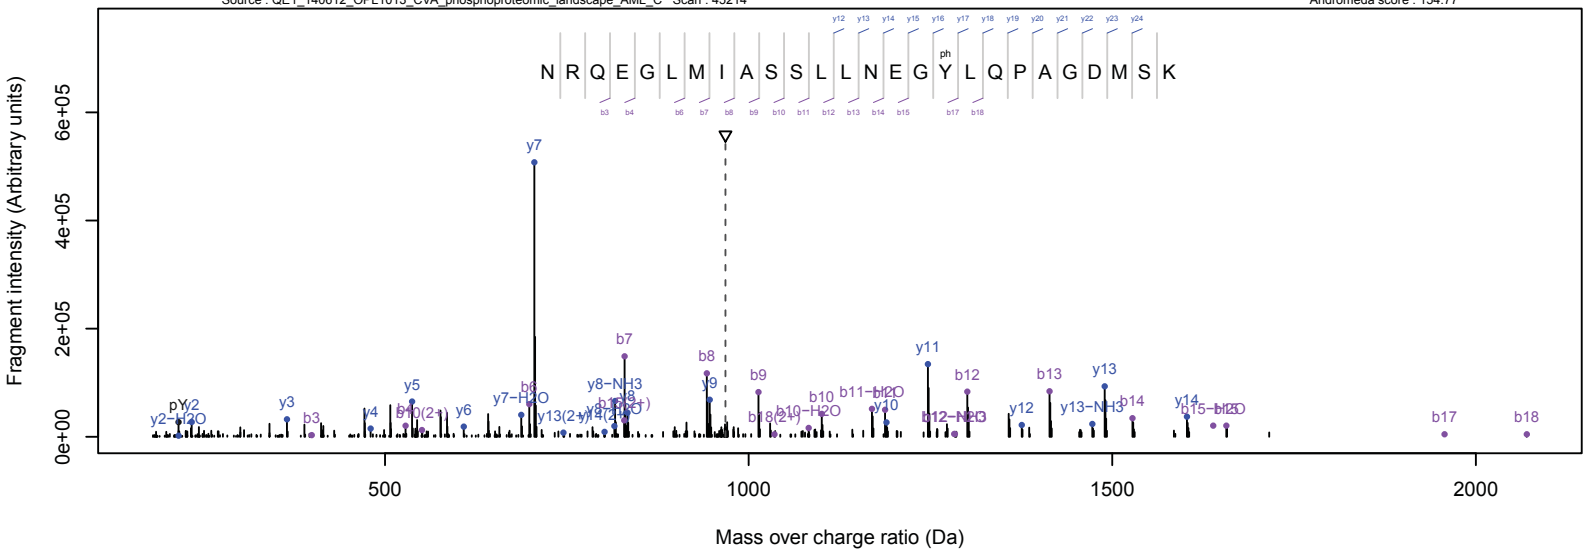

DY(ph)LHLPEIVPATLR-2+

Source : QE1\_140612\_OPL1013\_CVA\_phosphoproteomic\_landscape\_AML\_B Scan : 45530

Andromeda score : 154.69

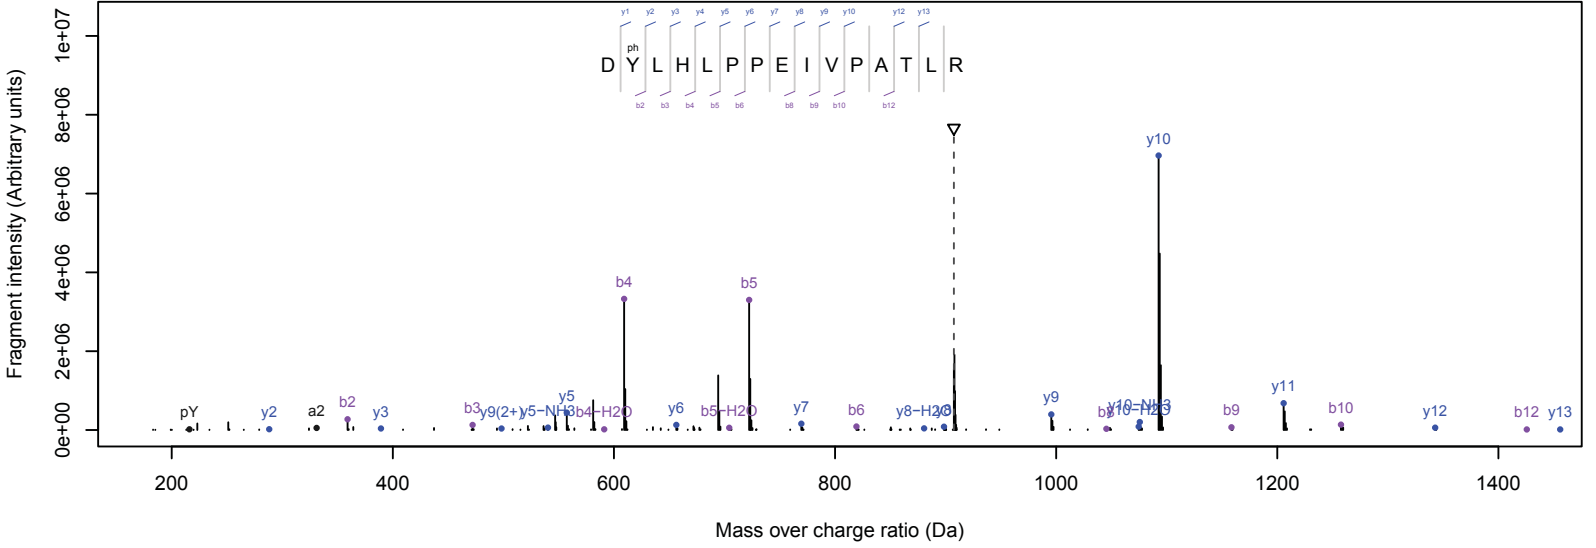

NRPPFGQGY(ph)TQPGPGYR-3+

Source : QE1\_140908\_OPL1013\_Cva\_pTyrIP\_AML\_HEL Scan : 18113

Andromeda score : 154.69

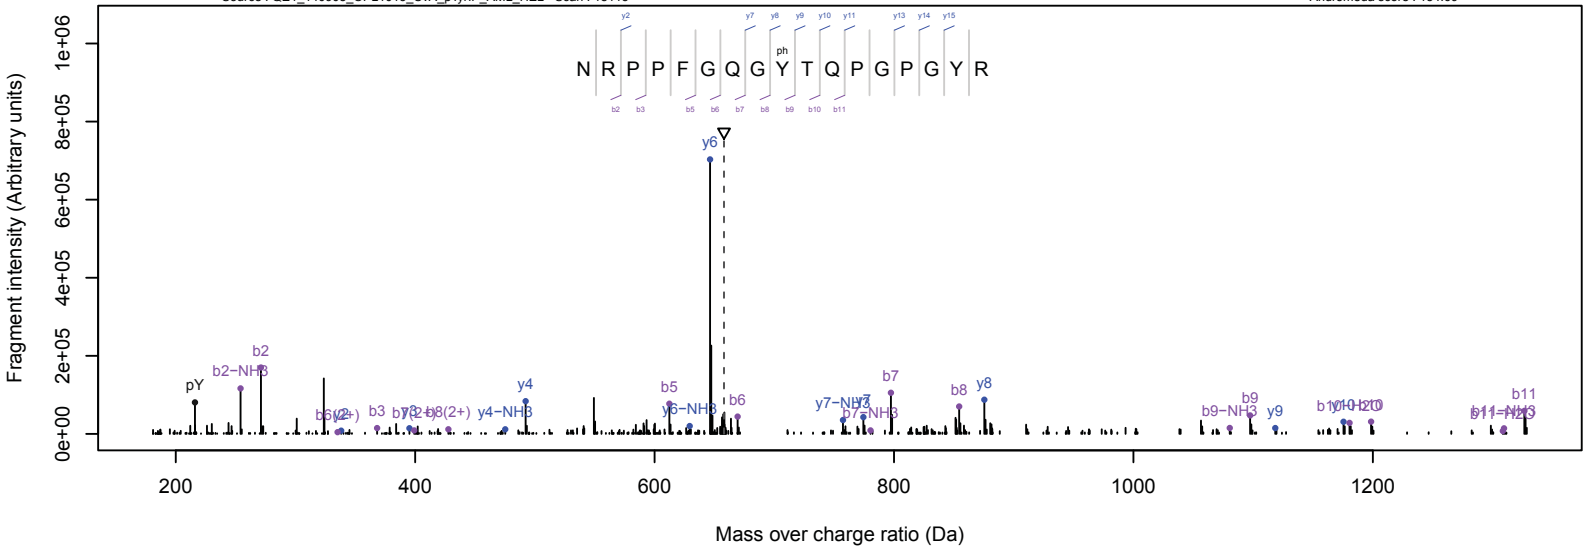

WVY(ph)PLTPEANFTDSTTQSCYHSR-3+

Source : QE1\_140612\_OPL1013\_CVA\_phosphoproteomic\_landscape\_AML\_B Scan : 34328

Andromeda score : 154.65

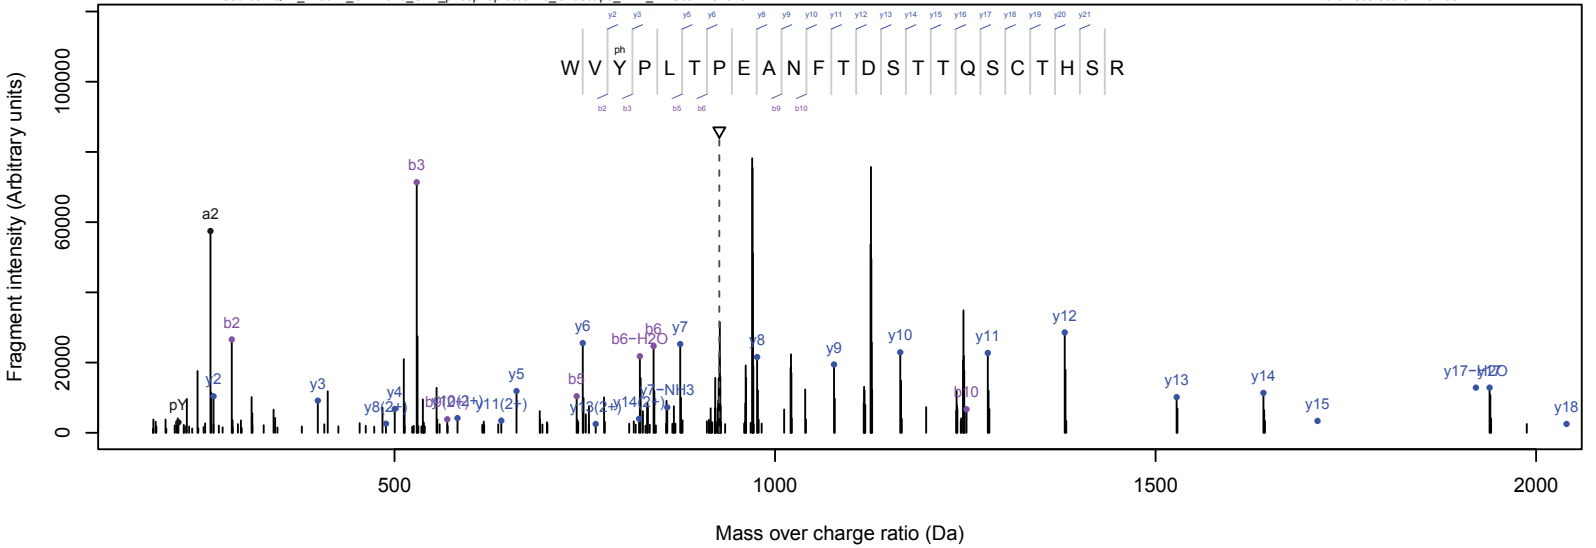

LVELLMHNDY(ph)KVVSPALR-3+

Source : QE1\_140612\_OPL1013\_CVA\_phosphoproteomic\_landscape\_AML\_B Scan : 36282

Andromeda score : 154.55

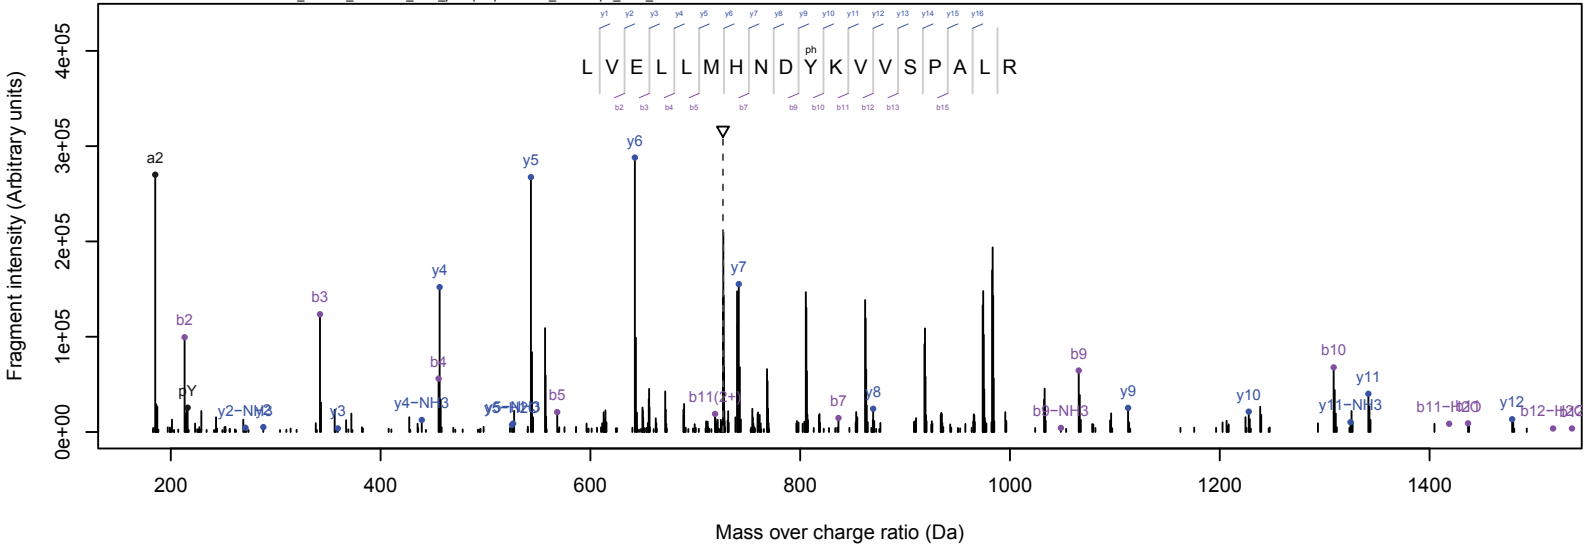

EY(ph)GMIYLGK-2+

Source : QE1\_140612\_OPL1013\_CVA\_phosphoproteomic\_landscape\_AML\_C Scan : 27757

Andromeda score : 154.49

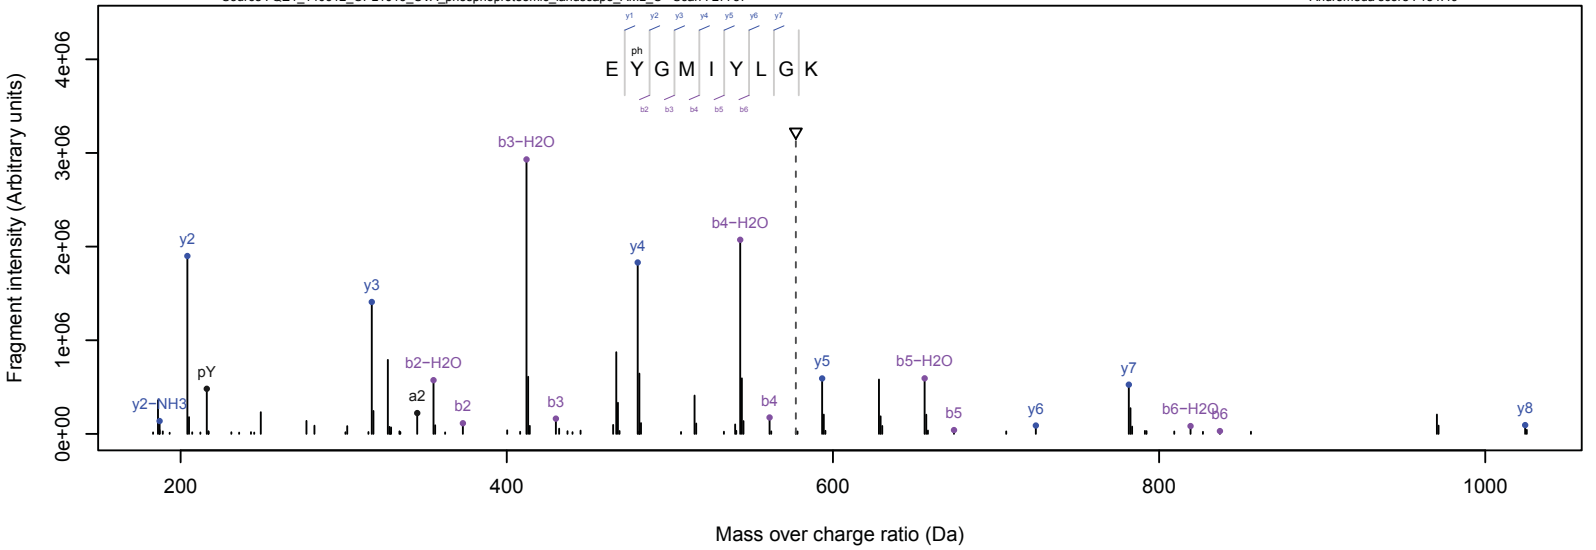

YISLIY(ph)TNYEAGKDDYVK-3+

Source : QE1\_140822\_OPL1013\_CvA\_pTyrIP\_AML\_cell\_lines\_part2\_B Scan : 27050

Andromeda score : 153.75

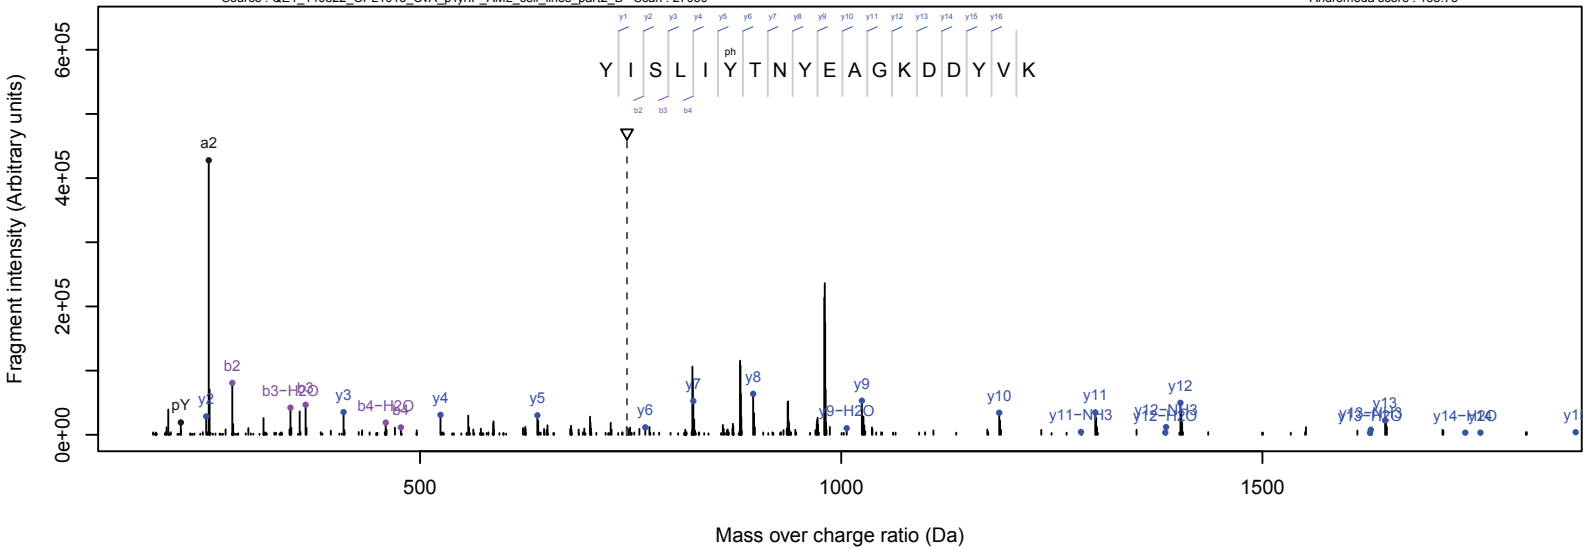

**QPGPVTNGQLQQPTTGAASGGY(ph)K-3+**

Source : QE1\_140908\_OPL1013\_CVA\_pTyrIP\_AML\_HEL Scan : 22526

Andromeda score : 153.65

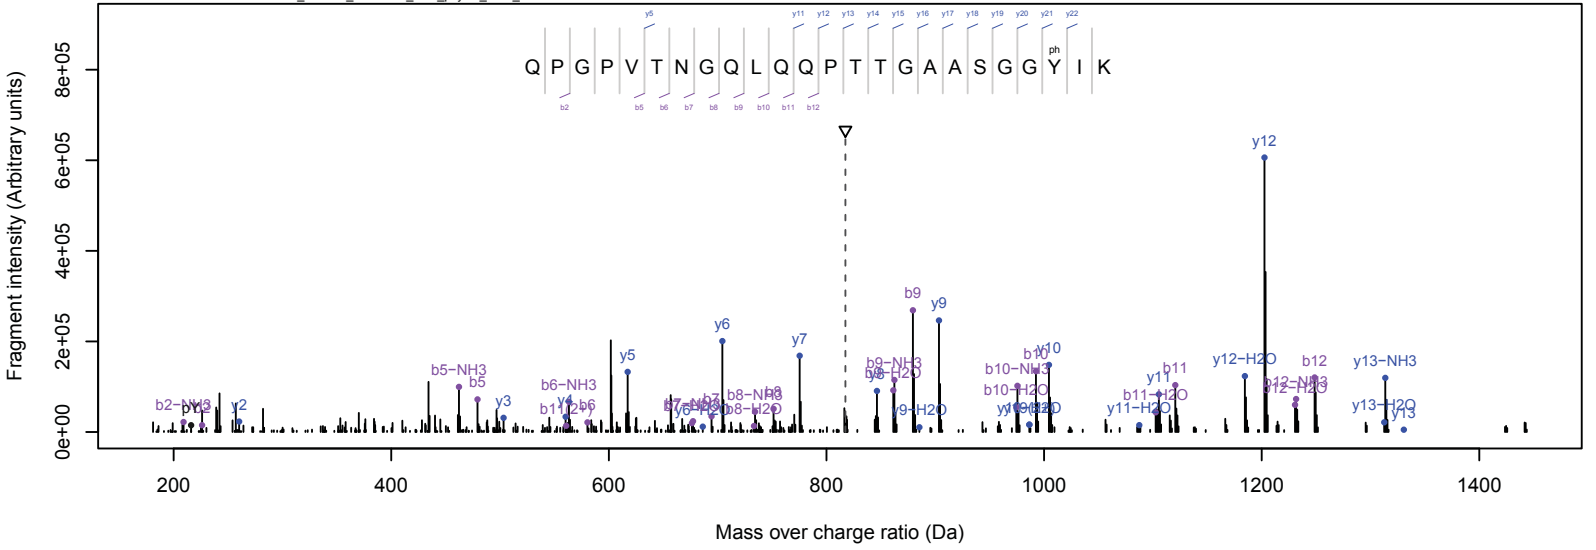

**LDDLHTLY(ph)HKK-2+**

Source : QE1\_140612\_OPL1013\_CVA\_phosphoproteomic\_landscape\_AML\_C Scan : 10333

Andromeda score : 153.34

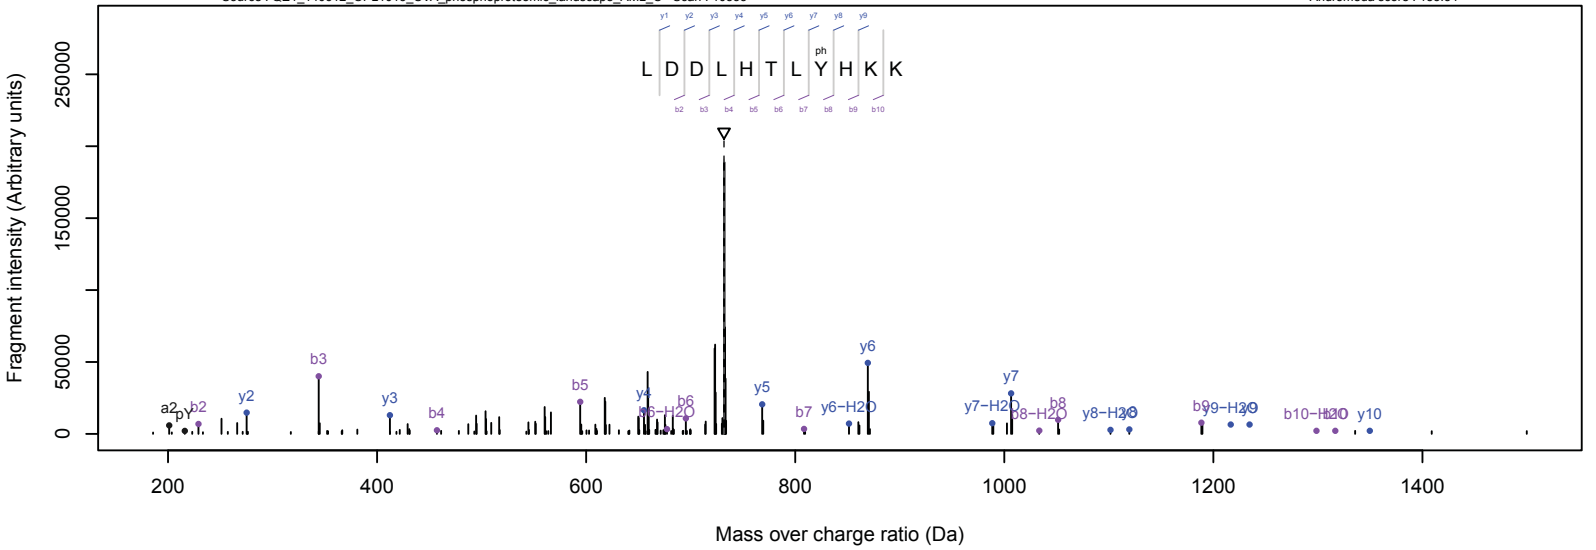

**SLY(ph)YYIQDQTKGDYQK-2+**

Source : QE1\_140612\_OPL1013\_CVA\_phosphoproteomic\_landscape\_AML\_C Scan : 26404

Andromeda score : 153.22

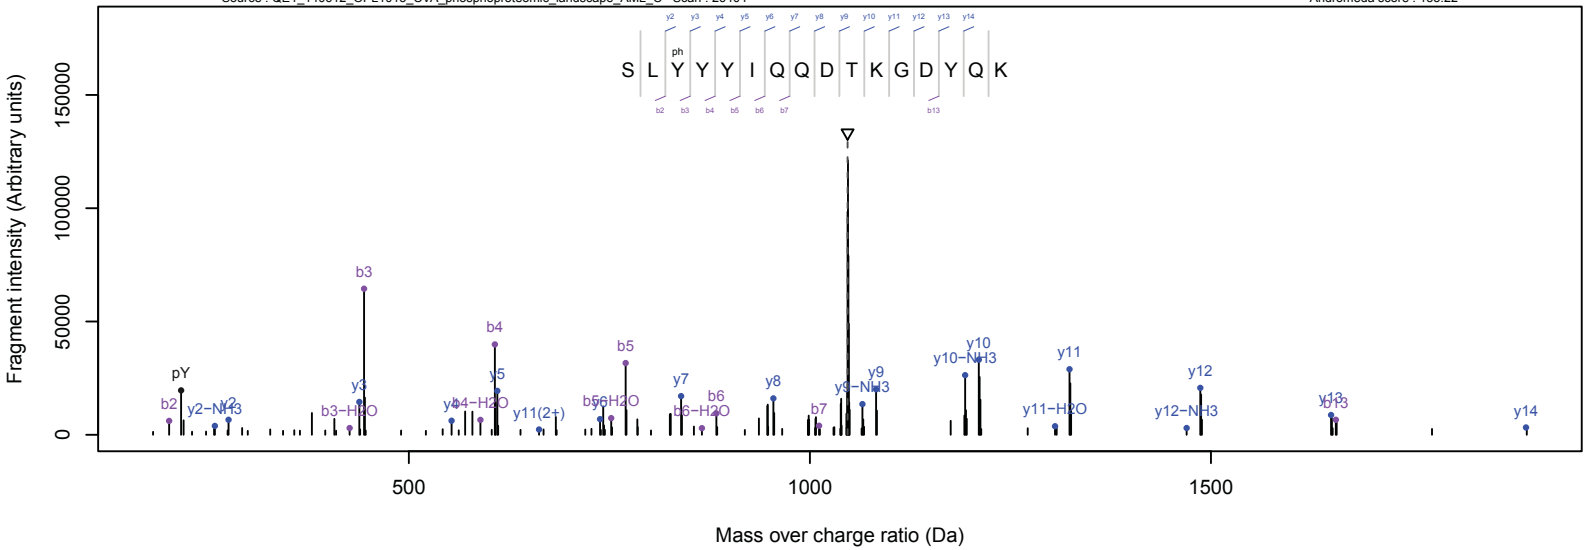

(ac)MDPLETPIKDGILLYQGHVK-3+

Source : QE1\_140612\_OPL1013\_CVA\_phosphoproteomic\_landscape\_AML\_C Scan : 42873

Andromeda score : 153.21

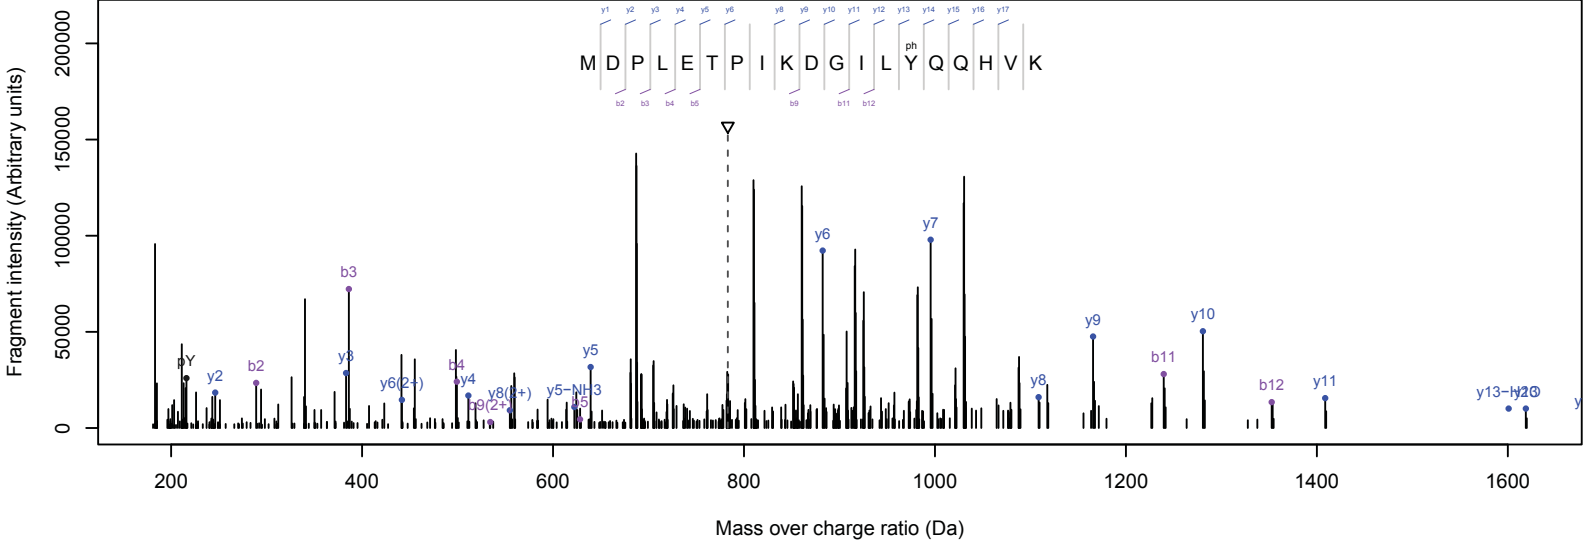

TATESFASDPILYRVPVAVALDTKGPEIR-3+

Source : QE1\_140612\_OPL1013\_CVA\_phosphoproteomic\_landscape\_AML\_C Scan : 43379

Andromeda score : 153.12

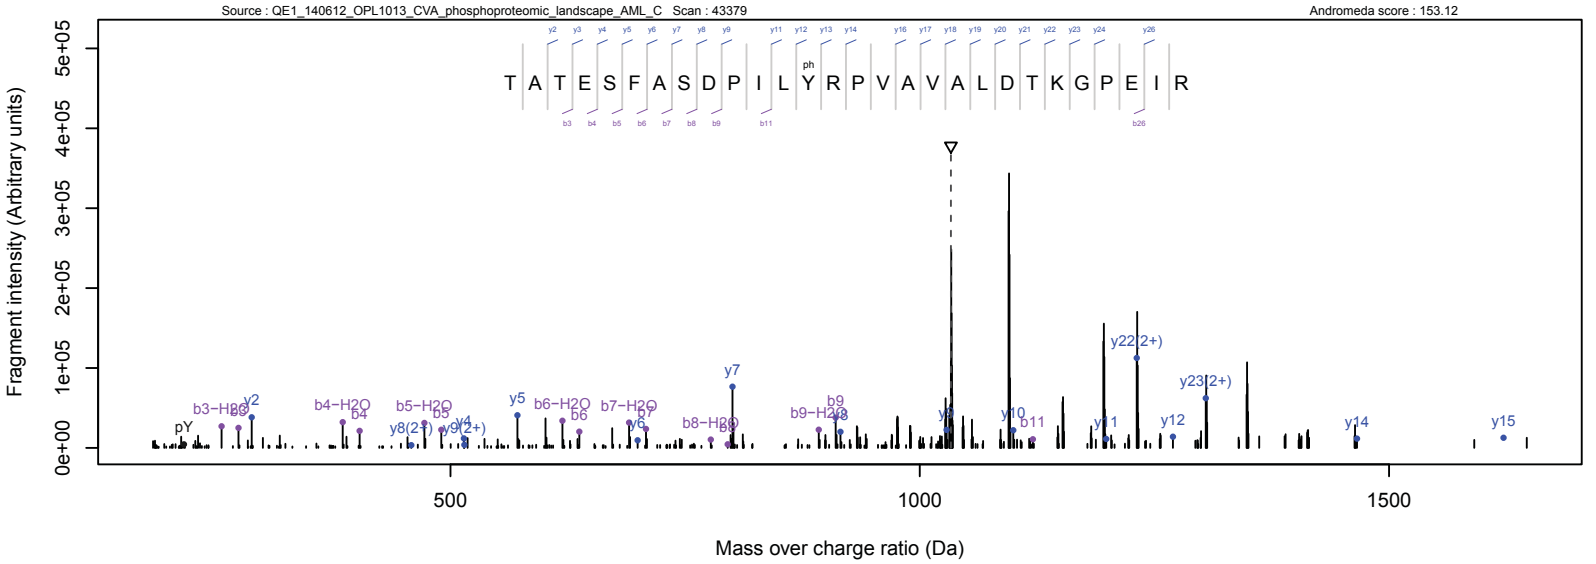

YVLEHHPGTNSNYQM(ox)HLLK-3+

Source : QE1\_140908\_OPL1013\_CvA\_pTyrIP\_AML\_OCI\_AML3 Scan : 20424

Andromeda score : 153.04

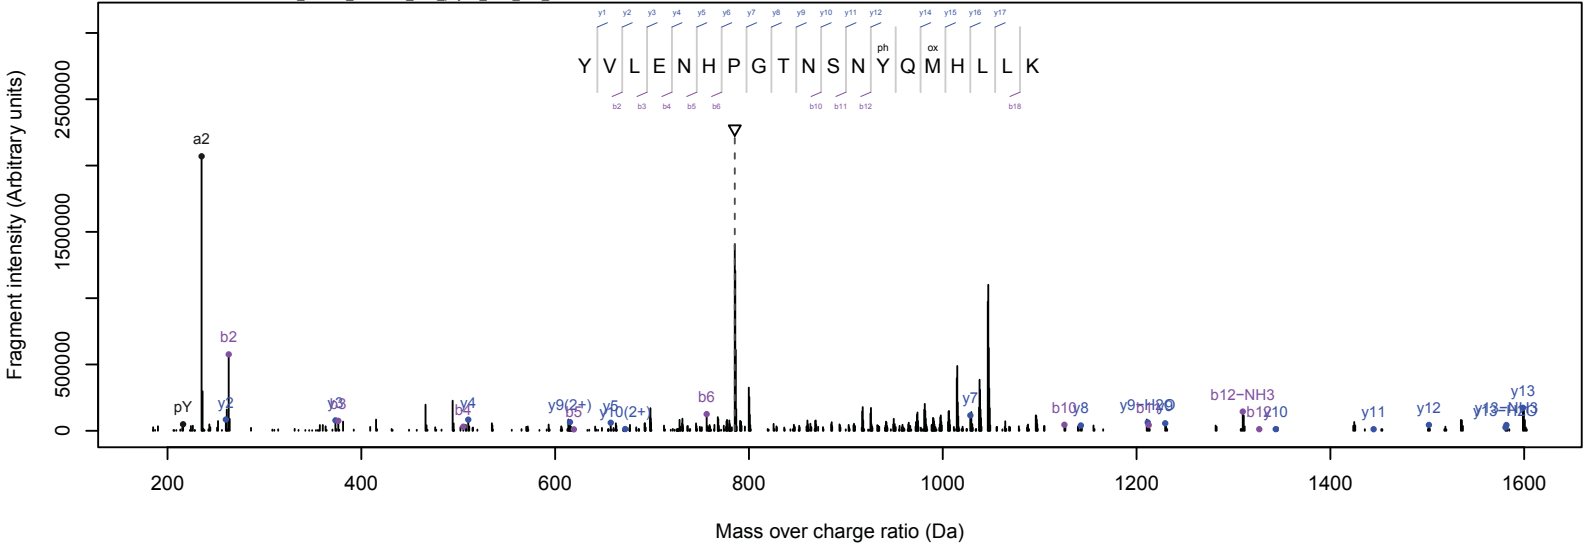



Y(ph)KNILPFDHSR-2+

Source : QE1\_140612\_OPL1013\_CVA\_phosphoproteomic\_landscape\_AML\_C Scan : 20552

Andromeda score : 152.96

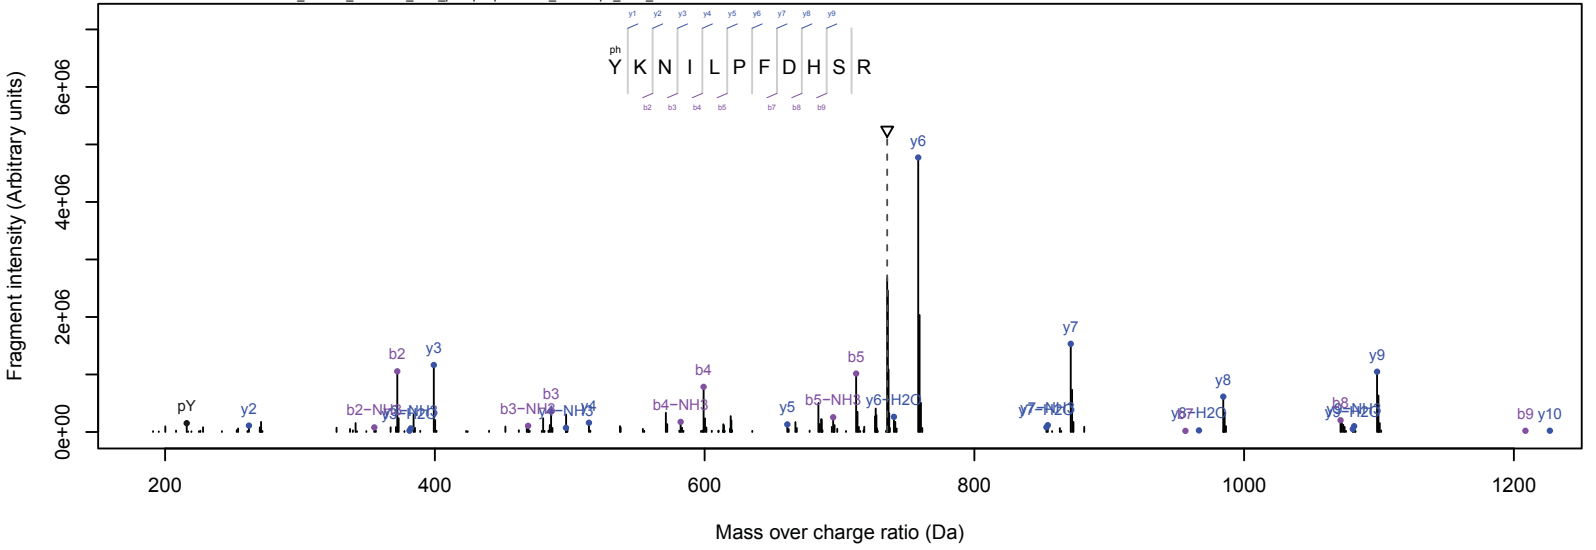

IRDQY(ph)LVWLTQK-2+

Source : QE1\_140612\_OPL1013\_CVA\_phosphoproteomic\_landscape\_AML\_A Scan : 35032

Andromeda score : 152.55

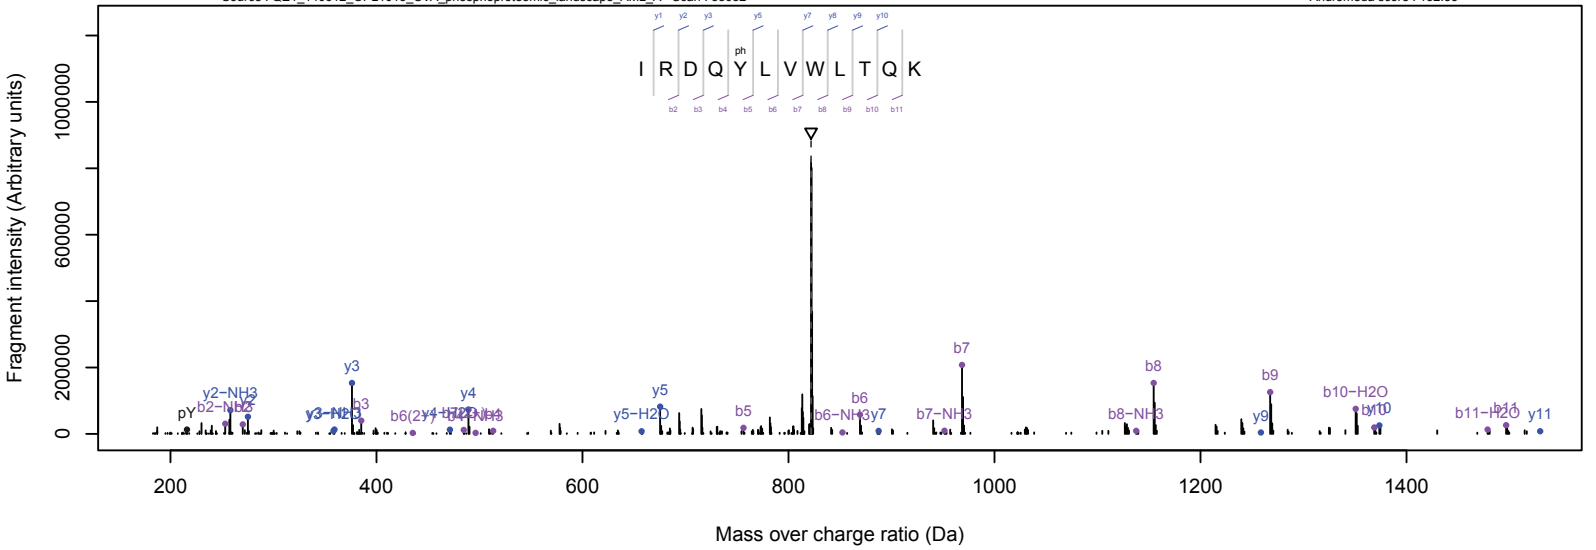

SY(ph)SFPKPGHR-2+

Source : QE1\_140612\_OPL1013\_CVA\_phosphoproteomic\_landscape\_AML\_B Scan : 7055

Andromeda score : 152.54

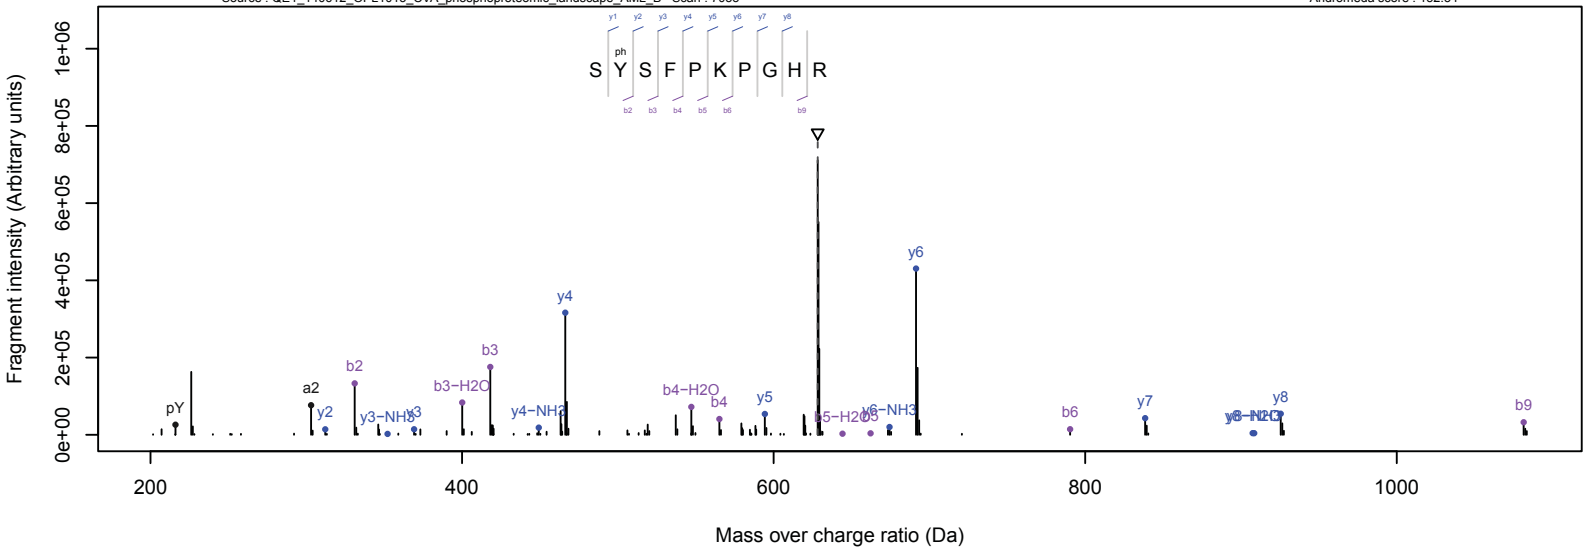

LGSSNY(ph)YYISPF<sup>CR</sup>-2+

Source : QE1\_140612\_OPL1013\_CVA\_phosphoproteomic\_landscape\_AML\_B Scan : 37535

Andromeda score : 152.34

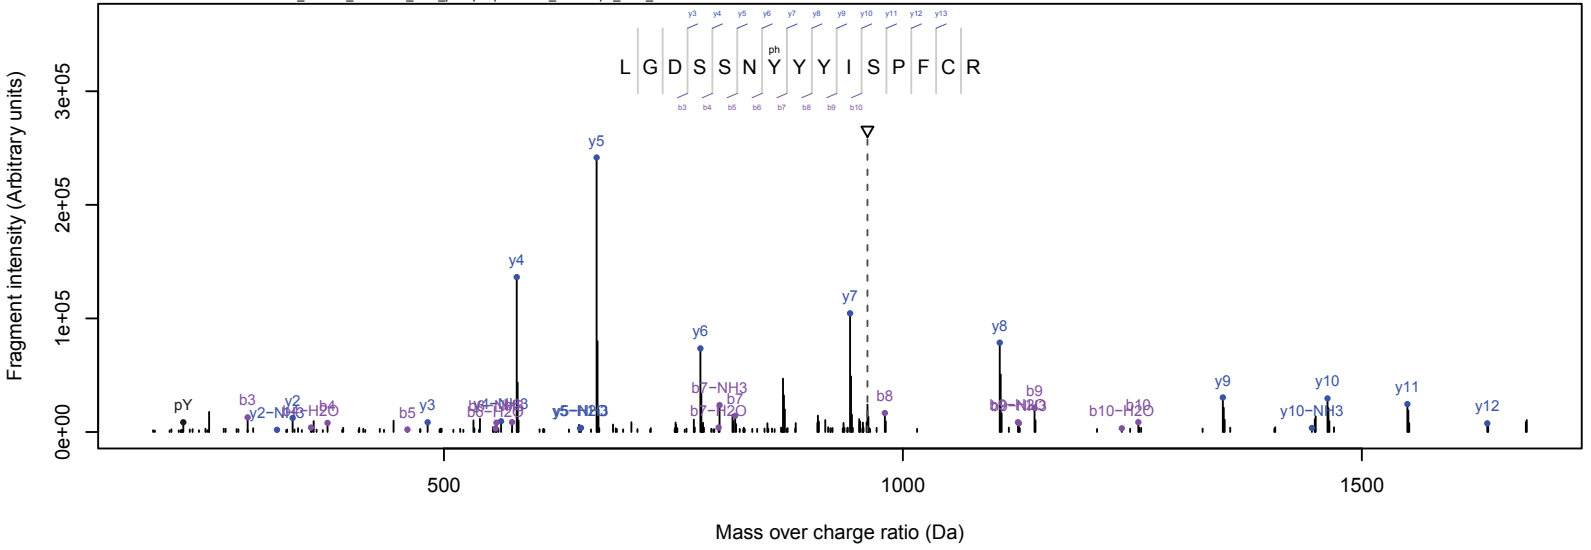

SPGIVSTNLPSY(ph)QKR-3+

Source : QE1\_140612\_OPL1013\_CVA\_phosphoproteomic\_landscape\_AML\_C Scan : 18493

Andromeda score : 152.34

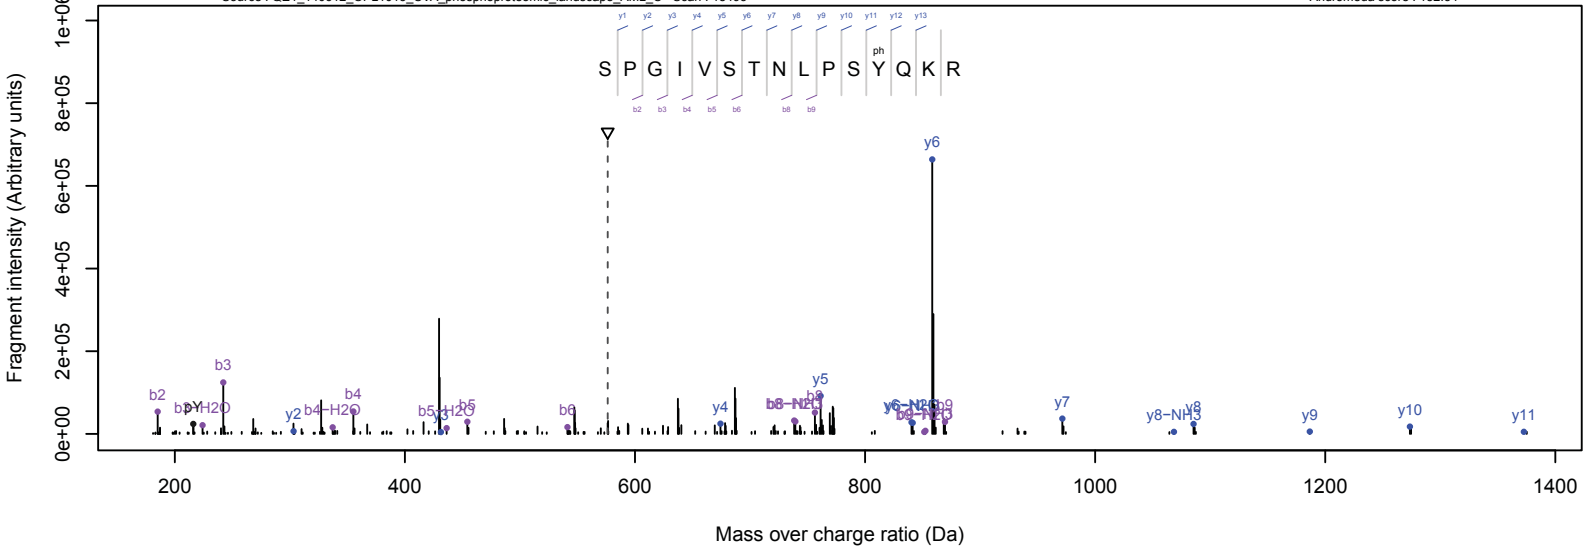

NDGY(ph)VHIHPSSVNYQVR-3+

Source : QE1\_140612\_OPL1013\_CVA\_phosphoproteomic\_landscape\_AML\_D Scan : 18813

Andromeda score : 152.32

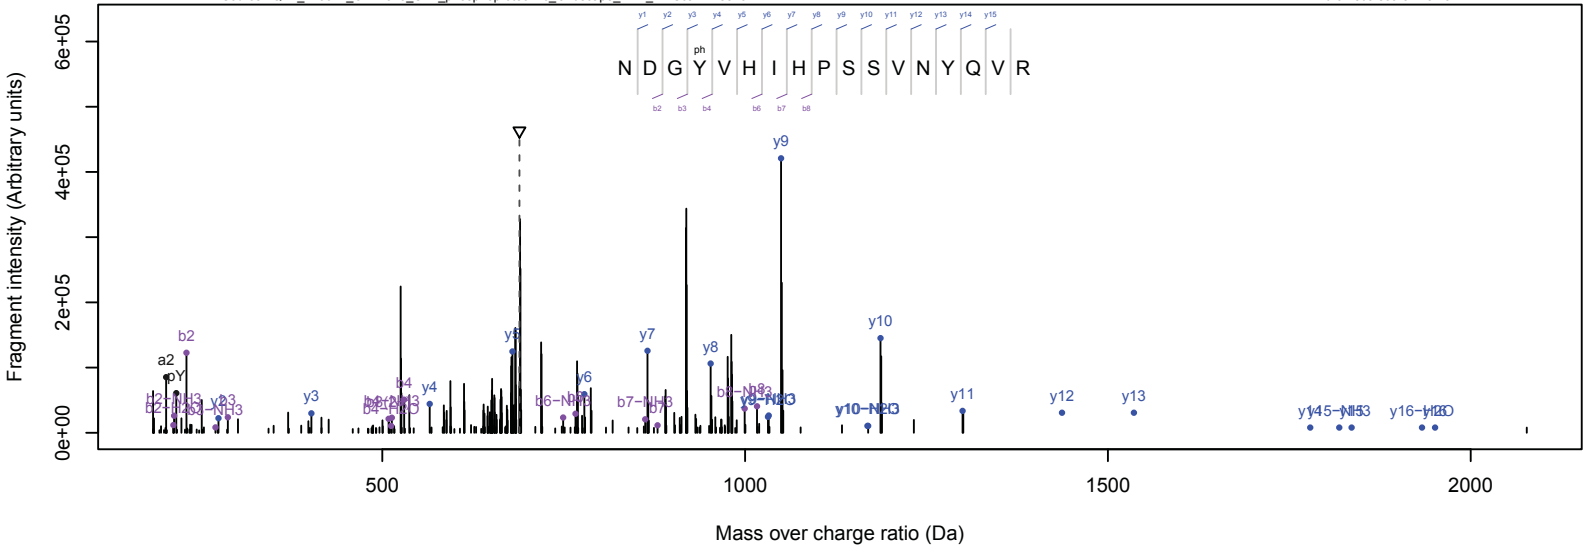

TLTGTVIDSGDGVTHVIPVAEGY(ph)VIGSCIK-3+

Source : QE1\_140612\_OPL1013\_CVA\_phosphoproteomic\_landscape\_AML\_A Scan : 46476

Andromeda score : 152.16

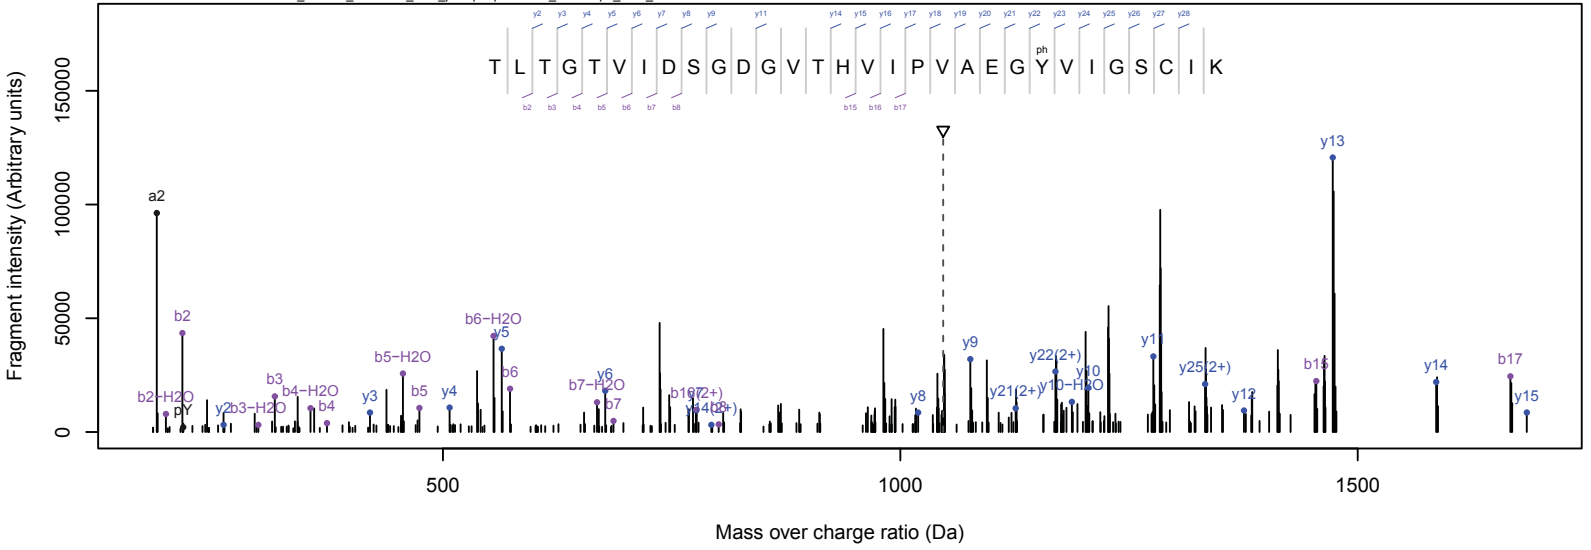

NSFNNPAY(ph)YVLEGVPHQLLPPEPPSPAR-4+

Source : QE1\_140822\_OPL1013\_CvA\_pTyrIP\_AML\_cell\_lines\_part2\_E Scan : 44374

Andromeda score : 152.15

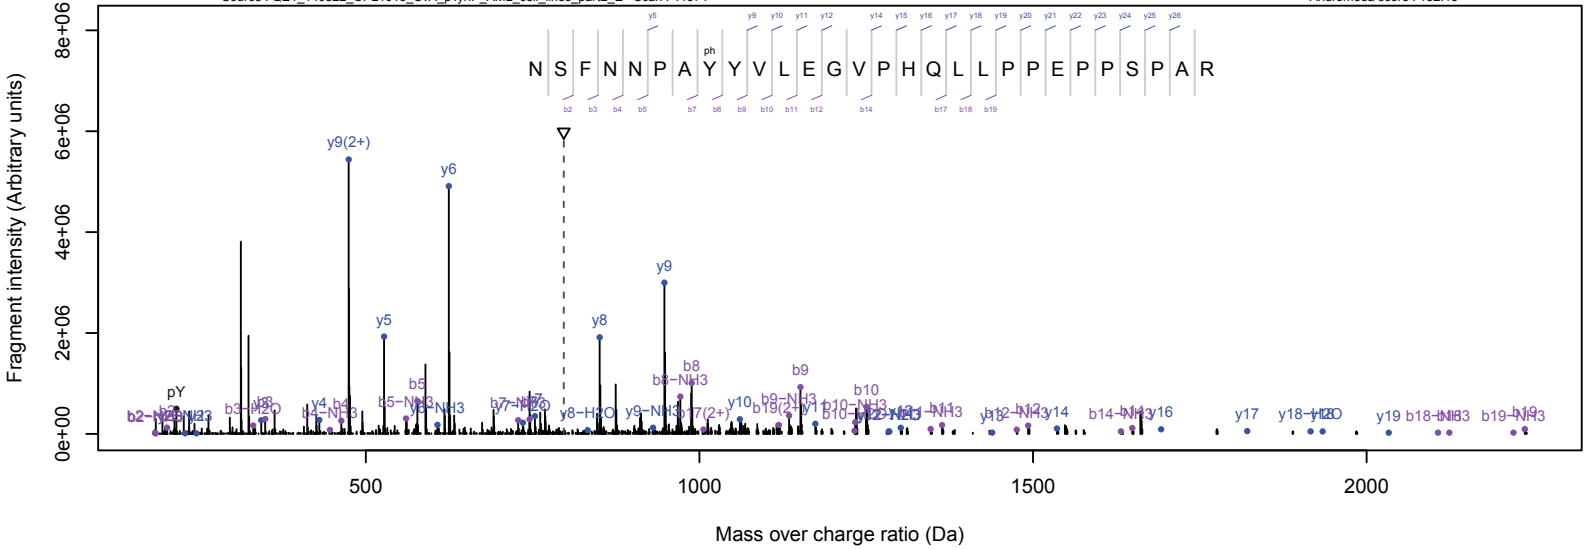

CIELDCWDGPDGMPVIYHGHTLTK-3+

Source : QE1\_140612\_OPL1013\_CVA\_phosphoproteomic\_landscape\_AML\_B Scan : 39294

Andromeda score : 152.07

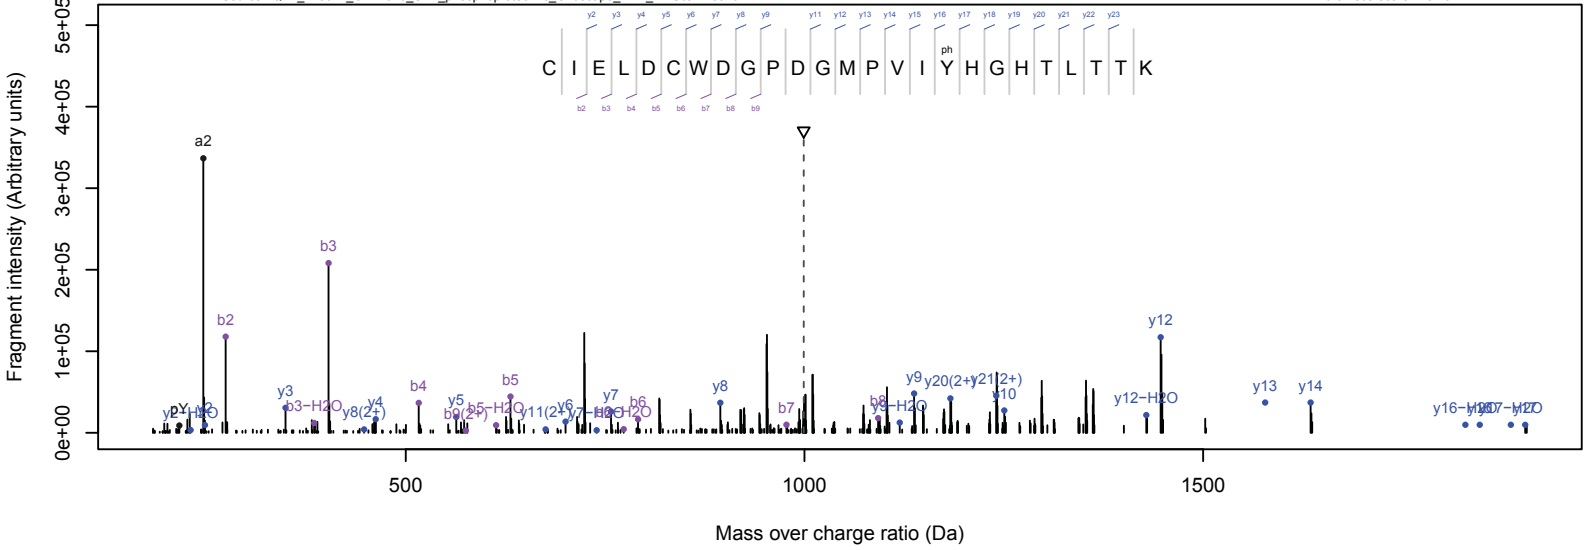

**SGQSLTVPES<sup>ph</sup>TYTSIQGDPQR-3+**

Source : QE1\_140908\_OPL1013\_CvA\_pTyrIP\_AML\_OCI\_AML3 Scan : 25788

Andromeda score : 152.06

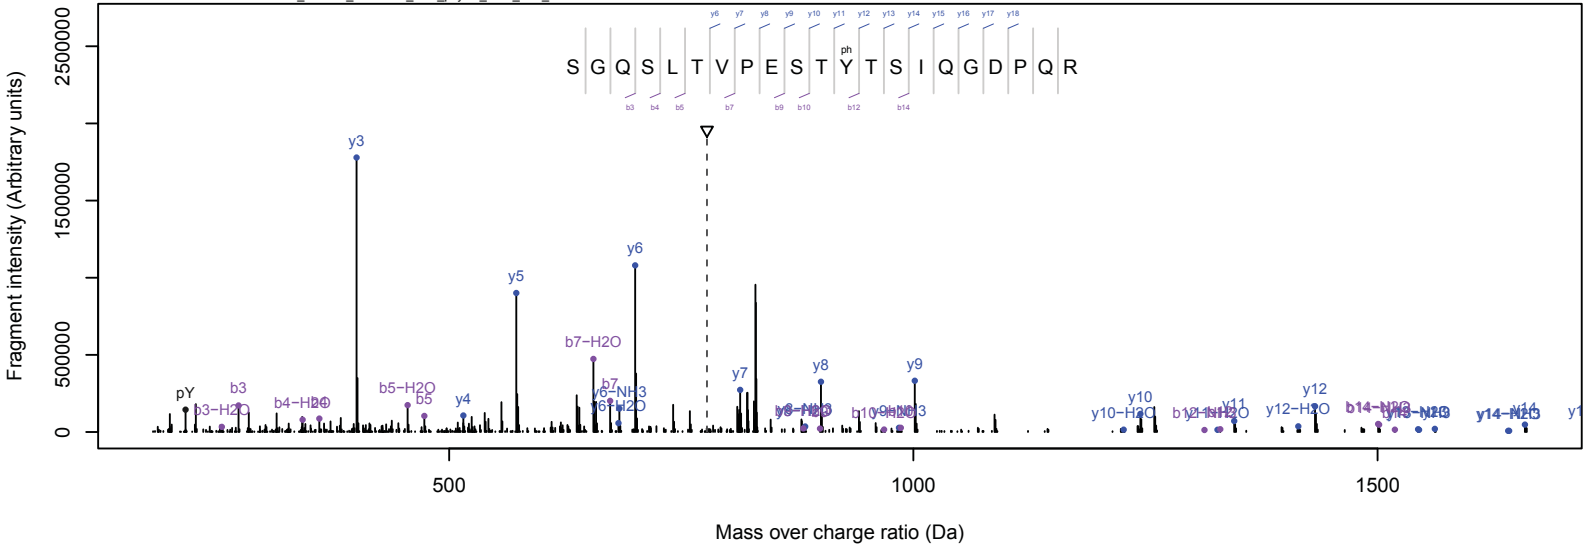

**TSY<sup>ph</sup>GWIEIVGCADR-2+**

Source : QE1\_140822\_OPL1013\_CvA\_pTyrIP\_AML\_cell\_lines\_part2\_E Scan : 32446

Andromeda score : 152

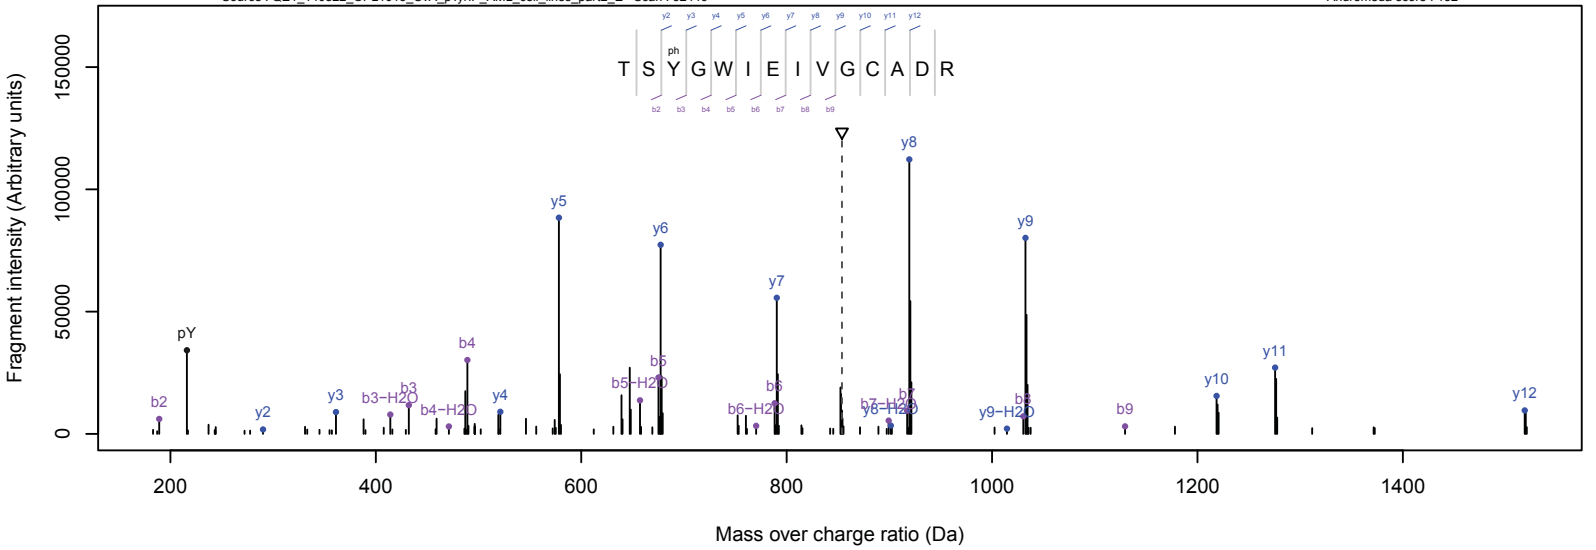

**(ac)SY<sup>ph</sup>GPLDMYRNPGPSGLR-3+**

Source : QE1\_140612\_OPL1013\_CVA\_phosphoproteomic\_landscape\_AML\_C Scan : 37185

Andromeda score : 151.87

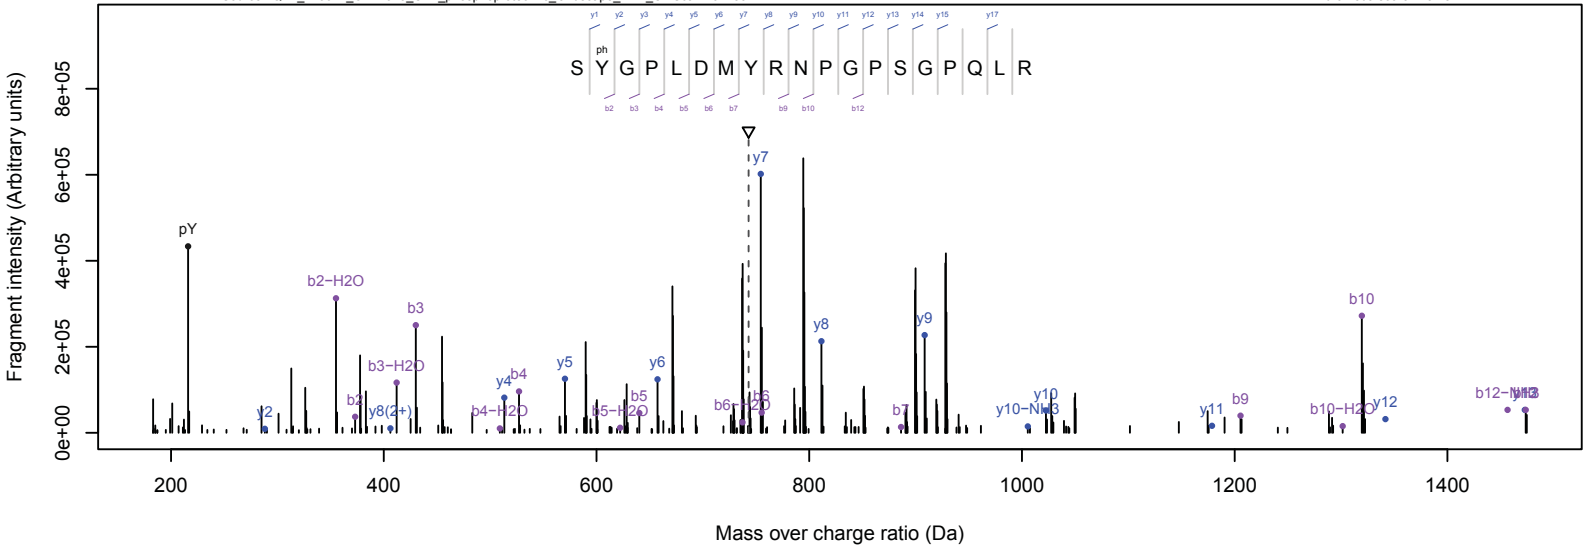

**KQFTLPPN LGQYHR-3+**

Source : QE1\_140612\_OPL1013\_CVA\_phosphoproteomic\_landscape\_AML\_C Scan : 23073

Andromeda score : 151.7

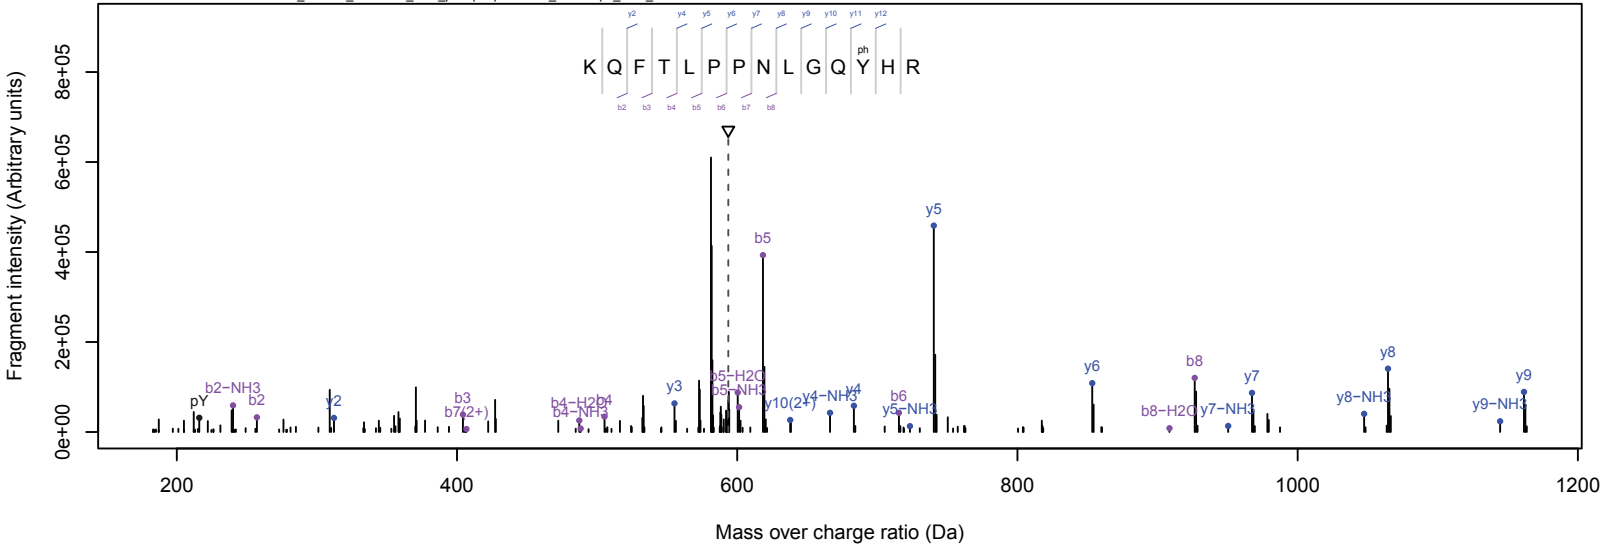

**GWV LGPN NY YSFASQQQKPEDTTIPSTELAK-3+**

Source : QE1\_140612\_OPL1013\_CVA\_phosphoproteomic\_landscape\_AML\_B Scan : 41210

Andromeda score : 151.67

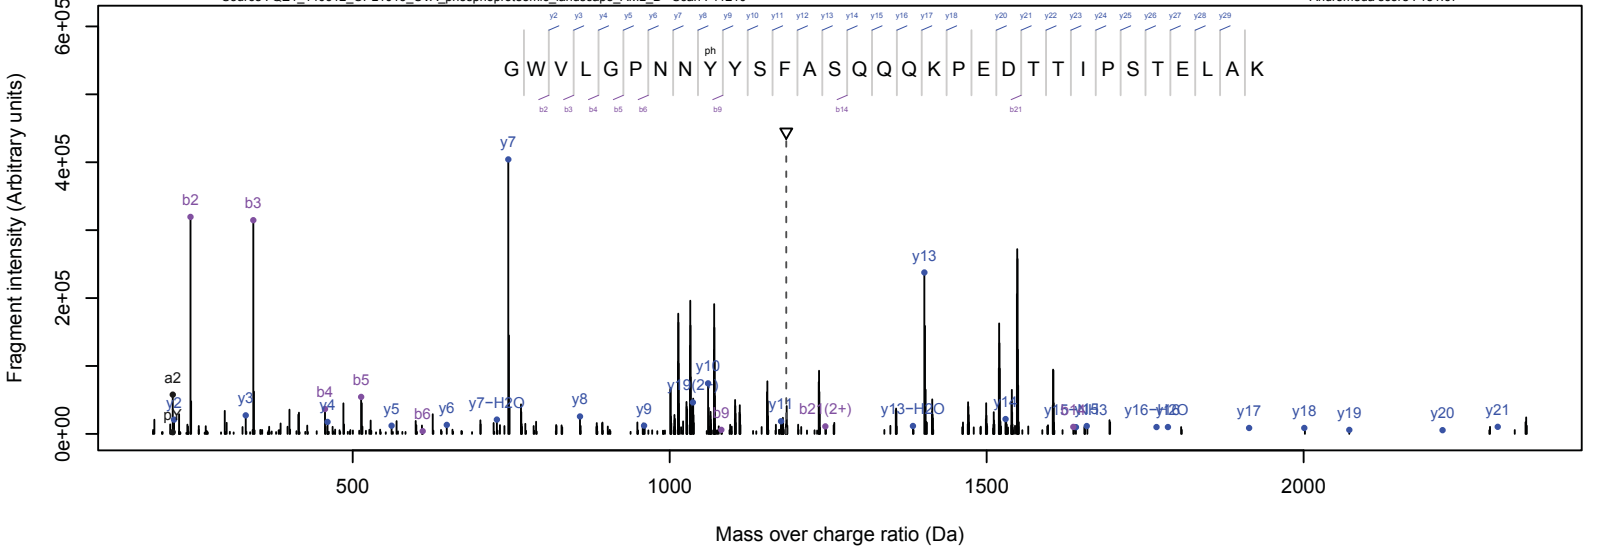

**VEKIGEGTYGVVYK-2+**

Source : QE1\_140822\_OPL1013\_CvA\_pTyrIP\_AML\_cell\_lines\_part2\_F Scan : 12934

Andromeda score : 151.56

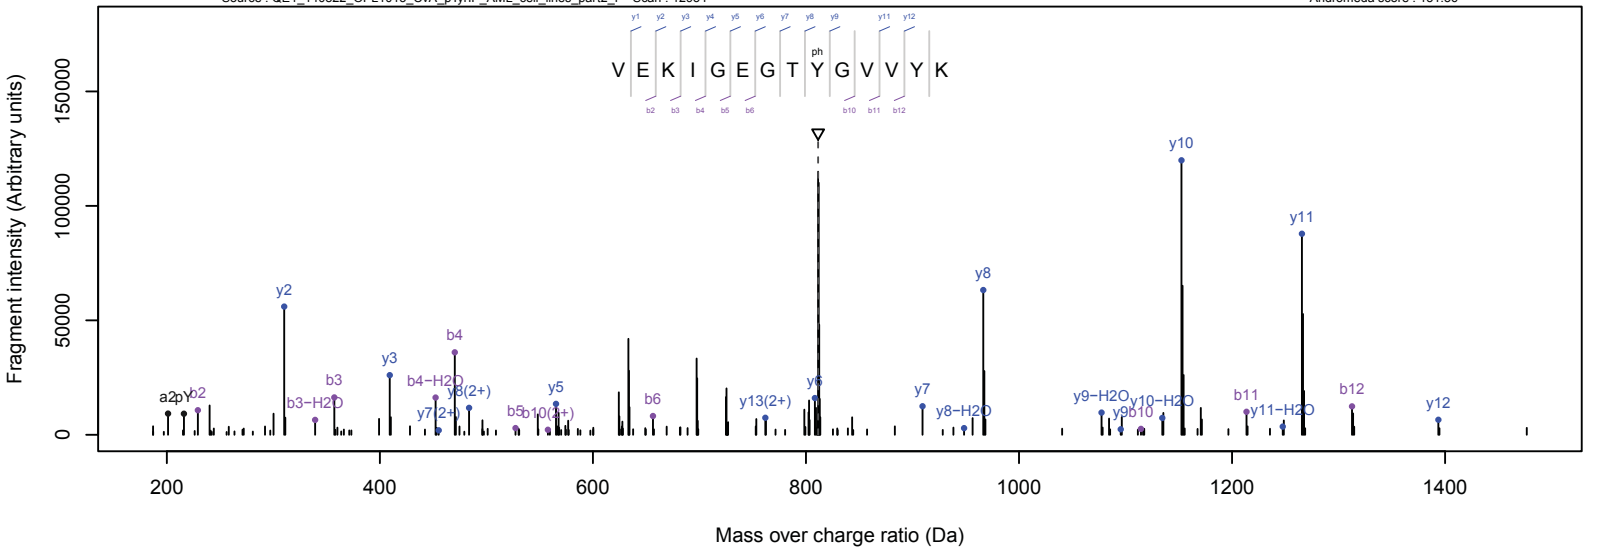

**LTIHGKEDEVSPY(ph)DYVLQVSGR-3+**

Source : QE1\_140612\_OPL1013\_CVA\_phosphoproteomic\_landscape\_AML\_A Scan : 34515

Andromeda score : 151.42

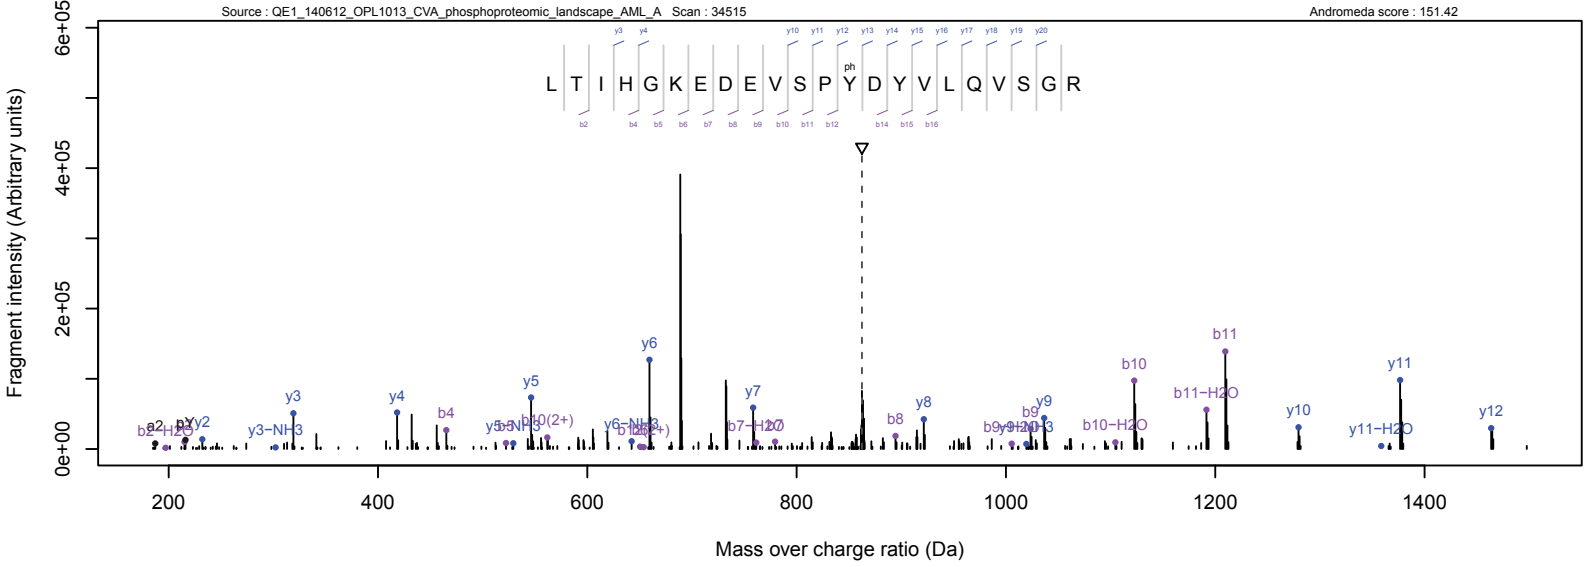

**GFFICDQPYEPVSPY(ph)SCK-2+**

Source : QE1\_140908\_OPL1013\_CvA\_pTyrIP\_AML\_HEL Scan : 40894

Andromeda score : 151.39

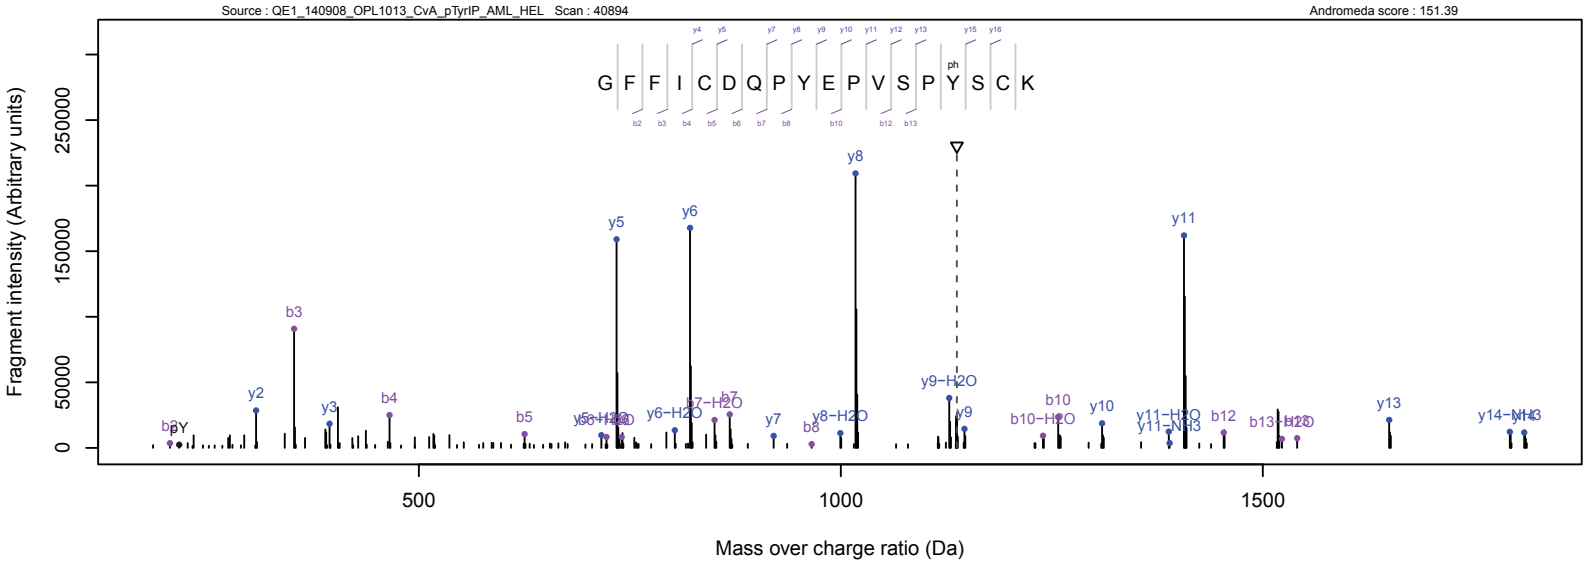

**GVGSPGPATPY(ph)LGR-2+**

Source : QE1\_140612\_OPL1013\_CVA\_phosphoproteomic\_landscape\_AML\_C Scan : 21937

Andromeda score : 151.38

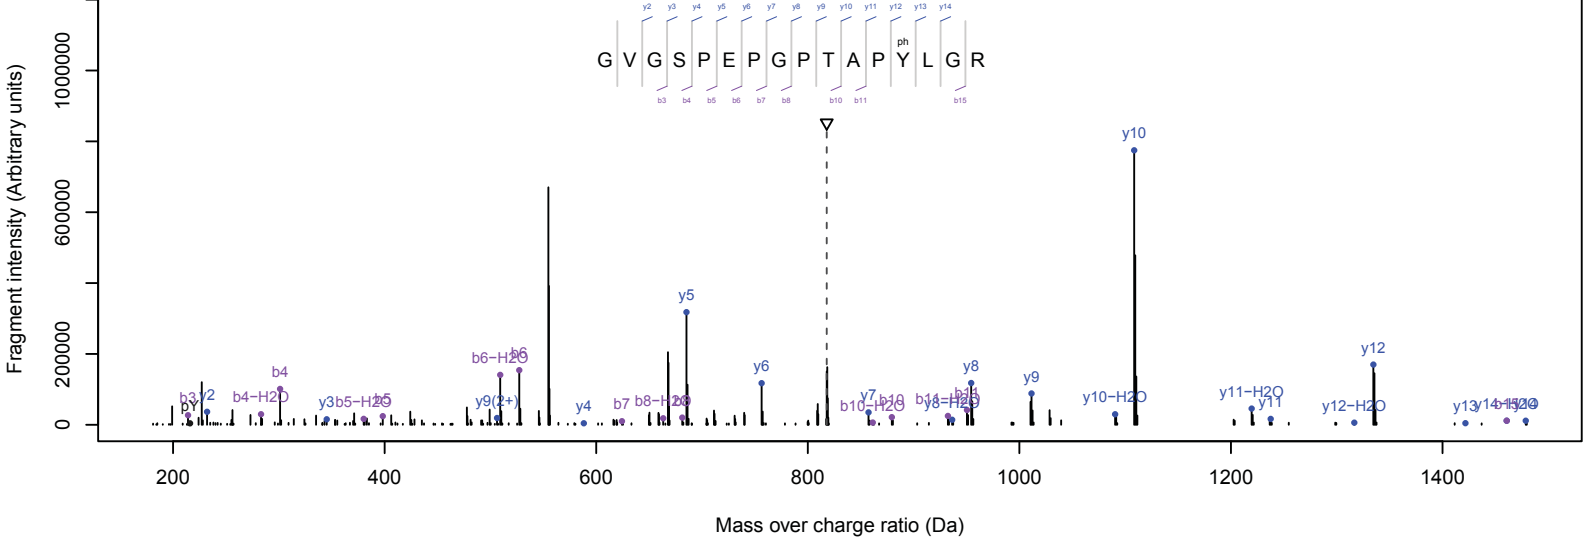

**AEERPTFDYLSVLDDFYTATEGQY(ph)QQQ-3+**

Source : QE1\_140822\_OPL1013\_CvA\_pTyrIP\_AML\_cell\_lines\_part2\_B Scan : 45411

Andromeda score : 151.25

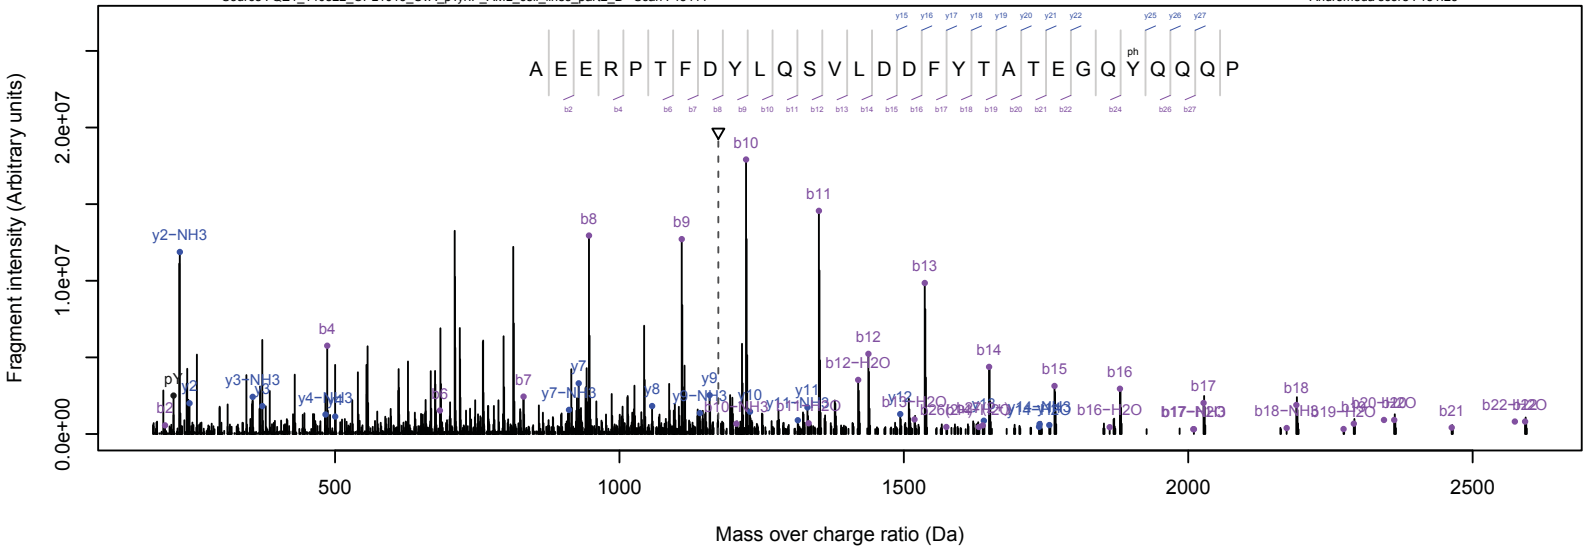

**TNADVM(ox)TALSQGY(ph)R-2+**

Source : QE1\_140822\_OPL1013\_CvA\_pTyrIP\_AML\_cell\_lines\_part2\_B Scan : 17629

Andromeda score : 151.22

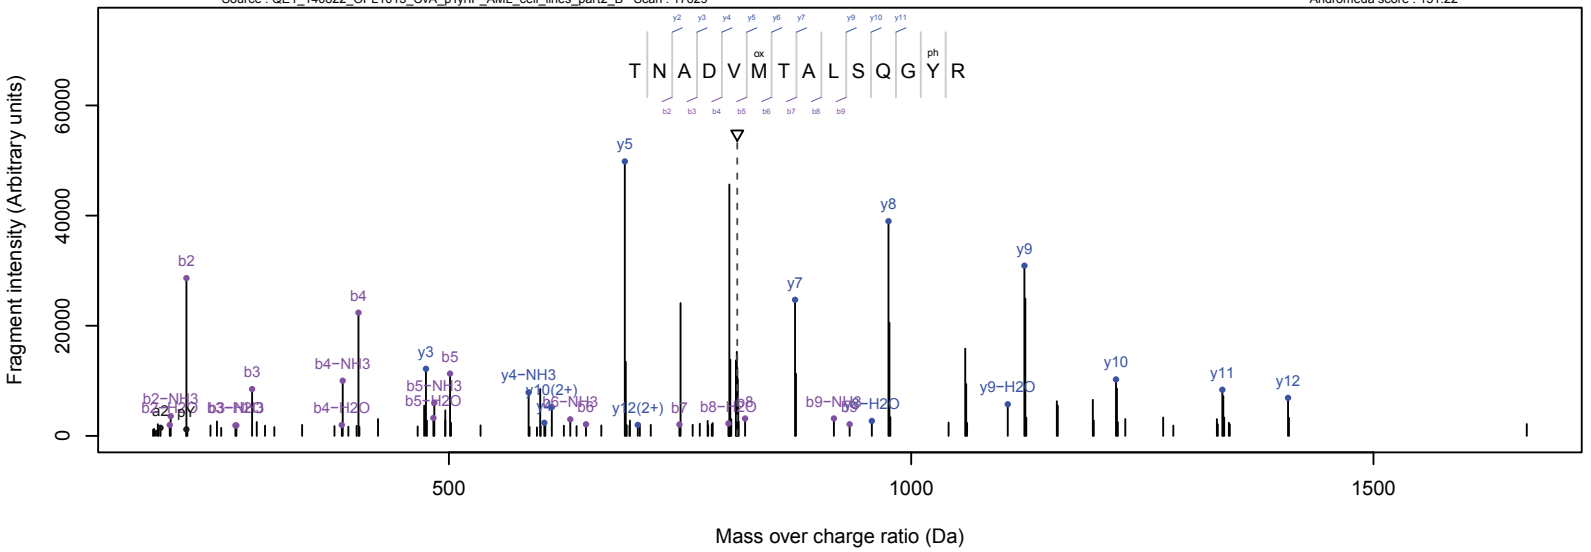

**(ac)ANRGPAY(ph)GLSR-2+**

Source : QE1\_140612\_OPL1013\_CVA\_phosphoproteomic\_landscape\_AML\_C Scan : 11467

Andromeda score : 151.13

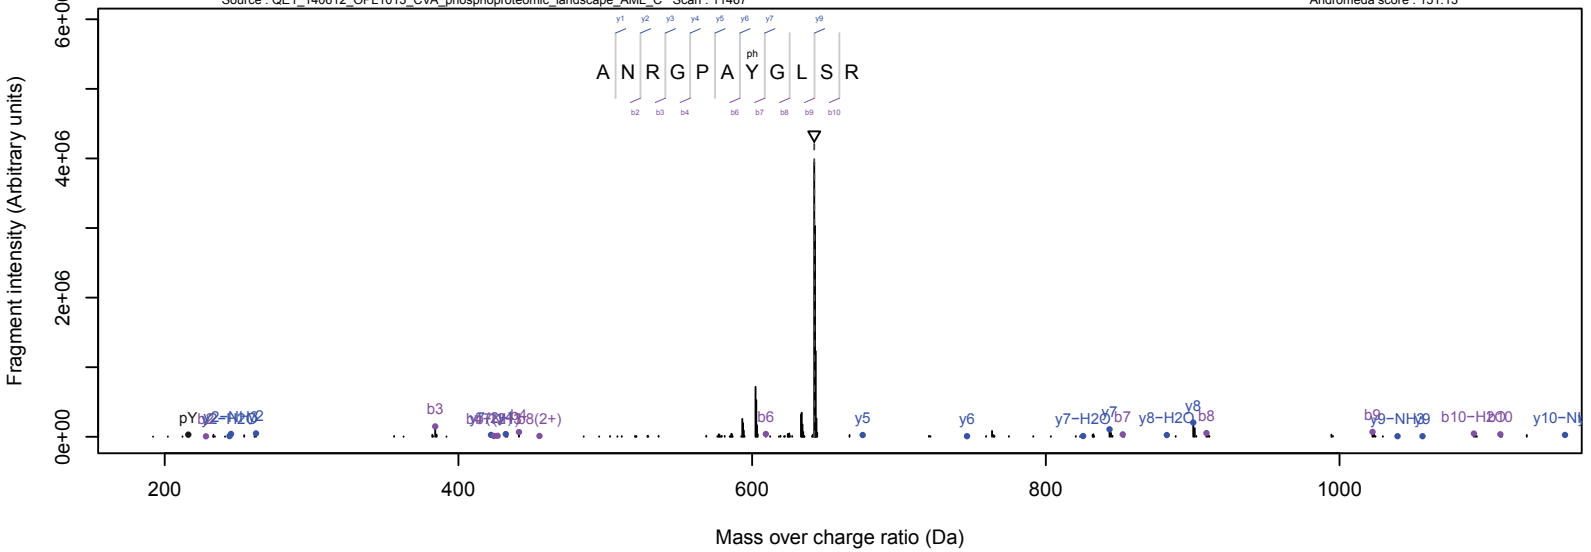

NGFRPLDVSLY(ph)AQR-3+

Source : QE1\_140908\_OPL1013\_CvA\_pTyrIP\_AML\_HEL Scan : 33009

Andromeda score : 151.07

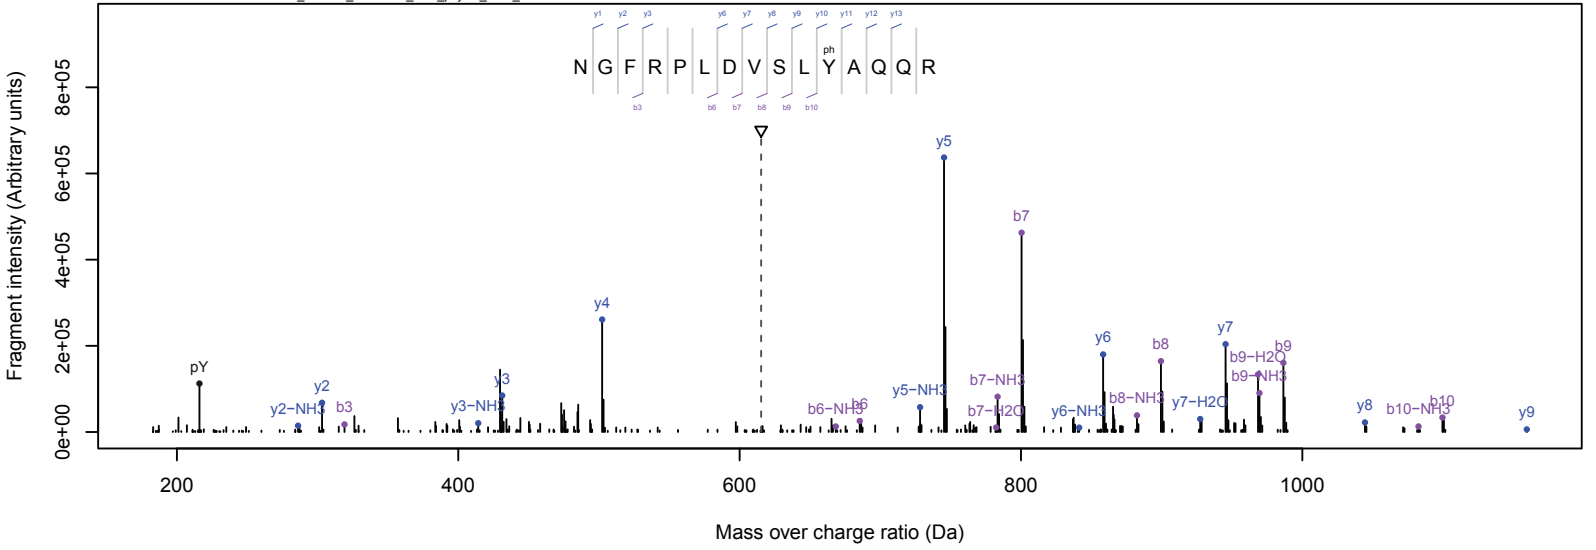

KGPCAVSSNPY(ph)AFKNPIYSQPAWM(ox)NDSHK-4+

Source : QE1\_140908\_OPL1013\_CvA\_pTyrIP\_AML\_OCI\_AML3 Scan : 29903

Andromeda score : 151.02

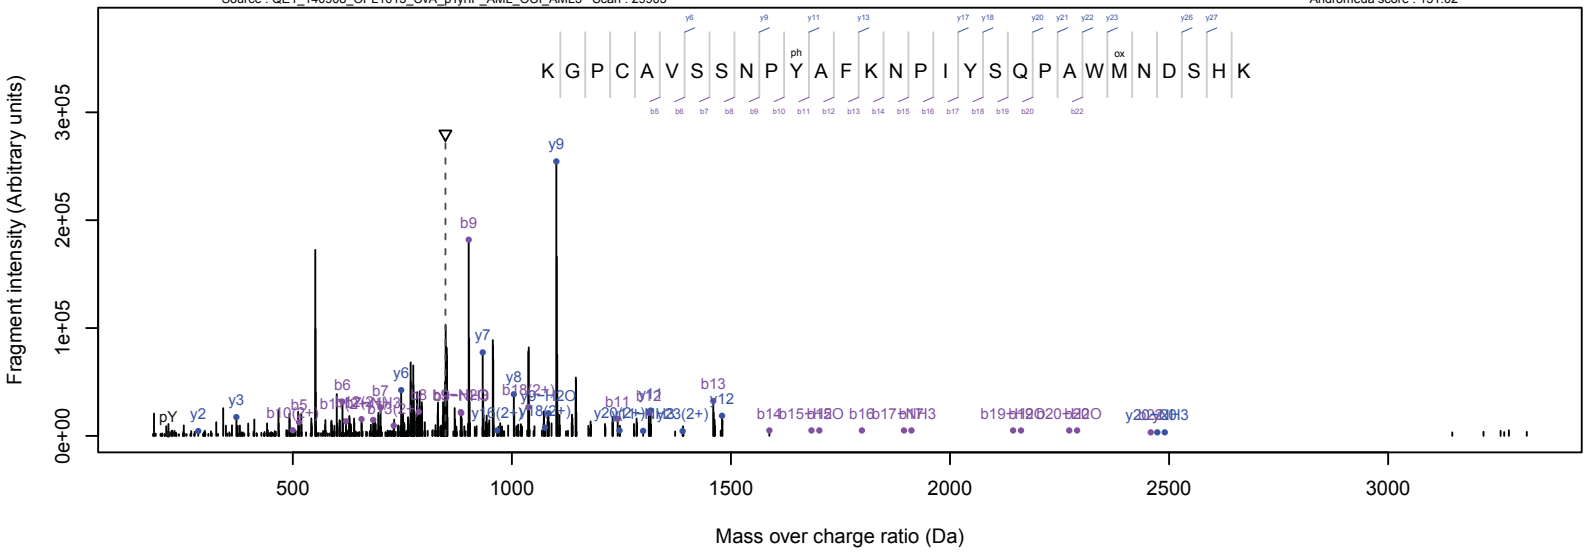

(ac)SEPPVY(ph)CNLVDLRR-2+

Source : QE1\_140908\_OPL1013\_CvA\_pTyrIP\_AML\_ML2 Scan : 36238

Andromeda score : 150.9

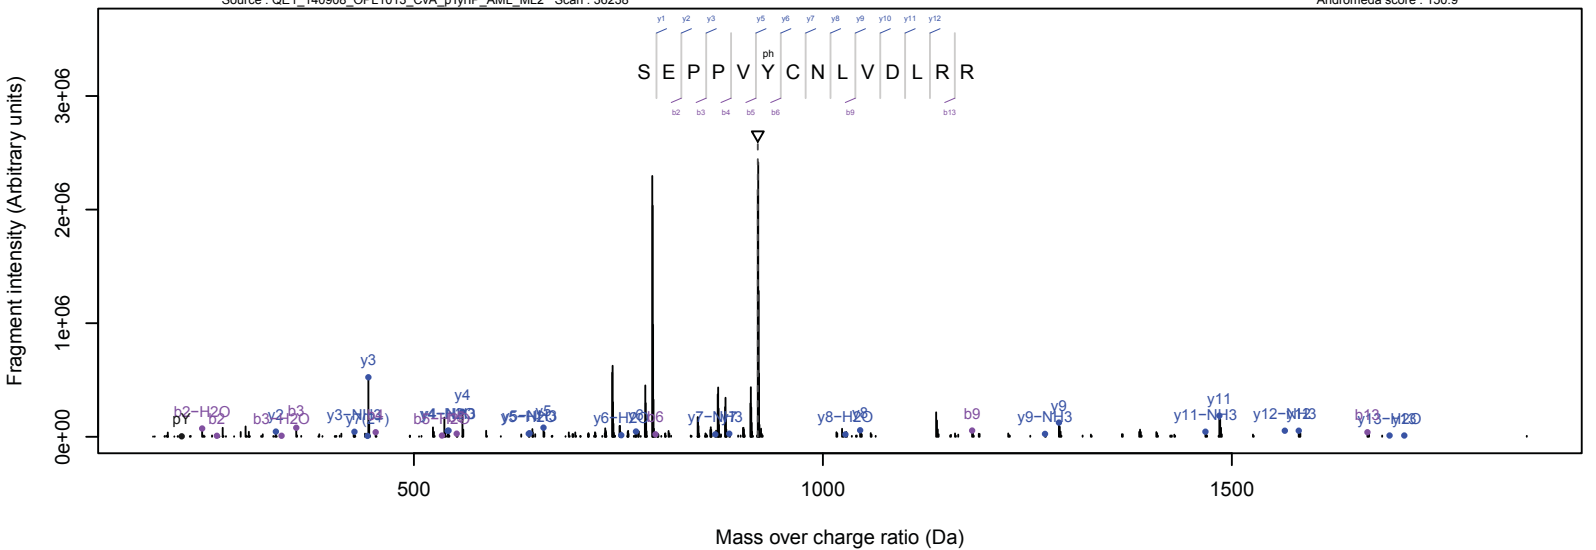



**TNHIIYVSSDDIKETGYTYILPK-3+**

Source : QE1\_140908\_OPL1013\_CvA\_pTyrIP\_AML\_HEL Scan : 35844

Andromeda score : 150.72

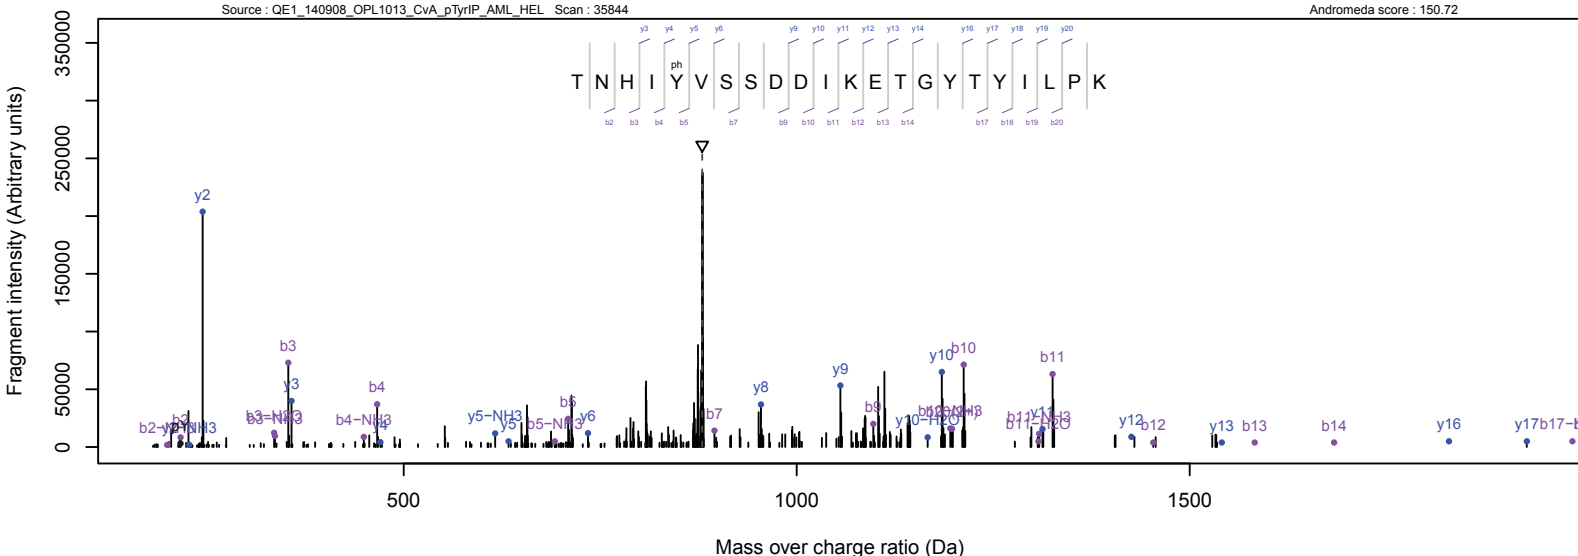

**QRPVPQPSSASLDEYTLMR-3+**

Source : QE1\_140612\_OPL1013\_CVA\_phosphoproteomic\_landscape\_AML\_D Scan : 28350

Andromeda score : 150.7

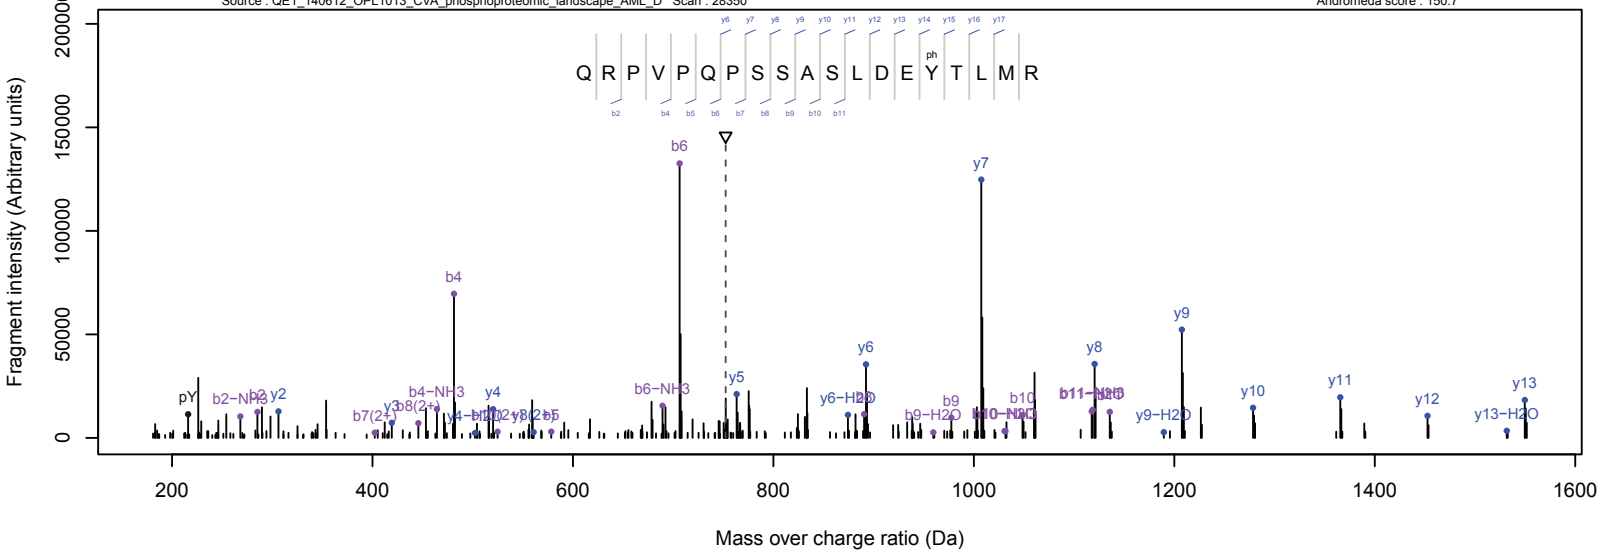

**LVTEMGTYATQSALSSSRPTK-3+**

Source : QE1\_140612\_OPL1013\_CVA\_phosphoproteomic\_landscape\_AML\_B Scan : 24306

Andromeda score : 150.69

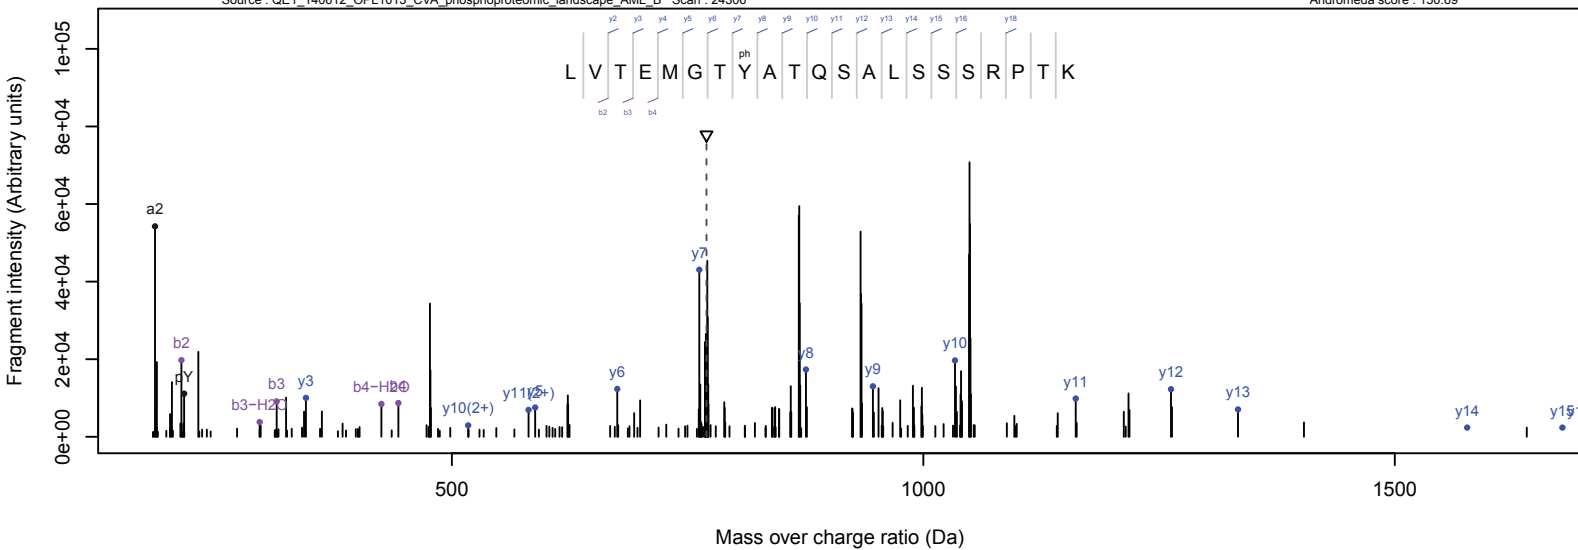

**PGFDY(ph)KFLEKPK-3+**

Source : QE1\_140612\_OPL1013\_CVA\_phosphoproteomic\_landscape\_AML\_D Scan : 25696

Andromeda score : 150.69

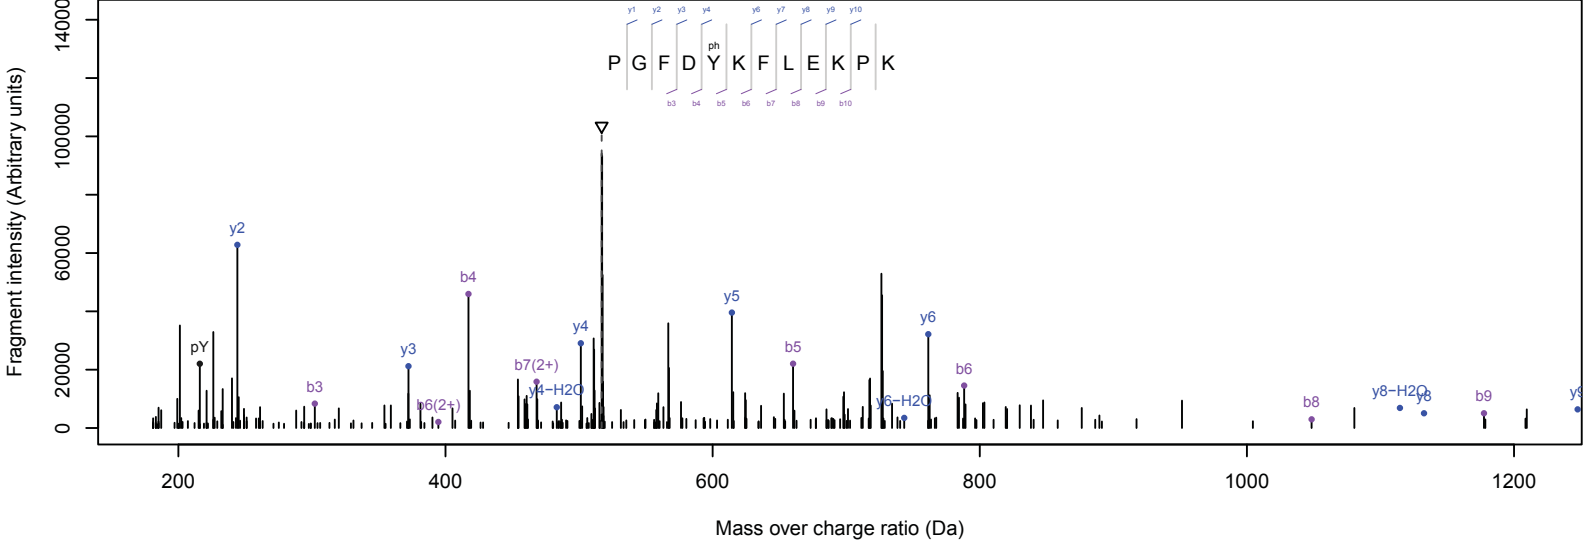

**QNGRDPPDYPVSLLLLPDK-3+**

Source : QE1\_140612\_OPL1013\_CVA\_phosphoproteomic\_landscape\_AML\_C Scan : 41872

Andromeda score : 150.69

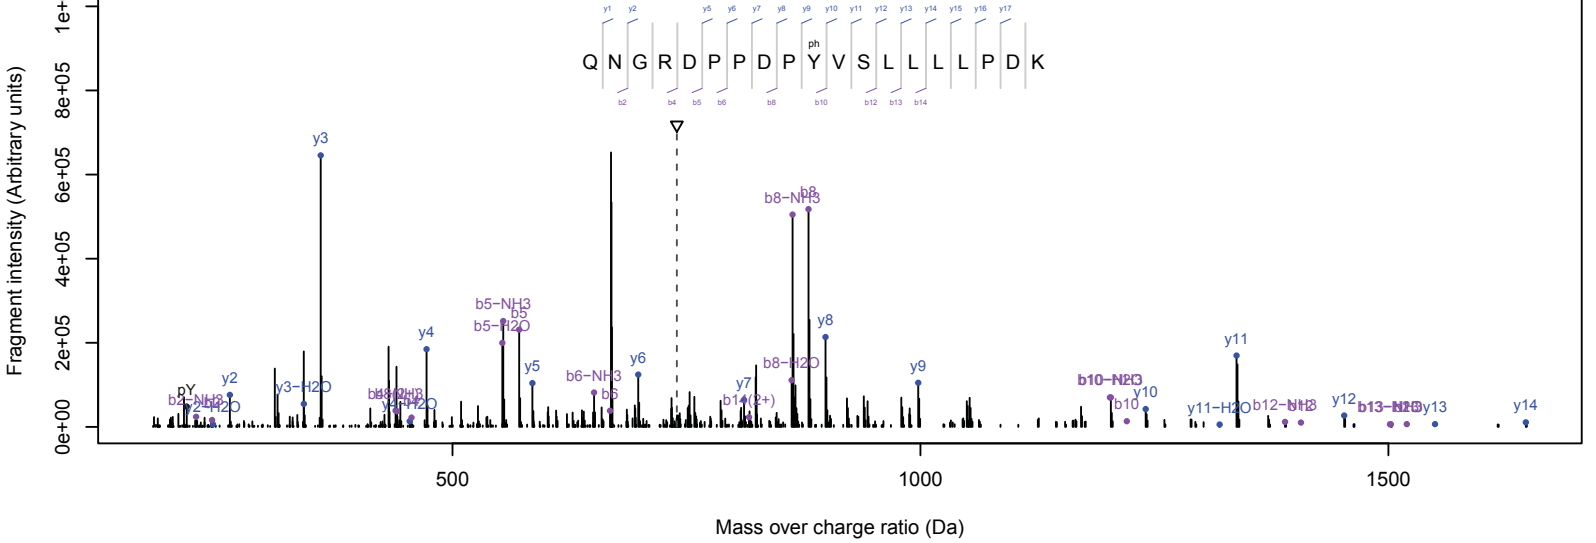

**ARDDY(ph)KTLVGSENPPLTVIR-3+**

Source : QE1\_140612\_OPL1013\_CVA\_phosphoproteomic\_landscape\_AML\_E Scan : 29957

Andromeda score : 150.65

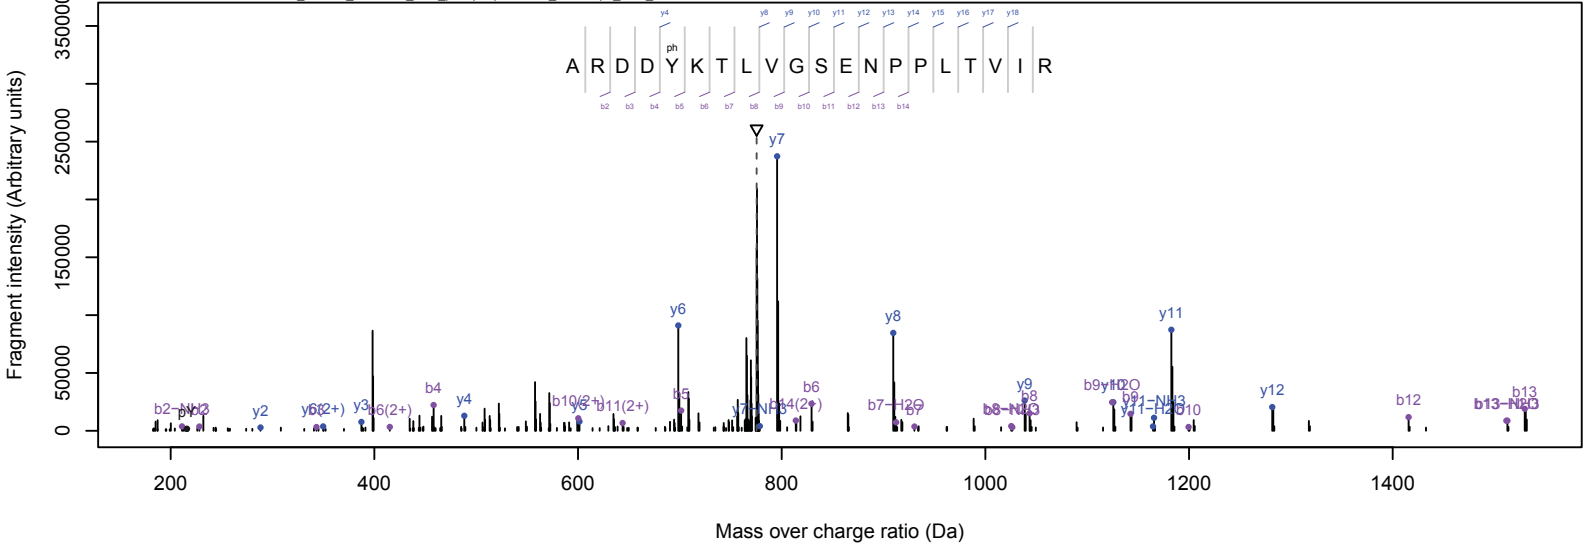

**NDASQQTNY(ph)GVAVLDK-2+**

Source : QE1\_140612\_OPL1013\_CVA\_phosphoproteomic\_landscape\_AML\_B Scan : 18910

Andromeda score : 150.59

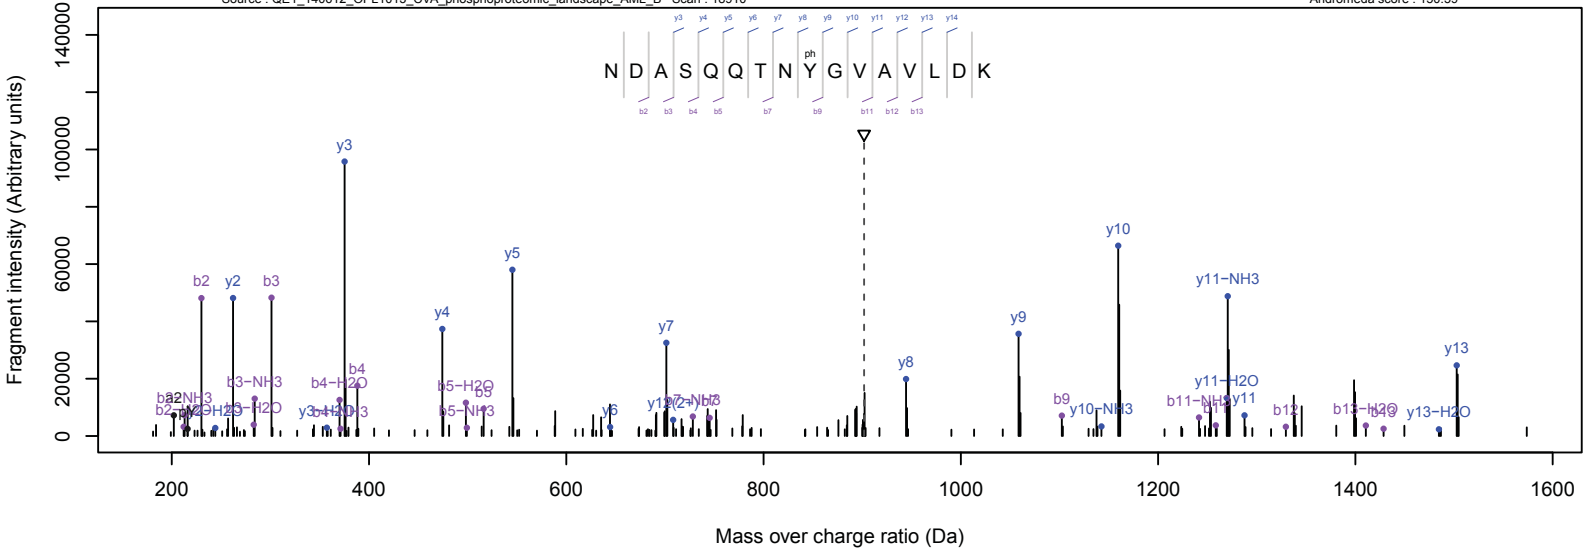

**TGHGYVY(ph)EYPSR-2+**

Source : QE1\_140908\_OPL1013\_CvA\_pTyrIP\_AML\_OCI\_AML3 Scan : 13707

Andromeda score : 150.49

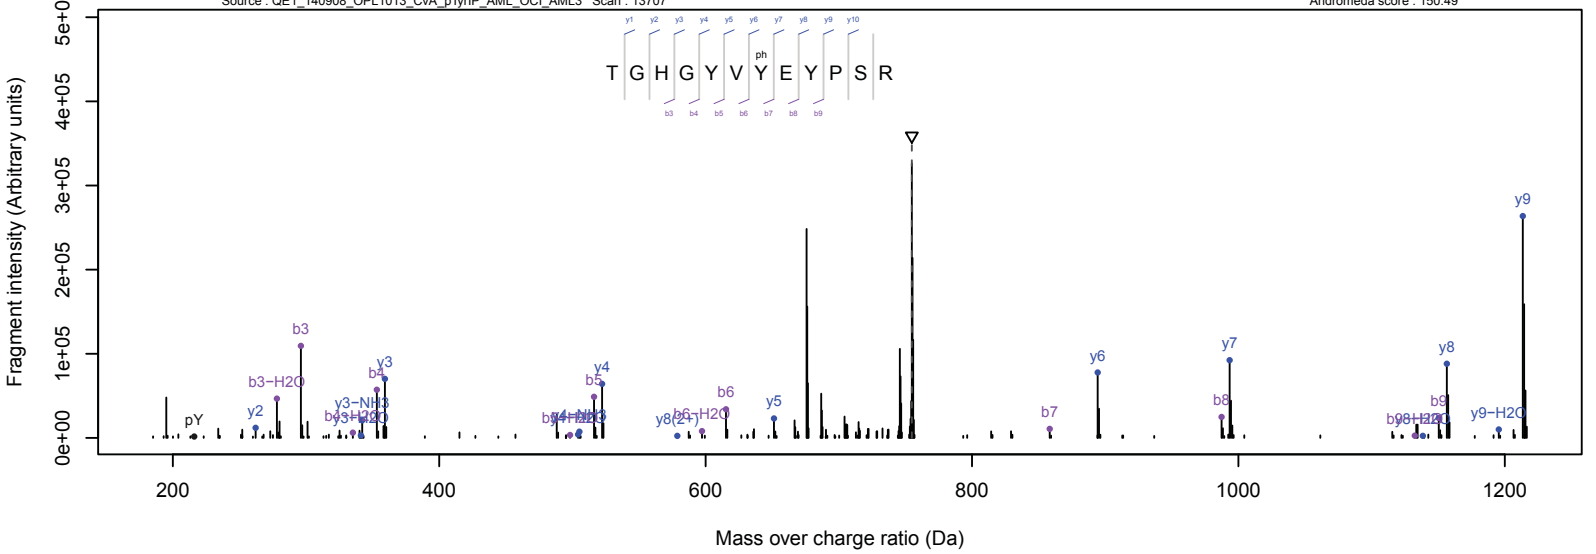

**LNEKNY(ph)ELLK-2+**

Source : QE1\_140612\_OPL1013\_CVA\_phosphoproteomic\_landscape\_AML\_D Scan : 16203

Andromeda score : 150.46

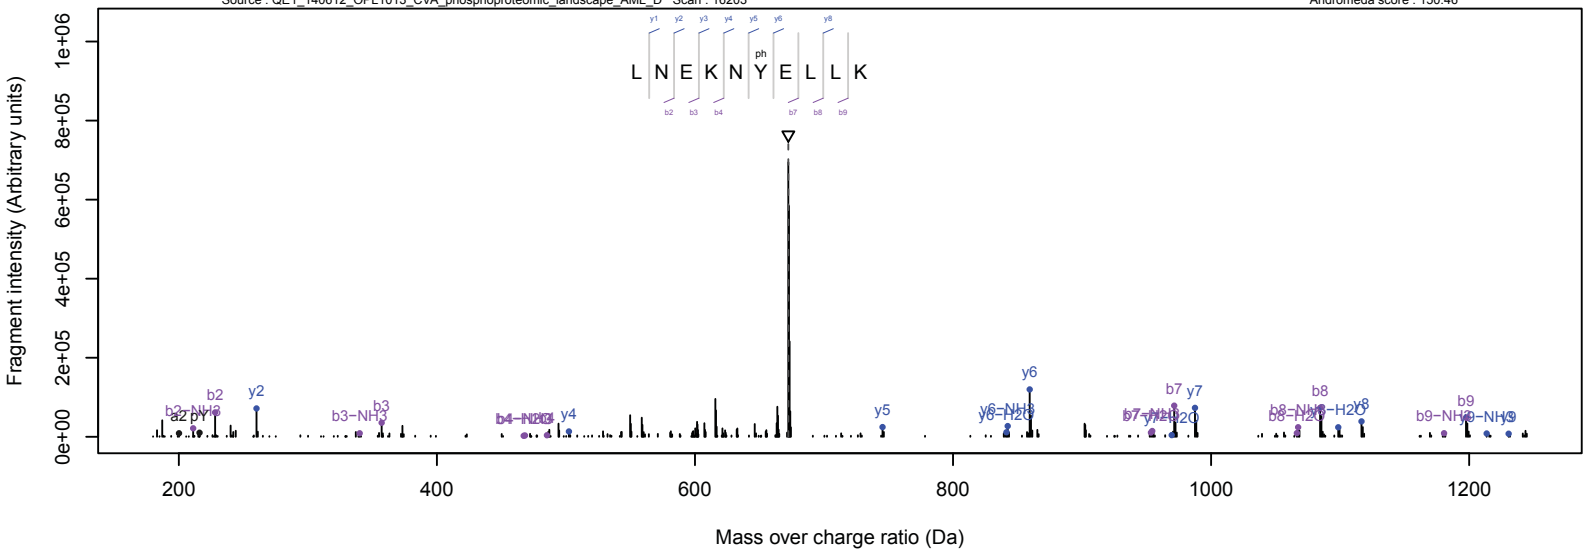

**HYCY(ph)PHFTCAVDTEIR-3+**

Source: QE1\_140612\_OPL1013\_CVA\_phosphoproteomic\_landscape\_AML\_B Scan: 25824

Andromeda score: 150.39

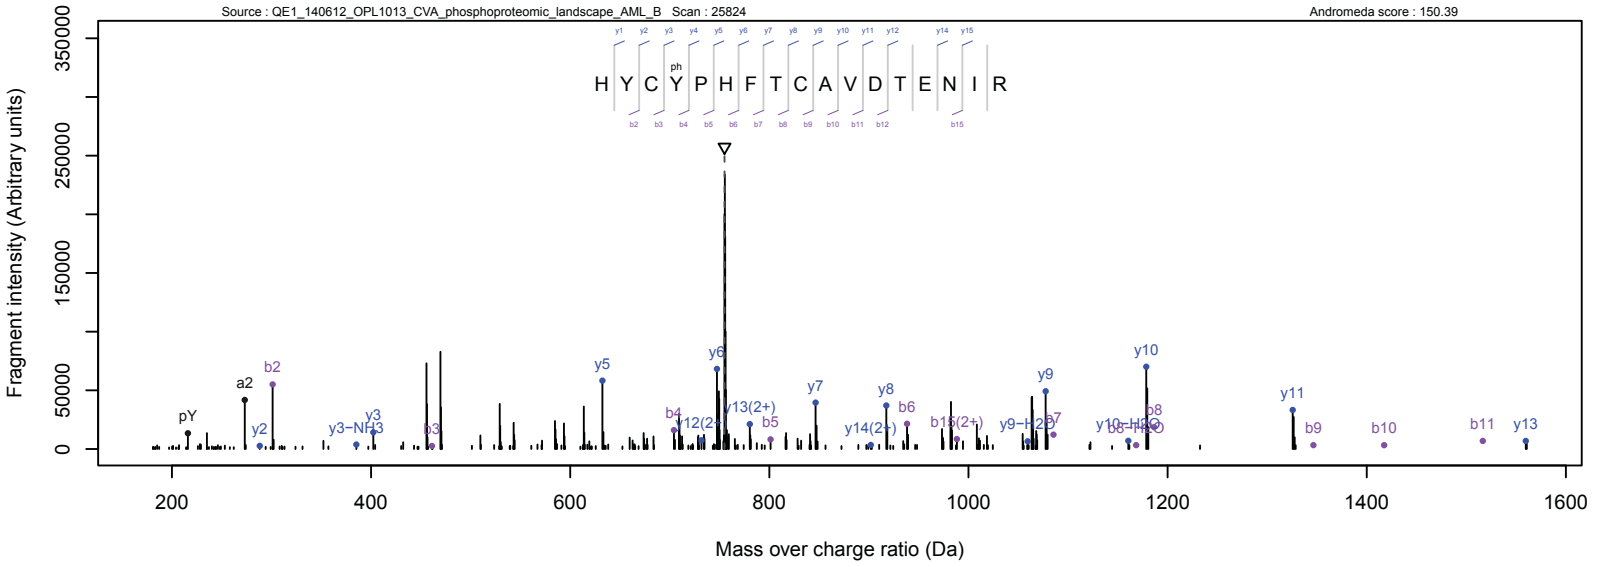

**YHGHSMDPGVSY(ph)R-3+**

Source: QE1\_140612\_OPL1013\_CVA\_phosphoproteomic\_landscape\_AML\_F Scan: 7587

Andromeda score: 150.22

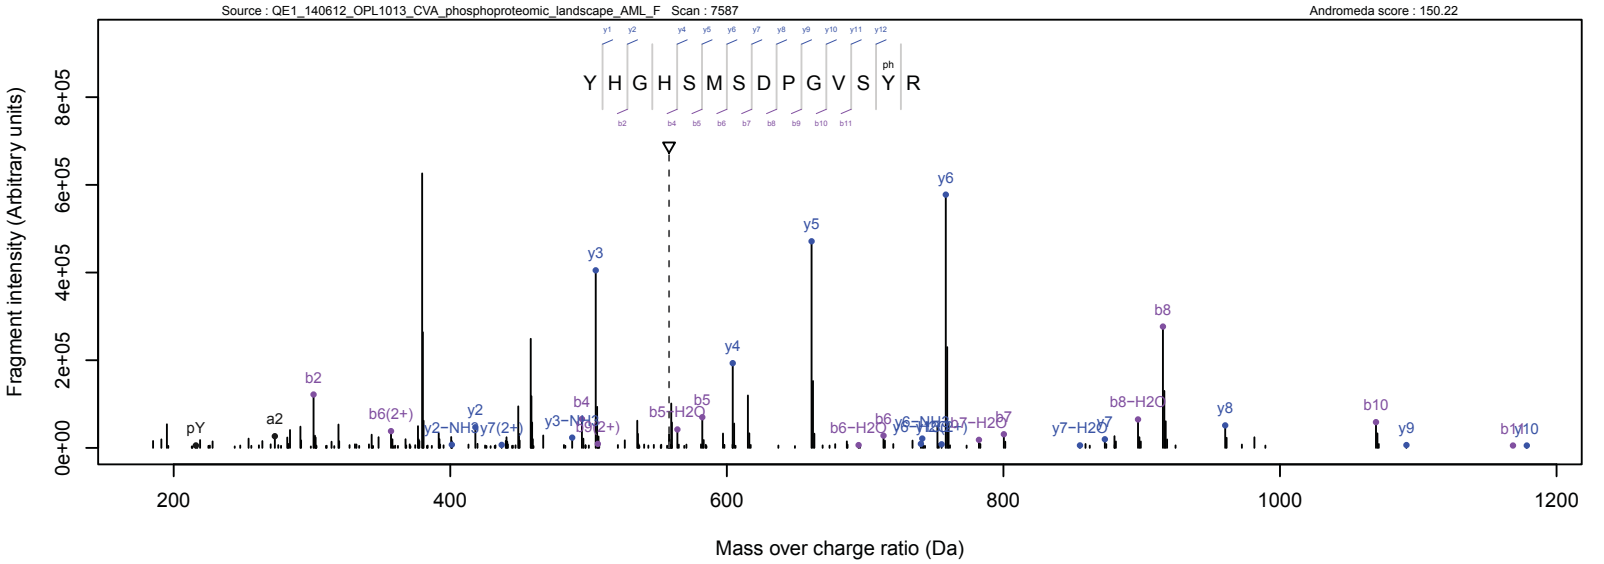

**NQLGNY(ph)PTLPLMK-2+**

Source: QE1\_140612\_OPL1013\_CVA\_phosphoproteomic\_landscape\_AML\_C Scan: 36338

Andromeda score: 150.11

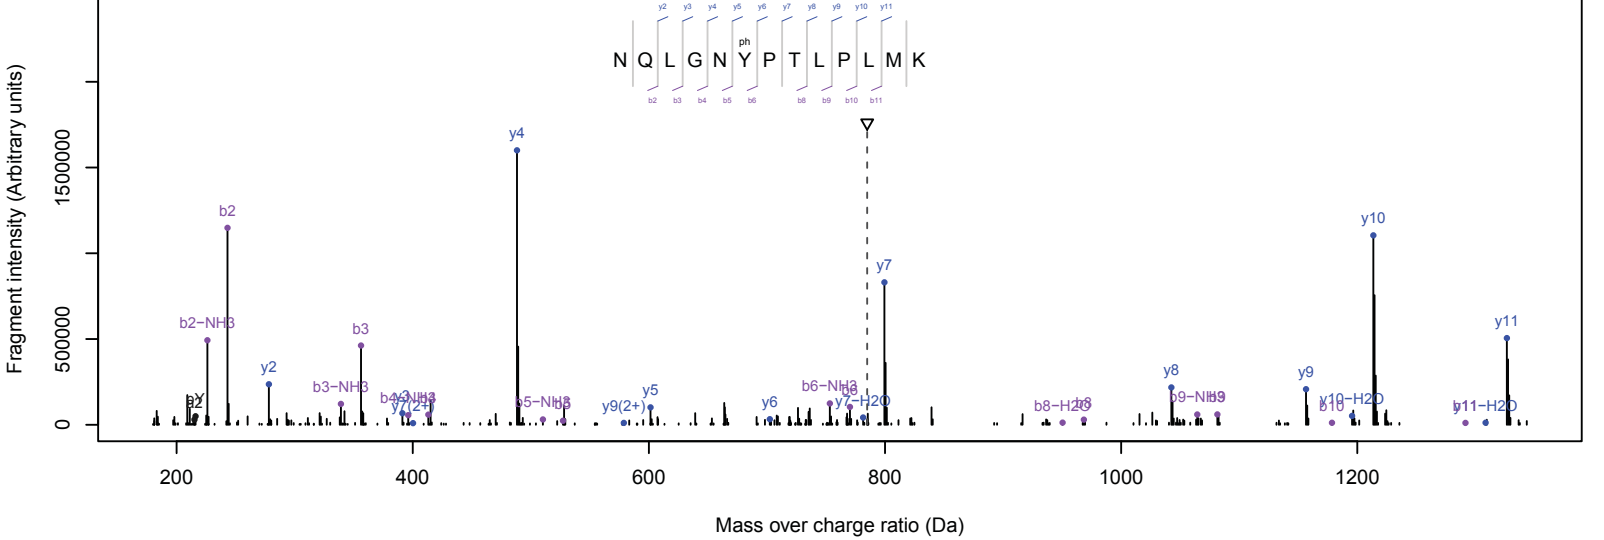

HY(ph)CVTIPEILPK-2+

Source : QE1\_140612\_OPL1013\_CVA\_phosphoproteomic\_landscape\_AML\_A Scan : 35131

Andromeda score : 150.06

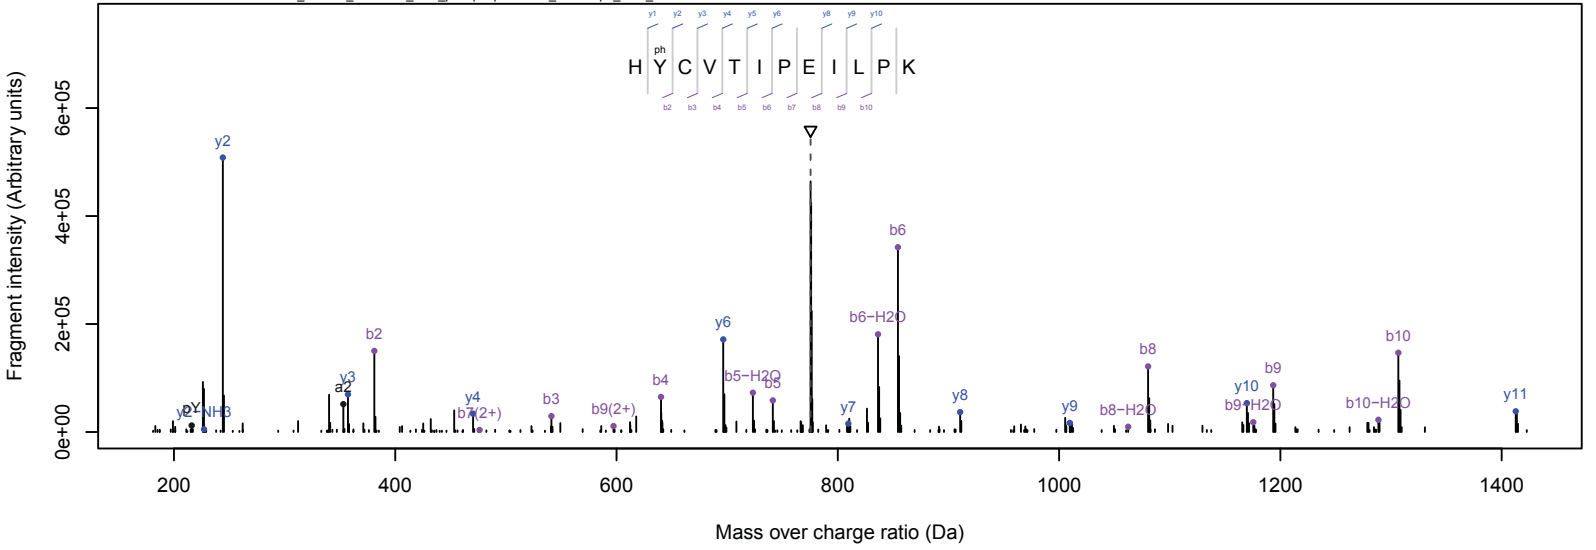

LQHQQLY(ph)YSQDDSNRK-3+

Source : QE1\_140612\_OPL1013\_CVA\_phosphoproteomic\_landscape\_AML\_C Scan : 8163

Andromeda score : 150.05

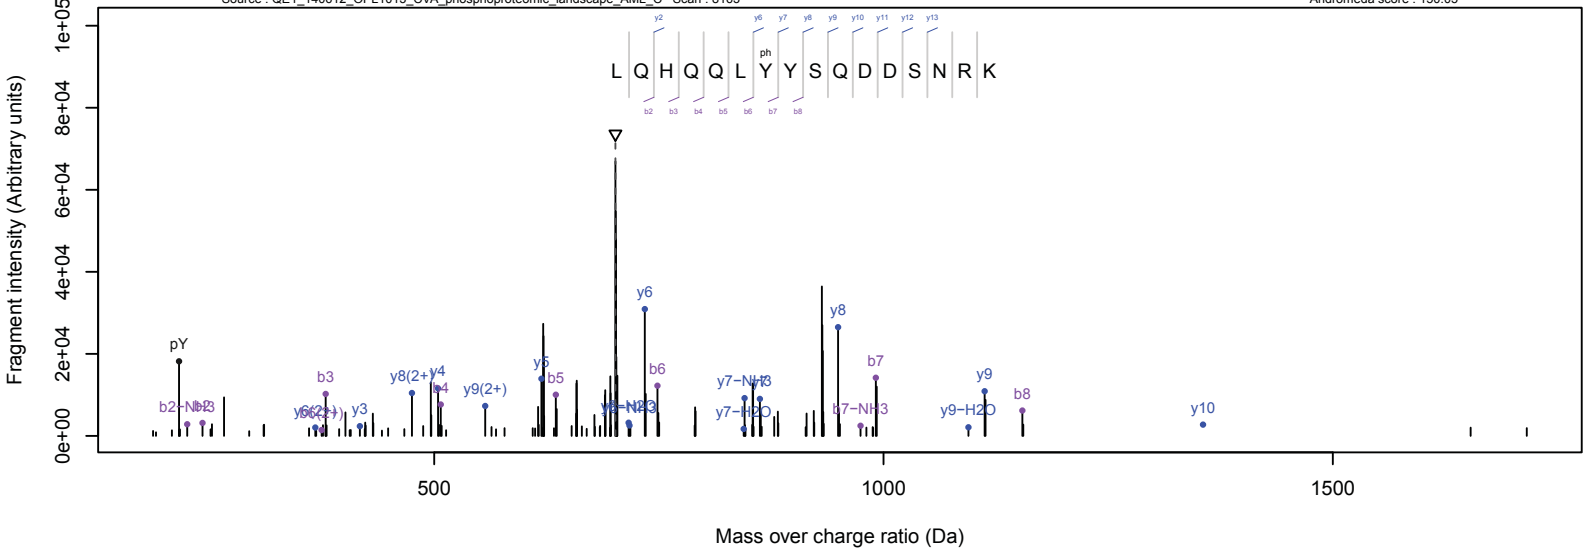

GHY(ph)NNVSCAVFHPR-3+

Source : QE1\_140908\_OPL1013\_CvA\_pTyrIP\_AML\_Kasumi1 Scan : 14606

Andromeda score : 149.96

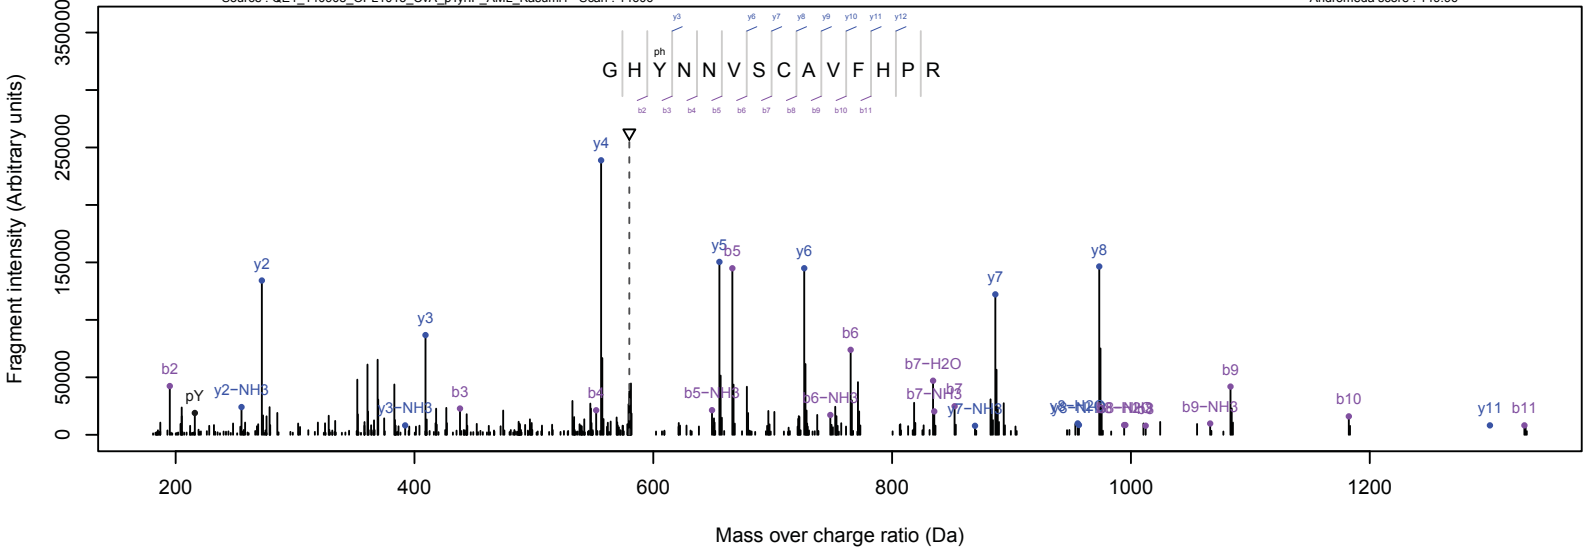

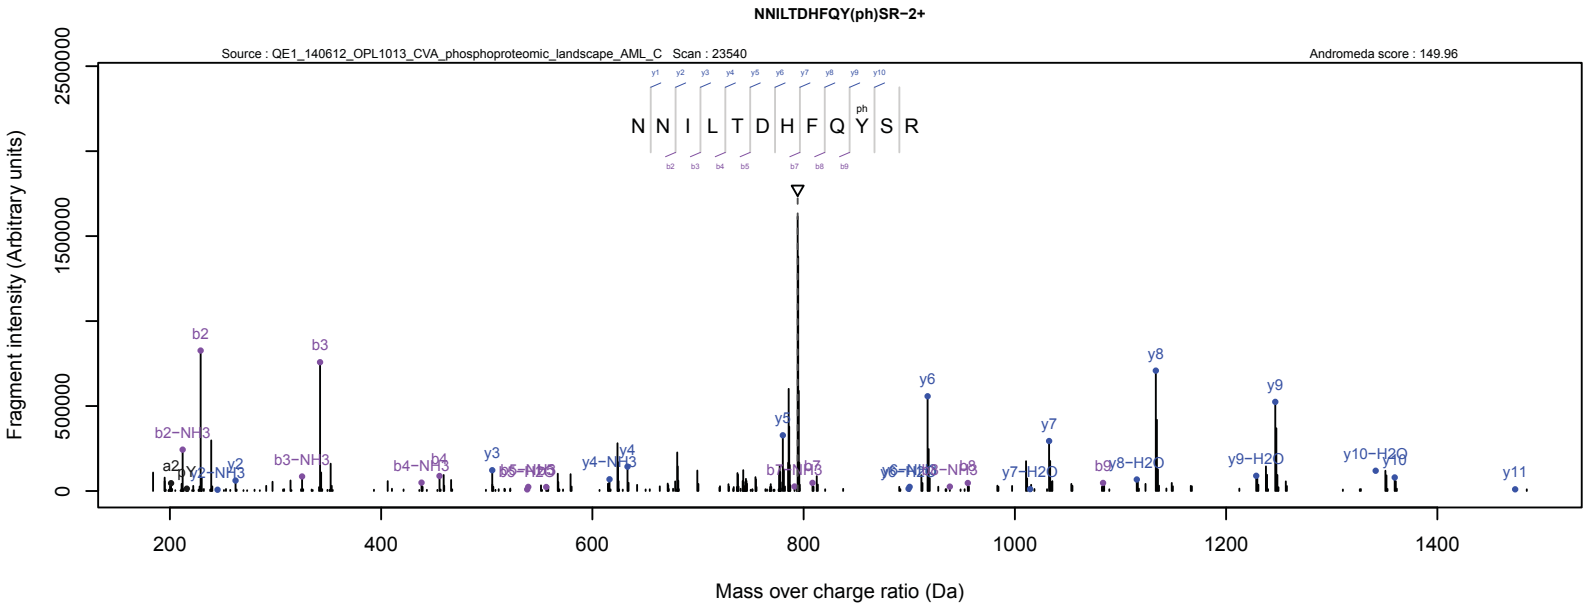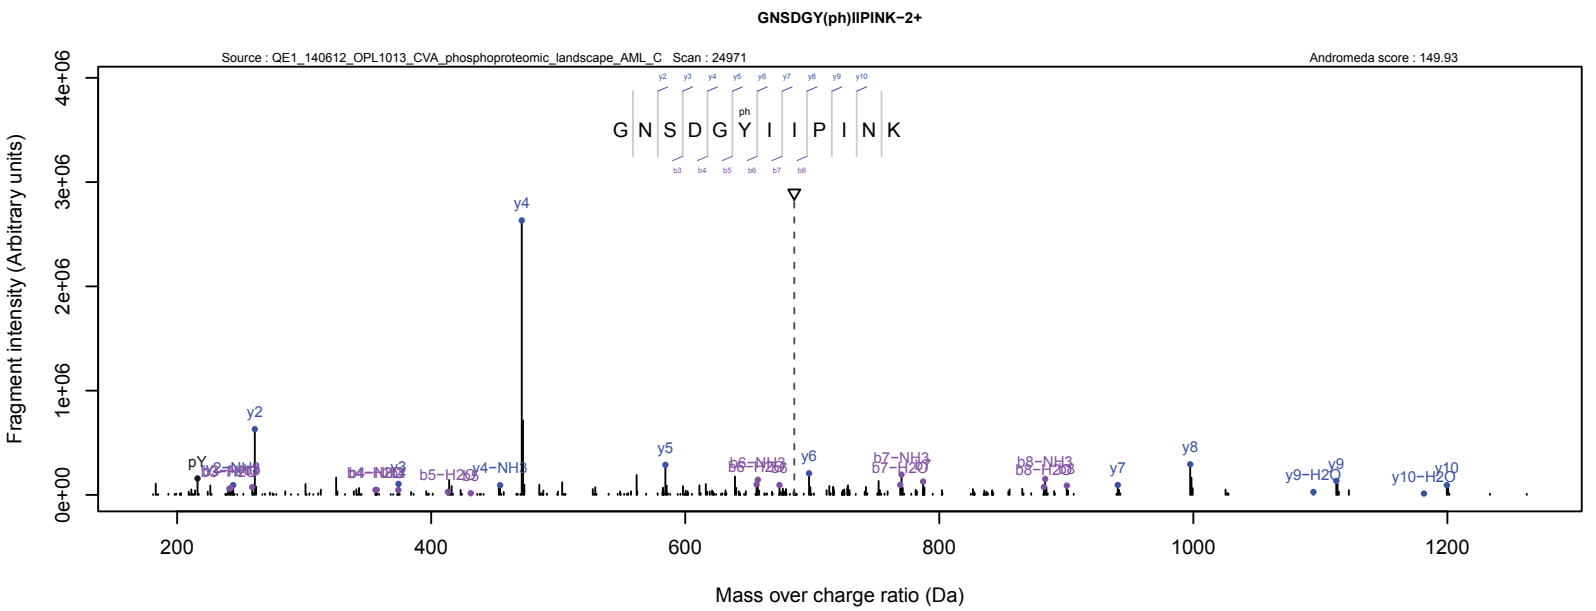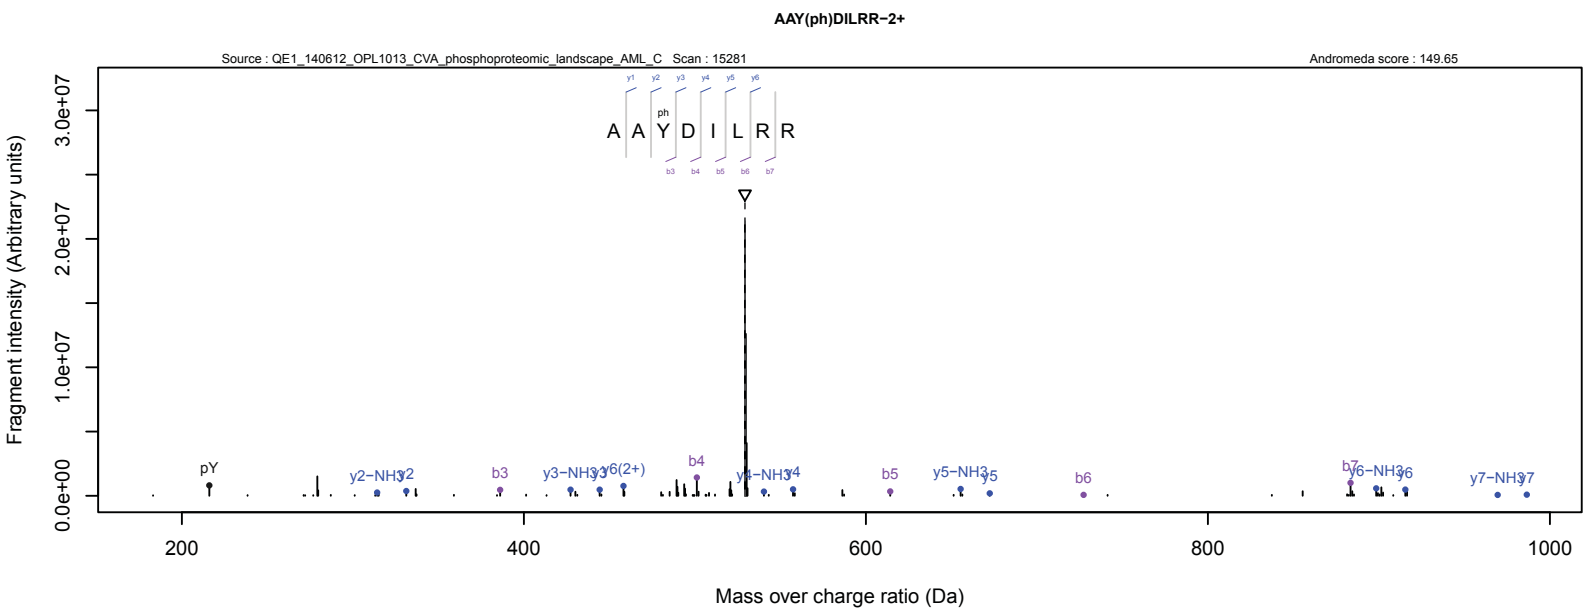

LHPEDFPEEDKKTYPHGEIFEK-4+

Source : QE1\_140908\_OPL1013\_CvA\_pTyrIP\_AML\_ML2 Scan : 25771

Andromeda score : 149.53

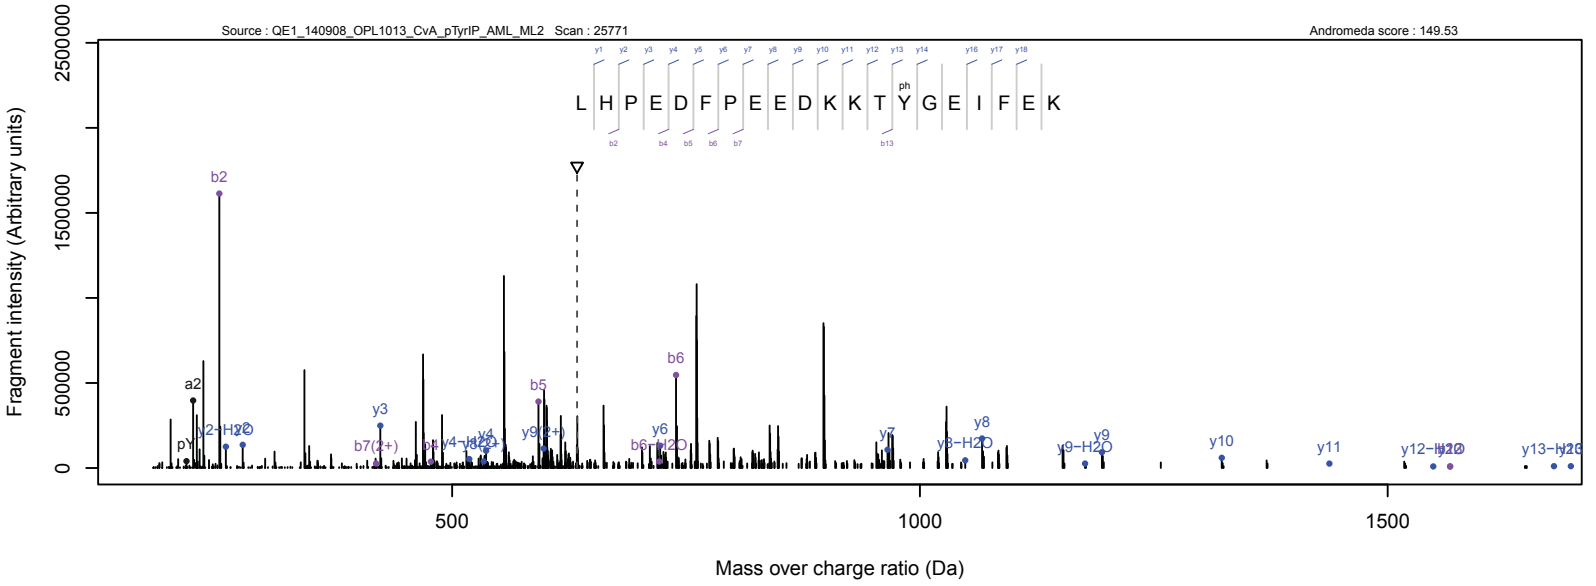

NDSPLDYENIKEITDYVNVNPER-3+

Source : QE1\_140908\_OPL1013\_CvA\_pTyrIP\_AML\_Kasumi1 Scan : 43402

Andromeda score : 149.32

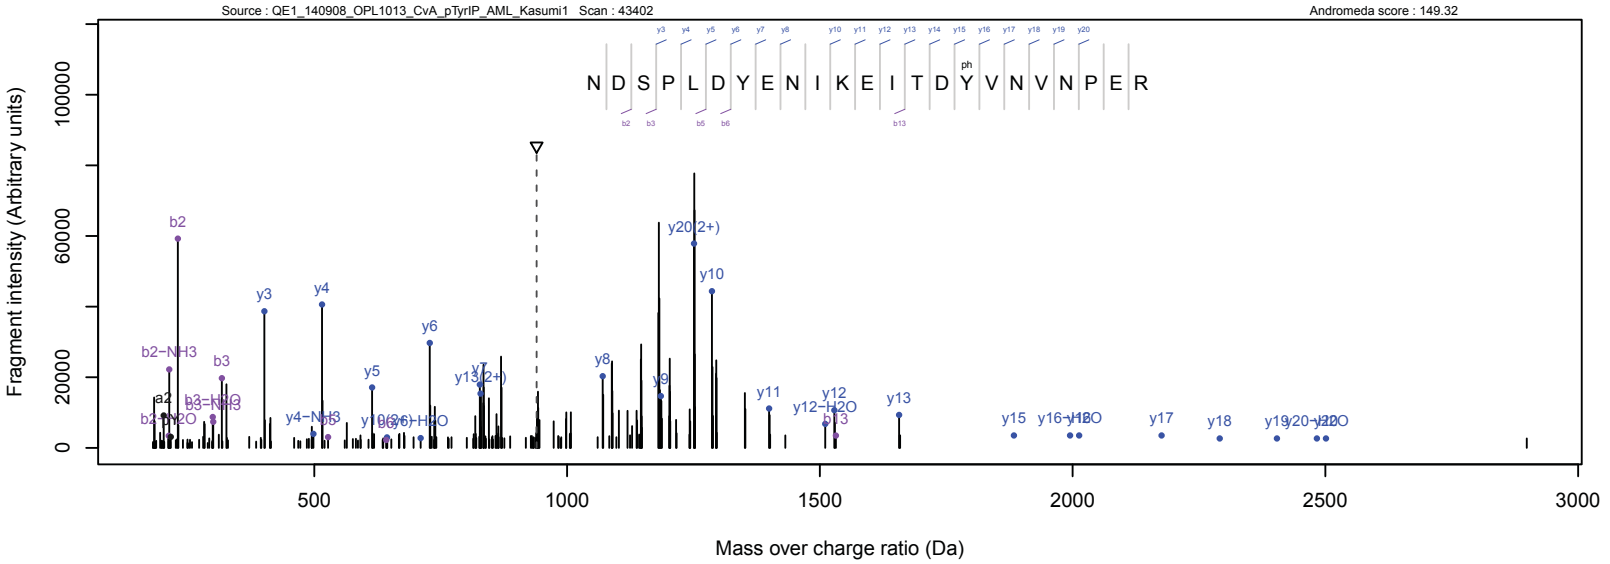

LSSSGTPMLAGVSEYELPEDPRWELPR-3+

Source : QE1\_140612\_OPL1013\_CVA\_phosphoproteomic\_landscape\_AML\_B Scan : 45816

Andromeda score : 149.3

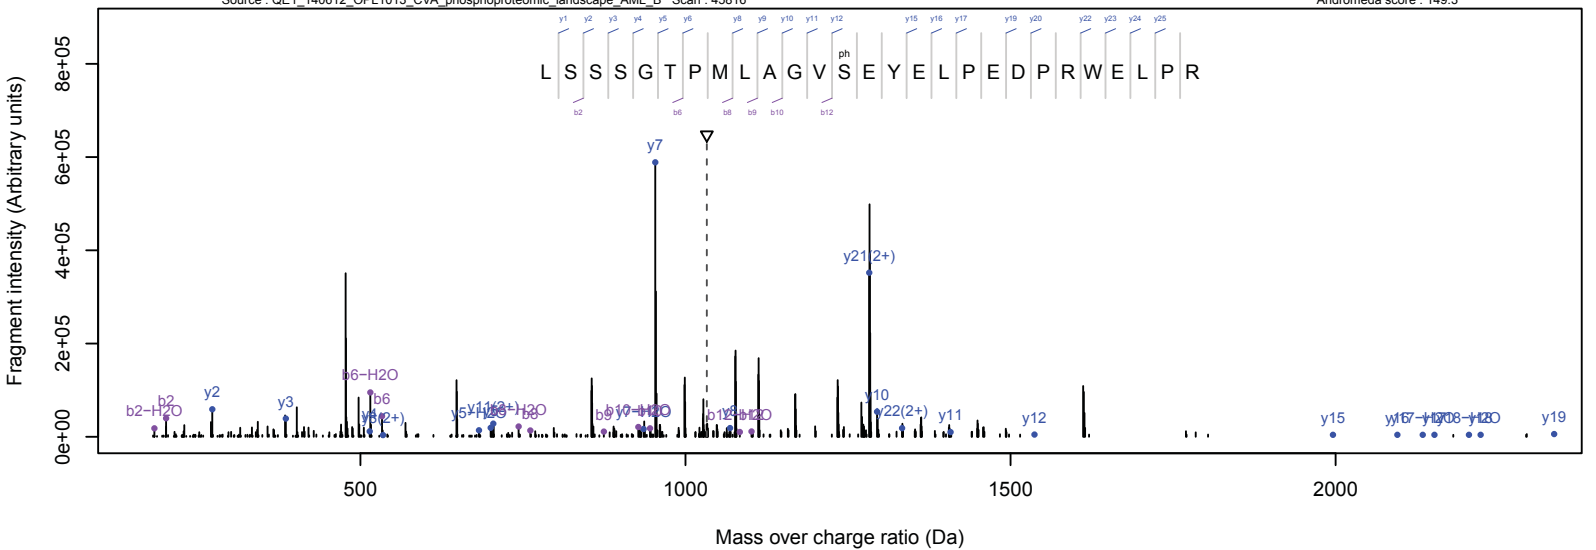

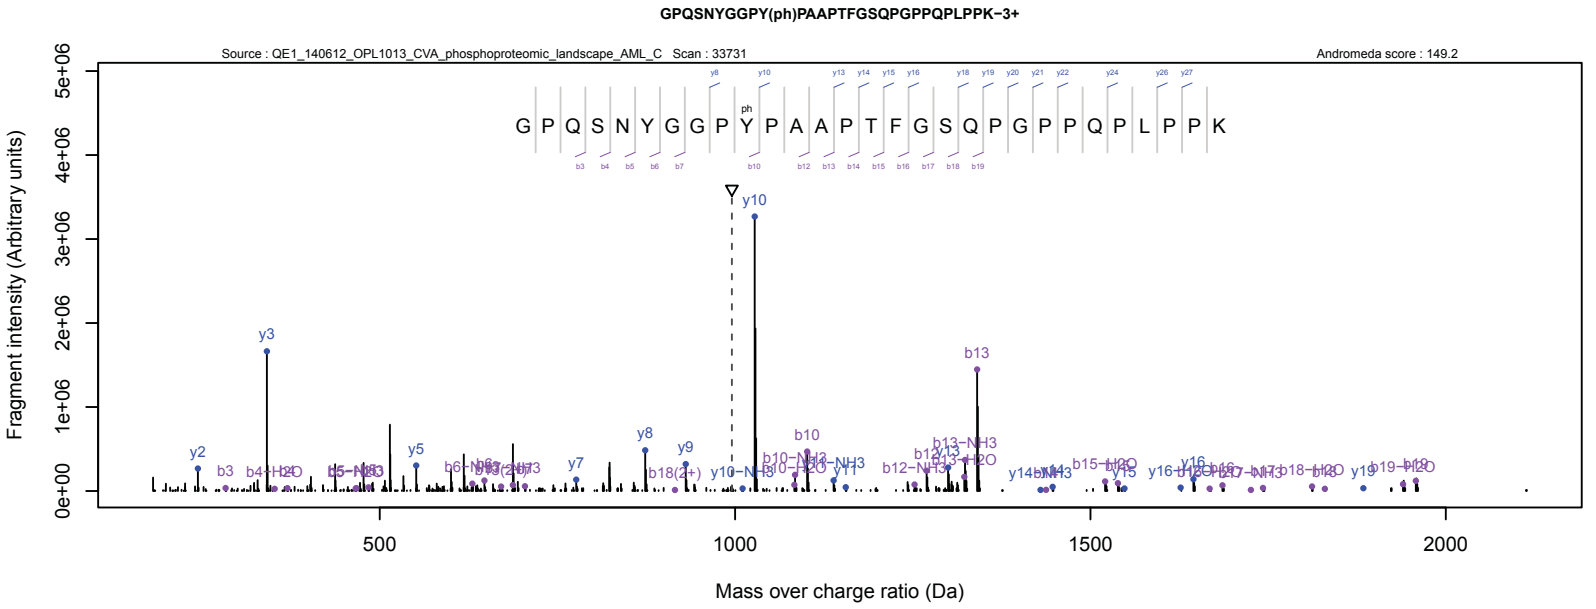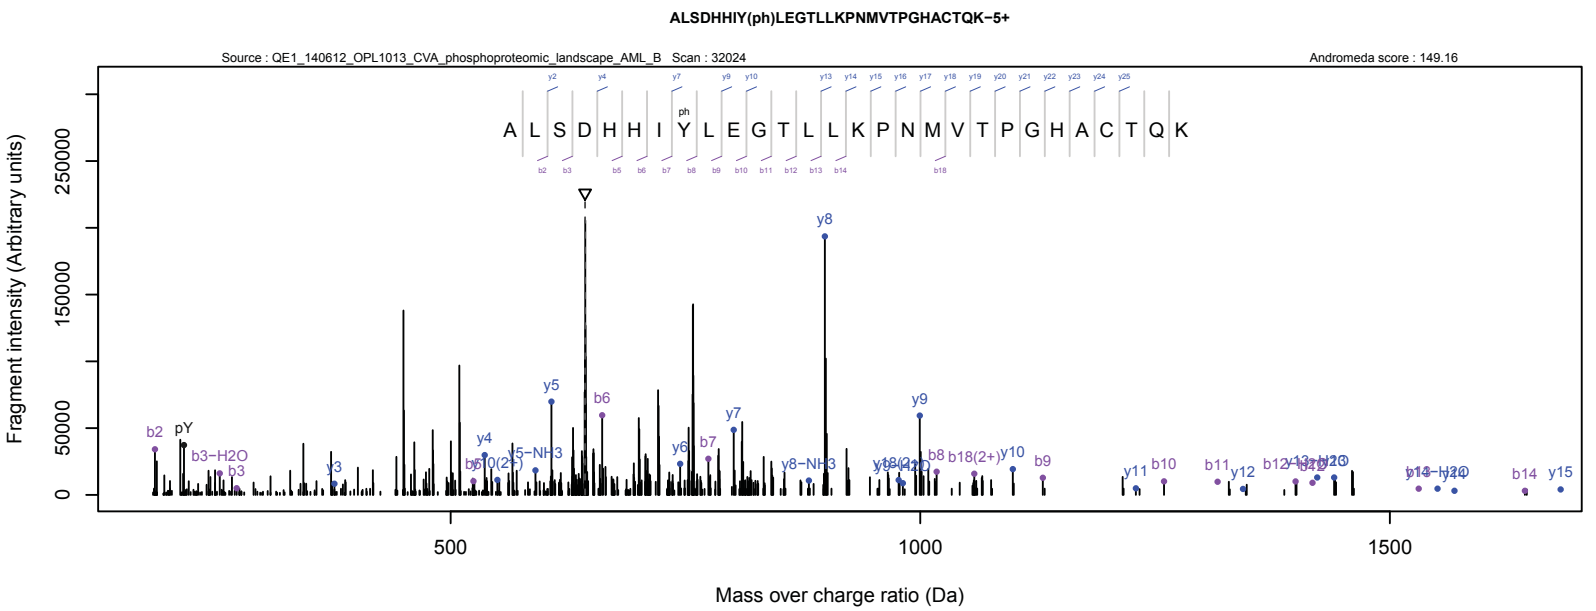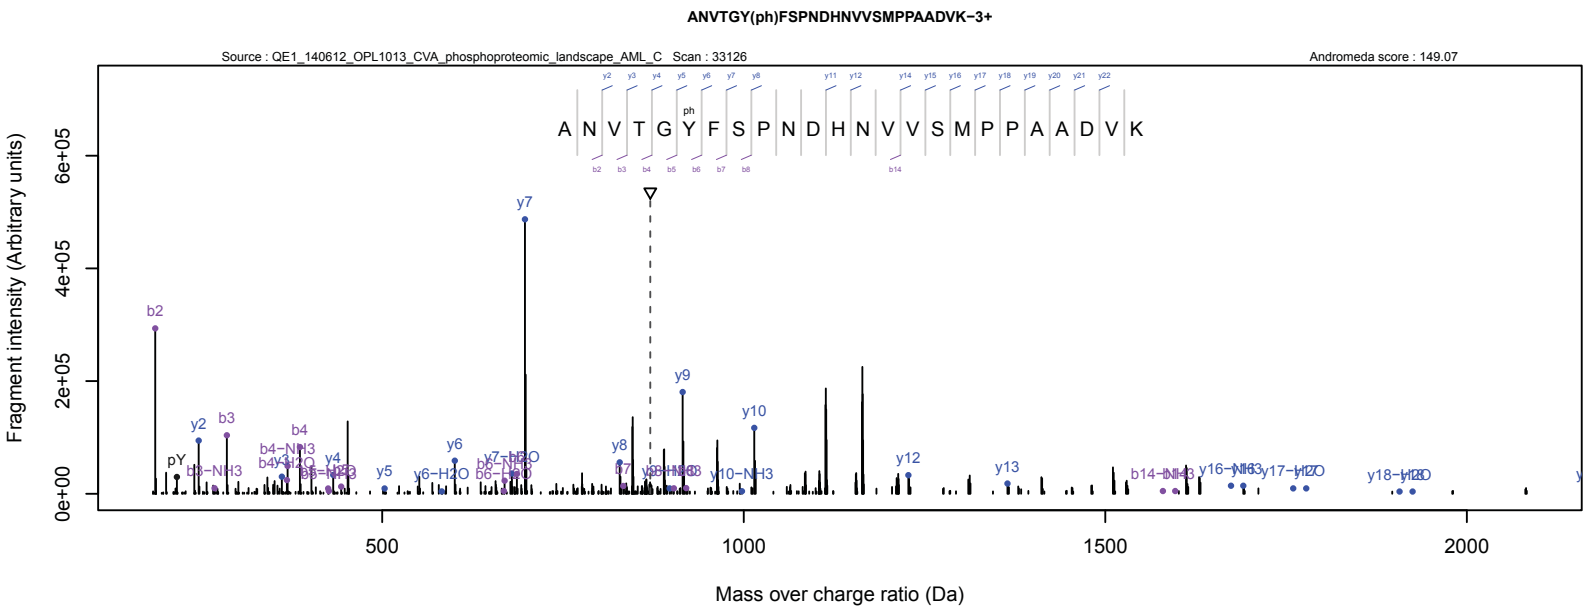



NGRPDY(ph)IIVTQRPLTDEEGTEHLR-4+

Source : QE1\_140612\_OPL1013\_CVA\_phosphoproteomic\_landscape\_AML\_B Scan : 25427

Andromeda score : 149.07

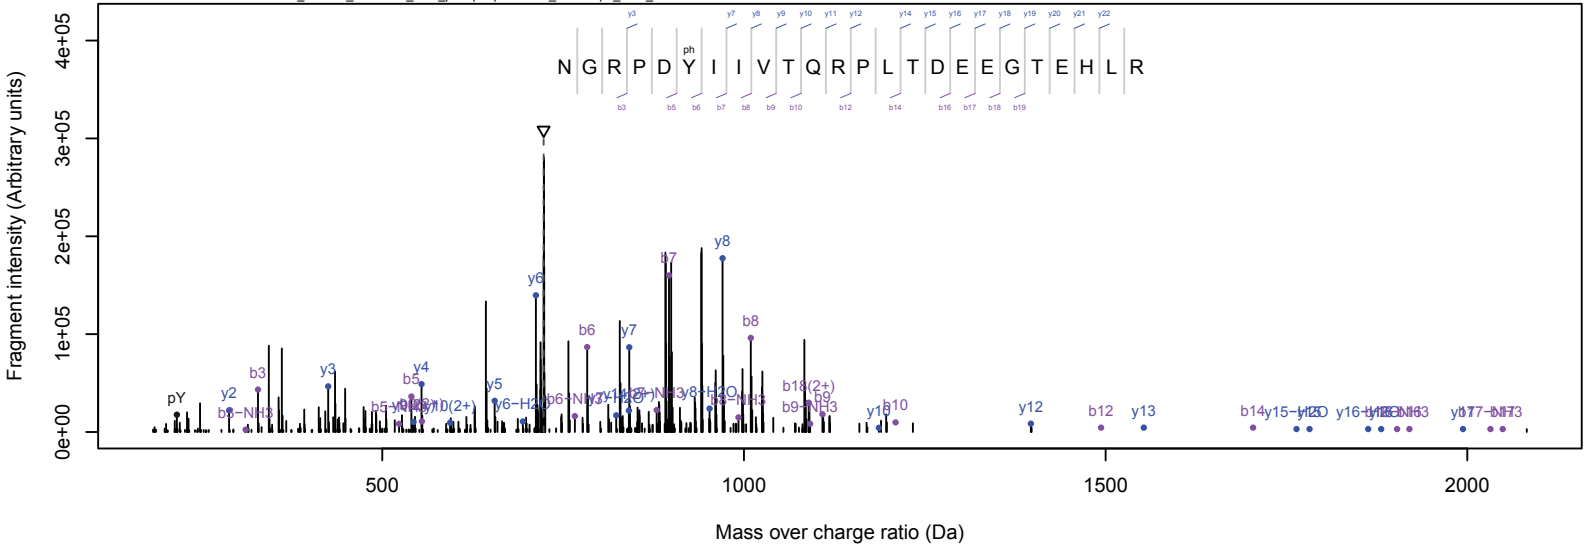

SLPSGSHQGPVIY(ph)AQLDHSGGHHSK-5+

Source : QE1\_140612\_OPL1013\_CVA\_phosphoproteomic\_landscape\_AML\_C Scan : 15677

Andromeda score : 149.07

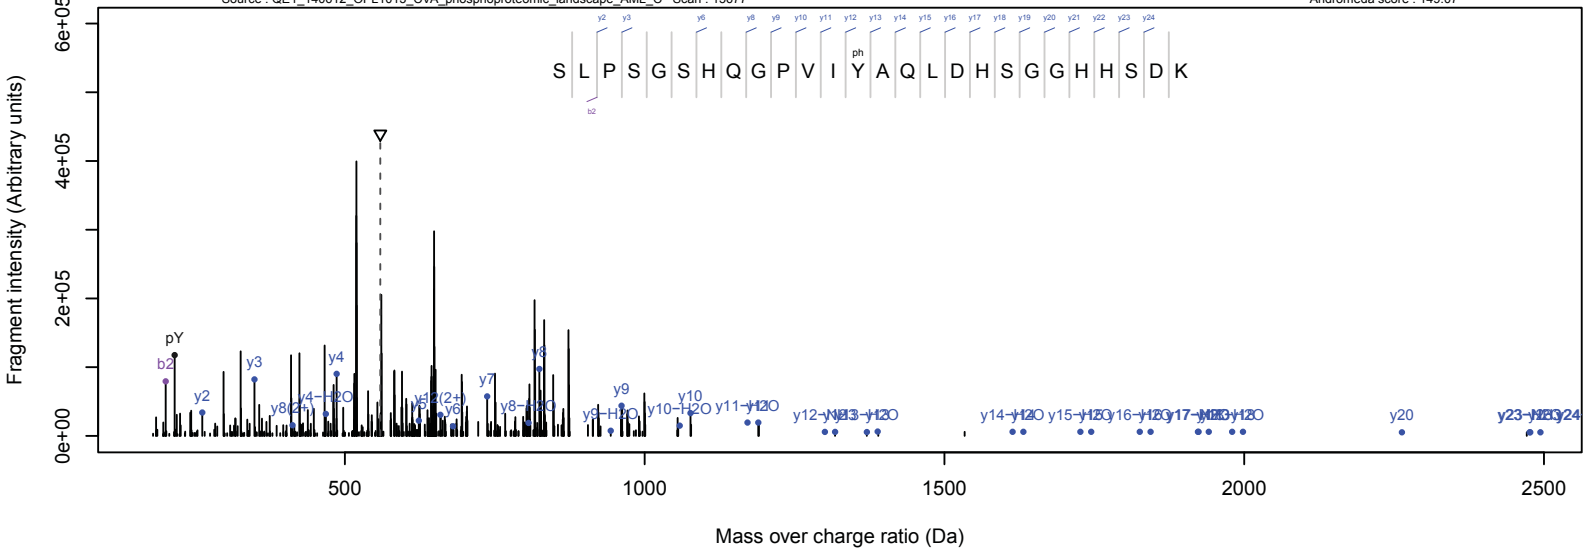

KYGLFKEENPYAR-3+

Source : QE1\_140908\_OPL1013\_CvA\_pTyrIP\_AML\_OCI\_AML3 Scan : 17225

Andromeda score : 149.02

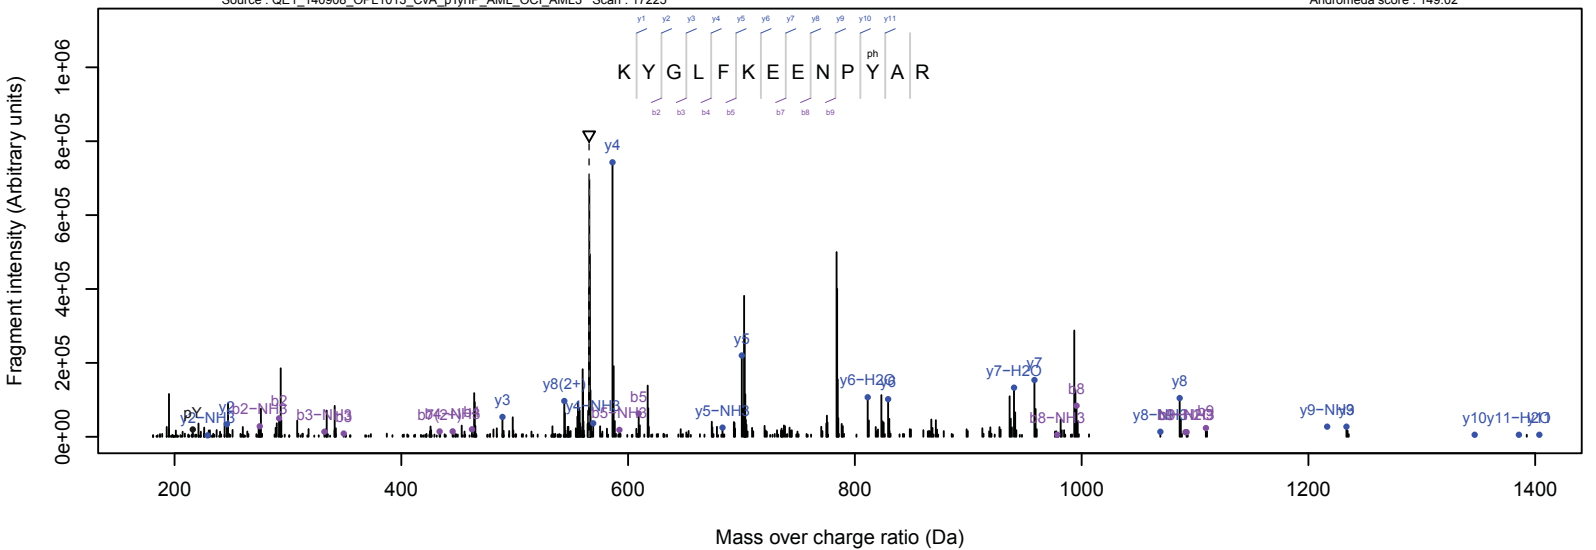

SPAAPY(ph)FLGSSFSFSPVR-2+

Source: QE1\_140822\_OPL1013\_CVA\_pTyrIP\_AML\_cell\_lines\_part2\_B Scan: 34415

Andromeda score: 149

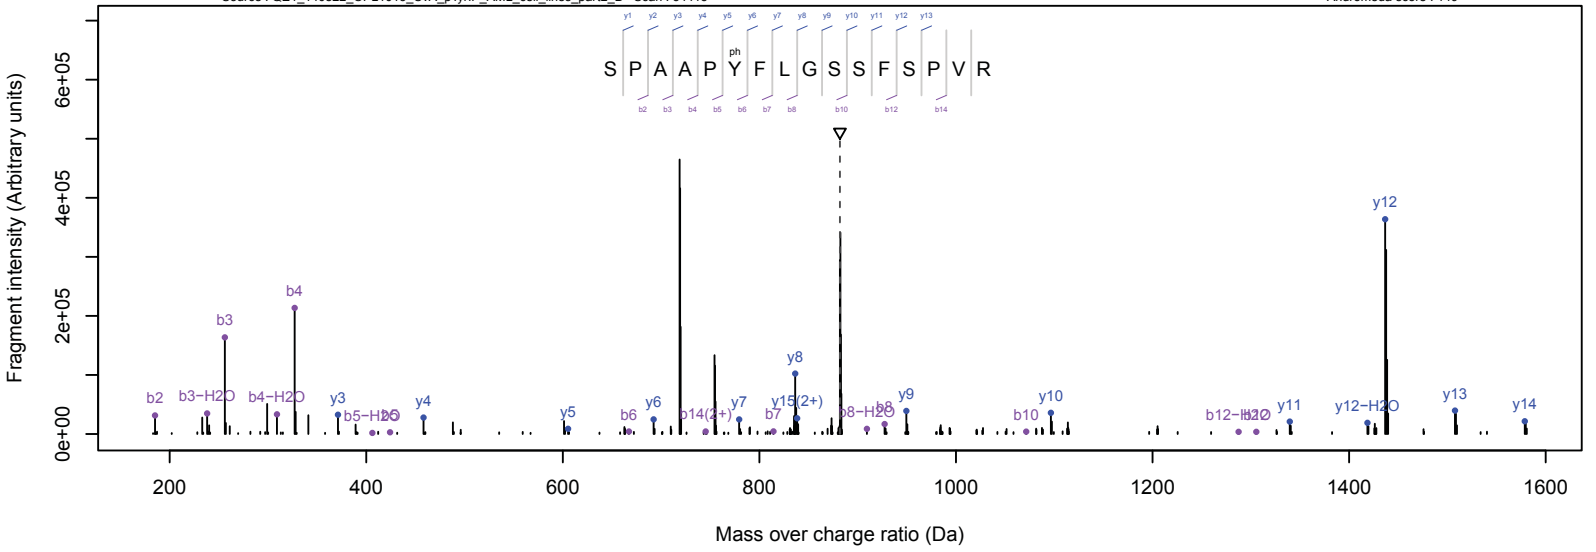

WRY(ph)PSLSLHGIEGAFSGSGAK-3+

Source: QE1\_140612\_OPL1013\_CVA\_phosphoproteomic\_landscape\_AML\_B Scan: 39426

Andromeda score: 149

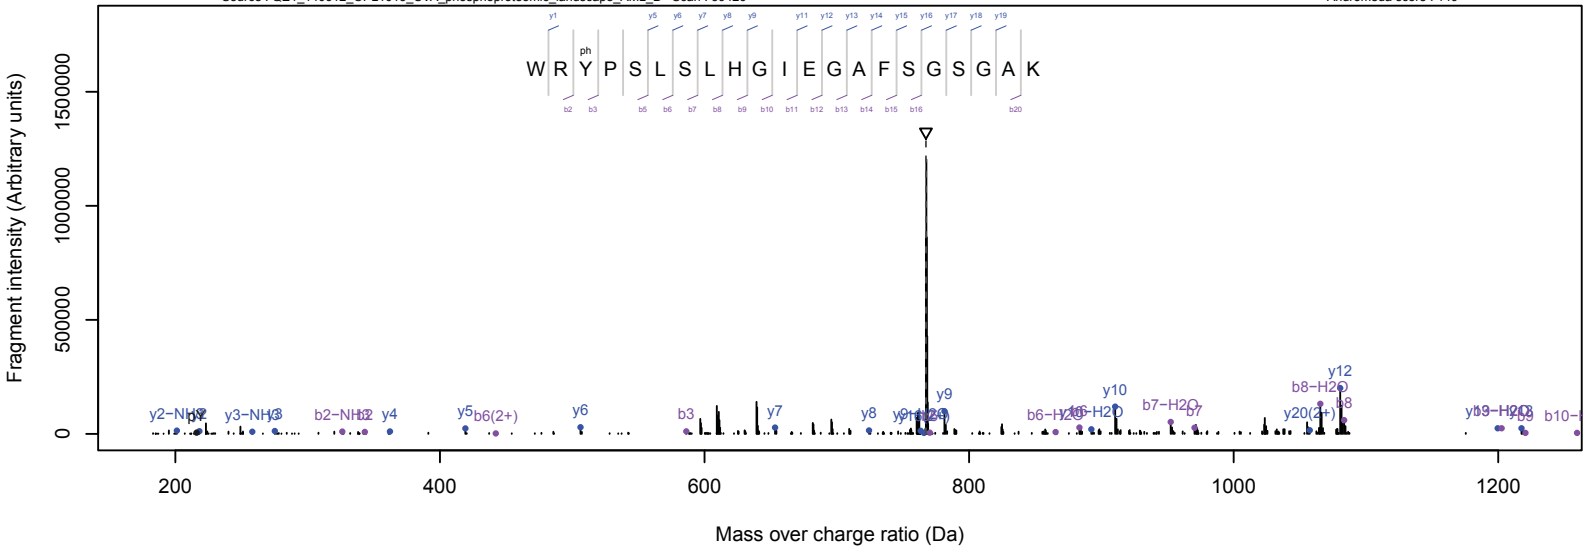

IKSY(ph)SFPKPGHR-2+

Source: QE1\_140612\_OPL1013\_CVA\_phosphoproteomic\_landscape\_AML\_B Scan: 7827

Andromeda score: 148.96

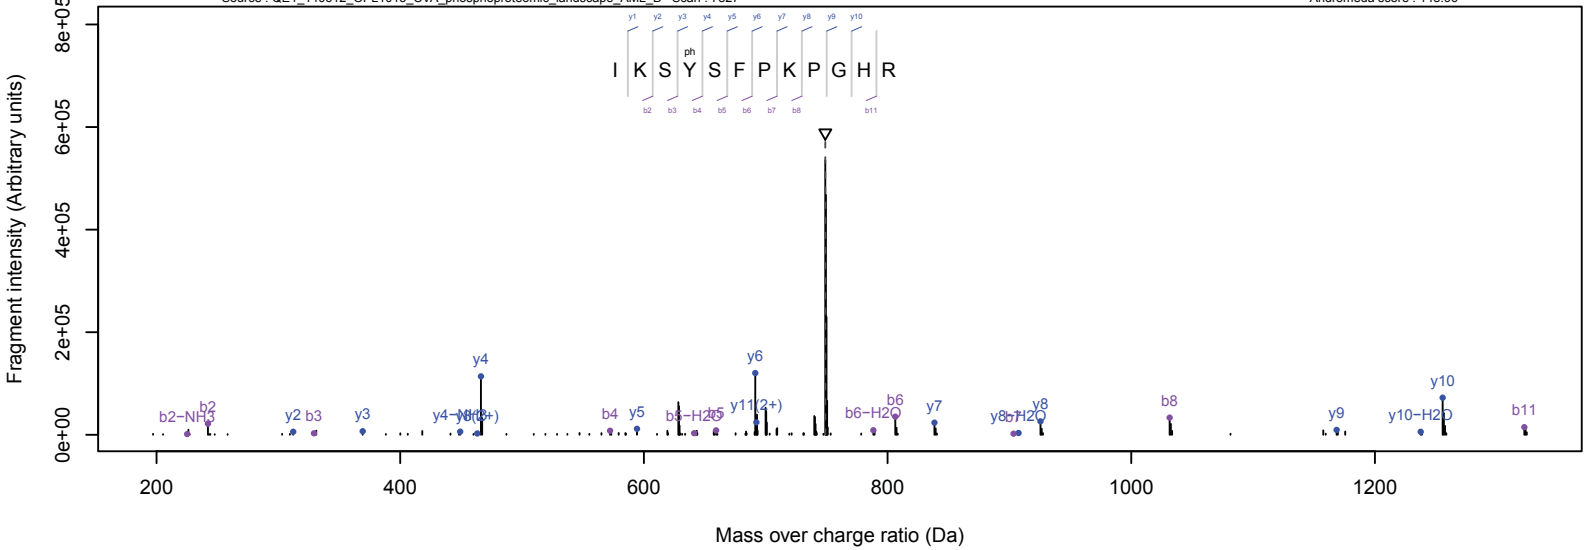

DSGY(ph)LHLLYK-2+

Source : QE1\_140612\_OPL1013\_CVA\_phosphoproteomic\_landscape\_AML\_D Scan : 29235

Andromeda score : 148.91

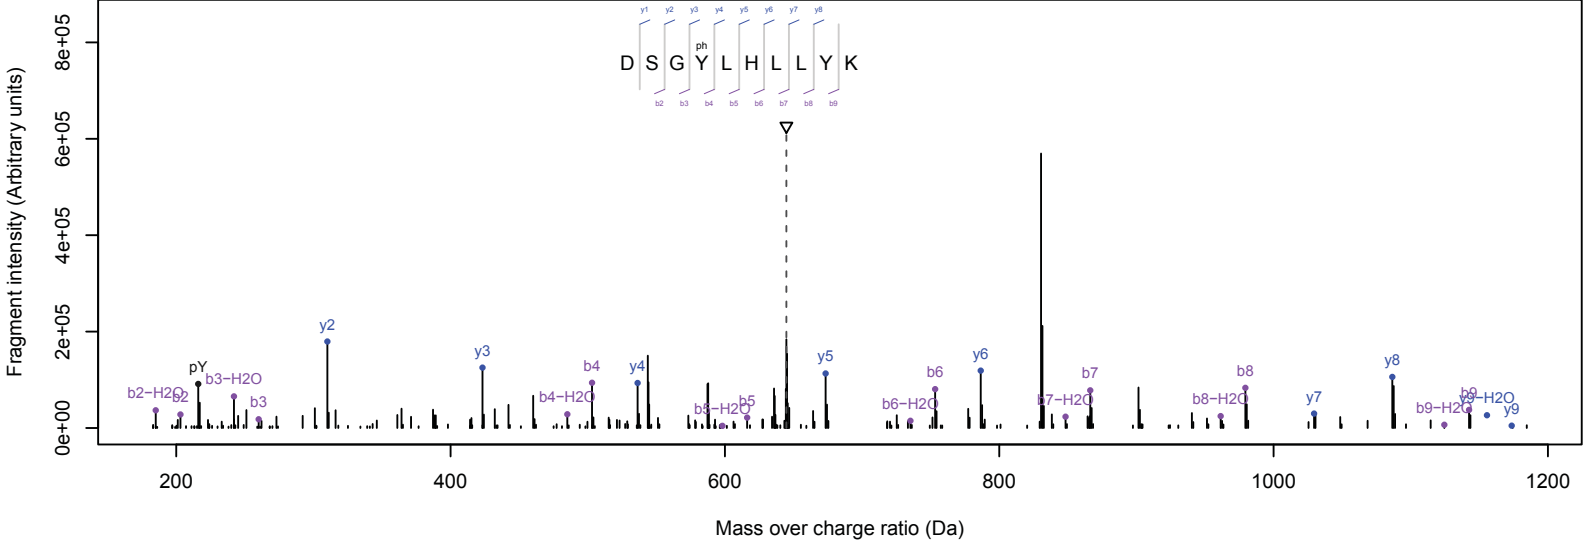

Y(ph)GMNPHQTPAQLYTLQPK-3+

Source : QE1\_140612\_OPL1013\_CVA\_phosphoproteomic\_landscape\_AML\_B Scan : 26980

Andromeda score : 148.46

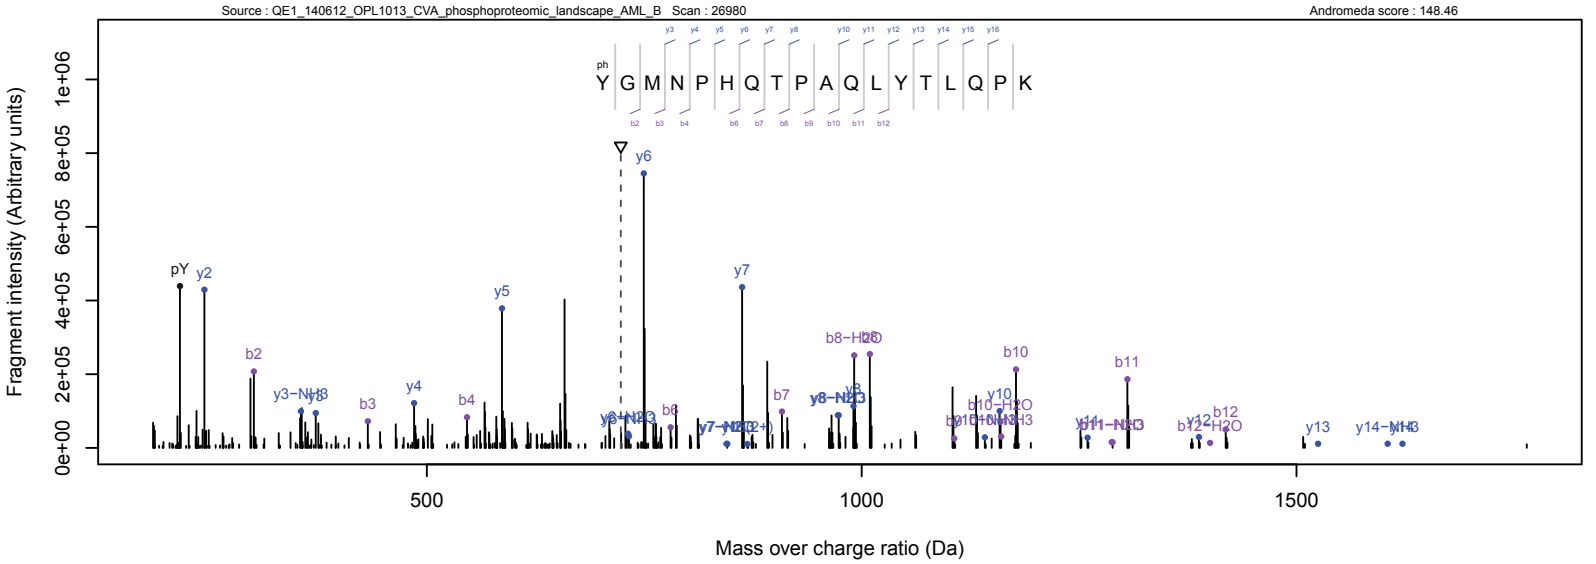

FYCDYCDTY(ph)LTHDPSVR-3+

Source : QE1\_140612\_OPL1013\_CVA\_phosphoproteomic\_landscape\_AML\_C Scan : 26344

Andromeda score : 148.44

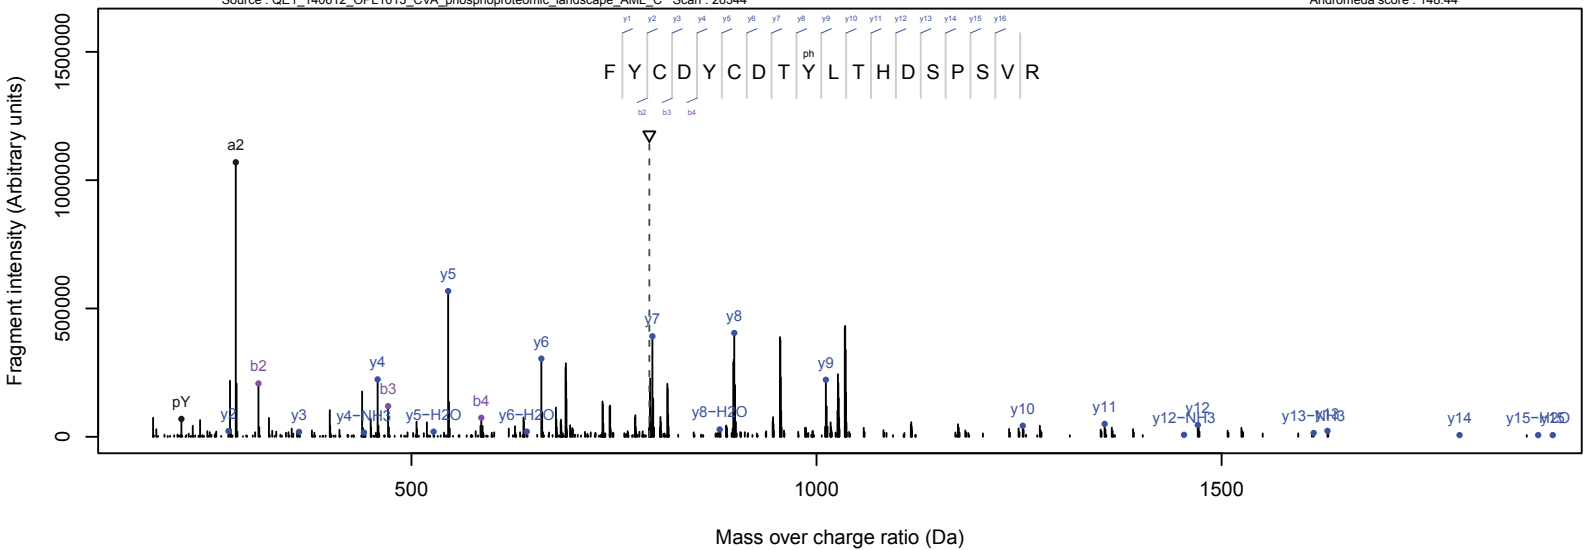

**VIEDNEY(ph)TAR-2+**

Source : Qe1\_141024\_OPL1013\_CvA\_AML\_pTyrIP\_MOLM13 Scan : 7741

Andromeda score : 148.32

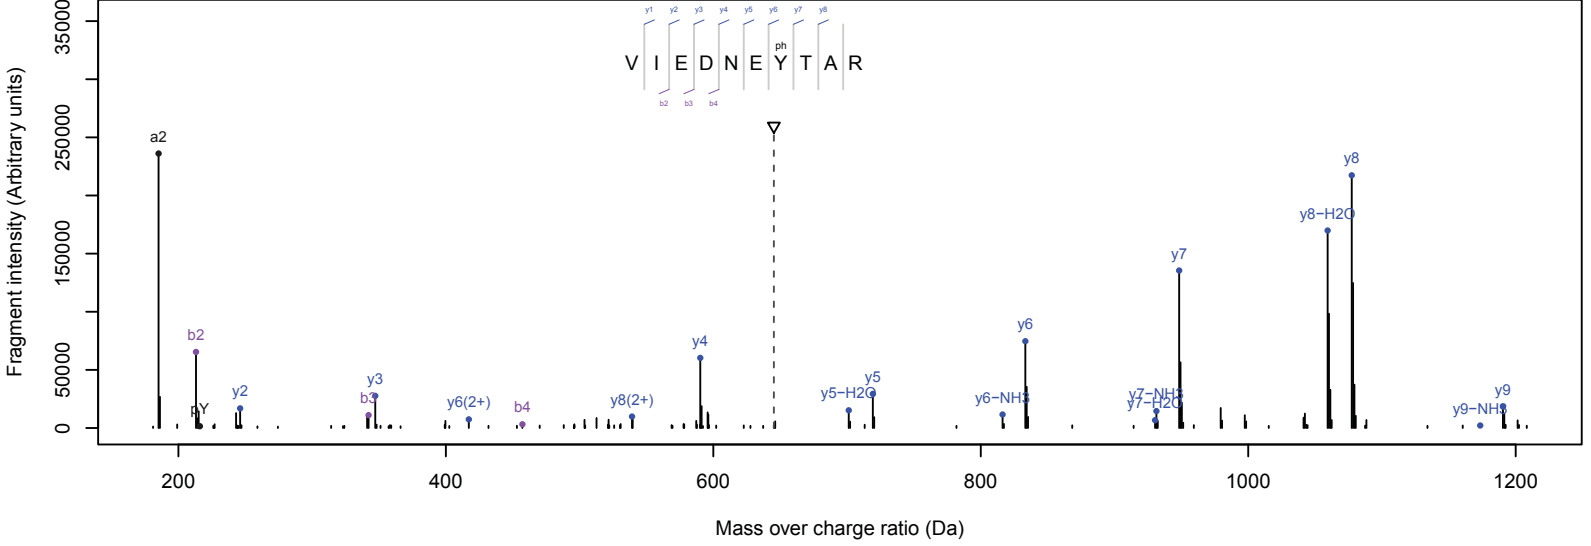

**FVDGLMIHSGDPVNY(ph)YVDTAVR-3+**

Source : QE1\_140612\_OPL1013\_CVA\_phosphoproteomic\_landscape\_AML\_C Scan : 45026

Andromeda score : 148.29

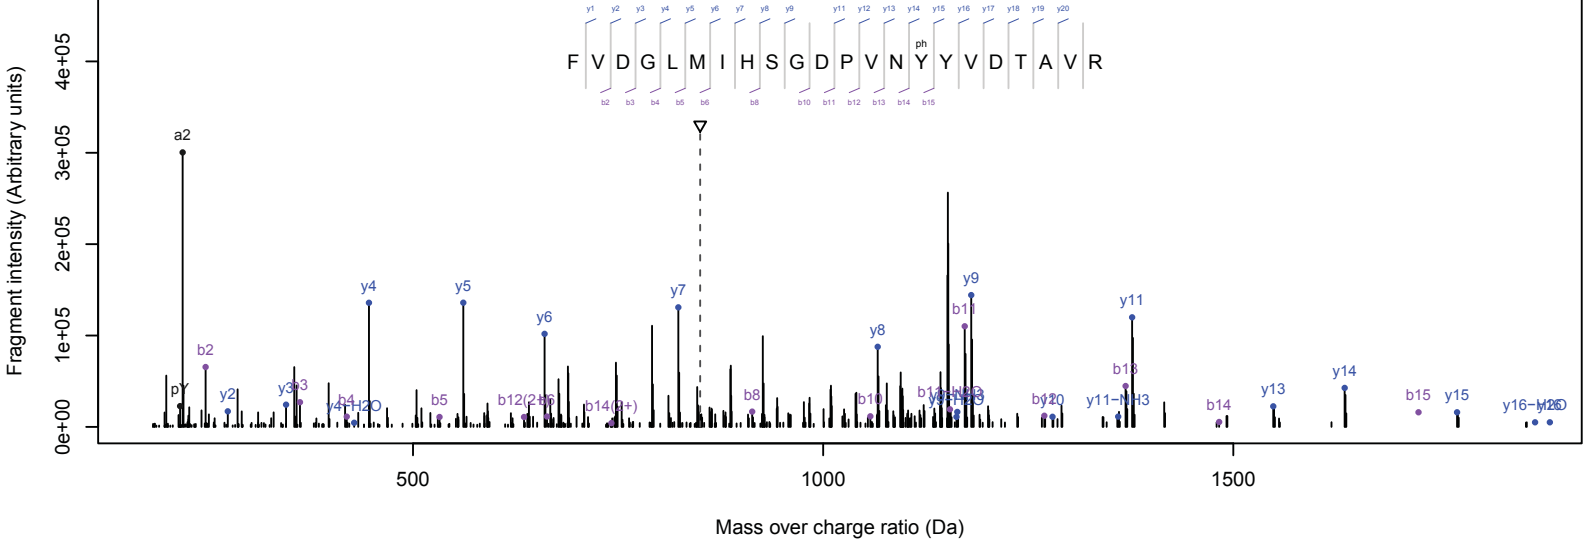

**(ac)AGRLPACVVDCGTGY(ph)TK-2+**

Source : QE1\_140612\_OPL1013\_CVA\_phosphoproteomic\_landscape\_AML\_D Scan : 27552

Andromeda score : 148.26

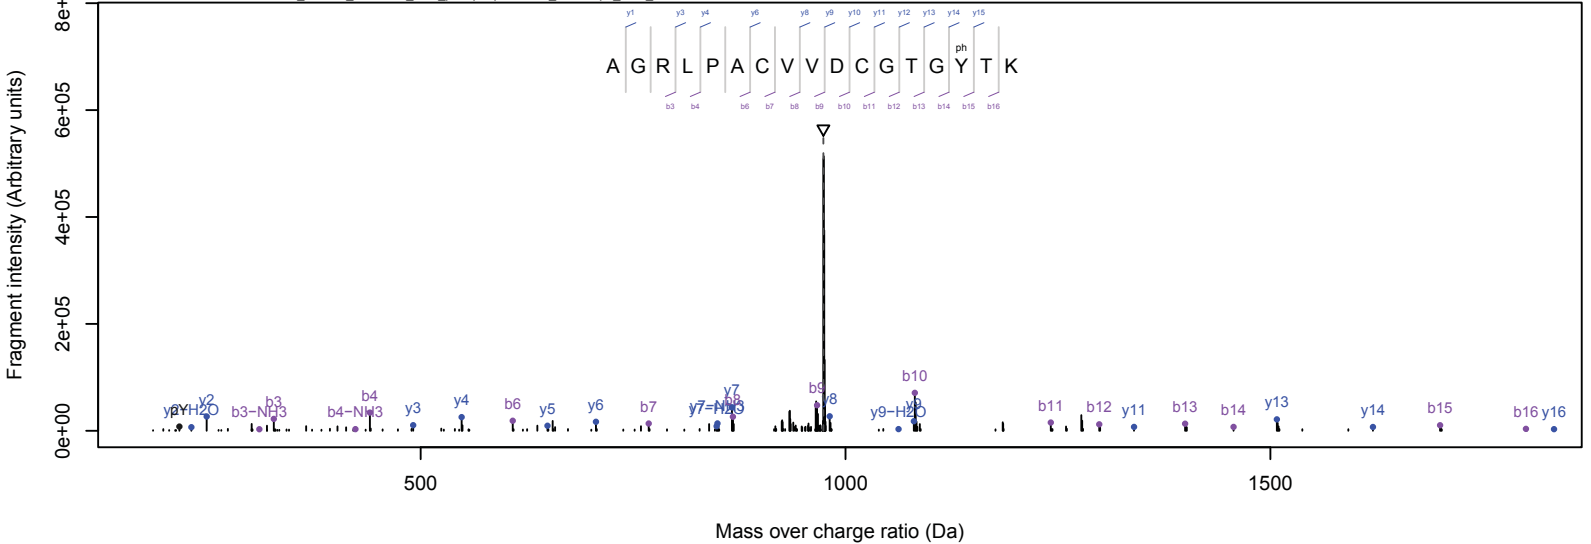

AVY(ph)IGVHVPF<sup>ph</sup>SK-2+

Source : QE1\_140612\_OPL1013\_CVA\_phosphoproteomic\_landscape\_AML\_C Scan : 34985

Andromeda score : 148.18

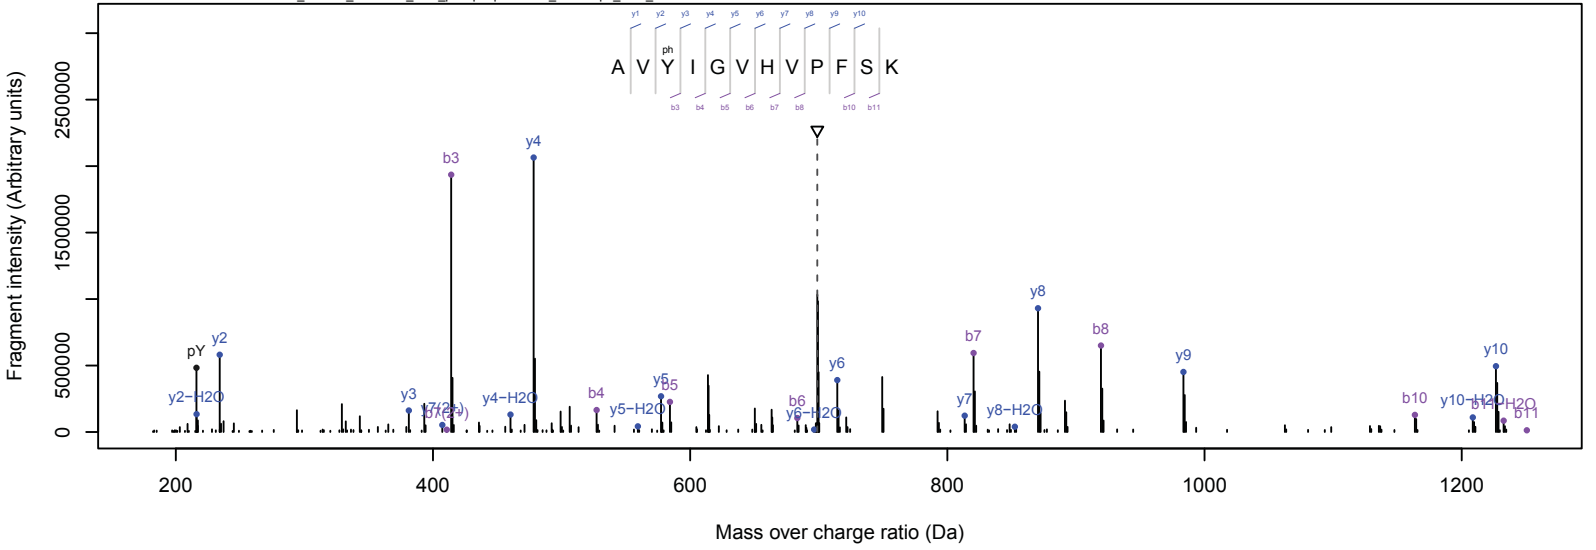

TLY(ph)SFFSPSPAR-2+

Source : QE1\_140612\_OPL1013\_CVA\_phosphoproteomic\_landscape\_AML\_B Scan : 35799

Andromeda score : 148.18

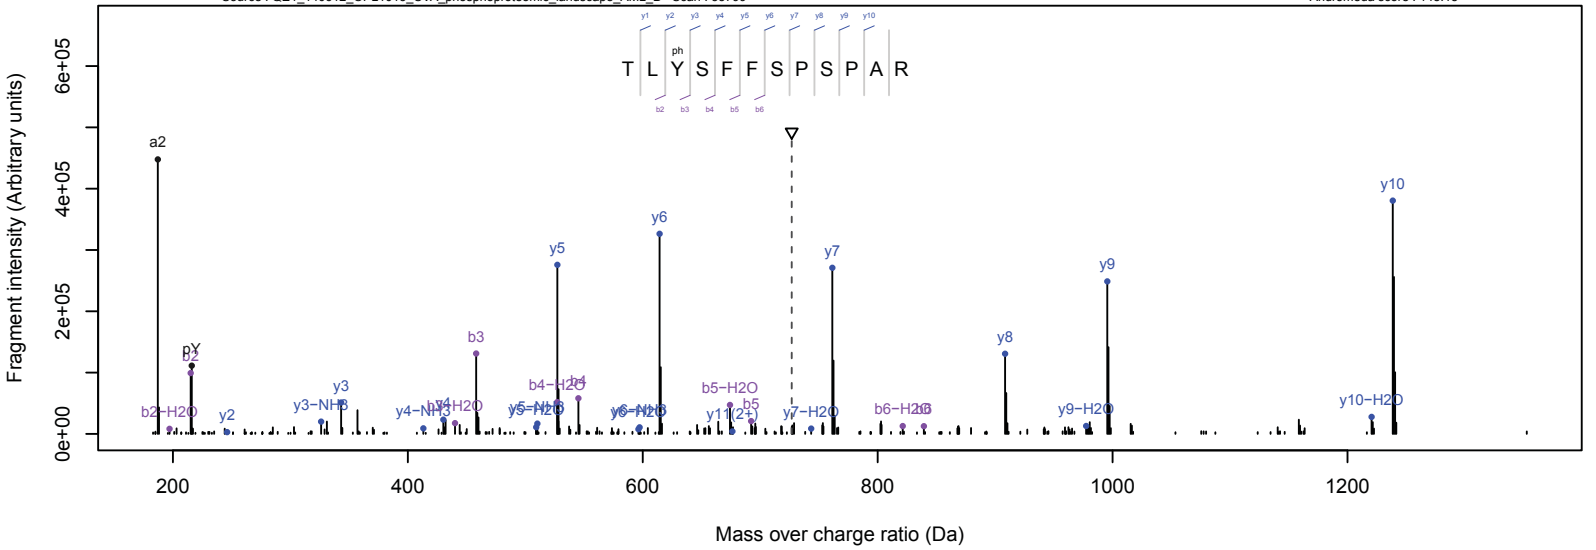

AVSTQPSQSGTSDQVLYGQLLGSPTSPGPGHY(ph)LR-4+

Source : QE1\_140908\_OPL1013\_CvA\_pTyrIP\_AML\_Kasumi1 Scan : 37489

Andromeda score : 148.12

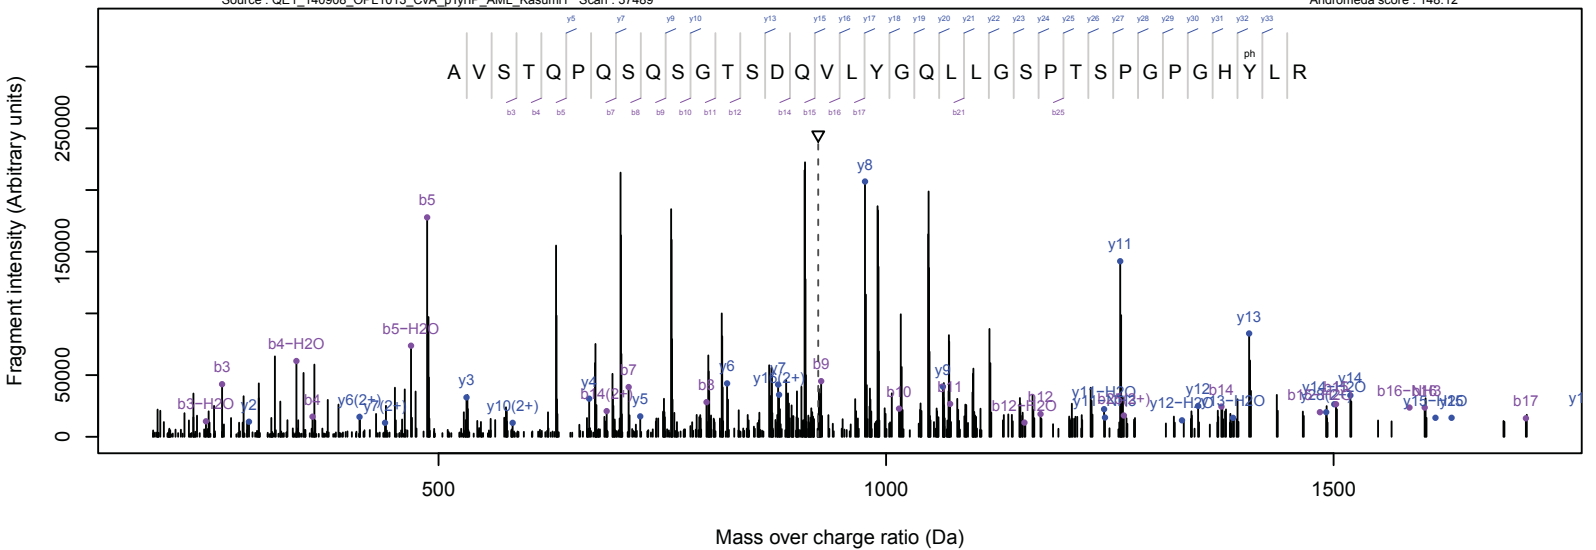

ASPSLSYSDPSGHY(ph)CQLQPPV R-3+

Source : QE1\_140612\_OPL1013\_CVA\_phosphoproteomic\_landscape\_AML\_B Scan : 27774

Andromeda score : 148.09

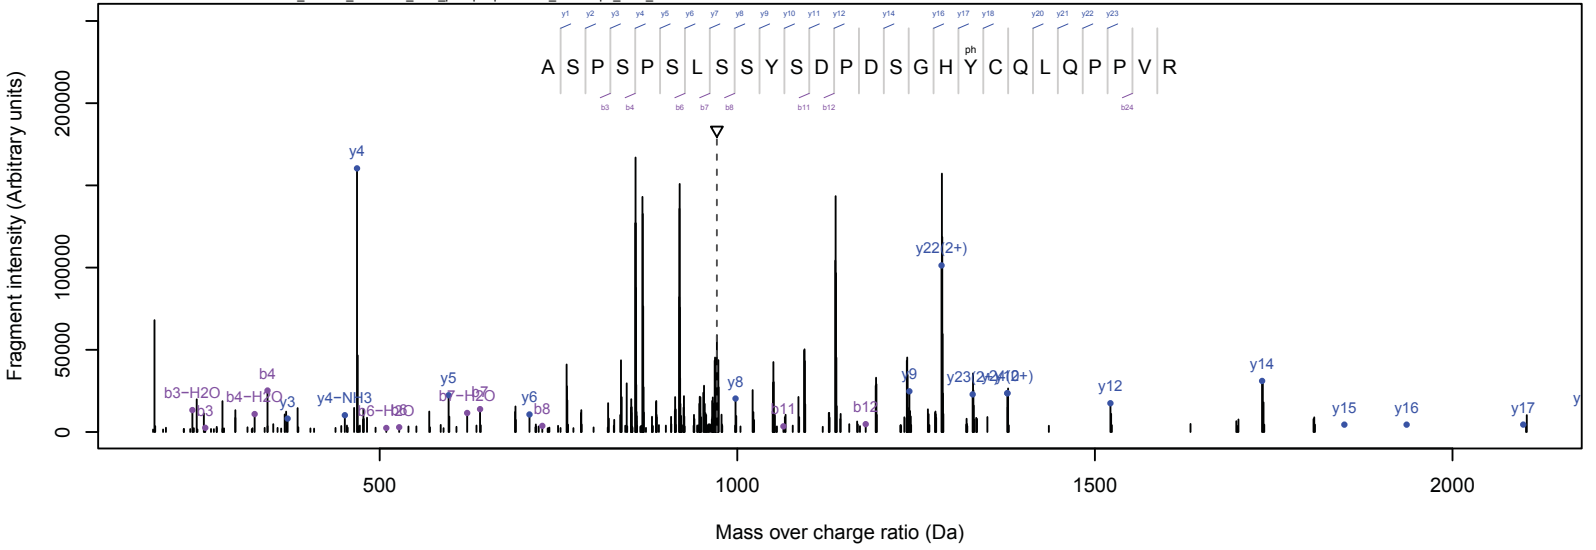

ELKPETISSPGY(ph)HILR-3+

Source : QE1\_140612\_OPL1013\_CVA\_phosphoproteomic\_landscape\_AML\_C Scan : 25454

Andromeda score : 147.7

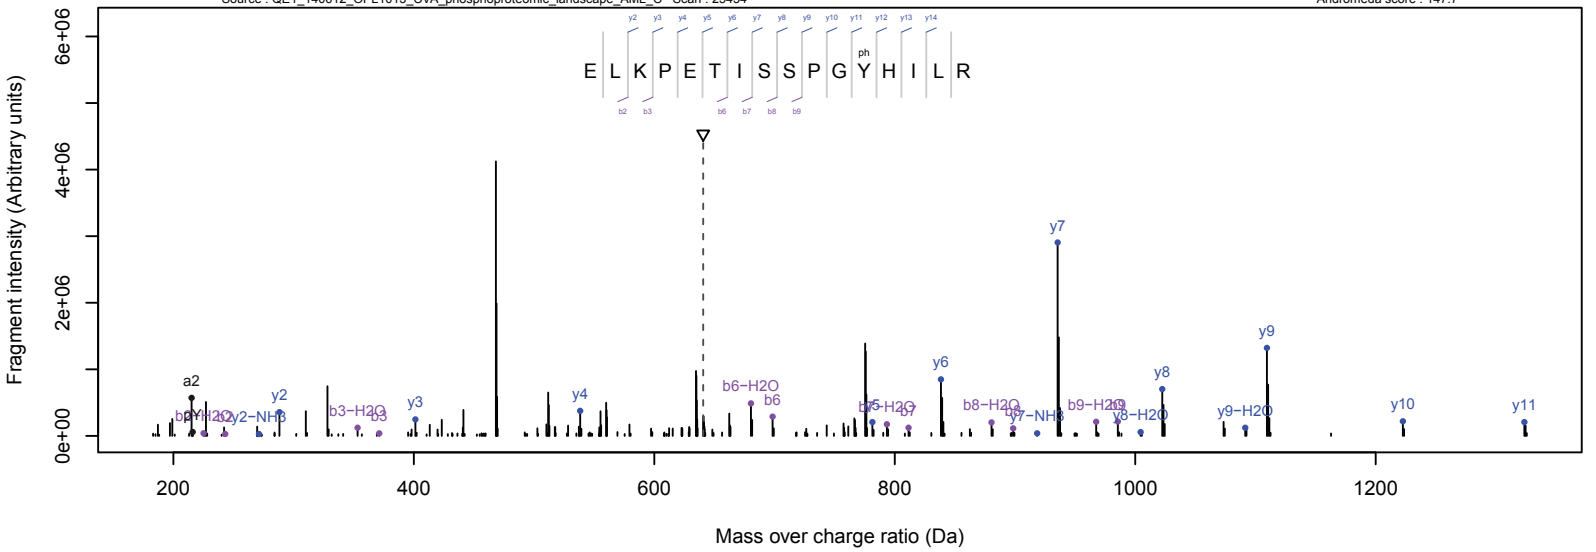

IEDPVYGIYYVDHINR K-4+

Source : QE1\_140908\_OPL1013\_CvA\_pTyrIP\_AML\_HEL Scan : 36606

Andromeda score : 147.7

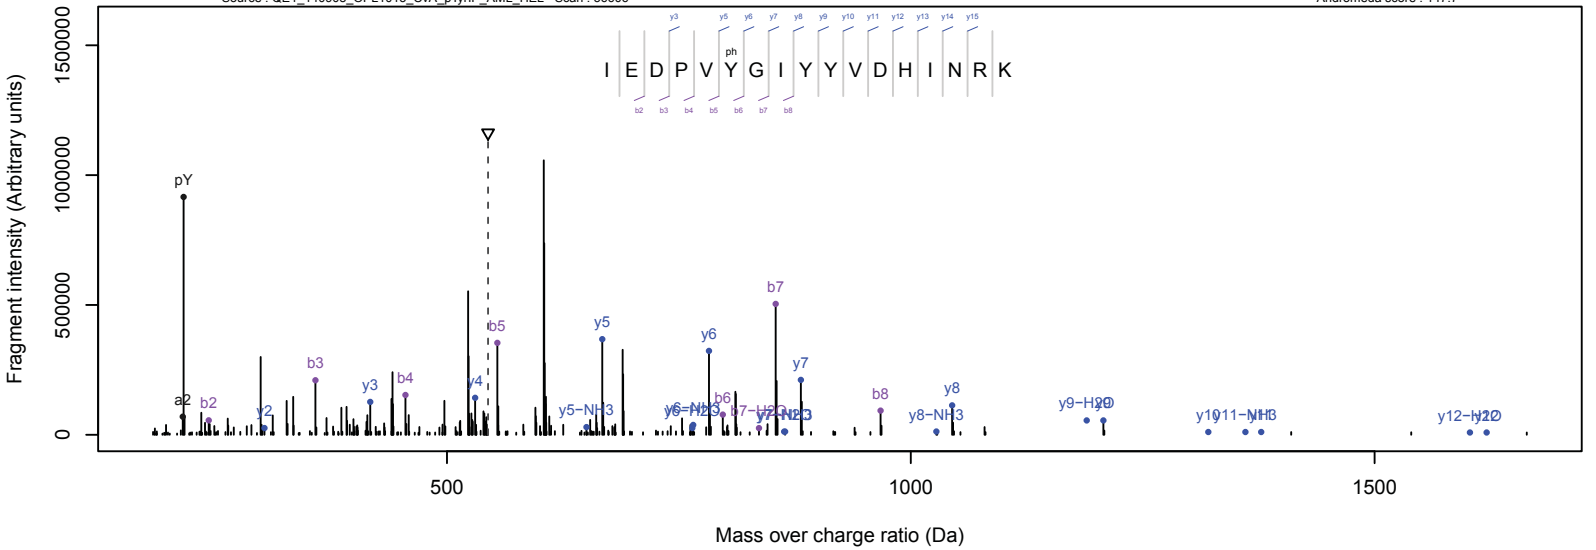

**RVY(ph)ELHGSSPAVSSSEECTPSR**

Source : QE1\_140612\_OPL1013\_CVA\_phosphoproteomic\_landscape\_AML\_B Scan : 12026

Andromeda score : 147.67

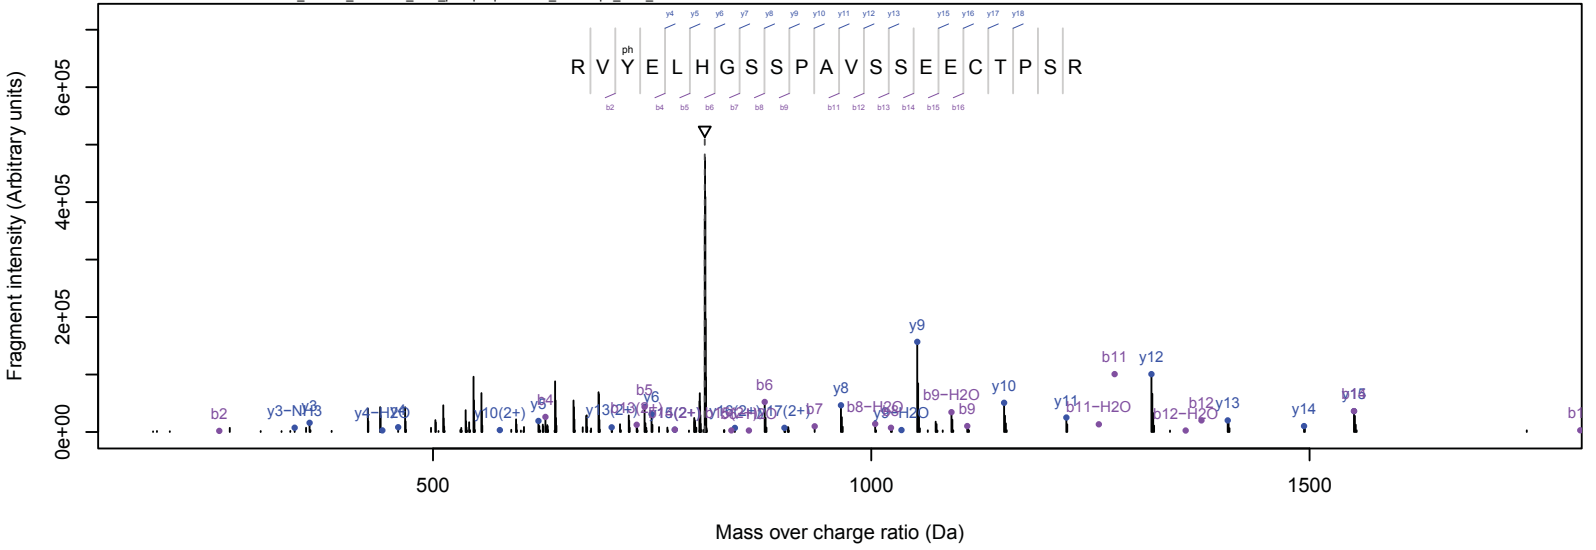

**VDKSAVGFNEMEAPTTAYKK**

Source : QE1\_140612\_OPL1013\_CVA\_phosphoproteomic\_landscape\_AML\_C Scan : 19559

Andromeda score : 147.67

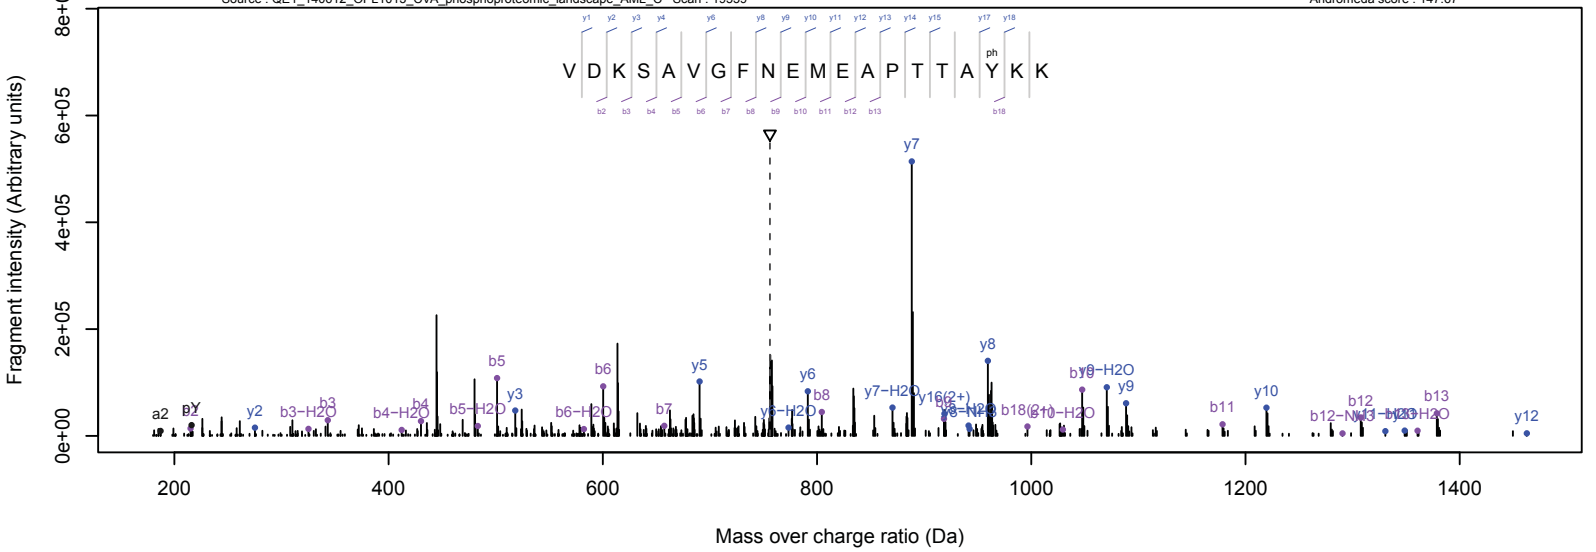

**VNESSHY(ph)DLAFTDVHFKPGQIR**

Source : QE1\_140908\_OPL1013\_CvA\_pTyrIP\_AML\_HL60 Scan : 33476

Andromeda score : 147.67

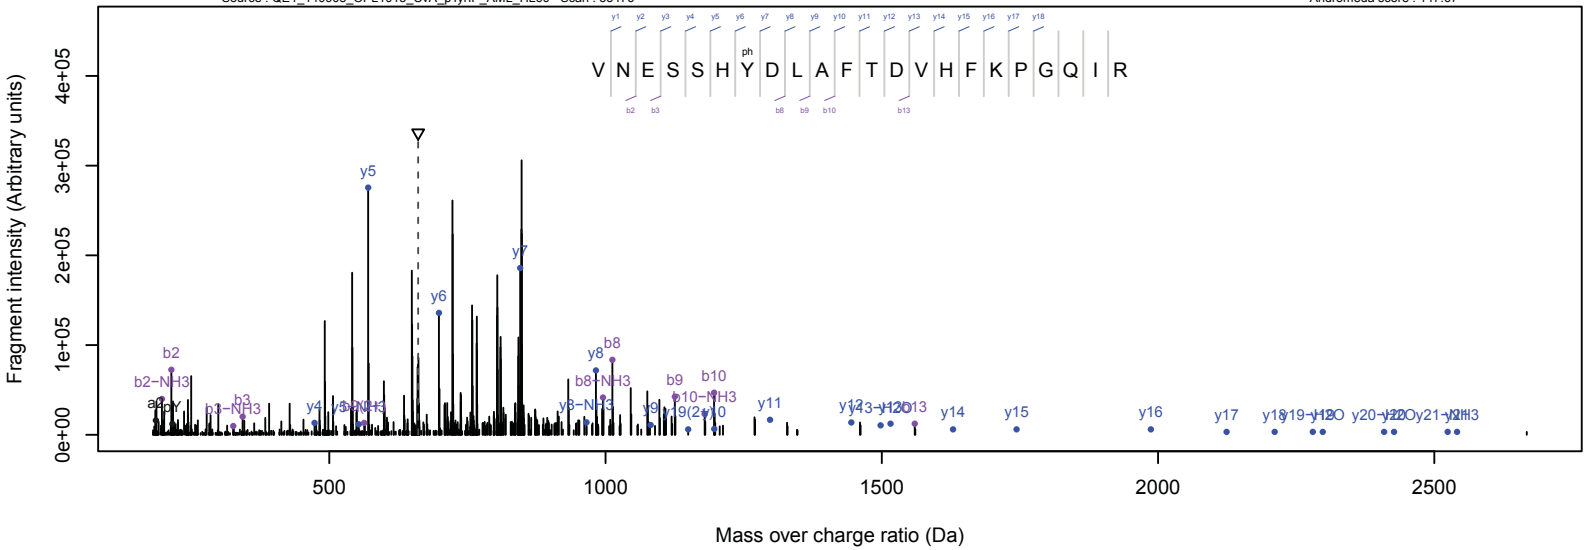

GAGSAMSTDAY(ph)PKNPHLR-3+

Source: QE1\_140612\_OPL1013\_CVA\_phosphoproteomic\_landscape\_AML\_C Scan: 10971

Andromeda score: 147.64

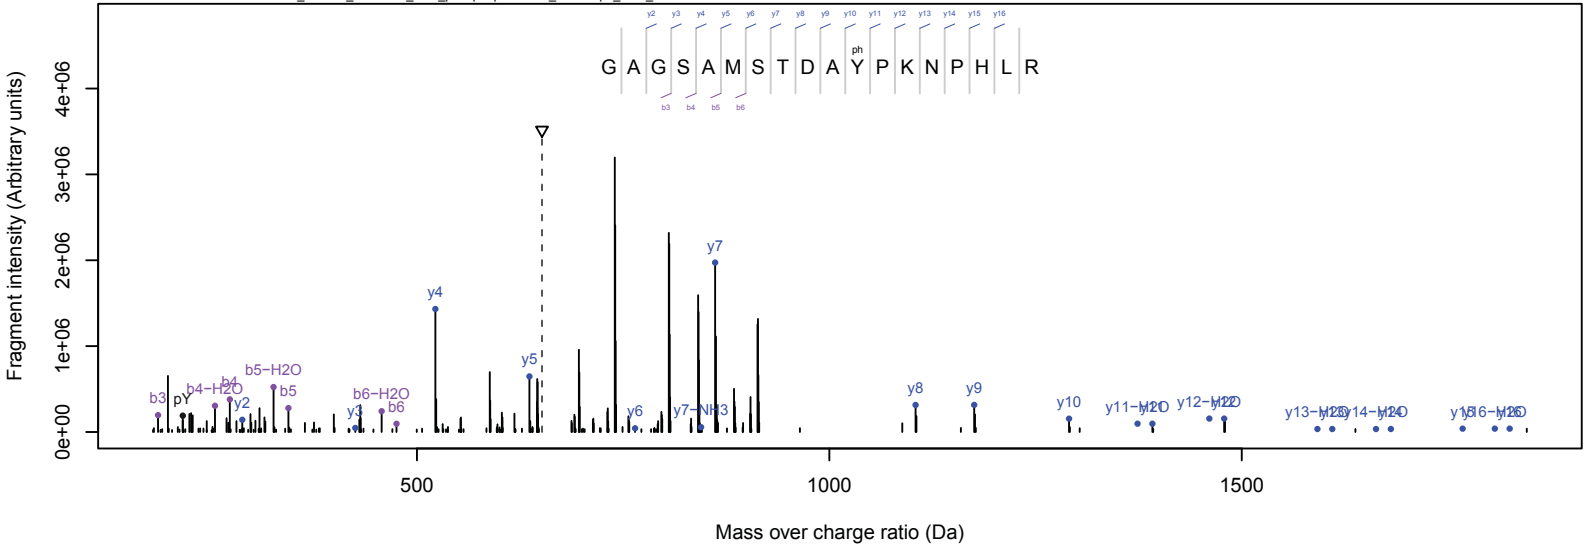

LKSY(ph)SMPISIEFQR-2+

Source: QE1\_140612\_OPL1013\_CVA\_phosphoproteomic\_landscape\_AML\_B Scan: 33934

Andromeda score: 147.64

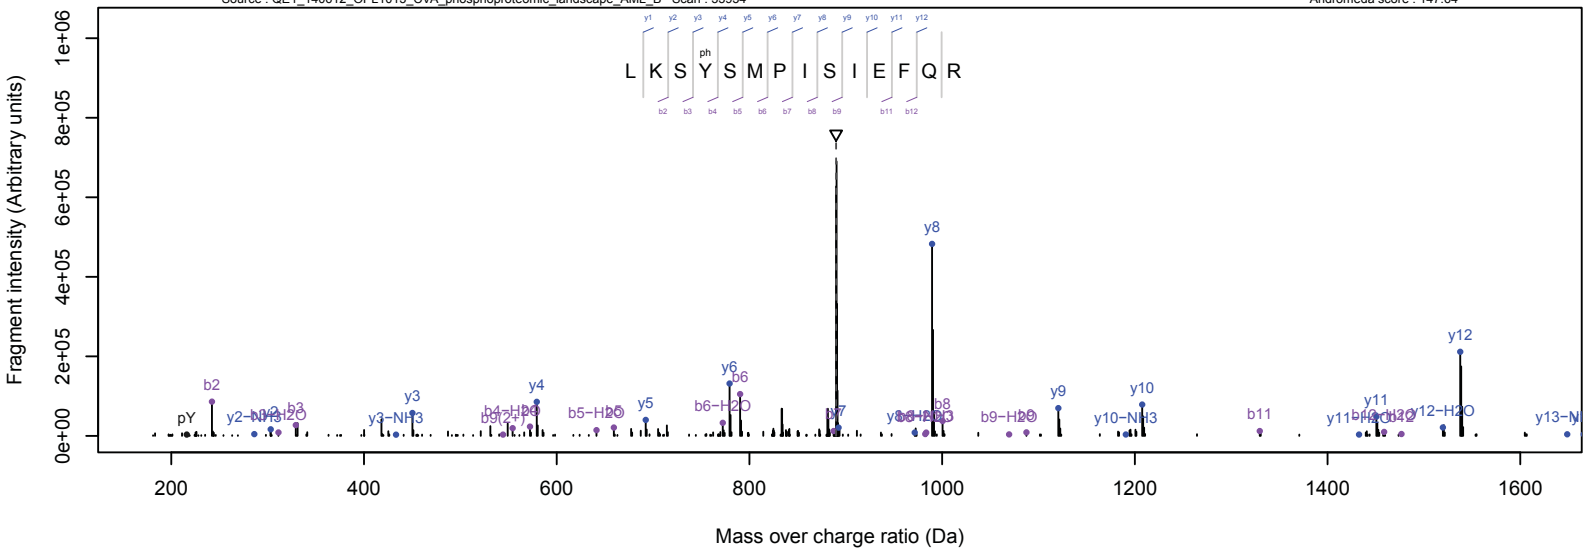

MNEGVSY(ph)EFKFFR-2+

Source: QE1\_140612\_OPL1013\_CVA\_phosphoproteomic\_landscape\_AML\_C Scan: 40157

Andromeda score: 147.51

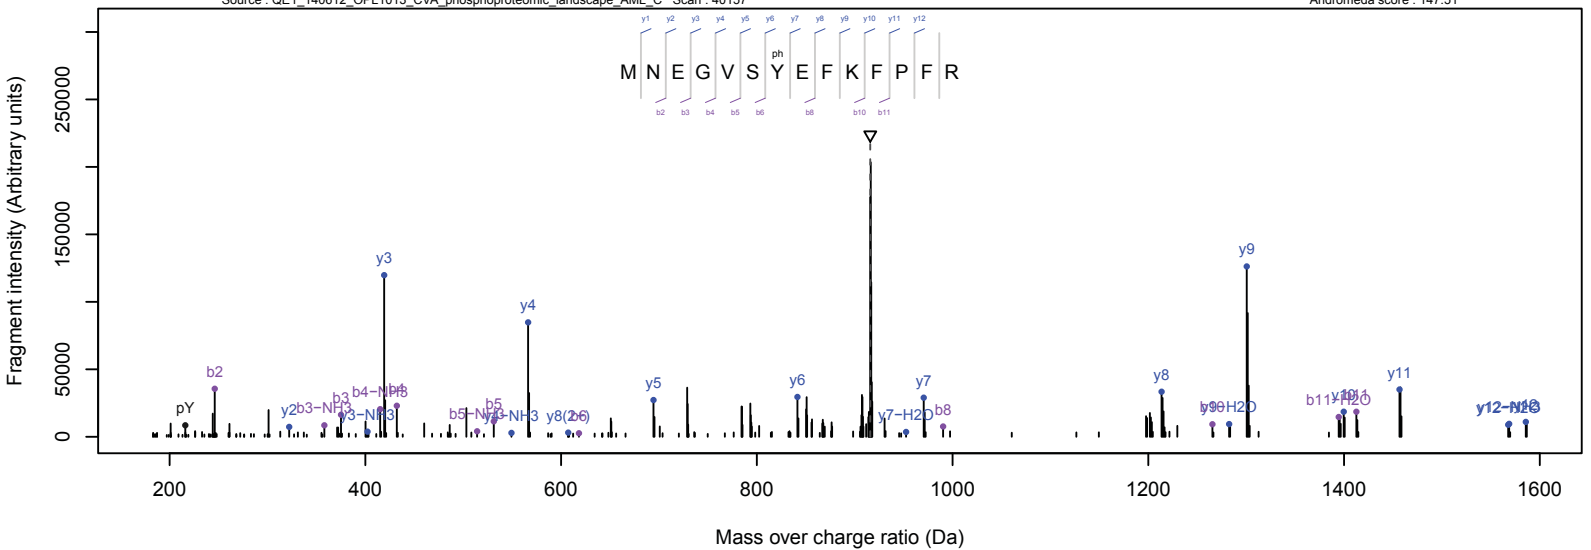



**NYVTVM(ox)QNNPLTSGLEPSPQCDY(ph)IRPSLTGK-3+**

Source : QE1\_140612\_OPL1013\_CVA\_phosphoproteomic\_landscape\_AML\_C Scan : 39046

Andromeda score : 147.42

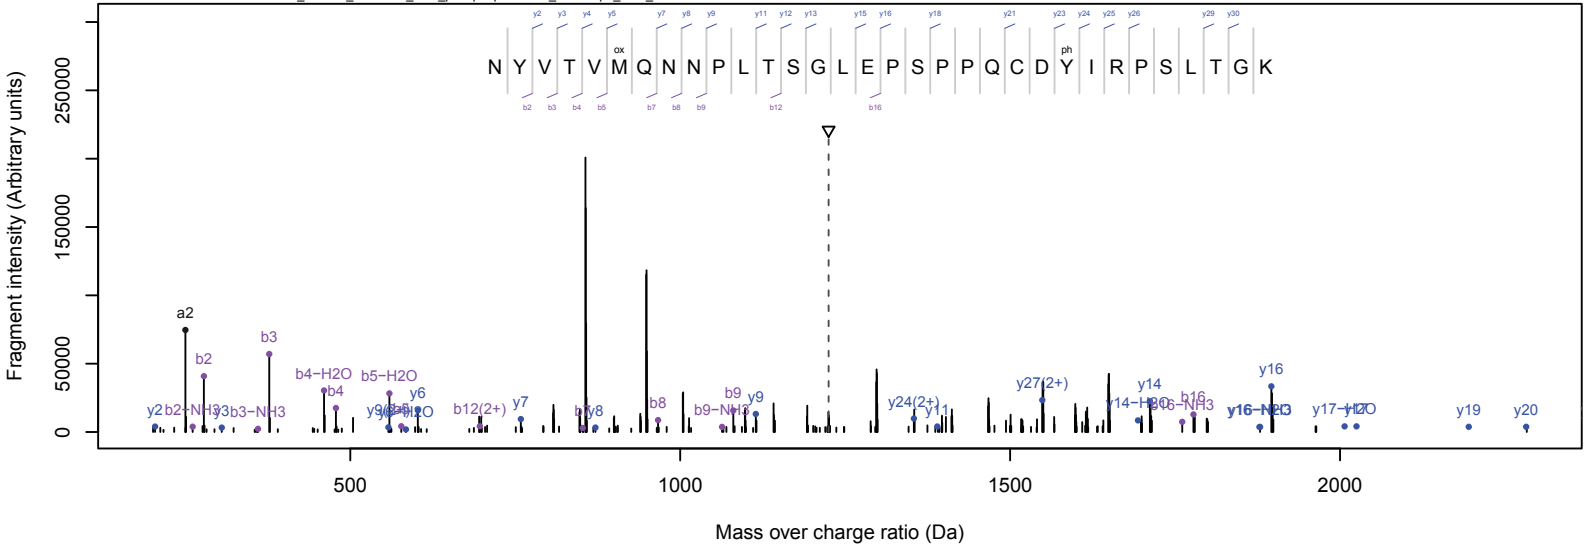

**TY(ph)PSLLQGEYNNR-2+**

Source : QE1\_140612\_OPL1013\_CVA\_phosphoproteomic\_landscape\_AML\_C Scan : 24656

Andromeda score : 147.26

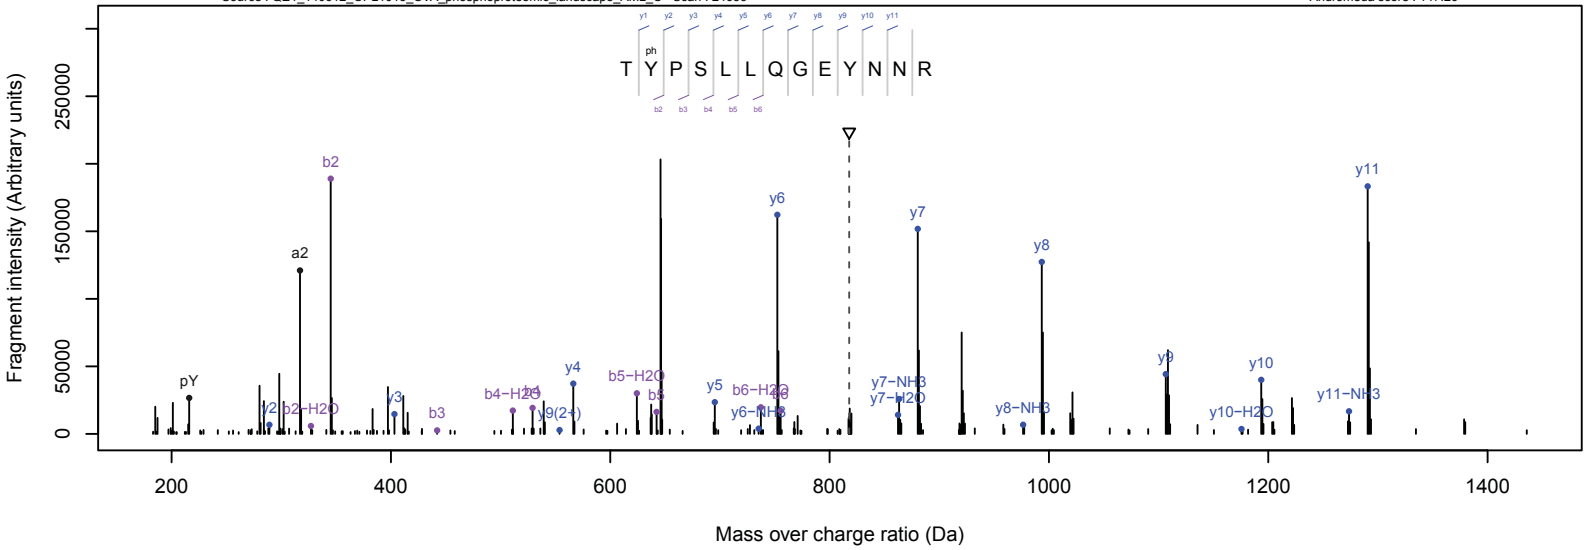

**Y(ph)FPTQALNFAFK-2+**

Source : QE1\_140822\_OPL1013\_CvA\_pTyrIP\_AML\_cell\_lines\_part2\_B Scan : 39117

Andromeda score : 147.26

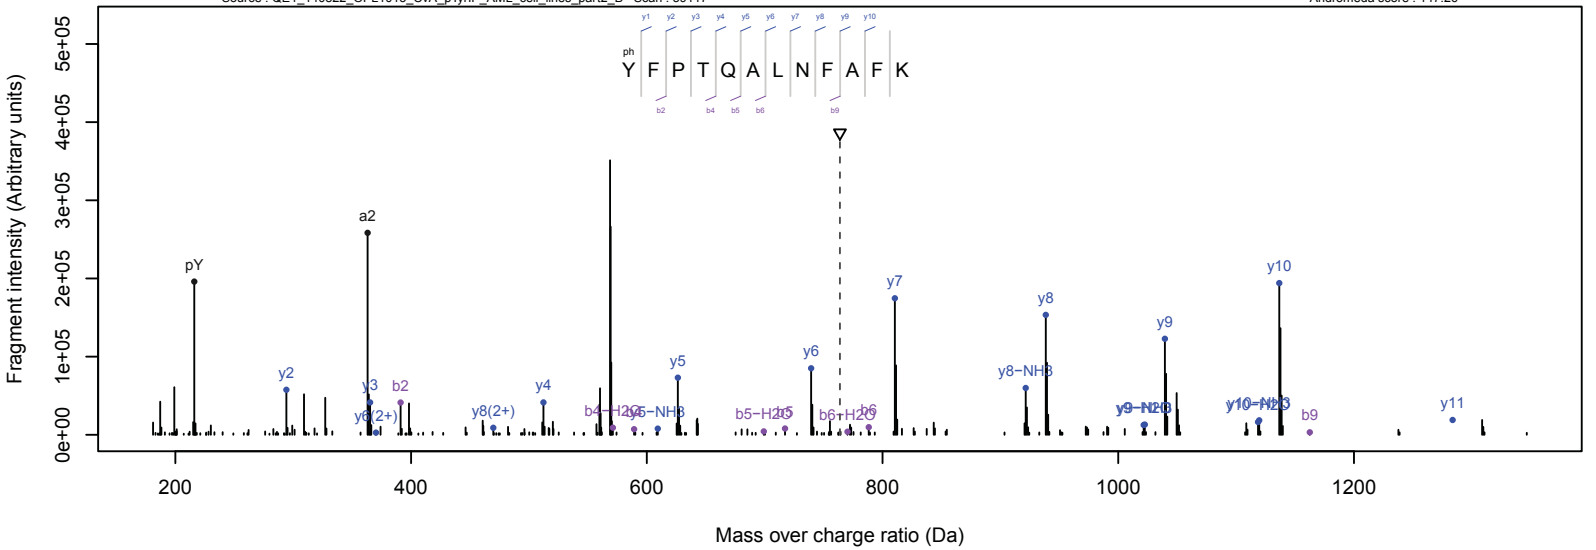

**YVLDDDEY(ph)TSSVGSKFPVR-2+**

Source: QE1\_140908\_OPL1013\_CVA\_pTyrIP\_AML\_HL60 Scan: 33302

Andromeda score: 147.17

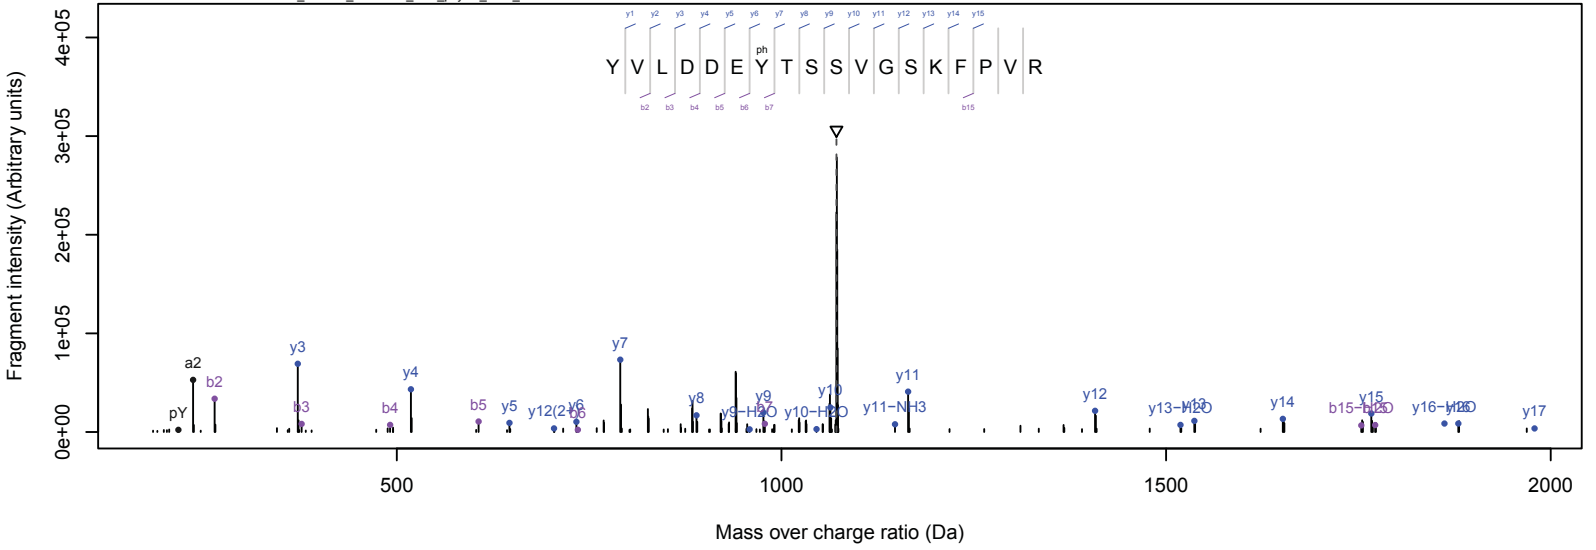

**VNSKFDTIY(ph)QLLKK-3+**

Source: QE1\_140612\_OPL1013\_CVA\_phosphoproteomic\_landscape\_AML\_C Scan: 38244

Andromeda score: 147.12

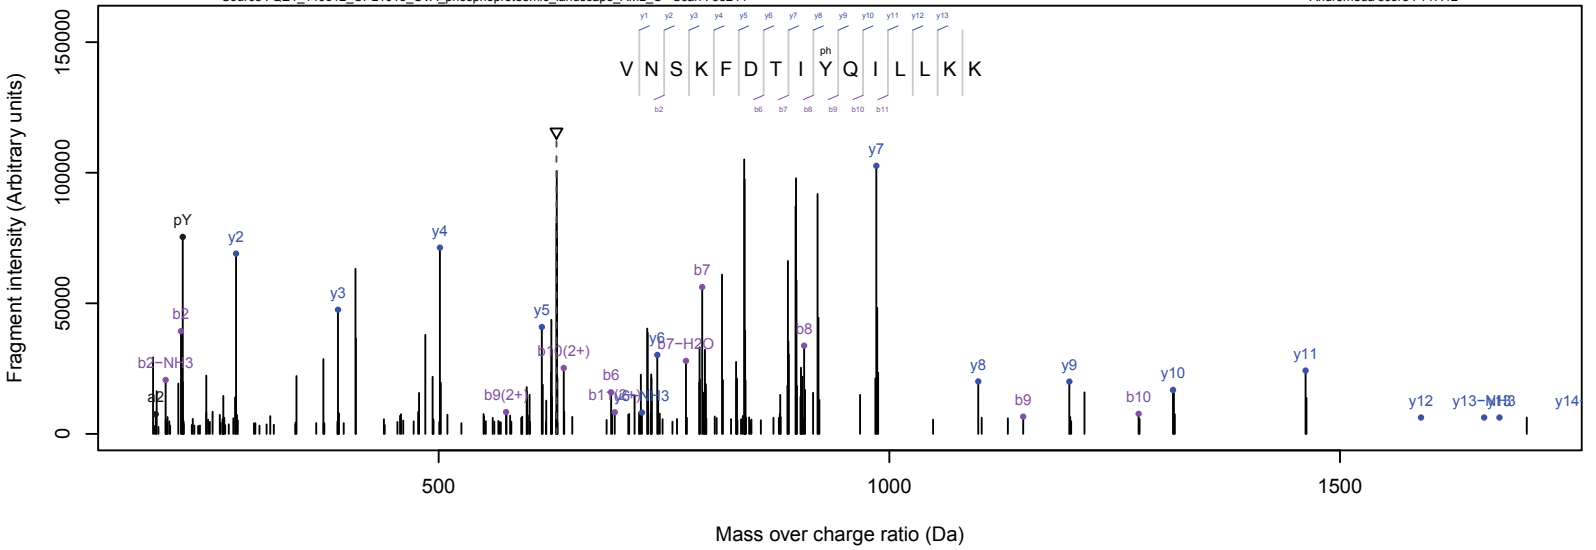

**AKEEY(ph)VVHTIFPSNGSSLCK-3+**

Source: QE1\_140612\_OPL1013\_CVA\_phosphoproteomic\_landscape\_AML\_C Scan: 27931

Andromeda score: 146.97

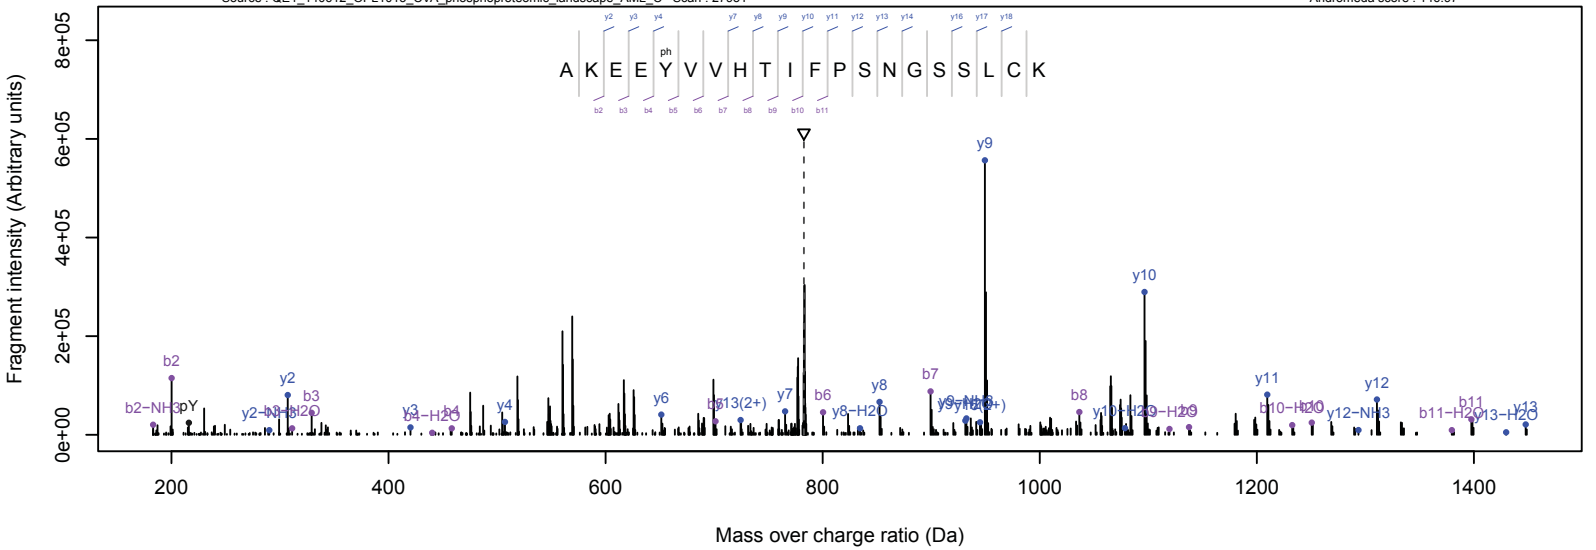

**EELHY(ph)ASVVFDSTNR-3+**

Source : QE1\_140612\_OPL1013\_CVA\_phosphoproteomic\_landscape\_AML\_C Scan : 27788

Andromeda score : 146.96

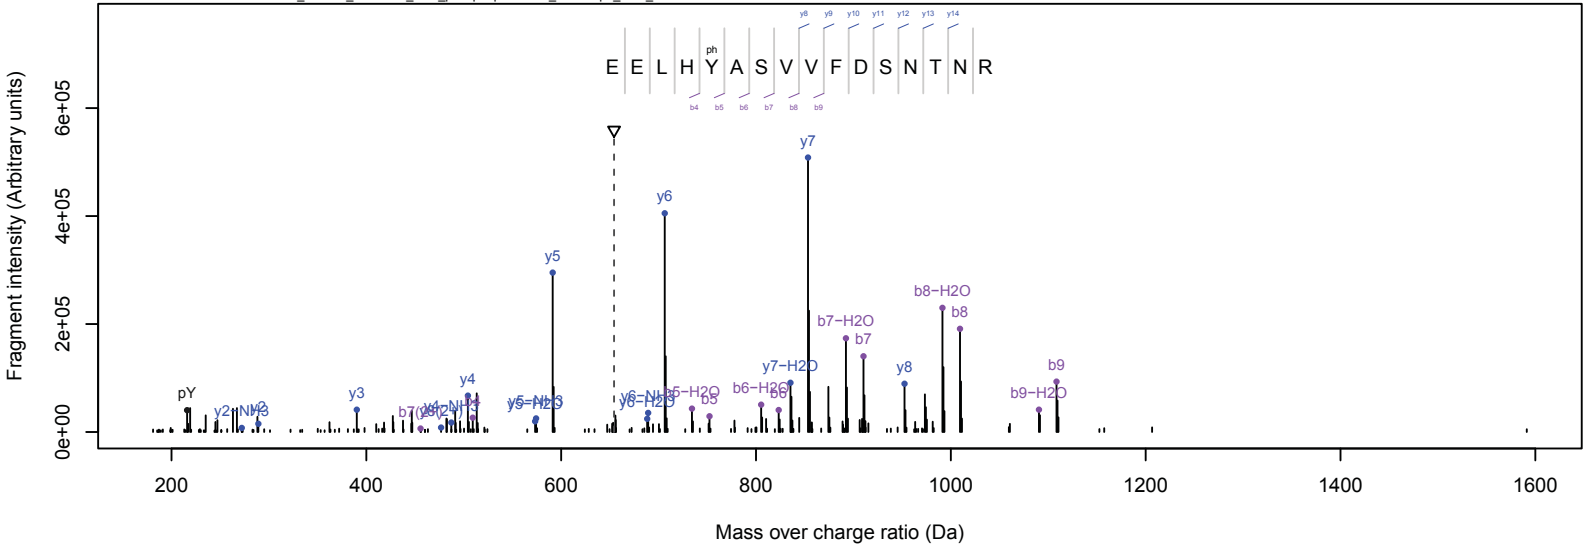

**SLY(ph)ASSPGGVYATR-2+**

Source : QE1\_140822\_OPL1013\_CvA\_pTyrIP\_AML\_cell\_lines\_part2\_F Scan : 14239

Andromeda score : 146.96

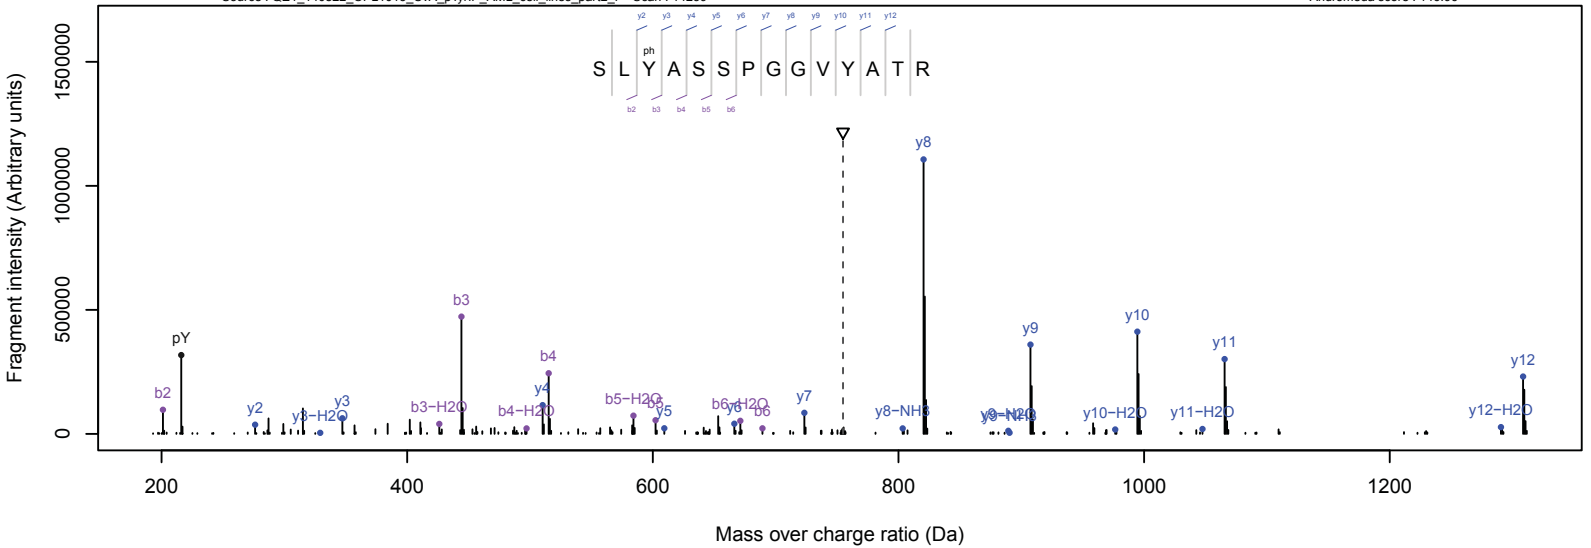

**LSLGQY(ph)DNDAGGQLPFSK-2+**

Source : QE1\_140612\_OPL1013\_CVA\_phosphoproteomic\_landscape\_AML\_D Scan : 35593

Andromeda score : 146.78

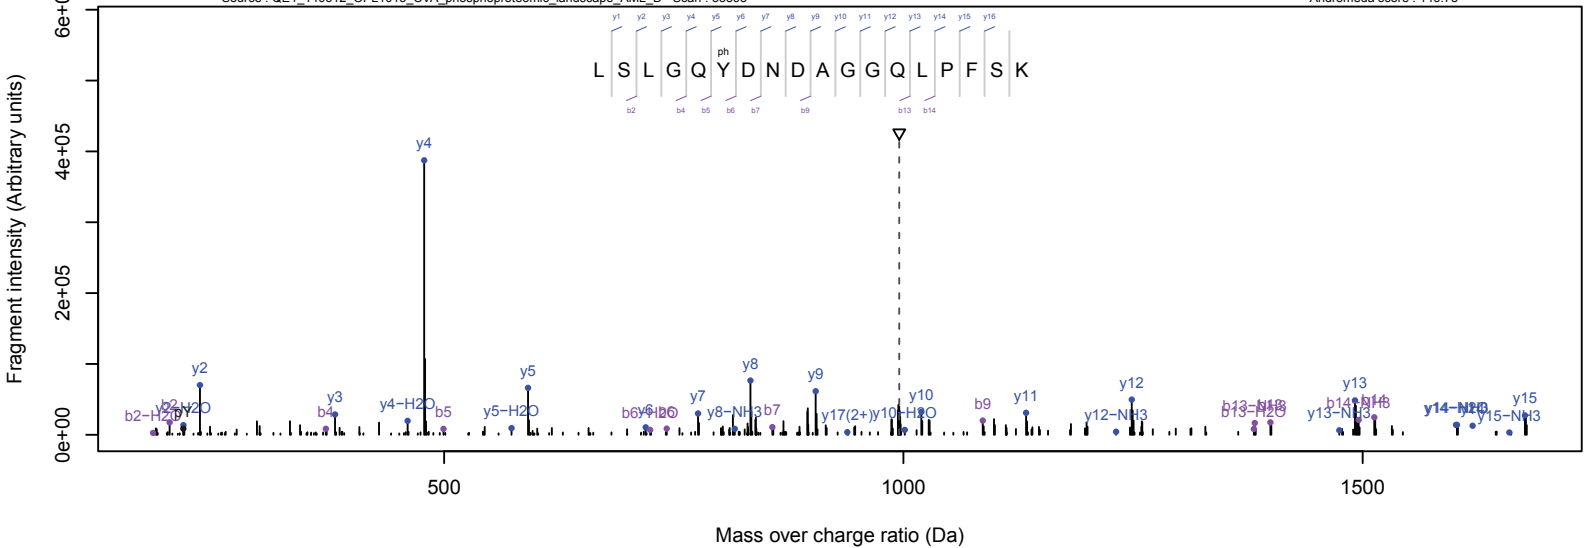

TQAVFNHTEDY(ph)VLLPDER-3+

Source : QE1\_140612\_OPL1013\_CVA\_phosphoproteomic\_landscape\_AML\_B Scan : 33046

Andromeda score : 146.78

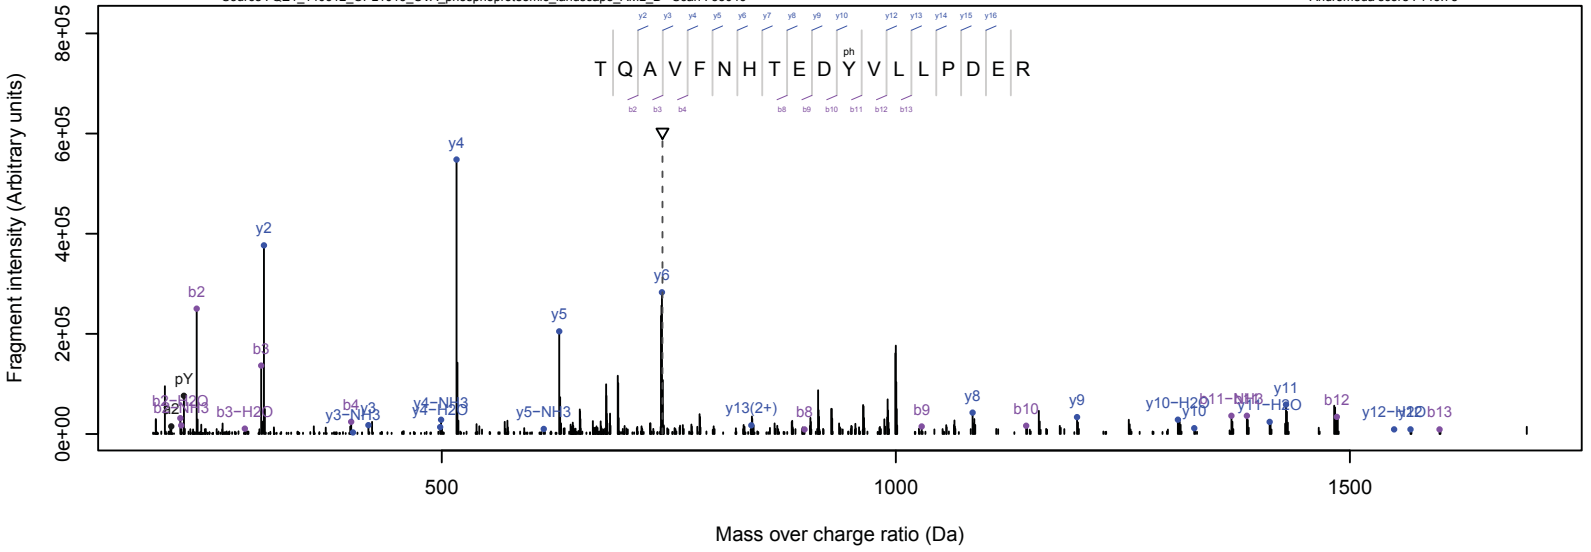

INSDDSNLY(ph)LTASK-2+

Source : QE1\_140612\_OPL1013\_CVA\_phosphoproteomic\_landscape\_AML\_C Scan : 17771

Andromeda score : 146.45

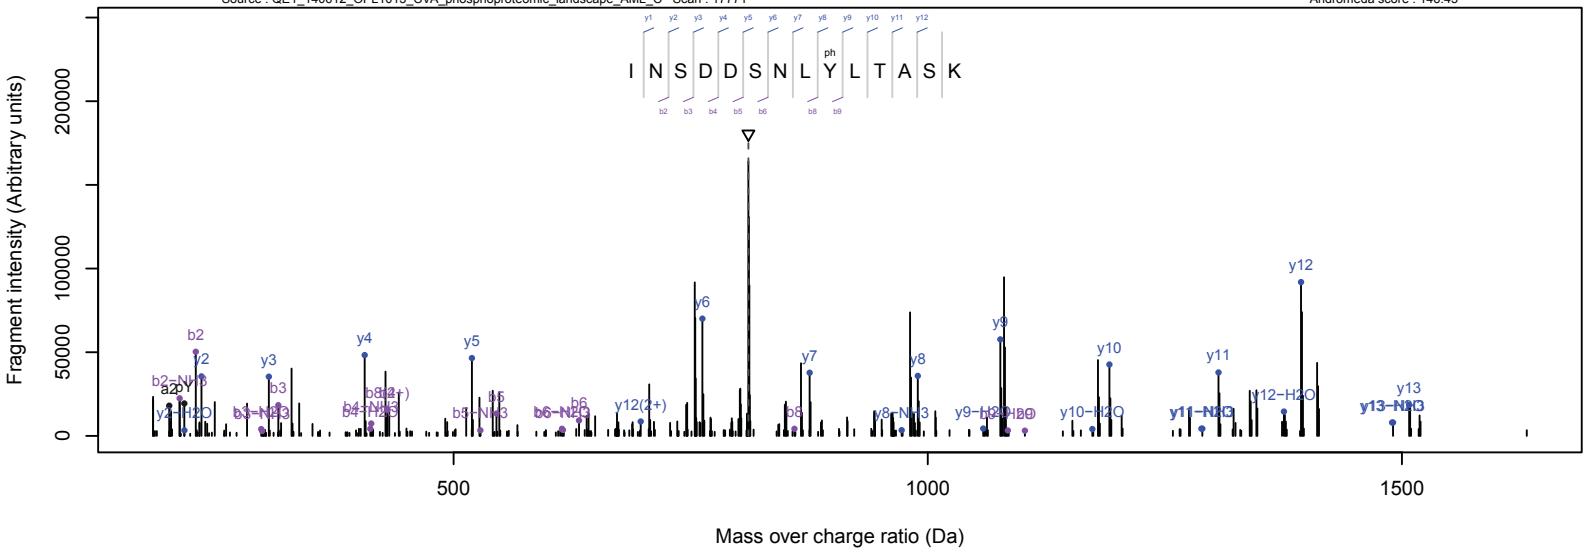

LEHAY(ph)KPVQFEGSLGK-3+

Source : QE1\_140612\_OPL1013\_CVA\_phosphoproteomic\_landscape\_AML\_C Scan : 19003

Andromeda score : 146.3

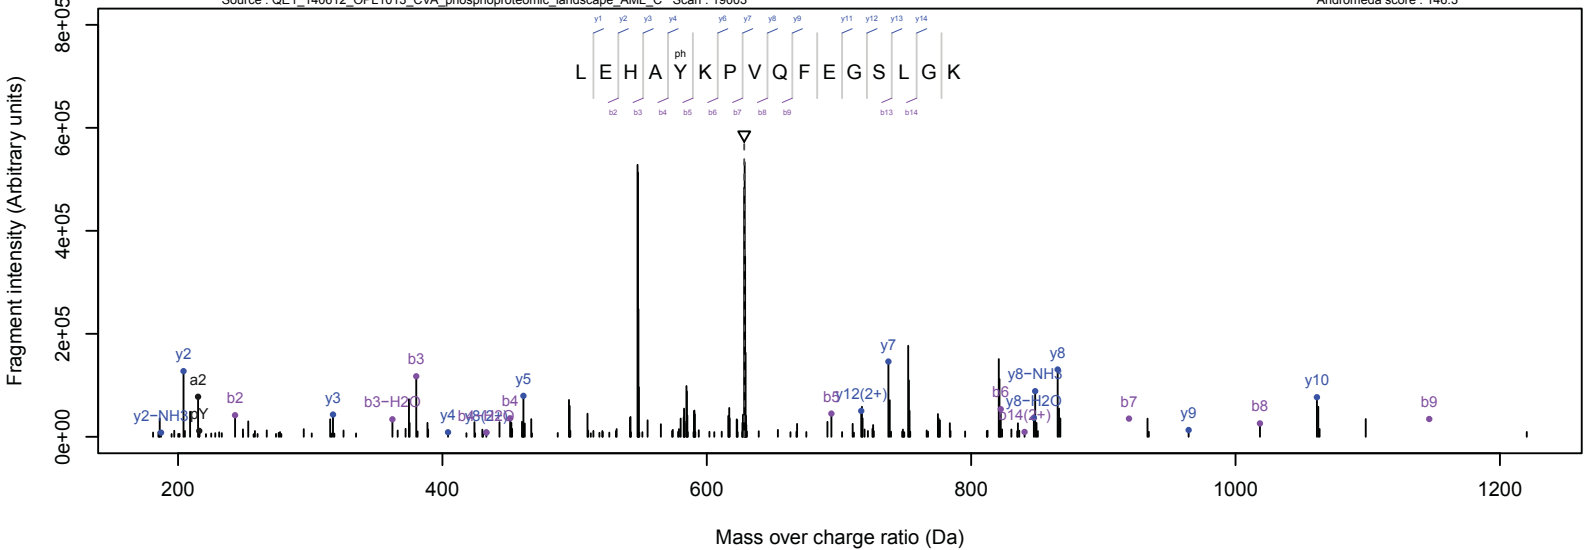

VVALY(ph)DYM(ox)PMNANDLQLR-2+

Source : QE1\_140908\_OPL1013\_CvA\_pTyrIP\_AML\_HEL Scan : 43016

Andromeda score : 146.3

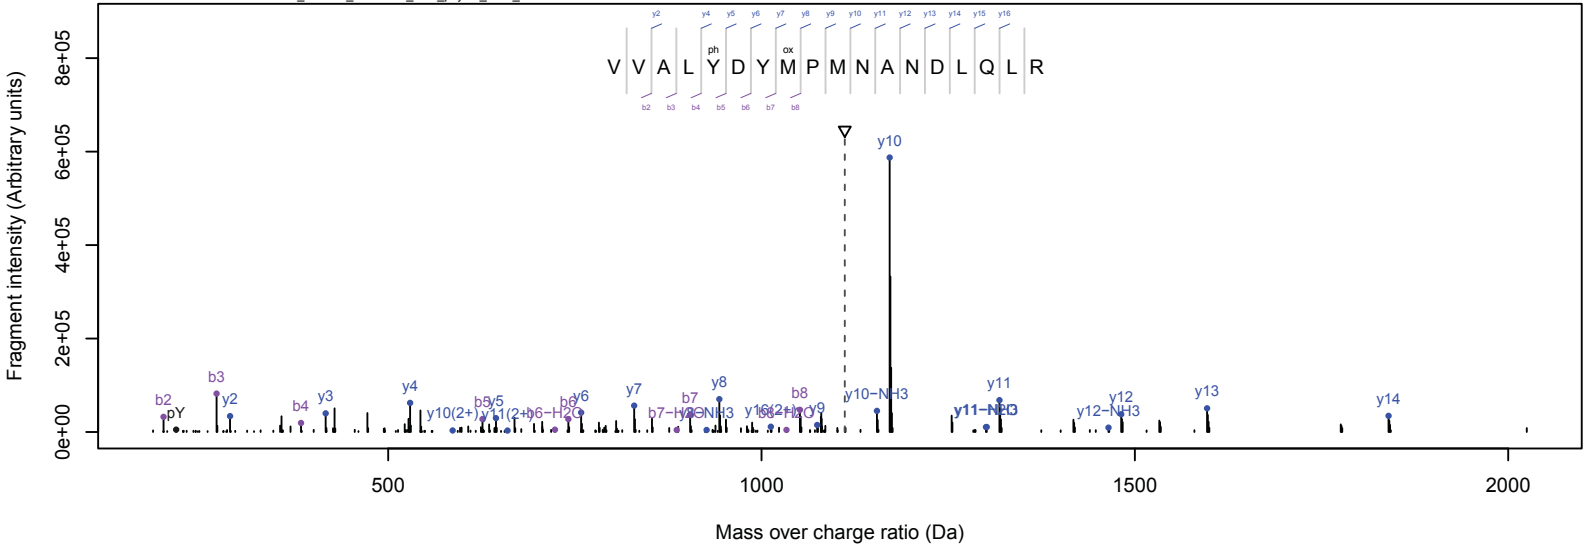

SADDTY(ph)LQLKK-2+

Source : QE1\_140612\_OPL1013\_CVA\_phosphoproteomic\_landscape\_AML\_C Scan : 11672

Andromeda score : 146.16

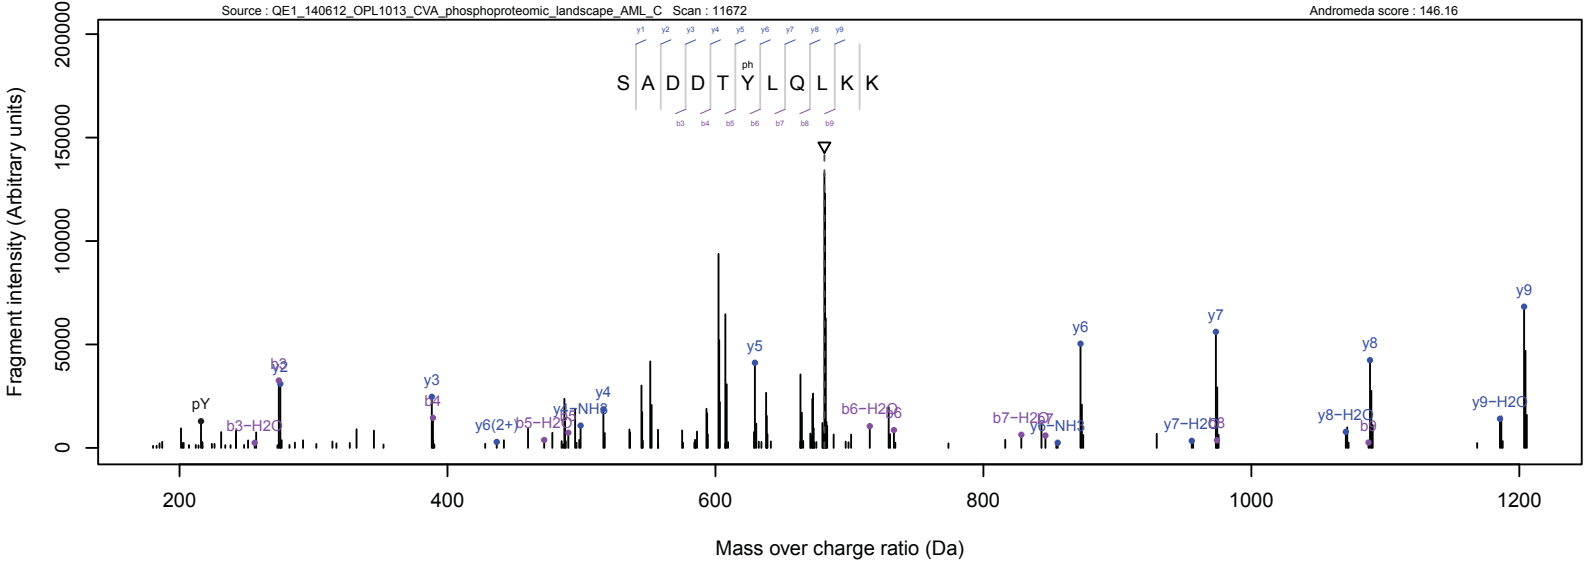

TTSSAIY(ph)MNLASHIQPGTVNR-3+

Source : QE1\_140612\_OPL1013\_CVA\_phosphoproteomic\_landscape\_AML\_D Scan : 32417

Andromeda score : 146.13

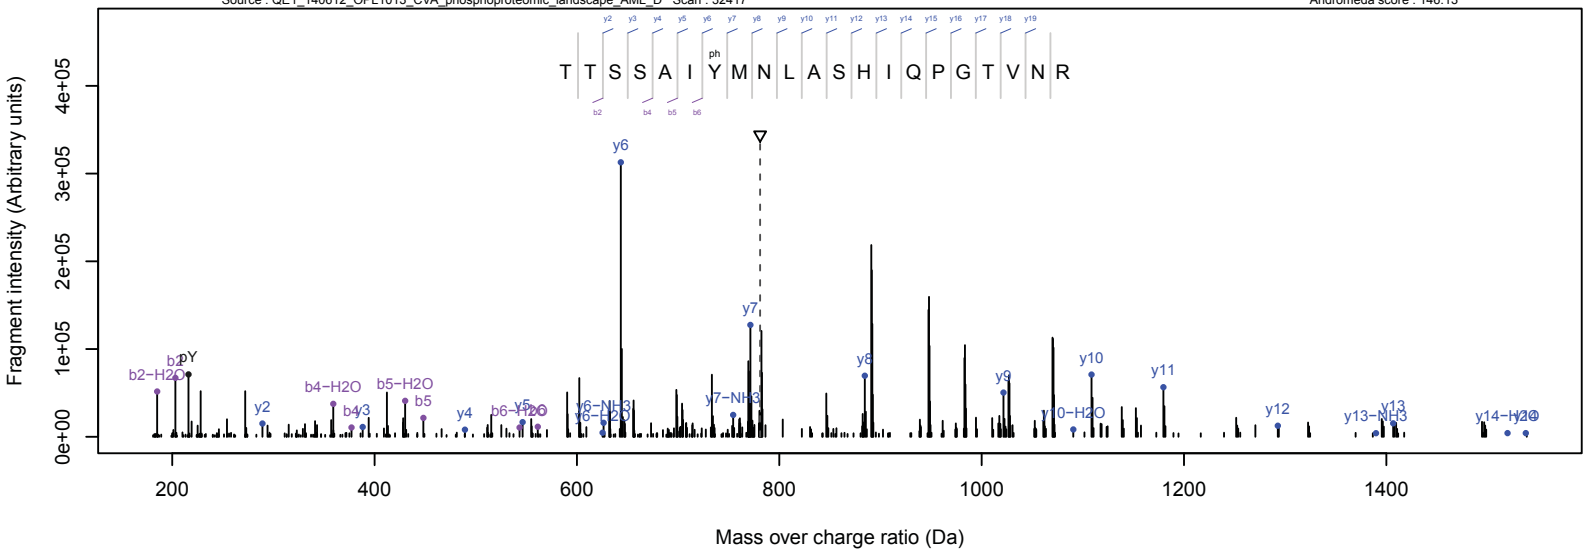

**DIHHIDY(ph)Y(ph)KK-3+**

Source : QE1\_140612\_OPL1013\_CVA\_phosphoproteomic\_landscape\_AML\_B Scan : 4906

Andromeda score : 146.11

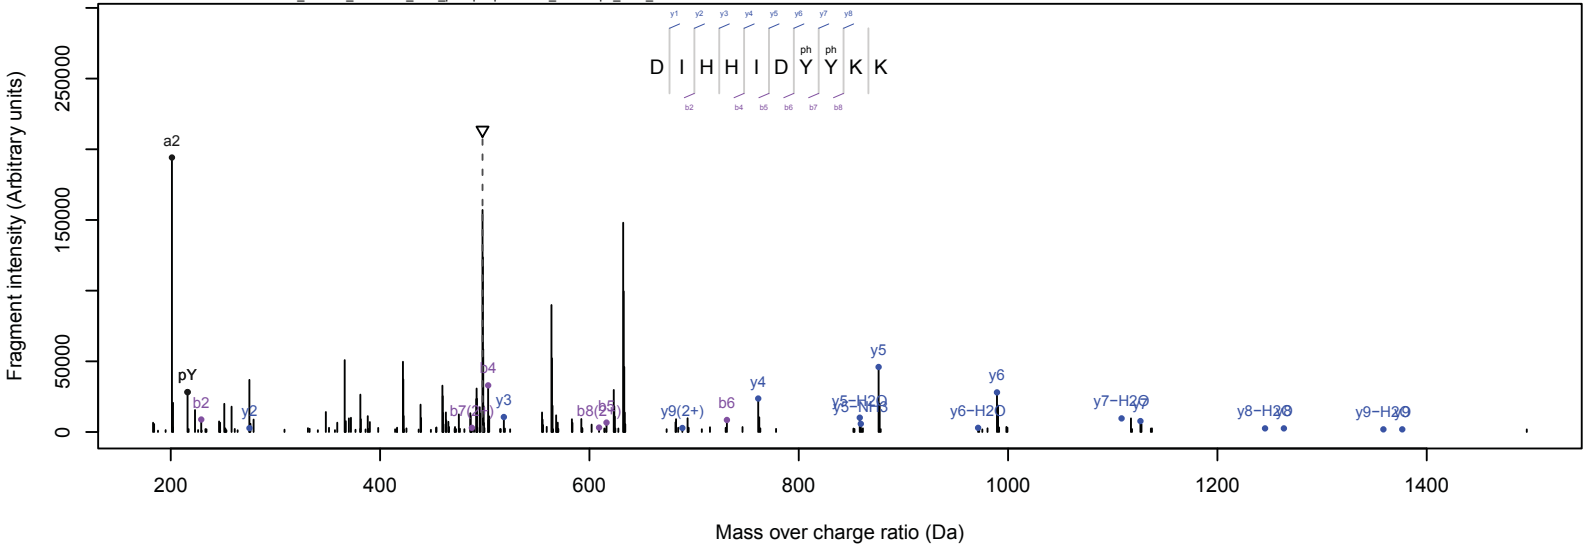

**DDKHGS(ph)YEDAVHSGALND-3+**

Source : QE1\_140612\_OPL1013\_CVA\_phosphoproteomic\_landscape\_AML\_B Scan : 9670

Andromeda score : 145.91

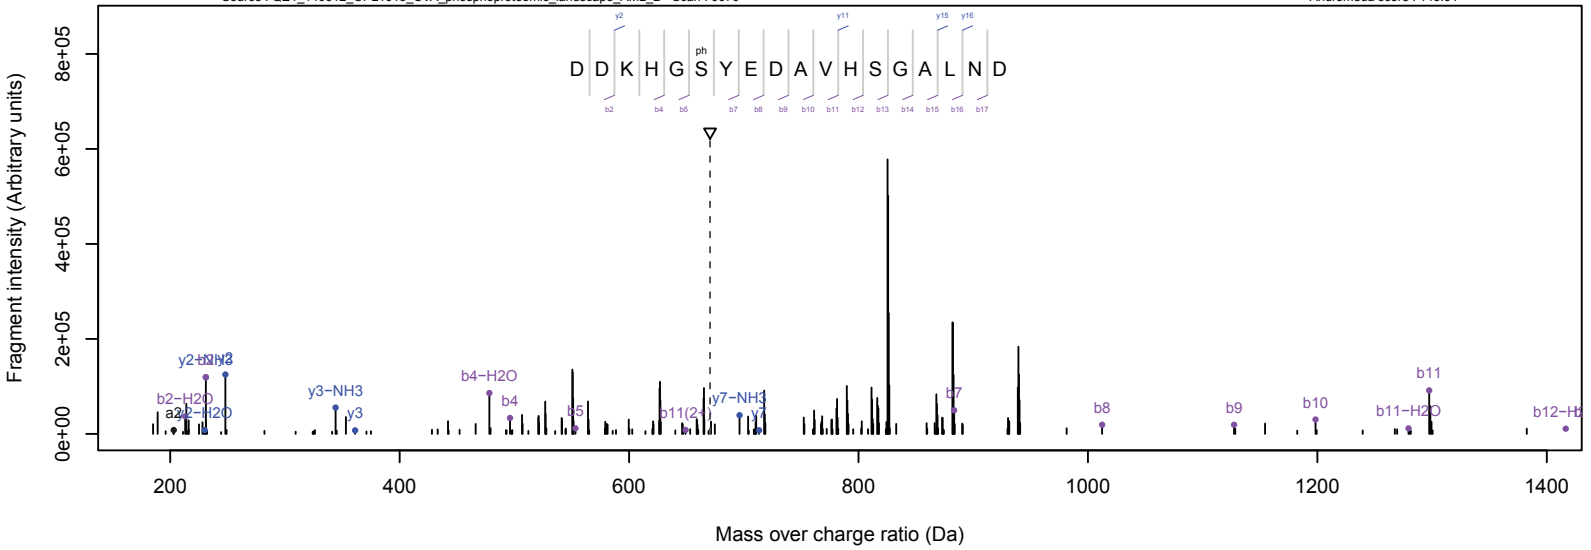

**FVEGVDSYHDENMY(ph)YSQSSMFPHR-3+**

Source : QE1\_140612\_OPL1013\_CVA\_phosphoproteomic\_landscape\_AML\_C Scan : 31398

Andromeda score : 145.81

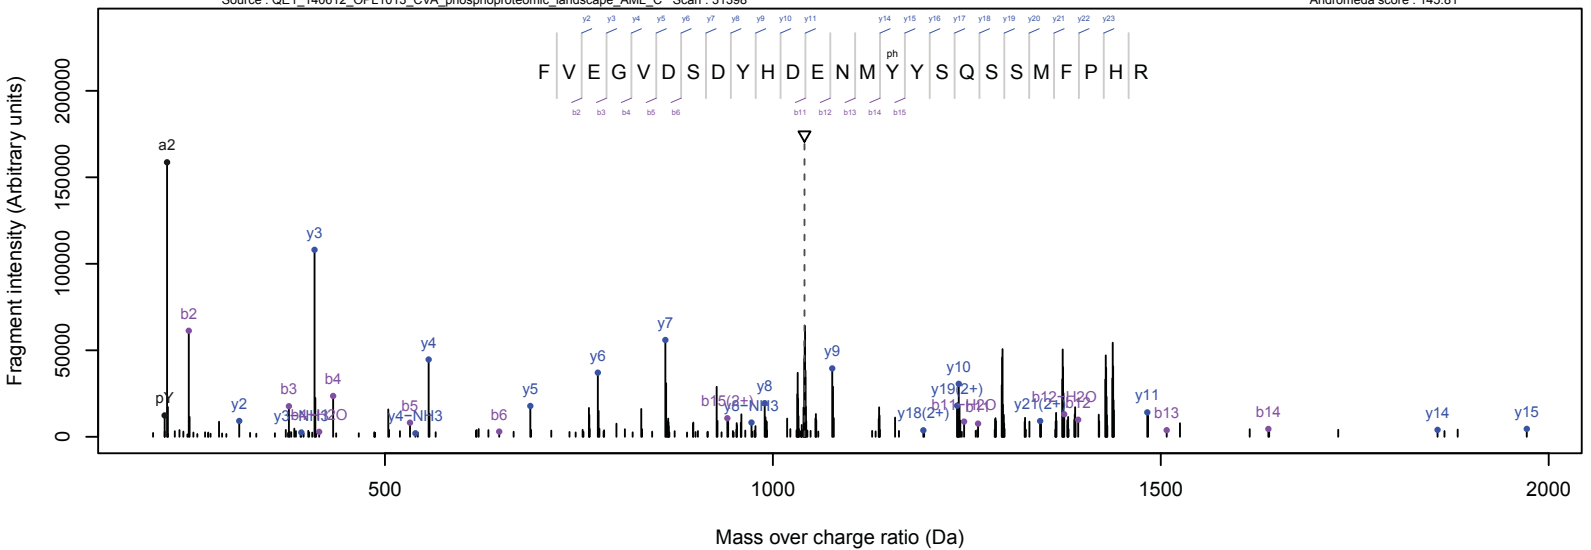

ELALQQEEGKTVMYTAVGSEWRPFGYPR-3+

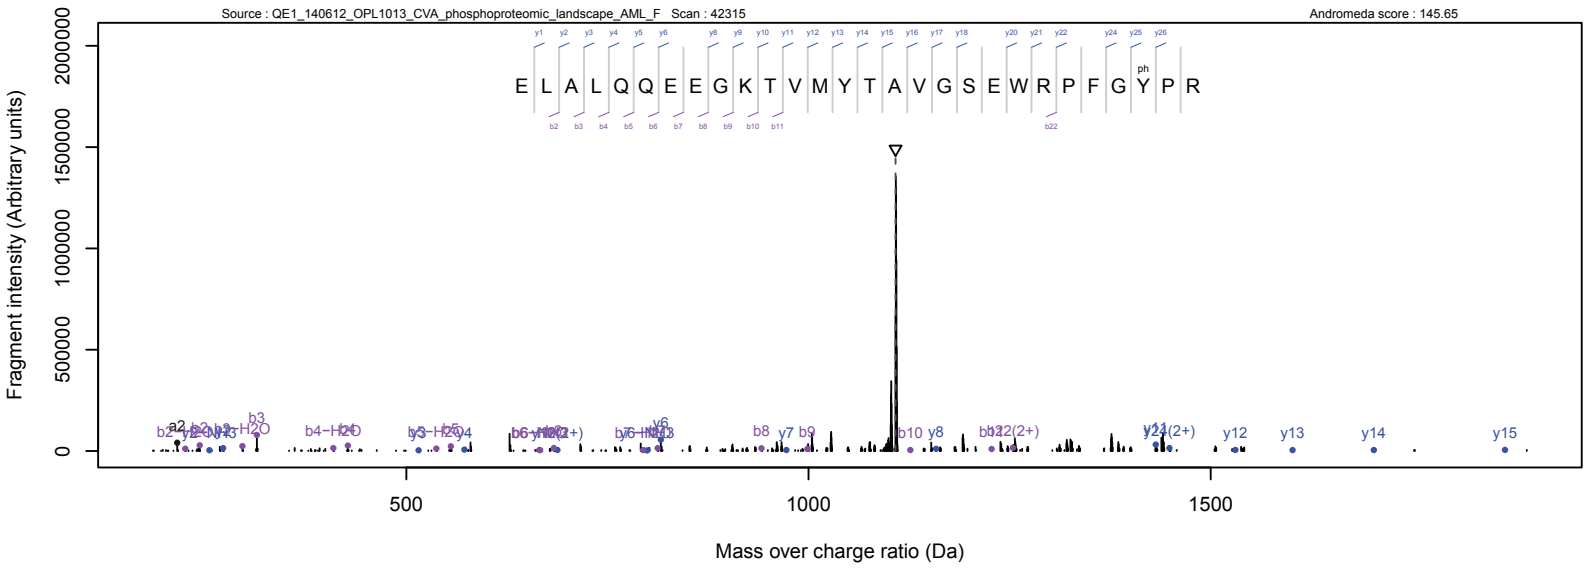

Y(ph)VLCPSTTSPAQPADR-3+

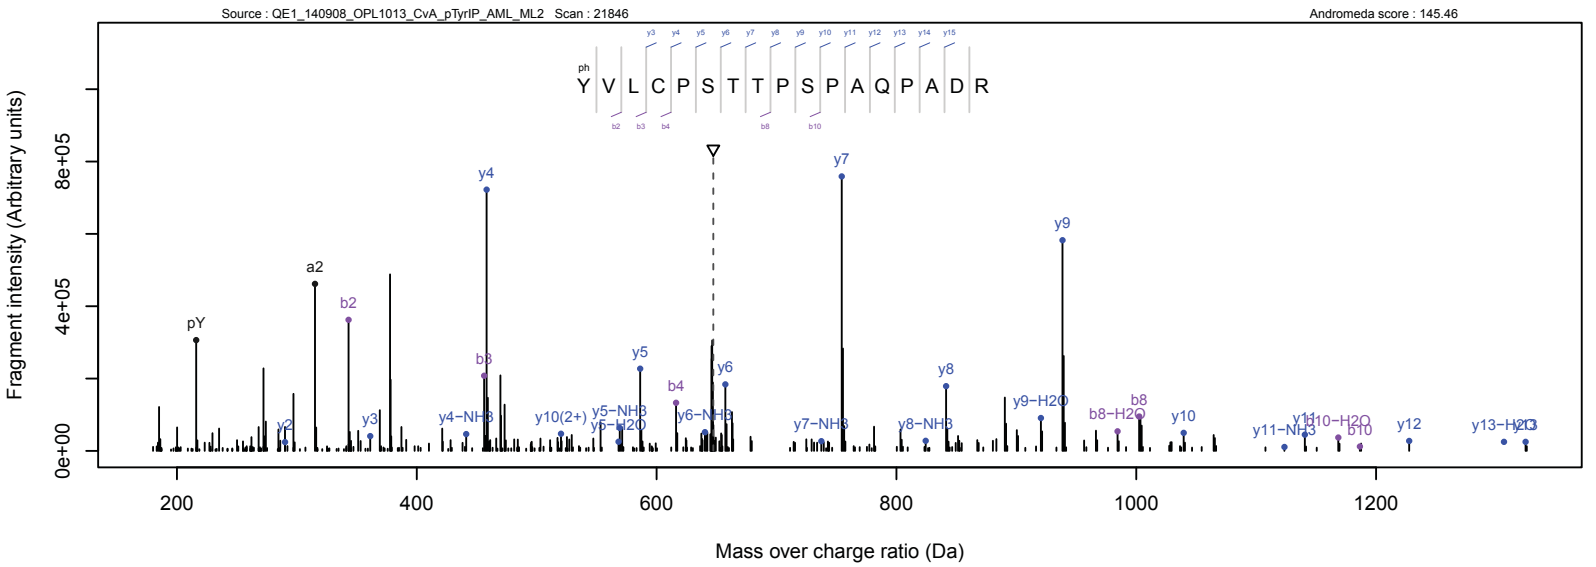

NMGY(ph)LNSSPLSR-2+

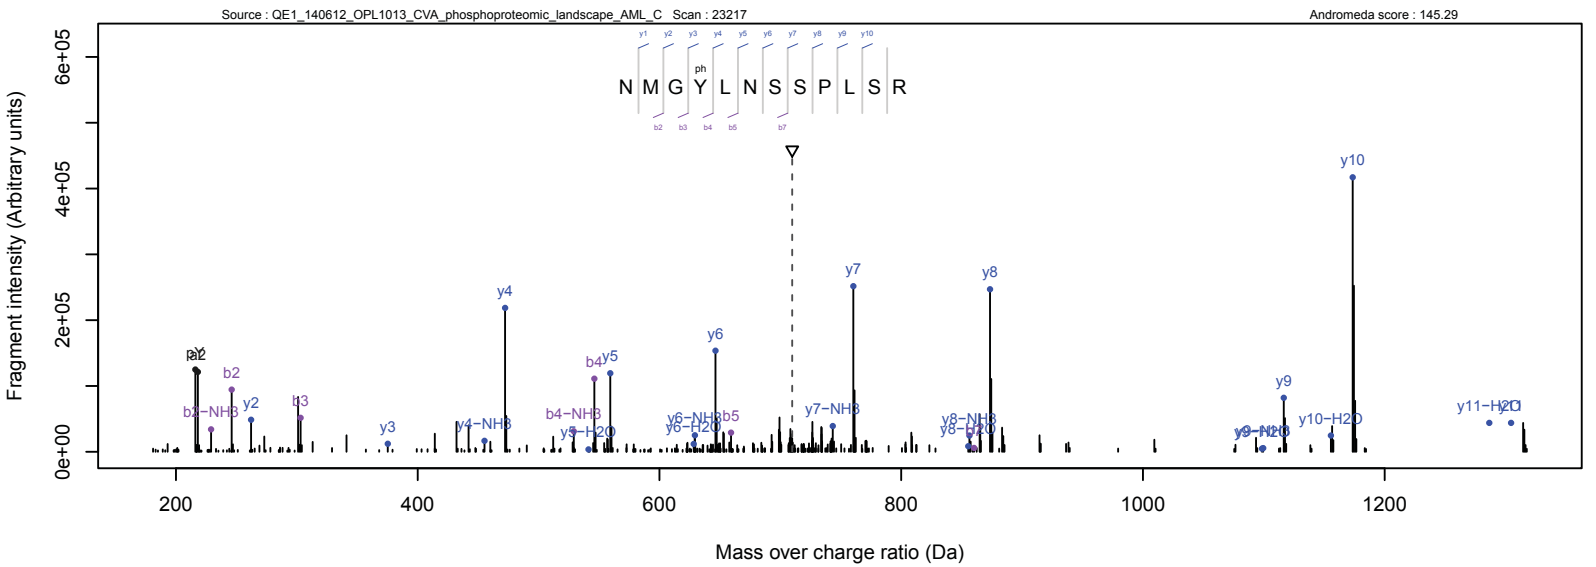

EEPEALY(ph)AAVNK-2+

Source : QE1\_140908\_OPL1013\_CvA\_pTyrIP\_AML\_HEL Scan : 23232

Andromeda score : 145.28

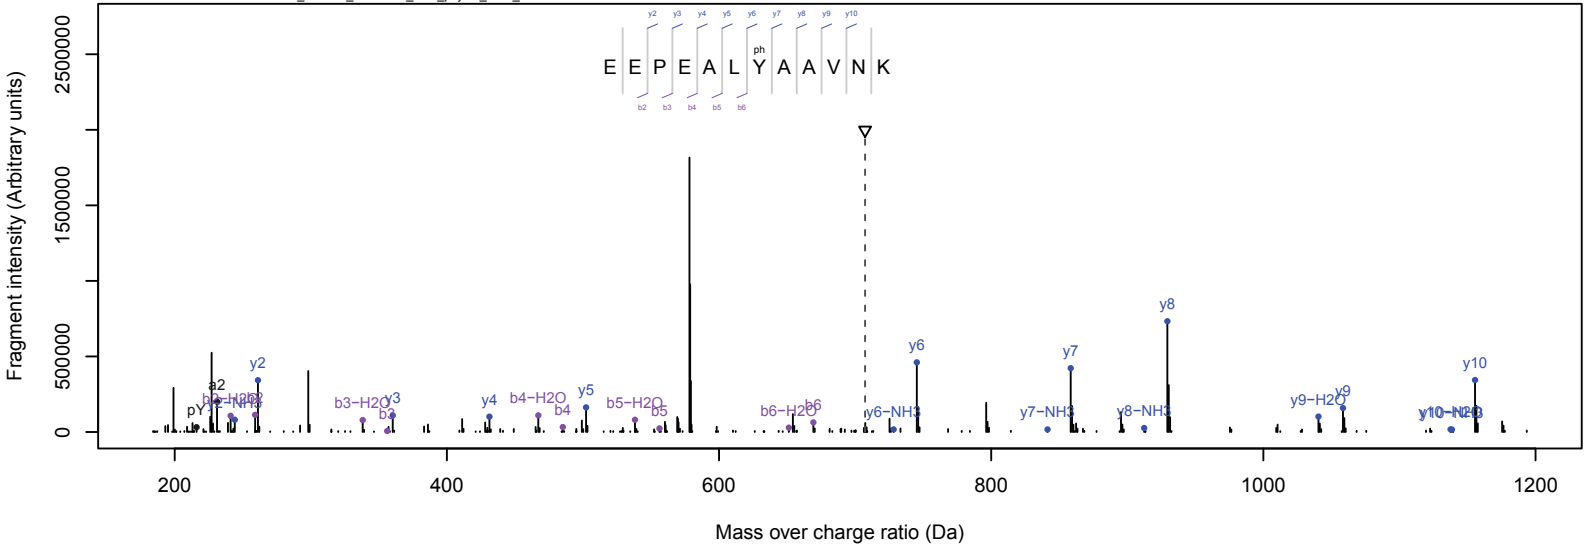

MHGDY(ph)TLTLRK-3+

Source : QE1\_140612\_OPL1013\_CVA\_phosphoproteomic\_landscape\_AML\_A Scan : 12529

Andromeda score : 145.28

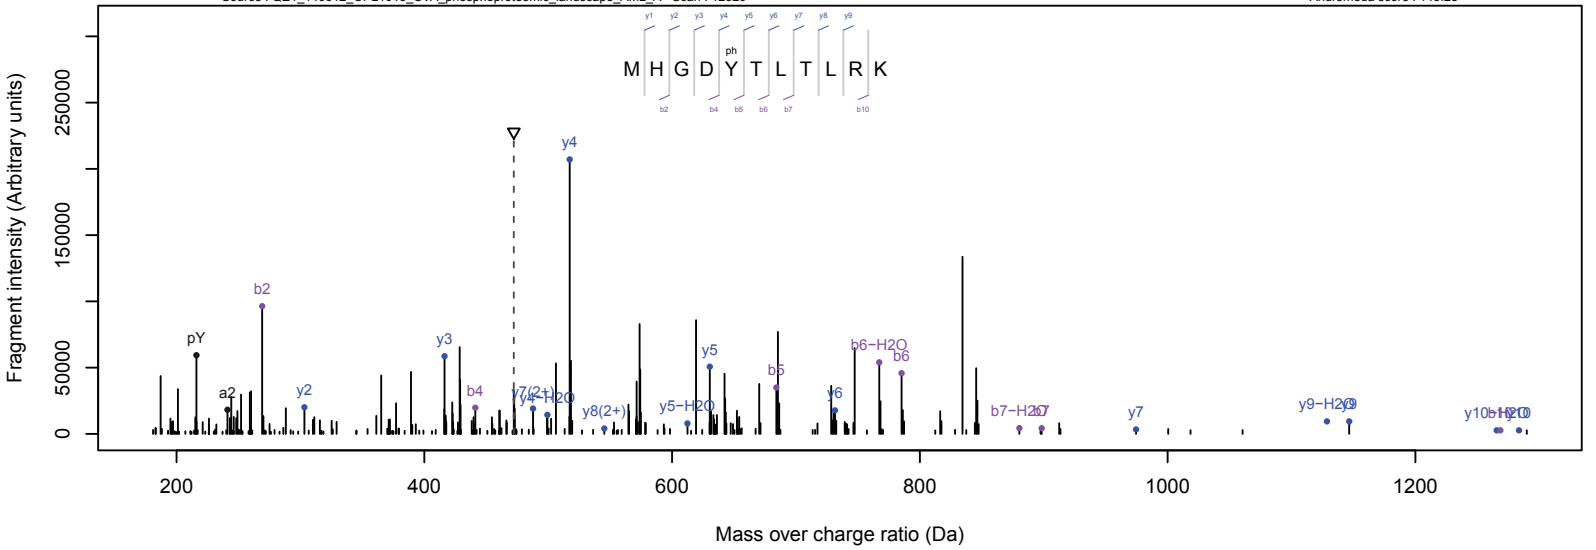

SVFMRPQAVGSSNY(ph)ASTSAGLK-3+

Source : QE1\_140612\_OPL1013\_CVA\_phosphoproteomic\_landscape\_AML\_D Scan : 27700

Andromeda score : 145.25

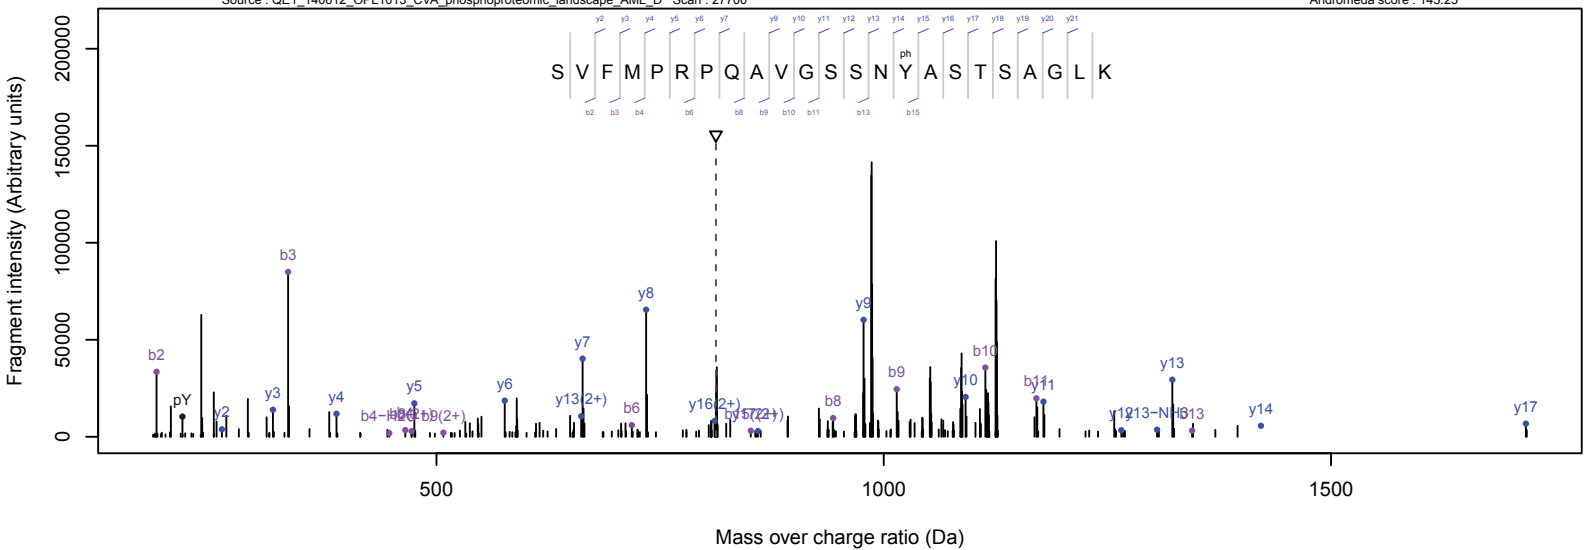



**KPAQPEFNVYPK-3+**

Source : QE1\_140612\_OPL1013\_CVA\_phosphoproteomic\_landscape\_AML\_C Scan : 16276

Andromeda score : 145.23

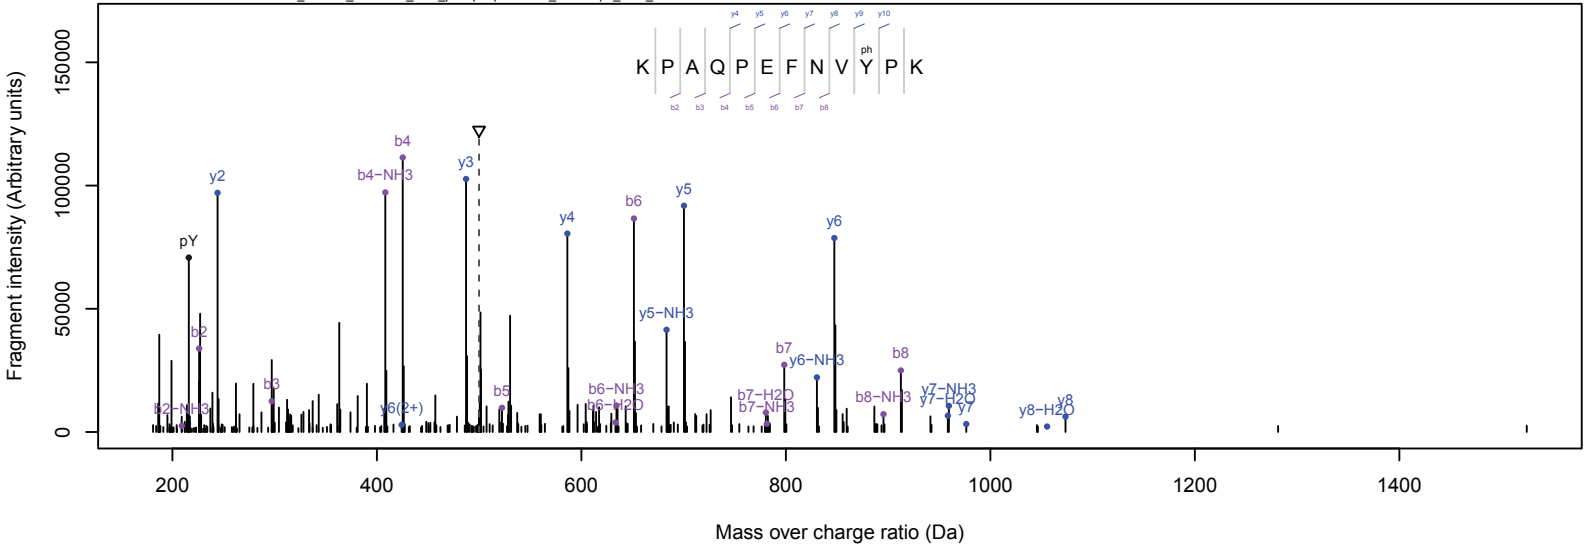

**QATADRDPAQLQHVQPAGQDFASASGWQPGTEY(ph)DNVVLK-4+**

Source : QE1\_140908\_OPL1013\_CvA\_pTyrIP\_AML\_HEL Scan : 35938

Andromeda score : 145.1

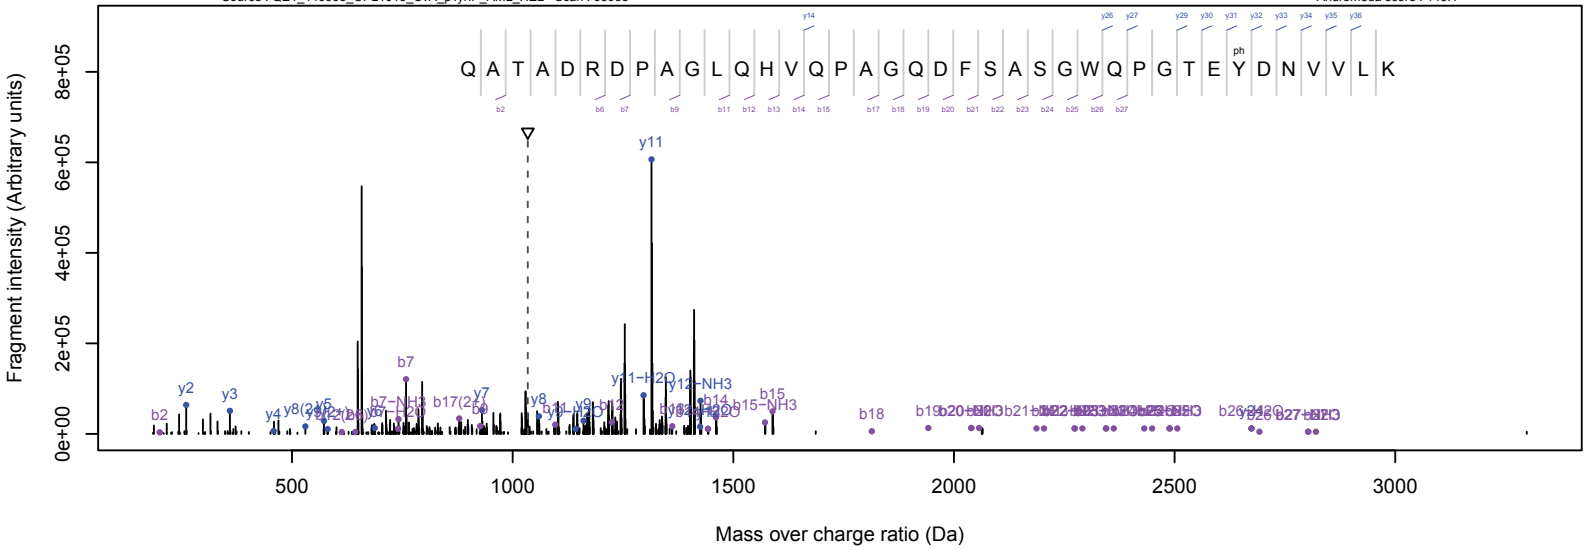

**SY(ph)SMPISIEFQR-2+**

Source : QE1\_140612\_OPL1013\_CVA\_phosphoproteomic\_landscape\_AML\_B Scan : 37414

Andromeda score : 145.09

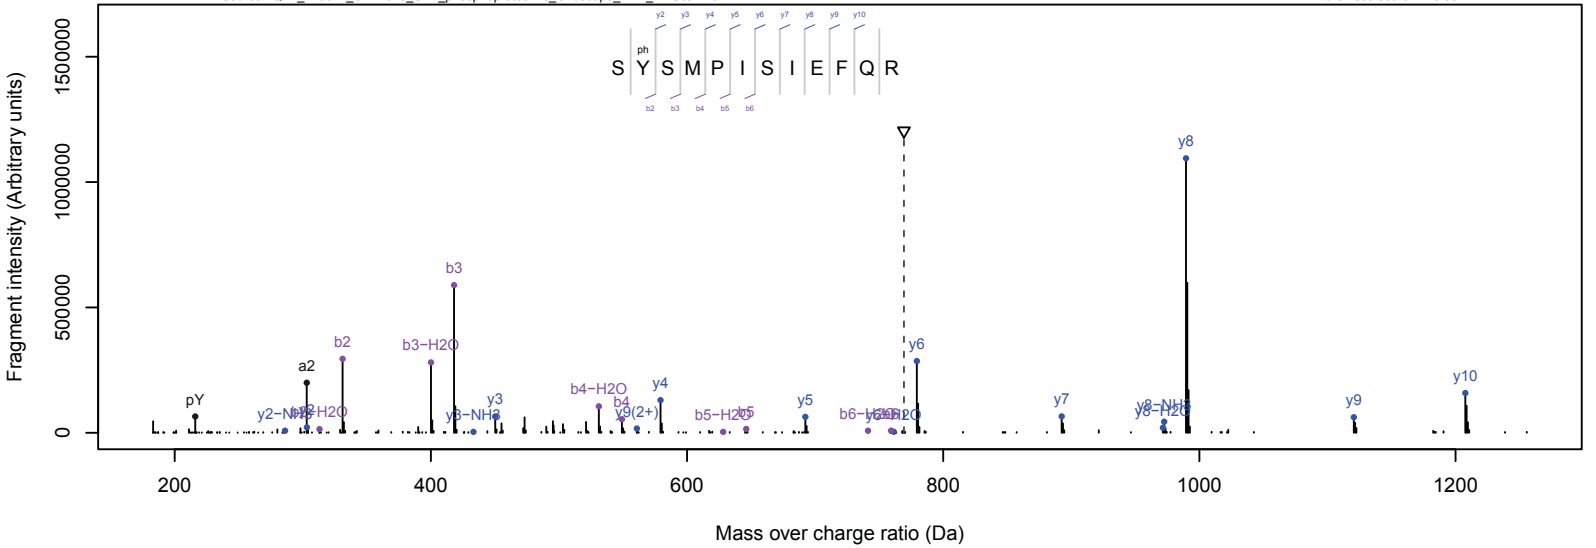

LTADSSHY(ph)LCHEVAPPR-3+

Source: QE1\_140908\_OPL1013\_CVA\_pTyrIP\_AML\_OCI\_AML3 Scan: 20081

Andromeda score: 144.97

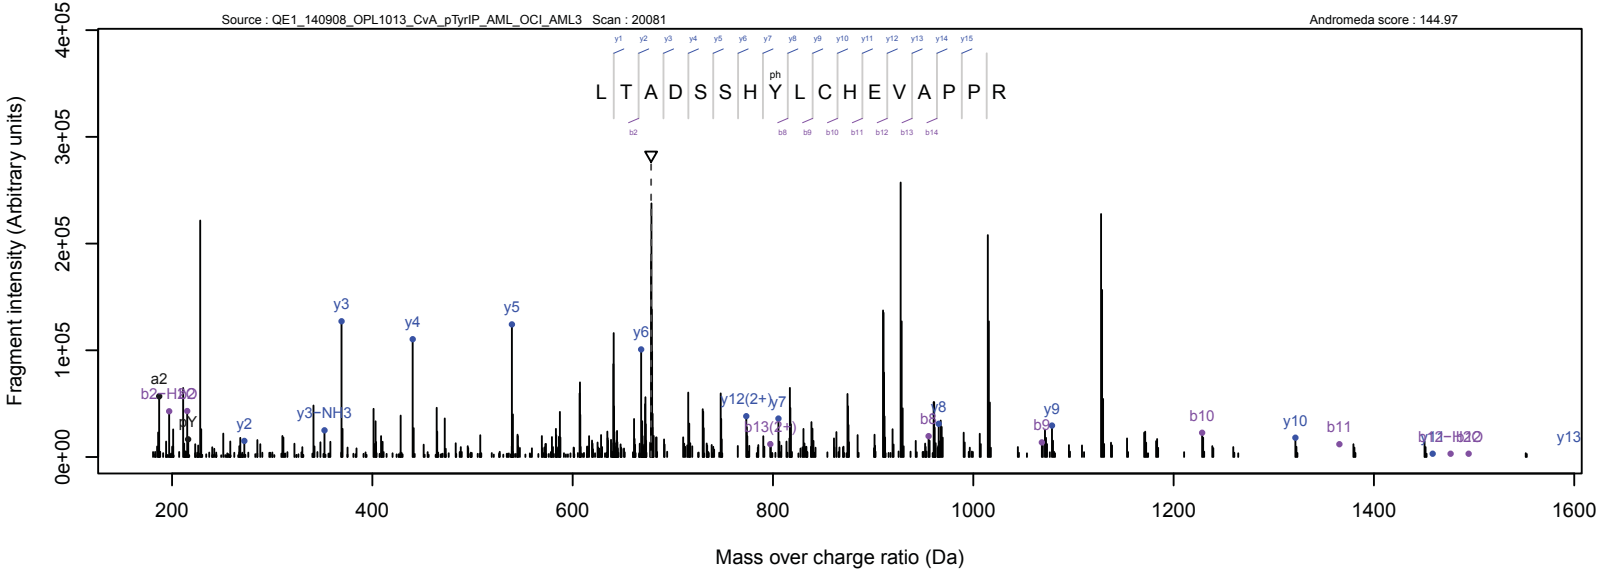

TSKLPDMLKDHY(ph)PCVSSLEQLTELGR-4+

Source: QE1\_140612\_OPL1013\_CVA\_phosphoproteomic\_landscape\_AML\_C Scan: 43755

Andromeda score: 144.83

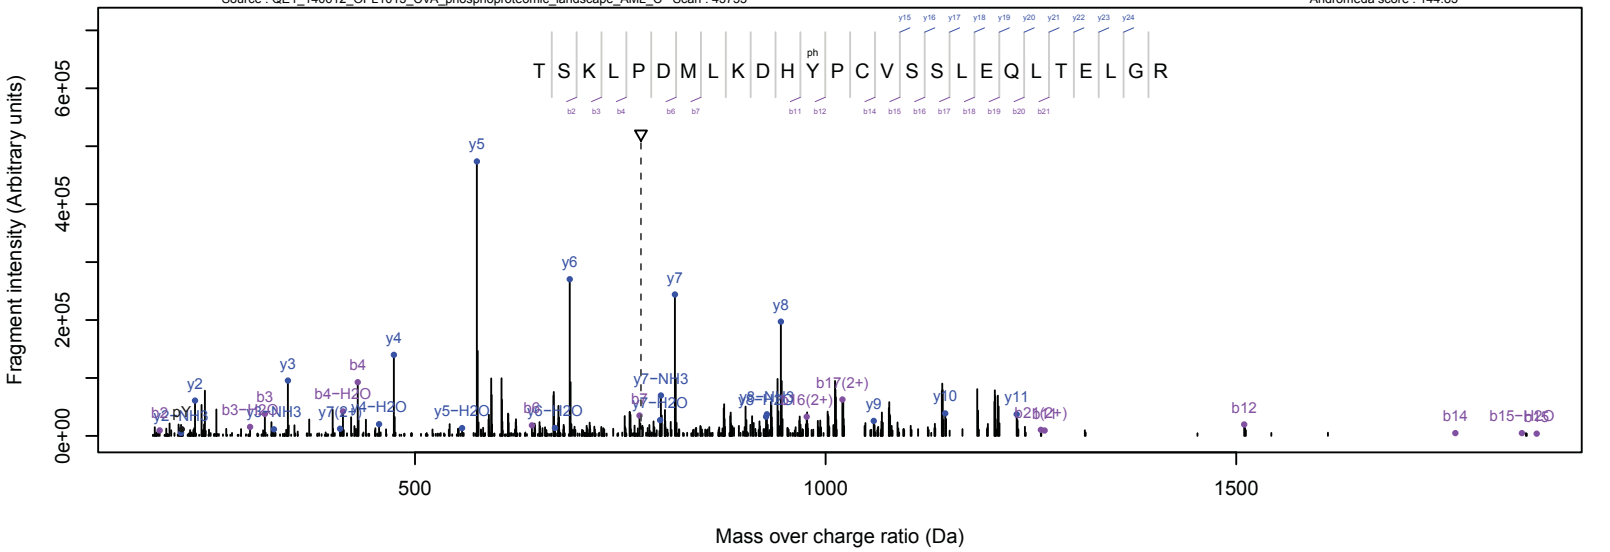

FSEIY(ph)HNINADQSK-2+

Source: QE1\_140612\_OPL1013\_CVA\_phosphoproteomic\_landscape\_AML\_C Scan: 15004

Andromeda score: 144.73

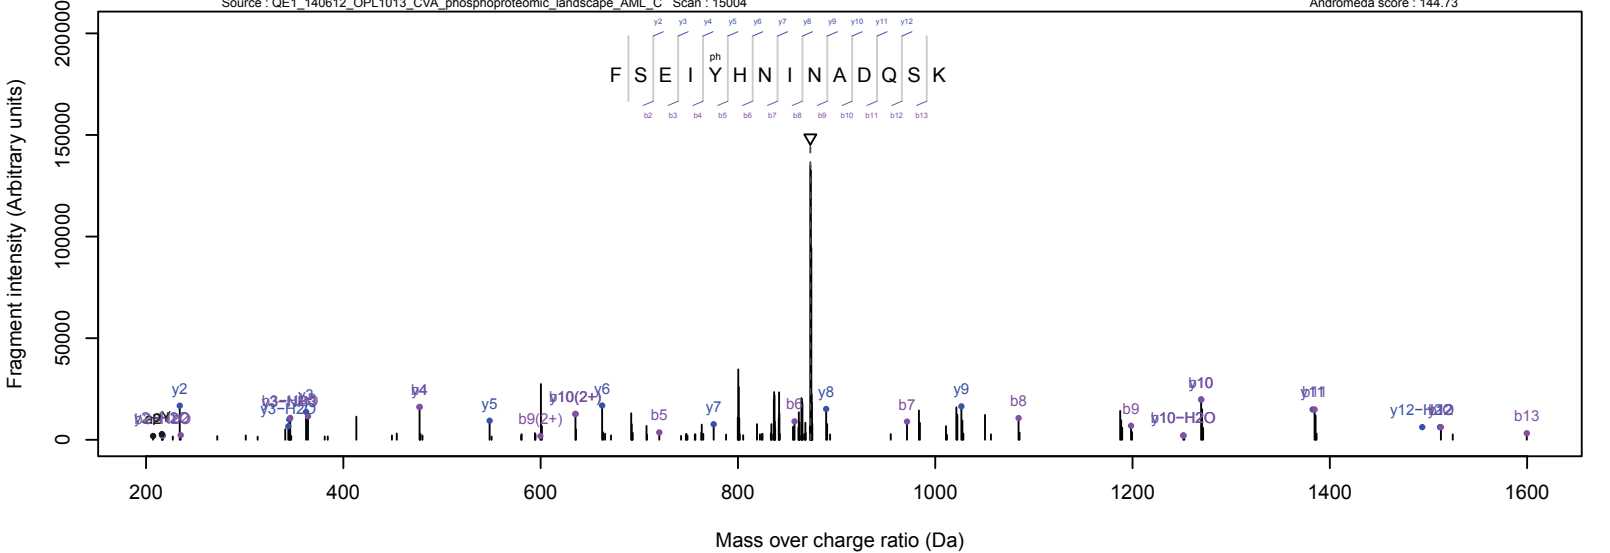

**KLPTSPY(ph)PCVFCCEETQQR-3+**

Source : QE1\_140612\_OPL1013\_CVA\_phosphoproteomic\_landscape\_AML\_D Scan : 27908

Andromeda score : 144.72

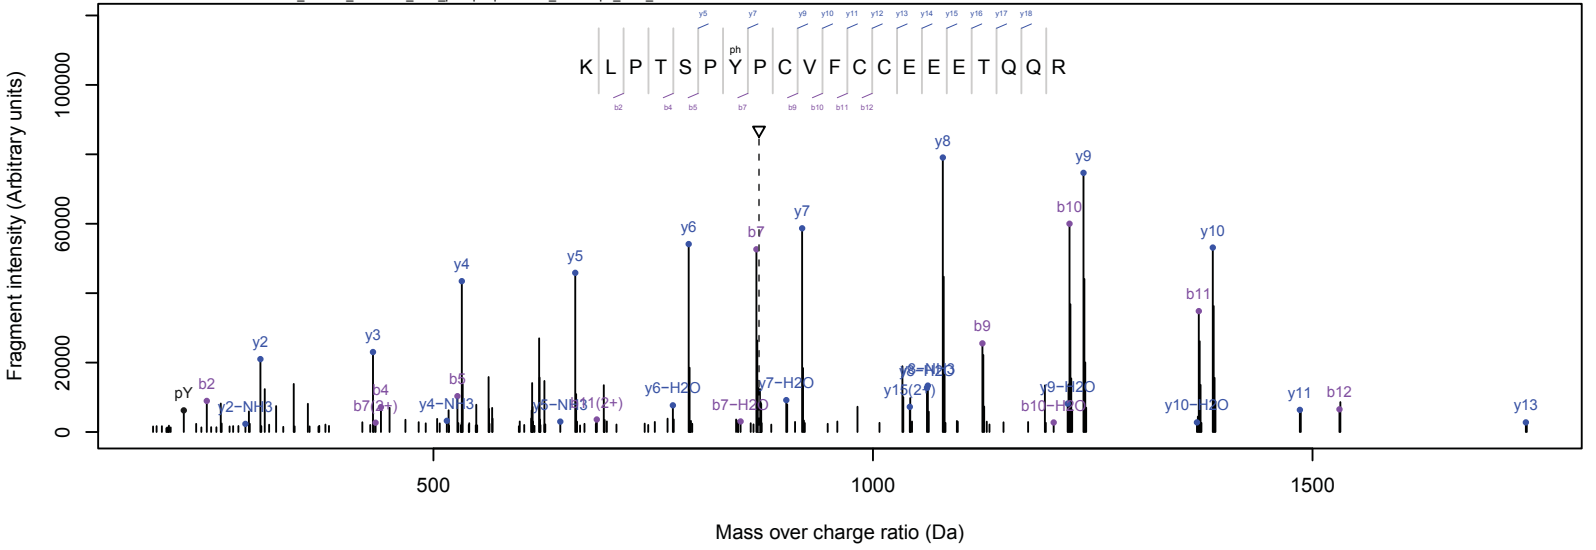

**AKDAALGGHHQAGQGDEGEAAGAADGIAAY(ph)SNYNNNGHR-5+**

Source : QE1\_140612\_OPL1013\_CVA\_phosphoproteomic\_landscape\_AML\_C Scan : 17571

Andromeda score : 144.71

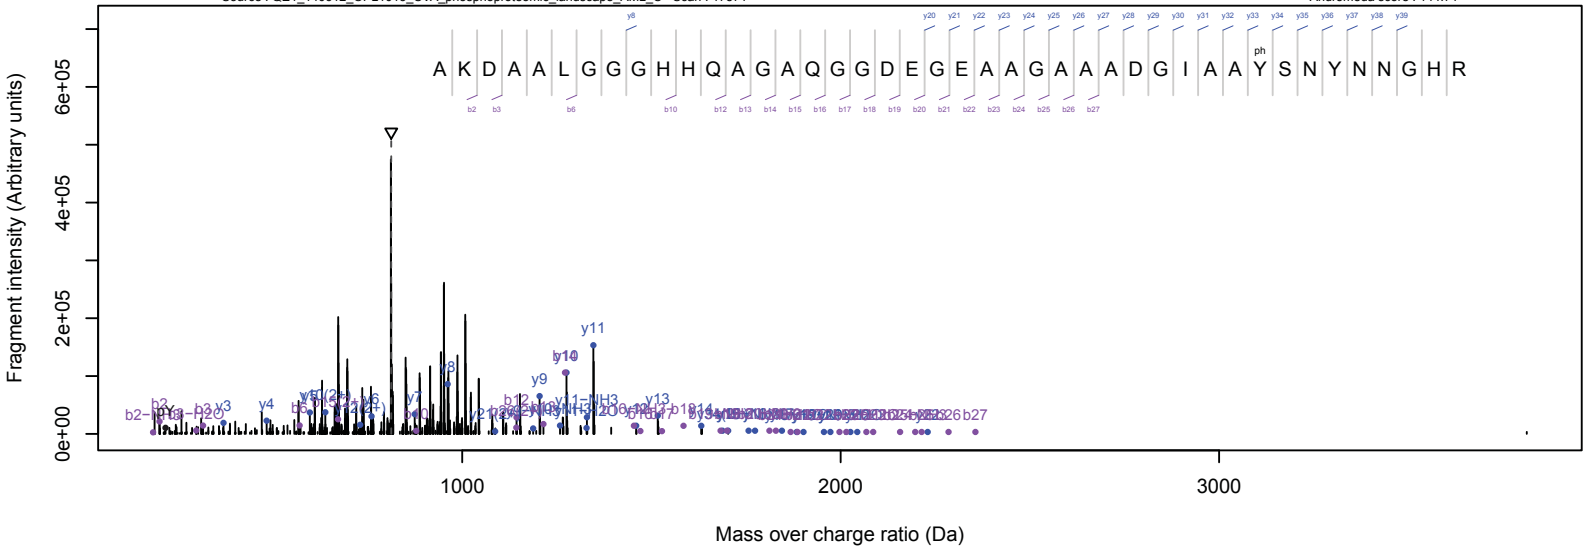

**LLY(ph)NSTDPTLR-2+**

Source : QE1\_140822\_OPL1013\_CvA\_pTyrIP\_AML\_cell\_lines\_part2\_B Scan : 15204

Andromeda score : 144.7

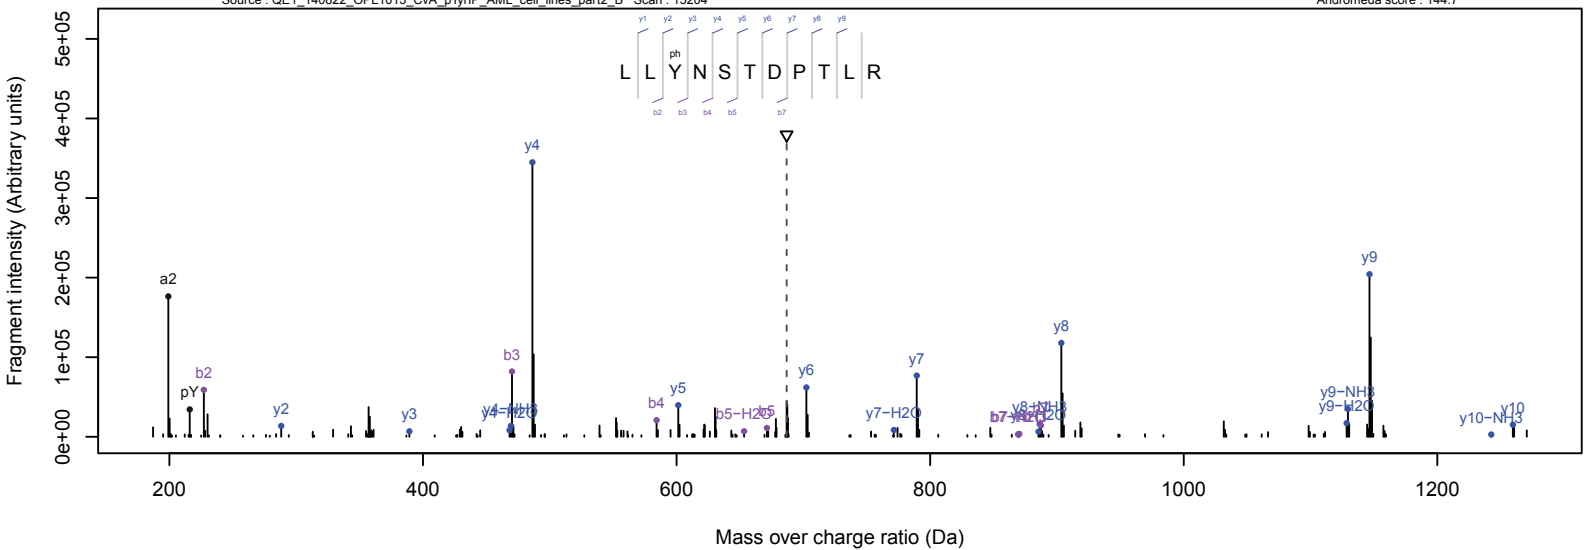



**KGIDY(ph)DFPSLILQK-2+**

Source : QE1\_140612\_OPL1013\_CVA\_phosphoproteomic\_landscape\_AML\_C Scan : 42048

Andromeda score : 144.29

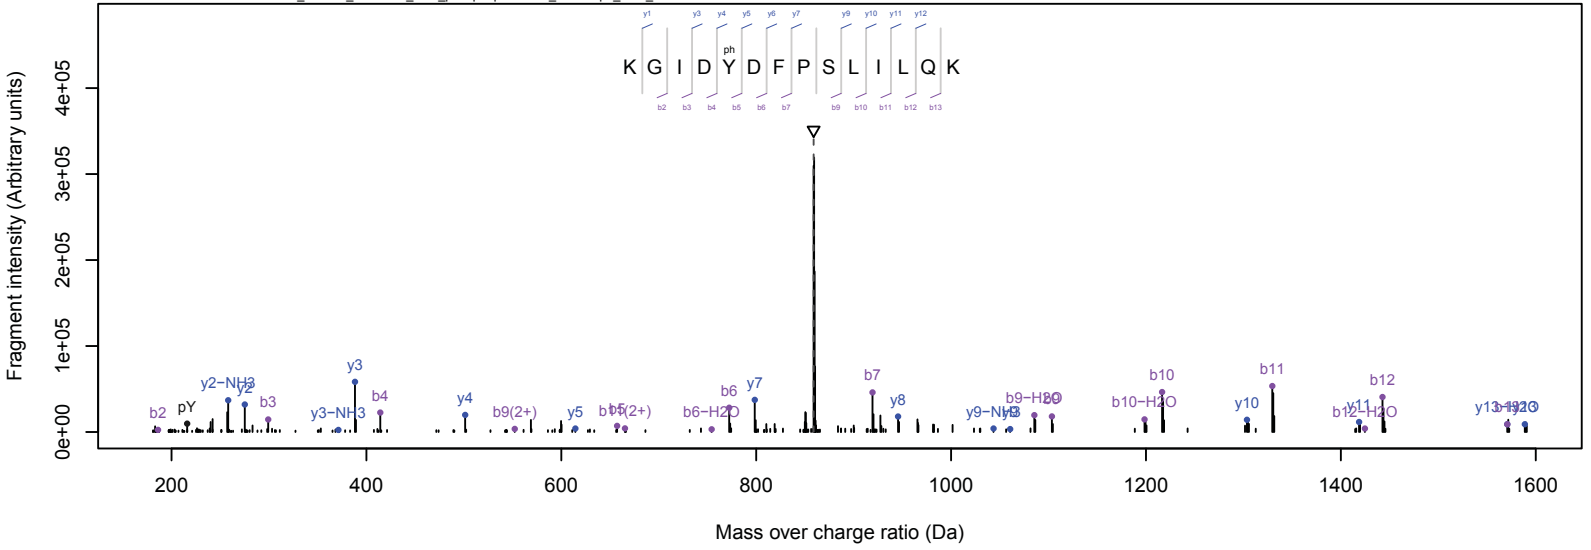

**QQSTTLSTLY(ph)PSTSSLLTNHQHEGRK-4+**

Source : QE1\_140908\_OPL1013\_CvA\_pTyrIP\_AML\_Kasumi1 Scan : 24603

Andromeda score : 144.29

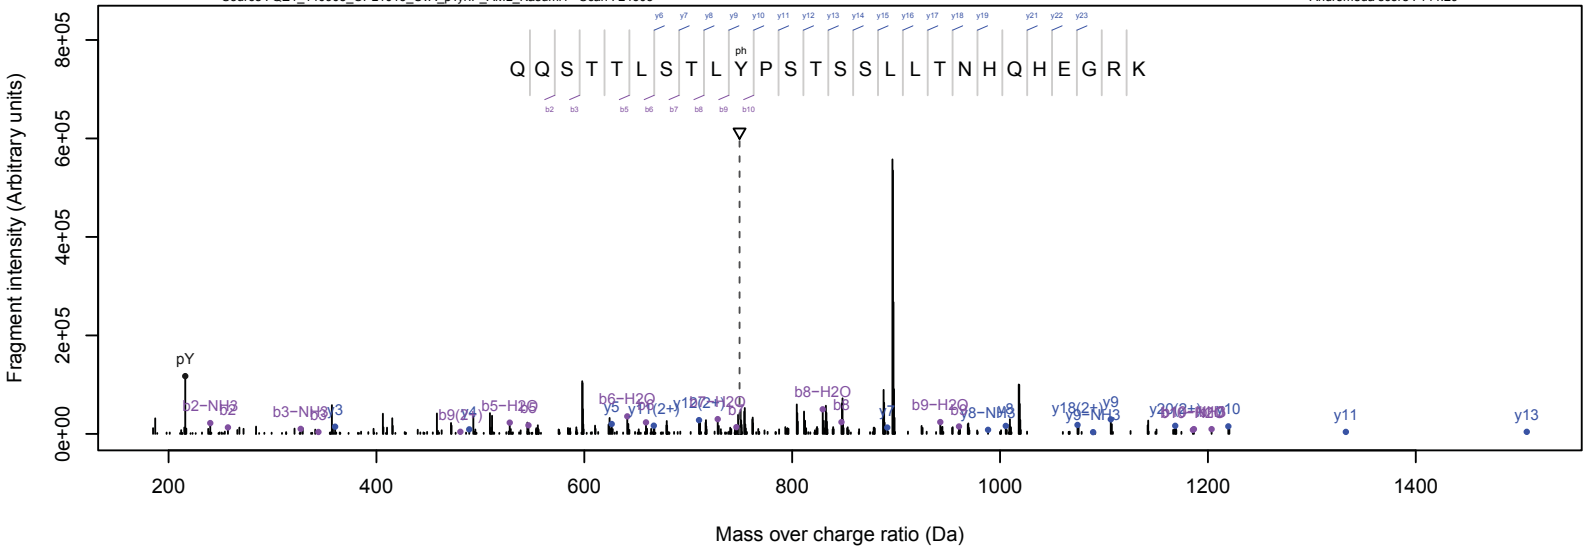

**VHTDFTSPY(ph)DHDSLK-3+**

Source : QE1\_140612\_OPL1013\_CVA\_phosphoproteomic\_landscape\_AML\_E Scan : 16781

Andromeda score : 144.29

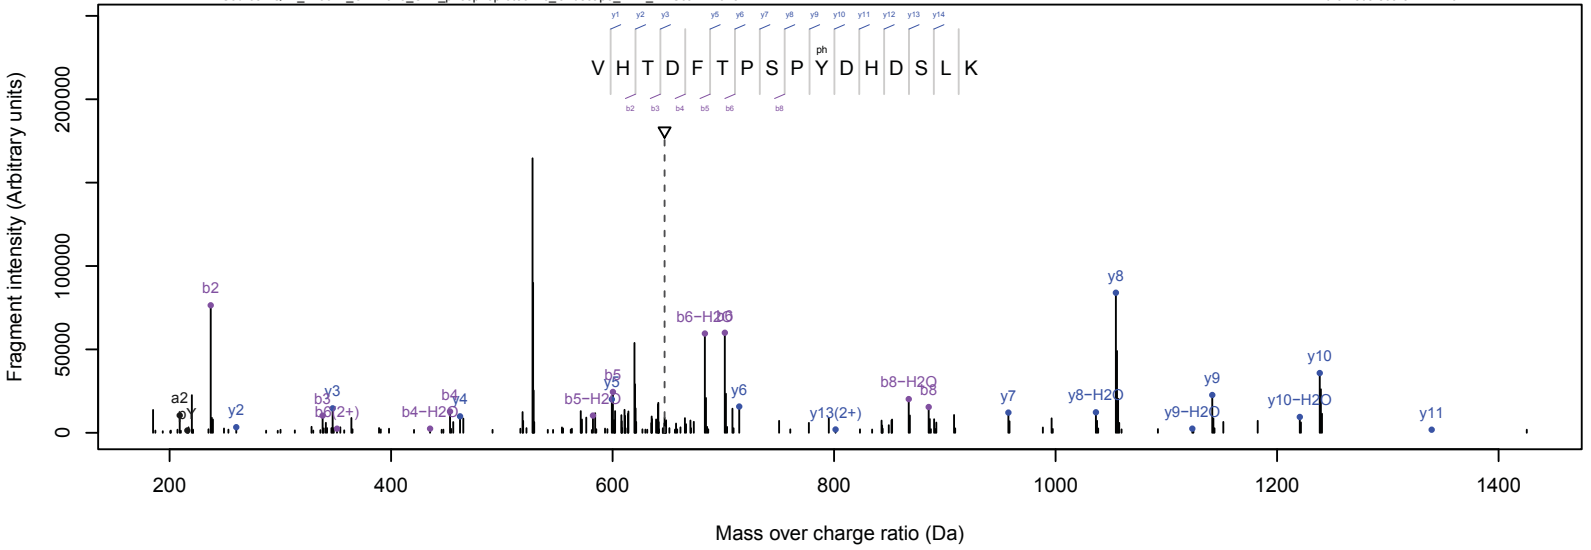

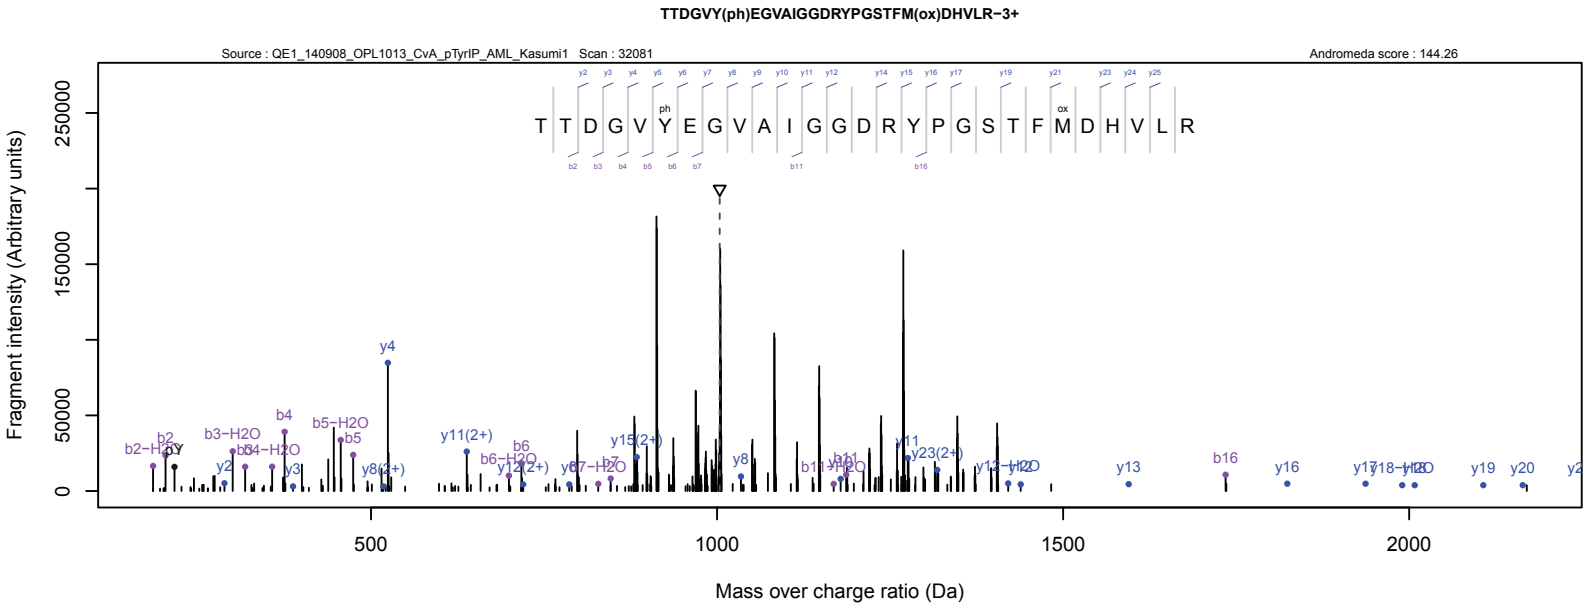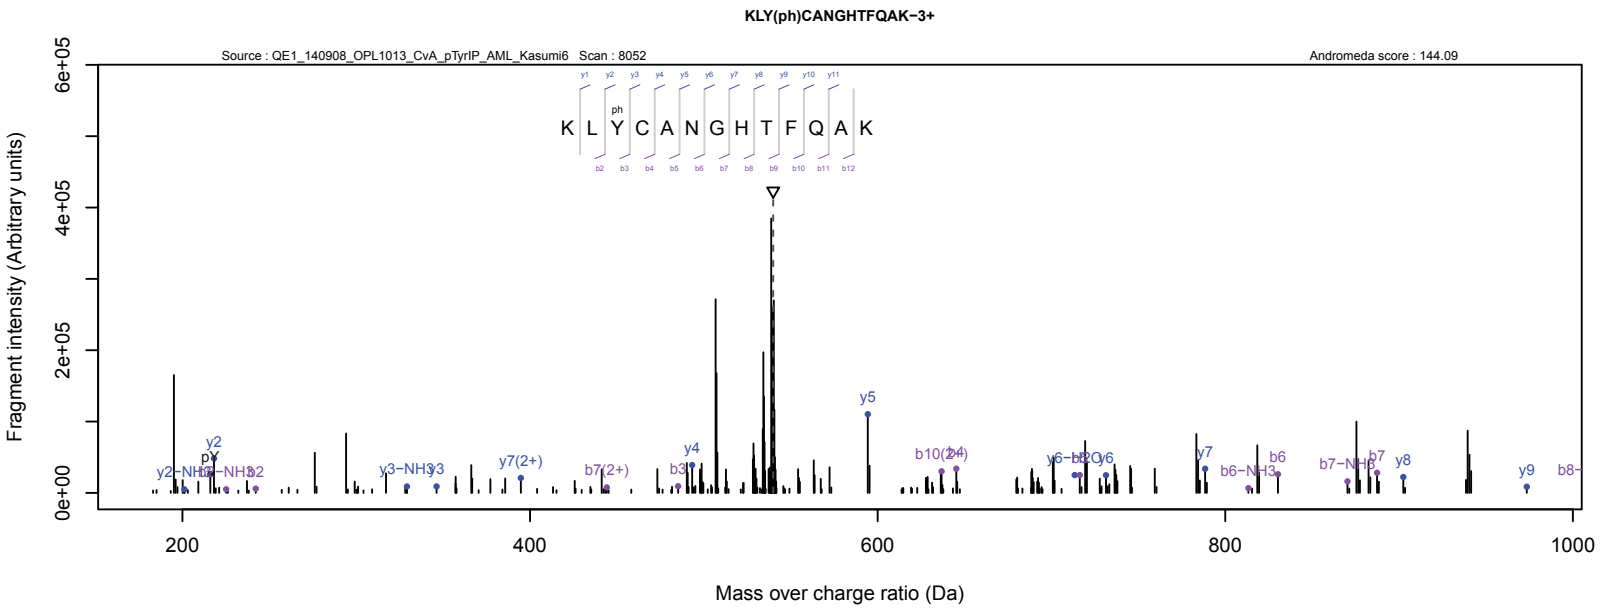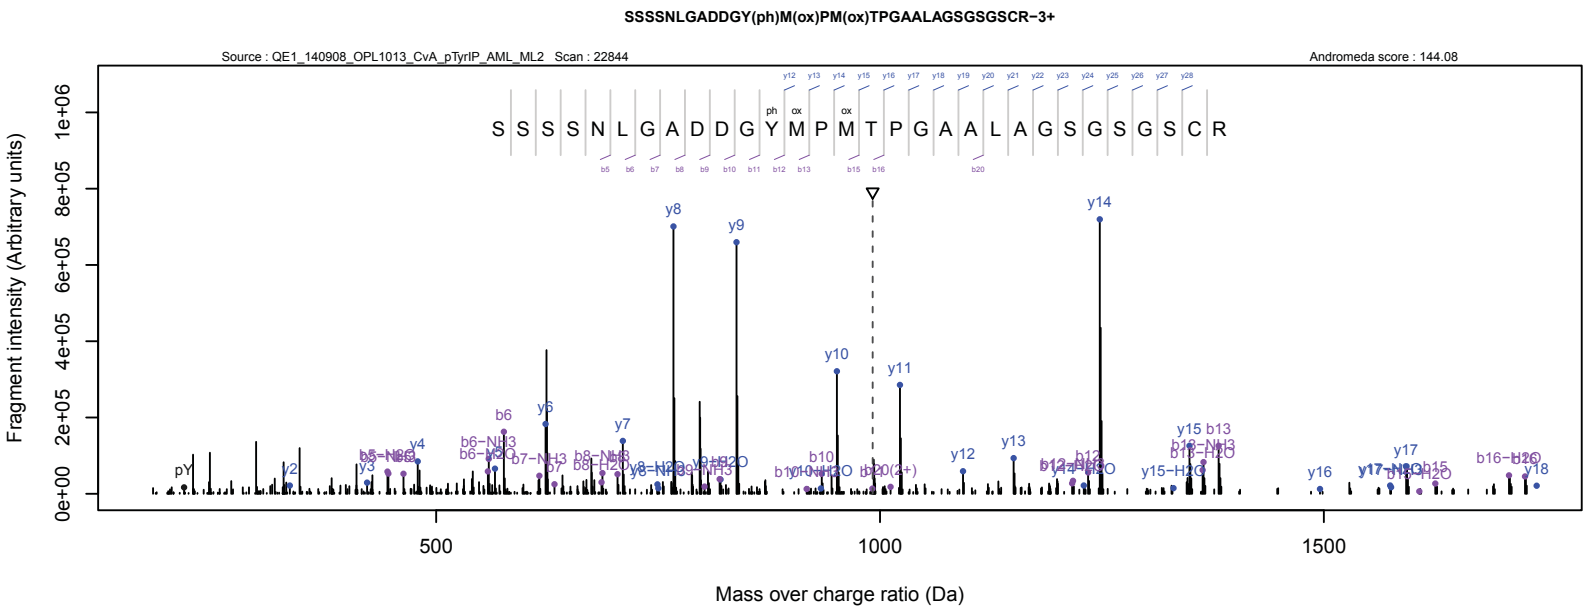

VYHQY(ph)QDKSR-3+

Source : QE1\_140612\_OPL1013\_CVA\_phosphoproteomic\_landscape\_AML\_A Scan : 3161

Andromeda score : 143.97

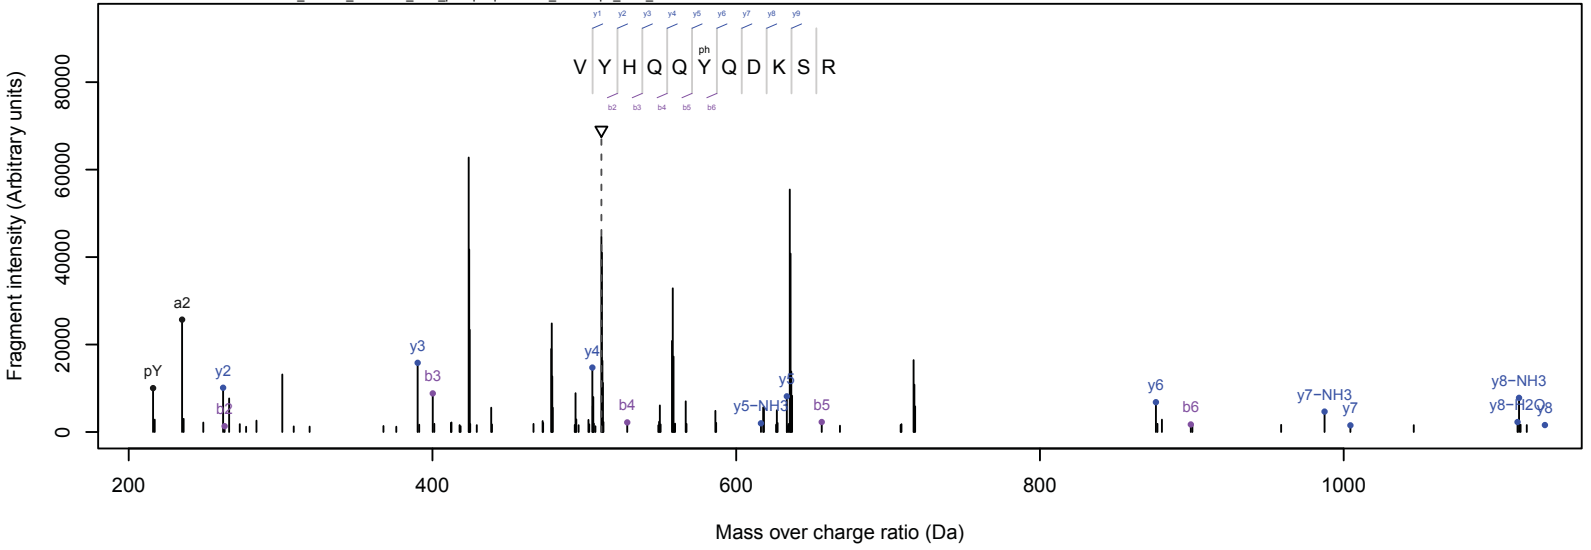

ARQY(ph)TSPEEIDAQLQAEKQK-3+

Source : QE1\_140612\_OPL1013\_CVA\_phosphoproteomic\_landscape\_AML\_C Scan : 19120

Andromeda score : 143.93

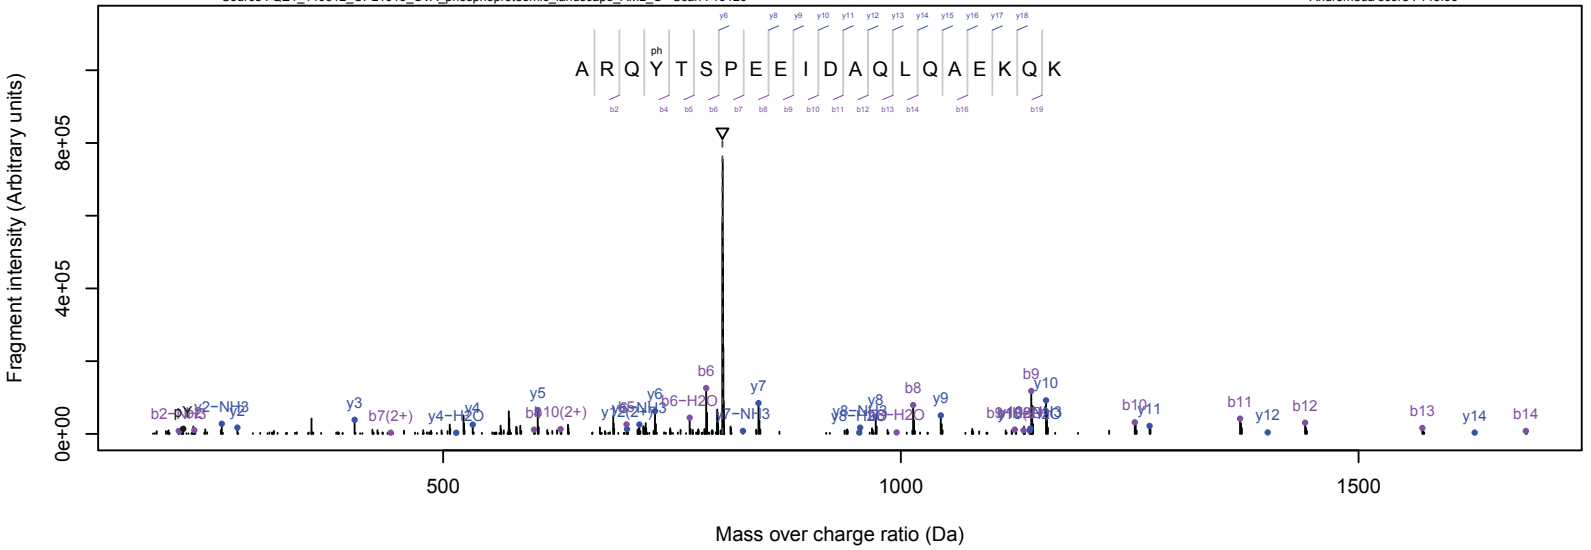

TDDYLDQPCY(ph)ETINR-2+

Source : QE1\_140908\_OPL1013\_CvA\_pTyrIP\_AML\_Kasumi1 Scan : 24281

Andromeda score : 143.93

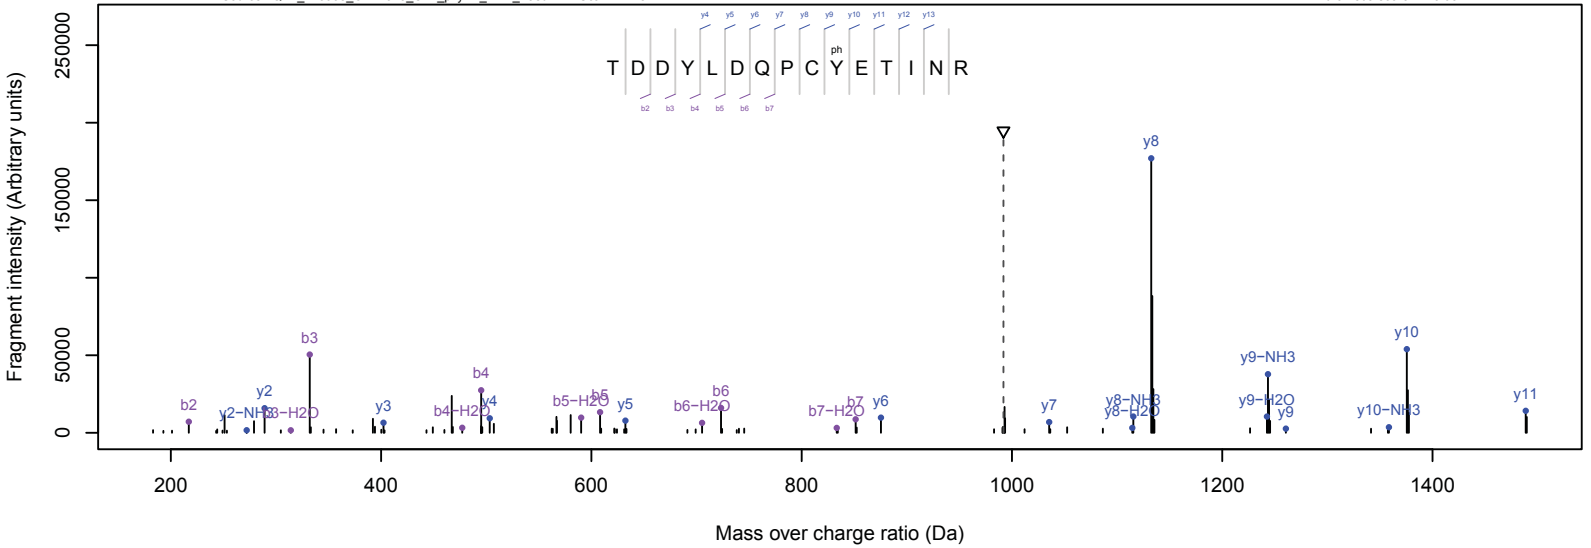

VTPPEGY(ph)EVVTVFPK-3+

Source : QE1\_140612\_OPL1013\_CVA\_phosphoproteomic\_landscape\_AML\_A Scan : 36461

Andromeda score : 143.93

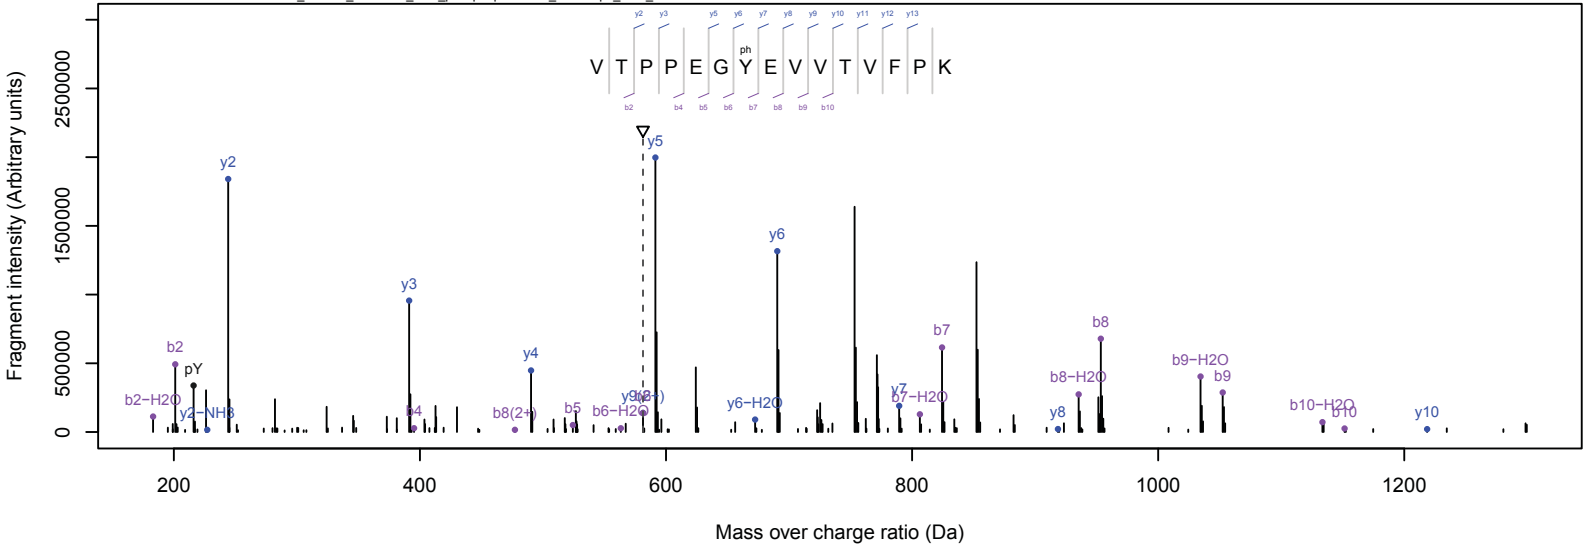

KVY(ph)LEKEISLLNSIHENFSQAMASPAAR-4+

Source : QE1\_140612\_OPL1013\_CVA\_phosphoproteomic\_landscape\_AML\_C Scan : 47788

Andromeda score : 143.92

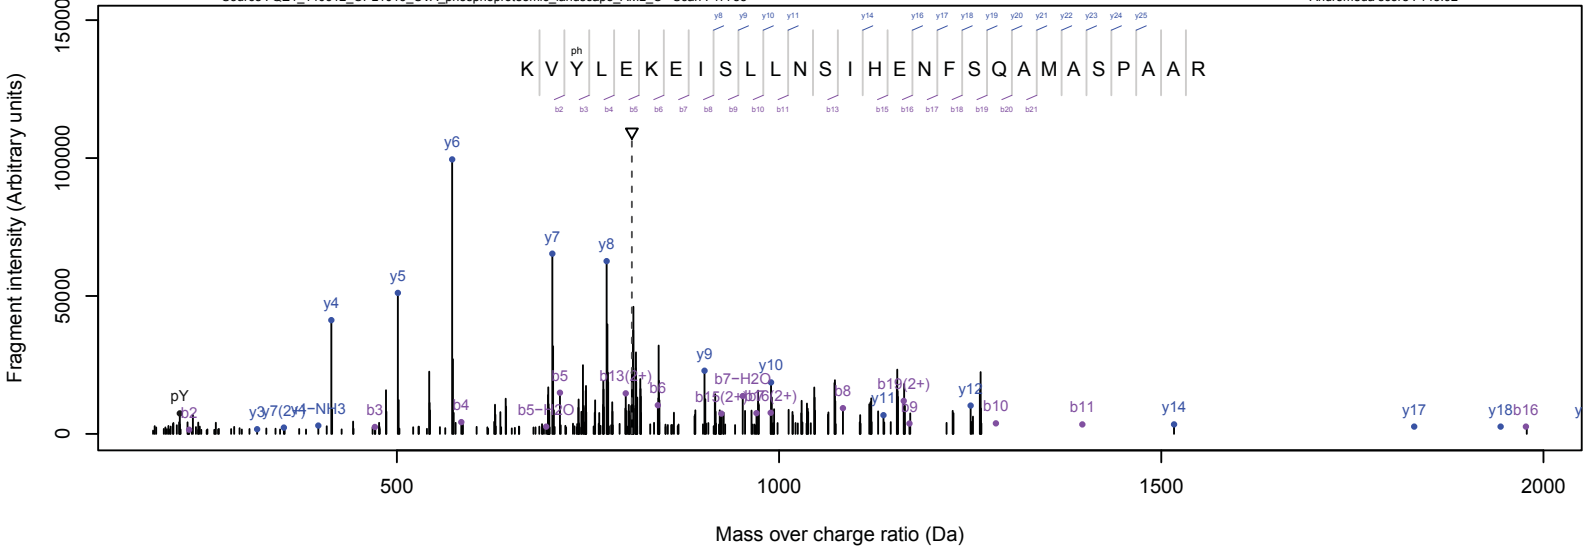

HEM(ox)PPHIY(ph)AITDTAYR-3+

Source : QE1\_140908\_OPL1013\_CvA\_pTyrIP\_AML\_HEL Scan : 23515

Andromeda score : 143.67

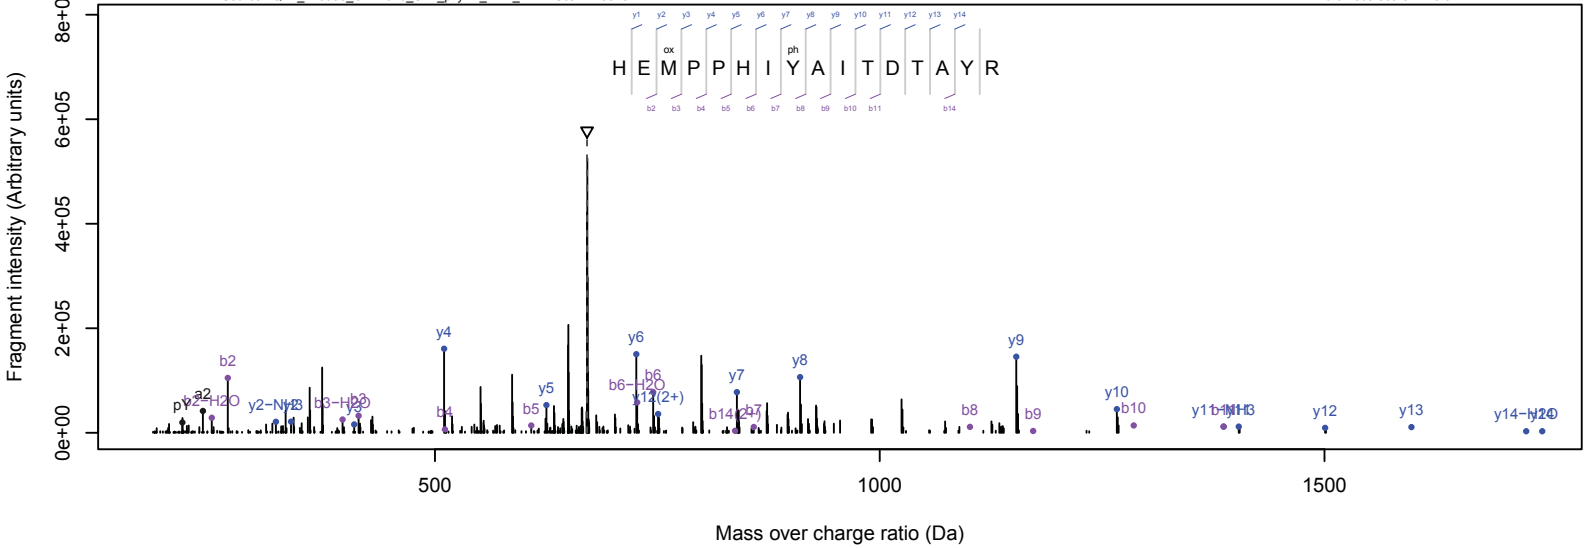



**IGEGT(ph)Y(ph)GVVYKGR-2+**

Source: QE1\_140612\_OPL1013\_CVA\_phosphoproteomic\_landscape\_AML\_F Scan: 16025

Andromeda score: 143.46

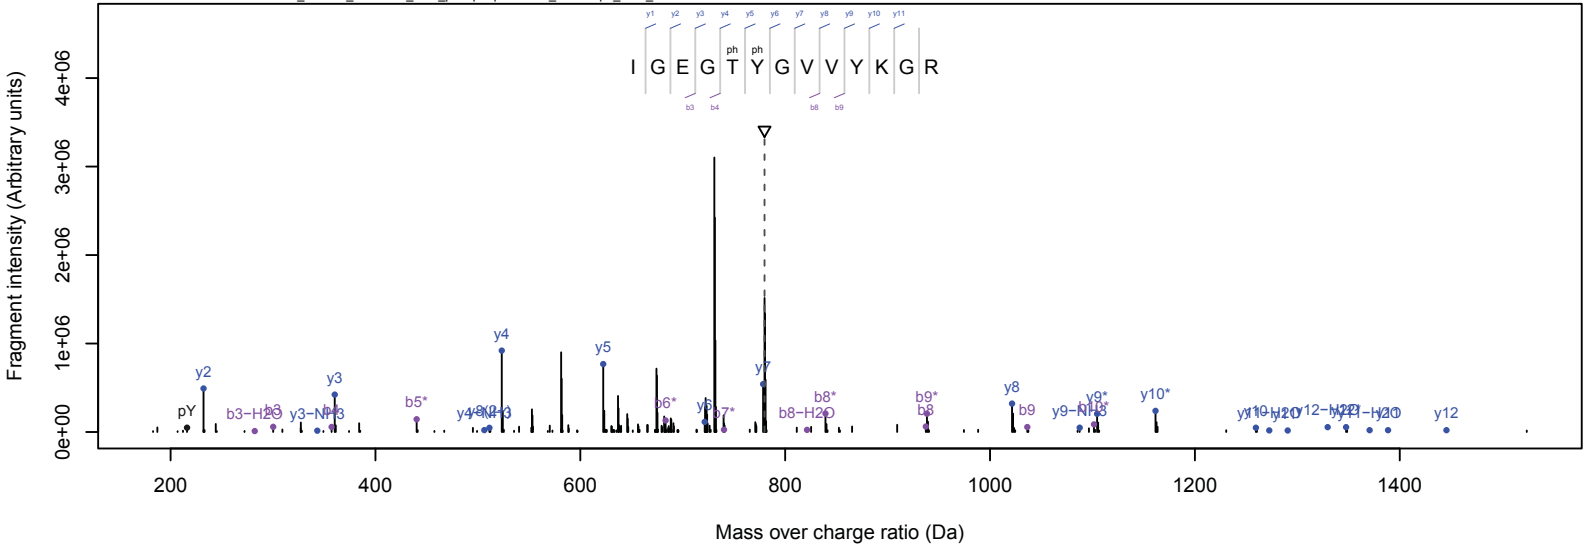

**KKY(ph)PYWPHQPIENL-2+**

Source: QE1\_140612\_OPL1013\_CVA\_phosphoproteomic\_landscape\_AML\_D Scan: 28219

Andromeda score: 143.46

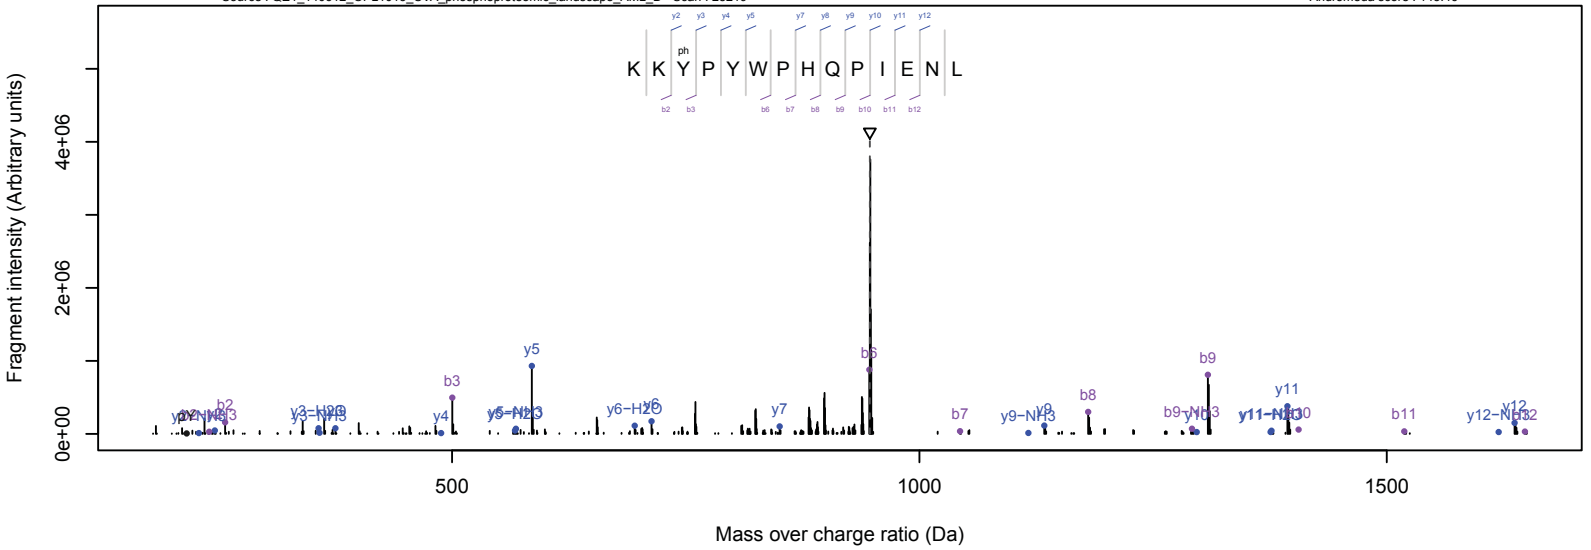

**KGDQCEFLHEYDMTKMPECY(ph)FYSK-4+**

Source: QE1\_140612\_OPL1013\_CVA\_phosphoproteomic\_landscape\_AML\_A Scan: 35612

Andromeda score: 143.32

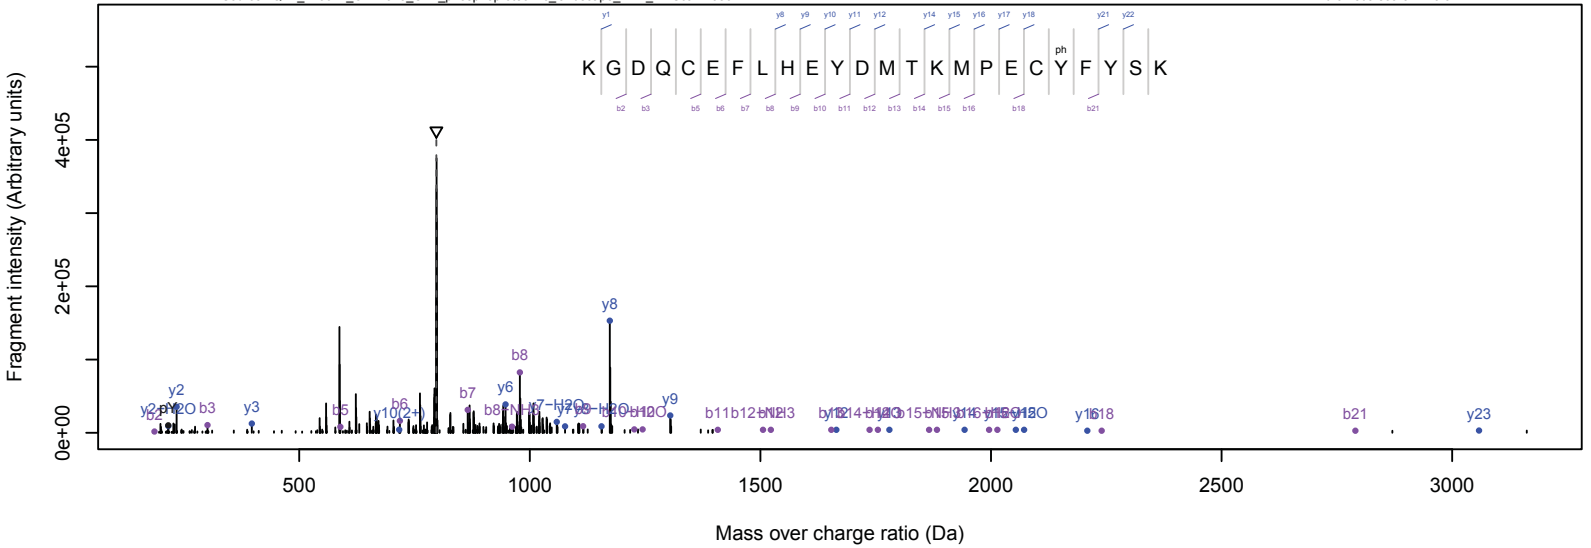

THSLLY(ph)QPQKK-3+

Source : QE1\_140612\_OPL1013\_CVA\_phosphoproteomic\_landscape\_AML\_C Scan : 8461

Andromeda score : 143.24

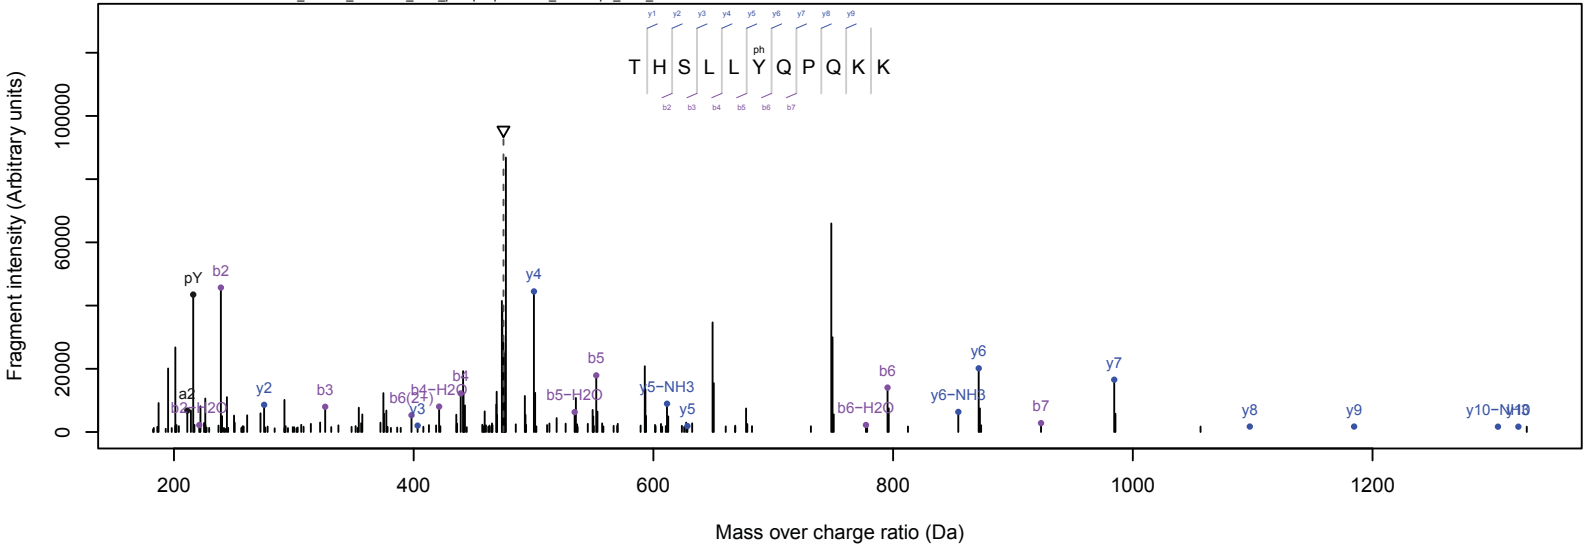

TNADVMTALSQGY(ph)R-2+

Source : QE1\_140612\_OPL1013\_CVA\_phosphoproteomic\_landscape\_AML\_C Scan : 27960

Andromeda score : 143.21

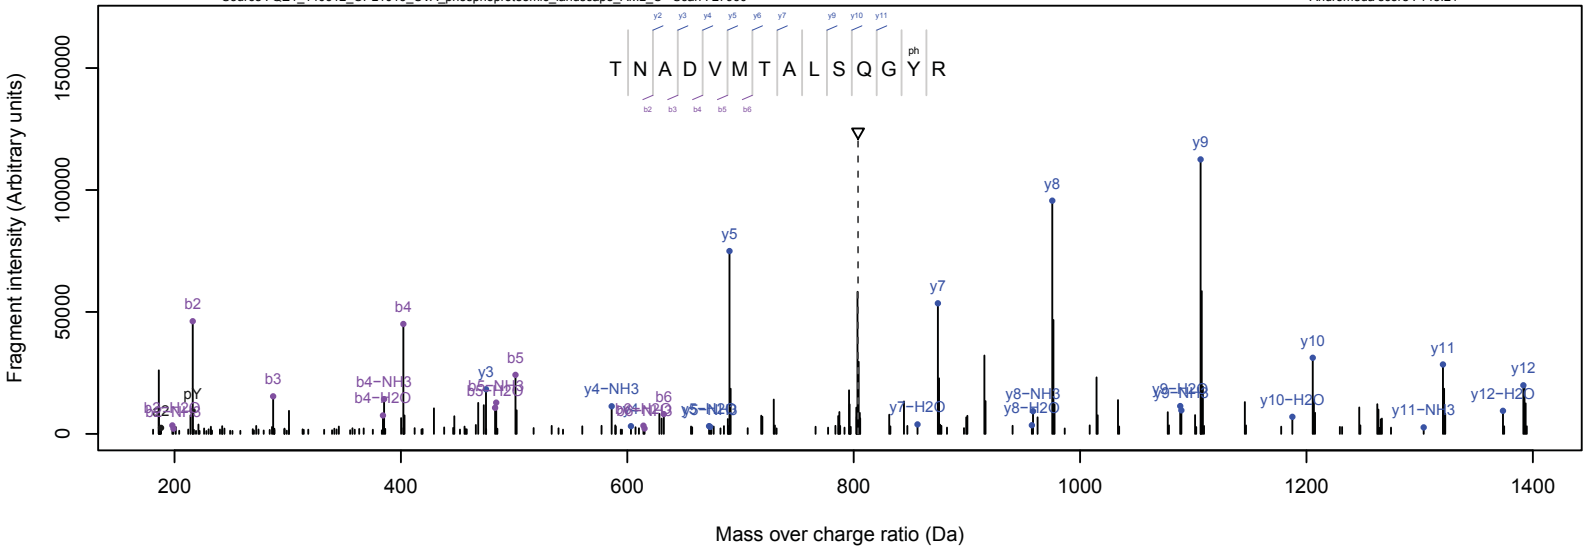

HATIY(ph)PTEELQAVQK-3+

Source : QE1\_140612\_OPL1013\_CVA\_phosphoproteomic\_landscape\_AML\_B Scan : 23326

Andromeda score : 143.05

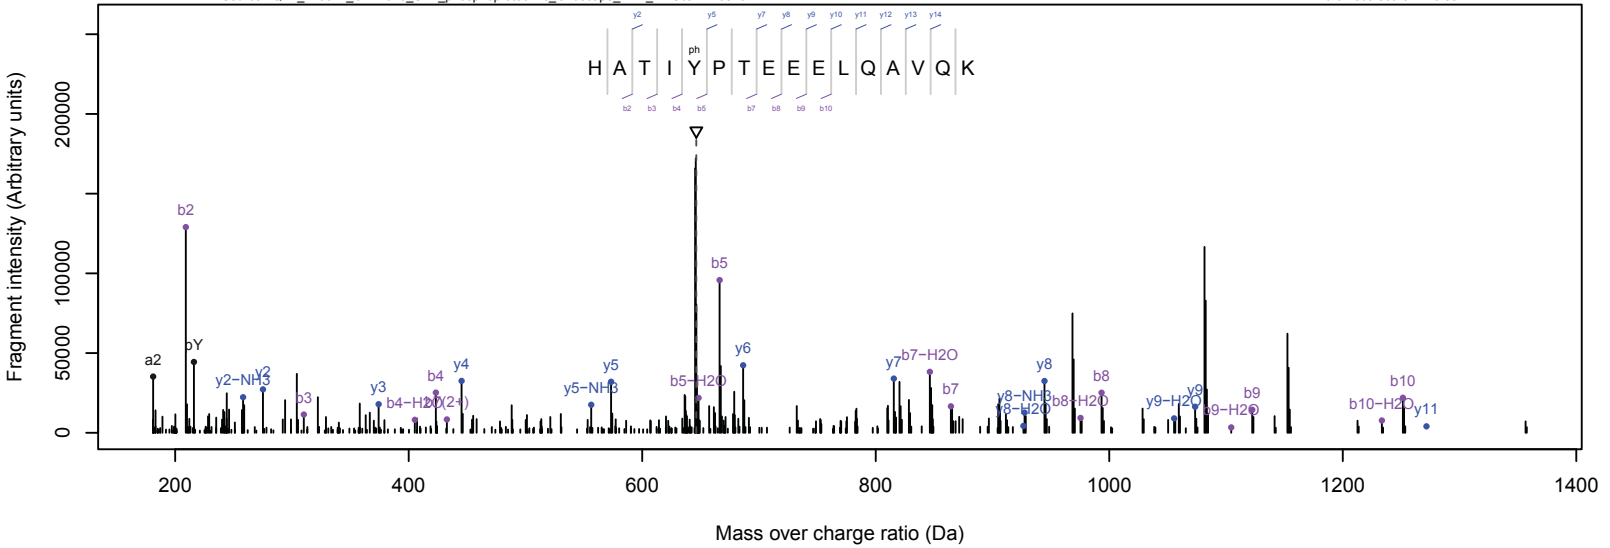

NSIALVSTNY(ph)PLSK-2+

Source : QE1\_140612\_OPL1013\_CVA\_phosphoproteomic\_landscape\_AML\_D Scan : 28729

Andromeda score : 143.05

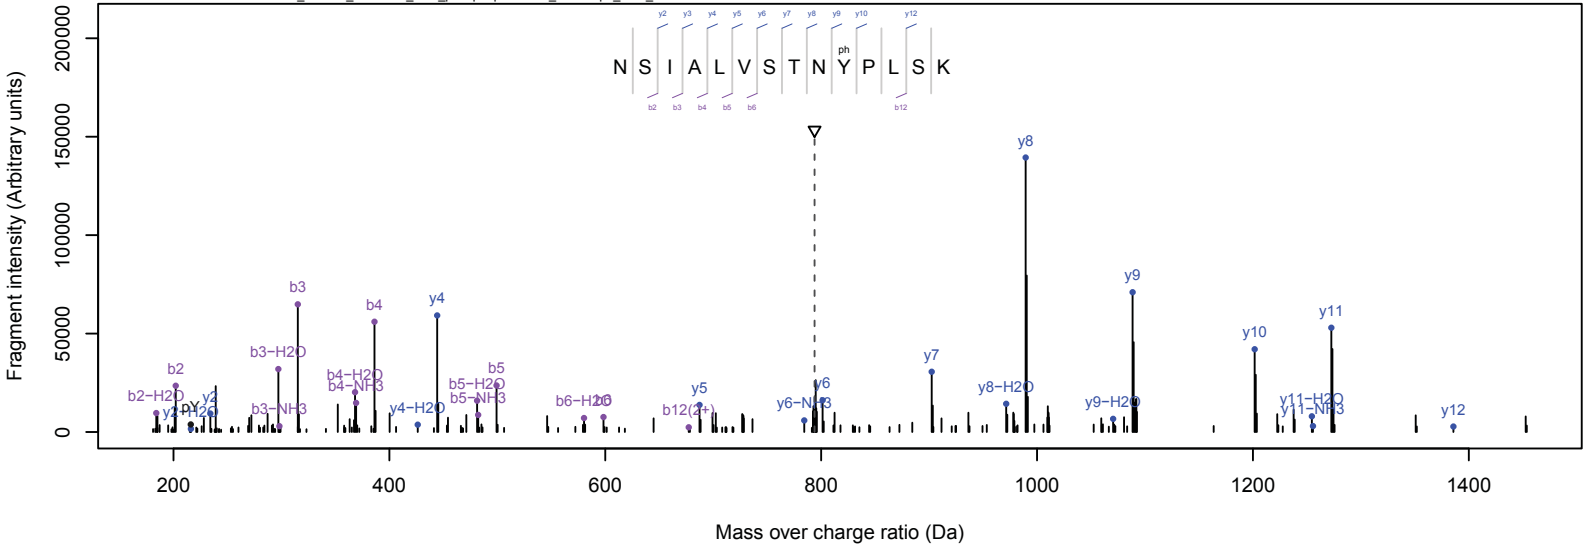

VLGTGNLY(ph)HR-2+

Source : QE1\_140612\_OPL1013\_CVA\_phosphoproteomic\_landscape\_AML\_C Scan : 11401

Andromeda score : 143.03

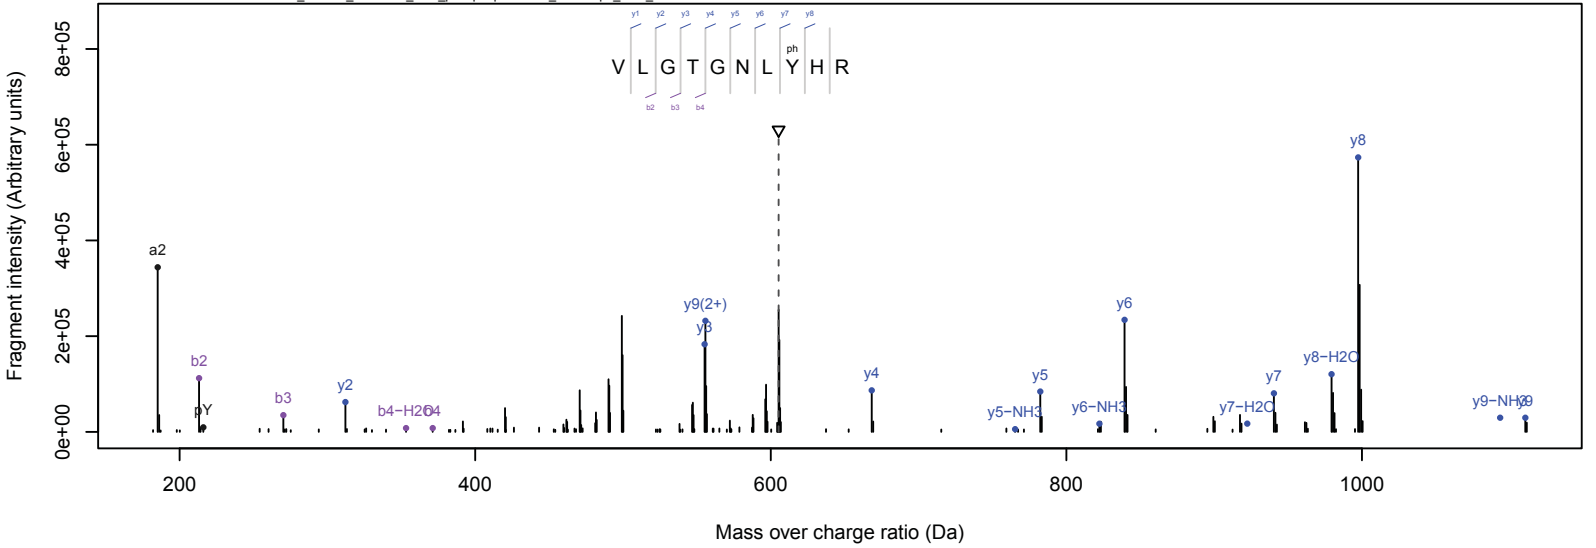

TY(ph)DYLFK-2+

Source : QE1\_140612\_OPL1013\_CVA\_phosphoproteomic\_landscape\_AML\_C Scan : 25993

Andromeda score : 143

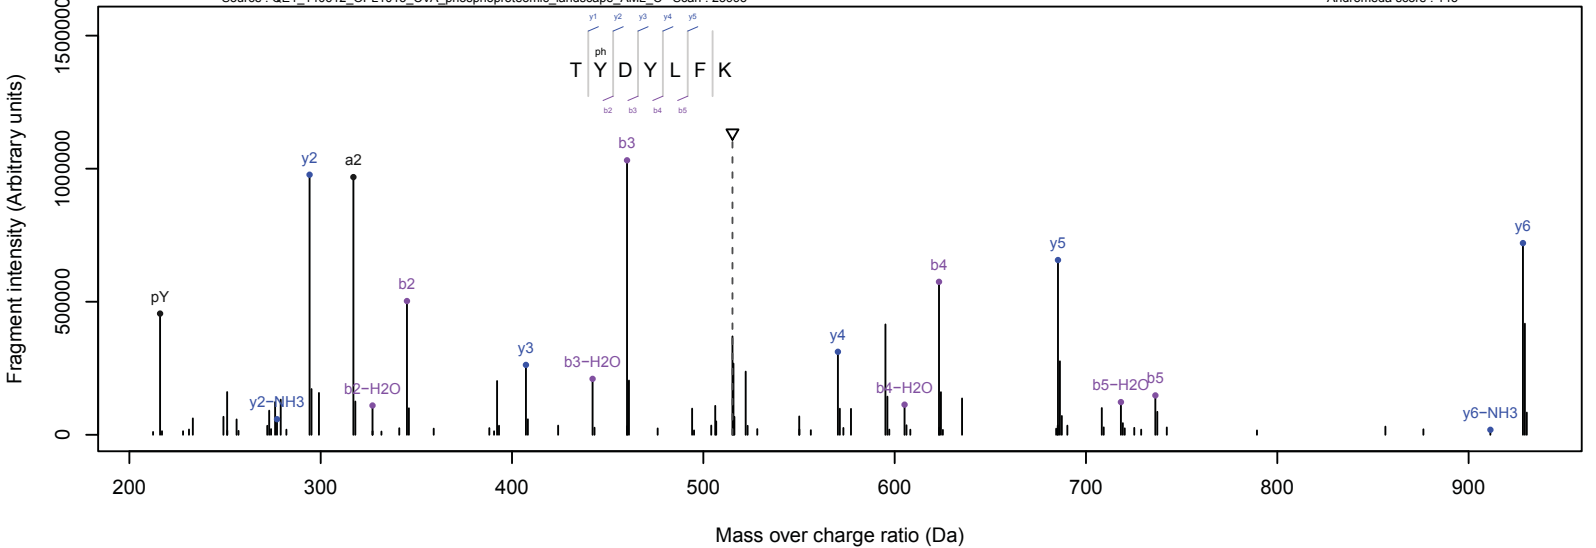

**SKEEPY(ph)VLAVFYENK-2+**

Source: QE1\_140612\_OPL1013\_CVA\_phosphoproteomic\_landscape\_AML\_D Scan: 38927

Andromeda score: 142.94

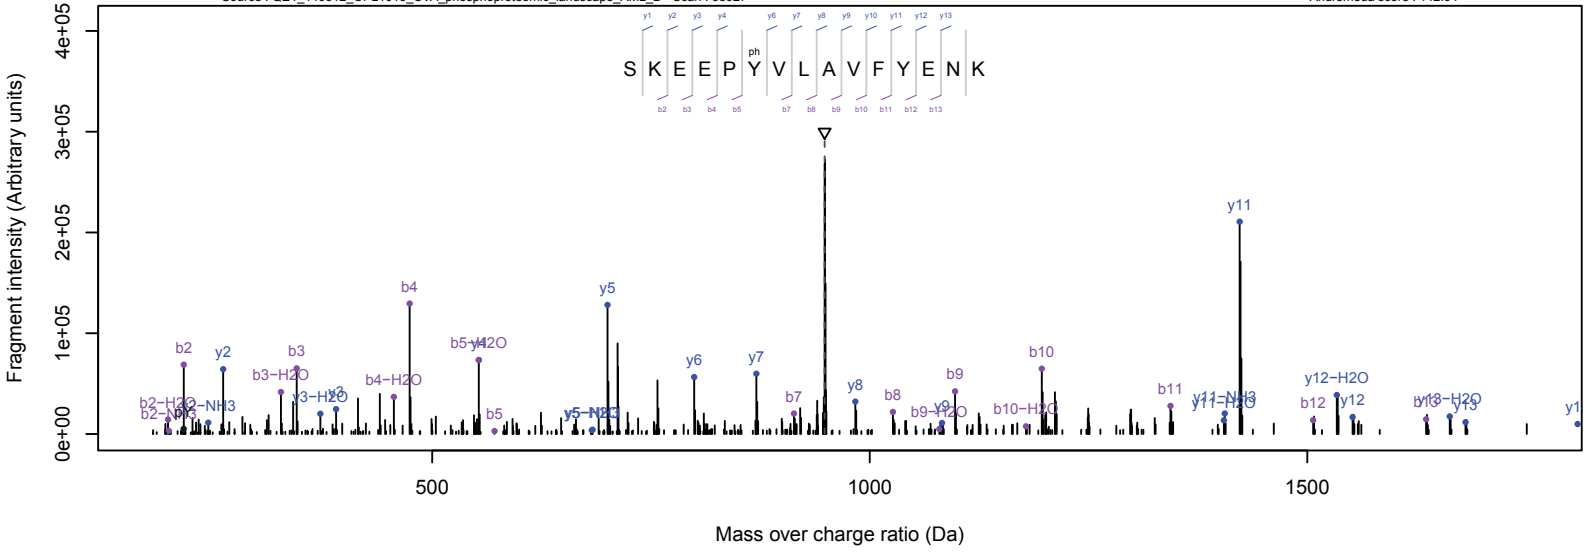

**LSLKNPEY(ph)VWVHEK-3+**

Source: QE1\_140612\_OPL1013\_CVA\_phosphoproteomic\_landscape\_AML\_B Scan: 29760

Andromeda score: 142.91

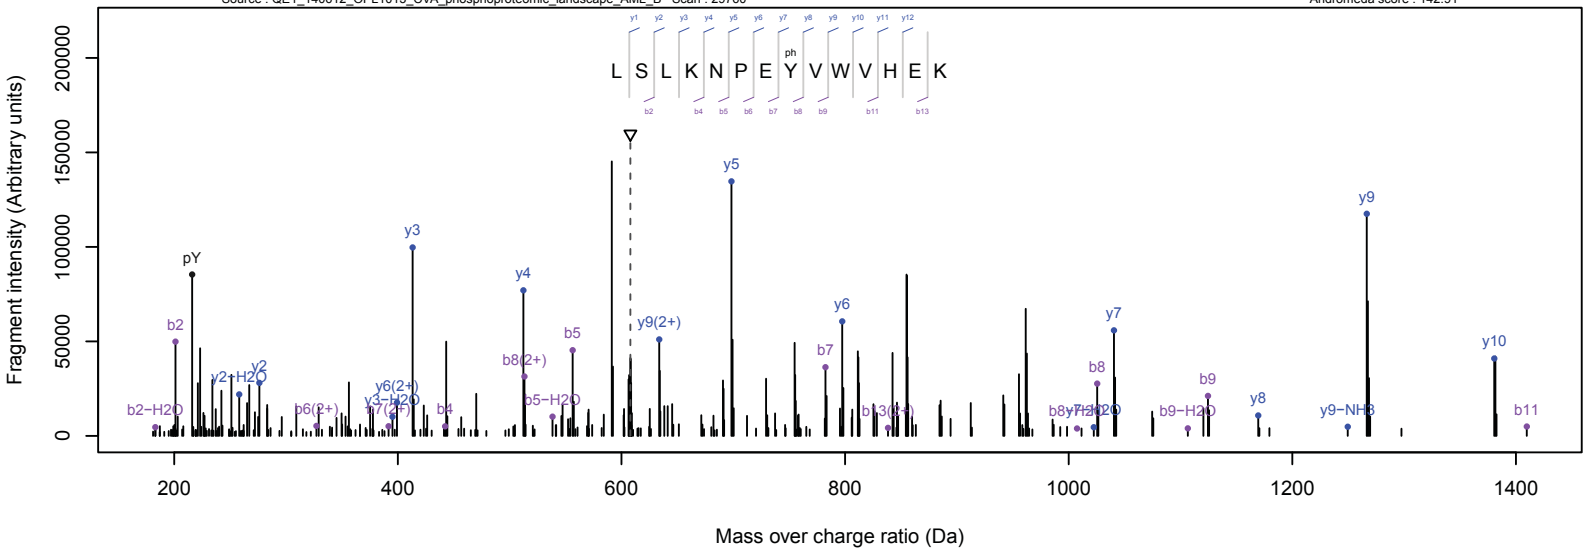

**PSSAIY(ph)PSDSFR-2+**

Source: QE1\_140612\_OPL1013\_CVA\_phosphoproteomic\_landscape\_AML\_C Scan: 19313

Andromeda score: 142.83

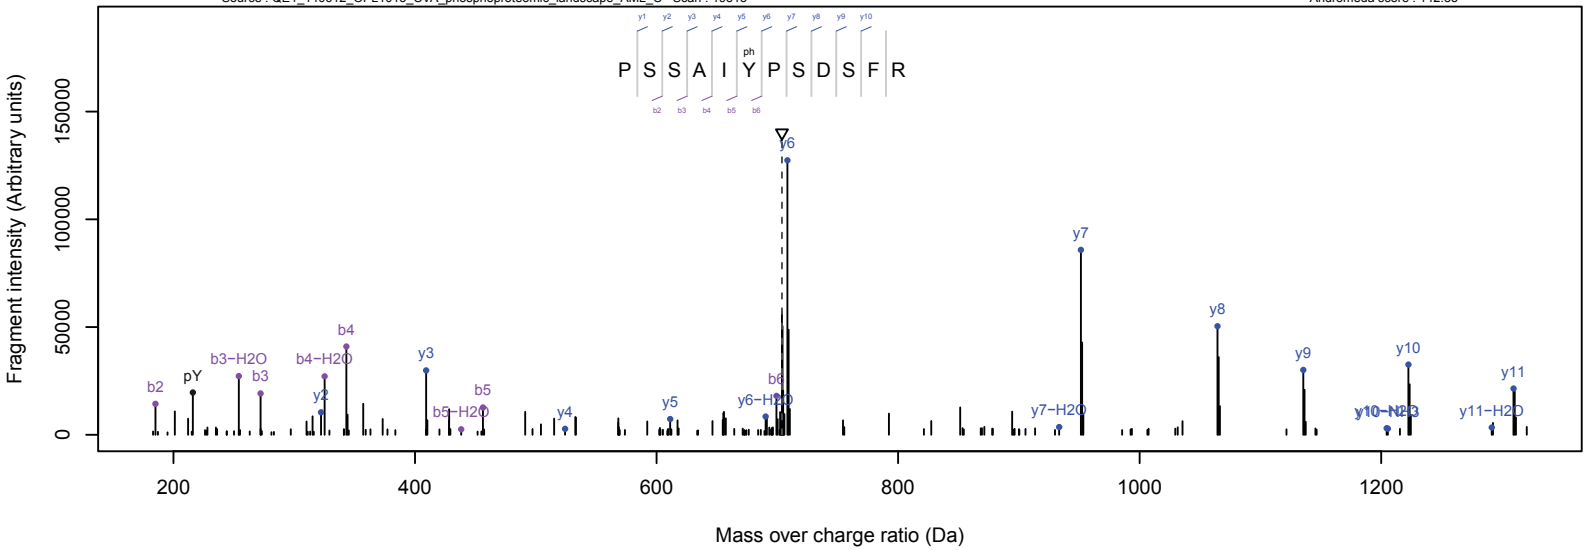

SSASPY(ph)SSVSASLIANGDSTSTCGMHSSGVS R-3+

Source : QE1\_140612\_OPL1013\_CVA\_phosphoproteomic\_landscape\_AML\_C Scan : 26509

Andromeda score : 142.68

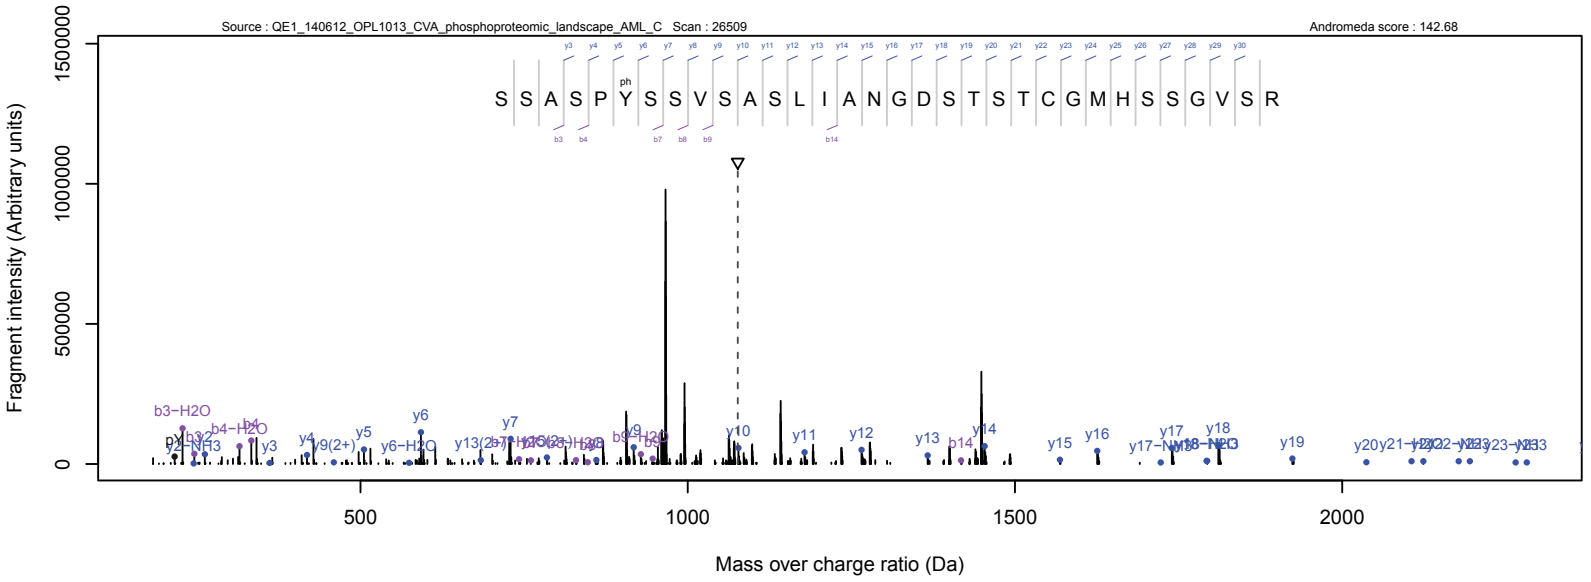

GPNVKGEY(ph)DVTMPK-2+

Source : QE1\_140612\_OPL1013\_CVA\_phosphoproteomic\_landscape\_AML\_C Scan : 14709

Andromeda score : 142.54

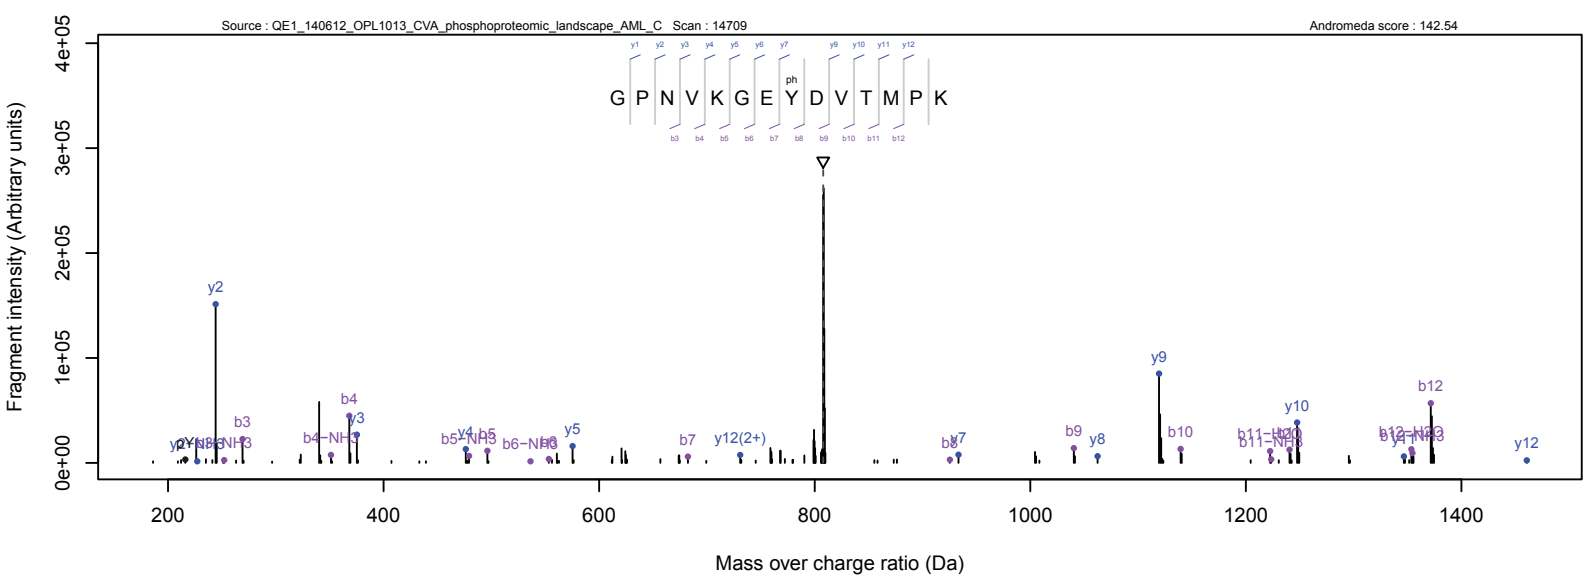

SSSLEMTPY(ph)NTPQLSPATTPANKK-3+

Source : QE1\_140612\_OPL1013\_CVA\_phosphoproteomic\_landscape\_AML\_C Scan : 25721

Andromeda score : 142.45

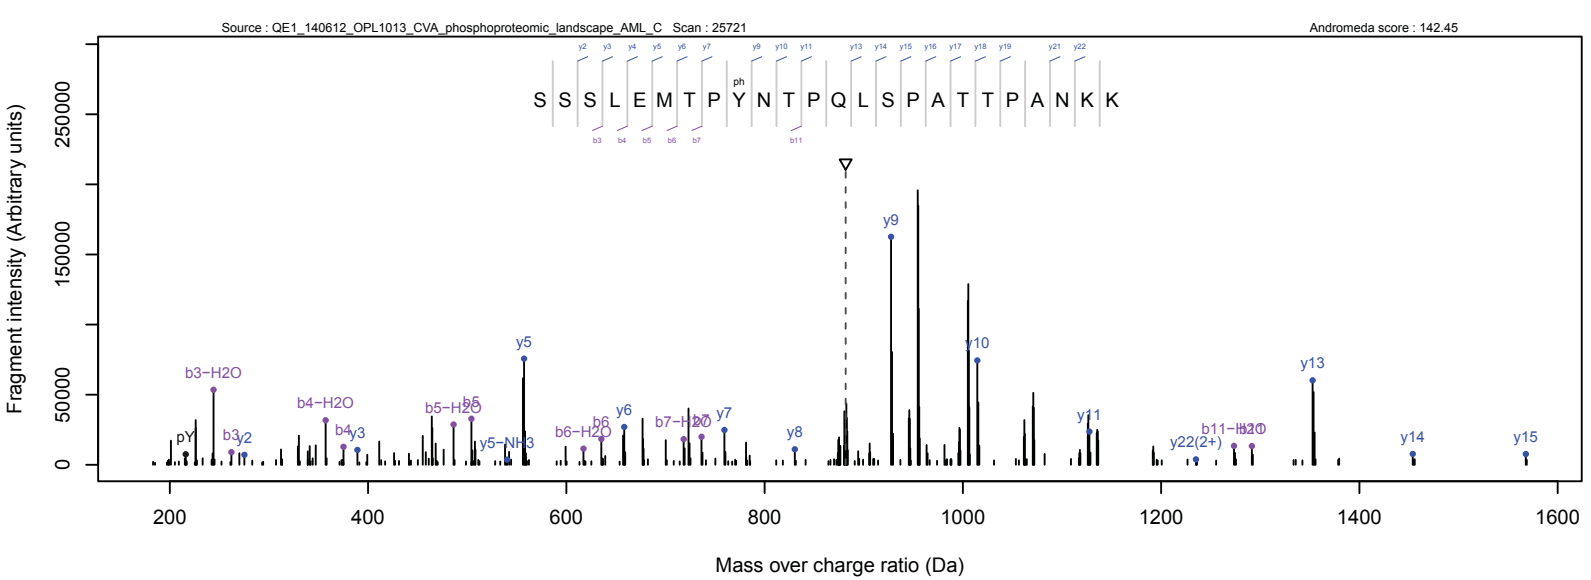

**IALHTALNNPYYYLKNEALK-3+**

Source: QE1\_140612\_OPL1013\_CVA\_phosphoproteomic\_landscape\_AML\_B Scan: 36089

Andromeda score: 142.43

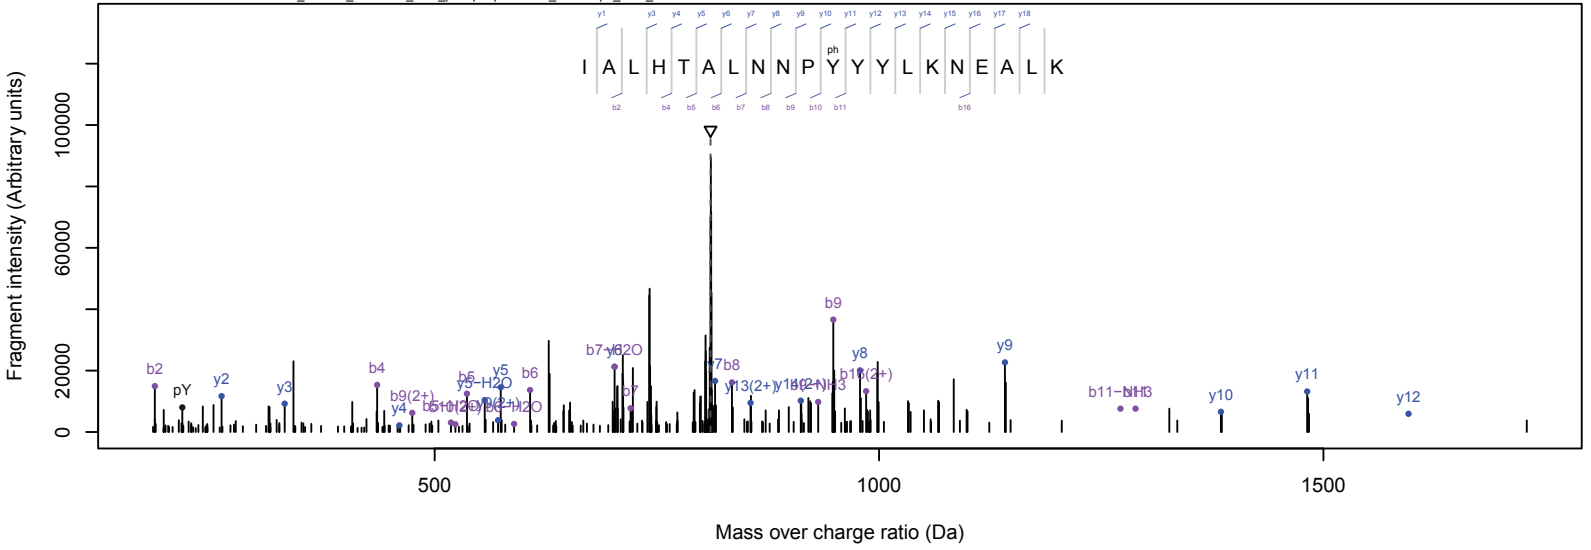

**HYSPEDEPSPEAQPIAAYK-3+**

Source: QE1\_140612\_OPL1013\_CVA\_phosphoproteomic\_landscape\_AML\_C Scan: 17972

Andromeda score: 142.39

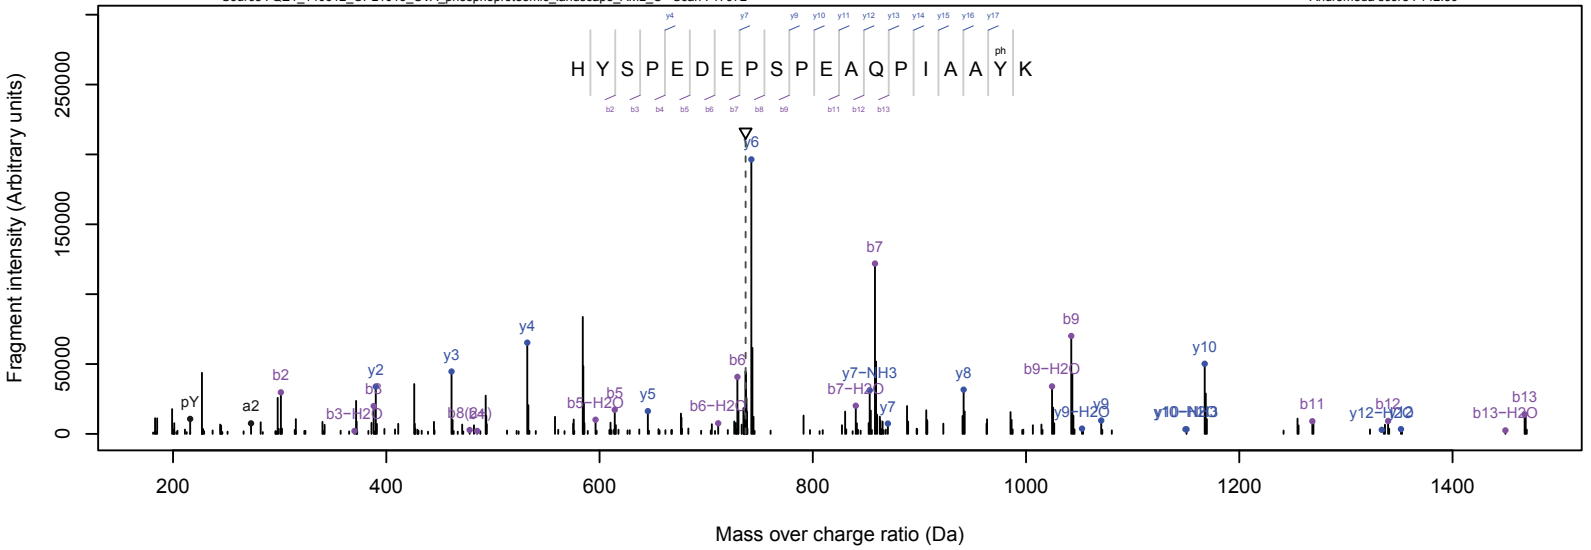

**HHAAY(V)NNLNVTEEK-3+**

Source: QE1\_140612\_OPL1013\_CVA\_phosphoproteomic\_landscape\_AML\_D Scan: 13146

Andromeda score: 142.38

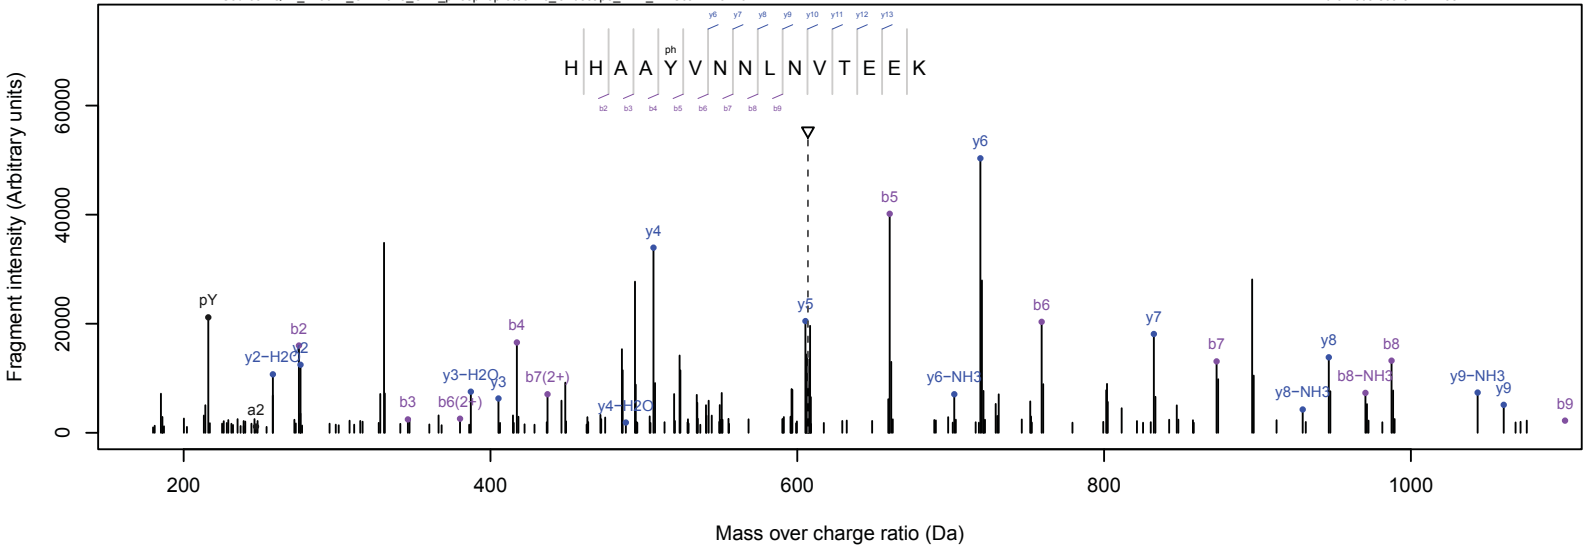



QAEDDRM(ox)DTEAAASEAPQDVT(ph)YAQLHSFTLR-4+

Source : QE1\_140908\_OPL1013\_CvA\_pTyrIP\_AML\_ML2 Scan : 35660

Andromeda score : 141.98

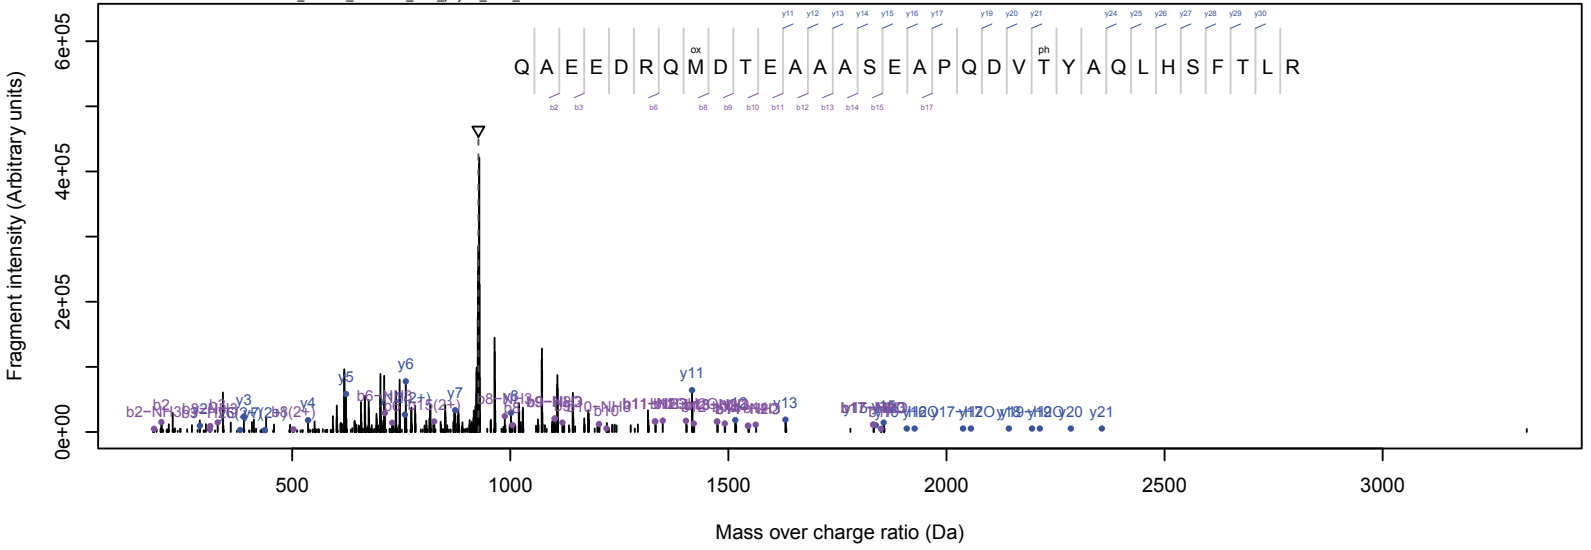

KEVKY(ph)EAPQATDGLAGALDAR-3+

Source : QE1\_140612\_OPL1013\_CVA\_phosphoproteomic\_landscape\_AML\_C Scan : 23650

Andromeda score : 141.79

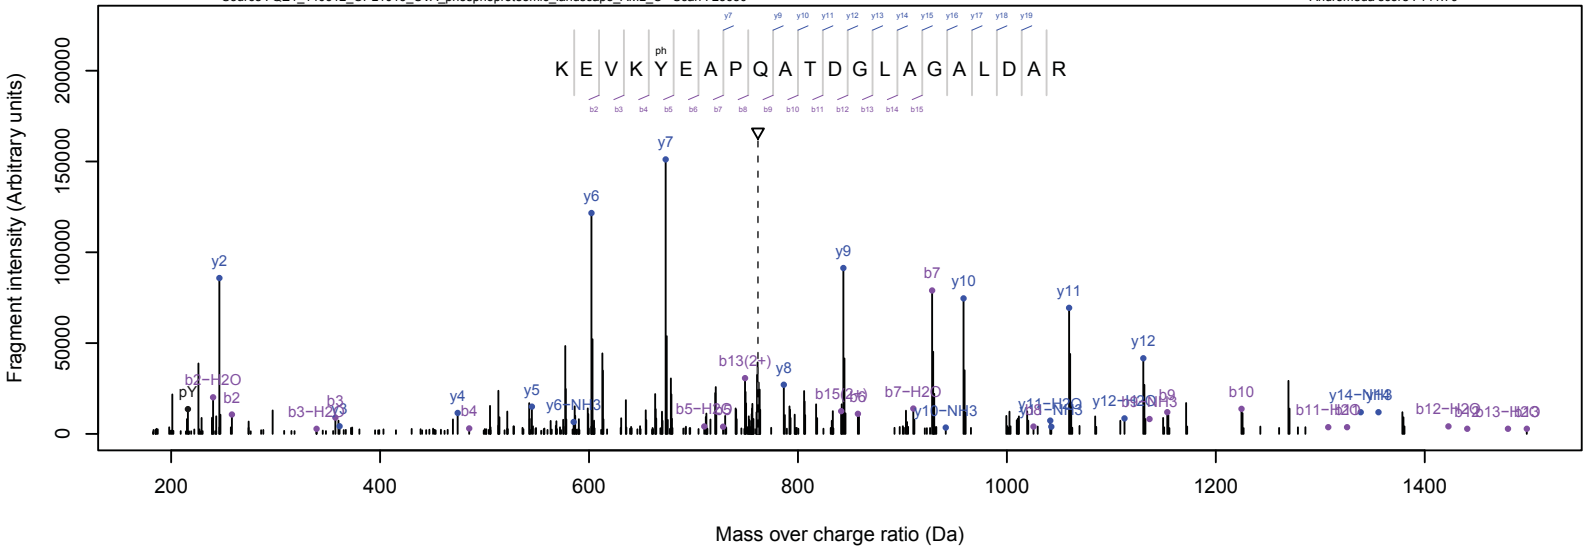

Y(ph)QCTLTHAAGYP-2+

Source : QE1\_140612\_OPL1013\_CVA\_phosphoproteomic\_landscape\_AML\_C Scan : 18162

Andromeda score : 141.71

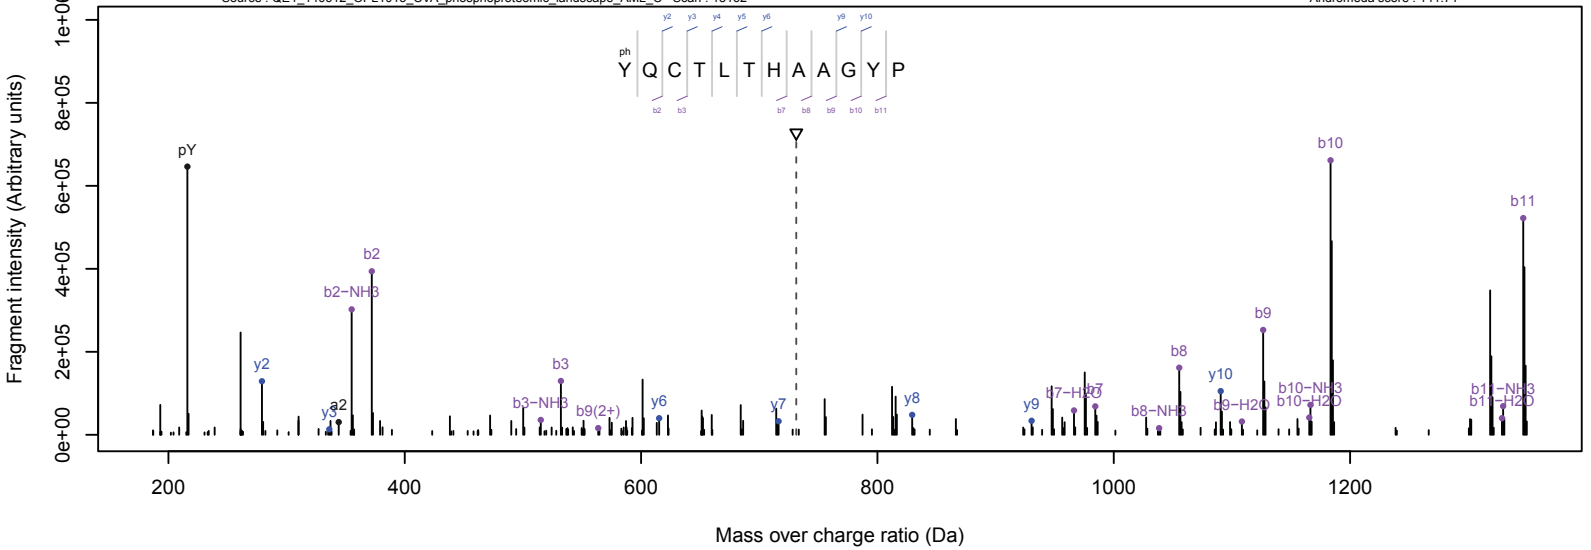



WKNNCPFSADENY<sup>ph</sup>RPLAK-3+

Source: QE1\_140908\_OPL1013\_CVA\_pTyrIP\_AML\_HEL Scan: 21804

Andromeda score: 141.6

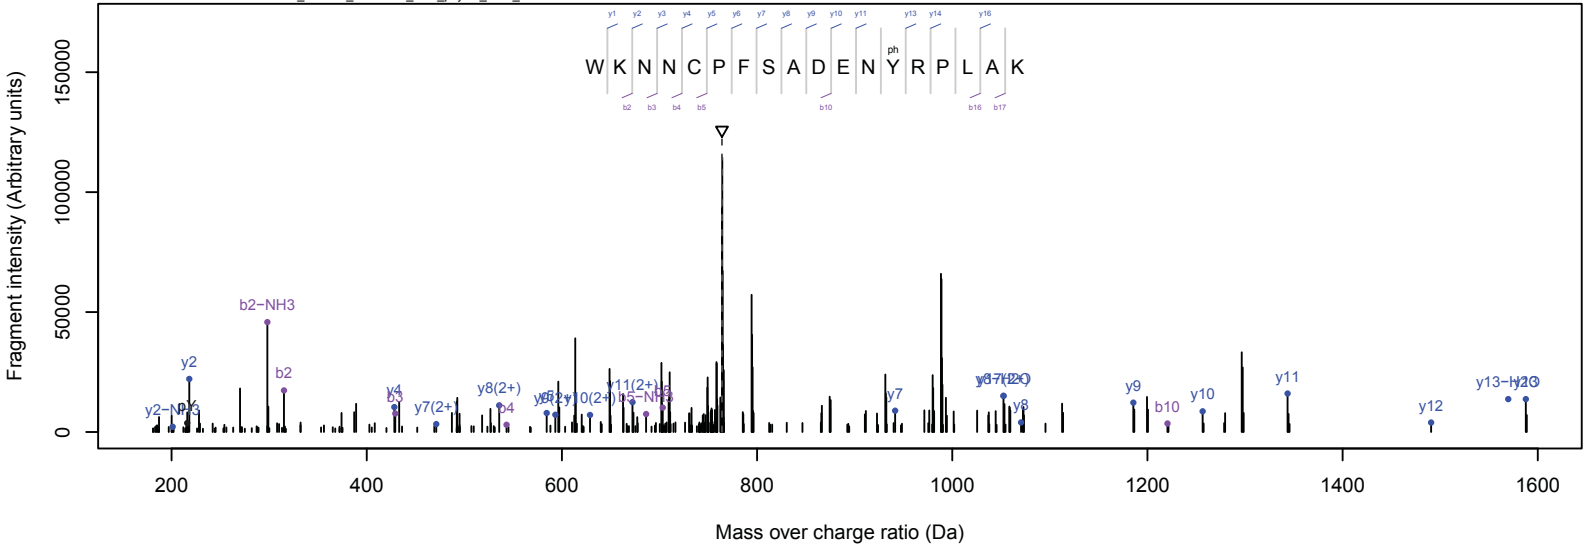

IGTAEPDY<sup>ph</sup>GALYEGR-2+

Source: QE1\_140612\_OPL1013\_CVA\_phosphoproteomic\_landscape\_AML\_B Scan: 22299

Andromeda score: 141.55

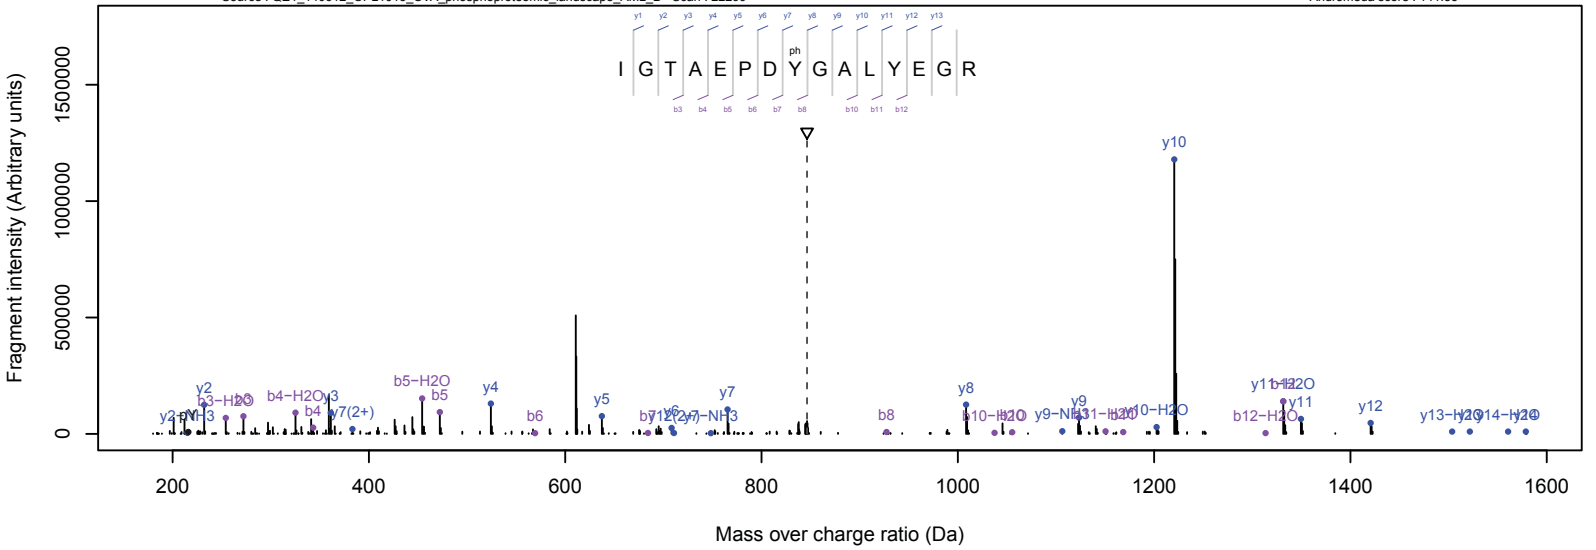

TY<sup>ph</sup>FNGDLK-2+

Source: QE1\_140612\_OPL1013\_CVA\_phosphoproteomic\_landscape\_AML\_C Scan: 14101

Andromeda score: 141.48

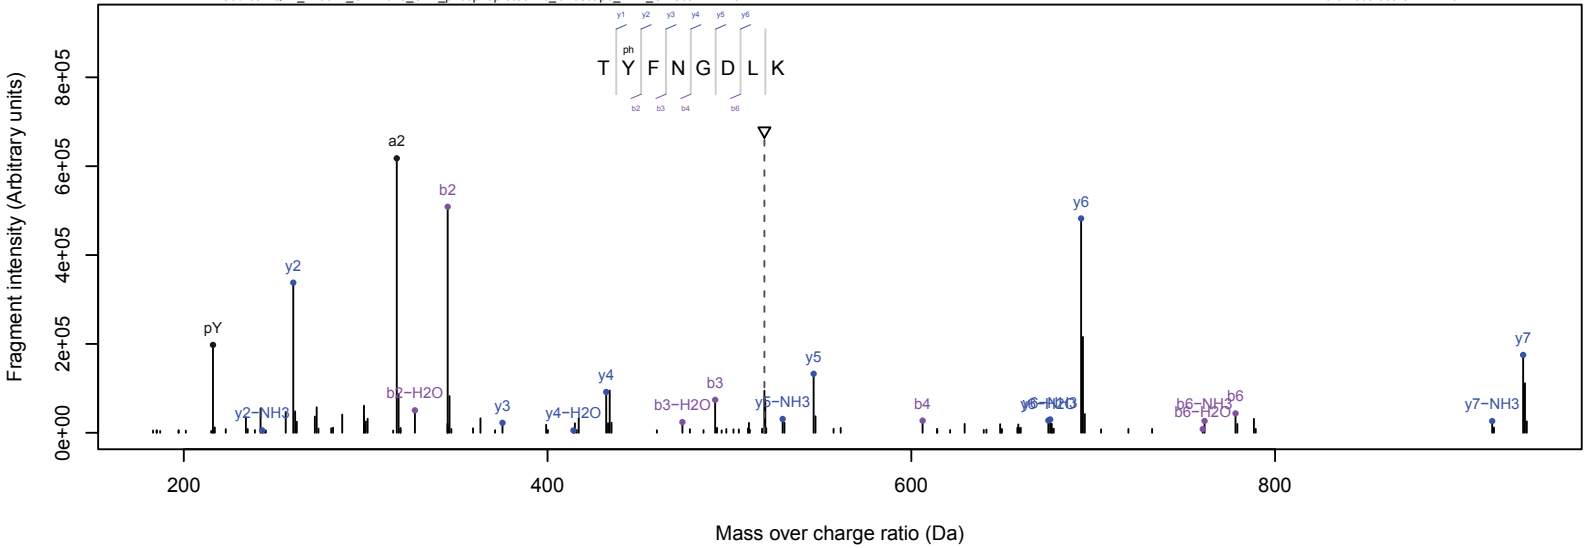

ANVAVVSGAPLQGQLVARPSSINYPH MVAPVTGNDVGIR-3+

Source: QE1\_140612\_OPL1013\_CVA\_phosphoproteomic\_landscape\_AML\_C Scan: 47017

Andromeda score: 141.36

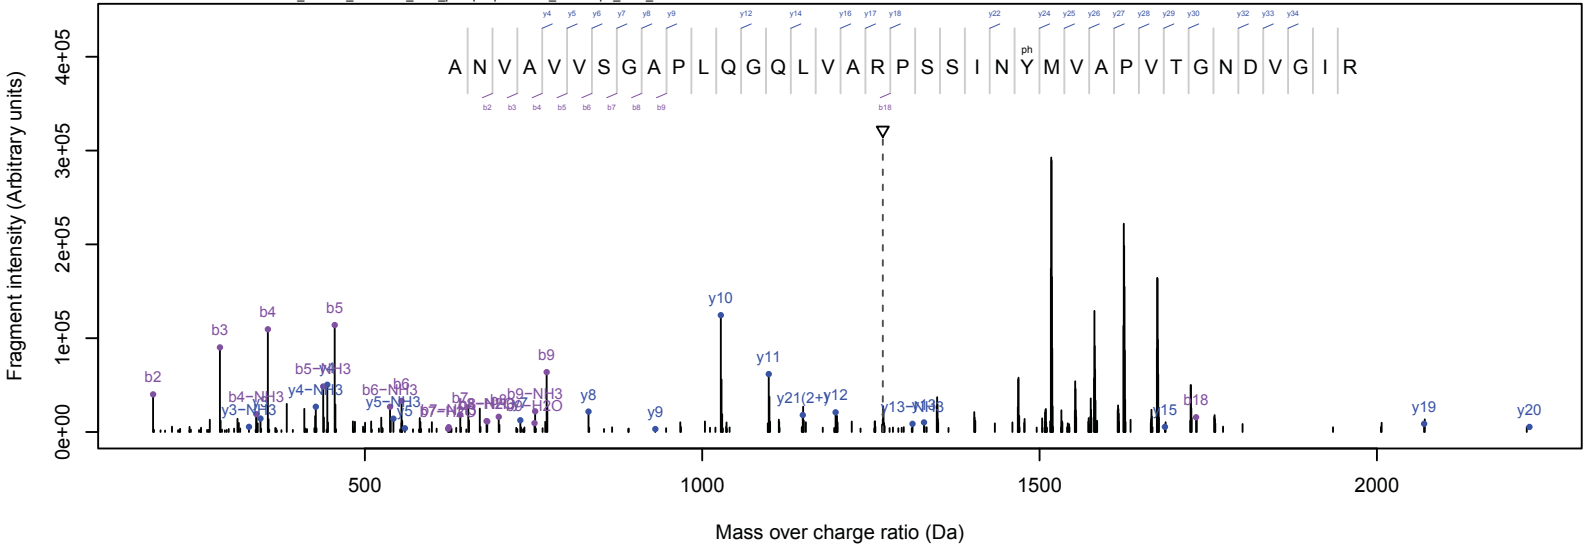

IY(pH)ILTGTVHQVPTENVQVHFTEK-3+

Source: QE1\_140612\_OPL1013\_CVA\_phosphoproteomic\_landscape\_AML\_C Scan: 39006

Andromeda score: 141.36

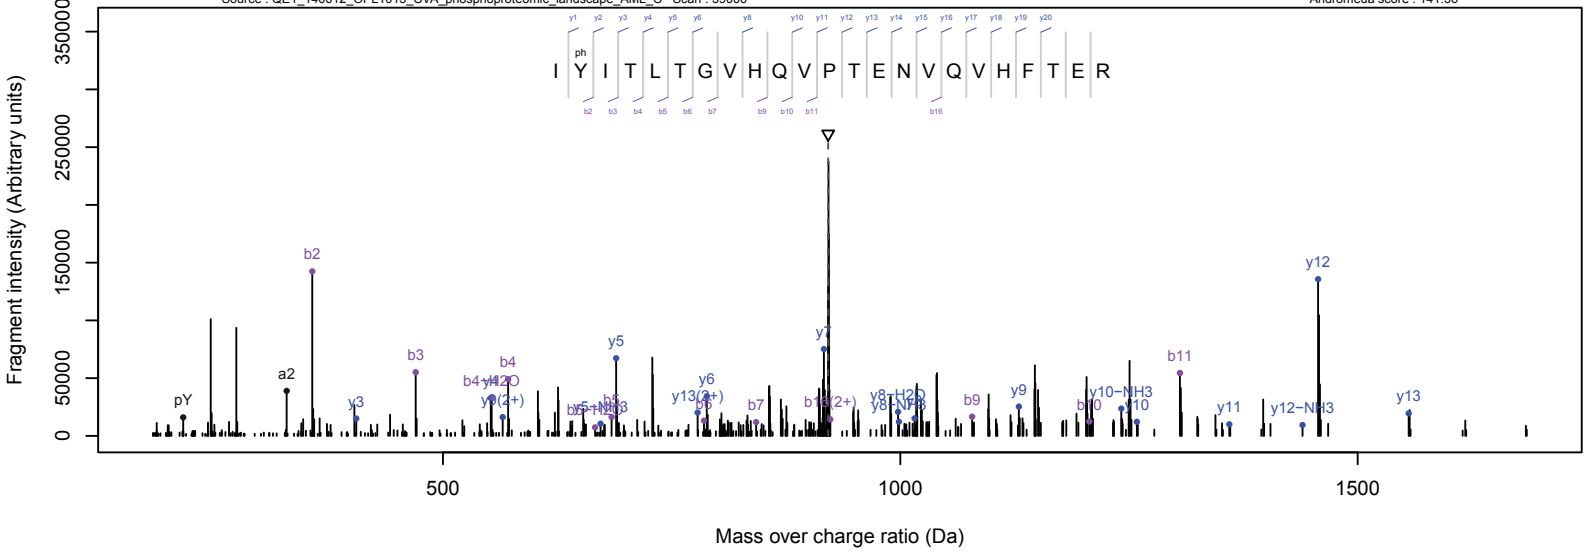

AVSPQSTKPM(ox)AESITYA AAVAR-3+

Source: QE1\_140612\_OPL1013\_CVA\_phosphoproteomic\_landscape\_AML\_C Scan: 25272

Andromeda score: 141.31

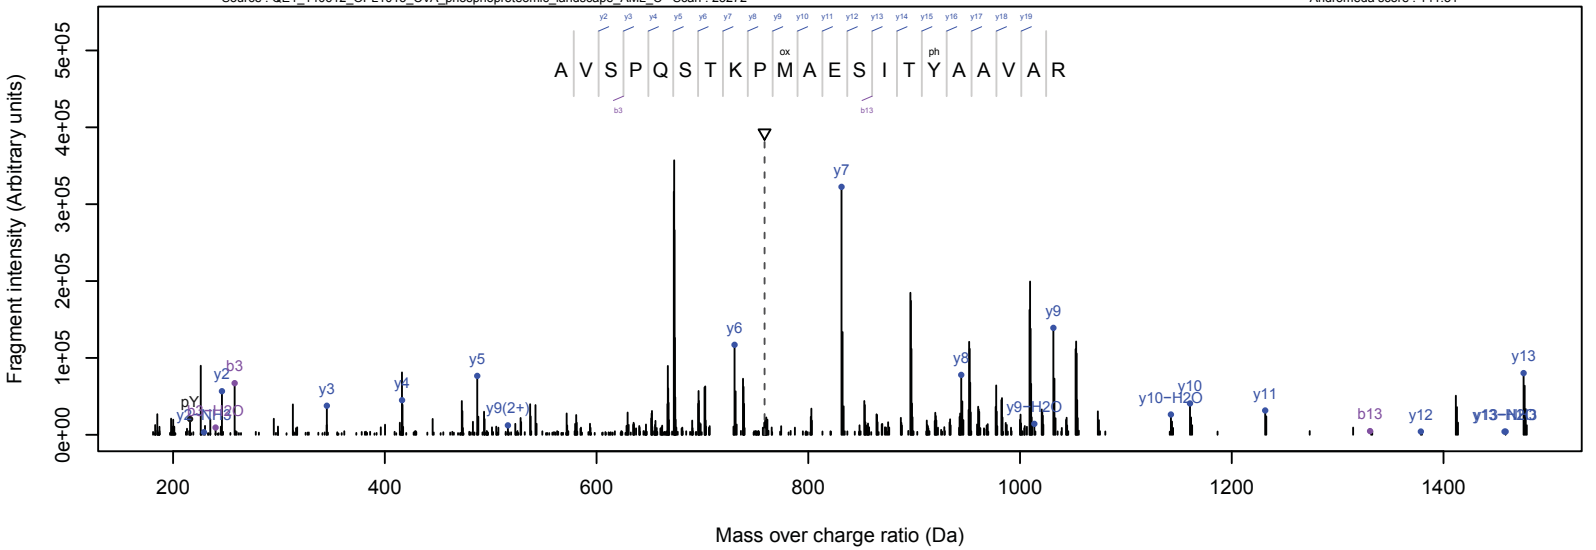

YGMLLY(ph)QNYR-2+

Source : QE1\_140612\_OPL1013\_CVA\_phosphoproteomic\_landscape\_AML\_C Scan : 29738

Andromeda score : 141.2

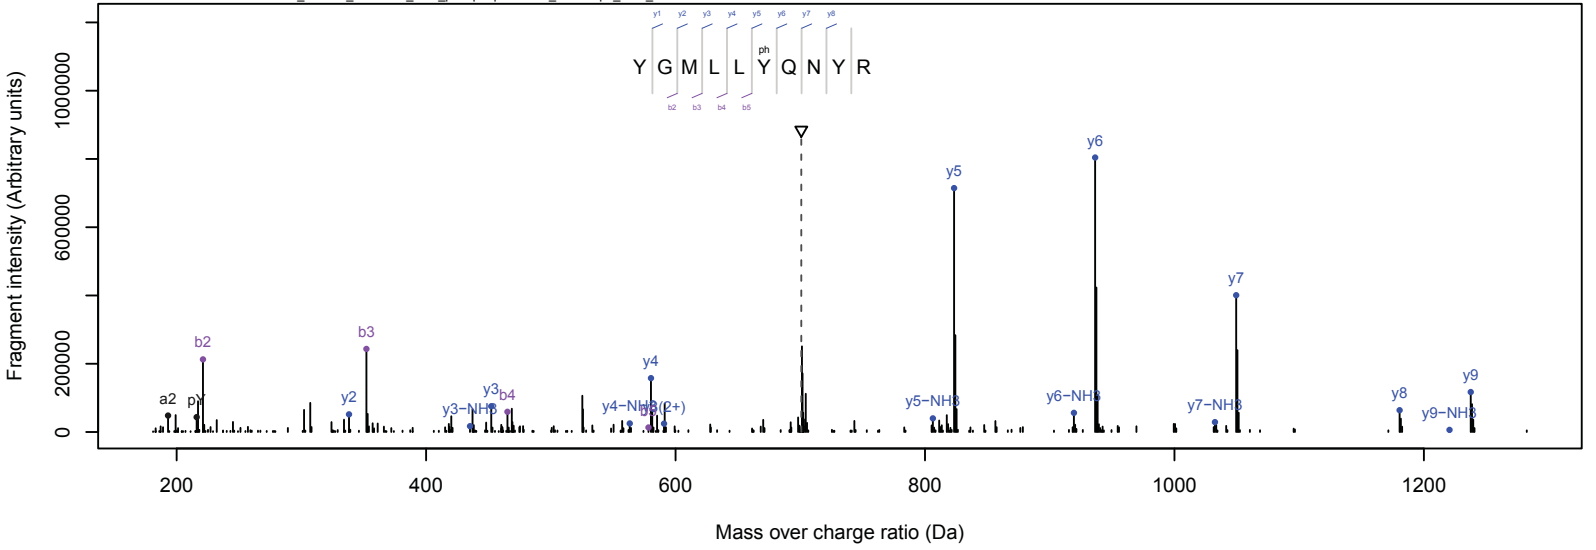

Y(ph)LTVAAVFR-2+

Source : QE1\_140612\_OPL1013\_CVA\_phosphoproteomic\_landscape\_AML\_C Scan : 39235

Andromeda score : 141.2

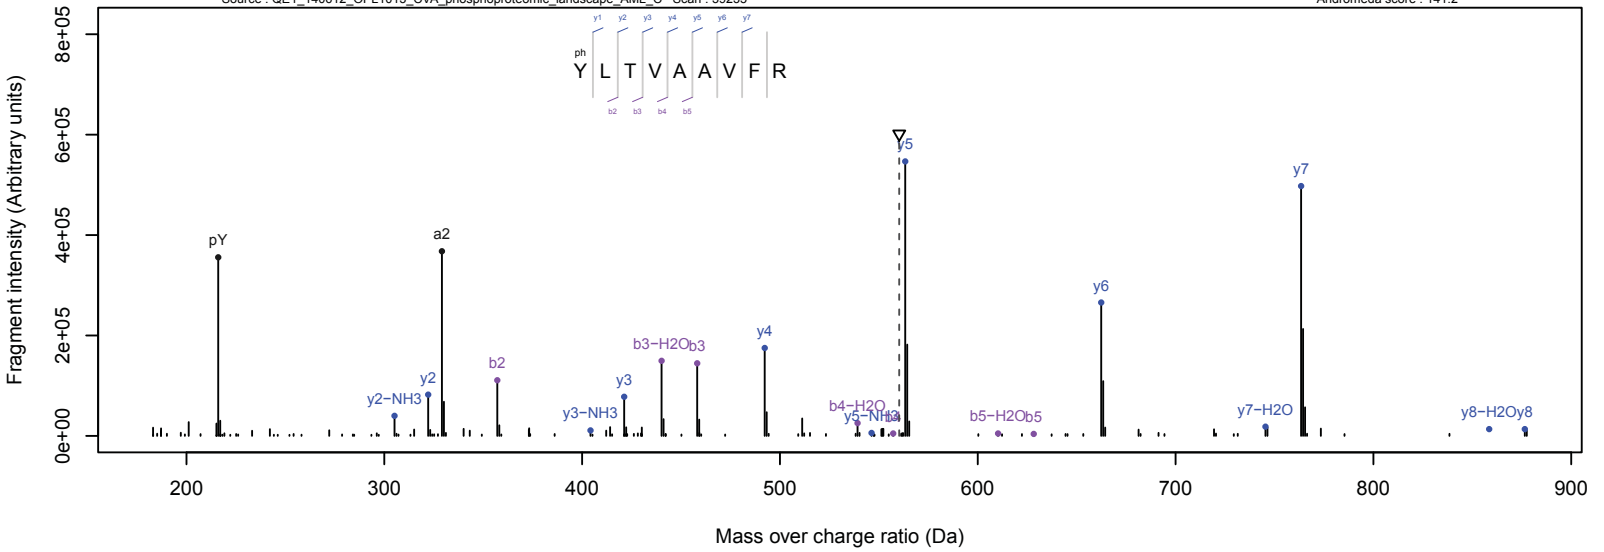

ALNGAEPNY(ph)HSLPSAR-2+

Source : QE1\_140612\_OPL1013\_CVA\_phosphoproteomic\_landscape\_AML\_C Scan : 16832

Andromeda score : 141.13

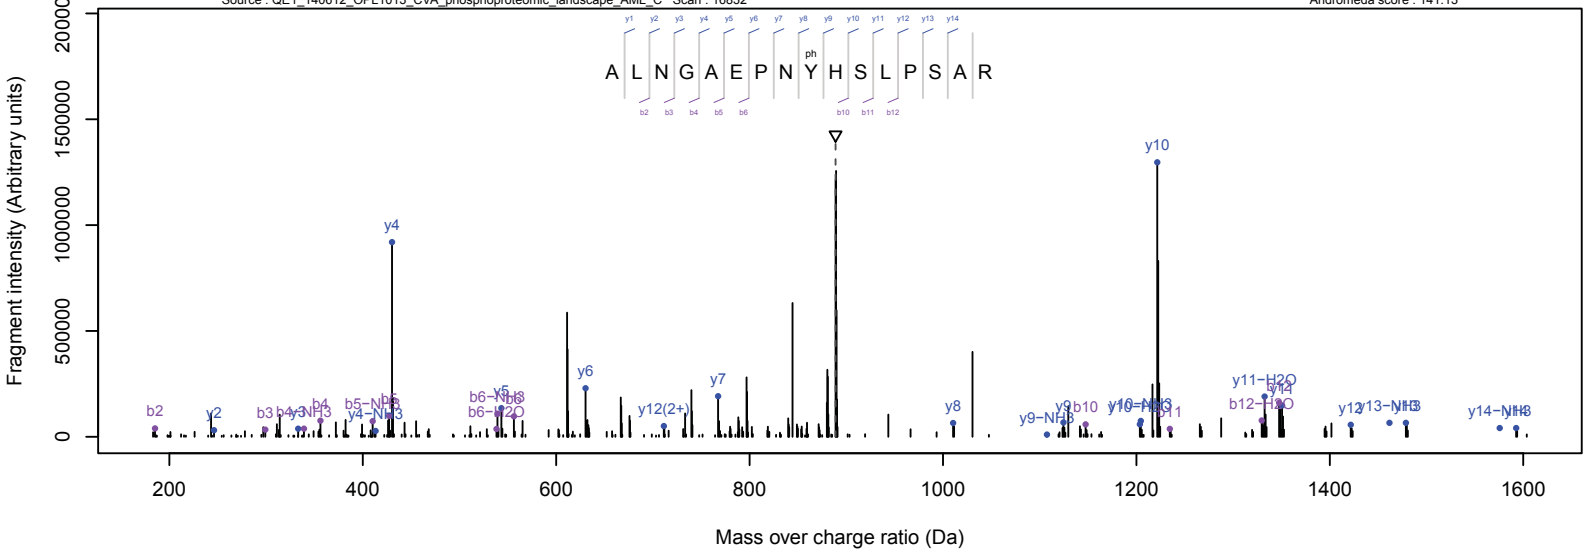

TSGTM(ox)NNY(ph)PTWR-2+

Source : QE1\_140612\_OPL1013\_CVA\_phosphoproteomic\_landscape\_AML\_C Scan : 11562

Andromeda score : 140.91

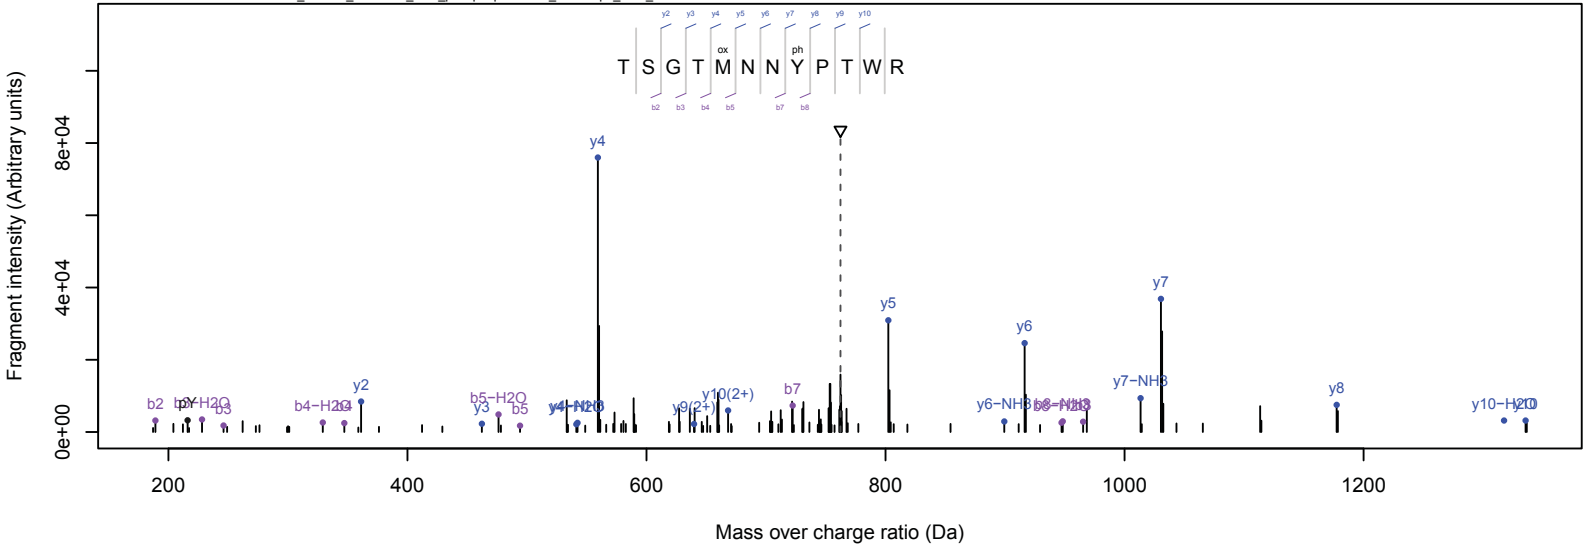

KEDLY(ph)LKPIQR-3+

Source : QE1\_140612\_OPL1013\_CVA\_phosphoproteomic\_landscape\_AML\_A Scan : 17904

Andromeda score : 140.78

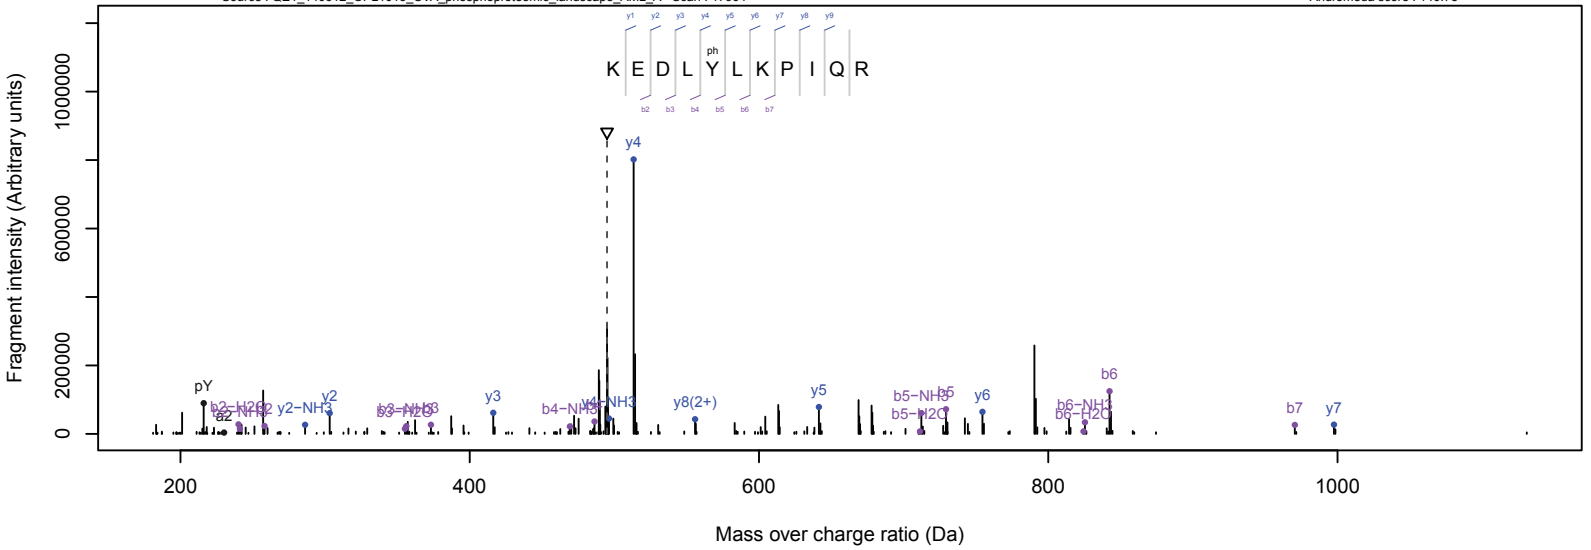

SNGTNTSAPQDIYAVNGIAFHPVHGTLATVGS DGR-4+

Source : QE1\_140908\_OPL1013\_CvA\_pTyrIP\_AML\_HEL Scan : 37613

Andromeda score : 140.49

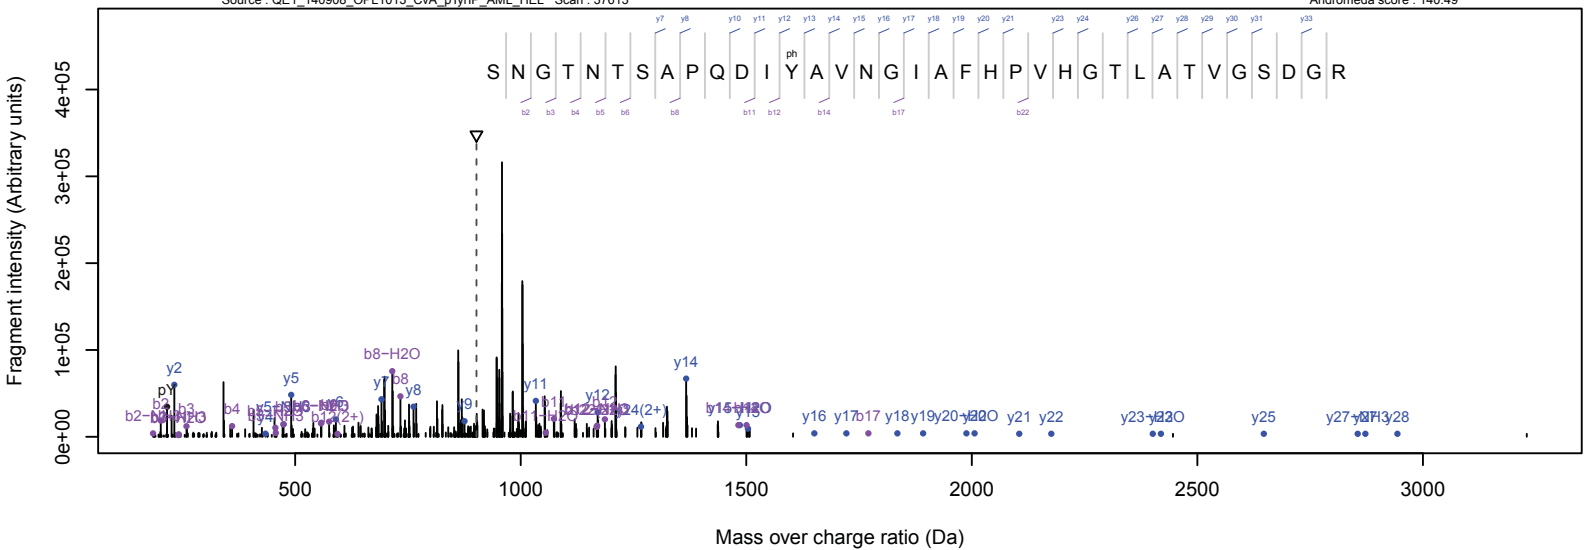



GGALAEDEPAAHLLPSPYS(ph)K-2+

Source : QE1\_140612\_OPL1013\_CVA\_phosphoproteomic\_landscape\_AML\_C Scan : 32005

Andromeda score : 140.27

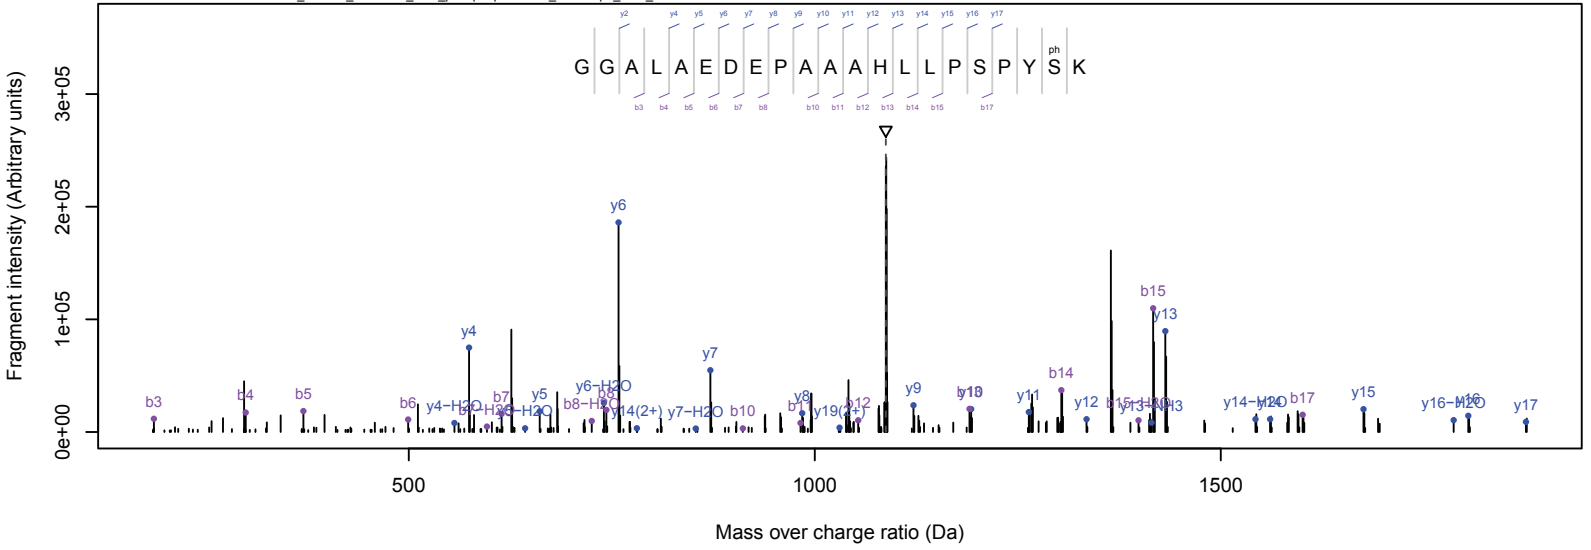

GHQQLY(ph)WSHPR-2+

Source : QE1\_140612\_OPL1013\_CVA\_phosphoproteomic\_landscape\_AML\_C Scan : 12054

Andromeda score : 140.24

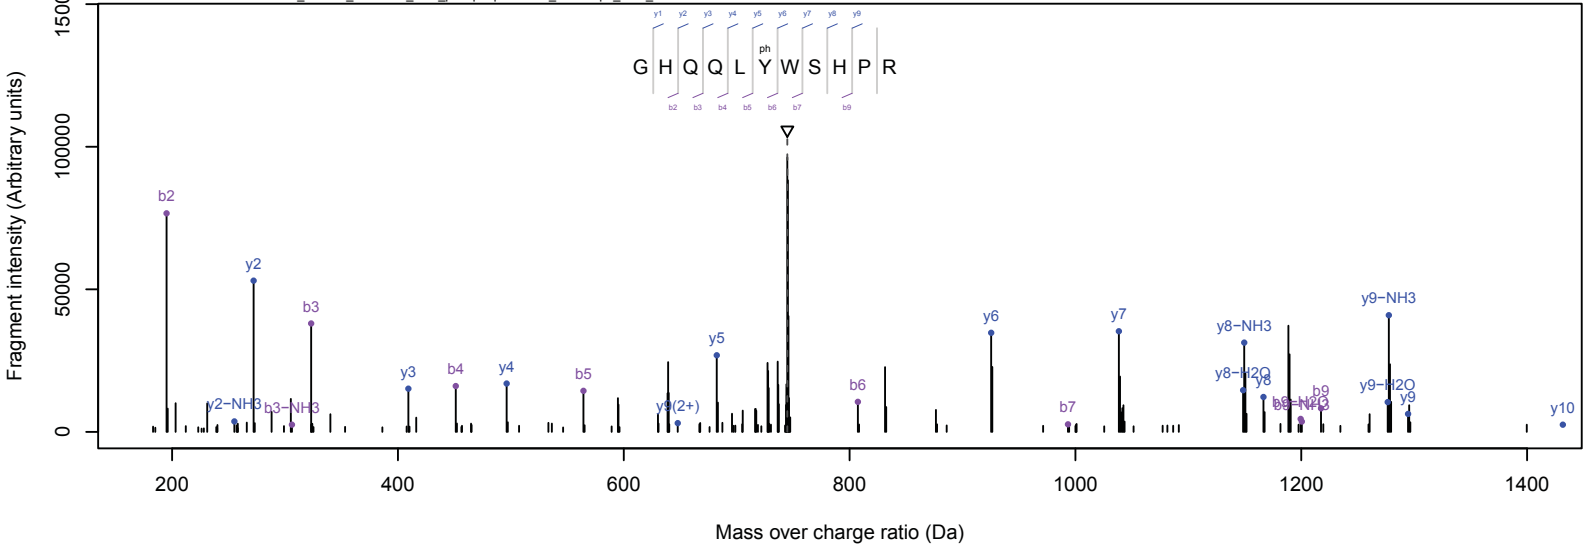

AVS(ph)PQSTKPMAESITYA(ph)AVAR-3+

Source : QE1\_140612\_OPL1013\_CVA\_phosphoproteomic\_landscape\_AML\_C Scan : 31070

Andromeda score : 140.21

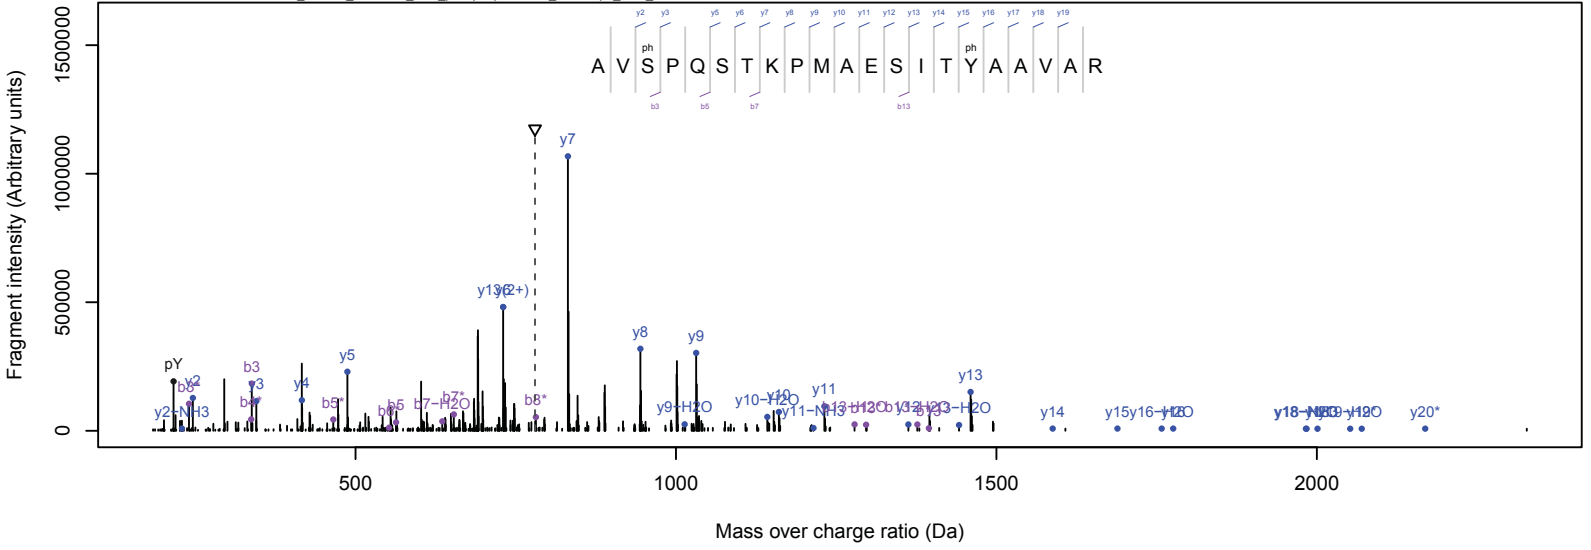

**FYIDPY(ph)KLLPLQR-3+**

Source: QE1\_140612\_OPL1013\_CVA\_phosphoproteomic\_landscape\_AML\_C Scan: 48195

Andromeda score: 140.01

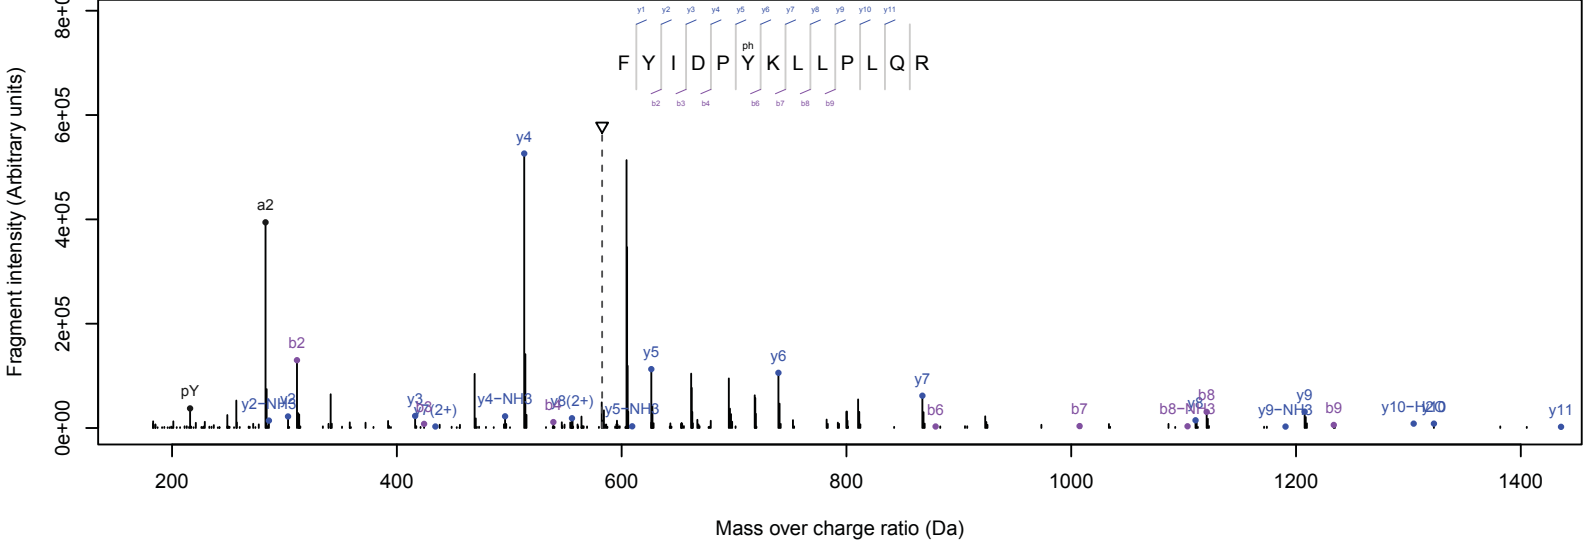

**LAGDKANY(ph)WWLR-2+**

Source: QE1\_140612\_OPL1013\_CVA\_phosphoproteomic\_landscape\_AML\_B Scan: 32177

Andromeda score: 140.01

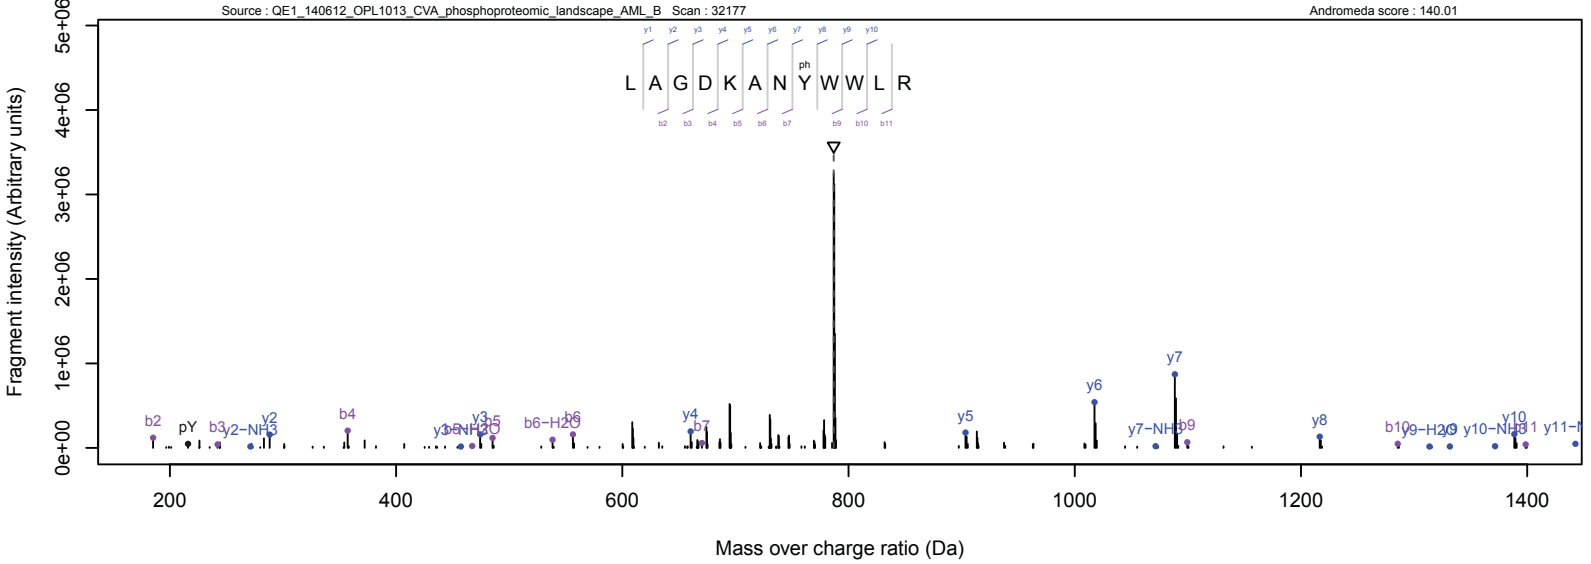

**AACIAEQY(ph)HTVLK-2+**

Source: QE1\_140612\_OPL1013\_CVA\_phosphoproteomic\_landscape\_AML\_C Scan: 16700

Andromeda score: 139.86

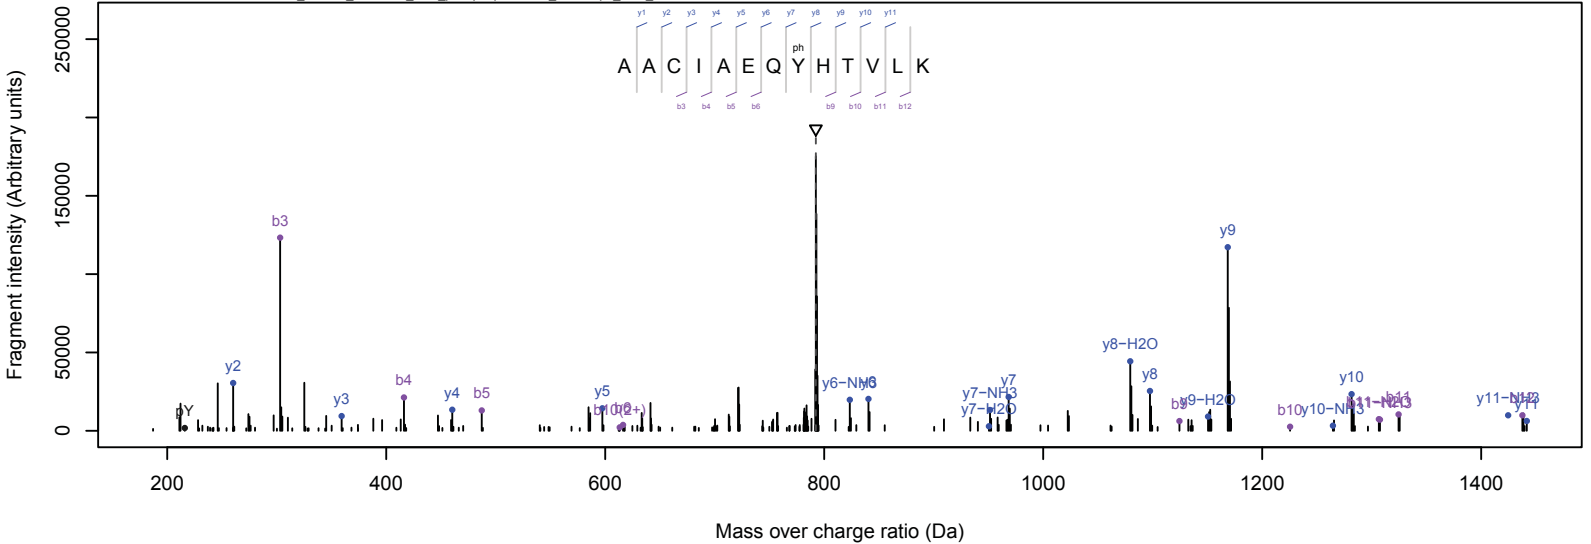

**VG FQ Y(ph) E G T Y K**

Source : QE1\_140612\_OPL1013\_CVA\_phosphoproteomic\_landscape\_AML\_A Scan : 15775

Andromeda score : 139.86

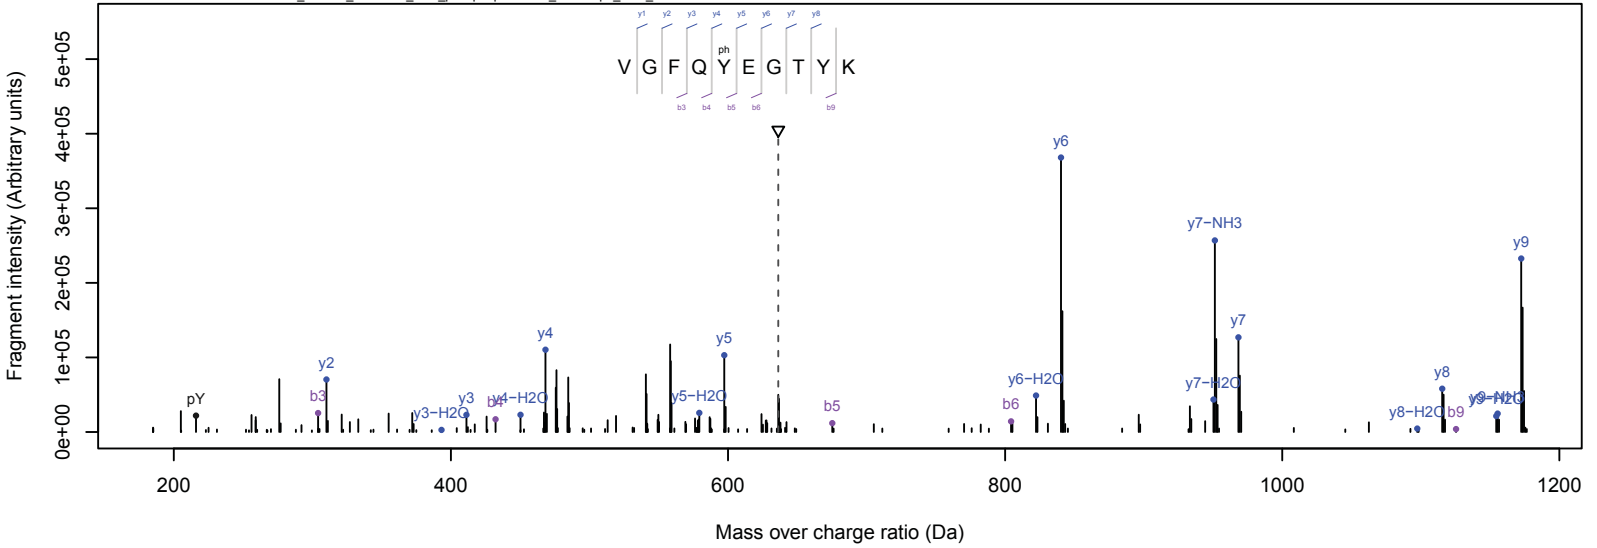

**Y(ph) E S L T D P S K L D S G K**

Source : QE1\_140908\_OPL1013\_CvA\_pTyrIP\_AML\_ML2 Scan : 17198

Andromeda score : 139.86

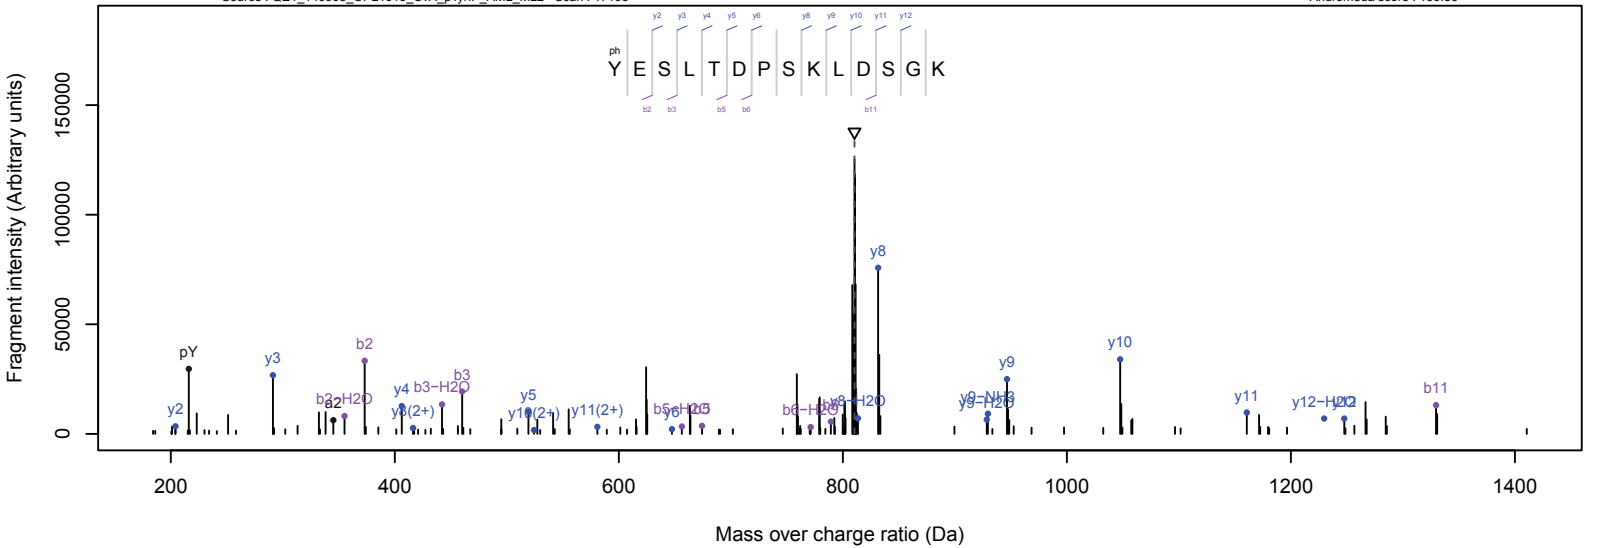

**Y N V S T T P Y L Q S V K**

Source : QE1\_140612\_OPL1013\_CVA\_phosphoproteomic\_landscape\_AML\_C Scan : 23226

Andromeda score : 139.86

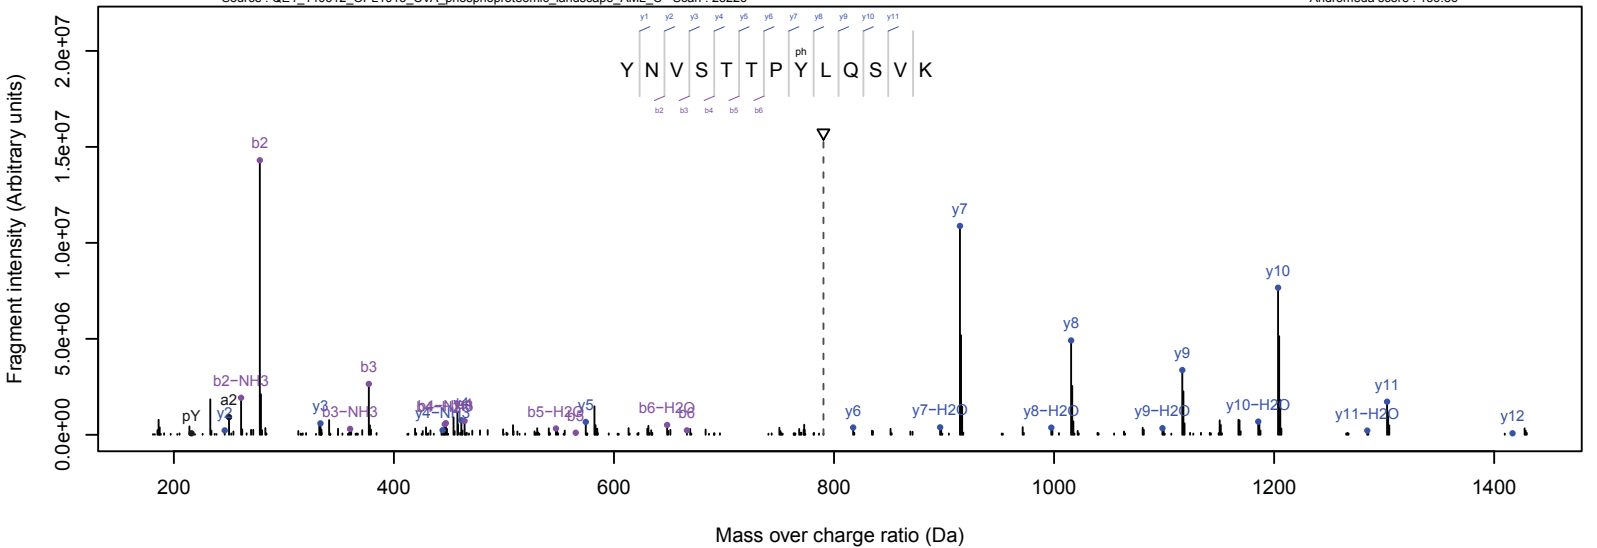



SMLEVNY(ph)PMENGIVR-2+

Source: QE1\_140612\_OPL1013\_CVA\_phosphoproteomic\_landscape\_AML\_B Scan: 35390

Andromeda score: 139.77

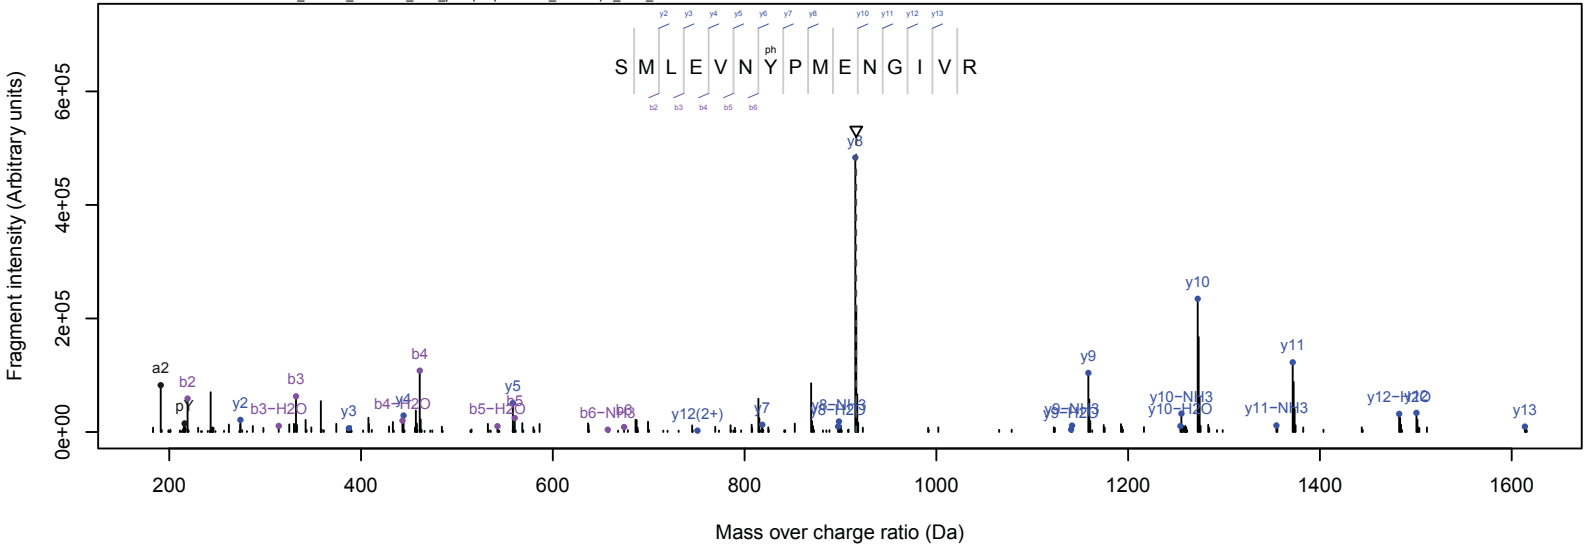

LPDGY(ph)EFKFPNR-2+

Source: QE1\_140612\_OPL1013\_CVA\_phosphoproteomic\_landscape\_AML\_C Scan: 28709

Andromeda score: 139.76

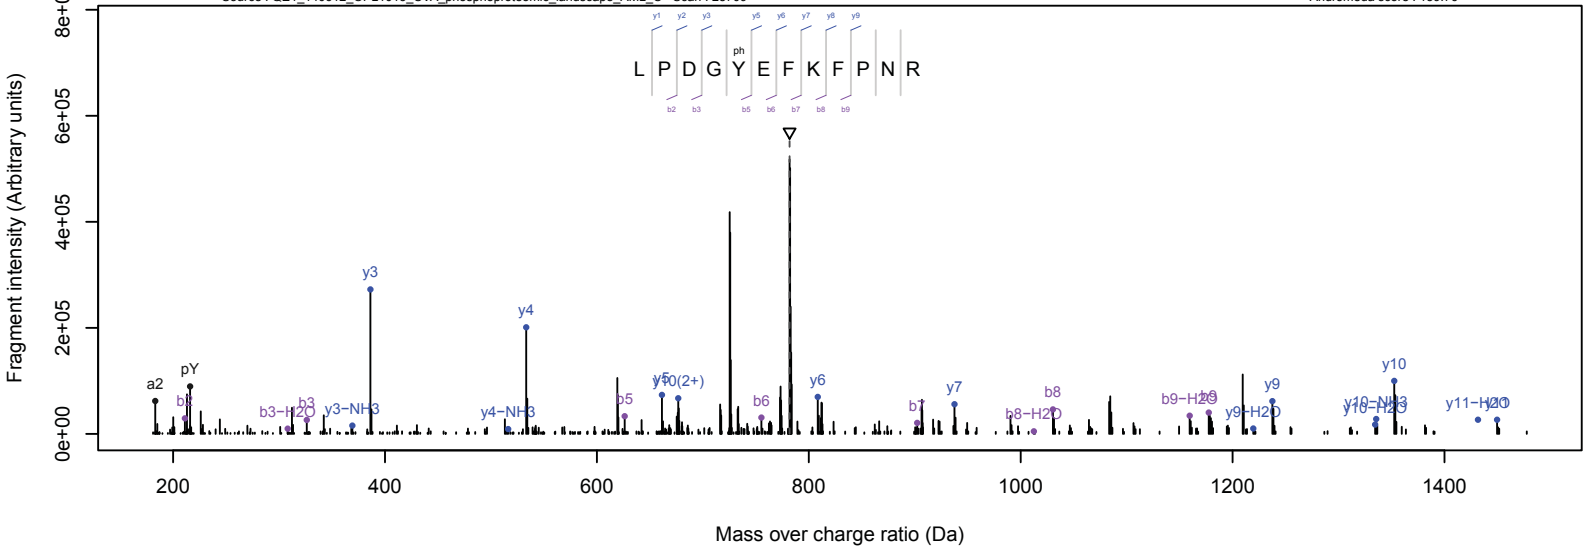

YGPQY(ph)GHPPPPPPPEYGHADSPVLMVYGLDQSK-4+

Source: QE1\_140612\_OPL1013\_CVA\_phosphoproteomic\_landscape\_AML\_C Scan: 40498

Andromeda score: 139.75

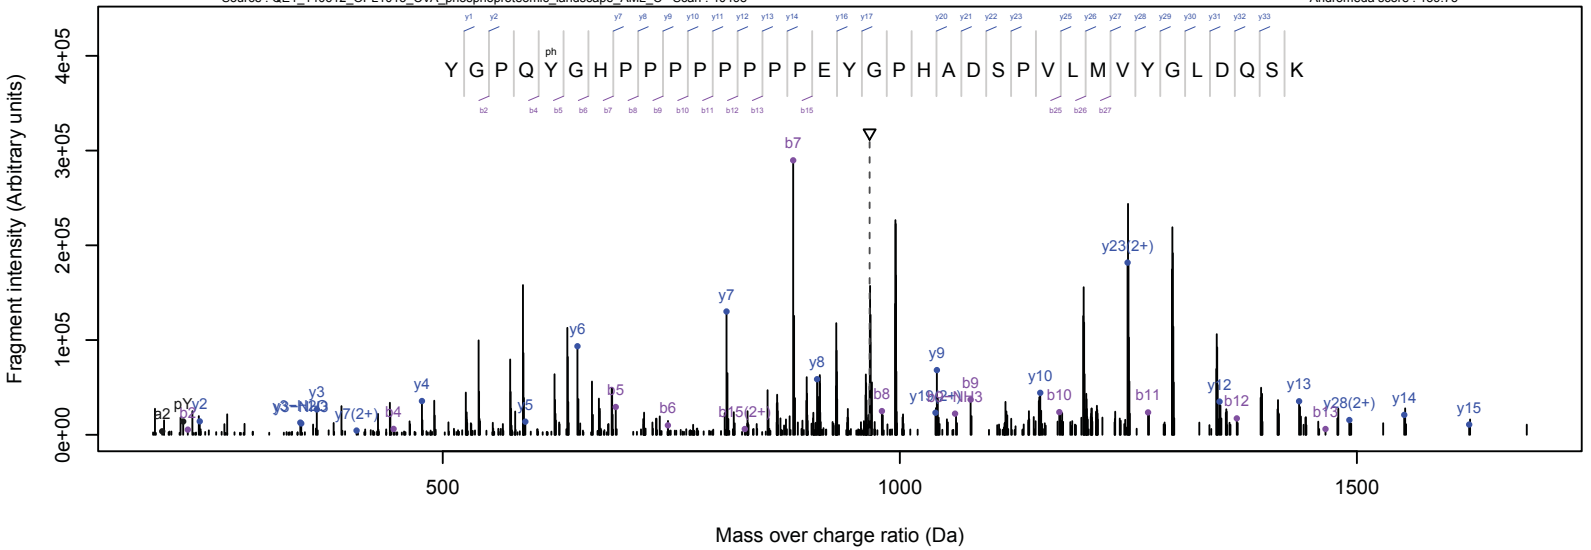

**Y(ph)RWTEYGLTFTEK-2+**

Source : QE1\_140612\_OPL1013\_CVA\_phosphoproteomic\_landscape\_AML\_B Scan : 32811

Andromeda score : 139.66

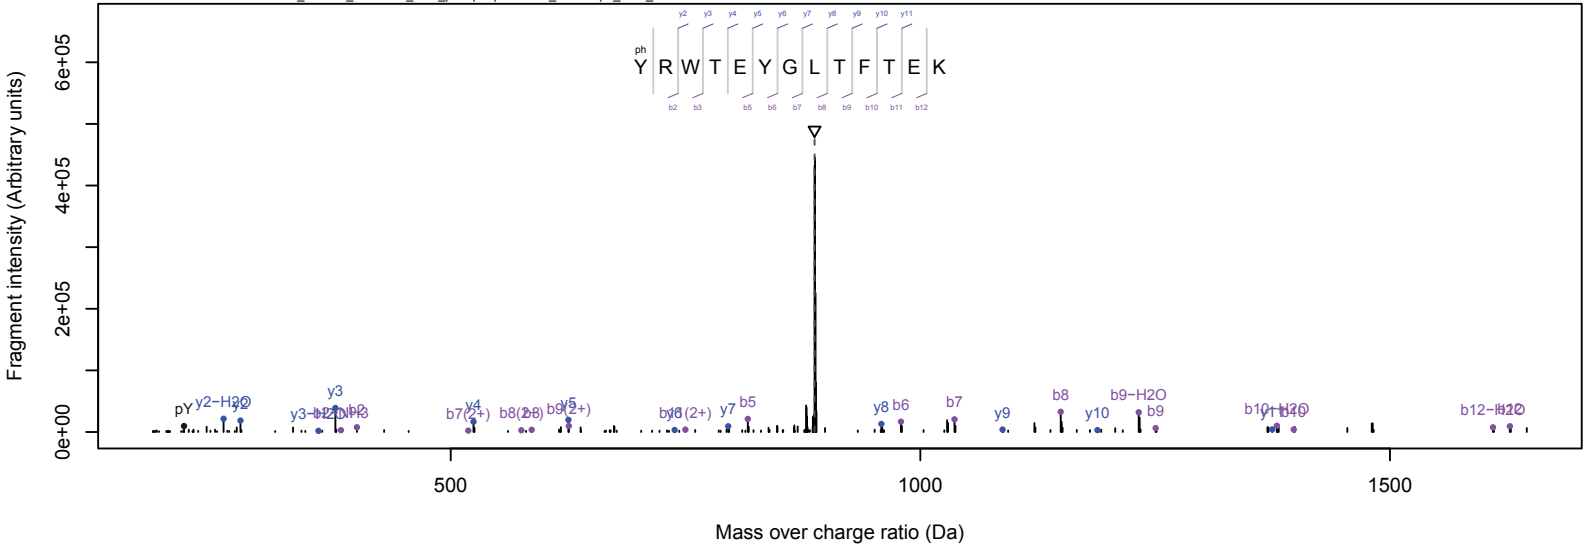

**KGREY(ph)ALLGNYSMYYQGVMQIQR-3+**

Source : QE1\_140612\_OPL1013\_CVA\_phosphoproteomic\_landscape\_AML\_D Scan : 43750

Andromeda score : 139.47

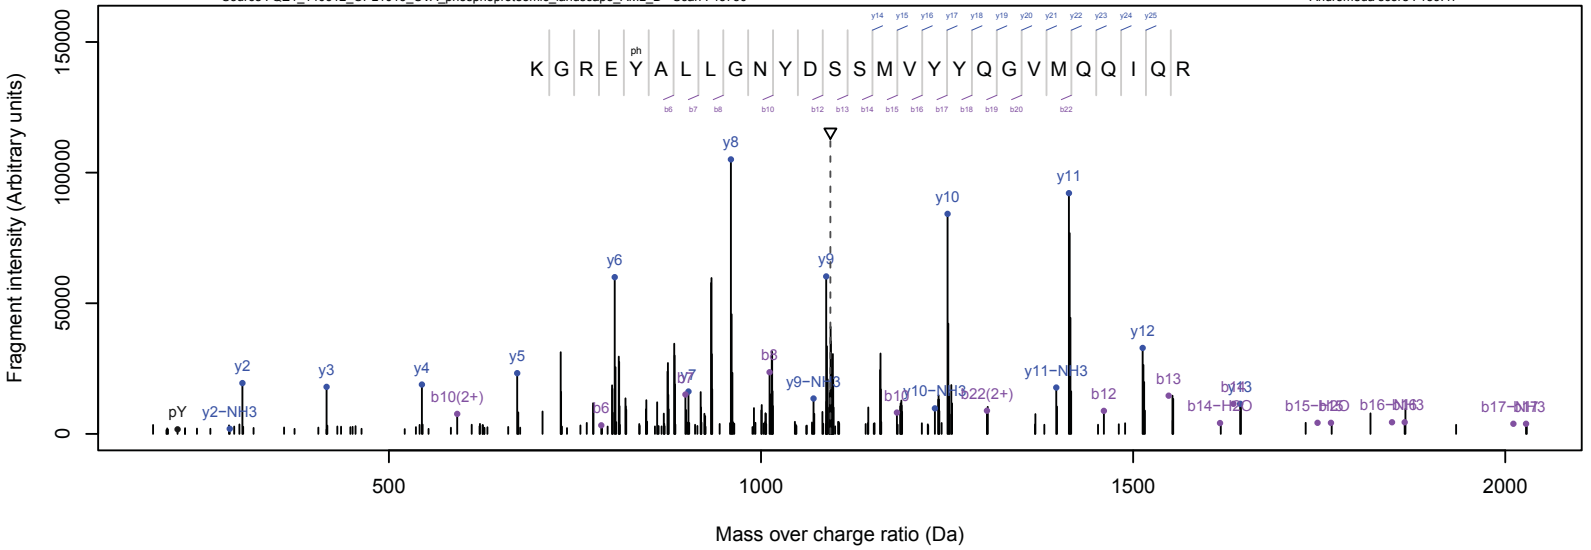

**NRDSGY(ph)LHLLYK-3+**

Source : QE1\_140612\_OPL1013\_CVA\_phosphoproteomic\_landscape\_AML\_B Scan : 22721

Andromeda score : 139.46

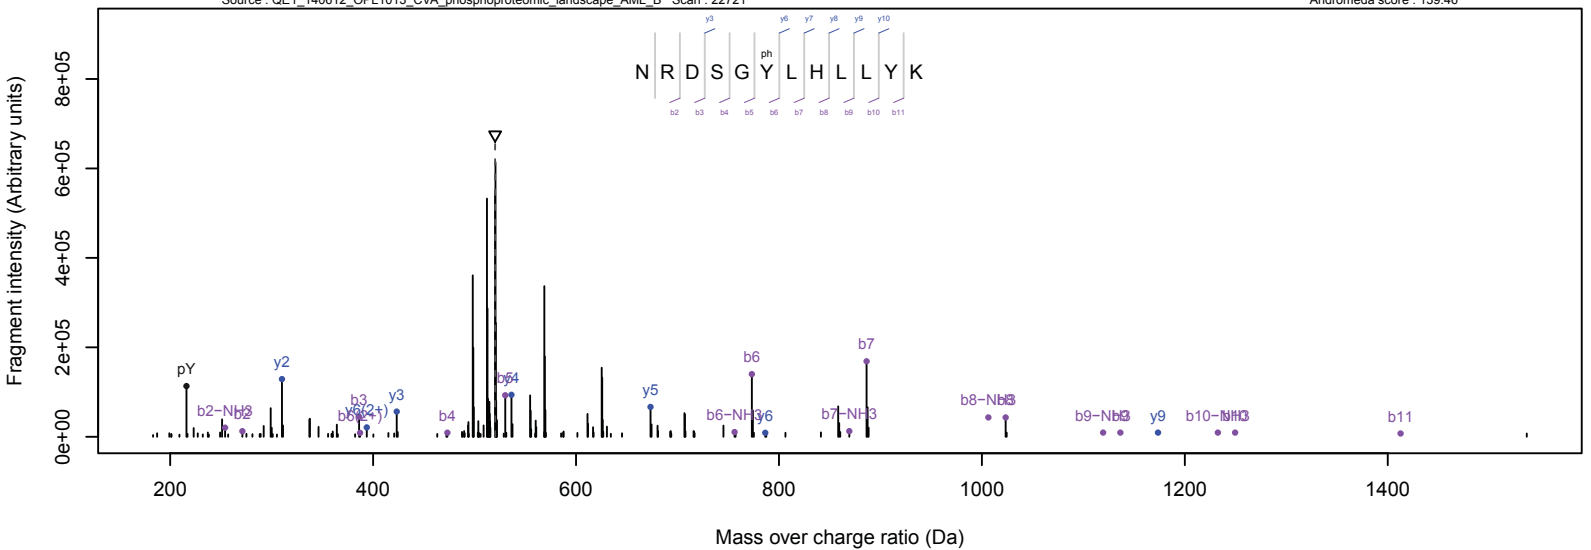

KVY(ph)ATSQQIFGAVK-2+

Source : QE1\_140612\_OPL1013\_CVA\_phosphoproteomic\_landscape\_AML\_C Scan : 23492

Andromeda score : 139.34

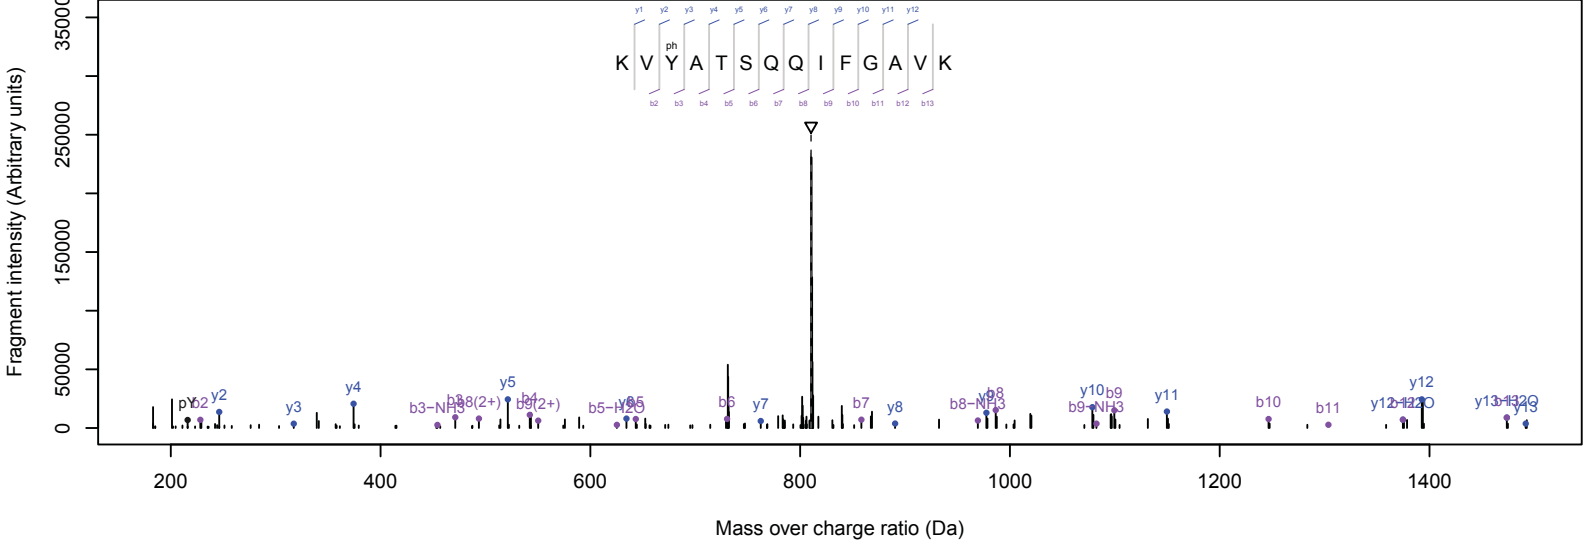

QY(ph)ADICLFNTAQYK-2+

Source : QE1\_140908\_OPL1013\_CvA\_pTyrIP\_AML\_HEL Scan : 37969

Andromeda score : 139.3

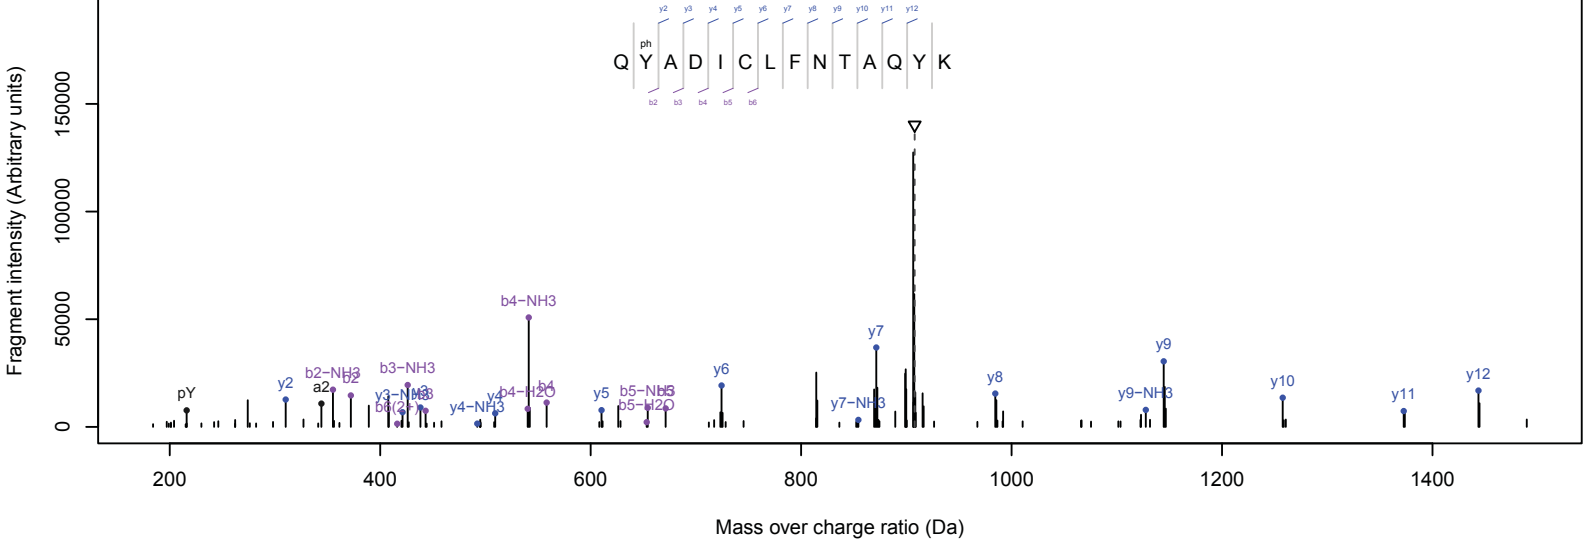

QDLGLGSPAQLSSSGKPGT(ph)AYYSFATSSR-3+

Source : QE1\_140612\_OPL1013\_CVA\_phosphoproteomic\_landscape\_AML\_C Scan : 33740

Andromeda score : 139.22

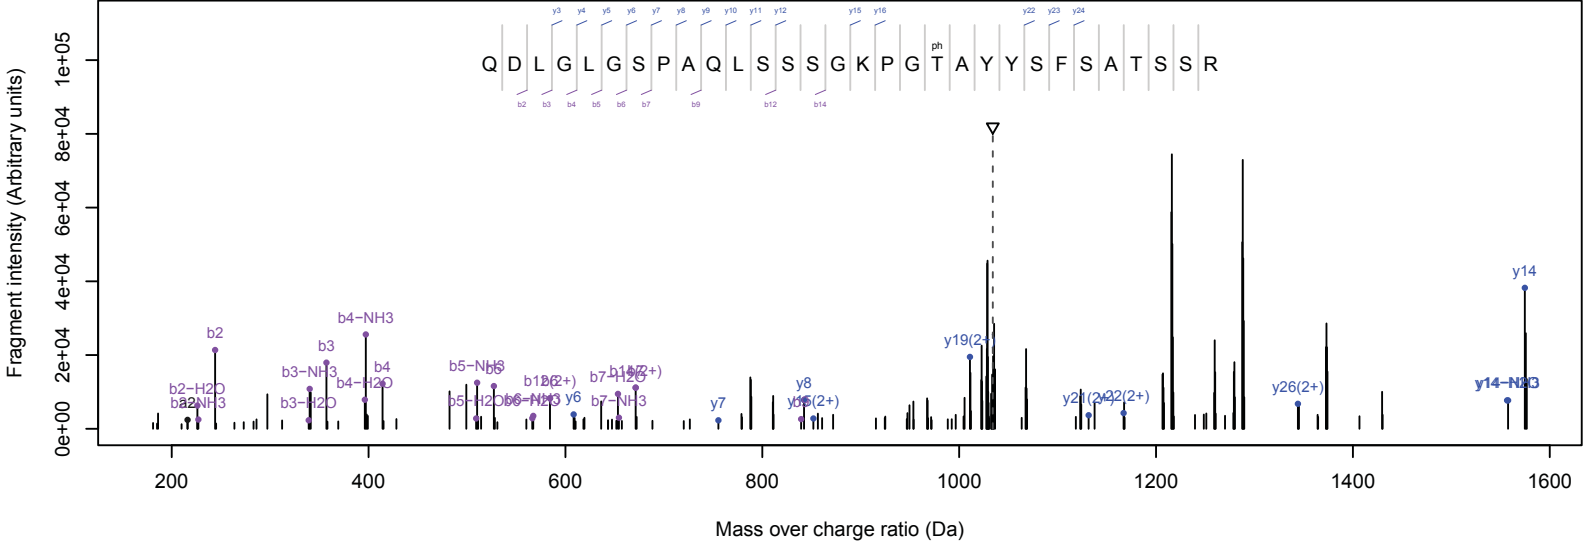

**HY(ph)RGPAGDATVASEKESVM-3+**

Source : QE1\_140612\_OPL1013\_CVA\_phosphoproteomic\_landscape\_AML\_C Scan : 13596

Andromeda score : 139.11

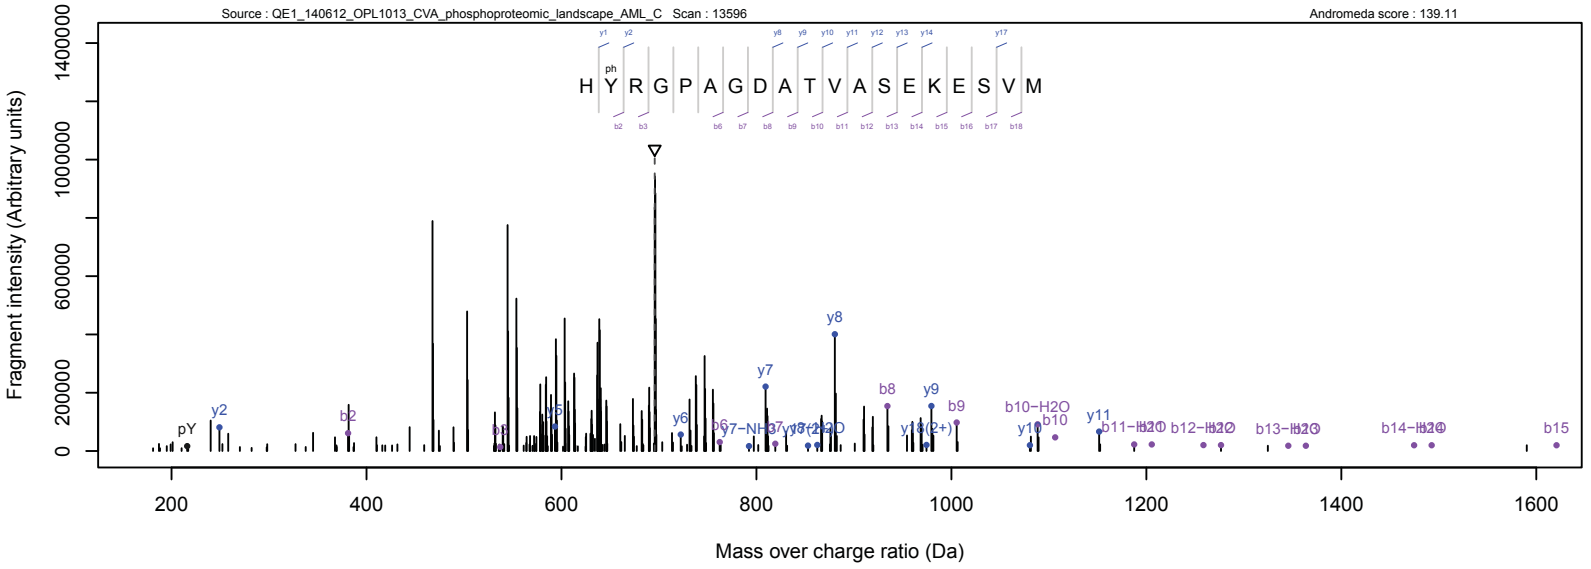

**RQSGLY(ph)DSQNPPVTNNCAQDR-3+**

Source : QE1\_140908\_OPL1013\_Cva\_pTyrIP\_AML\_HEL Scan : 13545

Andromeda score : 139.02

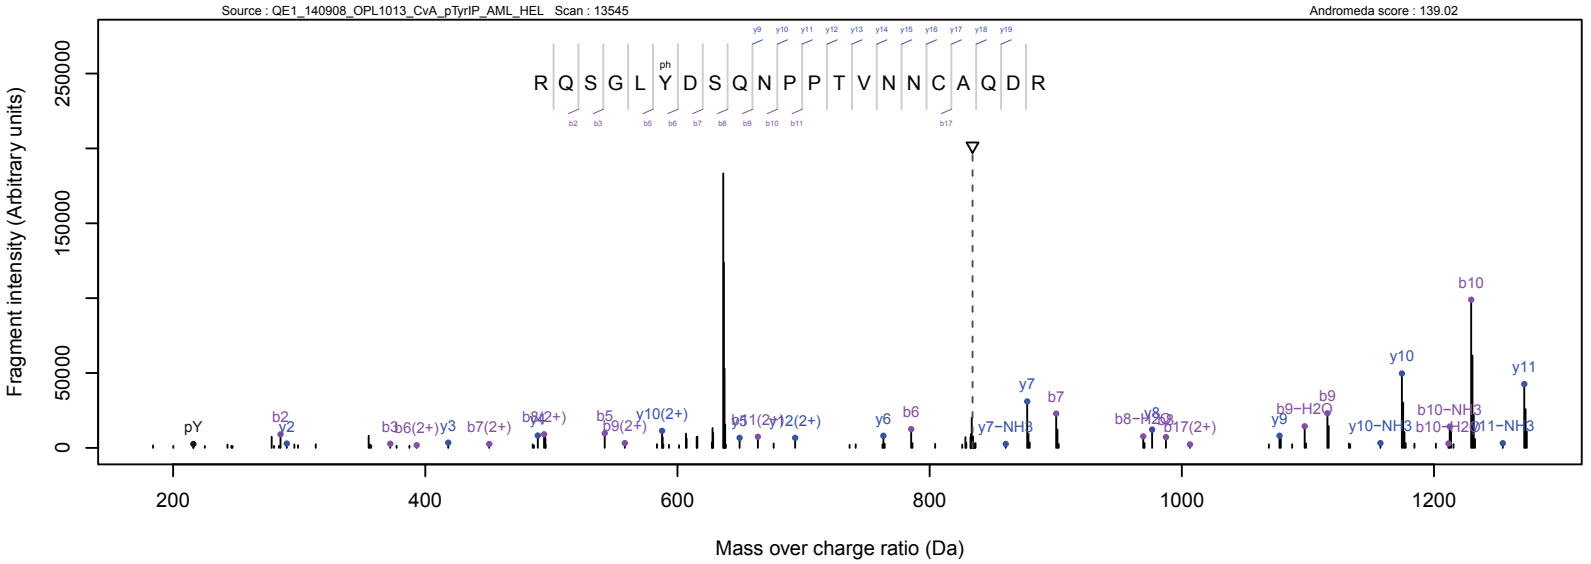

**SVDGQGLGM(ox)EGPY(ph)EVLKDSSENMVEDCLYETVK-3+**

Source : QE1\_140612\_OPL1013\_CVA\_phosphoproteomic\_landscape\_AML\_B Scan : 47331

Andromeda score : 139.02

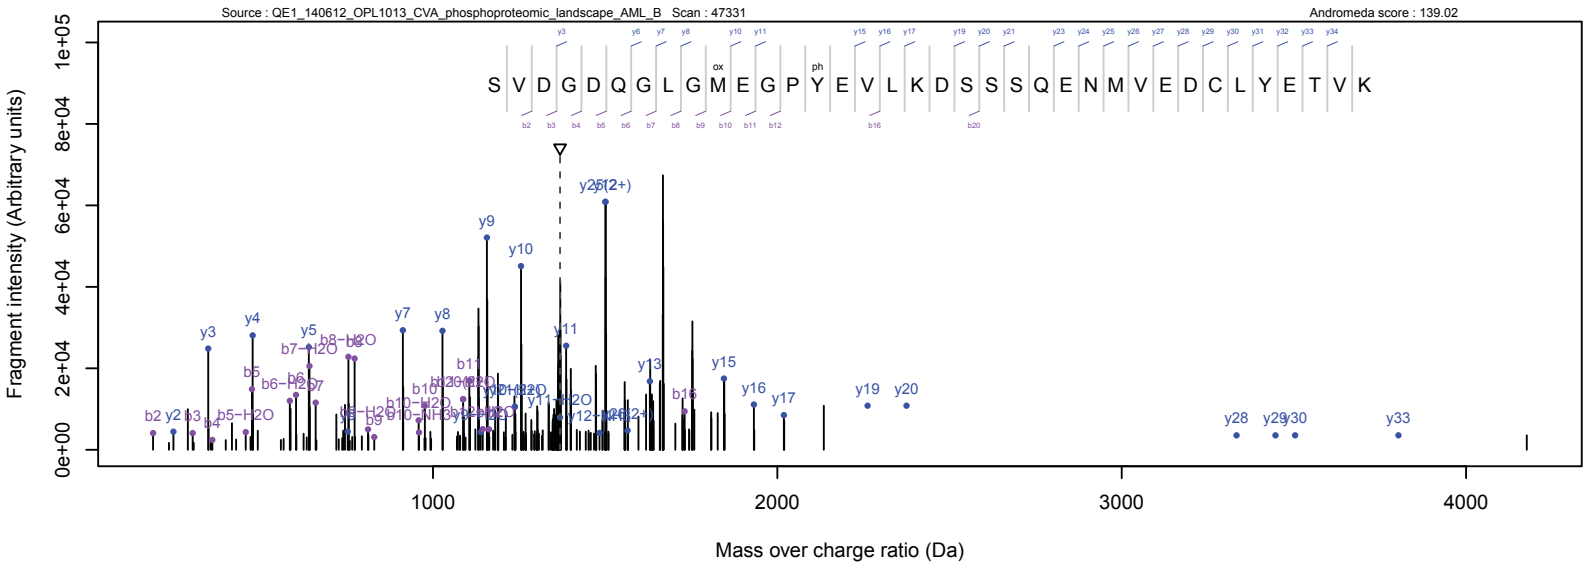

NLTEQNSY(ph)SNIPHEGK-3+

Source : QE1\_140612\_OPL1013\_CVA\_phosphoproteomic\_landscape\_AML\_B Scan : 10910

Andromeda score : 138.91

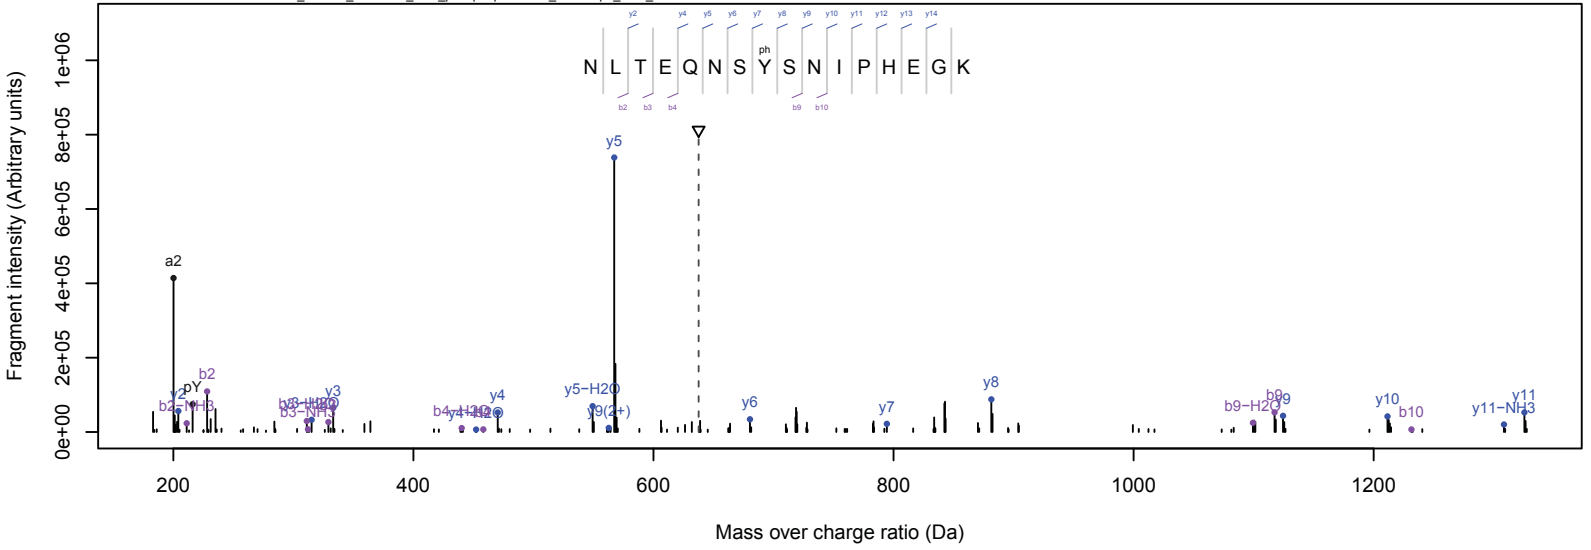

EVSKY(ph)SDIQR-2+

Source : QE1\_140822\_OPL1013\_CvA\_pTyrIP\_AML\_cell\_lines\_part2\_B Scan : 3562

Andromeda score : 138.76

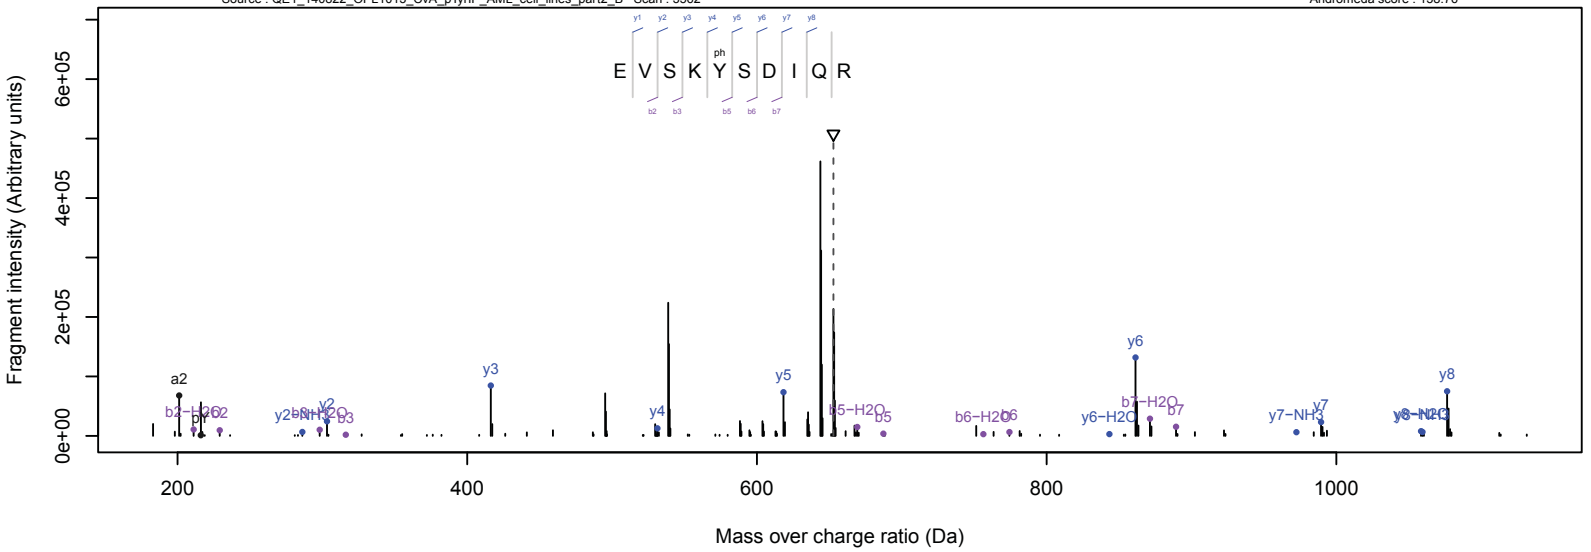

DQLIY(ph)NLLKEEQTPQNK-2+

Source : QE1\_140612\_OPL1013\_CVA\_phosphoproteomic\_landscape\_AML\_B Scan : 40643

Andromeda score : 138.75

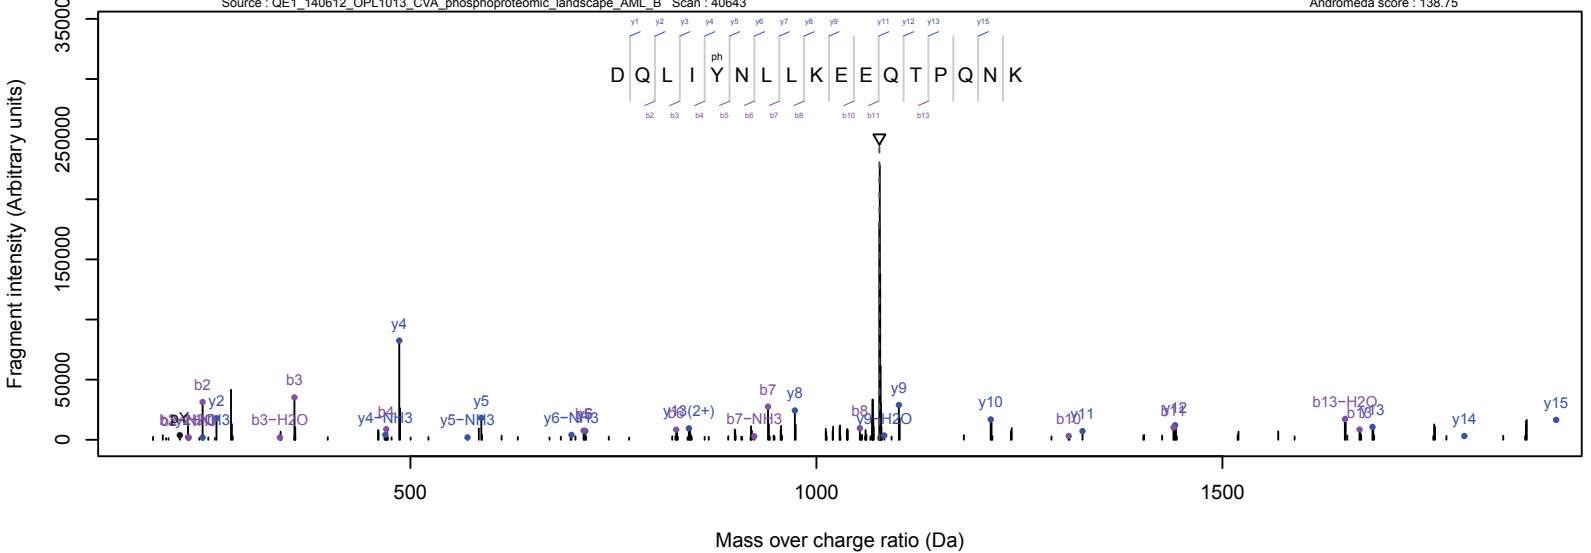

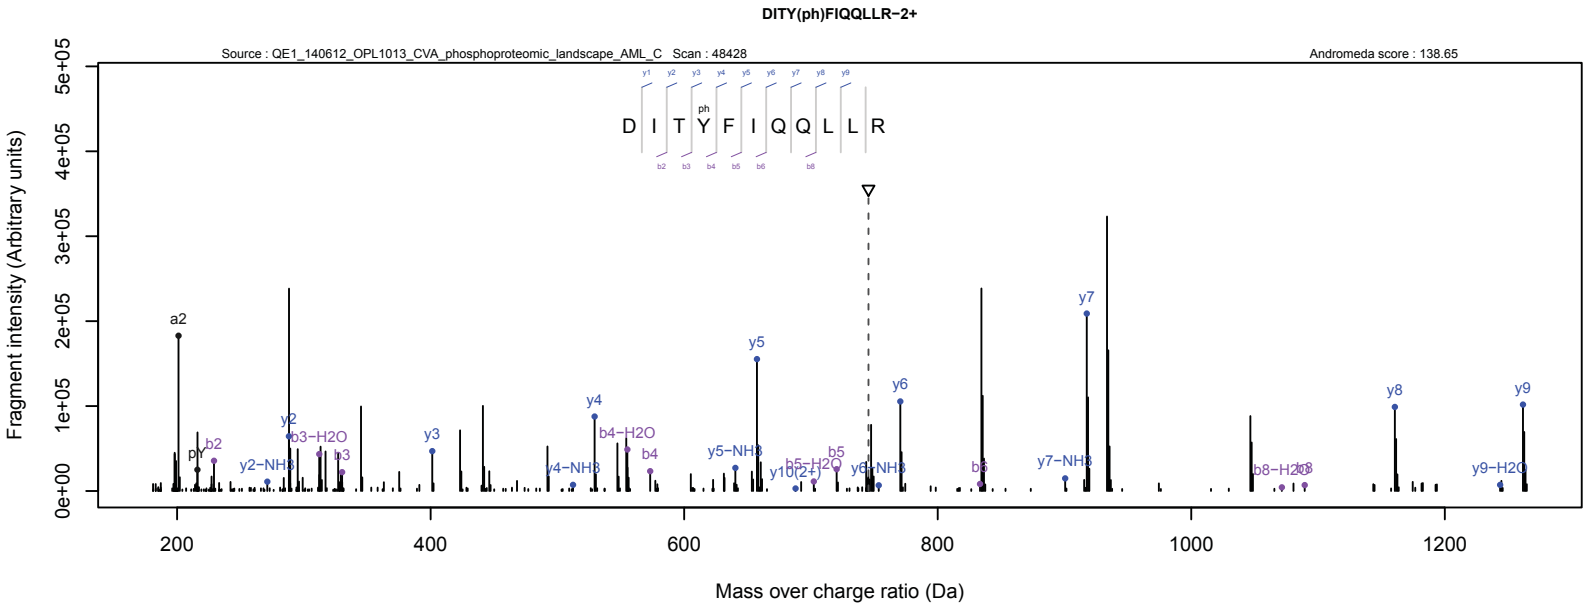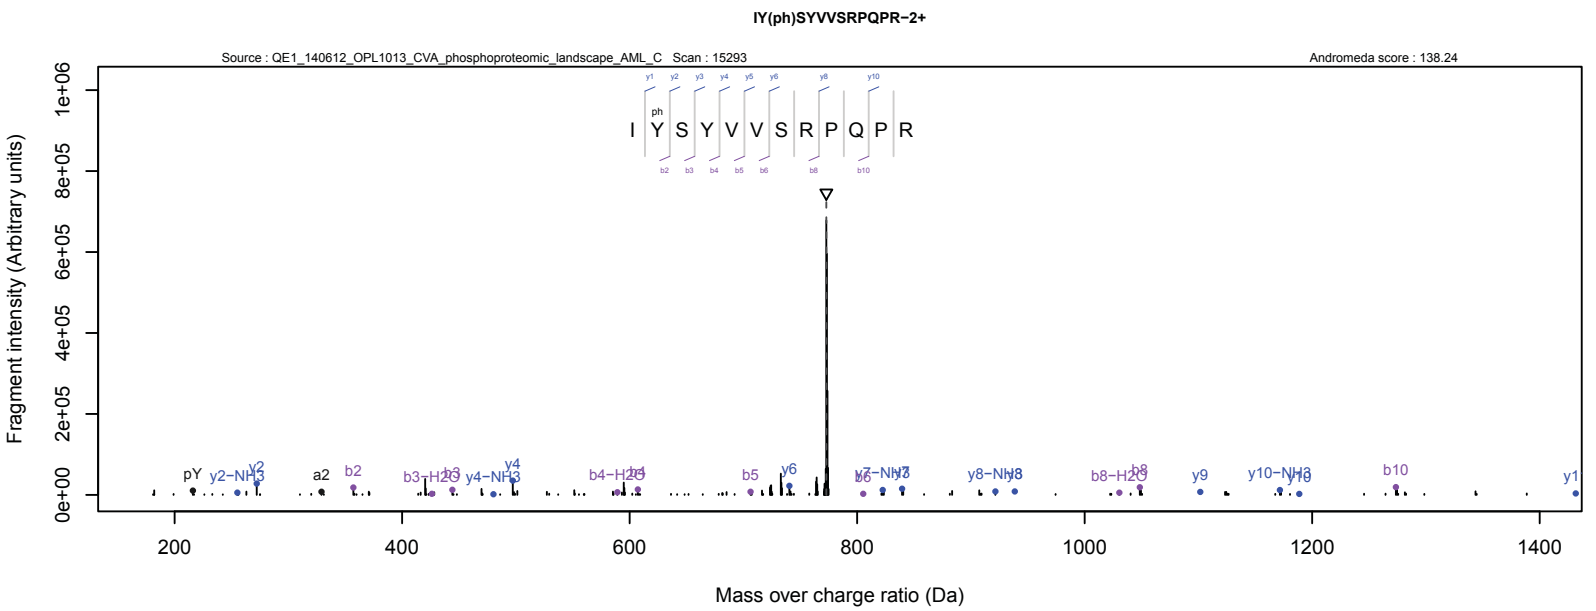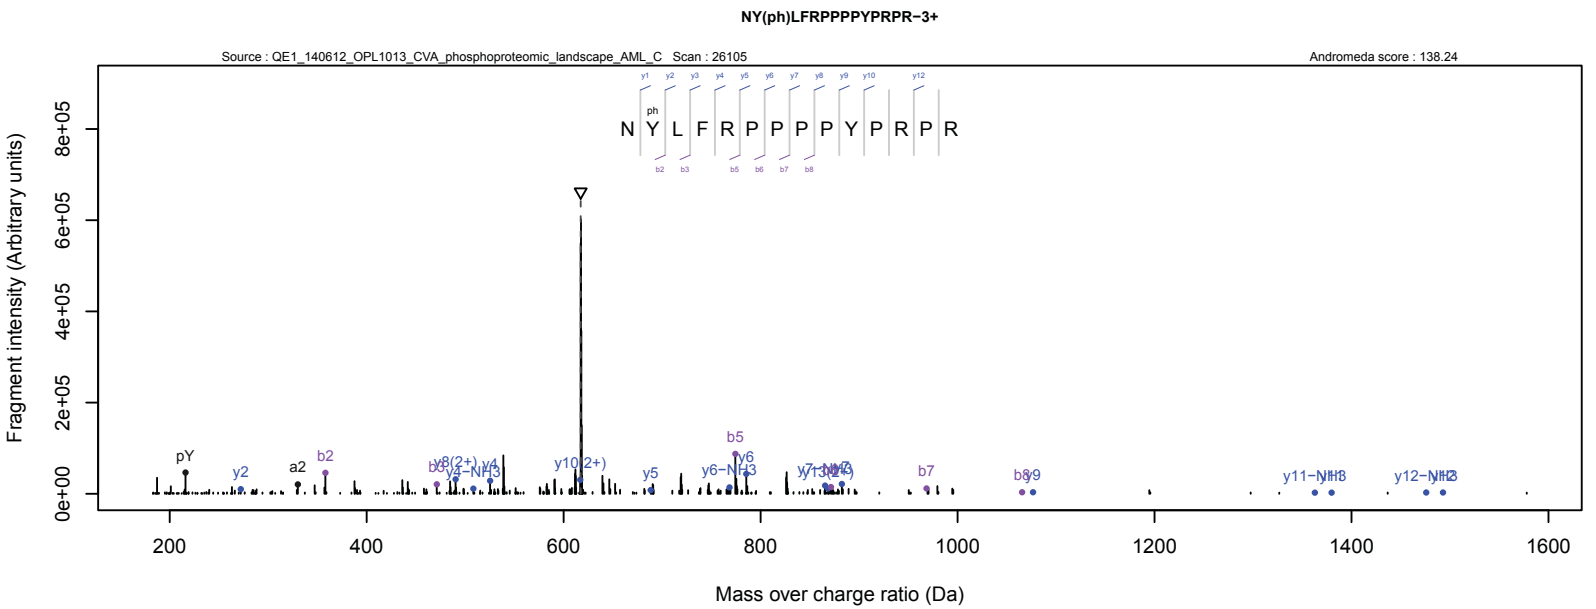

SPHDEDPAVTY(ph)AK-2+

Source : Qe1\_141024\_OPL1013\_CvA\_AML\_pTyrIP\_MOLM13 Scan : 8314

Andromeda score : 138.19

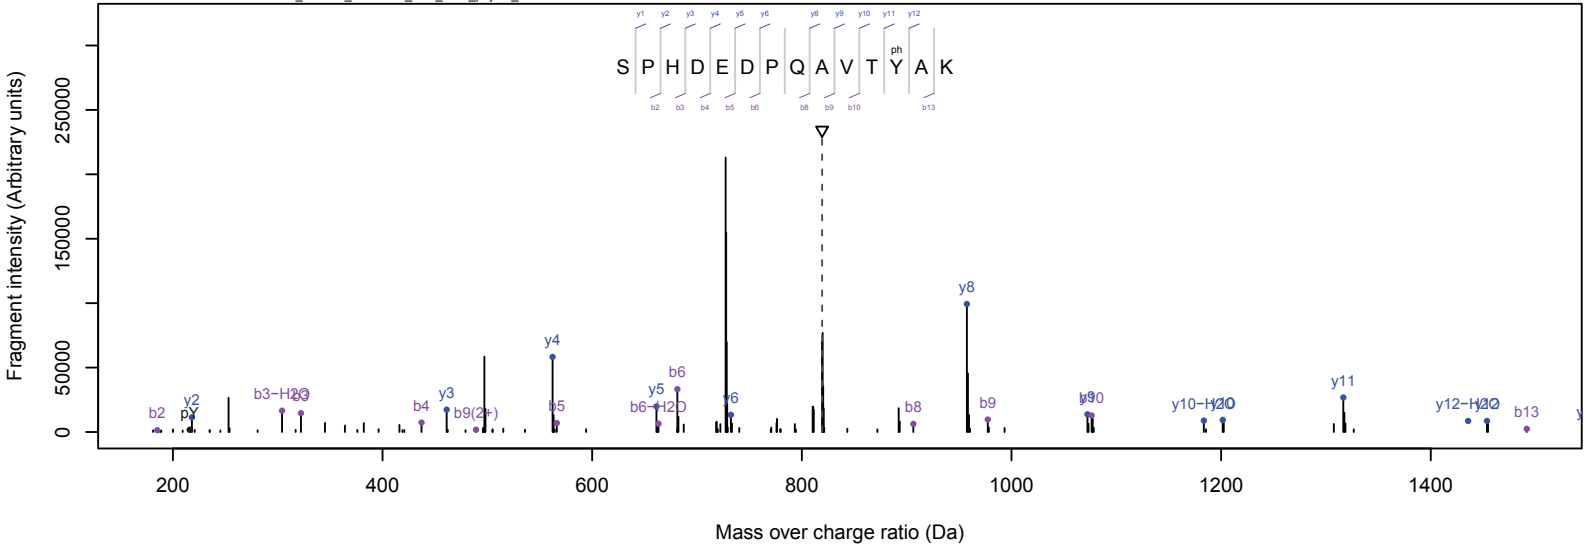

KTY(ph)DLLFK-2+

Source : QE1\_140612\_OPL1013\_CVA\_phosphoproteomic\_landscape\_AML\_C Scan : 23430

Andromeda score : 138.08

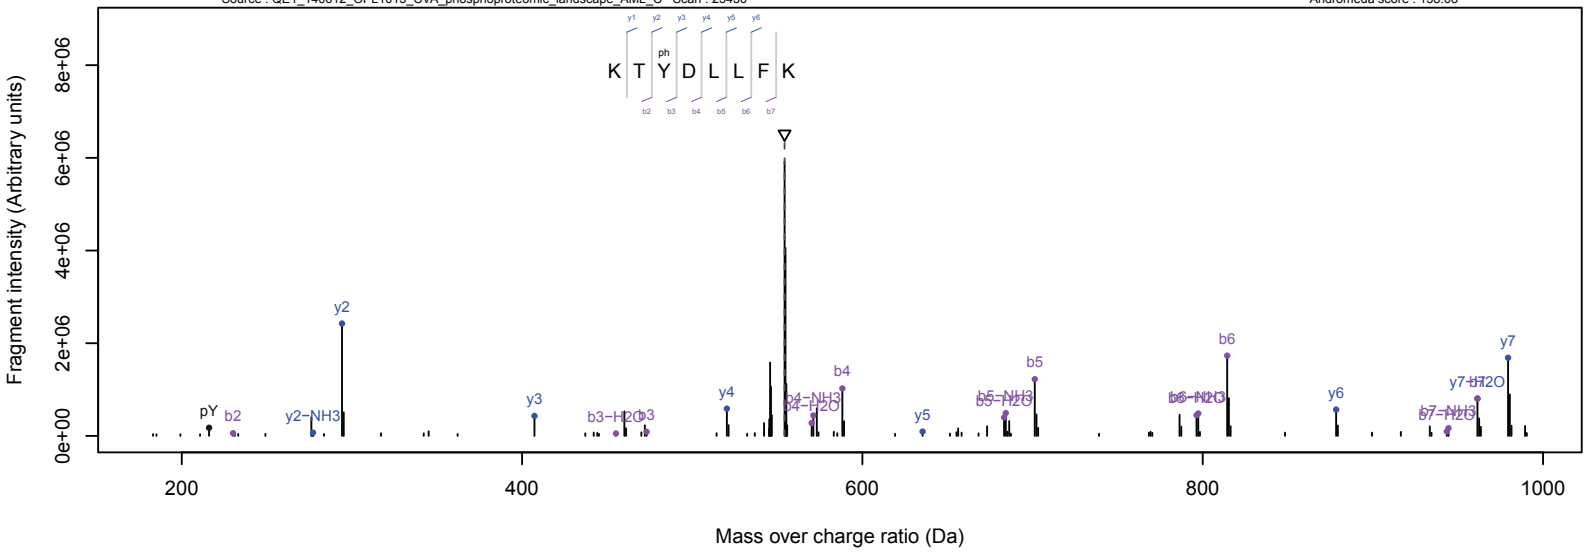

VLLDDKY(ph)FLFR-2+

Source : QE1\_140612\_OPL1013\_CVA\_phosphoproteomic\_landscape\_AML\_B Scan : 38327

Andromeda score : 138.02

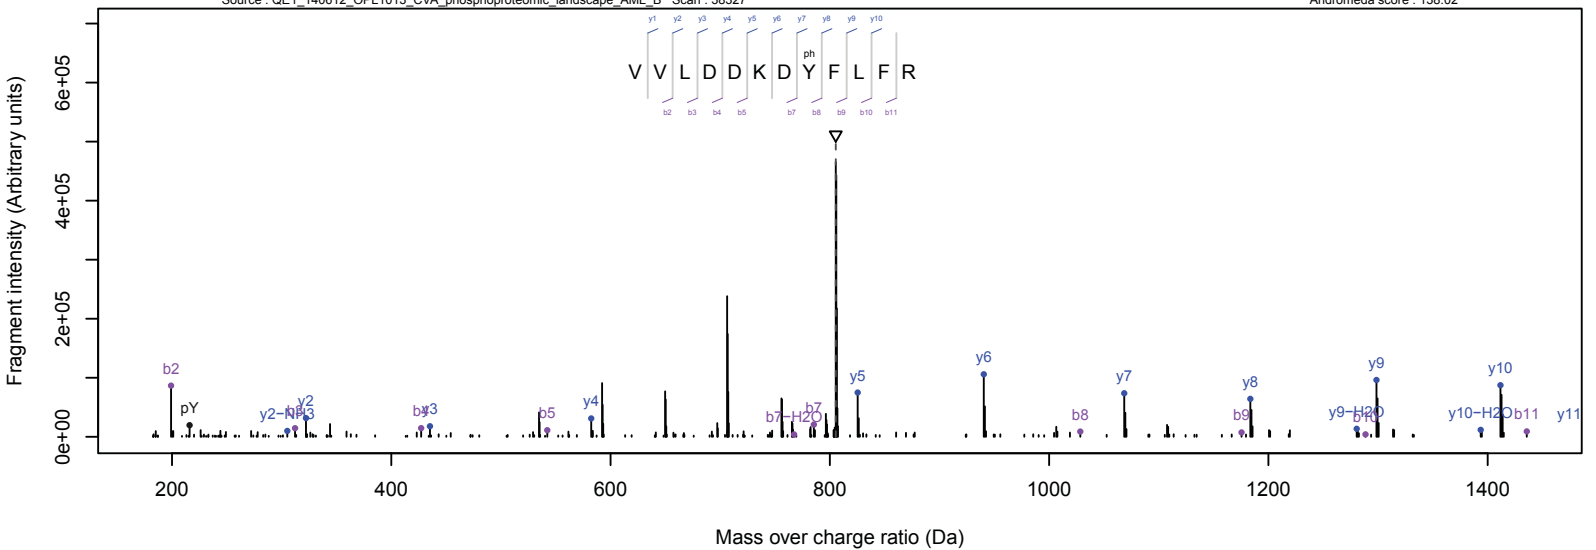

YKAPTDY(ph)CFVLK-3+

Source : QE1\_140612\_OPL1013\_CVA\_phosphoproteomic\_landscape\_AML\_D Scan : 27980

Andromeda score : 138.02

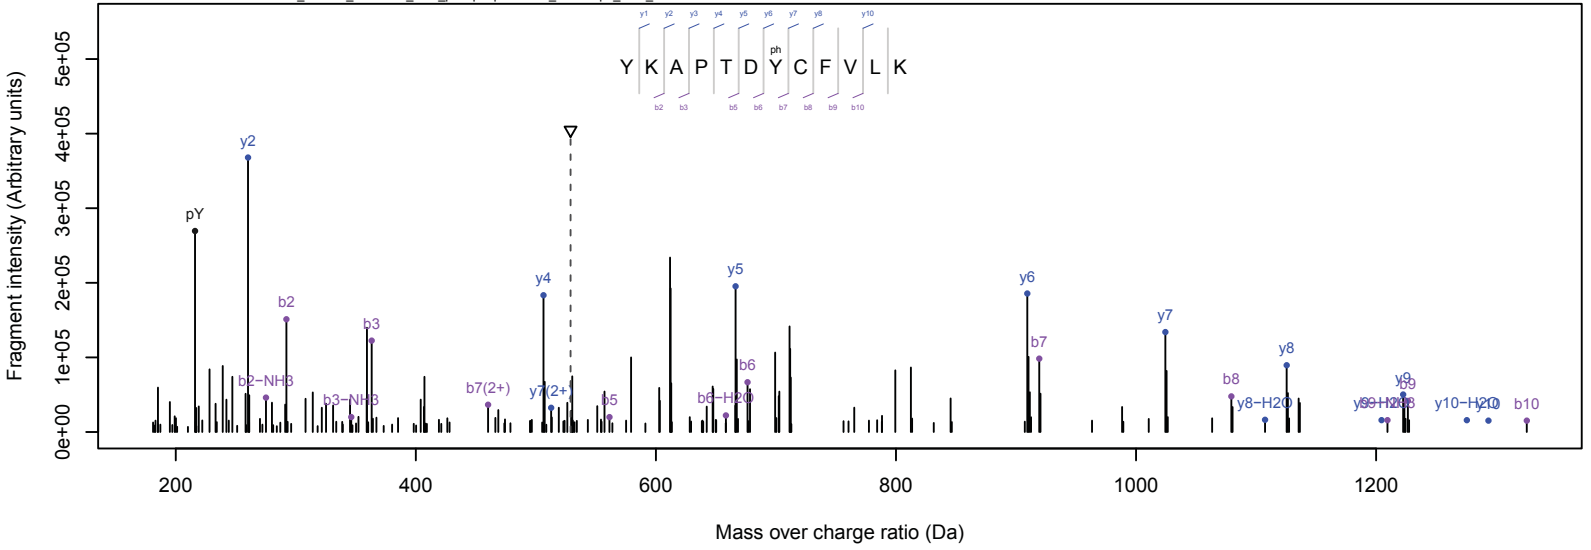

IIQLDDY(ph)PK-2+

Source : QE1\_140612\_OPL1013\_CVA\_phosphoproteomic\_landscape\_AML\_B Scan : 33146

Andromeda score : 137.98

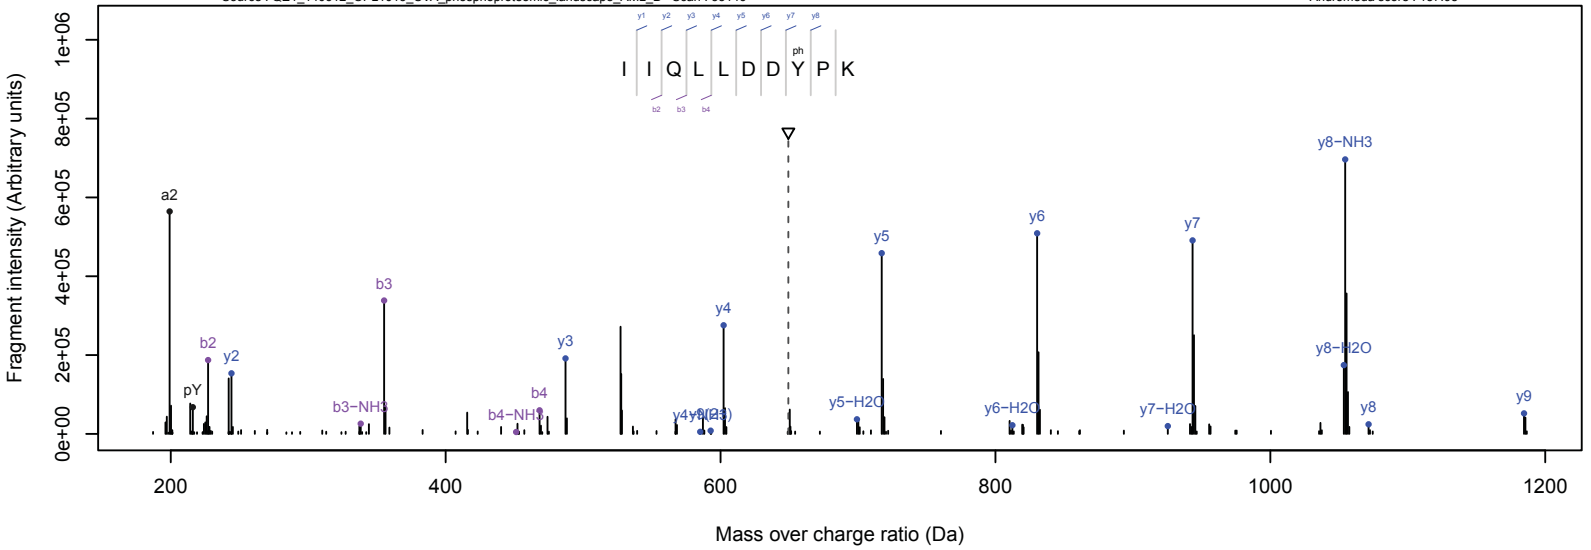

NY(ph)VTPVNR-2+

Source : QE1\_140612\_OPL1013\_CVA\_phosphoproteomic\_landscape\_AML\_C Scan : 6451

Andromeda score : 137.9

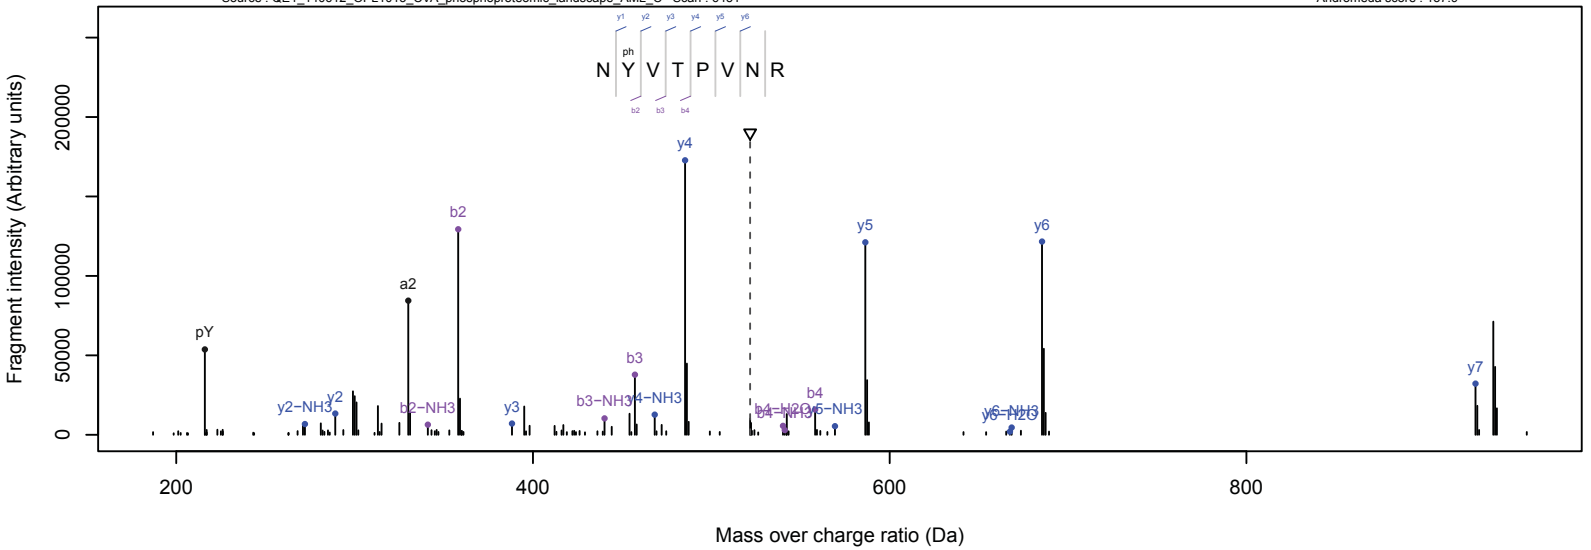





SGENQSVDKSDTIPIPIPNNGVVTTNNSGY(ph)ITNGYMGK-3+

Source : QE1\_140612\_OPL1013\_CVA\_phosphoproteomic\_landscape\_AML\_F Scan : 36704

Andromeda score : 137.25

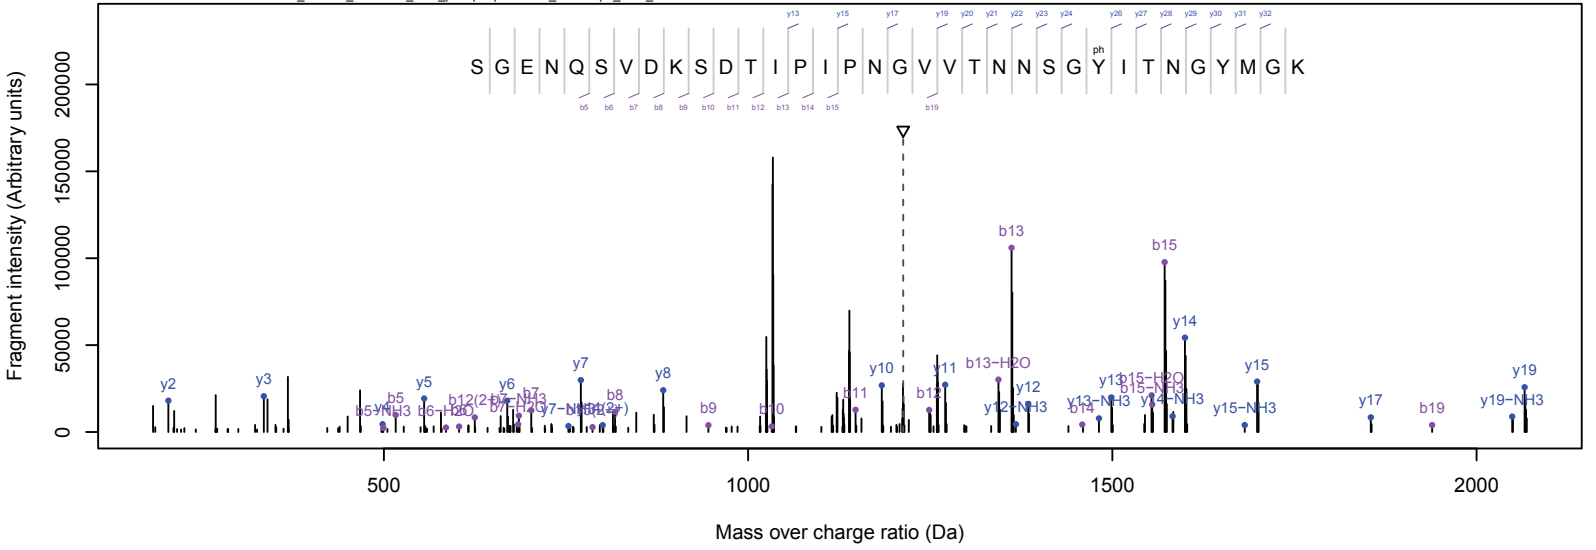

SSTQMNSYSDSGY(ph)QEAGSFHNSQNVSK-3+

Source : QE1\_140612\_OPL1013\_CVA\_phosphoproteomic\_landscape\_AML\_C Scan : 15026

Andromeda score : 137.03

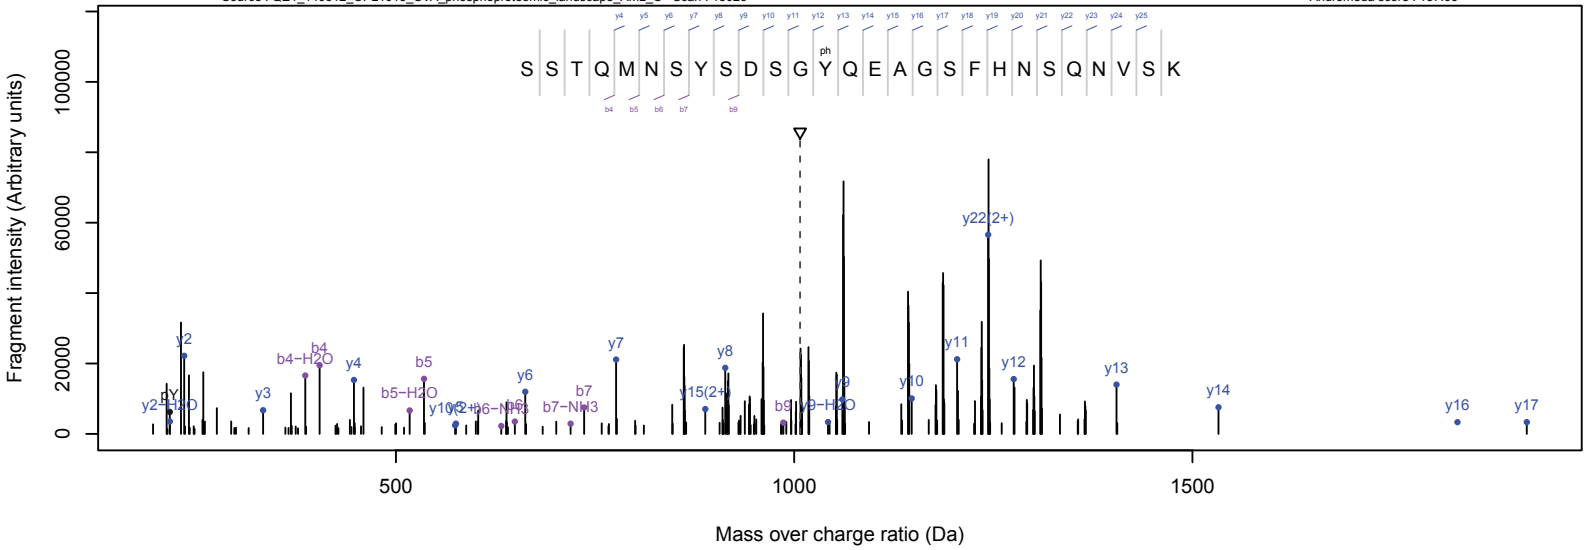

TWTEIFKEHNFSFY(ph)PTFQSHPNSSM(ox)PGSR-4+

Source : QE1\_140908\_OPL1013\_CvA\_pTyrIP\_AML\_Kasumi6 Scan : 44744

Andromeda score : 137.03

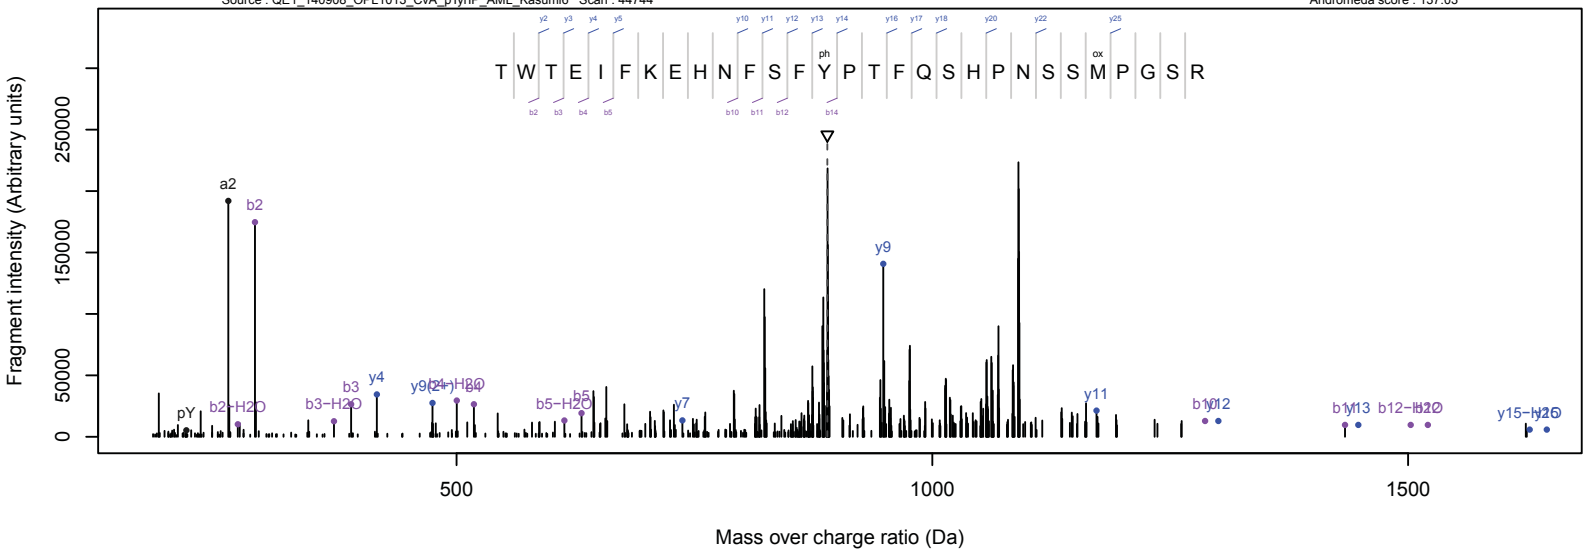

DDGM(ox)EEVVGHTQGPLDGSLY(ph)AK-3+

Source : QE1\_140908\_OPL1013\_CvA\_pTyrIP\_AML\_HEL Scan : 27953

Andromeda score : 136.96

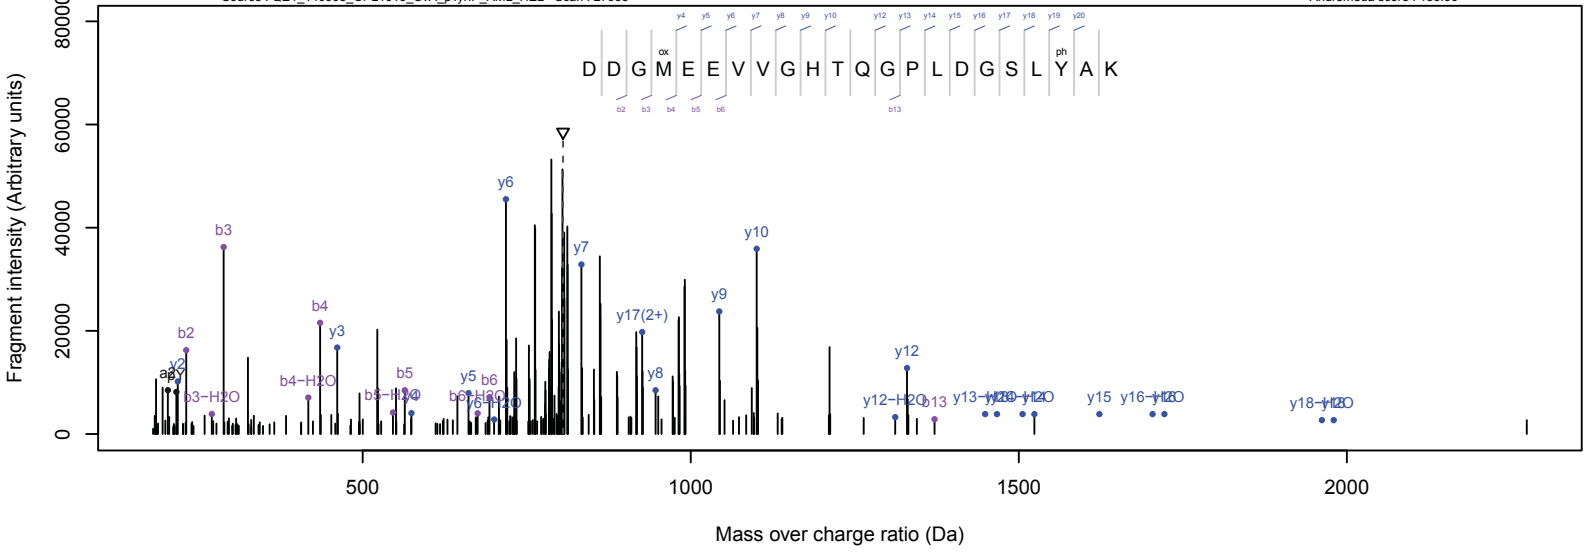

KVVALY(ph)DYMPMNANDLQLR-2+

Source : QE1\_140612\_OPL1013\_CVA\_phosphoproteomic\_landscape\_AML\_C Scan : 45726

Andromeda score : 136.96

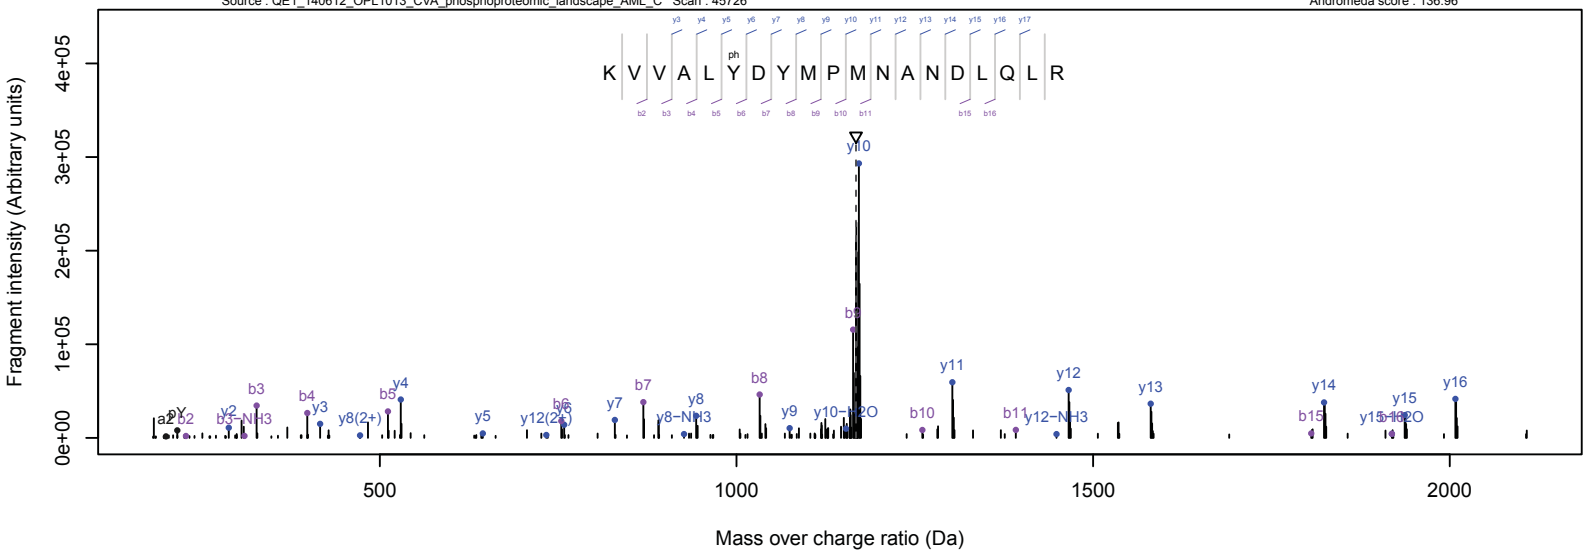

TLHY(ph)ECIVLVK-2+

Source : QE1\_140612\_OPL1013\_CVA\_phosphoproteomic\_landscape\_AML\_A Scan : 27031

Andromeda score : 136.96

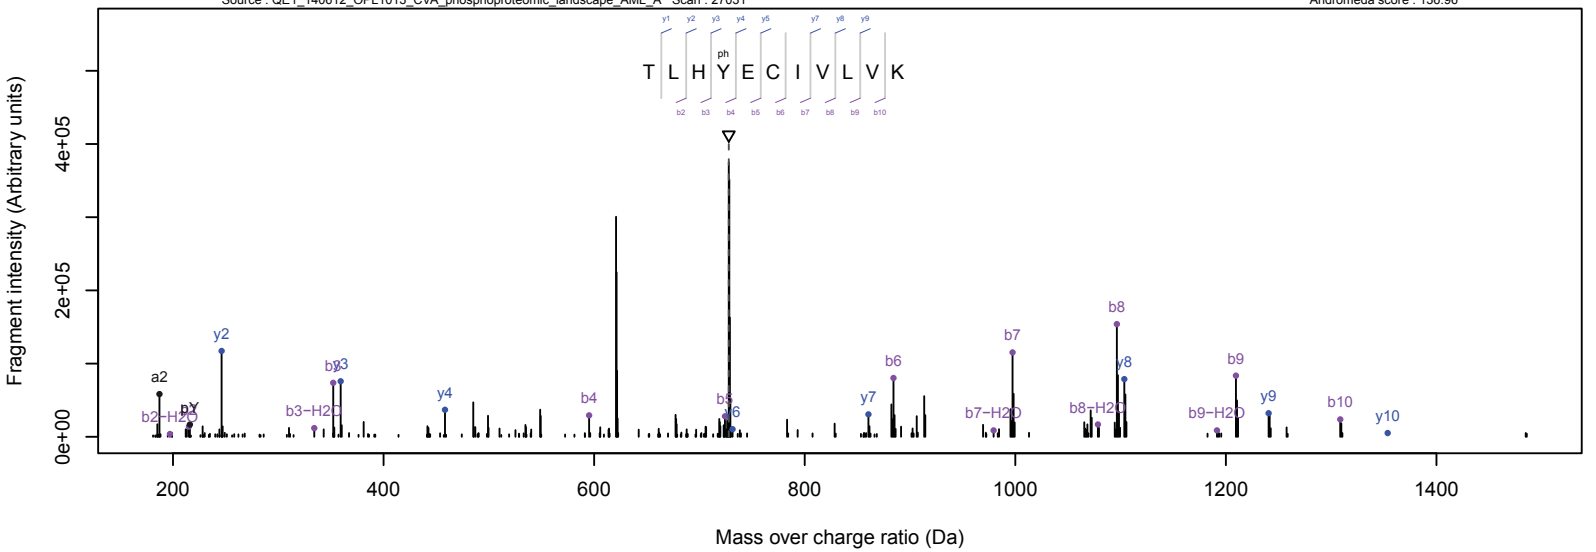

ISVYYNEATGGKY(ph)VPR-2+

Source : QE1\_140612\_OPL1013\_CVA\_phosphoproteomic\_landscape\_AML\_C Scan : 21715

Andromeda score : 136.81

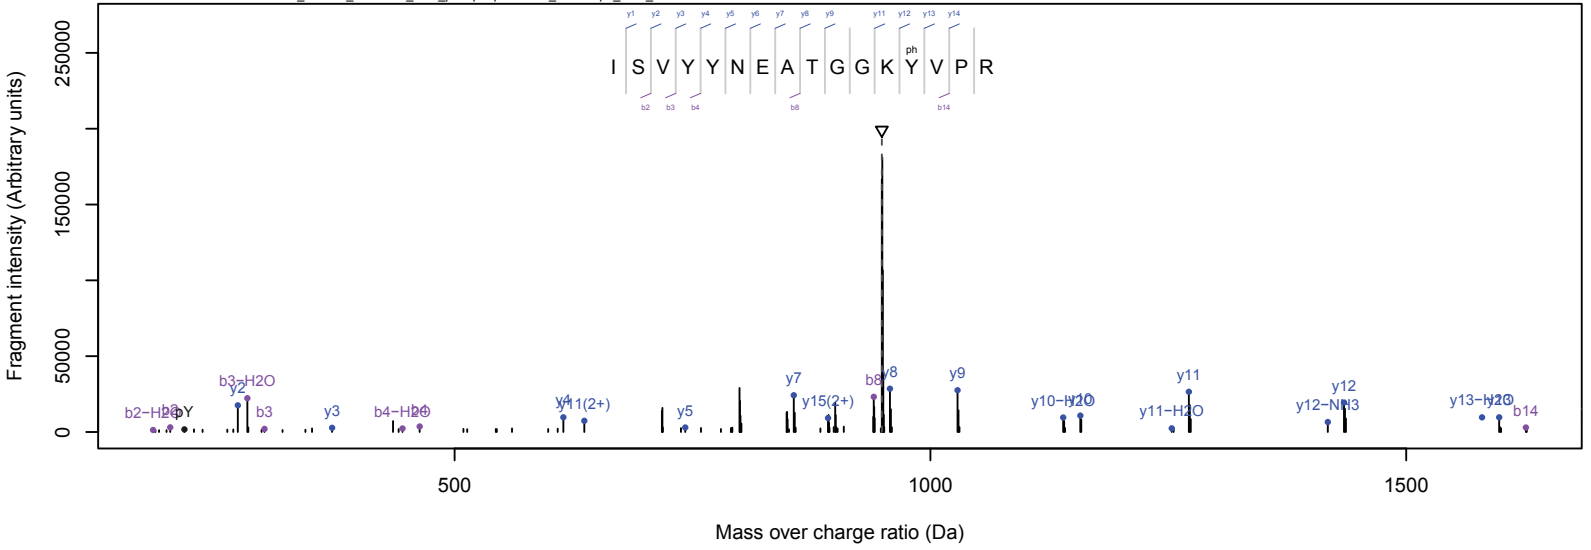

AADSSAPEDSEKLVGDTV(ph)YSK-3+

Source : QE1\_140612\_OPL1013\_CVA\_phosphoproteomic\_landscape\_AML\_C Scan : 20512

Andromeda score : 136.64

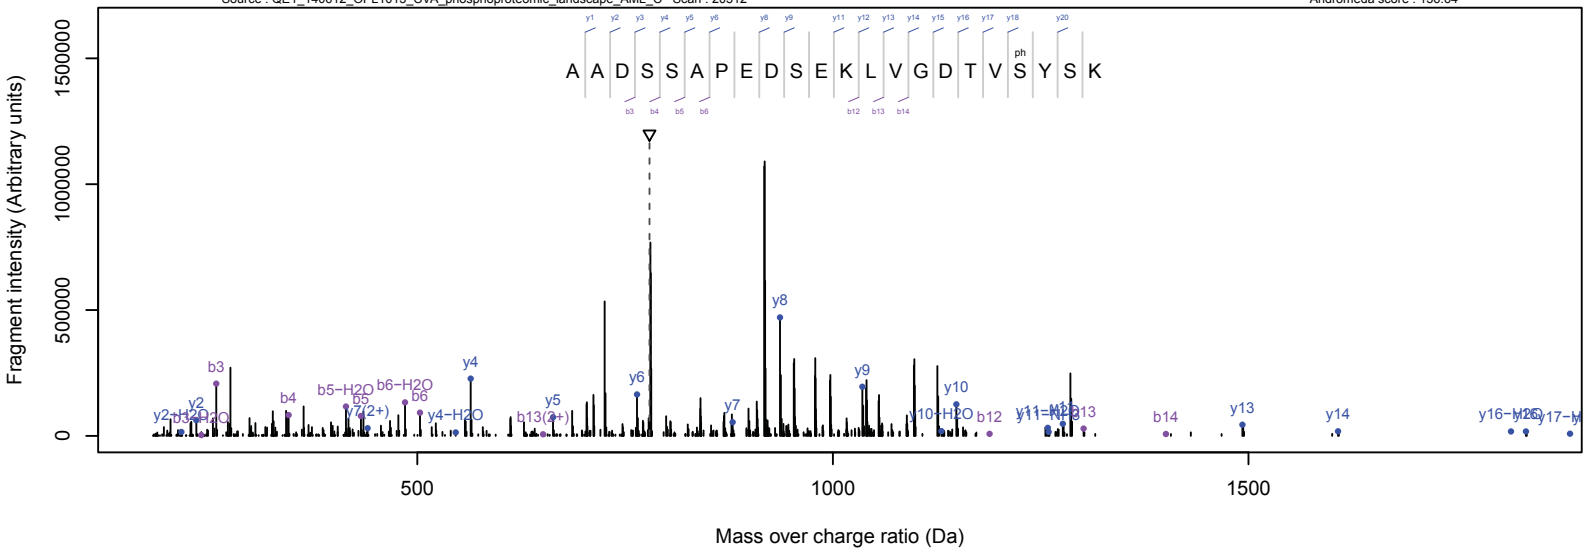

EHNFSFY(ph)PTFQSHPNSSMPGSR-3+

Source : QE1\_140908\_OPL1013\_CvA\_pTyrIP\_AML\_Kasumi6 Scan : 28386

Andromeda score : 136.64

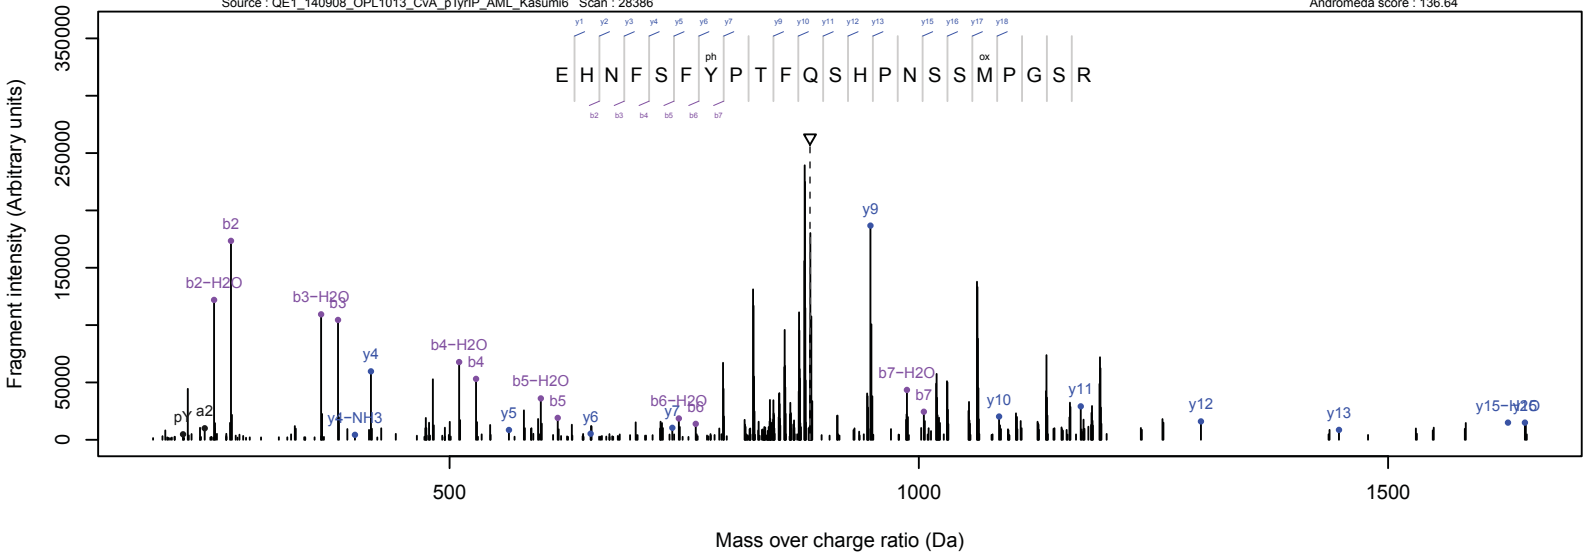

LHY(ph)PM(ox)VEYCIPTTSGEDVRDFTK-3+

Source : QE1\_140612\_OPL1013\_CVA\_phosphoproteomic\_landscape\_AML\_D Scan : 33790

Andromeda score : 136.62

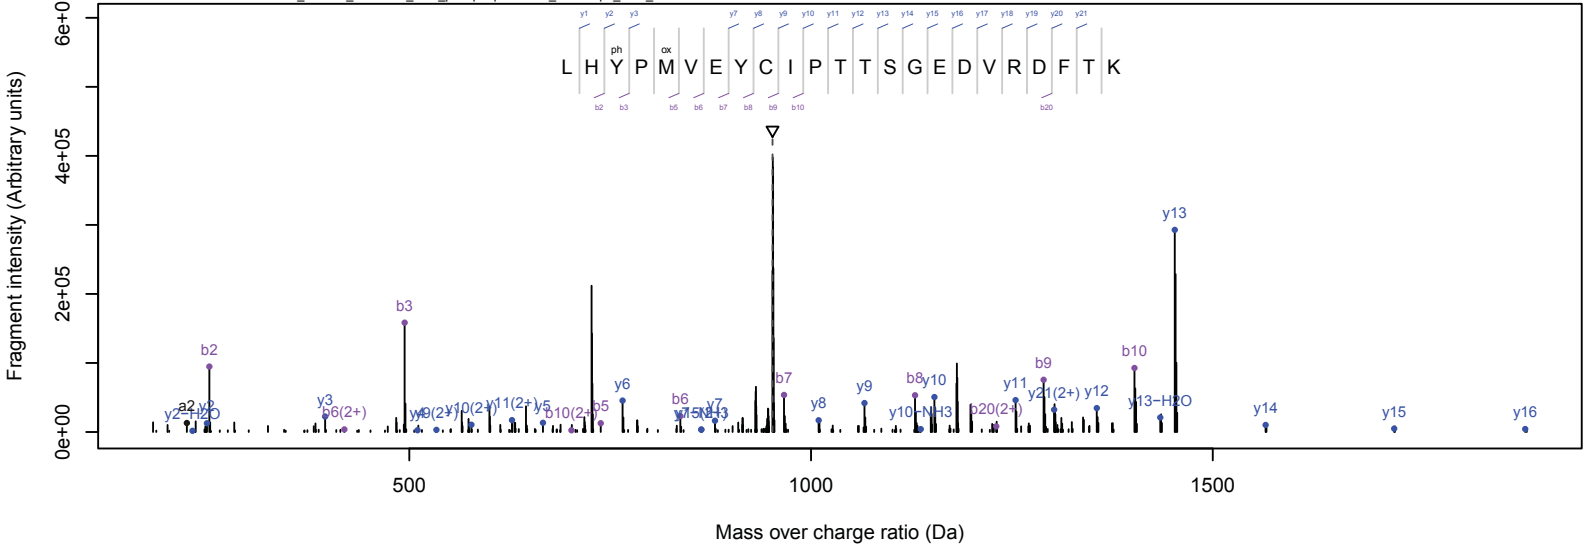

IGY(ph)FPPGIVEVSK-2+

Source : QE1\_140612\_OPL1013\_CVA\_phosphoproteomic\_landscape\_AML\_C Scan : 45609

Andromeda score : 136.6

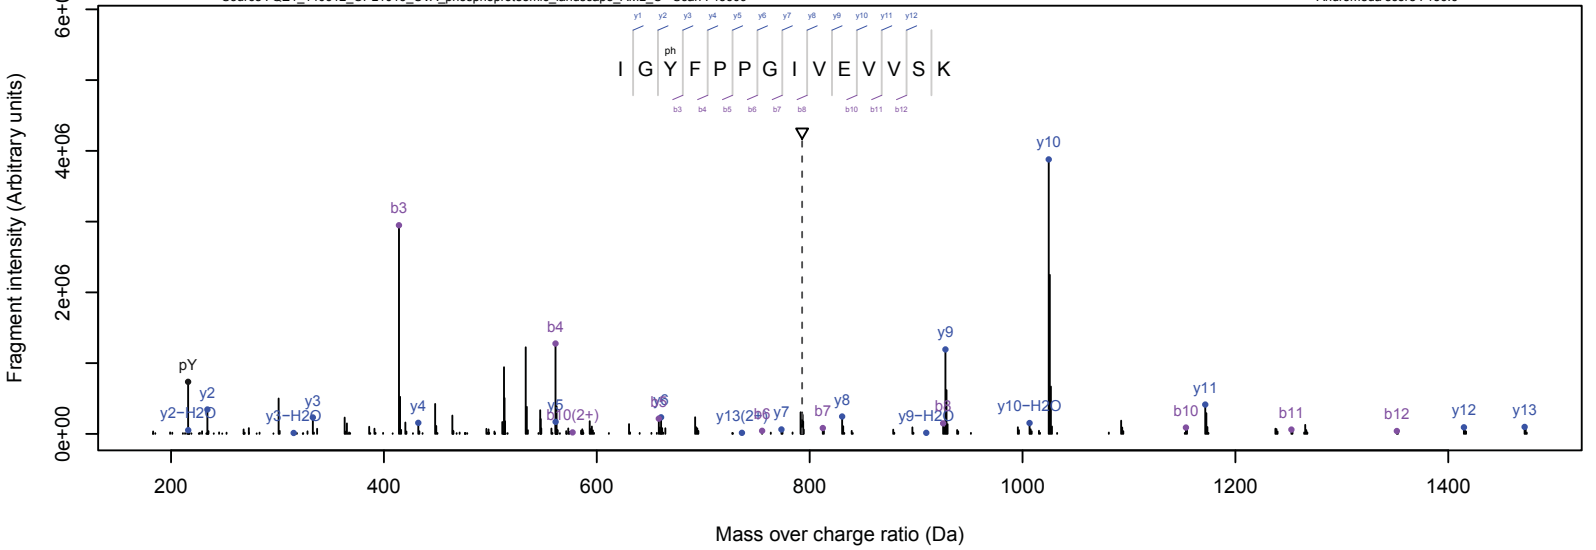

GLNTDELGQKEEAKNY(ph)YK-3+

Source : QE1\_140612\_OPL1013\_CVA\_phosphoproteomic\_landscape\_AML\_C Scan : 13575

Andromeda score : 136.36

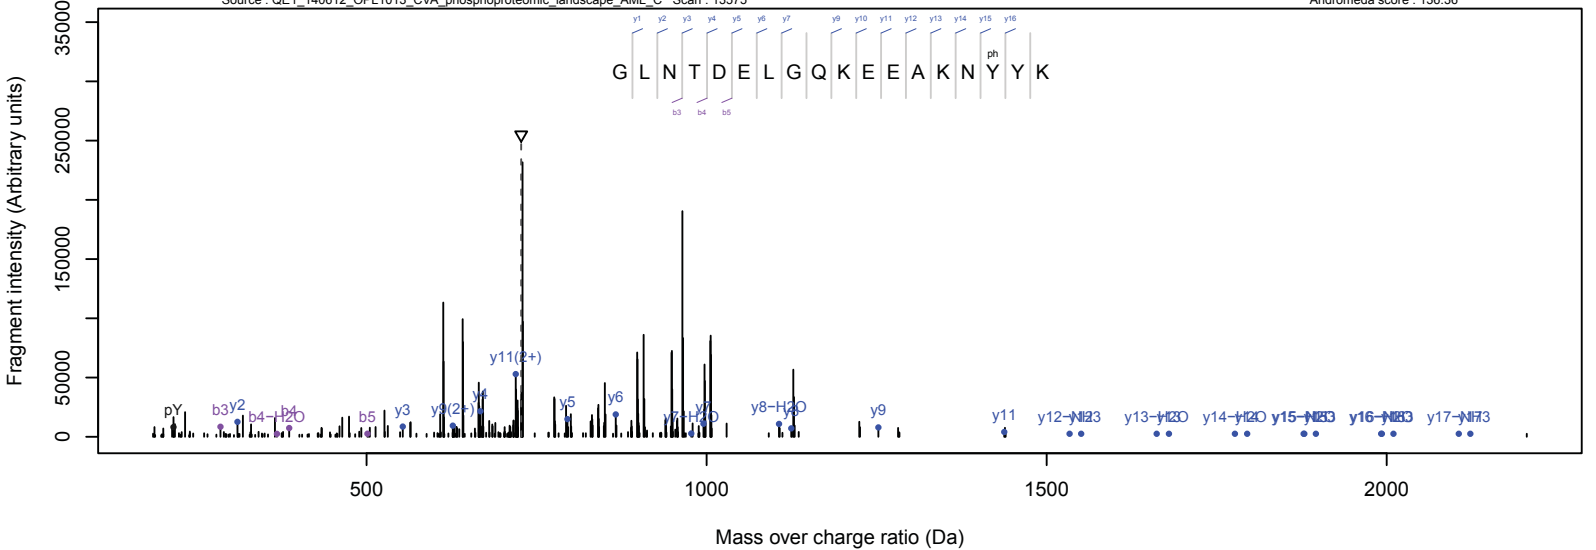

GRQDPASY(ph)APDAKPSDLQLSK-3+

Source: QE1\_140822\_OPL1013\_CvA\_pTyrIP\_AML\_cell\_lines\_part2\_F Scan: 14521

Andromeda score: 136.34

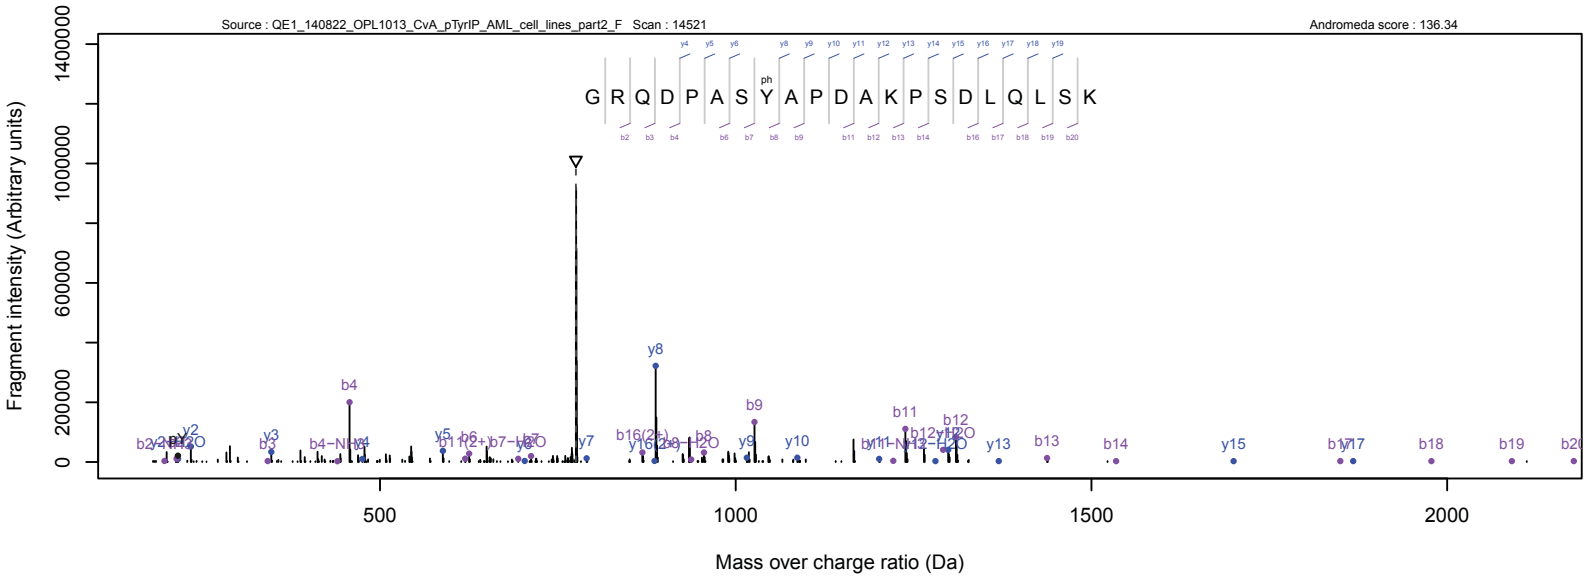

LQDEANY(ph)HLYGSR-2+

Source: QE1\_140612\_OPL1013\_CvA\_phosphoproteomic\_landscape\_AML\_C Scan: 13401

Andromeda score: 136.33

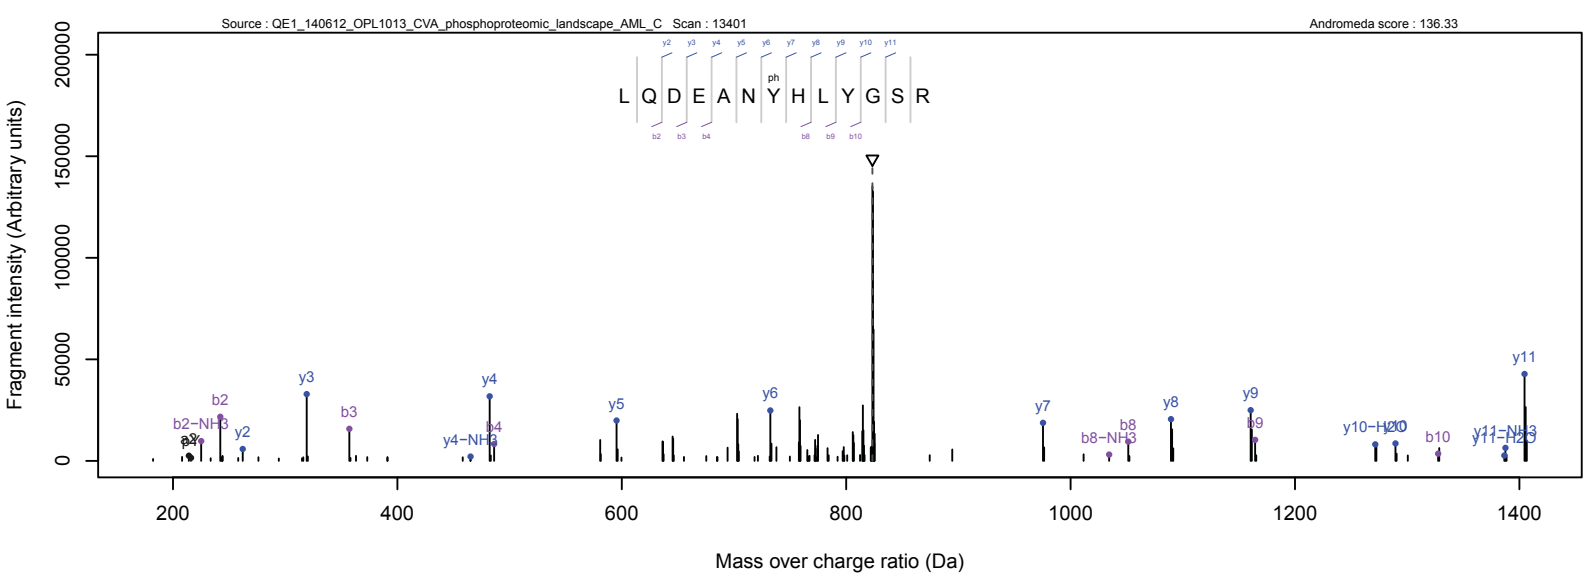

NY(ph)QQNYQNSESGEKNEGSESAPEGQAQR-3+

Source: QE1\_140908\_OPL1013\_CvA\_pTyrIP\_AML\_Kasumi6 Scan: 8359

Andromeda score: 136.3

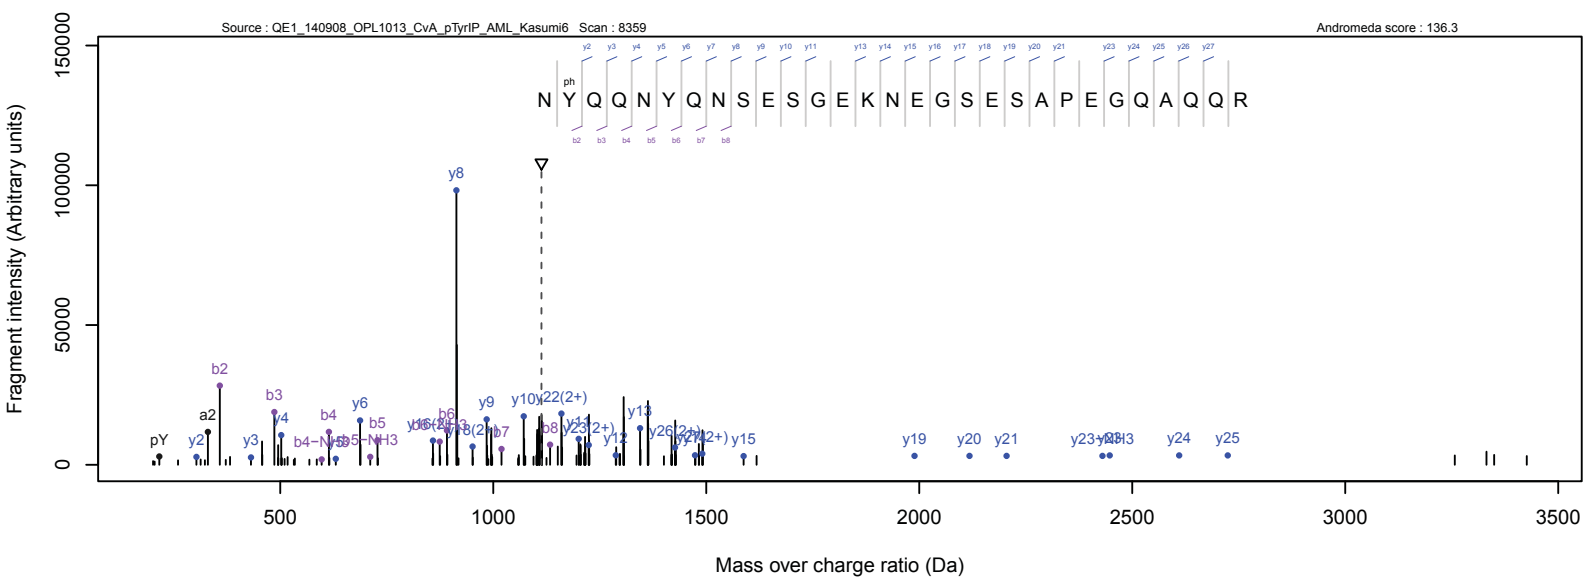

**TVEY(ph)LHAQGVVHR-2+**

Source : QE1\_140612\_OPL1013\_CVA\_phosphoproteomic\_landscape\_AML\_B Scan : 12211

Andromeda score : 136.3

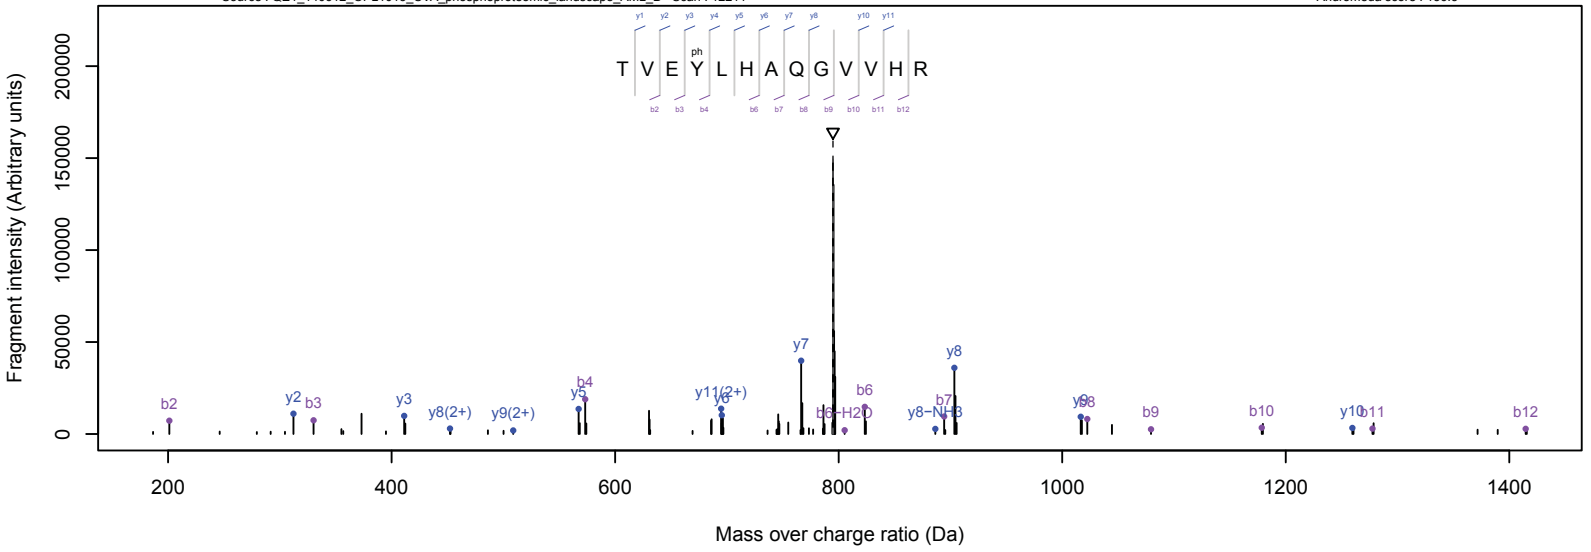

**ILY(ph)QNLNEPTTWSLTSR-2+**

Source : QE1\_140908\_OPL1013\_CvA\_pTyrIP\_AML\_Kasumi1 Scan : 37635

Andromeda score : 136.26

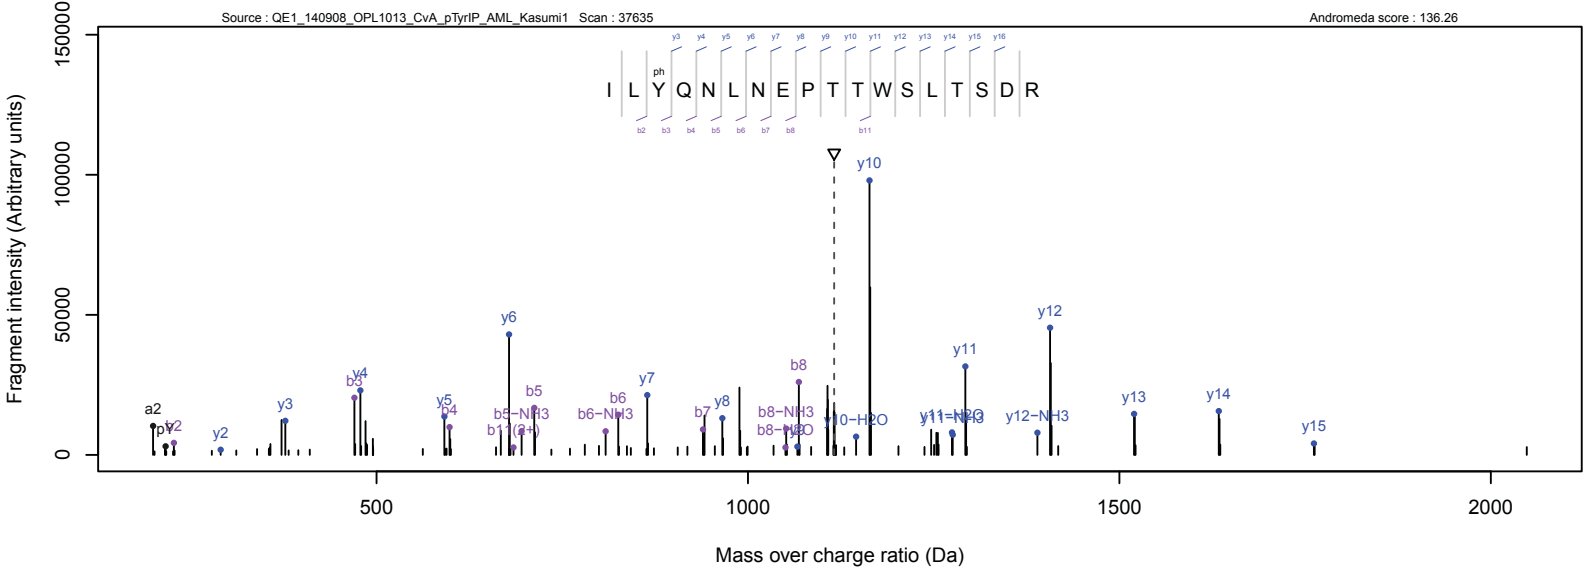

**INNY(ph)LTPAHKLD(ph)PTMSR-3+**

Source : QE1\_140612\_OPL1013\_CVA\_phosphoproteomic\_landscape\_AML\_C Scan : 26719

Andromeda score : 136.24

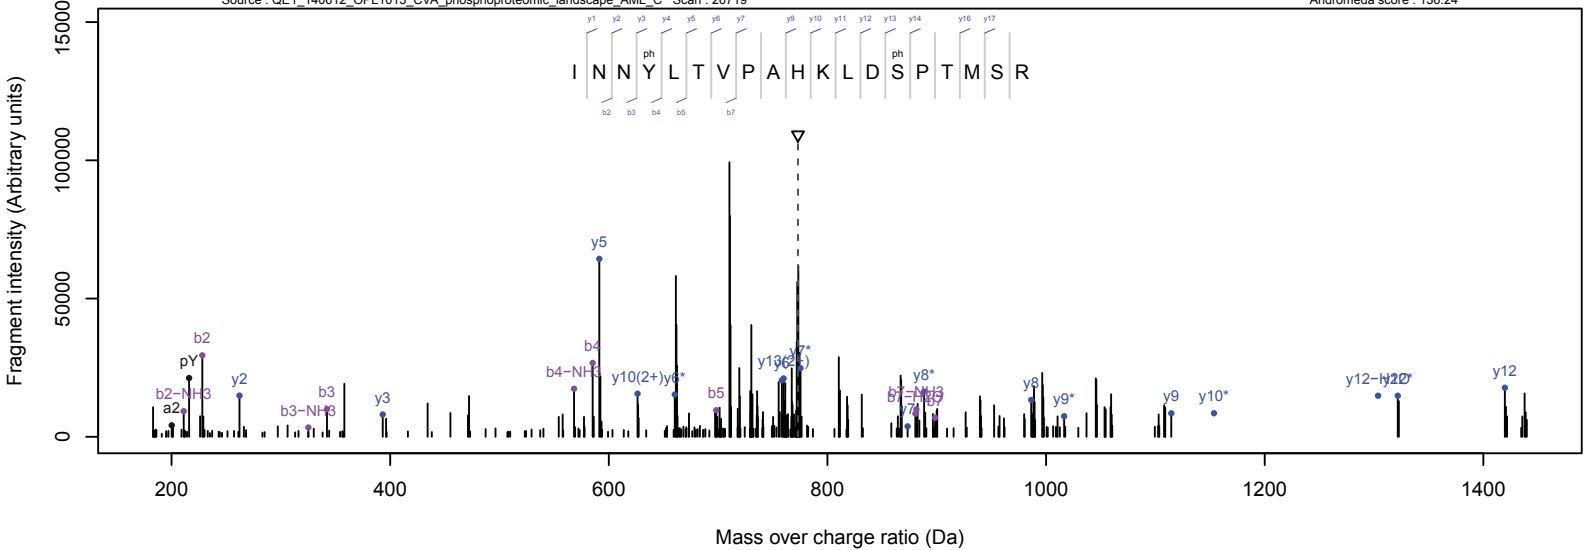

Y(ph)SSLNLFDTYK GK-2+

Source : QE1\_140612\_OPL1013\_CVA\_phosphoproteomic\_landscape\_AML\_C Scan : 30561

Andromeda score : 136.24

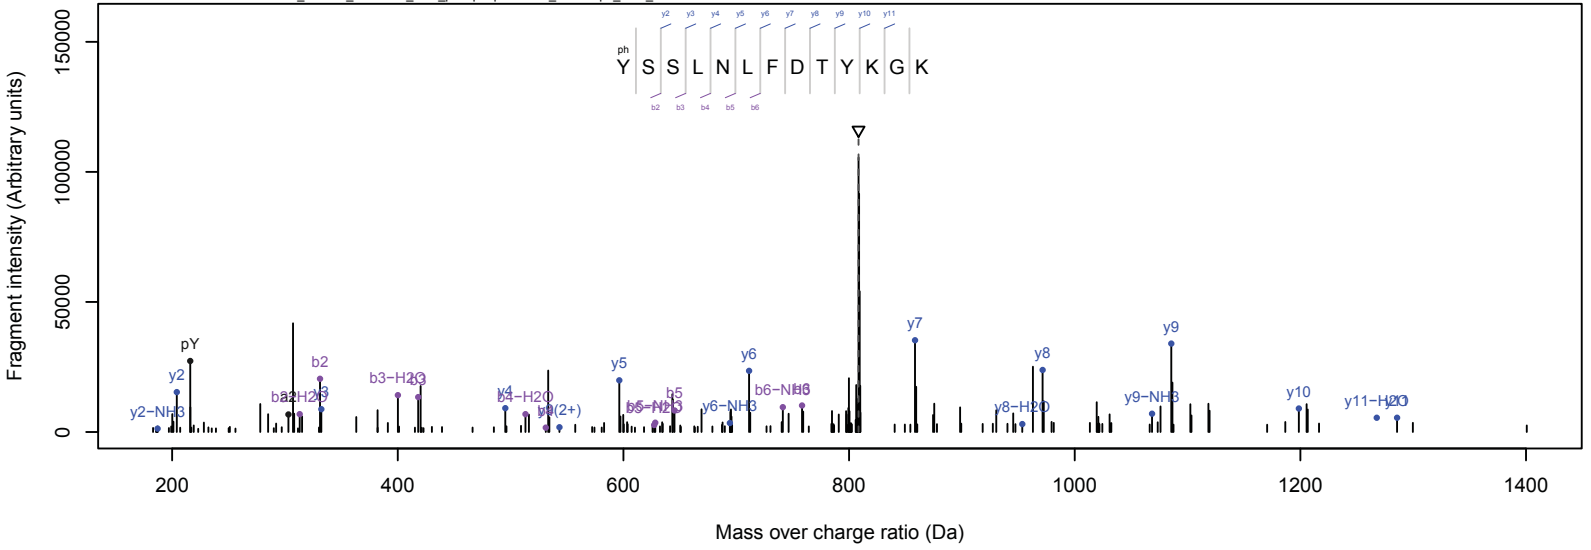

LFTAHHNNM(ox)TNY(ph)ATVWASK-3+

Source : QE1\_140908\_OPL1013\_CvA\_pTyrIP\_AML\_Kasumi1 Scan : 25702

Andromeda score : 135.95

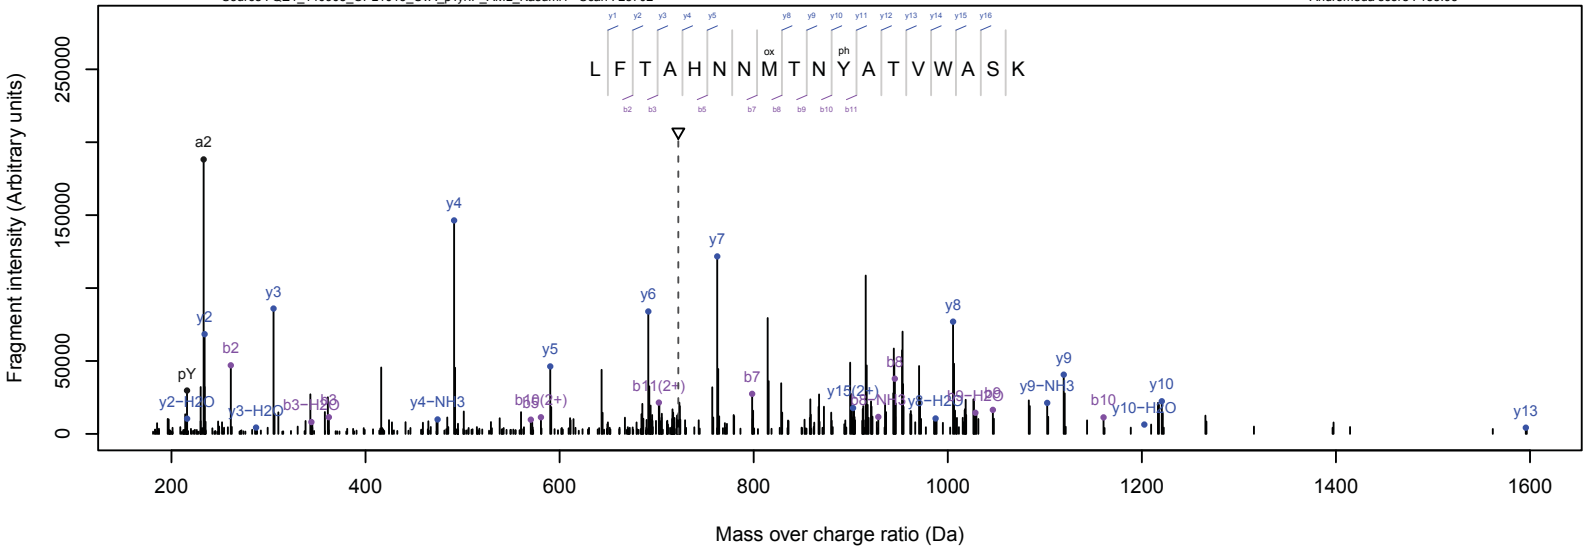

HSQHLPKVEFGVY(ph)ESGPR-3+

Source : QE1\_140908\_OPL1013\_CvA\_pTyrIP\_AML\_HL60 Scan : 21506

Andromeda score : 135.91

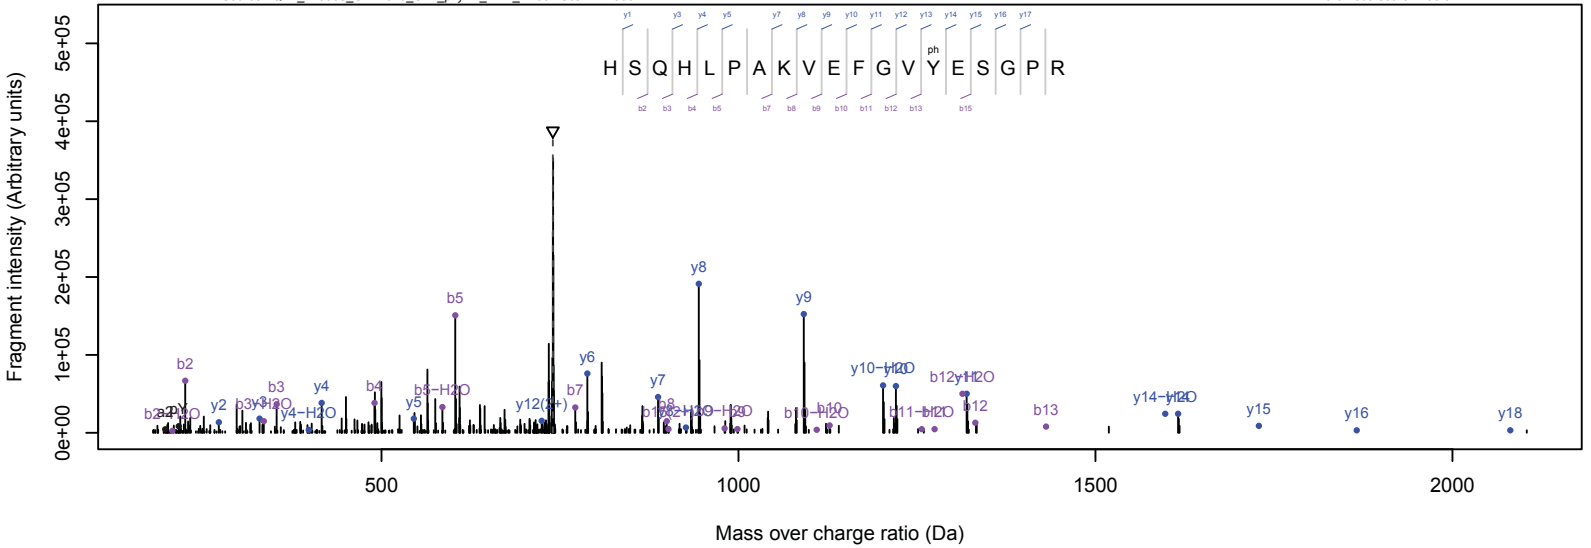



IEKIGEGT(ph)Y(ph)GVVYKGR-3+

Source : QE1\_140612\_OPL1013\_CVA\_phosphoproteomic\_landscape\_AML\_F Scan : 18499

Andromeda score : 135.91

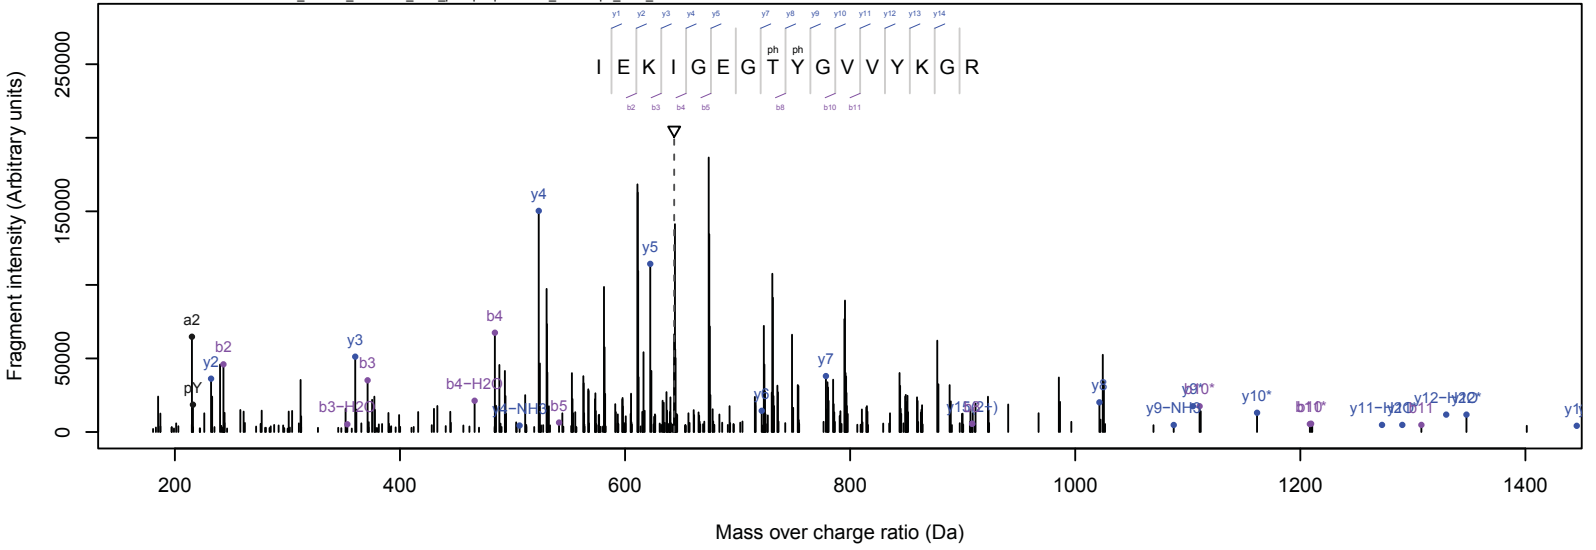

NLEDLVTEY(ph)HGNSAWSGVSK-3+

Source : QE1\_140908\_OPL1013\_CvA\_pTyrIP\_AML\_Kasumi6 Scan : 46591

Andromeda score : 135.91

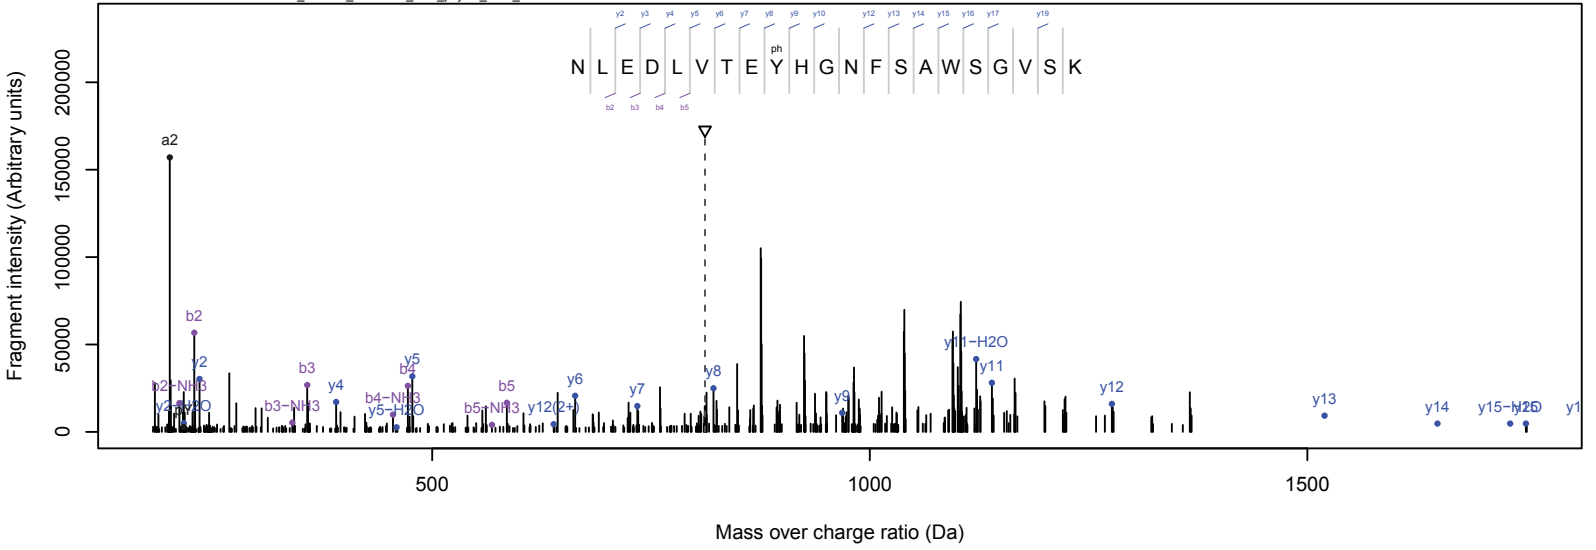

AY(ph)EYVECPPIR-2+

Source : QE1\_140908\_OPL1013\_CvA\_pTyrIP\_AML\_ML2 Scan : 21985

Andromeda score : 135.86

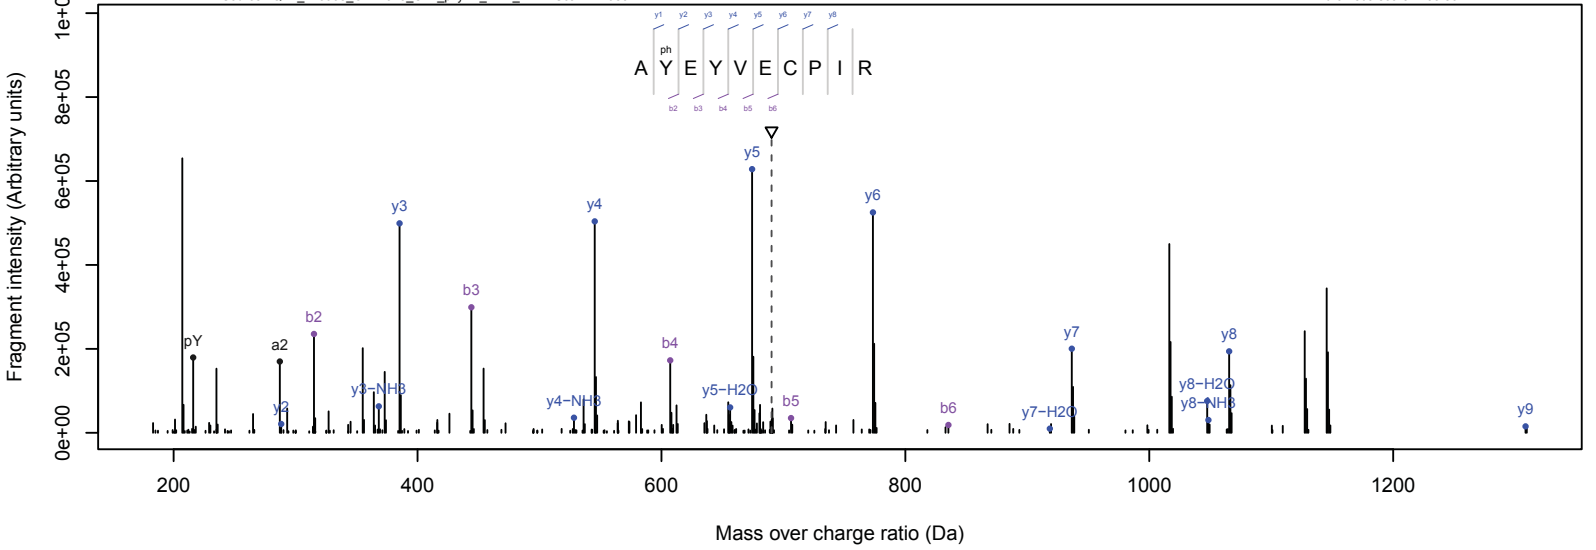

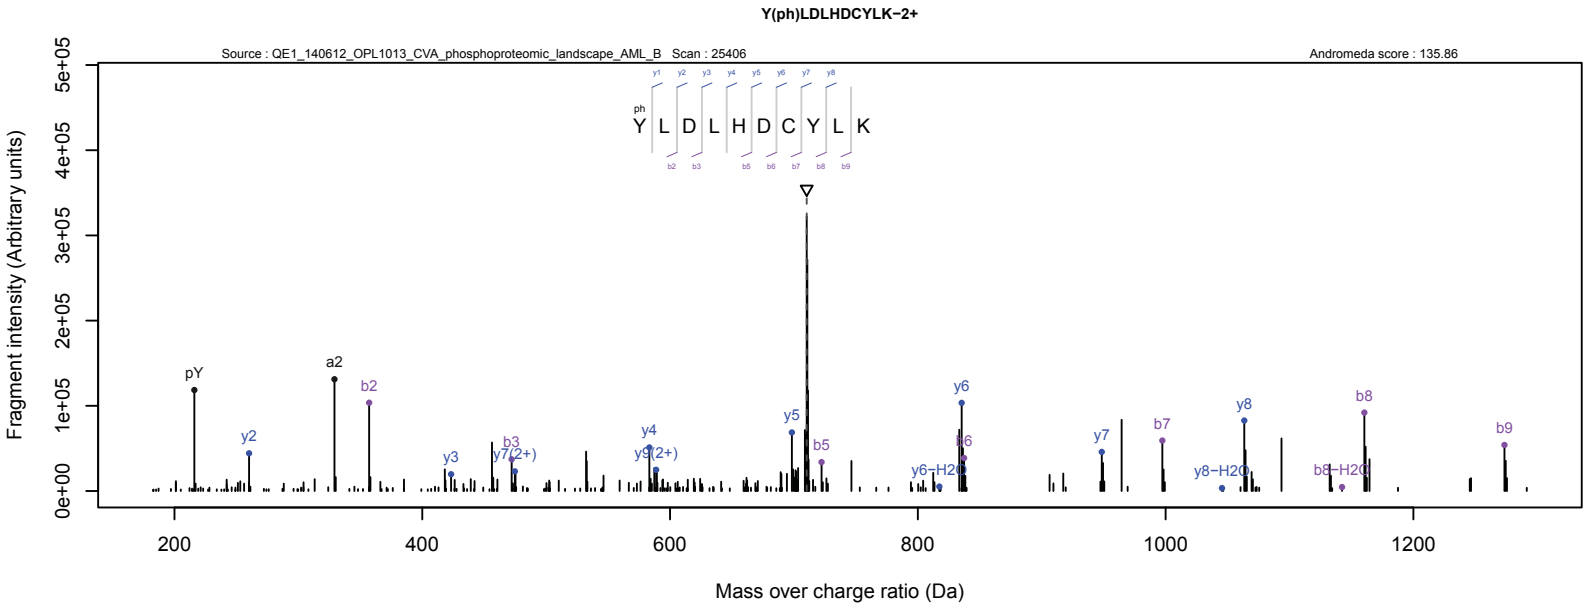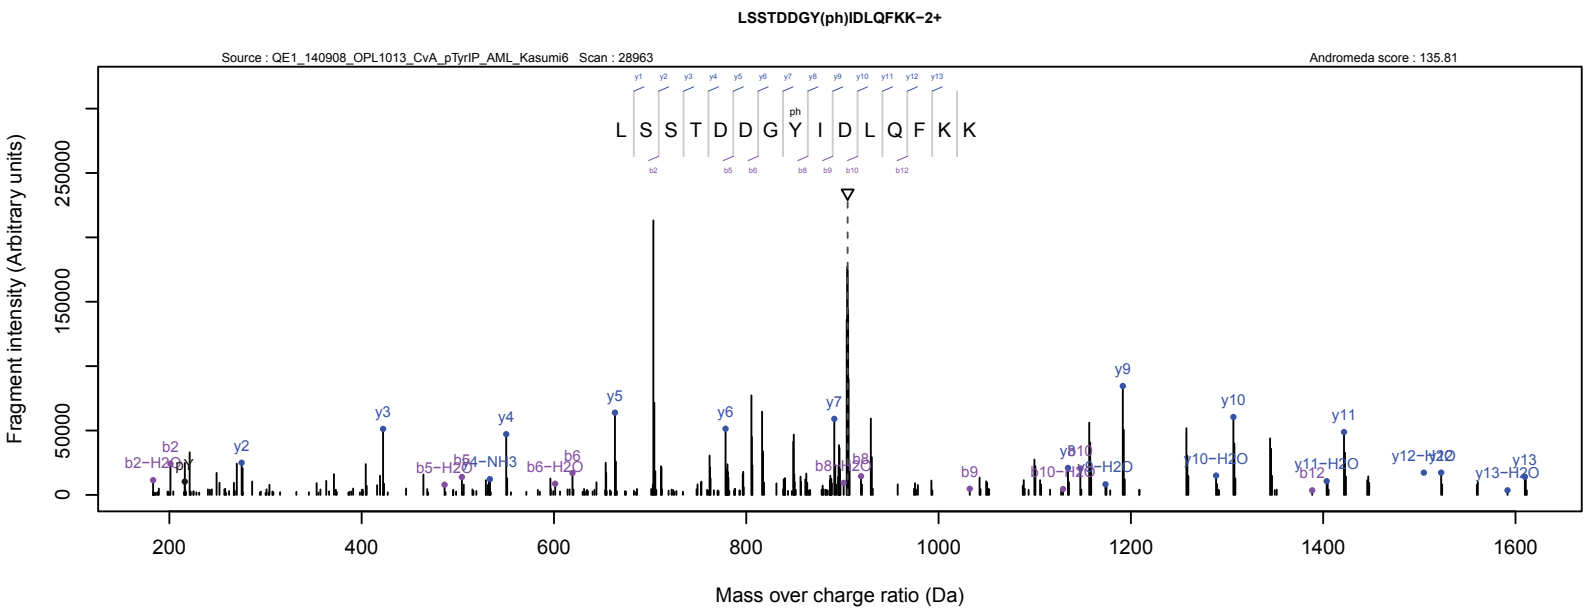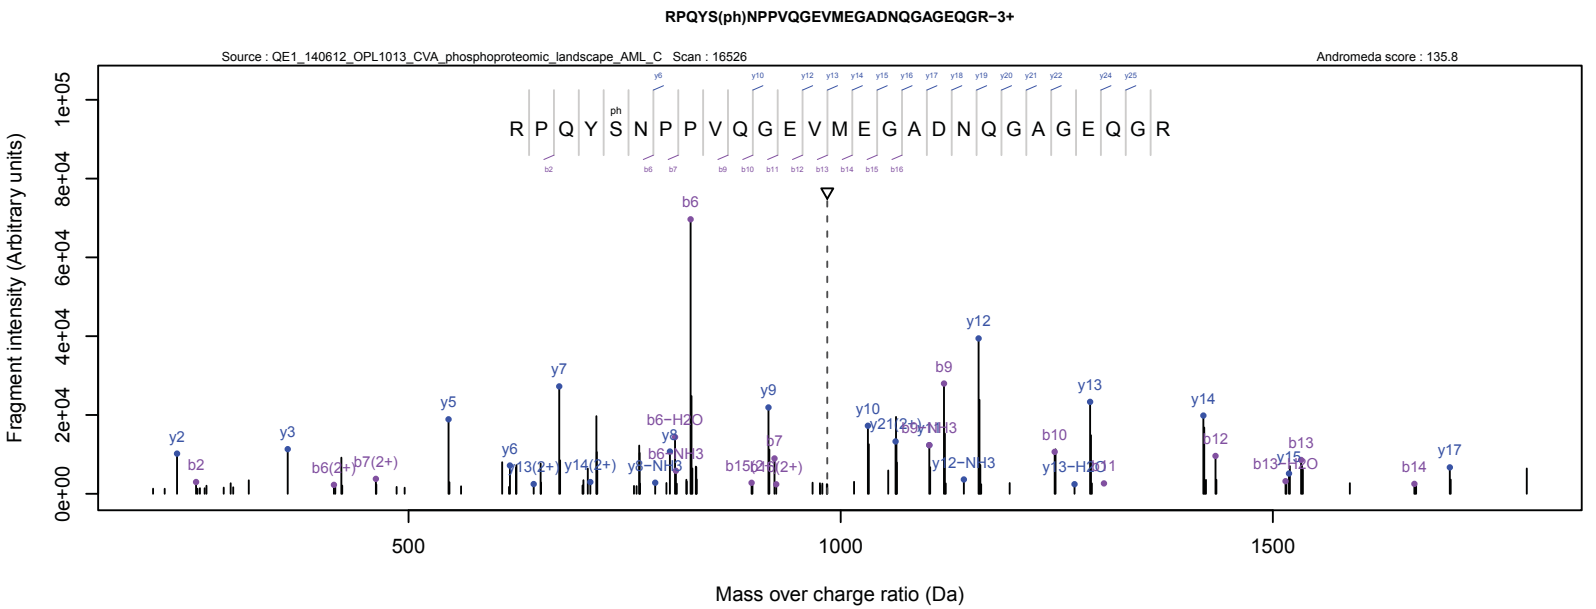

**AGLQTADKY(ph)AALANLDNIFSAAGQGQGGDQGSFGTTGK-3+**

Source : QE1\_140612\_OPL1013\_CVA\_phosphoproteomic\_landscape\_AML\_B Scan : 47302

Andromeda score : 135.77

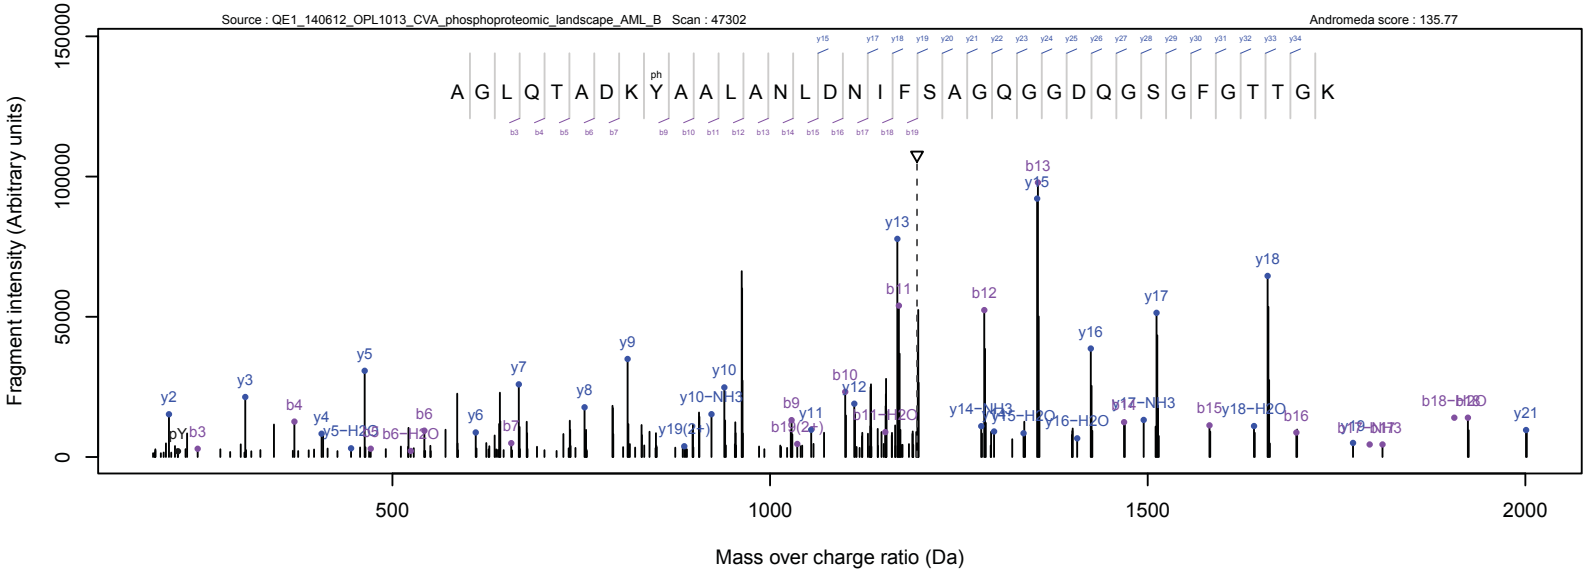

**AELLDNEKPAAVVAPITTTG(ph)TVK-2+**

Source : QE1\_140612\_OPL1013\_CVA\_phosphoproteomic\_landscape\_AML\_C Scan : 34541

Andromeda score : 135.62

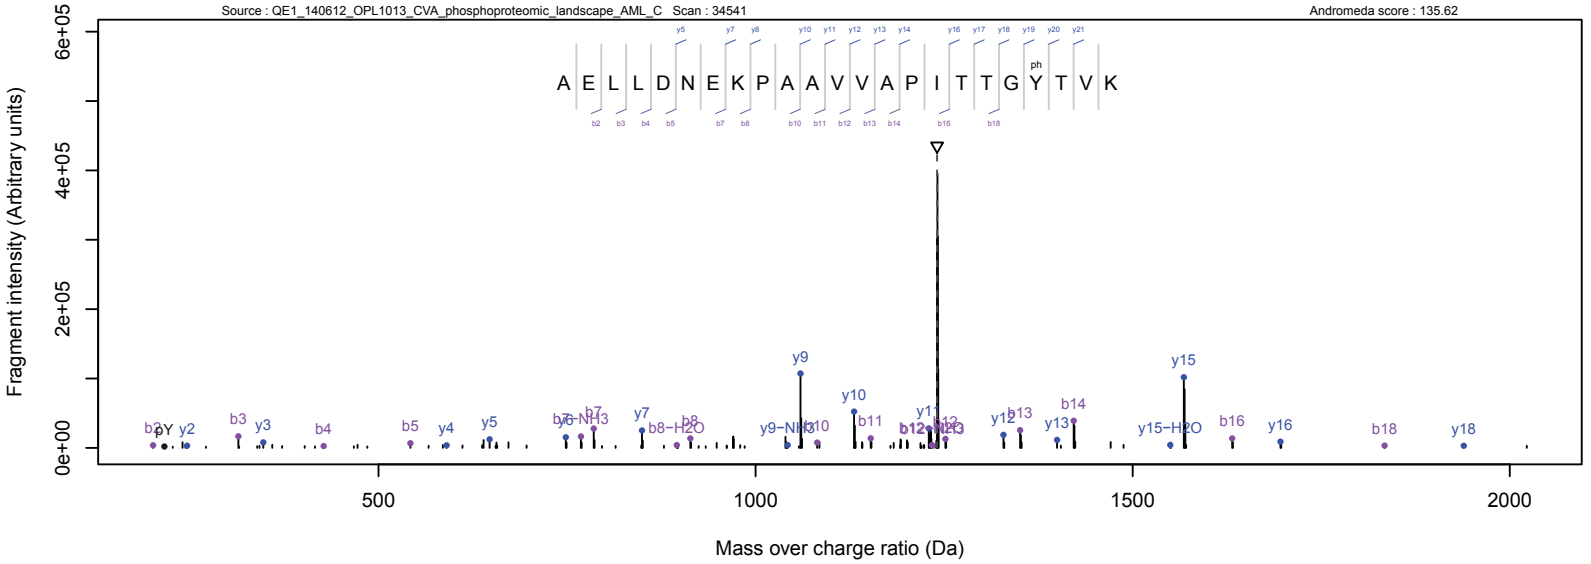

**EDHGRGYP(h)FEYIEENKYSR-4+**

Source : QE1\_140612\_OPL1013\_CVA\_phosphoproteomic\_landscape\_AML\_C Scan : 21071

Andromeda score : 135.58

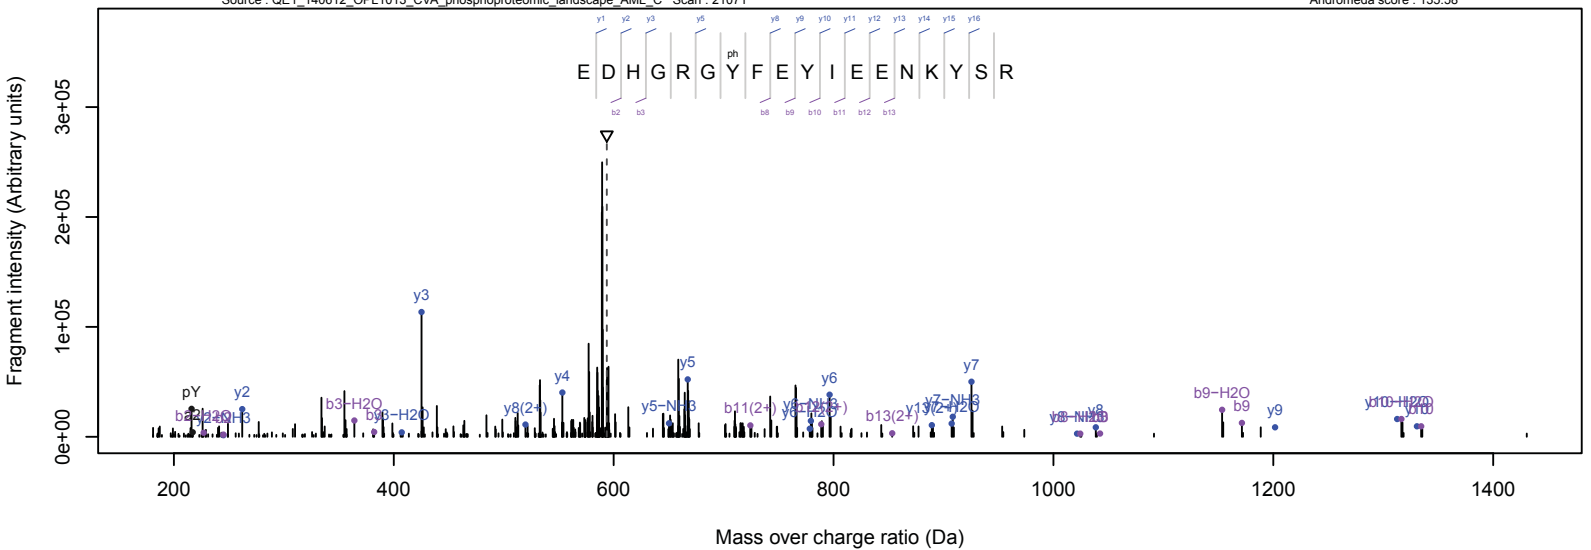

CTSGGY(ph)YRDDMLVVPIIENTPEEK-3+

Source : QE1\_140612\_OPL1013\_CVA\_phosphoproteomic\_landscape\_AML\_B Scan : 46005

Andromeda score : 135.55

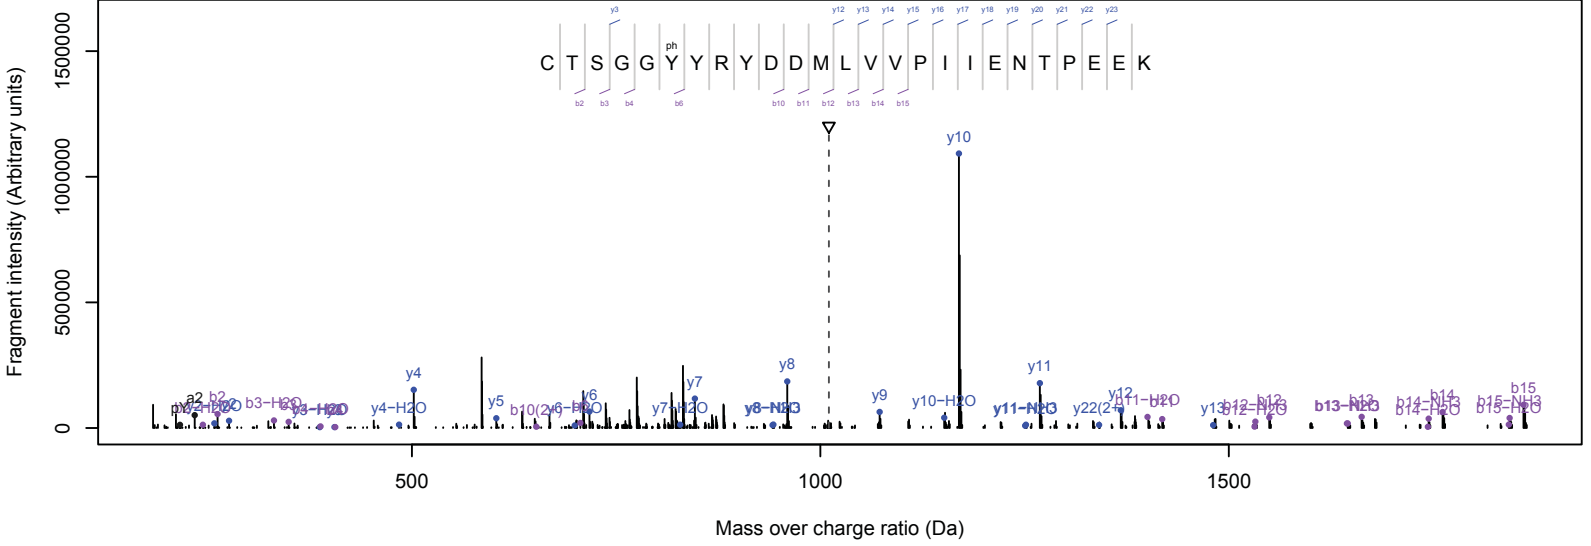

Y(ph)LSIMPLGTIHCIFHATGHHYTWK-4+

Source : QE1\_140612\_OPL1013\_CVA\_phosphoproteomic\_landscape\_AML\_C Scan : 46954

Andromeda score : 135.54

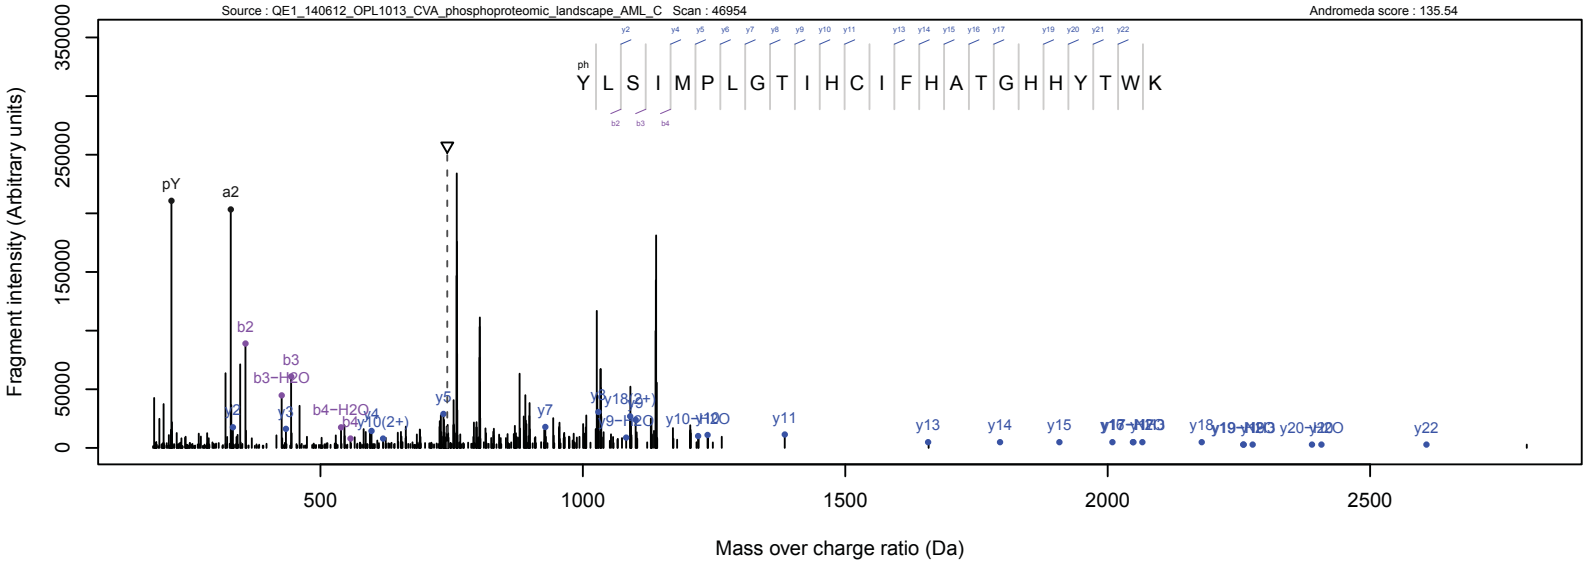

ARPATDSFDDY(ph)PPRR-3+

Source : QE1\_140612\_OPL1013\_CVA\_phosphoproteomic\_landscape\_AML\_B Scan : 10192

Andromeda score : 135.47

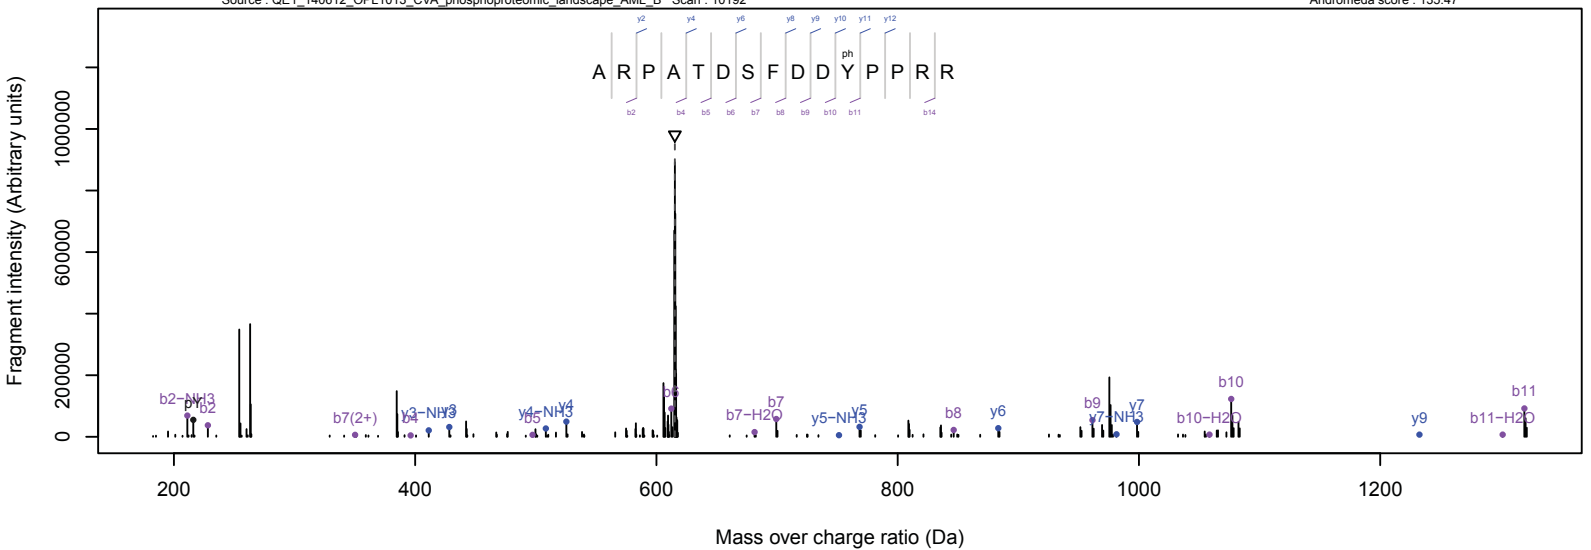

**EKLY(ph)DFVK-2+**

Source: QE1\_140612\_OPL1013\_CVA\_phosphoproteomic\_landscape\_AML\_D Scan: 21625

Andromeda score: 135.43

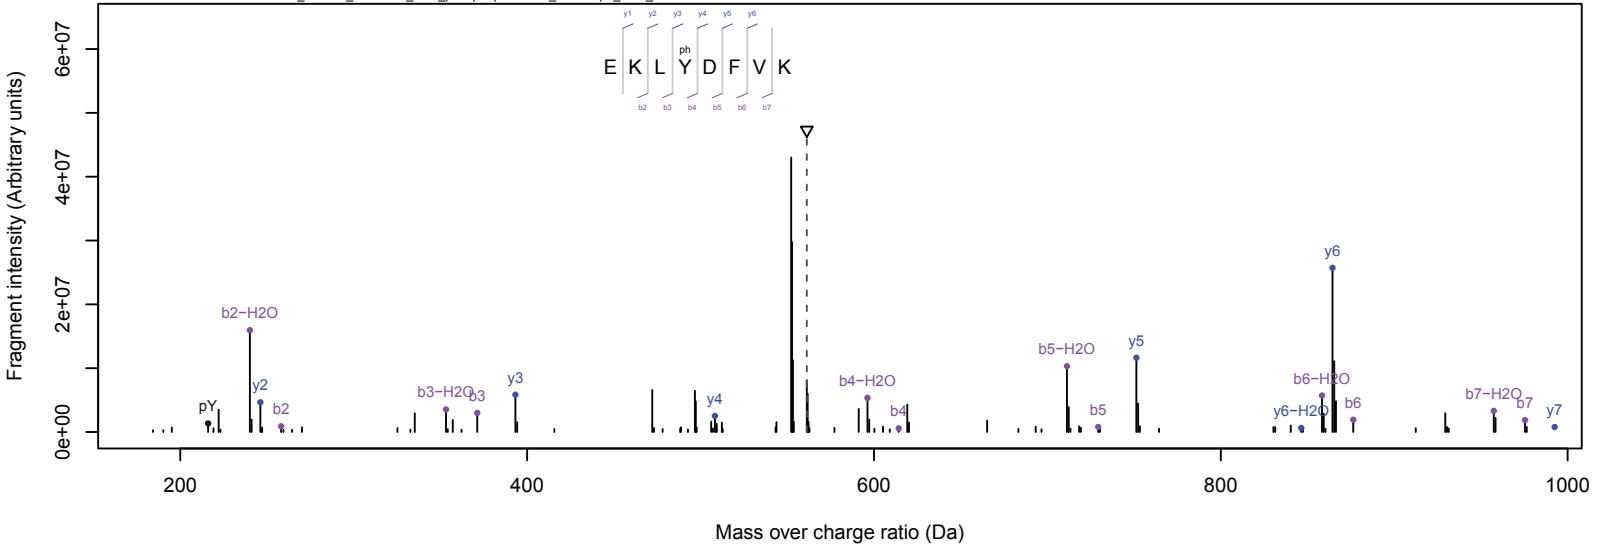

**Y(ph)HSLAPMYR-2+**

Source: QE1\_140612\_OPL1013\_CVA\_phosphoproteomic\_landscape\_AML\_C Scan: 19302

Andromeda score: 135.43

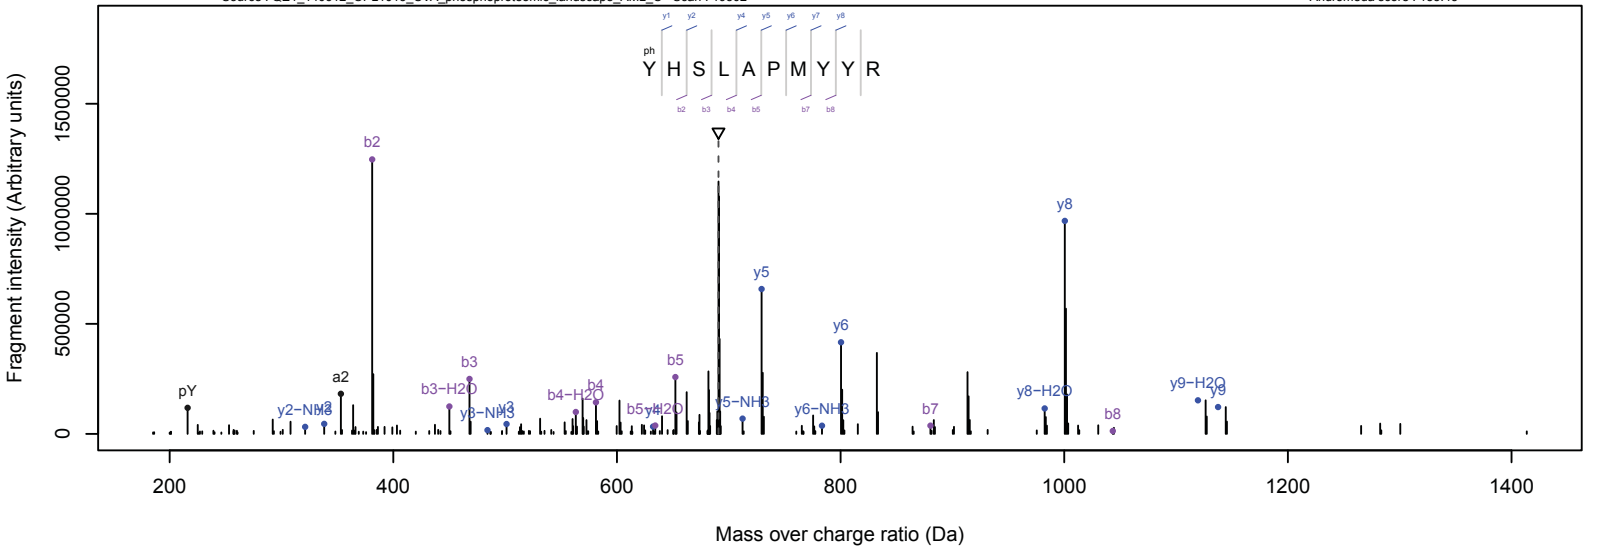

**GY(ph)YSPYVS GSGSTAGSR-2+**

Source: QE1\_140612\_OPL1013\_CVA\_phosphoproteomic\_landscape\_AML\_C Scan: 16222

Andromeda score: 135.29

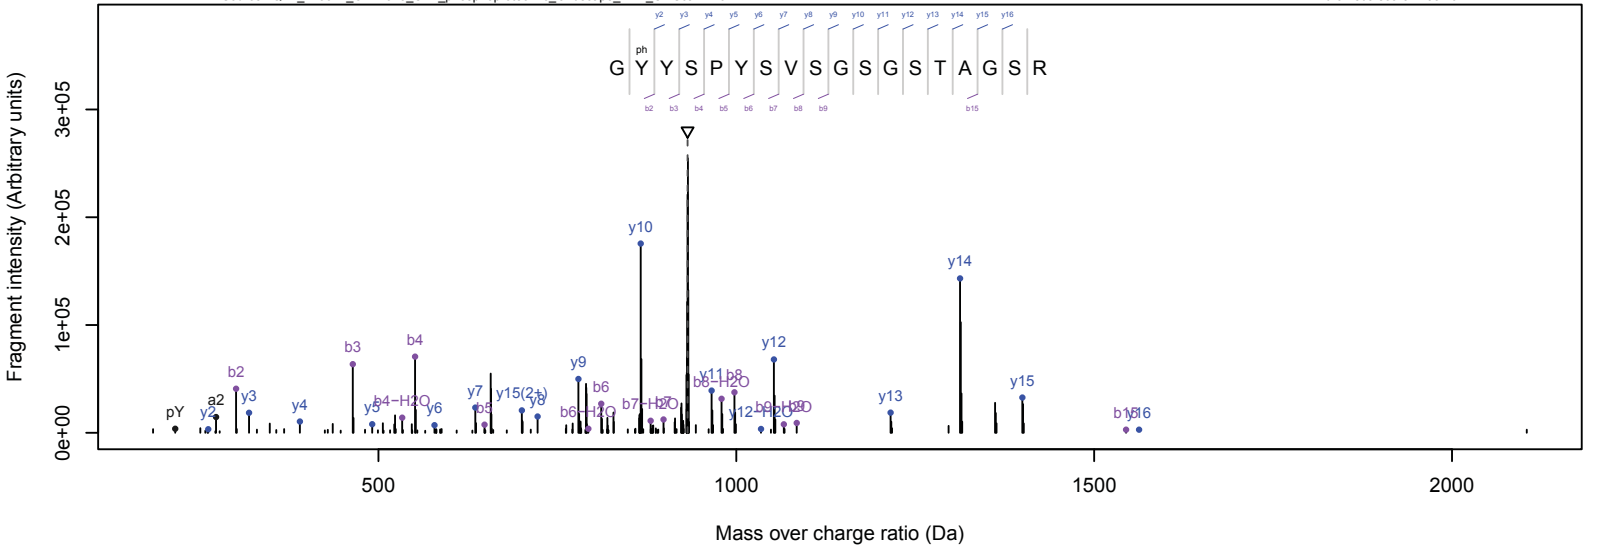

KIGDEY(ph)FTTDCDKPK-3+

Source : QE1\_140612\_OPL1013\_CVA\_phosphoproteomic\_landscape\_AML\_B Scan : 31944

Andromeda score : 135.29

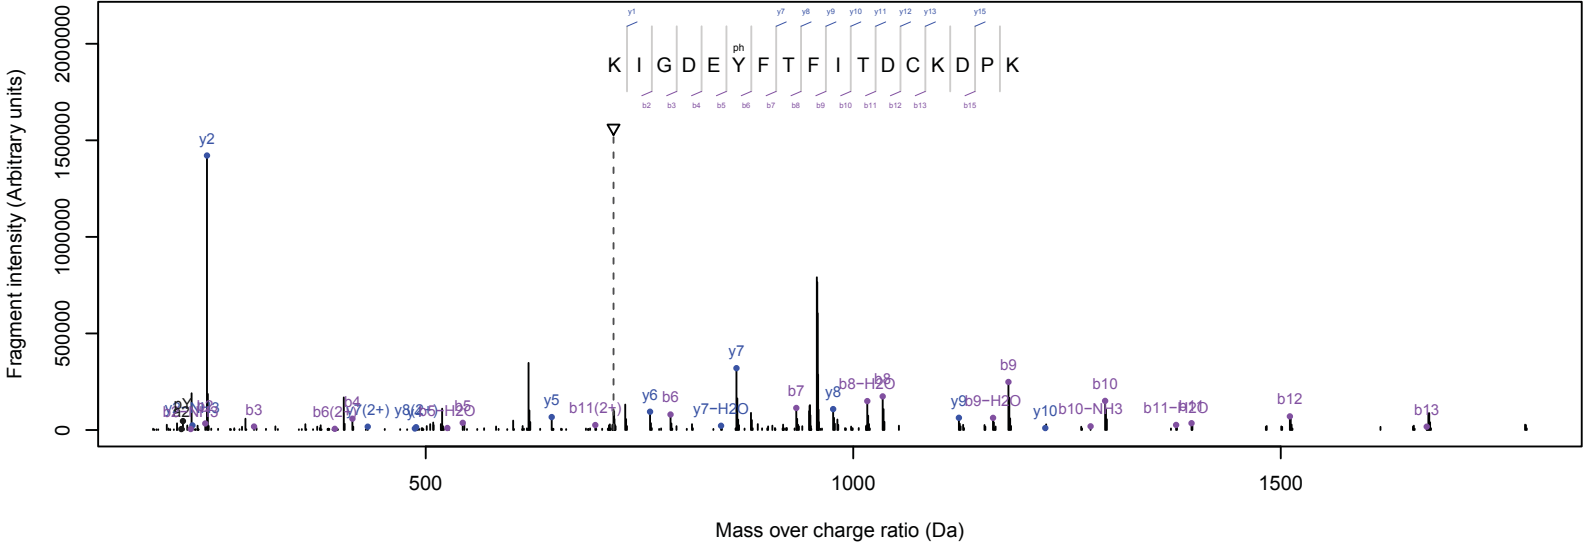

KGGSY(ph)SQAASSDSAQGS DMSLTACKV-3+

Source : QE1\_140908\_OPL1013\_CvA\_pTyrIP\_AML\_Kasumi6 Scan : 21052

Andromeda score : 135.25

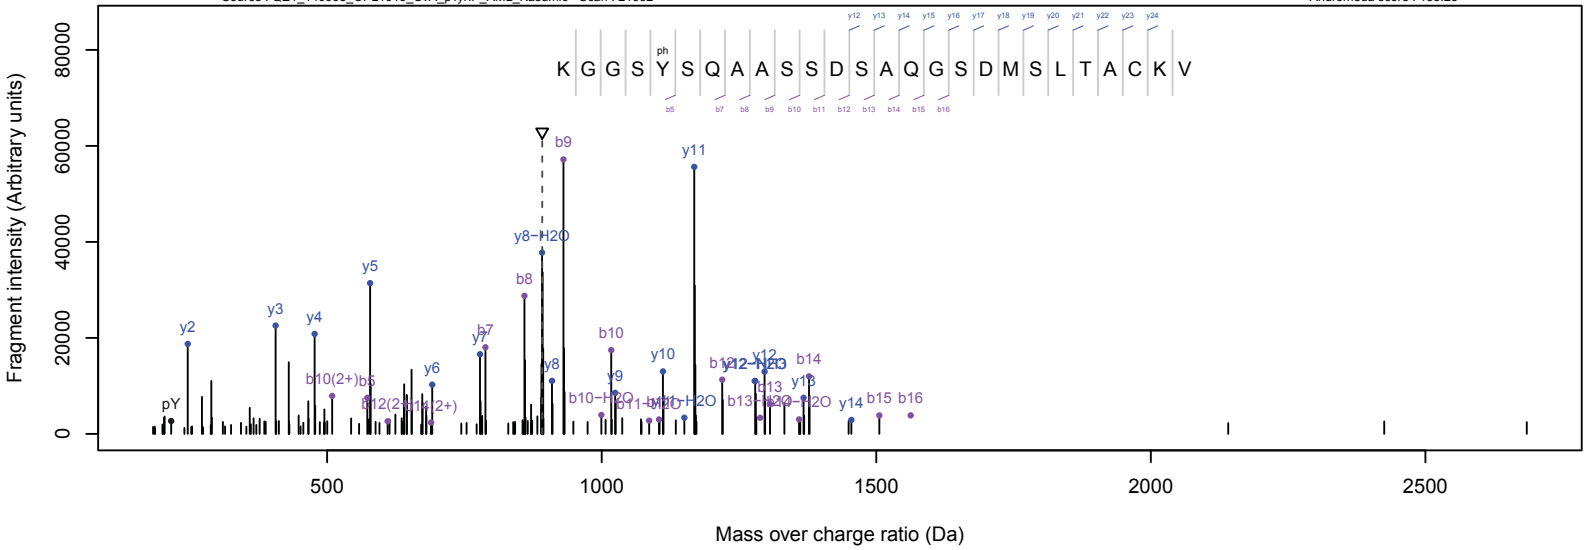

NHGFVLY(ph)HSVK-2+

Source : QE1\_140612\_OPL1013\_CVA\_phosphoproteomic\_landscape\_AML\_C Scan : 21074

Andromeda score : 135.24

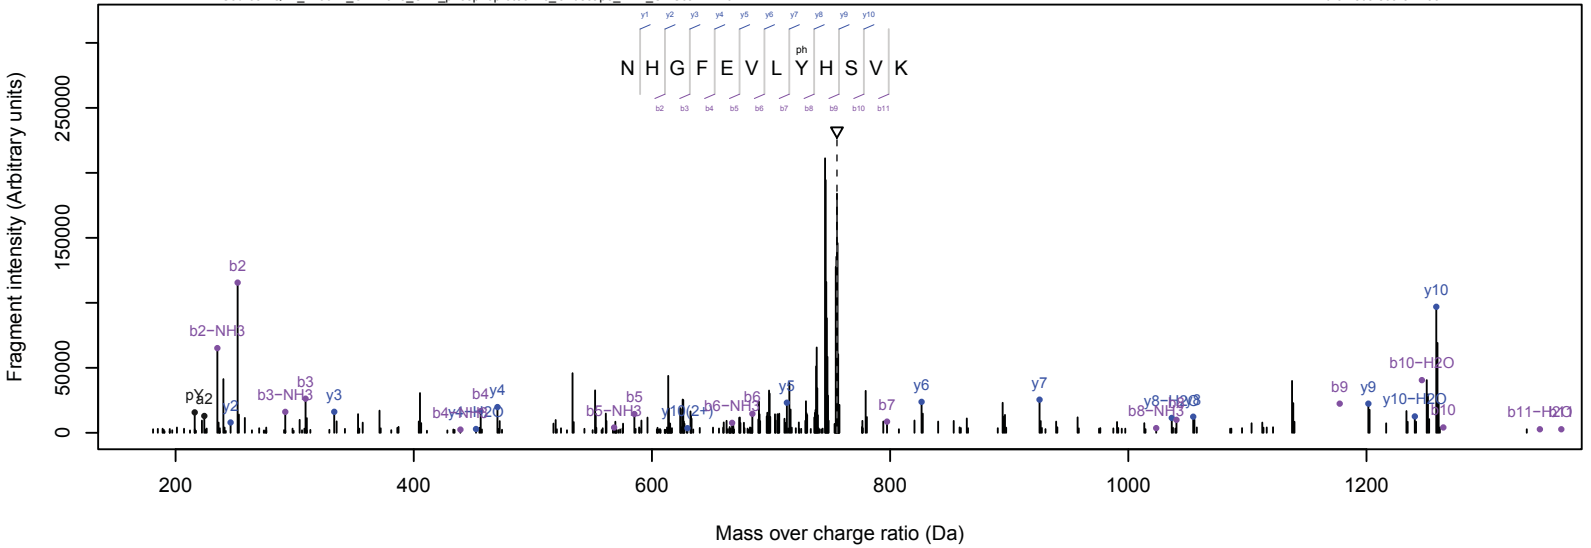

APIFTSEQGEKLY(ph)LVK-2+

Source: QE1\_140612\_OPL1013\_CVA\_phosphoproteomic\_landscape\_AML\_C Scan: 33155

Andromeda score: 135.09

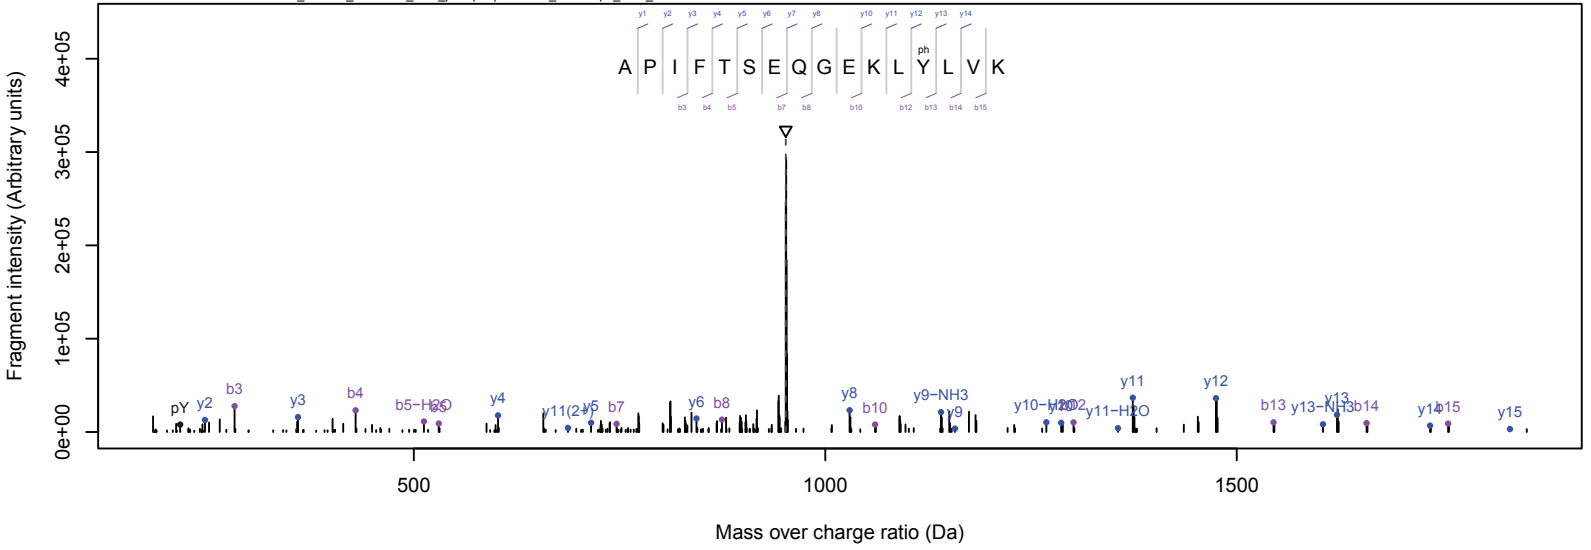

DSAY(ph)QSITHYRVPVSASR-3+

Source: QE1\_140612\_OPL1013\_CVA\_phosphoproteomic\_landscape\_AML\_C Scan: 18597

Andromeda score: 135.09

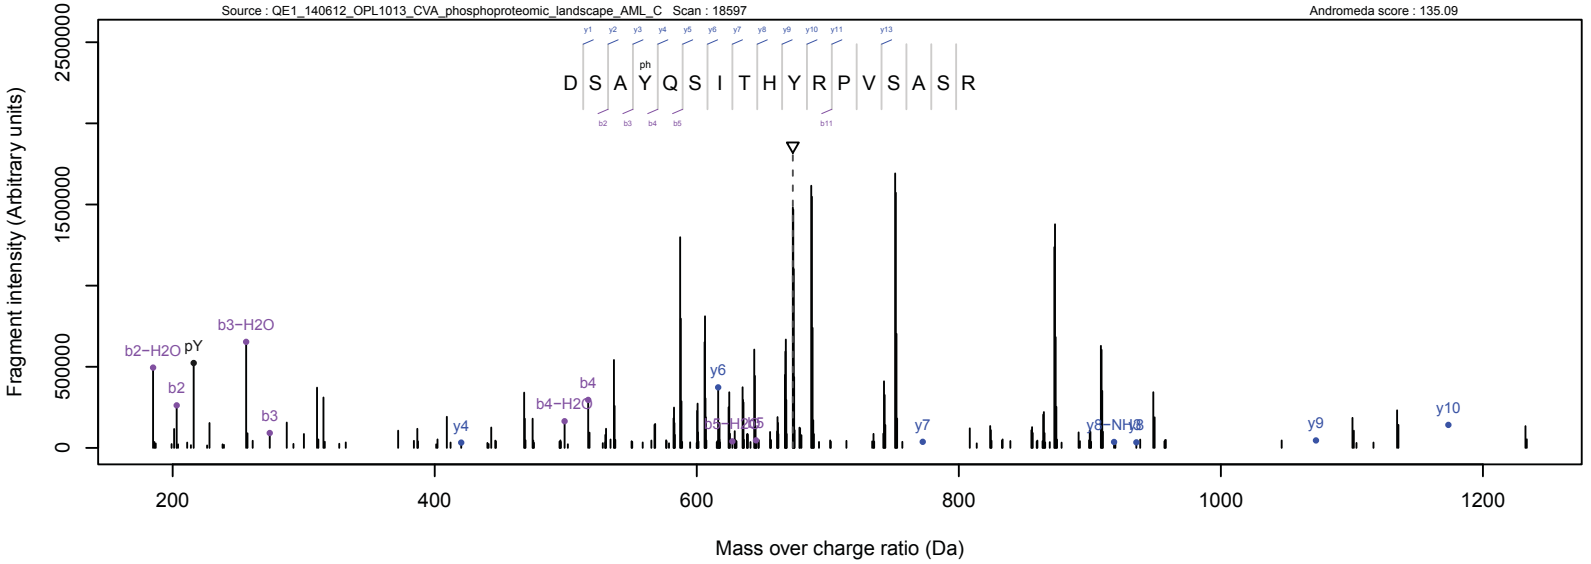

GY(ph)FLEYASPAHVAVDVK-3+

Source: QE1\_140612\_OPL1013\_CVA\_phosphoproteomic\_landscape\_AML\_D Scan: 40656

Andromeda score: 135.09

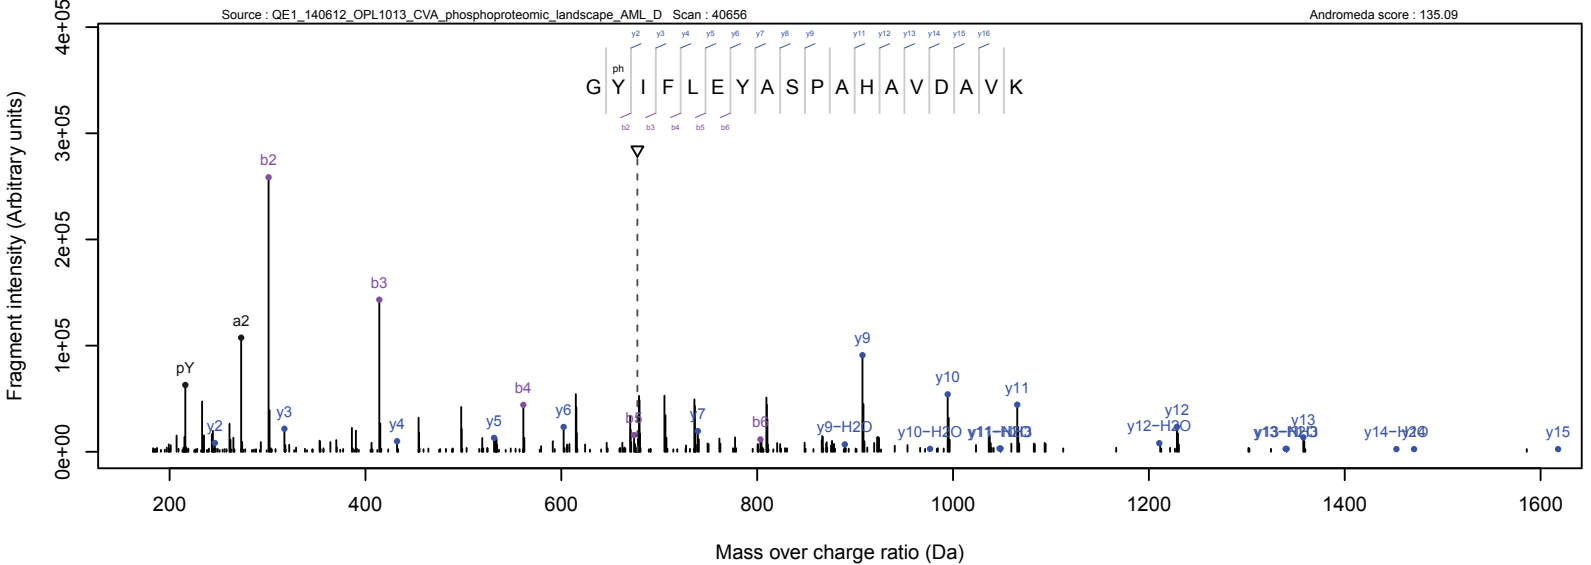

QEVPSWLENMAY(ph)EHYK-3+

Source : QE1\_140612\_OPL1013\_CVA\_phosphoproteomic\_landscape\_AML\_C Scan : 34700

Andromeda score : 135.09

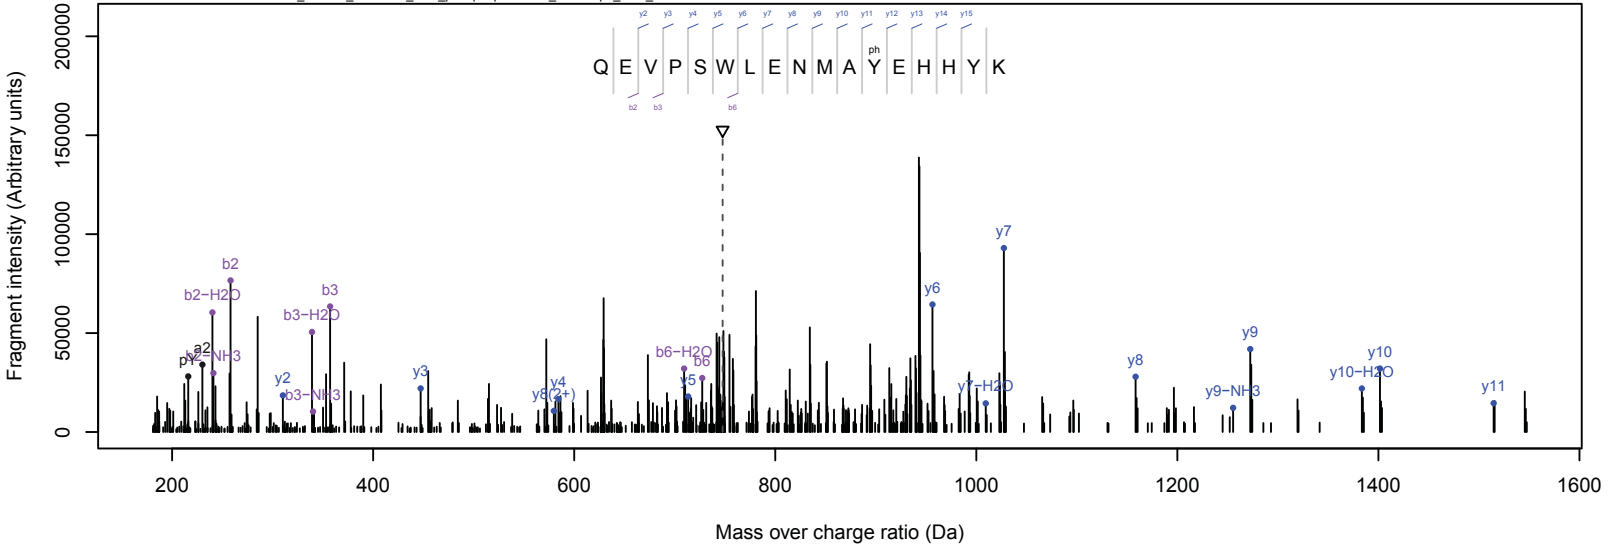

VPTISINKTDGCHAY(ph)LSK-3+

Source : QE1\_140612\_OPL1013\_CVA\_phosphoproteomic\_landscape\_AML\_C Scan : 20476

Andromeda score : 135.09

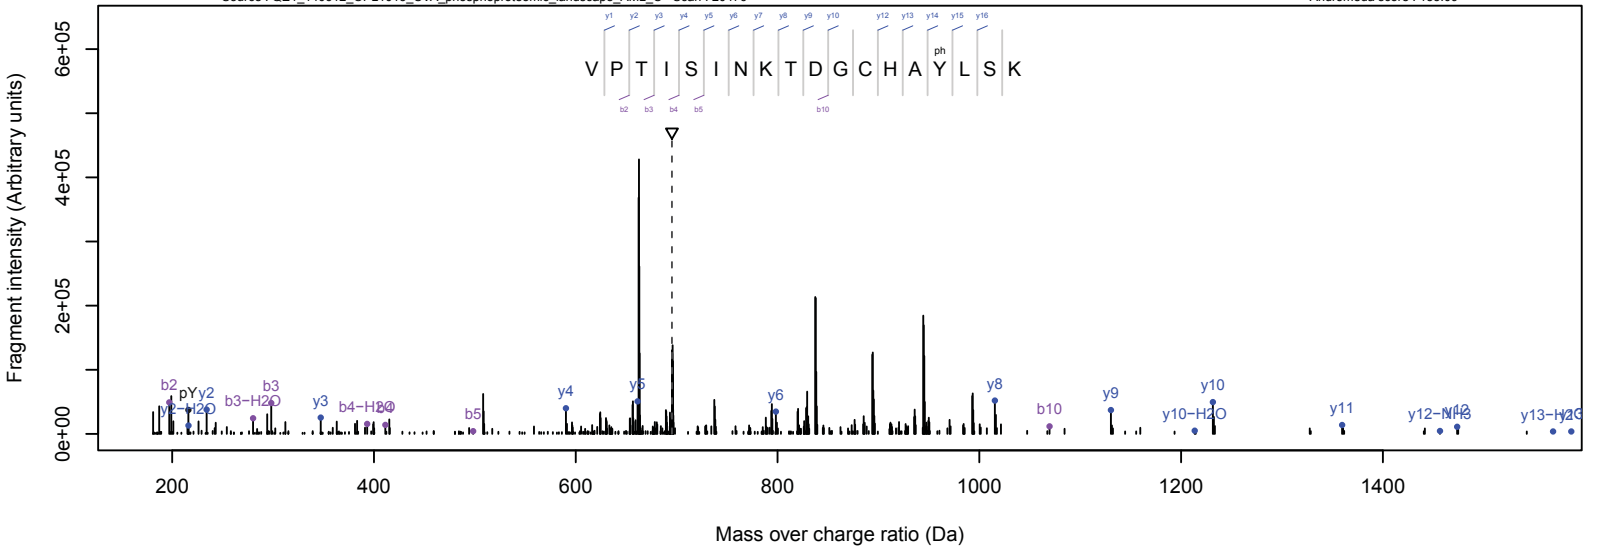

AMESTESRHY(ph)PVFENPK-3+

Source : QE1\_140612\_OPL1013\_CVA\_phosphoproteomic\_landscape\_AML\_C Scan : 13950

Andromeda score : 135.08

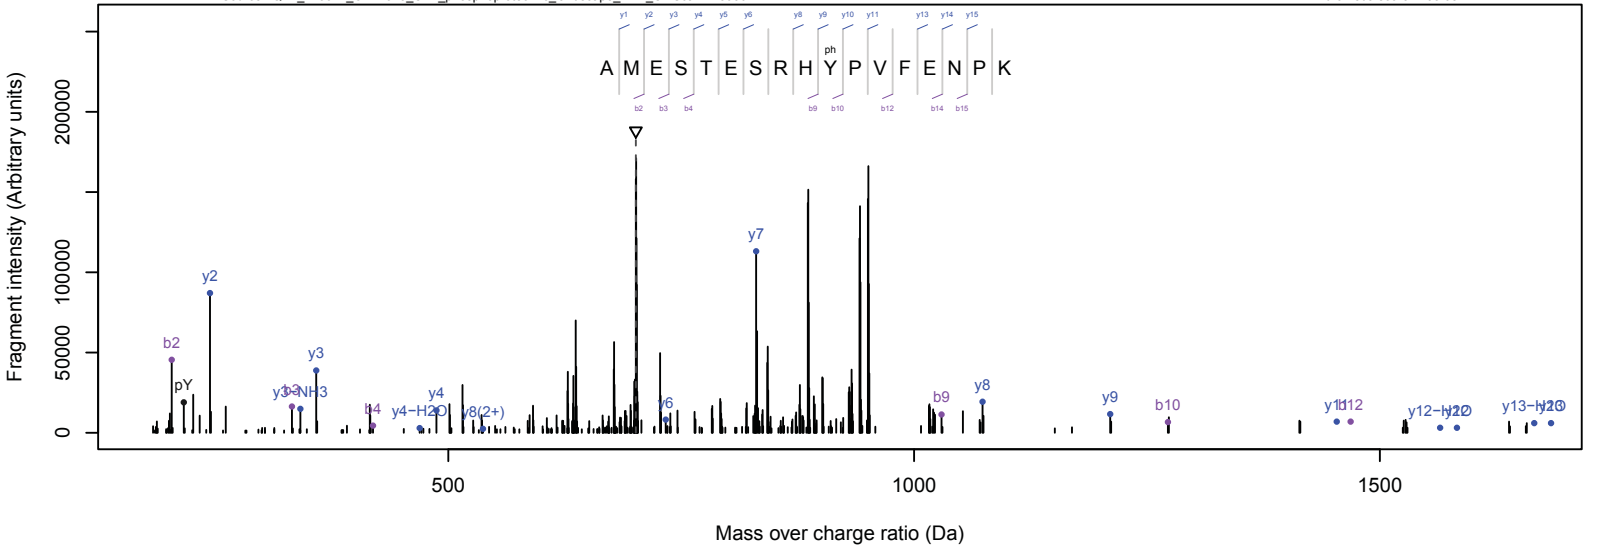



**KDYNEAYNYTK-2+**

Source : QE1\_140612\_OPL1013\_CVA\_phosphoproteomic\_landscape\_AML\_D Scan : 14246

Andromeda score : 135.02

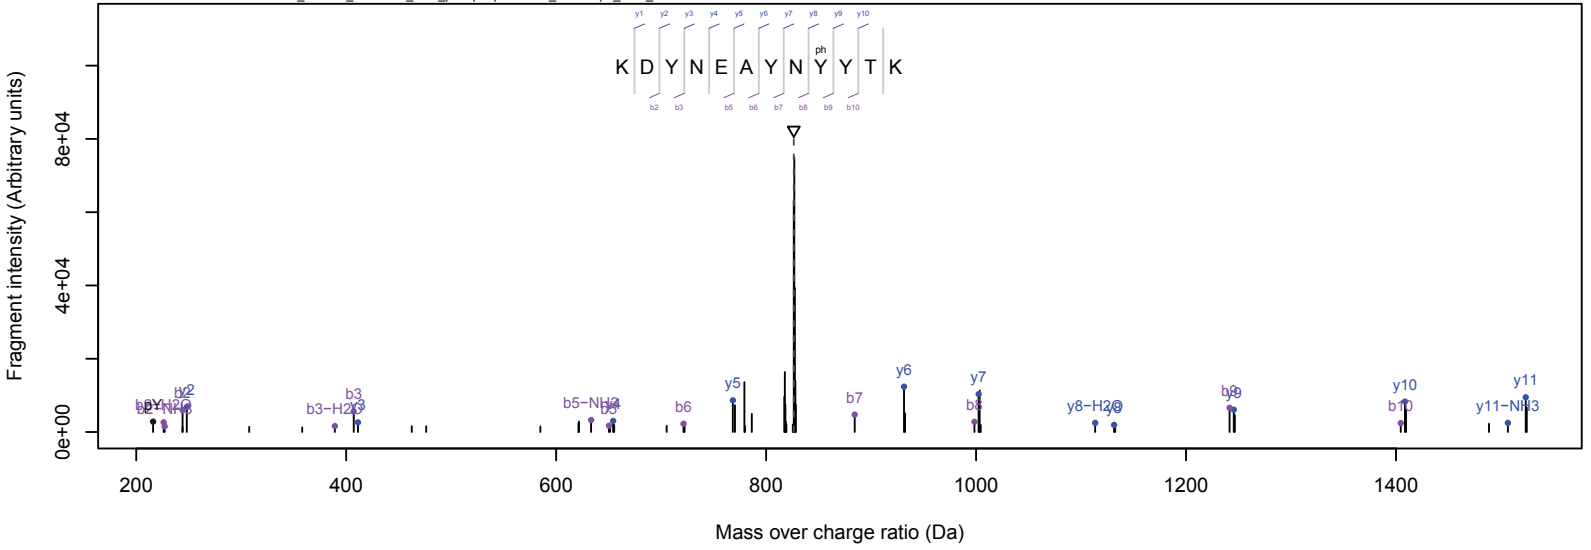

**HQVEY(p)LGLKENIR-3+**

Source : QE1\_140612\_OPL1013\_CVA\_phosphoproteomic\_landscape\_AML\_C Scan : 19214

Andromeda score : 134.88

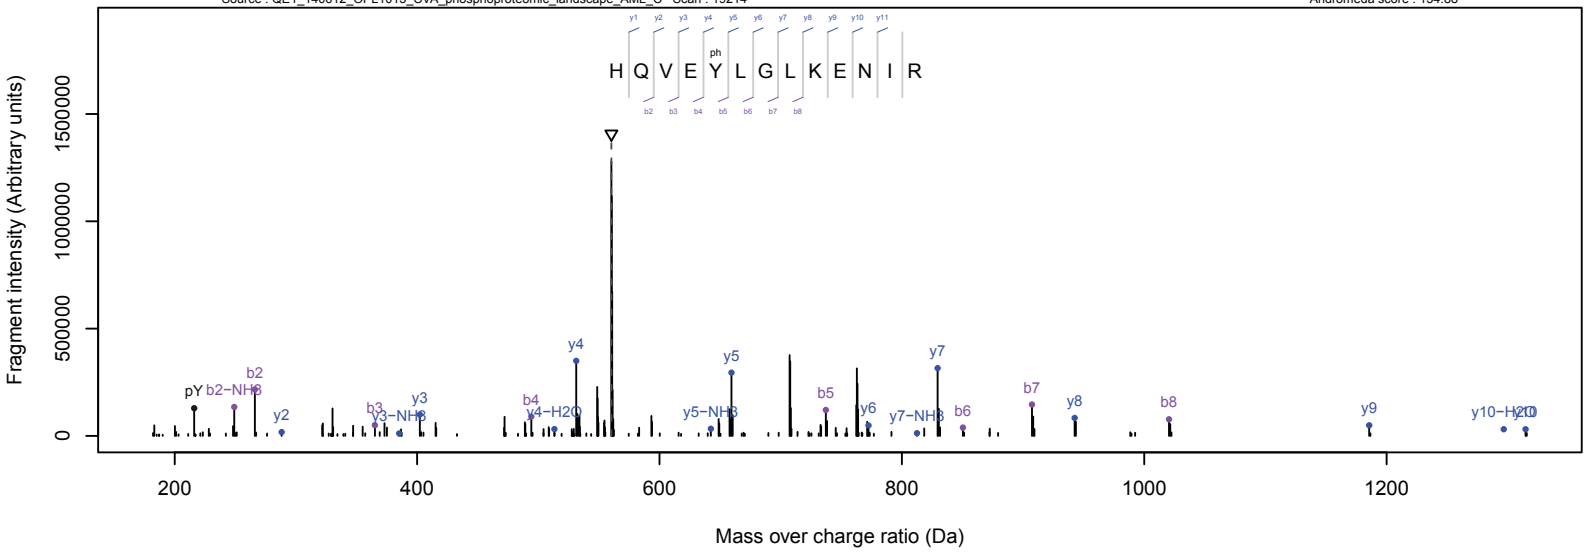

**SDVY(p)SDLNTQRPYYK-3+**

Source : QE1\_140822\_OPL1013\_CvA\_pTyrIP\_AML\_cell\_lines\_part2\_E Scan : 12486

Andromeda score : 134.88

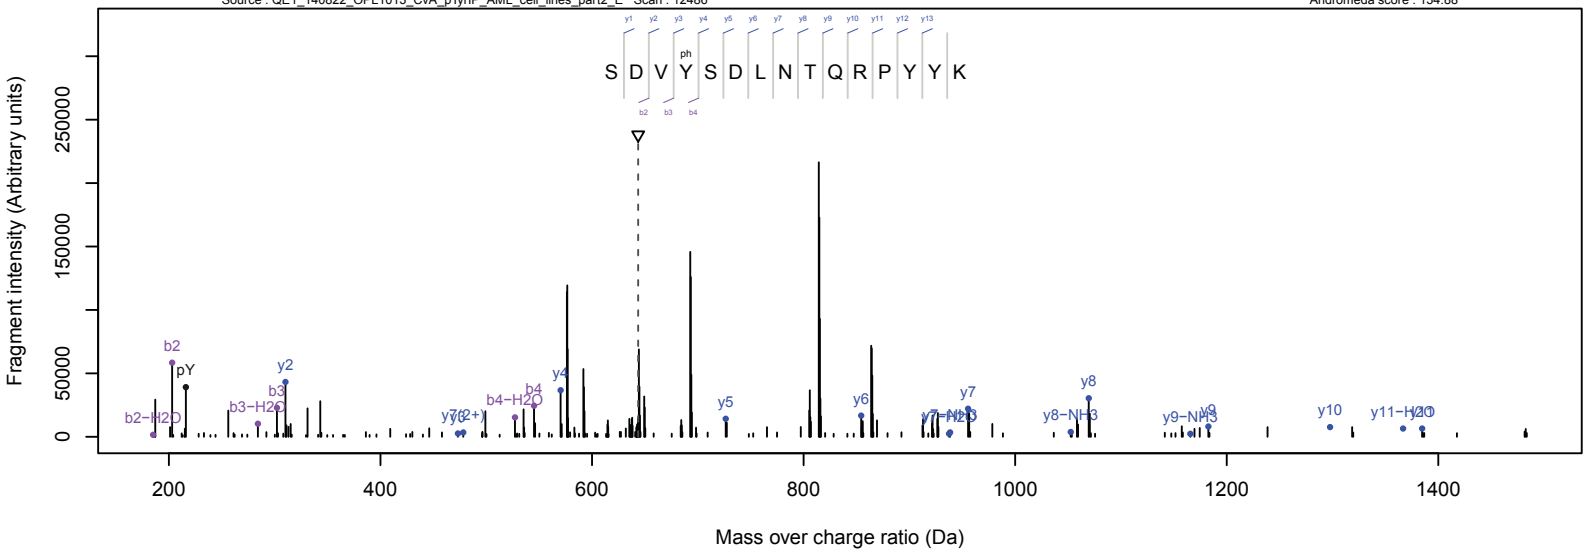

SYIAINTVYVY(ph)GQEK-2+

Source : QE1\_140908\_OPL1013\_CVA\_pTyrIP\_AML\_HL60 Scan : 33726

Andromeda score : 134.88

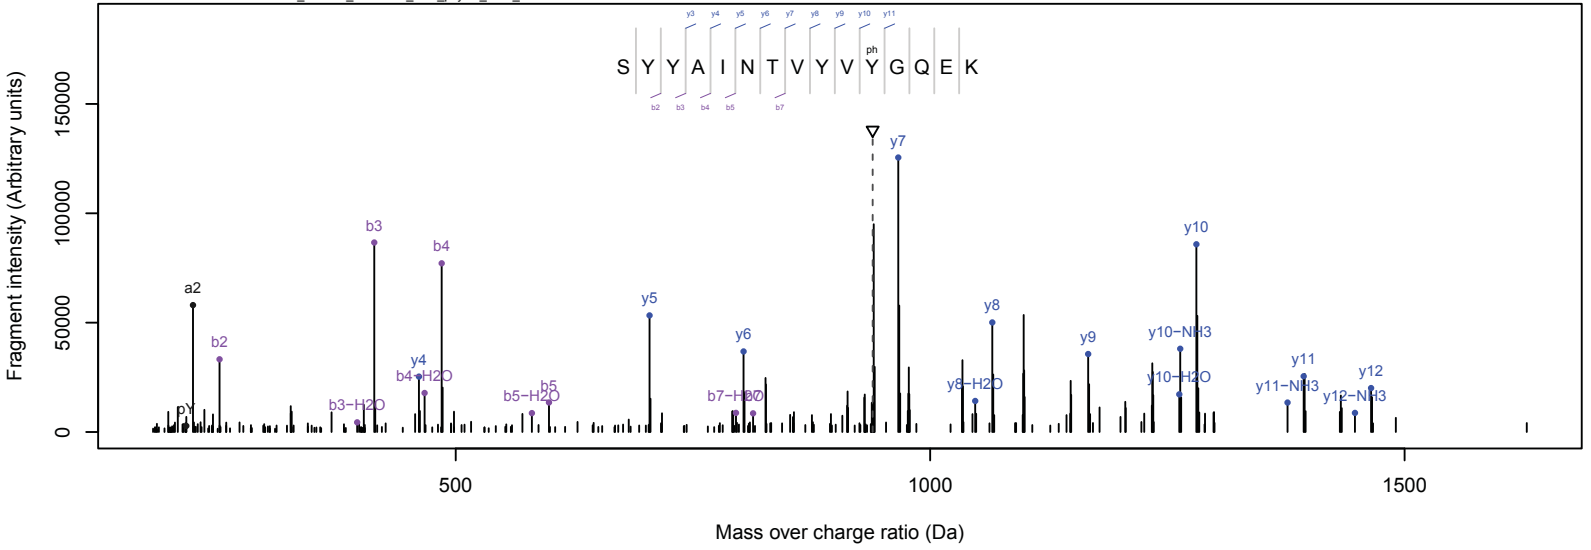

YKLY(ph)PWIHQFSNNR-3+

Source : QE1\_140612\_OPL1013\_CVA\_phosphoproteomic\_landscape\_AML\_B Scan : 31738

Andromeda score : 134.88

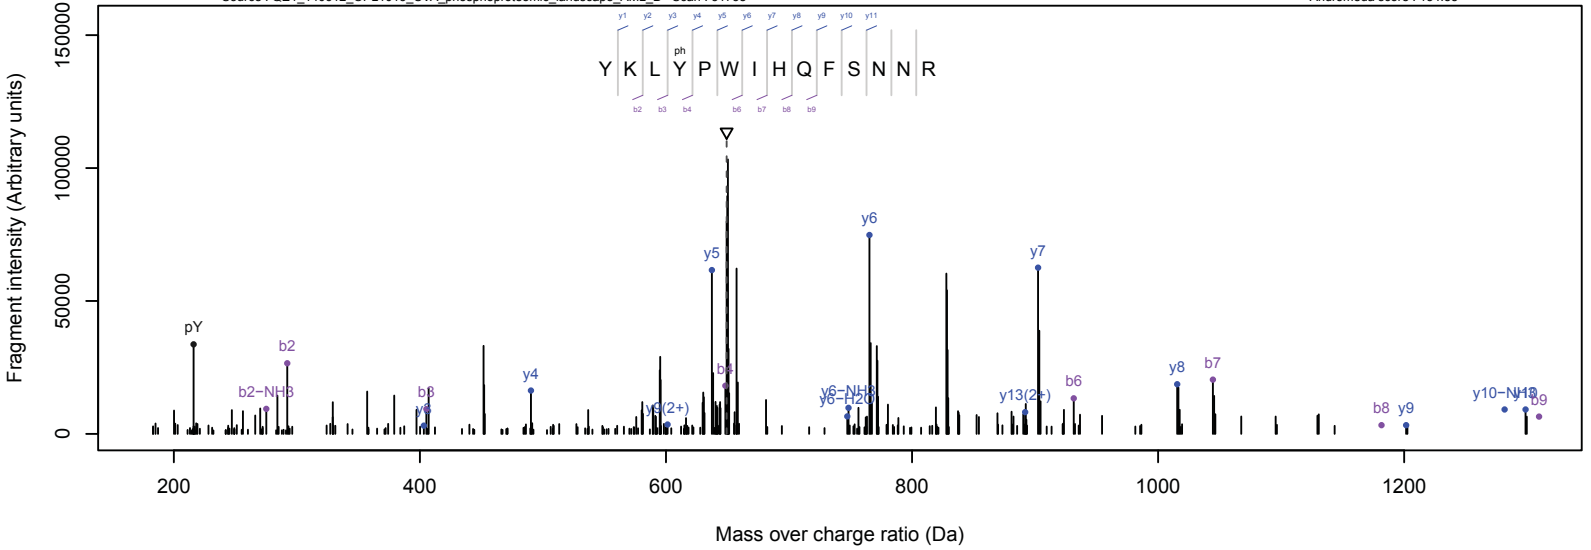

DIDKIYVR-2+

Source : QE1\_140612\_OPL1013\_CVA\_phosphoproteomic\_landscape\_AML\_A Scan : 15972

Andromeda score : 134.77

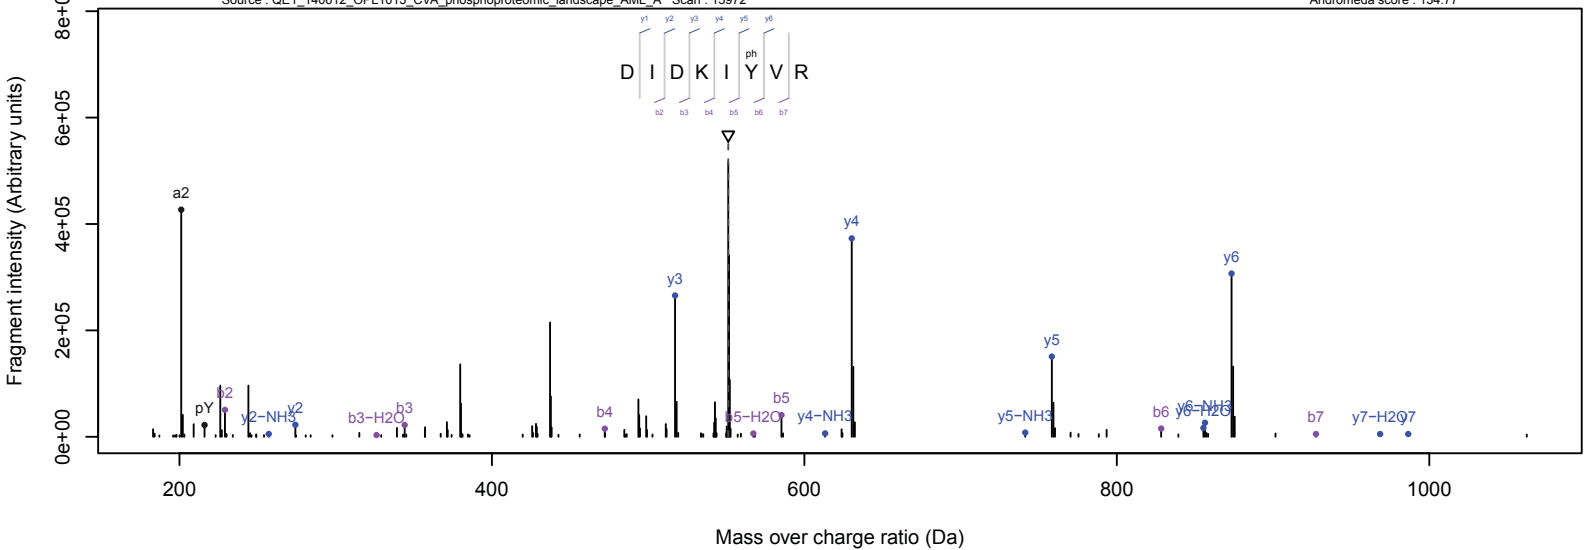

DIVHSGLAY(ph)TMER-3+

Source : QE1\_140612\_OPL1013\_CVA\_phosphoproteomic\_landscape\_AML\_E Scan : 29137

Andromeda score : 134.68

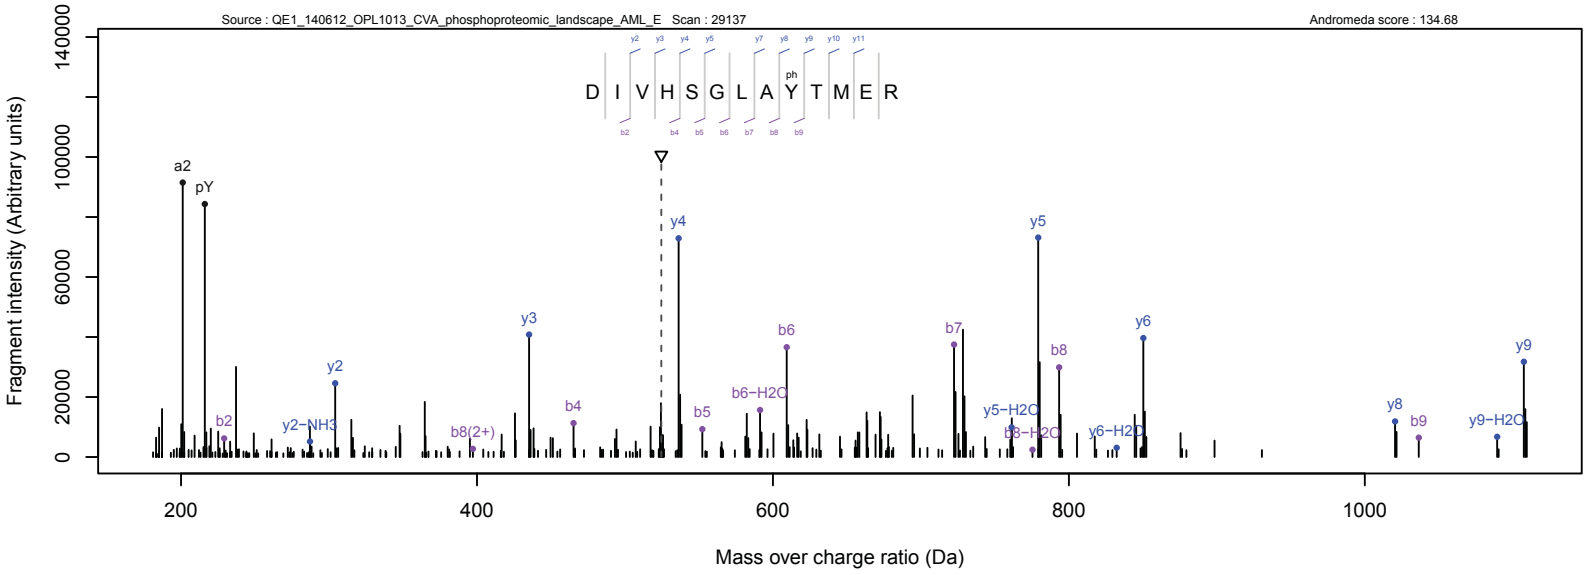

VIESISPDGHEY(ph)IYVDPM(ox)QLPYDSR-3+

Source : QE1\_140822\_OPL1013\_CvA\_pTyrIP\_AML\_cell\_lines\_part2\_B Scan : 35029

Andromeda score : 134.68

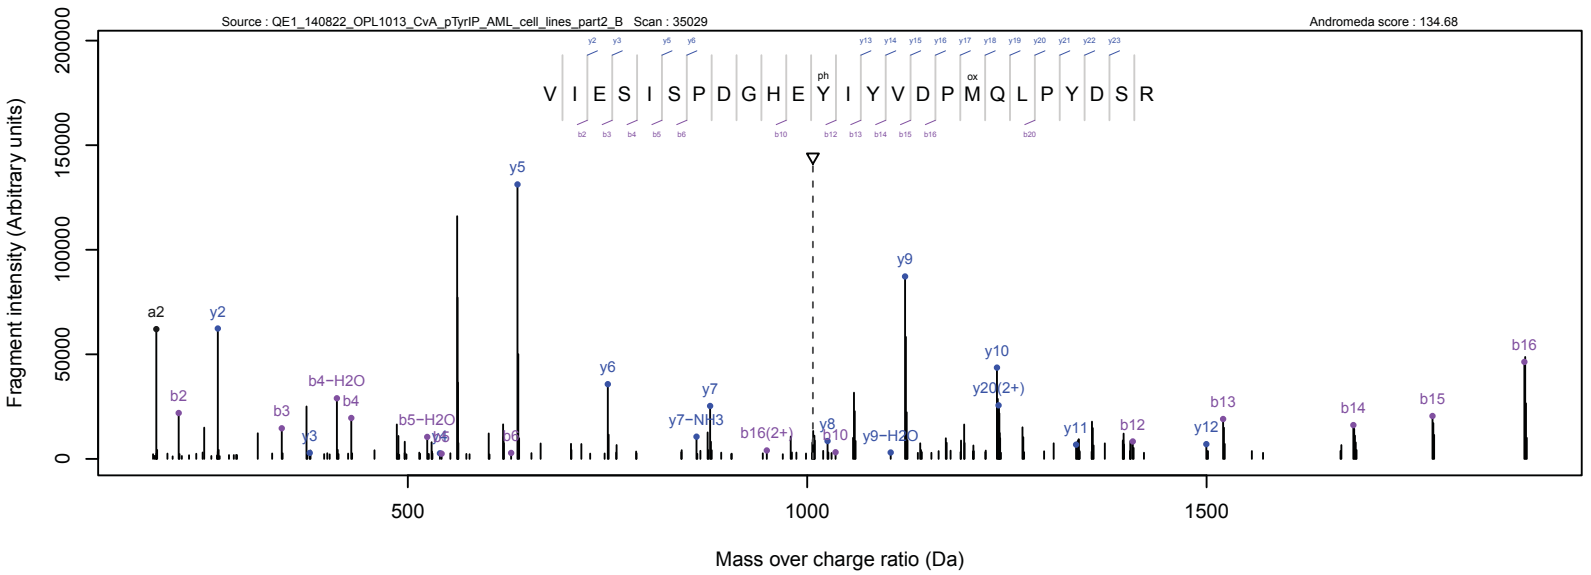

ILRKEY(ph)VFADSK-3+

Source : QE1\_140612\_OPL1013\_CVA\_phosphoproteomic\_landscape\_AML\_D Scan : 14956

Andromeda score : 134.61

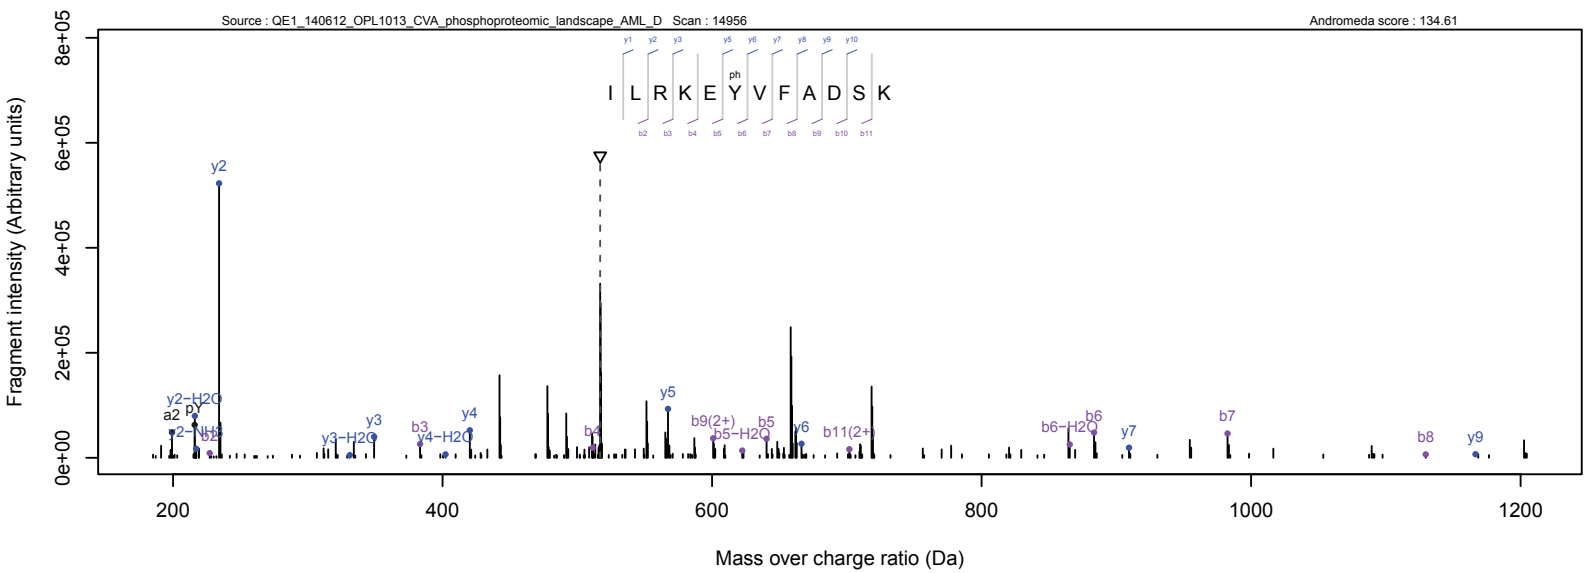

NLDNGGFY(ph)ISPR-2+

Source : QE1\_140822\_OPL1013\_CVA\_pTyrIP\_AML\_cell\_lines\_part2\_B Scan : 21982

Andromeda score : 134.56

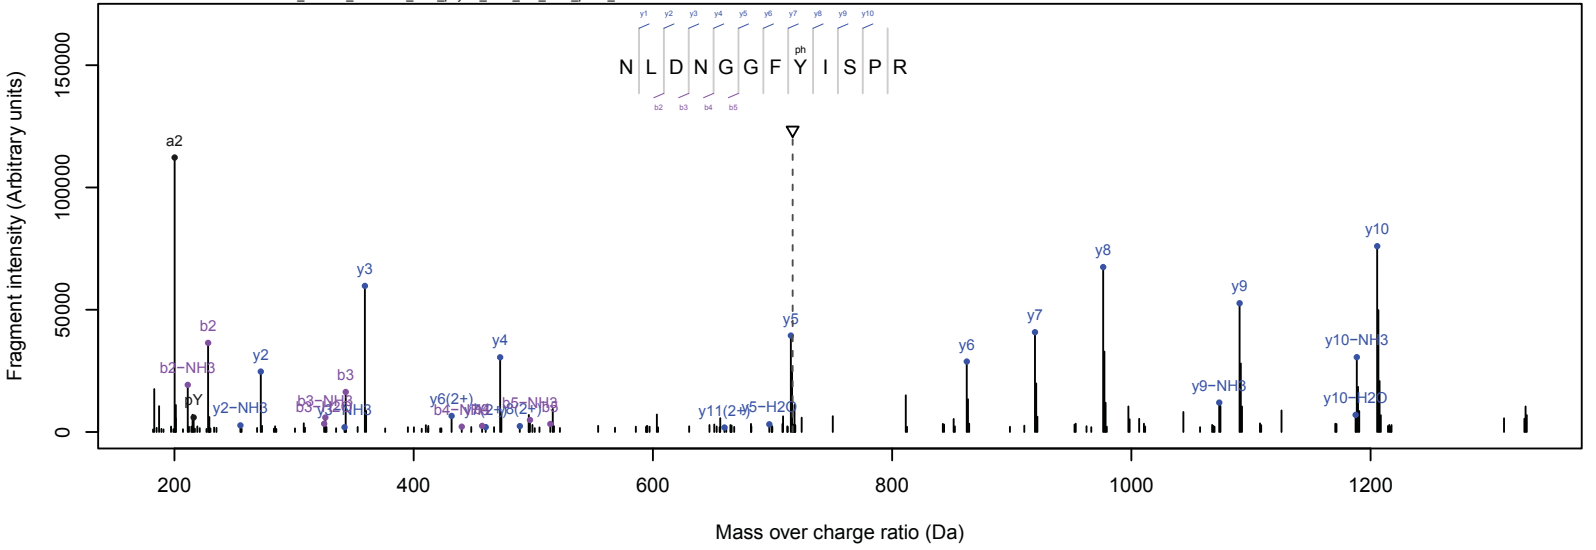

TMNNSAENHTANSSMAY(ph)PSLVAMASQR-3+

Source : QE1\_140612\_OPL1013\_CVA\_phosphoproteomic\_landscape\_AML\_C Scan : 29503

Andromeda score : 134.4

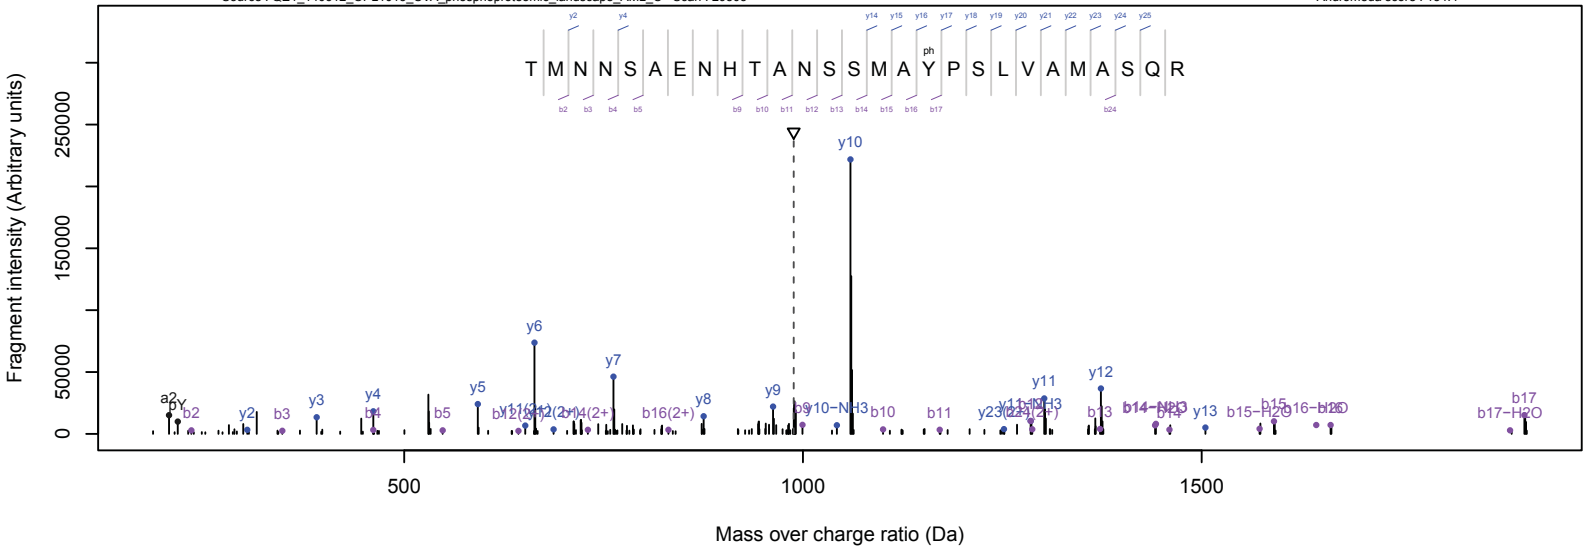

PTSIPPKEETTPY(ph)IAQVFQK-3+

Source : QE1\_140612\_OPL1013\_CVA\_phosphoproteomic\_landscape\_AML\_B Scan : 33067

Andromeda score : 134.32

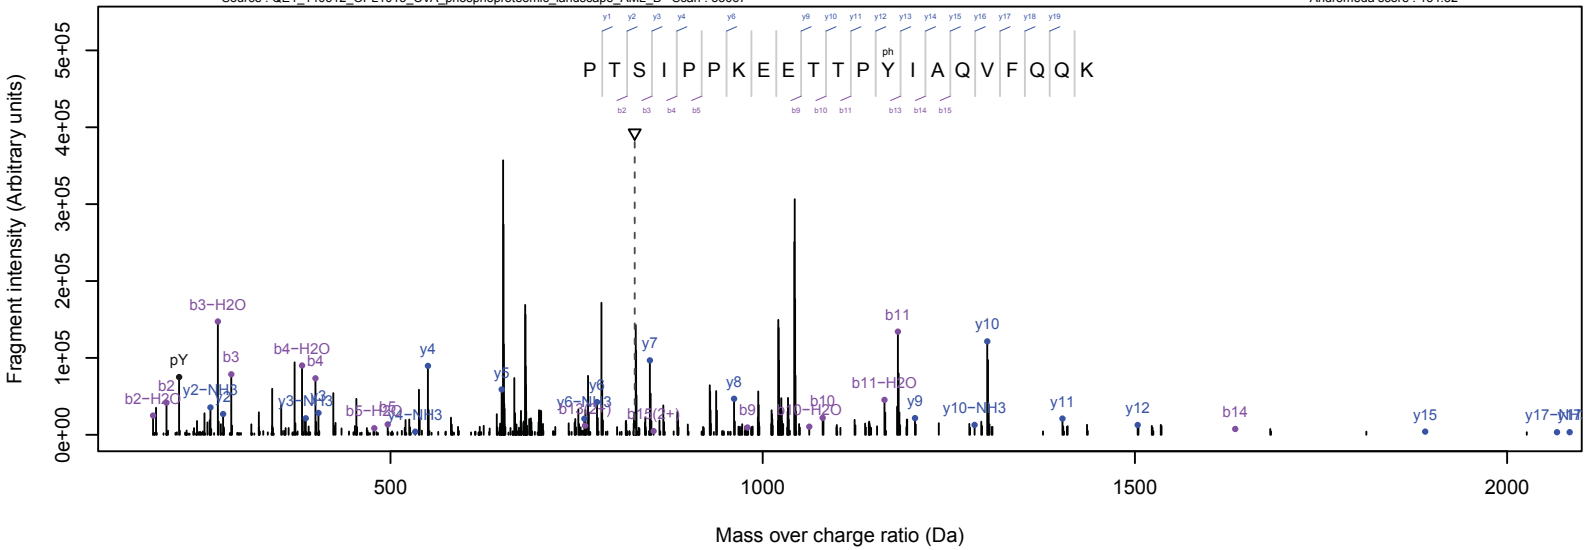

**QEDHAEALYK-2+**

Source : QE1\_140908\_OPL1013\_CvA\_pTyrIP\_AML\_Kasumi1 Scan : 5871

Andromeda score : 134.3

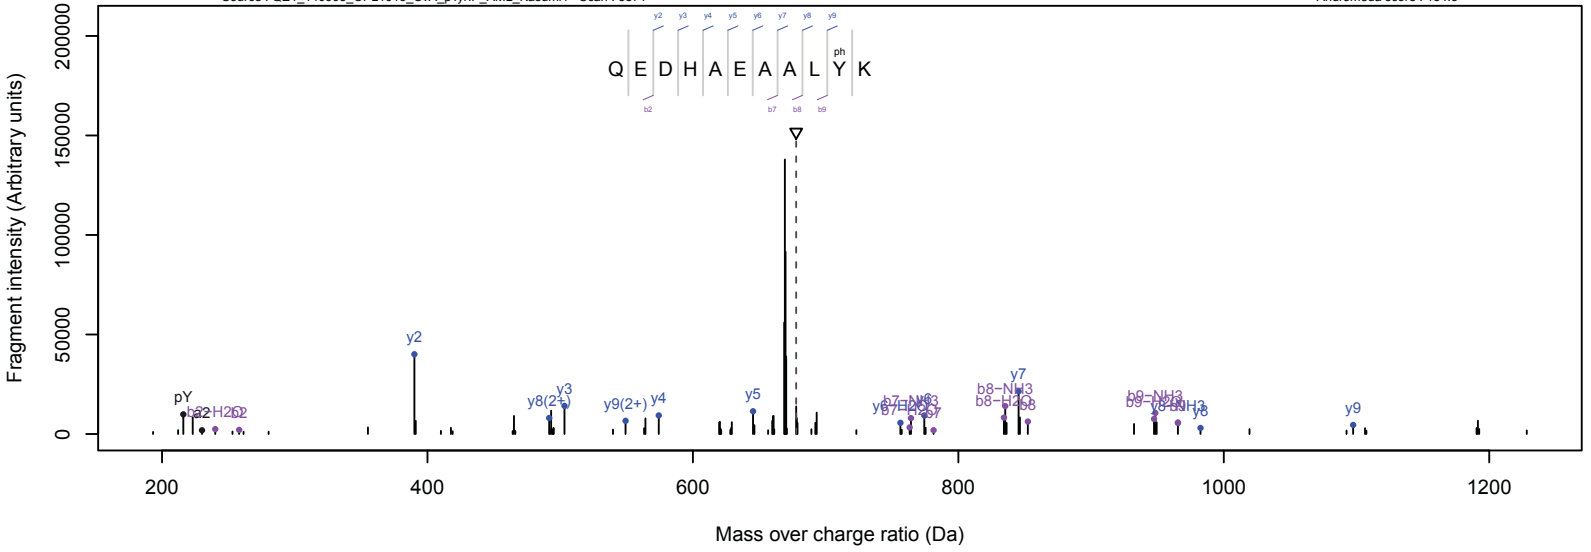

**VELHVHLDGSIKPEITILYGR-4+**

Source : QE1\_140612\_OPL1013\_CVA\_phosphoproteomic\_landscape\_AML\_B Scan : 41131

Andromeda score : 134.29

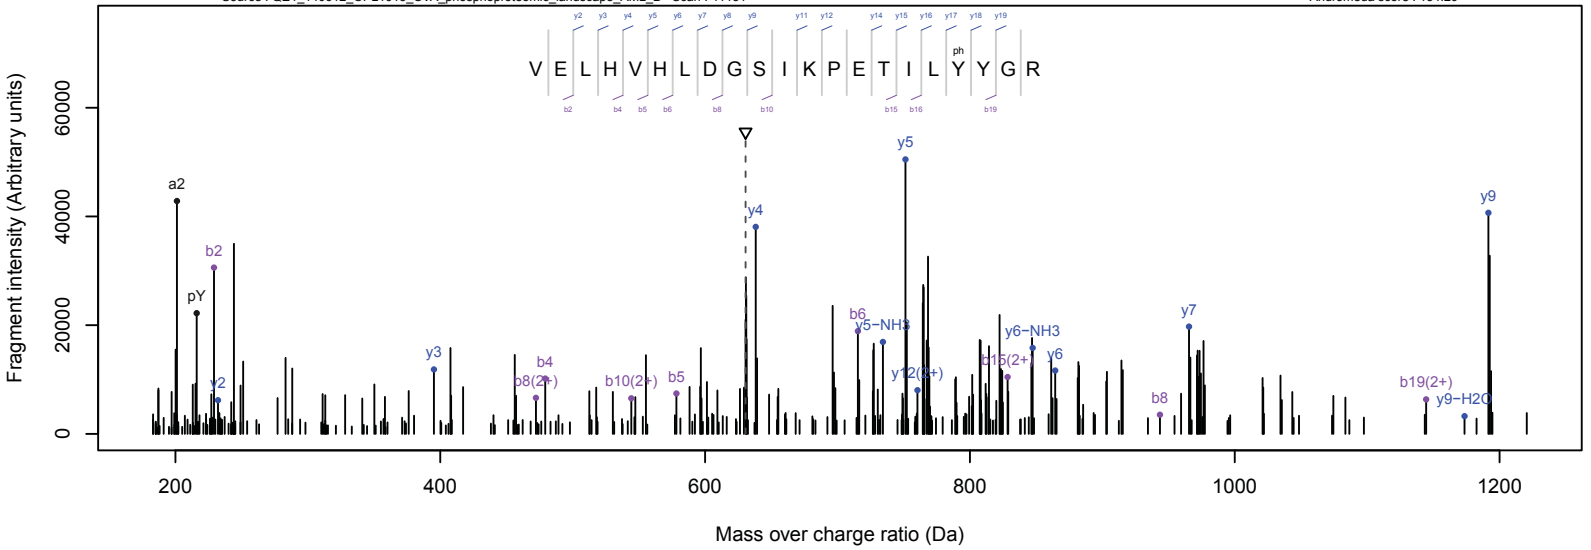

**SSISNNYLNLTFFPR-2+**

Source : QE1\_140822\_OPL1013\_CvA\_pTyrIP\_AML\_cell\_lines\_part2\_E Scan : 29665

Andromeda score : 134.06

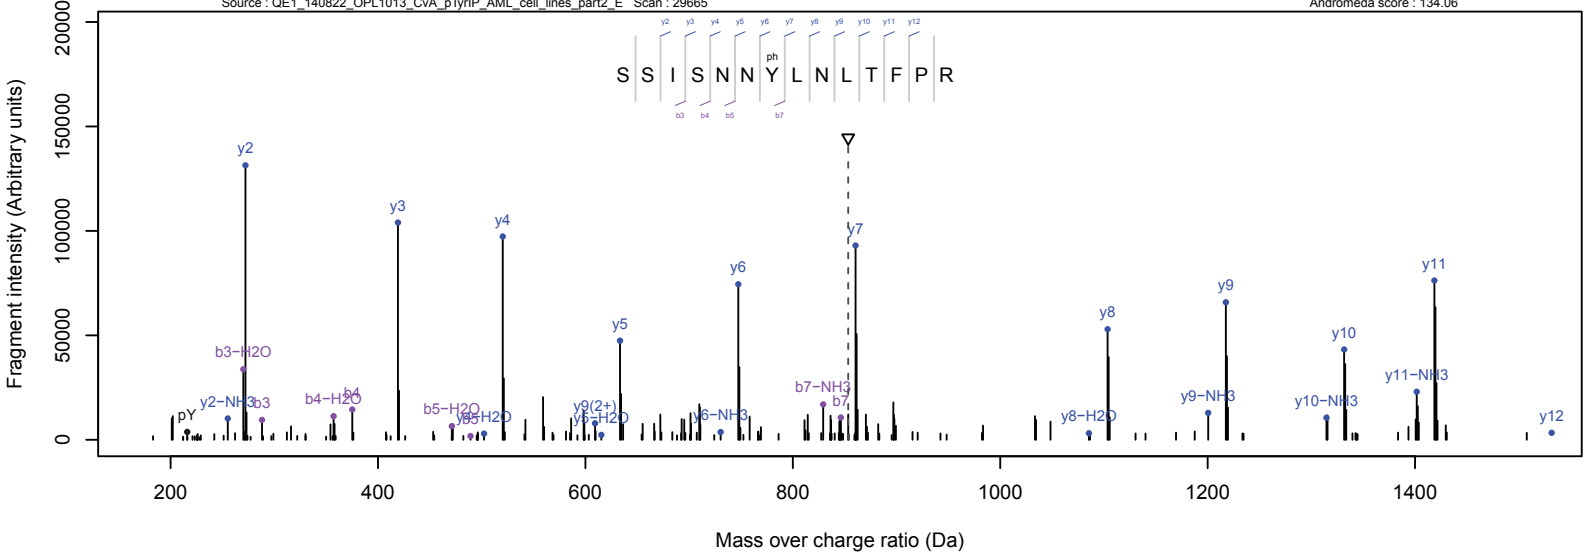



SSSVGSSSSYPISPAVSR-2+

Source: QE1\_140612\_OPL1013\_CVA\_phosphoproteomic\_landscape\_AML\_B Scan: 15590

Andromeda score: 133.94

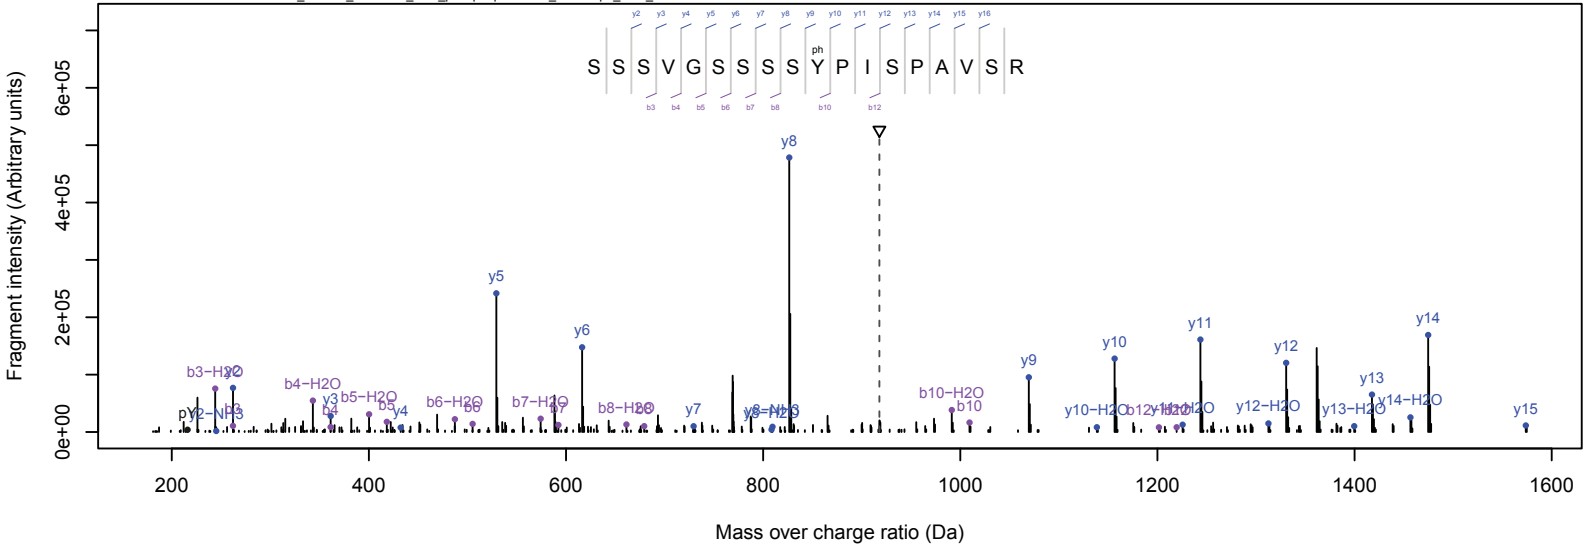

QFFTLYNTLDDKKVYLEK-3+

Source: QE1\_140612\_OPL1013\_CVA\_phosphoproteomic\_landscape\_AML\_C Scan: 38727

Andromeda score: 133.93

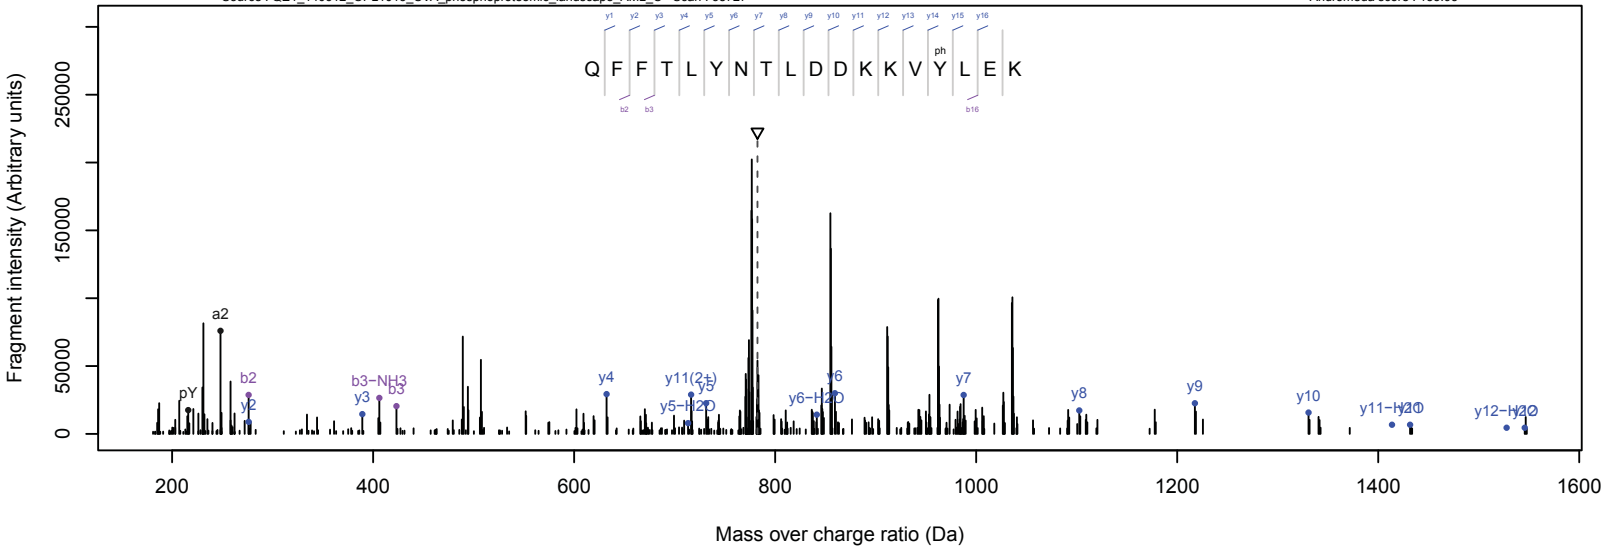

RHY(ph)PLNTVTFCDLPQER-3+

Source: QE1\_140612\_OPL1013\_CVA\_phosphoproteomic\_landscape\_AML\_B Scan: 29448

Andromeda score: 133.93

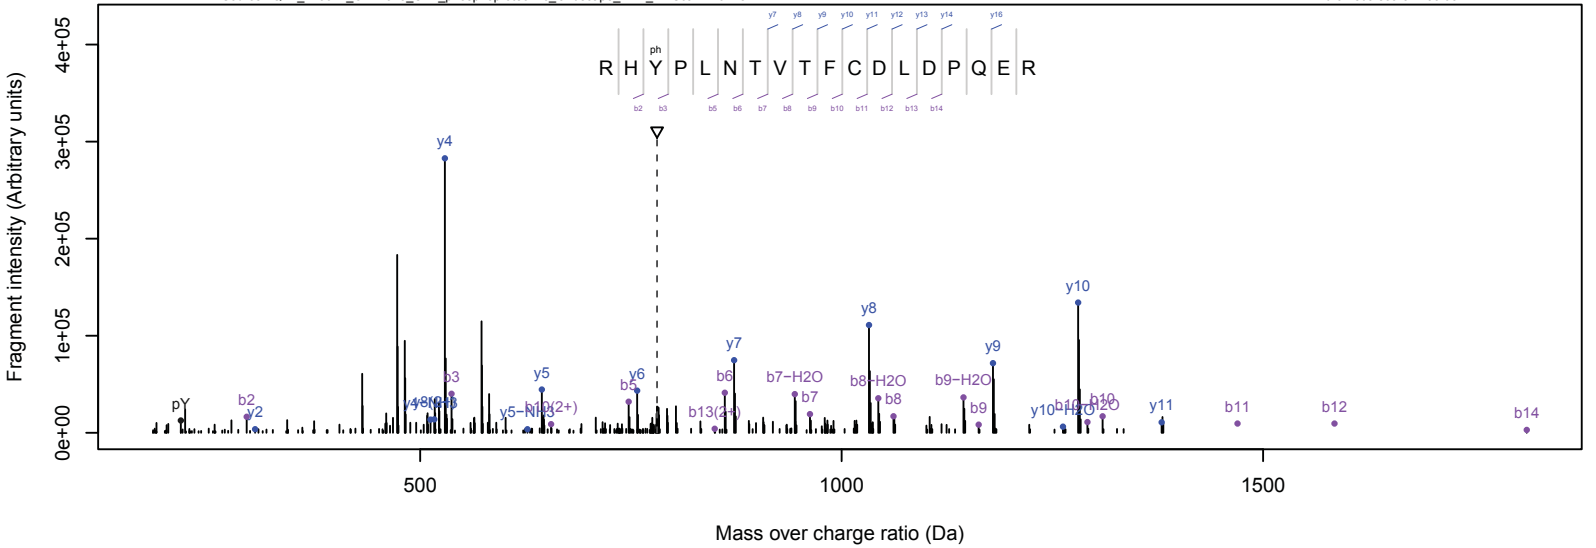

DSGNSPGNAFY(ph)NVLYRPR-3+

Source : QE1\_140612\_OPL1013\_CVA\_phosphoproteomic\_landscape\_AML\_C Scan : 29540

Andromeda score : 133.86

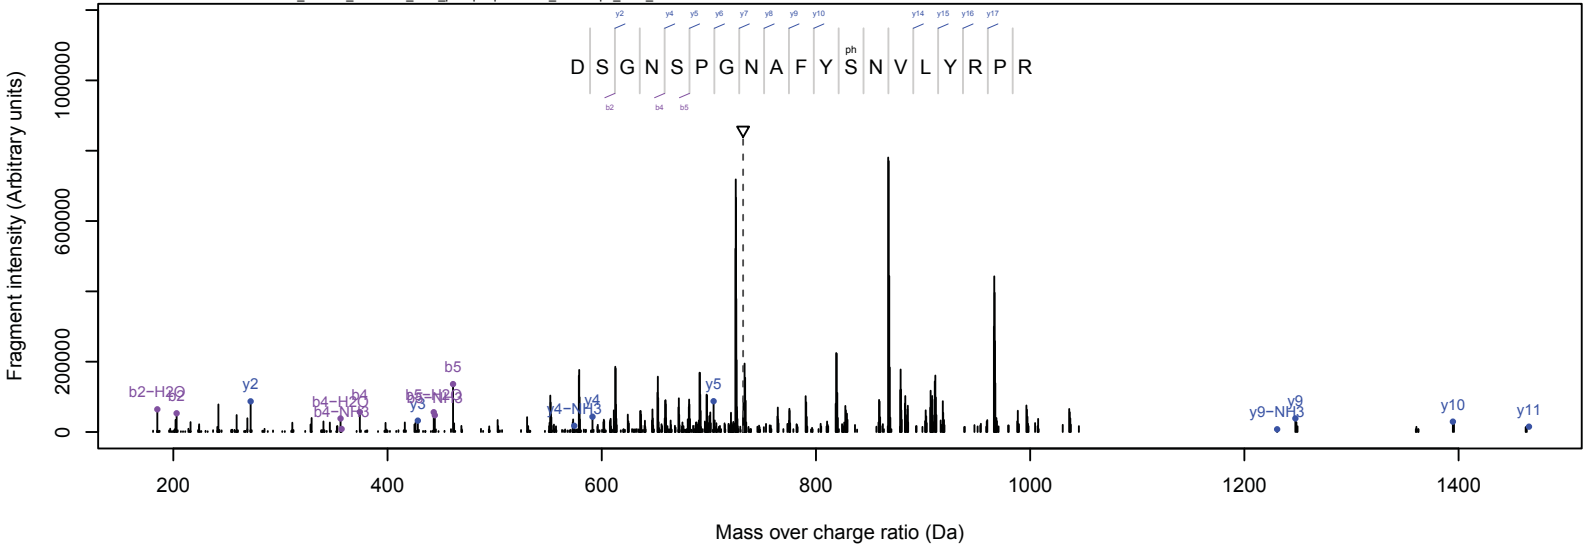

VLQY(ph)HKPVQASYFETLR-3+

Source : QE1\_140612\_OPL1013\_CVA\_phosphoproteomic\_landscape\_AML\_A Scan : 26401

Andromeda score : 133.78

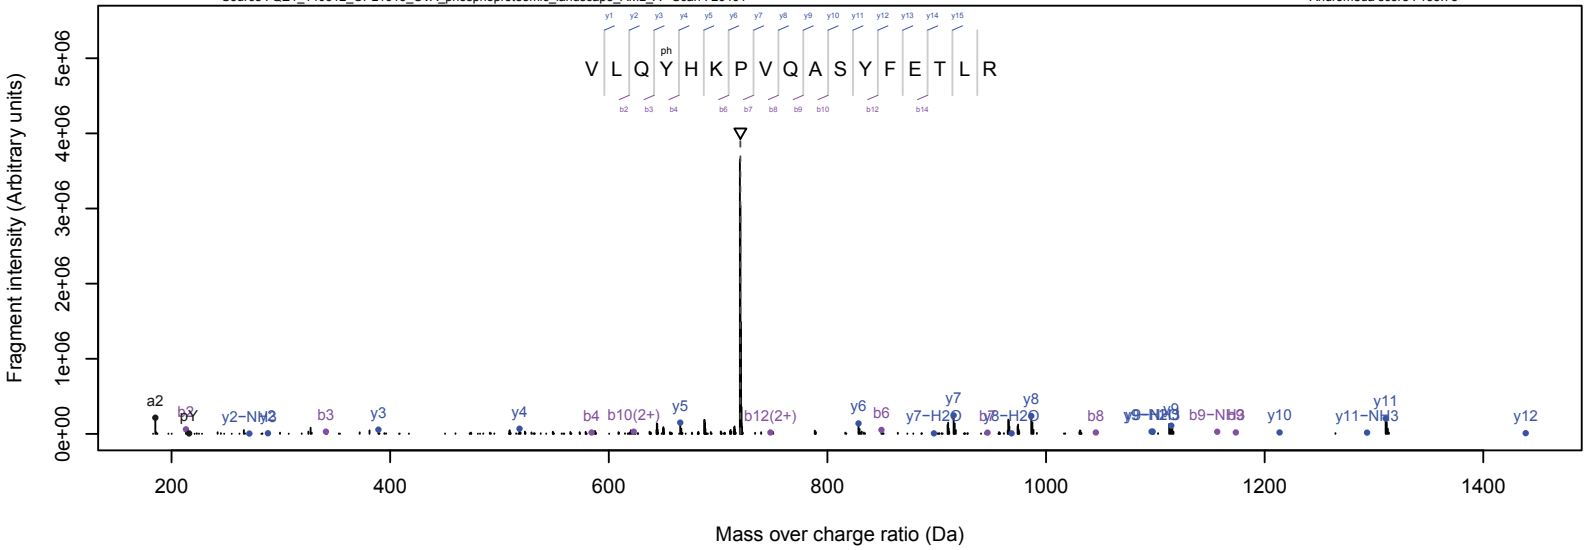

TSHY(ph)LTPQSNHLSLSK-3+

Source : QE1\_140908\_OPL1013\_CvA\_pTyrIP\_AML\_HEL Scan : 17228

Andromeda score : 133.52

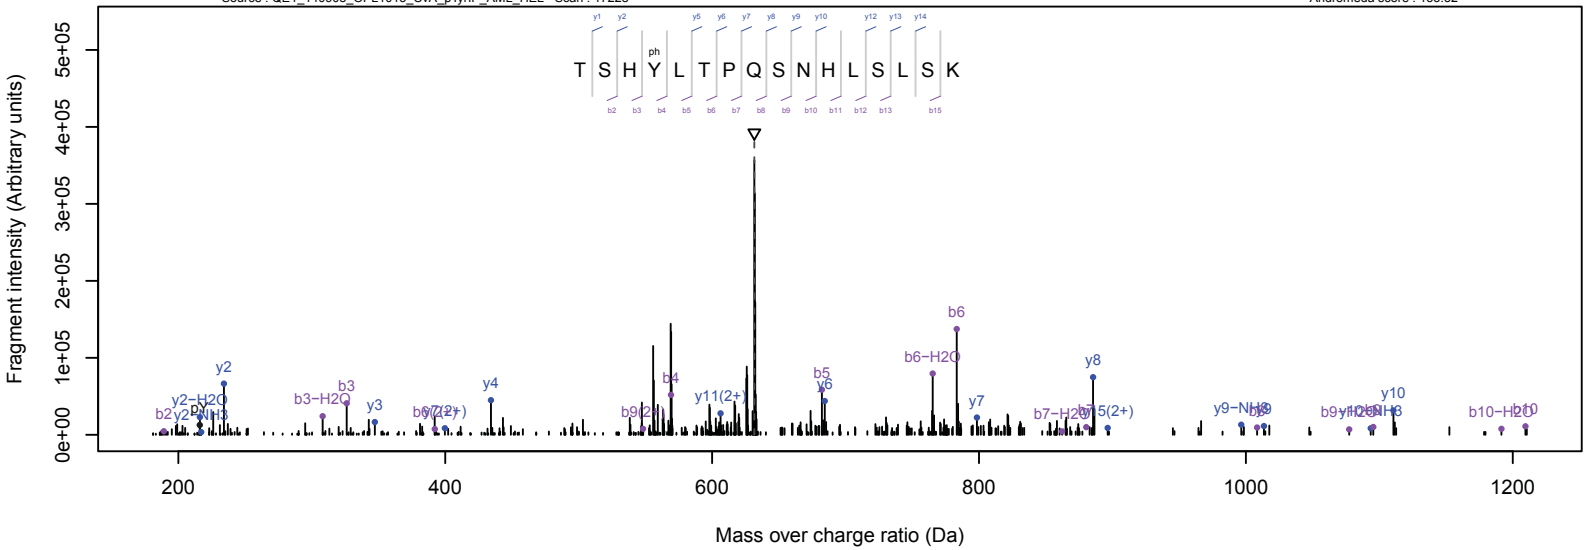



**HAASYSSDSENQGSYPHSGVIPPPGR-3+**

Source: QE1\_140612\_OPL1013\_CVA\_phosphoproteomic\_landscape\_AML\_C Scan: 18872

Andromeda score: 133.41

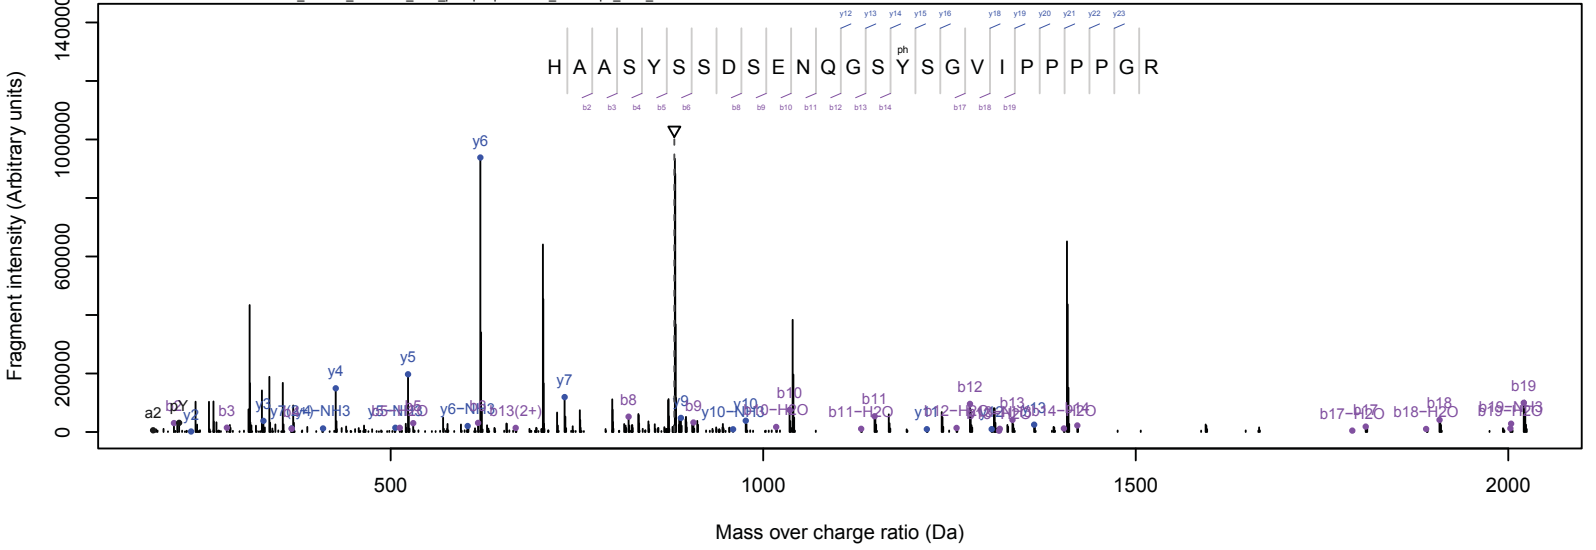

**SSGRVYPHFNHITNASQWERPSGNSSSSGGK-4+**

Source: QE1\_140612\_OPL1013\_CVA\_phosphoproteomic\_landscape\_AML\_C Scan: 25107

Andromeda score: 133.4

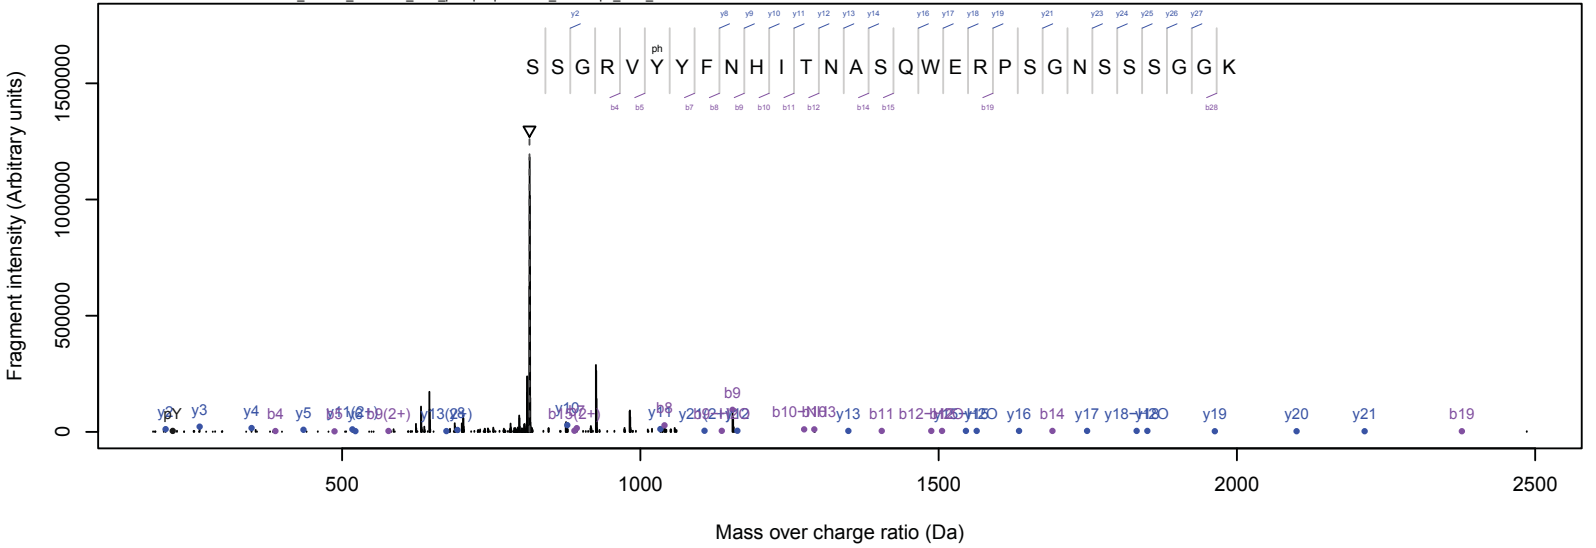

**NNAYLDAQSPQLYK-2+**

Source: QE1\_140612\_OPL1013\_CVA\_phosphoproteomic\_landscape\_AML\_C Scan: 21564

Andromeda score: 133.32

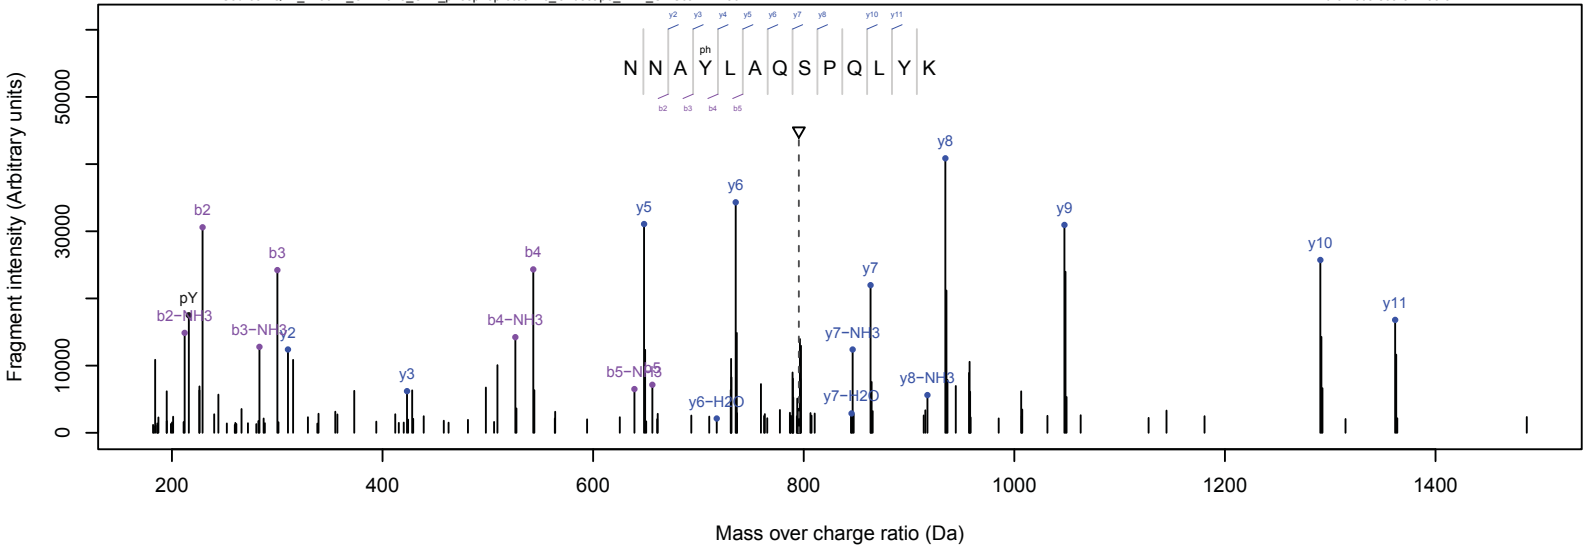

PSLY(ph)AQVQKPPR-2+

Source : QE1\_140908\_OPL1013\_CvA\_pTyrIP\_AML\_HEL Scan : 15065

Andromeda score : 133.32

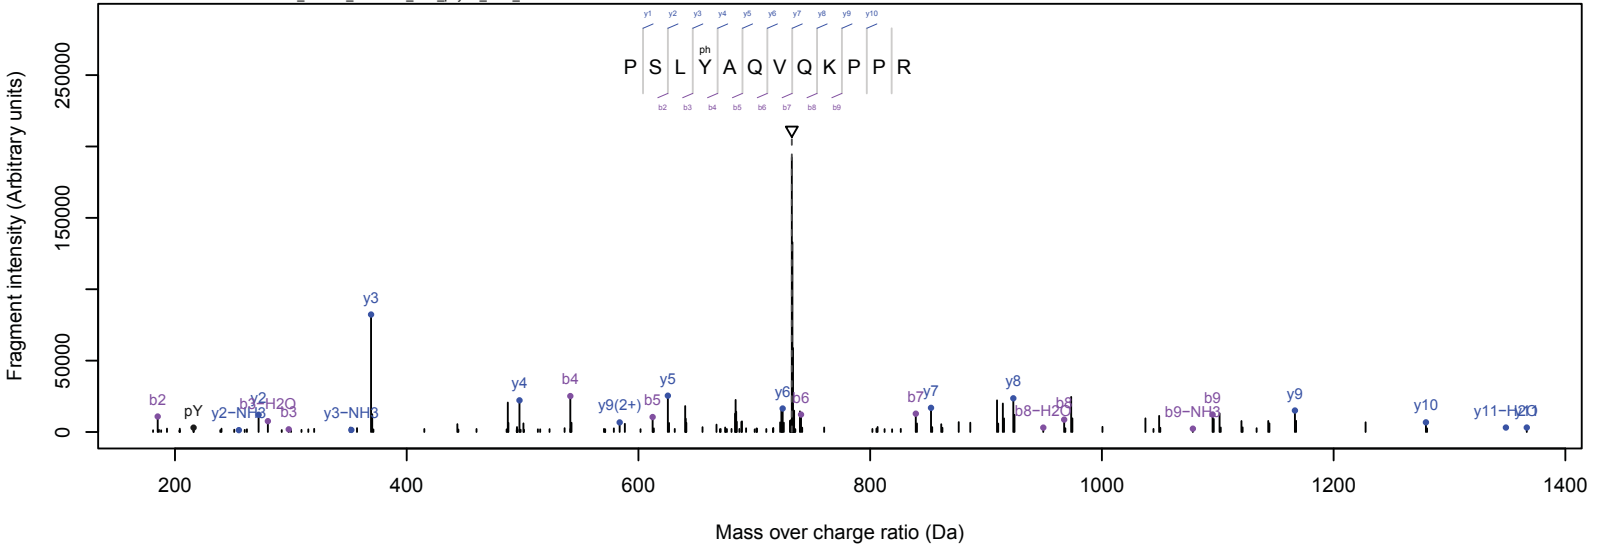

AASSSVVPY(ph)LPRLPILPSK-2+

Source : QE1\_140612\_OPL1013\_CVA\_phosphoproteomic\_landscape\_AML\_C Scan : 47468

Andromeda score : 133.21

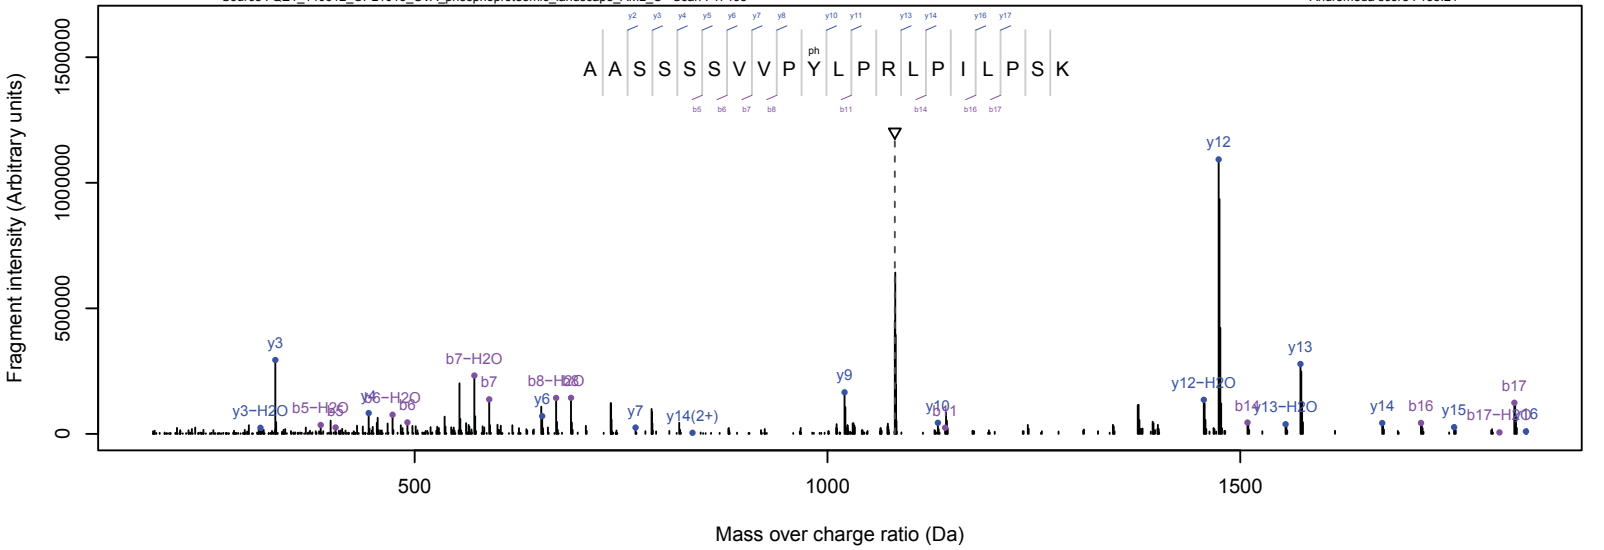

GLCTSPAEHQYFMTEY(ph)VATR-3+

Source : Qe1\_141024\_OPL1013\_CvA\_AML\_pTyrIP\_MOLM13 Scan : 30808

Andromeda score : 133.21

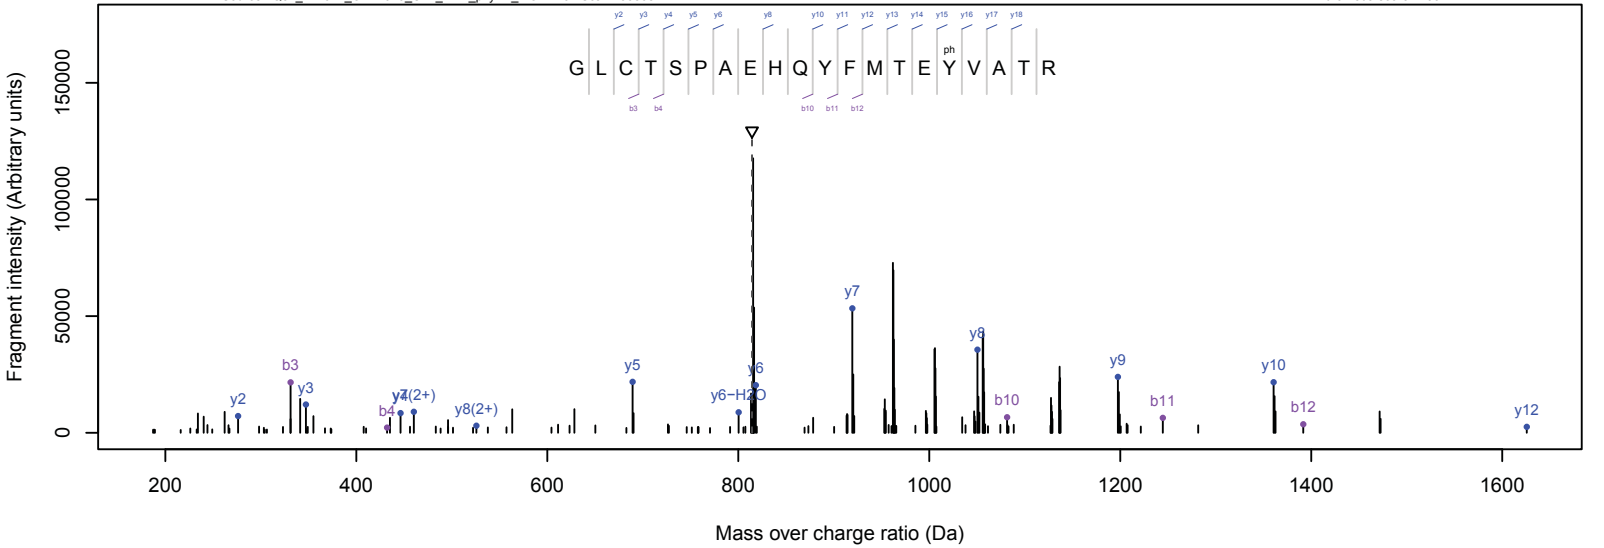

**Y(ph)PAVDYNLVQDLKGGDDTAVR-3+**

Source : QE1\_140612\_OPL1013\_CVA\_phosphoproteomic\_landscape\_AML\_C Scan : 37295

Andromeda score : 133.21

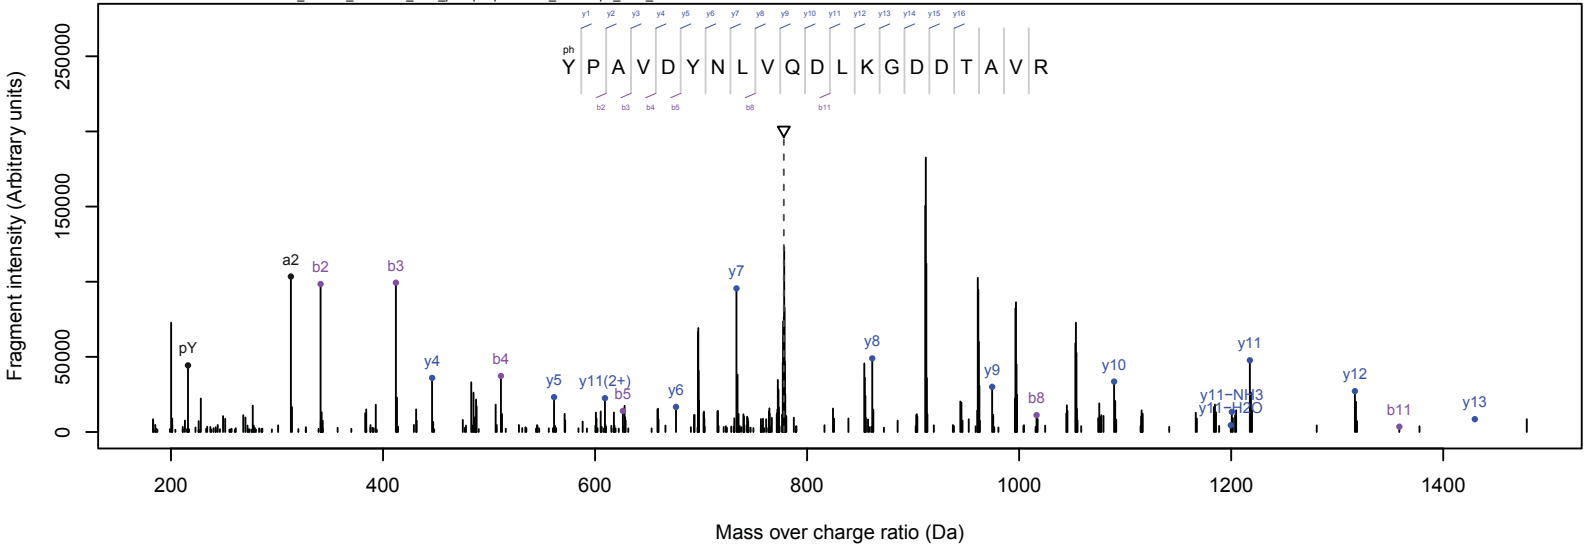

**FNLETEWKNNY(ph)PR-2+**

Source : QE1\_140612\_OPL1013\_CVA\_phosphoproteomic\_landscape\_AML\_B Scan : 27621

Andromeda score : 133.16

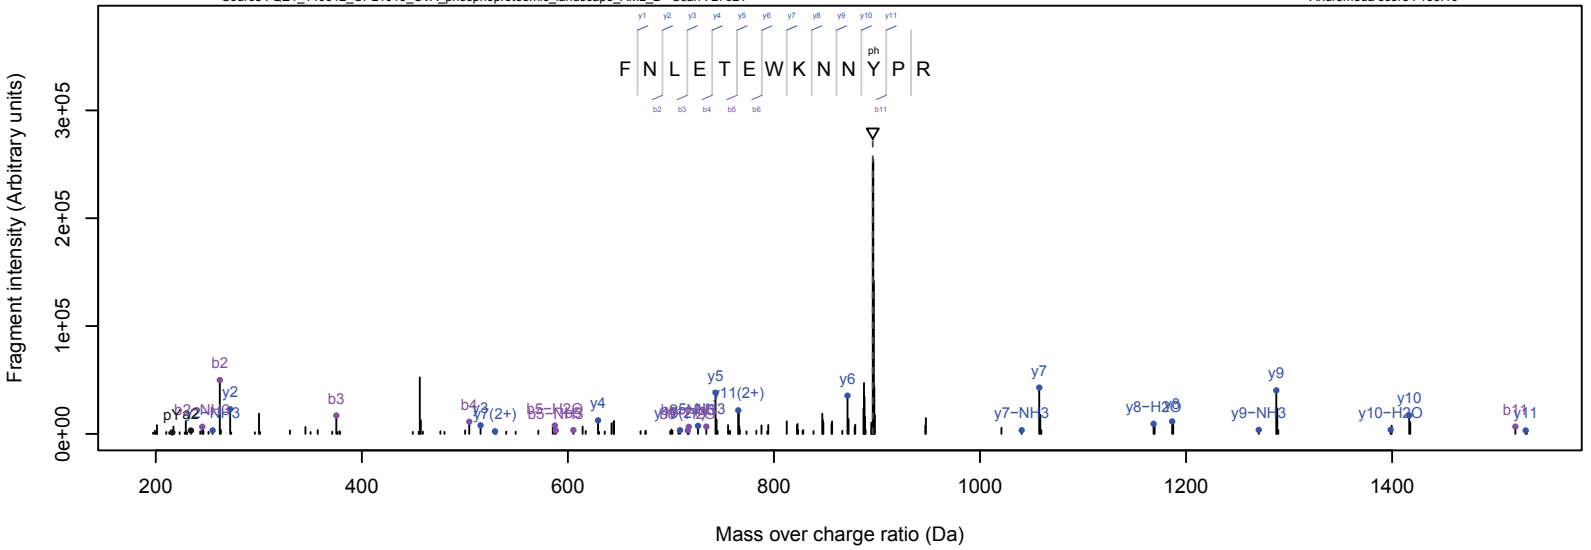

**SYSPY(ph)DMLESIRK-2+**

Source : QE1\_140612\_OPL1013\_CVA\_phosphoproteomic\_landscape\_AML\_C Scan : 36316

Andromeda score : 133.15

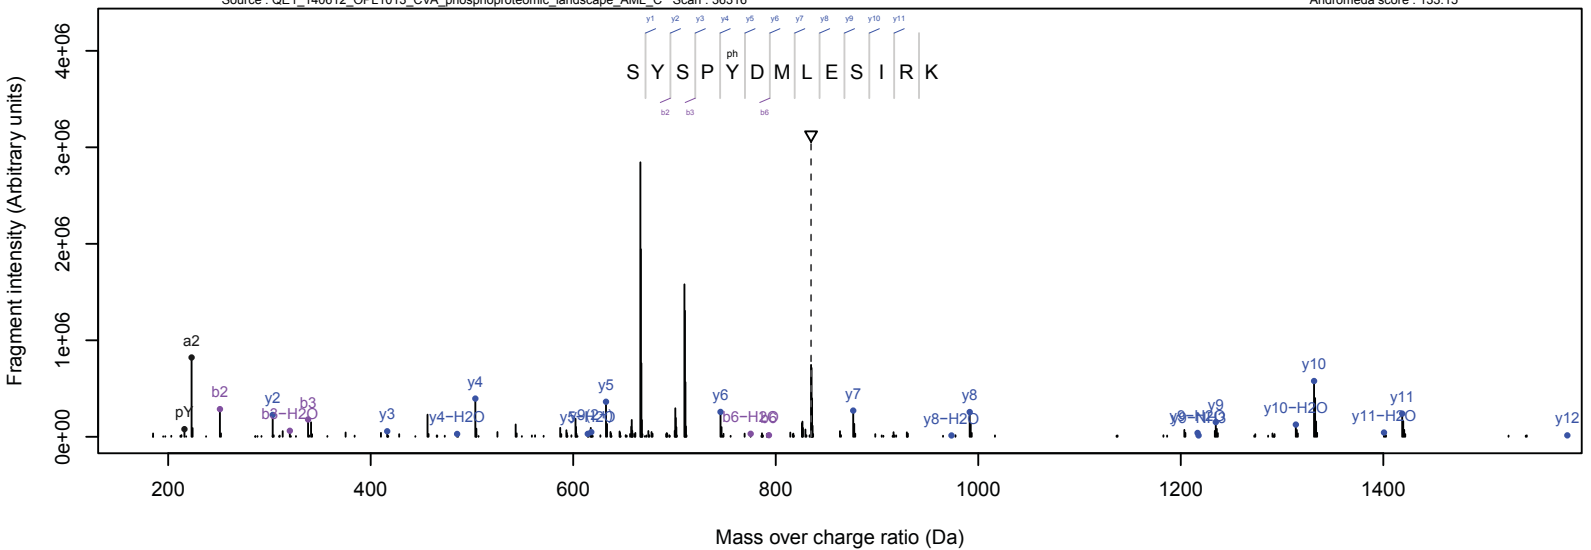

SPSETLAY(ph)QHL PVR-2+

Source : QE1\_140612\_OPL1013\_CVA\_phosphoproteomic\_landscape\_AML\_C Scan : 22023

Andromeda score : 132.97

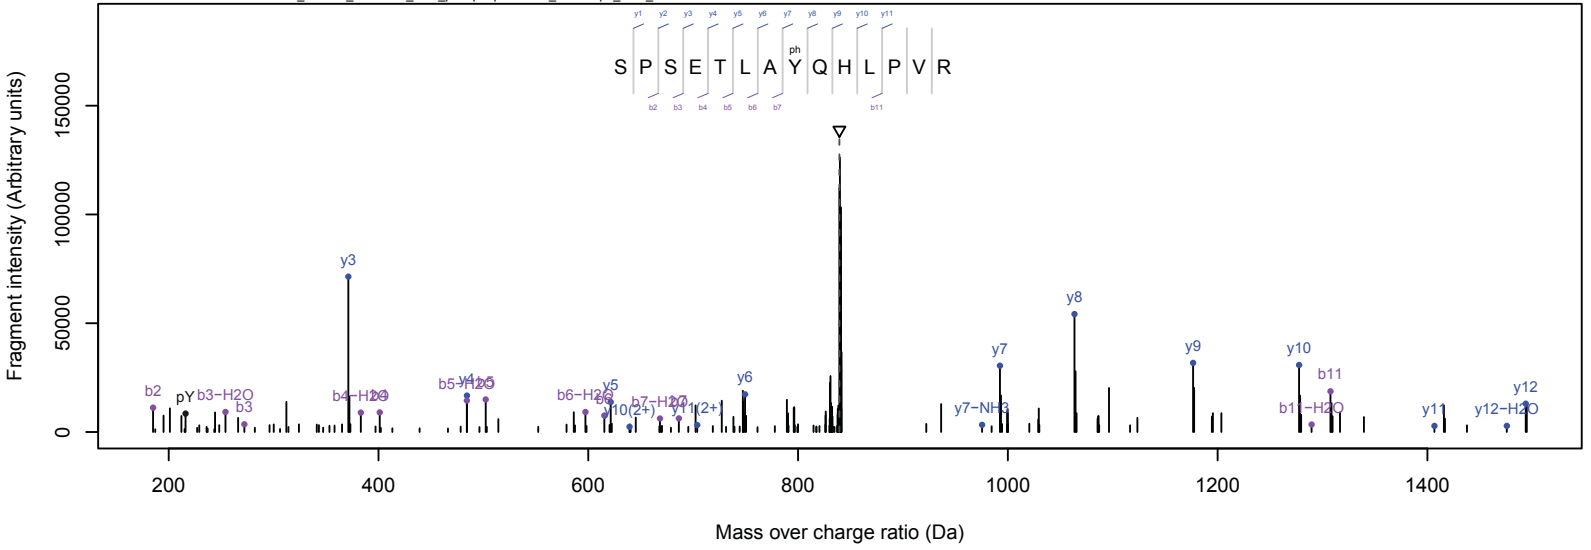

FANY(ph)IDKVR-2+

Source : Qe1\_141024\_OPL1013\_CvA\_AML\_pTyrIP\_MOLM13 Scan : 17996

Andromeda score : 132.88

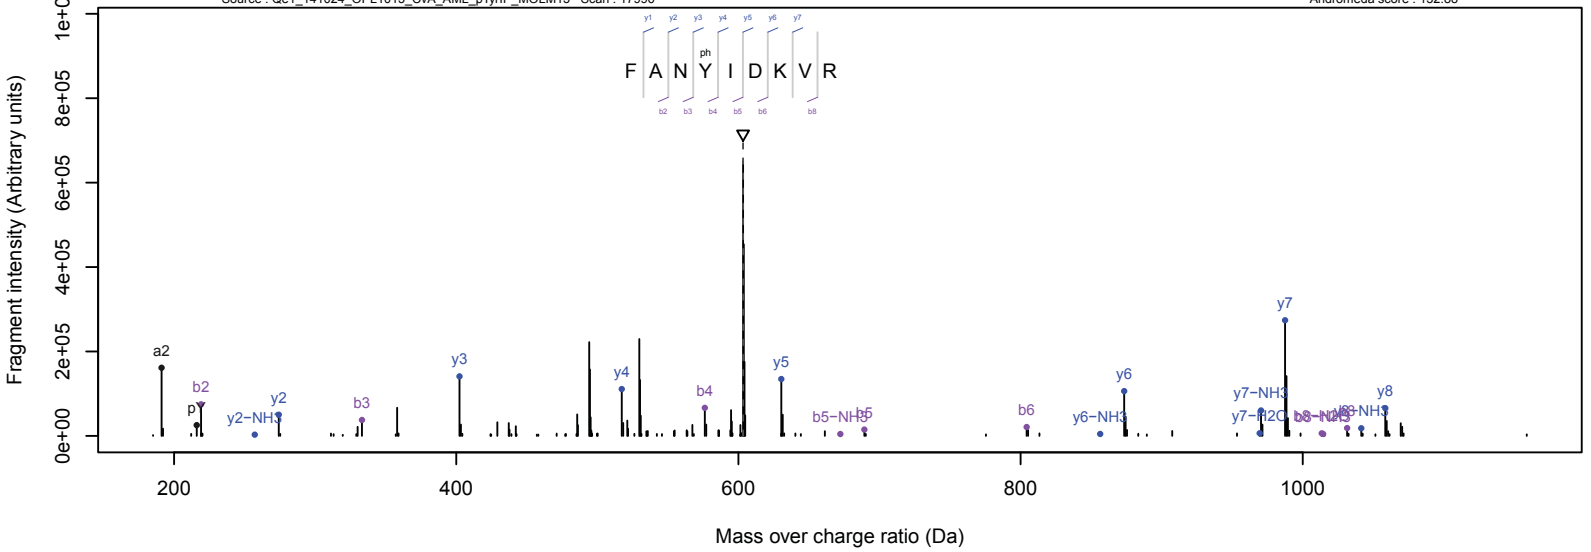

KGQQIY(ph)Y(ph)HKF-2+

Source : QE1\_140612\_OPL1013\_CVA\_phosphoproteomic\_landscape\_AML\_B Scan : 10531

Andromeda score : 132.88

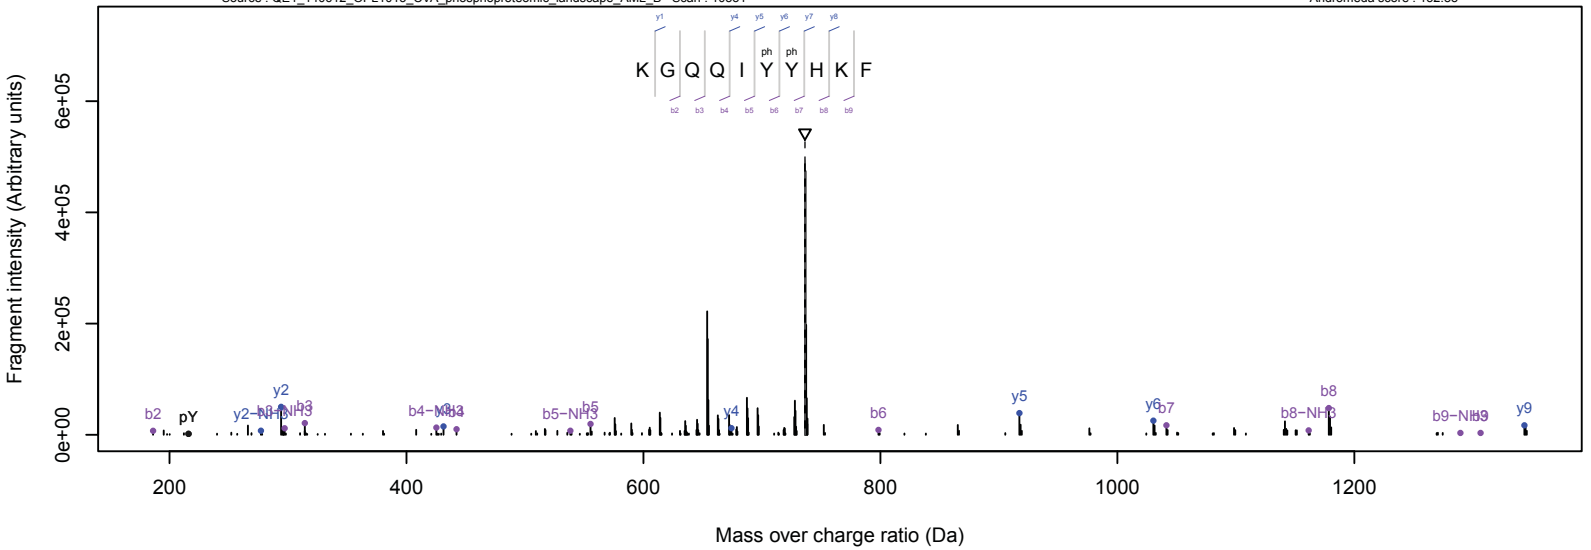

LY(ph)DFVKTER-2+

Source : QE1\_140908\_OPL1013\_CvA\_pTyrIP\_AML\_HEL Scan : 18330

Andromeda score : 132.88

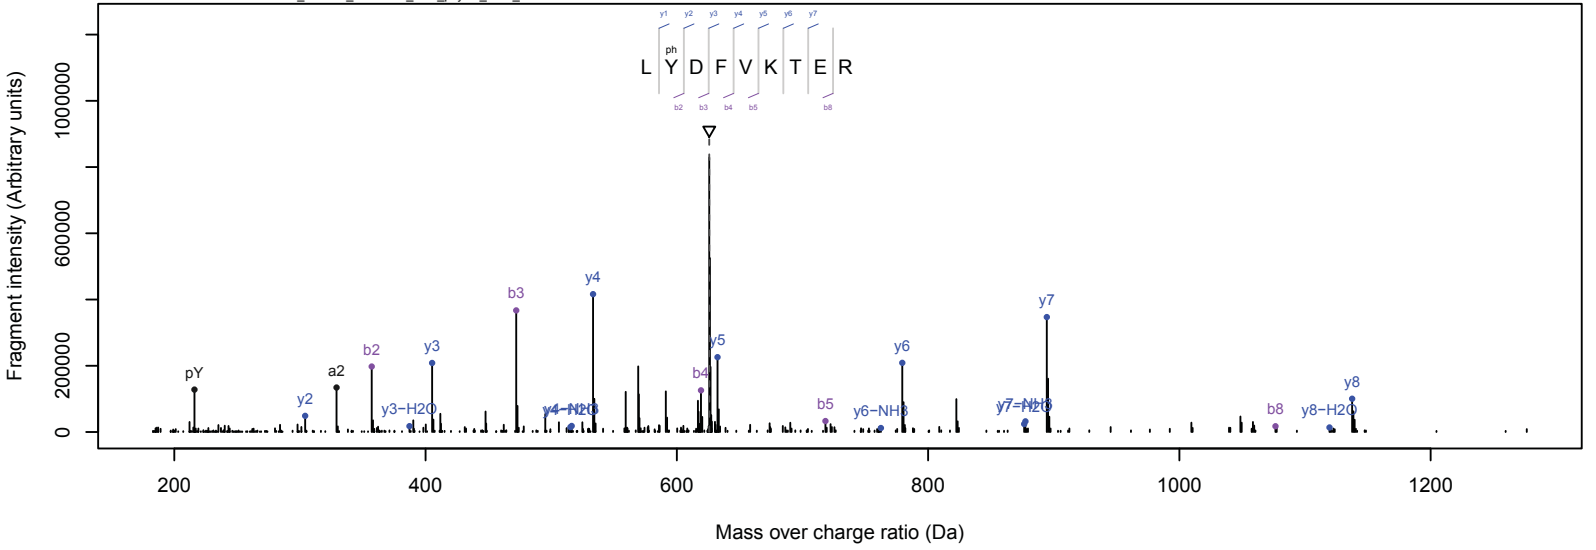

GLPSDY(ph)GRPLSFPPR-2+

Source : QE1\_140612\_OPL1013\_CVA\_phosphoproteomic\_landscape\_AML\_C Scan : 30037

Andromeda score : 132.84

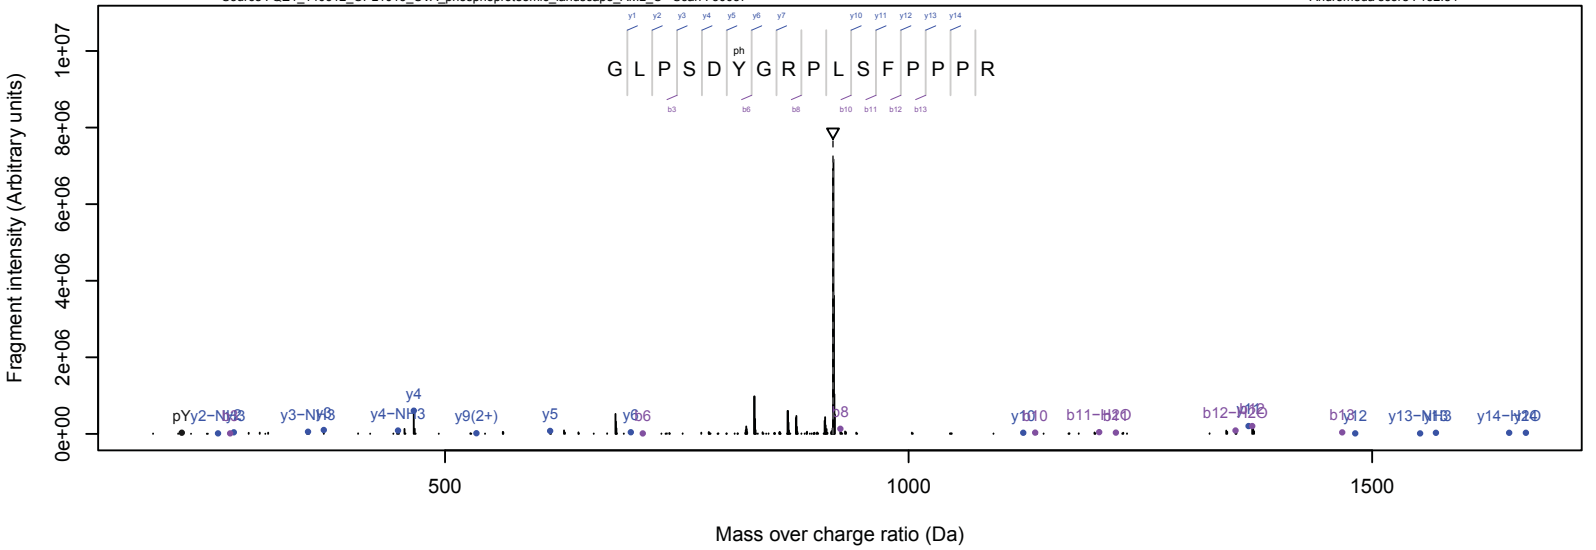

LASLFGLDQAAAGHGNEFFQY(ph)APK-3+

Source : QE1\_140612\_OPL1013\_CVA\_phosphoproteomic\_landscape\_AML\_C Scan : 46139

Andromeda score : 132.84

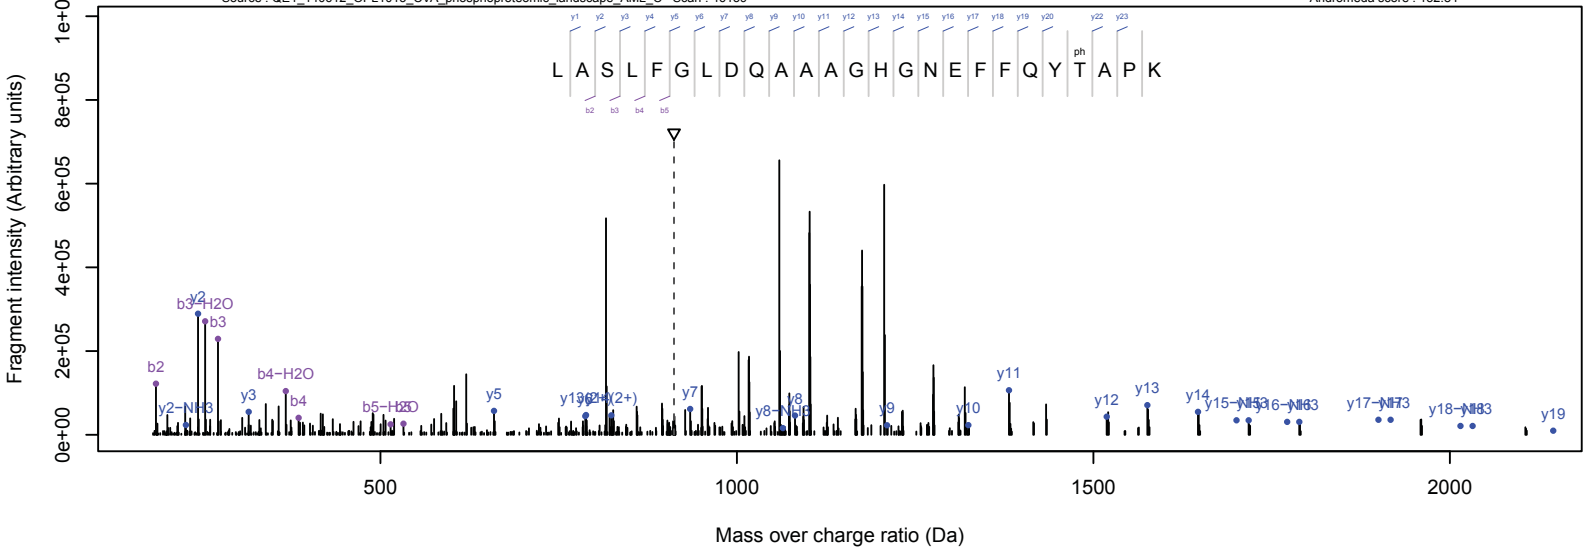

GLYPGSSKPSPIYISSYSSPAR-3+

Source: QE1\_140612\_OPL1013\_CVA\_phosphoproteomic\_landscape\_AML\_C Scan: 31606

Andromeda score: 132.83

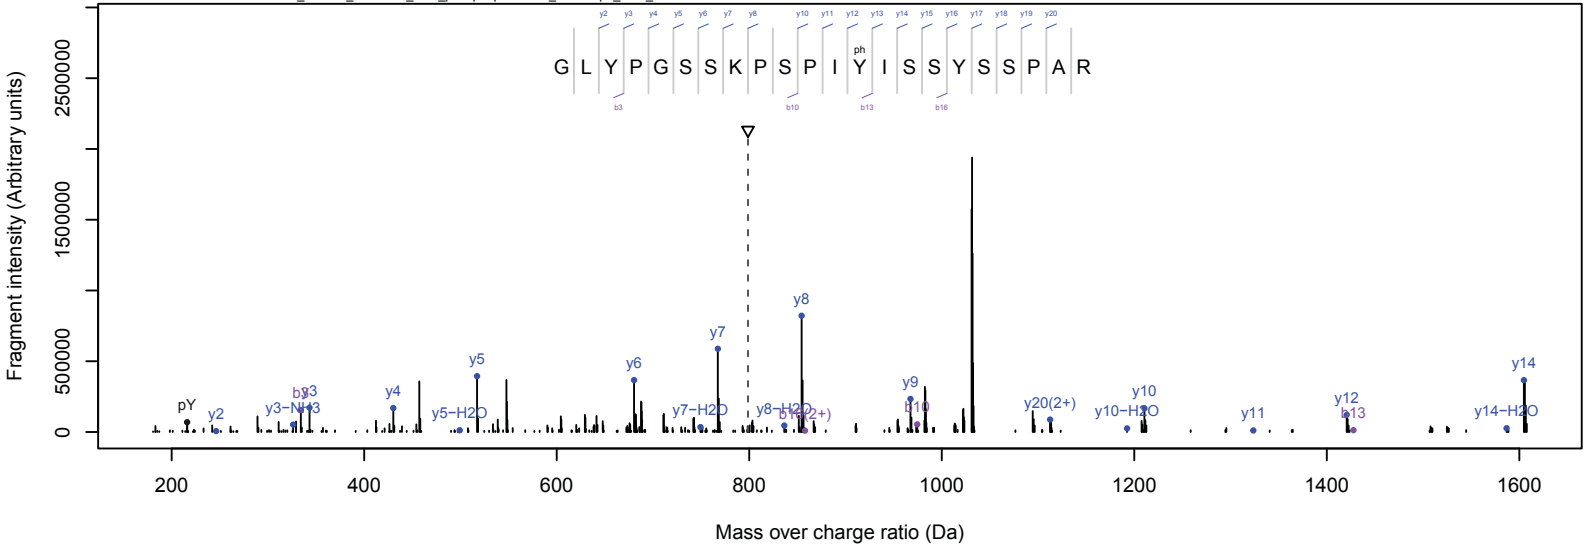

GHAGGSHSNQHMQKEYTSW K-4+

Source: QE1\_140612\_OPL1013\_CVA\_phosphoproteomic\_landscape\_AML\_C Scan: 6221

Andromeda score: 132.79

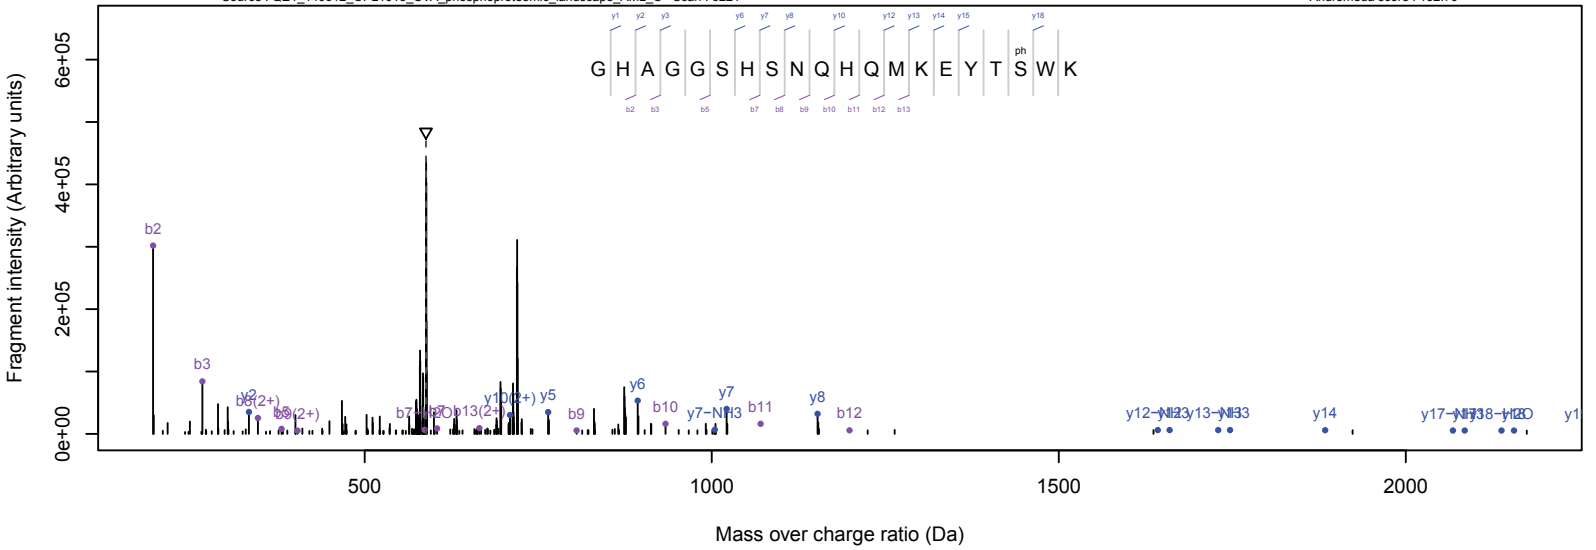

LHY(ph)PMVEYCIPTTSGEDVR-2+

Source: QE1\_140612\_OPL1013\_CVA\_phosphoproteomic\_landscape\_AML\_C Scan: 32548

Andromeda score: 132.79

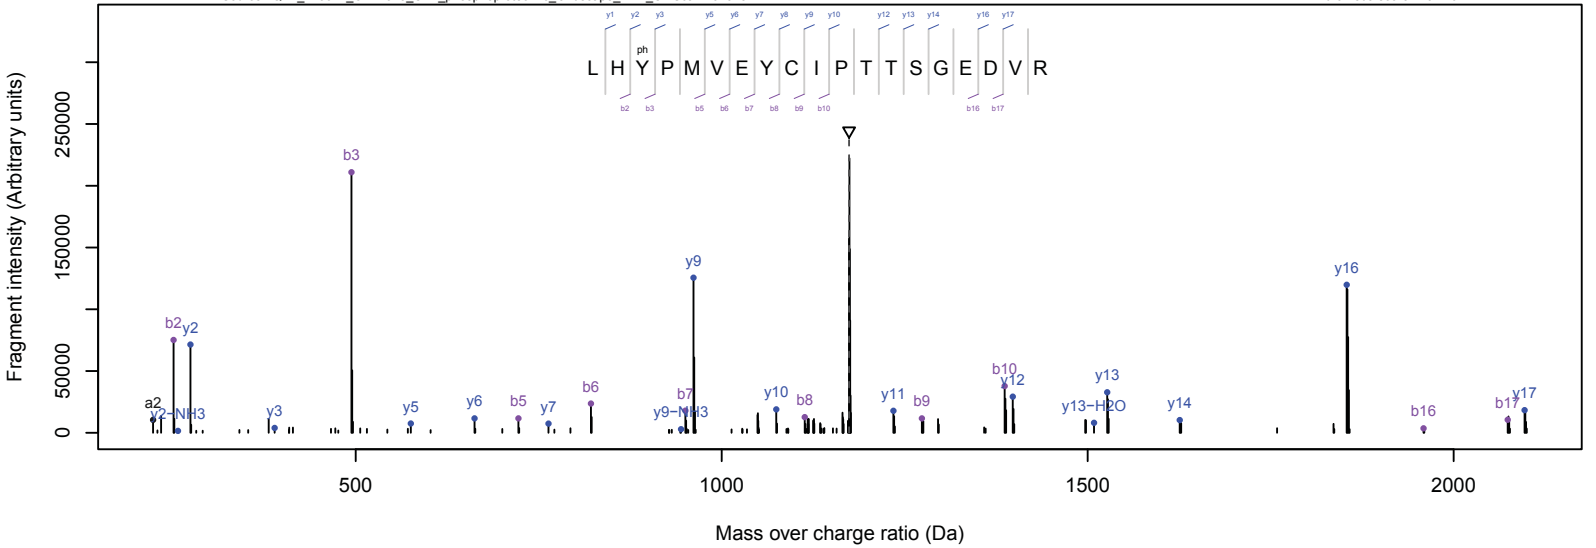

LQQTQEY(ph)FIQYQESLR-2+

Source : QE1\_140612\_OPL1013\_CVA\_phosphoproteomic\_landscape\_AML\_D Scan : 42066

Andromeda score : 132.79

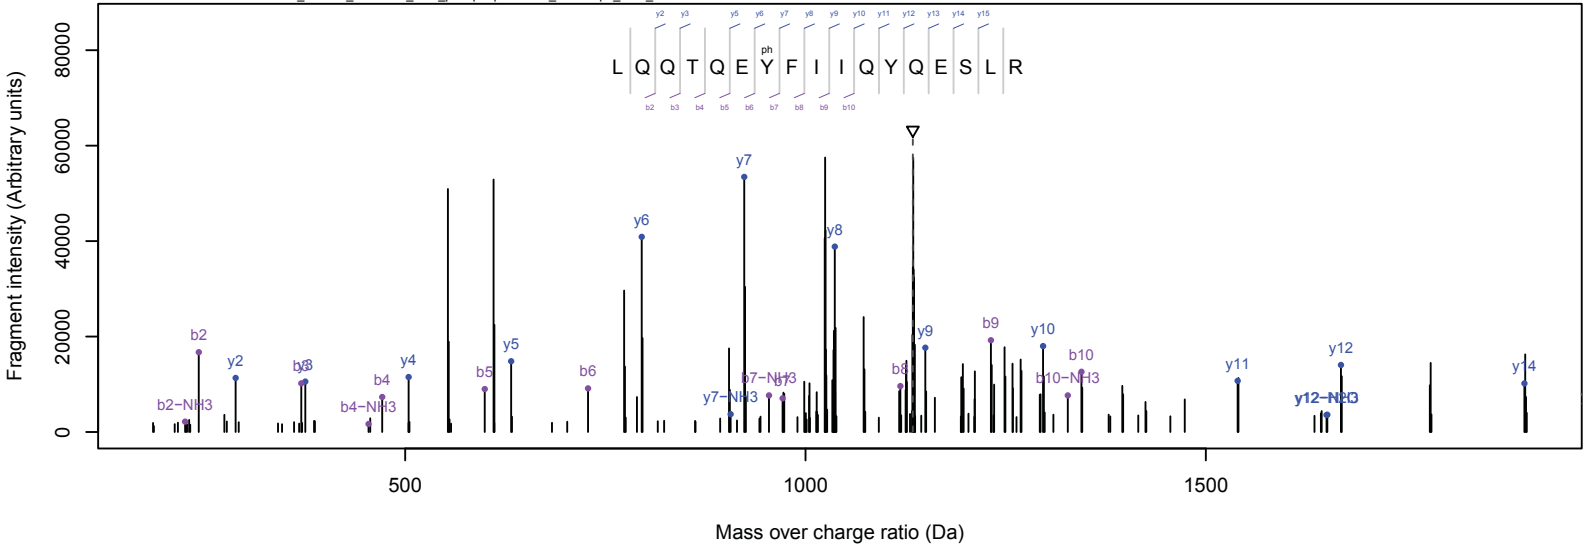

SHSITNMEIGGLKIY(ph)DILSDNGPQQPSTTVK-3+

Source : QE1\_140612\_OPL1013\_CVA\_phosphoproteomic\_landscape\_AML\_B Scan : 45742

Andromeda score : 132.73

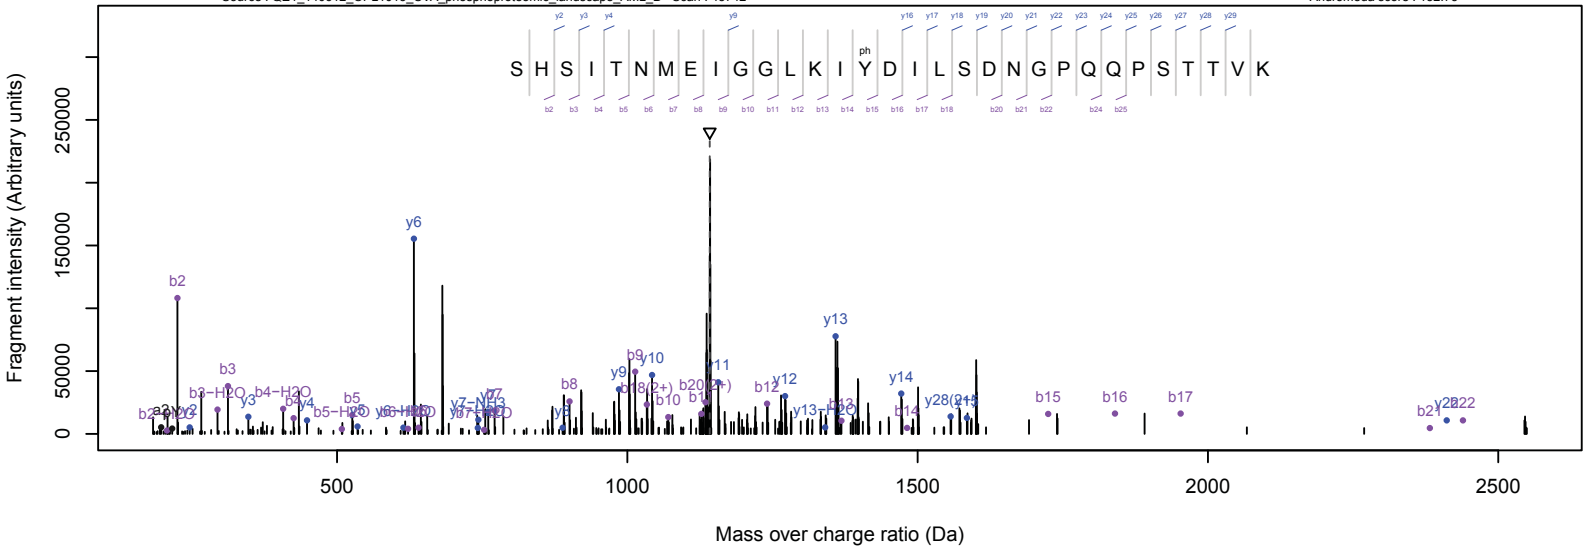

NSFSSY(ph)AQLPKPTSTYSLSSFFR-3+

Source : QE1\_140612\_OPL1013\_CVA\_phosphoproteomic\_landscape\_AML\_C Scan : 46424

Andromeda score : 132.72

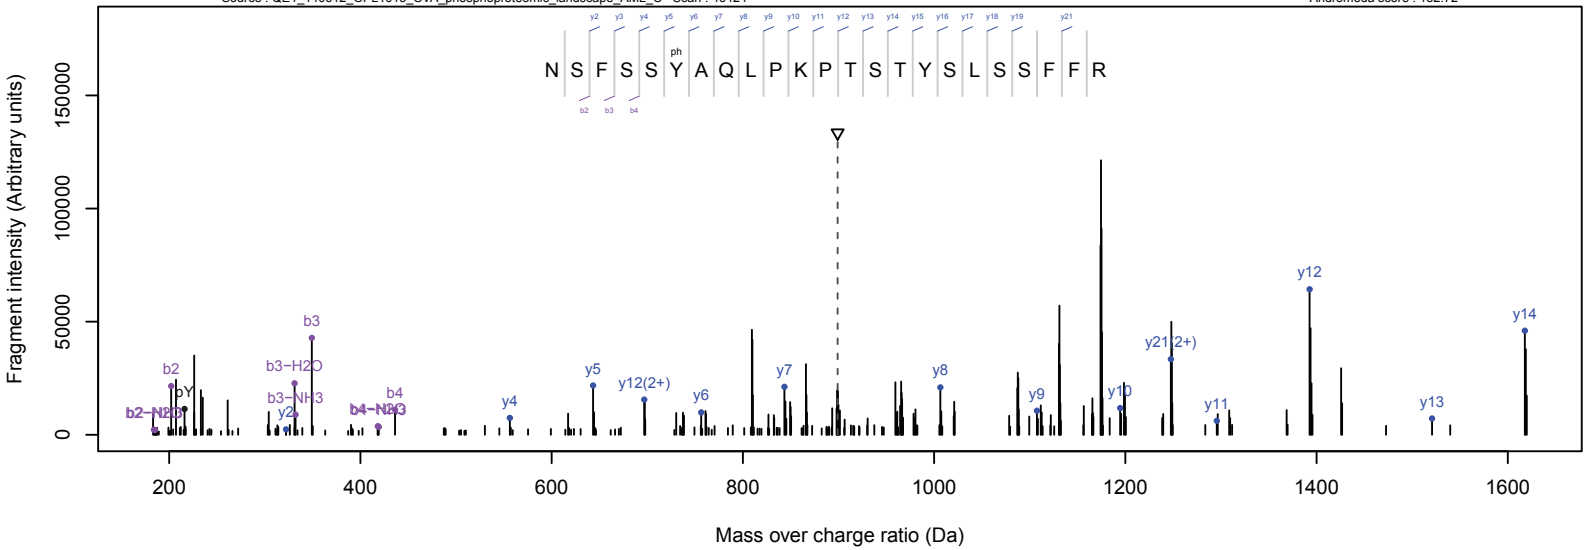

SFIKDY(ph)PVVSIEDPFDQDDWGAWQK-3+

Source : QE1\_140612\_OPL1013\_CVA\_phosphoproteomic\_landscape\_AML\_B Scan : 48052

Andromeda score : 132.72

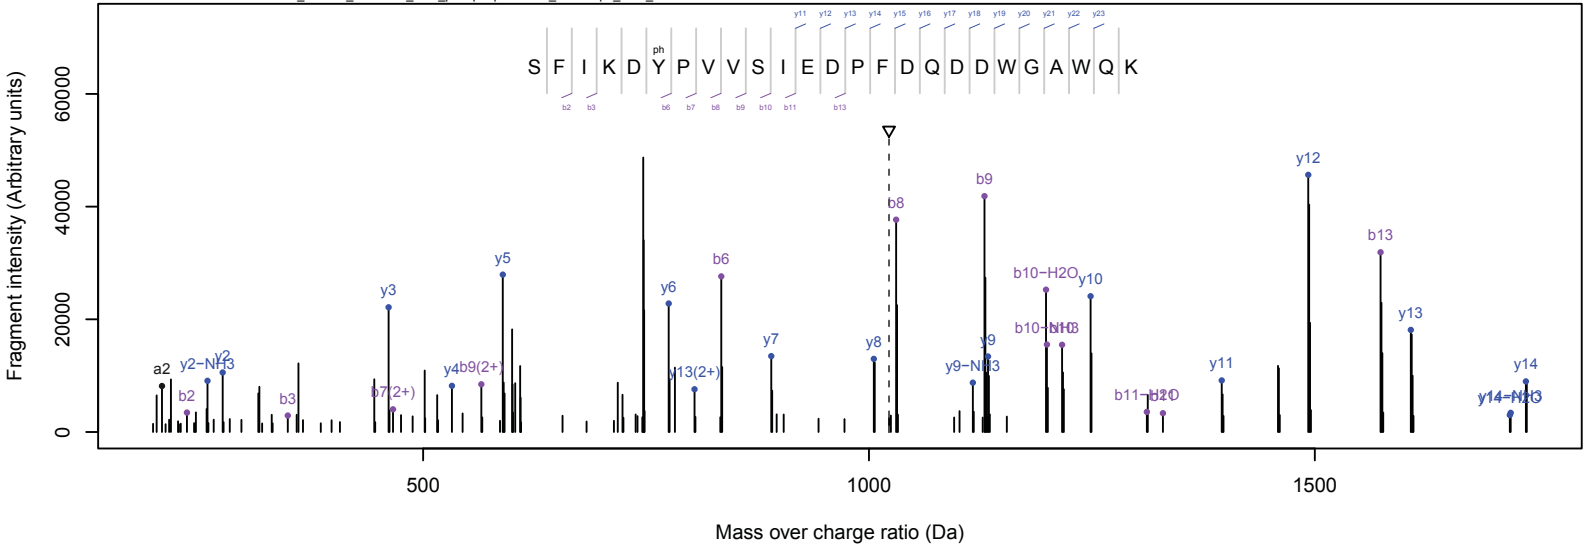

VSSTHY(ph)LLPERPSYLER-3+

Source : QE1\_140612\_OPL1013\_CVA\_phosphoproteomic\_landscape\_AML\_B Scan : 30542

Andromeda score : 132.64

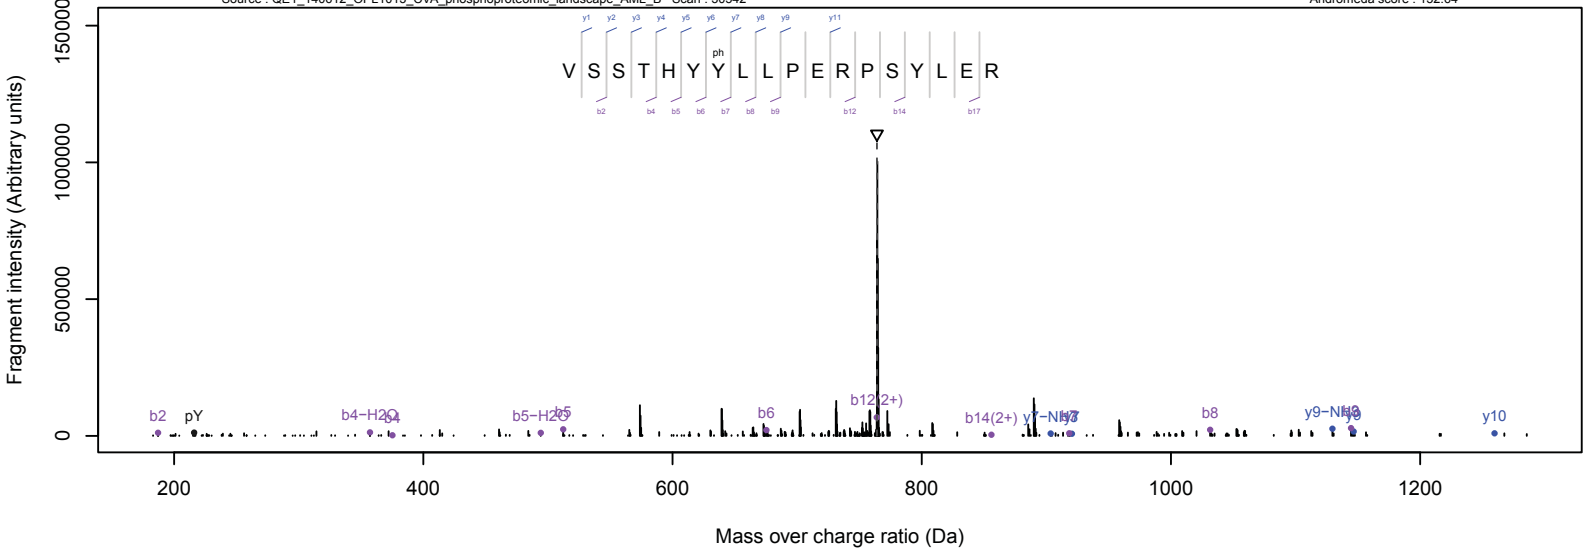

GPGLQMLPINPY(ph)RAKEEYVHTIFPSNGSSLCK-4+

Source : QE1\_140612\_OPL1013\_CVA\_phosphoproteomic\_landscape\_AML\_C Scan : 44939

Andromeda score : 132.6

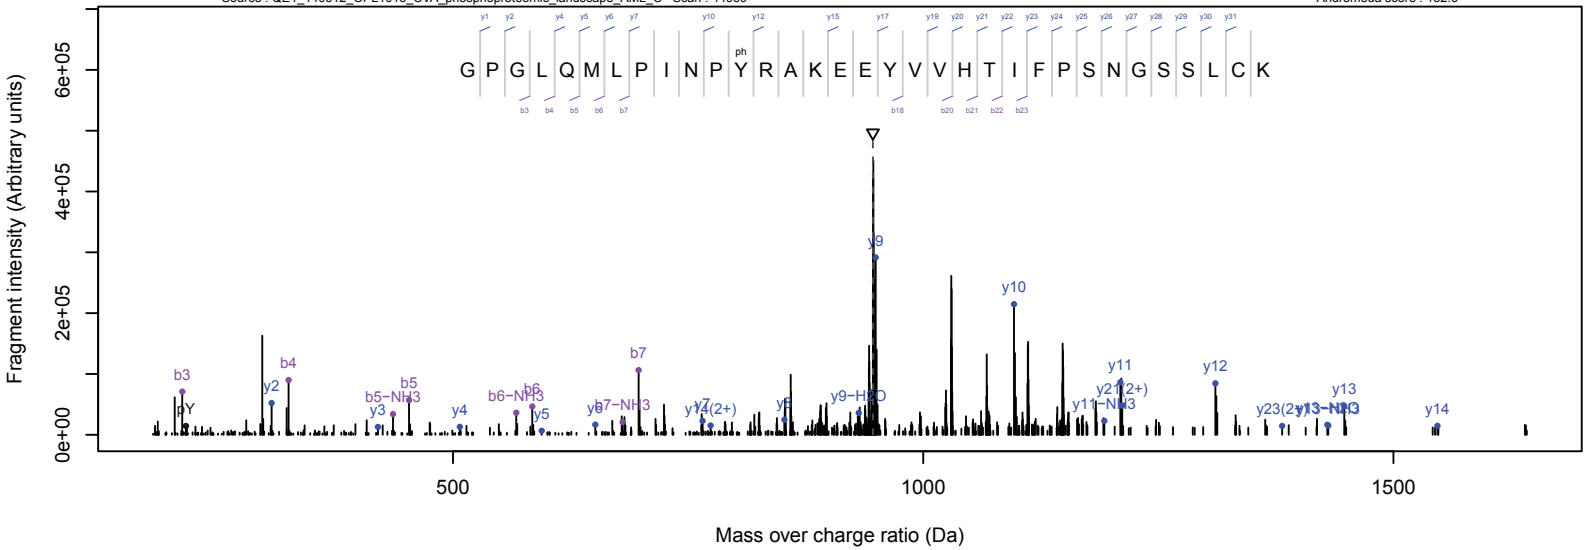



LVTVWSAPNY(ph)CYR-2+

Source : QE1\_140612\_OPL1013\_CVA\_phosphoproteomic\_landscape\_AML\_B Scan : 32929

Andromeda score : 132.5

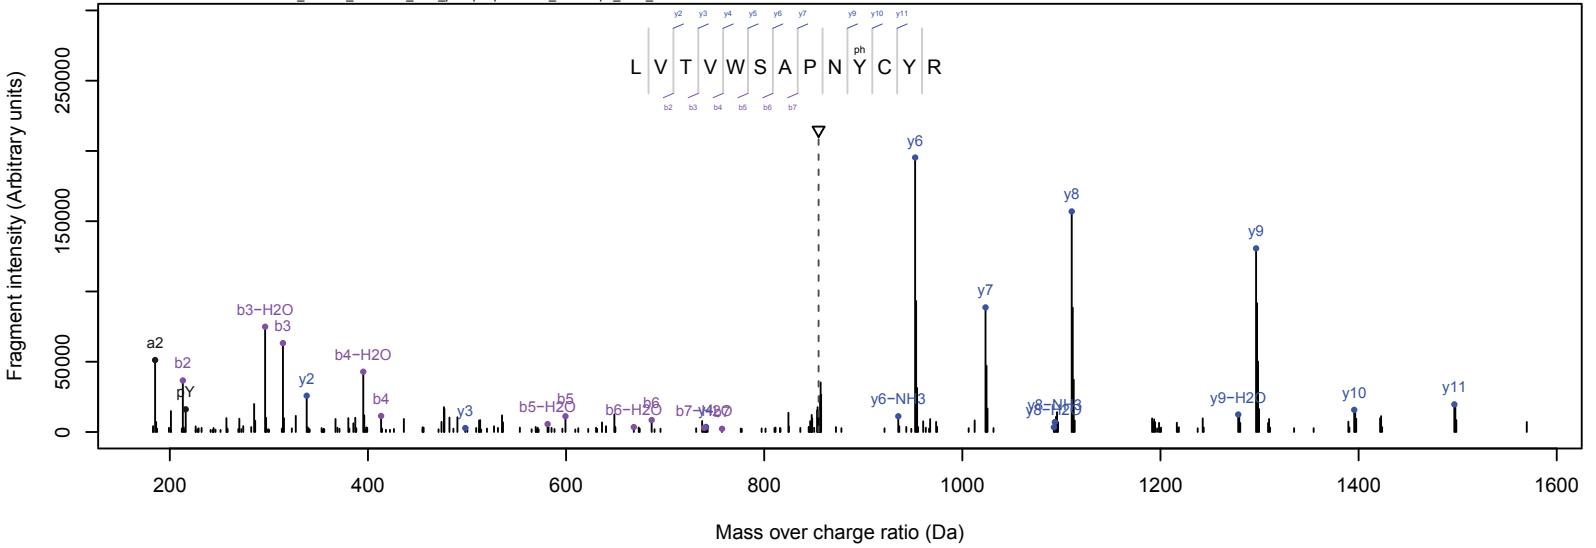

ATASALHFPSTSIQQSSPY(ph)FTHPTIR-3+

Source : QE1\_140612\_OPL1013\_CVA\_phosphoproteomic\_landscape\_AML\_C Scan : 39360

Andromeda score : 132.28

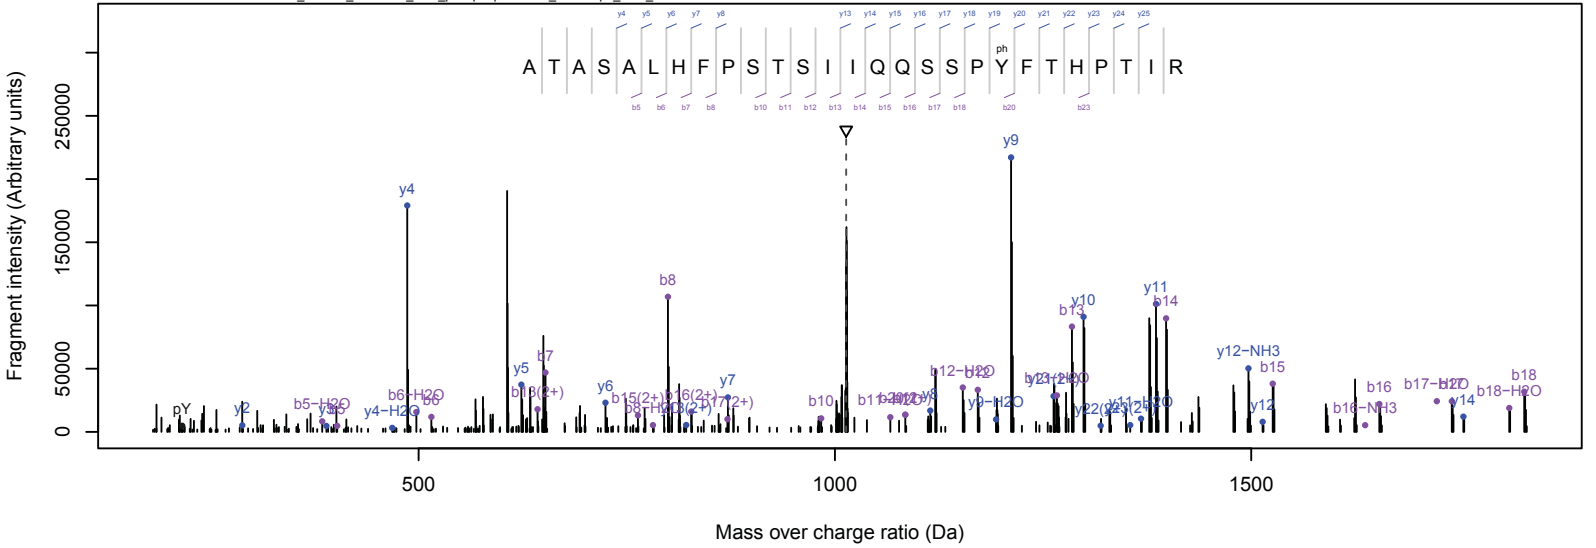

KAQSNPY(ph)YNGPHLNLK-3+

Source : QE1\_140612\_OPL1013\_CVA\_phosphoproteomic\_landscape\_AML\_E Scan : 18265

Andromeda score : 132.25

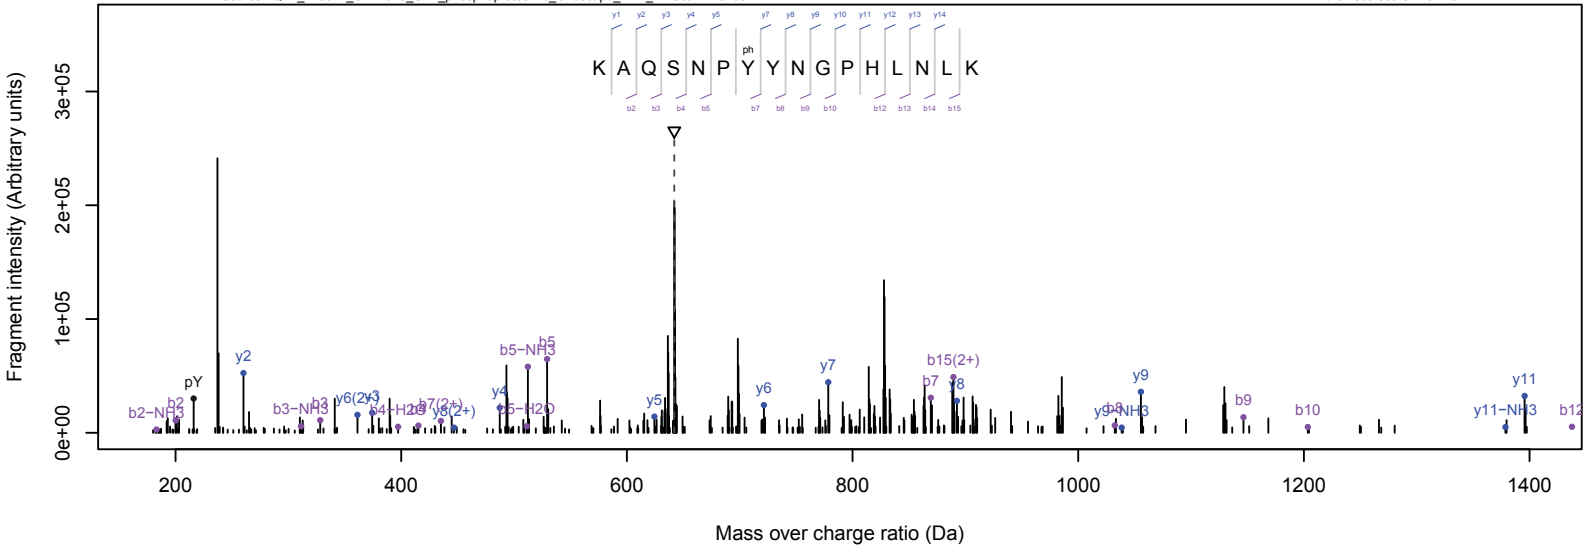

**SNY(ph)NFEKPLWLR-2+**

Source : QE1\_140612\_OPL1013\_CVA\_phosphoproteomic\_landscape\_AML\_B Scan : 45323

Andromeda score : 132.23

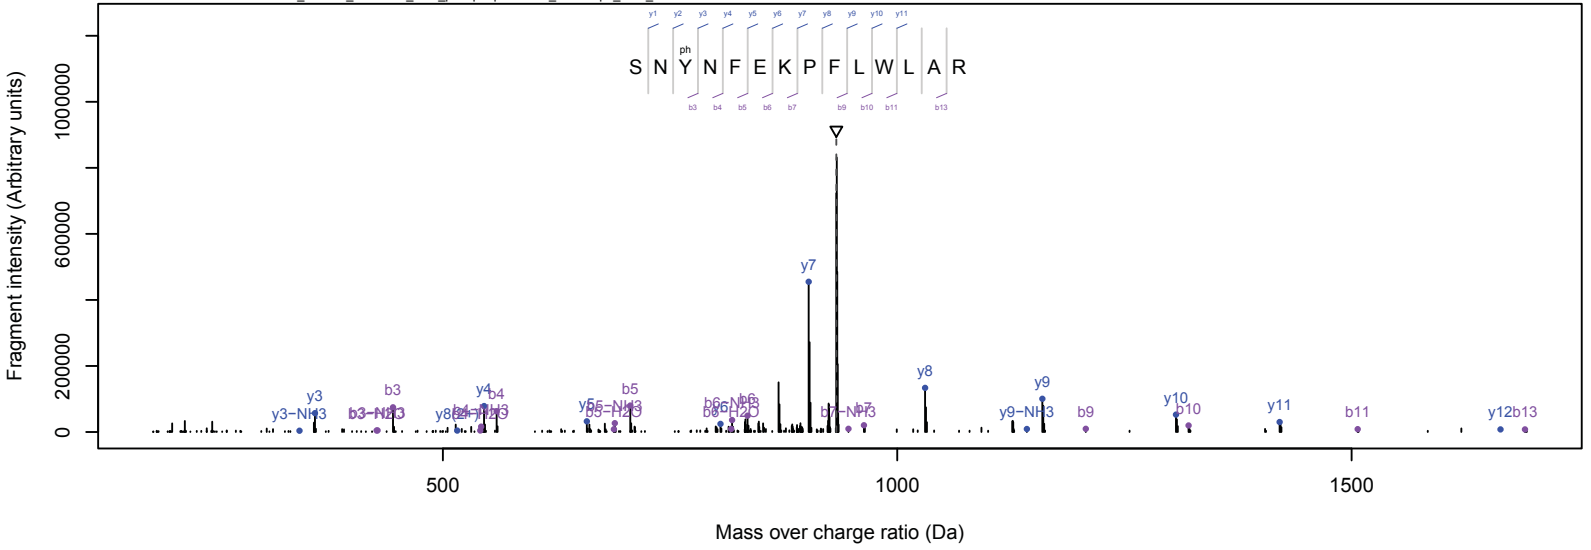

**QSPHDEDPAVTY(ph)AK-3+**

Source : QE1\_140908\_OPL1013\_CvA\_pTyrIP\_AML\_OCI\_AML3 Scan : 8168

Andromeda score : 132.21

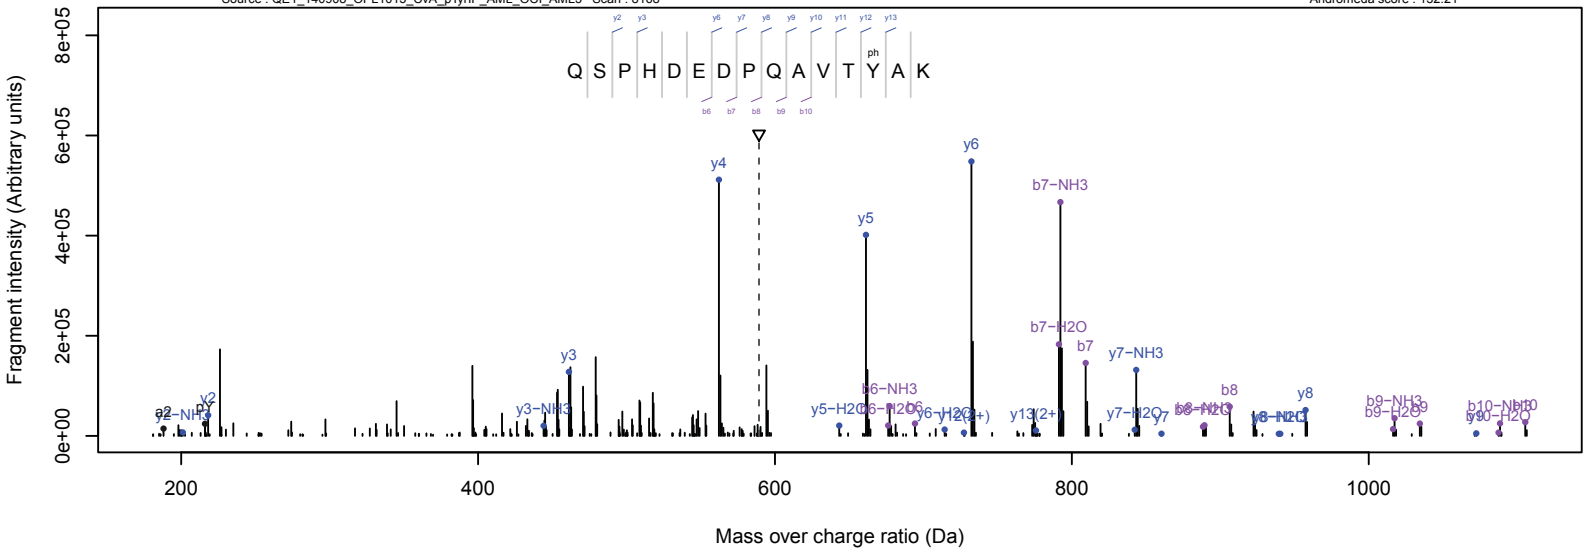

**AVDGY(ph)VKPQIK-2+**

Source : QE1\_140612\_OPL1013\_CVA\_phosphoproteomic\_landscape\_AML\_A Scan : 11174

Andromeda score : 132.17

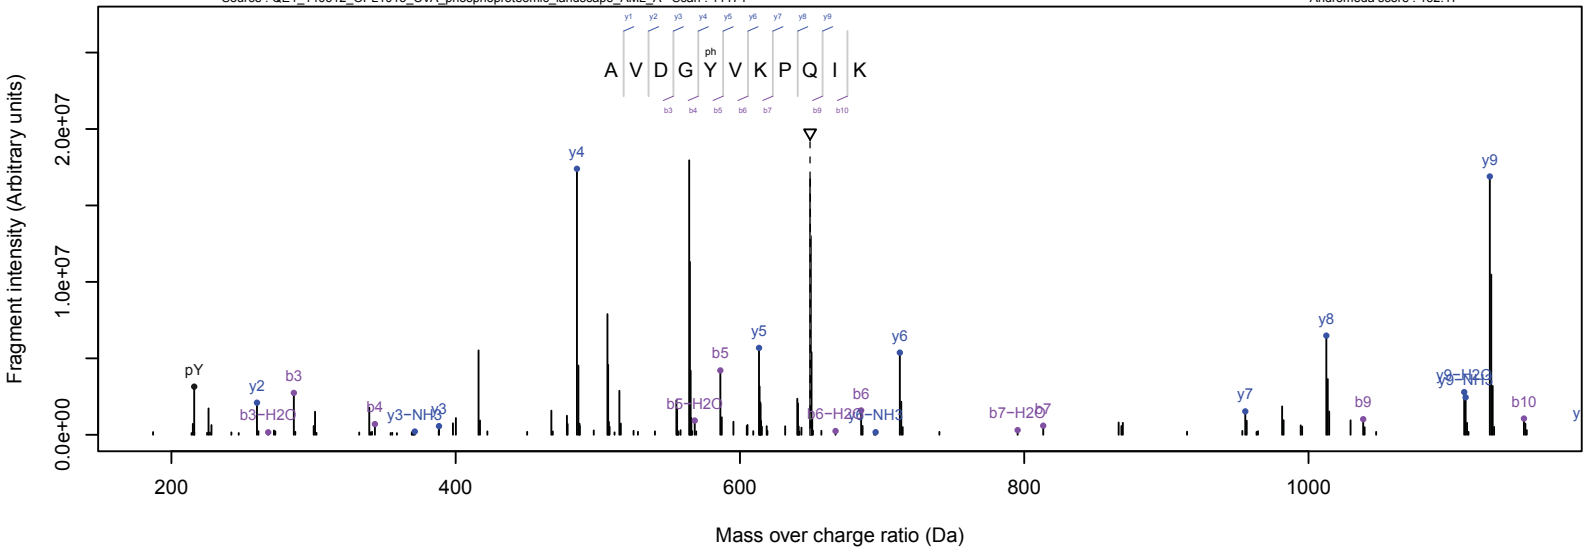

SPTTSPHYHNGQLSWPGPANDS(ph)TLEAQYRR-4+

Source: QE1\_140612\_OPL1013\_CVA\_phosphoproteomic\_landscape\_AML\_C Scan: 31244

Andromeda score: 131.95

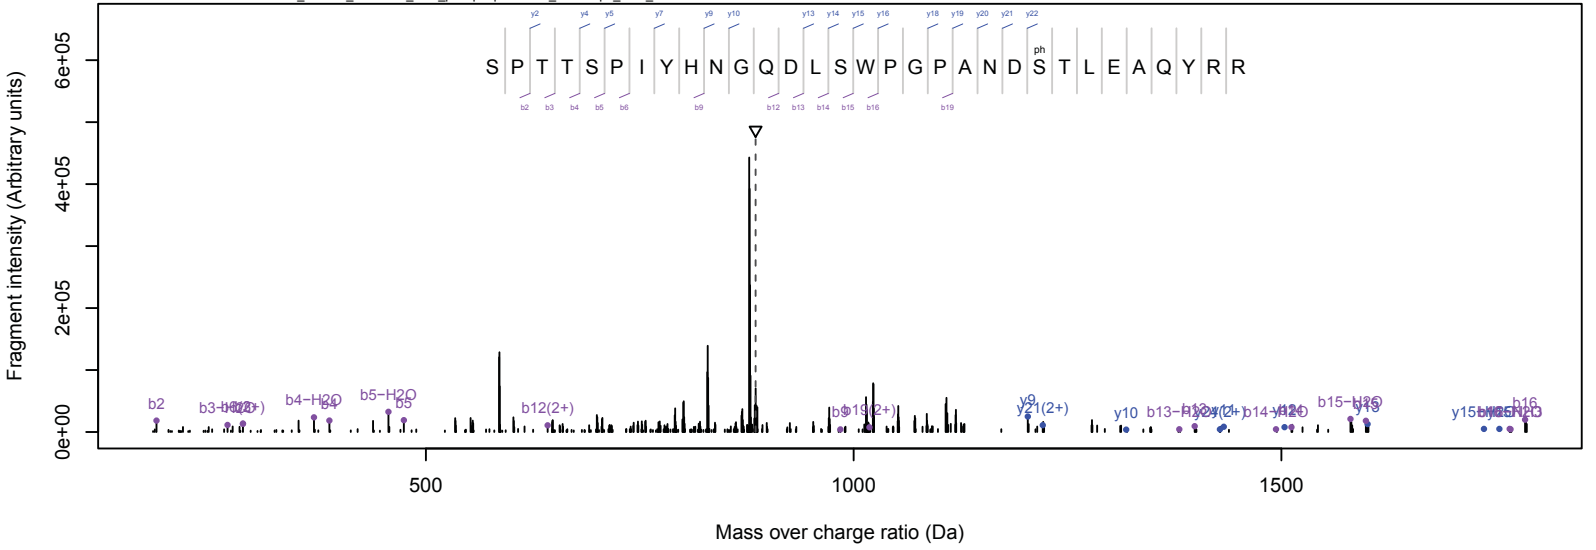

KGGS(ph)YTQAASSDSAQGS DVS LTACK-3+

Source: QE1\_140612\_OPL1013\_CVA\_phosphoproteomic\_landscape\_AML\_C Scan: 12371

Andromeda score: 131.94

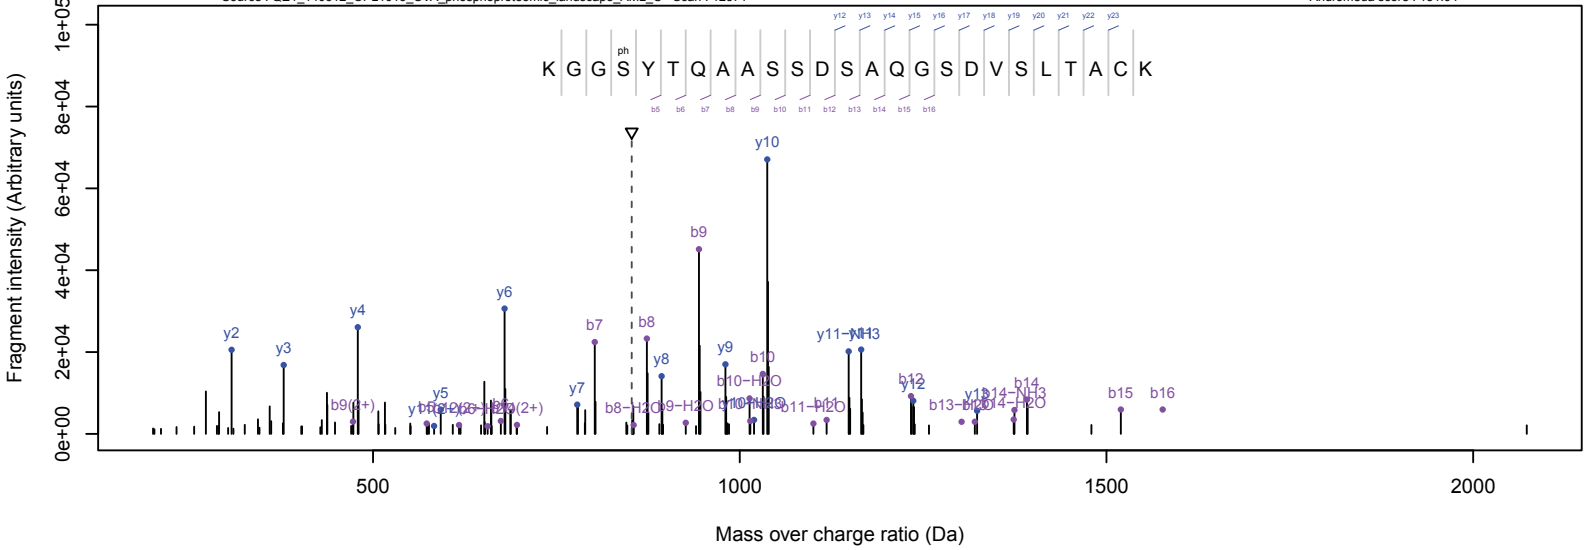

GSSLPPVY(ph)WLPSIHR-2+

Source: QE1\_140612\_OPL1013\_CVA\_phosphoproteomic\_landscape\_AML\_C Scan: 44820

Andromeda score: 131.86

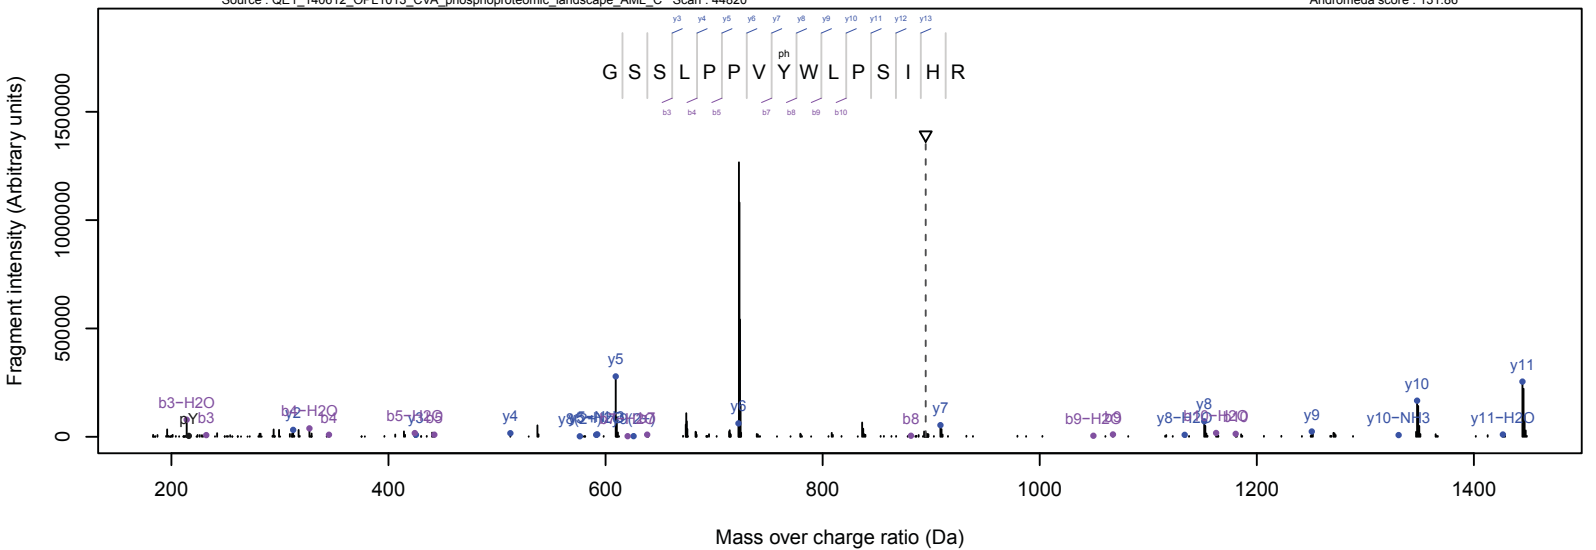

HSVESMITTLDPGMAPY(ph)K-3+

Source : QE1\_140612\_OPL1013\_CVA\_phosphoproteomic\_landscape\_AML\_A Scan : 42246

Andromeda score : 131.82

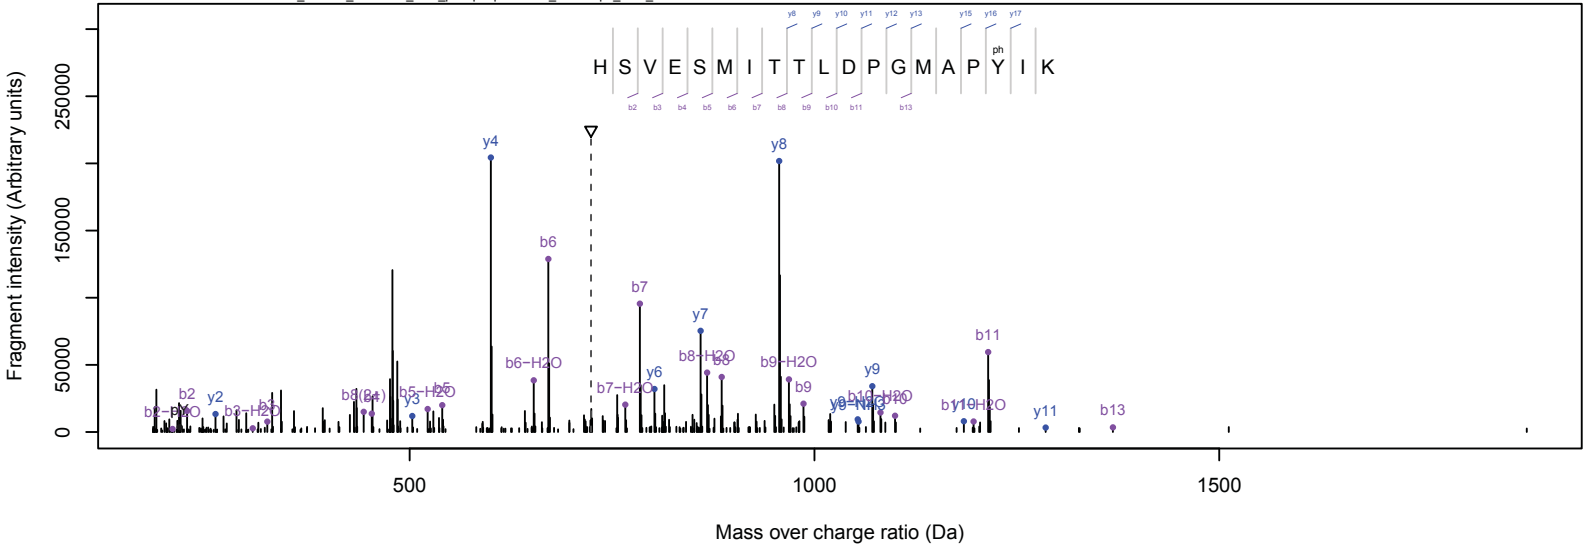

MVNEGSDGGQSVY(ph)HVLHVLGGR-4+

Source : QE1\_140612\_OPL1013\_CVA\_phosphoproteomic\_landscape\_AML\_C Scan : 26136

Andromeda score : 131.82

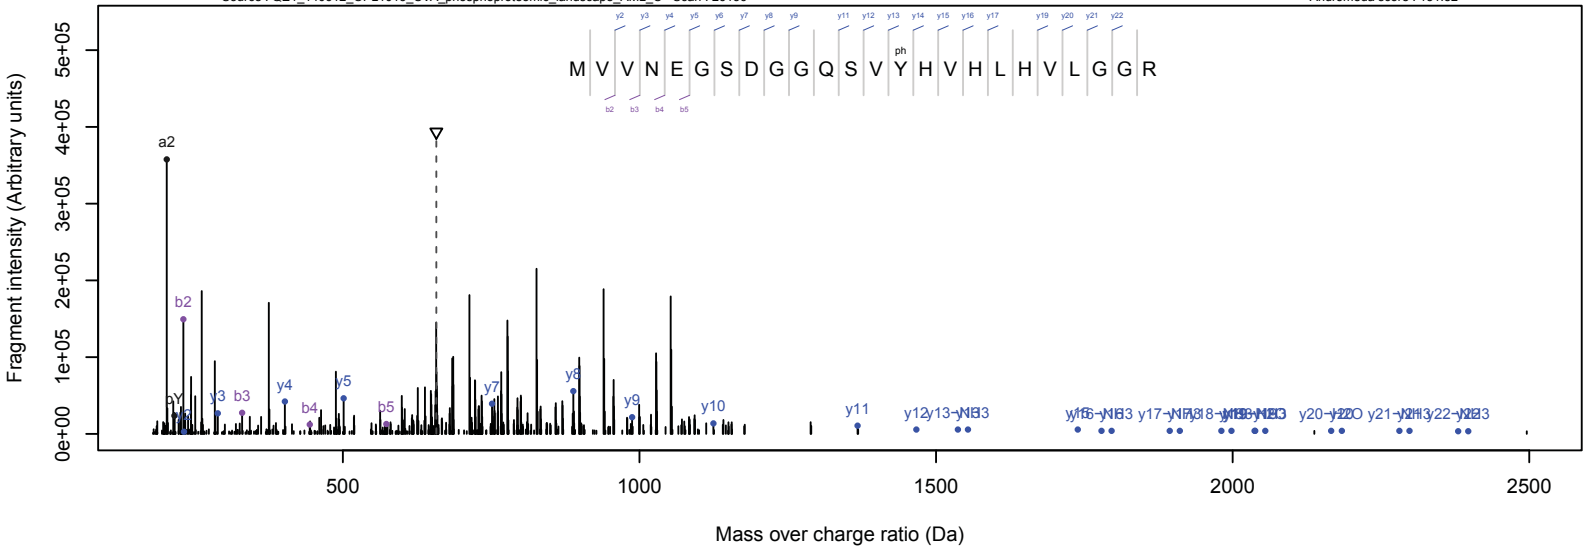

TY(ph)TCLASCHYCSCPFAFASVLR-3+

Source : QE1\_140612\_OPL1013\_CVA\_phosphoproteomic\_landscape\_AML\_B Scan : 42100

Andromeda score : 131.82

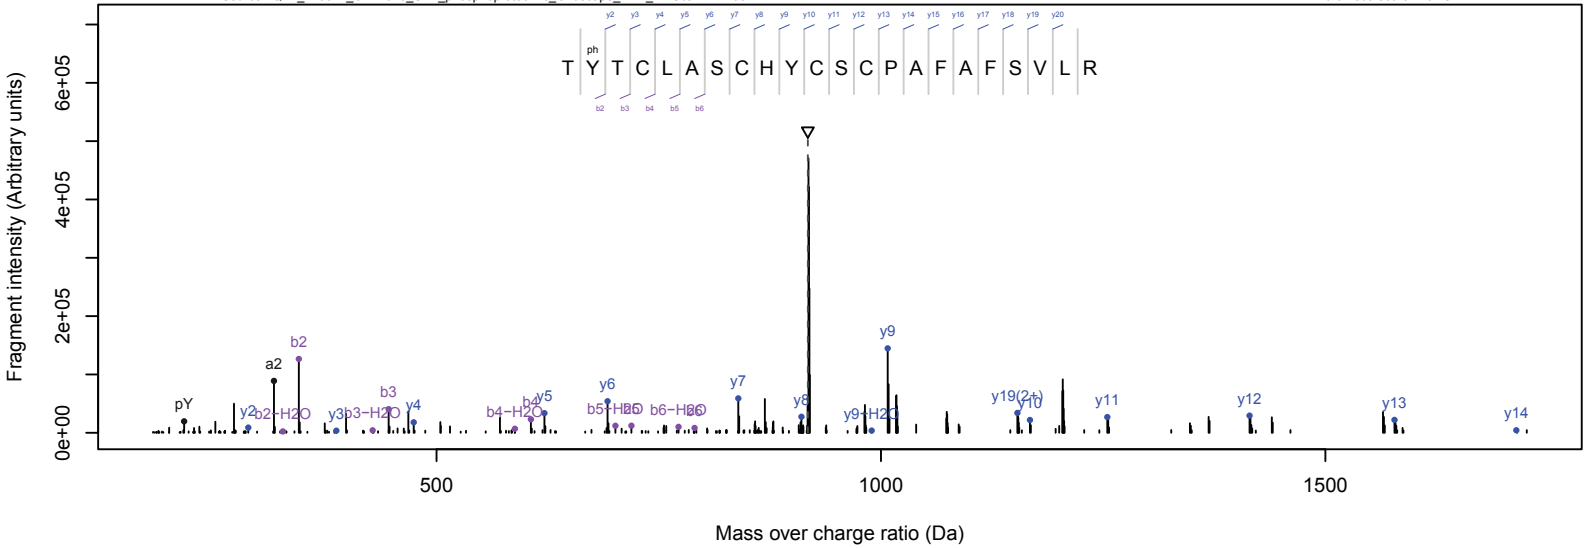



LQQSSTIAPY(ph)VTLRR-2+

Source : QE1\_140612\_OPL1013\_CVA\_phosphoproteomic\_landscape\_AML\_C Scan : 24319

Andromeda score : 131.61

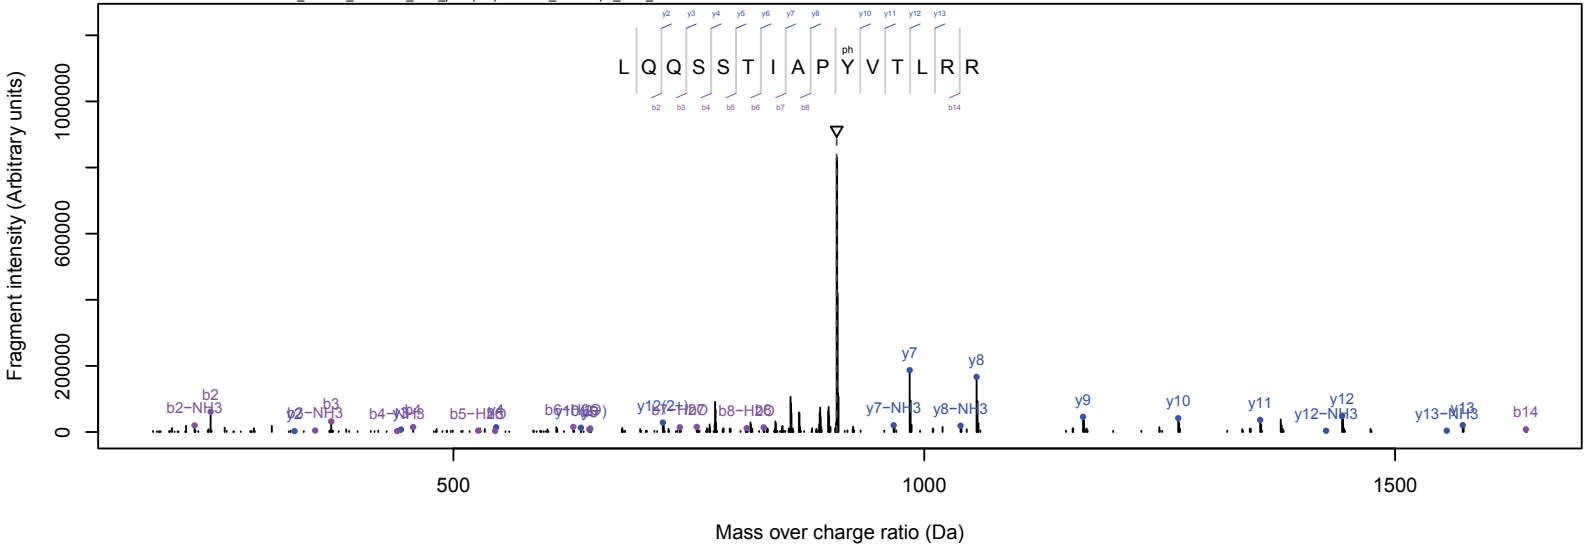

(ac)AAPRSPAISVSVSAPAFY(ph)APQKK-3+

Source : QE1\_140612\_OPL1013\_CVA\_phosphoproteomic\_landscape\_AML\_C Scan : 35106

Andromeda score : 131.56

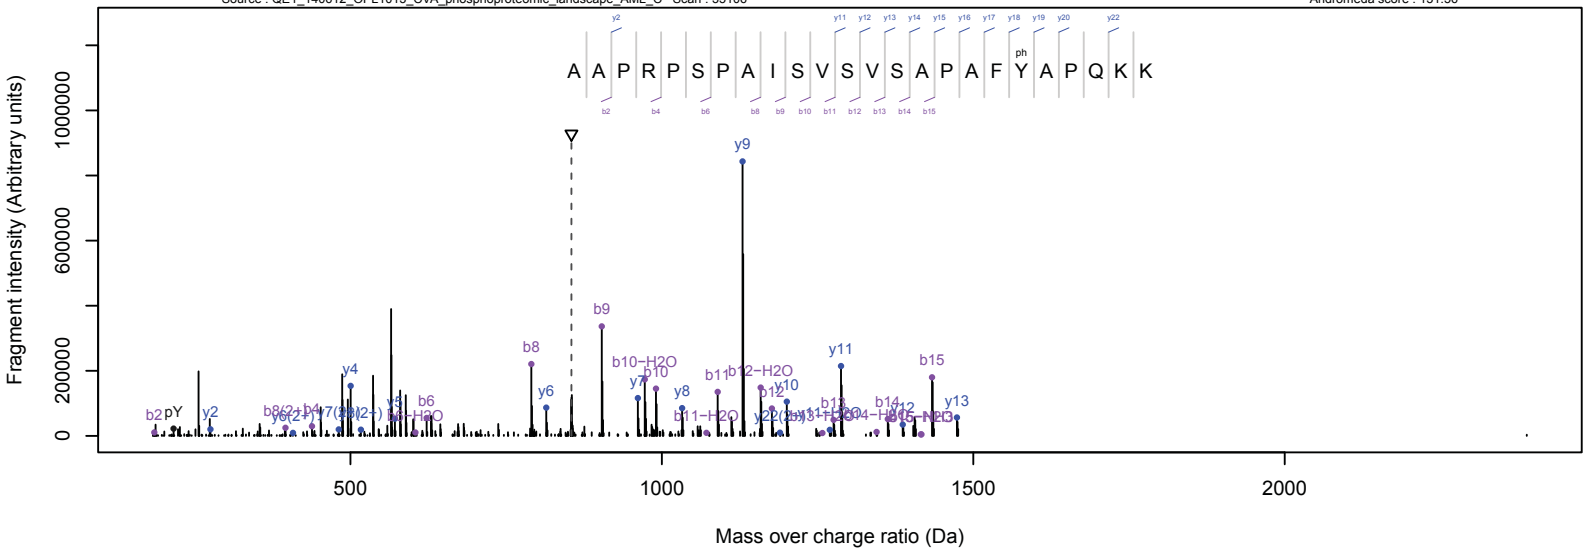

DNTDLIY(PHPN)ASAEK-2+

Source : QE1\_140612\_OPL1013\_CVA\_phosphoproteomic\_landscape\_AML\_C Scan : 18694

Andromeda score : 131.56

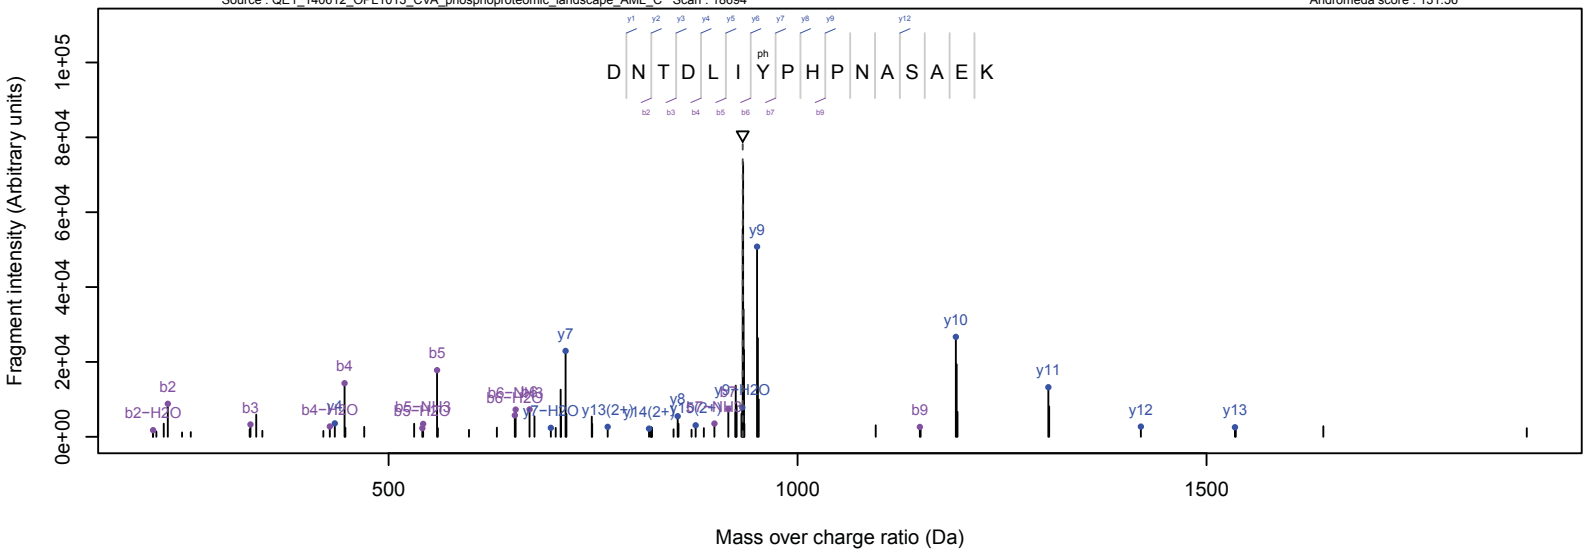

DY(ph)LHLPPEIVPATLRR-3+

Source : QE1\_140612\_OPL1013\_CVA\_phosphoproteomic\_landscape\_AML\_B Scan : 40515

Andromeda score : 131.56

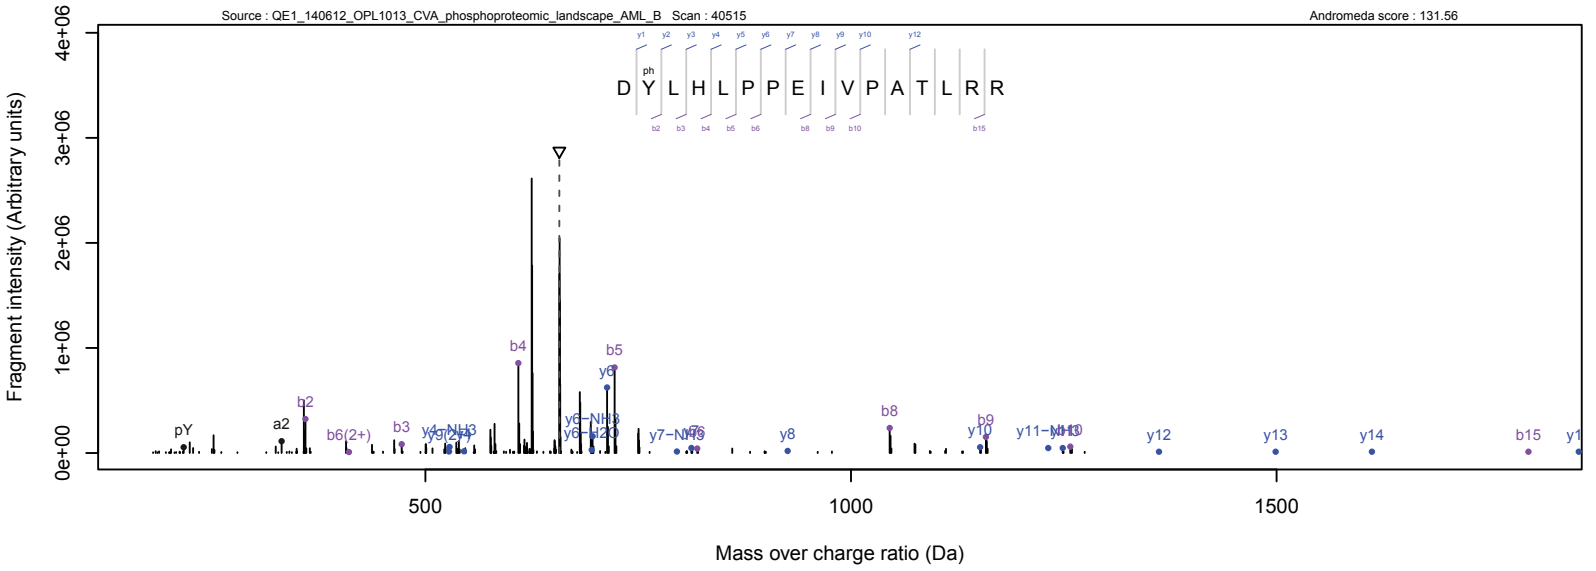

LGHPEALSAGTGSPPSFTY(ph)AQQR-3+

Source : QE1\_140908\_OPL1013\_CvA\_pTyrIP\_AML\_HEL Scan : 27229

Andromeda score : 131.56

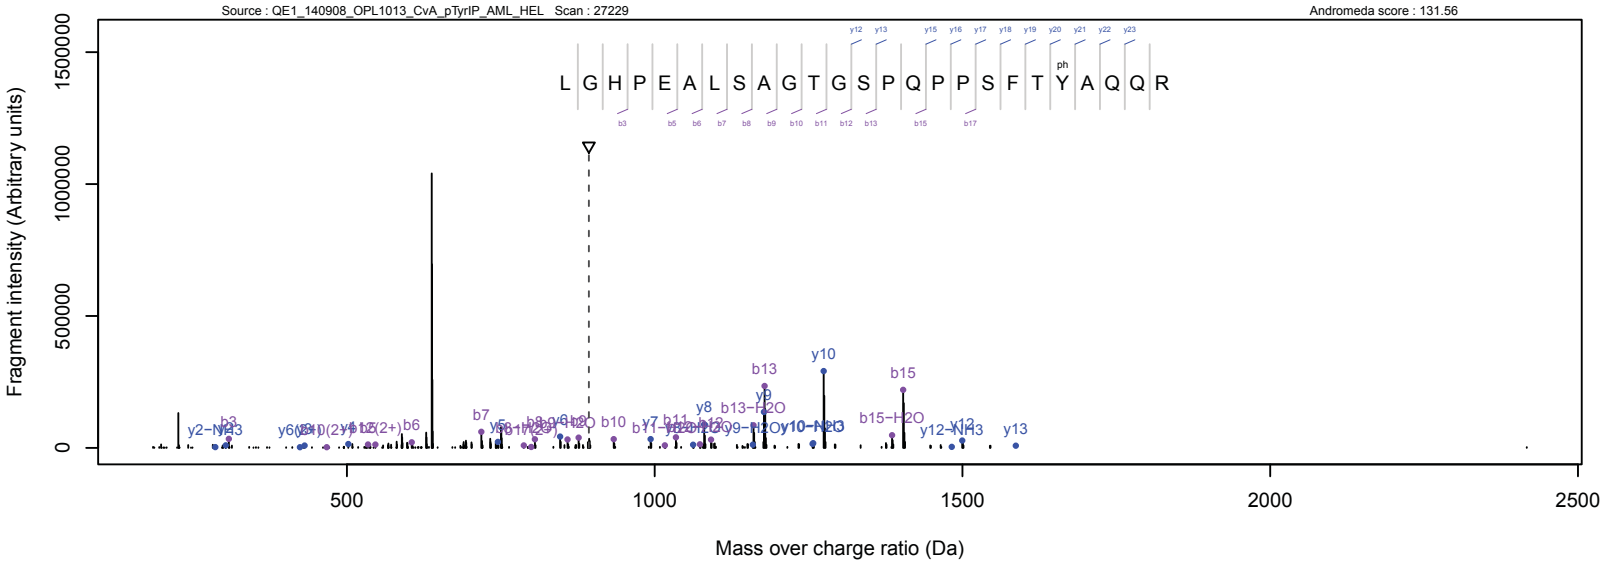

LFTAHHNMTNY(ph)ATVWASK-3+

Source : QE1\_140612\_OPL1013\_CVA\_phosphoproteomic\_landscape\_AML\_B Scan : 32038

Andromeda score : 131.54

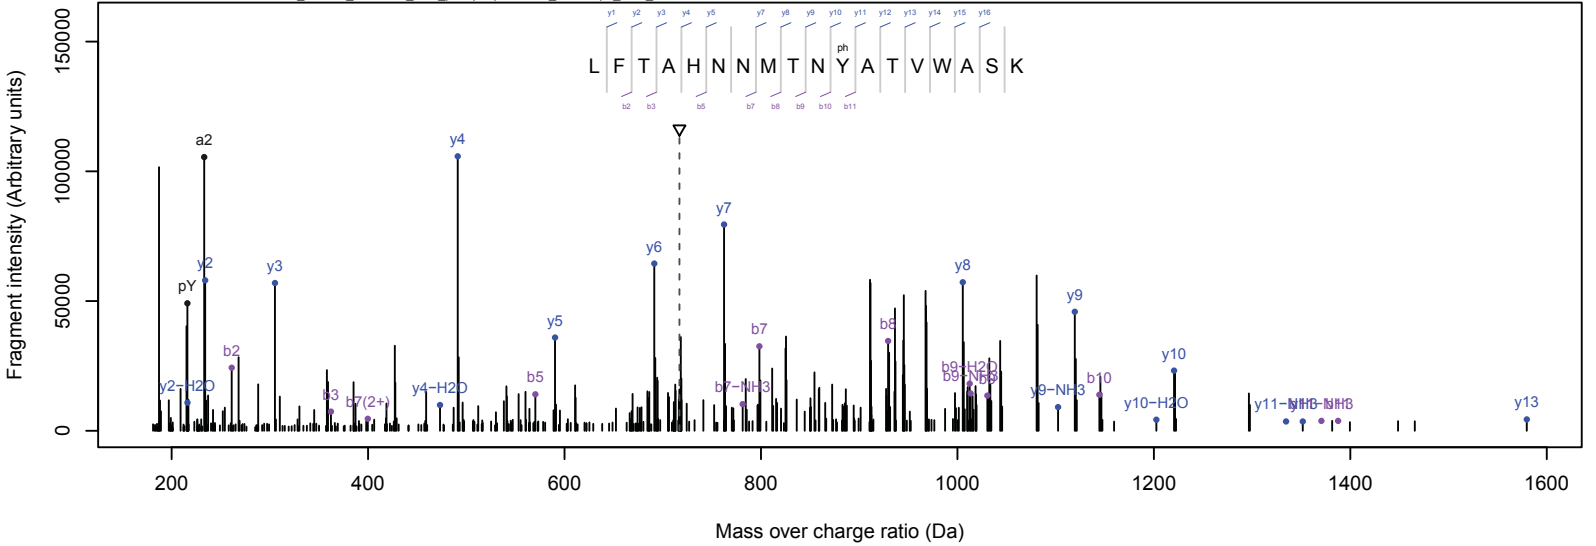

RLGAGQFGEVWVG<sup>ox</sup>GY<sup>ph</sup>YNNSTK-3+

Source: QE1\_140908\_OPL1013\_CvA\_pTyrIP\_AML\_Kasumi1 Scan: 31449

Andromeda score: 131.54

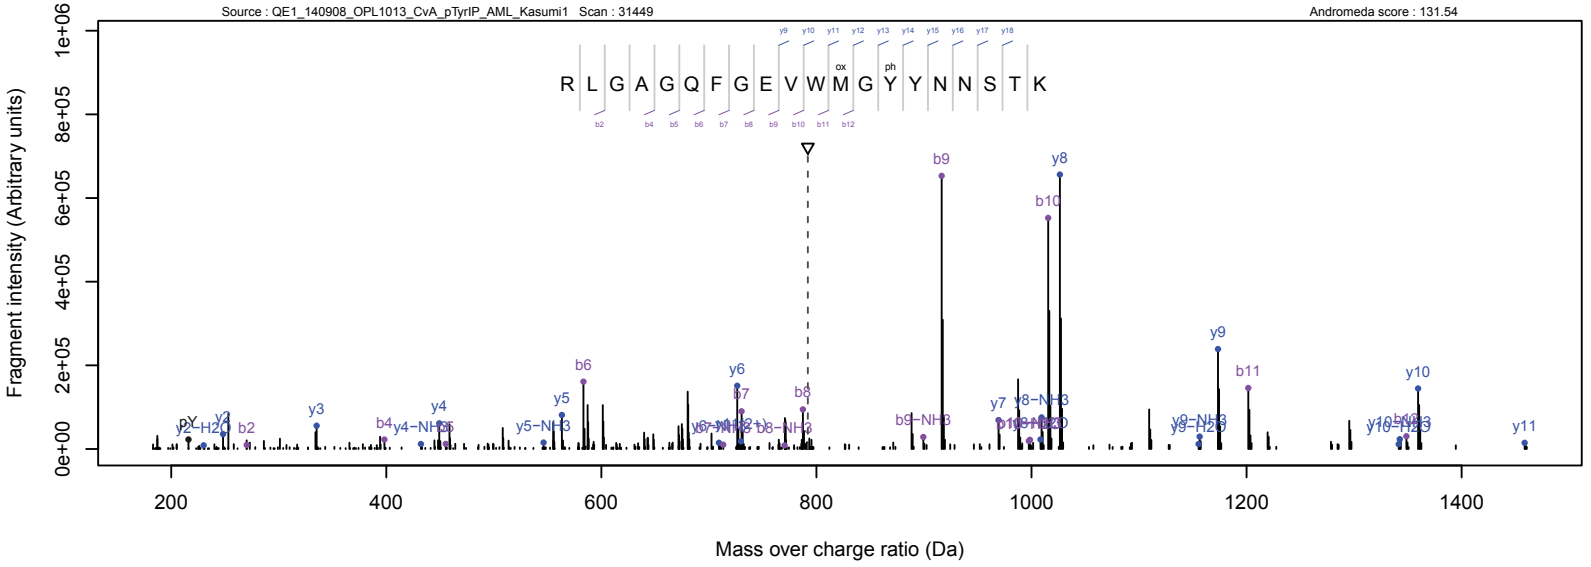

ATY<sup>ph</sup>INLKPAR-2+

Source: QE1\_140612\_OPL1013\_CVA\_phosphoproteomic\_landscape\_AML\_C Scan: 14265

Andromeda score: 131.52

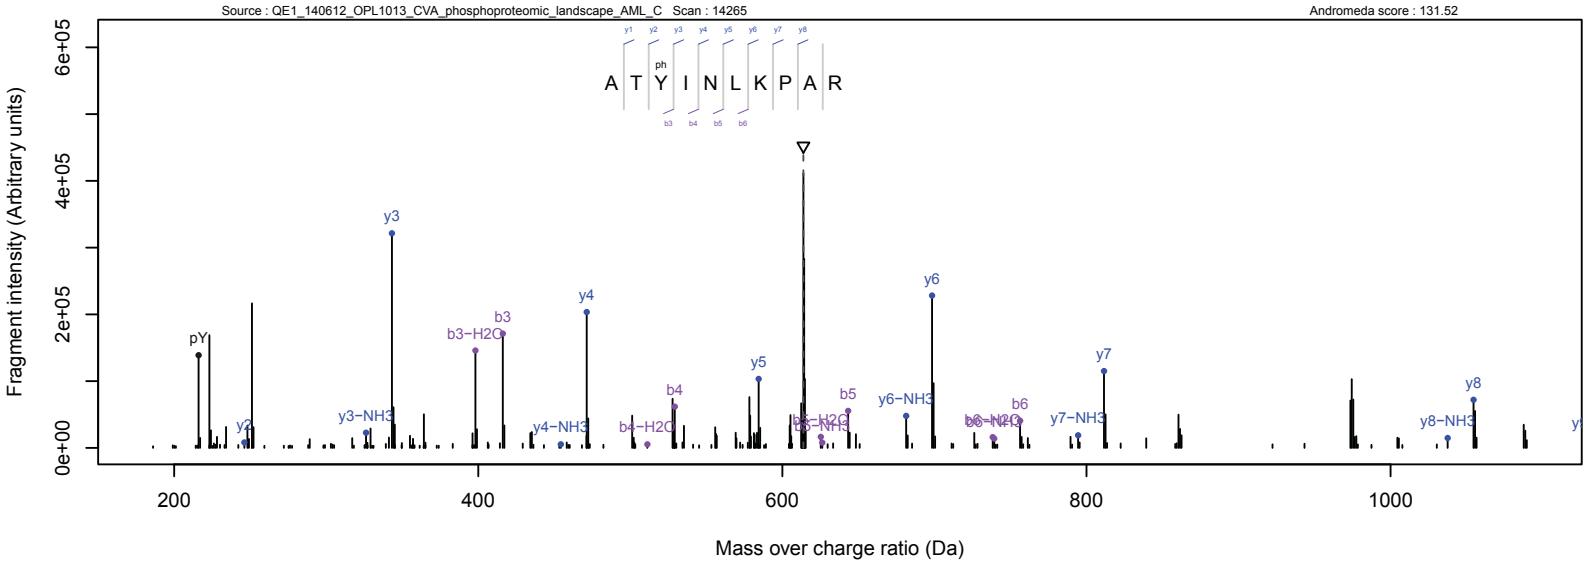

SDDY<sup>ph</sup>MPMSPASVSAPK-2+

Source: QE1\_140612\_OPL1013\_CVA\_phosphoproteomic\_landscape\_AML\_D Scan: 27421

Andromeda score: 131.4

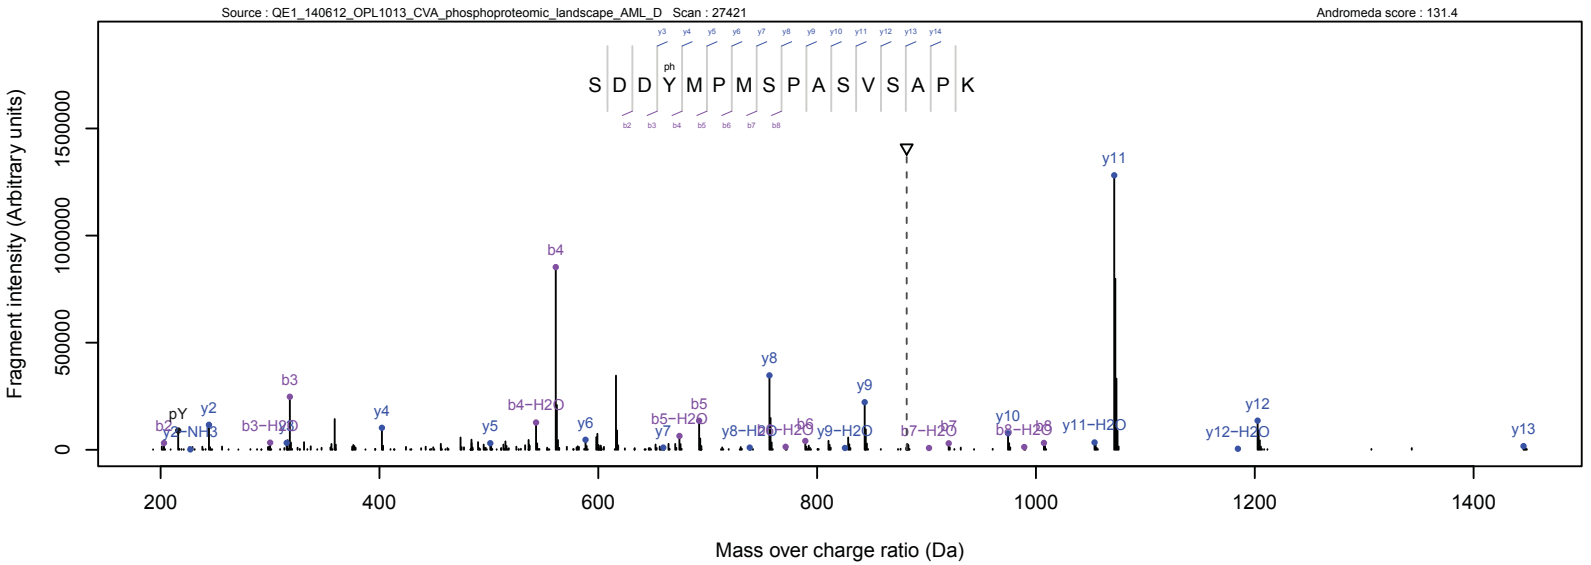



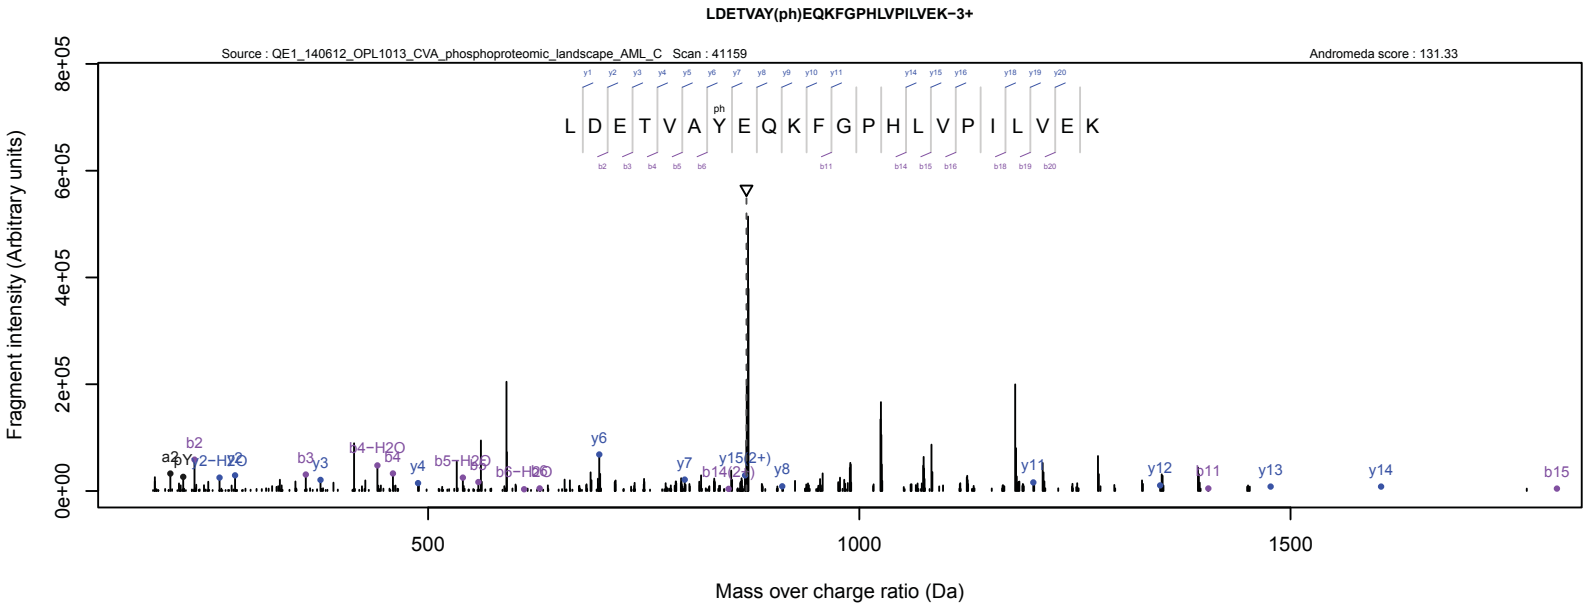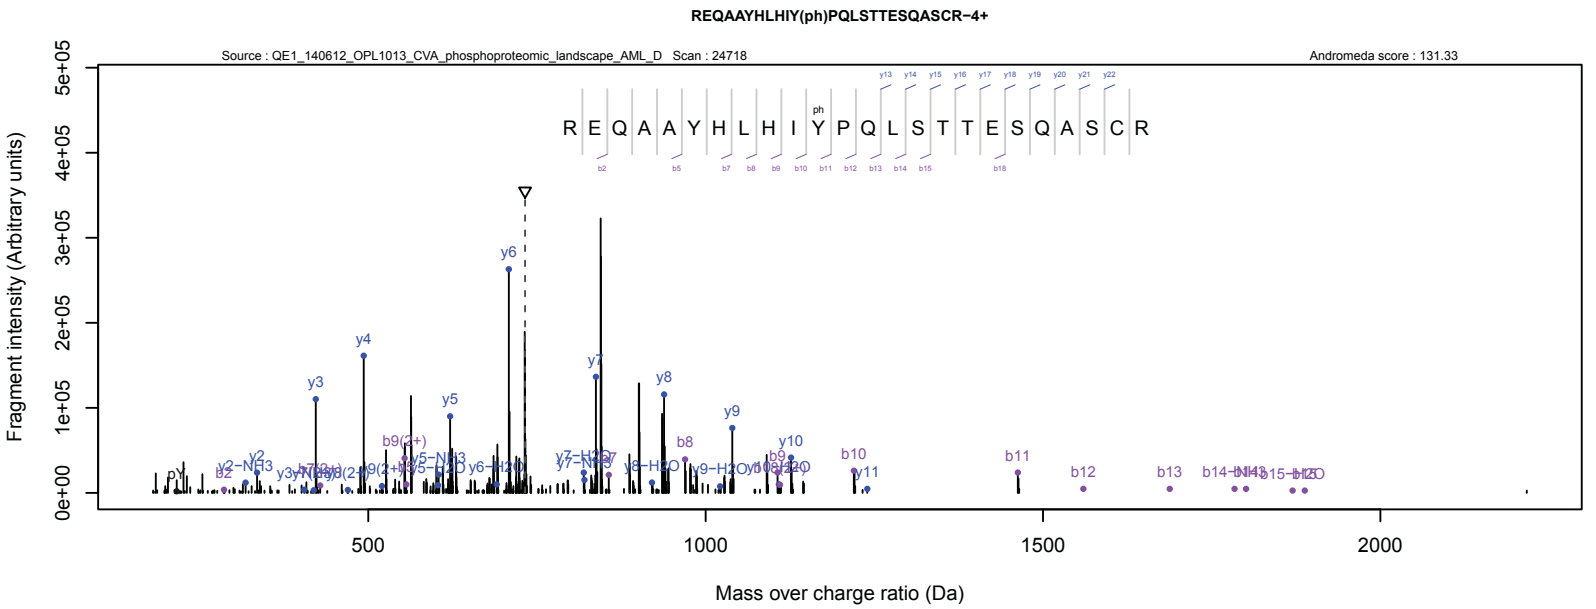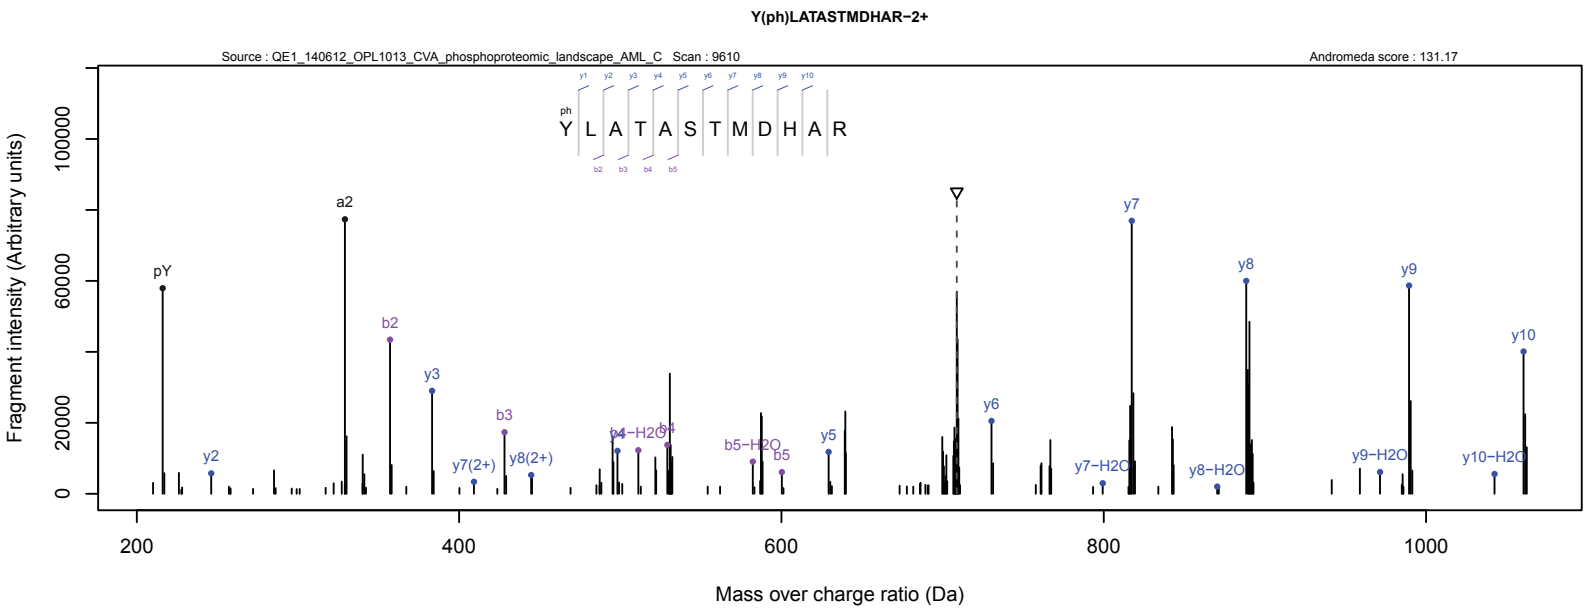

EDLQDKPASGVKEEWY(ph)AR-3+

Source: QE1\_140612\_OPL1013\_CVA\_phosphoproteomic\_landscape\_AML\_A Scan: 25697

Andromeda score: 131.09

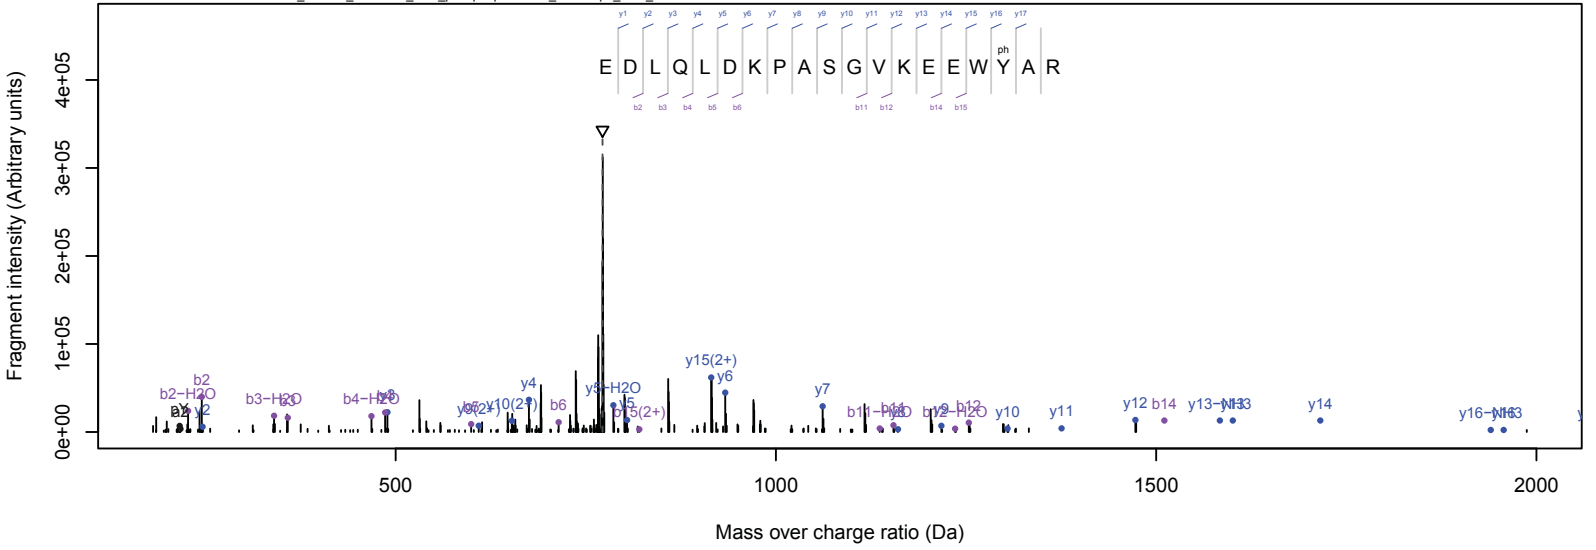

TLEPVKPTVPNDY(ph)MTSPAR-3+

Source: QE1\_140908\_OPL1013\_CvA\_pTyrIP\_AML\_HEL Scan: 30045

Andromeda score: 131.09

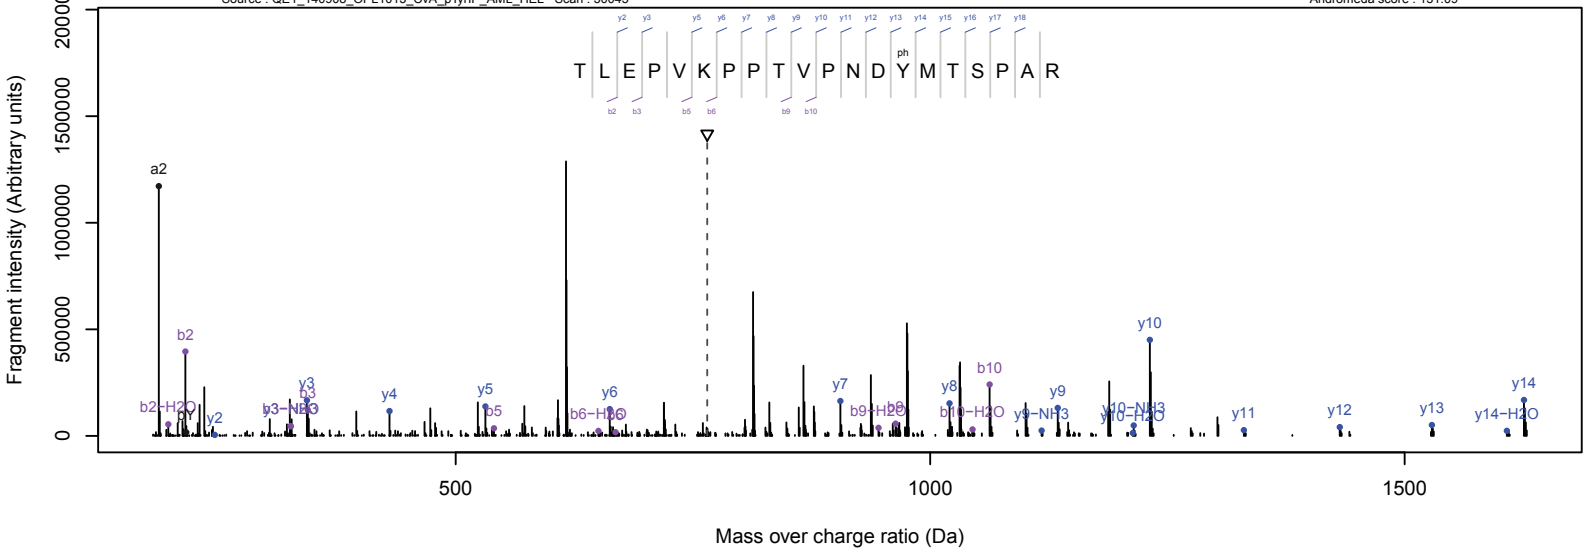

ITNDFYPEEDGKTKGY(ph)IFLEYASPAHA VDAVK-4+

Source: QE1\_140612\_OPL1013\_CVA\_phosphoproteomic\_landscape\_AML\_D Scan: 41061

Andromeda score: 131.08

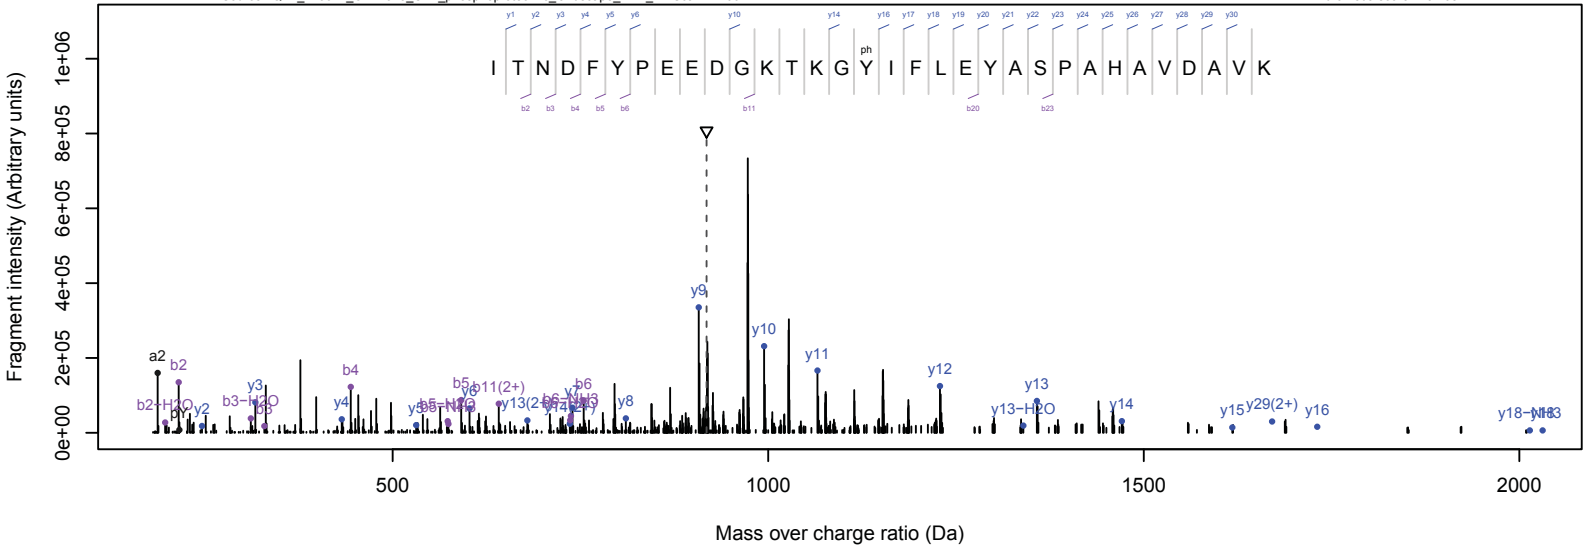

LEPQIASASEY(ph)AHRGLDKLEENLPILQQPTEK-4+

Source : QE1\_140612\_OPL1013\_CVA\_phosphoproteomic\_landscape\_AML\_C Scan : 46516

Andromeda score : 131.08

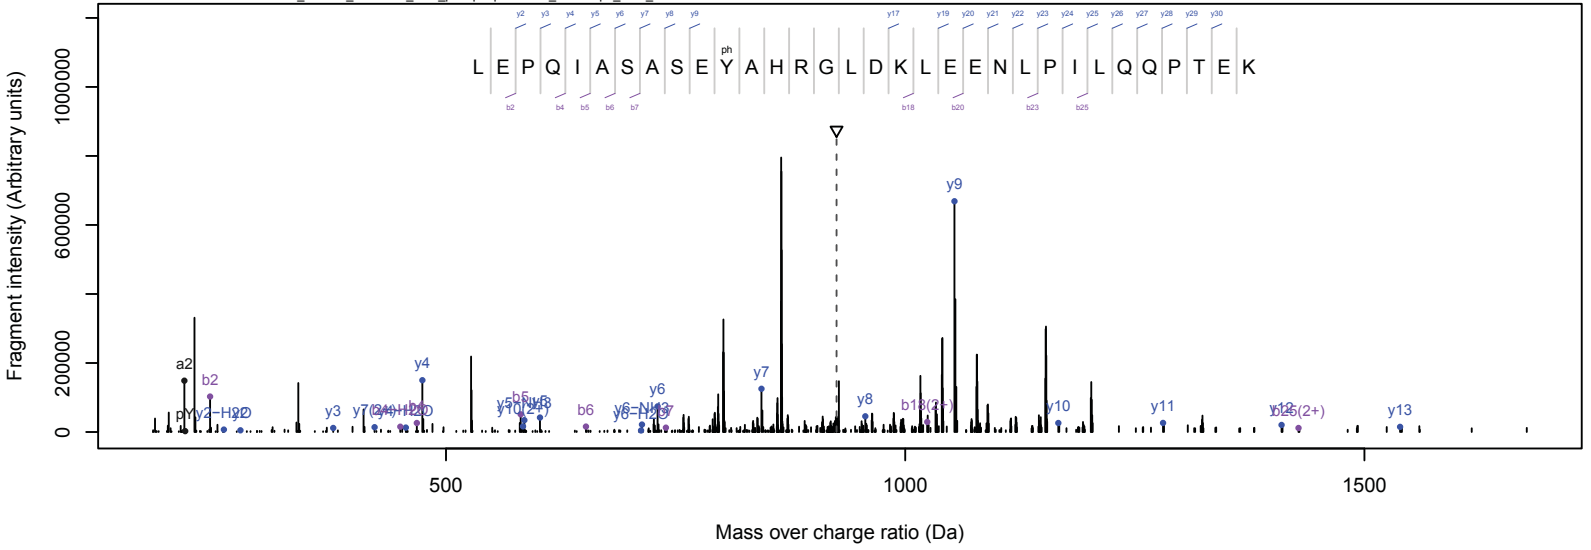

VSSY(ph)ATLFAQALPR-2+

Source : QE1\_140612\_OPL1013\_CVA\_phosphoproteomic\_landscape\_AML\_C Scan : 41729

Andromeda score : 131.08

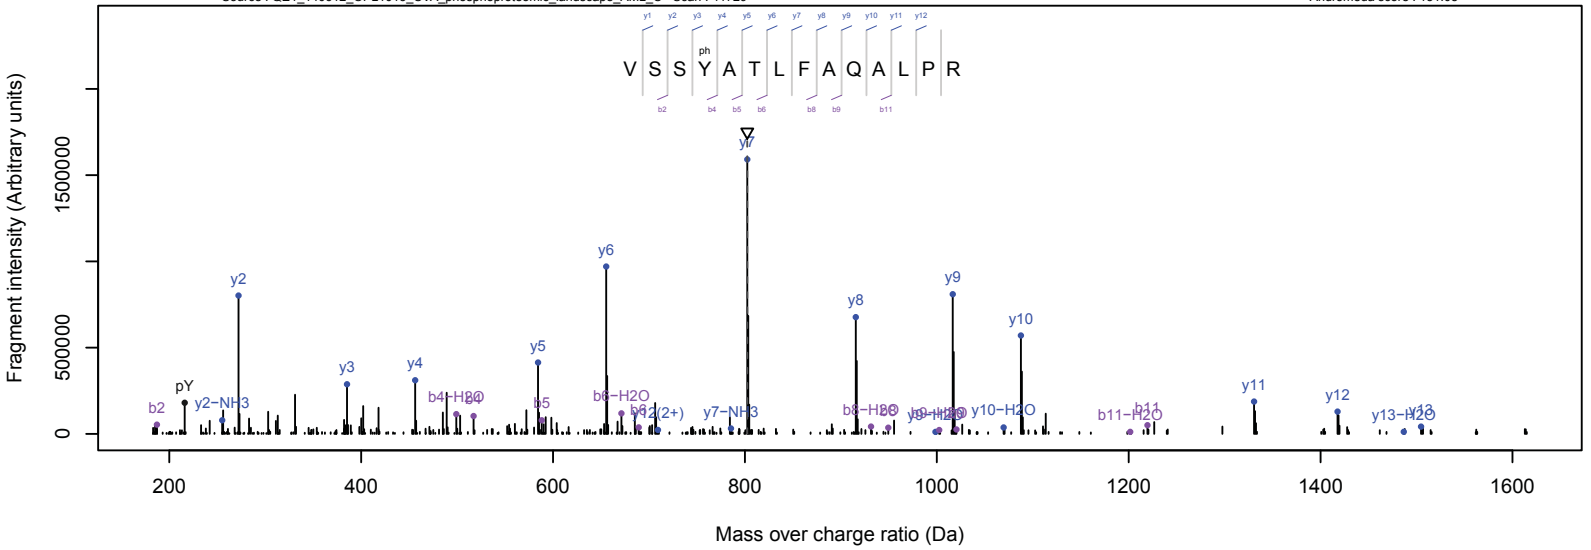

HSPYRT(ph)LEPVRPPVVPNDYVPSPTR-4+

Source : QE1\_140908\_OPL1013\_CvA\_pTyrIP\_AML\_HL60 Scan : 32627

Andromeda score : 131.04

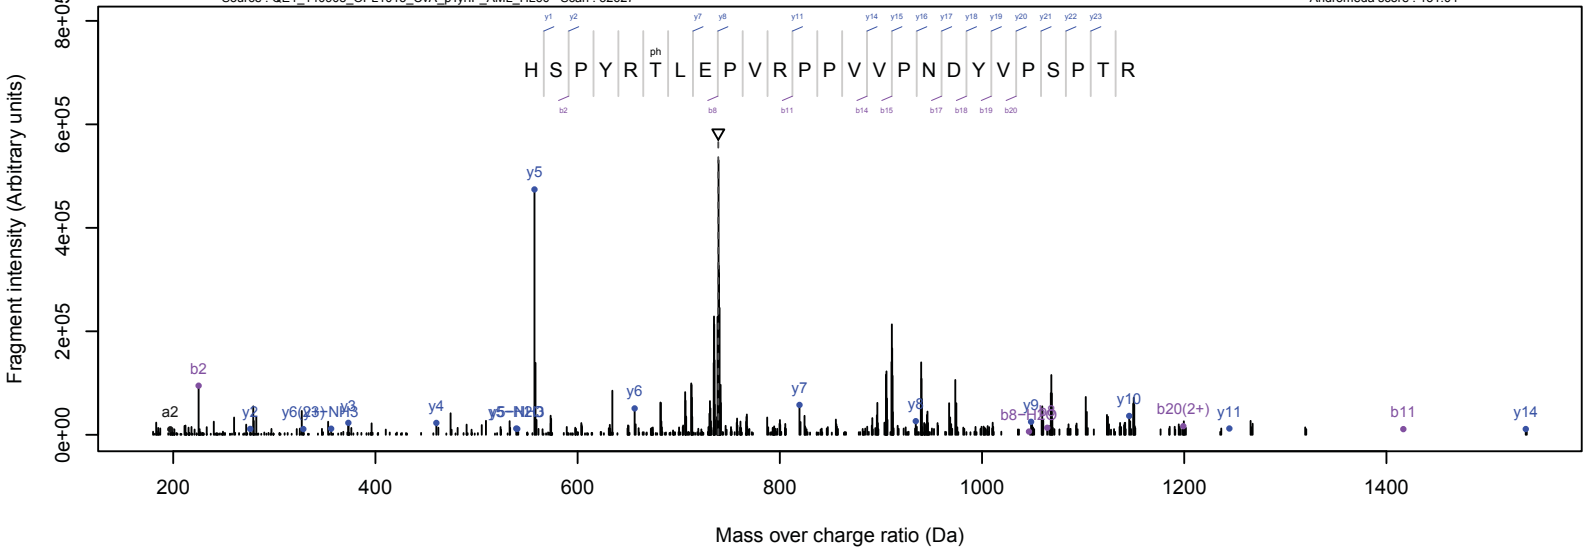

VY(ph)CHYFVK-2+

Source : QE1\_140612\_OPL1013\_CVA\_phosphoproteomic\_landscape\_AML\_C Scan : 13451

Andromeda score : 131.04

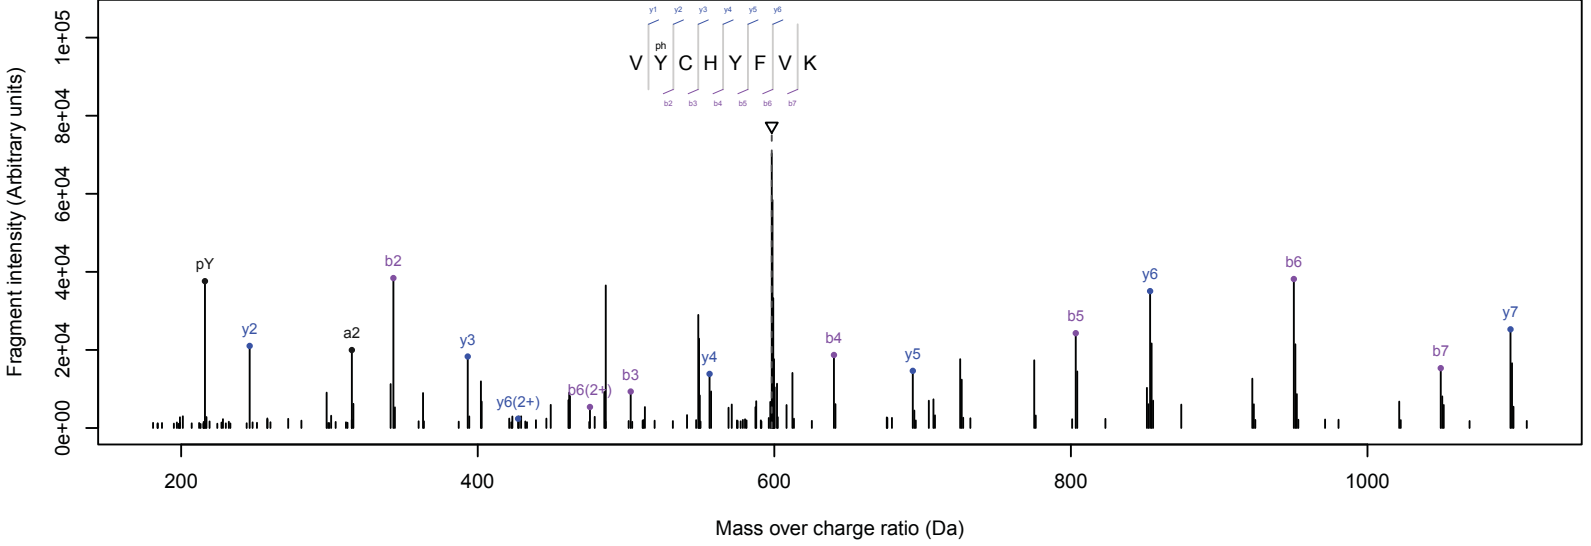

YVHDDGRVSY(ph)PLCFIFSSPVGCKPEQMMYAGSK-4+

Source : QE1\_140612\_OPL1013\_CVA\_phosphoproteomic\_landscape\_AML\_B Scan : 44441

Andromeda score : 130.88

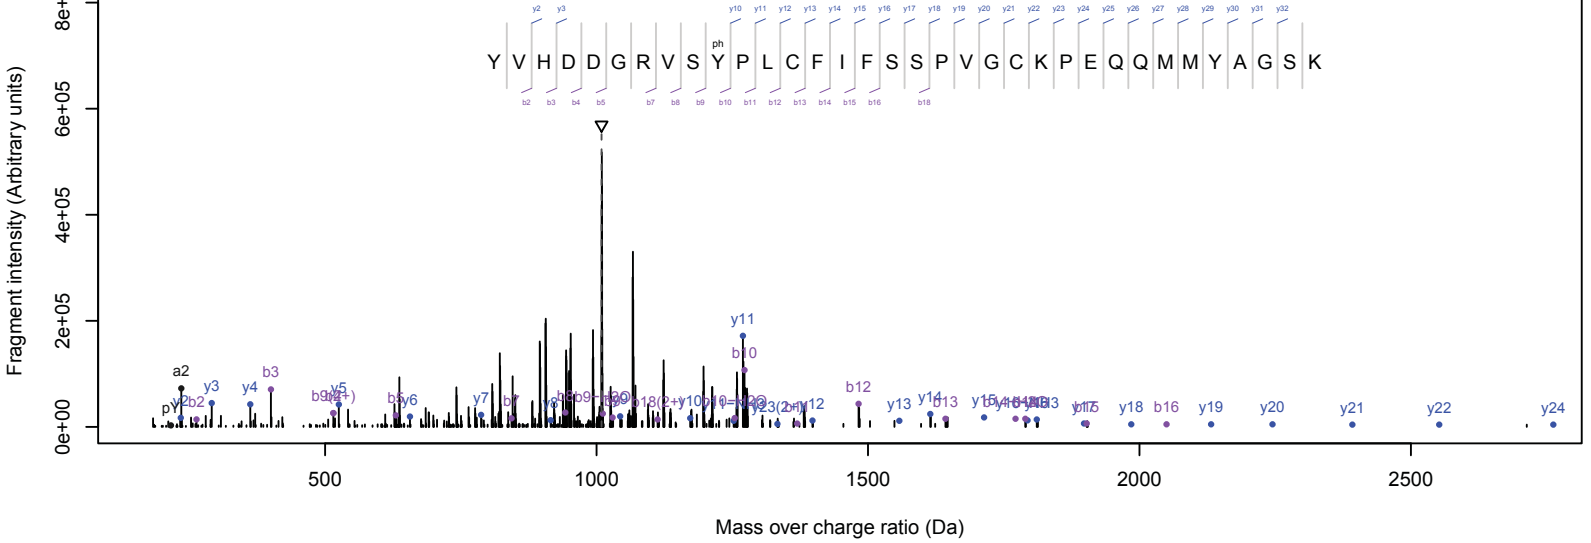

APVAGTCYQAEWDDYVPKLYEQLSGK-3+

Source : QE1\_140612\_OPL1013\_CVA\_phosphoproteomic\_landscape\_AML\_B Scan : 46223

Andromeda score : 130.57

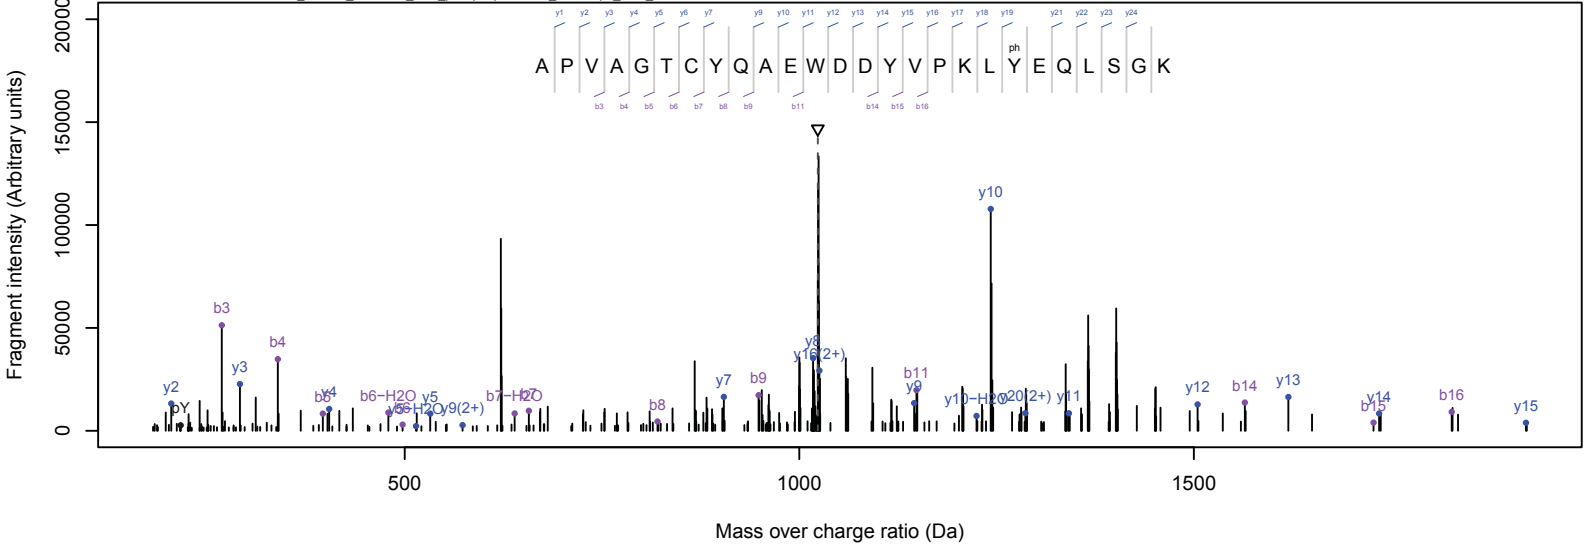

DGVIEASINHEKGYVQSK-2+

Source : QE1\_140612\_OPL1013\_CVA\_phosphoproteomic\_landscape\_AML\_B Scan : 20739

Andromeda score : 130.56

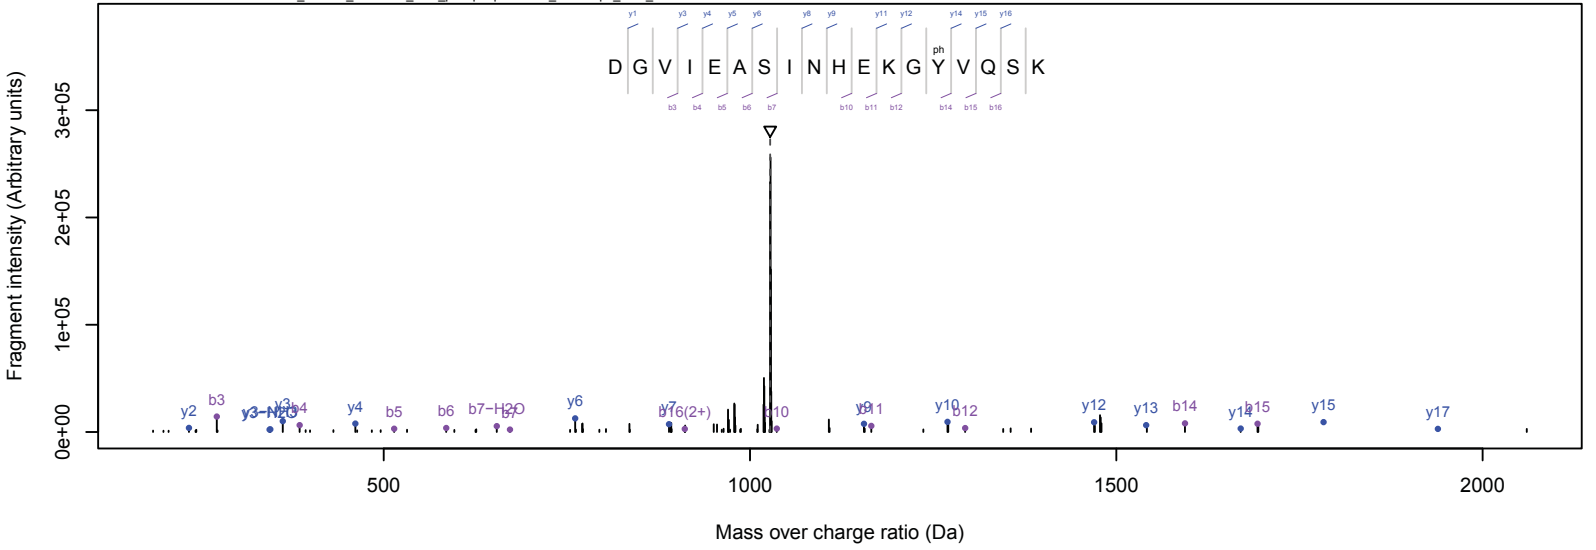

LLDLVQSCNYK-2+

Source : QE1\_140612\_OPL1013\_CVA\_phosphoproteomic\_landscape\_AML\_A Scan : 28054

Andromeda score : 130.56

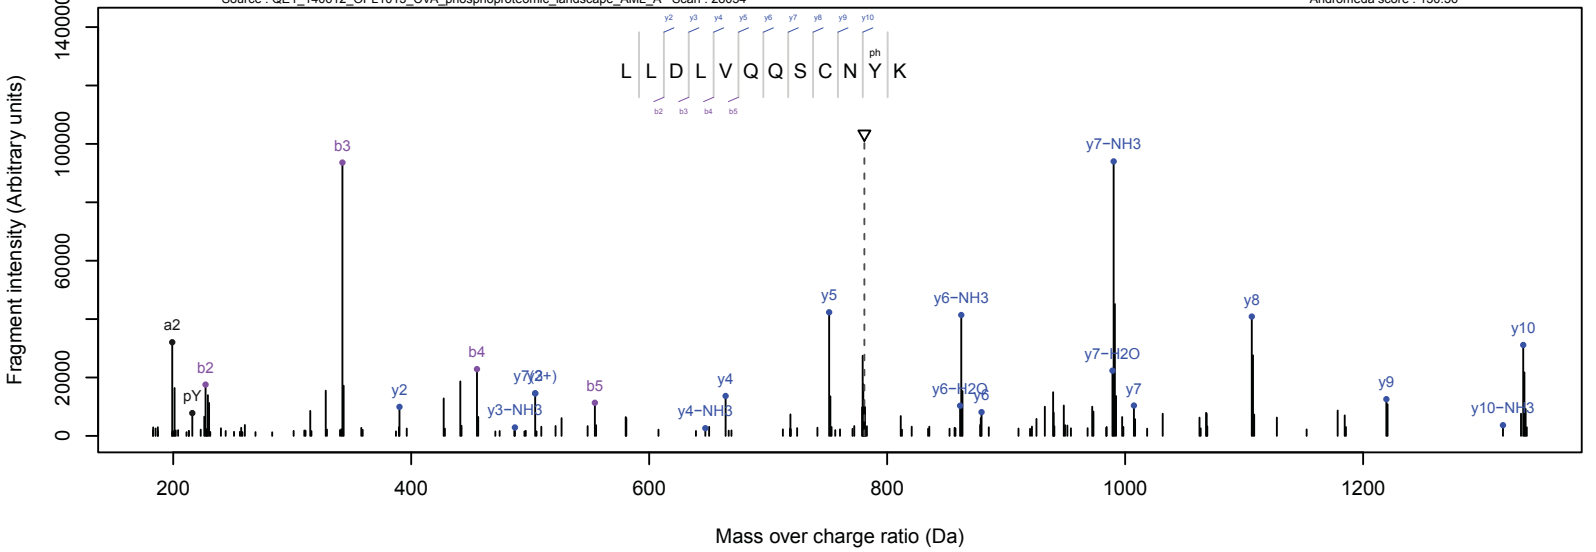

SLY(ph)DRPASYSK-2+

Source : QE1\_140612\_OPL1013\_CVA\_phosphoproteomic\_landscape\_AML\_A Scan : 9062

Andromeda score : 130.56

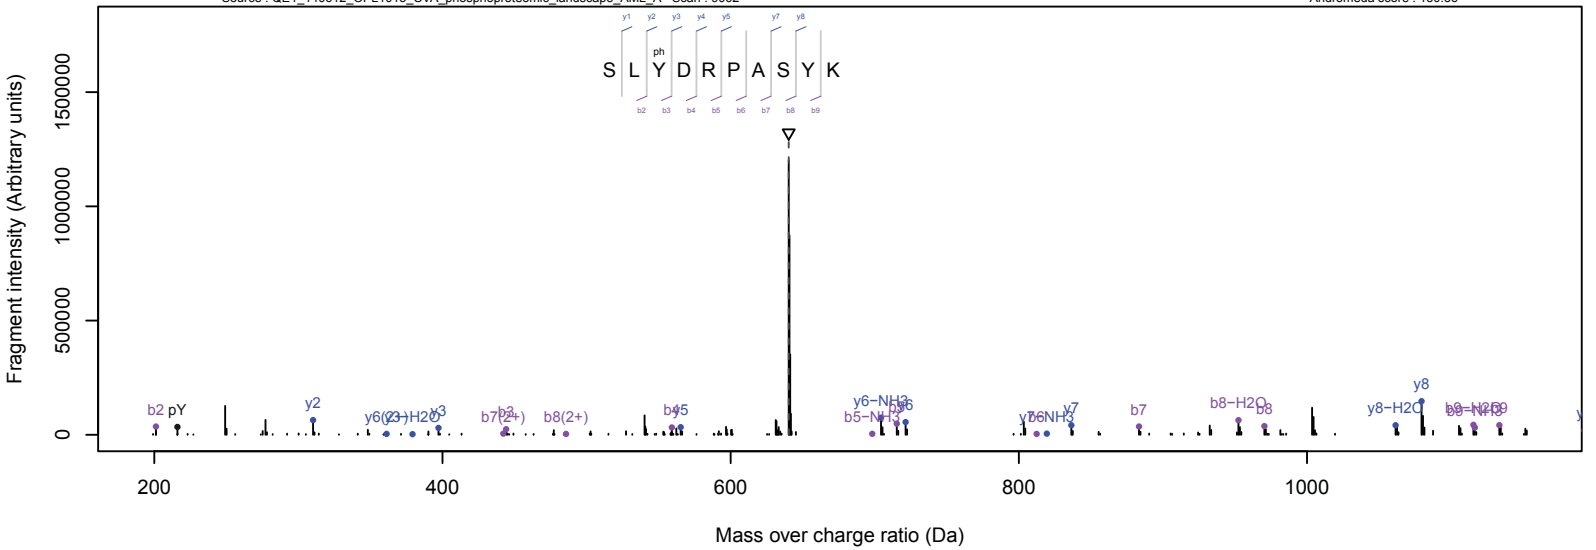

QFY(ph)FVHSAGQFK-2+

Source : QE1\_140612\_OPL1013\_CVA\_phosphoproteomic\_landscape\_AML\_C Scan : 28615

Andromeda score : 130.44

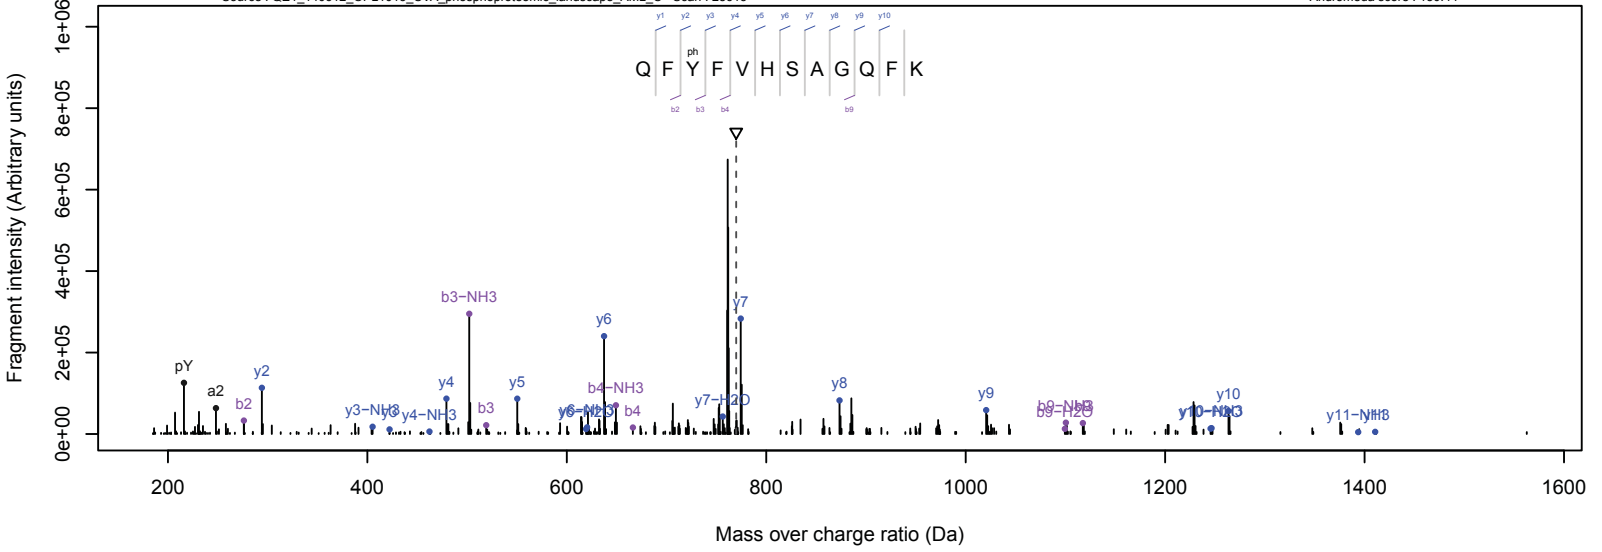

NIHY(ph)YFMALK-2+

Source : QE1\_140612\_OPL1013\_CVA\_phosphoproteomic\_landscape\_AML\_B Scan : 32982

Andromeda score : 130.41

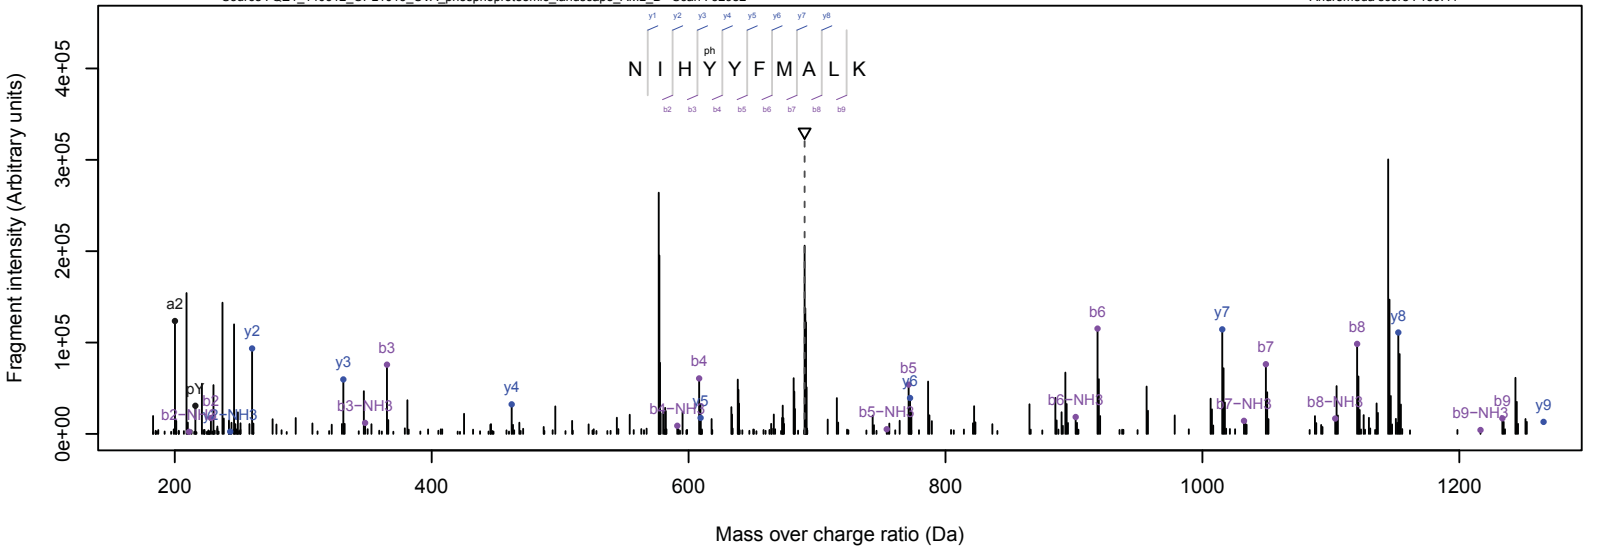

IVGSKPLY(ph)VALAQR-2+

Source : QE1\_140612\_OPL1013\_CVA\_phosphoproteomic\_landscape\_AML\_C Scan : 28306

Andromeda score : 130.27

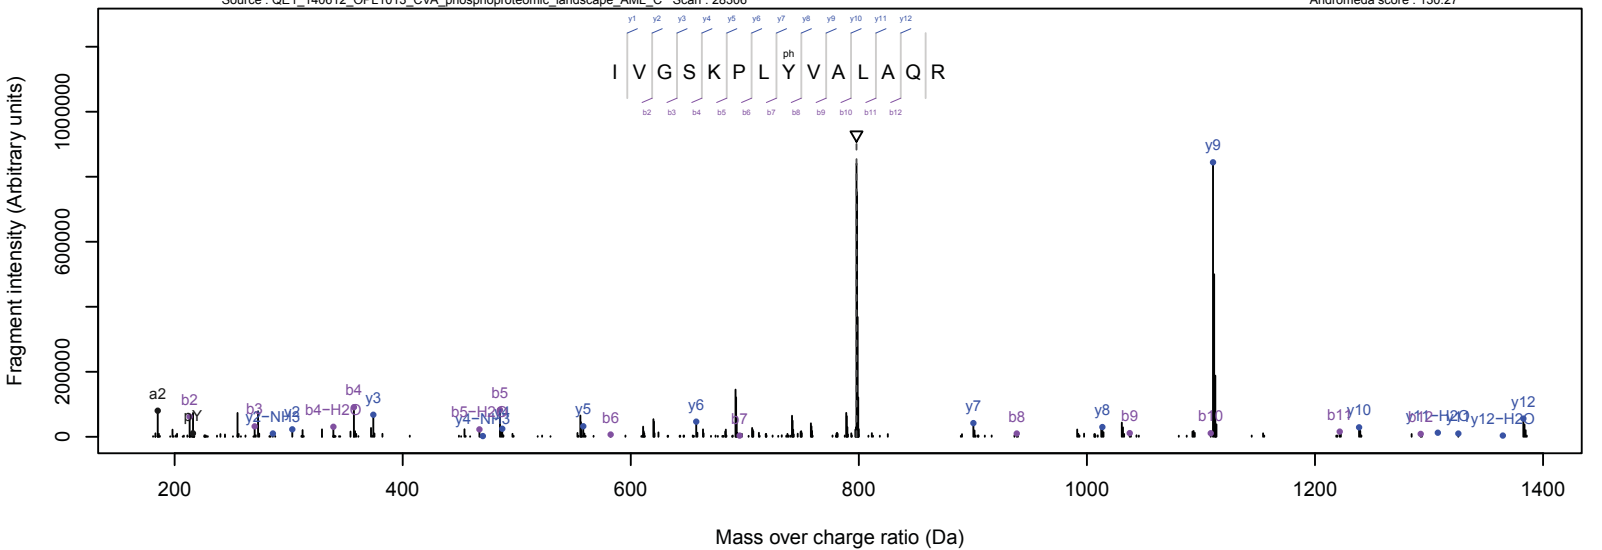

**KAPIFTSEQEKLYLVK-3+**

Source : QE1\_140612\_OPL1013\_CVA\_phosphoproteomic\_landscape\_AML\_C Scan : 28393

Andromeda score : 130.27

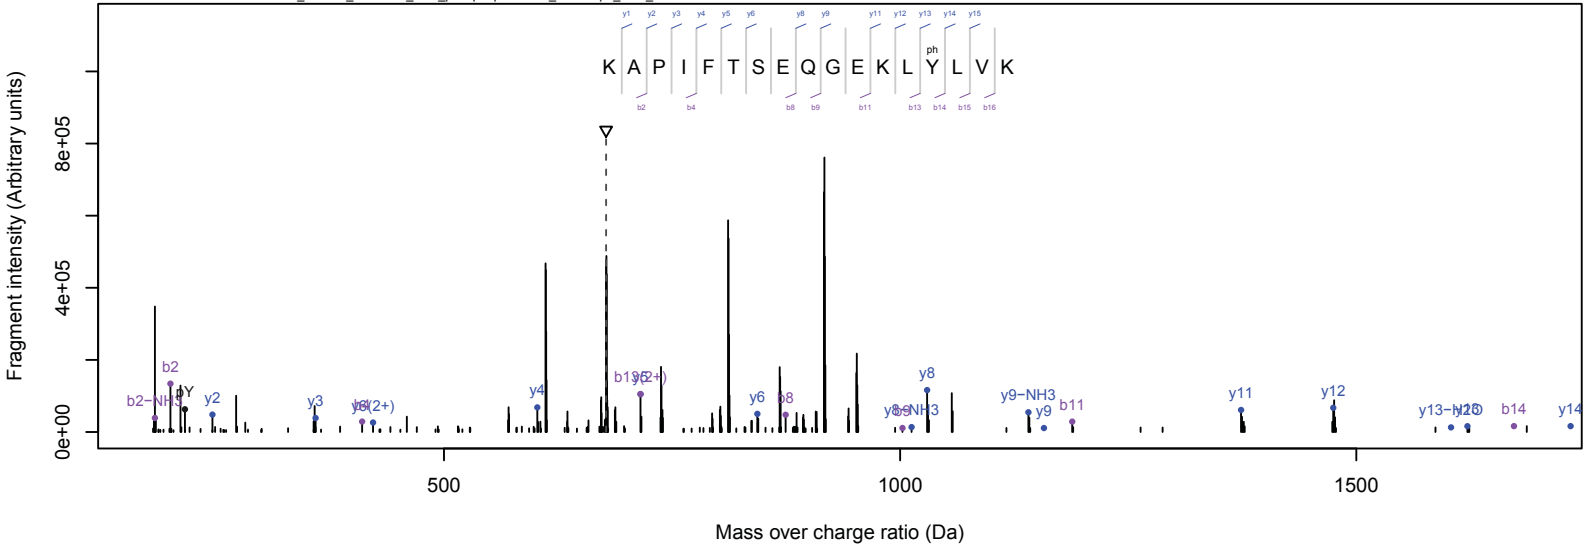

**STSQLVNLQPDYINPR-2+**

Source : QE1\_140612\_OPL1013\_CVA\_phosphoproteomic\_landscape\_AML\_B Scan : 31641

Andromeda score : 130.21

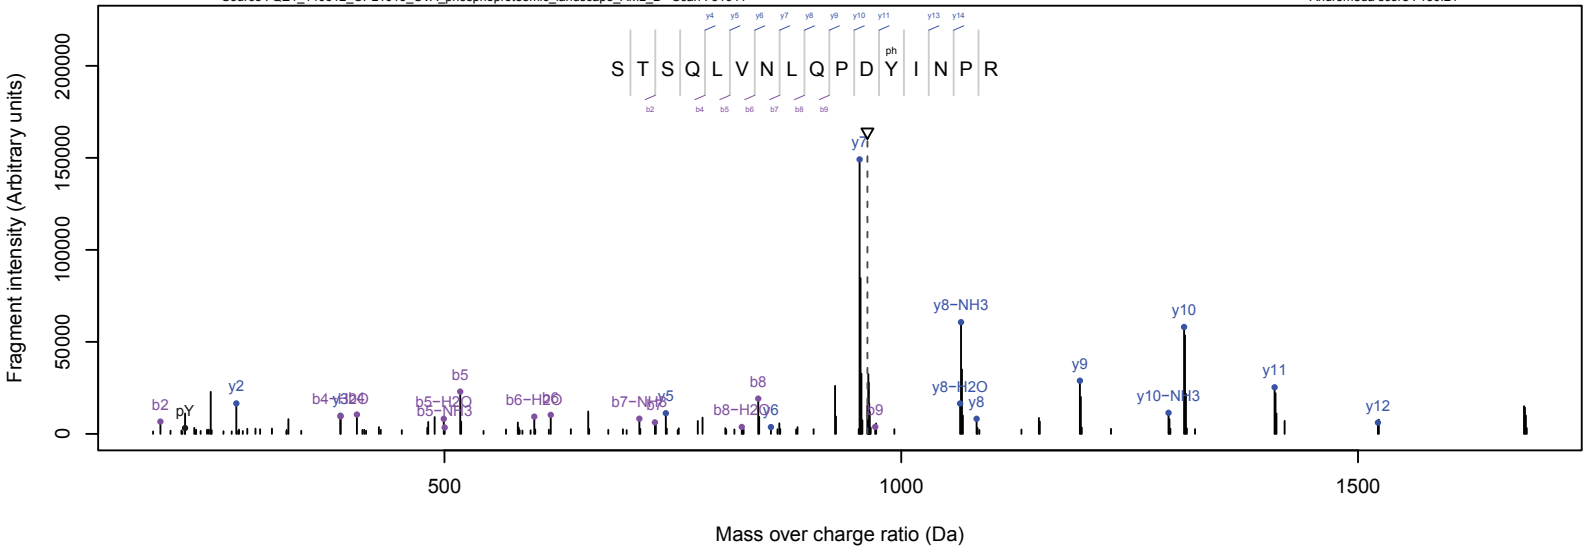

**IQQY(ph)FPSNYVEDISTADFEELK-3+**

Source : QE1\_140822\_OPL1013\_CvA\_pTyrIP\_AML\_cell\_lines\_part2\_B Scan : 43888

Andromeda score : 130.19

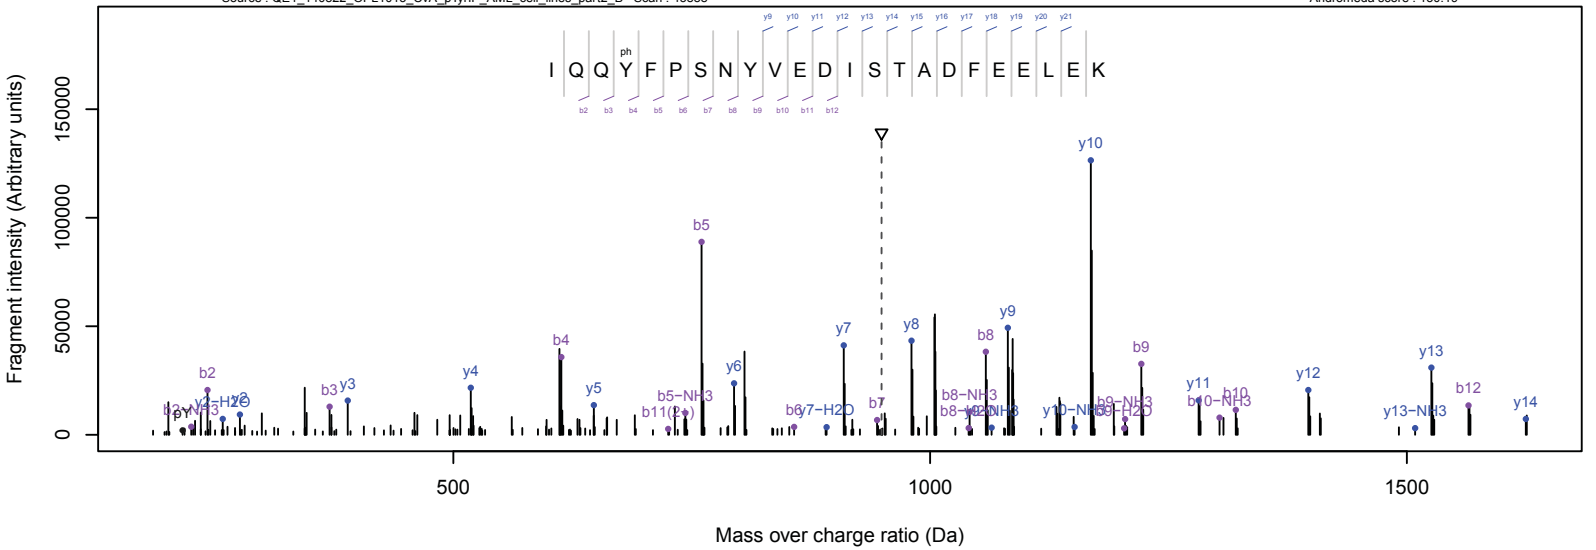

(ac)AGMSQRPPSMY(W)WCVGPEESAVCPER-3+

Source : QE1\_140612\_OPL1013\_CVA\_phosphoproteomic\_landscape\_AML\_C Scan : 40313

Andromeda score : 130.15

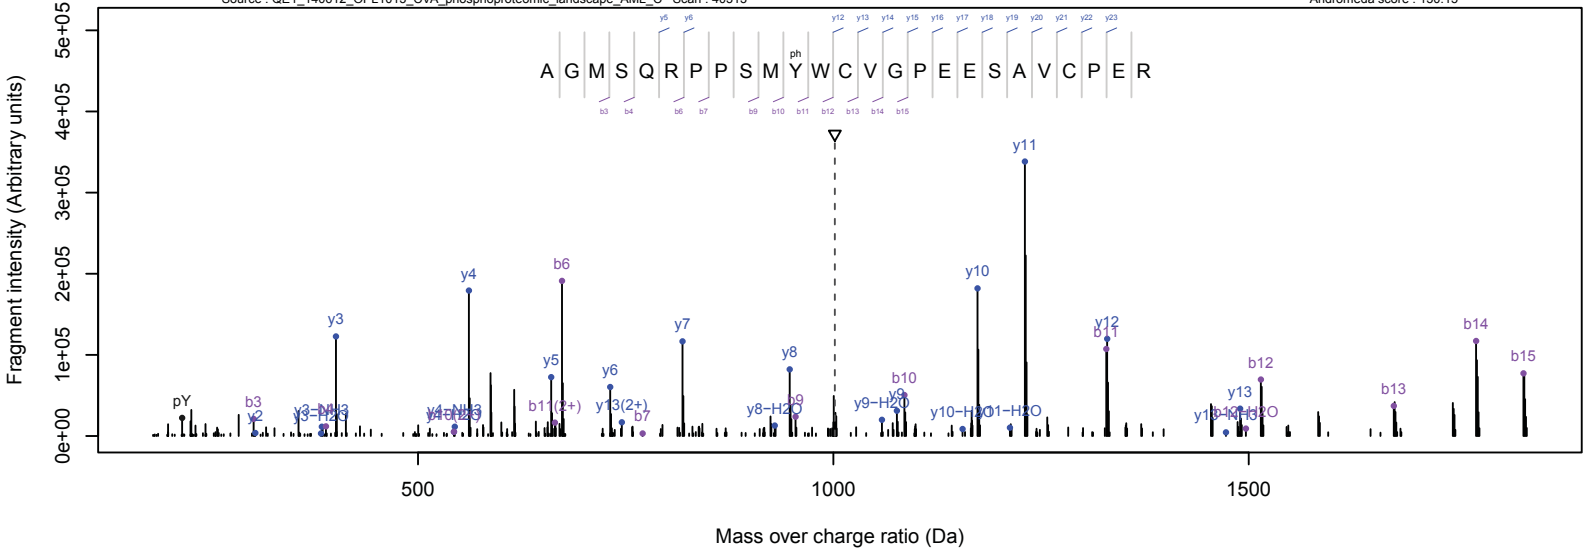

DGGGGGFYGY(M)(ox)TMDRPLSHCGR-3+

Source : QE1\_140908\_OPL1013\_CvA\_pTyrIP\_AML\_ML2 Scan : 24568

Andromeda score : 130.05

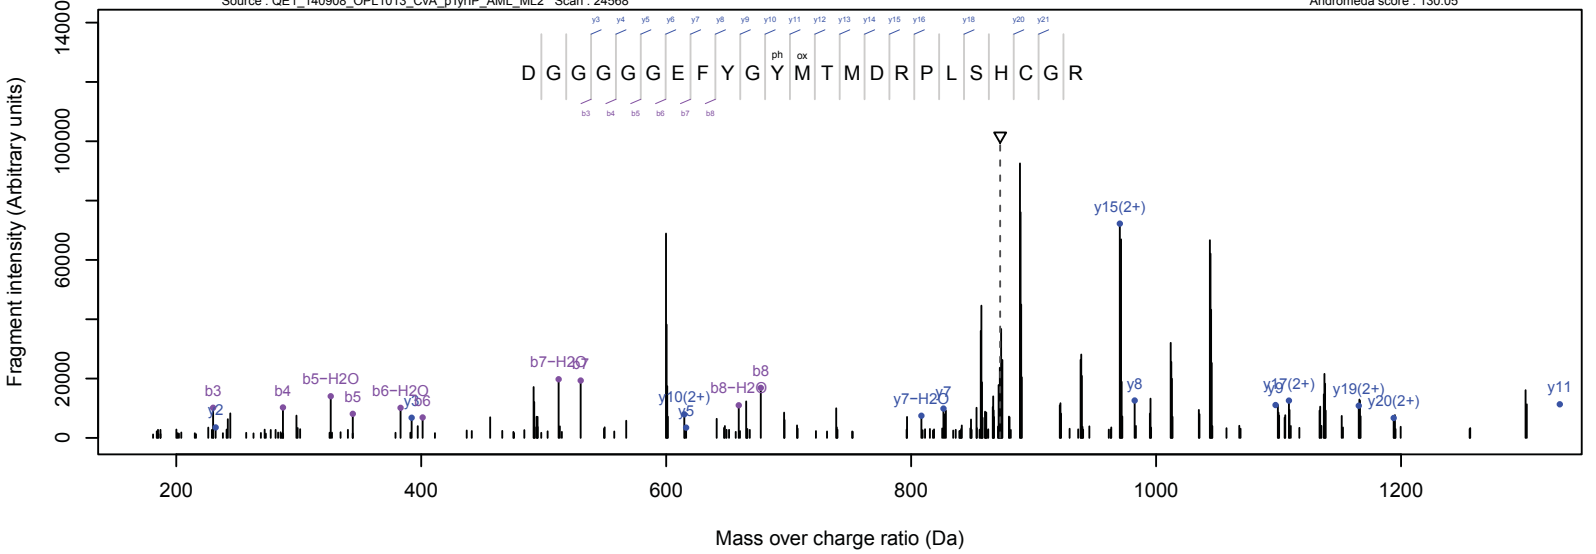

FDTIY(Q)ILLKK-3+

Source : QE1\_140612\_OPL1013\_CVA\_phosphoproteomic\_landscape\_AML\_C Scan : 39696

Andromeda score : 130.01

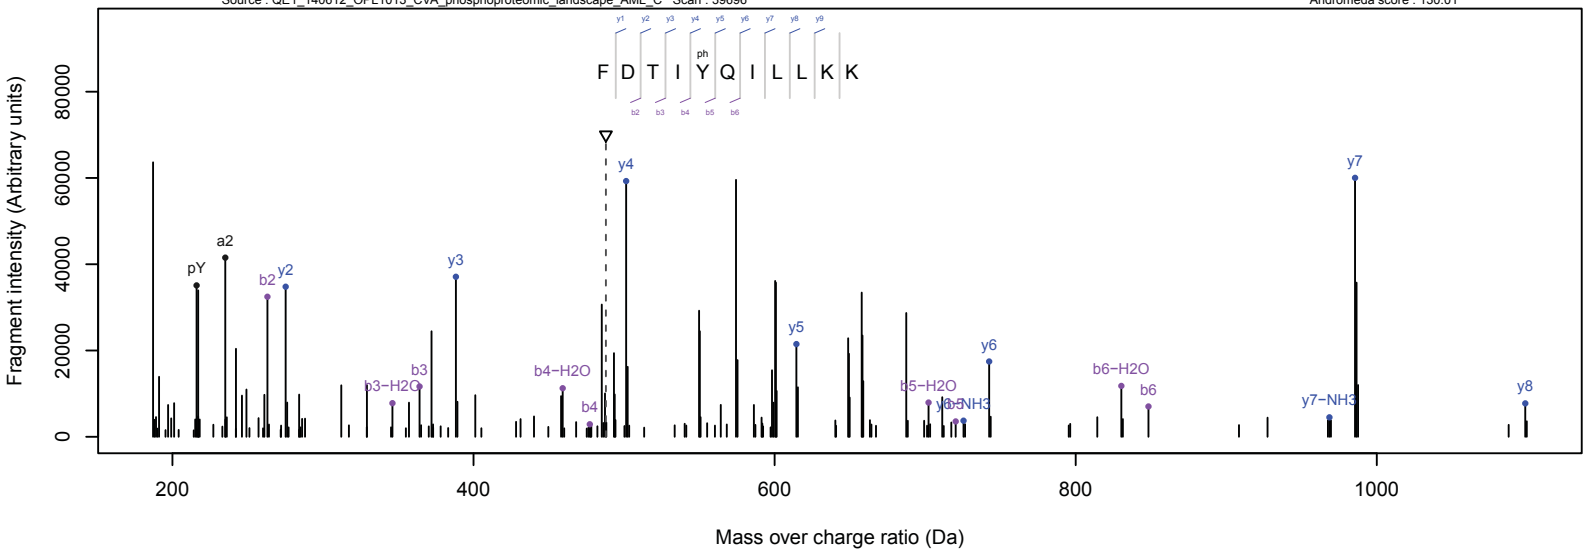



**Y(ph)GTELNQDLK-2+**

Source : QE1\_140612\_OPL1013\_CVA\_phosphoproteomic\_landscape\_AML\_B Scan : 12050

Andromeda score : 129.82

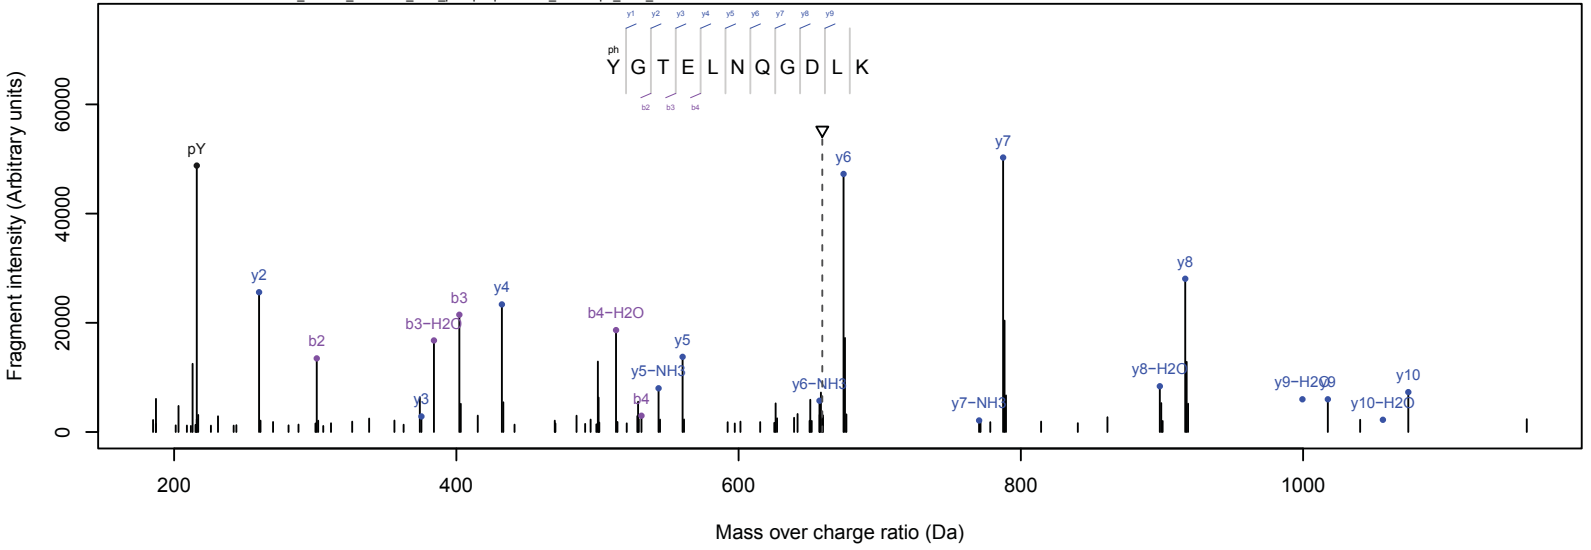

**IHEDKHY(ph)PCTLVGTWNTWYGEQDQAVHLWR-5+**

Source : QE1\_140612\_OPL1013\_CVA\_phosphoproteomic\_landscape\_AML\_C Scan : 42973

Andromeda score : 129.72

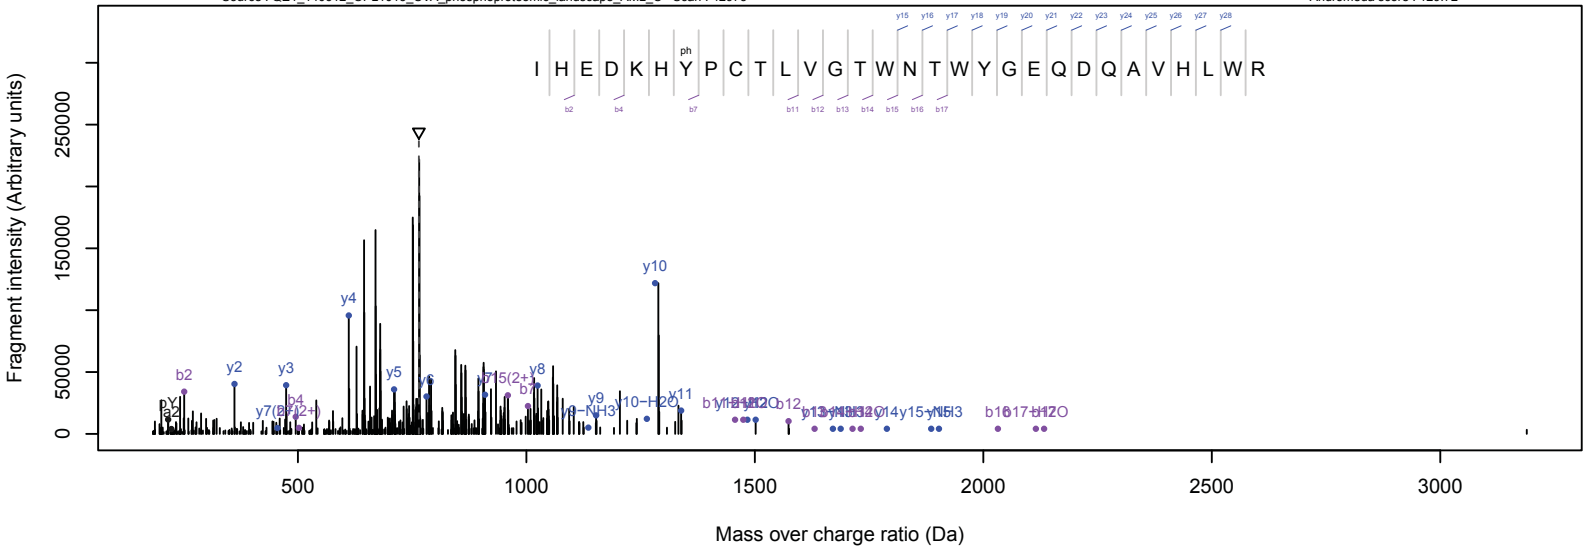

**ESLY(ph)SQLPMDCFMPSYSR-2+**

Source : QE1\_140612\_OPL1013\_CVA\_phosphoproteomic\_landscape\_AML\_A Scan : 45904

Andromeda score : 129.46

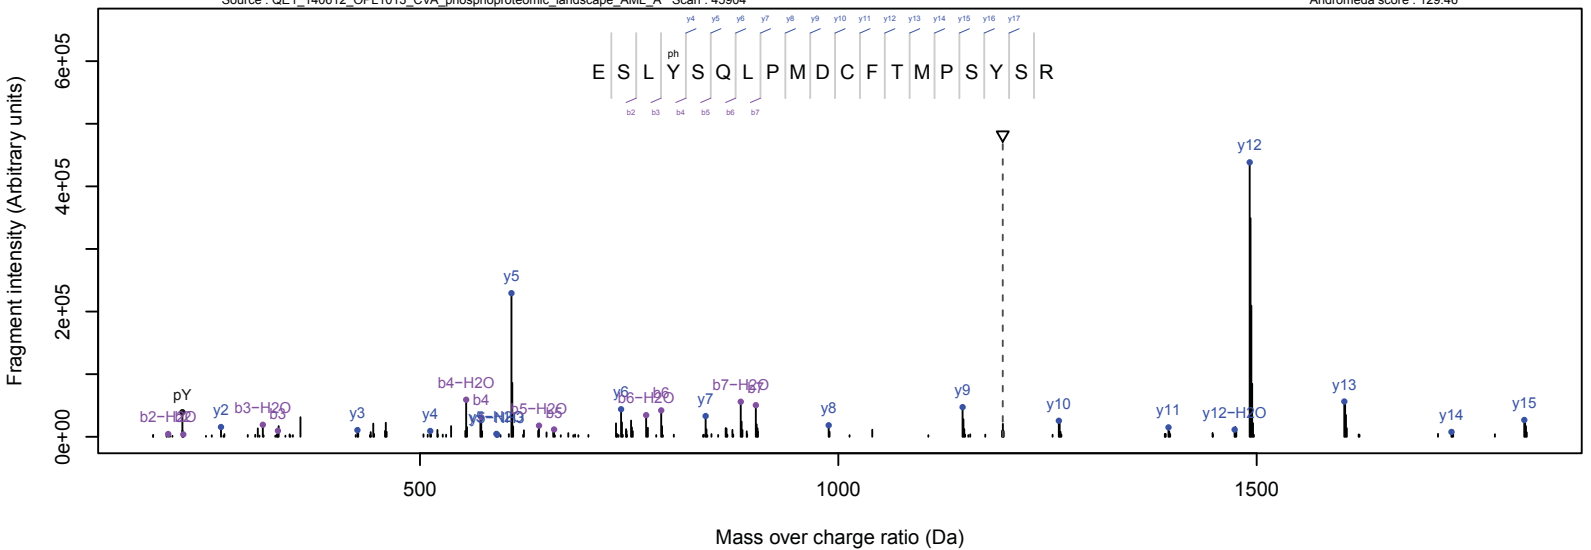

VVCFNHDNTLLATGGTDGYVR-3+

Source : QE1\_140822\_OPL1013\_CvA\_pTyrIP\_AML\_cell\_lines\_part2\_E Scan : 22064

Andromeda score : 129.46

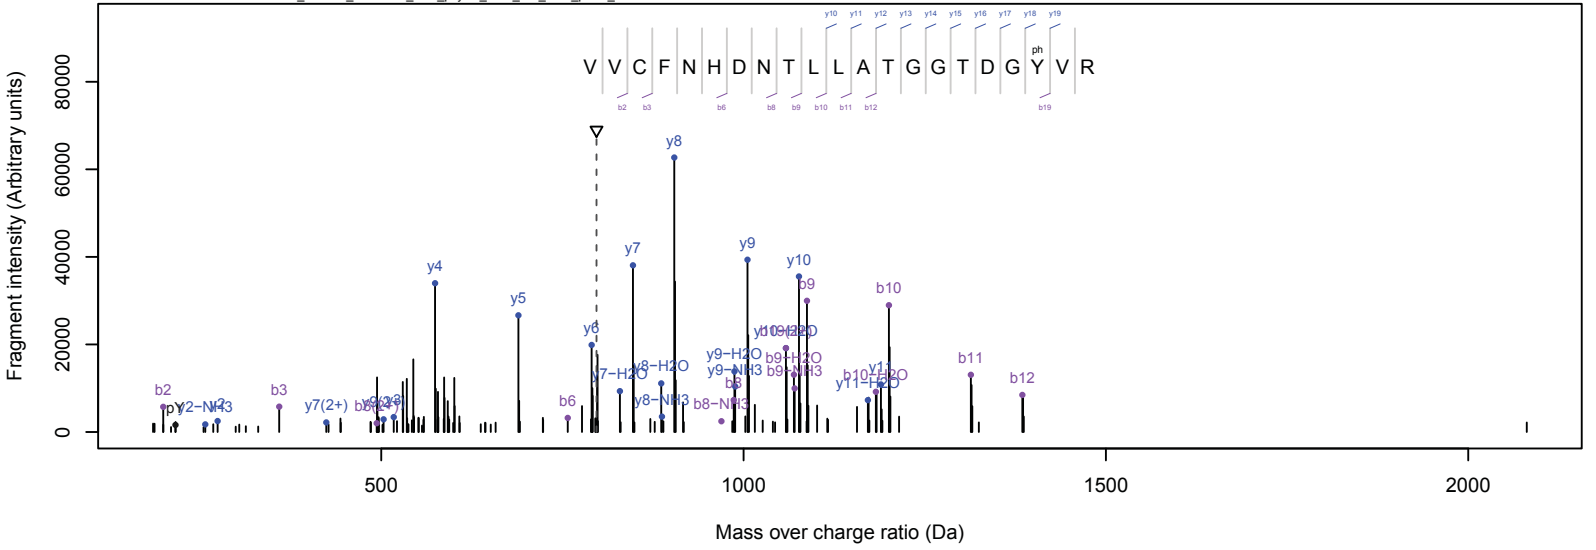

ATEPPSQEGASPAEPSVYATLAIH-3+

Source : QE1\_140822\_OPL1013\_CvA\_pTyrIP\_AML\_cell\_lines\_part2\_E Scan : 25872

Andromeda score : 129.43

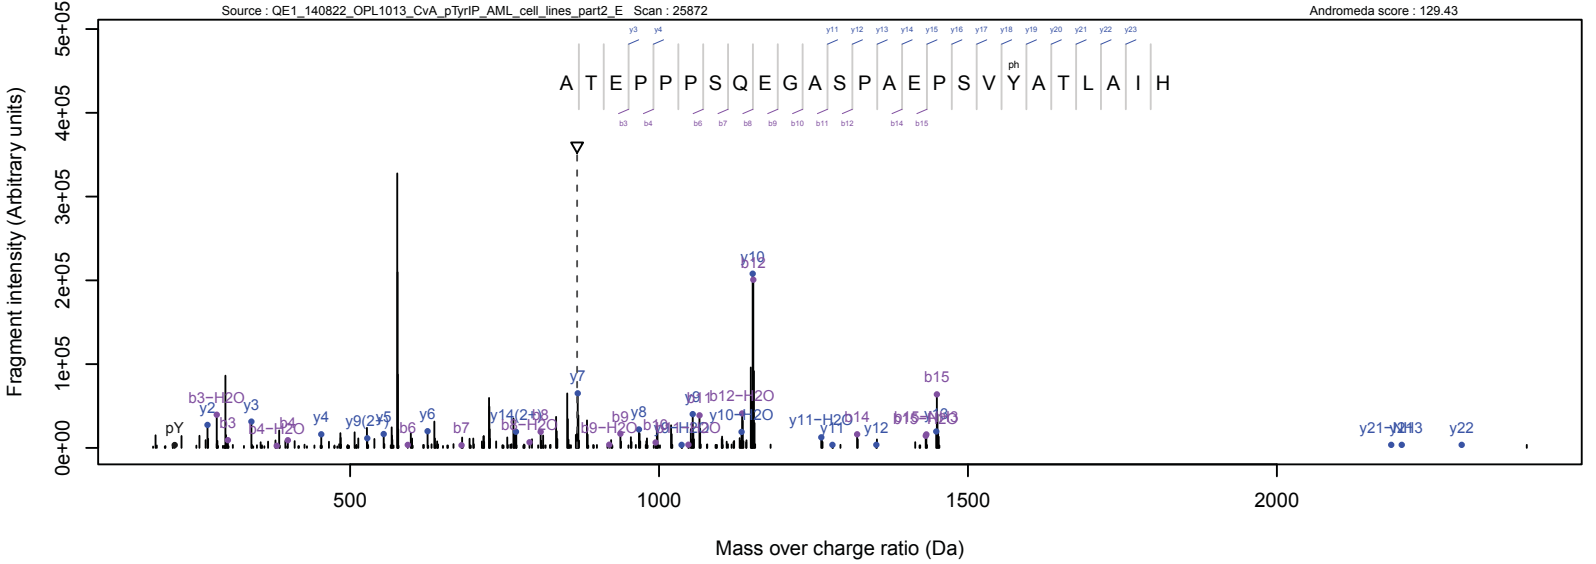

NPY(ph)FDKNGNPSMFGVGNATAAQP R-3+

Source : QE1\_140612\_OPL1013\_CVA\_phosphoproteomic\_landscape\_AML\_C Scan : 28917

Andromeda score : 129.43

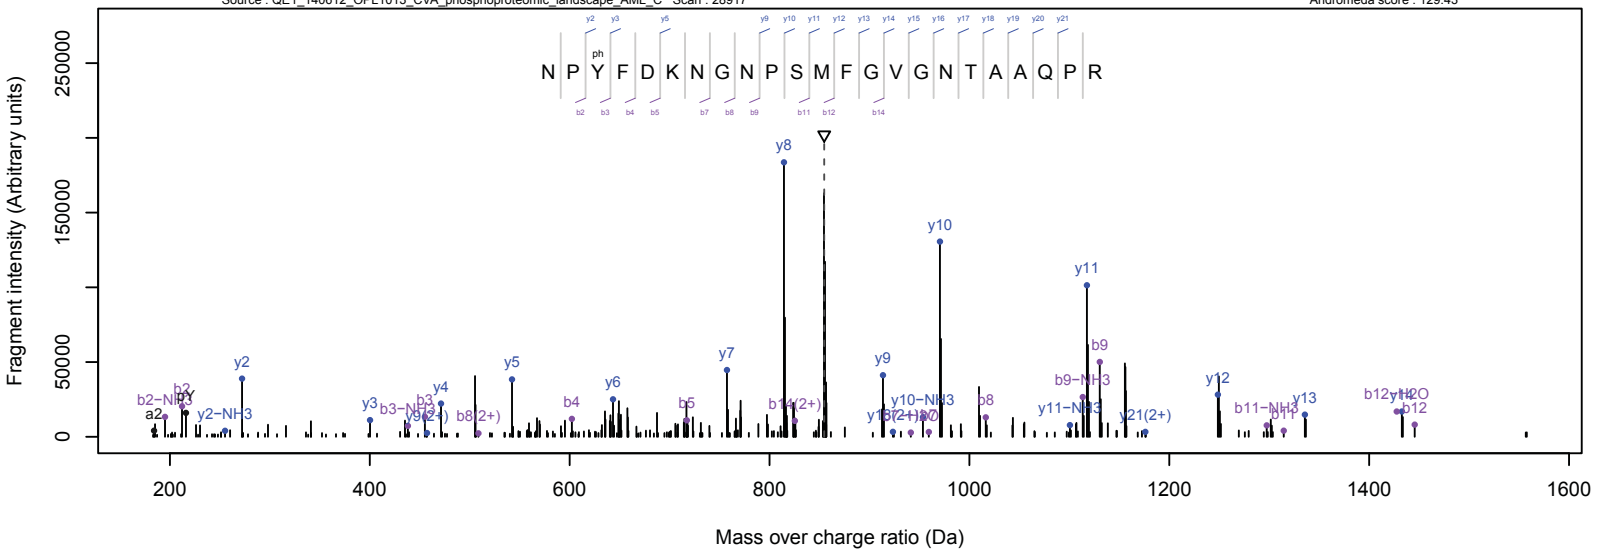

SADHPPKLY(ph)HSALNR-4+

Source : QE1\_140612\_OPL1013\_CVA\_phosphoproteomic\_landscape\_AML\_C Scan : 9663

Andromeda score : 129.38

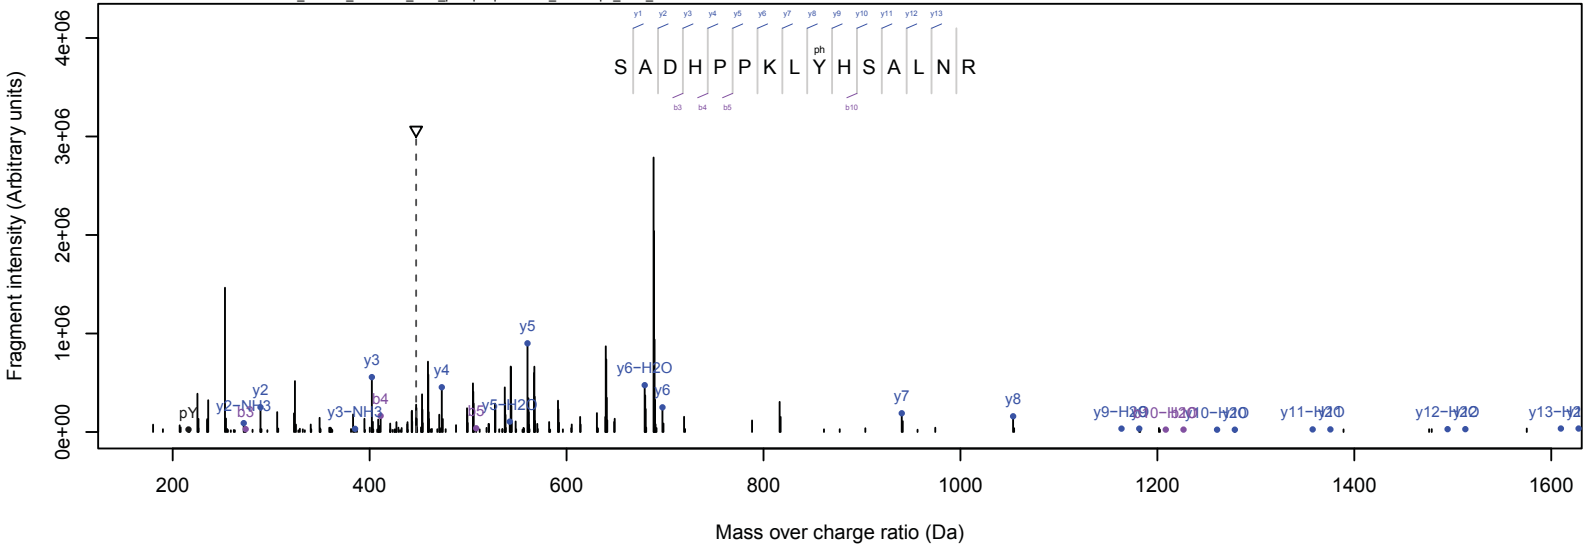

YCRPESQEHPGSAAPY(ph)LKTK-4+

Source : QE1\_140612\_OPL1013\_CVA\_phosphoproteomic\_landscape\_AML\_D Scan : 14155

Andromeda score : 129.29

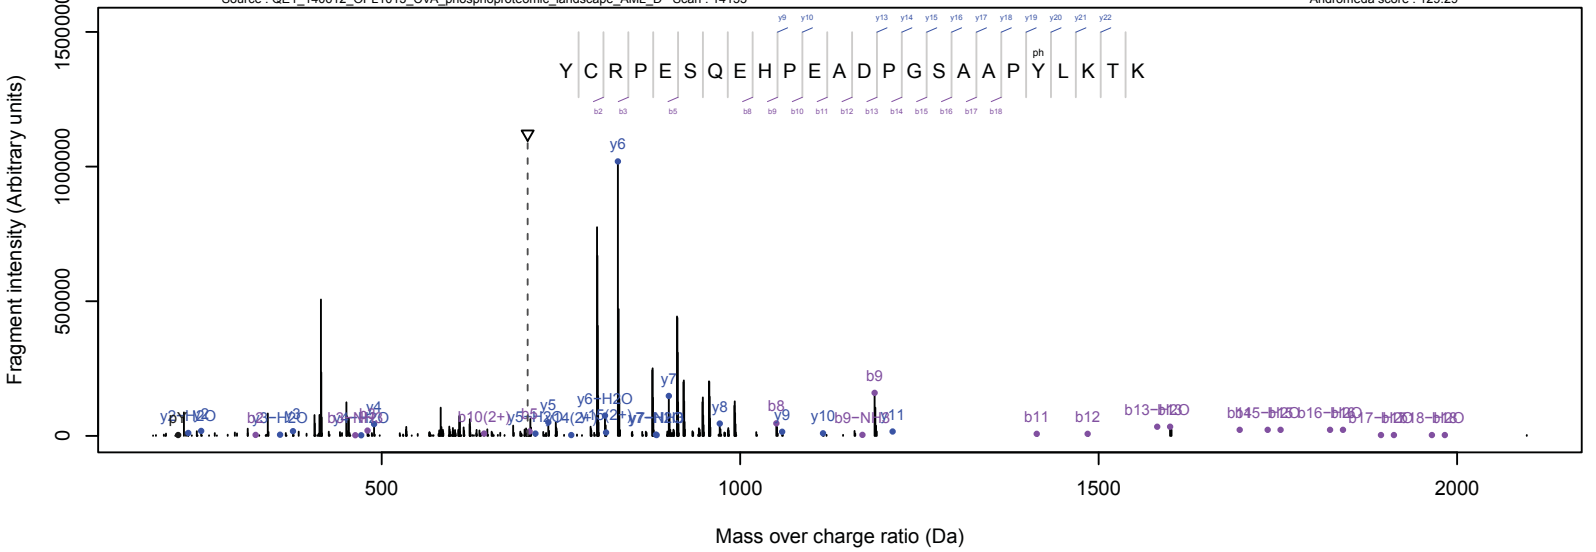

GTHMQHAYDFYKPDMLSEYP IVDGK-4+

Source : QE1\_140612\_OPL1013\_CVA\_phosphoproteomic\_landscape\_AML\_B Scan : 34257

Andromeda score : 129.27

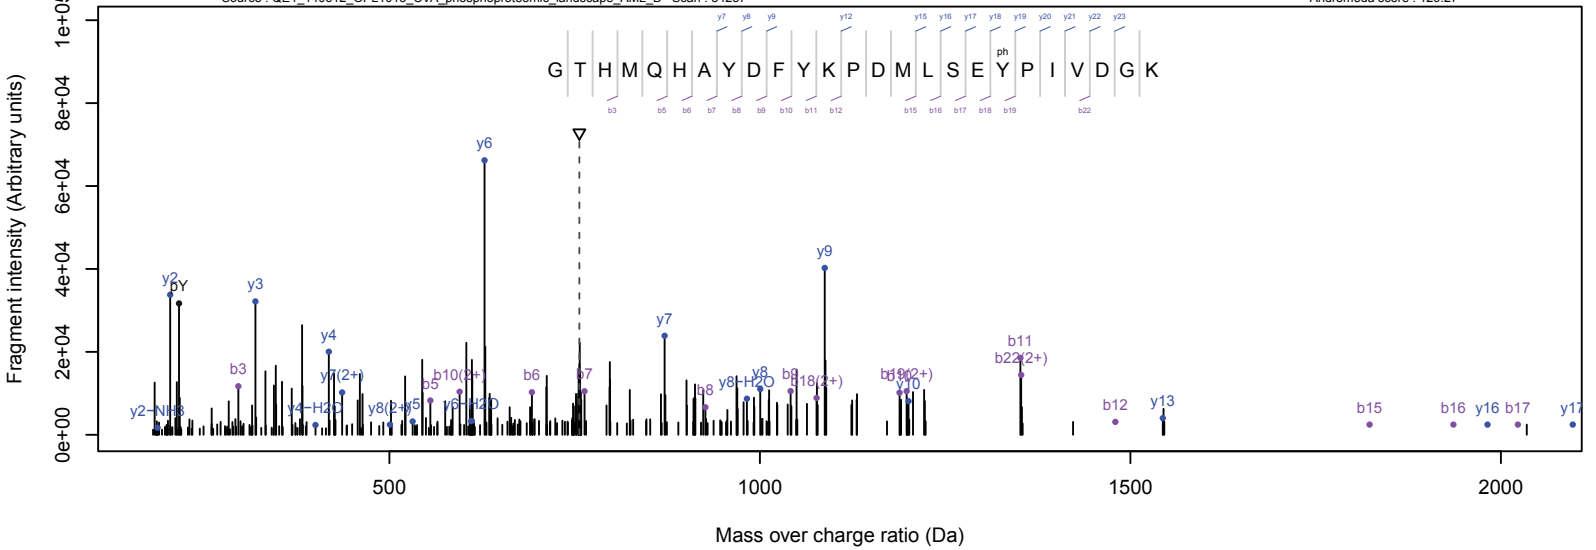



VVALY(ph)DYM(ox)PM(ox)NANDLQLR-2+

Source : QE1\_140908\_OPL1013\_CvA\_pTyrIP\_AML\_HEL Scan : 37350

Andromeda score : 129.05

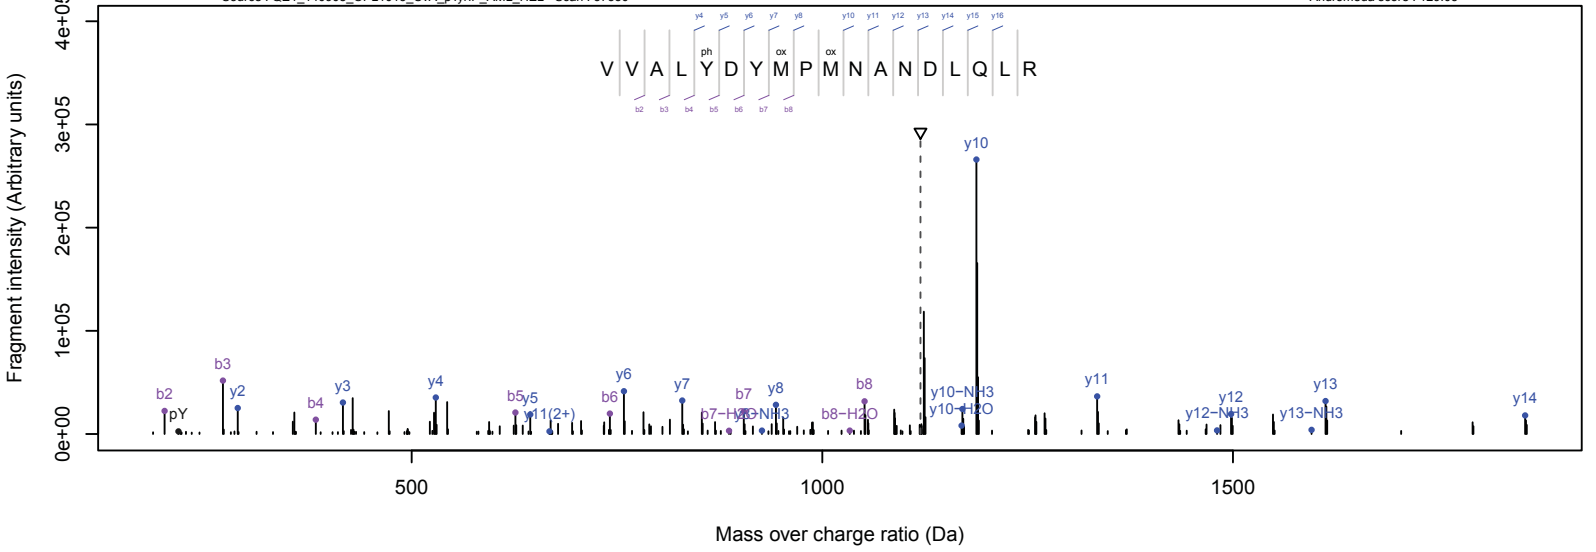

GY(ph)DVIAQAQSGTGK-2+

Source : QE1\_140612\_OPL1013\_CVA\_phosphoproteomic\_landscape\_AML\_D Scan : 14850

Andromeda score : 128.95

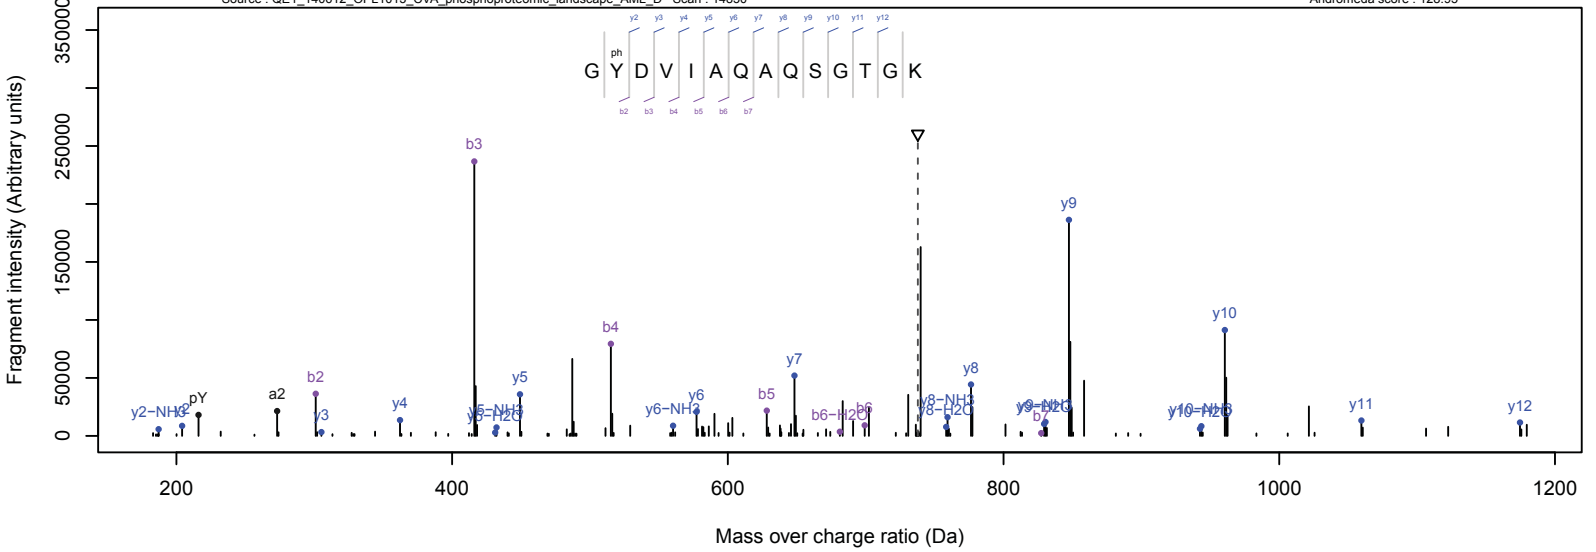

AQVYNKQDY(ph)DLMVFPESDSQKR-3+

Source : QE1\_140612\_OPL1013\_CVA\_phosphoproteomic\_landscape\_AML\_C Scan : 28382

Andromeda score : 128.88

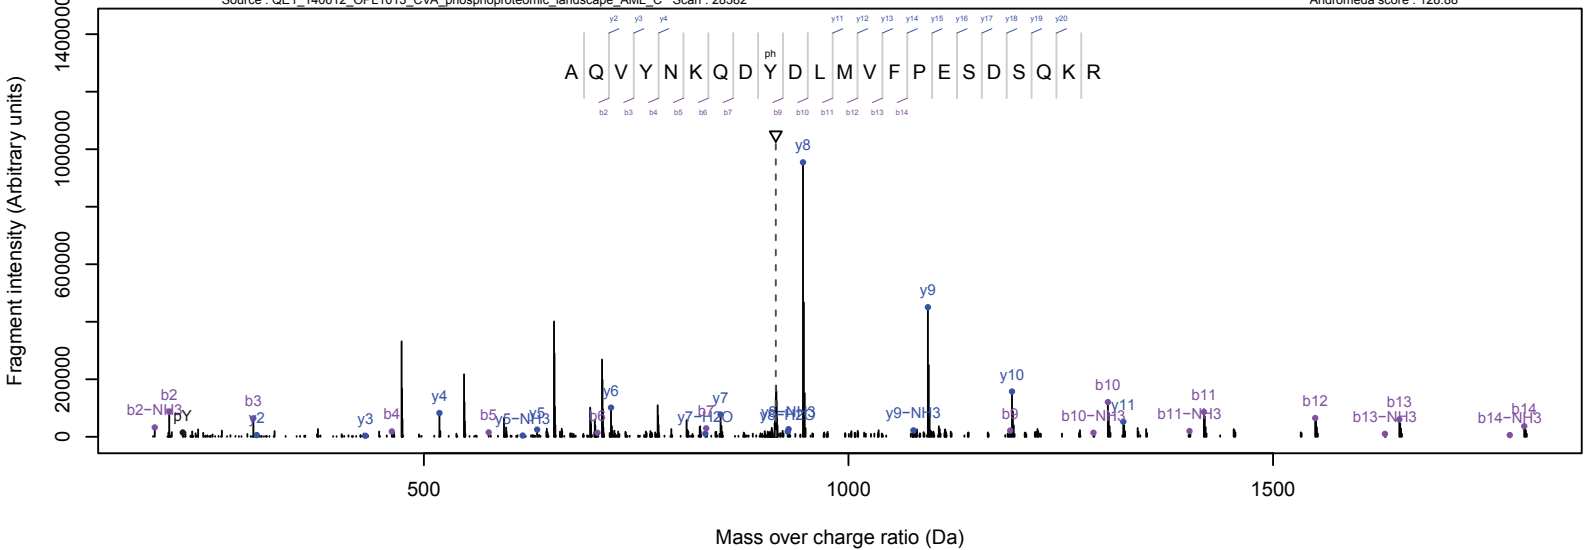

**KAY(ph)ILVTPLK-2+**

Source : QE1\_140612\_OPL1013\_CVA\_phosphoproteomic\_landscape\_AML\_C Scan : 27220

Andromeda score : 128.88

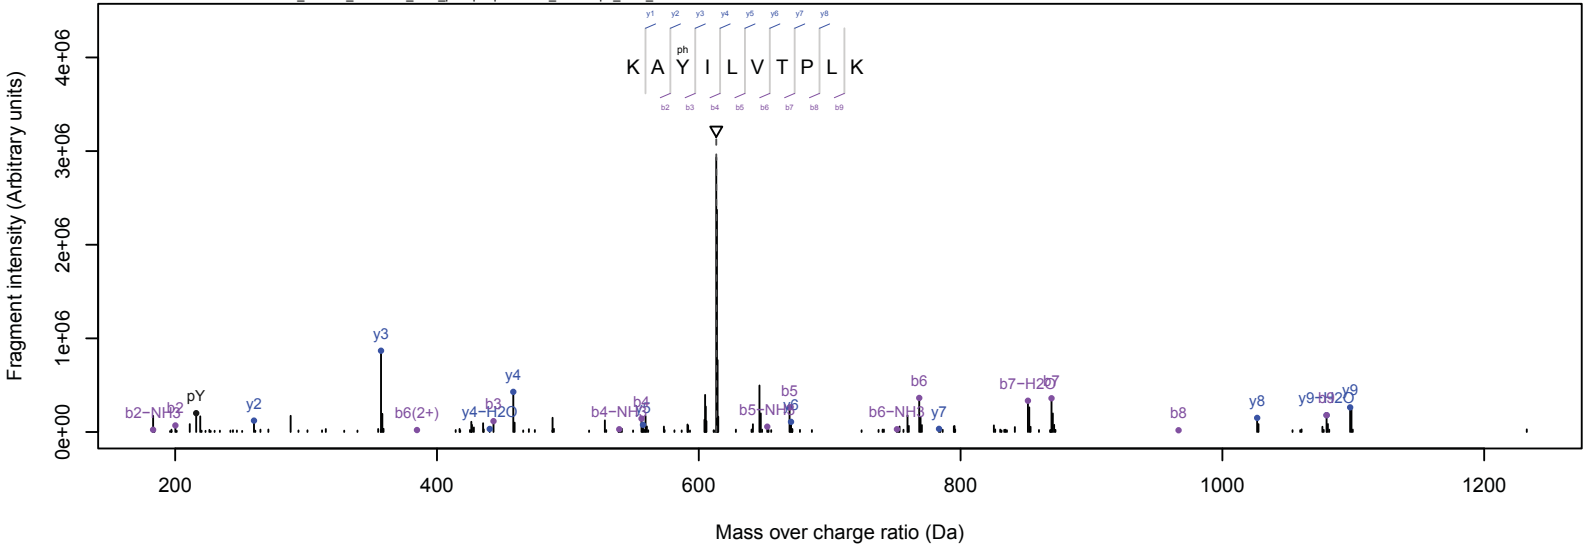

**VAY(ph)VSFGPHAGK-2+**

Source : QE1\_140612\_OPL1013\_CVA\_phosphoproteomic\_landscape\_AML\_C Scan : 16588

Andromeda score : 128.88

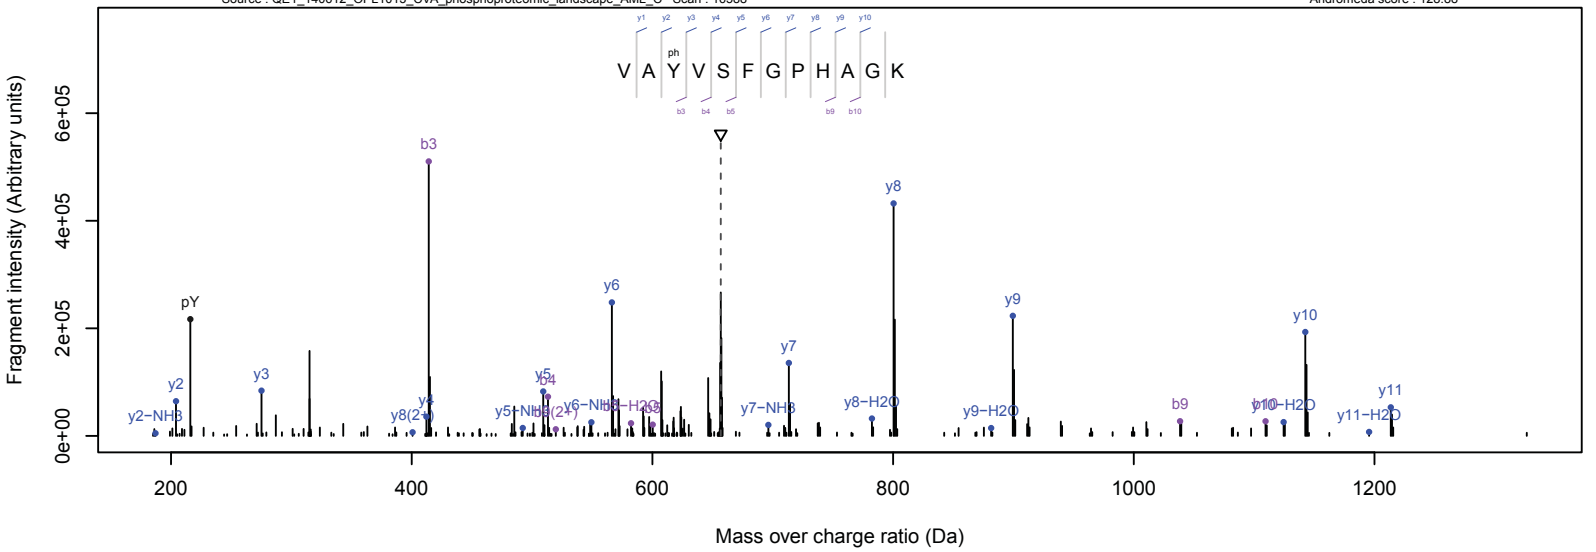

**ACY(ph)RDM(ox)SSFPETK-3+**

Source : QE1\_140612\_OPL1013\_CVA\_phosphoproteomic\_landscape\_AML\_D Scan : 9371

Andromeda score : 128.76

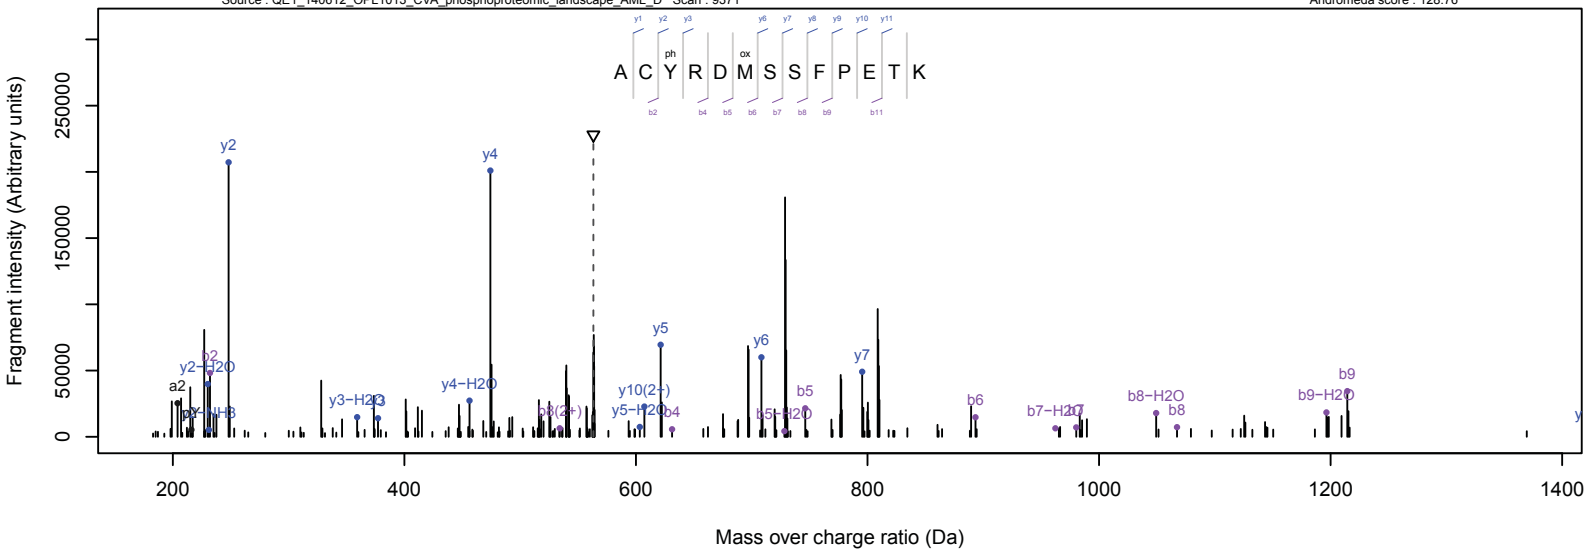

TY(ph)SLGSALRPSTR-3+

Source : QE1\_140612\_OPL1013\_CVA\_phosphoproteomic\_landscape\_AML\_C Scan : 17445

Andromeda score : 128.76

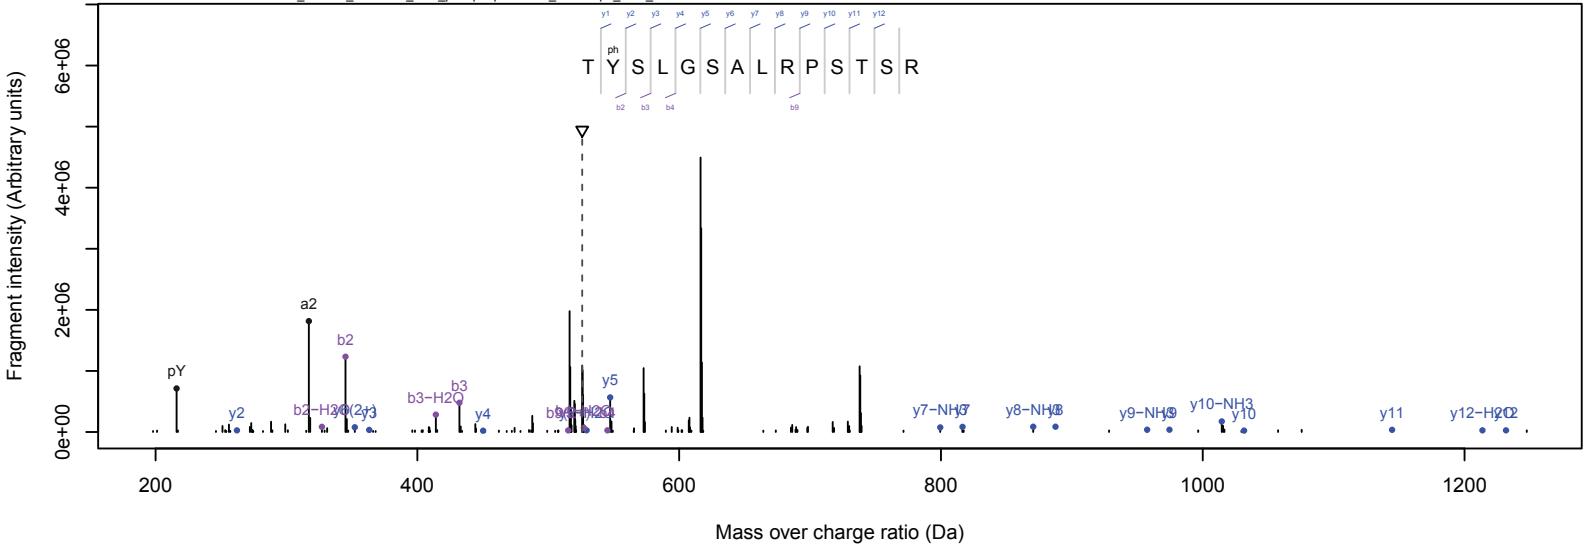

ERHPY(ph)TVPYGPGVYSNK-3+

Source : QE1\_140612\_OPL1013\_CVA\_phosphoproteomic\_landscape\_AML\_C Scan : 18052

Andromeda score : 128.72

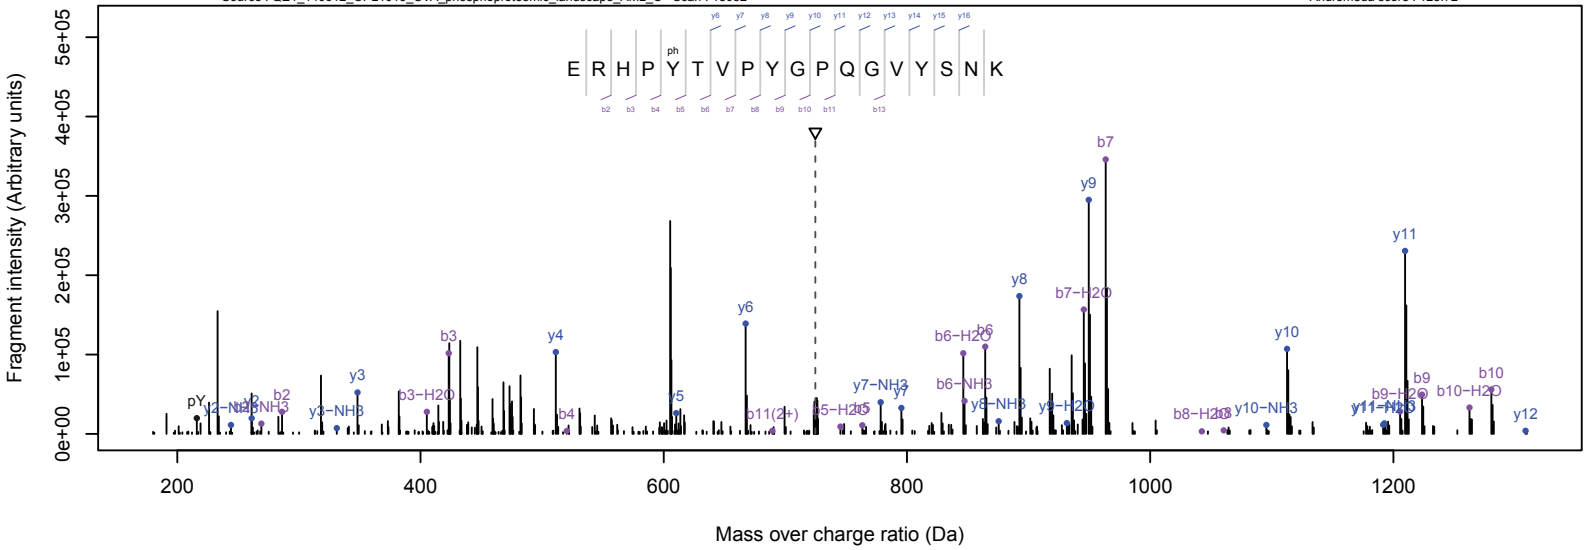

NGDVSQFPY(ph)VEFTGR-2+

Source : QE1\_140822\_OPL1013\_CvA\_pTyrIP\_AML\_cell\_lines\_part2\_B Scan : 28771

Andromeda score : 128.71

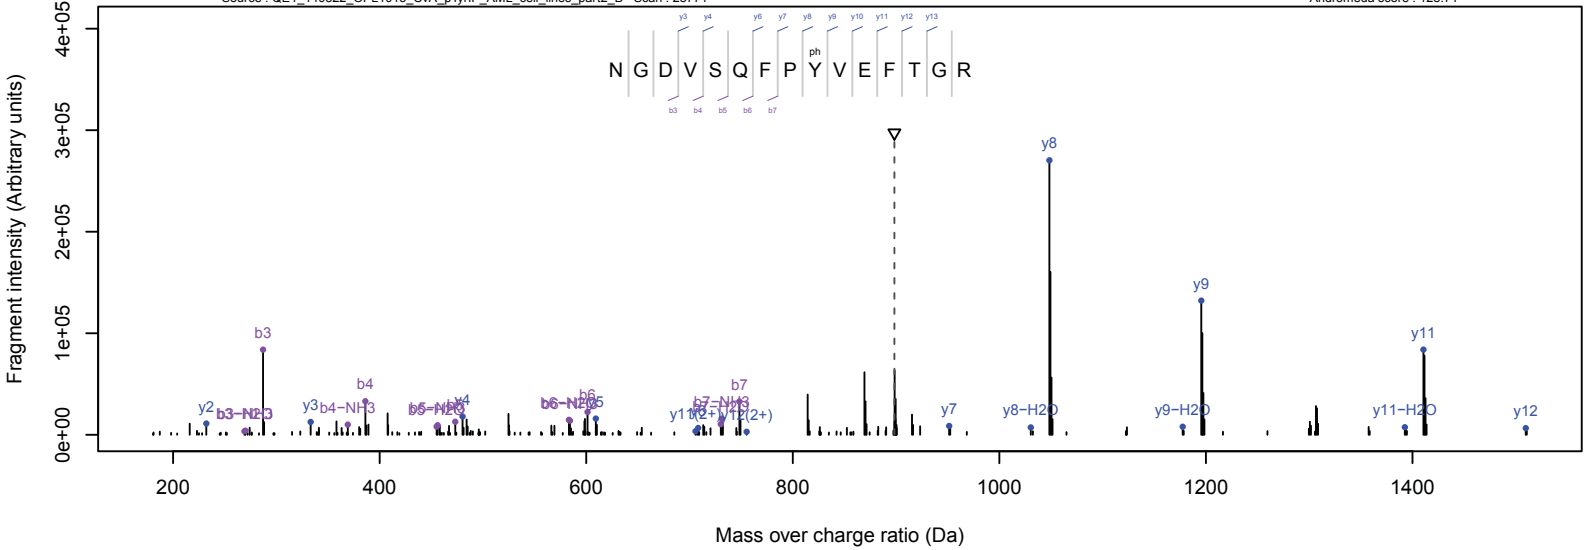





EGHPVY(ph)PQLRPGYIPIPLHEGAENR-4+

Source : QE1\_140612\_OPL1013\_CVA\_phosphoproteomic\_landscape\_AML\_C Scan : 38728

Andromeda score : 128.4

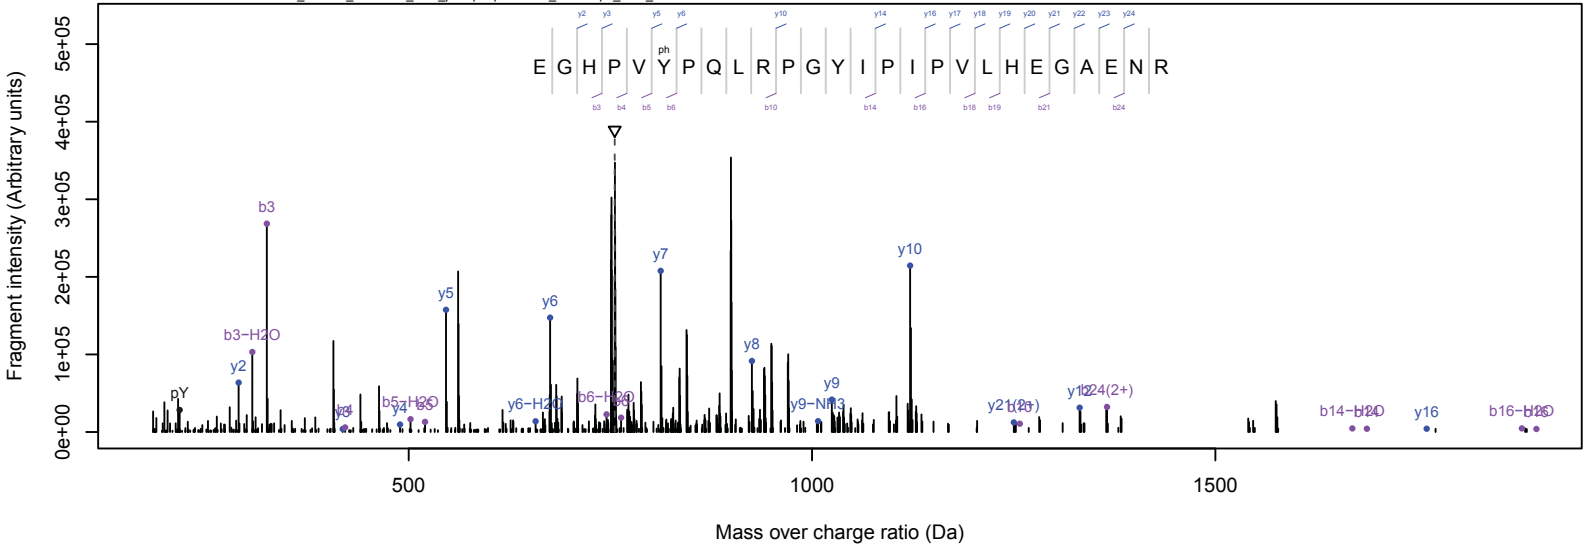

AKY(ph)PSLGQKPGGSDFLMK-2+

Source : QE1\_140612\_OPL1013\_CVA\_phosphoproteomic\_landscape\_AML\_C Scan : 23935

Andromeda score : 128.38

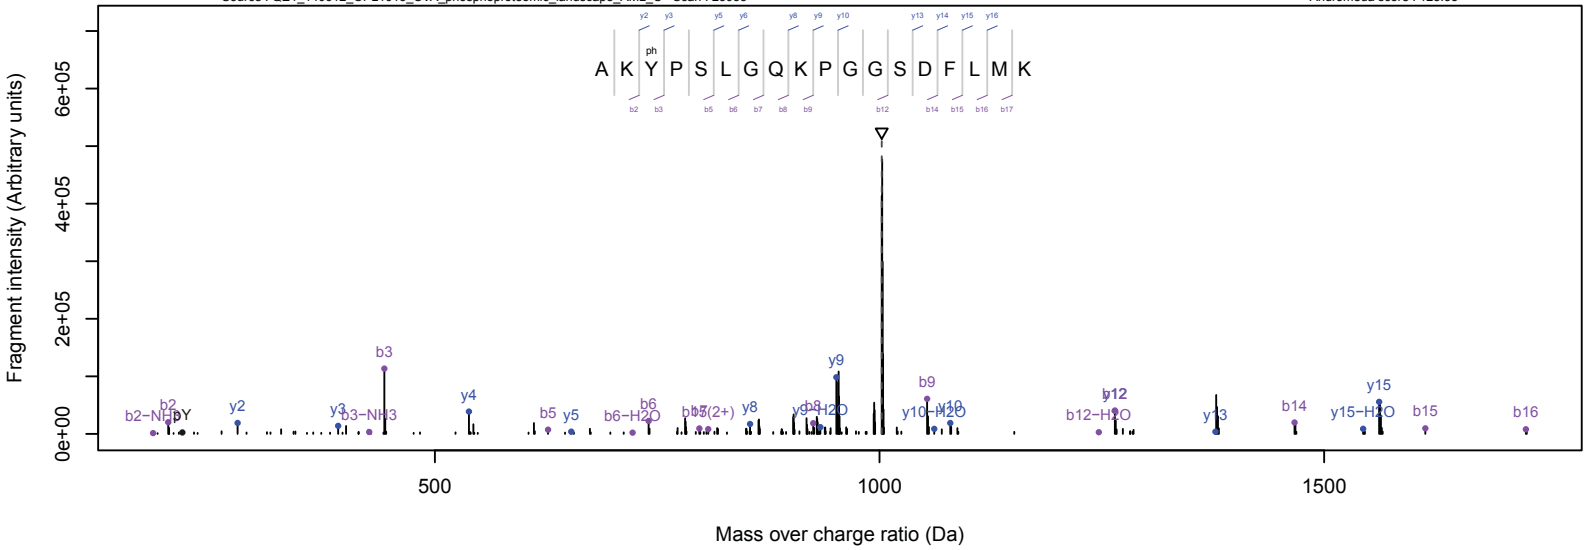

DY(ph)HFVTSR-2+

Source : QE1\_140612\_OPL1013\_CVA\_phosphoproteomic\_landscape\_AML\_C Scan : 8930

Andromeda score : 128.36

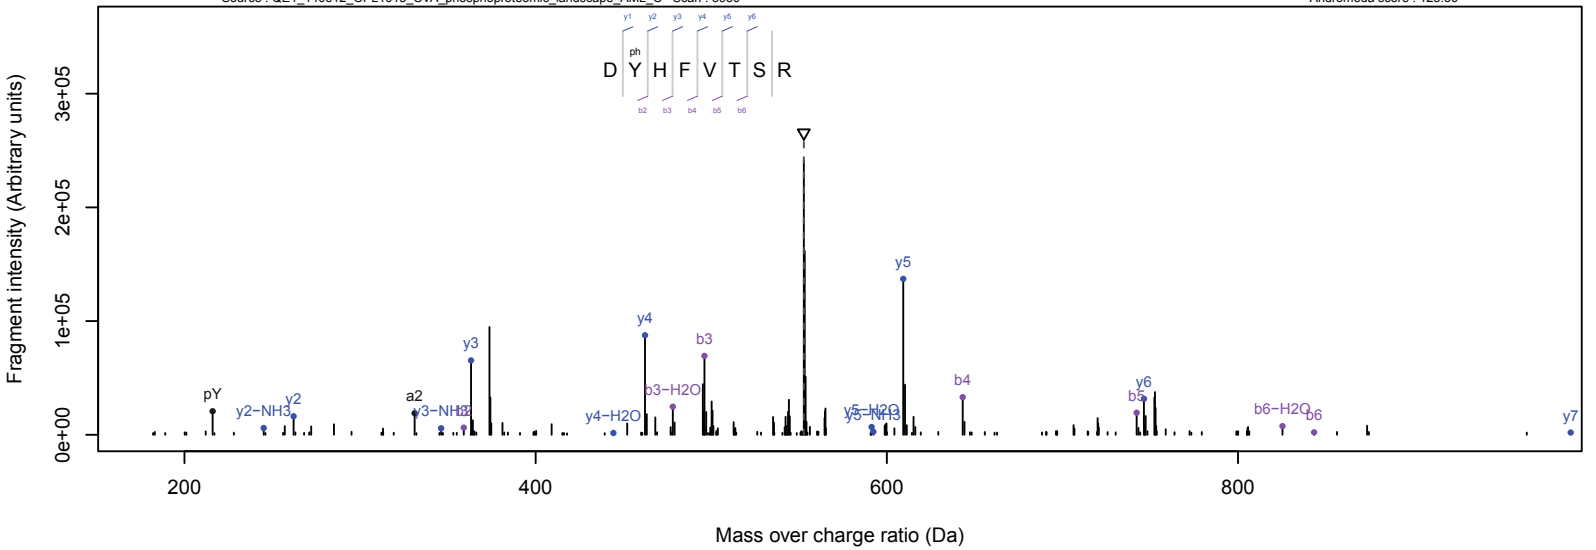

GADSA<sup>ph</sup>YQVGQTGK-2+

Source : QE1\_140612\_OPL1013\_CVA\_phosphoproteomic\_landscape\_AML\_C Scan : 9241

Andromeda score : 128.22

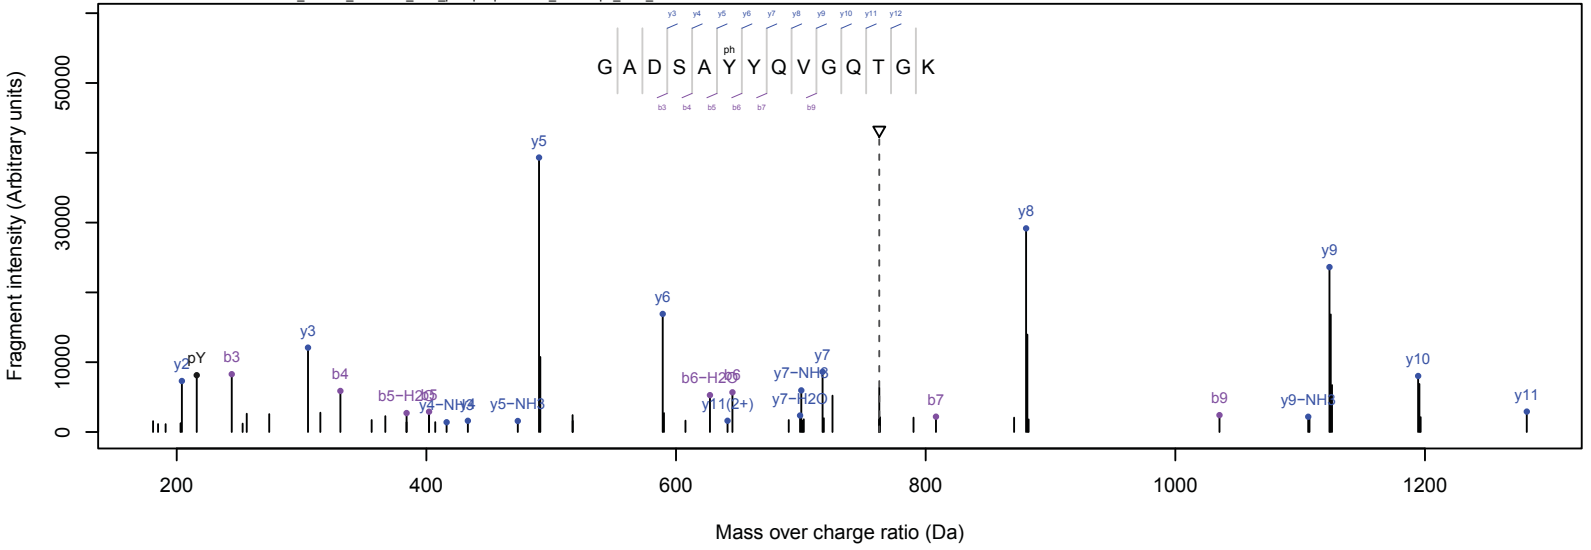

IDSIPLN<sup>ph</sup>NSTPLVDPSVY<sup>ph</sup>GYGVQK-3+

Source : QE1\_140612\_OPL1013\_CVA\_phosphoproteomic\_landscape\_AML\_B Scan : 38237

Andromeda score : 128.07

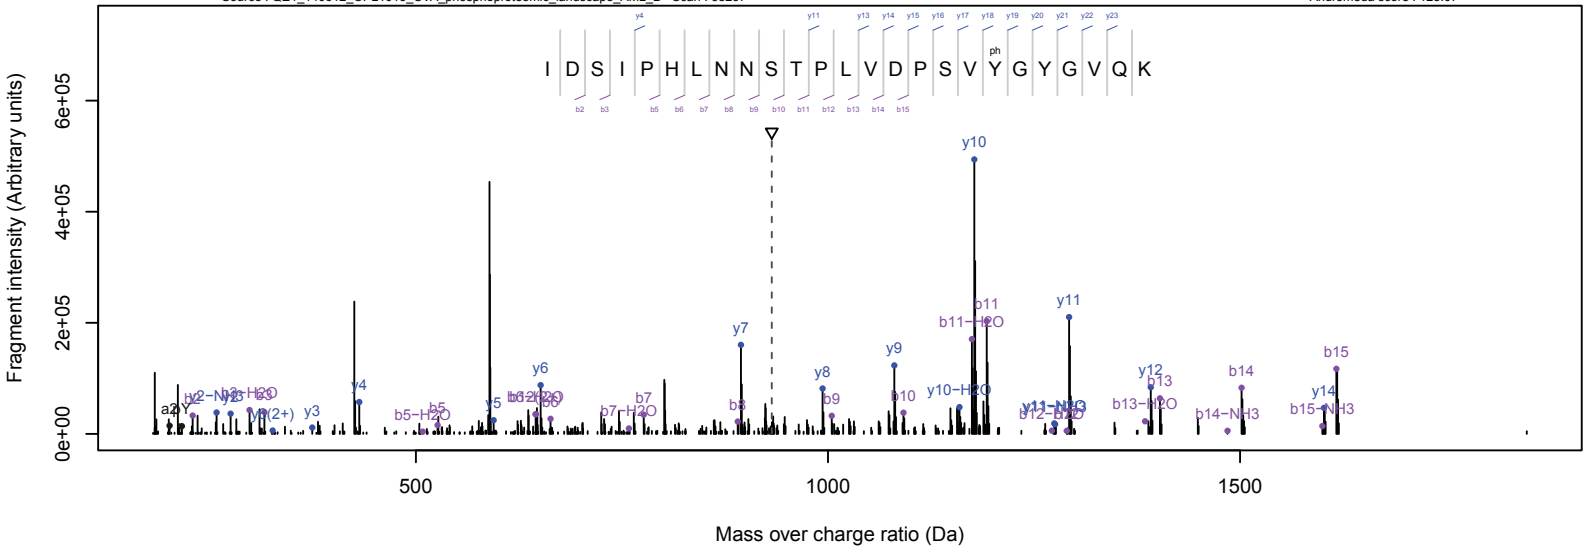

KLAQQY<sup>ph</sup>LVYQEPIPTAQLVQR-3+

Source : QE1\_140612\_OPL1013\_CVA\_phosphoproteomic\_landscape\_AML\_B Scan : 40329

Andromeda score : 128.01

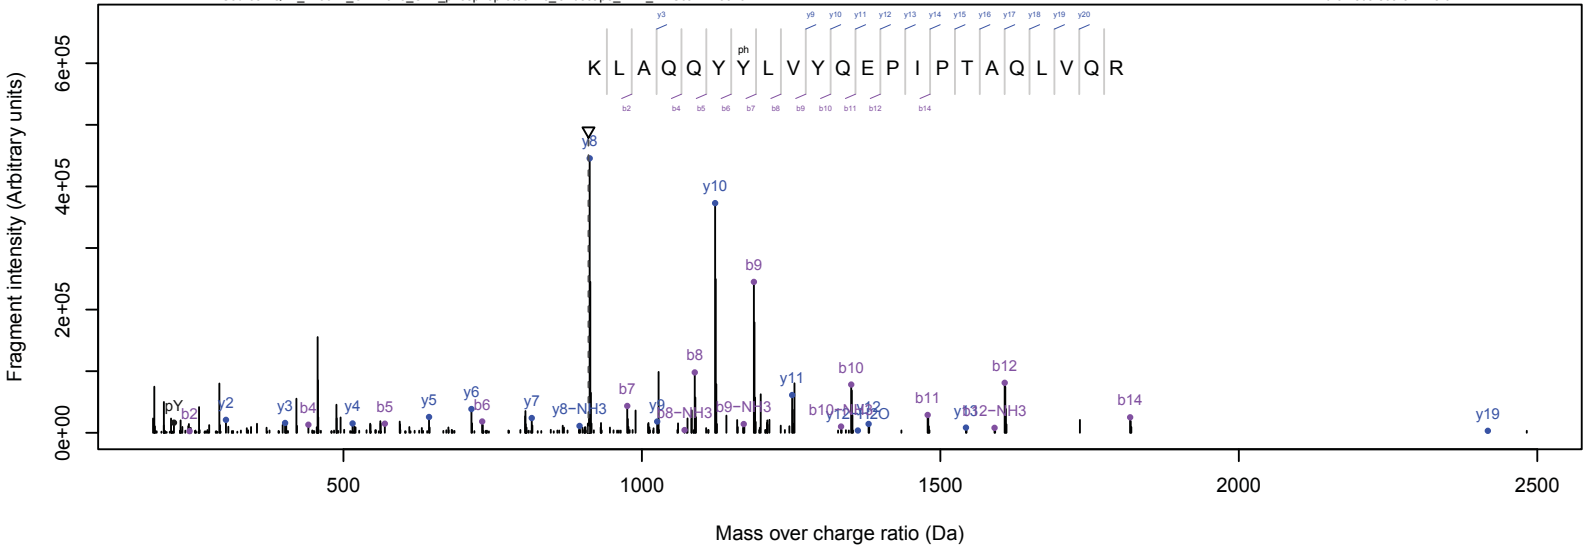

**KELNY(ph)FAK-2+**

Source : QE1\_140612\_OPL1013\_CVA\_phosphoproteomic\_landscape\_AML\_A Scan : 10846

Andromeda score : 128

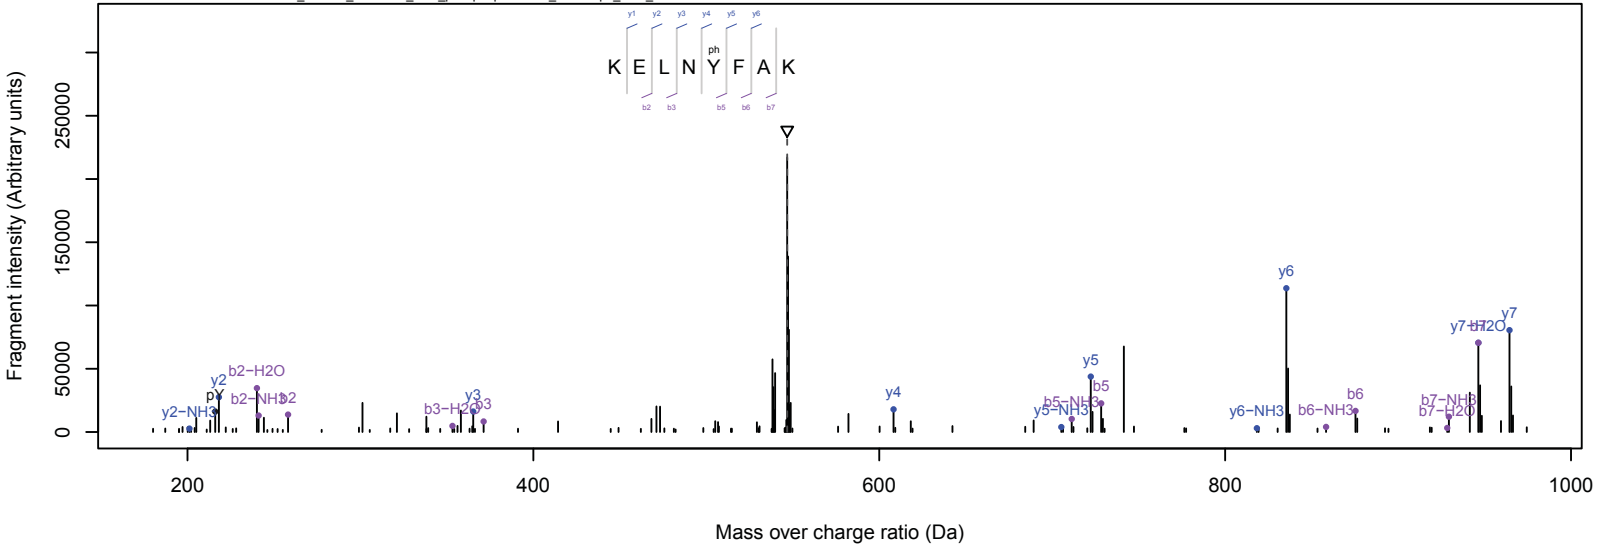

Mass over charge ratio (Da)

**TALFYHSGSSGY(ph)ESVMR-3+**

Source : QE1\_140612\_OPL1013\_CVA\_phosphoproteomic\_landscape\_AML\_C Scan : 25281

Andromeda score : 127.97

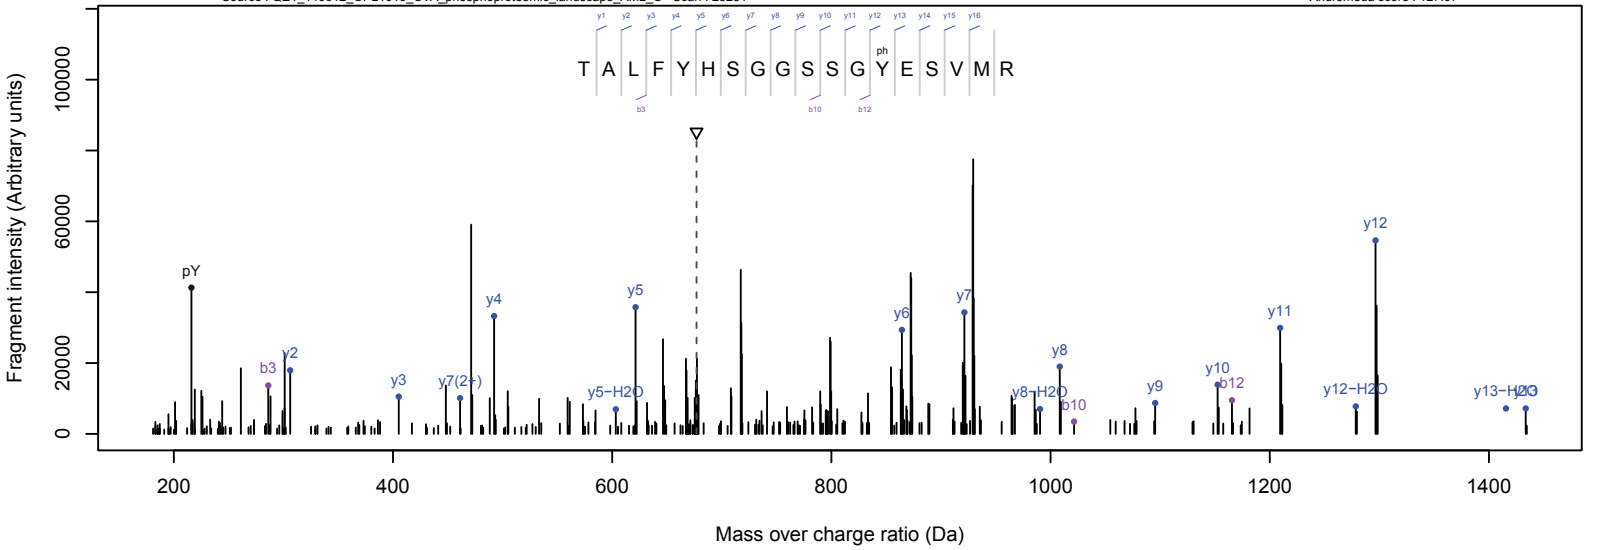

Mass over charge ratio (Da)

**VQEY(ph)PTLKVPYETLNKR-3+**

Source : QE1\_140612\_OPL1013\_CVA\_phosphoproteomic\_landscape\_AML\_B Scan : 26535

Andromeda score : 127.97

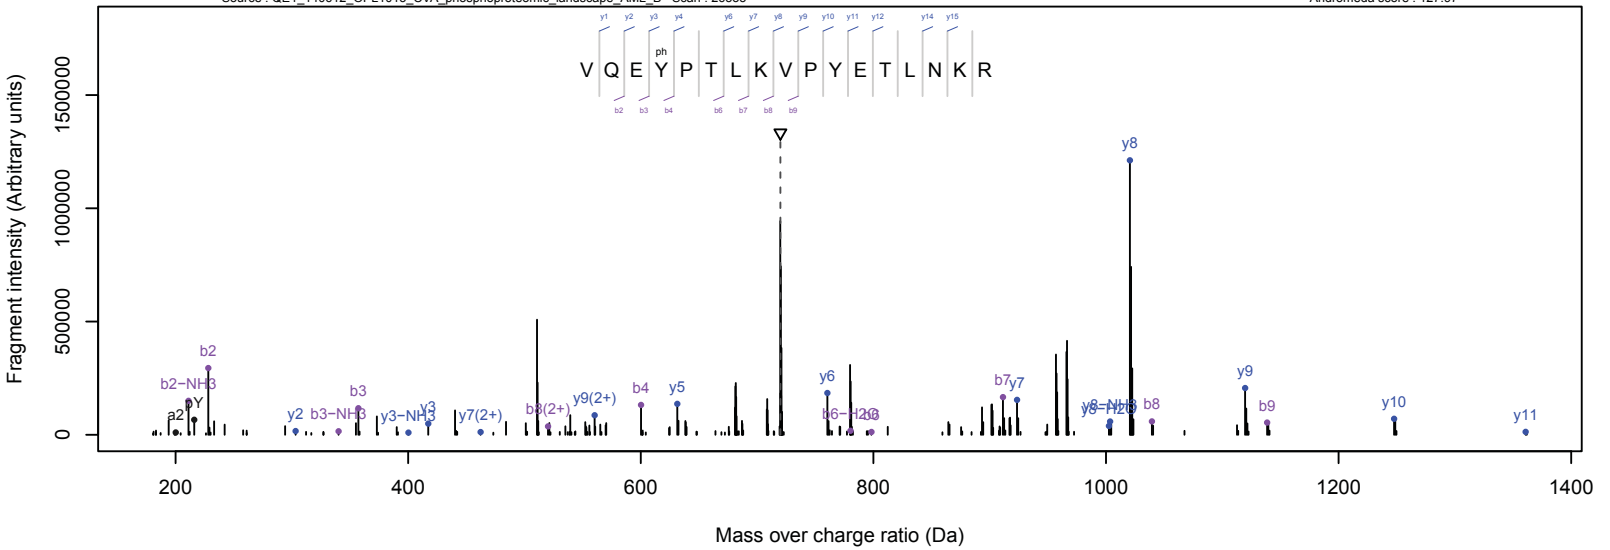

Mass over charge ratio (Da)

**QKATEPPPSQEGASPAEPSVYATLAIH-3+**

Source : QE1\_140822\_OPL1013\_CvA\_pTyrIP\_AML\_cell\_lines\_part2\_E Scan : 21939

Andromeda score : 127.92

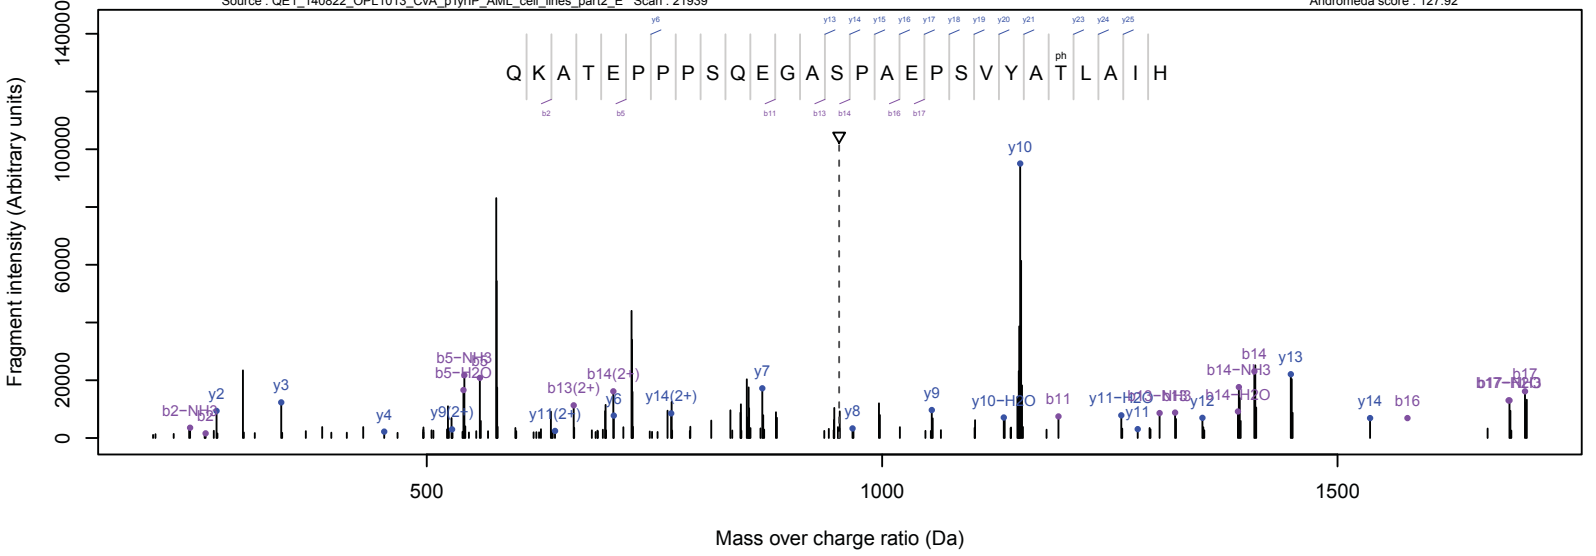

**YSKEY(ph)IEK-2+**

Source : QE1\_140822\_OPL1013\_CvA\_pTyrIP\_AML\_cell\_lines\_part2\_B Scan : 3476

Andromeda score : 127.76

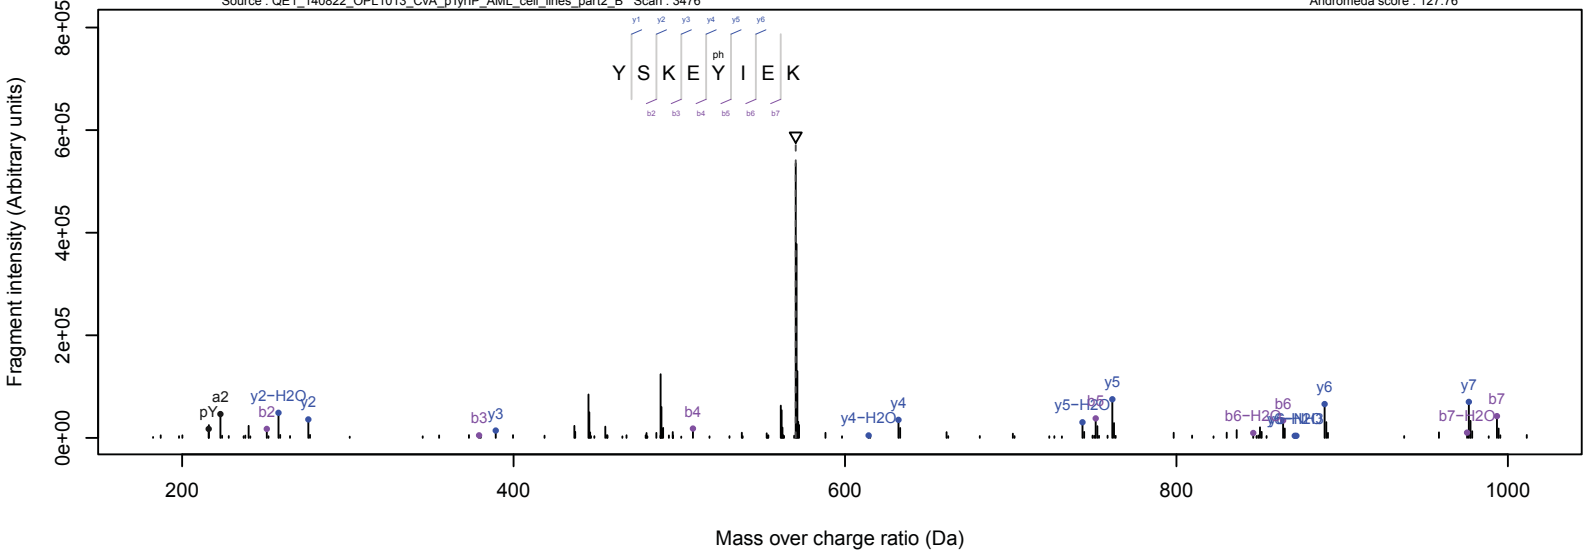

**ALDVIQAGKEY(ph)VEHTVKER-4+**

Source : QE1\_140612\_OPL1013\_CVA\_phosphoproteomic\_landscape\_AML\_C Scan : 29003

Andromeda score : 127.59

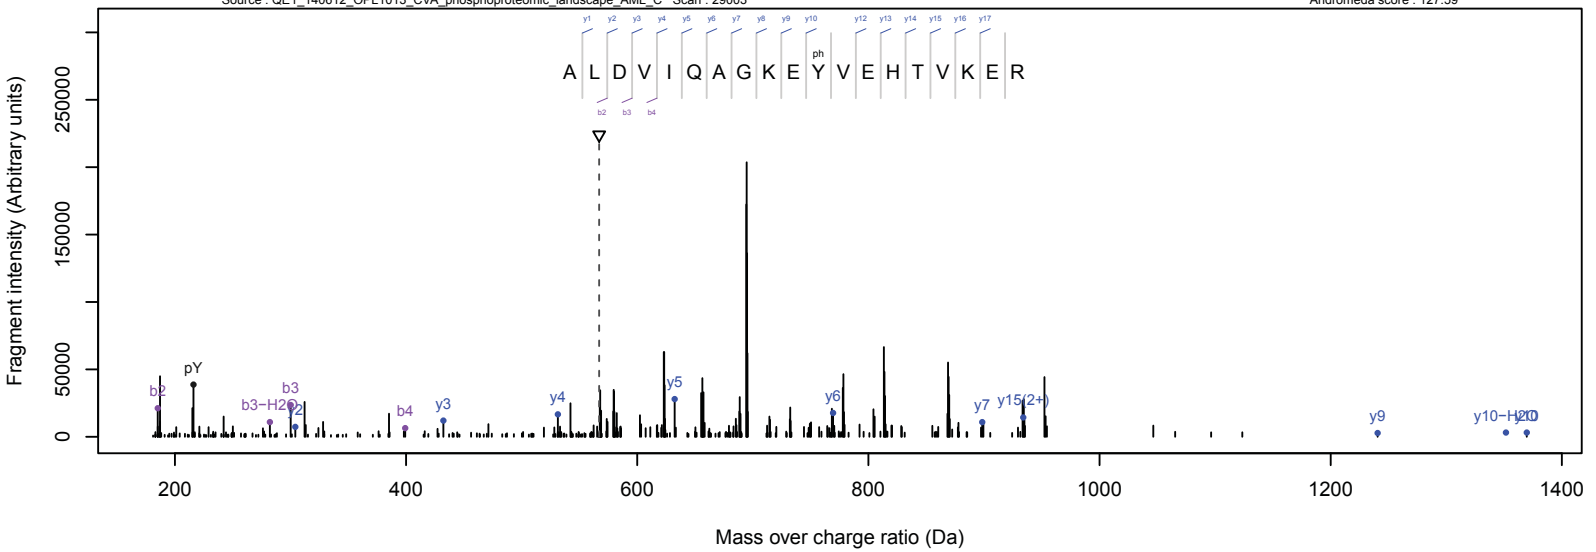

NVVHQLSVTLLEDLY(ph)NGATRK-3+

Source : QE1\_140908\_OPL1013\_CvA\_pTyrIP\_AML\_ML2 Scan : 44964

Andromeda score : 127.58

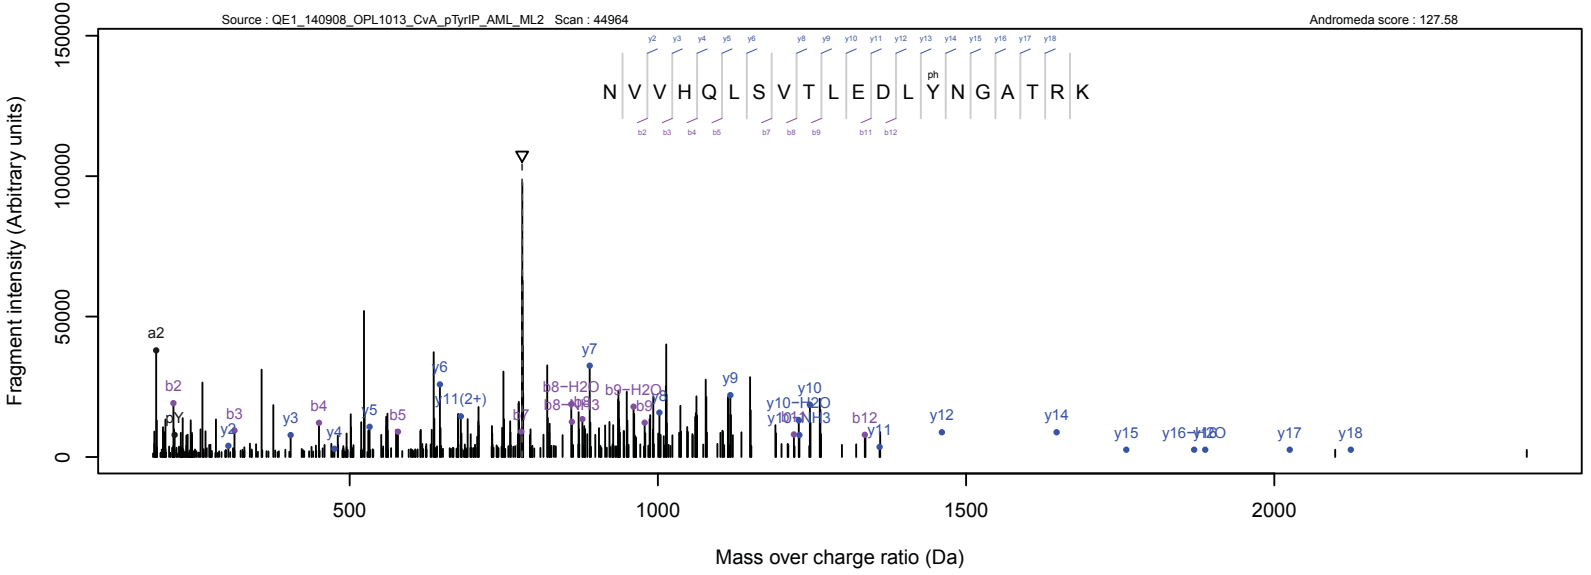

SVFALTNGIY(ph)PHK-2+

Source : QE1\_140908\_OPL1013\_CvA\_pTyrIP\_AML\_HEL Scan : 32890

Andromeda score : 127.56

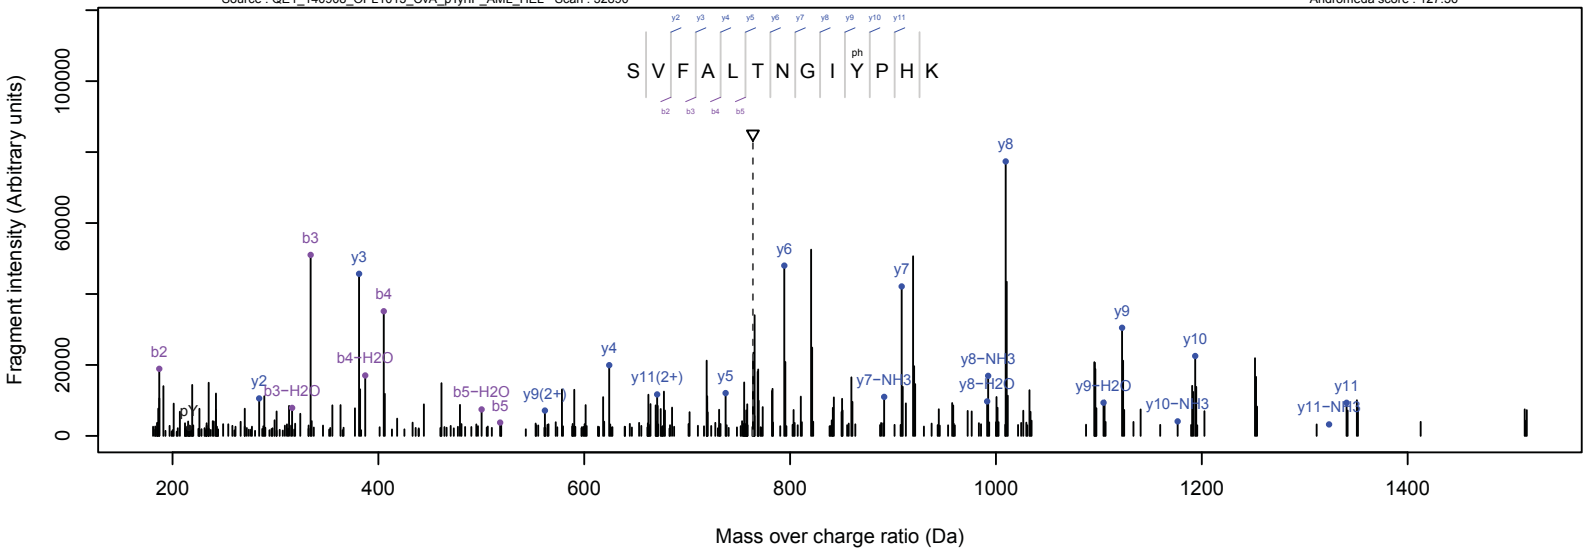

KKTQAEIEQEMATLQY(ph)TNPQLLEQLK-3+

Source : QE1\_140612\_OPL1013\_CVA\_phosphoproteomic\_landscape\_AML\_A Scan : 40283

Andromeda score : 127.53

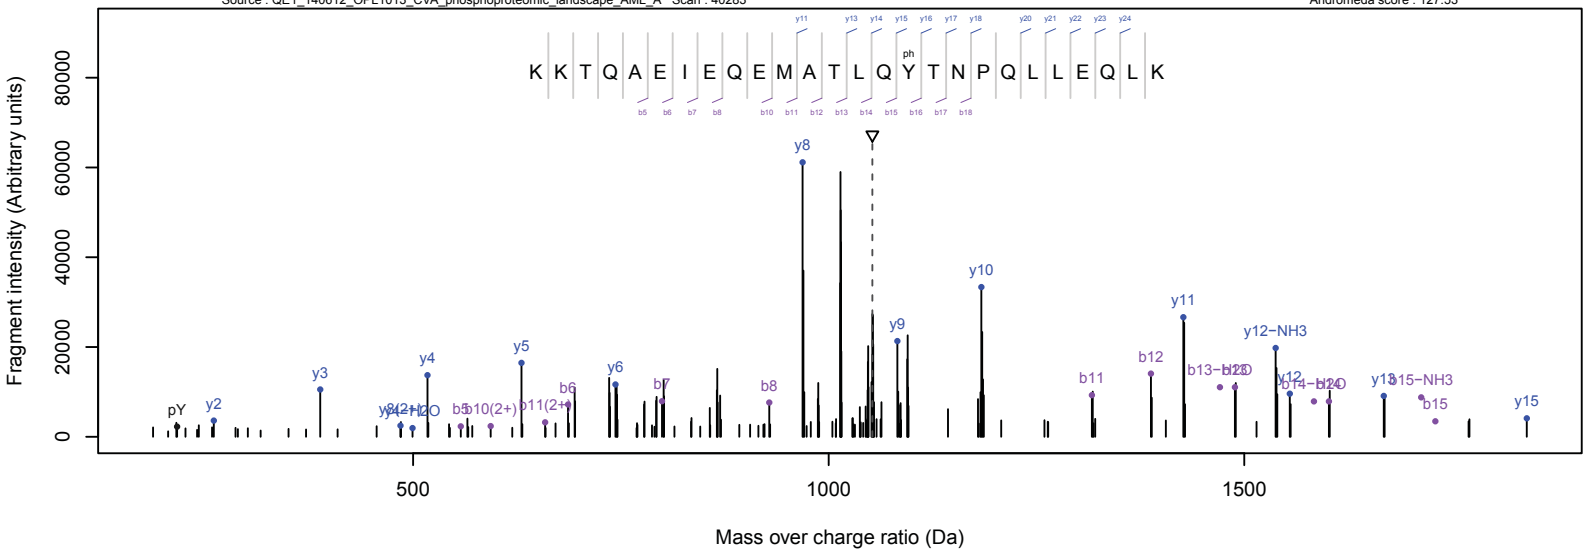

INVY(ph)YNEATGGK-2+

Source: QE1\_140612\_OPL1013\_CVA\_phosphoproteomic\_landscape\_AML\_B Scan: 15448

Andromeda score: 127.52

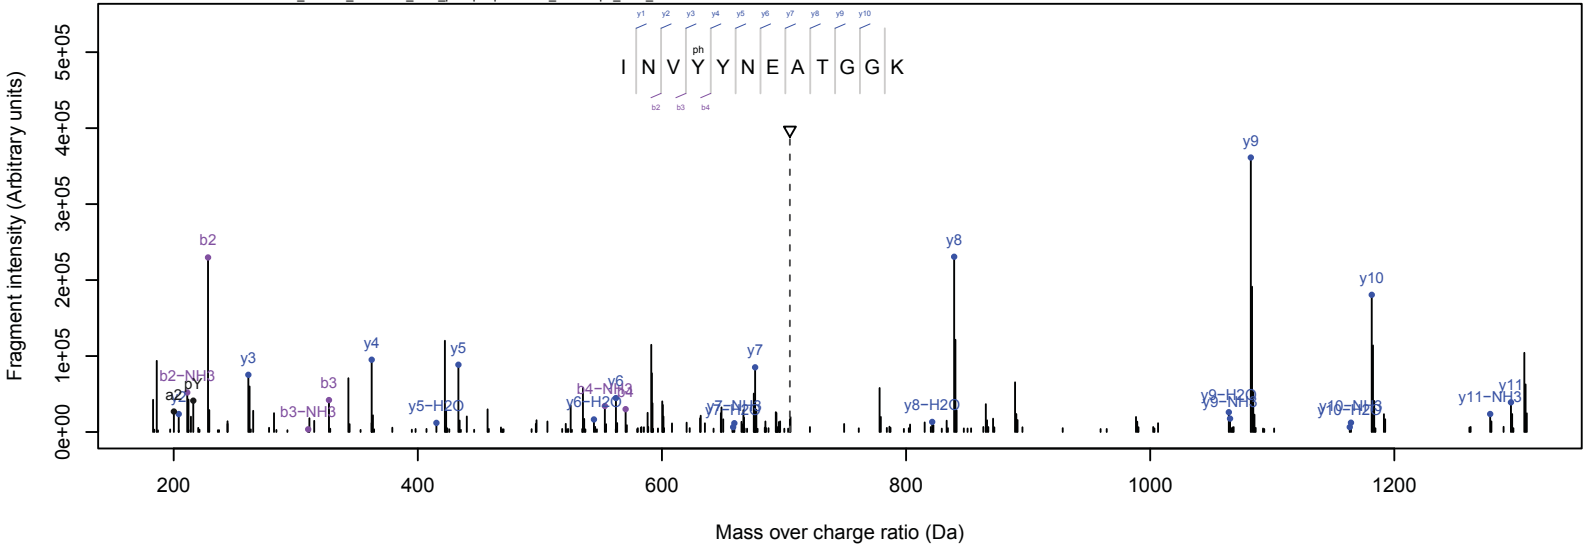

VSEYSLPSDATGPFVLSGYSYKQVQVPR-3+

Source: QE1\_140612\_OPL1013\_CVA\_phosphoproteomic\_landscape\_AML\_C Scan: 42246

Andromeda score: 127.49

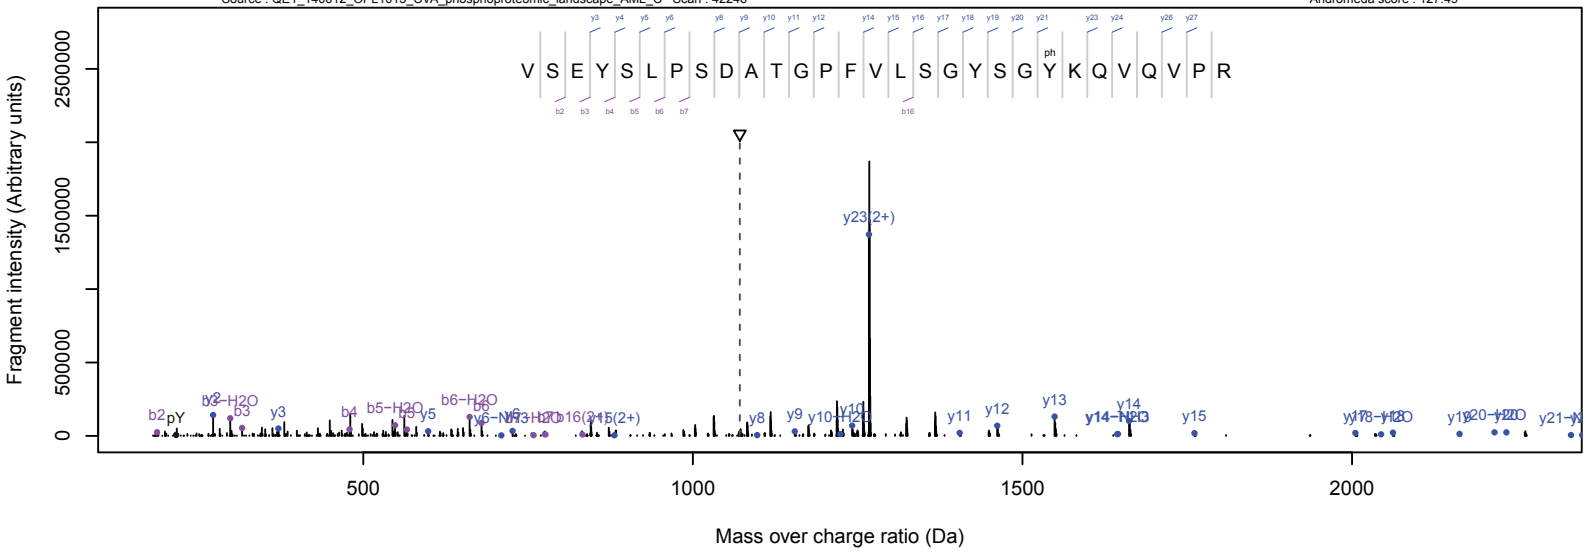

ILALCMGNHELYMRR-3+

Source: QE1\_140612\_OPL1013\_CVA\_phosphoproteomic\_landscape\_AML\_C Scan: 31705

Andromeda score: 127.36

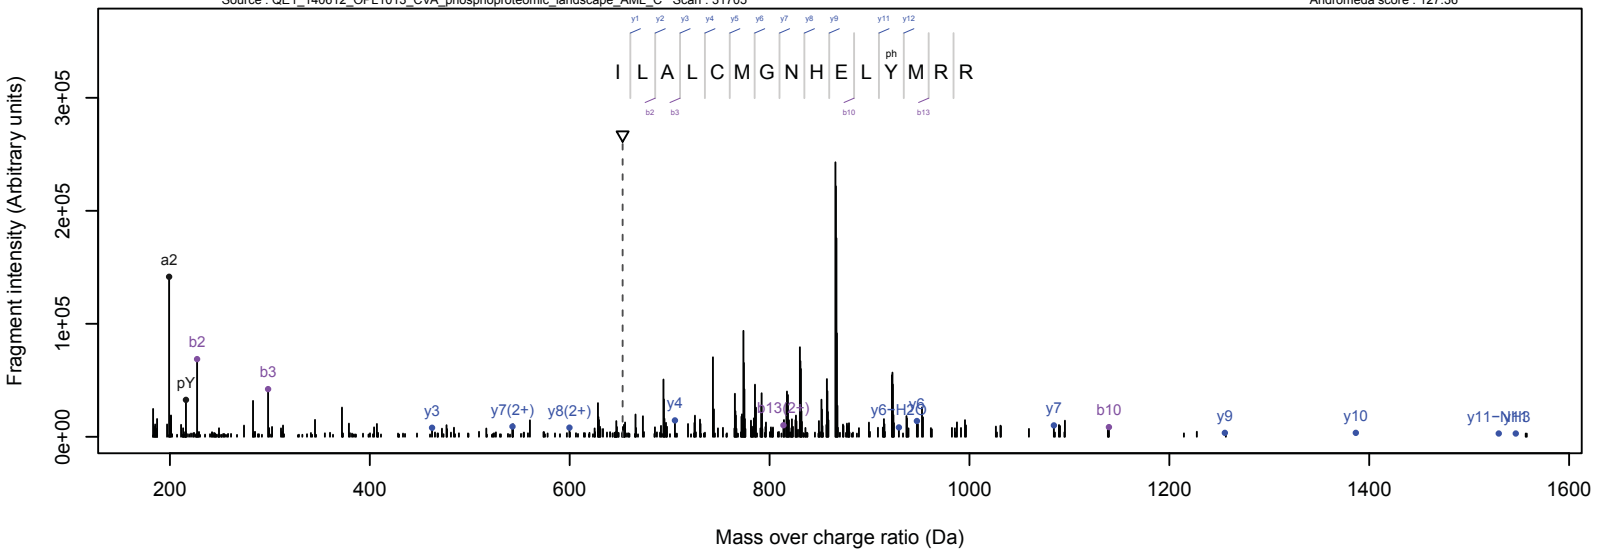

DSSGWSSSKDKDAY(ph)SSFGSR-3+

Source : QE1\_140612\_OPL1013\_CVA\_phosphoproteomic\_landscape\_AML\_C Scan : 12527

Andromeda score : 127.32

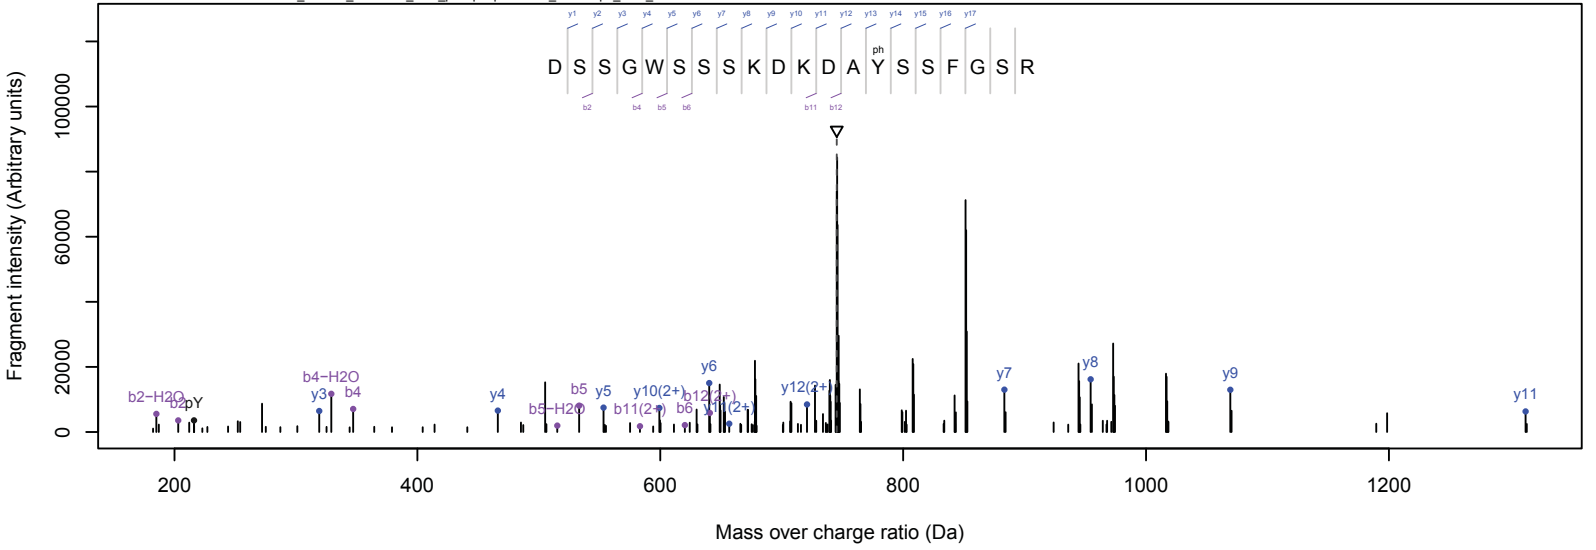

IDFYFDENPY(ph)FENK-2+

Source : QE1\_140822\_OPL1013\_CvA\_pTyrIP\_AML\_cell\_lines\_part2\_B Scan : 34296

Andromeda score : 127.32

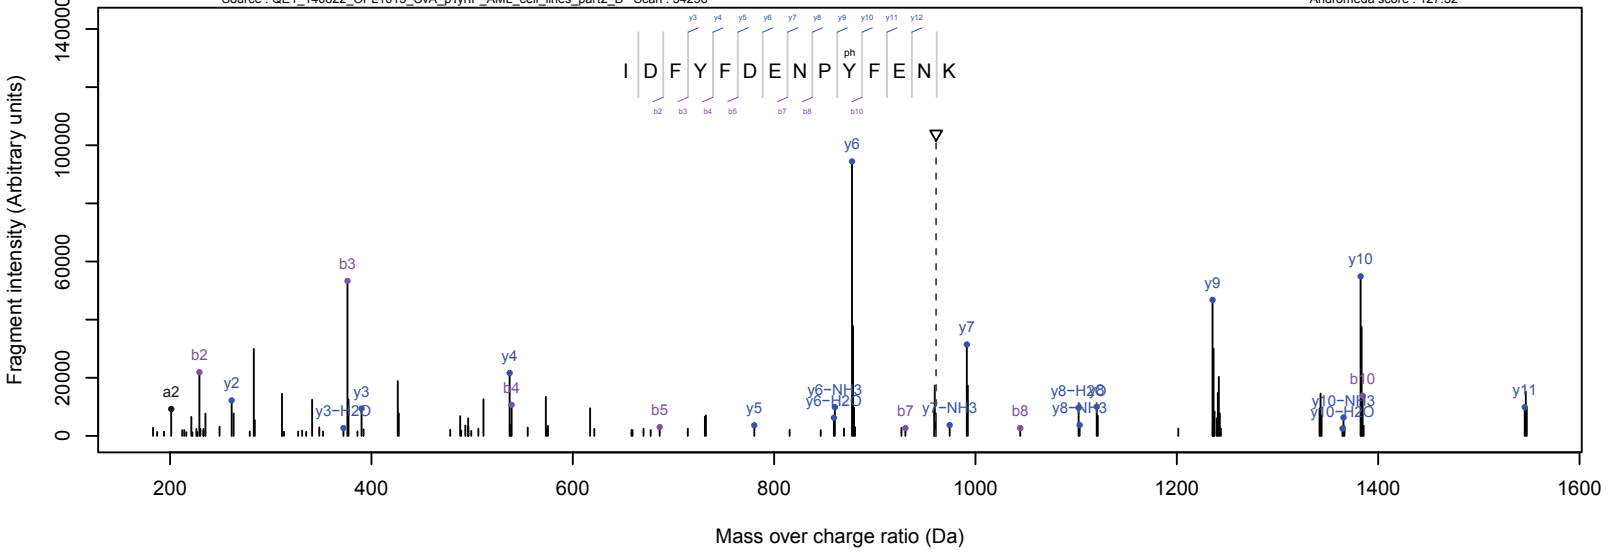

IGTSNY(ph)YWAFPSK-2+

Source : QE1\_140612\_OPL1013\_CVA\_phosphoproteomic\_landscape\_AML\_C Scan : 36314

Andromeda score : 127.32

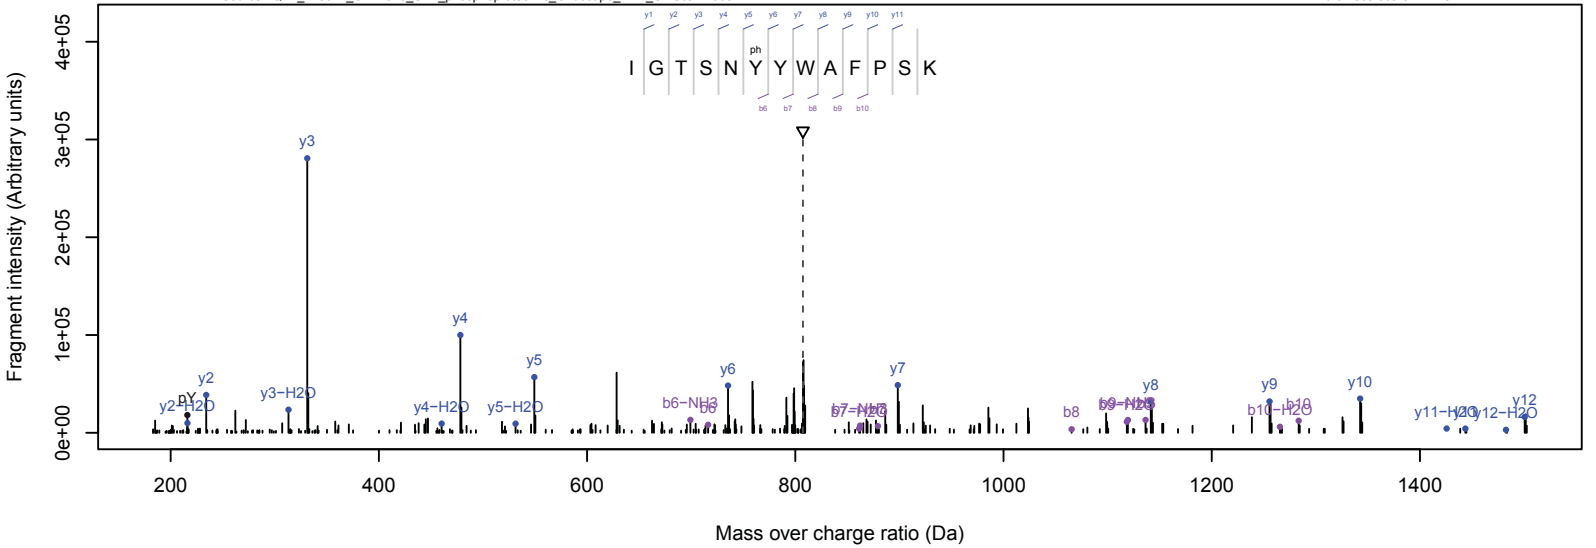

TVM(ox)YTAGSEWRPFY(ph)PR-3+

Source : QE1\_140908\_OPL1013\_CVA\_pTyrIP\_AML\_HL60 Scan : 39015

Andromeda score : 127.3

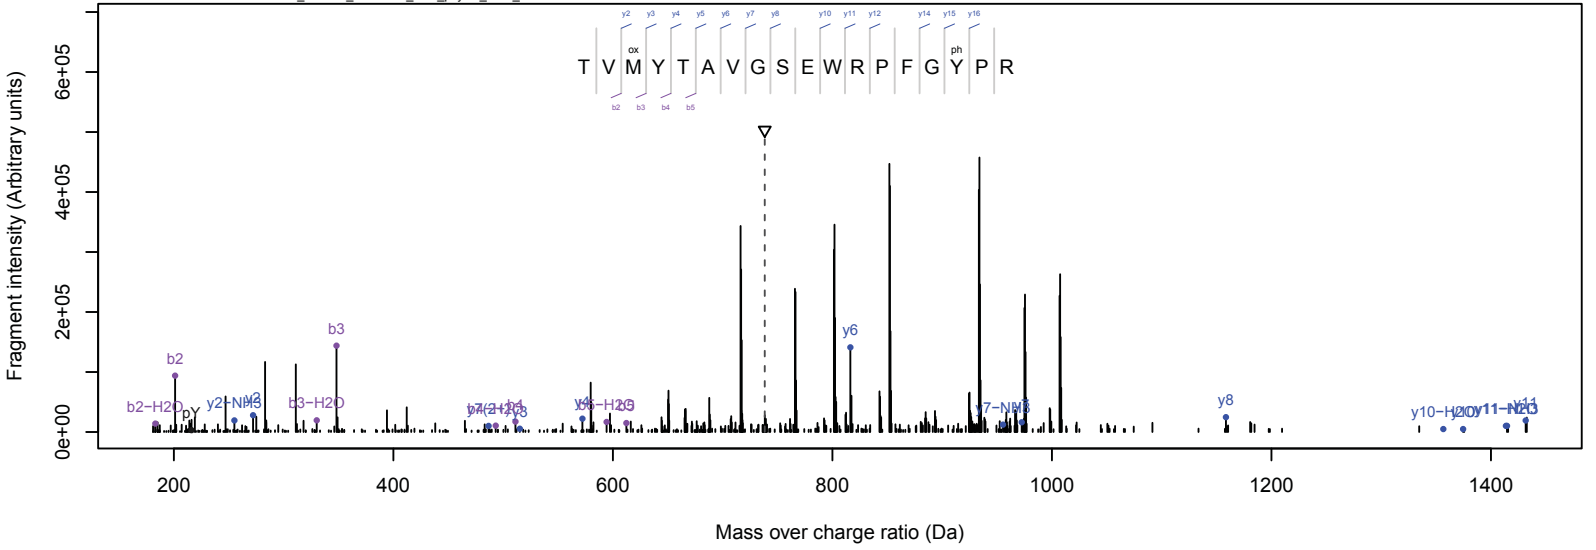

RVGFQY(ph)EGTYK-2+

Source : QE1\_140612\_OPL1013\_CVA\_phosphoproteomic\_landscape\_AML\_A Scan : 13218

Andromeda score : 127.17

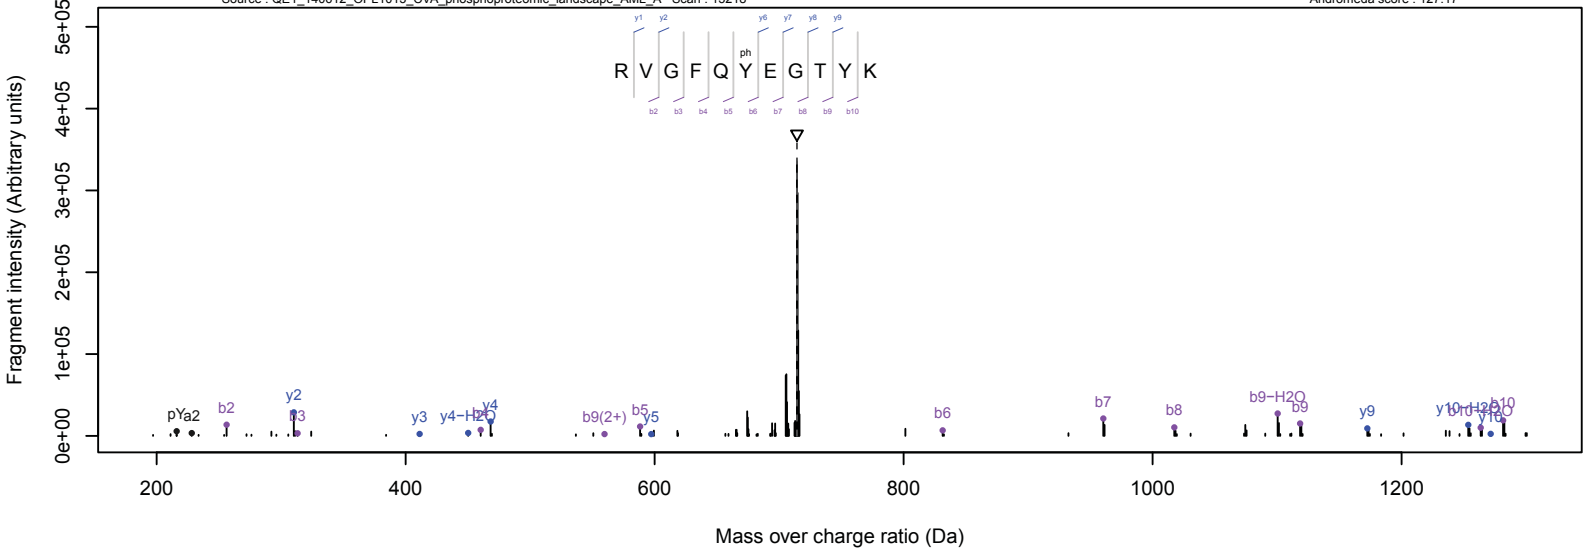

GTGLSSDY(ph)RIINGK-2+

Source : QE1\_140612\_OPL1013\_CVA\_phosphoproteomic\_landscape\_AML\_C Scan : 26667

Andromeda score : 127.07

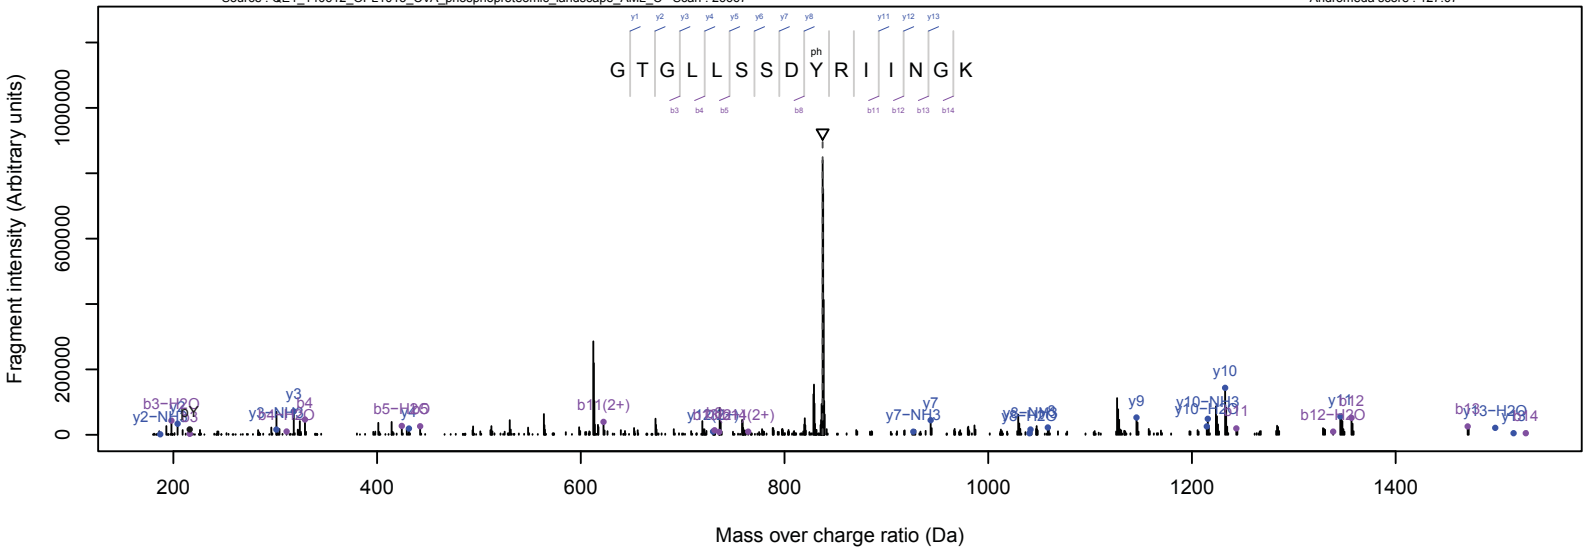



**AEDPSQPSAGY(ph)TALHYASR-3+**

Source: QE1\_140822\_OPL1013\_CvA\_pTyrIP\_AML\_cell\_lines\_part2\_E Scan: 15694

Andromeda score: 126.91

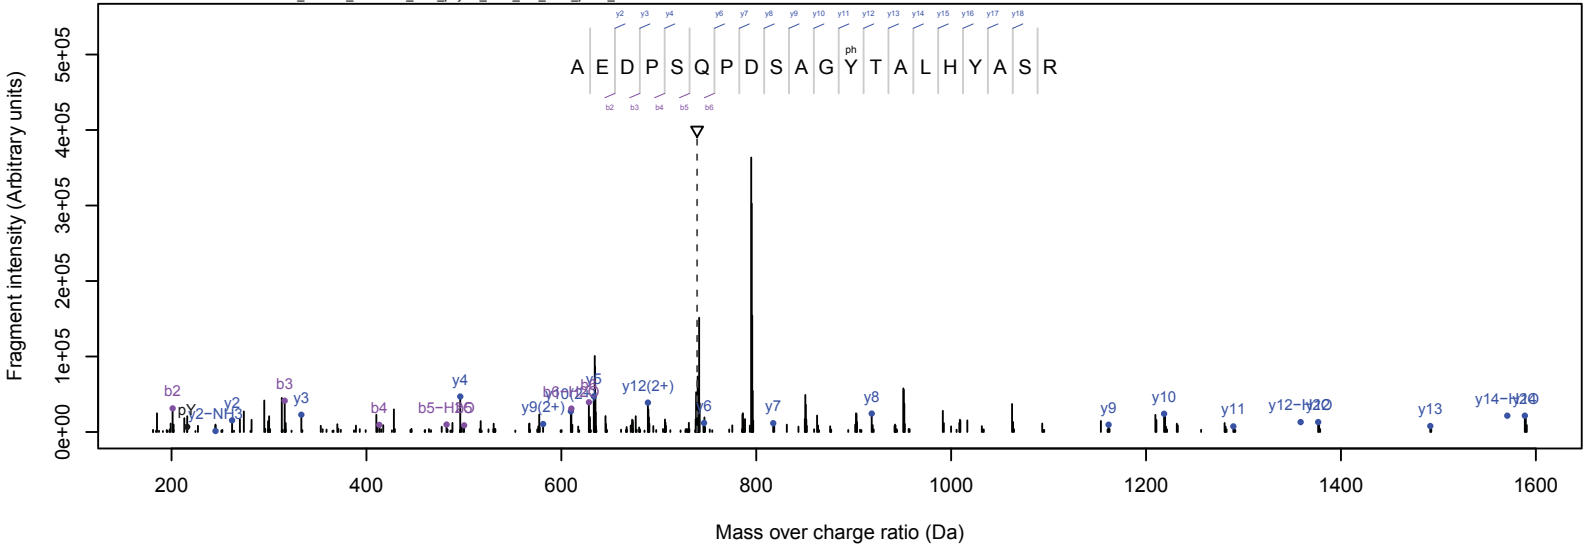

**(ac)SAVGAATPY(ph)LHHPGDSHSGR-3+**

Source: QE1\_140612\_OPL1013\_CvA\_phosphoproteomic\_landscape\_AML\_C Scan: 15222

Andromeda score: 126.91

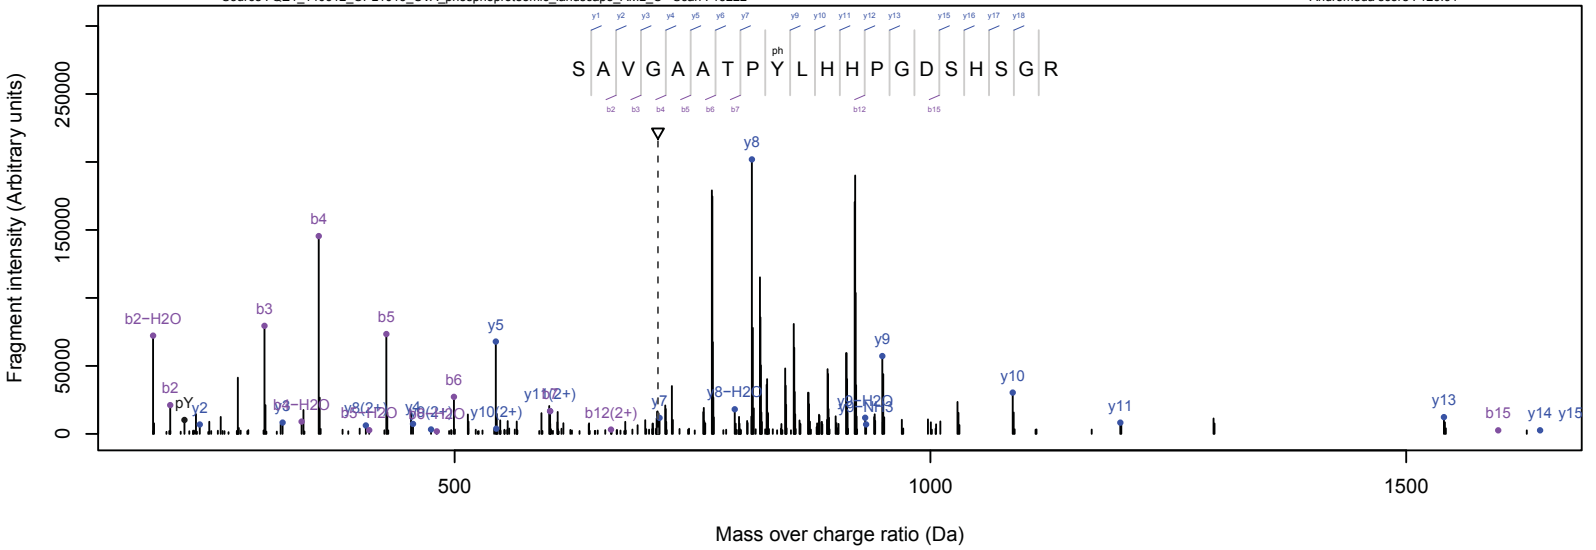

**EALSVVSEDQSLFECAY(ph)GTPHLAK-3+**

Source: QE1\_140612\_OPL1013\_CvA\_phosphoproteomic\_landscape\_AML\_B Scan: 39416

Andromeda score: 126.86

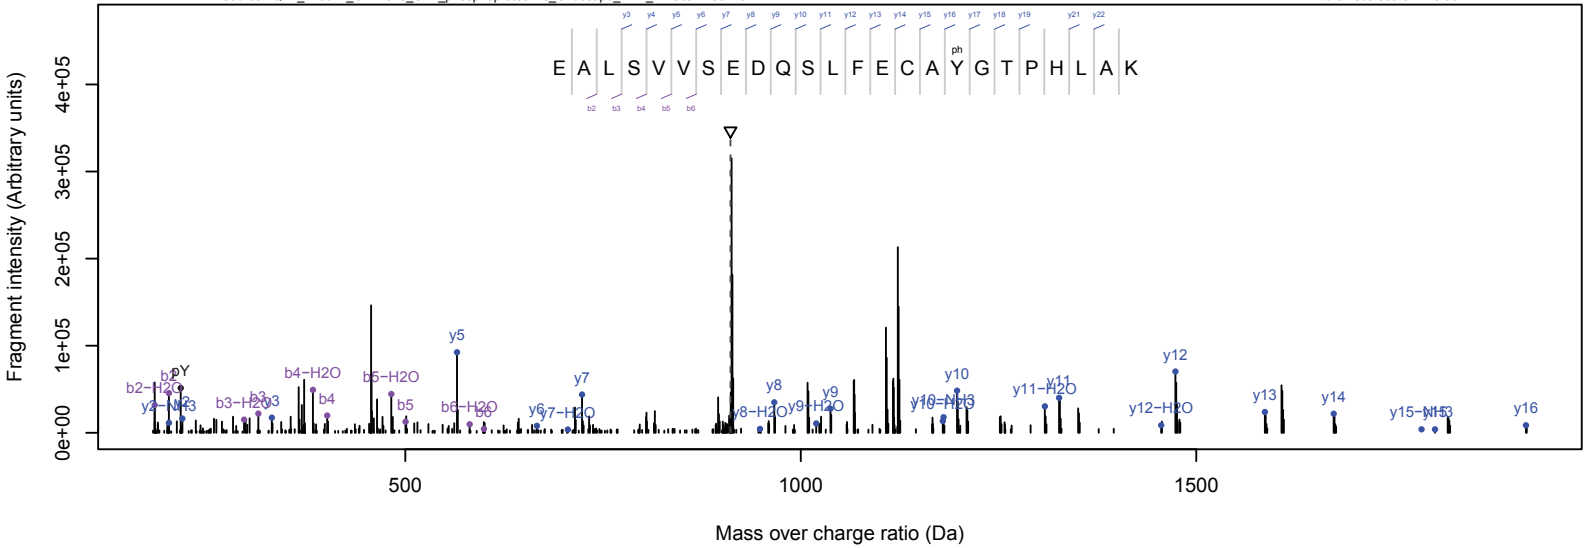



Y(ph)FKKEPNLFSHDAVVR-3+

Source : QE1\_140612\_OPL1013\_CVA\_phosphoproteomic\_landscape\_AML\_C Scan : 21779

Andromeda score : 126.63

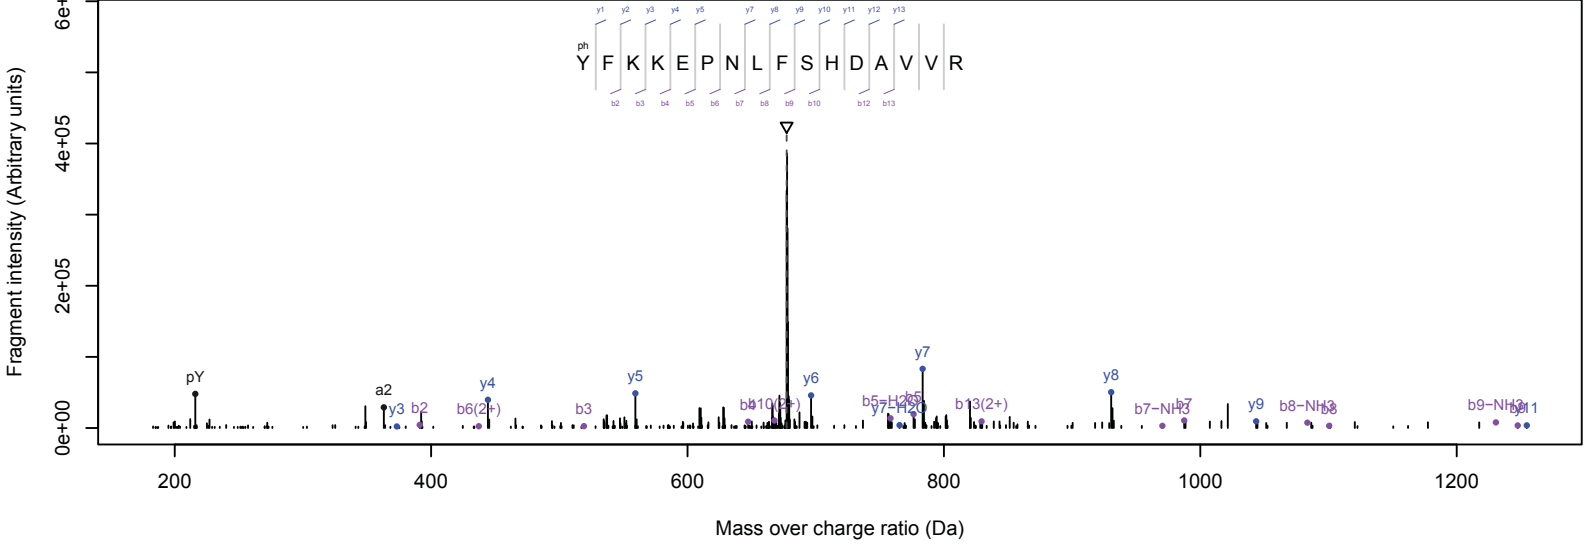

DQEKPY(ph)FSSFDSGASTNRK-3+

Source : QE1\_140612\_OPL1013\_CVA\_phosphoproteomic\_landscape\_AML\_C Scan : 16983

Andromeda score : 126.37

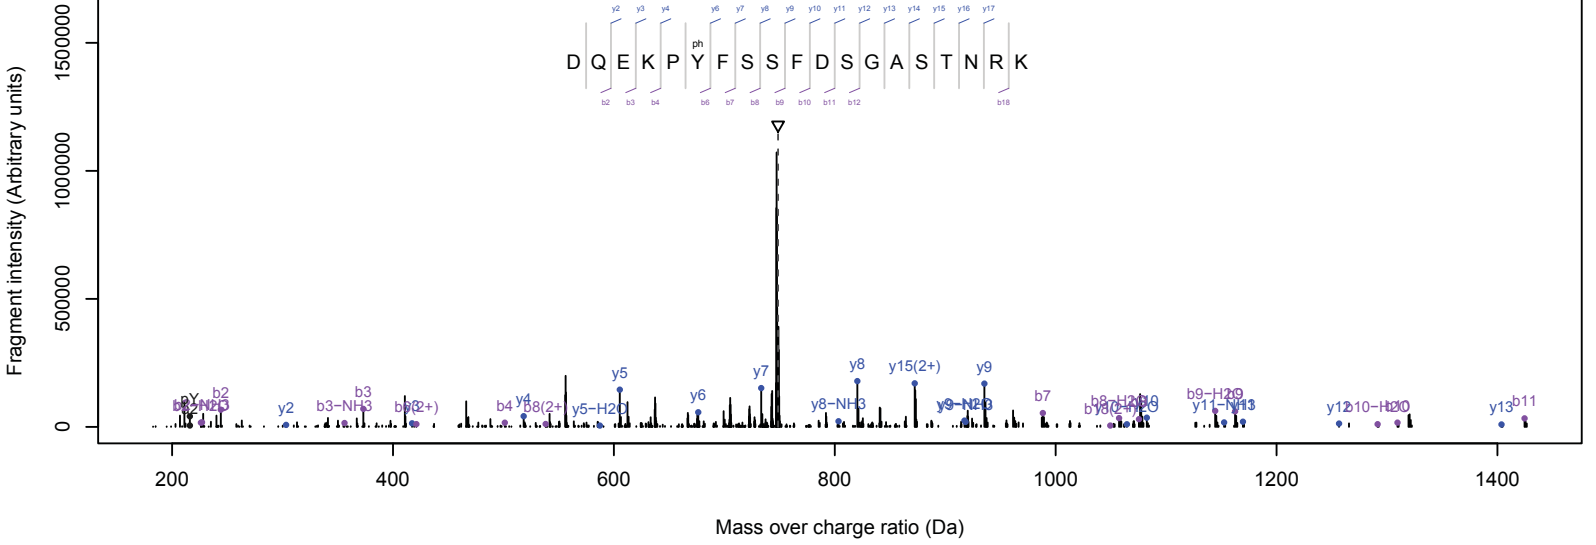

TY(ph)HALSNLPK-2+

Source : QE1\_140612\_OPL1013\_CVA\_phosphoproteomic\_landscape\_AML\_B Scan : 12236

Andromeda score : 126.19

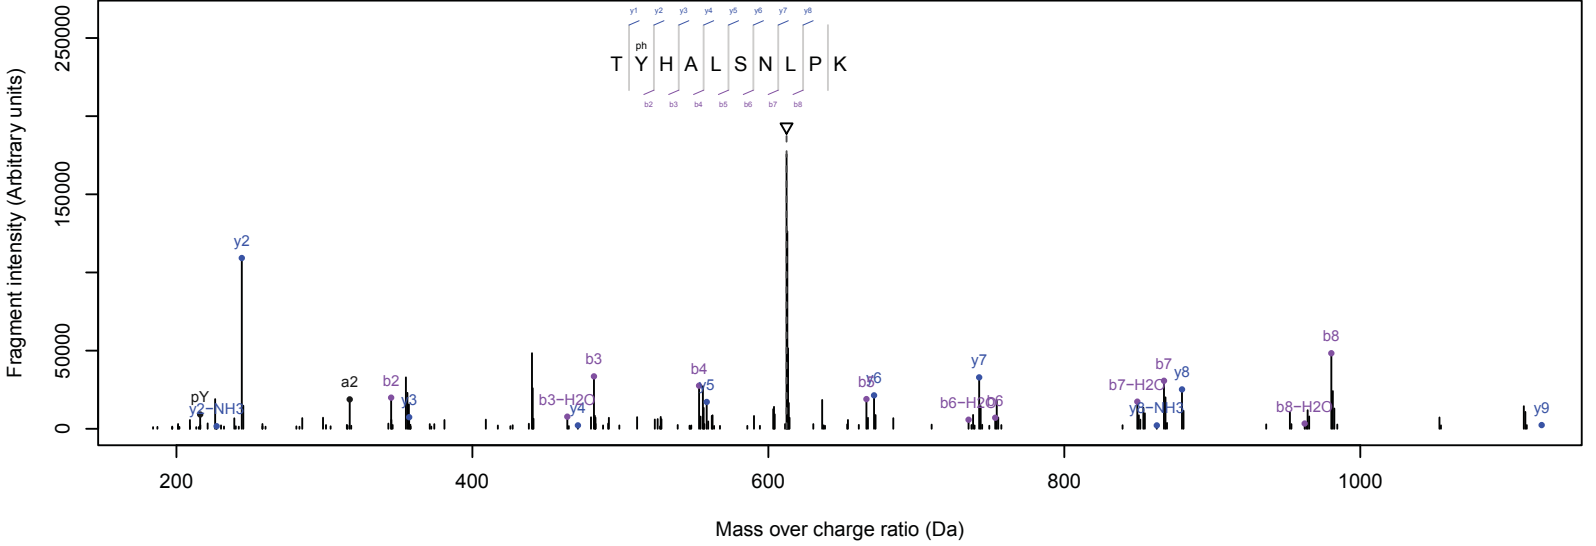

HSSSPY(ph)VVYPSDKPFLNSDLR-3+

Source : QE1\_140612\_OPL1013\_CVA\_phosphoproteomic\_landscape\_AML\_C Scan : 30834

Andromeda score : 126.09

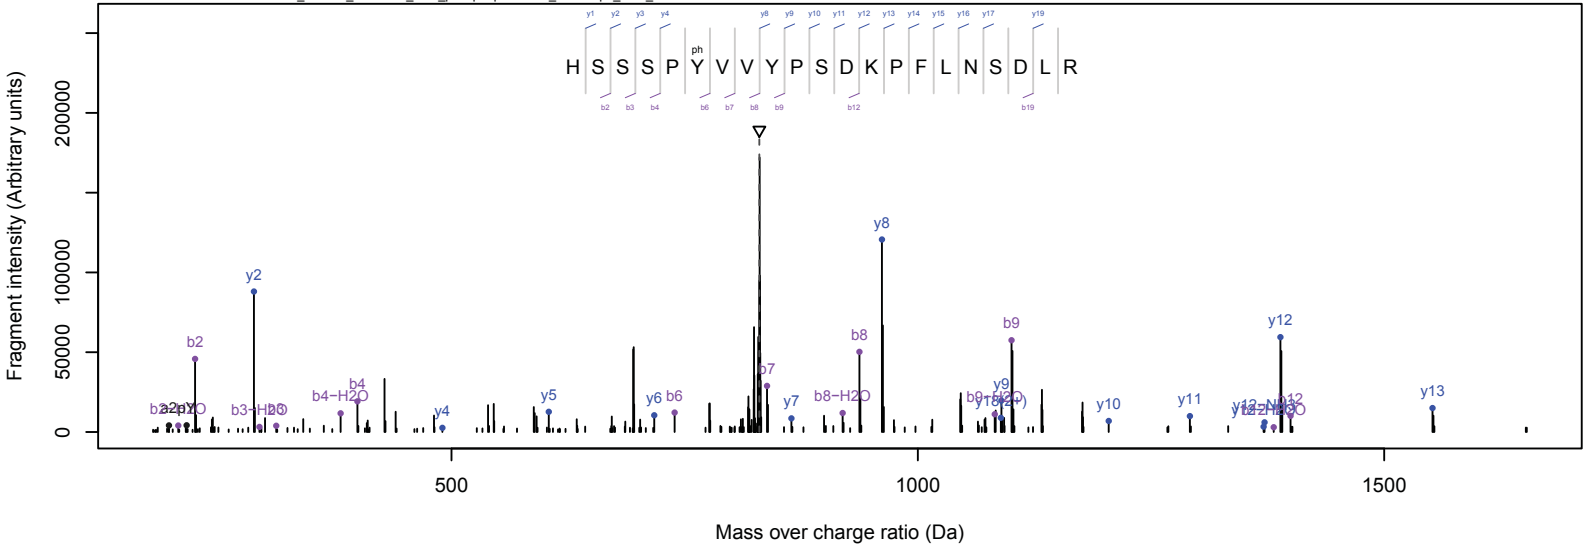

CVY(ph)YRKPLLESGLGTK-3+

Source : QE1\_140612\_OPL1013\_CVA\_phosphoproteomic\_landscape\_AML\_A Scan : 22352

Andromeda score : 126.07

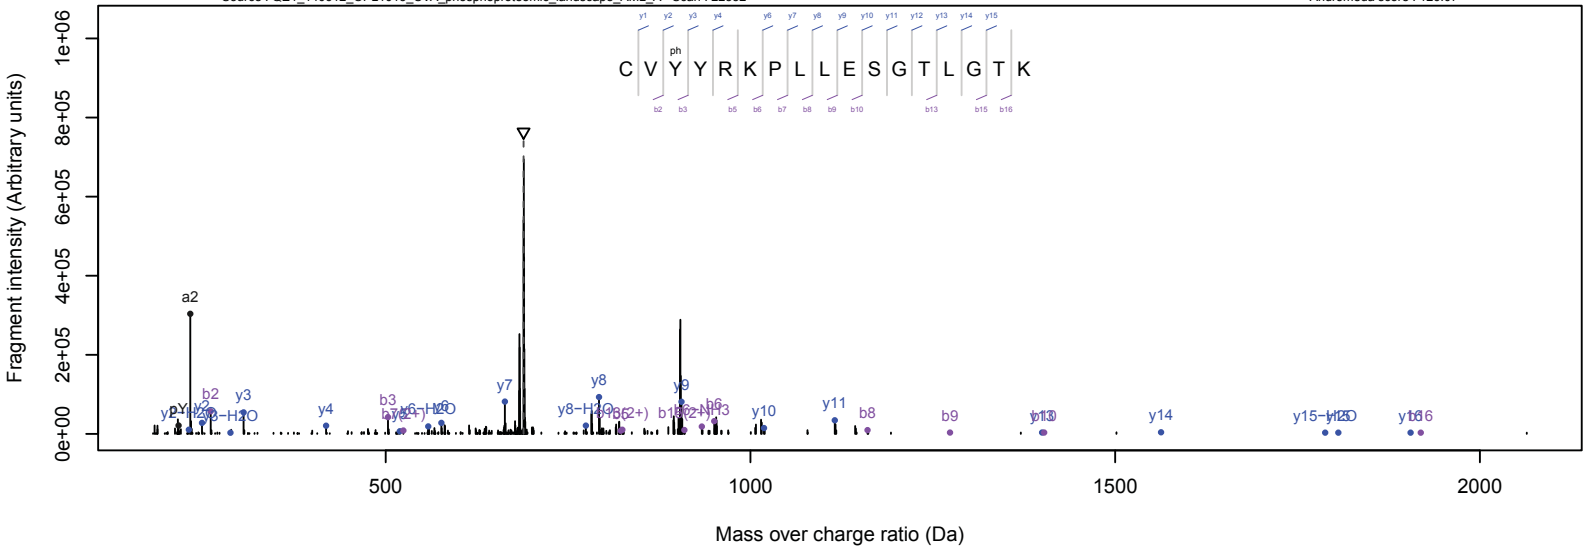

KTTTNPY(ph)VLMVLYKDK-3+

Source : QE1\_140612\_OPL1013\_CVA\_phosphoproteomic\_landscape\_AML\_B Scan : 32659

Andromeda score : 126.07

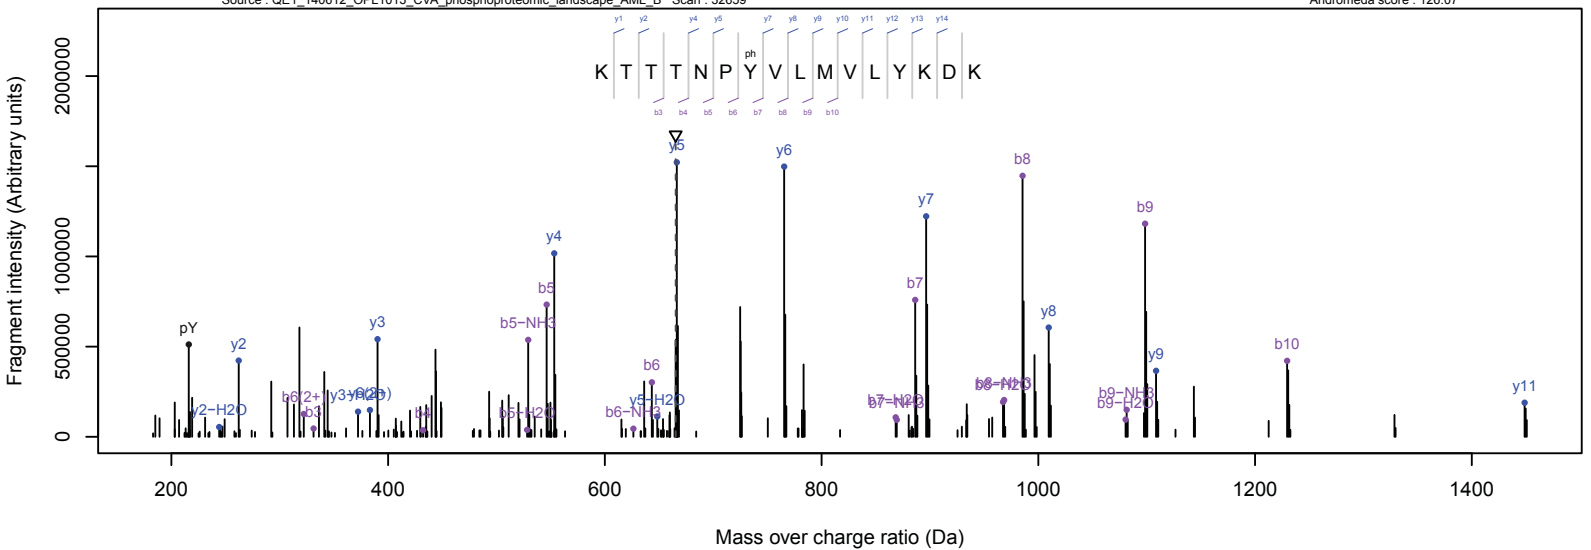

YGY(ph)LSLPKMK-2+

Source : QE1\_140612\_OPL1013\_CVA\_phosphoproteomic\_landscape\_AML\_C Scan : 28052

Andromeda score : 126.03

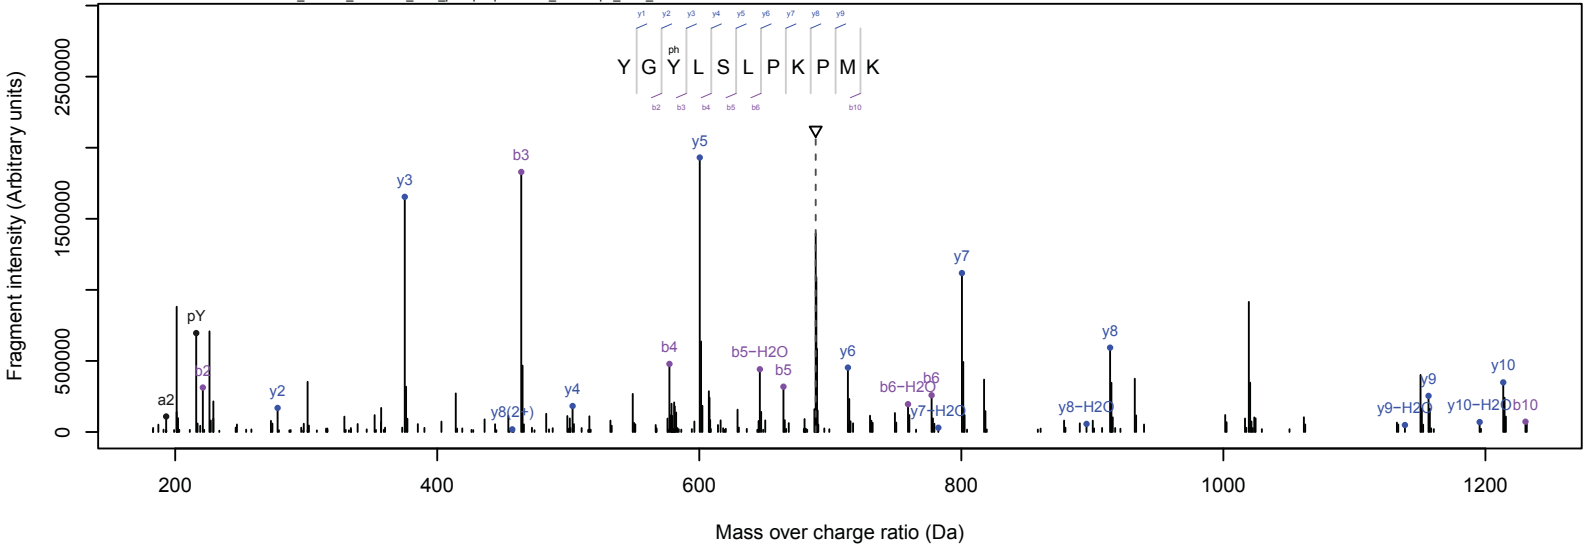

AAASEAPQDVTY(ph)AQLHSFTLR-2+

Source : QE1\_140908\_OPL1013\_CvA\_pTyrIP\_AML\_ML2 Scan : 36189

Andromeda score : 126.02

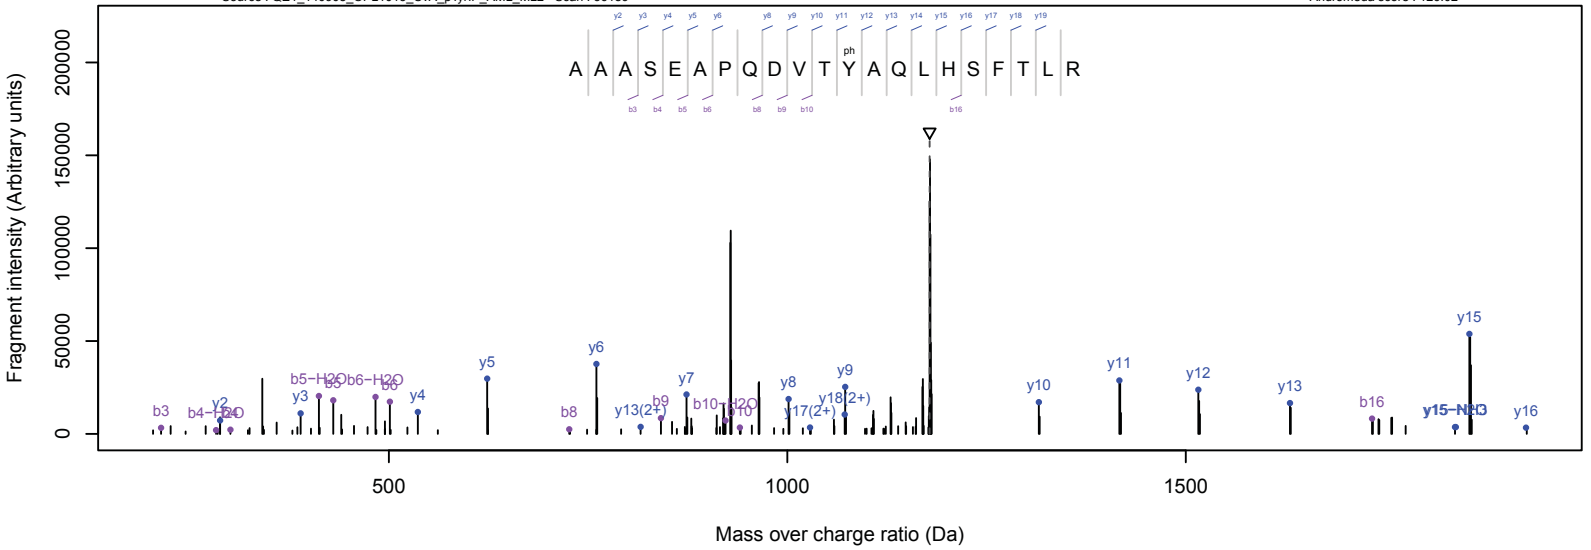

VFGAGY(ph)PSLPTMTVSDWYEQHRK-3+

Source : QE1\_140612\_OPL1013\_CVA\_phosphoproteomic\_landscape\_AML\_C Scan : 41543

Andromeda score : 126.02

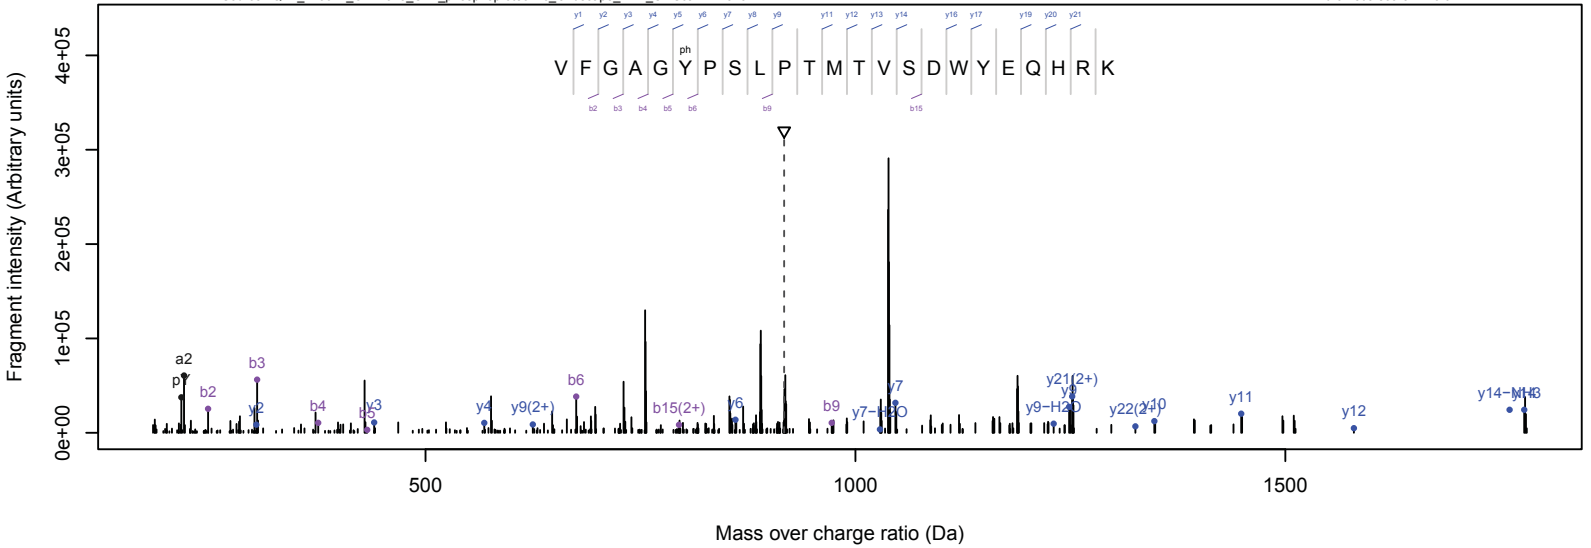

TNSSTY(ph)HLLHTFVNR-4+

Source : QE1\_140612\_OPL1013\_CVA\_phosphoproteomic\_landscape\_AML\_C Scan : 10343

Andromeda score : 125.97

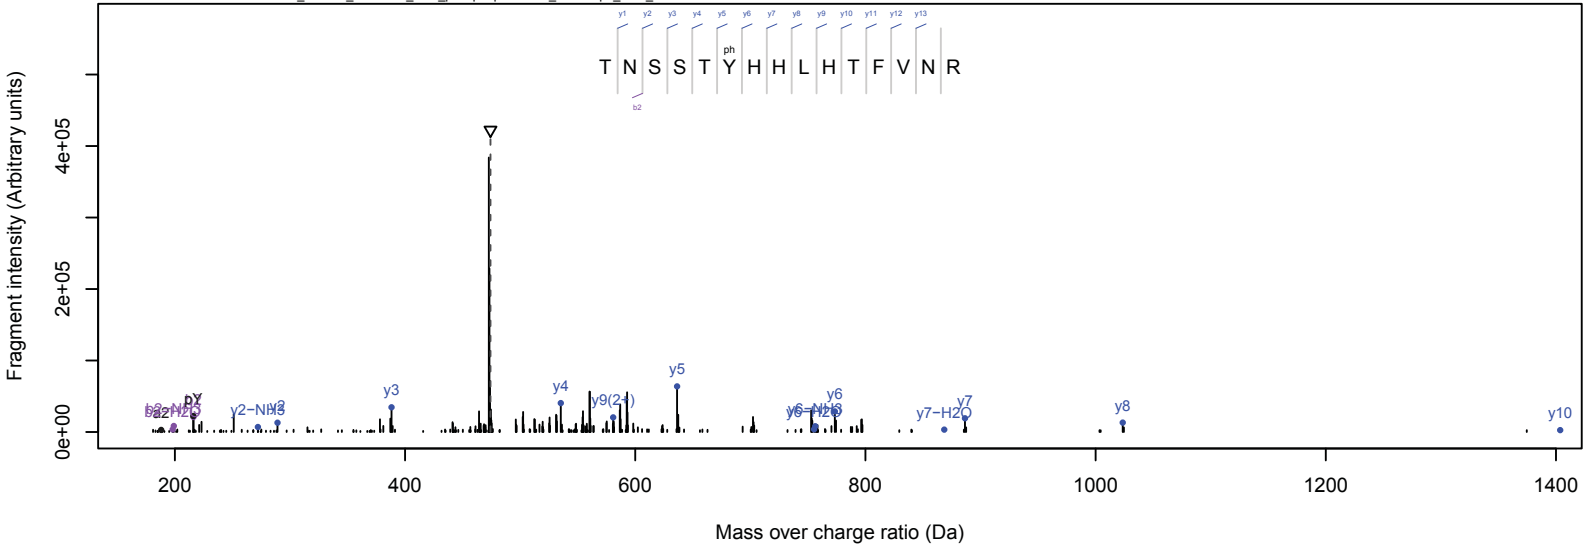

TY(ph)SYLTPDLWK-2+

Source : QE1\_140612\_OPL1013\_CVA\_phosphoproteomic\_landscape\_AML\_C Scan : 40501

Andromeda score : 125.97

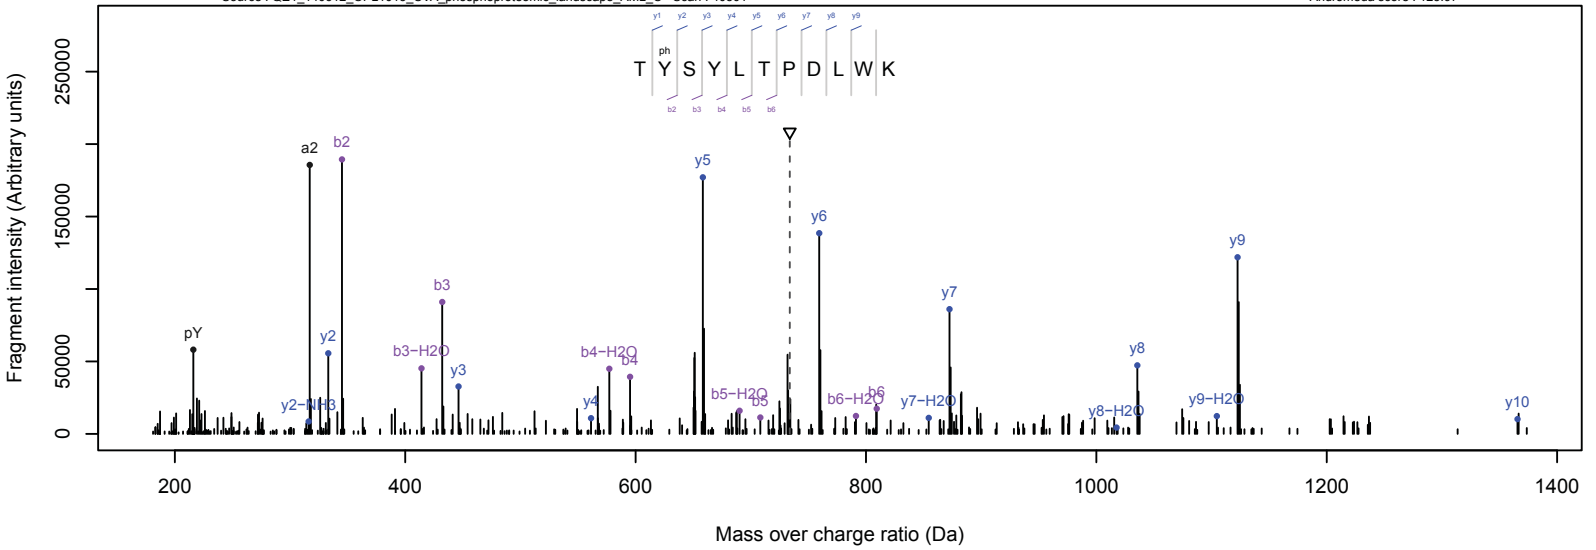

STTNY(ph)VDFYSTK-2+

Source : QE1\_140612\_OPL1013\_CVA\_phosphoproteomic\_landscape\_AML\_C Scan : 22130

Andromeda score : 125.82

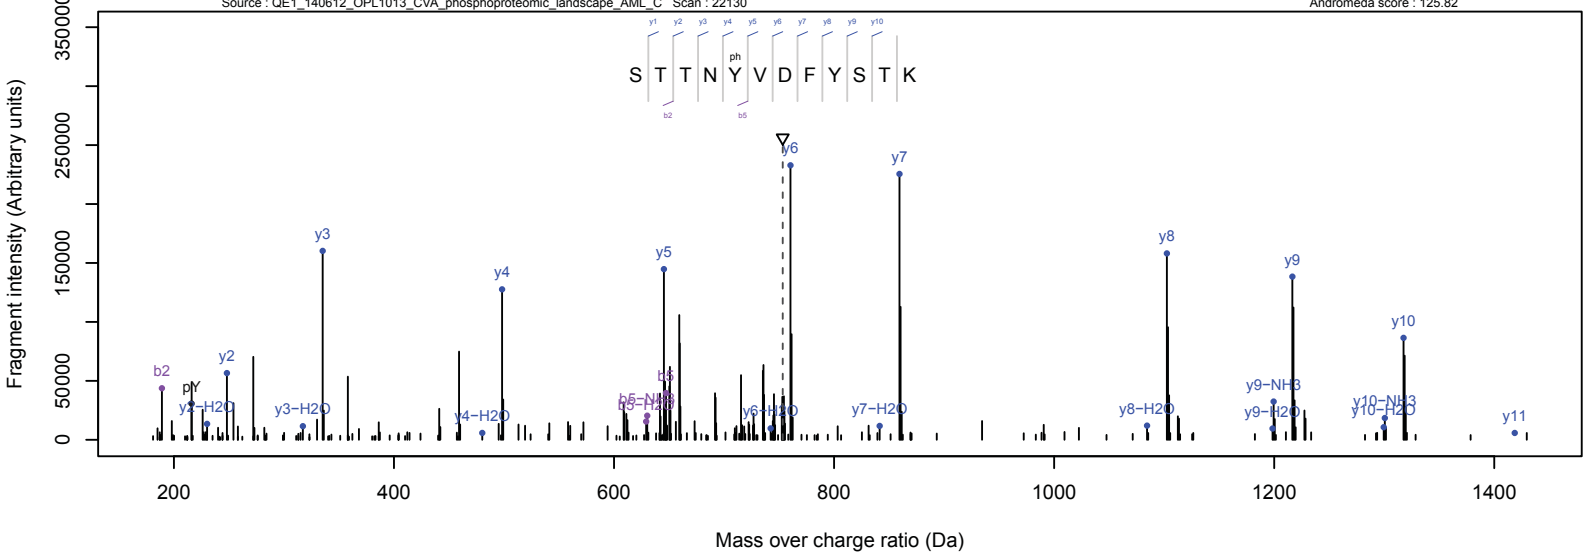

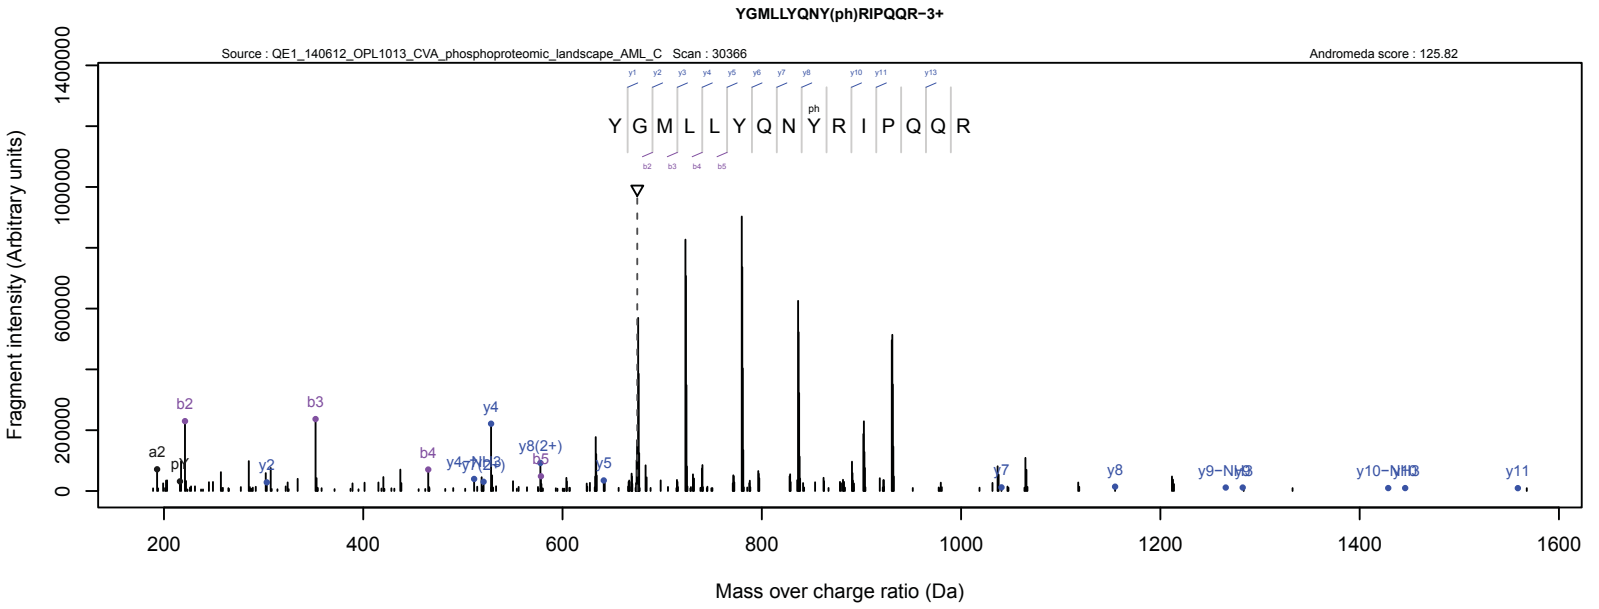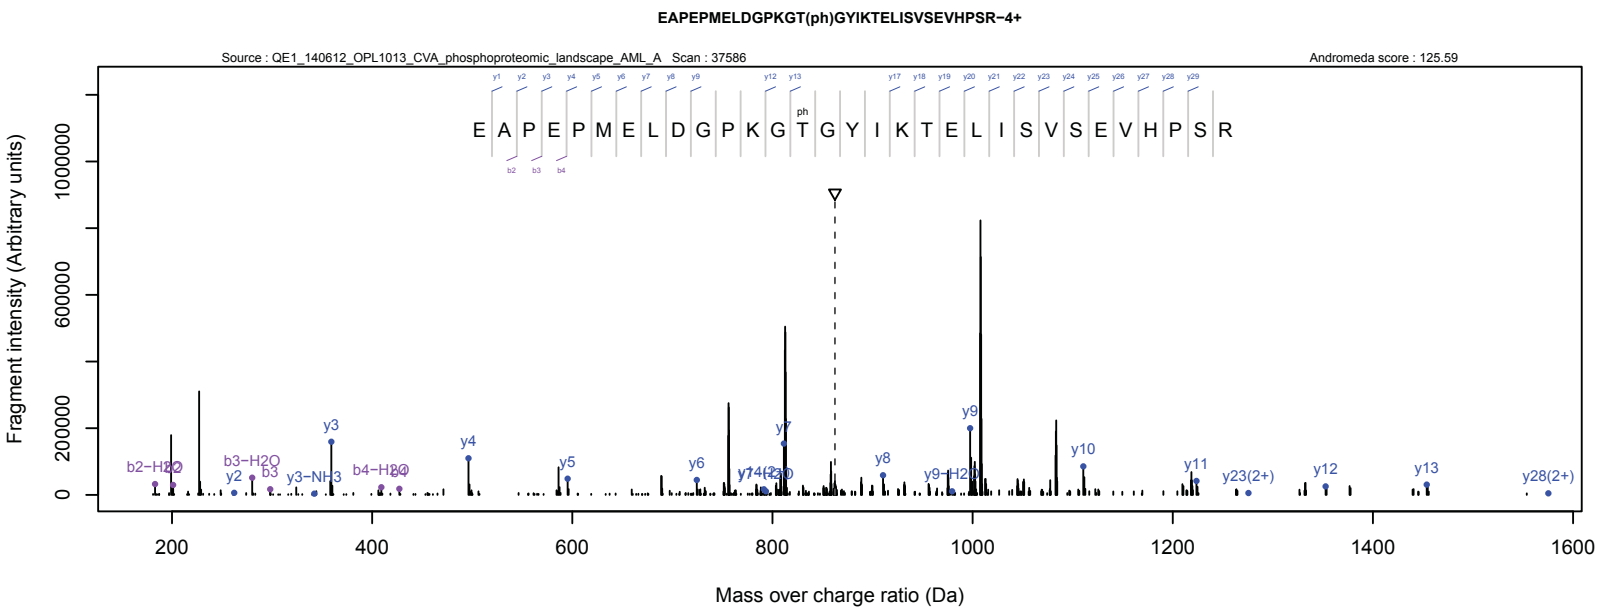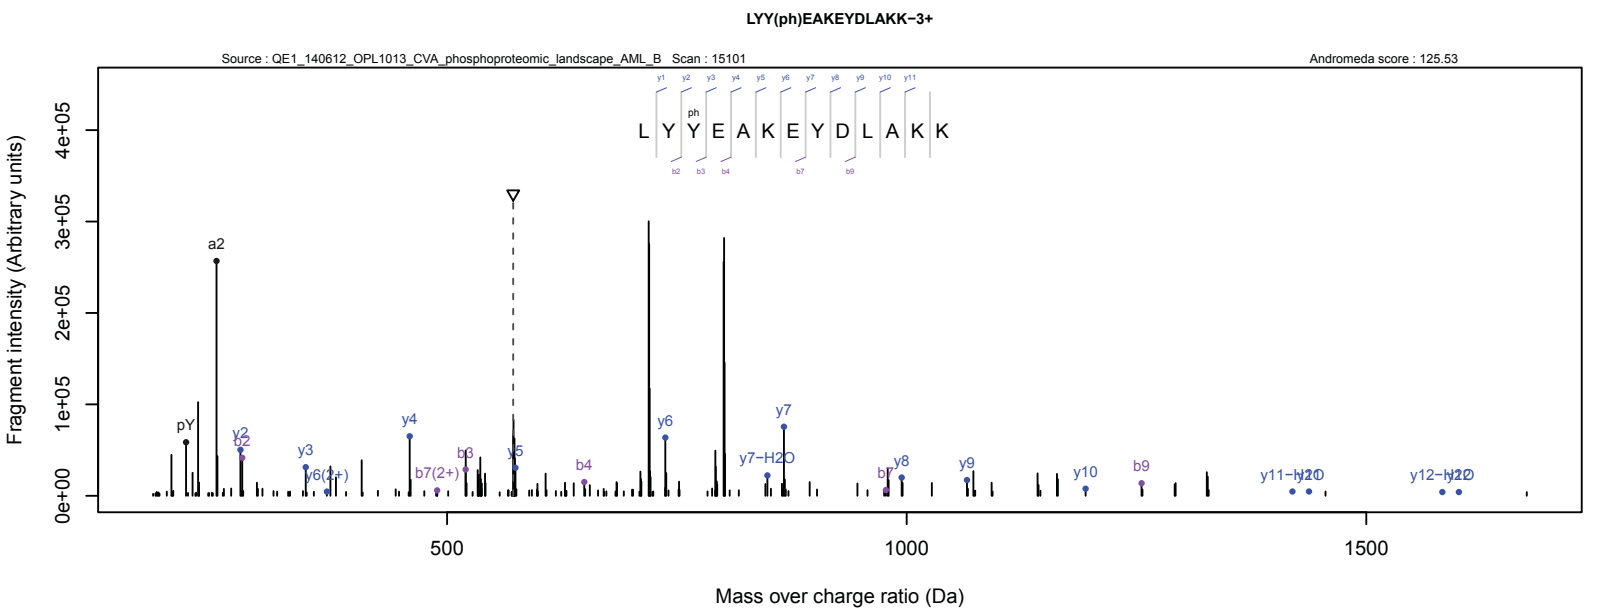

LVY(ph)ENINGLSIPSASGVR-2+

Source : QE1\_140612\_OPL1013\_CVA\_phosphoproteomic\_landscape\_AML\_B Scan : 37085

Andromeda score : 125.51

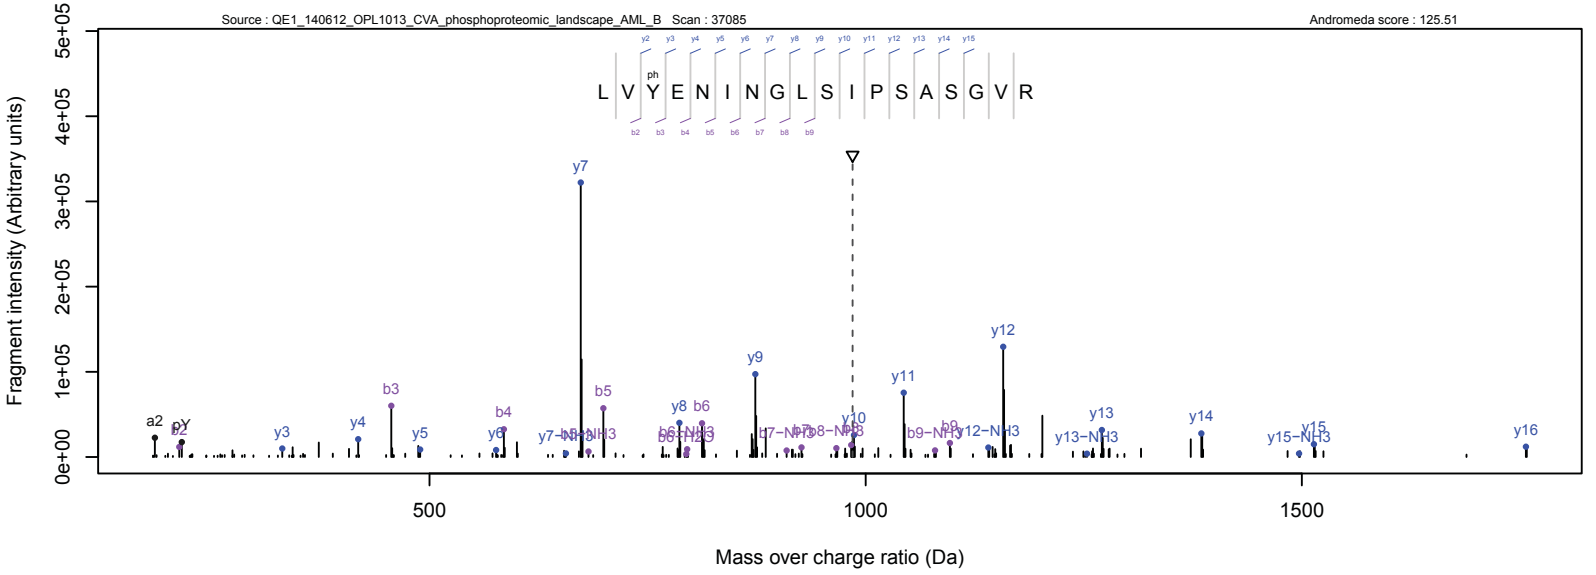

NM(ox)GGPYGGNGYGGSGGGY(ph)GGR-2+

Source : QE1\_140908\_OPL1013\_CvA\_pTyrIP\_AML\_Kasumi6 Scan : 14691

Andromeda score : 125.39

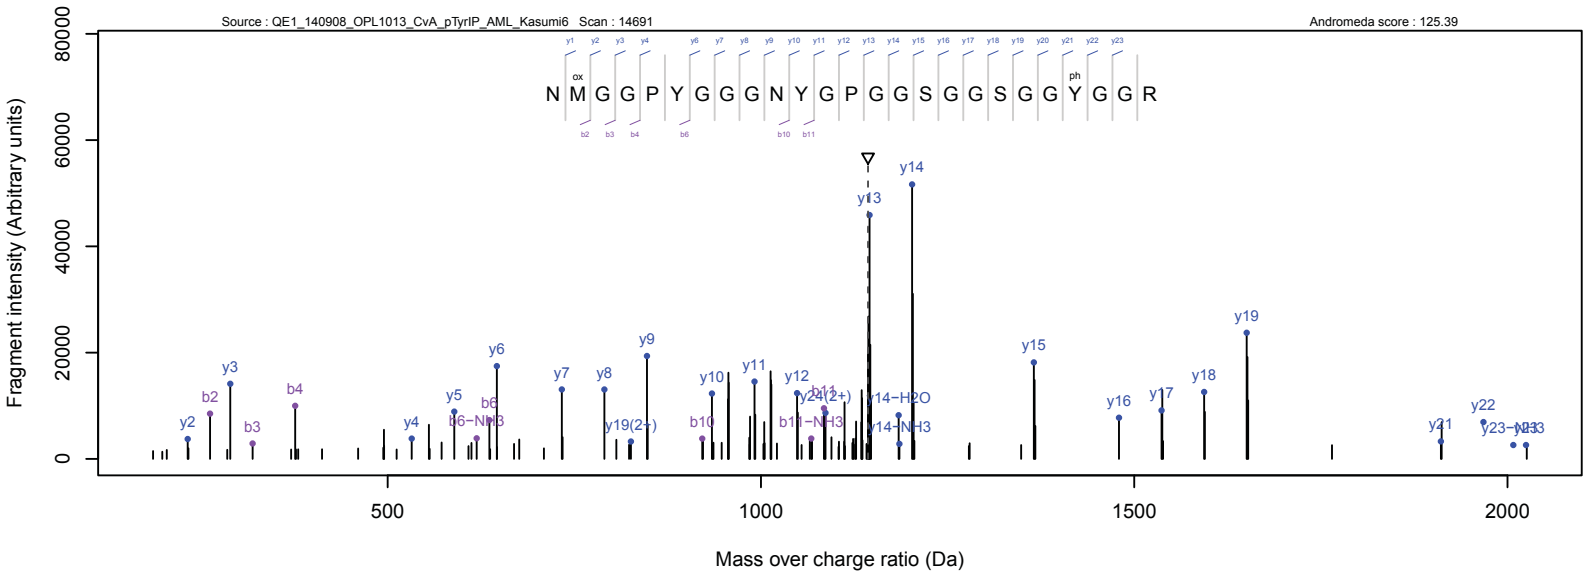

SEGTY(ph)CCGPVVR-2+

Source : QE1\_140908\_OPL1013\_CvA\_pTyrIP\_AML\_HEL Scan : 15879

Andromeda score : 125.36

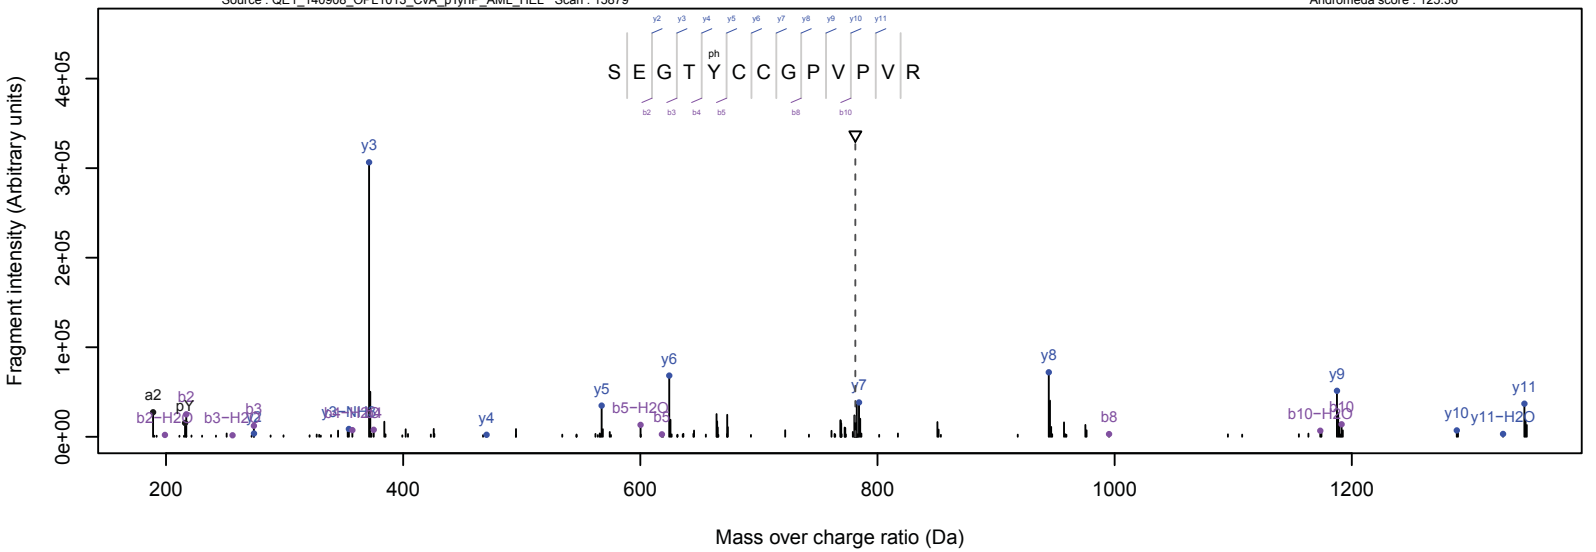



**KAY(ph)YLACGFCR-2+**

Source: QE1\_140612\_OPL1013\_CVA\_phosphoproteomic\_landscape\_AML\_C Scan: 21374

Andromeda score: 125.23

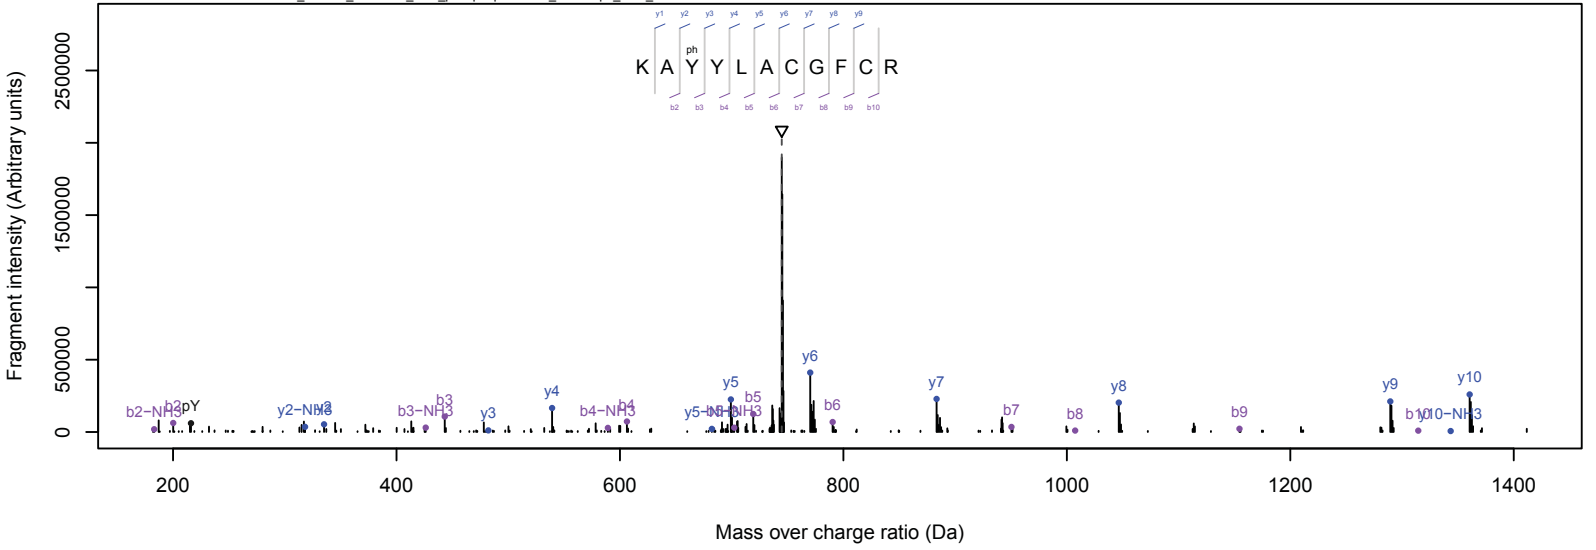

**NQALNTDNY(ph)GHDLASVQALQR-3+**

Source: QE1\_140612\_OPL1013\_CVA\_phosphoproteomic\_landscape\_AML\_B Scan: 25858

Andromeda score: 125.23

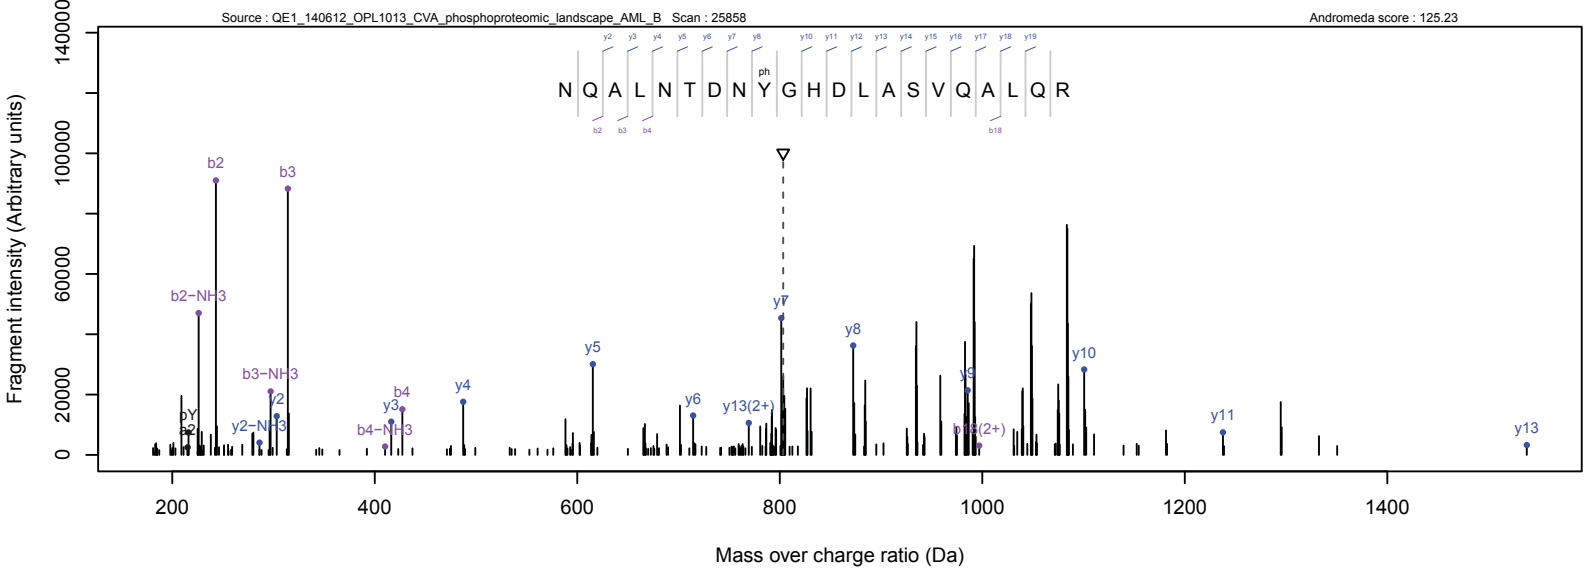

**VTY(ph)KNVPNWHR-3+**

Source: QE1\_140612\_OPL1013\_CVA\_phosphoproteomic\_landscape\_AML\_C Scan: 11692

Andromeda score: 125.23

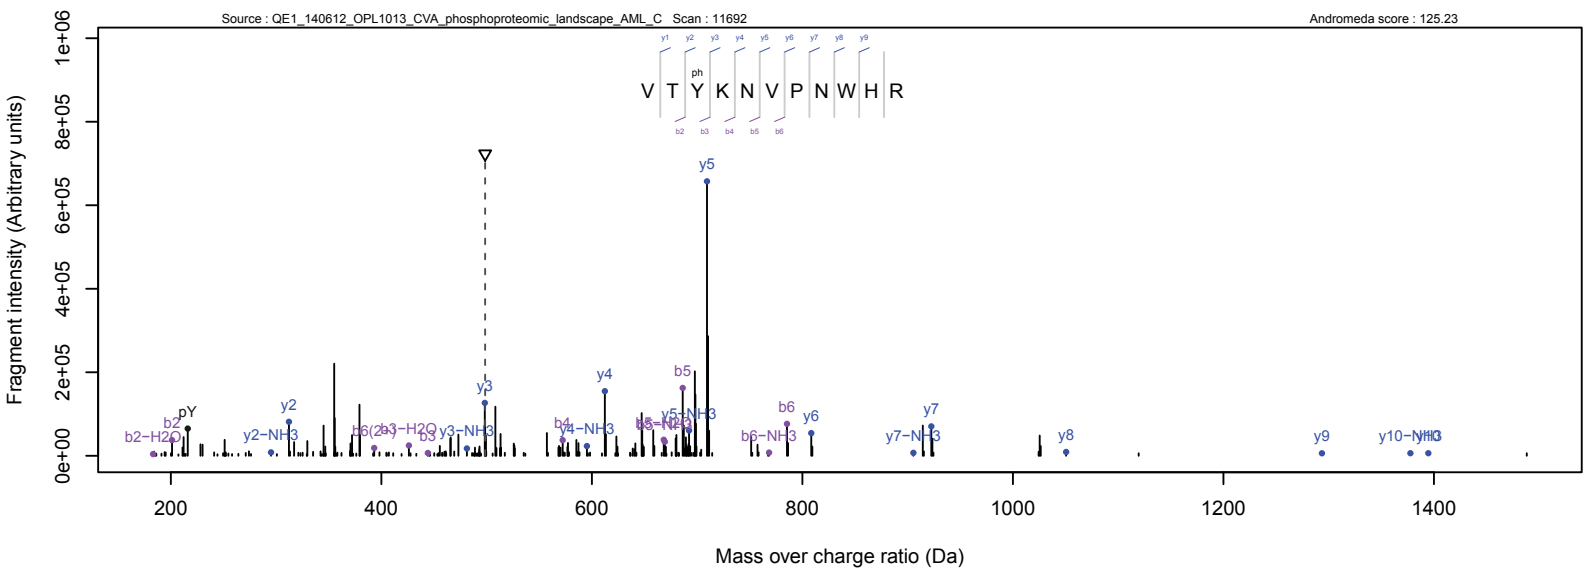

NGY(ph)IPSNYVAPADSIQAEWYFGK-3+

Source : QE1\_140612\_OPL1013\_CVA\_phosphoproteomic\_landscape\_AML\_C Scan : 47163

Andromeda score : 125.11

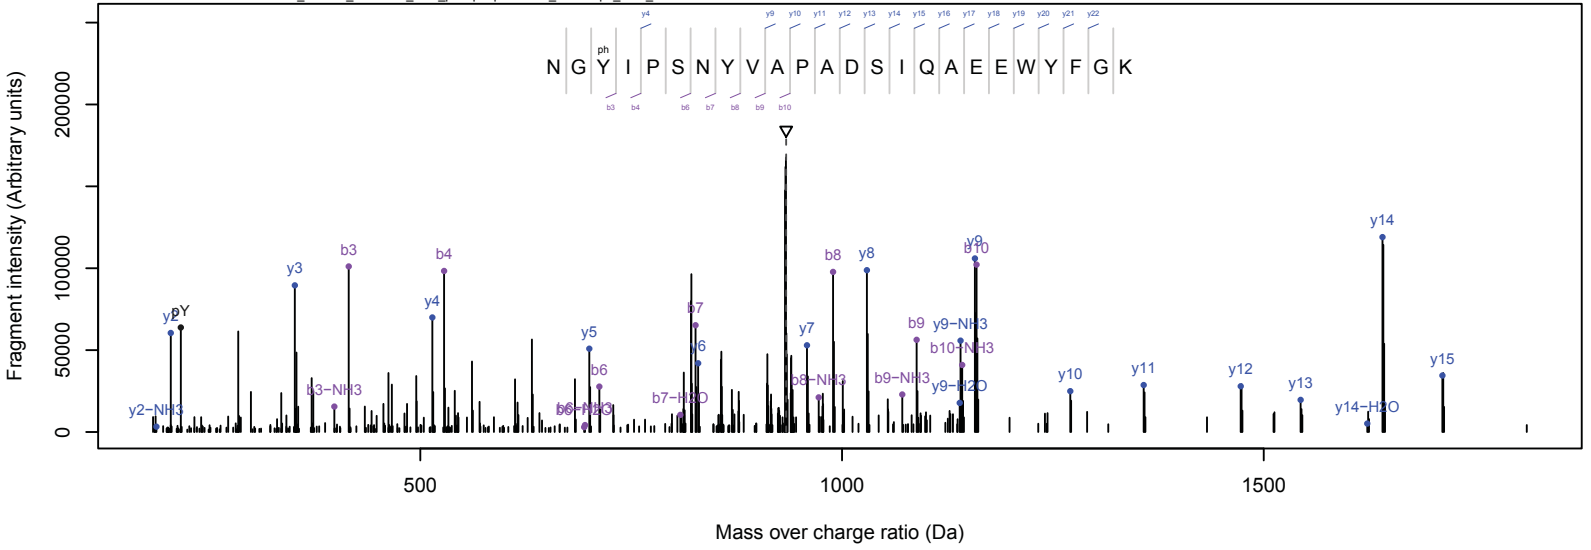

KFSLDY(ph)LALDFNSASPAPMox)QQK-3+

Source : QE1\_140612\_OPL1013\_CVA\_phosphoproteomic\_landscape\_AML\_B Scan : 47346

Andromeda score : 125.04

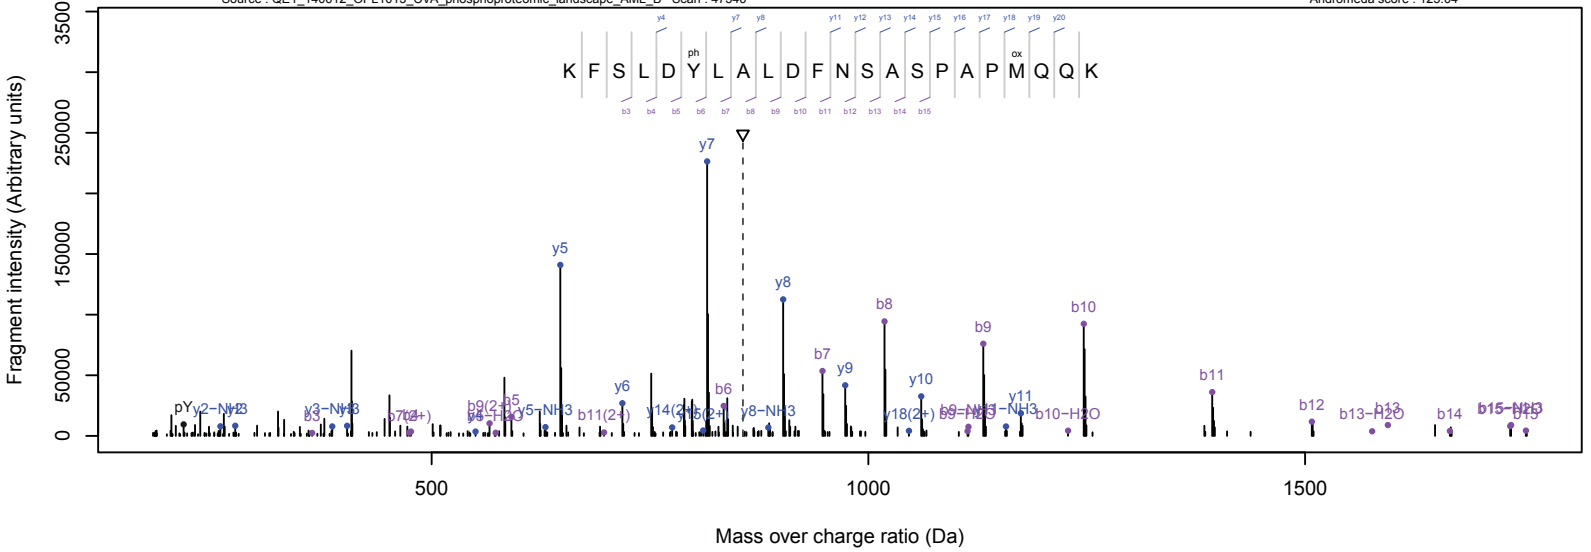

VASMP LISSTCDMVSAAAY(ph)ASTK-2+

Source : QE1\_140612\_OPL1013\_CVA\_phosphoproteomic\_landscape\_AML\_C Scan : 44701

Andromeda score : 125.04

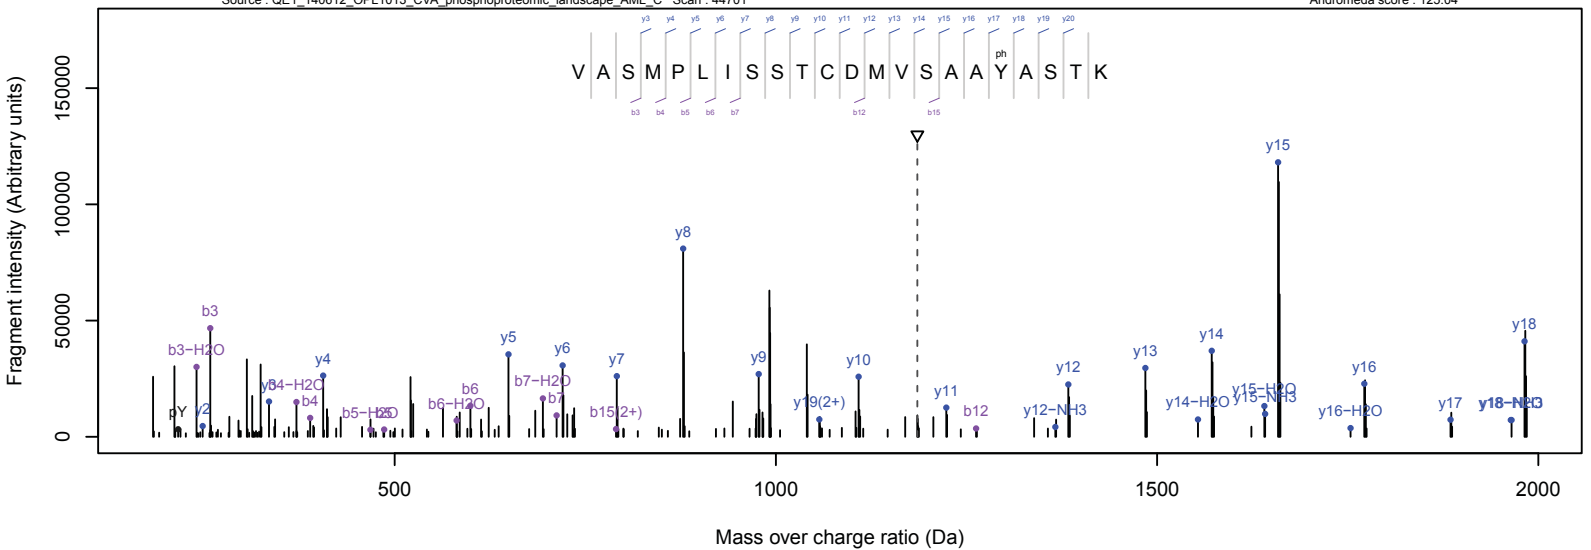

**NHFPGEAETLYNSLEPSYQK-3+**

Source : QE1\_140612\_OPL1013\_CVA\_phosphoproteomic\_landscape\_AML\_C Scan : 33624

Andromeda score : 124.73

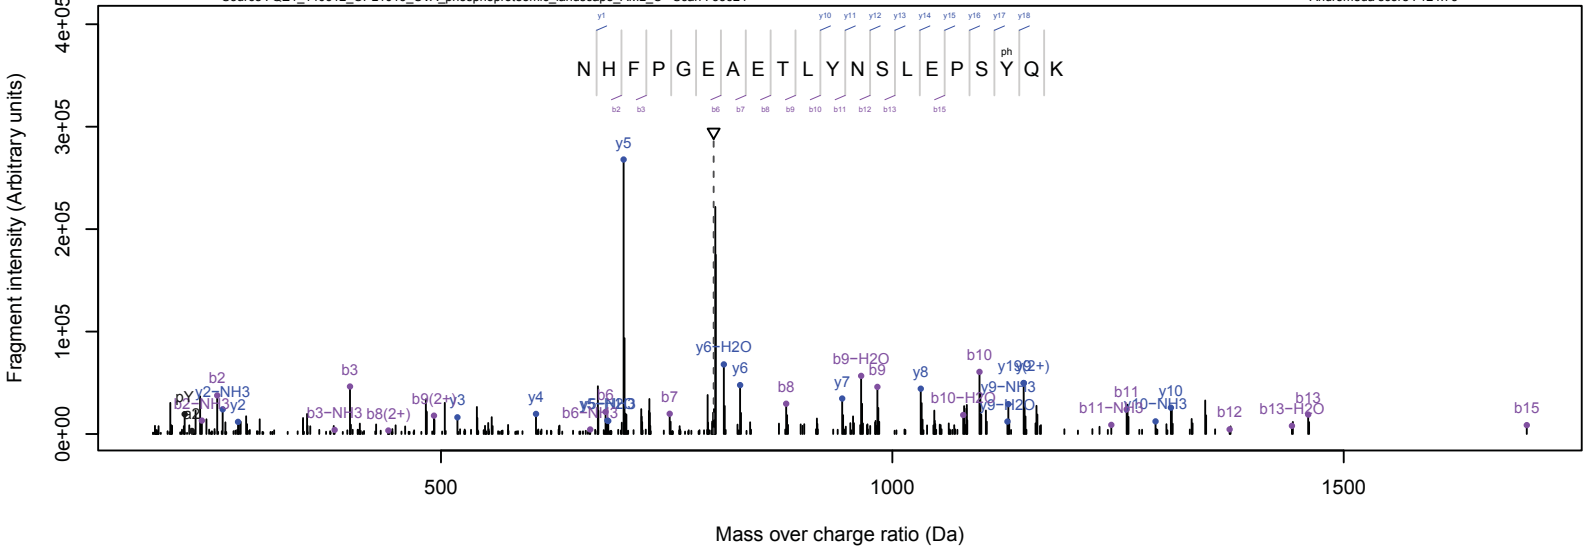

**KVPY(ph)AKPIPAQFQQAWM(ox)QNK-3+**

Source : QE1\_140612\_OPL1013\_CVA\_phosphoproteomic\_landscape\_AML\_A Scan : 29172

Andromeda score : 124.68

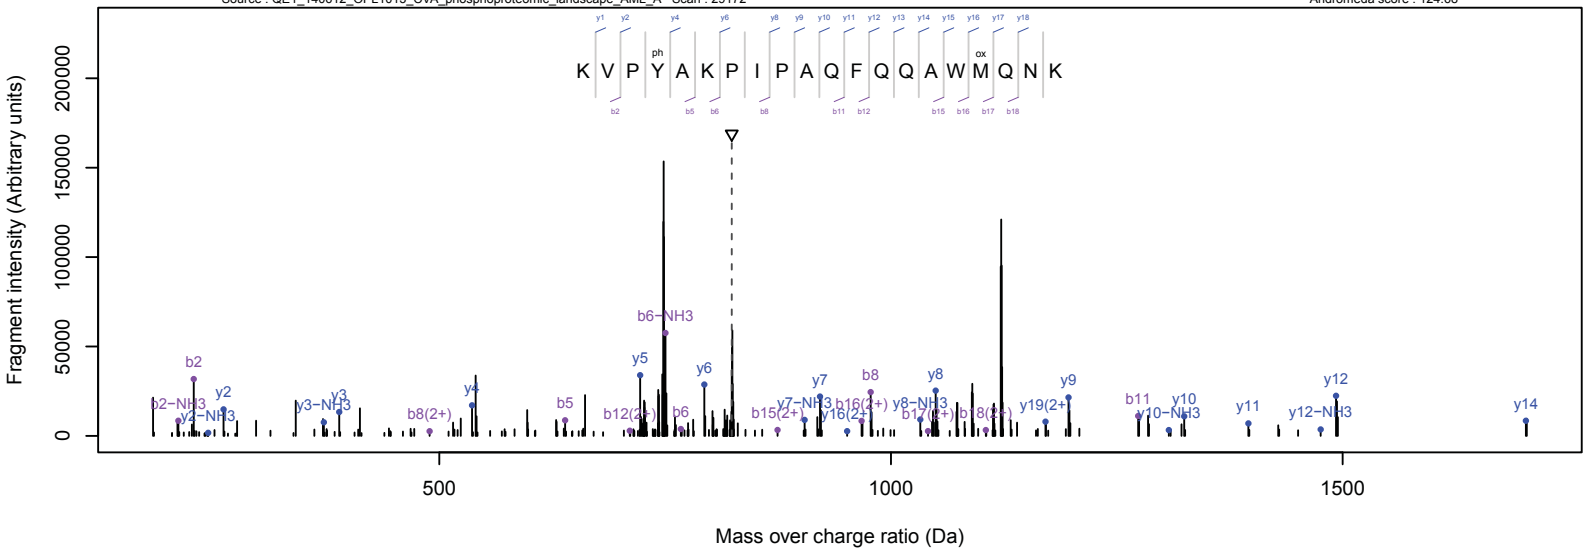

**VGDY(ph)VYFENSSNPYLVR-2+**

Source : QE1\_140612\_OPL1013\_CVA\_phosphoproteomic\_landscape\_AML\_B Scan : 36727

Andromeda score : 124.68

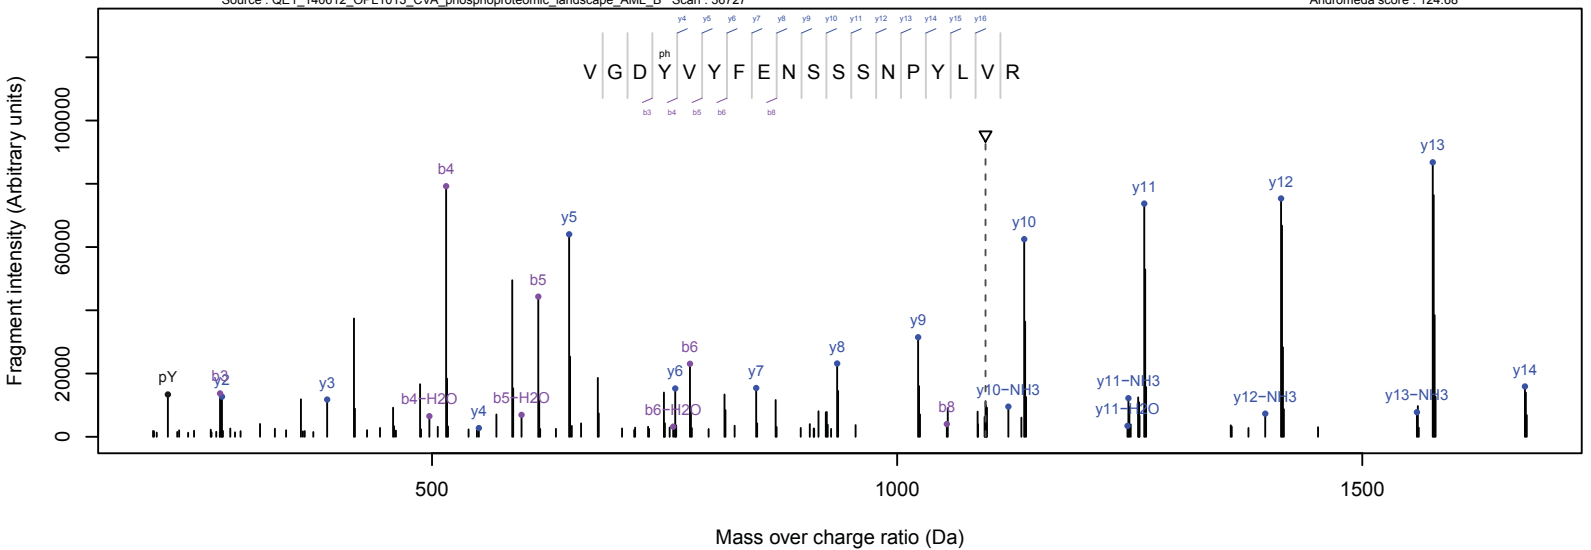

VCEPCY(ph)EQLNR-2+

Source : QE1\_140908\_OPL1013\_CvA\_pTyrIP\_AML\_Kasumi6 Scan : 15214

Andromeda score : 124.67

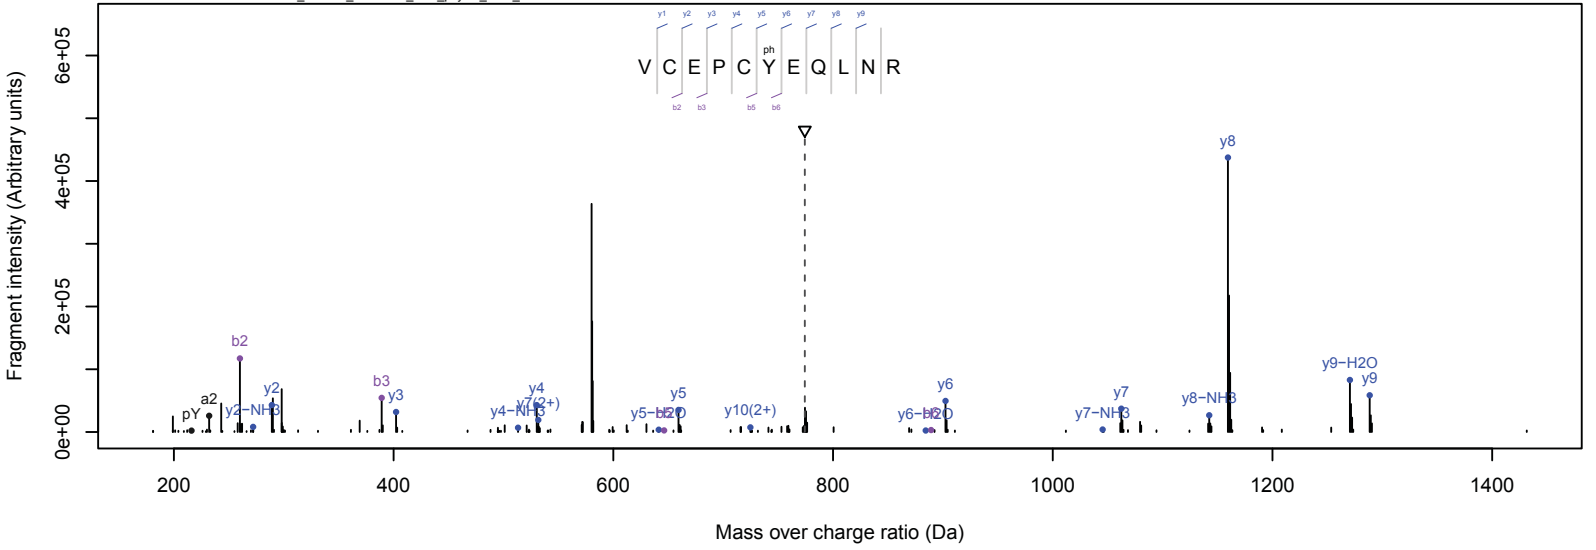

APTDDDKNIY(ph)LTLPNDHVSNN-3+

Source : QE1\_140908\_OPL1013\_CvA\_pTyrIP\_AML\_HEL Scan : 29224

Andromeda score : 124.66

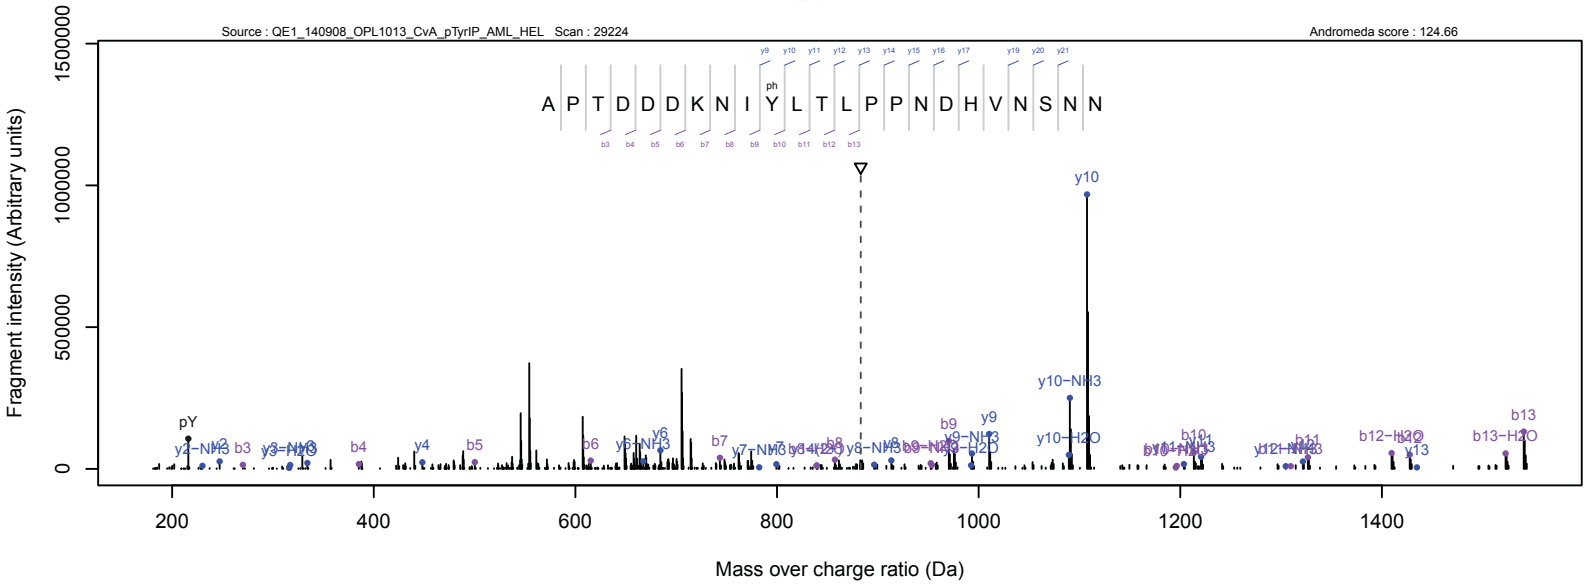

IIASLDRPY(ph)EPPQKPPR-3+

Source : QE1\_140612\_OPL1013\_CVA\_phosphoproteomic\_landscape\_AML\_B Scan : 19408

Andromeda score : 124.63

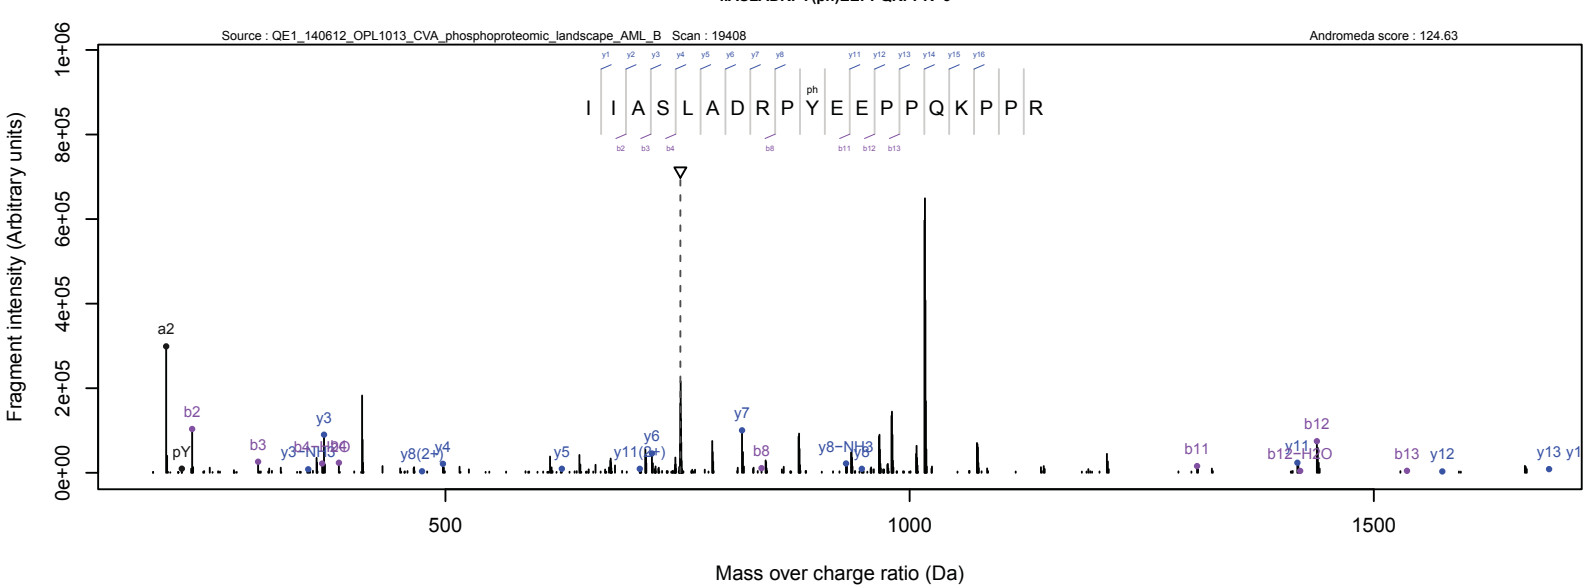

YANNSNY(ph)KNDVMOIRK-3+

Source : QE1\_140908\_OPL1013\_CvA\_pTyrIP\_AML\_OCI\_AML3 Scan : 7157

Andromeda score : 124.62

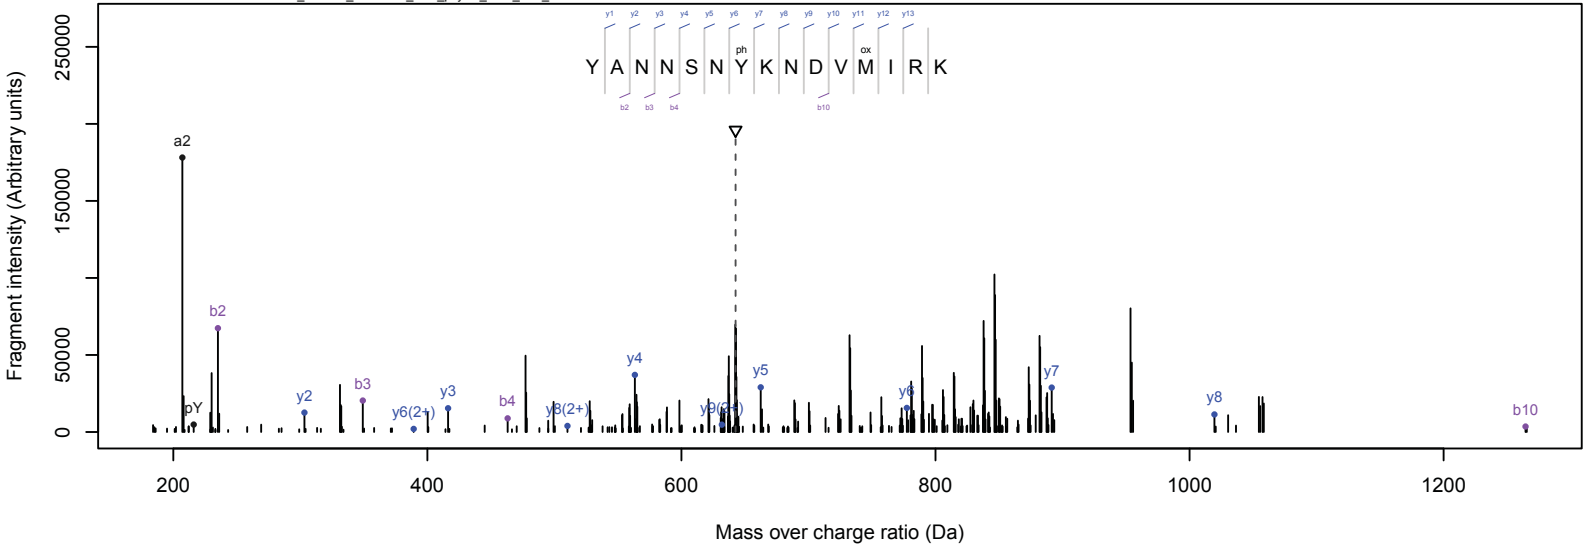

AFSIQTPEQY(ph)FCYK-2+

Source : QE1\_140612\_OPL1013\_CVA\_phosphoproteomic\_landscape\_AML\_C Scan : 39674

Andromeda score : 124.51

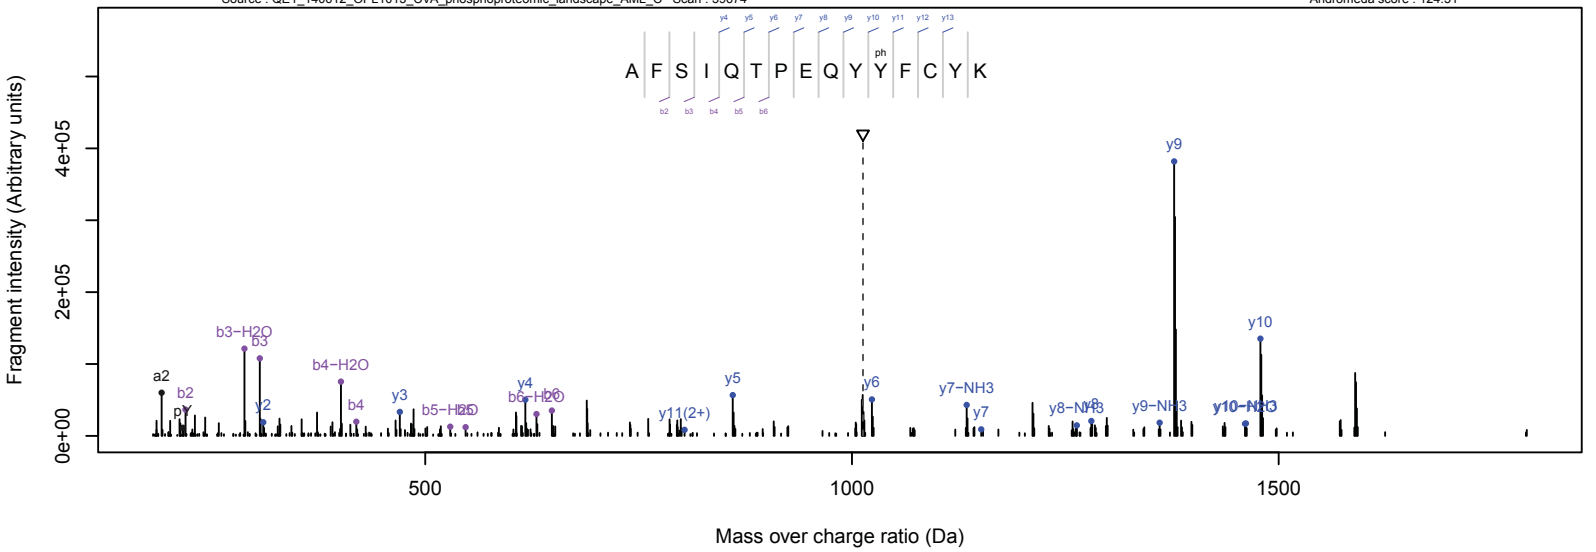

GSY(ph)VSIISSGFR-2+

Source : QE1\_140612\_OPL1013\_CVA\_phosphoproteomic\_landscape\_AML\_C Scan : 14937

Andromeda score : 124.38

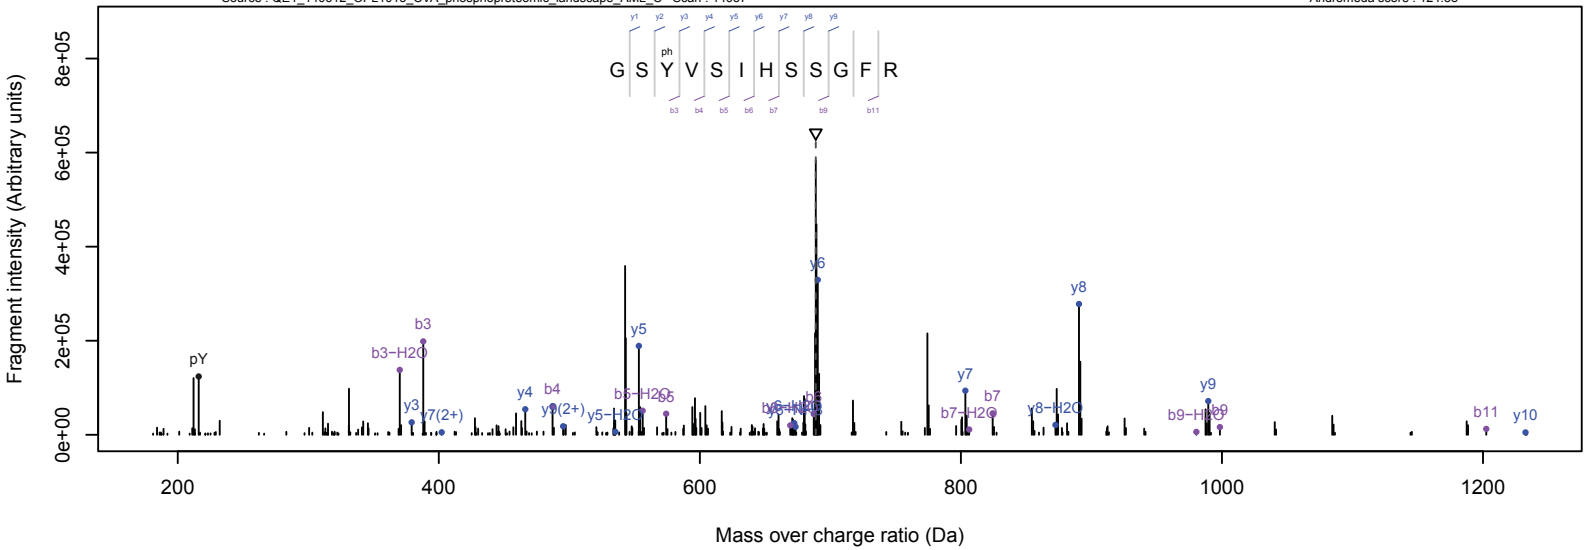

VY(ph)FQSPPGAAGEGPGADDEGPVRR-3+

Source : QE1\_140612\_OPL1013\_CVA\_phosphoproteomic\_landscape\_AML\_C Scan : 22935

Andromeda score : 124.31

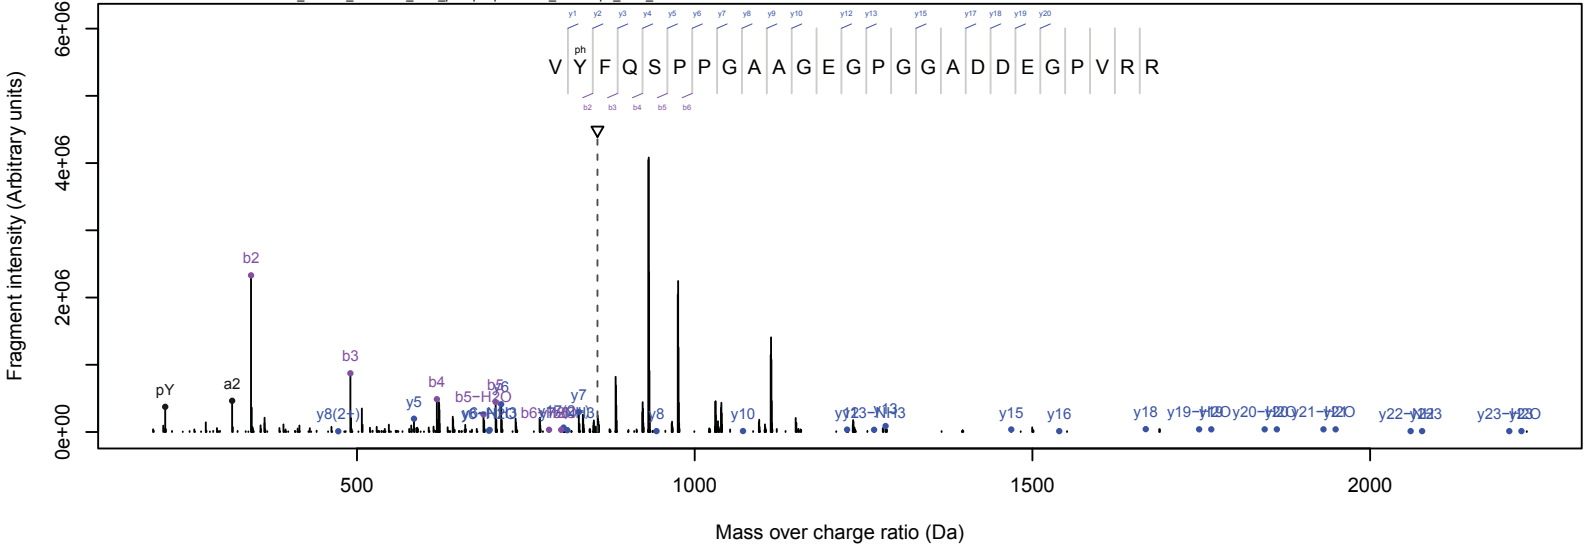

Y(ph)AAIDPSMVAEELEVK-2+

Source : QE1\_140612\_OPL1013\_CVA\_phosphoproteomic\_landscape\_AML\_C Scan : 36966

Andromeda score : 124.29

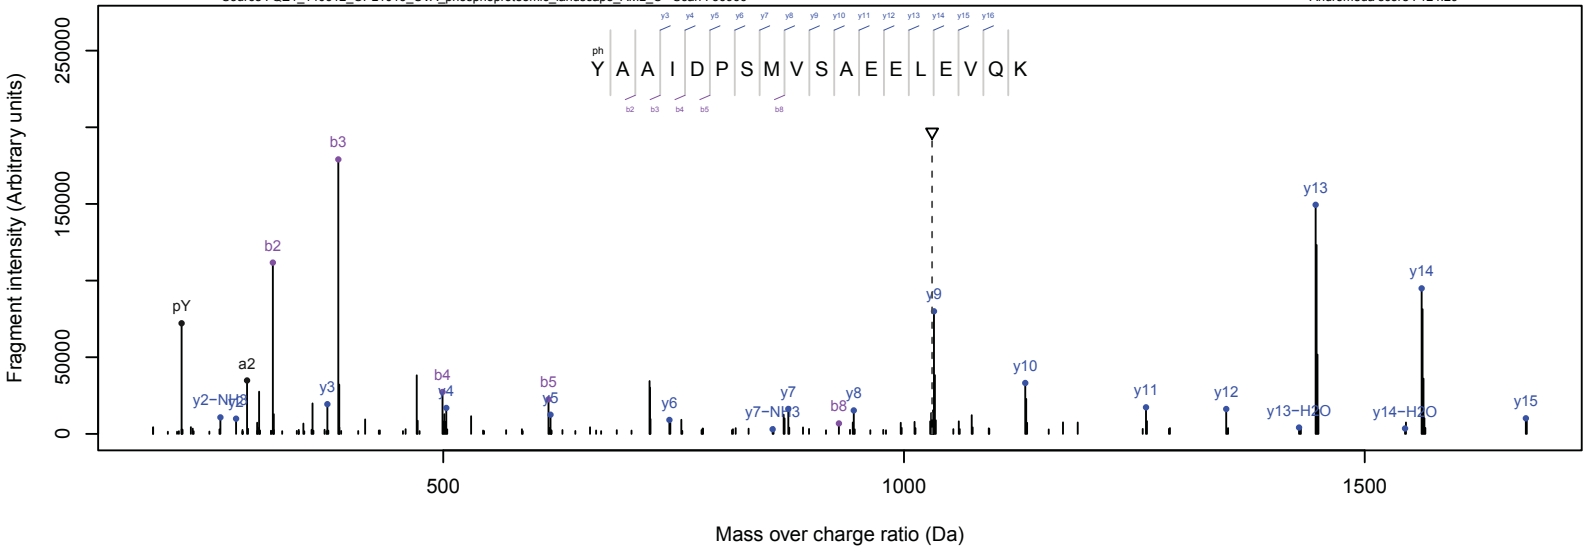

Y(ph)RSDIHTEAVQAALAK-3+

Source : QE1\_140612\_OPL1013\_CVA\_phosphoproteomic\_landscape\_AML\_C Scan : 18004

Andromeda score : 124.29

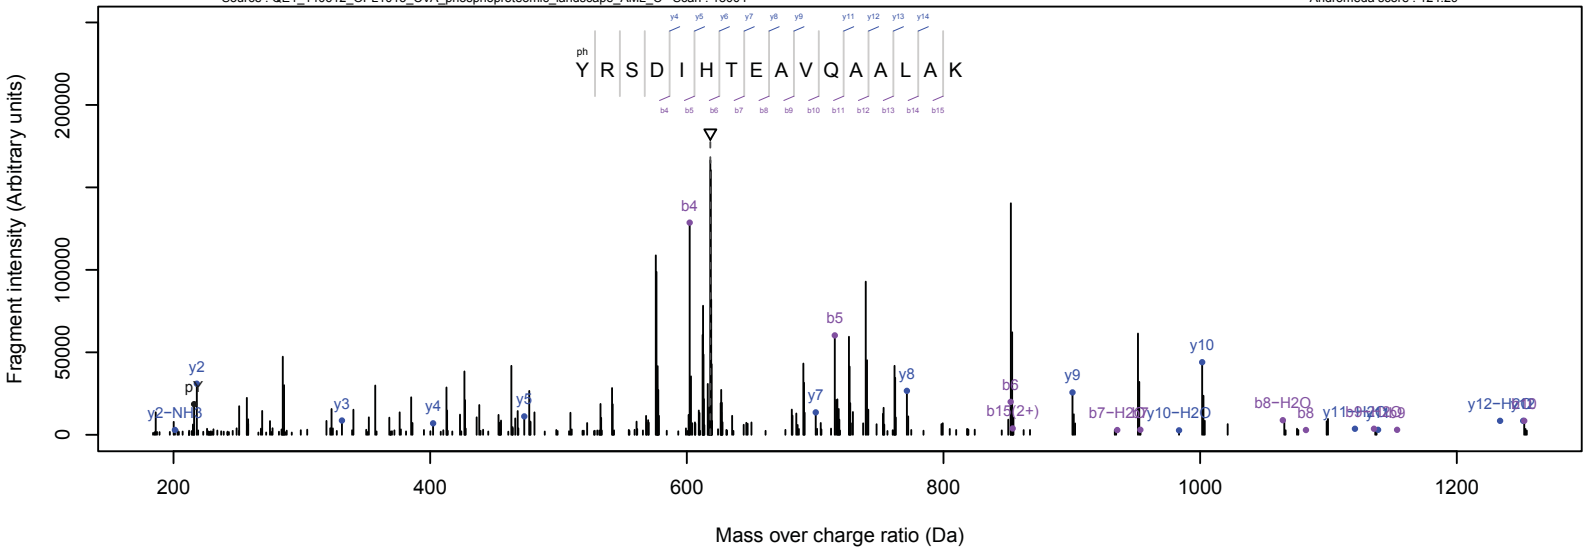

SQEELREDKAYQLER-3+

Source : QE1\_140612\_OPL1013\_CVA\_phosphoproteomic\_landscape\_AML\_C Scan : 10442

Andromeda score : 124.25

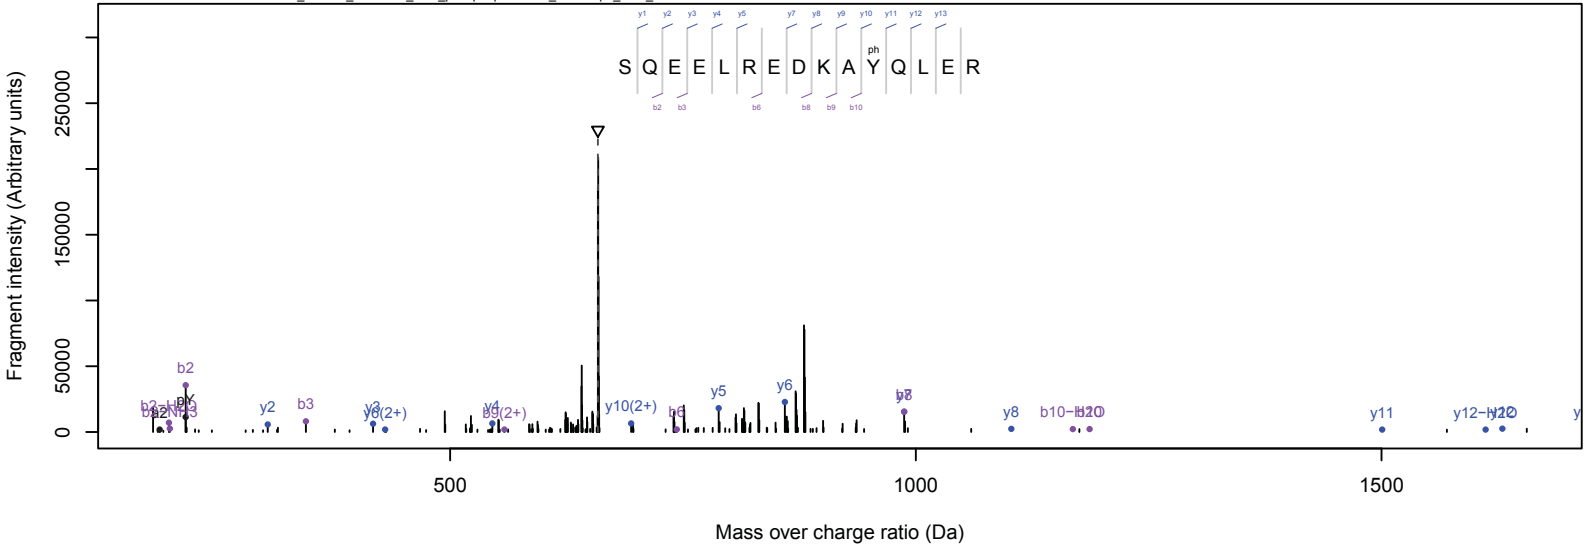

FTY(ph)FSSSPMAR-2+

Source : QE1\_140612\_OPL1013\_CVA\_phosphoproteomic\_landscape\_AML\_C Scan : 35833

Andromeda score : 124.21

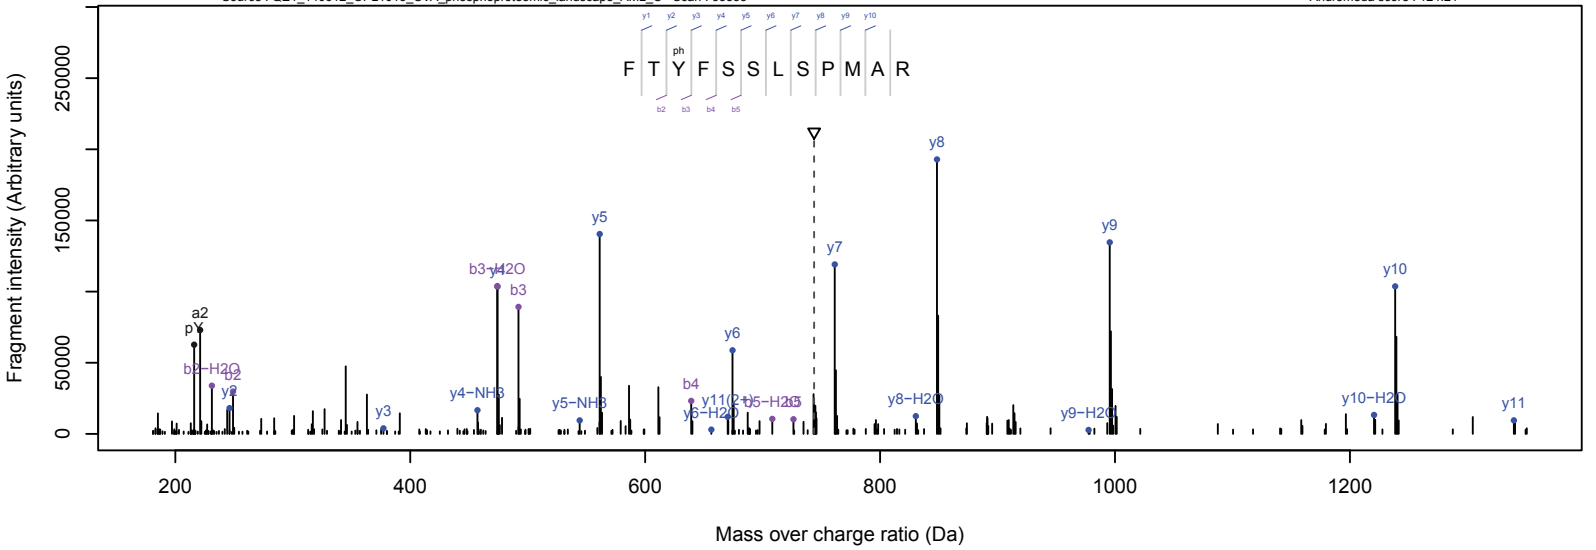

IEELTGLLNQYRK-2+

Source : QE1\_140612\_OPL1013\_CVA\_phosphoproteomic\_landscape\_AML\_C Scan : 30644

Andromeda score : 124.21

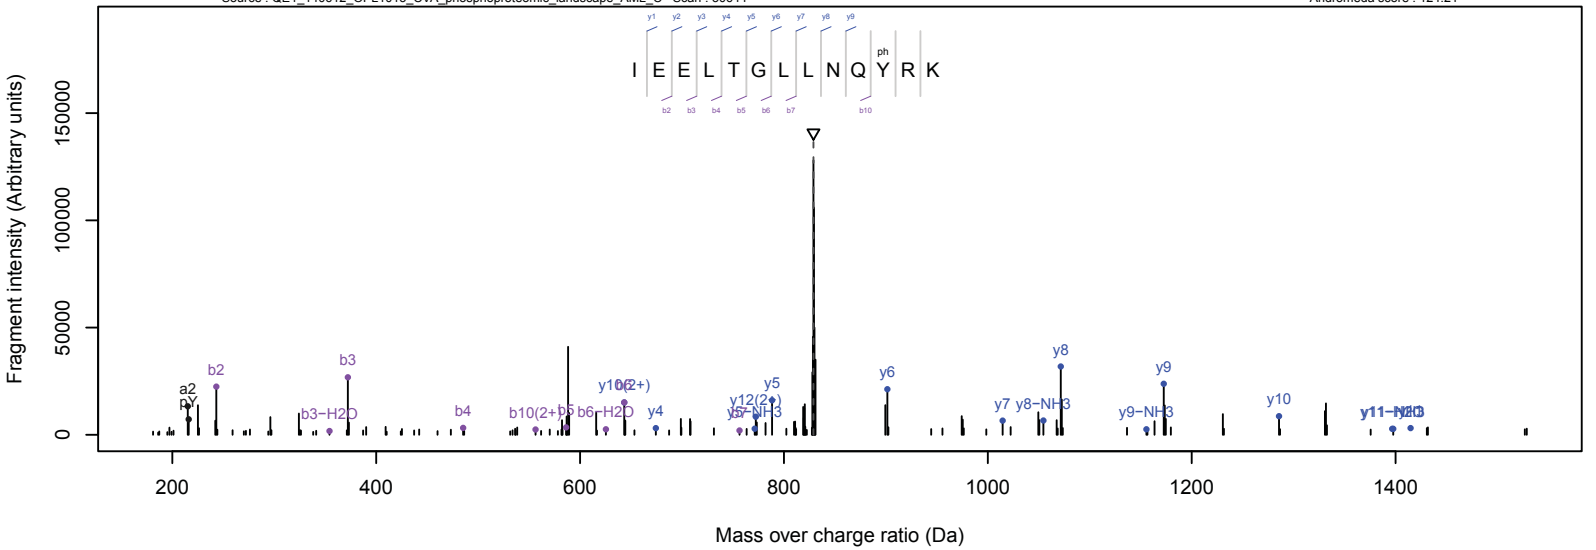

FDTQYPY(ph)GEKQDEFKR-3+

Source: QE1\_140908\_OPL1013\_CvA\_pTyrIP\_AML\_OCI\_AML3 Scan: 17926

Andromeda score: 124.2

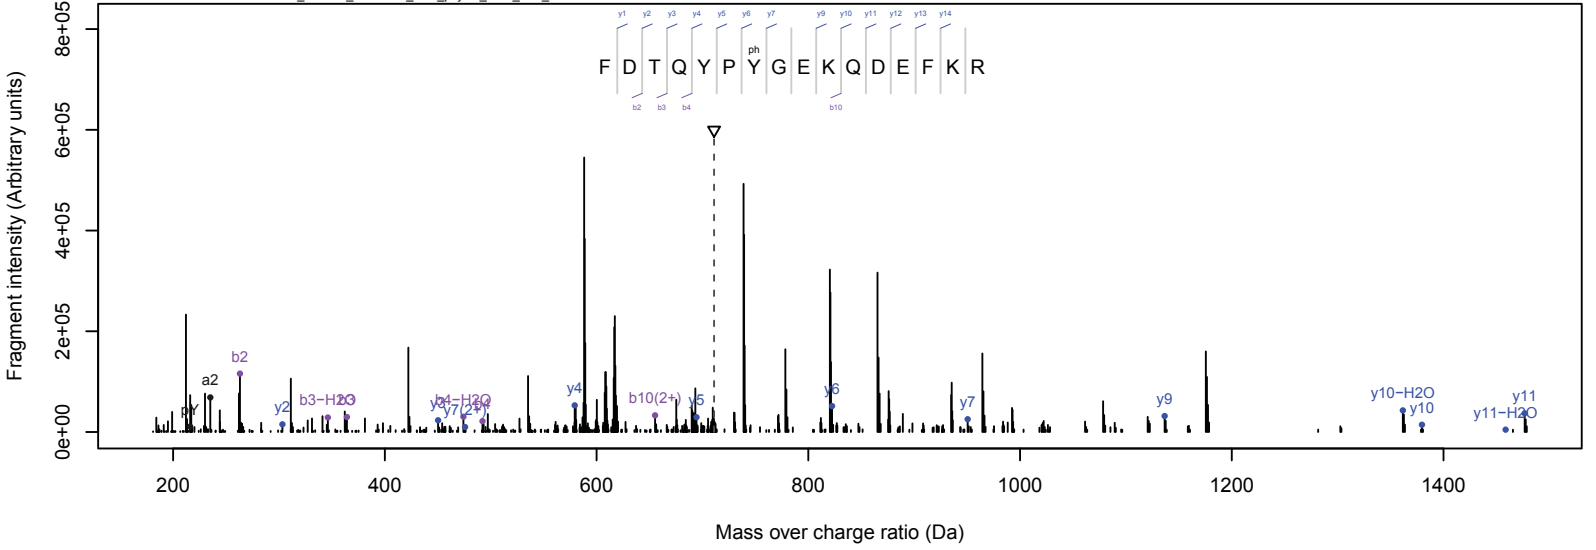

KVYENAY(ph)GQFIGPHR-3+

Source: QE1\_140908\_OPL1013\_CvA\_pTyrIP\_AML\_Kasumi1 Scan: 20123

Andromeda score: 124.2

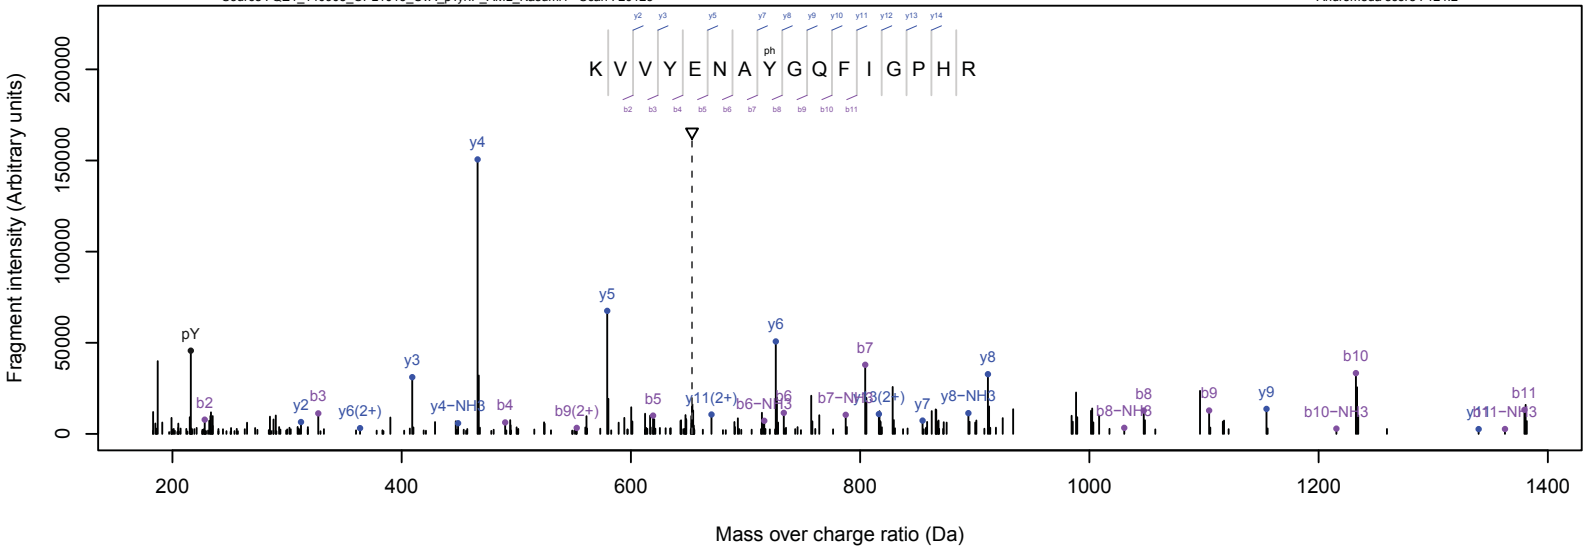

QLLQLELLNAY(ph)QSK-3+

Source: QE1\_140612\_OPL1013\_CVA\_phosphoproteomic\_landscape\_AML\_C Scan: 37079

Andromeda score: 124.2

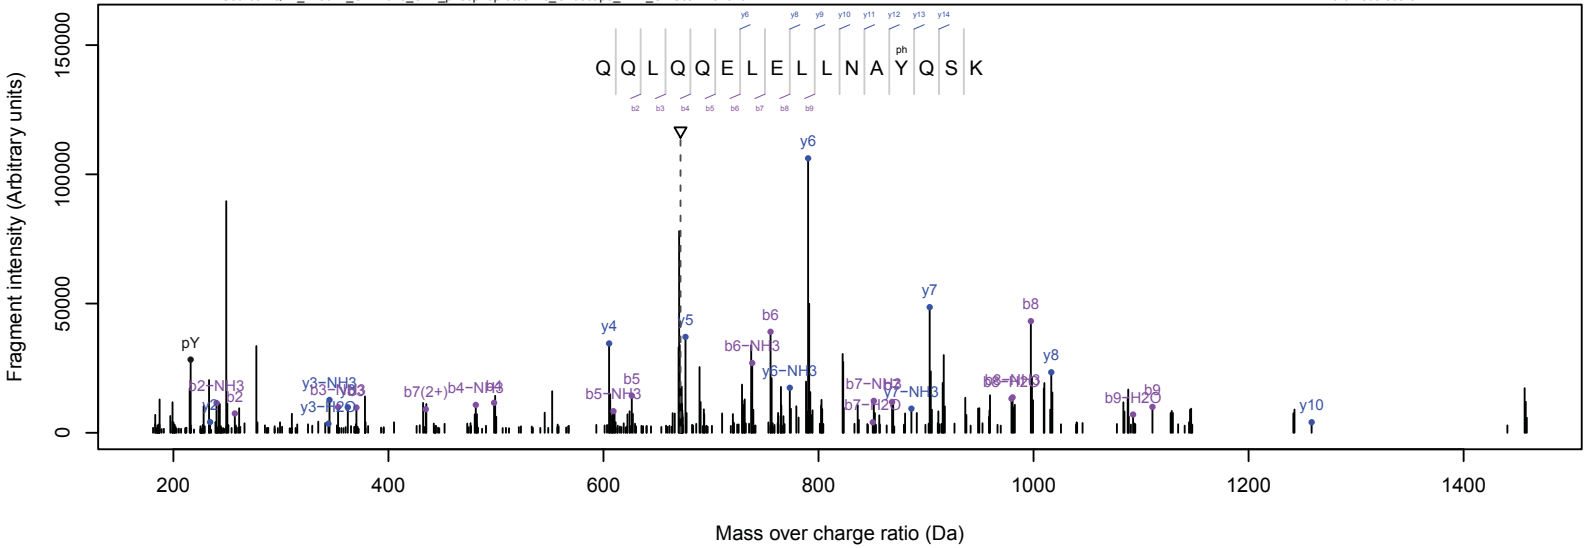



**SSFSHY(ph)SGLKHEDKR-3+**

Source: QE1\_140612\_OPL1013\_CVA\_phosphoproteomic\_landscape\_AML\_C Scan: 5360

Andromeda score: 124.2

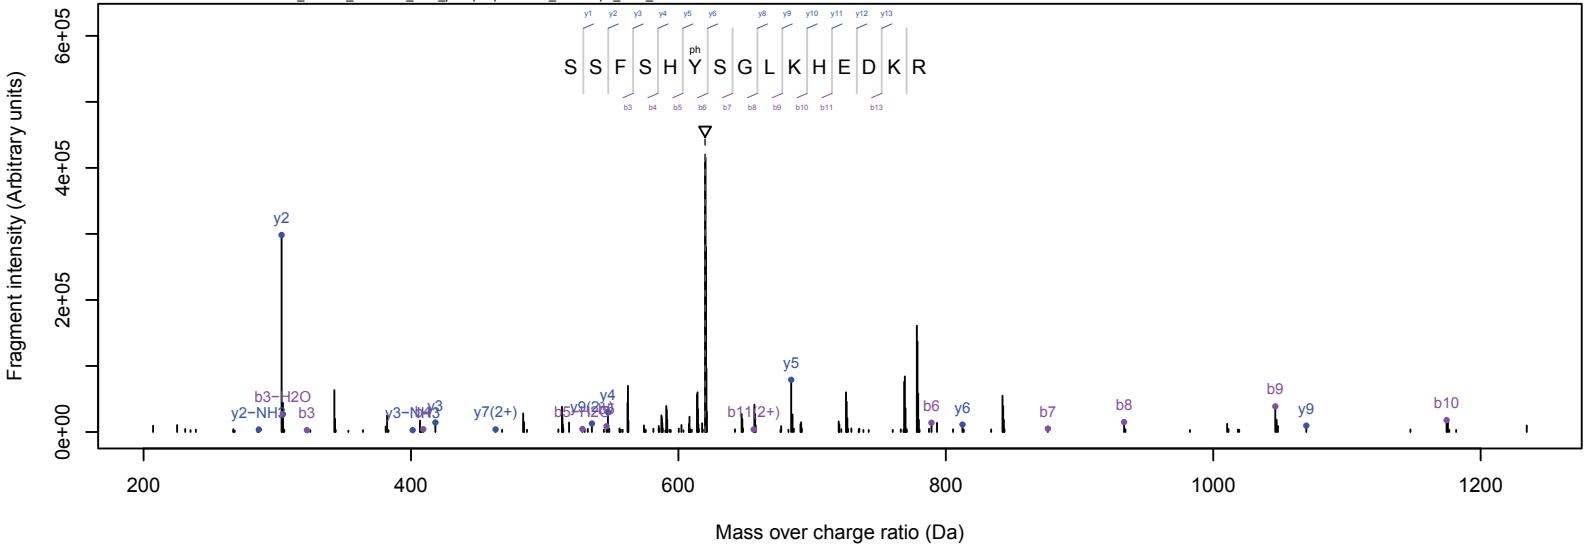

**TDLHNEGY(ph)ILELDCCSLDHPDQK-3+**

Source: QE1\_140612\_OPL1013\_CVA\_phosphoproteomic\_landscape\_AML\_C Scan: 32461

Andromeda score: 124.17

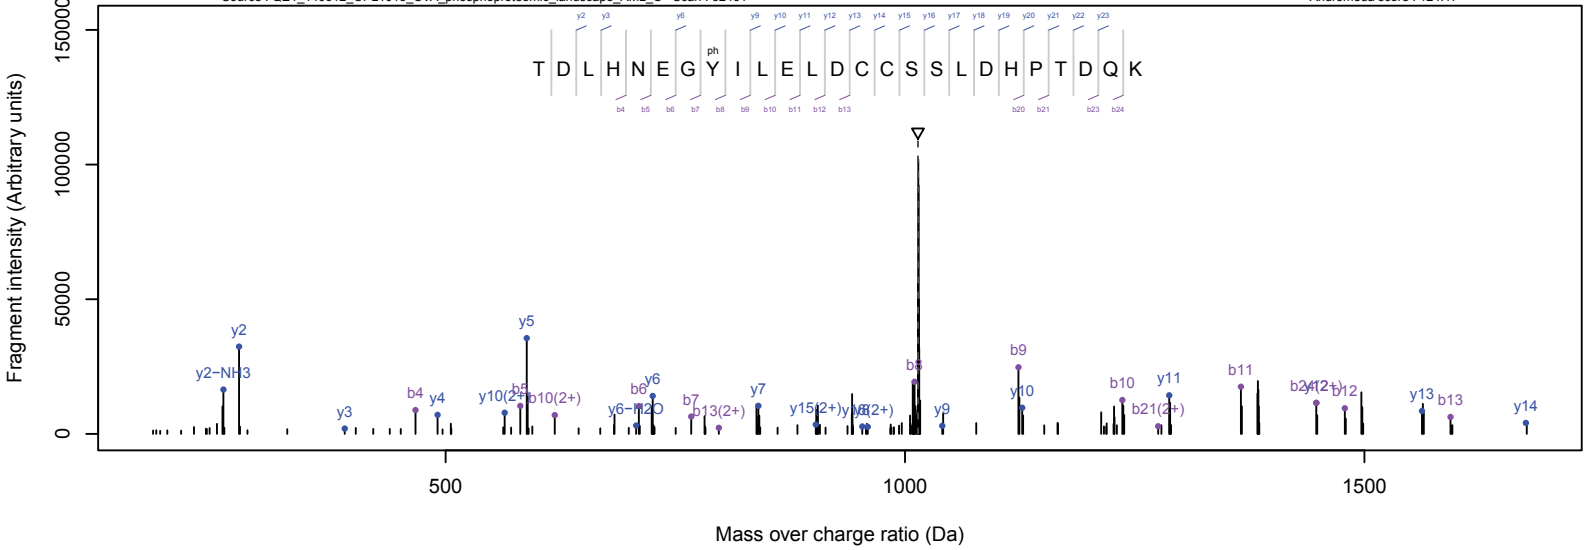

**YVLENHPG(TNSNY(ph)QM(ox))HLLKK-3+**

Source: QE1\_140908\_OPL1013\_CvA\_pTyrIP\_AML\_HEL Scan: 15571

Andromeda score: 124.08

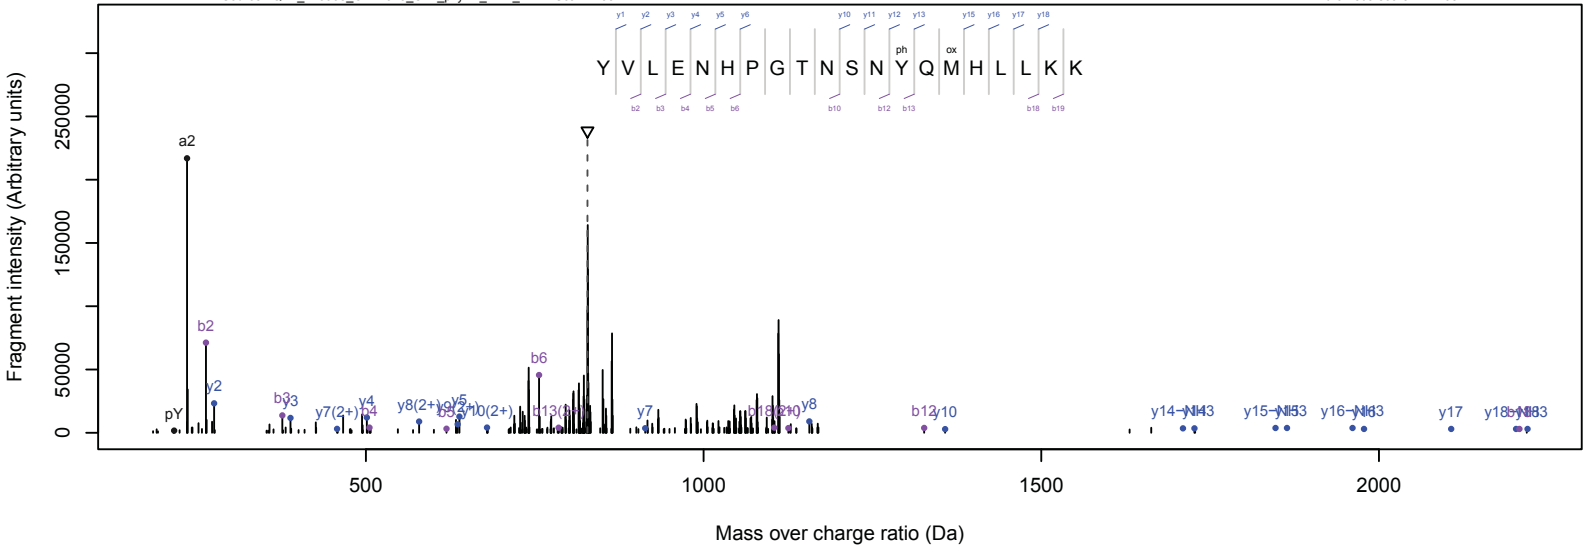

**ALEHFTDLYD<sup>ph</sup>IKR-3+**

Source : QE1\_140908\_OPL1013\_CvA\_pTyrIP\_AML\_HEL Scan : 28572

Andromeda score : 124.07

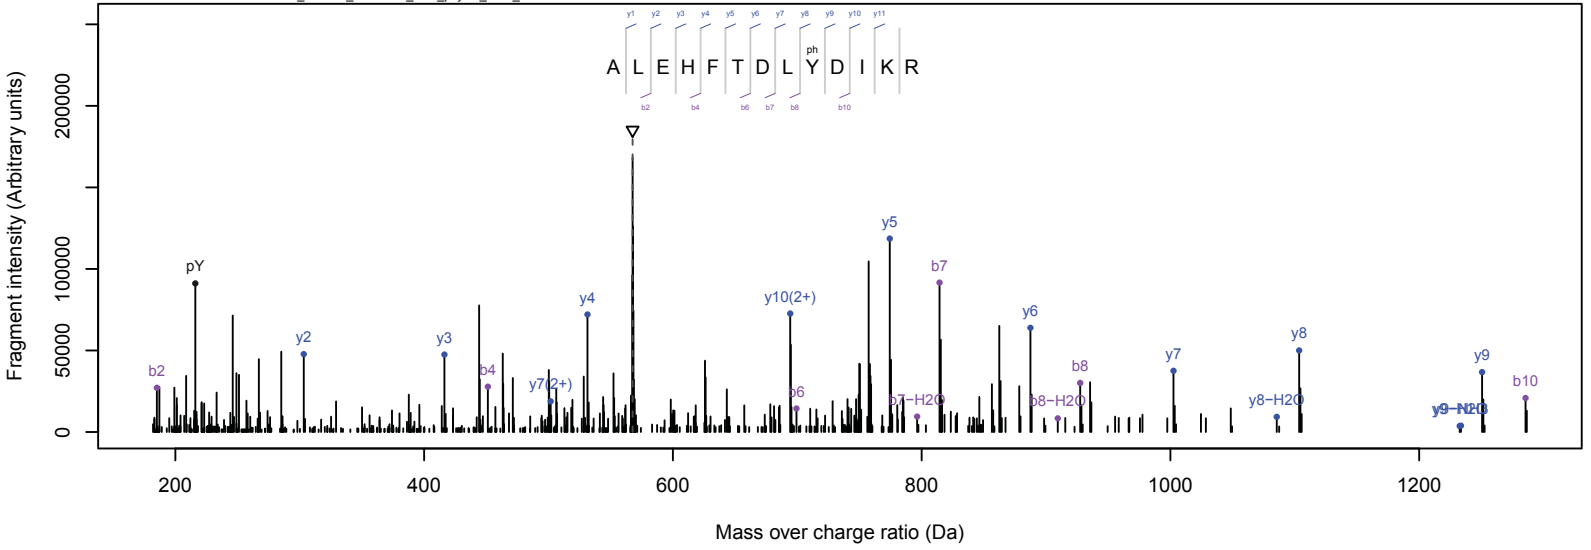

**LKPY<sup>ph</sup>FLTDGTGTVTPANASGINDGAAAVVLMK-3+**

Source : QE1\_140612\_OPL1013\_CVA\_phosphoproteomic\_landscape\_AML\_D Scan : 47417

Andromeda score : 124.06

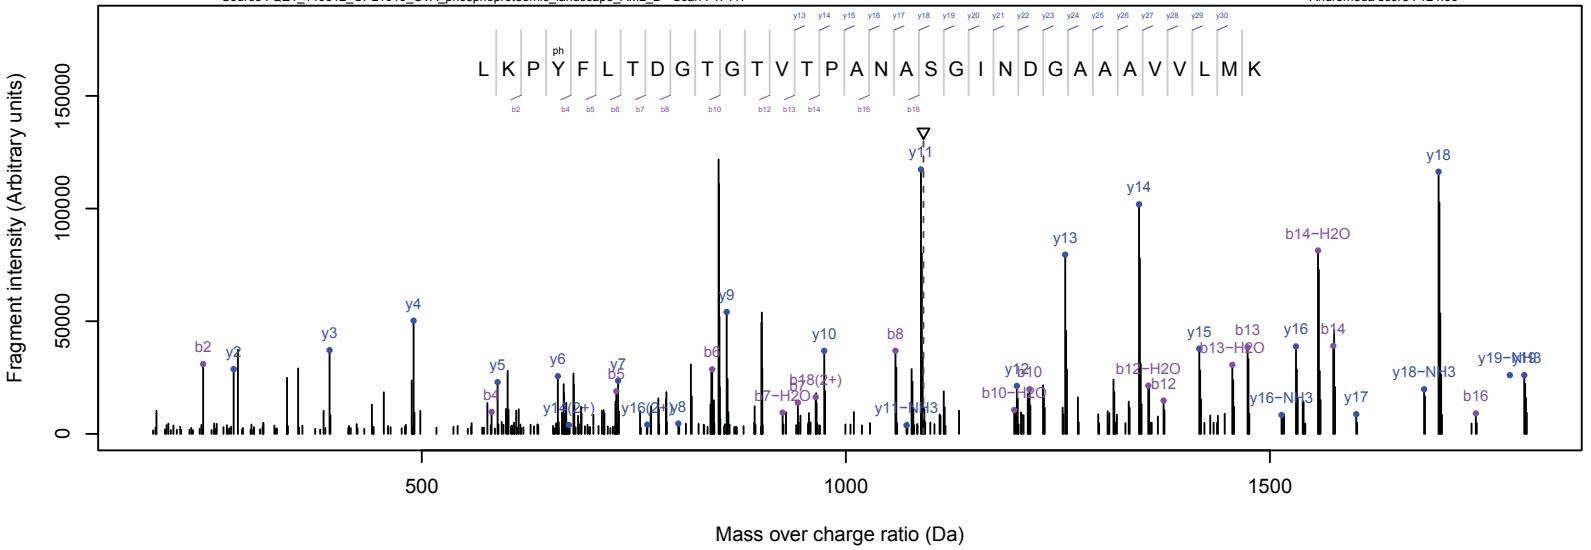

**YSSQFGGGSQY<sup>ph</sup>AYFHEEDESFLVD<sup>ph</sup>TAR-3+**

Source : QE1\_140908\_OPL1013\_CvA\_pTyrIP\_AML\_Kasumi6 Scan : 48803

Andromeda score : 124.03

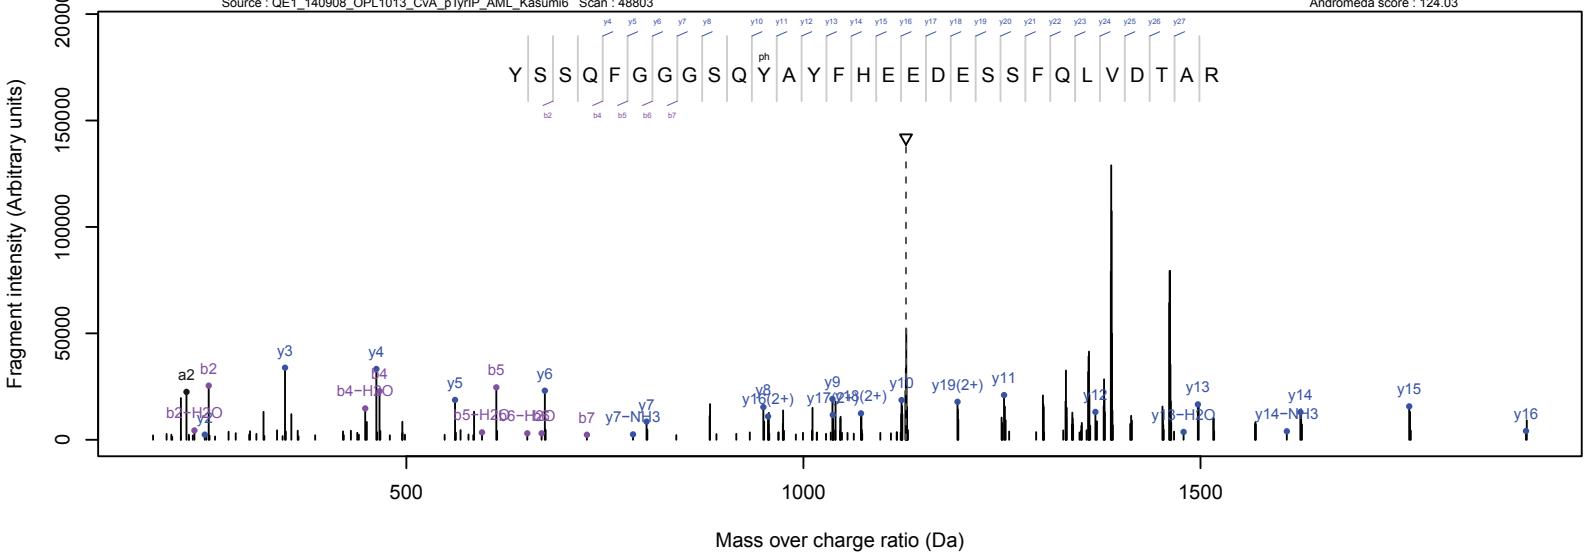

FTAILY(ph)R-2+

Source: QE1\_140612\_OPL1013\_CVA\_phosphoproteomic\_landscape\_AML\_C Scan: 25050

Andromeda score: 123.99

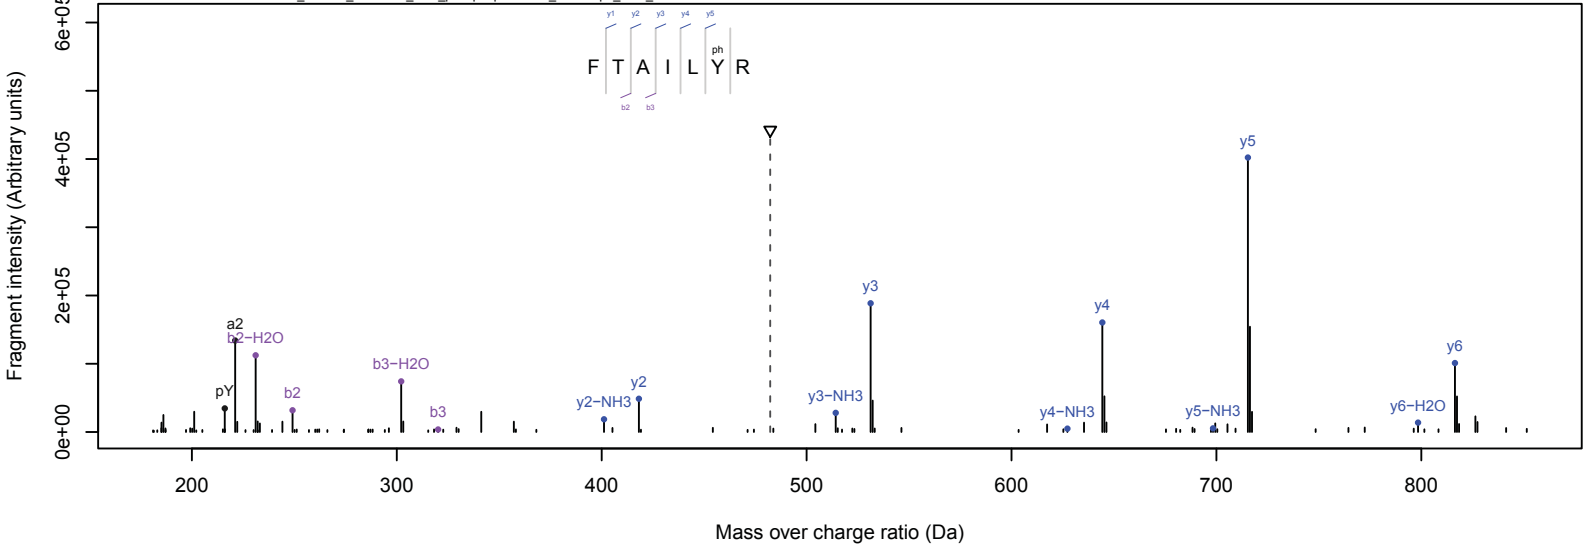

SLY(ph)PSSEIQLNKK-2+

Source: QE1\_140612\_OPL1013\_CVA\_phosphoproteomic\_landscape\_AML\_C Scan: 23963

Andromeda score: 123.95

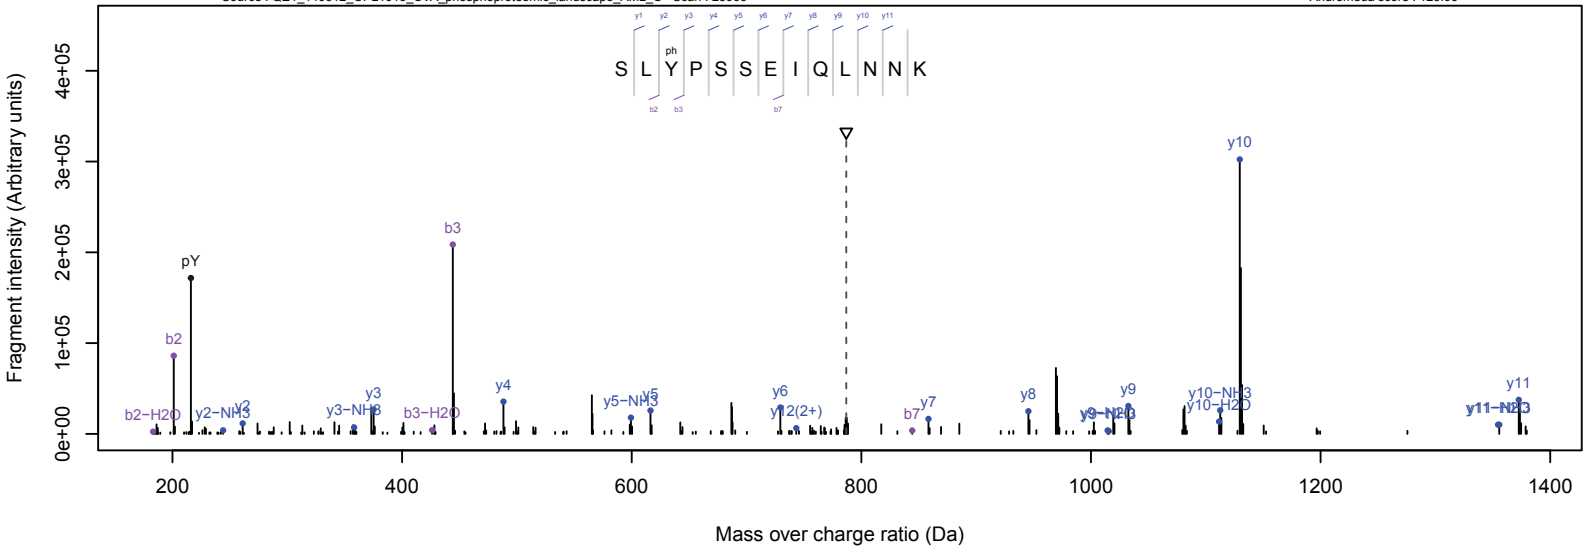

SVTDY(ph)DFAPFLNNSPQQNPAAQIPAR-3+

Source: QE1\_140612\_OPL1013\_CVA\_phosphoproteomic\_landscape\_AML\_C Scan: 45610

Andromeda score: 123.87

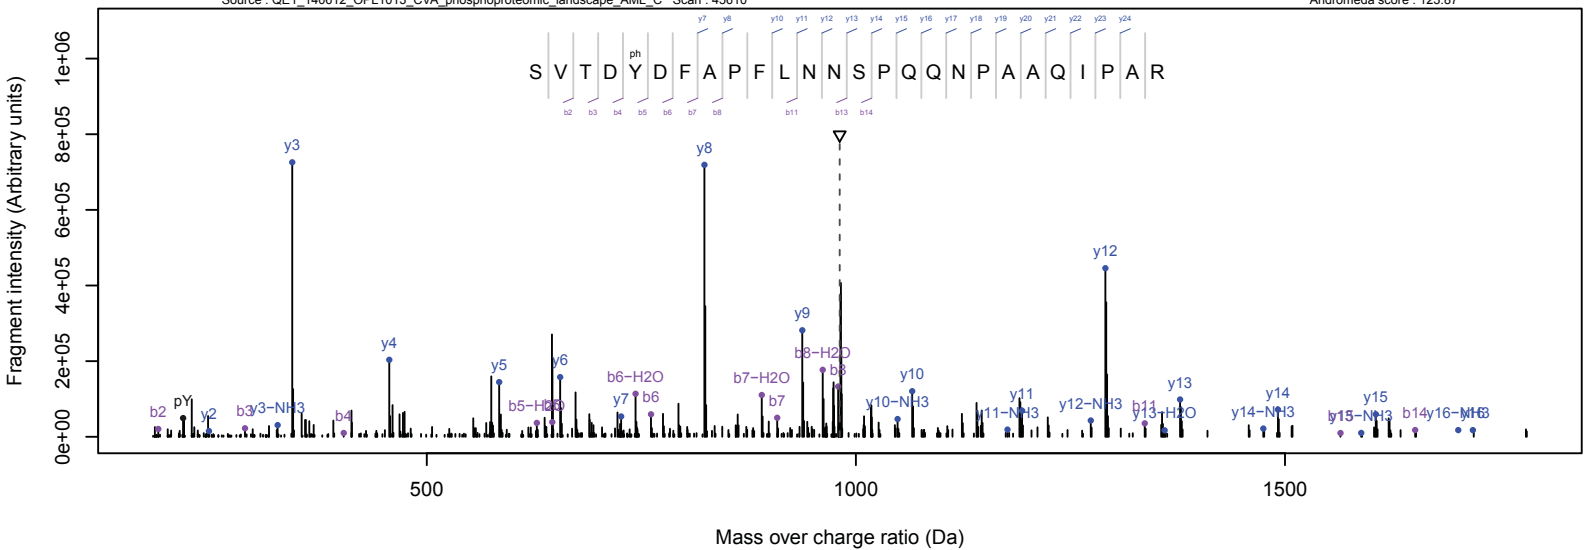

**YEEIVKEVSTY(ph)IKK-3+**

Source : QE1\_140908\_OPL1013\_CVA\_pTyrIP\_AML\_HEL Scan : 27547

Andromeda score : 123.76

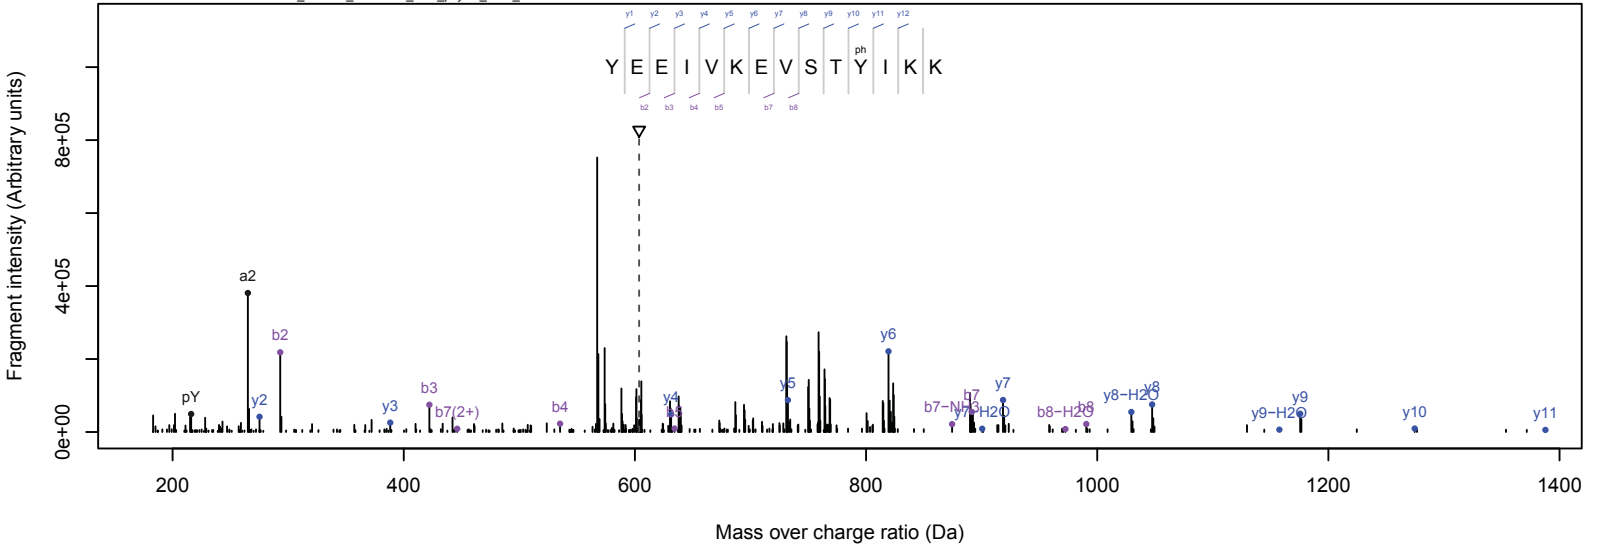

**VAY(ph)HPYPEDYGDIEIGSHR-3+**

Source : QE1\_140612\_OPL1013\_CVA\_phosphoproteomic\_landscape\_AML\_C Scan : 24649

Andromeda score : 123.63

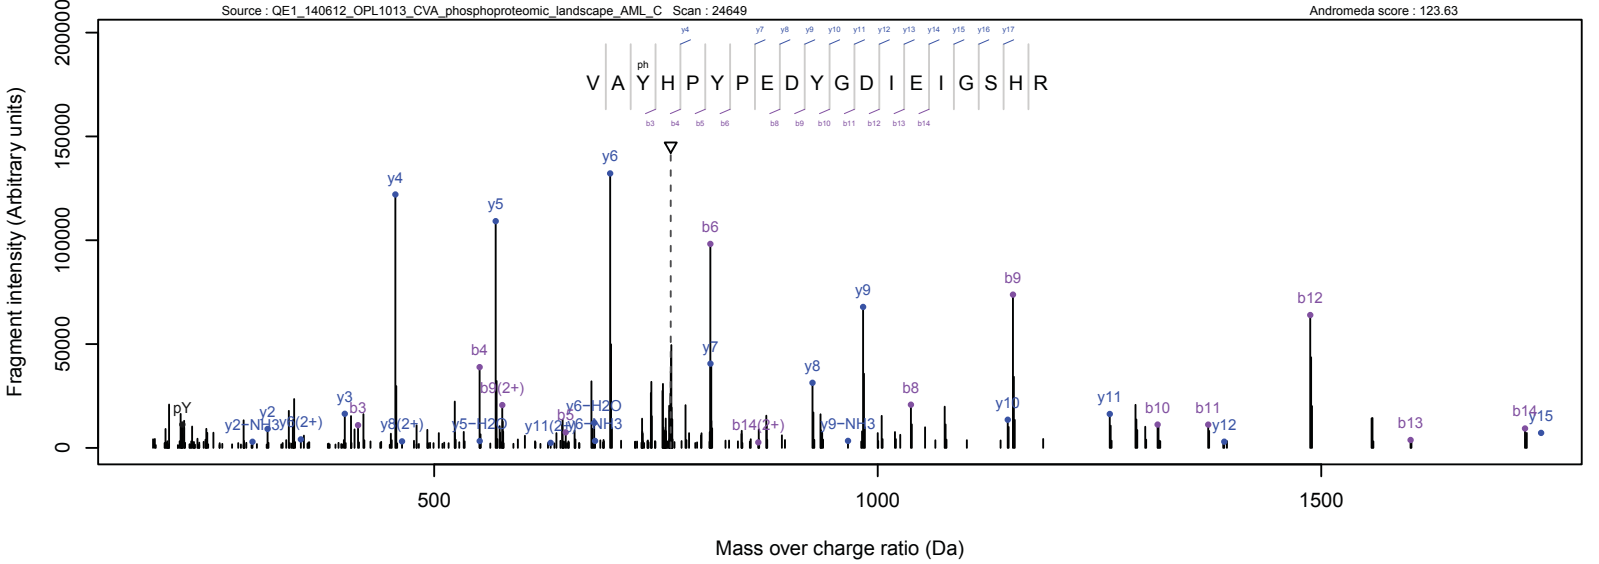

**LIY(ph)DFIEDQGGLEAVRQEMR-3+**

Source : QE1\_140612\_OPL1013\_CVA\_phosphoproteomic\_landscape\_AML\_B Scan : 45673

Andromeda score : 123.55

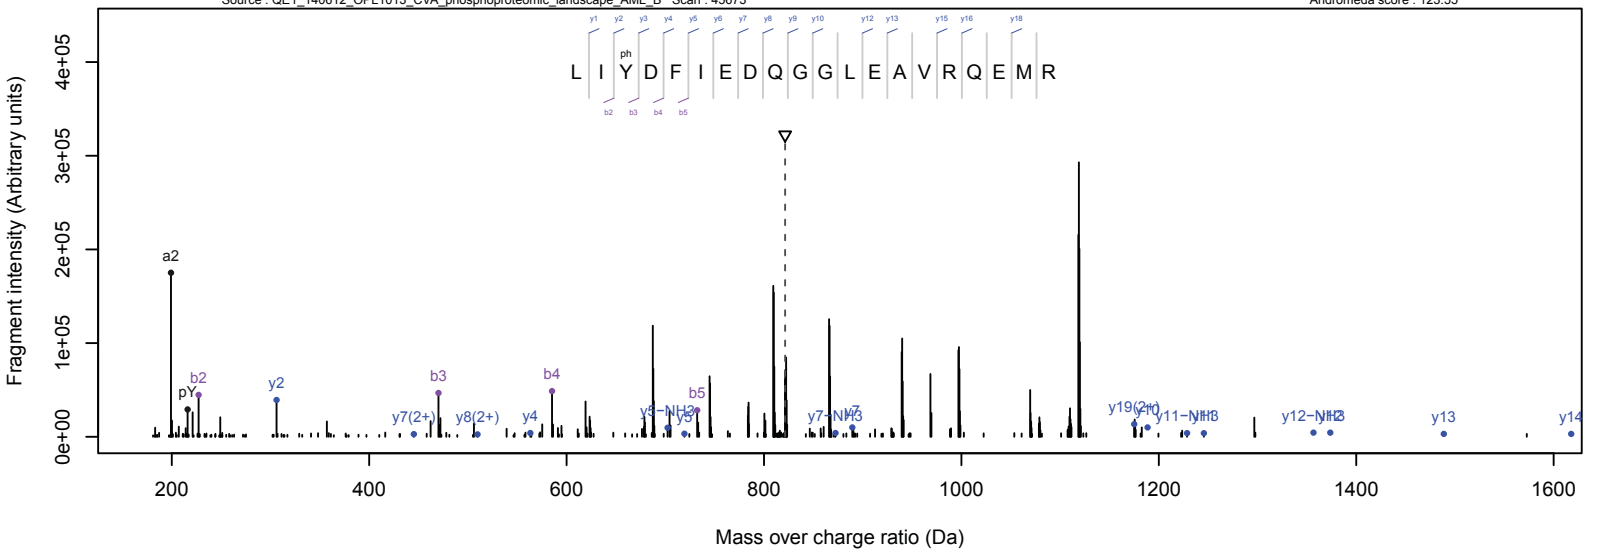

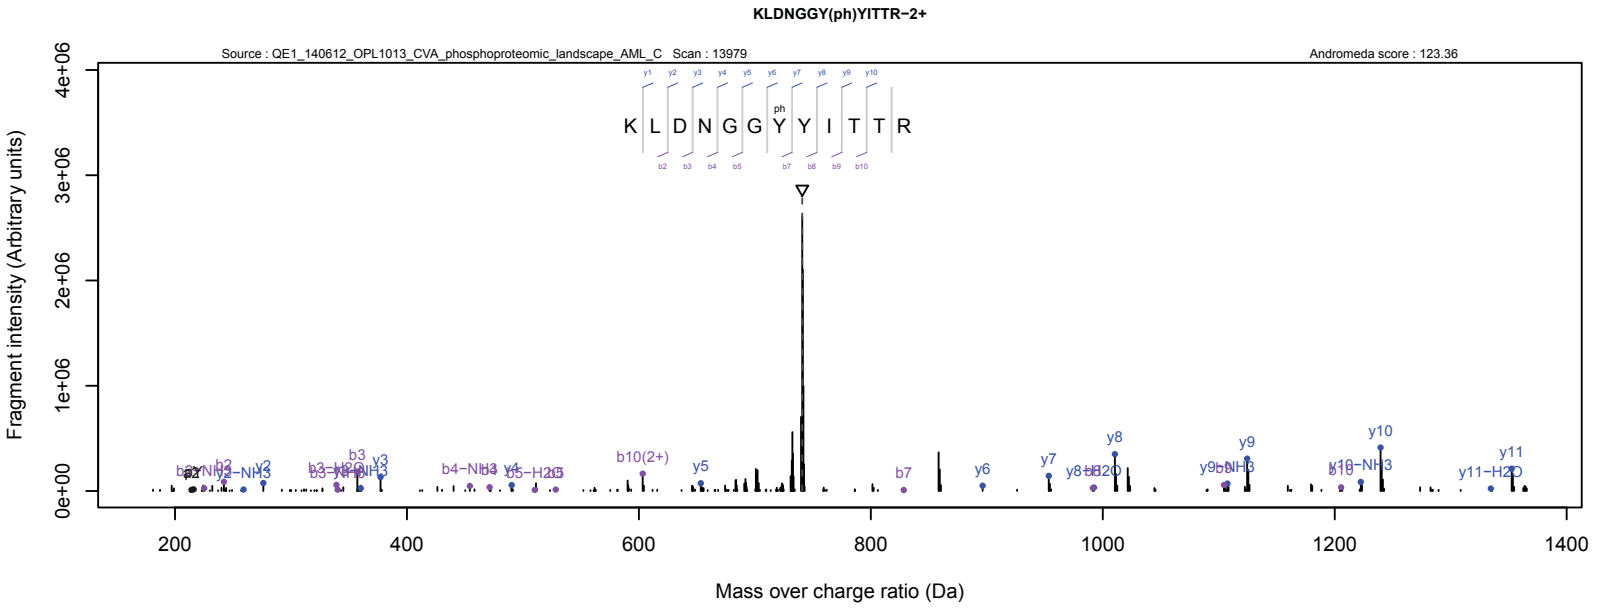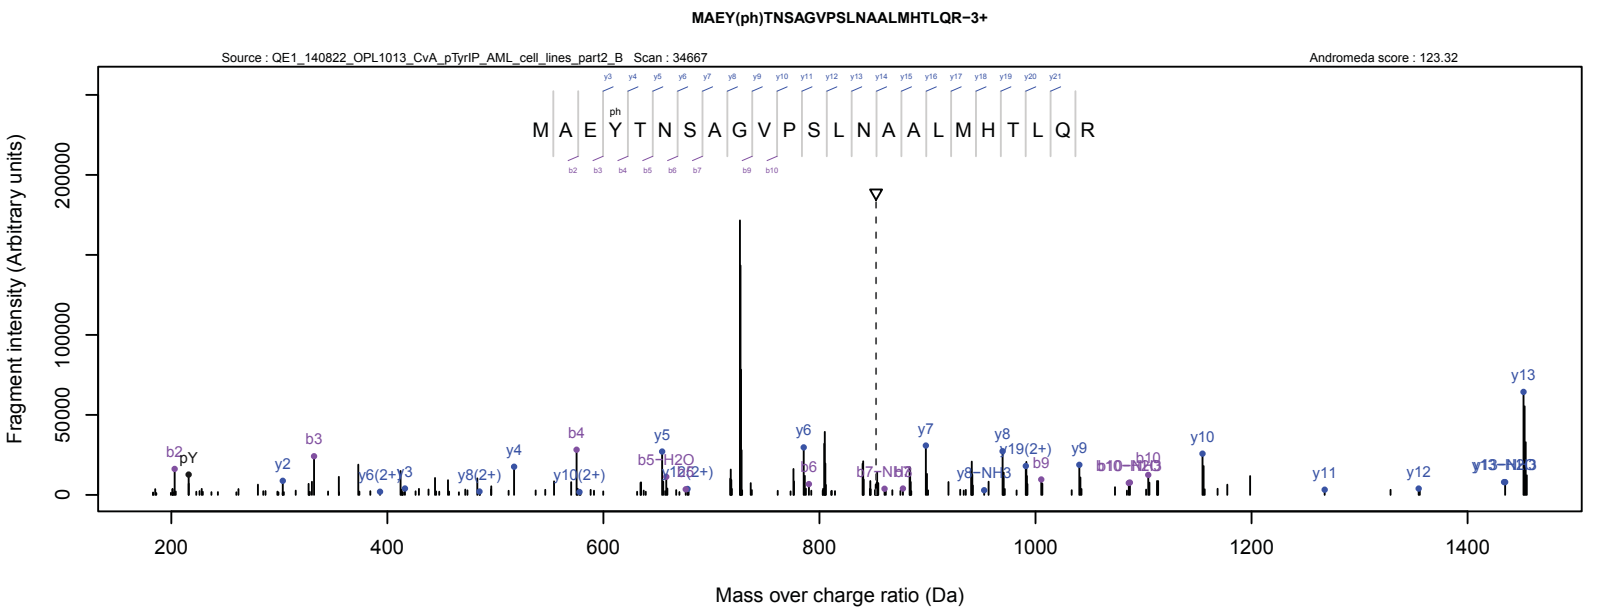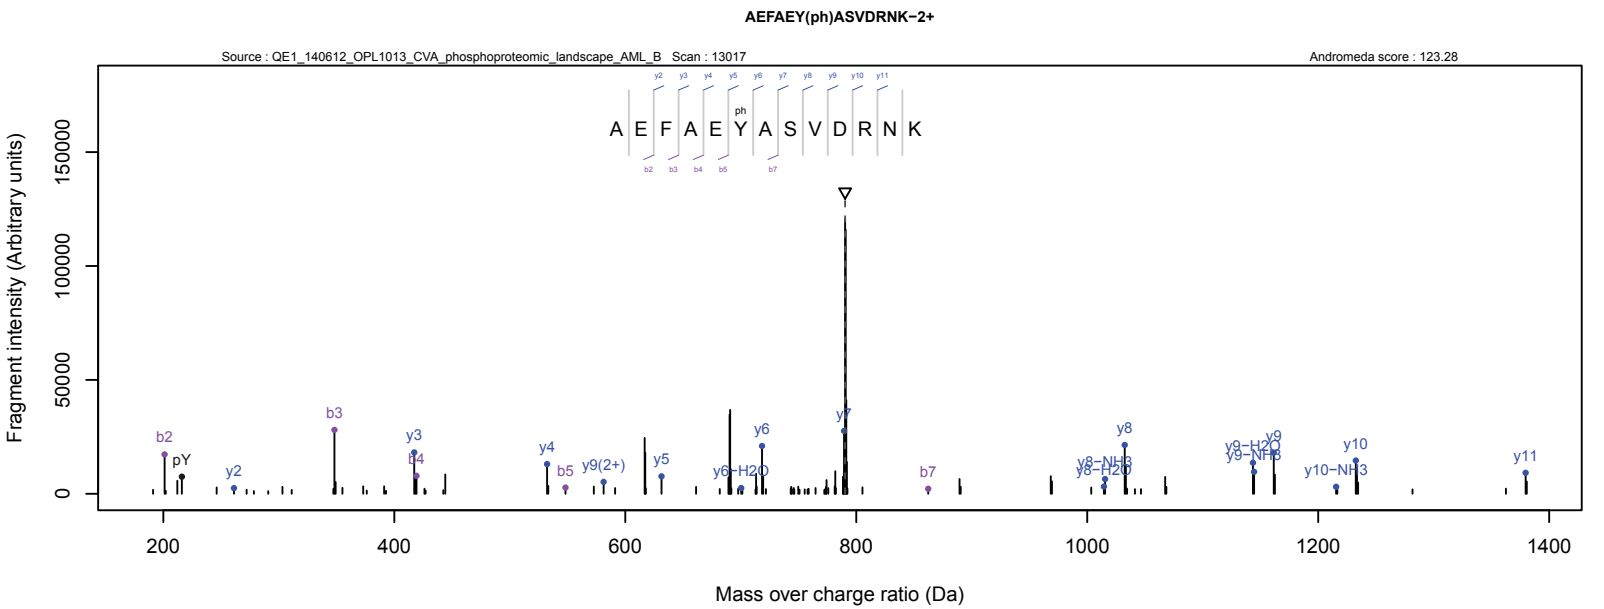

**LGFSSPY(ph)EGLNLK-2+**

Source: QE1\_140612\_OPL1013\_CVA\_phosphoproteomic\_landscape\_AML\_B Scan: 29714

Andromeda score: 123.28

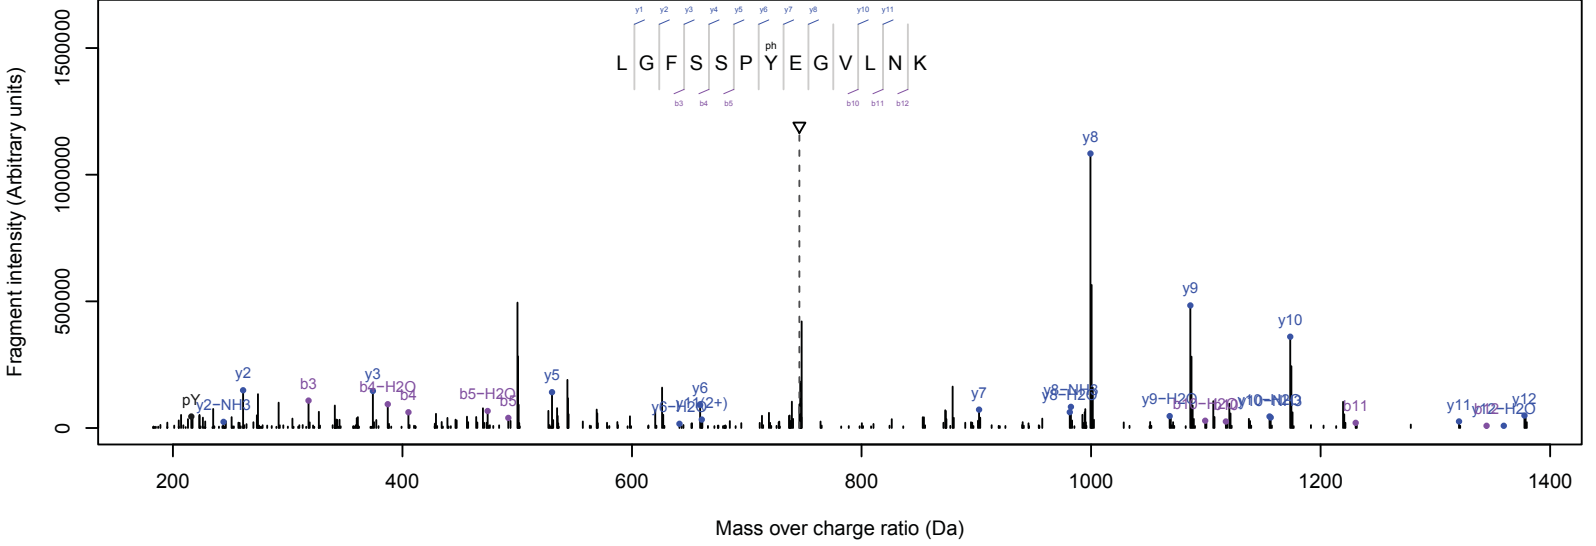

**AELGSQEGY(ph)VPKNFIDIQFPK-3+**

Source: QE1\_140908\_OPL1013\_CvA\_pTyrIP\_AML\_HEL Scan: 44899

Andromeda score: 123.19

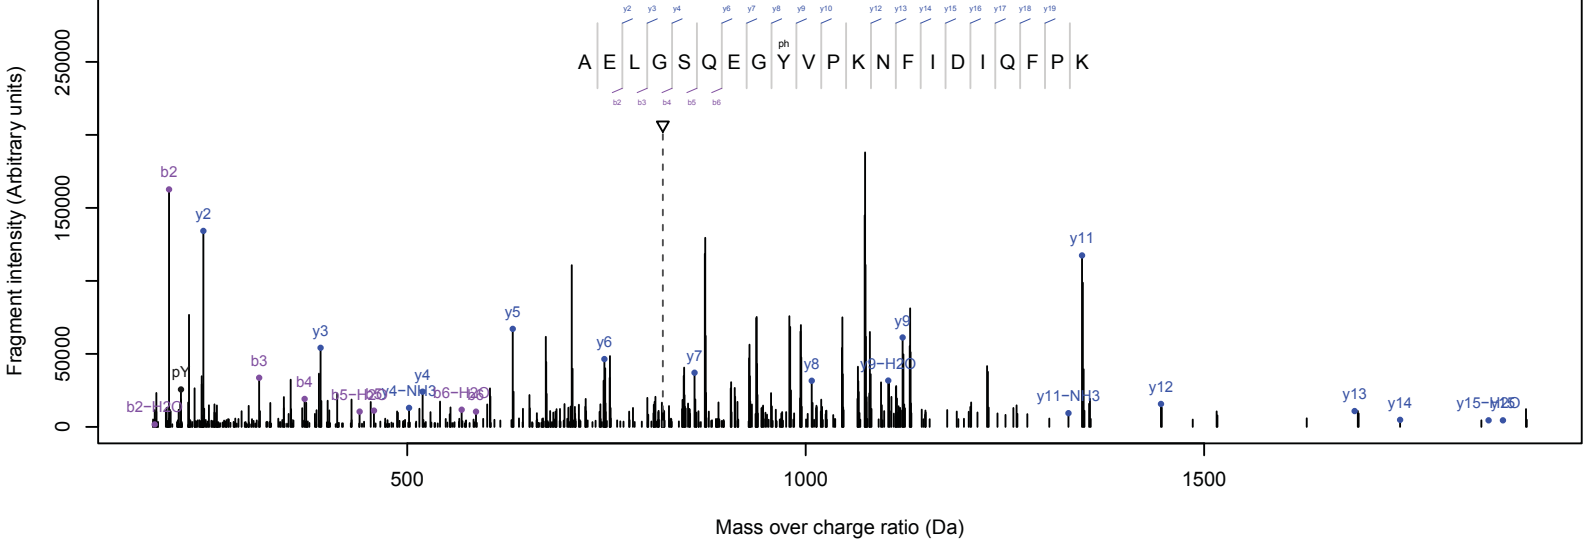

**IYHMDEETPY(ph)LVKLPVAPER-3+**

Source: QE1\_140612\_OPL1013\_CVA\_phosphoproteomic\_landscape\_AML\_C Scan: 39481

Andromeda score: 123.19

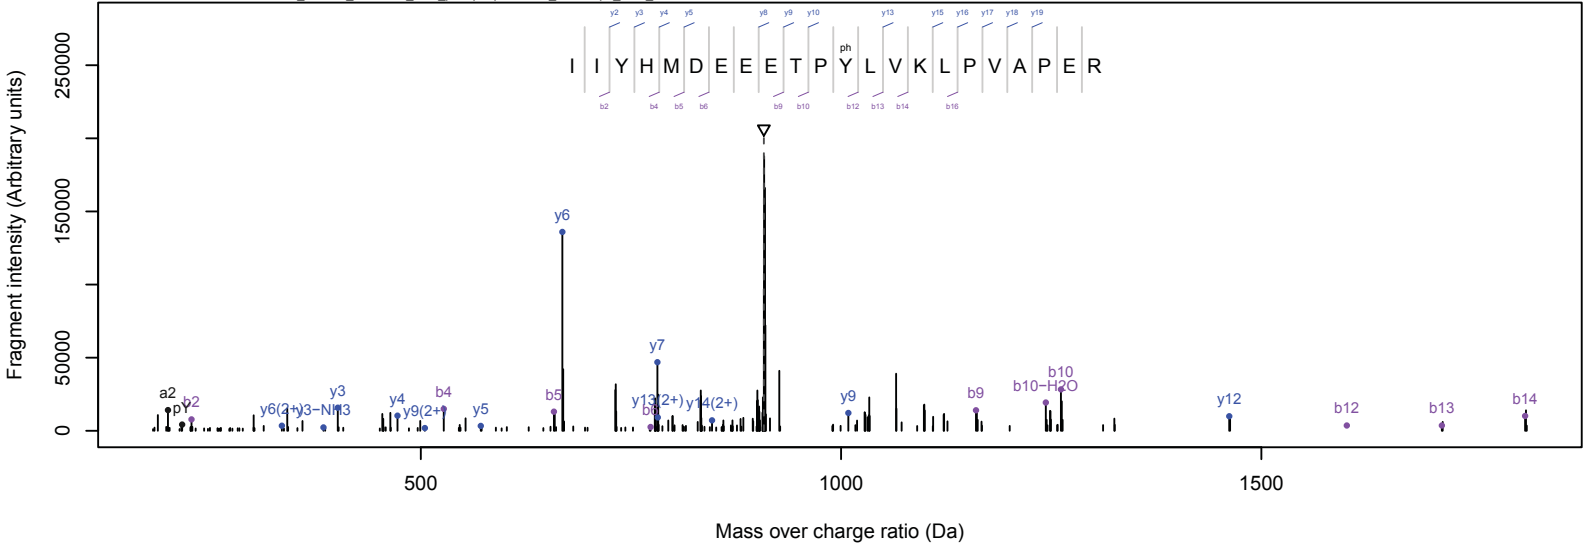

VPNGSGSPDKALGGYTR-3+

Source : QE1\_140612\_OPL1013\_CVA\_phosphoproteomic\_landscape\_AML\_C Scan : 10824

Andromeda score : 123.19

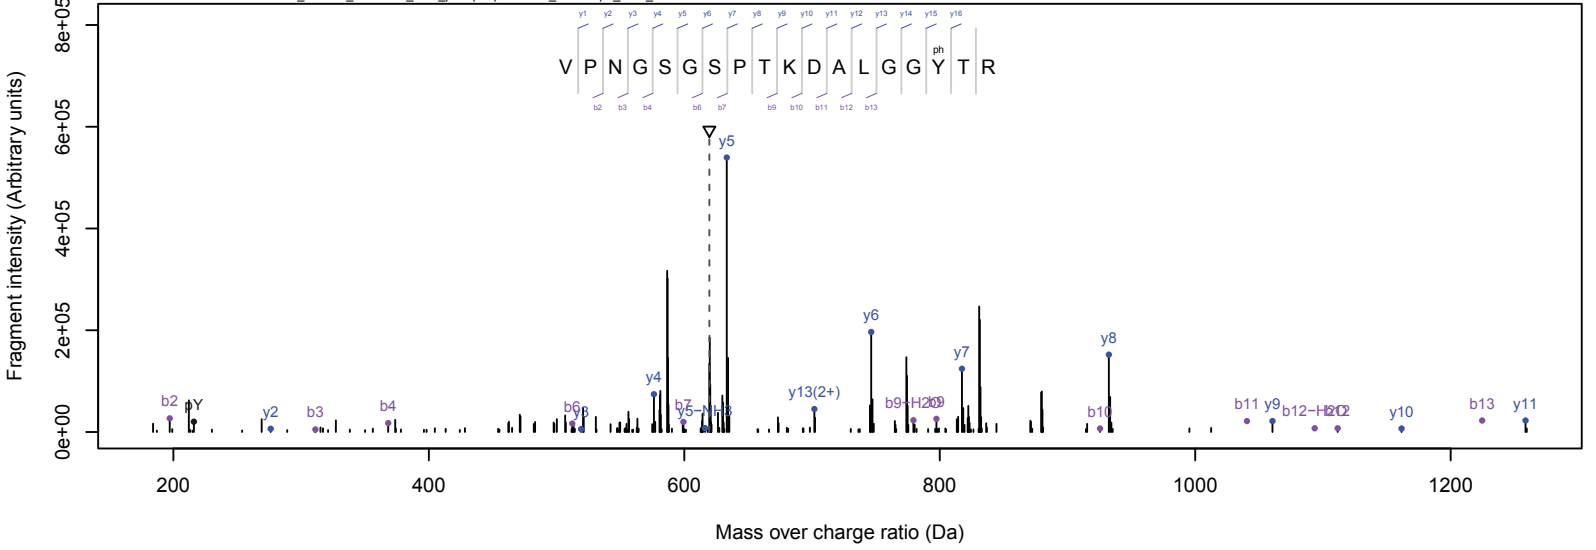

SDDY(ph)M(ox)PM(ox)SPASVSAPK-2+

Source : QE1\_140908\_OPL1013\_CvA\_pTyrIP\_AML\_ML2 Scan : 14729

Andromeda score : 123.02

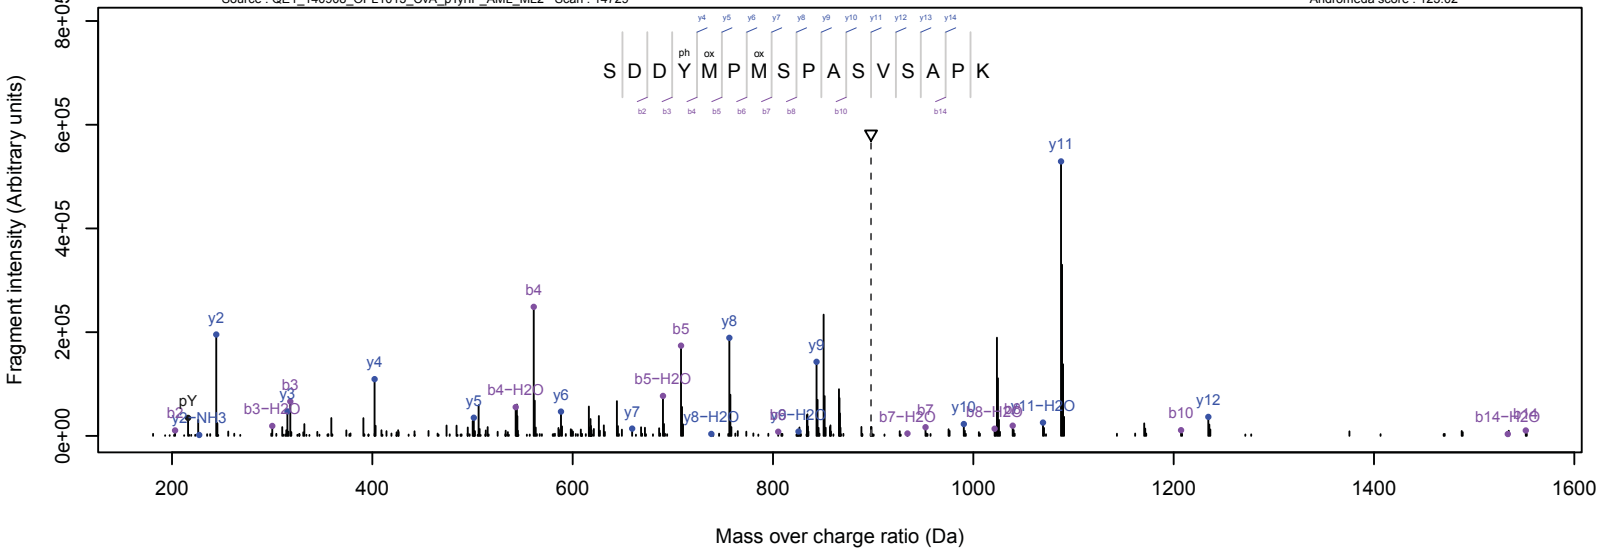

MY(ph)FDKYVLKPALEGK-3+

Source : QE1\_140612\_OPL1013\_CVA\_phosphoproteomic\_landscape\_AML\_C Scan : 28110

Andromeda score : 122.96

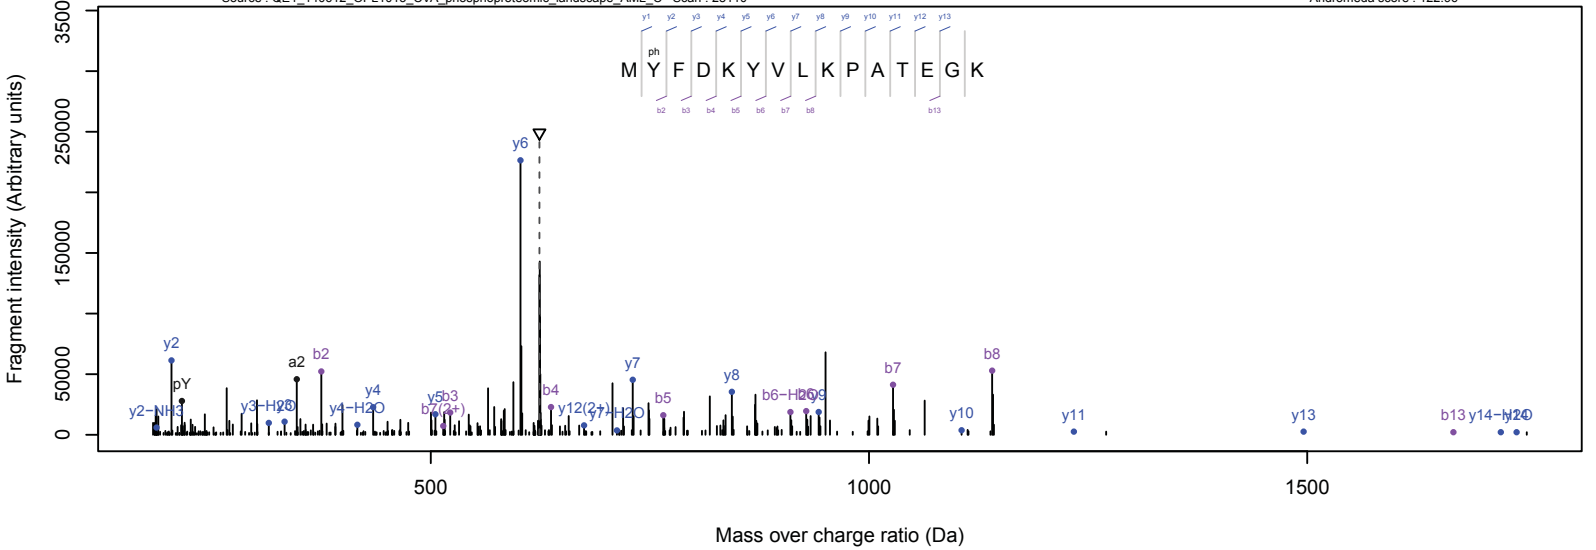

SVSEINSDDELSGKGY(ph)ALVPIIVNSSTPK-3+

Source : QE1\_140612\_OPL1013\_CVA\_phosphoproteomic\_landscape\_AML\_C Scan : 42456

Andromeda score : 122.89

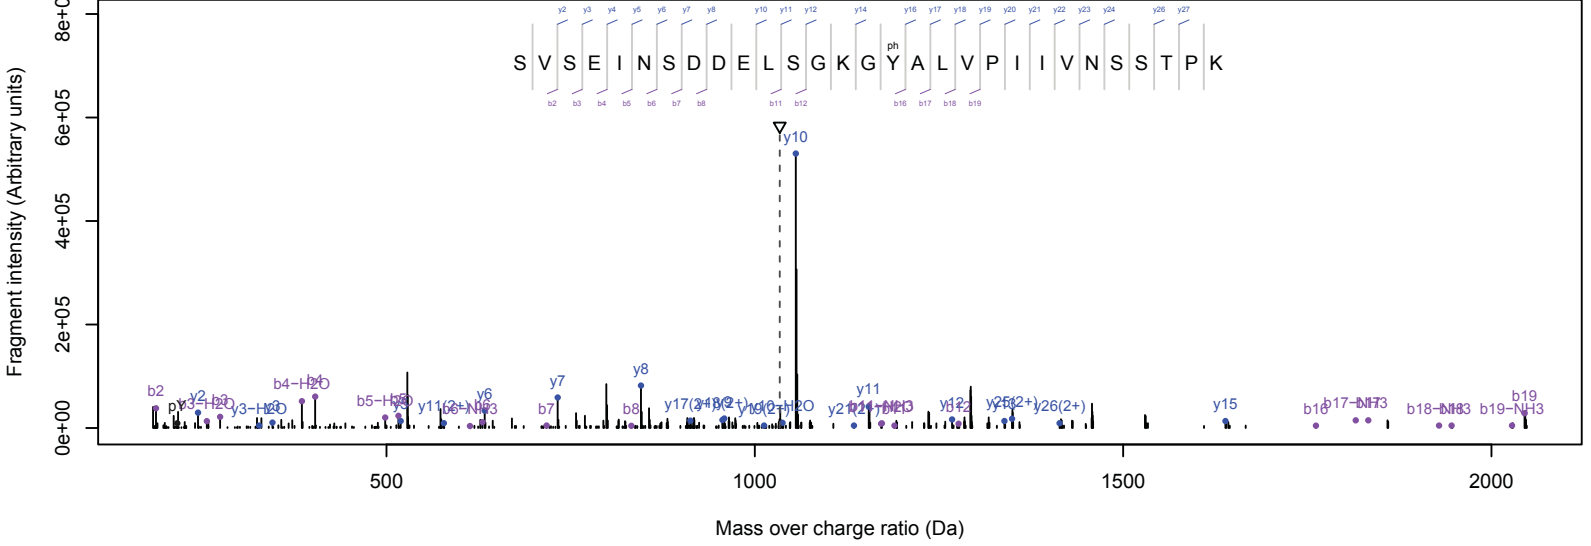

KGGs(ph)YSQAASSDSAQGSVDVSLTACK-3+

Source : QE1\_140908\_OPL1013\_CvA\_pTyrIP\_AML\_OCI\_AML3 Scan : 13419

Andromeda score : 122.84

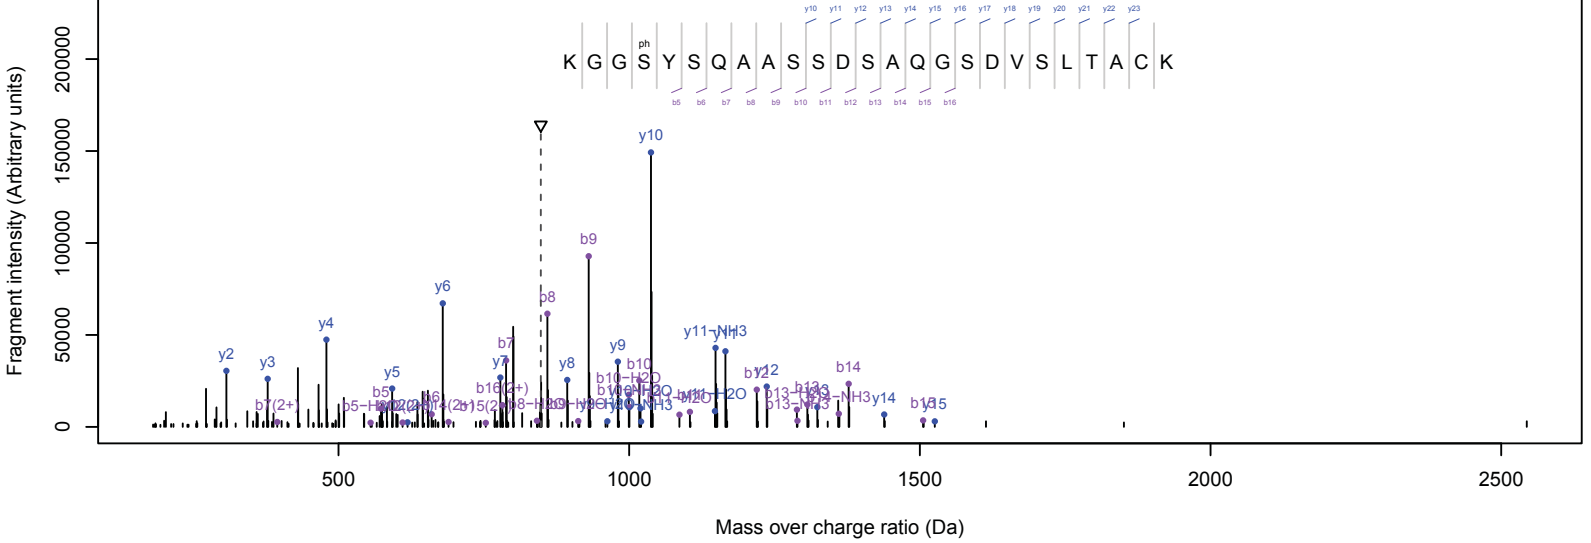

SLPSGSHQGPVIY(ph)AQLDHSGGHSDKINK-5+

Source : QE1\_140612\_OPL1013\_CVA\_phosphoproteomic\_landscape\_AML\_C Scan : 15488

Andromeda score : 122.8

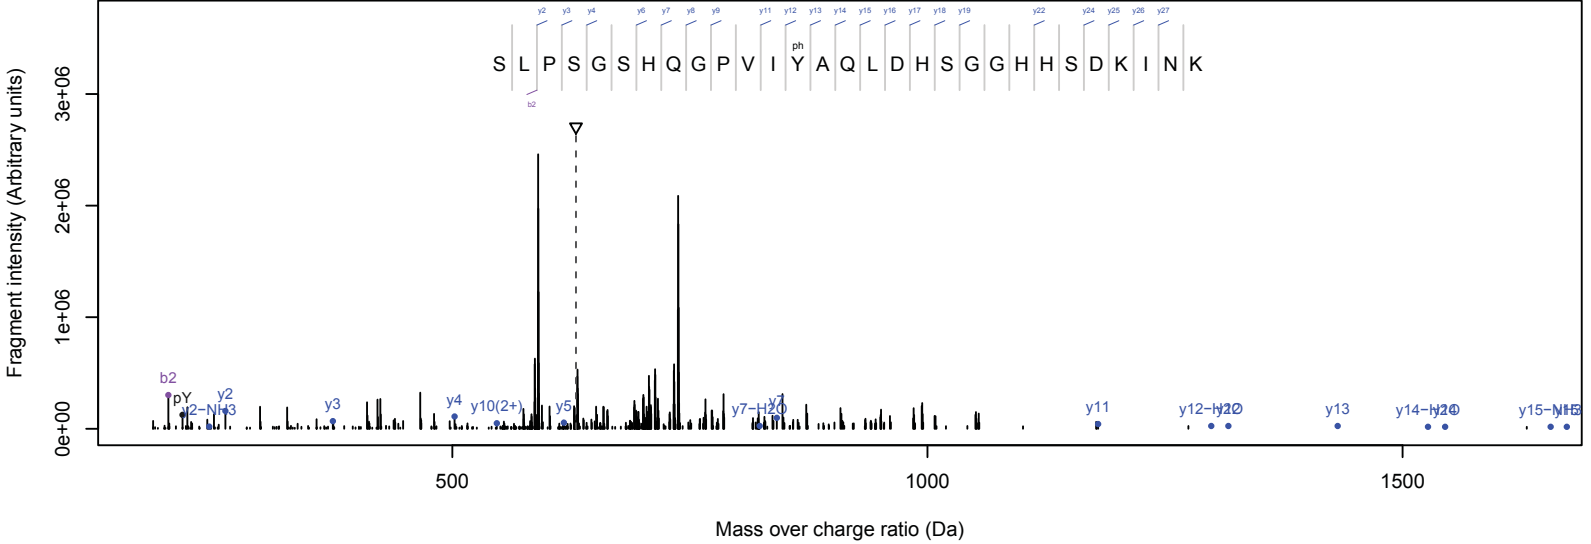



Y(ph)YTLFGR-2+

Source : QE1\_140612\_OPL1013\_CVA\_phosphoproteomic\_landscape\_AML\_B Scan : 28393

Andromeda score : 122.79

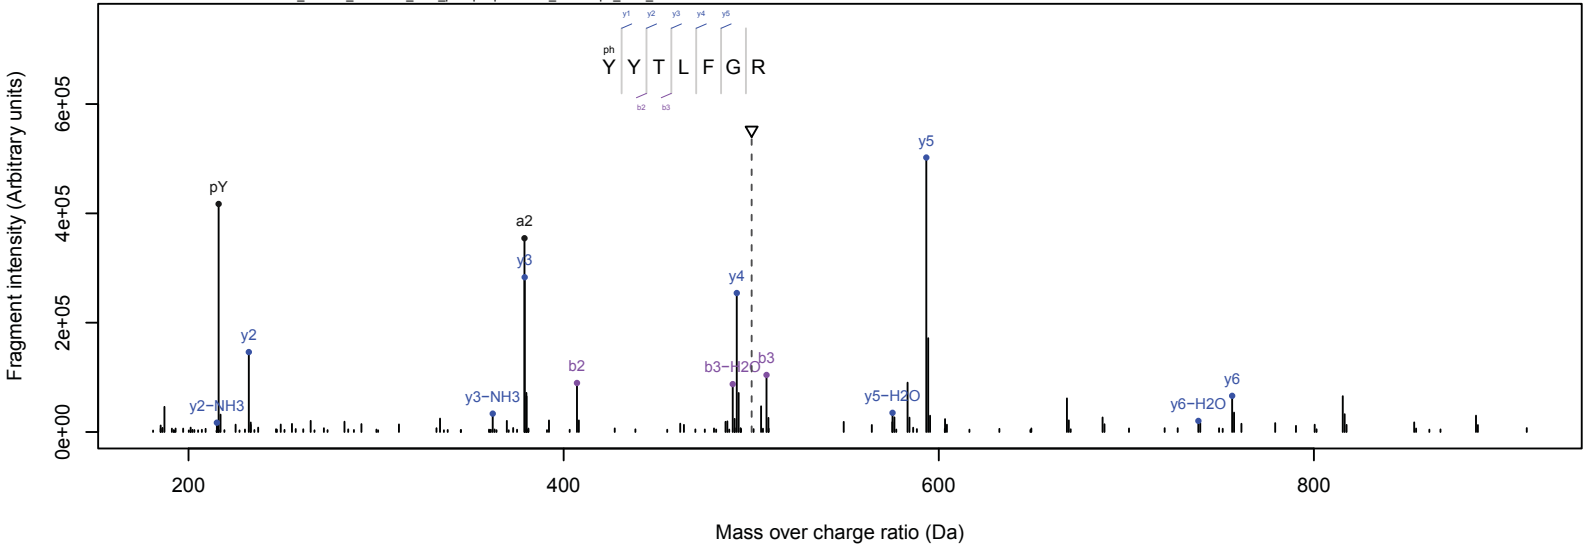

VMNATAY(ph)GISK-2+

Source : QE1\_140612\_OPL1013\_CVA\_phosphoproteomic\_landscape\_AML\_C Scan : 12256

Andromeda score : 122.7

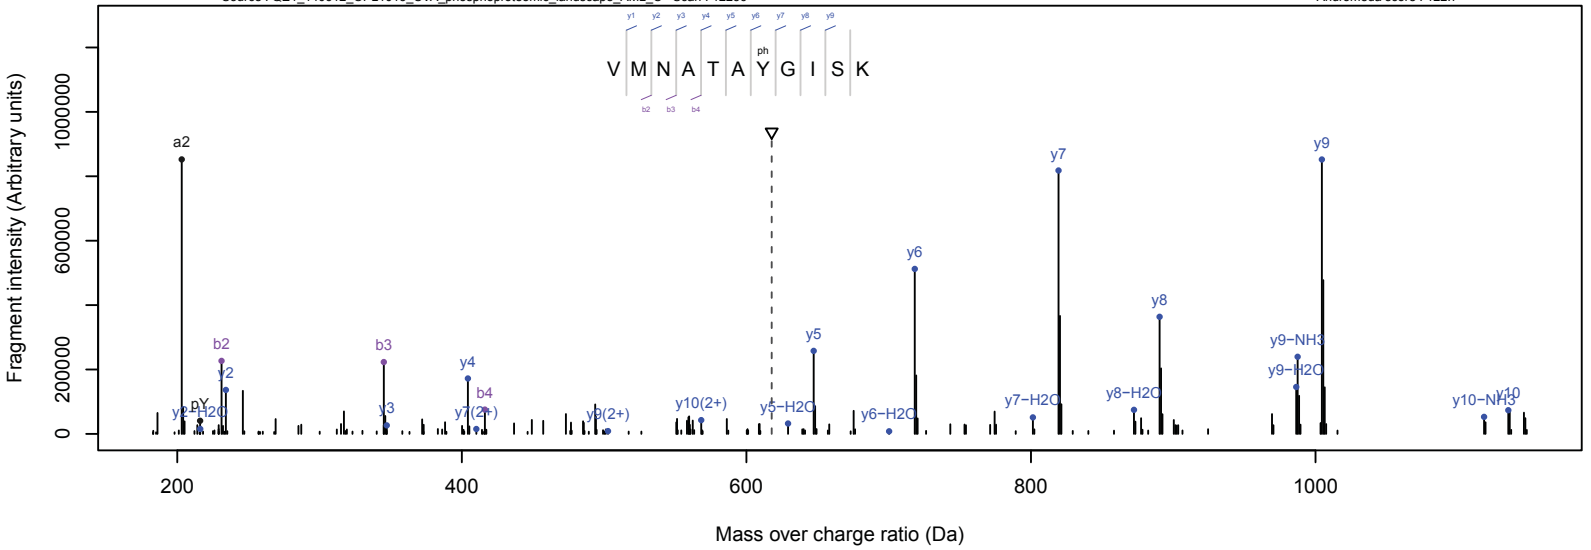

LKIMEY(ph)YEKK-3+

Source : QE1\_140612\_OPL1013\_CVA\_phosphoproteomic\_landscape\_AML\_C Scan : 18353

Andromeda score : 122.69

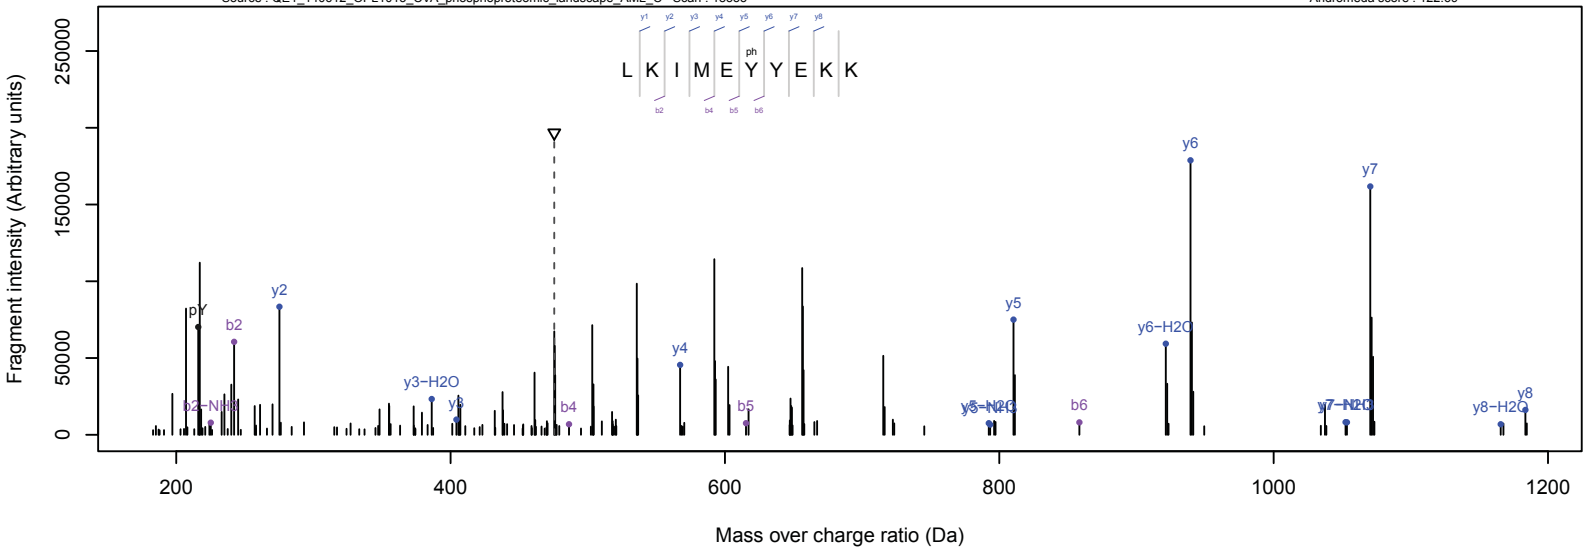

**QHGVNVSINASATPFQQPS(ph)YGSHGYNTGR-4+**

Source : QE1\_140612\_OPL1013\_CVA\_phosphoproteomic\_landscape\_AML\_C Scan : 22708

Andromeda score : 122.67

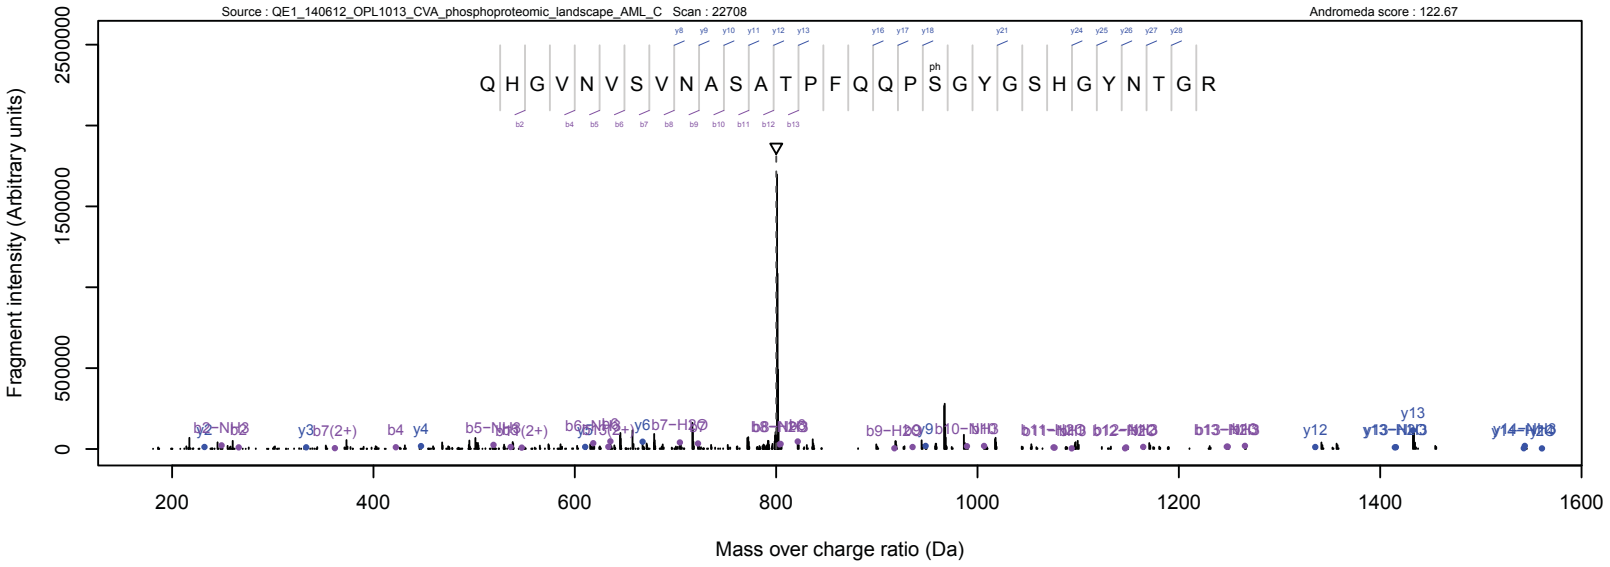

**LGPNYLHIPVNCYP(ph)R-2+**

Source : QE1\_140612\_OPL1013\_CVA\_phosphoproteomic\_landscape\_AML\_C Scan : 33512

Andromeda score : 122.64

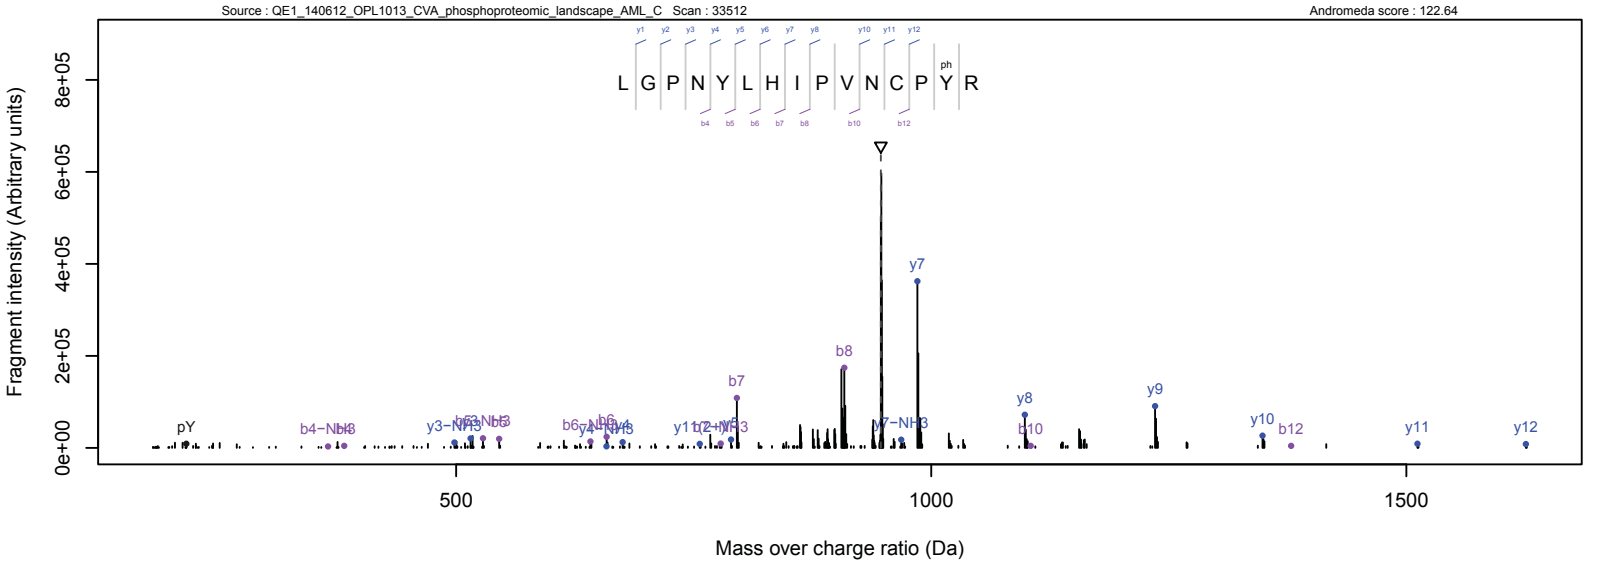

**DAALGGHHQAGQGDEGEAAGAADGIAAY(ph)SNYNGHRK-5+**

Source : QE1\_140612\_OPL1013\_CVA\_phosphoproteomic\_landscape\_AML\_C Scan : 18969

Andromeda score : 122.62

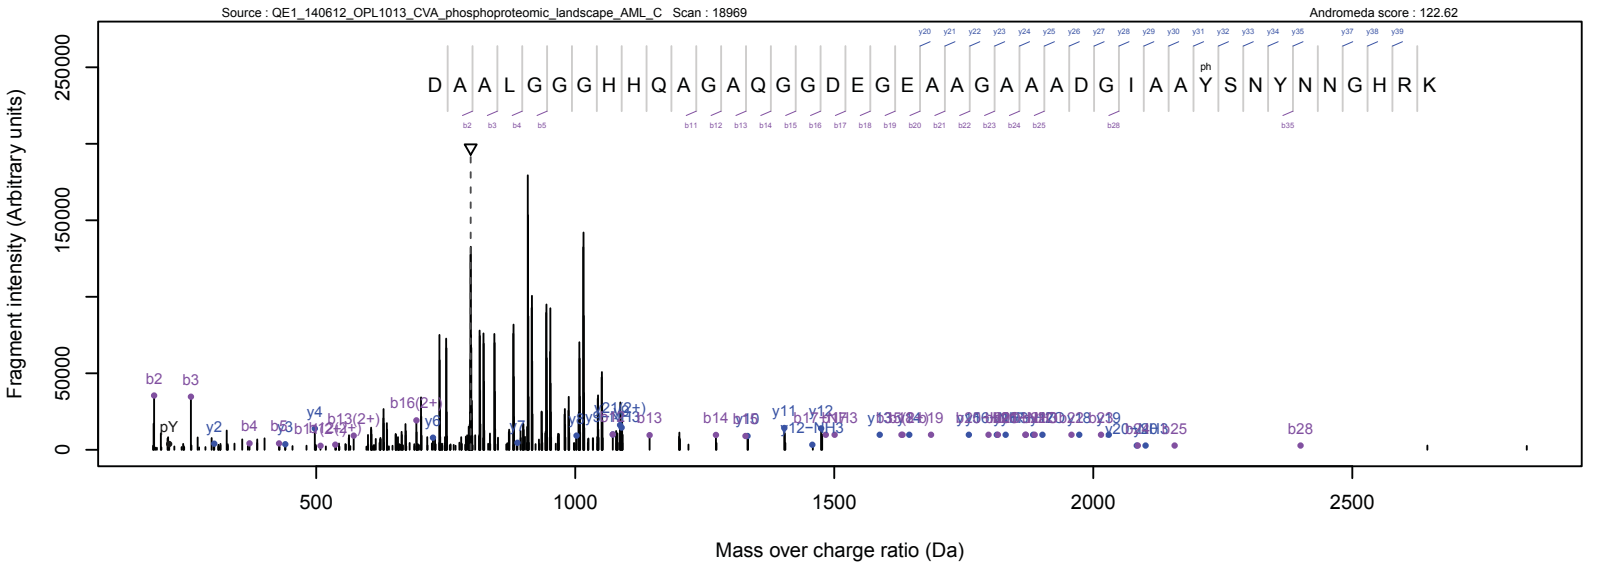

**GLISEEELGASVASLSENPY(ph)ATIR-2+**

Source : QE1\_140908\_OPL1013\_CvA\_pTyrIP\_AML\_HEL Scan : 47105

Andromeda score : 122.6

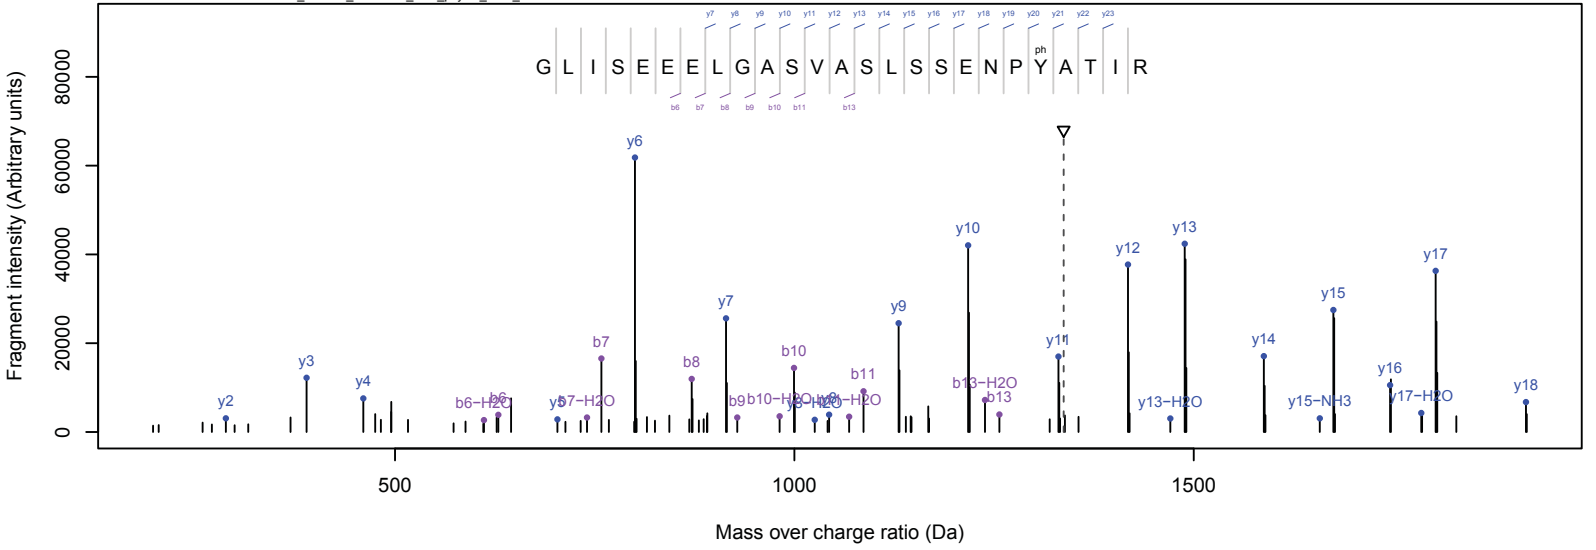

**IAPCPSQDSL(ph)SDPLDSTSAQAGEGVQR-3+**

Source : QE1\_140822\_OPL1013\_CvA\_pTyrIP\_AML\_cell\_lines\_part2\_B Scan : 23897

Andromeda score : 122.53

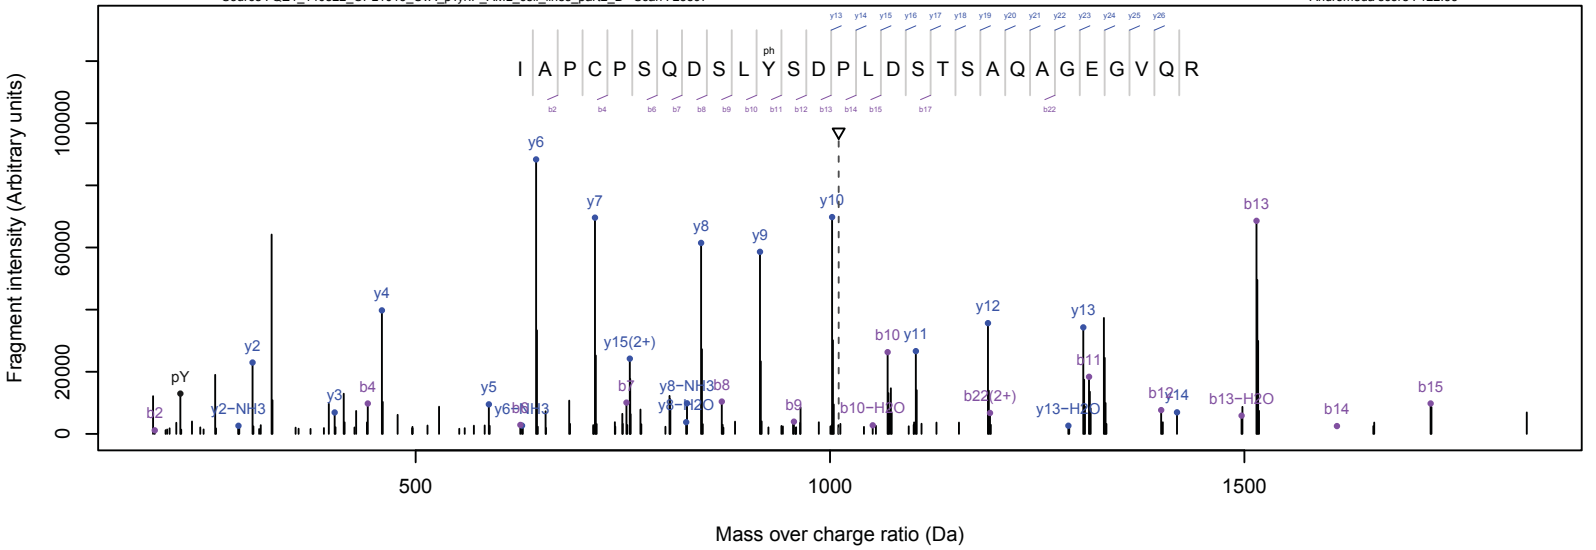

**KT(ph)YITDPVSAPCAPPLQPK-2+**

Source : QE1\_140612\_OPL1013\_CvA\_phosphoproteomic\_landscape\_AML\_C Scan : 29057

Andromeda score : 122.49

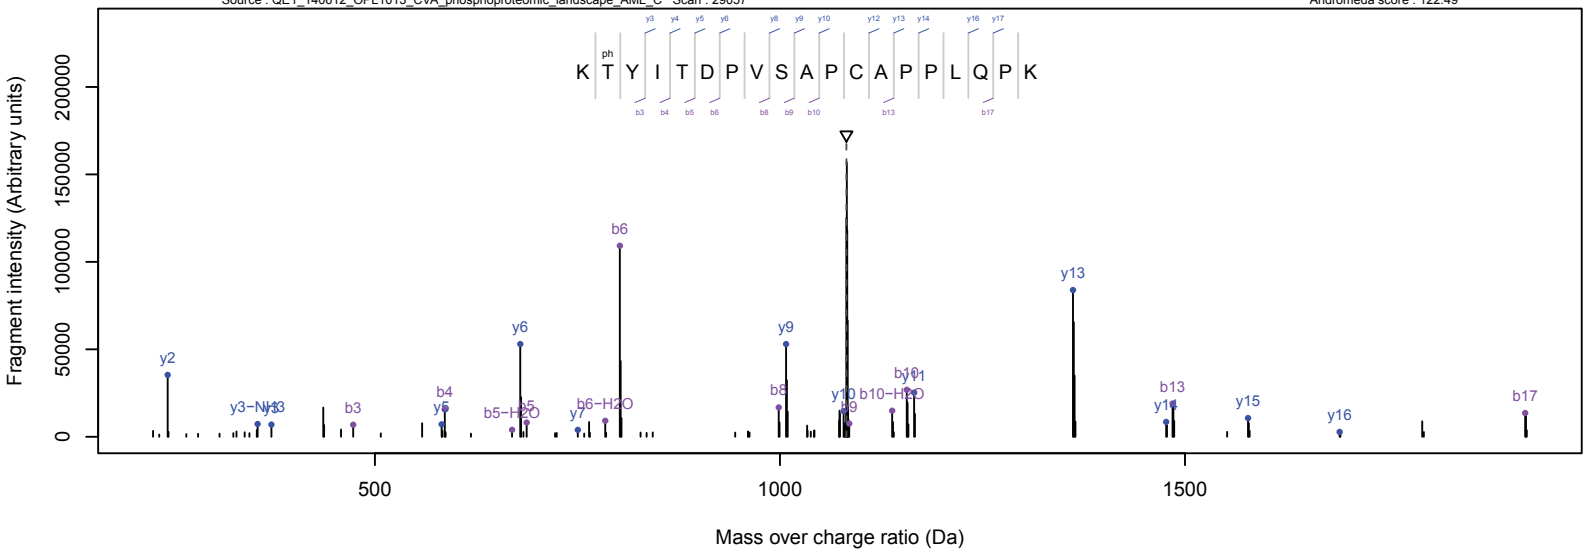

**TMCPLLSMKPGEYS(ph)FSPR-3+**

Source : QE1\_140612\_OPL1013\_CVA\_phosphoproteomic\_landscape\_AML\_C Scan : 40872

Andromeda score : 122.49

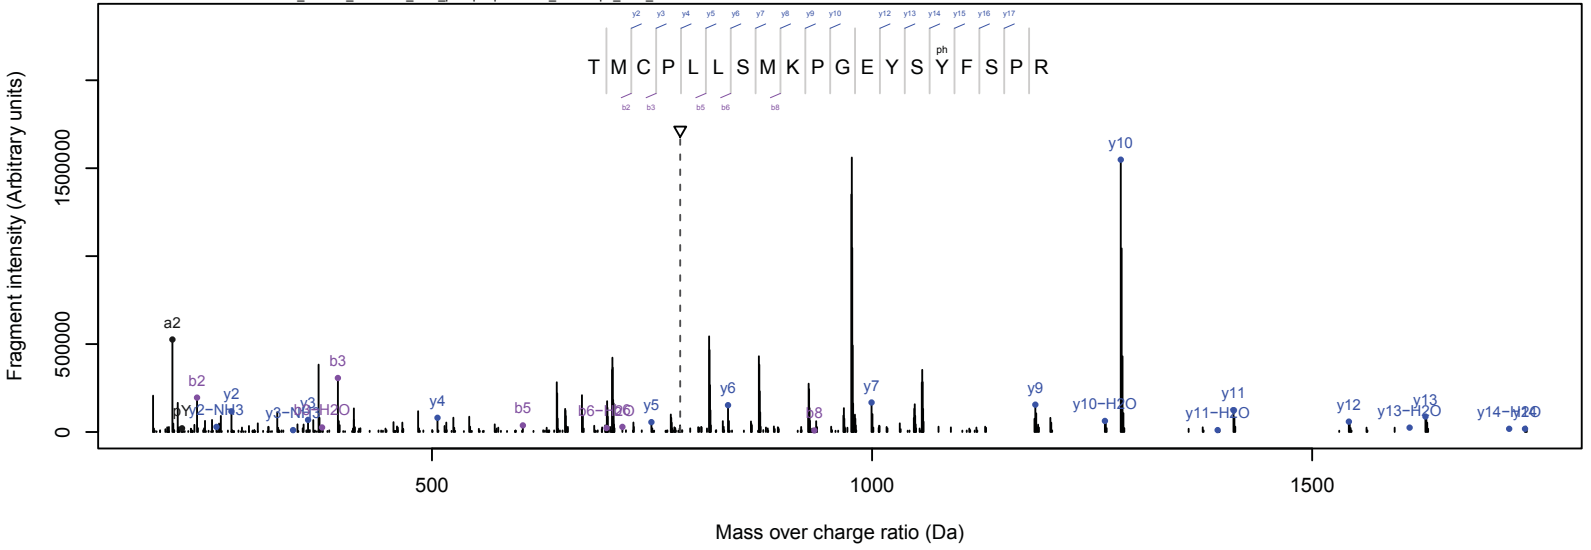

**NY(ph)LWREENAQQALAAK-3+**

Source : QE1\_140612\_OPL1013\_CVA\_phosphoproteomic\_landscape\_AML\_A Scan : 26390

Andromeda score : 122.46

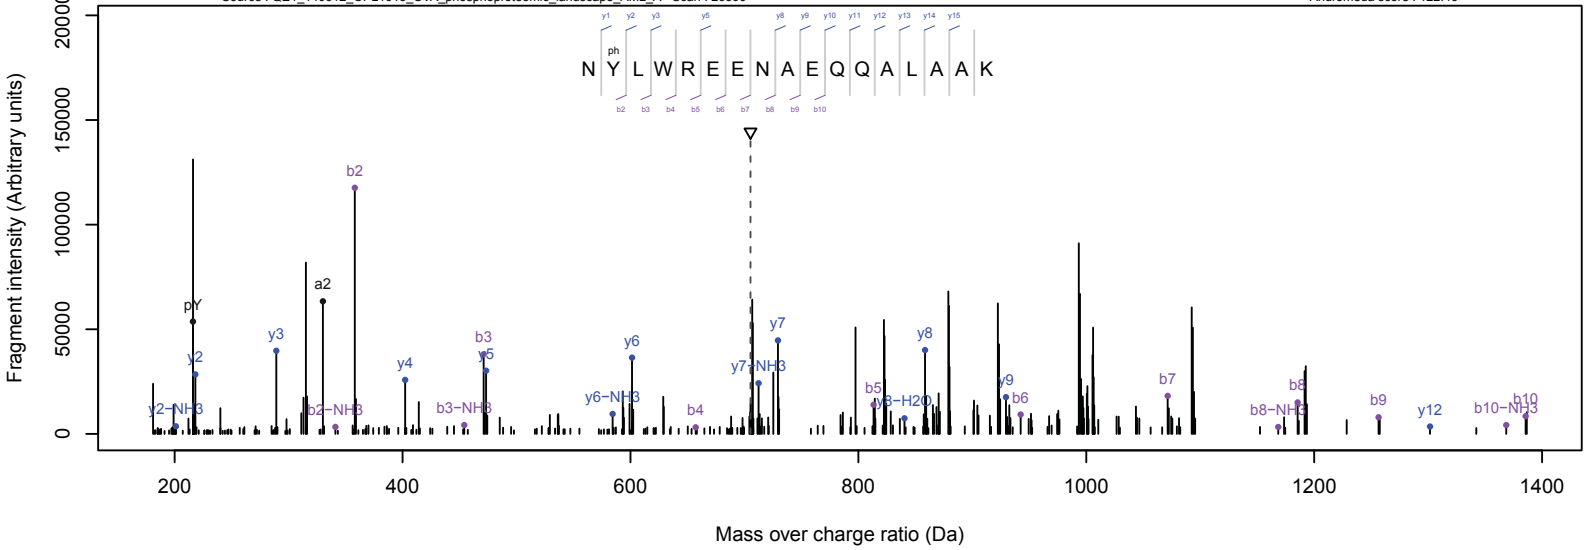

**HGSEEAYIDPIAEMEY(ph)YNWGR-3+**

Source : QE1\_140908\_OPL1013\_CvA\_pTyrIP\_AML\_Kasumi6 Scan : 40254

Andromeda score : 122.44

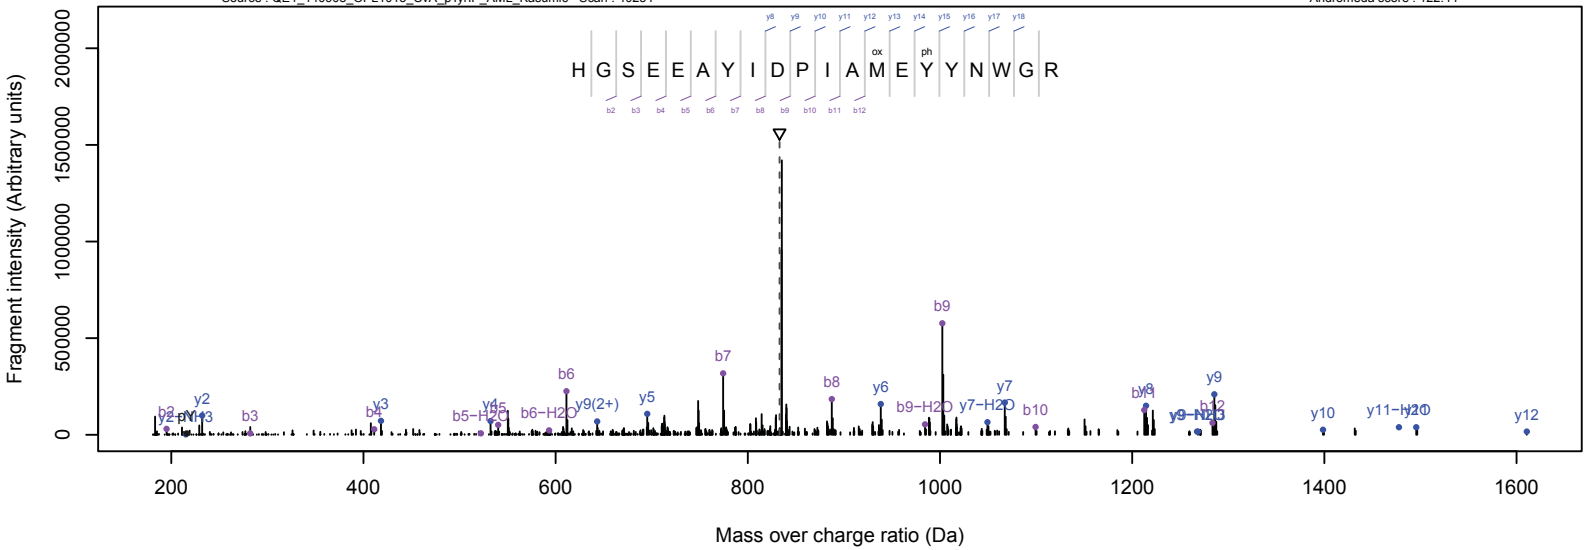

**QGYSLSGY(ph)YTHPFQGYEHR-3+**

Source : QE1\_140612\_OPL1013\_CVA\_phosphoproteomic\_landscape\_AML\_C Scan : 28085

Andromeda score : 122.44

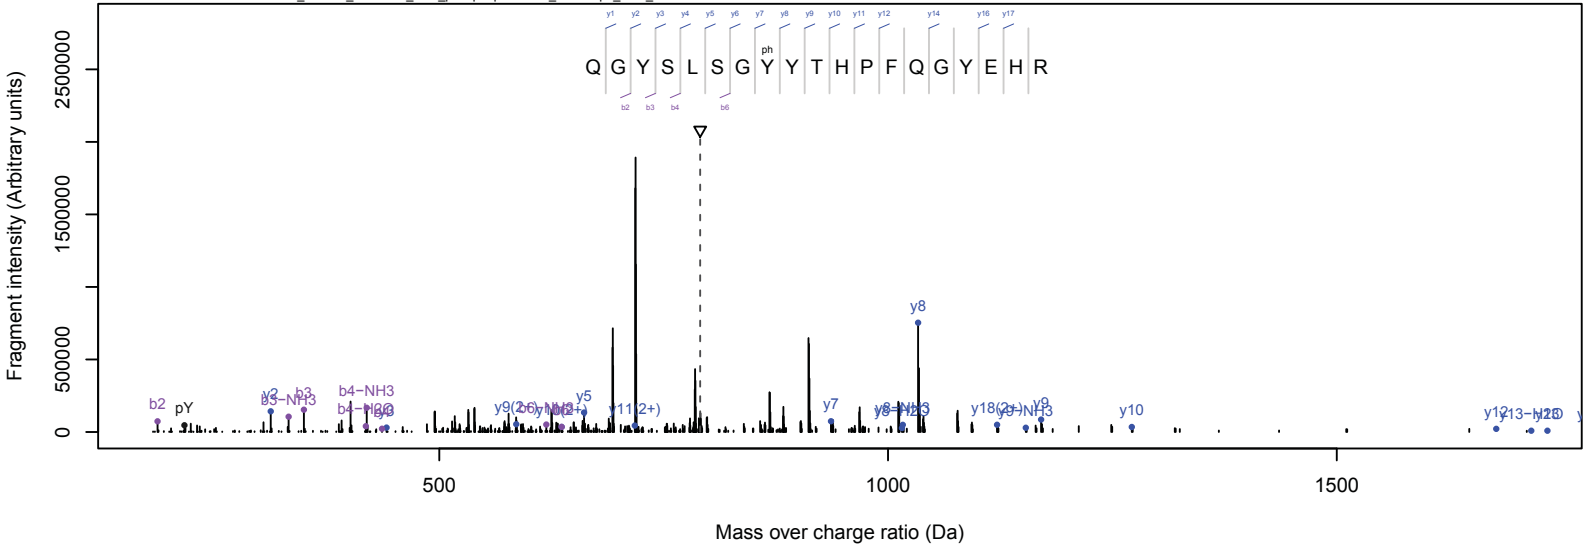

**KEVSKY(ph)SDIQR-3+**

Source : QE1\_140822\_OPL1013\_CvA\_pTyrIP\_AML\_cell\_lines\_part2\_B Scan : 2892

Andromeda score : 122.34

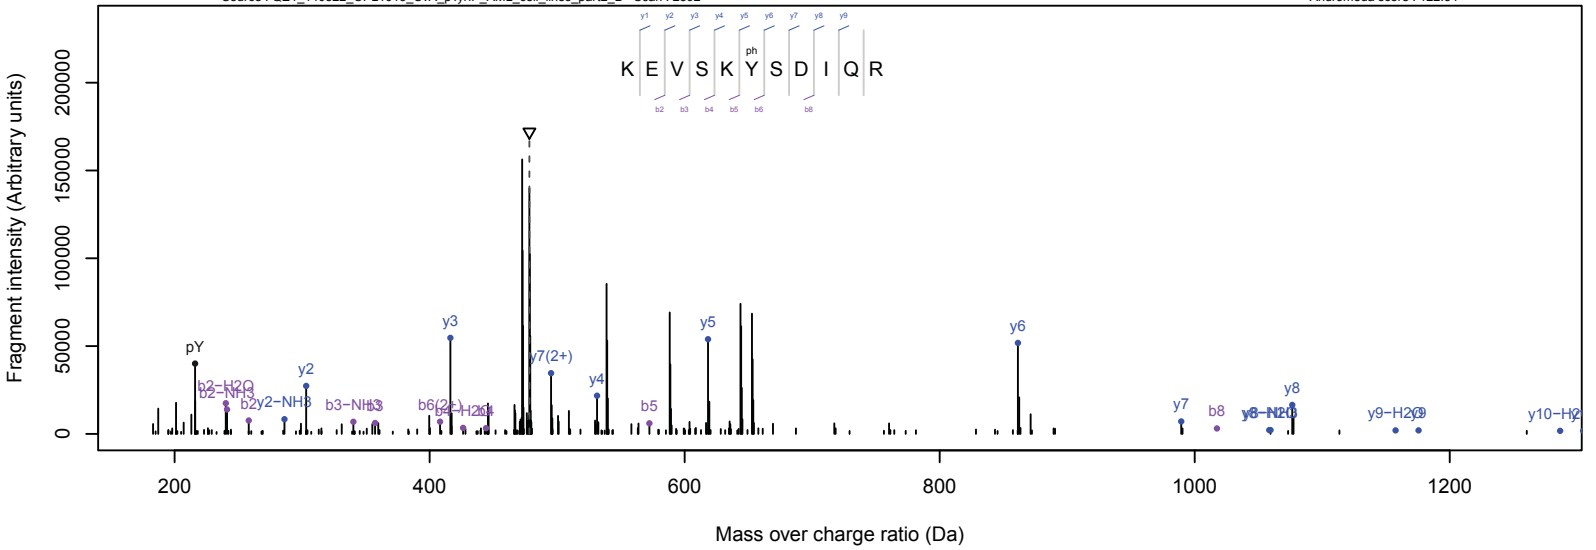

**KNIEGSHQY(ph)ELLK-3+**

Source : QE1\_140612\_OPL1013\_CVA\_phosphoproteomic\_landscape\_AML\_B Scan : 13331

Andromeda score : 122.33

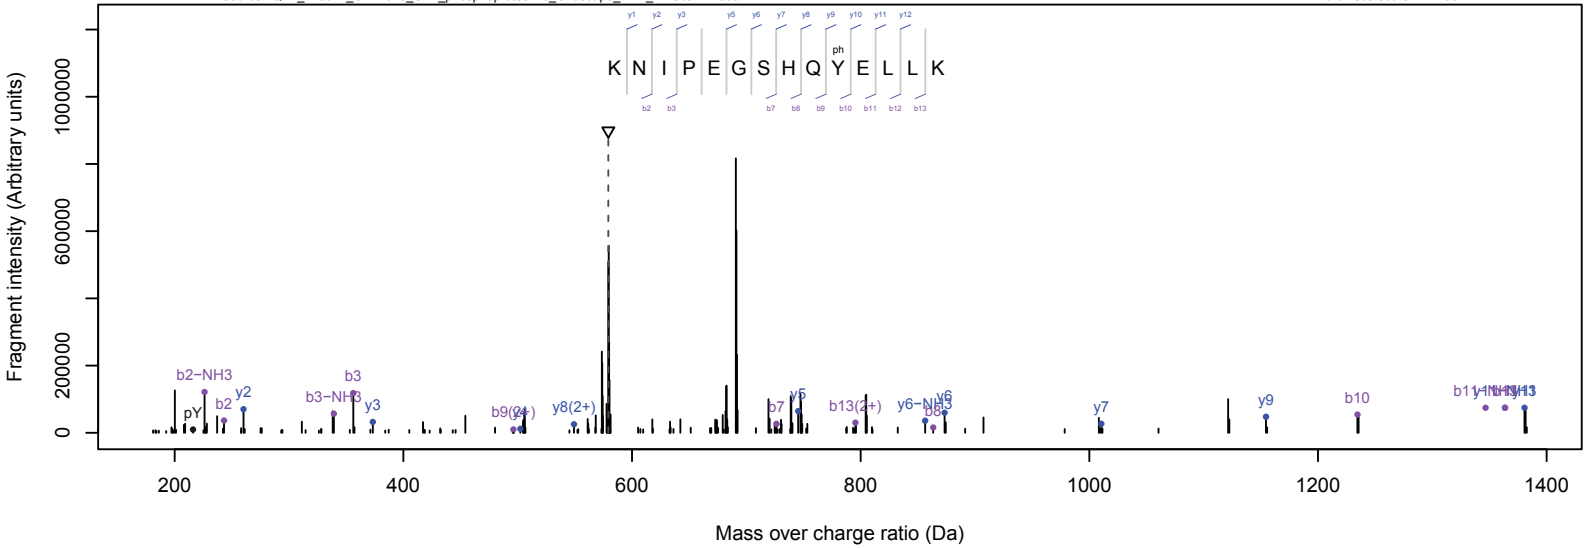

LCLVSEIPPKGALGEGPGASPCNQHSPLYWAPPCTLKPET-4+

Source : QE1\_140908\_OPL1013\_CvA\_pTyrIP\_AML\_Kasumi6 Scan : 43455

Andromeda score : 122.3

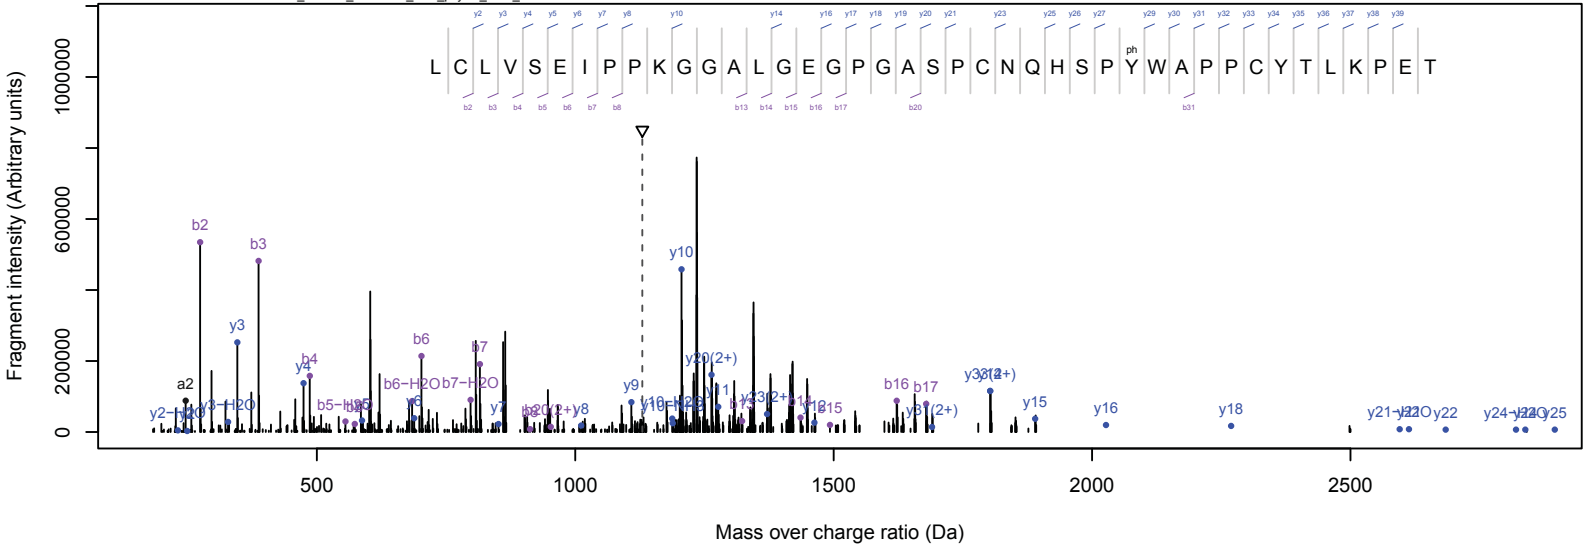

MTLDTLSIY(ph)ETPSMGLLDKK-3+

Source : QE1\_140908\_OPL1013\_CvA\_pTyrIP\_AML\_HL60 Scan : 48674

Andromeda score : 122.19

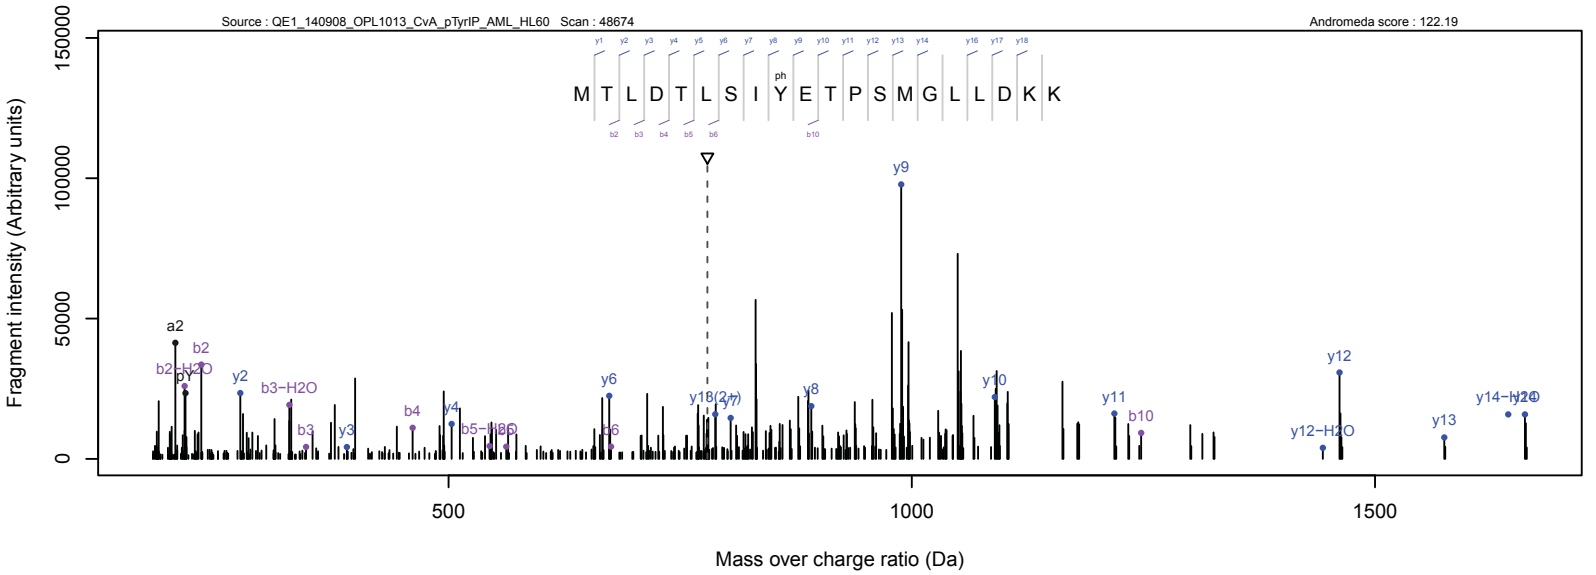

RFPPYY(ph)MR-2+

Source : QE1\_140612\_OPL1013\_CVA\_phosphoproteomic\_landscape\_AML\_C Scan : 23562

Andromeda score : 122.18

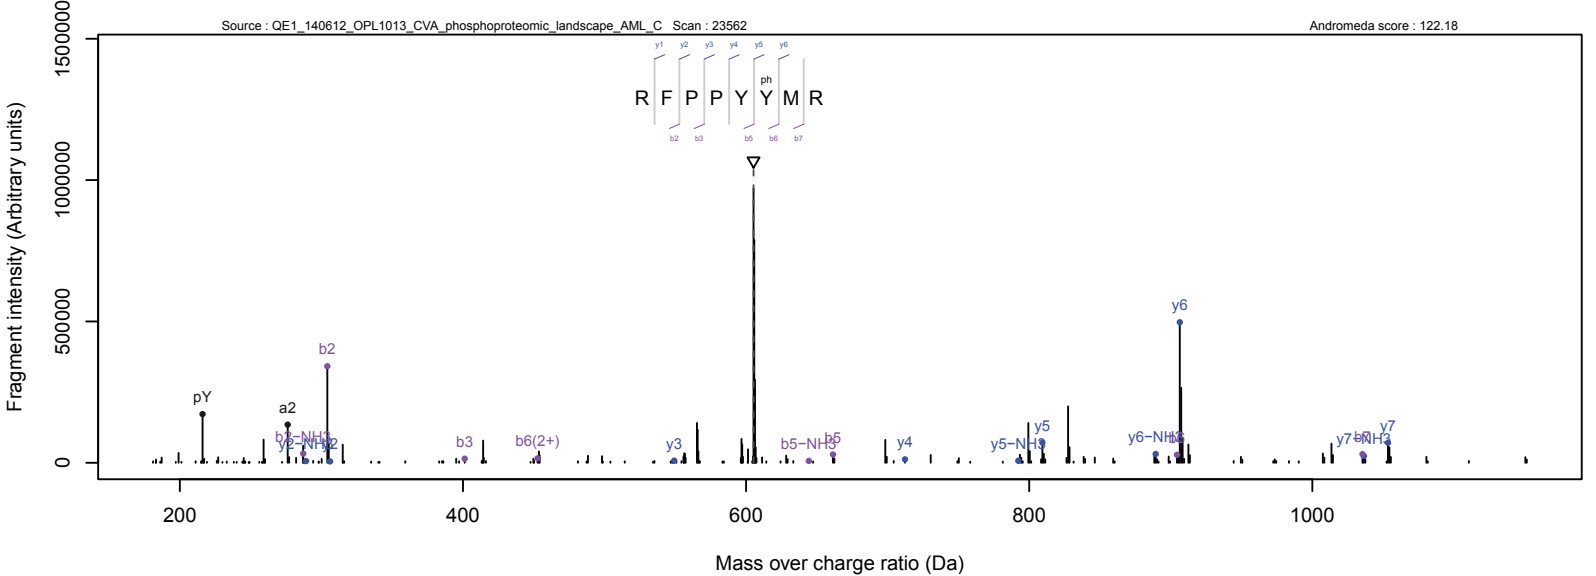

SPYTLDSL(ph)WSVKPASSFGSEAK-3+

Source : QE1\_140908\_OPL1013\_CvA\_pTyrIP\_AML\_HEL Scan : 43604

Andromeda score : 122.18

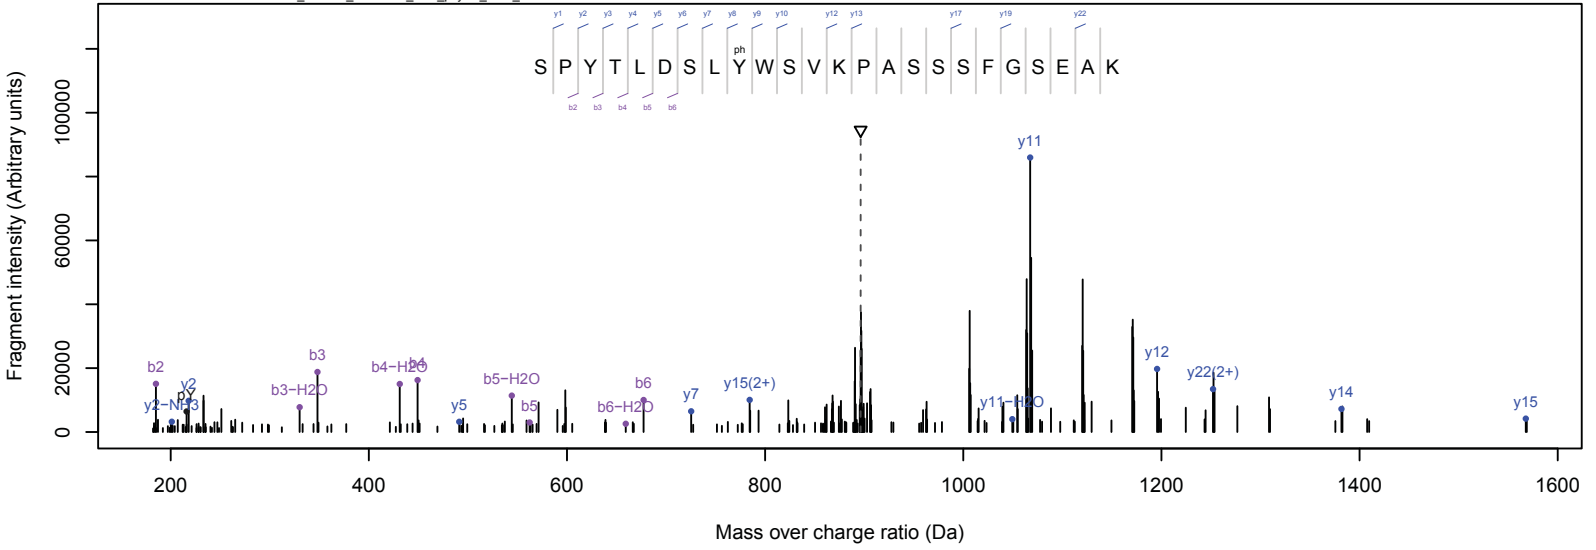

(ac)AY(ph)HSFLVEPISCHAWNKDR-3+

Source : QE1\_140612\_OPL1013\_CVA\_phosphoproteomic\_landscape\_AML\_C Scan : 35618

Andromeda score : 122.1

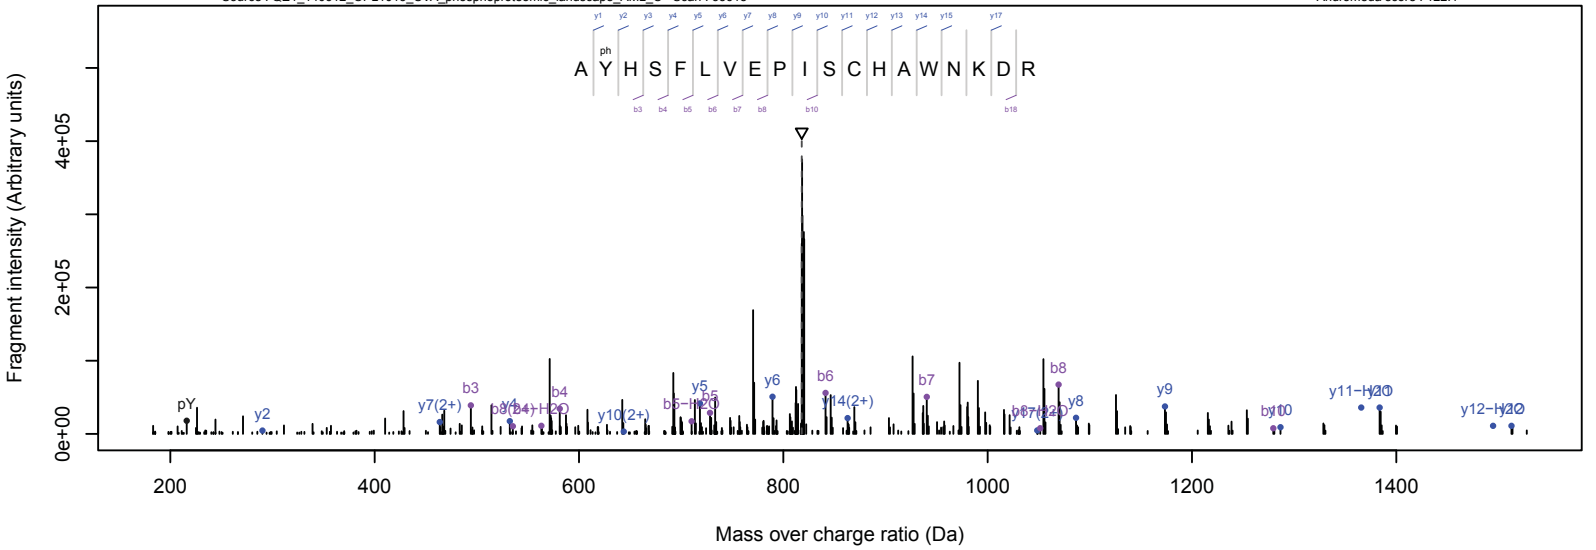

HEMPPHIYAITDTAYR-3+

Source : QE1\_140908\_OPL1013\_CvA\_pTyrIP\_AML\_ML2 Scan : 27587

Andromeda score : 122.08

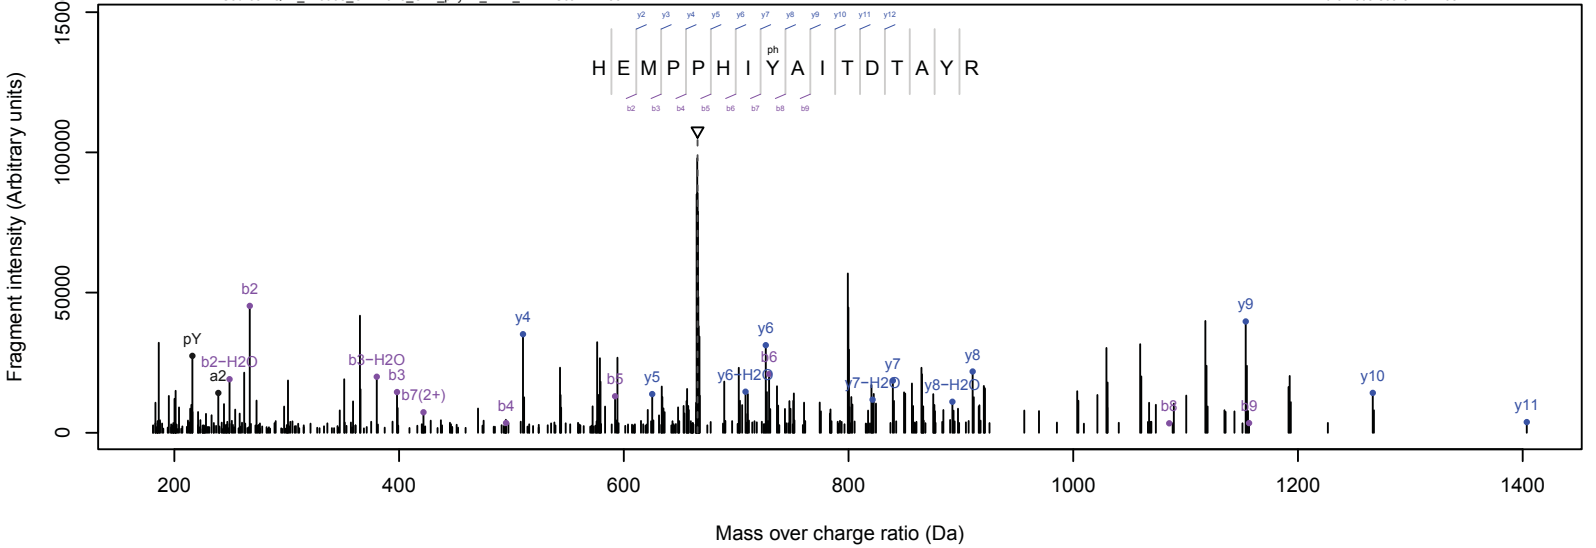

RNRPVTYQFHPNLDYYK-4+

Source : QE1\_140612\_OPL1013\_CVA\_phosphoproteomic\_landscape\_AML\_C Scan : 24761

Andromeda score : 122.01

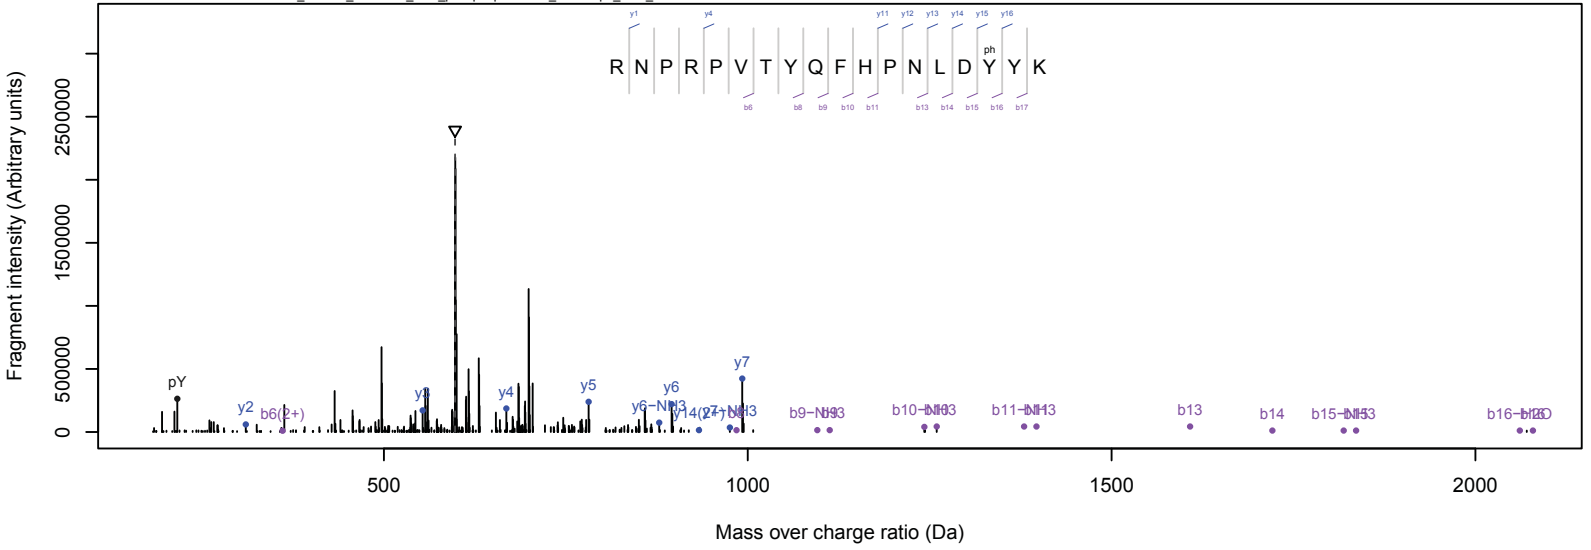

Y(ph)LSRPLPGDLGVC-2+

Source : QE1\_140612\_OPL1013\_CVA\_phosphoproteomic\_landscape\_AML\_C Scan : 31859

Andromeda score : 121.99

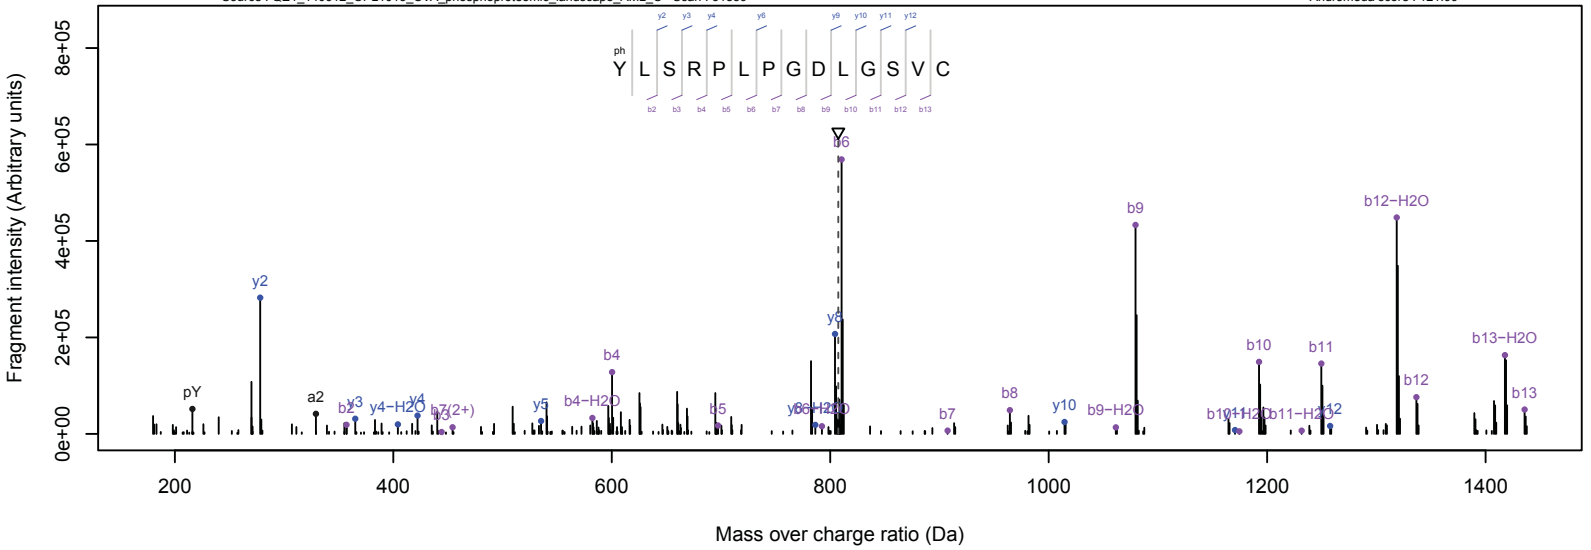

GY(ph)LPLR-2+

Source : QE1\_140612\_OPL1013\_CVA\_phosphoproteomic\_landscape\_AML\_C Scan : 24330

Andromeda score : 121.87

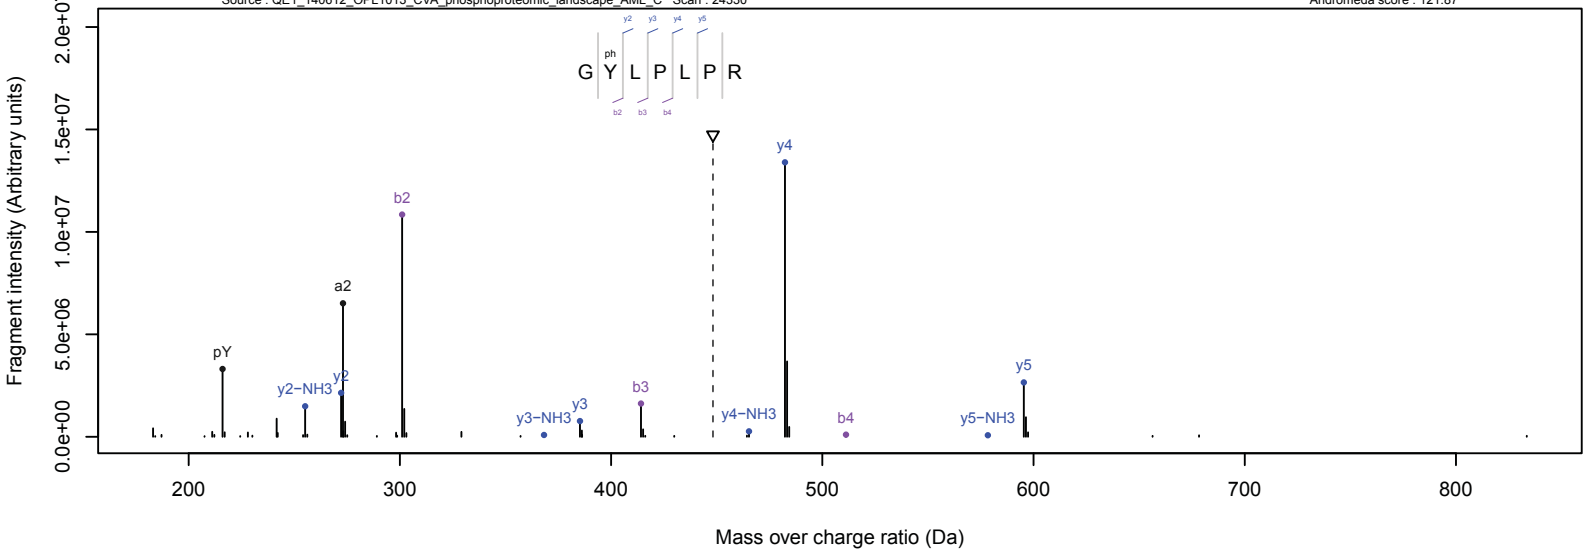



**EKPPEPTWTGY(ph)FGK-2+**

Source: QE1\_140612\_OPL1013\_CVA\_phosphoproteomic\_landscape\_AML\_C Scan: 28262

Andromeda score: 121.82

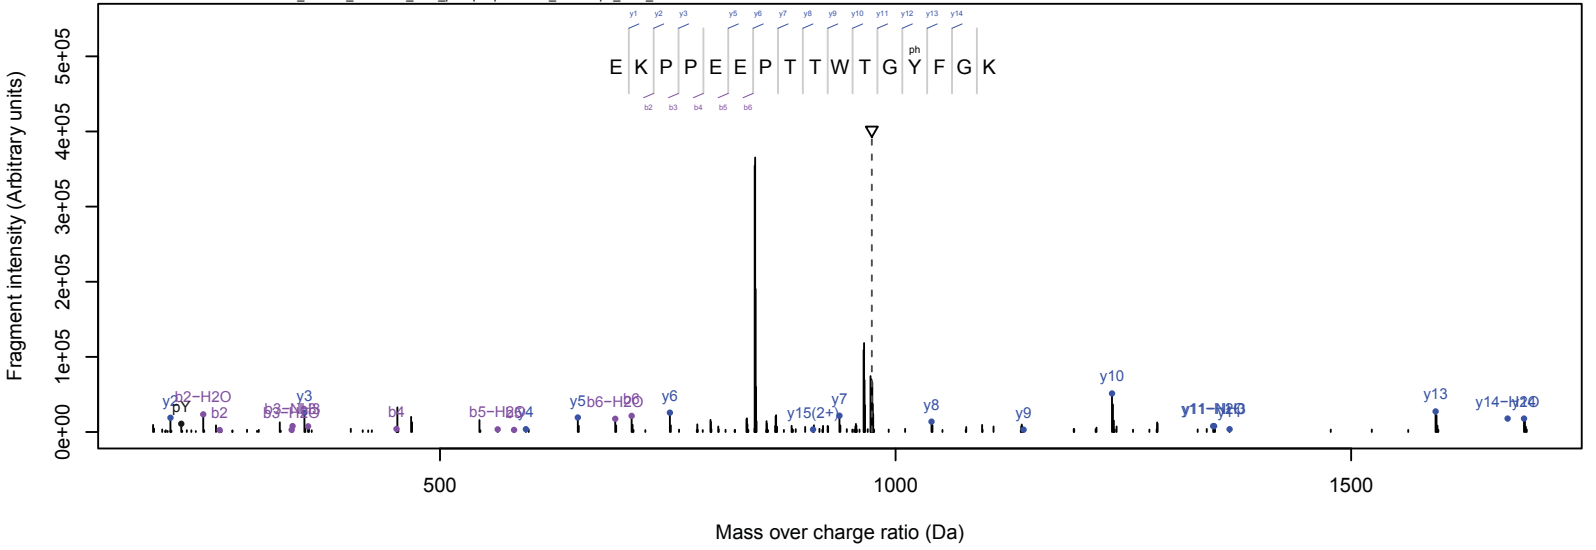

**ENDTITY(ph)STINHSK-2+**

Source: QE1\_140908\_OPL1013\_CvA\_pTyrIP\_AML\_HEL Scan: 23576

Andromeda score: 121.82

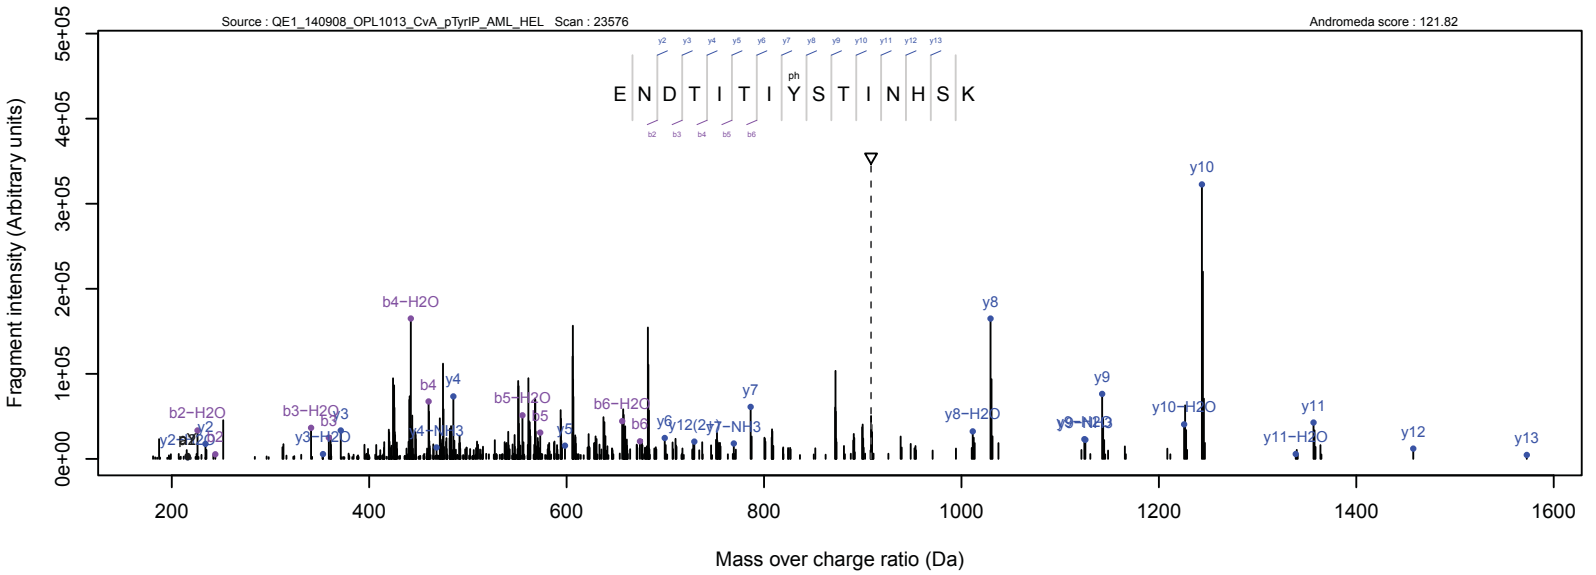

**LFNLSKEDDVRQY(ph)VVR-3+**

Source: QE1\_140612\_OPL1013\_CVA\_phosphoproteomic\_landscape\_AML\_C Scan: 28969

Andromeda score: 121.82

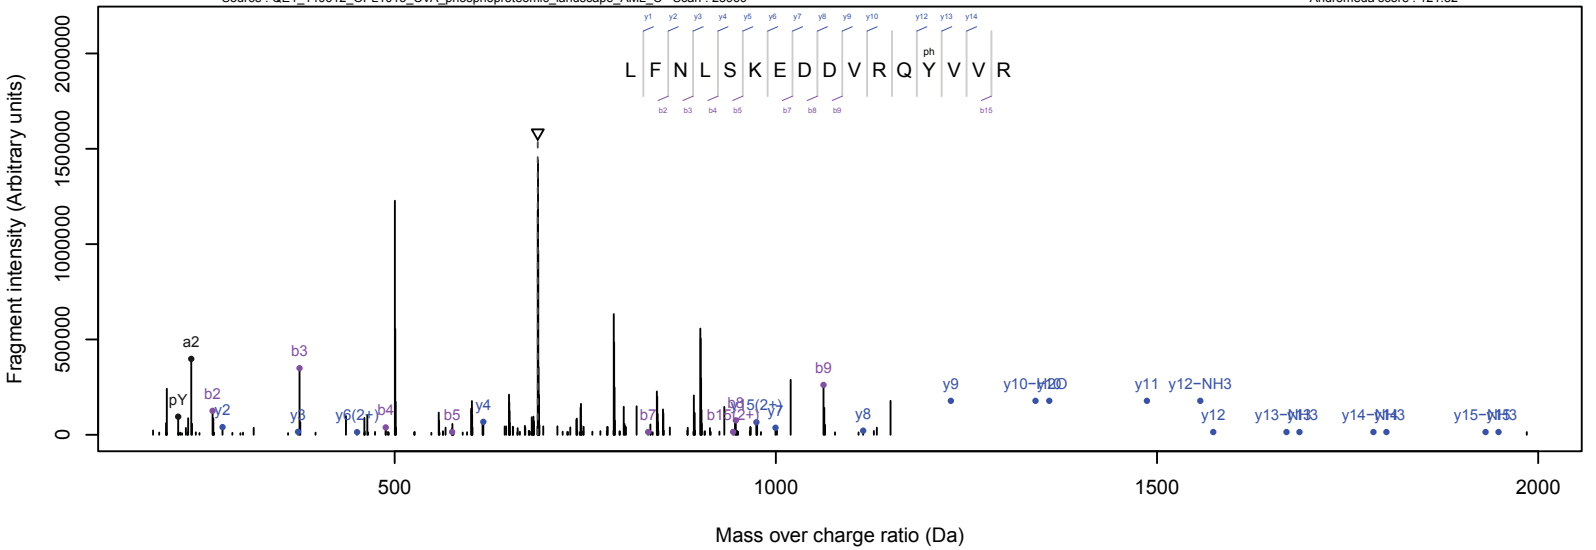



**MGSGIQ(ph)GDAALR-2+**

Source: QE1\_140612\_OPL1013\_CVA\_phosphoproteomic\_landscape\_AML\_C Scan: 19505

Andromeda score: 121.56

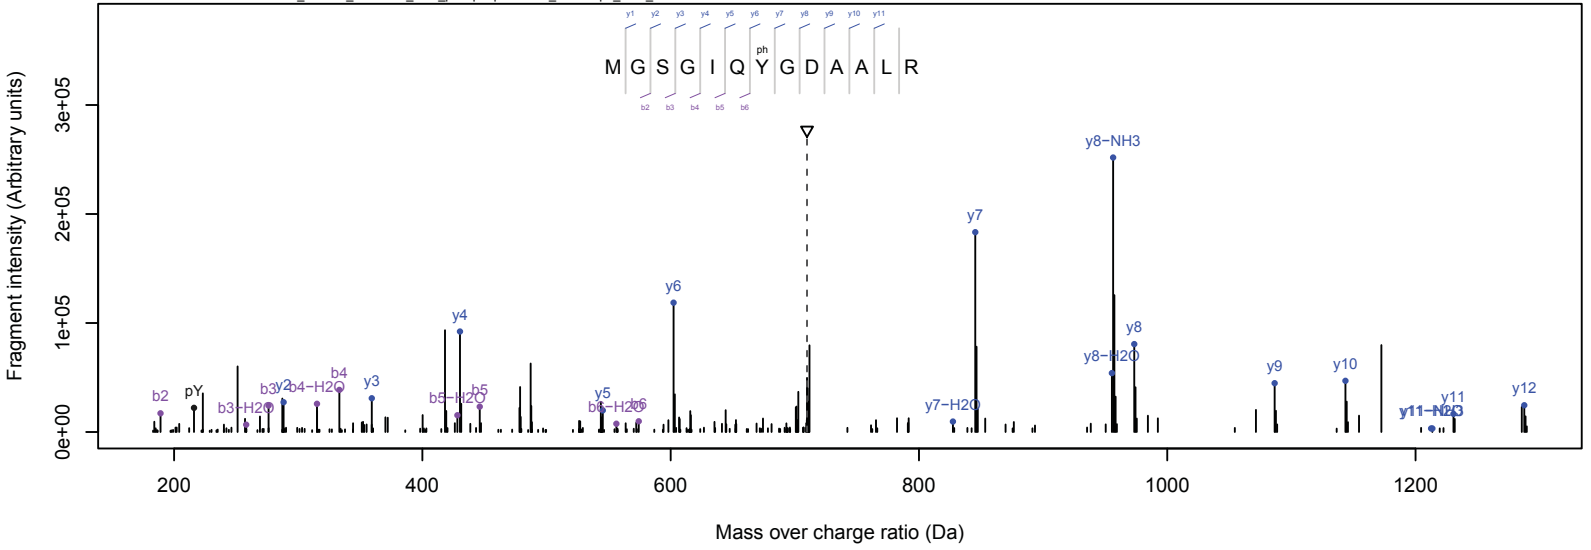

**Y(ph)NFHGTAEQDLPFCK-2+**

Source: QE1\_140908\_OPL1013\_CvA\_pTyrIP\_AML\_HEL Scan: 28006

Andromeda score: 121.32

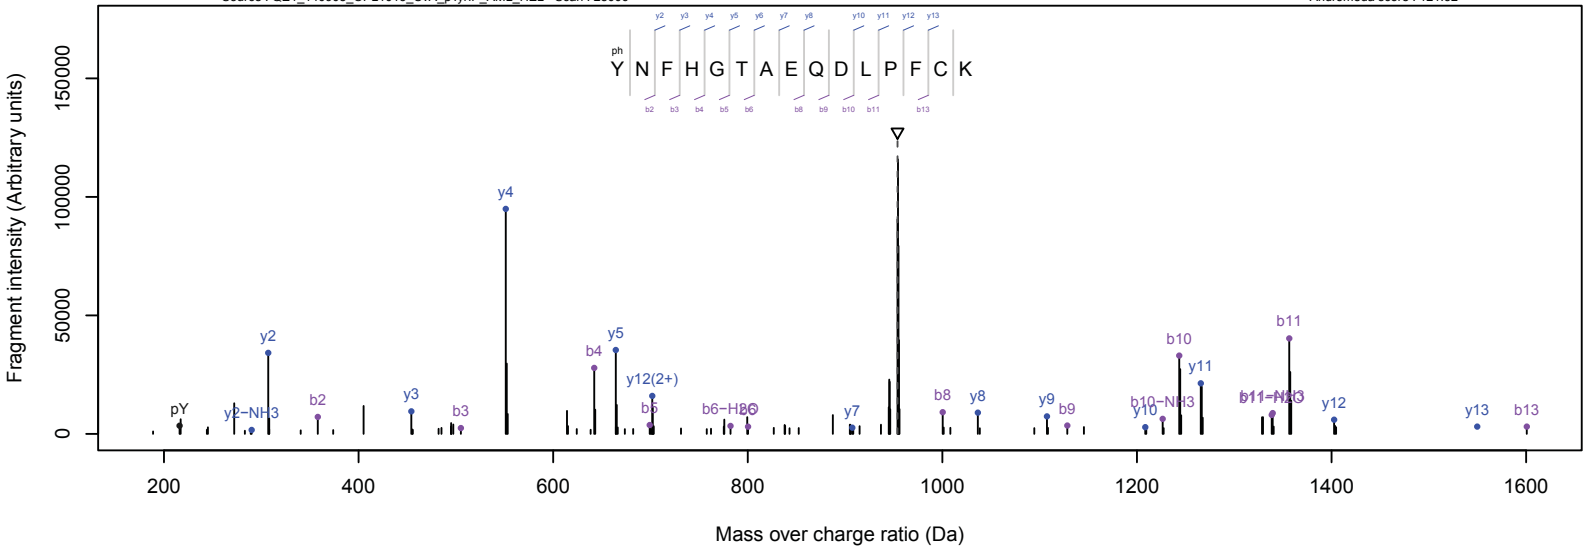

**TY(ph)AYLFK-2+**

Source: QE1\_140612\_OPL1013\_CVA\_phosphoproteomic\_landscape\_AML\_C Scan: 25280

Andromeda score: 121.29

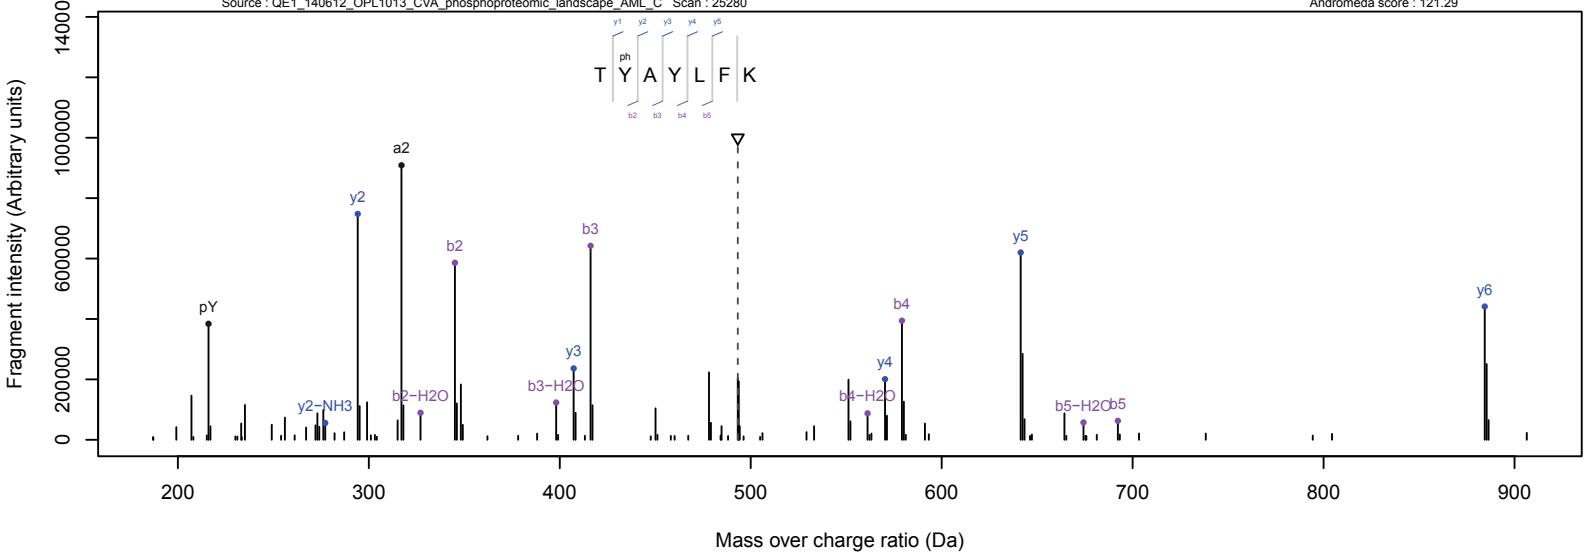

HIVIDGSNVAMVHGLQHY(ph)FSSR-4+

Source : QE1\_140612\_OPL1013\_CVA\_phosphoproteomic\_landscape\_AML\_C Scan : 31733

Andromeda score : 121.25

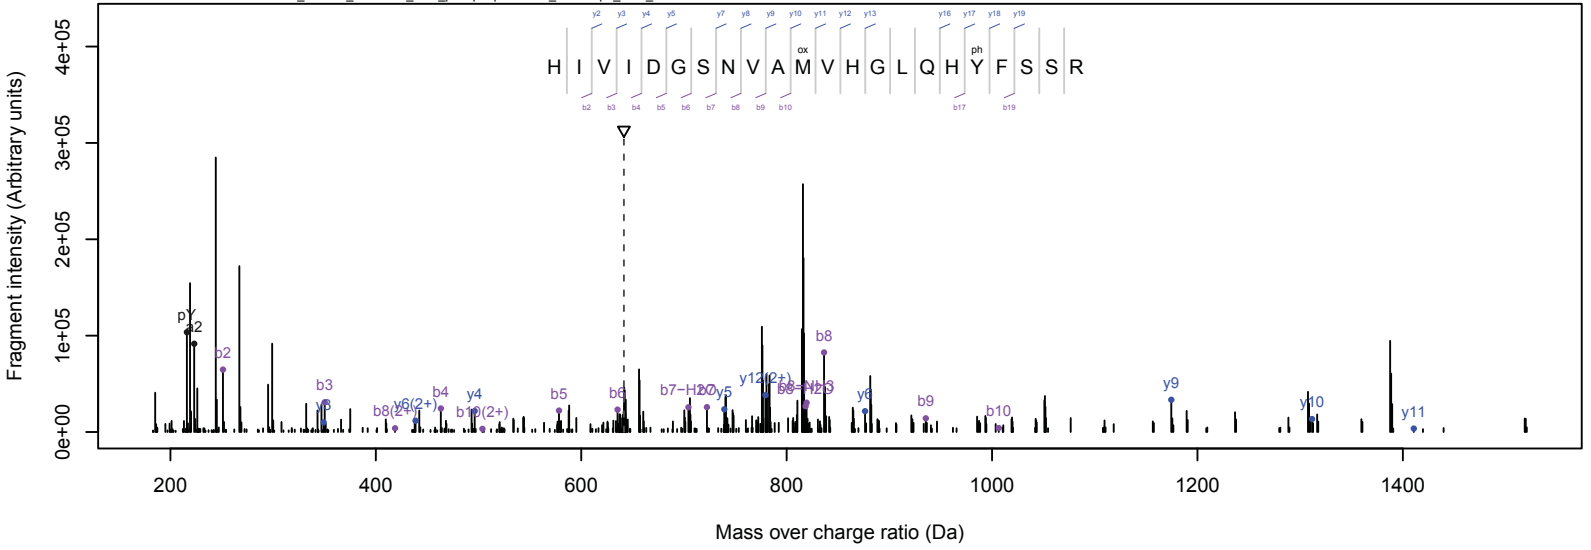

YANNSNY(ph)KNDVMIR-3+

Source : QE1\_140612\_OPL1013\_CVA\_phosphoproteomic\_landscape\_AML\_B Scan : 12210

Andromeda score : 121.24

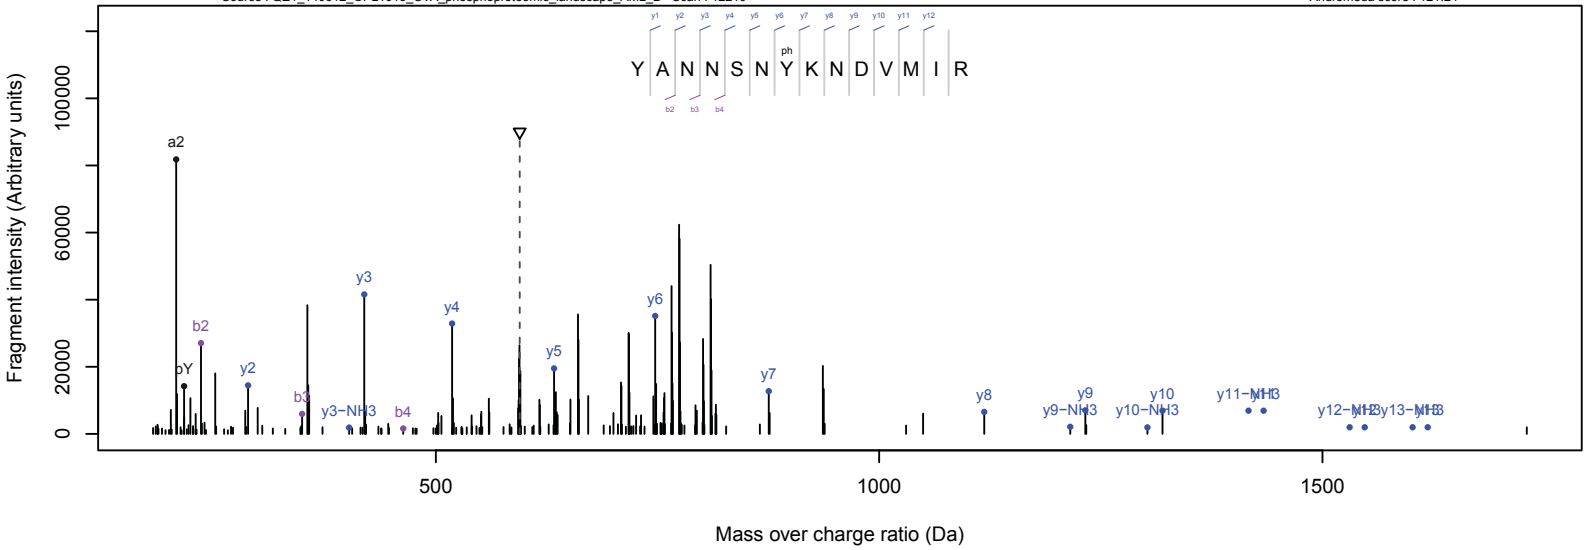

FHY(ph)DNTAGISQYLQNSK-3+

Source : QE1\_140908\_OPL1013\_CvA\_pTyrIP\_AML\_HEL Scan : 29708

Andromeda score : 121.03

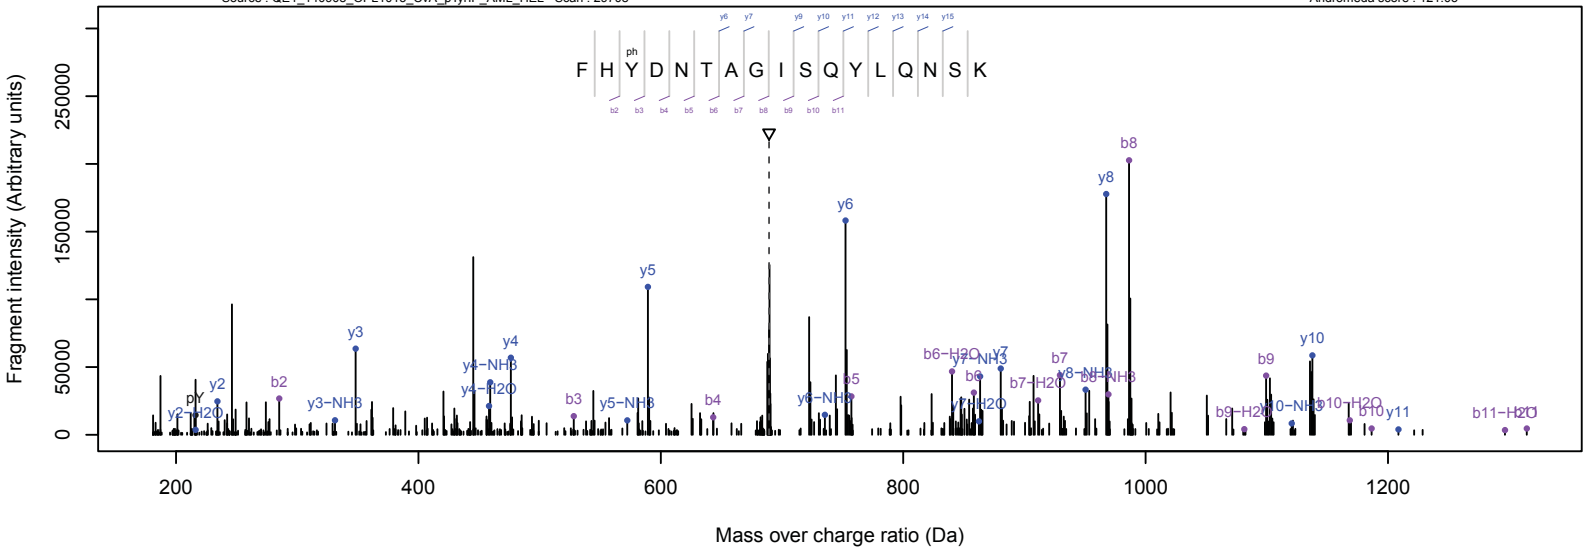

RASGPPGNEHLY(ph)ENLCVLEASPTLHGGEPEPEHGGPSR-5+

Source: QE1\_140908\_OPL1013\_CVA\_pTyrIP\_AML\_OCI\_AML3 Scan: 32457

Andromeda score: 120.98

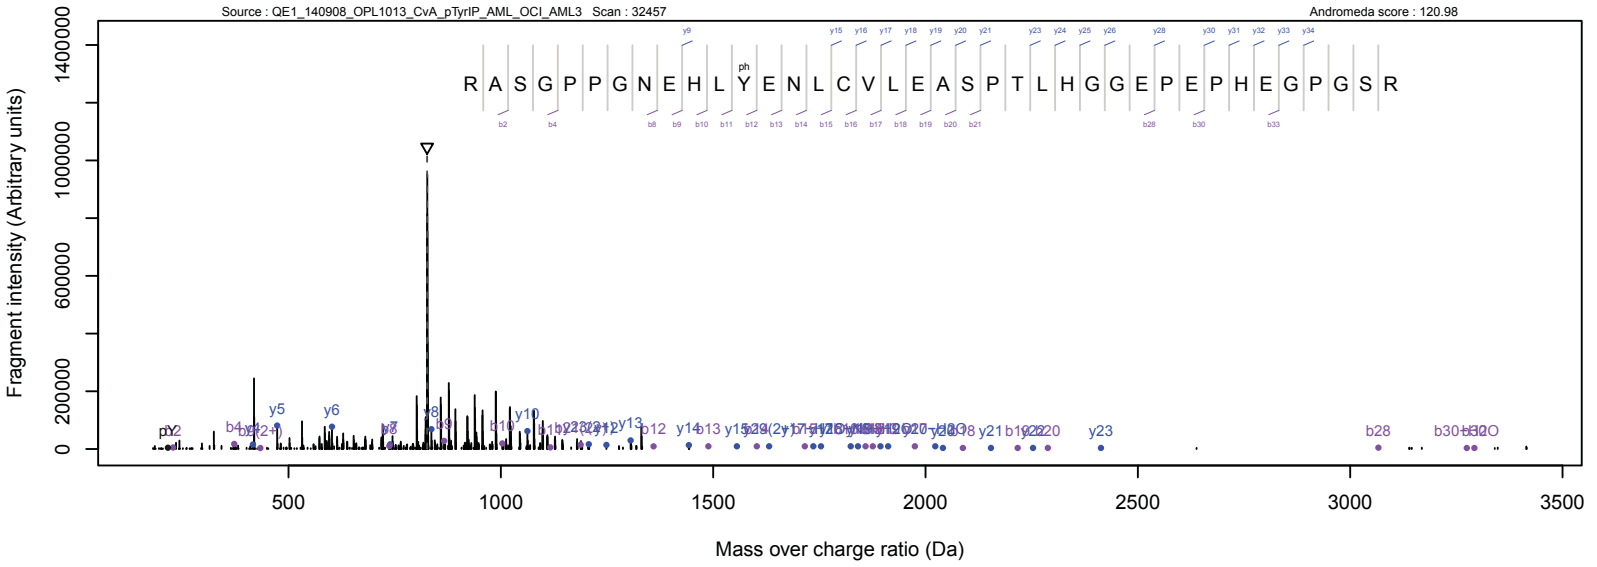

KLSPTPEKNYGS(ph)YSTQASAAAATAELLK-3+

Source: QE1\_140612\_OPL1013\_CVA\_phosphoproteomic\_landscape\_AML\_C Scan: 30761

Andromeda score: 120.93

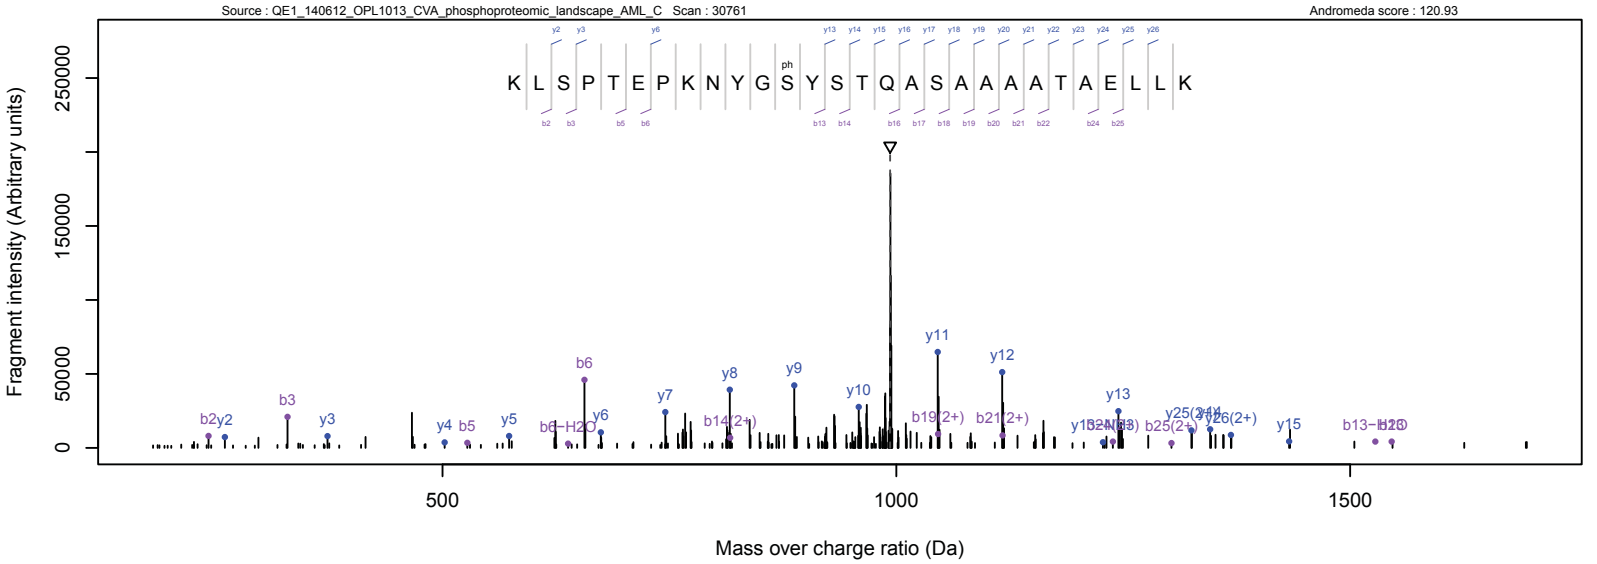

Y(ph)KPHILLSQENTQIR-3+

Source : QE1\_140612\_OPL1013\_CVA\_phosphoproteomic\_landscape\_AML\_B Scan : 19228

Andromeda score : 120.92

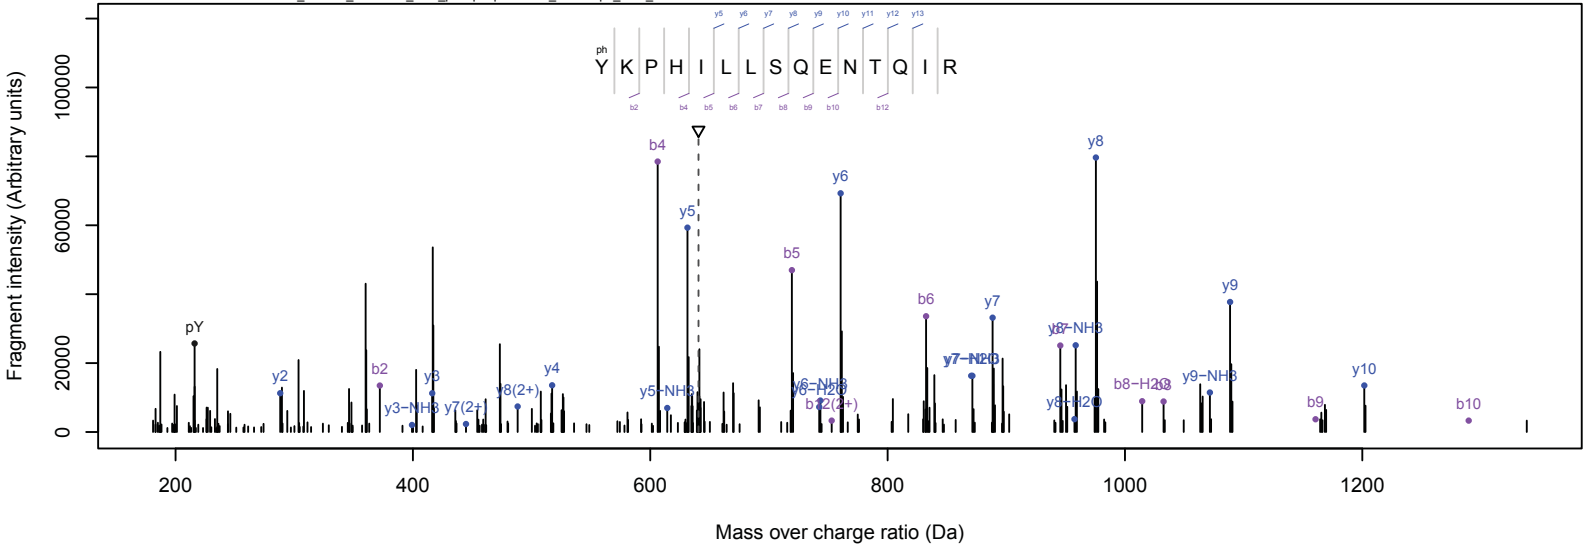

DM(ox)GSCEIY(ph)PQTIQHNPNGR-3+

Source : QE1\_140908\_OPL1013\_CvA\_pTyrIP\_AML\_Kasumi6 Scan : 16840

Andromeda score : 120.9

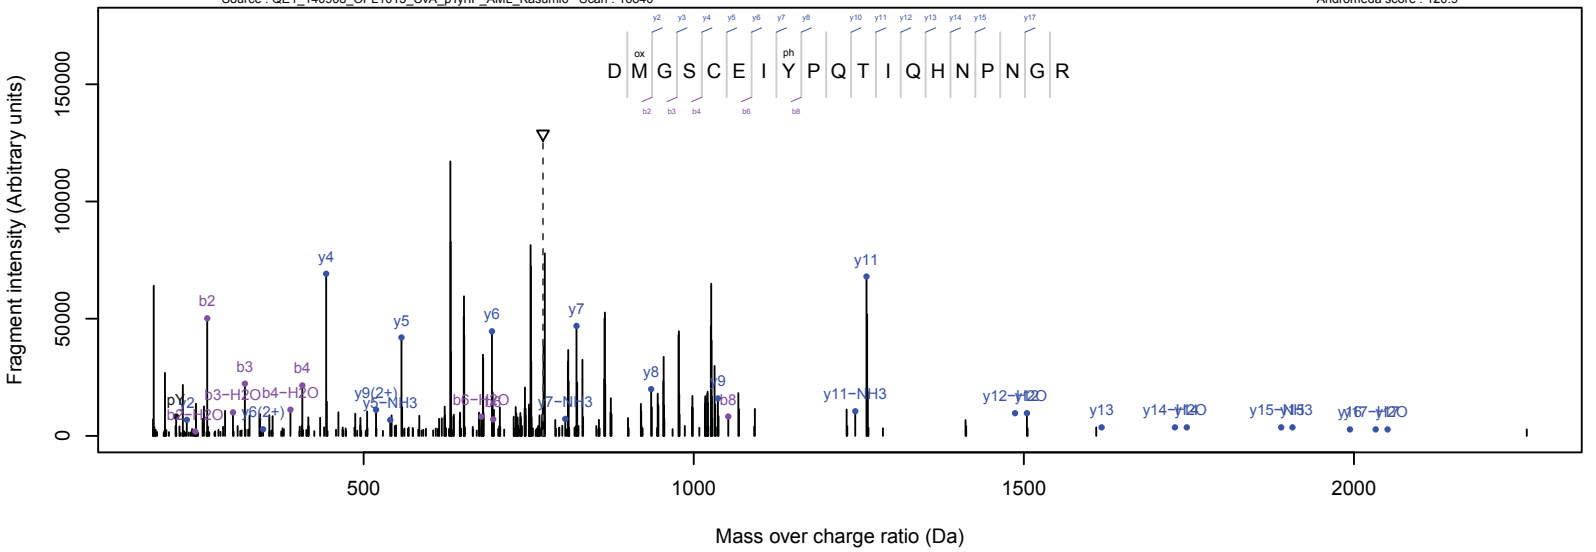

Y(ph)LYTLVITDKEK-2+

Source : QE1\_140612\_OPL1013\_CVA\_phosphoproteomic\_landscape\_AML\_C Scan : 31553

Andromeda score : 120.87

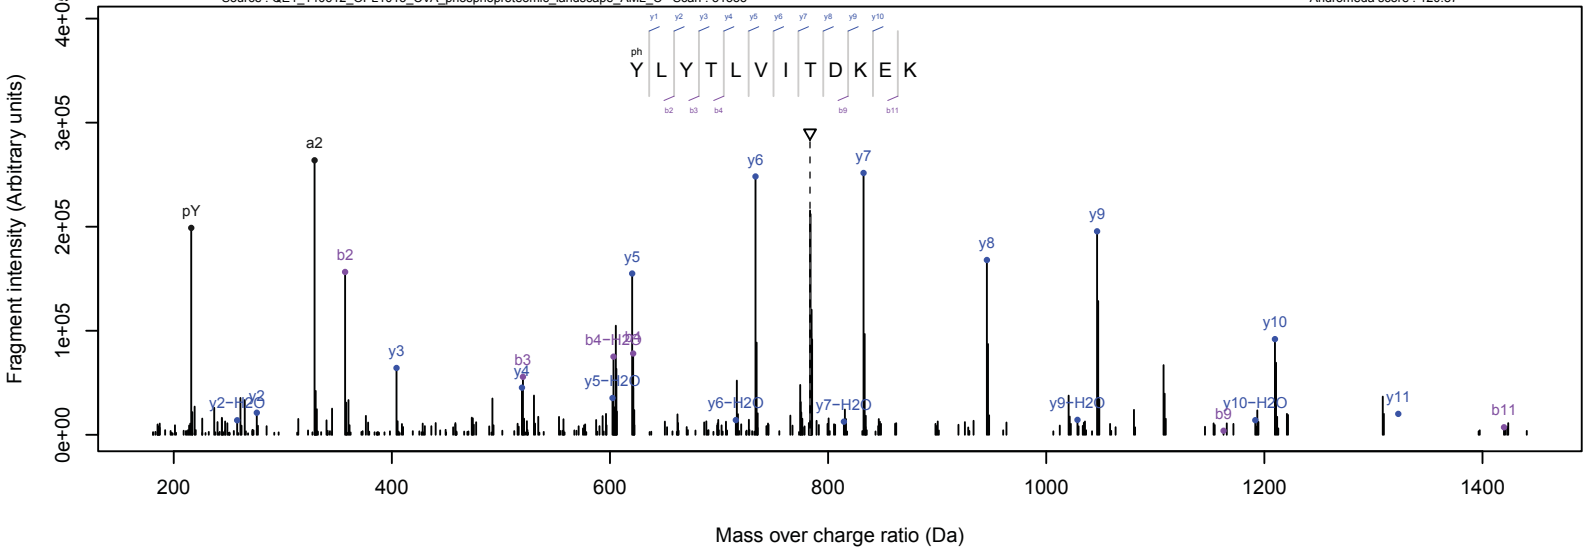

**GKY(ph)GQFSLNPGGRPITPPR-3+**

Source : QE1\_140612\_OPL1013\_CVA\_phosphoproteomic\_landscape\_AML\_B Scan : 22356

Andromeda score : 120.71

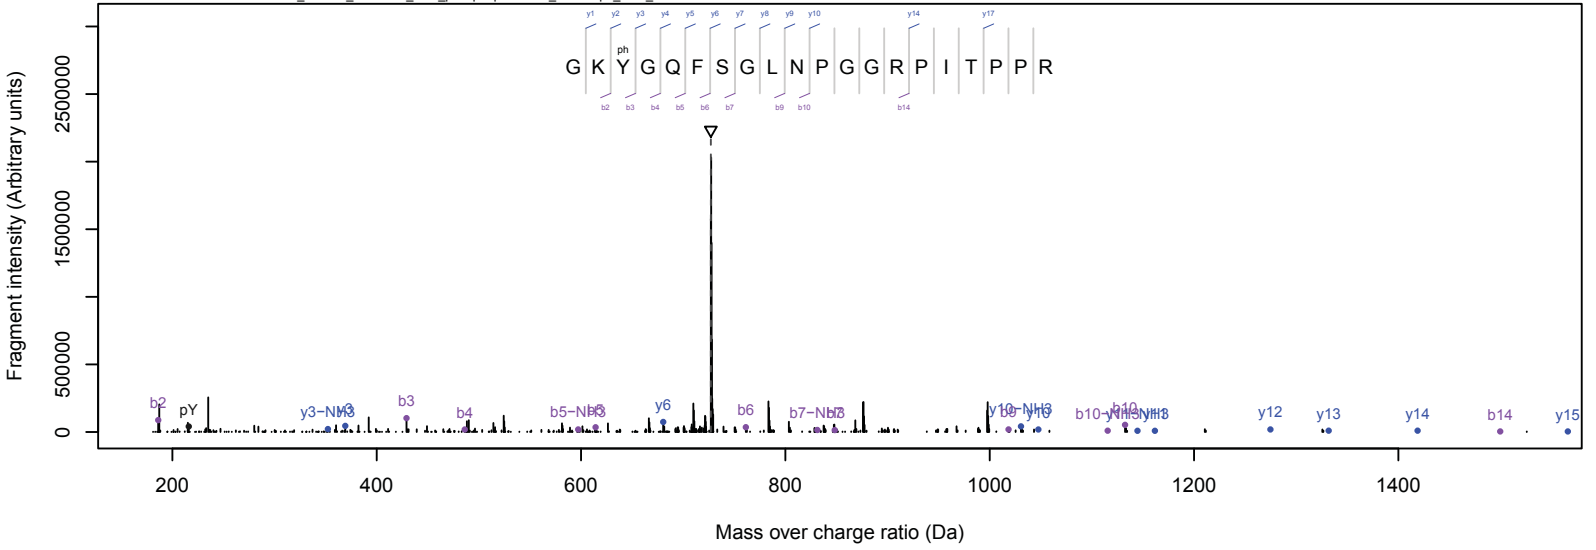

**ISY(ph)FTFIGTPVQATNMNDFKR-3+**

Source : QE1\_140612\_OPL1013\_CVA\_phosphoproteomic\_landscape\_AML\_C Scan : 44253

Andromeda score : 120.71

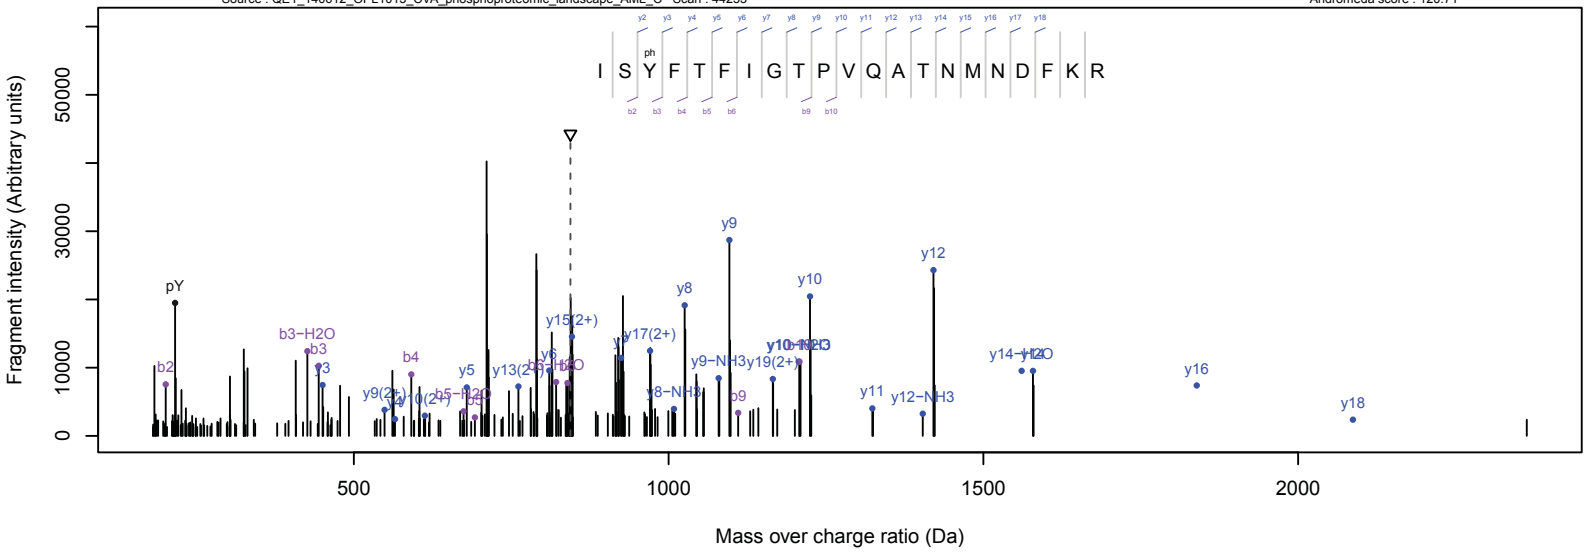

**Y(ph)FMAPLKR-2+**

Source : QE1\_140612\_OPL1013\_CVA\_phosphoproteomic\_landscape\_AML\_B Scan : 20502

Andromeda score : 120.65

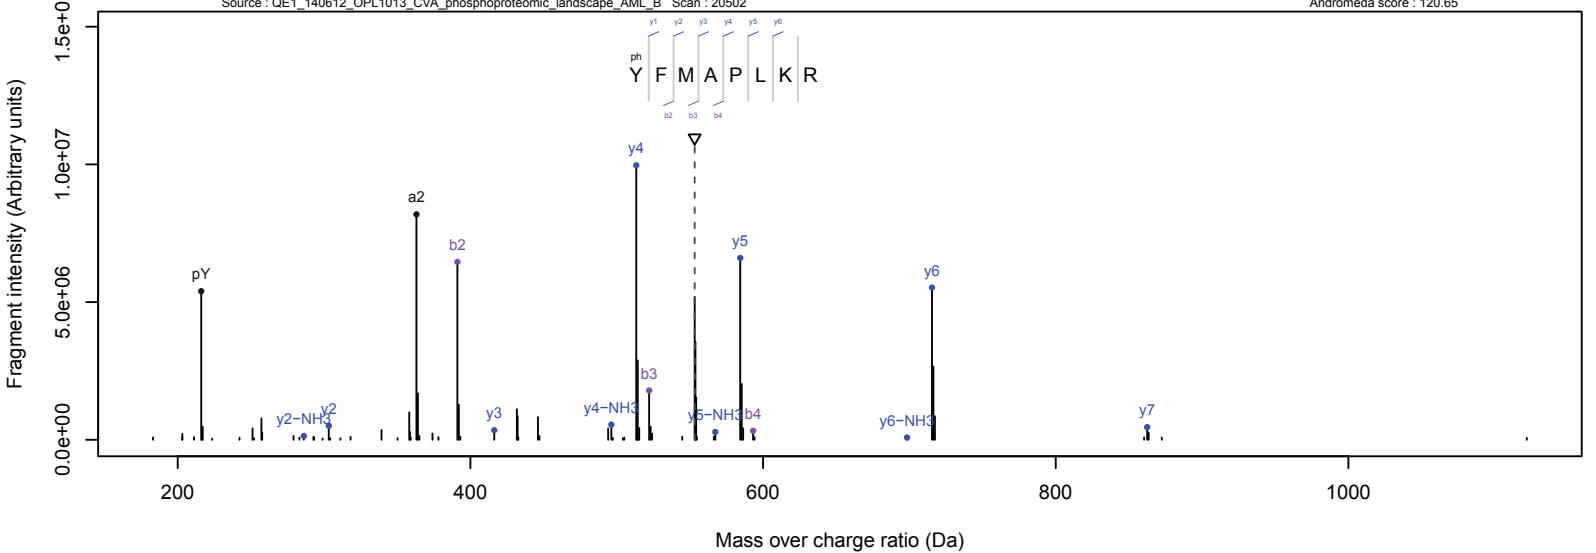

IDKNSTASYLKNY(ph)PLYR-3+

Source : QE1\_140612\_OPL1013\_CVA\_phosphoproteomic\_landscape\_AML\_B Scan : 21822

Andromeda score : 120.63

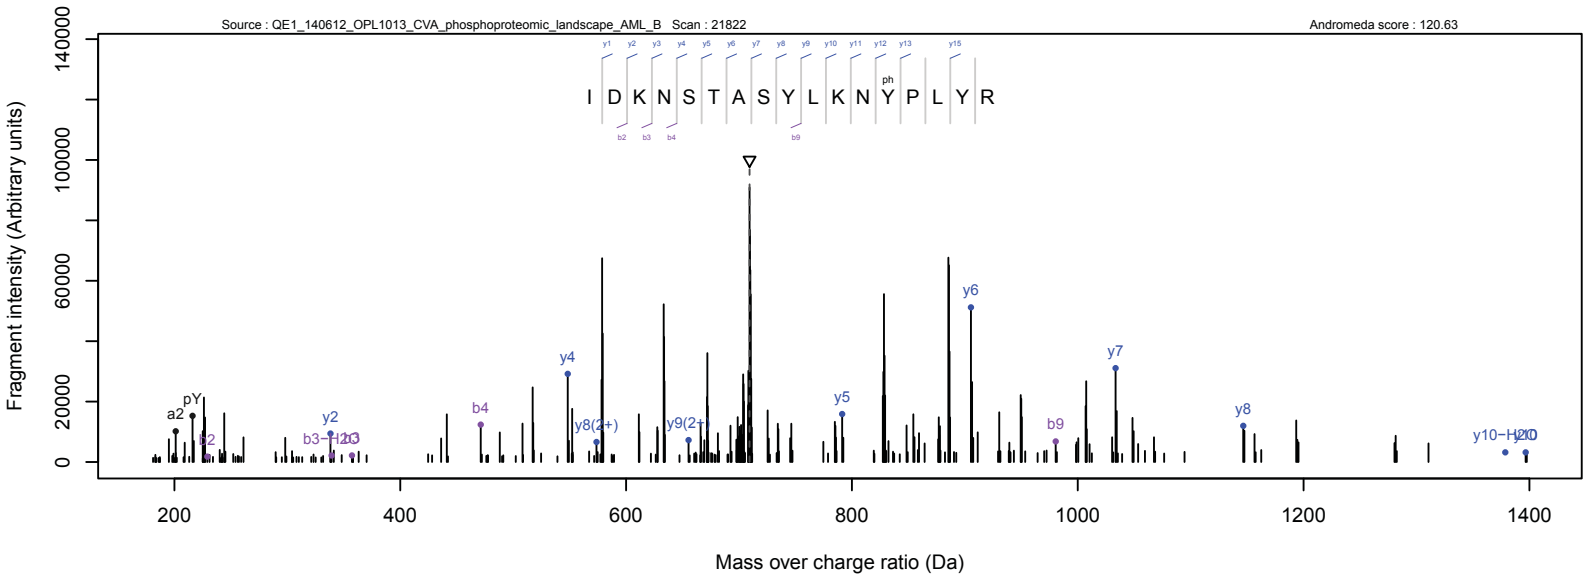

MKDCEY(ph)QQISPGAAPLPASPGAR-3+

Source : QE1\_140612\_OPL1013\_CVA\_phosphoproteomic\_landscape\_AML\_C Scan : 23322

Andromeda score : 120.63

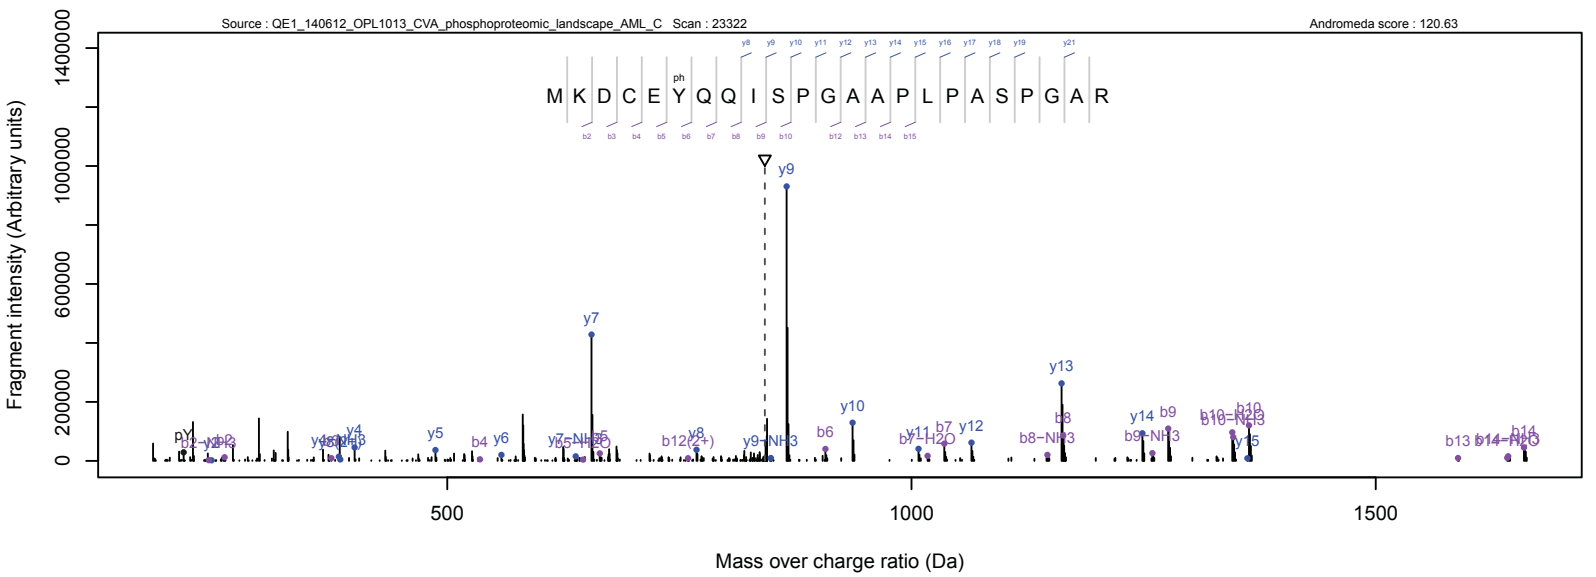

YQQLAVALDSSY(ph)VTNK-2+

Source : QE1\_140612\_OPL1013\_CVA\_phosphoproteomic\_landscape\_AML\_C Scan : 30871

Andromeda score : 120.63

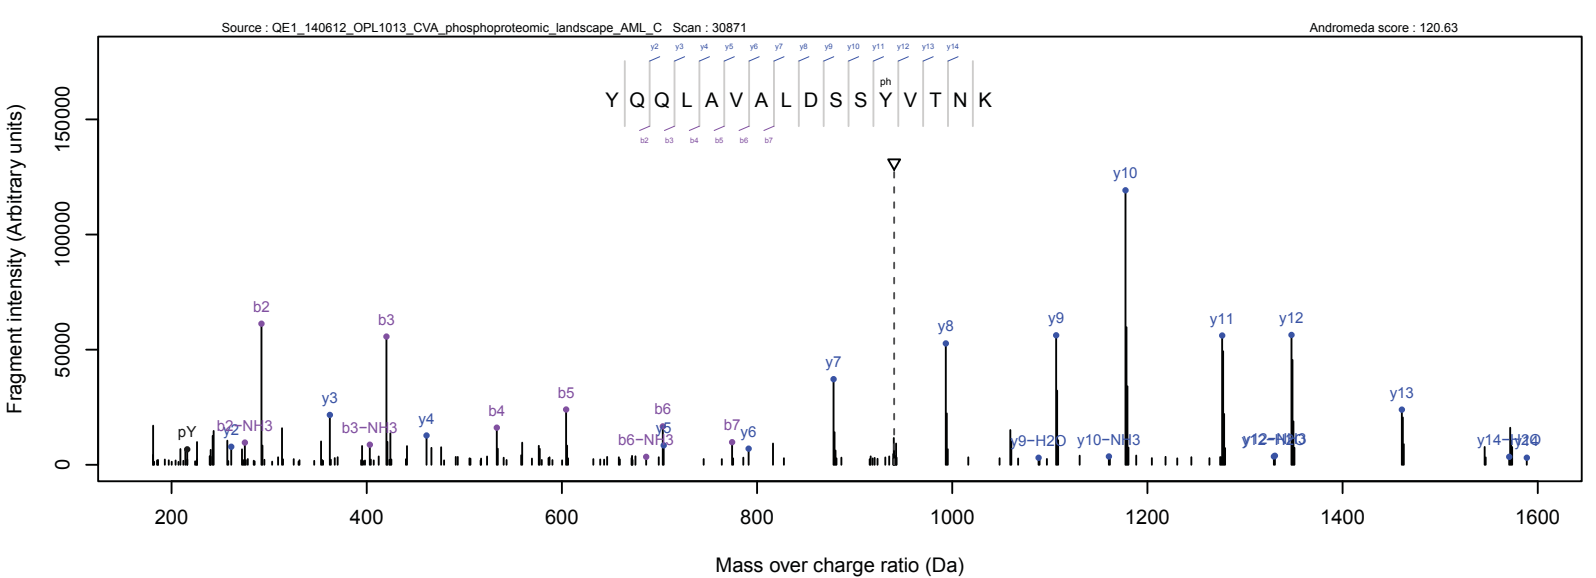



Y(ph)KASITALEAK-2+

Source : QE1\_140612\_OPL1013\_CVA\_phosphoproteomic\_landscape\_AML\_A Scan : 13873

Andromeda score : 120.6

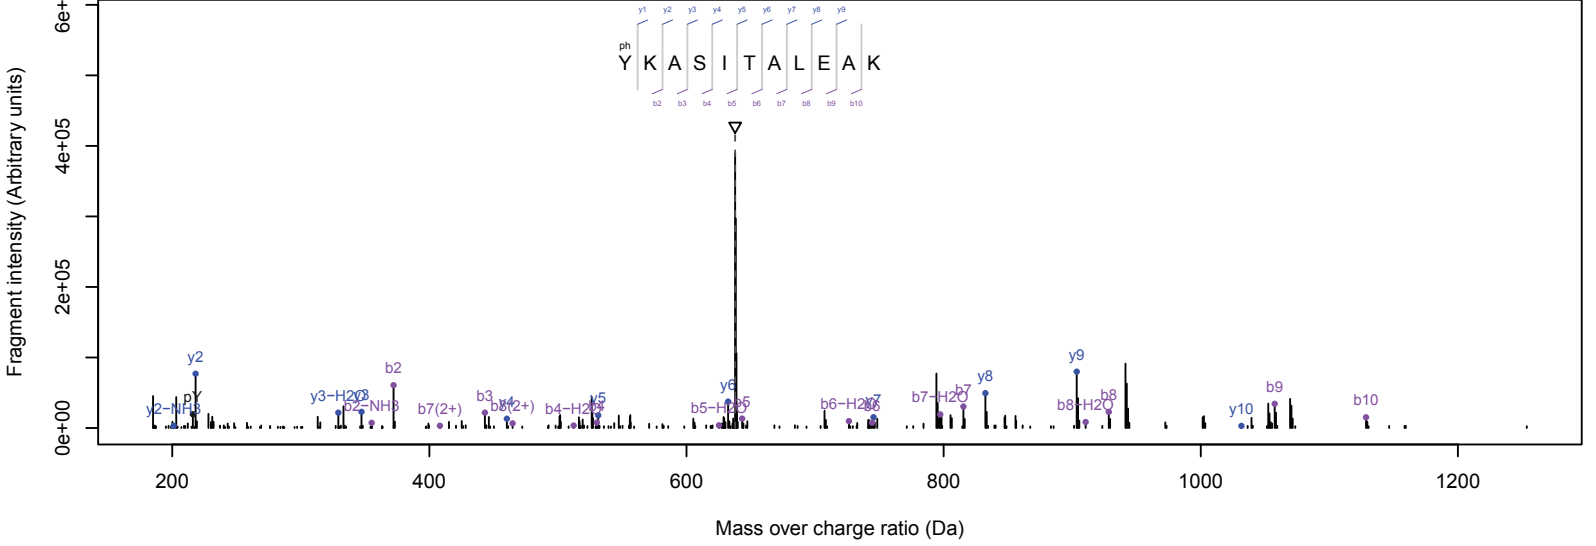

EAAAKYY(ph)DAIACK-2+

Source : QE1\_140612\_OPL1013\_CVA\_phosphoproteomic\_landscape\_AML\_B Scan : 26558

Andromeda score : 120.54

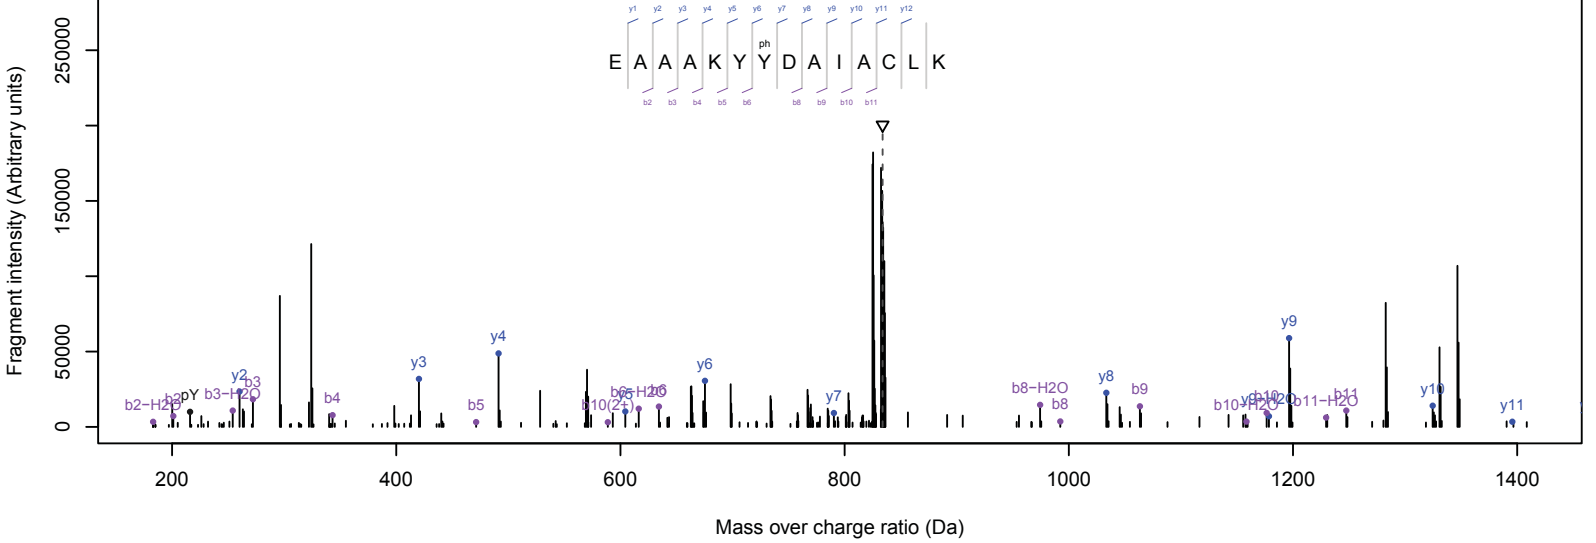

TLDNGGFY(ph)ISPR-2+

Source : Qe1\_141024\_OPL1013\_CvA\_AML\_pTyrIP\_MOLM13 Scan : 29086

Andromeda score : 120.53

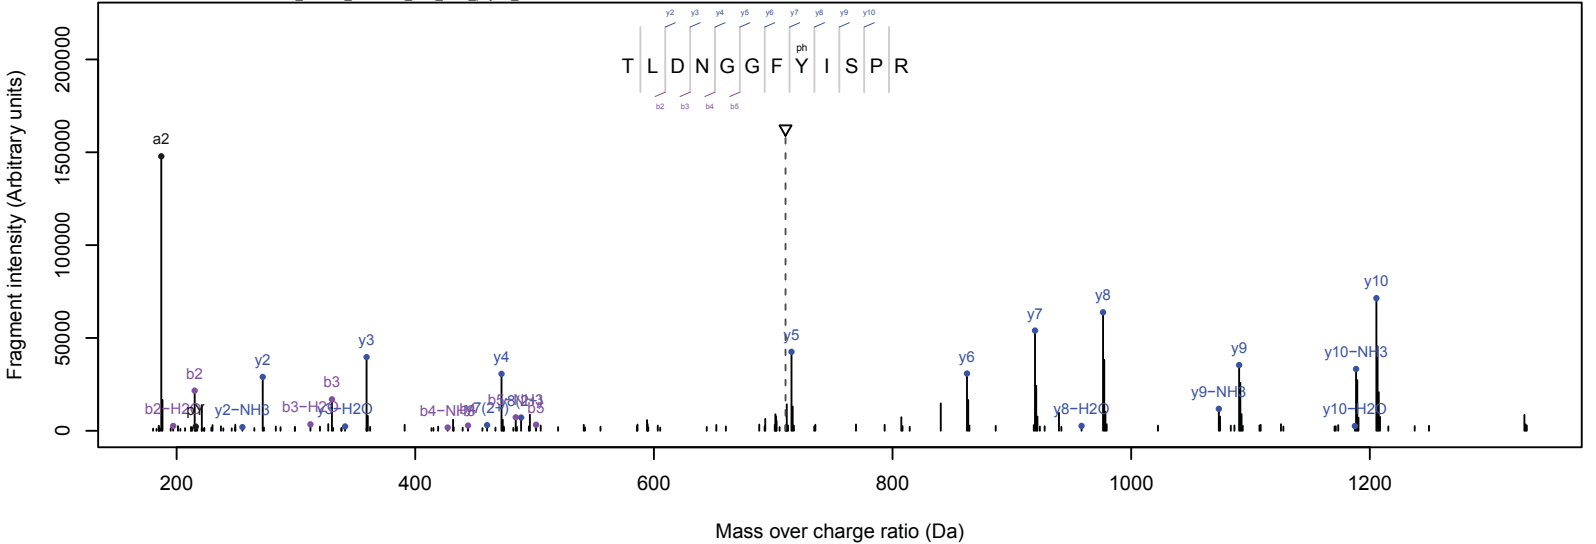

AQPVPHY(ph)GVFPFKPIPEAR-3+

Source : QE1\_140908\_OPL1013\_CvA\_pTyrIP\_AML\_HEL Scan : 29648

Andromeda score : 120.4

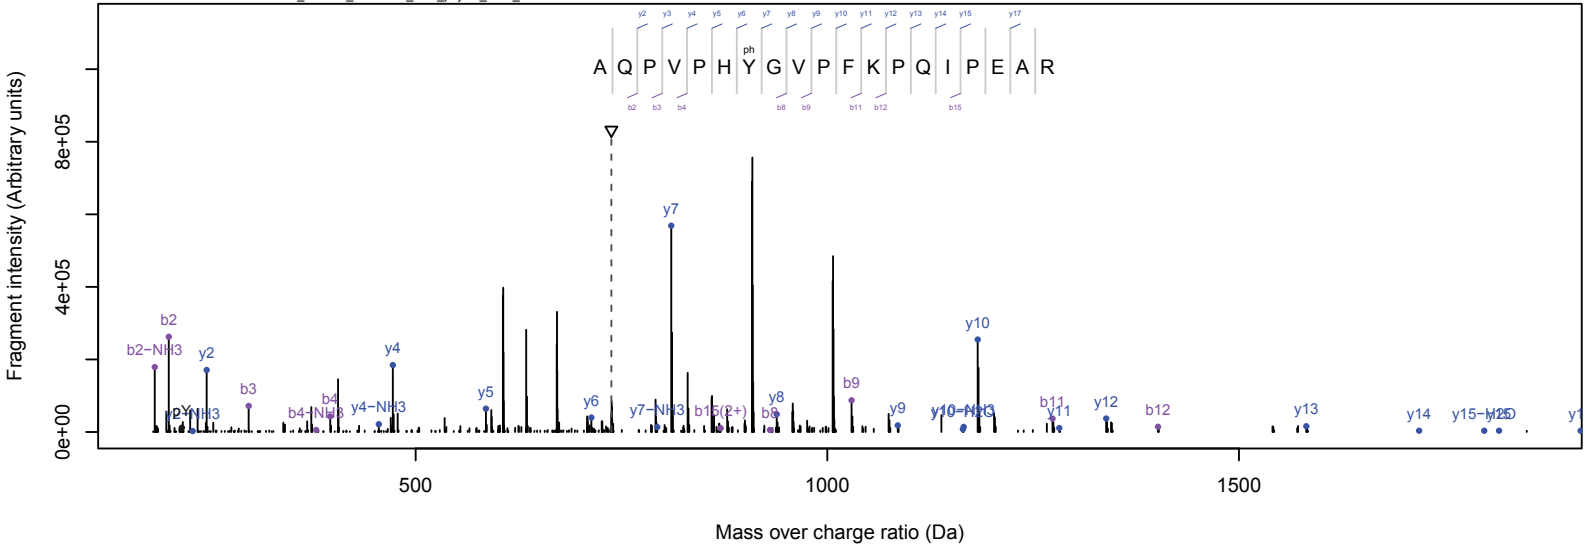

FSGWY(ph)DADLSPAGHEEAKR-3+

Source : QE1\_140908\_OPL1013\_CvA\_pTyrIP\_AML\_HEL Scan : 27770

Andromeda score : 120.4

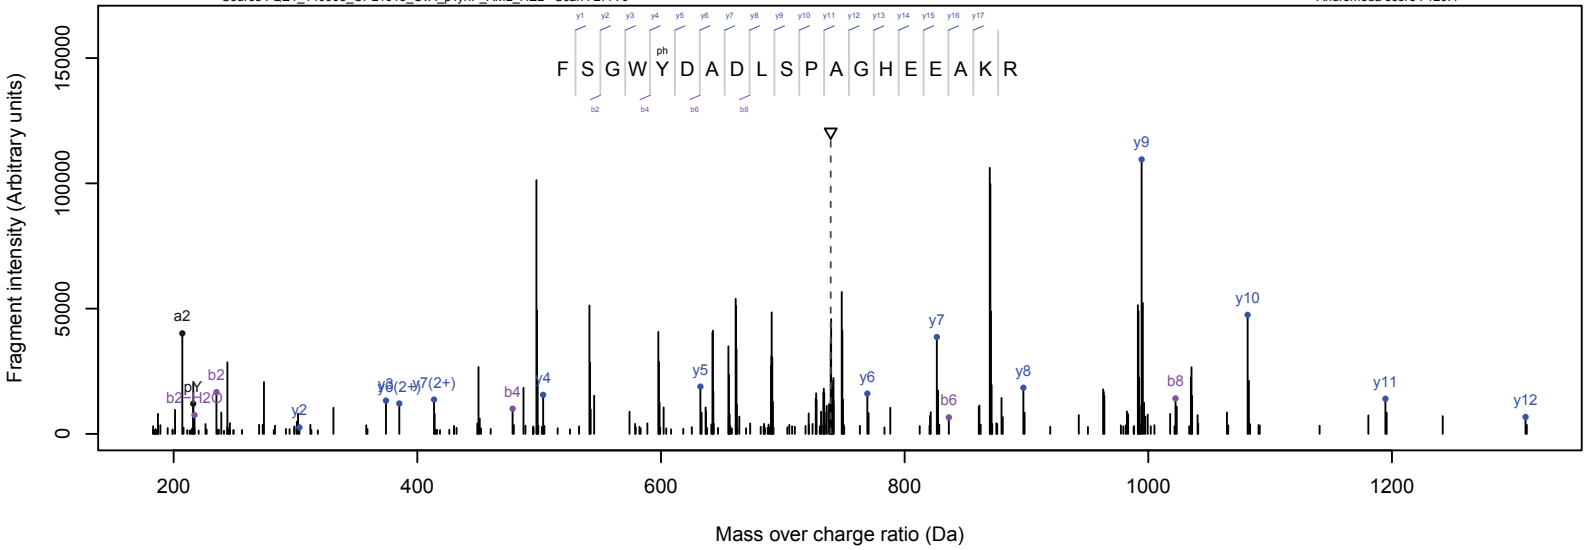

GHSPTSSLVQPQSQYQLSQMTFHK-3+

Source : QE1\_140908\_OPL1013\_CvA\_pTyrIP\_AML\_HEL Scan : 29549

Andromeda score : 120.33

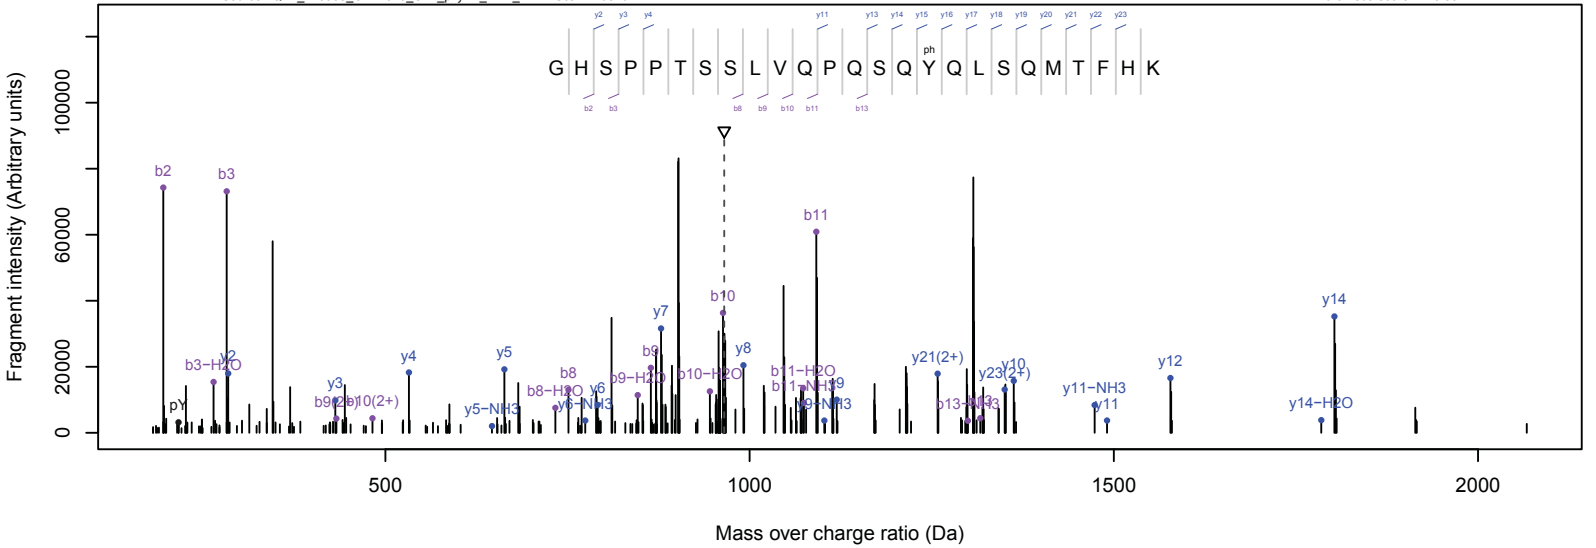



YRGSIHDFPFGDPNQDAEALY<sup>ph</sup>TAMK-3+

Source: QE1\_140908\_OPL1013\_CvA\_pTyrIP\_AML\_OCI\_AML3 Scan: 46411

Andromeda score: 120.27

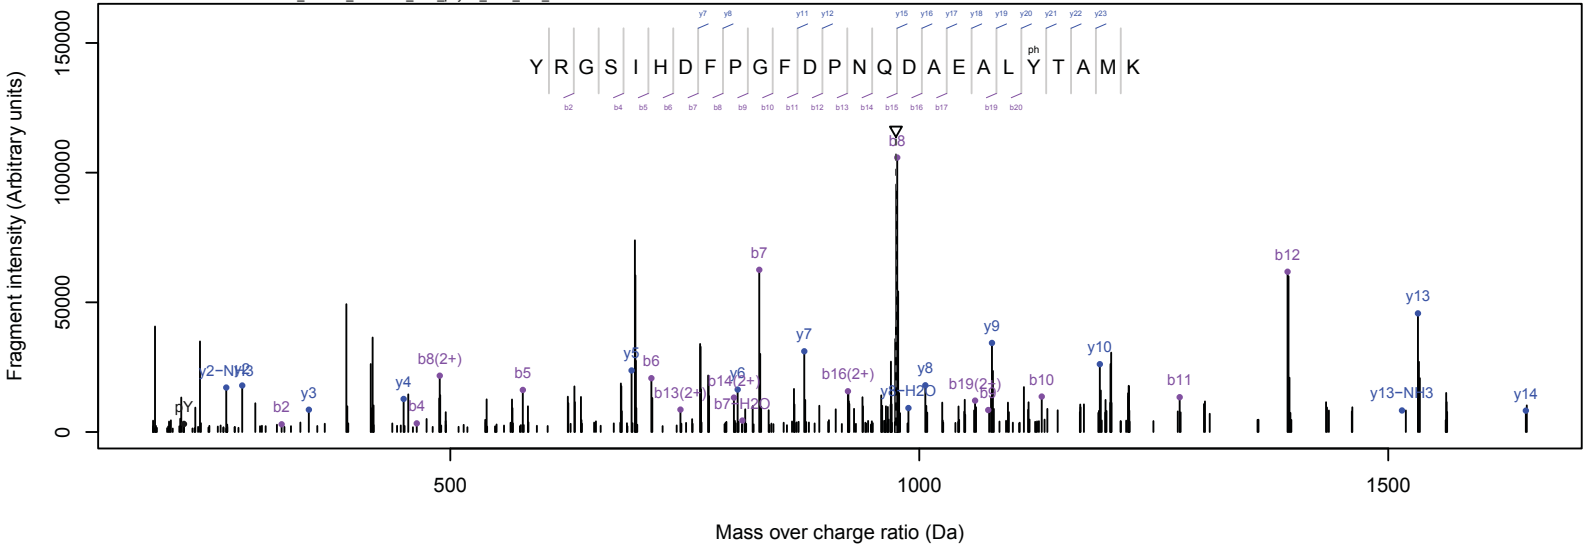

EGD<sup>ph</sup>NVNYD<sup>ph</sup>WIHWDPESHSEYEFK-3+

Source: QE1\_140908\_OPL1013\_CvA\_pTyrIP\_AML\_Kasumi1 Scan: 42018

Andromeda score: 120.23

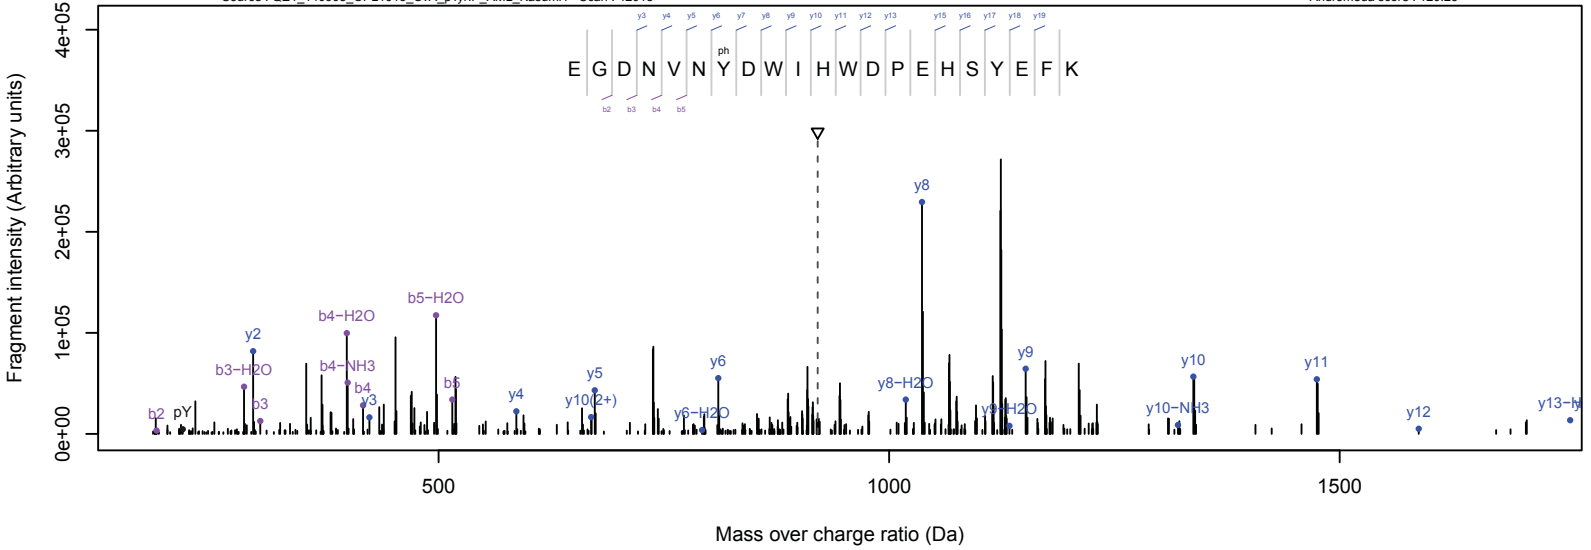

**YSSSGY(ph)SSAEQINQLNQLLK-2+**

Source : QE1\_140612\_OPL1013\_CVA\_phosphoproteomic\_landscape\_AML\_C Scan : 42232

Andromeda score : 120.23

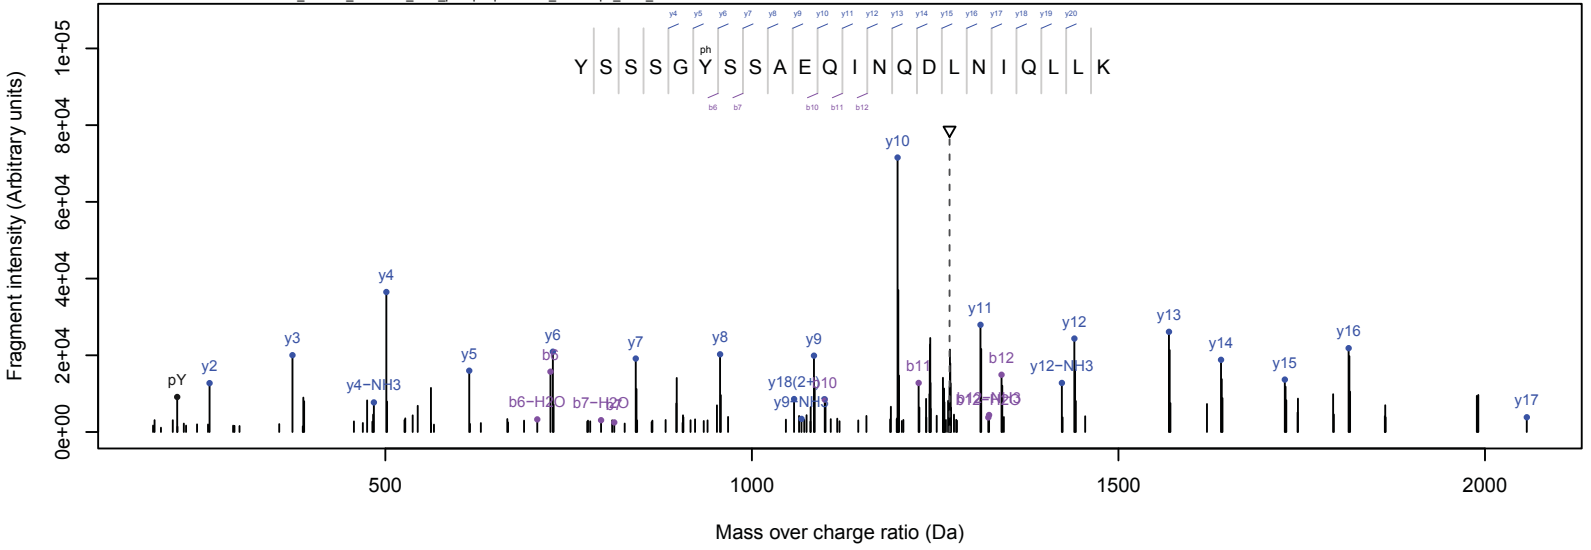

**TGTGTTPLFSTATPGY(ph)TMASGSVYSPPTRPLPR-3+**

Source : QE1\_140612\_OPL1013\_CVA\_phosphoproteomic\_landscape\_AML\_C Scan : 38936

Andromeda score : 120.22

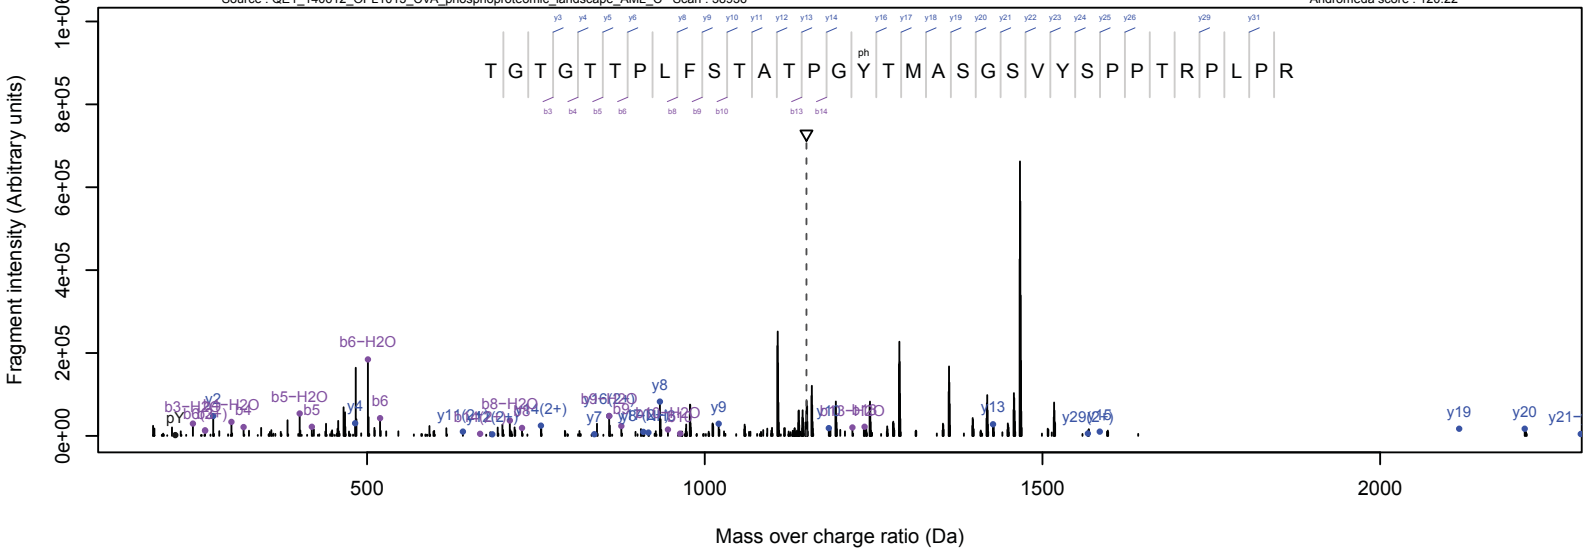

**Y(ph)ATLPNIMK-2+**

Source : QE1\_140612\_OPL1013\_CVA\_phosphoproteomic\_landscape\_AML\_C Scan : 28666

Andromeda score : 120.15

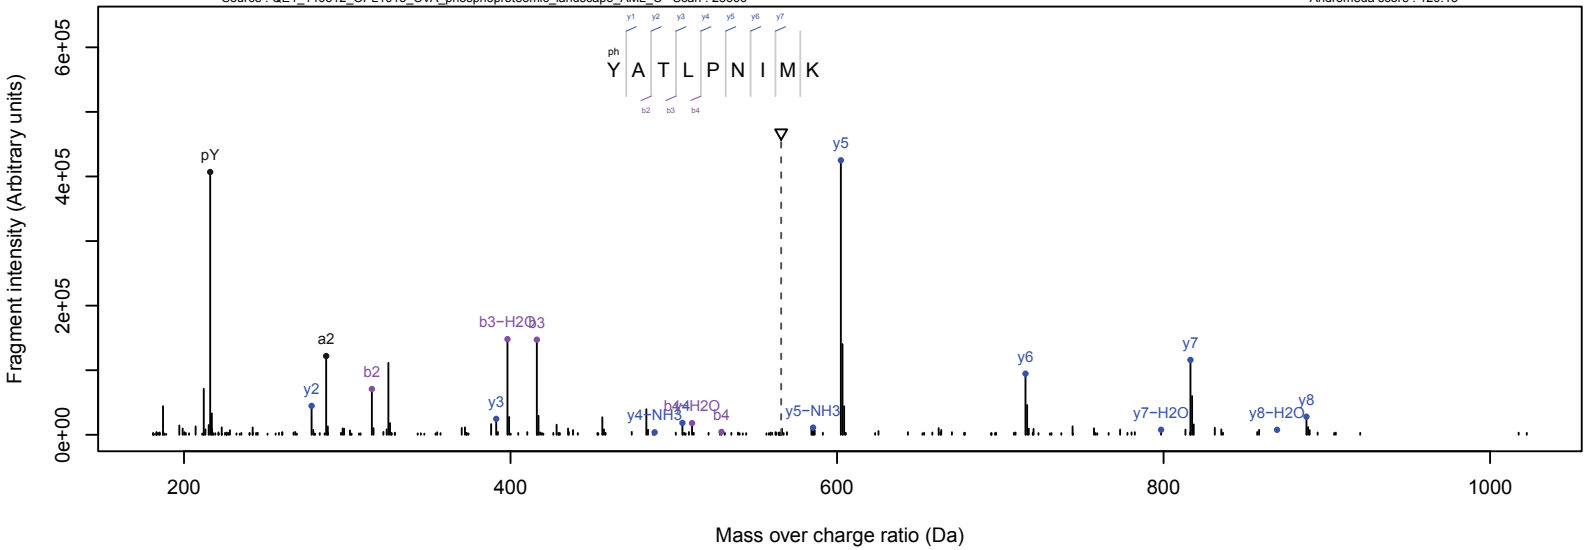

VIEDDPEAVY(ph)TTGGKIPVR-3+

Source : QE1\_140822\_OPL1013\_CvA\_pTyrIP\_AML\_cell\_lines\_part2\_F Scan : 21418

Andromeda score : 120.11

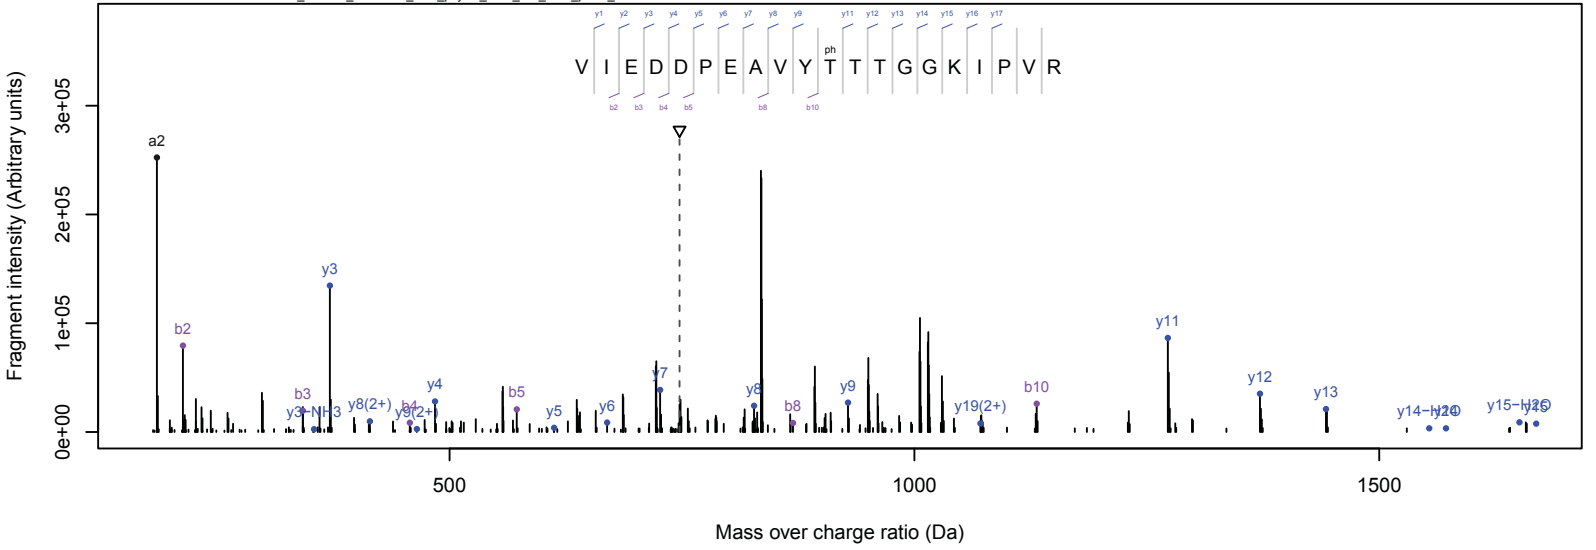

HGY(ph)FSSLAGCLMK-2+

Source : QE1\_140612\_OPL1013\_CVA\_phosphoproteomic\_landscape\_AML\_C Scan : 42222

Andromeda score : 119.87

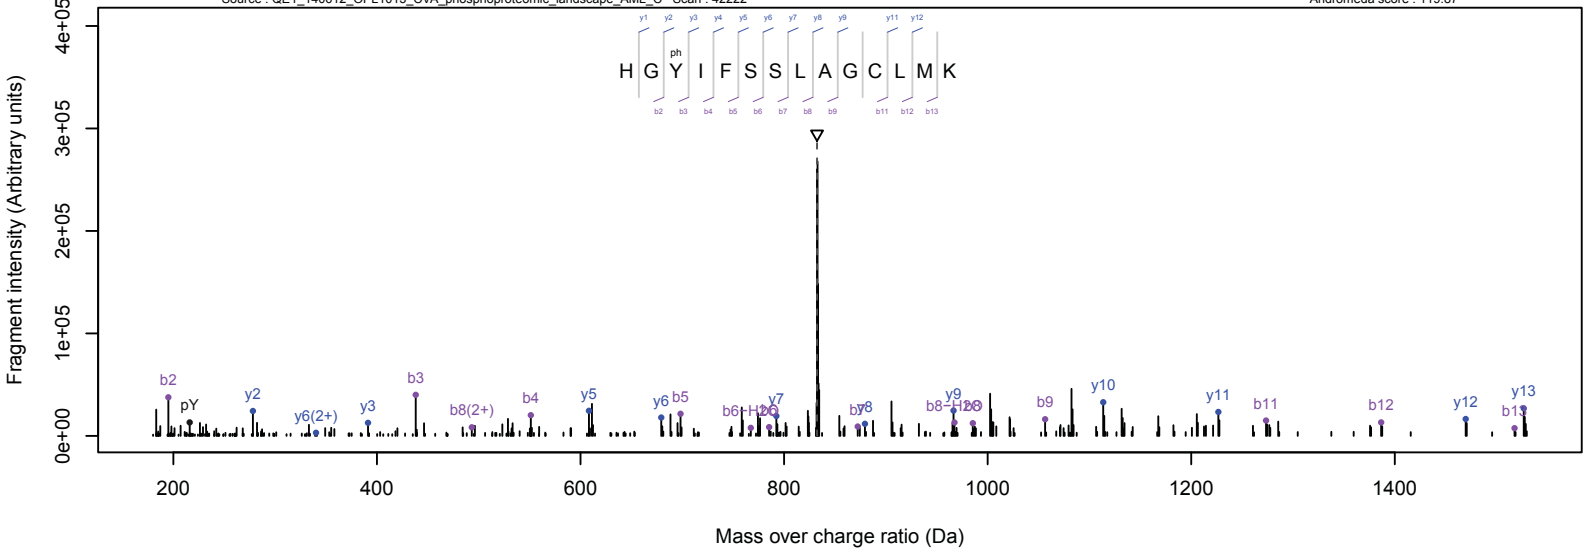

LEGMLSQSVSSQY(ph)NMAGVR-2+

Source : QE1\_140612\_OPL1013\_CVA\_phosphoproteomic\_landscape\_AML\_B Scan : 29689

Andromeda score : 119.8

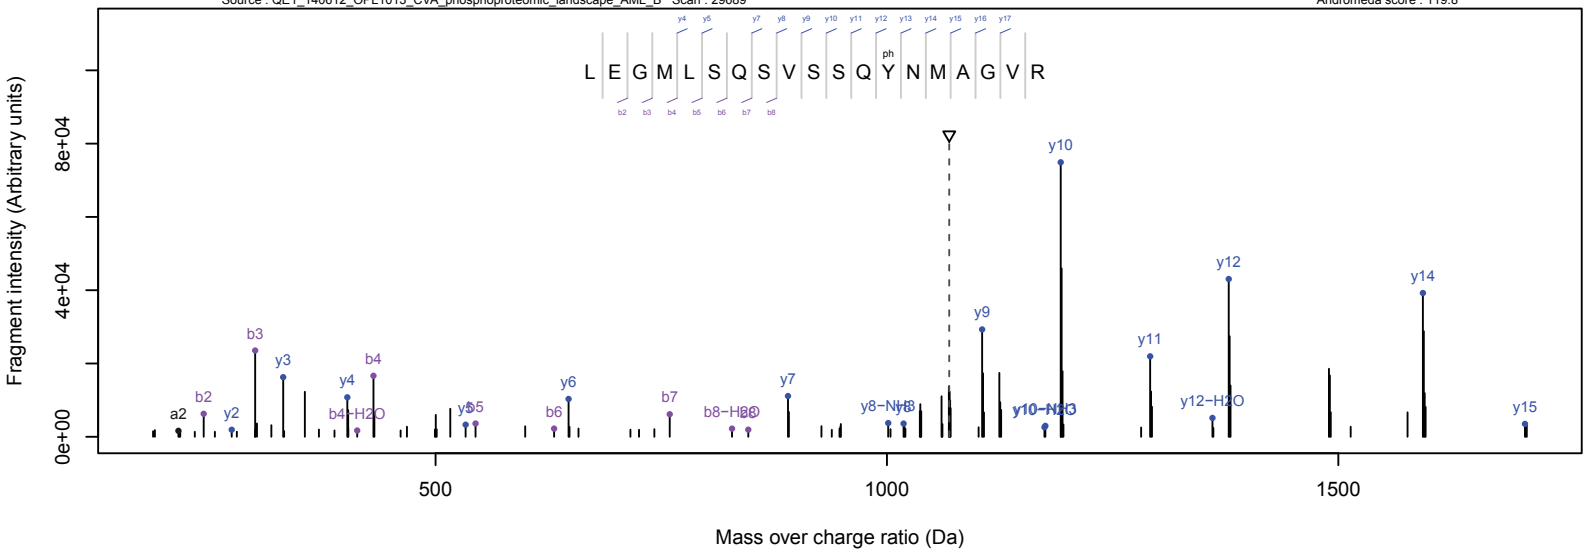



**EAPEPMELDGPKGTGYI<sup>ph</sup>K-2+**

Source: QE1\_140612\_OPL1013\_CVA\_phosphoproteomic\_landscape\_AML\_C Scan: 24491

Andromeda score: 119.68

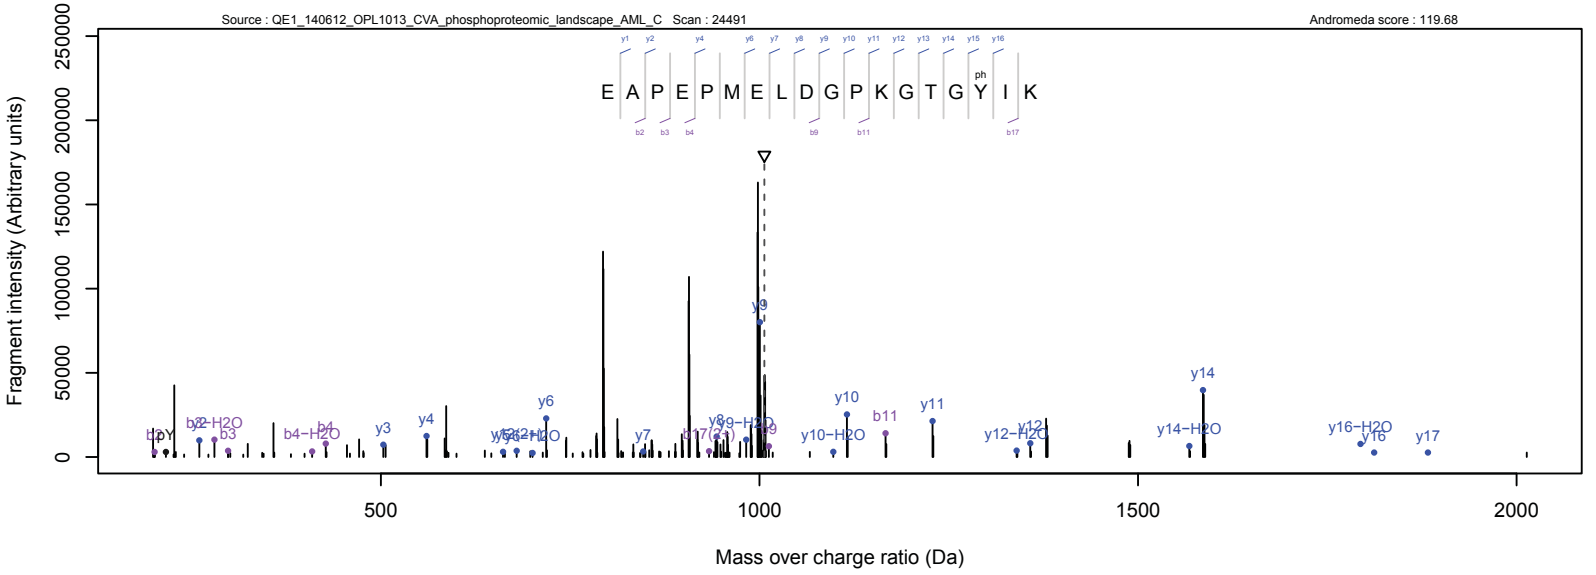

**IKPSSSANA<sup>ph</sup>YSLAAR-2+**

Source: QE1\_140612\_OPL1013\_CVA\_phosphoproteomic\_landscape\_AML\_A Scan: 22572

Andromeda score: 119.68

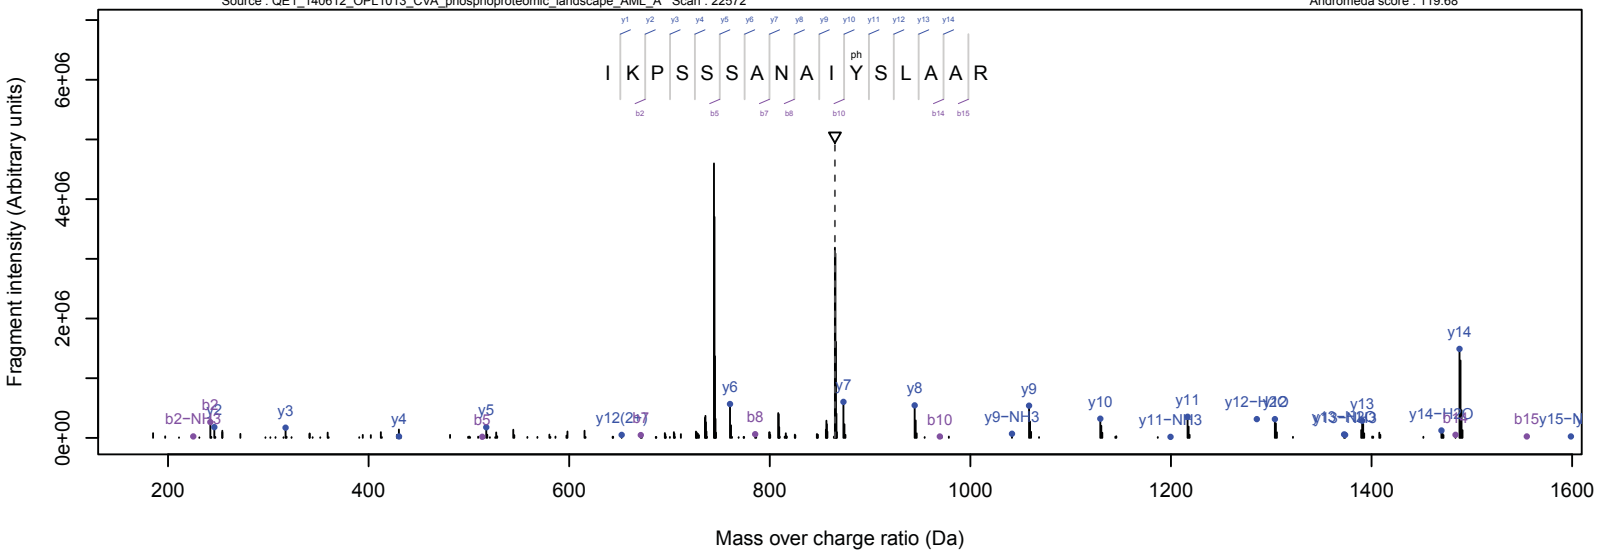

**VPCAY<sup>ph</sup>DKTALALEVGDIVK-3+**

Source: QE1\_140612\_OPL1013\_CVA\_phosphoproteomic\_landscape\_AML\_B Scan: 39448

Andromeda score: 119.62

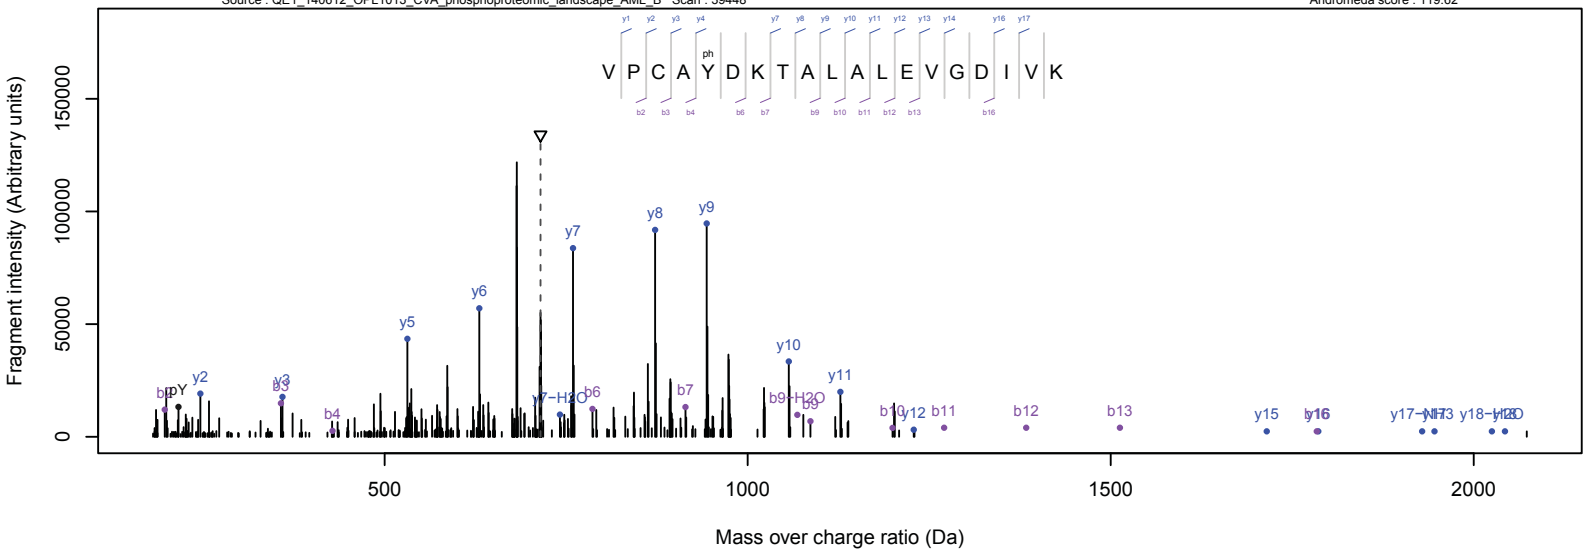



**VTDEY(ph)SEIK-2+**

Source : QE1\_140822\_OPL1013\_CVA\_pTyrIP\_AML\_cell\_lines\_part2\_B Scan : 5291

Andromeda score : 119.6

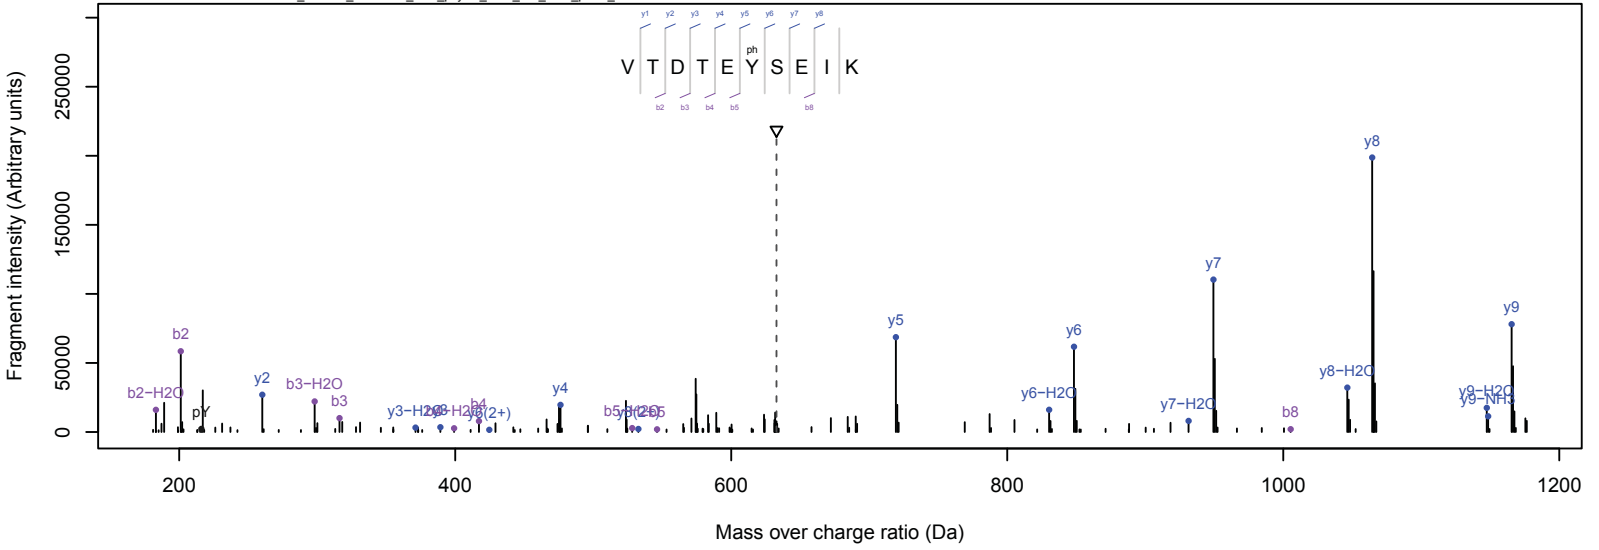

**QGY(ph)ENLCCLR-2+**

Source : QE1\_140612\_OPL1013\_CVA\_phosphoproteomic\_landscape\_AML\_B Scan : 17521

Andromeda score : 119.53

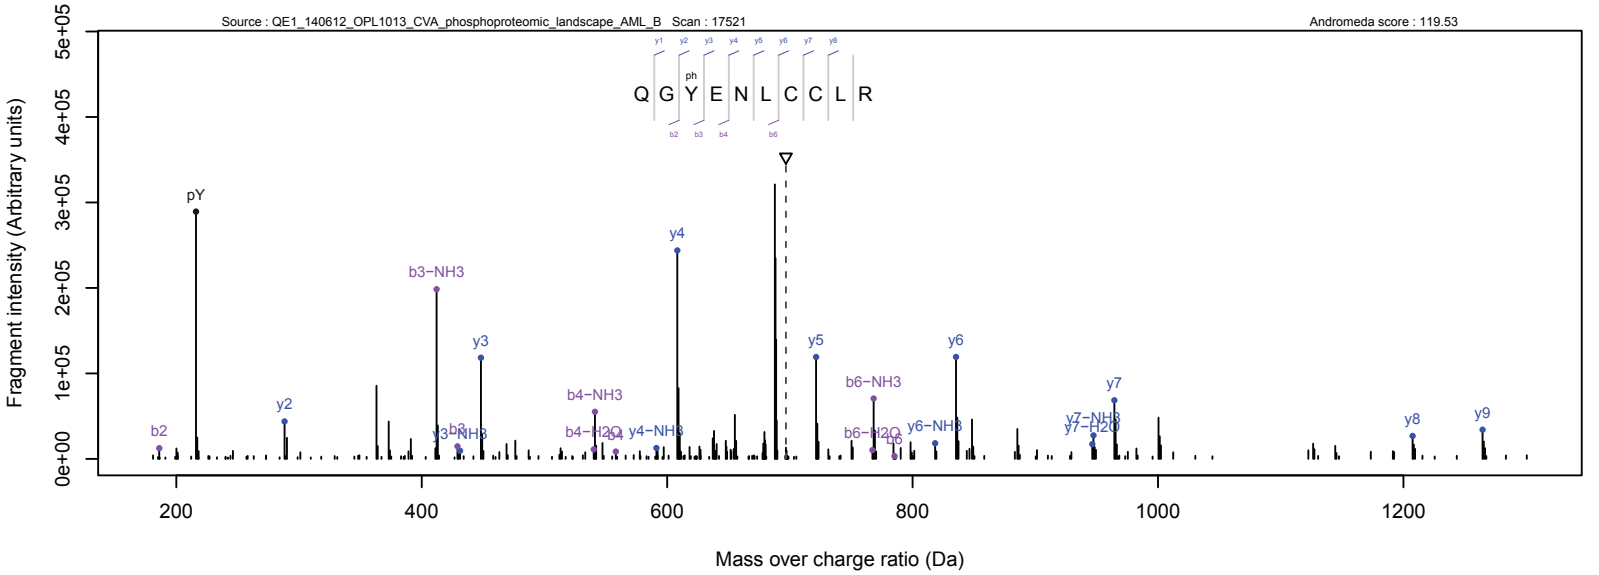

**AEAQY(ph)LLVSNGLHPK-2+**

Source : QE1\_140612\_OPL1013\_CVA\_phosphoproteomic\_landscape\_AML\_C Scan : 27564

Andromeda score : 119.47

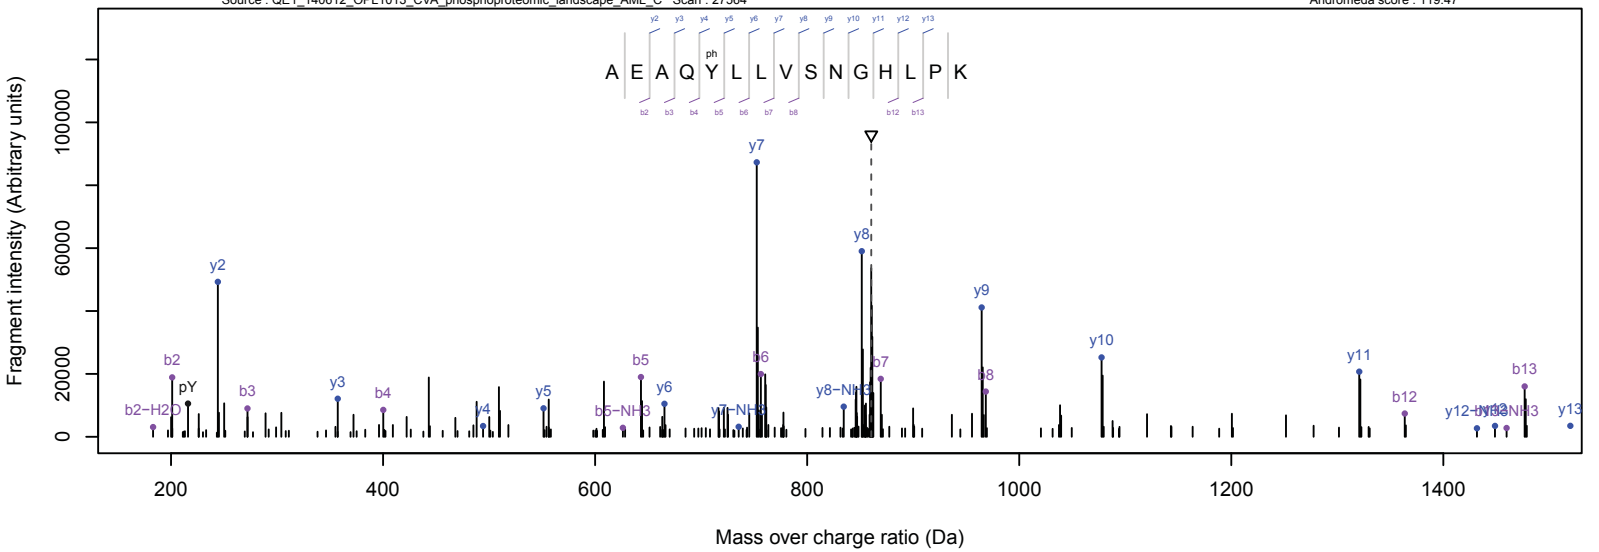

VILHLKEDQTEY(ph)LEER-3+

Source : QE1\_140908\_OPL1013\_CvA\_pTyrIP\_AML\_HL60 Scan : 26550

Andromeda score : 119.46

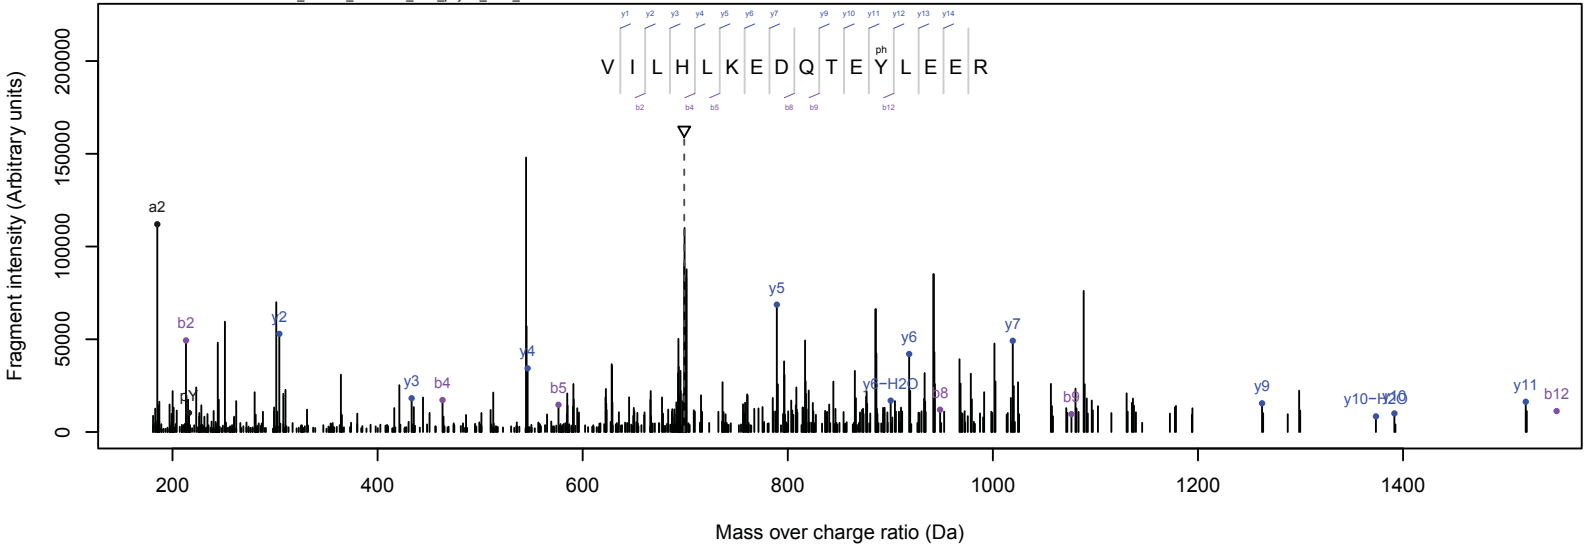

(ac)ASASY(ph)HISNLEK-2+

Source : QE1\_140612\_OPL1013\_CVA\_phosphoproteomic\_landscape\_AML\_C Scan : 32887

Andromeda score : 119.45

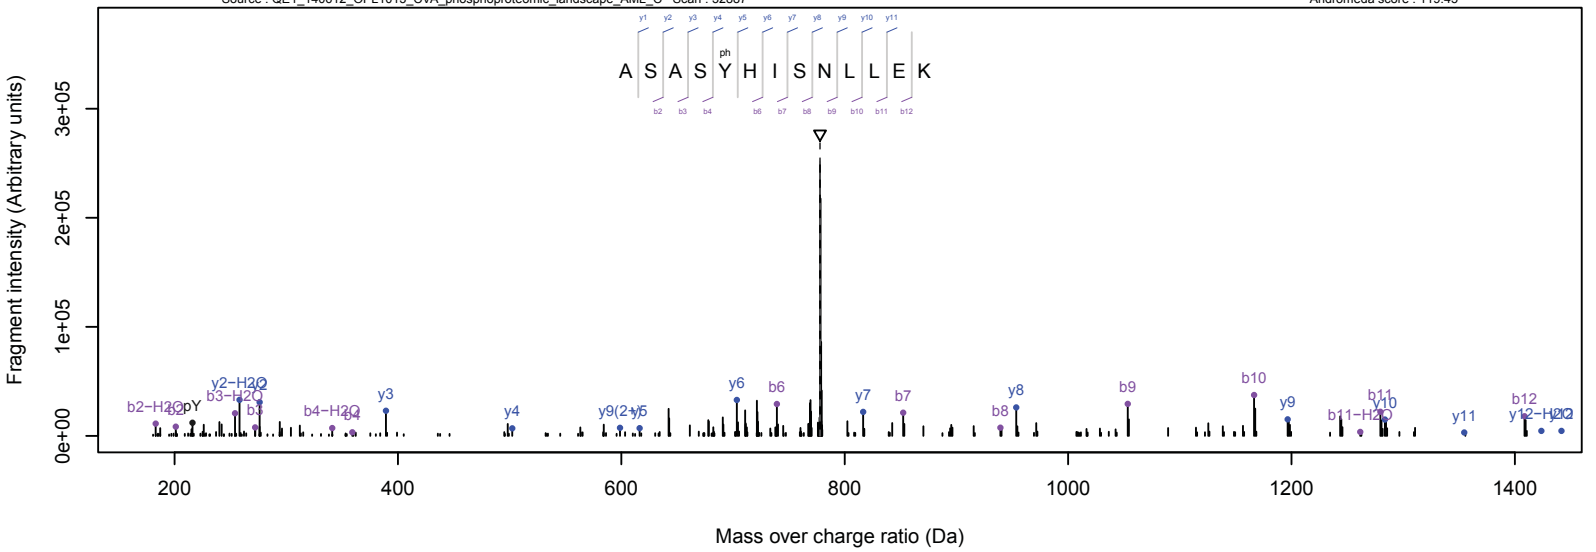

TLLDQHGQY(ph)PIWMNQR-3+

Source : QE1\_140612\_OPL1013\_CVA\_phosphoproteomic\_landscape\_AML\_C Scan : 34536

Andromeda score : 119.45

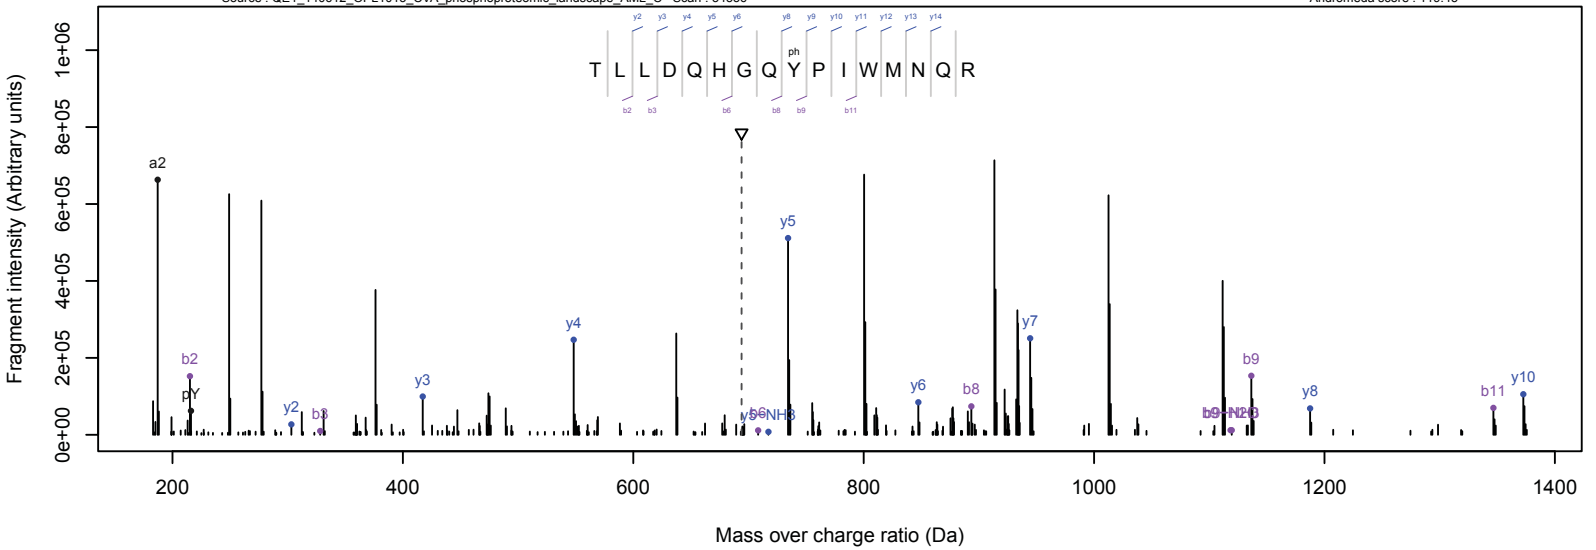

VHY(ph)ARPSHPPDPPILEGAVGGNEAR-4+

Source : QE1\_140612\_OPL1013\_CVA\_phosphoproteomic\_landscape\_AML\_C Scan : 22936

Andromeda score : 119.45

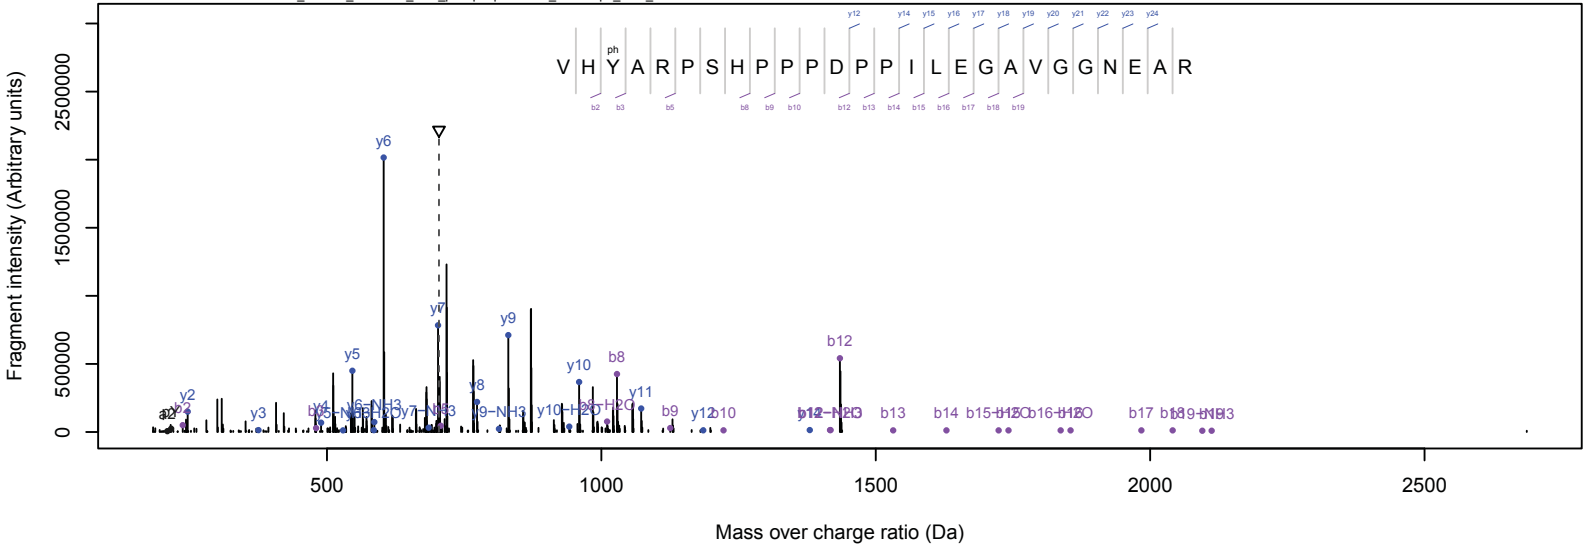

AQEAENY(ph)VIKR-3+

Source : QE1\_140612\_OPL1013\_CVA\_phosphoproteomic\_landscape\_AML\_C Scan : 8535

Andromeda score : 119.39

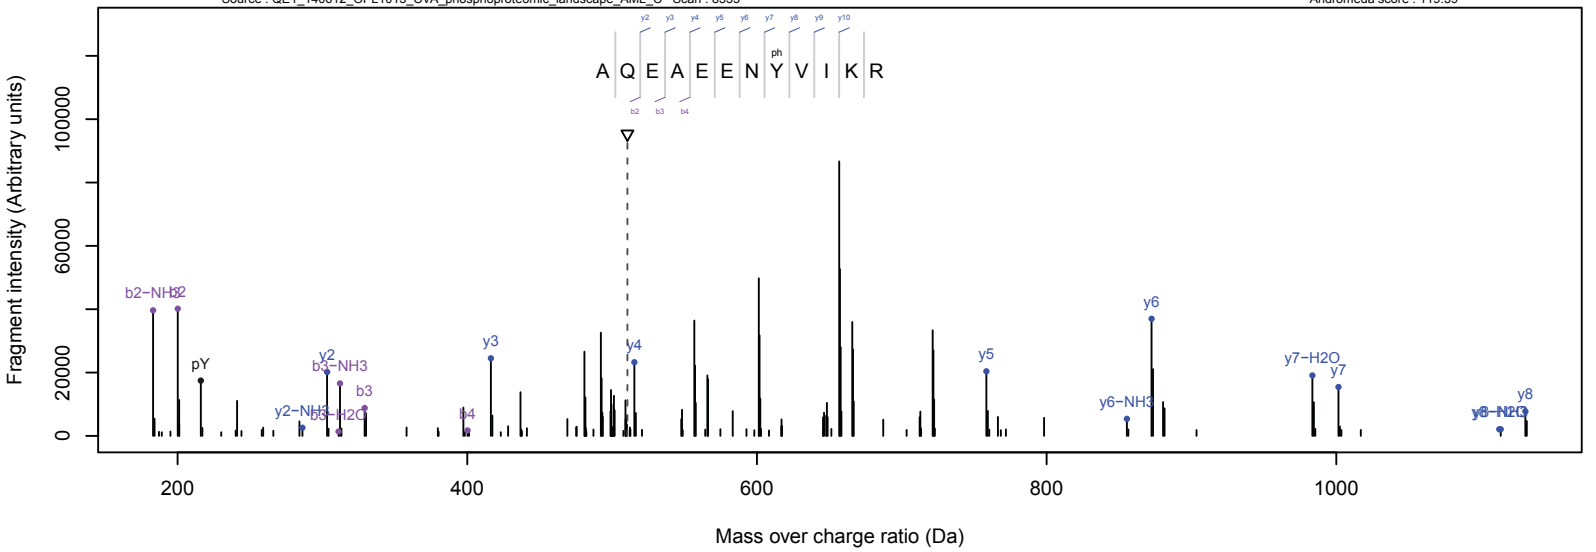

NMTPY(ph)RSPPYVPP-2+

Source : QE1\_140612\_OPL1013\_CVA\_phosphoproteomic\_landscape\_AML\_C Scan : 25171

Andromeda score : 119.39

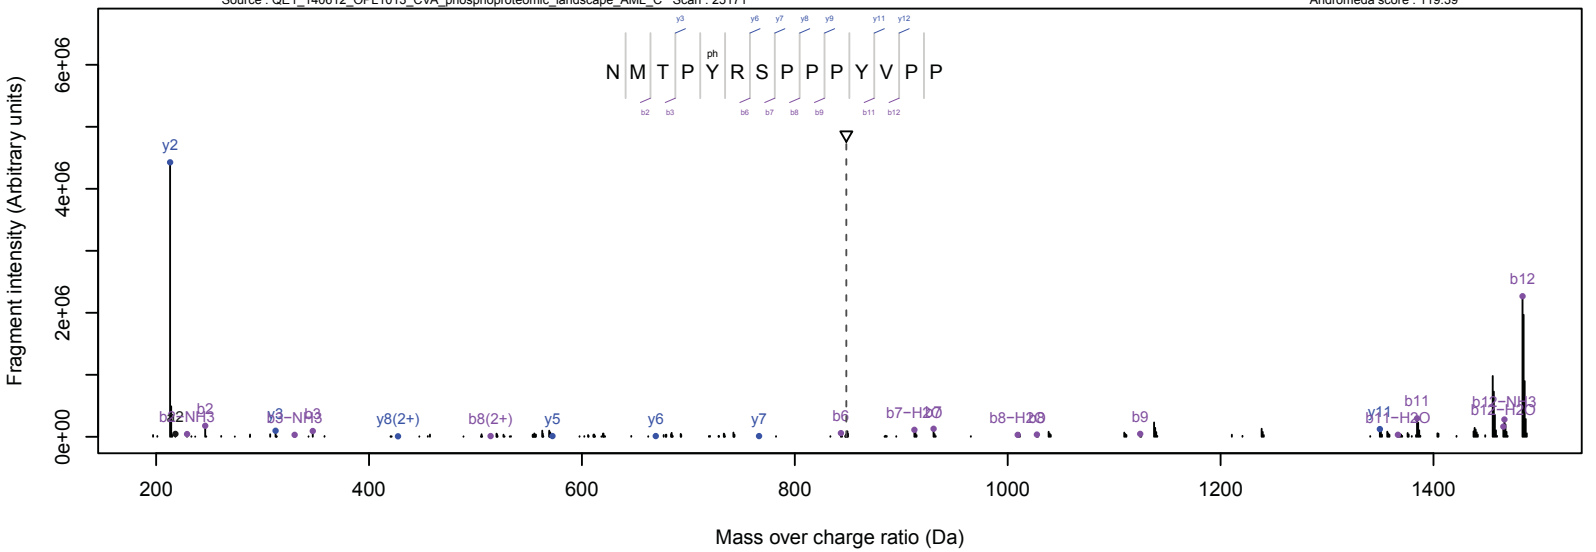

SLPSY(ph)LNGVMPPTQSFAPDPK-2+

Source: QE1\_140612\_OPL1013\_CVA\_phosphoproteomic\_landscape\_AML\_C Scan: 44059

Andromeda score: 119.38

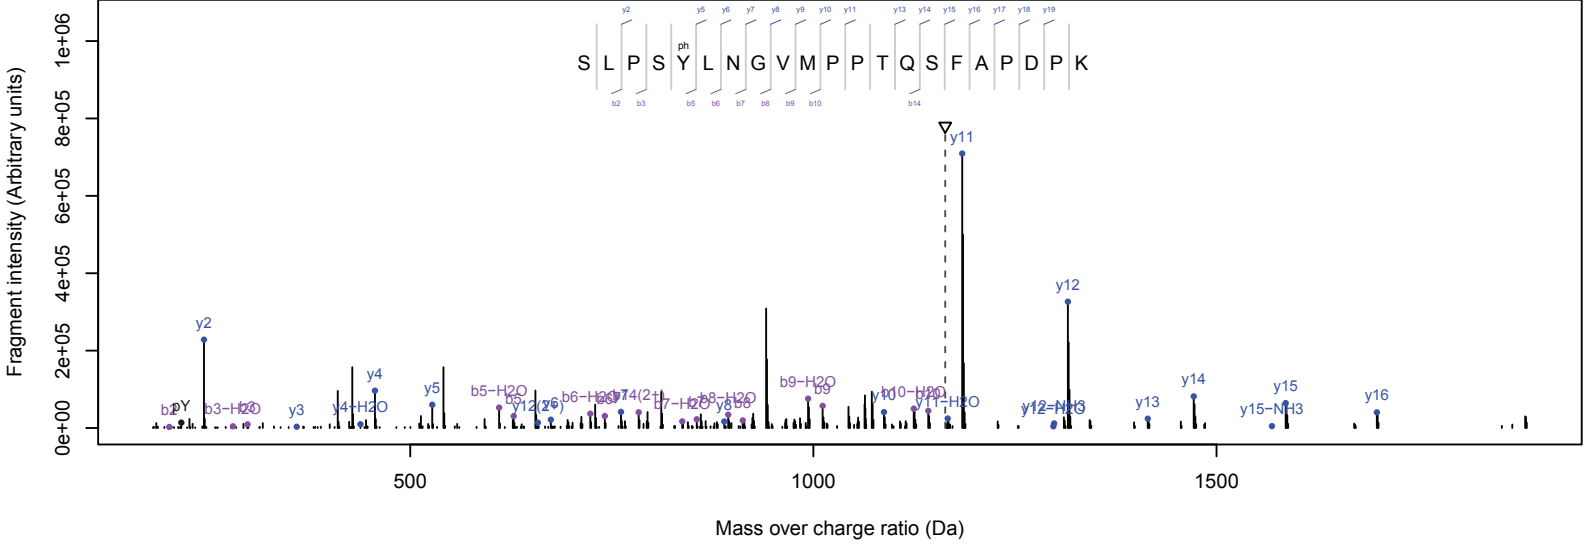

T(ph)YSLVGQAWPGPLADM(ox)APTR-2+

Source: QE1\_140908\_OPL1013\_CvA\_pTyrIP\_AML\_Kasumi6 Scan: 44397

Andromeda score: 119.38

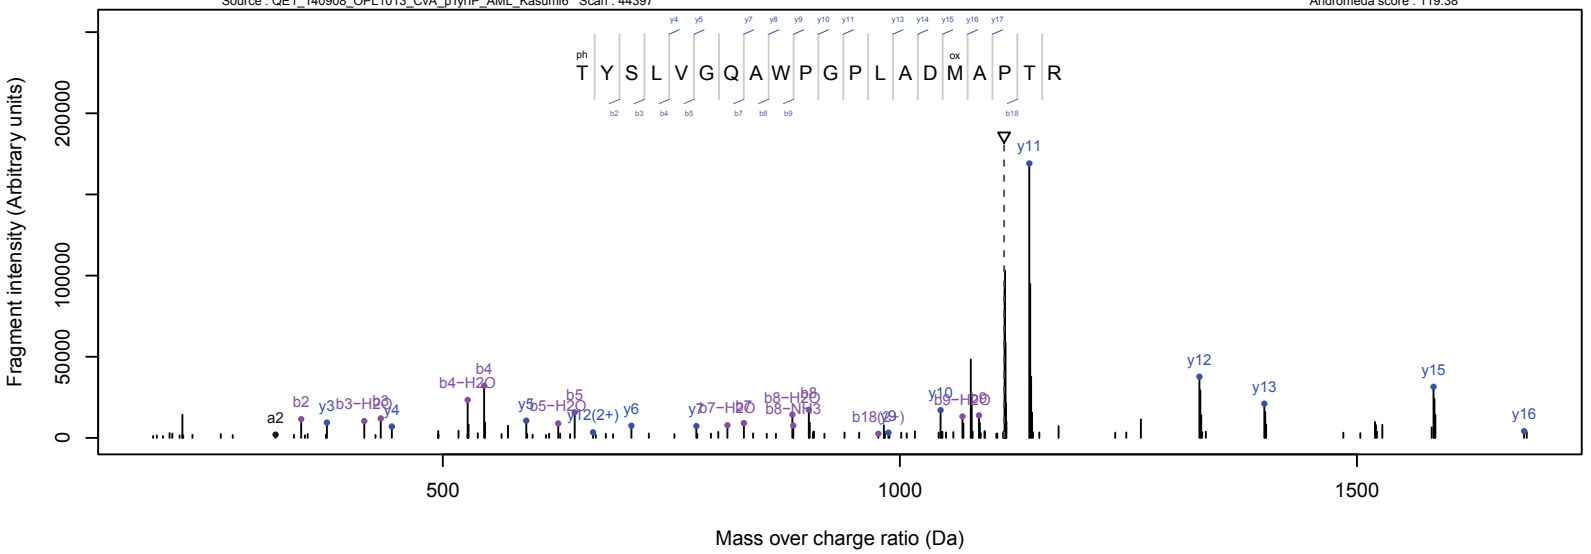

KGHEY(ph)TNIK-3+

Source: QE1\_140822\_OPL1013\_CvA\_pTyrIP\_AML\_cell\_lines\_part2\_B Scan: 2679

Andromeda score: 119.34

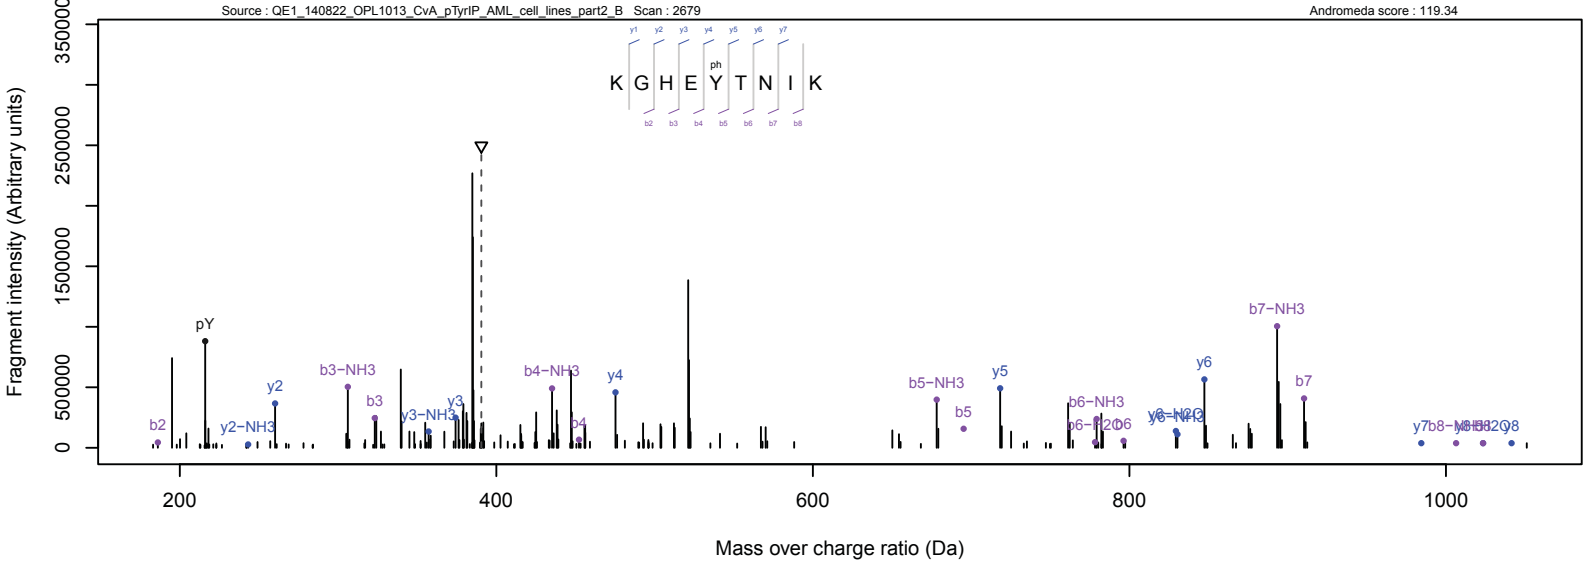

LTDGTG(ph)LQLYYEQGLEKPF<sup>3+</sup>

Source : QE1\_140612\_OPL1013\_CVA\_phosphoproteomic\_landscape\_AML\_D Scan : 42514

Andromeda score : 119.27

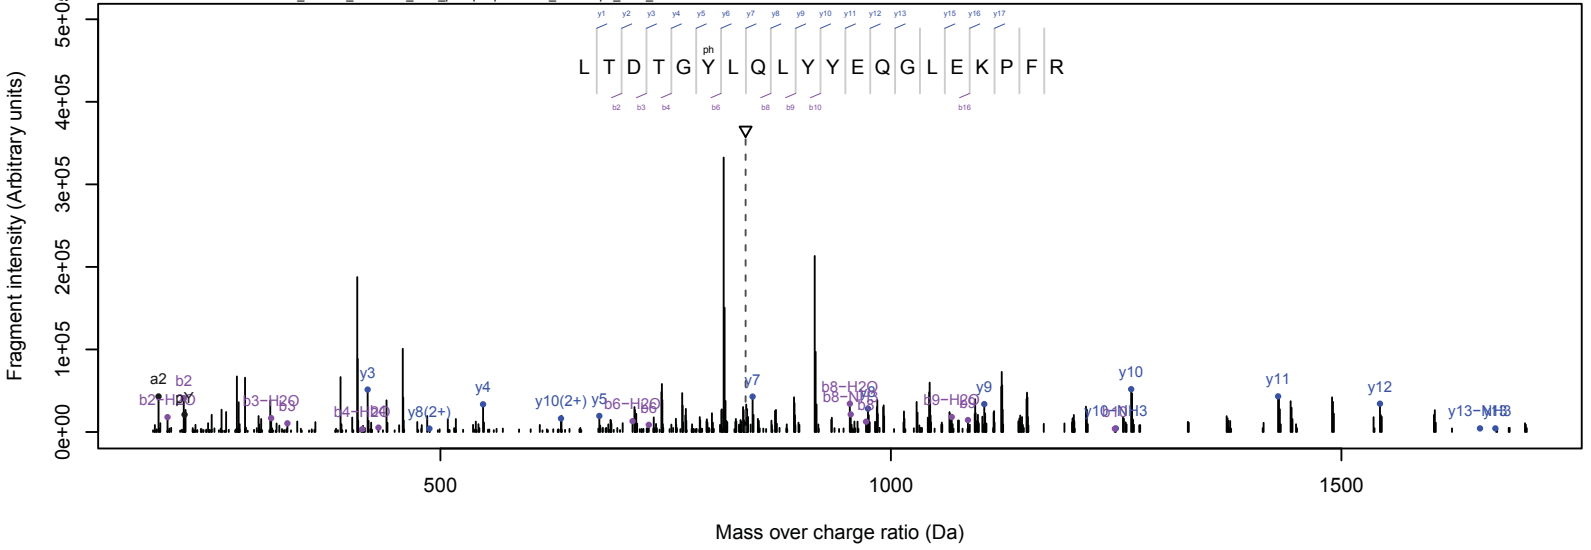

SQSHLPY(ph)FTP<sup>3+</sup>KPPQDSAVIK

Source : QE1\_140612\_OPL1013\_CVA\_phosphoproteomic\_landscape\_AML\_C Scan : 28362

Andromeda score : 119.27

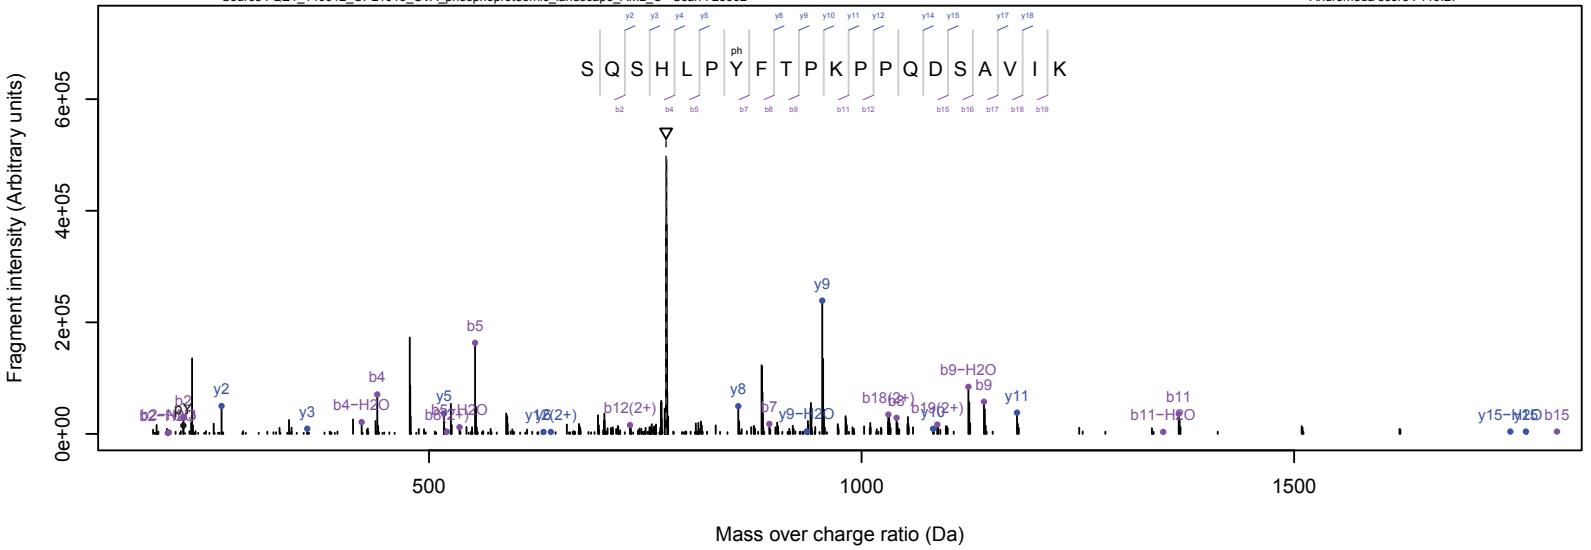

FDY(ph)YMPAIAIGCR<sup>2+</sup>

Source : QE1\_140612\_OPL1013\_CVA\_phosphoproteomic\_landscape\_AML\_B Scan : 33965

Andromeda score : 119.03

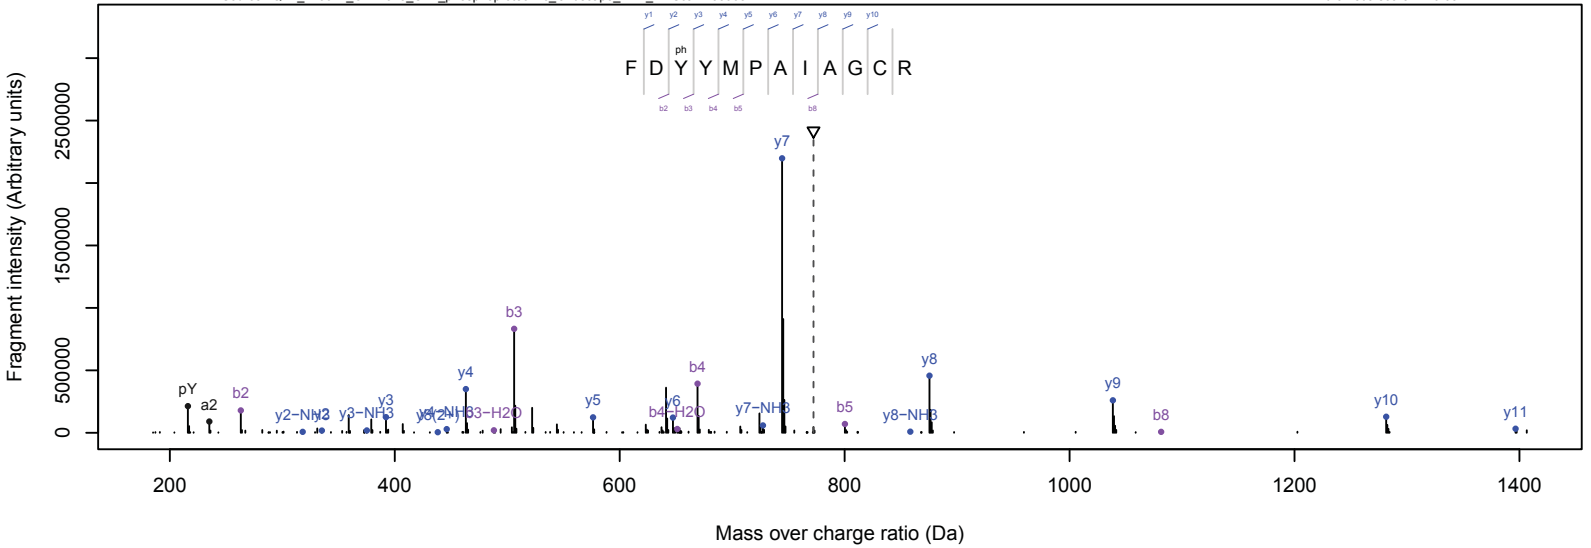

**SQY(ph)HDLQAPDNQQTK-3+**

Source: QE1\_140612\_OPL1013\_CVA\_phosphoproteomic\_landscape\_AML\_C Scan: 6467

Andromeda score: 119.02

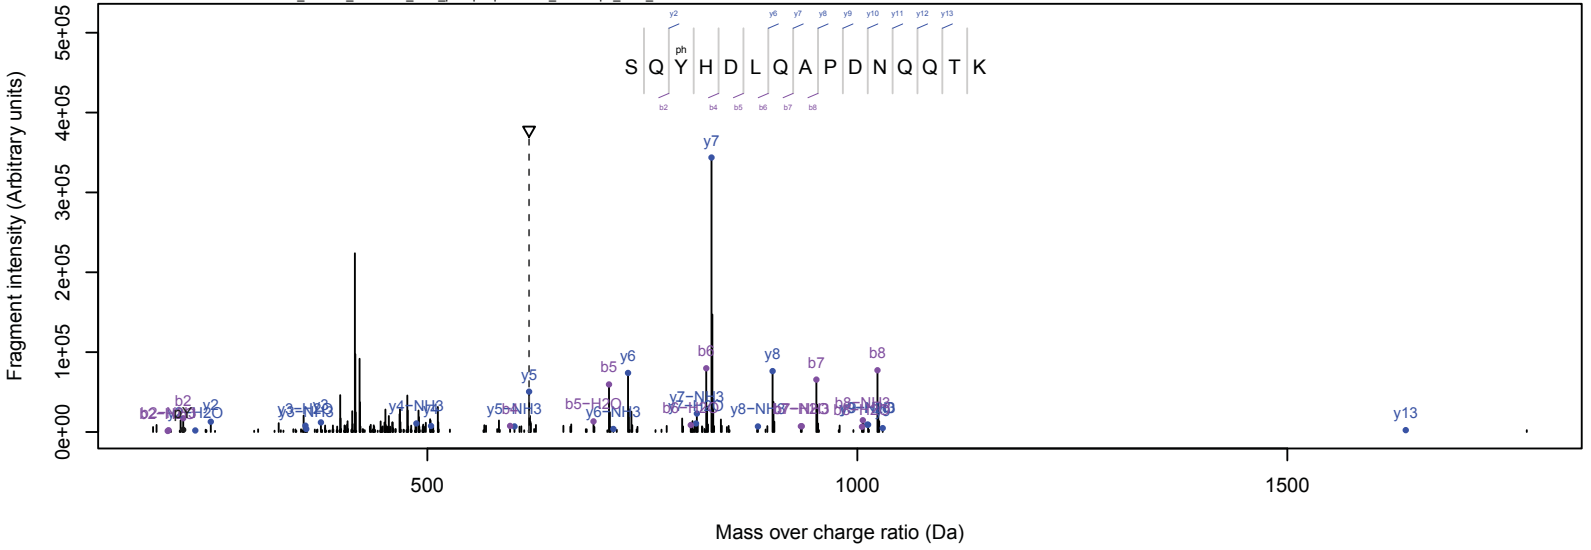

**HPEIVG(ph)SVPGR-3+**

Source: QE1\_140612\_OPL1013\_CVA\_phosphoproteomic\_landscape\_AML\_C Scan: 16642

Andromeda score: 118.9

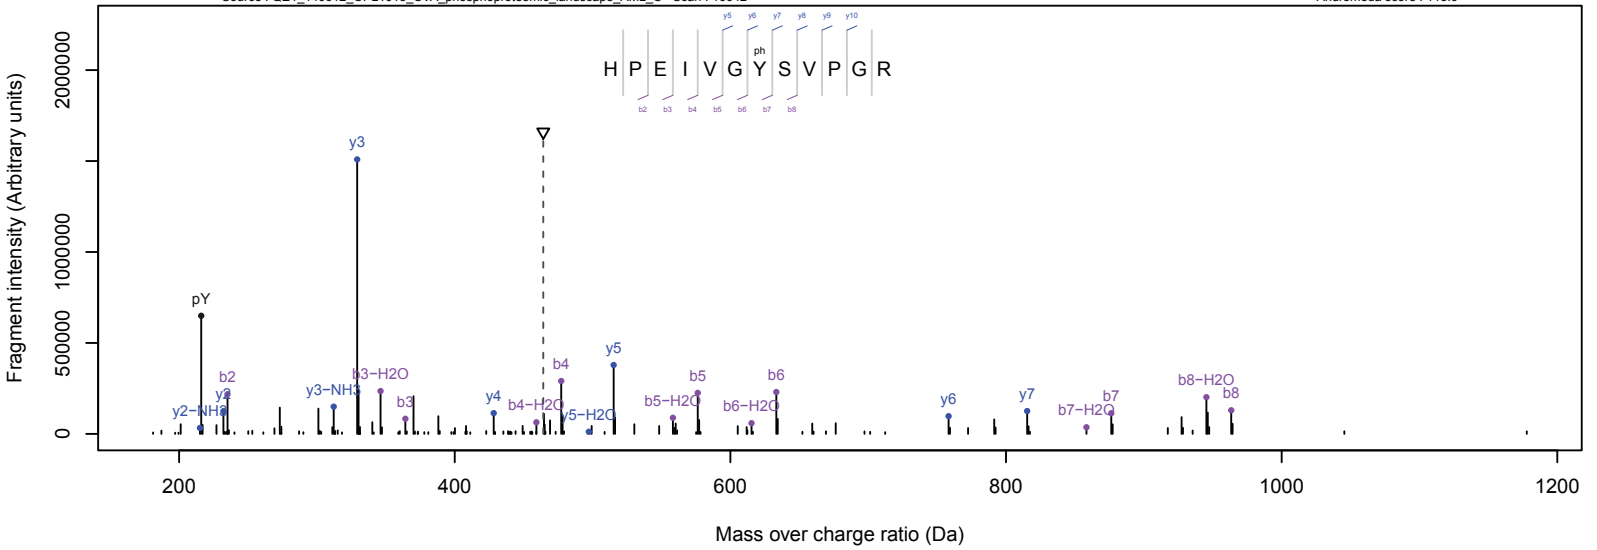

**QSMISTQNQY(ph)STLSKPAALTGTLEVR-3+**

Source: QE1\_140612\_OPL1013\_CVA\_phosphoproteomic\_landscape\_AML\_C Scan: 34674

Andromeda score: 118.9

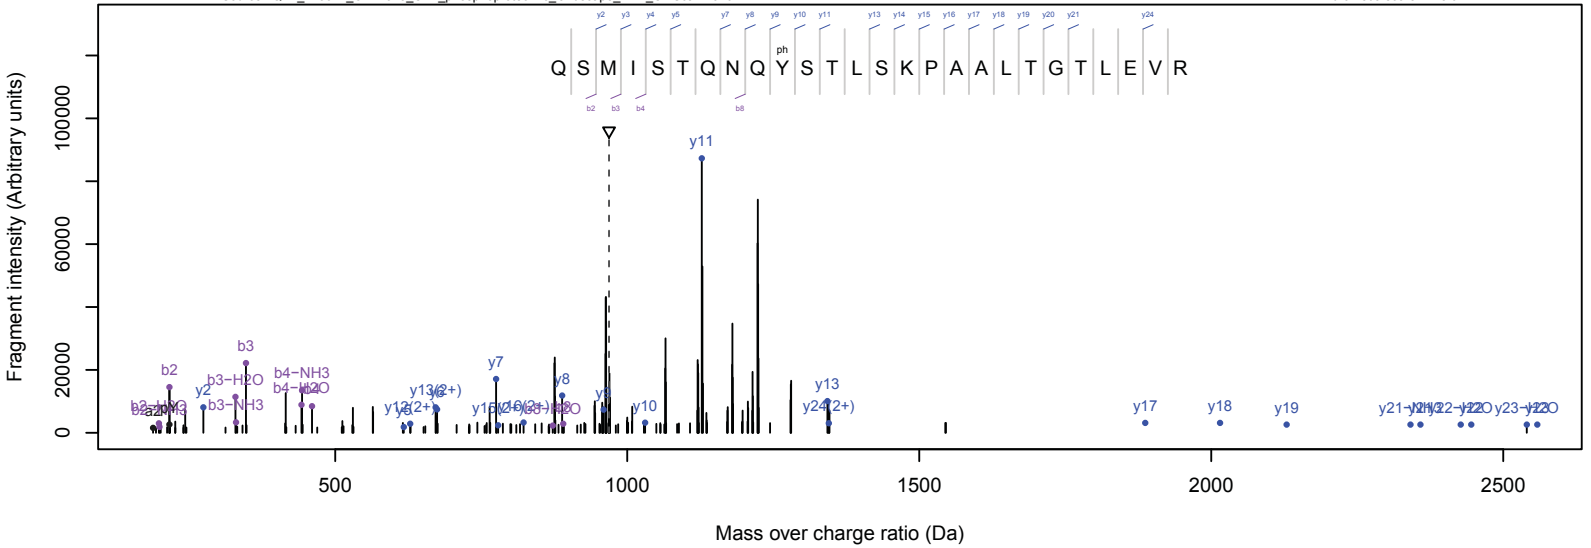



LHGQEGLFPGNY(ph)VEKI-2+

Source : QE1\_140612\_OPL1013\_CVA\_phosphoproteomic\_landscape\_AML\_C Scan : 33846

Andromeda score : 118.55

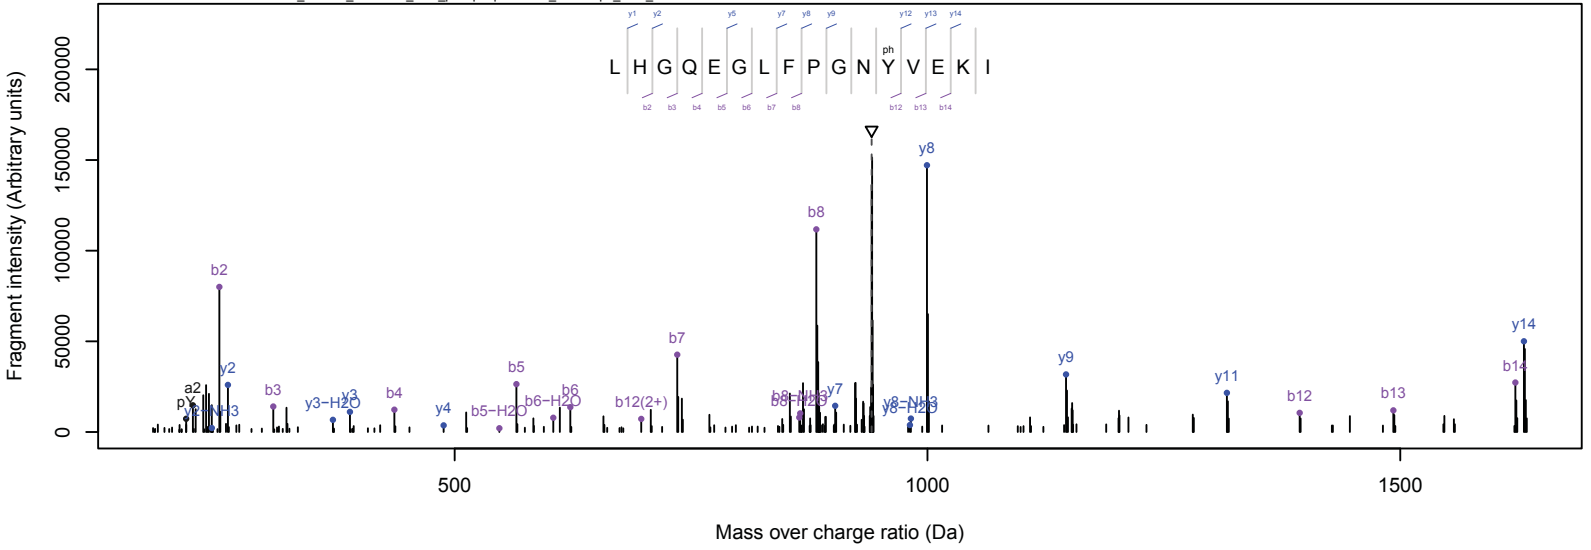

ASTLAMTKEY(ph)SFLR-2+

Source : QE1\_140612\_OPL1013\_CVA\_phosphoproteomic\_landscape\_AML\_C Scan : 28035

Andromeda score : 118.52

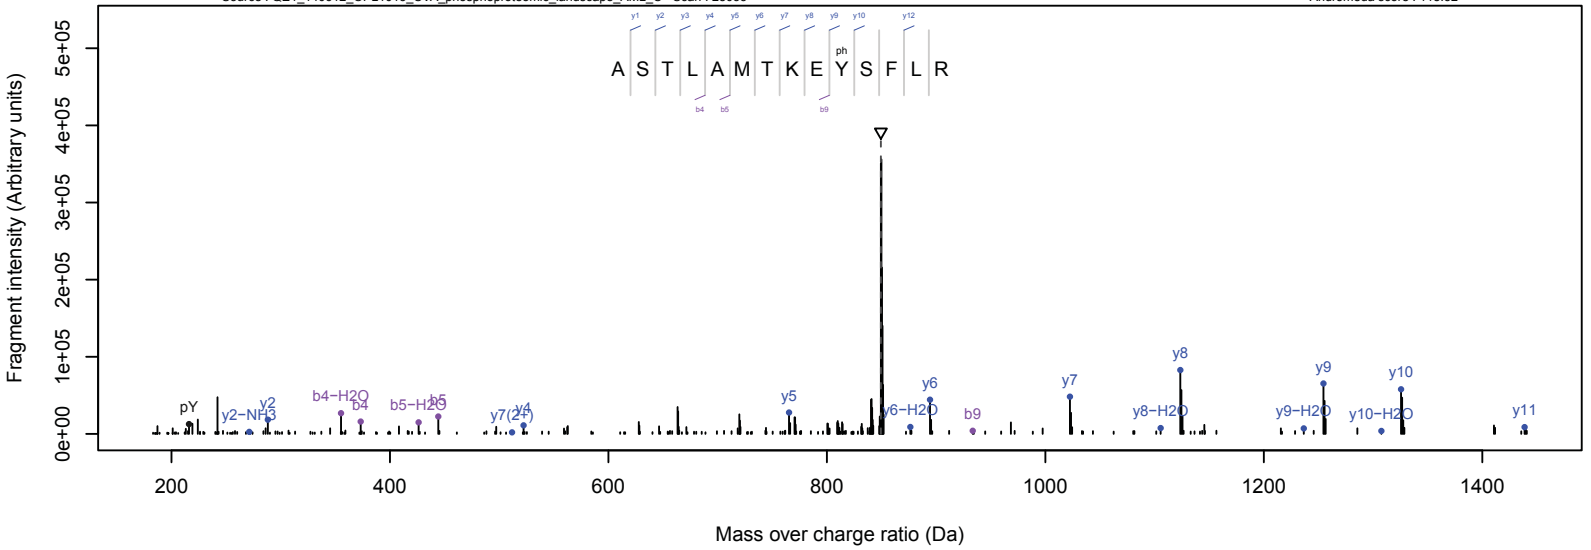

LKDY(ph)AFIHFDER-3+

Source : QE1\_140612\_OPL1013\_CVA\_phosphoproteomic\_landscape\_AML\_B Scan : 28511

Andromeda score : 118.52

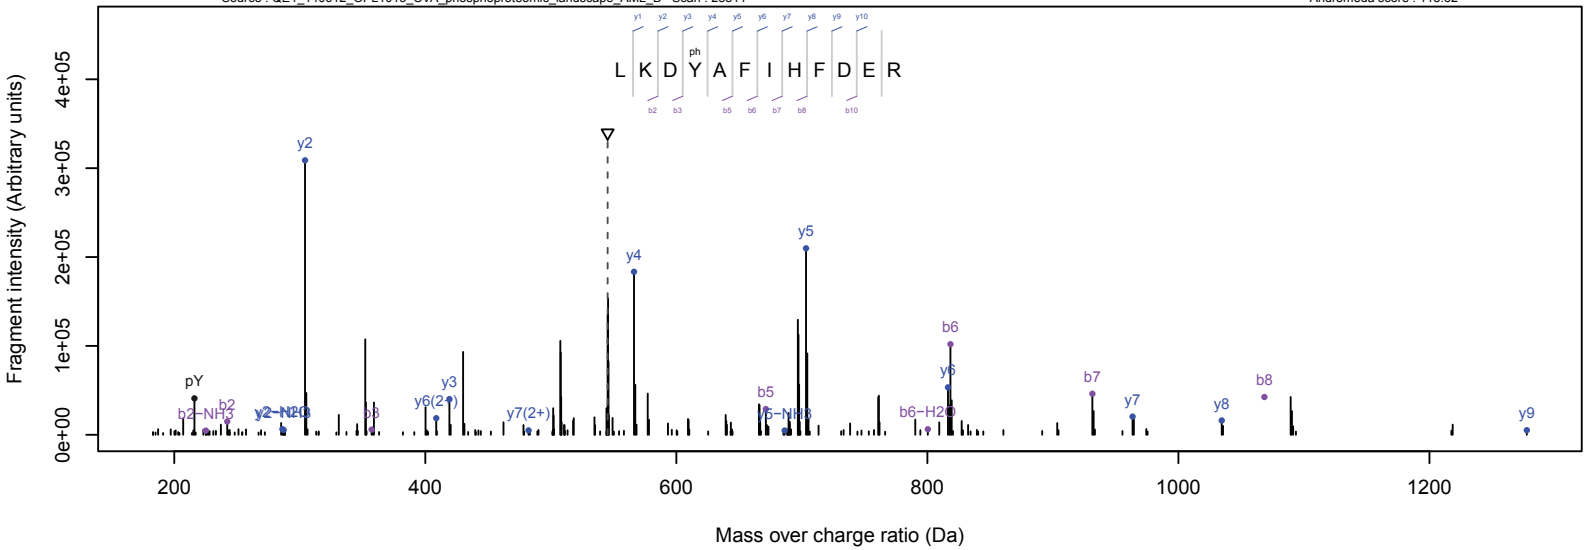



**M(ox)LGEALSKNPGYIK-2+**

Source: QE1\_140612\_OPL1013\_CVA\_phosphoproteomic\_landscape\_AML\_C Scan: 21624

Andromeda score: 118.52

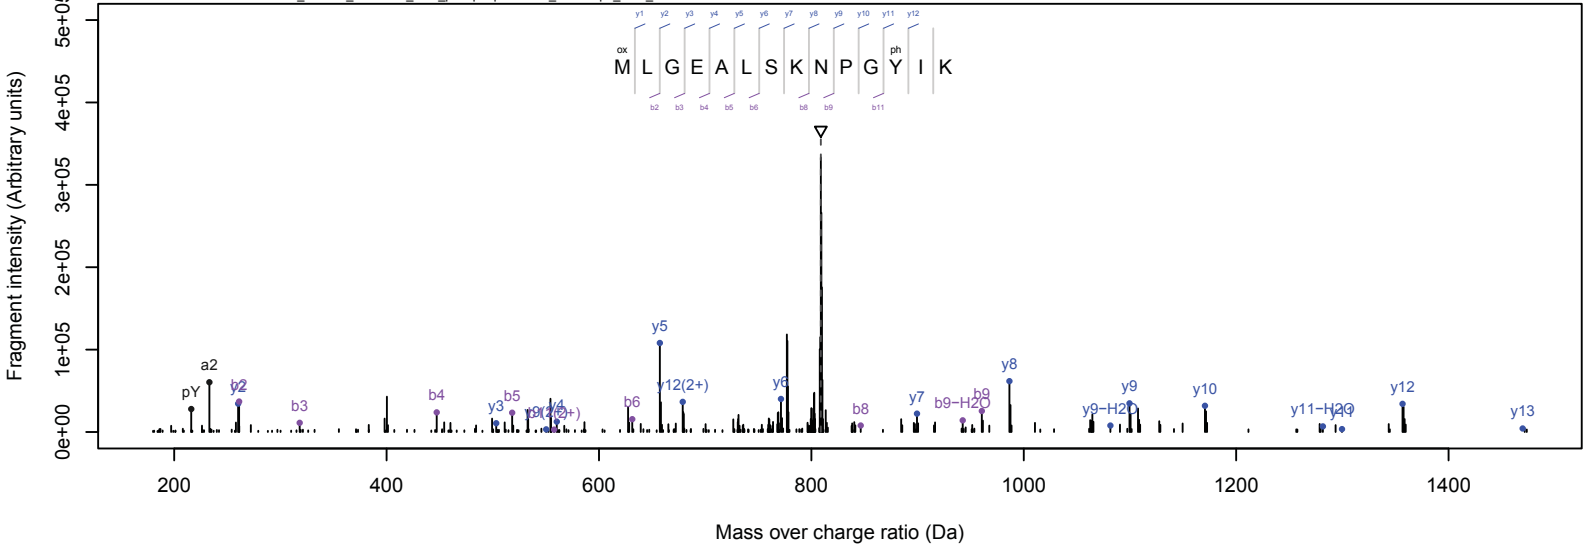

**SGY(ph)YTLYHSLHHYK-3+**

Source: QE1\_140612\_OPL1013\_CVA\_phosphoproteomic\_landscape\_AML\_D Scan: 18607

Andromeda score: 118.52

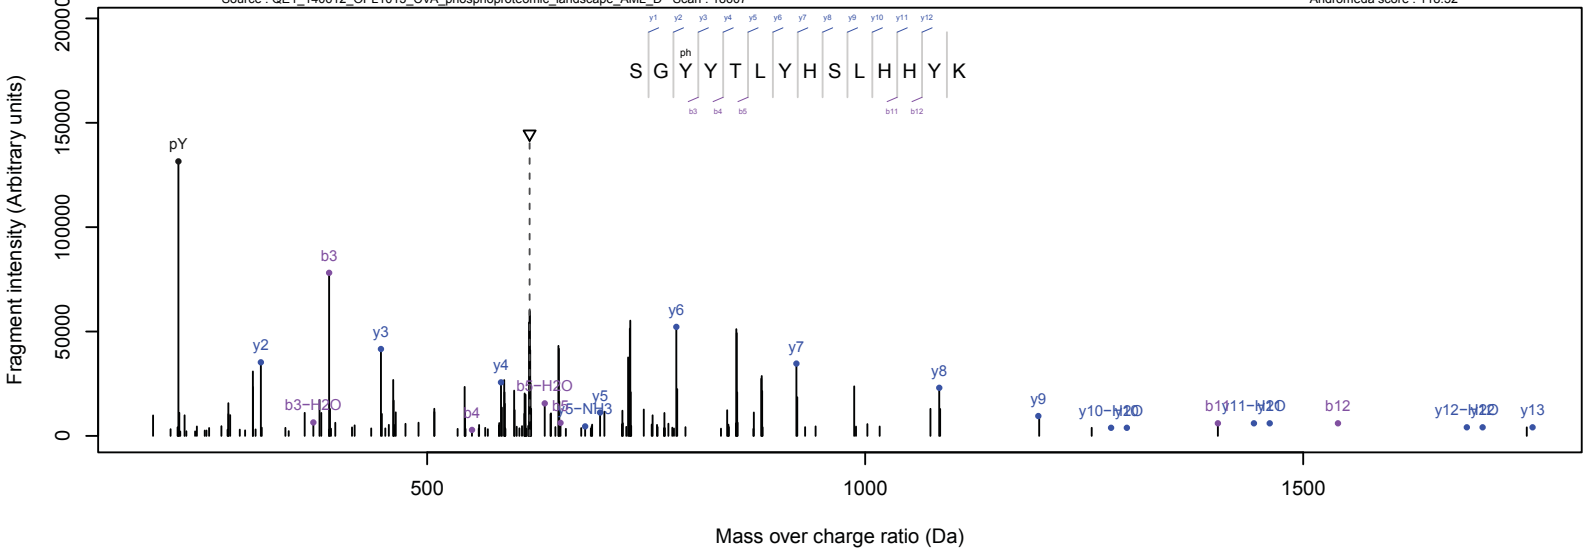

**Y(ph)AILNEPFKGE MN R-2+**

Source: QE1\_140612\_OPL1013\_CVA\_phosphoproteomic\_landscape\_AML\_B Scan: 27488

Andromeda score: 118.52

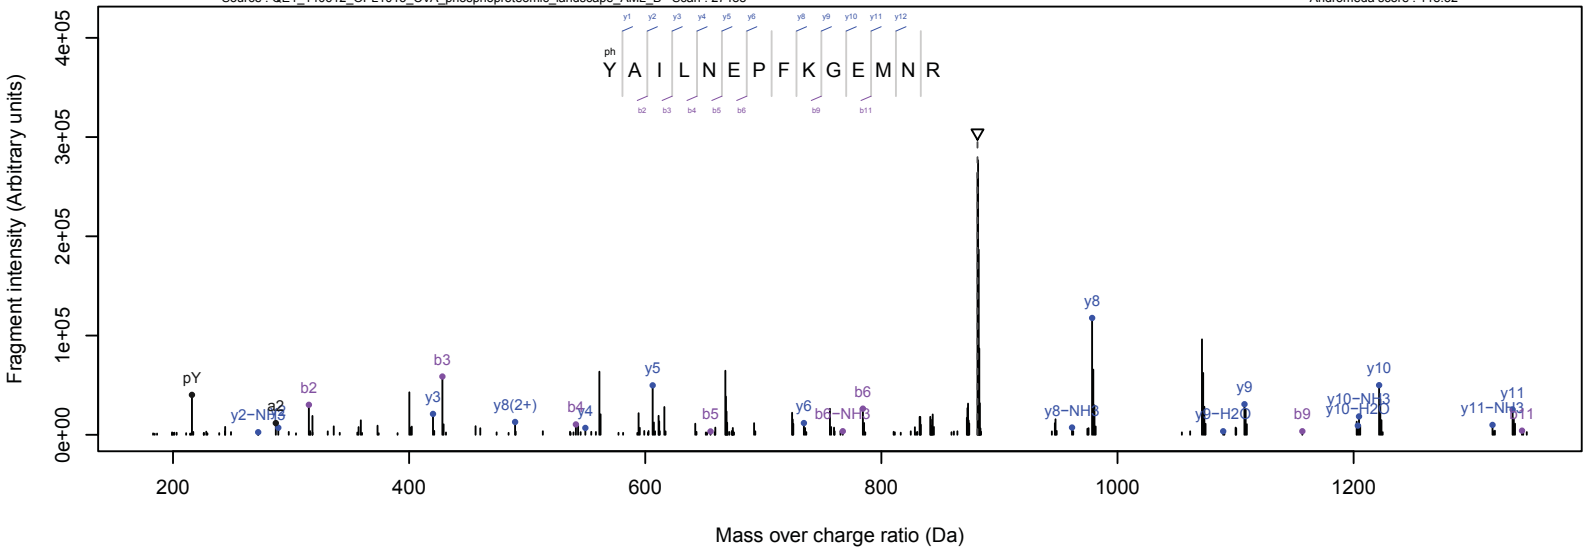

ARPQYPQEAEIGYEY(ph)SEINIPK-3+

Source : QE1\_140908\_OPL1013\_CvA\_pTyrIP\_AML\_Kasumi6 Scan : 33480

Andromeda score : 118.51

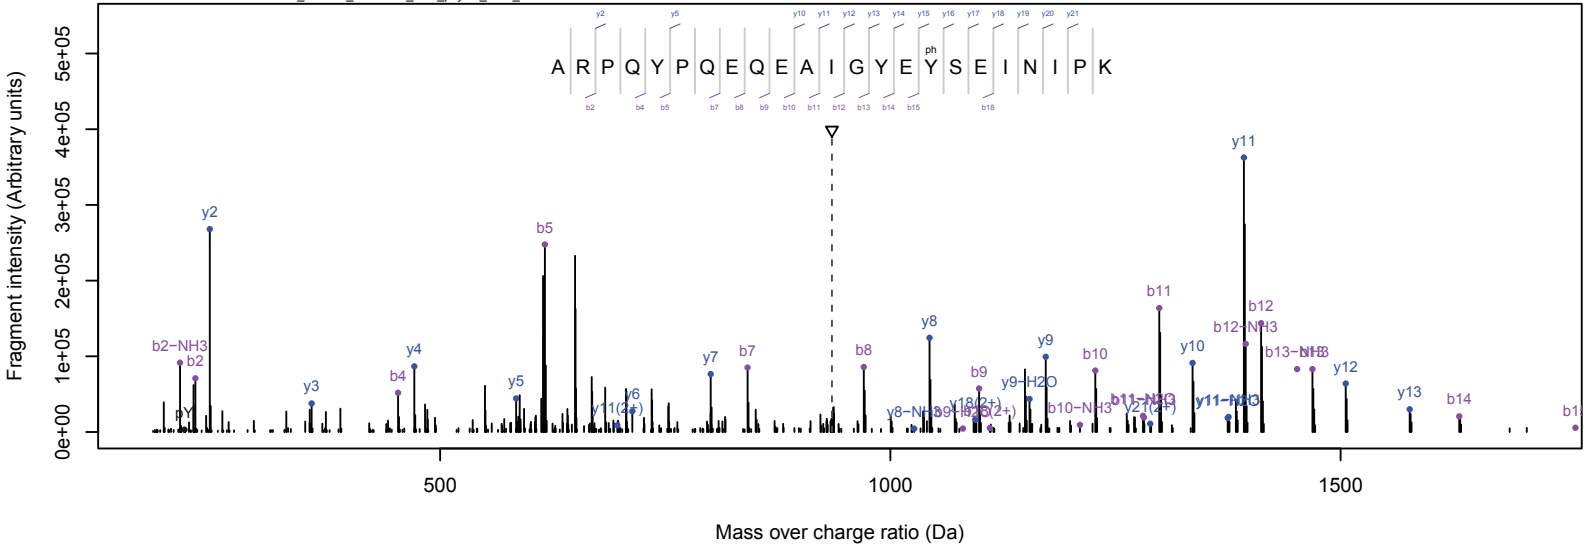

AVLIDEVCTMNDGPHSALY(ph)TMMK-3+

Source : QE1\_140612\_OPL1013\_CvA\_phosphoproteomic\_landscape\_AML\_C Scan : 44305

Andromeda score : 118.51

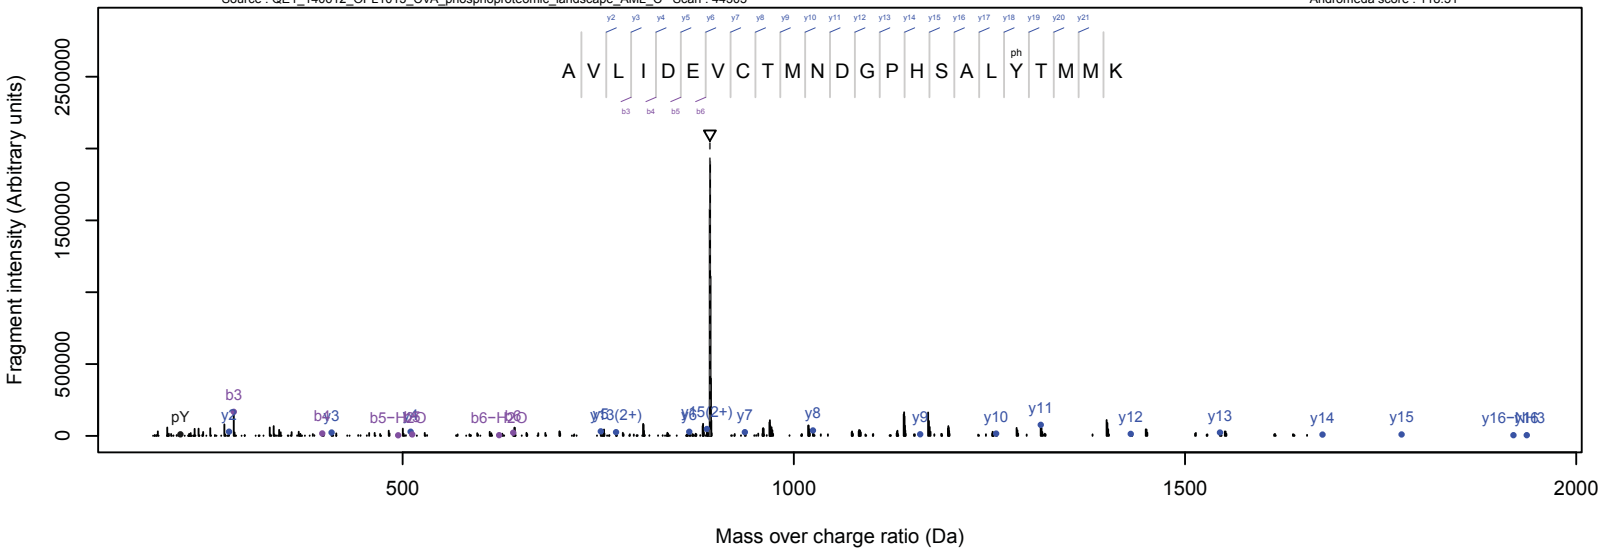

LHY(ph)GDLTDSLTK-2+

Source : QE1\_140612\_OPL1013\_CvA\_phosphoproteomic\_landscape\_AML\_D Scan : 24404

Andromeda score : 118.51

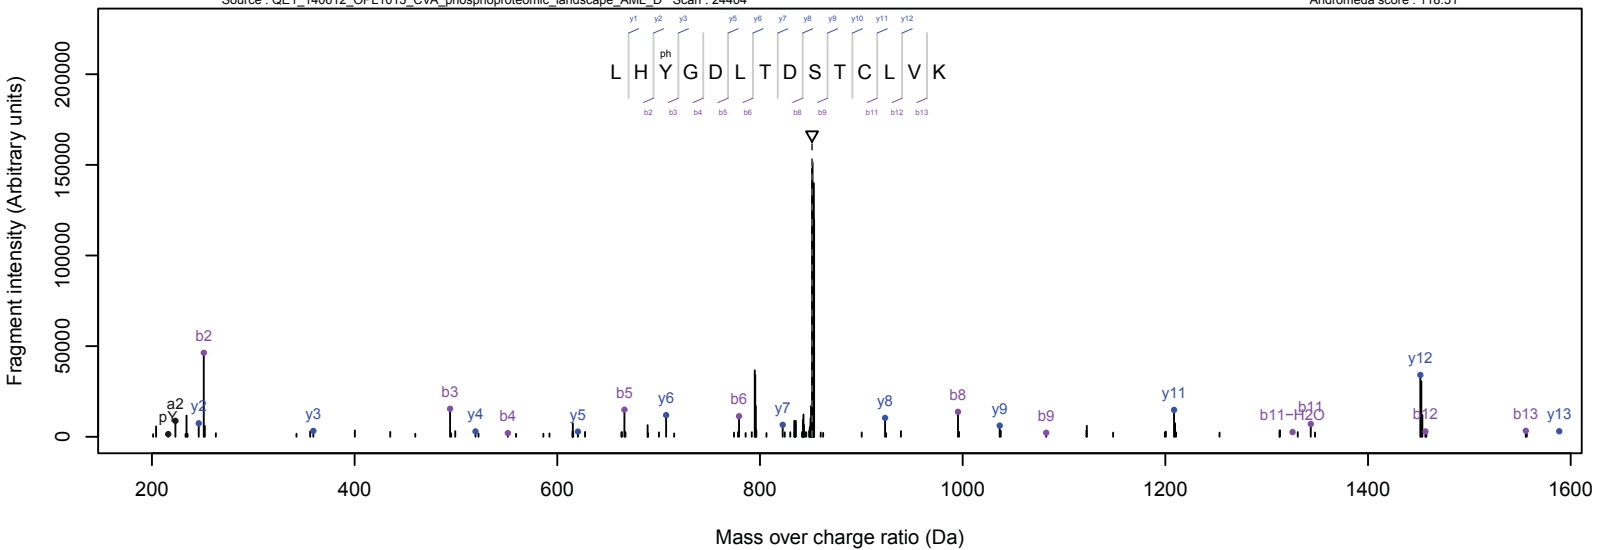

SSSQ(ph)ESFWQSSQSNFTAHDK-3+

Source : QE1\_140612\_OPL1013\_CVA\_phosphoproteomic\_landscape\_AML\_C Scan : 35971

Andromeda score : 118.51

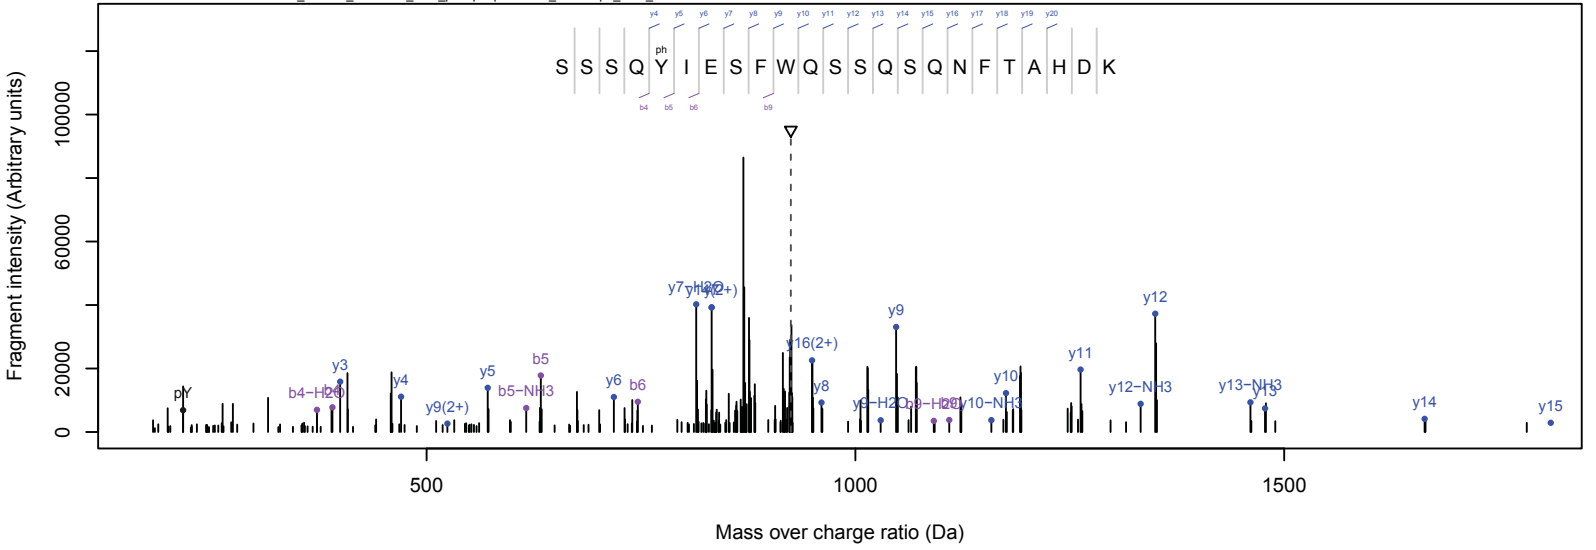

YHSQ(ph)HTVAGNDIK-3+

Source : QE1\_140612\_OPL1013\_CVA\_phosphoproteomic\_landscape\_AML\_C Scan : 6352

Andromeda score : 118.51

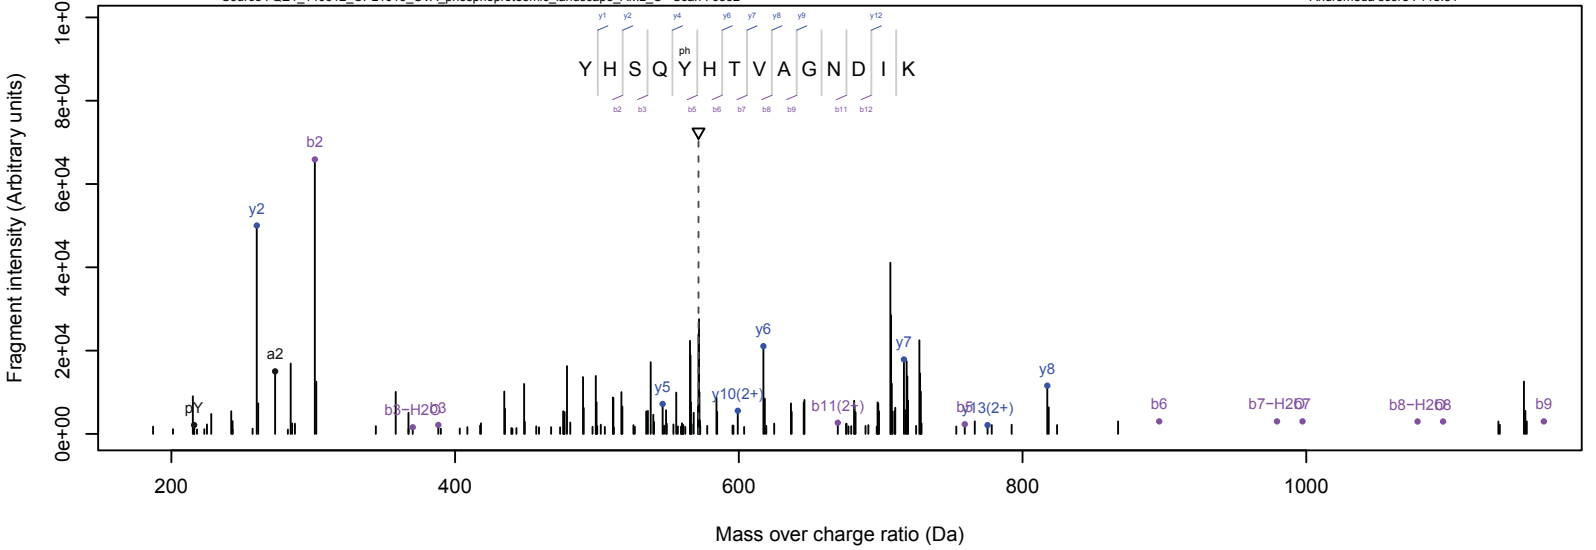

Y(ph)QQDQVVKEDNIEAVGK-3+

Source : QE1\_140612\_OPL1013\_CVA\_phosphoproteomic\_landscape\_AML\_A Scan : 16734

Andromeda score : 118.48

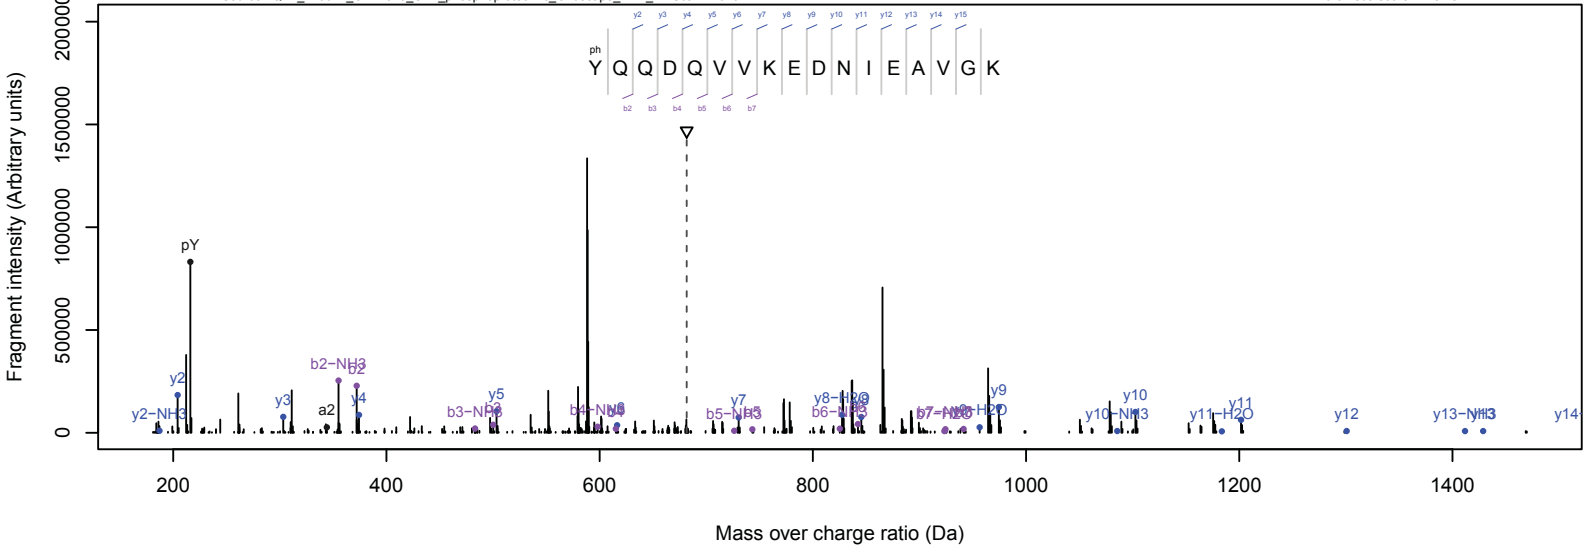

(ac)SSPEPTPEPEPDNPTWSTQPTY(ph)SNLGQIR-3+

Source : QE1\_140822\_OPL1013\_CvA\_pTyrIP\_AML\_cell\_lines\_part2\_E Scan : 31963

Andromeda score : 118.42

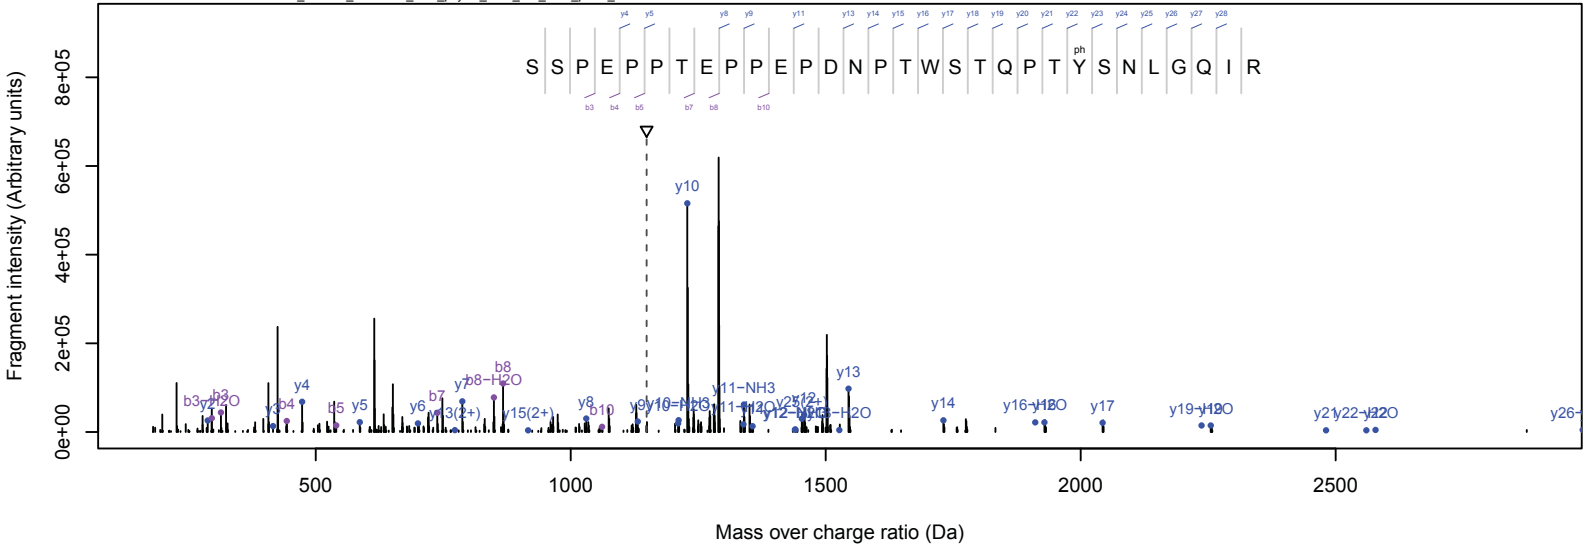

HGDEIITSTTSNY(ph)ETQTFSSK-3+

Source : QE1\_140908\_OPL1013\_CvA\_pTyrIP\_AML\_HEL Scan : 22740

Andromeda score : 118.37

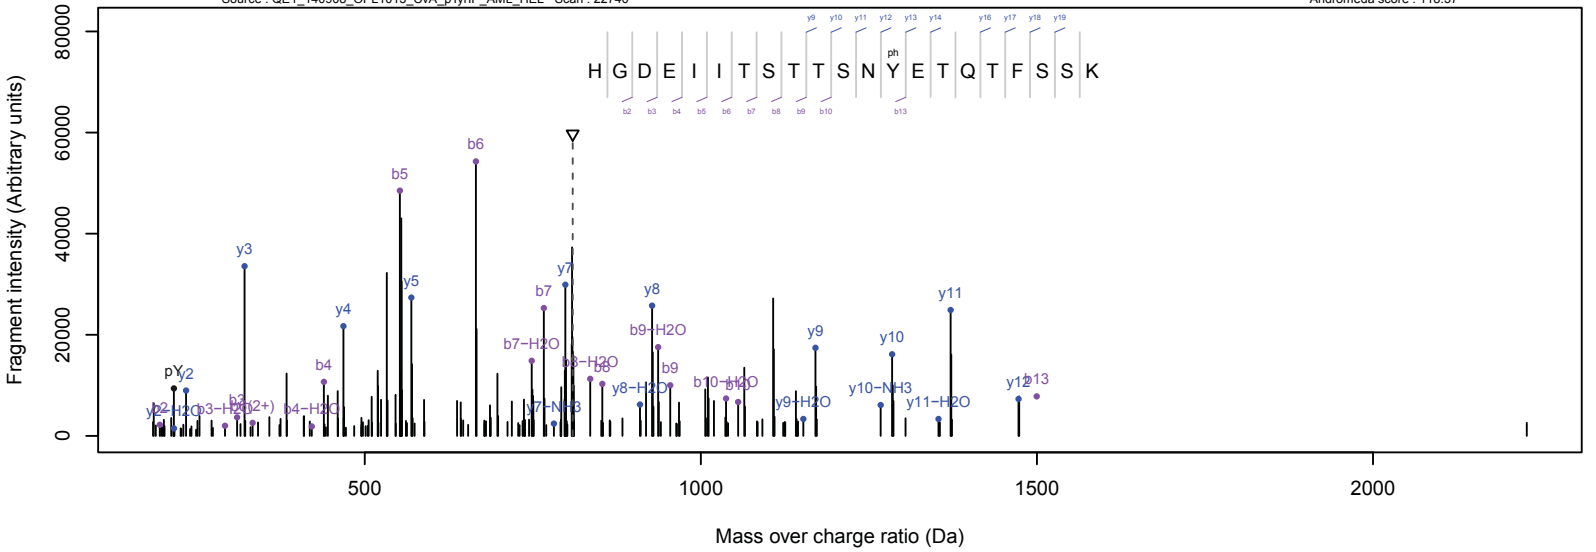

LLQGRPLDFY(ph)PPGVHPSGLVPR-3+

Source : QE1\_140612\_OPL1013\_CVA\_phosphoproteomic\_landscape\_AML\_C Scan : 41686

Andromeda score : 118.37

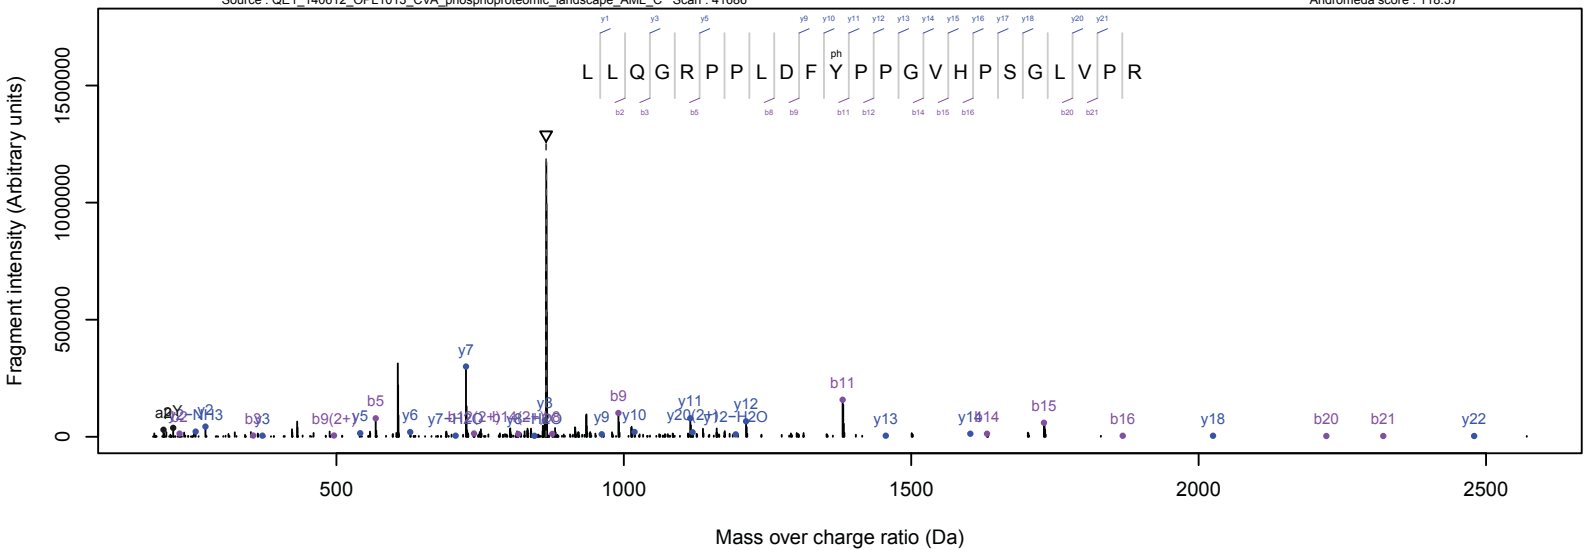

**KLIY(ph)FQLHR-3+**

Source : QE1\_140612\_OPL1013\_CVA\_phosphoproteomic\_landscape\_AML\_D Scan : 27432

Andromeda score : 118.33

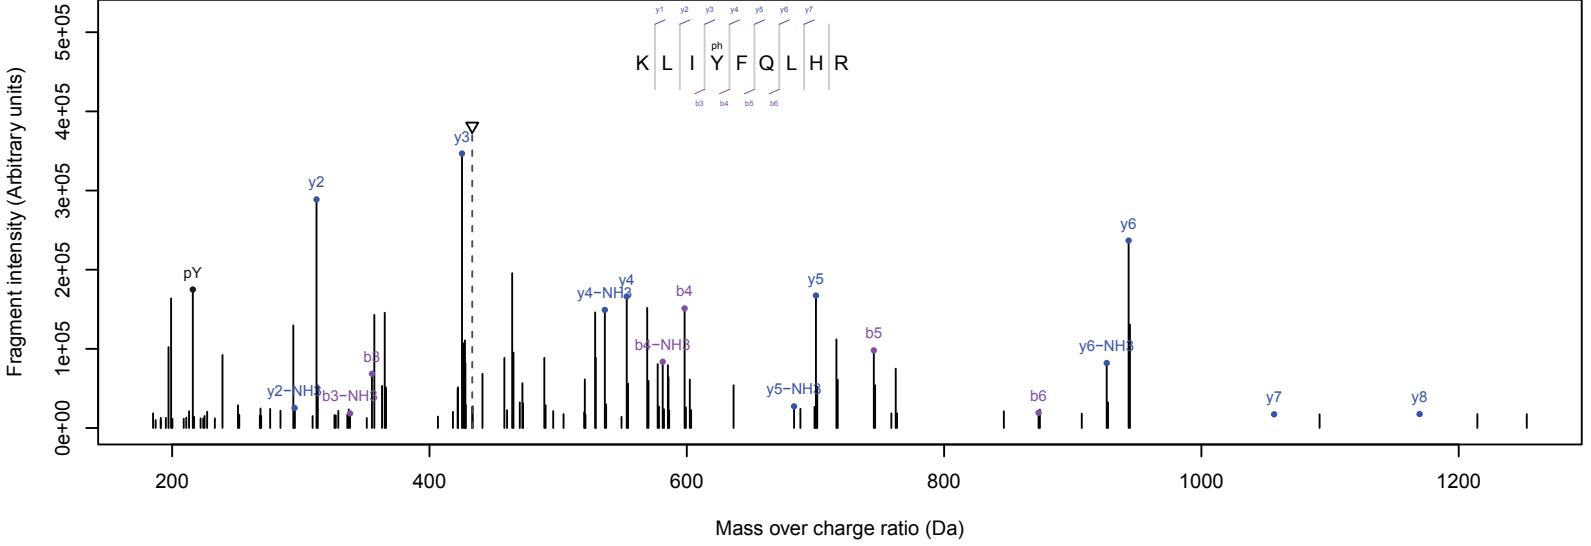

**GNLY(ph)SFGCPYGLGHNSDGK-3+**

Source : QE1\_140908\_OPL1013\_CvA\_pTyrIP\_AML\_HEL Scan : 28333

Andromeda score : 118.32

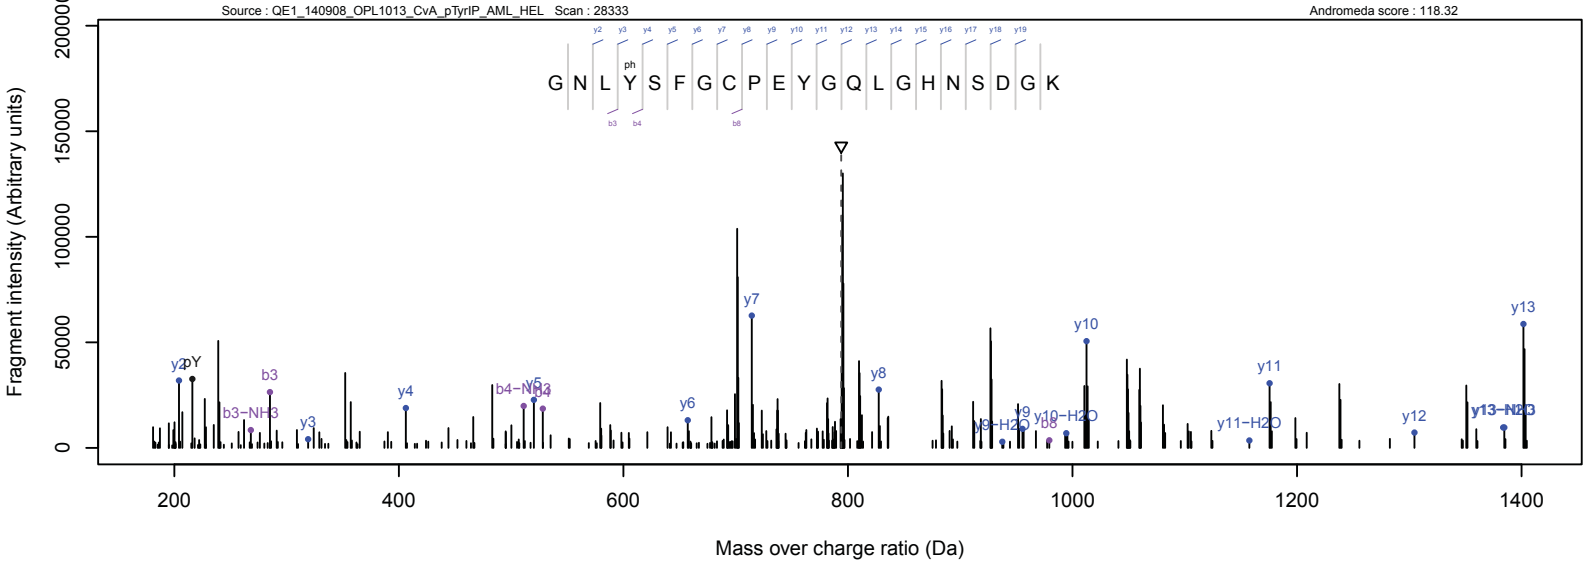

**ALLEAGALPNAPNS(ph)YGR-2+**

Source : QE1\_140612\_OPL1013\_CVA\_phosphoproteomic\_landscape\_AML\_C Scan : 30146

Andromeda score : 118.31

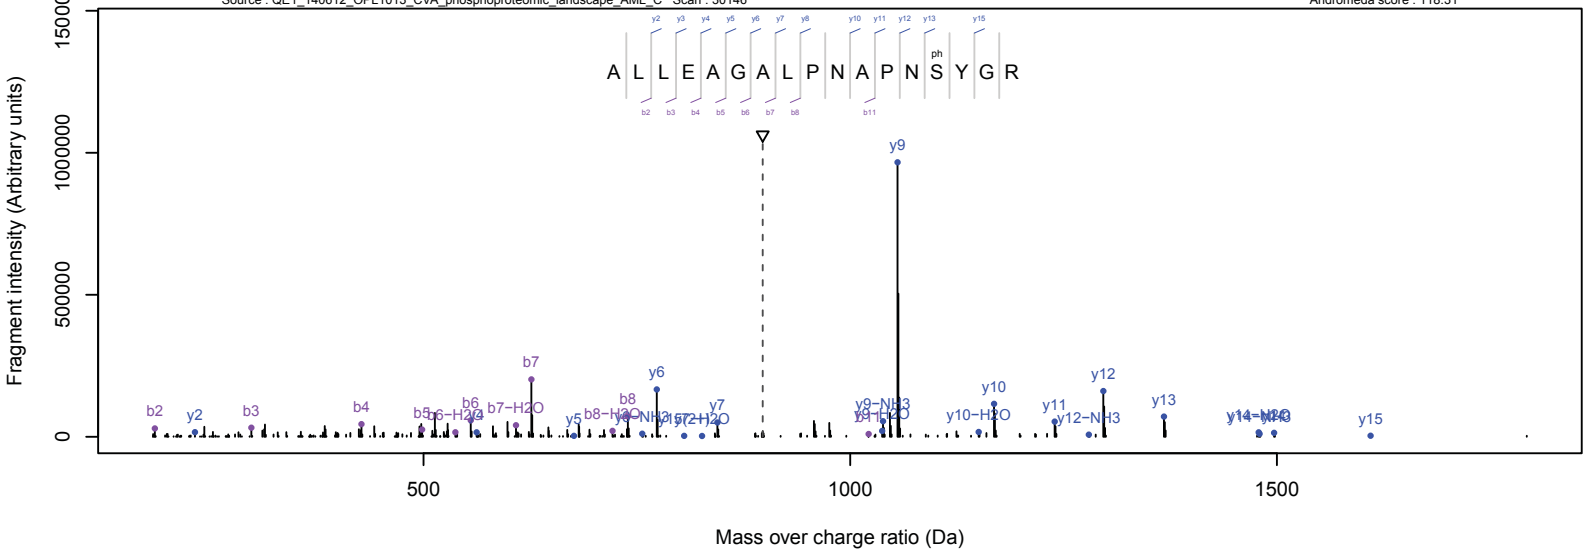

LDVY(ph)TQWHQQSQSTKPK-3+

Source : QE1\_140612\_OPL1013\_CVA\_phosphoproteomic\_landscape\_AML\_A Scan : 16327

Andromeda score : 118.31

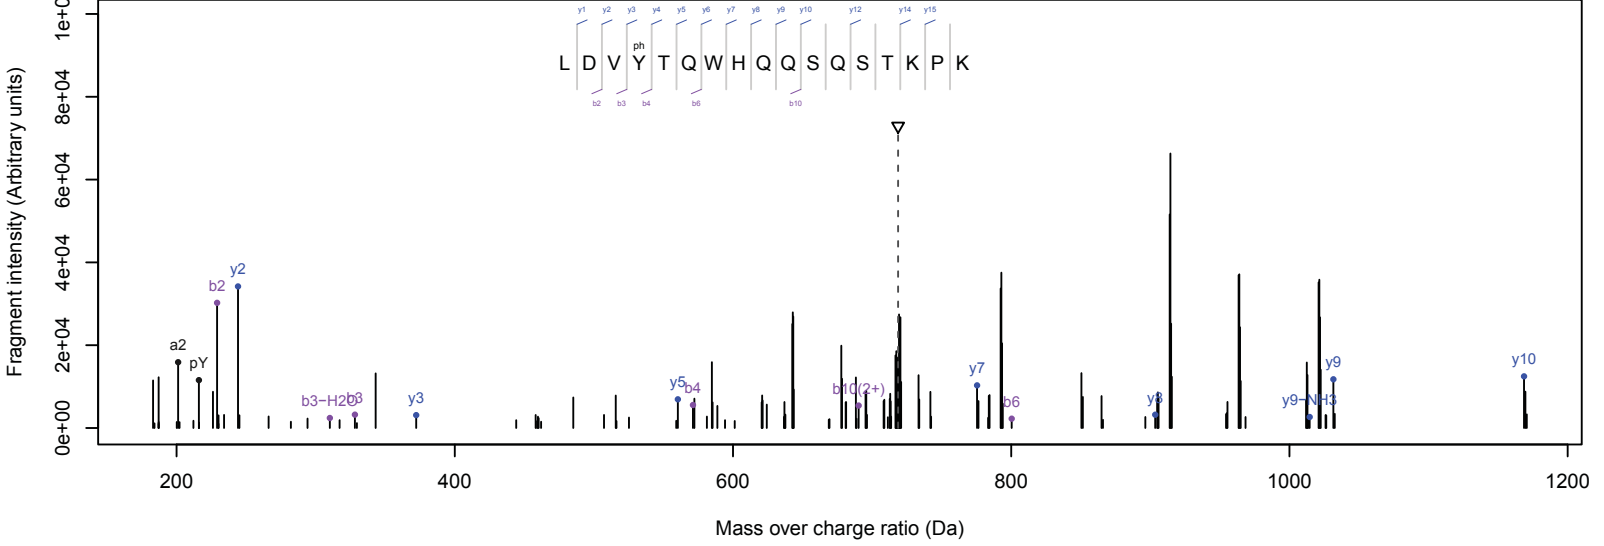

NTQPAES(ph)RIYDEILQSK-2+

Source : QE1\_140612\_OPL1013\_CVA\_phosphoproteomic\_landscape\_AML\_C Scan : 26804

Andromeda score : 118.31

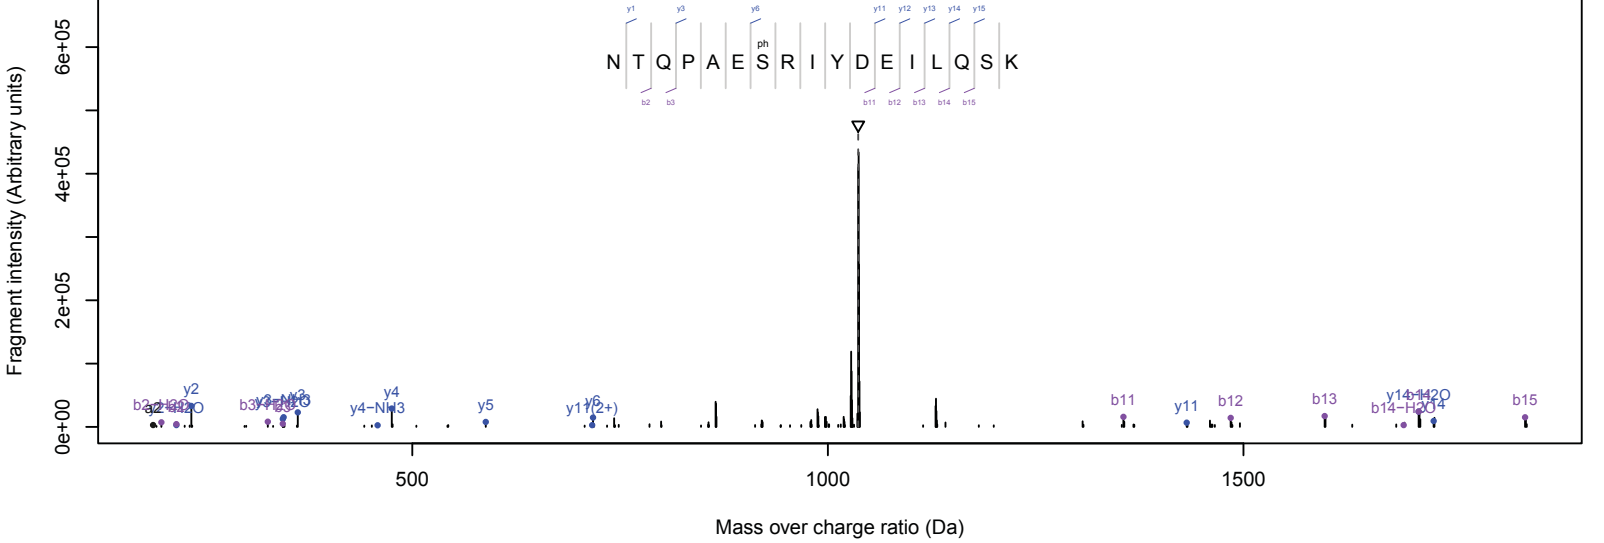

VSNLQYLHSYLT(ph)IK-2+

Source : QE1\_140612\_OPL1013\_CVA\_phosphoproteomic\_landscape\_AML\_C Scan : 39409

Andromeda score : 118.31

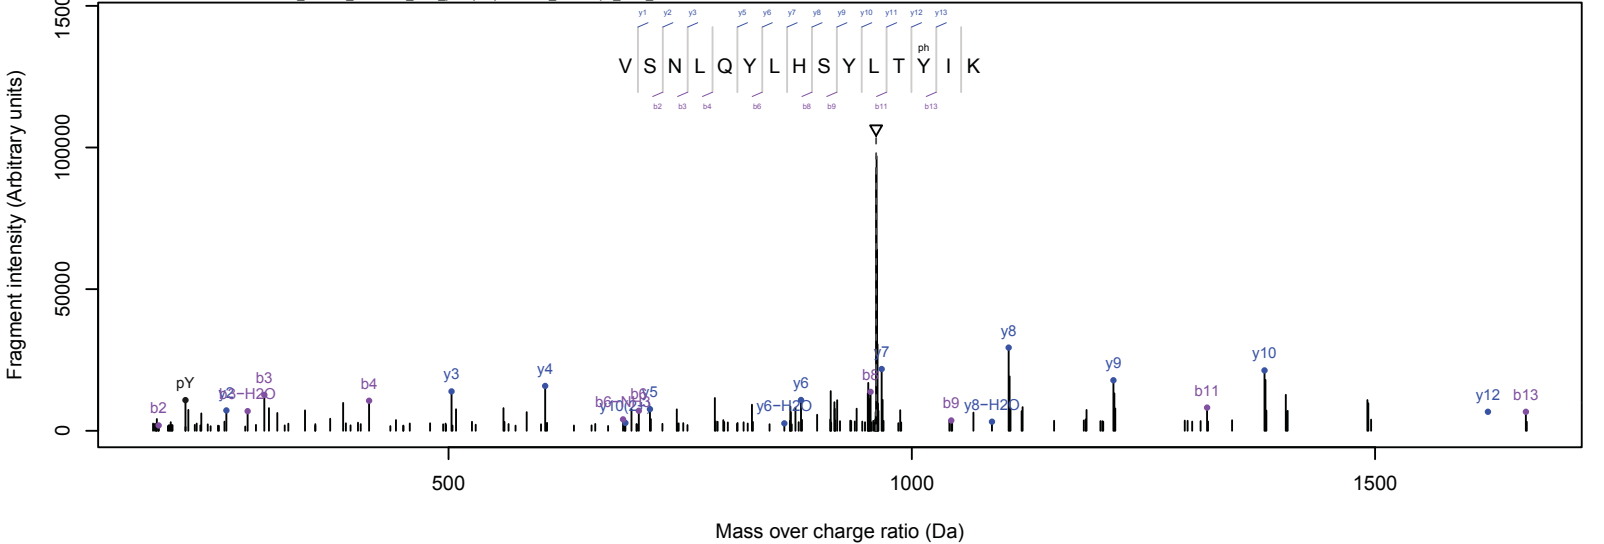

Y(ph)KDAANLLNDALAIR-2+

Source : QE1\_140612\_OPL1013\_CVA\_phosphoproteomic\_landscape\_AML\_C Scan : 40448

Andromeda score : 118.31

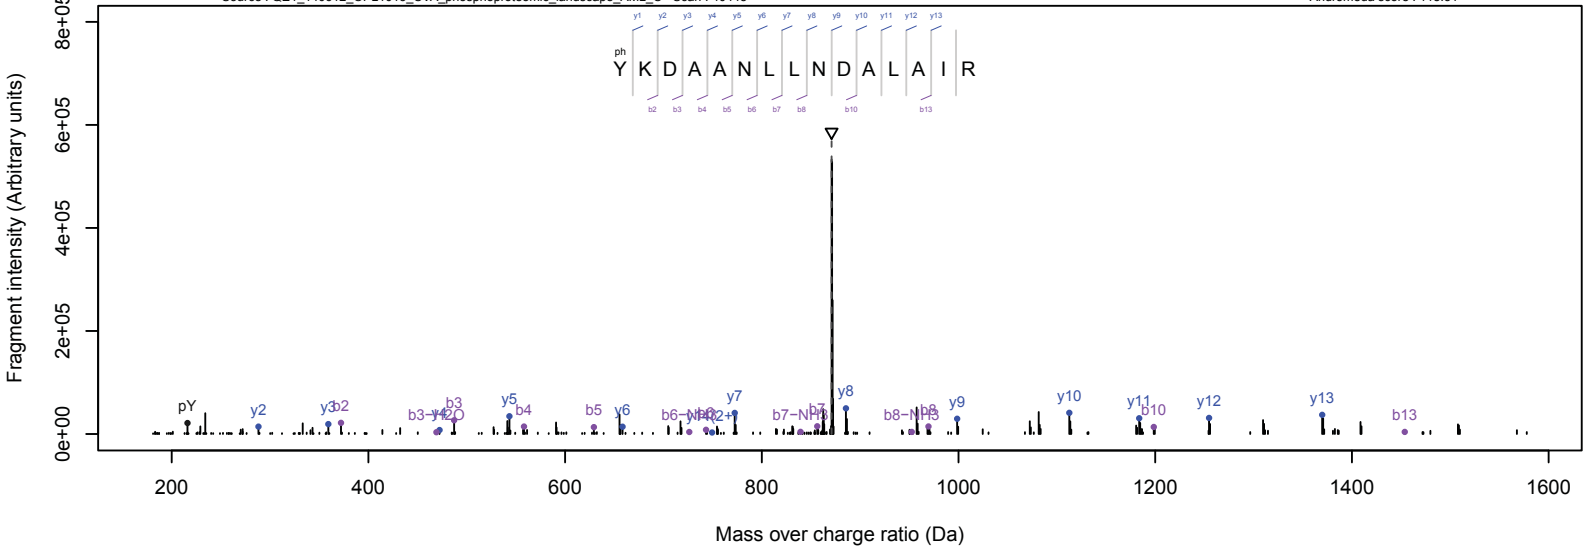

SAYFAEKLY(ph)K-2+

Source : QE1\_140612\_OPL1013\_CVA\_phosphoproteomic\_landscape\_AML\_C Scan : 18222

Andromeda score : 118.28

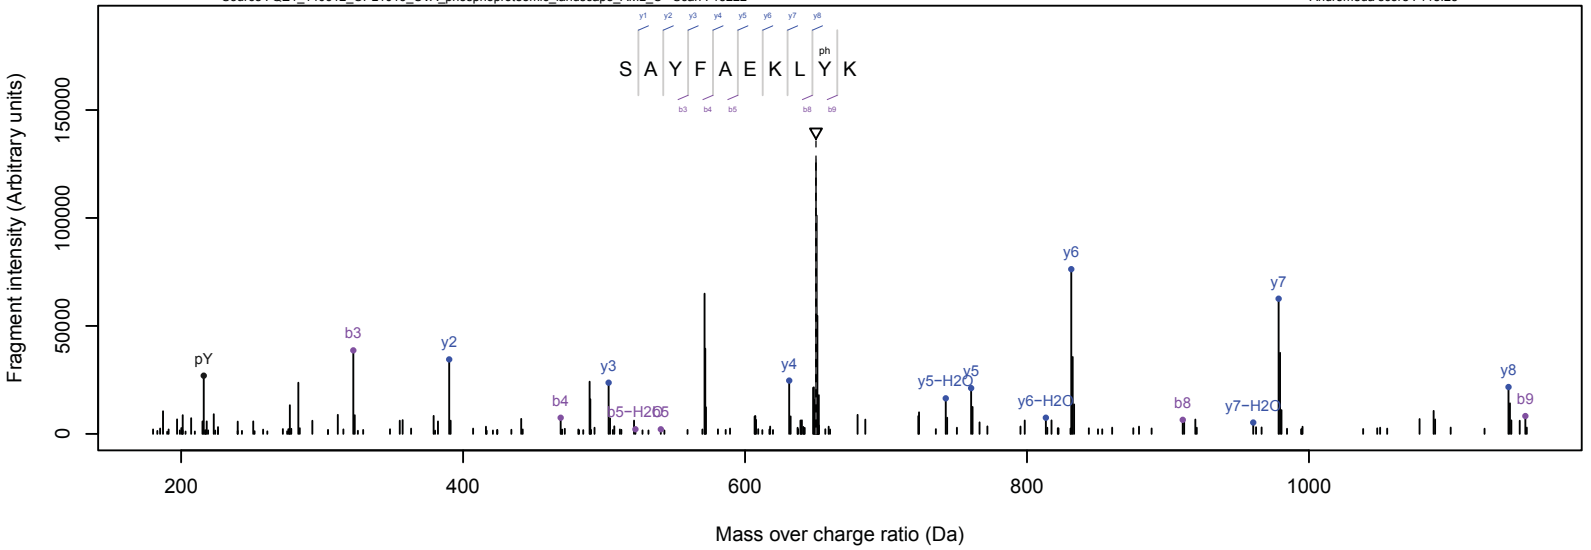

SPQNETLY(ph)SVLKA-2+

Source : QE1\_140612\_OPL1013\_CVA\_phosphoproteomic\_landscape\_AML\_F Scan : 34216

Andromeda score : 118.26

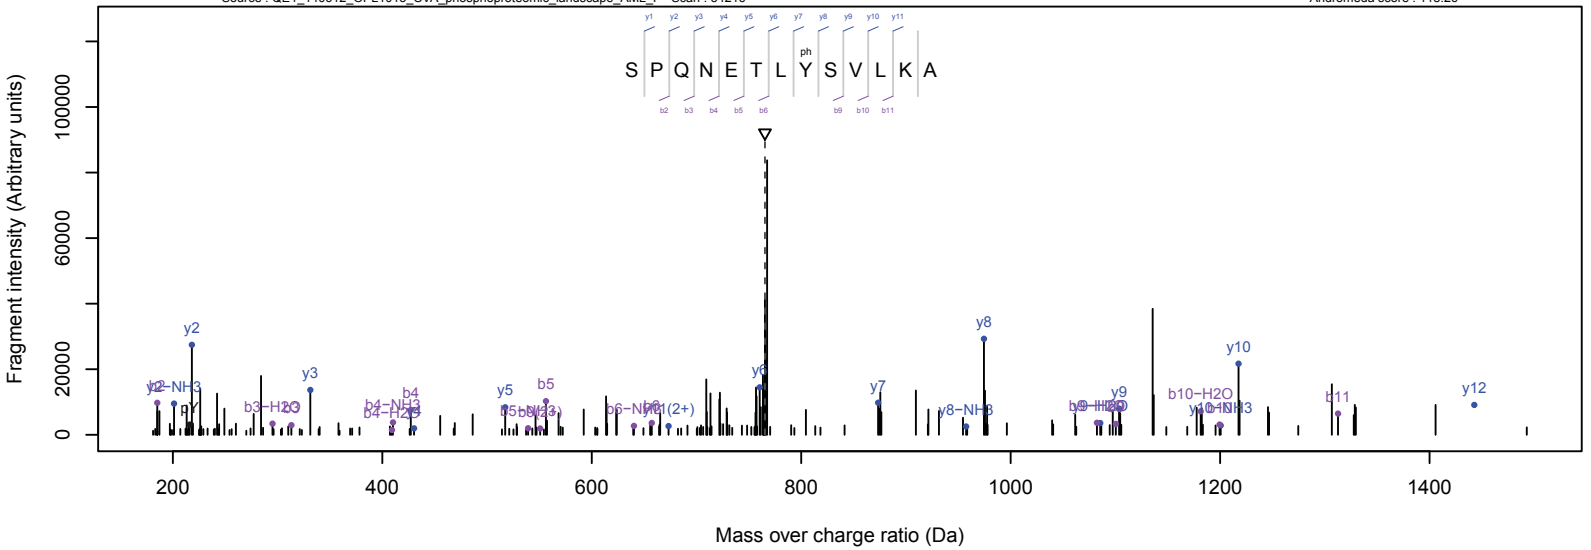







**SHEGETSY(ph)IRVYPER-3+**

Source : QE1\_140612\_OPL1013\_CVA\_phosphoproteomic\_landscape\_AML\_A Scan : 15290

Andromeda score : 118.16

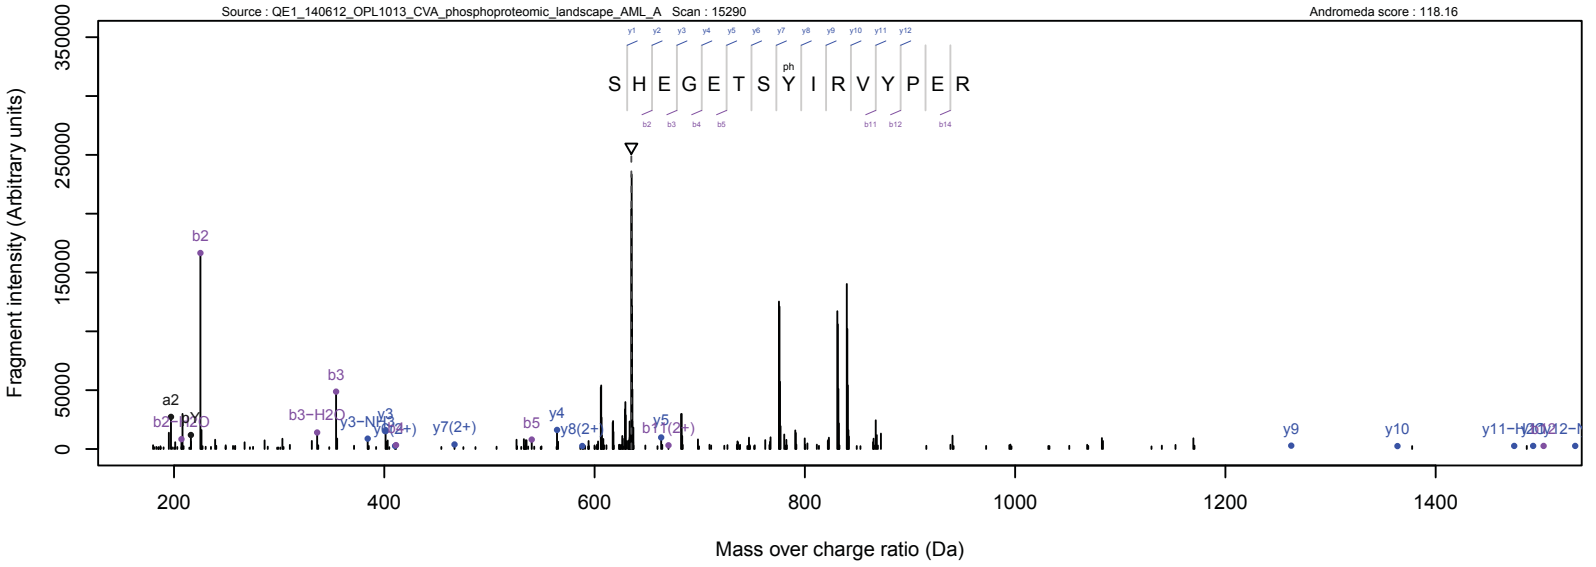

**QADTTQY(ph)VPMLERK-2+**

Source : QE1\_140612\_OPL1013\_CVA\_phosphoproteomic\_landscape\_AML\_A Scan : 20173

Andromeda score : 118.08

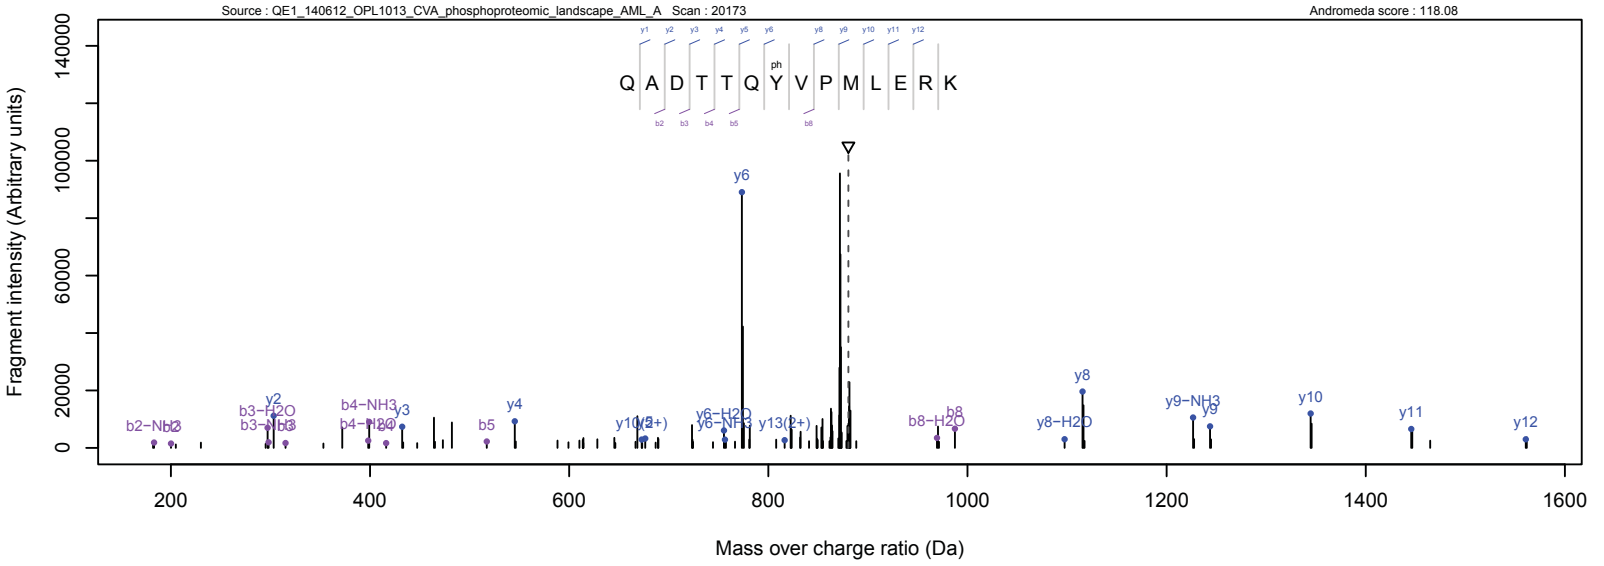

**CQY(ph)VTEK-2+**

Source : QE1\_140822\_OPL1013\_CvA\_pTyrIP\_AML\_cell\_lines\_part2\_E Scan : 2899

Andromeda score : 118.07

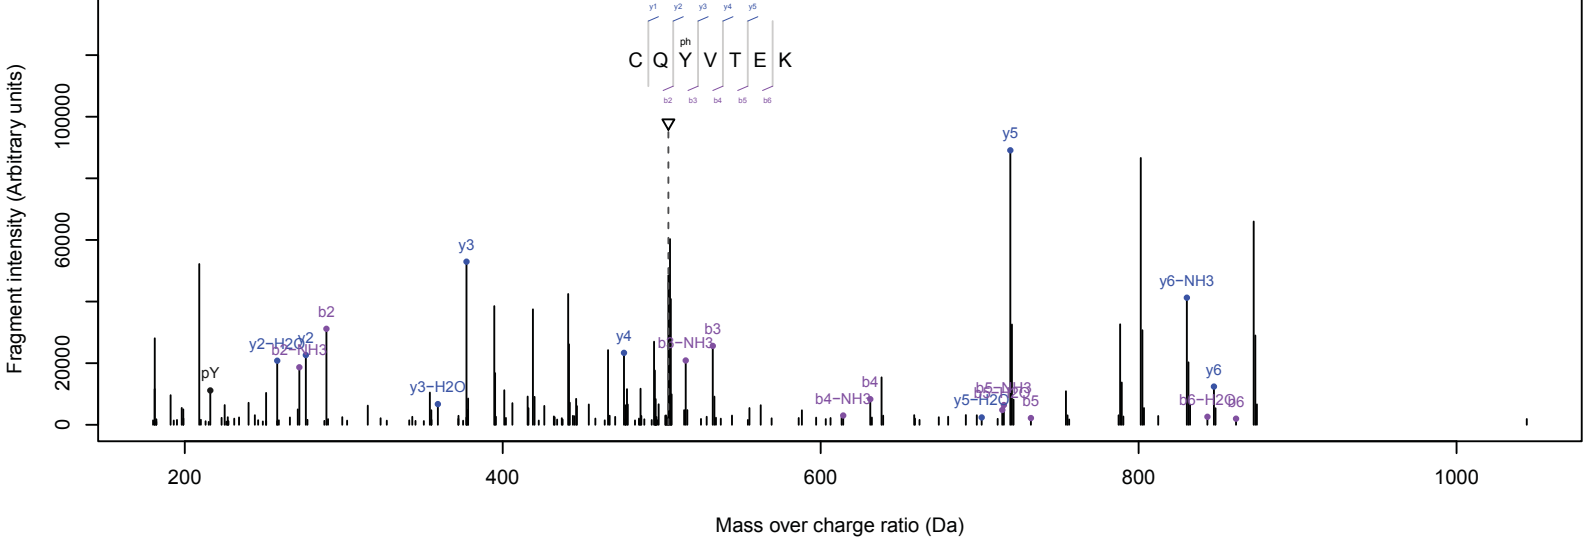

KRPQVY(ph)F-2+

Source: QE1\_140612\_OPL1013\_CVA\_phosphoproteomic\_landscape\_AML\_C Scan: 14480

Andromeda score: 118.06

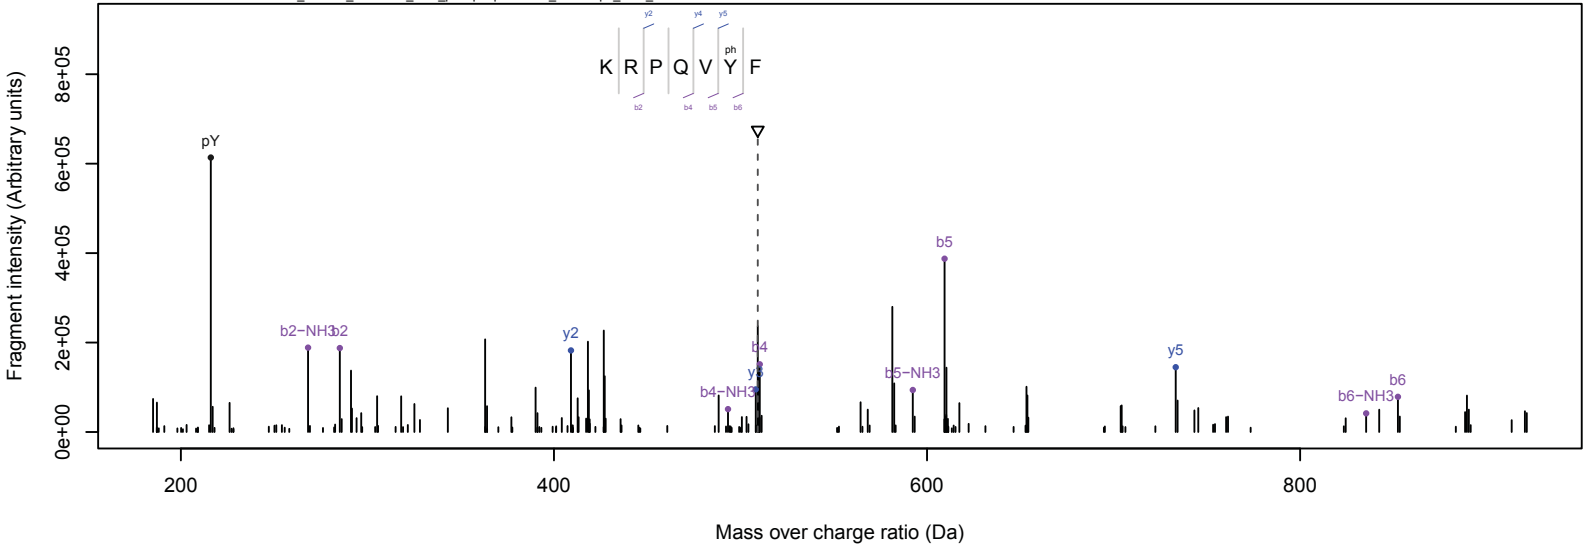

Y(ph)FWQNFR-2+

Source: QE1\_140612\_OPL1013\_CVA\_phosphoproteomic\_landscape\_AML\_C Scan: 37009

Andromeda score: 118.06

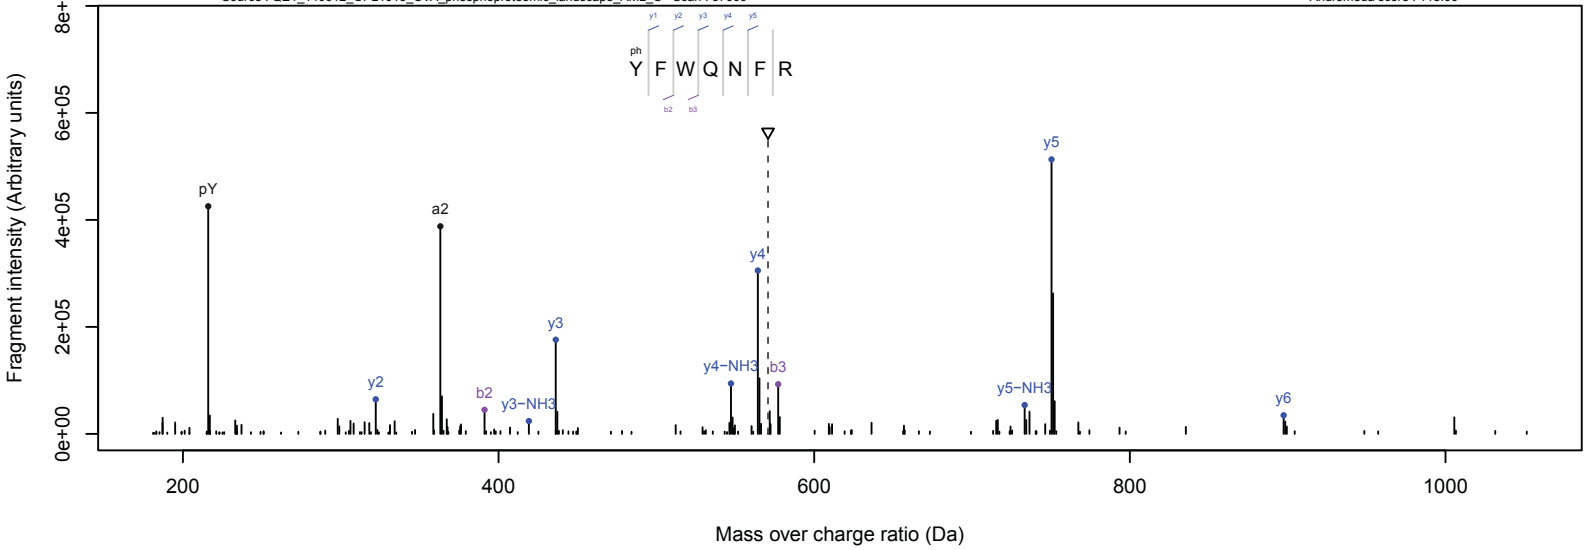

Y(ph)HTINGHNCEVKK-4+

Source: QE1\_140612\_OPL1013\_CVA\_phosphoproteomic\_landscape\_AML\_D Scan: 3616

Andromeda score: 117.93

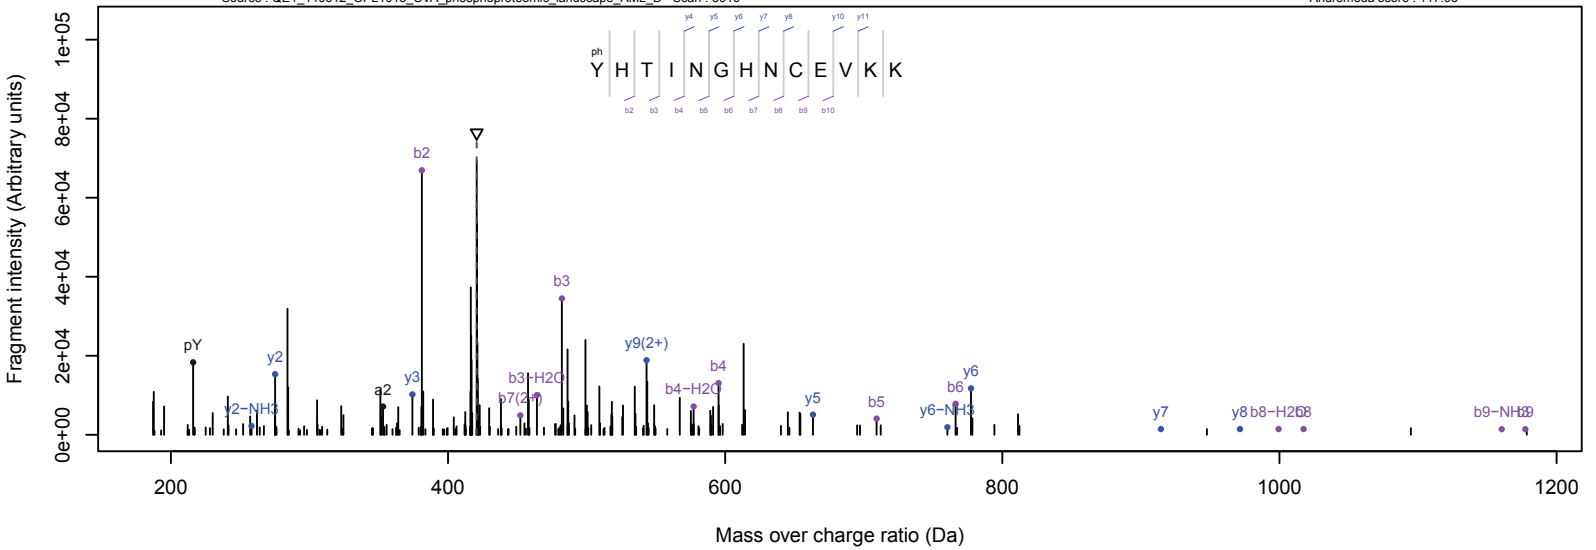

Y(ph)PWMAFPR-2+

Source : QE1\_140612\_OPL1013\_CVA\_phosphoproteomic\_landscape\_AML\_C Scan : 37395

Andromeda score : 117.93

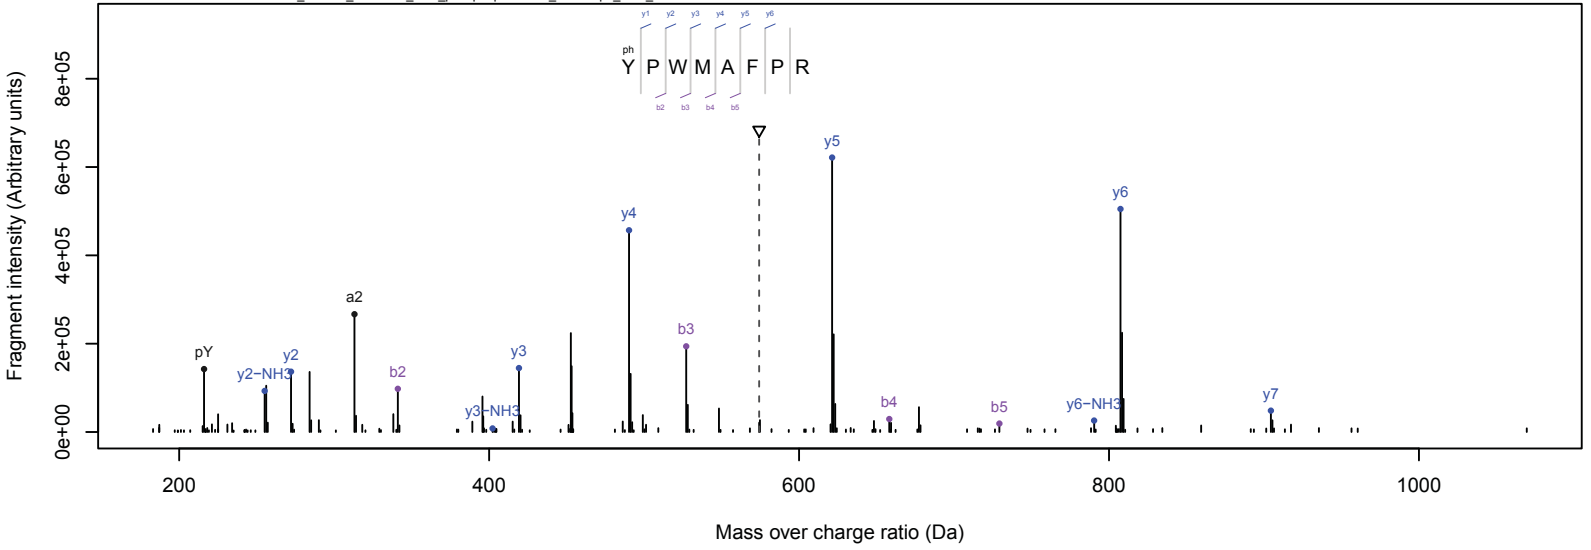

GY(ph)IYVEAYK-2+

Source : QE1\_140612\_OPL1013\_CVA\_phosphoproteomic\_landscape\_AML\_B Scan : 22048

Andromeda score : 117.89

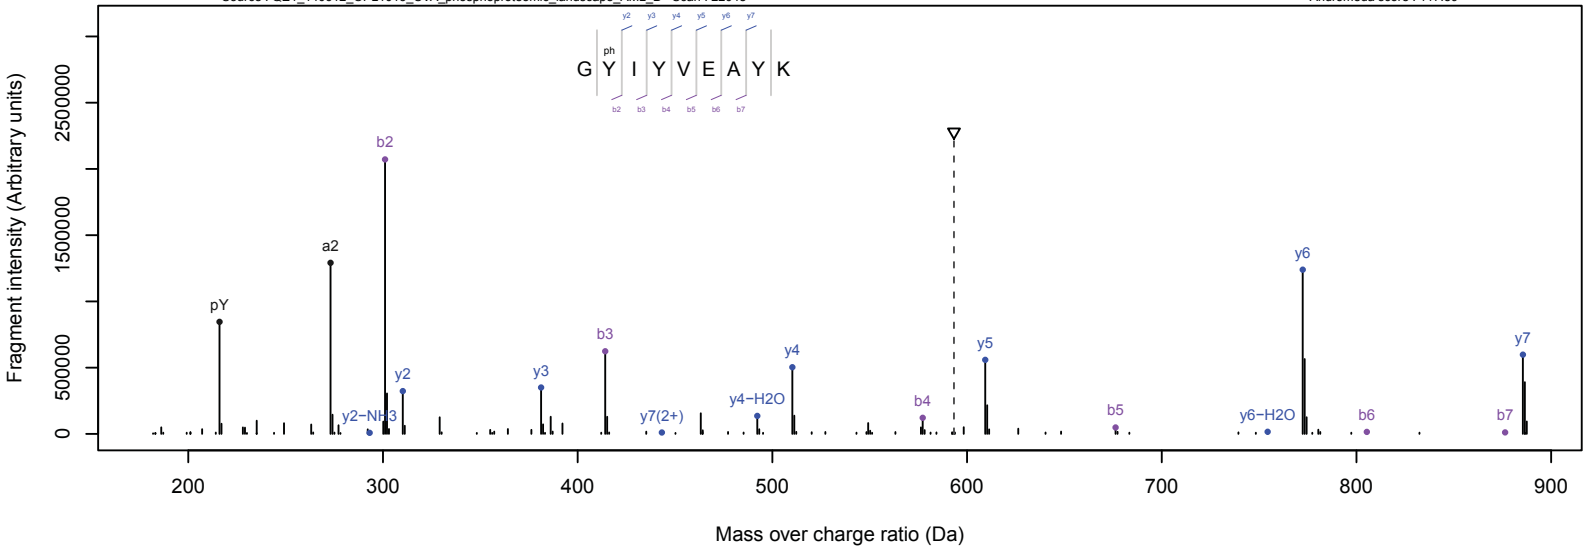

QYAGYDYSQQGR-2+

Source : QE1\_140612\_OPL1013\_CVA\_phosphoproteomic\_landscape\_AML\_C Scan : 7335

Andromeda score : 117.86

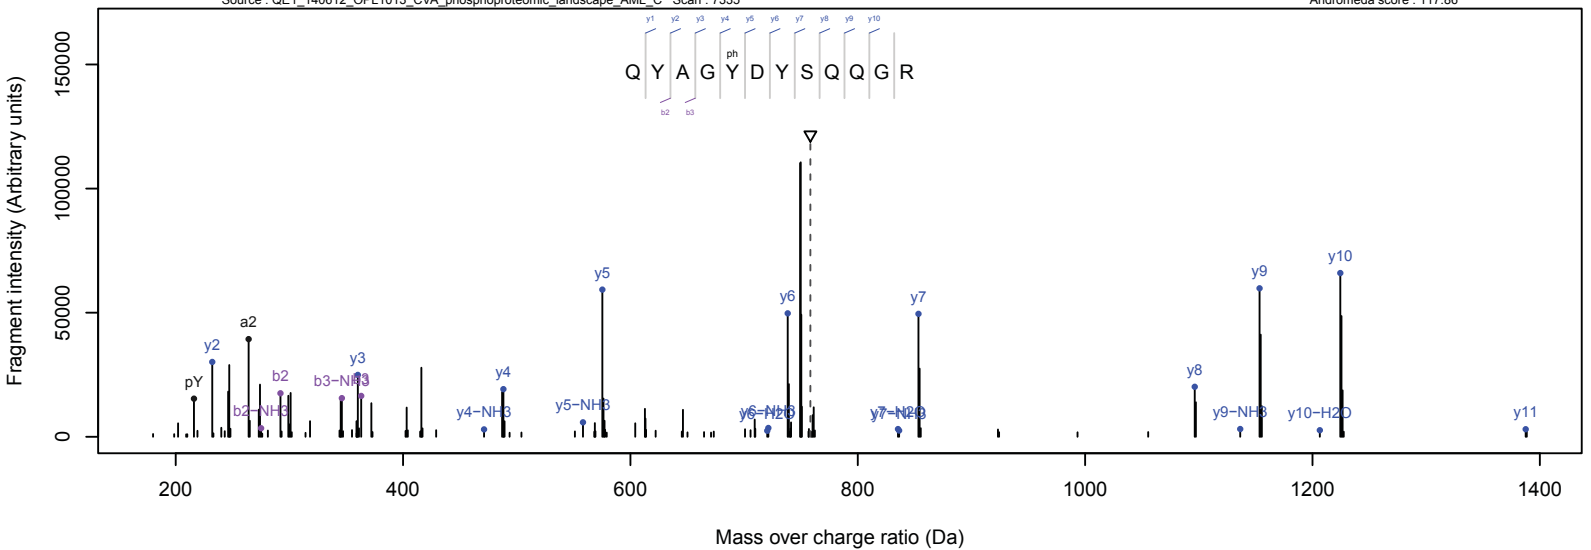

FAAYFQQGDMESNGKY(ph)ITK-3+

Source : QE1\_140612\_OPL1013\_CVA\_phosphoproteomic\_landscape\_AML\_C Scan : 27233

Andromeda score : 117.84

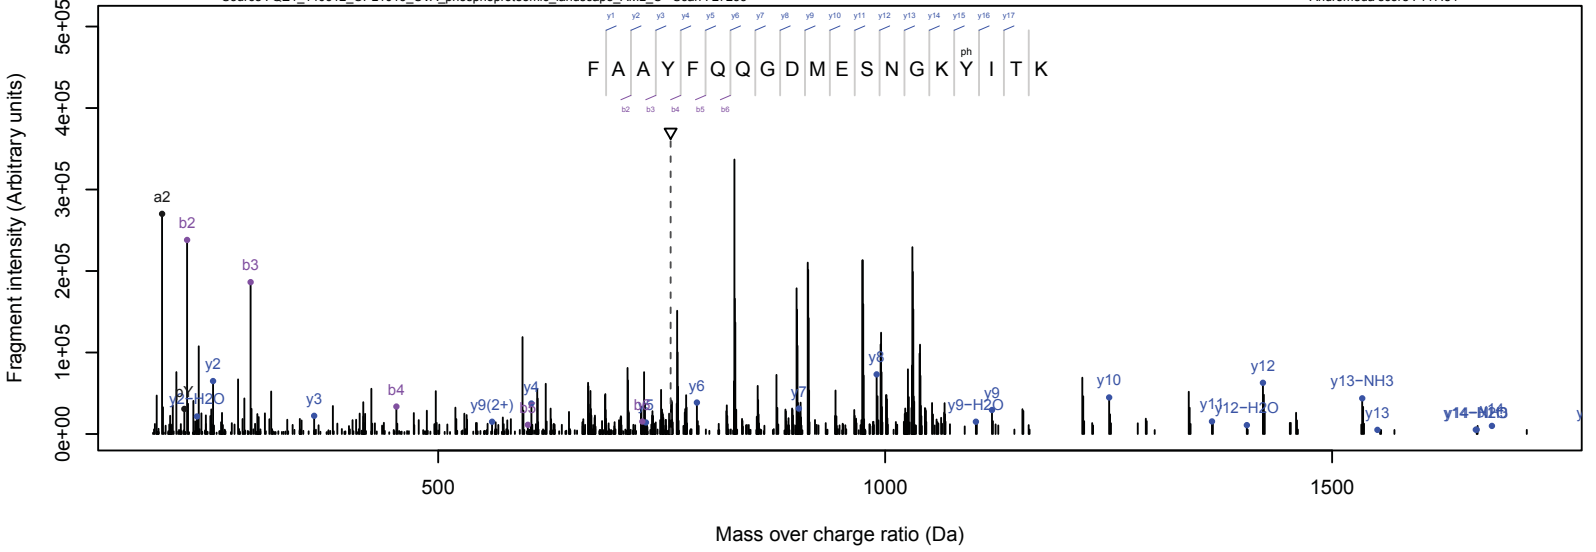

ATFYGEQVDY(ph)YK-2+

Source : QE1\_140612\_OPL1013\_CVA\_phosphoproteomic\_landscape\_AML\_C Scan : 24692

Andromeda score : 117.79

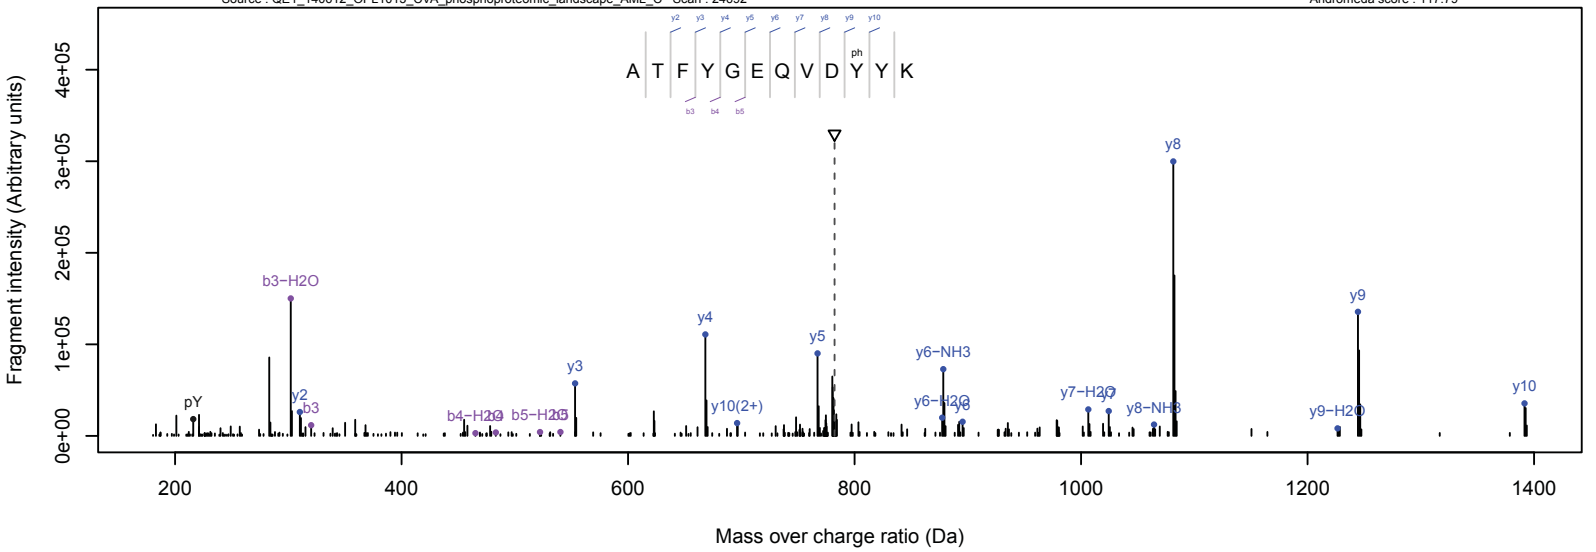

KPSEEEYVIRK-3+

Source : QE1\_140612\_OPL1013\_CVA\_phosphoproteomic\_landscape\_AML\_C Scan : 7026

Andromeda score : 117.79

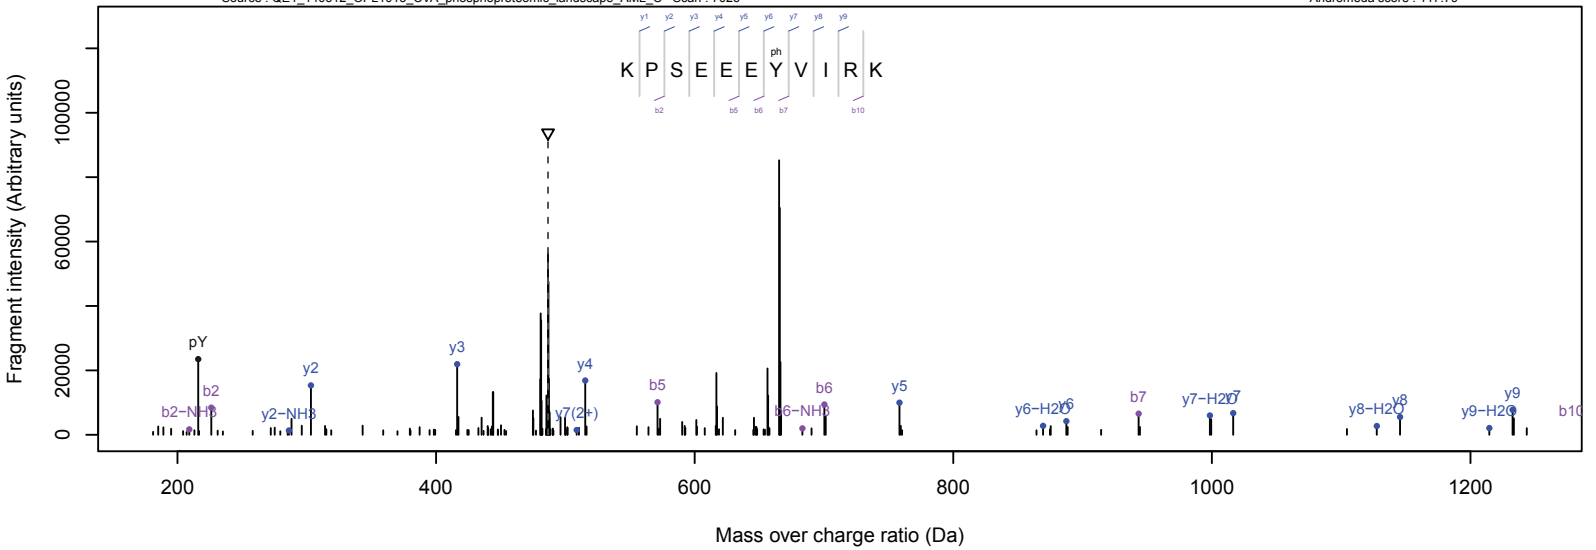

WPTVDASY(ph)YGGR-2+

Source : QE1\_140612\_OPL1013\_CVA\_phosphoproteomic\_landscape\_AML\_C Scan : 28272

Andromeda score : 117.79

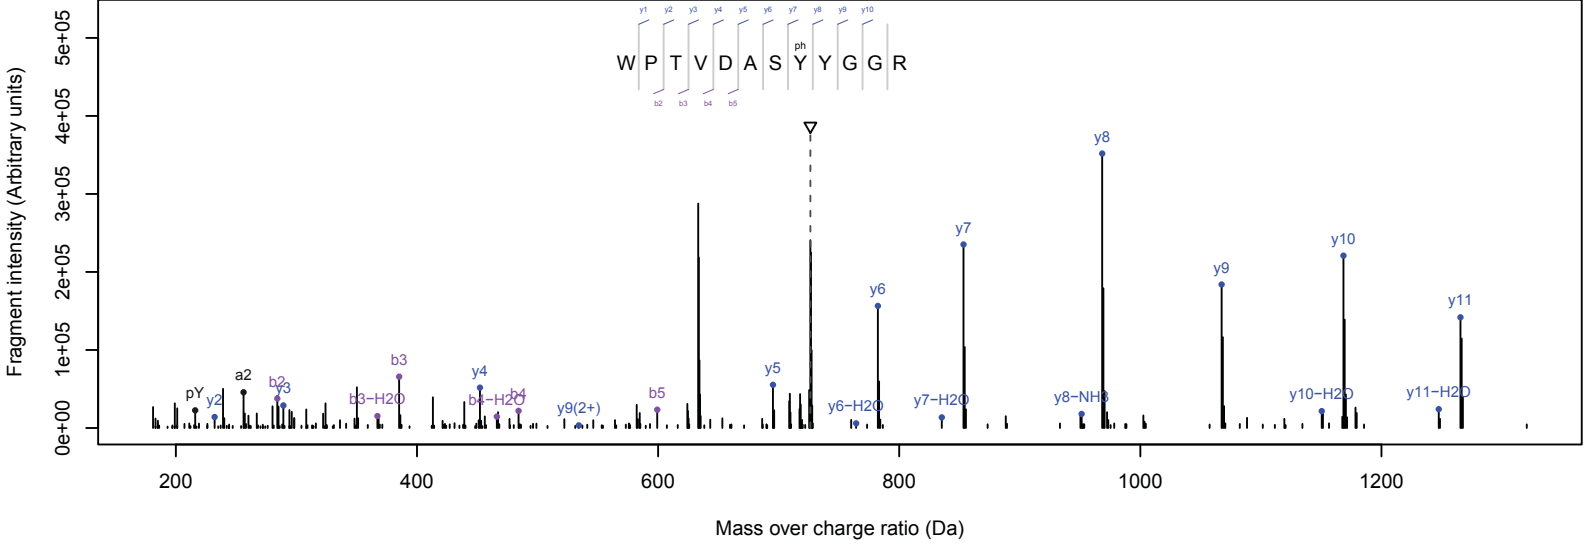

LVNEAPVYSVYS(ph)K-2+

Source : QE1\_140908\_OPL1013\_CvA\_pTyrIP\_AML\_HEL Scan : 23031

Andromeda score : 117.7

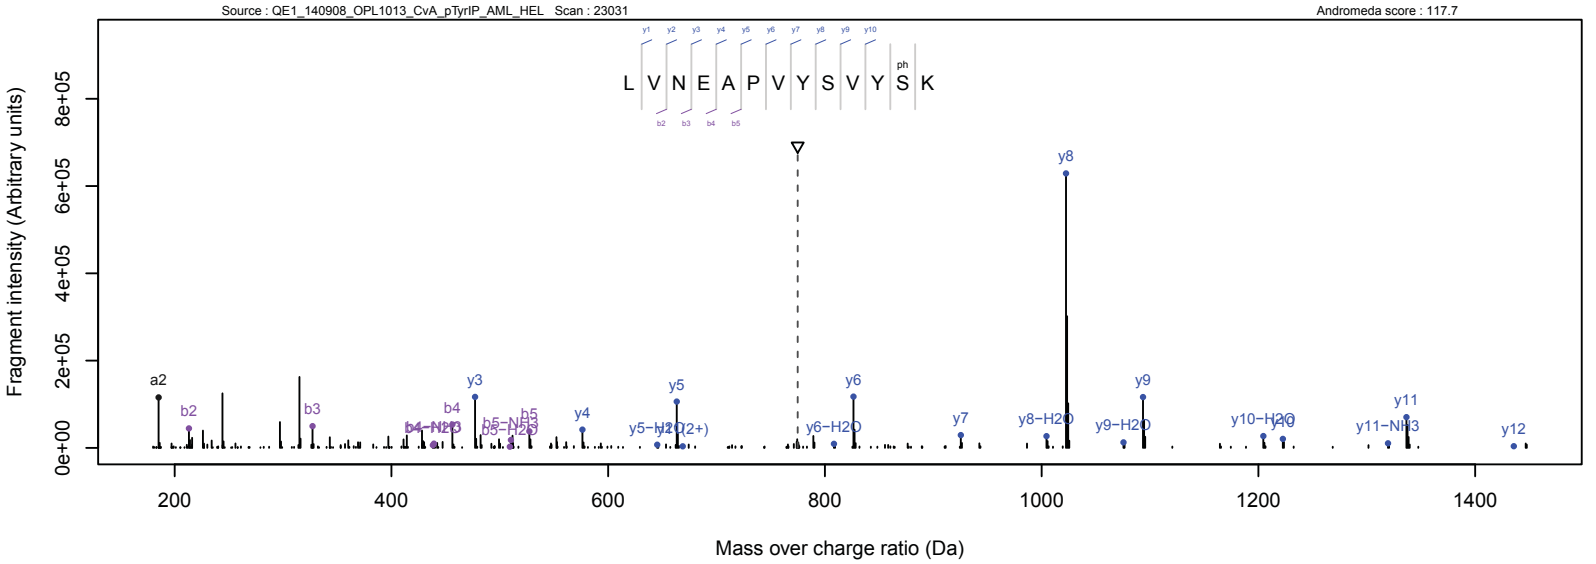

LVQSPNSY(ph)FMDVK-2+

Source : QE1\_140612\_OPL1013\_CVA\_phosphoproteomic\_landscape\_AML\_A Scan : 29377

Andromeda score : 117.7

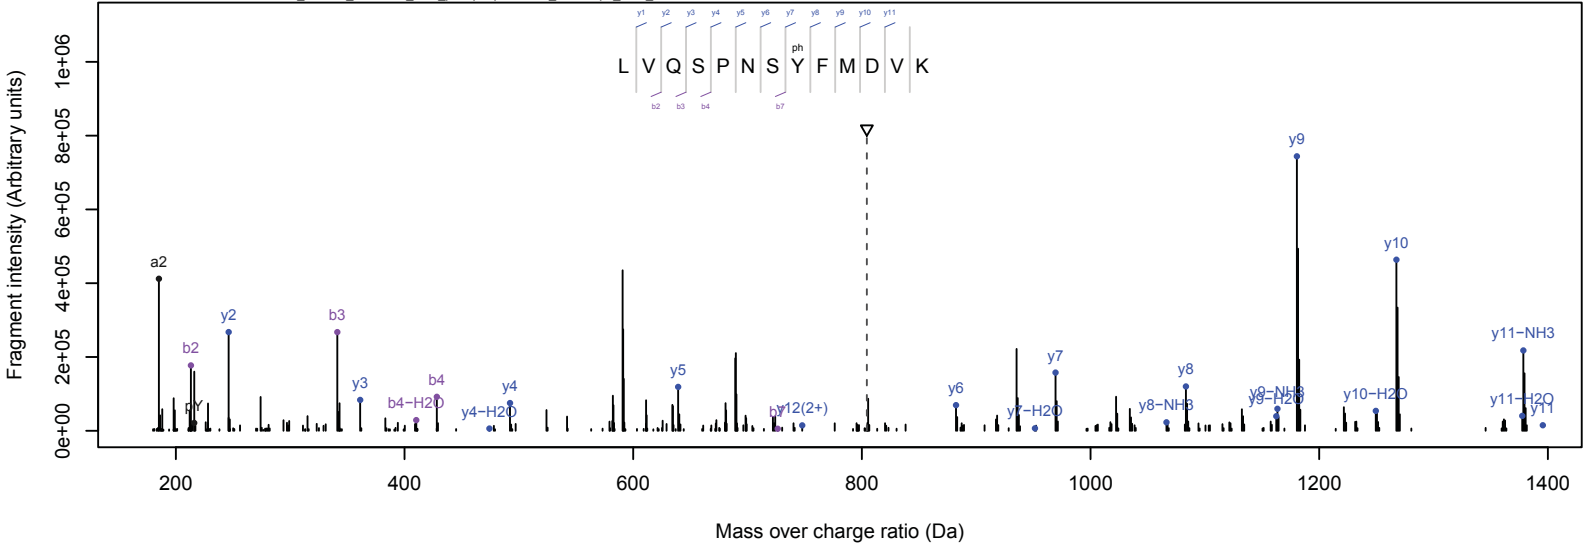

ATEDGTPYDPY(ph)KALWFER-3+

Source : QE1\_140822\_OPL1013\_CvA\_pTyrIP\_AML\_cell\_lines\_part2\_E Scan : 29046

Andromeda score : 117.65

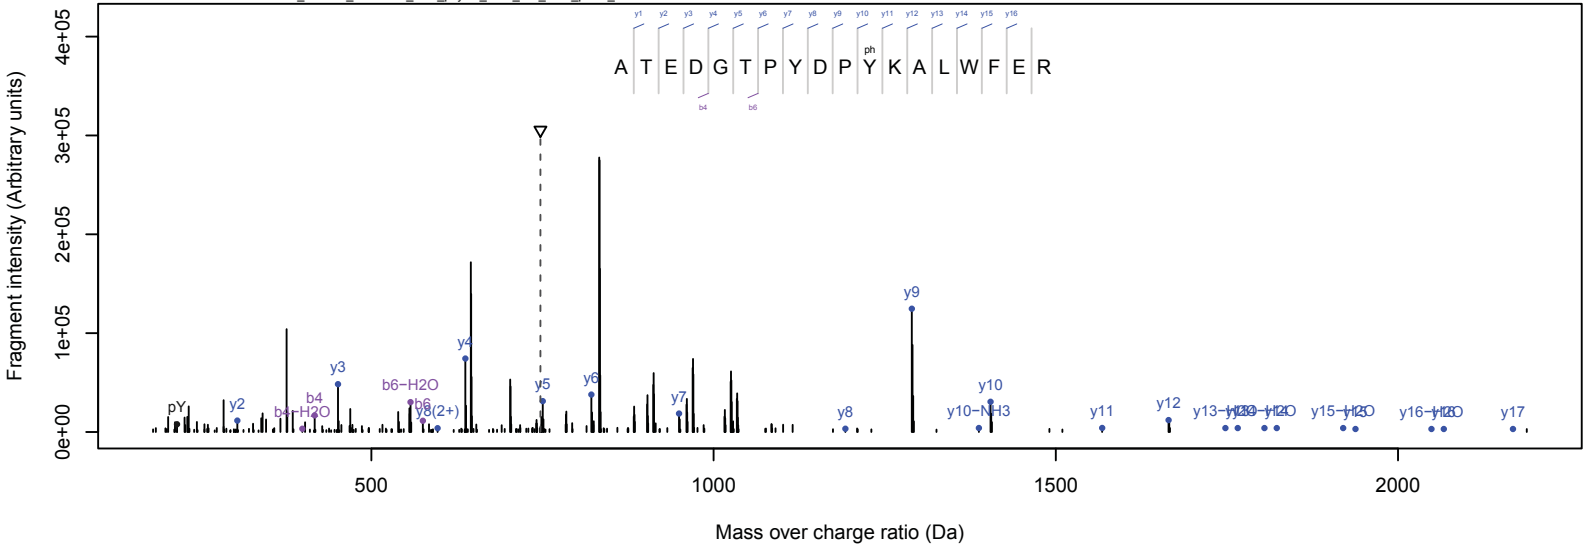

SPLEKPHNGLLPQHG DYQY(ph)GR-4+

Source : QE1\_140908\_OPL1013\_CvA\_pTyrIP\_AML\_Kasumi1 Scan : 23295

Andromeda score : 117.62

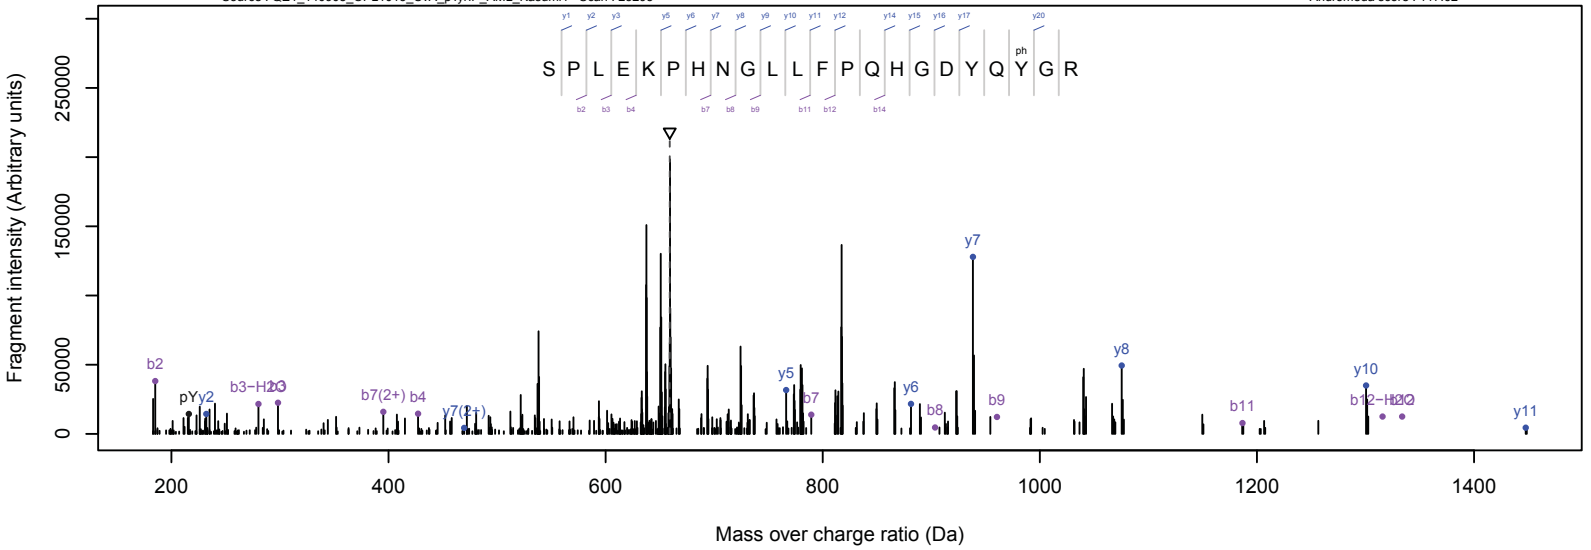

NTPY(ph)KTLPEVKPPTVPNDYMTSPAR-3+

Source : QE1\_140908\_OPL1013\_CvA\_pTyrIP\_AML\_HEL Scan : 26285

Andromeda score : 117.61

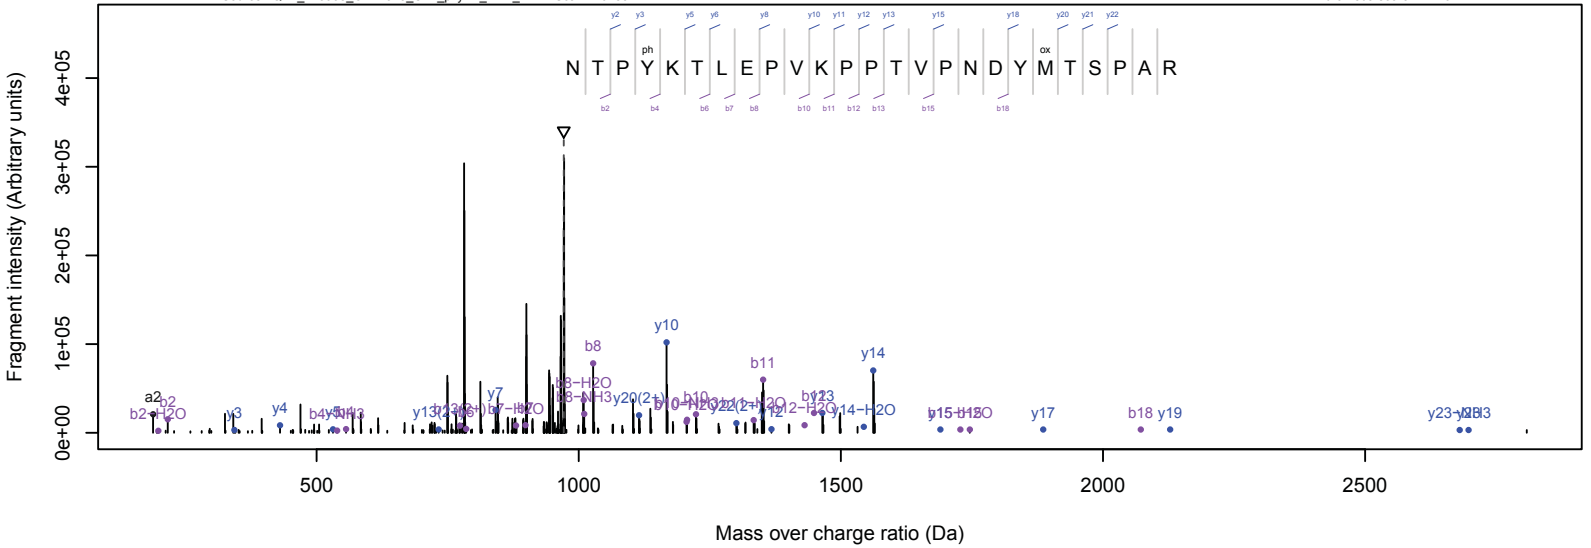

AVQCTSDY(ph)PEHVCEVLLTMER-3+

Source : QE1\_140612\_OPL1013\_CVA\_phosphoproteomic\_landscape\_AML\_B Scan : 39228

Andromeda score : 117.38

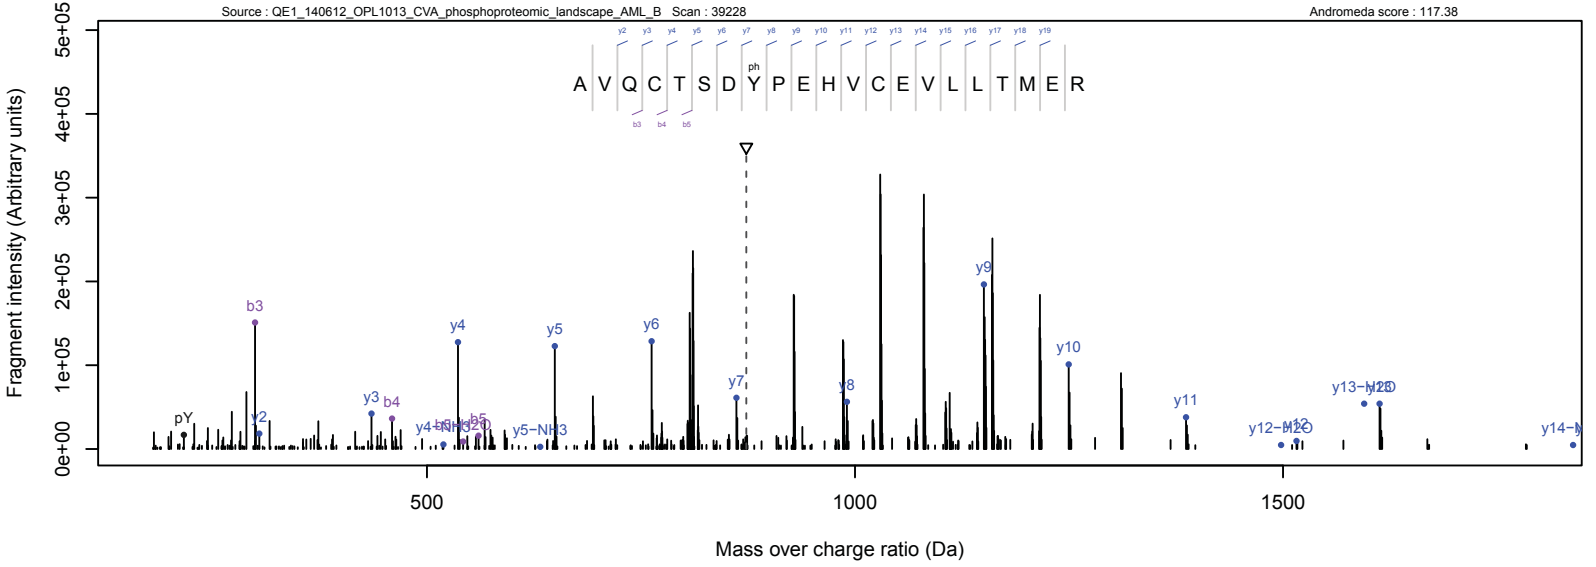

Y(ph)SYVCPDLVKEFNKYDTDGSK-3+

Source : QE1\_140612\_OPL1013\_CVA\_phosphoproteomic\_landscape\_AML\_B Scan : 35124

Andromeda score : 117.38

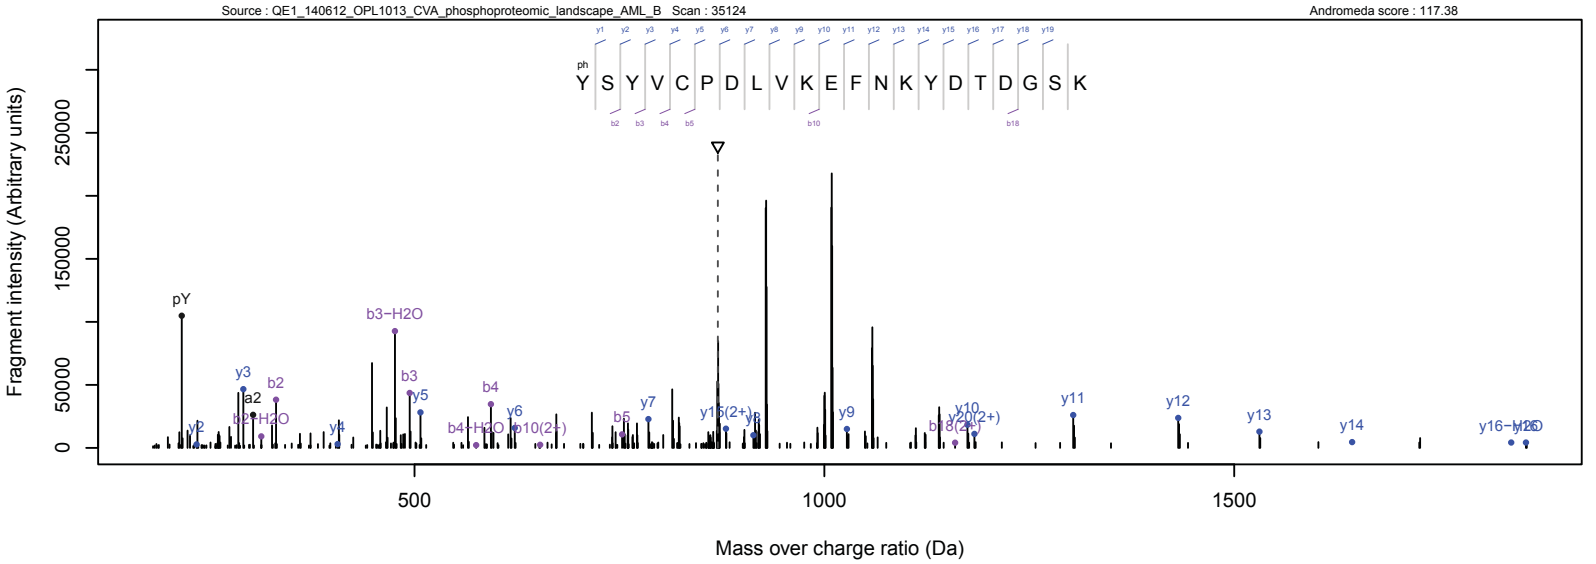

HVY(ph)LDEPIK-2+

Source : QE1\_140612\_OPL1013\_CVA\_phosphoproteomic\_landscape\_AML\_B Scan : 18275

Andromeda score : 117.31

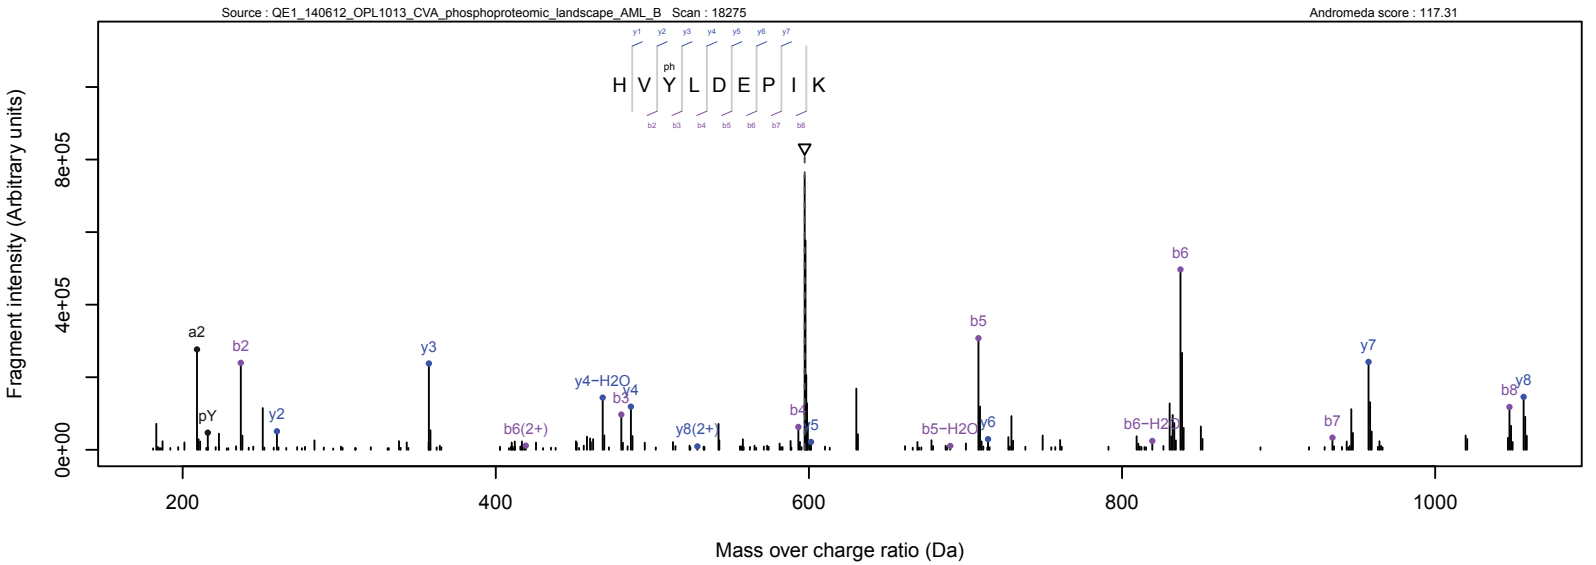



Y(ph)M(ox)EDSTYYK-2+

Source : QE1\_140908\_OPL1013\_CvA\_pTyrIP\_AML\_Kasumi1 Scan : 7304

Andromeda score : 117.31

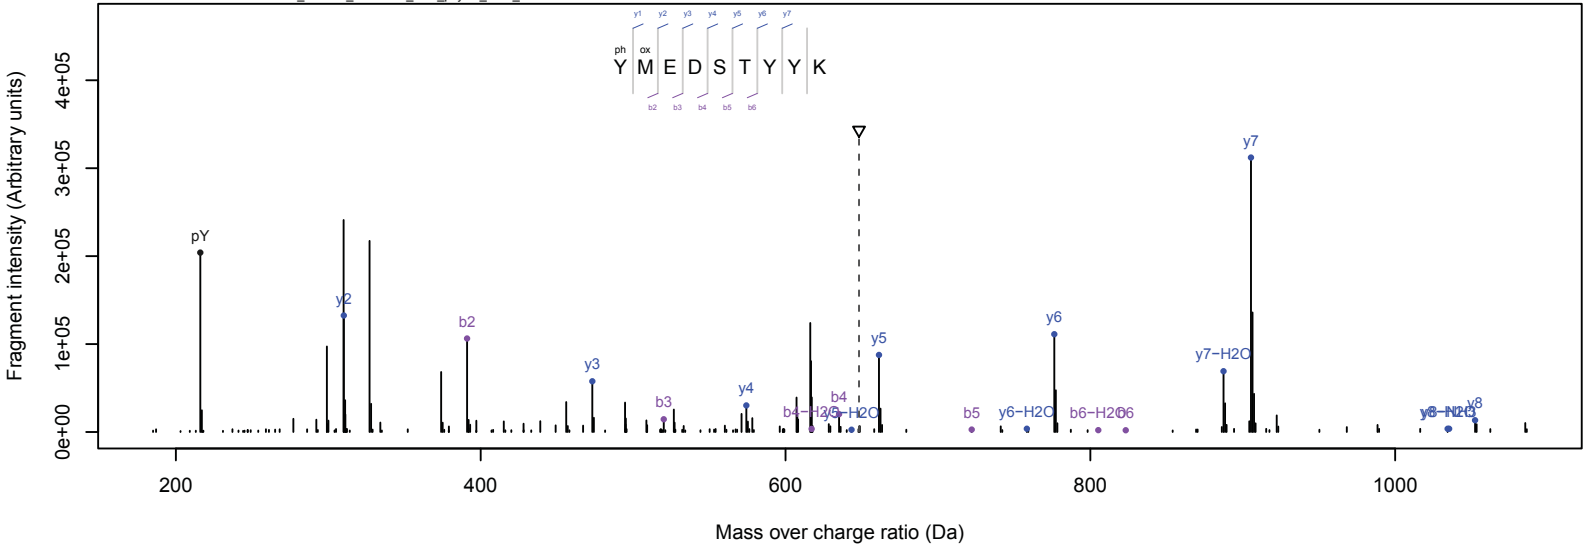

SINISDYSPYGT(ph)HGGWGWASPYSPHQNIP SQGHFSEK-4+

Source : QE1\_140908\_OPL1013\_CvA\_pTyrIP\_AML\_HL60 Scan : 34361

Andromeda score : 117.26

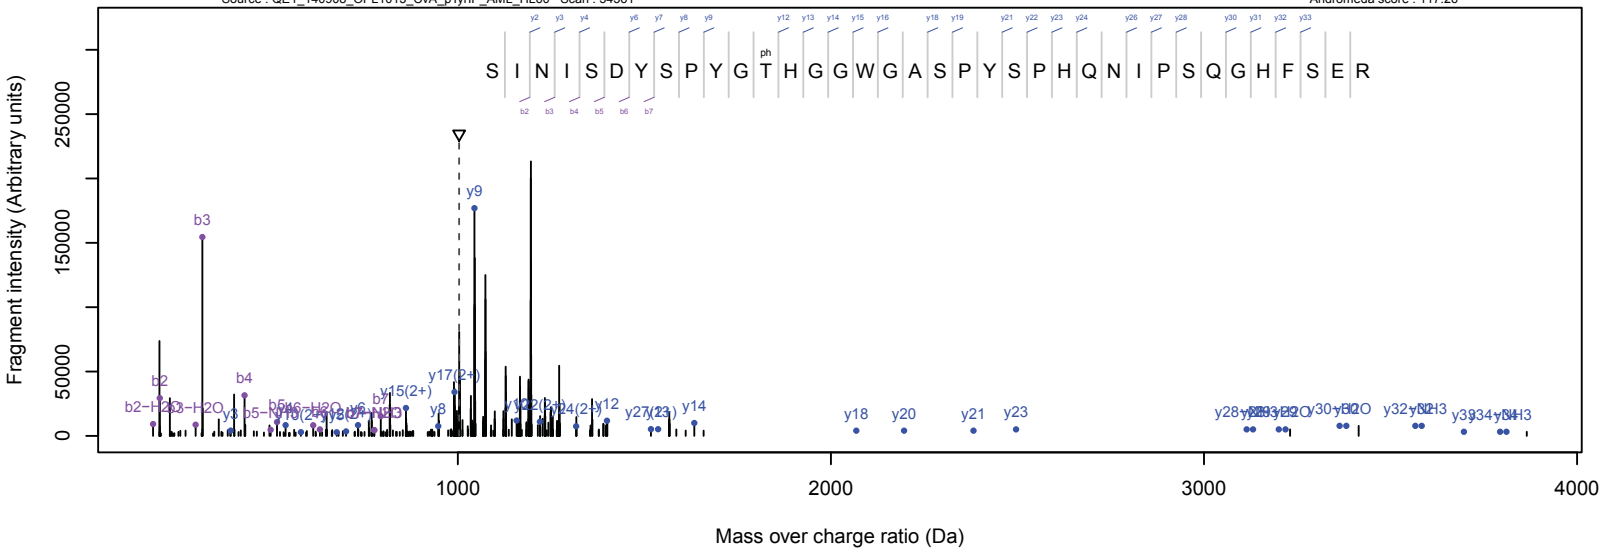

HLGIY(ph)SVLPNHK-3+

Source : QE1\_140612\_OPL1013\_CvA\_phosphoproteomic\_landscape\_AML\_B Scan : 24365

Andromeda score : 117.25

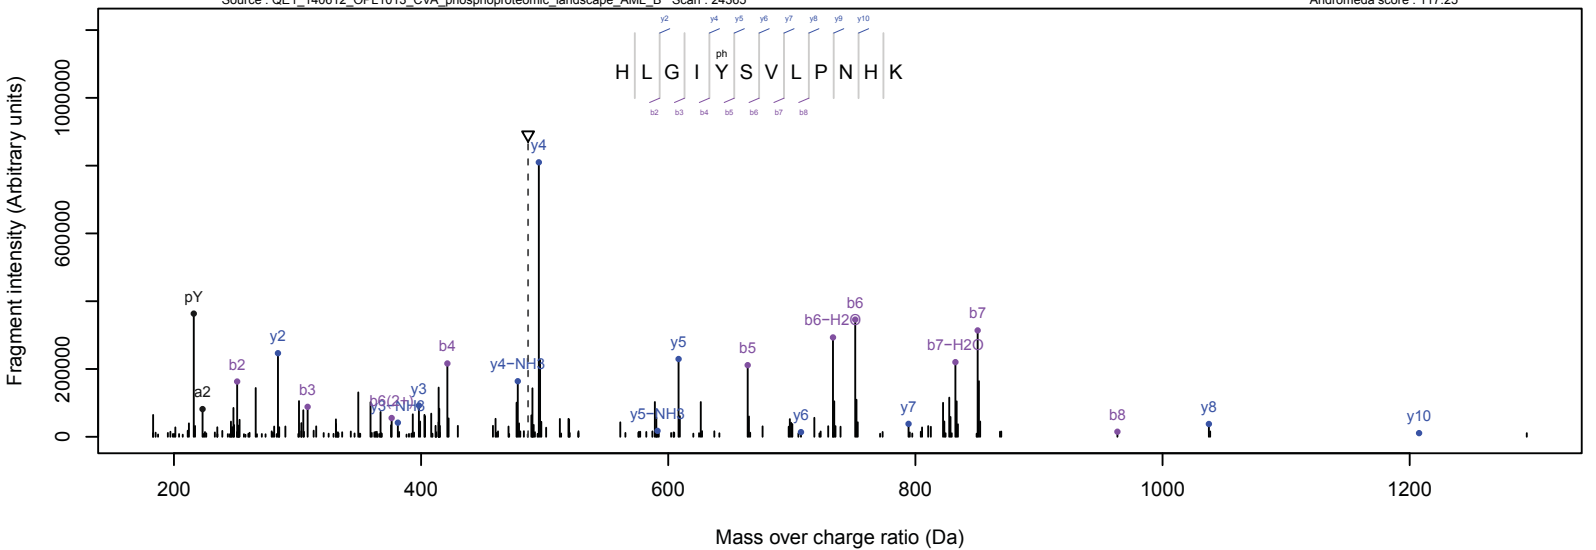

RPGNIY(ph)STLK-2+

Source : QE1\_140612\_OPL1013\_CVA\_phosphoproteomic\_landscape\_AML\_B Scan : 10078

Andromeda score : 117.25

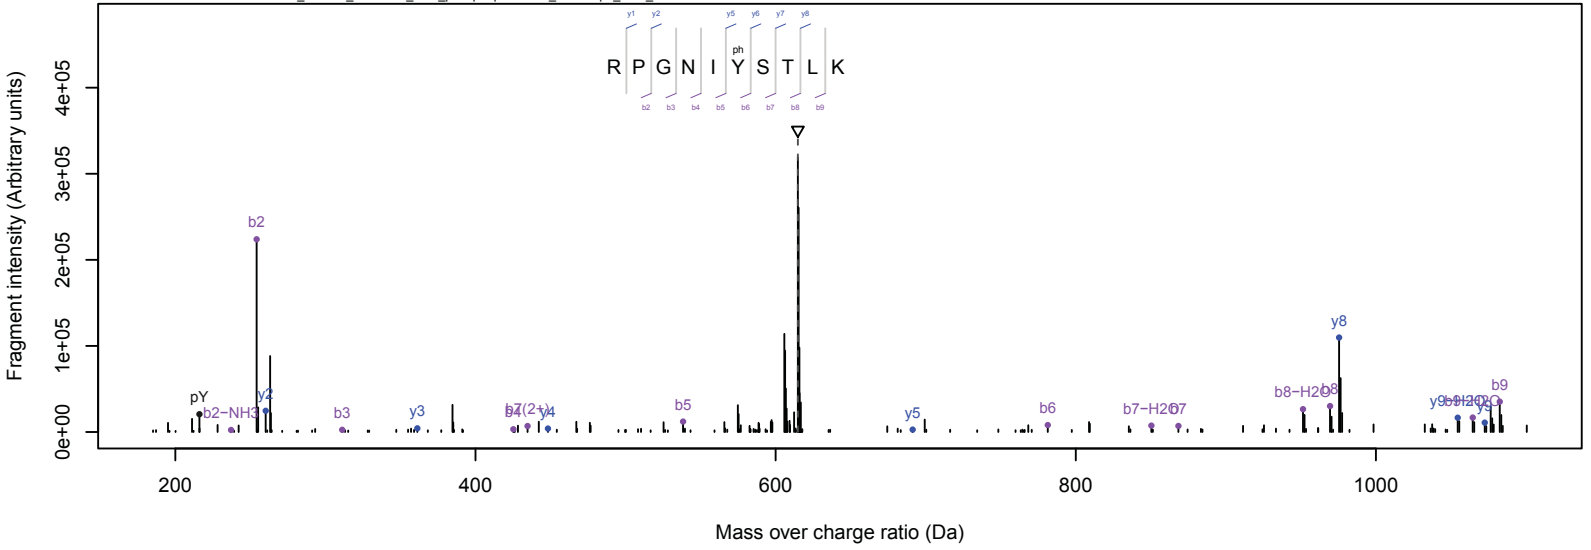

VSGDYGHPVYIQEMPQPSPANIY(ph)YKV-3+

Source : QE1\_140612\_OPL1013\_CVA\_phosphoproteomic\_landscape\_AML\_C Scan : 40905

Andromeda score : 117.21

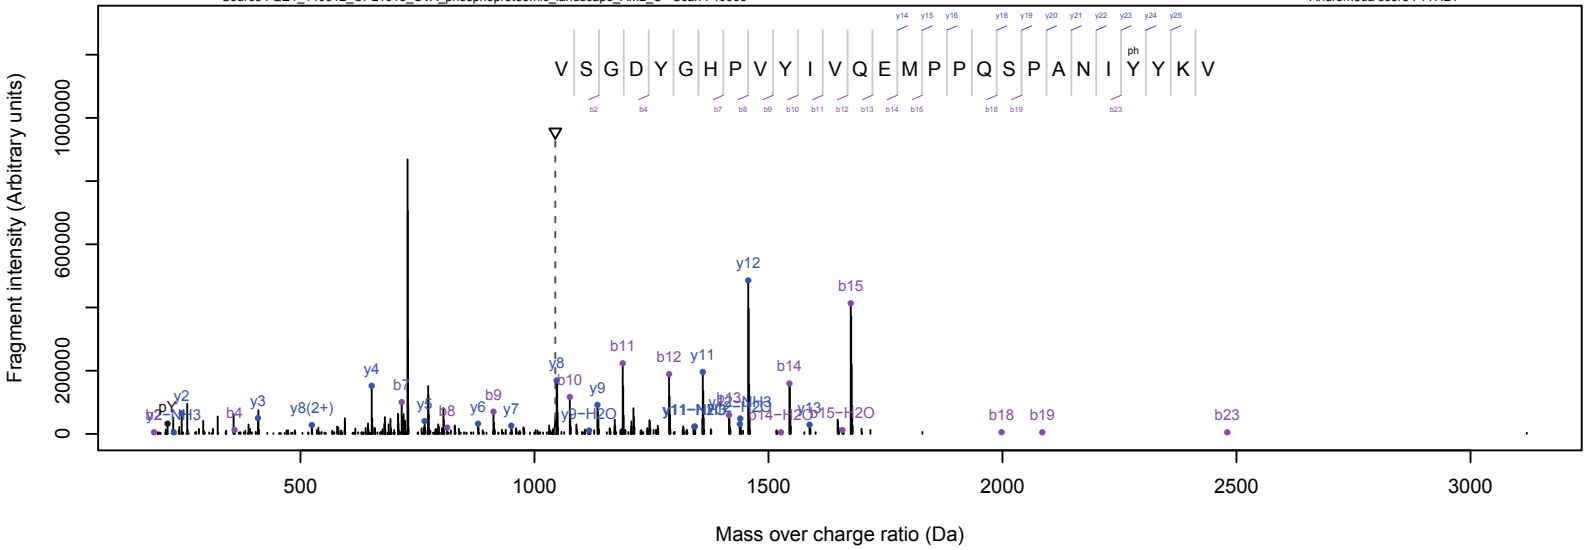

CY(ph)YYEDTISTIK-2+

Source : QE1\_140908\_OPL1013\_CvA\_pTyrIP\_AML\_Kasumi6 Scan : 31241

Andromeda score : 117.2

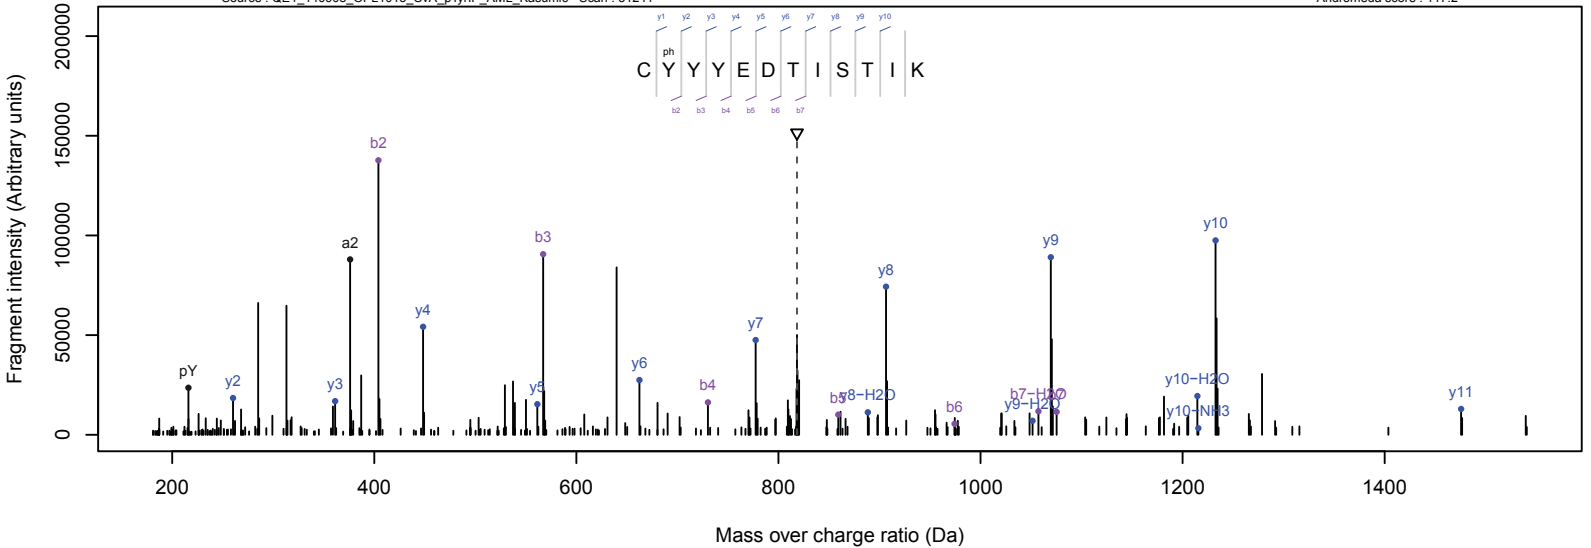

EGYVPQEEVPV(ph)ENKYVK-2+

Source : QE1\_140612\_OPL1013\_CVA\_phosphoproteomic\_landscape\_AML\_C Scan : 26406

Andromeda score : 117.2

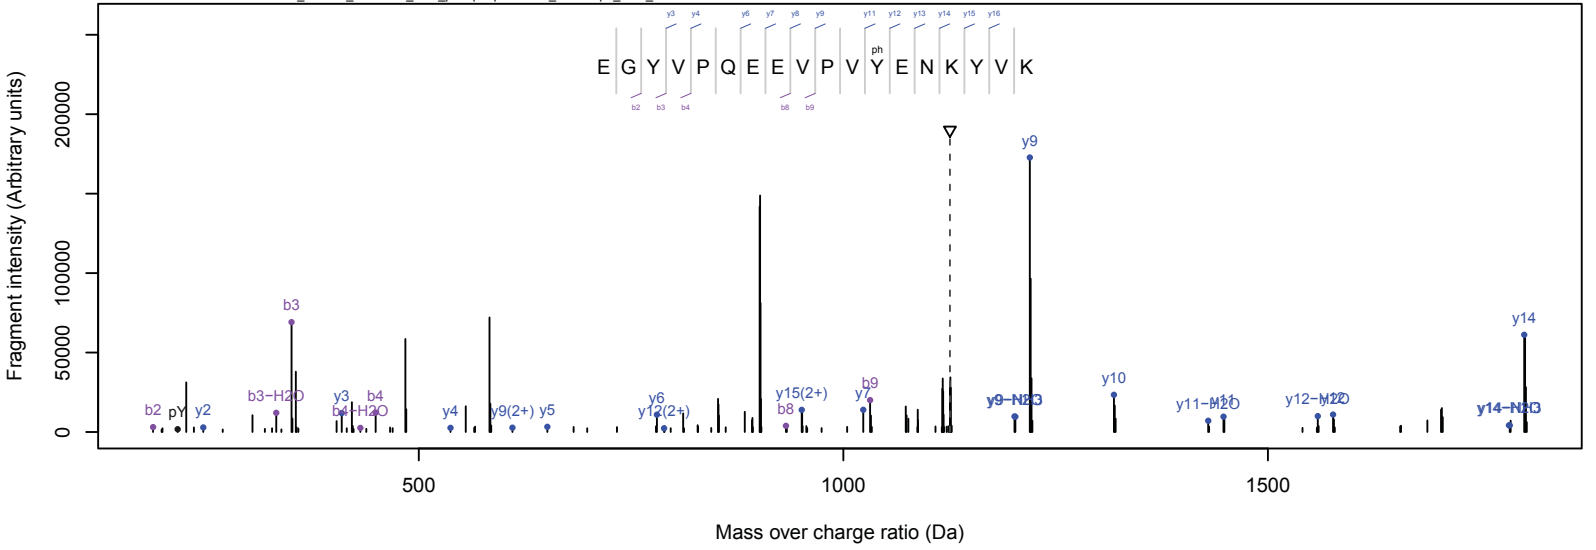

FSDQAGPAITNS(ph)YSK-2+

Source : QE1\_140612\_OPL1013\_CVA\_phosphoproteomic\_landscape\_AML\_C Scan : 18587

Andromeda score : 117.2

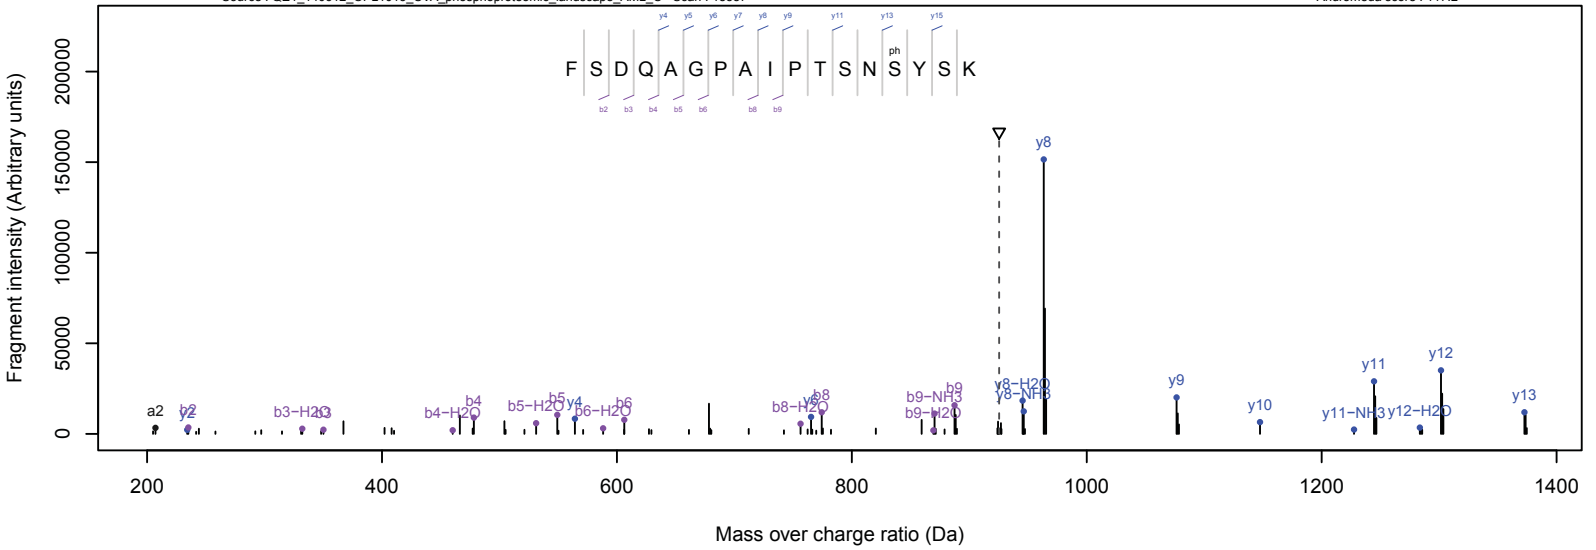

KIRDQY(ph)LVWLTK-3+

Source : QE1\_140612\_OPL1013\_CVA\_phosphoproteomic\_landscape\_AML\_A Scan : 30628

Andromeda score : 117.2

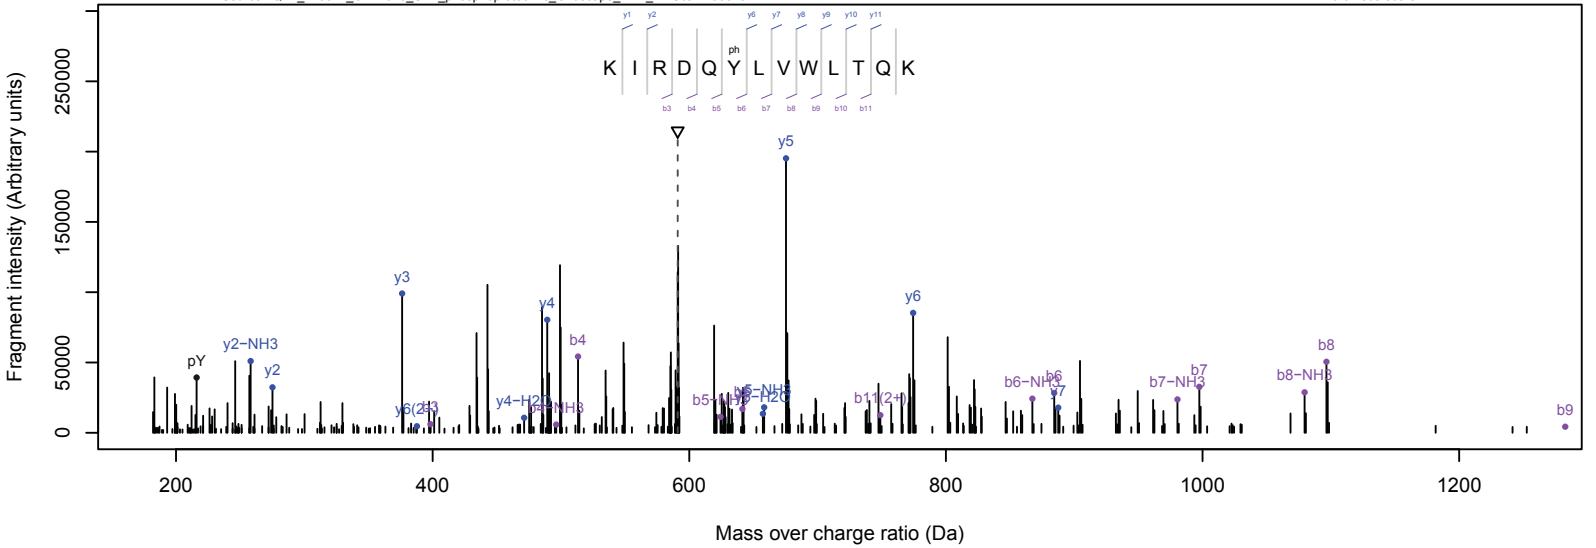

**KQPY(ph)YYPFDK-2+**

Source : QE1\_140612\_OPL1013\_CVA\_phosphoproteomic\_landscape\_AML\_A Scan : 20816

Andromeda score : 117.2

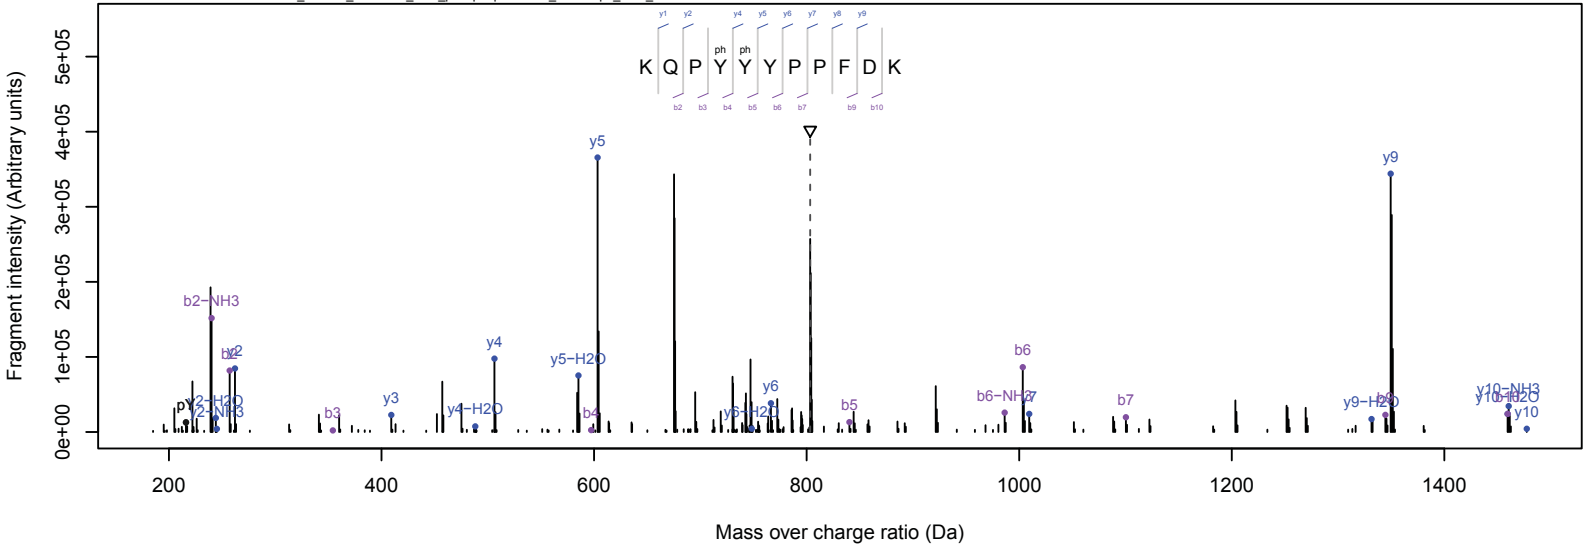

**SPGEY(ph)INIDFGEPGAR-2+**

Source : QE1\_140612\_OPL1013\_CVA\_phosphoproteomic\_landscape\_AML\_D Scan : 37086

Andromeda score : 117.18

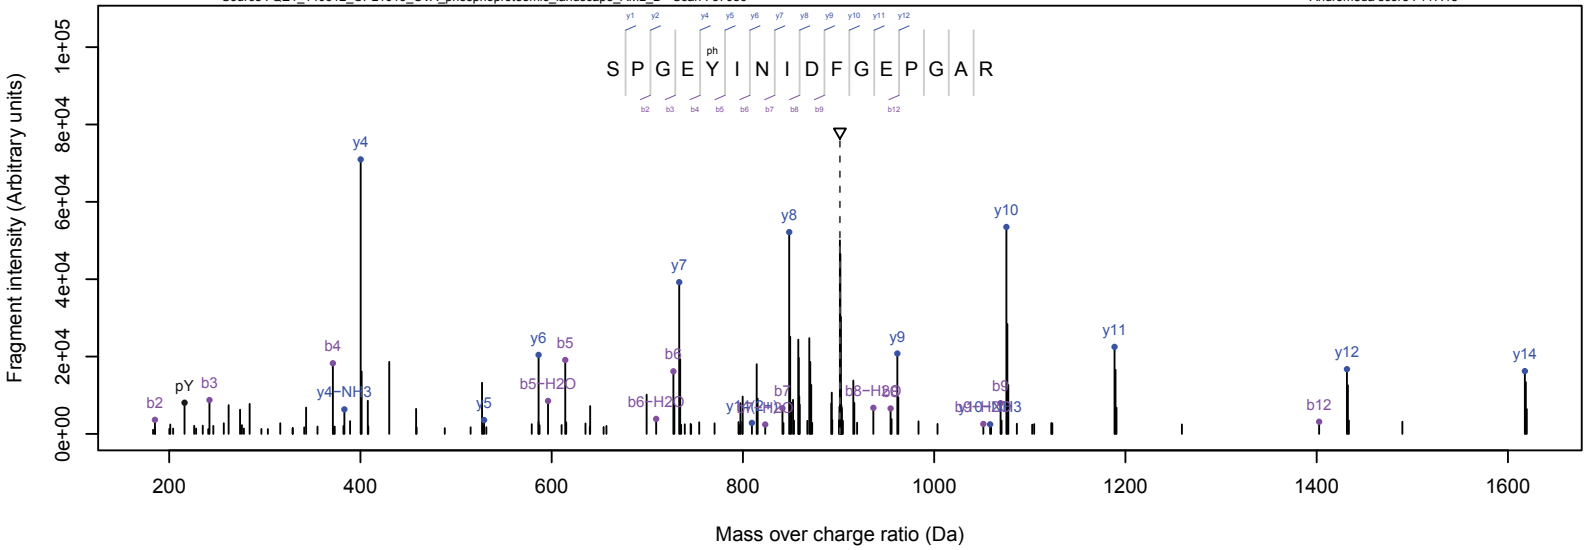

**NYMSNPSYNY(ph)EIVNR-2+**

Source : QE1\_140612\_OPL1013\_CVA\_phosphoproteomic\_landscape\_AML\_A Scan : 24321

Andromeda score : 117.08

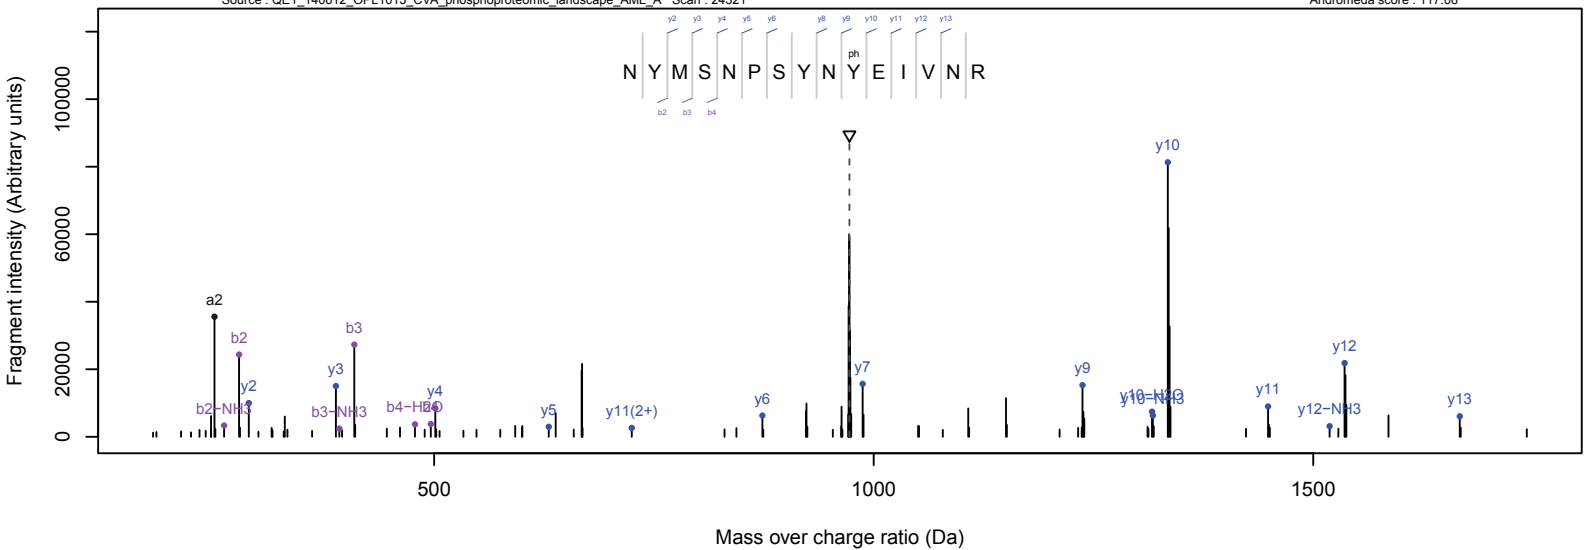

SAVGHEY(ph)VAEVEK-2+

Source : QE1\_140908\_OPL1013\_CvA\_pTyrIP\_AML\_OCI\_AML3 Scan : 12436

Andromeda score : 117.08

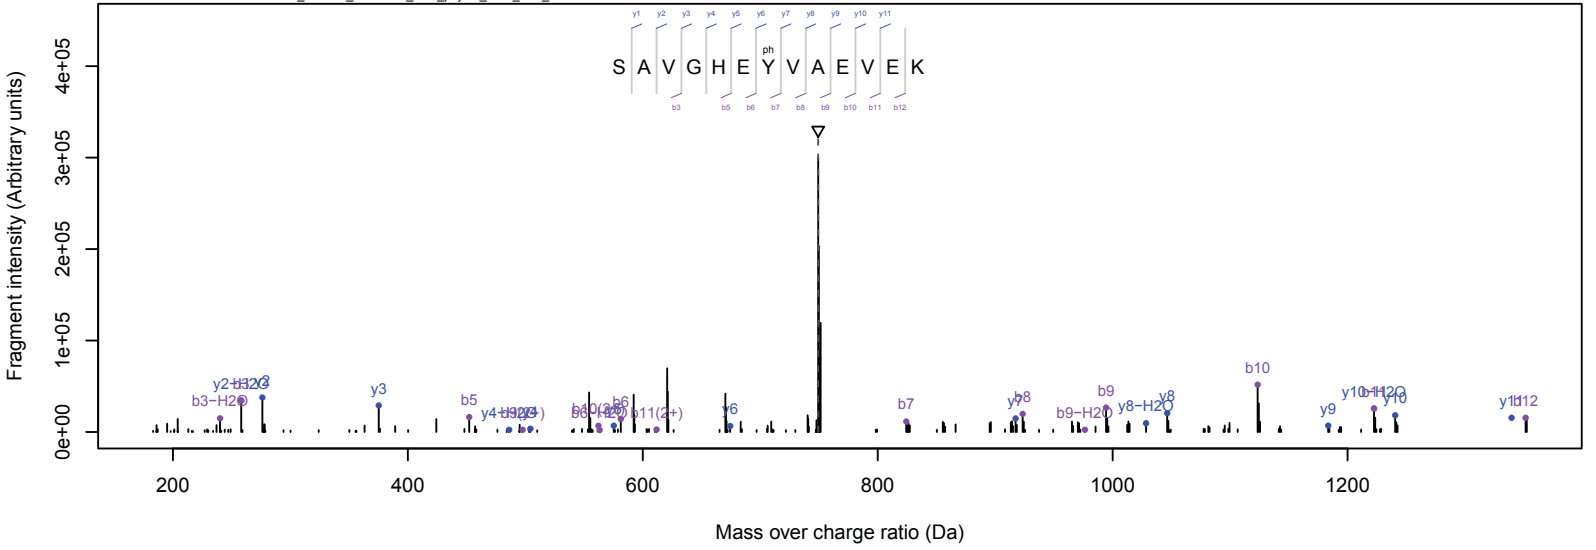

ADKEGDY(ph)YVLNGSK-2+

Source : QE1\_140612\_OPL1013\_CVA\_phosphoproteomic\_landscape\_AML\_B Scan : 12452

Andromeda score : 116.86

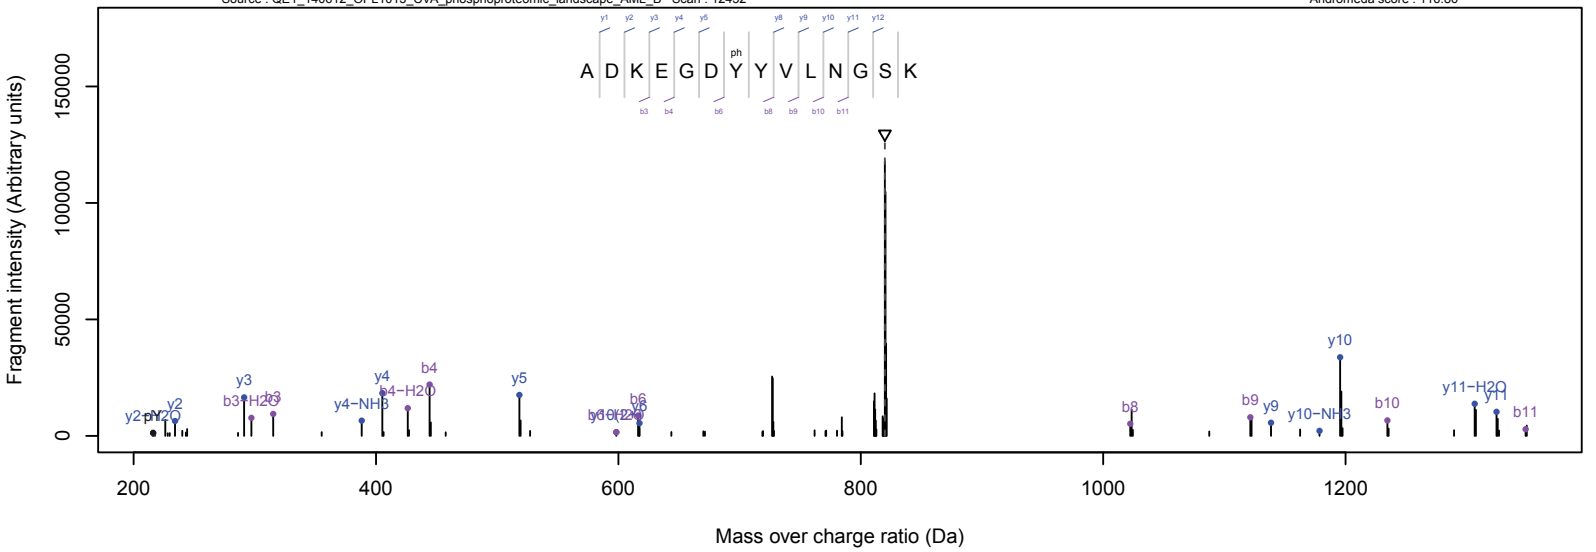

KSY(ph)IATQGCLQNTVDFWR-3+

Source : QE1\_140612\_OPL1013\_CVA\_phosphoproteomic\_landscape\_AML\_A Scan : 38486

Andromeda score : 116.73

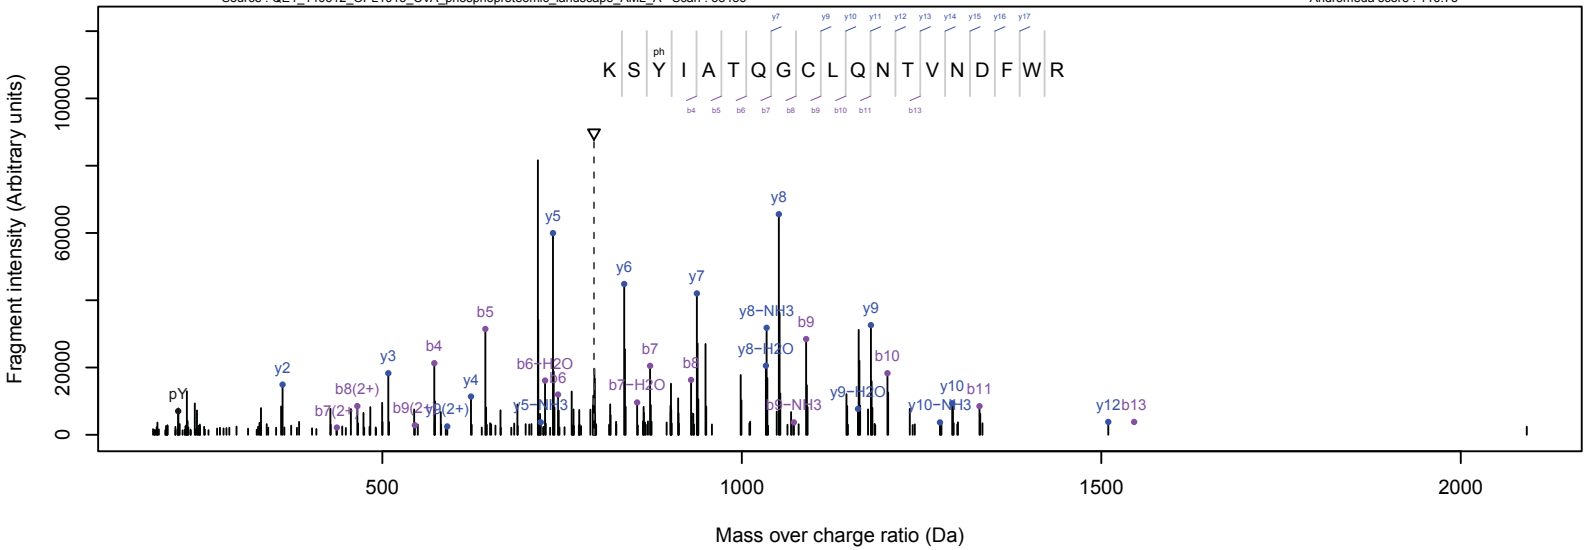

VNNSTM(ox)LGASGDY(ph)ADFQYLK-2+

Source : QE1\_140612\_OPL1013\_CVA\_phosphoproteomic\_landscape\_AML\_D Scan : 33160

Andromeda score : 116.73

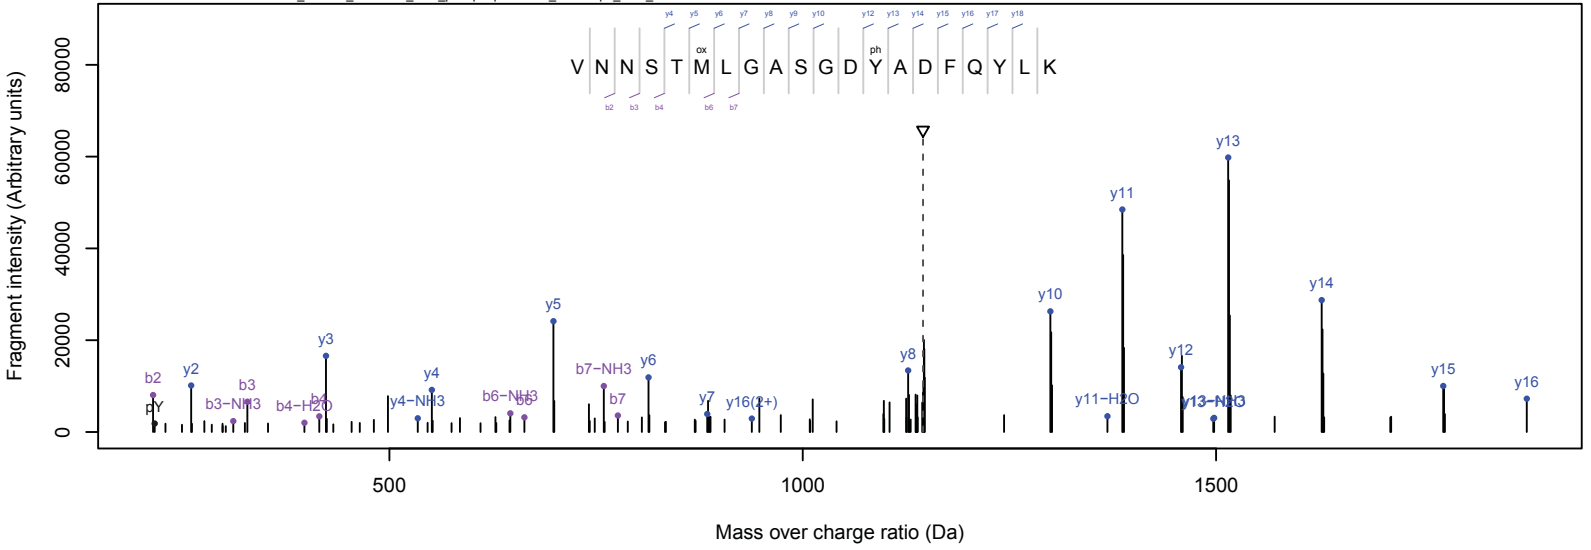

Y(ph)YFYHGLSWPQLSYIAEDENGK-3+

Source : QE1\_140822\_OPL1013\_Cva\_pTyrIP\_AML\_cell\_lines\_part2\_E Scan : 39604

Andromeda score : 116.73

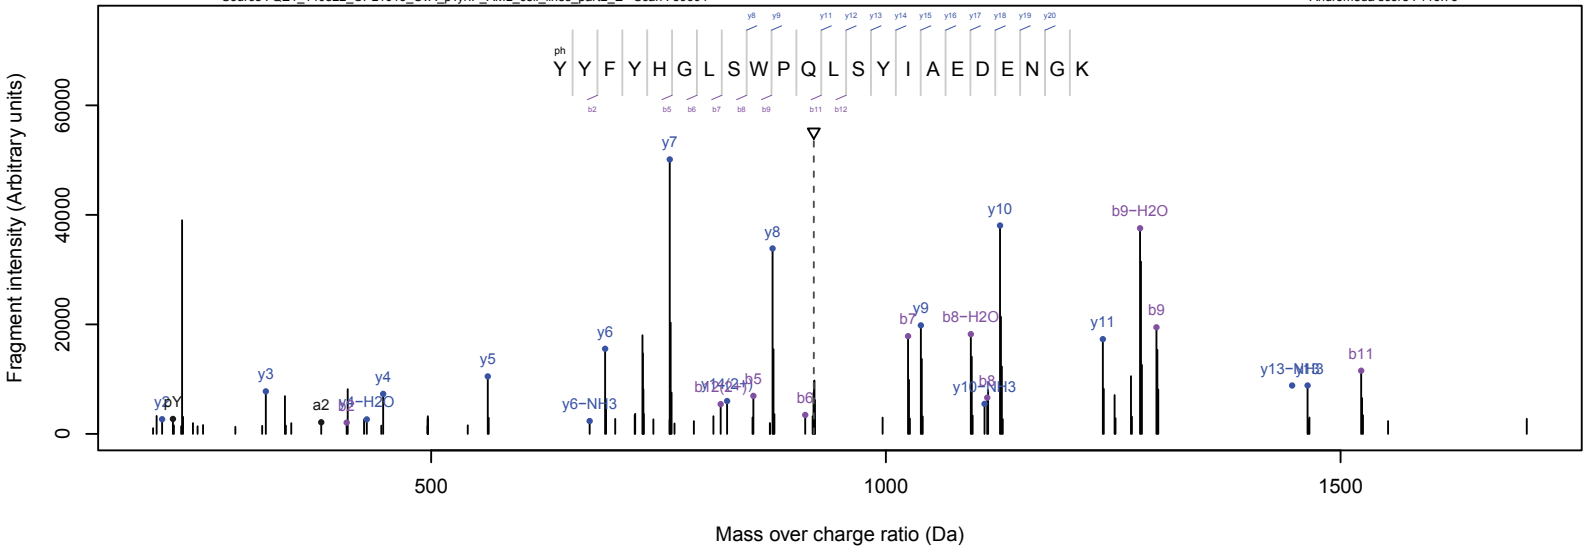

LSDSY(ph)SNTLPVRK-2+

Source : QE1\_140612\_OPL1013\_CVA\_phosphoproteomic\_landscape\_AML\_C Scan : 13010

Andromeda score : 116.63

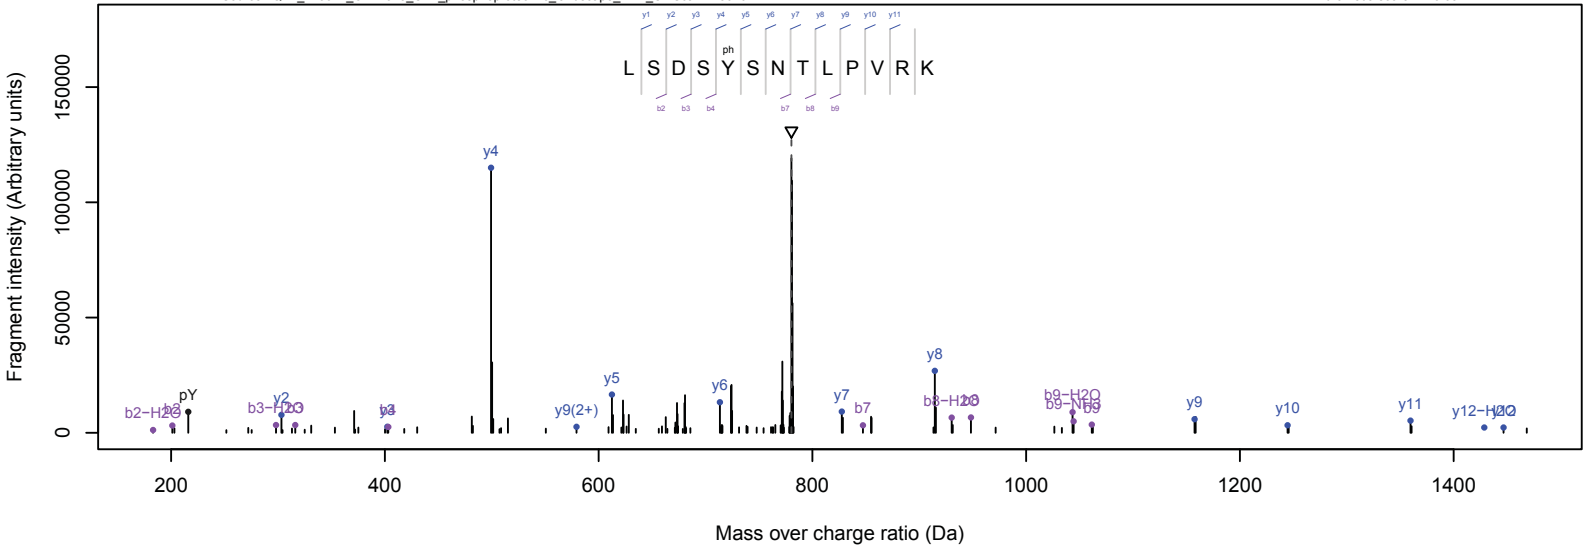

LKDY(ph)AFIHFDERDGAVK-3+

Source : QE1\_140612\_OPL1013\_CVA\_phosphoproteomic\_landscape\_AML\_B Scan : 26798

Andromeda score : 116.6

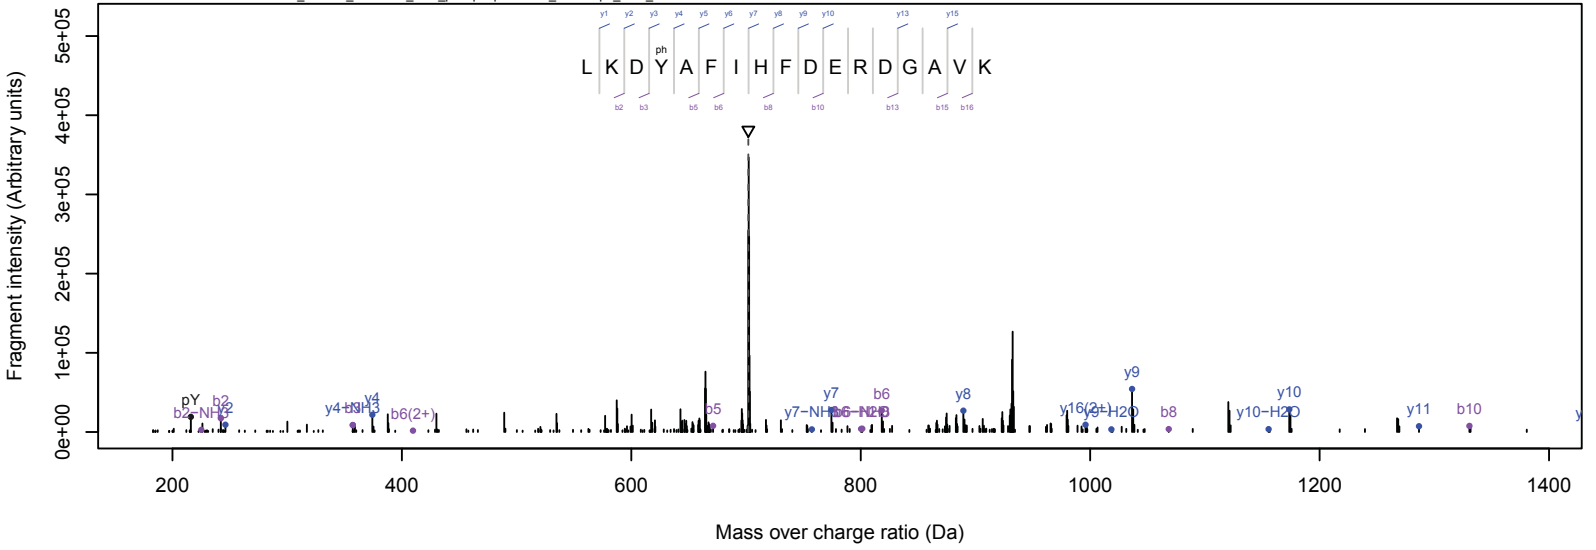

DSDY(ph)YNMLLKK-3+

Source : QE1\_140612\_OPL1013\_CVA\_phosphoproteomic\_landscape\_AML\_C Scan : 25927

Andromeda score : 116.55

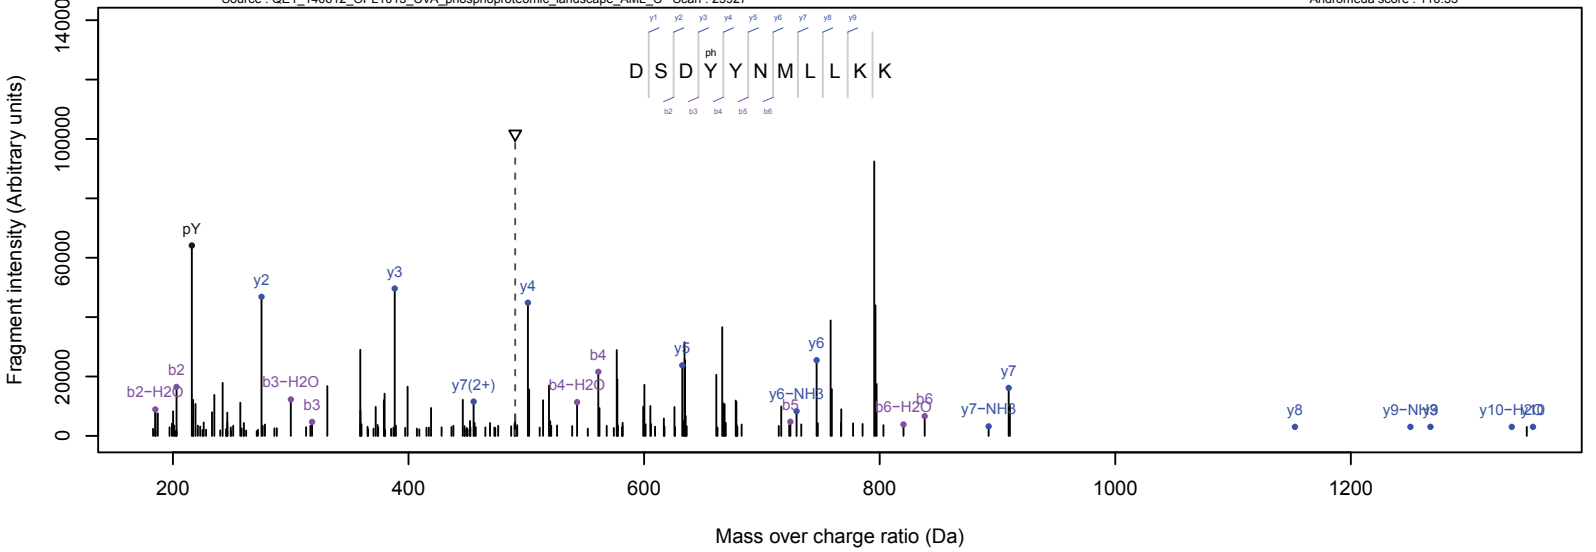

HIY(ph)LSTR-2+

Source : QE1\_140822\_OPL1013\_CvA\_pTyrIP\_AML\_cell\_lines\_part2\_E Scan : 6613

Andromeda score : 116.54

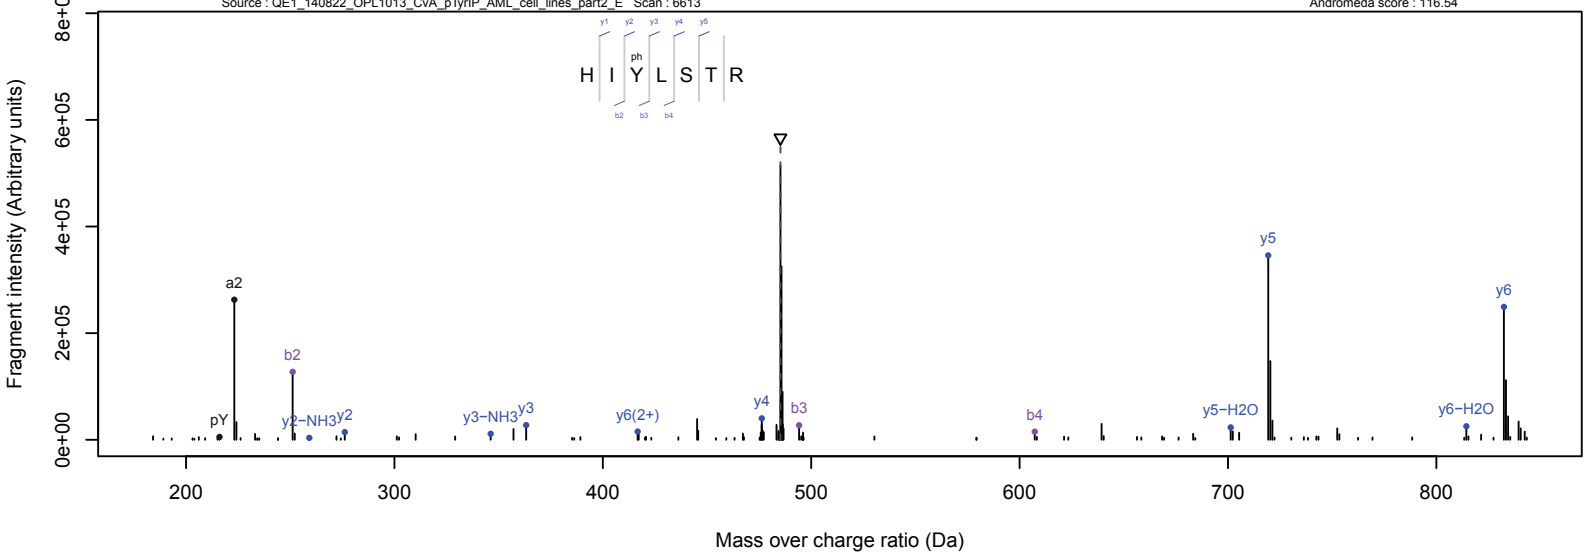

EFEVY(ph)GPIKR-2+

Source: QE1\_140612\_OPL1013\_CVA\_phosphoproteomic\_landscape\_AML\_E Scan: 22196

Andromeda score: 116.52

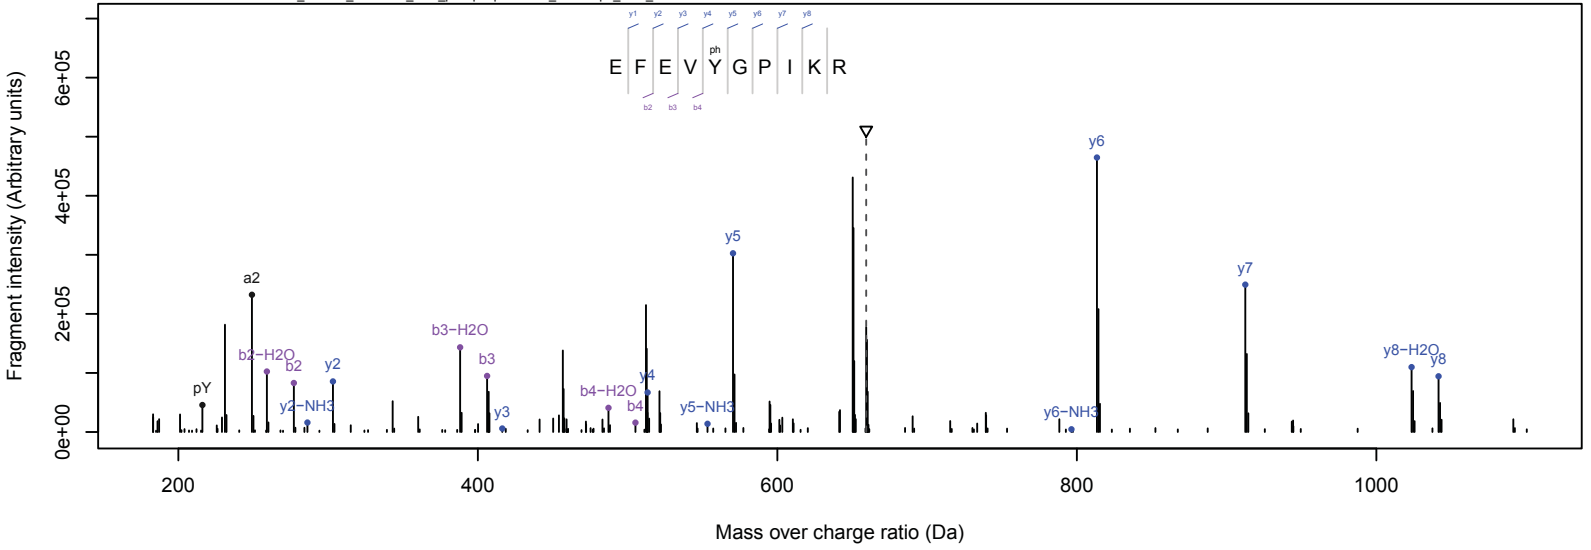

ATAVLVIAS(ph)DVKDTGASYYGEQTLHYIATNGESAVVQLPK-4+

Source: QE1\_140822\_OPL1013\_CvA\_pTyrIP\_AML\_cell\_lines\_part2\_B Scan: 44870

Andromeda score: 116.51

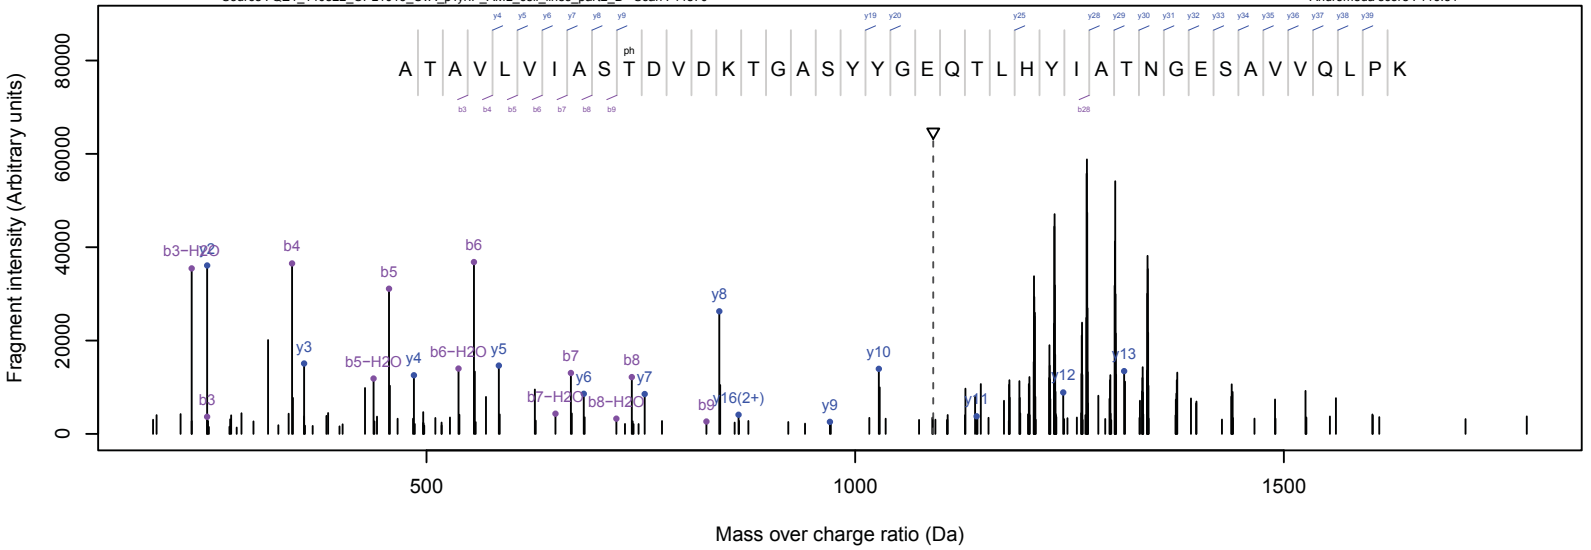

DAALGGHHQAGAQQGDEGEAAGAAADGIAAYSNY(ph)NNGHR-4+

Source: QE1\_140908\_OPL1013\_CvA\_pTyrIP\_AML\_HEL Scan: 23937

Andromeda score: 116.51

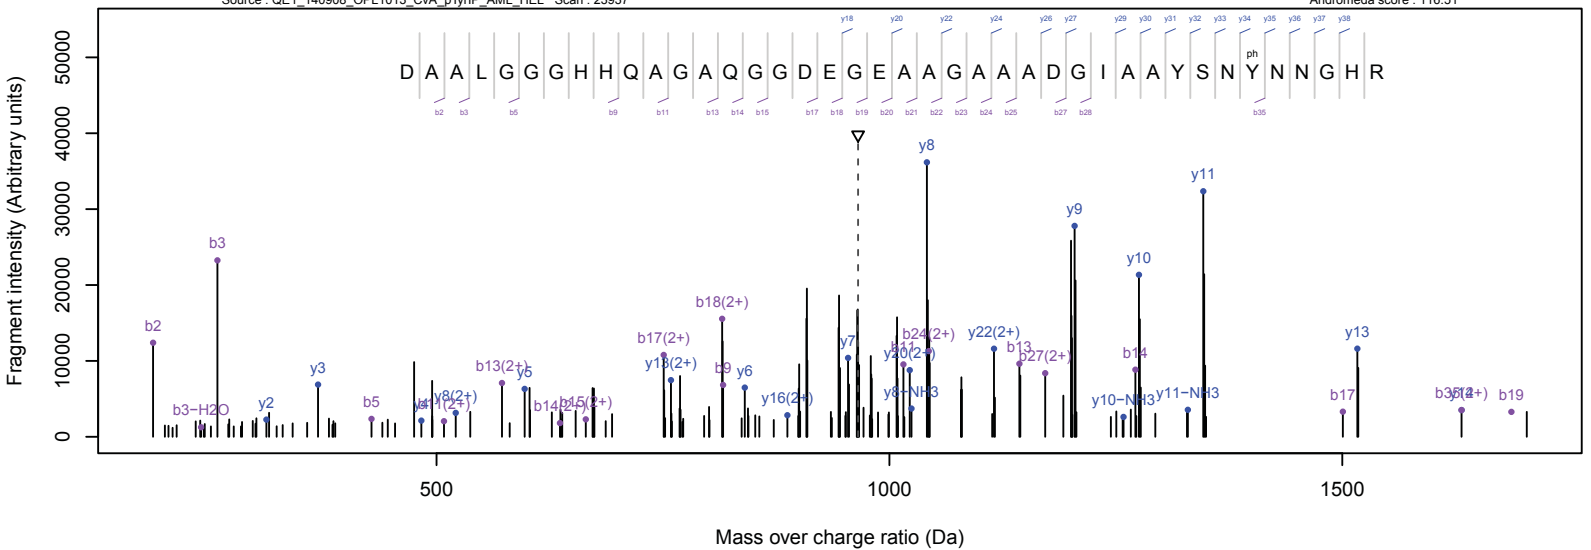



HIGLVY(ph)SGMGPDYR-3+

Source: QE1\_140612\_OPL1013\_CVA\_phosphoproteomic\_landscape\_AML\_C Scan: 27044

Andromeda score: 116.51

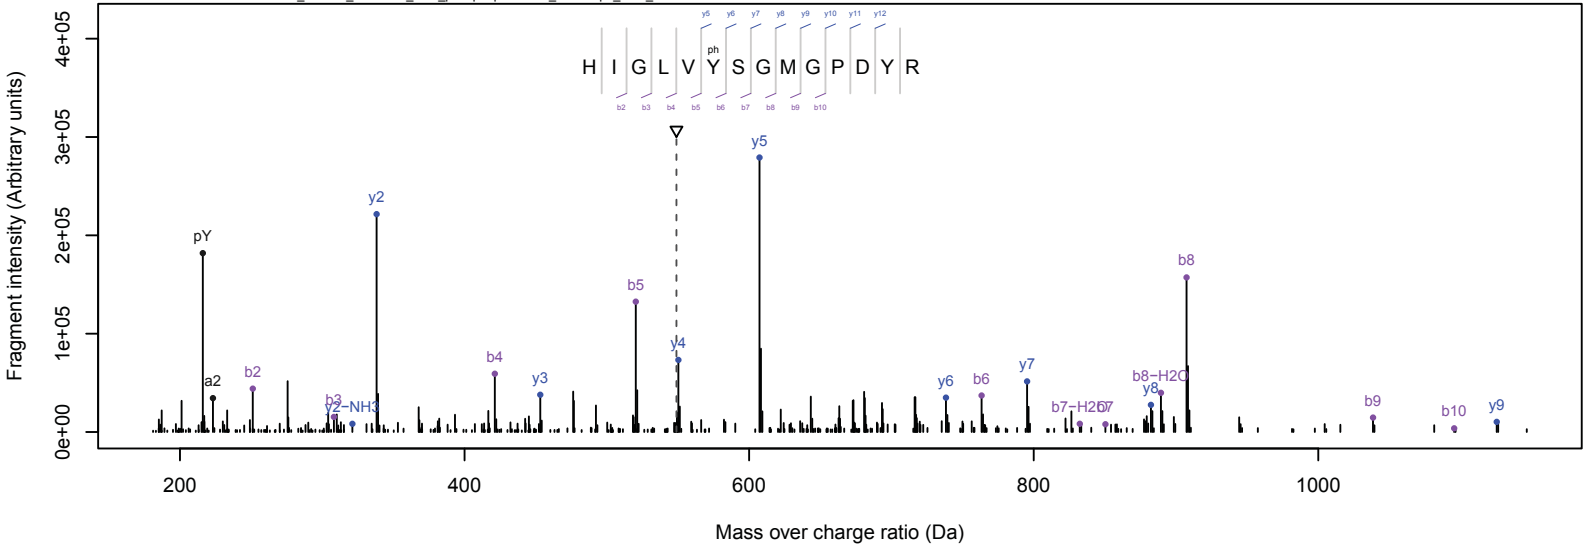

LKY(ph)GTELNQGLK-3+

Source: QE1\_140612\_OPL1013\_CVA\_phosphoproteomic\_landscape\_AML\_B Scan: 14323

Andromeda score: 116.51

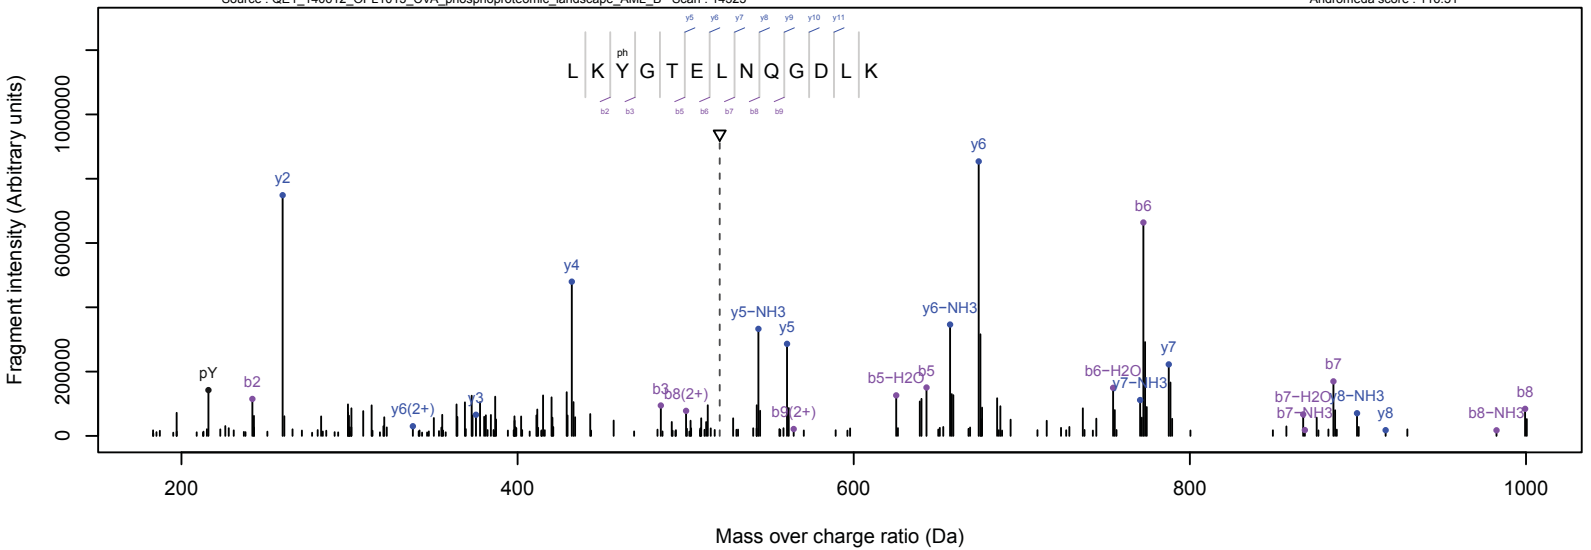

KVAEPELMGTPDGTCTCYPPPPVPR-3+

Source: QE1\_140612\_OPL1013\_CVA\_phosphoproteomic\_landscape\_AML\_B Scan: 30032

Andromeda score: 116.45

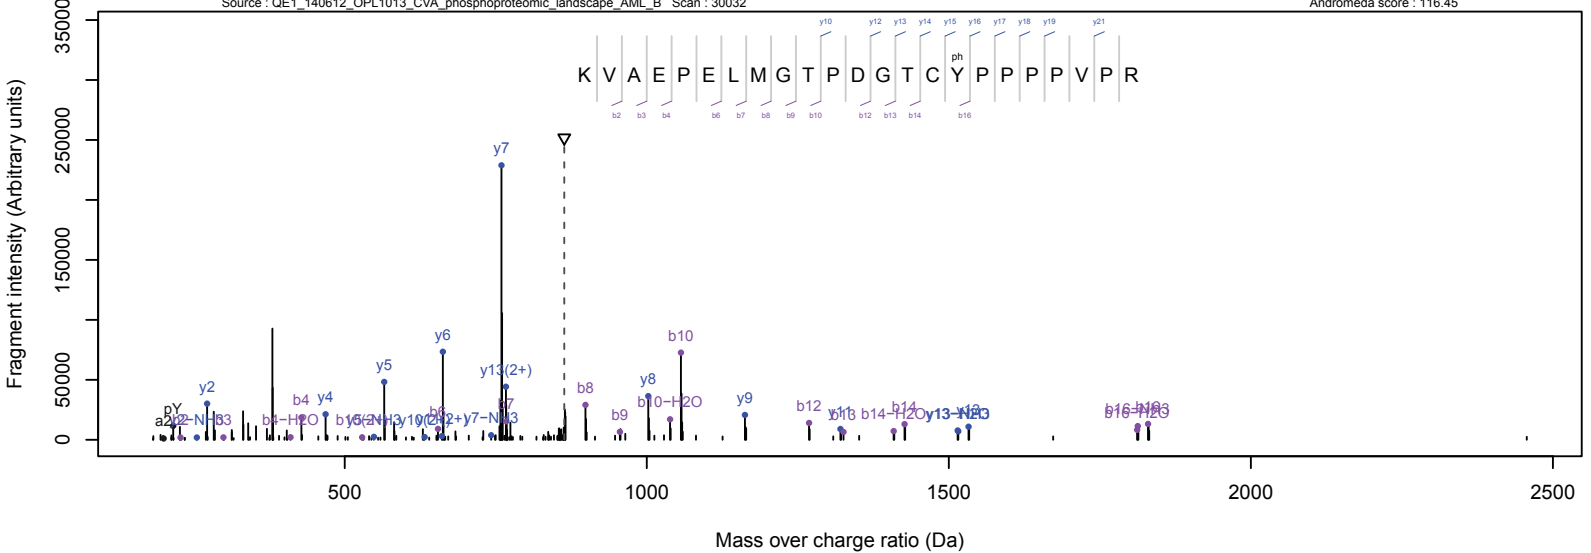

LVTEMGT<sup>(ph)</sup>ATQSALSSSRPTKK-3+

Source : QE1\_140612\_OPL1013\_CVA\_phosphoproteomic\_landscape\_AML\_C Scan : 21845

Andromeda score : 116.43

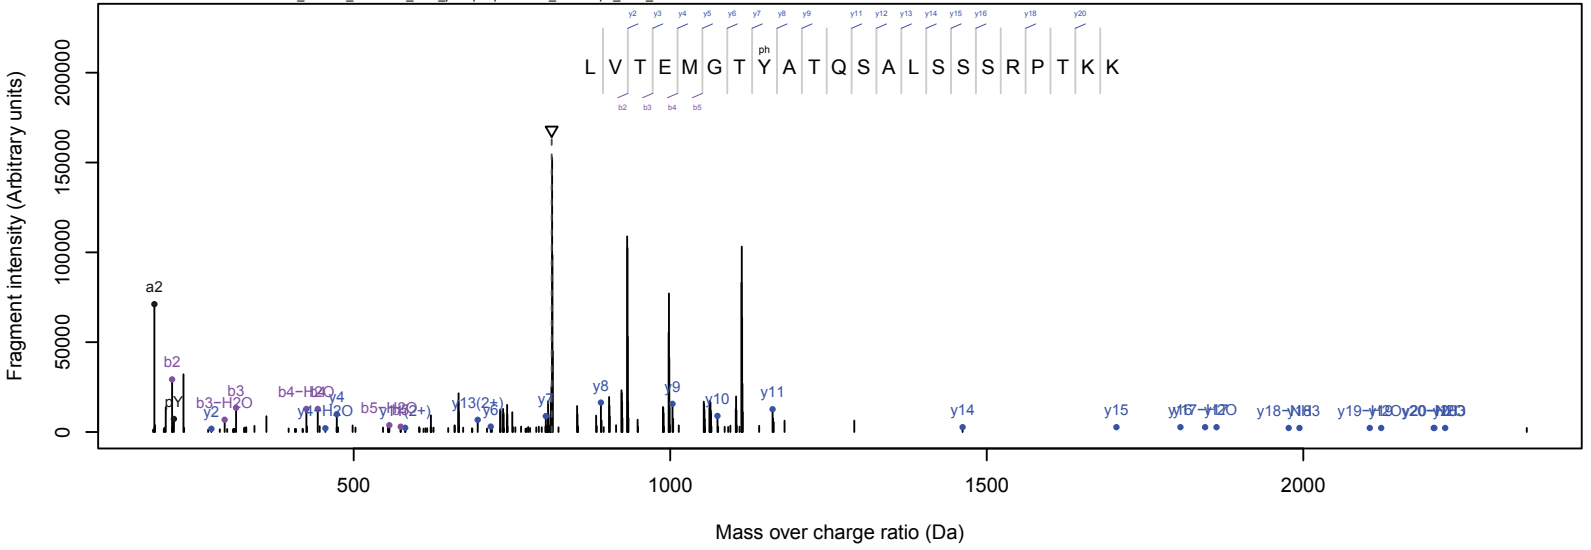

KKPHASVGT<sup>(ph)</sup>H<sup>(ox)</sup>MAPEVLQK-4+

Source : QE1\_140612\_OPL1013\_CVA\_phosphoproteomic\_landscape\_AML\_C Scan : 11711

Andromeda score : 116.39

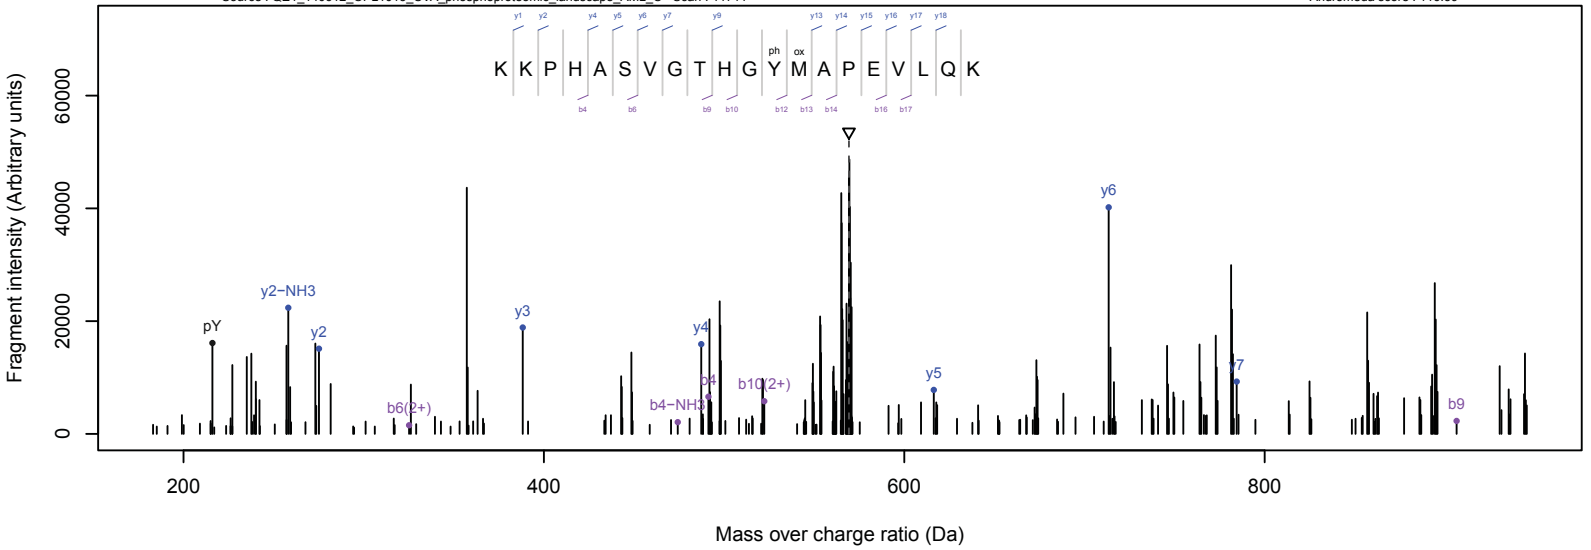

ALDY<sup>(ph)</sup>YMLR-2+

Source : QE1\_140612\_OPL1013\_CVA\_phosphoproteomic\_landscape\_AML\_B Scan : 30477

Andromeda score : 116.37

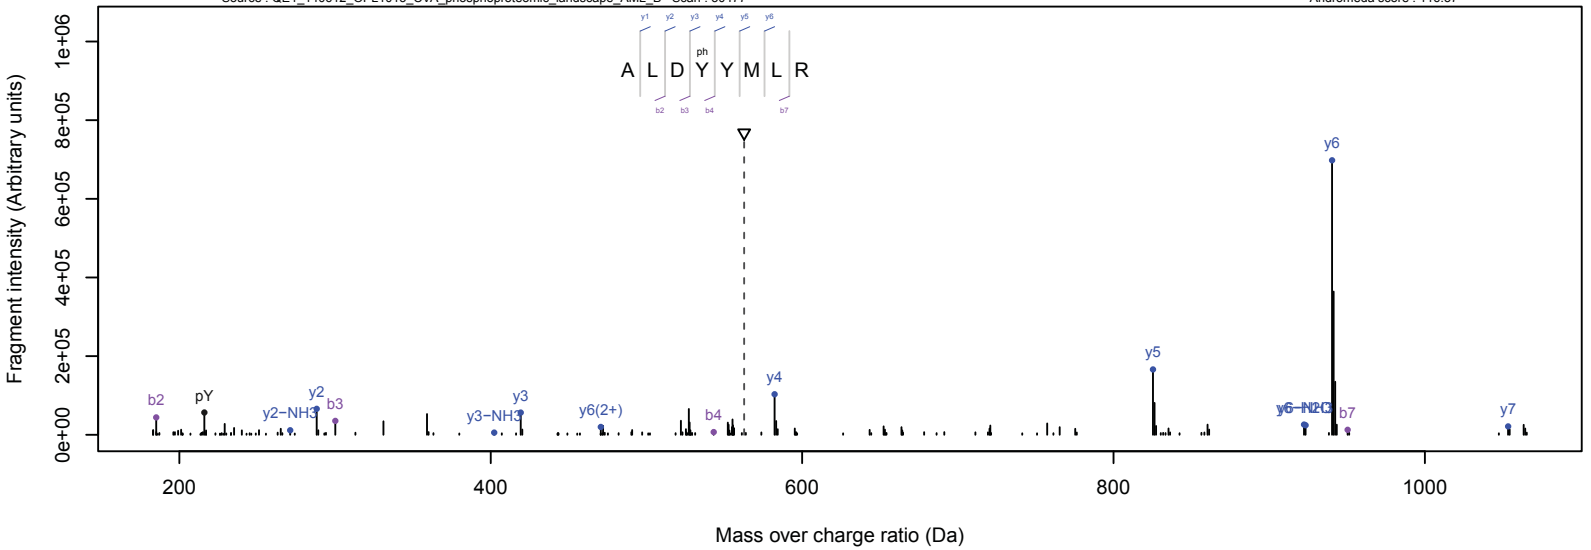

IYNGDY(ph)YR-2+

Source : QE1\_140822\_OPL1013\_CvA\_pTyrIP\_AML\_cell\_lines\_part2\_E Scan : 6258

Andromeda score : 116.37

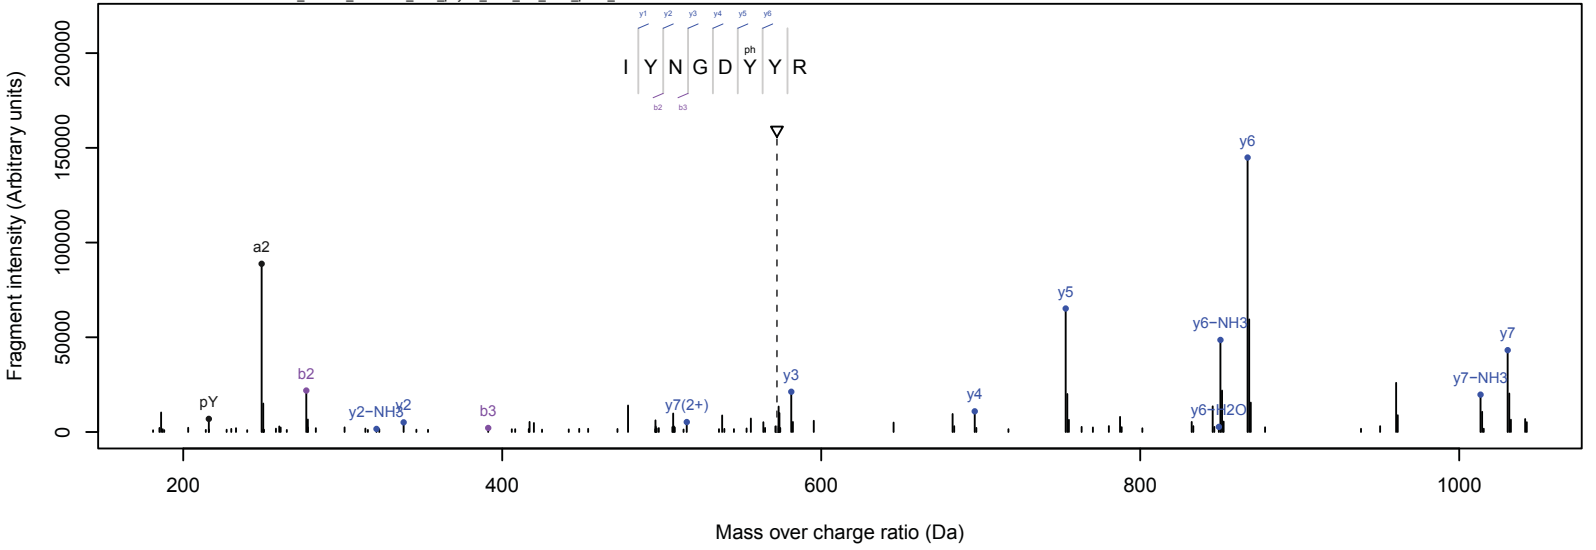

VEFGVY(ph)ESGPRK-2+

Source : QE1\_140908\_OPL1013\_CvA\_pTyrIP\_AML\_OCI\_AML3 Scan : 17578

Andromeda score : 116.24

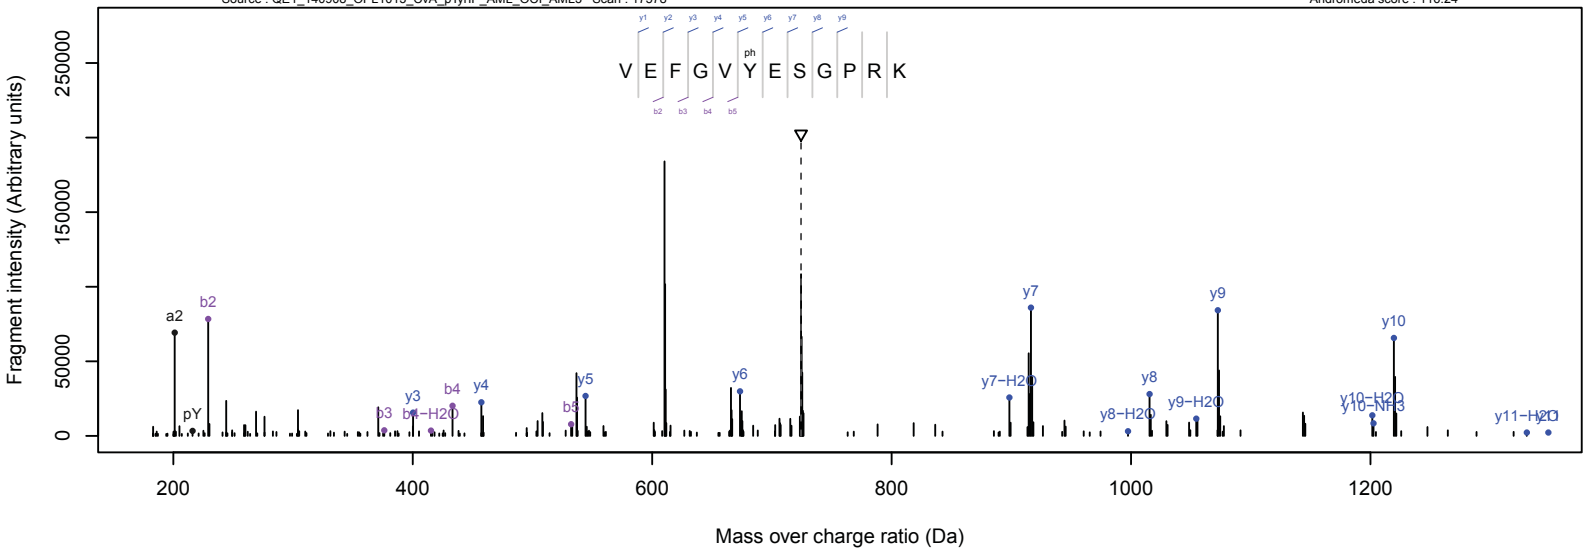

VGMAHPY(ph)ESWYK-2+

Source : QE1\_140612\_OPL1013\_CVA\_phosphoproteomic\_landscape\_AML\_C Scan : 21387

Andromeda score : 116.24

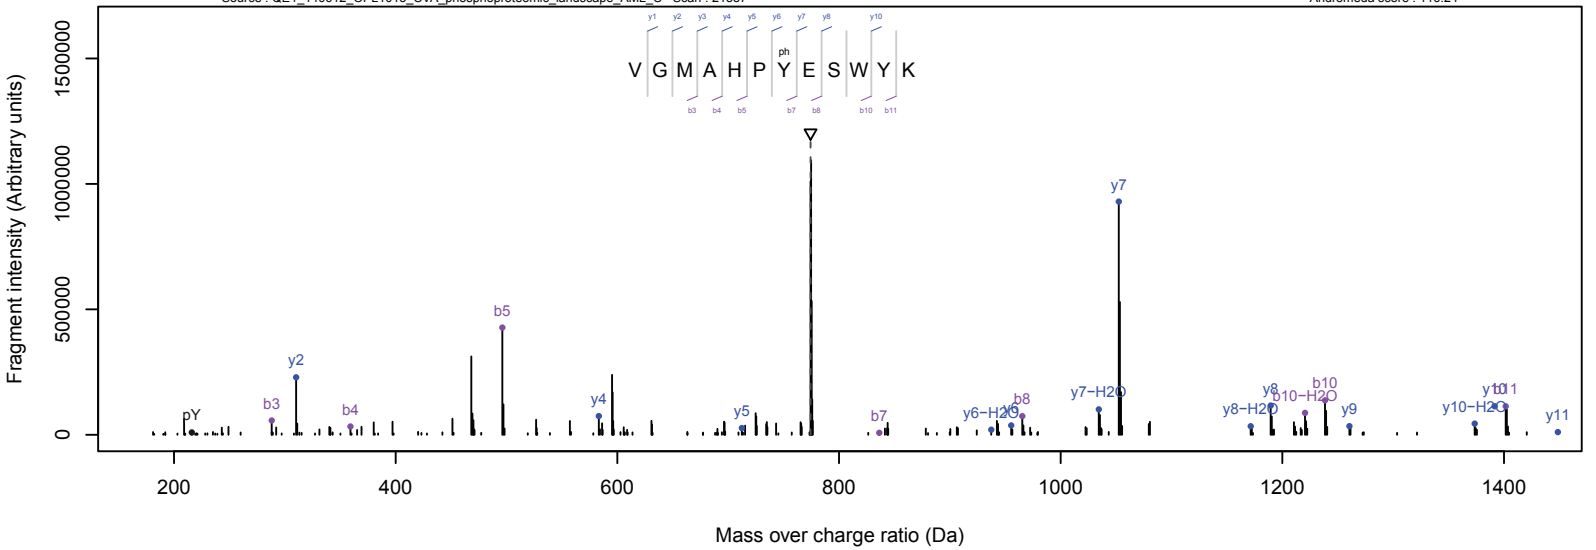

LGQSVTTIPTVGFNVETVY(ph)KNVK-3+

Source : QE1\_140612\_OPL1013\_CVA\_phosphoproteomic\_landscape\_AML\_C Scan : 39999

Andromeda score : 116.2

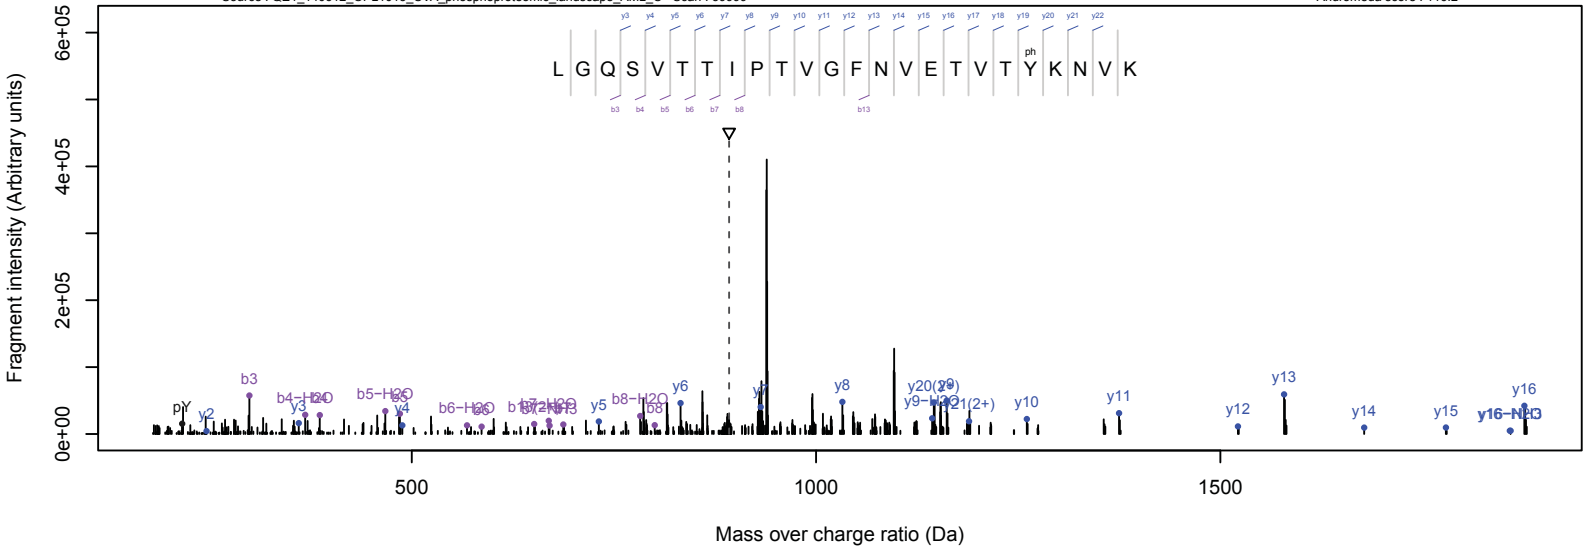

NVVTIFSAPNYC(ph)R-2+

Source : QE1\_140612\_OPL1013\_CVA\_phosphoproteomic\_landscape\_AML\_A Scan : 36506

Andromeda score : 116.19

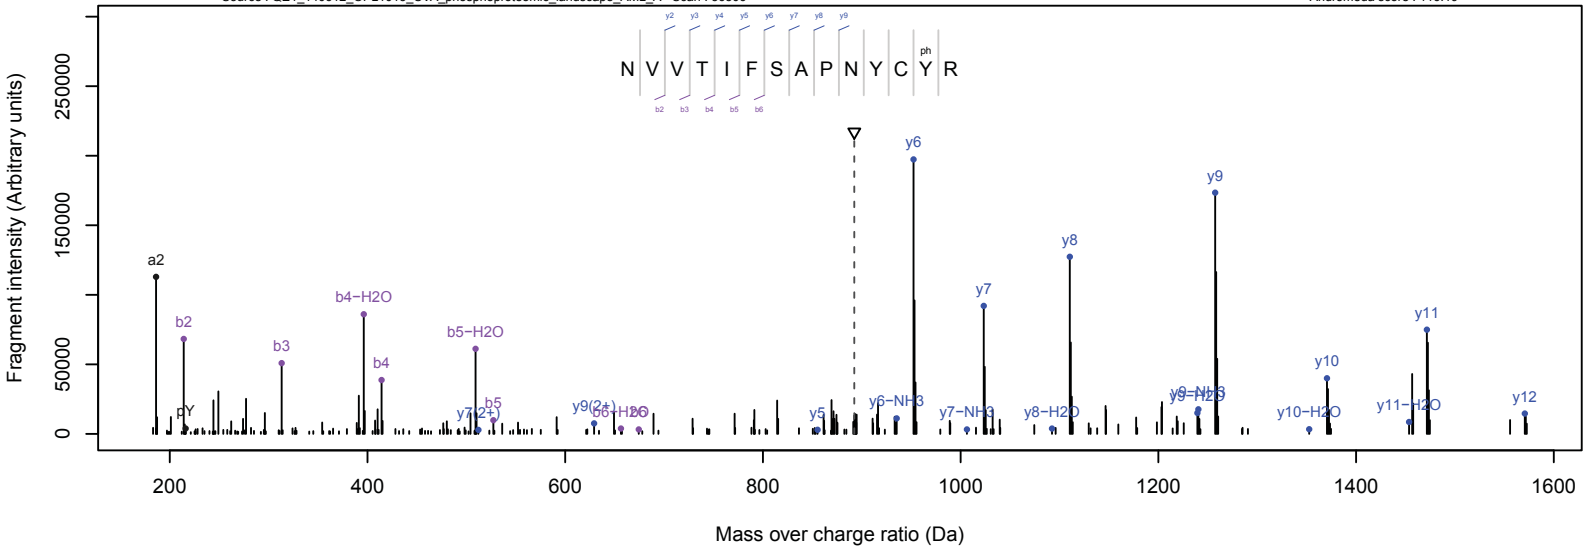

ASENGHY(ph)ELEHLSTPK-3+

Source : QE1\_140612\_OPL1013\_CVA\_phosphoproteomic\_landscape\_AML\_B Scan : 14592

Andromeda score : 116.13

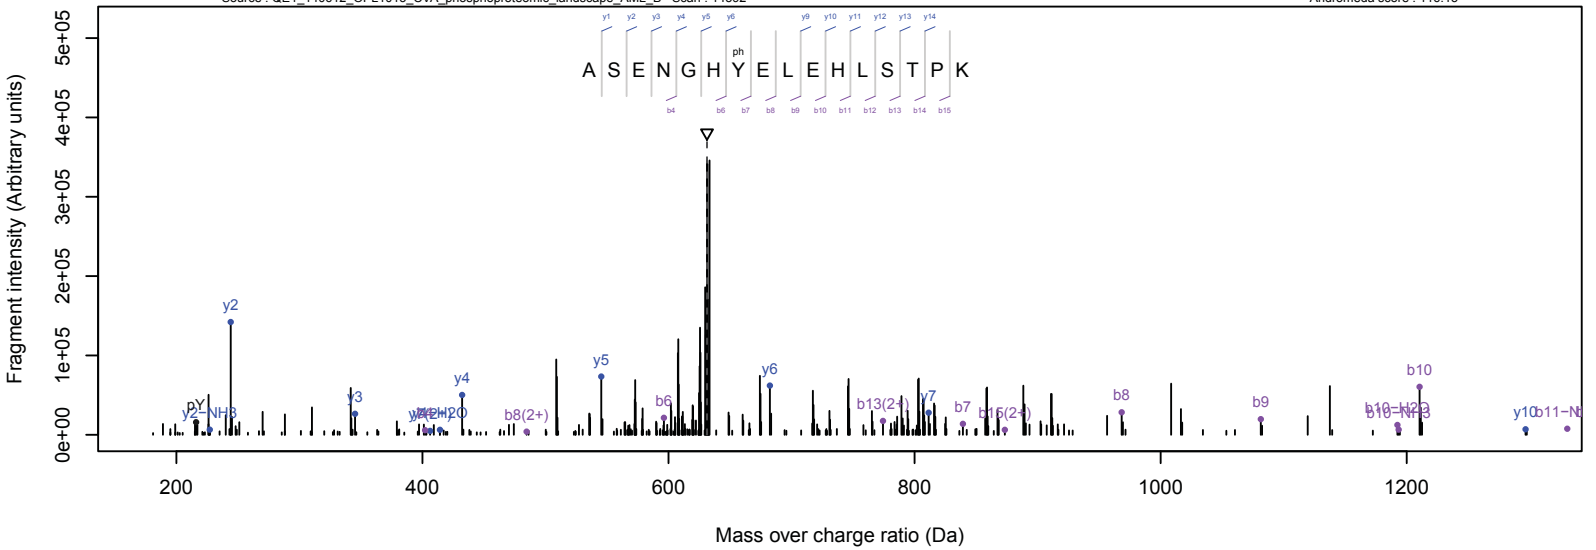

**ALDVIQAGKEY(ph)VEHTVK-2+**

Source : QE1\_140612\_OPL1013\_CVA\_phosphoproteomic\_landscape\_AML\_B Scan : 28053

Andromeda score : 116.06

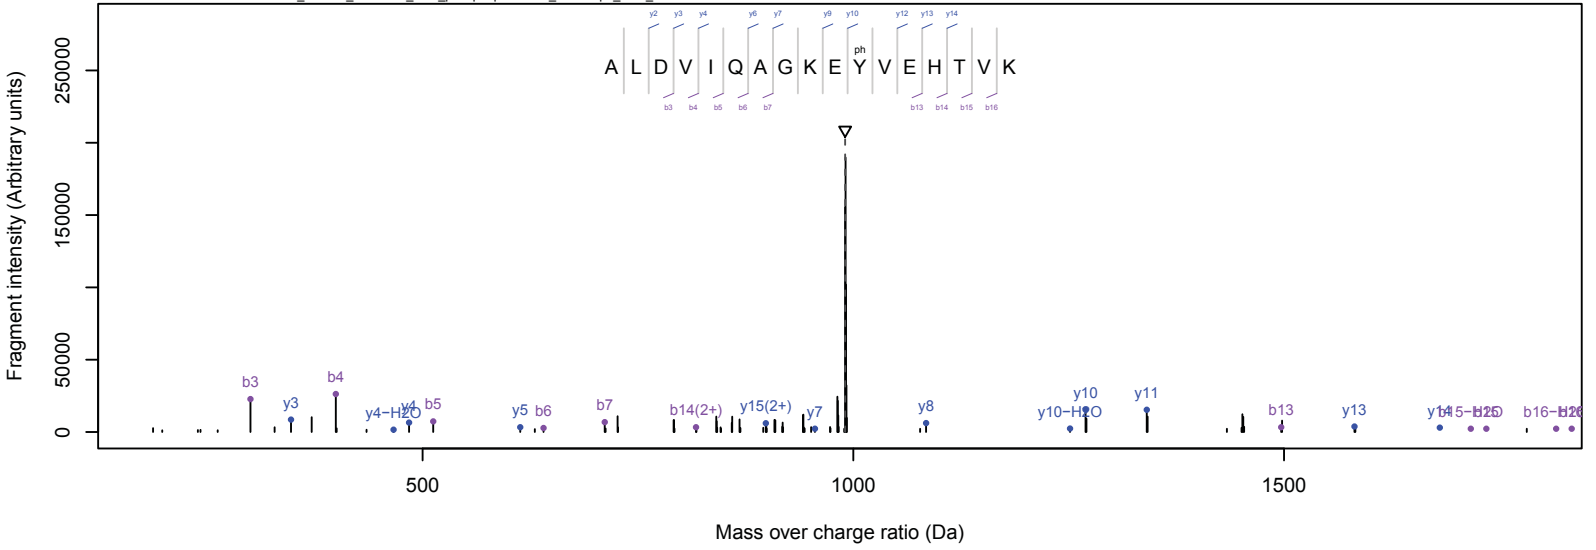

**IGSSLY(ph)ALGTQDSTDICK-2+**

Source : QE1\_140612\_OPL1013\_CVA\_phosphoproteomic\_landscape\_AML\_B Scan : 28933

Andromeda score : 116.06

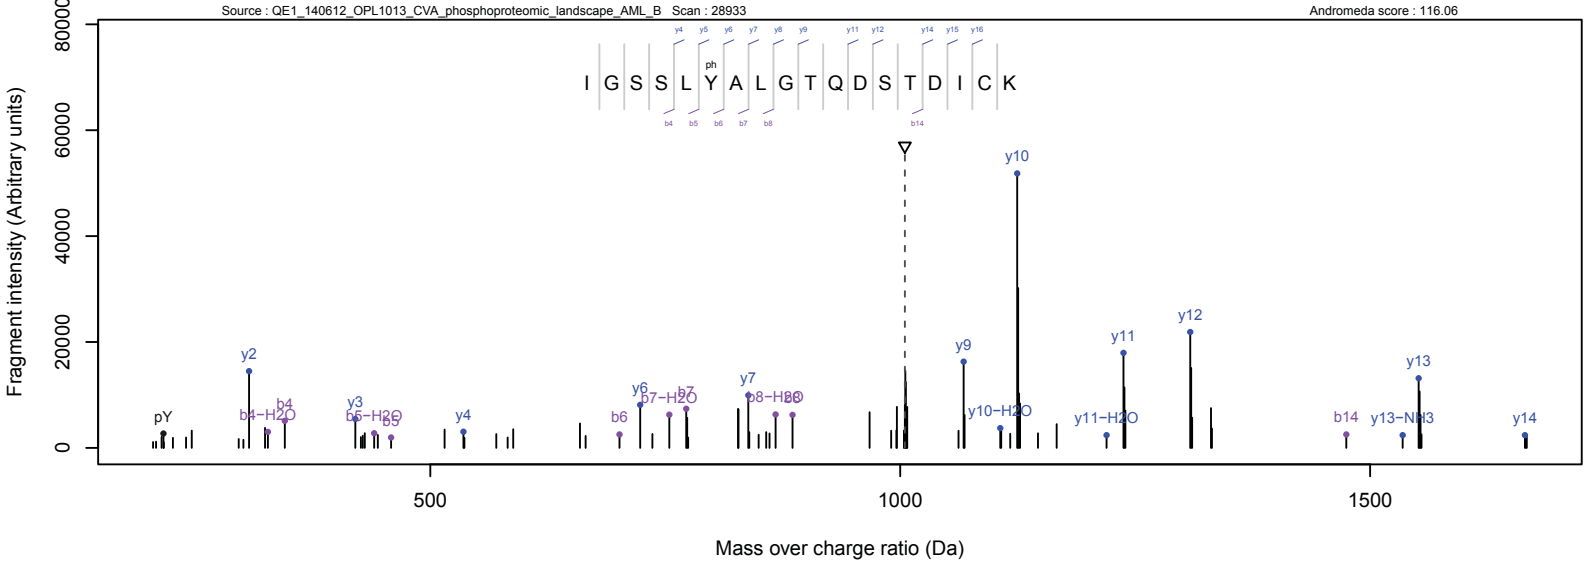

**SGLAYCPNDY(ph)HQLFSR-2+**

Source : QE1\_140612\_OPL1013\_CVA\_phosphoproteomic\_landscape\_AML\_A Scan : 31098

Andromeda score : 116.06

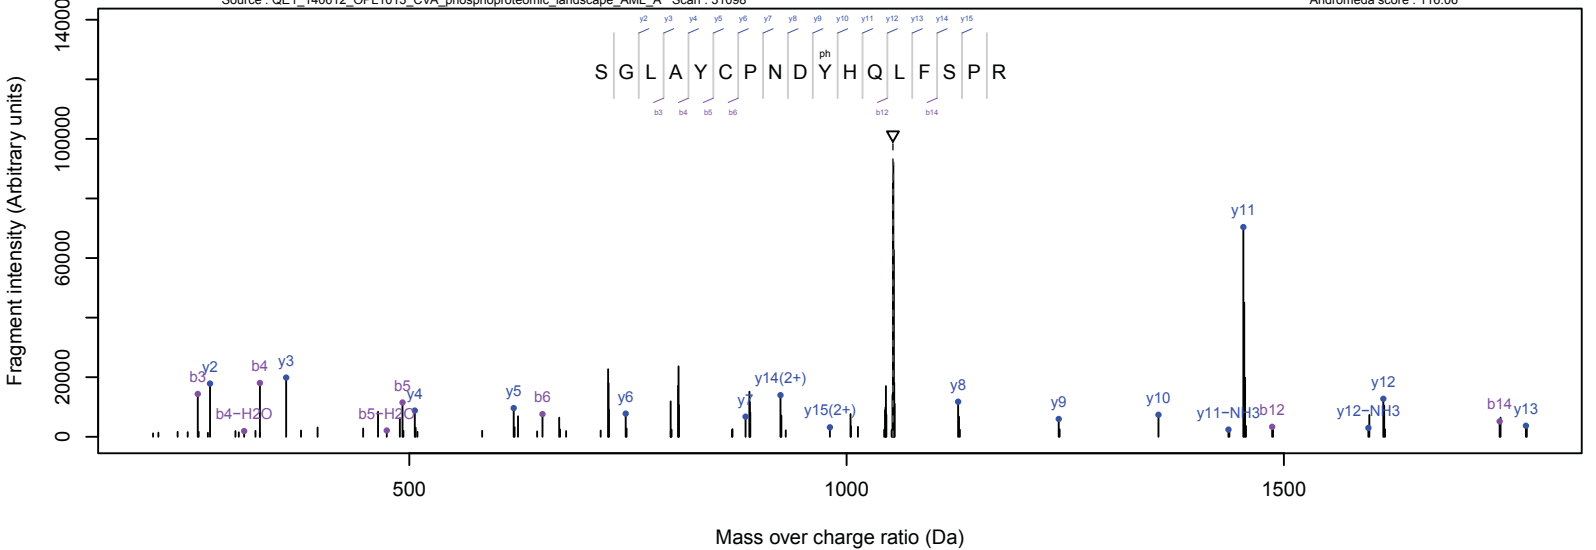

IGAFGY(ph)MECSAK-2+

Source : QE1\_140612\_OPL1013\_CVA\_phosphoproteomic\_landscape\_AML\_D Scan : 24892

Andromeda score : 116.03

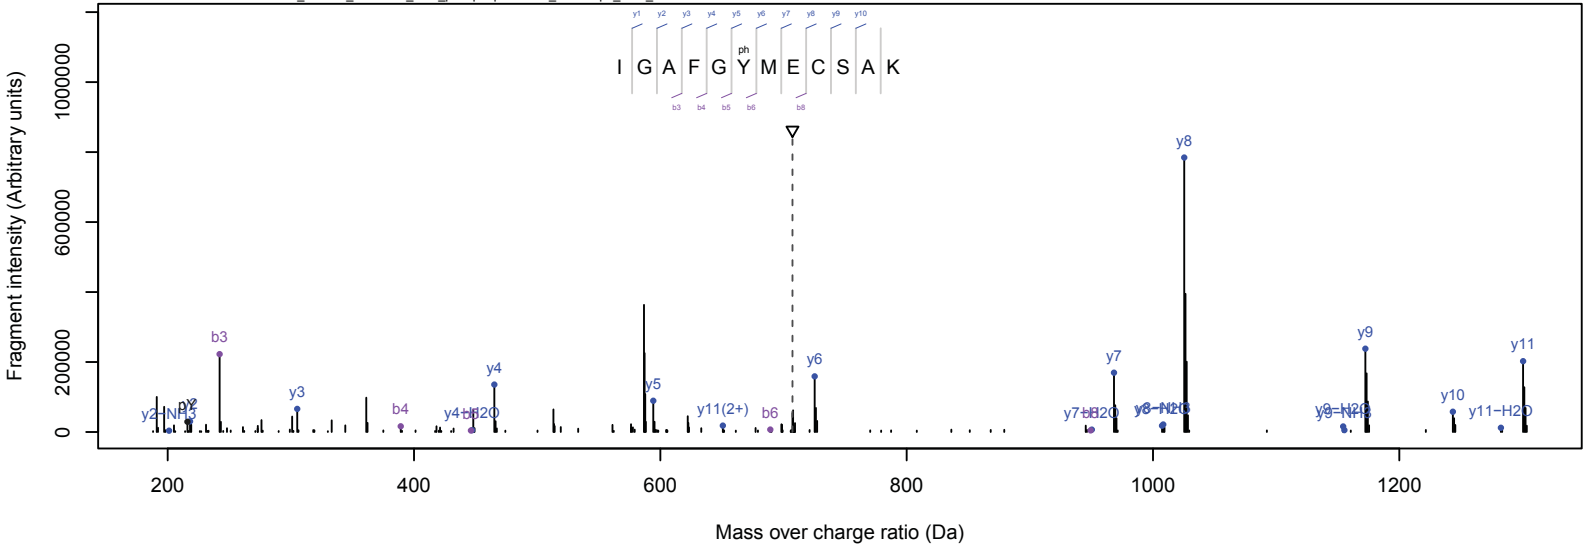

GILGY(ph)TEHQVVSSDFNSDTHSSTFDAGAGIALNDHFVK-4+

Source : QE1\_140612\_OPL1013\_CVA\_phosphoproteomic\_landscape\_AML\_B Scan : 41541

Andromeda score : 115.87

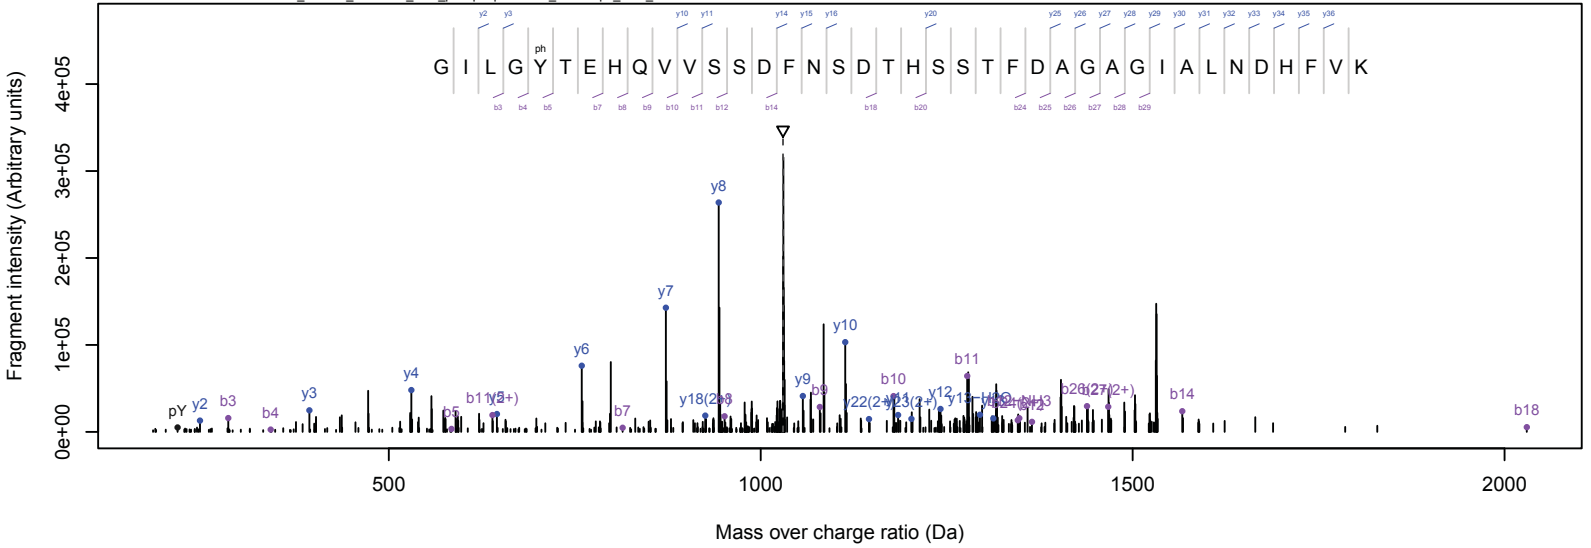

YNVSTTPY(ph)LQSVKK-2+

Source : QE1\_140612\_OPL1013\_CVA\_phosphoproteomic\_landscape\_AML\_C Scan : 18200

Andromeda score : 115.68

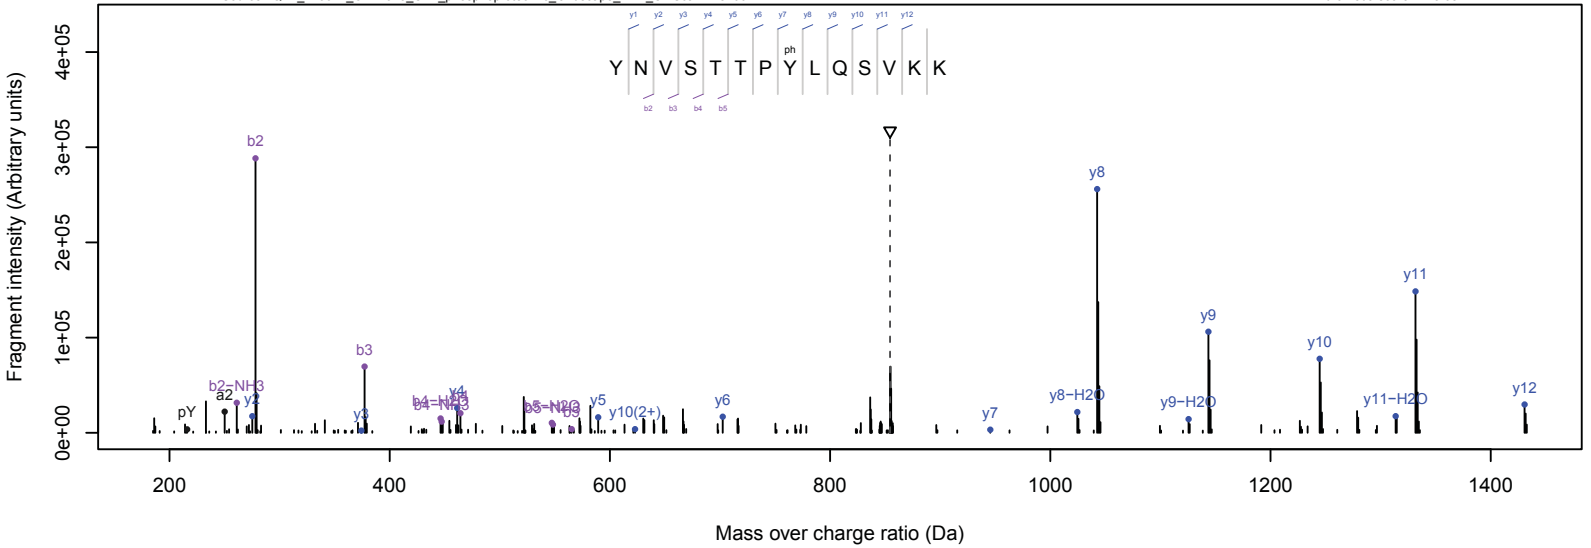

**MSAATVLSREPY(ph)MCAQCK-3+**

Source : QE1\_140612\_OPL1013\_CVA\_phosphoproteomic\_landscape\_AML\_B Scan : 24698

Andromeda score : 115.66

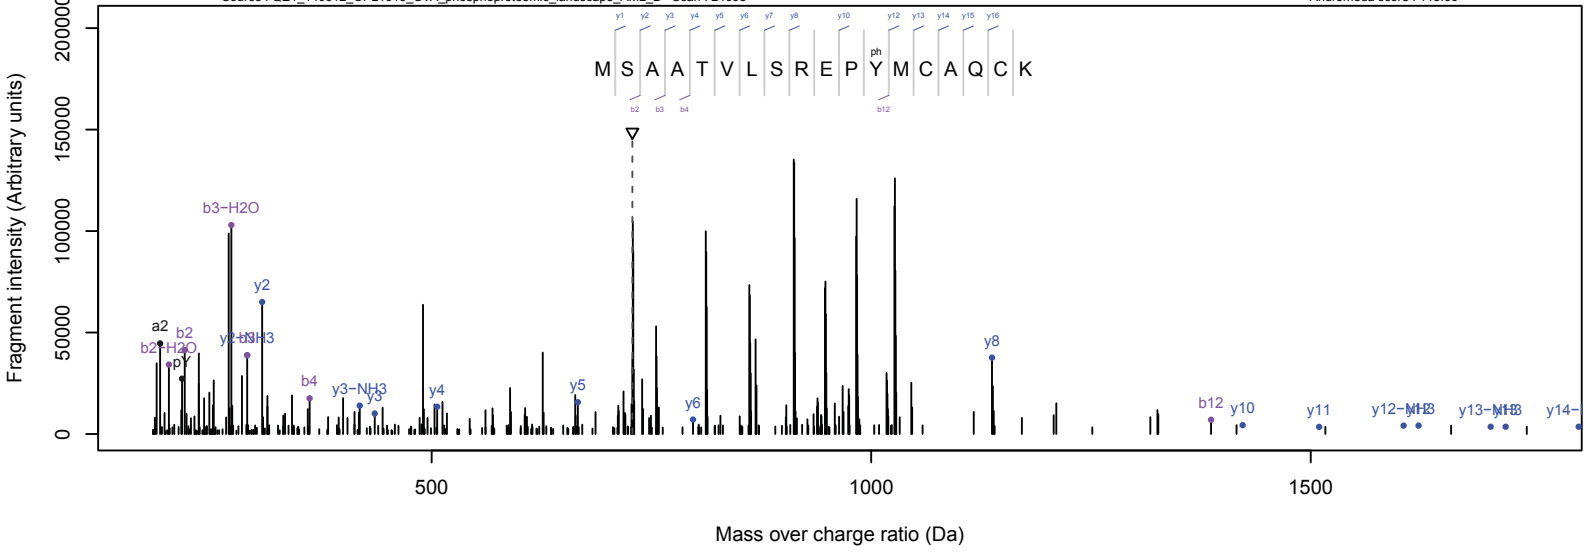

**IIDINY(ph)YPVPEACLSNKR-3+**

Source : QE1\_140612\_OPL1013\_CVA\_phosphoproteomic\_landscape\_AML\_B Scan : 35561

Andromeda score : 115.57

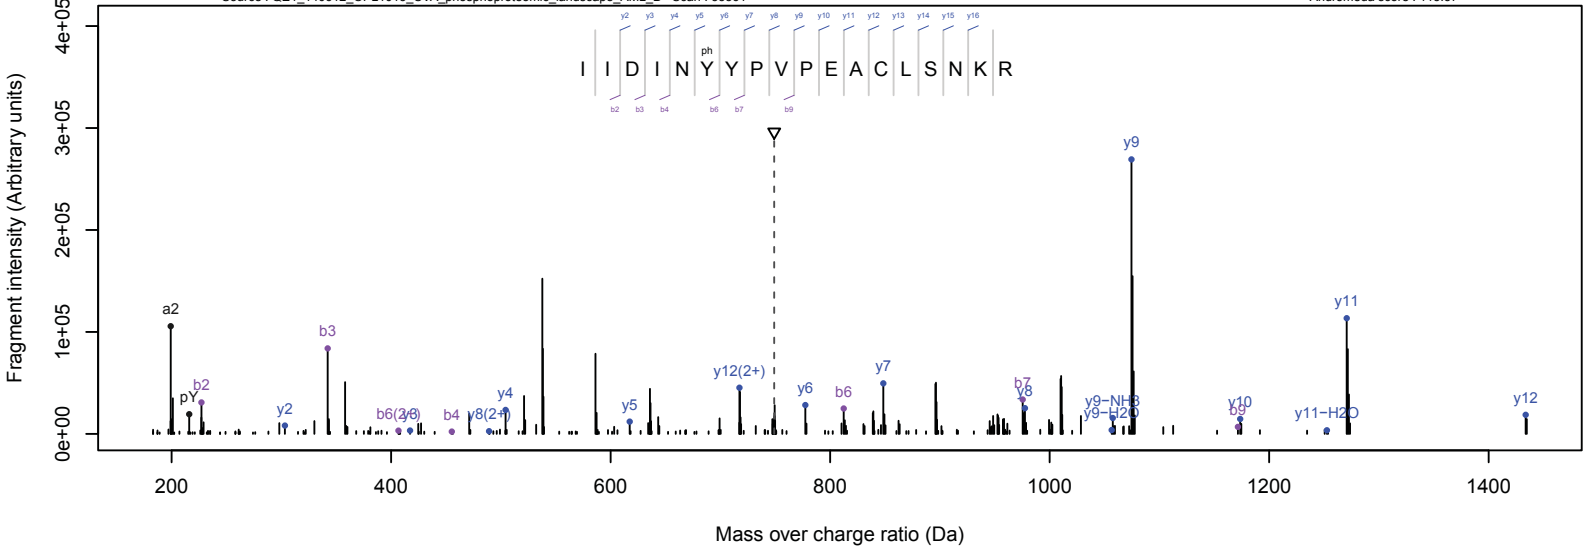

**MLAQLKDSDEVY(ph)NIKK-3+**

Source : QE1\_140612\_OPL1013\_CVA\_phosphoproteomic\_landscape\_AML\_C Scan : 35351

Andromeda score : 115.57

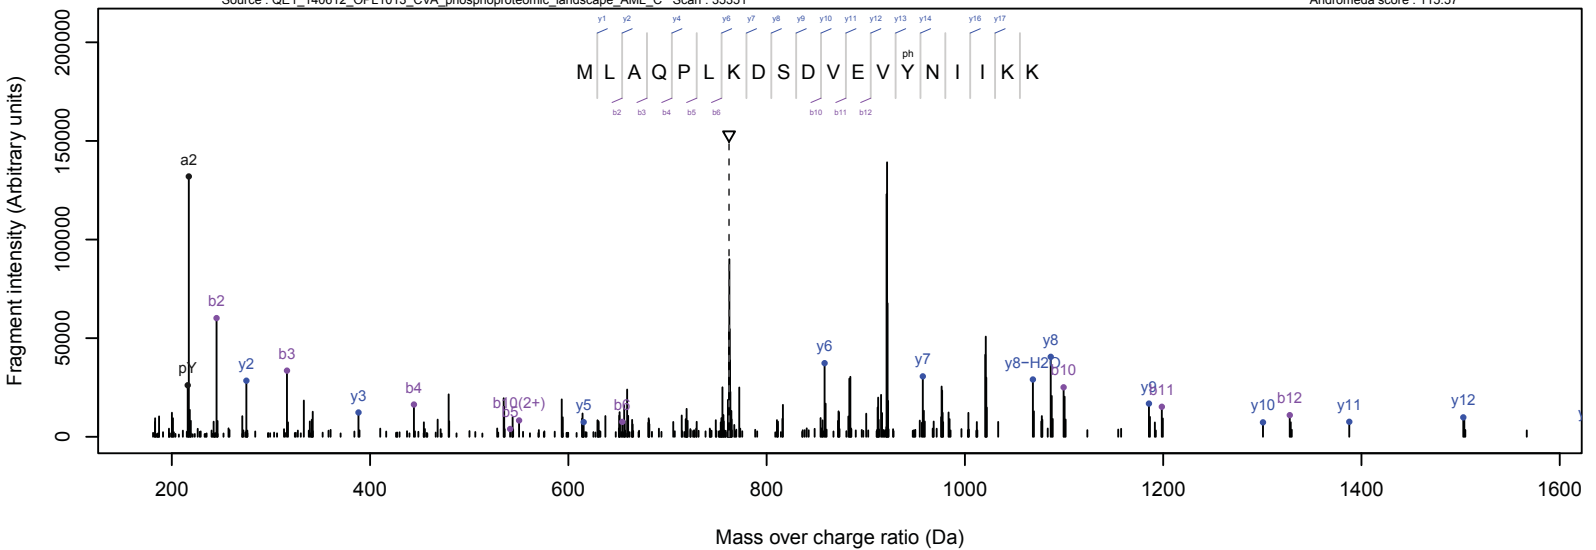

QMPIGGDVPALQLQY(ph)DHCK-3+

Source : QE1\_140612\_OPL1013\_CVA\_phosphoproteomic\_landscape\_AML\_C Scan : 34614

Andromeda score : 115.57

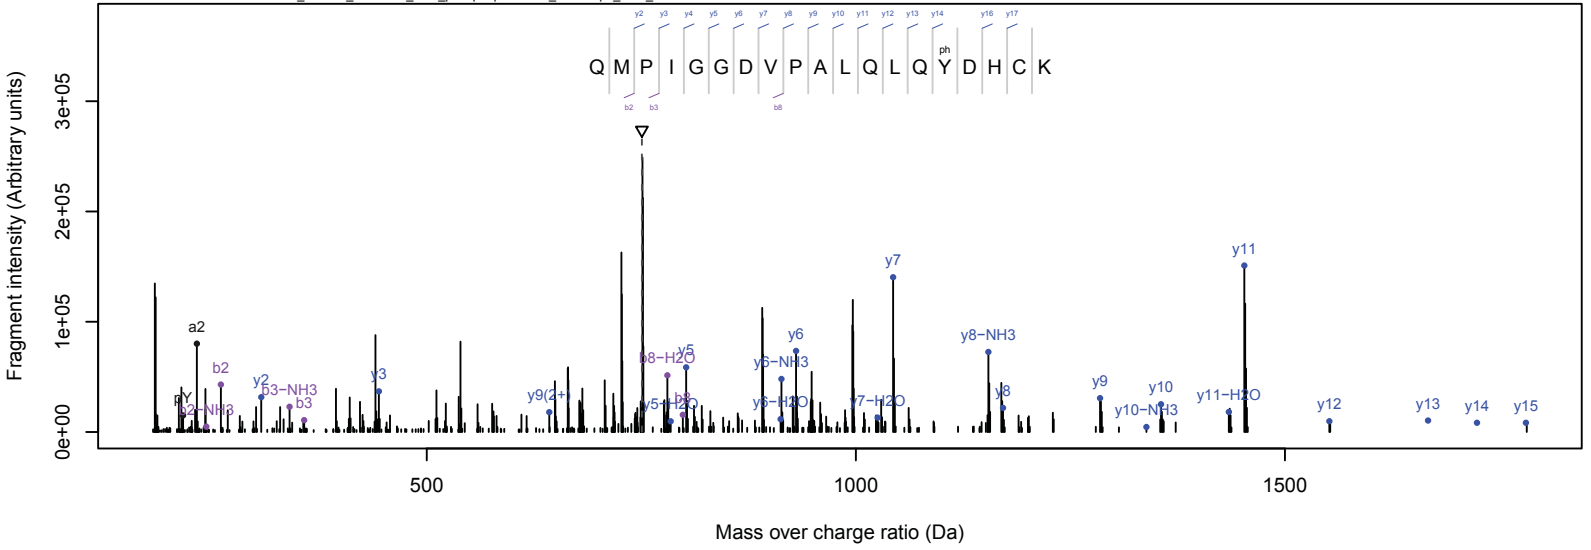

RRNY(ph)MPLAFSDK-3+

Source : QE1\_140612\_OPL1013\_CVA\_phosphoproteomic\_landscape\_AML\_C Scan : 20961

Andromeda score : 115.57

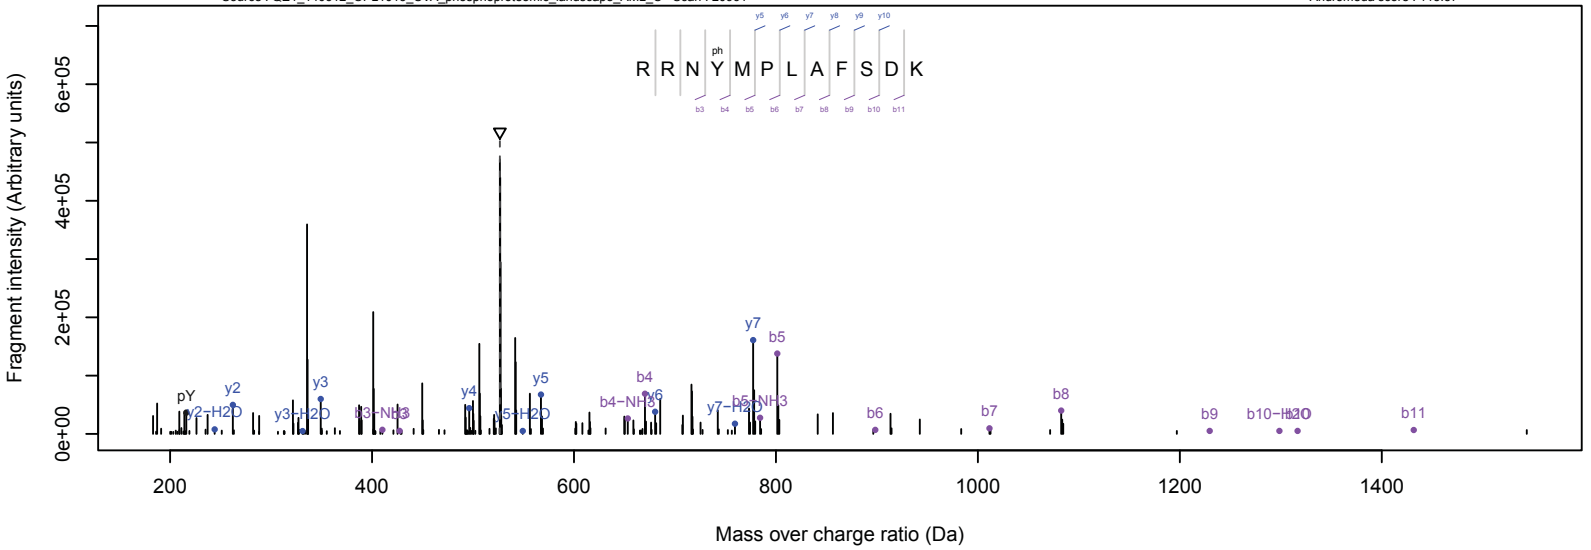

SGSY(ph)SYLEER-2+

Source : QE1\_140612\_OPL1013\_CVA\_phosphoproteomic\_landscape\_AML\_B Scan : 12906

Andromeda score : 115.57

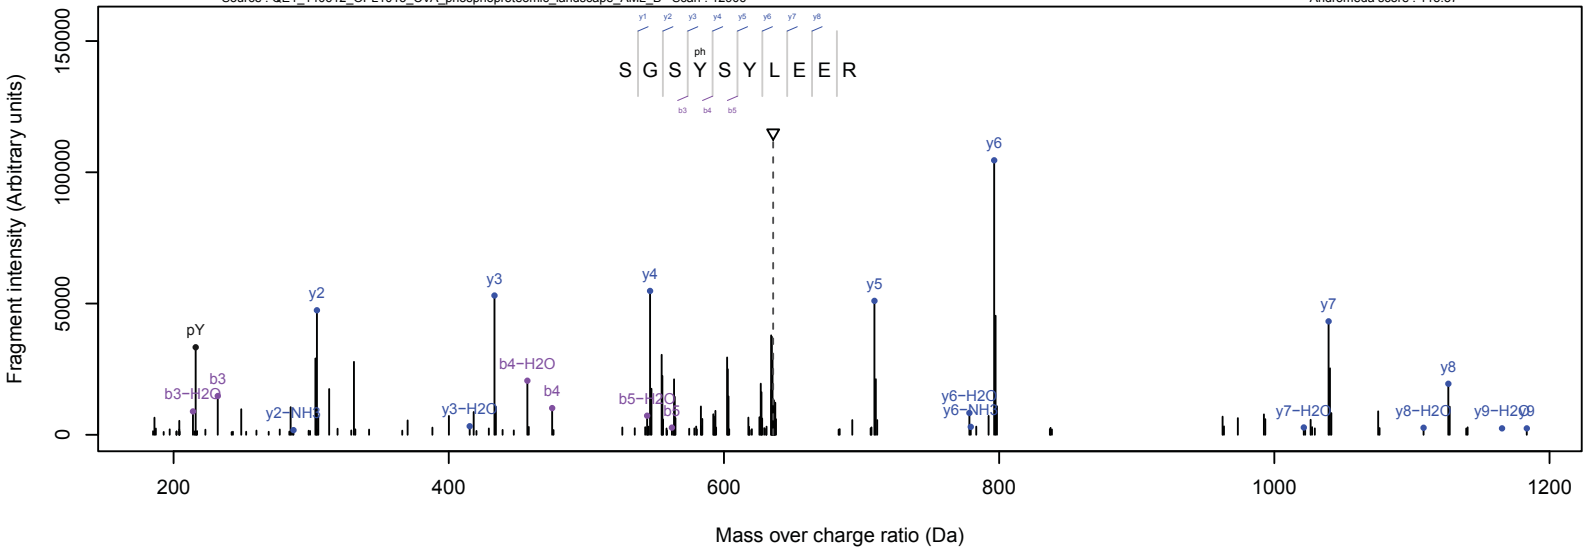



SLDNGGY(ph)YISPR-2+

Source: QE1\_140612\_OPL1013\_CVA\_phosphoproteomic\_landscape\_AML\_D Scan: 20217

Andromeda score: 115.57

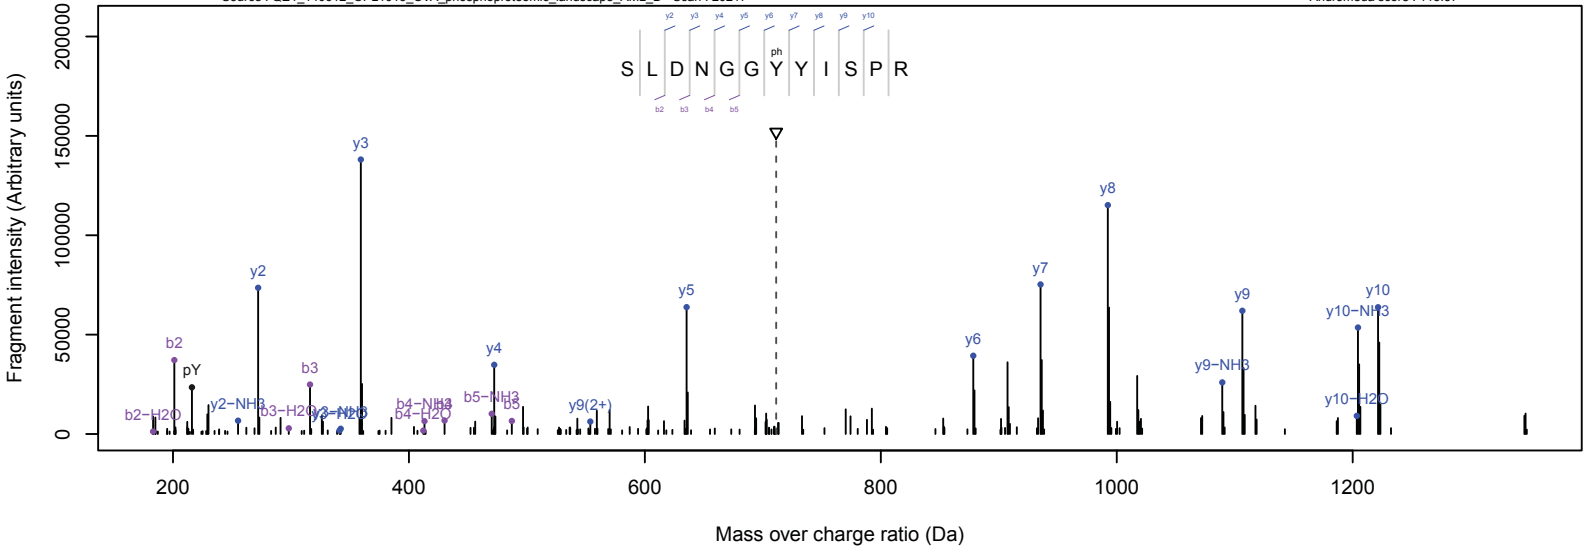

Y(ph)FHVVIAGPQDSPFEGGTFK-3+

Source: QE1\_140612\_OPL1013\_CVA\_phosphoproteomic\_landscape\_AML\_B Scan: 41241

Andromeda score: 115.57

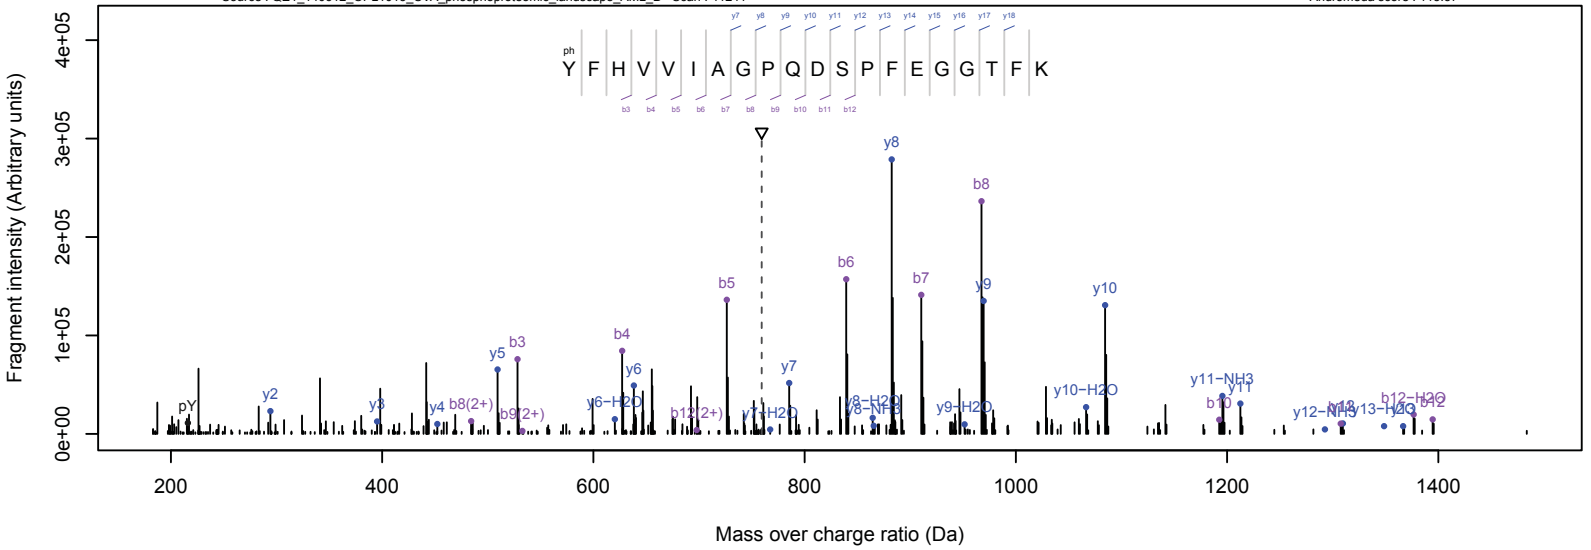

DLQY(ph)ITVSKHEELSSGDSLSPDPWK-3+

Source: QE1\_140612\_OPL1013\_CVA\_phosphoproteomic\_landscape\_AML\_C Scan: 40963

Andromeda score: 115.55

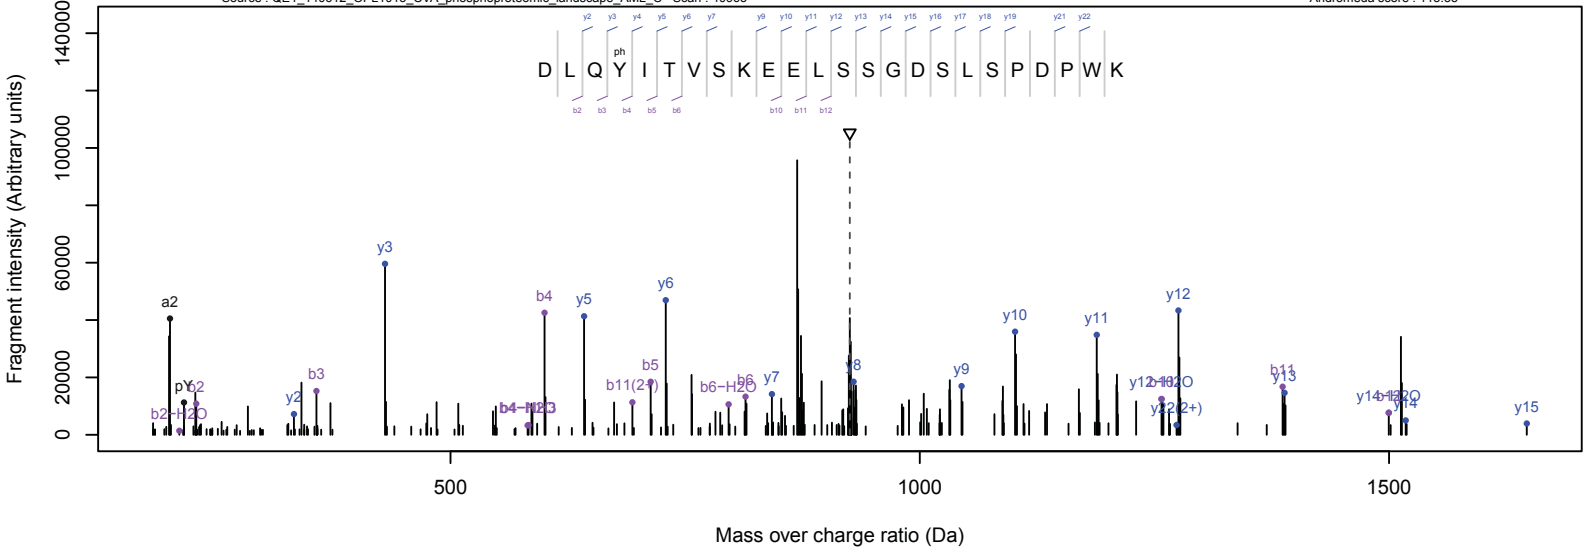



SIYSLDKLY(ph)PESQGSDTAWR-3+

Source : QE1\_140908\_OPL1013\_CvA\_pTyrIP\_AML\_HEL Scan : 35883

Andromeda score : 115.42

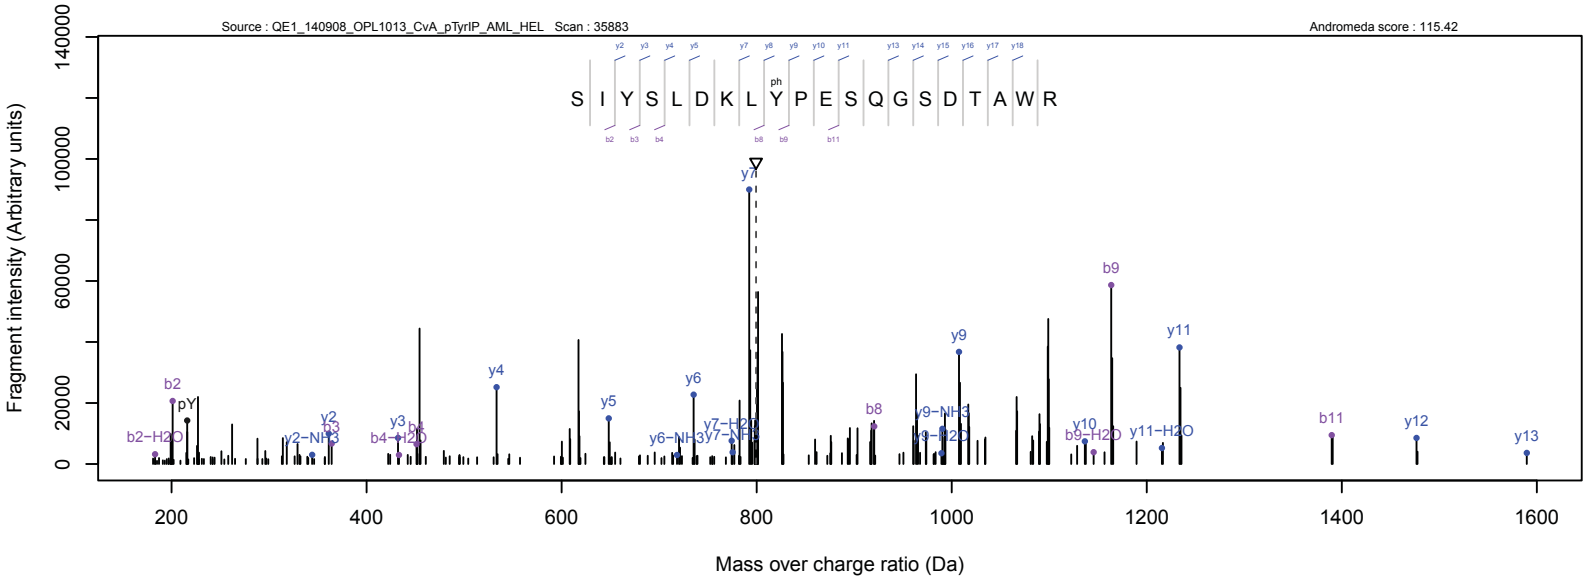

IY(ph)VDDGLISLQVK-2+

Source : QE1\_140612\_OPL1013\_CVA\_phosphoproteomic\_landscape\_AML\_D Scan : 44870

Andromeda score : 115.34

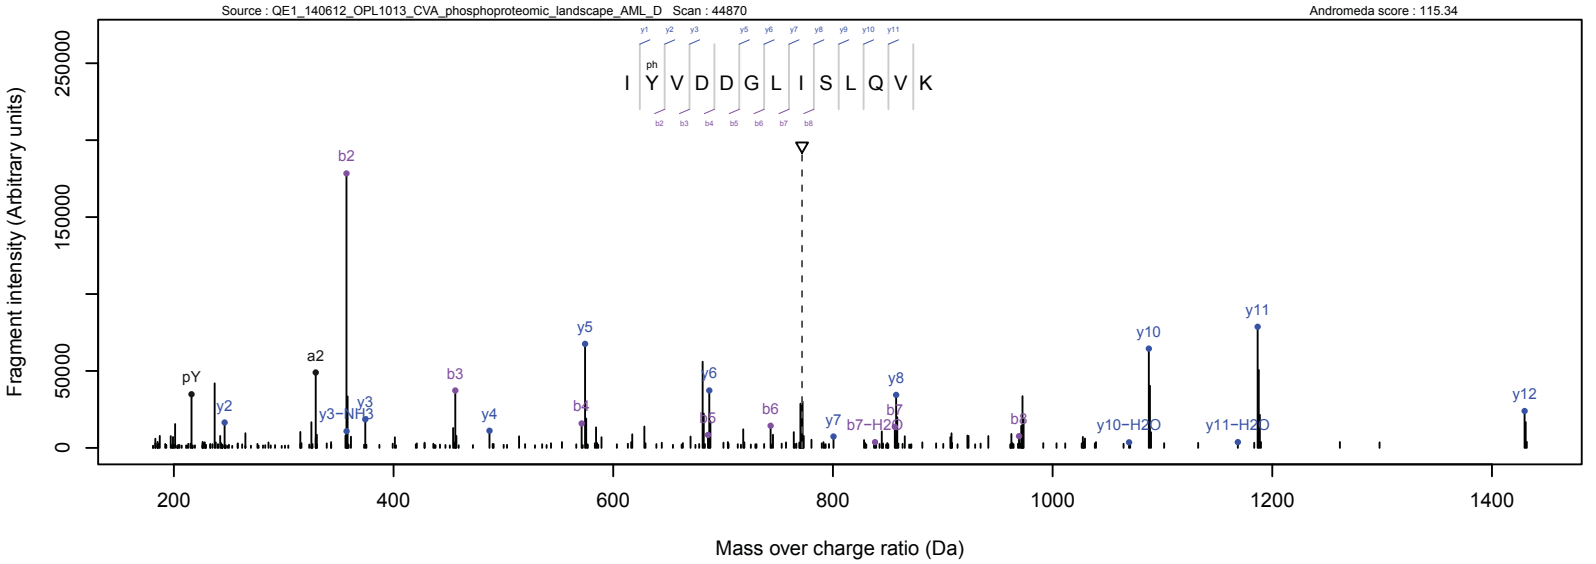

SLY(ph)DRPASY(ph)K-2+

Source : QE1\_140612\_OPL1013\_CVA\_phosphoproteomic\_landscape\_AML\_A Scan : 8085

Andromeda score : 115.33

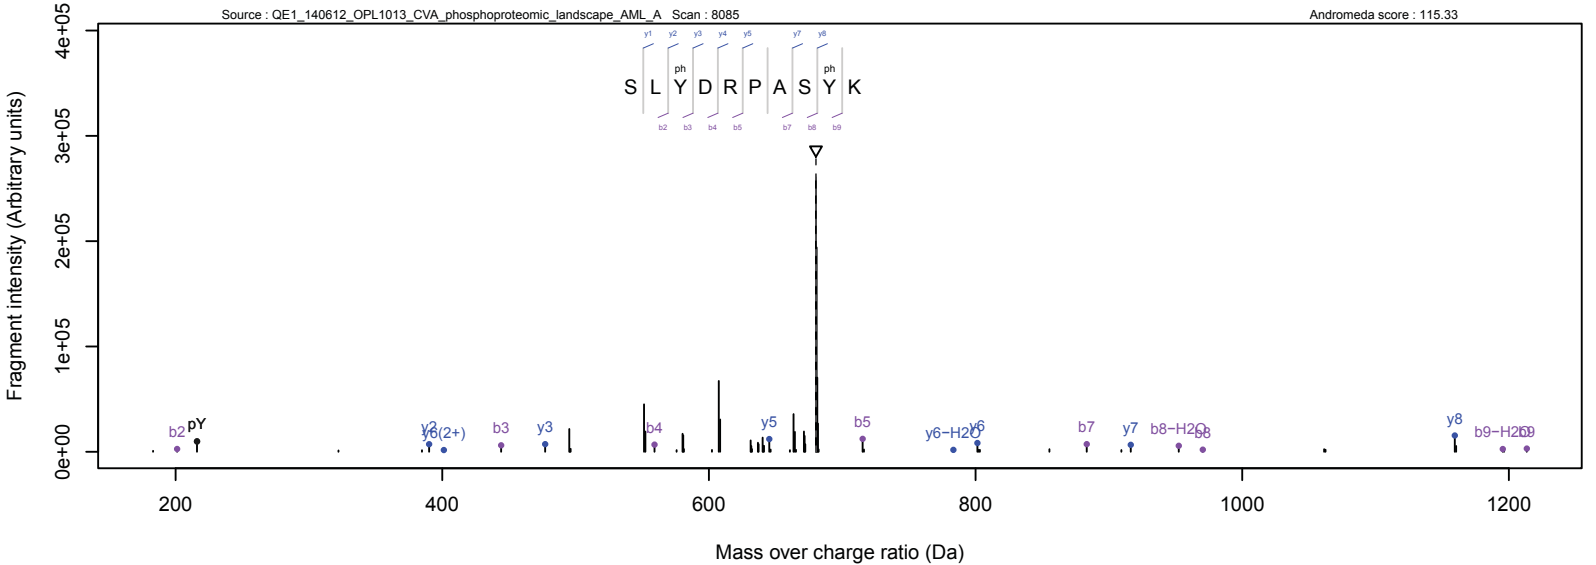

ELVLHYQHTSLVQHNDSLNVTLAY(ph)PVYAQR-4+

Source : QE1\_140612\_OPL1013\_CVA\_phosphoproteomic\_landscape\_AML\_B Scan : 37339

Andromeda score : 115.06

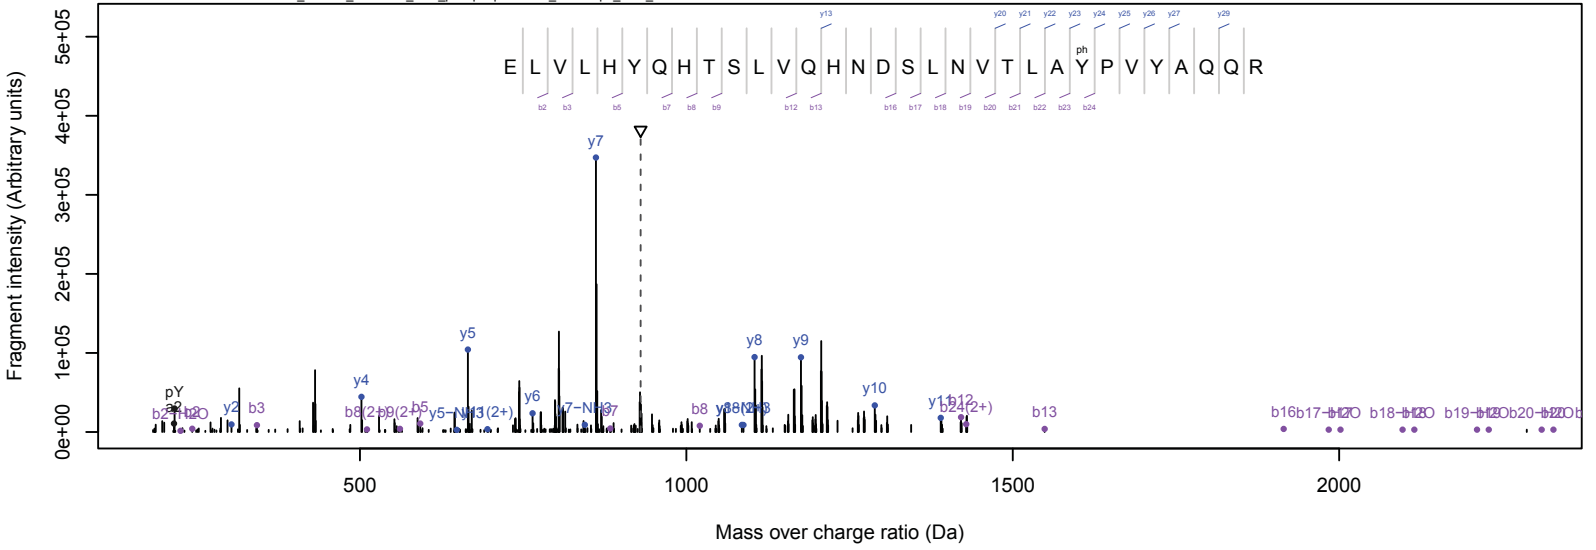

KRPSFPNLTSLGCLADAEEMY(ph)QNV DGR-4+

Source : QE1\_140612\_OPL1013\_CVA\_phosphoproteomic\_landscape\_AML\_C Scan : 48378

Andromeda score : 115.05

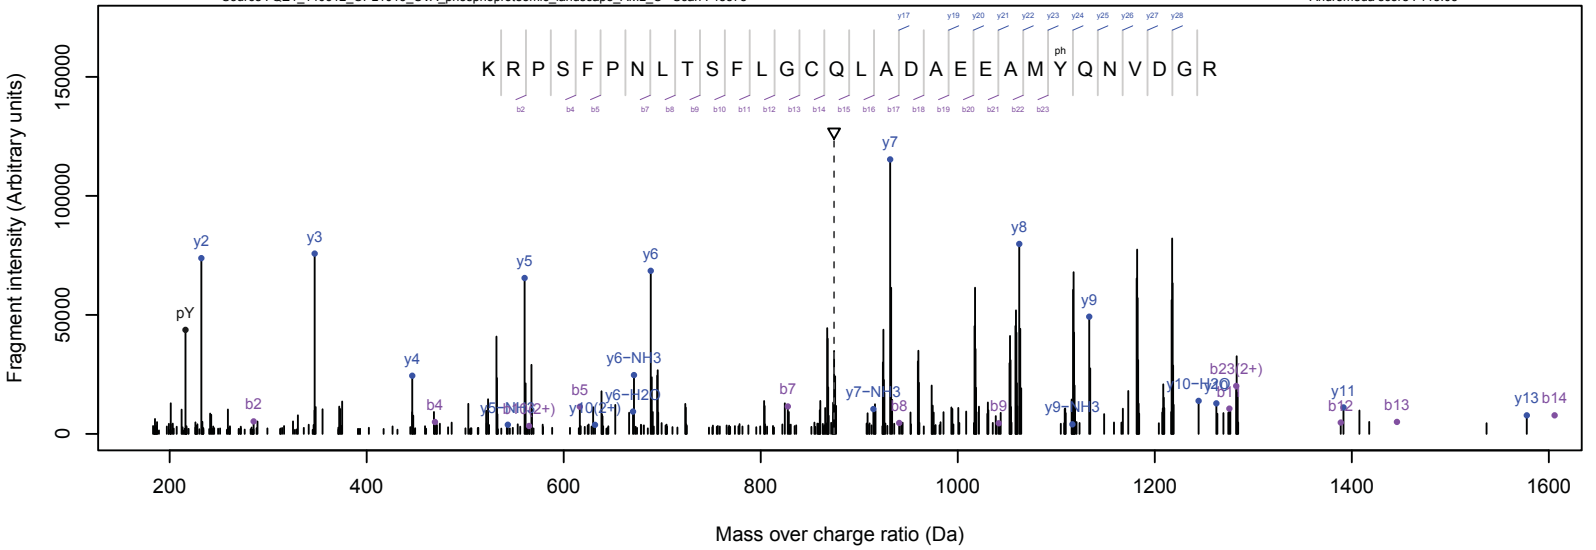

HSSLIDISVPTY(ph)KWK-3+

Source : QE1\_140612\_OPL1013\_CVA\_phosphoproteomic\_landscape\_AML\_C Scan : 33236

Andromeda score : 115.04

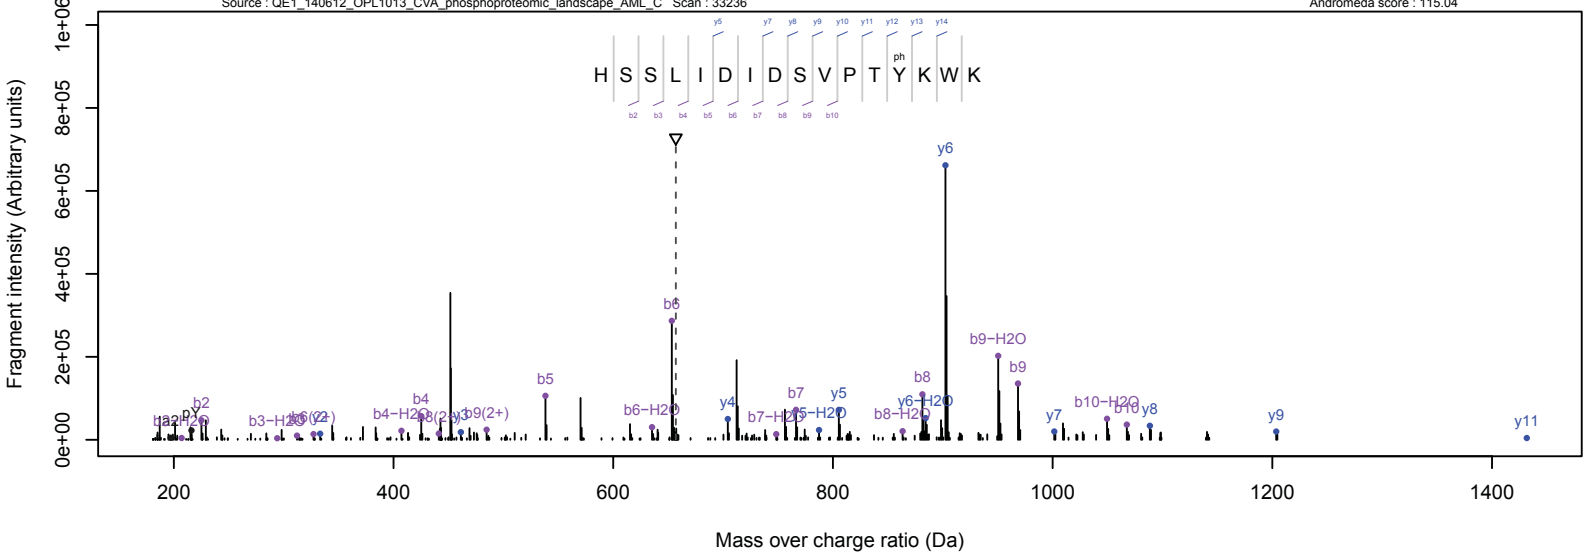

TTTGSY(ph)IANR-2+

Source : QE1\_140822\_OPL1013\_CvA\_pTyrIP\_AML\_cell\_lines\_part2\_B Scan : 3836

Andromeda score : 114.97

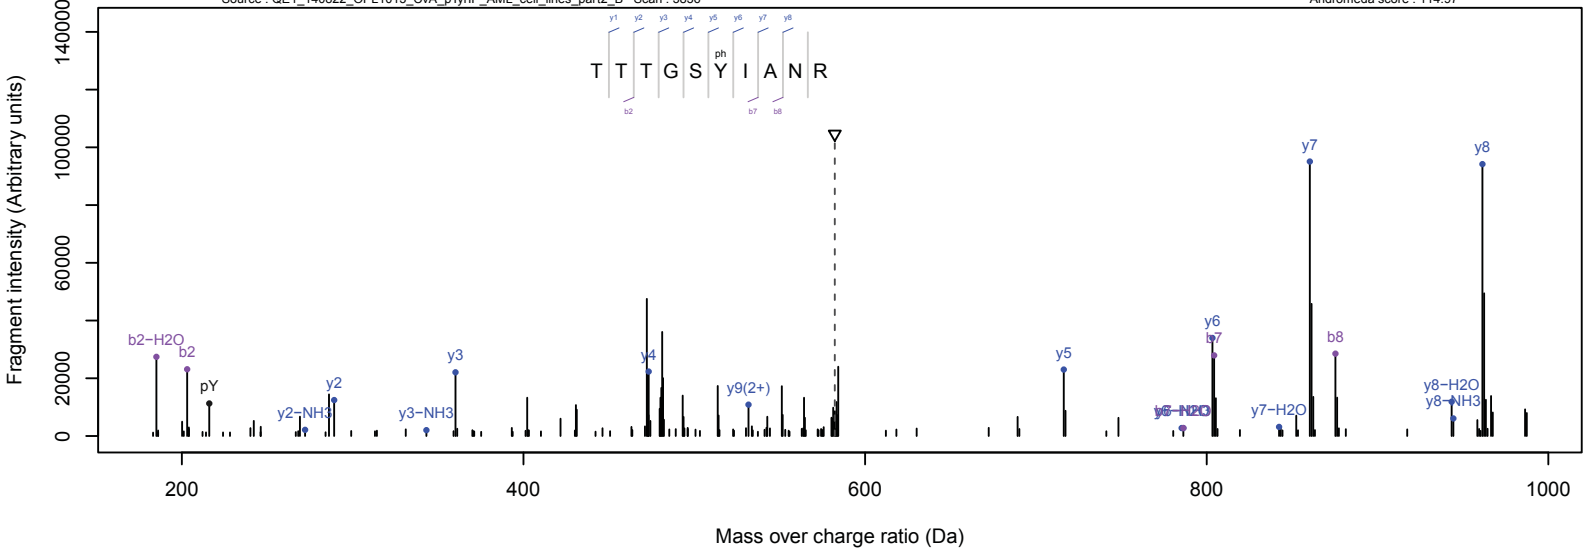

QY(ph)LLCPGSSGVENTELVK-2+

Source : QE1\_140612\_OPL1013\_CvA\_phosphoproteomic\_landscape\_AML\_D Scan : 33226

Andromeda score : 114.96

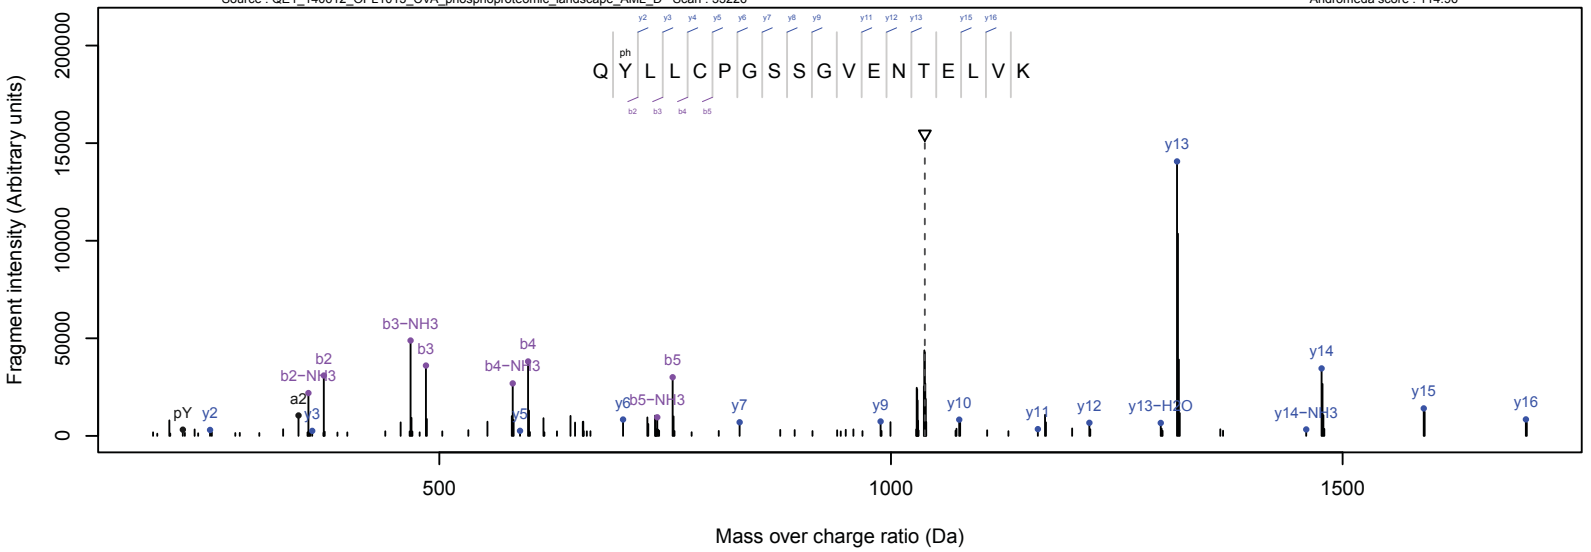

Y(ph)SEFTTSTGTHNQTR-3+

Source : QE1\_140908\_OPL1013\_CvA\_pTyrIP\_AML\_Kasumi6 Scan : 7766

Andromeda score : 114.96

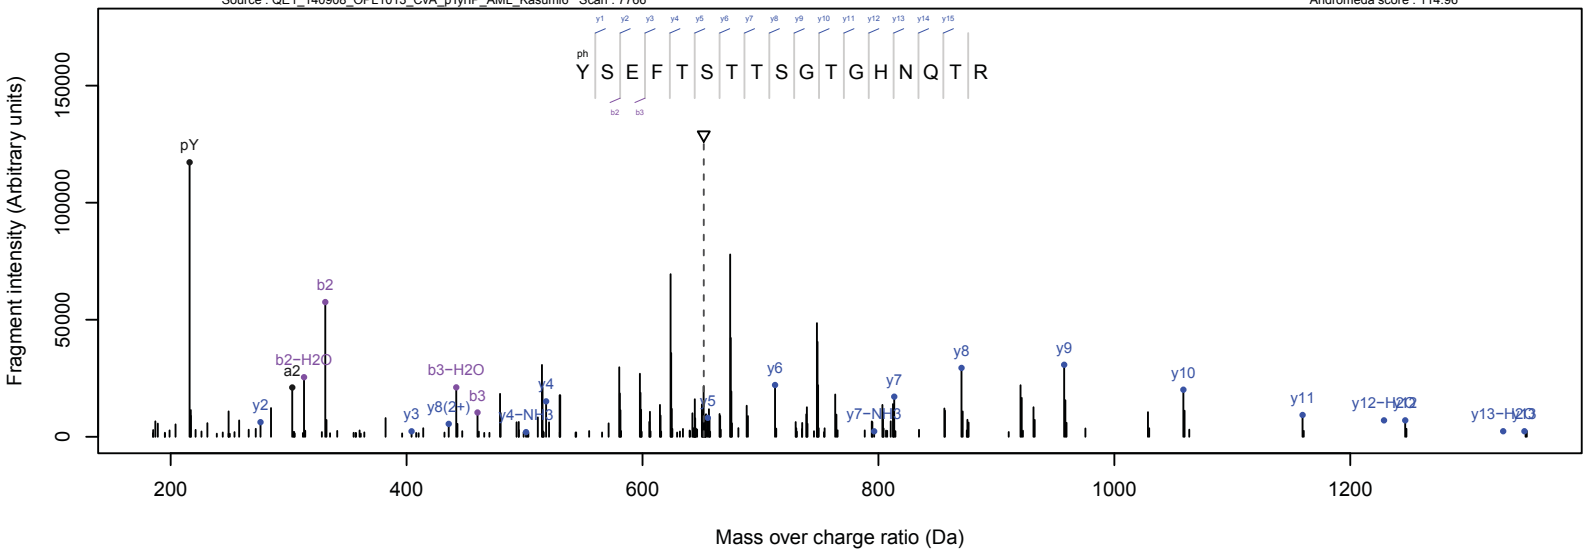

GEGY(ph)AKPNEGAIVEVALEGGYKDK-3+

Source : QE1\_140612\_OPL1013\_CVA\_phosphoproteomic\_landscape\_AML\_B Scan : 38254

Andromeda score : 114.9

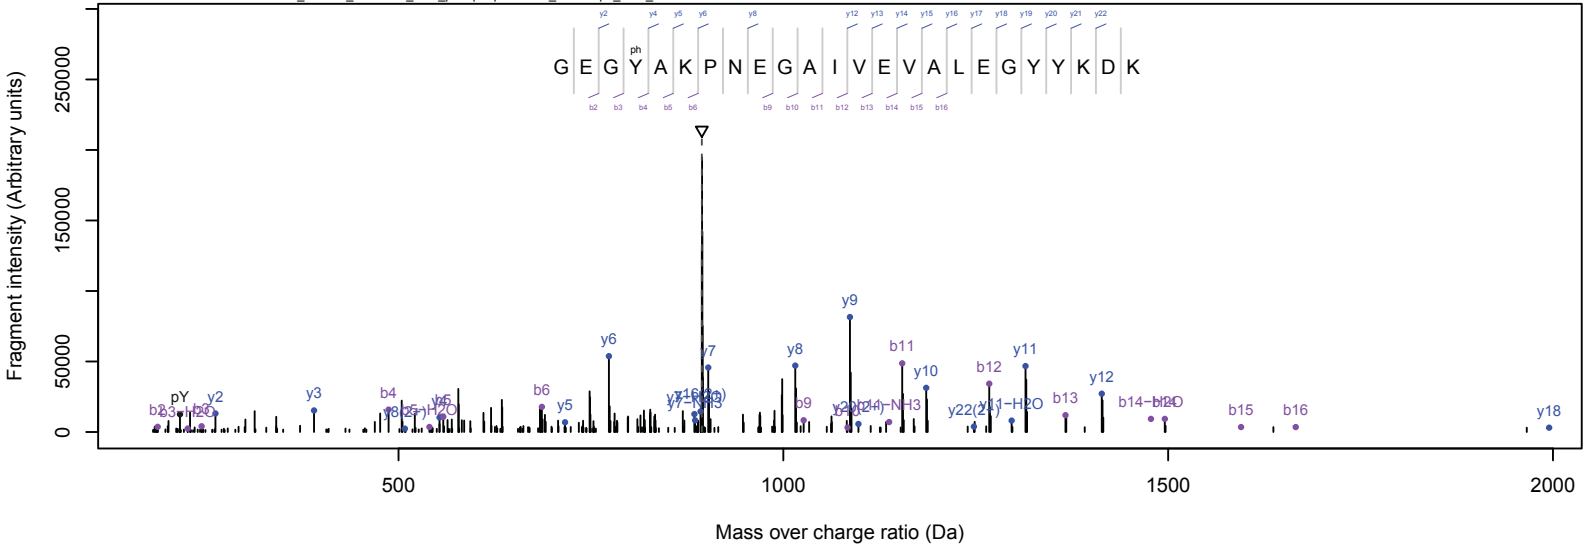

GHEY(ph)TNIK-2+

Source : QE1\_140822\_OPL1013\_CvA\_pTyrIP\_AML\_cell\_lines\_part2\_E Scan : 2943

Andromeda score : 114.89

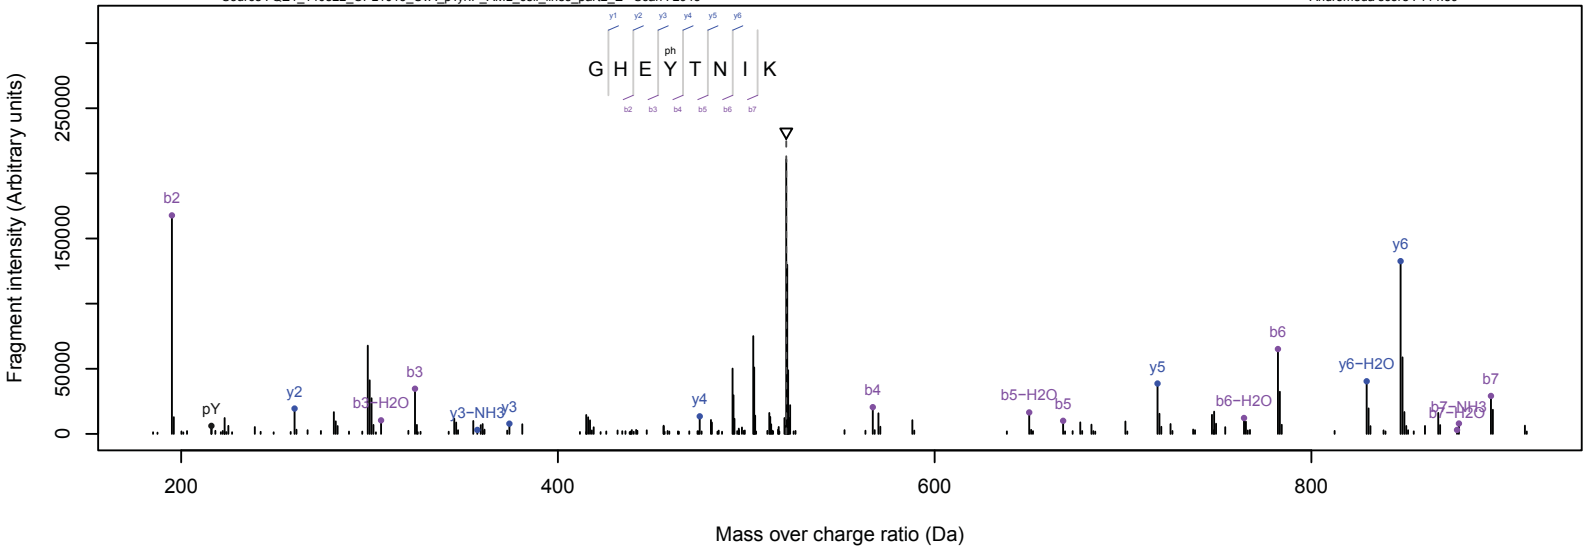

TINPSKY(ph)QTIR-3+

Source : QE1\_140612\_OPL1013\_CVA\_phosphoproteomic\_landscape\_AML\_C Scan : 11032

Andromeda score : 114.86

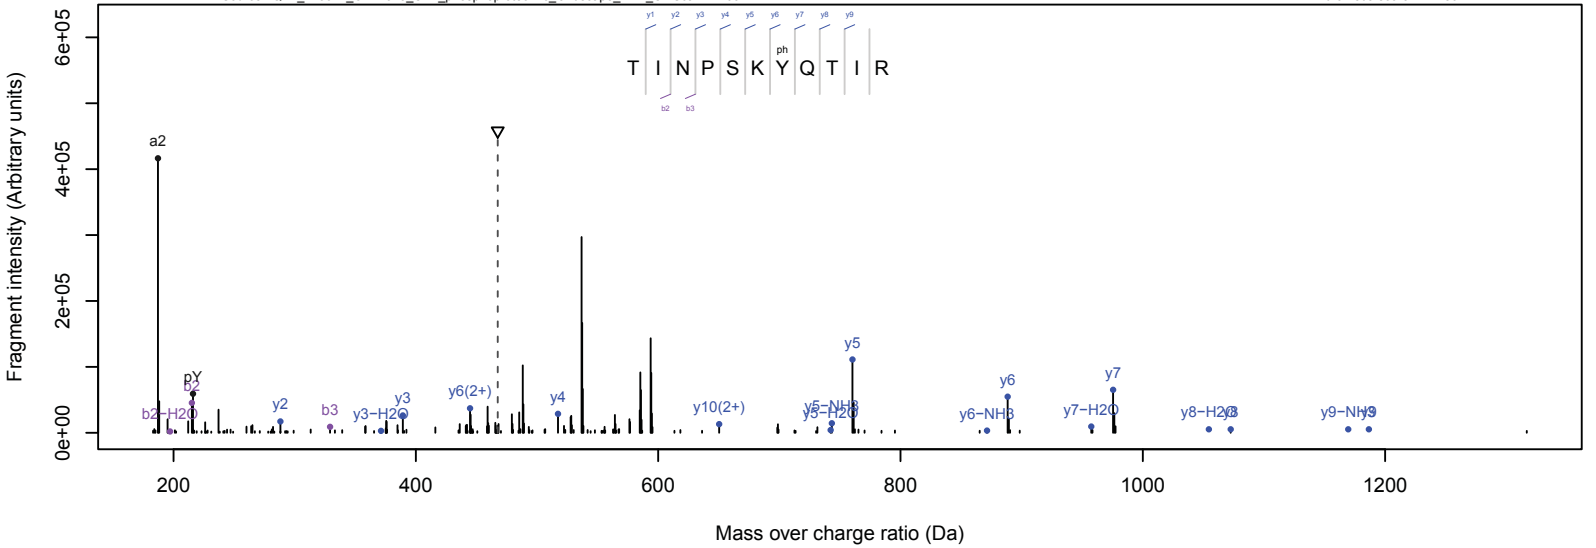

TREKLY(ph)DFVK-3+

Source : QE1\_140612\_OPL1013\_CVA\_phosphoproteomic\_landscape\_AML\_A Scan : 18264

Andromeda score : 114.86

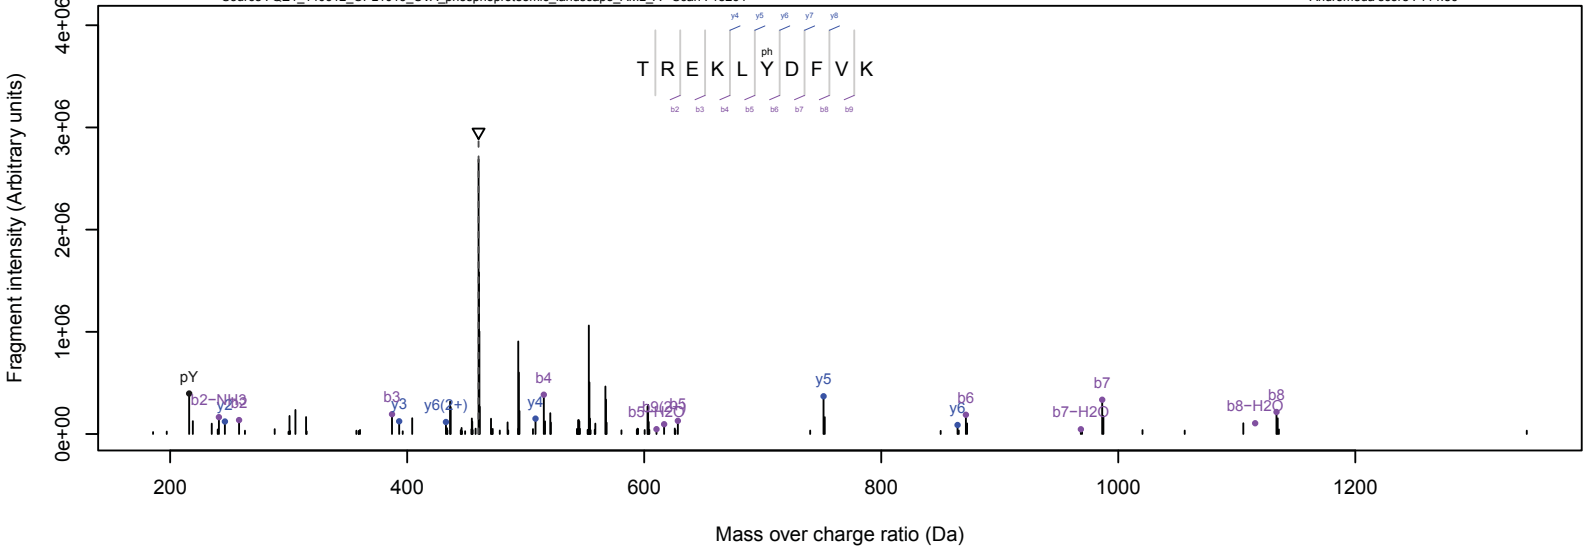

AY(ph)DHLFK-2+

Source : QE1\_140612\_OPL1013\_CVA\_phosphoproteomic\_landscape\_AML\_C Scan : 11507

Andromeda score : 114.78

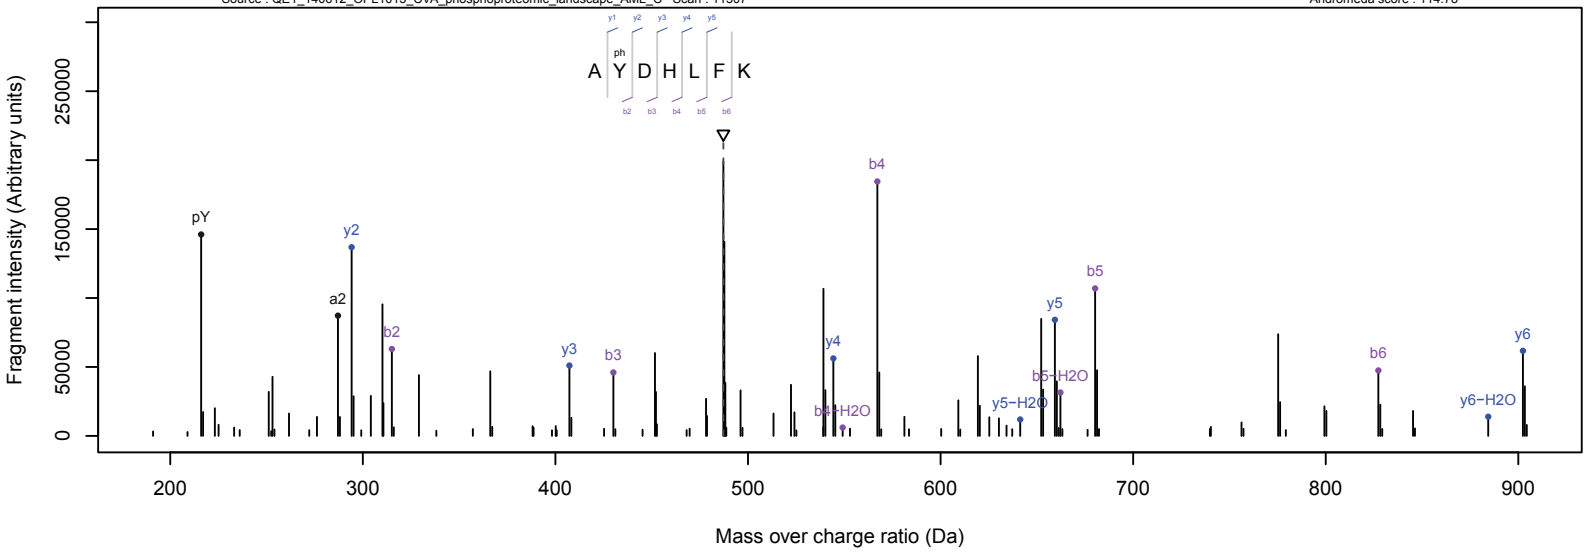

IFEY(ph)FRR-2+

Source : Qe1\_141024\_OPL1013\_CvA\_AML\_pTyrIP\_MOLM13 Scan : 23288

Andromeda score : 114.78

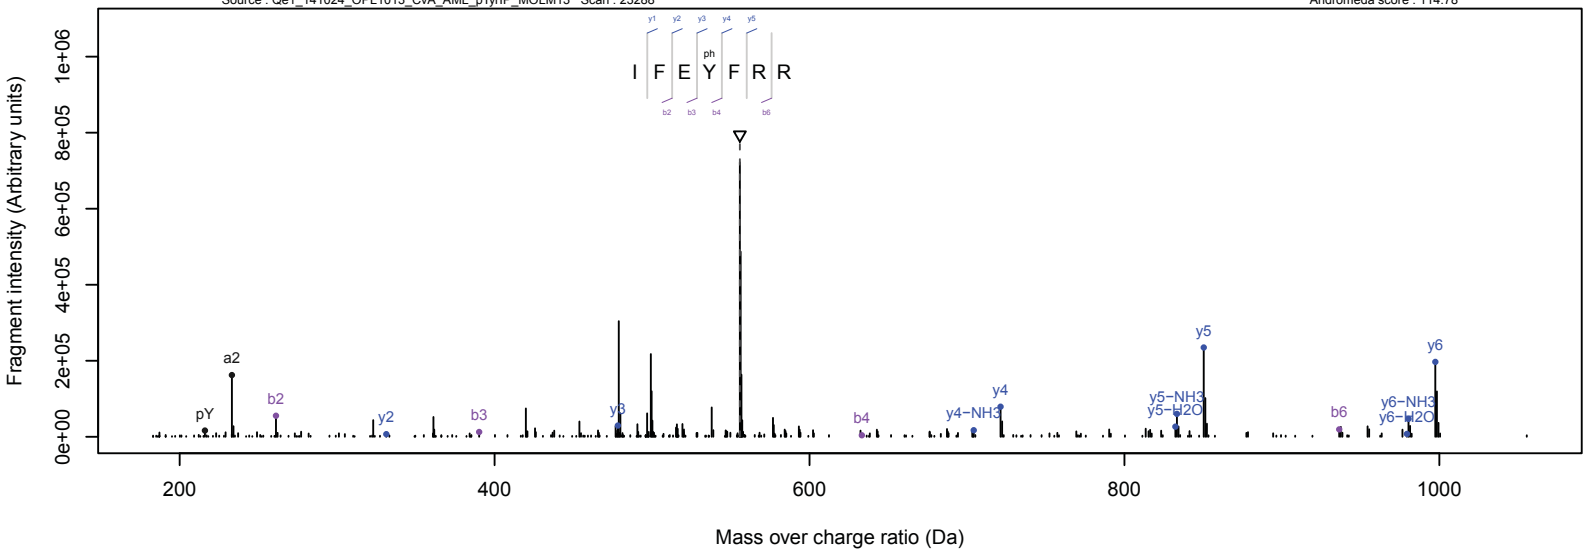

**KIEISTIAS(ph)NYHLEVNPSDAGNSDR-3+**

Source : QE1\_140612\_OPL1013\_CVA\_phosphoproteomic\_landscape\_AML\_B Scan : 29777

Andromeda score : 114.74

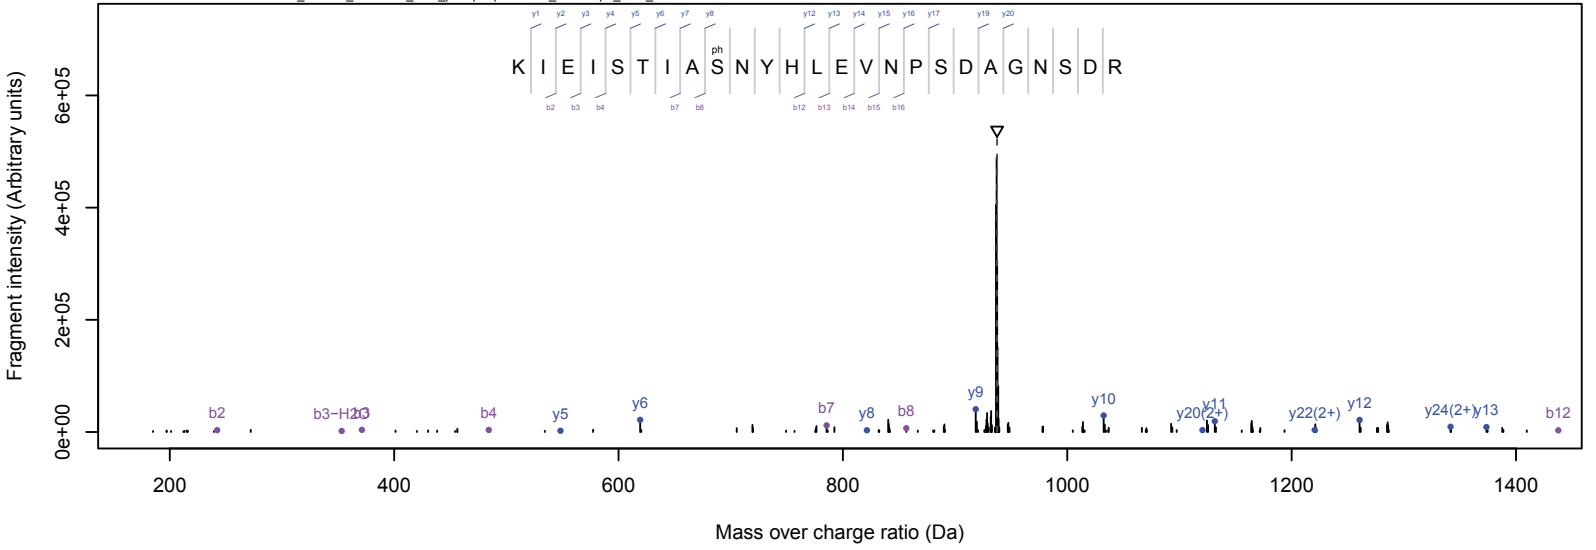

**KQPY(ph)YPPFDK-2+**

Source : QE1\_140612\_OPL1013\_CVA\_phosphoproteomic\_landscape\_AML\_C Scan : 23227

Andromeda score : 114.72

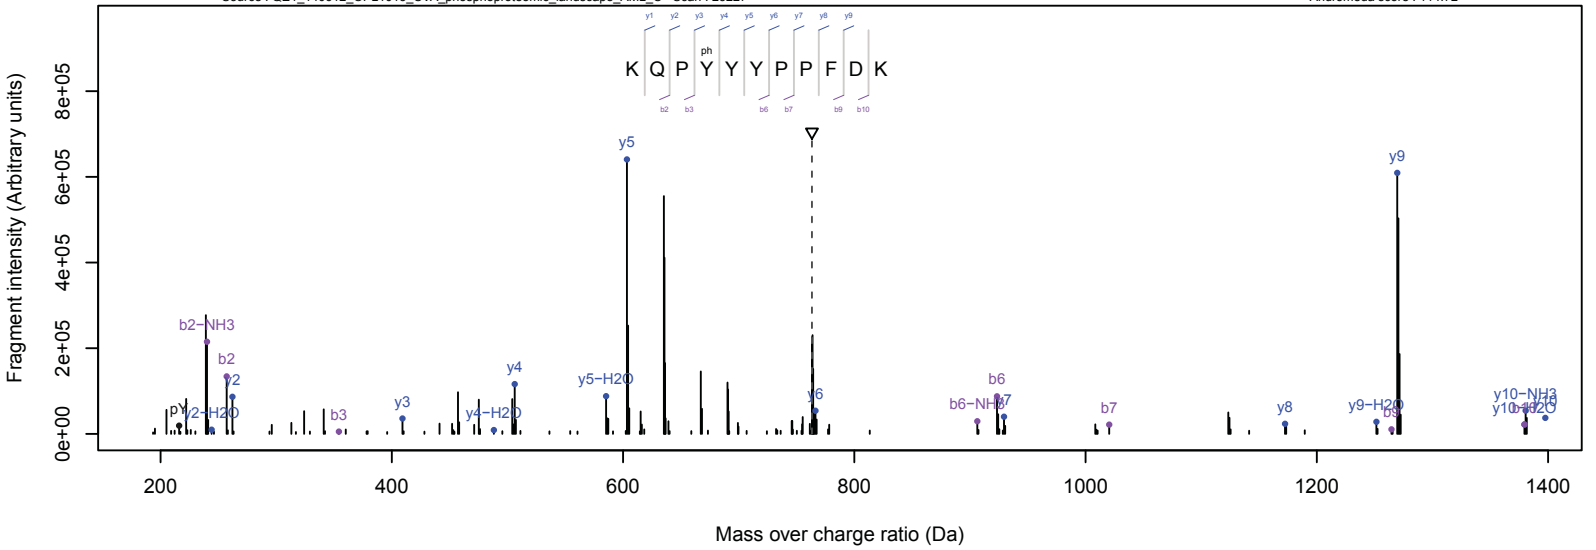

**KDTETVY(ph)SEVRK-3+**

Source : Qe1\_141024\_OPL1013\_CvA\_AML\_pTyrIP\_MOLM13 Scan : 6761

Andromeda score : 114.7

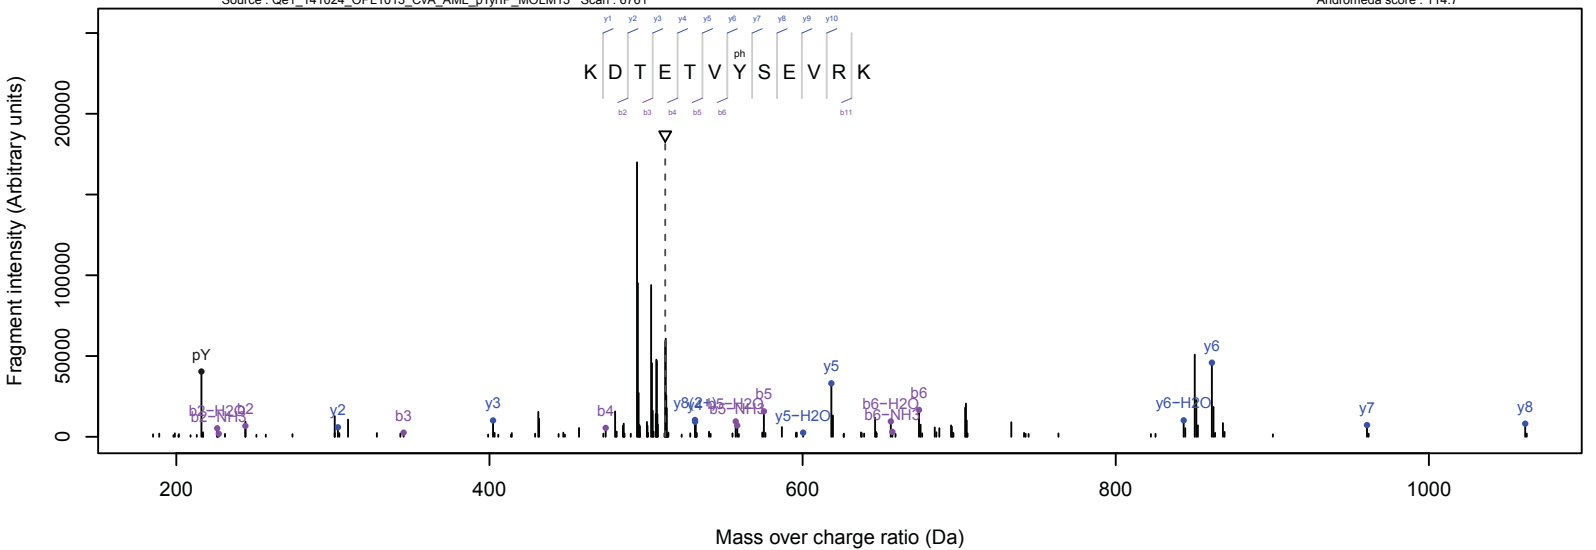



**QEDGGVY(ph)SSGLK-2+**

Source : QE1\_140612\_OPL1013\_CVA\_phosphoproteomic\_landscape\_AML\_B Scan : 6903

Andromeda score : 114.7

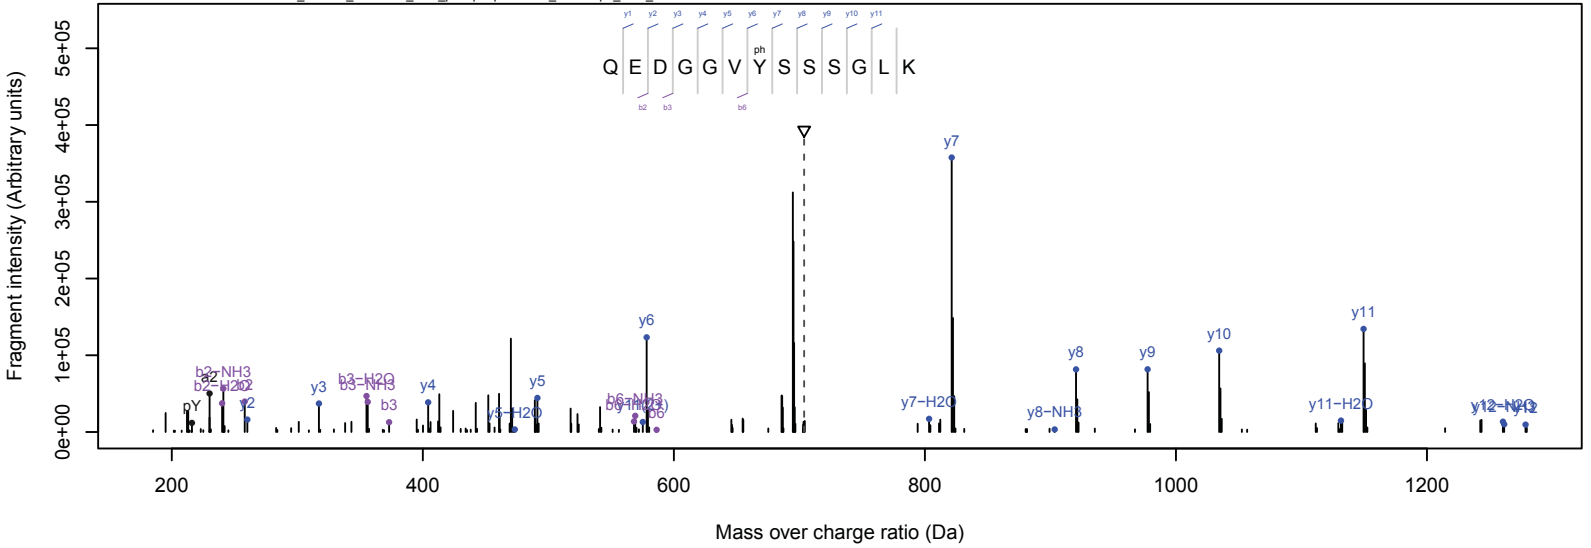

**YANNSNY(ph)KNDVM(ox)IR-3+**

Source : QE1\_140908\_OPL1013\_CvA\_pTyrIP\_AML\_HEL Scan : 10277

Andromeda score : 114.7

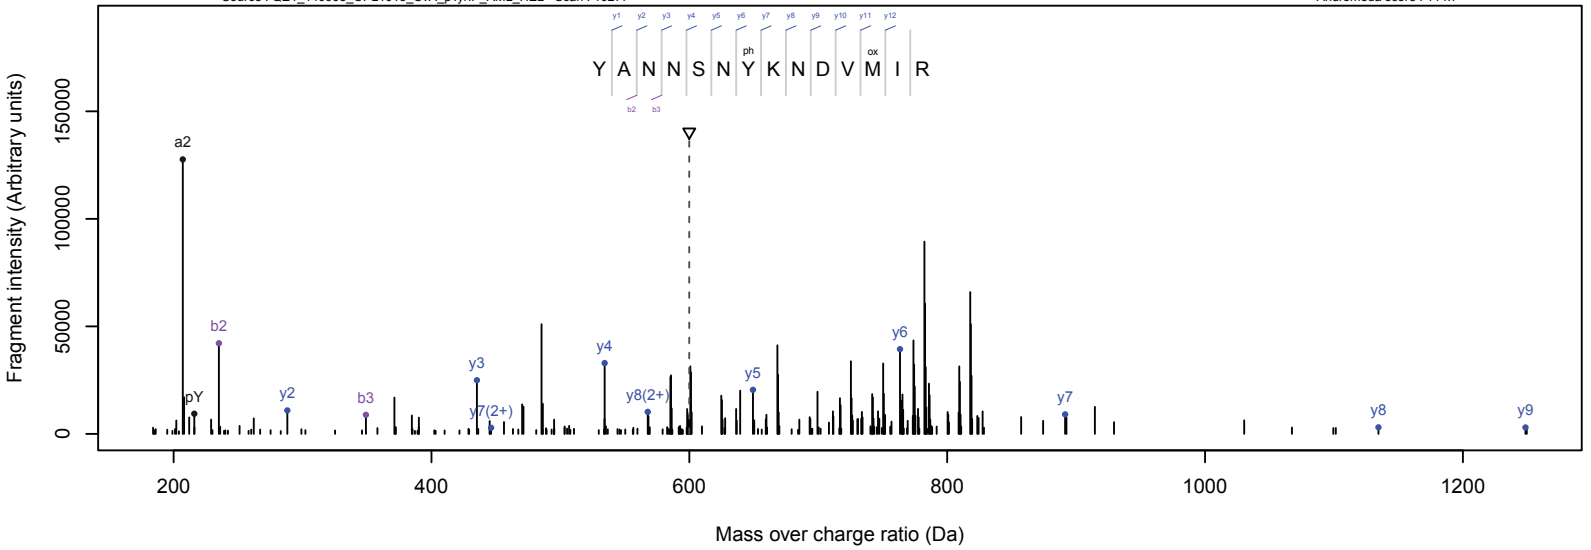

**(ac)AQQAADKYL(ph)VDK-2+**

Source : QE1\_140612\_OPL1013\_CVA\_phosphoproteomic\_landscape\_AML\_C Scan : 27072

Andromeda score : 114.64

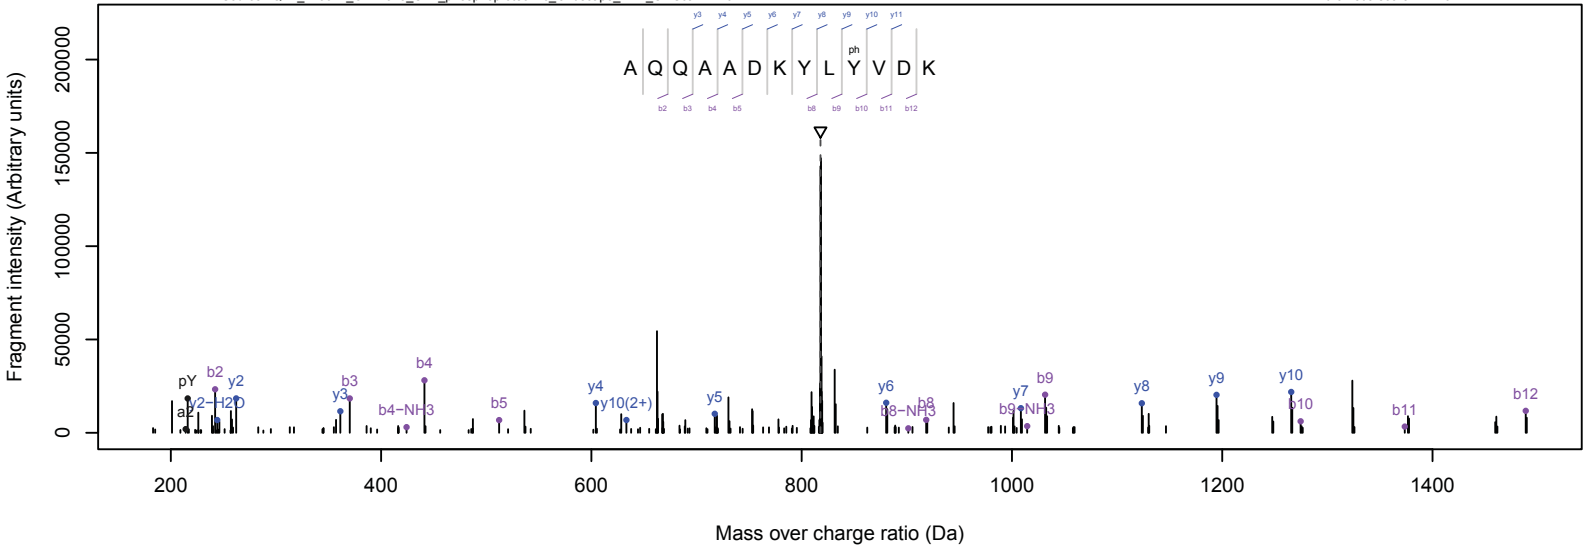

IGY(ph)FPPGIVEVSKR-3+

Source : QE1\_140612\_OPL1013\_CVA\_phosphoproteomic\_landscape\_AML\_C Scan : 41916

Andromeda score : 114.64

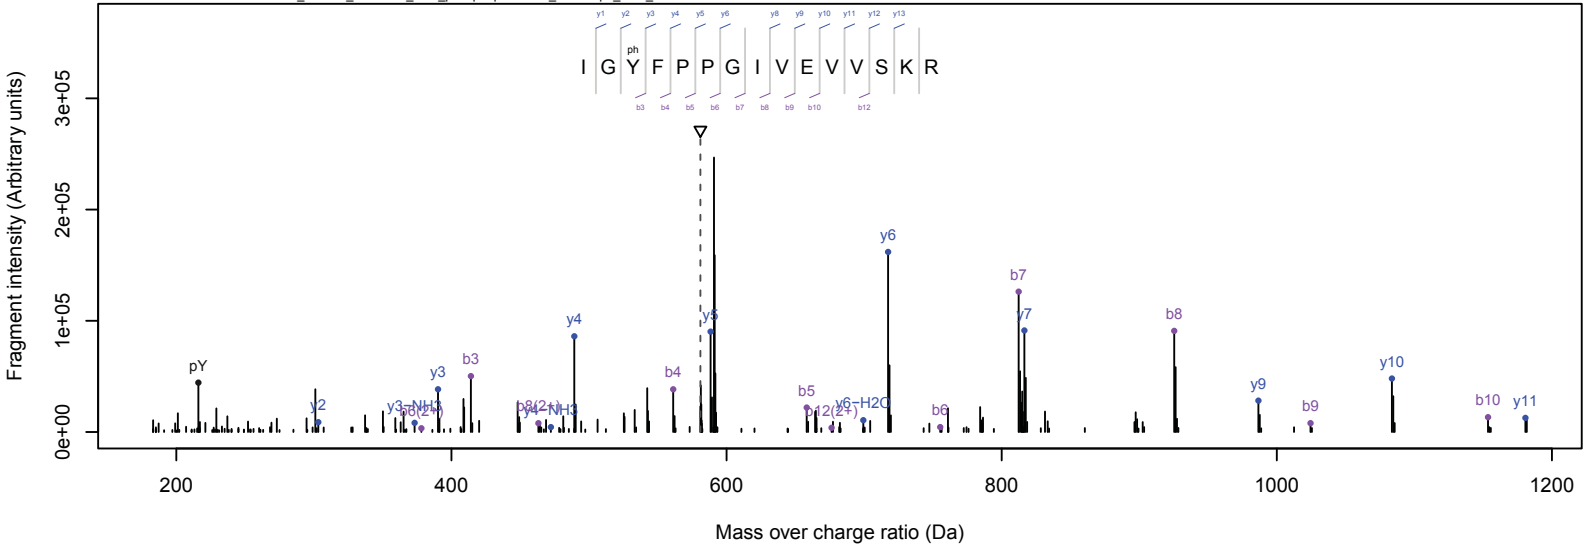

LEGEVTPNSLST(ph)SYK-2+

Source : QE1\_140612\_OPL1013\_CVA\_phosphoproteomic\_landscape\_AML\_C Scan : 20441

Andromeda score : 114.64

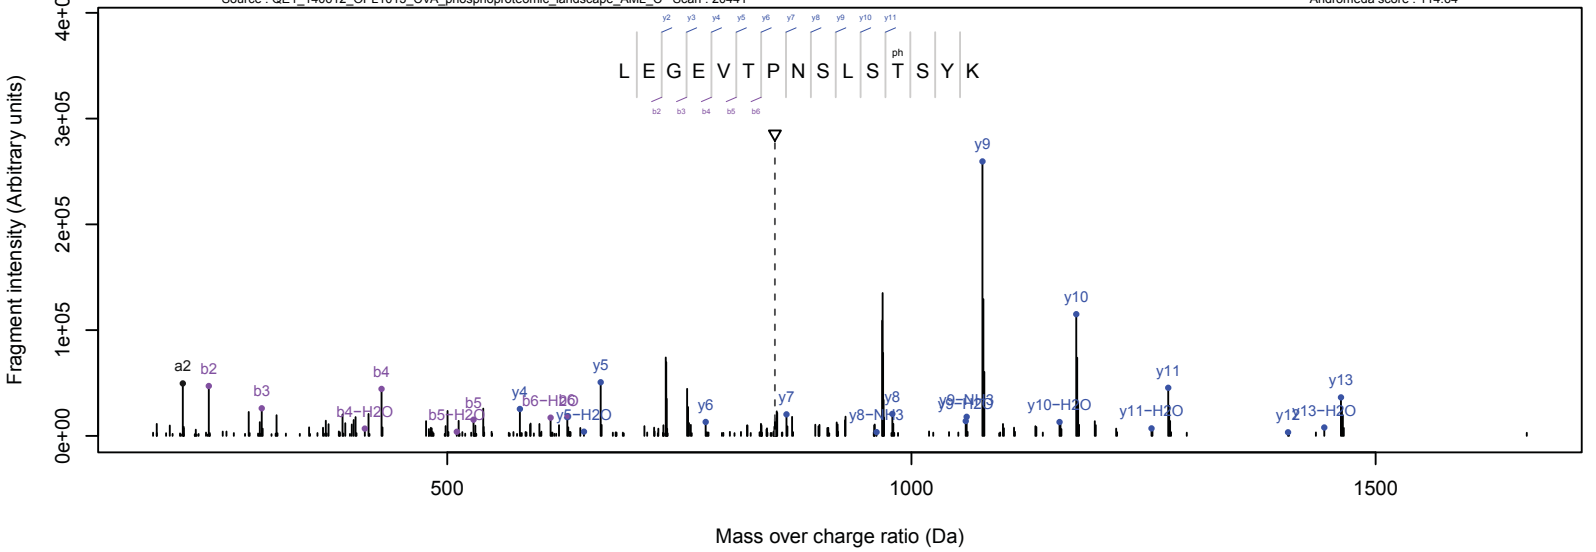

LHSLVKPSVDY(ph)VCQLK-2+

Source : QE1\_140612\_OPL1013\_CVA\_phosphoproteomic\_landscape\_AML\_B Scan : 25893

Andromeda score : 114.64

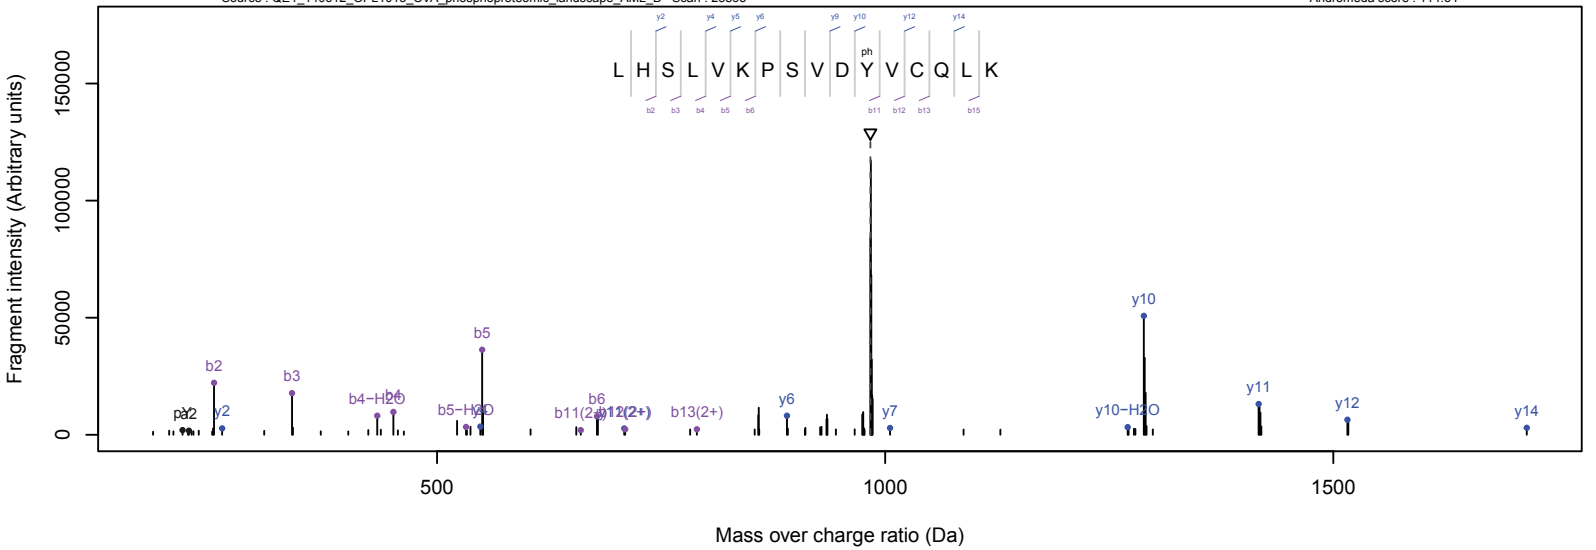

**YANNSNY(ph)KNDVMIRK-3+**

Source : QE1\_140908\_OPL1013\_CvA\_pTyrIP\_AML\_ML2 Scan : 8967

Andromeda score : 114.64

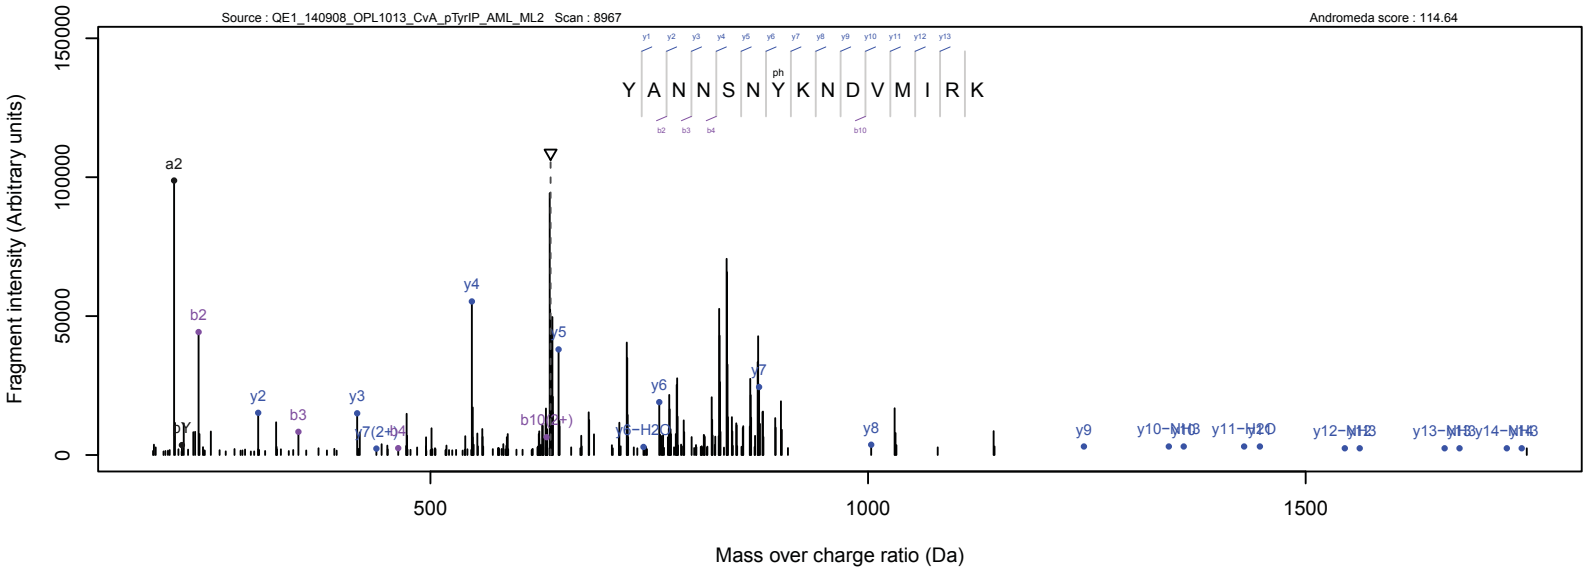

**VTGDLFY(ph)THVTTMGQR-3+**

Source : QE1\_140612\_OPL1013\_CVA\_phosphoproteomic\_landscape\_AML\_C Scan : 29595

Andromeda score : 114.63

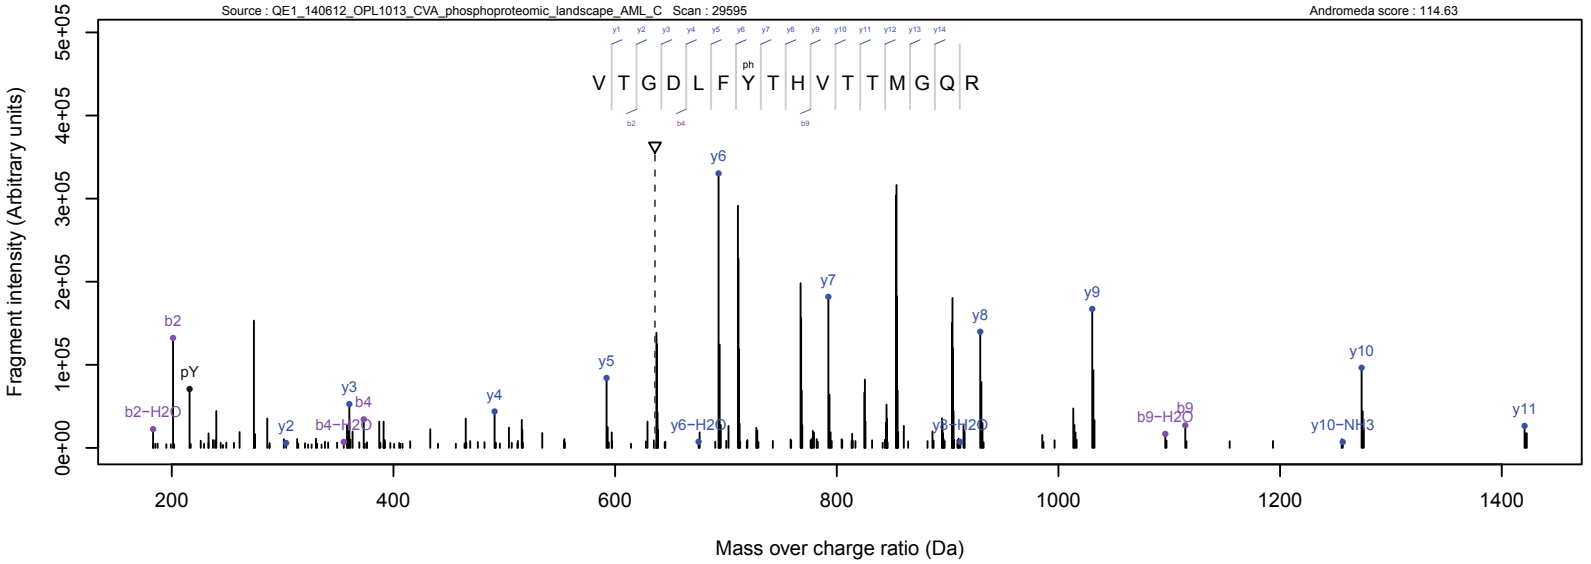

**APVSAY(ph)QYALANGDVWK-2+**

Source : QE1\_140612\_OPL1013\_CVA\_phosphoproteomic\_landscape\_AML\_C Scan : 36334

Andromeda score : 114.55

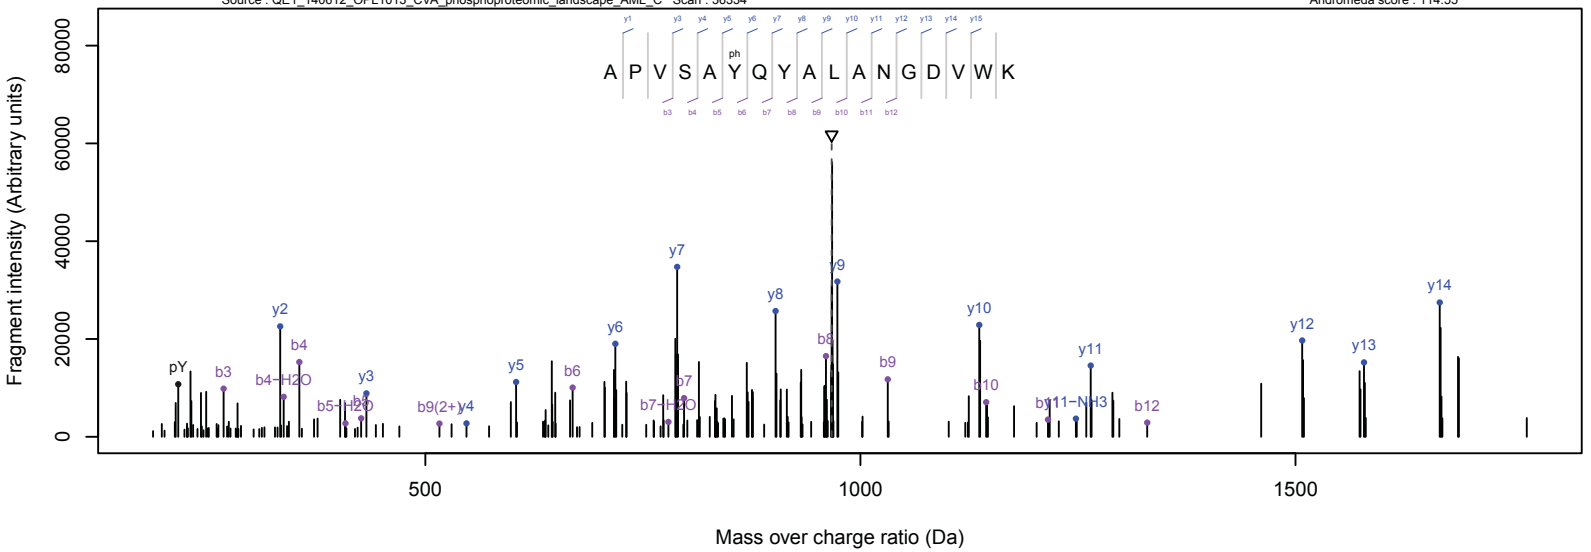

Y(ph)VASYLLAALGGNSSPSAK-2+

Source: QE1\_140612\_OPL1013\_CVA\_phosphoproteomic\_landscape\_AML\_B Scan: 46359

Andromeda score: 114.55

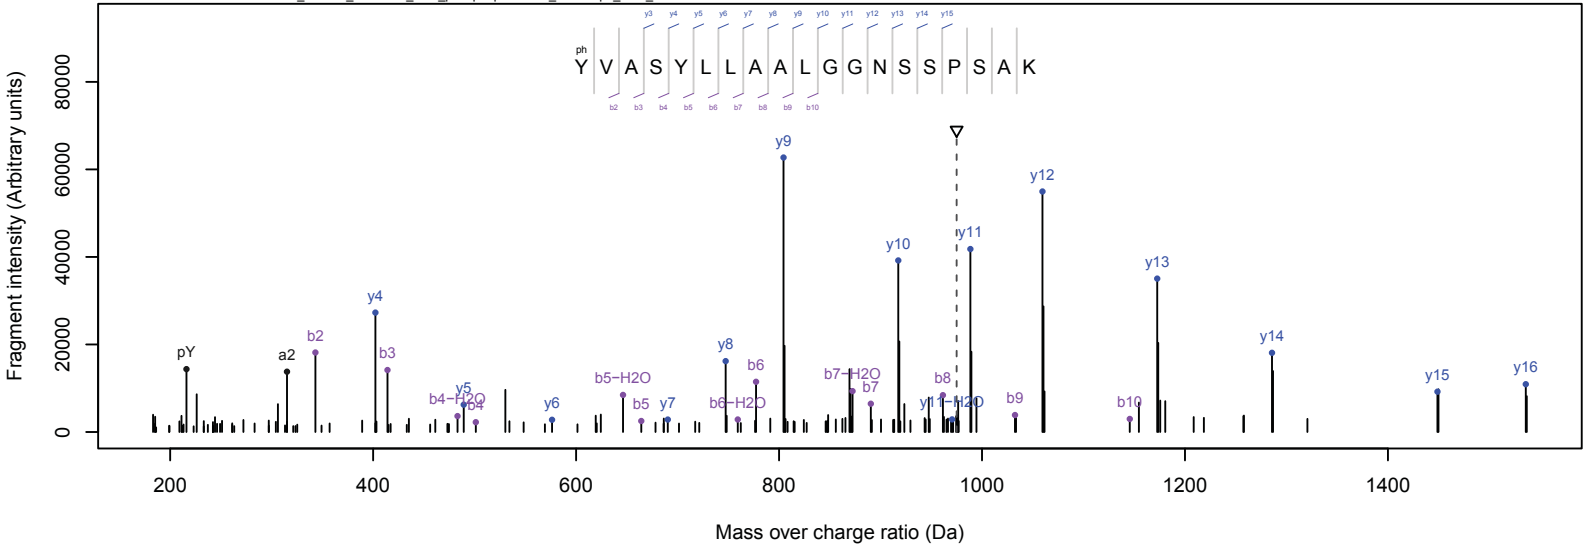

EY(ph)FTFPASK-2+

Source: QE1\_140612\_OPL1013\_CVA\_phosphoproteomic\_landscape\_AML\_C Scan: 27087

Andromeda score: 114.51

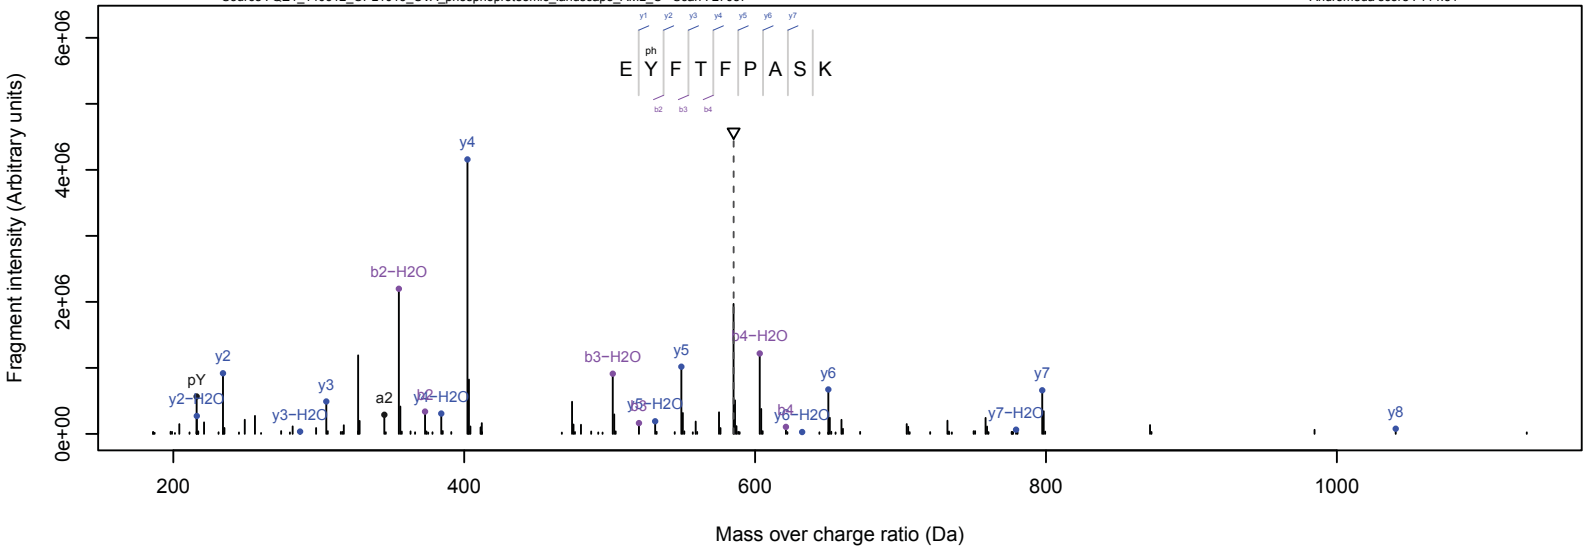

LLGPGVNY(ph)SGCQITWAK-2+

Source: QE1\_140612\_OPL1013\_CVA\_phosphoproteomic\_landscape\_AML\_B Scan: 34627

Andromeda score: 114.28

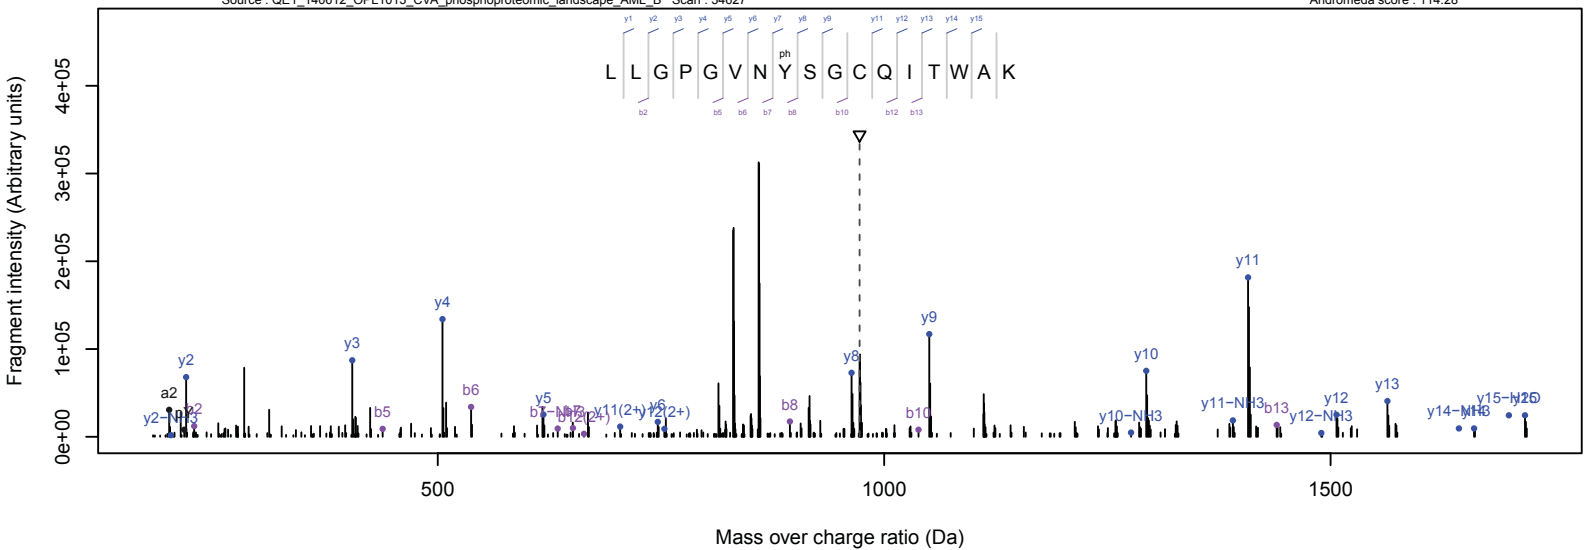

YCRPESQEHPEADPGAAPY(ph)LKTK-4+

Source: QE1\_140612\_OPL1013\_CVA\_phosphoproteomic\_landscape\_AML\_D Scan: 13618

Andromeda score: 114.15

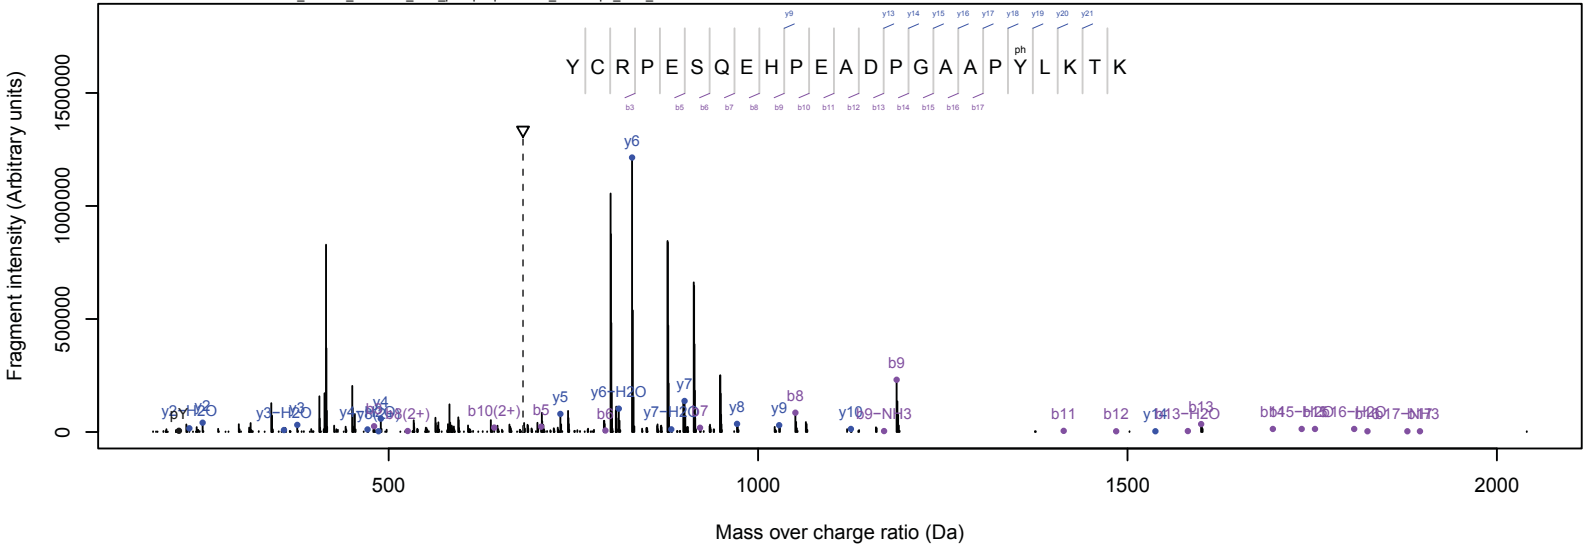

FPGFAKPGTEQY(ph)LLAK-2+

Source: QE1\_140612\_OPL1013\_CVA\_phosphoproteomic\_landscape\_AML\_C Scan: 33853

Andromeda score: 114.06

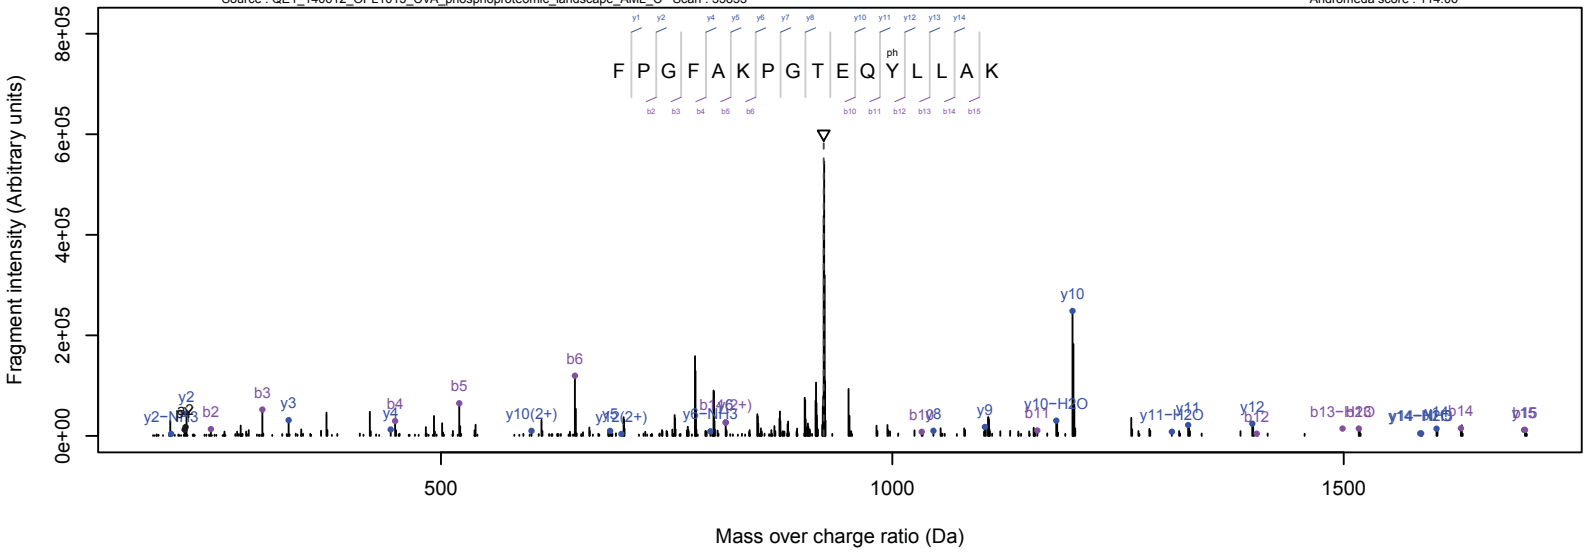

IPFIRPADQYKDPQSK-3+

Source: QE1\_140612\_OPL1013\_CVA\_phosphoproteomic\_landscape\_AML\_C Scan: 20314

Andromeda score: 114.01

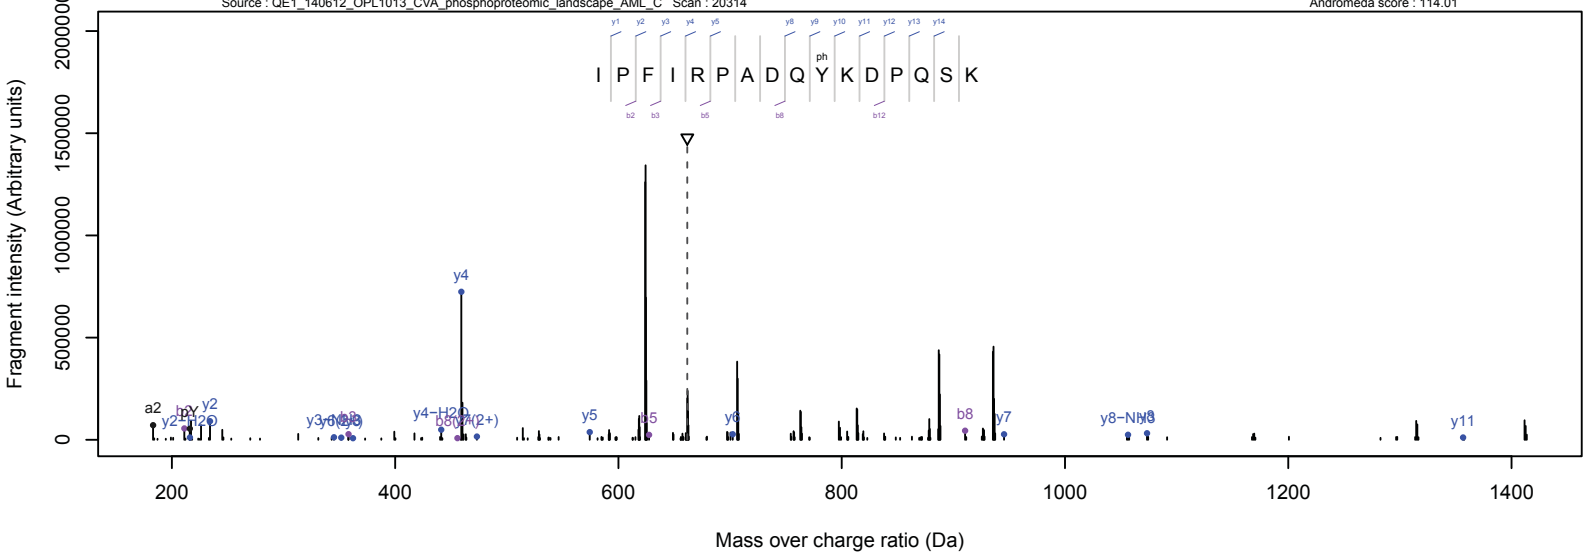

**IKSYDY(ph)EAWAK-2+**

Source : QE1\_140612\_OPL1013\_CVA\_phosphoproteomic\_landscape\_AML\_B Scan : 18056

Andromeda score : 113.99

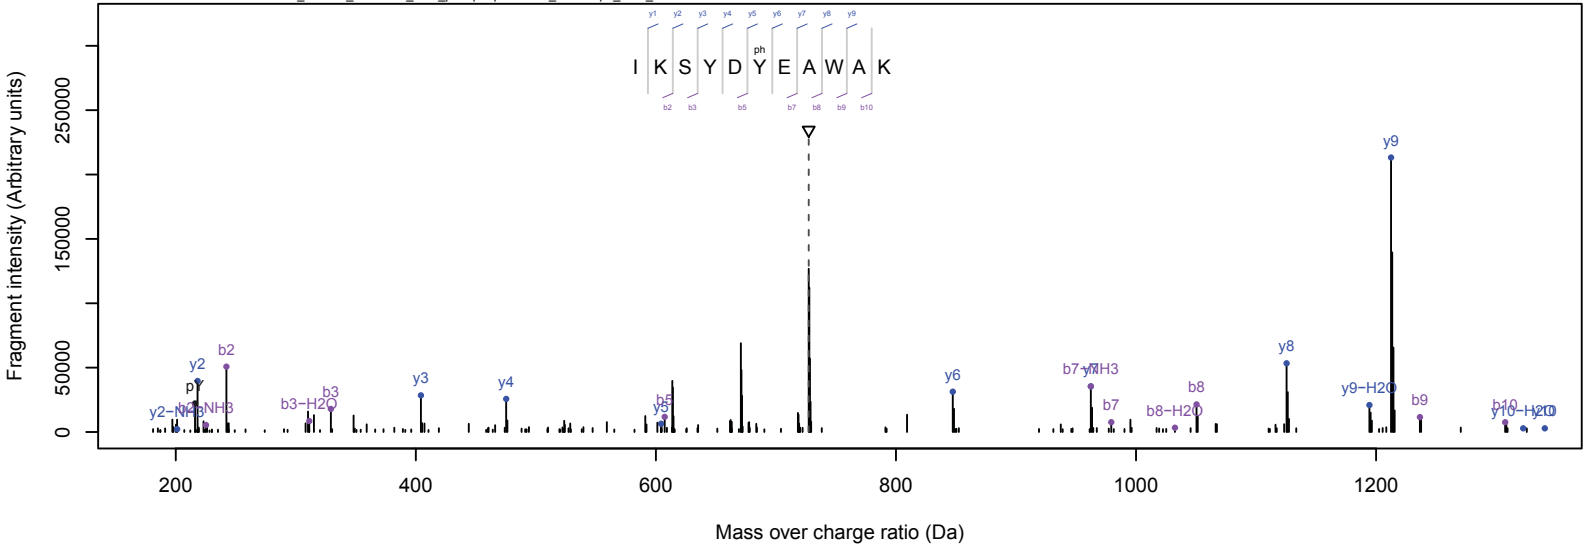

**DVRPY(ph)IVGAVR-2+**

Source : QE1\_140612\_OPL1013\_CVA\_phosphoproteomic\_landscape\_AML\_C Scan : 29793

Andromeda score : 113.95

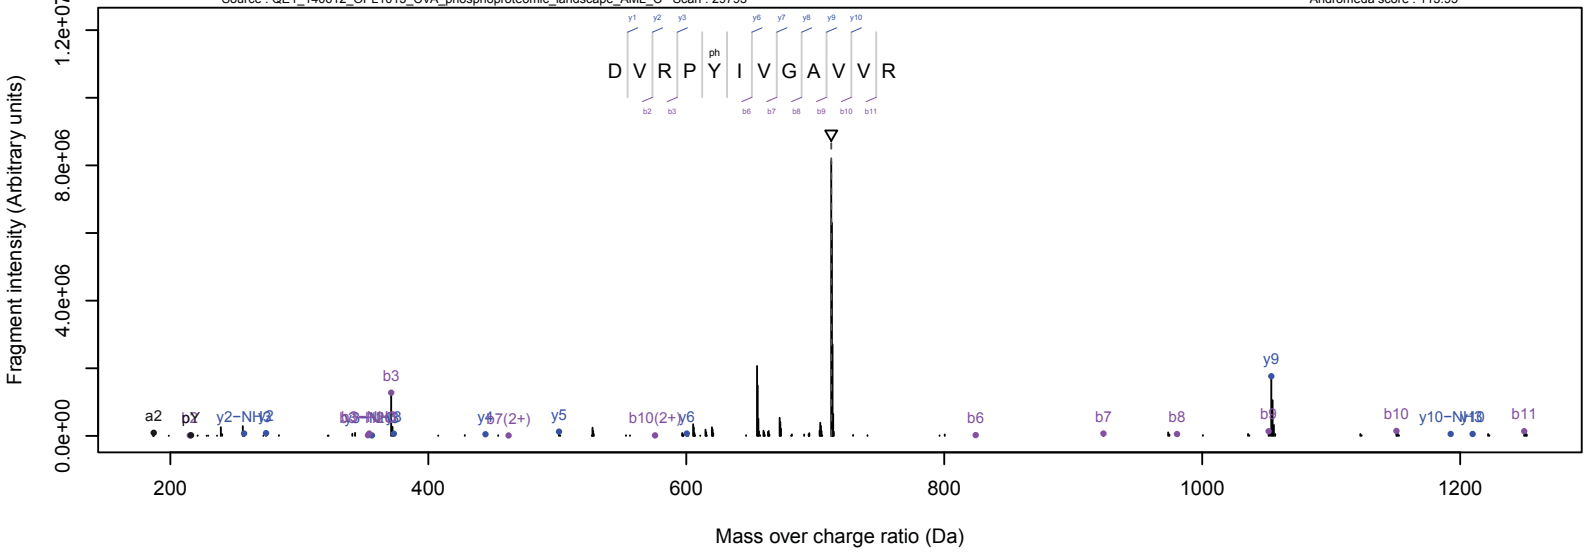

**AY(ph)QCVLLQ GK-2+**

Source : QE1\_140612\_OPL1013\_CVA\_phosphoproteomic\_landscape\_AML\_B Scan : 24335

Andromeda score : 113.93

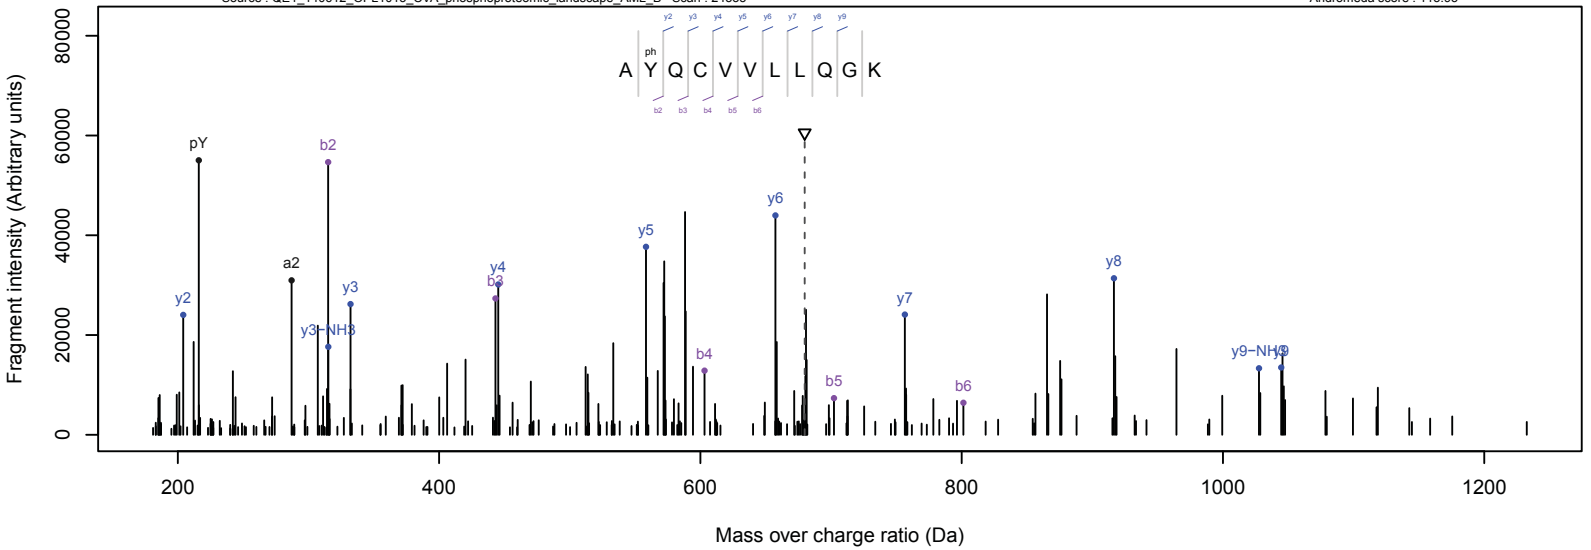

IY(ph)GISFPDPK-2+

Source : QE1\_140612\_OPL1013\_CVA\_phosphoproteomic\_landscape\_AML\_C Scan : 33183

Andromeda score : 113.93

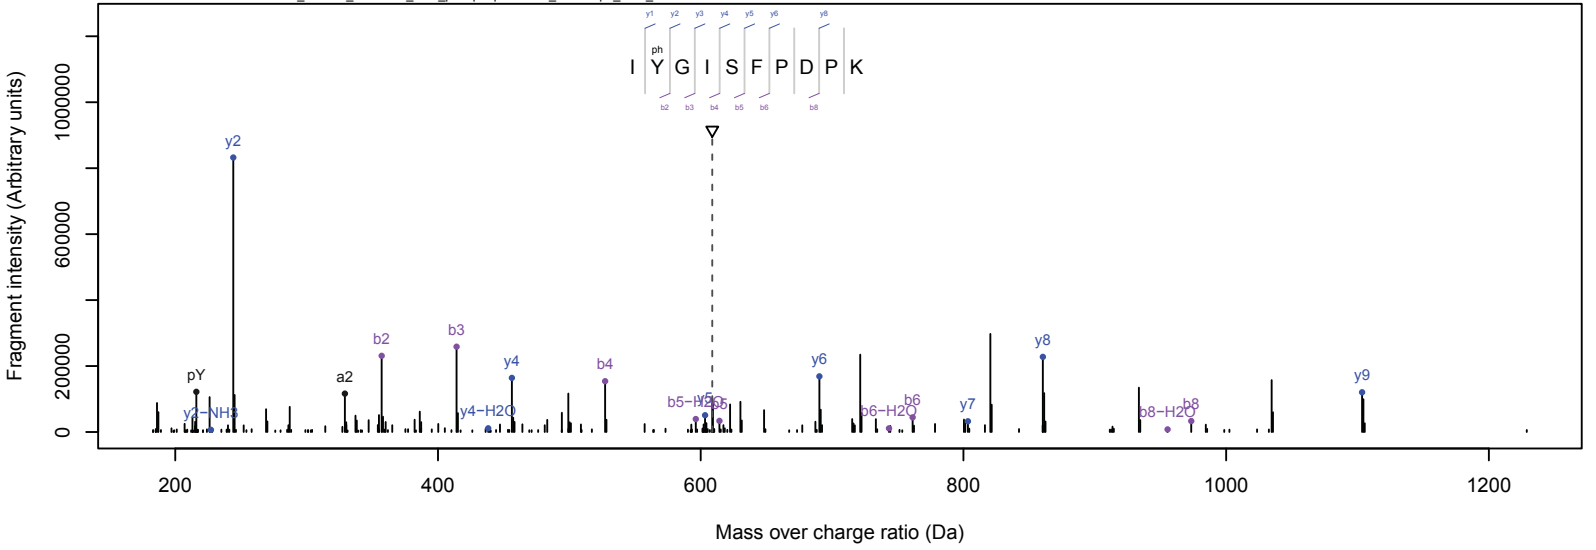

DPPDPY(ph)VSLLLPDKNR-3+

Source : QE1\_140612\_OPL1013\_CVA\_phosphoproteomic\_landscape\_AML\_C Scan : 44334

Andromeda score : 113.88

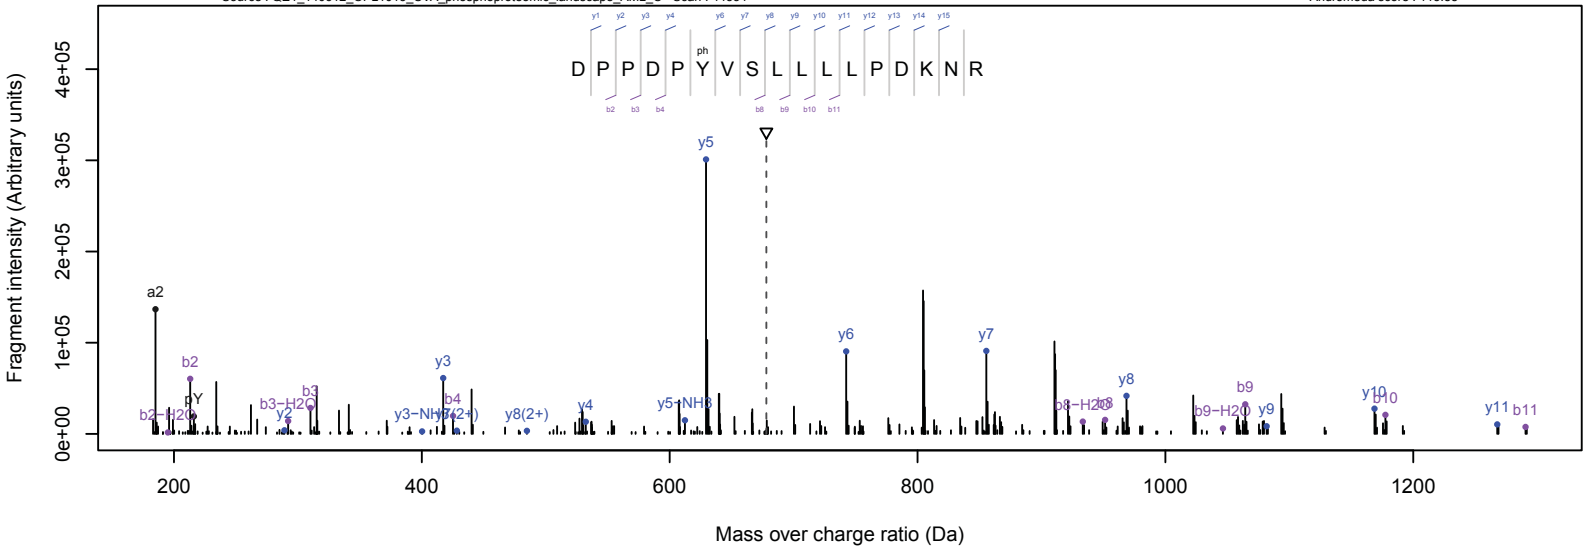

LQAEAQELLY(ph)QVDPK-2+

Source : QE1\_140612\_OPL1013\_CVA\_phosphoproteomic\_landscape\_AML\_F Scan : 33262

Andromeda score : 113.88

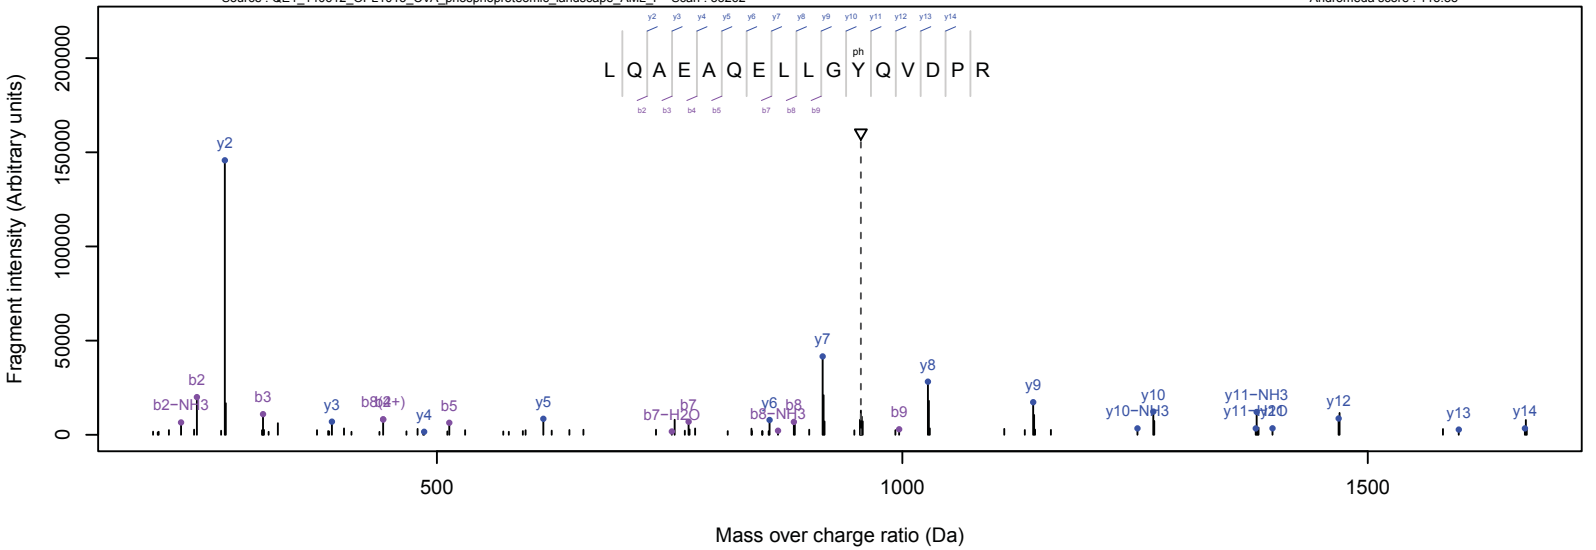

**QIDIANGTSSGGY(ph)RPPPR-3+**

Source: QE1\_140612\_OPL1013\_CVA\_phosphoproteomic\_landscape\_AML\_C Scan: 14063

Andromeda score: 113.88

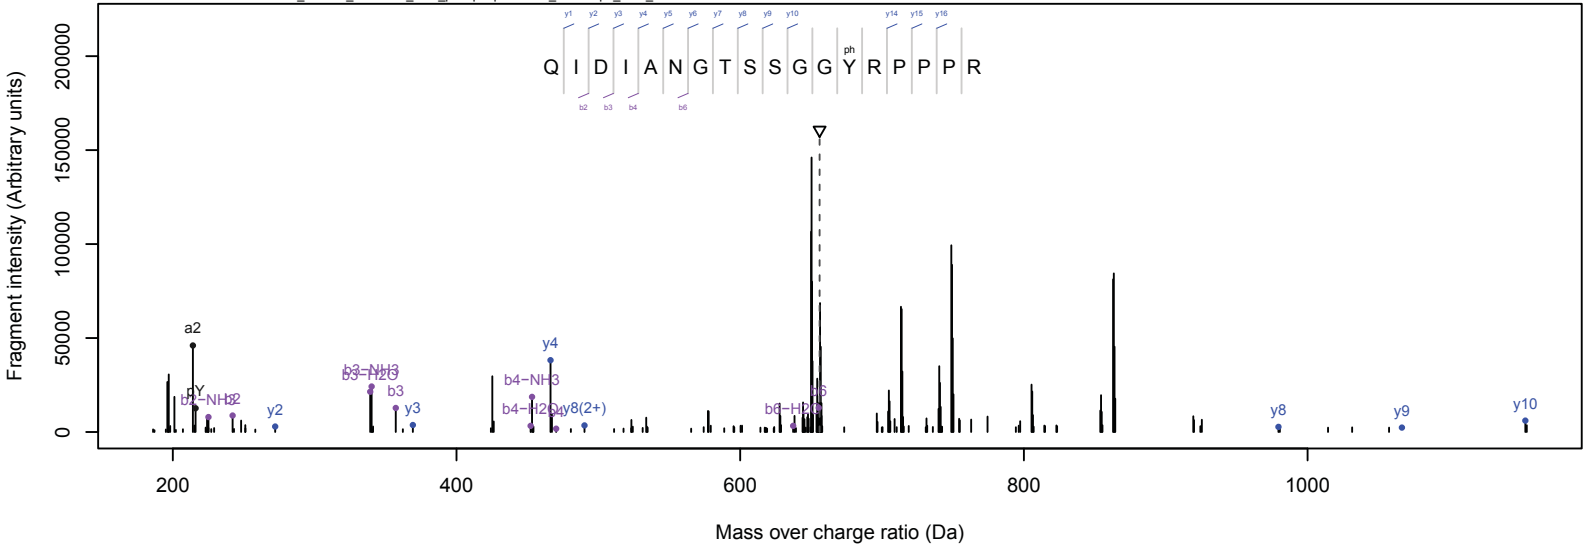

**VSSGY(ph)VPPPVATPFSSK-2+**

Source: QE1\_140612\_OPL1013\_CVA\_phosphoproteomic\_landscape\_AML\_C Scan: 31848

Andromeda score: 113.88

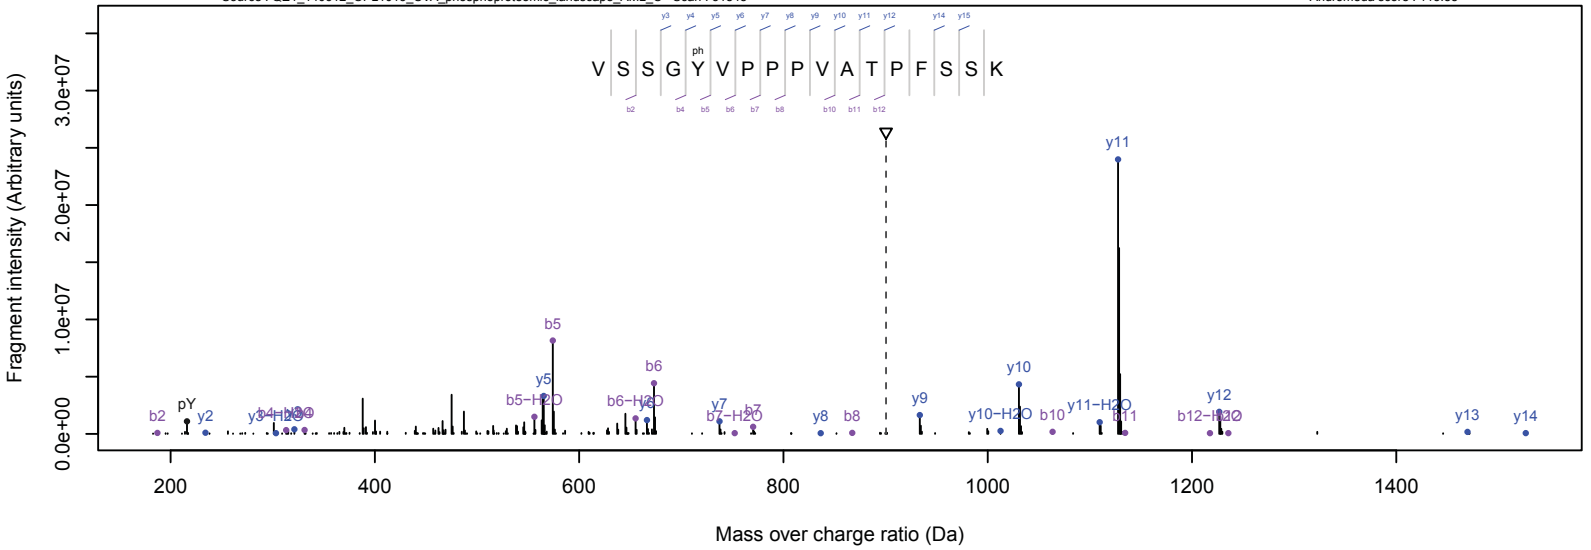

**HSAILVPSYRPTPDY(ph)ETVMR-3+**

Source: QE1\_140612\_OPL1013\_CVA\_phosphoproteomic\_landscape\_AML\_C Scan: 29432

Andromeda score: 113.86

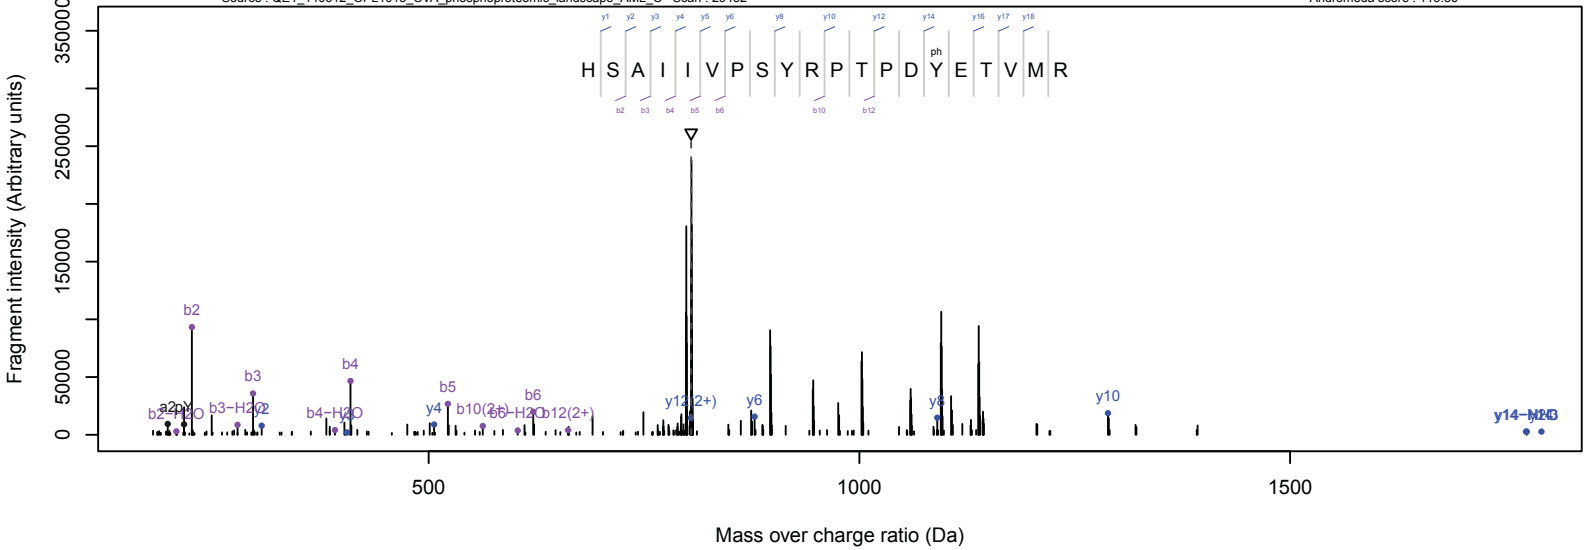



**GASQAGMTGYGM<sup>ox</sup>PR-2+**

Source: QE1\_140612\_OPL1013\_CVA\_phosphoproteomic\_landscape\_AML\_B Scan: 11831

Andromeda score: 113.8

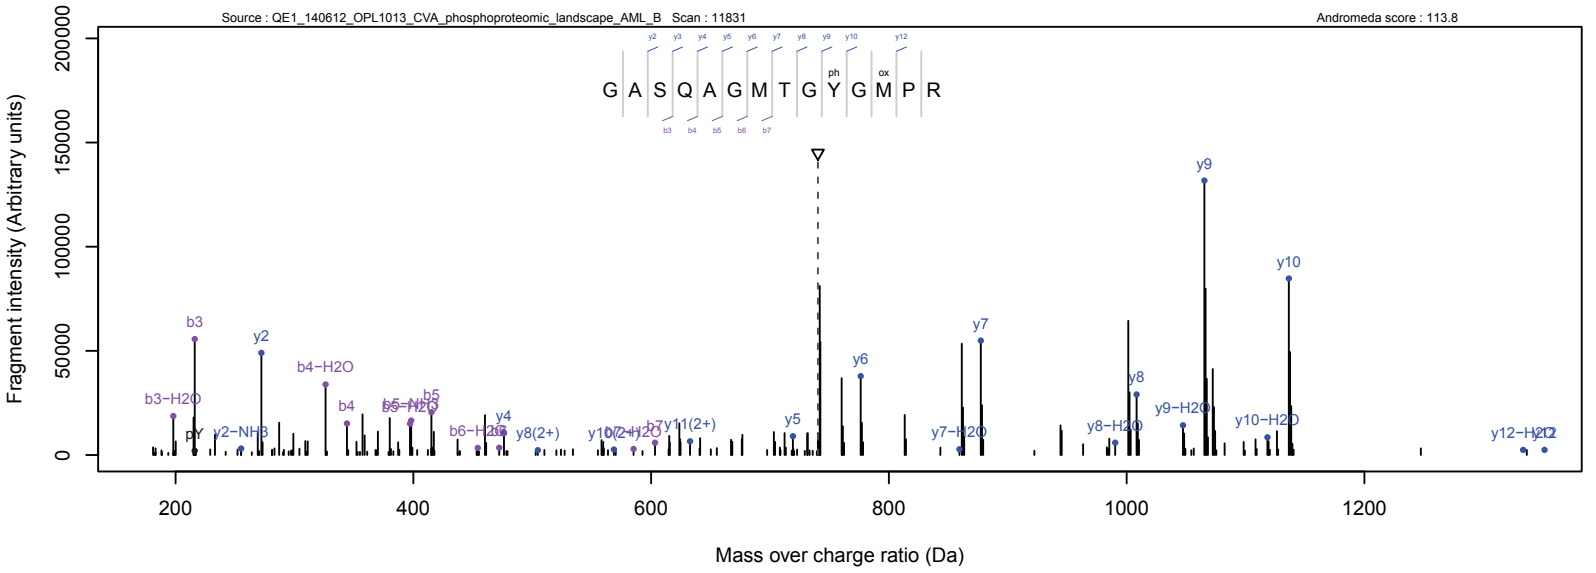

**LIY(ph)EDYVSILSPK-2+**

Source: QE1\_140612\_OPL1013\_CVA\_phosphoproteomic\_landscape\_AML\_C Scan: 44775

Andromeda score: 113.76

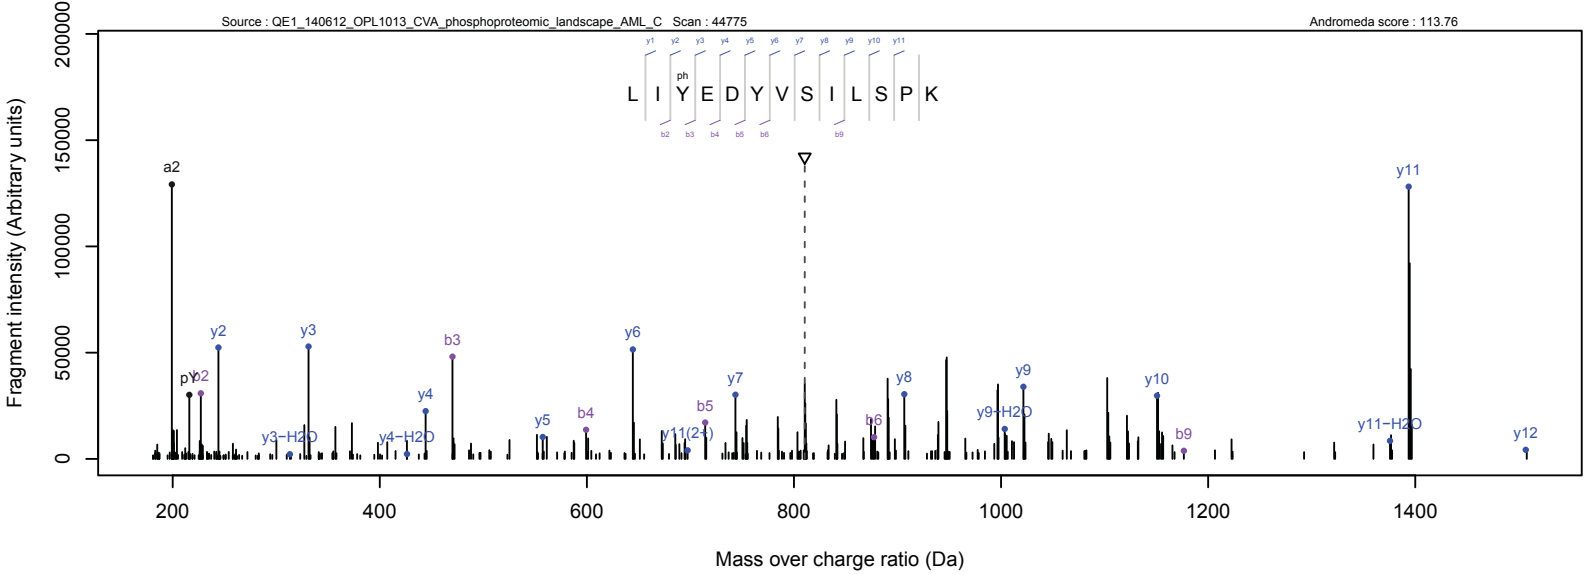

**LYQTDPSTGYHAWK-2+**

Source: QE1\_140612\_OPL1013\_CVA\_phosphoproteomic\_landscape\_AML\_C Scan: 16919

Andromeda score: 113.76

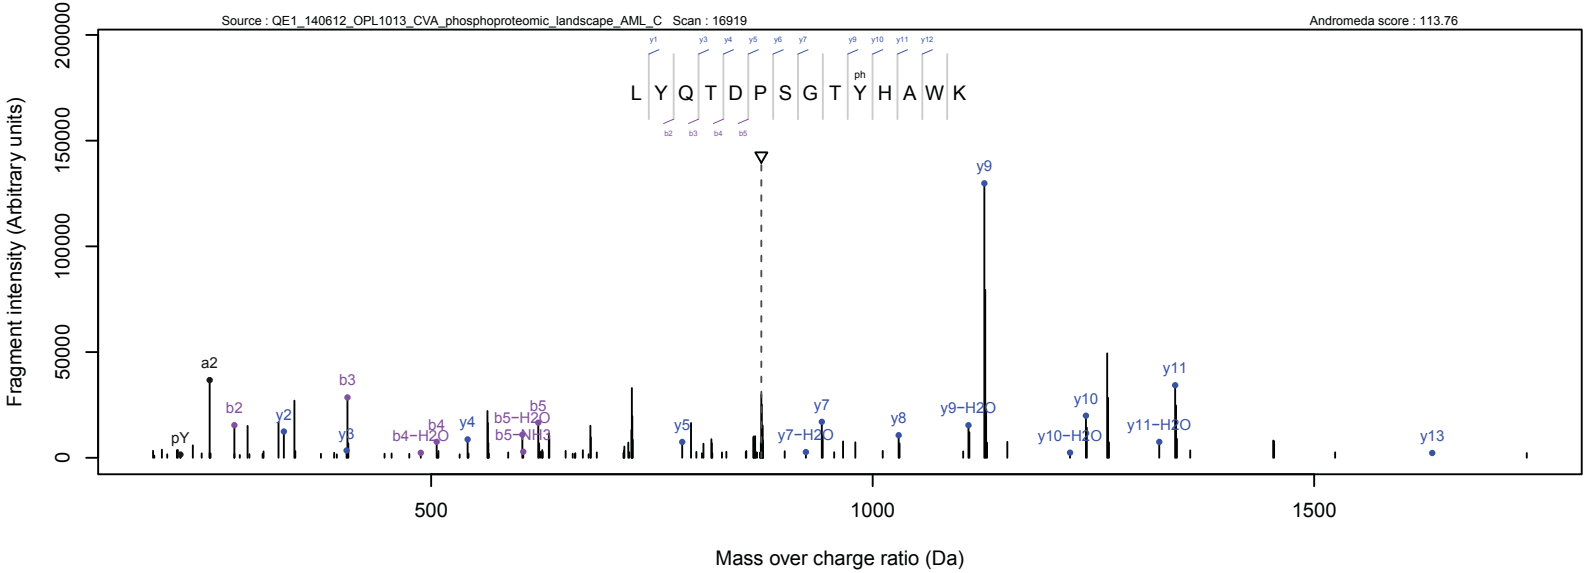

**KVSSTHY(ph)YLLPERPSYLER-4+**

Source : QE1\_140908\_OPL1013\_CVA\_pTyrIP\_AML\_Kasumi1 Scan : 25486

Andromeda score : 113.73

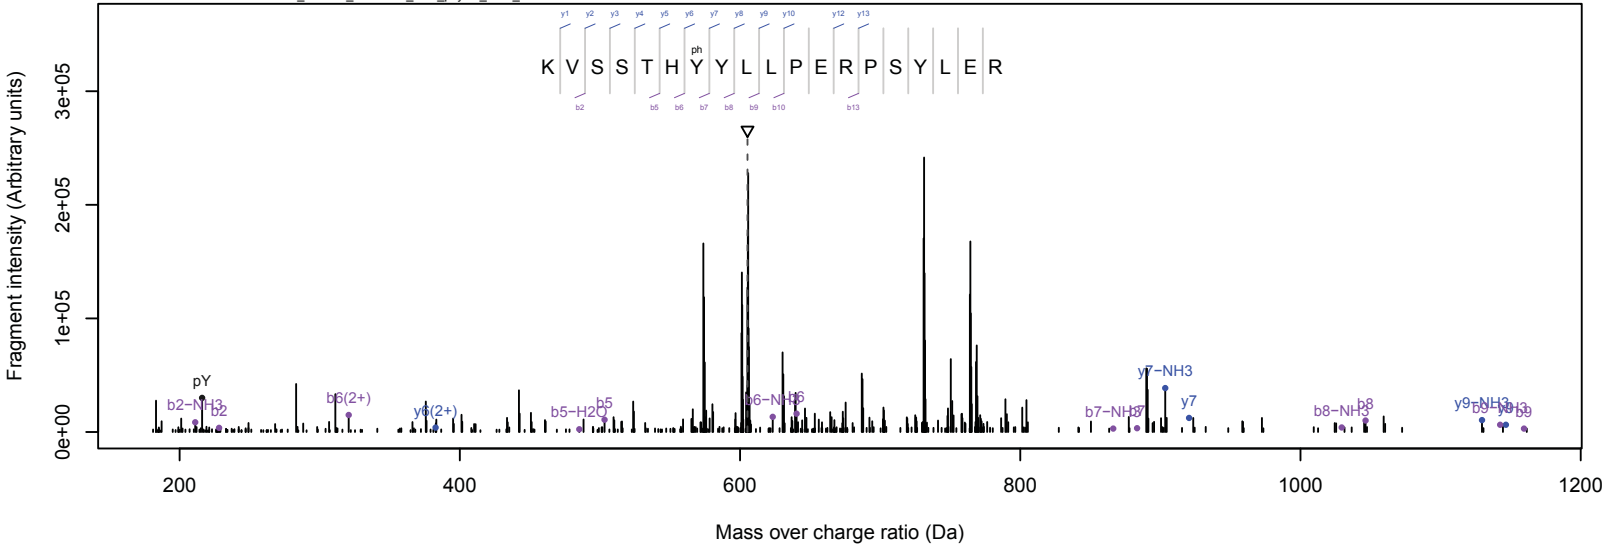

**VKEGYVPQEEVPV(ph)ENKYVK-3+**

Source : QE1\_140612\_OPL1013\_CVA\_phosphoproteomic\_landscape\_AML\_C Scan : 23334

Andromeda score : 113.71

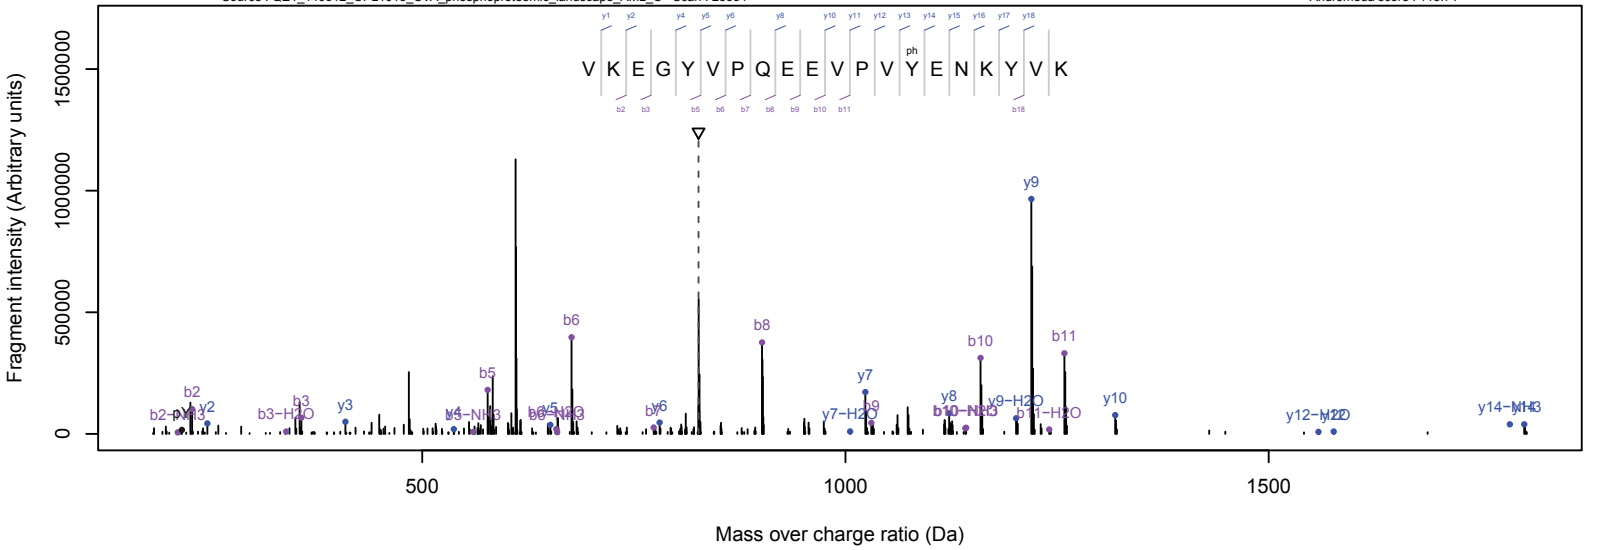

**TIY(ph)TYIMASR-2+**

Source : QE1\_140612\_OPL1013\_CVA\_phosphoproteomic\_landscape\_AML\_C Scan : 28843

Andromeda score : 113.69

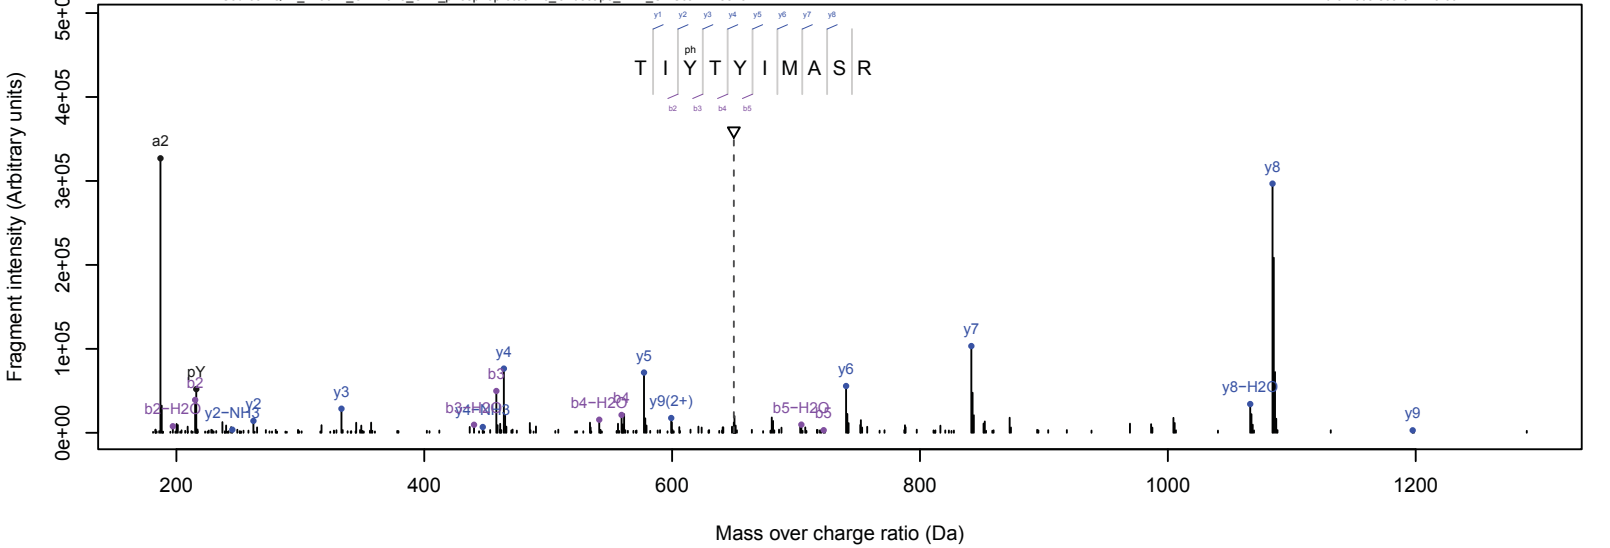

ADALY(ph)PVVSAASICAK-3+

Source : QE1\_140612\_OPL1013\_CVA\_phosphoproteomic\_landscape\_AML\_B Scan : 35161

Andromeda score : 113.65

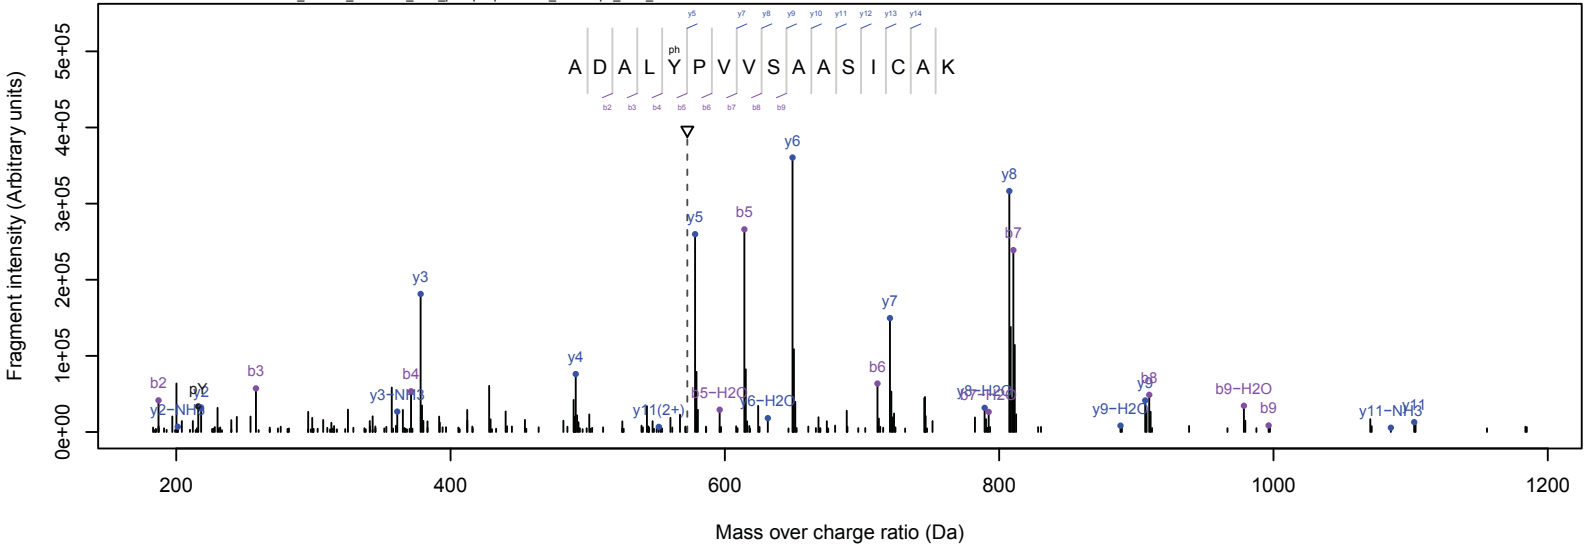

LQQSSTIAPY(ph)VTLR-2+

Source : QE1\_140612\_OPL1013\_CVA\_phosphoproteomic\_landscape\_AML\_C Scan : 29485

Andromeda score : 113.65

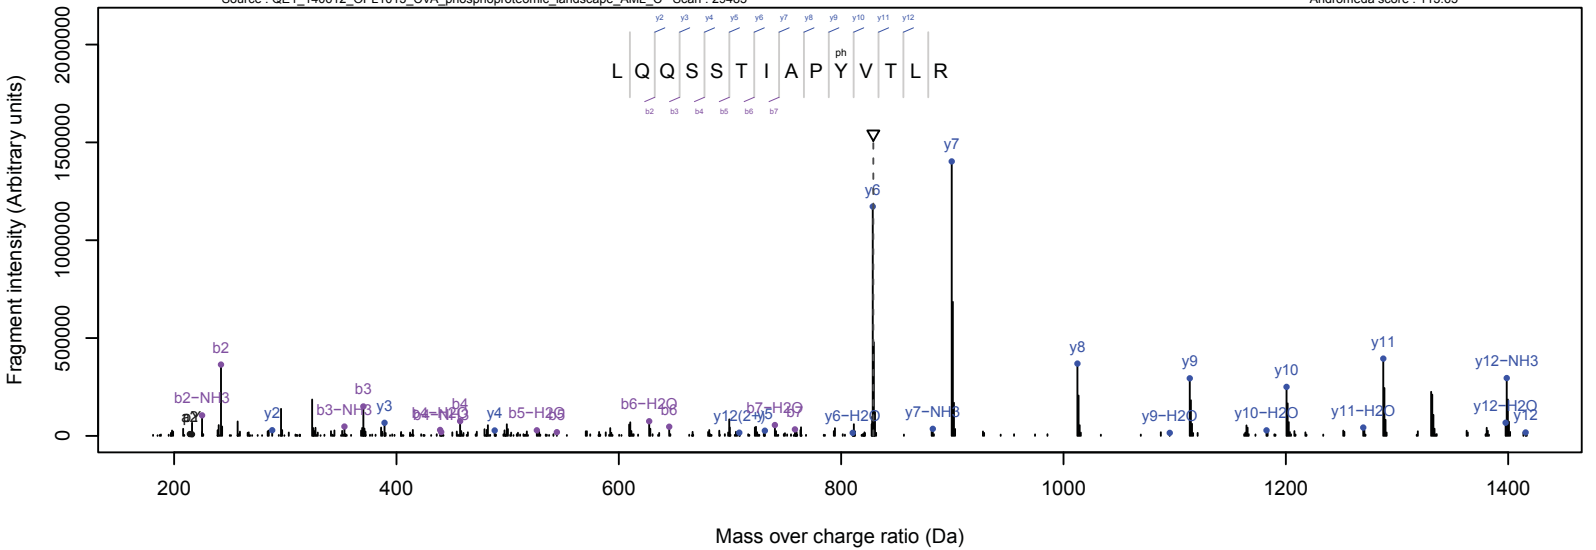

M(ox)EKGEHSIVYLPYSYAFGSVGK-4+

Source : QE1\_140908\_OPL1013\_CvA\_pTyrIP\_AML\_HEL Scan : 31171

Andromeda score : 113.65

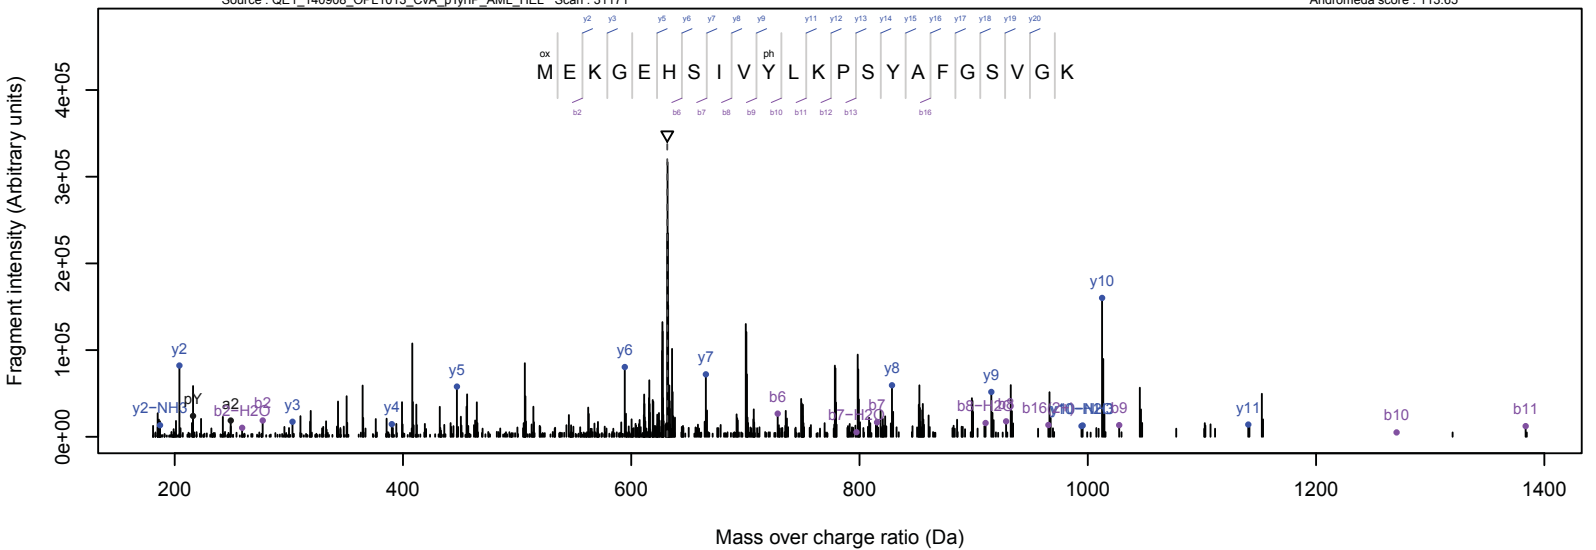

**S(ph)SHYGGSLPNVNQIGSGLAEFQSP LHSPLDSSR-4+**

Source : QE1\_140612\_OPL1013\_CVA\_phosphoproteomic\_landscape\_AML\_C Scan : 44919

Andromeda score : 113.65

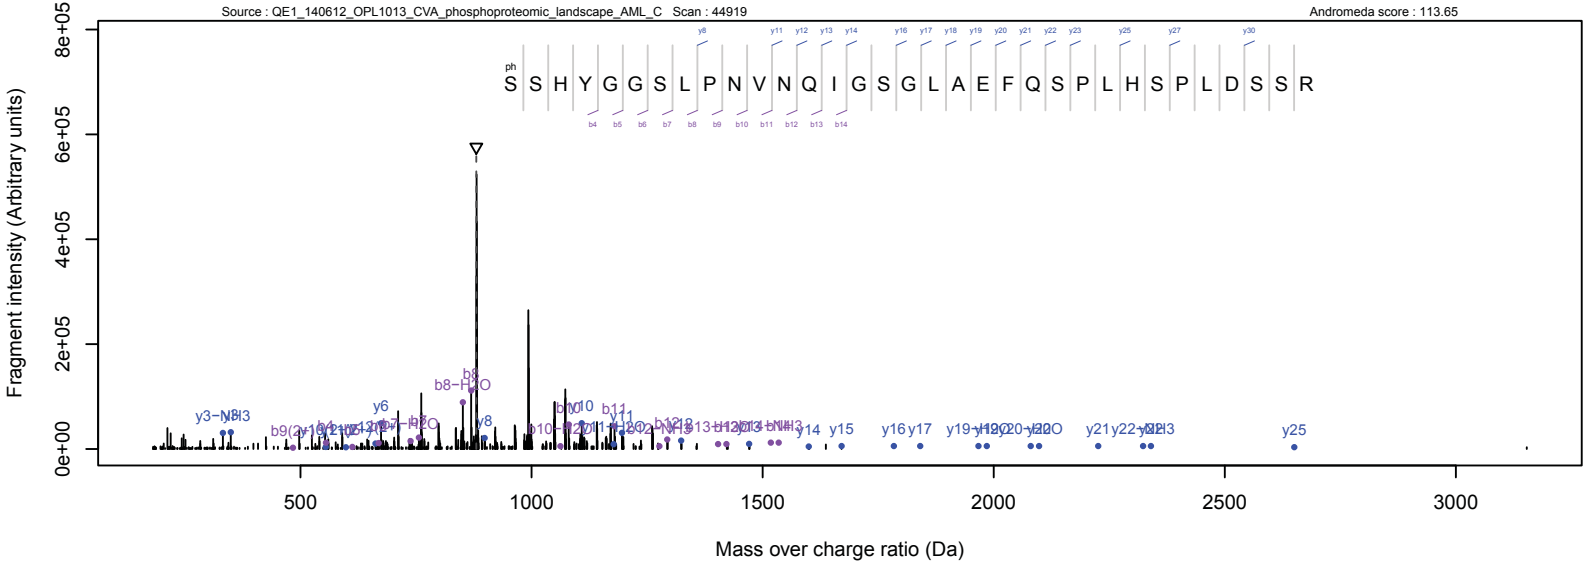

**(ac)GDTAKPY(ph)FVKR-3+**

Source : QE1\_140612\_OPL1013\_CVA\_phosphoproteomic\_landscape\_AML\_C Scan : 12833

Andromeda score : 113.61

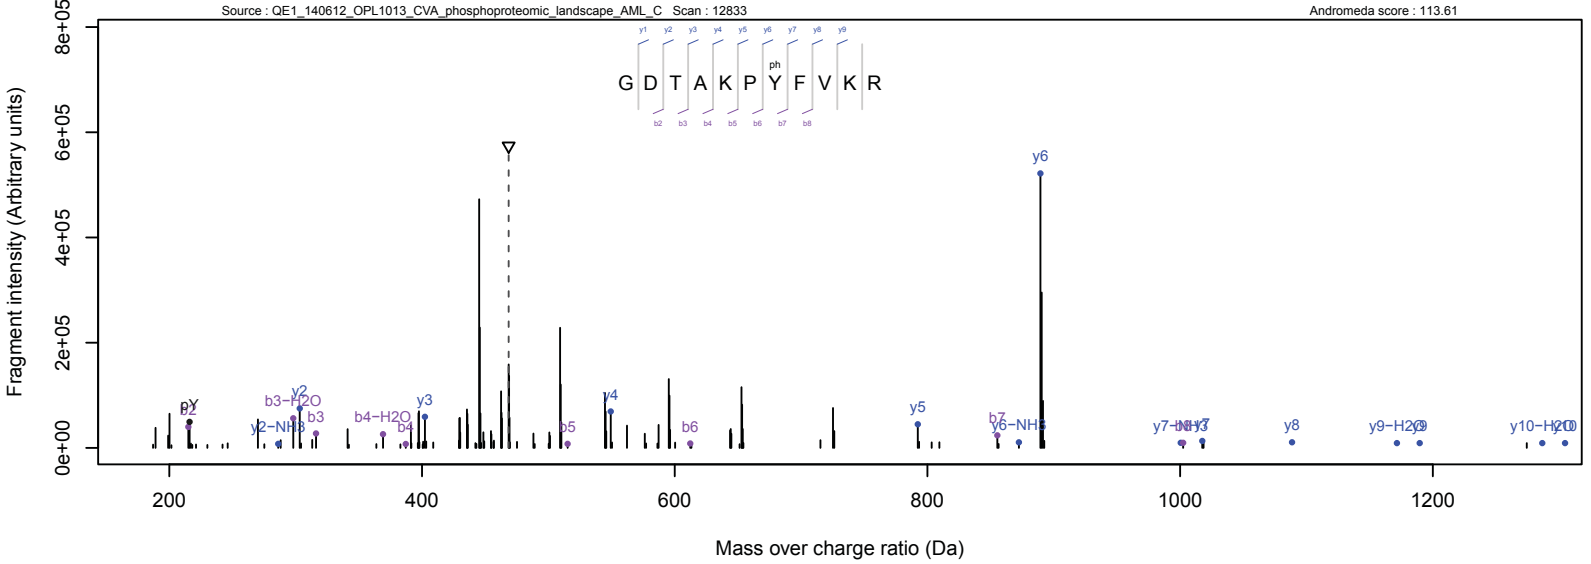

**LYPELSQY(ph)M(ox)GLSLNEEEIR-2+**

Source : QE1\_140908\_OPL1013\_CvA\_pTyrIP\_AML\_OCI\_AML3 Scan : 42044

Andromeda score : 113.54

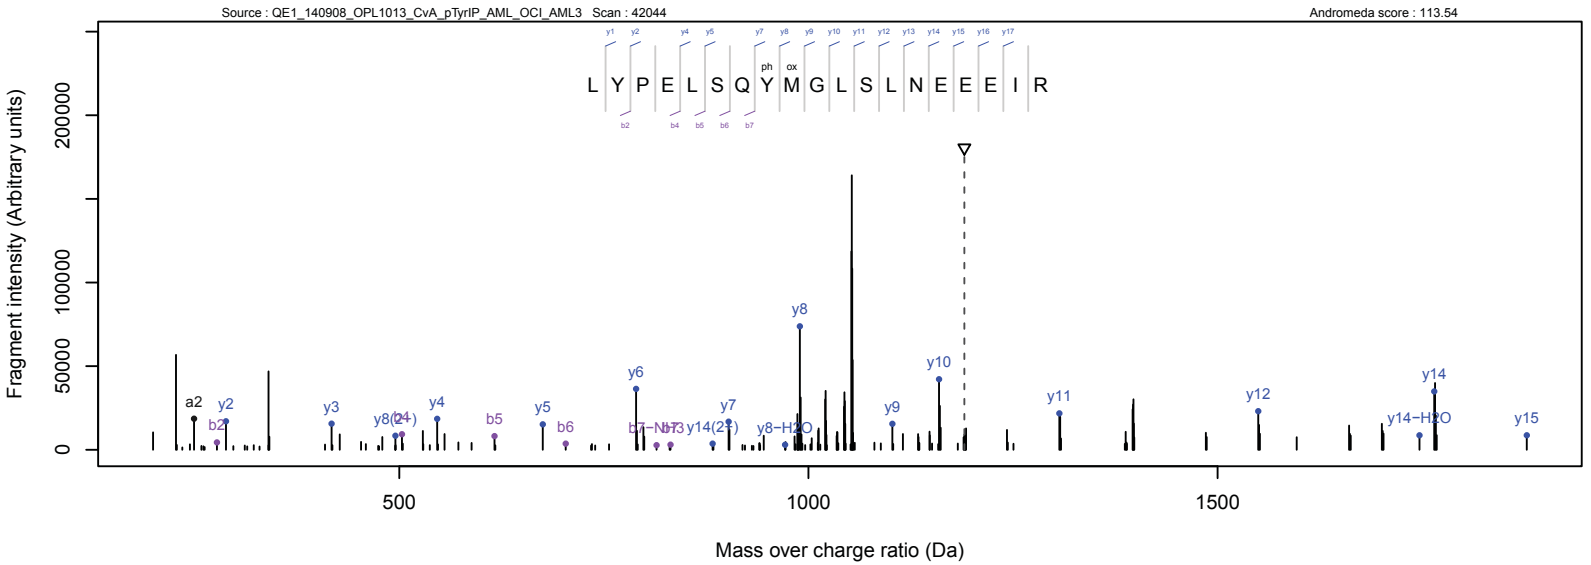



INIVEVMNRHEYLPHK-2+

Source : QE1\_140612\_OPL1013\_CVA\_phosphoproteomic\_landscape\_AML\_A Scan : 38442

Andromeda score : 113.47

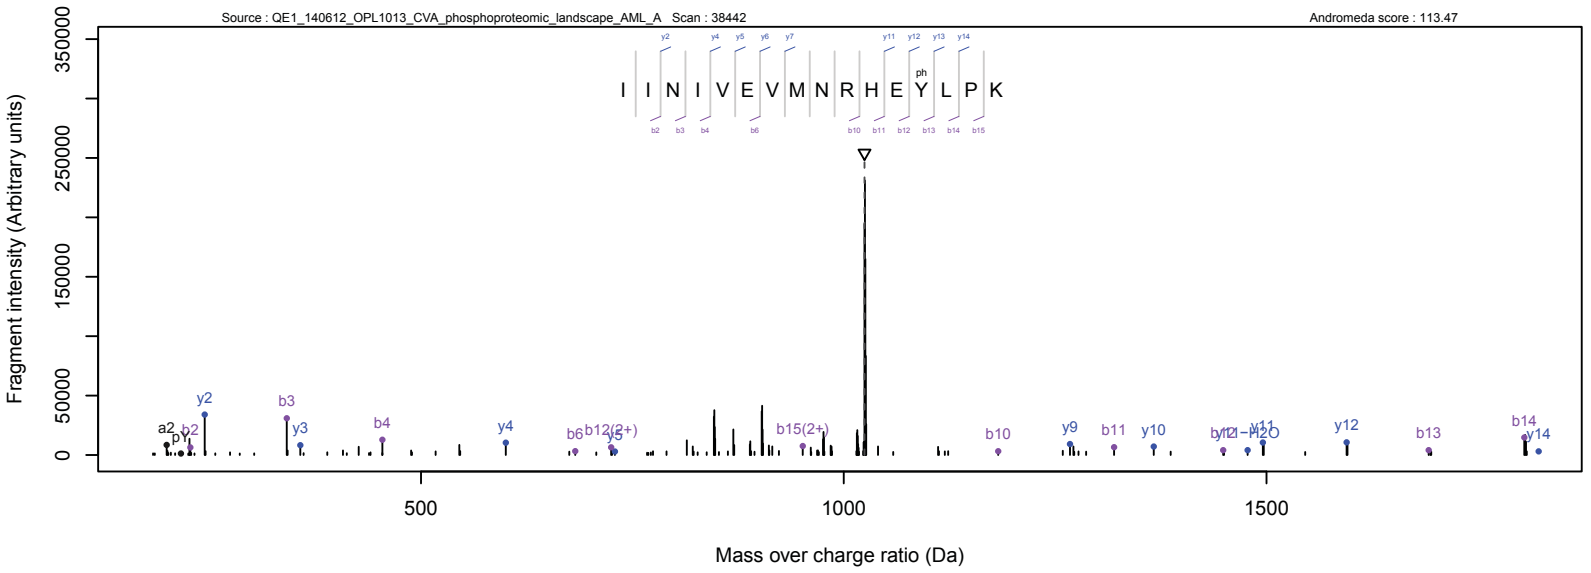

YQY(ph)GGLNSGRPVTPPR-3+

Source : QE1\_140612\_OPL1013\_CVA\_phosphoproteomic\_landscape\_AML\_B Scan : 14825

Andromeda score : 113.4

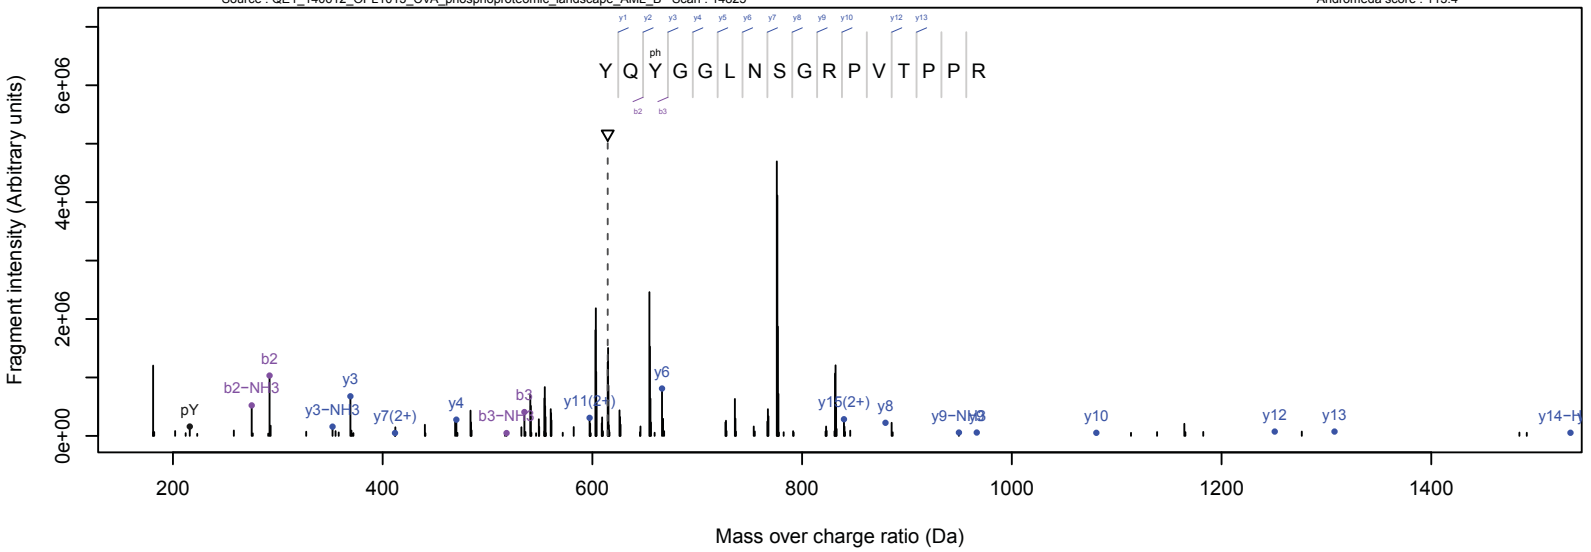

VYTY(ph)IQSR-2+

Source : QE1\_140612\_OPL1013\_CVA\_phosphoproteomic\_landscape\_AML\_E Scan : 10284

Andromeda score : 113.26

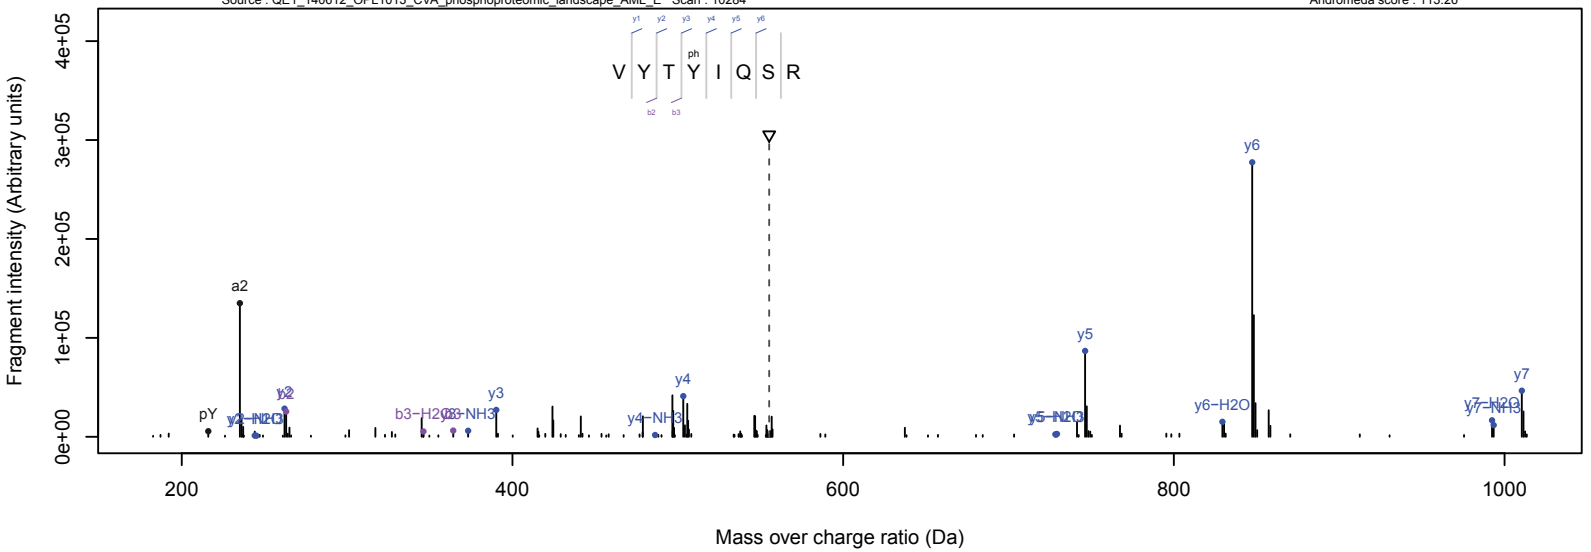

HAY(ph)VSKPCMR-3+

Source : QE1\_140908\_OPL1013\_CvA\_pTyrIP\_AML\_HEL Scan : 17814

Andromeda score : 113.24

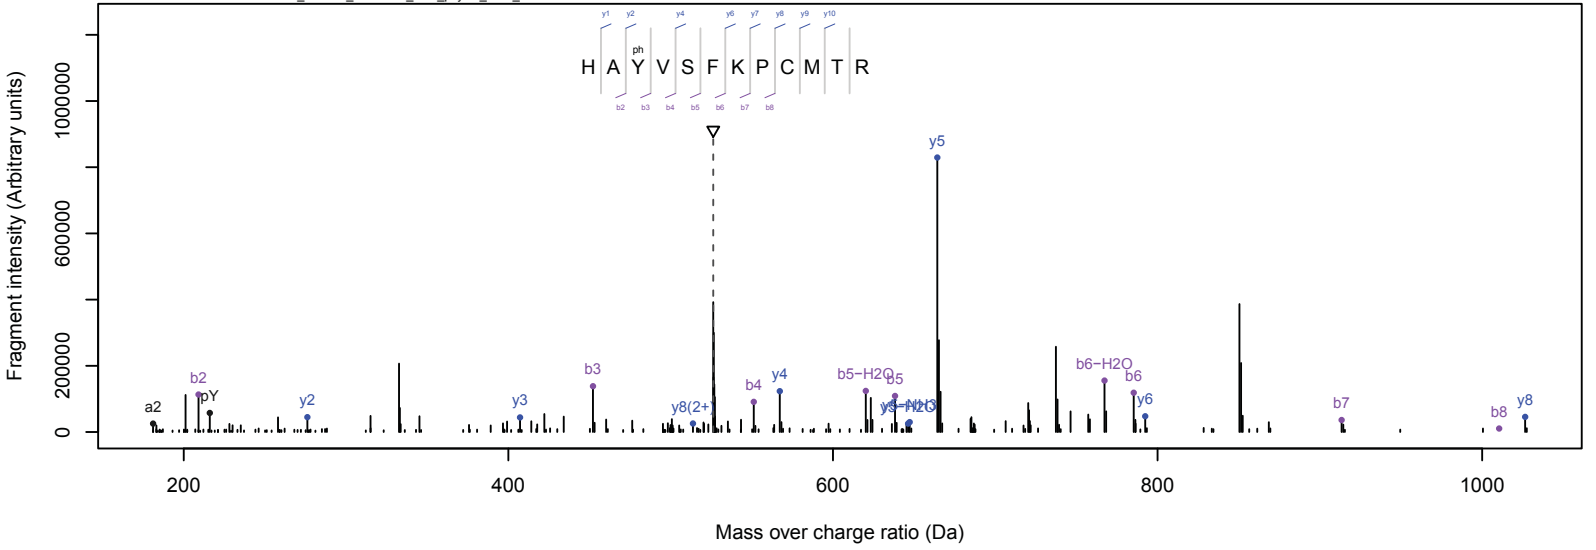

SQVVAGTNY(ph)FIK-2+

Source : QE1\_140612\_OPL1013\_CVA\_phosphoproteomic\_landscape\_AML\_C Scan : 26489

Andromeda score : 113.24

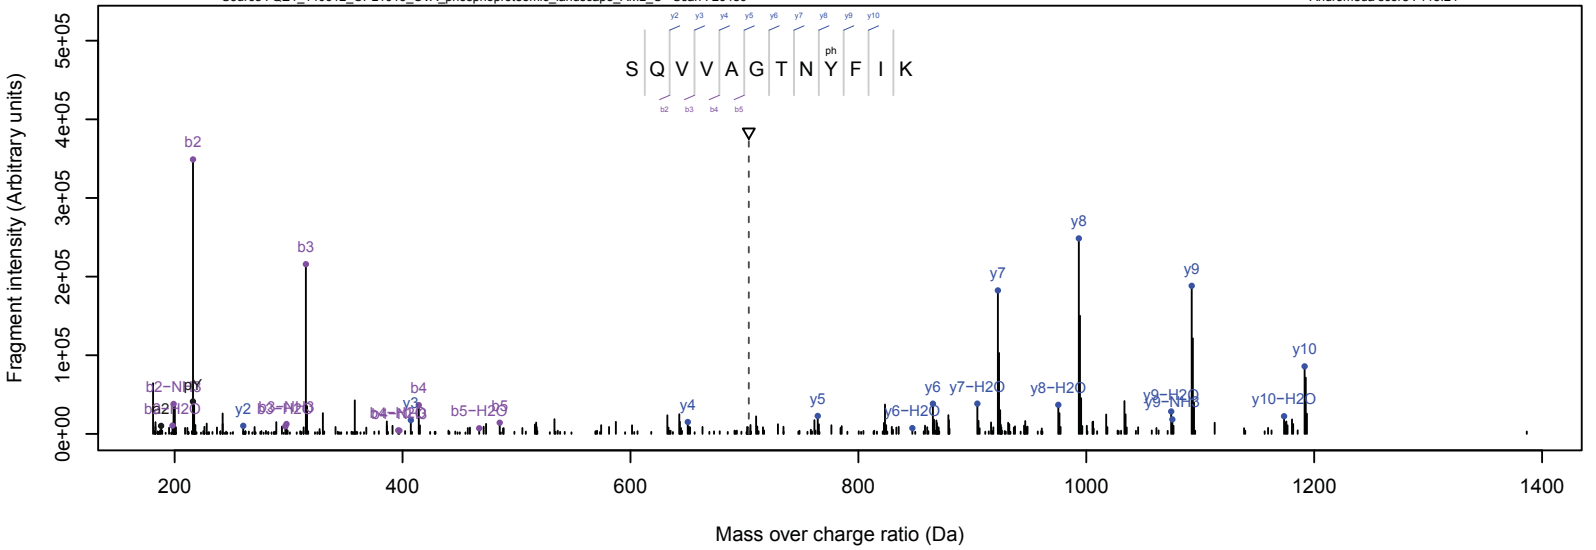

VGPVAATY(ph)PMLNK-2+

Source : QE1\_140612\_OPL1013\_CVA\_phosphoproteomic\_landscape\_AML\_C Scan : 24919

Andromeda score : 113.24

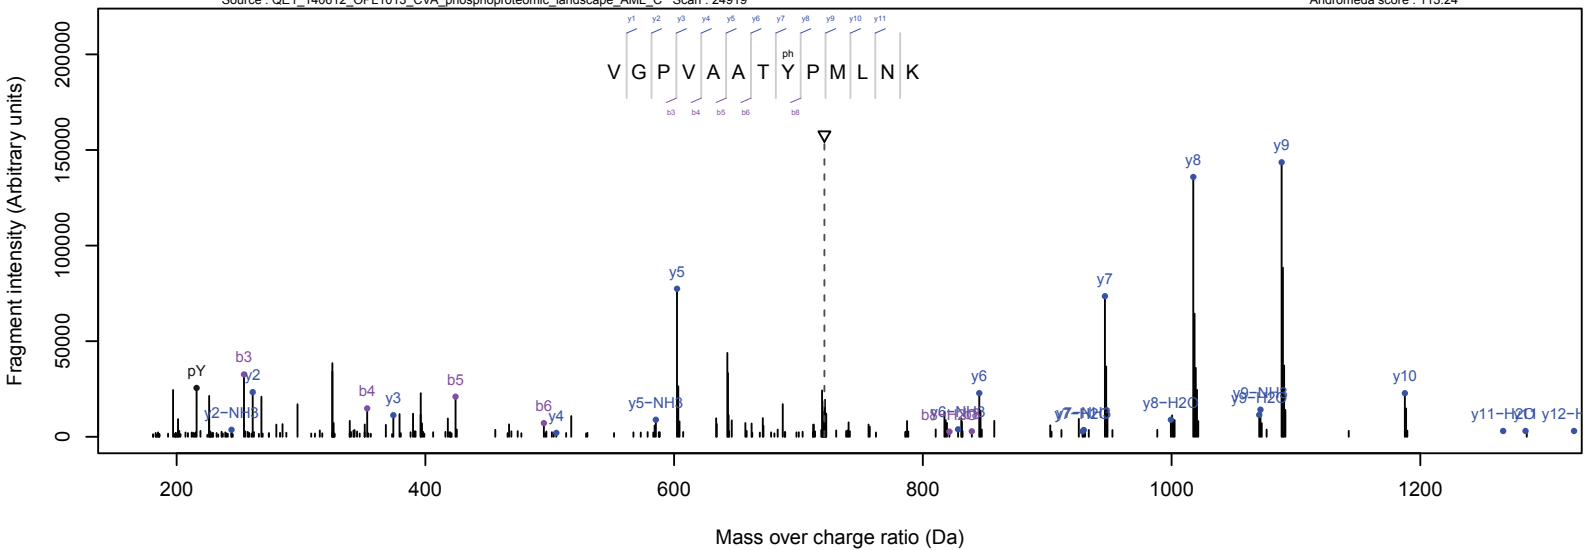

LY(ph)DLNM(ox)PAYVK-2+

Source : QE1\_140908\_OPL1013\_CvA\_pTyrIP\_AML\_HEL Scan : 23970

Andromeda score : 113.22

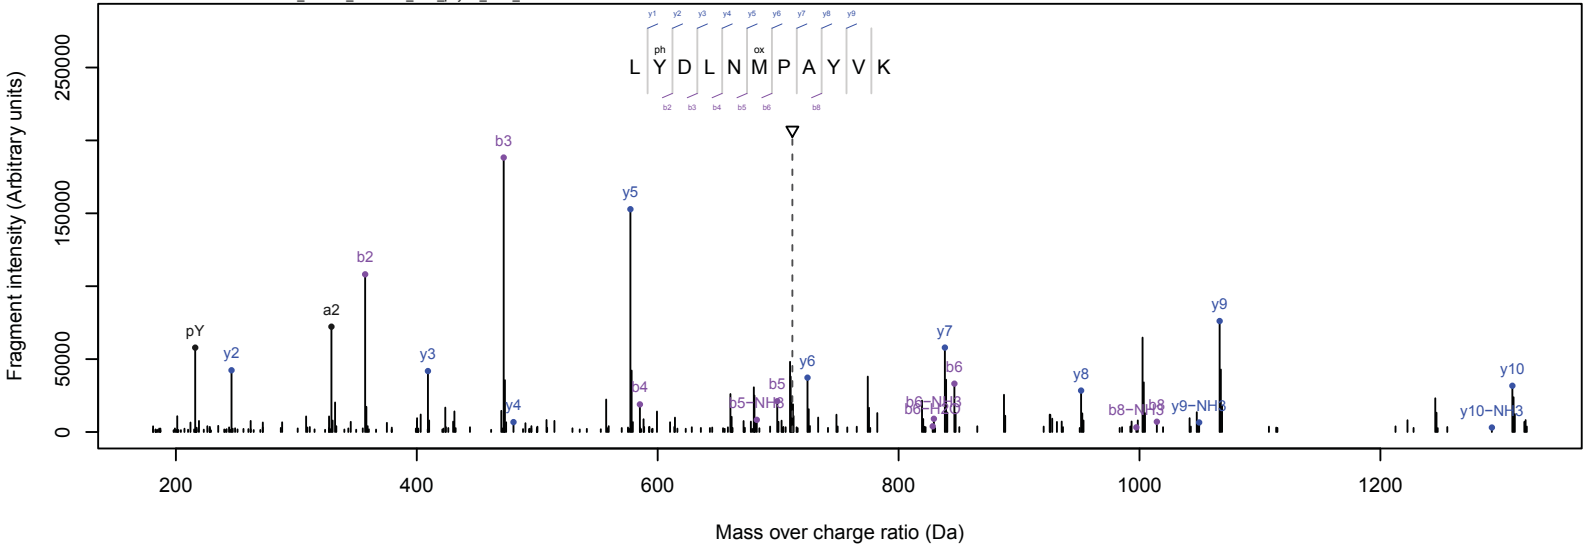

SPGGSPGQSPPTGY(ph)SILSPAHFSGPR-3+

Source : QE1\_140612\_OPL1013\_CVA\_phosphoproteomic\_landscape\_AML\_C Scan : 32369

Andromeda score : 113.13

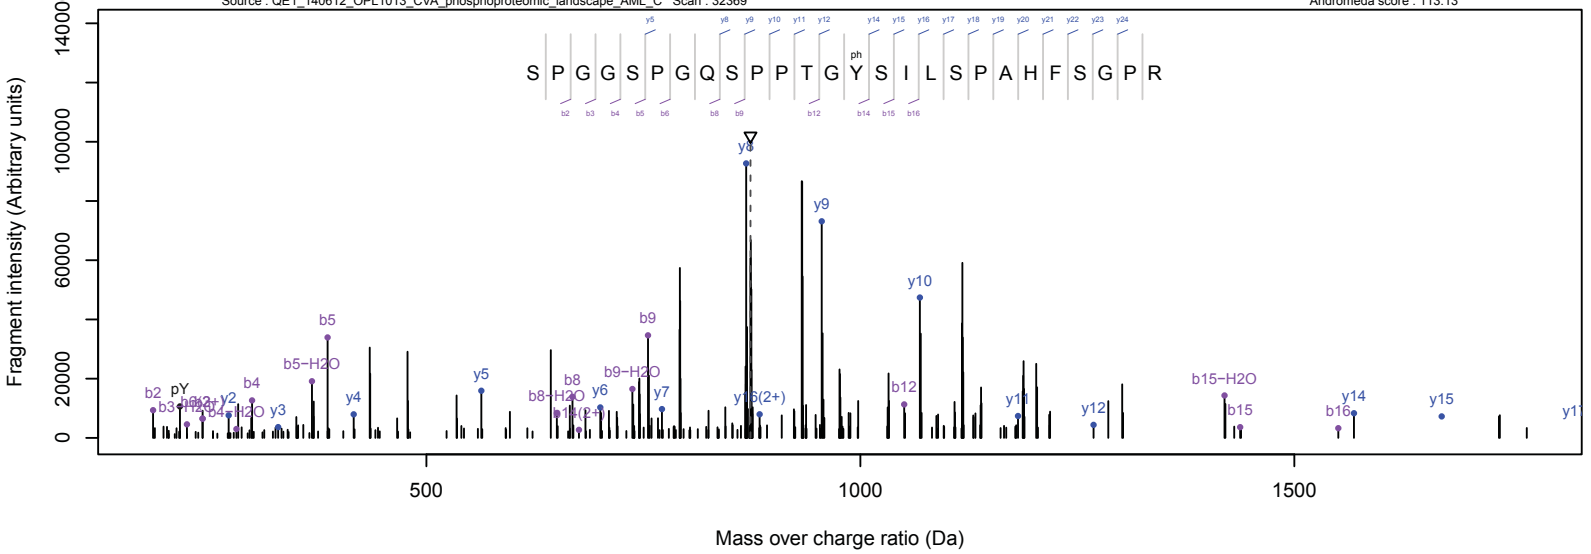

QDIMGTPVPE(TT)LYHTFQQSSLQHK-3+

Source : QE1\_140612\_OPL1013\_CVA\_phosphoproteomic\_landscape\_AML\_C Scan : 37554

Andromeda score : 113.08

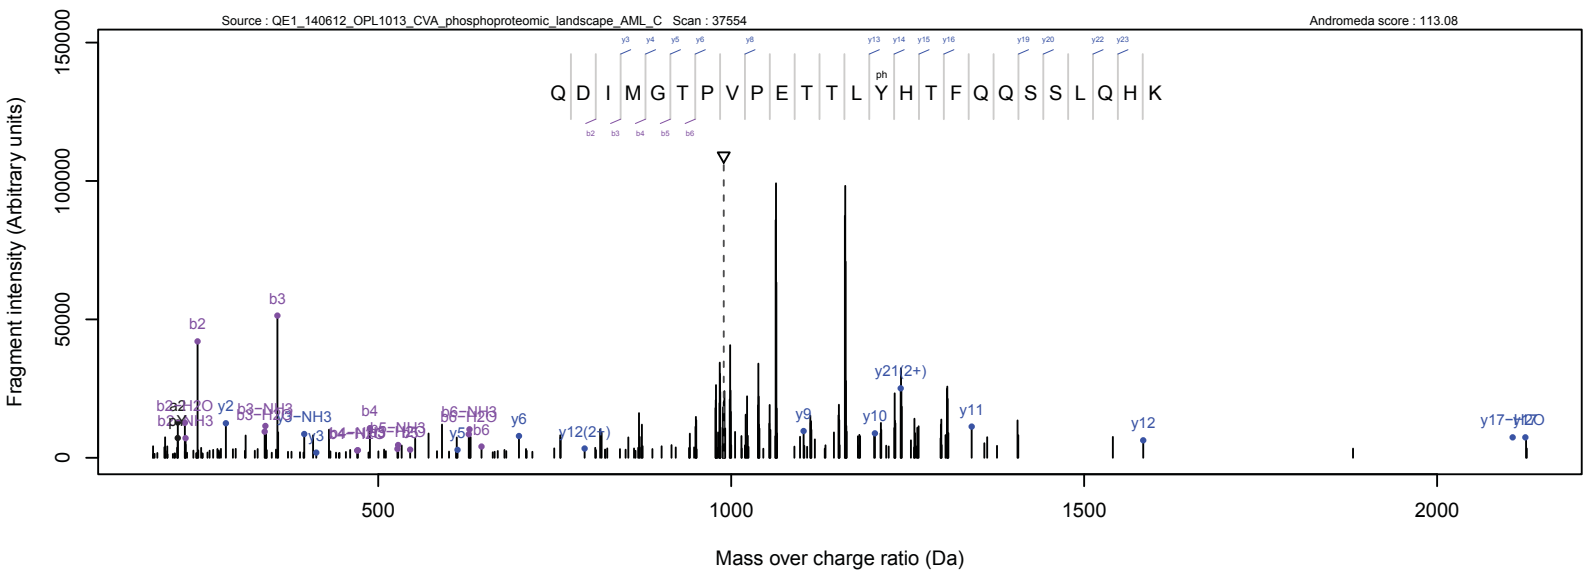



TTTNPY(ph)VLMVLYK-3+

Source : QE1\_140612\_OPL1013\_CVA\_phosphoproteomic\_landscape\_AML\_B Scan : 42604

Andromeda score : 113.07

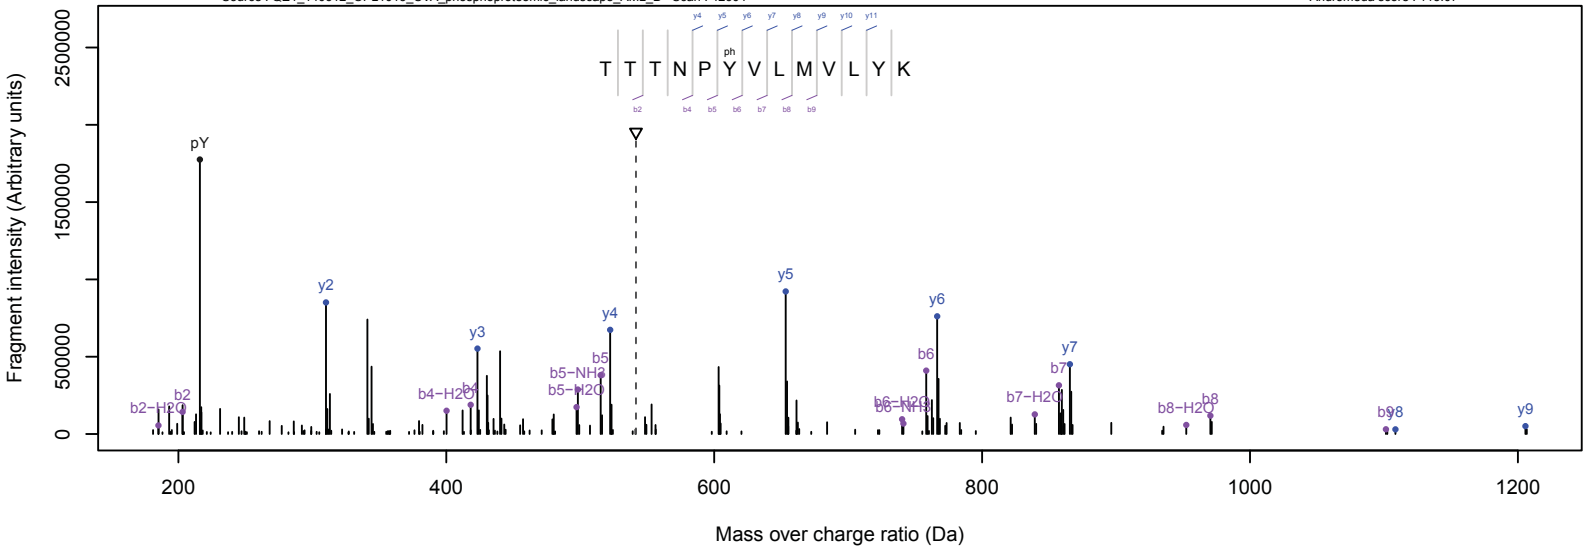

HIANY(ph)ISGIQTIGHR-3+

Source : QE1\_140612\_OPL1013\_CVA\_phosphoproteomic\_landscape\_AML\_A Scan : 25807

Andromeda score : 112.96

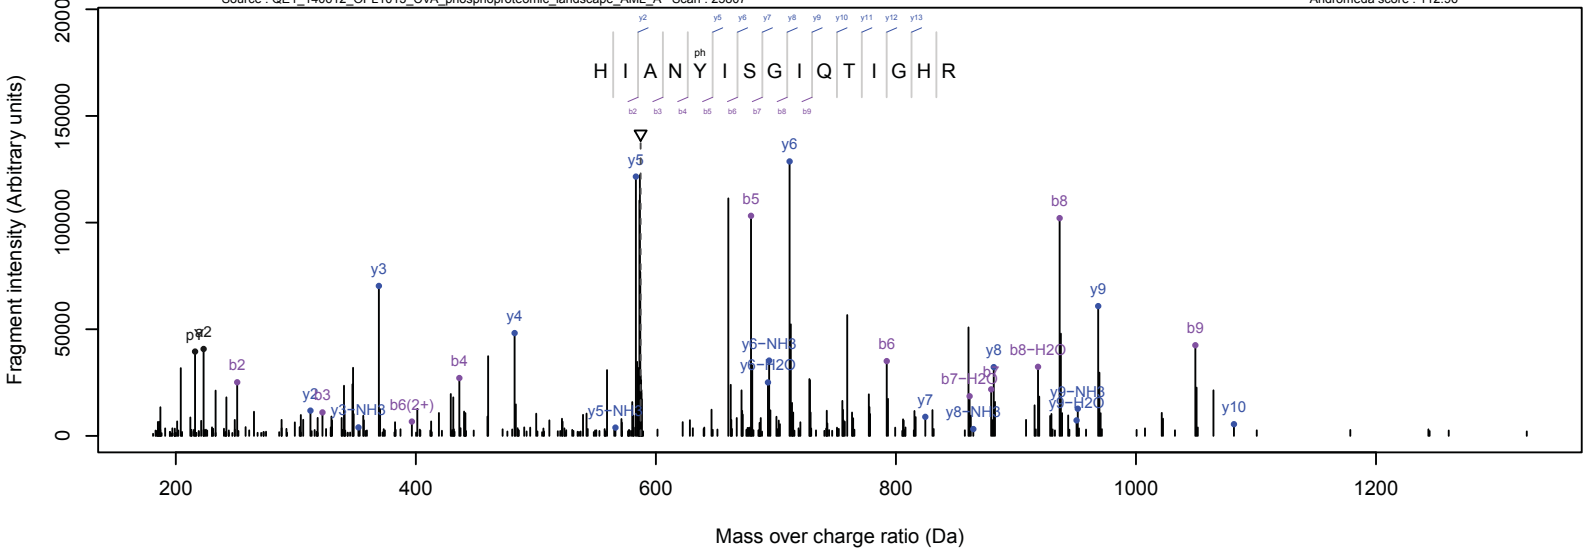

QAHLTNQ(ph)MQR-3+

Source : QE1\_140612\_OPL1013\_CVA\_phosphoproteomic\_landscape\_AML\_C Scan : 6499

Andromeda score : 112.85

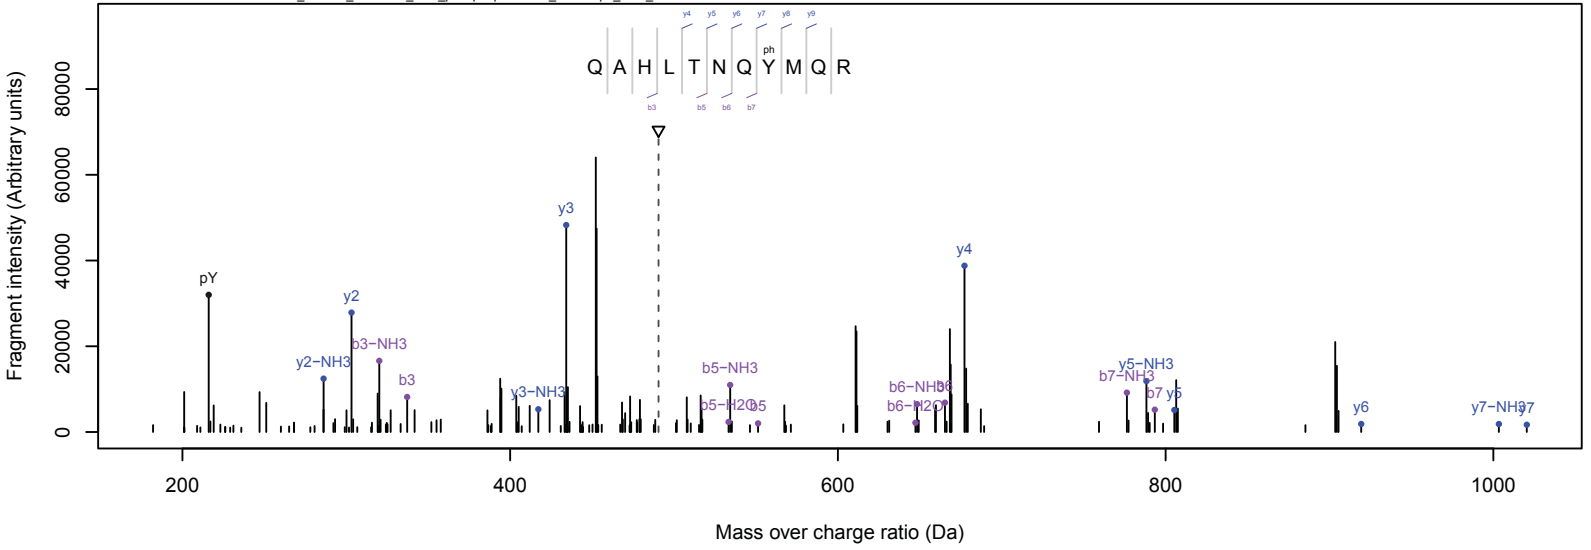

AAALEAMKDYTK-2+

Source : QE1\_140612\_OPL1013\_CVA\_phosphoproteomic\_landscape\_AML\_B Scan : 13235

Andromeda score : 112.82

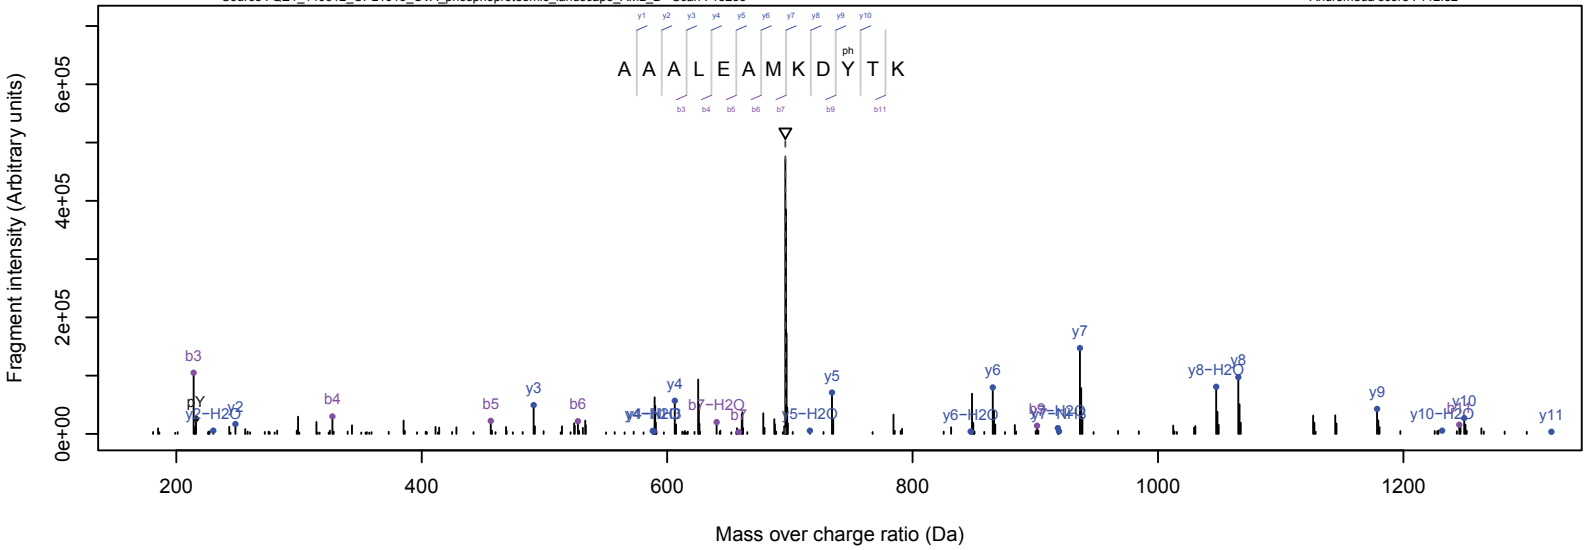

ETTQNALQTPCYPYVAVPEVLGPEKYDK-3+

Source : QE1\_140612\_OPL1013\_CVA\_phosphoproteomic\_landscape\_AML\_C Scan : 39678

Andromeda score : 112.6

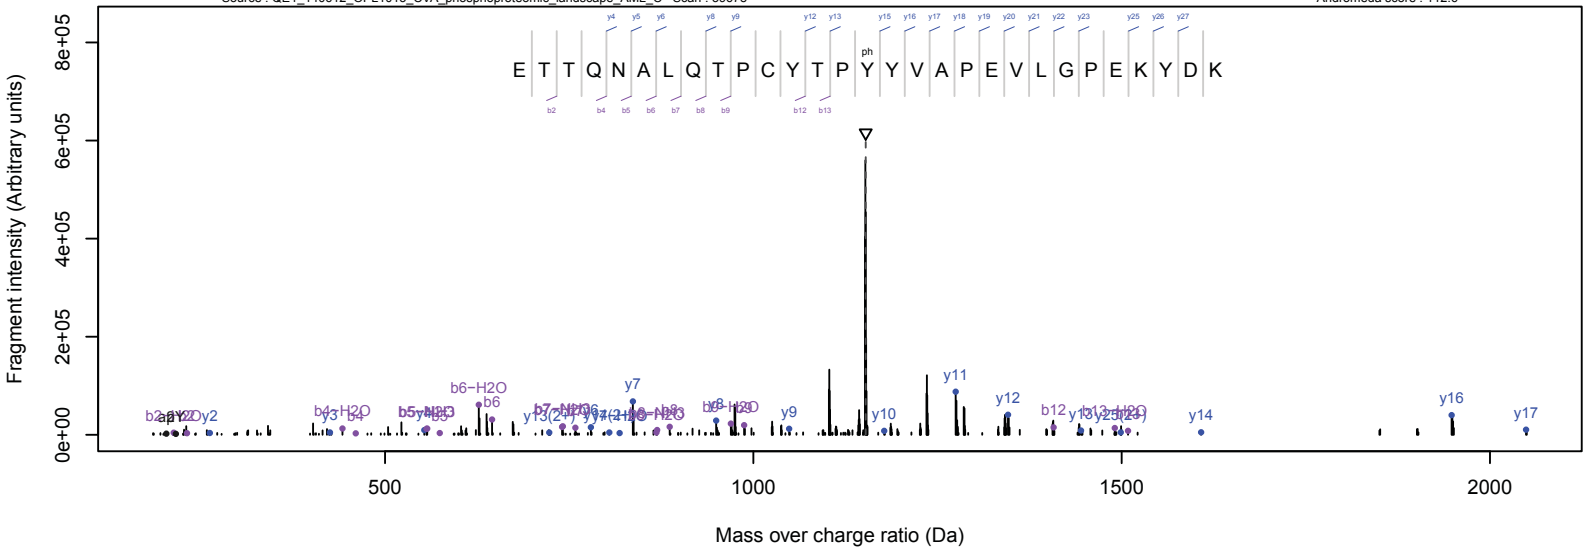

**VSSTHY(ph)YLLPERPPYLDKYEK-3+**

Source : QE1\_140612\_OPL1013\_CVA\_phosphoproteomic\_landscape\_AML\_C Scan : 31276

Andromeda score : 112.58

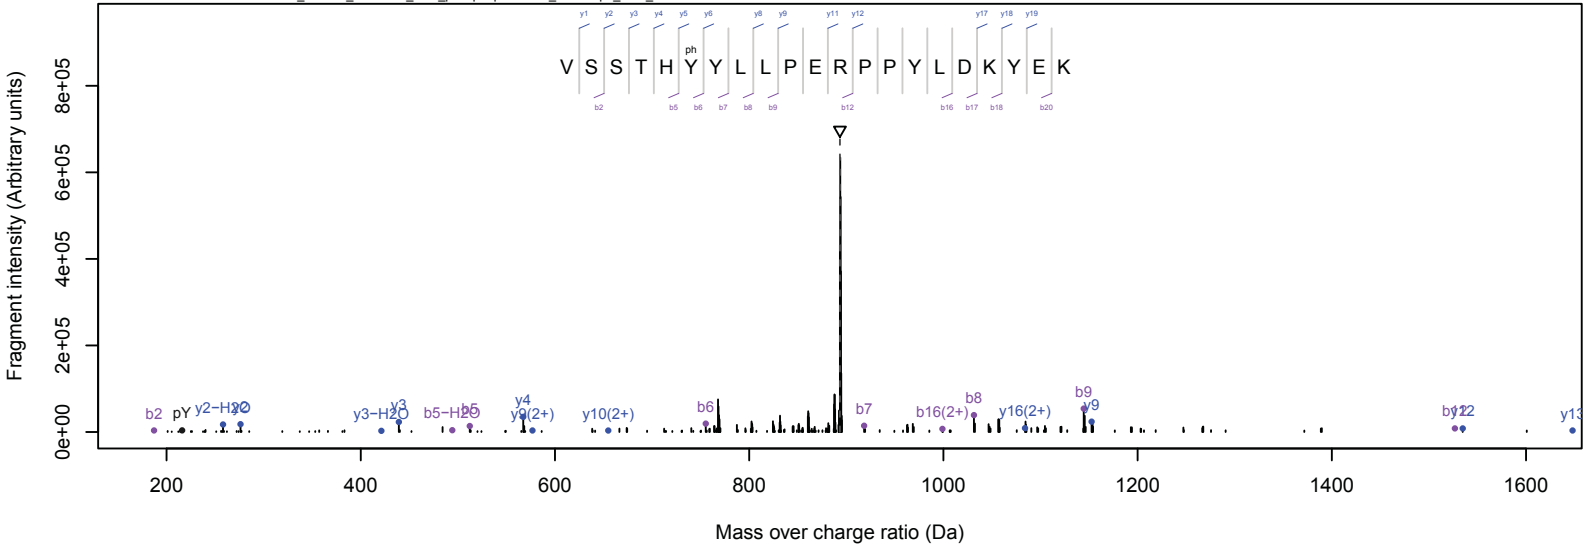

**VKTPAGHVY(ph)EYIPHLGHMCK-4+**

Source : QE1\_140612\_OPL1013\_CVA\_phosphoproteomic\_landscape\_AML\_B Scan : 27378

Andromeda score : 112.55

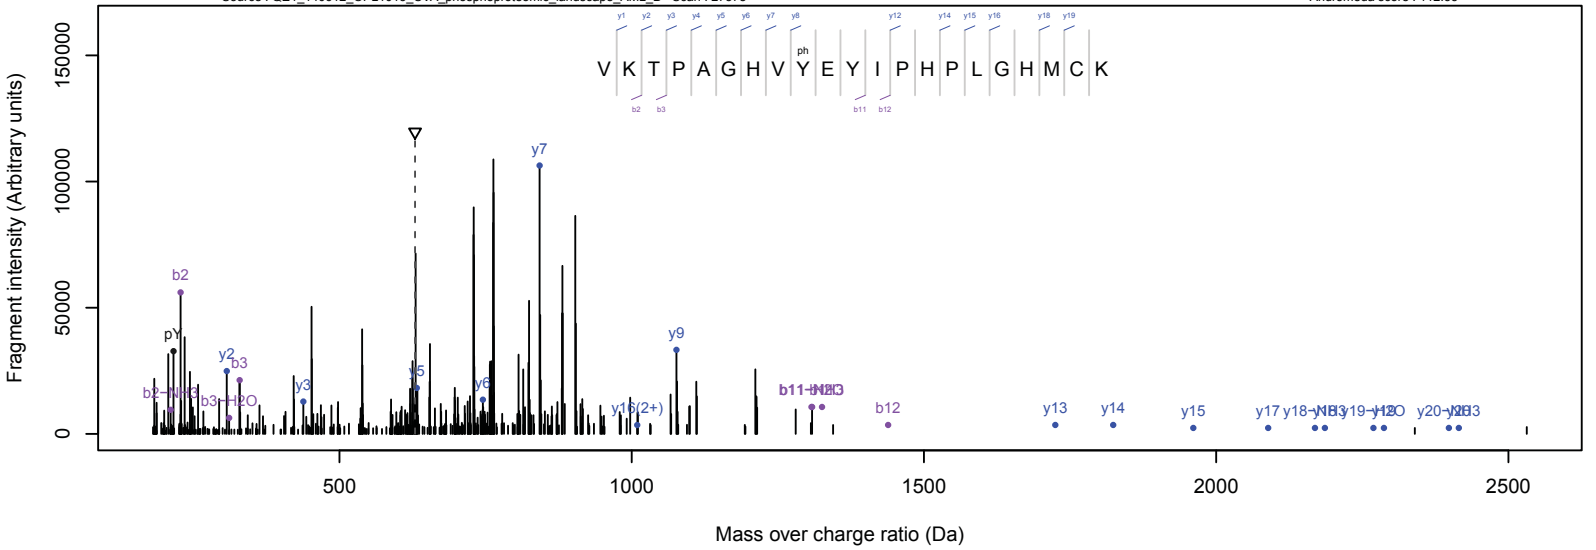

**YVLENHPGTS(ph)NYQMHLKK-3+**

Source : QE1\_140908\_OPL1013\_CvA\_pTyrIP\_AML\_OCI\_AML3 Scan : 21782

Andromeda score : 112.55

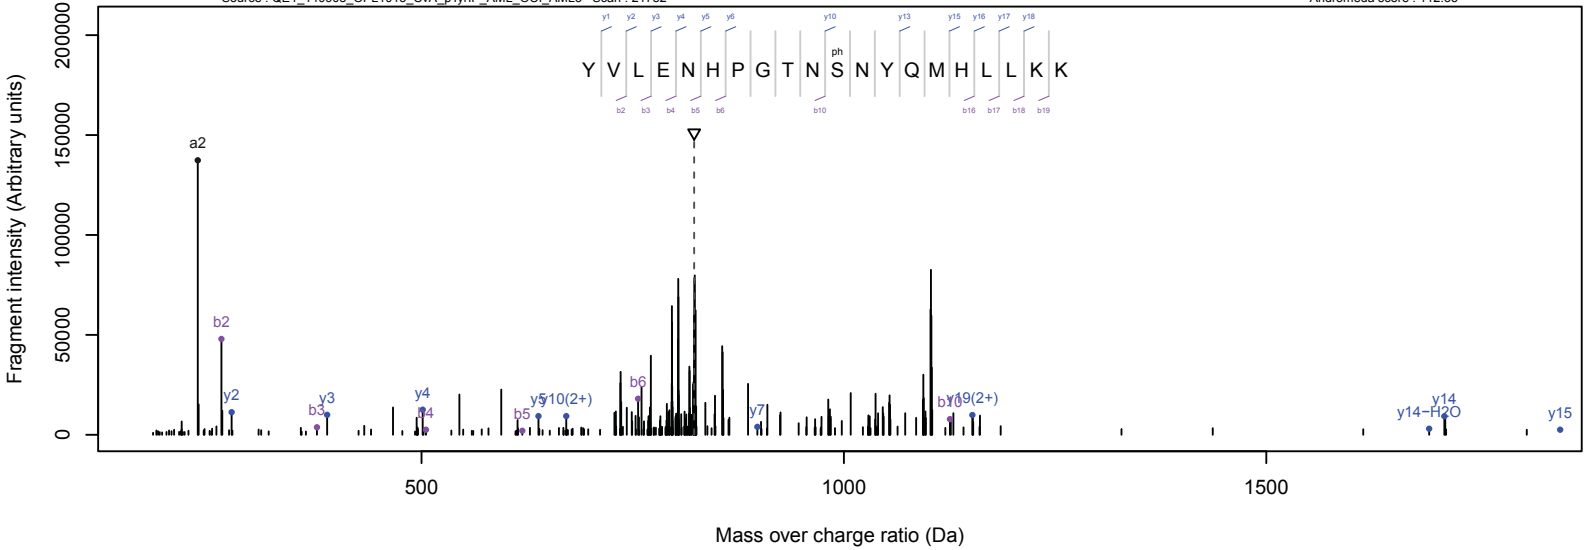

**SCLEHWLSSNTSY(ph)CELCHFR-3+**

Source : QE1\_140612\_OPL1013\_CVA\_phosphoproteomic\_landscape\_AML\_C Scan : 35141

Andromeda score : 112.53

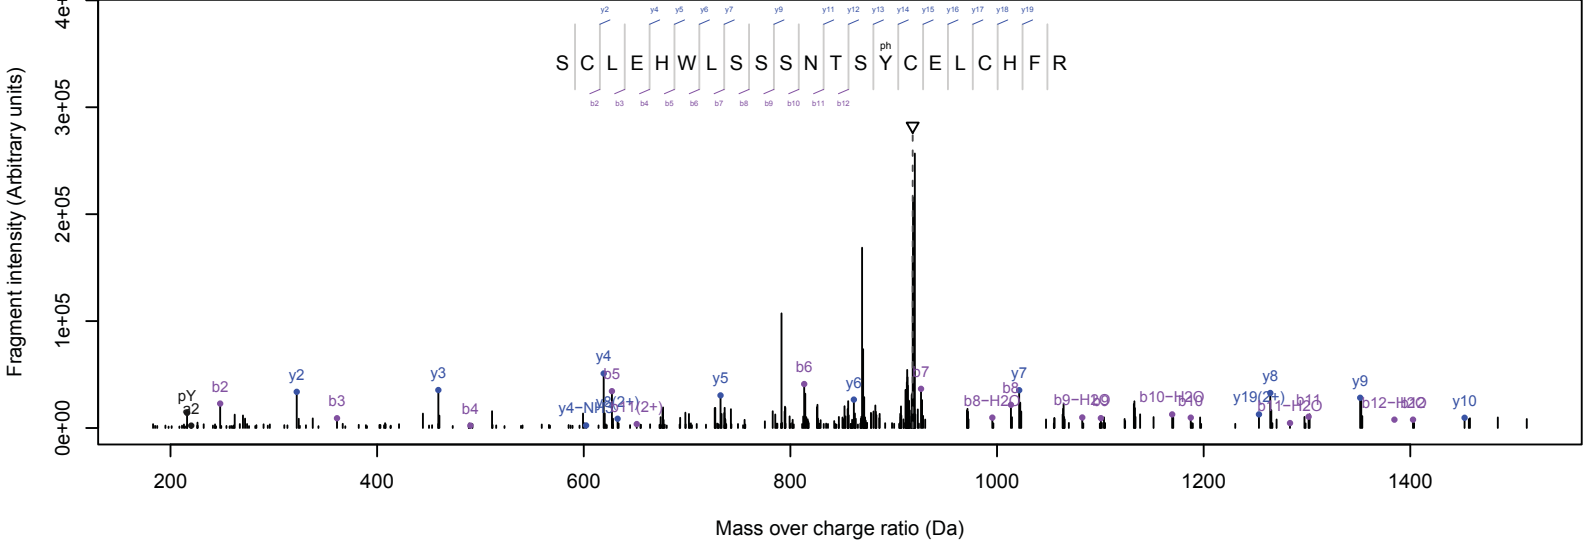

**LTY(ph)NQINDVIK-2+**

Source : QE1\_140612\_OPL1013\_CVA\_phosphoproteomic\_landscape\_AML\_C Scan : 26467

Andromeda score : 112.5

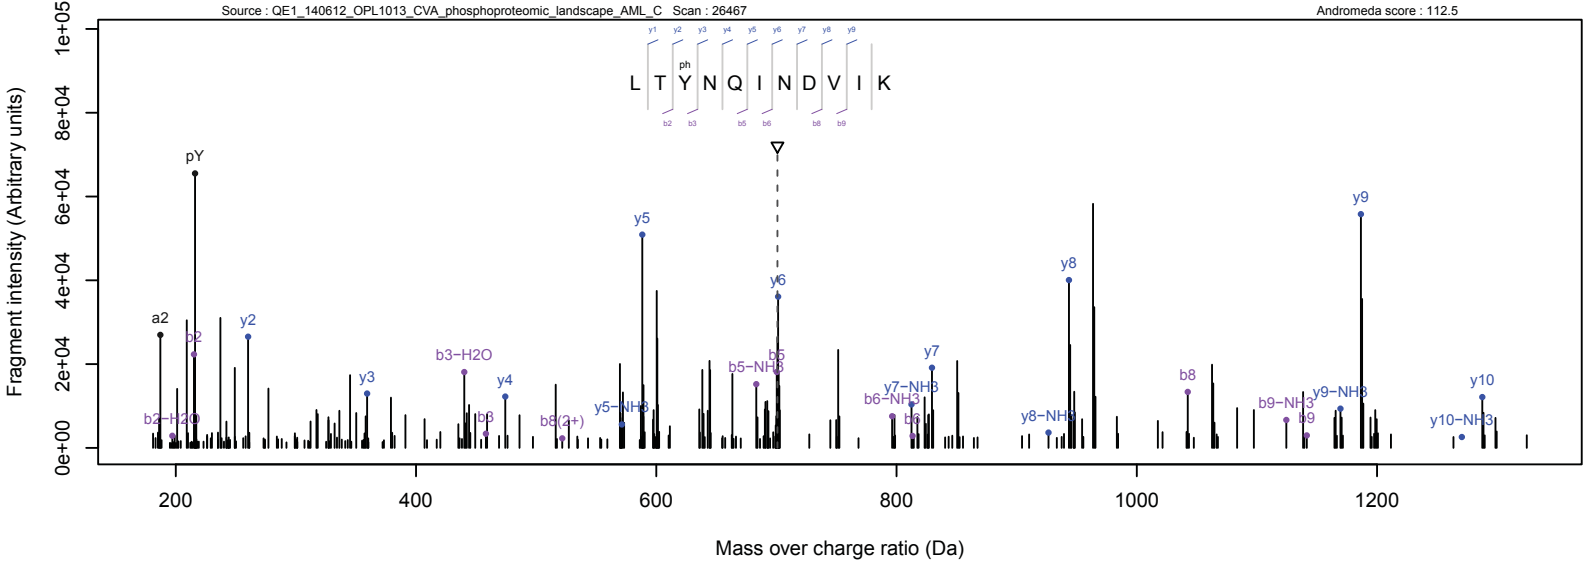

**PGNFY(ph)VSSESISIR-2+**

Source : QE1\_140612\_OPL1013\_CVA\_phosphoproteomic\_landscape\_AML\_A Scan : 22977

Andromeda score : 112.44

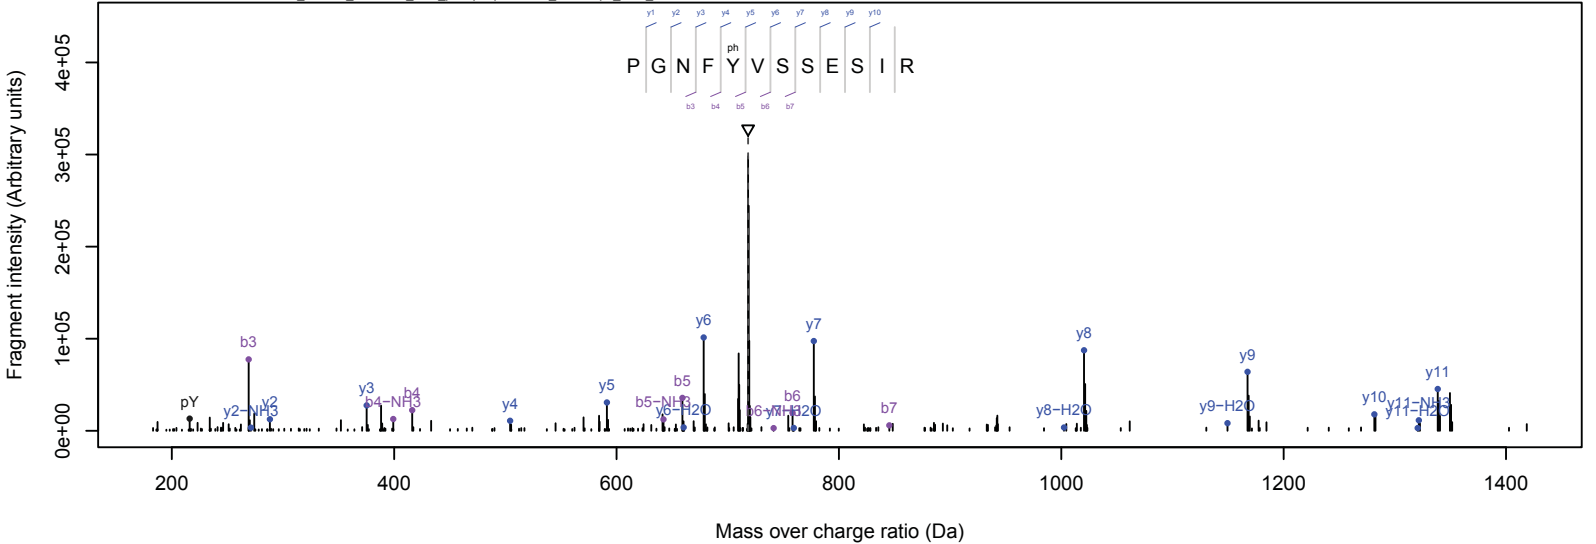

VSHDPFAQRPY(ph)ENFQNTGK-3+

Source : QE1\_140612\_OPL1013\_CVA\_phosphoproteomic\_landscape\_AML\_C Scan : 18984

Andromeda score : 112.44

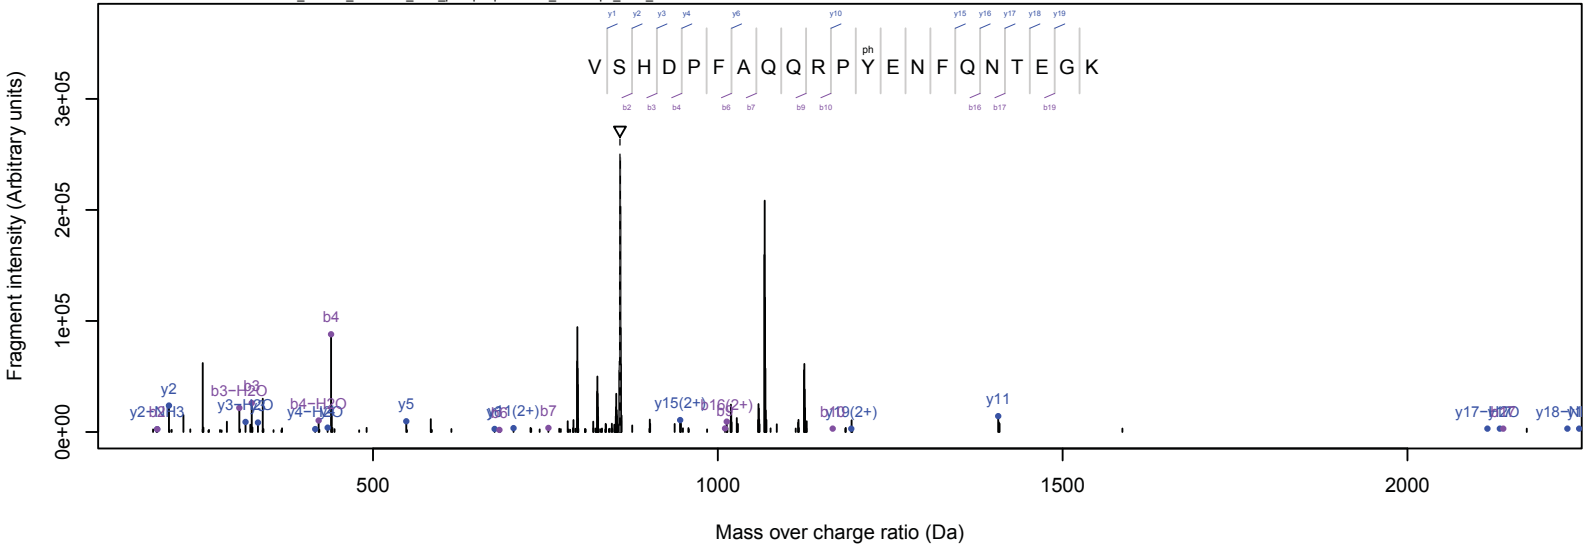

LEPQIASASEY(ph)AHR-3+

Source : QE1\_140612\_OPL1013\_CVA\_phosphoproteomic\_landscape\_AML\_B Scan : 15166

Andromeda score : 112.42

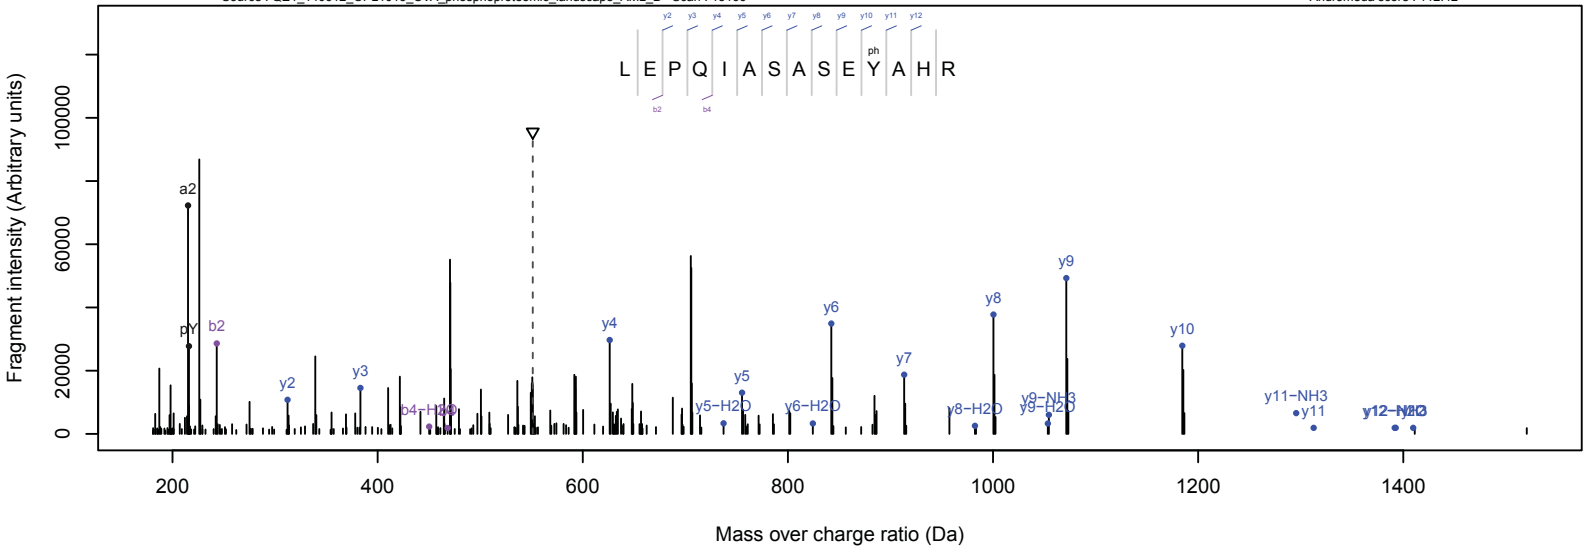

QVAPASGY(ph)LTFER-2+

Source : QE1\_140612\_OPL1013\_CVA\_phosphoproteomic\_landscape\_AML\_B Scan : 26382

Andromeda score : 112.42

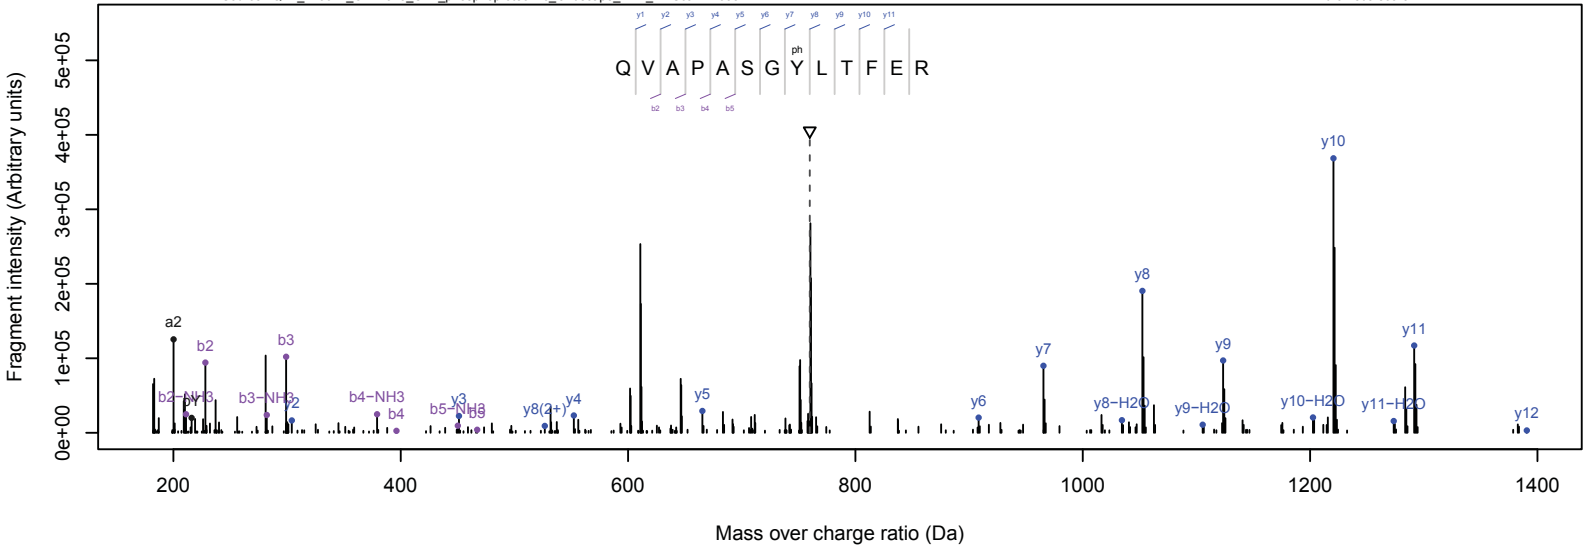

SSFY(ph)VNGLTGGQK-2+

Source: QE1\_140612\_OPL1013\_CVA\_phosphoproteomic\_landscape\_AML\_C Scan: 34426

Andromeda score: 112.42

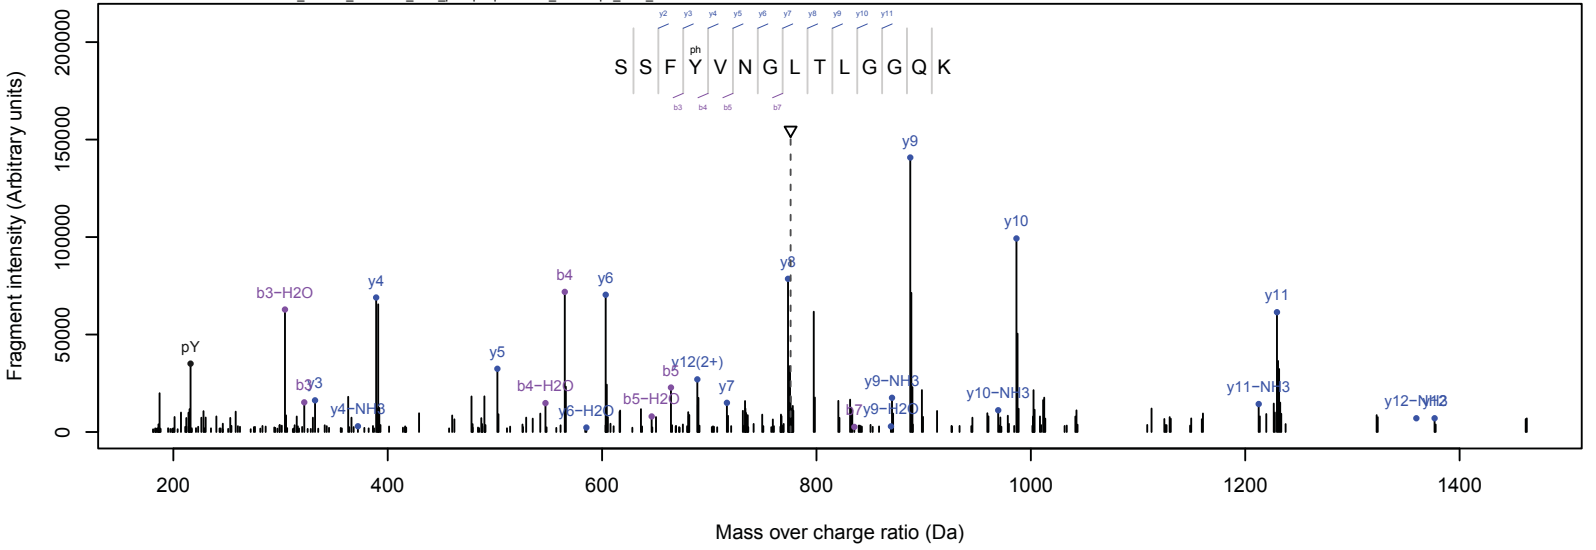

NQNY(ph)MNILR-2+

Source: QE1\_140612\_OPL1013\_CVA\_phosphoproteomic\_landscape\_AML\_A Scan: 23793

Andromeda score: 112.41

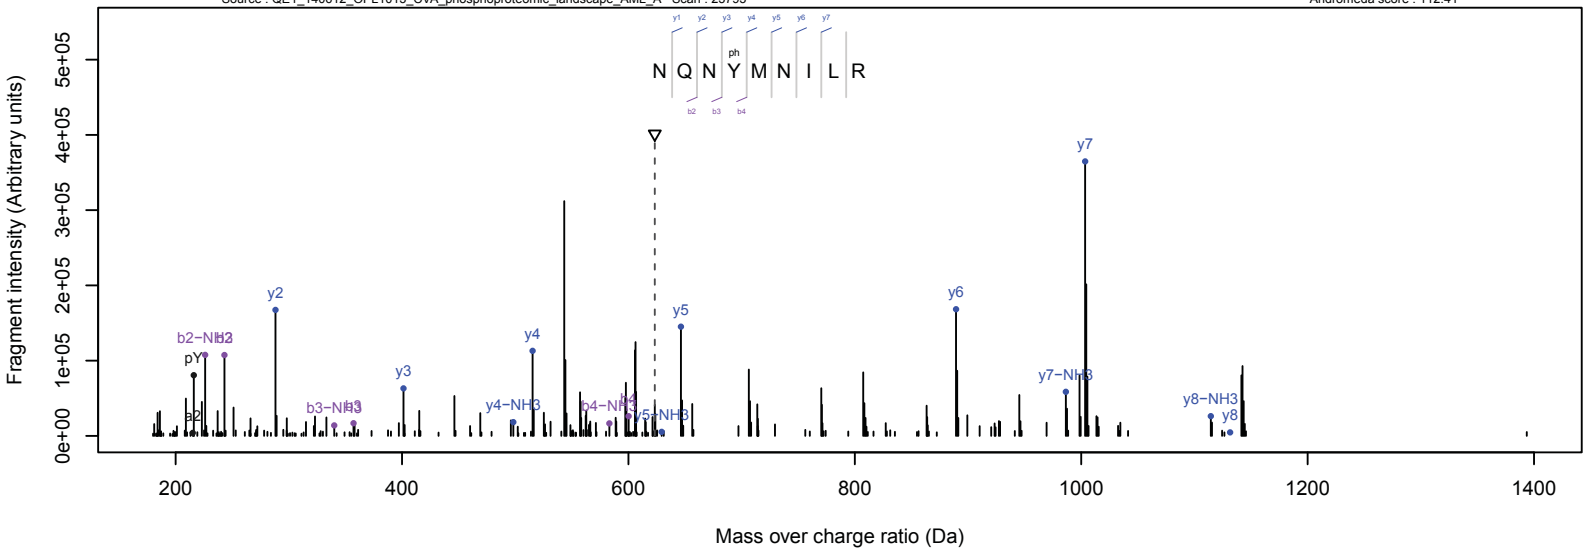

Y(ph)GQFSLNPGGRPI(ph)PPRSAK-3+

Source: QE1\_140612\_OPL1013\_CVA\_phosphoproteomic\_landscape\_AML\_B Scan: 23059

Andromeda score: 112.39

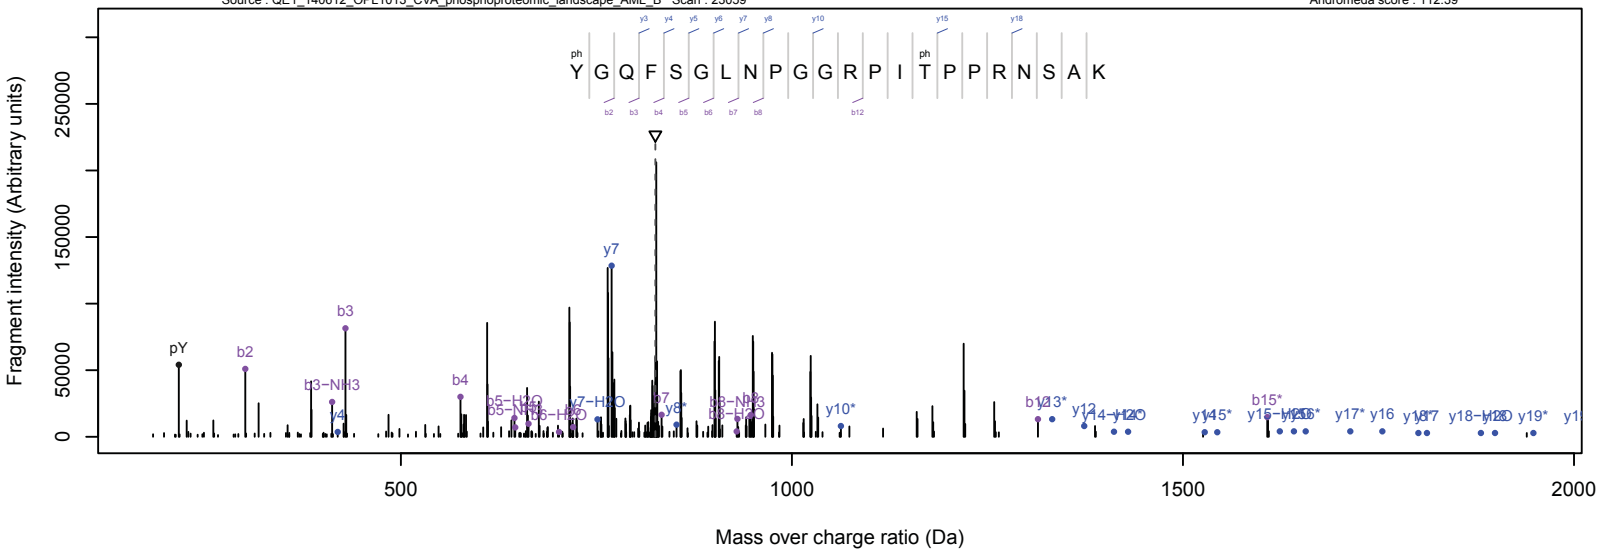

SKLHGPTETSSCSGAAPTVEEMDEELHYASLNFHGMNPSK-5+

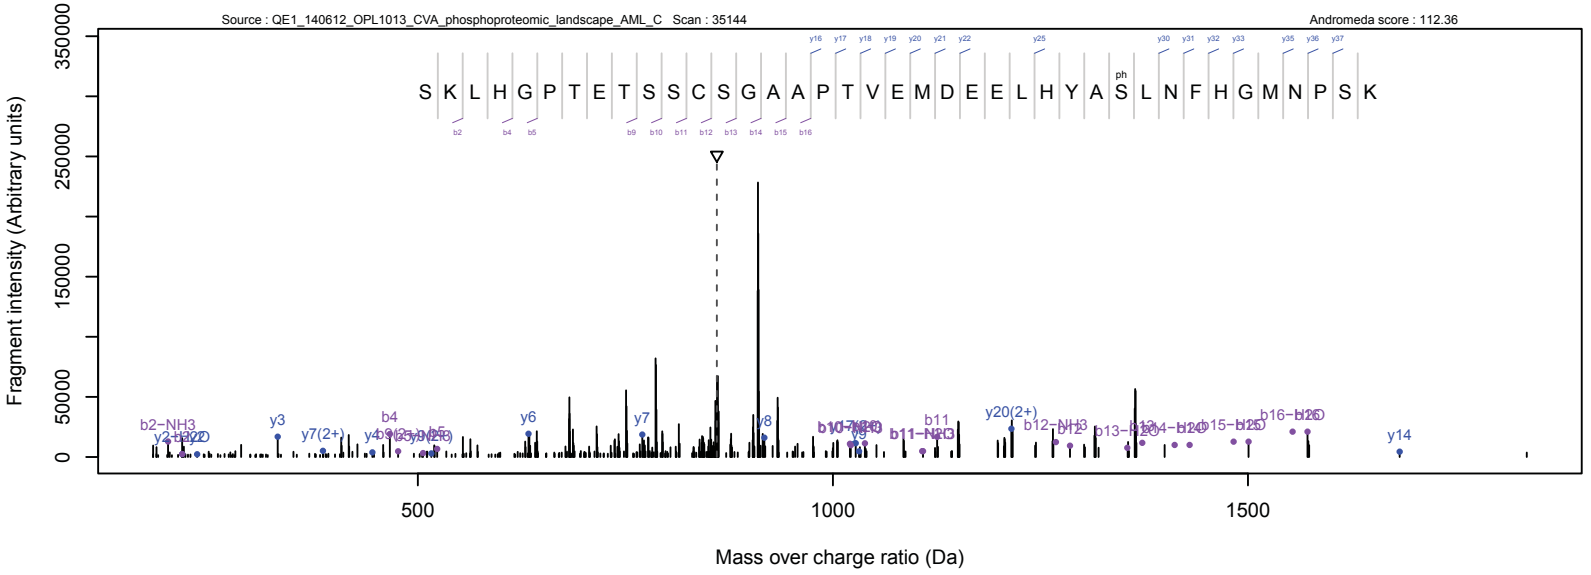

VVQDTYQIMK-2+

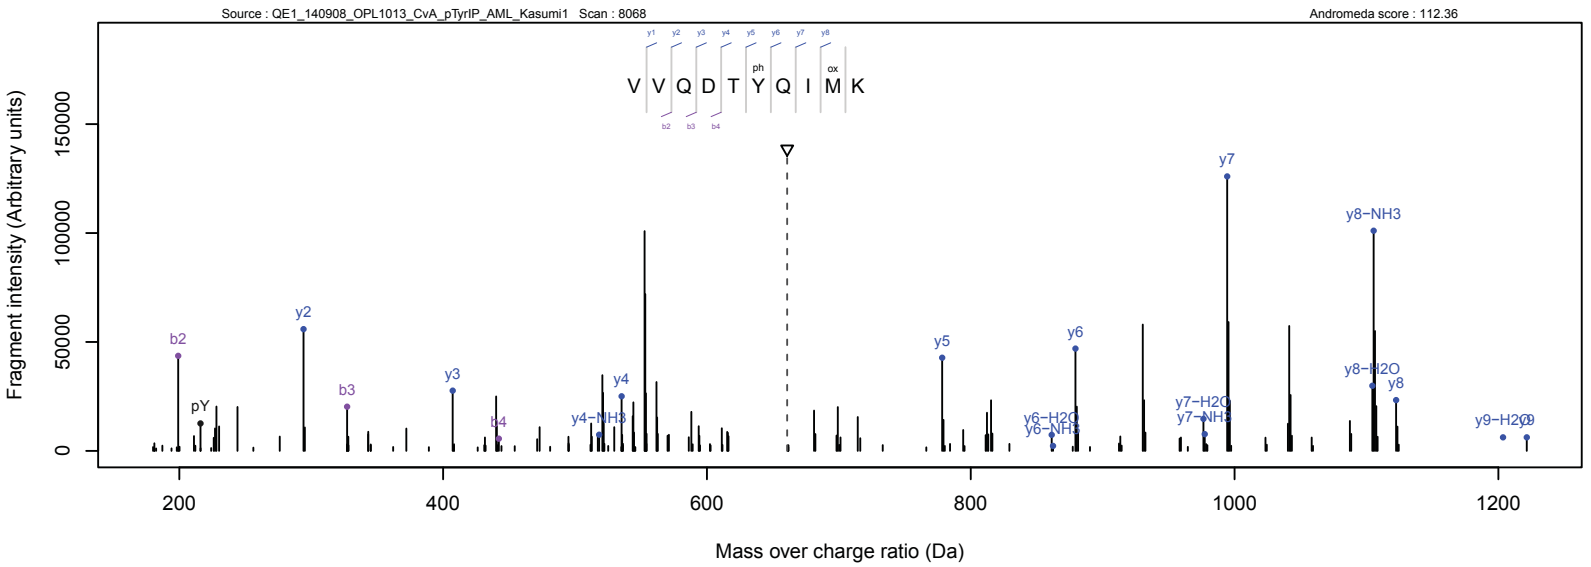

Y(ph)FSSMAEFLK-2+

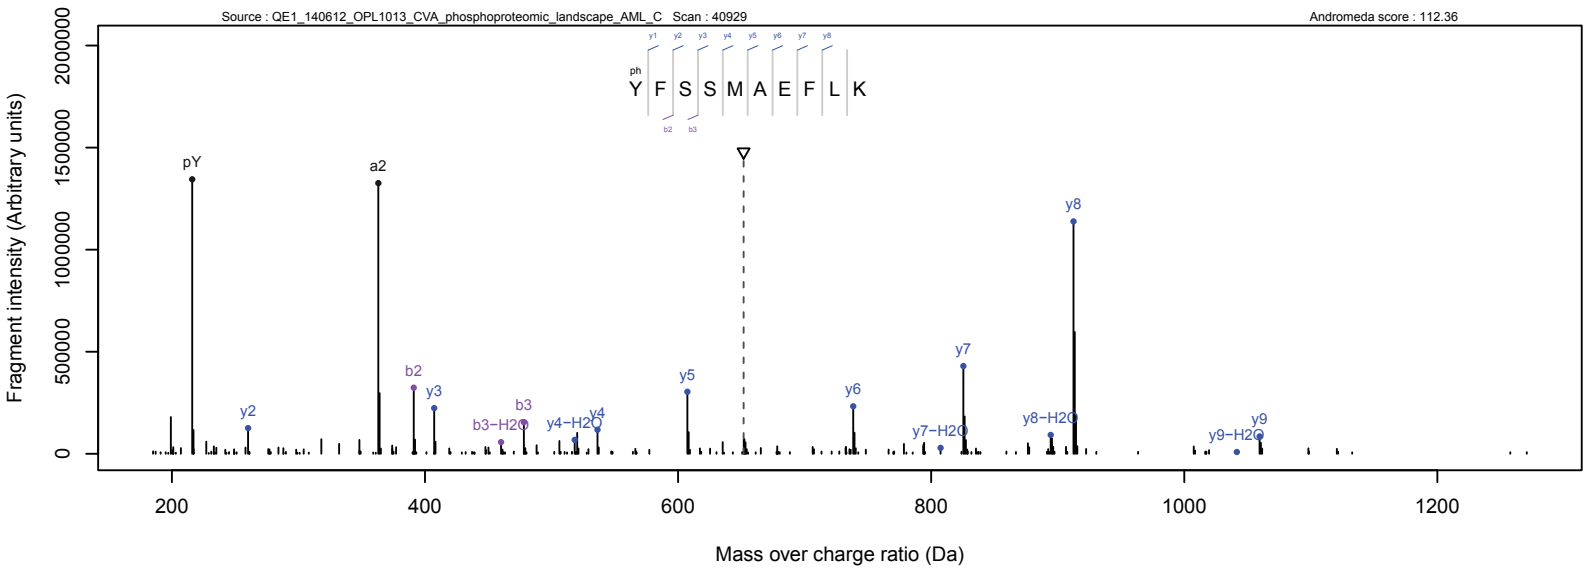

DTLY(ph)SCAAM(ox)PNSASRDEFPCGFTSPANR-3+

Source : QE1\_140908\_OPL1013\_CvA\_pTyrIP\_AML\_HEL Scan : 31983

Andromeda score : 112.34

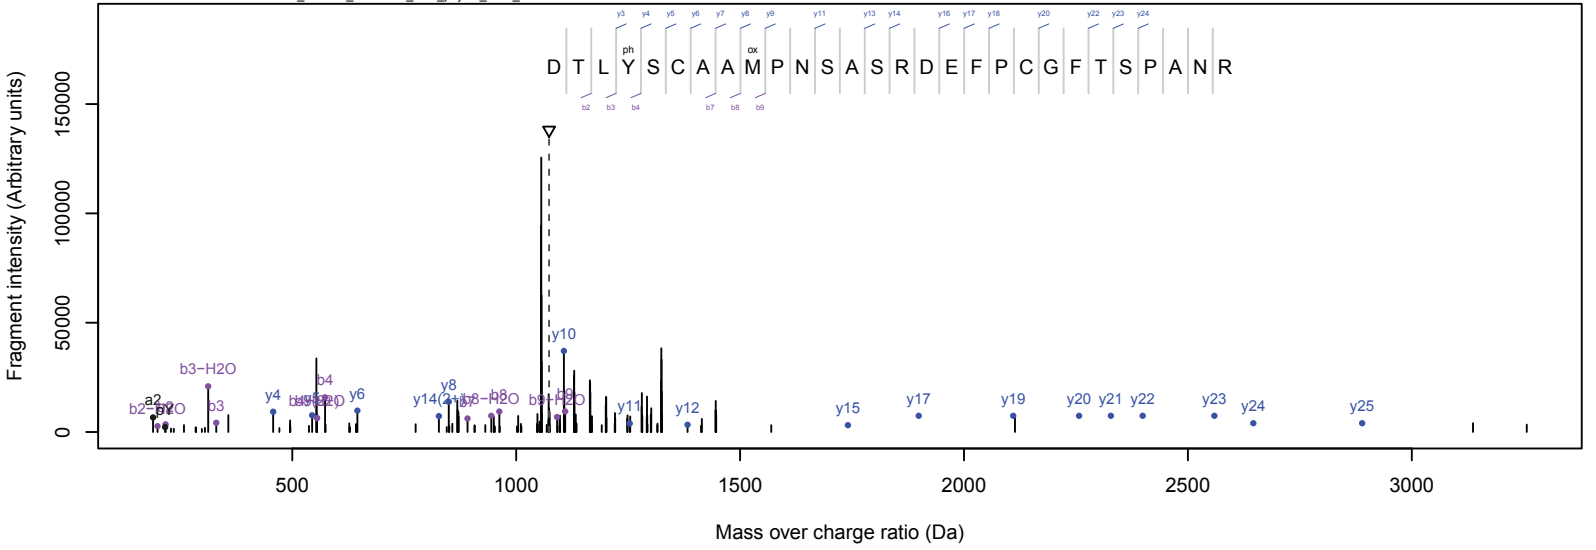

AFVAIGDY(ph)NGHVLGVK-3+

Source : QE1\_140908\_OPL1013\_CvA\_pTyrIP\_AML\_ML2 Scan : 34609

Andromeda score : 112.17

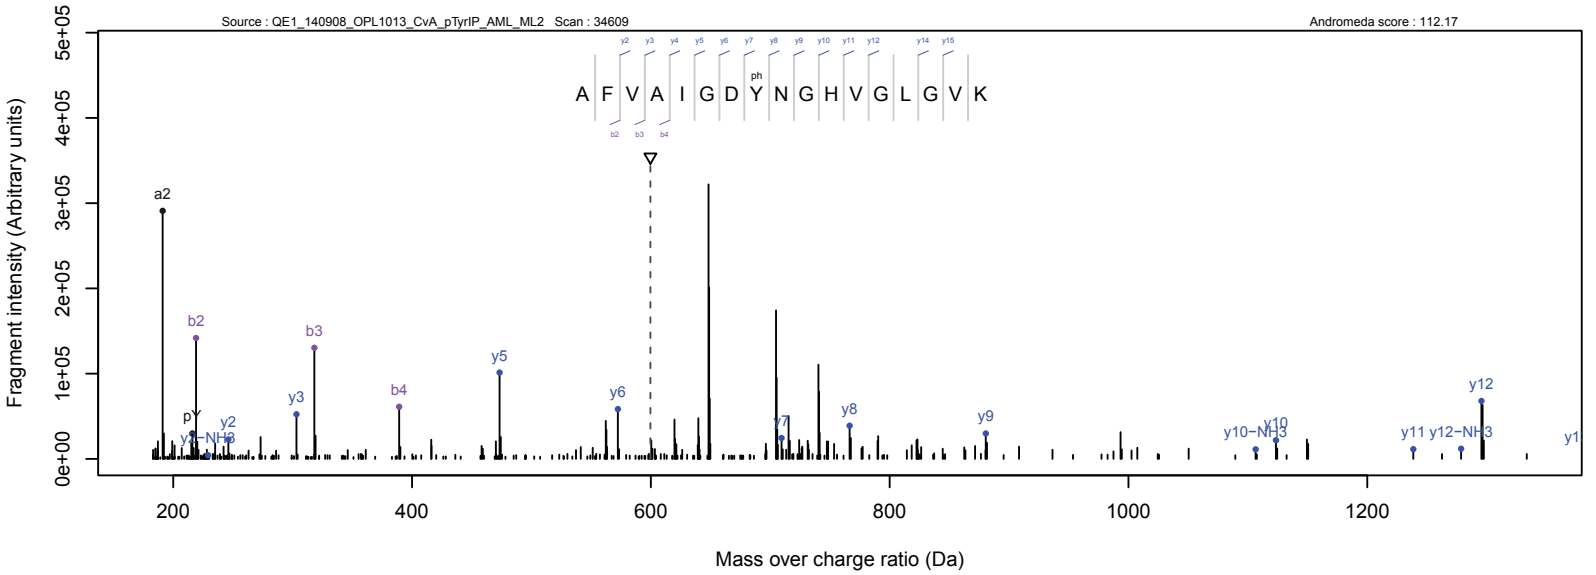

SLSLHNNLLTY(ph)LPR-2+

Source : QE1\_140612\_OPL1013\_CvA\_phosphoproteomic\_landscape\_AML\_A Scan : 40602

Andromeda score : 112.17

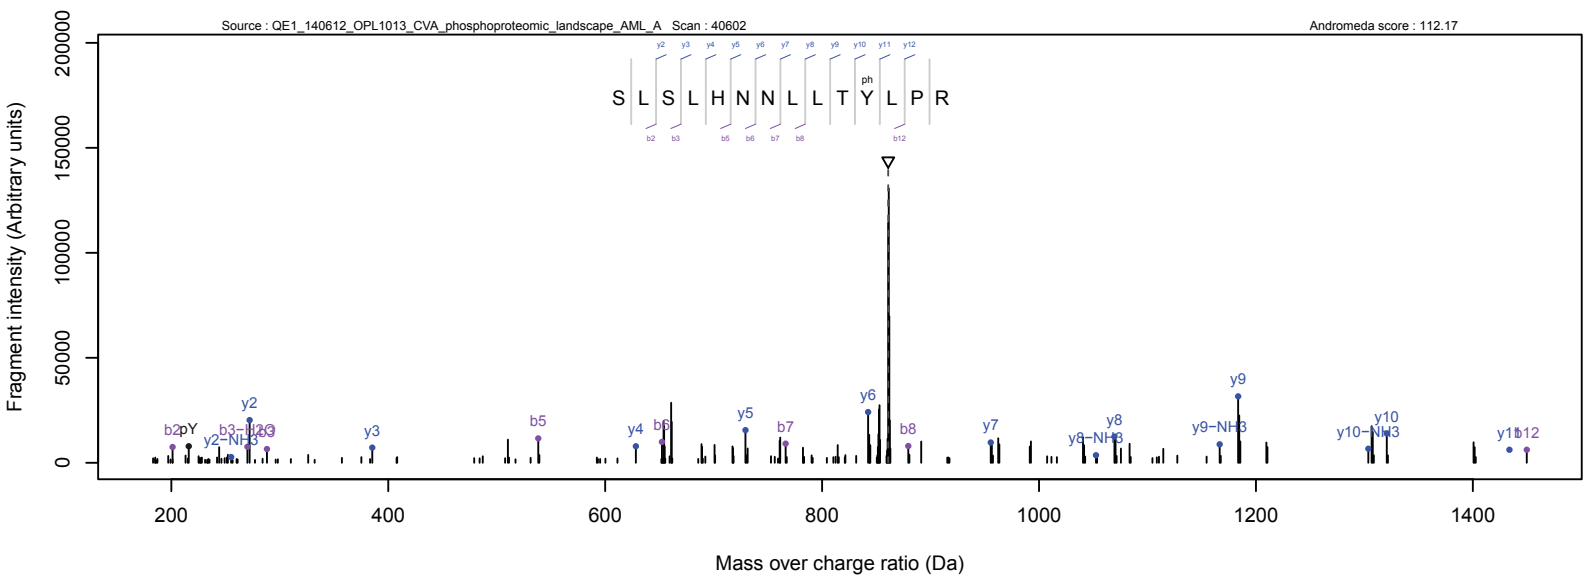



(ac)MNPVYSPGSSGVYPYANA K-2+

Source : QE1\_140612\_OPL1013\_CVA\_phosphoproteomic\_landscape\_AML\_C Scan : 31612

Andromeda score : 112.16

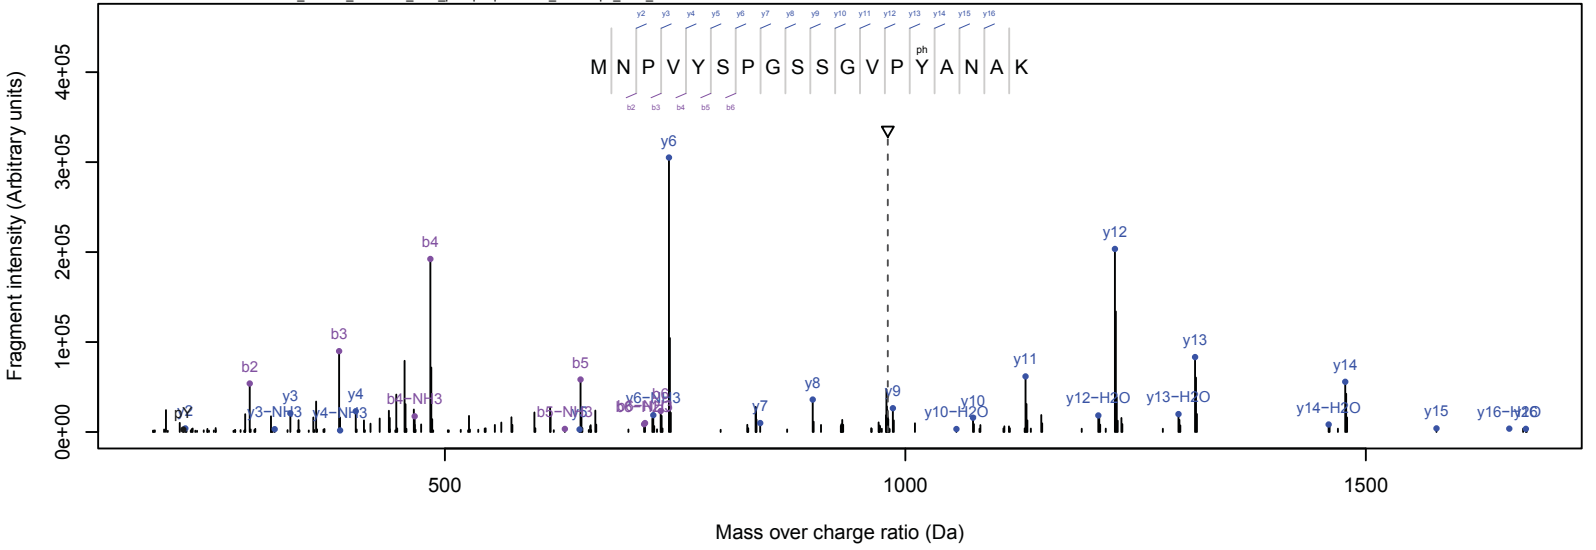

SAEEAPLYSK-2+

Source : QE1\_140908\_OPL1013\_CvA\_pTyrIP\_AML\_Kasumi1 Scan : 7874

Andromeda score : 112.13

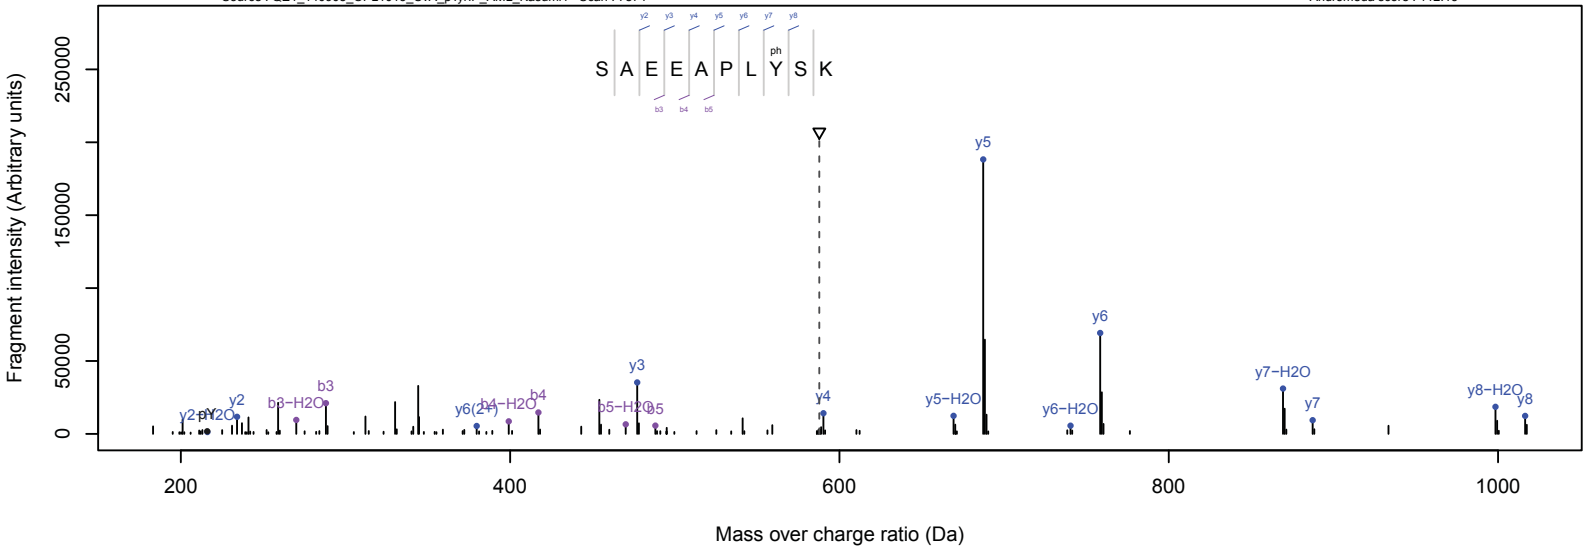

TVCS TYLQSR-2+

Source : QE1\_140612\_OPL1013\_CVA\_phosphoproteomic\_landscape\_AML\_F Scan : 8753

Andromeda score : 112.13

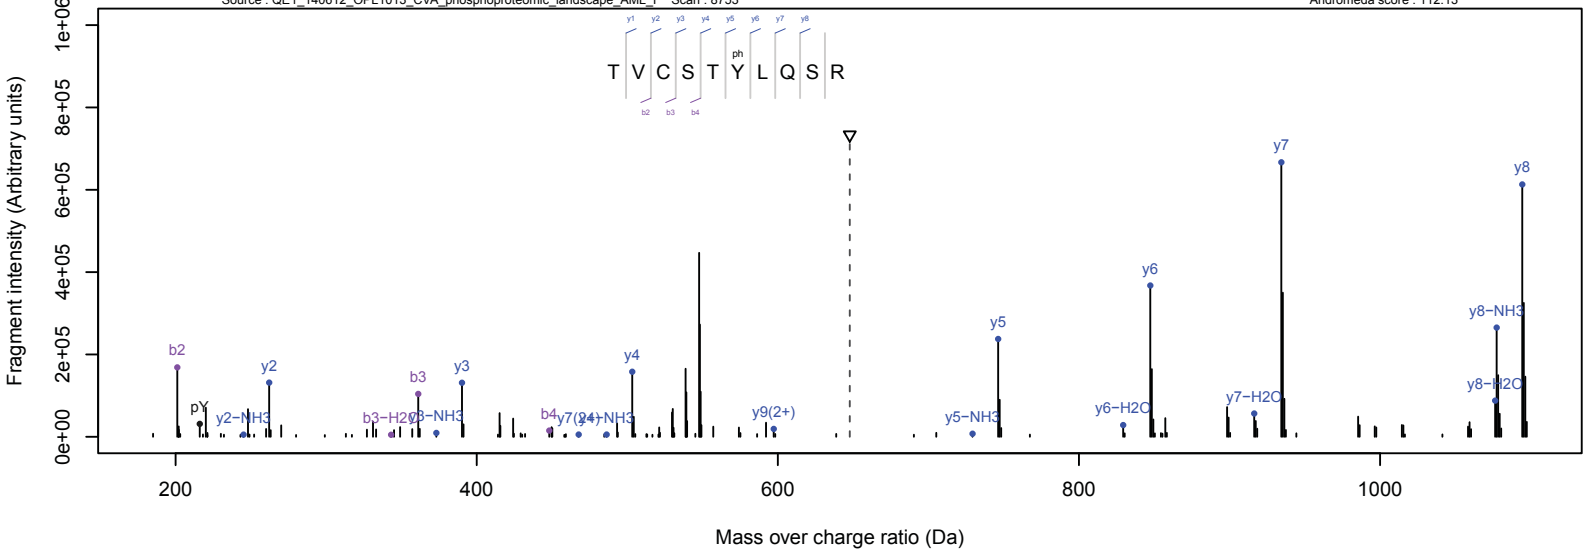

TLSEVDY(ph)APAGPAR-2+

Source: QE1\_140612\_OPL1013\_CVA\_phosphoproteomic\_landscape\_AML\_C Scan: 17568

Andromeda score: 112.08

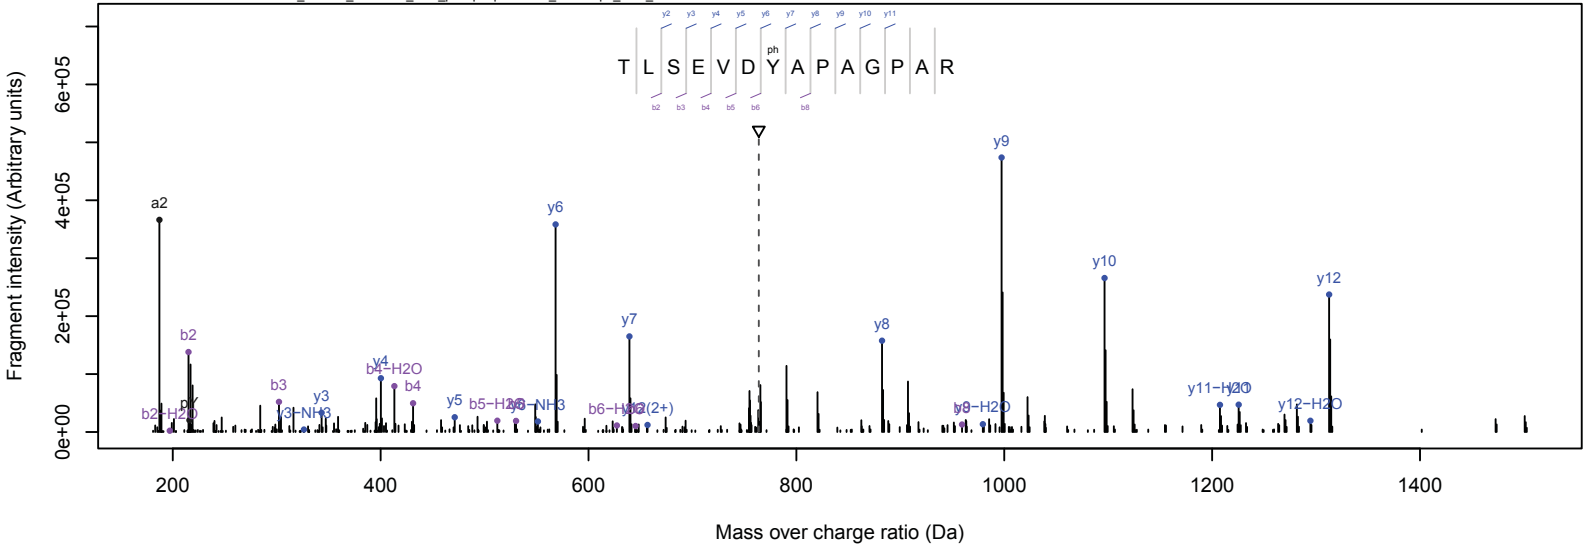

MKGDY(ph)DVTVPK-2+

Source: QE1\_140612\_OPL1013\_CVA\_phosphoproteomic\_landscape\_AML\_C Scan: 11709

Andromeda score: 112.02

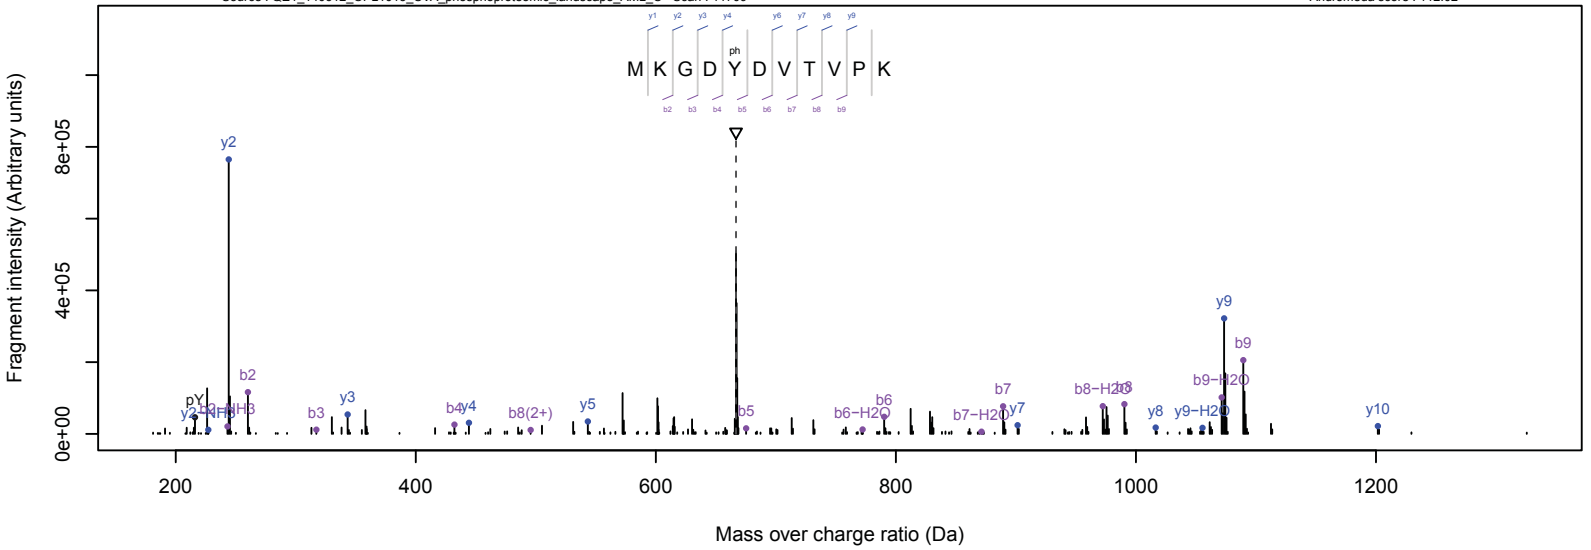

RNY(ph)GGVYVGLPSEAVNMVSSQTK-3+

Source: QE1\_140612\_OPL1013\_CVA\_phosphoproteomic\_landscape\_AML\_B Scan: 38876

Andromeda score: 111.97

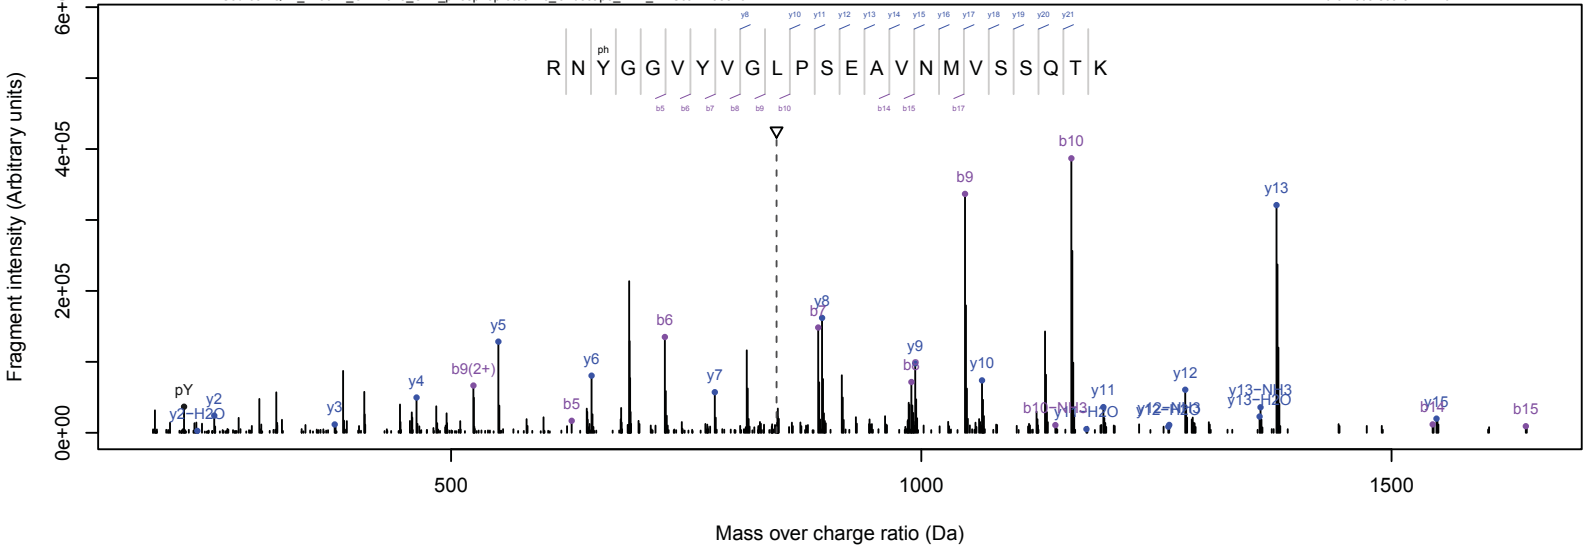

ERLY(ph)PLRK-3+

Source : QE1\_140612\_OPL1013\_CVA\_phosphoproteomic\_landscape\_AML\_C Scan : 7919

Andromeda score : 111.95

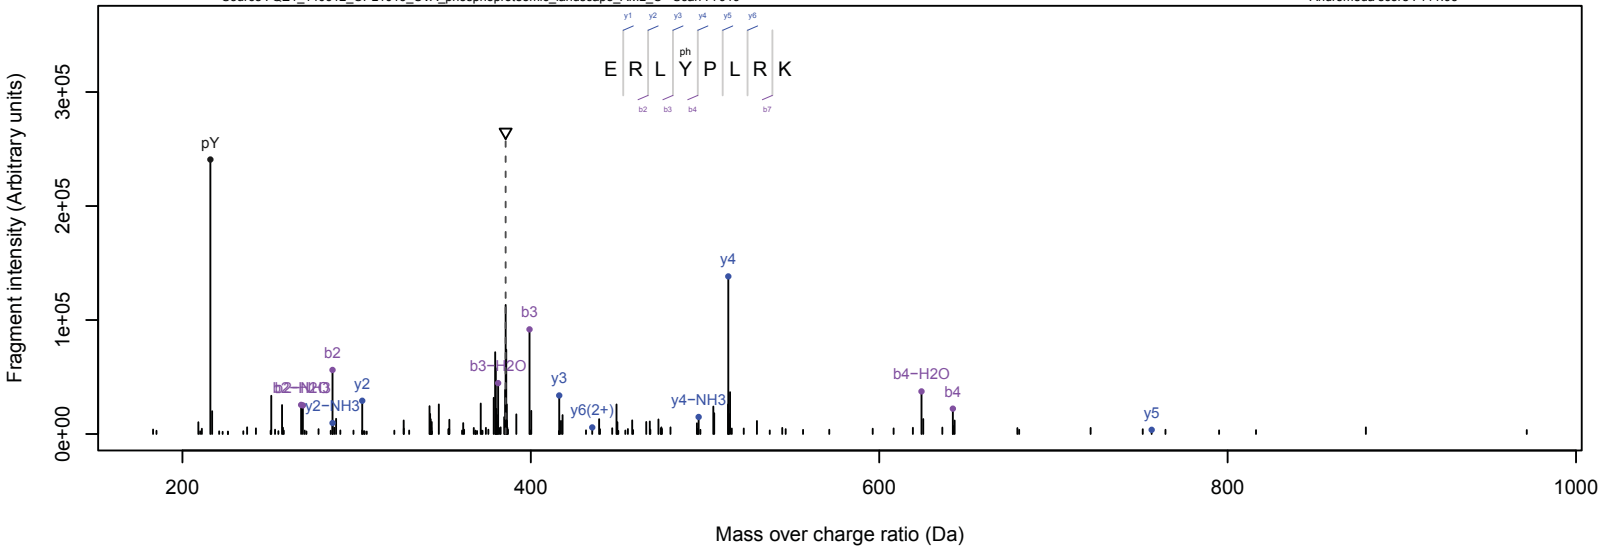

Y(ph)PQLLPGIR-2+

Source : QE1\_140612\_OPL1013\_CVA\_phosphoproteomic\_landscape\_AML\_B Scan : 33439

Andromeda score : 111.95

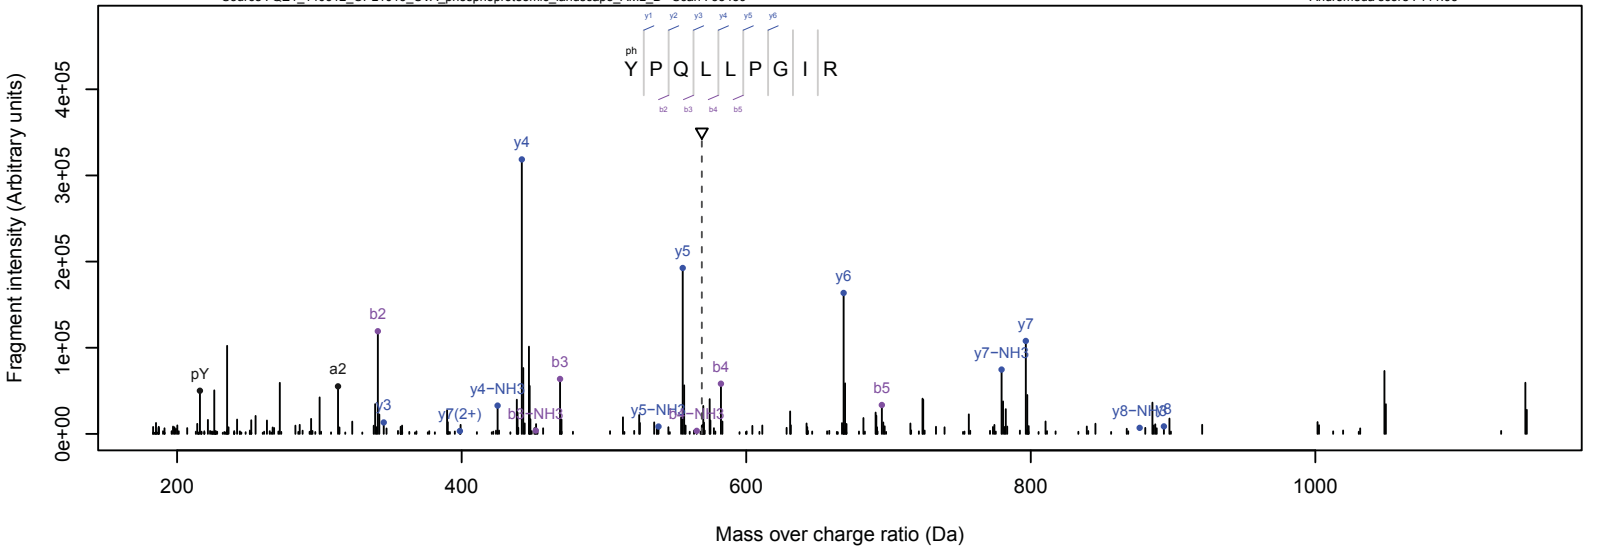

Y(ph)YQLQPMVR-2+

Source : QE1\_140612\_OPL1013\_CVA\_phosphoproteomic\_landscape\_AML\_C Scan : 24973

Andromeda score : 111.95

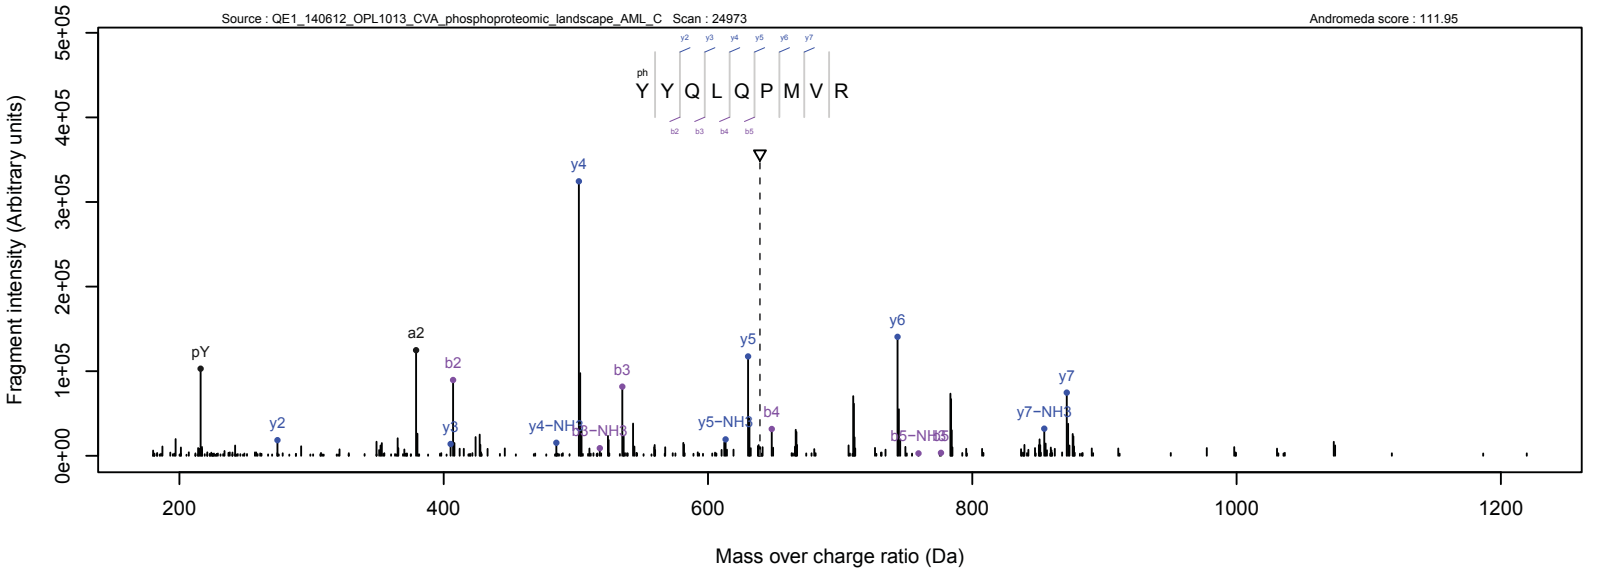

**GYISPY(ph)FINTSK-2+**

Source : QE1\_140612\_OPL1013\_CVA\_phosphoproteomic\_landscape\_AML\_A Scan : 31292

Andromeda score : 111.94

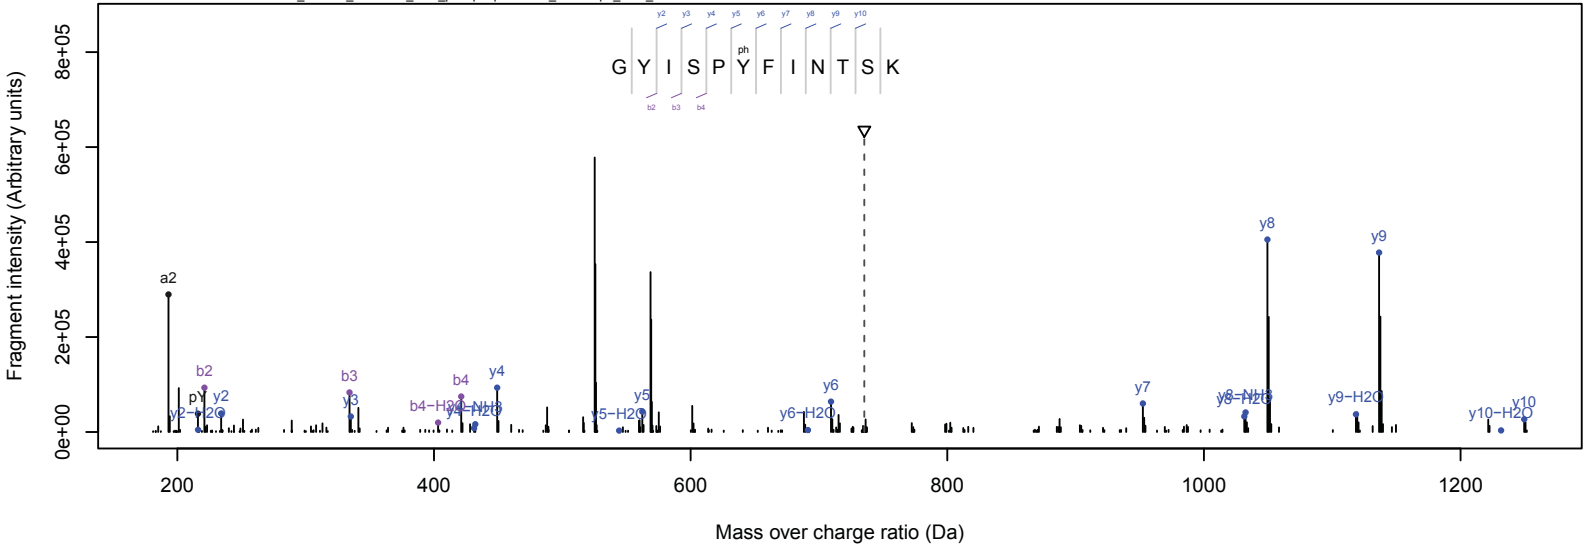

**FPTYVPVPH(ph)SFF-2+**

Source : QE1\_140612\_OPL1013\_CVA\_phosphoproteomic\_landscape\_AML\_C Scan : 47759

Andromeda score : 111.86

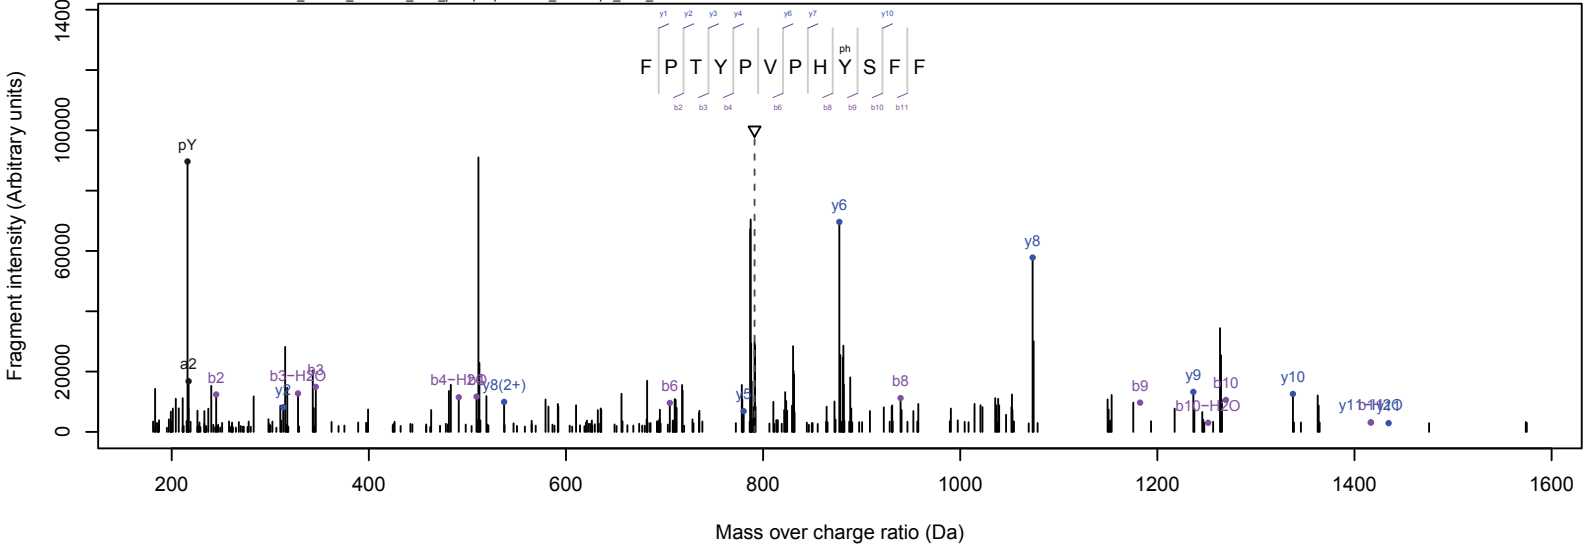

**NSNY(ph)CLPSYTAYK-2+**

Source : QE1\_140612\_OPL1013\_CVA\_phosphoproteomic\_landscape\_AML\_A Scan : 22903

Andromeda score : 111.83

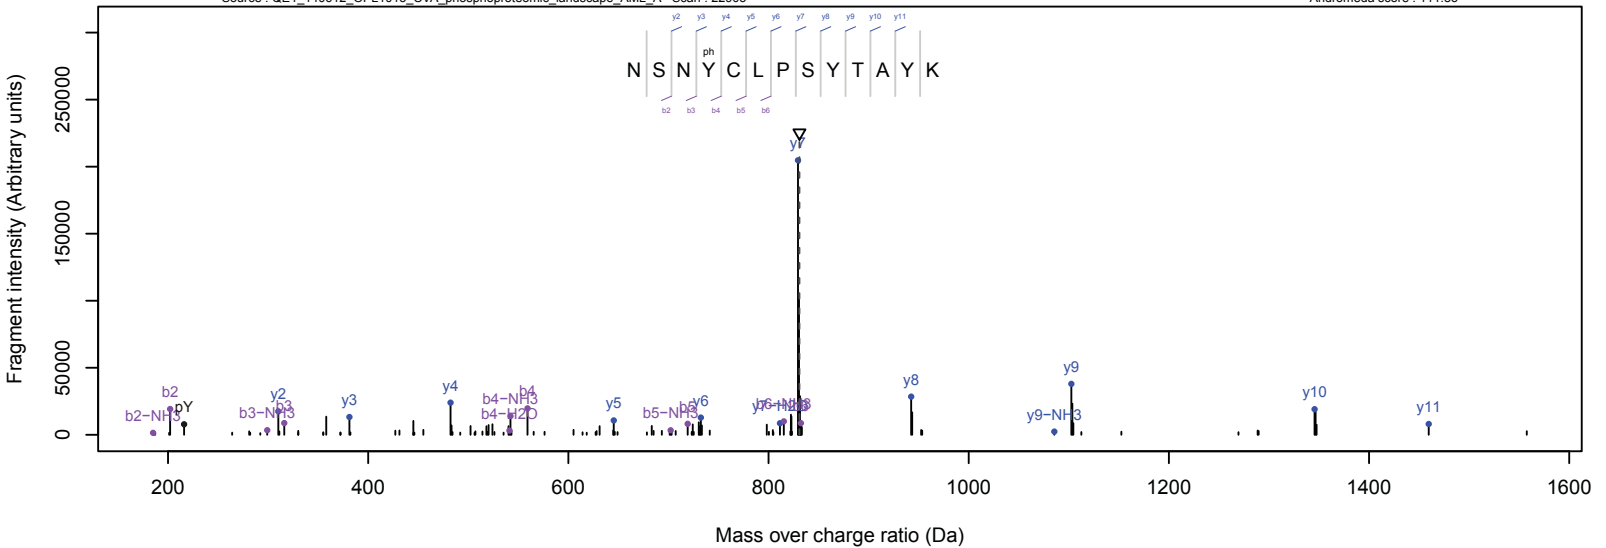

**YHVSEKPY(ph)GIVEK-3+**

Source : QE1\_140908\_OPL1013\_CvA\_pTyrIP\_AML\_ML2 Scan : 13763

Andromeda score : 111.83

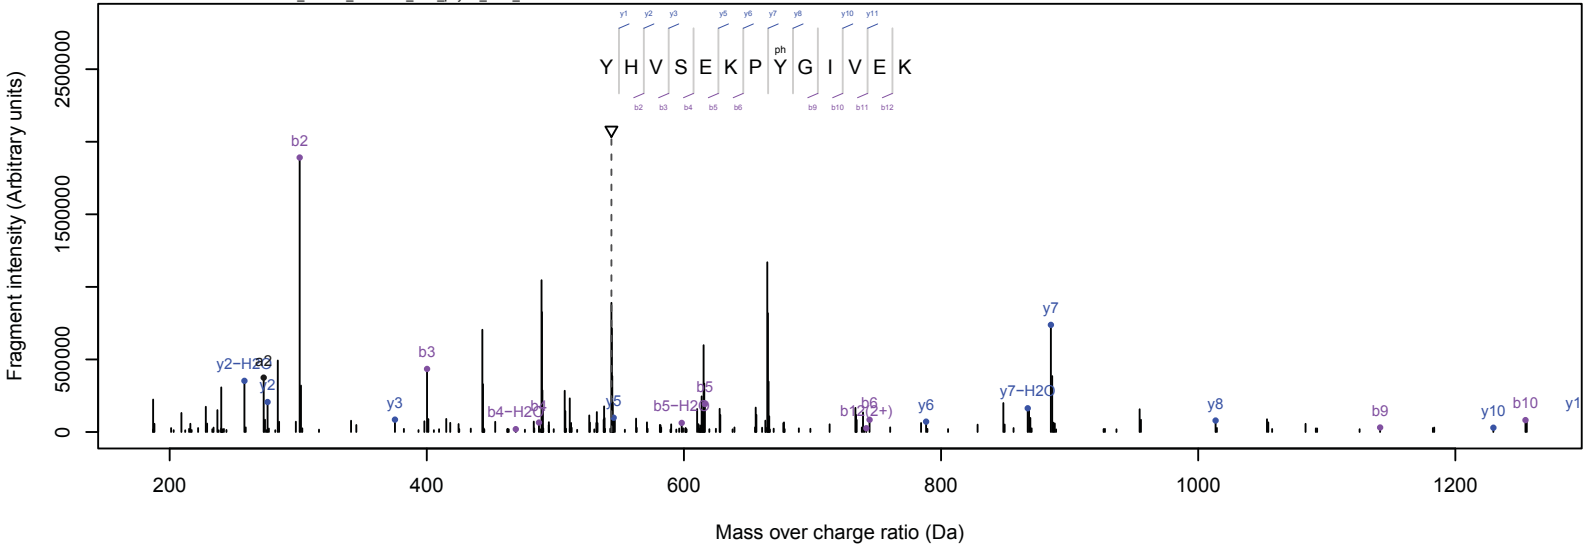

**NLYTNEY(ph)VAIKLEPIK-3+**

Source : QE1\_140612\_OPL1013\_CVA\_phosphoproteomic\_landscape\_AML\_C Scan : 38043

Andromeda score : 111.78

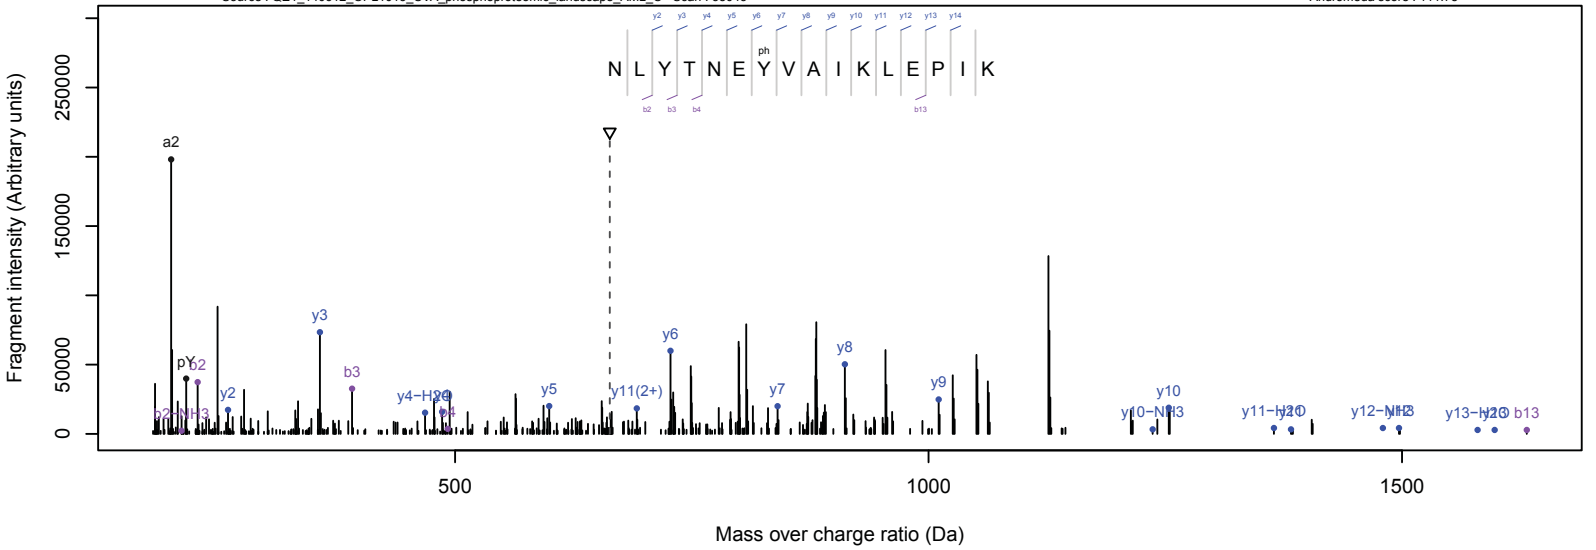

**FSNQY(ph)KATIGADFLTK-3+**

Source : QE1\_140612\_OPL1013\_CVA\_phosphoproteomic\_landscape\_AML\_C Scan : 30102

Andromeda score : 111.77

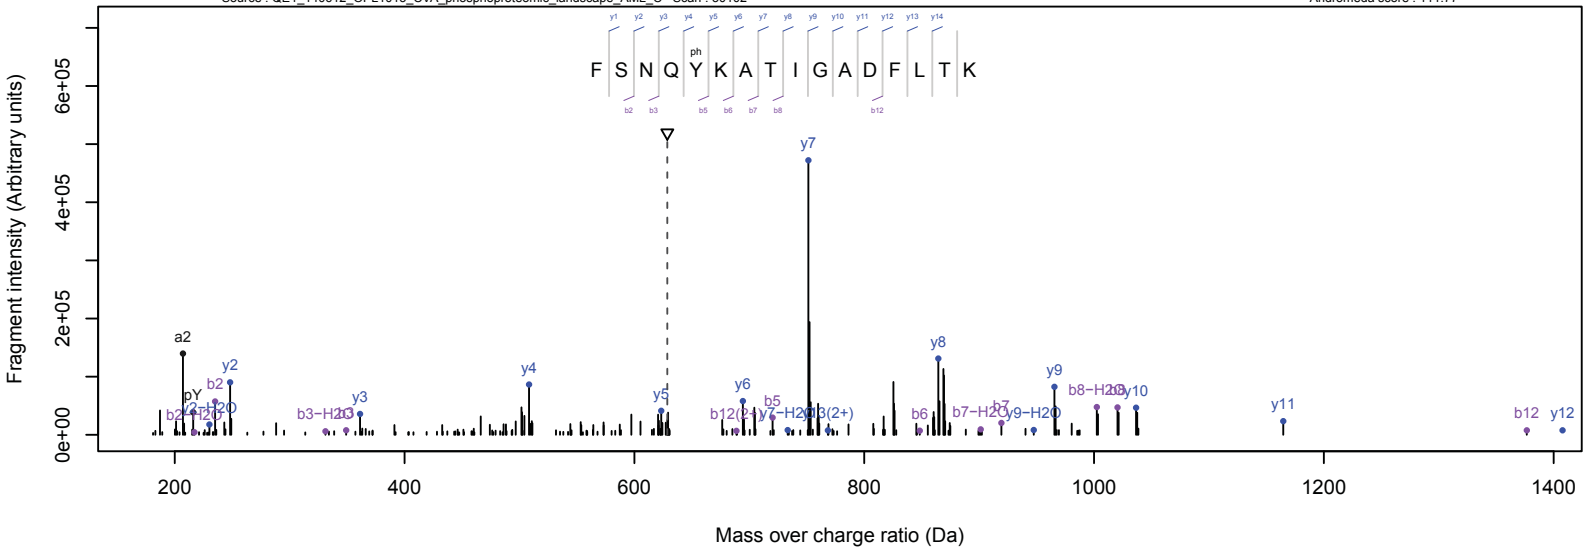

RAY(ph)FDLQTHVIQVPQGK-3+

Source : QE1\_140612\_OPL1013\_CVA\_phosphoproteomic\_landscape\_AML\_C Scan : 30553

Andromeda score : 111.77

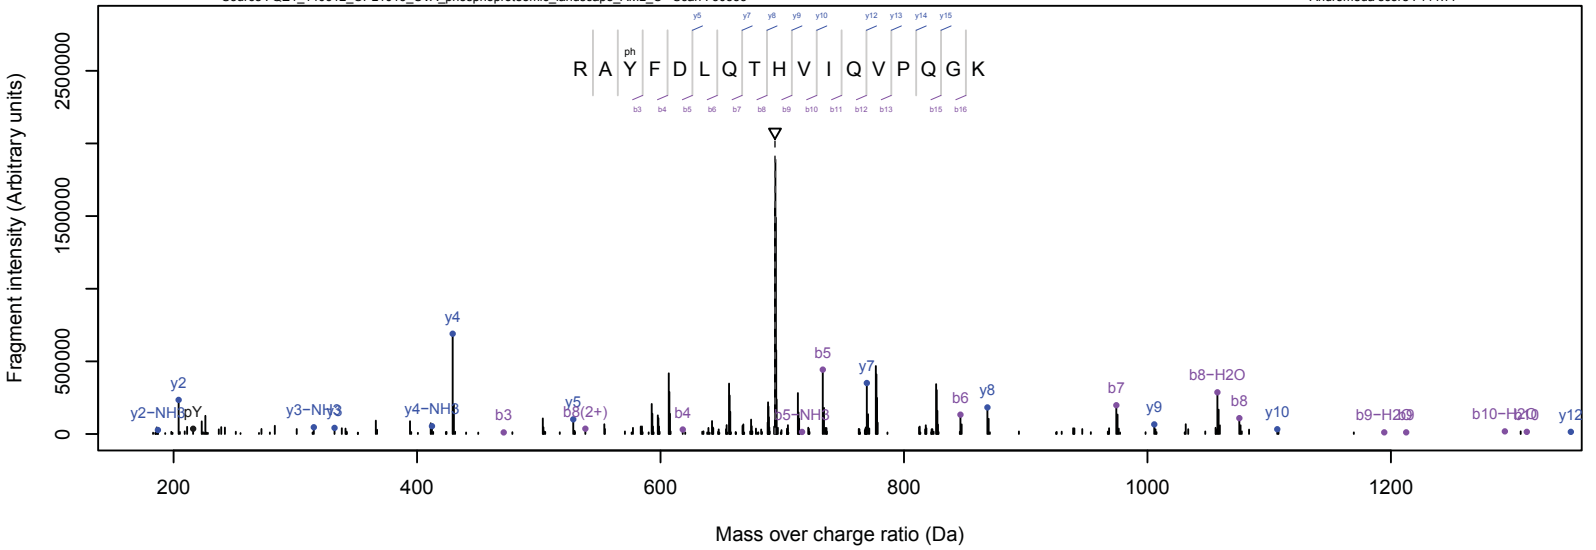

Y(ph)MMWFQR-2+

Source : QE1\_140612\_OPL1013\_CVA\_phosphoproteomic\_landscape\_AML\_C Scan : 36043

Andromeda score : 111.69

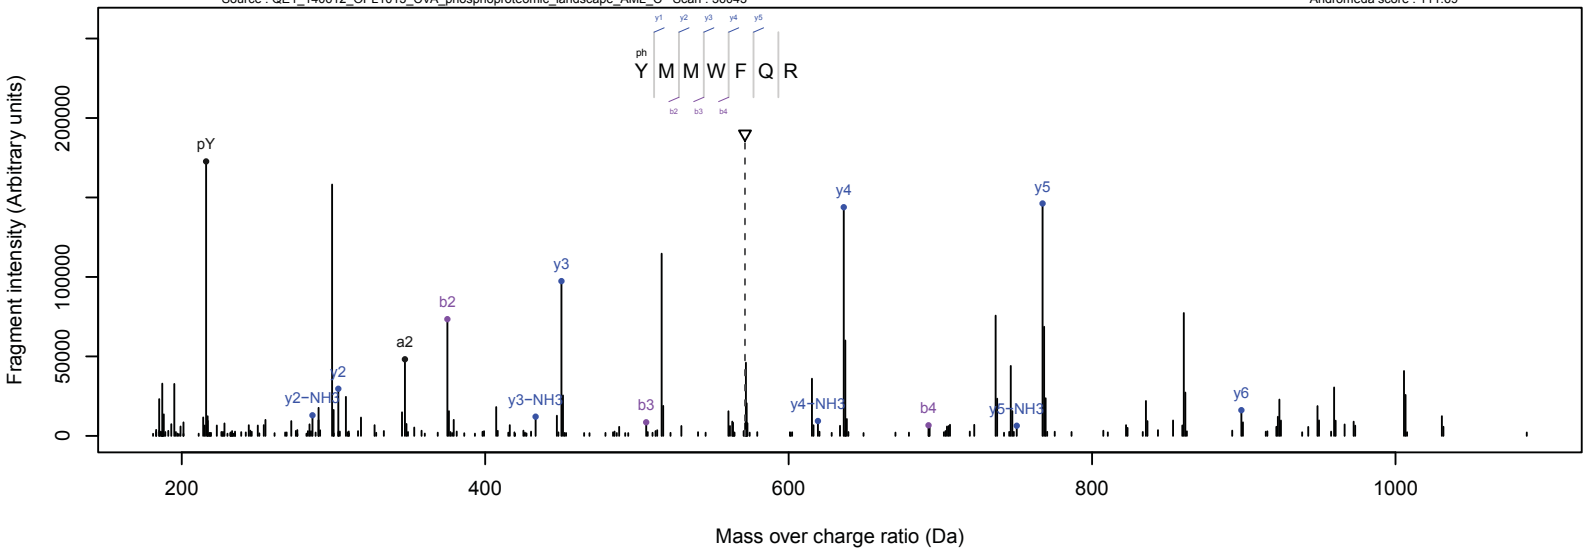

ELDPTNMTYITNQAAVY(ph)FEKGDYNK-3+

Source : QE1\_140612\_OPL1013\_CVA\_phosphoproteomic\_landscape\_AML\_C Scan : 45600

Andromeda score : 111.65

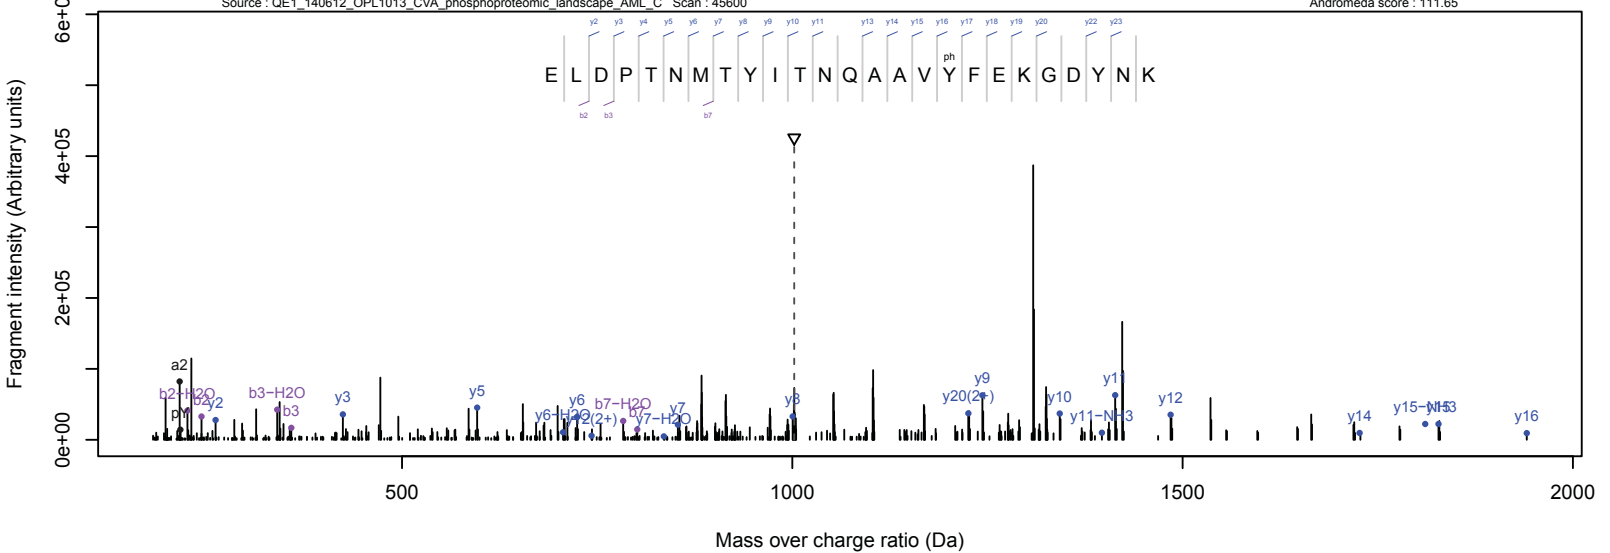

**M(ox)Y(ph)VDPSEINPSPMPQR**

Source: QE1\_140612\_OPL1013\_CVA\_phosphoproteomic\_landscape\_AML\_A Scan: 24276

Andromeda score: 111.64

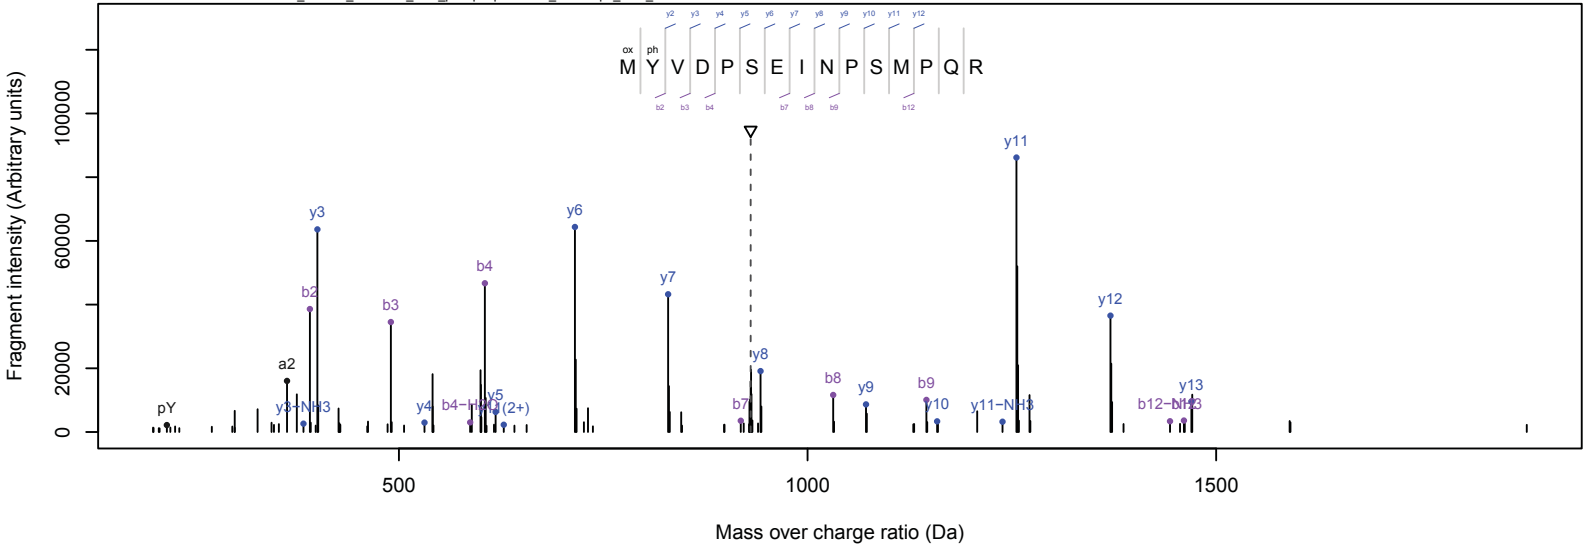

**NLY(ph)PSSSPYTR**

Source: QE1\_140612\_OPL1013\_CVA\_phosphoproteomic\_landscape\_AML\_C Scan: 14469

Andromeda score: 111.63

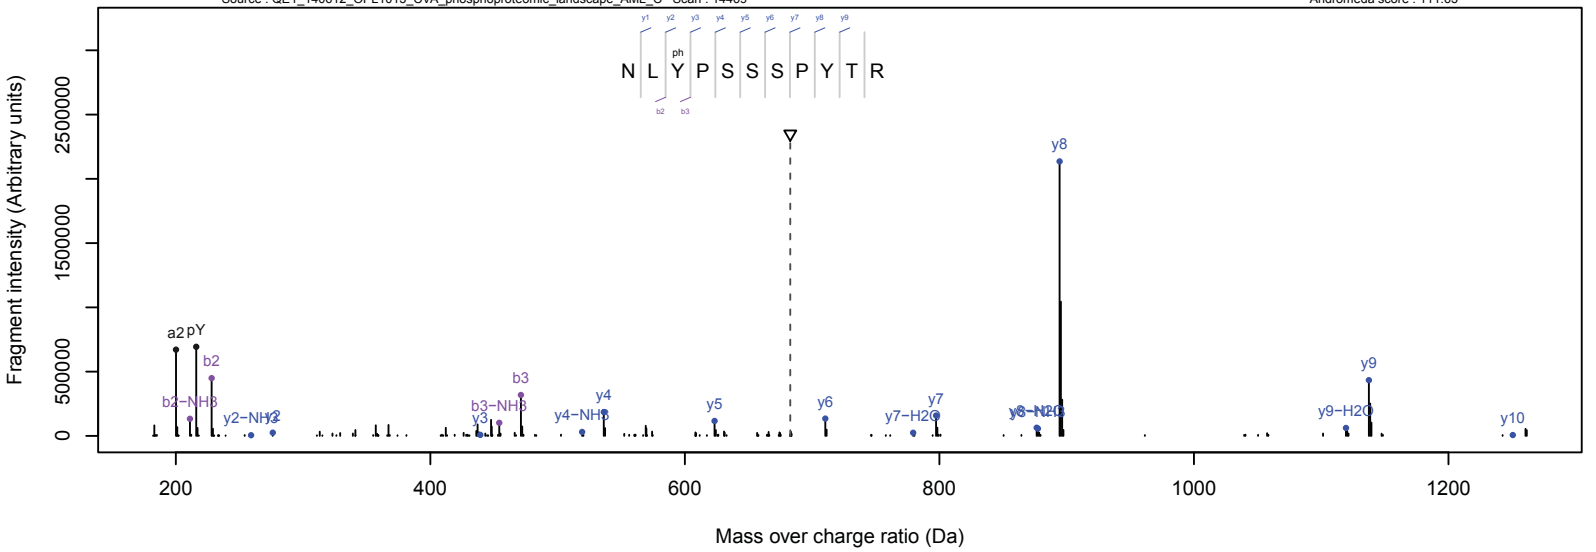

**NY(ph)YKQGIGHLLR**

Source: QE1\_140612\_OPL1013\_CVA\_phosphoproteomic\_landscape\_AML\_C Scan: 18723

Andromeda score: 111.63

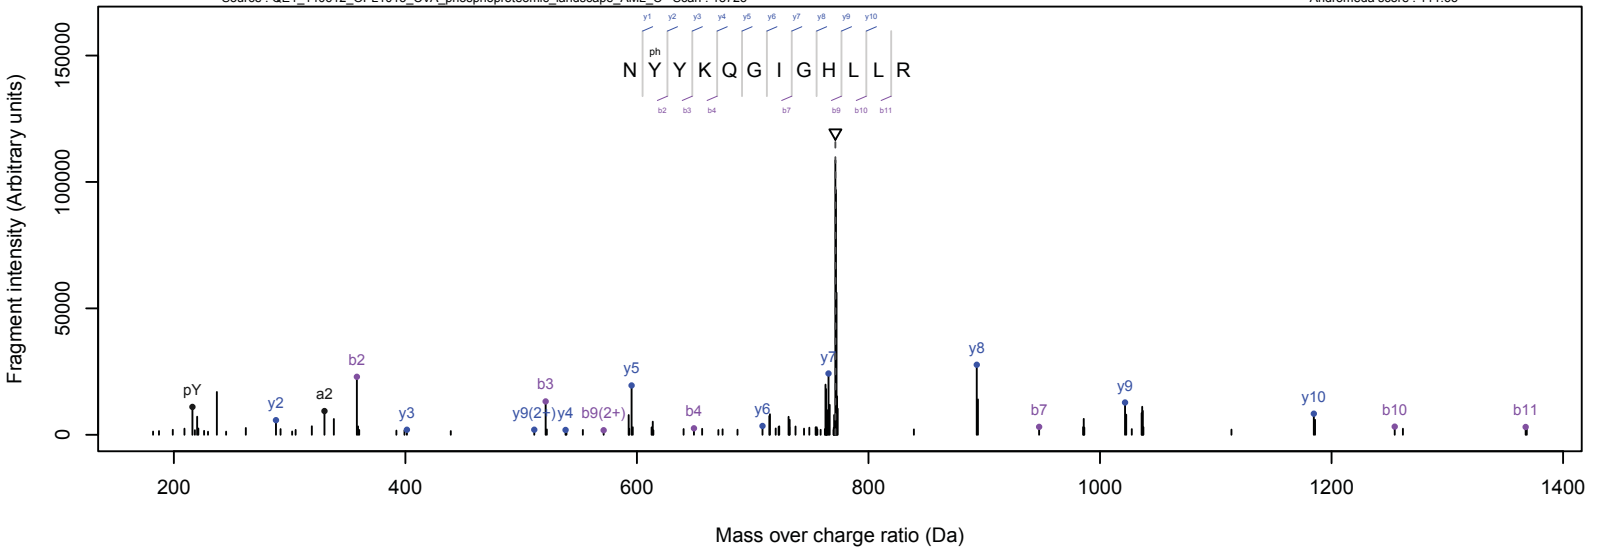

SFY(ph)QFQHYR-2+

Source : QE1\_140612\_OPL1013\_CVA\_phosphoproteomic\_landscape\_AML\_D Scan : 20144

Andromeda score : 111.61

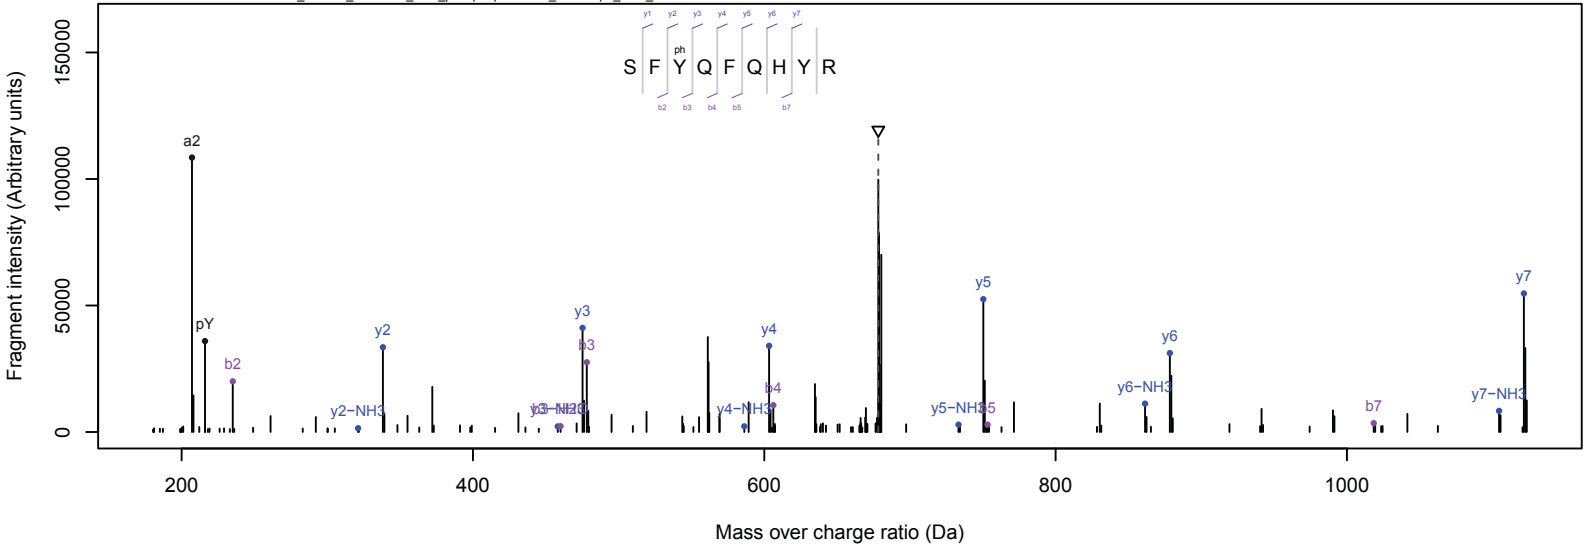

Y(ph)LSLSPWDK-2+

Source : QE1\_140612\_OPL1013\_CVA\_phosphoproteomic\_landscape\_AML\_C Scan : 34571

Andromeda score : 111.61

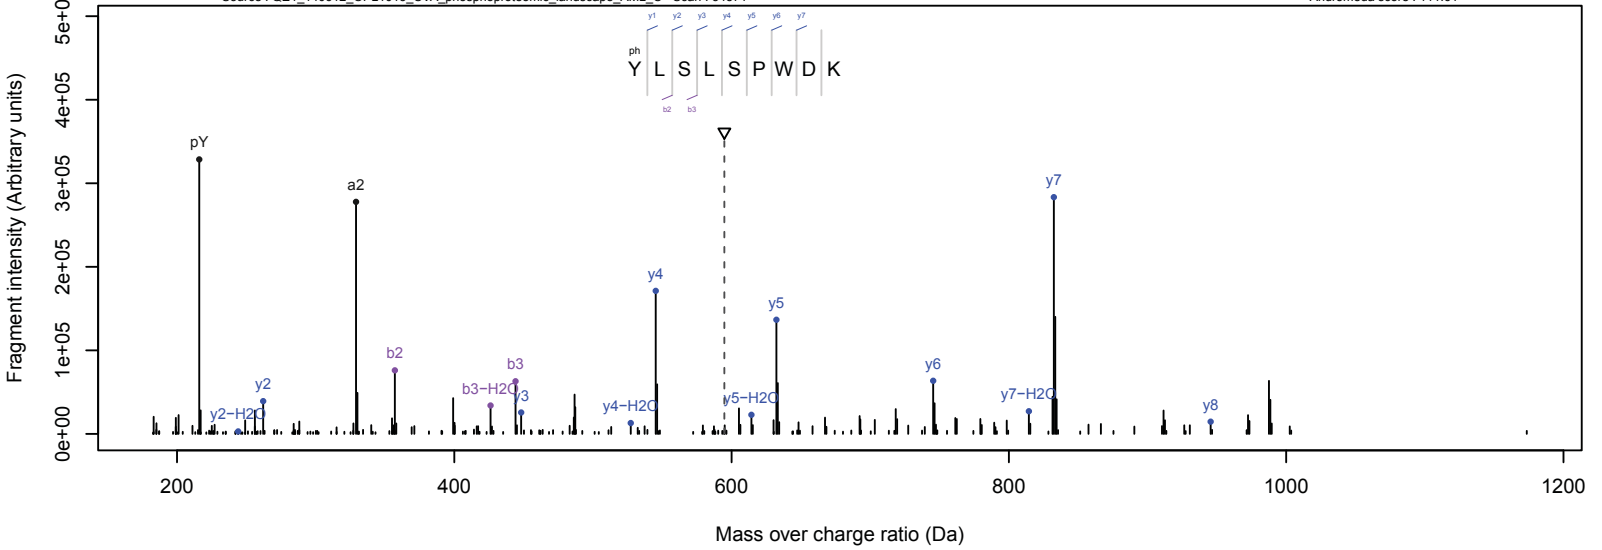

HYVY(ph)GPLQSFQK-3+

Source : QE1\_140908\_OPL1013\_CvA\_pTyrIP\_AML\_ML2 Scan : 36123

Andromeda score : 111.58

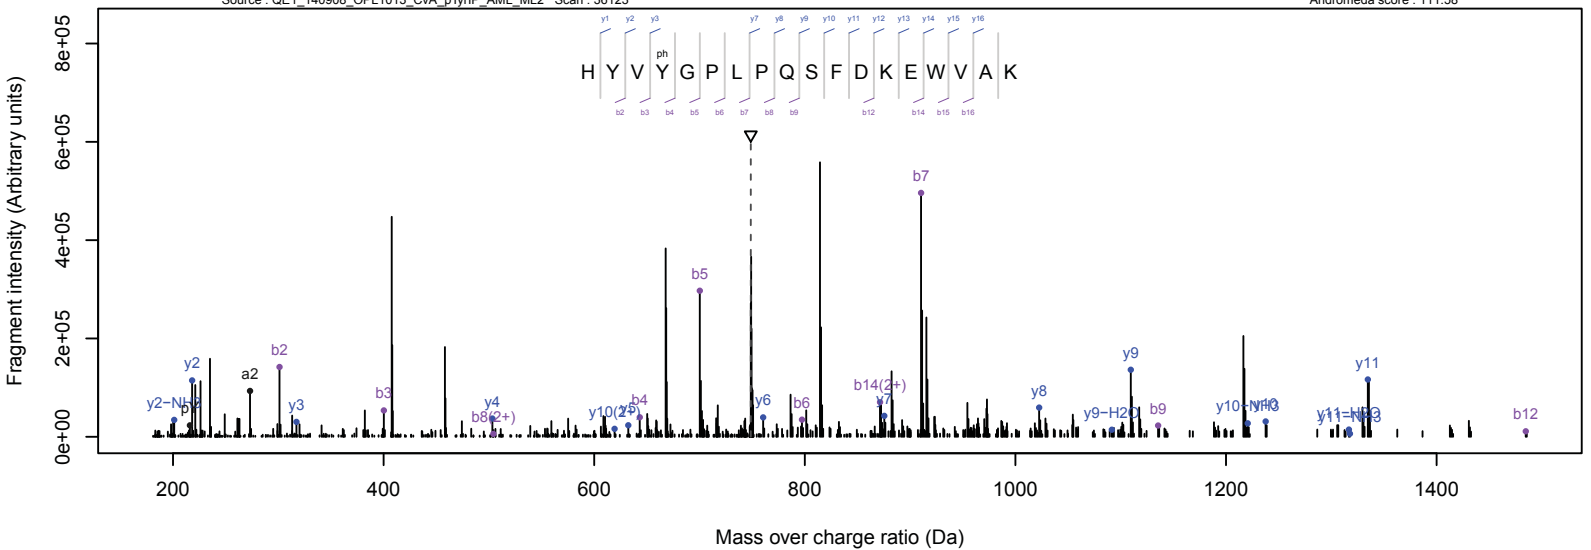



**YVLEHPTNSNY(ph)QMHLK-3+**

Source : QE1\_140908\_OPL1013\_CvA\_pTyrIP\_AML\_HEL Scan : 25703

Andromeda score : 111.58

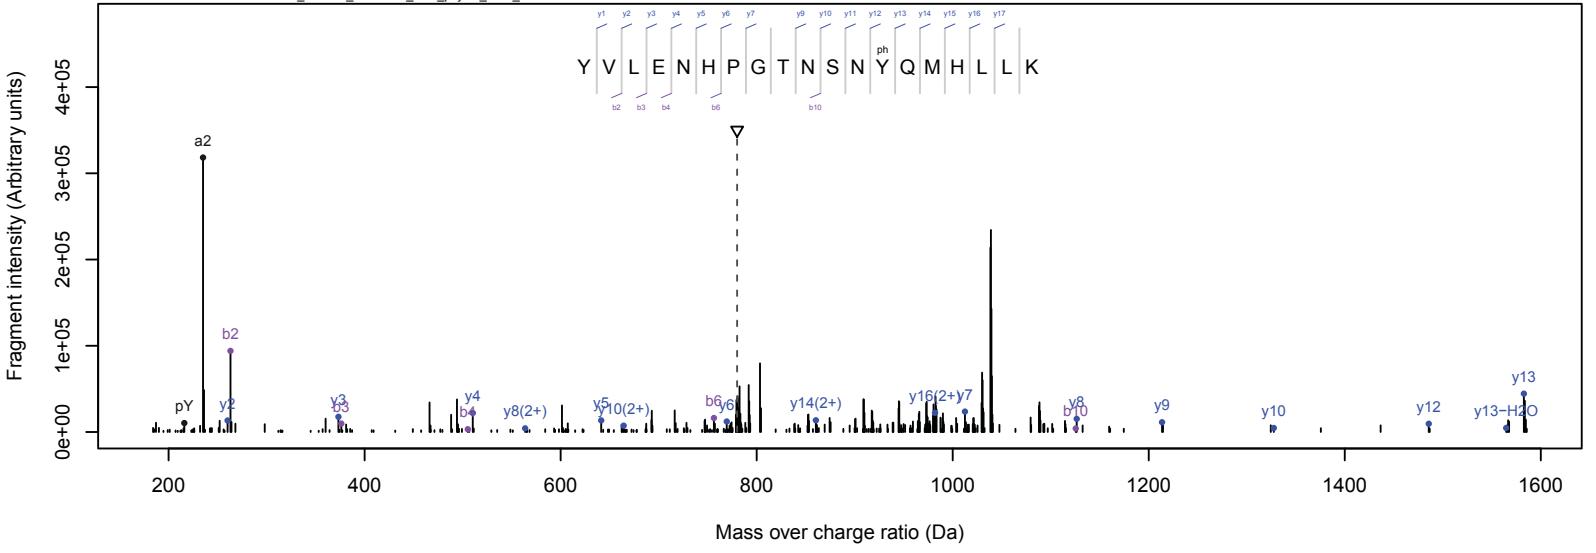

**IY(ph)PLPHMYVIK-3+**

Source : QE1\_140612\_OPL1013\_CVA\_phosphoproteomic\_landscape\_AML\_B Scan : 33969

Andromeda score : 111.46

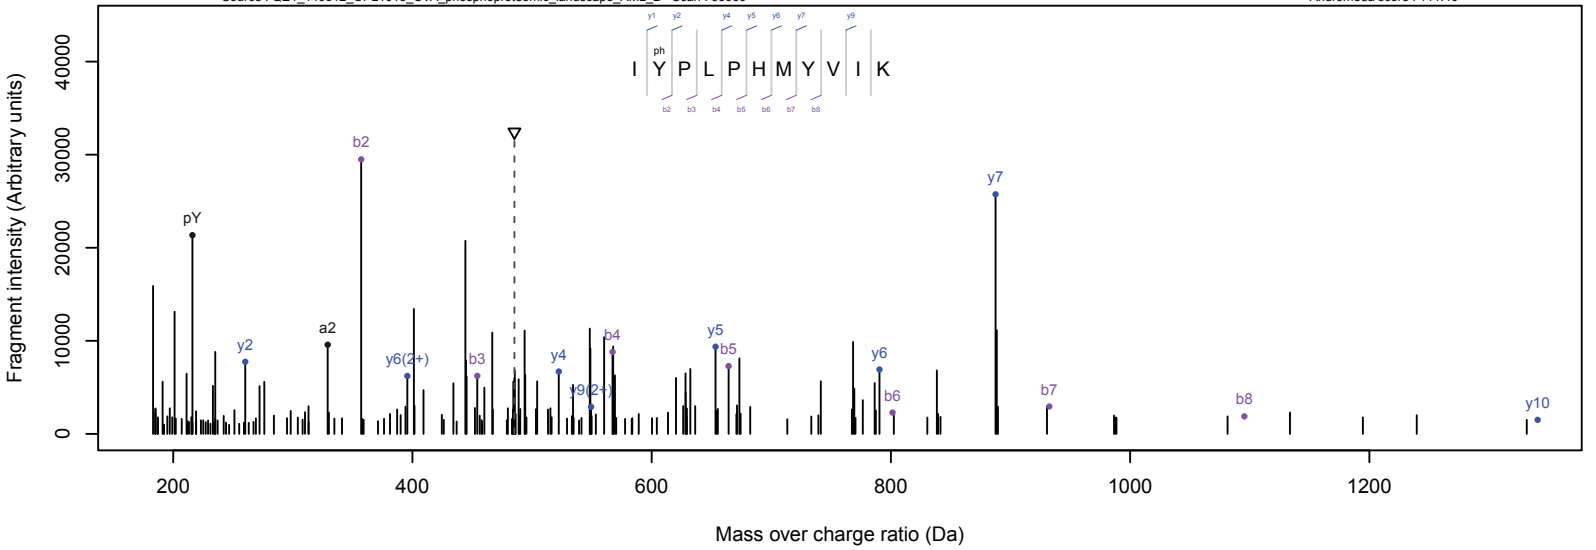

**NTSDFVY(ph)LK-2+**

Source : QE1\_140612\_OPL1013\_CVA\_phosphoproteomic\_landscape\_AML\_C Scan : 24645

Andromeda score : 111.46

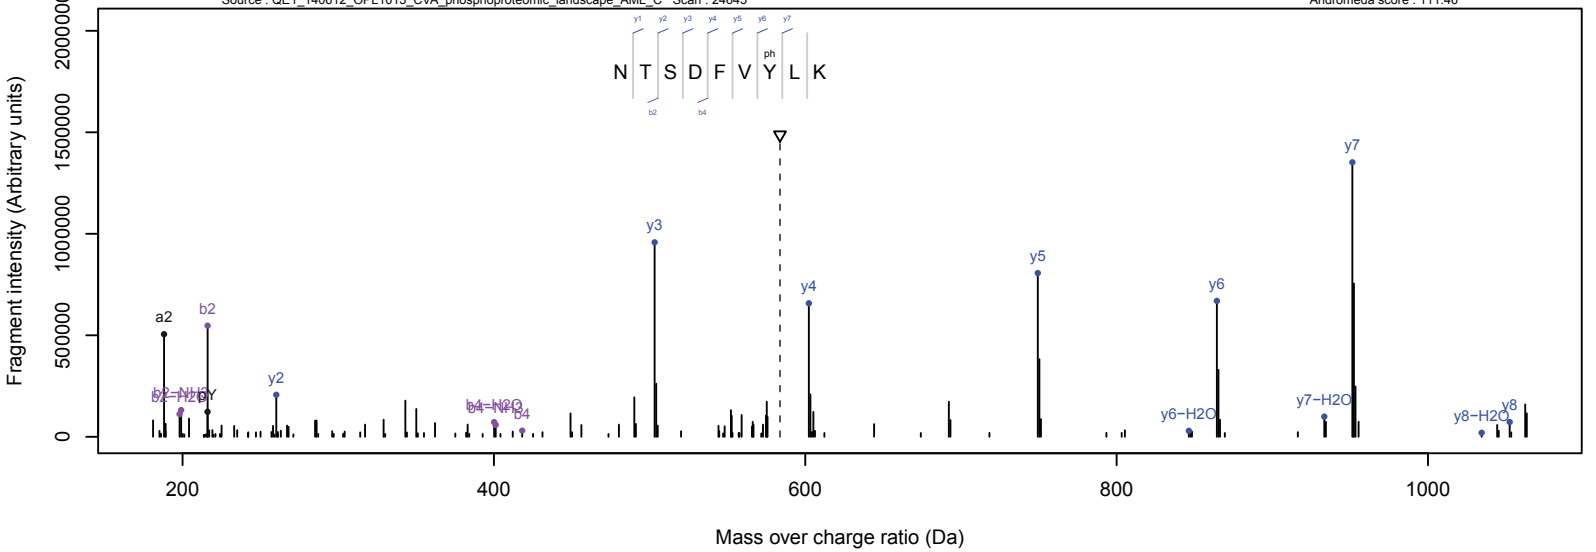

VAGCSVHKGY(ph)AFVQYSNER-3+

Source : QE1\_140612\_OPL1013\_CVA\_phosphoproteomic\_landscape\_AML\_B Scan : 15681

Andromeda score : 111.4

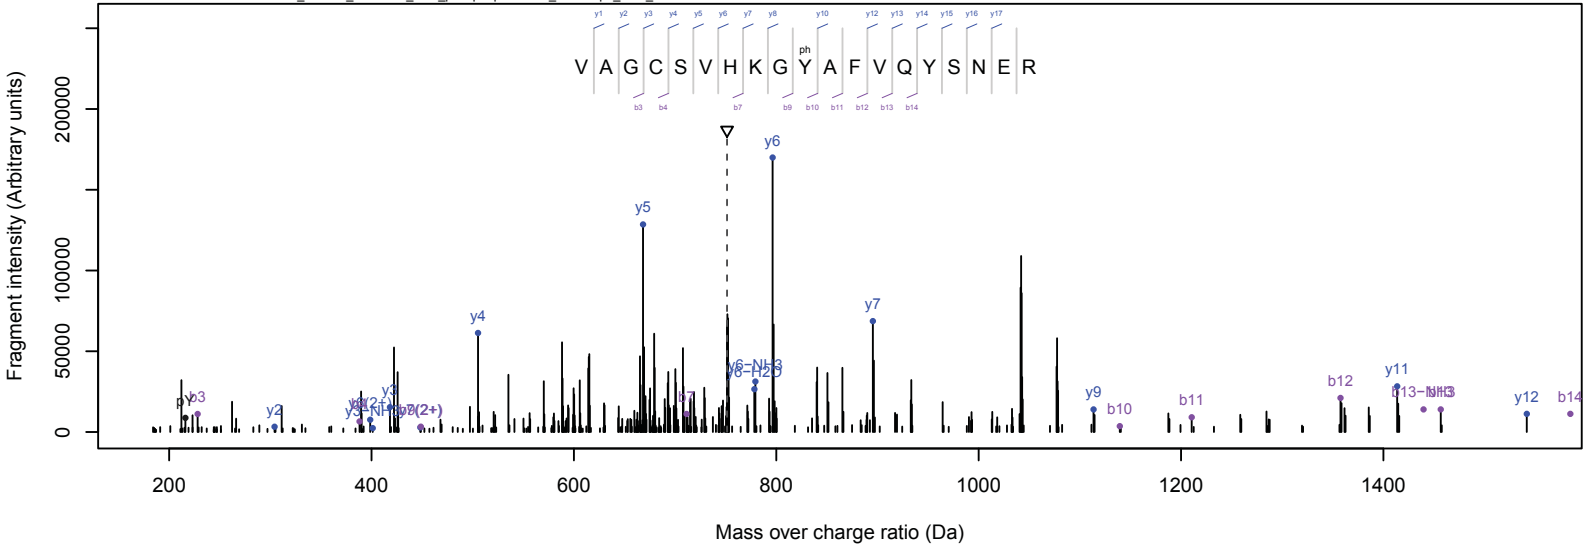

KQY(ph)VQQPTDLSVDSVELTPMKK-3+

Source : QE1\_140612\_OPL1013\_CVA\_phosphoproteomic\_landscape\_AML\_C Scan : 30299

Andromeda score : 111.38

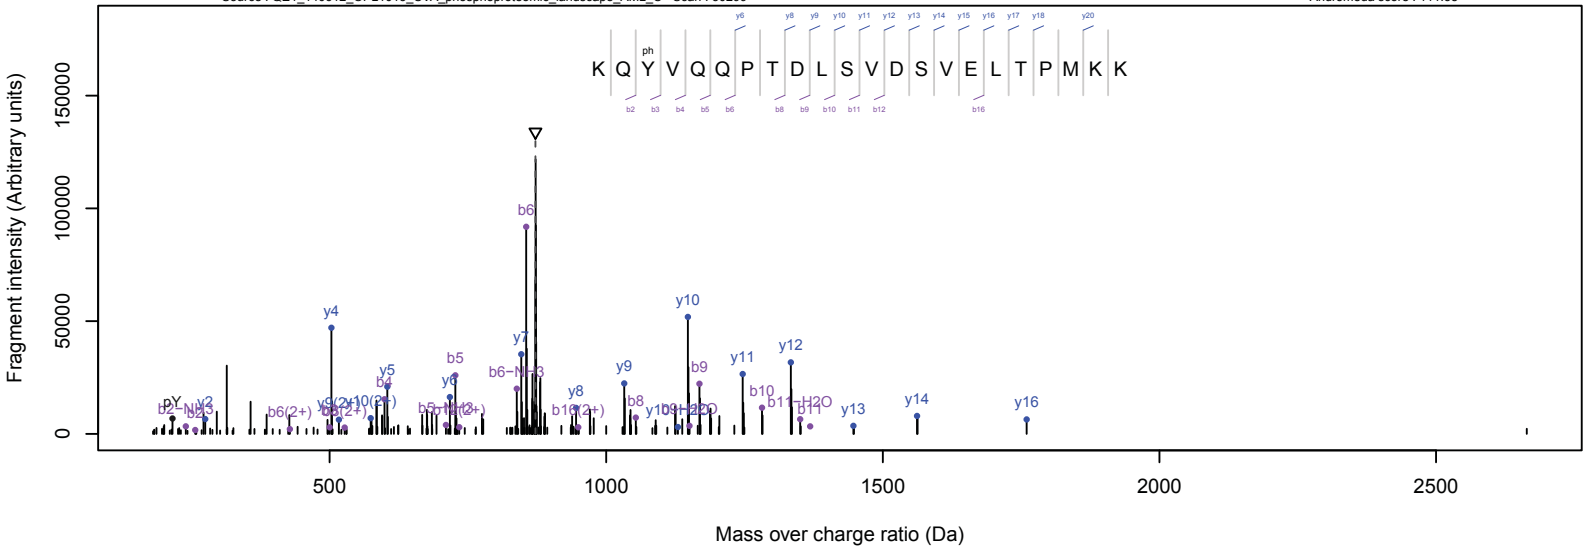

ALDEY(ph)YDKHFTEFVPLR-3+

Source : QE1\_140612\_OPL1013\_CVA\_phosphoproteomic\_landscape\_AML\_B Scan : 38635

Andromeda score : 111.34

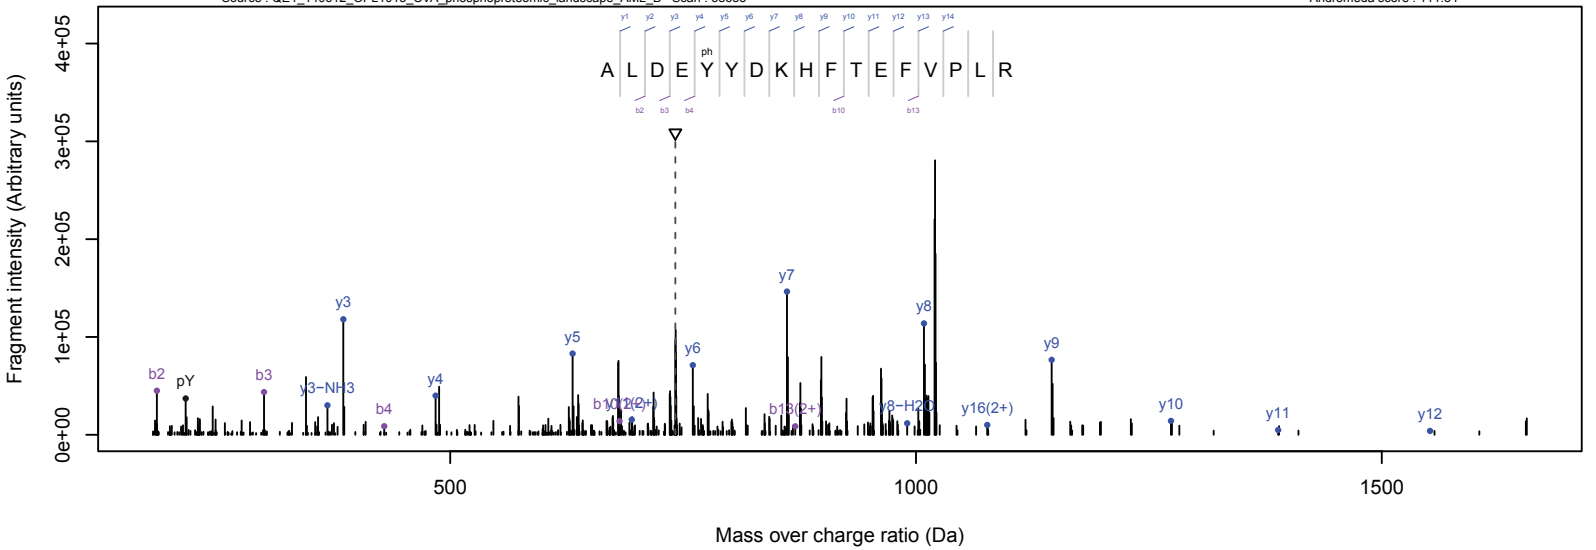

**NPNGPYPY(ph)TLK-2+**

Source : QE1\_140612\_OPL1013\_CVA\_phosphoproteomic\_landscape\_AML\_A Scan : 16672

Andromeda score : 111.26

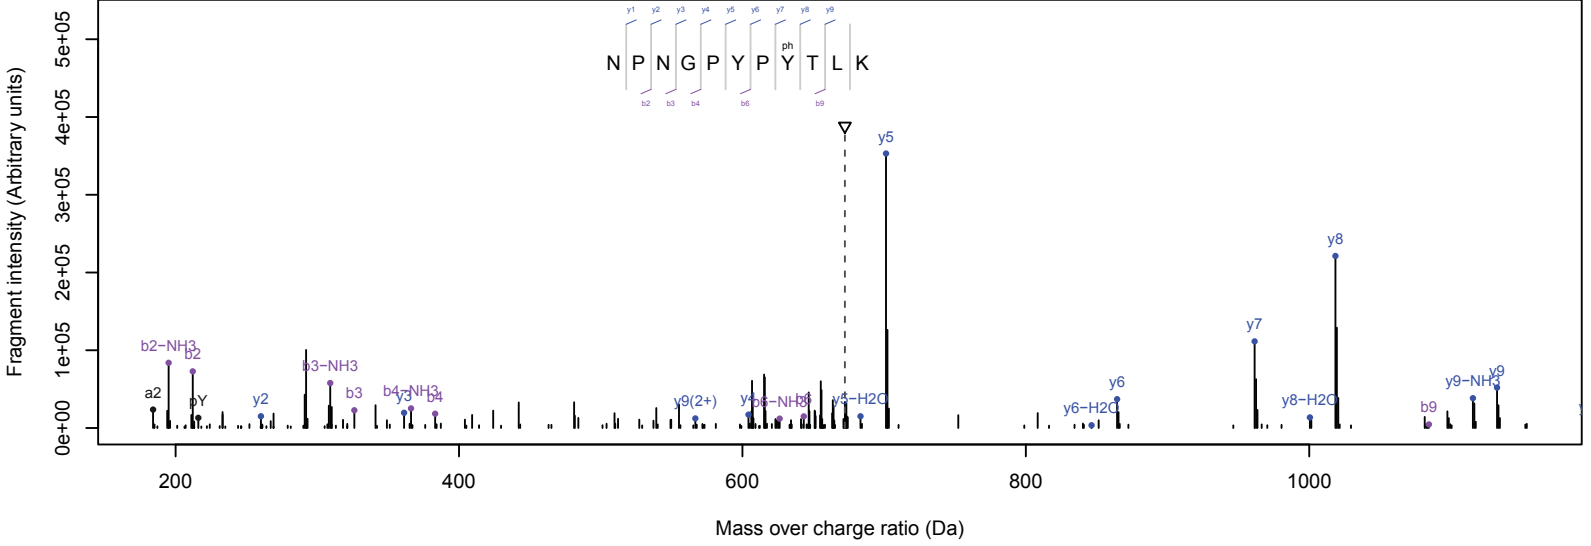

**VY(ph)VGNLGTGAGKGELEER-3+**

Source : QE1\_140908\_OPL1013\_CvA\_pTyrIP\_AML\_HEL Scan : 21499

Andromeda score : 111.22

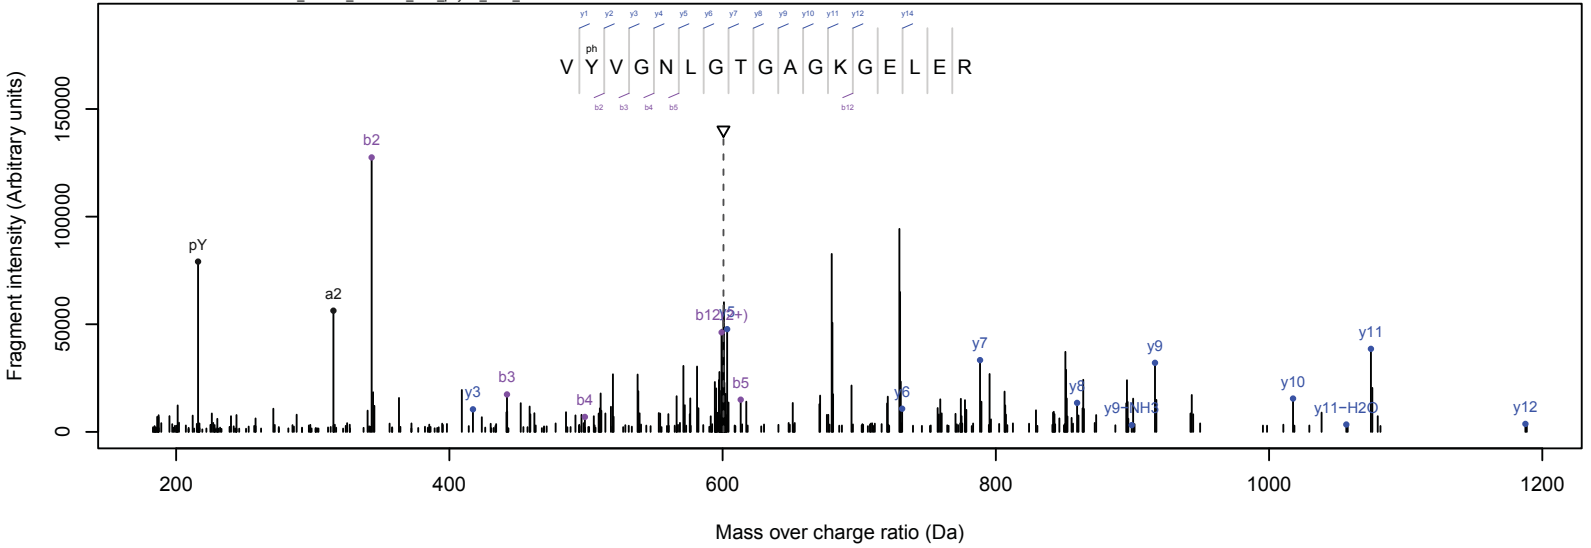

**CWDPSQAY(ph)FTLPR-2+**

Source : QE1\_140612\_OPL1013\_CVA\_phosphoproteomic\_landscape\_AML\_C Scan : 40318

Andromeda score : 111.12

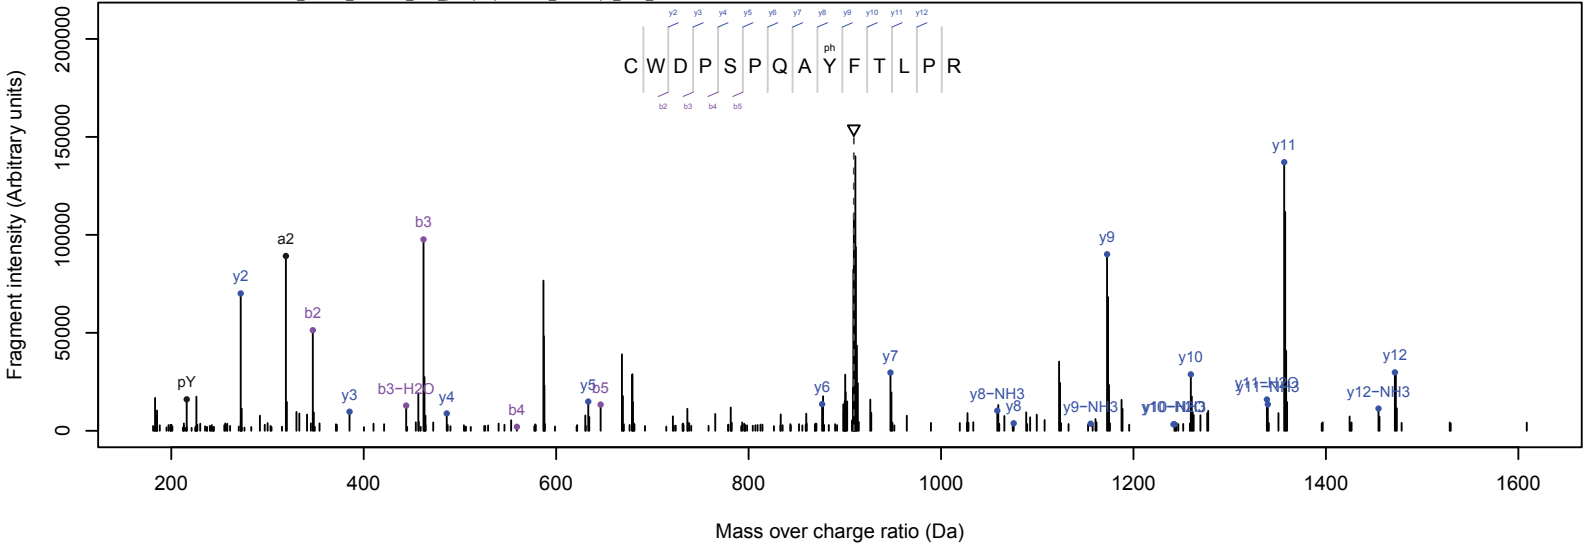

**SSFSHY(ph)SGLKHEDK-3+**

Source : QE1\_140612\_OPL1013\_CVA\_phosphoproteomic\_landscape\_AML\_C Scan : 6010

Andromeda score : 111.12

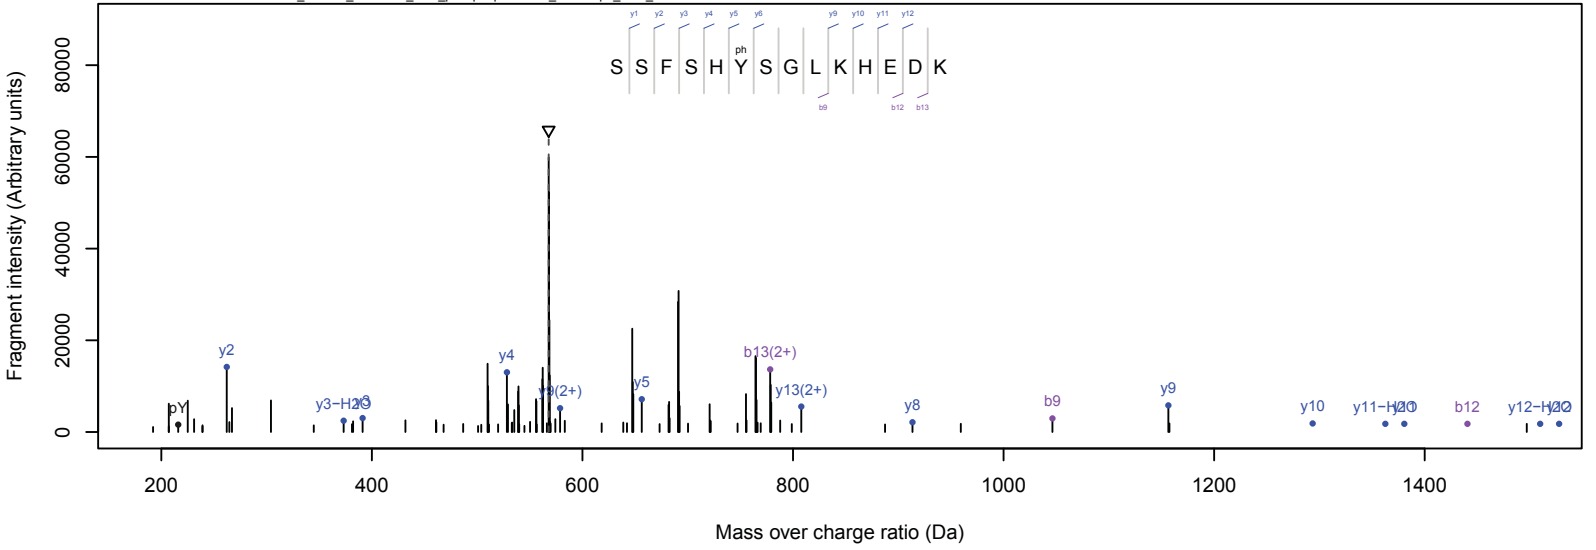

**VWY(ph)HVCSSR-2+**

Source : QE1\_140612\_OPL1013\_CVA\_phosphoproteomic\_landscape\_AML\_D Scan : 12335

Andromeda score : 111.06

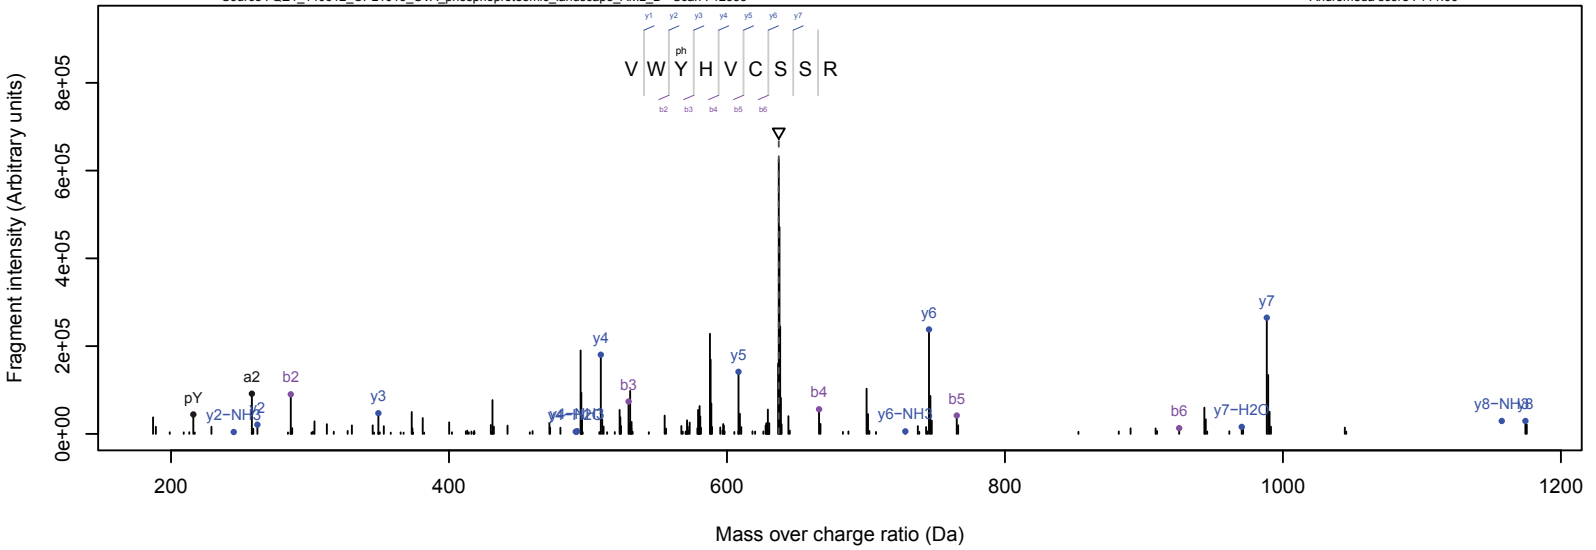

**FPMADGHTDSY(ph)STSAVLR-3+**

Source : QE1\_140612\_OPL1013\_CVA\_phosphoproteomic\_landscape\_AML\_C Scan : 26324

Andromeda score : 111.01

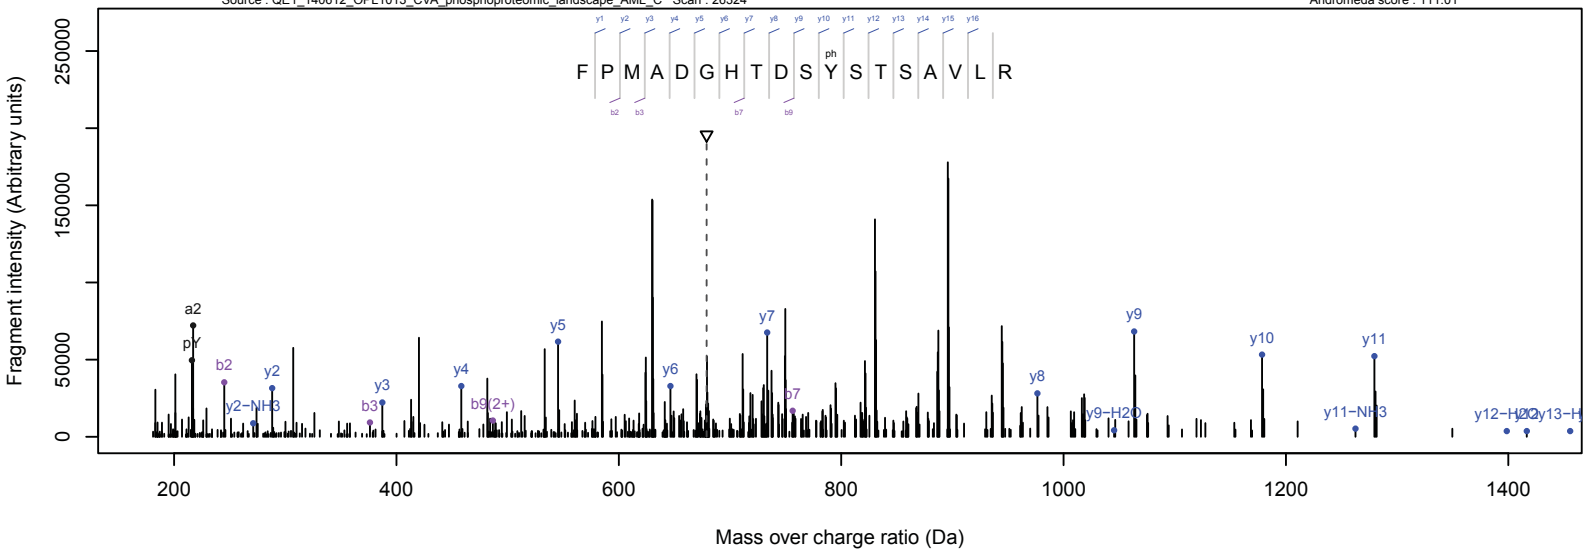

QRSPLSDY(ph)MNLDFSSPK-3+

Source: QE1\_140612\_OPL1013\_CVA\_phosphoproteomic\_landscape\_AML\_C Scan: 36507

Andromeda score: 111.01

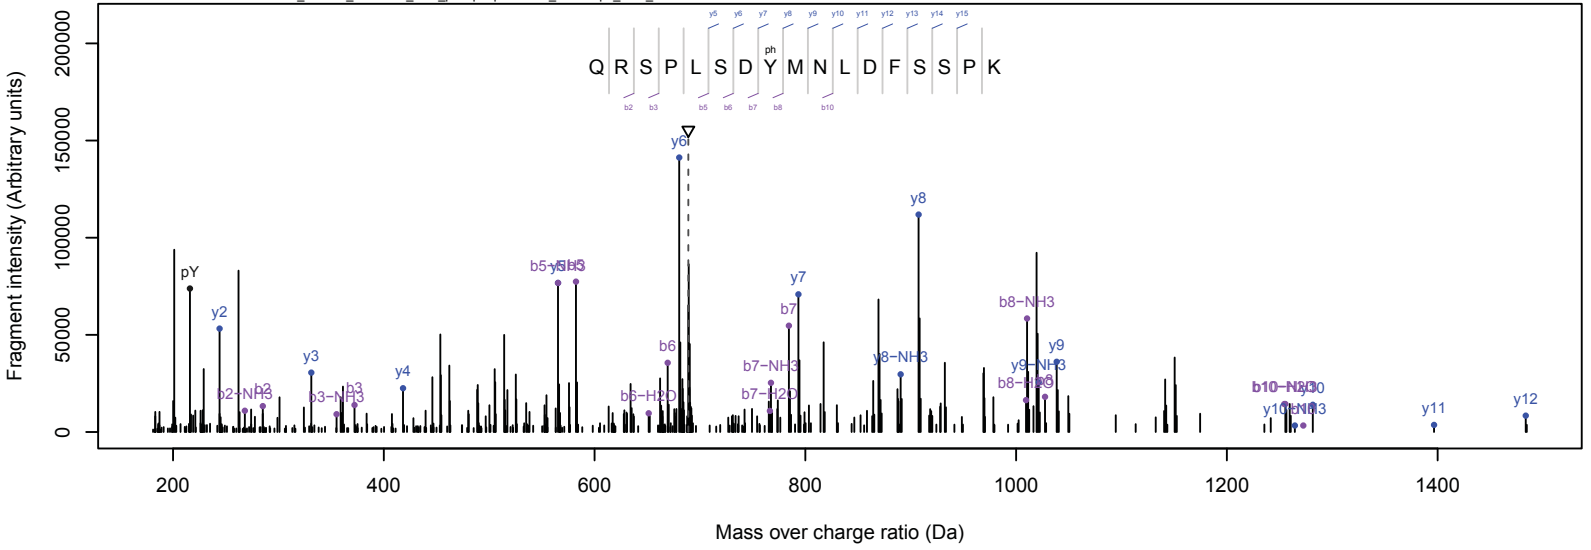

NIY(ph)AFMGTPVQK-2+

Source: QE1\_140612\_OPL1013\_CVA\_phosphoproteomic\_landscape\_AML\_B Scan: 30190

Andromeda score: 110.98

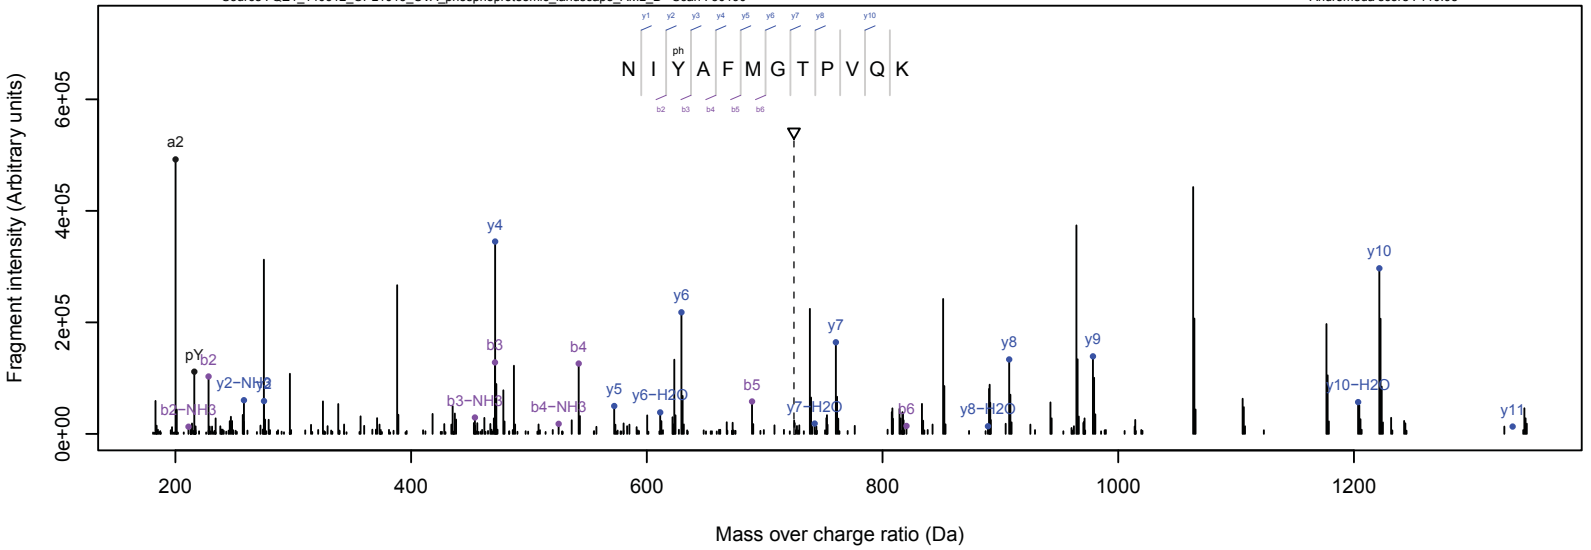

AFHSSLHESI QKPY NQK-4+

Source: QE1\_140612\_OPL1013\_CVA\_phosphoproteomic\_landscape\_AML\_C Scan: 10252

Andromeda score: 110.97

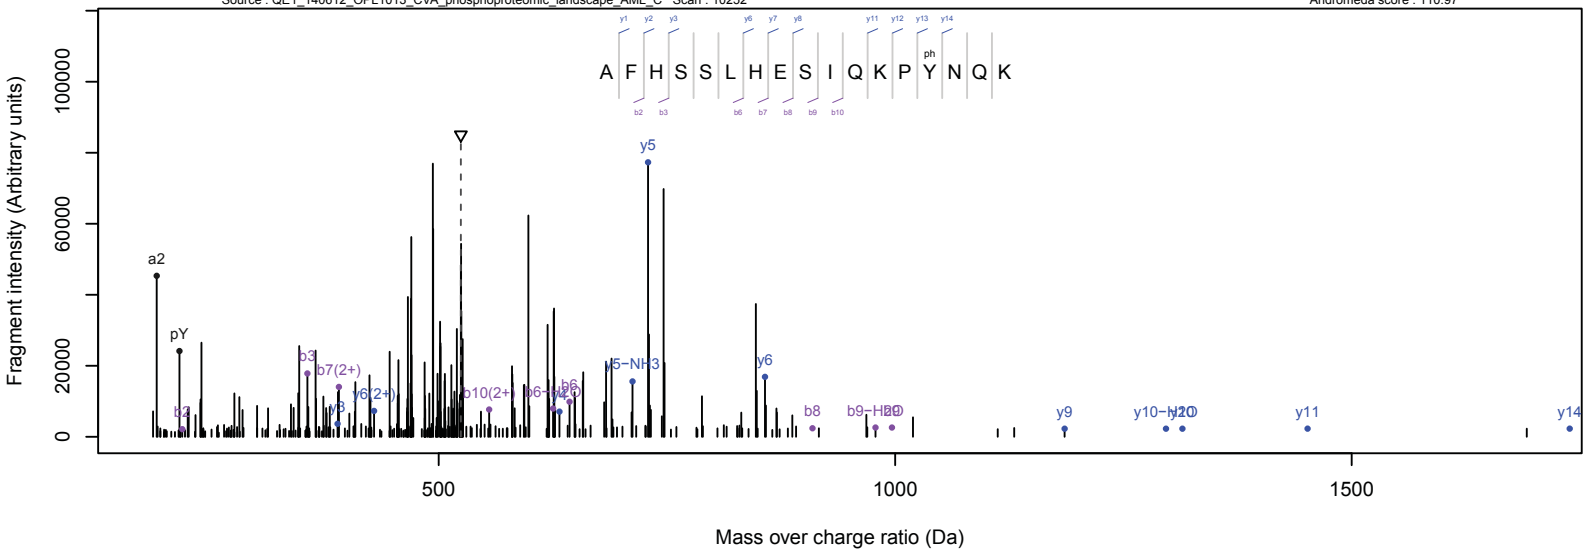

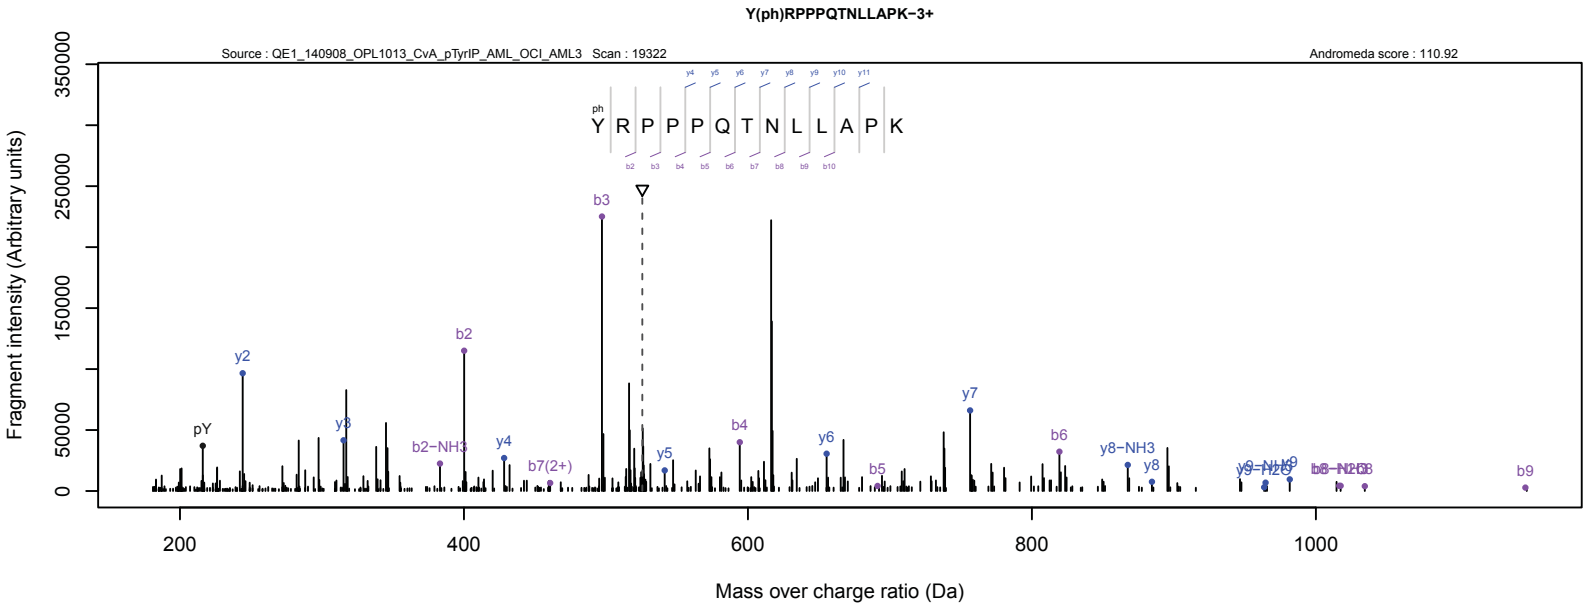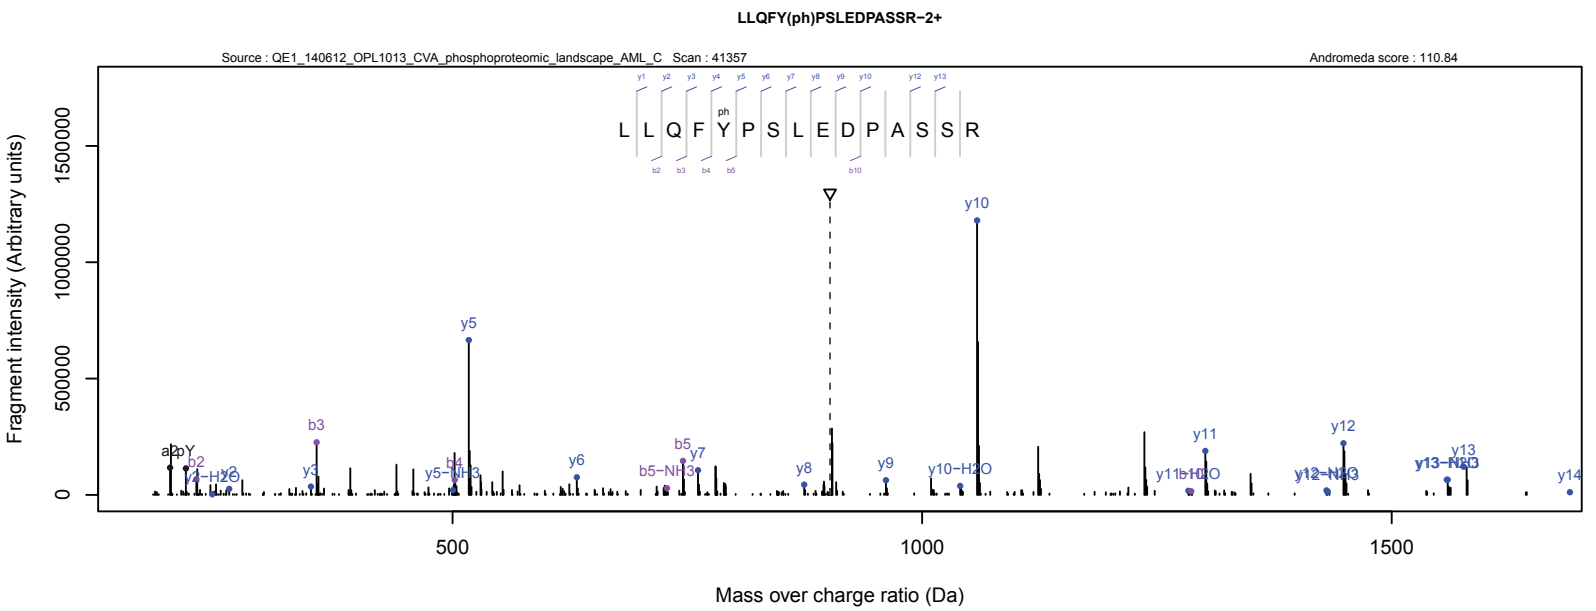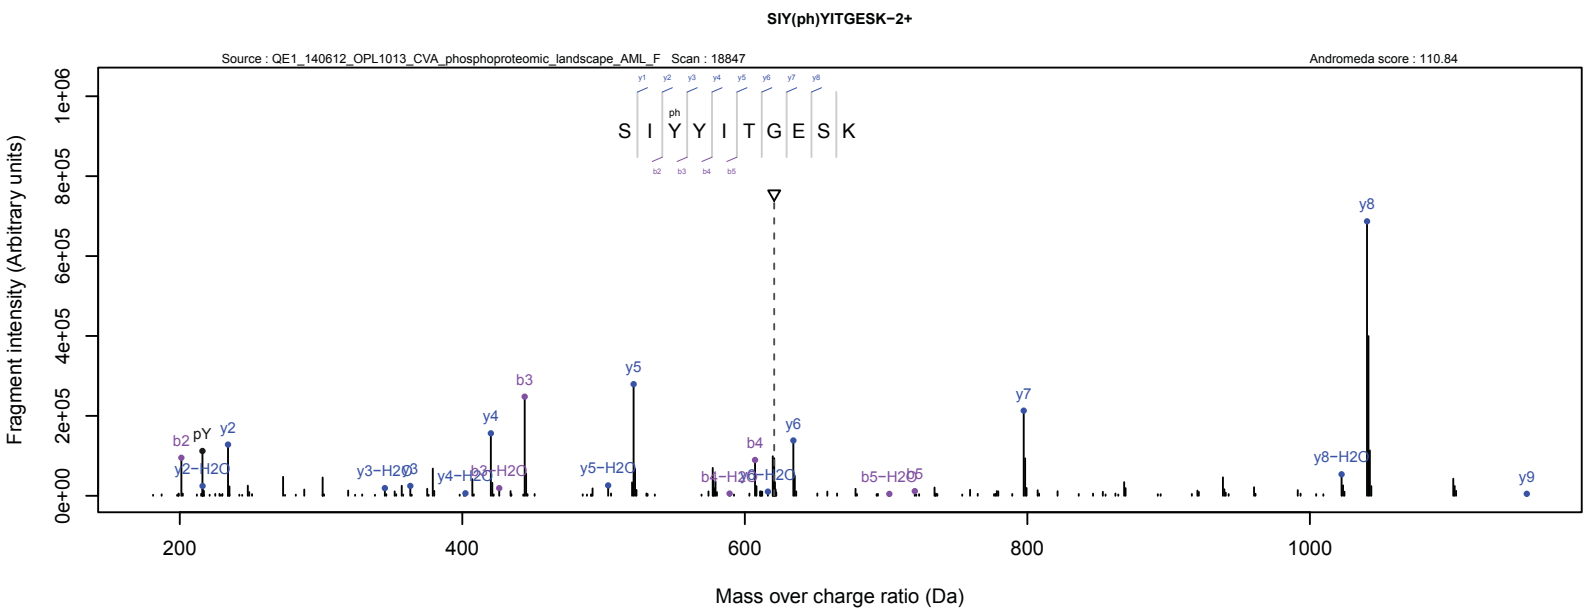

FM(ox)QTFVLAPEGSVANKFY(ph)VHNDIFR-4+

Source : QE1\_140908\_OPL1013\_CvA\_pTyrIP\_AML\_HEL Scan : 46377

Andromeda score : 110.83

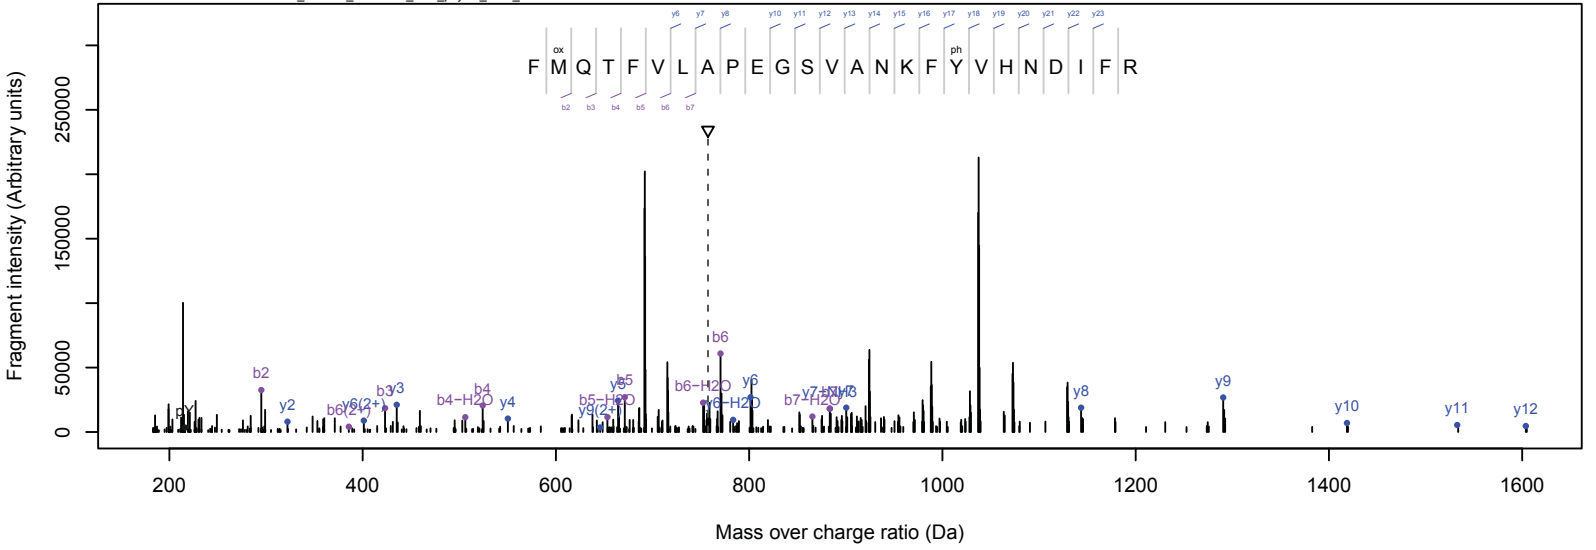

SAAWGGHTEVVSALLYAGVK-3+

Source : QE1\_140612\_OPL1013\_CvA\_phosphoproteomic\_landscape\_AML\_A Scan : 43755

Andromeda score : 110.74

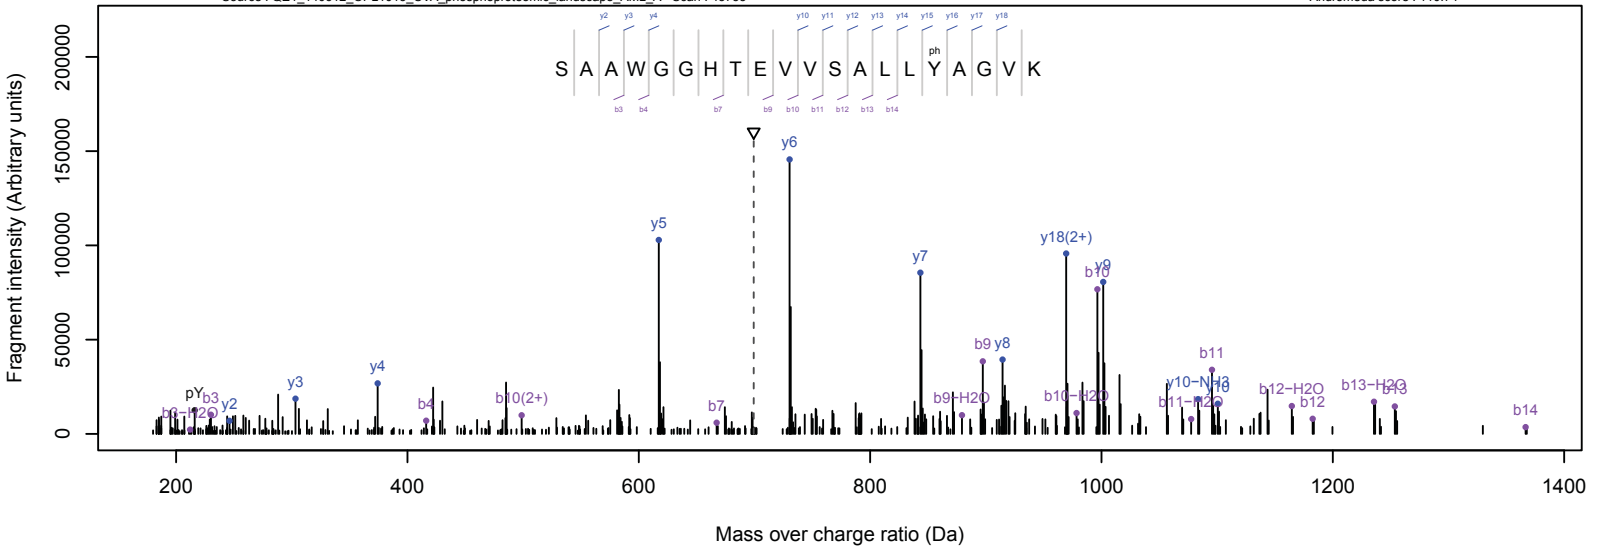

SY(ph)LELVTSNHHSVQALSWR-3+

Source : QE1\_140908\_OPL1013\_CvA\_pTyrIP\_AML\_Kasumi1 Scan : 33171

Andromeda score : 110.74

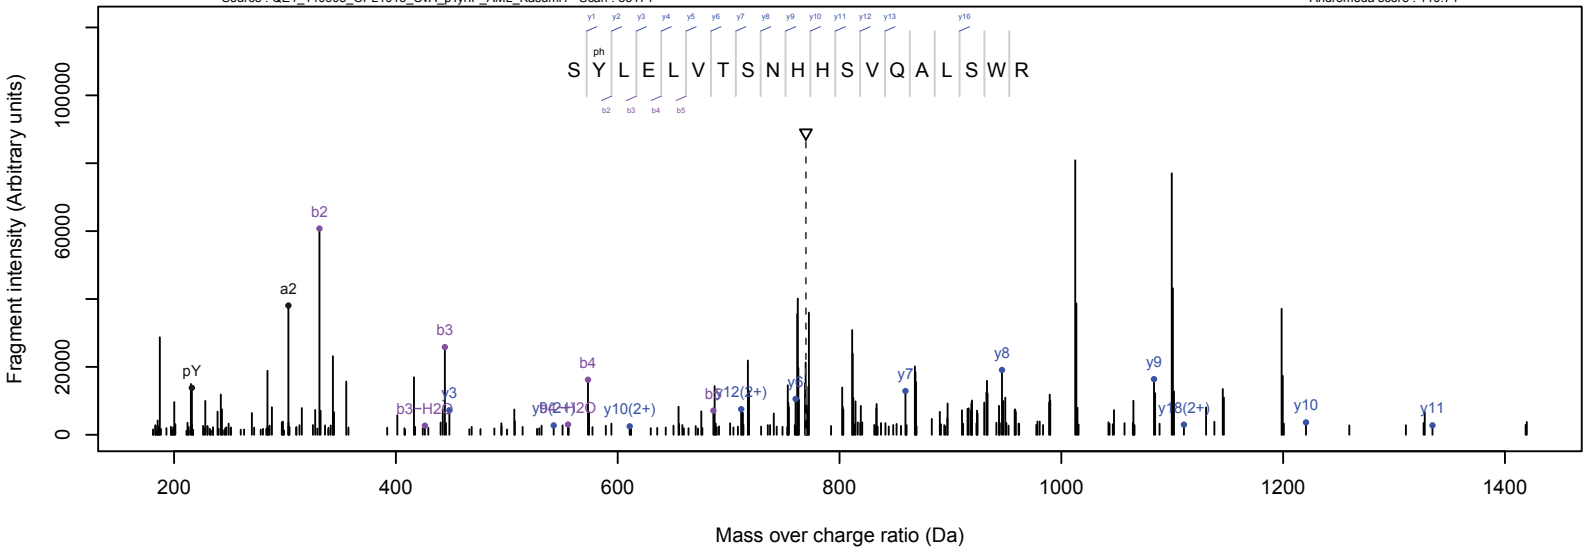

**VDQETLTEMVKPSIDYVR-3+**

Source : QE1\_140612\_OPL1013\_CVA\_phosphoproteomic\_landscape\_AML\_C Scan : 36503

Andromeda score : 110.74

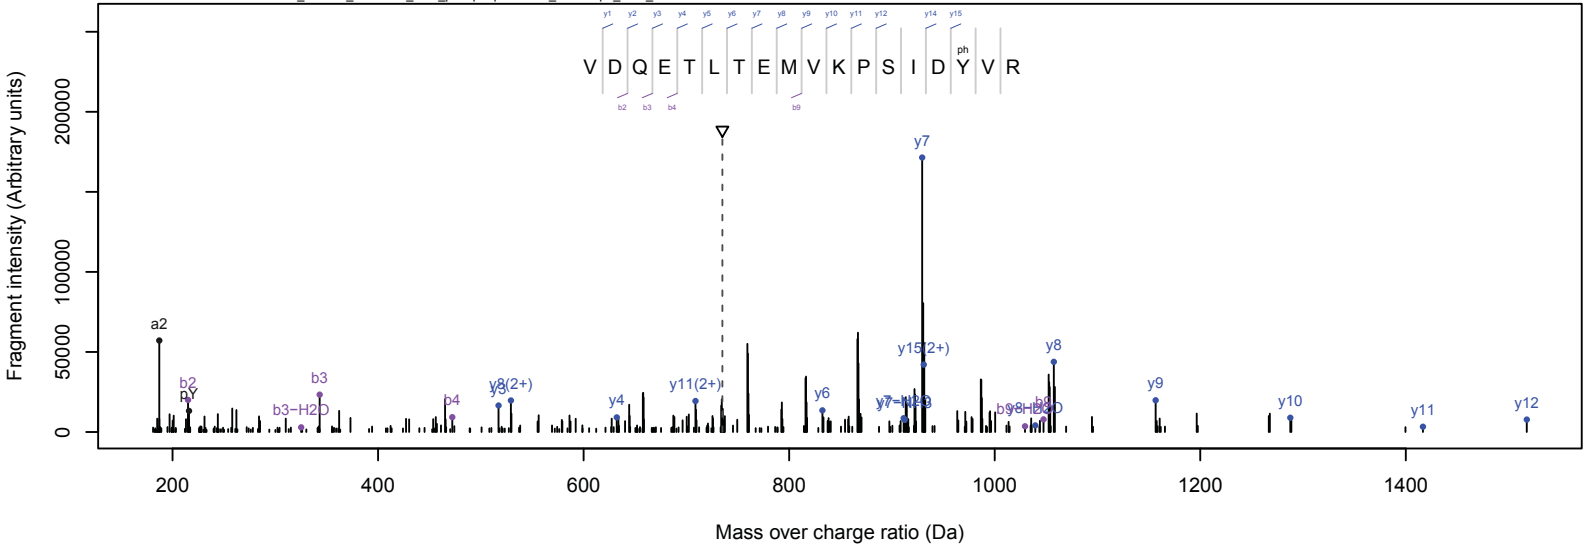

**YQY(ph)GGLNSGRPVT(ph)PPR-3+**

Source : QE1\_140612\_OPL1013\_CVA\_phosphoproteomic\_landscape\_AML\_B Scan : 16952

Andromeda score : 110.6

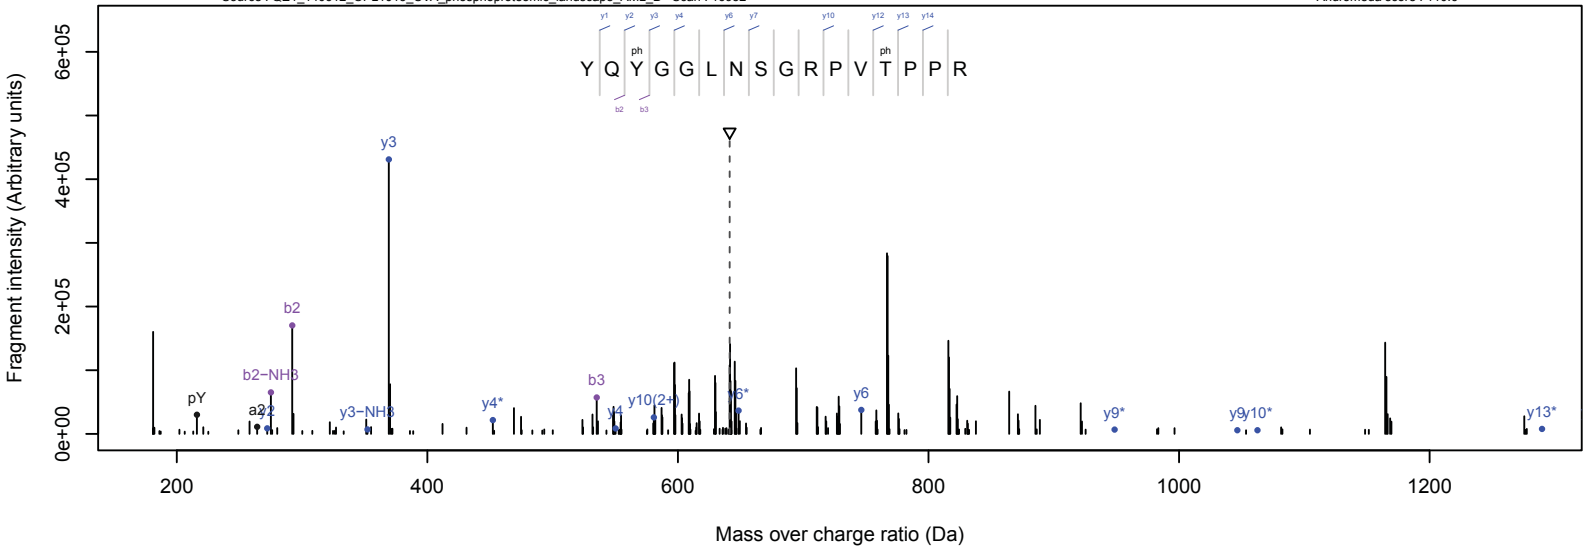

**LTLY(ph)DIAHTPGVAADLSHIETK-3+**

Source : QE1\_140908\_OPL1013\_CvA\_pTyrIP\_AML\_Kasumi1 Scan : 43938

Andromeda score : 110.57

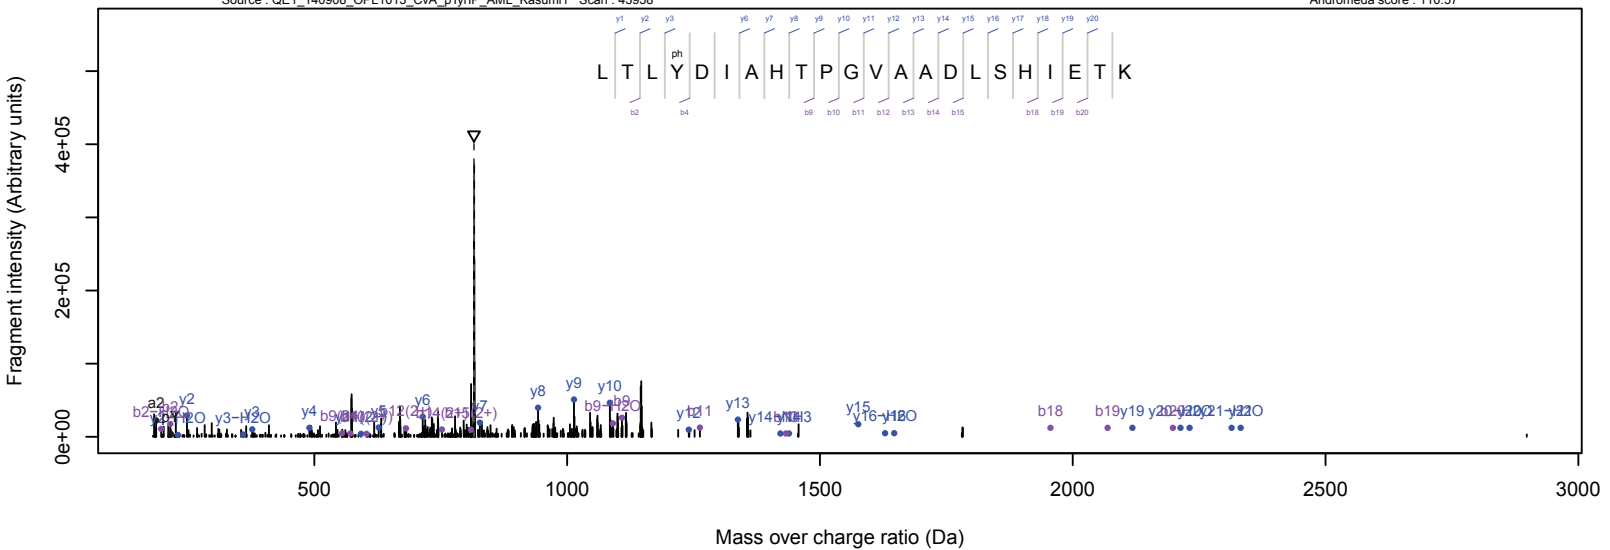



IKEY(ph)PLYIEGGATPVVVR-2+

Source: QE1\_140612\_OPL1013\_CVA\_phosphoproteomic\_landscape\_AML\_B Scan: 34355

Andromeda score: 110.56

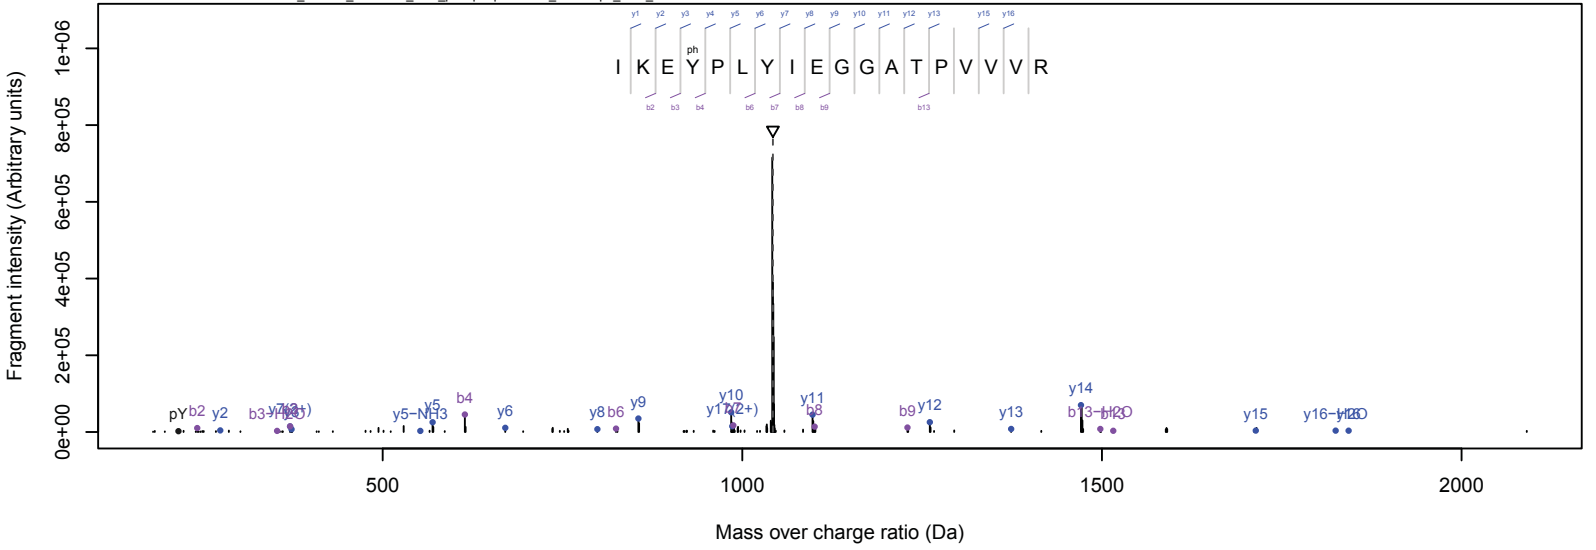

ARPASSFAHIPNY(ph)SNFSSQAINPGFLDSGTIR-3+

Source: QE1\_140612\_OPL1013\_CVA\_phosphoproteomic\_landscape\_AML\_C Scan: 40958

Andromeda score: 110.47

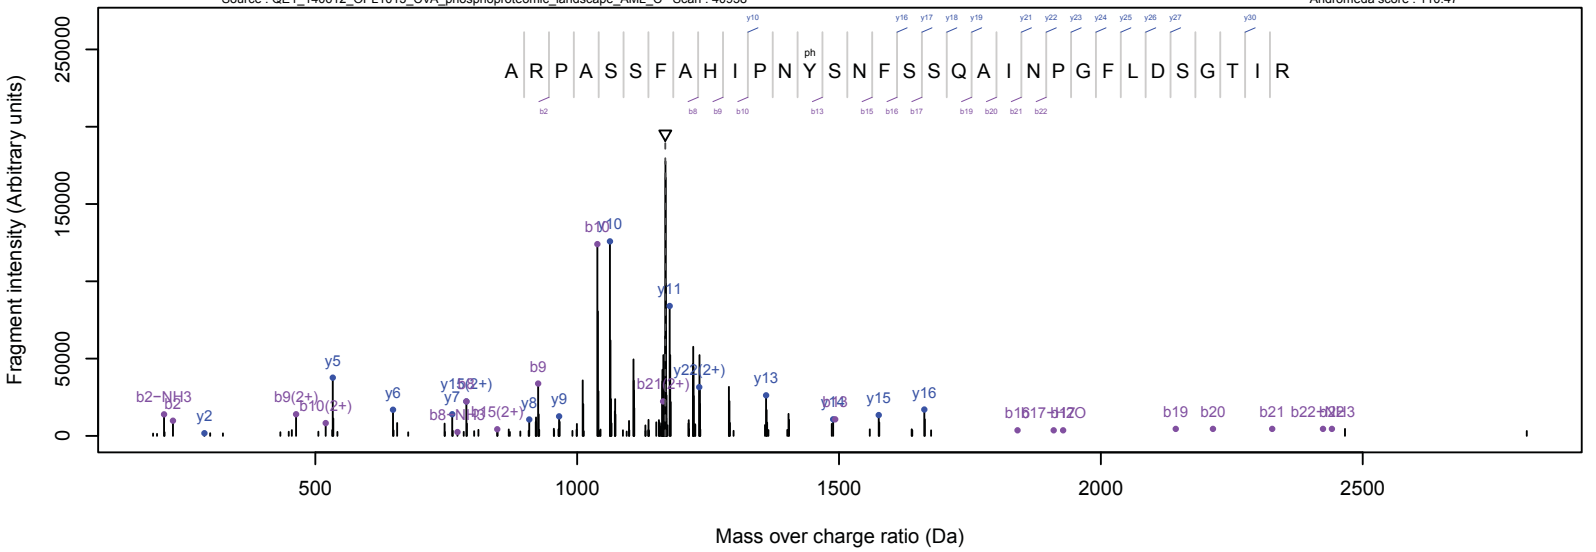

IGAEVY(ph)HNLK-2+

Source: QE1\_140612\_OPL1013\_CVA\_phosphoproteomic\_landscape\_AML\_C Scan: 12020

Andromeda score: 110.47

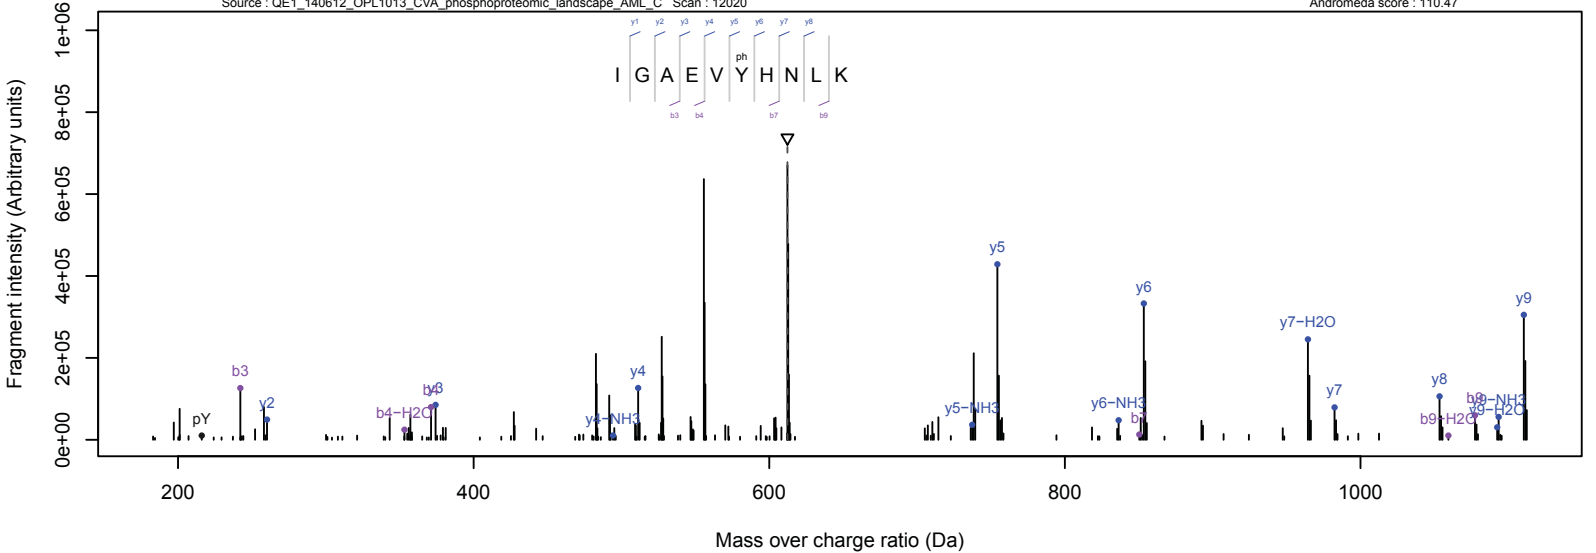

MPECY(ph)FYSK-2+

Source : QE1\_140612\_OPL1013\_CVA\_phosphoproteomic\_landscape\_AML\_A Scan : 20210

Andromeda score : 110.47

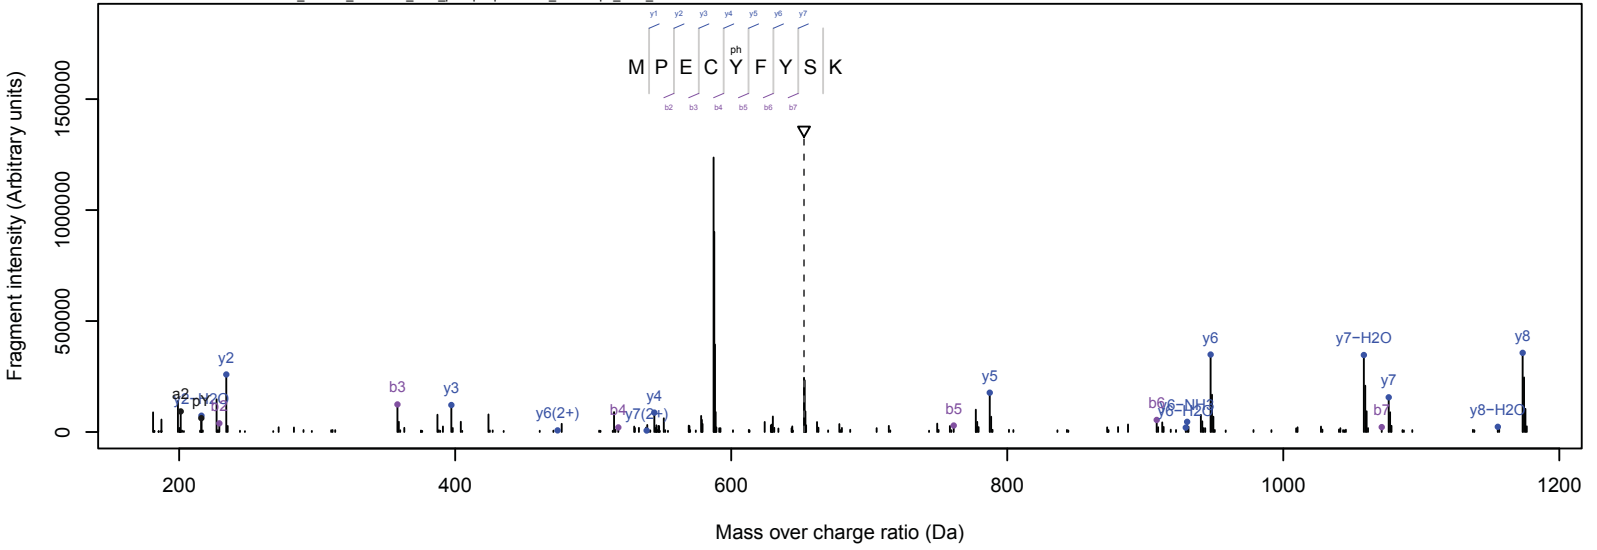

SELPLDPLPVPTEEGNPLLKHRYRGPAGDATVAS(ph)EK-4+

Source : QE1\_140612\_OPL1013\_CVA\_phosphoproteomic\_landscape\_AML\_C Scan : 40784

Andromeda score : 110.47

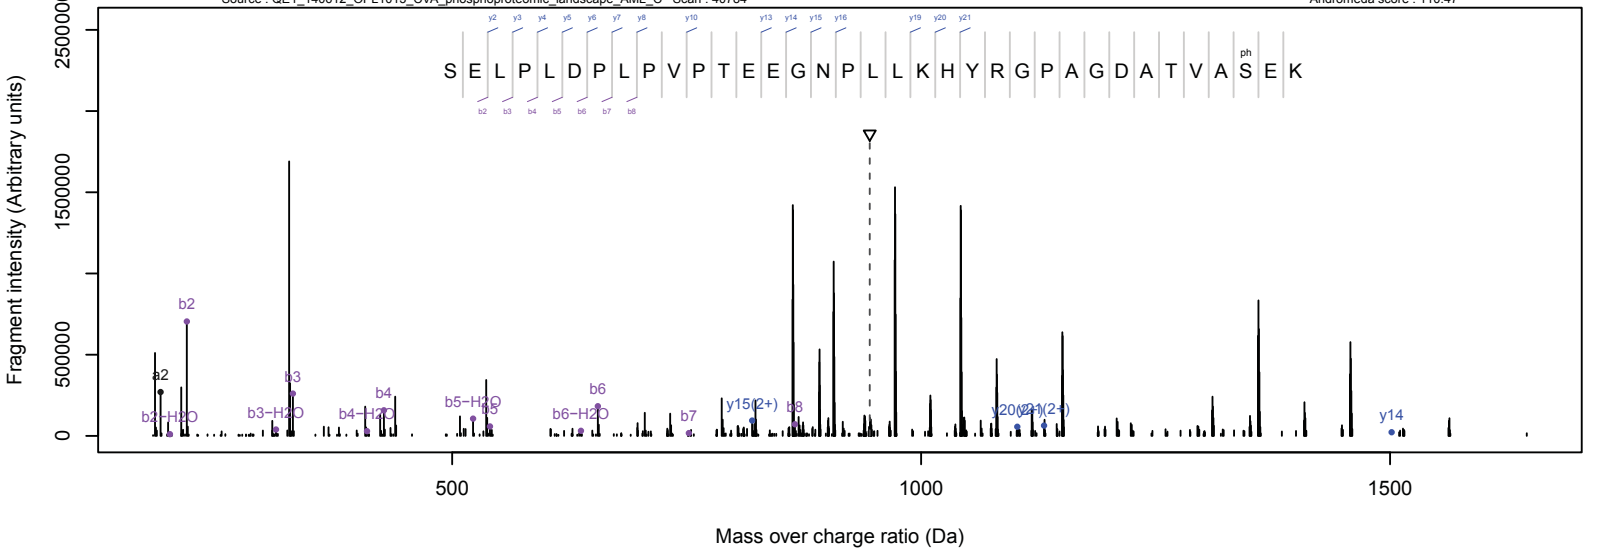

QITSY(ph)GETCPGLEQYAIKK-3+

Source : QE1\_140908\_OPL1013\_CvA\_pTyrIP\_AML\_HEL Scan : 26536

Andromeda score : 110.44

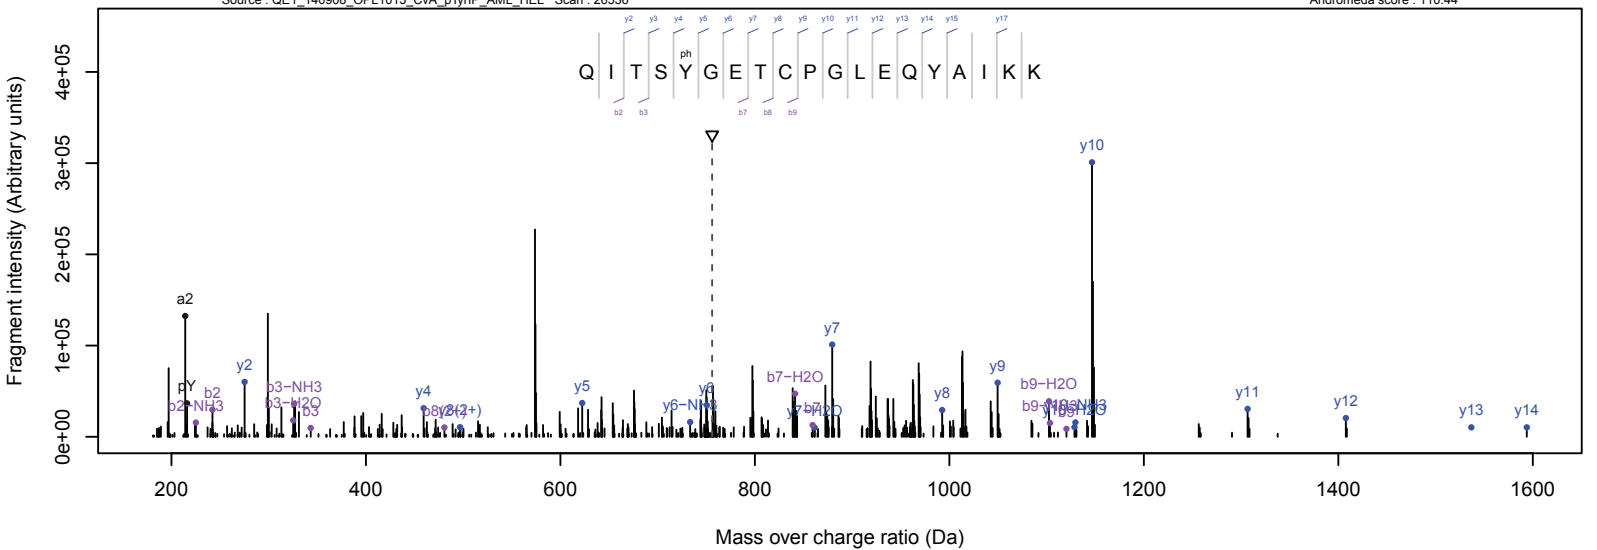

SDGVY(ph)TGLSTR-2+

Source: QE1\_140822\_OPL1013\_CVA\_pTyrIP\_AML\_cell\_lines\_part2\_E Scan: 8491

Andromeda score: 110.44

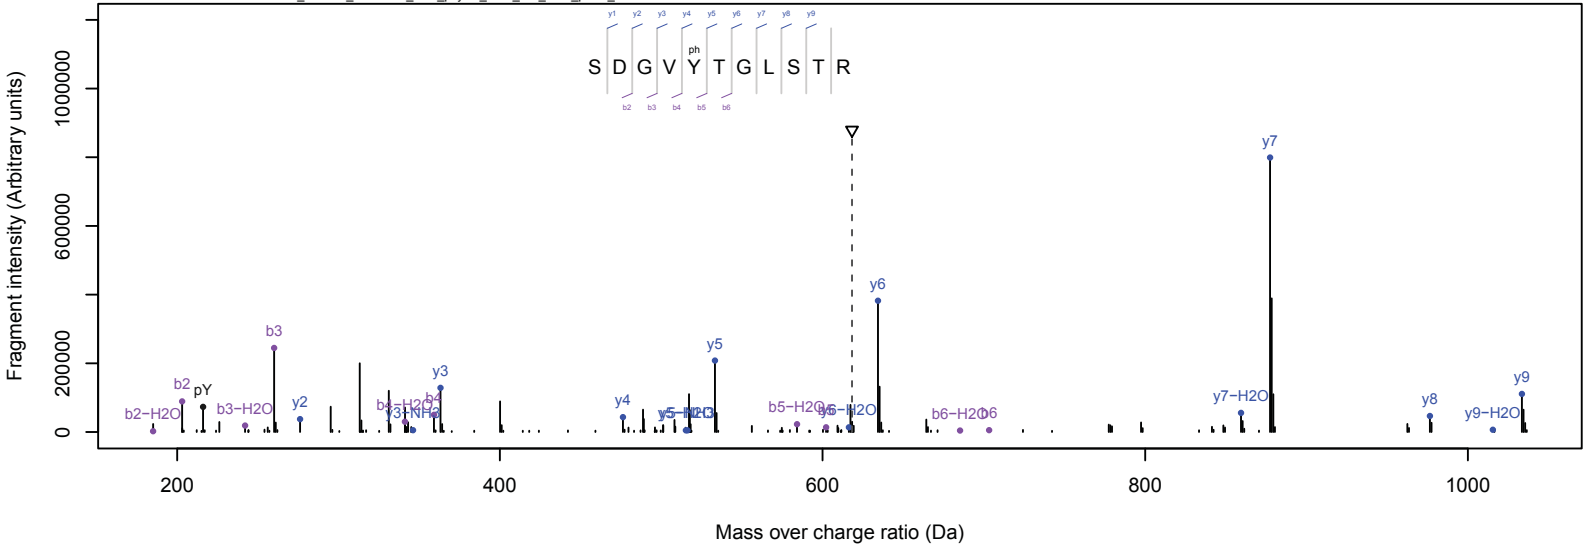

SGGSSQVY(ph)FMLTGR-2+

Source: QE1\_140612\_OPL1013\_CVA\_phosphoproteomic\_landscape\_AML\_C Scan: 32884

Andromeda score: 110.44

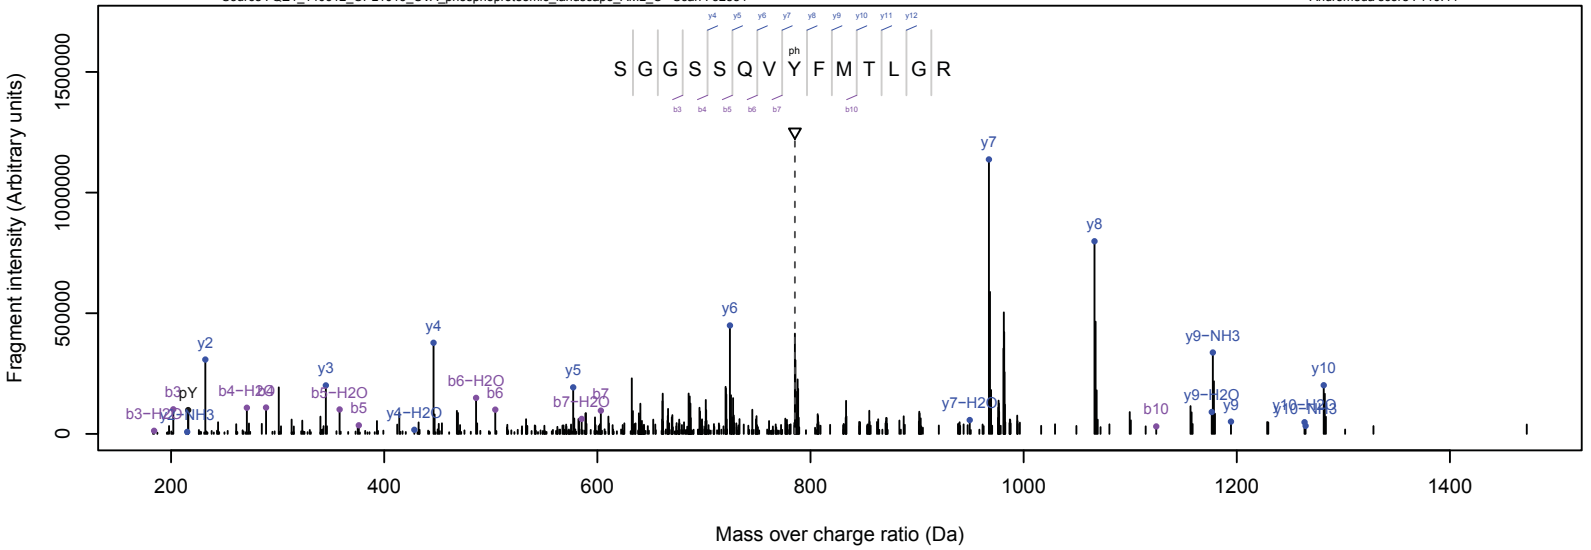

LLETCPQY(ph)IR-2+

Source: QE1\_140612\_OPL1013\_CVA\_phosphoproteomic\_landscape\_AML\_C Scan: 21139

Andromeda score: 110.39

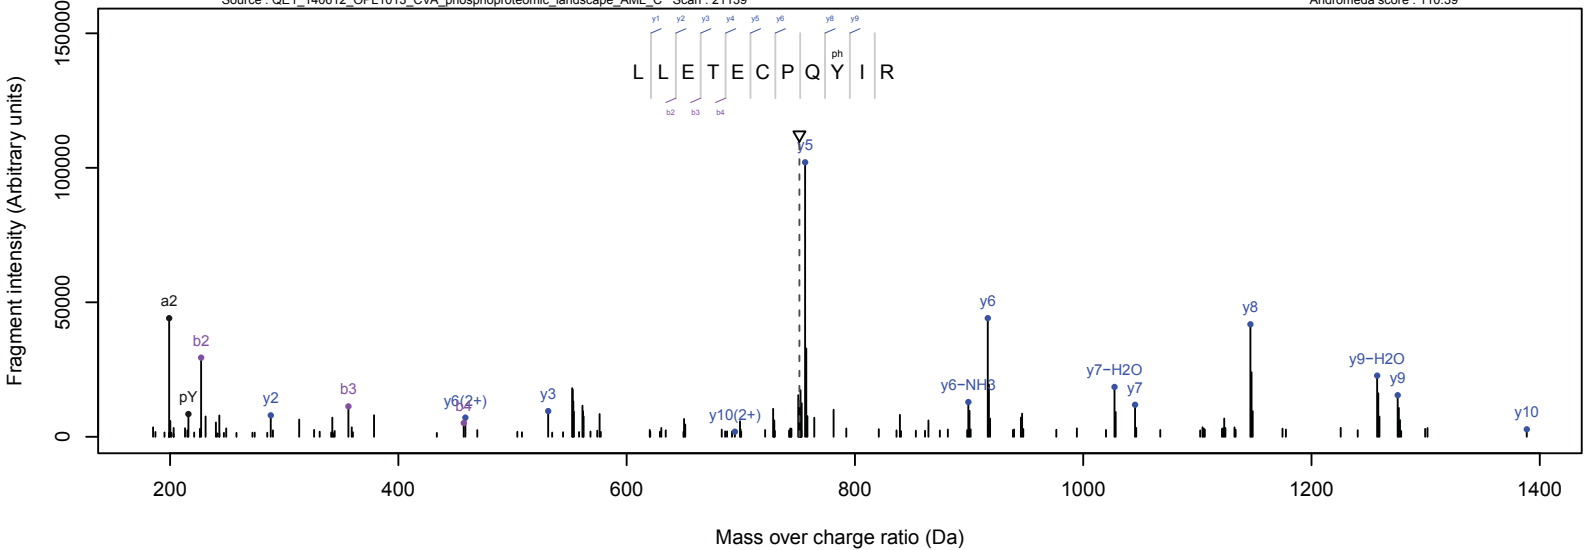

STLNEIY(ph)FGK-2+

Source : QE1\_140612\_OPL1013\_CVA\_phosphoproteomic\_landscape\_AML\_C Scan : 27570

Andromeda score : 110.39

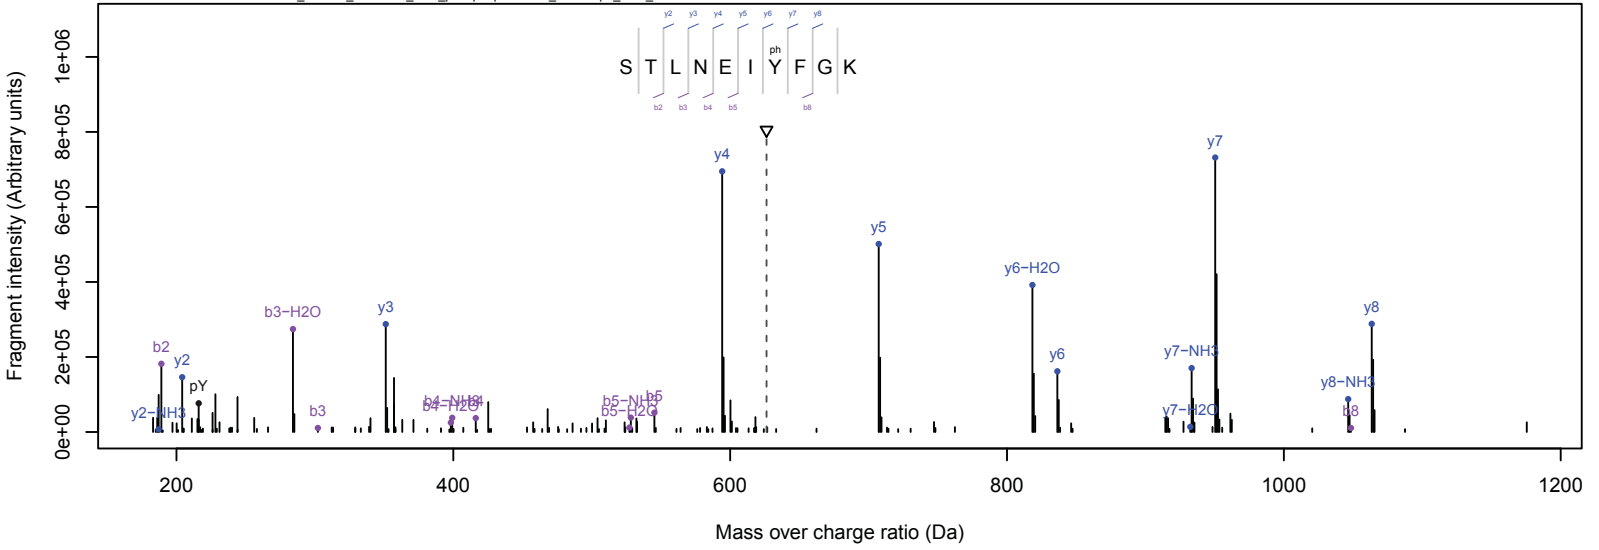

ANVLNKVEY(ph)AQQR-3+

Source : QE1\_140612\_OPL1013\_CVA\_phosphoproteomic\_landscape\_AML\_C Scan : 15769

Andromeda score : 110.38

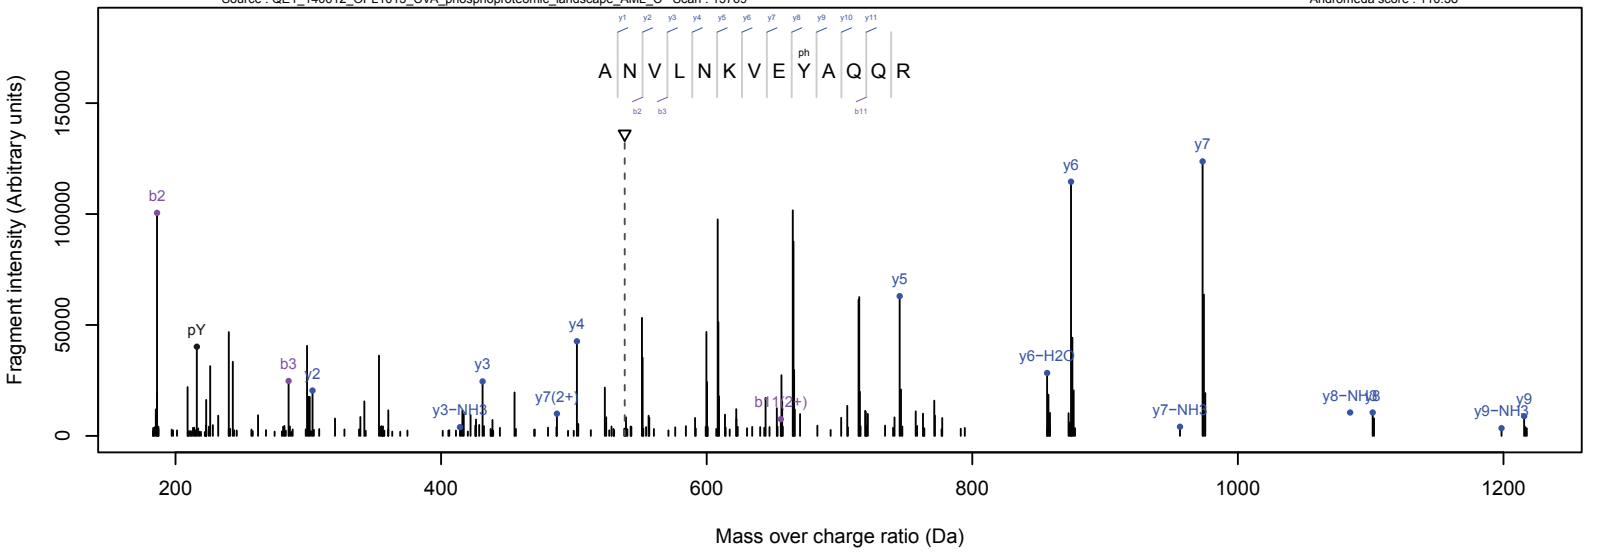

AVCSTY(ph)LQSR-2+

Source : QE1\_140908\_OPL1013\_CvA\_pTyrIP\_AML\_OCI\_AML3 Scan : 9802

Andromeda score : 110.38

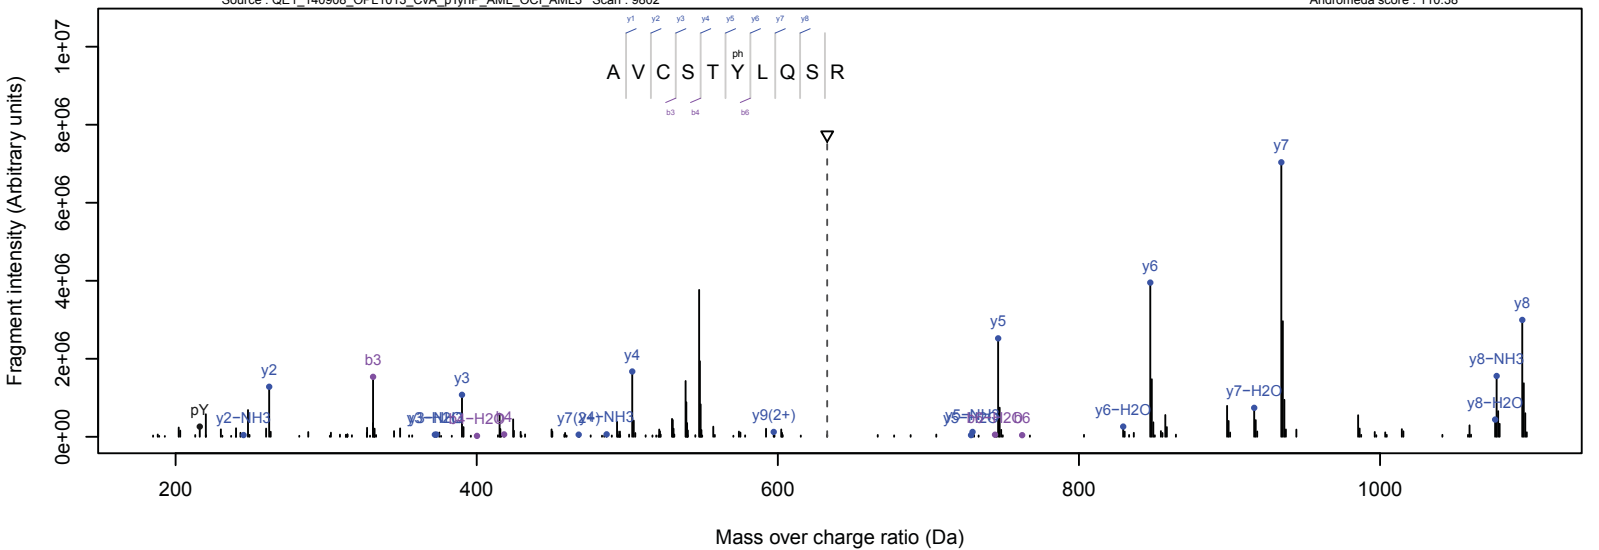

EDDVRQ(ph)VVR-2+

Source: QE1\_140612\_OPL1013\_CVA\_phosphoproteomic\_landscape\_AML\_C Scan: 10517

Andromeda score: 110.38

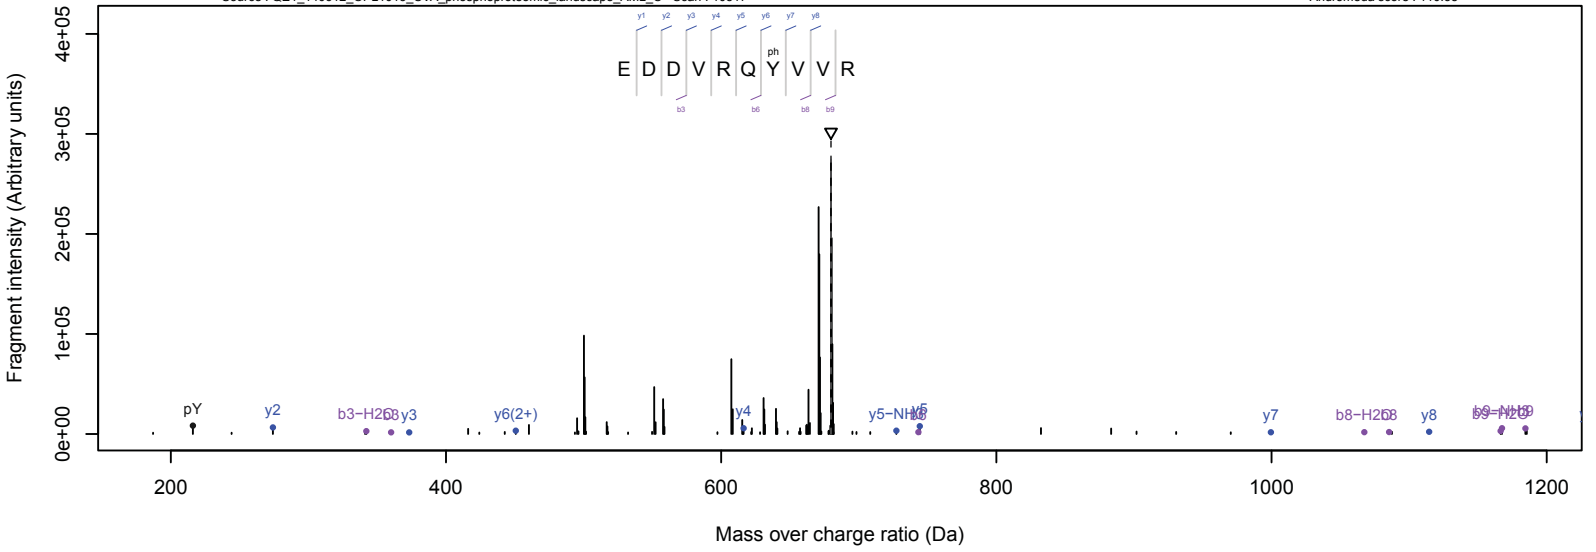

FDTIY(ph)QILLK-2+

Source: QE1\_140612\_OPL1013\_CVA\_phosphoproteomic\_landscape\_AML\_C Scan: 45876

Andromeda score: 110.38

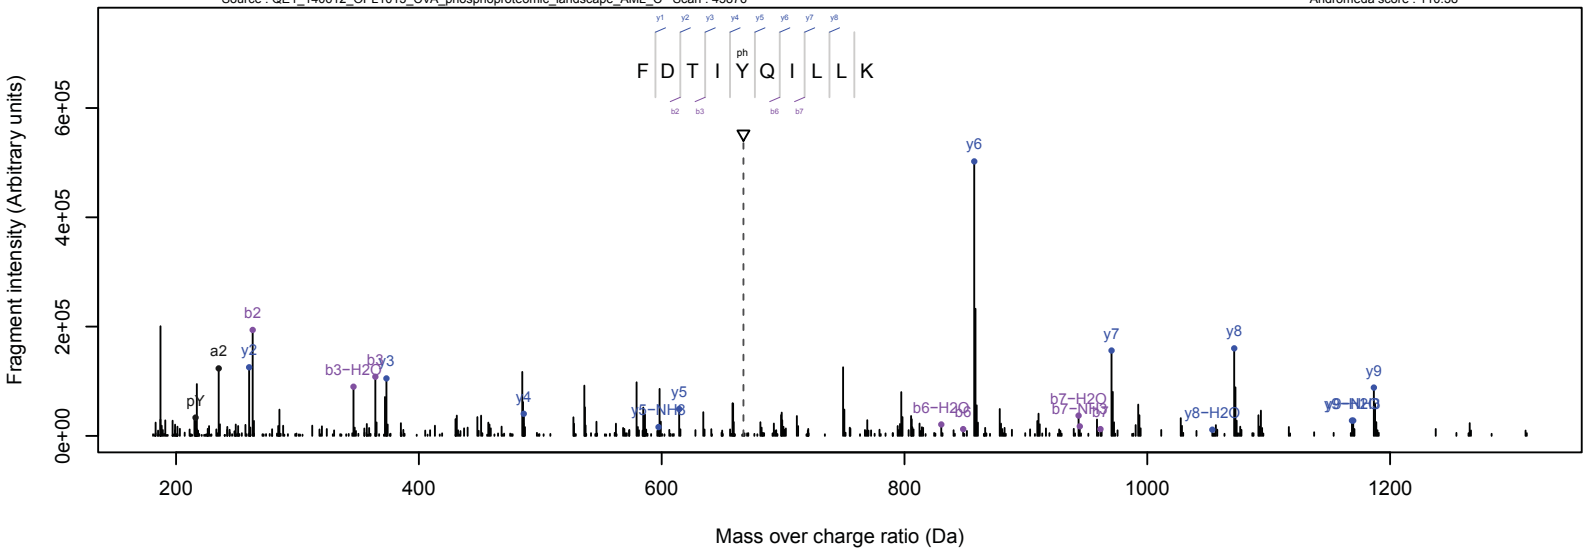

Y(ph)SSGGNFETPSK-2+

Source: QE1\_140612\_OPL1013\_CVA\_phosphoproteomic\_landscape\_AML\_C Scan: 7110

Andromeda score: 110.38

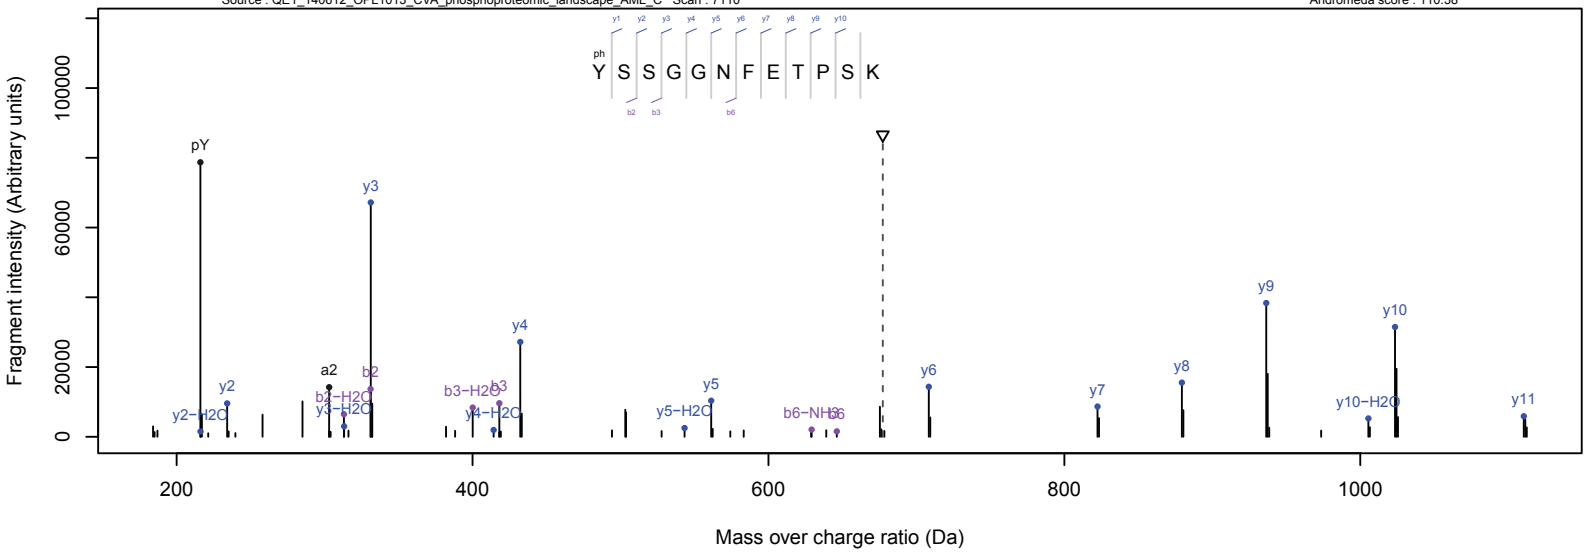

Y(ph)TSWRPPFK-2+

Source : QE1\_140612\_OPL1013\_CVA\_phosphoproteomic\_landscape\_AML\_B Scan : 27148

Andromeda score : 110.38

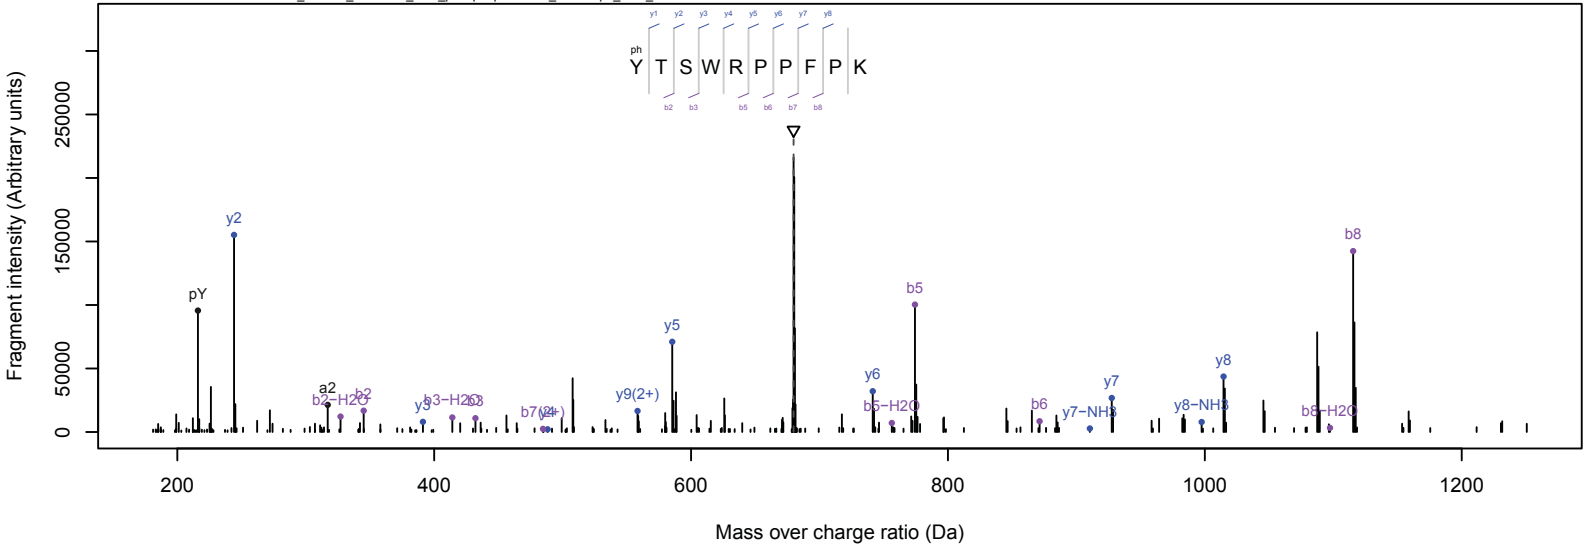

ERLY(ph)EWISIDKDEAGAK-3+

Source : QE1\_140612\_OPL1013\_CVA\_phosphoproteomic\_landscape\_AML\_C Scan : 30829

Andromeda score : 110.26

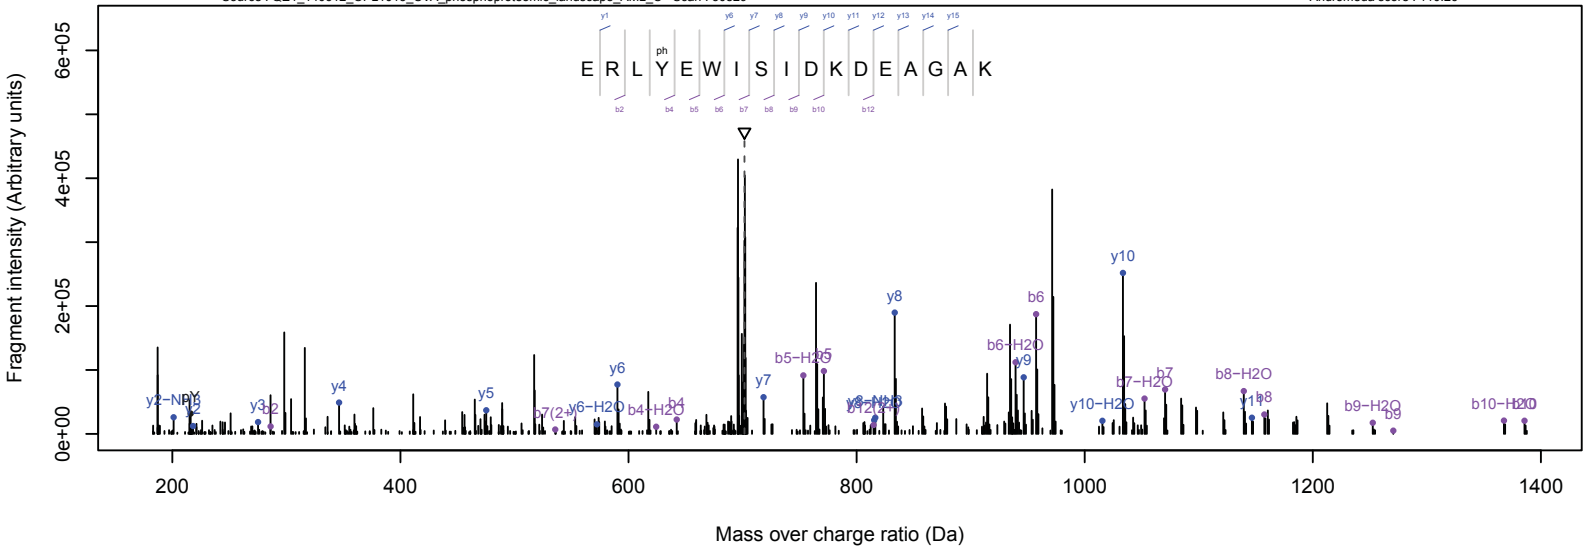

PGPTPSGTNVGSS(ph)GRSPSK-3+

Source : QE1\_140908\_OPL1013\_CvA\_pTyrIP\_AML\_Kasumi6 Scan : 6424

Andromeda score : 110.18

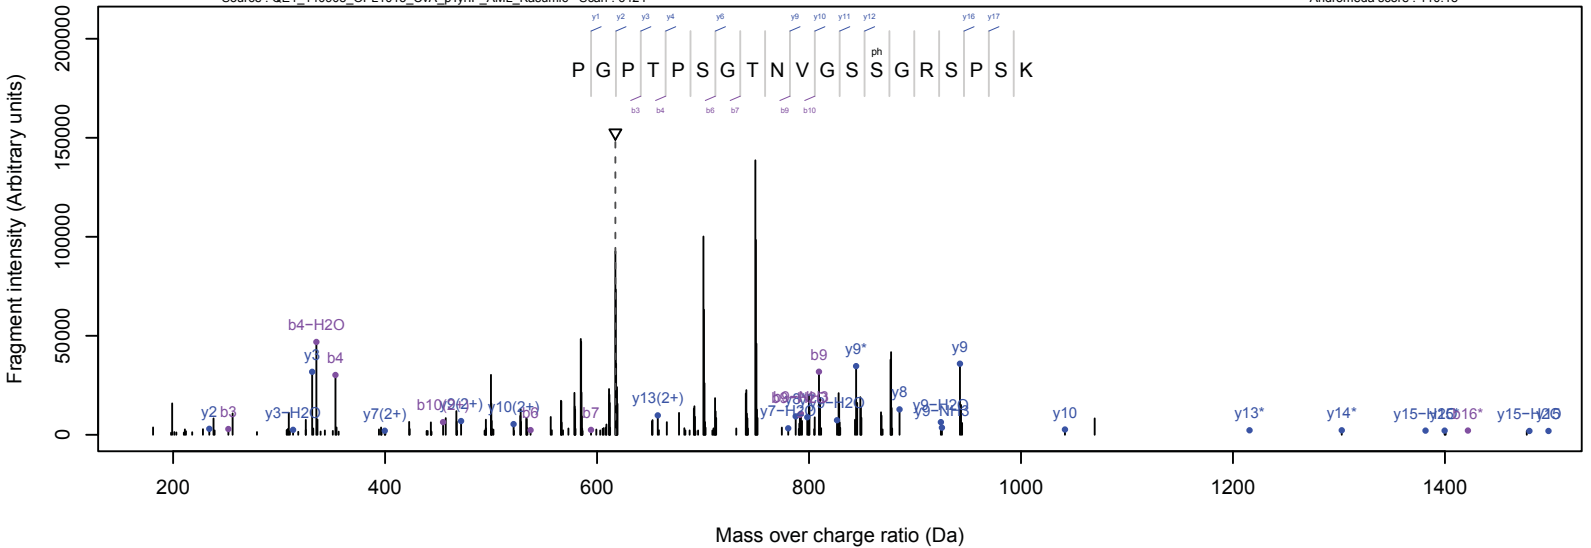

**DATDPVY(ph)KTVTSSTEK-3+**

Source : QE1\_140612\_OPL1013\_CVA\_phosphoproteomic\_landscape\_AML\_C Scan : 14972

Andromeda score : 110.12

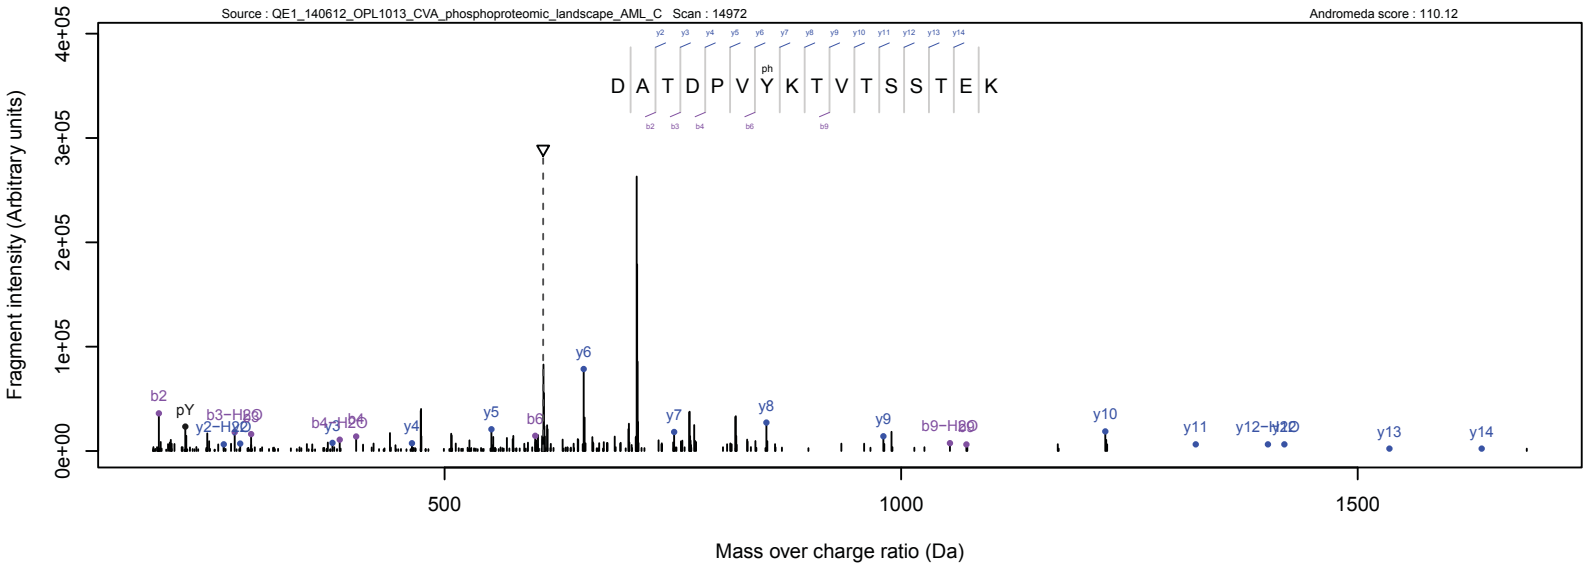

**KLY(ph)YQQLK-2+**

Source : QE1\_140612\_OPL1013\_CVA\_phosphoproteomic\_landscape\_AML\_C Scan : 12363

Andromeda score : 110.12

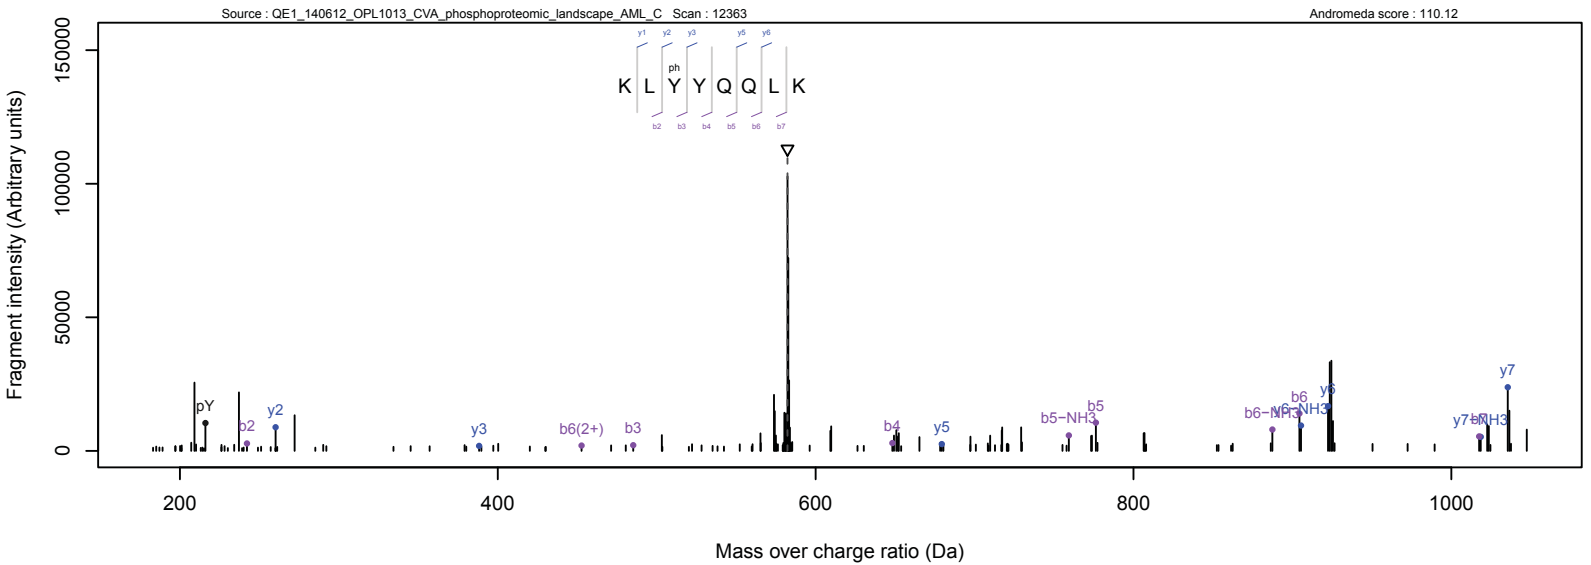

**RGSGELY(ph)EHEKDLVWK-3+**

Source : QE1\_140612\_OPL1013\_CVA\_phosphoproteomic\_landscape\_AML\_A Scan : 21797

Andromeda score : 110.12

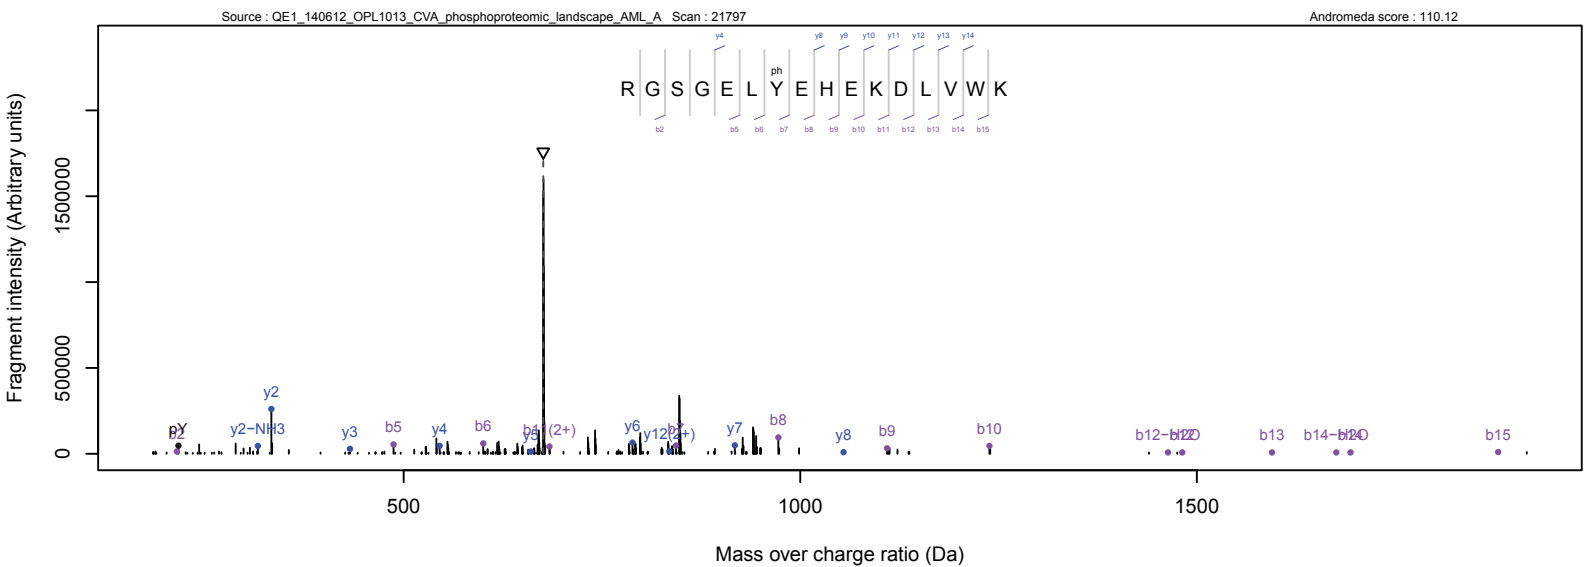

AY(ph)AKPPSHHVK-3+

Source : QE1\_140612\_OPL1013\_CVA\_phosphoproteomic\_landscape\_AML\_D Scan : 3388

Andromeda score : 110.08

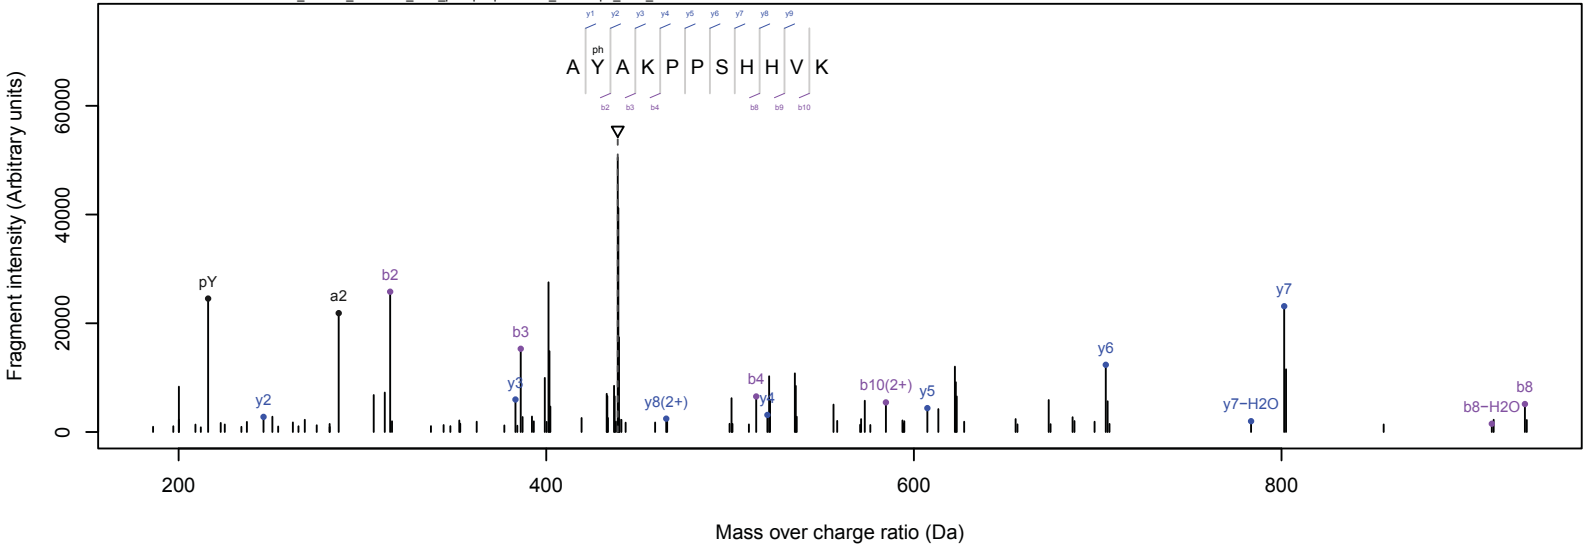

SVIY(ph)HALSQK-2+

Source : QE1\_140612\_OPL1013\_CVA\_phosphoproteomic\_landscape\_AML\_C Scan : 12750

Andromeda score : 110.08

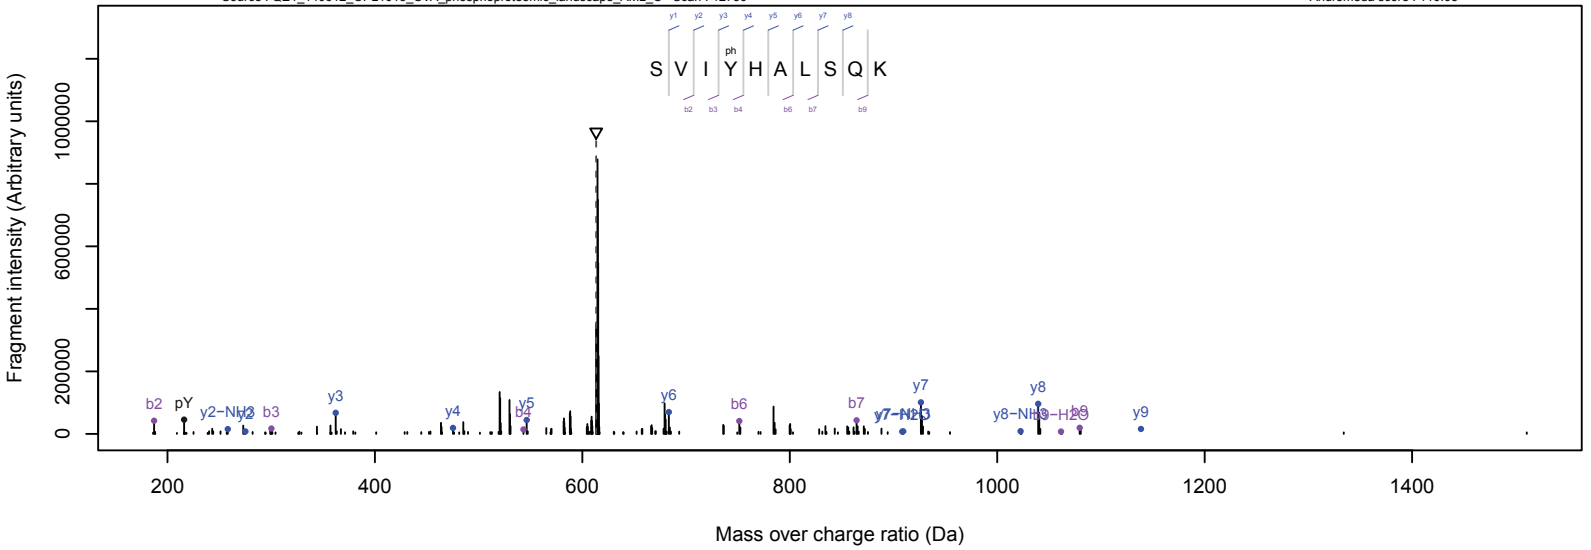

VSY(ph)PLCFIFSSPVGCKPEQMQMMYAGSK-3+

Source : QE1\_140612\_OPL1013\_CVA\_phosphoproteomic\_landscape\_AML\_D Scan : 47347

Andromeda score : 110.01

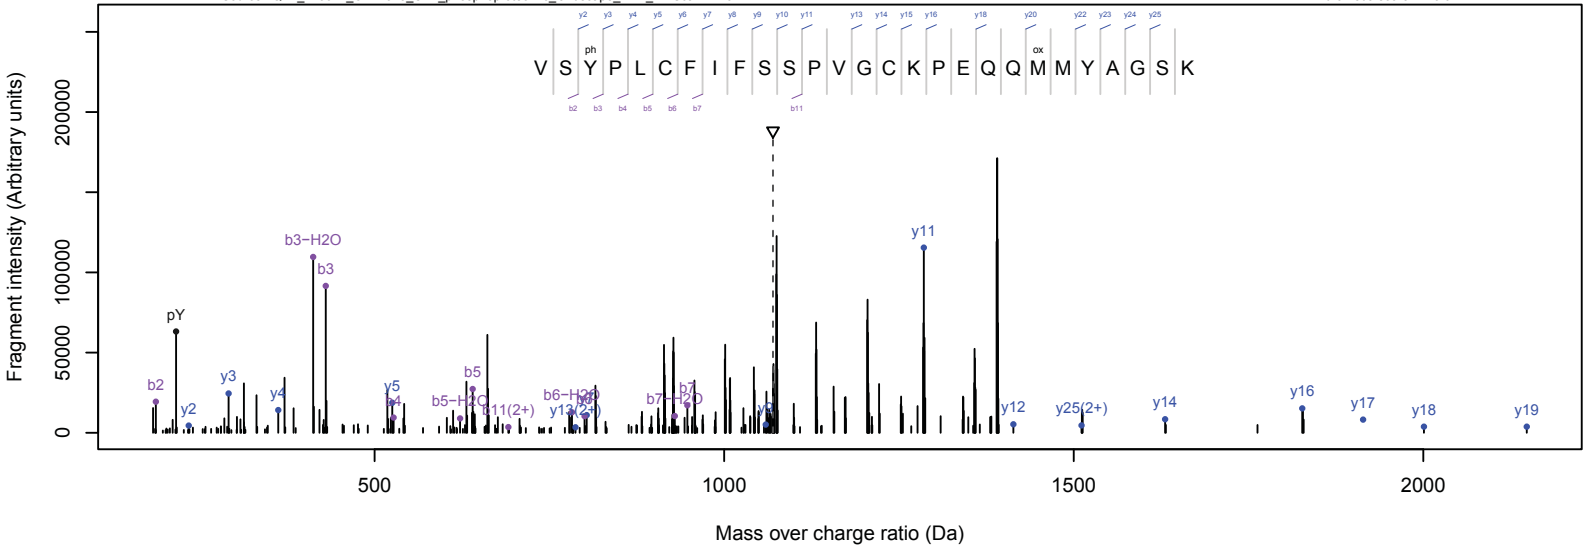







ISGASEKDIVHSGLAY(ph)TMER-3+

Source : QE1\_140612\_OPL1013\_CVA\_phosphoproteomic\_landscape\_AML\_E Scan : 26859

Andromeda score : 109.56

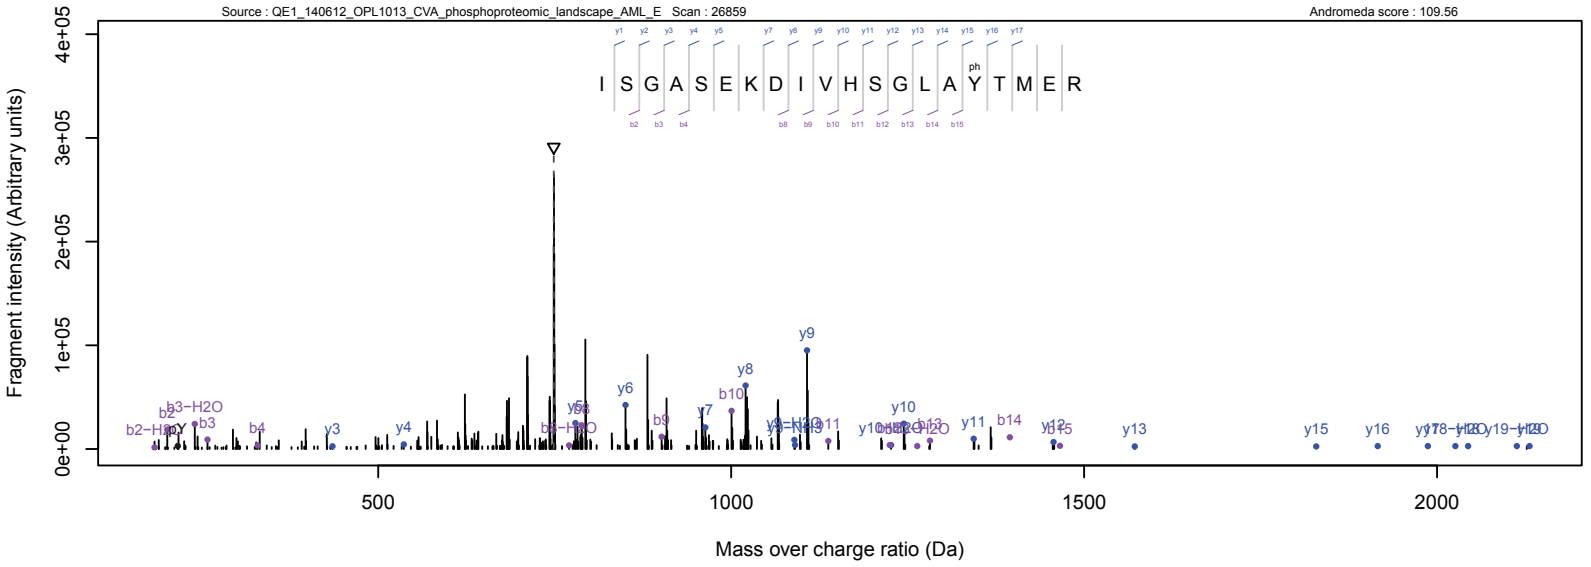

LCVLEY(ph)QGK-2+

Source : QE1\_140612\_OPL1013\_CVA\_phosphoproteomic\_landscape\_AML\_A Scan : 17635

Andromeda score : 109.48

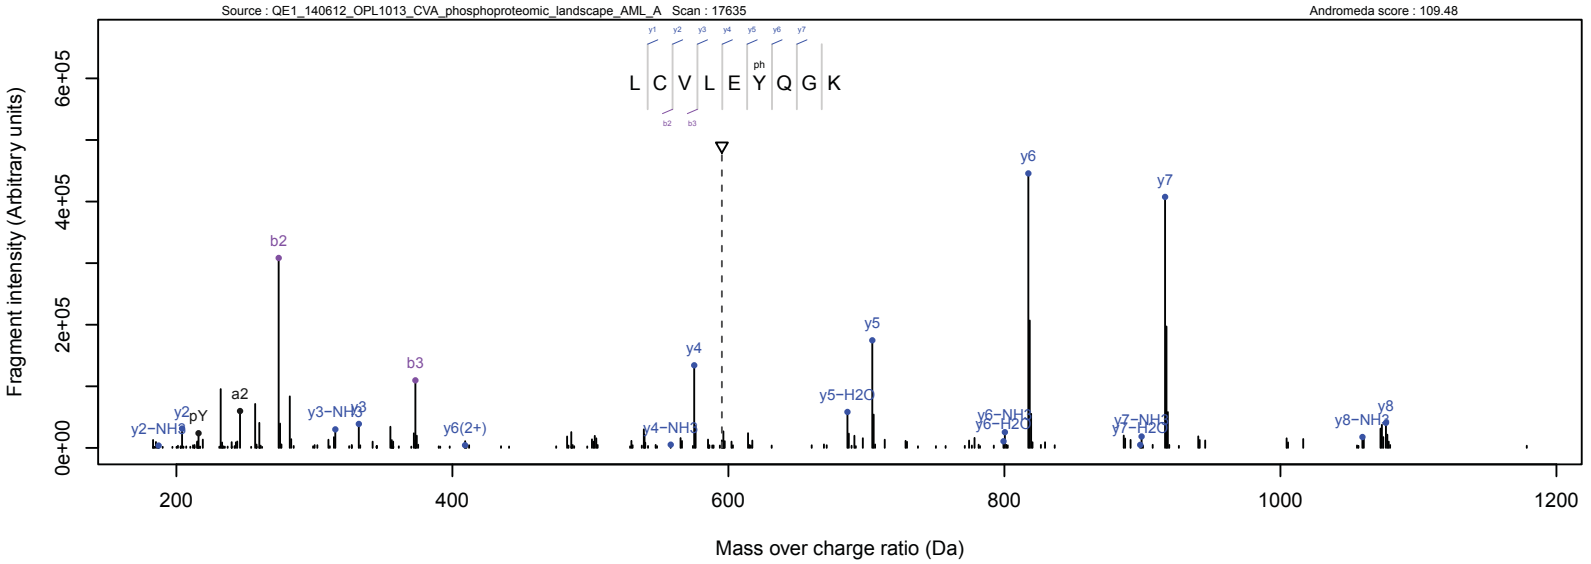

Y(ph)RTSGSDEEQEGAGAINQNVALAIAGNNFNLK-3+

Source : QE1\_140612\_OPL1013\_CVA\_phosphoproteomic\_landscape\_AML\_C Scan : 42570

Andromeda score : 109.48

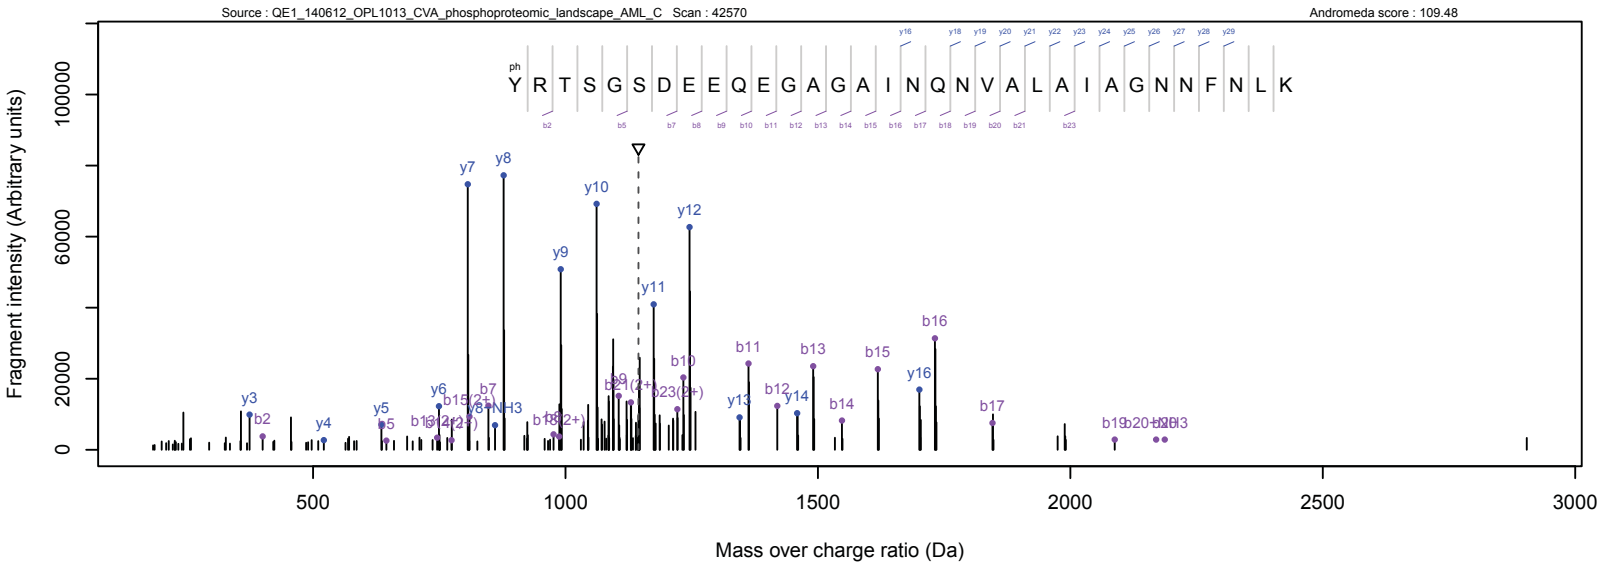

AQNPAY(ph)FEGKPSLDEGAMAGAR-3+

Source : QE1\_140612\_OPL1013\_CVA\_phosphoproteomic\_landscape\_AML\_C Scan : 25767

Andromeda score : 109.44

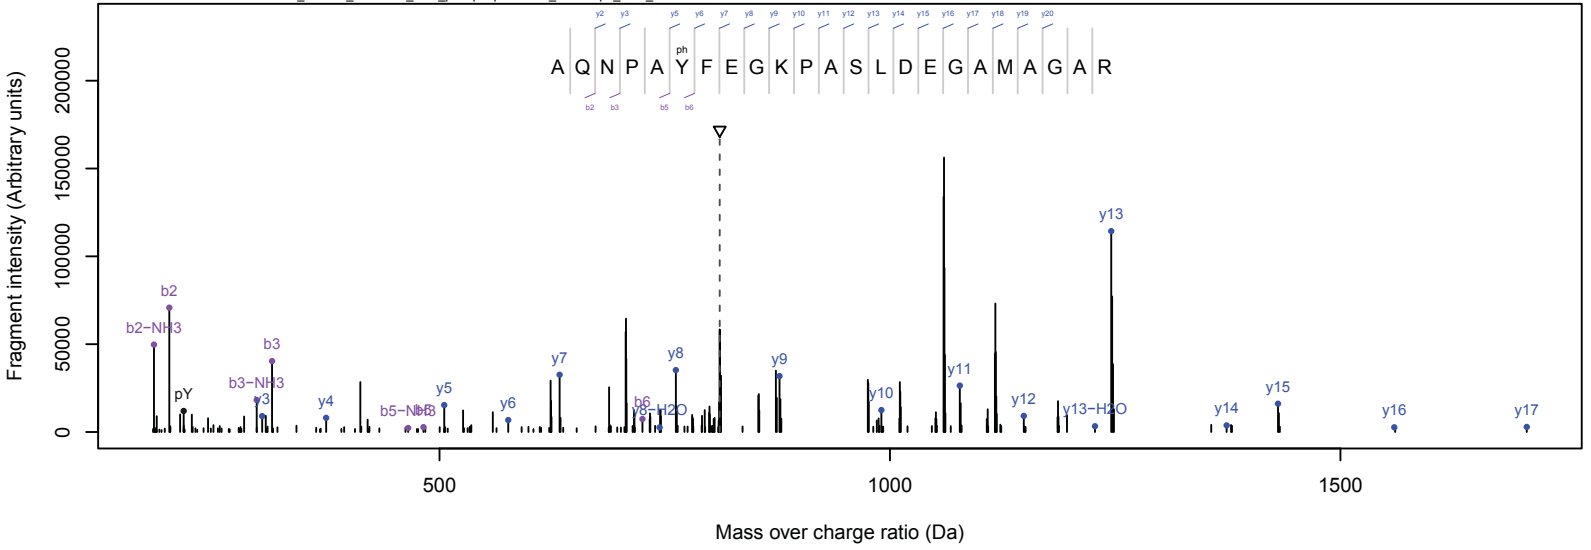

FY(ph)VHNDIFR-3+

Source : QE1\_140908\_OPL1013\_CvA\_pTyrIP\_AML\_Kasumi1 Scan : 28152

Andromeda score : 109.44

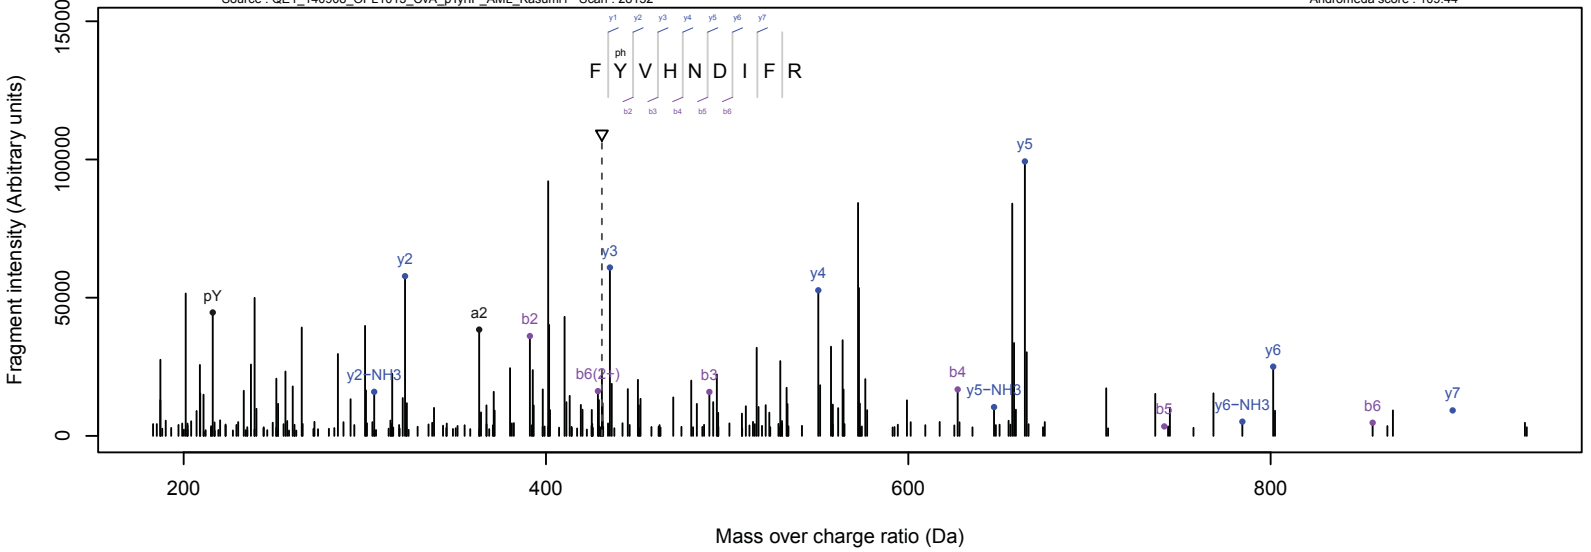

NLTQY(ph)EQLK-2+

Source : QE1\_140612\_OPL1013\_CVA\_phosphoproteomic\_landscape\_AML\_B Scan : 14757

Andromeda score : 109.44

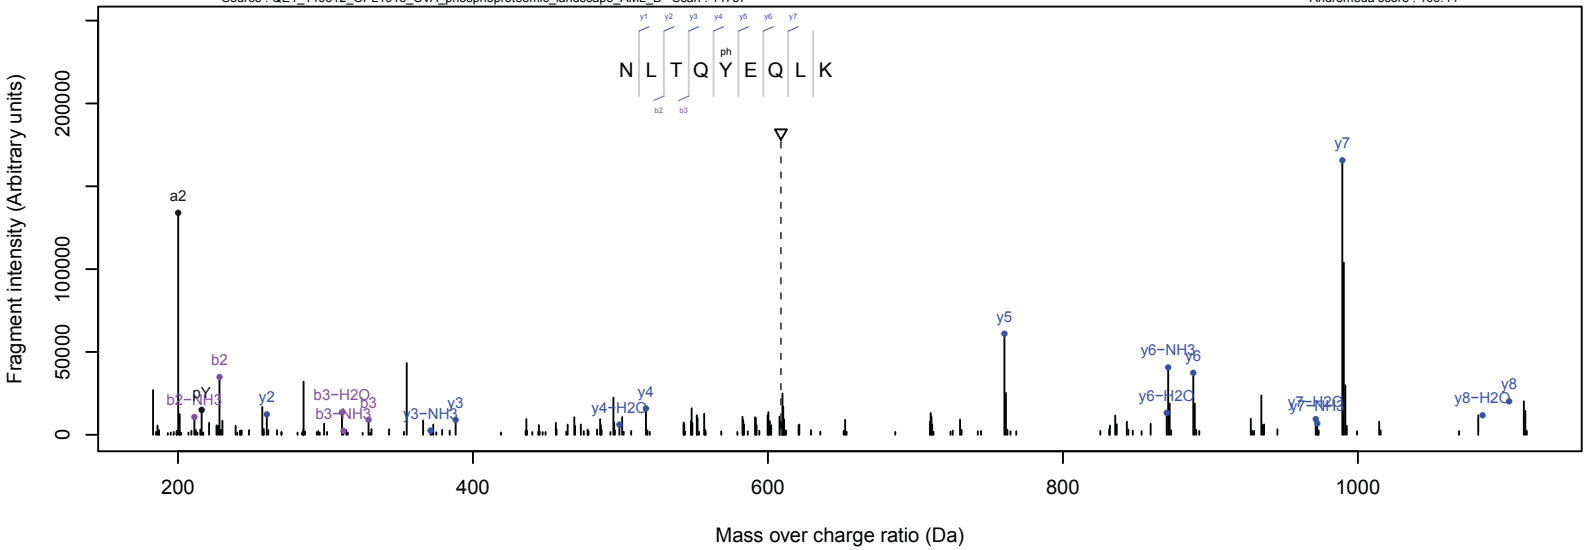

RAGLGEGVPPGNYGNYGY(ph)ANSYGSACEEENERLTESLR-4+

Source : QE1\_140612\_OPL1013\_CVA\_phosphoproteomic\_landscape\_AML\_C Scan : 31782

Andromeda score : 109.27

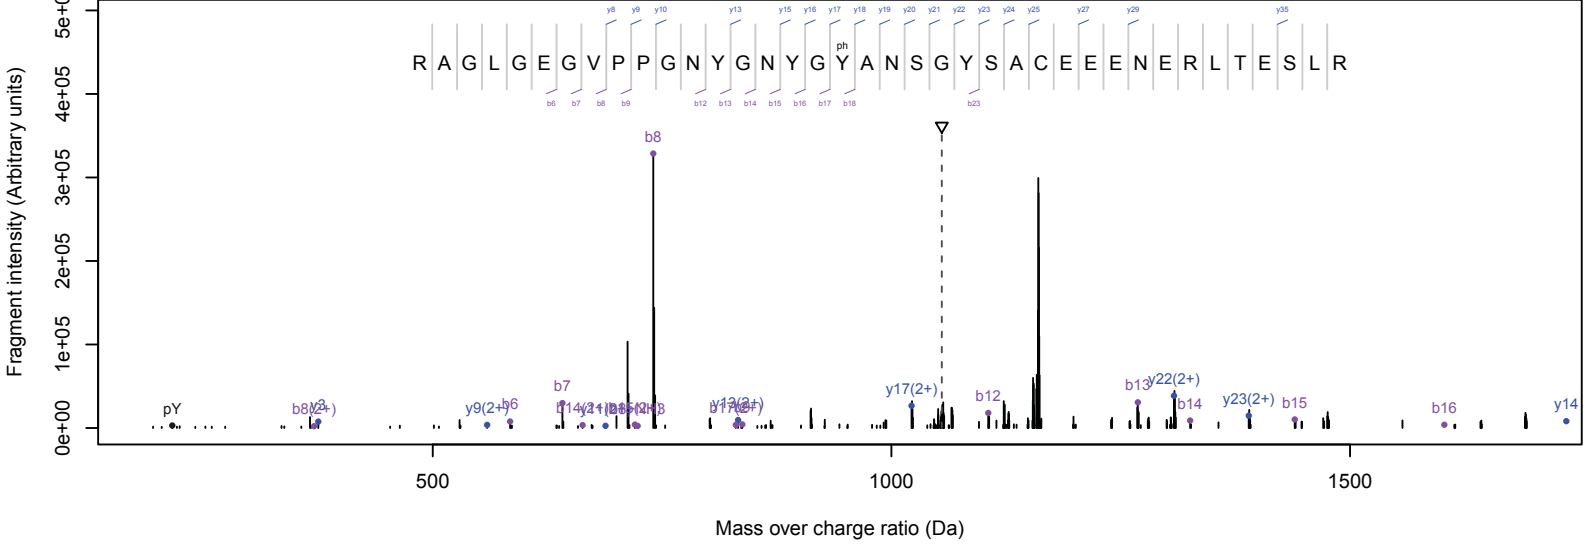

IDQISIEELDIY(ph)KVPHCVPISAHHR-5+

Source : QE1\_140612\_OPL1013\_CVA\_phosphoproteomic\_landscape\_AML\_C Scan : 44194

Andromeda score : 109.25

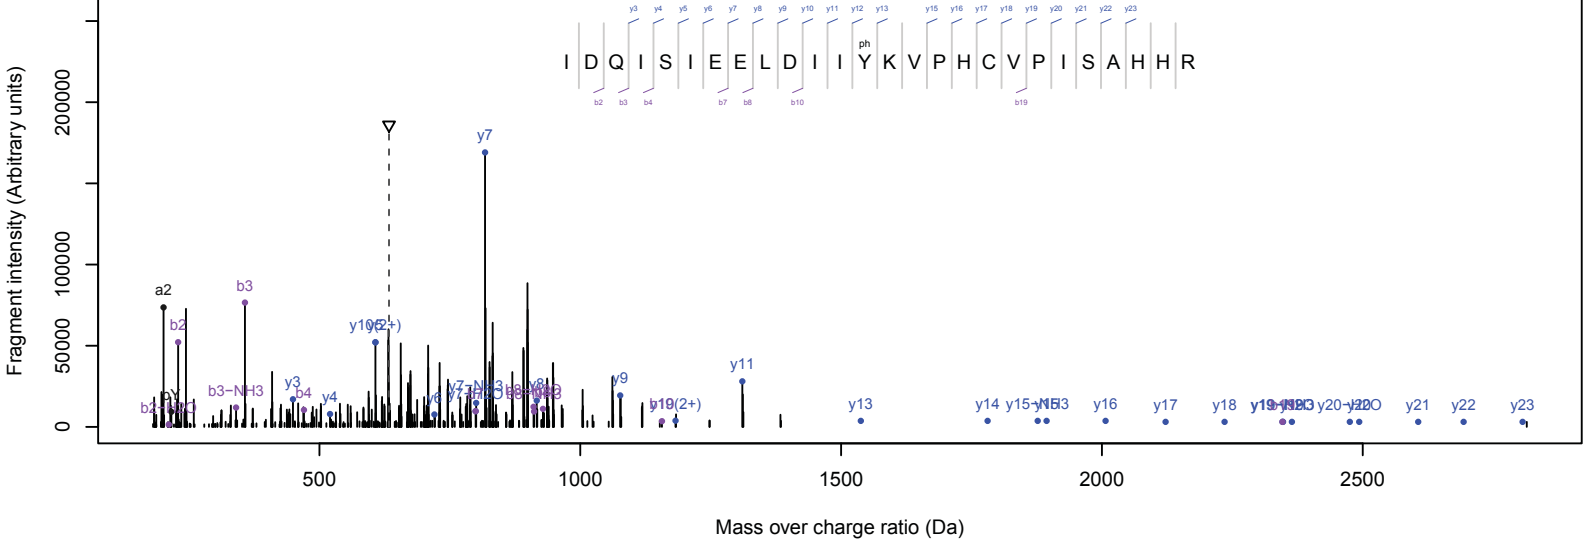

VGLPTQQGFSSQFVSPYPPLPQRPPR-4+

Source : QE1\_140612\_OPL1013\_CVA\_phosphoproteomic\_landscape\_AML\_C Scan : 40303

Andromeda score : 109.23

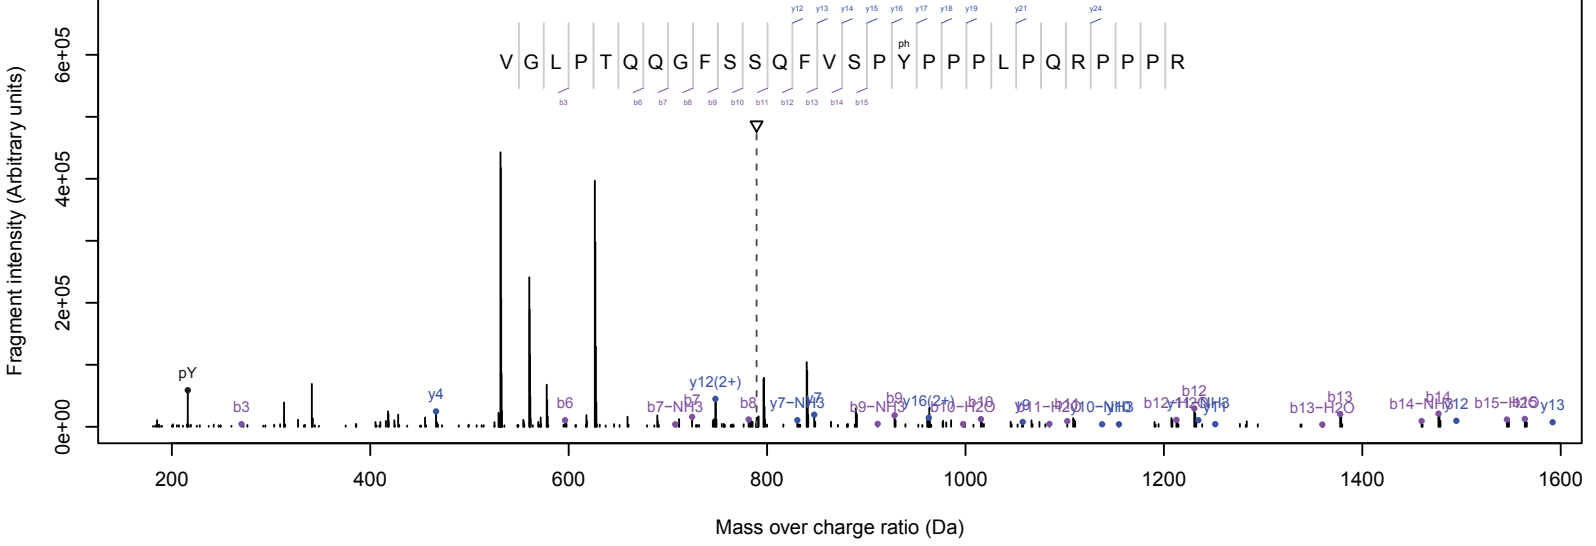

(ac)AKTY(ph)DYLFK-2+

Source: QE1\_140612\_OPL1013\_CVA\_phosphoproteomic\_landscape\_AML\_C Scan: 31223

Andromeda score: 109.16

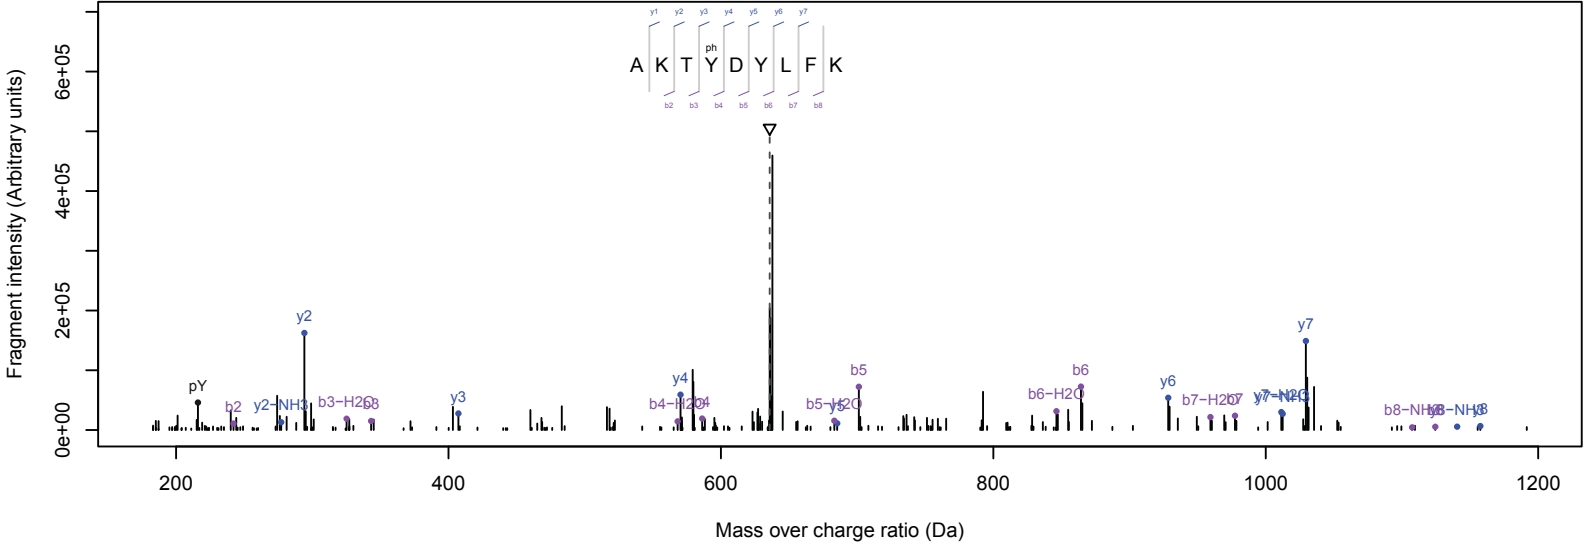

LTLHGLQQYY(ph)VK-2+

Source: QE1\_140612\_OPL1013\_CVA\_phosphoproteomic\_landscape\_AML\_A Scan: 27143

Andromeda score: 109.16

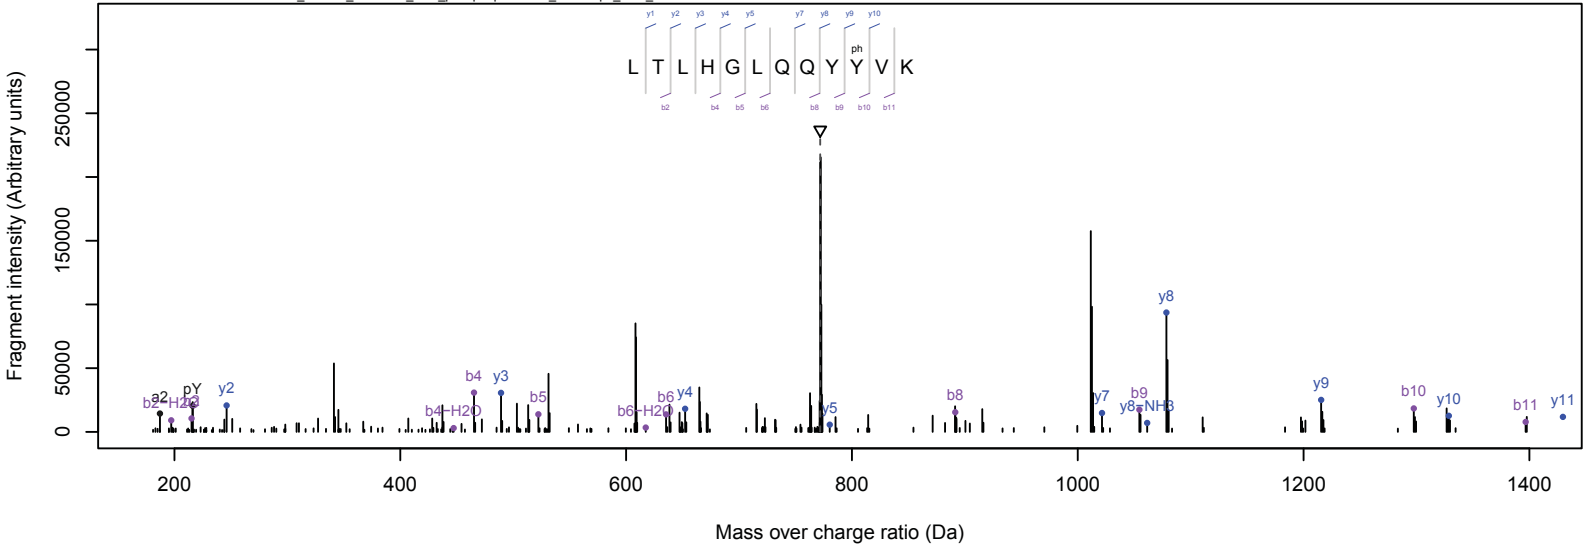

NLQY(ph)YDISAK-2+

Source: QE1\_140612\_OPL1013\_CVA\_phosphoproteomic\_landscape\_AML\_D Scan: 20413

Andromeda score: 109.16

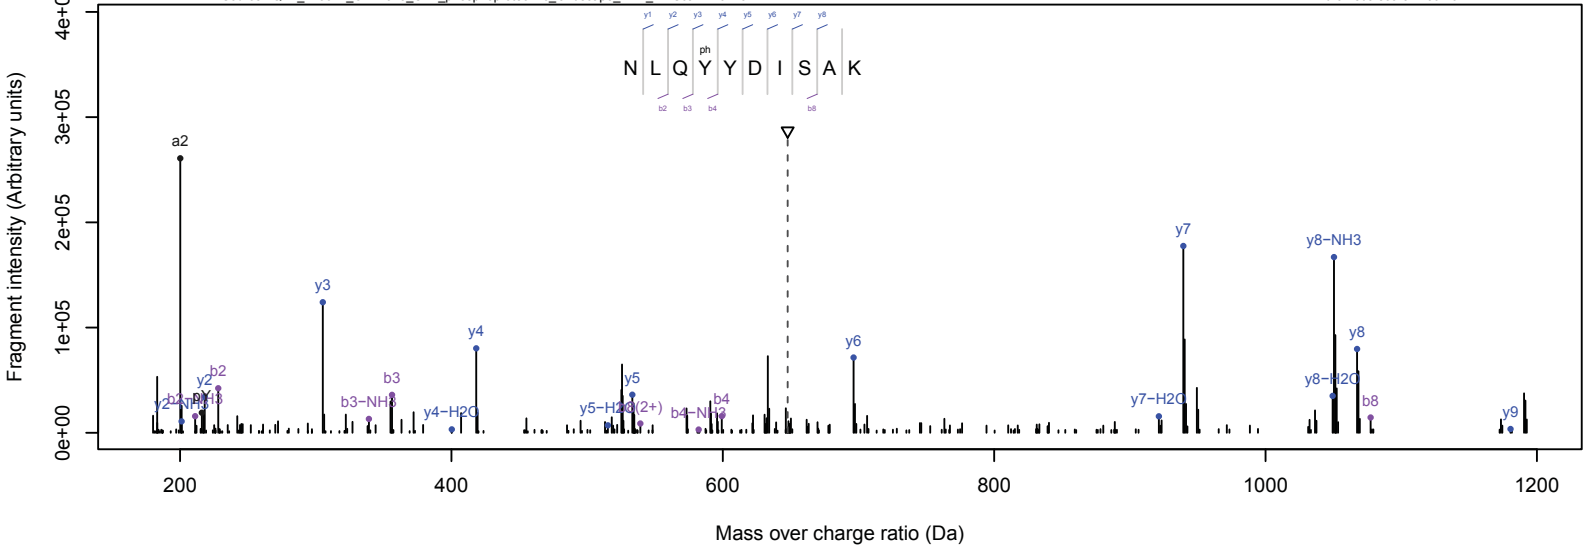

IDYGEY(ph)MDKNNVR-3+

Source: QE1\_140612\_OPL1013\_CVA\_phosphoproteomic\_landscape\_AML\_E Scan: 16835

Andromeda score: 109.15

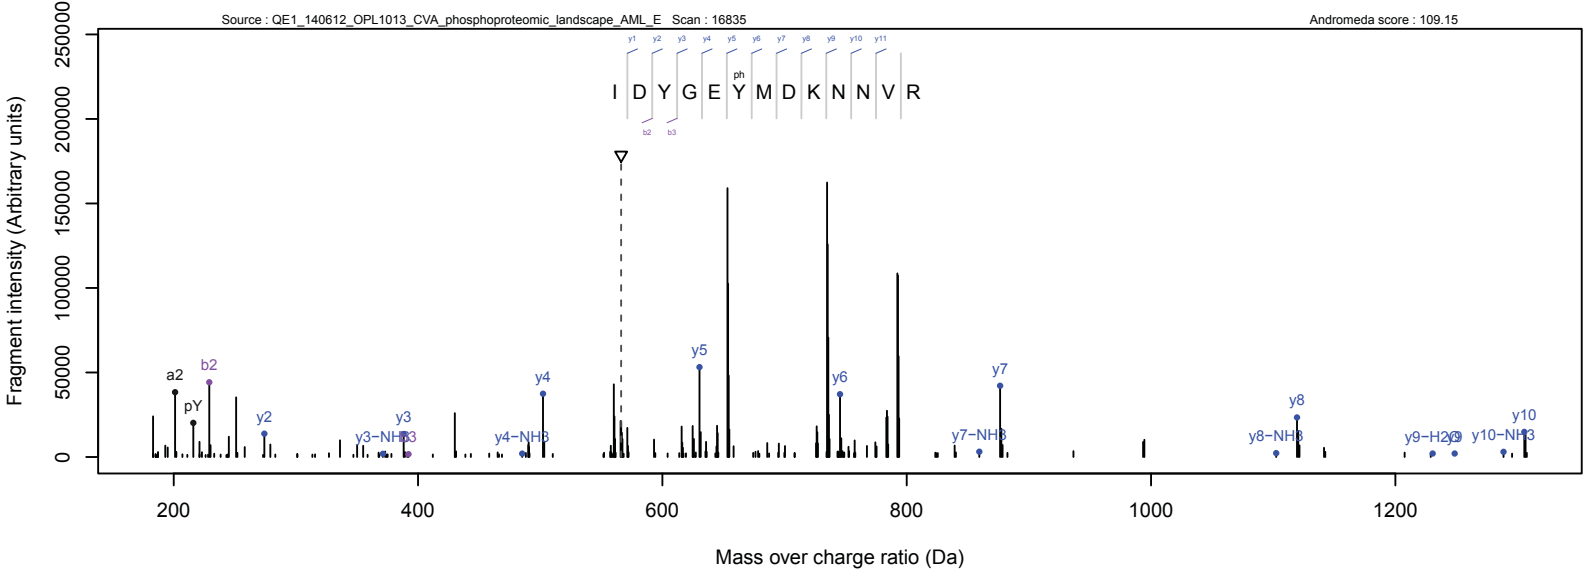

LYTY(ph)QSR-2+

Source: QE1\_140612\_OPL1013\_CVA\_phosphoproteomic\_landscape\_AML\_F Scan: 13764

Andromeda score: 109.11

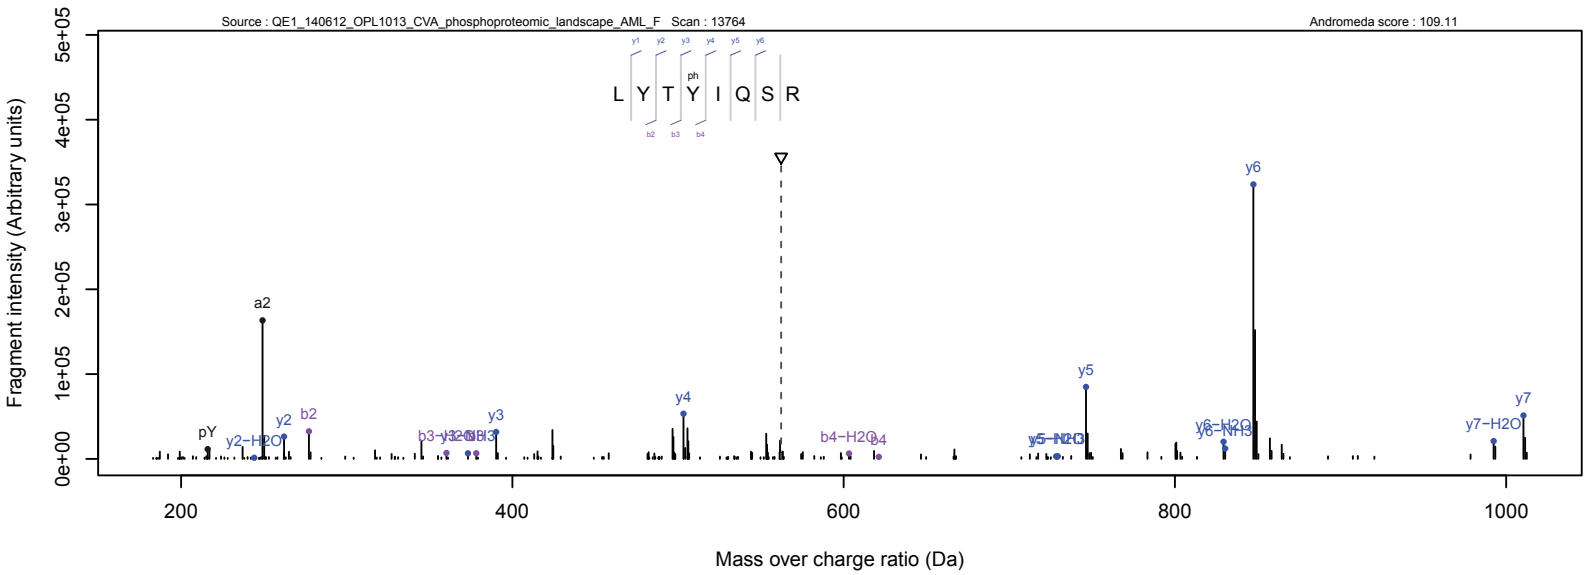

ANNTFY(ph)GLSAGVFTK-2+

Source: QE1\_140822\_OPL1013\_CvA\_pTyrIP\_AML\_cell\_lines\_part2\_B Scan: 30616

Andromeda score: 109.1

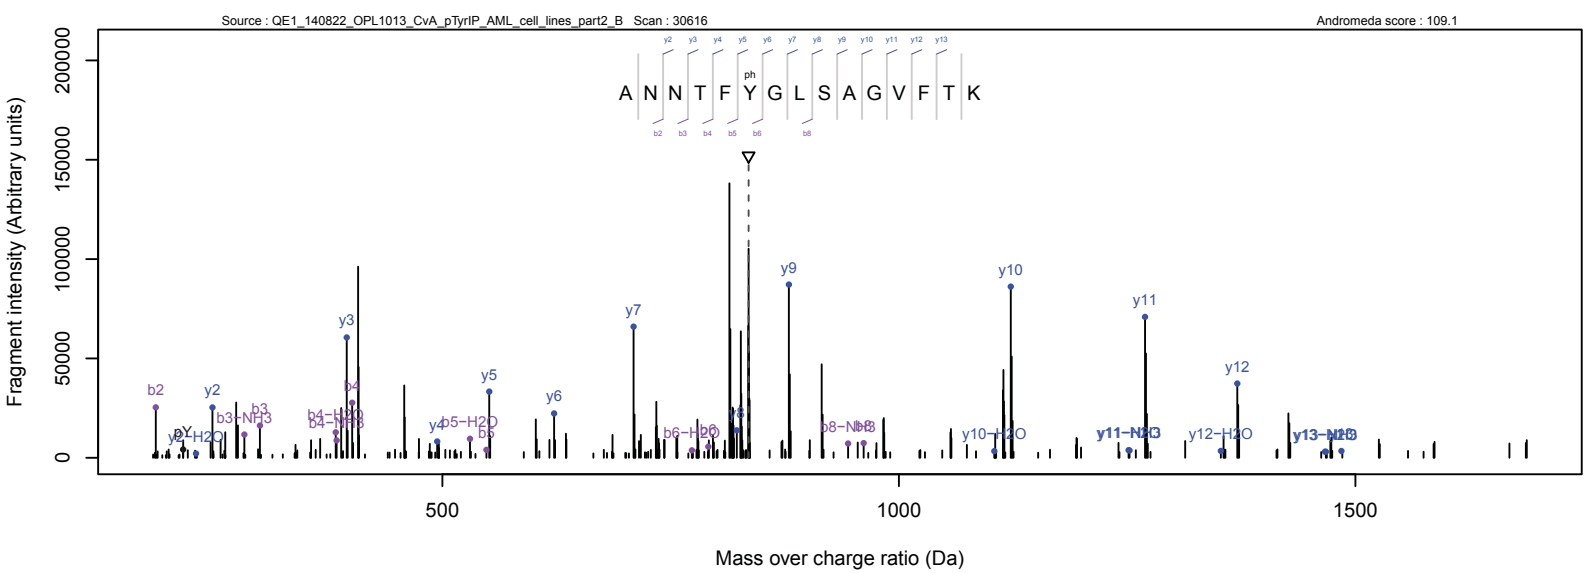

ISTATPY(ph)MNGETSTK-2+

Source : QE1\_140612\_OPL1013\_CVA\_phosphoproteomic\_landscape\_AML\_A Scan : 12564

Andromeda score : 109.07

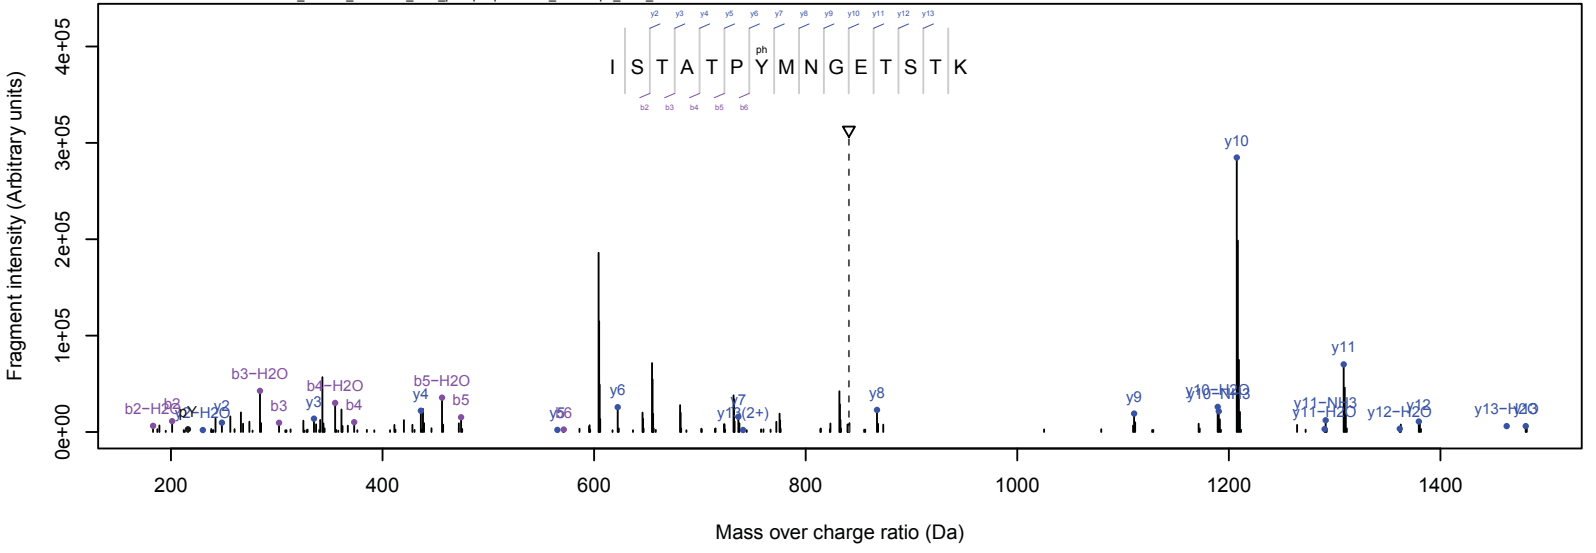

FGPY(ph)YTEPVIAGLDPK-2+

Source : QE1\_140612\_OPL1013\_CVA\_phosphoproteomic\_landscape\_AML\_B Scan : 42607

Andromeda score : 109.04

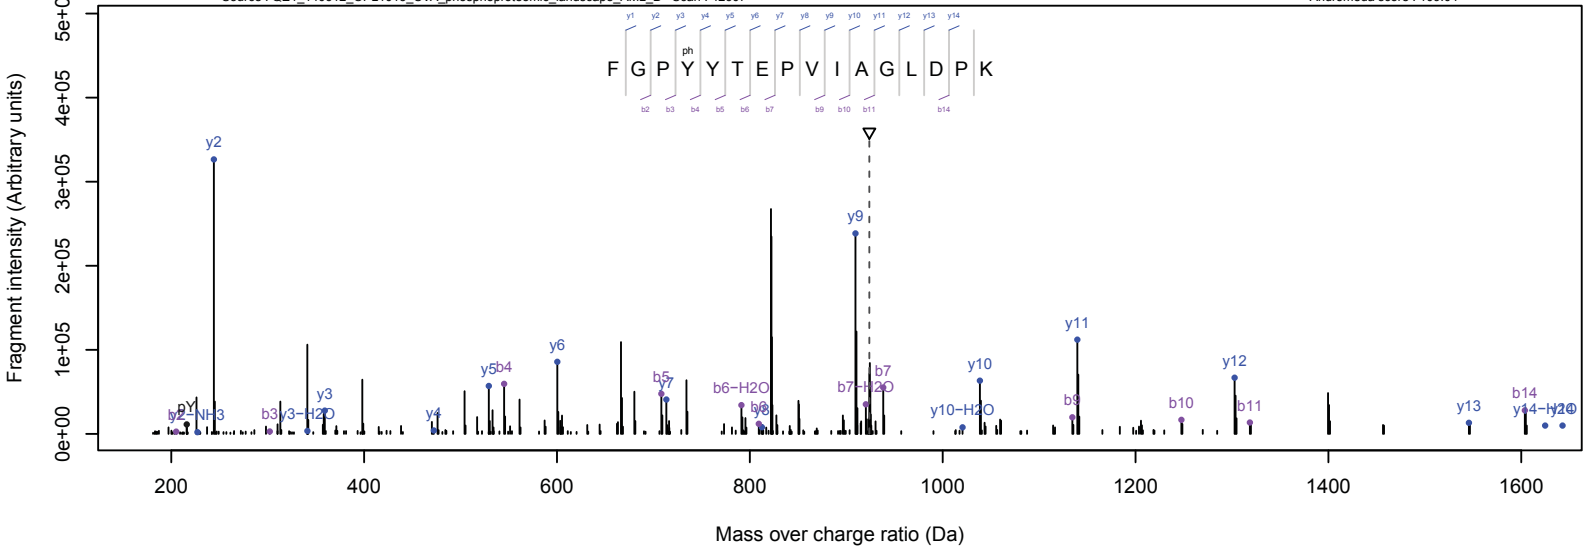

MTQNPNY(ph)YNLQGISHR-2+

Source : QE1\_140612\_OPL1013\_CVA\_phosphoproteomic\_landscape\_AML\_D Scan : 21712

Andromeda score : 109.04

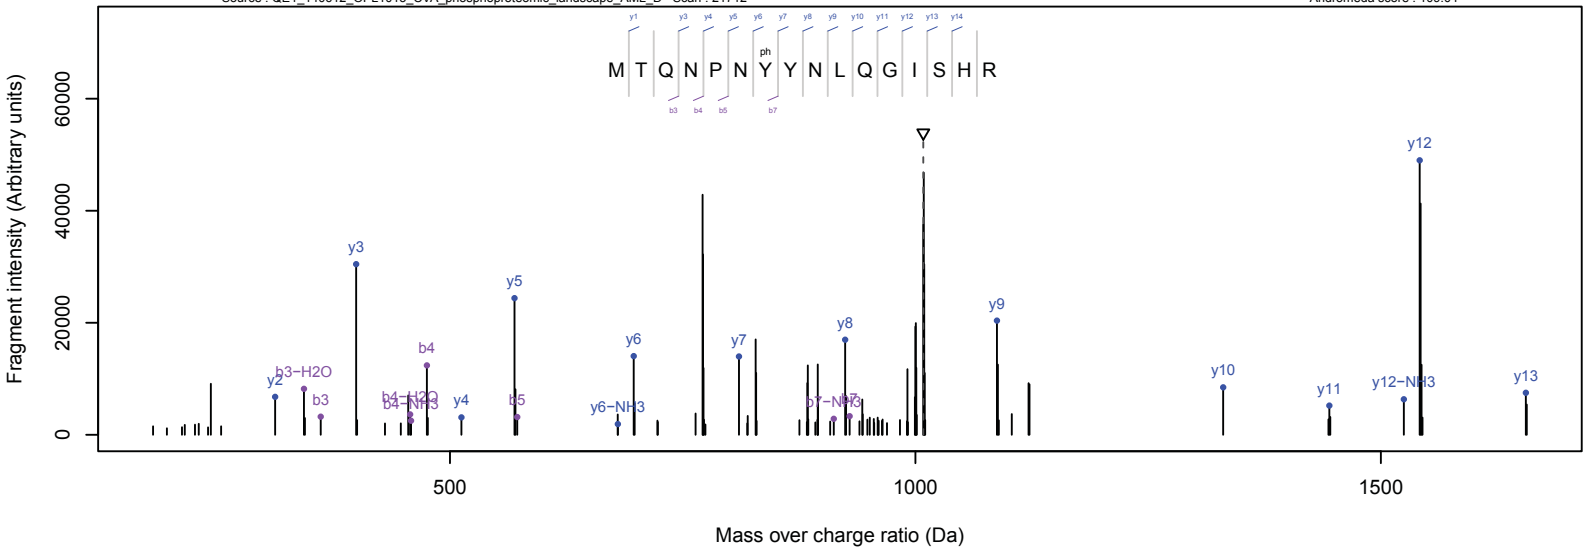



**FLSY(ph)KTQCPTCCVTVTEPDLK-3+**

Source : QE1\_140908\_OPL1013\_CVA\_pTyrIP\_AML\_HEL Scan : 30007

Andromeda score : 108.96

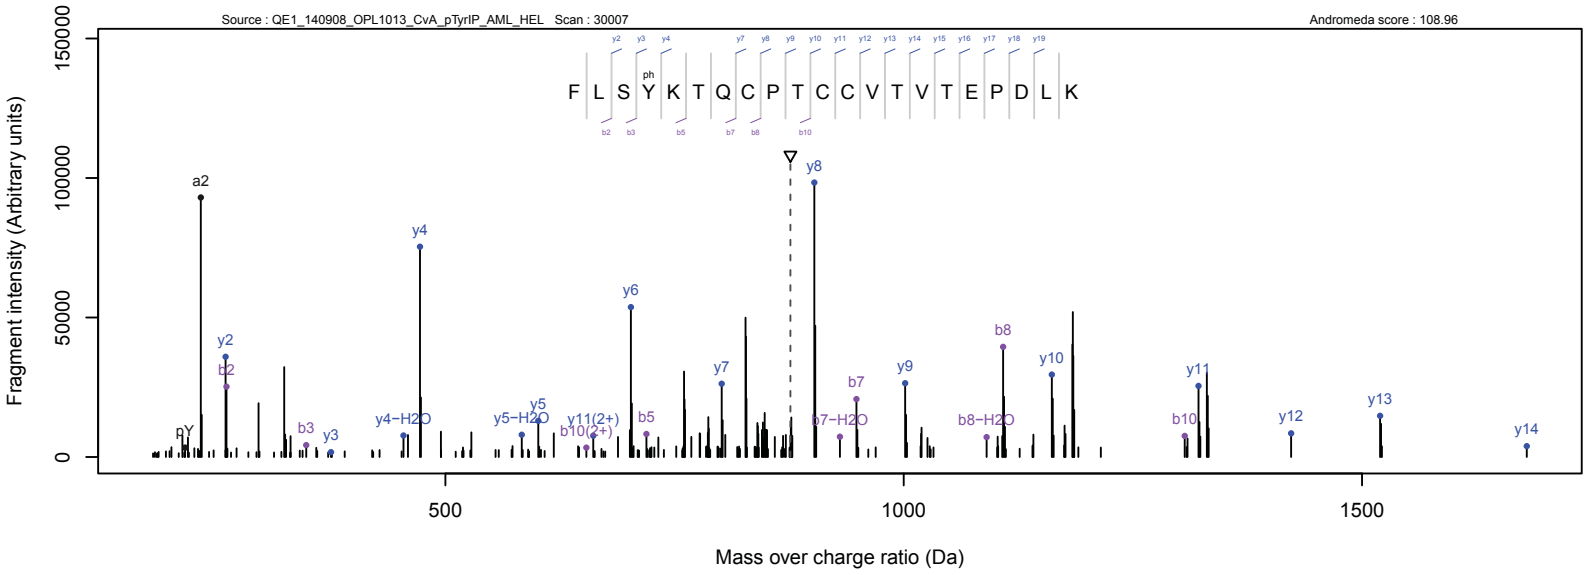

**QVVESAY(ph)EVIK-2+**

Source : QE1\_140612\_OPL1013\_CVA\_phosphoproteomic\_landscape\_AML\_C Scan : 22763

Andromeda score : 108.77

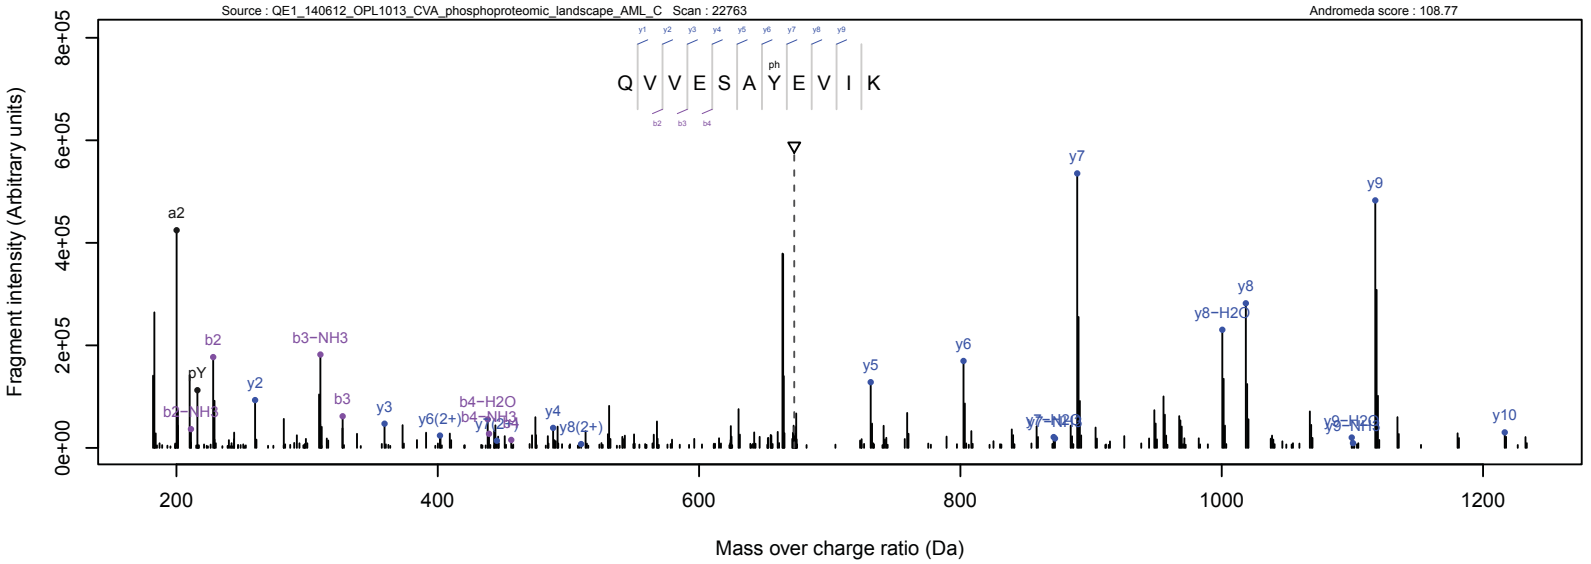

**STSTLY(ph)SQFQTAESNR-2+**

Source : QE1\_140612\_OPL1013\_CVA\_phosphoproteomic\_landscape\_AML\_C Scan : 23795

Andromeda score : 108.77

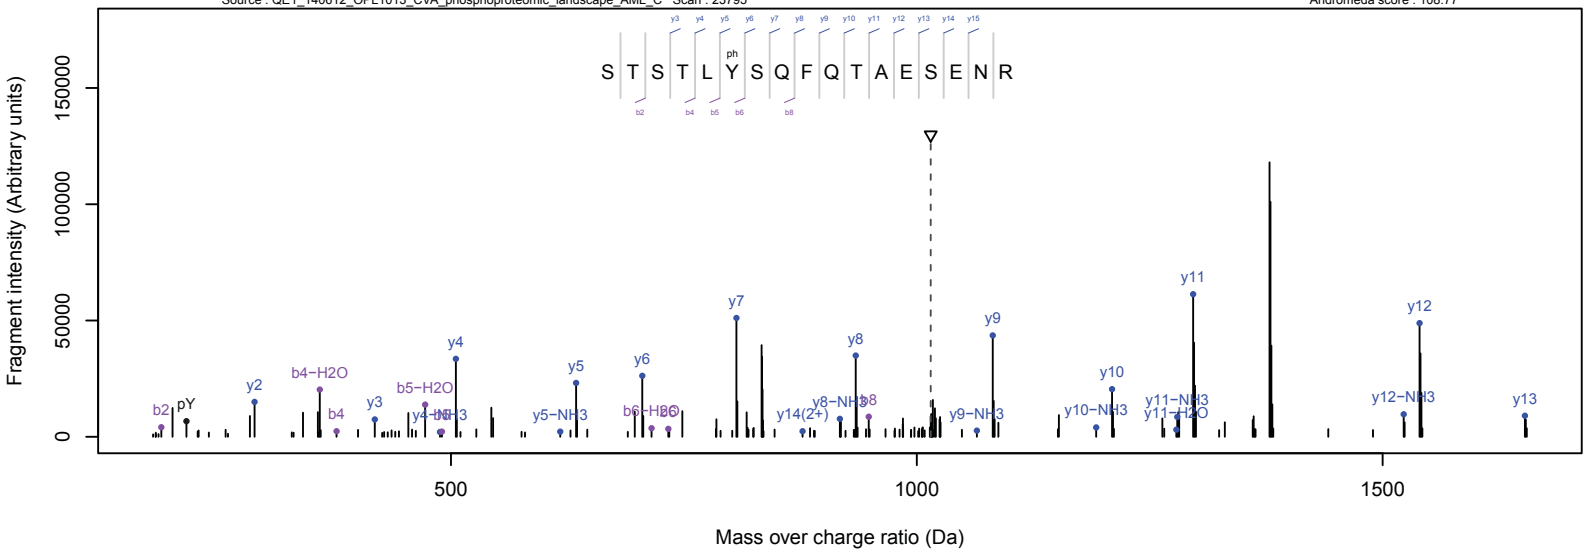

**NY(ph)VVLSDGPAALHPAHAPQISYTGPSSSGR-3+**

Source : QE1\_140612\_OPL1013\_CVA\_phosphoproteomic\_landscape\_AML\_C Scan : 33959

Andromeda score : 108.72

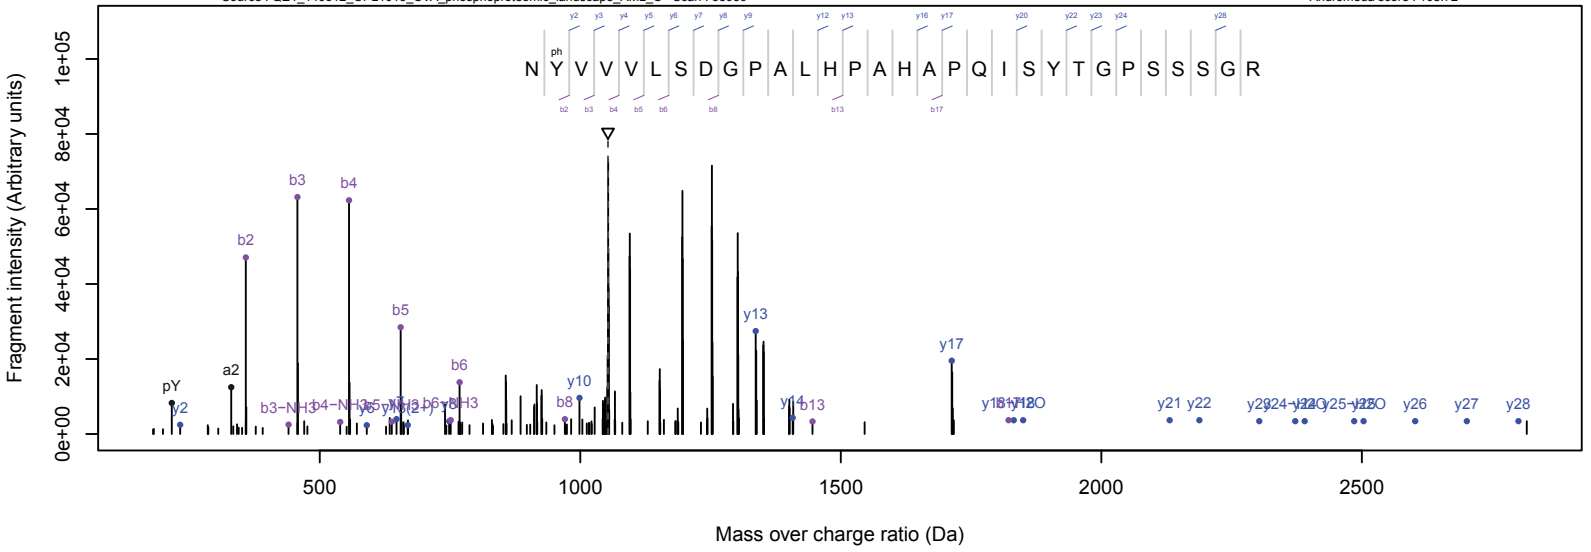

**EAEY(ph)SDKHGQYLIGHGTK-3+**

Source : QE1\_140612\_OPL1013\_CVA\_phosphoproteomic\_landscape\_AML\_C Scan : 8649

Andromeda score : 108.71

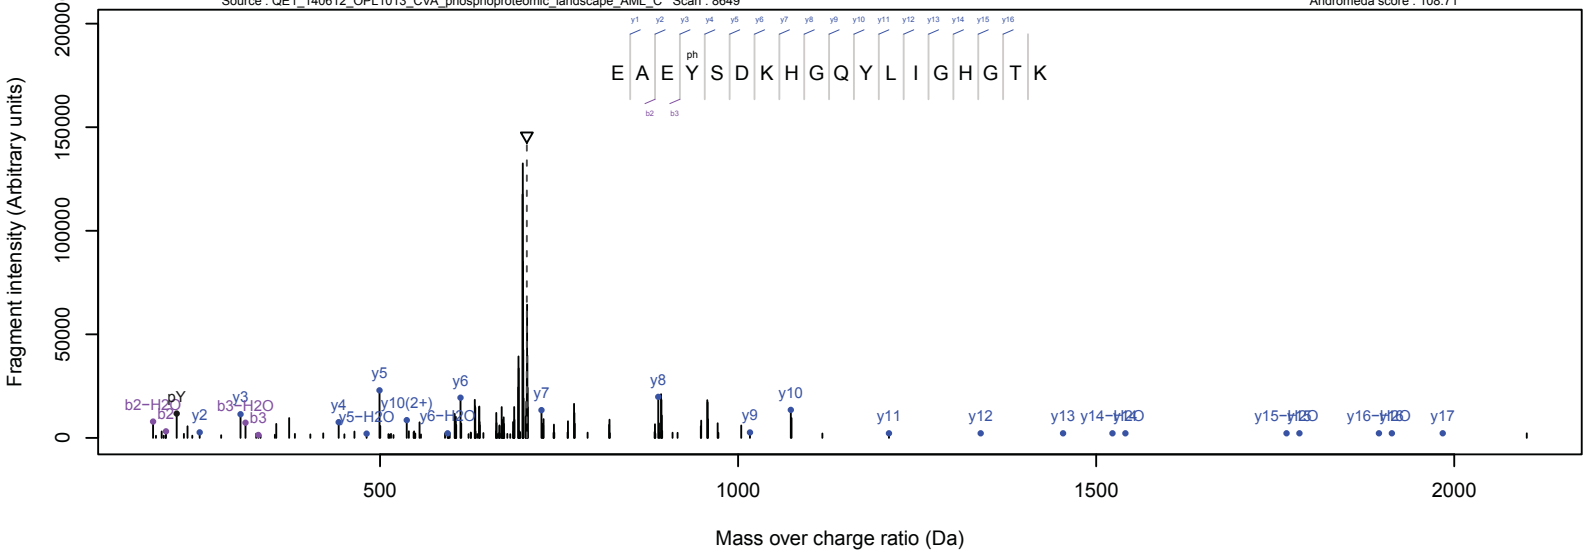

**GQWYEYDKY(ph)QVVQTLDCLR-3+**

Source : QE1\_140612\_OPL1013\_CVA\_phosphoproteomic\_landscape\_AML\_C Scan : 47178

Andromeda score : 108.71

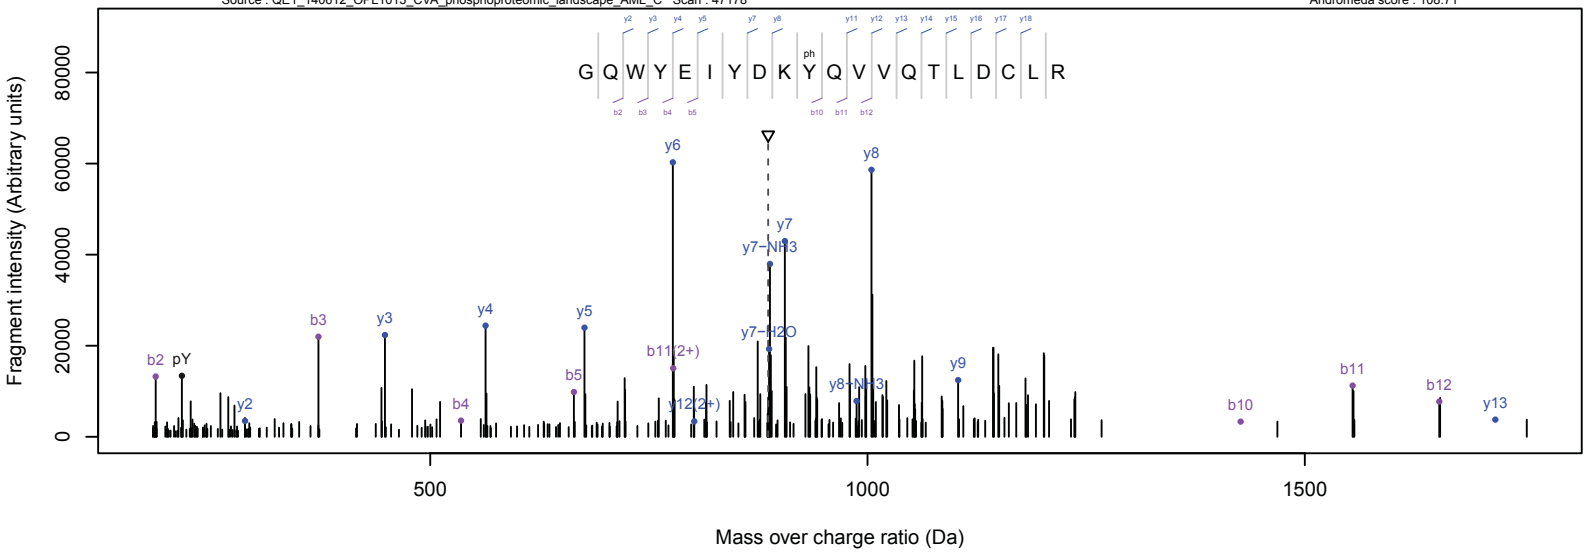

QA E E D R Q M D T E A A A S E A P Q D V T Y A Q L H S F T L R

Source: QE1\_140908\_OPL1013\_CvA\_pTyrIP\_AML\_OCI\_AML3 Scan: 38546

Andromeda score: 108.71

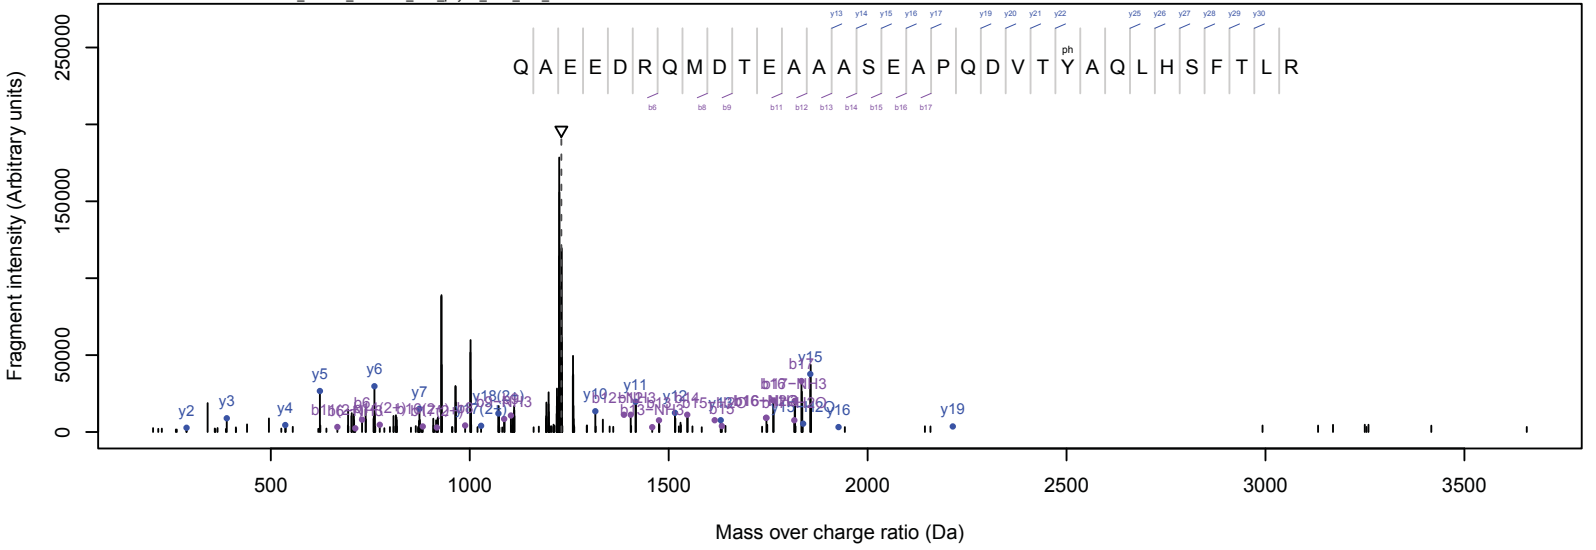

H I G N P E Y L M K R

Source: QE1\_140612\_OPL1013\_CvA\_phosphoproteomic\_landscape\_AML\_C Scan: 18812

Andromeda score: 108.7

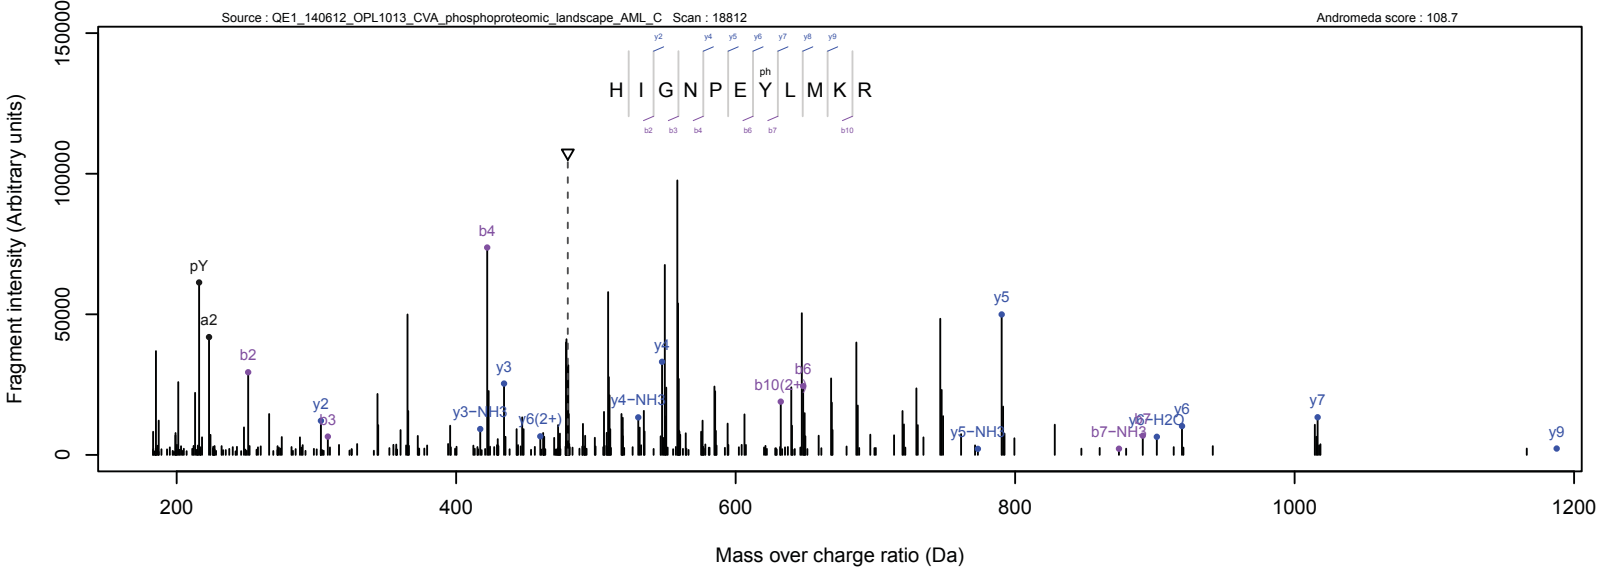

L I E D N E Y T A R

Source: QE1\_140822\_OPL1013\_CvA\_pTyrIP\_AML\_cell\_lines\_part2\_F Scan: 6458

Andromeda score: 108.7

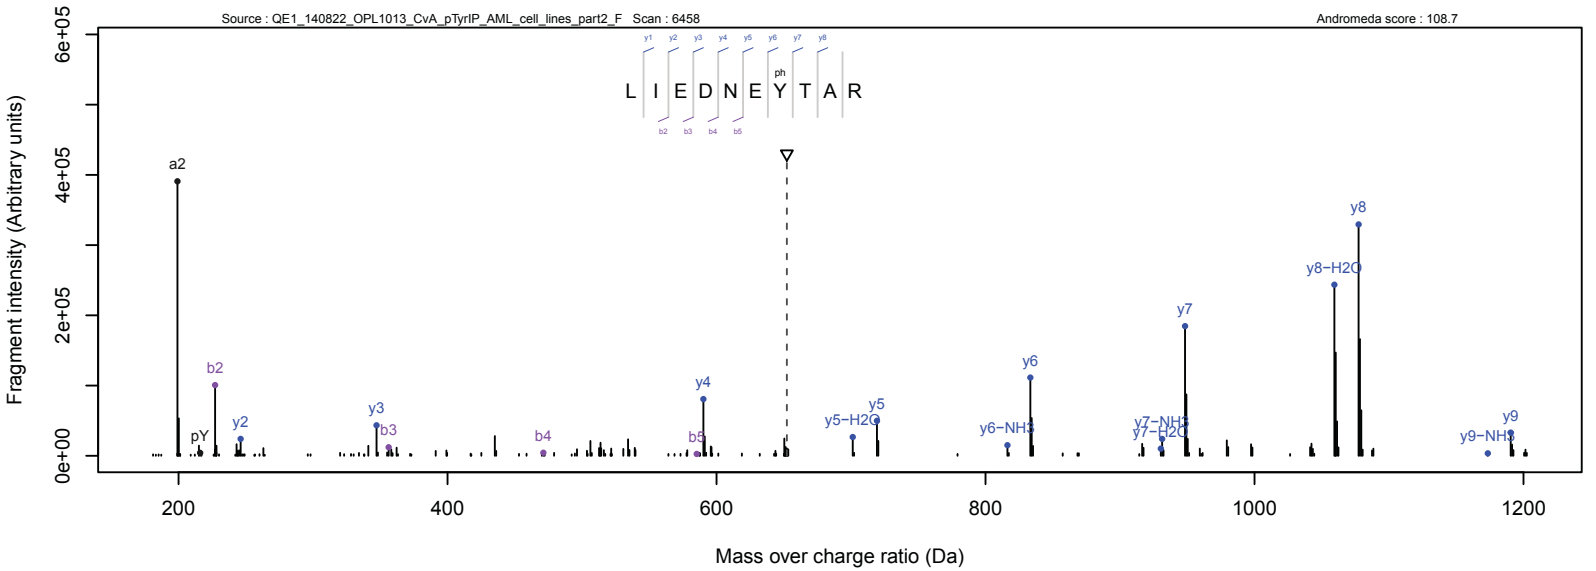

**GIY(ph)AYGFEKPSAIQQR-3+**

Source: QE1\_140612\_OPL1013\_CVA\_phosphoproteomic\_landscape\_AML\_C Scan: 26718

Andromeda score: 108.63

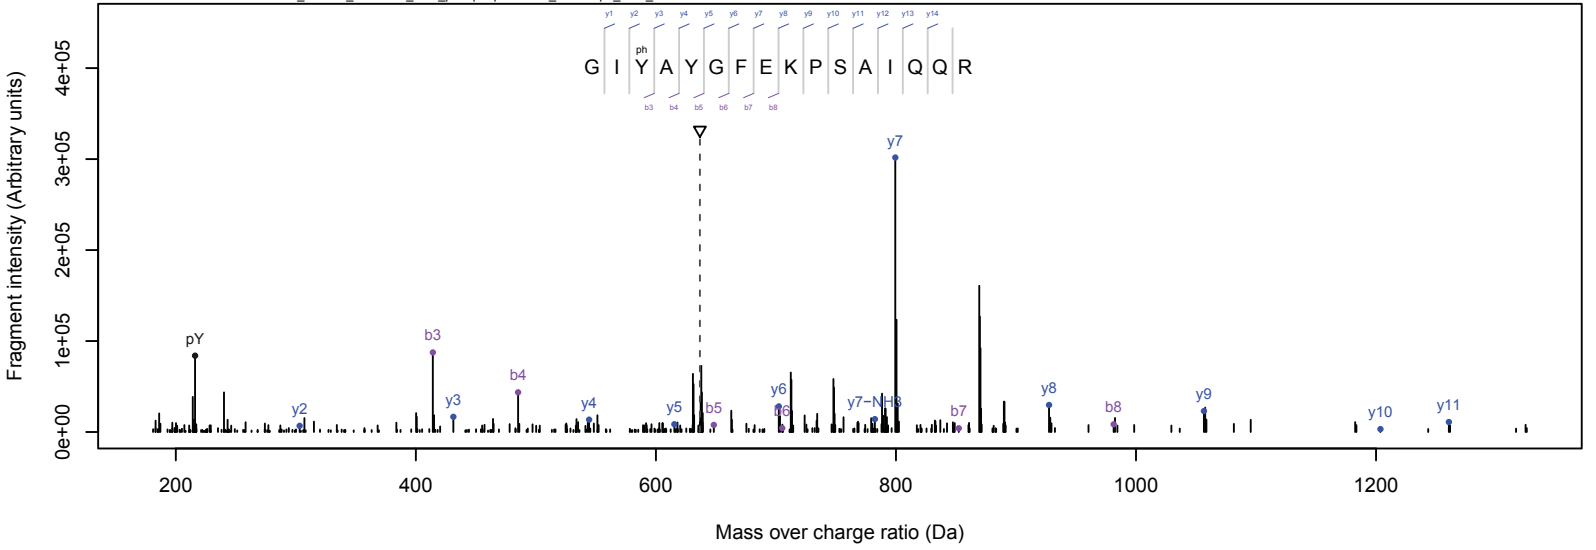

**VY(ph)LLYRPGHYDILYK-3+**

Source: QE1\_140612\_OPL1013\_CVA\_phosphoproteomic\_landscape\_AML\_C Scan: 36943

Andromeda score: 108.63

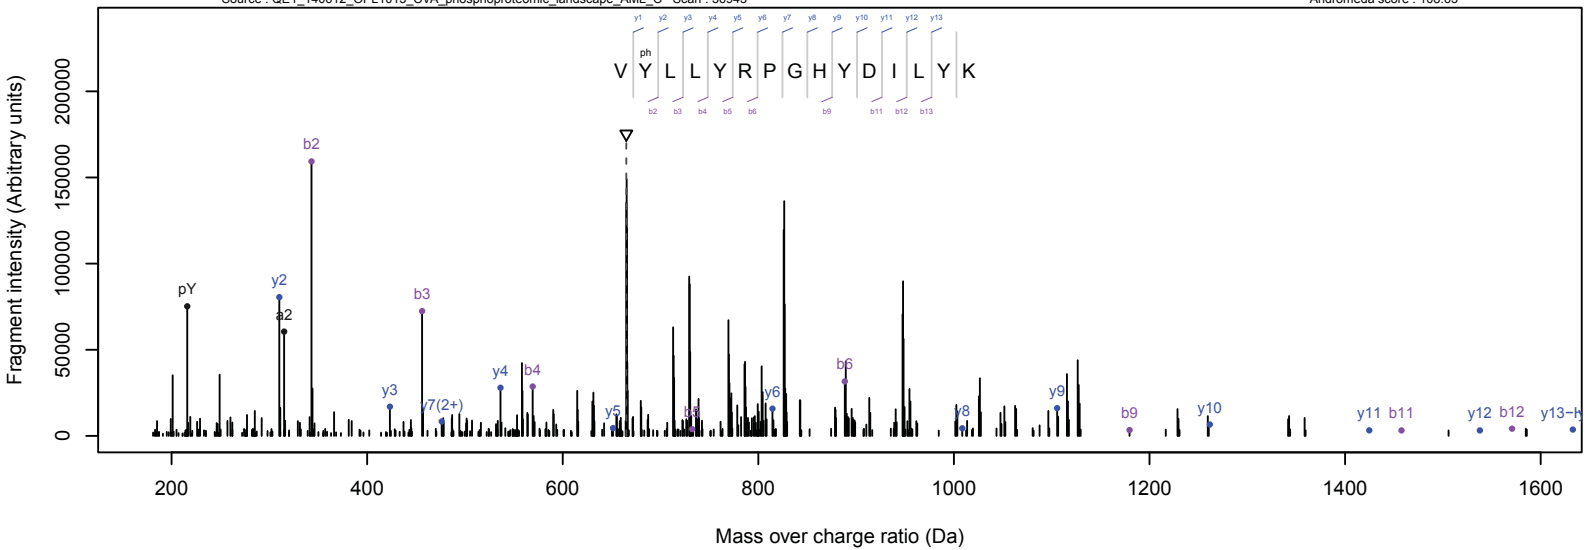

**FY(ph)EQMNGPVAGASR-2+**

Source: QE1\_140612\_OPL1013\_CVA\_phosphoproteomic\_landscape\_AML\_D Scan: 18473

Andromeda score: 108.58

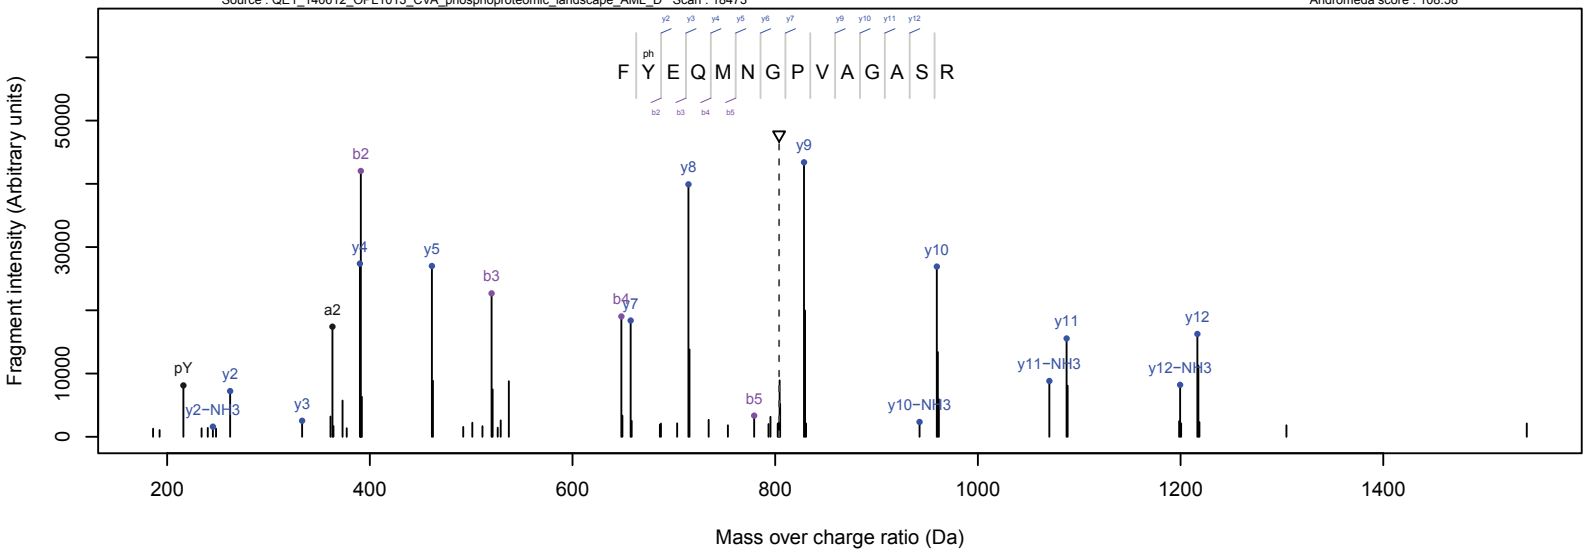

APSY(ph)LEISSMR-2+

Source : QE1\_140612\_OPL1013\_CVA\_phosphoproteomic\_landscape\_AML\_C Scan : 25041

Andromeda score : 108.56

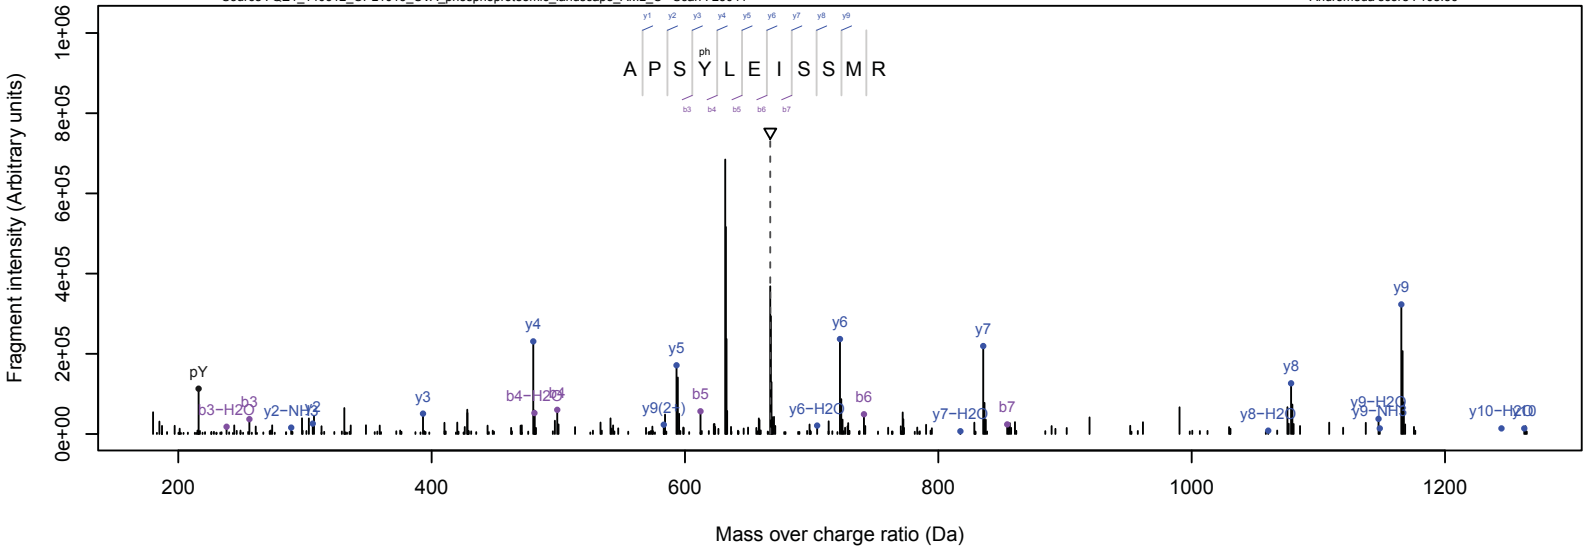

DRETDTSALAAGSSQEVY(ph)AQLDHWALTQR-4+

Source : QE1\_140612\_OPL1013\_CVA\_phosphoproteomic\_landscape\_AML\_C Scan : 37615

Andromeda score : 108.39

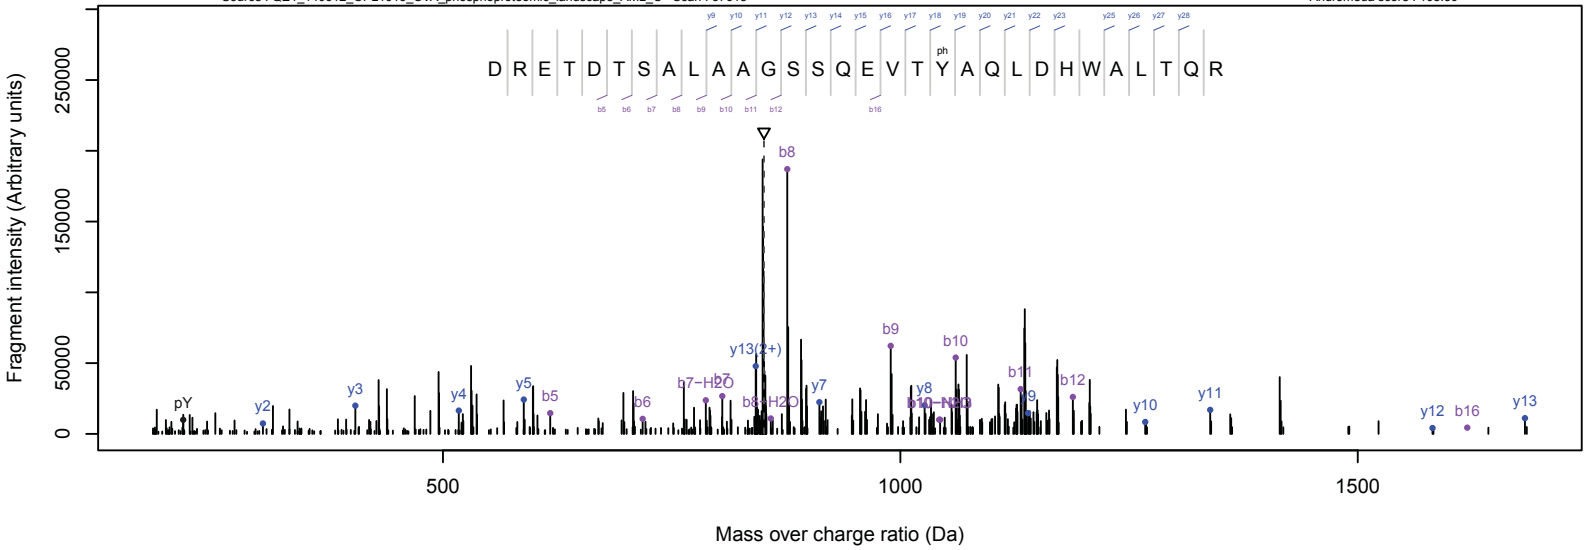

EIQYAPLSFHKGEPQDLSGQEATNNEY(ph)SEIKIPK-4+

Source : QE1\_140908\_OPL1013\_CvA\_pTyrIP\_AML\_OCI\_AML3 Scan : 35971

Andromeda score : 108.39

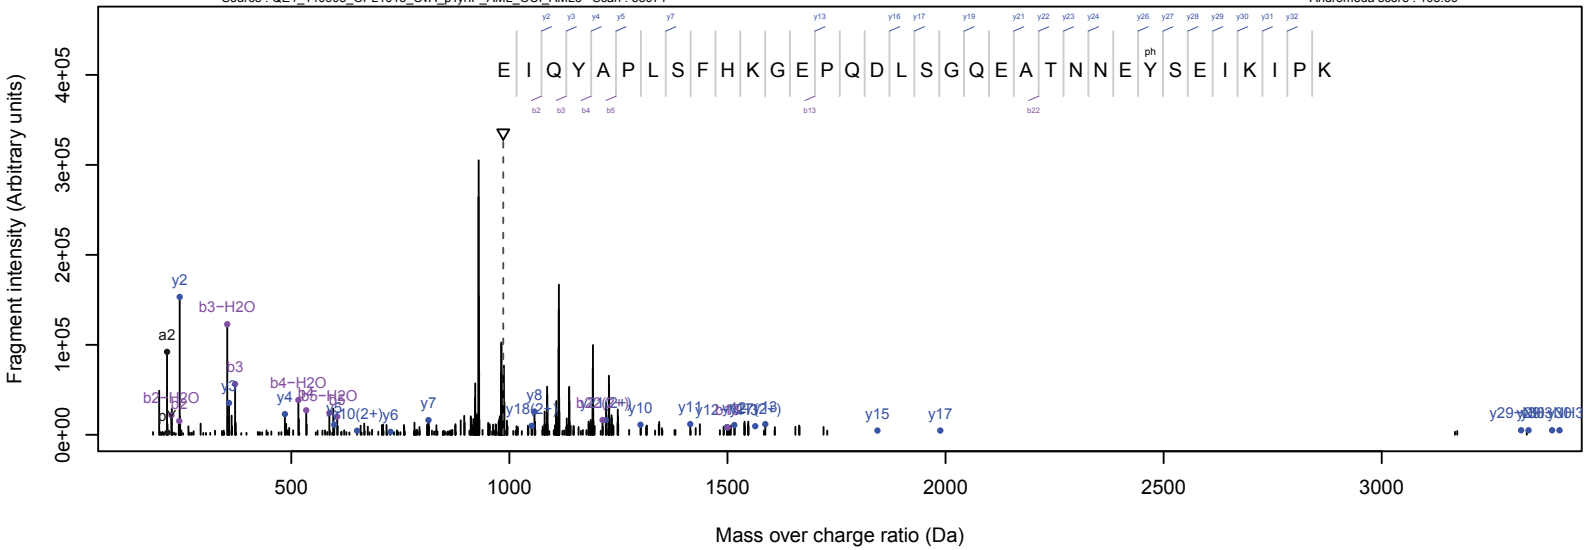

NVVHQLSVTLEDLYNGATR-3+

Source : QE1\_140908\_OPL1013\_CVA\_pTyrIP\_AML\_Kasumi1 Scan : 44538

Andromeda score : 108.39

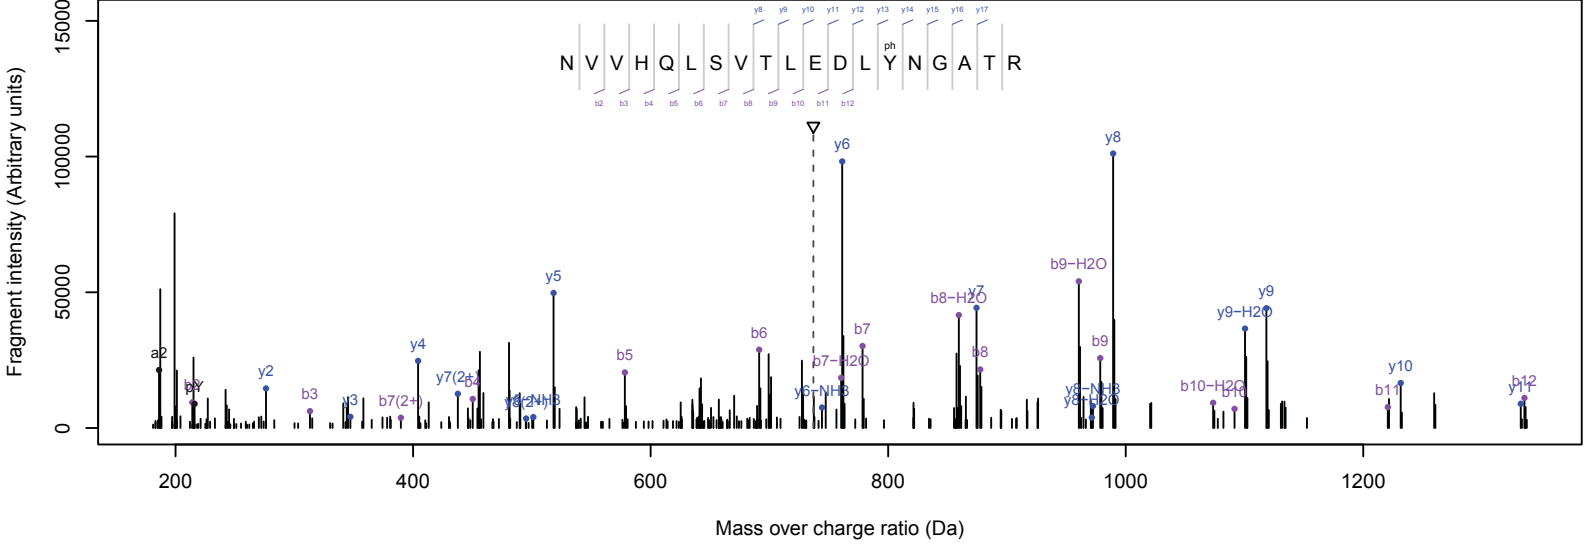

AEFAEY(ph)ASVDR-2+

Source : QE1\_140612\_OPL1013\_CVA\_phosphoproteomic\_landscape\_AML\_B Scan : 17125

Andromeda score : 108.35

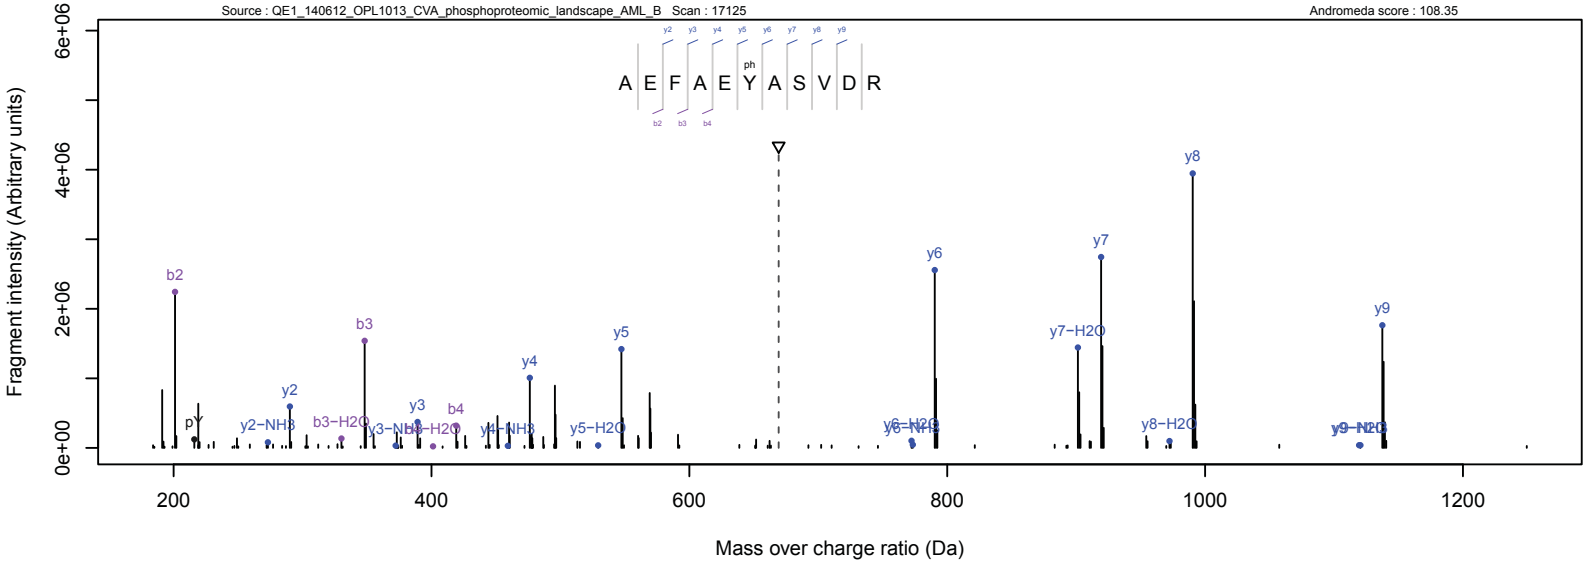

ATY(ph)INLKPAARK-2+

Source : QE1\_140612\_OPL1013\_CVA\_phosphoproteomic\_landscape\_AML\_C Scan : 10161

Andromeda score : 108.35

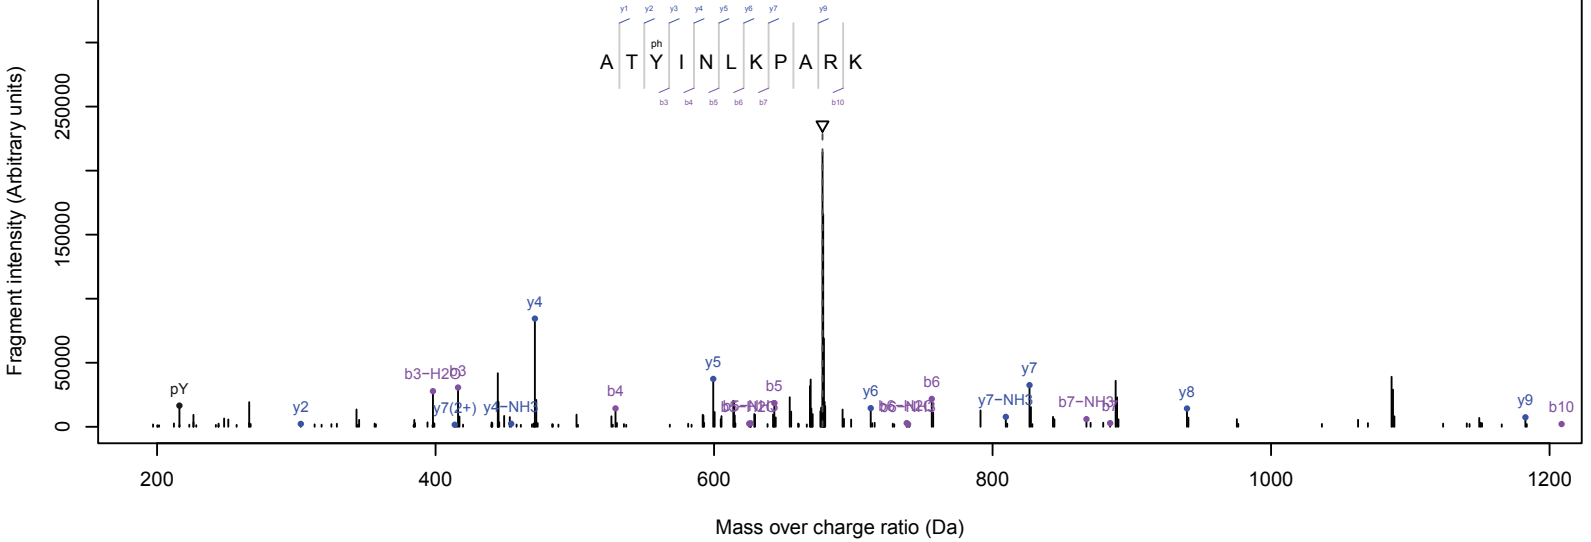

VEFGVY(ph)ESGPR-2+

Source : QE1\_140612\_OPL1013\_CVA\_phosphoproteomic\_landscape\_AML\_A Scan : 20875

Andromeda score : 108.35

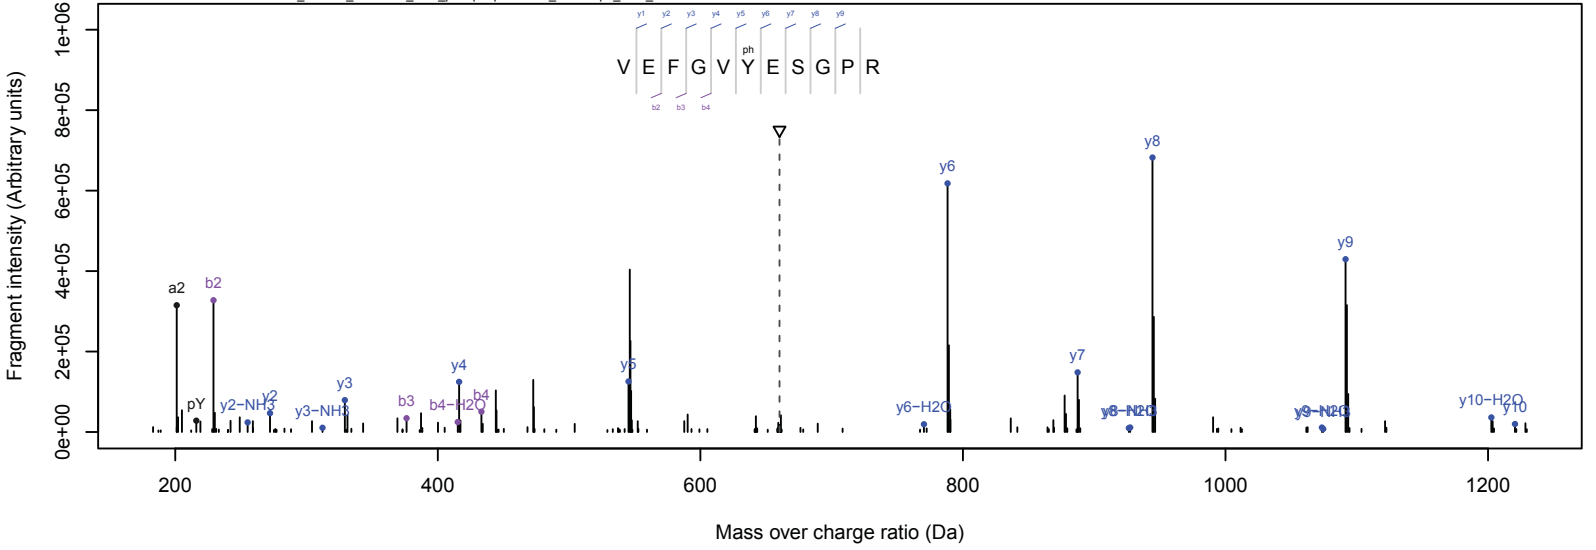

ANNPPYLPPEAEDGNIEY(ph)KLK-3+

Source : QE1\_140612\_OPL1013\_CVA\_phosphoproteomic\_landscape\_AML\_C Scan : 32411

Andromeda score : 108.25

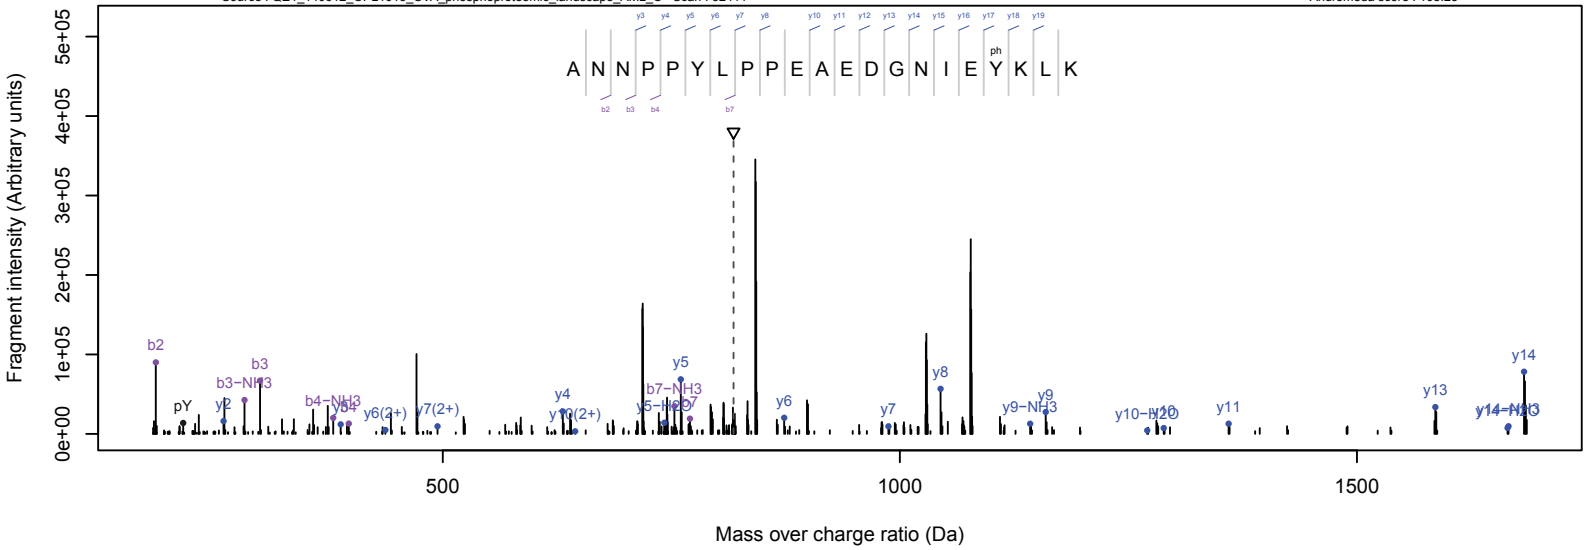

KGTGLSSDYR(ph)IINGK-3+

Source : QE1\_140612\_OPL1013\_CVA\_phosphoproteomic\_landscape\_AML\_C Scan : 22333

Andromeda score : 108.18

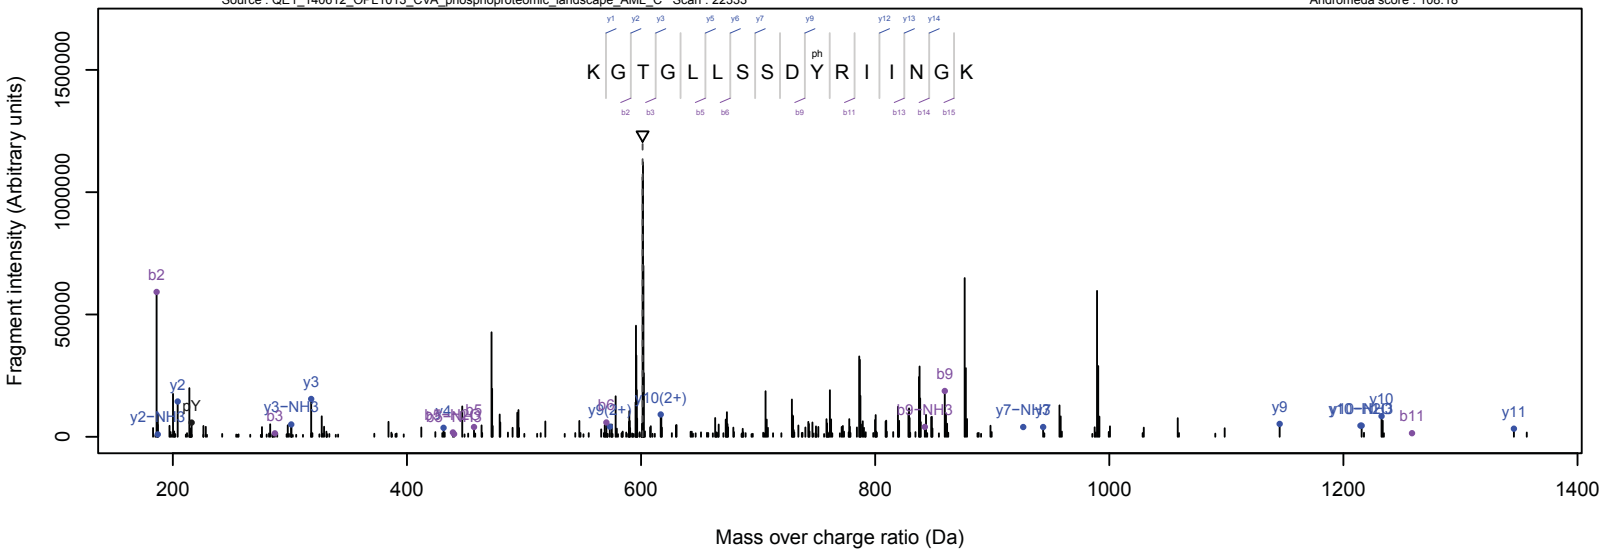

PNPSTSS(ph)PYPLPEEIR-2+

Source : QE1\_140908\_OPL1013\_CVA\_pTyrIP\_AML\_HEL Scan : 26090

Andromeda score : 108.18

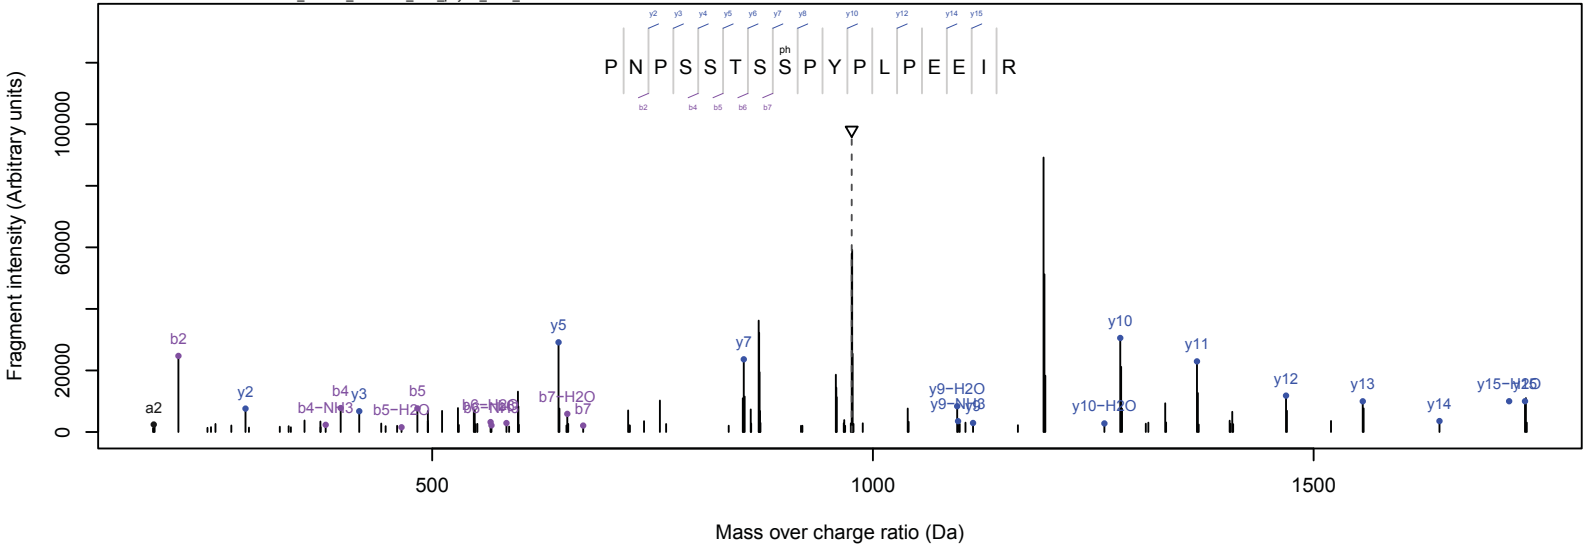

ESMCSTPAFPVSPETPY(ph)VKTALR-3+

Source : QE1\_140612\_OPL1013\_CVA\_phosphoproteomic\_landscape\_AML\_C Scan : 36548

Andromeda score : 108.14

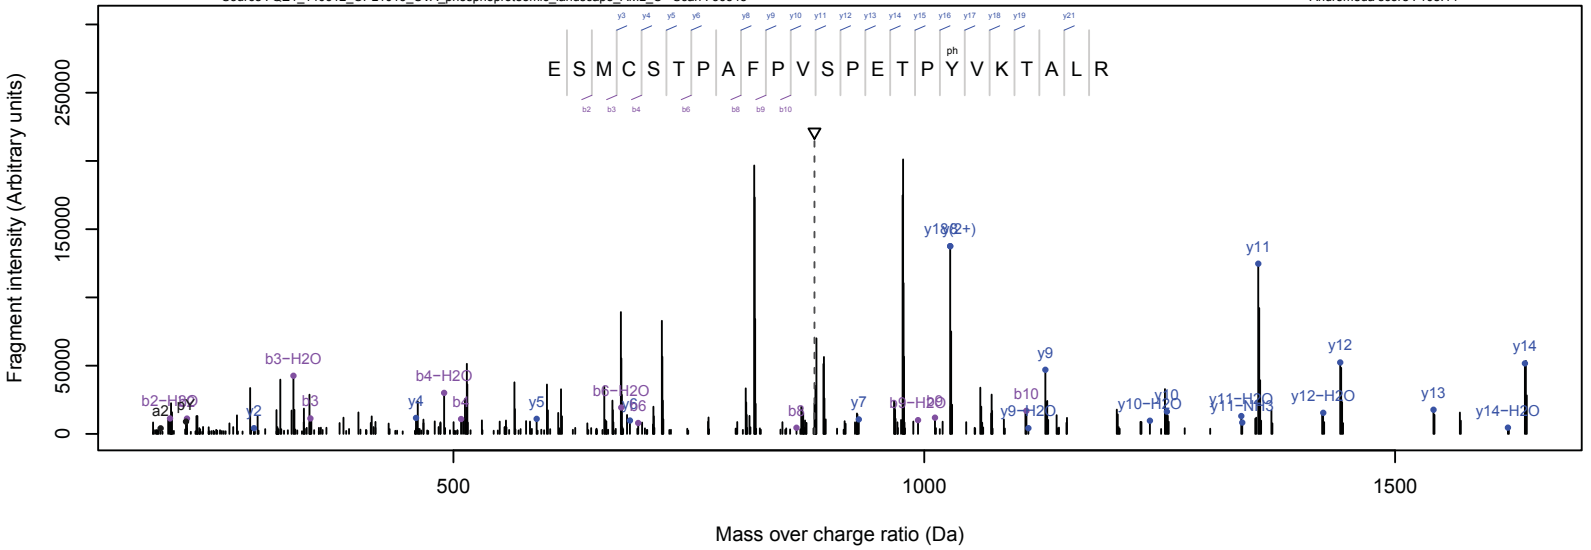

LHHPAQGSAAGTPY(ph)PSSASLR-3+

Source : QE1\_140612\_OPL1013\_CVA\_phosphoproteomic\_landscape\_AML\_C Scan : 11329

Andromeda score : 108.12

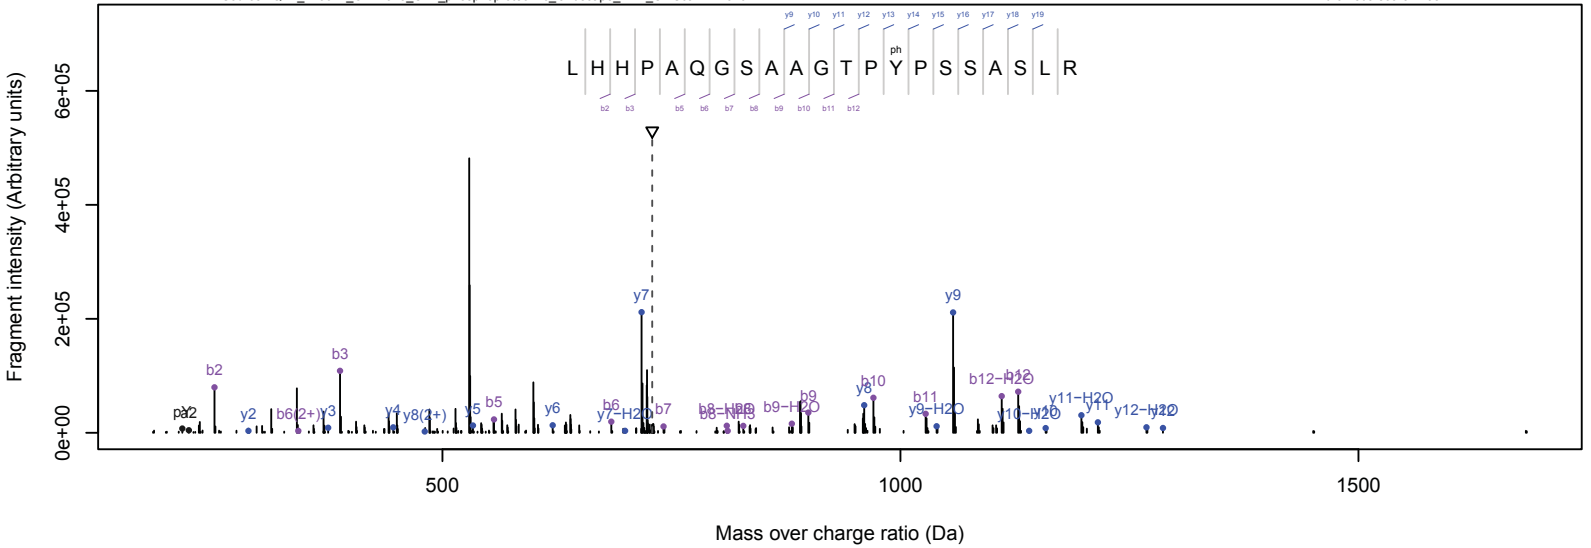



LIY(ph)FQLHR-2+

Source : QE1\_140612\_OPL1013\_CVA\_phosphoproteomic\_landscape\_AML\_B Scan : 29542

Andromeda score : 108.09

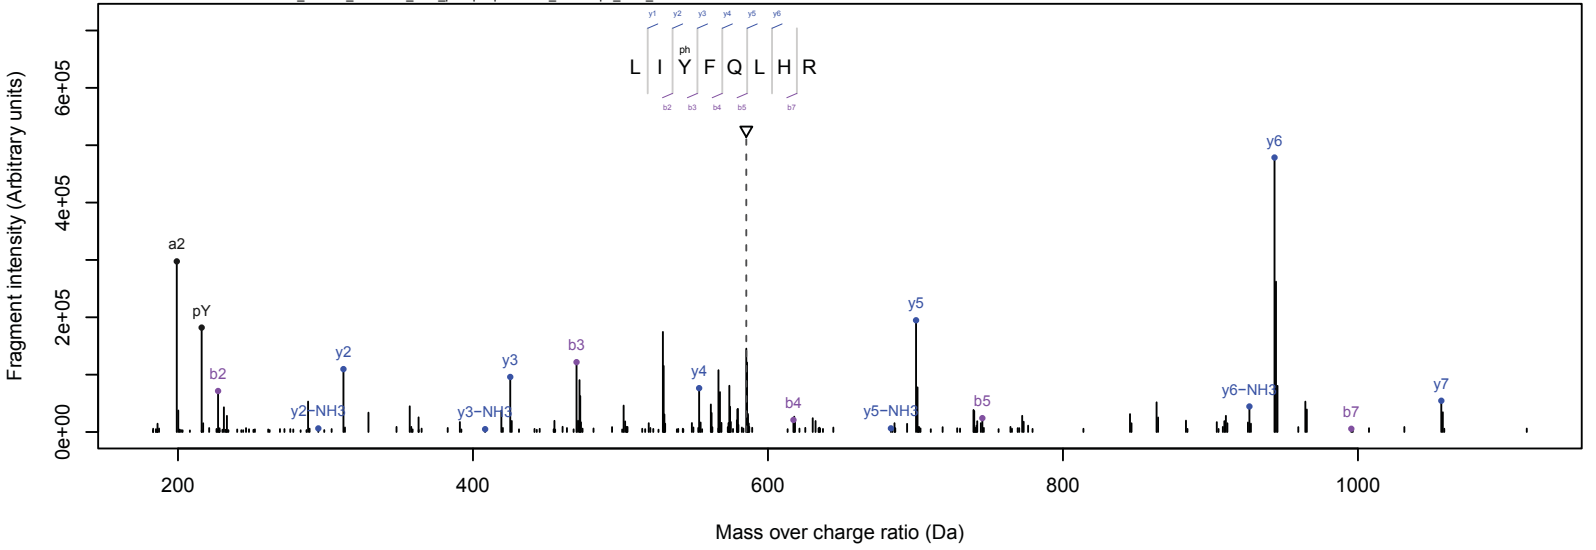

QGCV(ph)ACSVVDGEVK-2+

Source : QE1\_140612\_OPL1013\_CVA\_phosphoproteomic\_landscape\_AML\_A Scan : 19882

Andromeda score : 107.82

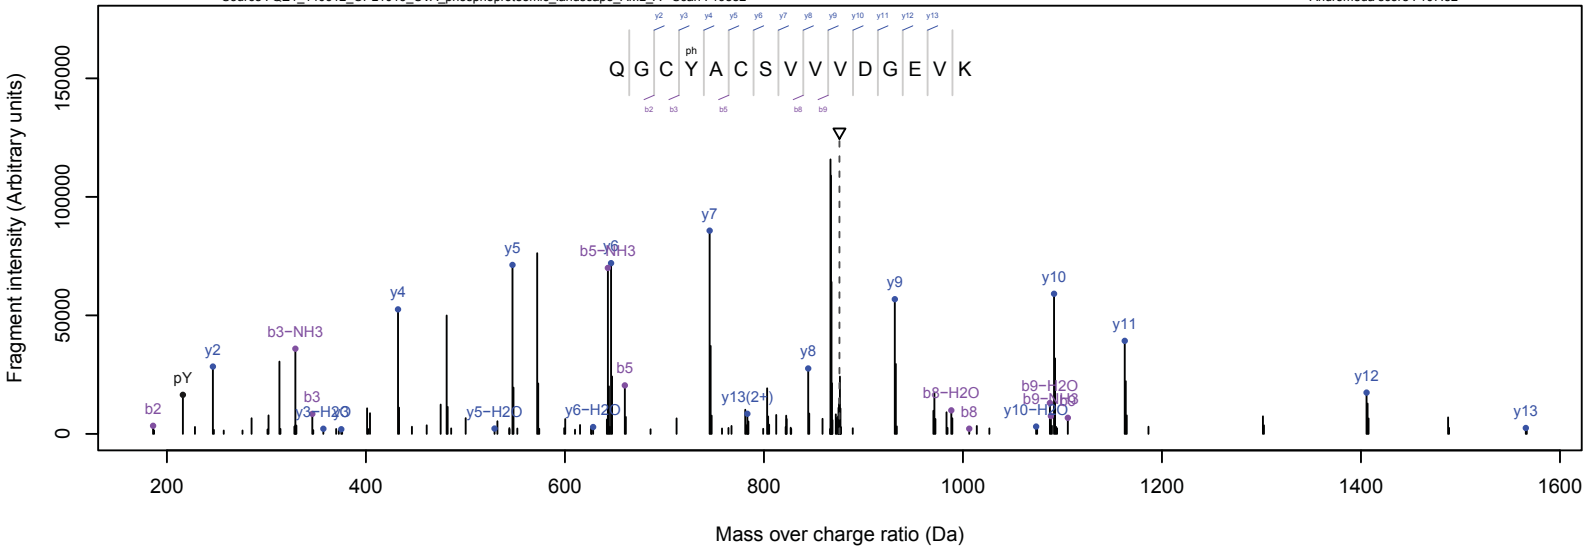

IMHNY(ph)DKLK-2+

Source : QE1\_140612\_OPL1013\_CVA\_phosphoproteomic\_landscape\_AML\_A Scan : 6158

Andromeda score : 107.79

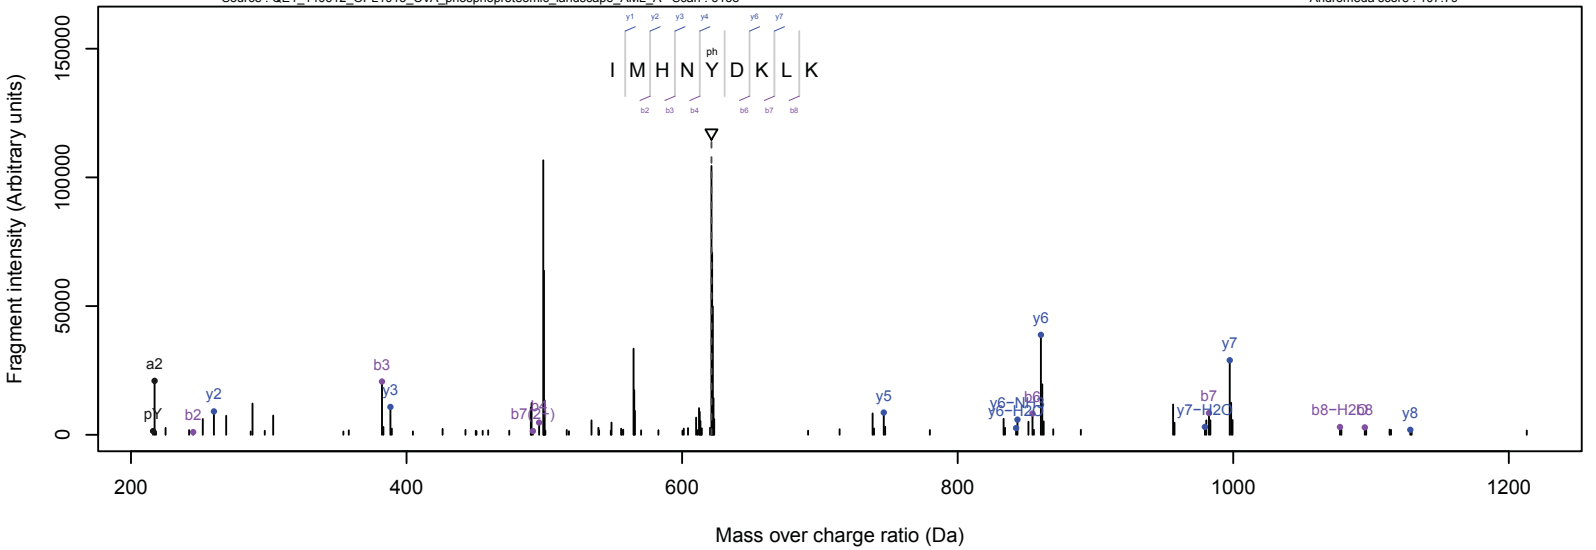

IREEY(ph)PDRIMNTFSVVPSK-3+

Source: QE1\_140612\_OPL1013\_CVA\_phosphoproteomic\_landscape\_AML\_B Scan: 34941

Andromeda score: 107.78

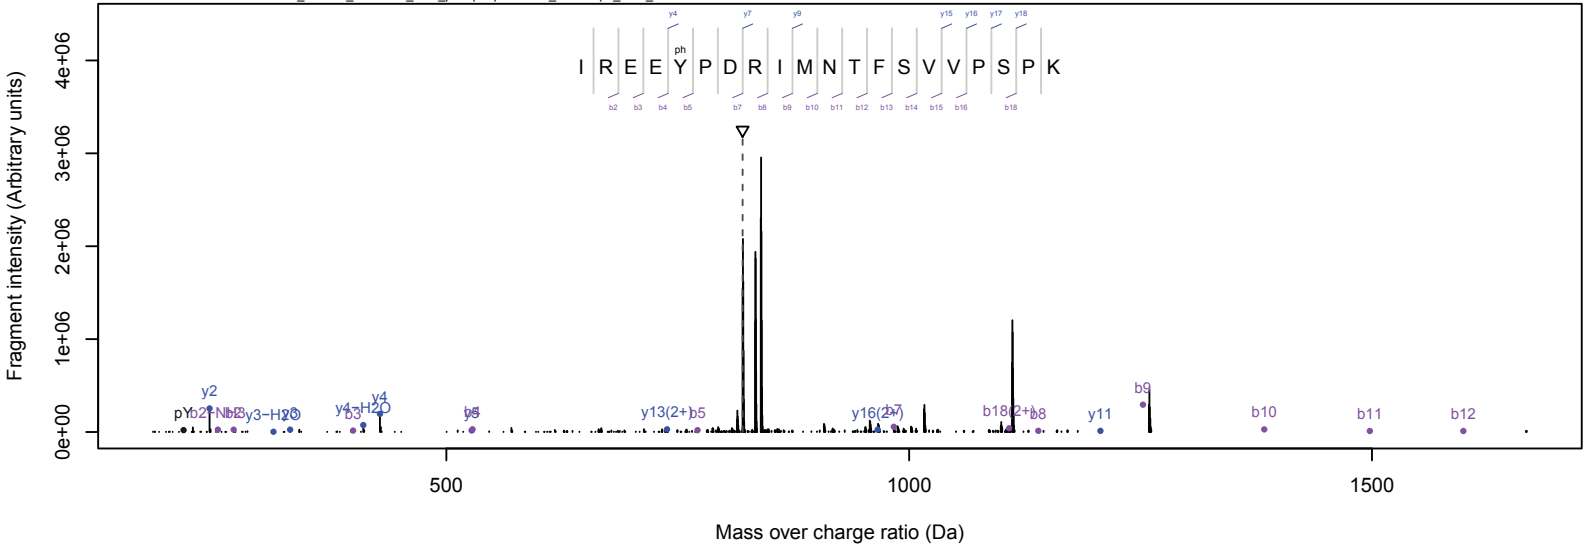

NPY(ph)YGGESASITPLEDLYKR-3+

Source: QE1\_140612\_OPL1013\_CVA\_phosphoproteomic\_landscape\_AML\_D Scan: 37803

Andromeda score: 107.78

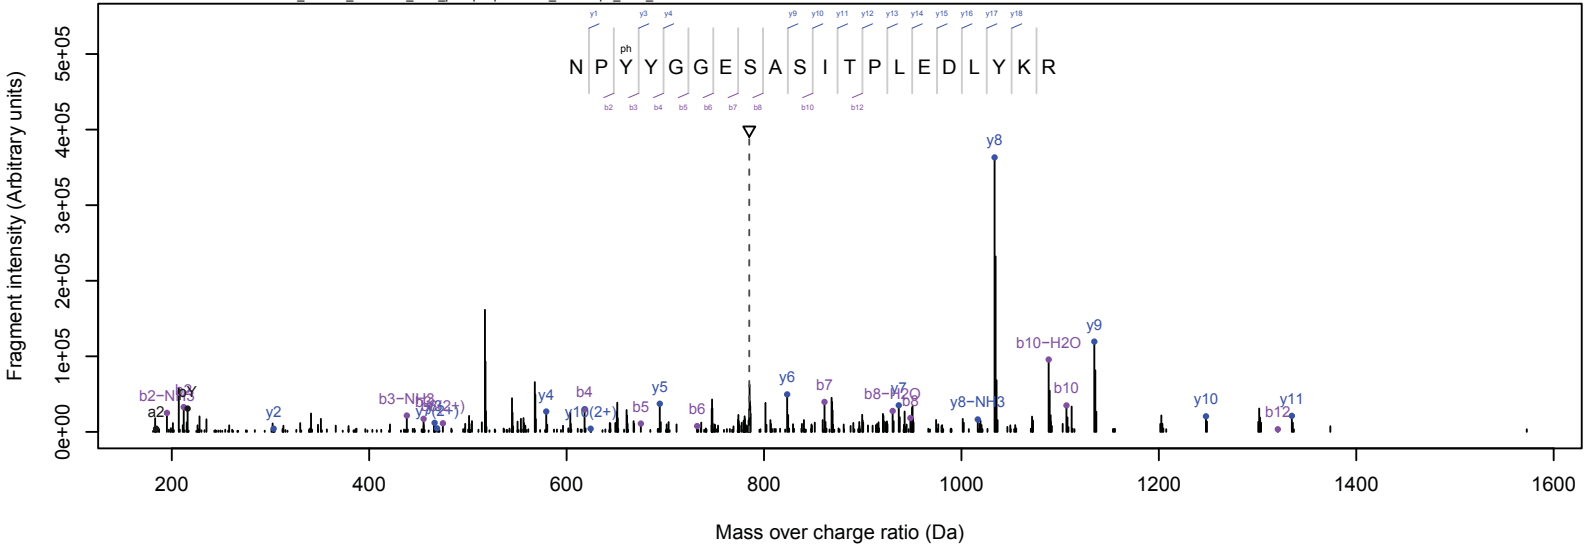

VTSVHLPDYAHY(ph)YTIGPM(ox)FPSSQIPSWK-3+

Source: QE1\_140908\_OPL1013\_CvA\_pTyrIP\_AML\_HEL Scan: 47180

Andromeda score: 107.75

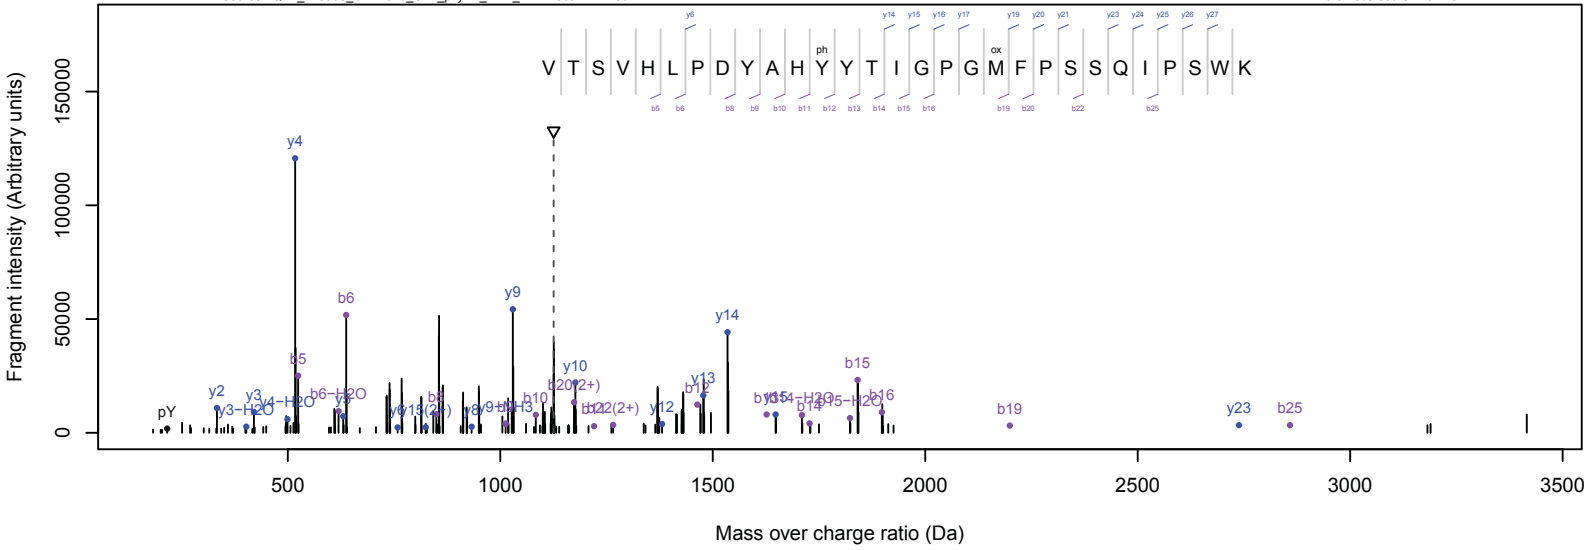

LAALPENPPAIDWAY(ph)YK-2+

Source : QE1\_140612\_OPL1013\_CVA\_phosphoproteomic\_landscape\_AML\_B Scan : 44289

Andromeda score : 107.73

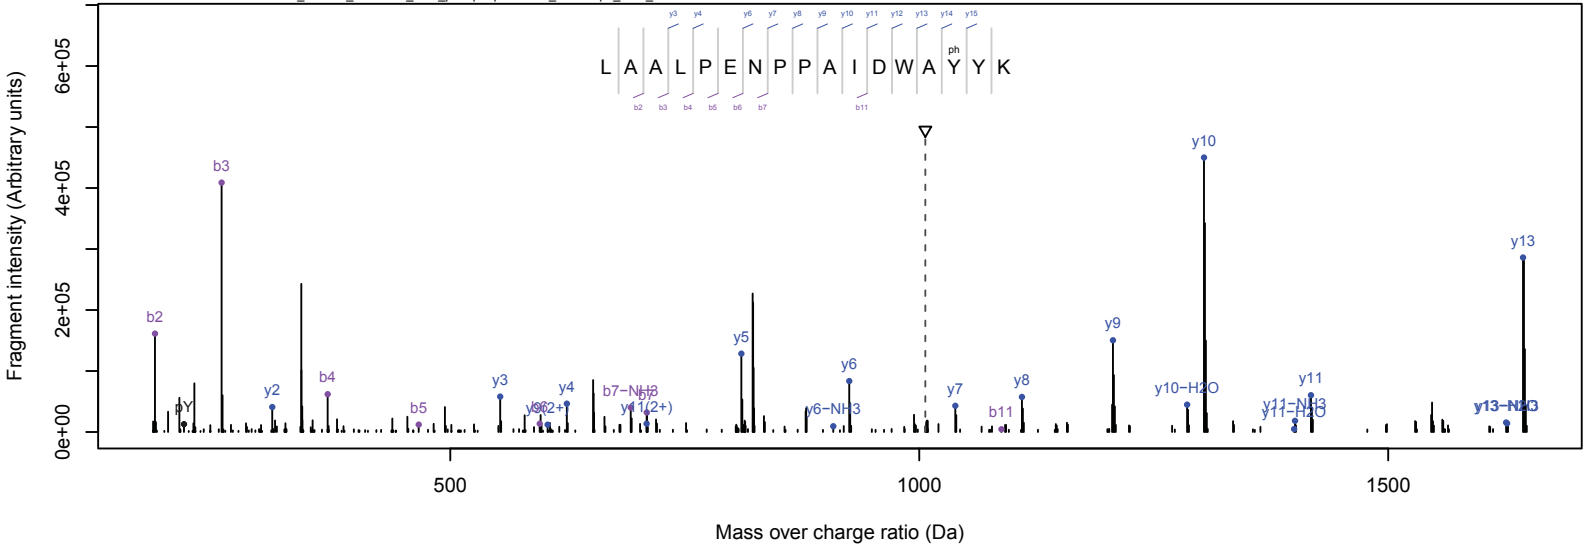

DYAPPPRDYT(ph)YRDYGHSSSR-4+

Source : QE1\_140612\_OPL1013\_CVA\_phosphoproteomic\_landscape\_AML\_C Scan : 11854

Andromeda score : 107.72

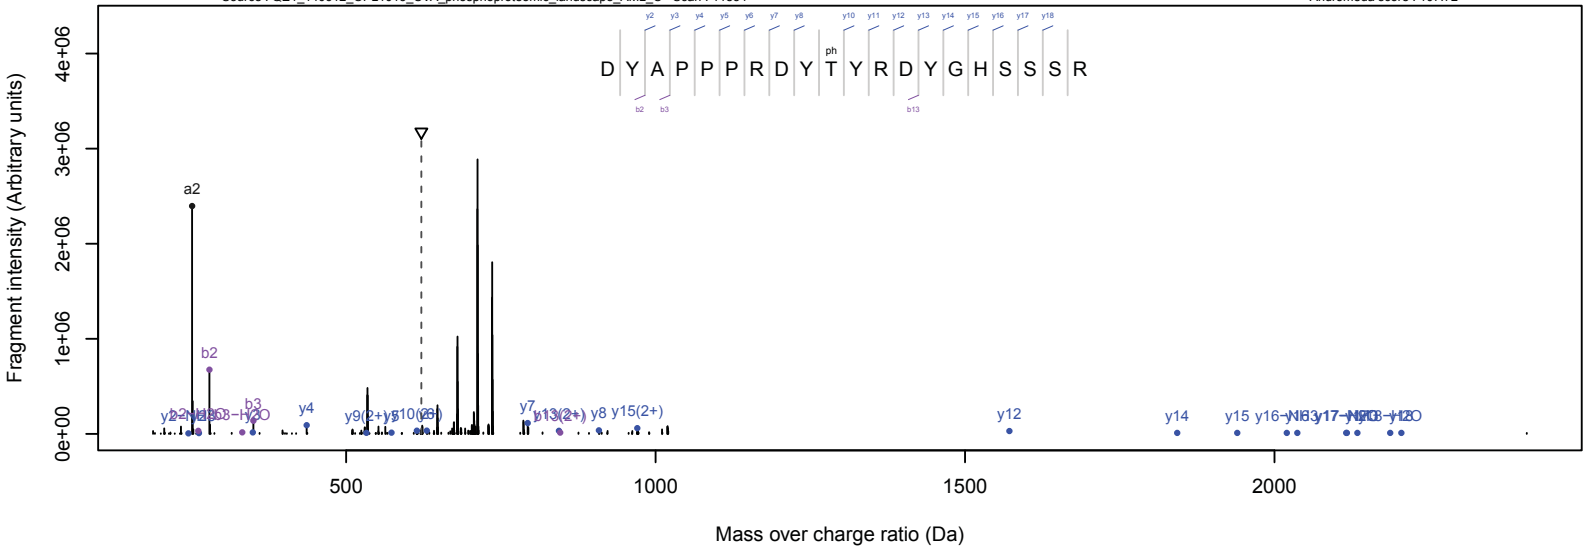

IGGDAGTSLNSNDY(ph)YGGQK-2+

Source : QE1\_140612\_OPL1013\_CVA\_phosphoproteomic\_landscape\_AML\_B Scan : 14886

Andromeda score : 107.72

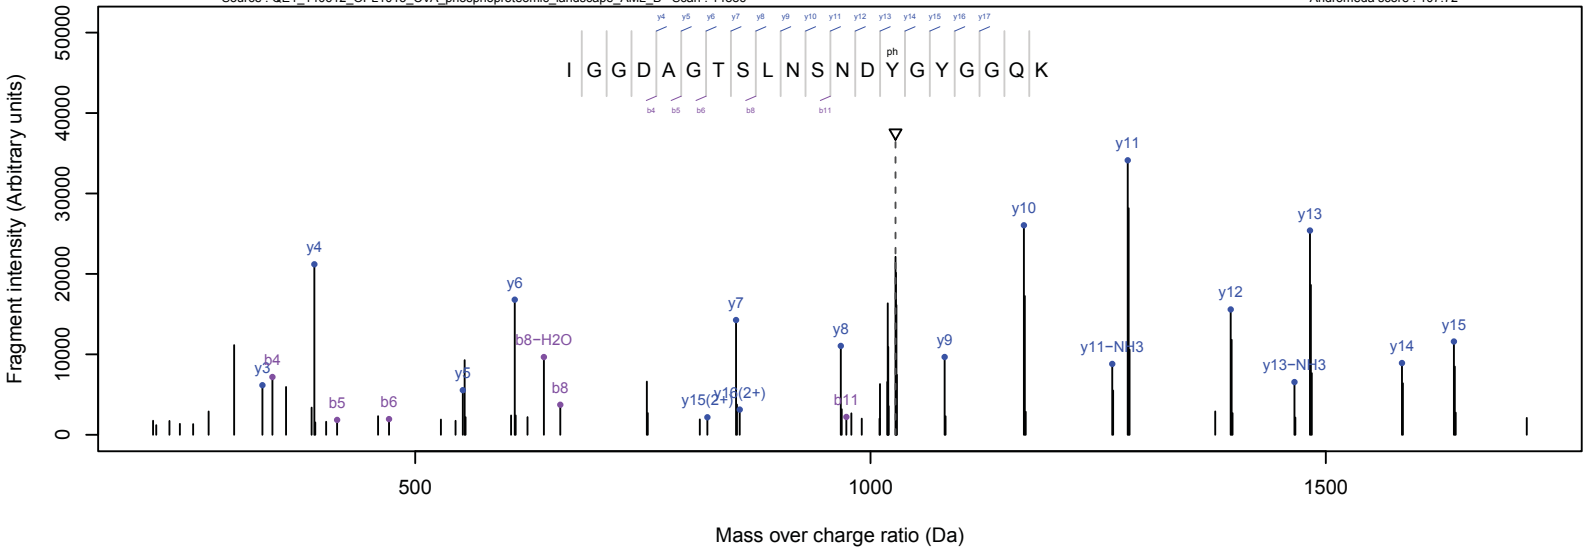



**AWQEYAAASHSY(ph)WNAQR-3+**

Source : QE1\_140908\_OPL1013\_CVA\_pTyrIP\_AML\_HEL Scan : 36741

Andromeda score : 107.65

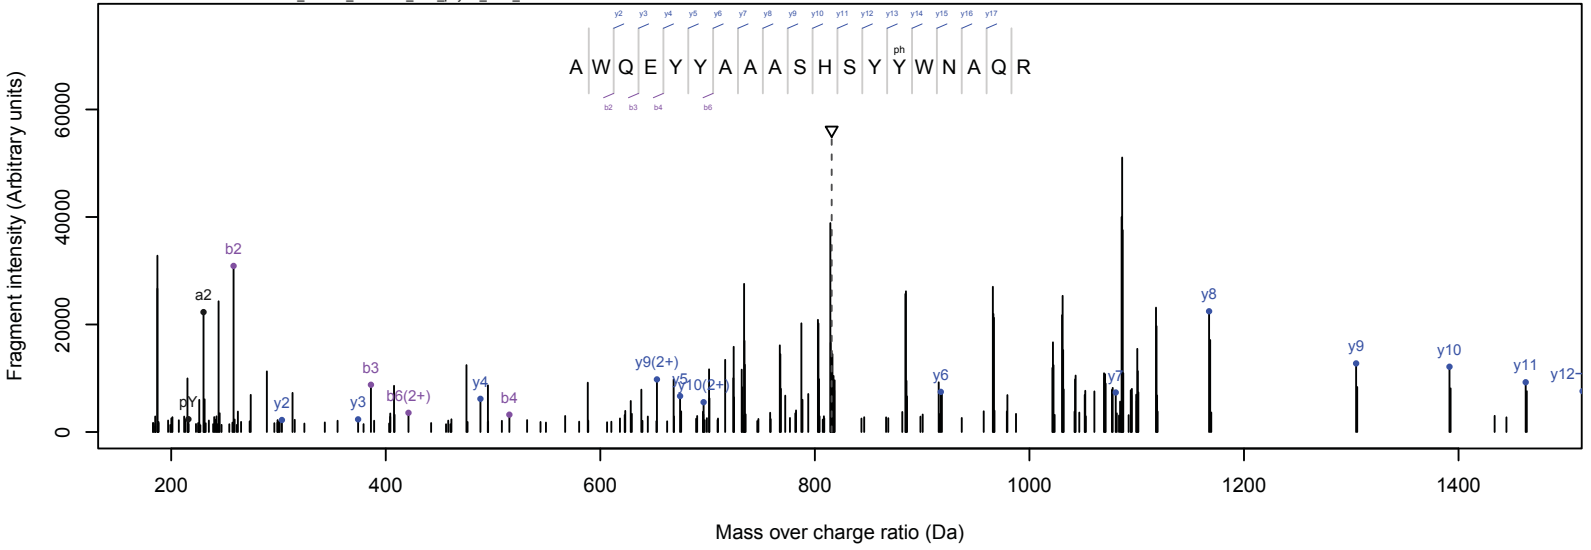

**DRPQSSIIY(ph)DPFAGMK-2+**

Source : QE1\_140612\_OPL1013\_CVA\_phosphoproteomic\_landscape\_AML\_C Scan : 31125

Andromeda score : 107.62

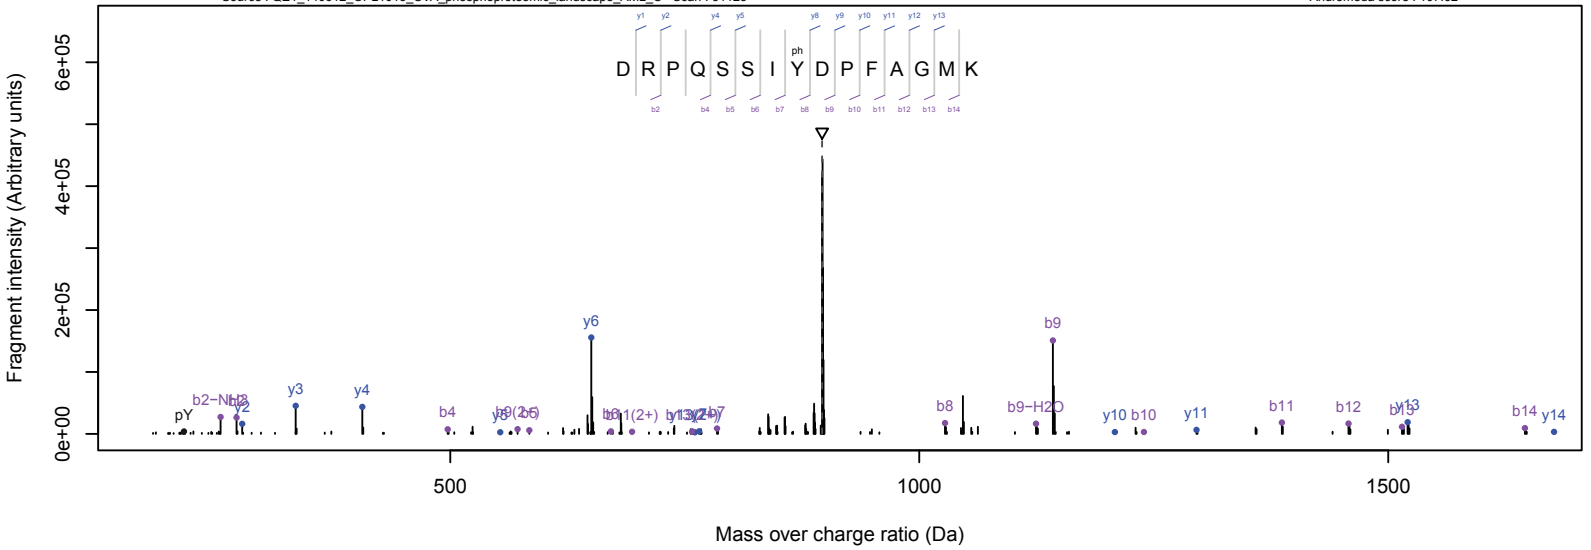

**FGYTVSEENY(ph)MCR-3+**

Source : QE1\_140612\_OPL1013\_CVA\_phosphoproteomic\_landscape\_AML\_C Scan : 21314

Andromeda score : 107.53

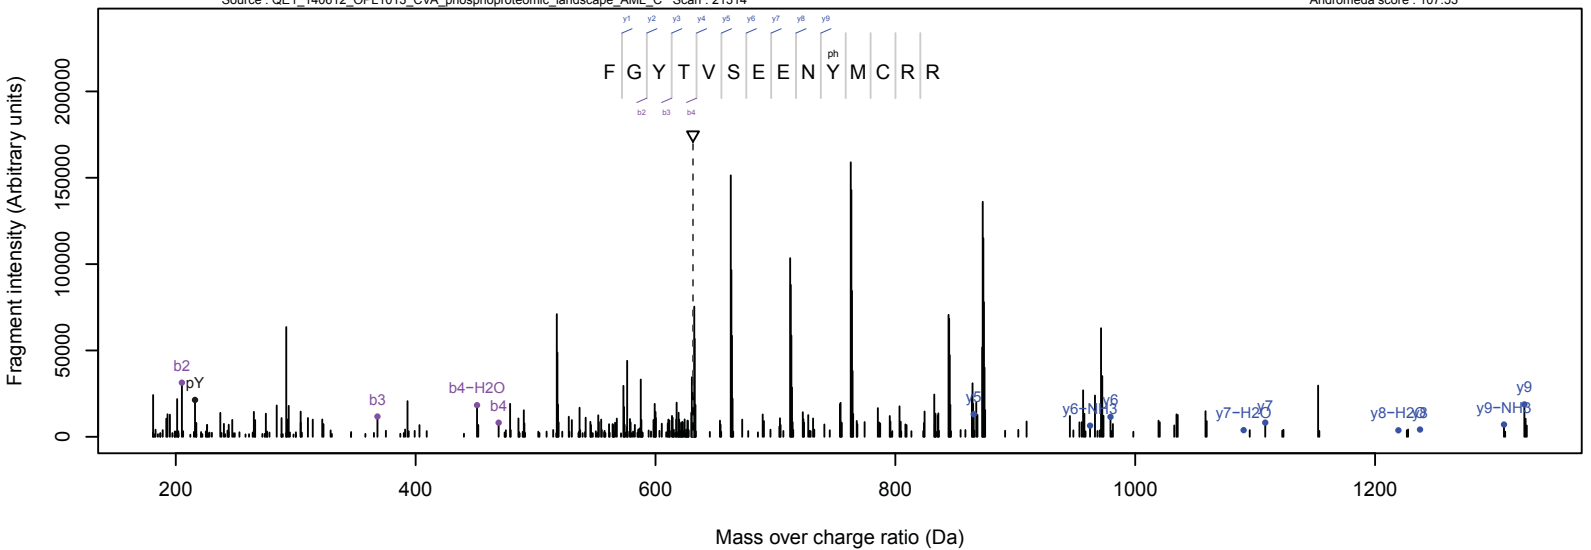

DYEVDGRDY(ph)HFVTSR-3+

Source : QE1\_140612\_OPL1013\_CVA\_phosphoproteomic\_landscape\_AML\_C Scan : 19195

Andromeda score : 107.5

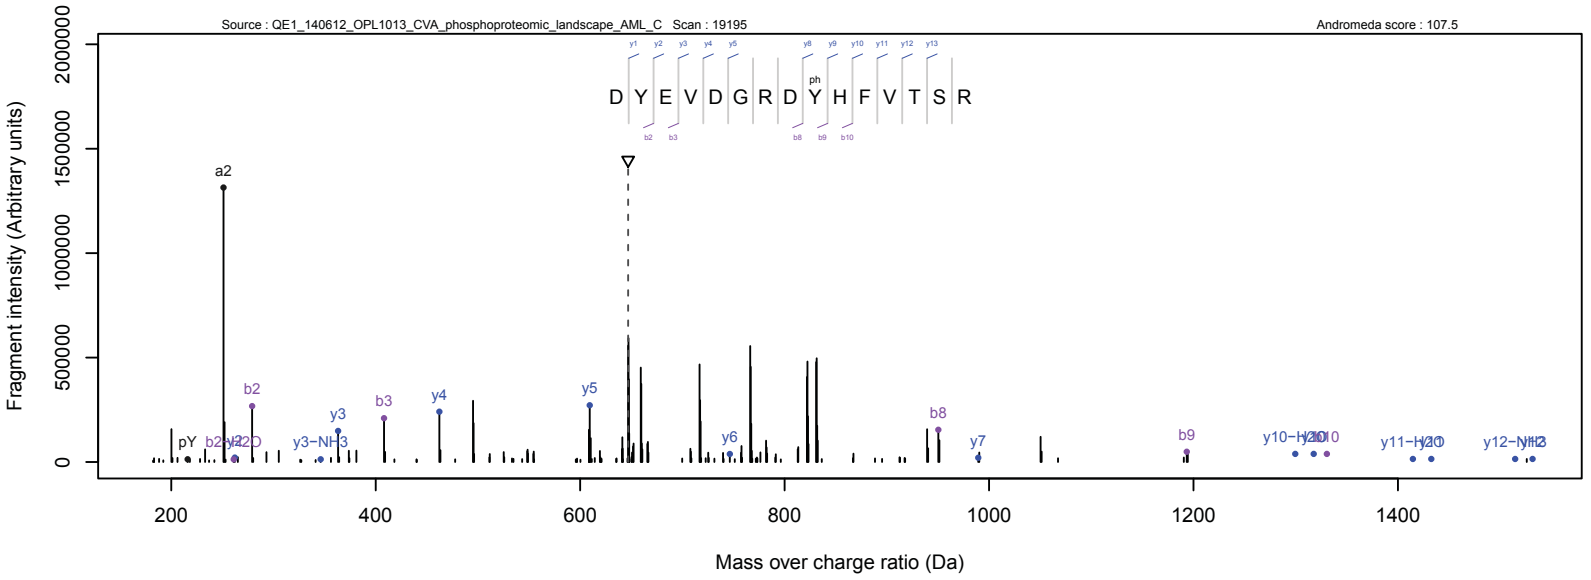

VAAVGPHYIQSSTMPR-3+

Source : QE1\_140612\_OPL1013\_CVA\_phosphoproteomic\_landscape\_AML\_C Scan : 24792

Andromeda score : 107.46

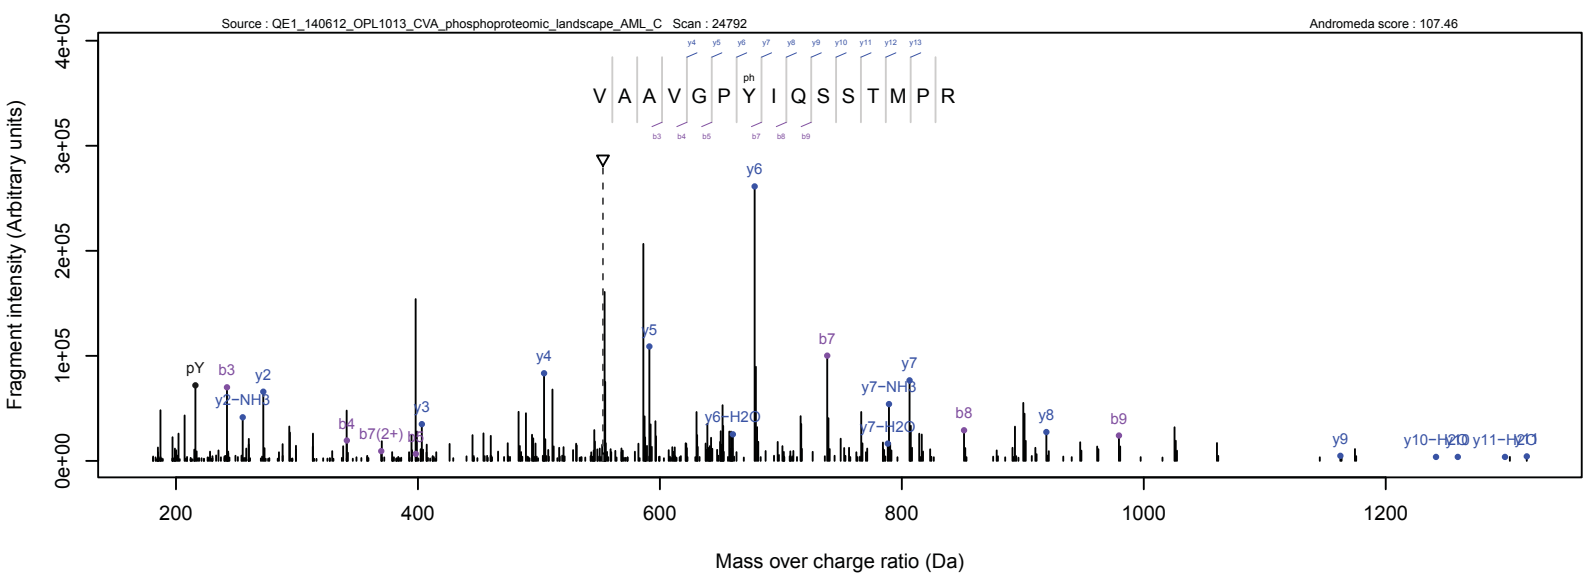

VVACNLYP(V)FVK-2+

Source : QE1\_140612\_OPL1013\_CVA\_phosphoproteomic\_landscape\_AML\_D Scan : 33724

Andromeda score : 107.45

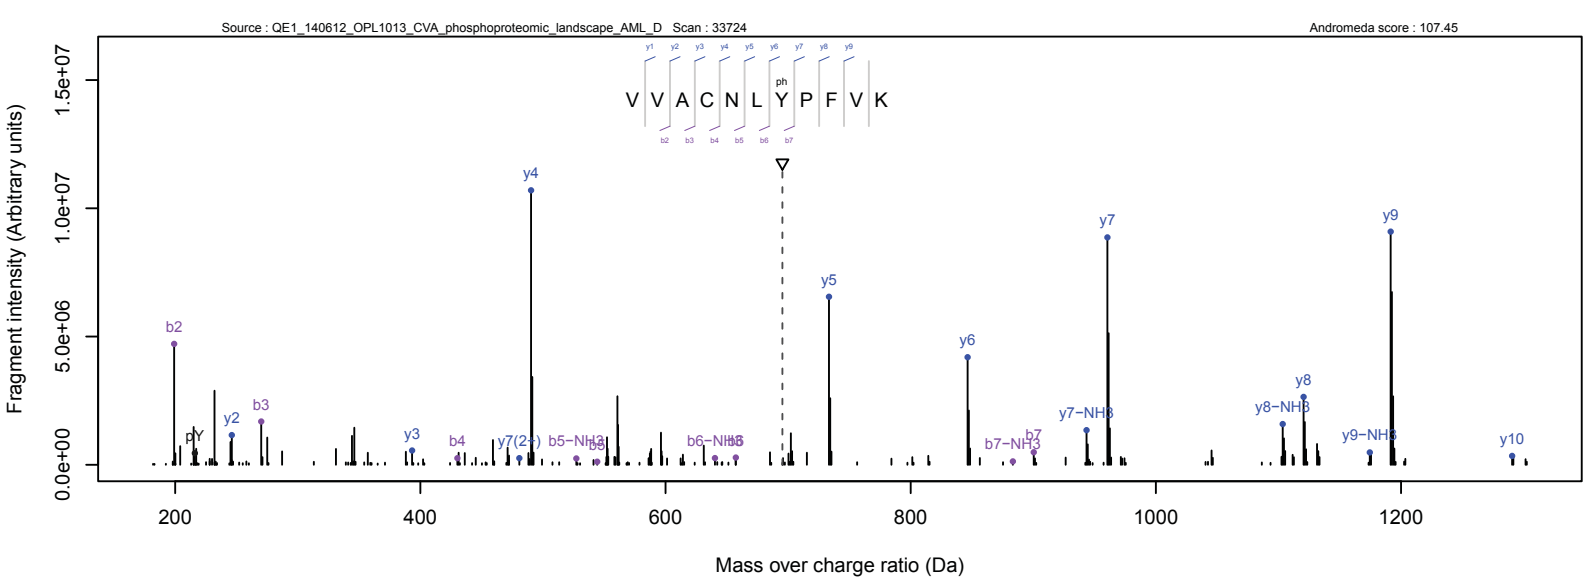

DSSSQENMVEDCLY(ph)ETVKEIK-3+

Source : QE1\_140822\_OPL1013\_CVA\_pTyrIP\_AML\_cell\_lines\_part2\_E Scan : 39790

Andromeda score : 107.39

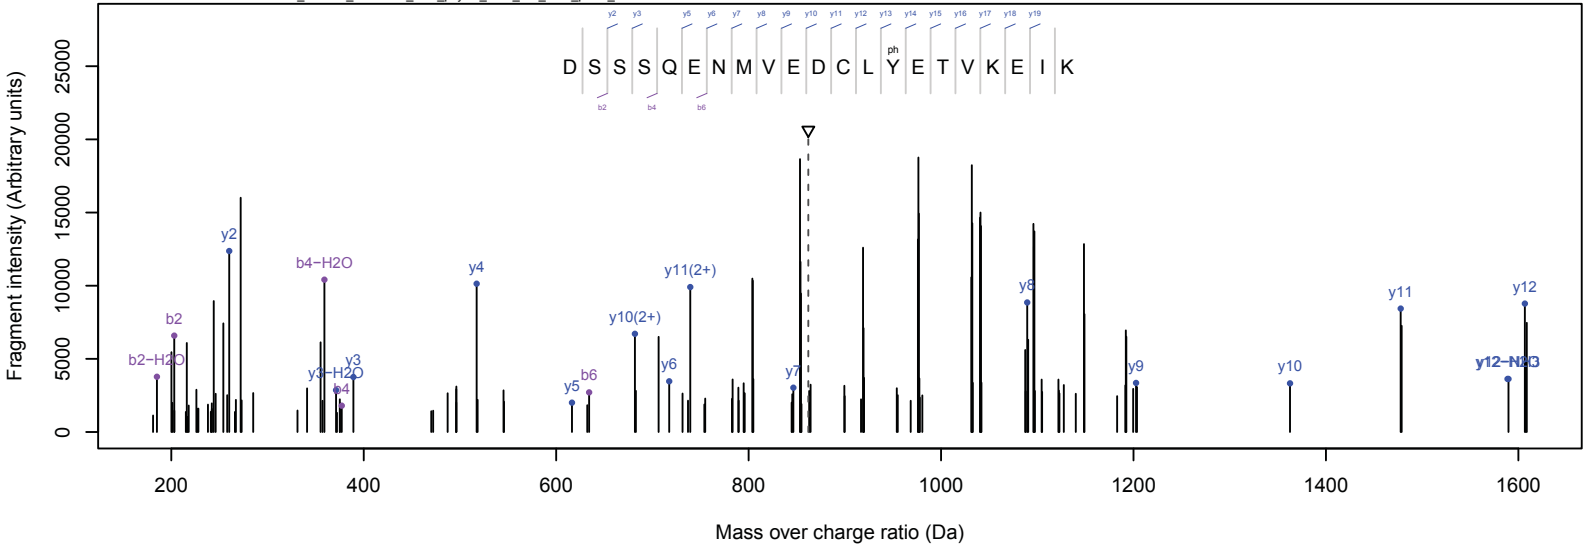

YGIY(ph)AVENEHMNR-3+

Source : QE1\_140612\_OPL1013\_CVA\_phosphoproteomic\_landscape\_AML\_C Scan : 20198

Andromeda score : 107.39

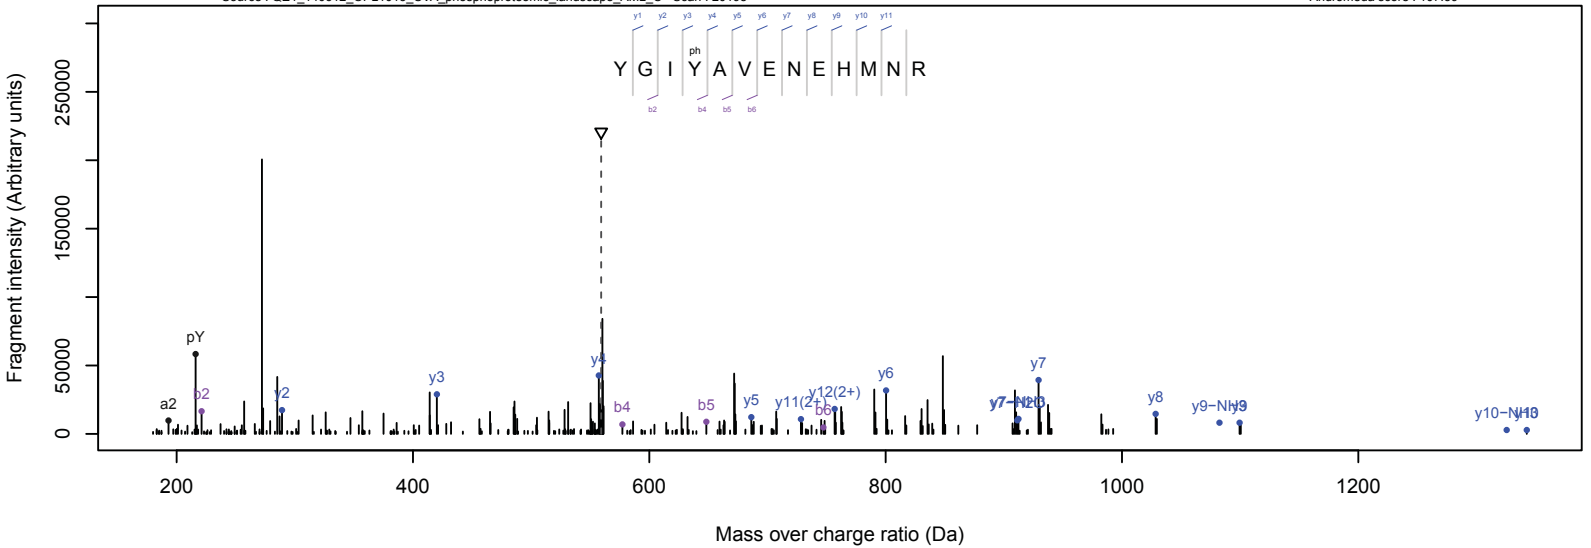

AY(ph)INFRNPDDILLFR-3+

Source : QE1\_140612\_OPL1013\_CVA\_phosphoproteomic\_landscape\_AML\_C Scan : 47143

Andromeda score : 107.35

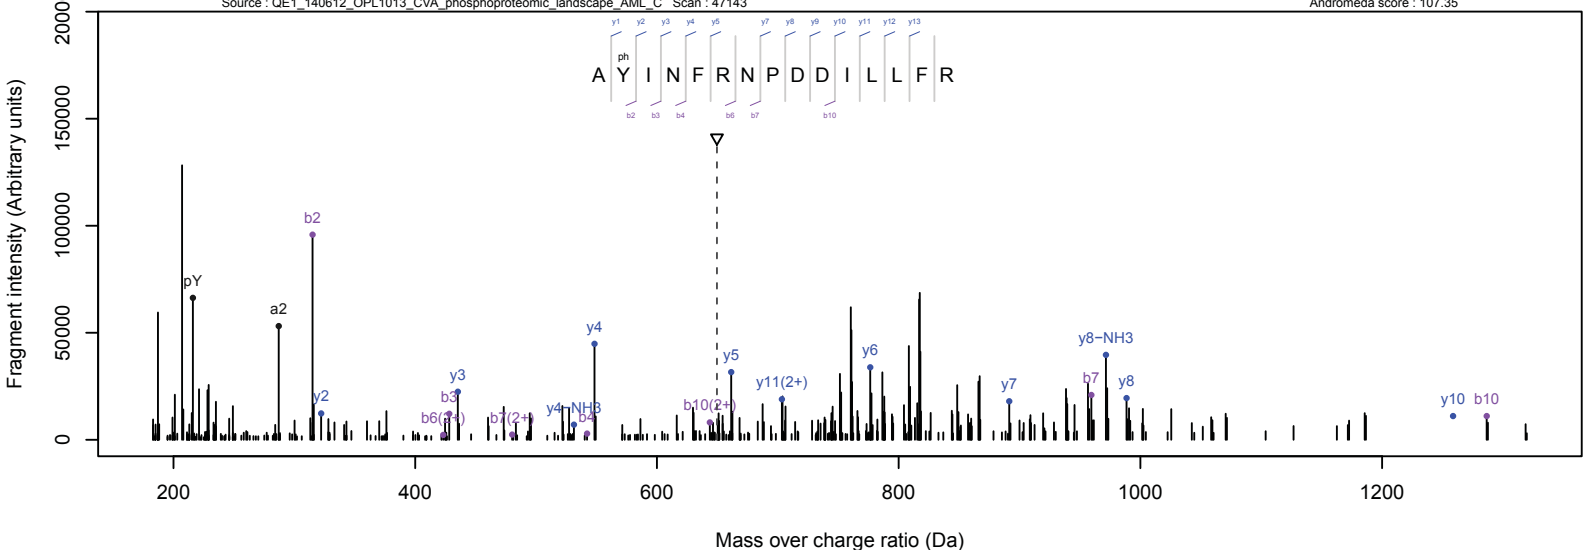





IGTAEPDYGALYEGRNPGFY(ph)VEANPMPFK-3+

Source : QE1\_140612\_OPL1013\_CVA\_phosphoproteomic\_landscape\_AML\_B Scan : 44431

Andromeda score : 107.3

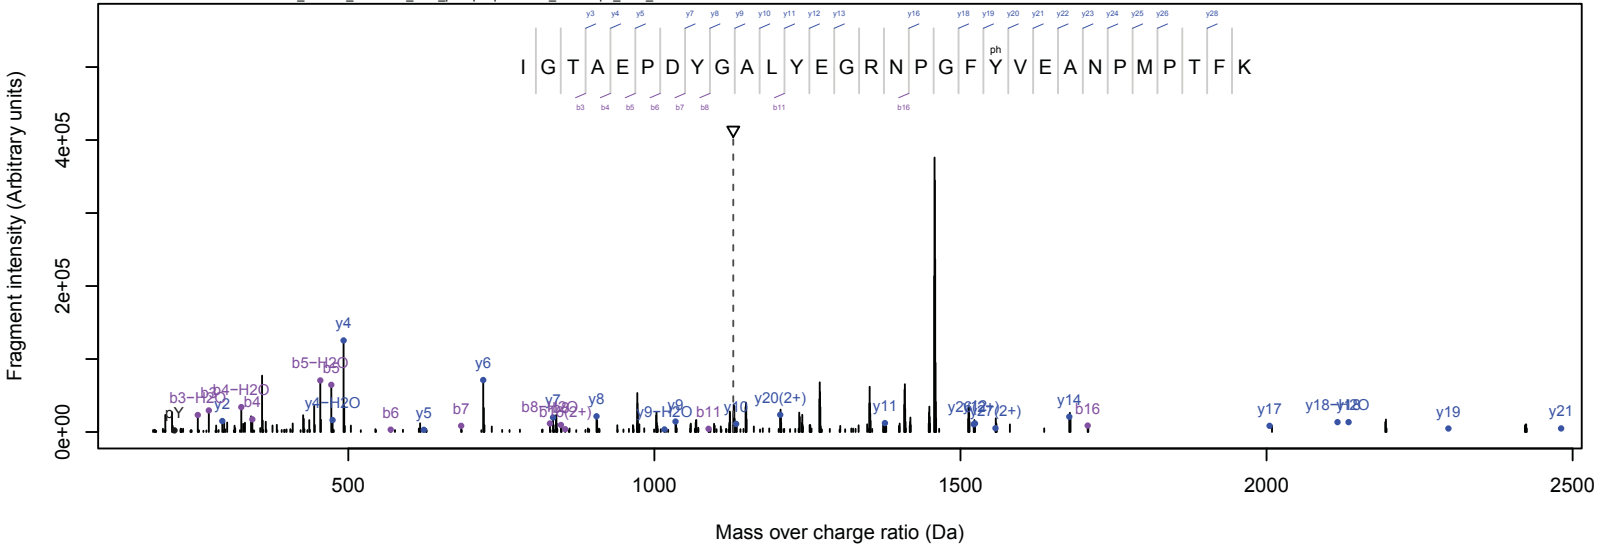

CY(ph)EMASHLR-2+

Source : QE1\_140612\_OPL1013\_CVA\_phosphoproteomic\_landscape\_AML\_D Scan : 9363

Andromeda score : 107.21

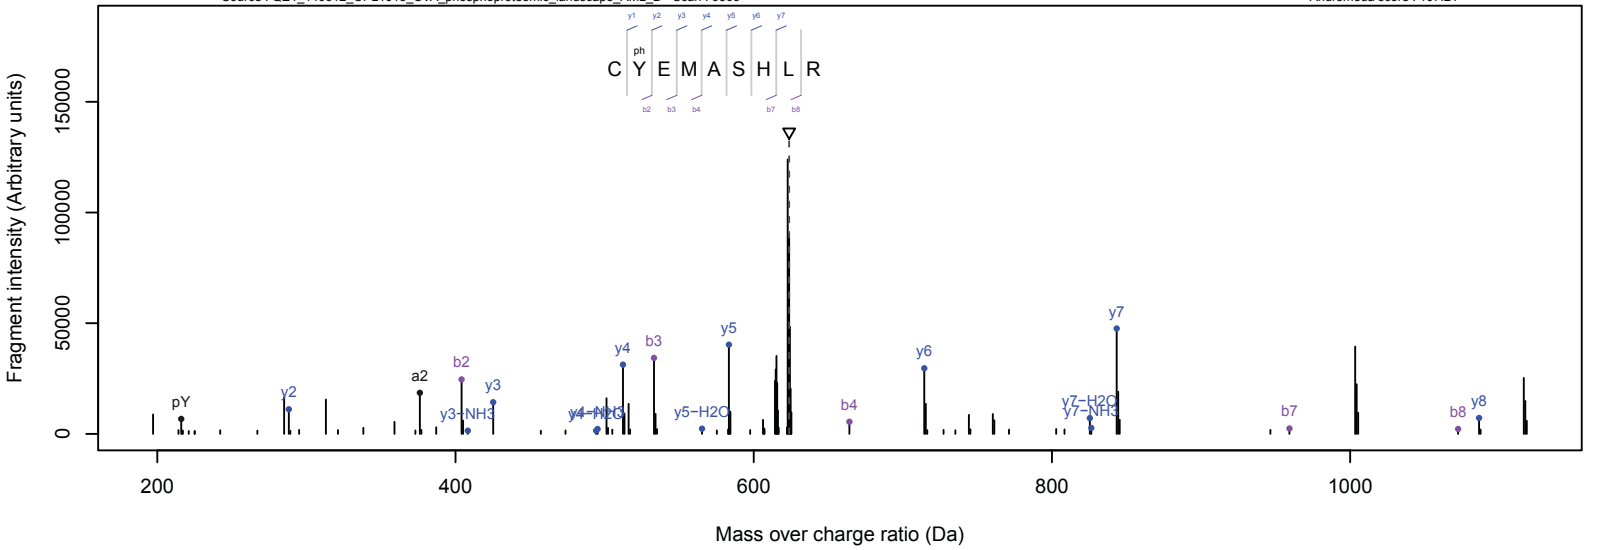

Y(ph)AHIQVTYVKPYFDDKELTER-4+

Source : QE1\_140612\_OPL1013\_CVA\_phosphoproteomic\_landscape\_AML\_C Scan : 31808

Andromeda score : 107.21

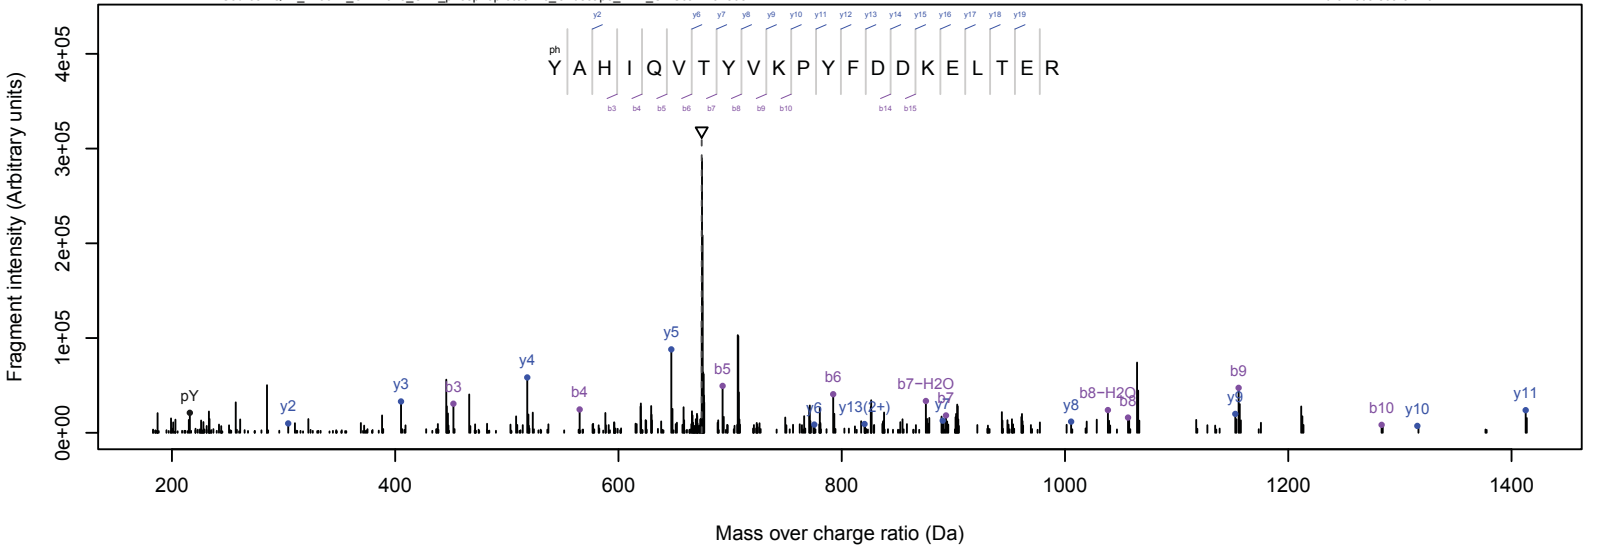

(ac)MDAATLTY(ph)DTLR-2+

Source: QE1\_140612\_OPL1013\_CVA\_phosphoproteomic\_landscape\_AML\_B Scan: 44310

Andromeda score: 107.09

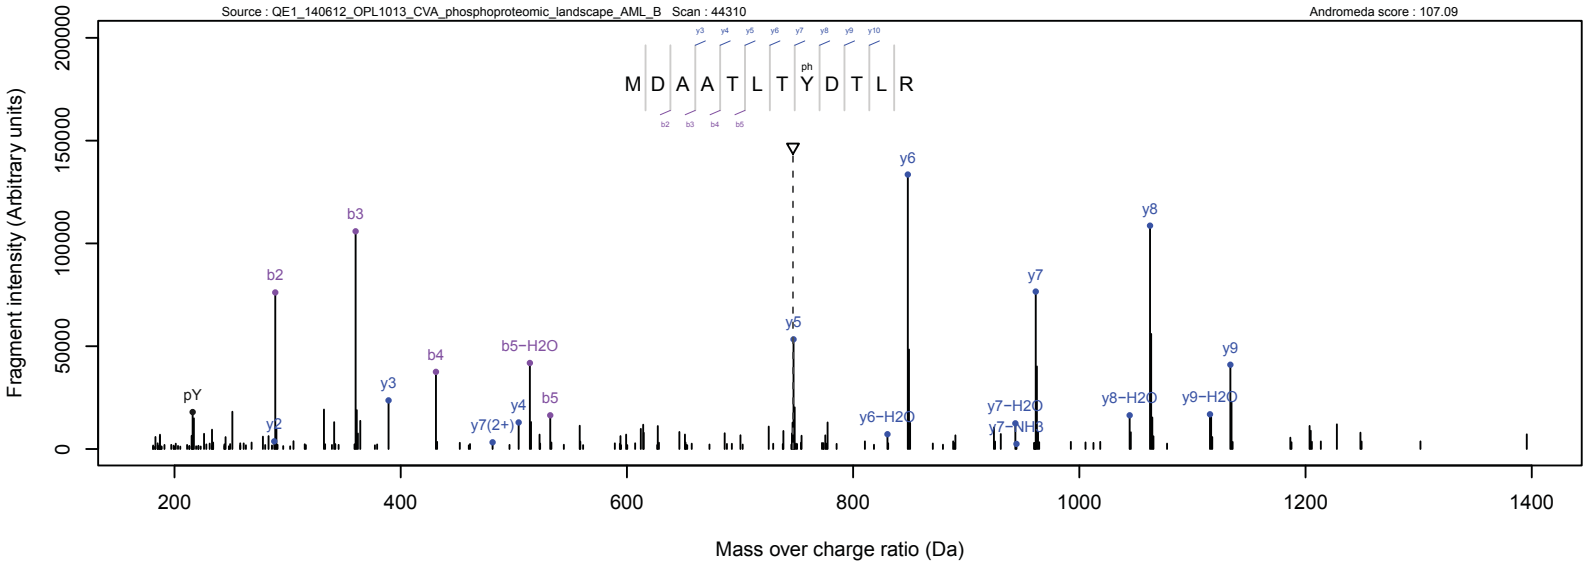

EHCVCVQNY(ph)IK-2+

Source: QE1\_140612\_OPL1013\_CVA\_phosphoproteomic\_landscape\_AML\_B Scan: 10595

Andromeda score: 107.06

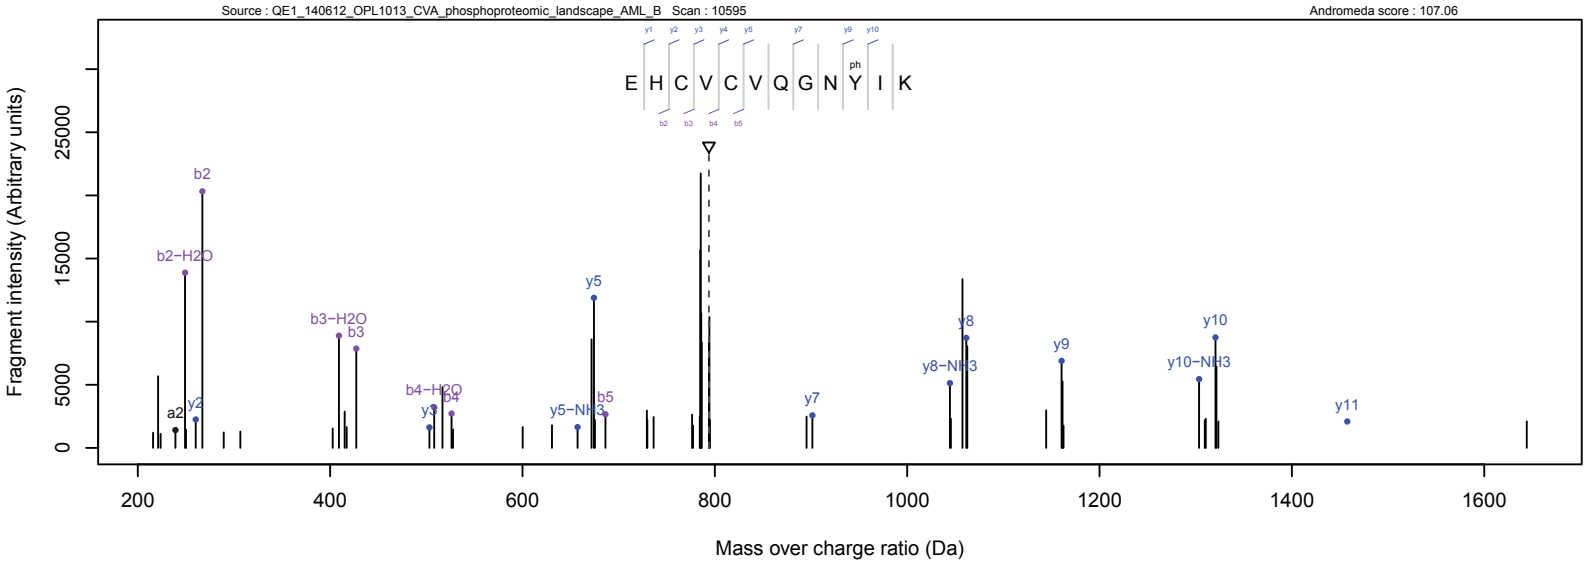

FGYHIIIMV(ox)EGR-2+

Source: QE1\_140612\_OPL1013\_CVA\_phosphoproteomic\_landscape\_AML\_C Scan: 26170

Andromeda score: 107.06

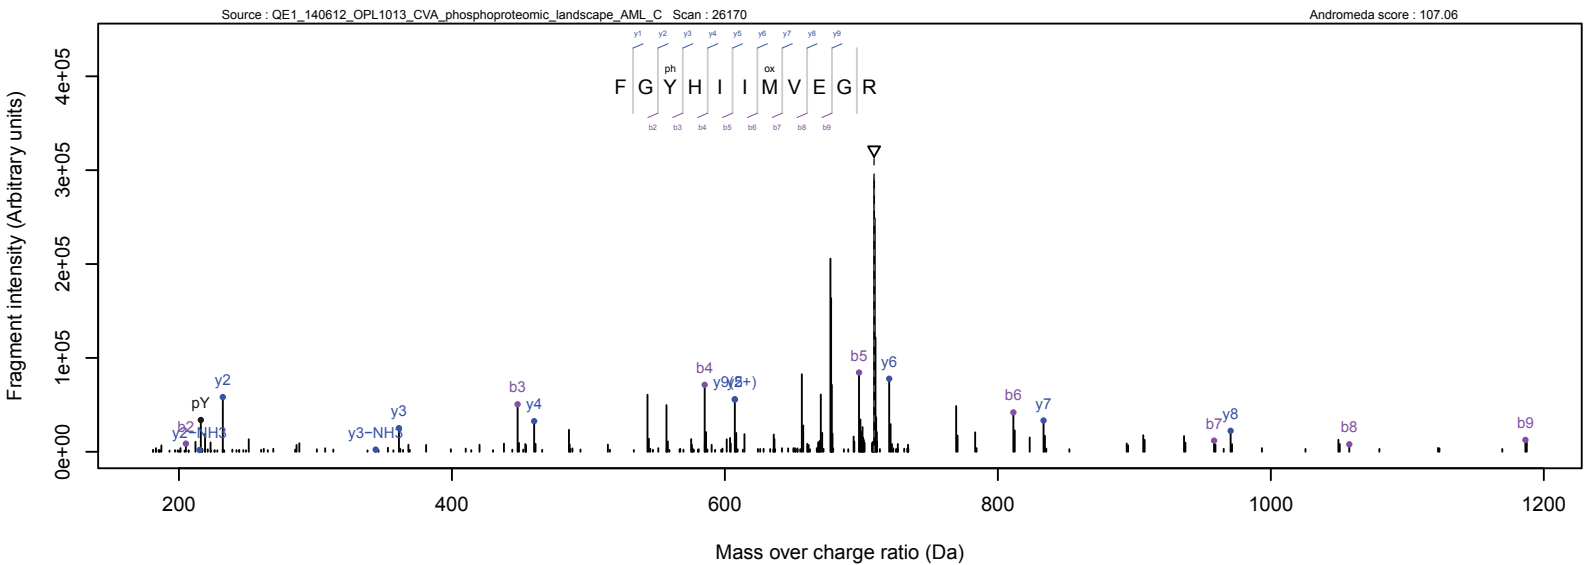

NY(ph)ISAWELQR-2+

Source : QE1\_140612\_OPL1013\_CVA\_phosphoproteomic\_landscape\_AML\_D Scan : 30096

Andromeda score : 107.06

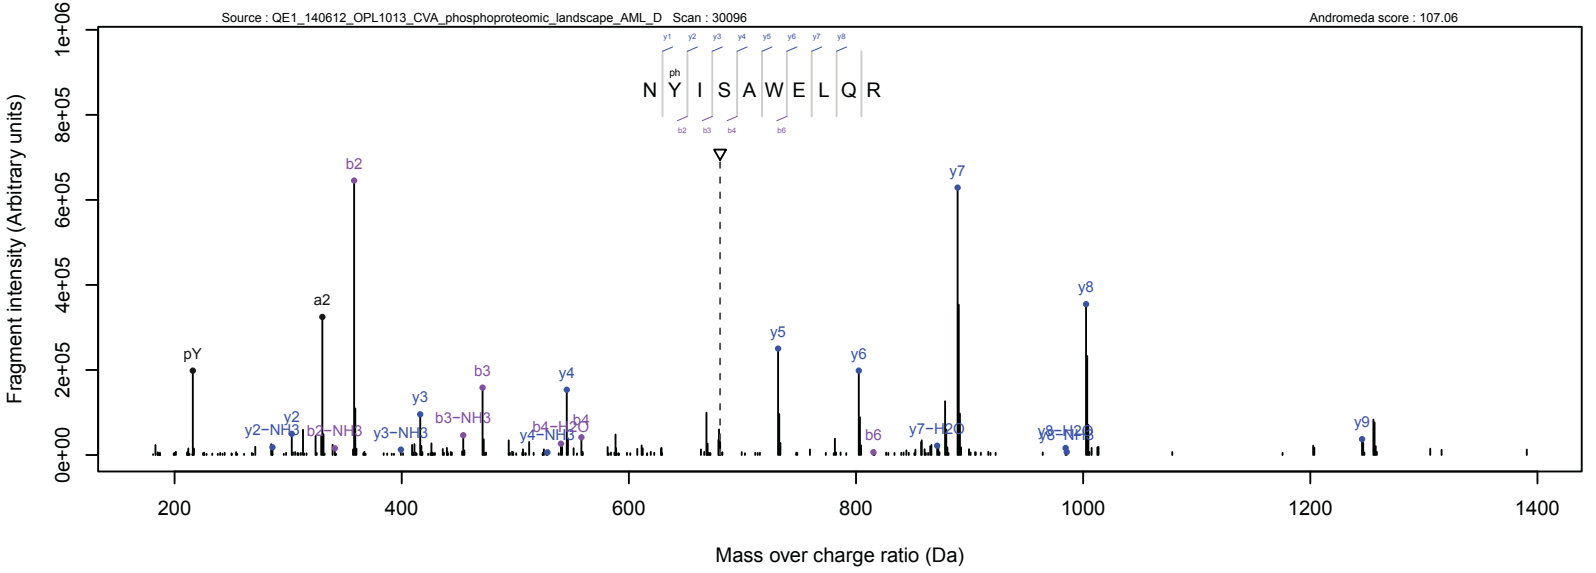

SLEDPY(ph)SQQIR-2+

Source : QE1\_140612\_OPL1013\_CVA\_phosphoproteomic\_landscape\_AML\_C Scan : 12879

Andromeda score : 107.06

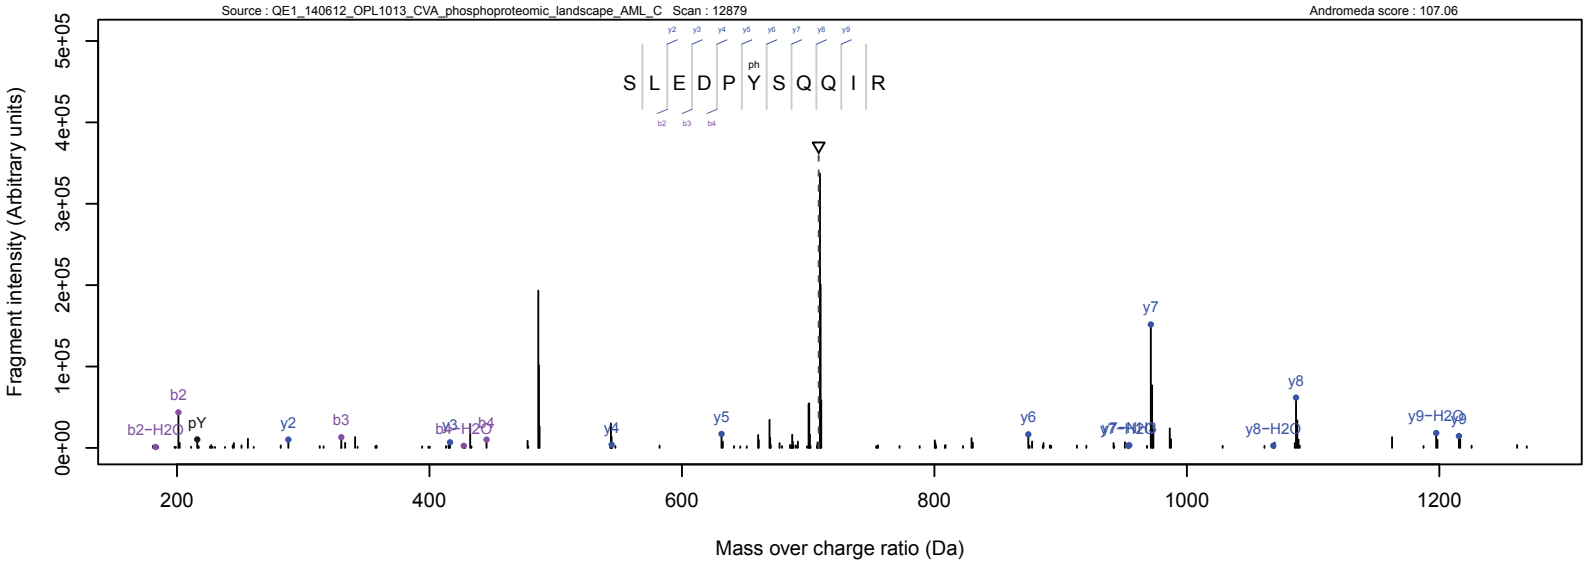

Y(ph)FDSGDYNAK-2+

Source : QE1\_140612\_OPL1013\_CVA\_phosphoproteomic\_landscape\_AML\_C Scan : 17358

Andromeda score : 107.06

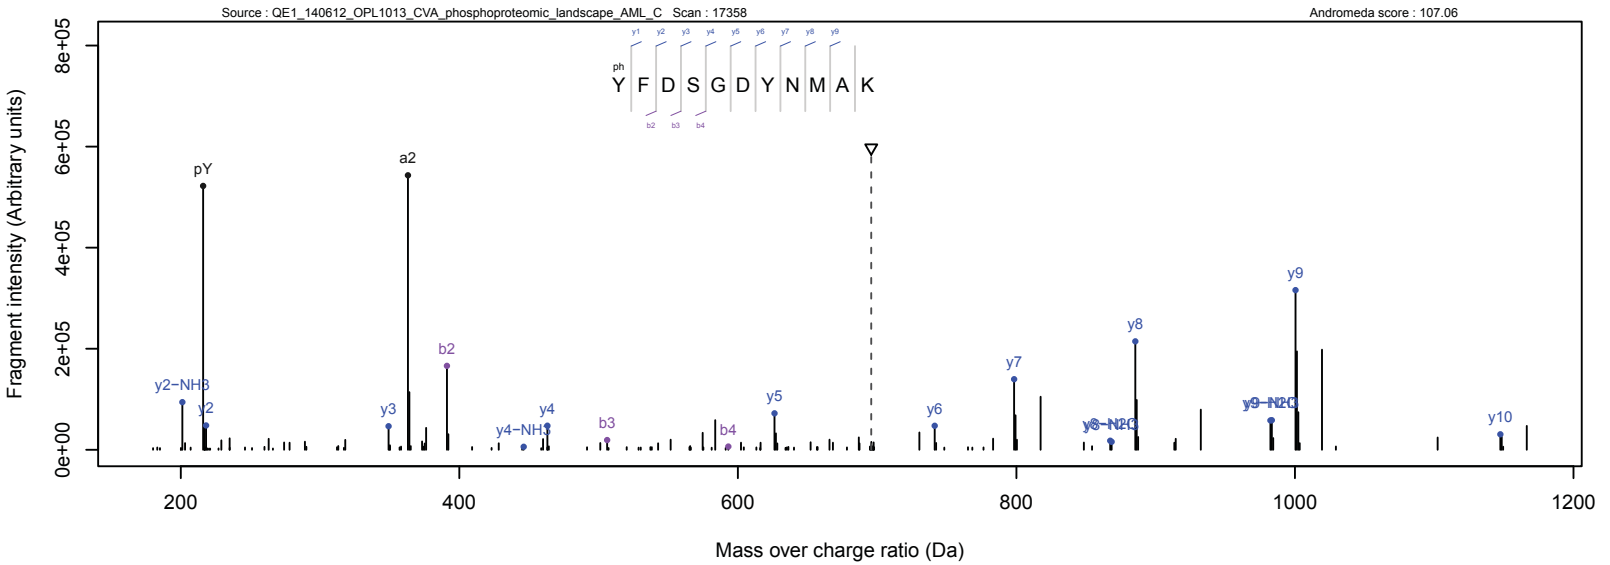

NKY(ph)FWQNFR-3+

Source : QE1\_140612\_OPL1013\_CVA\_phosphoproteomic\_landscape\_AML\_C Scan : 31286

Andromeda score : 106.94

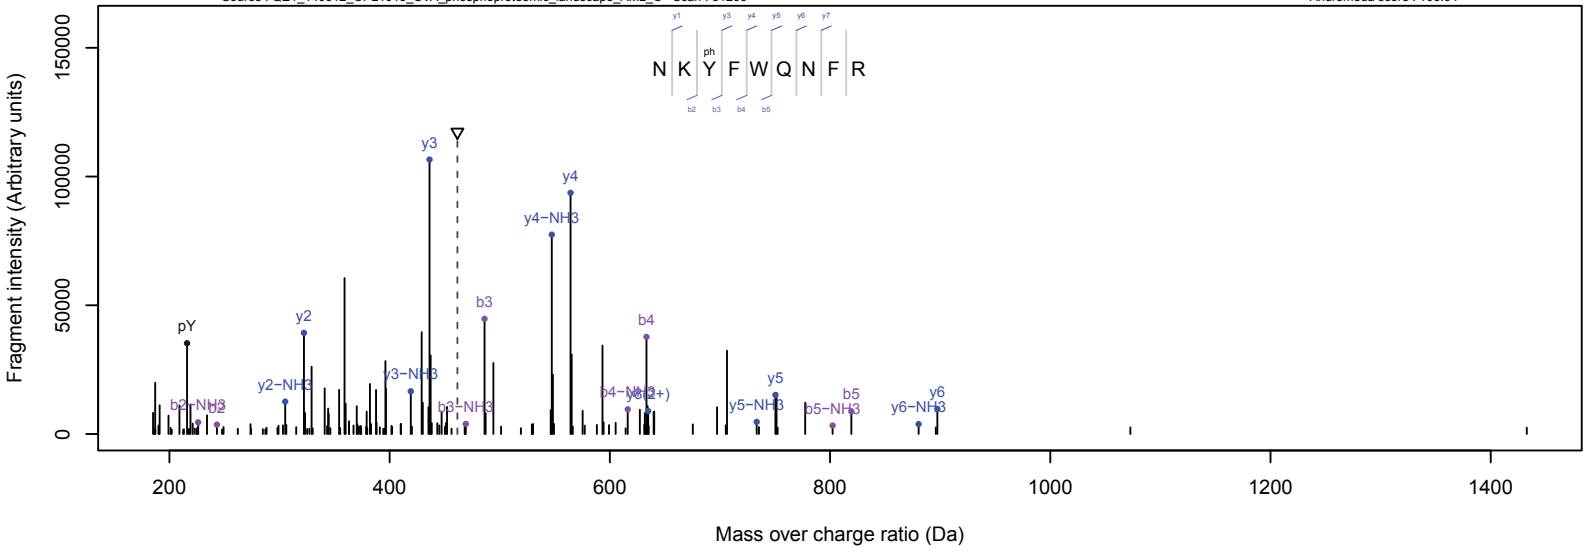

TLNHQYD(ph)TFDWTMLK-3+

Source : QE1\_140612\_OPL1013\_CVA\_phosphoproteomic\_landscape\_AML\_B Scan : 41955

Andromeda score : 106.93

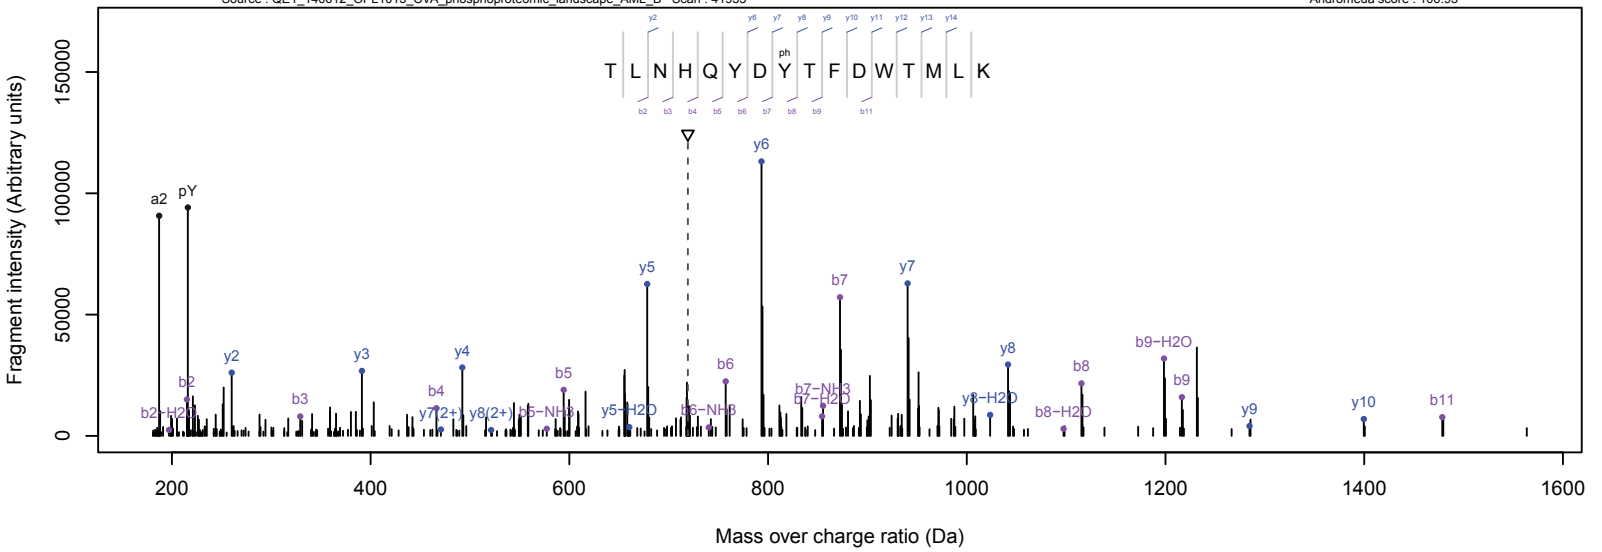

TY(ph)AICGAIR-2+

Source : QE1\_140612\_OPL1013\_CVA\_phosphoproteomic\_landscape\_AML\_B Scan : 16434

Andromeda score : 106.93

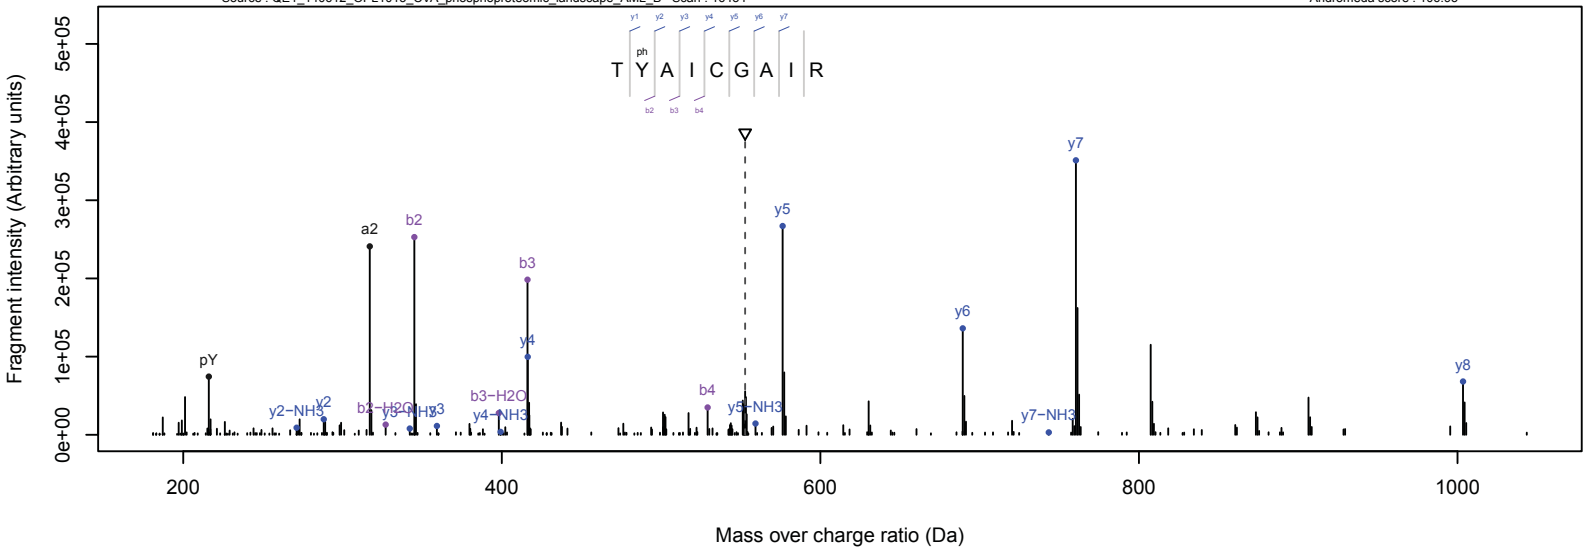

DAYREY(ph)IAQMSQLEGGPGSTTISGR-3+

Source: QE1\_140612\_OPL1013\_CVA\_phosphoproteomic\_landscape\_AML\_C Scan: 37882

Andromeda score: 106.88

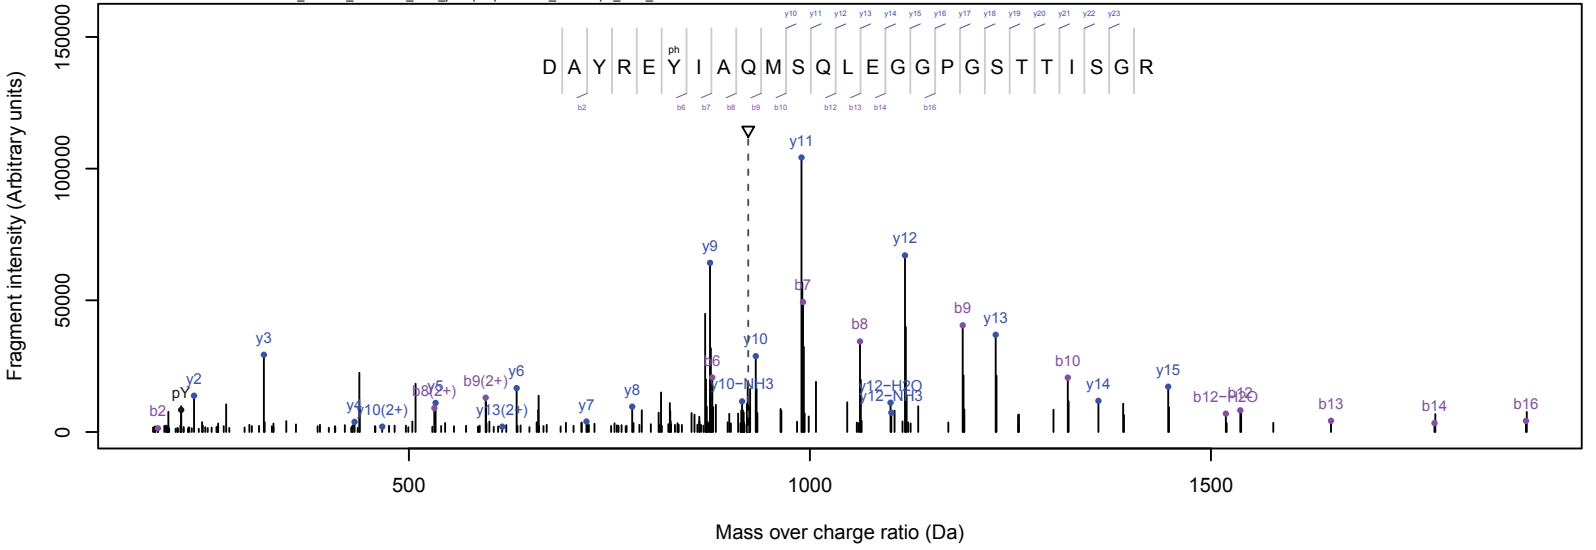

DRPFKPY(ph)NFLAHGVLPDSGHLHPLLK-6+

Source: QE1\_140612\_OPL1013\_CVA\_phosphoproteomic\_landscape\_AML\_C Scan: 40256

Andromeda score: 106.88

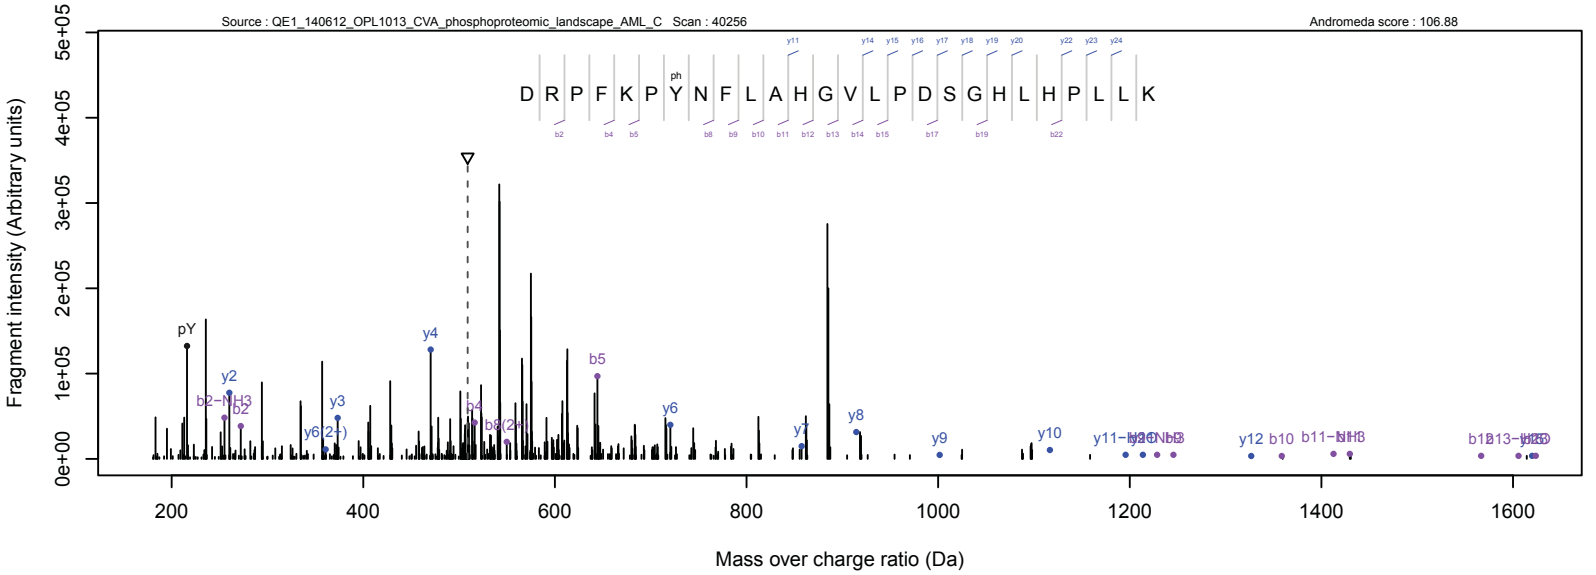

**SYDY(ph)DLIIIGGGGGLAAK-2+**

Source : QE1\_140612\_OPL1013\_CVA\_phosphoproteomic\_landscape\_AML\_B Scan : 43980

Andromeda score : 106.75

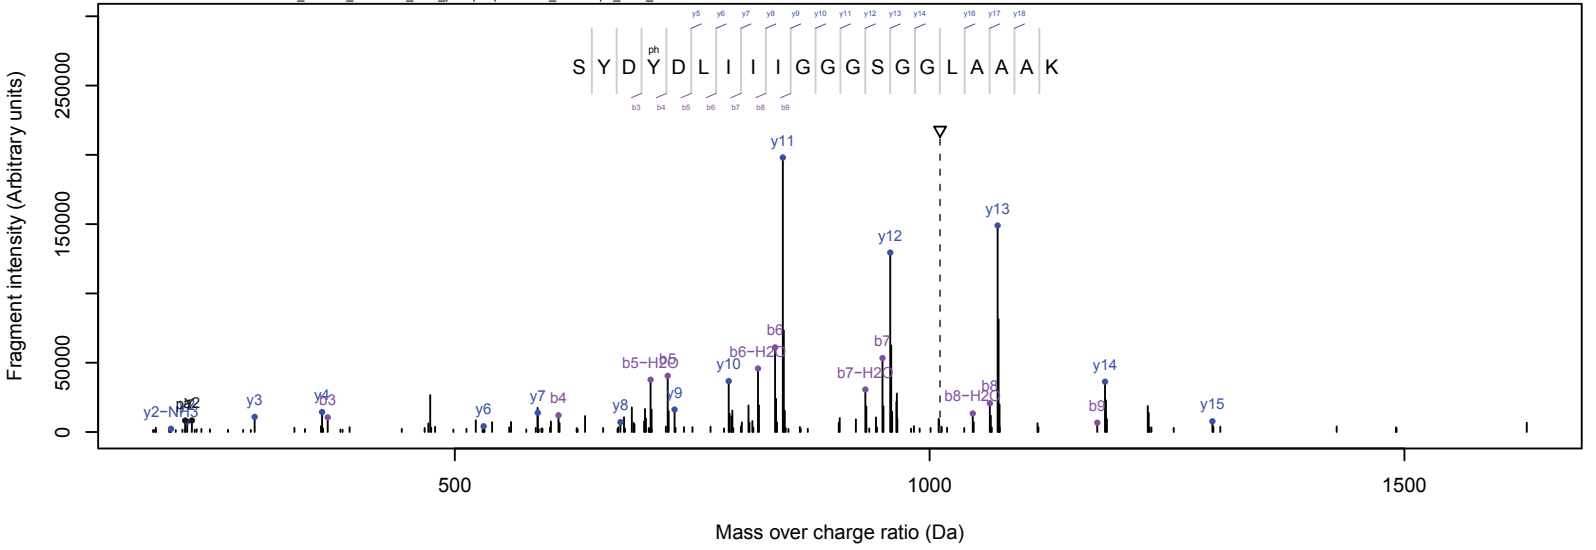

**ALIESY(ph)QLNTR-2+**

Source : QE1\_140612\_OPL1013\_CVA\_phosphoproteomic\_landscape\_AML\_C Scan : 21881

Andromeda score : 106.67

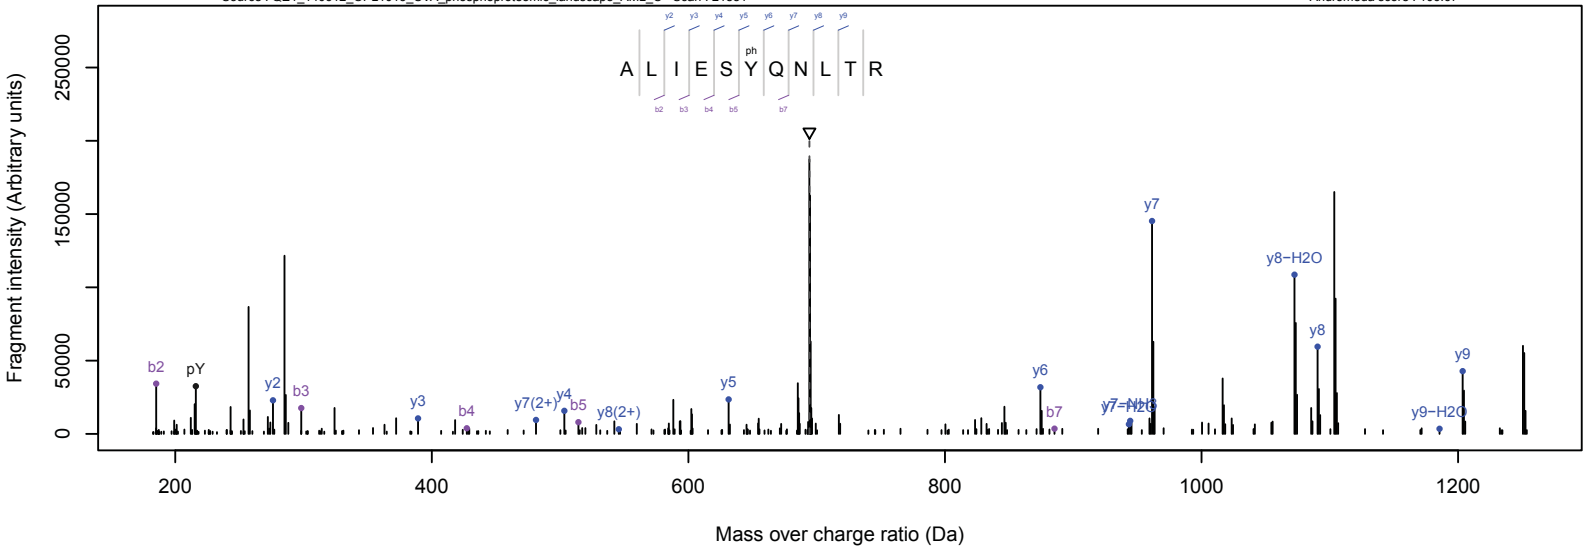

**IY(ph)VGNLPPDIR-2+**

Source : QE1\_140612\_OPL1013\_CVA\_phosphoproteomic\_landscape\_AML\_A Scan : 32463

Andromeda score : 106.67

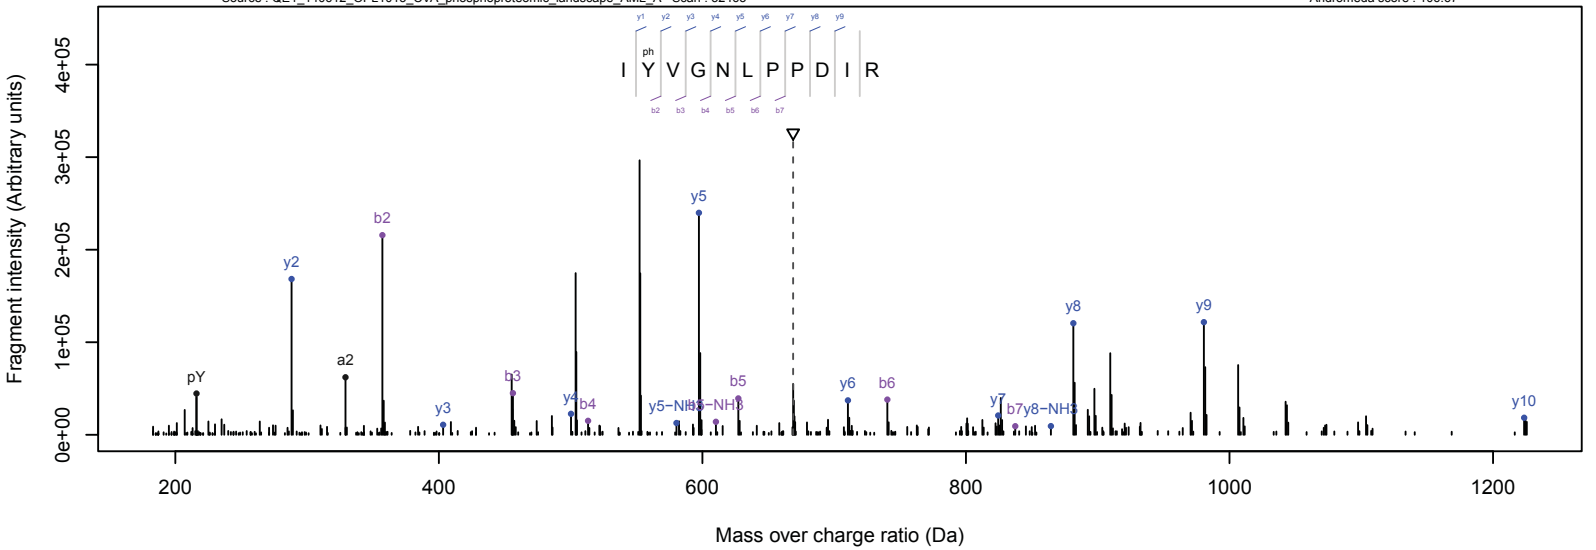

**NKNIHY(ph)YFMALK-2+**

Source : QE1\_140612\_OPL1013\_CVA\_phosphoproteomic\_landscape\_AML\_B Scan : 28266

Andromeda score : 106.67

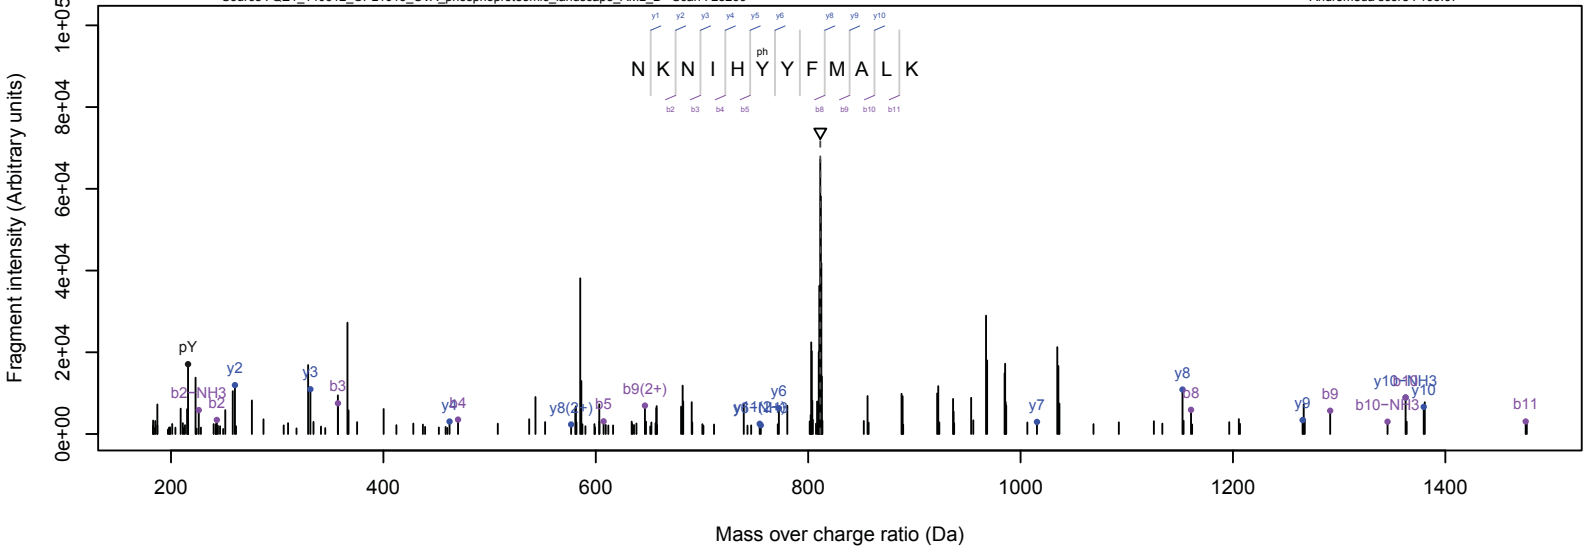

**IGEGTY(ph)GVVYK-2+**

Source : Qe1\_141024\_OPL1013\_CvA\_AML\_pTyrIP\_MOLM13 Scan : 29366

Andromeda score : 106.62

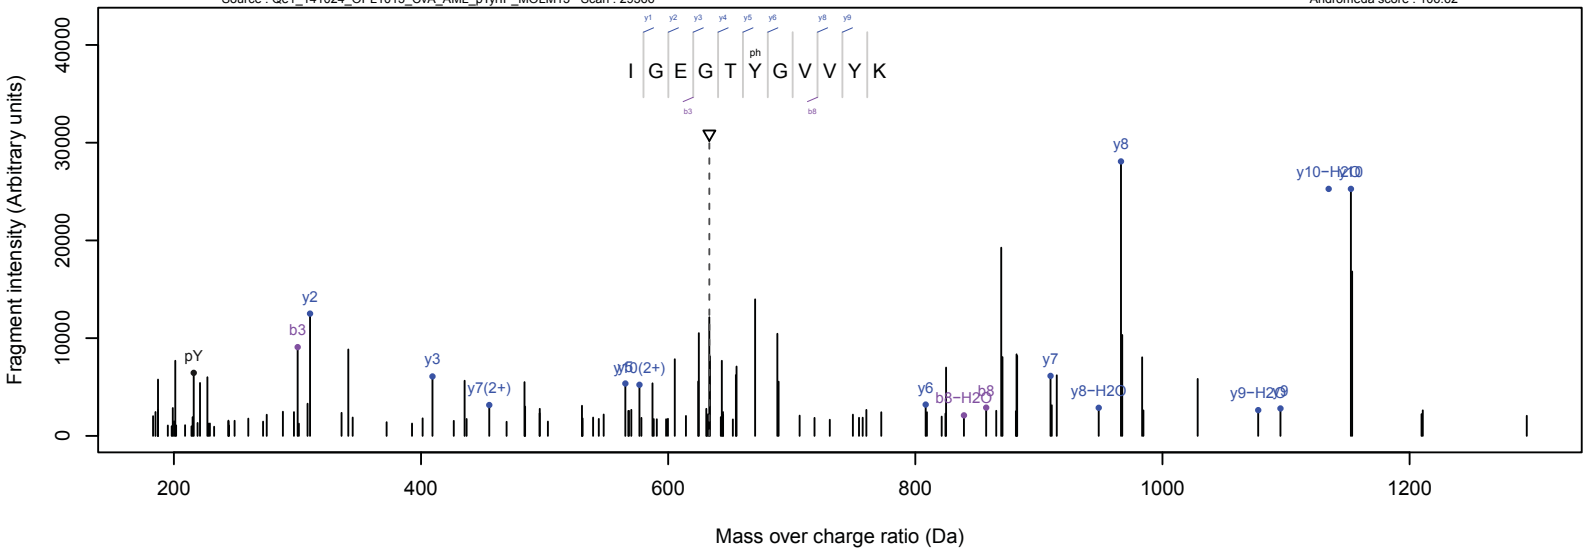

**LNLHY(ph)AVVSK-2+**

Source : QE1\_140908\_OPL1013\_CvA\_pTyrIP\_AML\_HEL Scan : 19873

Andromeda score : 106.62

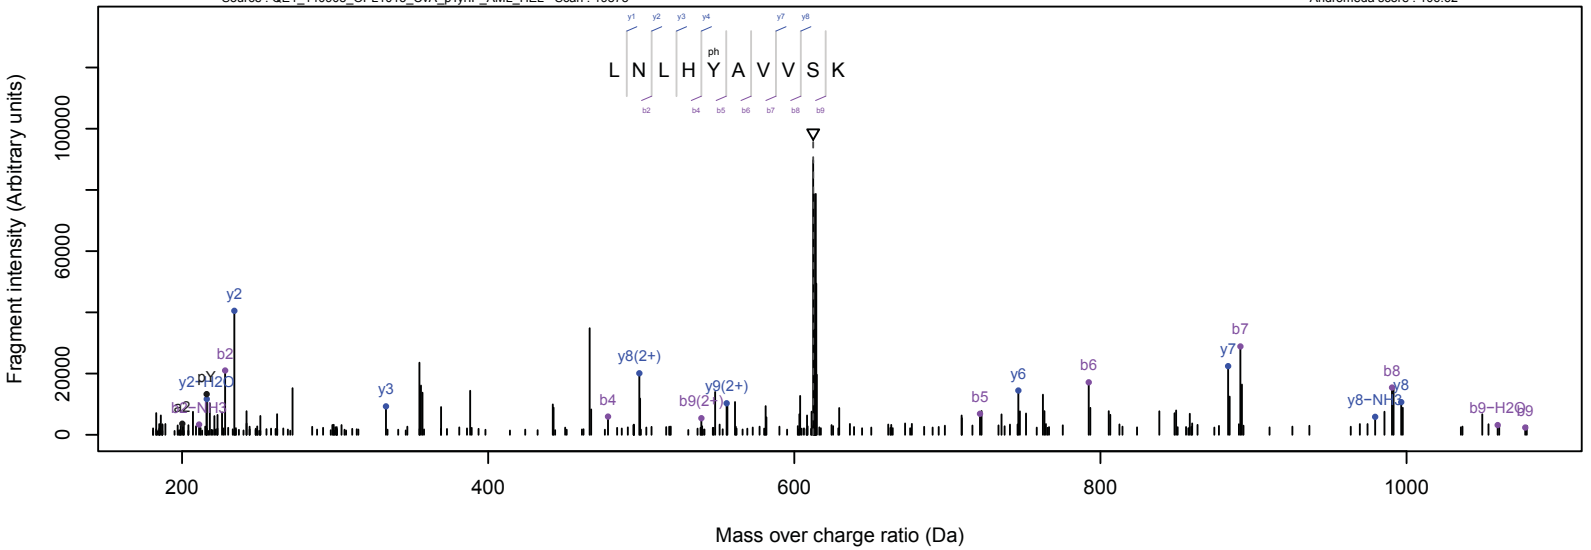

TSGSVY(ph)TLK-2+

Source : QE1\_140908\_OPL1013\_CvA\_pTyrIP\_AML\_HEL Scan : 24327

Andromeda score : 106.62

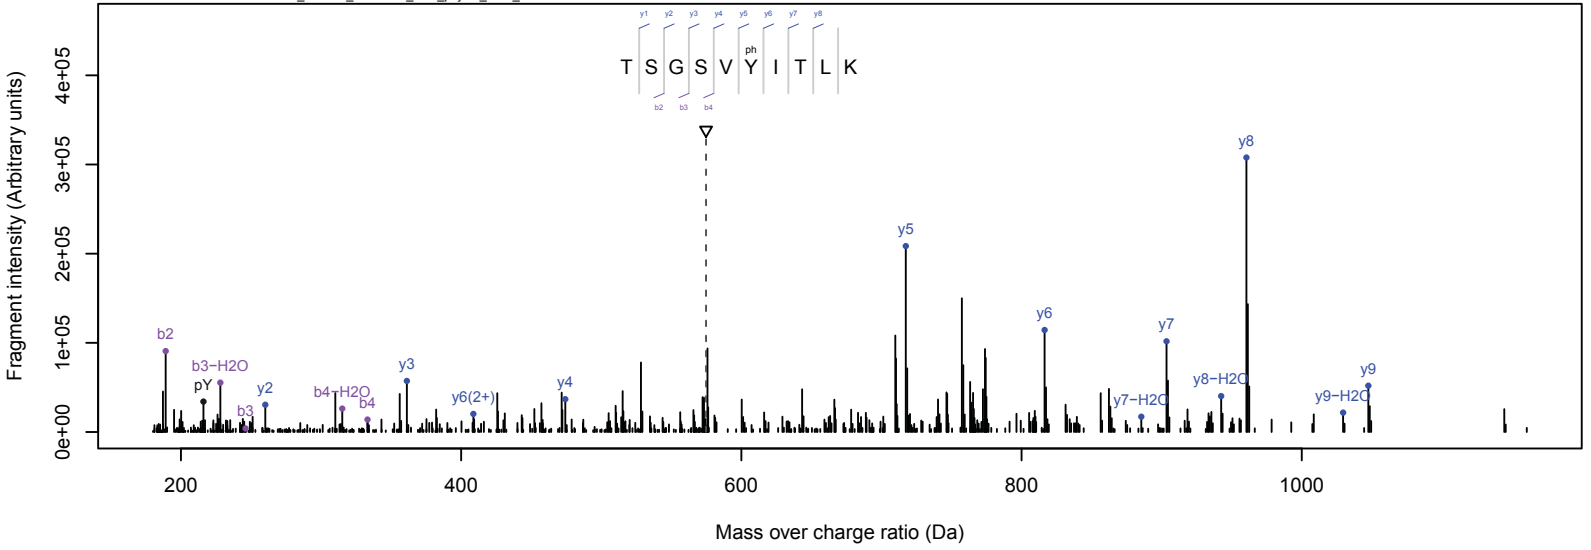

GGY(ph)YYYHNLETQEGGWDEPPNFVQNSMQLSR-3+

Source : QE1\_140612\_OPL1013\_CVA\_phosphoproteomic\_landscape\_AML\_C Scan : 43713

Andromeda score : 106.6

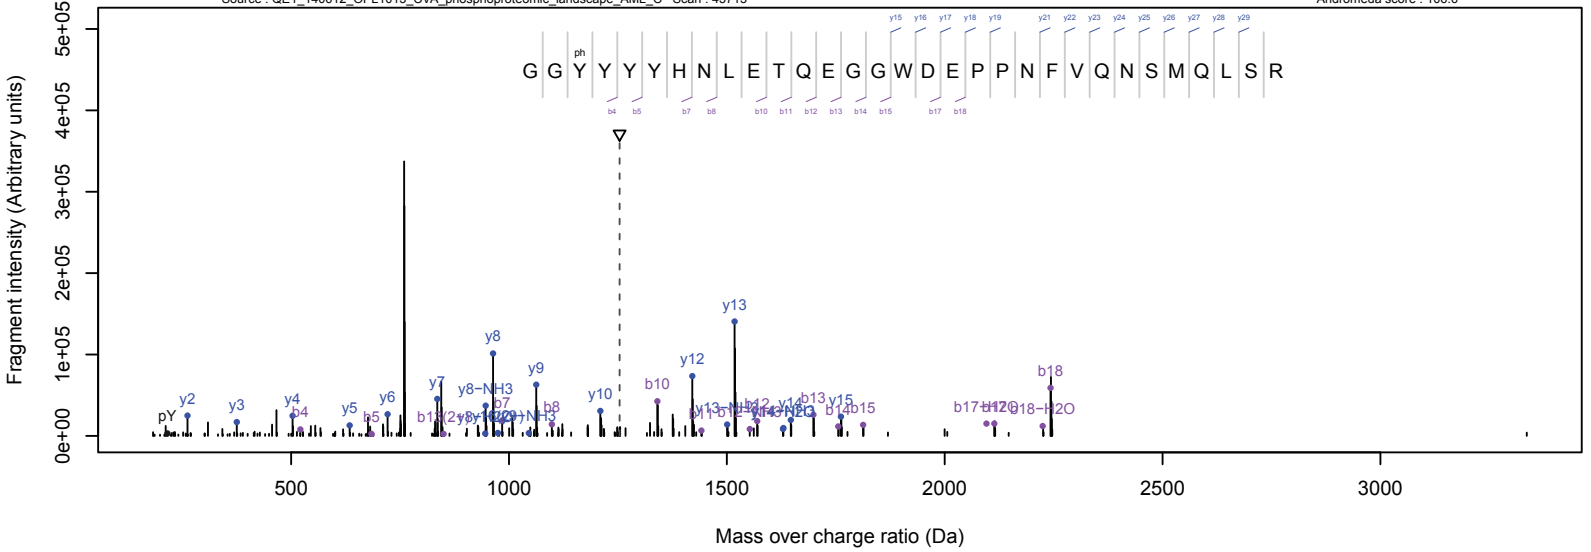

LVY(ph)SNSSSGPTATLQK-2+

Source : QE1\_140908\_OPL1013\_CvA\_pTyrIP\_AML\_Kasumi6 Scan : 16970

Andromeda score : 106.6

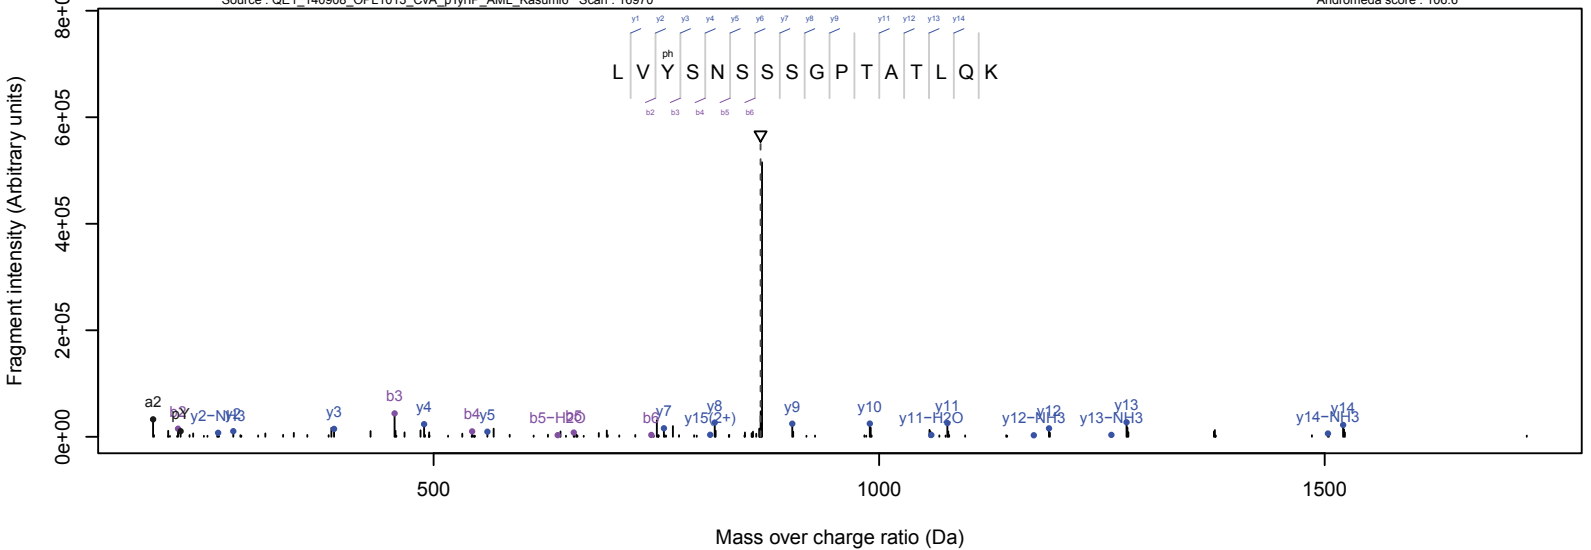



RPAQAFPVSY(ph)SSSGAR-3+

Source : QE1\_140822\_OPL1013\_CVA\_pTyrIP\_AML\_cell\_lines\_part2\_F Scan : 10550

Andromeda score : 106.6

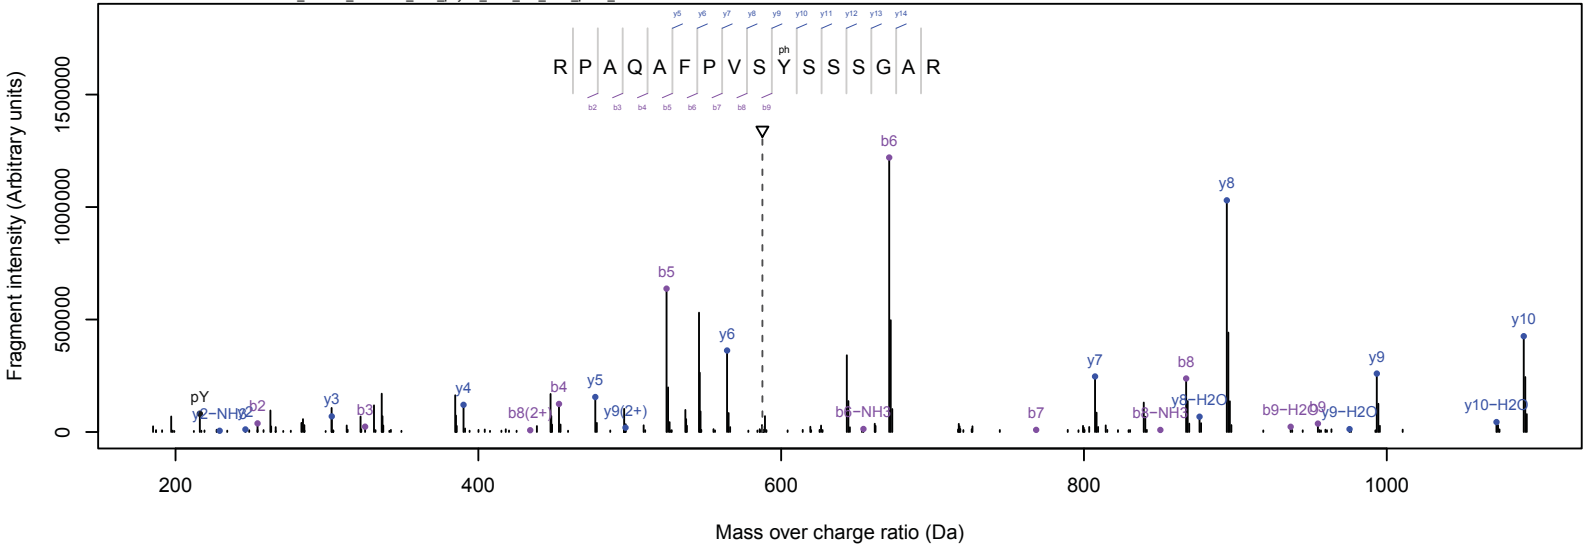

MASAPASY(ph)GSTTKPMGLLSR-3+

Source : QE1\_140612\_OPL1013\_CVA\_phosphoproteomic\_landscape\_AML\_C Scan : 25727

Andromeda score : 106.42

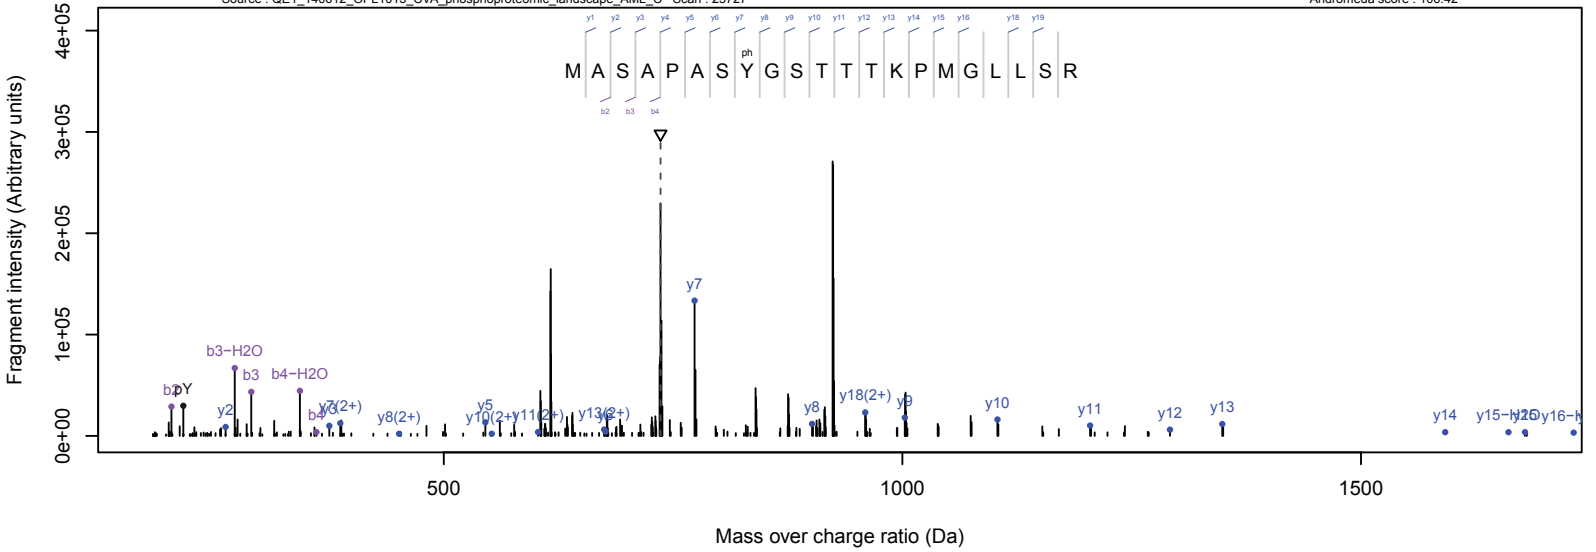

ALNSIDVY(ph)HKYSLIK-3+

Source : QE1\_140612\_OPL1013\_CVA\_phosphoproteomic\_landscape\_AML\_C Scan : 36790

Andromeda score : 106.38

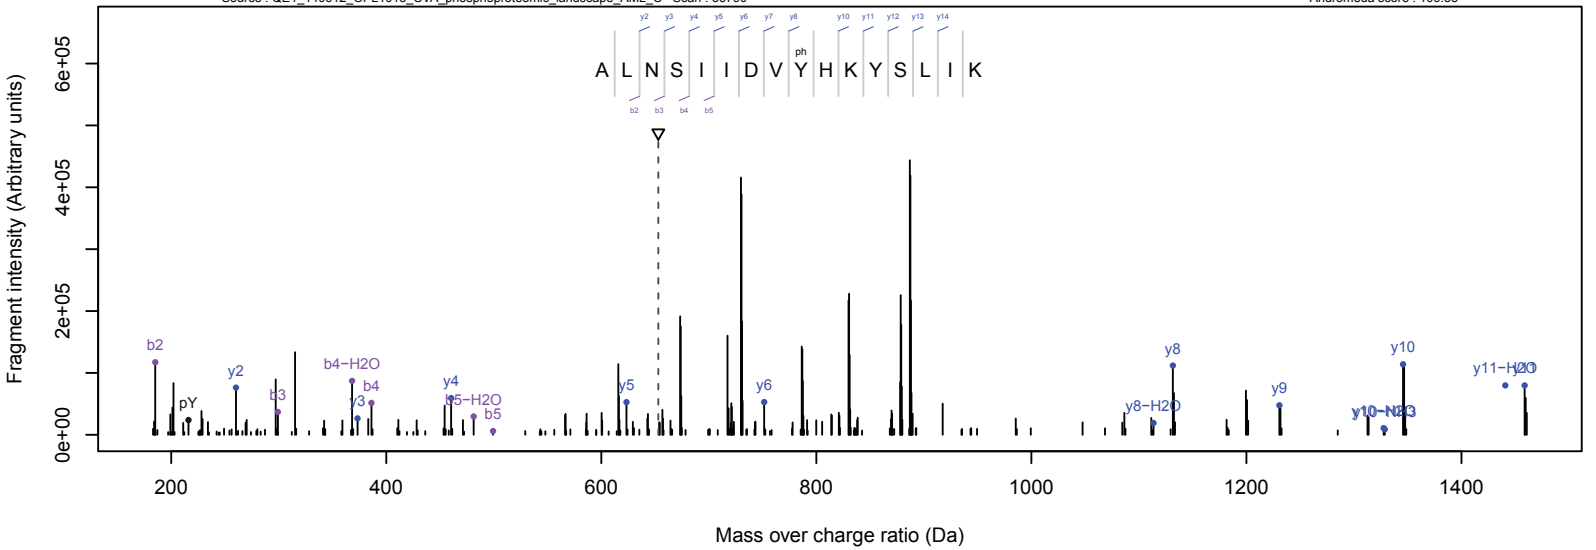

QIY(ph)YSDKYFDEHYEYR-3+

Source : QE1\_140612\_OPL1013\_CVA\_phosphoproteomic\_landscape\_AML\_C Scan : 27603

Andromeda score : 106.38

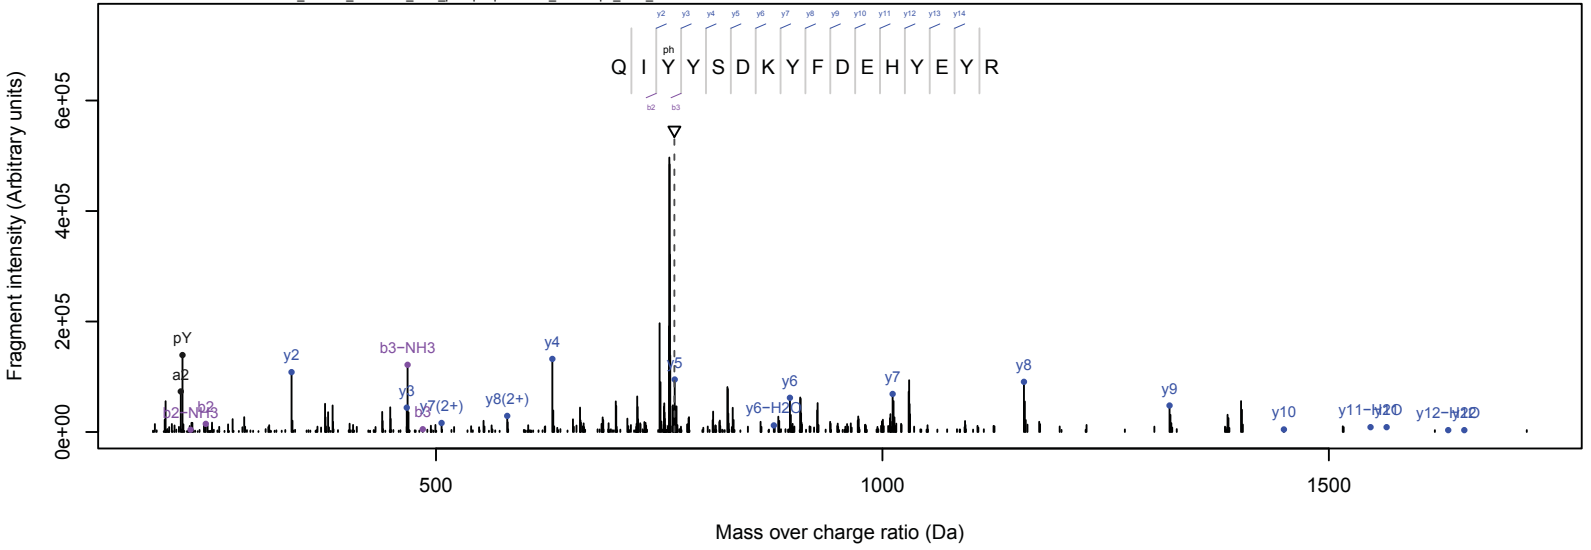

IHYLDTTLLIEPAPRY(ph)PSPPM(ox)GSVSAPNLPPTAEDNLEYVR-4+

Source : QE1\_140612\_OPL1013\_CVA\_phosphoproteomic\_landscape\_AML\_A Scan : 43306

Andromeda score : 106.36

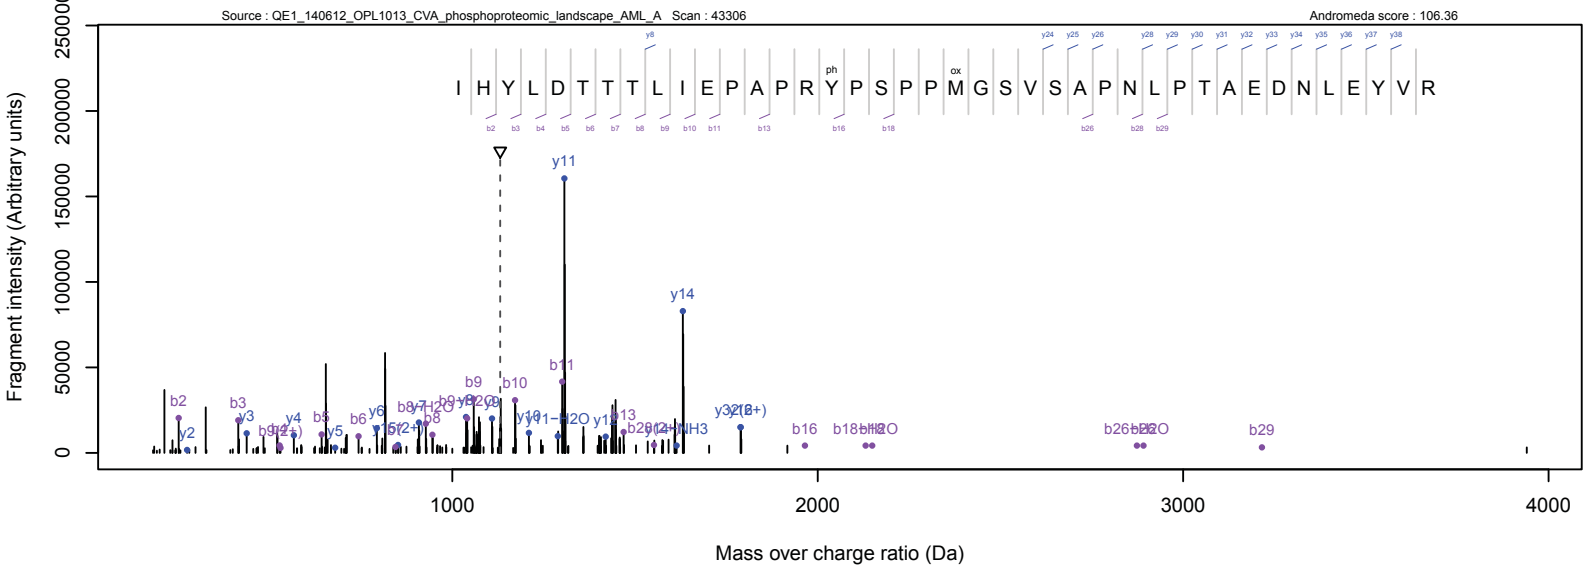

FETSKYY(ph)VTIIDAPGHRDFIK-4+

Source : QE1\_140612\_OPL1013\_CVA\_phosphoproteomic\_landscape\_AML\_B Scan : 32650

Andromeda score : 106.35

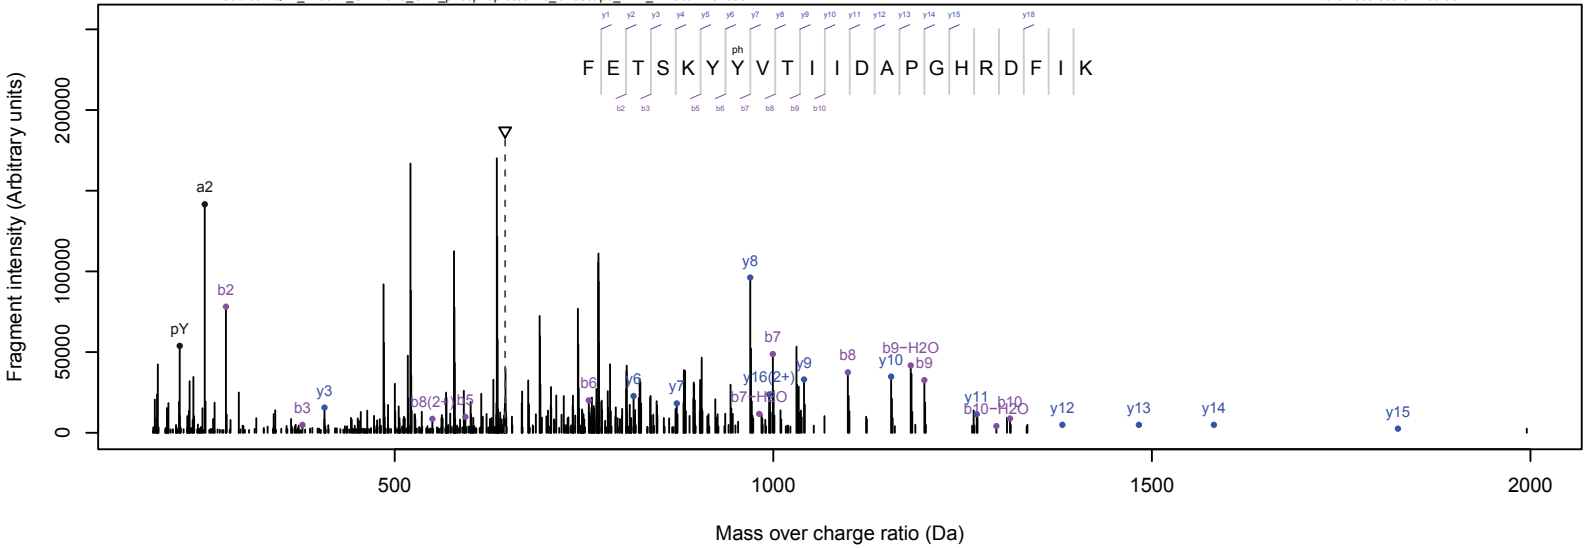

**WLNSPNTY(ph)MK-2+**

Source : QE1\_140612\_OPL1013\_CVA\_phosphoproteomic\_landscape\_AML\_C Scan : 22841

Andromeda score : 106.35

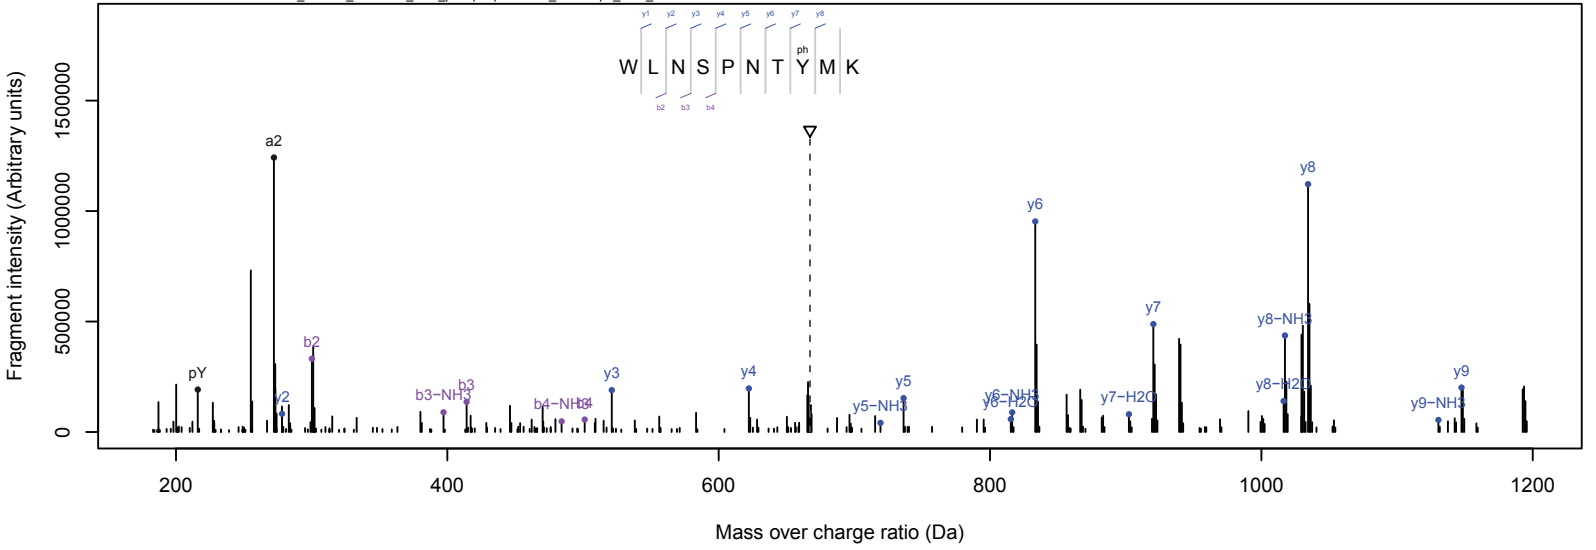

**KLQQTQEY(ph)FIQYQESLR-3+**

Source : QE1\_140612\_OPL1013\_CVA\_phosphoproteomic\_landscape\_AML\_D Scan : 37076

Andromeda score : 106.31

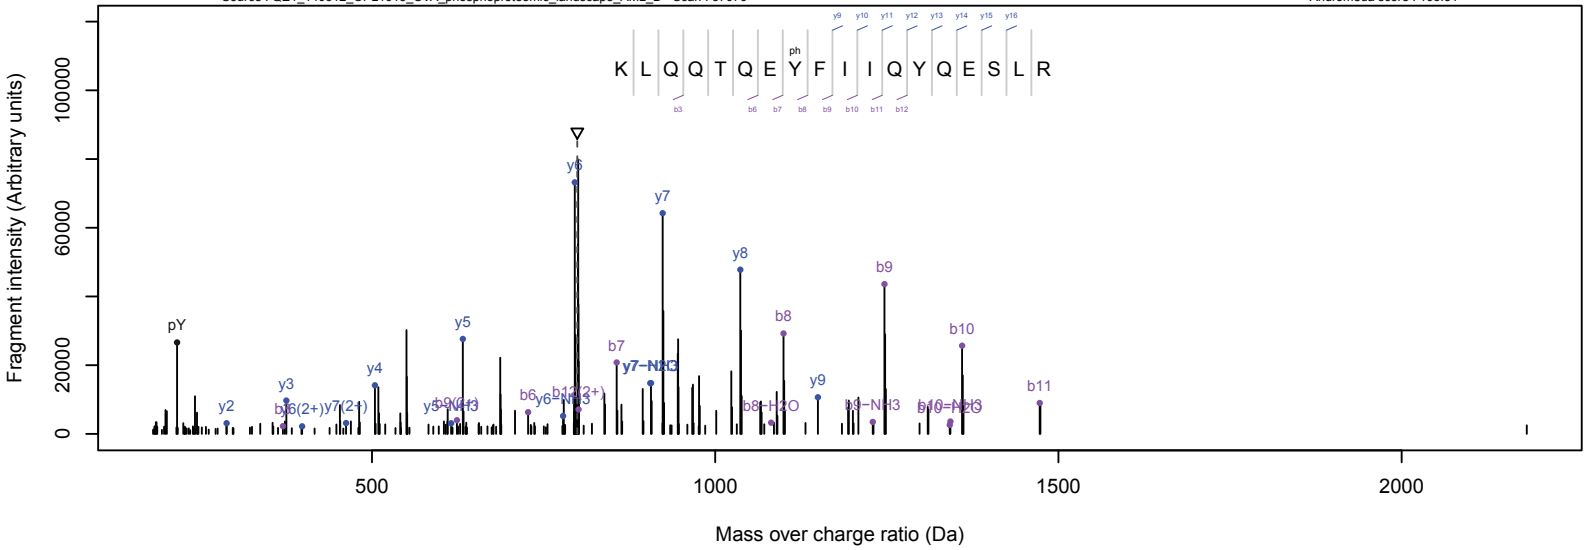

**INVYNEATGGKY(ph)VPR-3+**

Source : QE1\_140612\_OPL1013\_CVA\_phosphoproteomic\_landscape\_AML\_B Scan : 21132

Andromeda score : 106.3

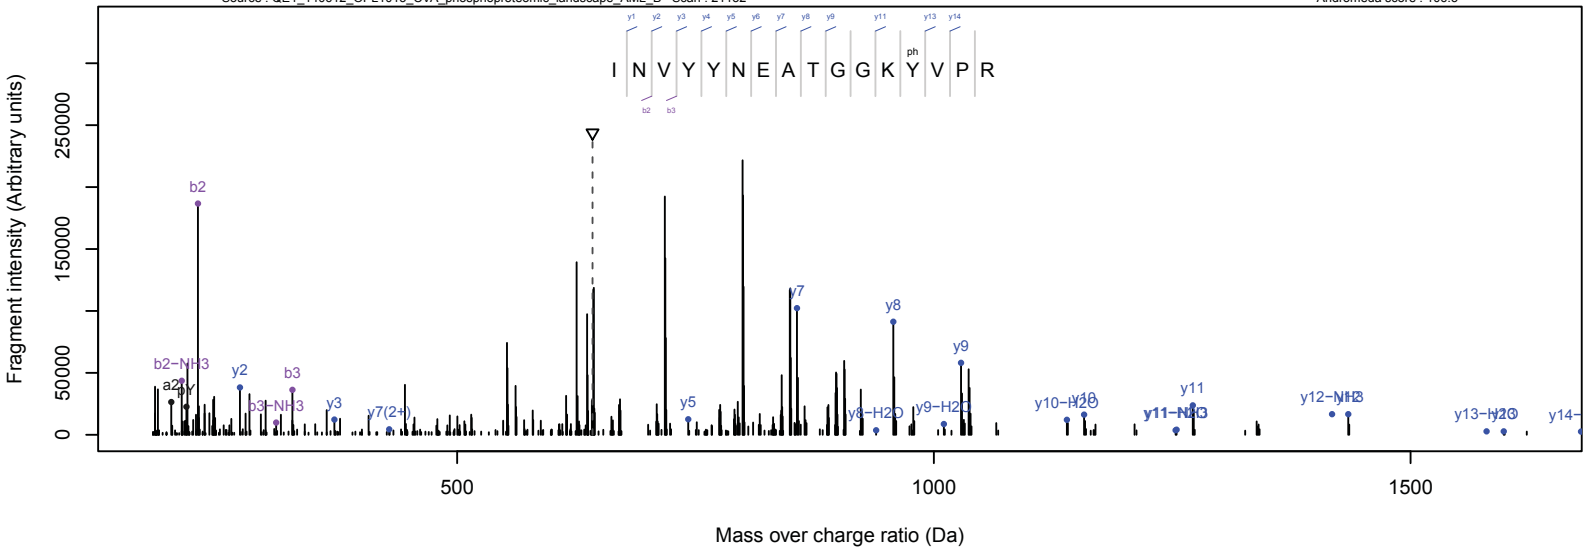

**AQSNPY(ph)YNGPHLNLK-2+**

Source: QE1\_140908\_OPL1013\_CvA\_pTyrIP\_AML\_ML2 Scan: 23188

Andromeda score: 106.29

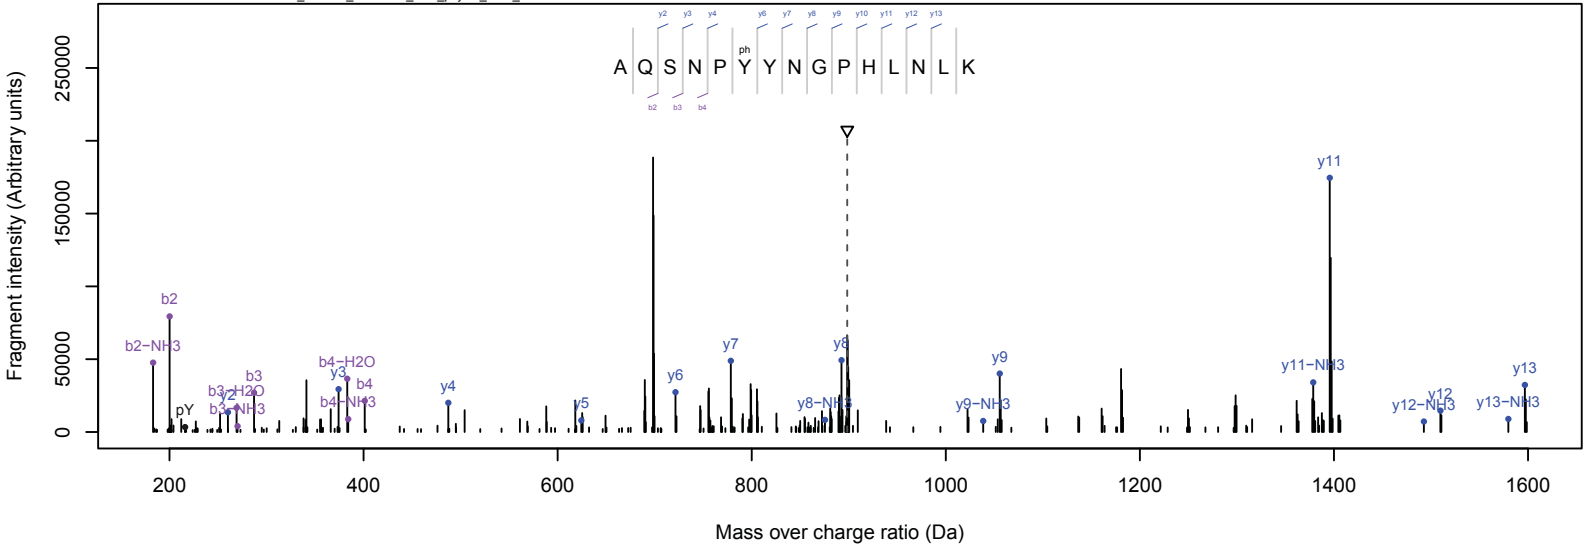

**AY(ph)QHGGVTGLSQY-2+**

Source: QE1\_140612\_OPL1013\_CVA\_phosphoproteomic\_landscape\_AML\_B Scan: 17447

Andromeda score: 106.26

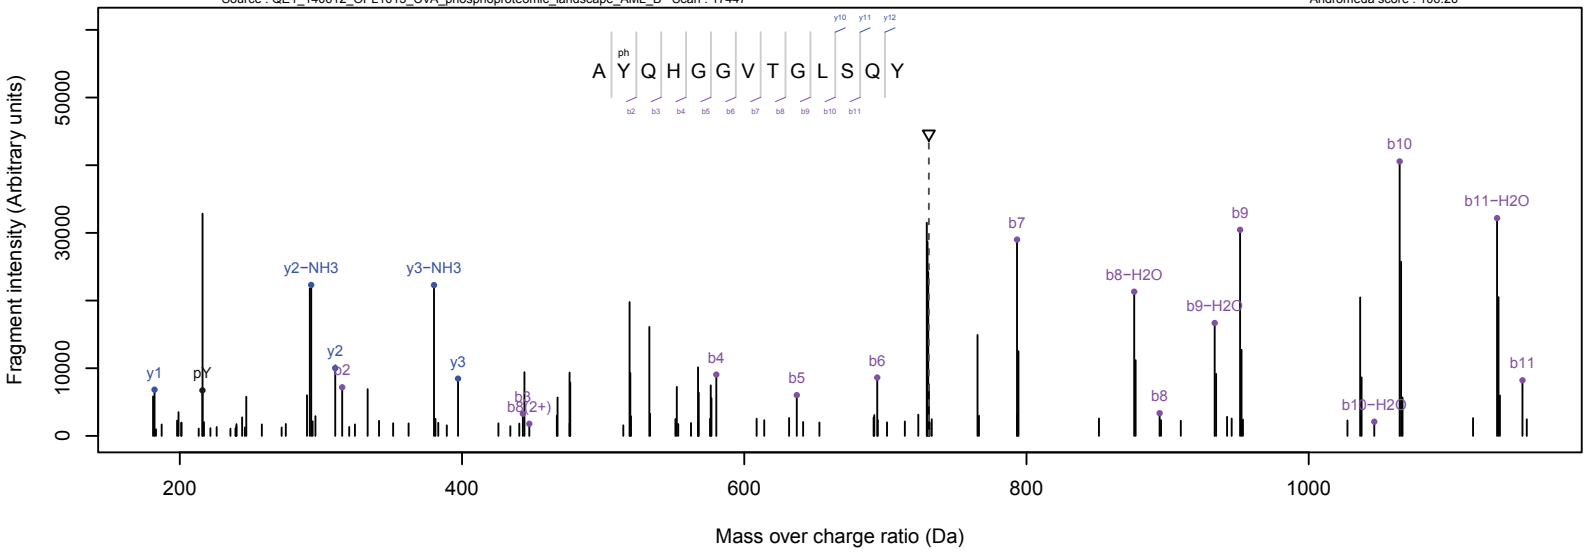

**FSDY(ph)VEVAK-2+**

Source: QE1\_140612\_OPL1013\_CVA\_phosphoproteomic\_landscape\_AML\_C Scan: 17926

Andromeda score: 106.18

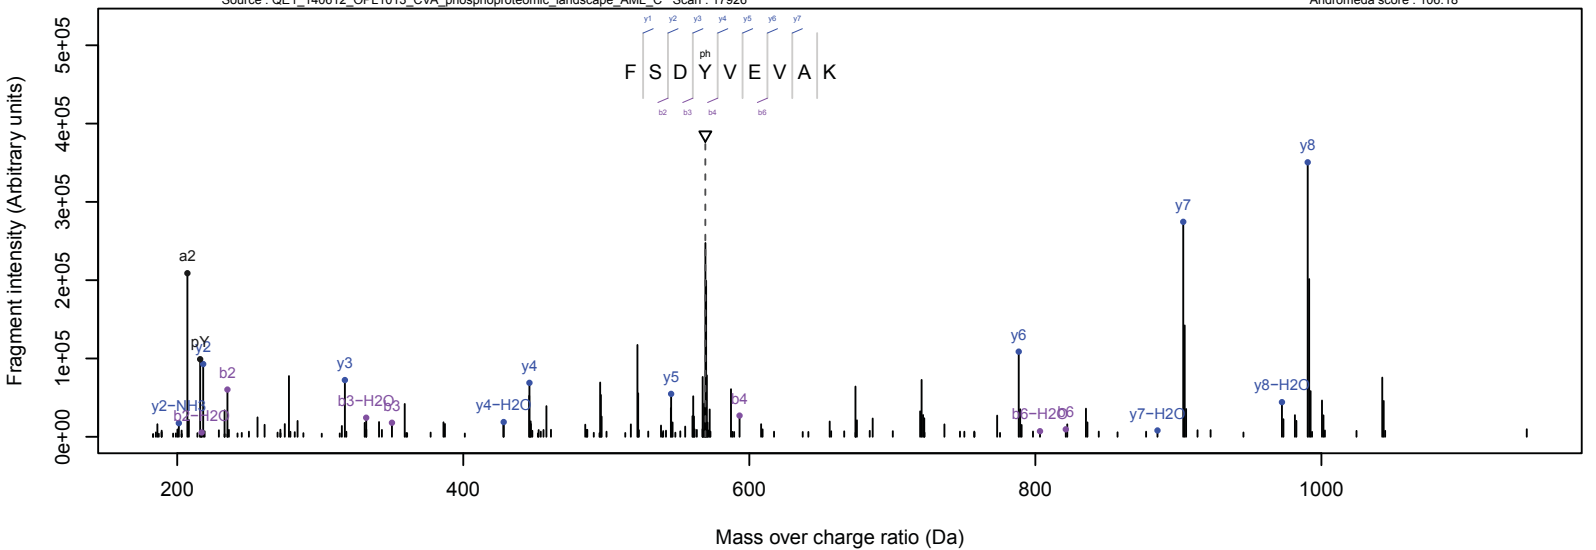

**GHQHQTGIVSDHPAEAGPISEDEQELHY(ph)AVLHFHK-6+**

Source : QE1\_140908\_OPL1013\_CvA\_pTyrIP\_AML\_ML2 Scan : 37657

Andromeda score : 106.18

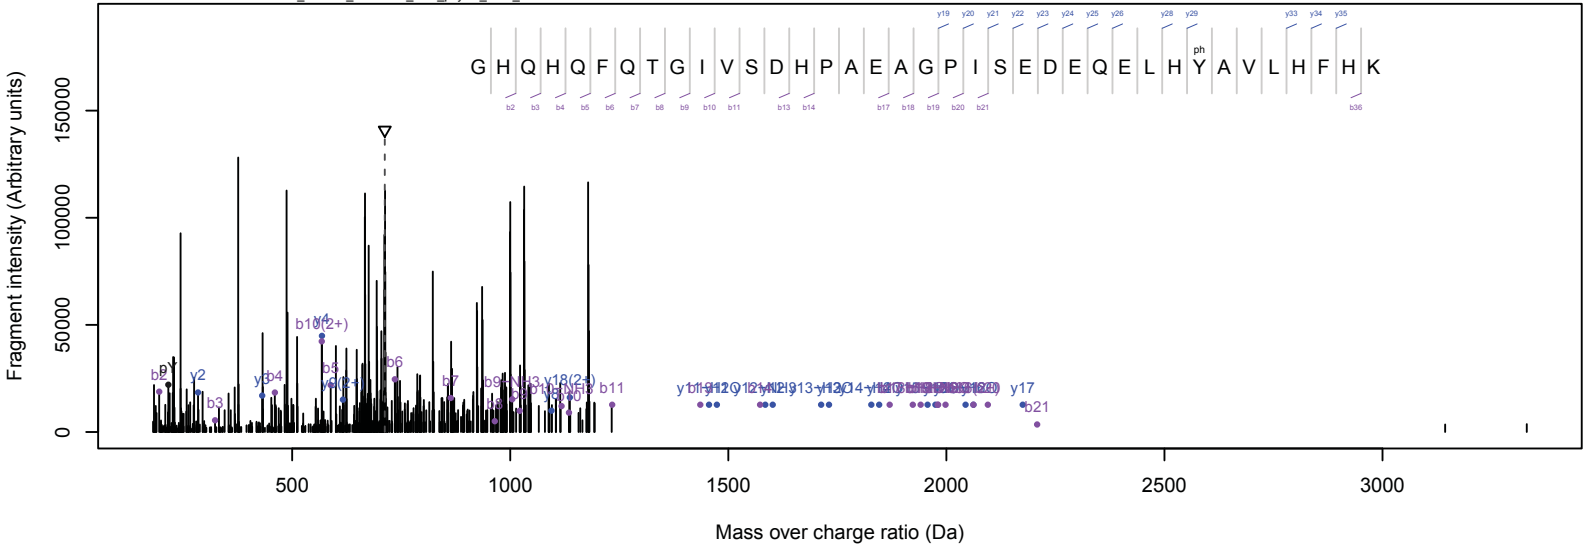

**HAY(ph)GLGEHYSVTR-3+**

Source : QE1\_140612\_OPL1013\_CVA\_phosphoproteomic\_landscape\_AML\_A Scan : 10338

Andromeda score : 106.14

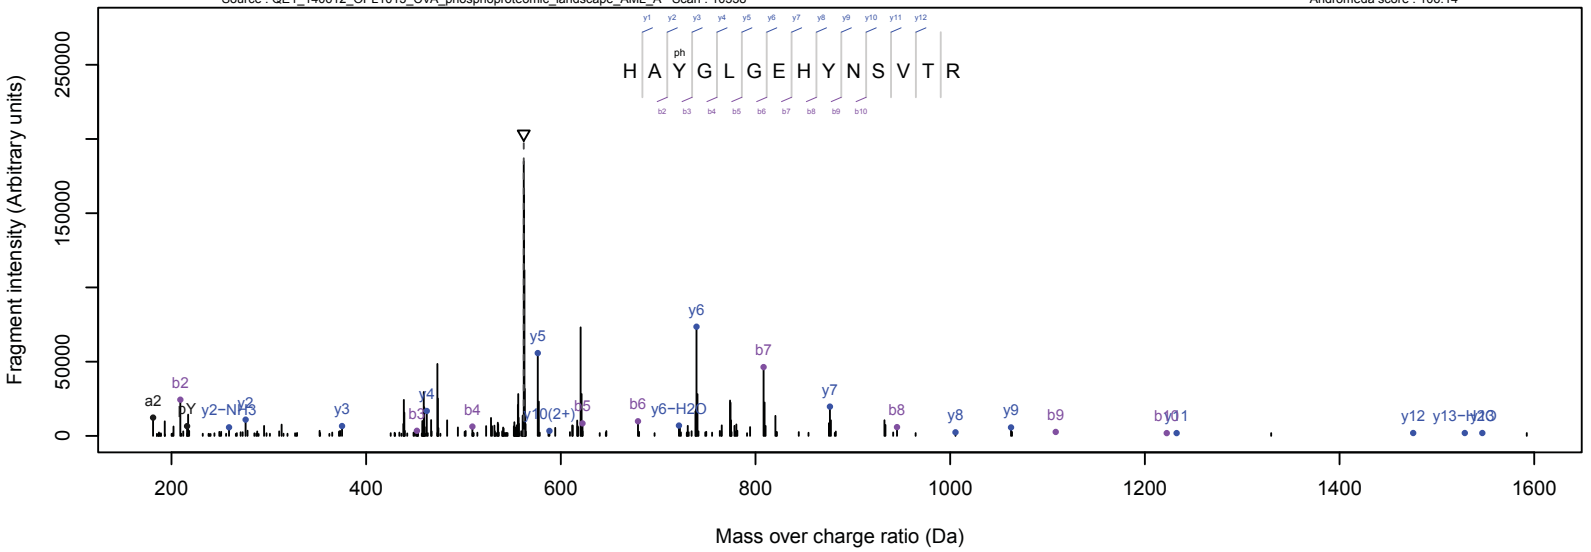

**LGIQGSY(ph)FCSQECFK-2+**

Source : QE1\_140612\_OPL1013\_CVA\_phosphoproteomic\_landscape\_AML\_A Scan : 31359

Andromeda score : 106.14

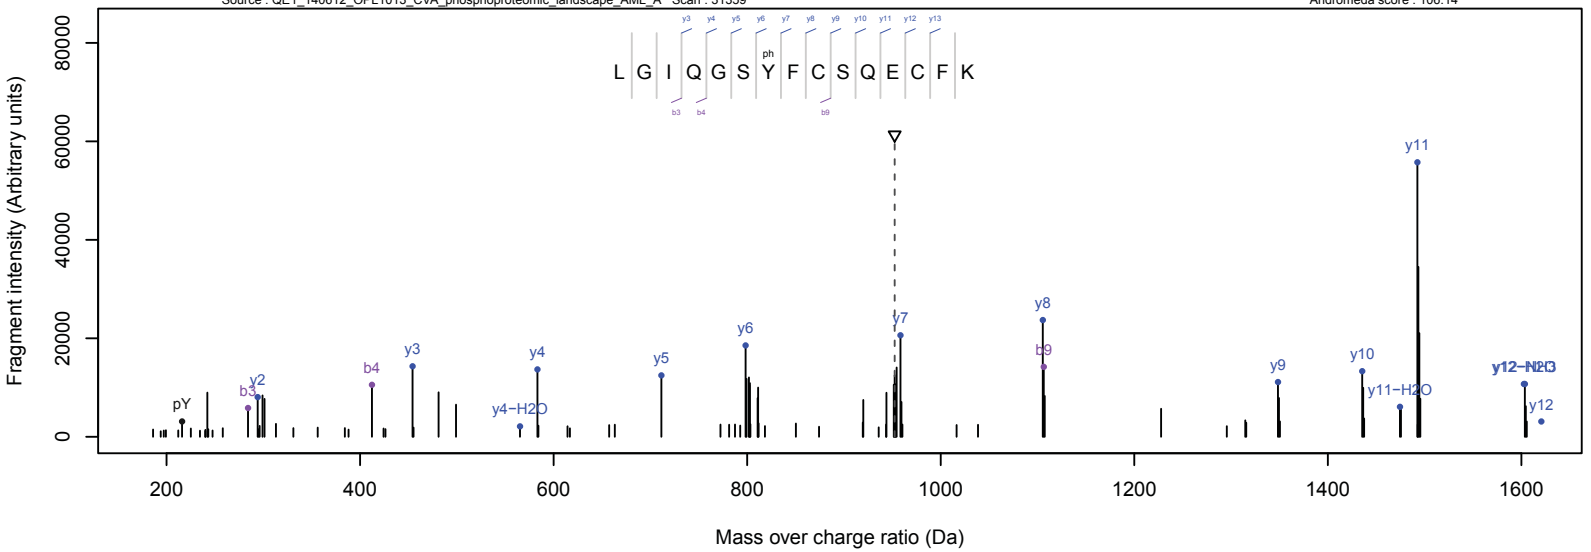

QANKEY(ph)LLGSTAEK-3+

Source : QE1\_140612\_OPL1013\_CVA\_phosphoproteomic\_landscape\_AML\_B Scan : 12973

Andromeda score : 106.14

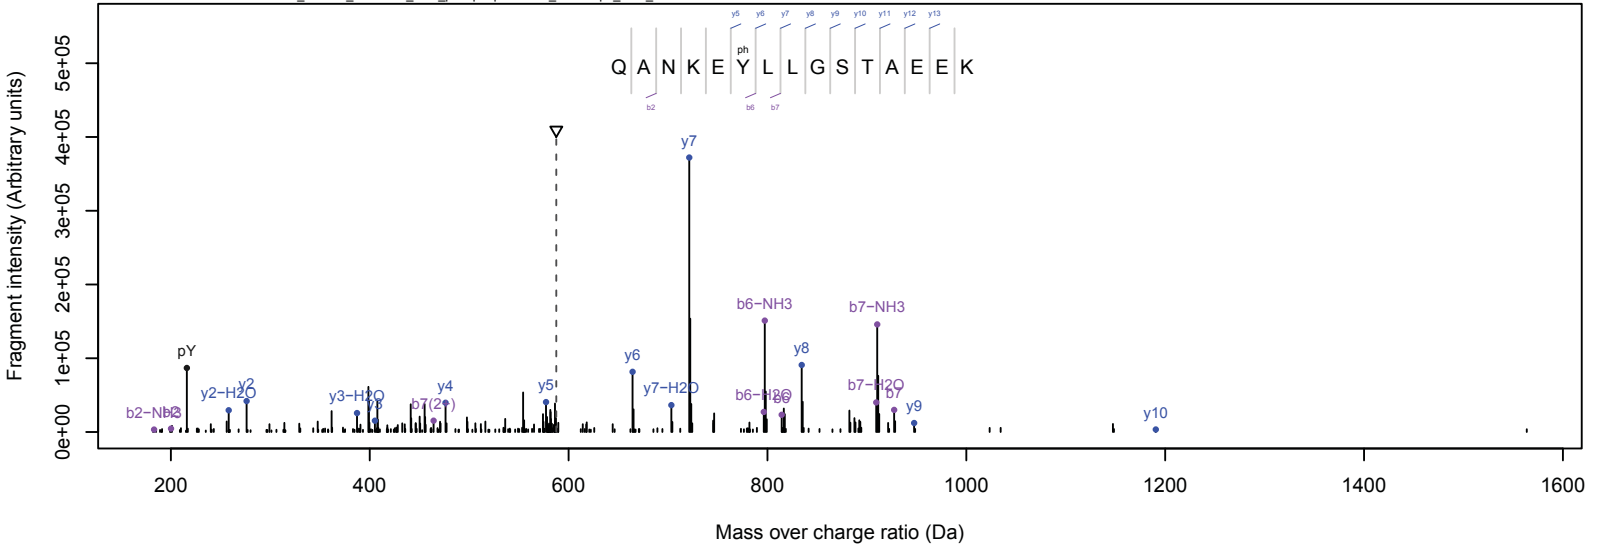

SGFEGY(ph)VELPPIEGR-2+

Source : QE1\_140908\_OPL1013\_CvA\_pTyrIP\_AML\_HEL Scan : 41813

Andromeda score : 106.14

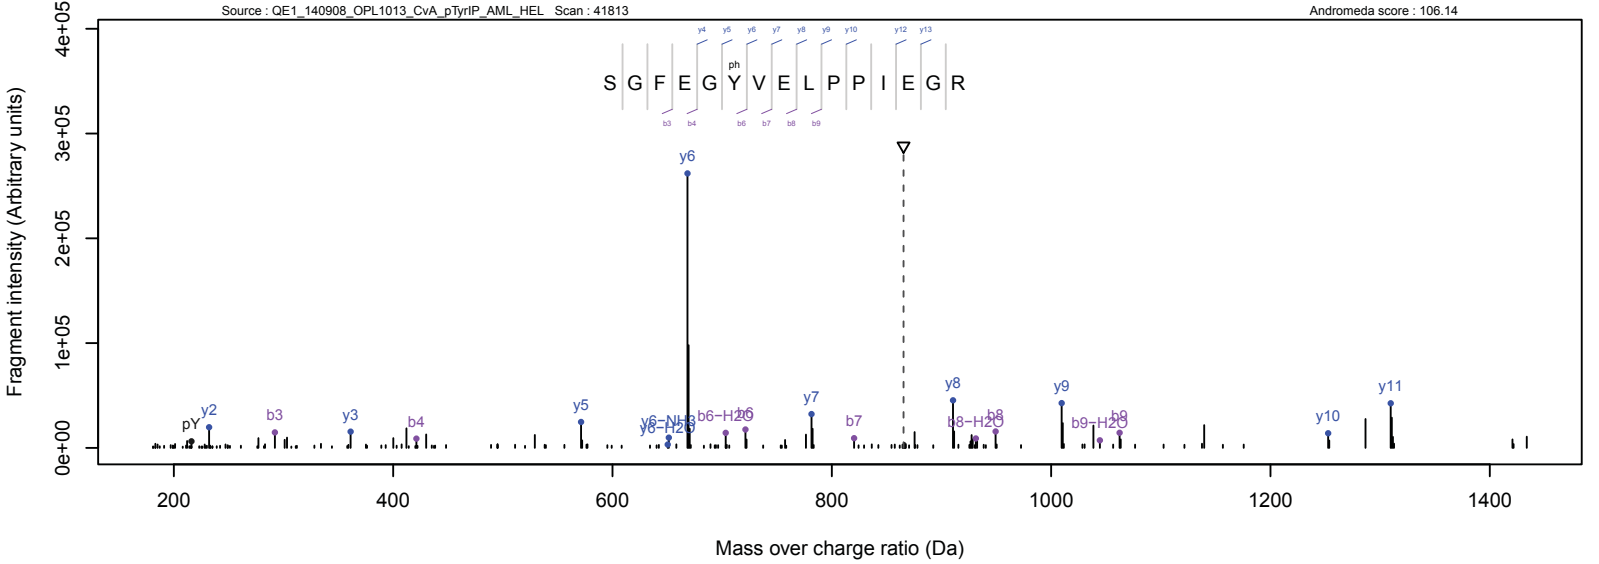

DTLY(ph)SCAAMPNSASRDEFPCGFTSPANR-3+

Source : QE1\_140908\_OPL1013\_CvA\_pTyrIP\_AML\_HEL Scan : 35377

Andromeda score : 106.11

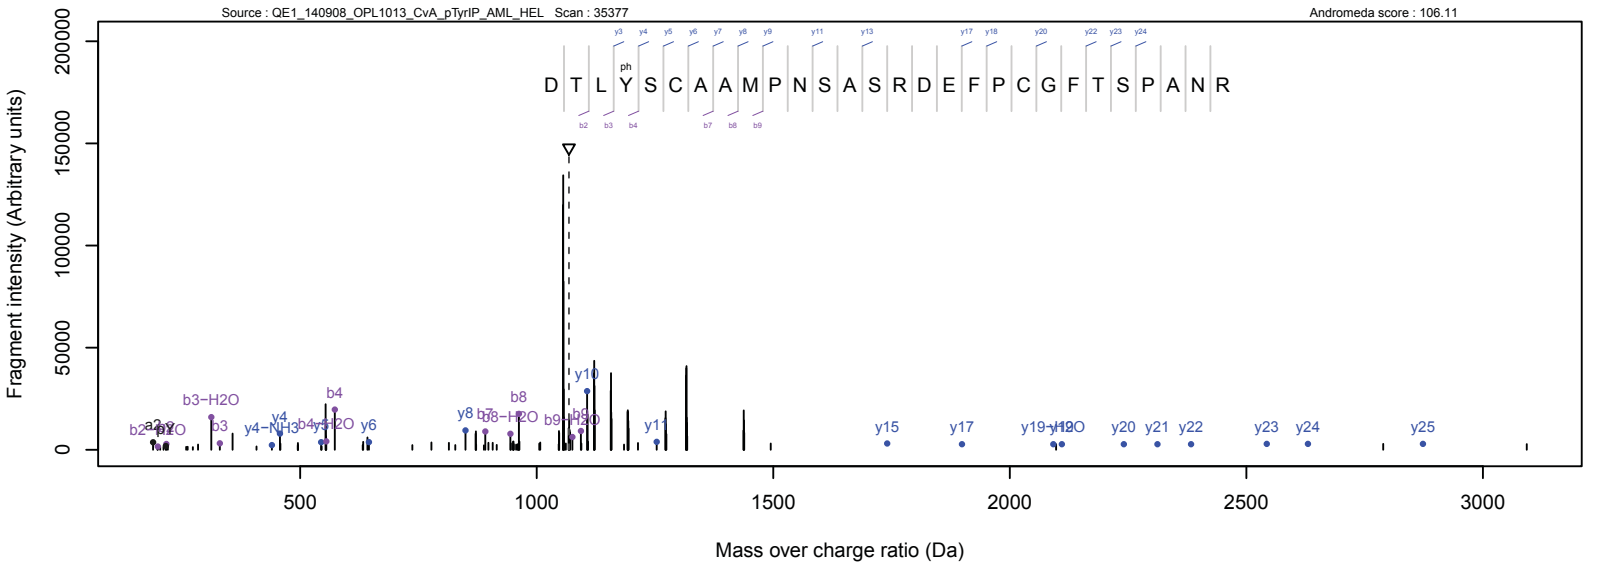

LVQSPNSY(ph)FM(ox)DVK-2+

Source : QE1\_140908\_OPL1013\_CVA\_pTyrIP\_AML\_HEL Scan : 24732

Andromeda score : 105.95

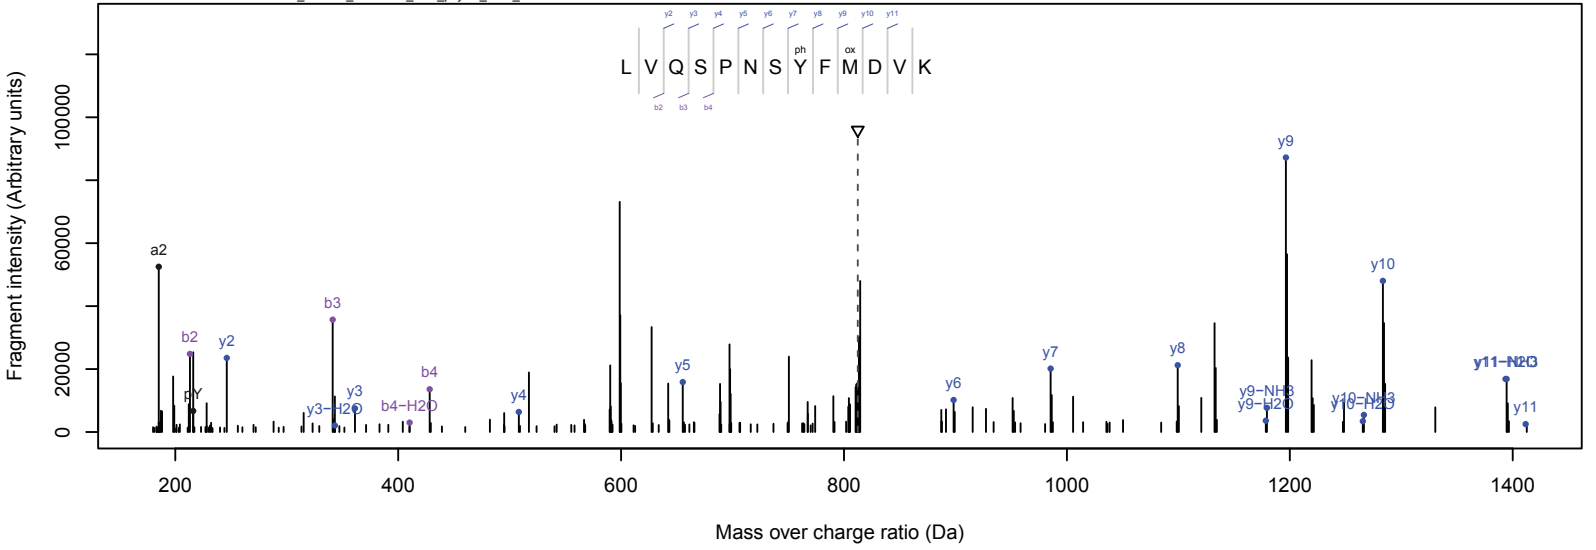

SQPVY(ph)IQYSNHR-2+

Source : QE1\_140612\_OPL1013\_CVA\_phosphoproteomic\_landscape\_AML\_C Scan : 13488

Andromeda score : 105.95

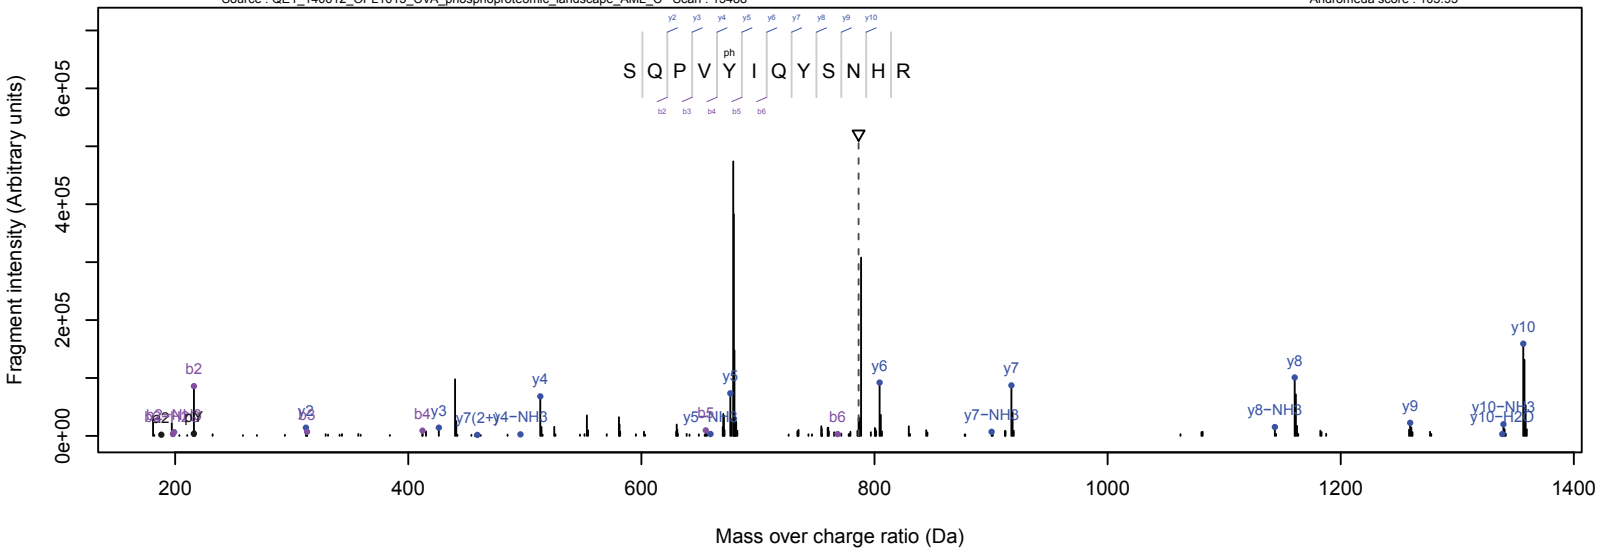

SSTIY(ph)SNAESFLPGICK-2+

Source : QE1\_140612\_OPL1013\_CVA\_phosphoproteomic\_landscape\_AML\_B Scan : 36825

Andromeda score : 105.9

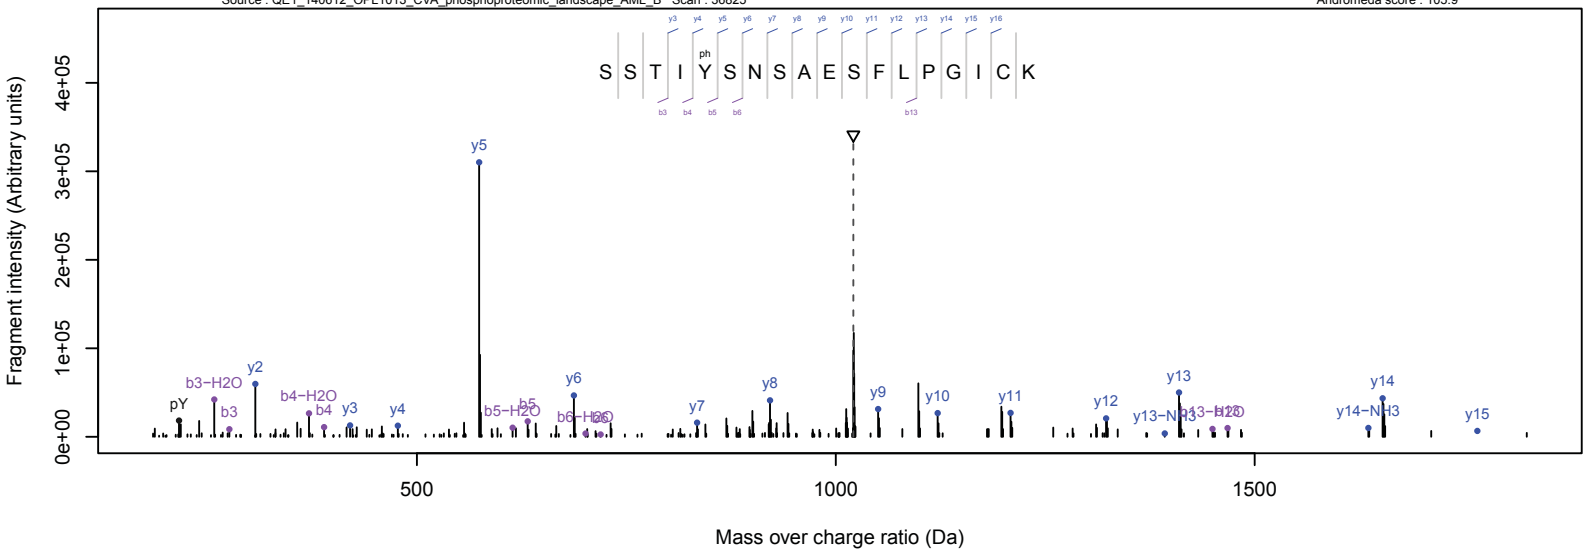

TQIELNPY(ph)LTCVFSGGK-2+

Source : QE1\_140612\_OPL1013\_CVA\_phosphoproteomic\_landscape\_AML\_C Scan : 45496

Andromeda score : 105.9

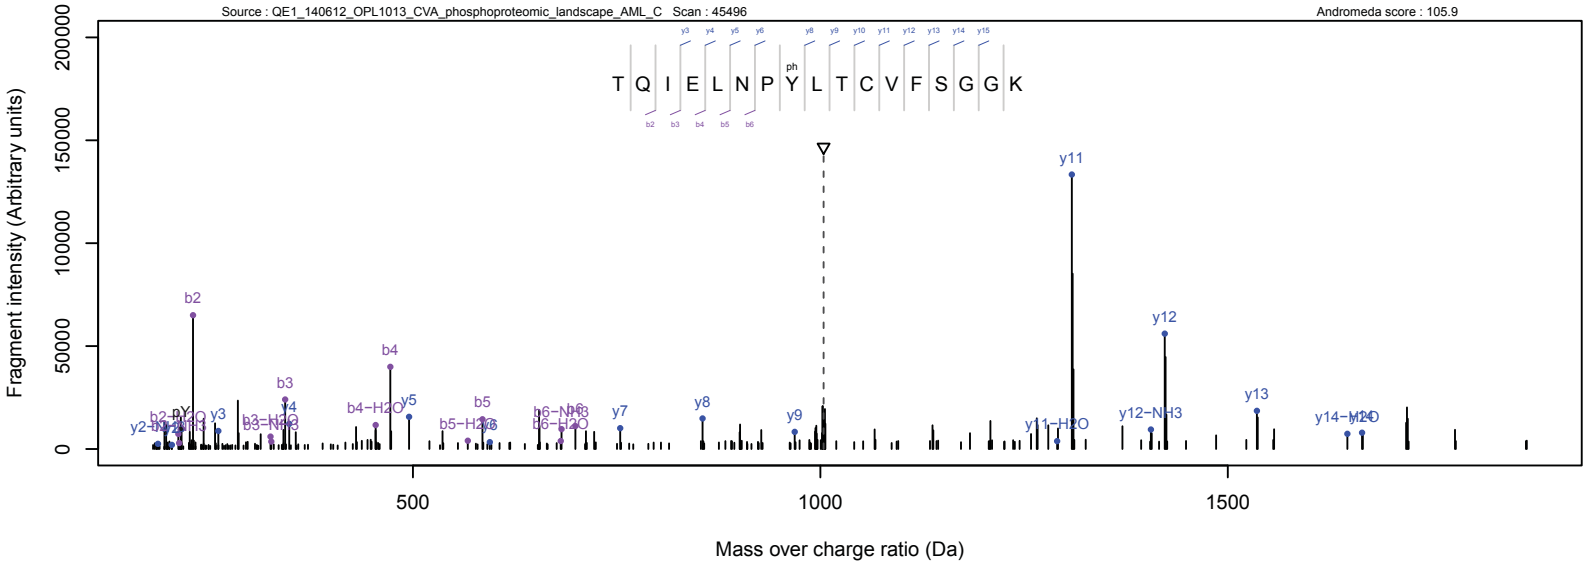

DVTIGGSAPIY(ph)VK-2+

Source : QE1\_140612\_OPL1013\_CVA\_phosphoproteomic\_landscape\_AML\_C Scan : 30301

Andromeda score : 105.65

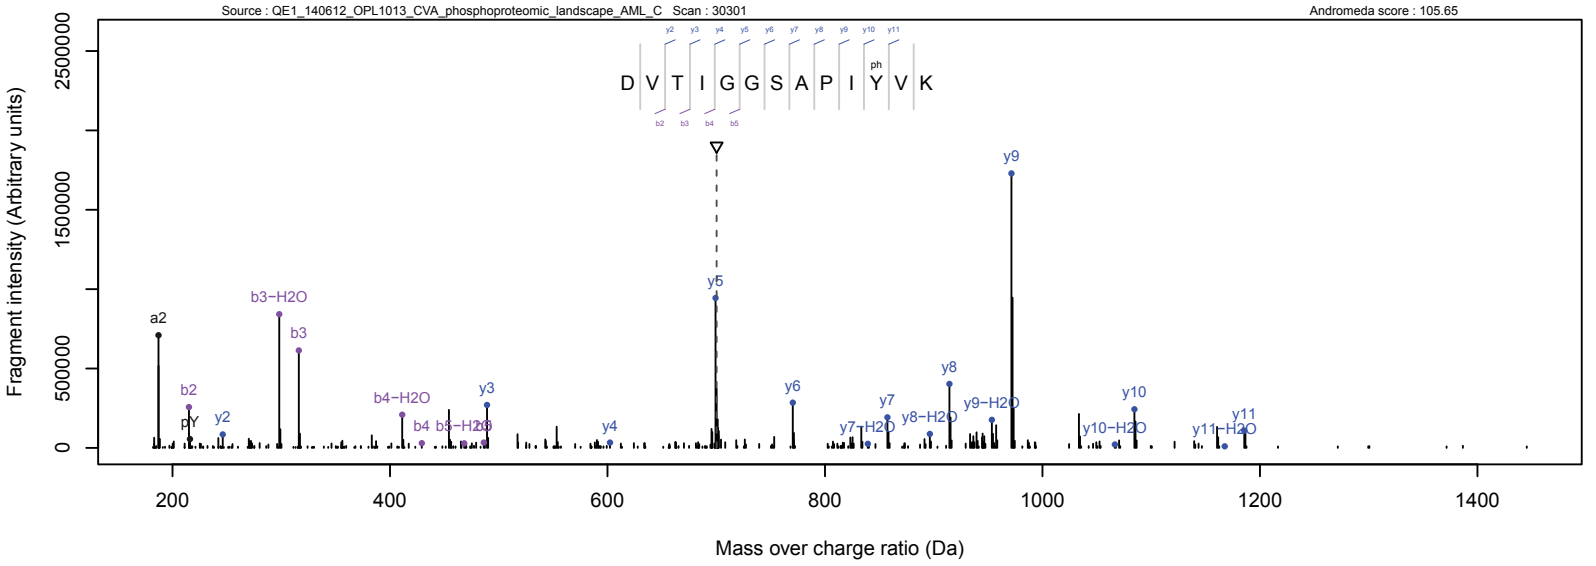

GGTLTQY(ph)EGKLR-2+

Source : QE1\_140612\_OPL1013\_CVA\_phosphoproteomic\_landscape\_AML\_C Scan : 13046

Andromeda score : 105.65

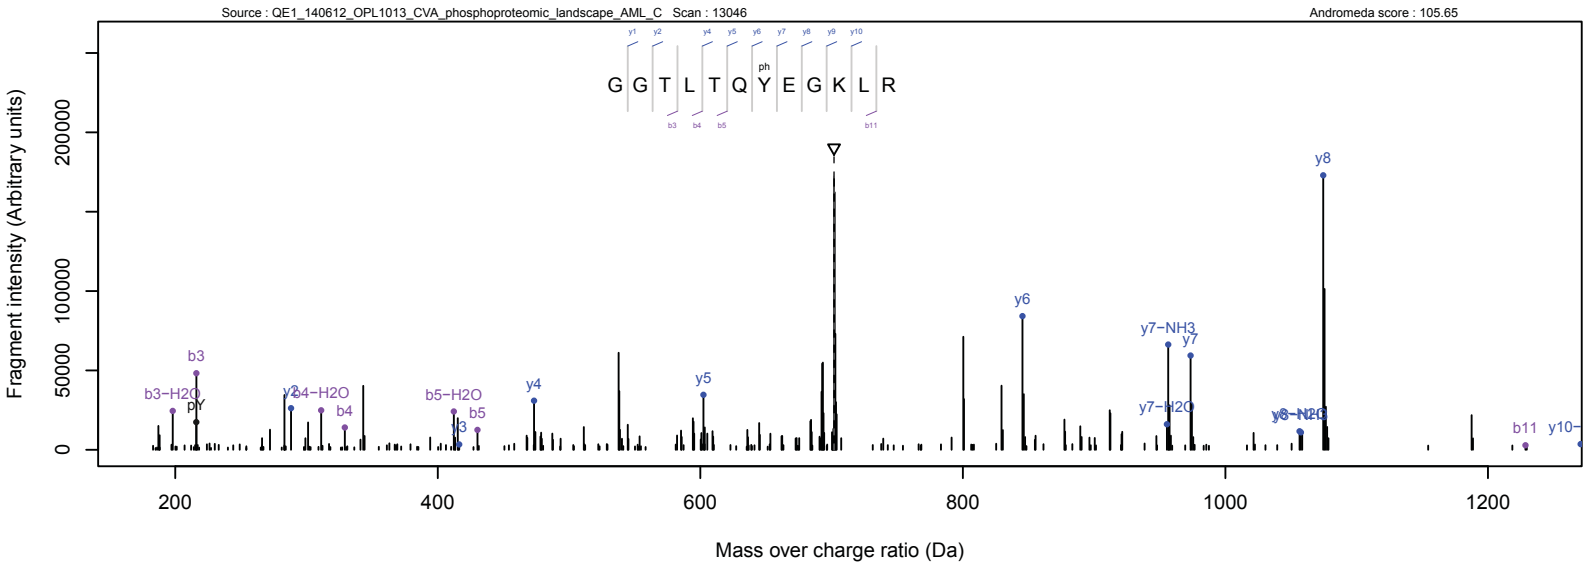



**M(ox)QQNGY(ph)ENPTYK-2+**

Source: QE1\_140908\_OPL1013\_CVA\_pTyrIP\_AML\_Kasumi1 Scan: 5179

Andromeda score: 105.65

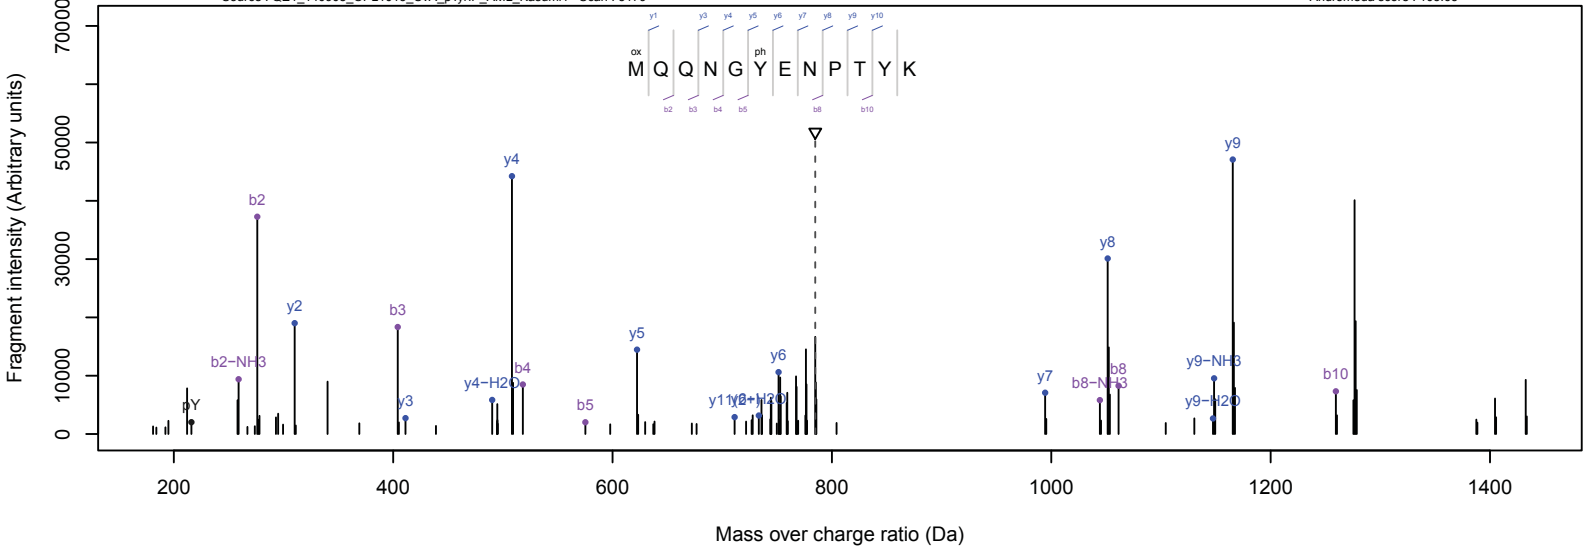

**NSHSLY(ph)LAGIFR-2+**

Source: QE1\_140612\_OPL1013\_CVA\_phosphoproteomic\_landscape\_AML\_C Scan: 37026

Andromeda score: 105.65

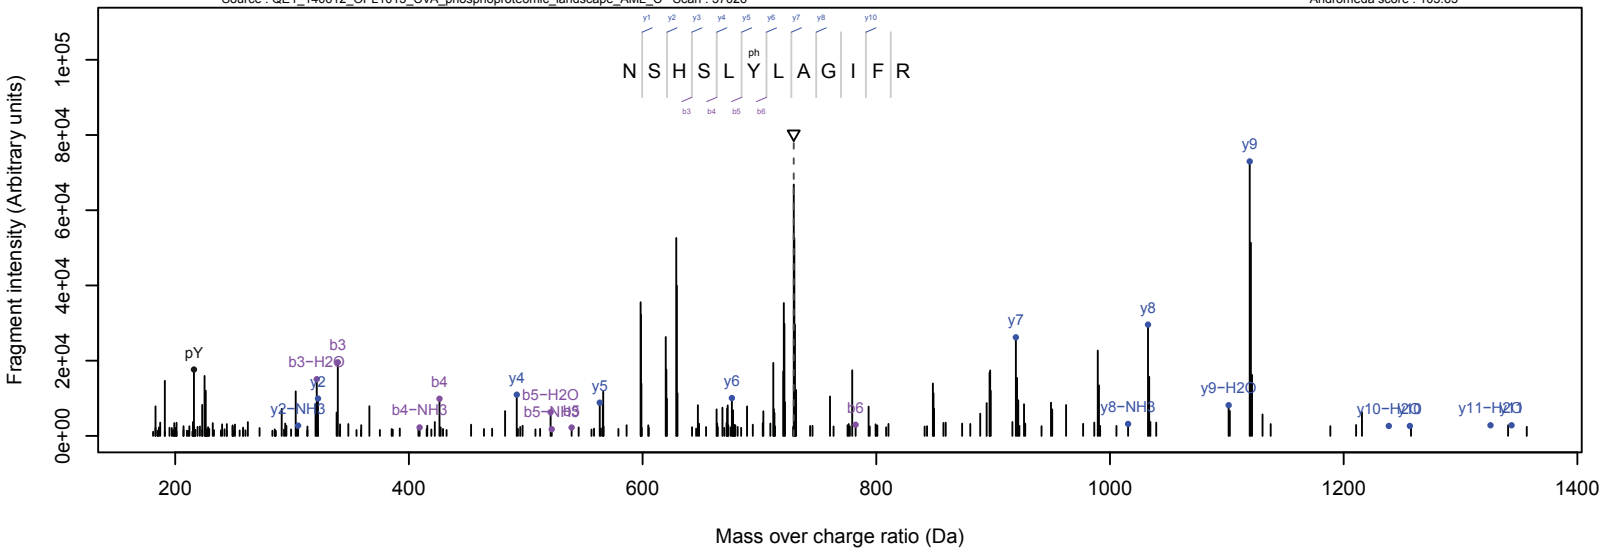

**SDY(ph)LNTFEFMDK-2+**

Source: QE1\_140612\_OPL1013\_CVA\_phosphoproteomic\_landscape\_AML\_B Scan: 40824

Andromeda score: 105.65

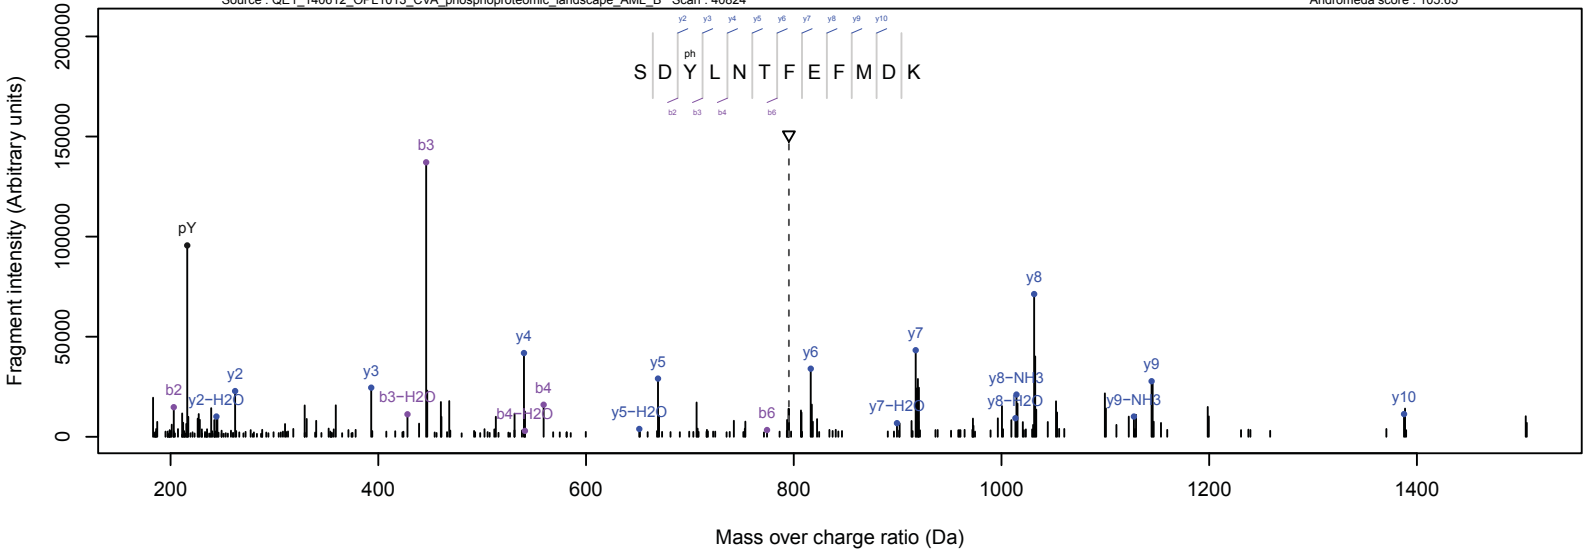

**AKPEPDILEEEKIY(ph)AYPSNITSETGFR-3+**

Source : QE1\_140612\_OPL1013\_CVA\_phosphoproteomic\_landscape\_AML\_C Scan : 38026

Andromeda score : 105.55

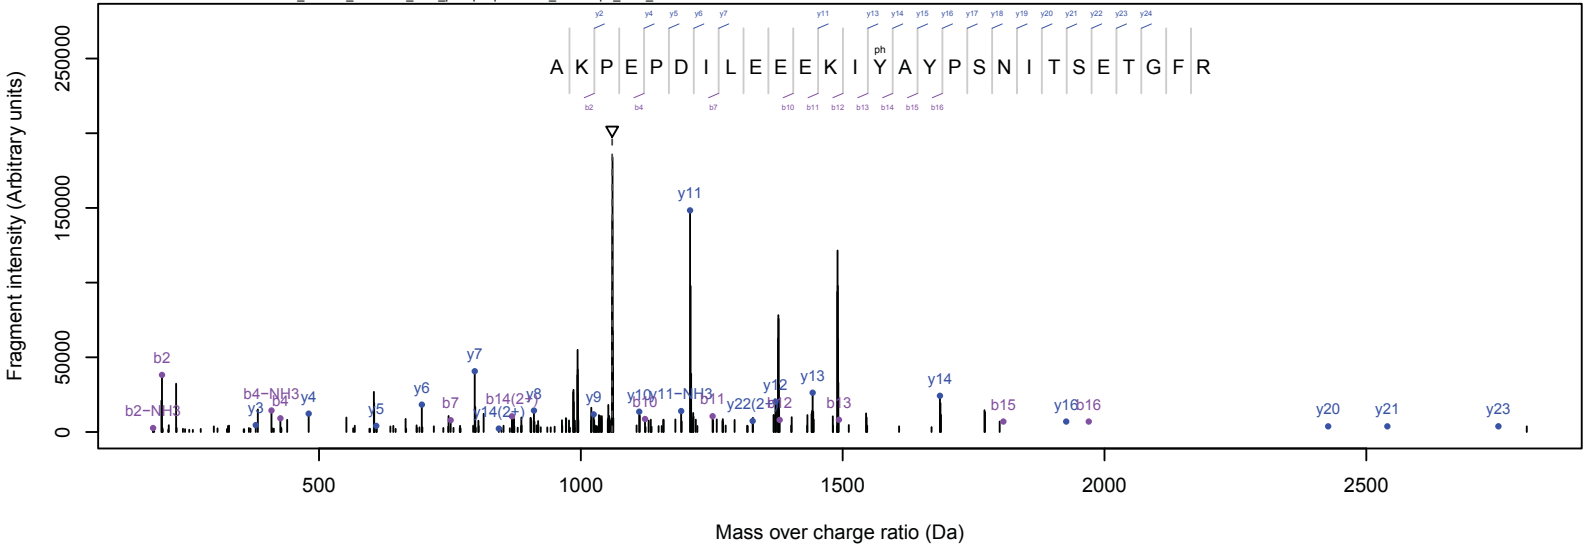

**GFGGQY(ph)GIQK-2+**

Source : QE1\_140612\_OPL1013\_CVA\_phosphoproteomic\_landscape\_AML\_E Scan : 11777

Andromeda score : 105.52

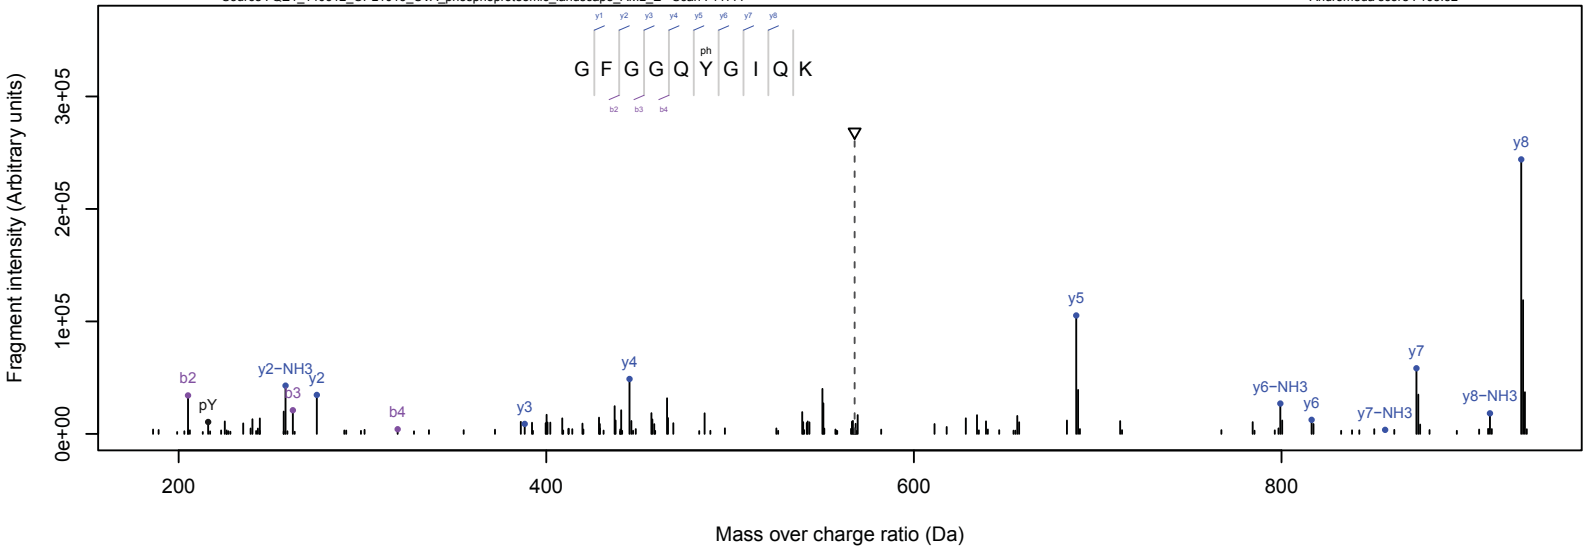

**MLQHIDY(ph)R-2+**

Source : QE1\_140612\_OPL1013\_CVA\_phosphoproteomic\_landscape\_AML\_C Scan : 11675

Andromeda score : 105.52

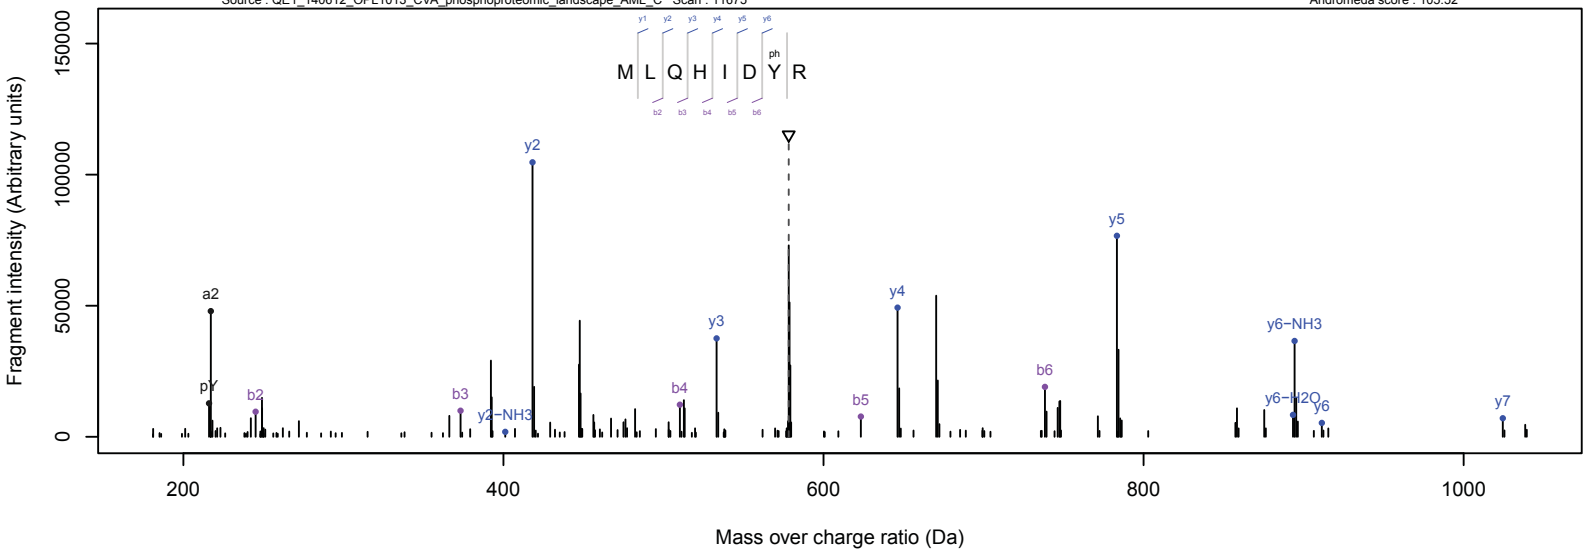

ASSHLLPADAVYDHALWGLHGYP-4+

Source : QE1\_140612\_OPL1013\_CVA\_phosphoproteomic\_landscape\_AML\_C Scan : 39751

Andromeda score : 105.51

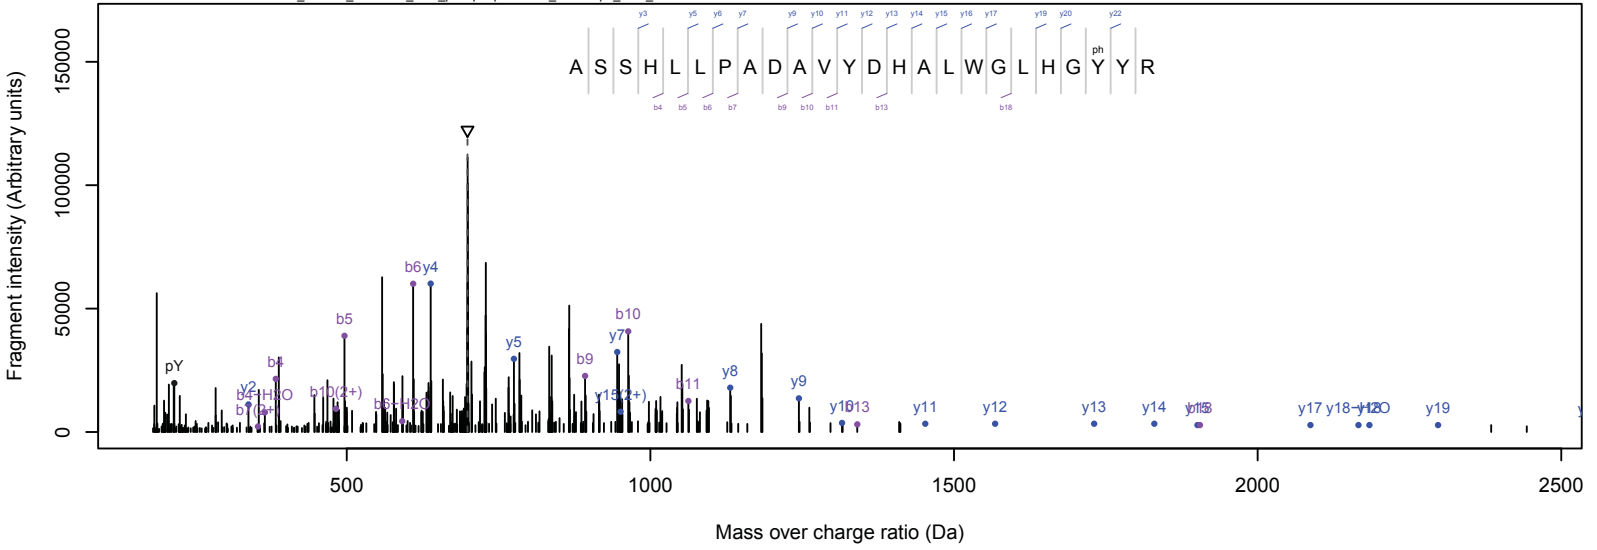

FGY(ph)HIMVEGR-3+

Source : QE1\_140612\_OPL1013\_CVA\_phosphoproteomic\_landscape\_AML\_C Scan : 28514

Andromeda score : 105.46

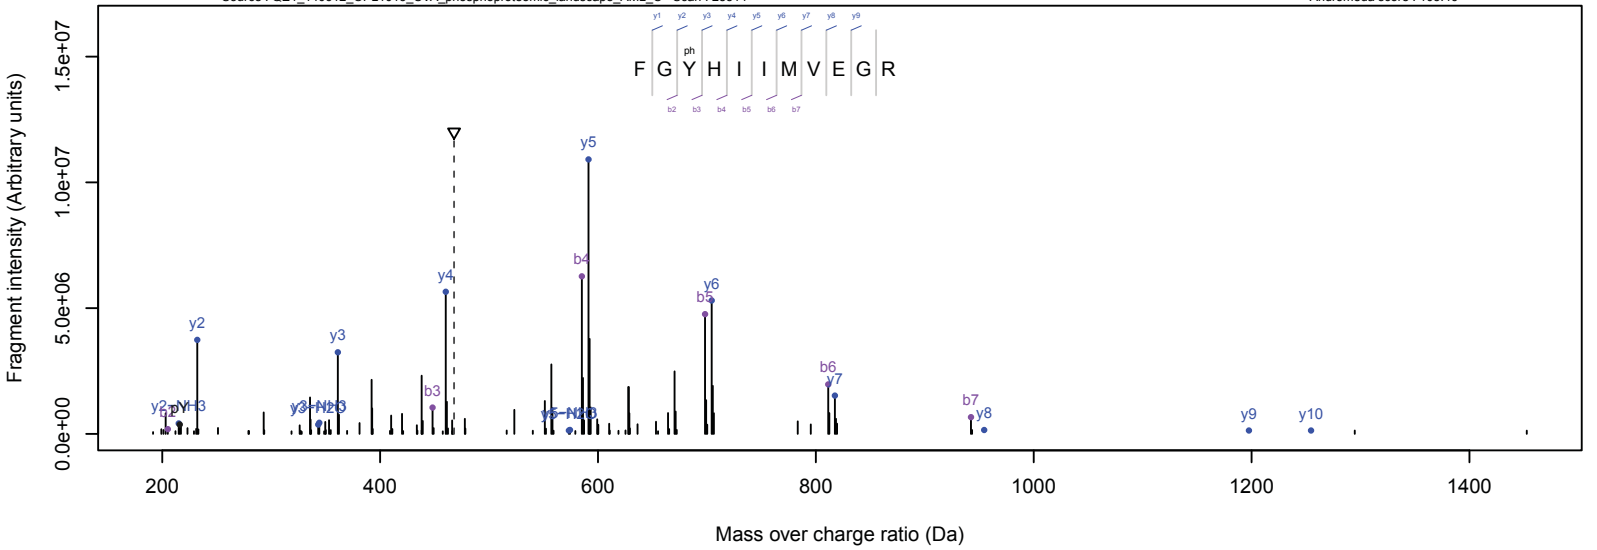

GY(ph)AFIEYEH-3+

Source : QE1\_140908\_OPL1013\_CvA\_pTyrIP\_AML\_HL60 Scan : 23425

Andromeda score : 105.46

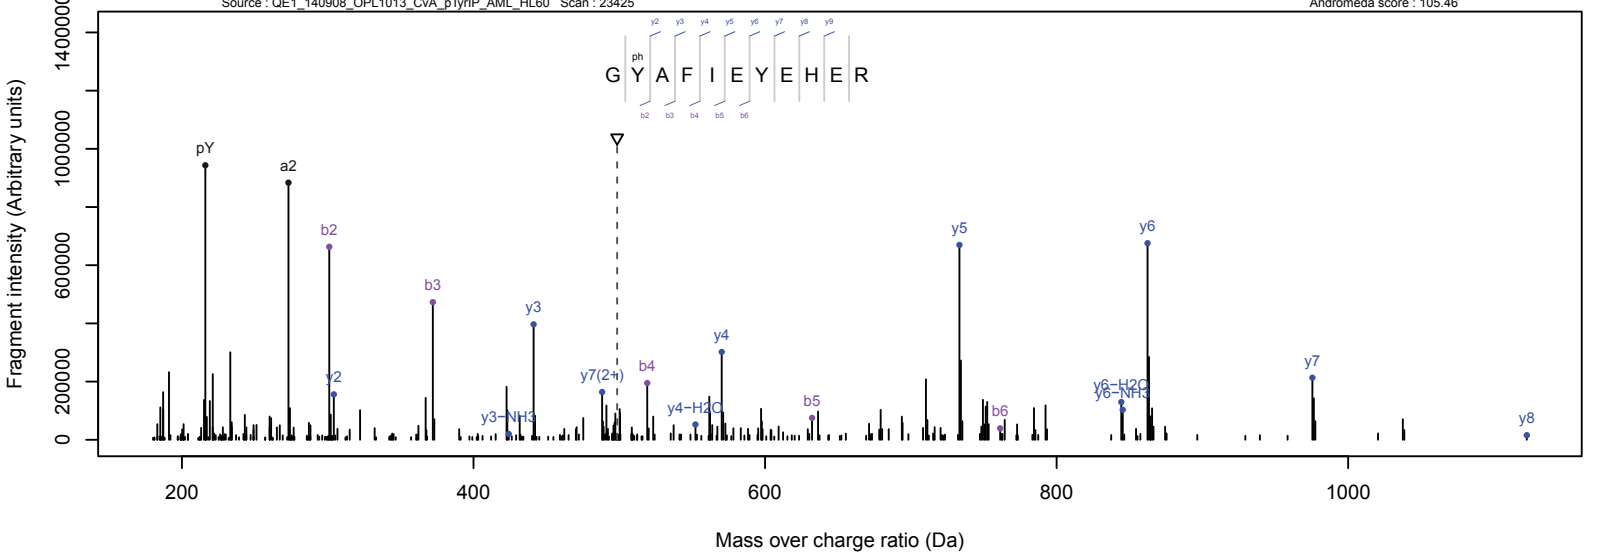

HRIY(ph)EYVESR-2+

Source: QE1\_140908\_OPL1013\_CvA\_pTyrIP\_AML\_Kasumi1 Scan: 9780

Andromeda score: 105.46

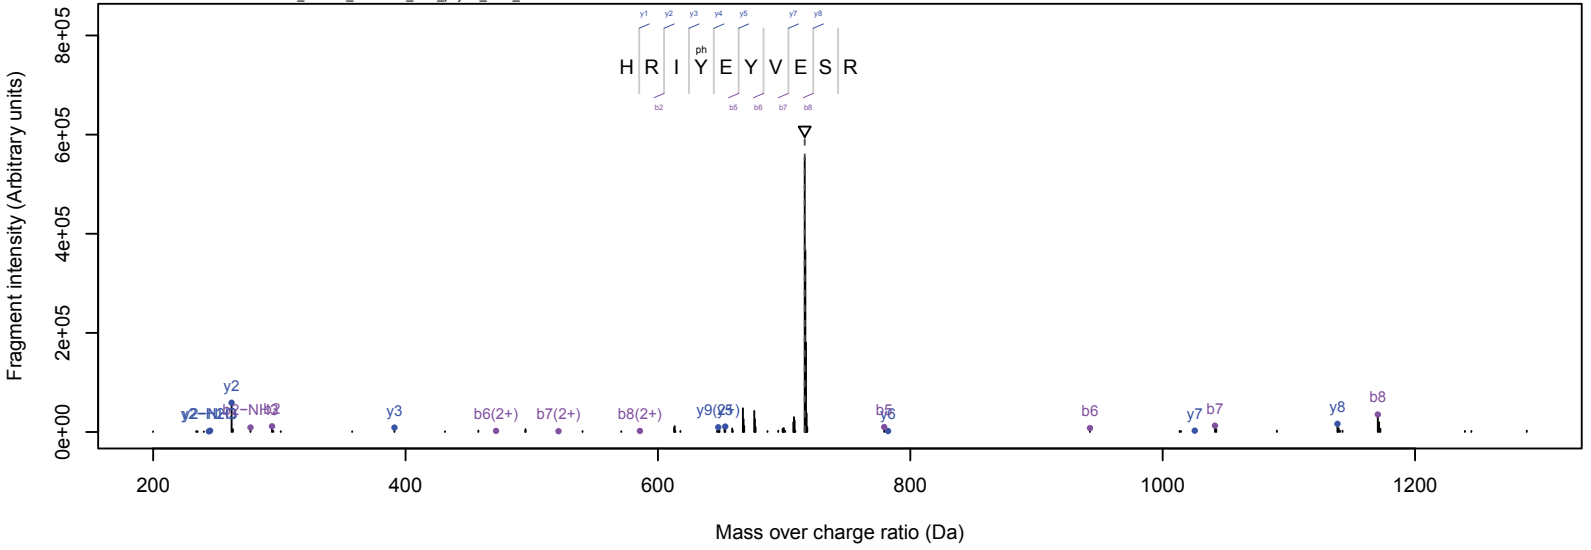

LIEY(ph)YQQLAQK-2+

Source: QE1\_140612\_OPL1013\_CvA\_phosphoproteomic\_landscape\_AML\_C Scan: 25575

Andromeda score: 105.46

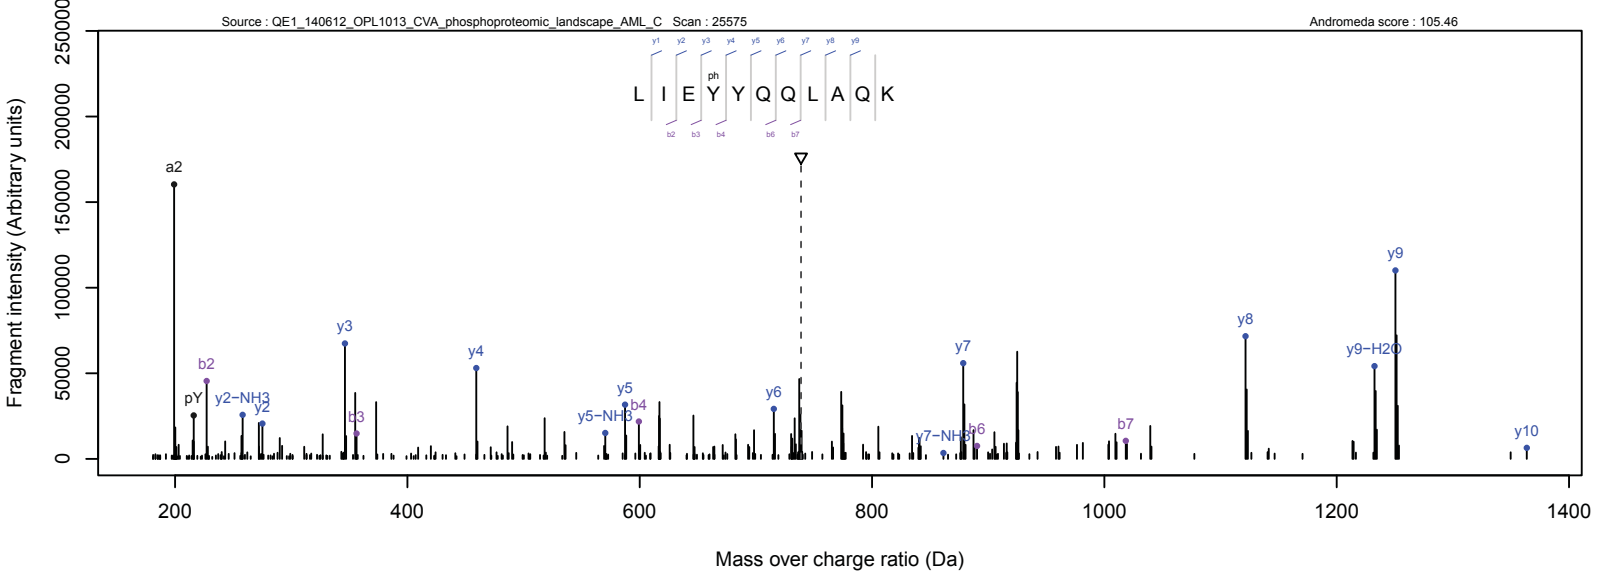

NLHHTQELLY(ph)ESTKDFLQLR-4+

Source: QE1\_140908\_OPL1013\_CvA\_pTyrIP\_AML\_HEL Scan: 46221

Andromeda score: 105.46

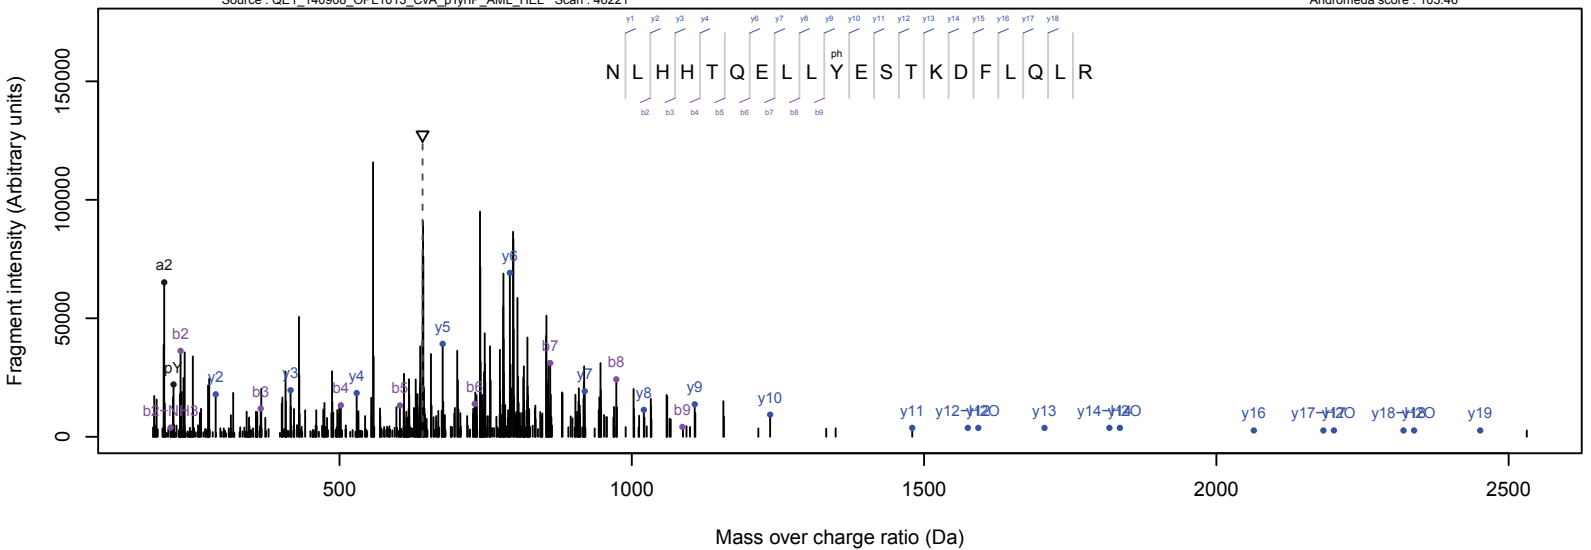

QAY(ph)EPPPPAYR-2+

Source : QE1\_140612\_OPL1013\_CVA\_phosphoproteomic\_landscape\_AML\_C Scan : 14001

Andromeda score : 105.46

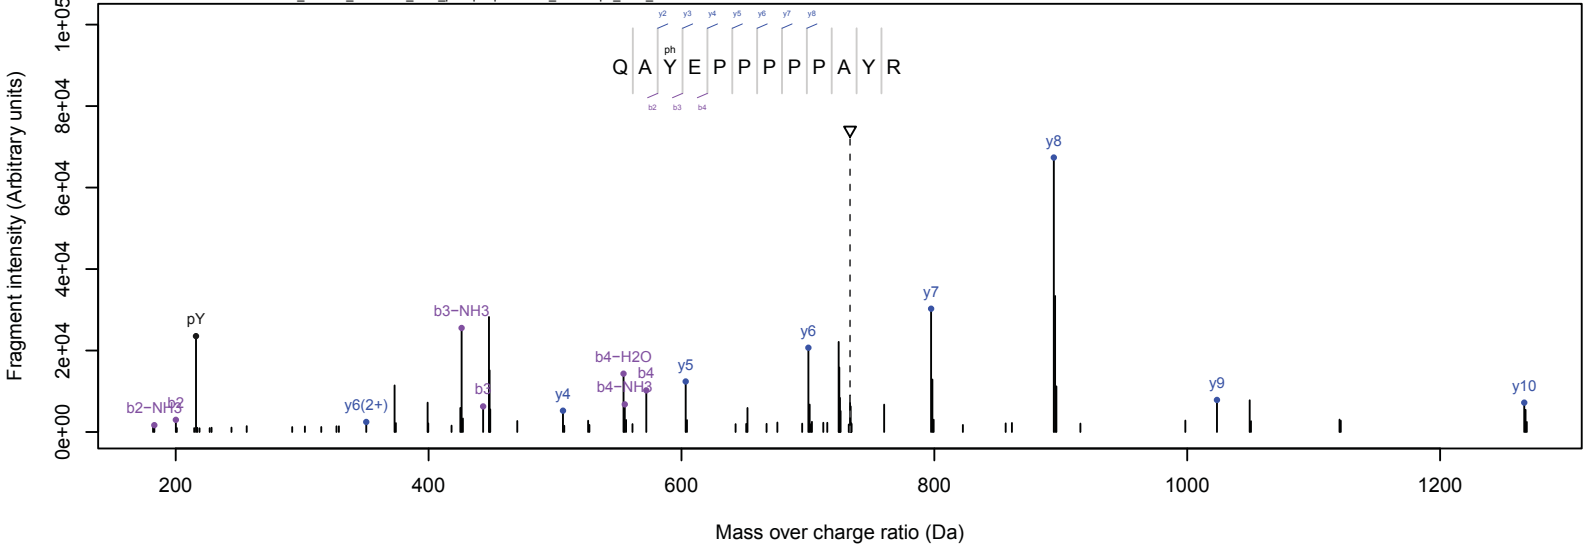

RPGY(ph)GAYDAFK-2+

Source : QE1\_140612\_OPL1013\_CVA\_phosphoproteomic\_landscape\_AML\_C Scan : 14081

Andromeda score : 105.46

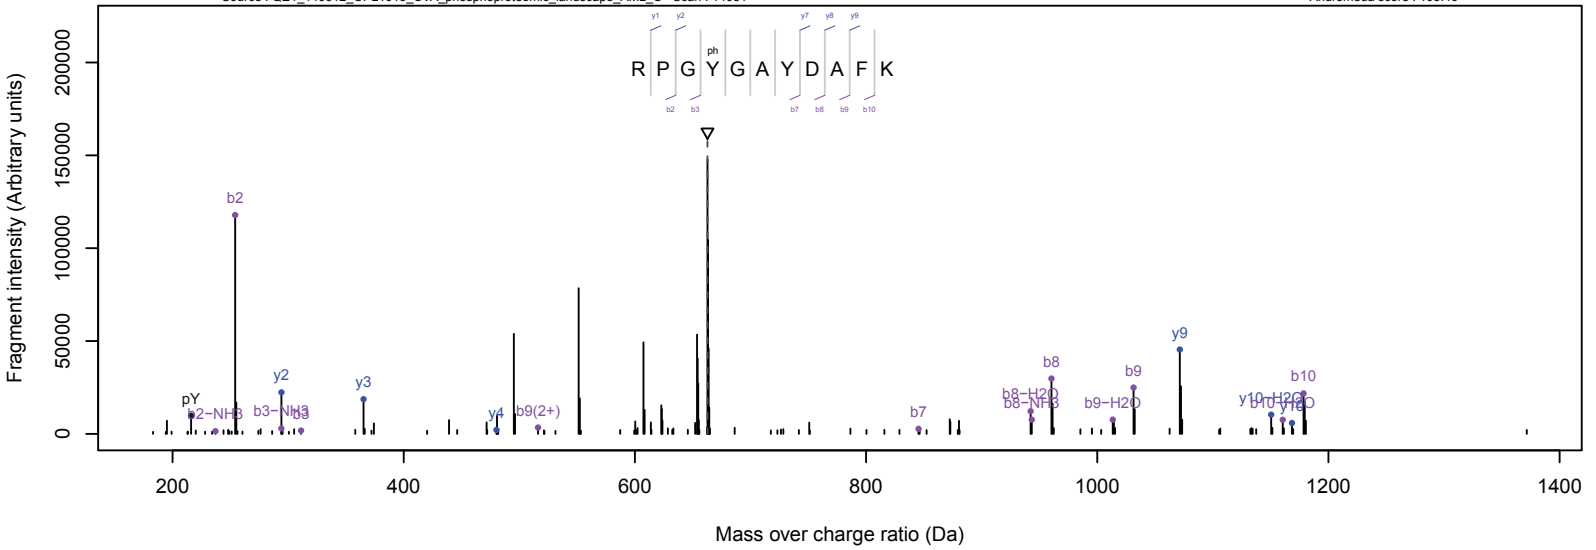

Y(ph)RAITSAYR-2+

Source : QE1\_140612\_OPL1013\_CVA\_phosphoproteomic\_landscape\_AML\_C Scan : 12414

Andromeda score : 105.46

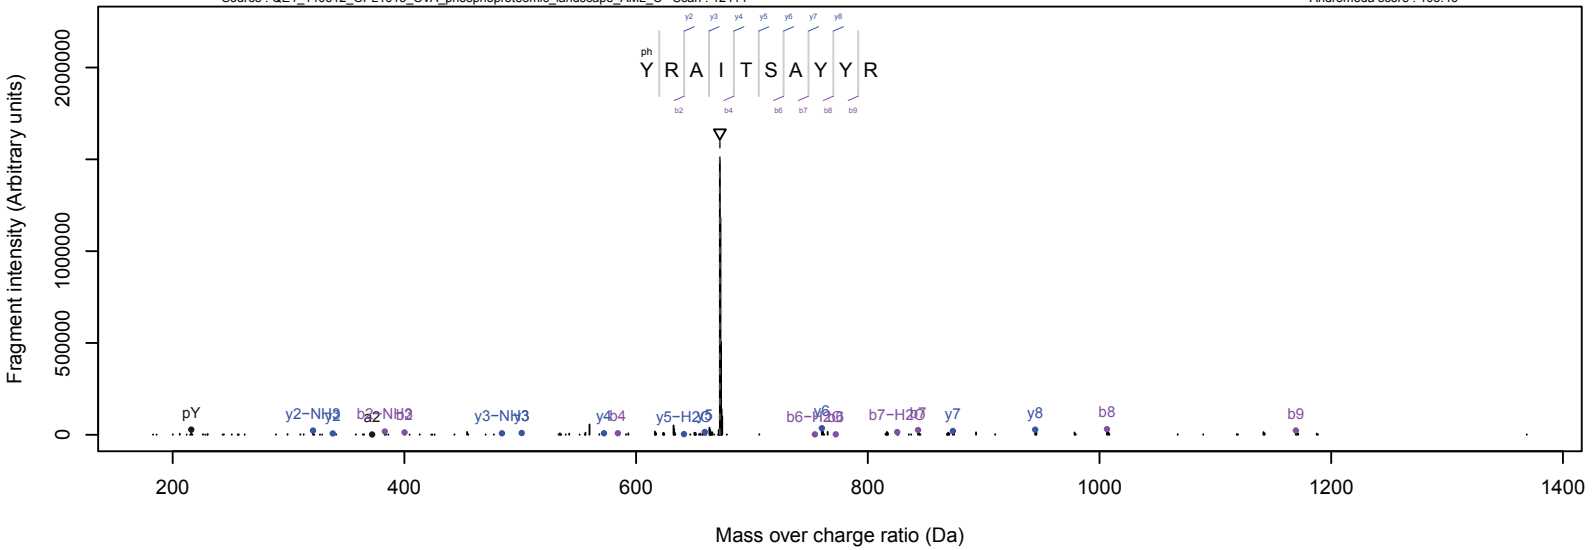

HPDIY(ph)AVPIK-2+

Source: QE1\_140908\_OPL1013\_CvA\_pTyrIP\_AML\_HEL Scan: 22439

Andromeda score: 105.4

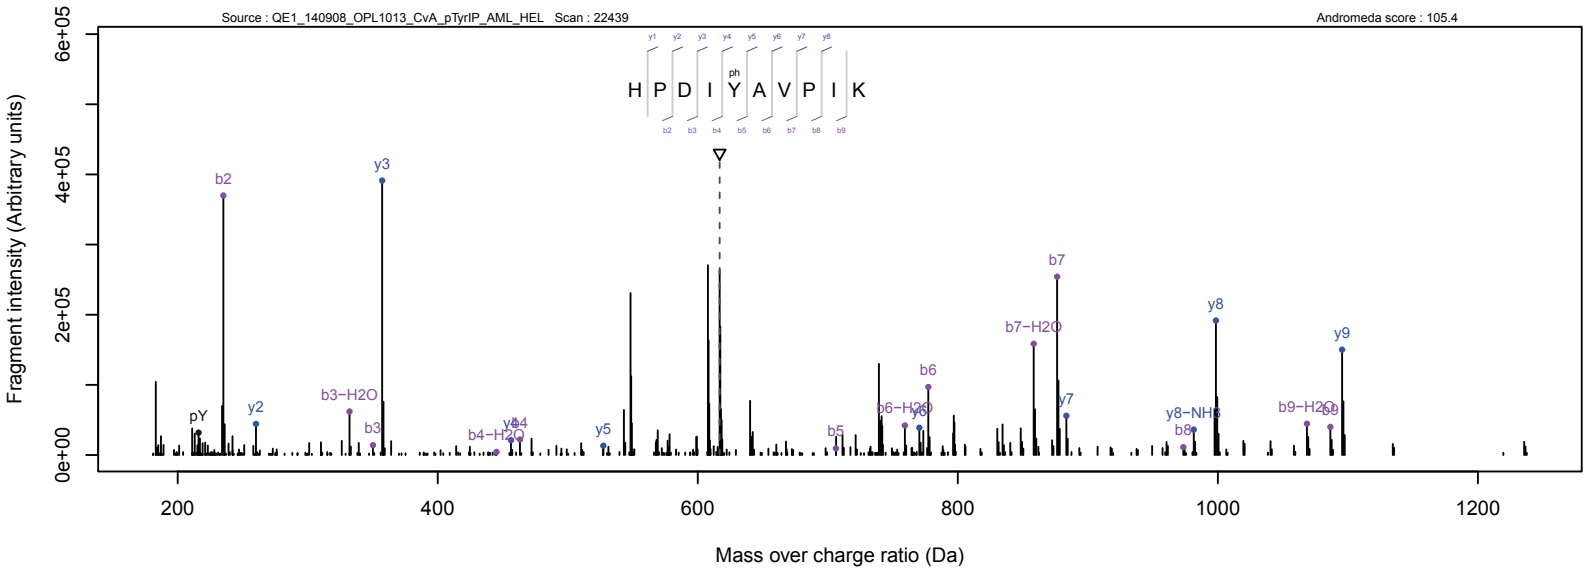

RTGFSTSPESPY(ph)THWK-3+

Source: QE1\_140612\_OPL1013\_CVA\_phosphoproteomic\_landscape\_AML\_C Scan: 16568

Andromeda score: 105.28

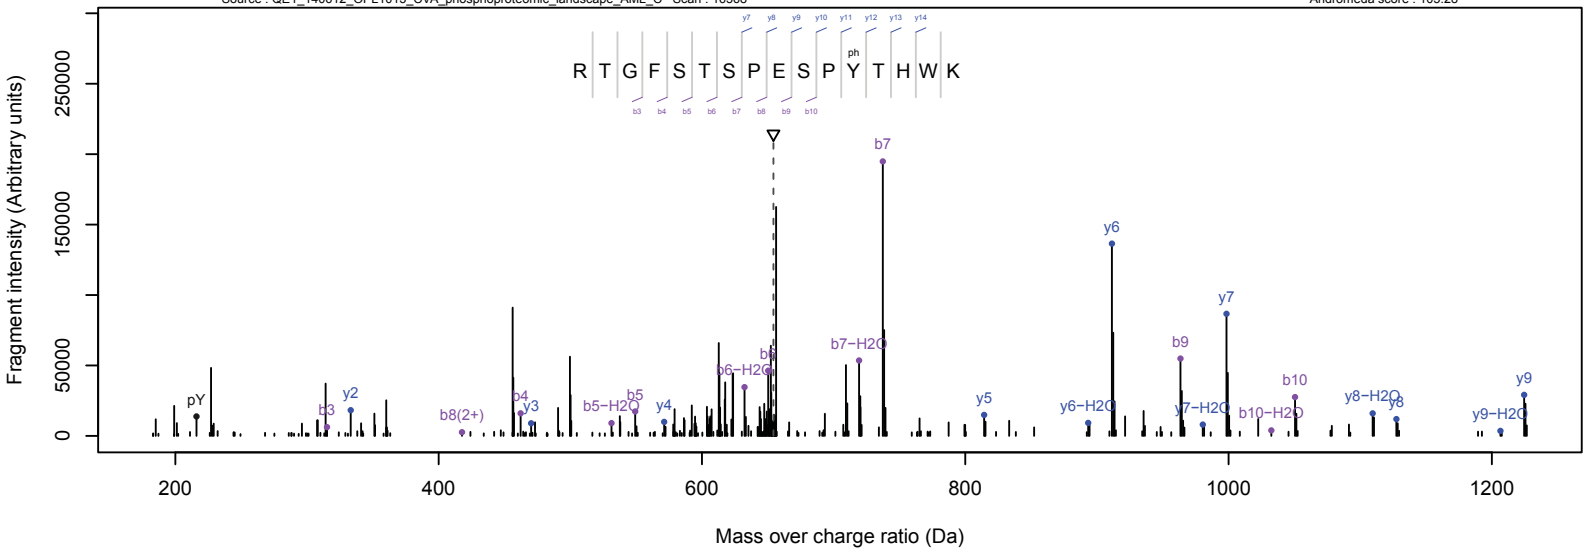

YLHVGYP(ph)IVPPAPEK-2+

Source: QE1\_140612\_OPL1013\_CVA\_phosphoproteomic\_landscape\_AML\_C Scan: 31256

Andromeda score: 105.19

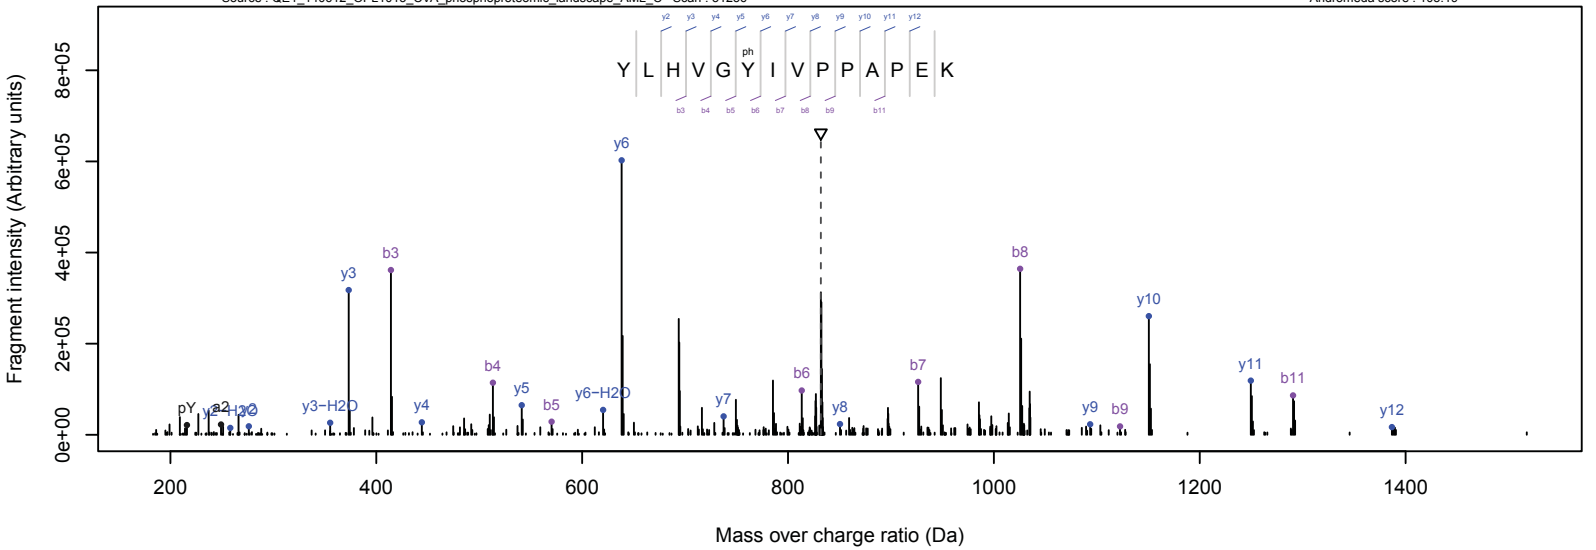

**TMPTTQSFASDPKY(ph)ATPQVIQAPGR-3+**

Source : QE1\_140612\_OPL1013\_CVA\_phosphoproteomic\_landscape\_AML\_F Scan : 31853

Andromeda score : 105.17

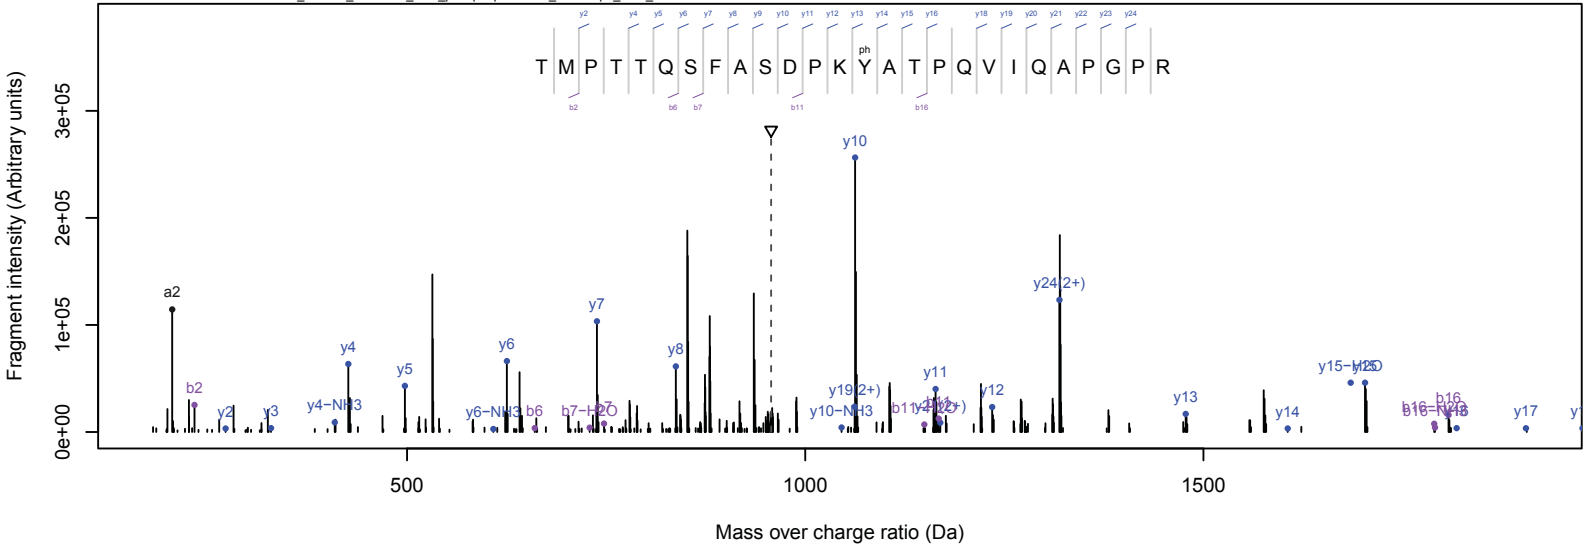

**LYLQSPHS(ph)YEDPYFDDR VHFPASTDYSTQYGLK-4+**

Source : QE1\_140612\_OPL1013\_CVA\_phosphoproteomic\_landscape\_AML\_C Scan : 39095

Andromeda score : 105.05

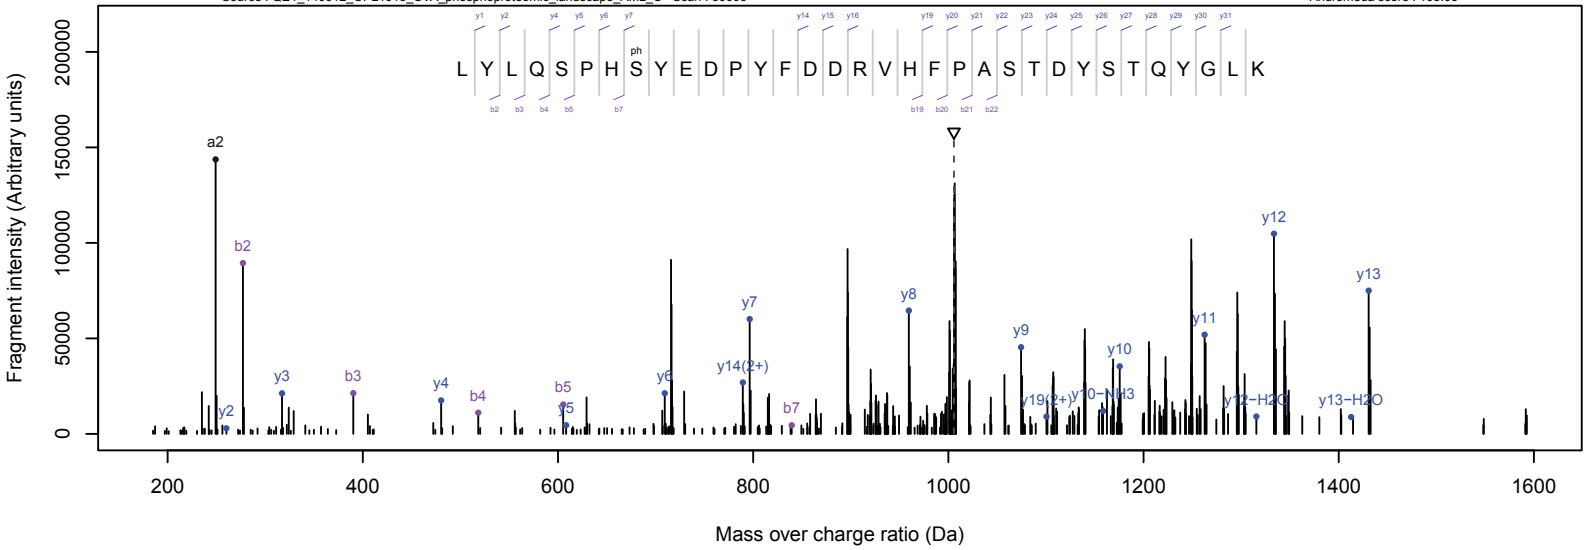

**Y(ph)KLLVELVQK-2+**

Source : QE1\_140612\_OPL1013\_CVA\_phosphoproteomic\_landscape\_AML\_C Scan : 30576

Andromeda score : 105.03

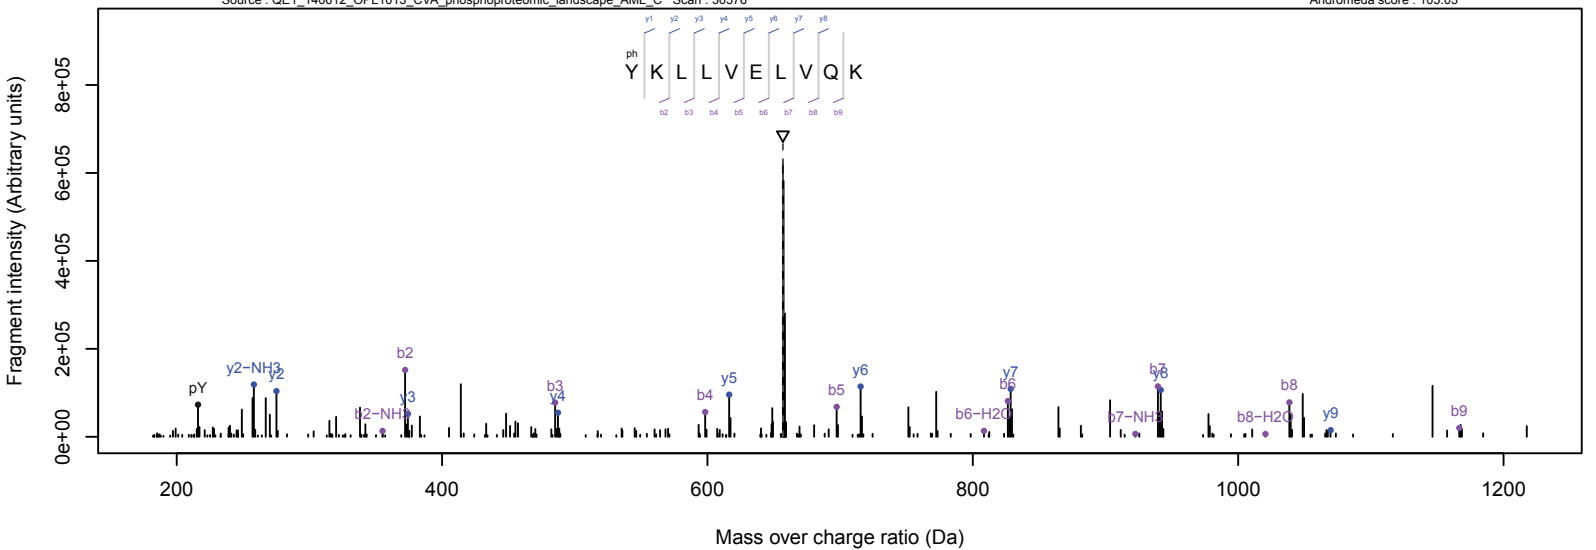

Y(ph)VNILPYDHSR-2+

Source : QE1\_140612\_OPL1013\_CVA\_phosphoproteomic\_landscape\_AML\_C Scan : 25251

Andromeda score : 105.03

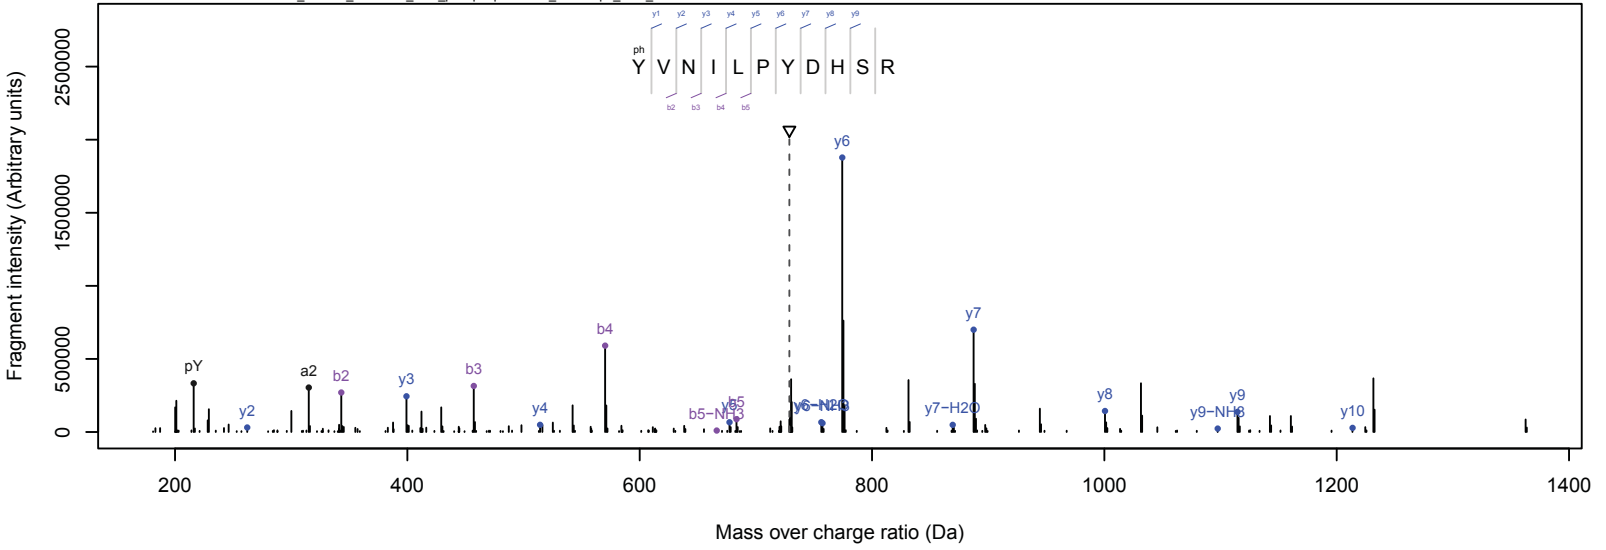

KIAGVDY(ph)VYFVQK-2+

Source : QE1\_140612\_OPL1013\_CVA\_phosphoproteomic\_landscape\_AML\_B Scan : 31510

Andromeda score : 104.95

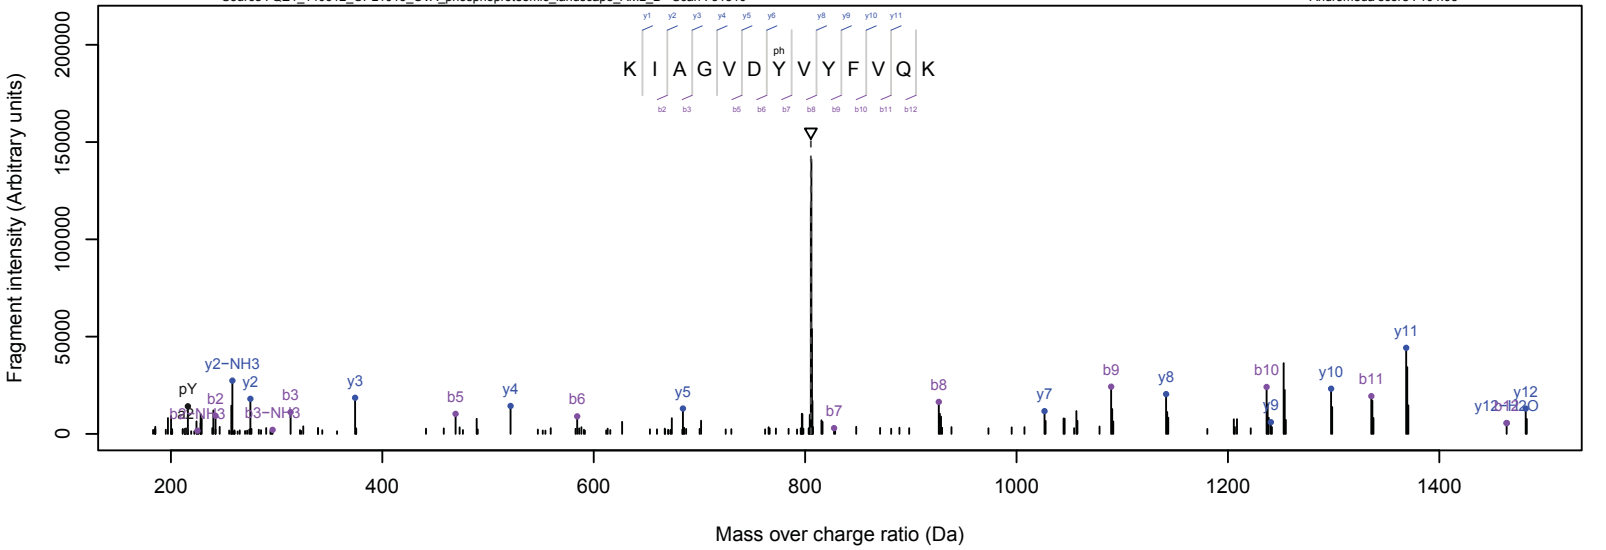

VSECPHTY(ph)QNRPF SR-4+

Source : QE1\_140612\_OPL1013\_CVA\_phosphoproteomic\_landscape\_AML\_C Scan : 7112

Andromeda score : 104.95

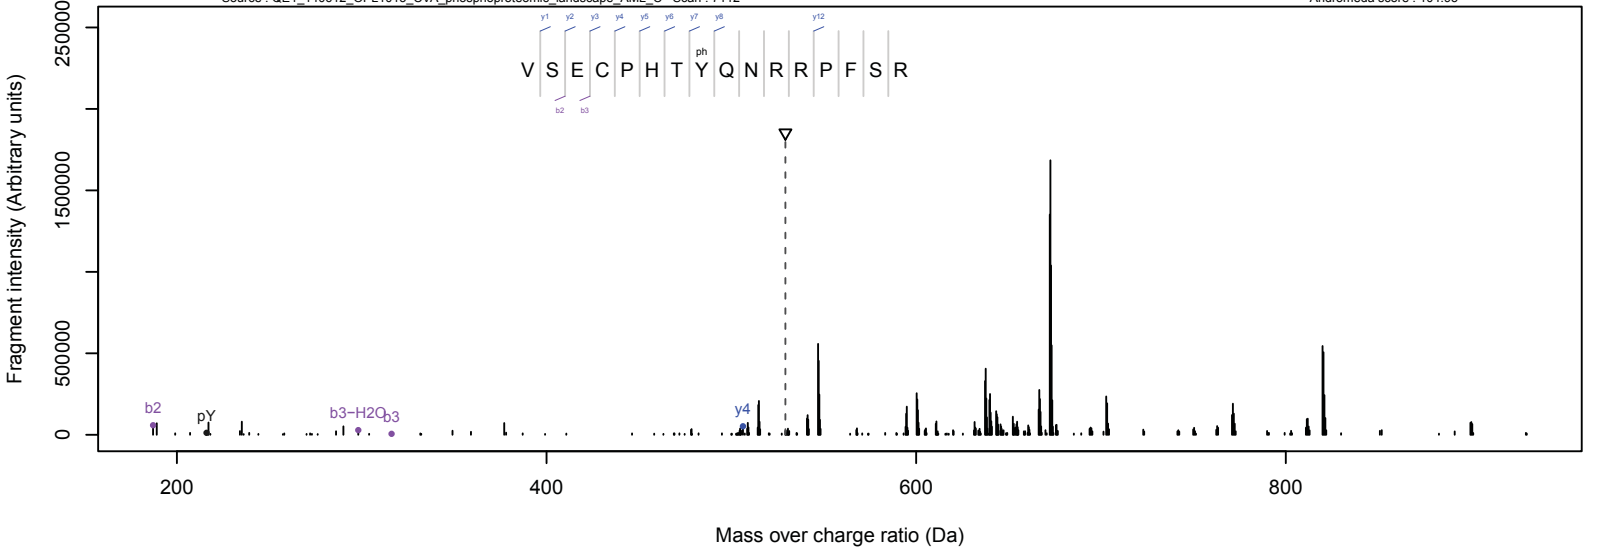



**VTNILDPSY(ph)HIPPLR-3+**

Source: QE1\_140908\_OPL1013\_CvA\_pTyrIP\_AML\_Kasumi1 Scan: 38046

Andromeda score: 104.95

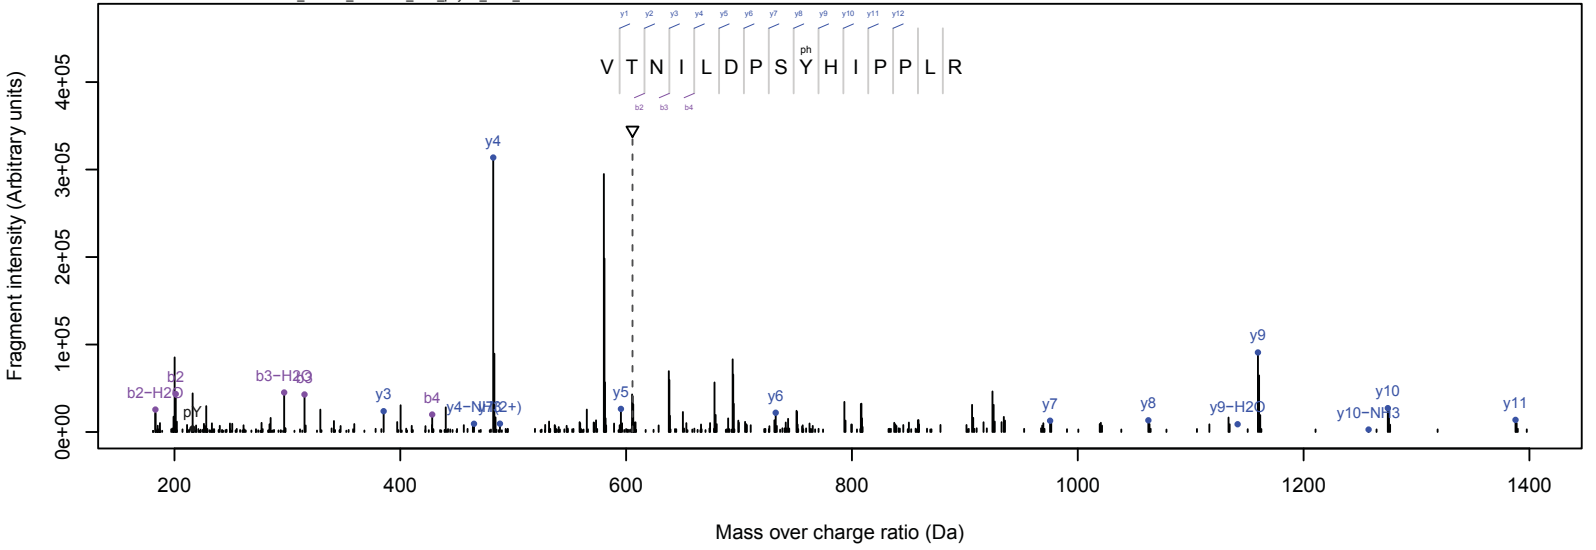

**VY(ph)NVTQHAVGIVVNK-2+**

Source: QE1\_140612\_OPL1013\_CVA\_phosphoproteomic\_landscape\_AML\_A Scan: 23534

Andromeda score: 104.95

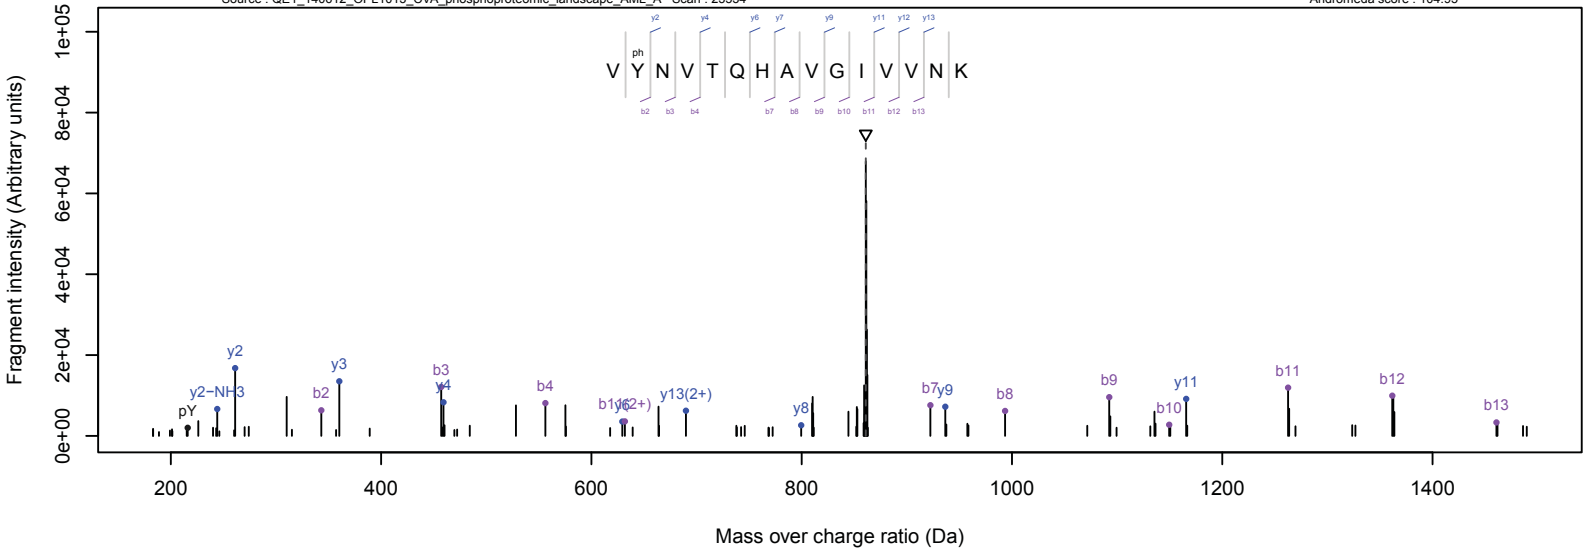

**M(ox)PEKEPPPY(ph)LPA-2+**

Source: QE1\_140908\_OPL1013\_CvA\_pTyrIP\_AML\_Kasumi1 Scan: 19738

Andromeda score: 104.94

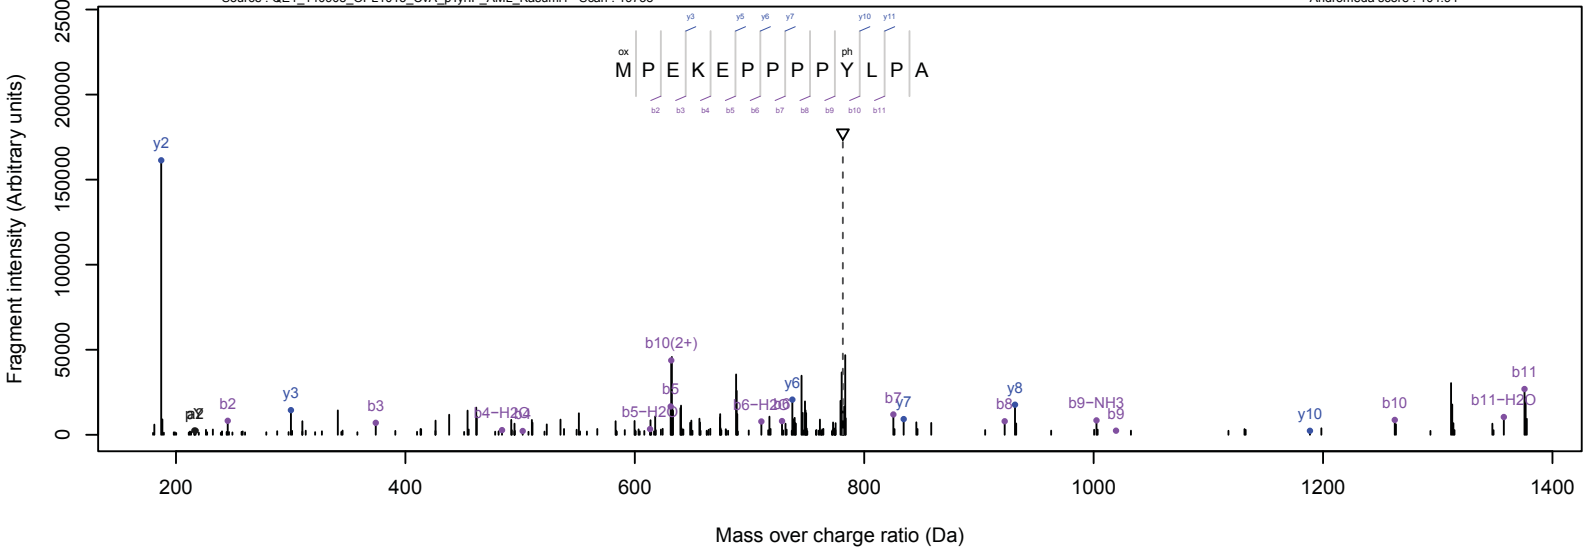

**Y(ph)GICAHENKELANAR-3+**

Source : QE1\_140612\_OPL1013\_CVA\_phosphoproteomic\_landscape\_AML\_C Scan : 9076

Andromeda score : 104.94

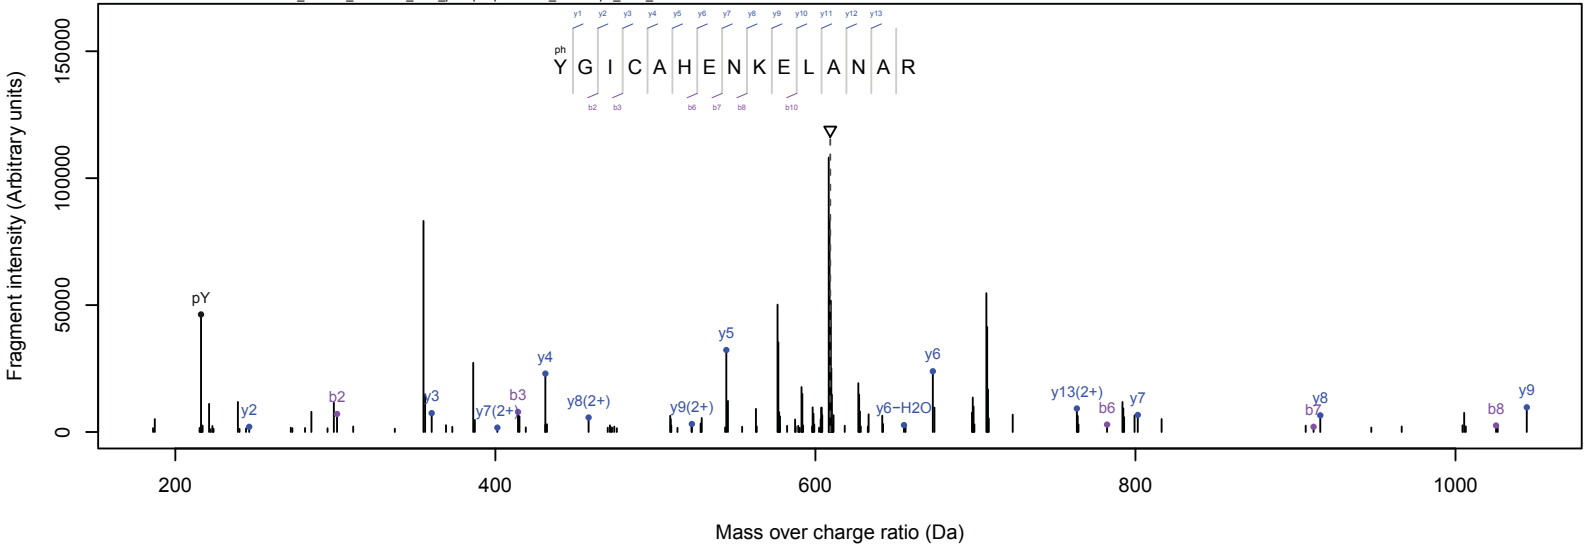

**DKPTYDEIFY(ph)TLSPVNGK-2+**

Source : QE1\_140612\_OPL1013\_CVA\_phosphoproteomic\_landscape\_AML\_C Scan : 46426

Andromeda score : 104.84

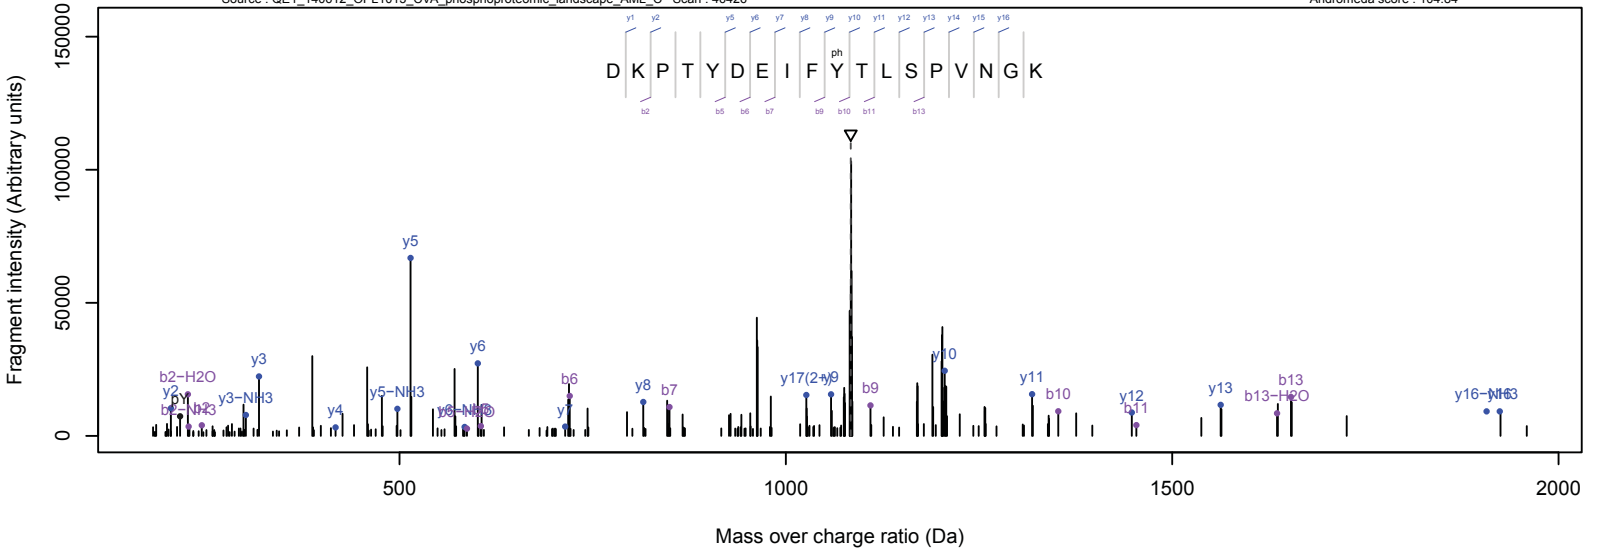

**NNPATPSTAMGSSVPYSTAK-2+**

Source : QE1\_140612\_OPL1013\_CVA\_phosphoproteomic\_landscape\_AML\_B Scan : 16930

Andromeda score : 104.84

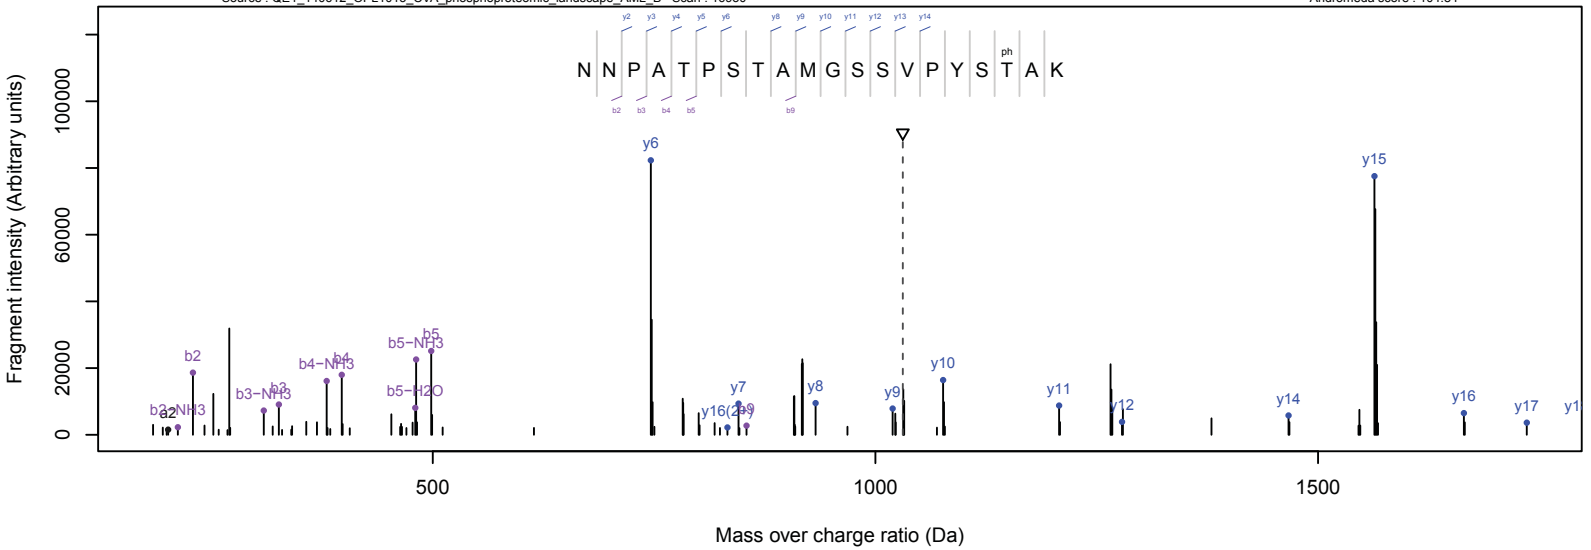

VICAEEPY(ph)ICKDFPETNNILK-3+

Source : QE1\_140612\_OPL1013\_CVA\_phosphoproteomic\_landscape\_AML\_A Scan : 38409

Andromeda score : 104.84

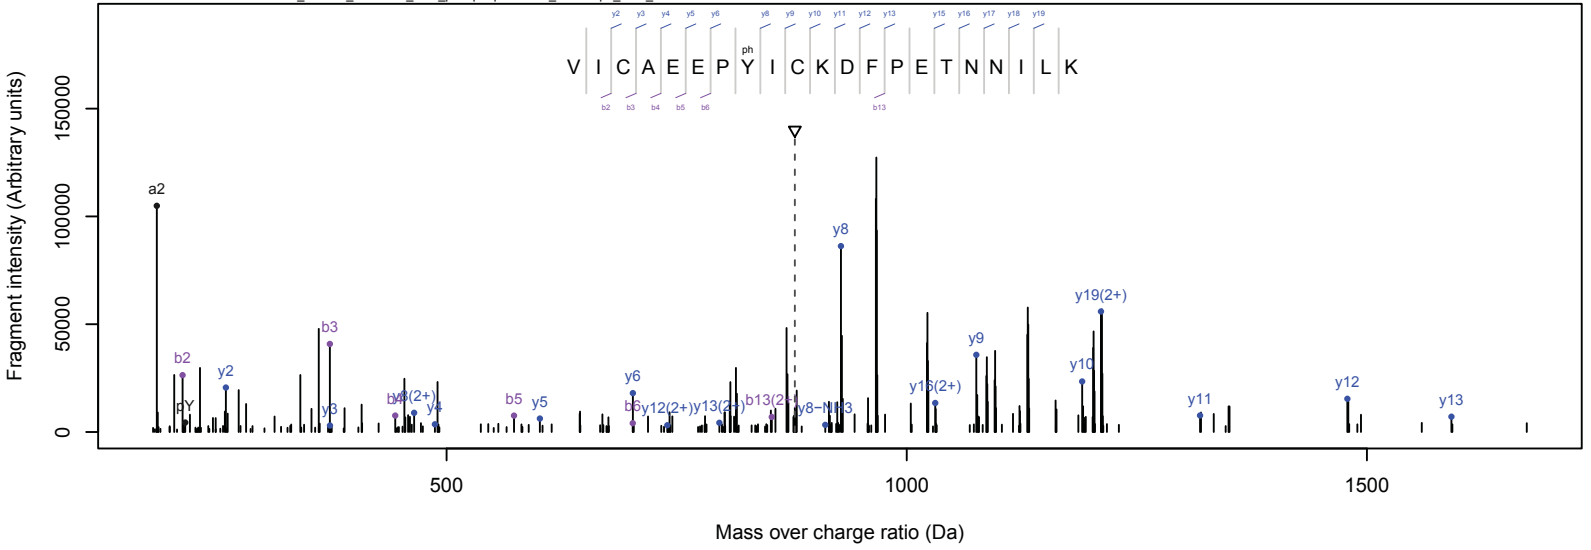

VPVDERFDLFCQ(ph)HKPASK-4+

Source : QE1\_140612\_OPL1013\_CVA\_phosphoproteomic\_landscape\_AML\_C Scan : 30354

Andromeda score : 104.84

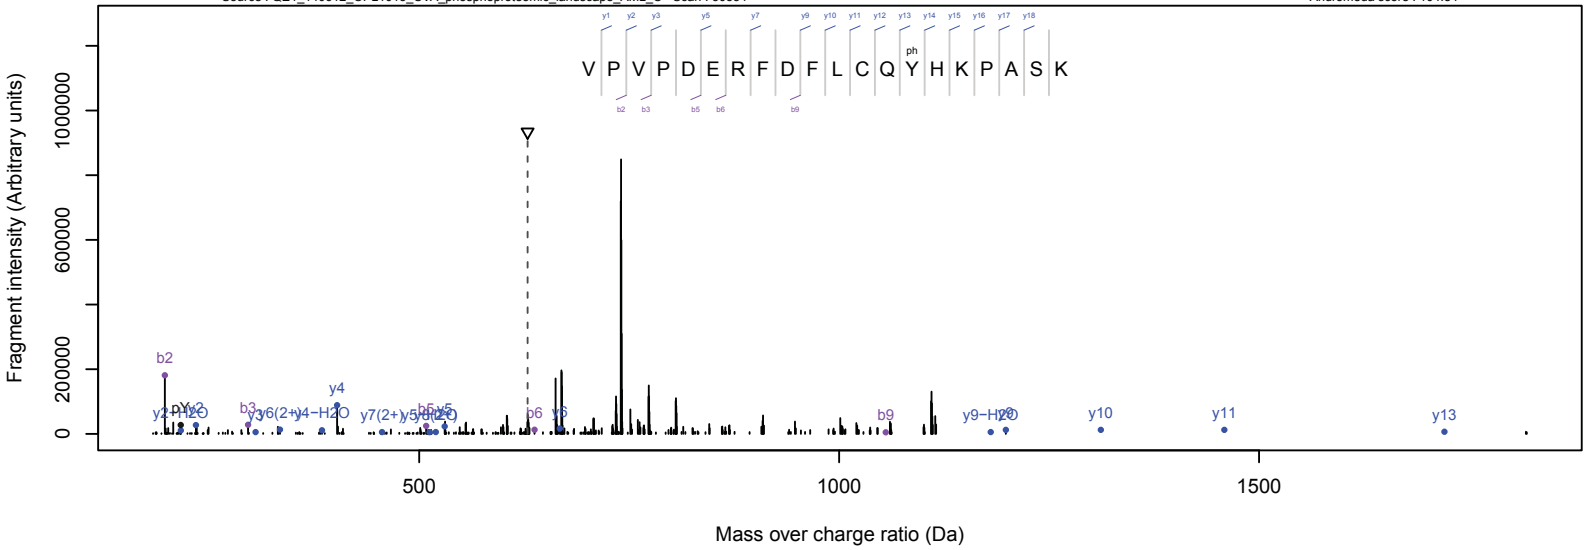

SNTISKPY(ph)ISNTLPSDAPK-3+

Source : QE1\_140612\_OPL1013\_CVA\_phosphoproteomic\_landscape\_AML\_B Scan : 22702

Andromeda score : 104.81

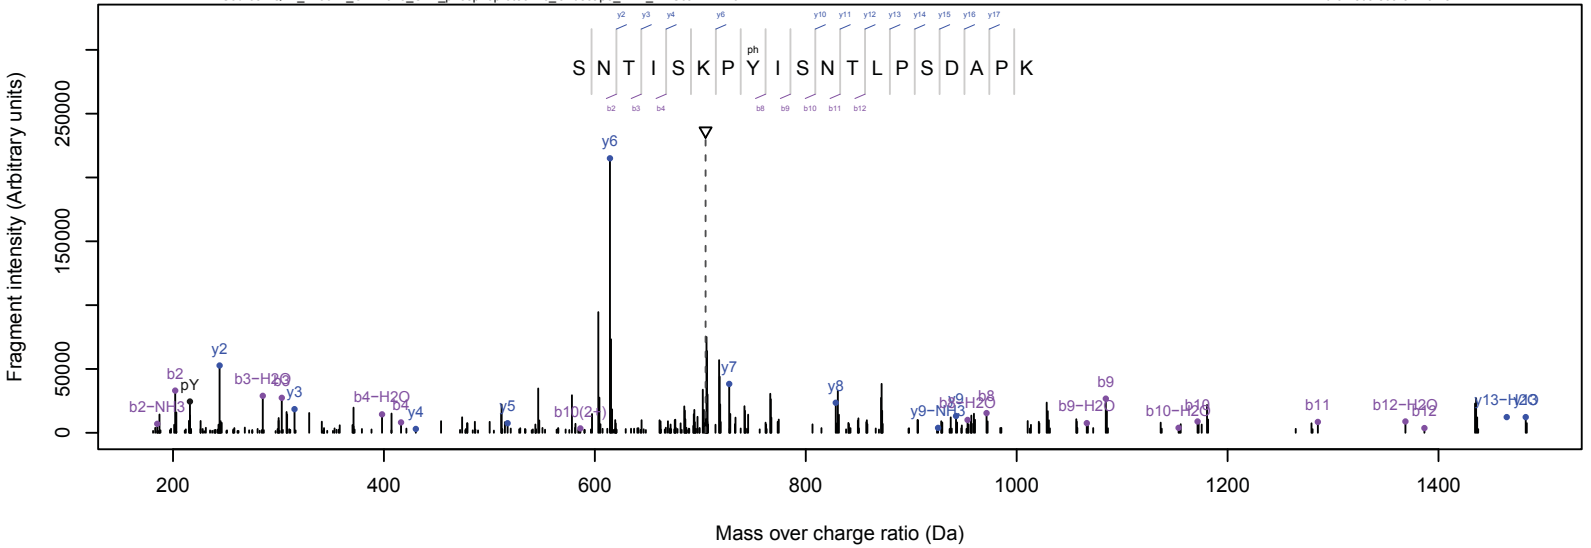

VSYARPSSEVIK(DANLY)ISGLPR-3+

Source : QE1\_140612\_OPL1013\_CVA\_phosphoproteomic\_landscape\_AML\_B Scan : 34596

Andromeda score : 104.81

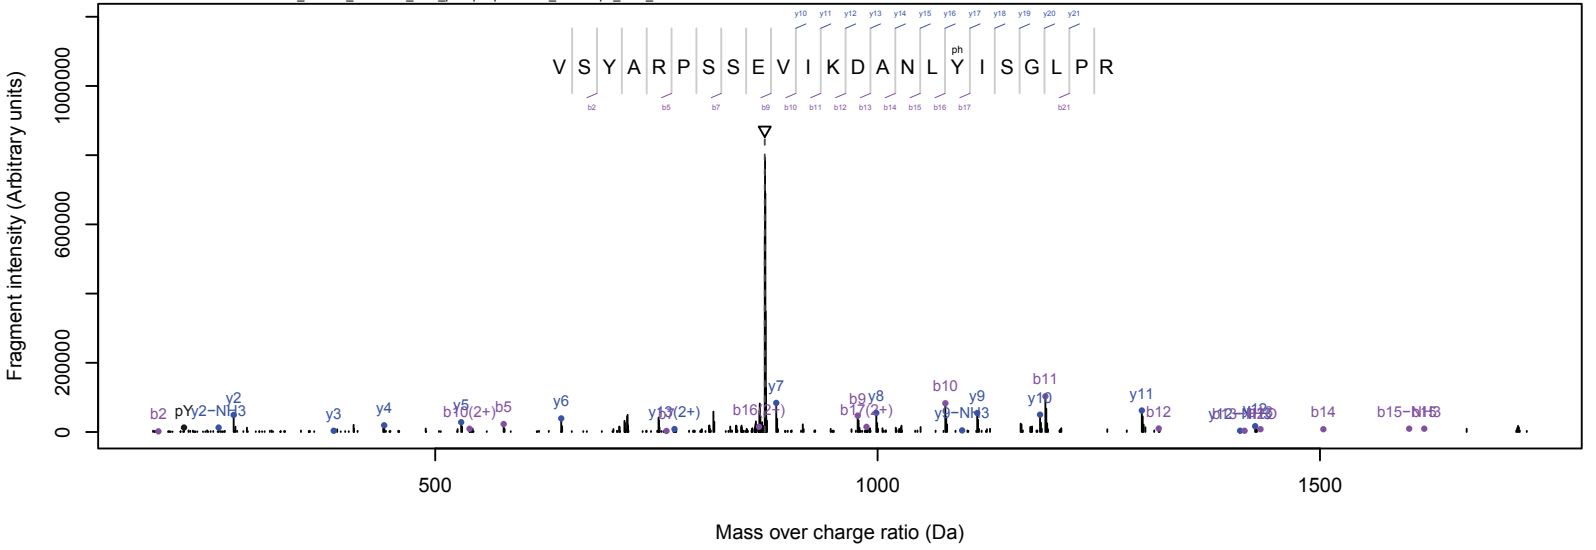

MGSGIQY(GDASLR)-2+

Source : QE1\_140612\_OPL1013\_CVA\_phosphoproteomic\_landscape\_AML\_C Scan : 17292

Andromeda score : 104.7

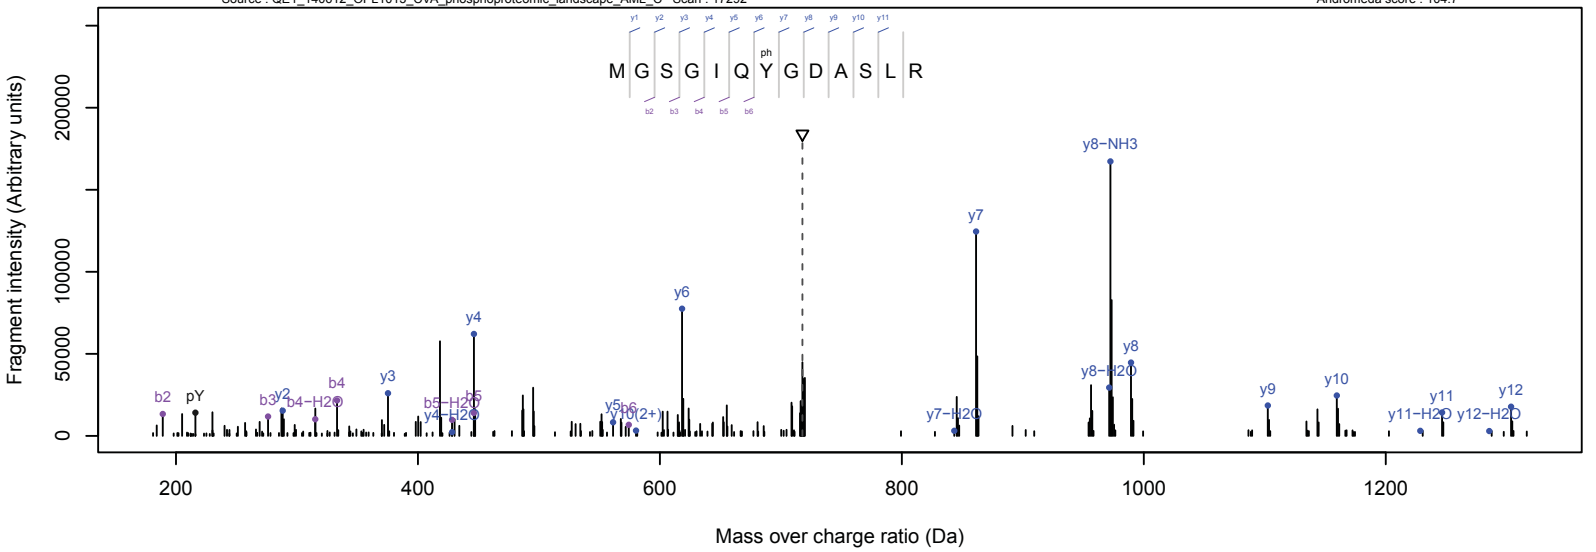

TQNNLESDY(LAR)-2+

Source : QE1\_140612\_OPL1013\_CVA\_phosphoproteomic\_landscape\_AML\_B Scan : 15004

Andromeda score : 104.59

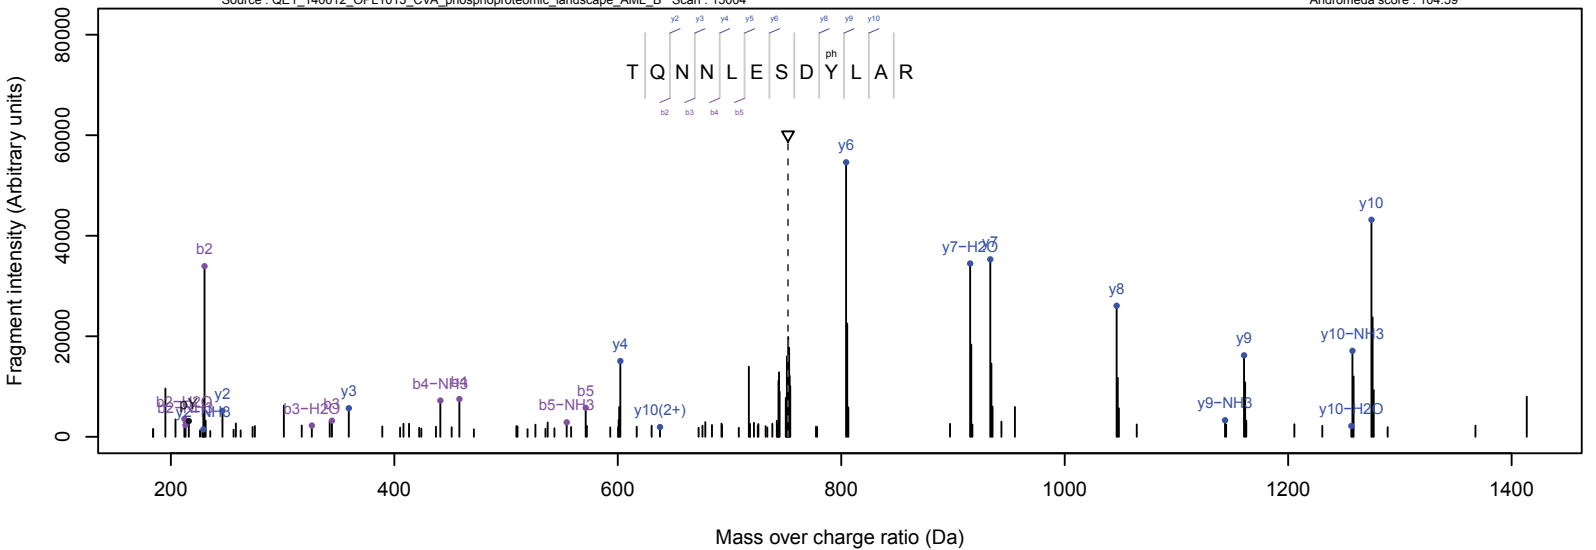

HSY(ph)PPALGSPGALAGAGVGAAGPLER-3+

Source : QE1\_140612\_OPL1013\_CVA\_phosphoproteomic\_landscape\_AML\_C Scan : 35576

Andromeda score : 104.53

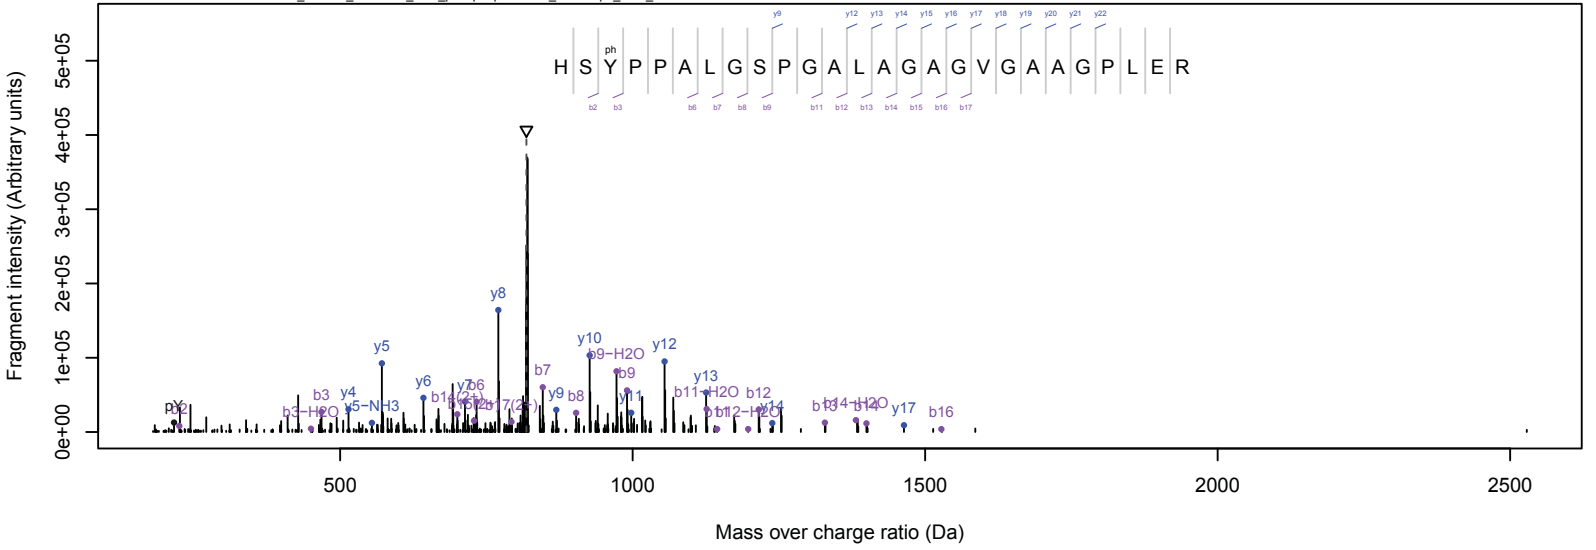

DTETVY(ph)SEVR-2+

Source : QE1\_140822\_OPL1013\_CvA\_pTyrIP\_AML\_cell\_lines\_part2\_B Scan : 6990

Andromeda score : 104.42

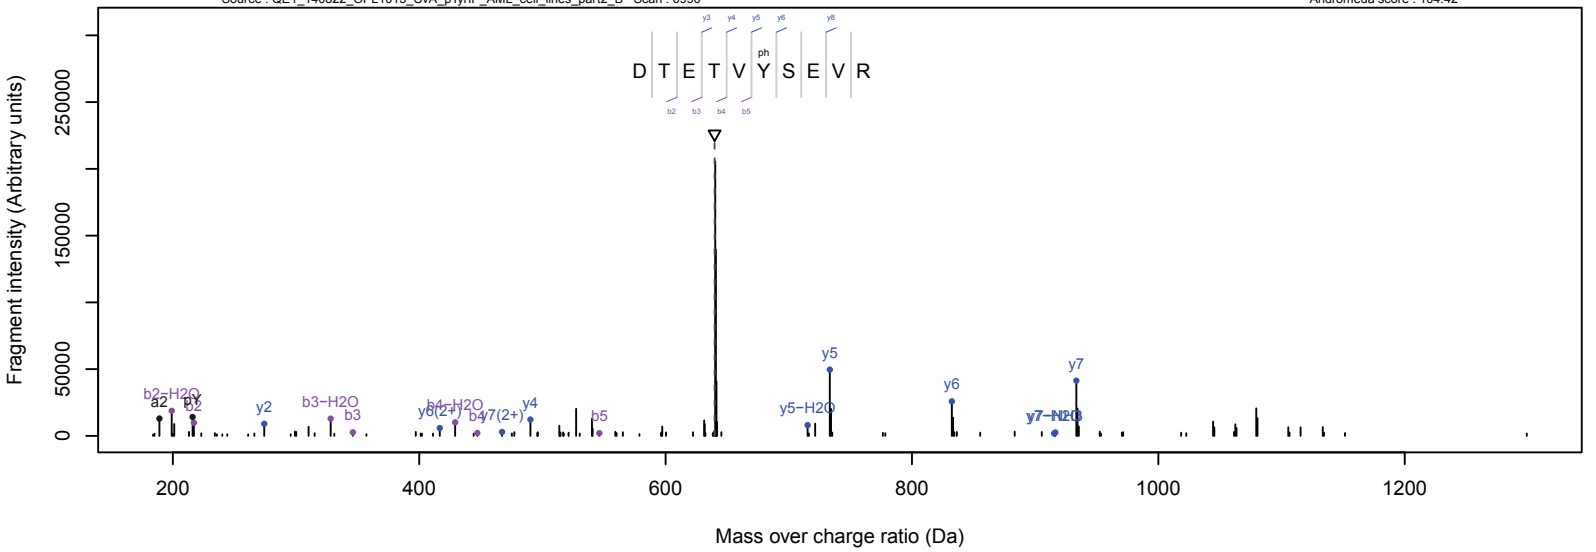

VISGTTLGYPK-2+

Source : QE1\_140612\_OPL1013\_CVA\_phosphoproteomic\_landscape\_AML\_B Scan : 28658

Andromeda score : 104.41

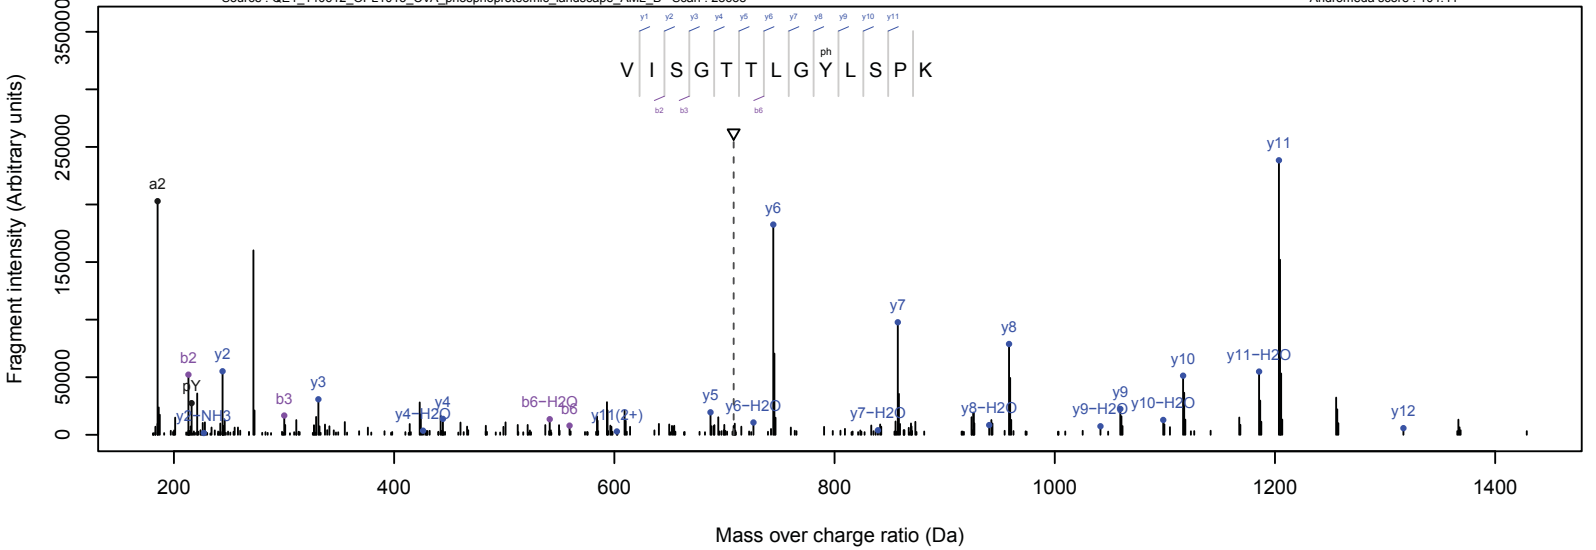



ICANH<sup>(ph)</sup>ITPMMELKPNAGSDR-3+

Source : QE1\_140612\_OPL1013\_CVA\_phosphoproteomic\_landscape\_AML\_C Scan : 31544

Andromeda score : 104.23

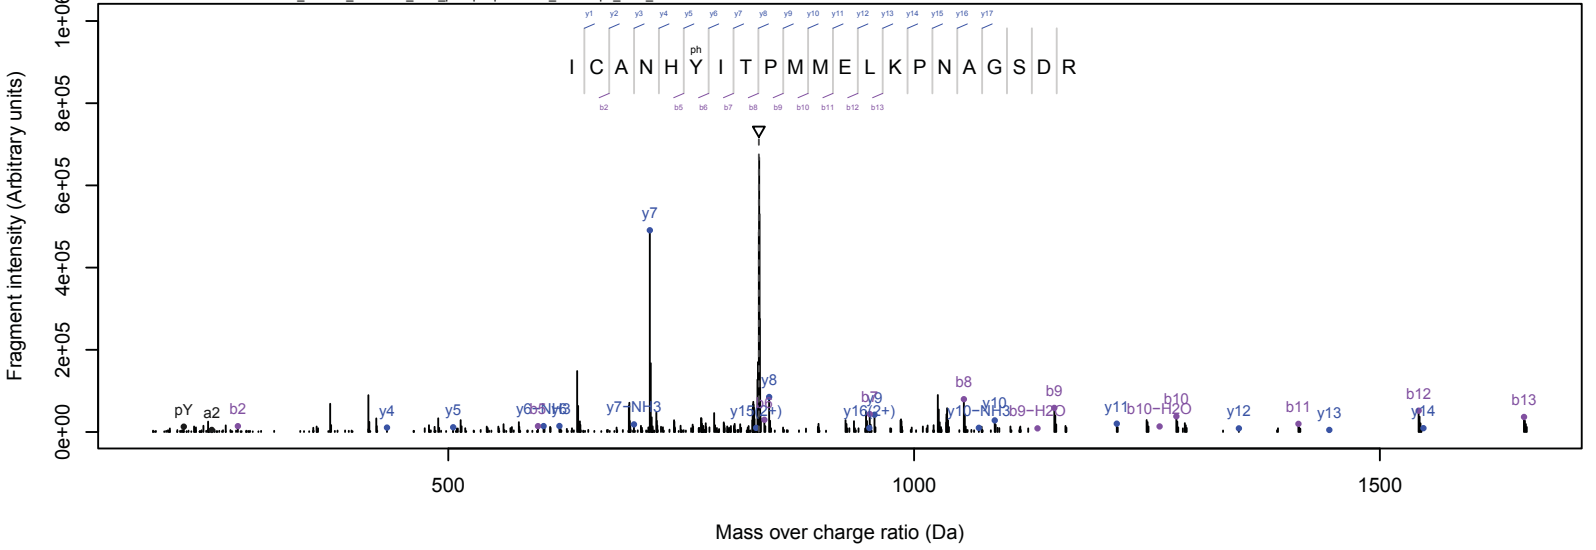

QRVPQPSSASLDEY<sup>(ph)</sup>LM<sup>(ox)</sup>R-3+

Source : QE1\_140908\_OPL1013\_CvA\_pTyrIP\_AML\_ML2 Scan : 23855

Andromeda score : 104.23

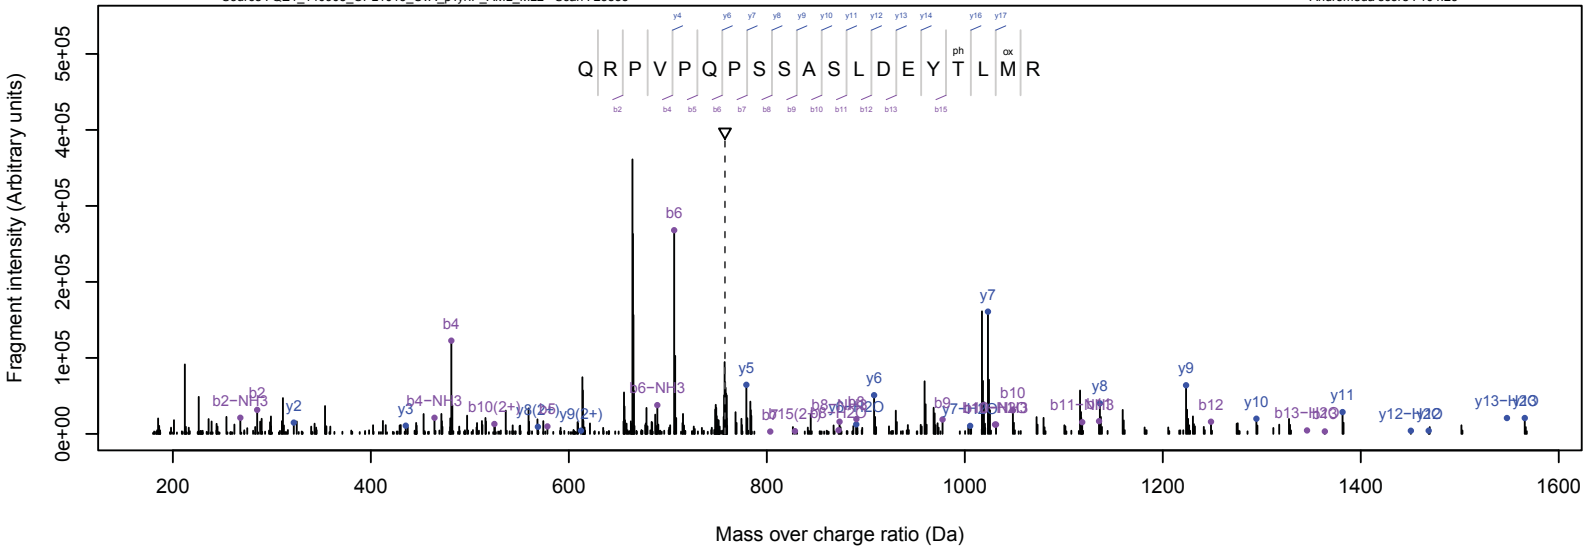

AIETDKEY<sup>(ph)</sup>YTVKDDR-3+

Source : QE1\_140908\_OPL1013\_CvA\_pTyrIP\_AML\_HEL Scan : 12186

Andromeda score : 104.2

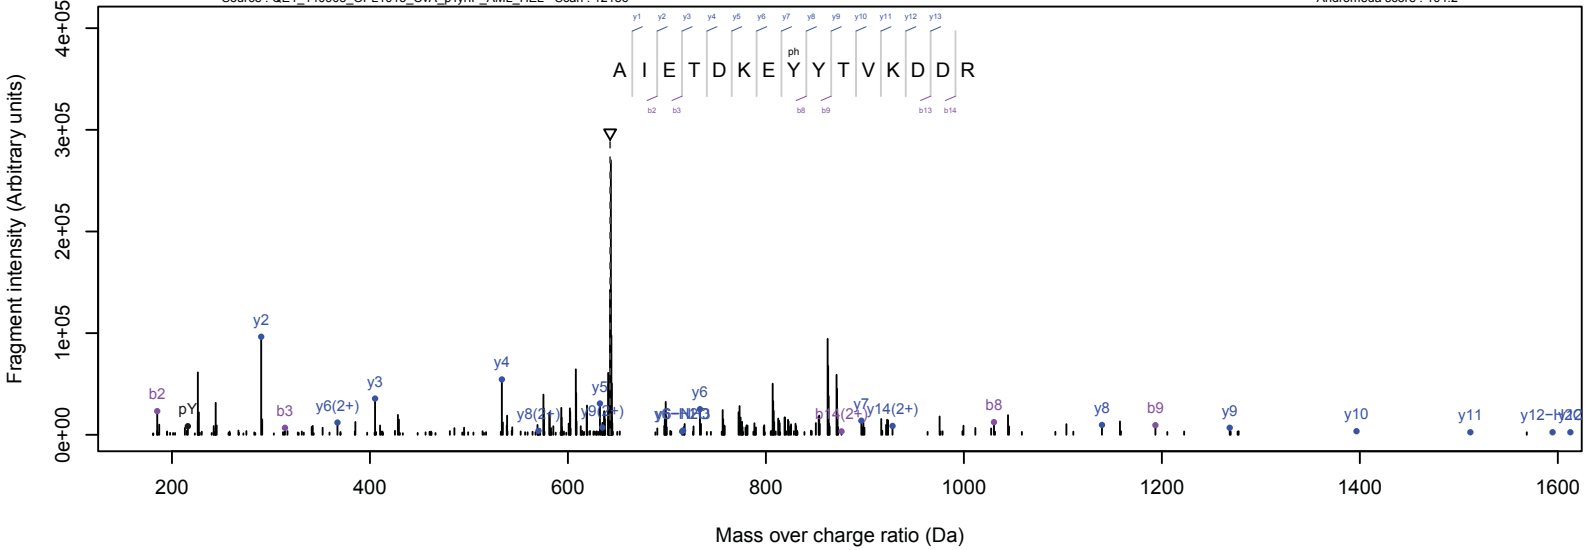

ASVEKGDY(ph)YEAHQMYR-3+

Source : QE1\_140612\_OPL1013\_CVA\_phosphoproteomic\_landscape\_AML\_B Scan : 11568

Andromeda score : 104.2

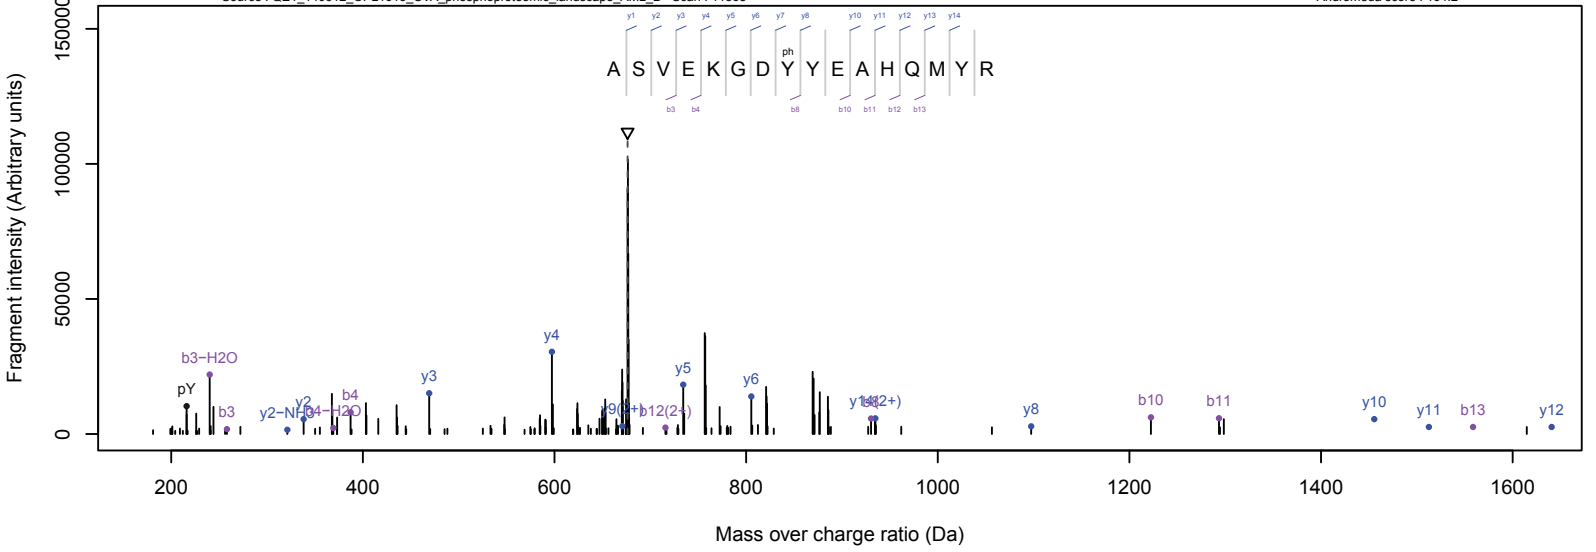

VQEY(ph)PTLK-2+

Source : QE1\_140612\_OPL1013\_CVA\_phosphoproteomic\_landscape\_AML\_B Scan : 10155

Andromeda score : 104.2

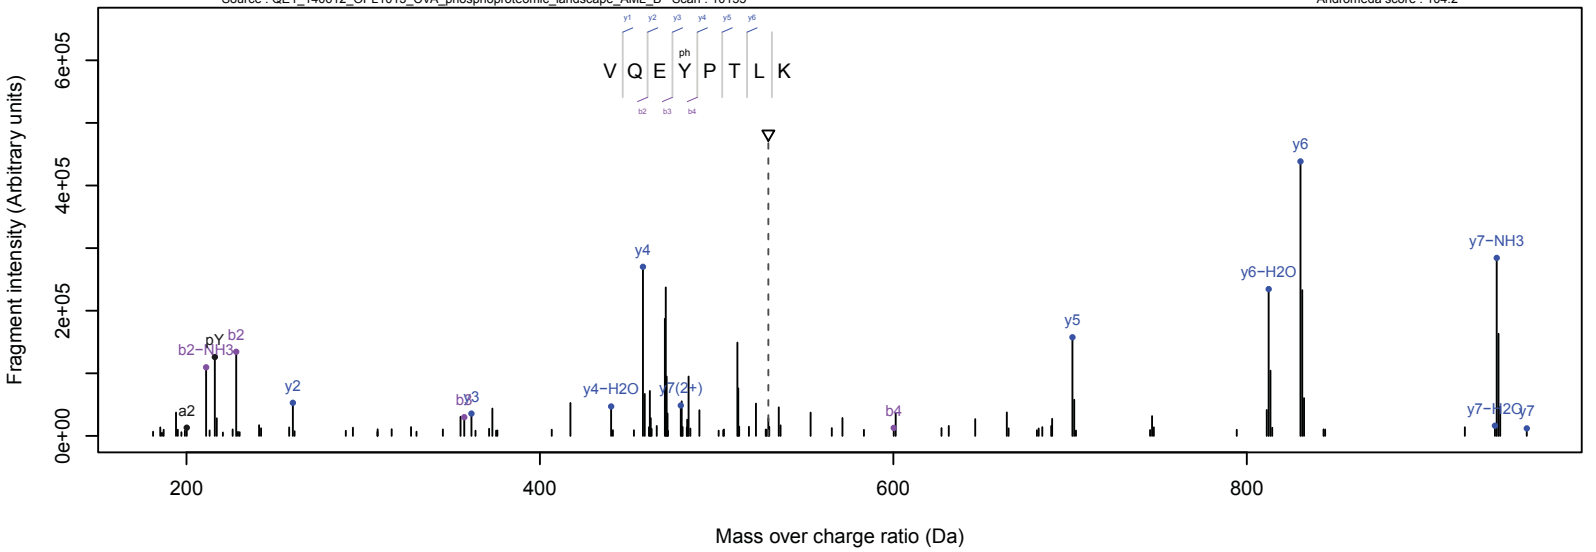

VIYHLDEEETPY(ph)LVKIPVPAER-3+

Source : QE1\_140612\_OPL1013\_CVA\_phosphoproteomic\_landscape\_AML\_C Scan : 40665

Andromeda score : 104.18

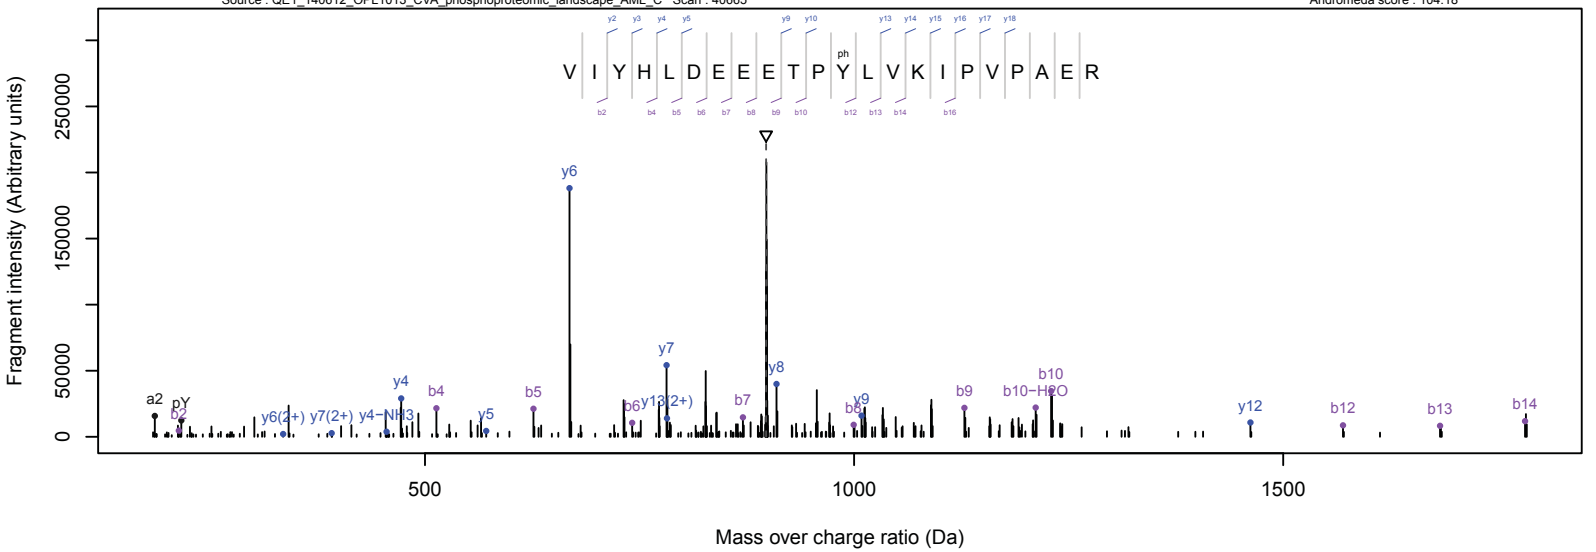



GFKDQIY(ph)DIFQK-2+

Source : QE1\_140908\_OPL1013\_CVA\_pTyrIP\_AML\_HEL Scan : 40784

Andromeda score : 104.17

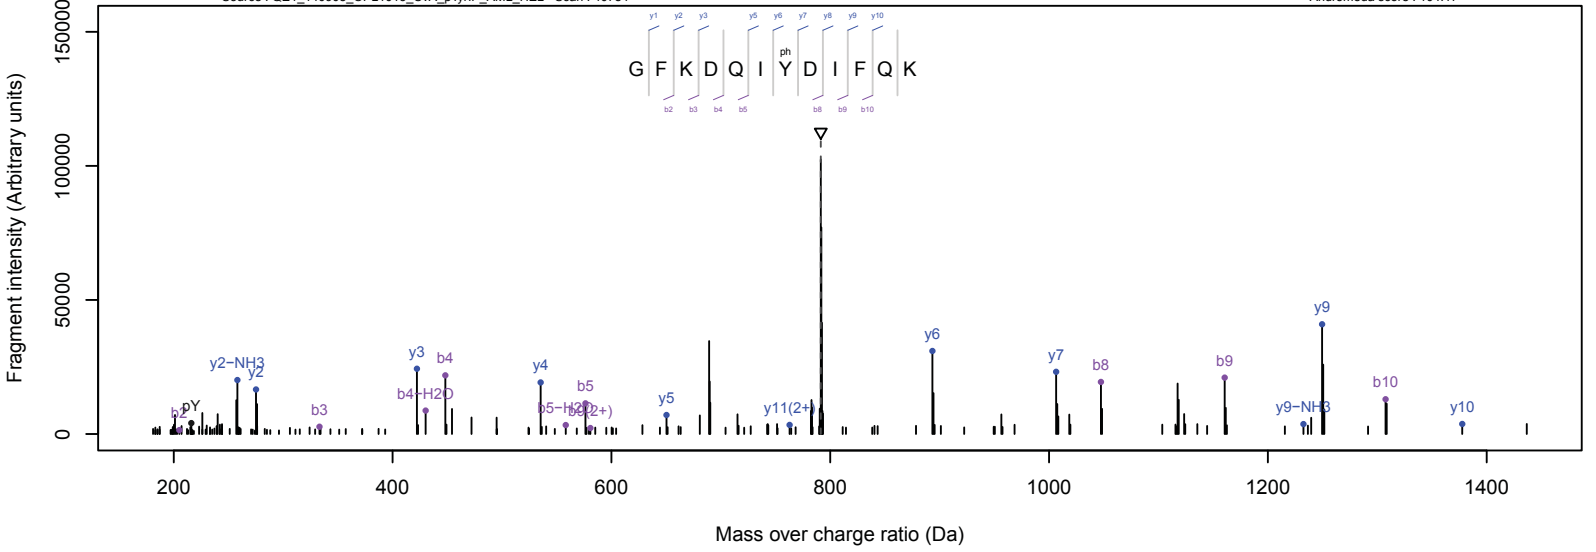

GPRPLEQVTCYK-2+

Source : QE1\_140612\_OPL1013\_CVA\_phosphoproteomic\_landscape\_AML\_A Scan : 14427

Andromeda score : 104.17

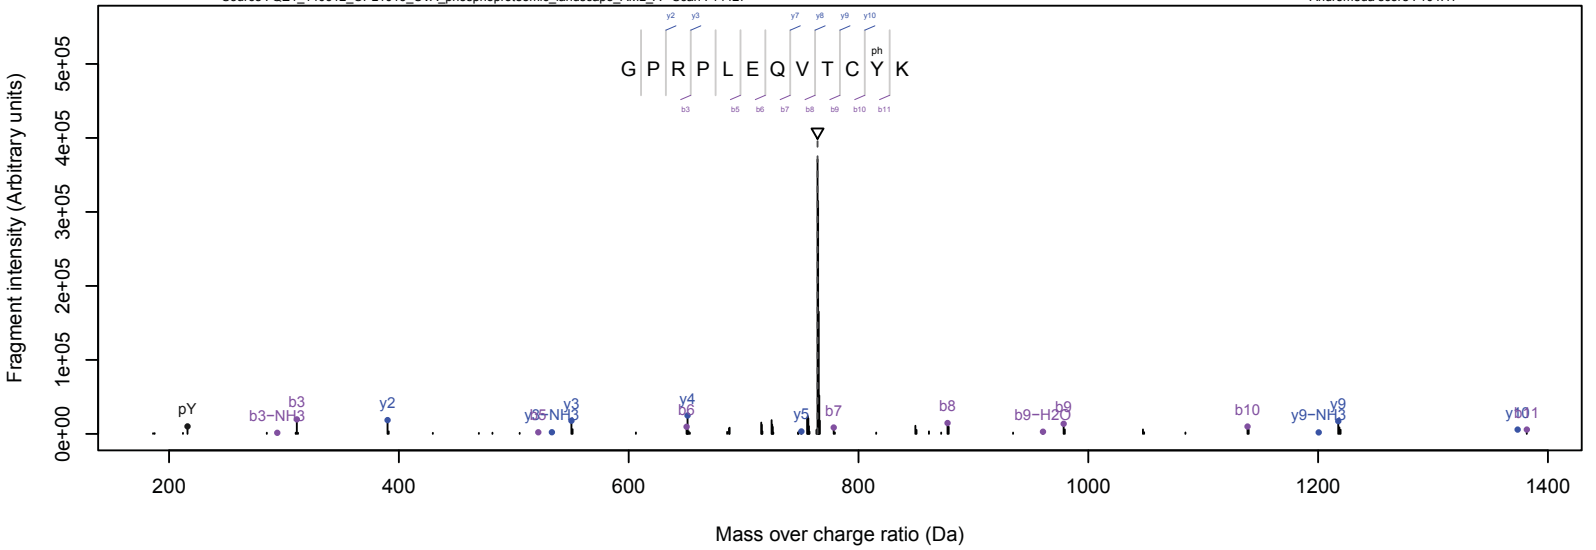

Y(ph)PSLLLSQEEK-2+

Source : QE1\_140612\_OPL1013\_CVA\_phosphoproteomic\_landscape\_AML\_C Scan : 20469

Andromeda score : 104.17

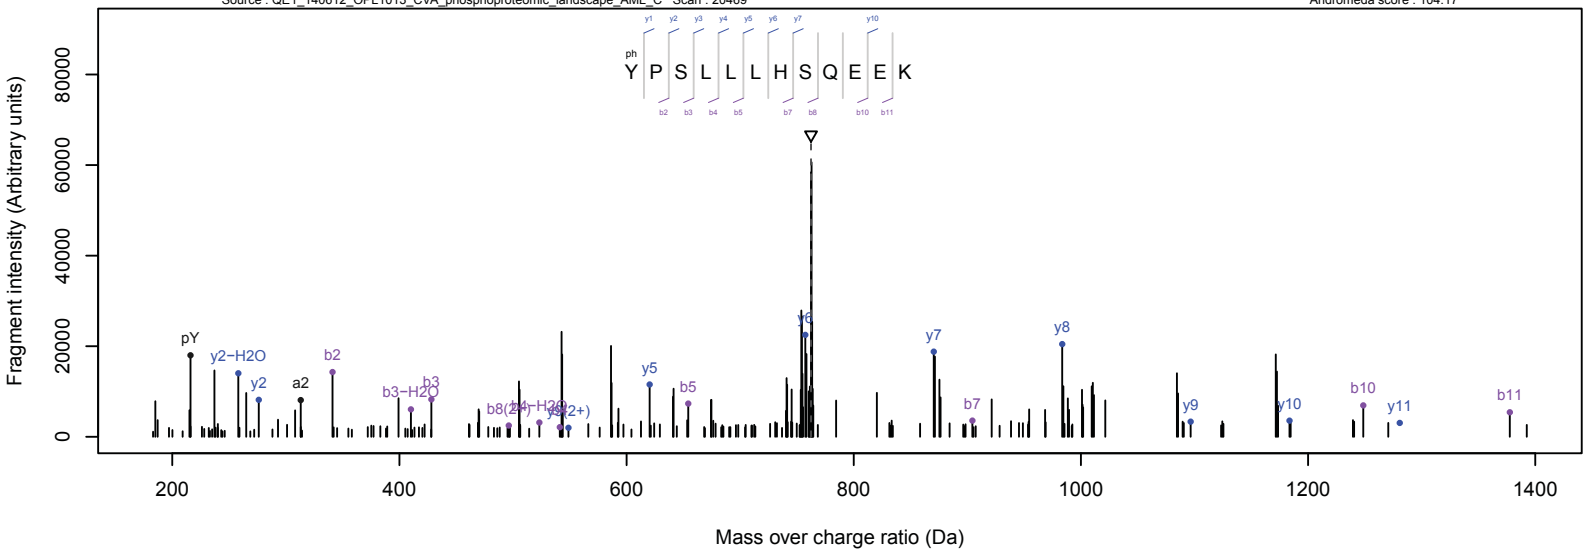

**TAGTSMMPY(ph)VVTR-2+**

Source : QE1\_140612\_OPL1013\_CVA\_phosphoproteomic\_landscape\_AML\_C Scan : 36815

Andromeda score : 104.09

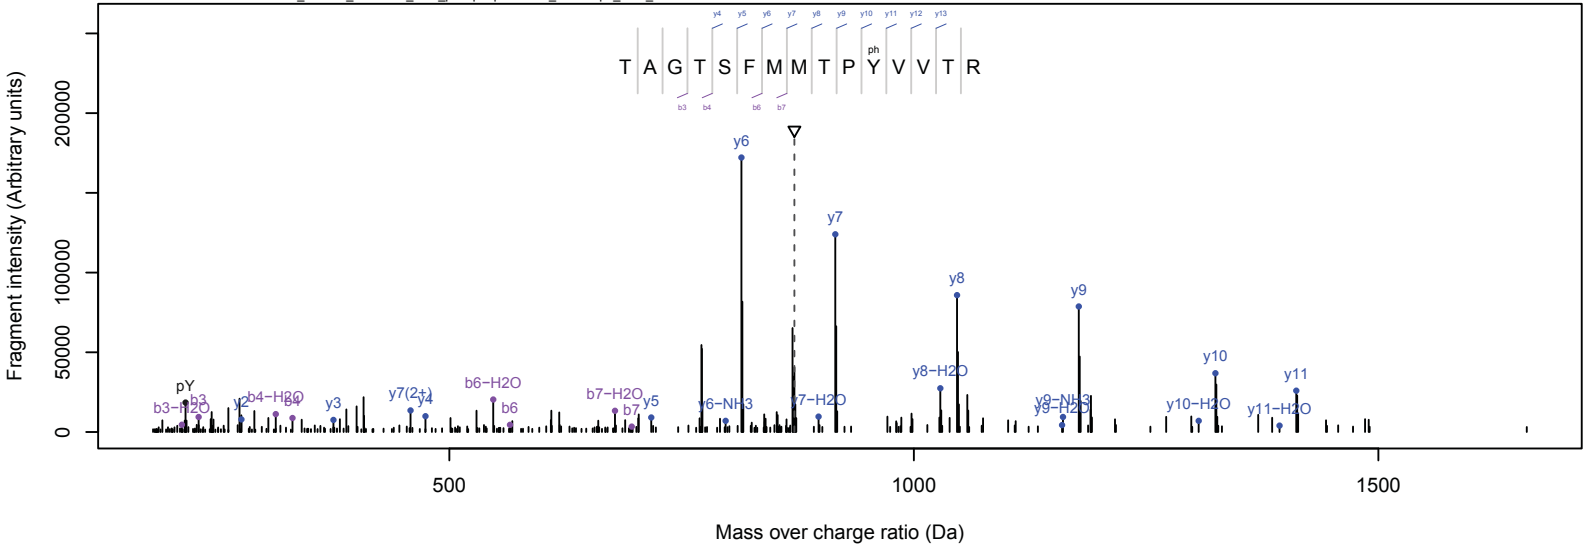

**VSCSPTSGAVPPYSSSPNPYQTAVY(ph)PVR-3+**

Source : QE1\_140612\_OPL1013\_CVA\_phosphoproteomic\_landscape\_AML\_C Scan : 31870

Andromeda score : 104.03

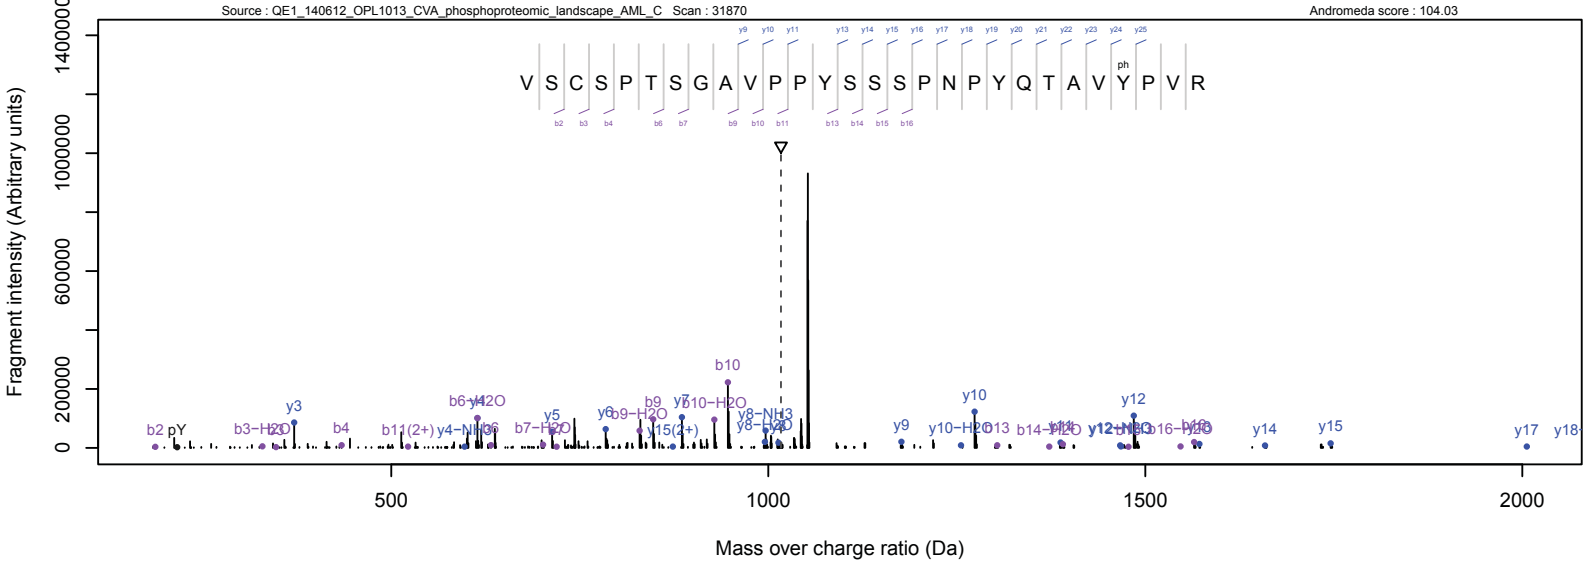

**HIY(ph)SPIIVR-2+**

Source : QE1\_140612\_OPL1013\_CVA\_phosphoproteomic\_landscape\_AML\_A Scan : 22842

Andromeda score : 104.01

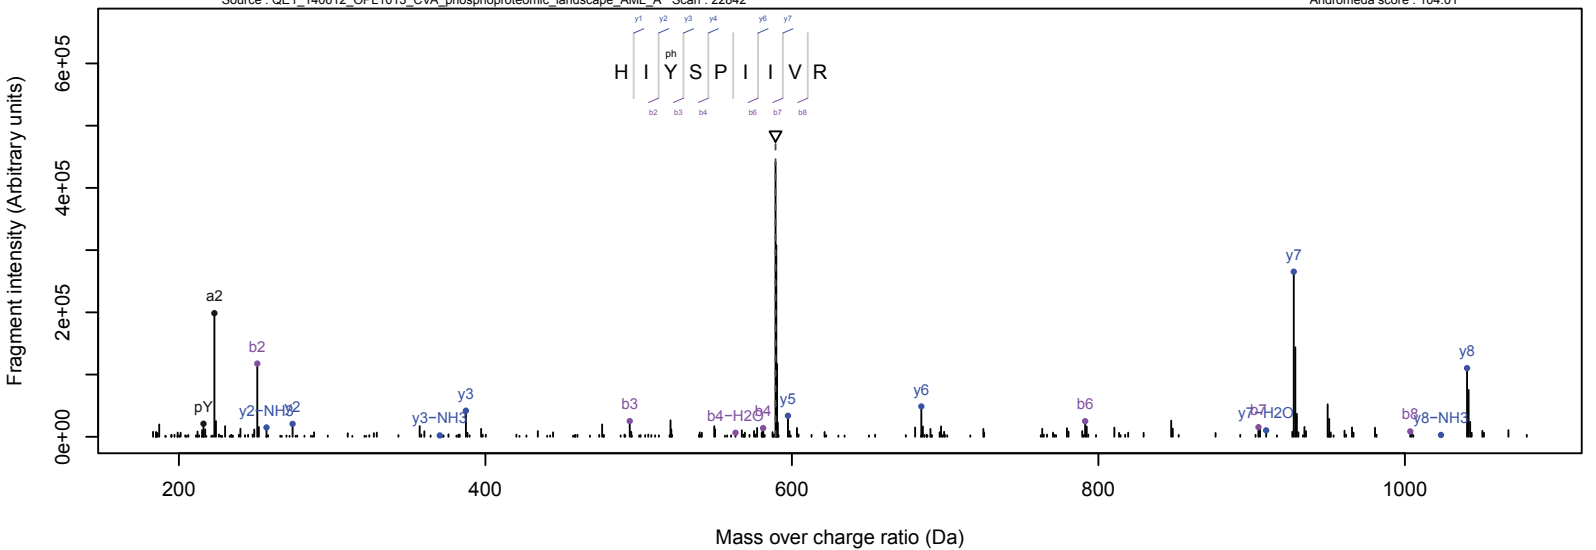

**GDKAAY(ph)DILR-3+**

Source: QE1\_140612\_OPL1013\_CVA\_phosphoproteomic\_landscape\_AML\_C Scan: 15847

Andromeda score: 103.91

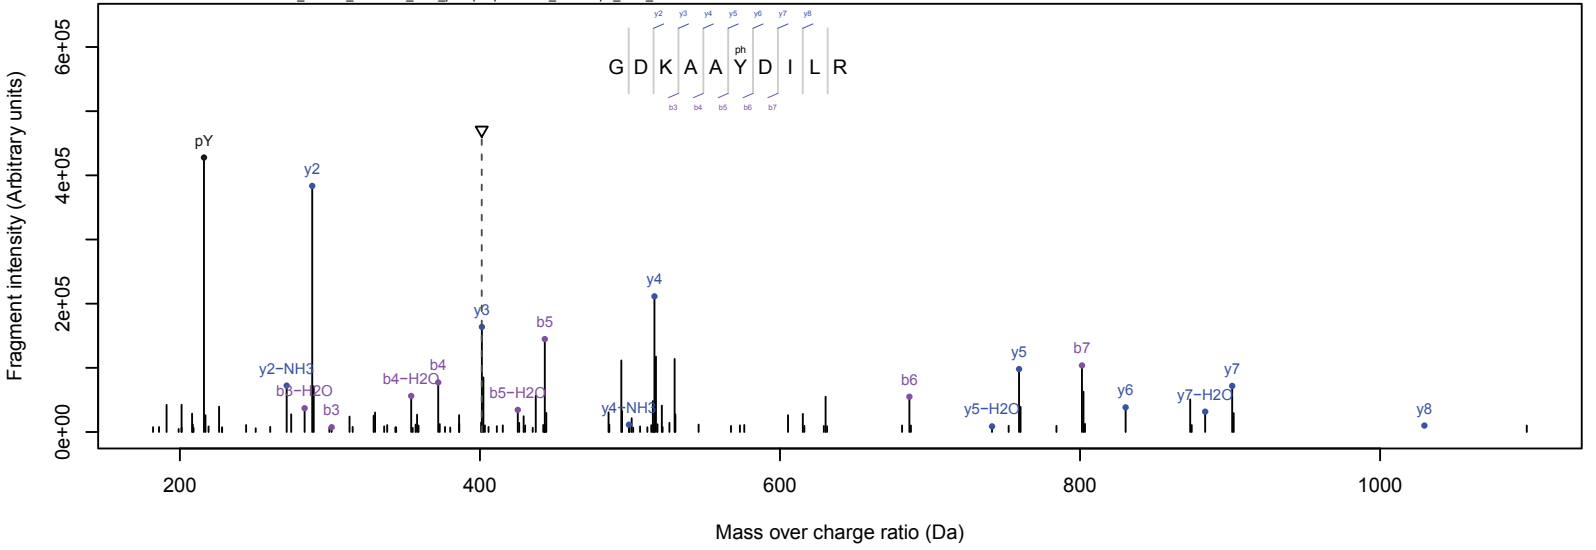

**Y(ph)GQFSLNPGGR-2+**

Source: QE1\_140612\_OPL1013\_CVA\_phosphoproteomic\_landscape\_AML\_B Scan: 18289

Andromeda score: 103.91

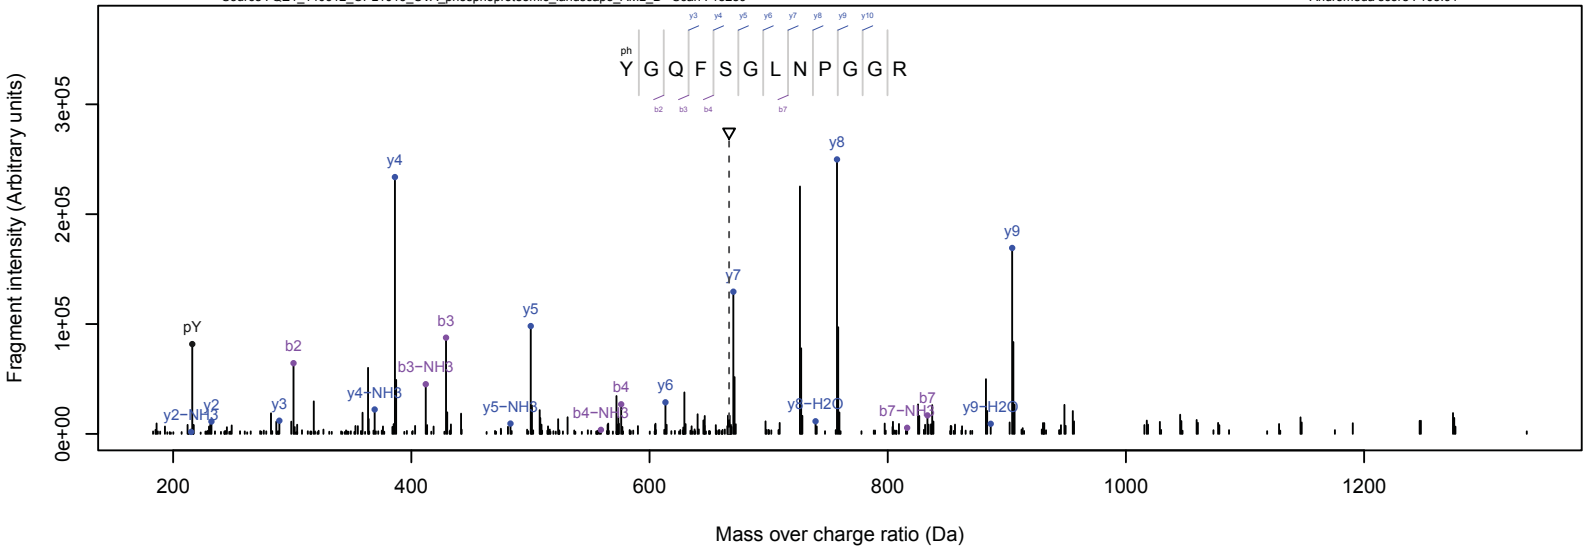

**EQYEQLSQSEKNNYYSR-3+**

Source: QE1\_140612\_OPL1013\_CVA\_phosphoproteomic\_landscape\_AML\_C Scan: 12282

Andromeda score: 103.88

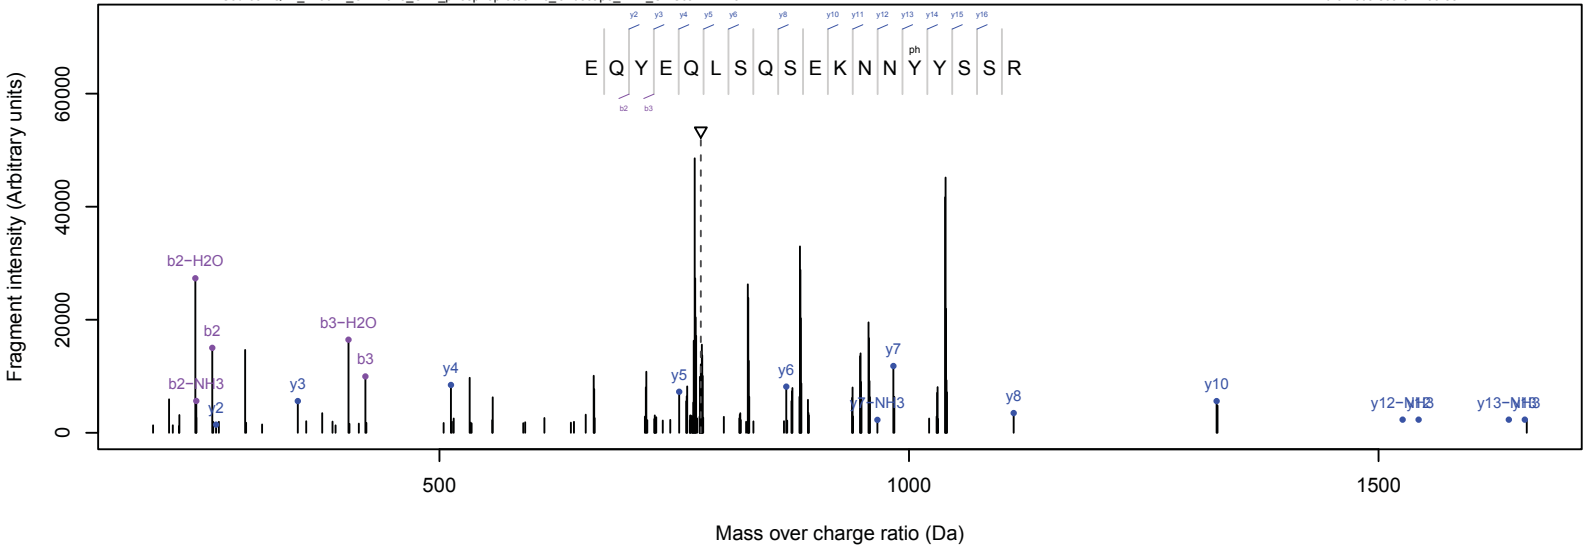

FIQY(ph)WQER-2+

Source : QE1\_140612\_OPL1013\_CVA\_phosphoproteomic\_landscape\_AML\_C Scan : 23789

Andromeda score : 103.87

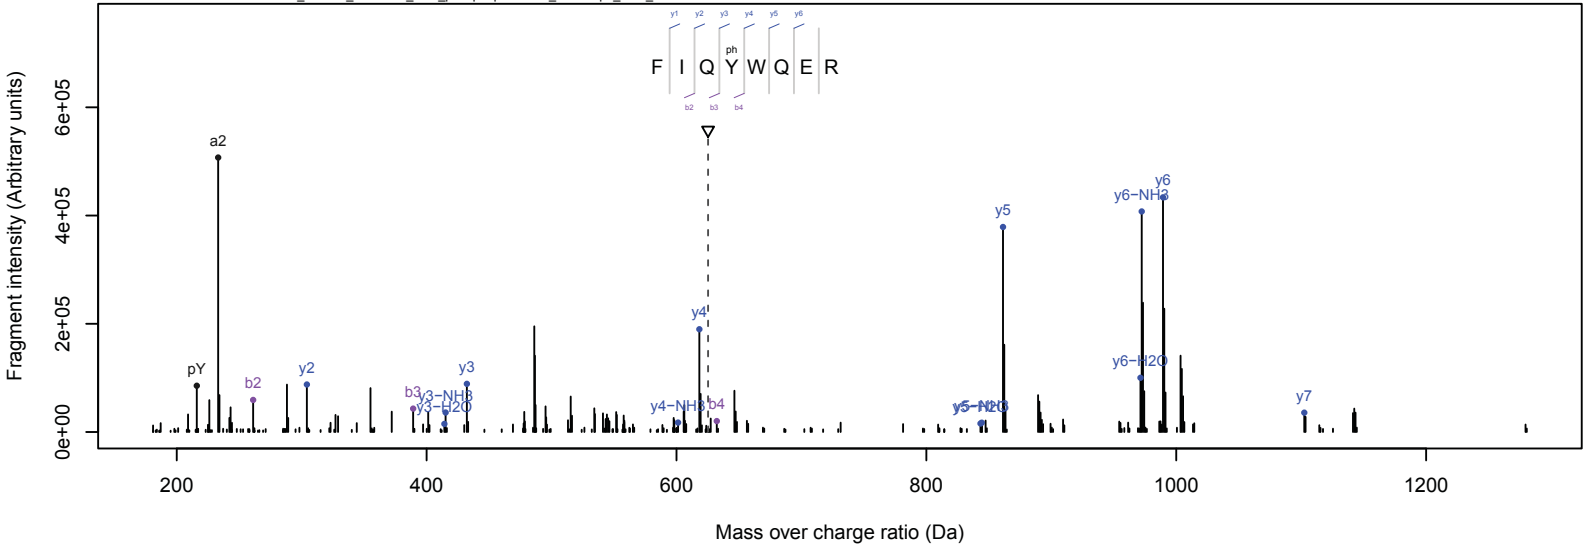

VLECDIKNY(ph)GFVHIEDK-4+

Source : QE1\_140612\_OPL1013\_CVA\_phosphoproteomic\_landscape\_AML\_B Scan : 34606

Andromeda score : 103.87

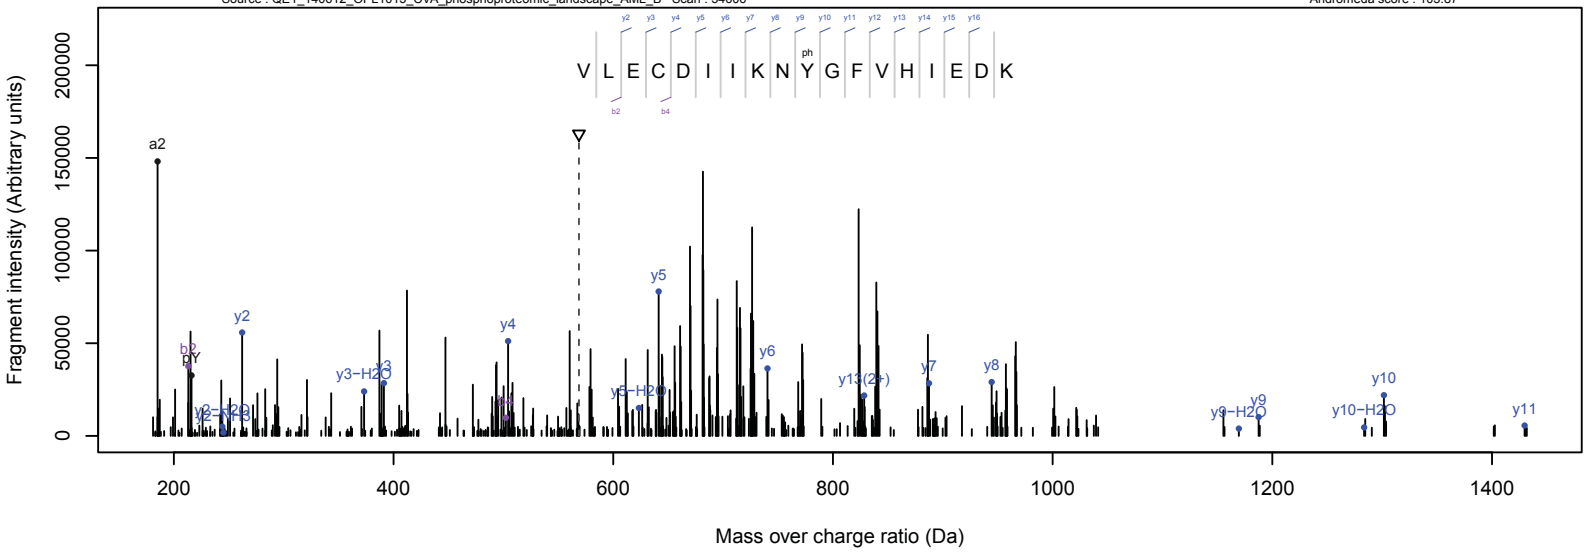

Y(ph)SYVCPDLVK-2+

Source : QE1\_140822\_OPL1013\_CvA\_pTyrIP\_AML\_cell\_lines\_part2\_E Scan : 18653

Andromeda score : 103.87

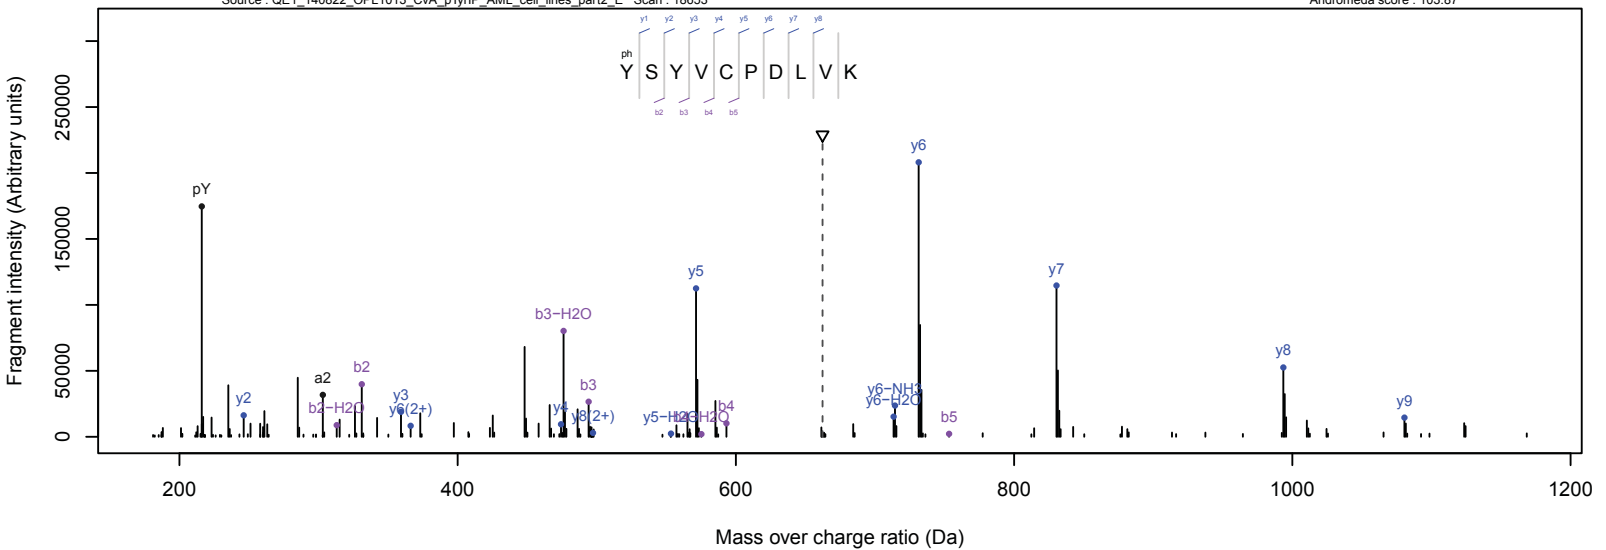

**EQVLEPMLNGTDKTPALISDYKEY(ph)HTDITTK-4+**

Source: QE1\_140612\_OPL1013\_CVA\_phosphoproteomic\_landscape\_AML\_B Scan: 34560

Andromeda score: 103.85

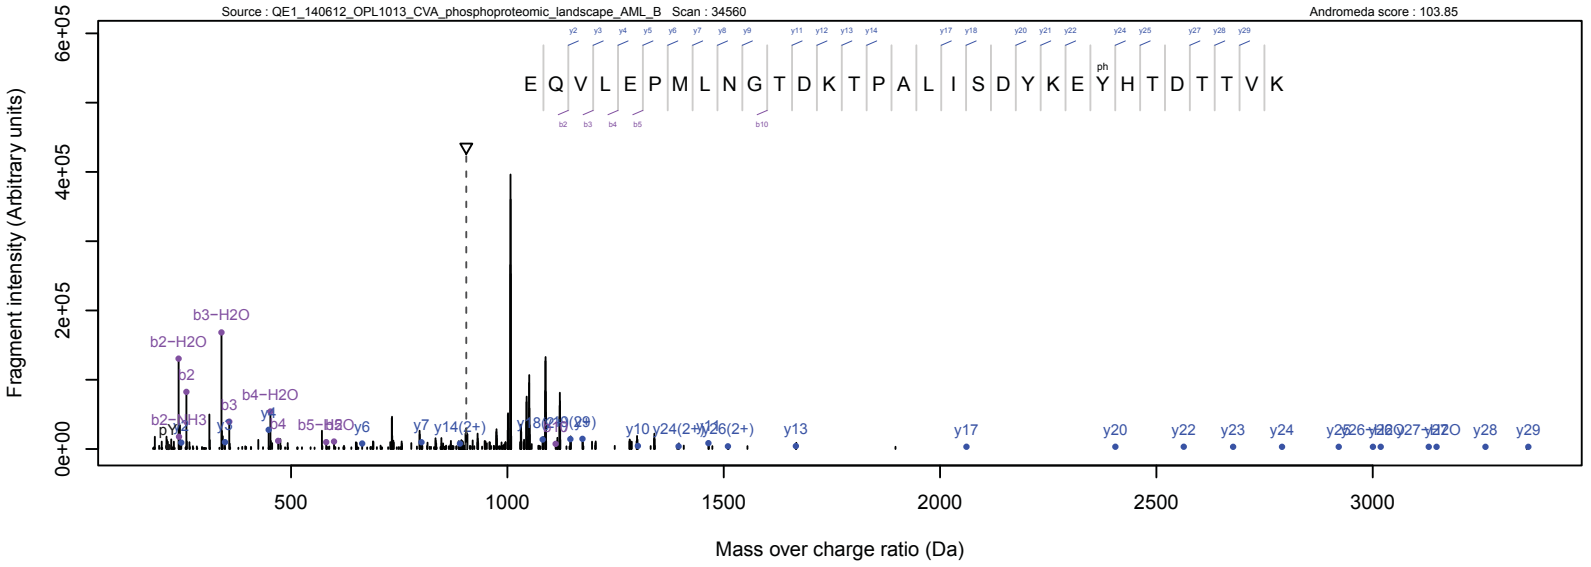

**MDKPSNCTNELY(MMMR)-3+**

Source: QE1\_140612\_OPL1013\_CVA\_phosphoproteomic\_landscape\_AML\_B Scan: 30894

Andromeda score: 103.77

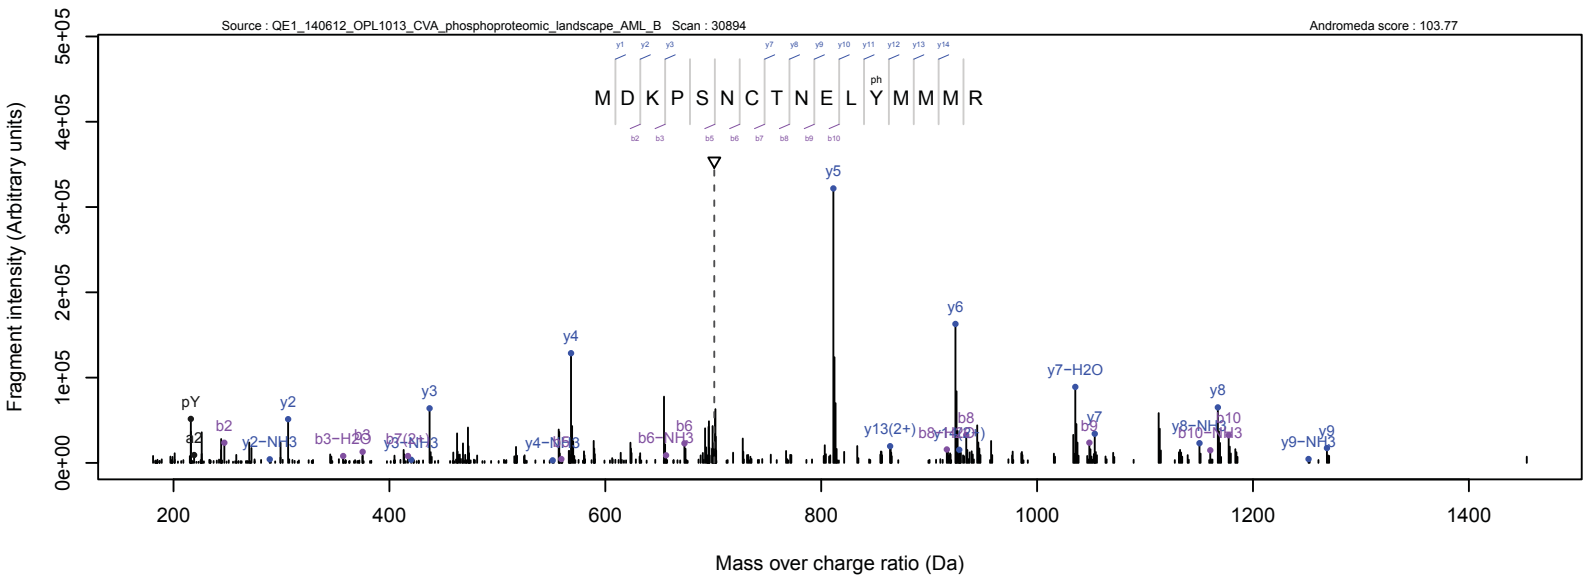

**DQEAPSTTEYS(ph)EIK-2+**

Source: QE1\_140822\_OPL1013\_CvA\_pTyrIP\_AML\_cell\_lines\_part2\_B Scan: 8010

Andromeda score: 103.76

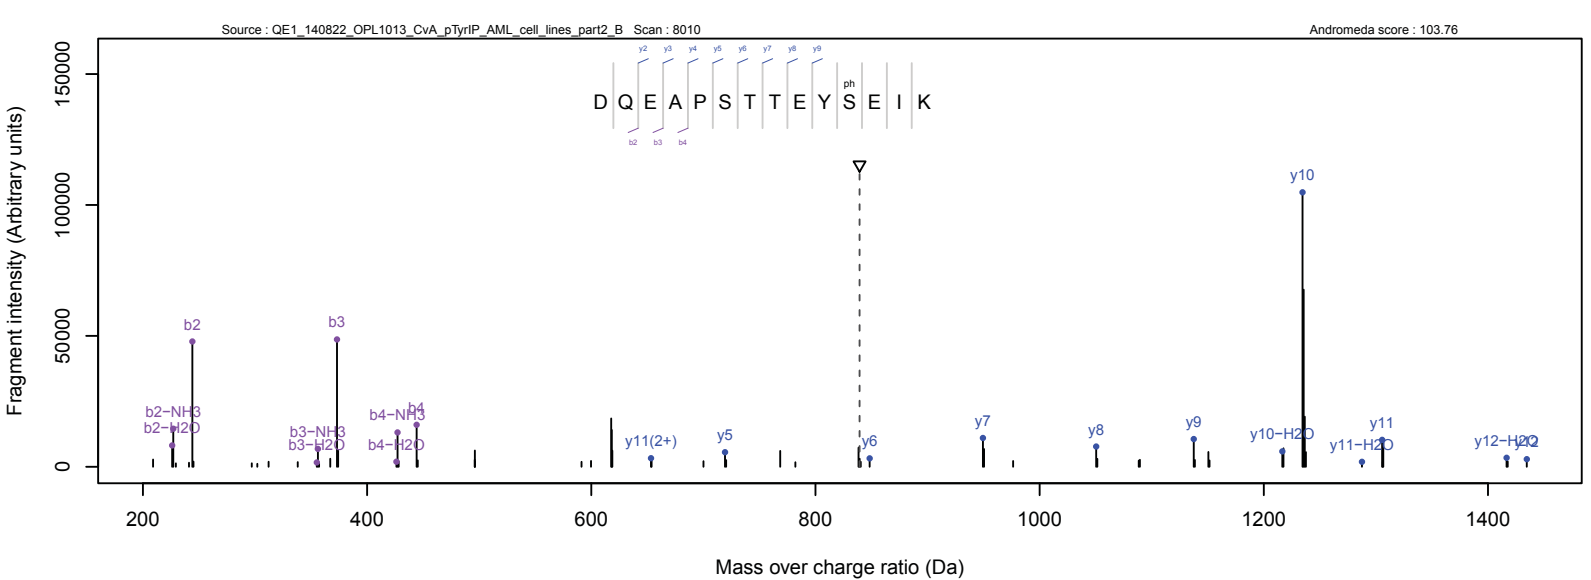

**NY(ph)IEMKHPWFFGK-3+**

Source: QE1\_140612\_OPL1013\_CVA\_phosphoproteomic\_landscape\_AML\_C Scan: 35812

Andromeda score: 103.76

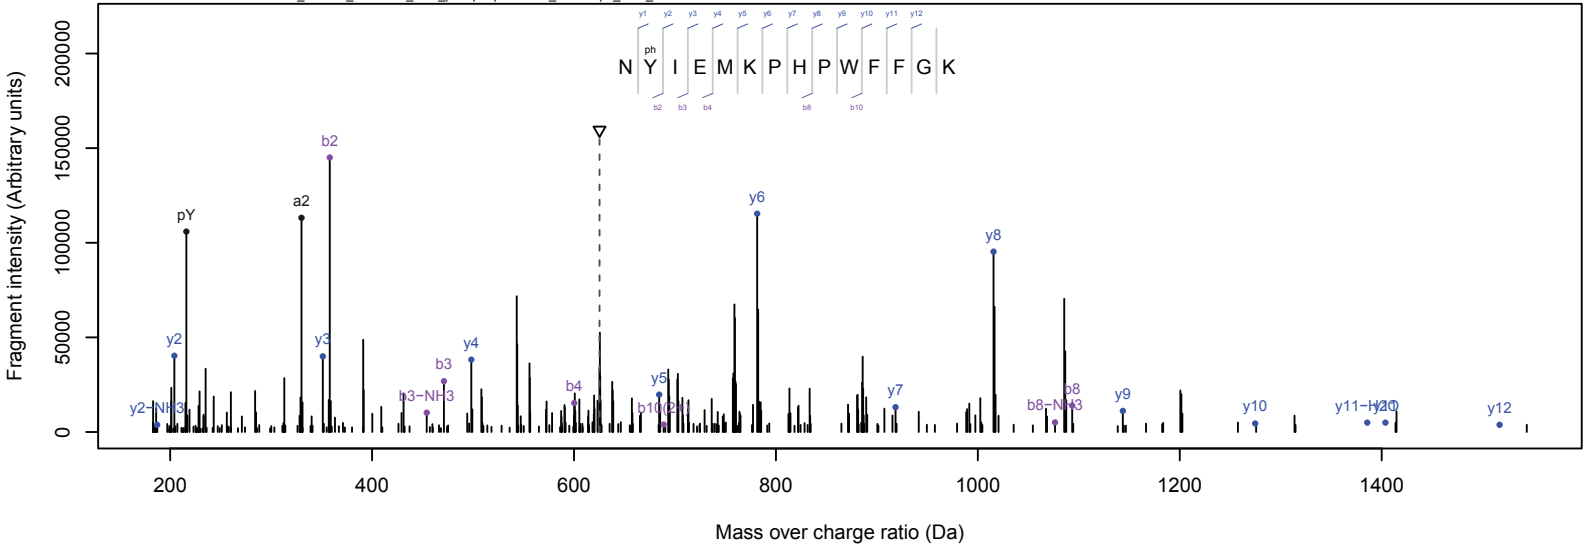

**Y(ph)CQRPCDNLHLCK-3+**

Source: QE1\_140612\_OPL1013\_CVA\_phosphoproteomic\_landscape\_AML\_C Scan: 11553

Andromeda score: 103.76

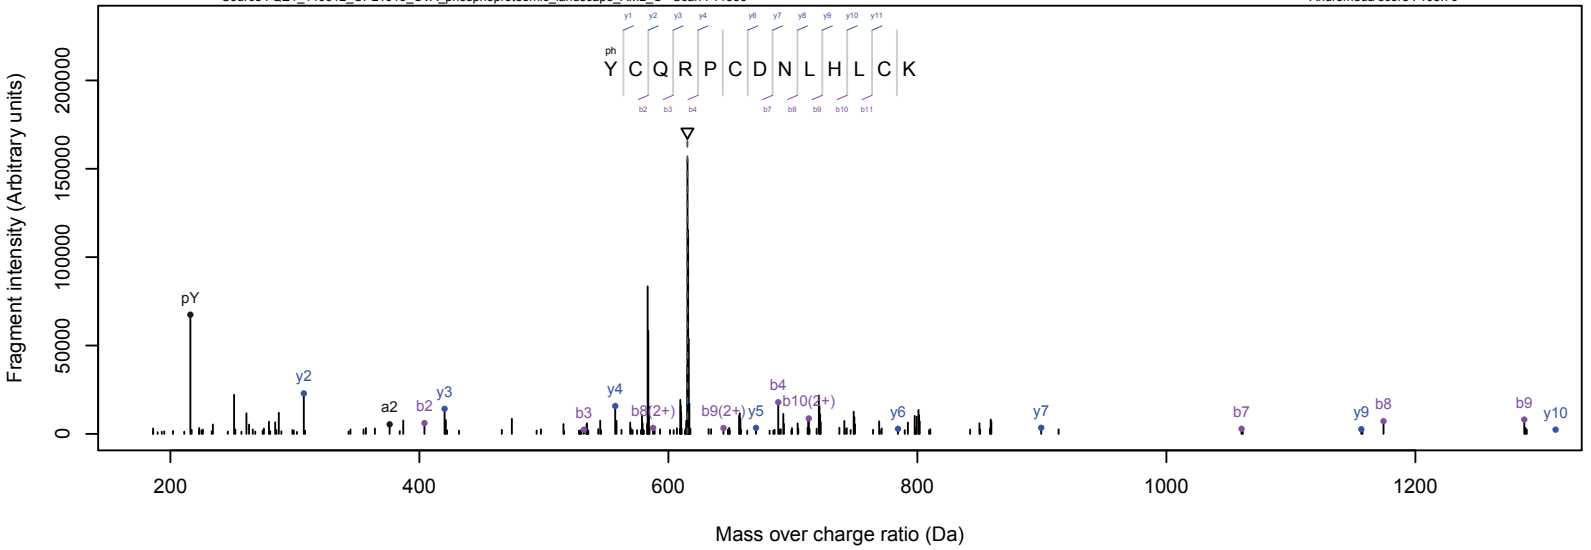

**AISESGCDSVTDTEPEDEKVVSY(ph)K-3+**

Source: QE1\_140612\_OPL1013\_CVA\_phosphoproteomic\_landscape\_AML\_A Scan: 19007

Andromeda score: 103.75

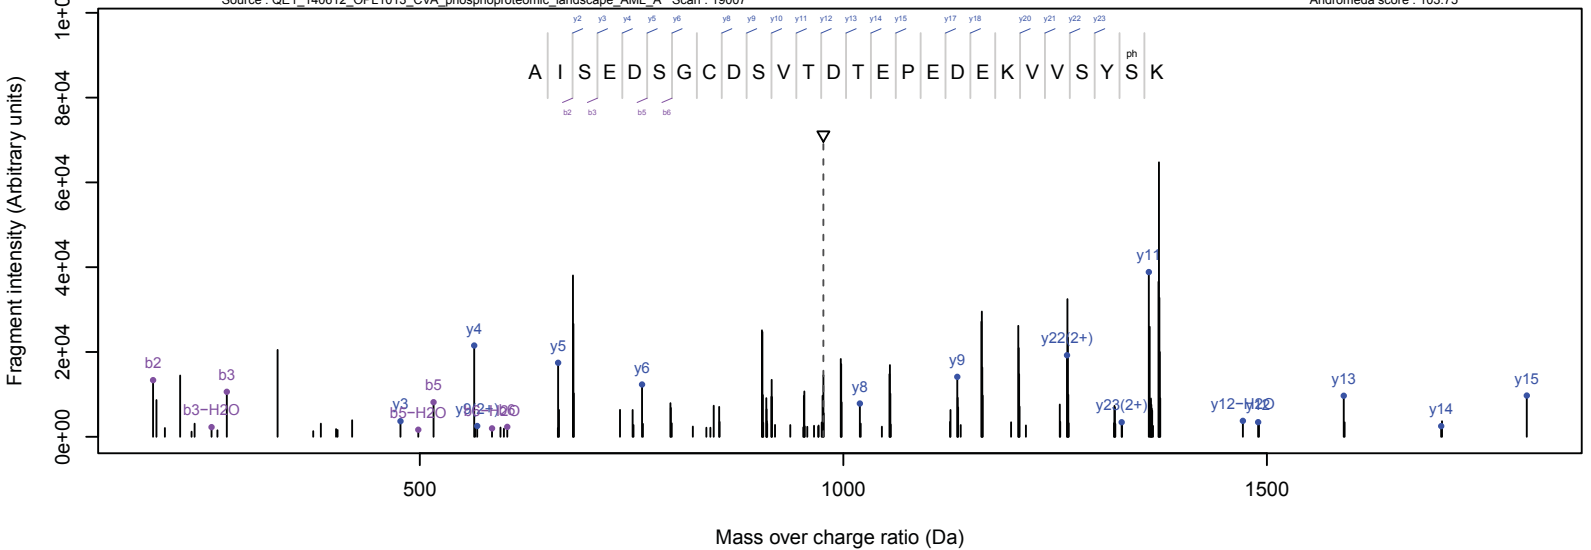

FCGQHNQSVNY(ph)FKDLYAK-3+

Source : QE1\_140612\_OPL1013\_CVA\_phosphoproteomic\_landscape\_AML\_C Scan : 24003

Andromeda score : 103.73

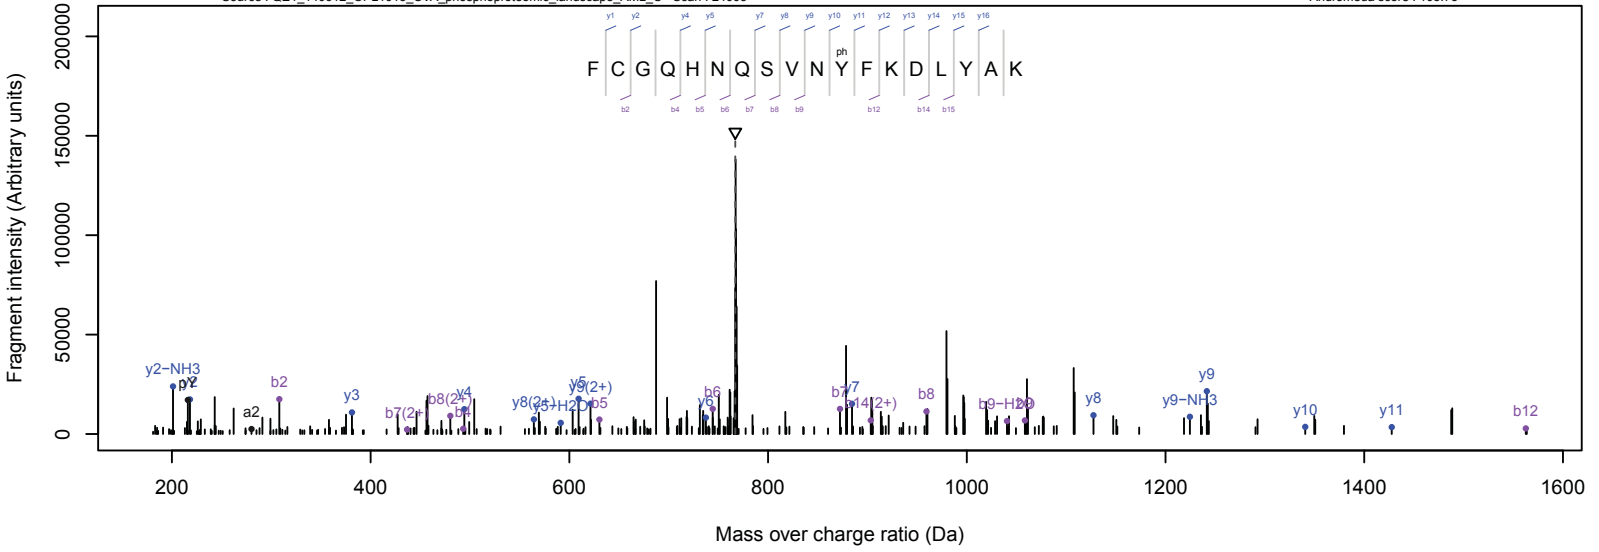

HNTEFRDSTY(ph)DLPR-3+

Source : QE1\_140908\_OPL1013\_CvA\_pTyrIP\_AML\_Kasumi6 Scan : 16618

Andromeda score : 103.66

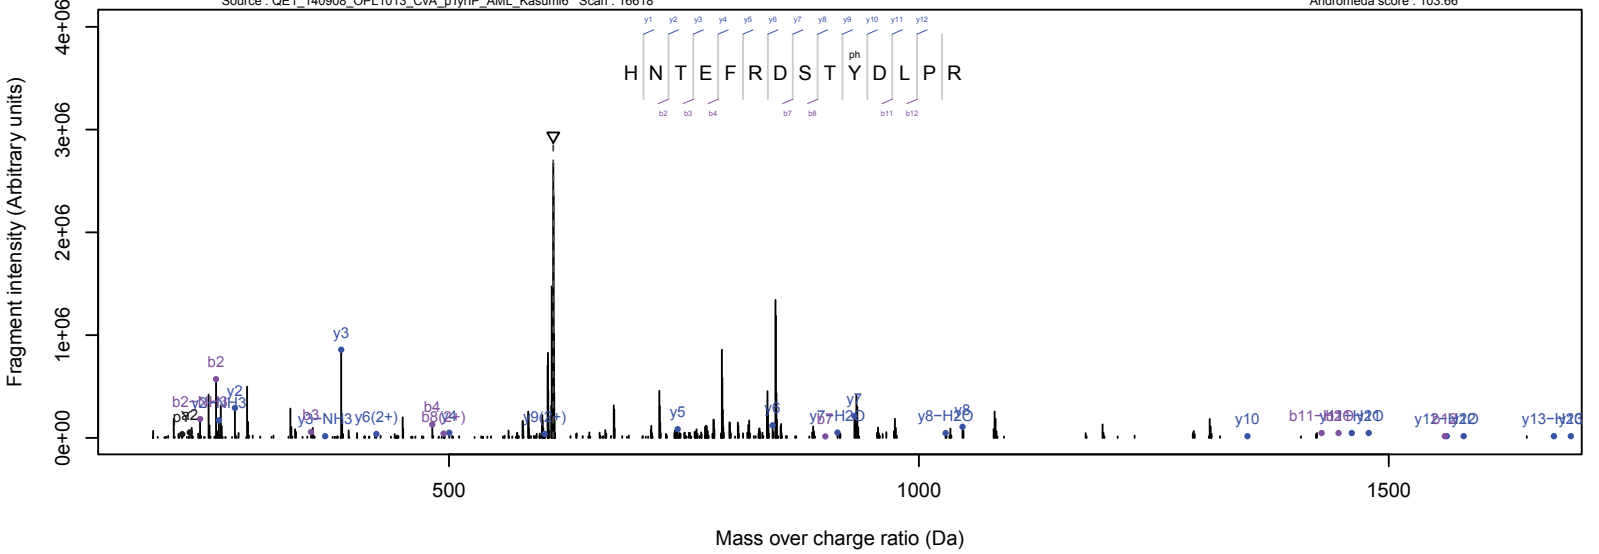

NLIPMDP NGLSDPY(ph)VKLK-2+

Source : QE1\_140612\_OPL1013\_CVA\_phosphoproteomic\_landscape\_AML\_C Scan : 40190

Andromeda score : 103.66

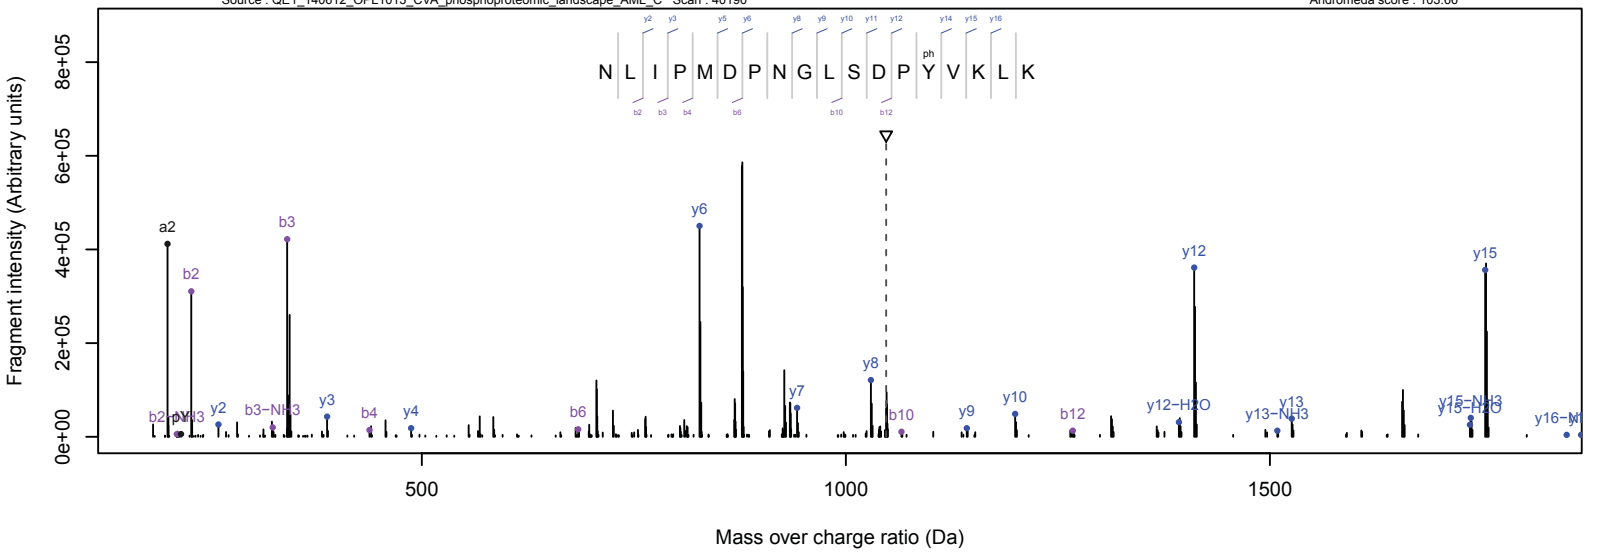

VSLDDTVY(ph)ECVVEK-2+

Source : QE1\_140908\_OPL1013\_CVA\_pTyrIP\_AML\_Kasumi1 Scan : 37163

Andromeda score : 103.6

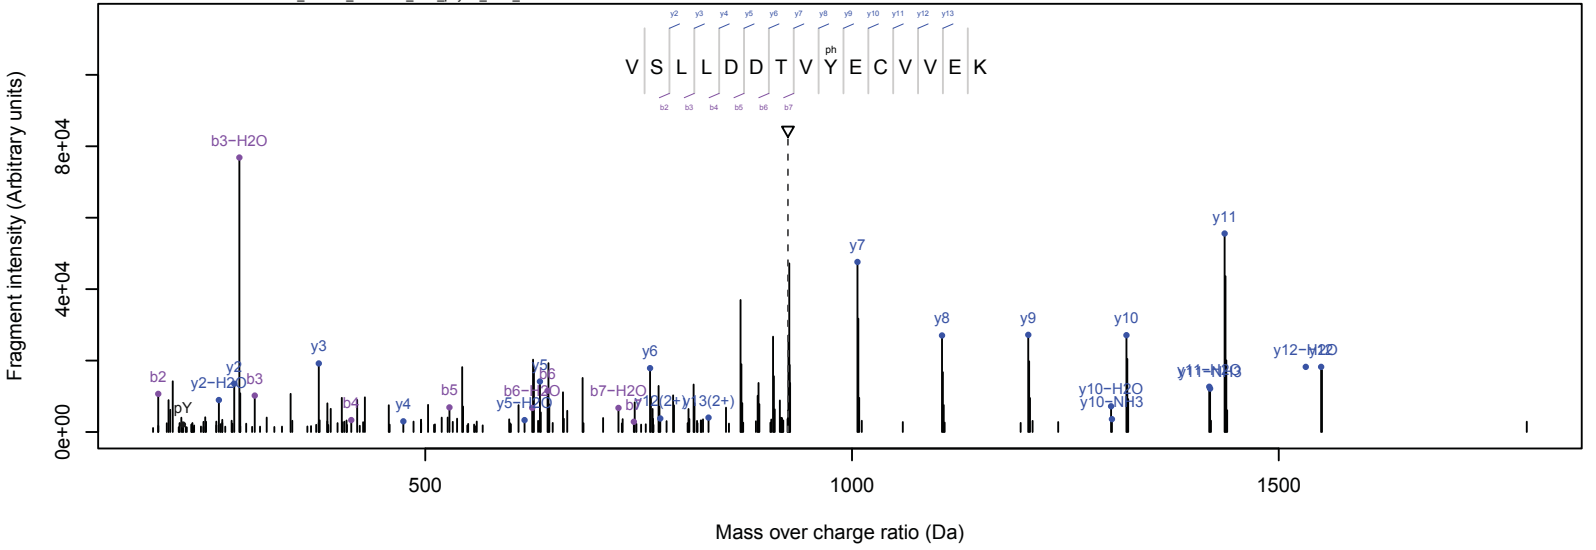

Y(ph)MEDSTYYK-2+

Source : QE1\_140612\_OPL1013\_CVA\_phosphoproteomic\_landscape\_AML\_D Scan : 11419

Andromeda score : 103.55

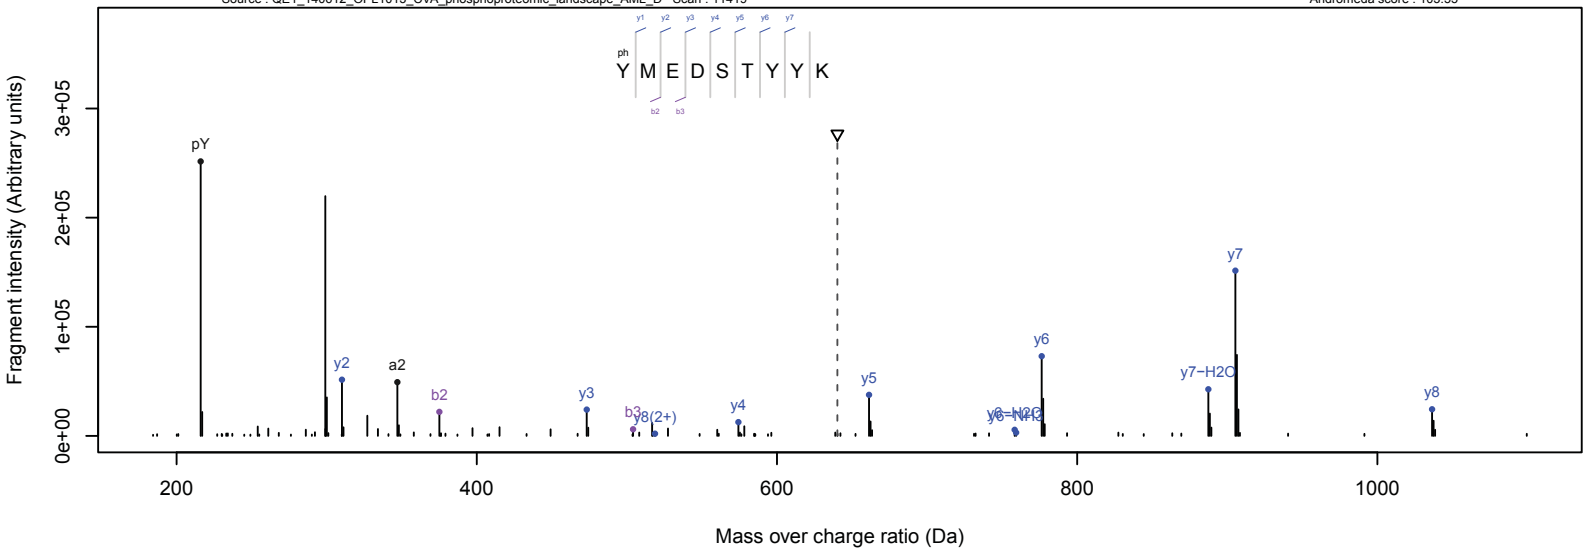

Y(ph)QQPFEDFR-2+

Source : QE1\_140612\_OPL1013\_CVA\_phosphoproteomic\_landscape\_AML\_A Scan : 25275

Andromeda score : 103.55

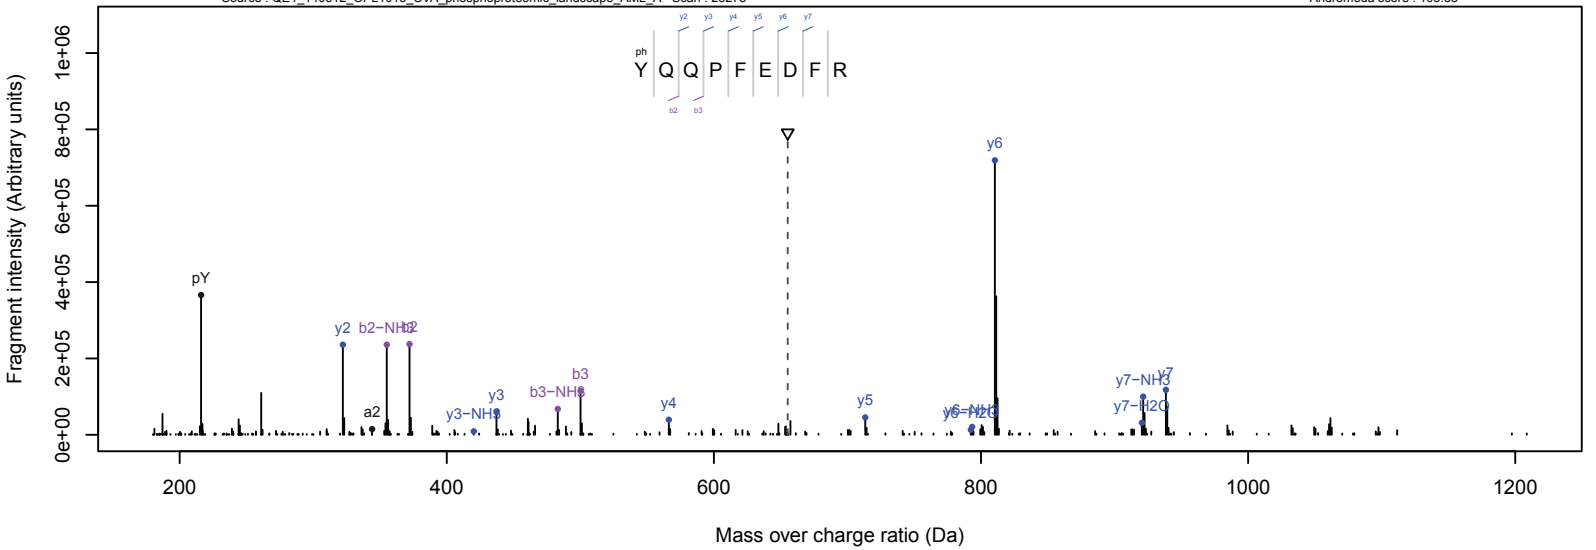



**SGLSSPIY(ph)IDLR-2+**

Source : QE1\_140612\_OPL1013\_CVA\_phosphoproteomic\_landscape\_AML\_C Scan : 42455

Andromeda score : 103.44

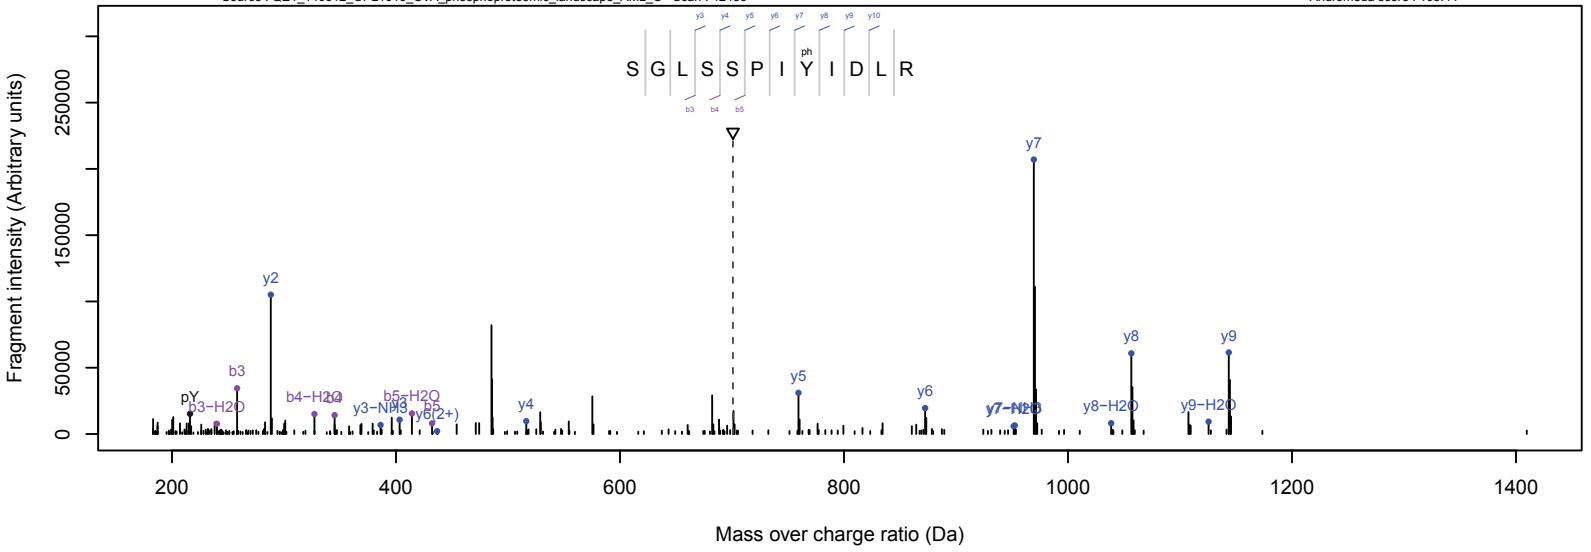

**DVCLY(ph)PR-2+**

Source : QE1\_140612\_OPL1013\_CVA\_phosphoproteomic\_landscape\_AML\_D Scan : 15232

Andromeda score : 103.29

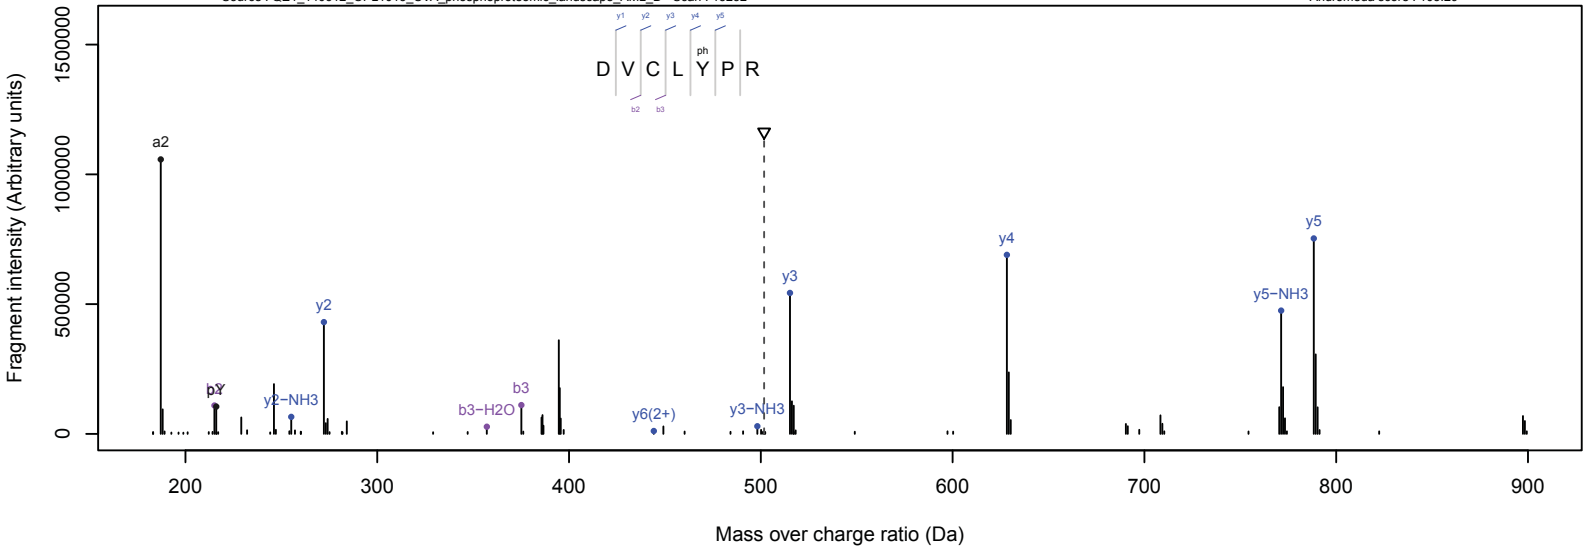

**WDTGENPIYK-2+**

Source : QE1\_140612\_OPL1013\_CVA\_phosphoproteomic\_landscape\_AML\_C Scan : 20273

Andromeda score : 103.26

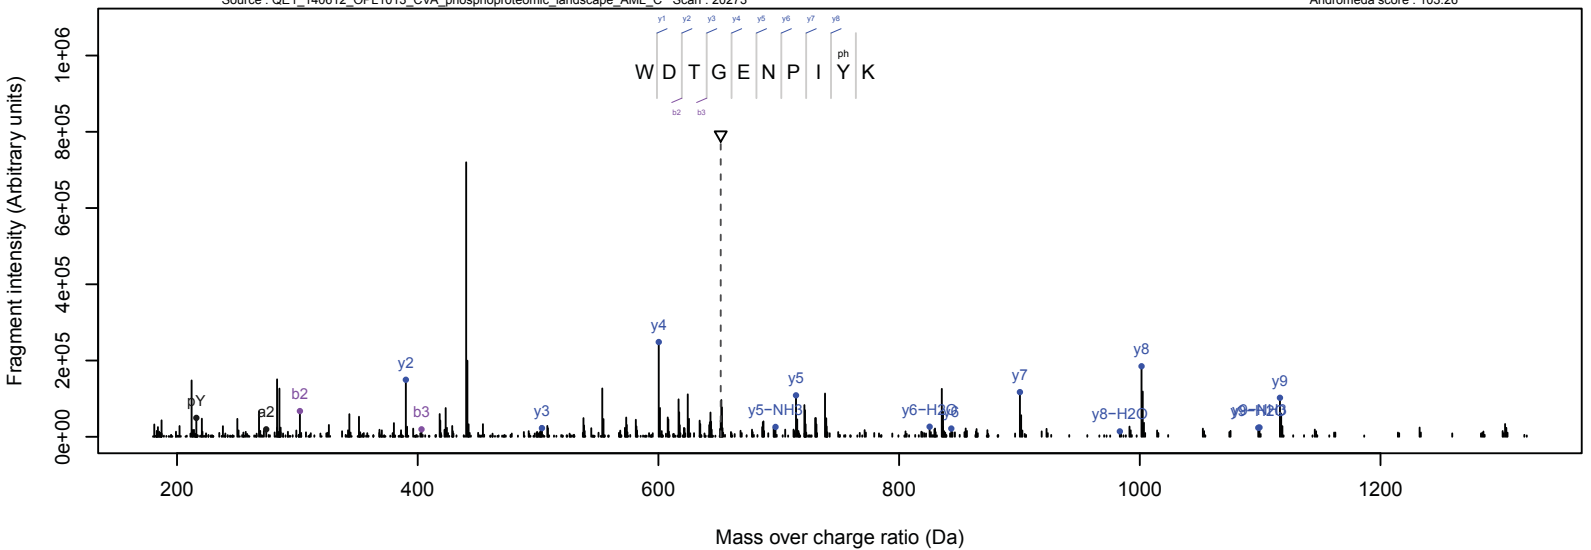

Y(ph)FSEADKIK-2+

Source : QE1\_140612\_OPL1013\_CVA\_phosphoproteomic\_landscape\_AML\_B Scan : 10088

Andromeda score : 103.26

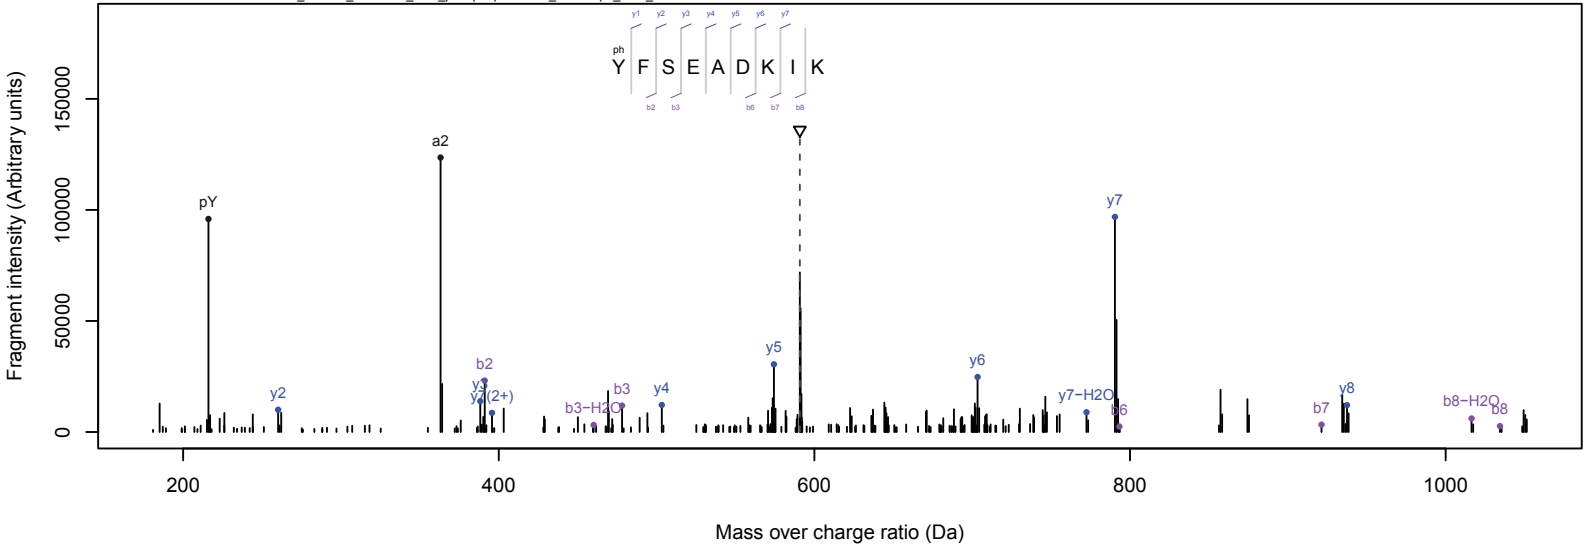

Mass over charge ratio (Da)

IILSNPPSQGDYHGCPFR-2+

Source : QE1\_140612\_OPL1013\_CVA\_phosphoproteomic\_landscape\_AML\_C Scan : 25506

Andromeda score : 103.13

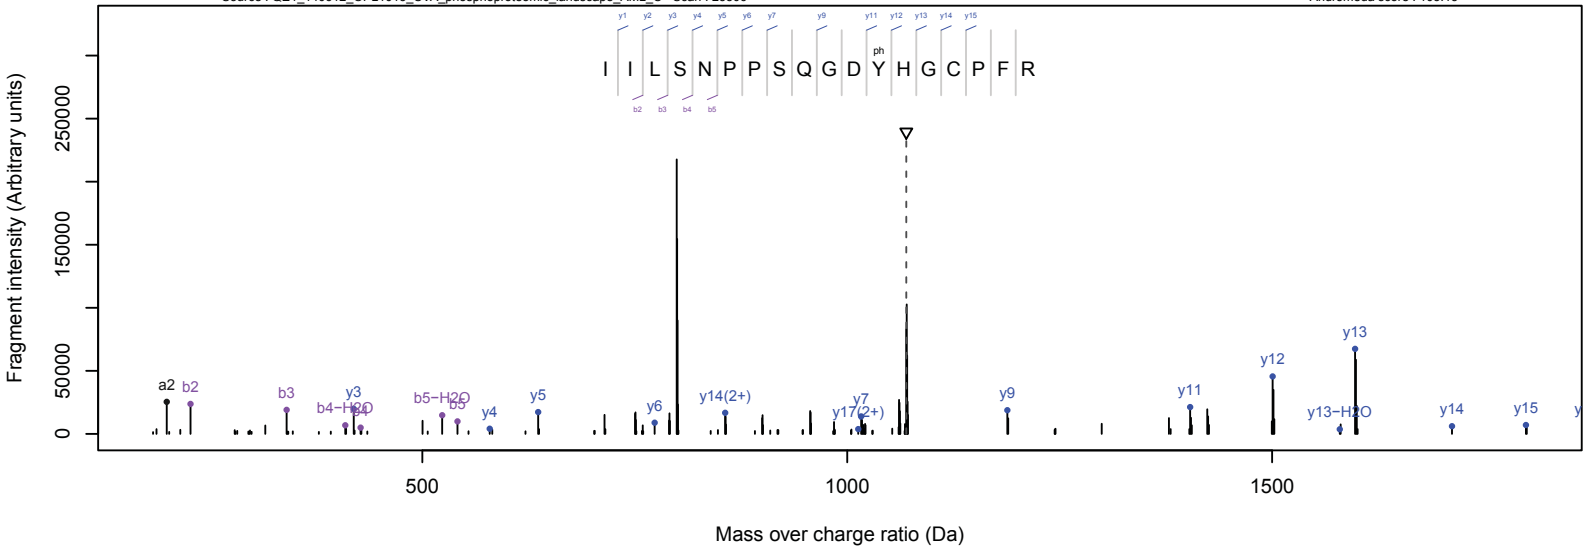

Mass over charge ratio (Da)

LGAPEEESAYVAGEKR-3+

Source : QE1\_140612\_OPL1013\_CVA\_phosphoproteomic\_landscape\_AML\_B Scan : 13451

Andromeda score : 103.13

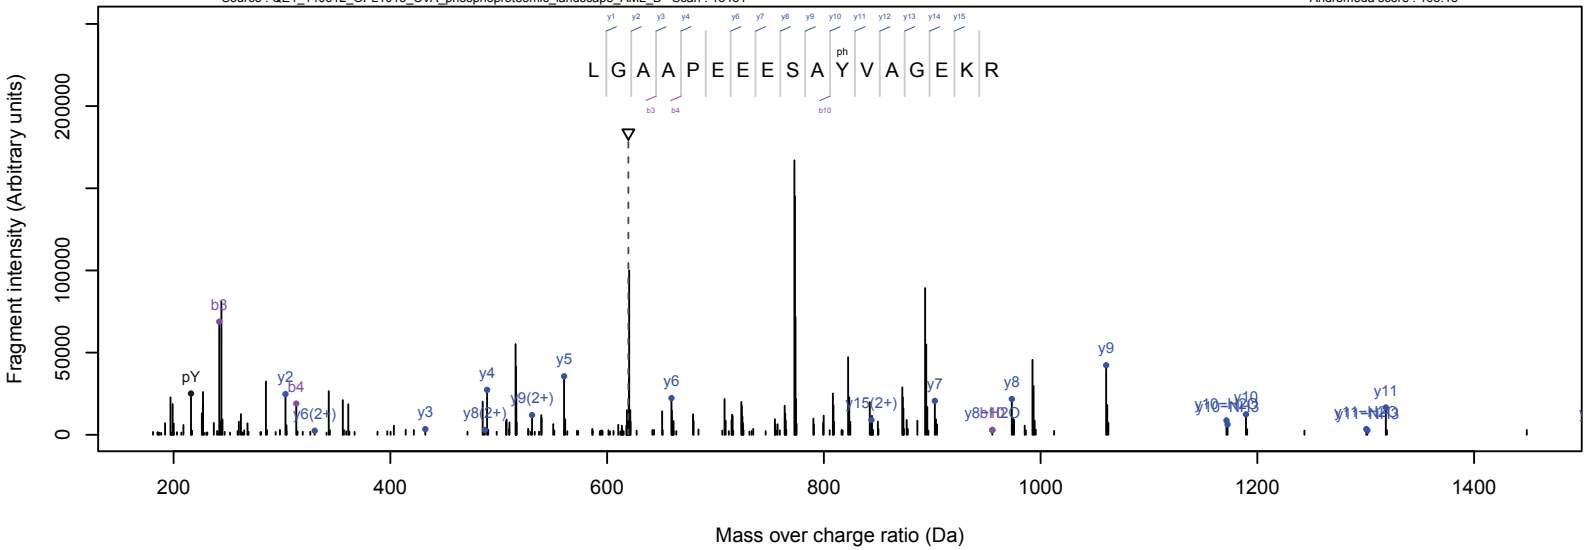

Mass over charge ratio (Da)

LKIMEY(ph)YEK-2+

Source : QE1\_140612\_OPL1013\_CVA\_phosphoproteomic\_landscape\_AML\_C Scan : 21801

Andromeda score : 103.08

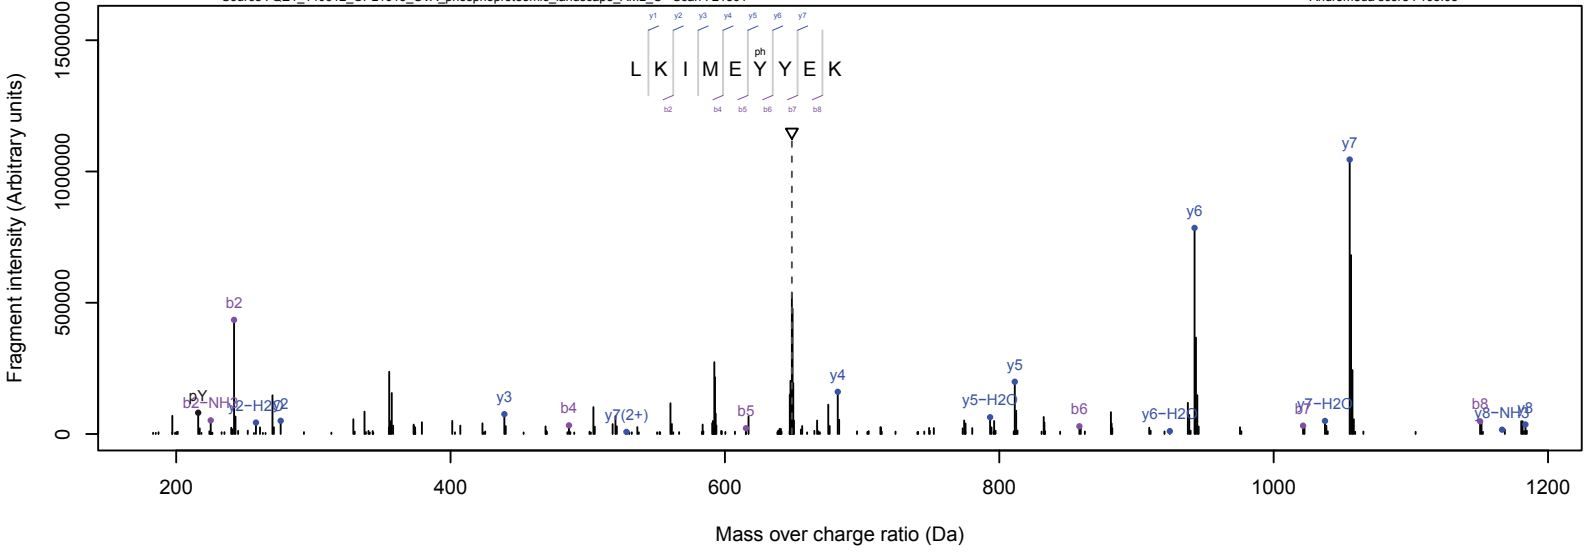

VDAY(ph)GNLLVCAHGFNFI R-3+

Source : QE1\_140908\_OPL1013\_CvA\_pTyrIP\_AML\_Kasumi6 Scan : 47405

Andromeda score : 103.04

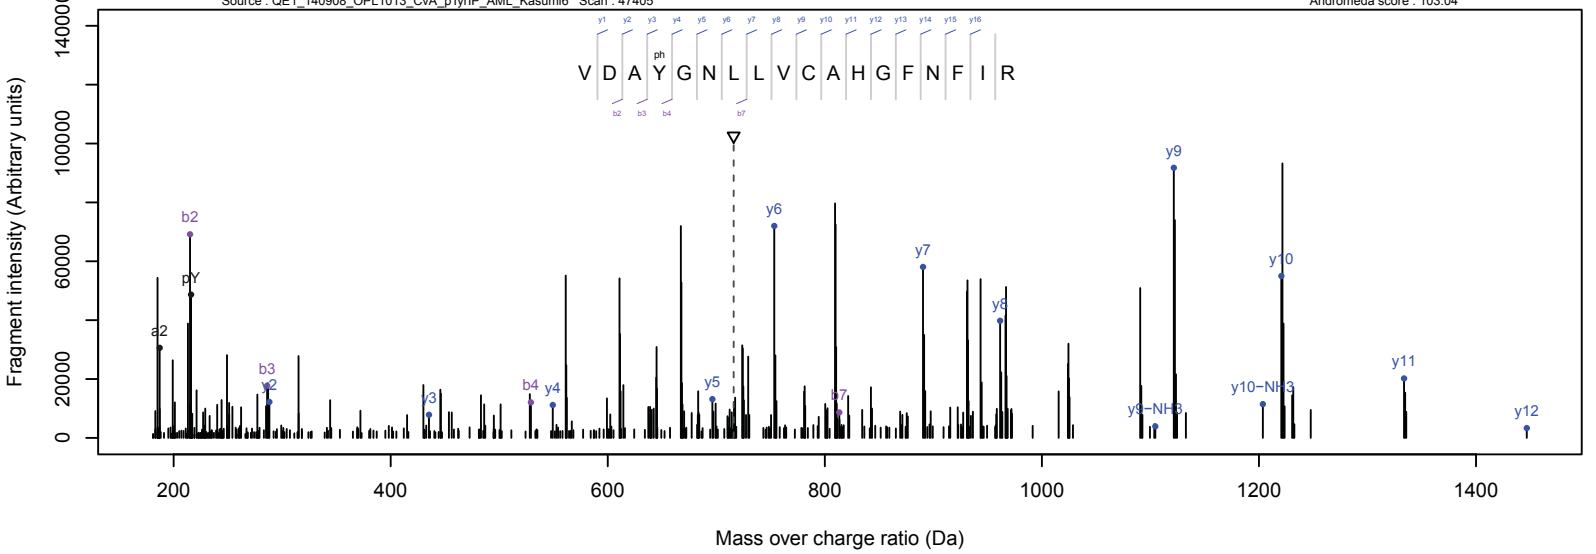

IQSSGTDY(ph)PDIHAAAK-3+

Source : QE1\_140612\_OPL1013\_CVA\_phosphoproteomic\_landscape\_AML\_B Scan : 10535

Andromeda score : 103.01

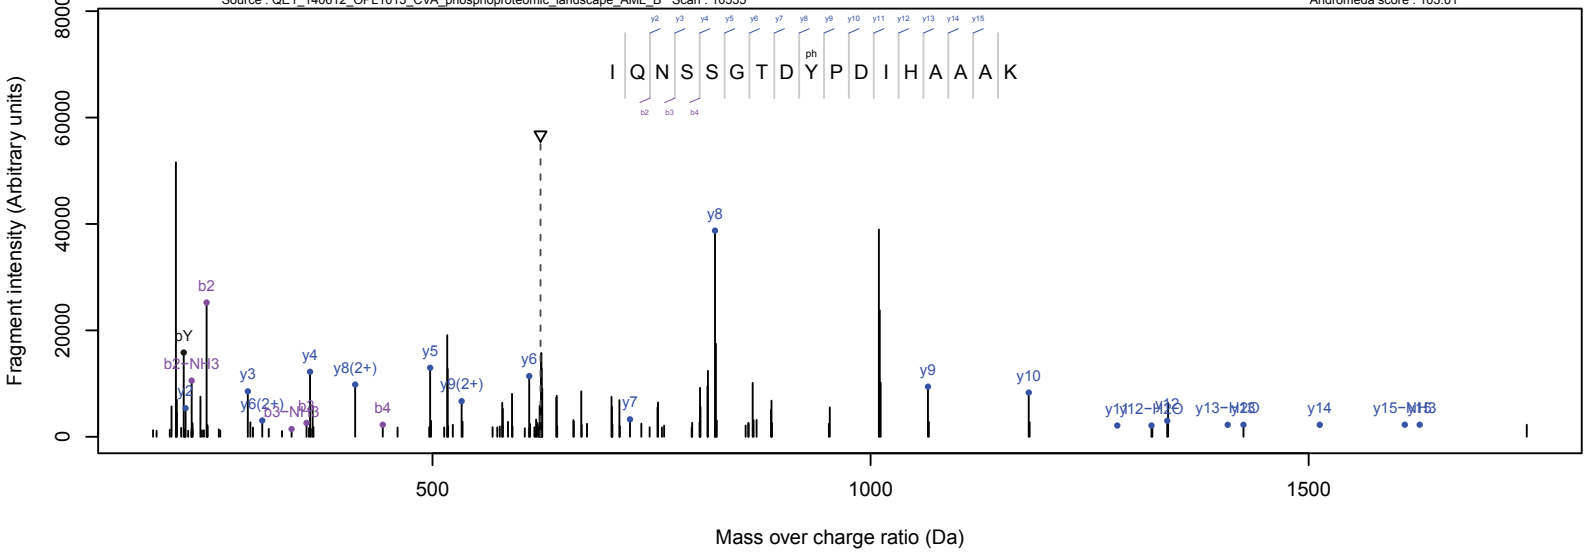

QRPY(ph)SVAVPAFSQGLDDYGAR-3+

Source : QE1\_140612\_OPL1013\_CVA\_phosphoproteomic\_landscape\_AML\_C Scan : 34810

Andromeda score : 103.01

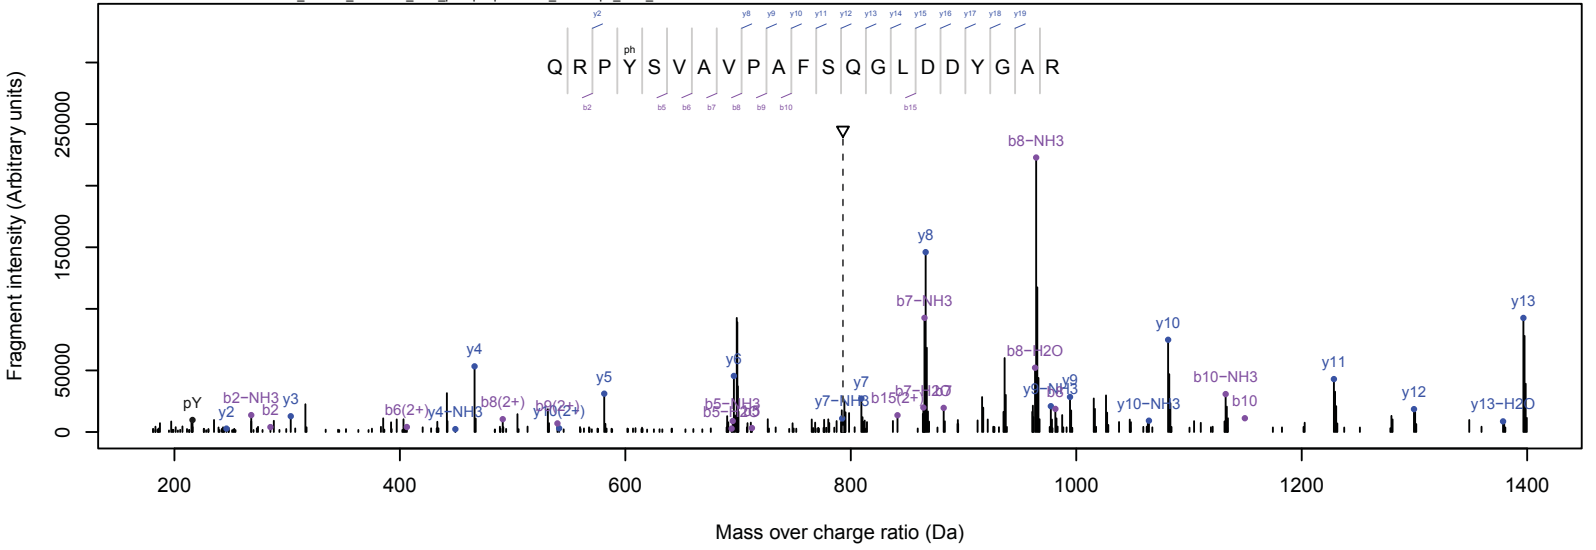

SPLSDY(ph)M(ox)NLDFSSPK-2+

Source : QE1\_140908\_OPL1013\_CvA\_pTyrIP\_AML\_Kasumi6 Scan : 33288

Andromeda score : 103.01

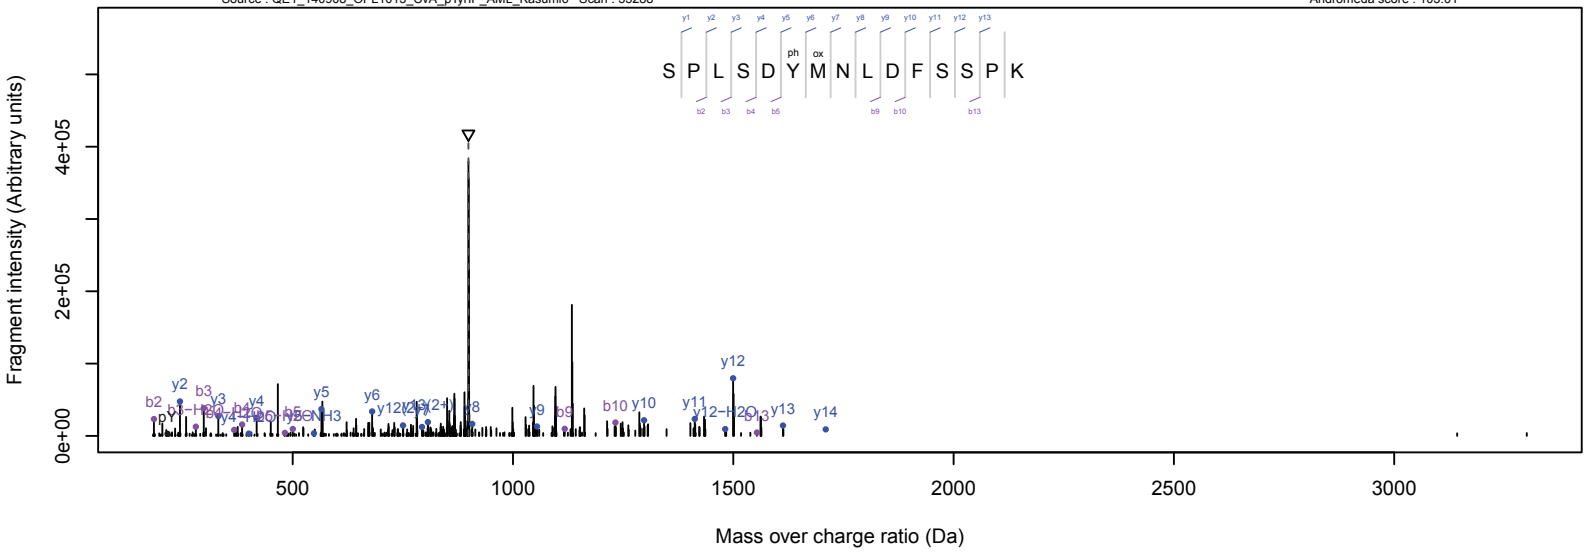

NGY(ph)FQVPHTPVIFGEAGR-3+

Source : QE1\_140612\_OPL1013\_CVA\_phosphoproteomic\_landscape\_AML\_A Scan : 38014

Andromeda score : 102.98

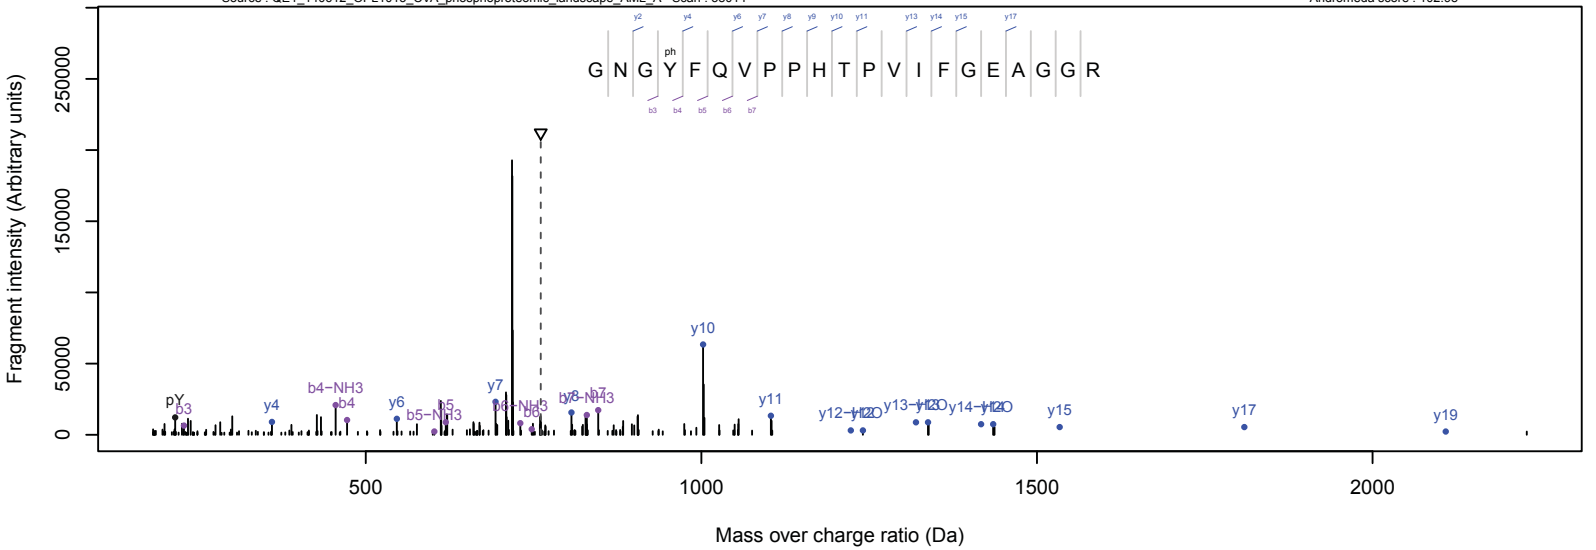

**KLWLEAM(ox)DGKEPIY(ph)TLPAISK-3+**

Source : QE1\_140908\_OPL1013\_CvA\_pTyrIP\_AML\_HEL Scan : 46423

Andromeda score : 102.97

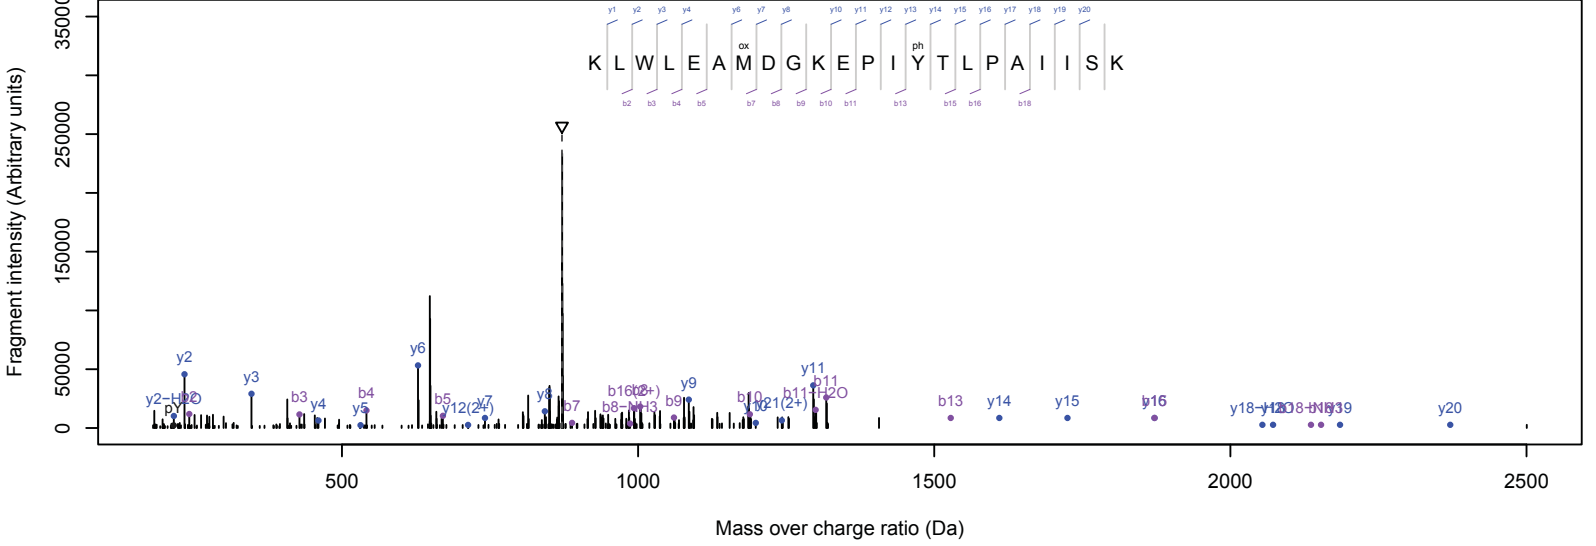

**TTAVEIDY(ph)DSLK-2+**

Source : QE1\_140908\_OPL1013\_CvA\_pTyrIP\_AML\_HEL Scan : 26696

Andromeda score : 102.97

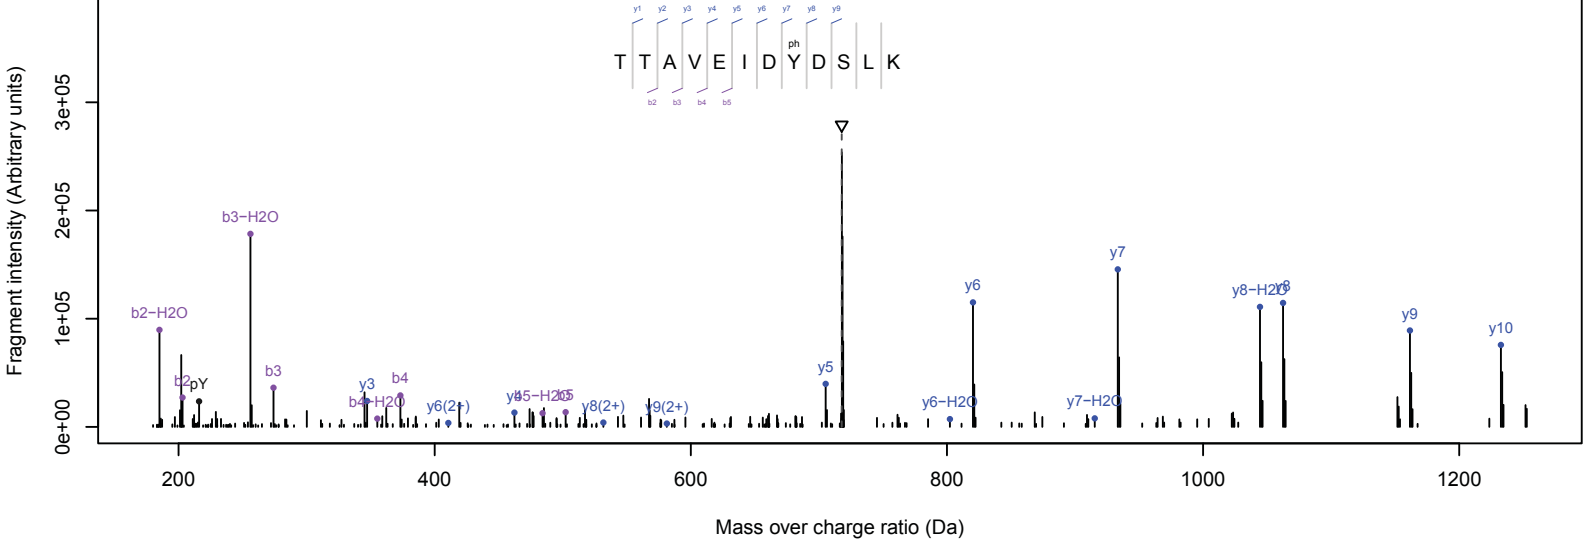

**LTRDETNY(ph)GIPQR-3+**

Source : QE1\_140822\_OPL1013\_CvA\_pTyrIP\_AML\_cell\_lines\_part2\_B Scan : 6844

Andromeda score : 102.9

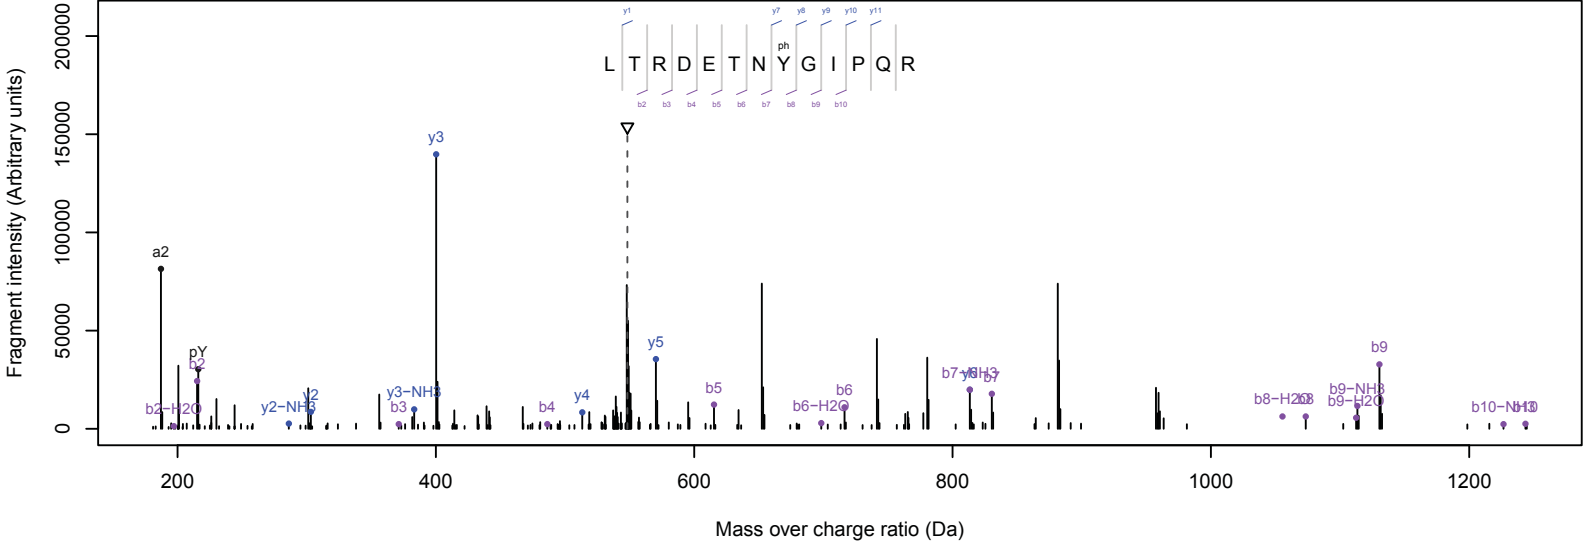

LIDFSAQI AEGMAY IERK-3+

Source : QE1\_140822\_OPL1013\_CvA\_pTyrIP\_AML\_cell\_lines\_part2\_B Scan : 44071

Andromeda score : 102.89

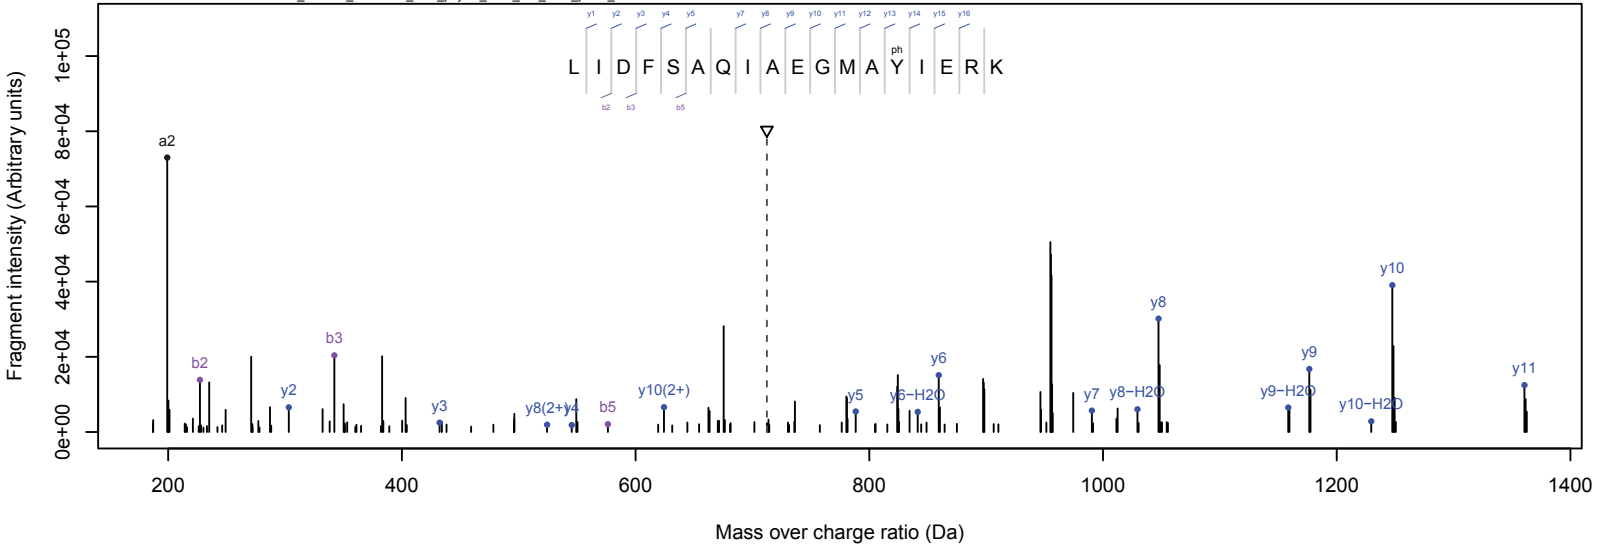

QASSFDNGPY LGPPHSR-3+

Source : QE1\_140908\_OPL1013\_CvA\_pTyrIP\_AML\_HEL Scan : 32463

Andromeda score : 102.89

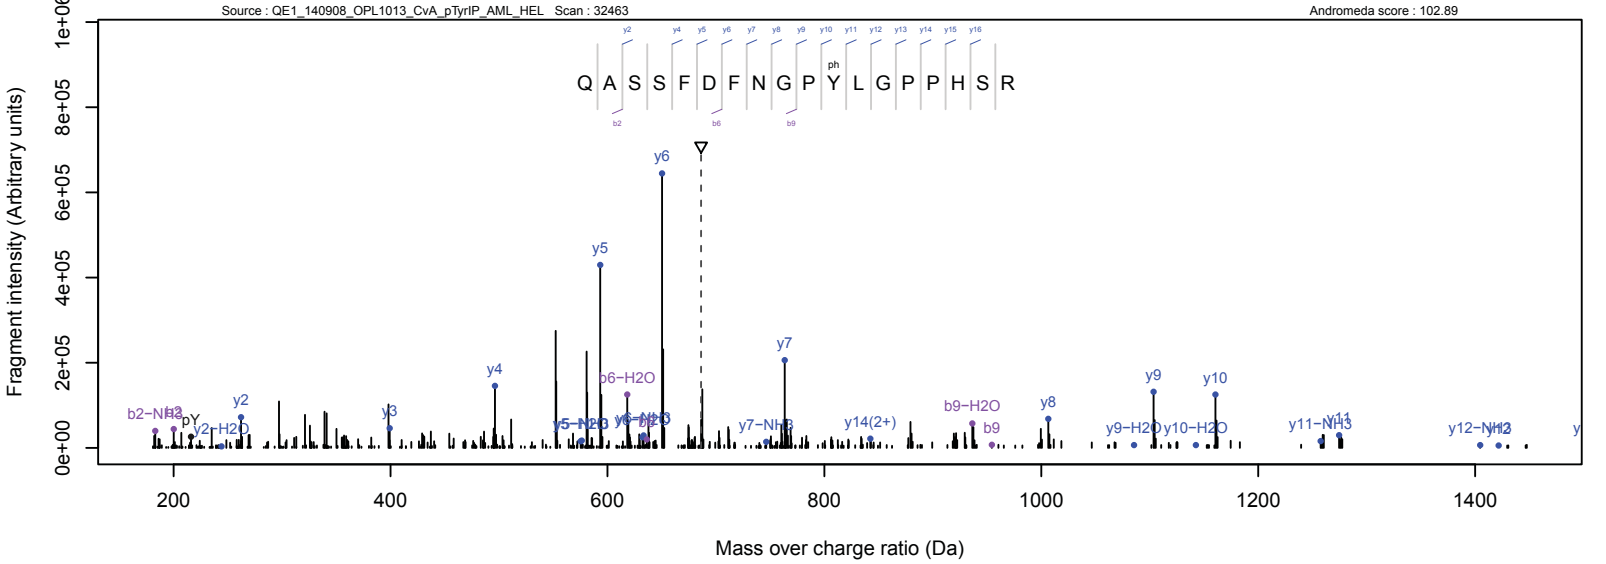

ALPQNDDHY VMQEH RK-4+

Source : QE1\_140612\_OPL1013\_CVA\_phosphoproteomic\_landscape\_AML\_E Scan : 9705

Andromeda score : 102.65

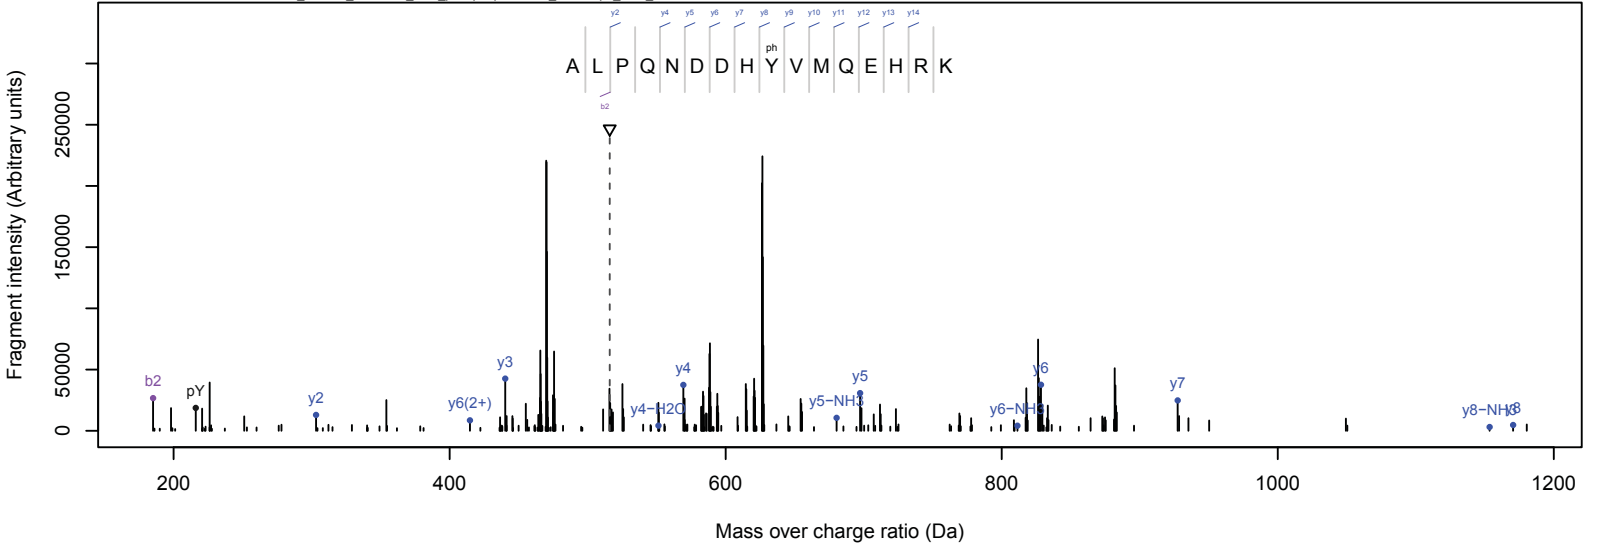

FIHNSHDLTY(ph)FAYLIK-3+

Source : QE1\_140612\_OPL1013\_CVA\_phosphoproteomic\_landscape\_AML\_D Scan : 43855

Andromeda score : 102.65

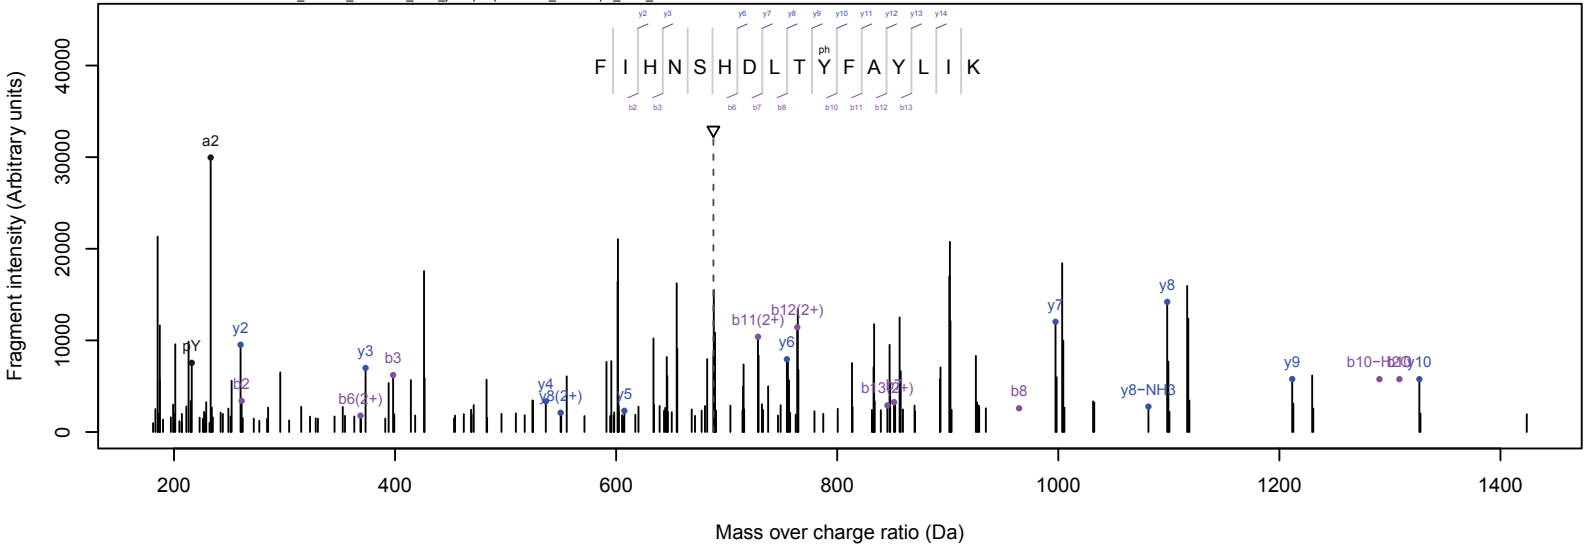

Y(ph)TEFYHVPHTSDASK-3+

Source : QE1\_140612\_OPL1013\_CVA\_phosphoproteomic\_landscape\_AML\_C Scan : 15176

Andromeda score : 102.65

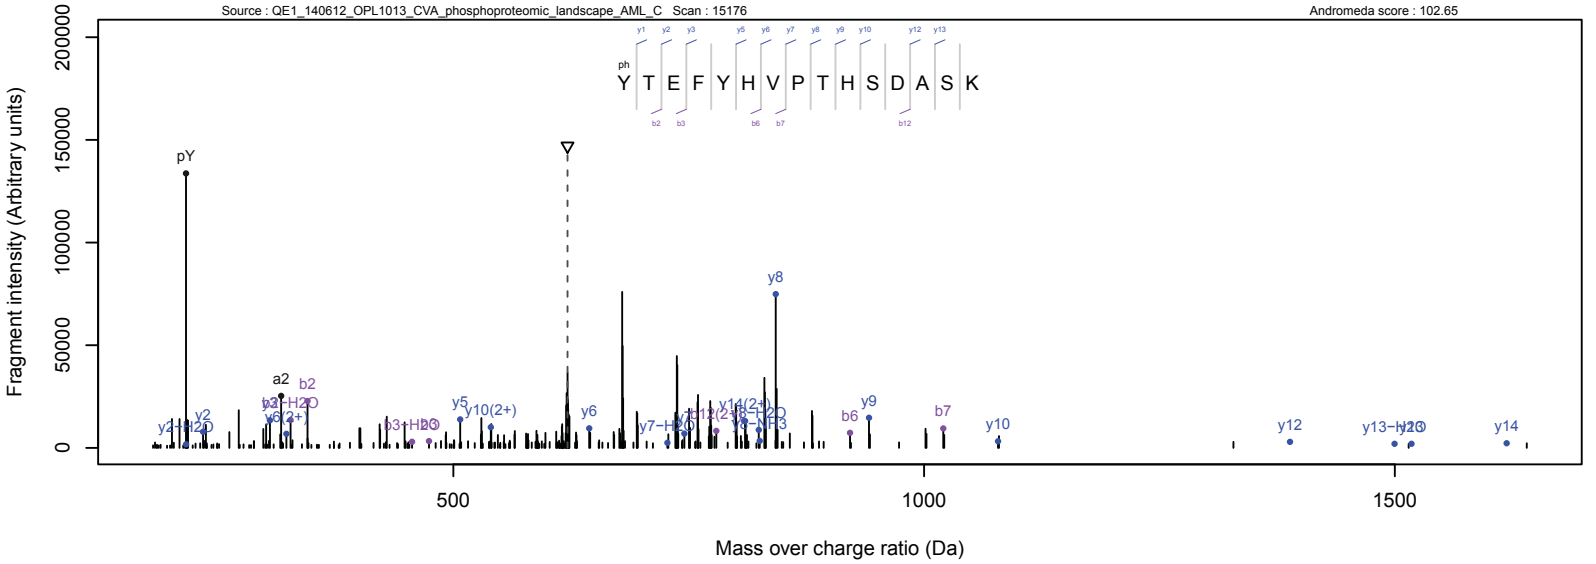

Y(ph)VDPVISKR-2+

Source : QE1\_140612\_OPL1013\_CVA\_phosphoproteomic\_landscape\_AML\_C Scan : 10114

Andromeda score : 102.55

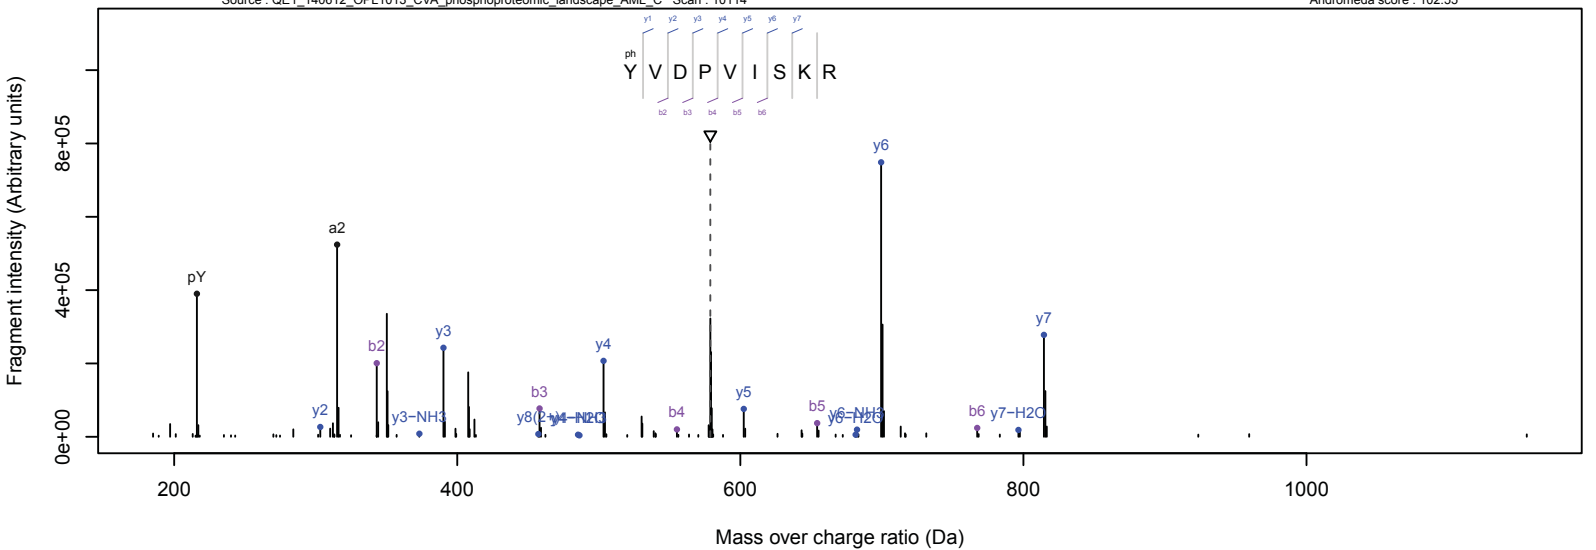

**QHY(ph)QMIQREDQETA V-3+**

Source : QE1\_140612\_OPL1013\_CVA\_phosphoproteomic\_landscape\_AML\_C Scan : 13693

Andromeda score : 102.52

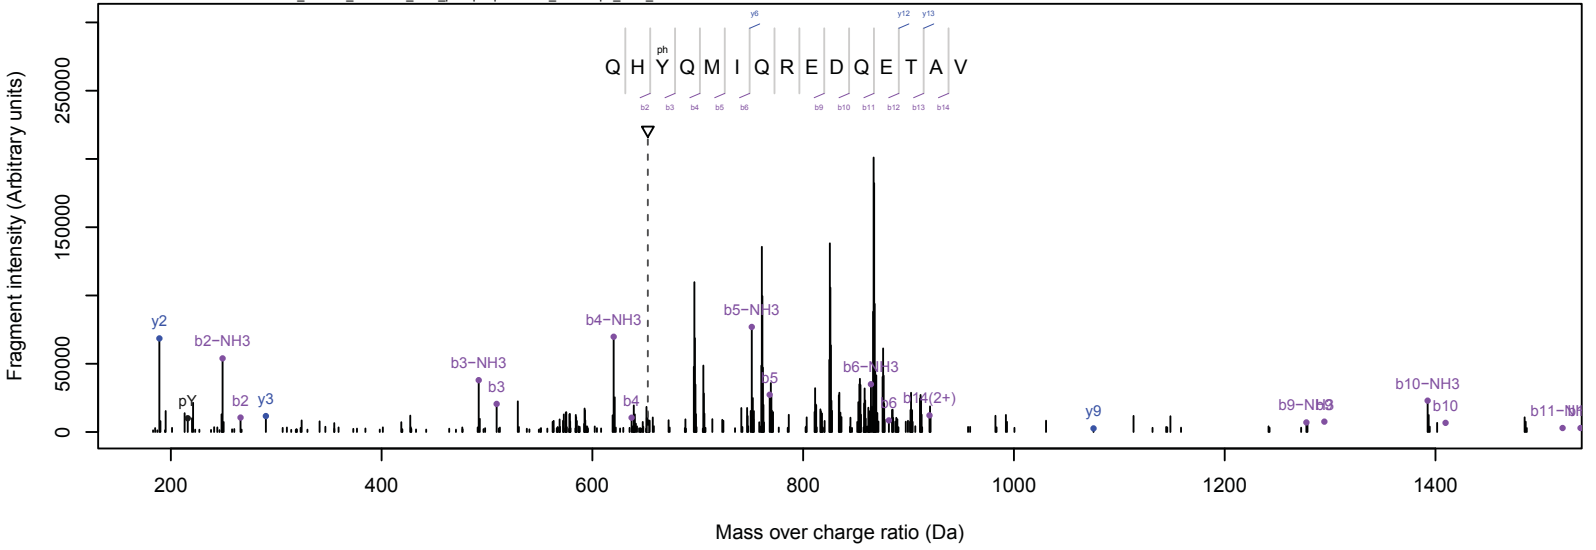

**SKEYDRLY(ph)EEYTR-3+**

Source : QE1\_140908\_OPL1013\_CvA\_pTyrIP\_AML\_Kasumi1 Scan : 16248

Andromeda score : 102.52

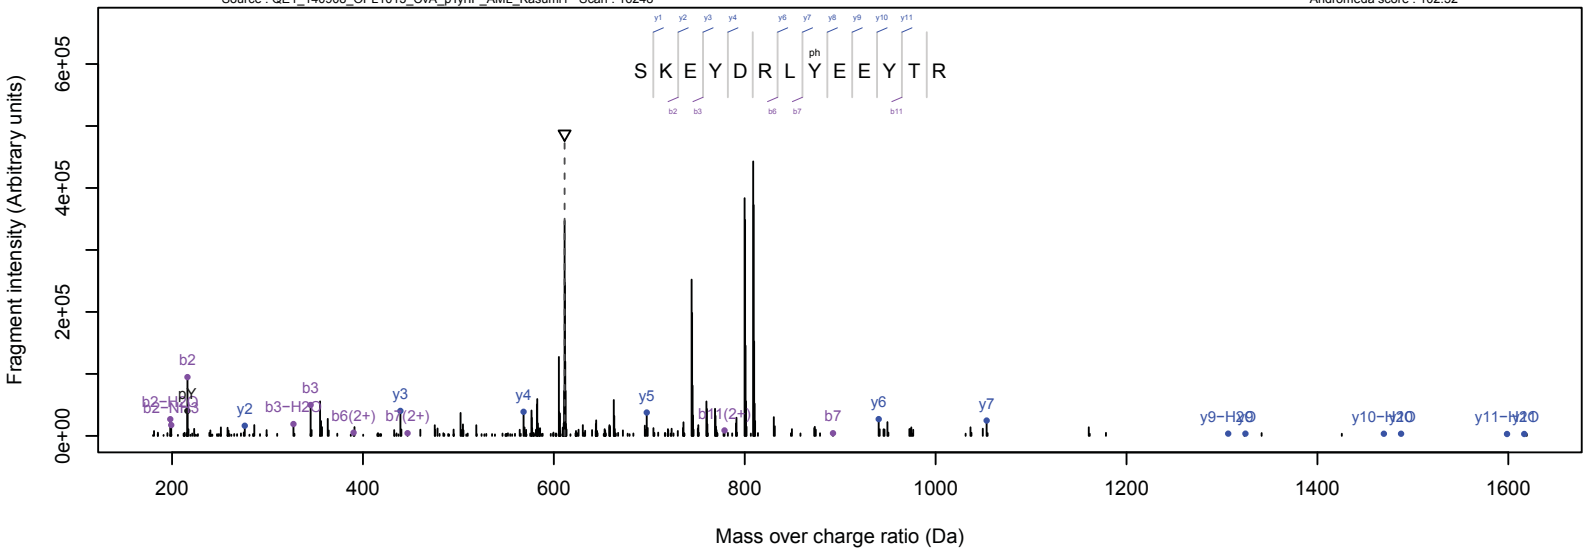

**STTTGHLIY(ph)K-2+**

Source : QE1\_140822\_OPL1013\_CvA\_pTyrIP\_AML\_cell\_lines\_part2\_F Scan : 5966

Andromeda score : 102.52

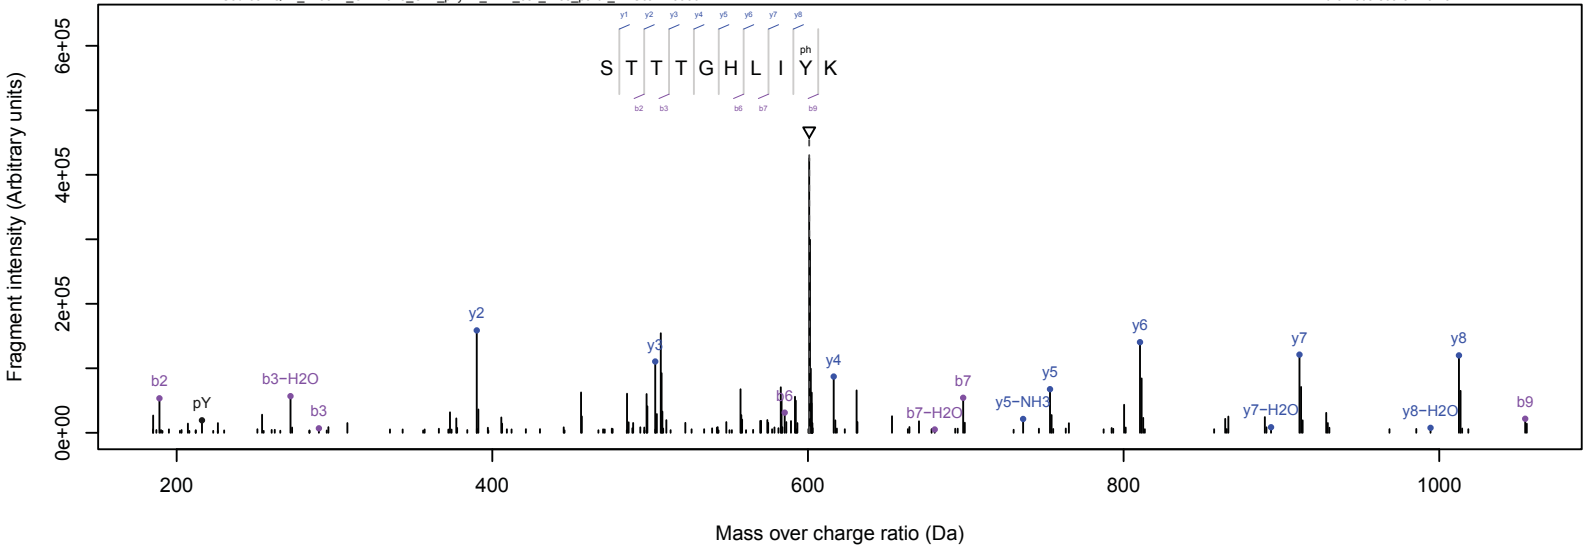



QLSSHFIY(ph)PFSLR-3+

Source : QE1\_140908\_OPL1013\_CvA\_pTyrIP\_AML\_Kasumi1 Scan : 40245

Andromeda score : 102.5

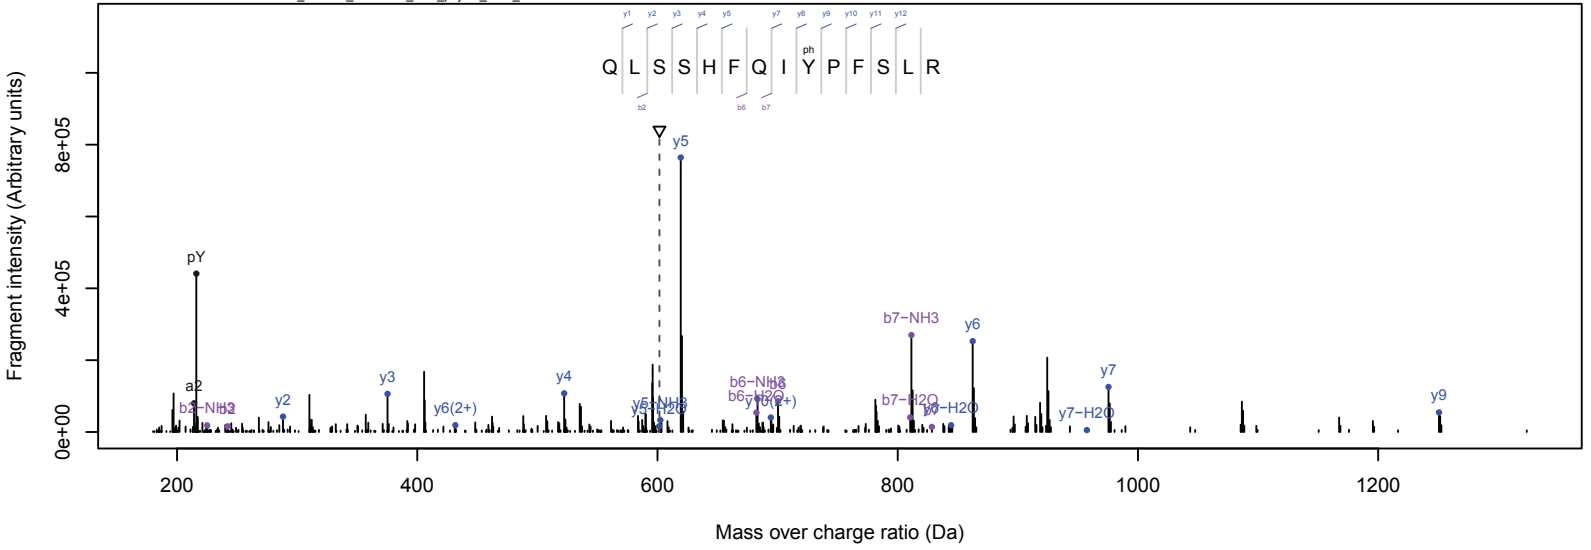

KGGS(ph)YSQAASSDSAQGS DVS LTACKV-3+

Source : QE1\_140822\_OPL1013\_CvA\_pTyrIP\_AML\_cell\_lines\_part2\_F Scan : 13329

Andromeda score : 102.46

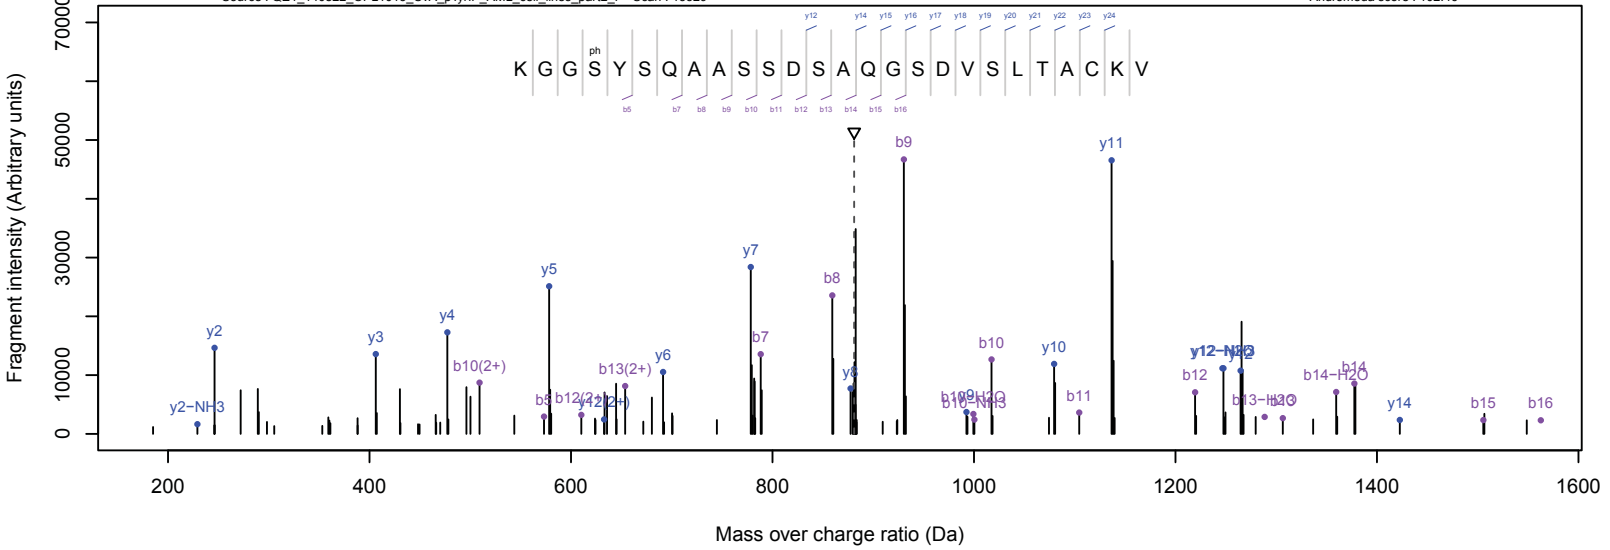

Y(ph)KDILPFDHSR-3+

Source : QE1\_140612\_OPL1013\_CvA\_phosphoproteomic\_landscape\_AML\_C Scan : 22646

Andromeda score : 102.46

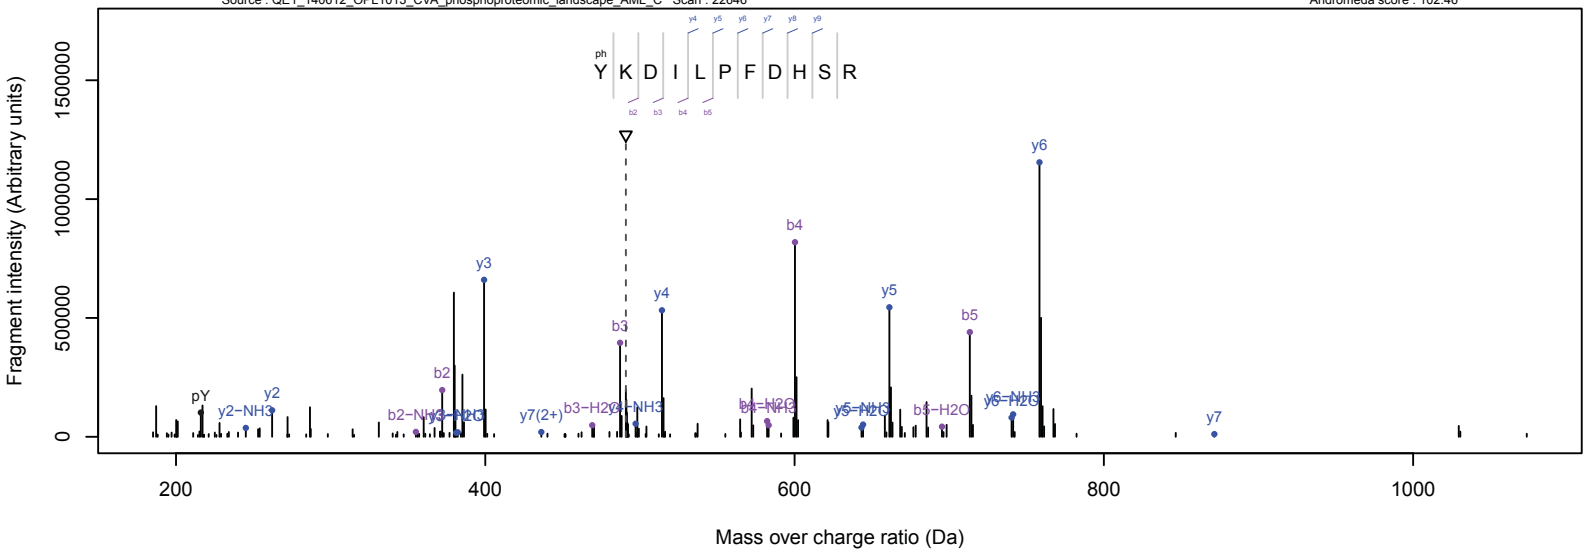

(ac)TQEPFREELAY(ph)DRMPTLER-3+

Source : QE1\_140908\_OPL1013\_CVA\_pTyrIP\_AML\_Kasumi1 Scan : 37401

Andromeda score : 102.45

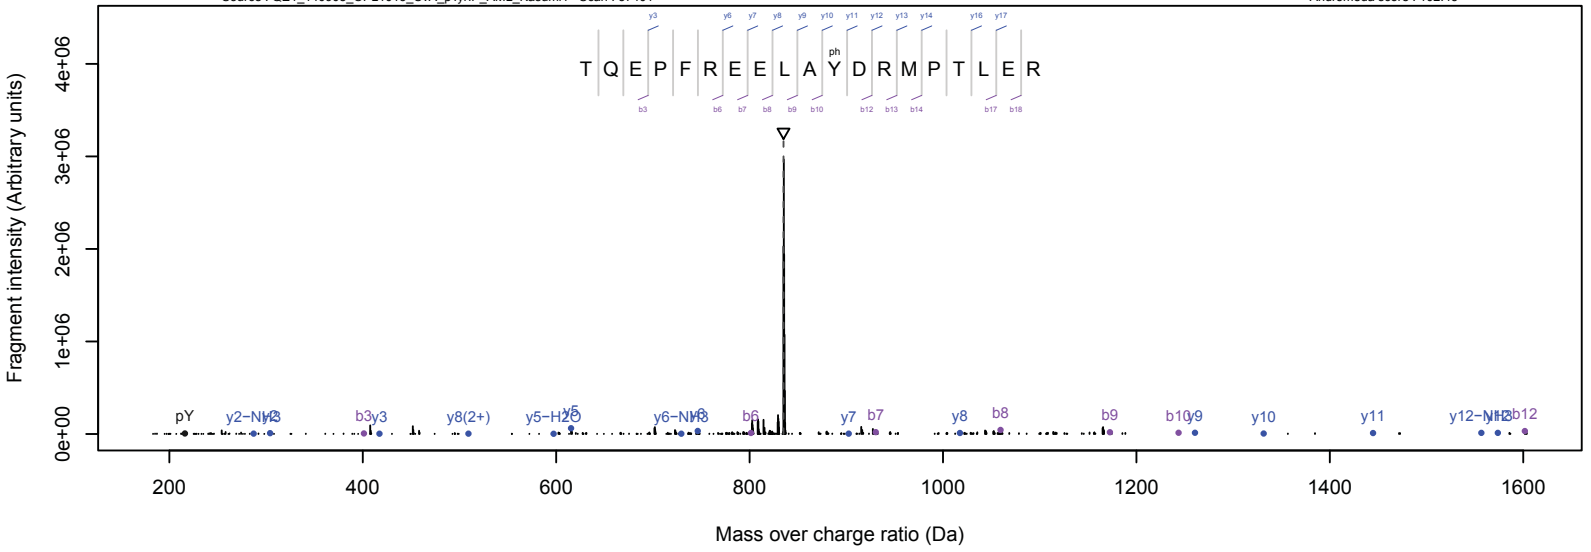

LFGYEPTIYYPK-2+

Source : QE1\_140612\_OPL1013\_CVA\_phosphoproteomic\_landscape\_AML\_D Scan : 40133

Andromeda score : 102.4

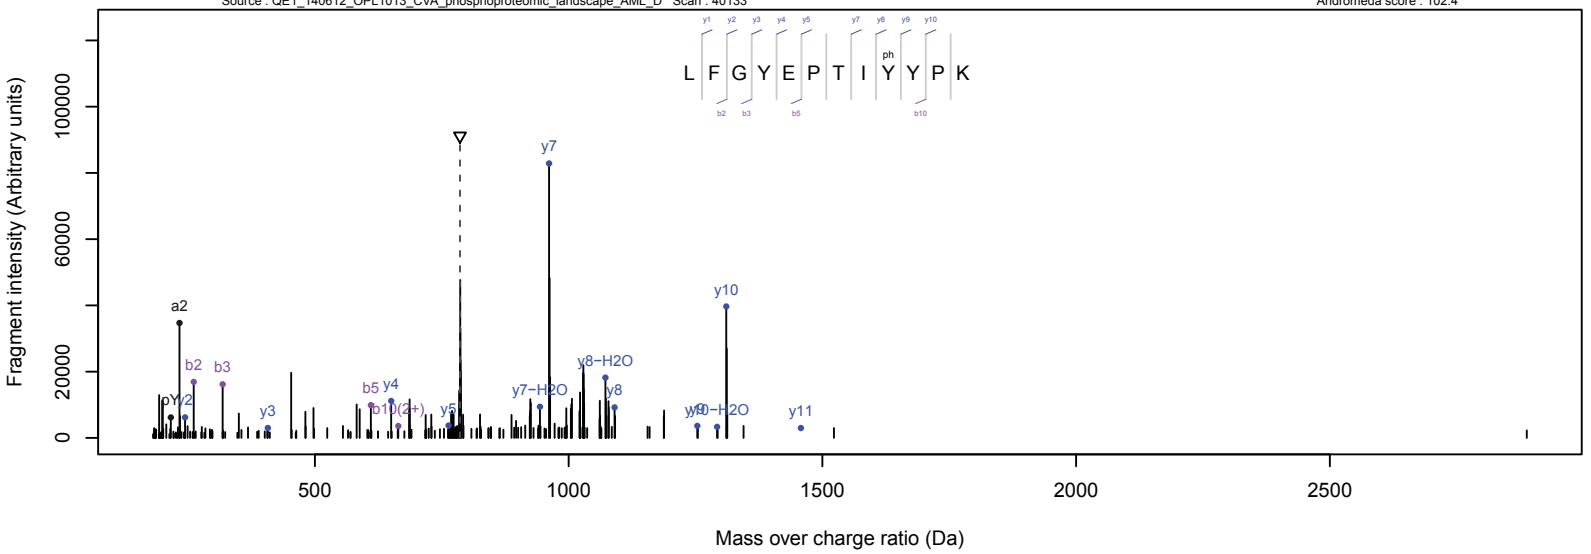

KQPY(ph)YPPFDKIIEK-2+

Source : QE1\_140612\_OPL1013\_CVA\_phosphoproteomic\_landscape\_AML\_A Scan : 33337

Andromeda score : 102.39

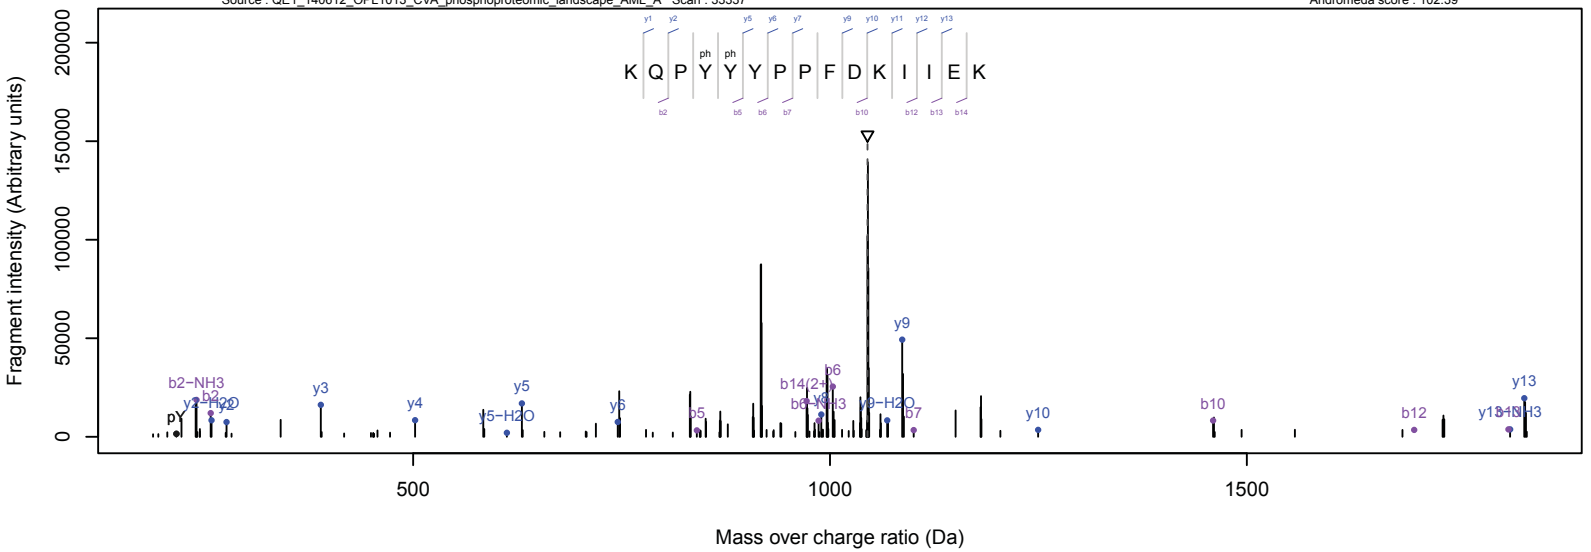

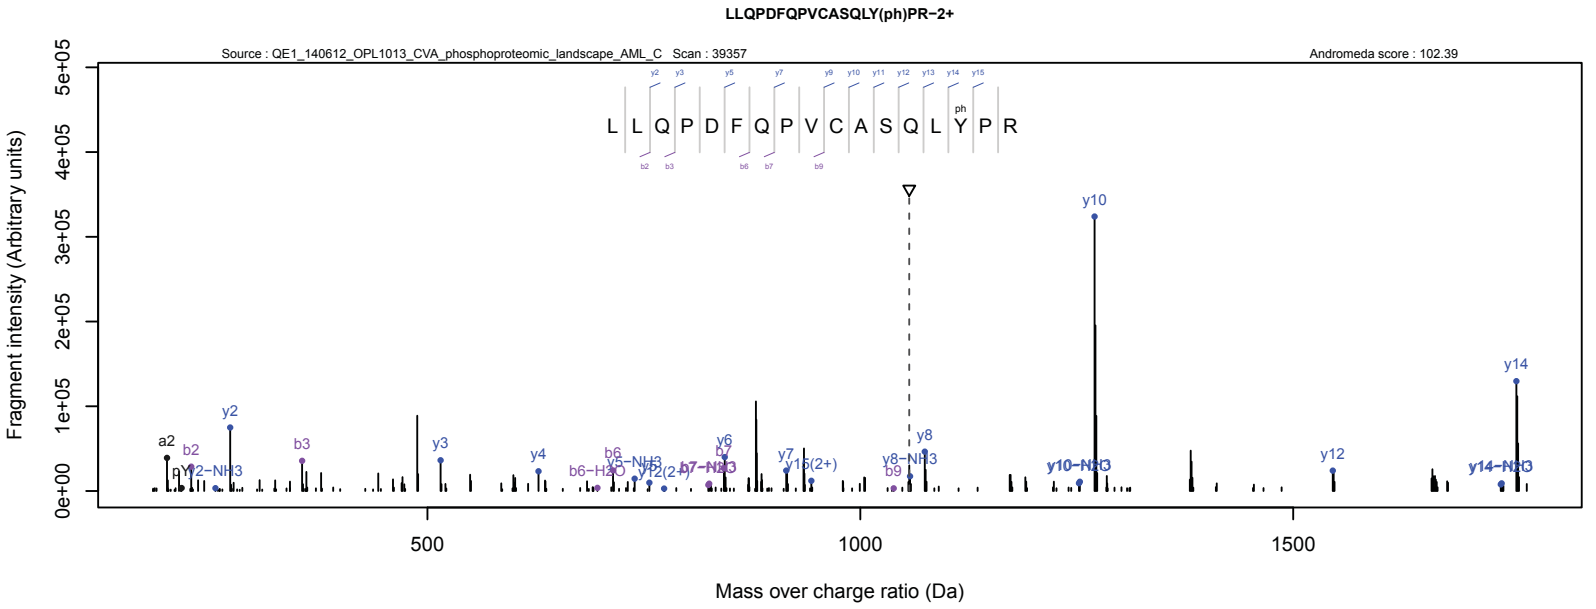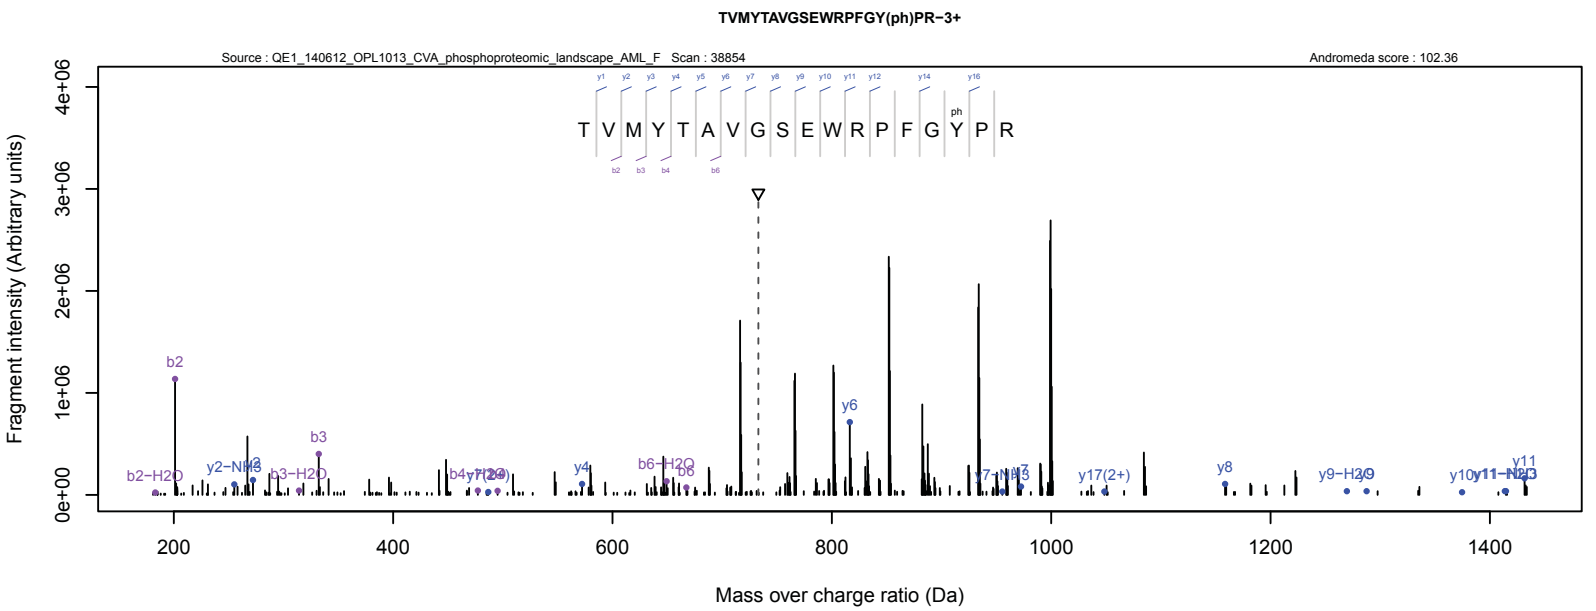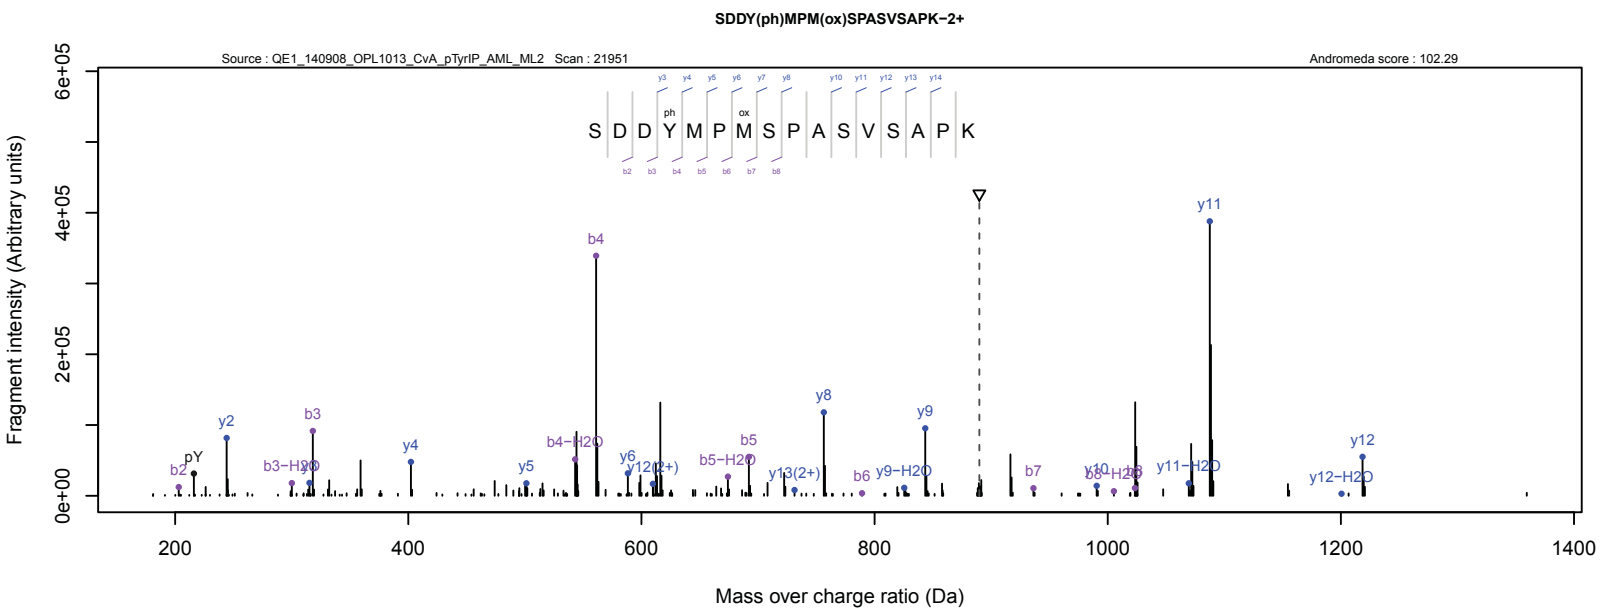

ISMPDVLHLKGNVKGEY(ph)DVTMPK-4+

Source : QE1\_140612\_OPL1013\_CVA\_phosphoproteomic\_landscape\_AML\_C Scan : 35791

Andromeda score : 102.21

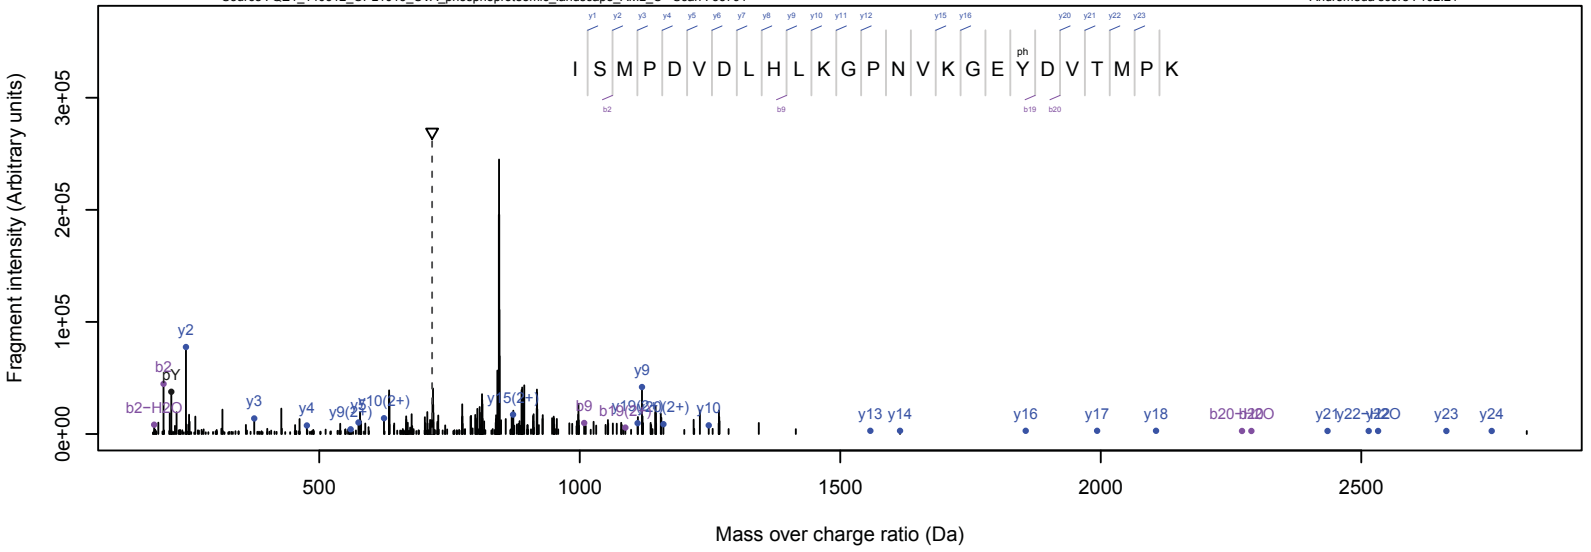

KSWTSSSLSDTYEPNY(ph)GTVK-3+

Source : QE1\_140612\_OPL1013\_CVA\_phosphoproteomic\_landscape\_AML\_B Scan : 21801

Andromeda score : 102.19

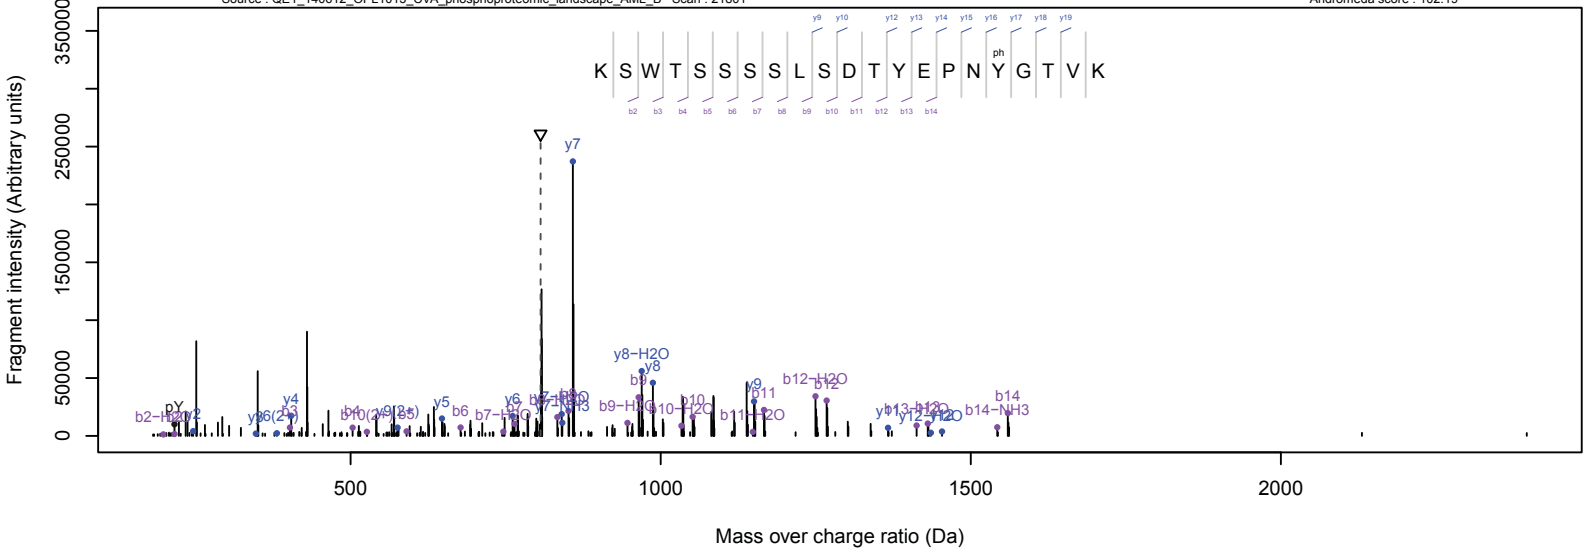

TACTNFM(ox)M(ox)TPY(ph)VVTR-2+

Source : QE1\_140908\_OPL1013\_CvA\_pTyrIP\_AML\_OCI\_AML3 Scan : 24451

Andromeda score : 102.15

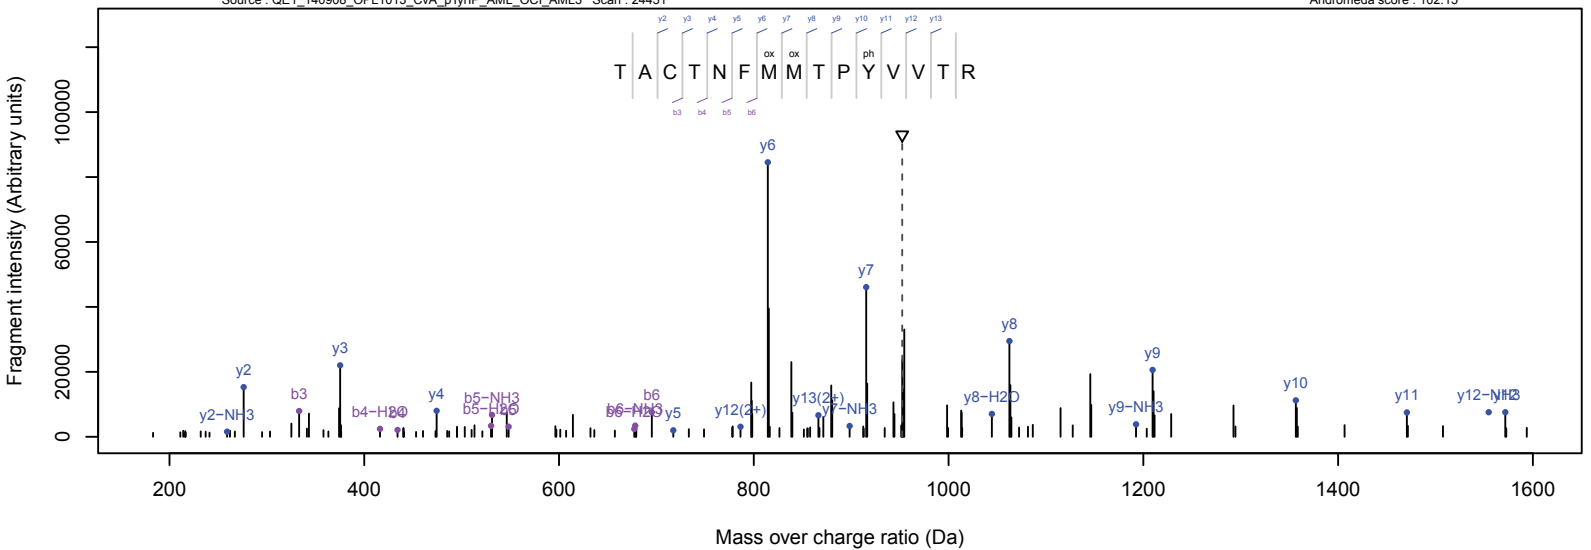

DSSDPNELYVNHKVYTR-3+

Source : QE1\_140908\_OPL1013\_CvA\_pTyrIP\_AML\_HL60 Scan : 17053

Andromeda score : 102.08

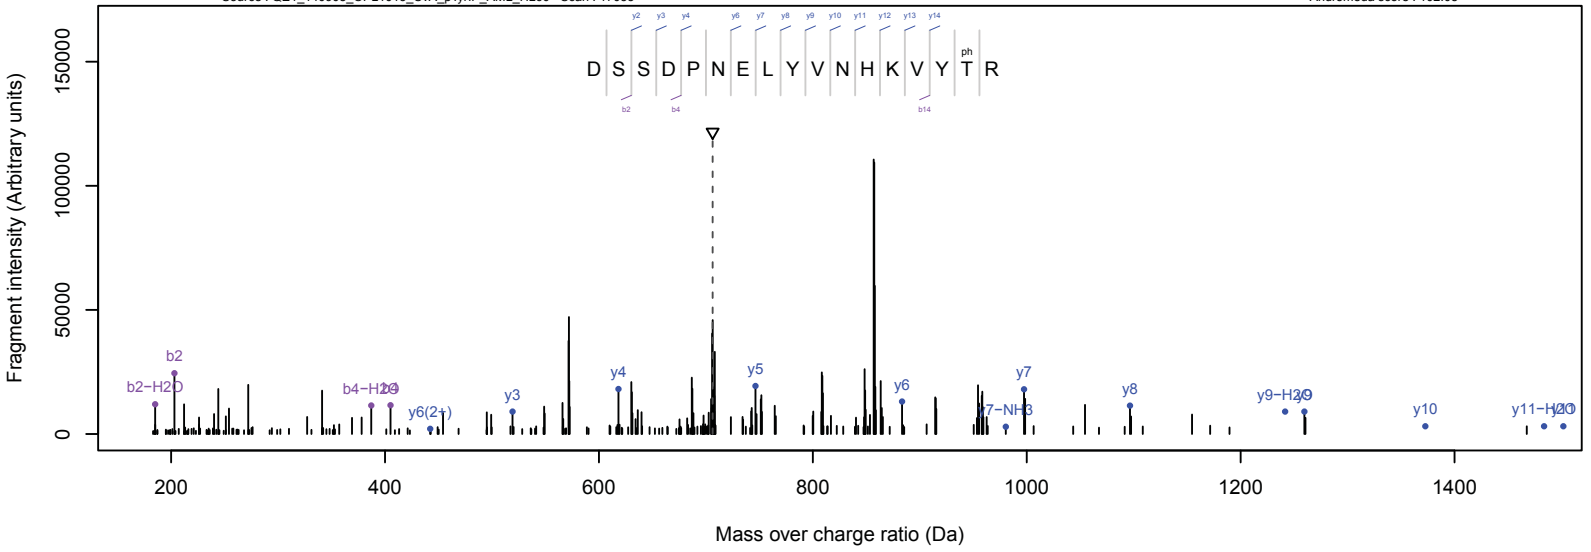

HVSPVT(ph)PPREVPIY(ph)ANR-3+

Source : QE1\_140612\_OPL1013\_CvA\_phosphoproteomic\_landscape\_AML\_C Scan : 24634

Andromeda score : 102.07

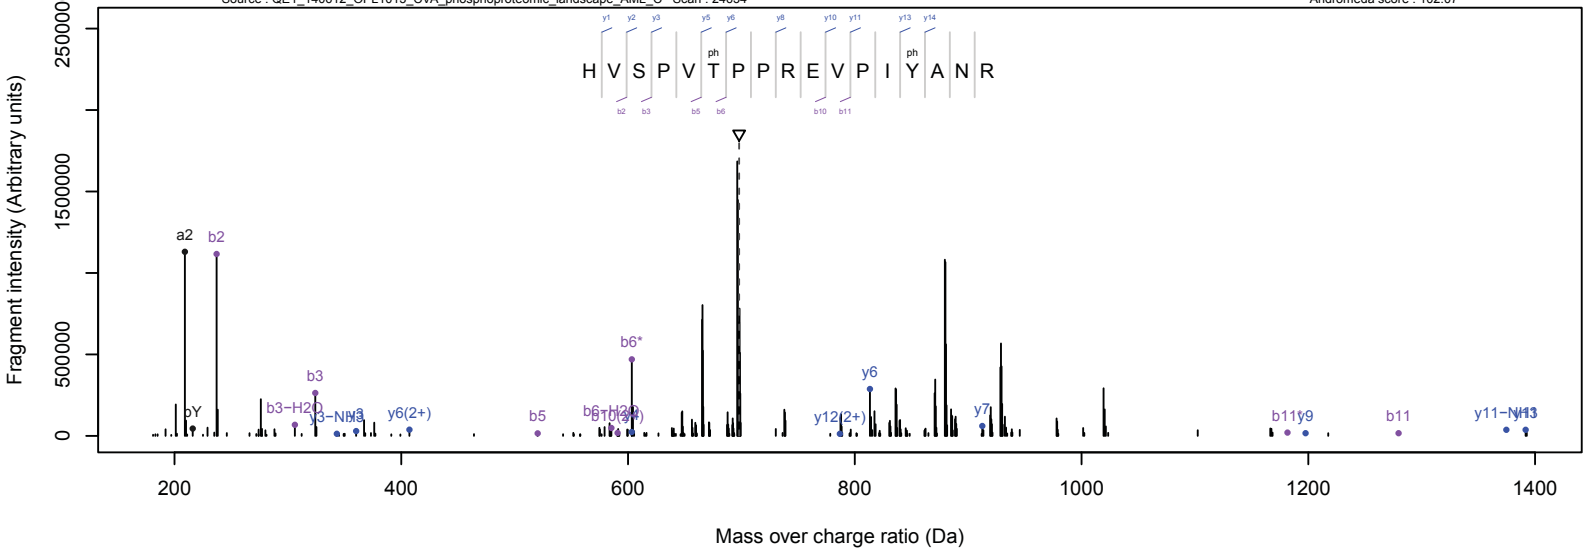

IIPGSEVKREEPEALYAAVNK-3+

Source : QE1\_140908\_OPL1013\_CvA\_pTyrIP\_AML\_HEL Scan : 28056

Andromeda score : 102.07

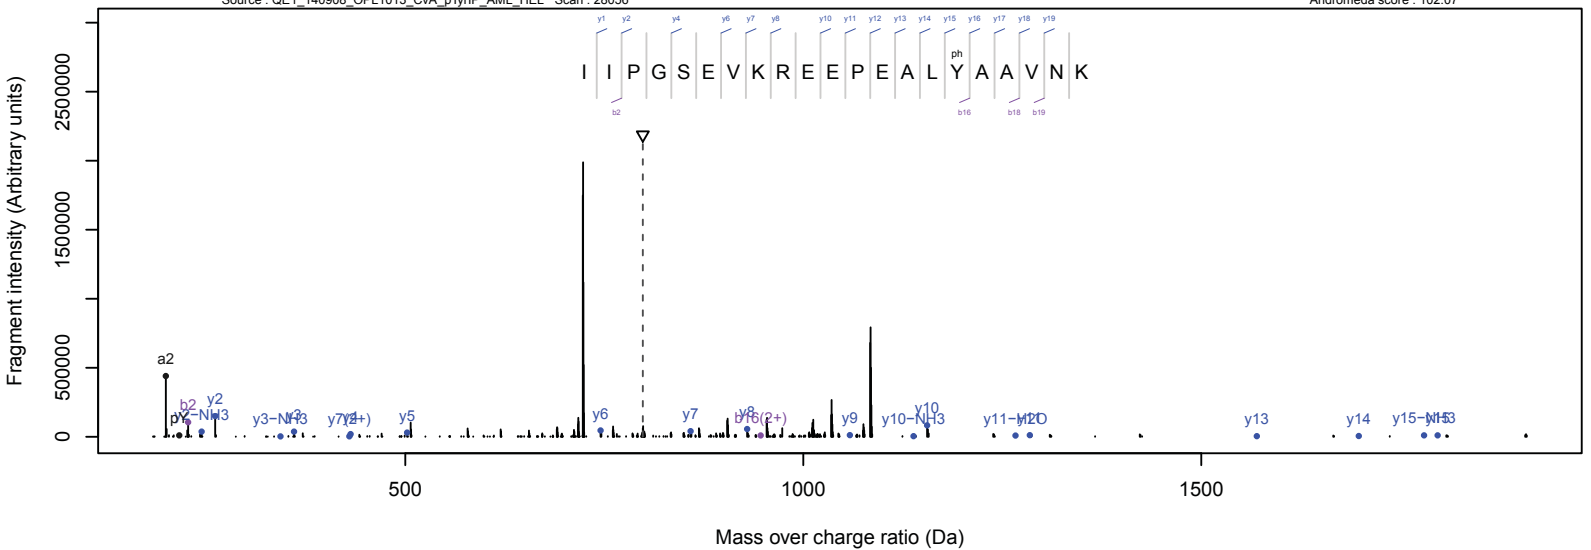

VMEGTVA A Q D E F Y R S G W A L N M K-3+

Source : QE1\_140612\_OPL1013\_CVA\_phosphoproteomic\_landscape\_AML\_B Scan : 38545

Andromeda score : 102.07

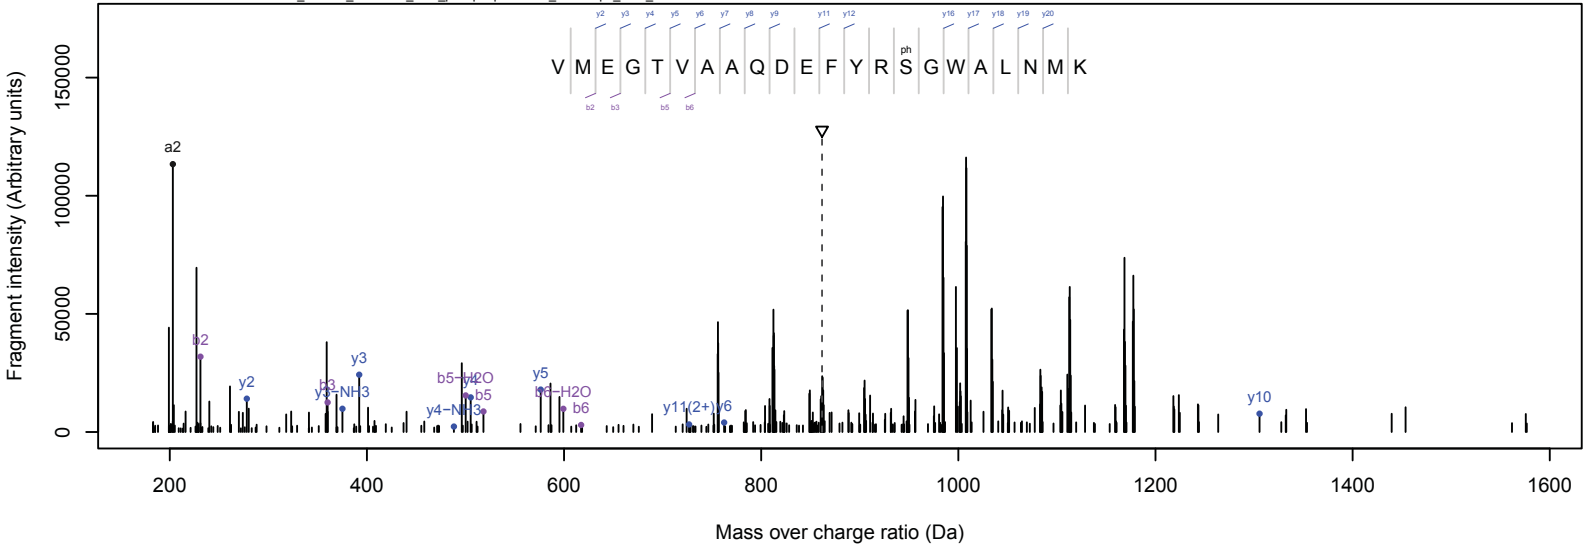

LFKNY(ph)QTLK-2+

Source : QE1\_140612\_OPL1013\_CVA\_phosphoproteomic\_landscape\_AML\_D Scan : 13812

Andromeda score : 102.06

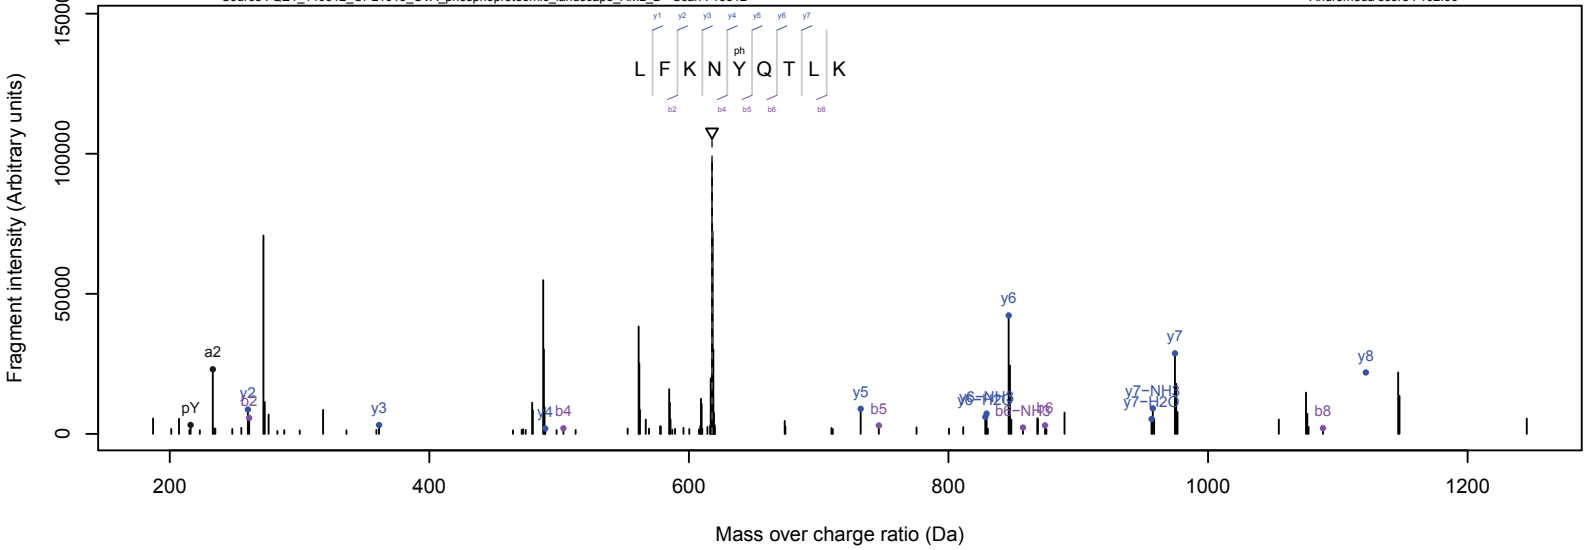

EFIESLQLKPGVVY(ph)KCPK-3+

Source : QE1\_140612\_OPL1013\_CVA\_phosphoproteomic\_landscape\_AML\_C Scan : 31751

Andromeda score : 102.03

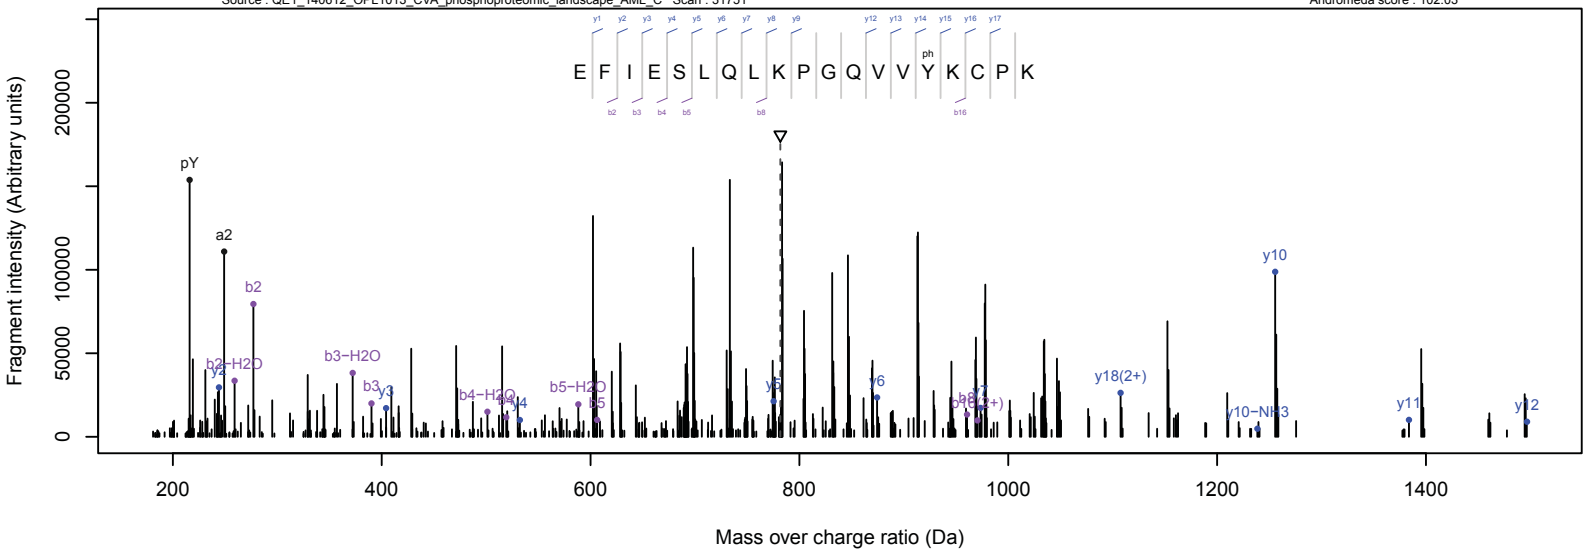

LNY(ph)QTPGMR-2+

Source : QE1\_140612\_OPL1013\_CVA\_phosphoproteomic\_landscape\_AML\_C Scan : 9775

Andromeda score : 102.01

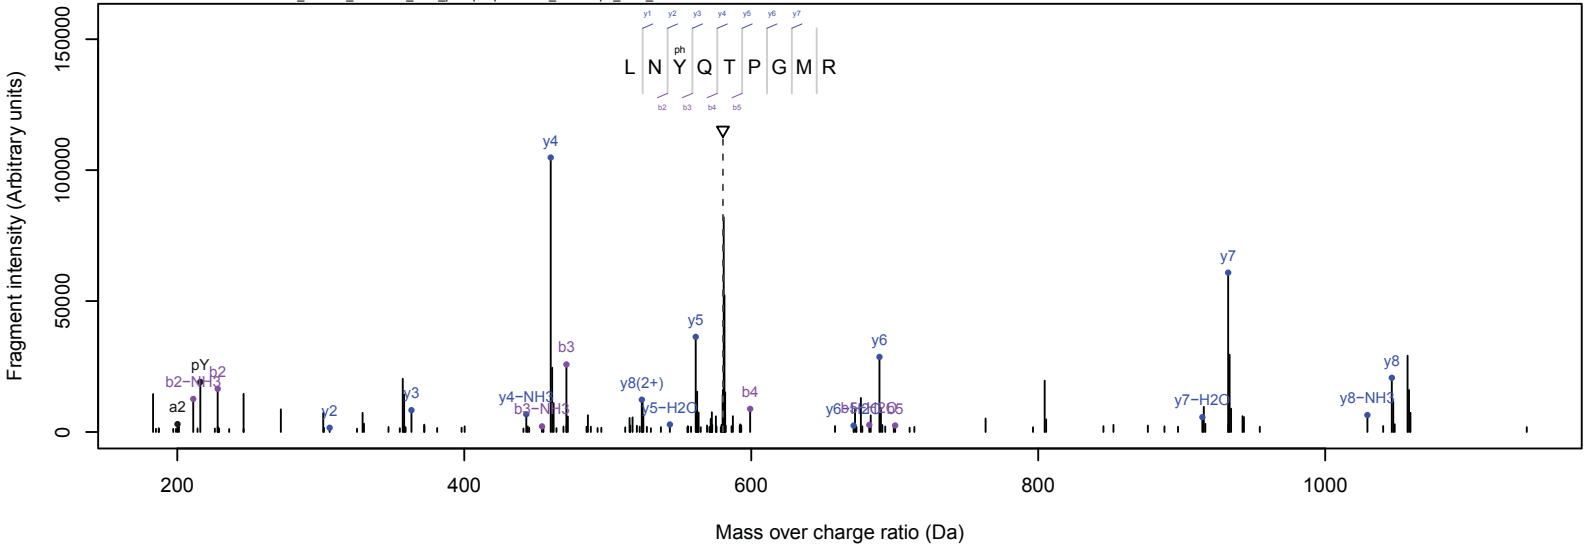

NLVMPDPNGLSDPY(ph)VKLK-2+

Source : QE1\_140612\_OPL1013\_CVA\_phosphoproteomic\_landscape\_AML\_C Scan : 37220

Andromeda score : 101.92

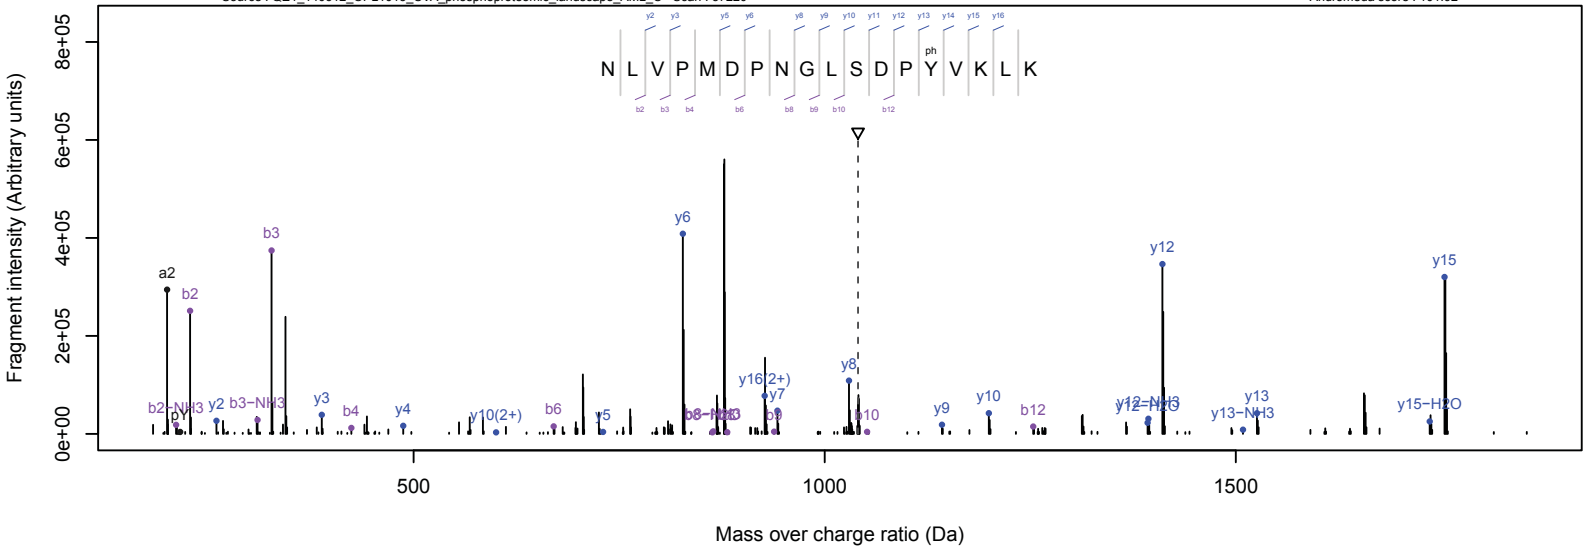

LIASY(ph)CNVGDIEGASK-2+

Source : QE1\_140612\_OPL1013\_CVA\_phosphoproteomic\_landscape\_AML\_E Scan : 24603

Andromeda score : 101.9

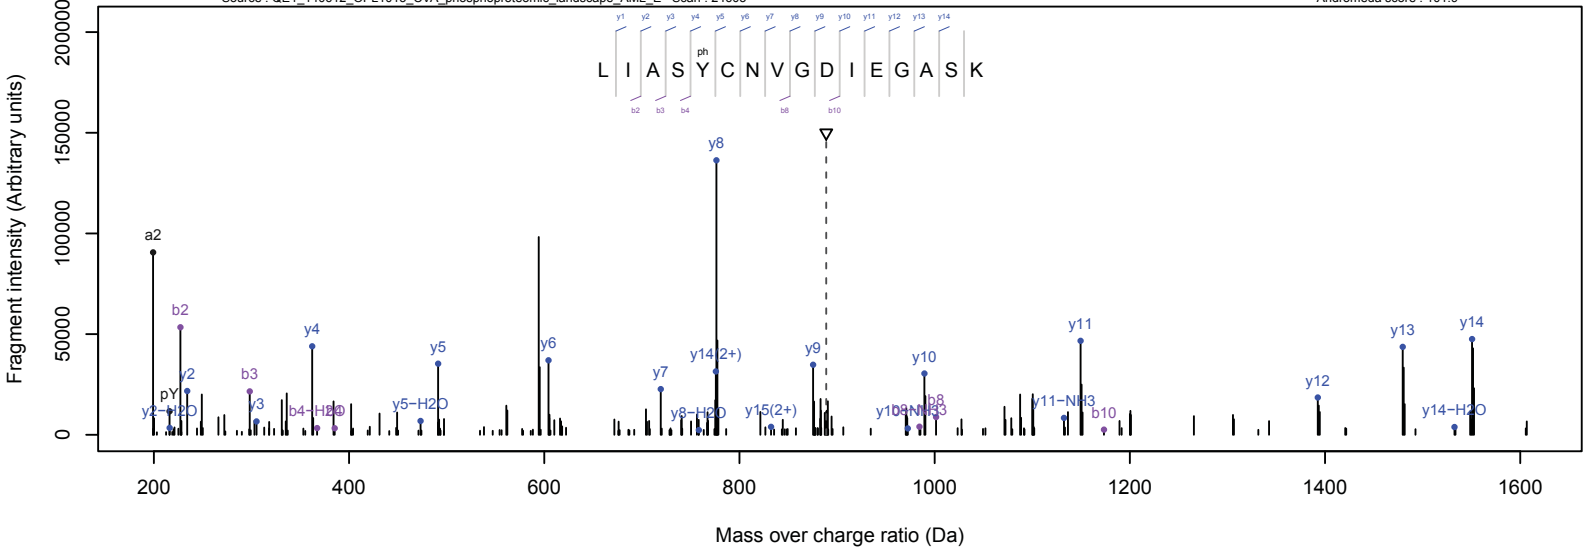

RHEM(ox)PPIHY(ph)AITDTAYR-4+

Source : QE1\_140908\_OPL1013\_CVA\_pTyrIP\_AML\_HEL Scan : 20164

Andromeda score : 101.9

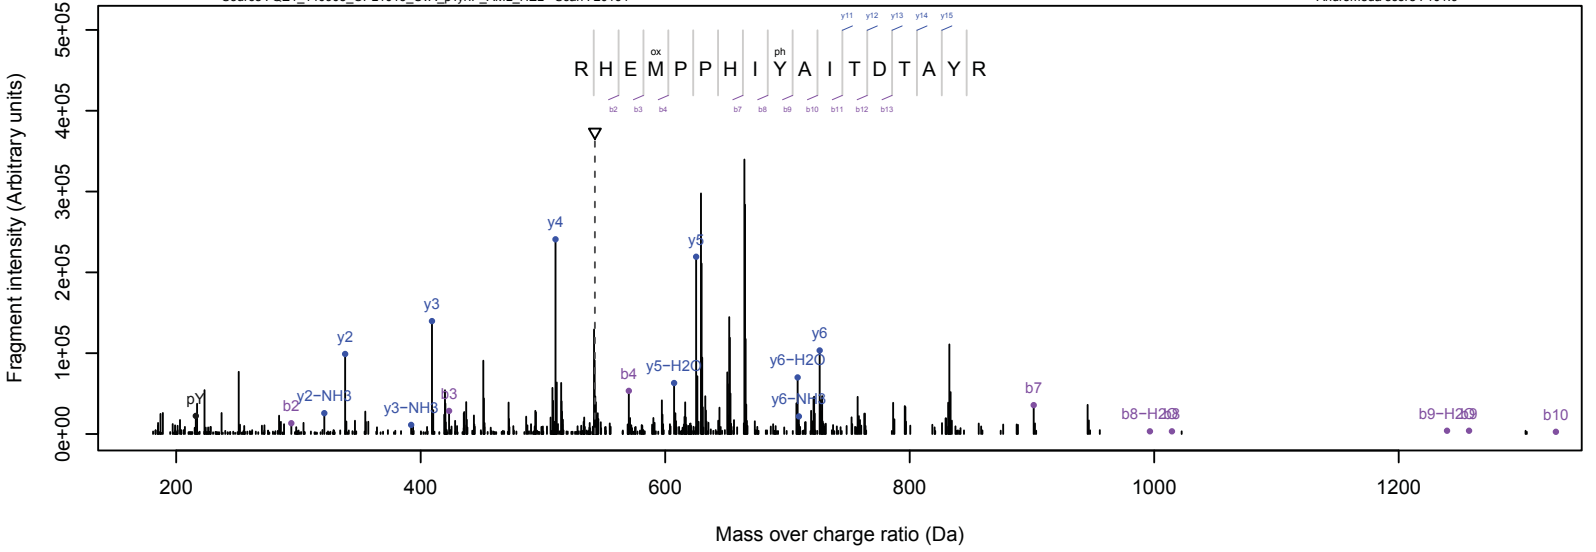

KRQLEETNNDYETADGGY(ph)MTLNPR-3+

Source : QE1\_140612\_OPL1013\_CVA\_phosphoproteomic\_landscape\_AML\_C Scan : 20076

Andromeda score : 101.85

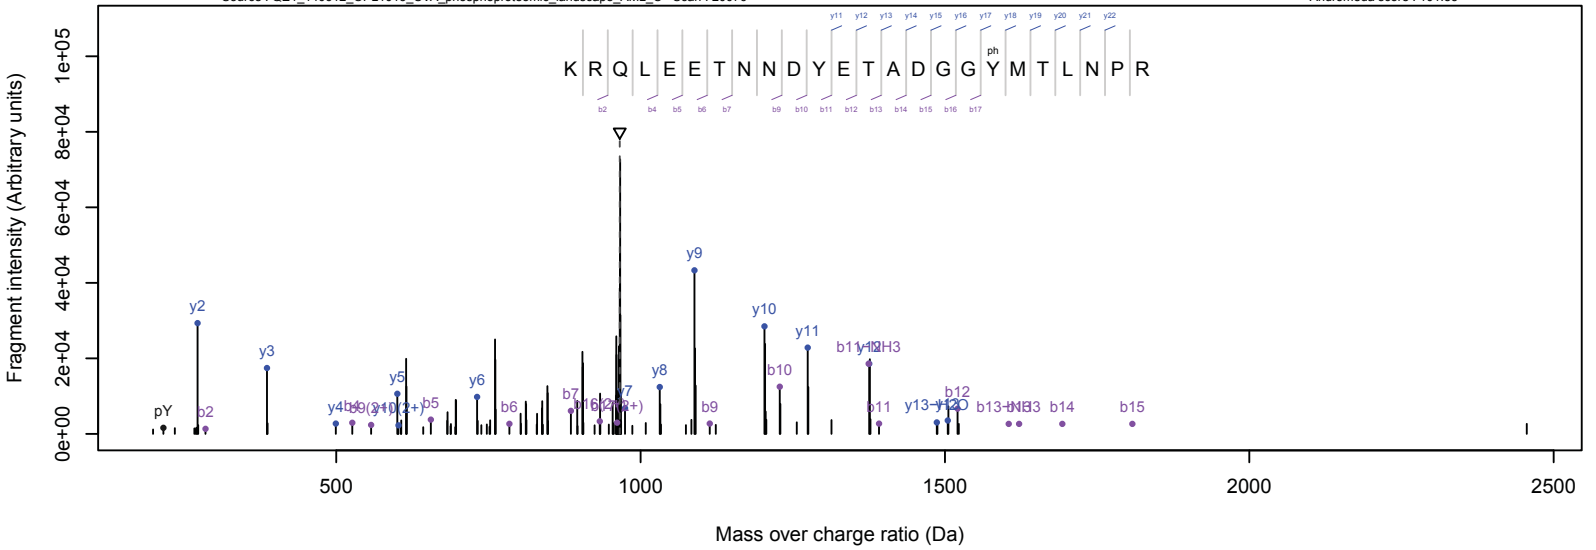

CLY(ph)MWPSVPDEKGE LLNPTGTVR-3+

Source : QE1\_140612\_OPL1013\_CVA\_phosphoproteomic\_landscape\_AML\_A Scan : 44302

Andromeda score : 101.75

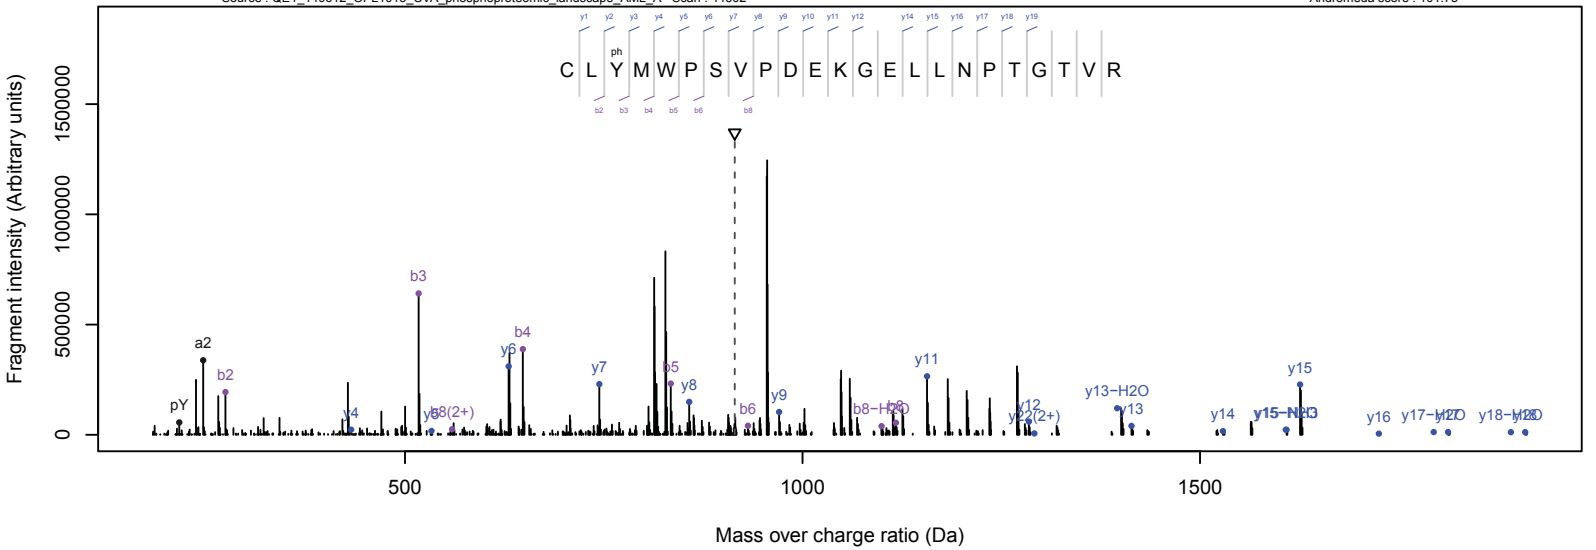



KLYGDADY(ph)LEER-2+

Source: QE1\_140612\_OPL1013\_CVA\_phosphoproteomic\_landscape\_AML\_B Scan: 18242

Andromeda score: 101.75

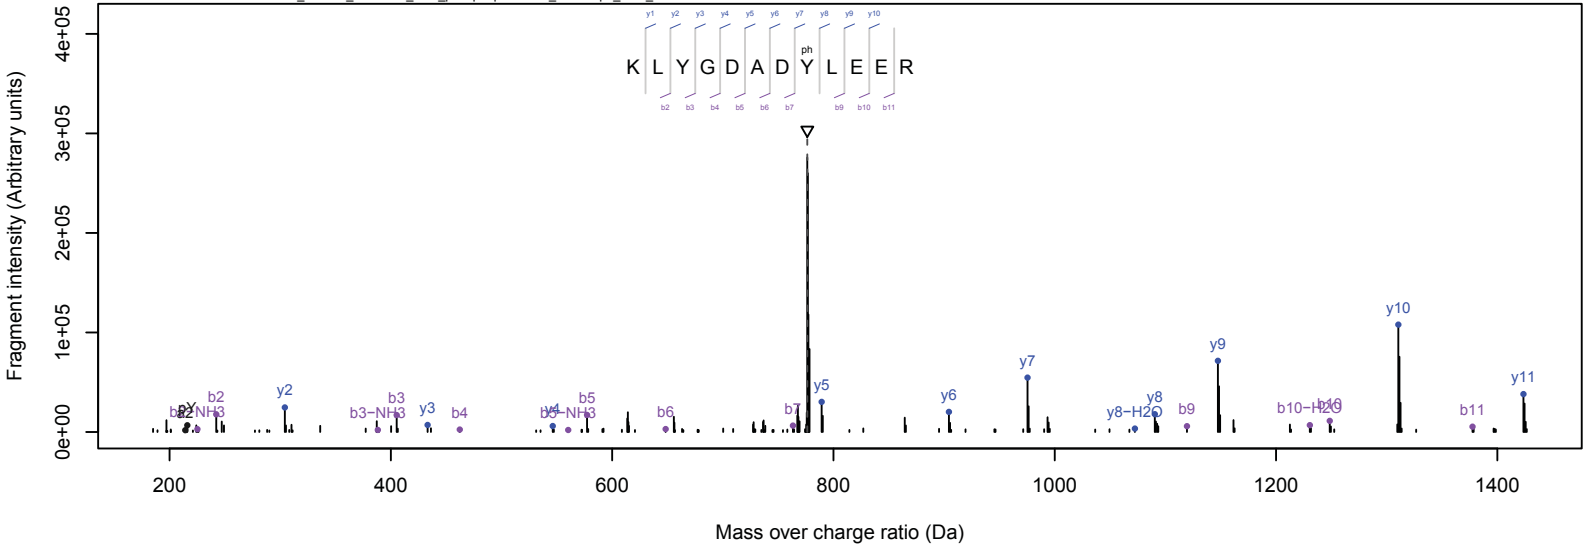

CSILAAANPAY(ph)GR-2+

Source: QE1\_140612\_OPL1013\_CVA\_phosphoproteomic\_landscape\_AML\_B Scan: 25427

Andromeda score: 101.72

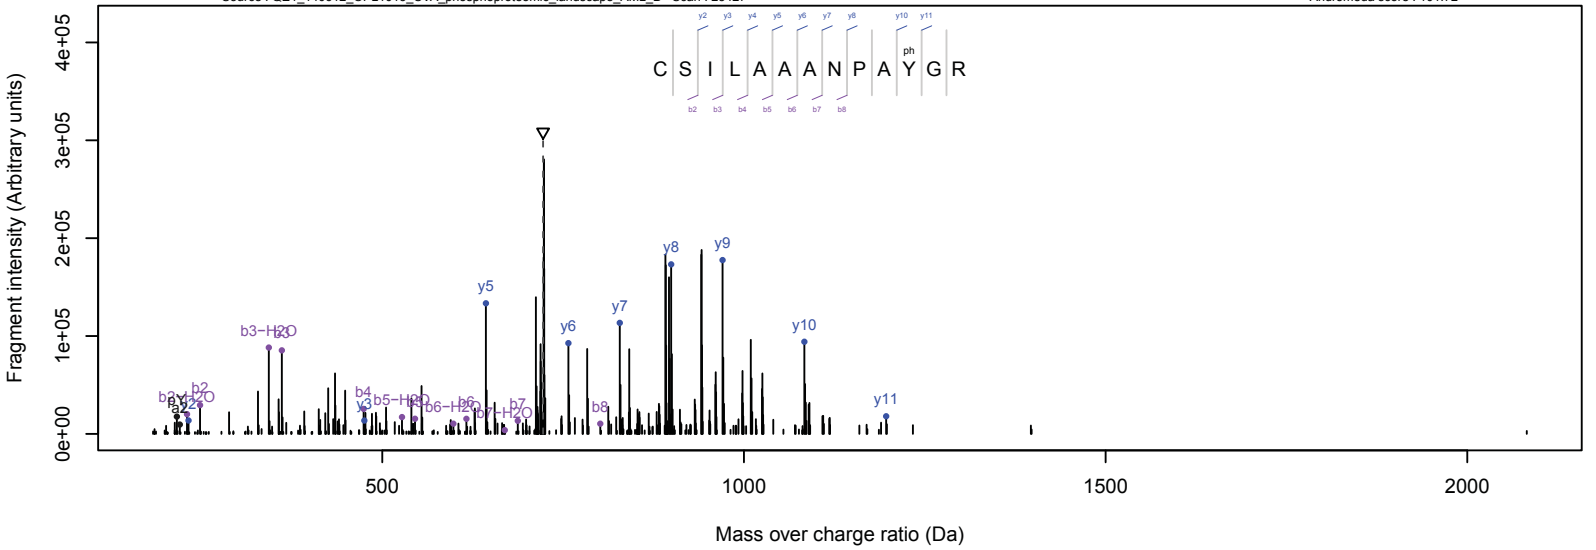

DYAPPPRDY(ph)YR-3+

Source: QE1\_140612\_OPL1013\_CVA\_phosphoproteomic\_landscape\_AML\_C Scan: 11291

Andromeda score: 101.71

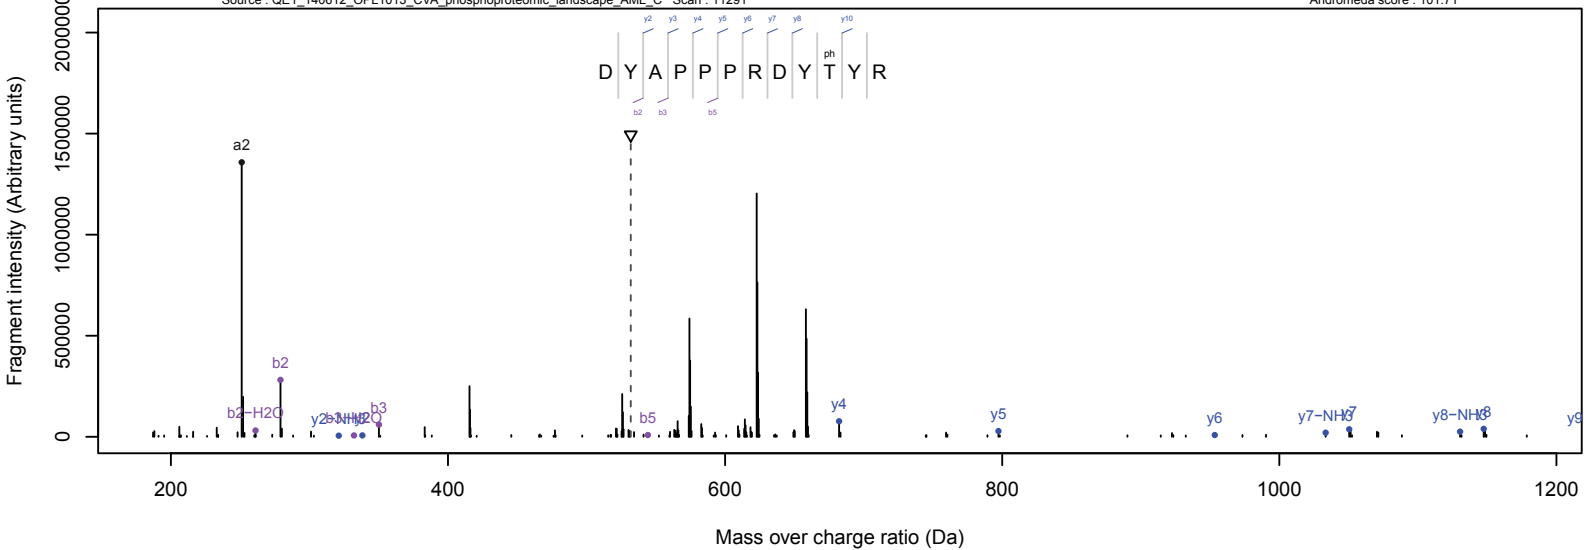

IY(ph)DEILQSK-2+

Source : Qe1\_141024\_OPL1013\_CvA\_AML\_pTyrIP\_MOLM13 Scan : 22166

Andromeda score : 101.66

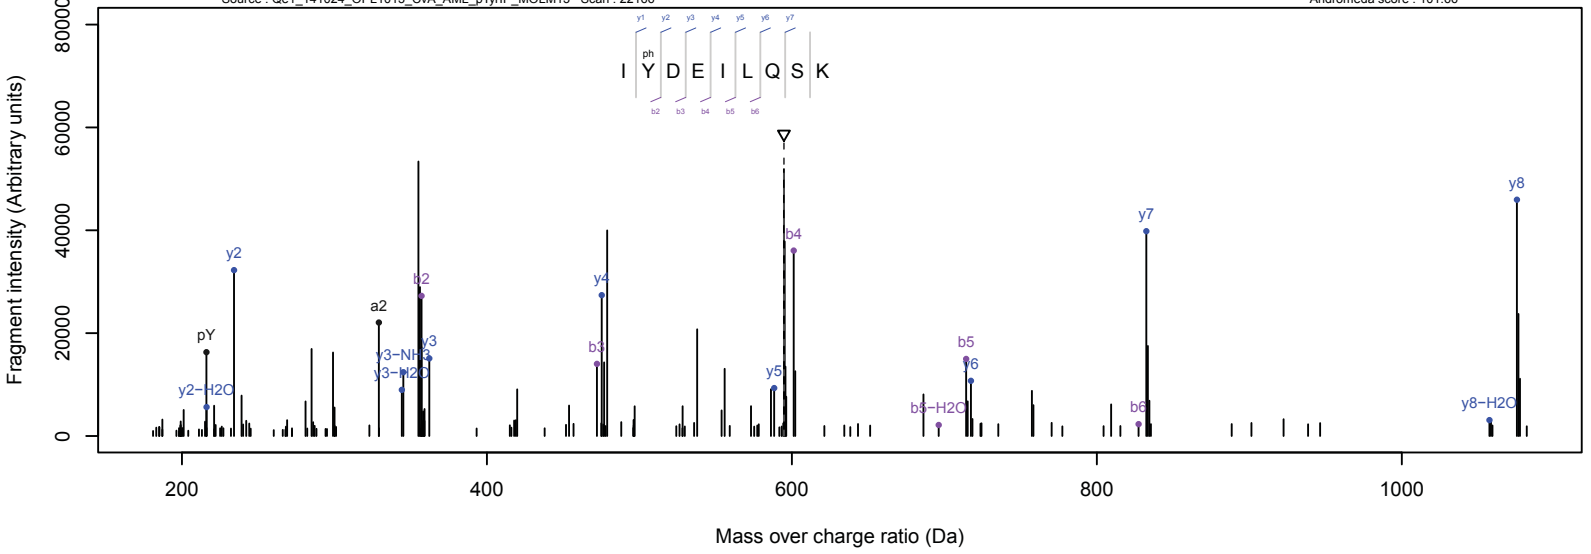

KLQEY(ph)LAAK-2+

Source : QE1\_140612\_OPL1013\_CVA\_phosphoproteomic\_landscape\_AML\_C Scan : 11146

Andromeda score : 101.66

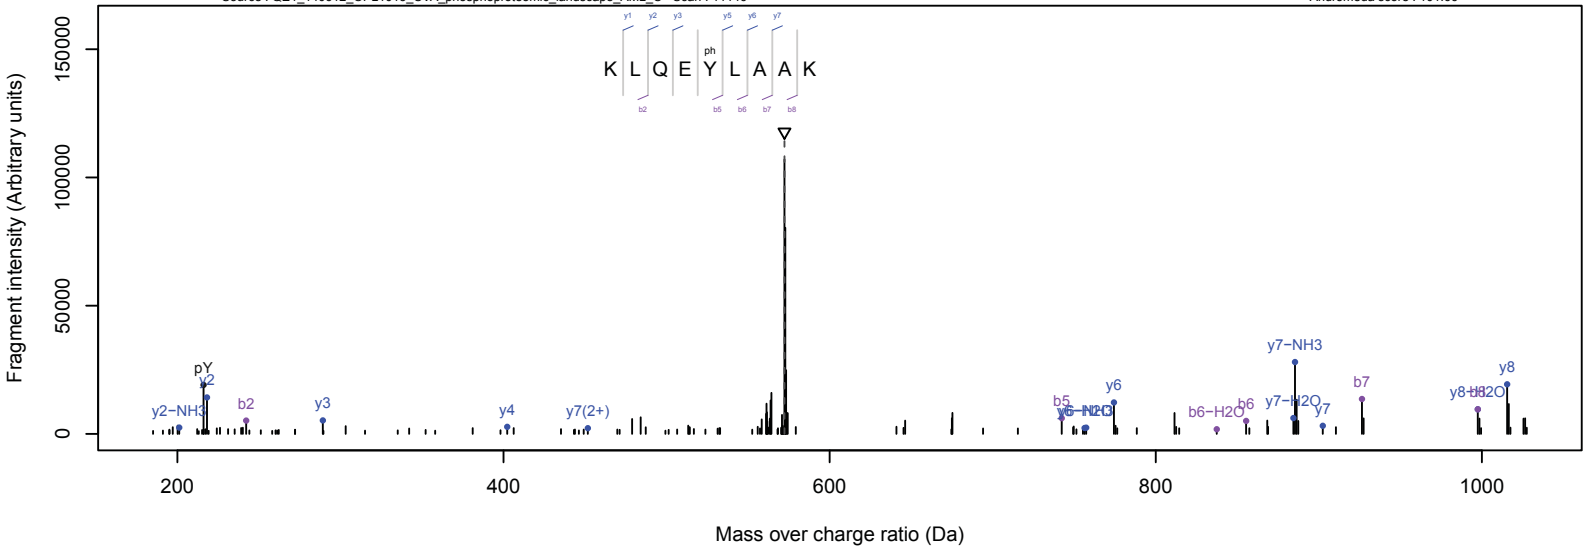

LEGEVTPNSLSTYSKTVSLPLSSPNIK-3+

Source : QE1\_140612\_OPL1013\_CVA\_phosphoproteomic\_landscape\_AML\_C Scan : 37874

Andromeda score : 101.66

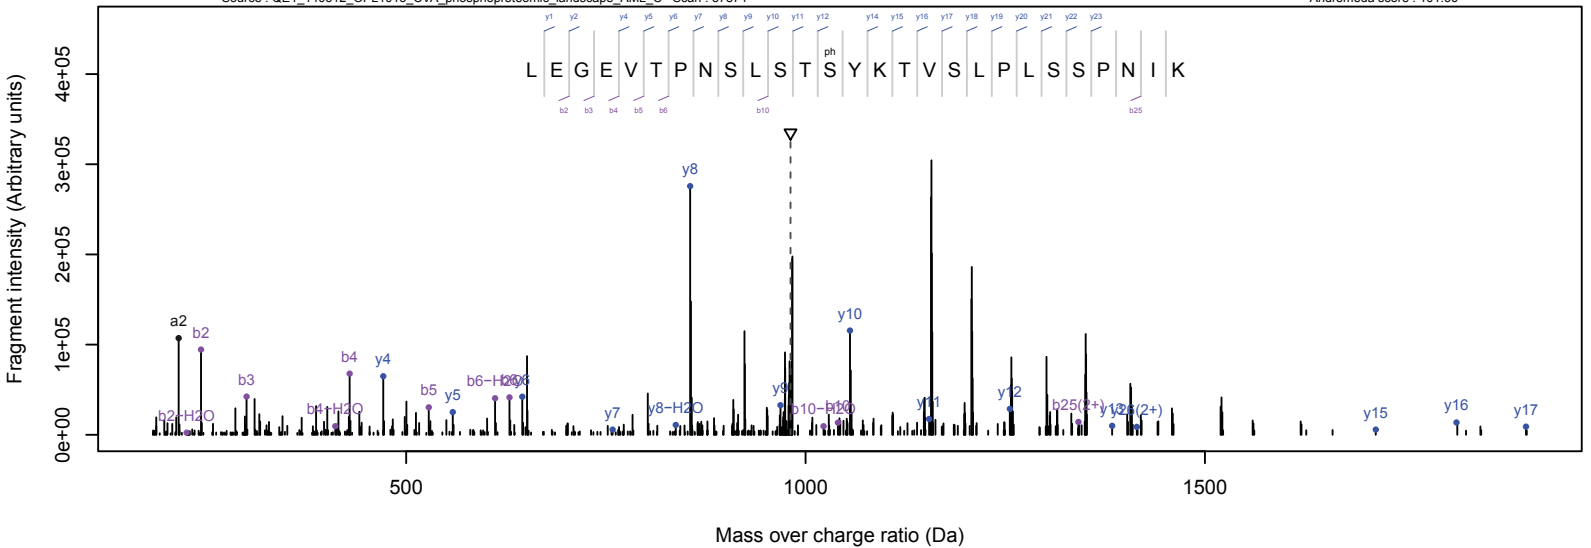

**CQVDETEEPDVHL P QPYAVAR-3+**

Source : QE1\_140612\_OPL1013\_CVA\_phosphoproteomic\_landscape\_AML\_C Scan : 29206

Andromeda score : 101.61

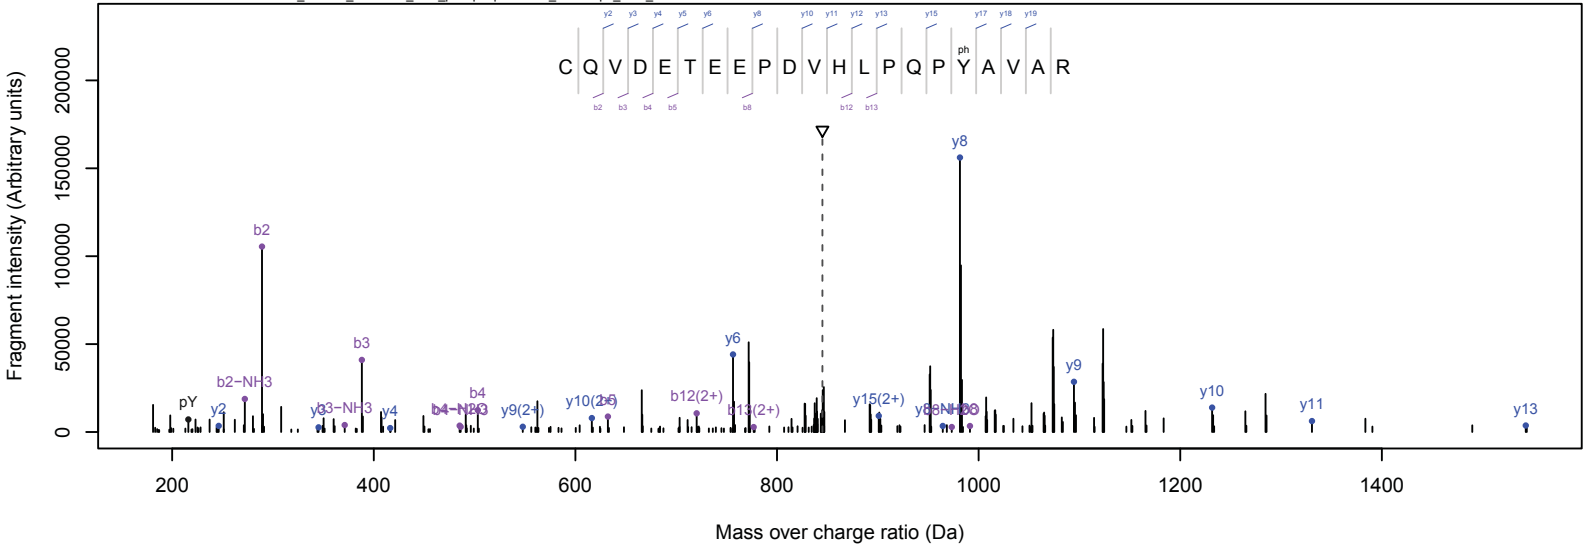

**ETSKVIY(ph)DFIEK-2+**

Source : QE1\_140612\_OPL1013\_CVA\_phosphoproteomic\_landscape\_AML\_B Scan : 31617

Andromeda score : 101.61

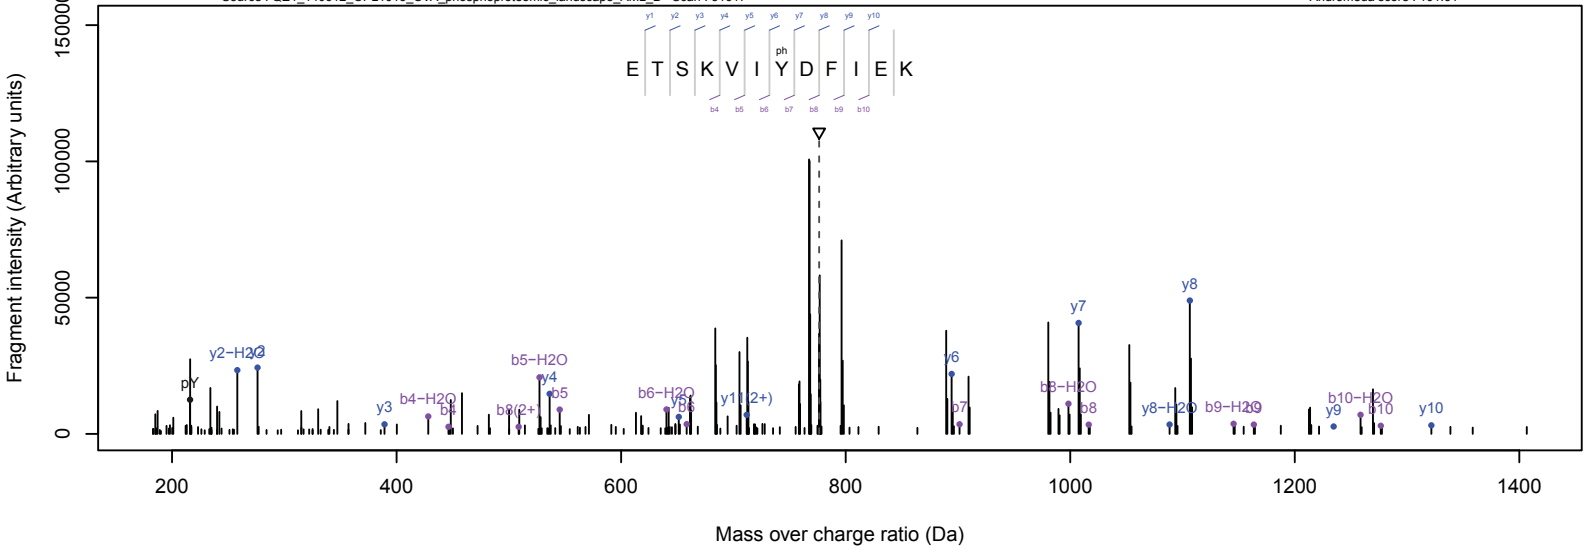

**KELTY(ph)QNTDLSEIK EEEQVK-3+**

Source : QE1\_140612\_OPL1013\_CVA\_phosphoproteomic\_landscape\_AML\_B Scan : 20815

Andromeda score : 101.6

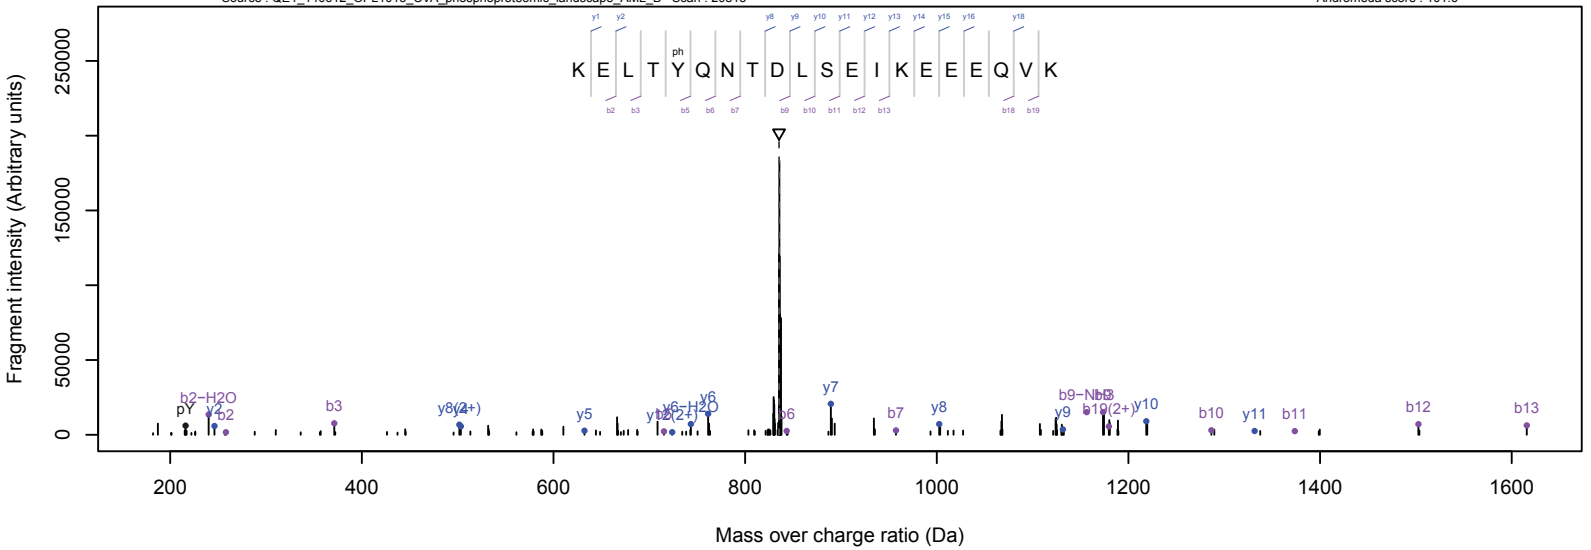

LIY(ph)LVPEK-2+

Source: QE1\_140822\_OPL1013\_CvA\_pTyrIP\_AML\_cell\_lines\_part2\_B Scan: 25201

Andromeda score: 101.54

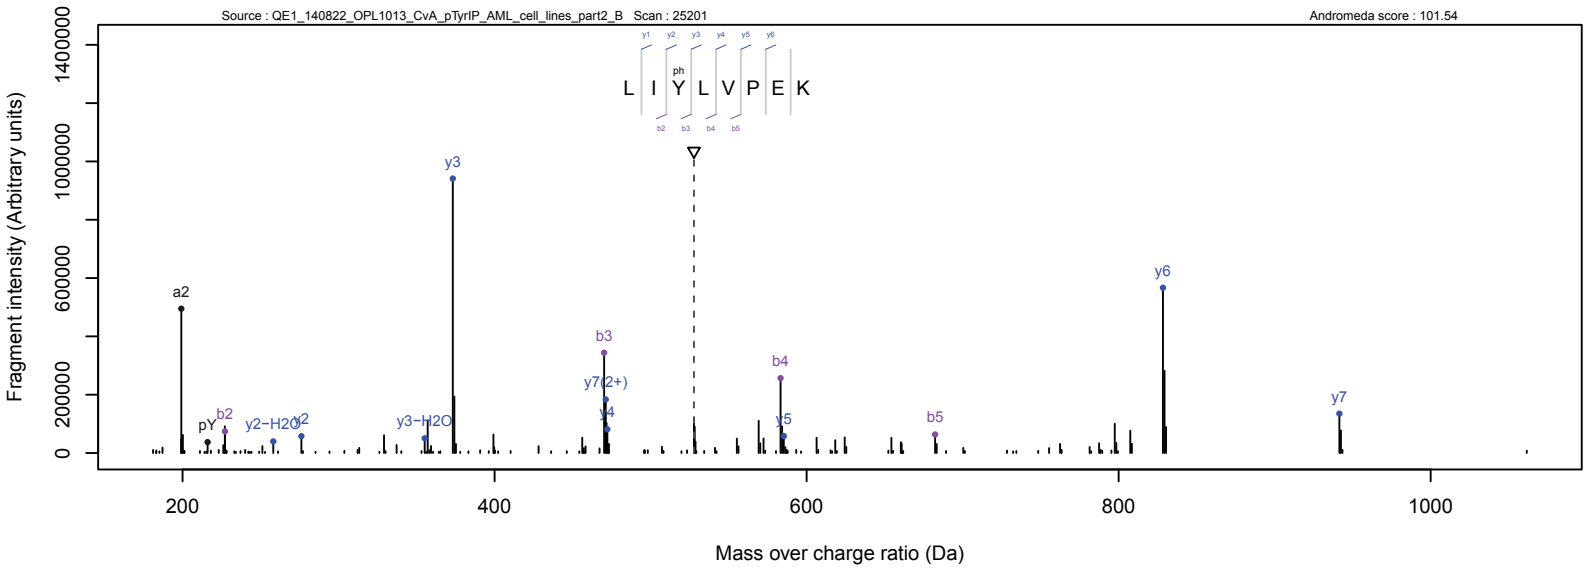

LELAEQDNY(ph)KELKR-3+

Source: QE1\_140908\_OPL1013\_CvA\_pTyrIP\_AML\_Kasumi1 Scan: 20906

Andromeda score: 101.53

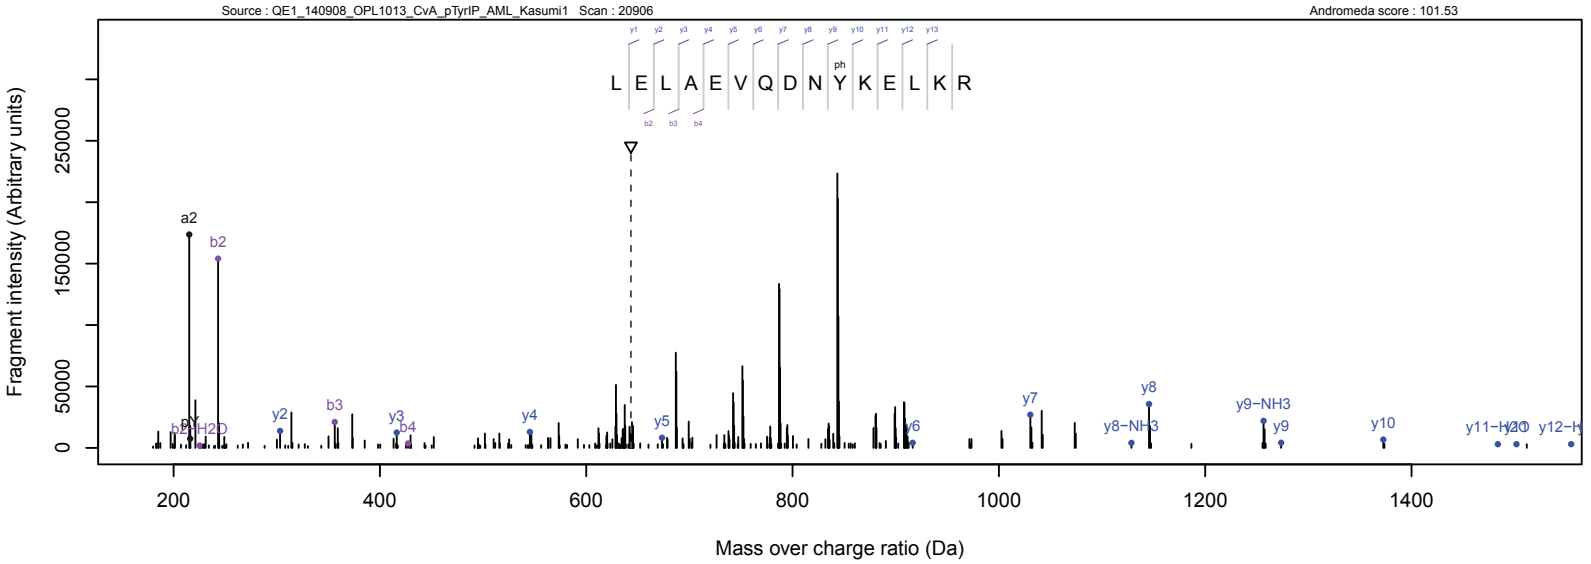

SKEPQLIAFY(ph)HK-2+

Source: QE1\_140612\_OPL1013\_CvA\_phosphoproteomic\_landscape\_AML\_C Scan: 21768

Andromeda score: 101.53

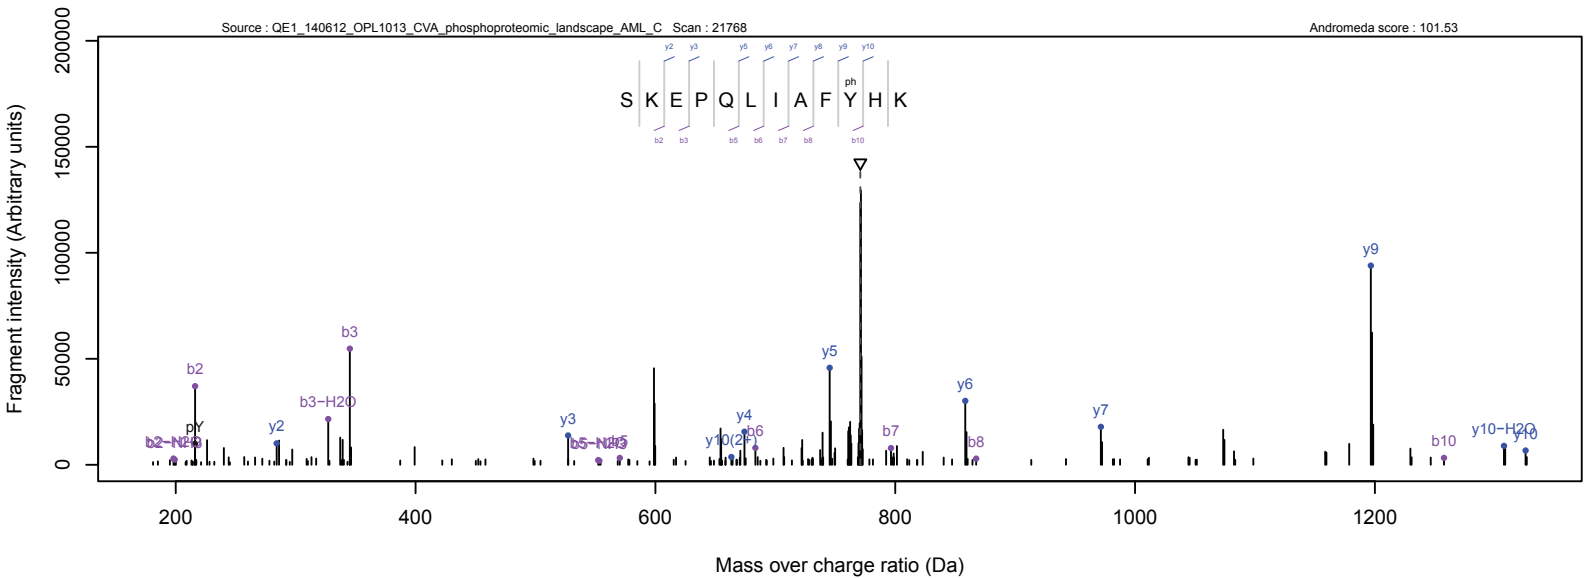

TTTNPY(ph)VLM(ox)VLYK-2+

Source : QE1\_140612\_OPL1013\_CVA\_phosphoproteomic\_landscape\_AML\_D Scan : 38015

Andromeda score : 101.53

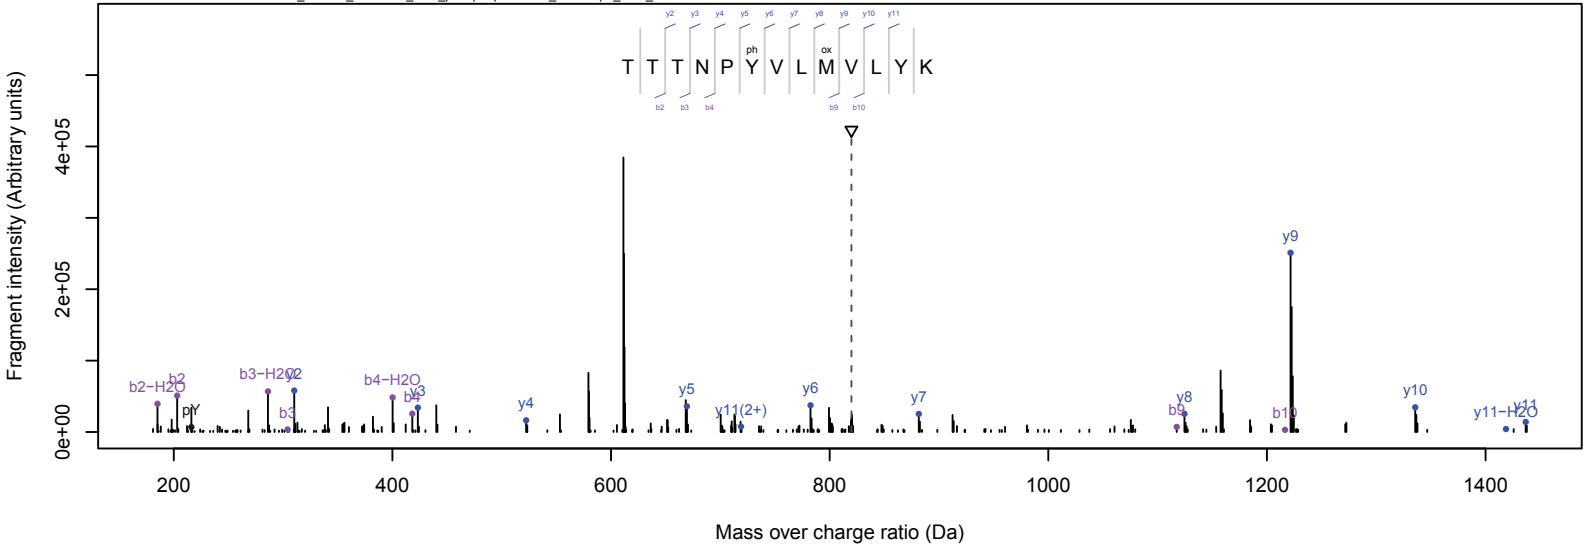

PETTAPGAHQLPDNEP(ph)YIFK-3+

Source : QE1\_140612\_OPL1013\_CVA\_phosphoproteomic\_landscape\_AML\_A Scan : 28261

Andromeda score : 101.49

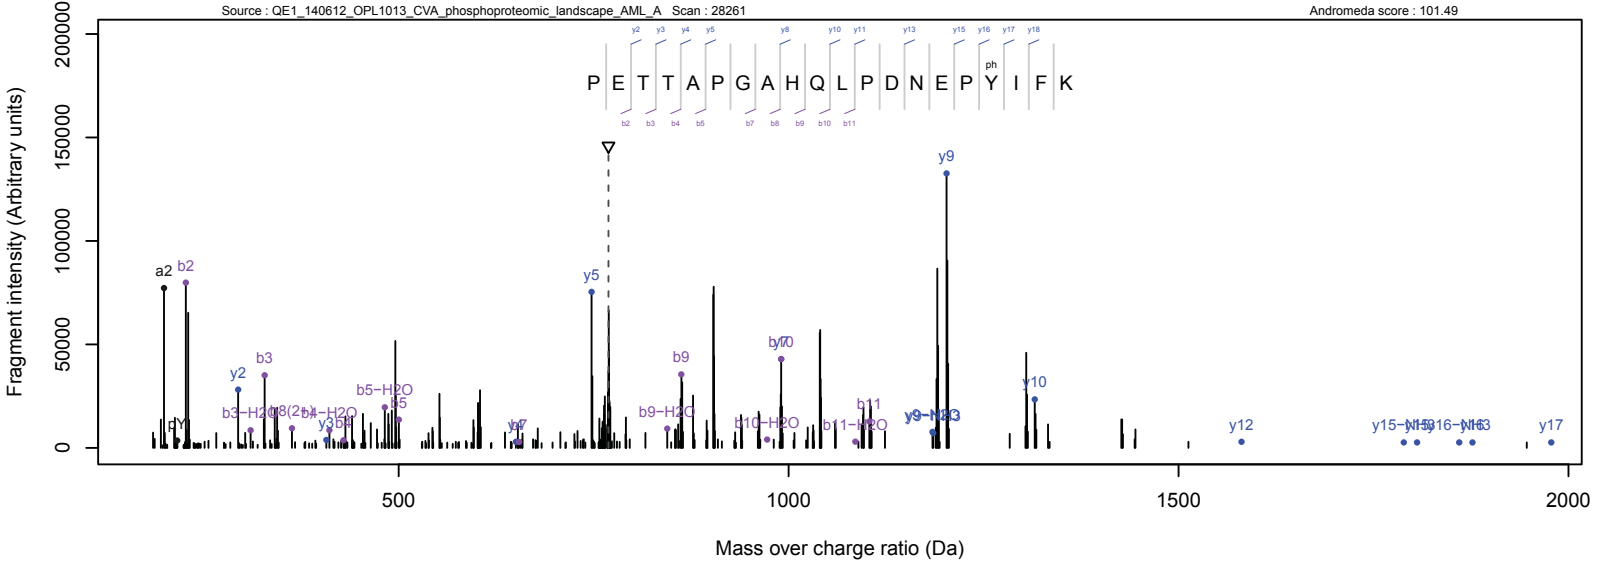

CLKDEDPYVRK-3+

Source : QE1\_140612\_OPL1013\_CVA\_phosphoproteomic\_landscape\_AML\_D Scan : 6425

Andromeda score : 101.48

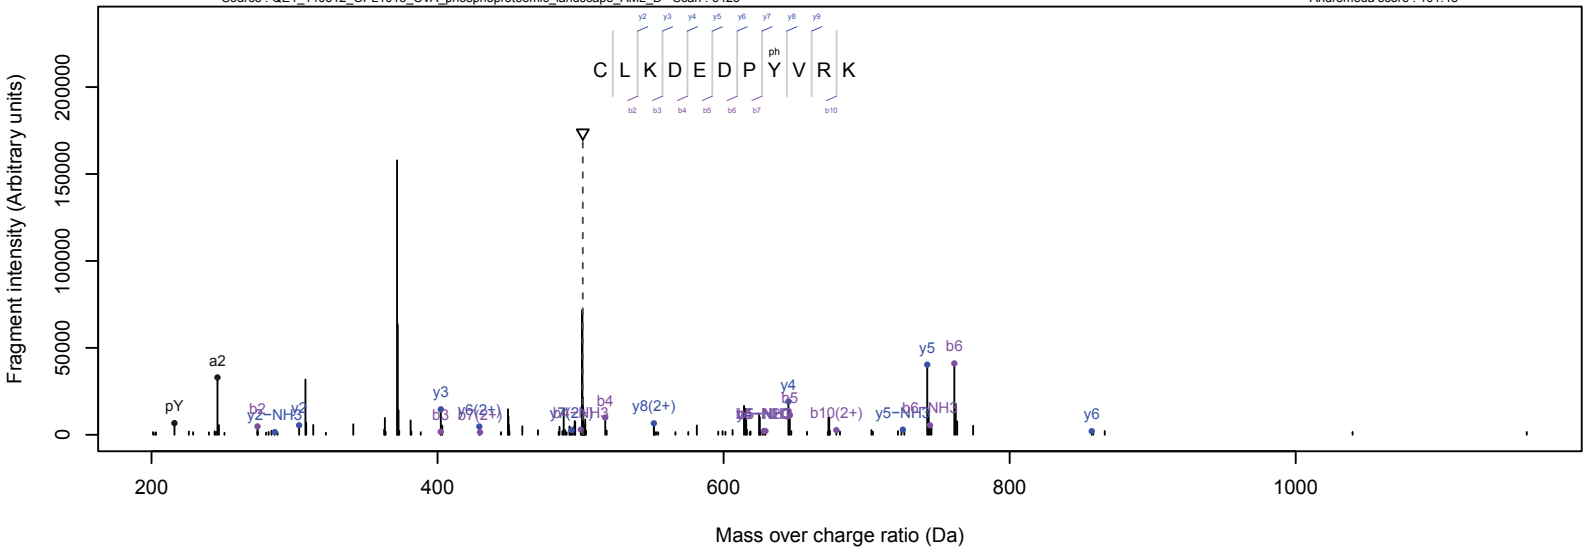

AVTNHSVY(ph)CSTK-2+

Source : QE1\_140822\_OPL1013\_CvA\_pTyrIP\_AML\_cell\_lines\_part2\_B Scan : 2960

Andromeda score : 101.3

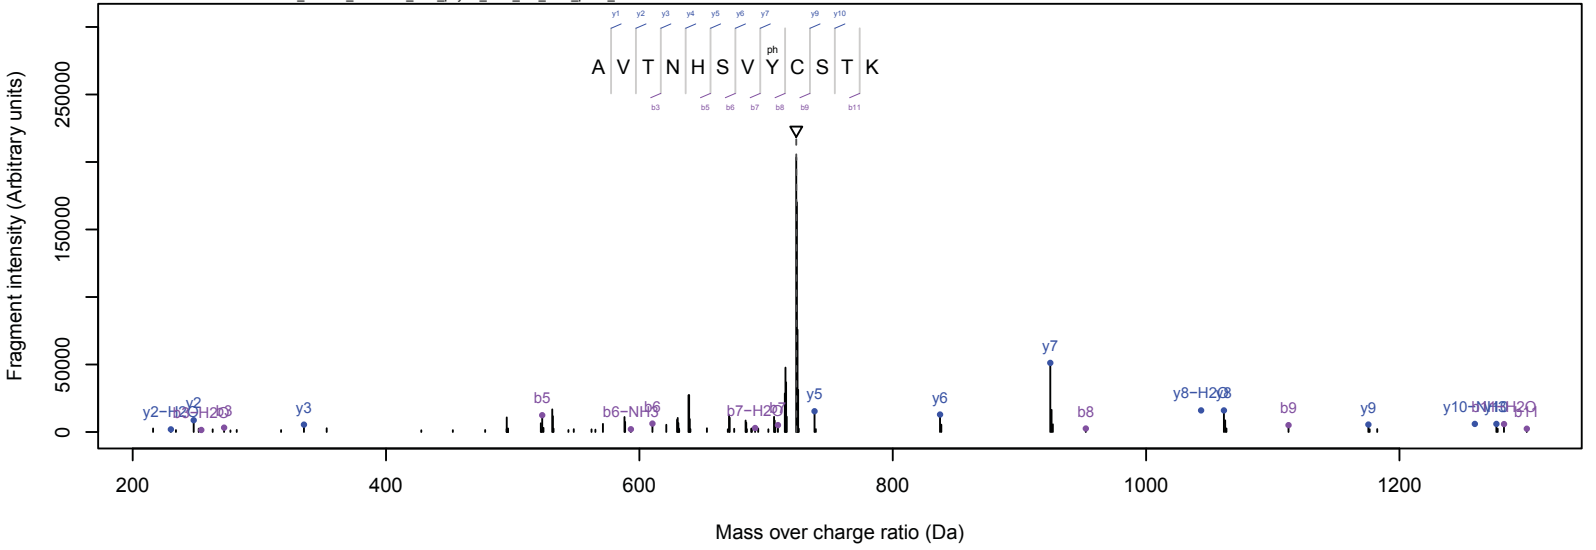

M(ox)Y(ph)VDPSEINP(ox)SMPQR-2+

Source : QE1\_140822\_OPL1013\_CvA\_pTyrIP\_AML\_cell\_lines\_part2\_B Scan : 20816

Andromeda score : 101.3

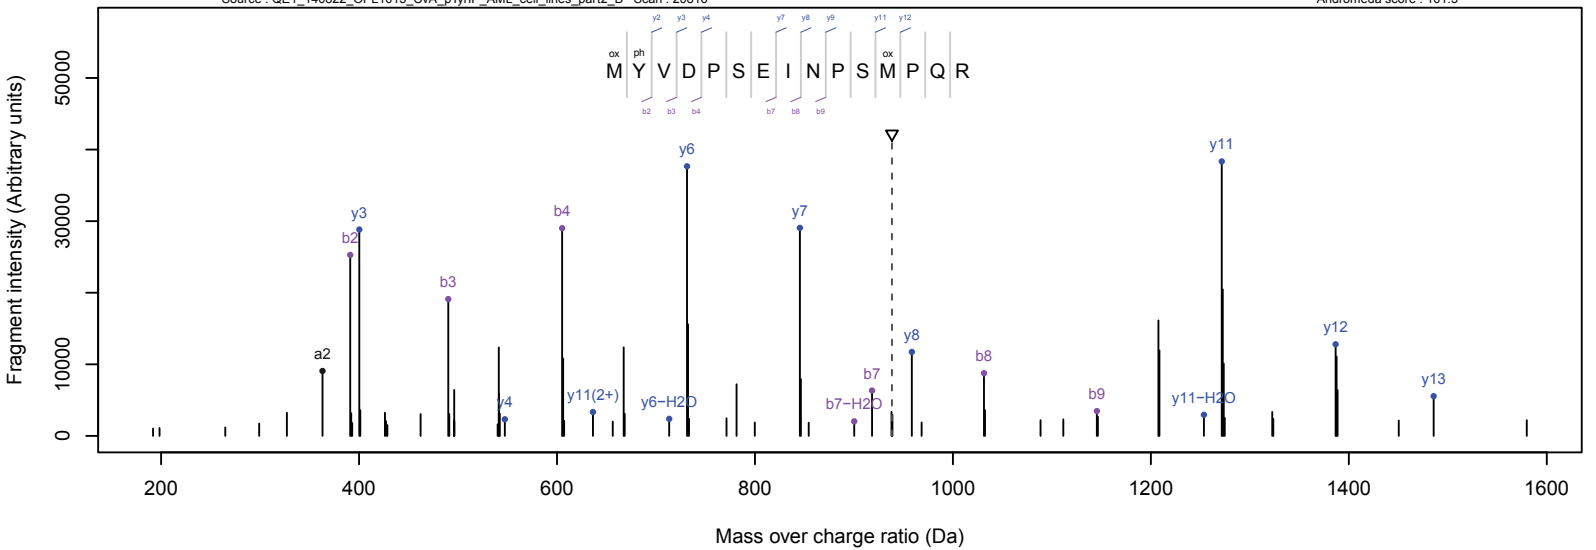

KLSDHPPTLPLQHQHQPPQY(ph)APAPQLQPPQQR-5+

Source : QE1\_140908\_OPL1013\_CvA\_pTyrIP\_AML\_HEL Scan : 24959

Andromeda score : 101.21

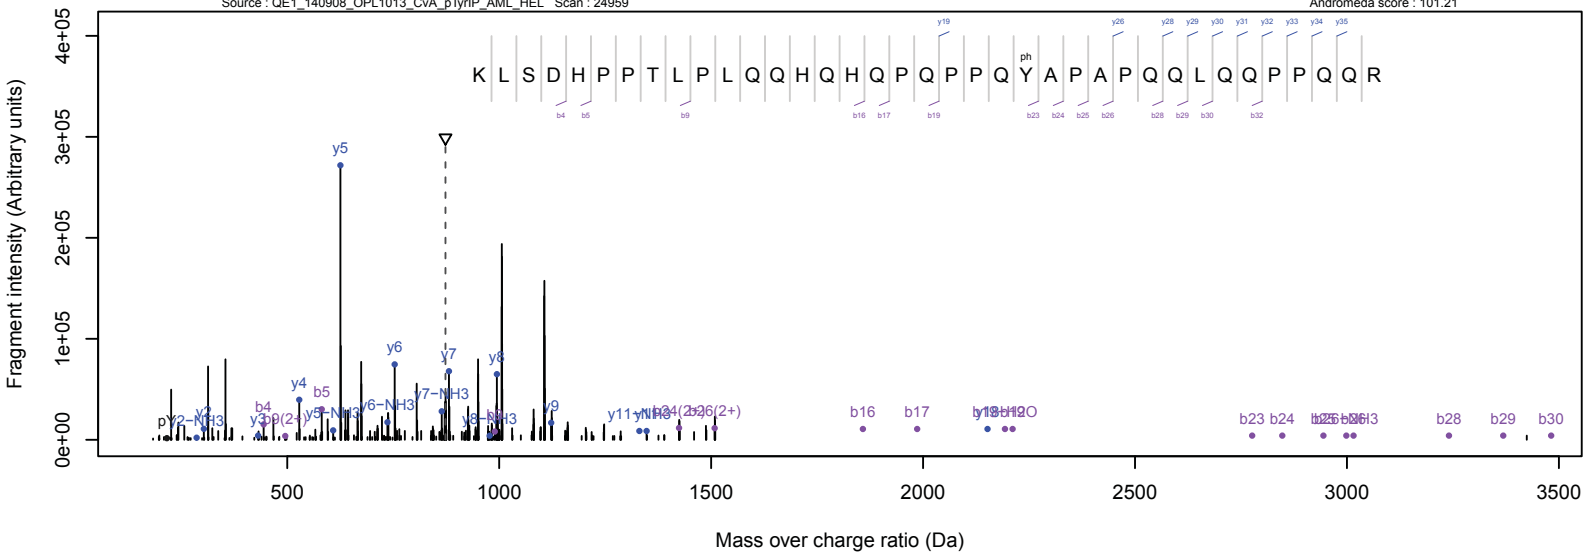

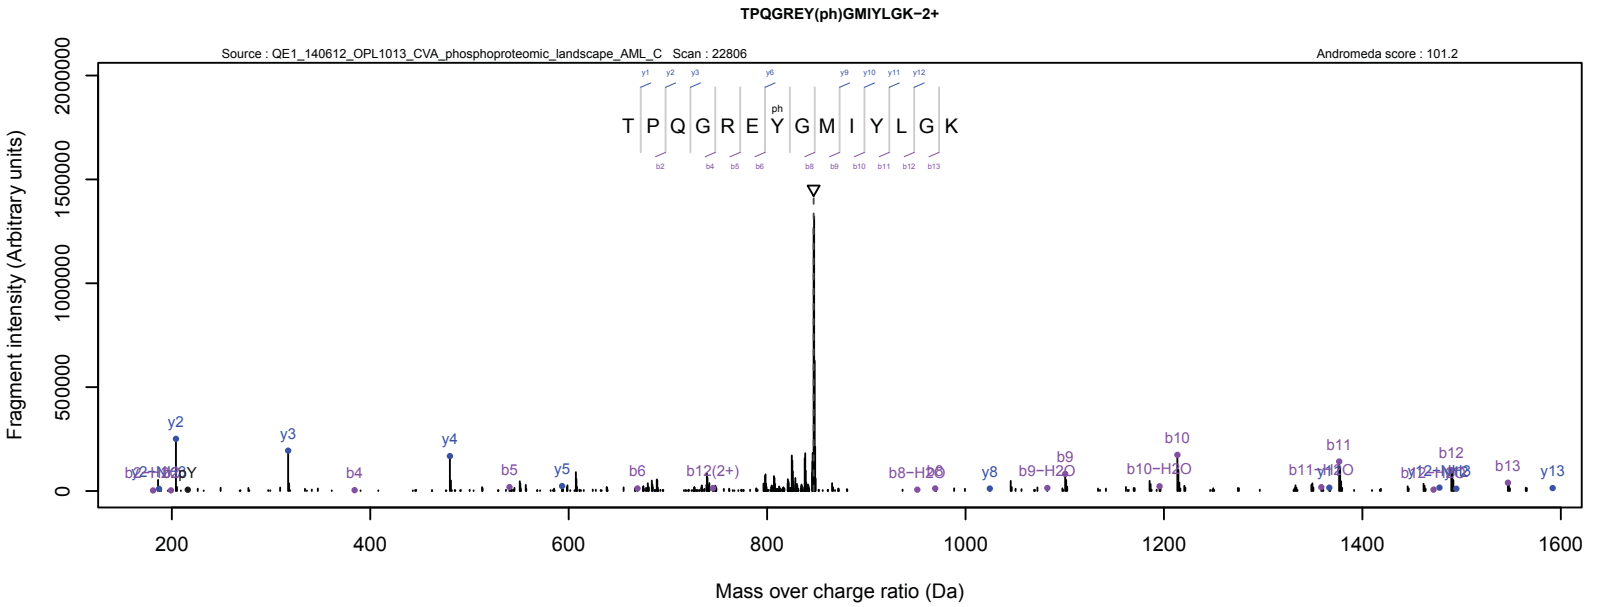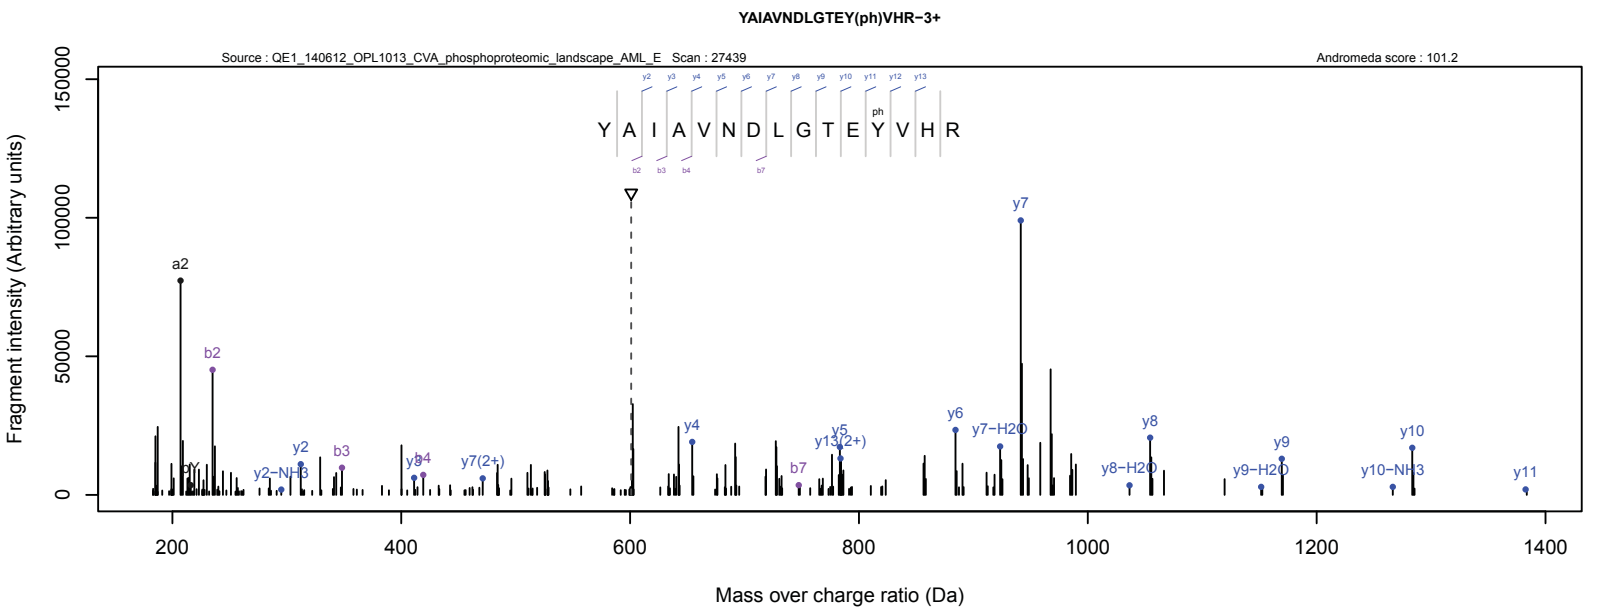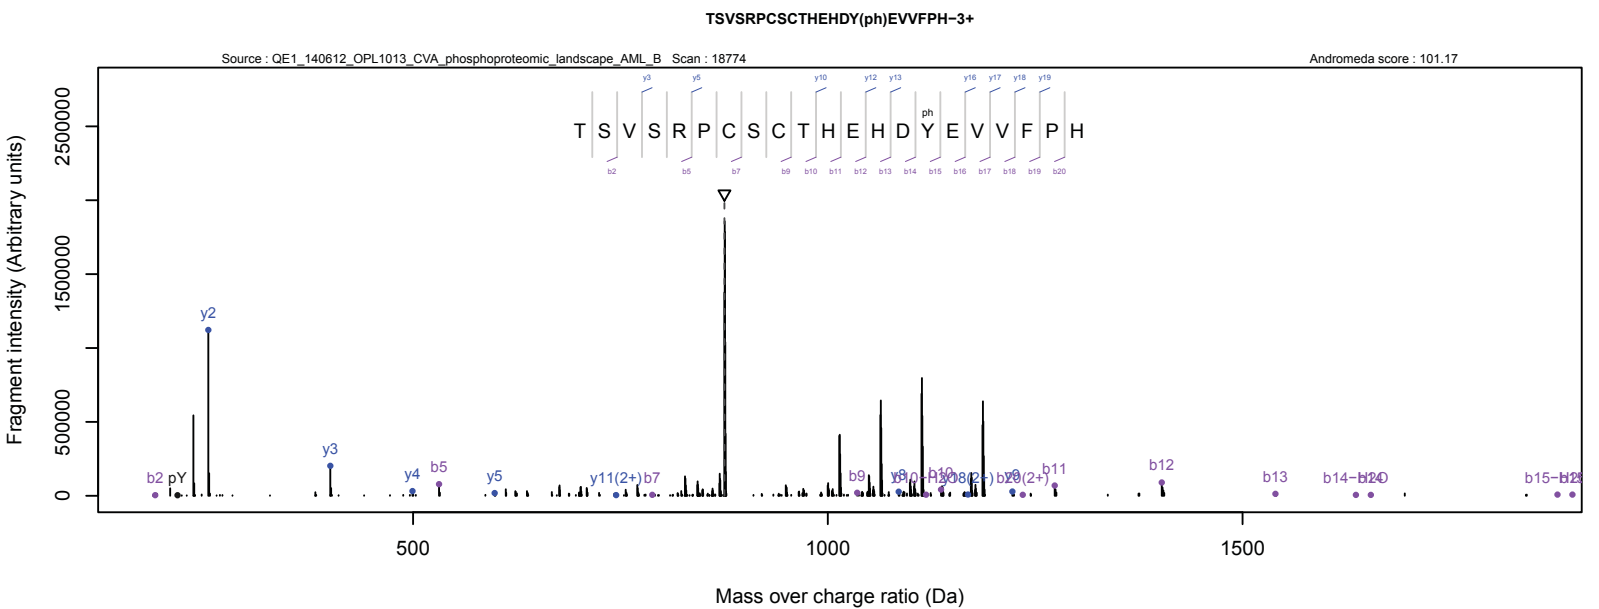

**ASGNY(ph)ATVISHNPETK-3+**

Source : QE1\_140612\_OPL1013\_CVA\_phosphoproteomic\_landscape\_AML\_C Scan : 11219

Andromeda score : 101.05

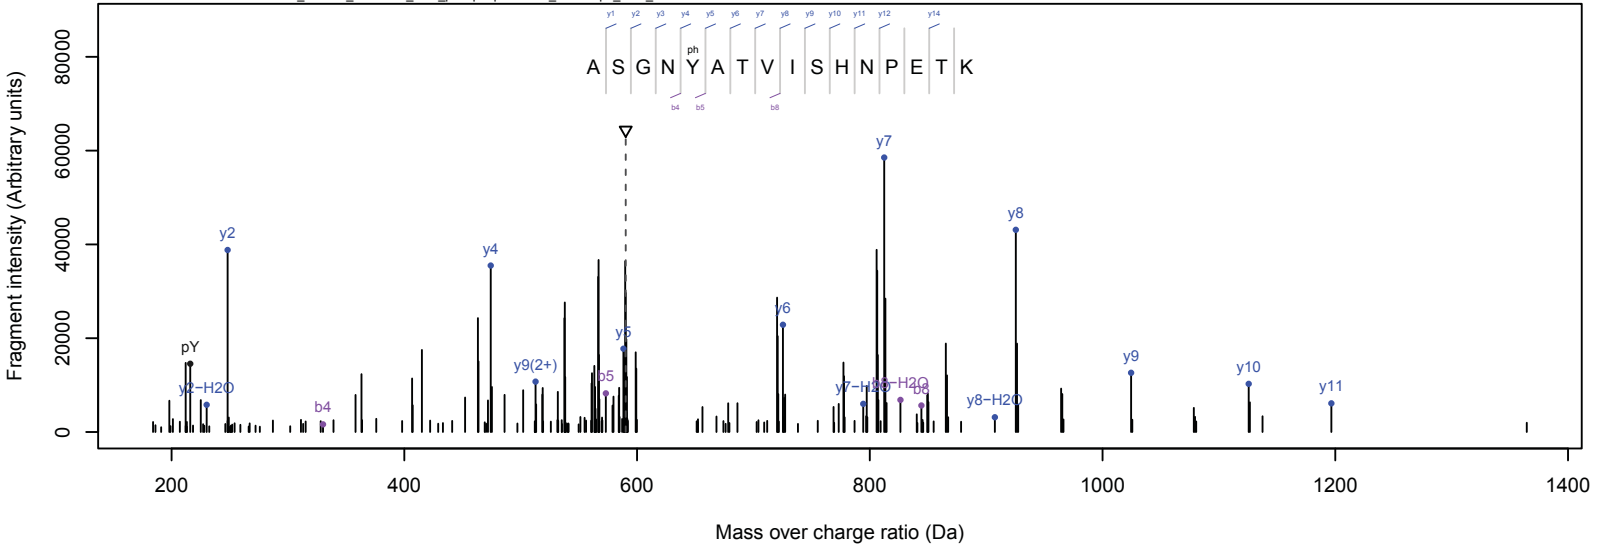

**QGFAATLEQVY(ph)FGTSHPR-3+**

Source : QE1\_140822\_OPL1013\_CvA\_pTyrIP\_AML\_cell\_lines\_part2\_E Scan : 28556

Andromeda score : 101.05

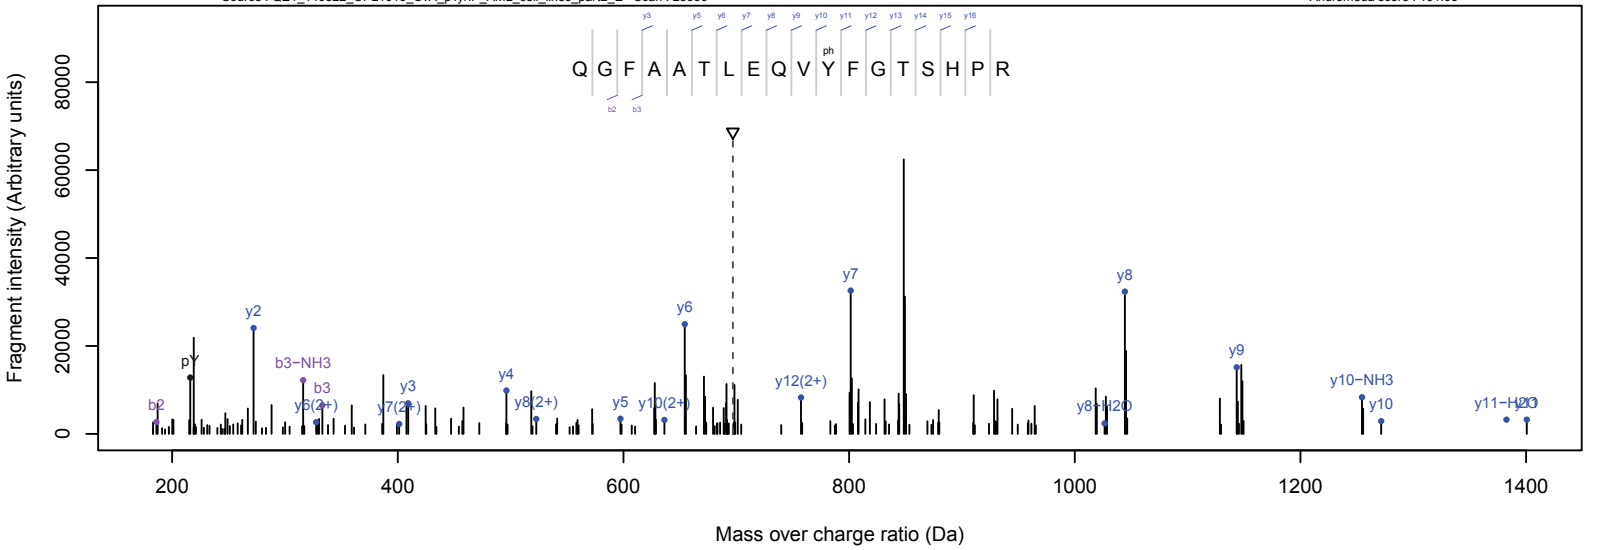

**WG TIEVENTTHCEFA Y L R-3+**

Source : QE1\_140612\_OPL1013\_CVA\_phosphoproteomic\_landscape\_AML\_C Scan : 36926

Andromeda score : 101.05

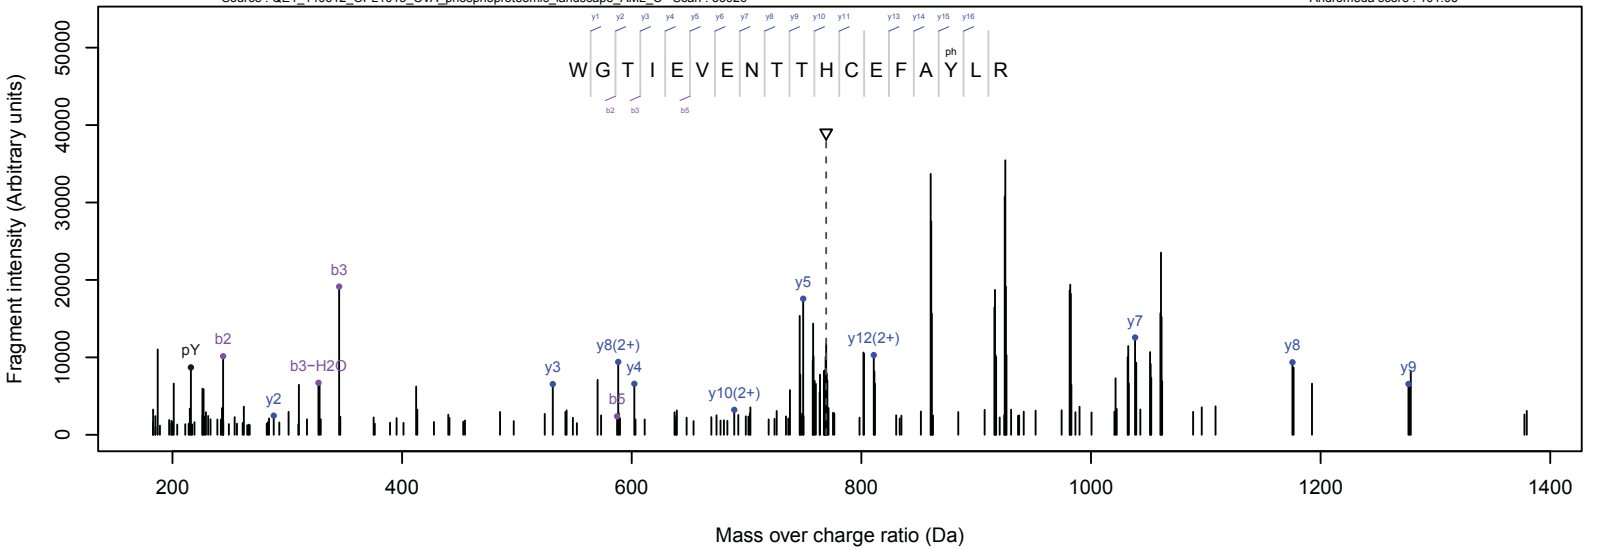



**AMSY(ph)KPICPTCQTSYGIQK-3+**

Source : QE1\_140612\_OPL1013\_CVA\_phosphoproteomic\_landscape\_AML\_C Scan : 20148

Andromeda score : 100.97

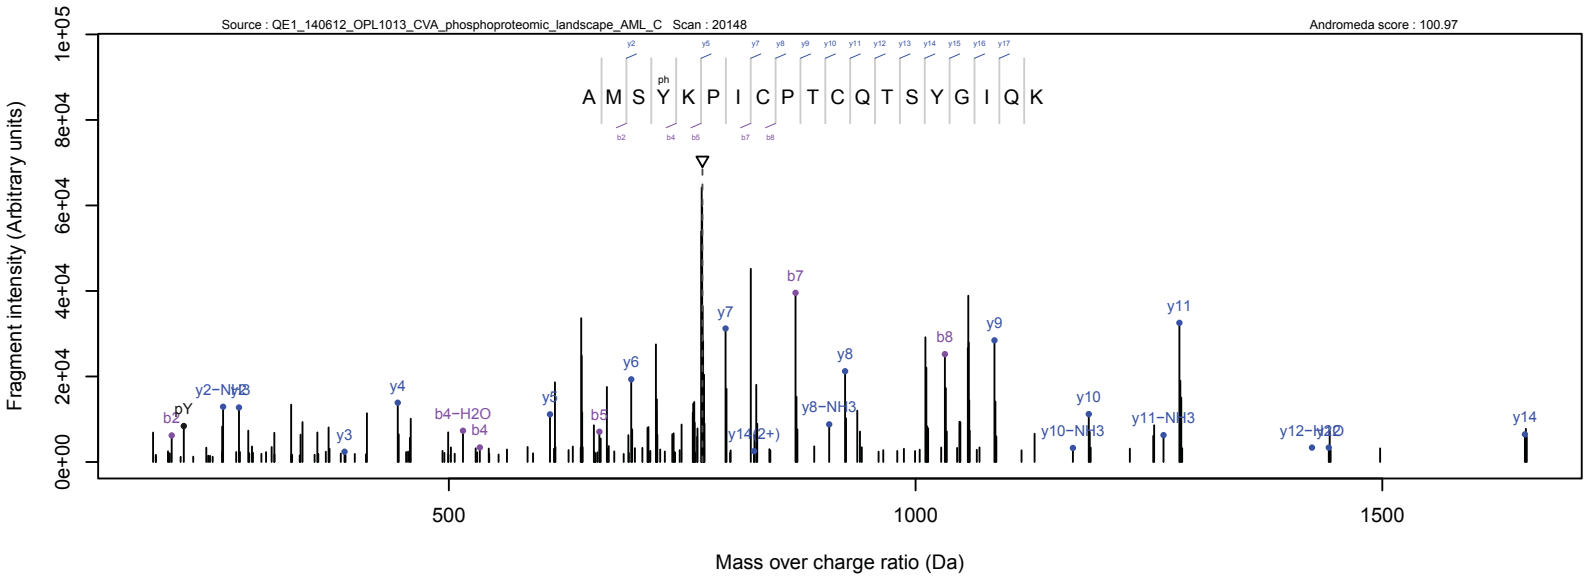

**VDTDNGY(ph)ISFNELDLFK-2+**

Source : QE1\_140822\_OPL1013\_CvA\_pTyrIP\_AML\_cell\_lines\_part2\_E Scan : 43613

Andromeda score : 100.97

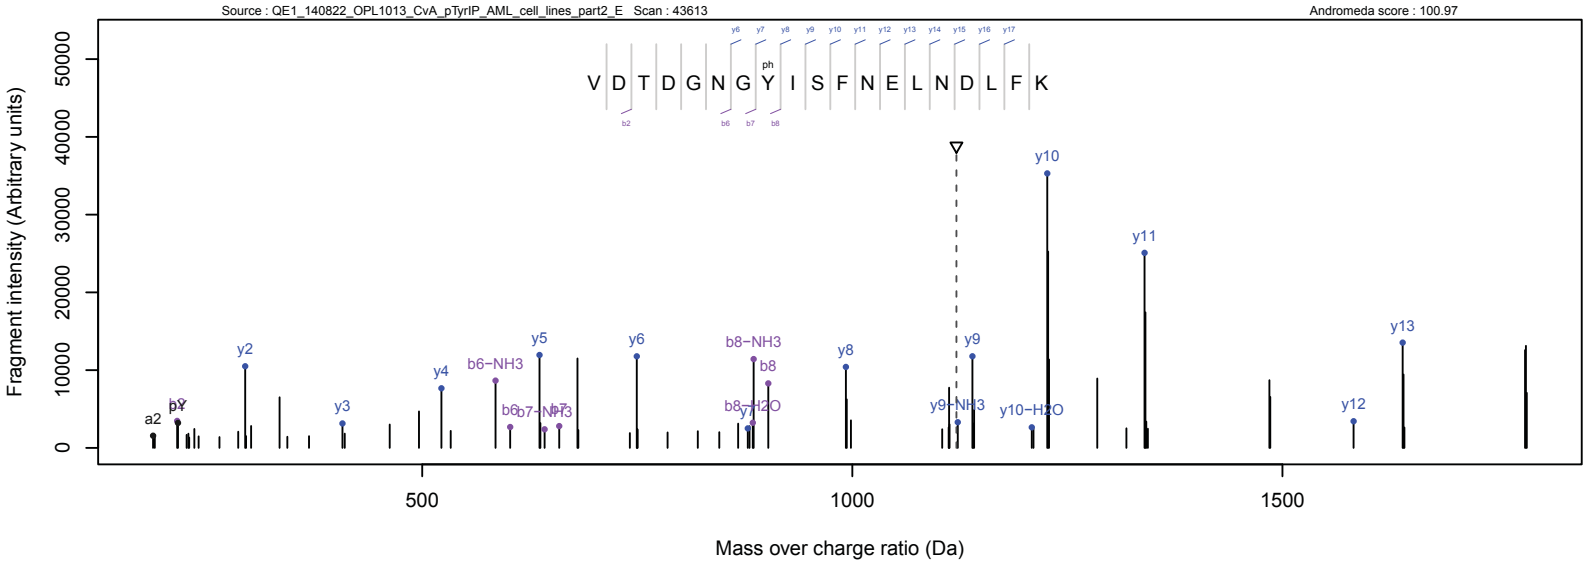

**LKNNKEY(ph)LEFR-3+**

Source : QE1\_140612\_OPL1013\_CVA\_phosphoproteomic\_landscape\_AML\_C Scan : 13136

Andromeda score : 100.93

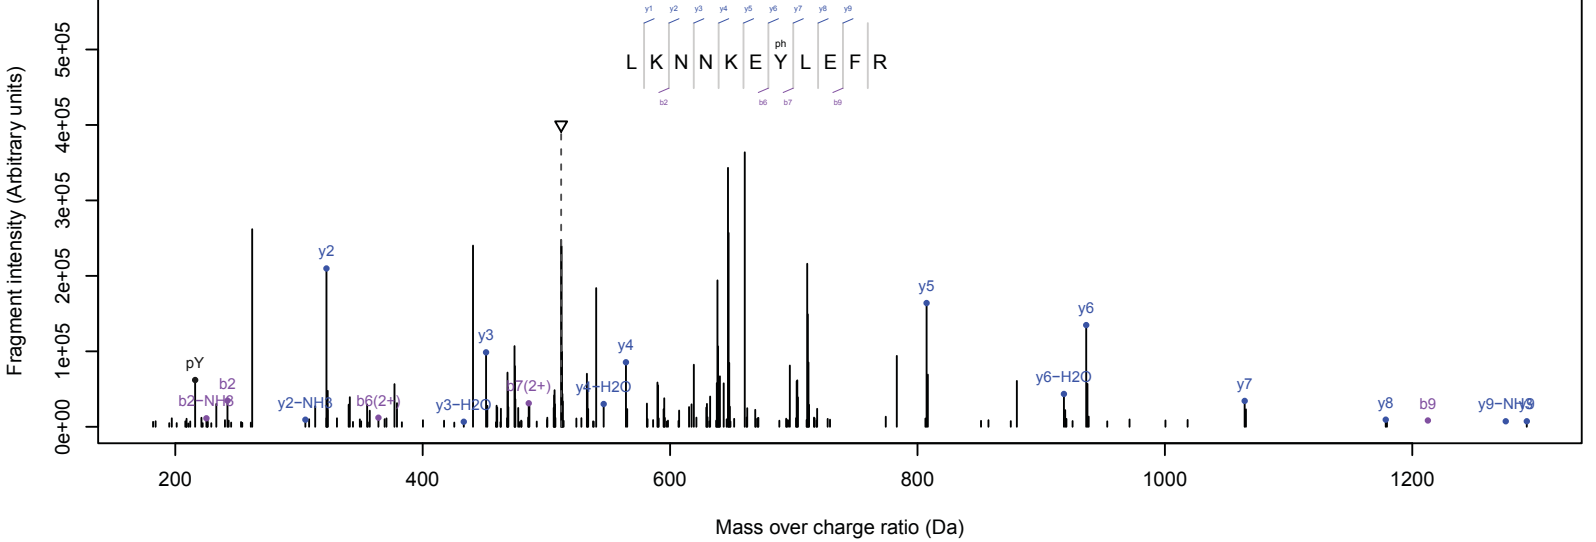

VM(ox)NATAY(ph)GISK-2+

Source : QE1\_140612\_OPL1013\_CVA\_phosphoproteomic\_landscape\_AML\_C Scan : 11531

Andromeda score : 100.93

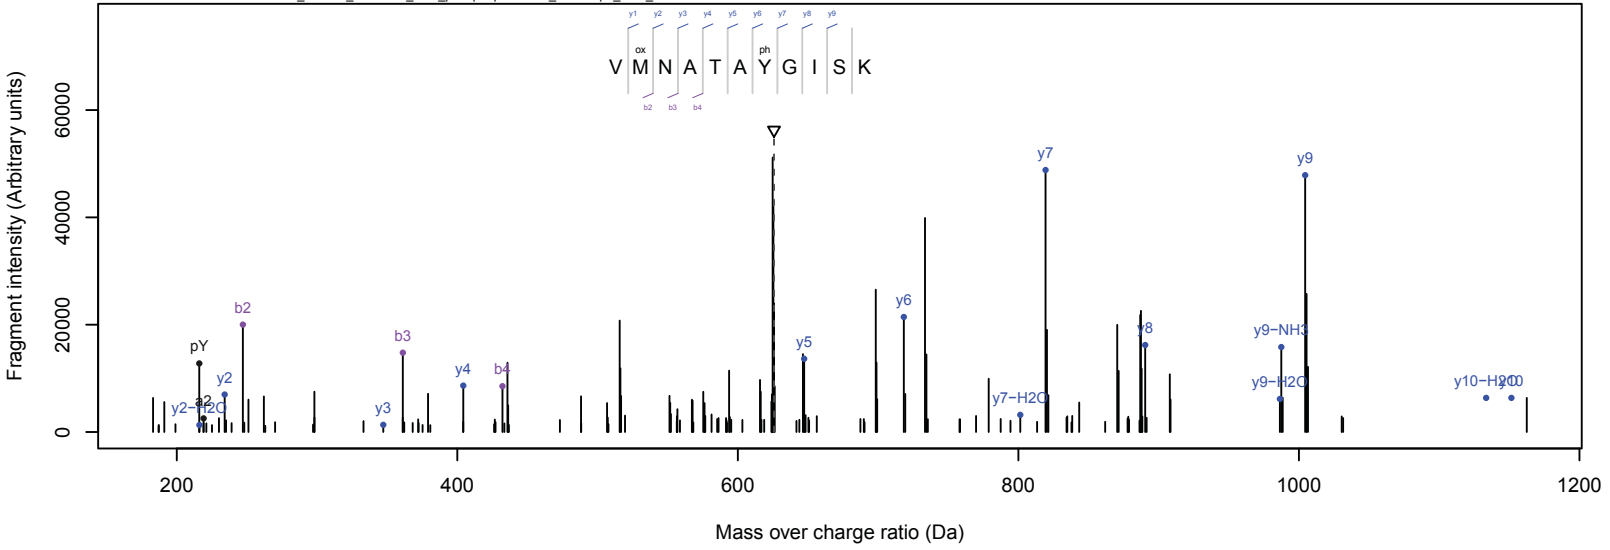

FDVAAEY(ph)YKK-2+

Source : QE1\_140612\_OPL1013\_CVA\_phosphoproteomic\_landscape\_AML\_C Scan : 15129

Andromeda score : 100.92

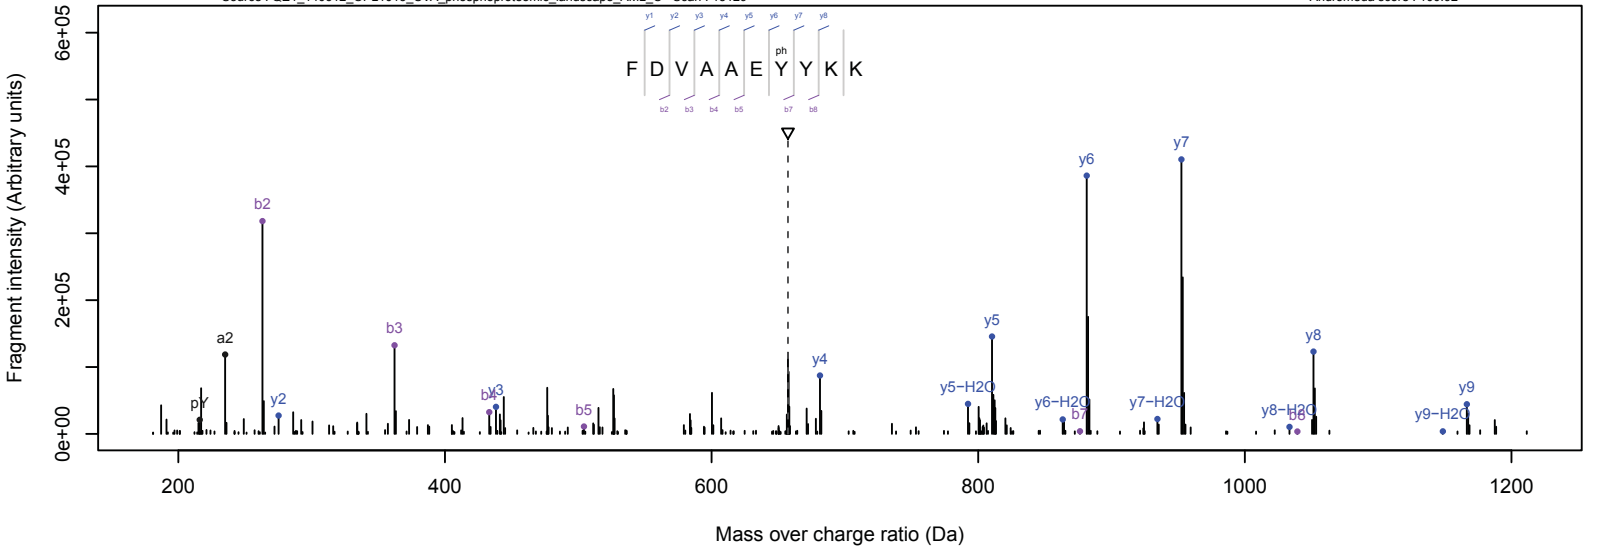

DIYETDY(ph)YRK-2+

Source : QE1\_140908\_OPL1013\_CvA\_pTyrIP\_AML\_ML2 Scan : 14502

Andromeda score : 100.88

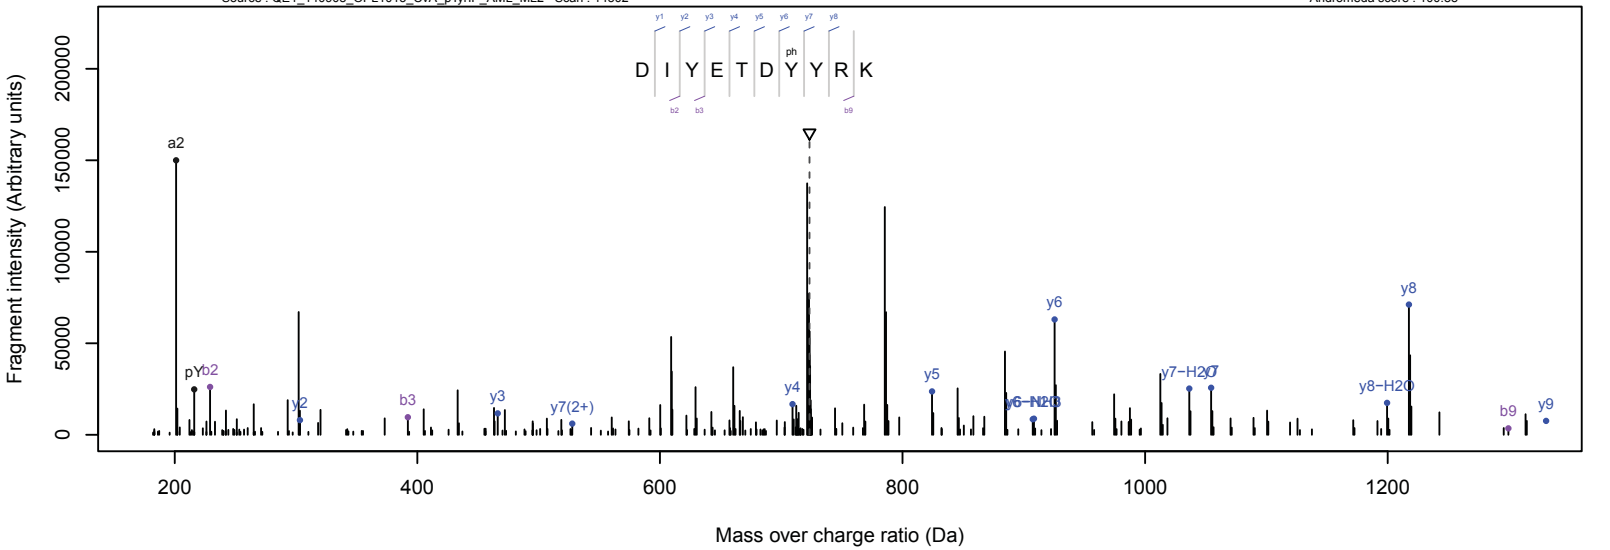

**FY(ph)PIPSLHSTGS-2+**

Source: QE1\_140612\_OPL1013\_CVA\_phosphoproteomic\_landscape\_AML\_C Scan: 31749

Andromeda score: 100.88

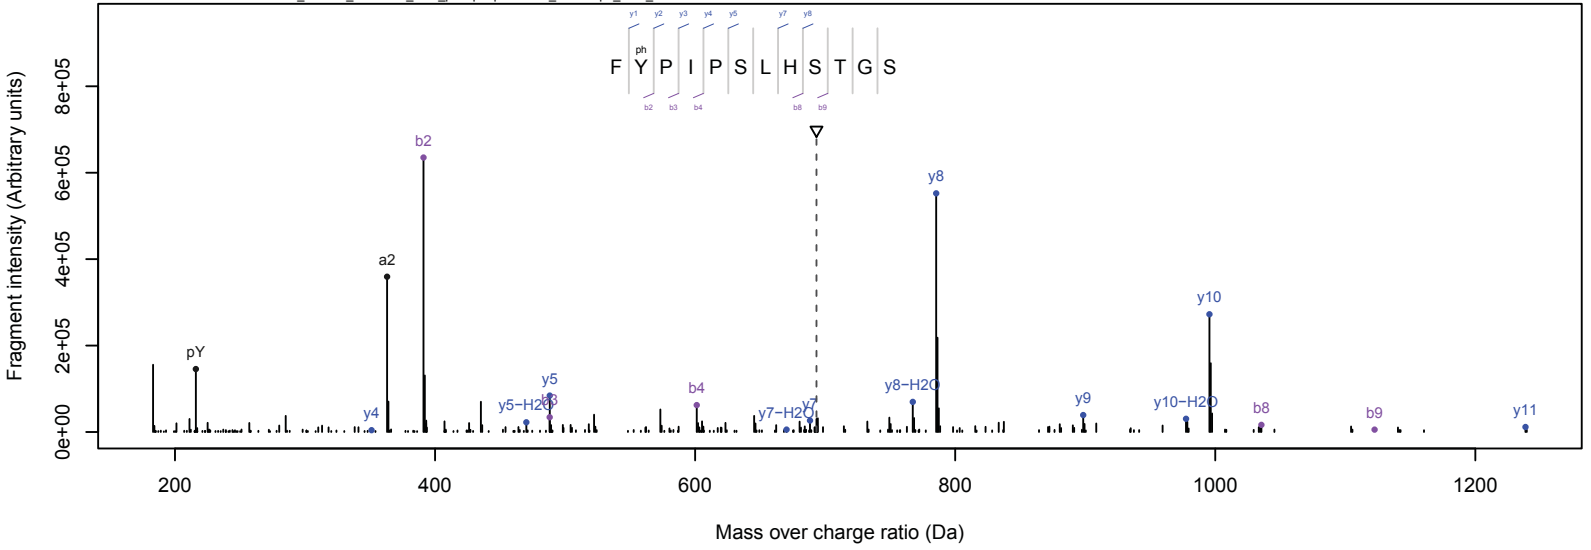

**Y(ph)VDIAIPCNNK-2+**

Source: QE1\_140908\_OPL1013\_CvA\_pTyrIP\_AML\_Kasumi6 Scan: 26719

Andromeda score: 100.88

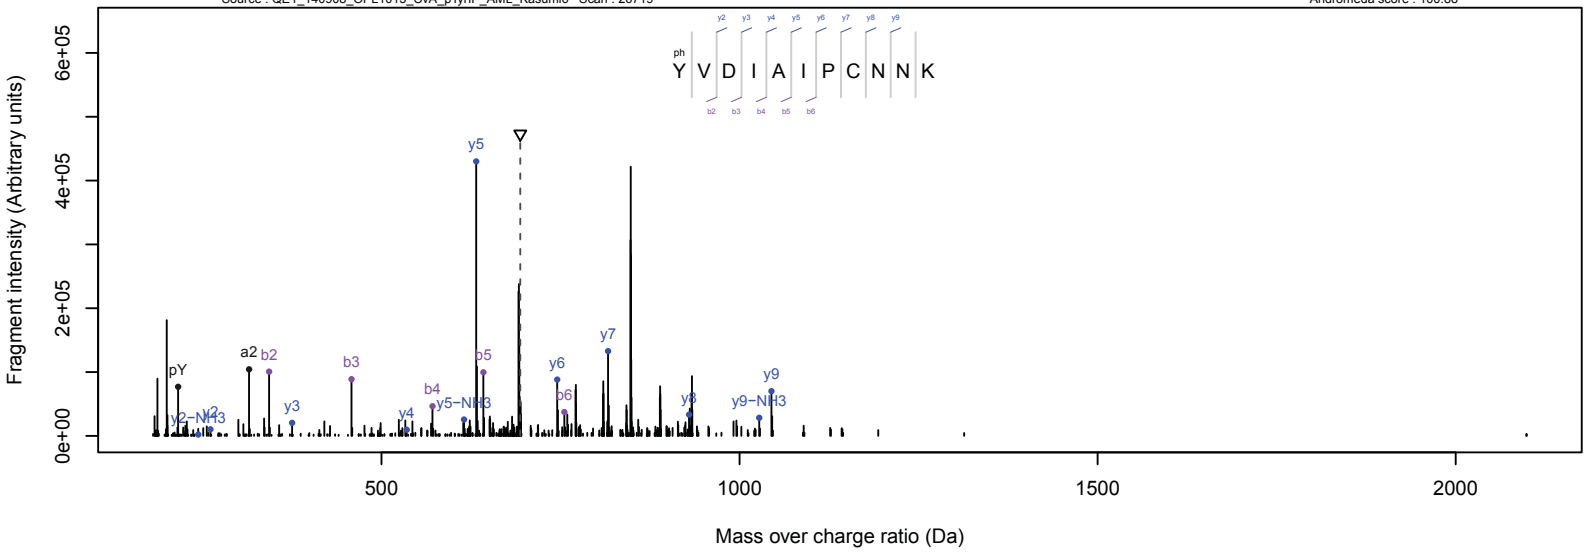

**FKEY(ph)CPMVFR-2+**

Source: QE1\_140612\_OPL1013\_CVA\_phosphoproteomic\_landscape\_AML\_B Scan: 25428

Andromeda score: 100.69

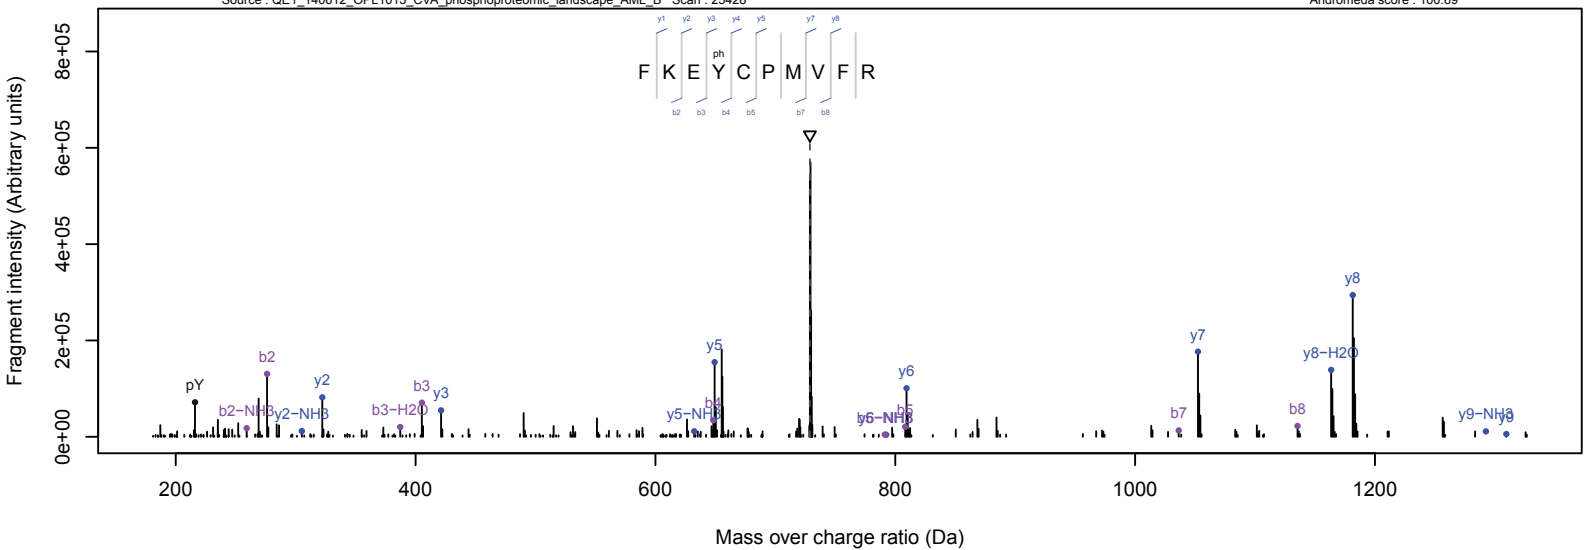

**YMKDVSPY(ph)FK-2+**

Source : QE1\_140612\_OPL1013\_CVA\_phosphoproteomic\_landscape\_AML\_C Scan : 18166

Andromeda score : 100.69

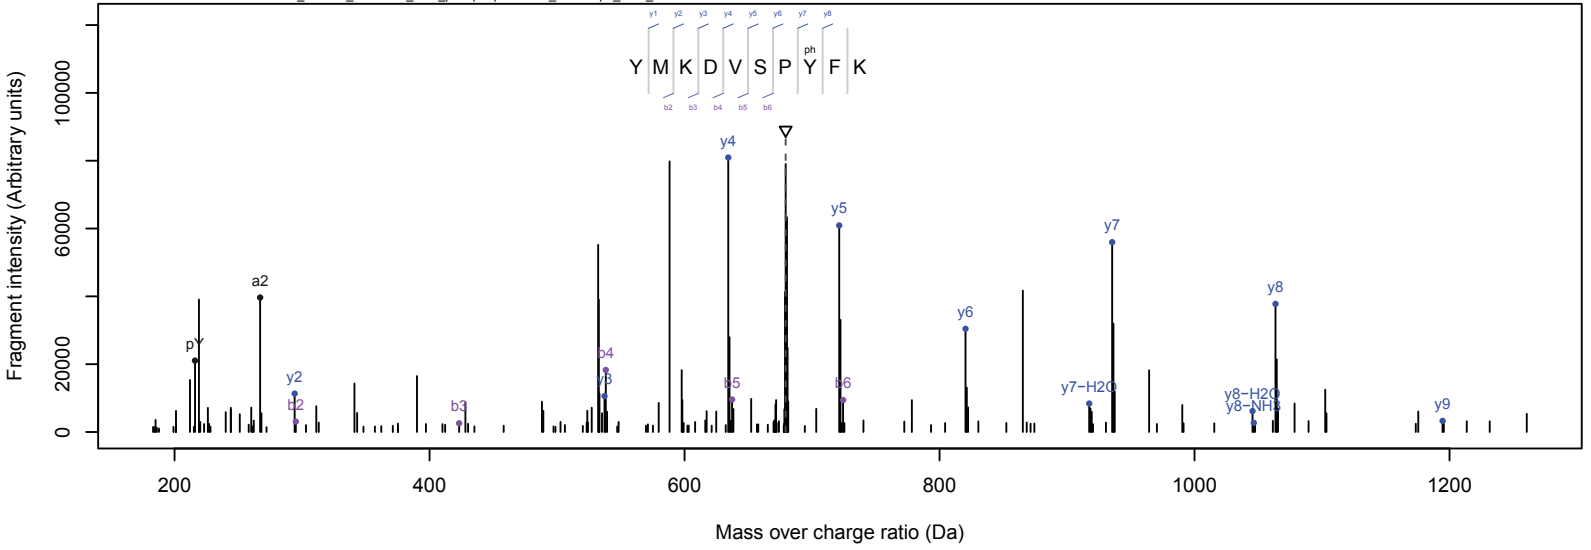

**TLDGIFSEQVAMGY(ph)SHSLVIARDESETEKEK-4+**

Source : QE1\_140612\_OPL1013\_CVA\_phosphoproteomic\_landscape\_AML\_C Scan : 38125

Andromeda score : 100.66

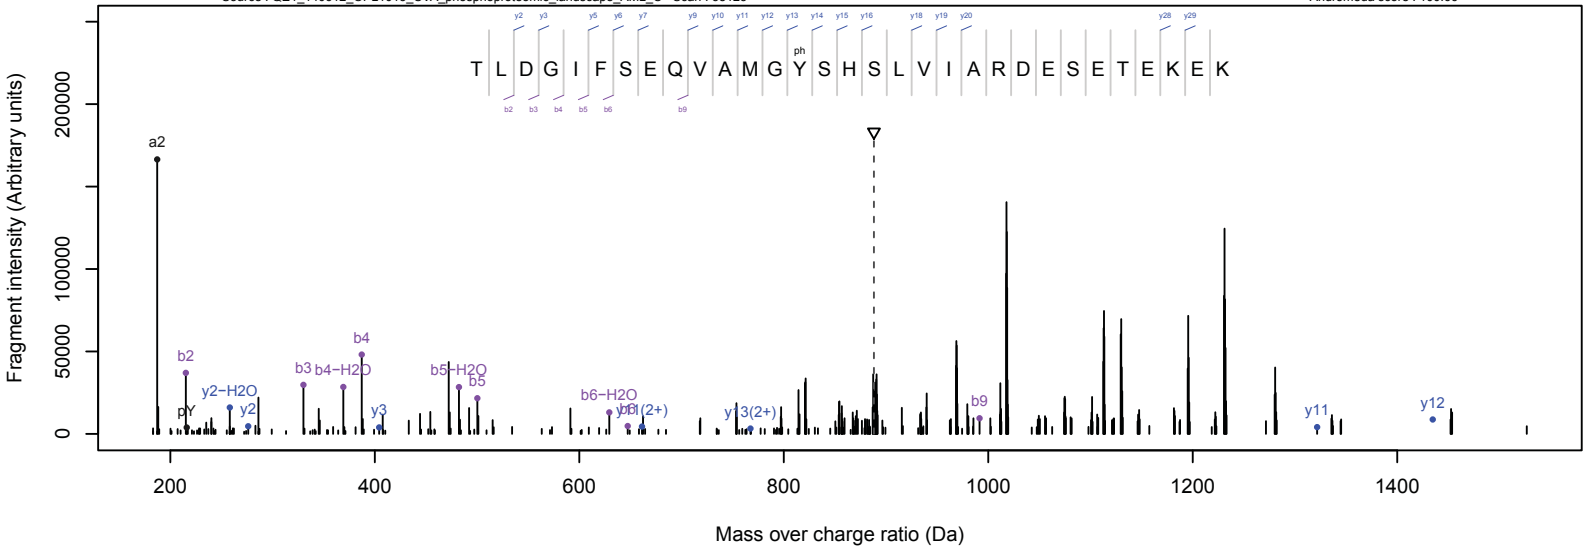

**NLSASFTEESSIN(ph)YTFKTPKEKPLWHAFTK-4+**

Source : QE1\_140612\_OPL1013\_CVA\_phosphoproteomic\_landscape\_AML\_B Scan : 41065

Andromeda score : 100.59

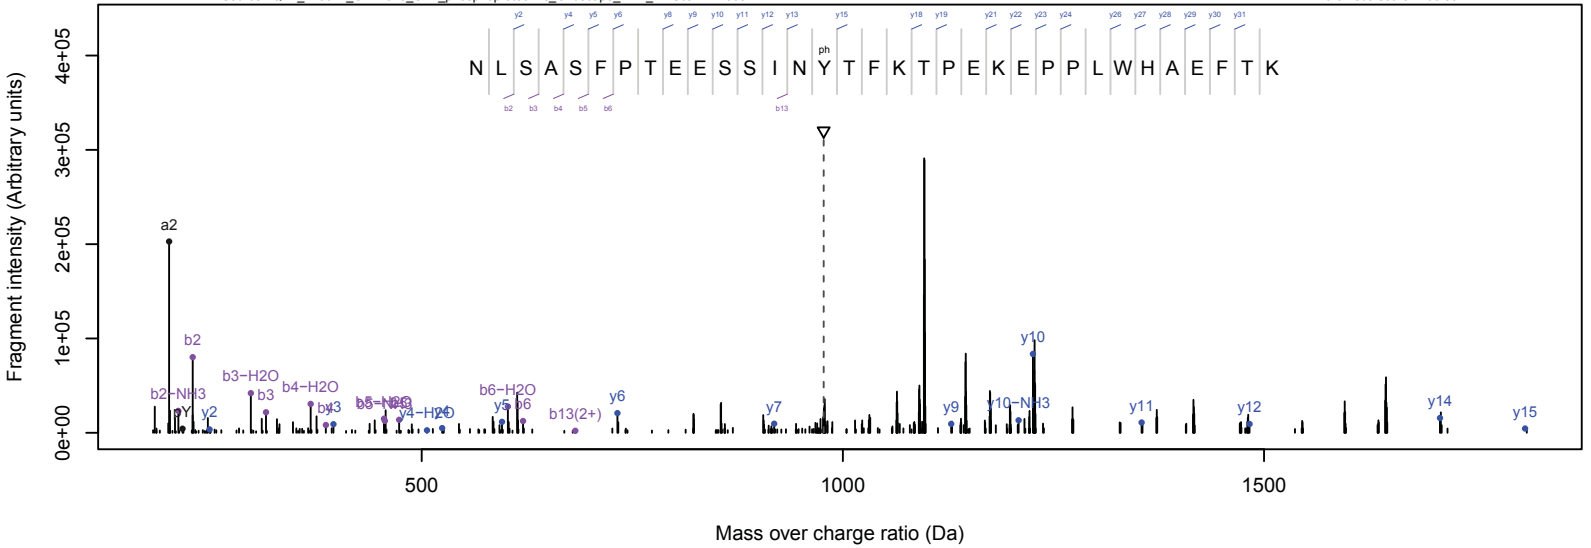



**NQSIAIELSDLVY(ph)CKPTSK-3+**

Source: QE1\_140612\_OPL1013\_CVA\_phosphoproteomic\_landscape\_AML\_C Scan: 44414

Andromeda score: 100.28

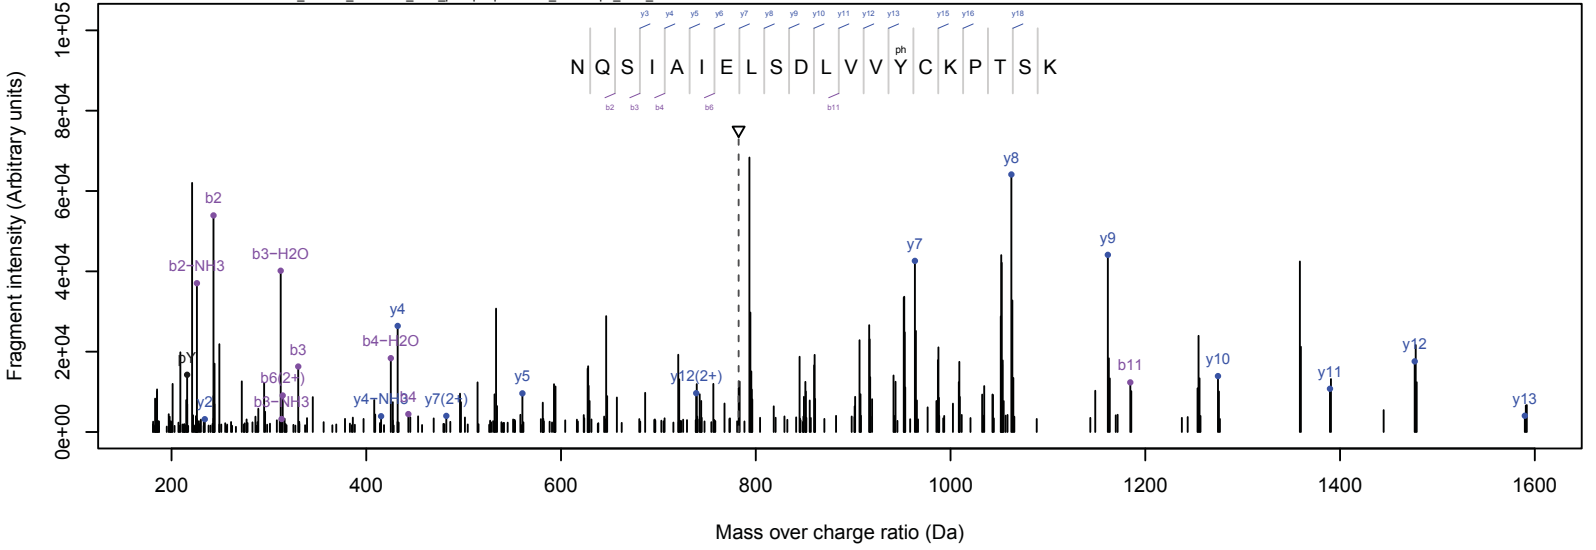

**DKLLQFY(ph)PSLEDPASSR-3+**

Source: QE1\_140612\_OPL1013\_CVA\_phosphoproteomic\_landscape\_AML\_C Scan: 38706

Andromeda score: 100.27

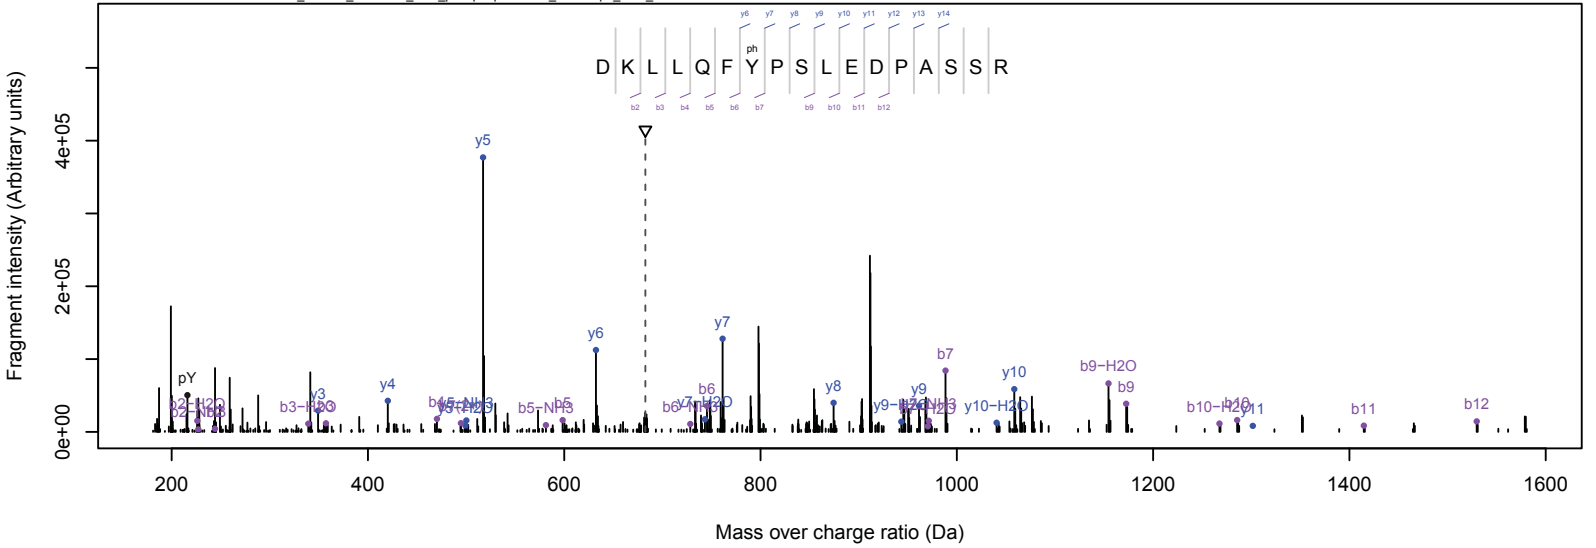

**TNHIGHTGY(ph)LNTVTVPDGLCASGGK-3+**

Source: QE1\_140612\_OPL1013\_CVA\_phosphoproteomic\_landscape\_AML\_B Scan: 23860

Andromeda score: 100.24

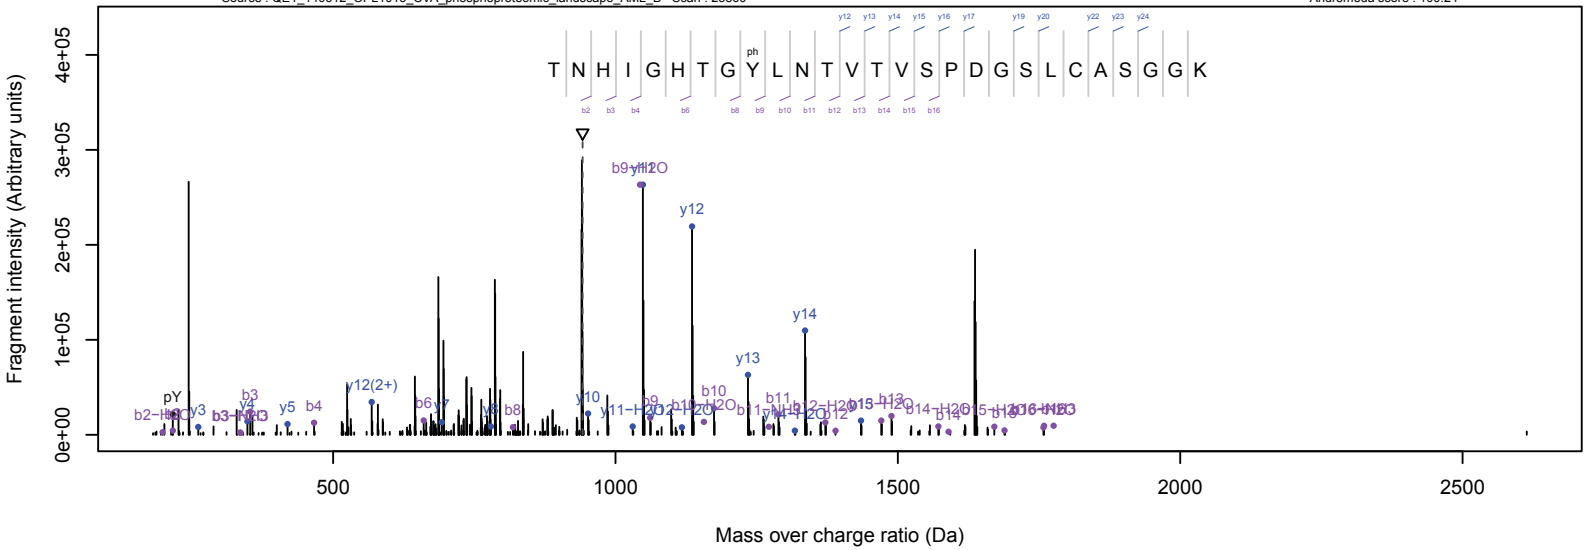

TESYRDFIYQNP<sup>ph</sup>HI<sup>ph</sup>FK-3+

Source : QE1\_140612\_OPL1013\_CVA\_phosphoproteomic\_landscape\_AML\_B Scan : 32684

Andromeda score : 100.23

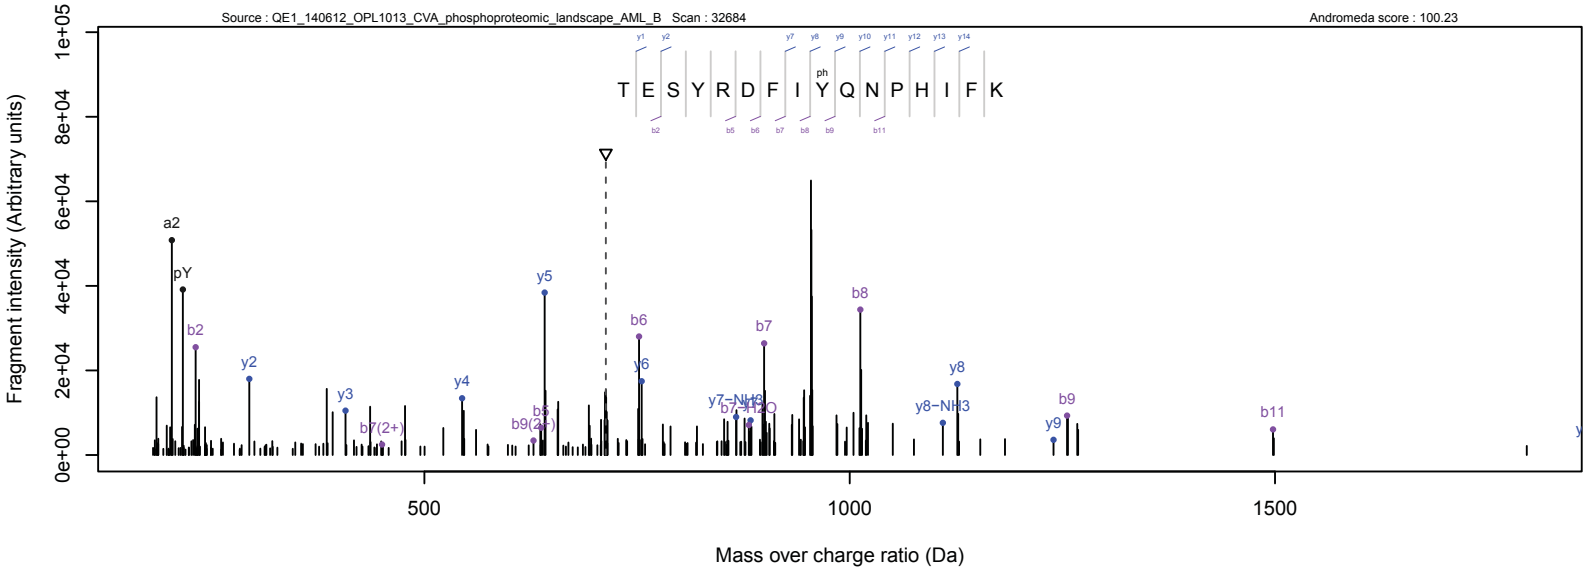

ALEEEKAYLSSR-2+

Source : QE1\_140612\_OPL1013\_CVA\_phosphoproteomic\_landscape\_AML\_C Scan : 11371

Andromeda score : 100.22

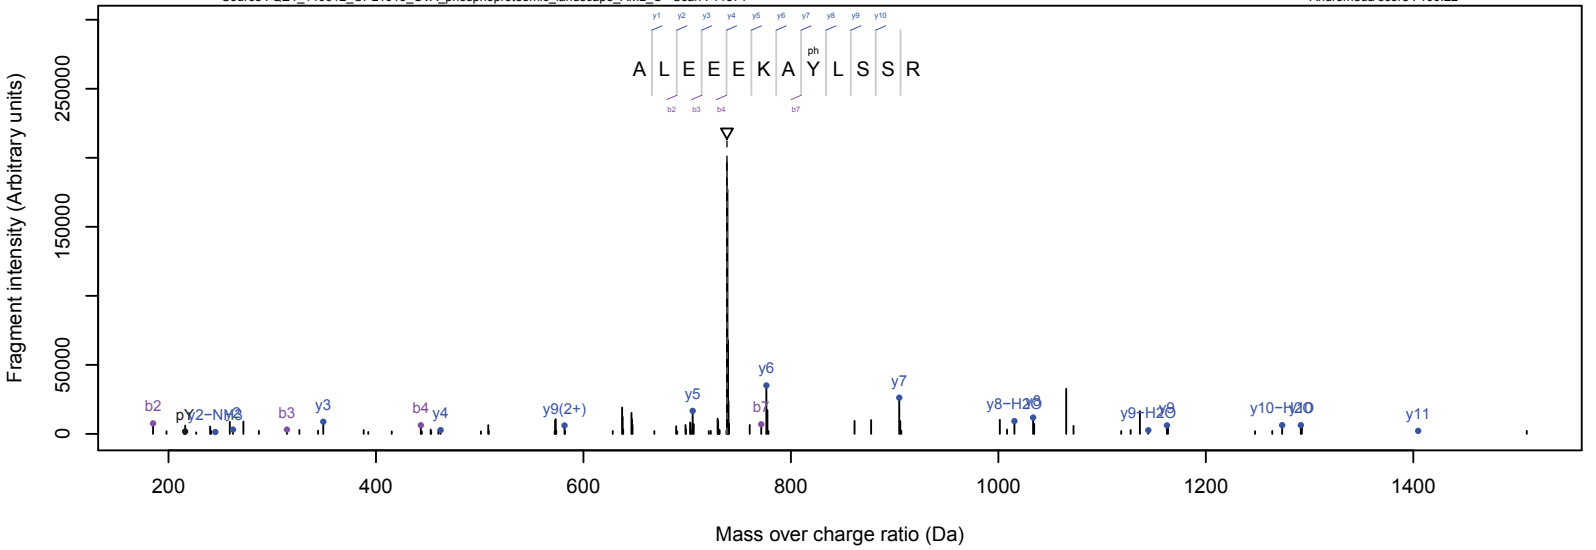

FD<sup>ph</sup>FLCQYHKPASK-3+

Source : QE1\_140612\_OPL1013\_CVA\_phosphoproteomic\_landscape\_AML\_C Scan : 21153

Andromeda score : 100.22

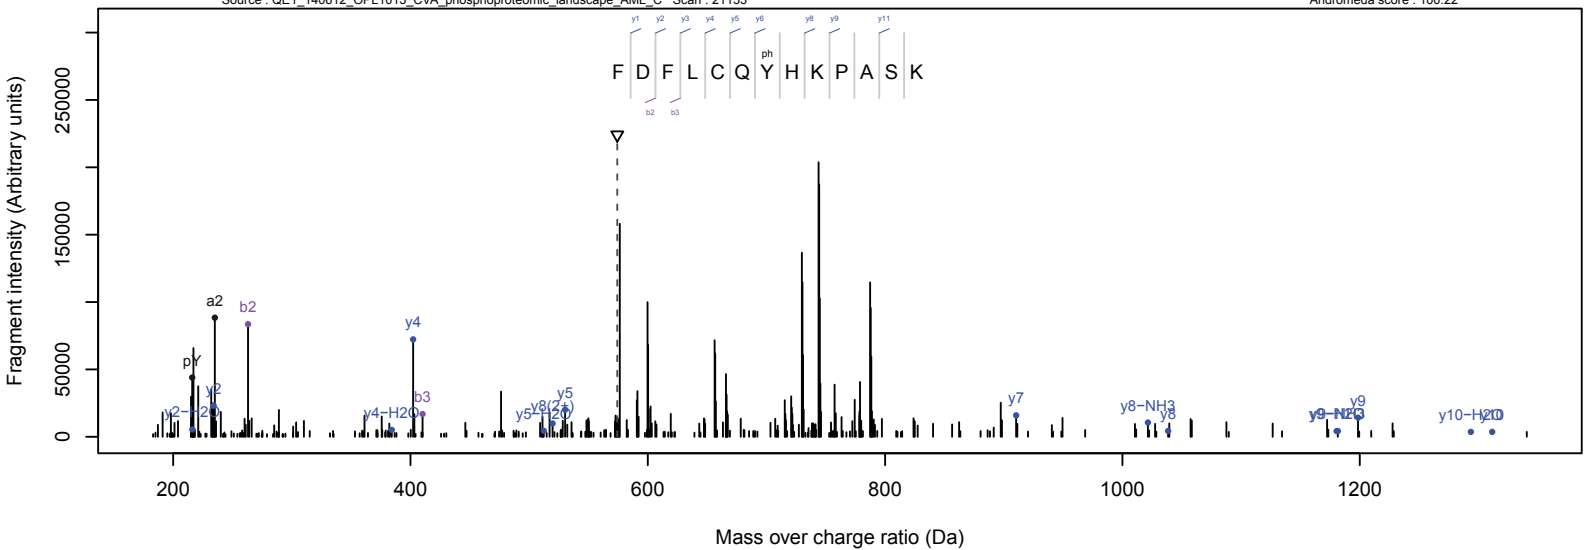

INFDKY(ph)HPGYFGK-3+

Source : QE1\_140612\_OPL1013\_CVA\_phosphoproteomic\_landscape\_AML\_C Scan : 22690

Andromeda score : 100.22

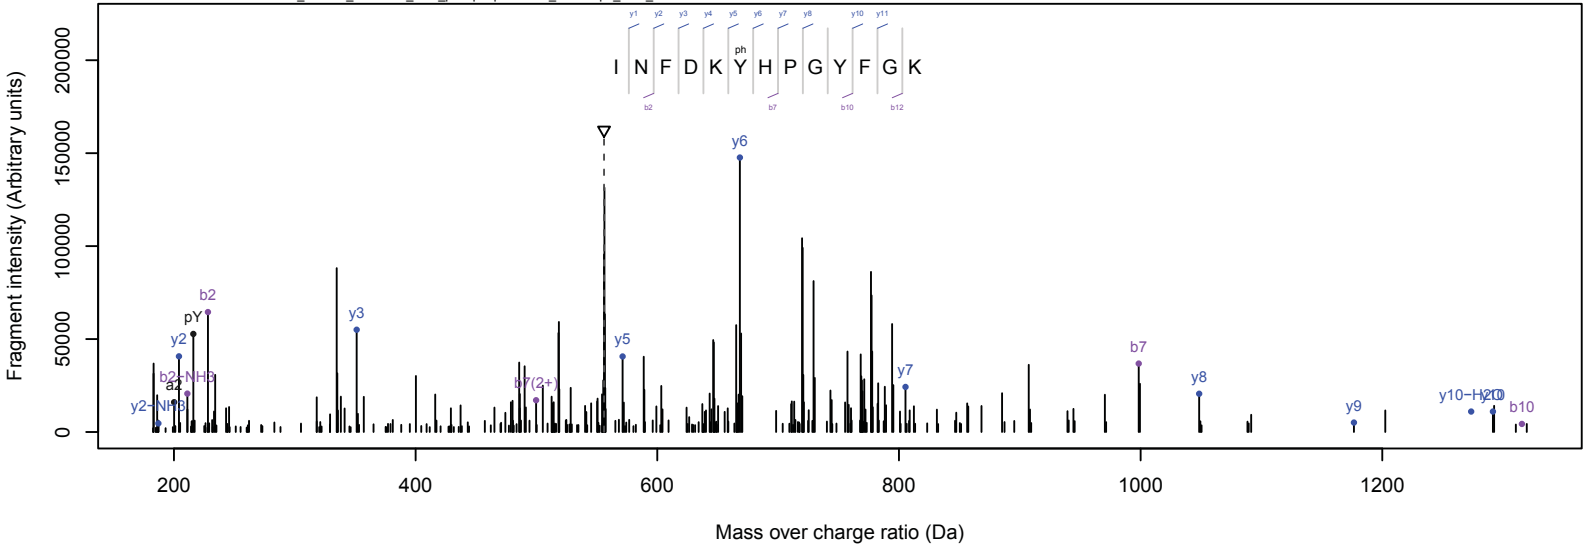

Y(ph)GTGVFGQNEYLR-2+

Source : QE1\_140612\_OPL1013\_CVA\_phosphoproteomic\_landscape\_AML\_C Scan : 29808

Andromeda score : 100.22

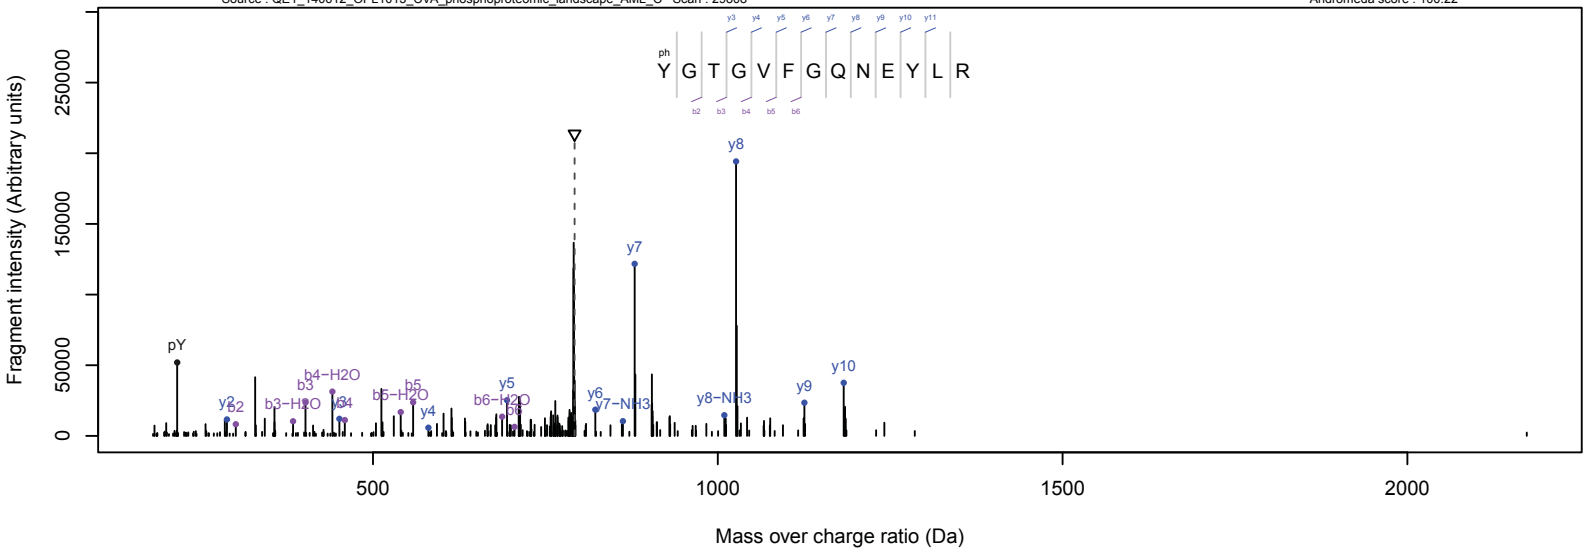

ELQDHSNQSSFNFSSPEWVNTTSSTPY(ph)QNIPCGSSR-4+

Source : QE1\_140612\_OPL1013\_CVA\_phosphoproteomic\_landscape\_AML\_D Scan : 39603

Andromeda score : 100.17

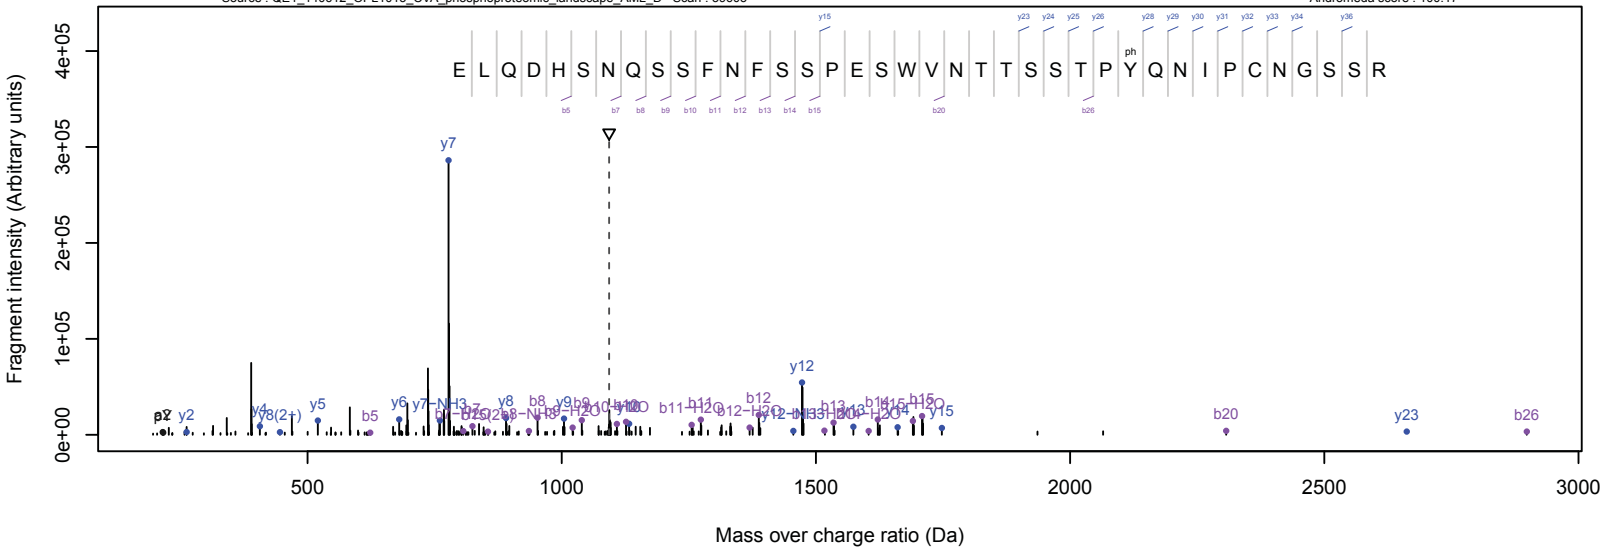



LKYPSPY(ph)SAHISK-3+

Source : QE1\_140612\_OPL1013\_CVA\_phosphoproteomic\_landscape\_AML\_C Scan : 13106

Andromeda score : 100.11

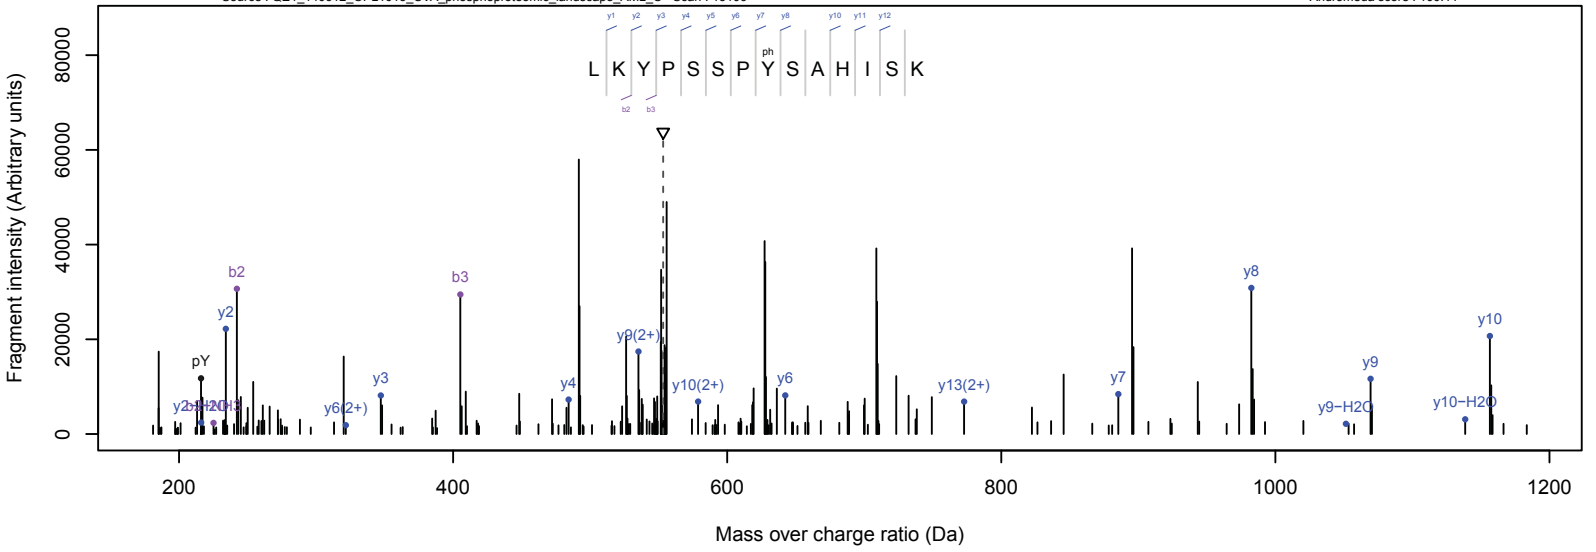

SLVDTVY(ph)ALKDEVR-3+

Source : QE1\_140612\_OPL1013\_CVA\_phosphoproteomic\_landscape\_AML\_C Scan : 42766

Andromeda score : 100.11

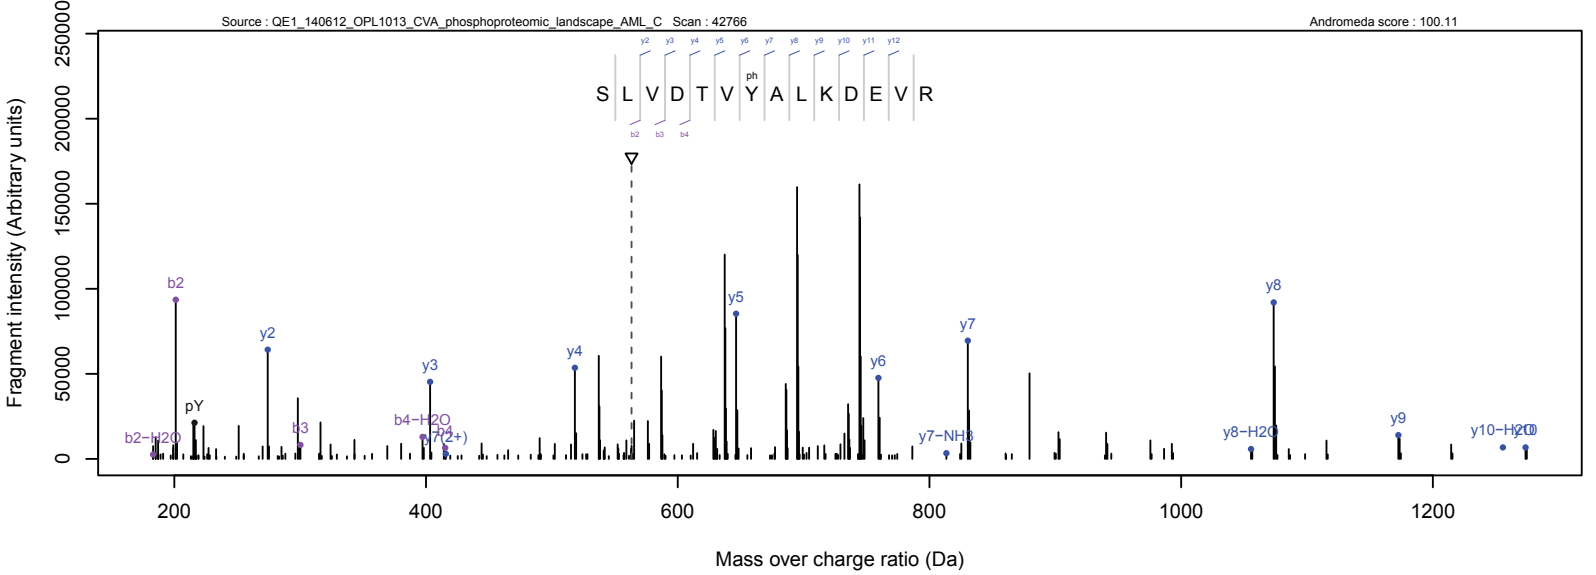

TCGLSY(ph)YMGQHC FIR-3+

Source : QE1\_140612\_OPL1013\_CVA\_phosphoproteomic\_landscape\_AML\_C Scan : 34425

Andromeda score : 100.11

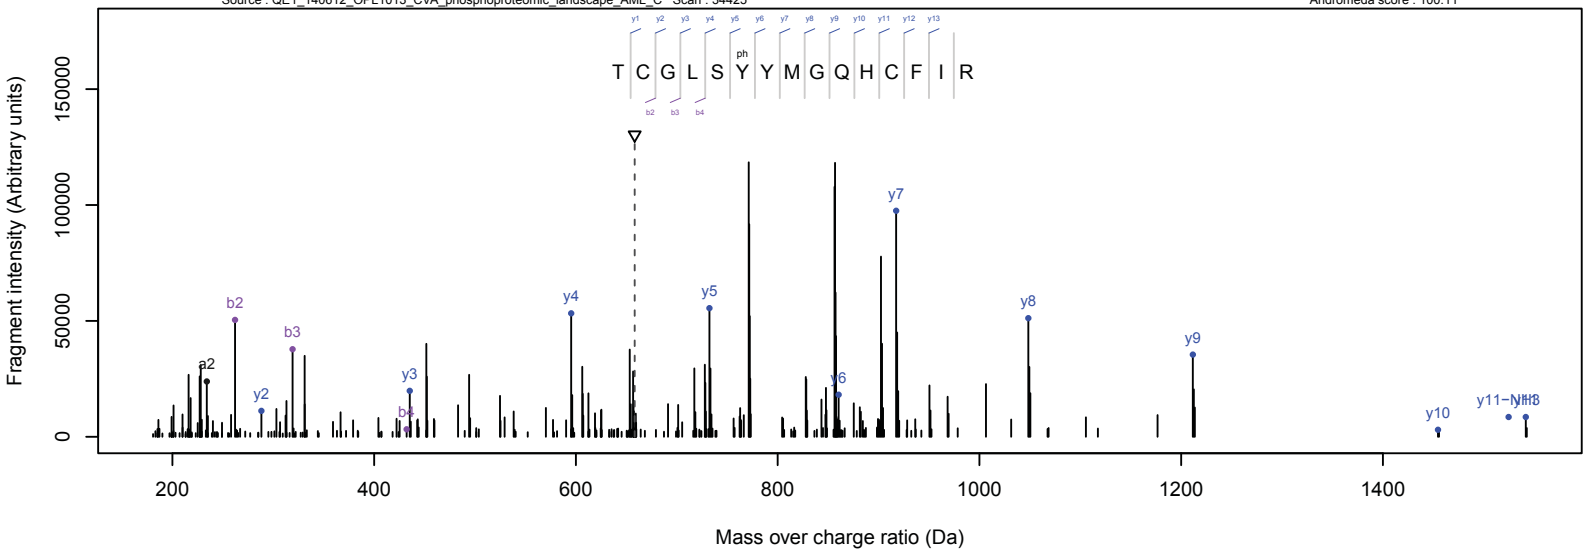

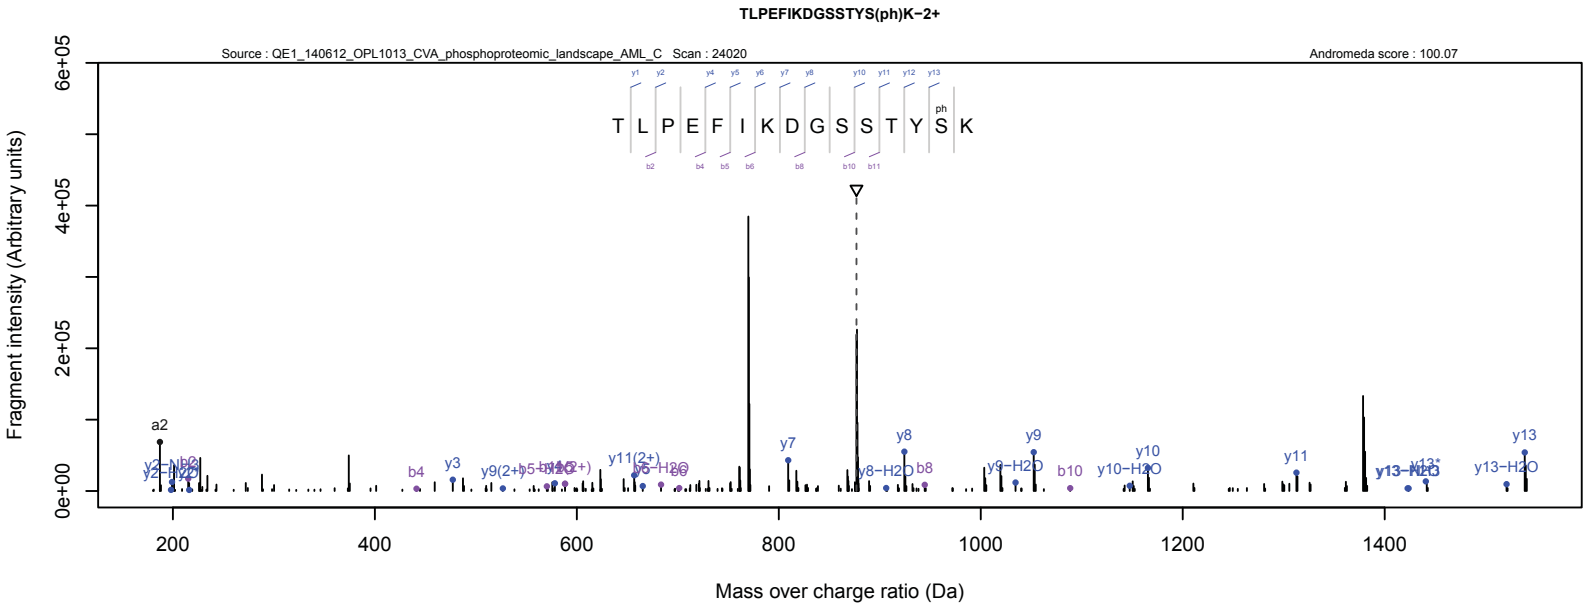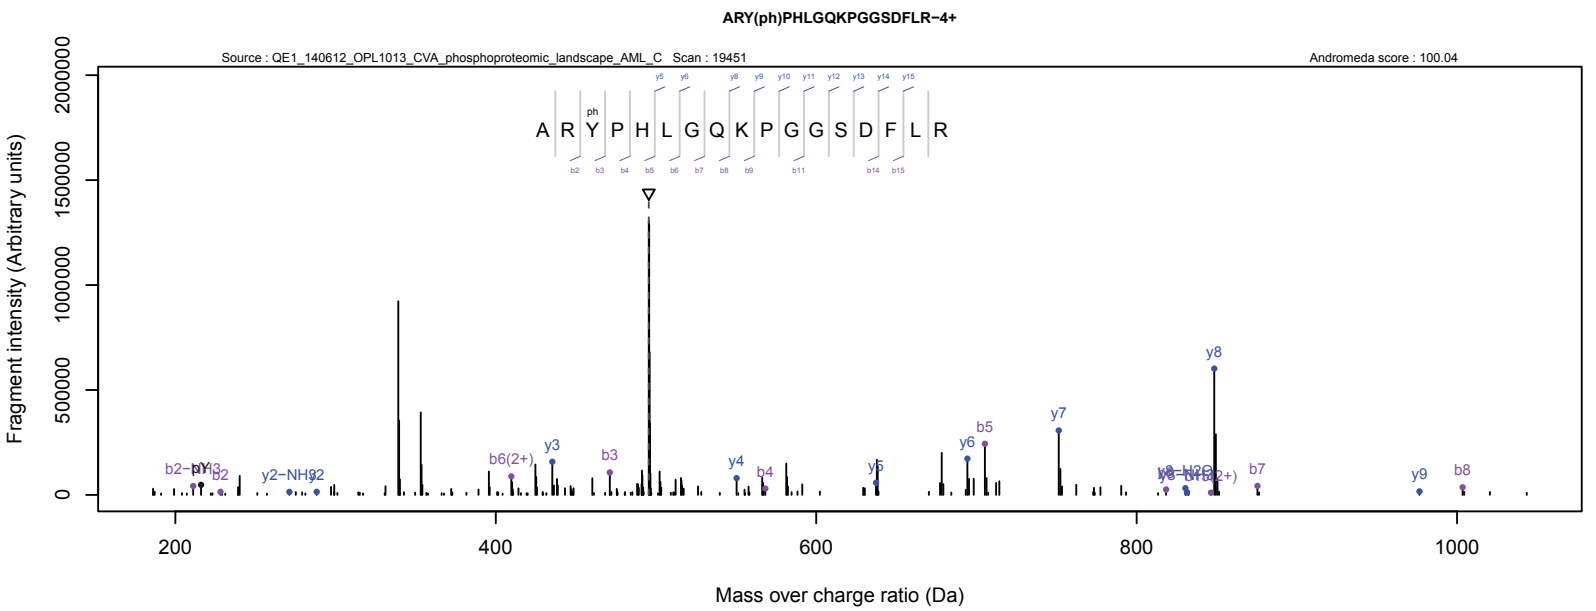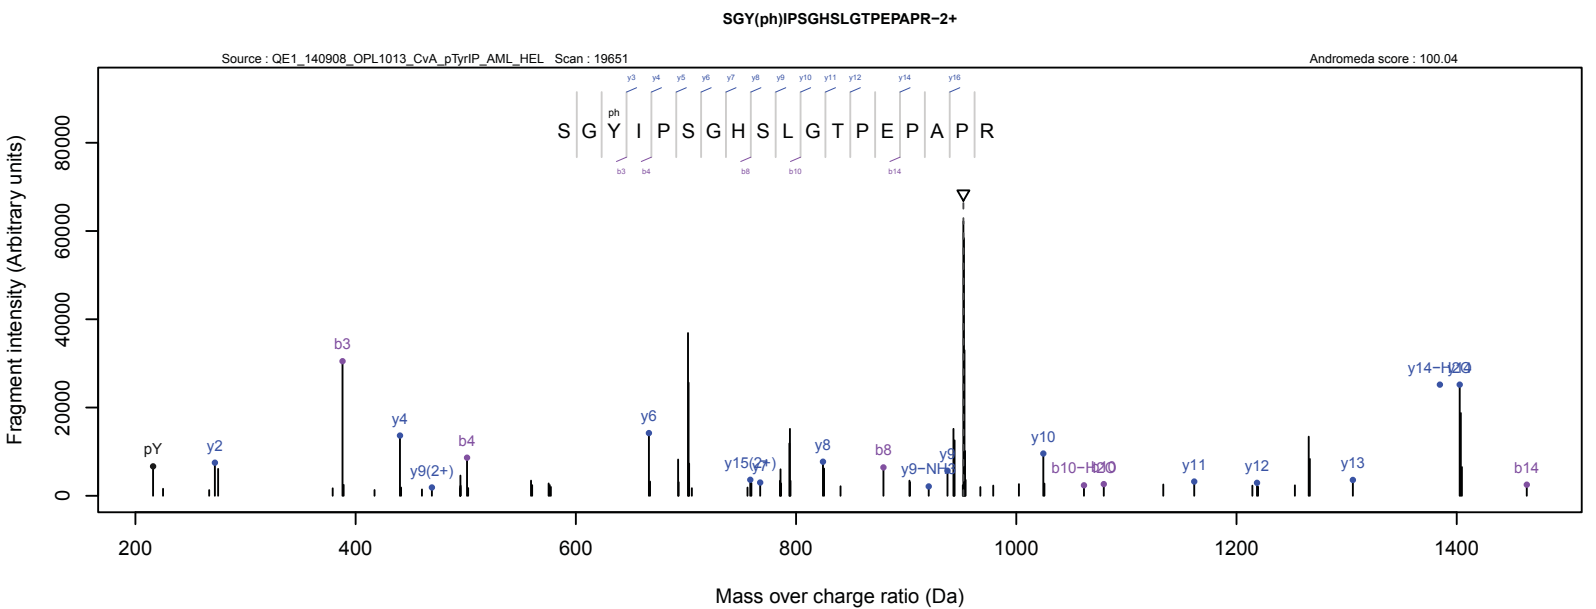

DKYGNEGY(ph)IPSNYVTGKK-3+

Source : QE1\_140612\_OPL1013\_CVA\_phosphoproteomic\_landscape\_AML\_C Scan : 18134

Andromeda score : 100.02

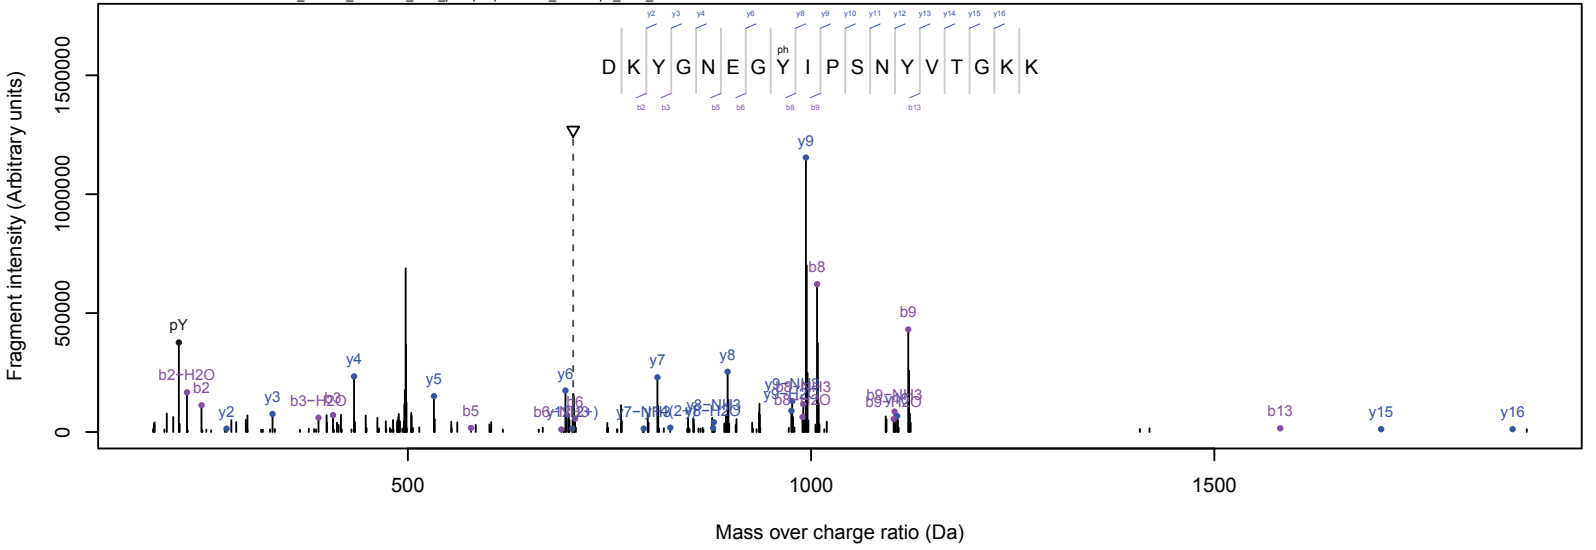

DSSSQENM(ox)VEDCLY(ph)ETVK-2+

Source : QE1\_140908\_OPL1013\_CvA\_pTyrIP\_AML\_OCI\_AML3 Scan : 34674

Andromeda score : 100.02

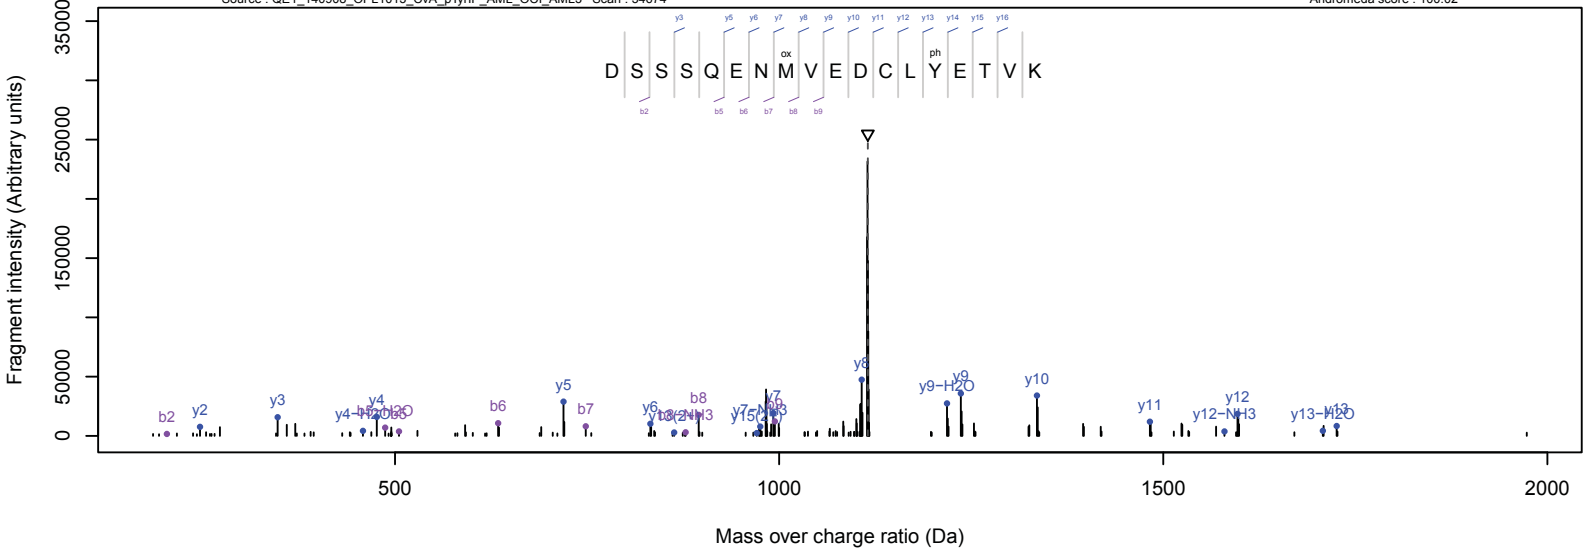

HY(ph)IAMFESSQNVLKPTESWR-3+

Source : QE1\_140612\_OPL1013\_CVA\_phosphoproteomic\_landscape\_AML\_B Scan : 40829

Andromeda score : 100.02

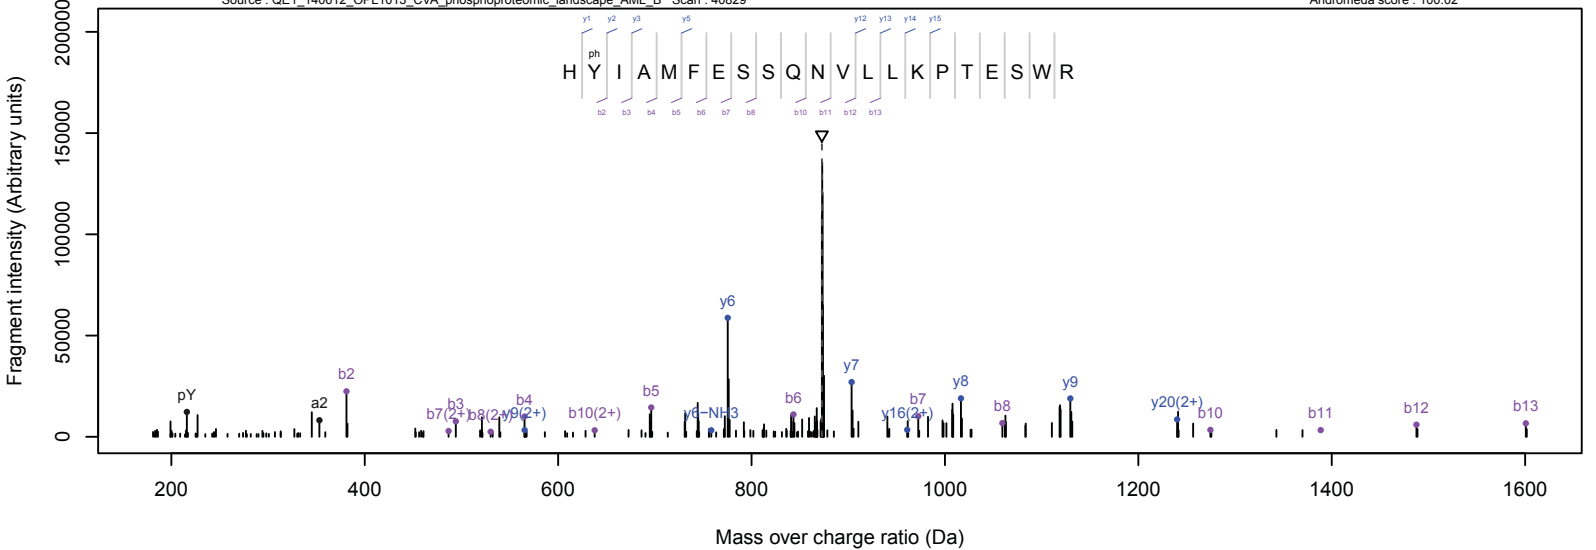

RHY(ph)PVNSVIFCALDPQDR-3+

Source : QE1\_140612\_OPL1013\_CVA\_phosphoproteomic\_landscape\_AML\_B Scan : 35966

Andromeda score : 100.02

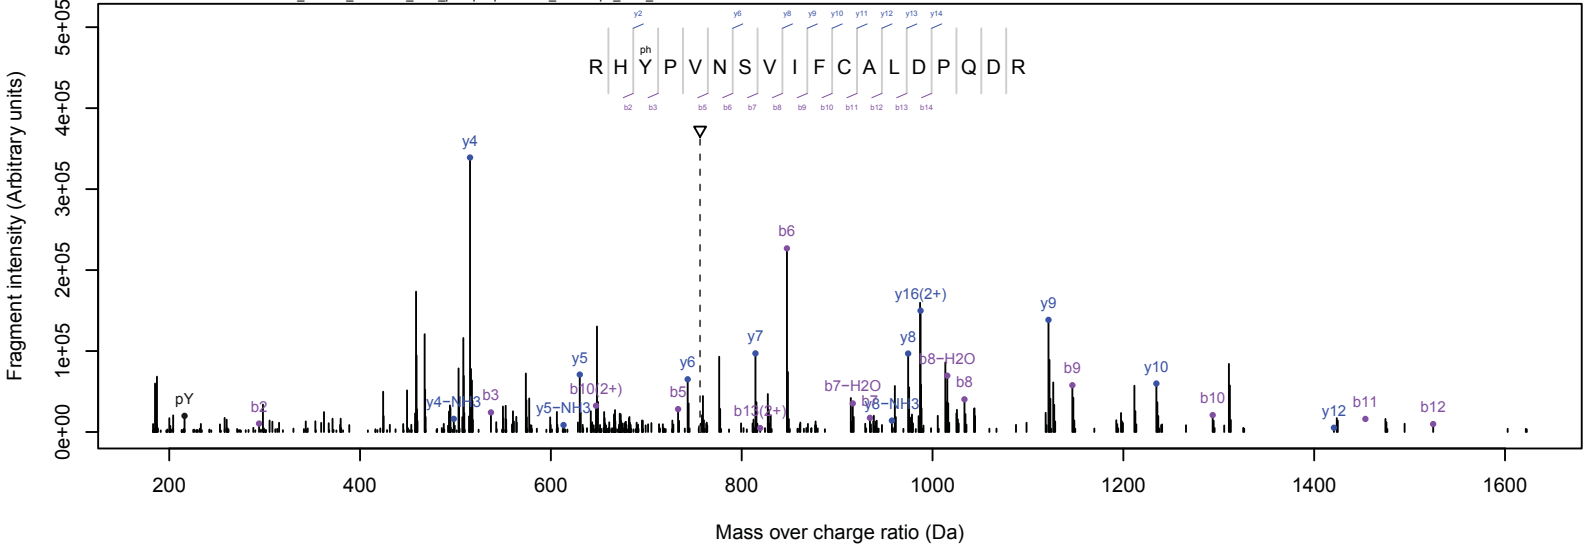

VVNLEQLCKPY(ph)TVVDVSAAMASEHLEGPVNSPK-4+

Source : QE1\_140612\_OPL1013\_CVA\_phosphoproteomic\_landscape\_AML\_C Scan : 44656

Andromeda score : 99.997

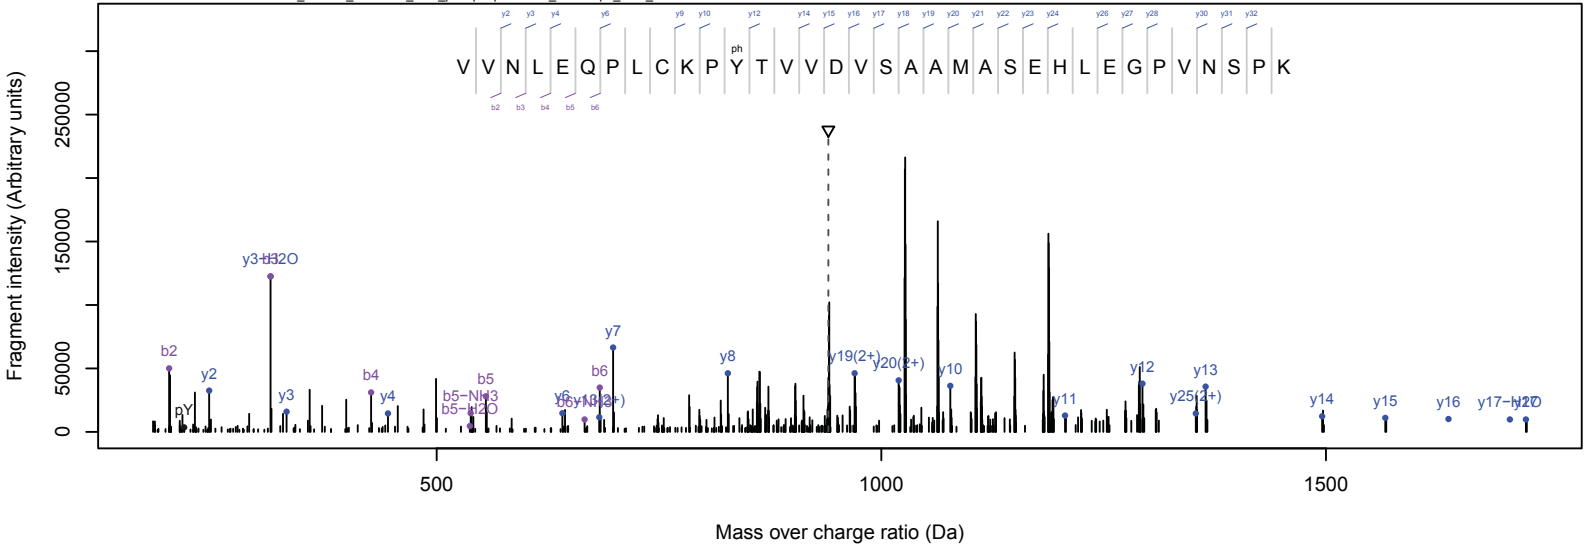

KGPCAVSSNPY(ph)YAFKNPIYSQPAWMNDSHK-4+

Source : QE1\_140908\_OPL1013\_CvA\_pTyrIP\_AML\_OCI\_AML3 Scan : 33447

Andromeda score : 99.987

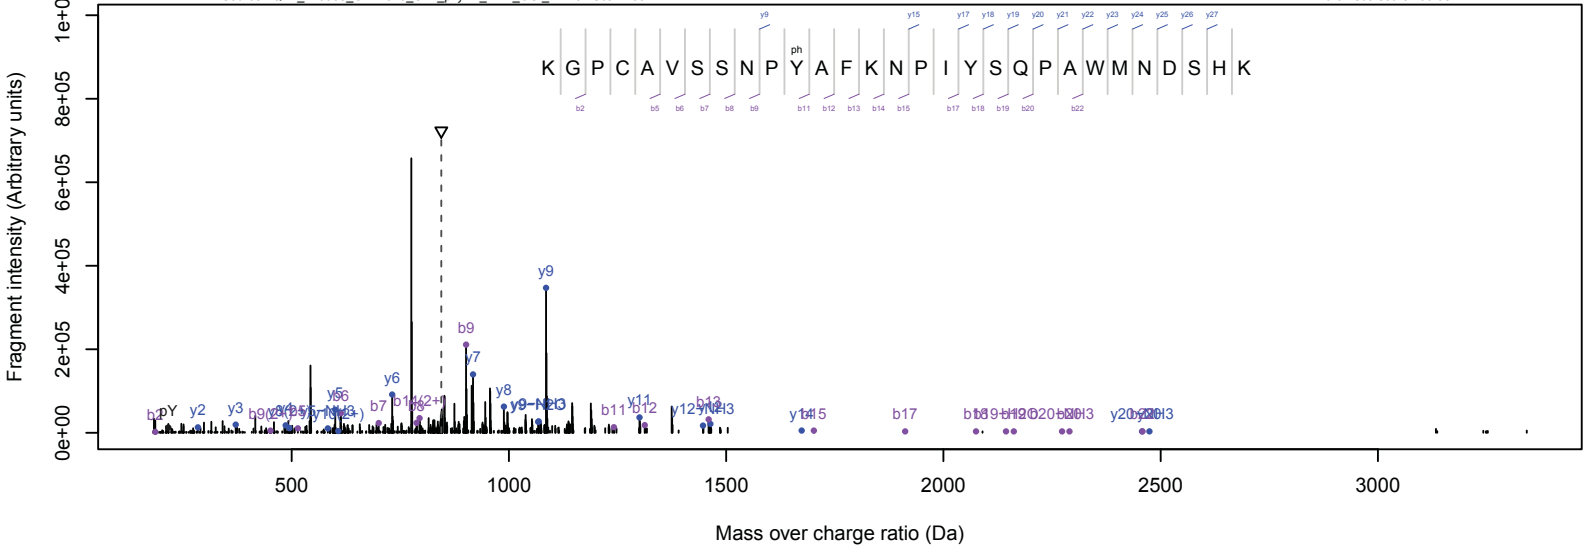

LGHY(ph)ATQLQNTYDR-3+

Source: QE1\_140612\_OPL1013\_CVA\_phosphoproteomic\_landscape\_AML\_B Scan: 15592

Andromeda score: 99.941

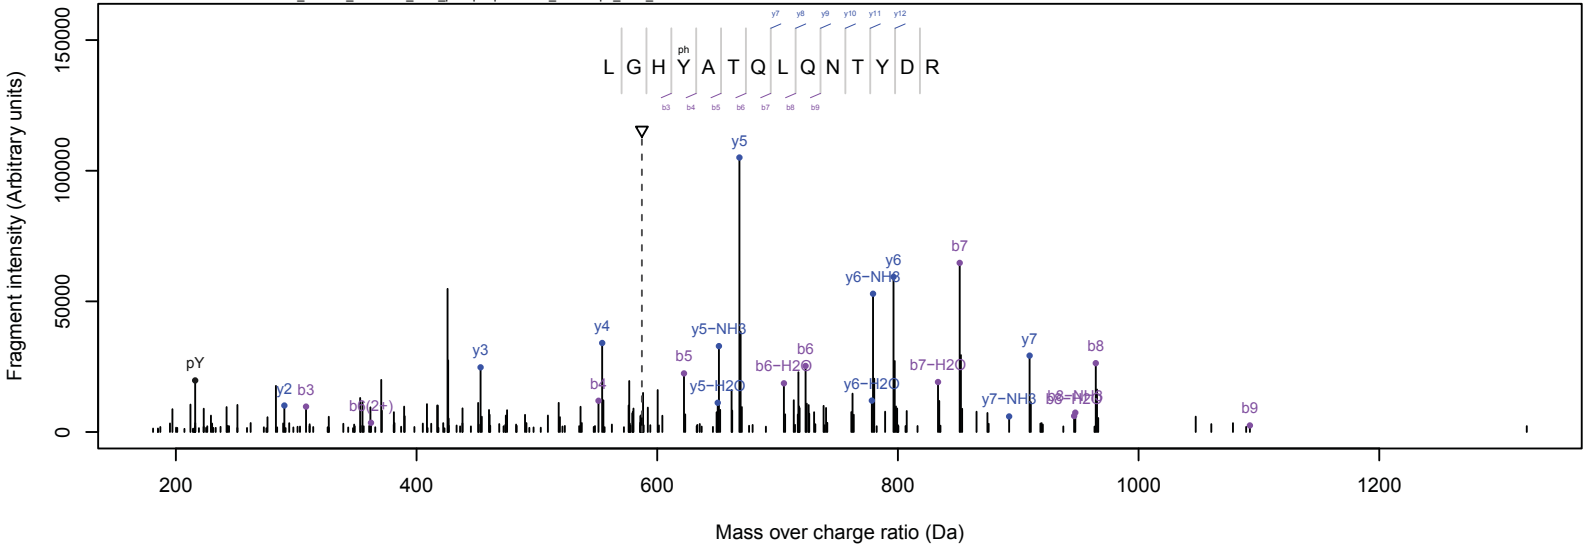

MY(ph)TAIPQSGSPFPQSGVQDPLHVWR-3+

Source: QE1\_140612\_OPL1013\_CVA\_phosphoproteomic\_landscape\_AML\_C Scan: 42631

Andromeda score: 99.93

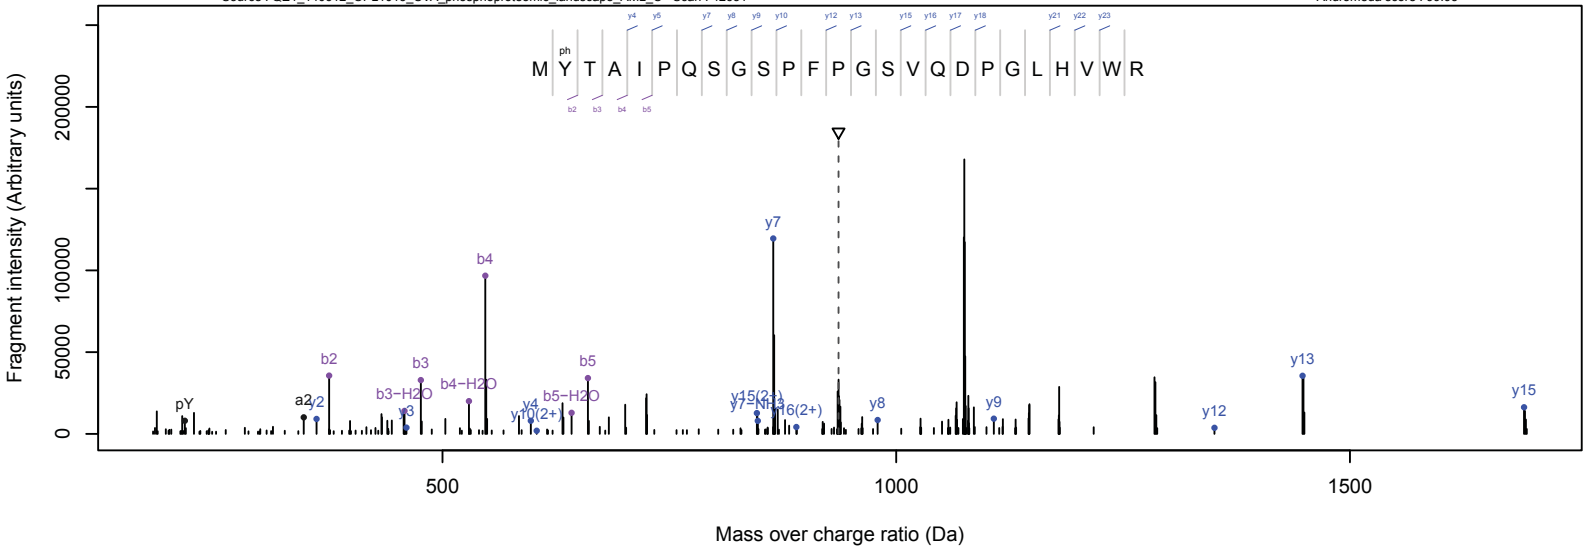

VLNAVRDY(ph)HIGIPLTYSQYK-3+

Source: QE1\_140612\_OPL1013\_CVA\_phosphoproteomic\_landscape\_AML\_B Scan: 34580

Andromeda score: 99.873

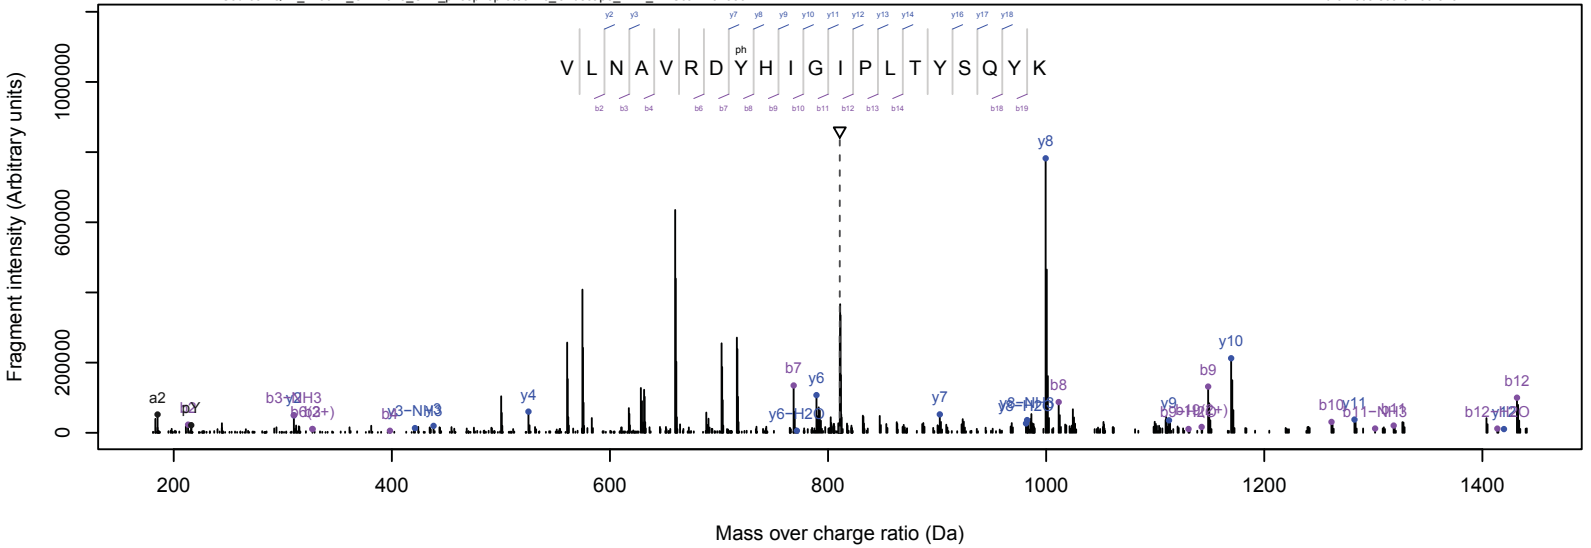

**GY(ph)AFITCGK-2+**

Source: QE1\_140612\_OPL1013\_CVA\_phosphoproteomic\_landscape\_AML\_D Scan: 33485

Andromeda score: 99.815

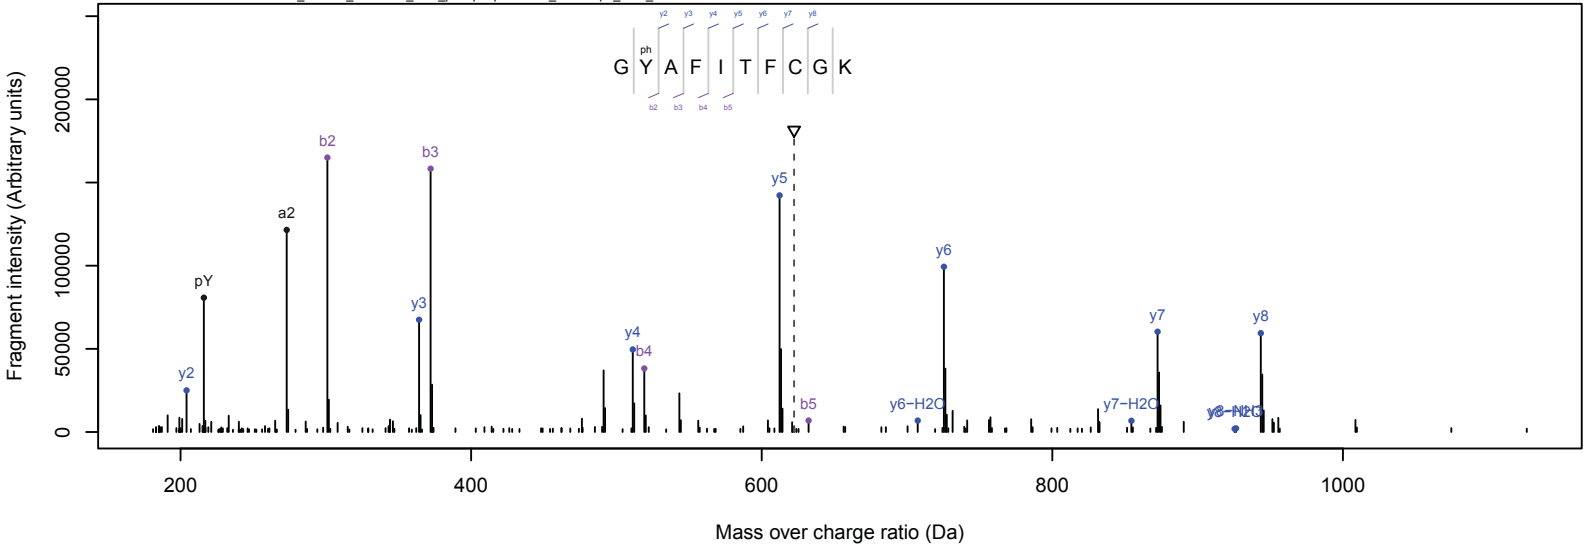

**SMIAAGY(ph)QHIR-2+**

Source: QE1\_140612\_OPL1013\_CVA\_phosphoproteomic\_landscape\_AML\_A Scan: 15350

Andromeda score: 99.752

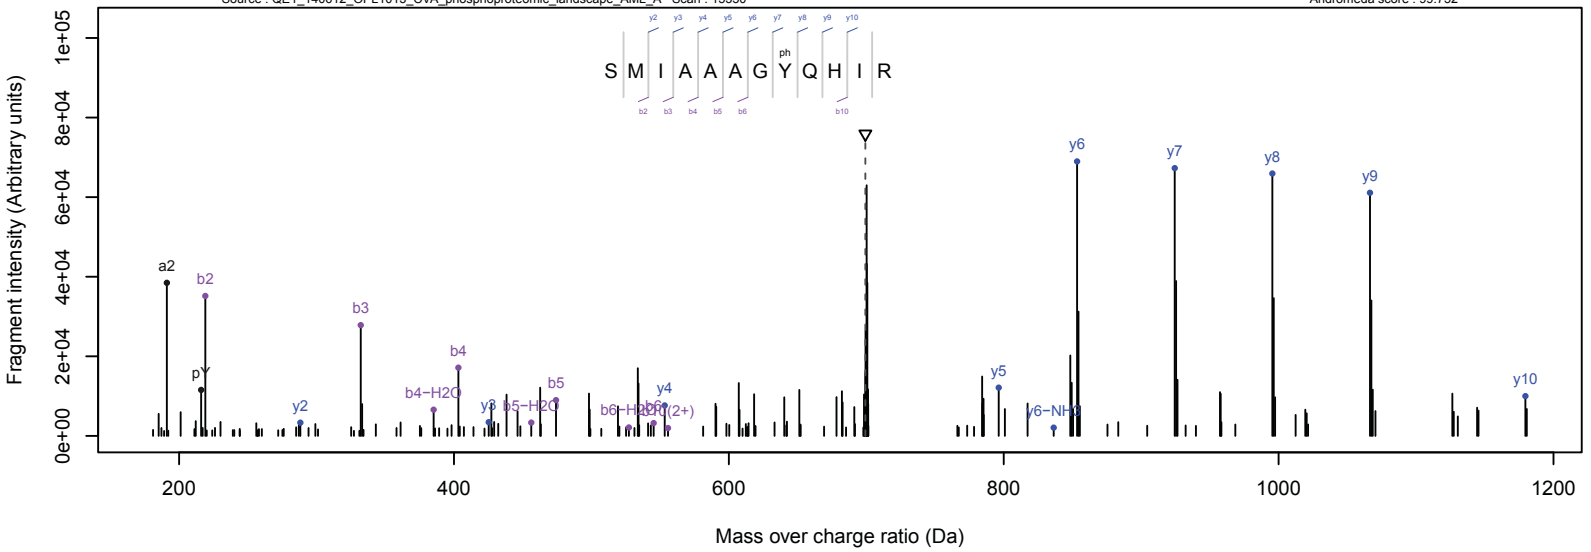

**YALYDATY(ph)ETK-2+**

Source: QE1\_140908\_OPL1013\_CvA\_pTyrIP\_AML\_OCI\_AML3 Scan: 23465

Andromeda score: 99.752

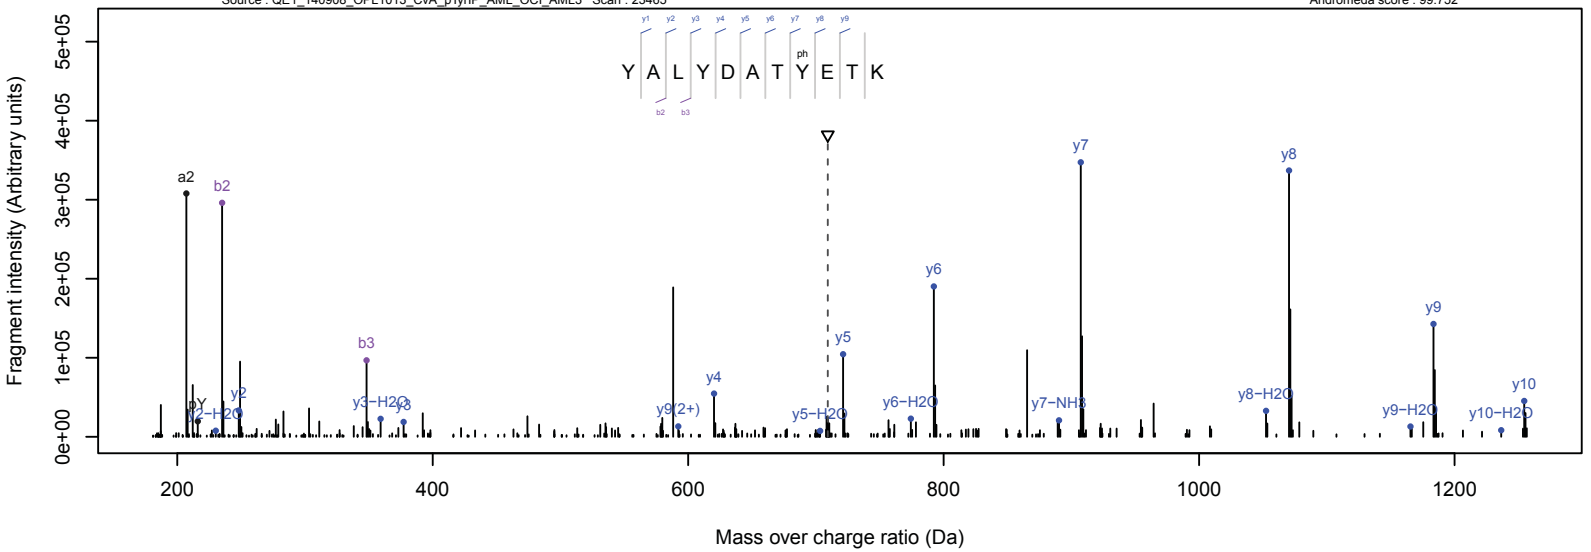

**GAHGSY(ph)LKVESELER-3+**

Source : QE1\_140612\_OPL1013\_CVA\_phosphoproteomic\_landscape\_AML\_C Scan : 17355

Andromeda score : 99.747

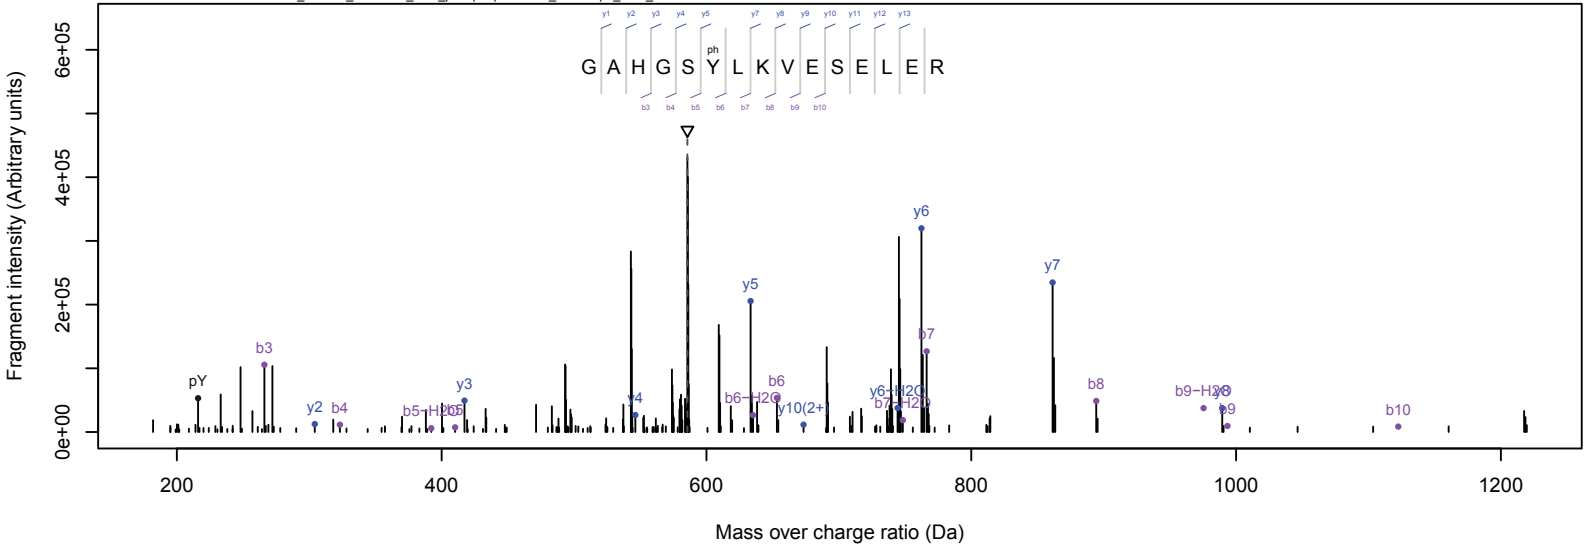

**AGSLPNY(ph)ATINGK-2+**

Source : QE1\_140612\_OPL1013\_CVA\_phosphoproteomic\_landscape\_AML\_C Scan : 16189

Andromeda score : 99.669

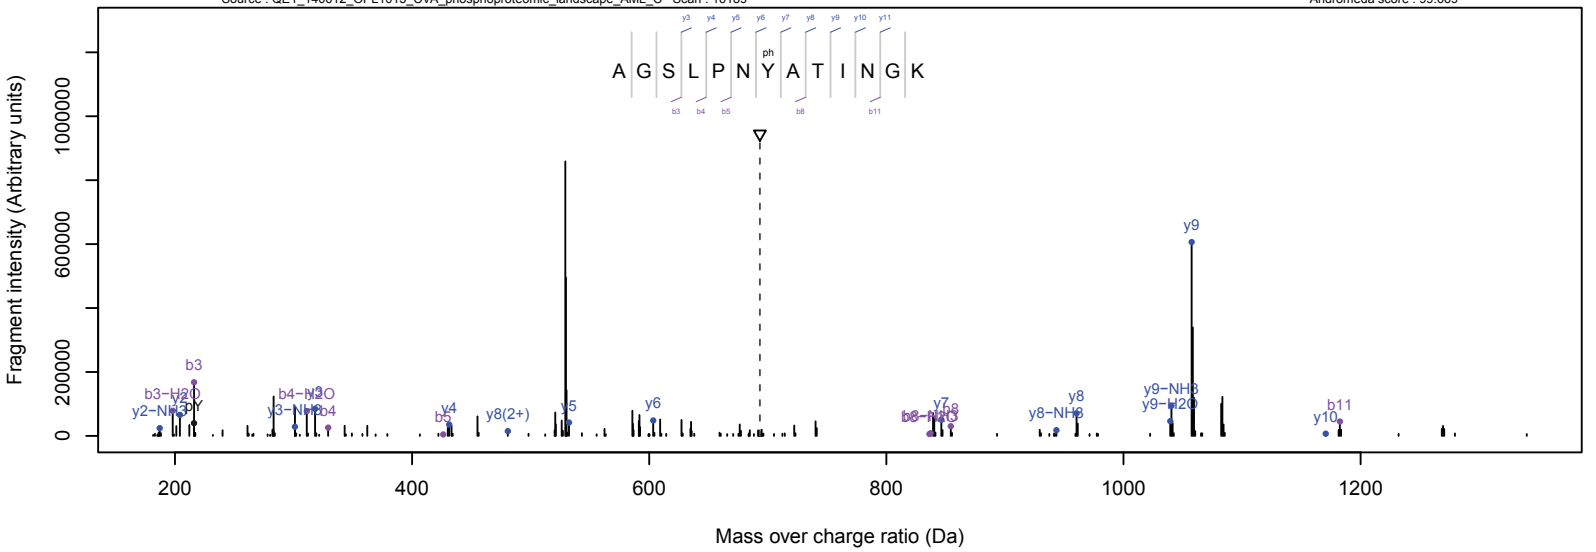

**GCLLY(ph)GPPGTGK-2+**

Source : QE1\_140612\_OPL1013\_CVA\_phosphoproteomic\_landscape\_AML\_B Scan : 20736

Andromeda score : 99.539

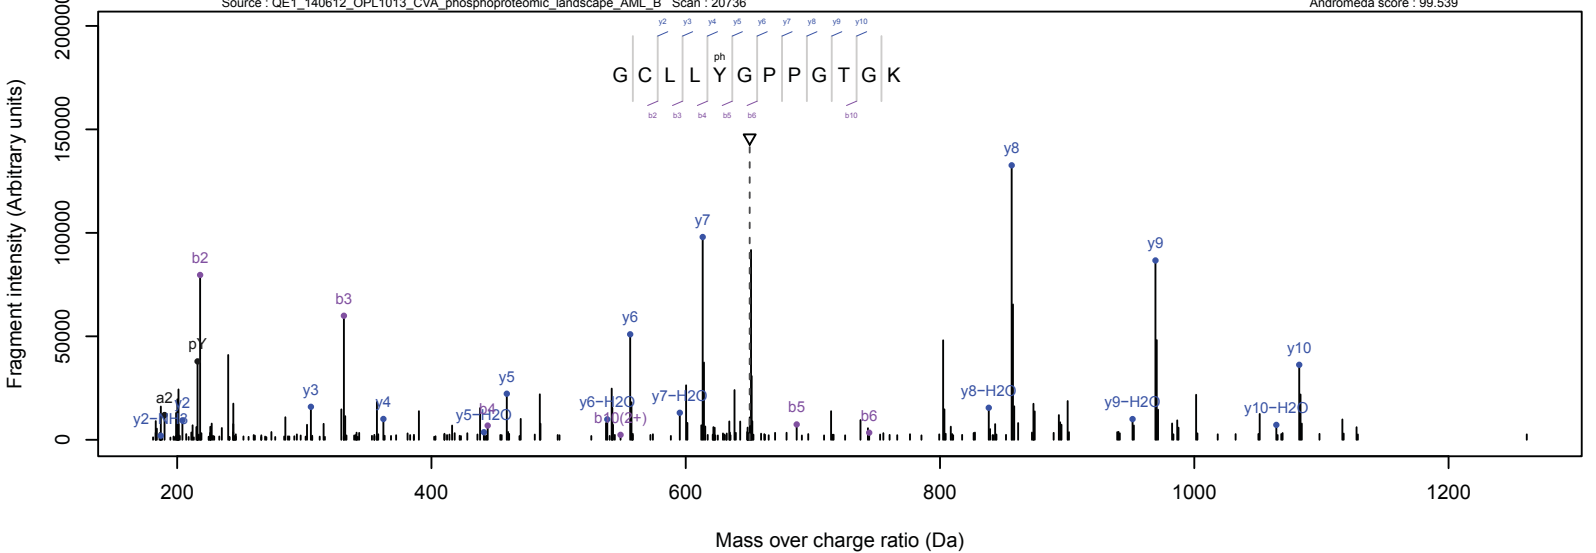

TMSVDFNY(ph)SR-2+

Source : QE1\_140612\_OPL1013\_CVA\_phosphoproteomic\_landscape\_AML\_C Scan : 19365

Andromeda score : 99.5

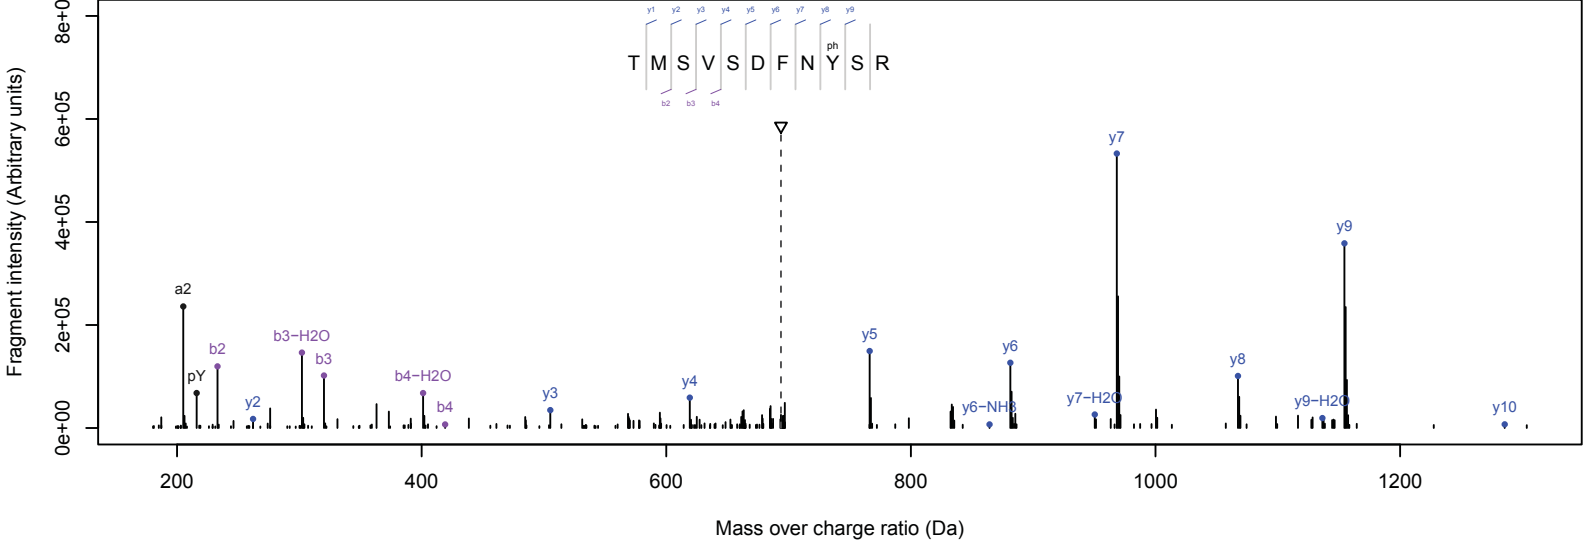

AY(ph)KTTWGDGGENSPCNVSK-3+

Source : QE1\_140612\_OPL1013\_CVA\_phosphoproteomic\_landscape\_AML\_C Scan : 16636

Andromeda score : 99.409

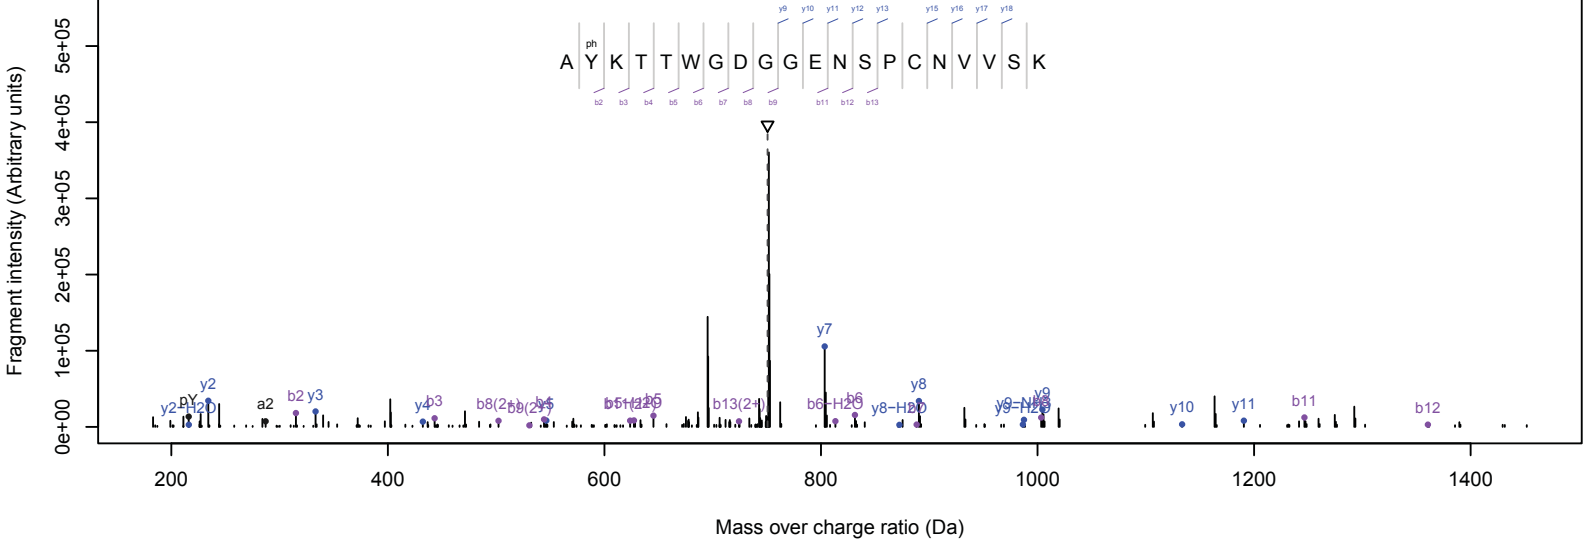

VNKIYYPDFIVDPK-2+

Source : QE1\_140612\_OPL1013\_CVA\_phosphoproteomic\_landscape\_AML\_D Scan : 38819

Andromeda score : 99.392

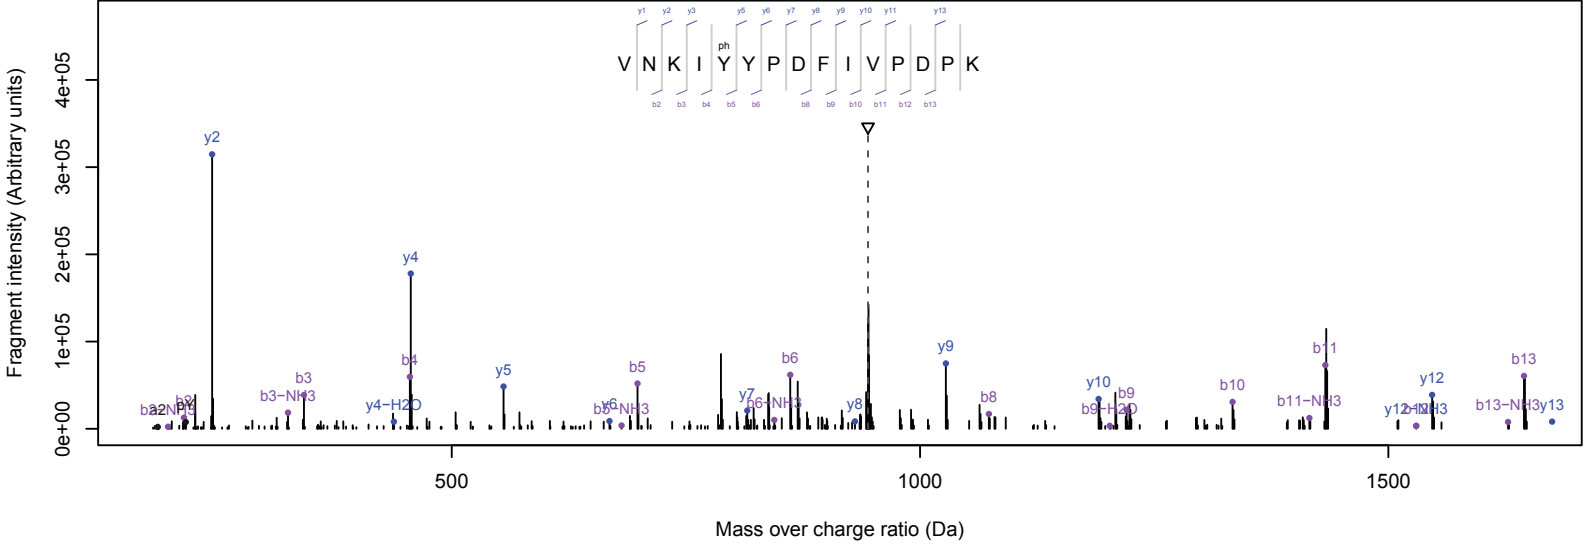



**S(ph)KSPLPPEEEAKDEEEDQLVNLDTYTSDLHFQVSK-4+**

Source: QE1\_140908\_OPL1013\_CvA\_pTyrIP\_AML\_HL60 Scan: 45989

Andromeda score: 99.357

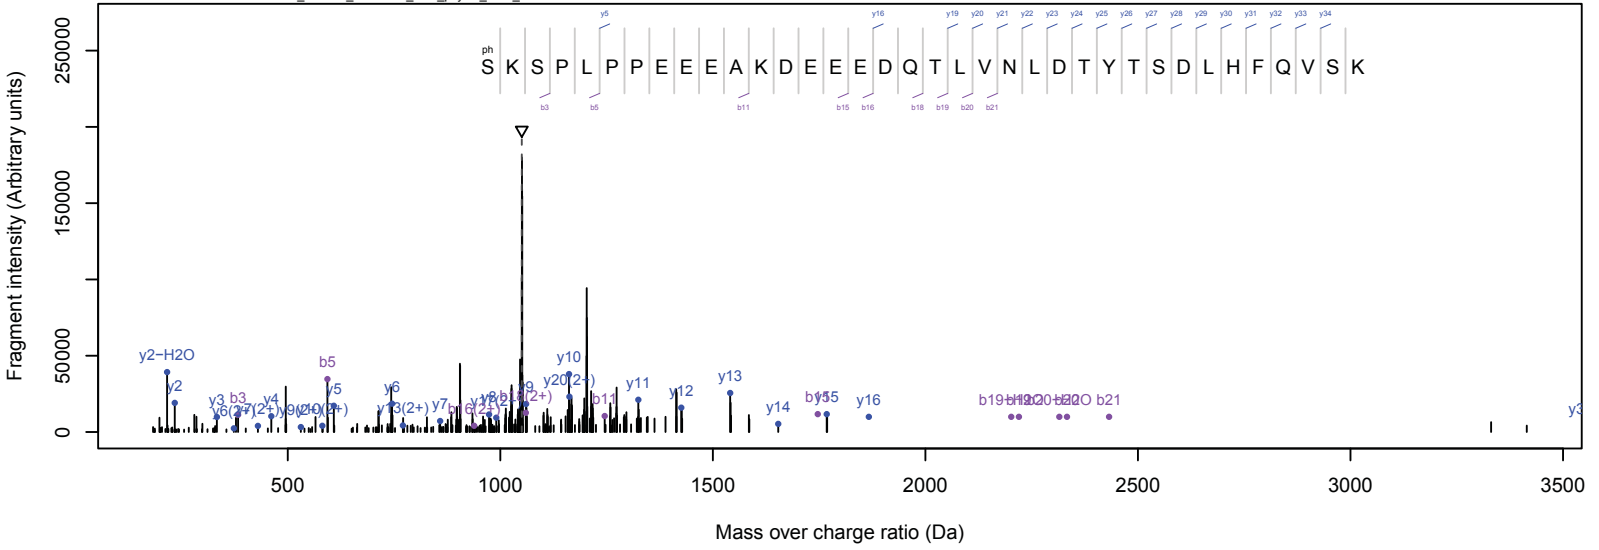

**DTRDY(ph)APPRDYTYR-3+**

Source: QE1\_140612\_OPL1013\_CVA\_phosphoproteomic\_landscape\_AML\_C Scan: 12494

Andromeda score: 99.344

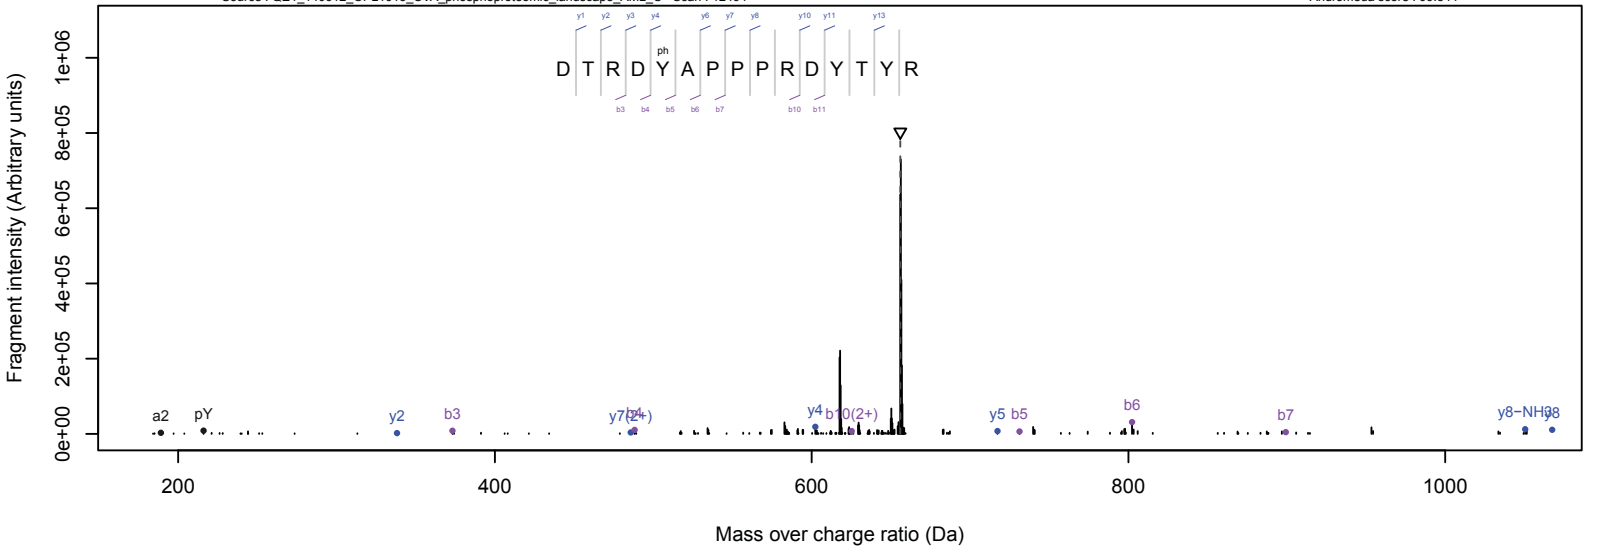

**KGPLY(ph)YVDEHGTR-3+**

Source: QE1\_140612\_OPL1013\_CVA\_phosphoproteomic\_landscape\_AML\_B Scan: 14137

Andromeda score: 99.344

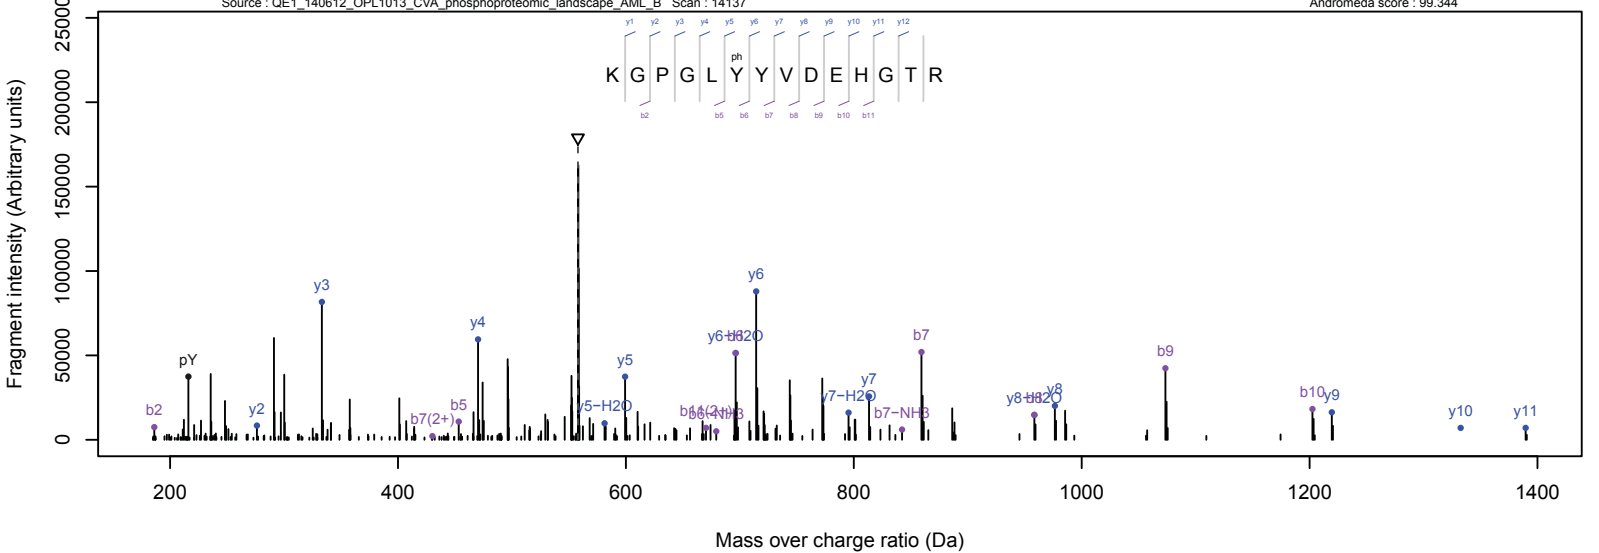

YSDHAGPAIPSVVAY<sup>ph</sup>PKR-3+

Source: QE1\_140612\_OPL1013\_CVA\_phosphoproteomic\_landscape\_AML\_C Scan: 23042

Andromeda score: 99.344

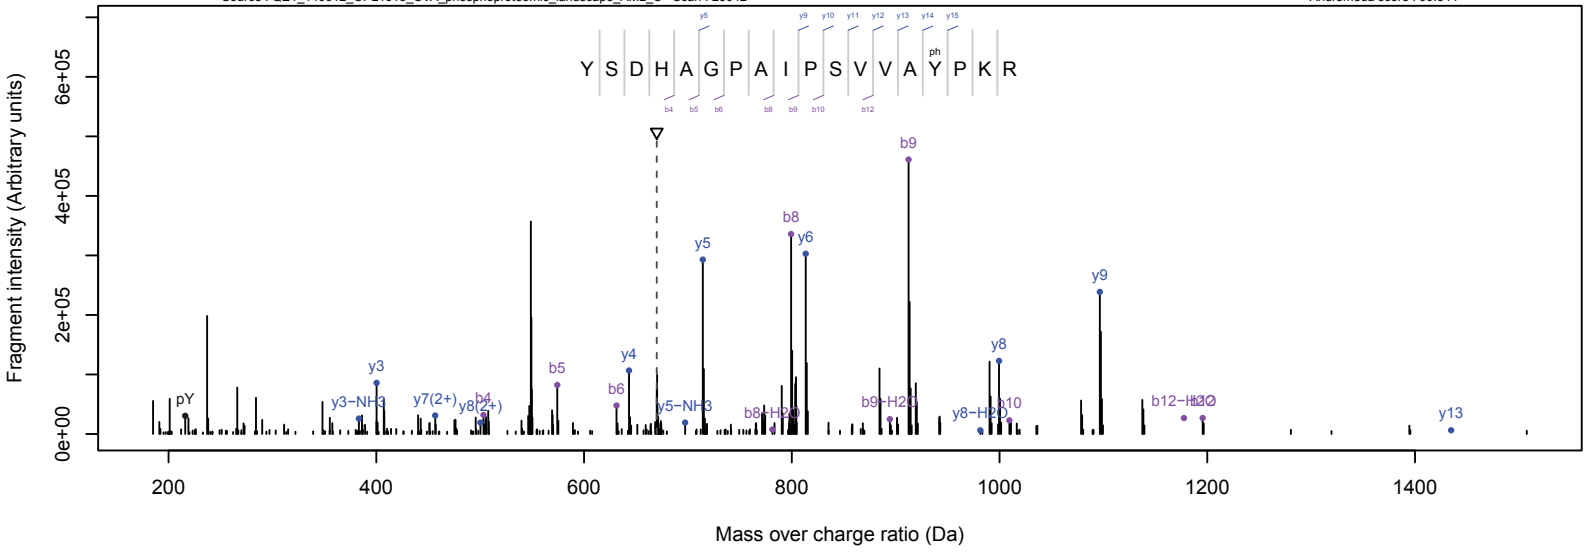

IRSY<sup>ph</sup>PVTEQR-3+

Source: QE1\_140612\_OPL1013\_CVA\_phosphoproteomic\_landscape\_AML\_C Scan: 5300

Andromeda score: 99.343

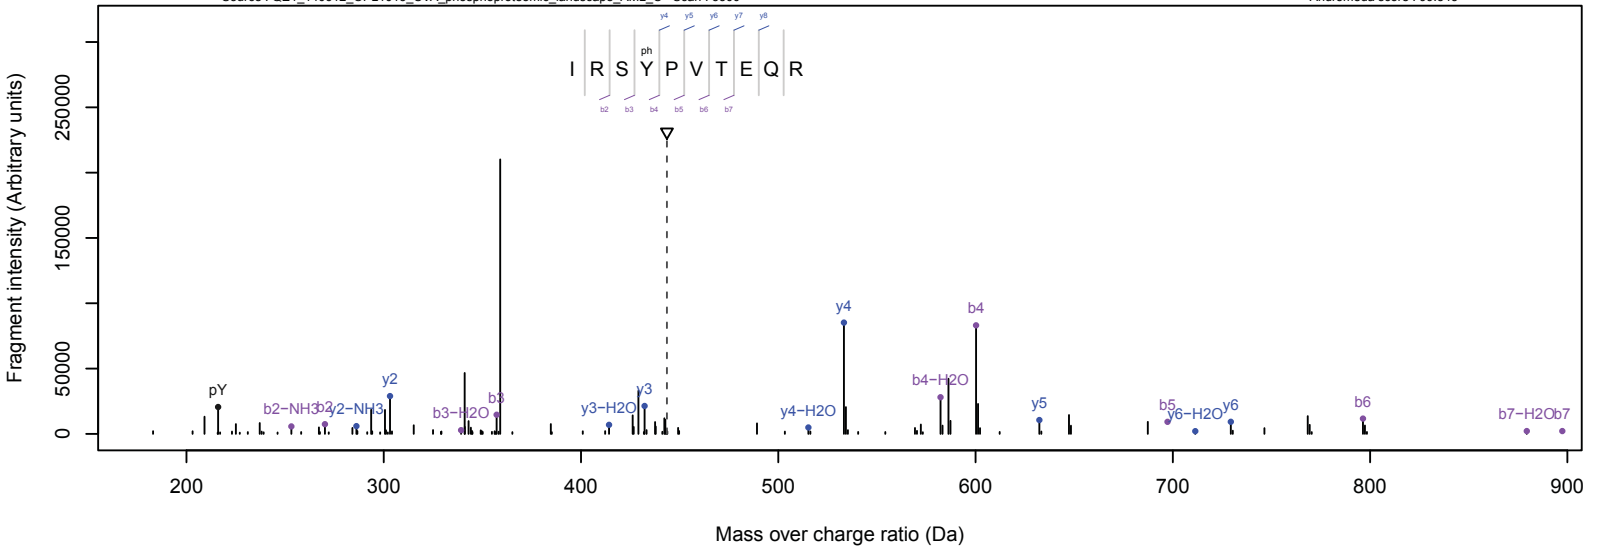

CNKEVY<sup>ph</sup>FAER-2+

Source: QE1\_140612\_OPL1013\_CVA\_phosphoproteomic\_landscape\_AML\_C Scan: 10876

Andromeda score: 99.283

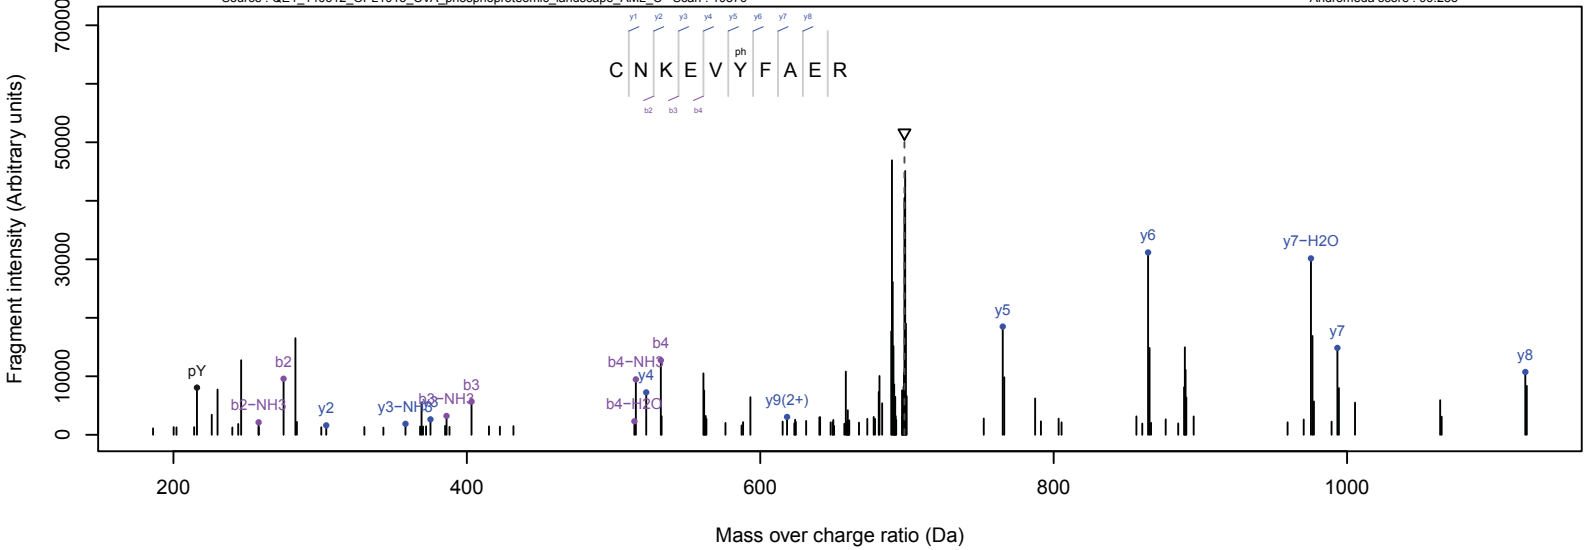





IHY(ph)PHVYDSQAEAMK-3+

Source : QE1\_140612\_OPL1013\_CVA\_phosphoproteomic\_landscape\_AML\_D Scan : 18824

Andromeda score : 99.069

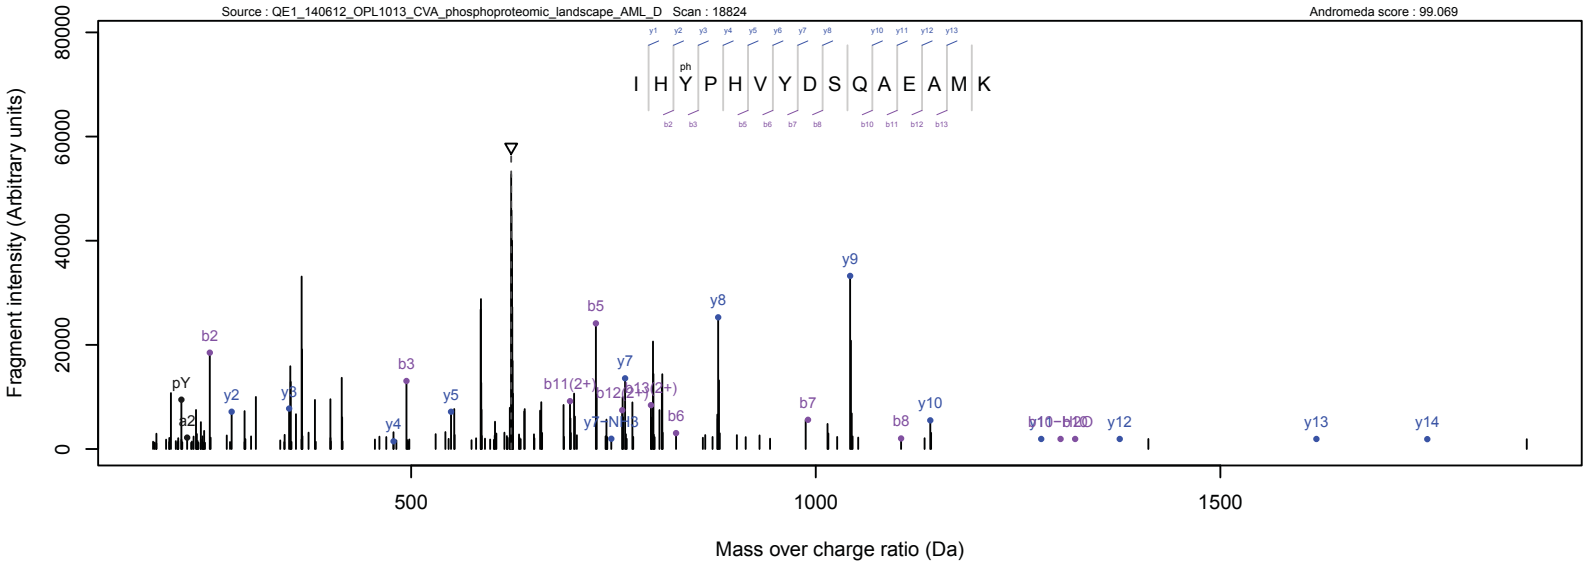

QAVTNPNTFY(ph)ATKR-3+

Source : QE1\_140908\_OPL1013\_CvA\_pTyrIP\_AML\_OCI\_AML3 Scan : 13173

Andromeda score : 99.069

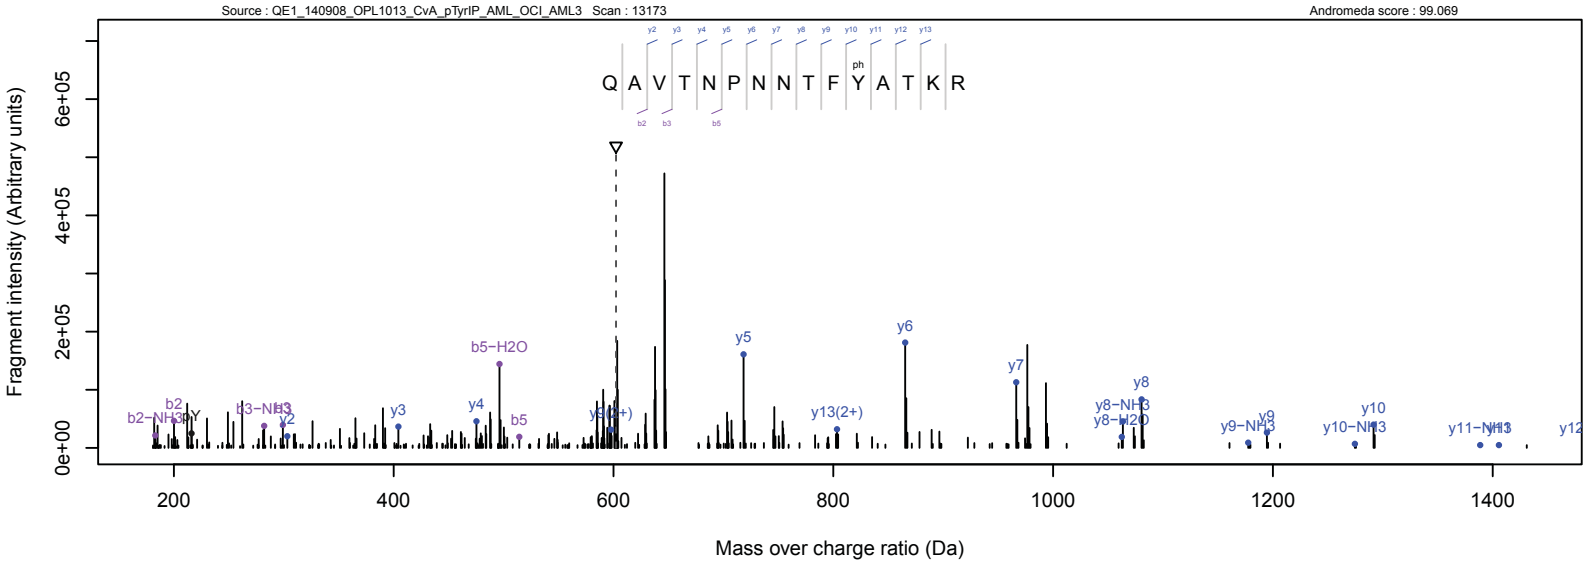

KEDIY(ph)AVEIVGGATR-2+

Source : QE1\_140908\_OPL1013\_CvA\_pTyrIP\_AML\_Kasumi6 Scan : 30082

Andromeda score : 99.044

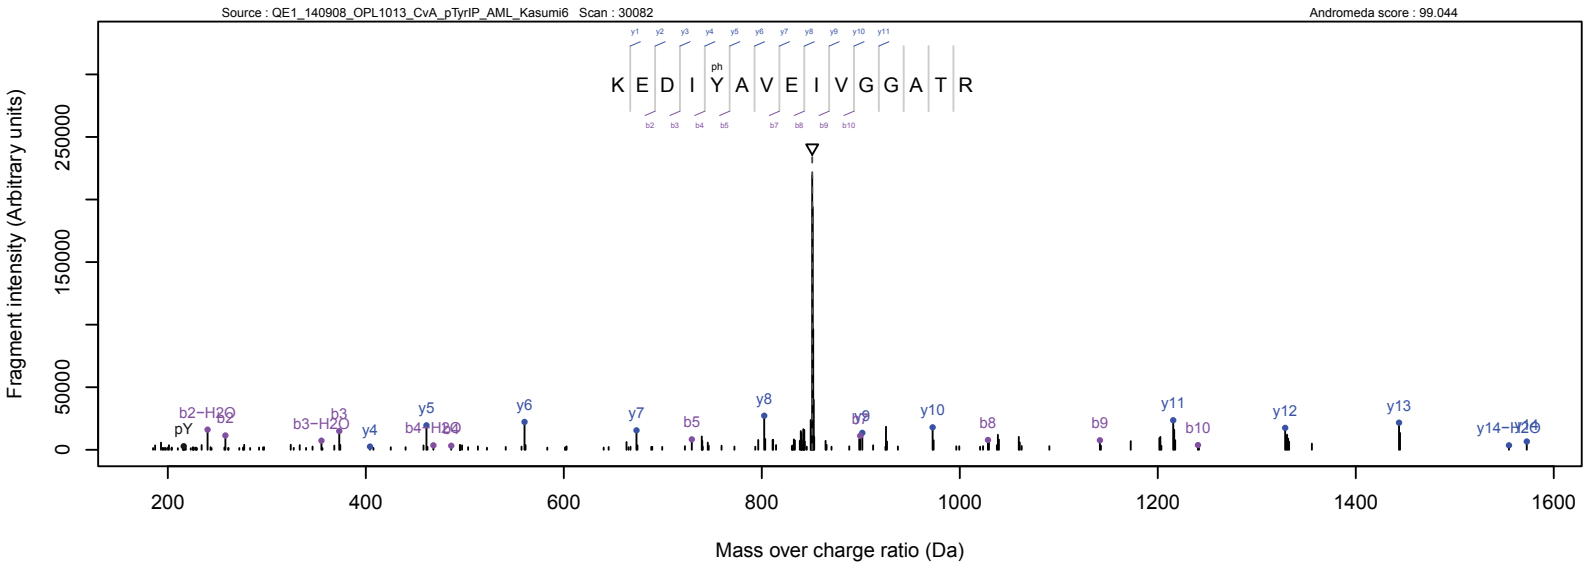

LDGENIY(ph)IR-2+

Source : QE1\_140612\_OPL1013\_CVA\_phosphoproteomic\_landscape\_AML\_C Scan : 21211

Andromeda score : 99.013

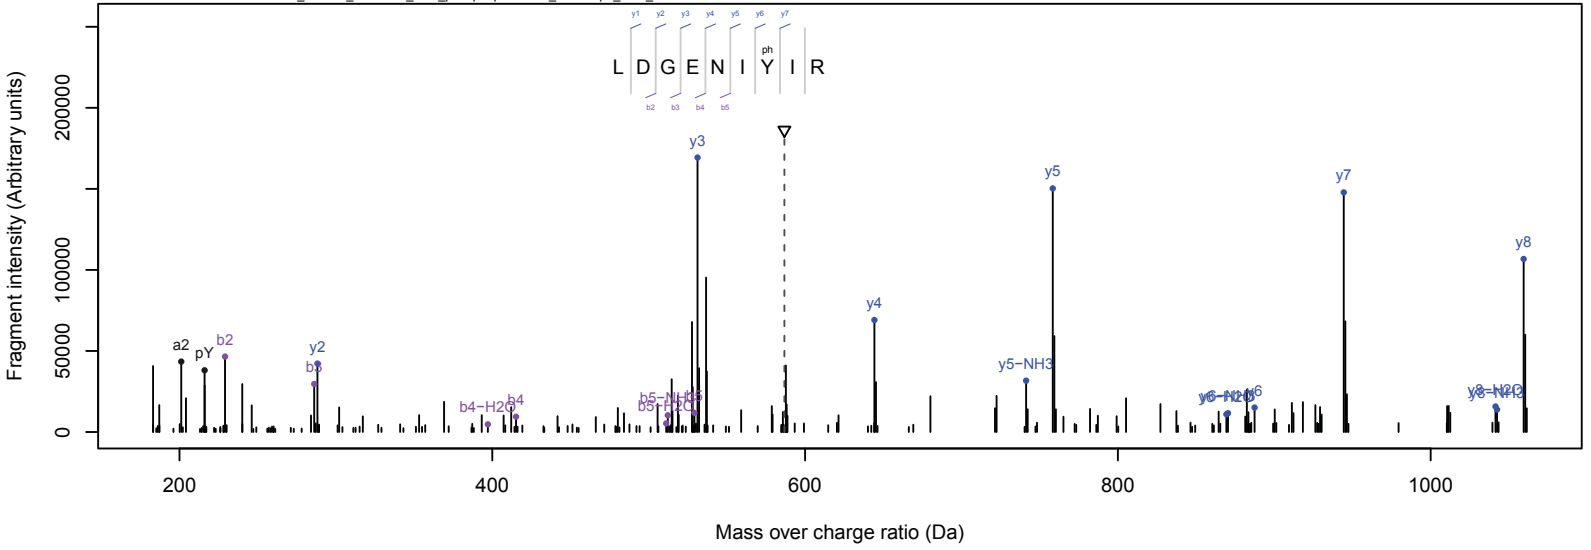

GQYTGHEY(ph)HVLSPK-3+

Source : QE1\_140612\_OPL1013\_CVA\_phosphoproteomic\_landscape\_AML\_B Scan : 10764

Andromeda score : 98.943

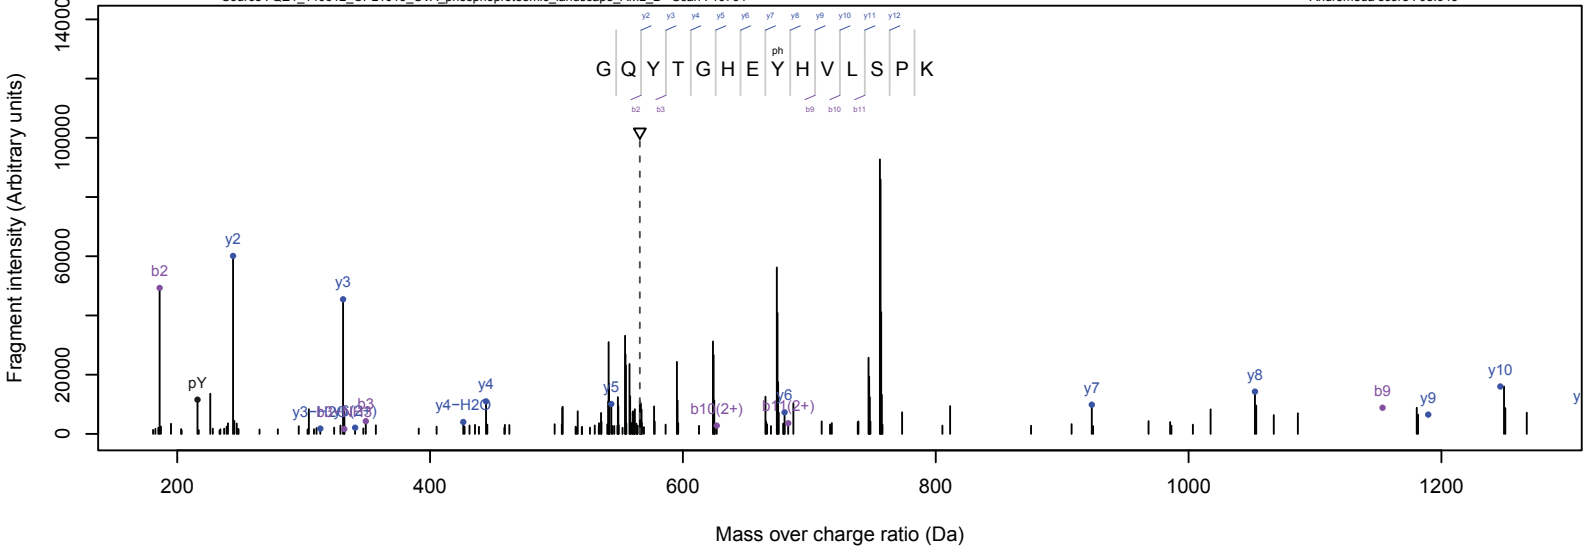

LHSNPSAFNIY(ph)CNVR-2+

Source : QE1\_140908\_OPL1013\_CvA\_pTyrIP\_AML\_OCI\_AML3 Scan : 25341

Andromeda score : 98.943

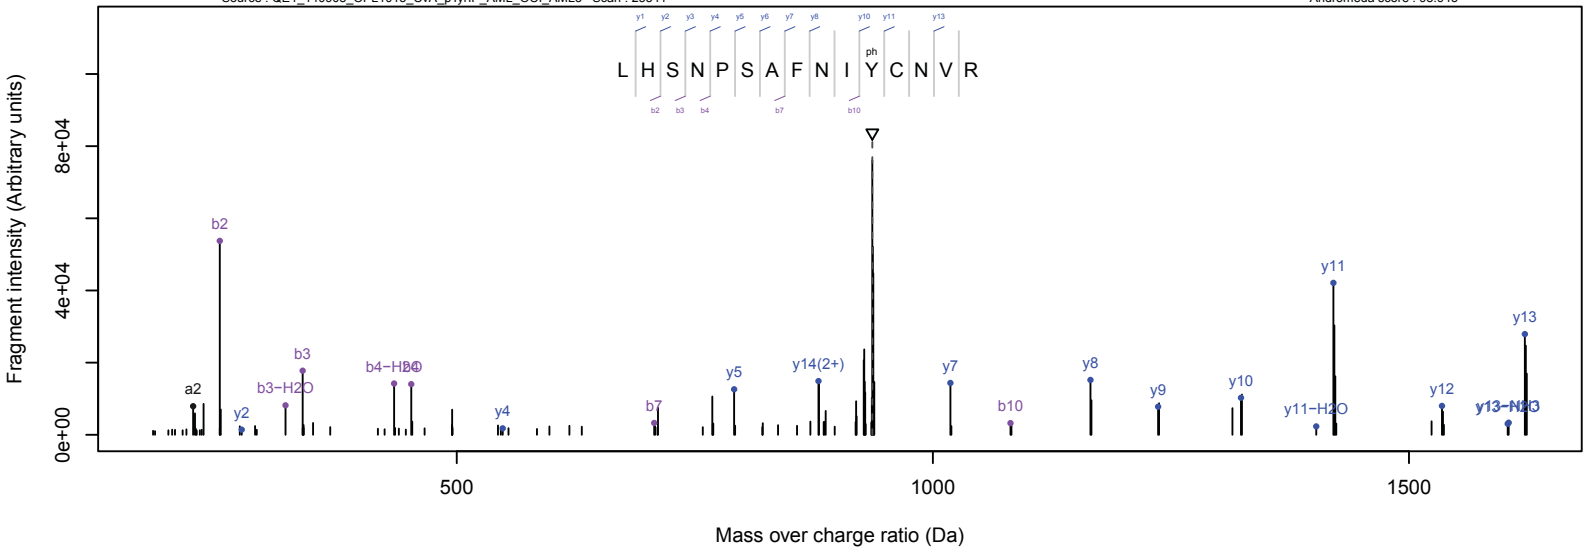

**YIEDEDY(ph)YKASVTR-3+**

Source: QE1\_140908\_OPL1013\_CvA\_pTyrIP\_AML\_OCI\_AML3 Scan: 19223

Andromeda score: 98.943

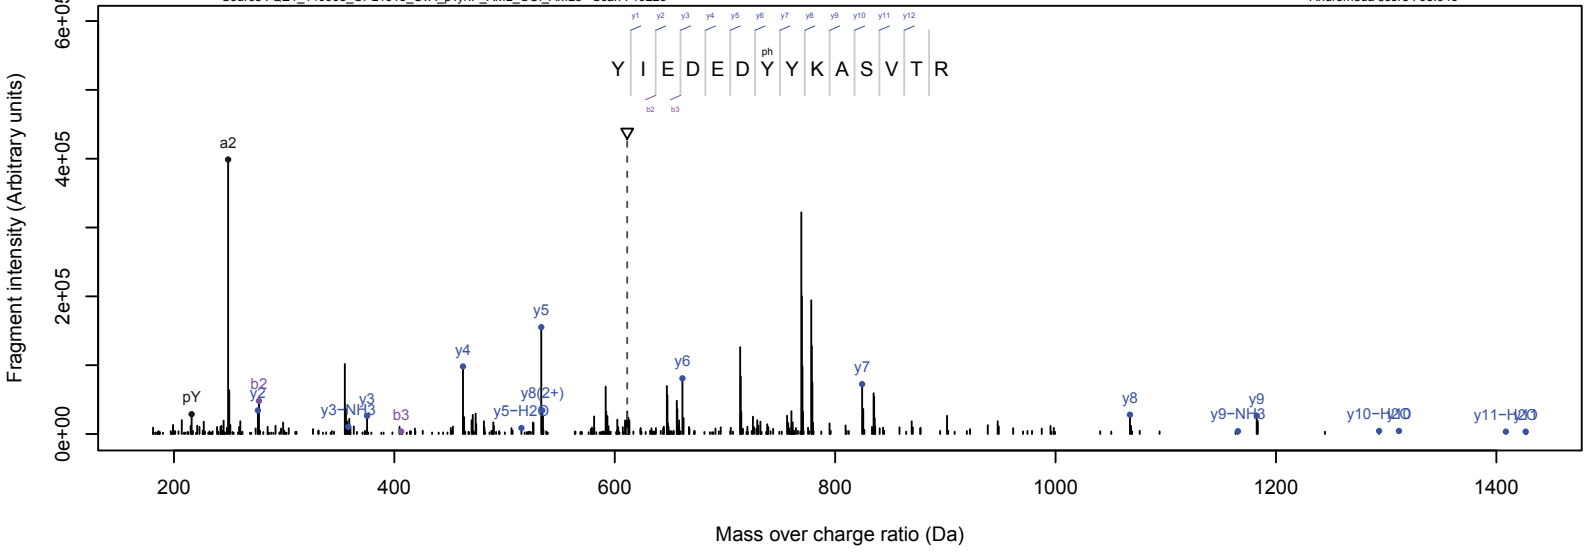

**IAAY(ph)AYSALSQIR-2+**

Source: QE1\_140908\_OPL1013\_CvA\_pTyrIP\_AML\_HEL Scan: 35255

Andromeda score: 98.942

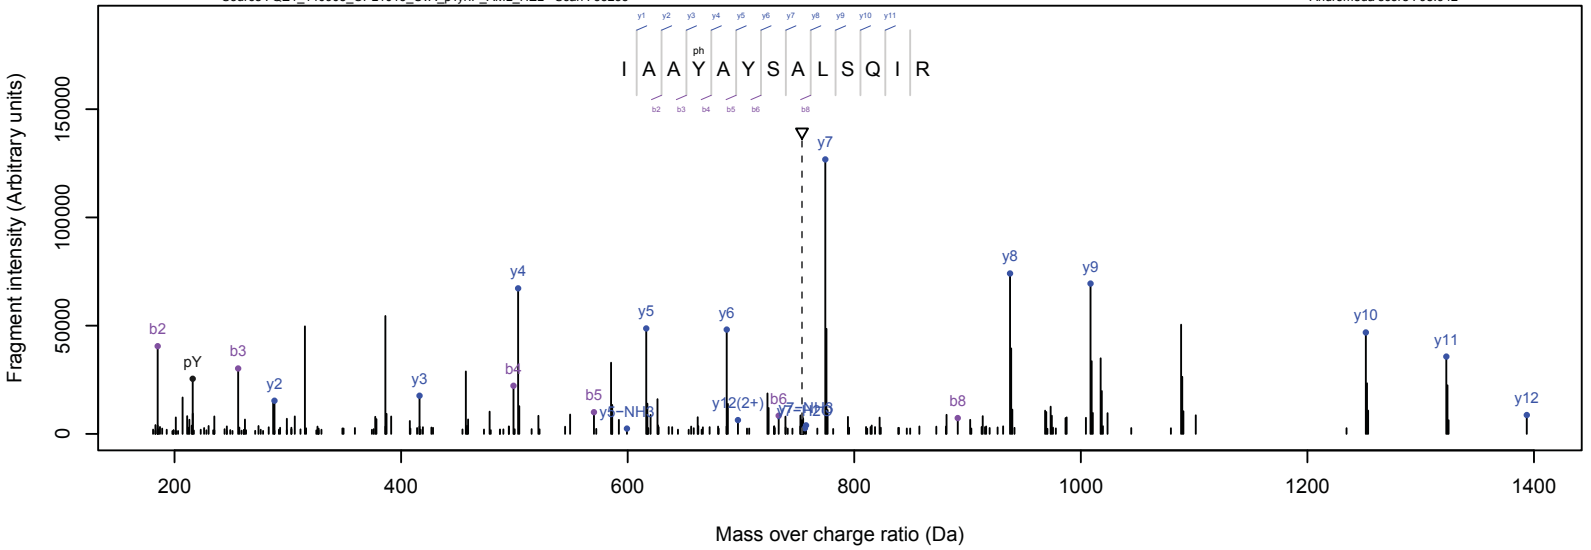

**M(ox)KEIAEAY(ph)LGK-2+**

Source: QE1\_140908\_OPL1013\_CvA\_pTyrIP\_AML\_HEL Scan: 13683

Andromeda score: 98.902

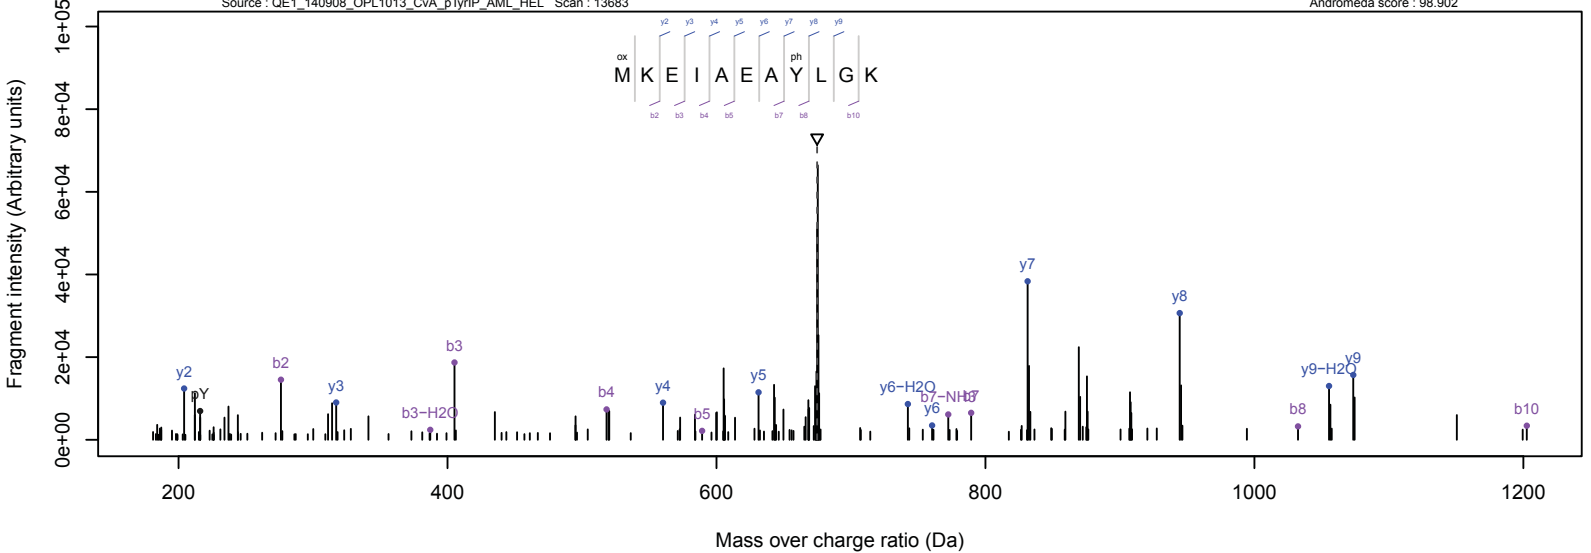

NGY(ph)VTVSEIK-2+

Source : QE1\_140612\_OPL1013\_CVA\_phosphoproteomic\_landscape\_AML\_C Scan : 16136

Andromeda score : 98.898

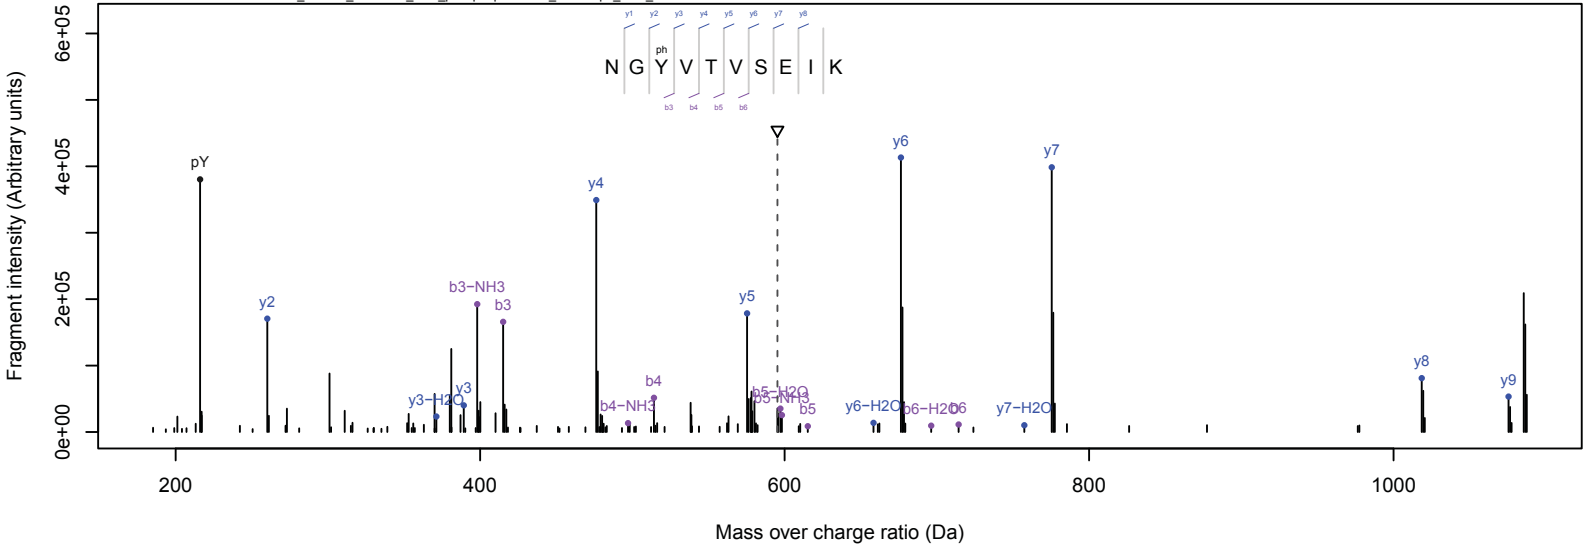

TTSSAIY(ph)M(ox)NLASHIQPGTVNR-3+

Source : QE1\_140908\_OPL1013\_CvA\_pTyrIP\_AML\_OCI\_AML3 Scan : 29953

Andromeda score : 98.76

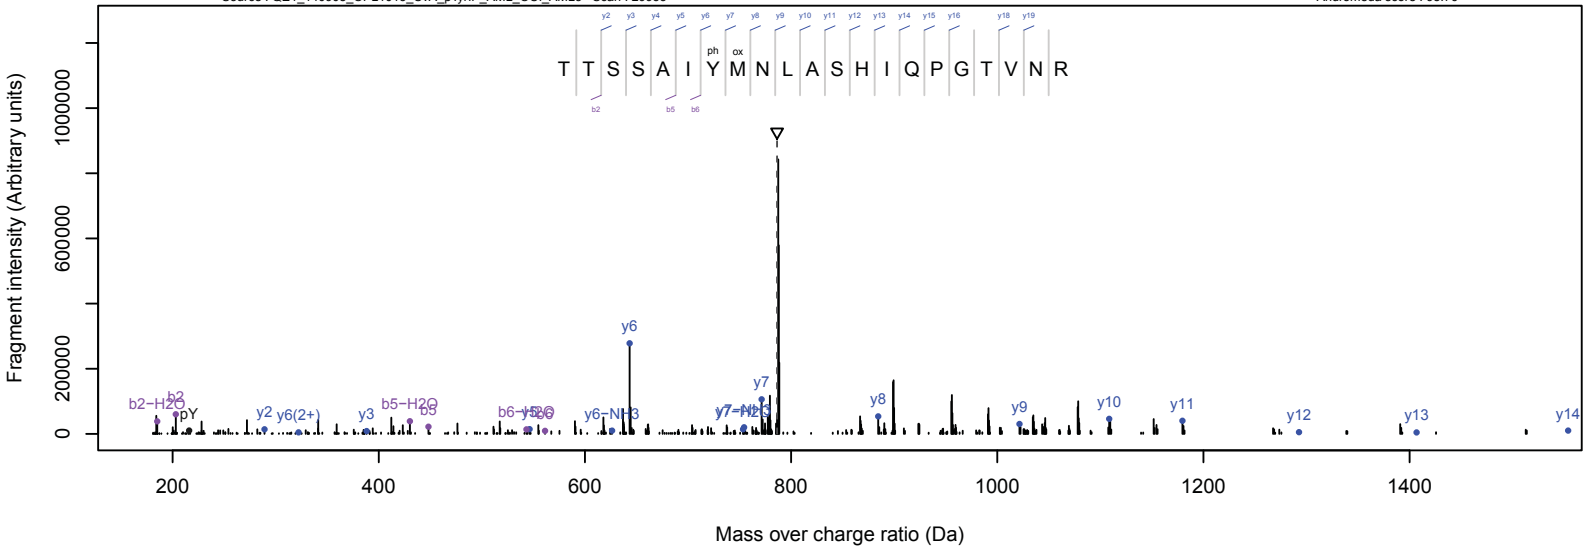

TMELKPLNVSNNALVWVTASDY(ph)ADGEAKVEQLAVR-4+

Source : QE1\_140612\_OPL1013\_CVA\_phosphoproteomic\_landscape\_AML\_B Scan : 45295

Andromeda score : 98.75

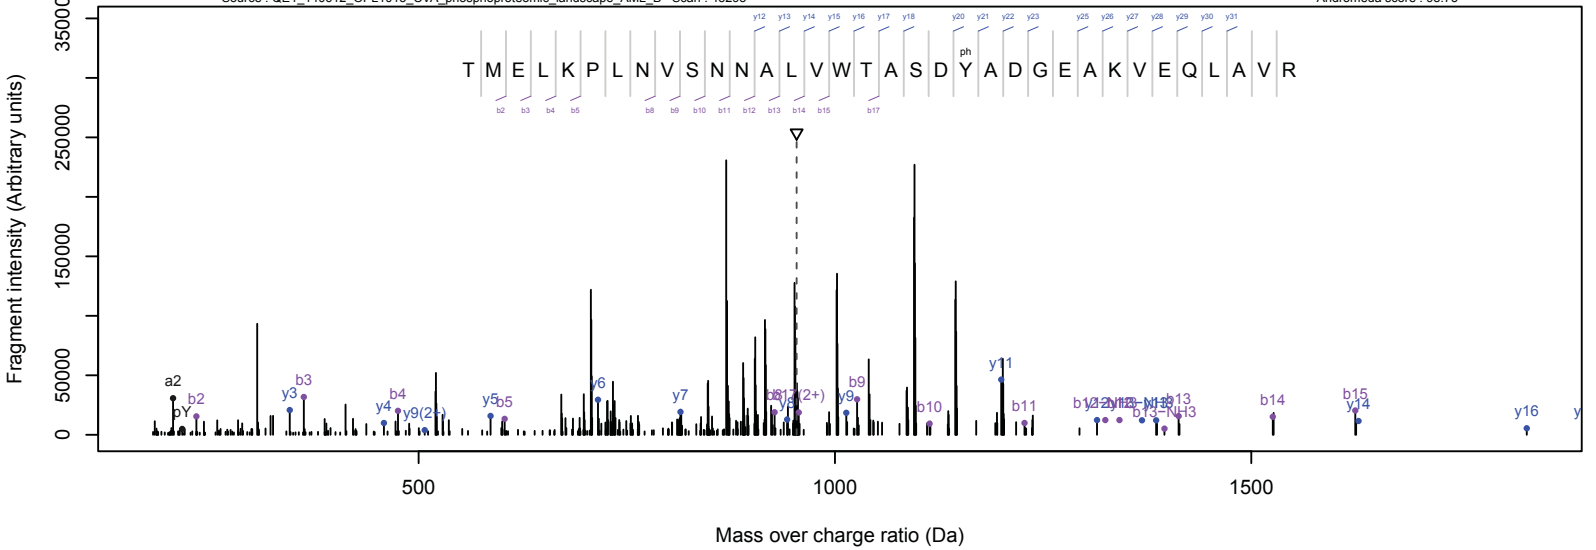



GFTAAY(ph)PTQSSIPFK-2+

Source: QE1\_140612\_OPL1013\_CVA\_phosphoproteomic\_landscape\_AML\_C Scan: 32412

Andromeda score: 98.676

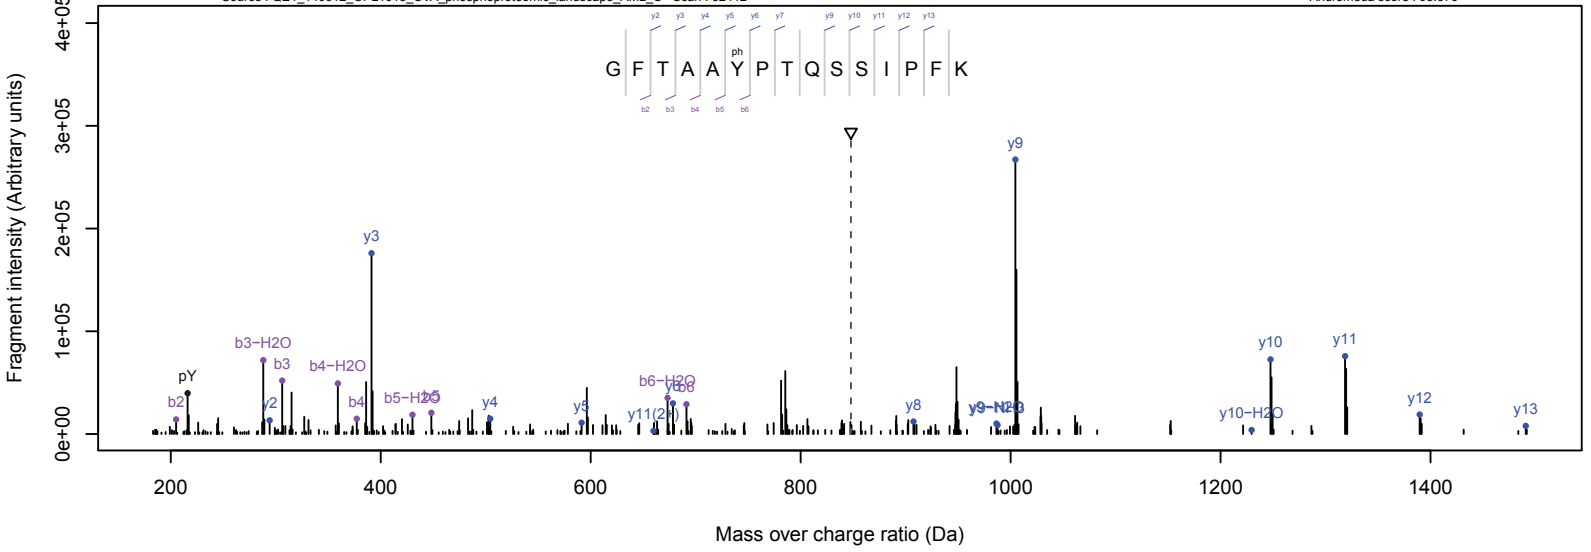

YYEGY(ph)YAAGPGYGR-2+

Source: QE1\_140612\_OPL1013\_CVA\_phosphoproteomic\_landscape\_AML\_C Scan: 19376

Andromeda score: 98.654

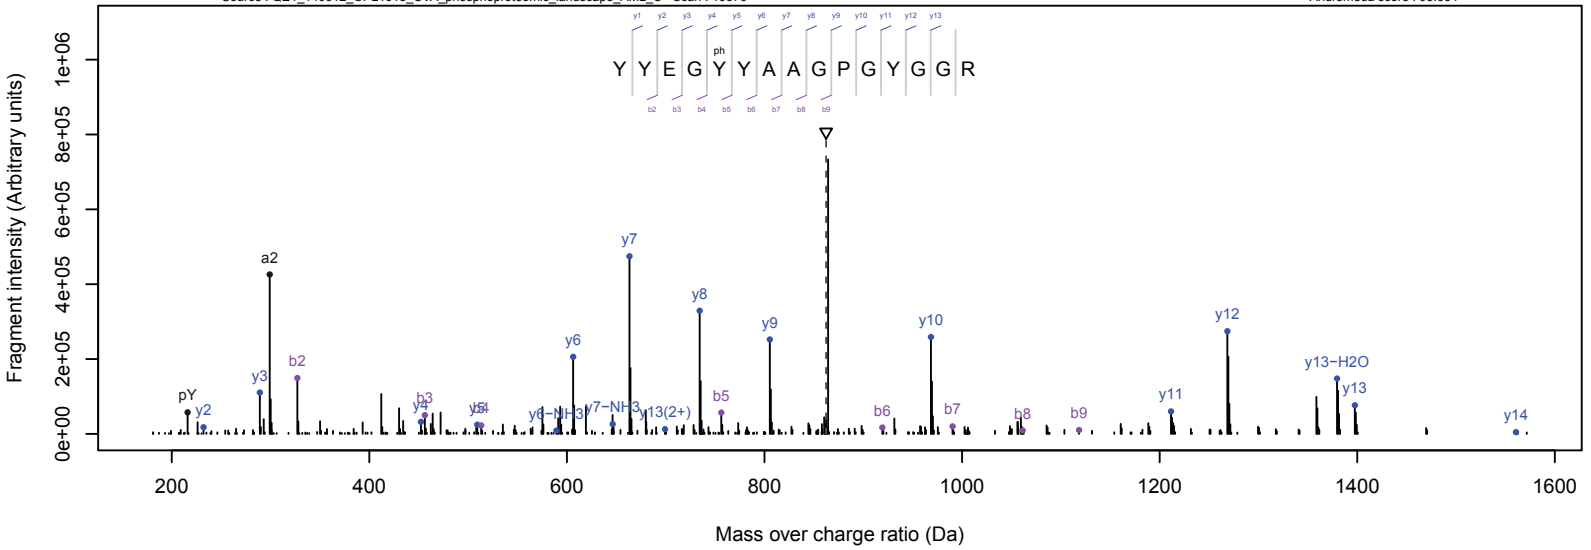

HIAEEADRKY(ph)EEVAR-3+

Source: QE1\_140612\_OPL1013\_CVA\_phosphoproteomic\_landscape\_AML\_B Scan: 7076

Andromeda score: 98.582

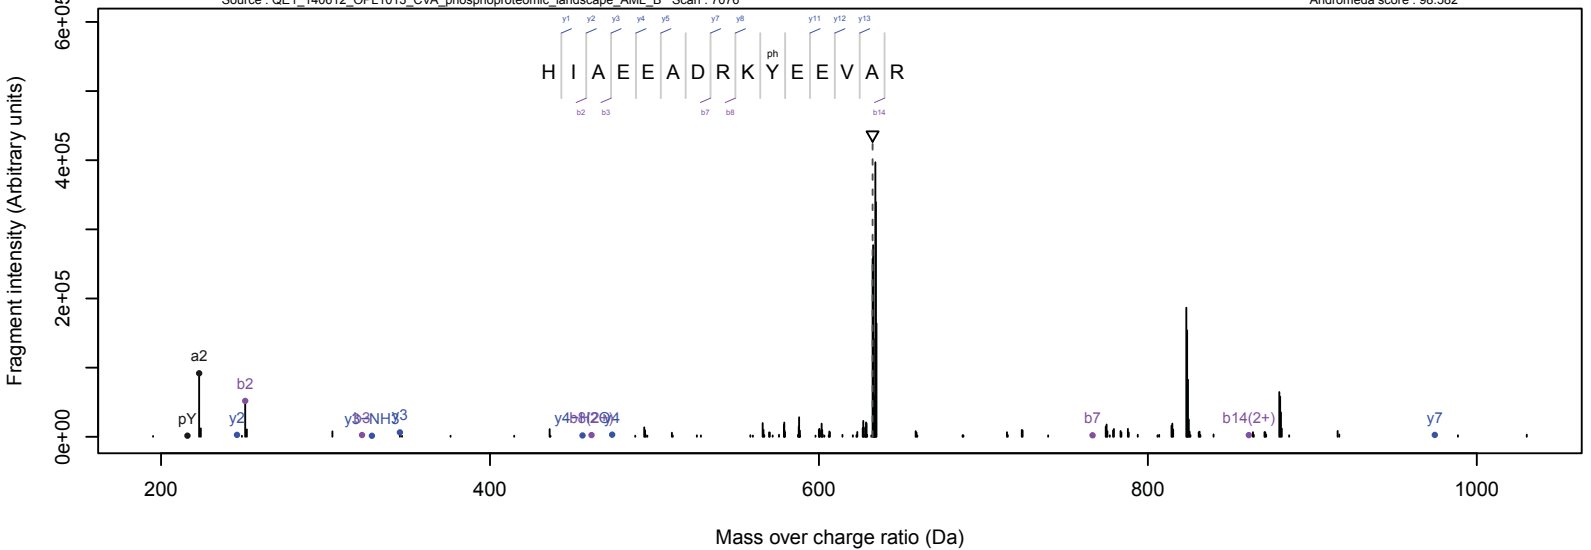

SAVGFNEM(ox)EAPTTAY(ph)KK-3+

Source : QE1\_140612\_OPL1013\_CVA\_phosphoproteomic\_landscape\_AML\_C Scan : 13909

Andromeda score : 98.573

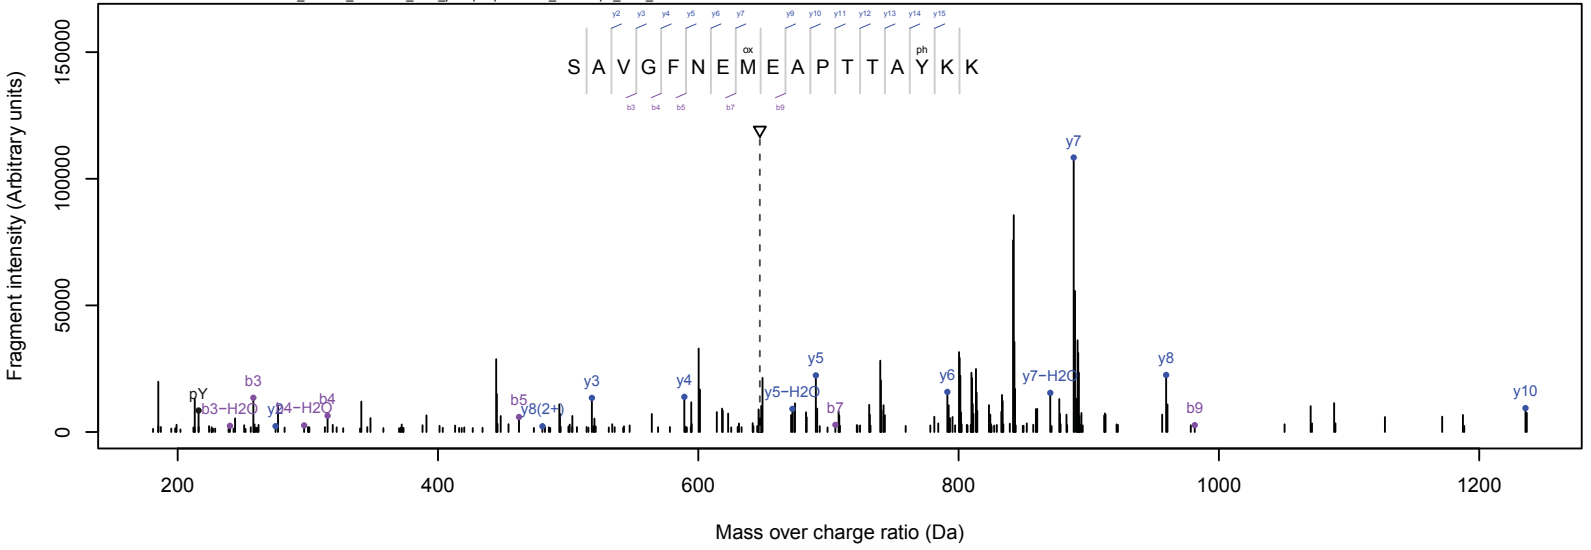

TYGVVAQYYRPLHDEY(ph)CFYNGK-3+

Source : QE1\_140612\_OPL1013\_CVA\_phosphoproteomic\_landscape\_AML\_C Scan : 33063

Andromeda score : 98.543

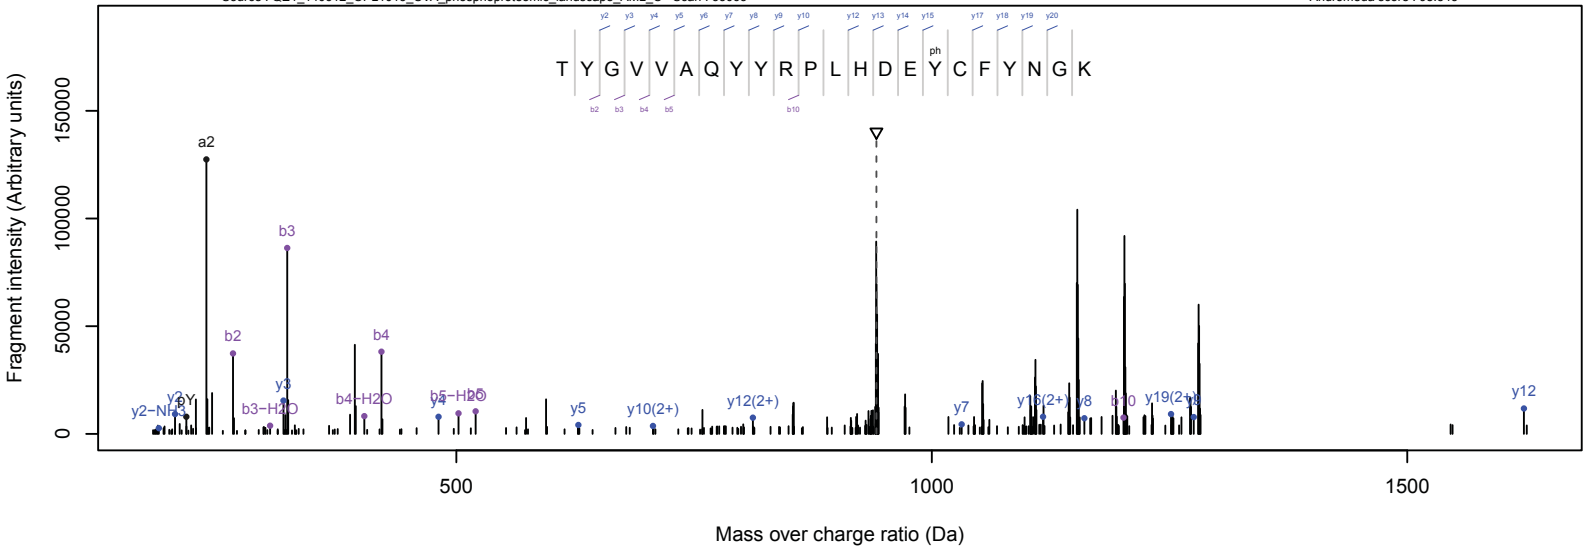

HVEVSQAPLPAPAY(ph)LSSPLALPSQR-3+

Source : QE1\_140612\_OPL1013\_CVA\_phosphoproteomic\_landscape\_AML\_A Scan : 42542

Andromeda score : 98.491

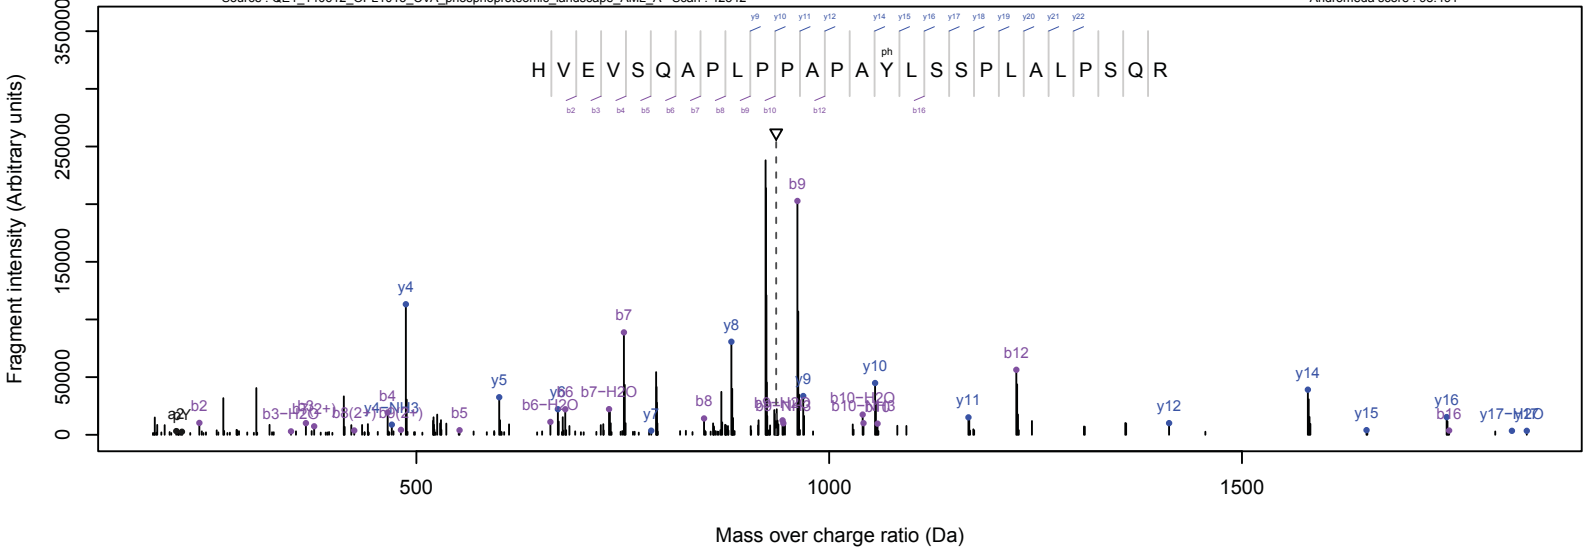

GLCTSPA<sup>ox</sup>EHQYFMTEYVATR-3+

Source : QE1\_140908\_OPL1013\_CvA\_pTyrIP\_AML\_OCI\_AML3 Scan : 28079

Andromeda score : 98.443

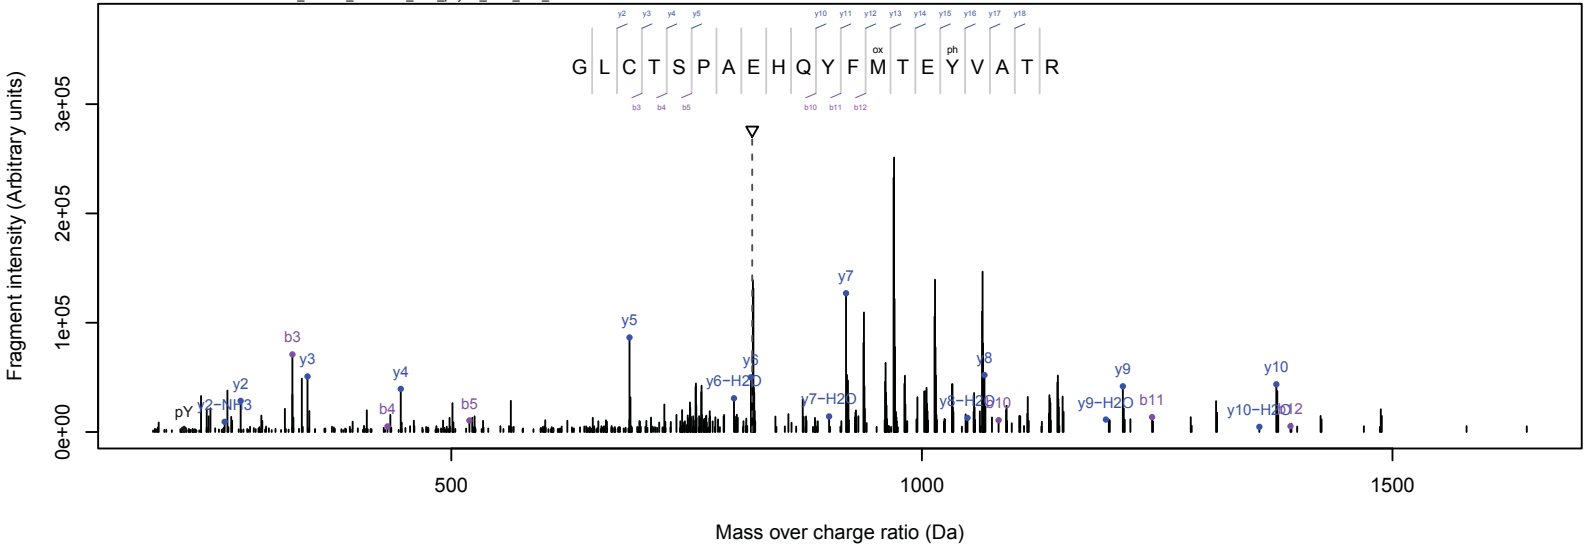

LLY(ph)PVS<sup>K</sup>-2+

Source : QE1\_140612\_OPL1013\_CVA\_phosphoproteomic\_landscape\_AML\_B Scan : 14411

Andromeda score : 98.418

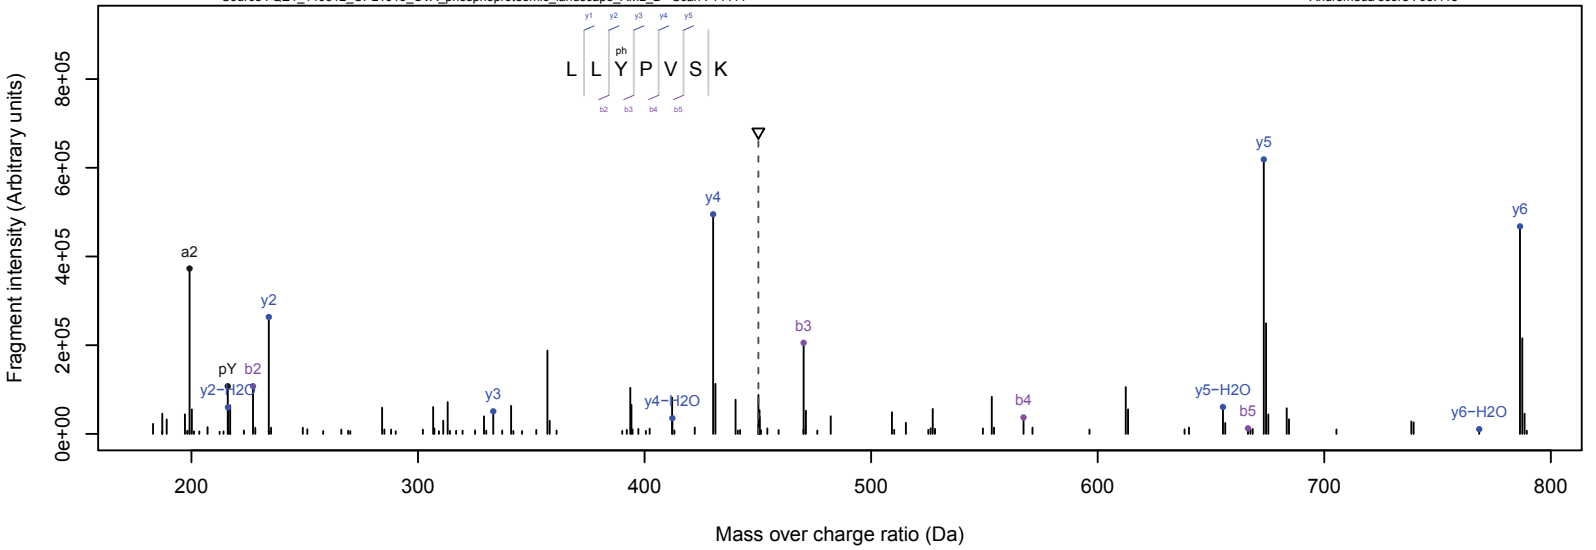

YNLFSVSNHYGGLDGGHYTAY<sup>ph</sup>CK-3+

Source : QE1\_140612\_OPL1013\_CVA\_phosphoproteomic\_landscape\_AML\_C Scan : 32776

Andromeda score : 98.21

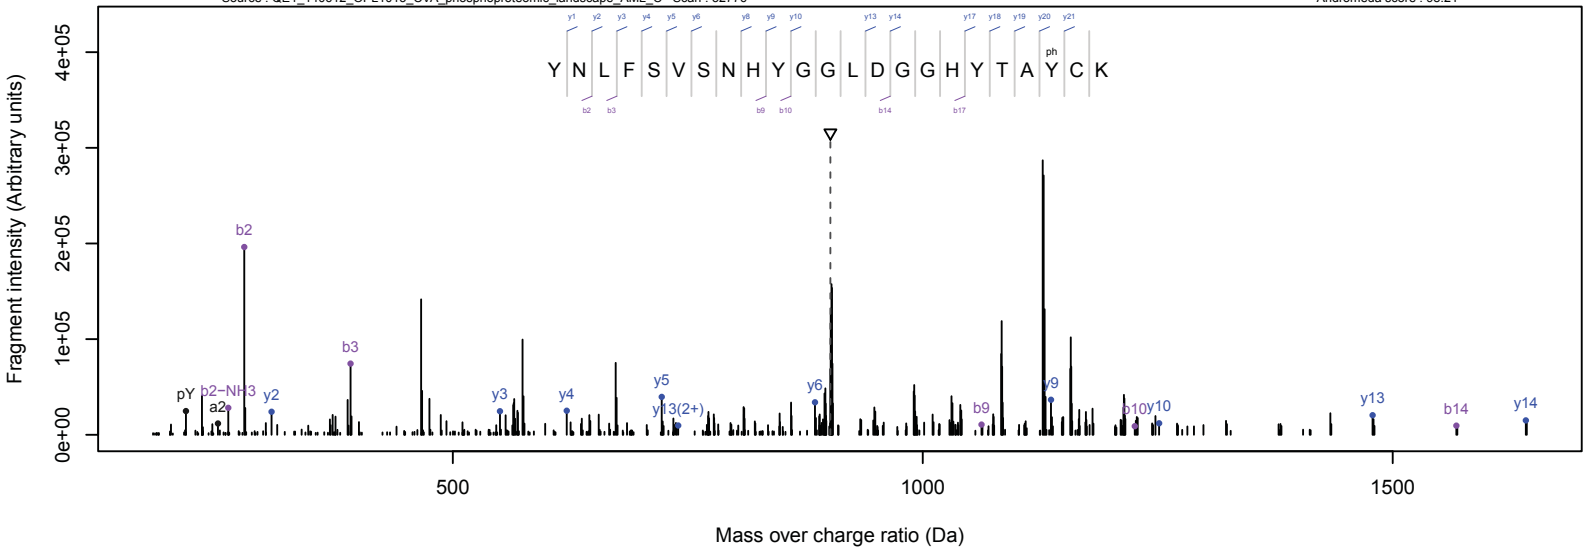

**AKEFTNVY(ph)IK-2+**

Source : QE1\_140612\_OPL1013\_CVA\_phosphoproteomic\_landscape\_AML\_C Scan : 17457

Andromeda score : 98.156

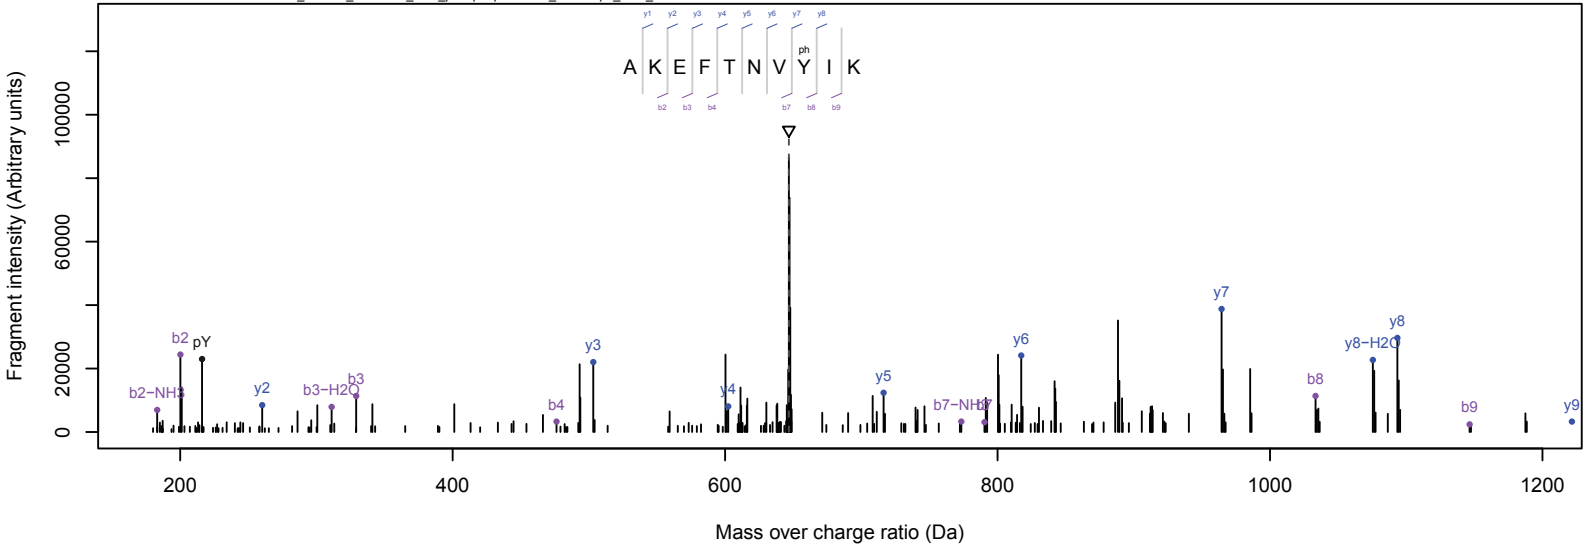

**IEELTGLLNQY(ph)R-2+**

Source : QE1\_140612\_OPL1013\_CVA\_phosphoproteomic\_landscape\_AML\_C Scan : 36523

Andromeda score : 98.156

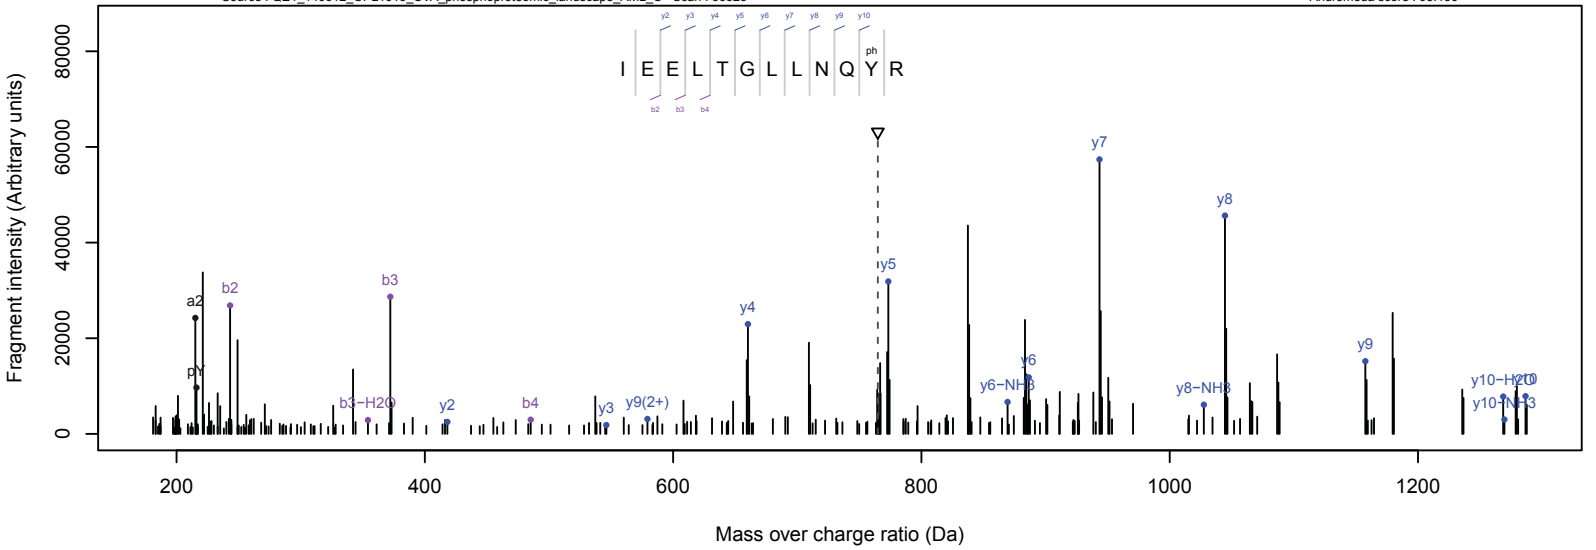

**LYYEAKY(ph)DLAK-2+**

Source : QE1\_140612\_OPL1013\_CVA\_phosphoproteomic\_landscape\_AML\_B Scan : 18155

Andromeda score : 98.105

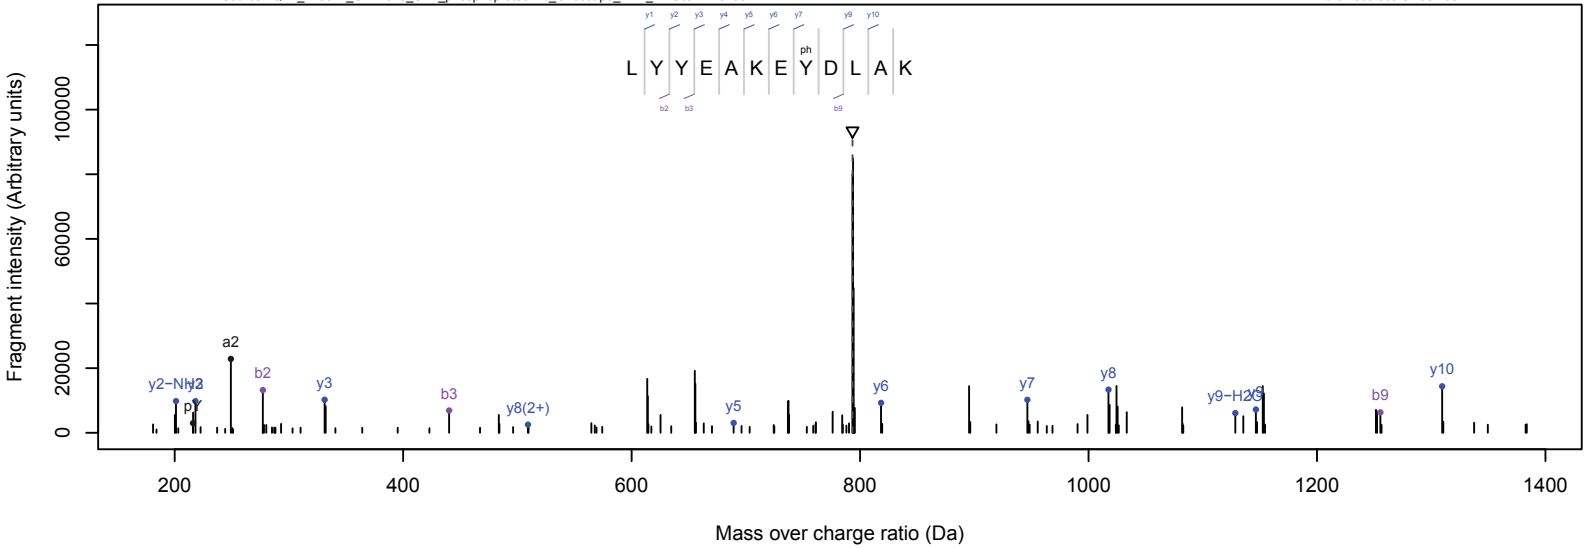

**MQQNGY(ph)ENPTYK-2+**

Source : QE1\_140822\_OPL1013\_CvA\_pTyrIP\_AML\_cell\_lines\_part2\_F Scan : 4489

Andromeda score : 98.105

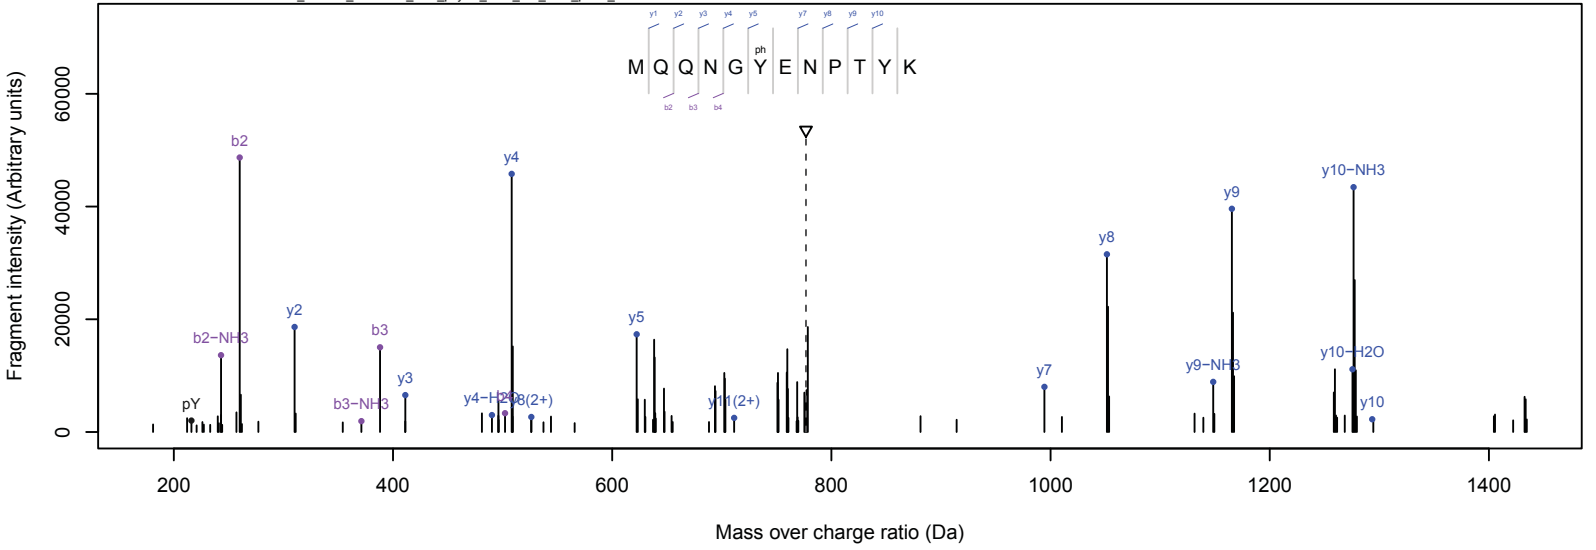

**TFHTIGFCPY(ph)GPR-2+**

Source : Qe1\_141024\_OPL1013\_CvA\_AML\_pTyrIP\_MOLM13 Scan : 27751

Andromeda score : 98.105

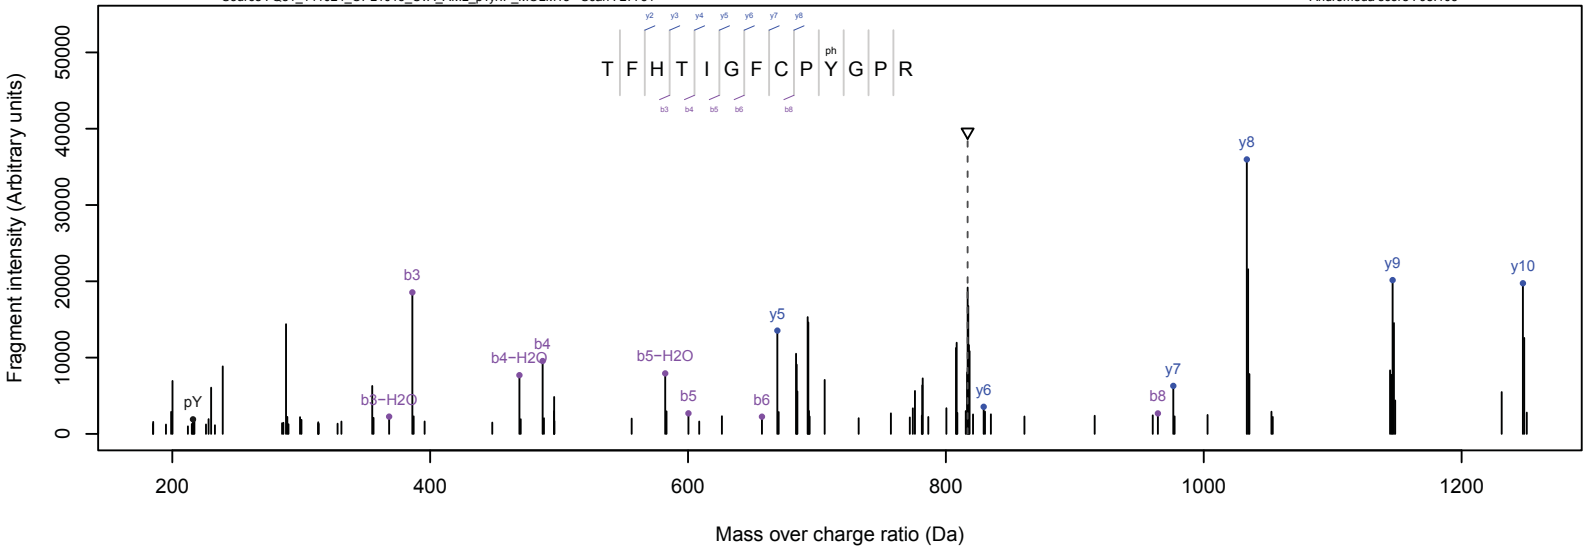

**LLGFHTHADY(ph)VLEMNMAK-3+**

Source : QE1\_140612\_OPL1013\_CvA\_phosphoproteomic\_landscape\_AML\_B Scan : 34828

Andromeda score : 98.062

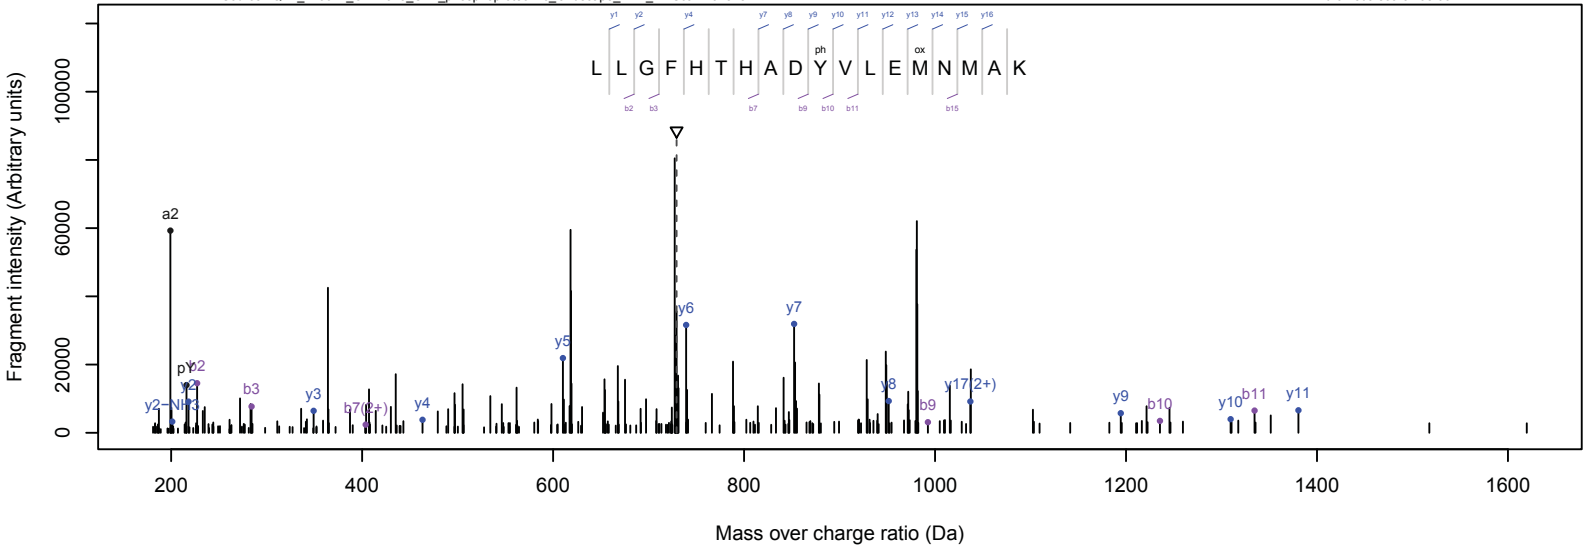

QQMYPQYATYYPQLQAK-2+

Source : QE1\_140612\_OPL1013\_CVA\_phosphoproteomic\_landscape\_AML\_C Scan : 39249

Andromeda score : 98.062

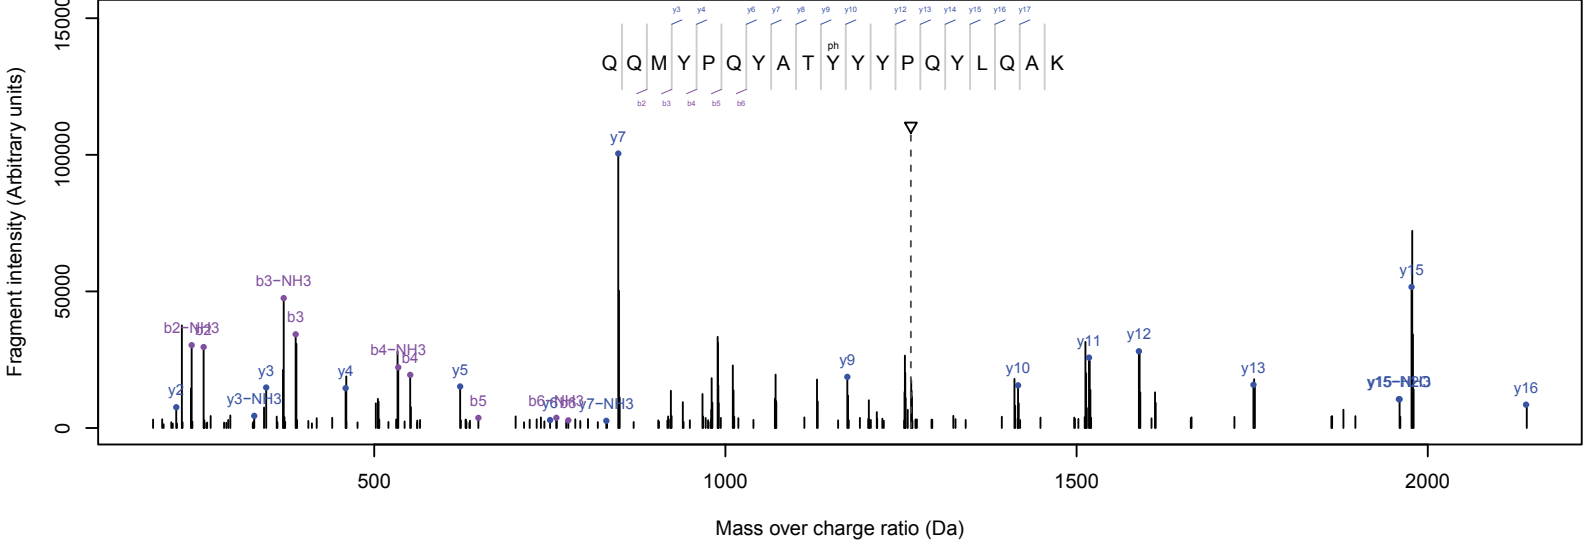

Y(pH)RHPGICYTCADCGLNLIK-3+

Source : QE1\_140612\_OPL1013\_CVA\_phosphoproteomic\_landscape\_AML\_A Scan : 16414

Andromeda score : 98.062

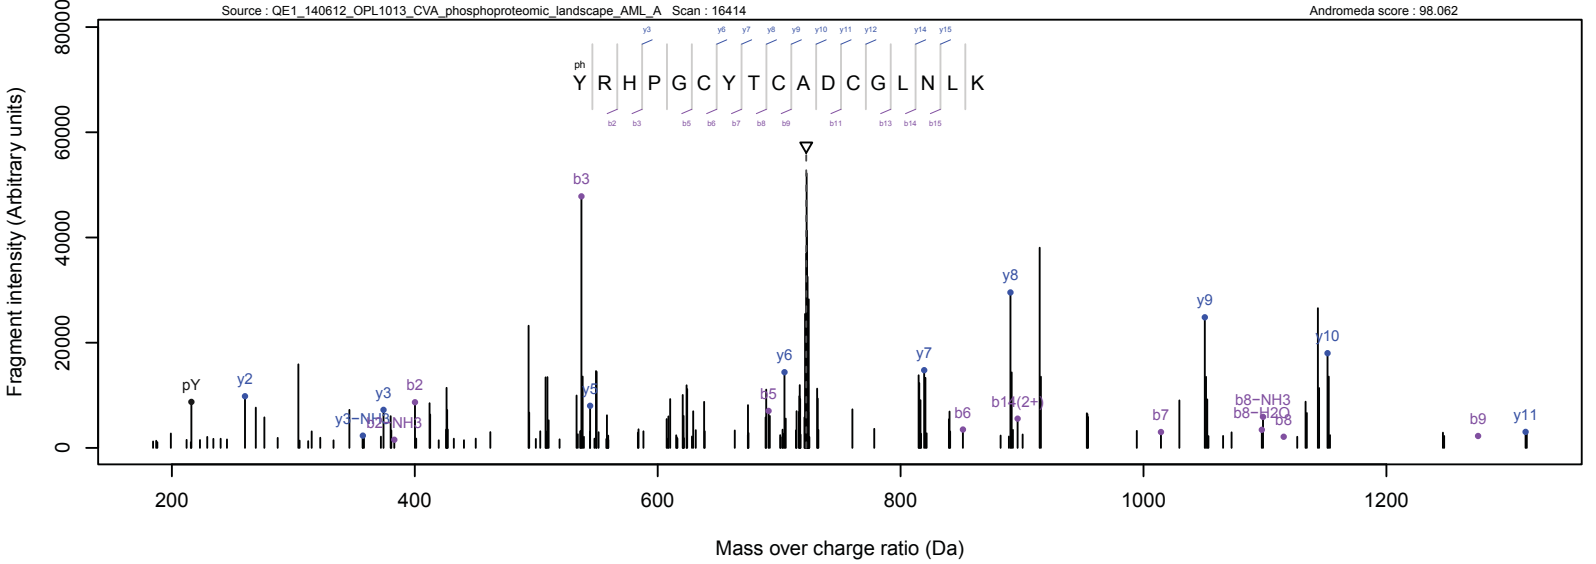

YSDY(pH)KGSNLDAPEPYR-3+

Source : QE1\_140612\_OPL1013\_CVA\_phosphoproteomic\_landscape\_AML\_B Scan : 22781

Andromeda score : 98.062

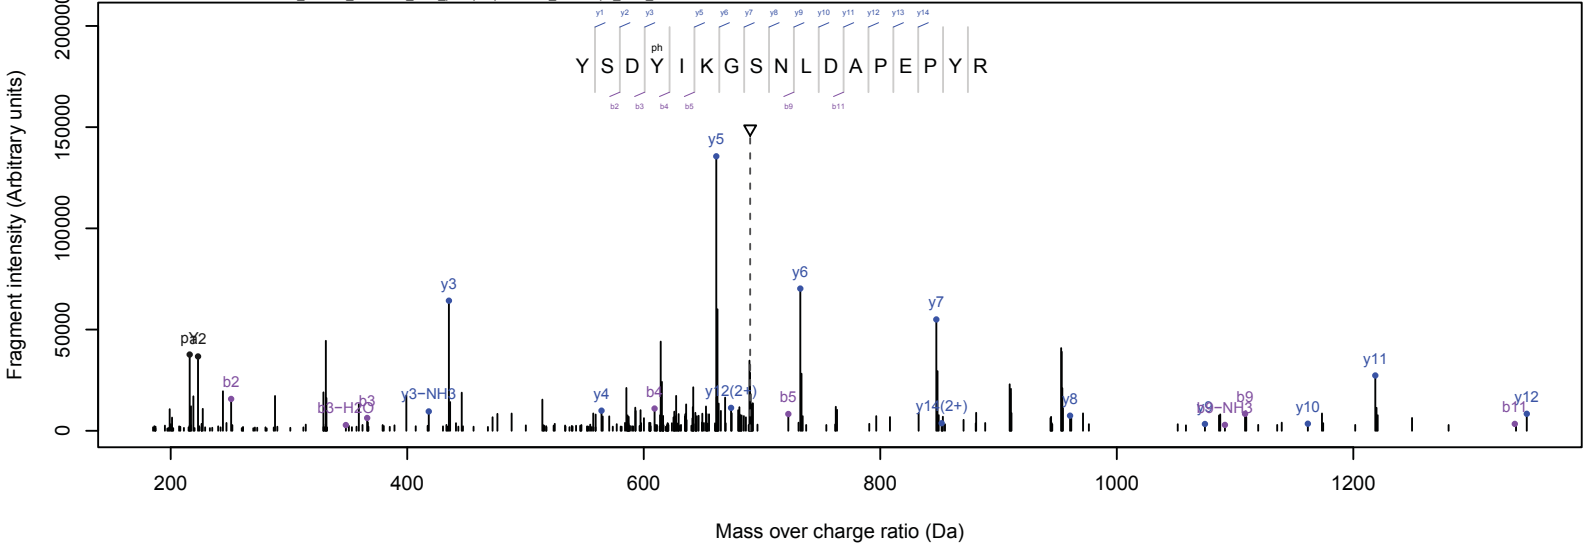

DISLSDY(ph)KGK-2+

Source : QE1\_140612\_OPL1013\_CVA\_phosphoproteomic\_landscape\_AML\_B Scan : 10253

Andromeda score : 98.048

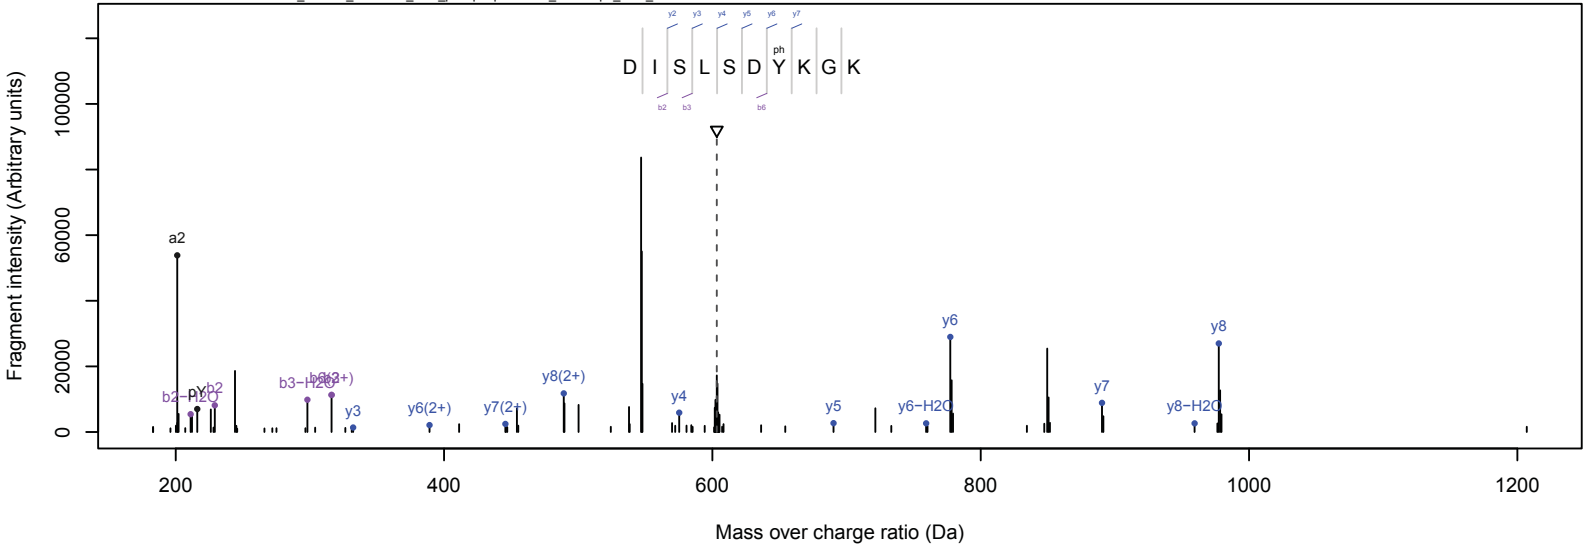

Y(ph)FHPPAHLQAK-2+

Source : QE1\_140612\_OPL1013\_CVA\_phosphoproteomic\_landscape\_AML\_C Scan : 13021

Andromeda score : 98.048

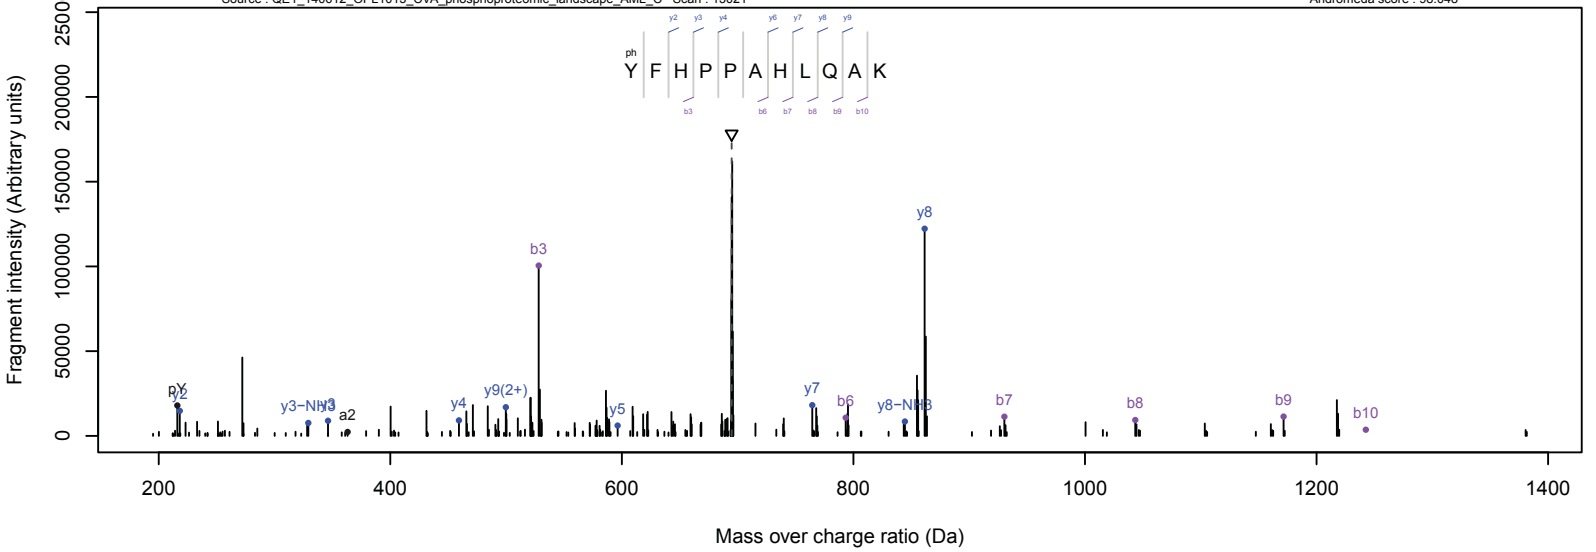

Y(ph)ISITVPSK-2+

Source : QE1\_140612\_OPL1013\_CVA\_phosphoproteomic\_landscape\_AML\_C Scan : 23674

Andromeda score : 98.048

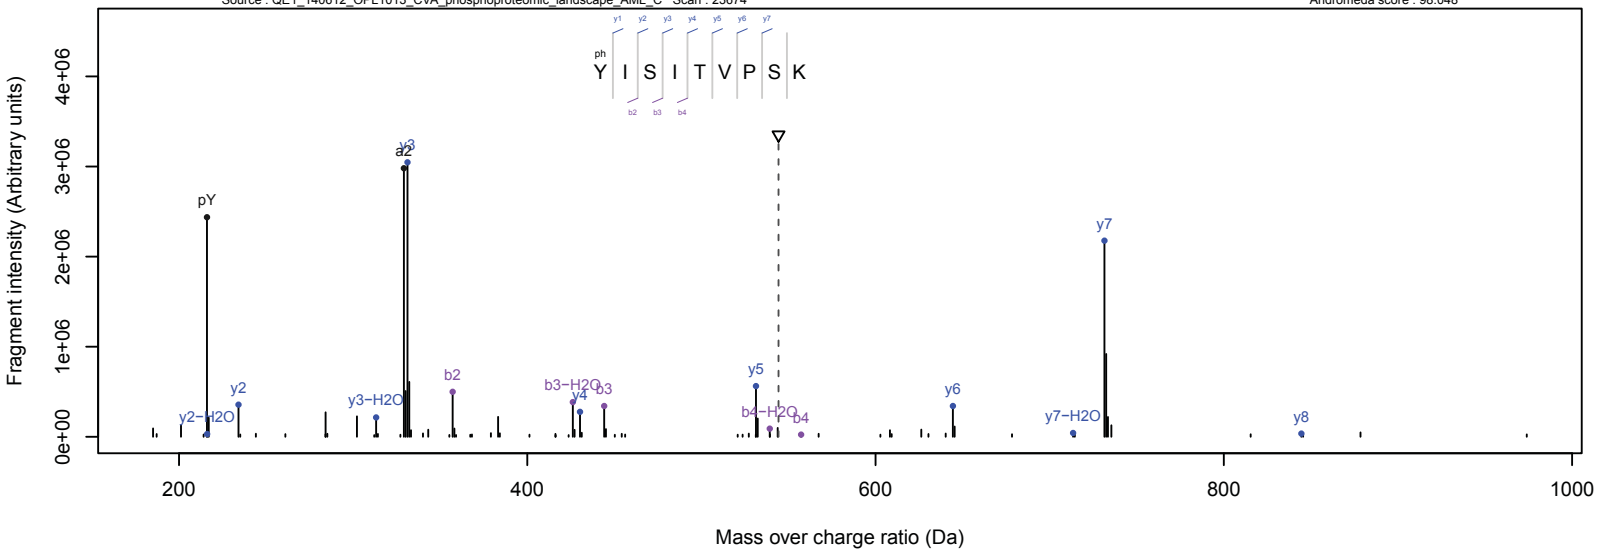

FY(ph)VHIKPAPAR-3+

Source : QE1\_140612\_OPL1013\_CVA\_phosphoproteomic\_landscape\_AML\_A Scan : 17748

Andromeda score : 98.044

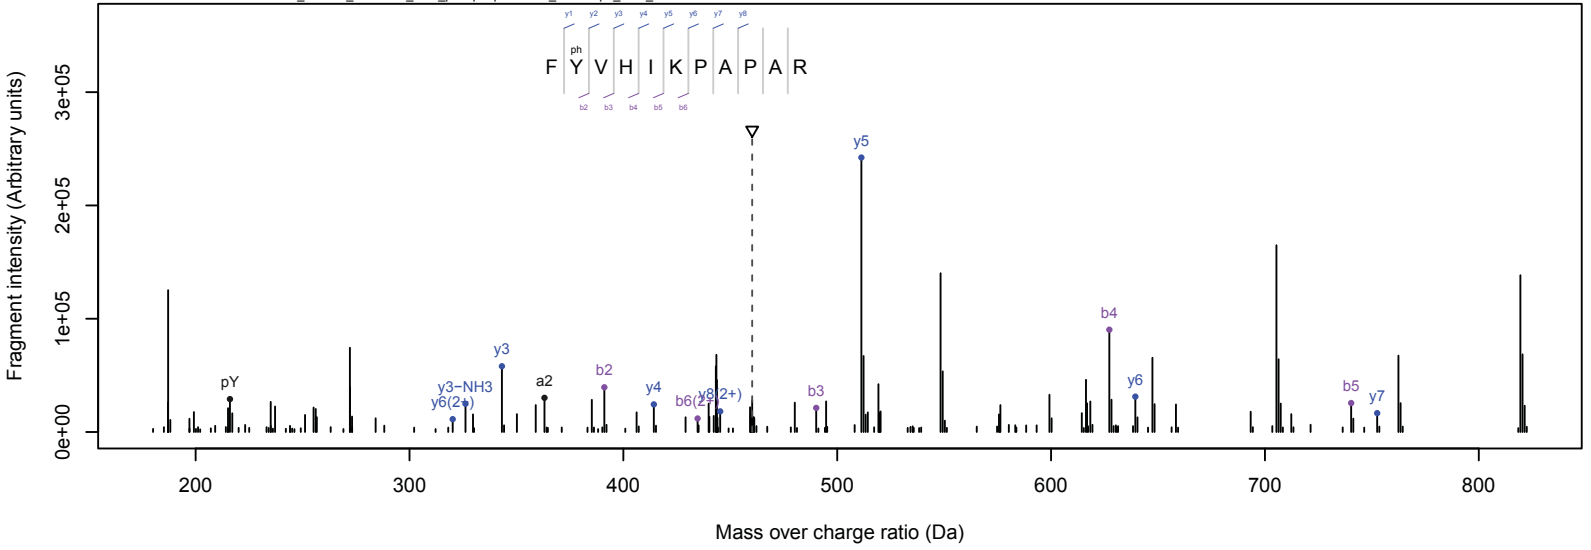

WIAIESLADR VY(ph)TSK-2+

Source : QE1\_140908\_OPL1013\_CvA\_pTyrIP\_AML\_ML2 Scan : 40836

Andromeda score : 97.904

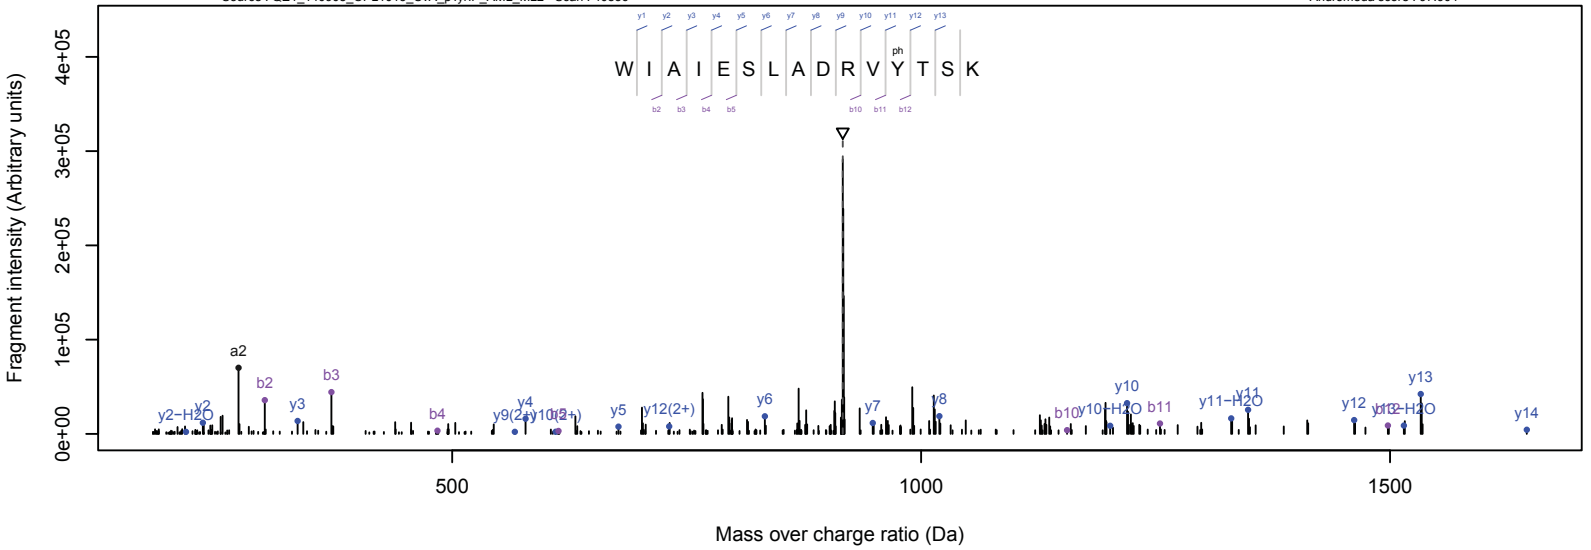

KLAEGSAYE E V P T S M M Y S E N D I S N S I K-3+

Source : QE1\_140612\_OPL1013\_CVA\_phosphoproteomic\_landscape\_AML\_B Scan : 34375

Andromeda score : 97.839

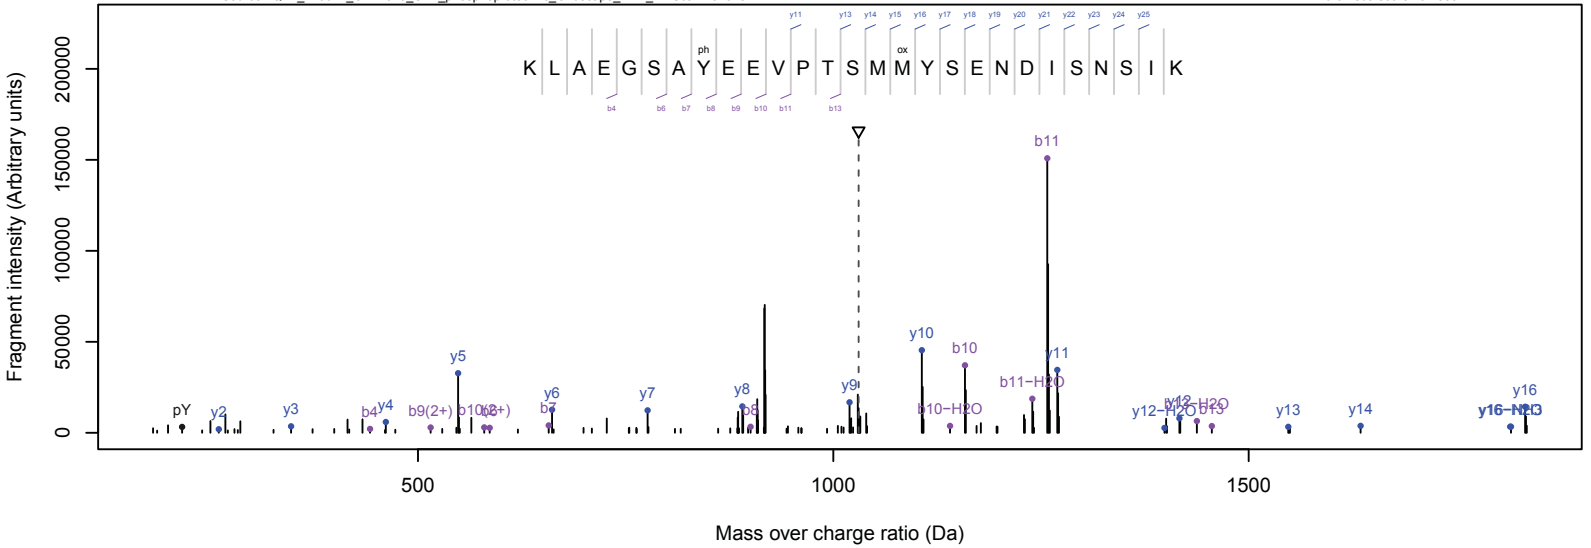



APT<sup>ph</sup>DYCFVLK-2+

Source : QE1\_140612\_OPL1013\_CVA\_phosphoproteomic\_landscape\_AML\_D Scan : 28773

Andromeda score : 97.813

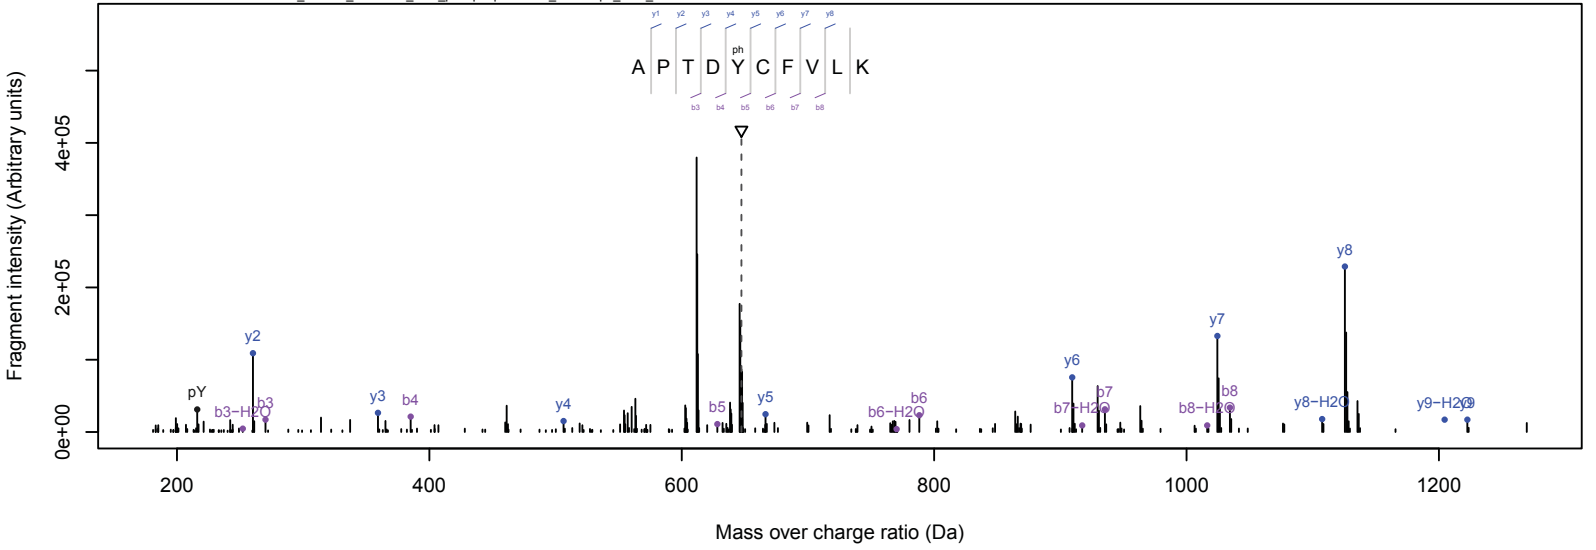

GY<sup>ph</sup>IDLSK-2+

Source : QE1\_140612\_OPL1013\_CVA\_phosphoproteomic\_landscape\_AML\_B Scan : 12068

Andromeda score : 97.798

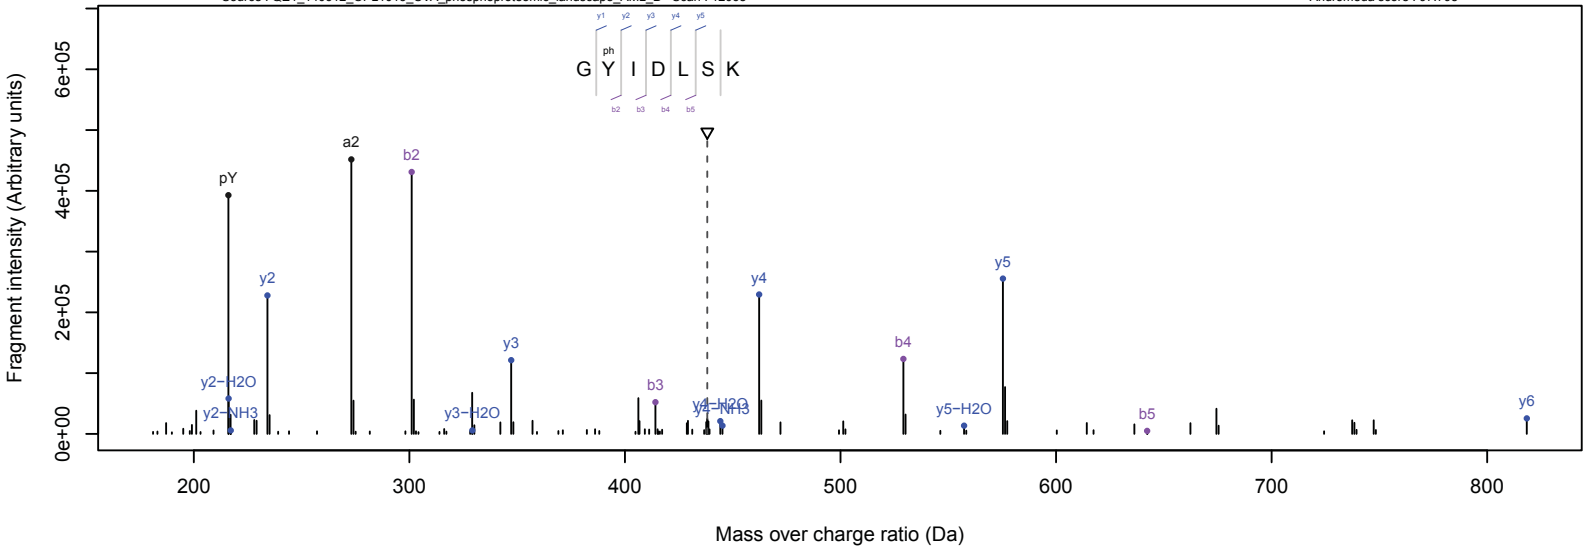

LY<sup>ph</sup>EEYTR-2+

Source : QE1\_140908\_OPL1013\_CvA\_pTyrIP\_AML\_Kasumi1 Scan : 8414

Andromeda score : 97.798

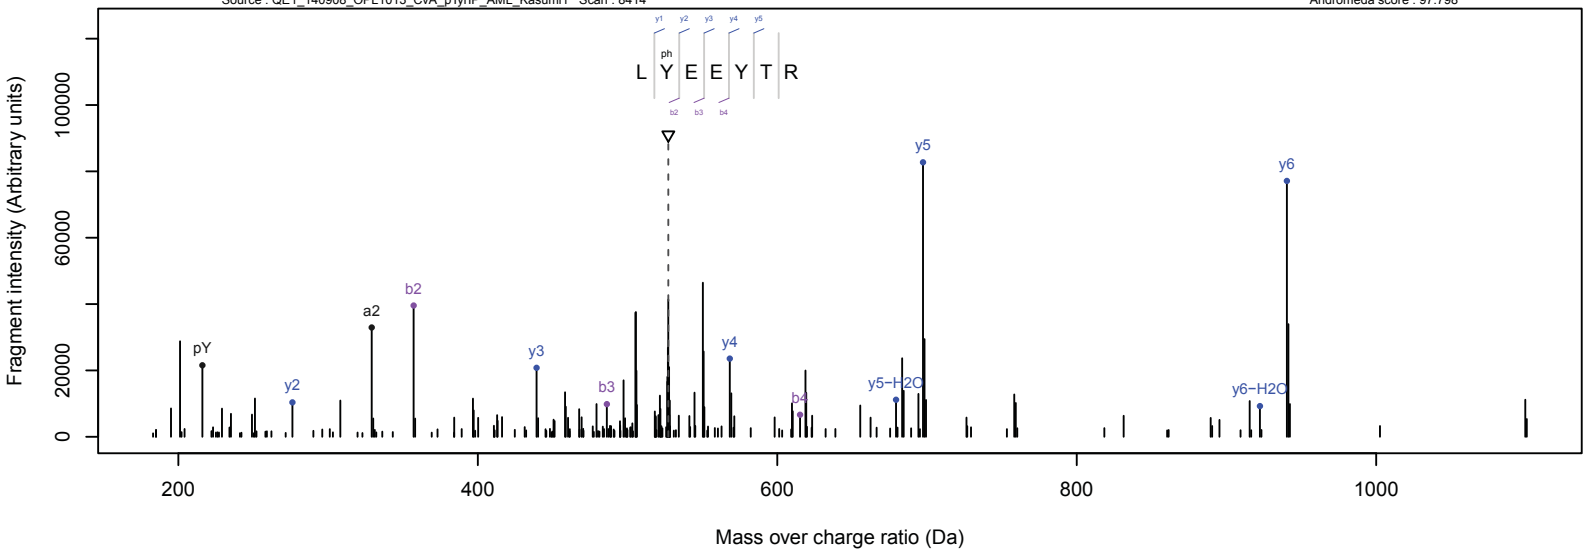

FPIKWTAEALYGR-2+

Source: QE1\_140612\_OPL1013\_CVA\_phosphoproteomic\_landscape\_AML\_C Scan: 38316

Andromeda score: 97.797

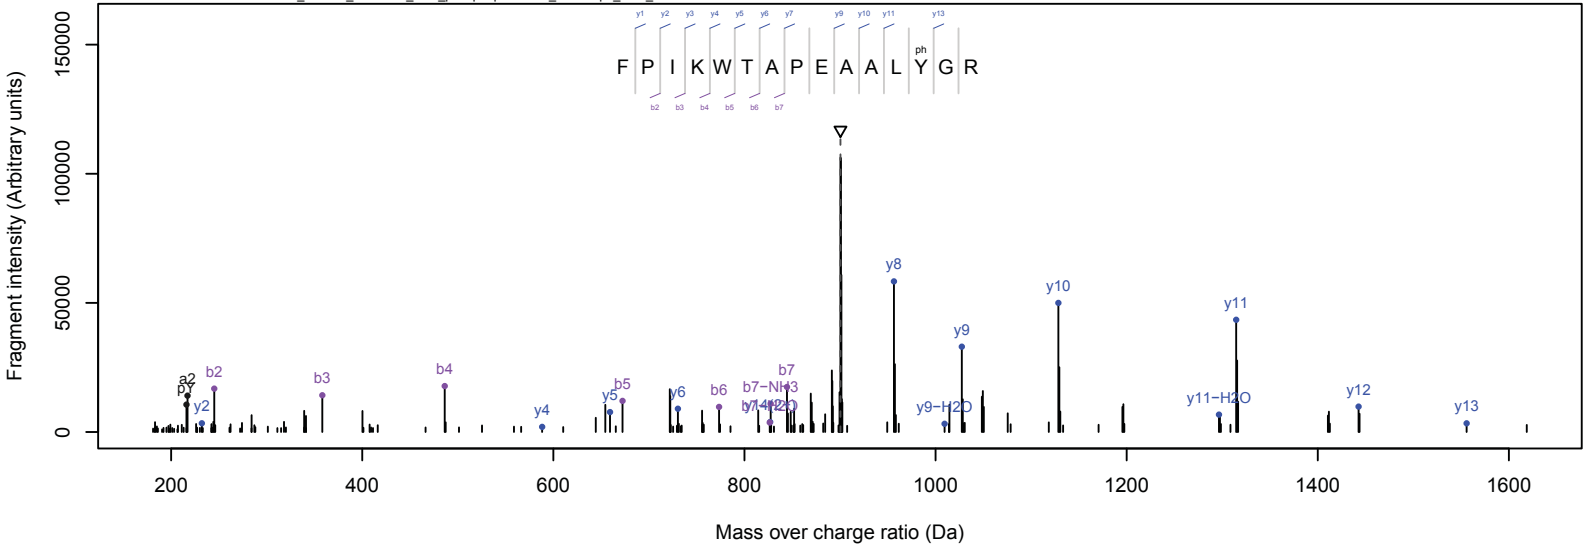

YQKDVY(ph)DIPPSHTTQGVYDIPSSAK-3+

Source: QE1\_140908\_OPL1013\_CvA\_pTyrIP\_AML\_OCI\_AML3 Scan: 26159

Andromeda score: 97.771

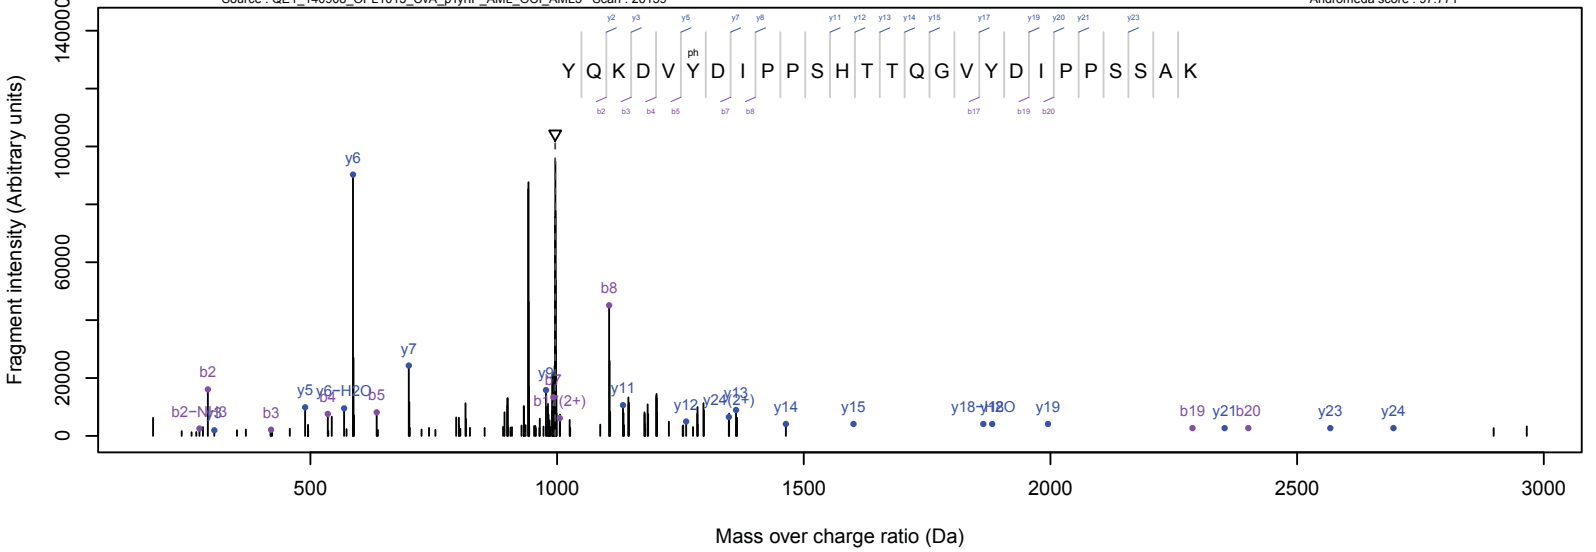

VLTTGYWPTQSATPK-2+

Source: QE1\_140612\_OPL1013\_CVA\_phosphoproteomic\_landscape\_AML\_B Scan: 26884

Andromeda score: 97.767

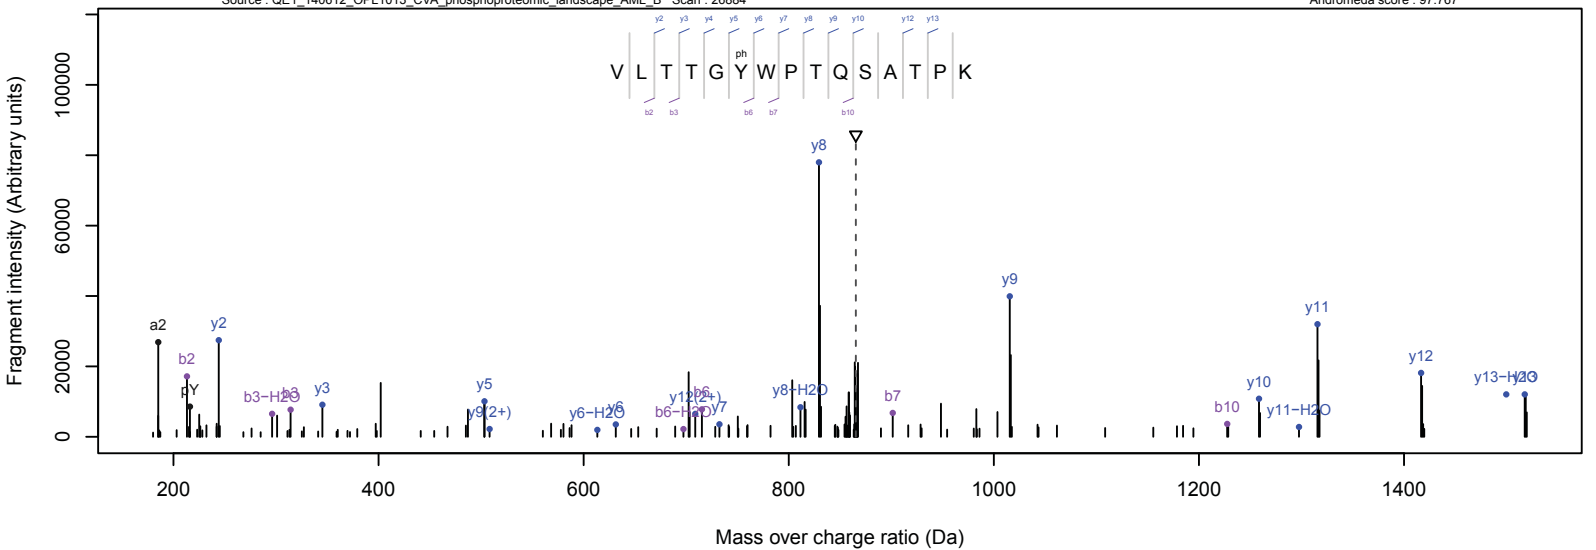

EGY(ph)IPSNYVAR-2+

Source : QE1\_140822\_OPL1013\_CVA\_pTyrIP\_AML\_cell\_lines\_part2\_E Scan : 13930

Andromeda score : 97.734

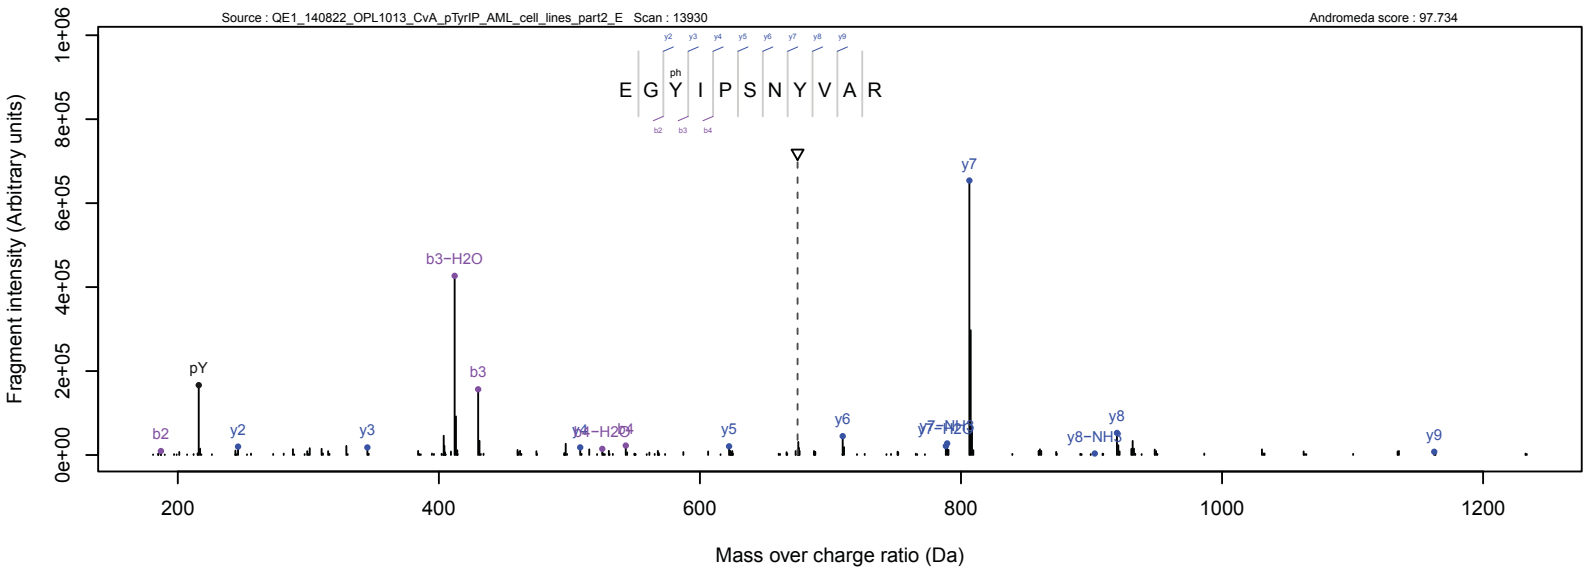

GY(ph)LDKLEPSK-2+

Source : QE1\_140612\_OPL1013\_CVA\_phosphoproteomic\_landscape\_AML\_E Scan : 15969

Andromeda score : 97.734

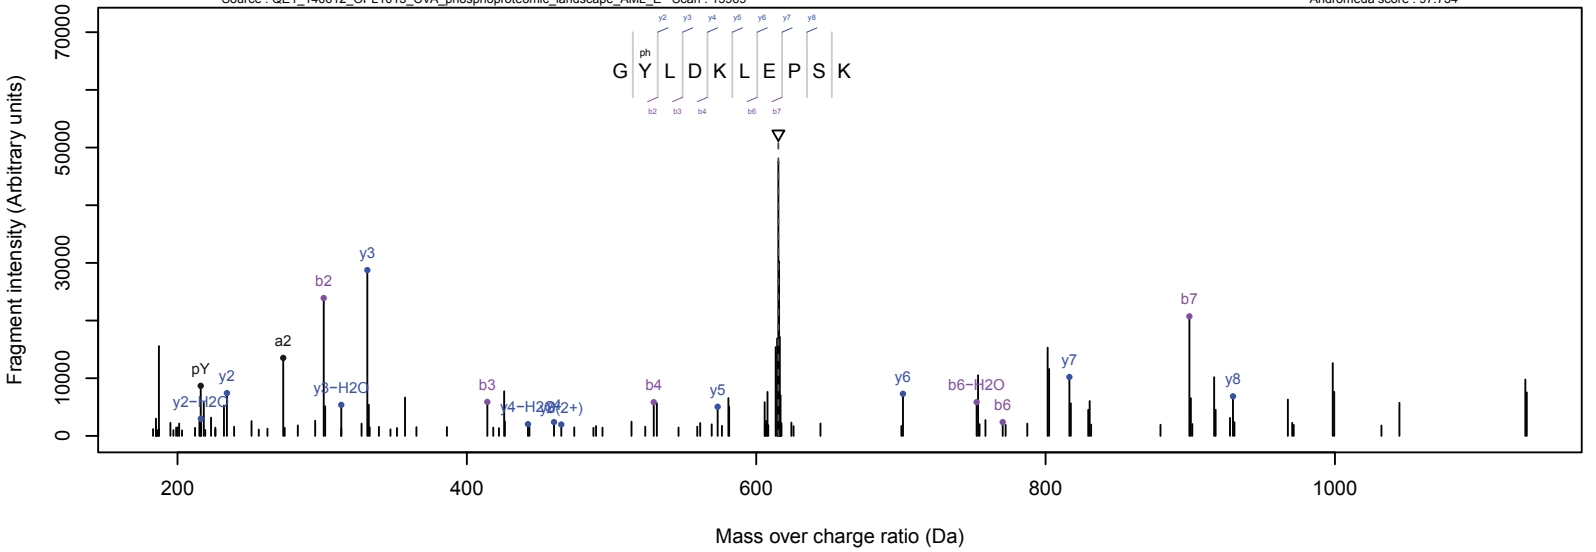

APGTPHSHTKPYVR-4+

Source : QE1\_140612\_OPL1013\_CVA\_phosphoproteomic\_landscape\_AML\_C Scan : 3687

Andromeda score : 97.69

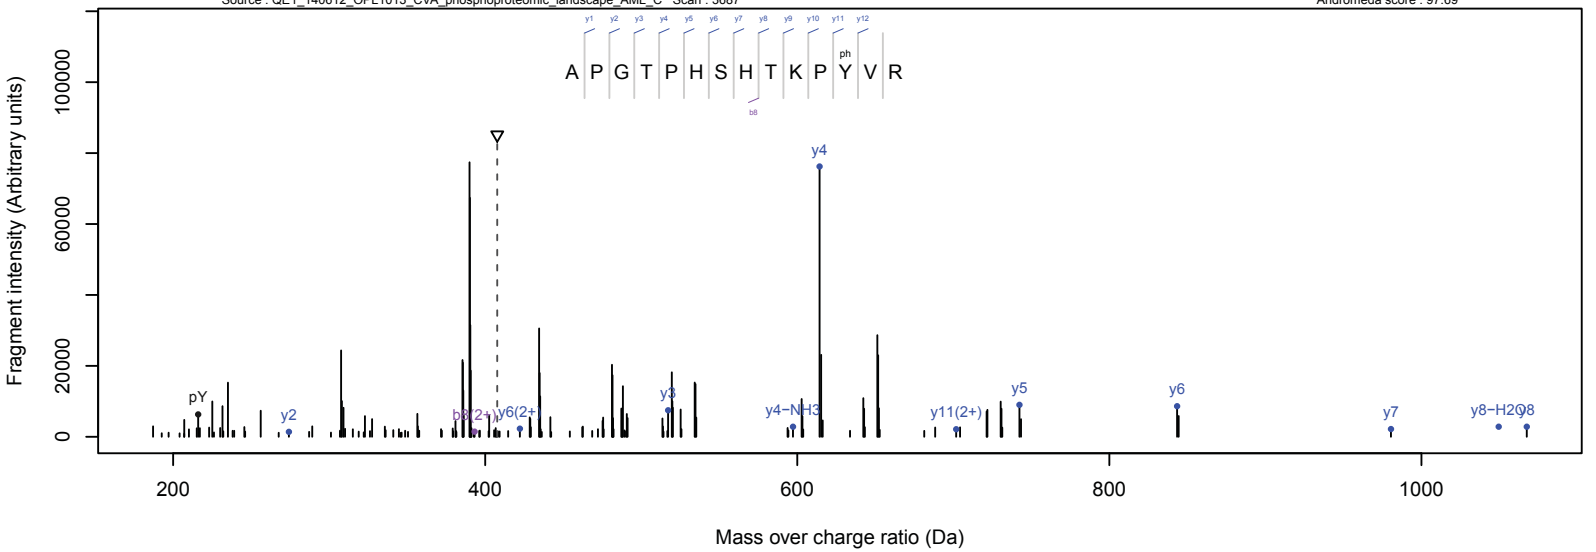

GFVY(ph)SSFLKPYNPR-2+

Source : QE1\_140612\_OPL1013\_CVA\_phosphoproteomic\_landscape\_AML\_C Scan : 35555

Andromeda score : 97.69

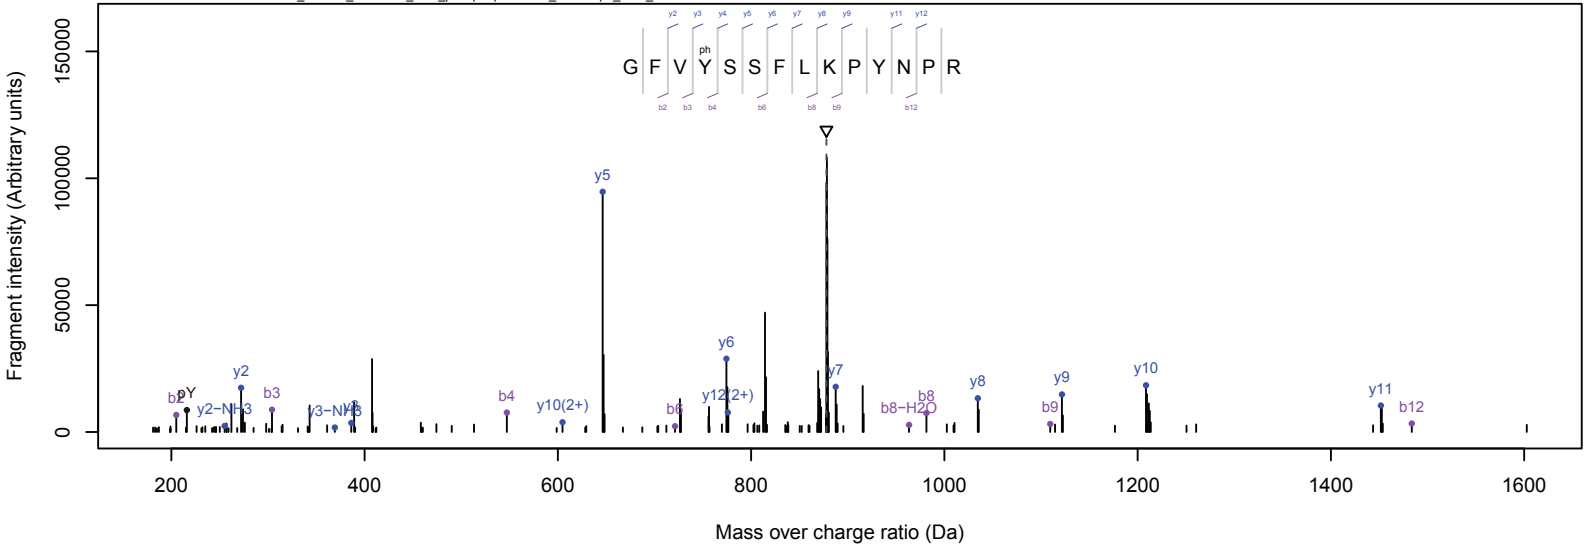

IGSGSFGTVY(ph)KGGK-2+

Source : QE1\_140612\_OPL1013\_CVA\_phosphoproteomic\_landscape\_AML\_C Scan : 11839

Andromeda score : 97.69

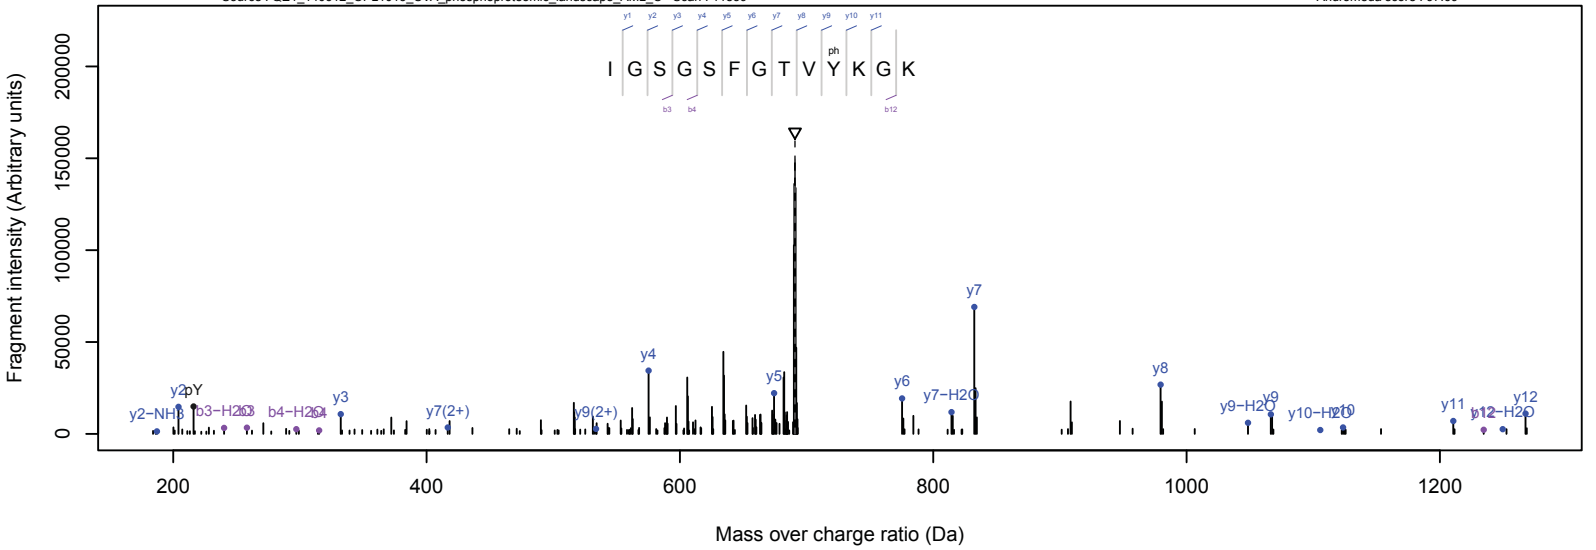

VSGQEDFSHQLY(ph)QR-3+

Source : QE1\_140612\_OPL1013\_CVA\_phosphoproteomic\_landscape\_AML\_C Scan : 15422

Andromeda score : 97.69

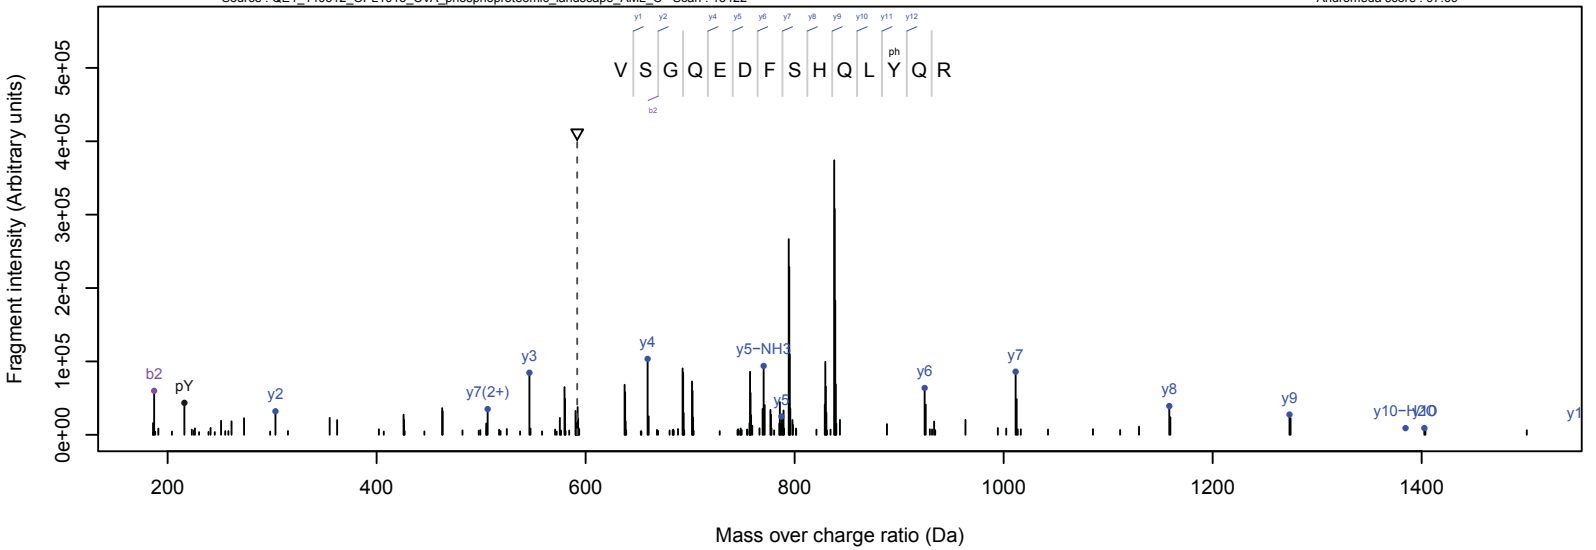

GQIQY(ph)HKF-2+

Source : QE1\_140612\_OPL1013\_CVA\_phosphoproteomic\_landscape\_AML\_B Scan : 15058

Andromeda score : 97.635

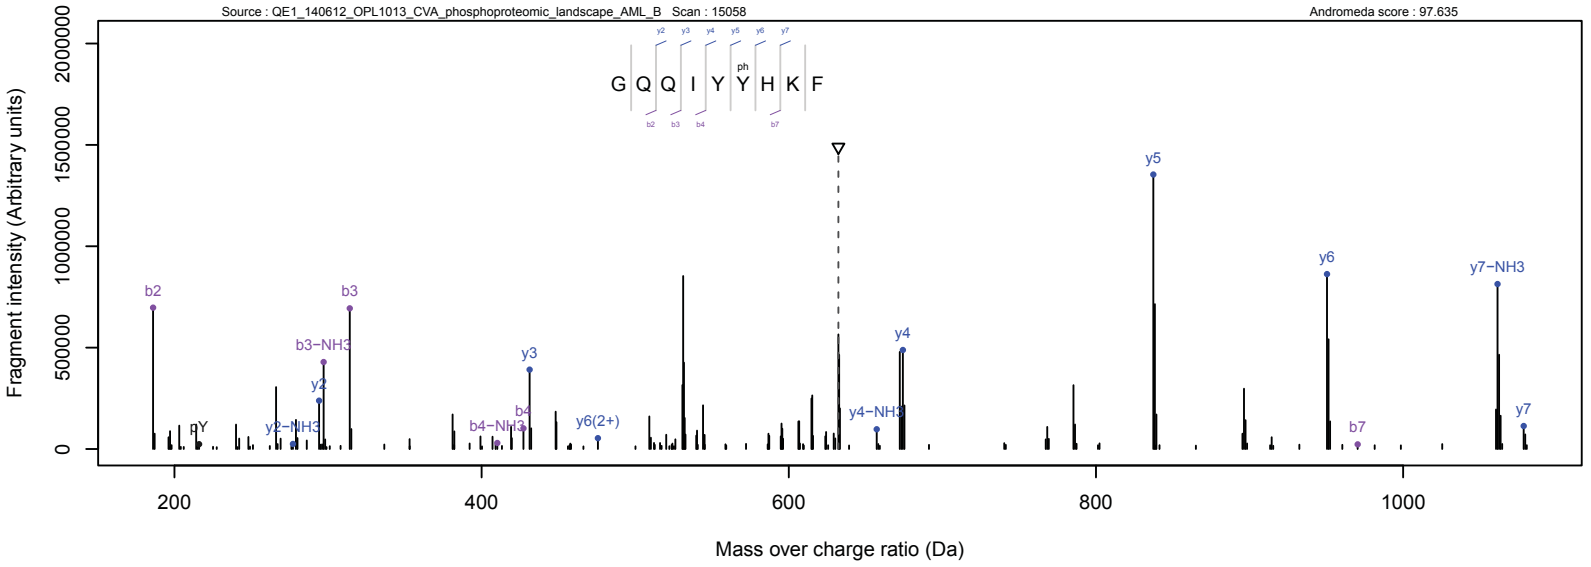

VSLEEIY(ph)SGCTKK-2+

Source : QE1\_140612\_OPL1013\_CVA\_phosphoproteomic\_landscape\_AML\_C Scan : 18243

Andromeda score : 97.631

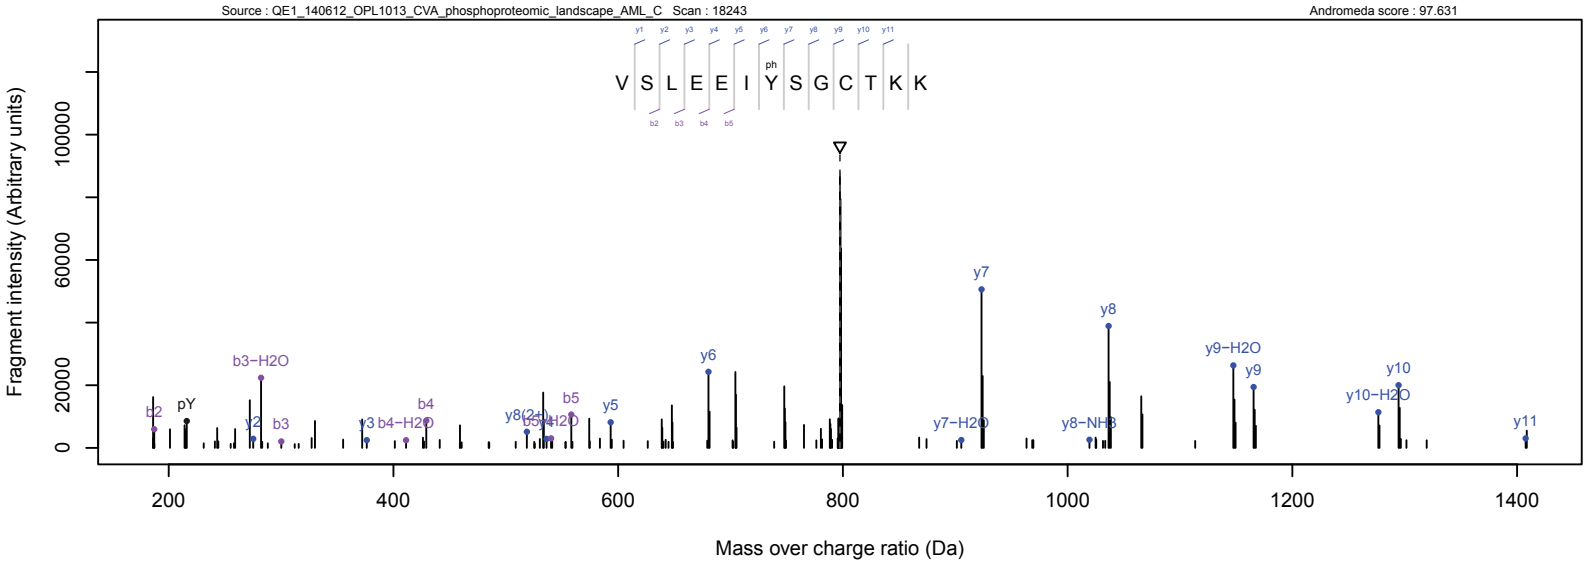

YKVEEY(ph)PIM(ox)YSTDPENGHIFNCIQR-3+

Source : QE1\_140908\_OPL1013\_CvA\_pTyrIP\_AML\_ML2 Scan : 34347

Andromeda score : 97.542

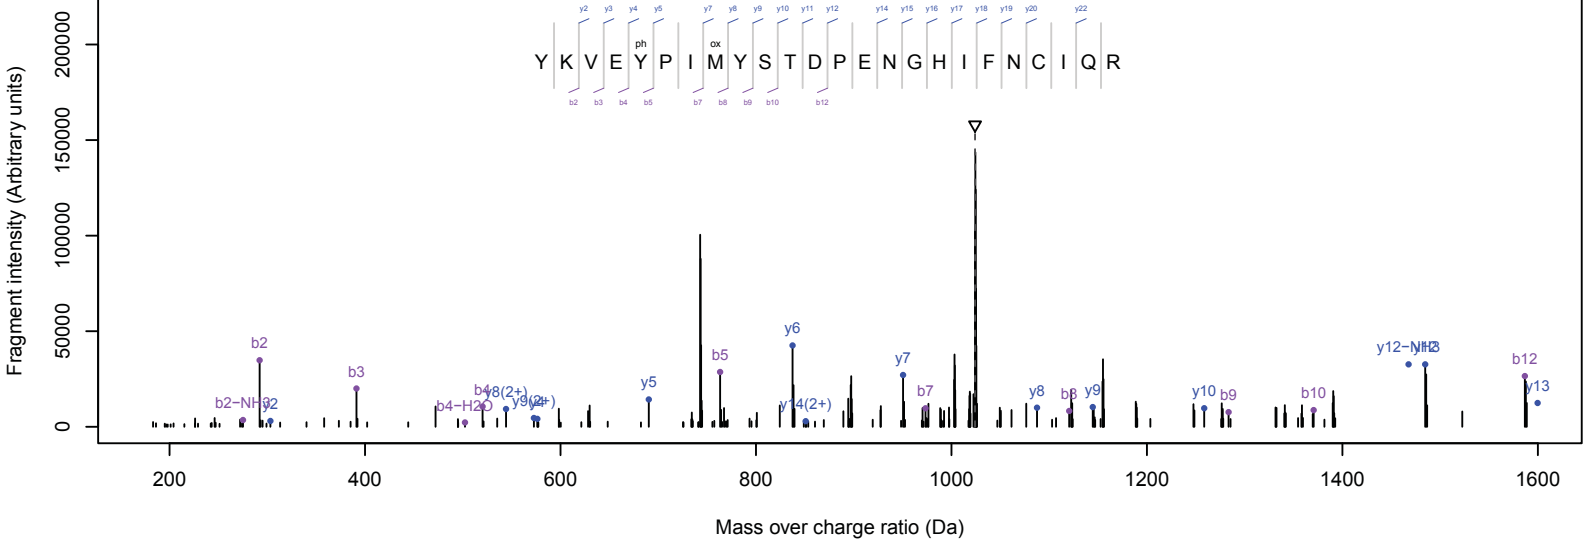

GTEFAESADAALQGDPALQDAGDSSRKEY(ph)FI-3+

Source : QE1\_140612\_OPL1013\_CVA\_phosphoproteomic\_landscape\_AML\_C Scan : 41692

Andromeda score : 97.469

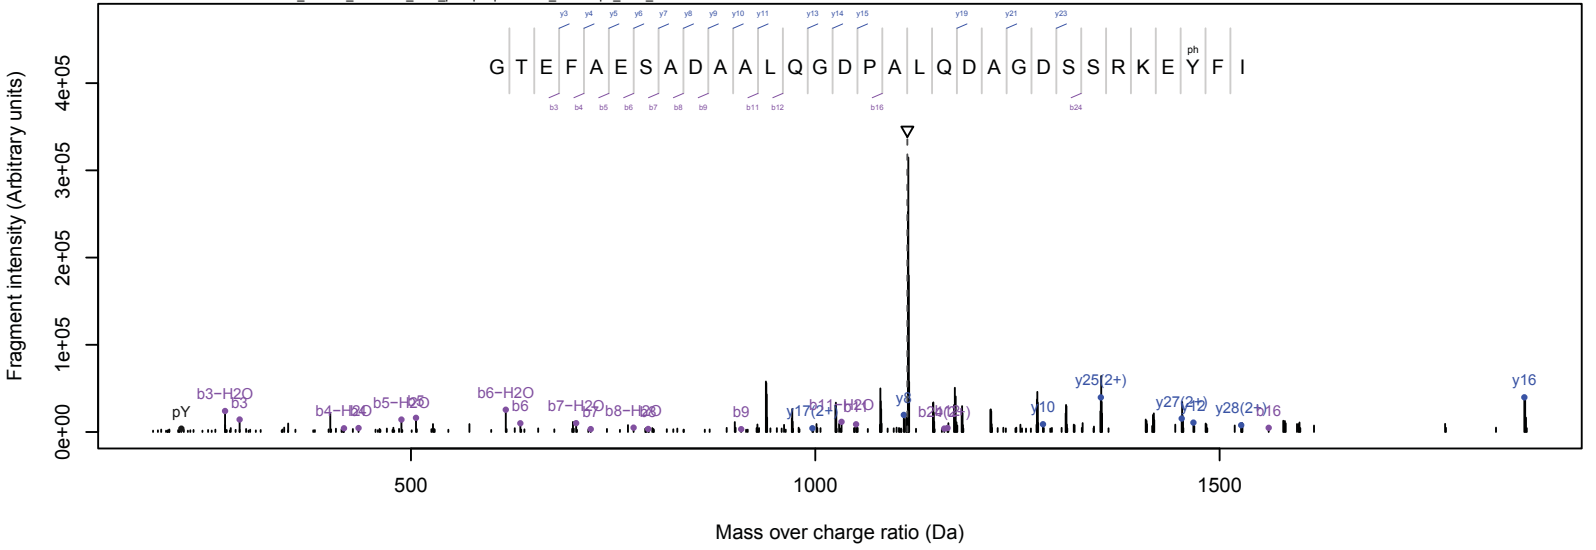

RLDEDLAAY(ph)CR-2+

Source : QE1\_140612\_OPL1013\_CVA\_phosphoproteomic\_landscape\_AML\_C Scan : 14643

Andromeda score : 97.463

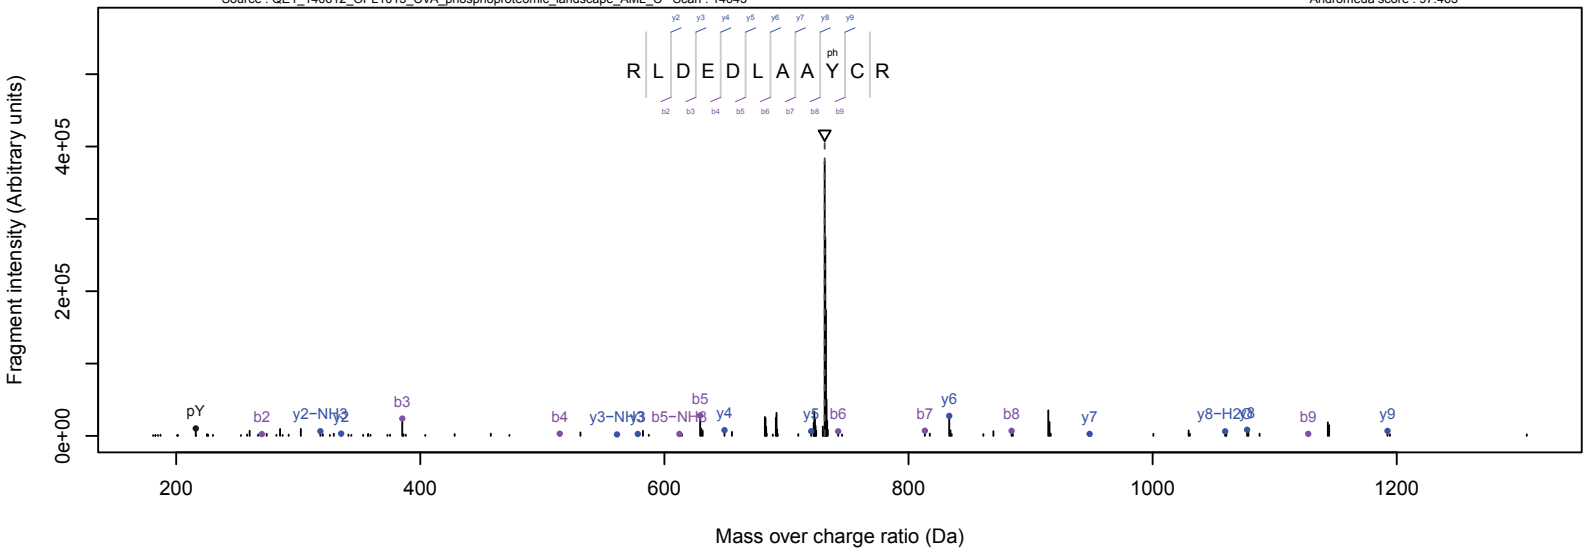

VATAY(ph)RPPALR-2+

Source : QE1\_140612\_OPL1013\_CVA\_phosphoproteomic\_landscape\_AML\_C Scan : 12483

Andromeda score : 97.452

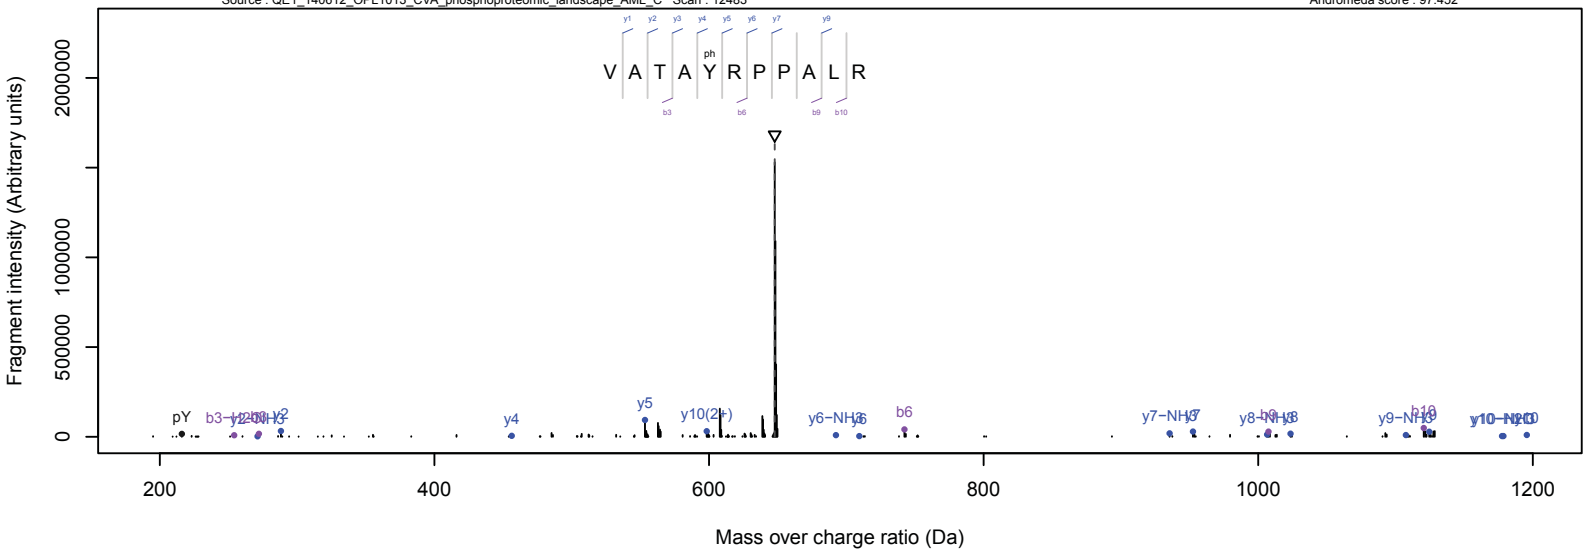

**GRDY(ph)RDNTLPHHGK-4+**

Source : QE1\_140612\_OPL1013\_CVA\_phosphoproteomic\_landscape\_AML\_A Scan : 3890

Andromeda score : 97.45

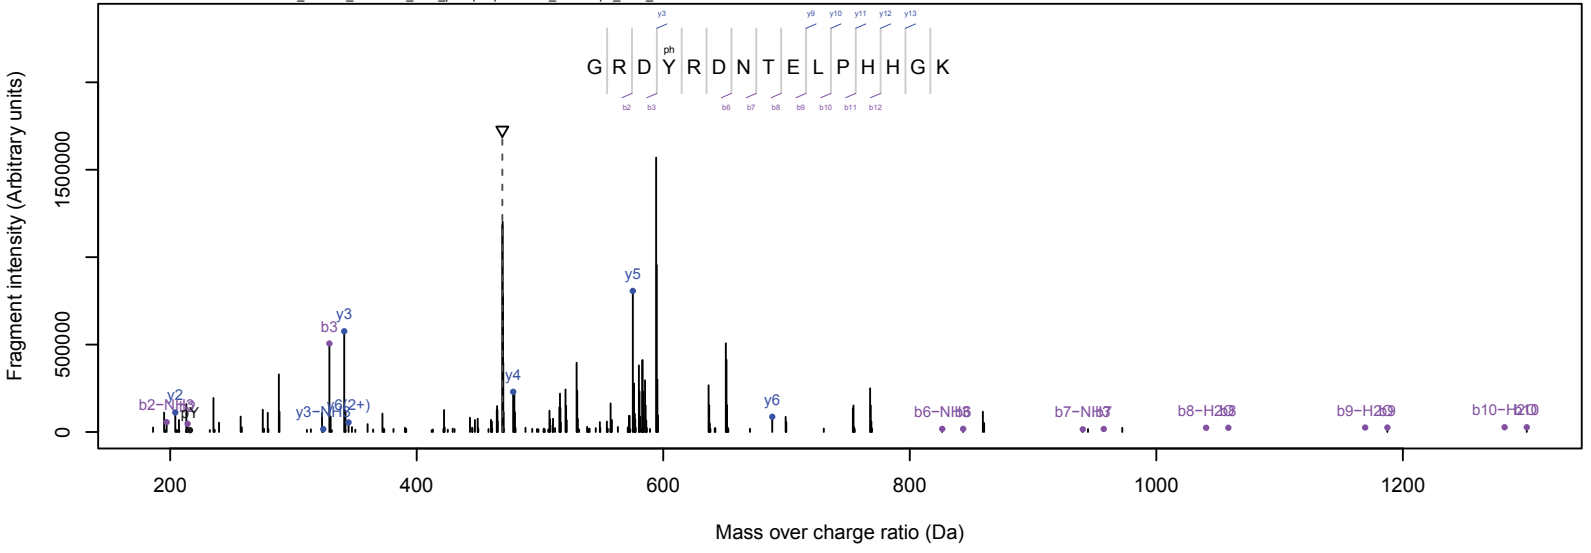

**I IHEDGYSEEECRQY(ph)R-3+**

Source : QE1\_140612\_OPL1013\_CVA\_phosphoproteomic\_landscape\_AML\_C Scan : 8627

Andromeda score : 97.45

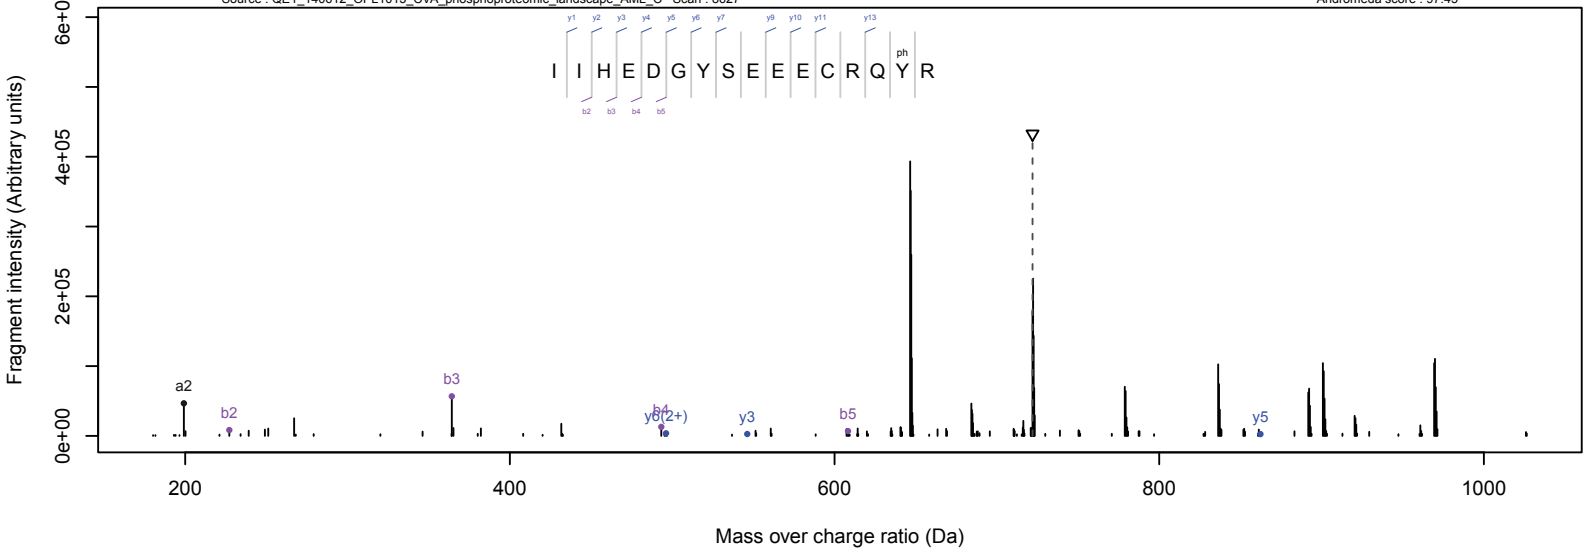

**SETEY(ph)ALLR-2+**

Source : QE1\_140612\_OPL1013\_CVA\_phosphoproteomic\_landscape\_AML\_B Scan : 19480

Andromeda score : 97.431

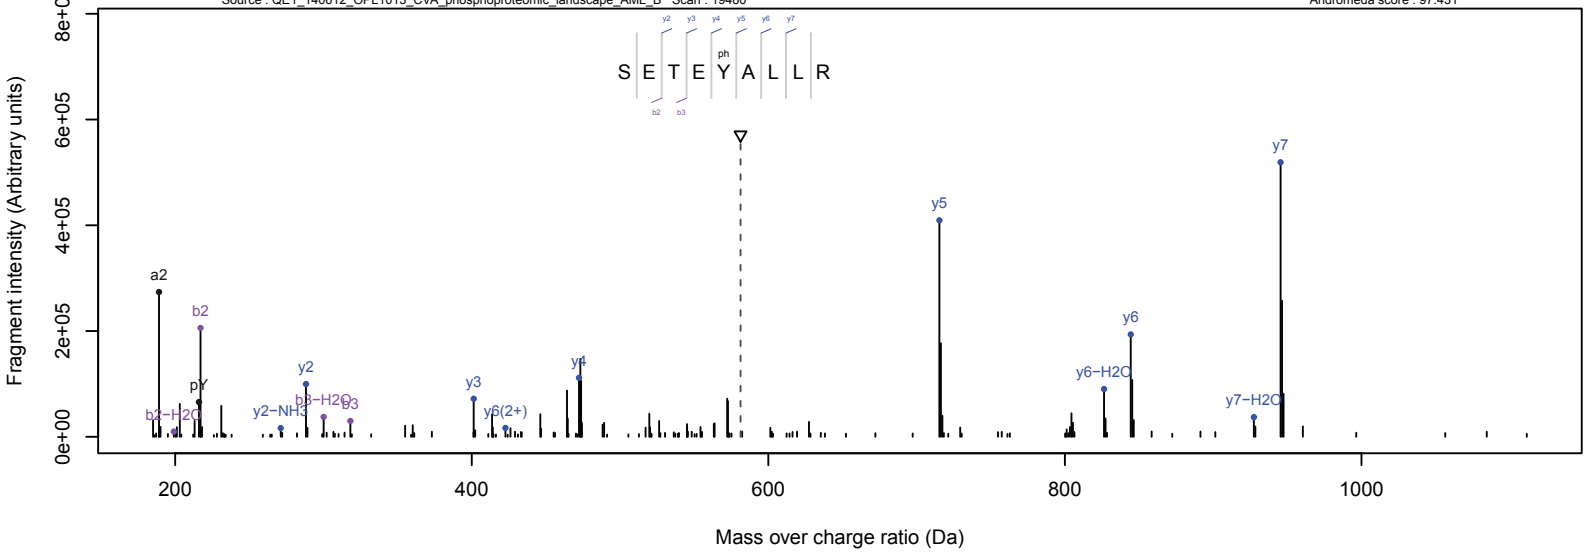

KRHEM(ox)PPIHY(ph)AITDTAYR-4+

Source : QE1\_140908\_OPL1013\_CVA\_pTyrIP\_AML\_HEL Scan : 17143

Andromeda score : 97.384

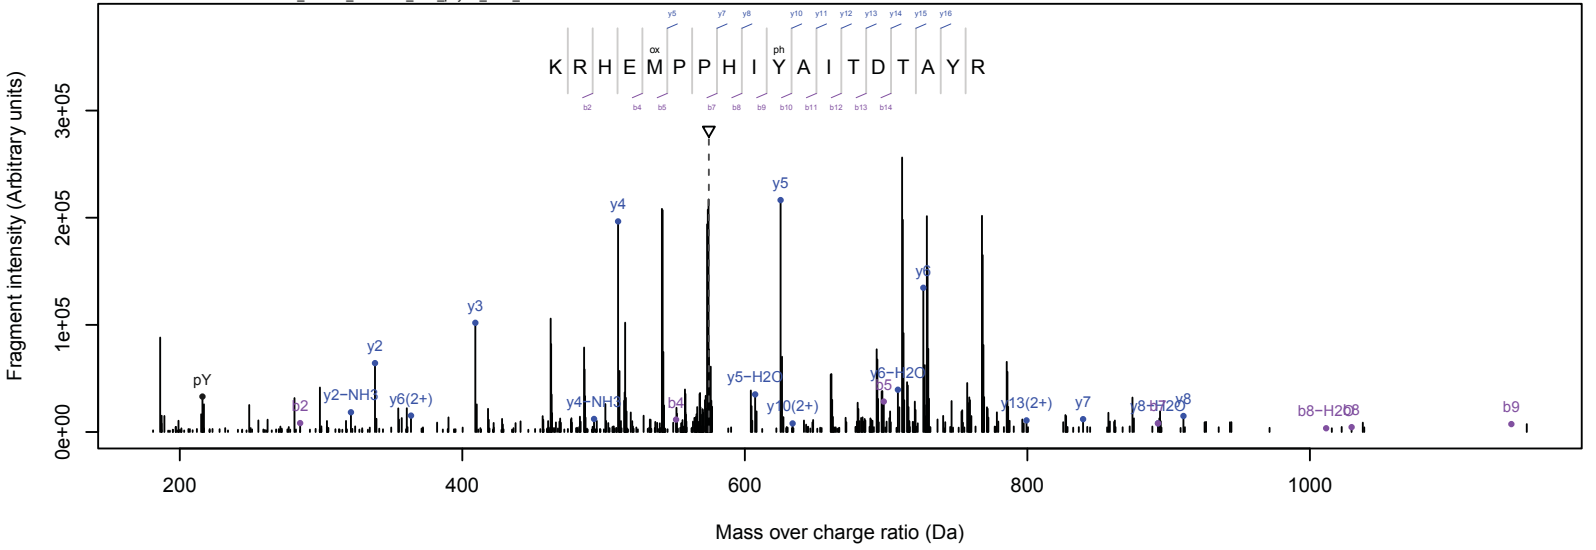

SGSTSISAPTGPSSPLPAPETPTAPAAESAPNGLSTVSHDY(ph)LK-4+

Source : QE1\_140612\_OPL1013\_CVA\_phosphoproteomic\_landscape\_AML\_C Scan : 37279

Andromeda score : 97.363

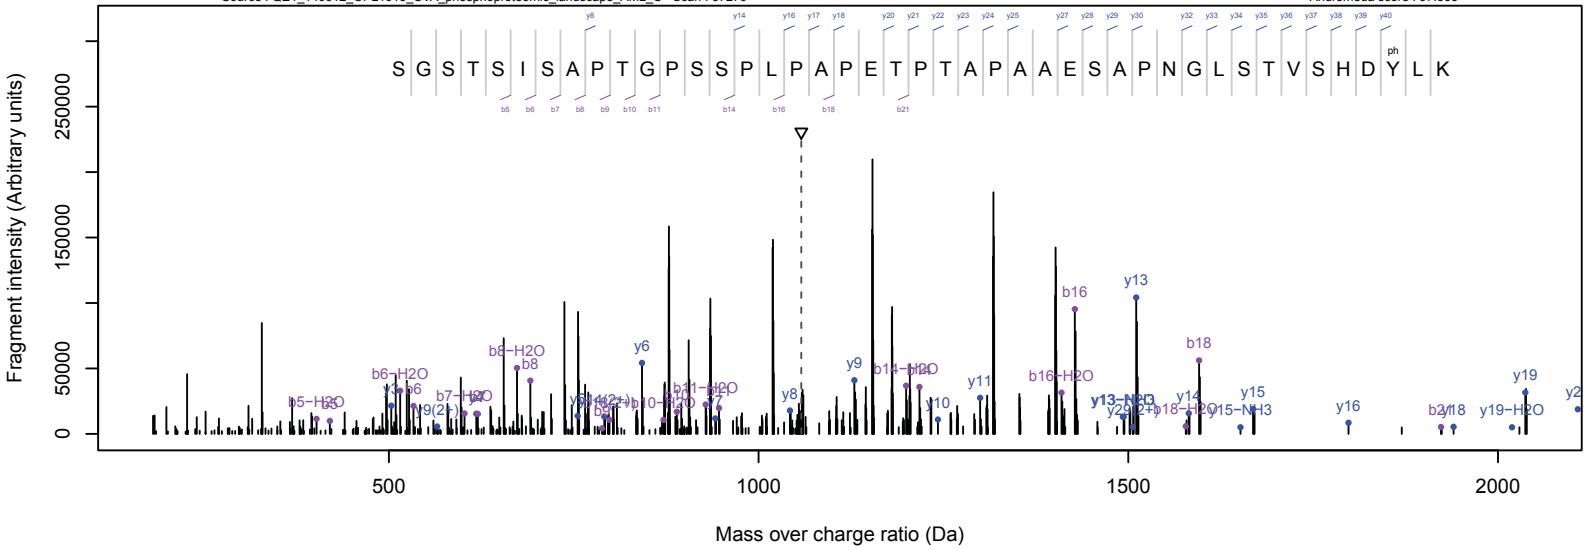

TGPFEDLKENLIREYV K-3+

Source : QE1\_140612\_OPL1013\_CVA\_phosphoproteomic\_landscape\_AML\_C Scan : 36648

Andromeda score : 97.352

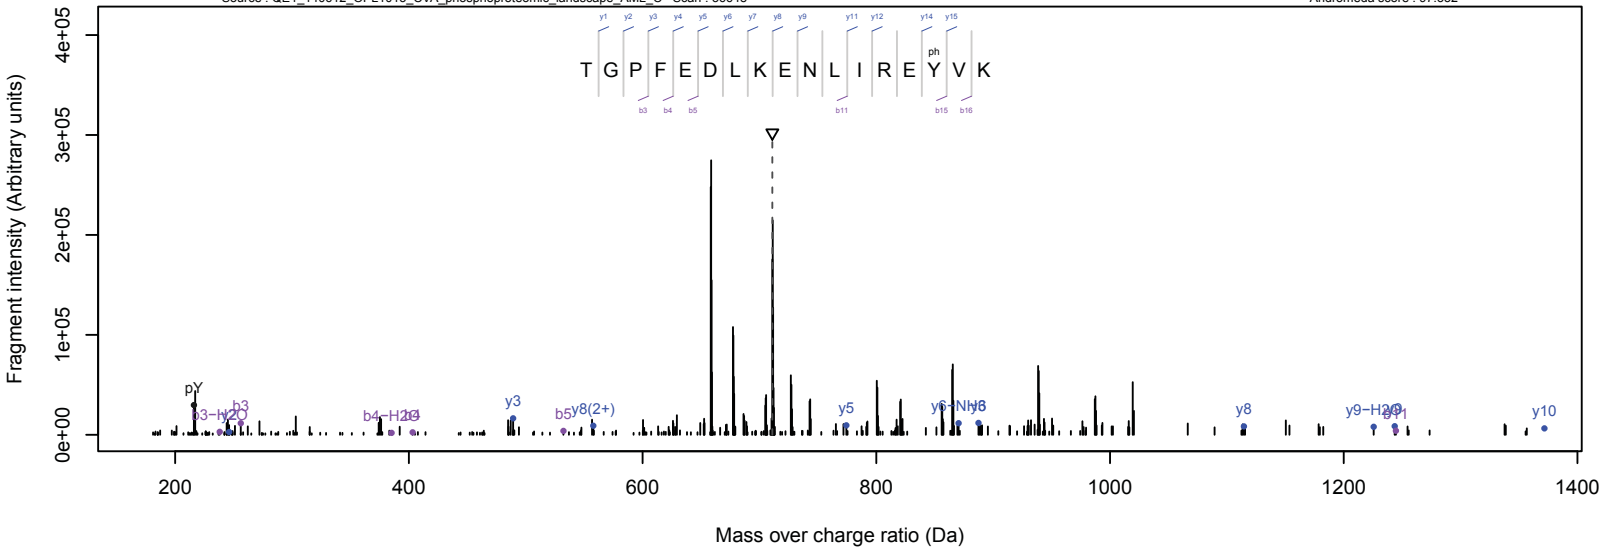



**Y(ph)KYG YEIPVDMLCK-2+**

Source : QE1\_140612\_OPL1013\_CVA\_phosphoproteomic\_landscape\_AML\_F Scan : 36645

Andromeda score : 97.291

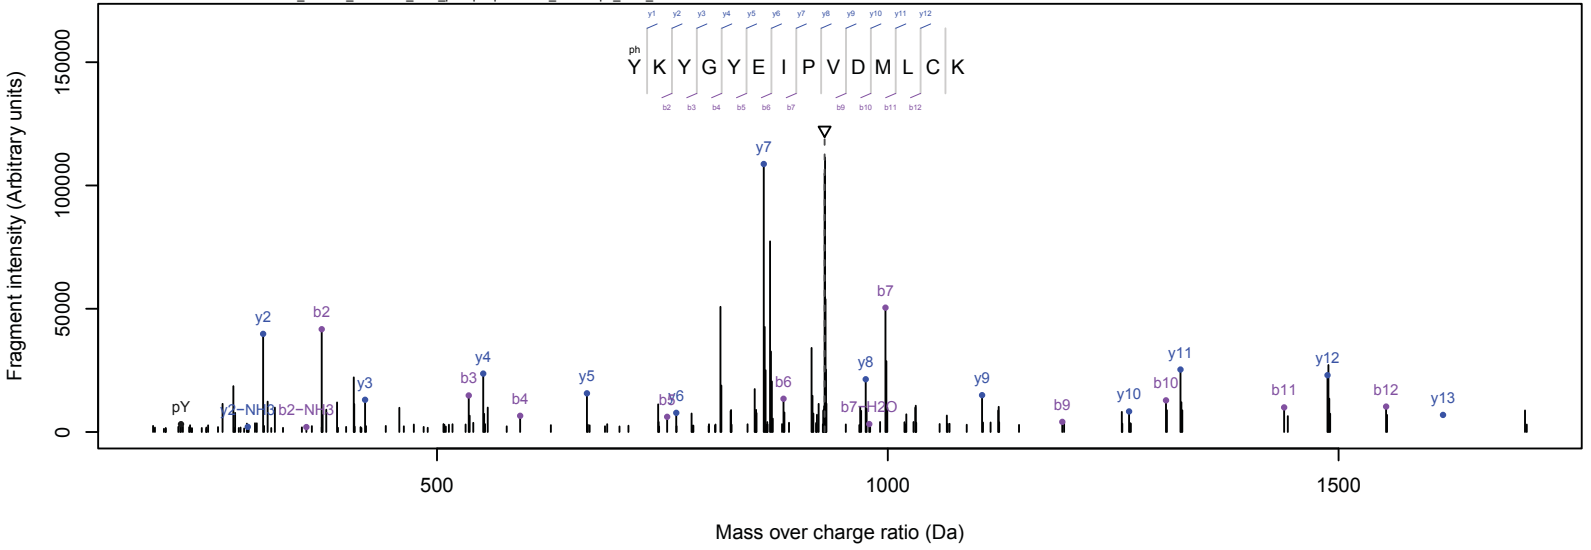

**AGMSY(ph)YNSPGLHVQHMGTSHGITRPSR-5+**

Source : QE1\_140612\_OPL1013\_CVA\_phosphoproteomic\_landscape\_AML\_B Scan : 20079

Andromeda score : 97.188

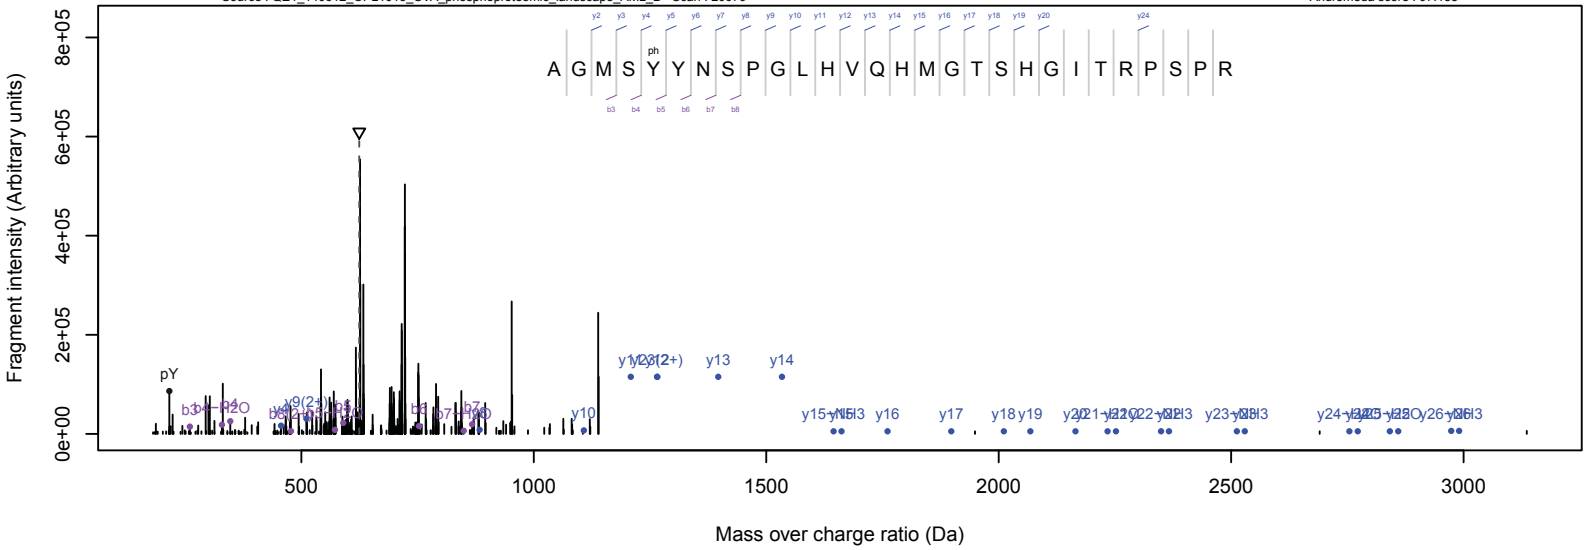

**NKDKY(ph)VGVS S D S V G G F R-3+**

Source : QE1\_140612\_OPL1013\_CVA\_phosphoproteomic\_landscape\_AML\_C Scan : 15168

Andromeda score : 97.095

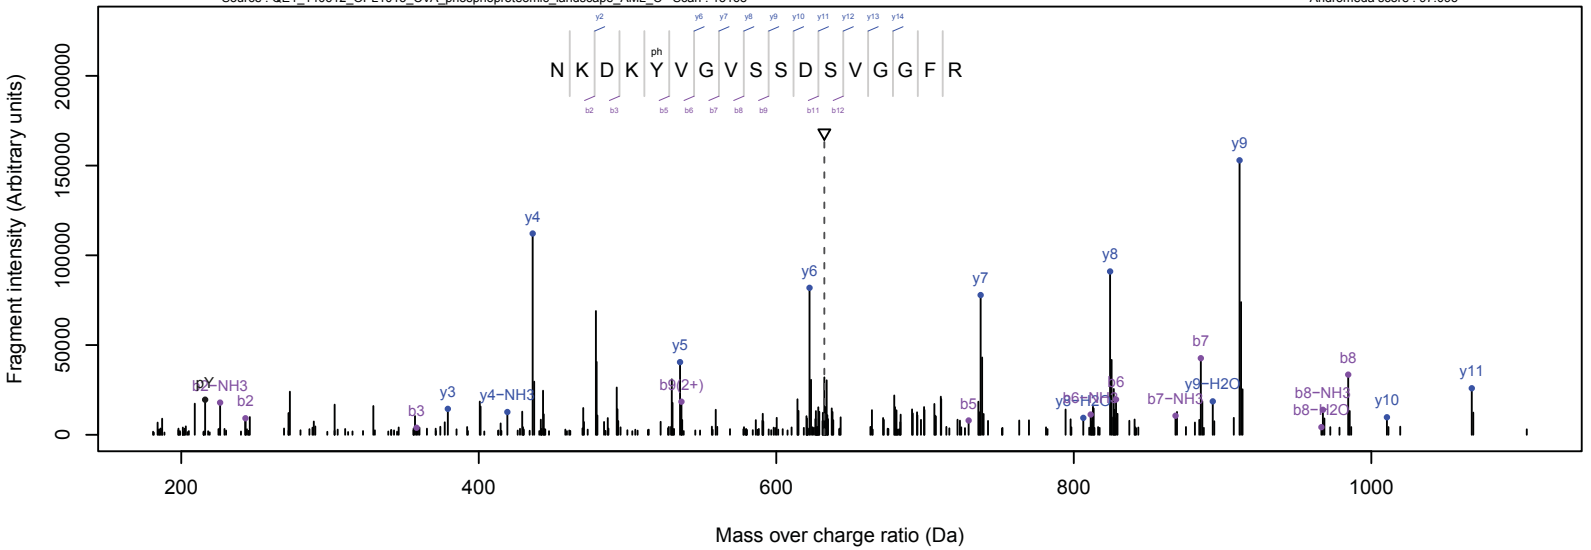

DIQY(ph)LKDSLALGK-2+

Source : QE1\_140612\_OPL1013\_CVA\_phosphoproteomic\_landscape\_AML\_A Scan : 31393

Andromeda score : 97.073

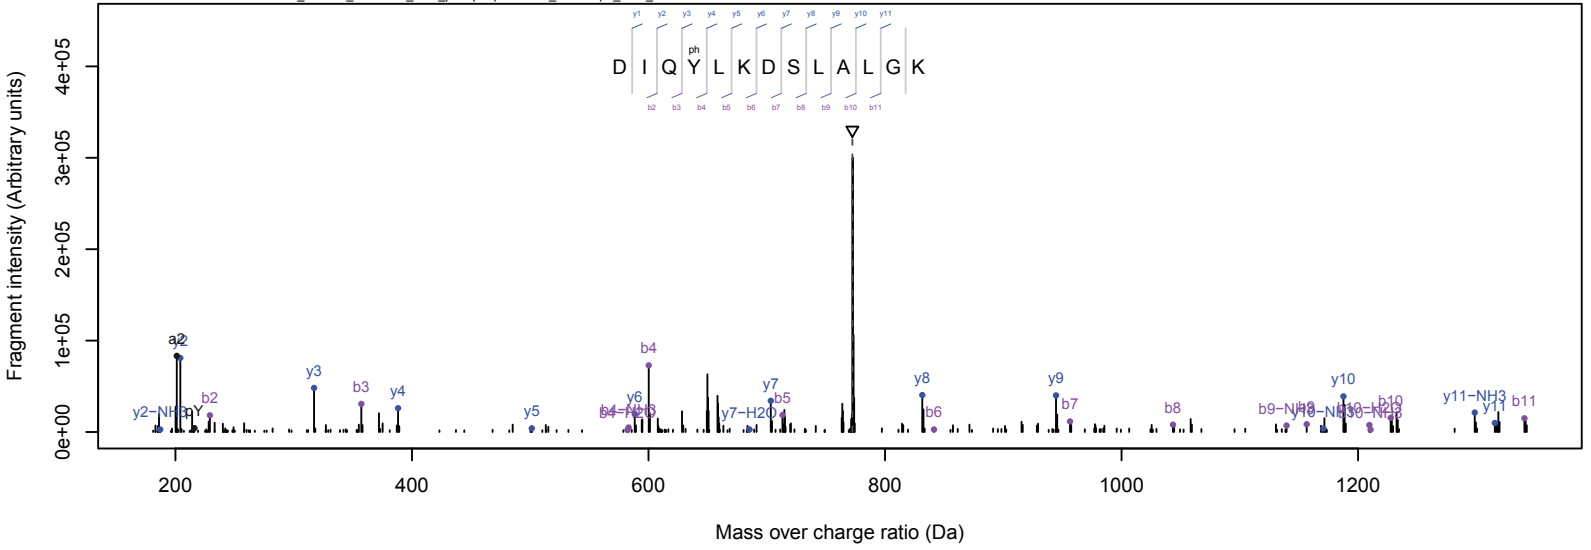

YQGVNLYVK-2+

Source : QE1\_140612\_OPL1013\_CVA\_phosphoproteomic\_landscape\_AML\_A Scan : 22318

Andromeda score : 96.948

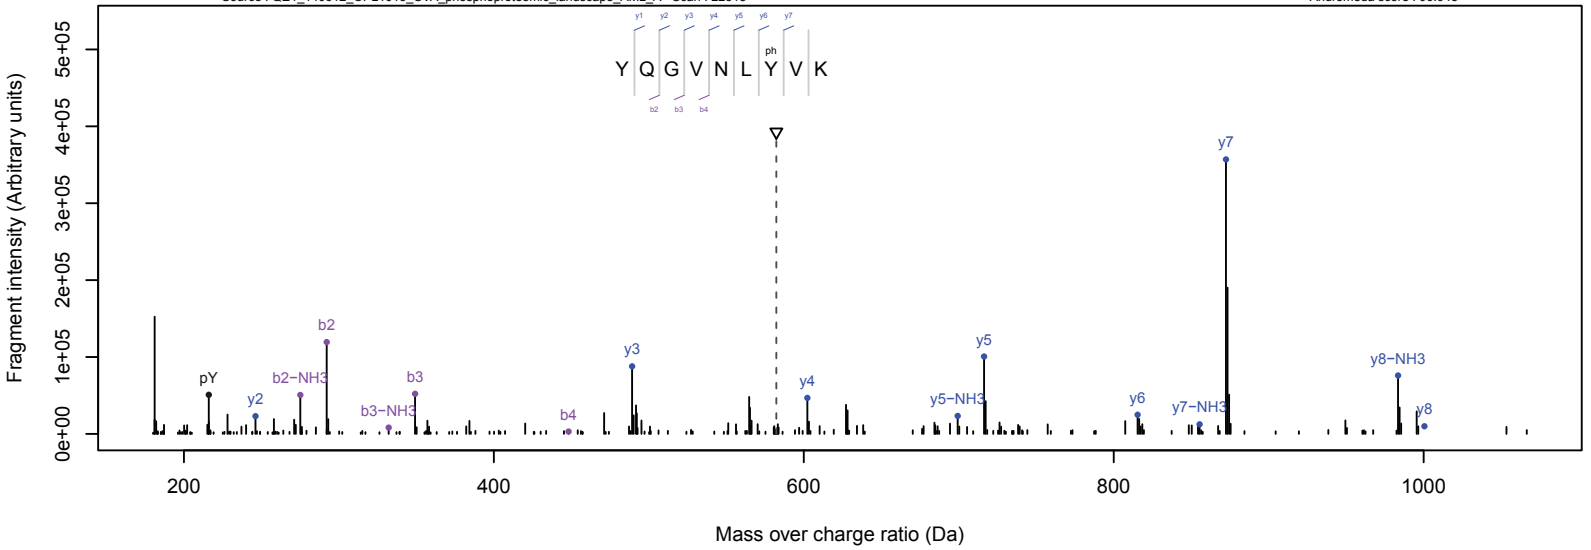

TVMYTAGVSEWRPFGYPRR-3+

Source : QE1\_140612\_OPL1013\_CVA\_phosphoproteomic\_landscape\_AML\_F Scan : 34249

Andromeda score : 96.881

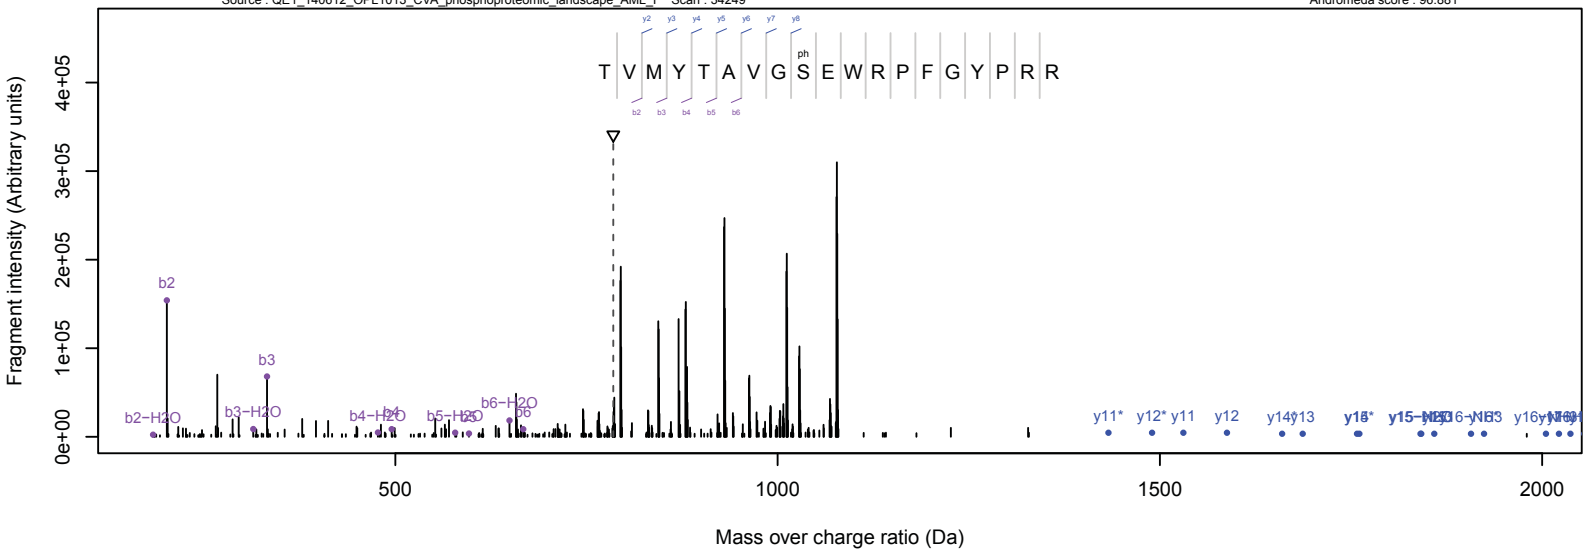

VKGEY(ph)DMTVPK-2+

Source : QE1\_140612\_OPL1013\_CVA\_phosphoproteomic\_landscape\_AML\_C Scan : 10886

Andromeda score : 96.866

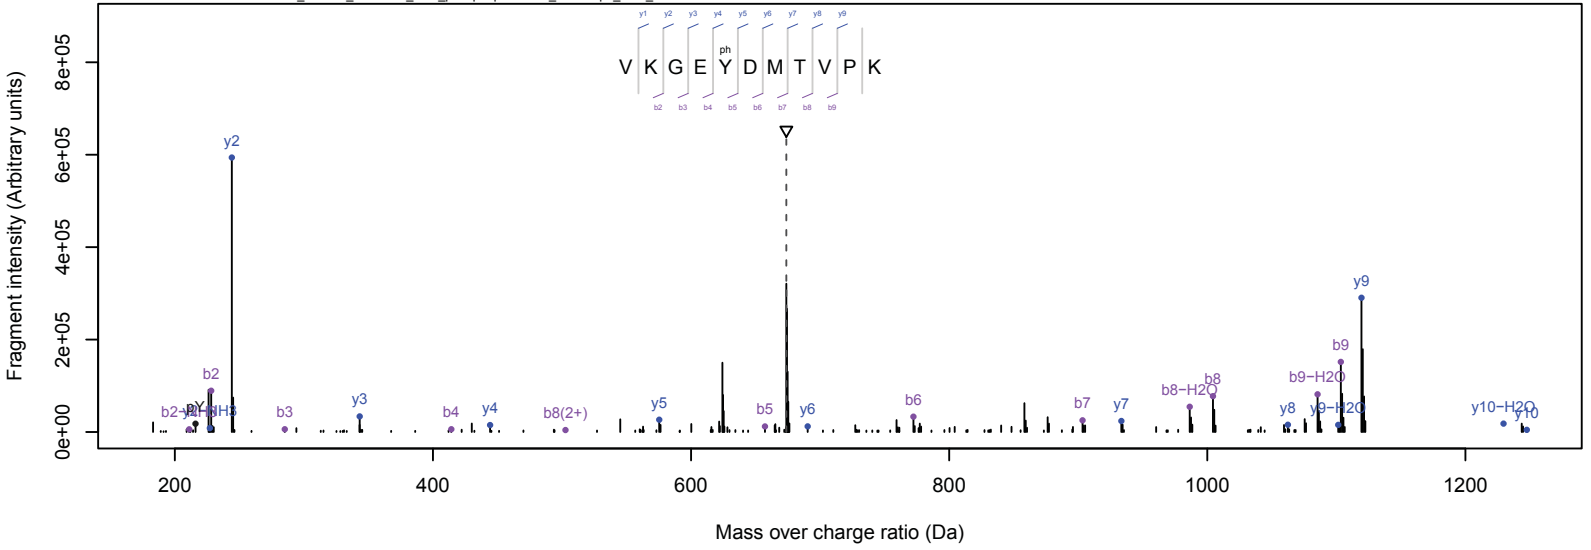

DLHSVMA<sup>ph</sup>YFLQQR-3+

Source : QE1\_140612\_OPL1013\_CVA\_phosphoproteomic\_landscape\_AML\_C Scan : 39428

Andromeda score : 96.82

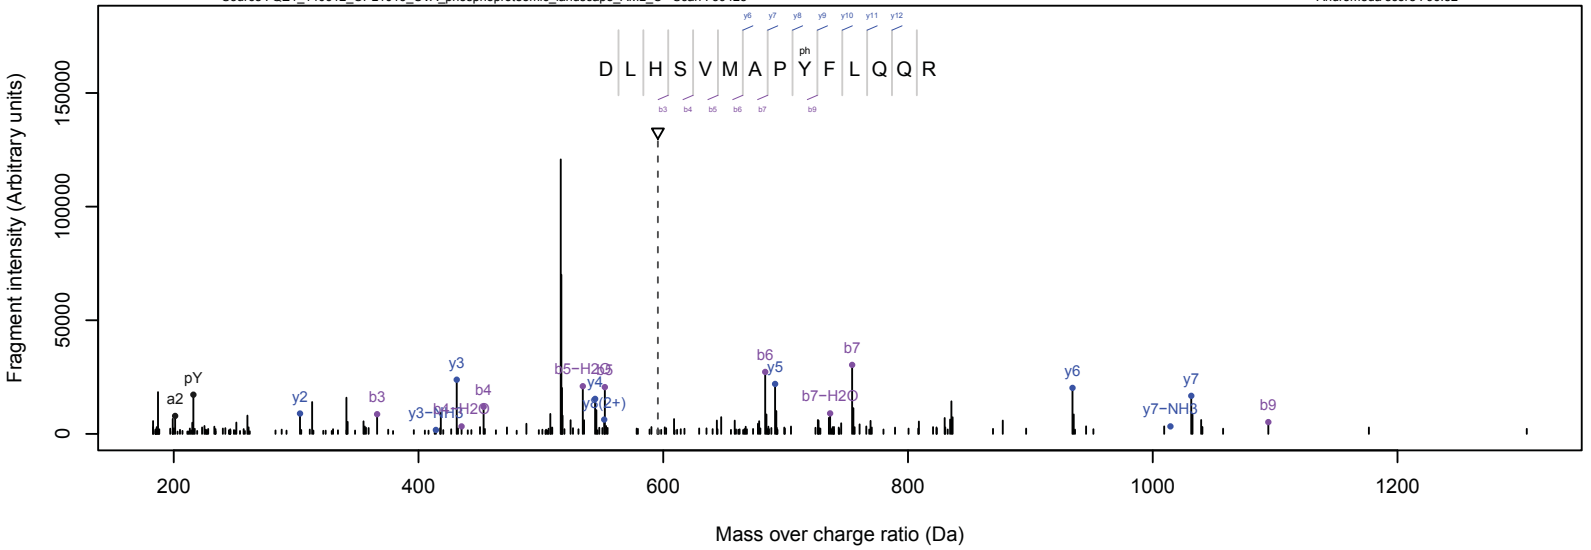

M(ox)QN<sup>H</sup>GYENPT<sup>ph</sup>YK-3+

Source : QE1\_140908\_OPL1013\_CvA\_pTyrIP\_AML\_Kasumi1 Scan : 4581

Andromeda score : 96.82

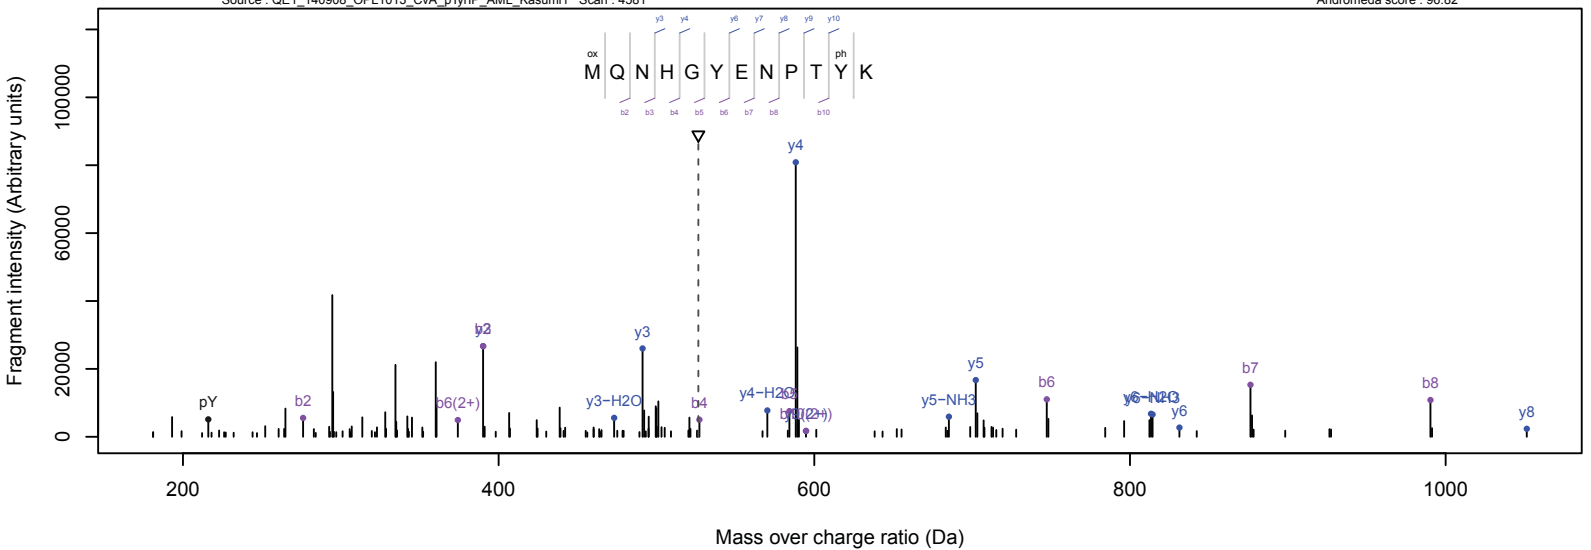

**VYDQTNPY(ph)TDVR-2+**

Source : QE1\_140612\_OPL1013\_CVA\_phosphoproteomic\_landscape\_AML\_A Scan : 10737

Andromeda score : 96.82

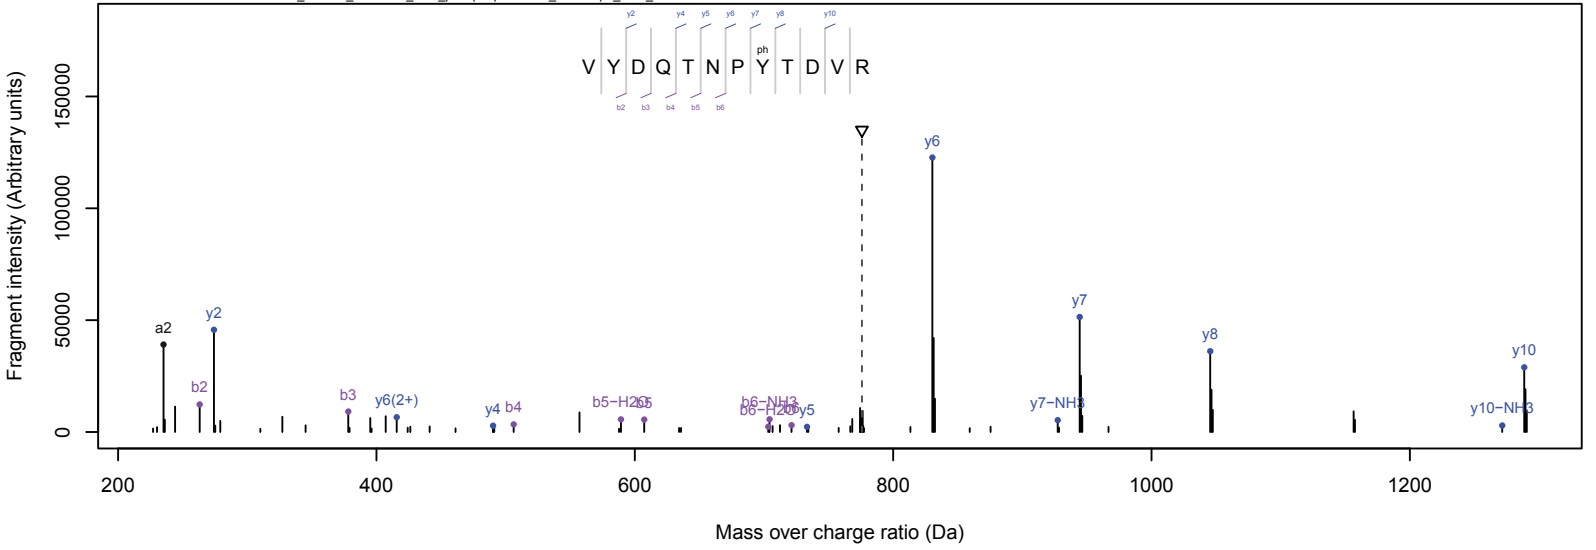

**PSSHHS GSGSTSTGY(ph)VTTAPSNNTSMADR-4+**

Source : QE1\_140612\_OPL1013\_CVA\_phosphoproteomic\_landscape\_AML\_C Scan : 8898

Andromeda score : 96.793

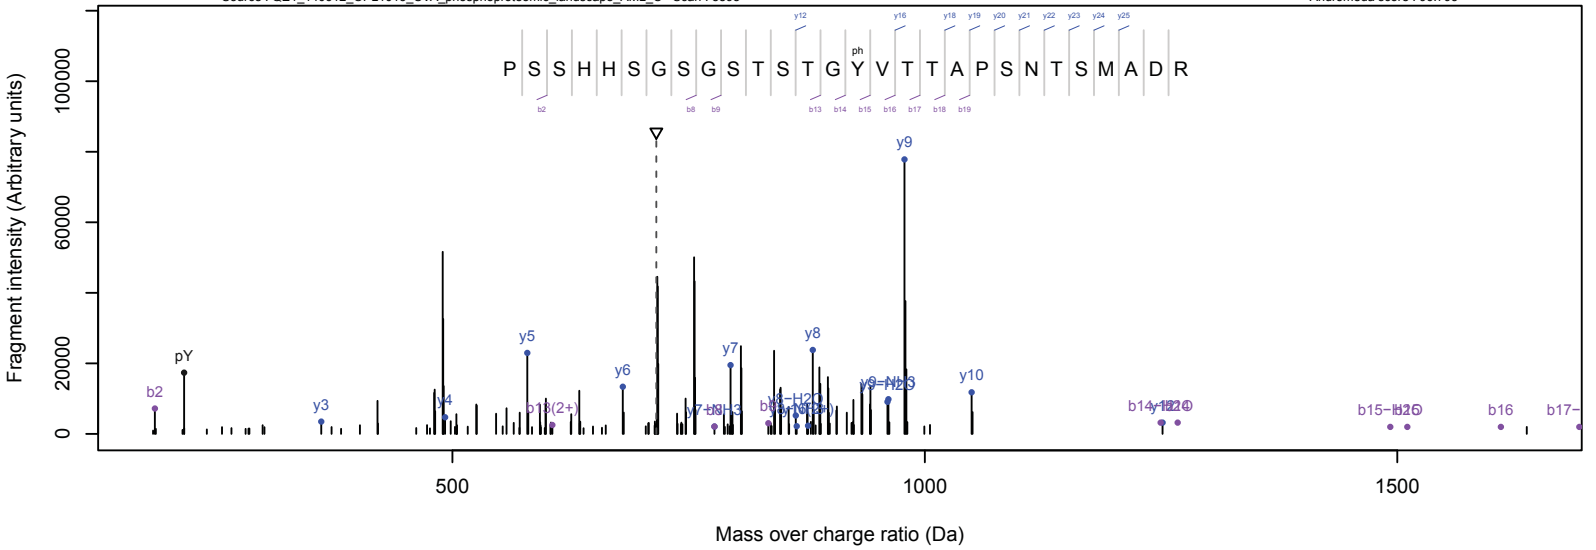

**KGSQTNLKDVPVGY(ph)CR-3+**

Source : QE1\_140908\_OPL1013\_CvA\_pTyrIP\_AML\_HEL Scan : 12566

Andromeda score : 96.773

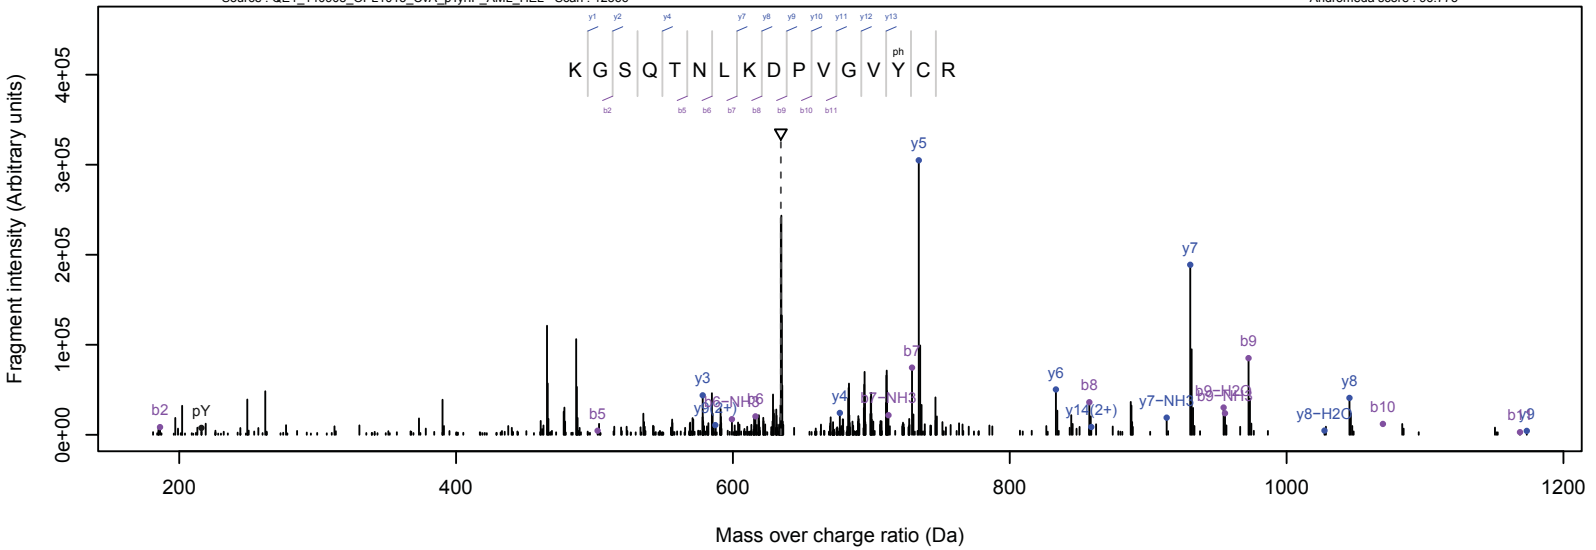

**KKNLQY(ph)YDISAK-3+**

Source : QE1\_140612\_OPL1013\_CVA\_phosphoproteomic\_landscape\_AML\_D Scan : 12283

Andromeda score : 96.745

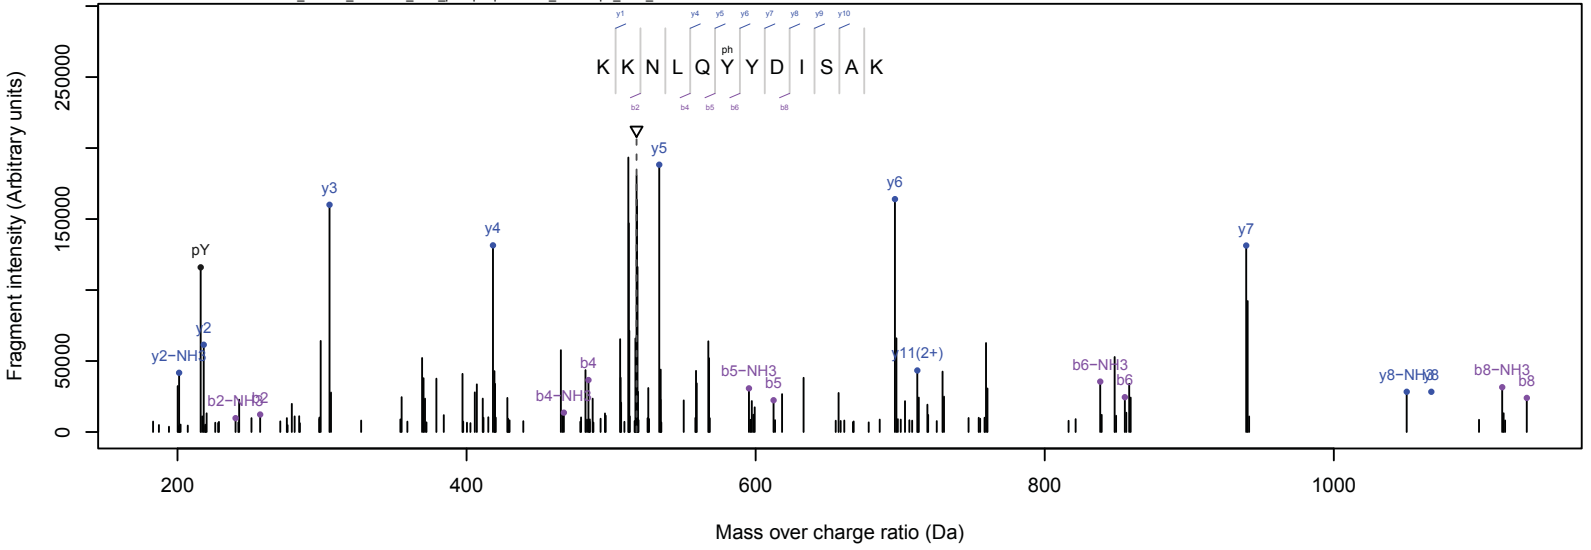

**SPLTPEKEVGY(ph)LEFTGPPQKPPR-3+**

Source : QE1\_140908\_OPL1013\_Cva\_pTyrIP\_AML\_OCI\_AML3 Scan : 36516

Andromeda score : 96.708

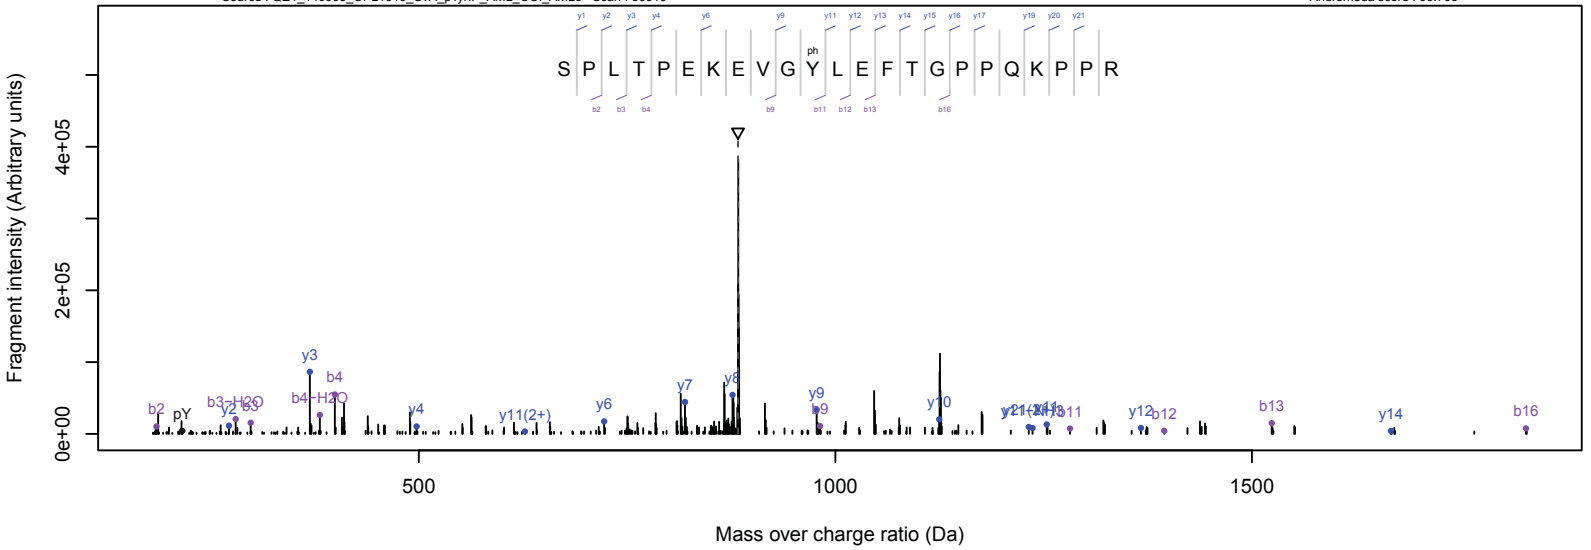

**GY(ph)LDLMGASQHSLR-2+**

Source : QE1\_140612\_OPL1013\_CVA\_phosphoproteomic\_landscape\_AML\_C Scan : 29070

Andromeda score : 96.707

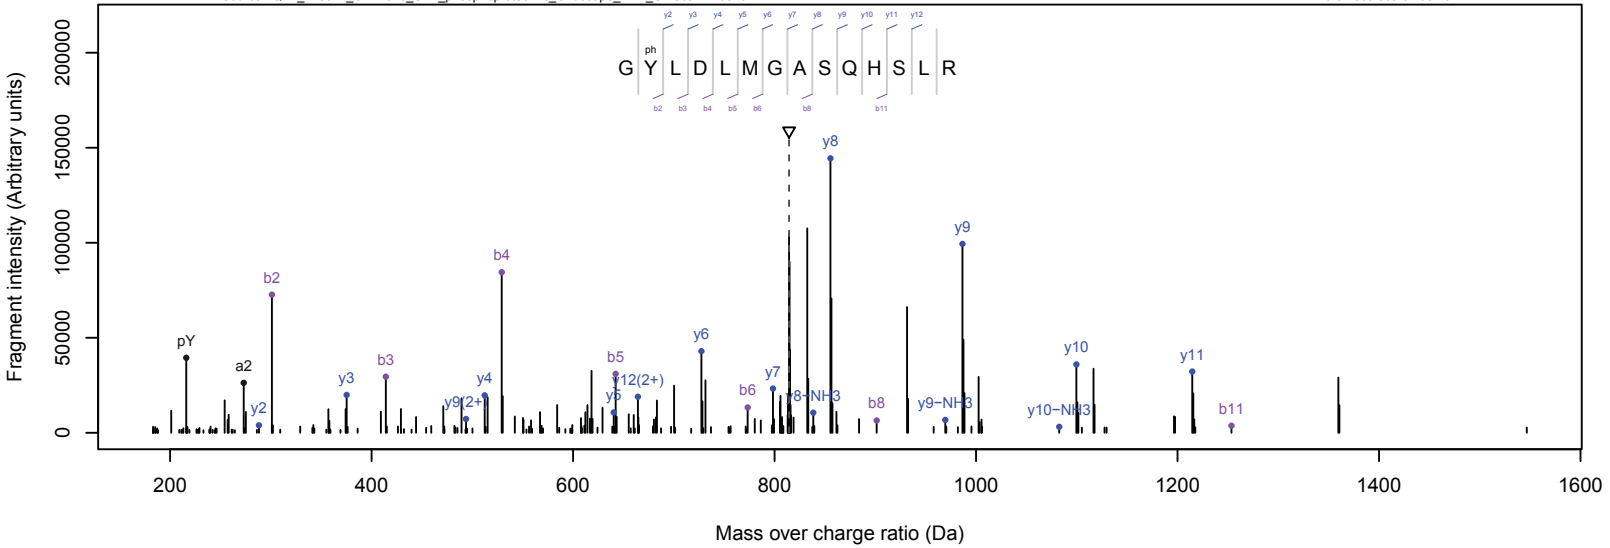



AGDNSQSVY(ph)IPMSPGAHHFDSLGY(ph)PSTTLPVHR-4+

Source : QE1\_140612\_OPL1013\_CVA\_phosphoproteomic\_landscape\_AML\_C Scan : 37915

Andromeda score : 96.598

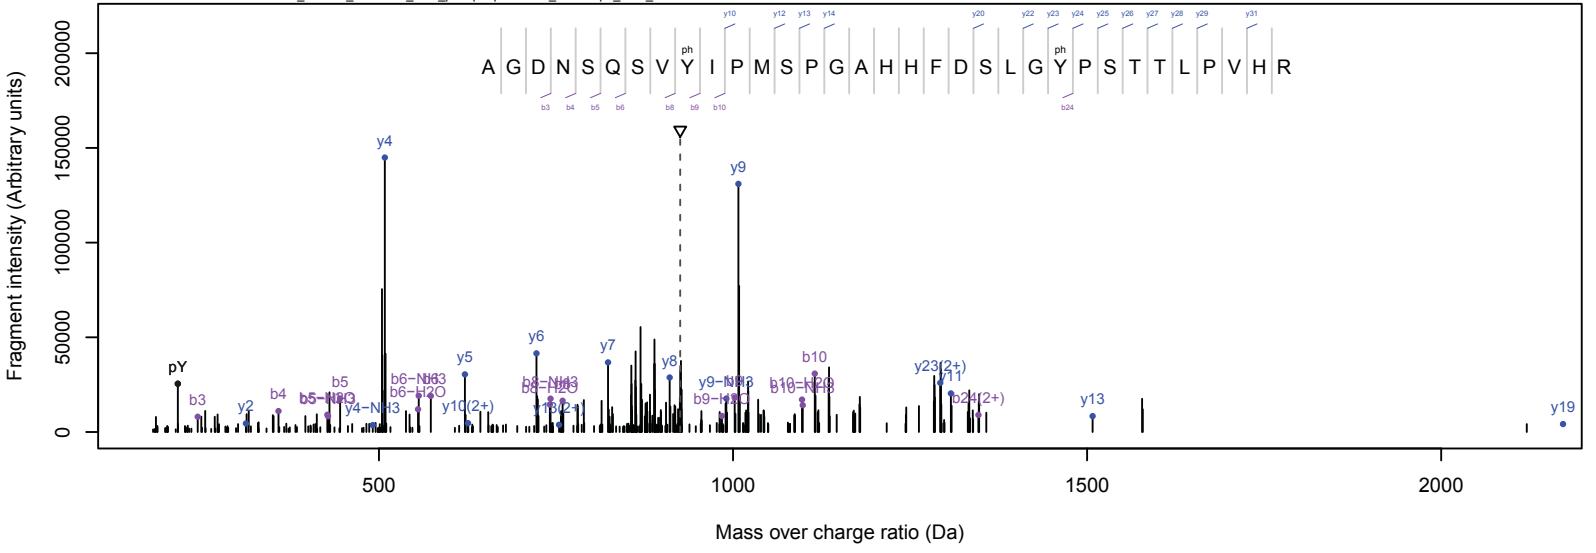

KQPAGNY(ph)SLSSVLPNAPDMAQFK-3+

Source : QE1\_140612\_OPL1013\_CVA\_phosphoproteomic\_landscape\_AML\_C Scan : 39191

Andromeda score : 96.591

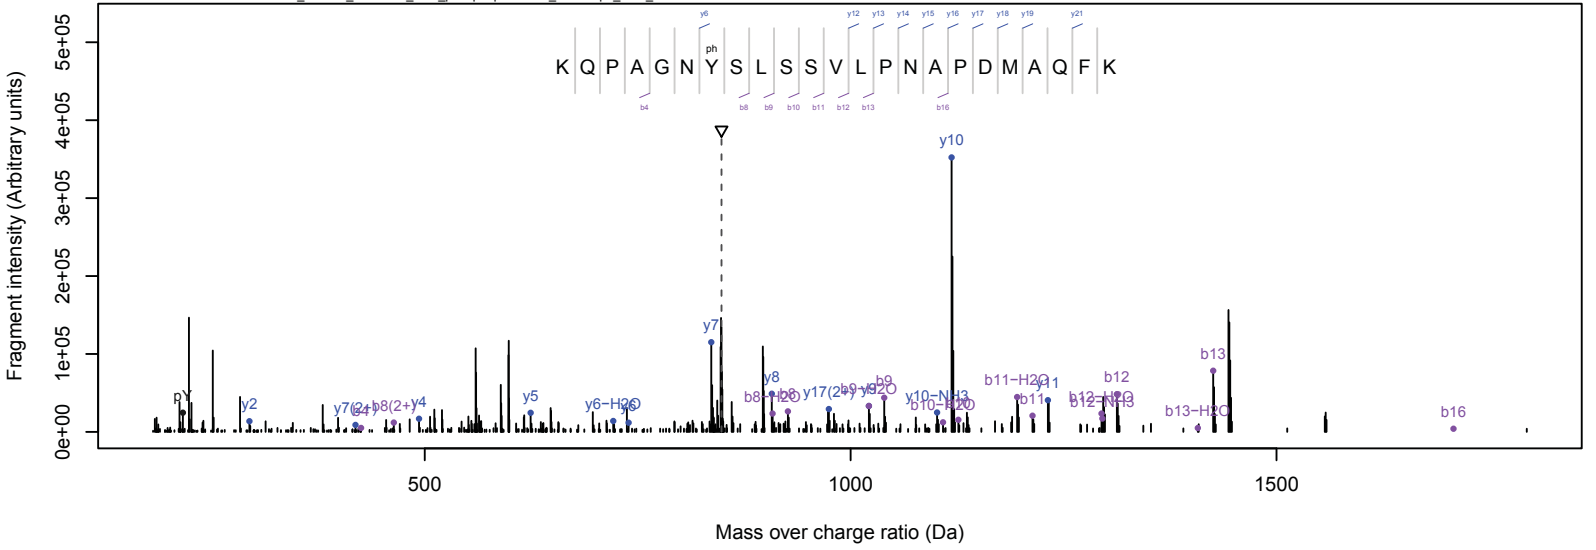

EGY(ph)SALPLQLDIER-2+

Source : QE1\_140612\_OPL1013\_CVA\_phosphoproteomic\_landscape\_AML\_E Scan : 34038

Andromeda score : 96.464

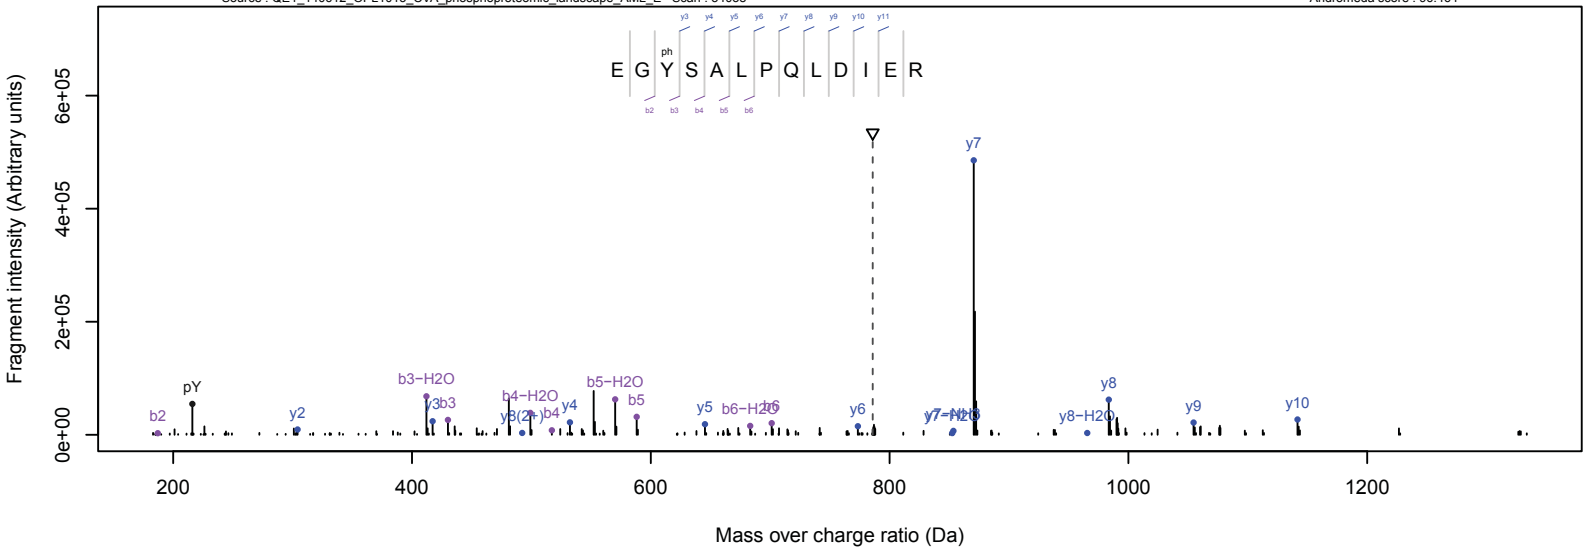

**KREGSDSY(ph)AITFR-3+**

Source : QE1\_140612\_OPL1013\_CVA\_phosphoproteomic\_landscape\_AML\_F Scan : 12378

Andromeda score : 96.464

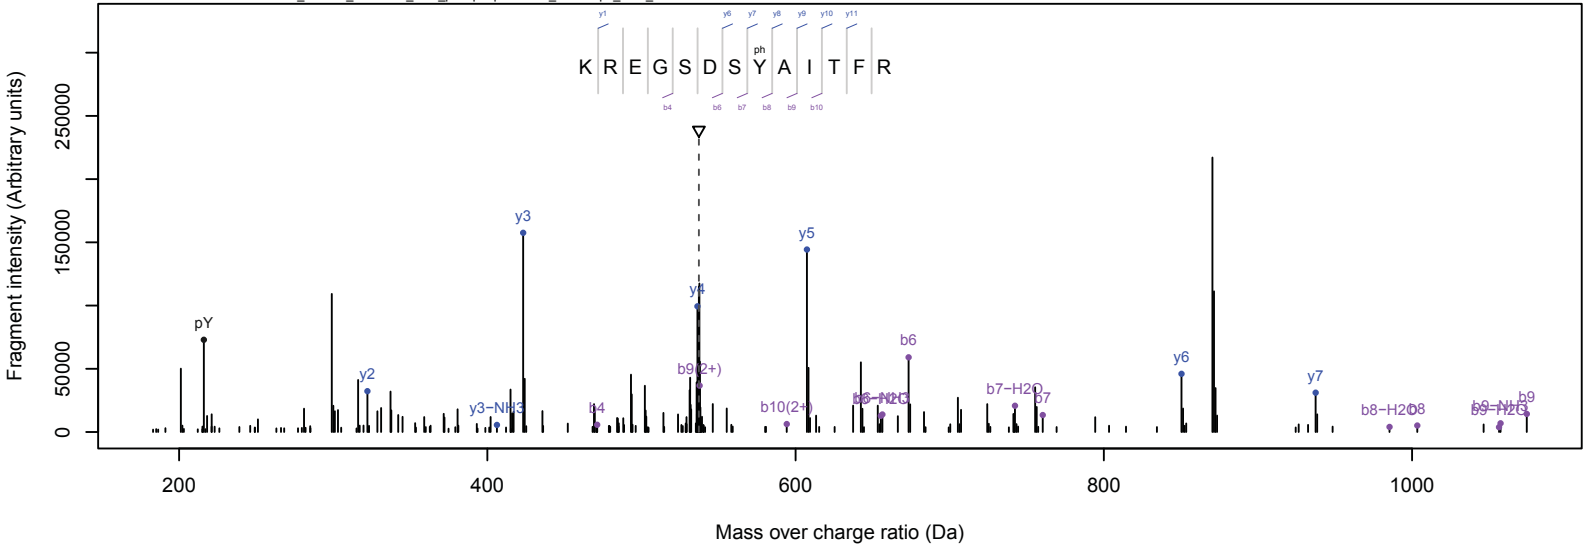

**PTQSVQSQALHY(ph)R-3+**

Source : QE1\_140612\_OPL1013\_CVA\_phosphoproteomic\_landscape\_AML\_C Scan : 9807

Andromeda score : 96.464

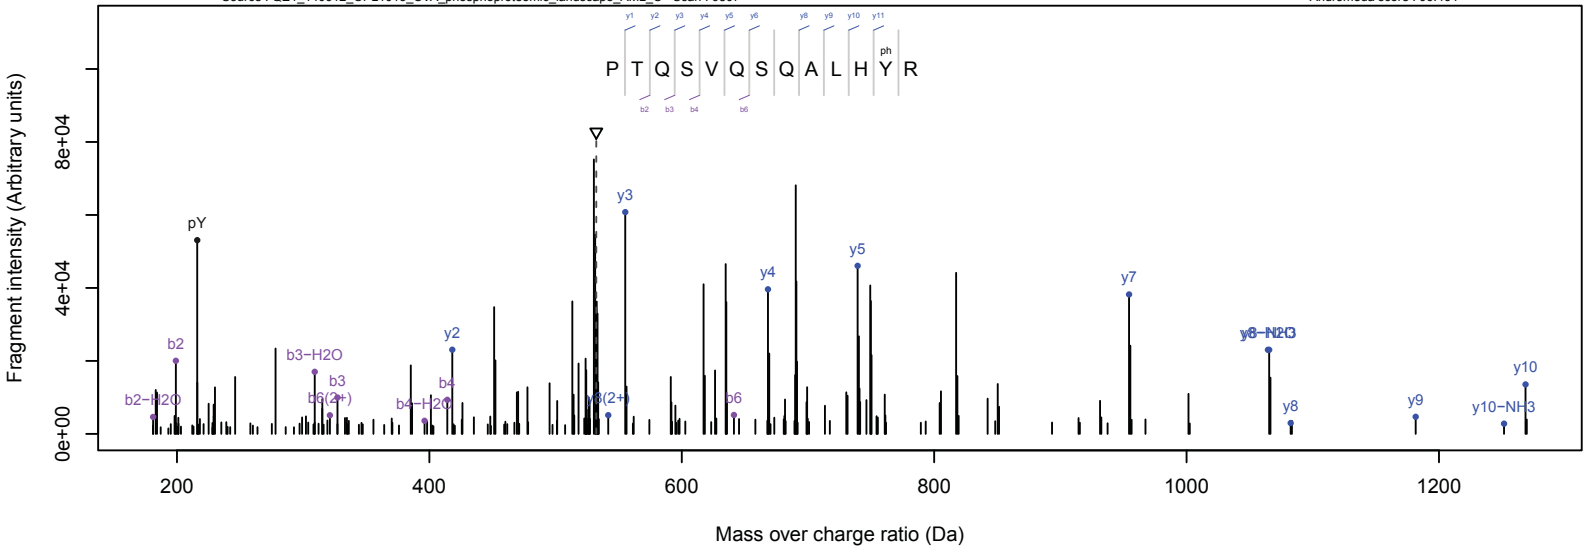

**SMGFIGHYLDQKR-3+**

Source : QE1\_140612\_OPL1013\_CVA\_phosphoproteomic\_landscape\_AML\_A Scan : 26036

Andromeda score : 96.464

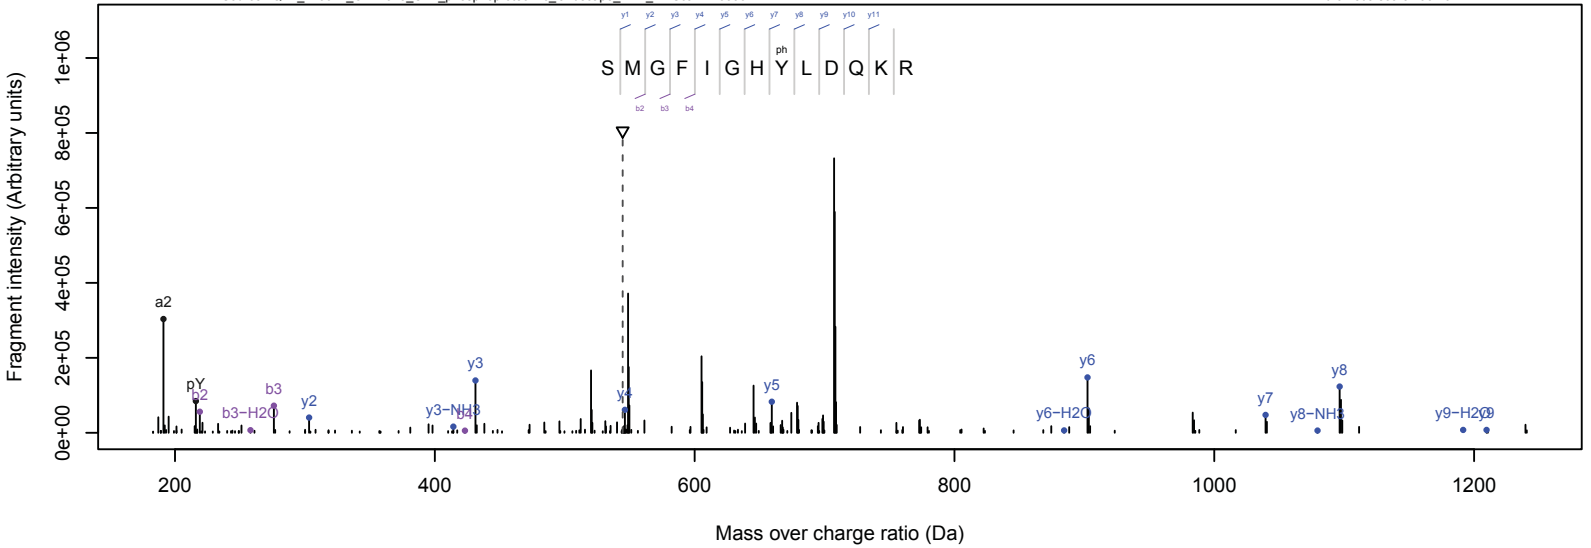



**FIHQQPSSSPV(ph)GSSAK-3+**

Source : QE1\_140612\_OPL1013\_CVA\_phosphoproteomic\_landscape\_AML\_B Scan : 10015

Andromeda score : 96.447

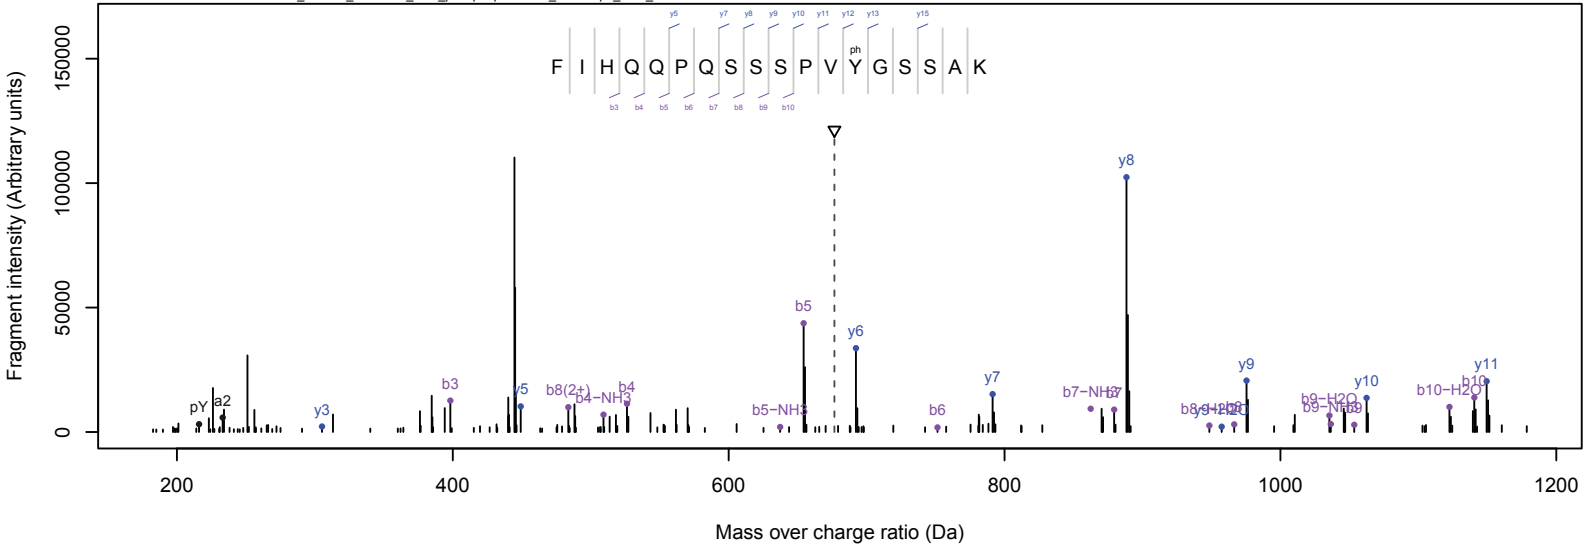

**IQETCGDWYRGY(ph)LIK-2+**

Source : QE1\_140612\_OPL1013\_CVA\_phosphoproteomic\_landscape\_AML\_C Scan : 31052

Andromeda score : 96.435

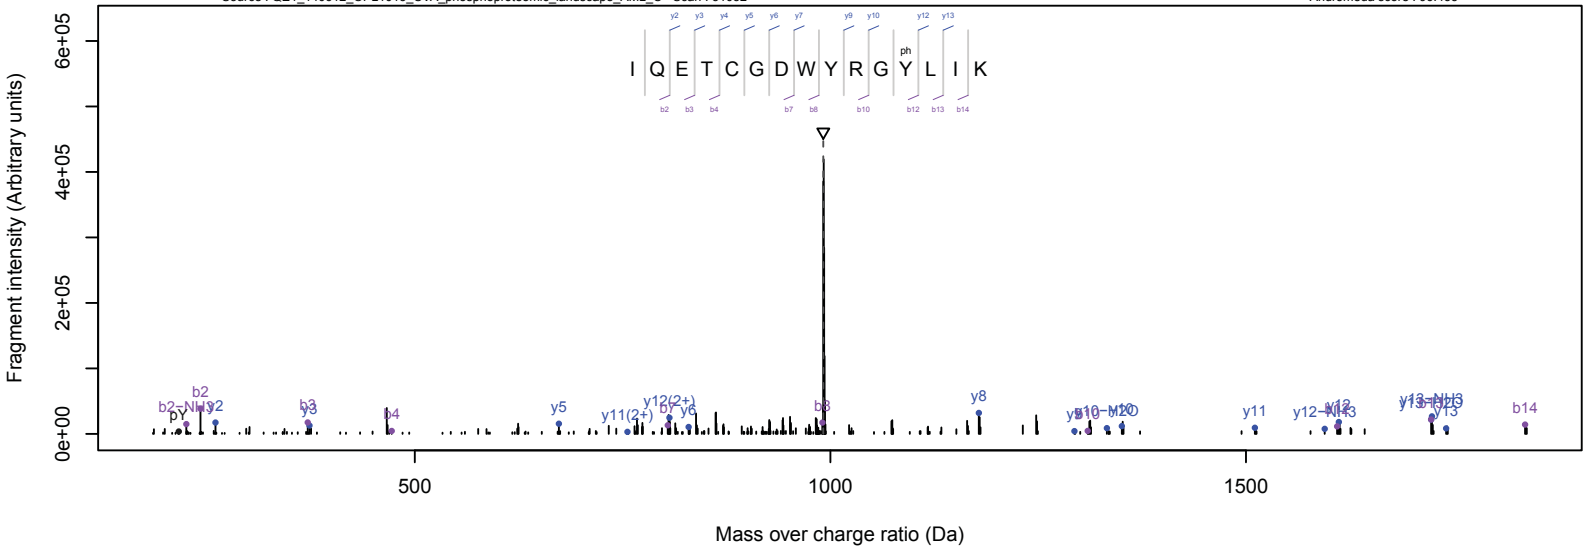

**ESSTDFKQFETNDQCRPY(ph)HR-4+**

Source : QE1\_140908\_OPL1013\_CvA\_pTyrIP\_AML\_Kasumi6 Scan : 16497

Andromeda score : 96.391

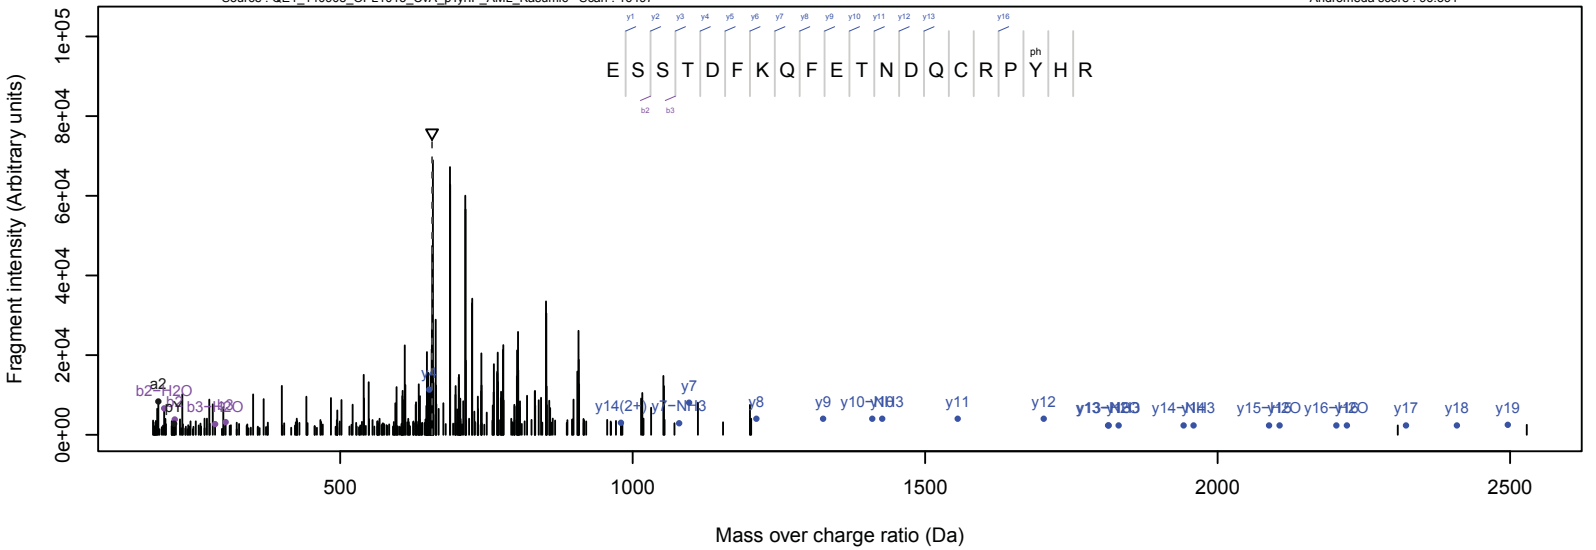

QTNEDELSVCKGDIYVTR-3+

Source : QE1\_140908\_OPL1013\_CvA\_pTyrIP\_AML\_HEL Scan : 31715

Andromeda score : 96.379

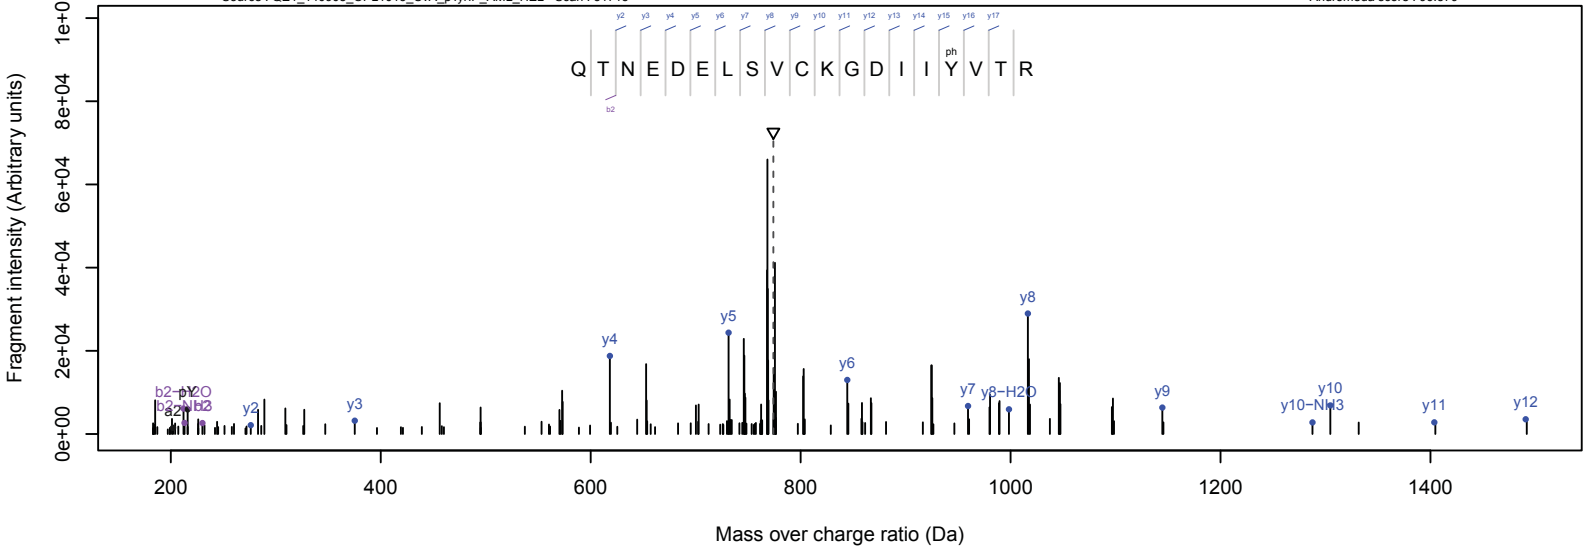

CEFCQKPGATVGCCLTSCTS(ph)NYHFMCSR-4+

Source : QE1\_140612\_OPL1013\_CVA\_phosphoproteomic\_landscape\_AML\_B Scan : 26853

Andromeda score : 96.351

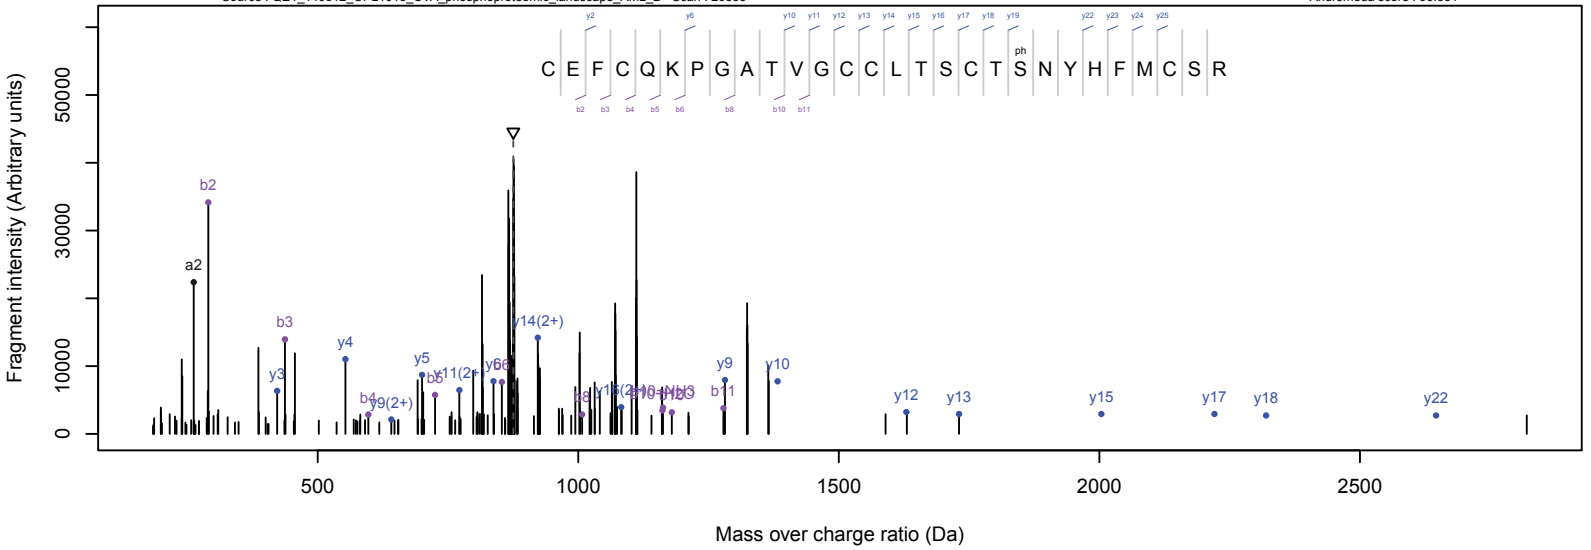

GPSY(ph)GLSAEVK-2+

Source : QE1\_140612\_OPL1013\_CVA\_phosphoproteomic\_landscape\_AML\_C Scan : 13254

Andromeda score : 96.334

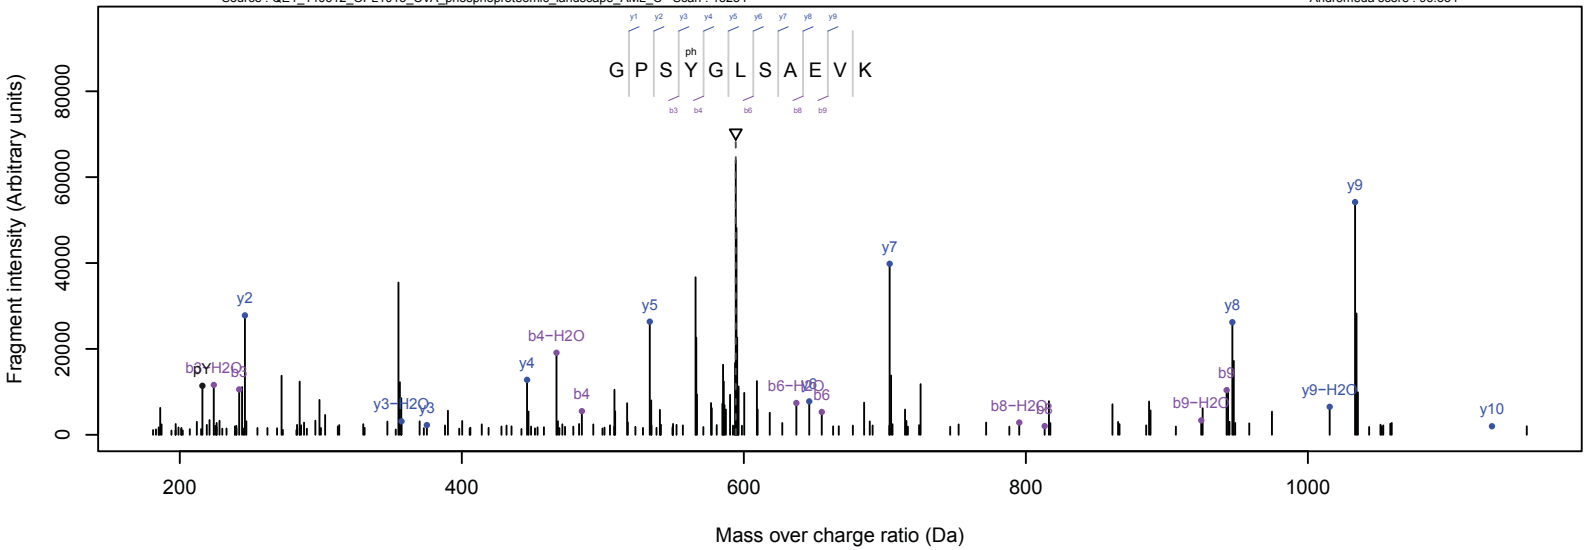

Y(ph)SLIVAQHVEK-2+

Source: QE1\_140612\_OPL1013\_CVA\_phosphoproteomic\_landscape\_AML\_C Scan: 17073

Andromeda score: 96.23

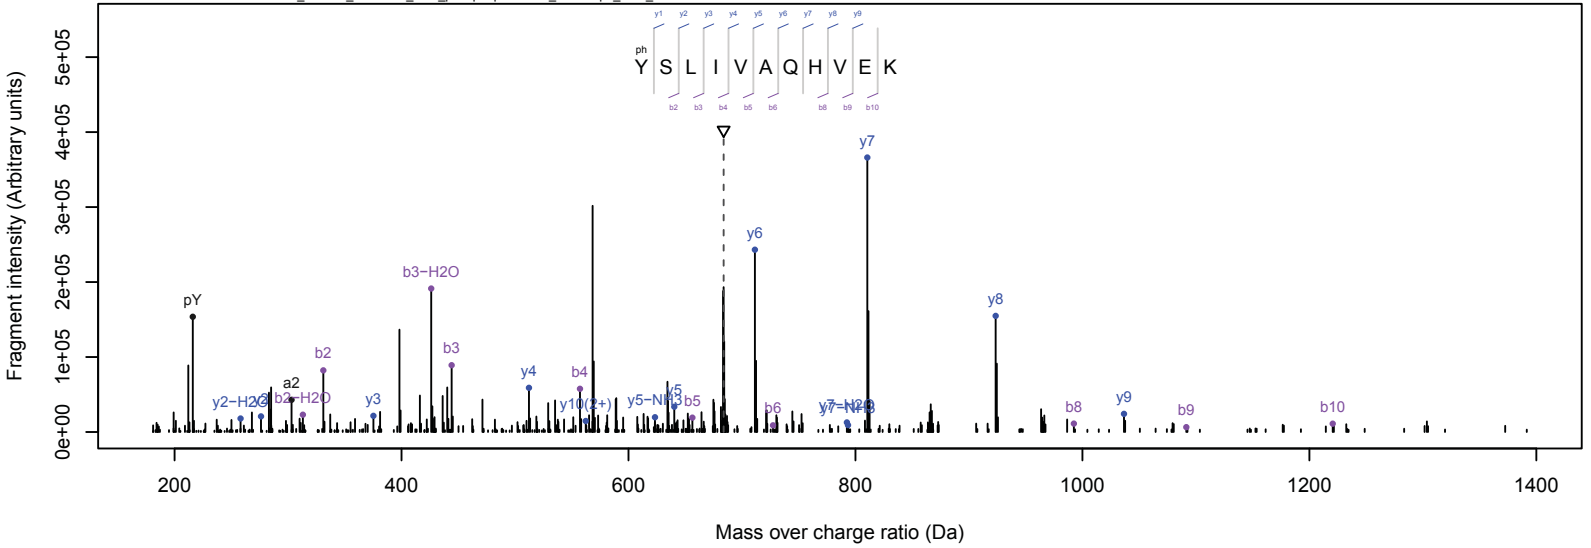

EGPHTLKPDPY(ph)SVAQR-4+

Source: QE1\_140612\_OPL1013\_CVA\_phosphoproteomic\_landscape\_AML\_C Scan: 14501

Andromeda score: 96.208

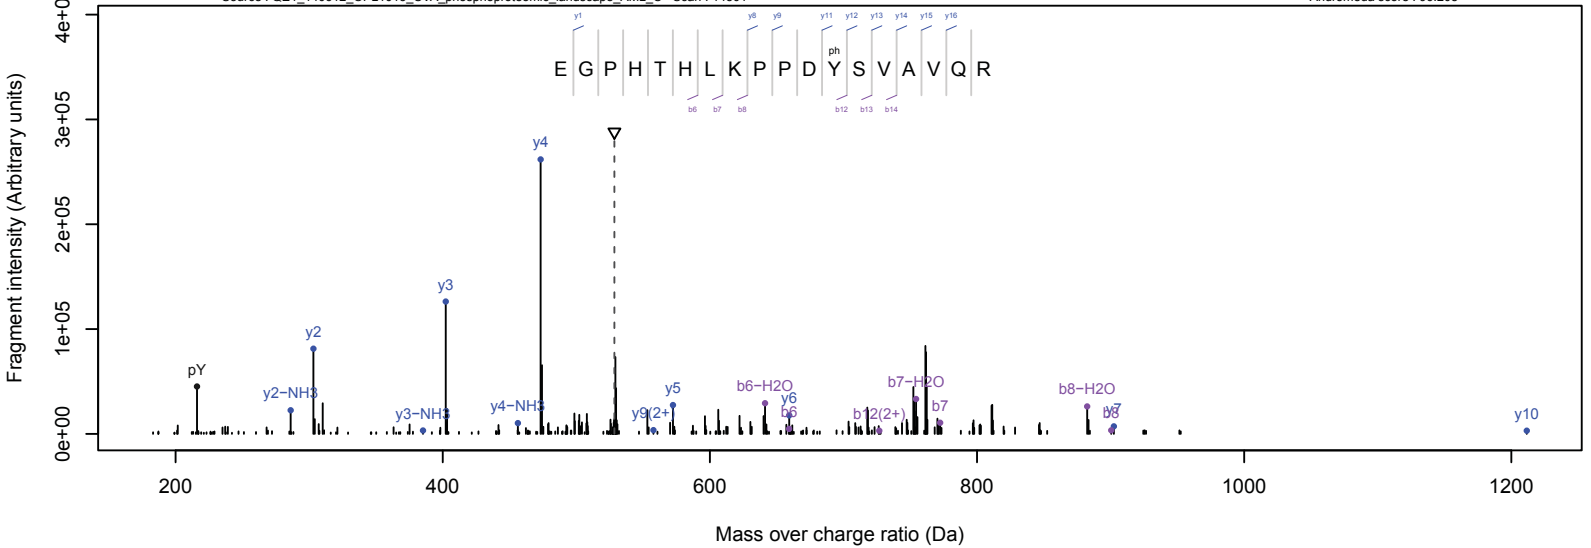

IEDPVY(ph)GIYYVDHINR-2+

Source: QE1\_140908\_OPL1013\_CvA\_pTyrIP\_AML\_HEL Scan: 41385

Andromeda score: 96.208

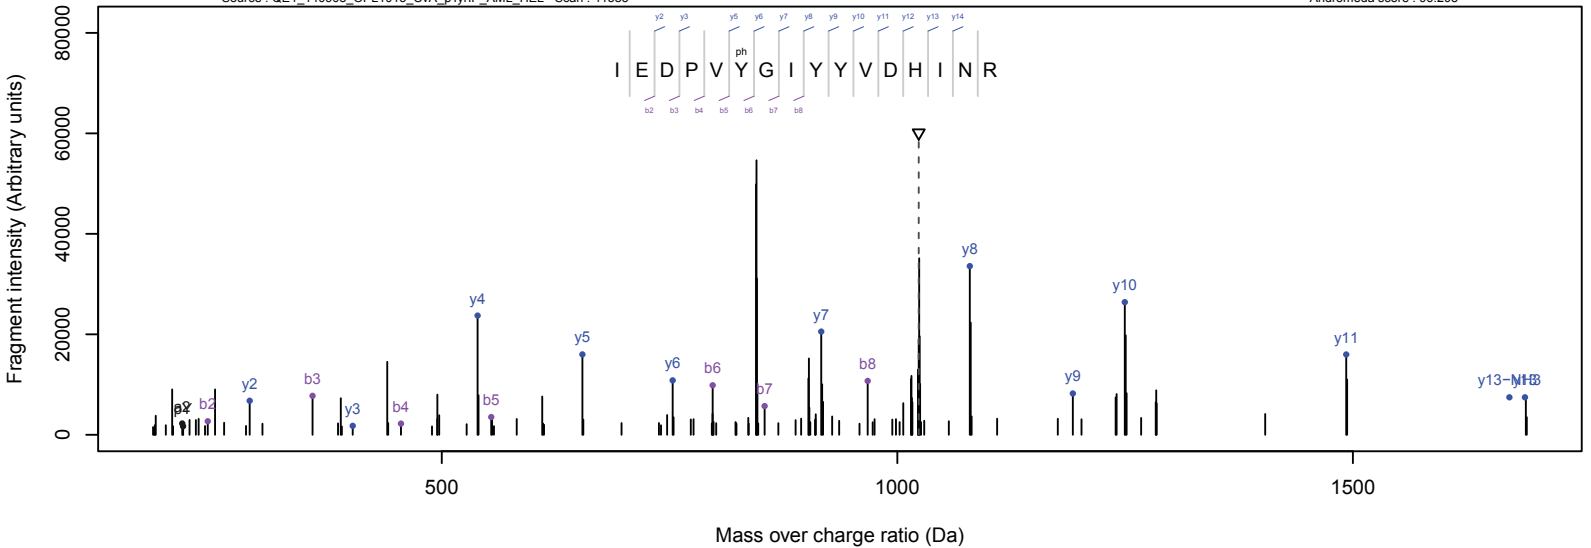

TLFAY(ph)KQENEMLSR-2+

Source : QE1\_140612\_OPL1013\_CVA\_phosphoproteomic\_landscape\_AML\_C Scan : 25662

Andromeda score : 96.208

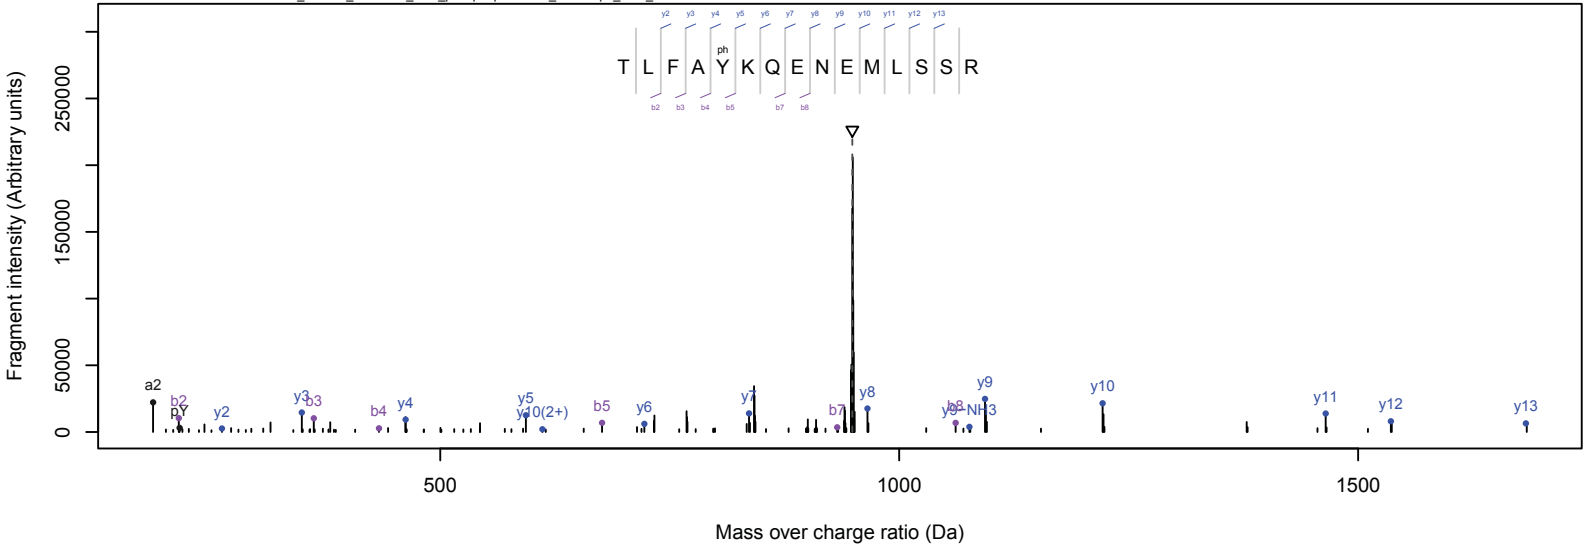

YY(ph)VLNALK-2+

Source : QE1\_140612\_OPL1013\_CVA\_phosphoproteomic\_landscape\_AML\_A Scan : 28988

Andromeda score : 96.19

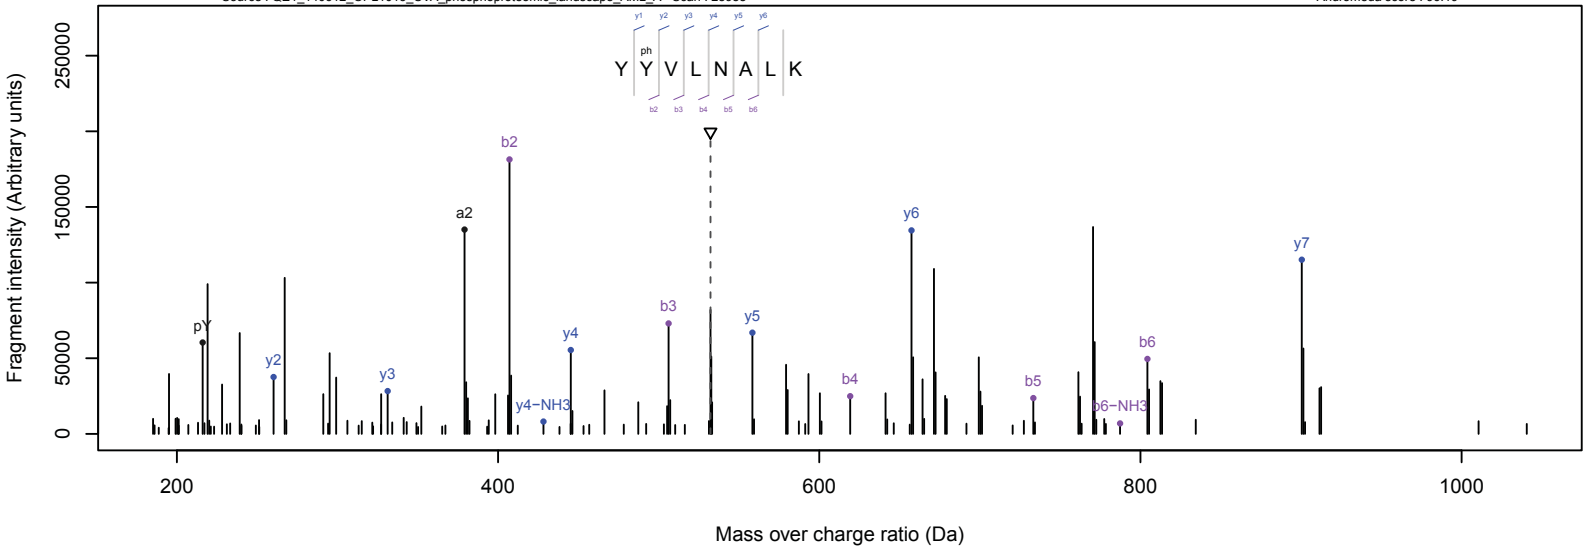

EQIVEGYLKEPVPMDQEQVLNDTVDGKEIYNT(ph)IR-4+

Source : QE1\_140612\_OPL1013\_CVA\_phosphoproteomic\_landscape\_AML\_C Scan : 44384

Andromeda score : 96.158

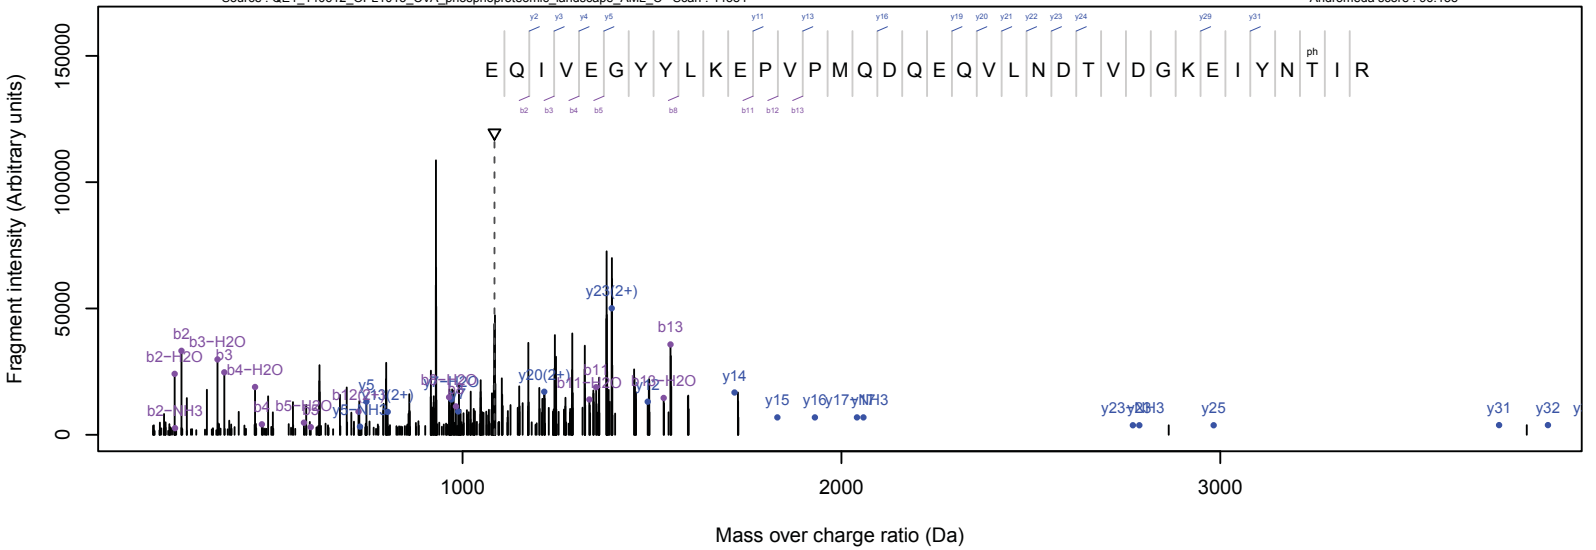

AVLQFTPASWTY(ph)VR-2+

Source : QE1\_140822\_OPL1013\_CVA\_pTyrIP\_AML\_cell\_lines\_part2\_E Scan : 36372

Andromeda score : 96.135

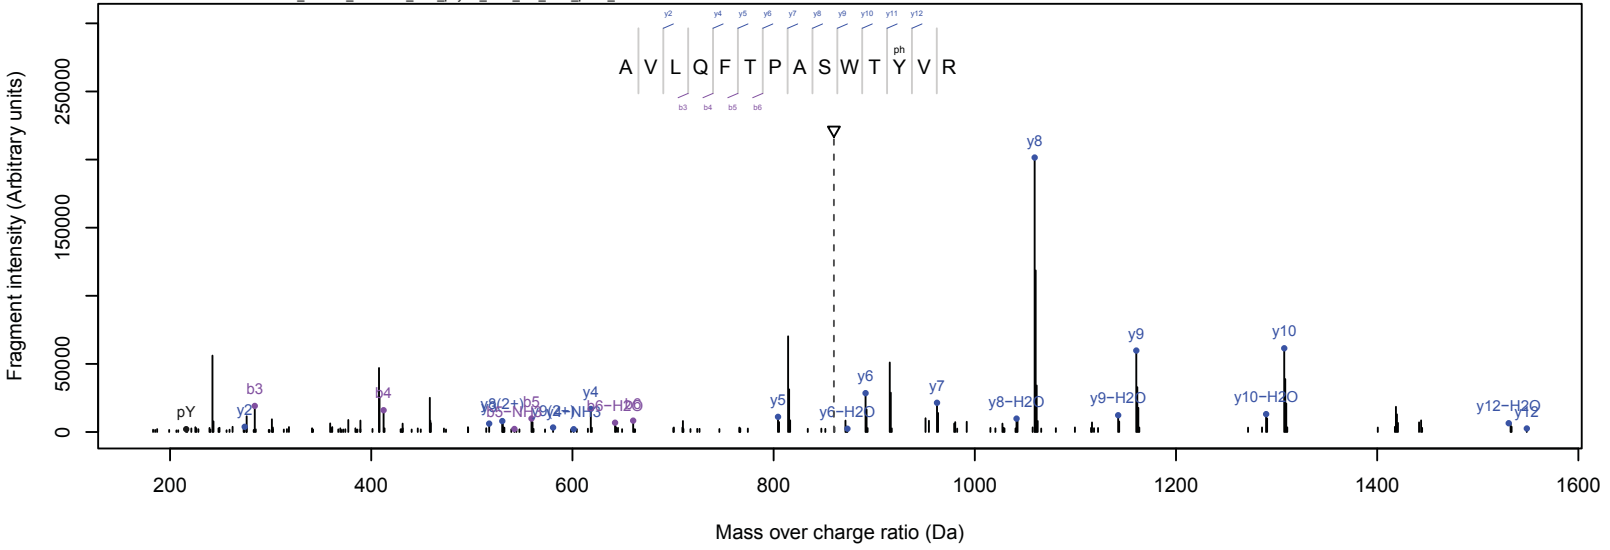

ETTSHNSLTTPCYTPYVVAPEVLGPEKYDK-4+

Source : QE1\_140612\_OPL1013\_CVA\_phosphoproteomic\_landscape\_AML\_C Scan : 35779

Andromeda score : 96.123

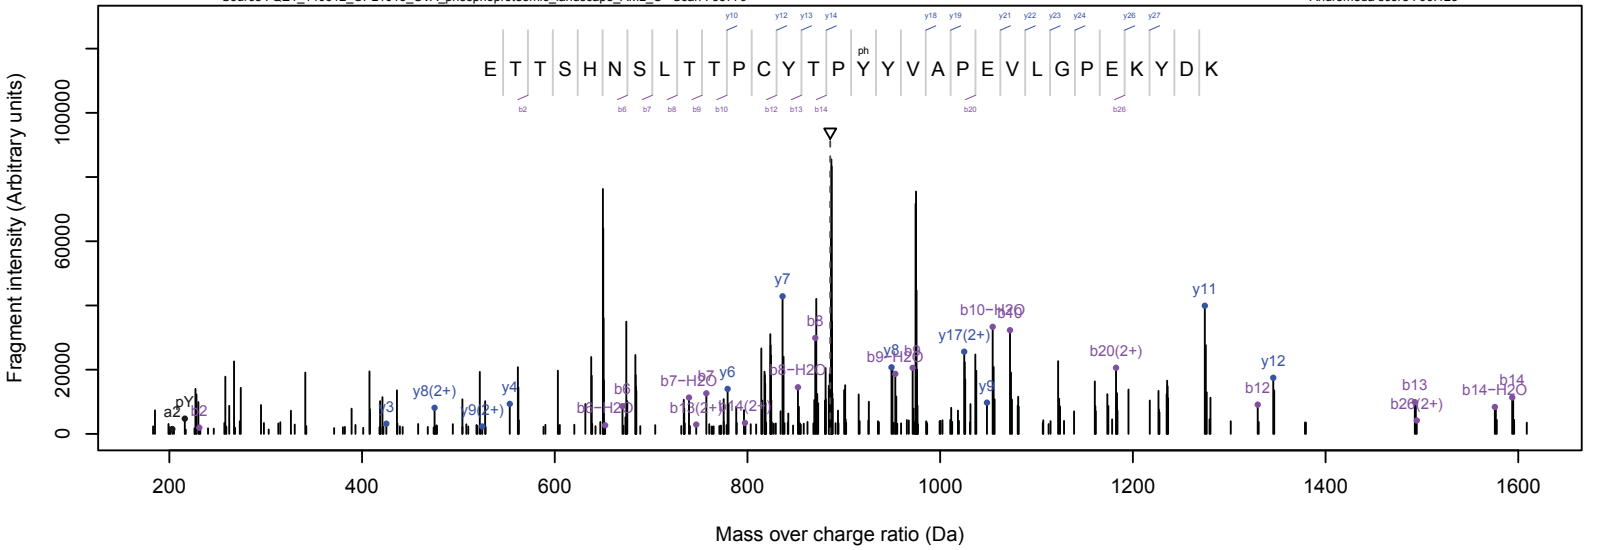

VPY(ph)AKPIPAQFQQAWM(ox)QNK-3+

Source : QE1\_140612\_OPL1013\_CVA\_phosphoproteomic\_landscape\_AML\_A Scan : 32795

Andromeda score : 96.096

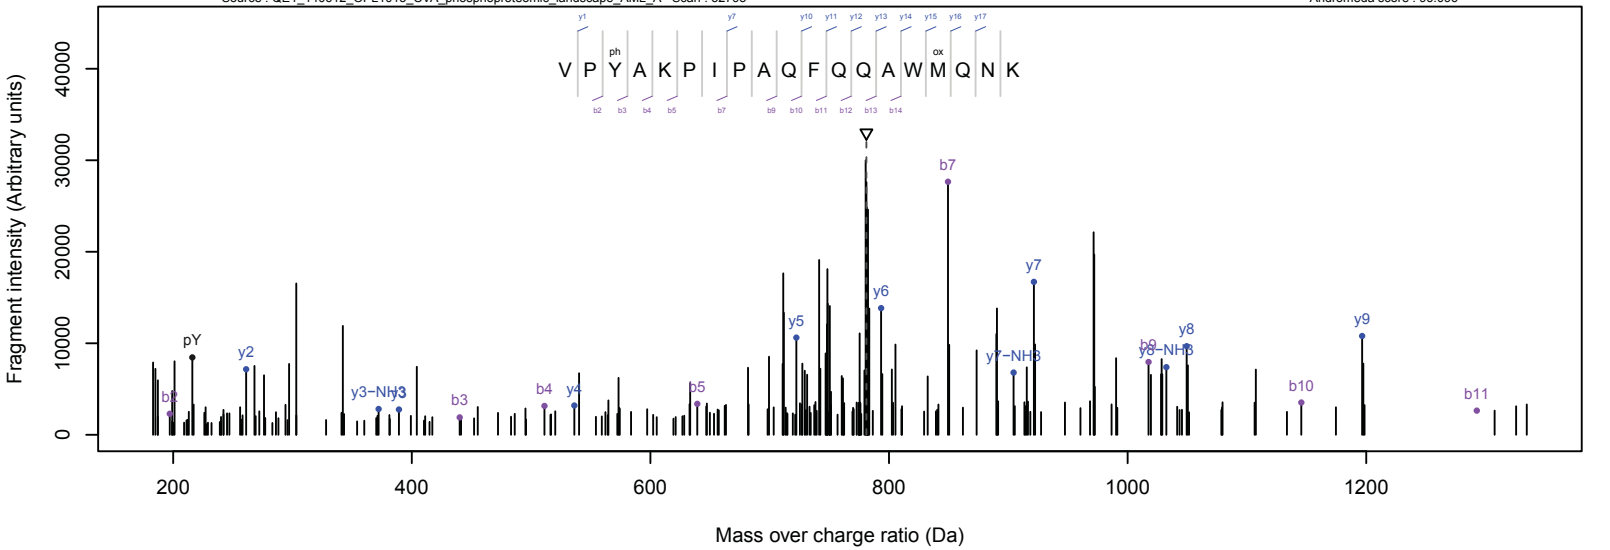

NMLSQVNY(ph)RVPNMR-3+

Source: QE1\_140612\_OPL1013\_CVA\_phosphoproteomic\_landscape\_AML\_B Scan: 27631

Andromeda score: 96.059

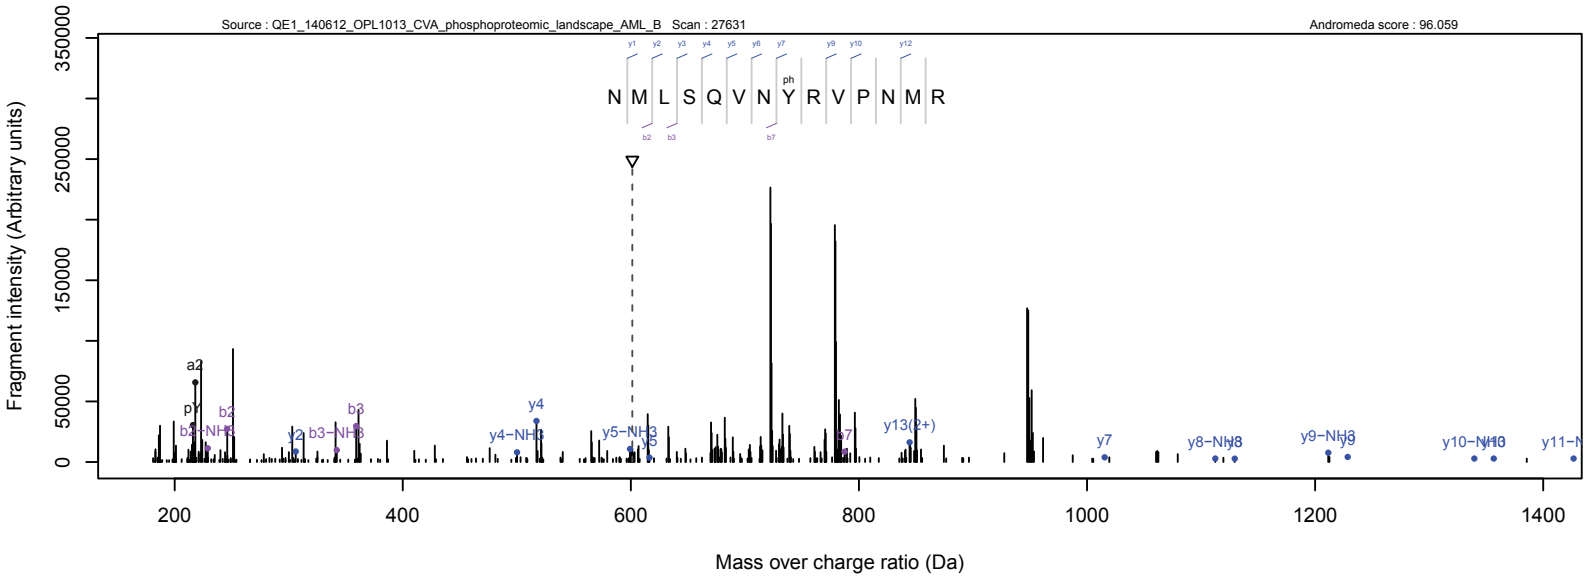

YVNLEEDNQTLDSYRNEIAY(ph)LNK-3+

Source: QE1\_140612\_OPL1013\_CVA\_phosphoproteomic\_landscape\_AML\_C Scan: 41737

Andromeda score: 96.016

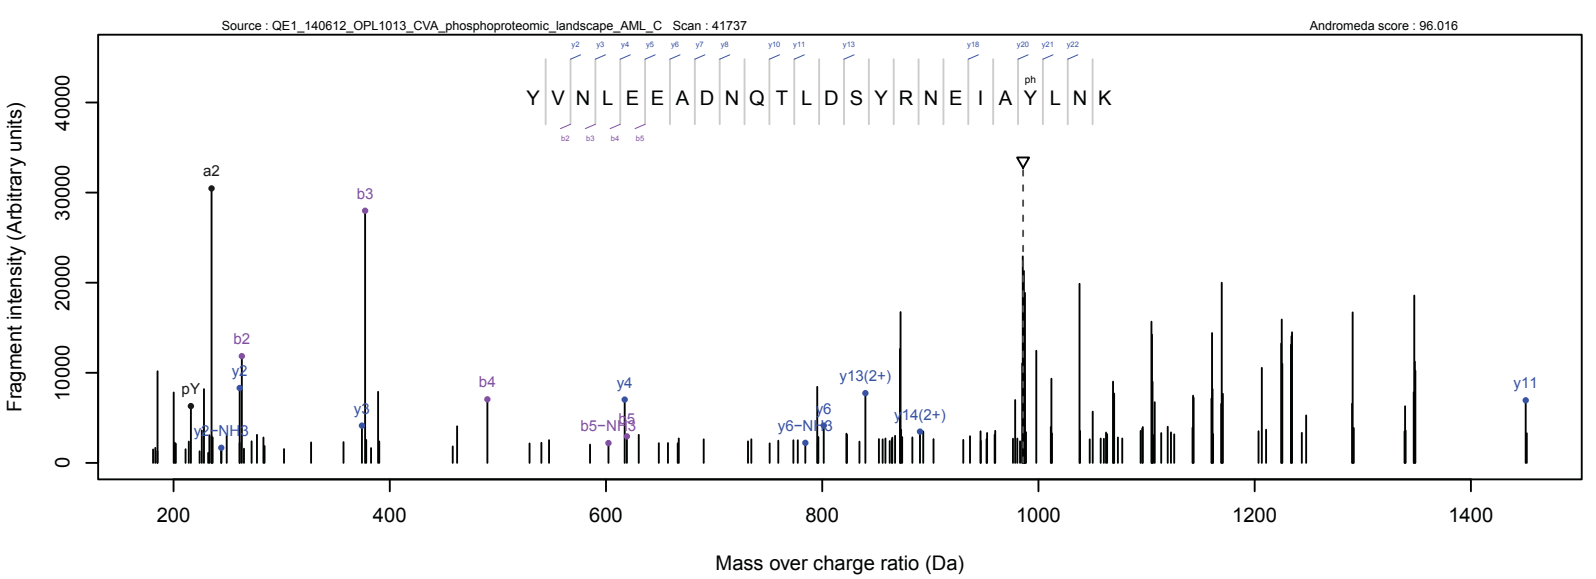

DLNY(ph)CFSGMSDHR-2+

Source: QE1\_140612\_OPL1013\_CVA\_phosphoproteomic\_landscape\_AML\_C Scan: 21824

Andromeda score: 95.981

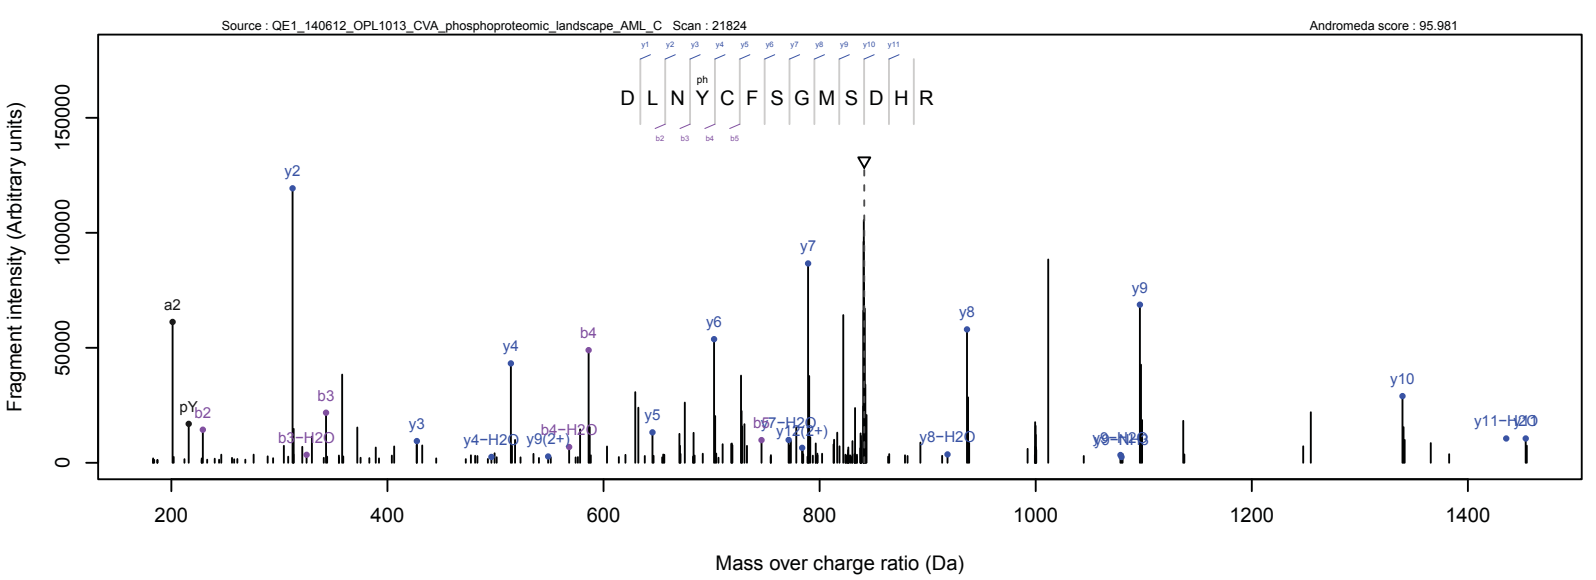

**NSHLVSPAVSNSHQNVLSNYPFR-4+**

Source: QE1\_140612\_OPL1013\_CVA\_phosphoproteomic\_landscape\_AML\_C Scan: 28420

Andromeda score: 95.926

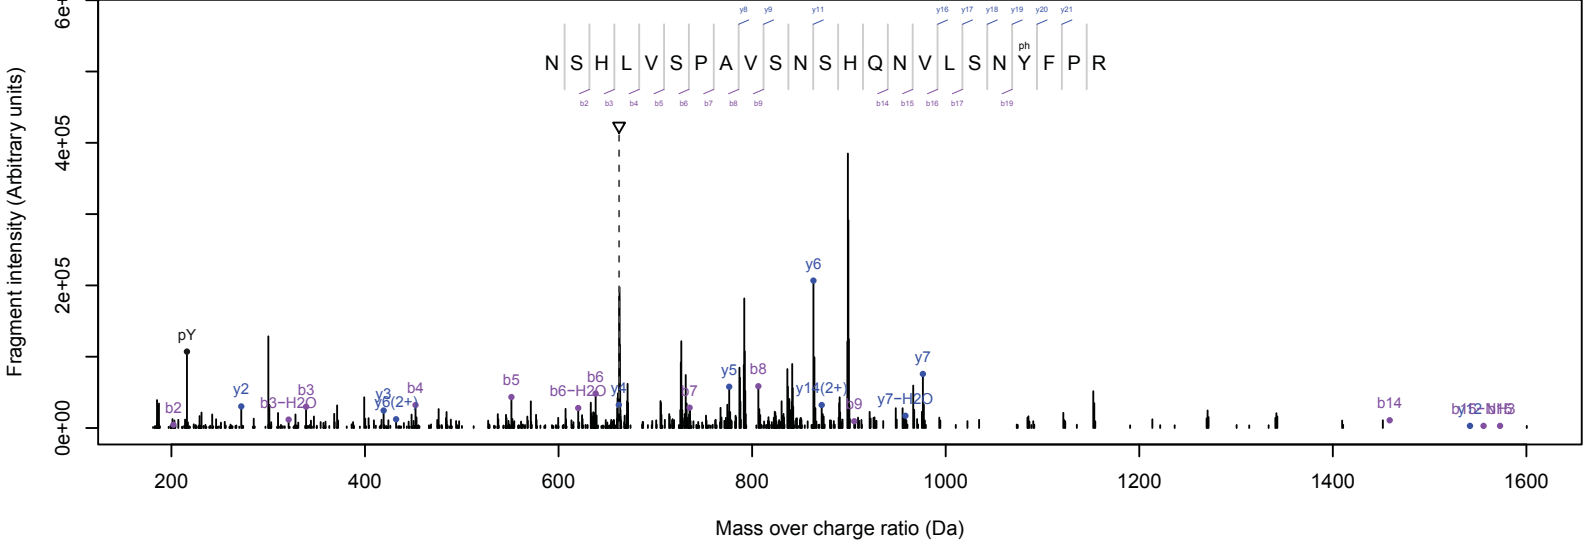

**KNYVHFAATQVQNR-3+**

Source: QE1\_140612\_OPL1013\_CVA\_phosphoproteomic\_landscape\_AML\_A Scan: 13111

Andromeda score: 95.854

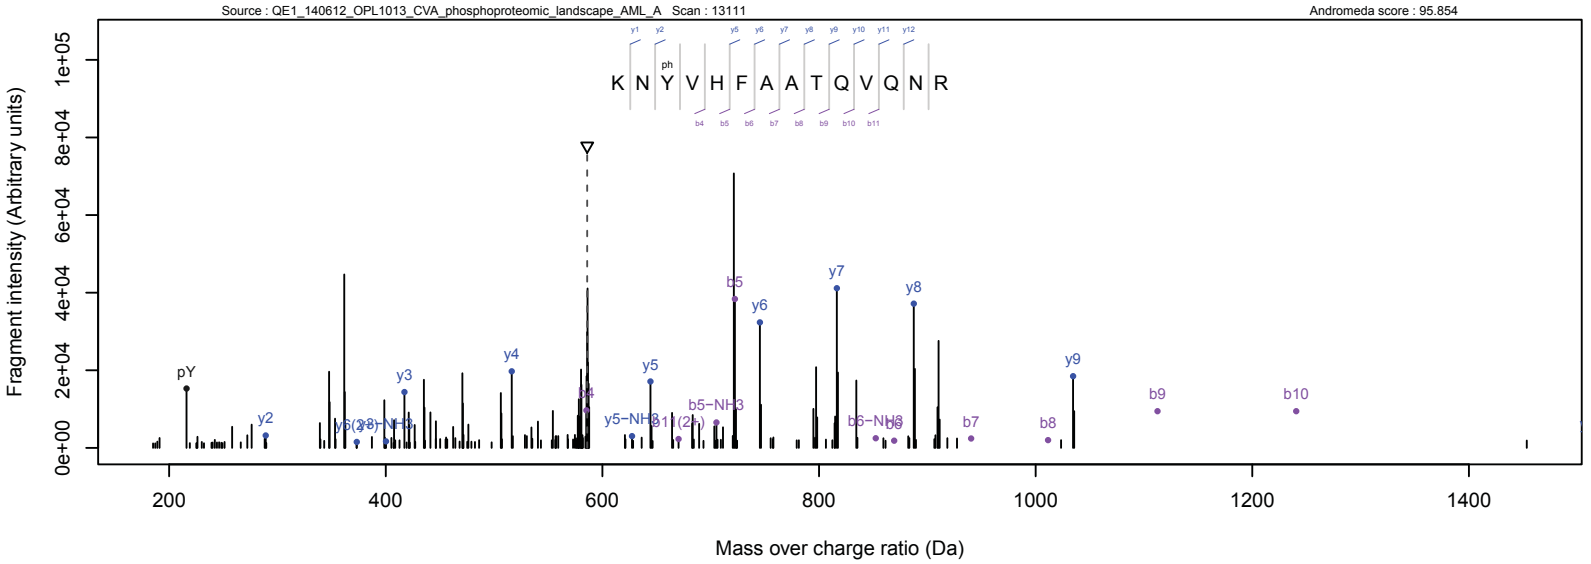

**NMAQYFK-2+**

Source: QE1\_140612\_OPL1013\_CVA\_phosphoproteomic\_landscape\_AML\_D Scan: 16115

Andromeda score: 95.793

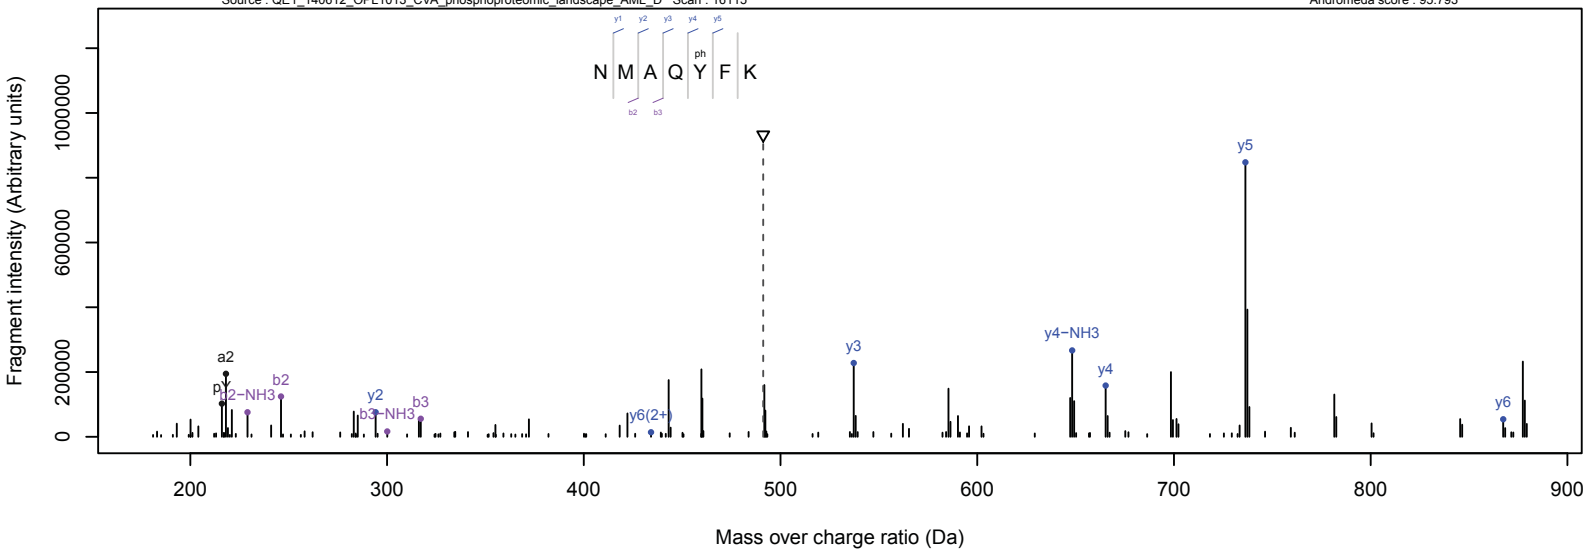

ETTSHNSLTPCYTPY(ph)YVAPEVLGPEK-3+

Source : QE1\_140612\_OPL1013\_CVA\_phosphoproteomic\_landscape\_AML\_C Scan : 37387

Andromeda score : 95.652

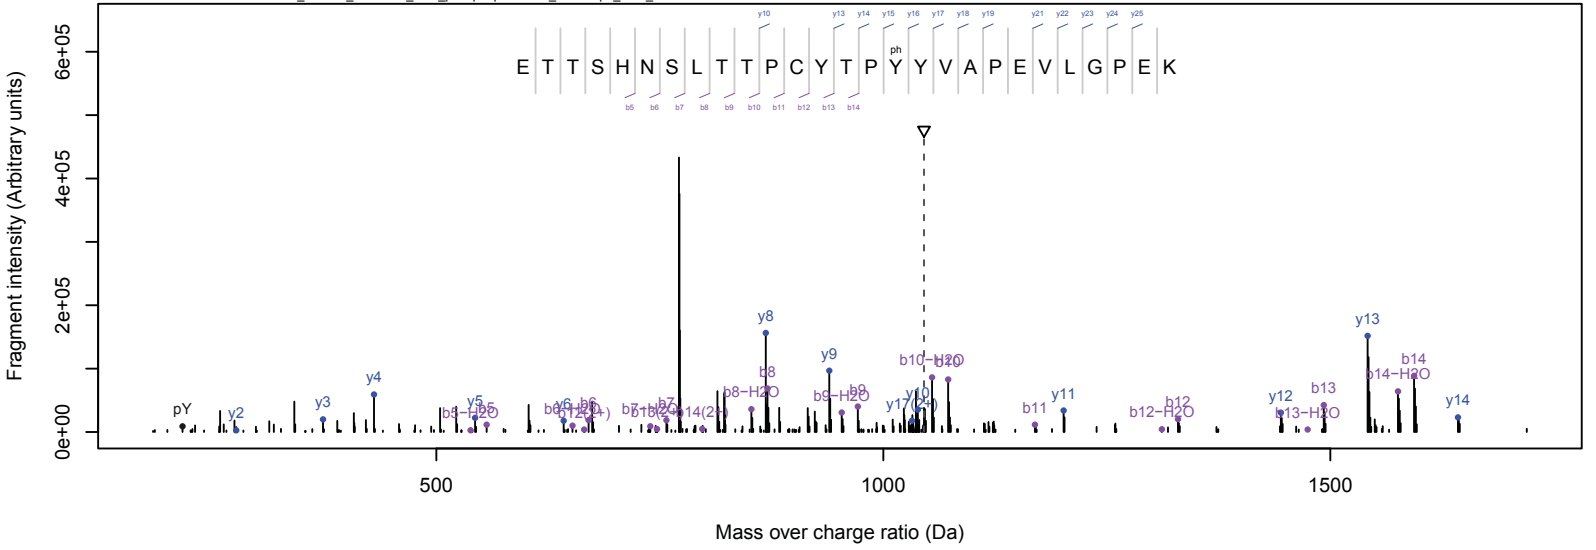



KCY(ph)EMASHLR-3+

Source : QE1\_140612\_OPL1013\_CVA\_phosphoproteomic\_landscape\_AML\_A Scan : 6686

Andromeda score : 95.618

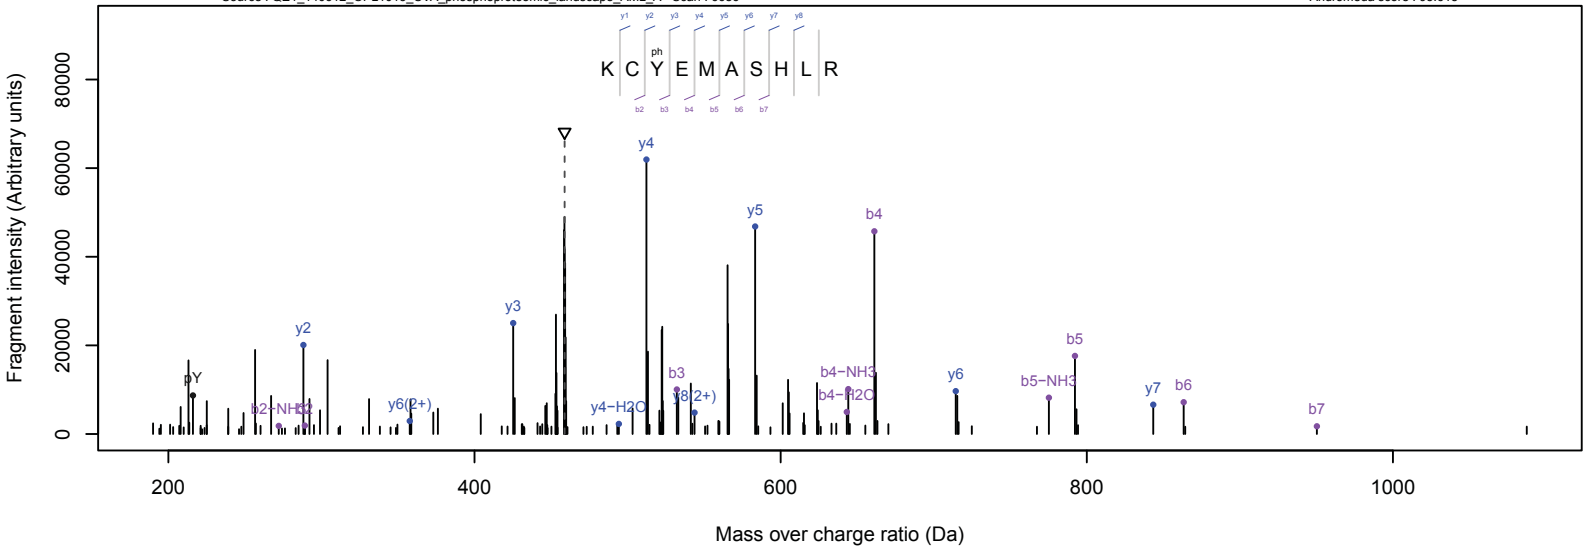

HYEDGYPGSDNY(ph)GSLSR-3+

Source : QE1\_140908\_OPL1013\_CvA\_pTyrIP\_AML\_Kasumi6 Scan : 16253

Andromeda score : 95.602

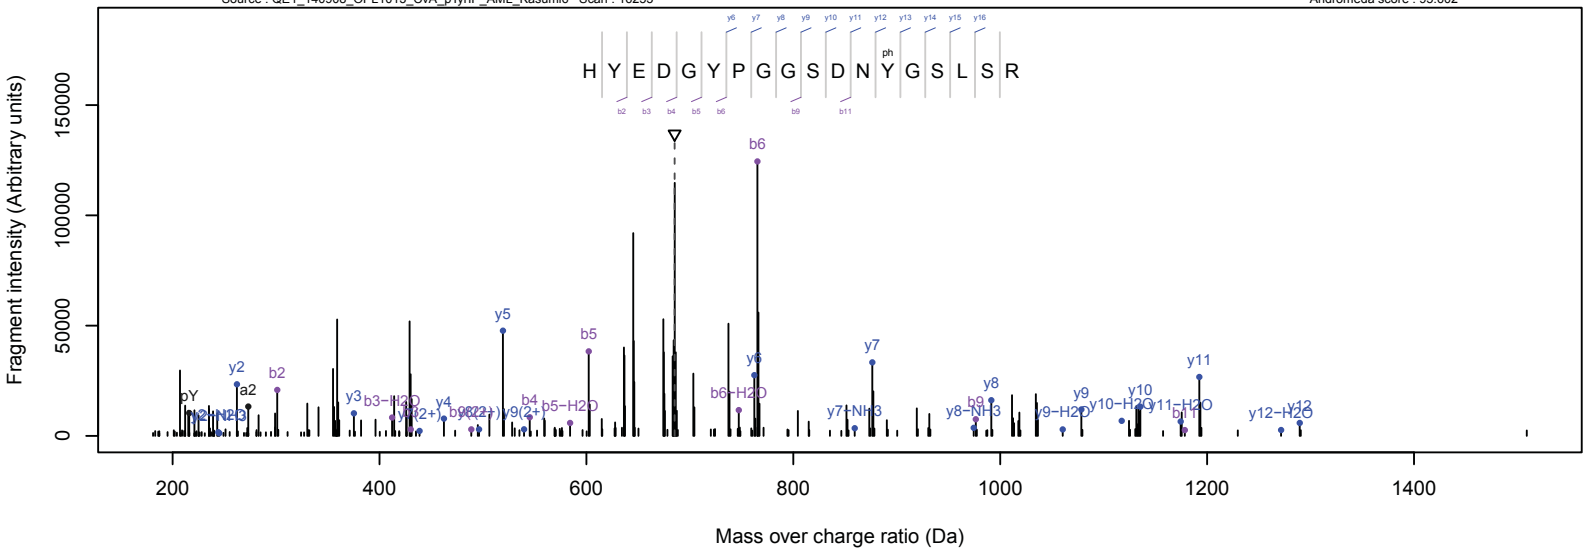

TM(ox)QFEPSTMVY(ph)DACR-2+

Source : QE1\_140908\_OPL1013\_CvA\_pTyrIP\_AML\_ML2 Scan : 30977

Andromeda score : 95.57

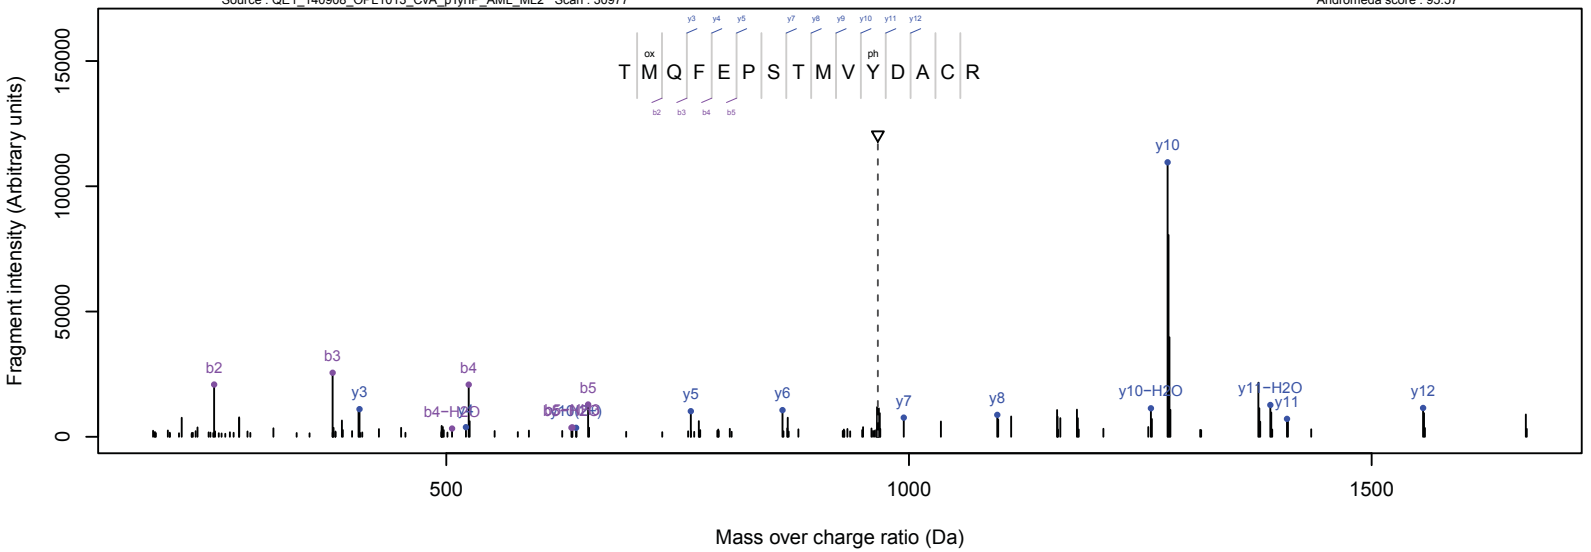

KNY(ph)IFLR-2+

Source: QE1\_140612\_OPL1013\_CVA\_phosphoproteomic\_landscape\_AML\_B Scan: 19673

Andromeda score: 95.541

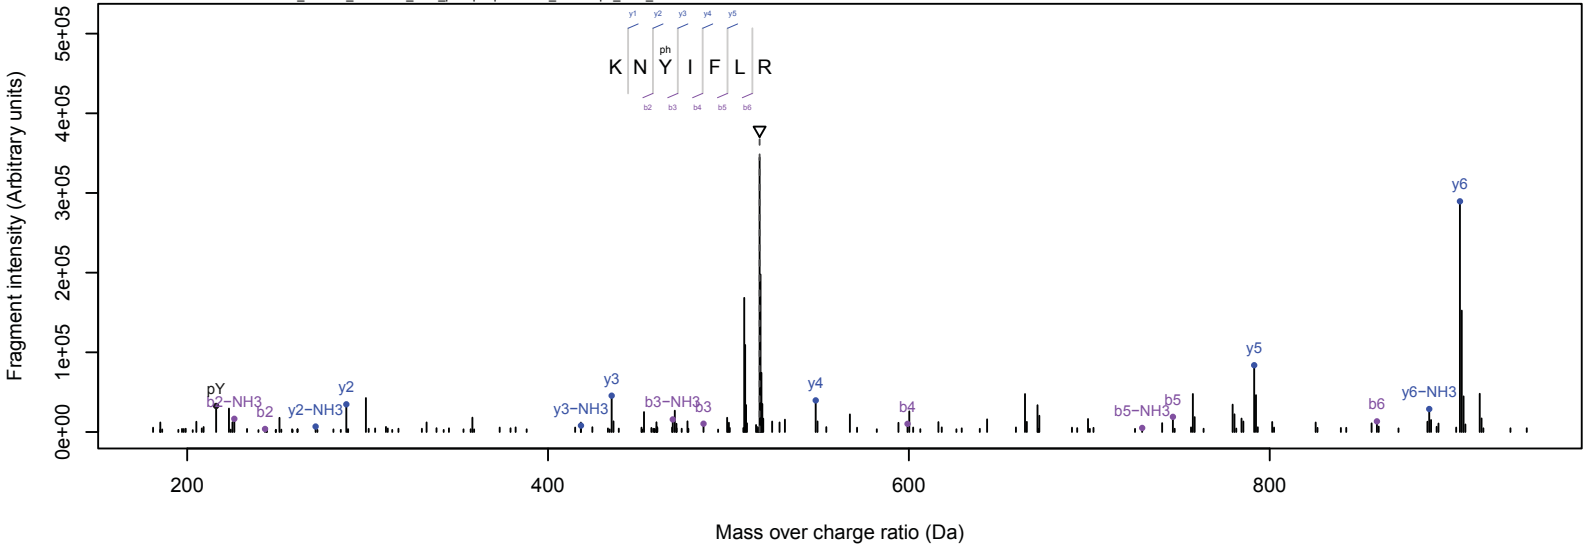

TY(ph)LLPDK-2+

Source: QE1\_140822\_OPL1013\_CvA\_pTyrIP\_AML\_cell\_lines\_part2\_B Scan: 13103

Andromeda score: 95.531

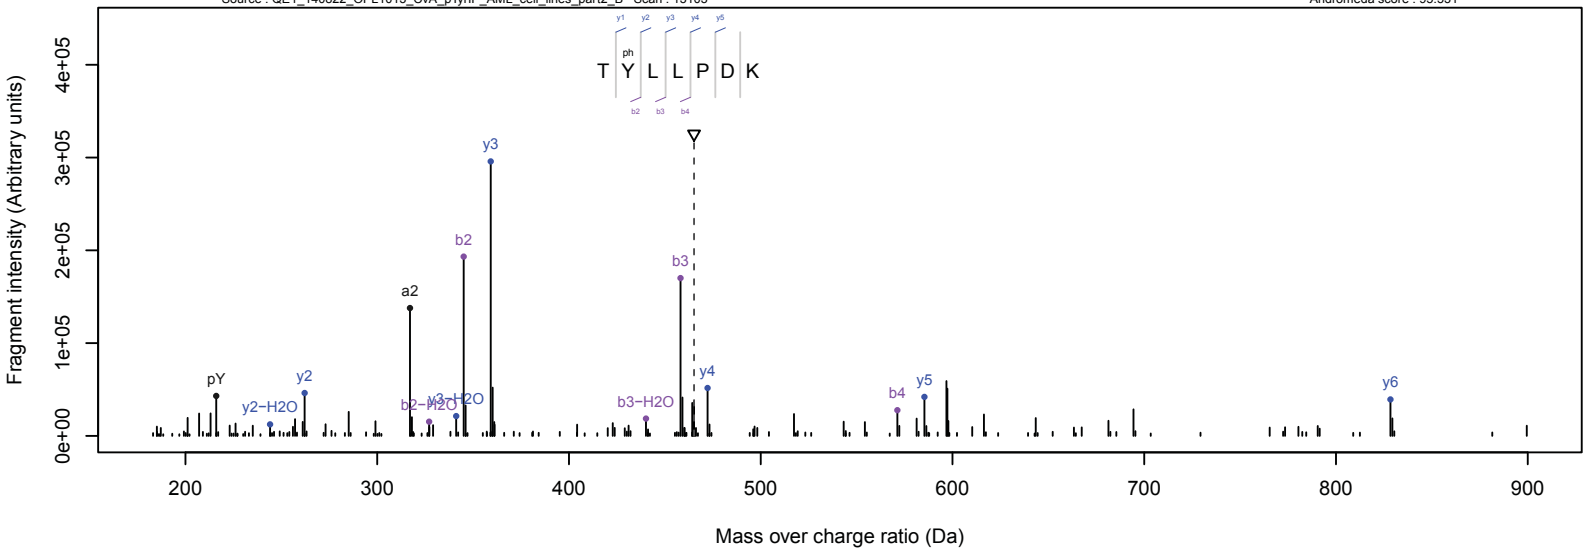

ATDY(ph)PLIAR-2+

Source: QE1\_140612\_OPL1013\_CVA\_phosphoproteomic\_landscape\_AML\_D Scan: 17397

Andromeda score: 95.502

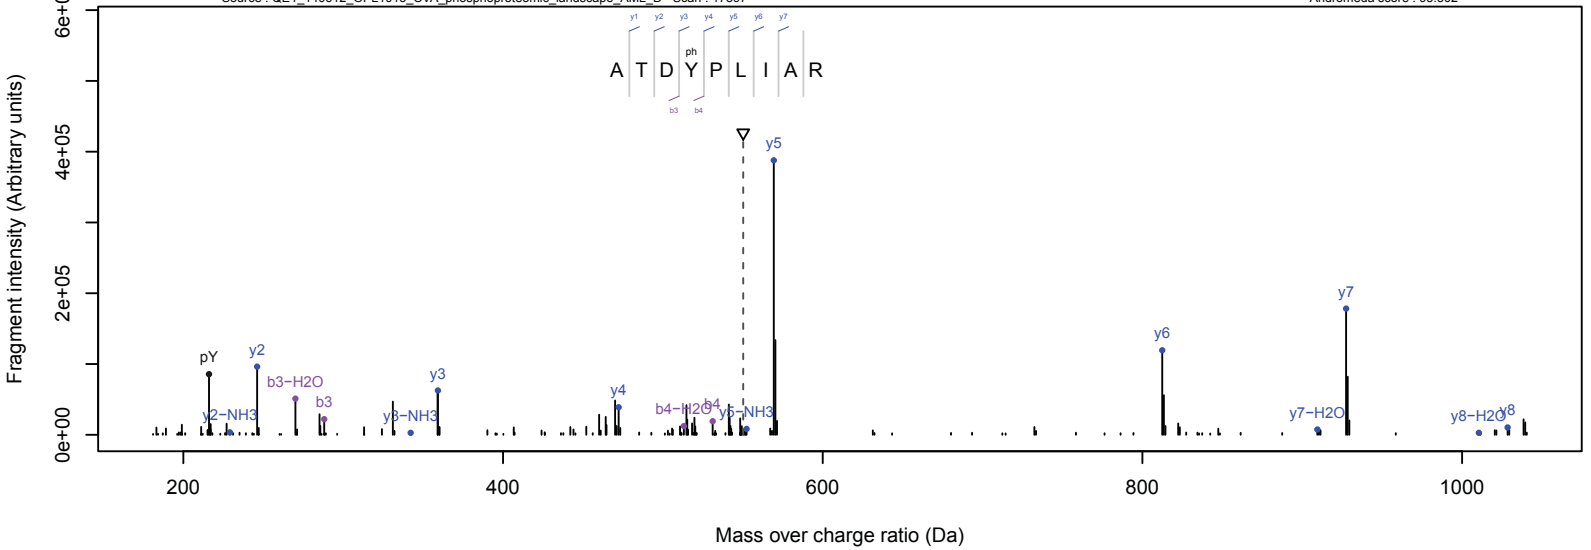

LVLVNAIY(ph)FK-2+

Source : QE1\_140612\_OPL1013\_CVA\_phosphoproteomic\_landscape\_AML\_C Scan : 44993

Andromeda score : 95.502

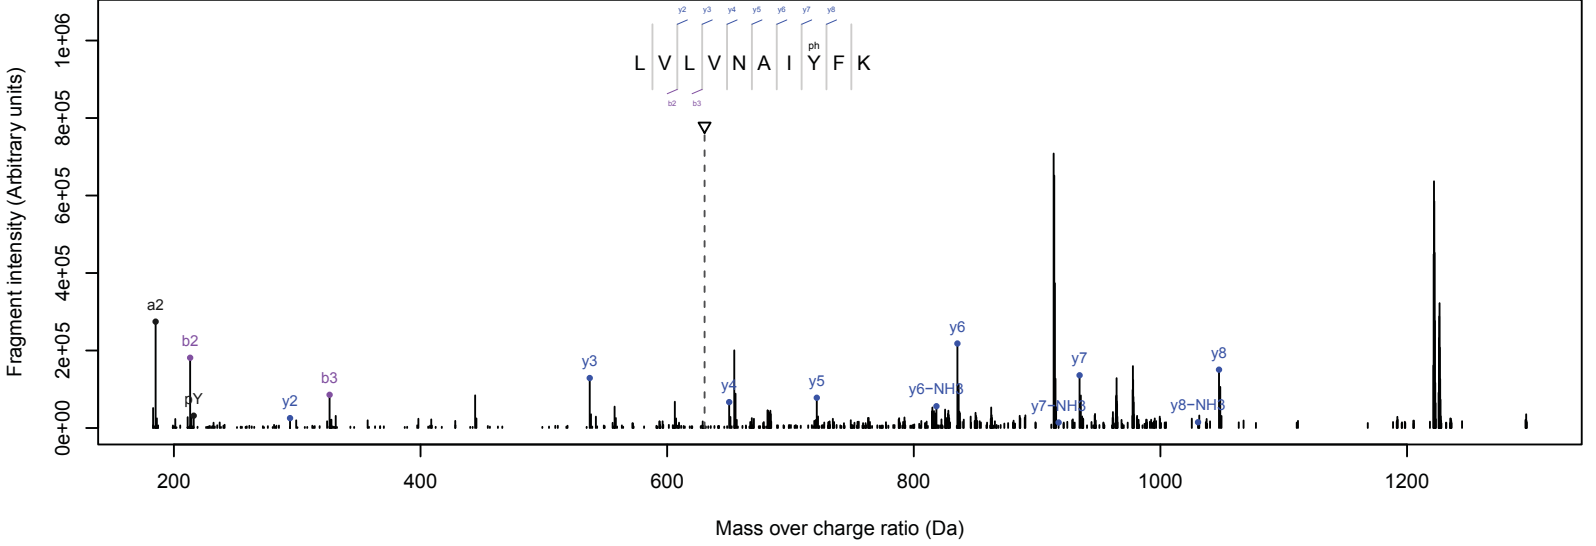

GSHLSIYAENSLKSDGY(ph)HKR-5+

Source : QE1\_140612\_OPL1013\_CVA\_phosphoproteomic\_landscape\_AML\_C Scan : 13404

Andromeda score : 95.5

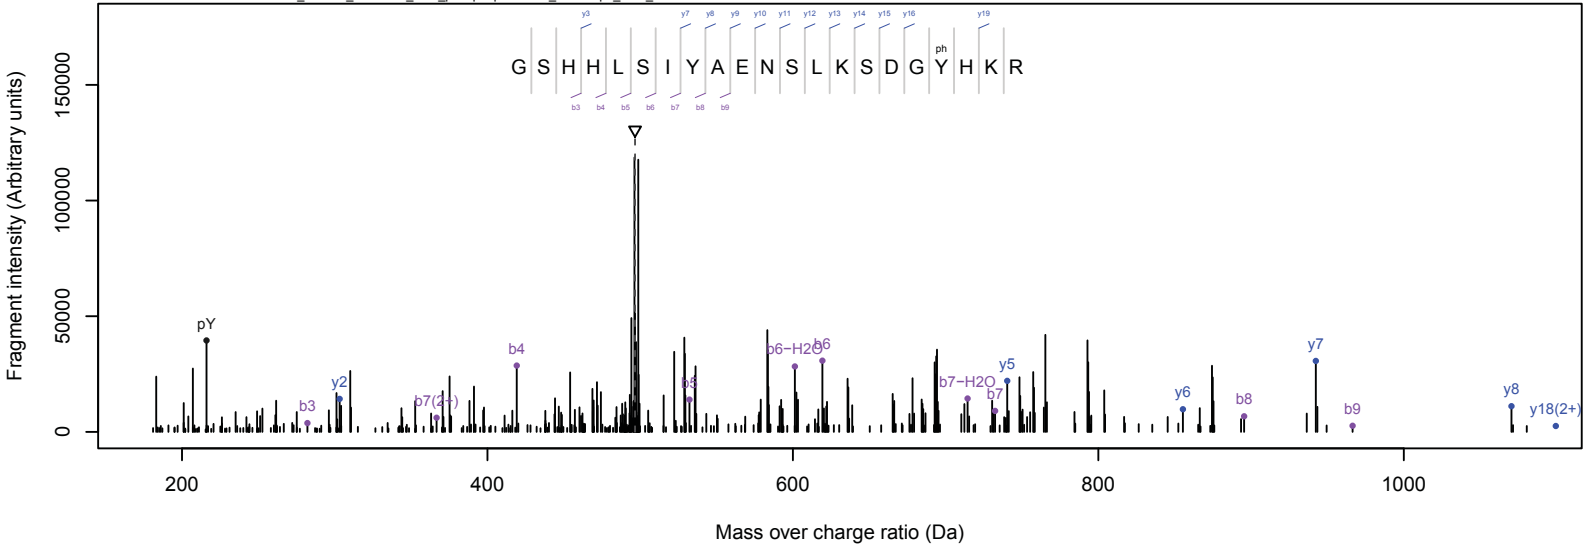

PSSINY(ph)MVA PVTGNDVGIR-3+

Source : Qe1\_141024\_OPL1013\_CvA\_AML\_pTyrIP\_MOLM13 Scan : 30510

Andromeda score : 95.5

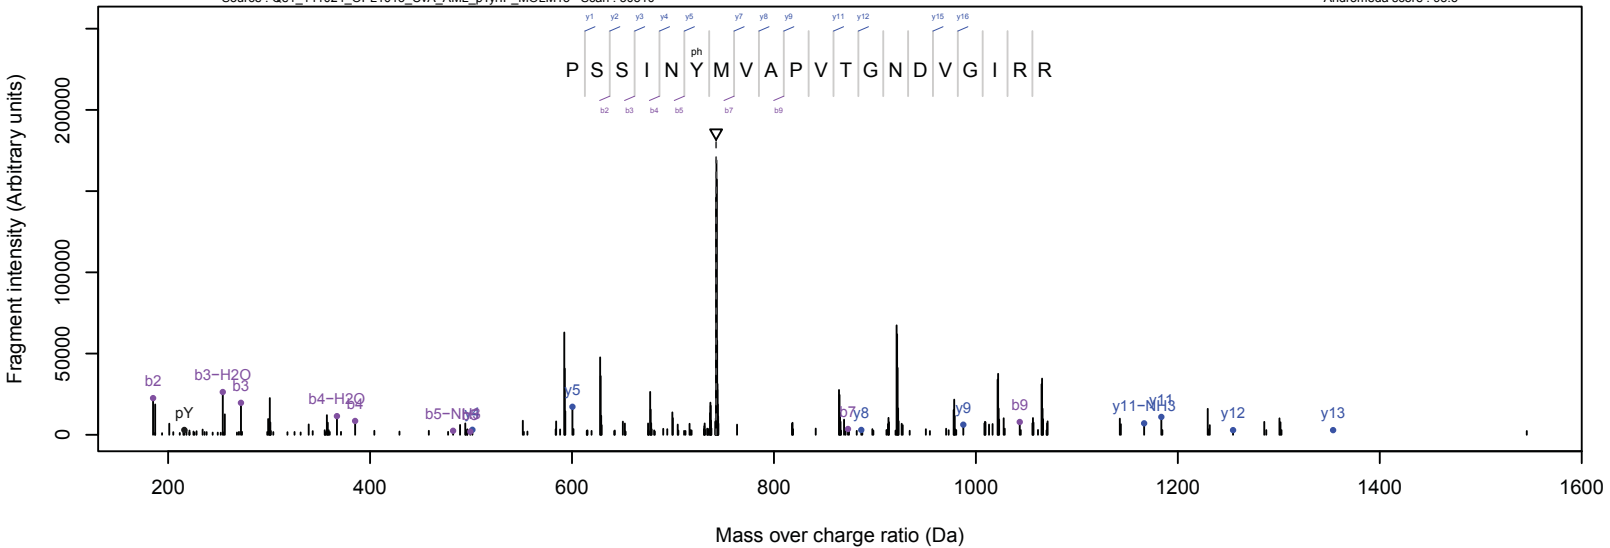

VWLLQY(ph)SGM(ox)THEDIVQESK-3+

Source : QE1\_140908\_OPL1013\_CvA\_pTyrIP\_AML\_HL60 Scan : 36911

Andromeda score : 95.5

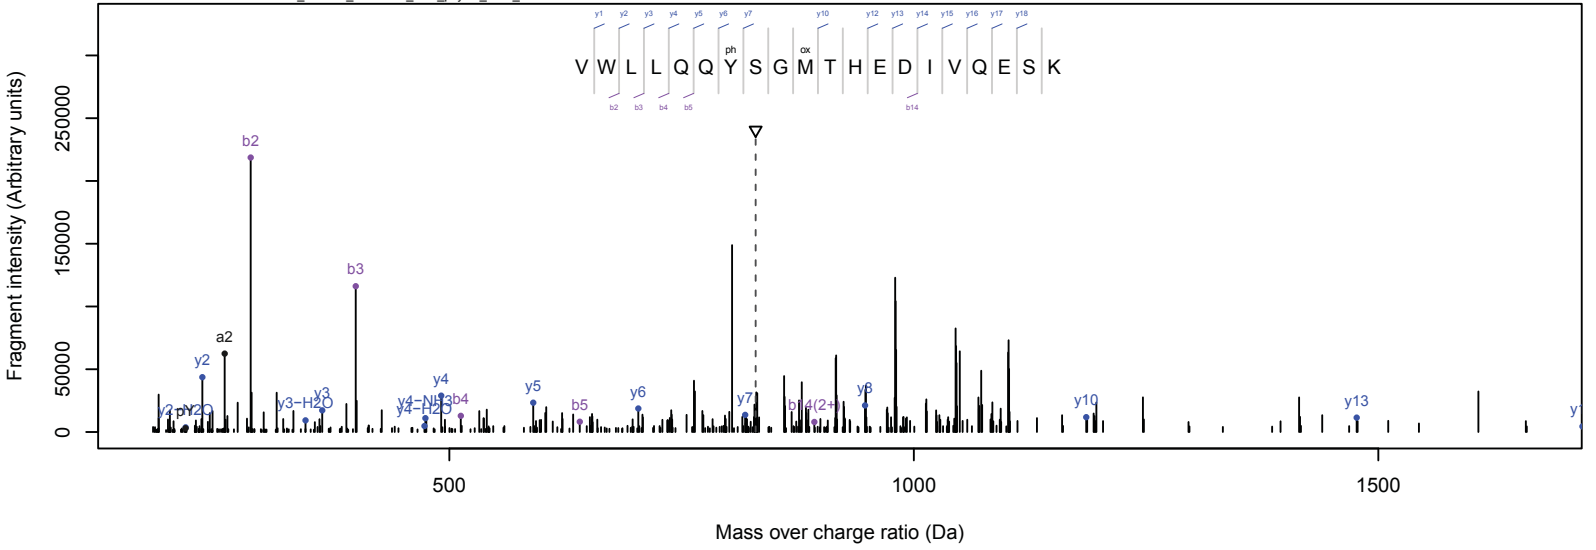

TGY(ph)VLQPESMR-2+

Source : QE1\_140612\_OPL1013\_CVA\_phosphoproteomic\_landscape\_AML\_A Scan : 19971

Andromeda score : 95.477

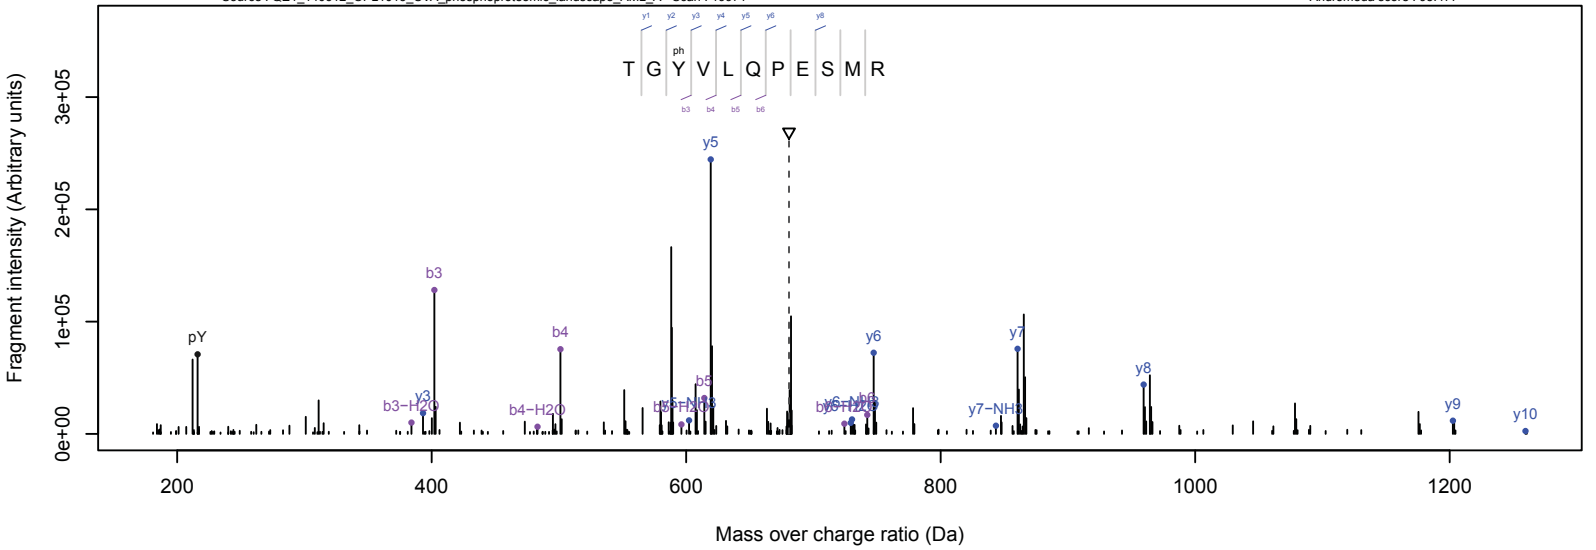

AEGSDVANAVLDGADCIMLSGETAKGDY(ph)PLEAVR-3+

Source : QE1\_140822\_OPL1013\_CvA\_pTyrIP\_AML\_cell\_lines\_part2\_B Scan : 43129

Andromeda score : 95.435

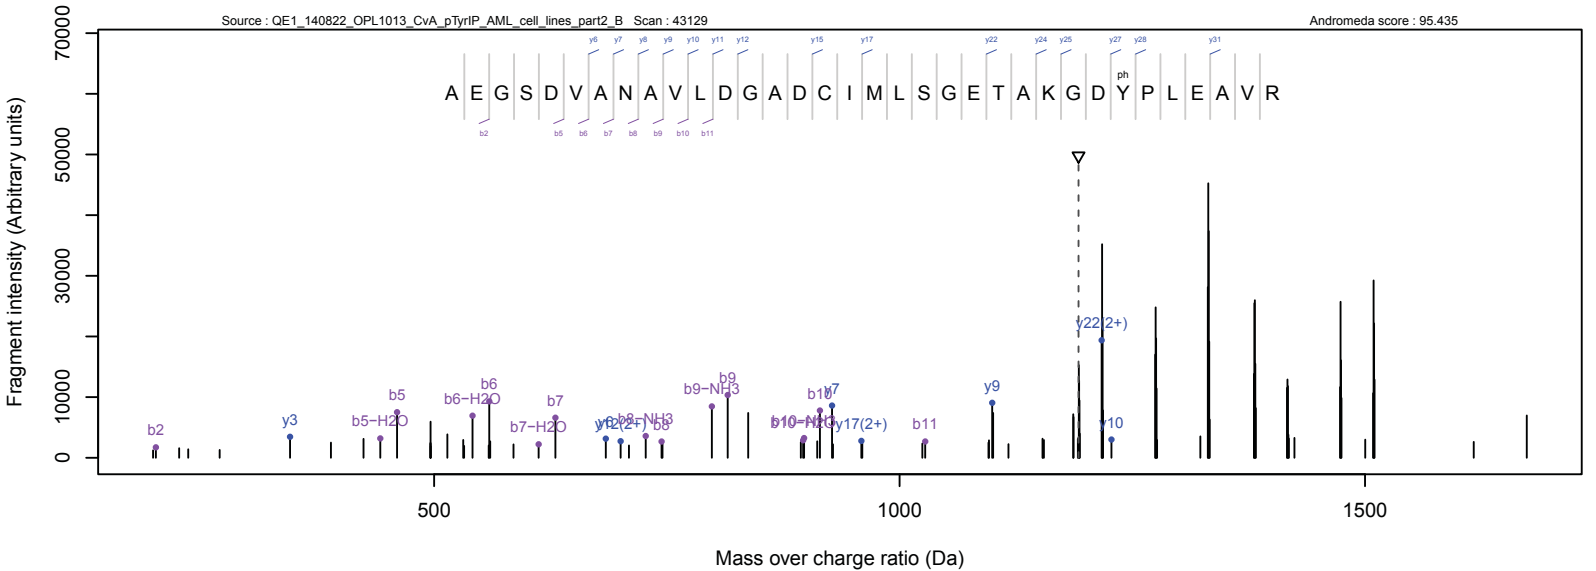

AGEEHY(ph)NCISALHK-3+

Source : QE1\_140612\_OPL1013\_CVA\_phosphoproteomic\_landscape\_AML\_D Scan : 11175

Andromeda score : 95.428

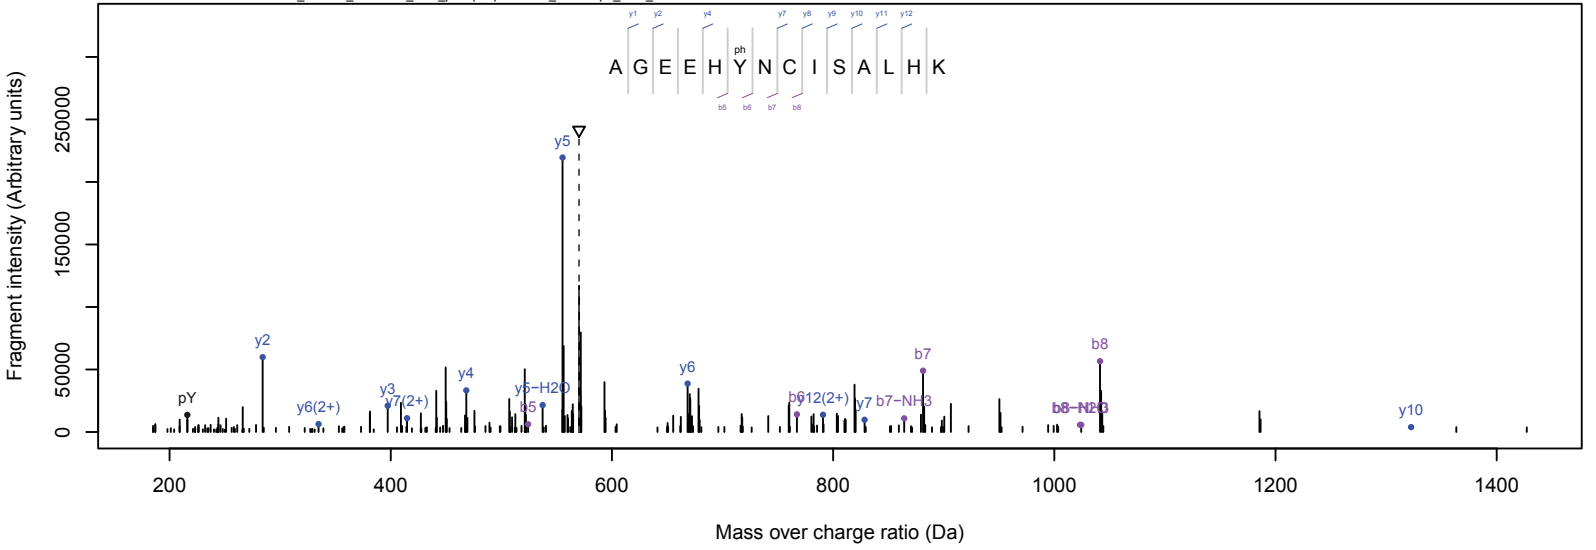

CLVLTGFGGY(ph)DKVK-2+

Source : QE1\_140612\_OPL1013\_CVA\_phosphoproteomic\_landscape\_AML\_C Scan : 30645

Andromeda score : 95.428

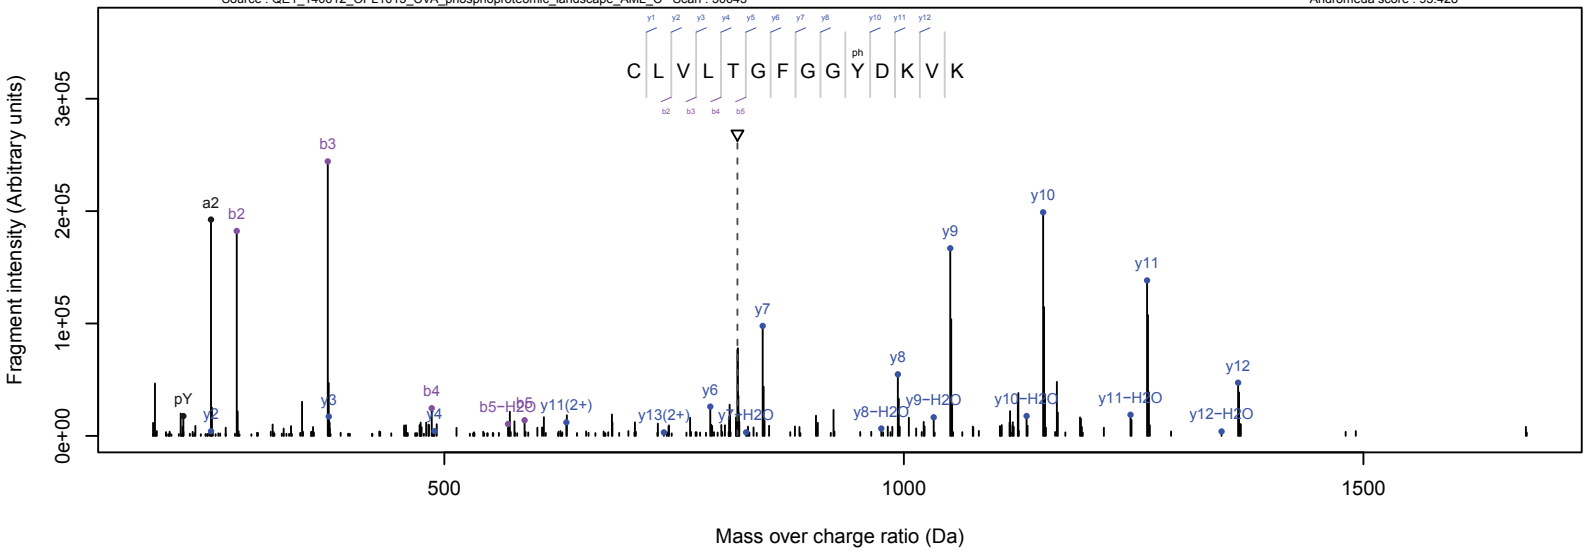

LYHEADKTY(ph)MLR-3+

Source : QE1\_140612\_OPL1013\_CVA\_phosphoproteomic\_landscape\_AML\_C Scan : 13866

Andromeda score : 95.417

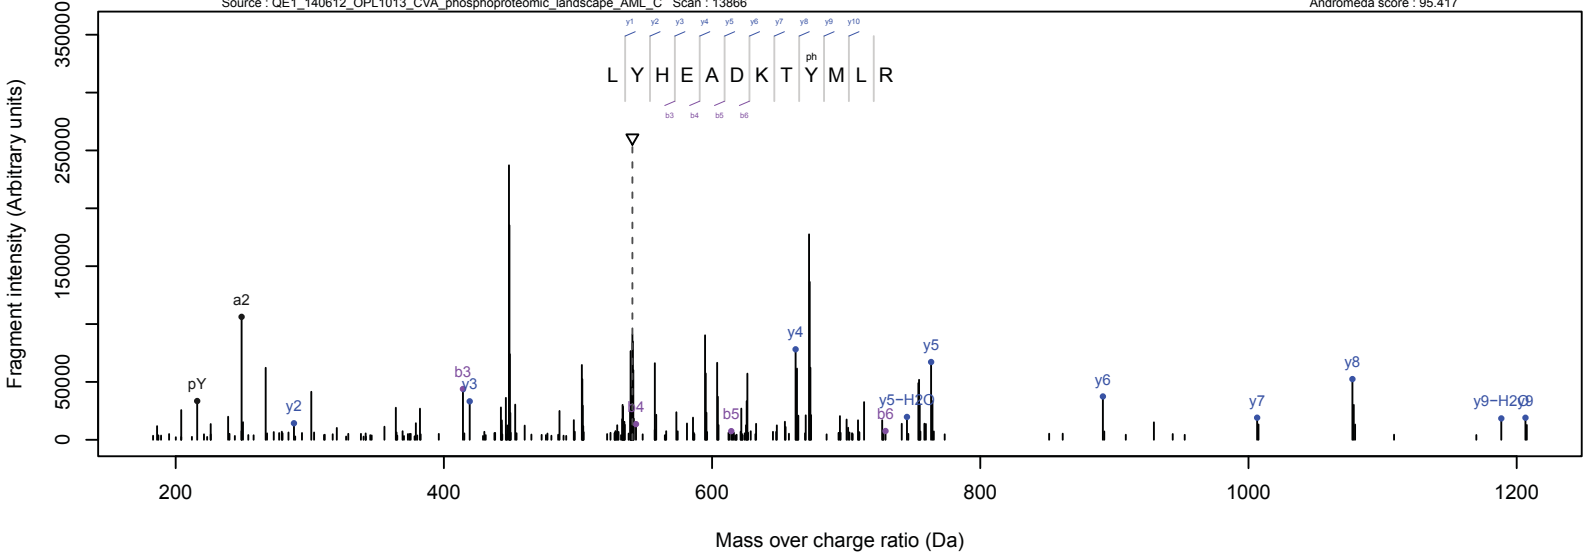

LY(ph)YVCTAPHCGHR-3+

Source : QE1\_140612\_OPL1013\_CVA\_phosphoproteomic\_landscape\_AML\_C Scan : 11281

Andromeda score : 95.417

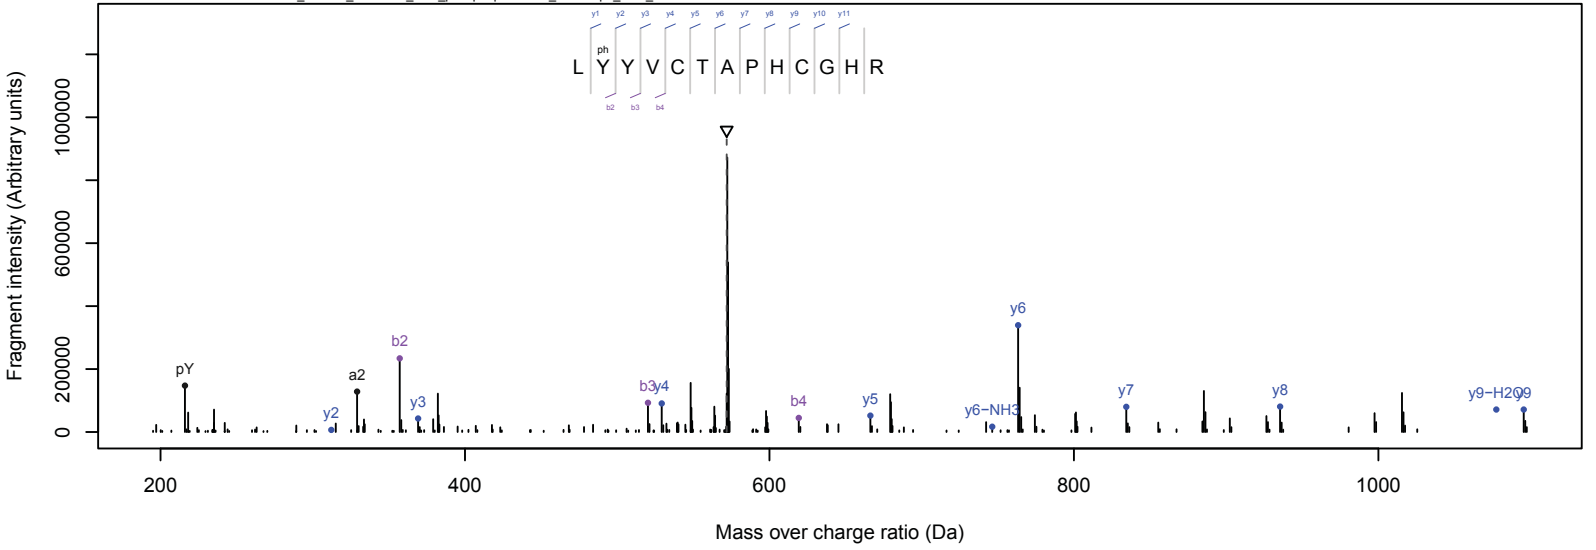

VEY(ph)VSSLSSVR-2+

Source : QE1\_140612\_OPL1013\_CVA\_phosphoproteomic\_landscape\_AML\_C Scan : 18454

Andromeda score : 95.417

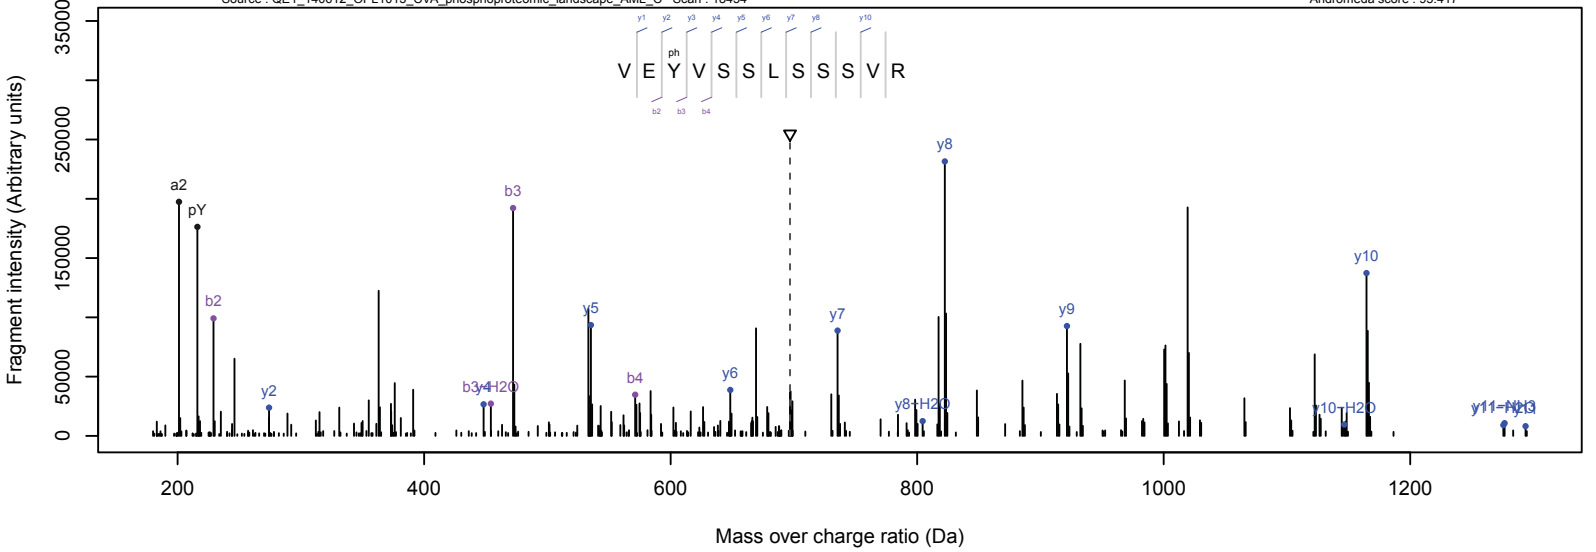

FKY(ph)FESDLGSGSHFSNR-4+

Source : QE1\_140612\_OPL1013\_CVA\_phosphoproteomic\_landscape\_AML\_C Scan : 19040

Andromeda score : 95.414

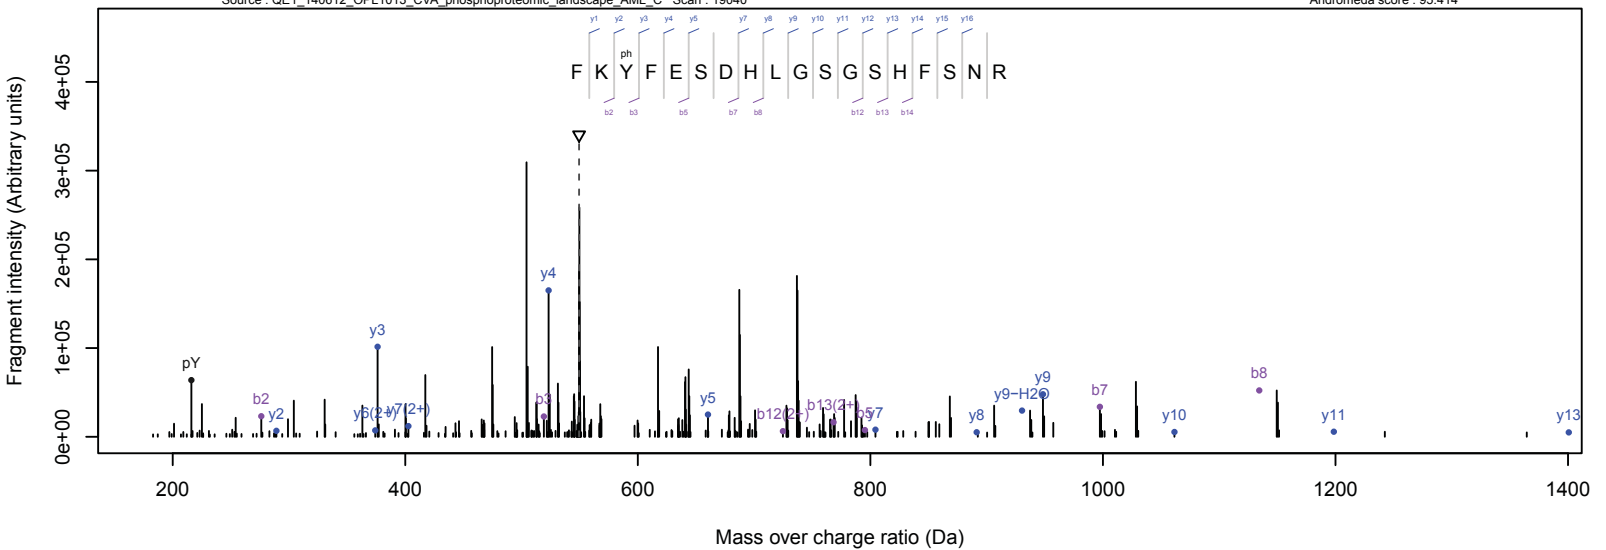

**SVDGDQGLG<sup>(ox)</sup>EGPY<sup>(ph)</sup>EVLK-2+**

Source : QE1\_140612\_OPL1013\_CVA\_phosphoproteomic\_landscape\_AML\_B Scan : 28191

Andromeda score : 95.205

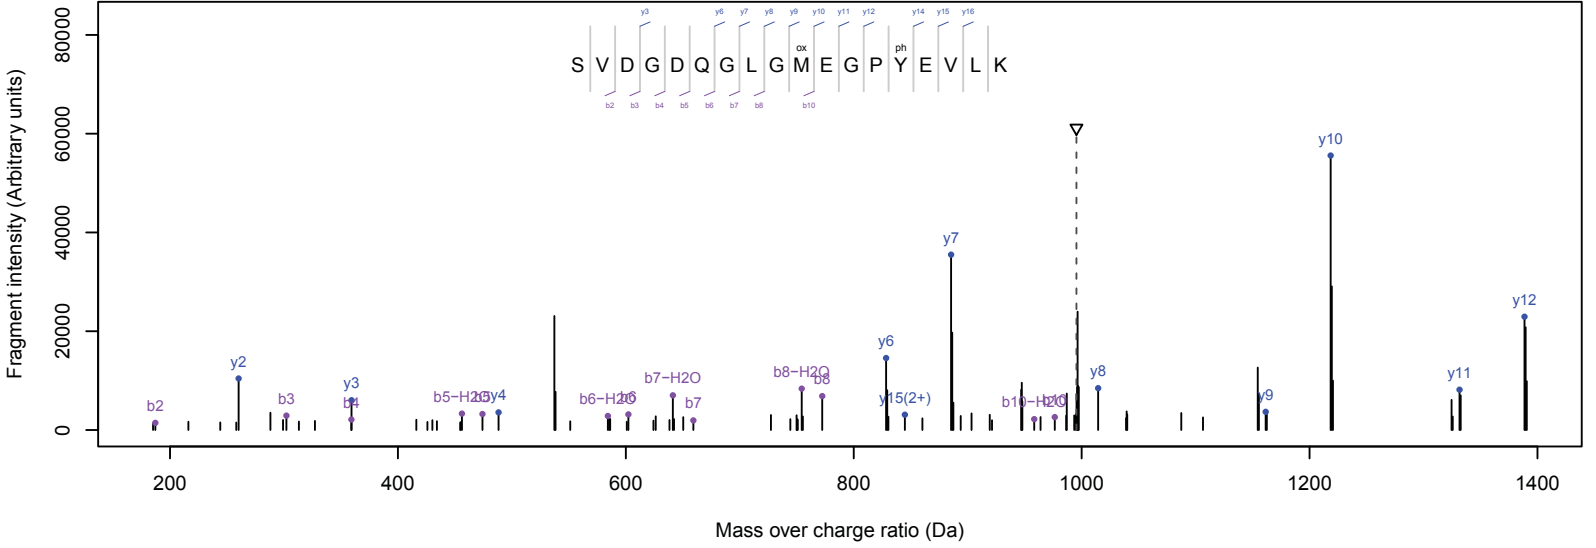

**IHVY<sup>(ph)</sup>GYSMAYGPAQHAISTEK-3+**

Source : QE1\_140612\_OPL1013\_CVA\_phosphoproteomic\_landscape\_AML\_C Scan : 26705

Andromeda score : 95.195

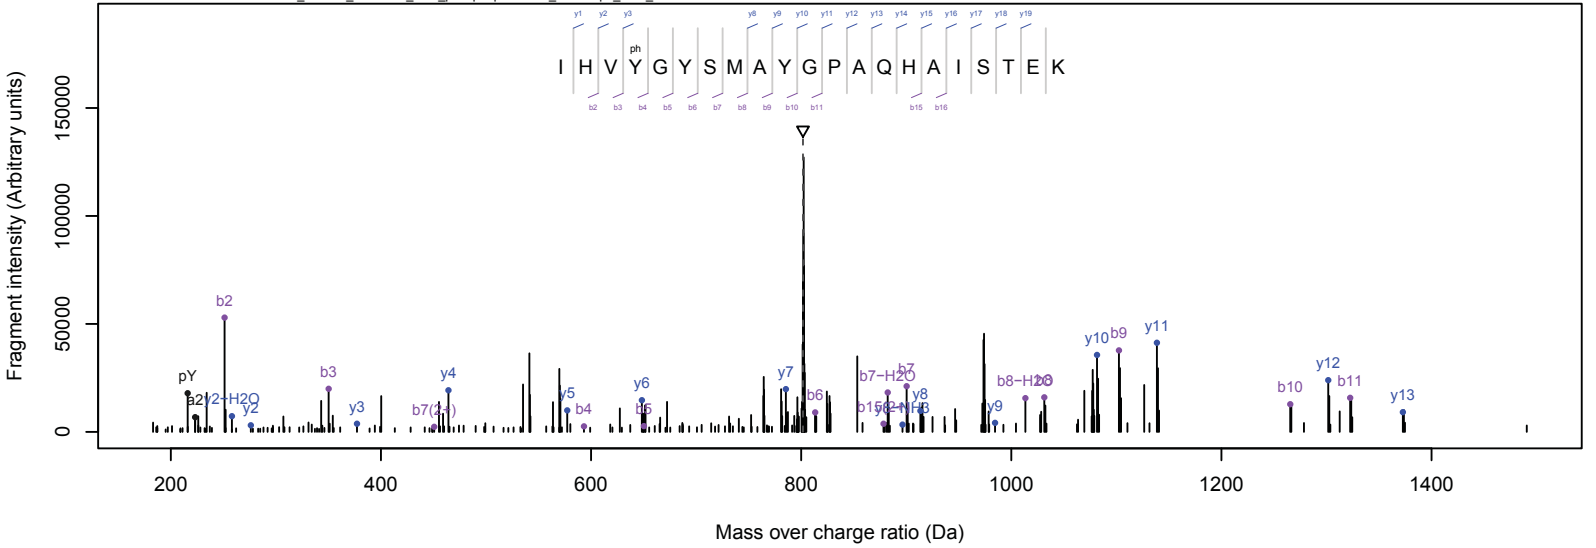

**VGEEHVY<sup>(ph)</sup>SFPNKQK-3+**

Source : QE1\_140612\_OPL1013\_CVA\_phosphoproteomic\_landscape\_AML\_E Scan : 10558

Andromeda score : 95.195

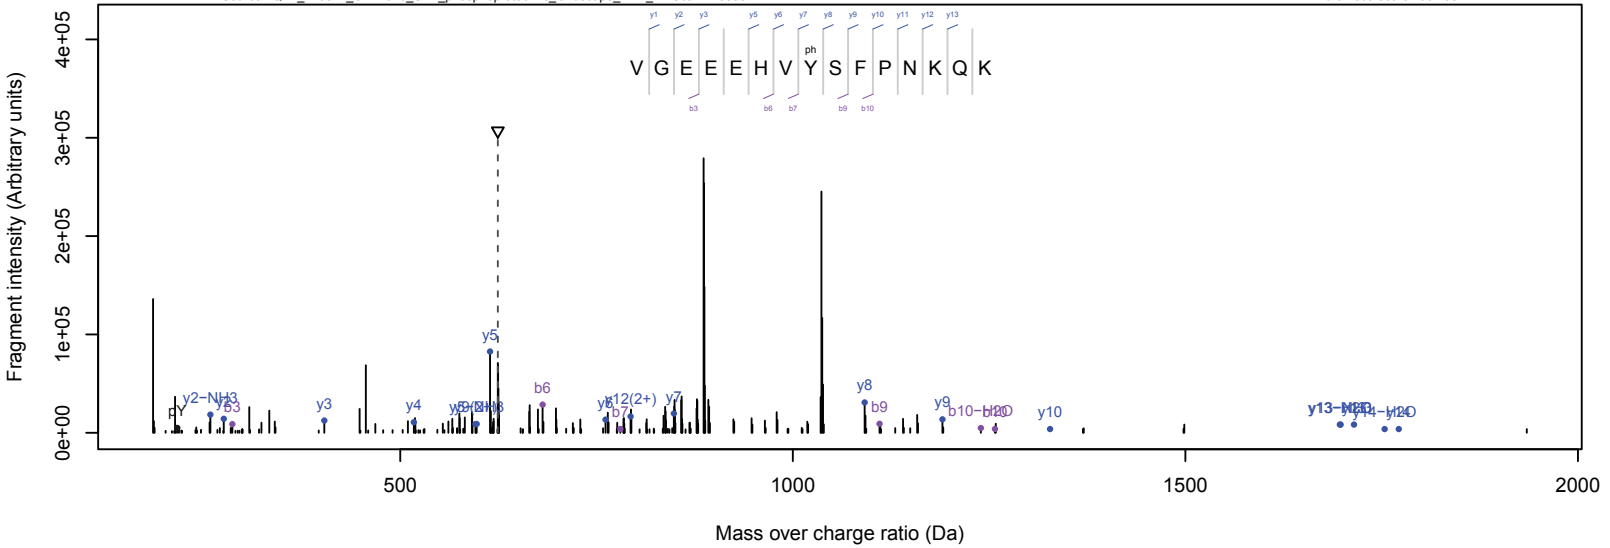

DIKNSNY(ph)VVK-2+

Source : QE1\_140822\_OPL1013\_CvA\_pTyrIP\_AML\_cell\_lines\_part2\_B Scan : 6714

Andromeda score : 95.183

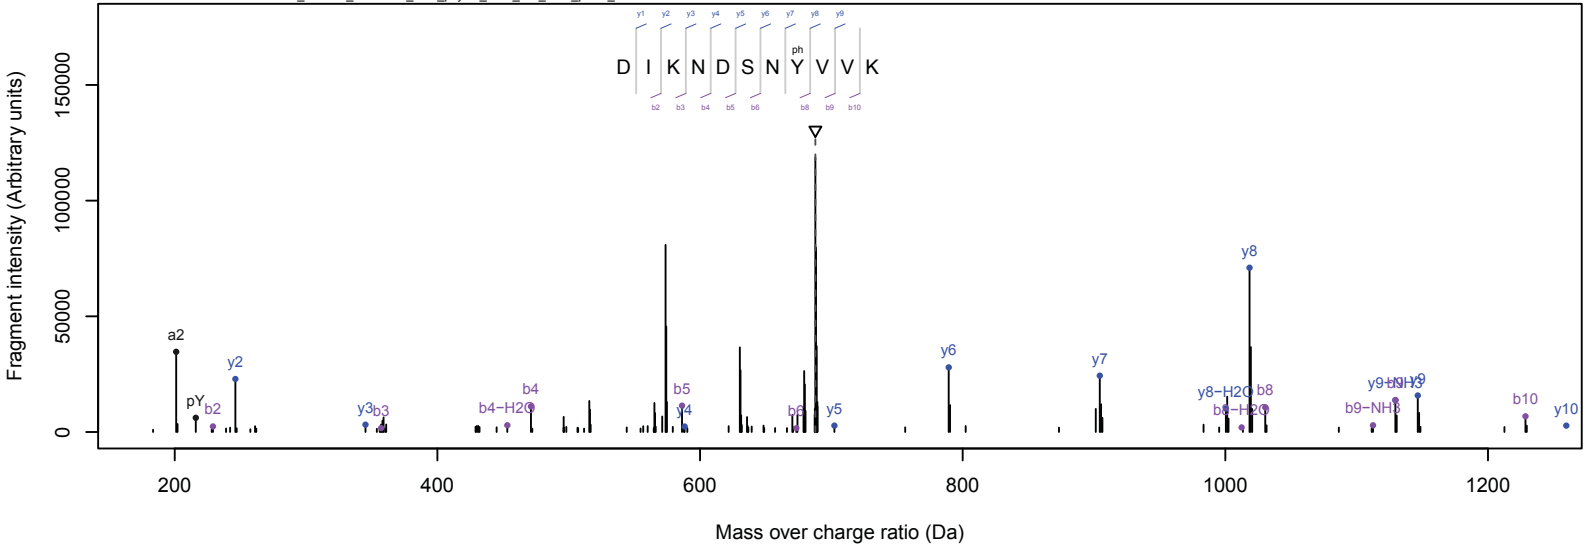

HEY(ph)WFAVPQER-2+

Source : QE1\_140612\_OPL1013\_CvA\_phosphoproteomic\_landscape\_AML\_D Scan : 31196

Andromeda score : 95.094

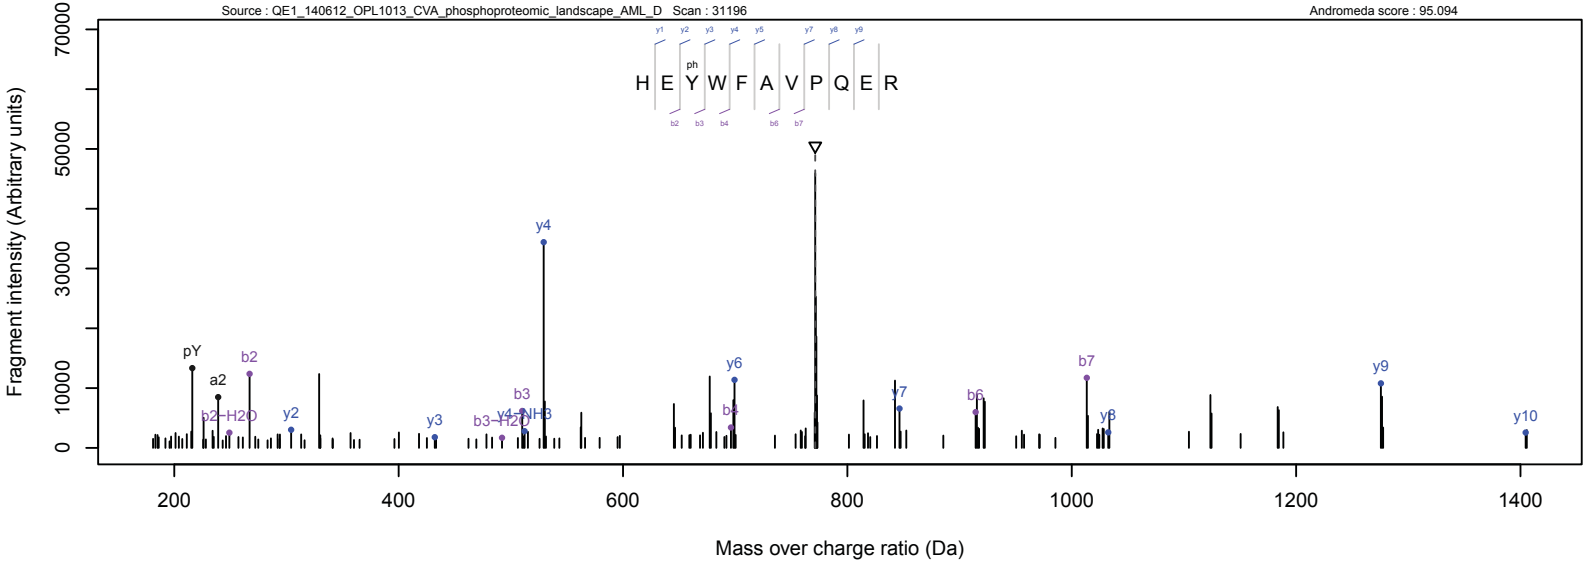

QHLEQEIYVNKK-3+

Source : QE1\_140908\_OPL1013\_CvA\_pTyrIP\_AML\_HEL Scan : 10912

Andromeda score : 95.094

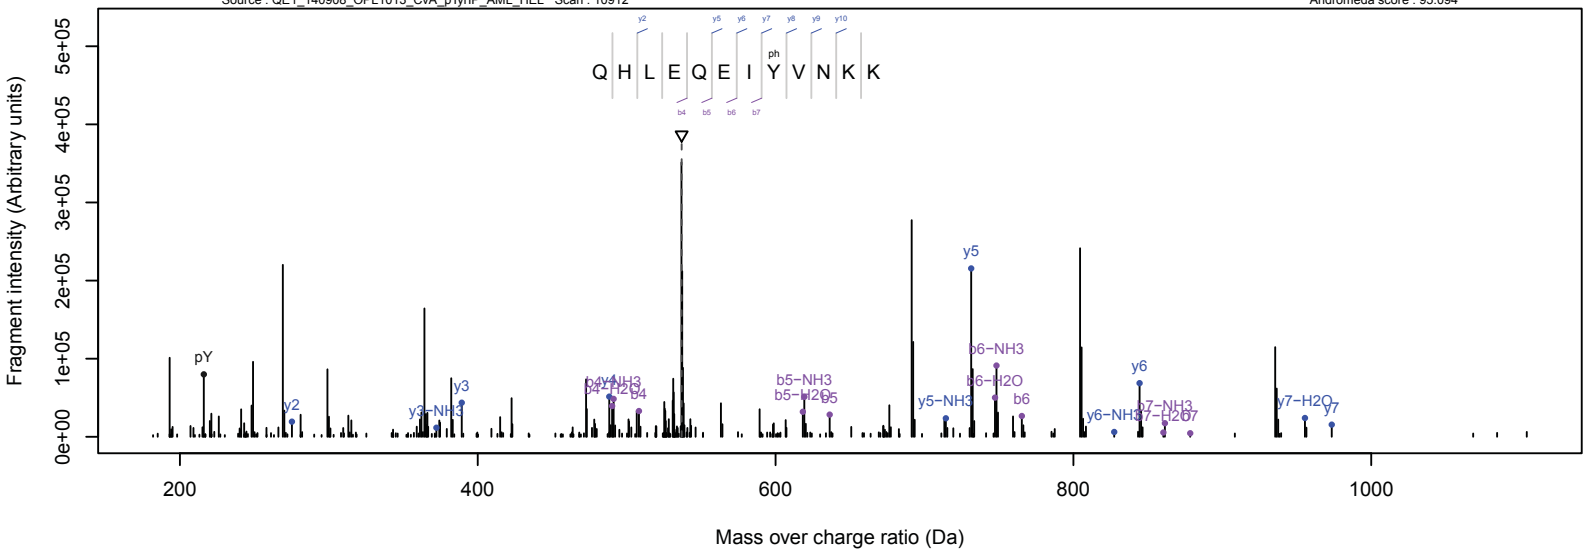



ASSPAESSPEDSGY(ph)M(ox)R-2+

Source : QE1\_140908\_OPL1013\_CVA\_pTyrIP\_AML\_Kasumi6 Scan : 5850

Andromeda score : 95.067

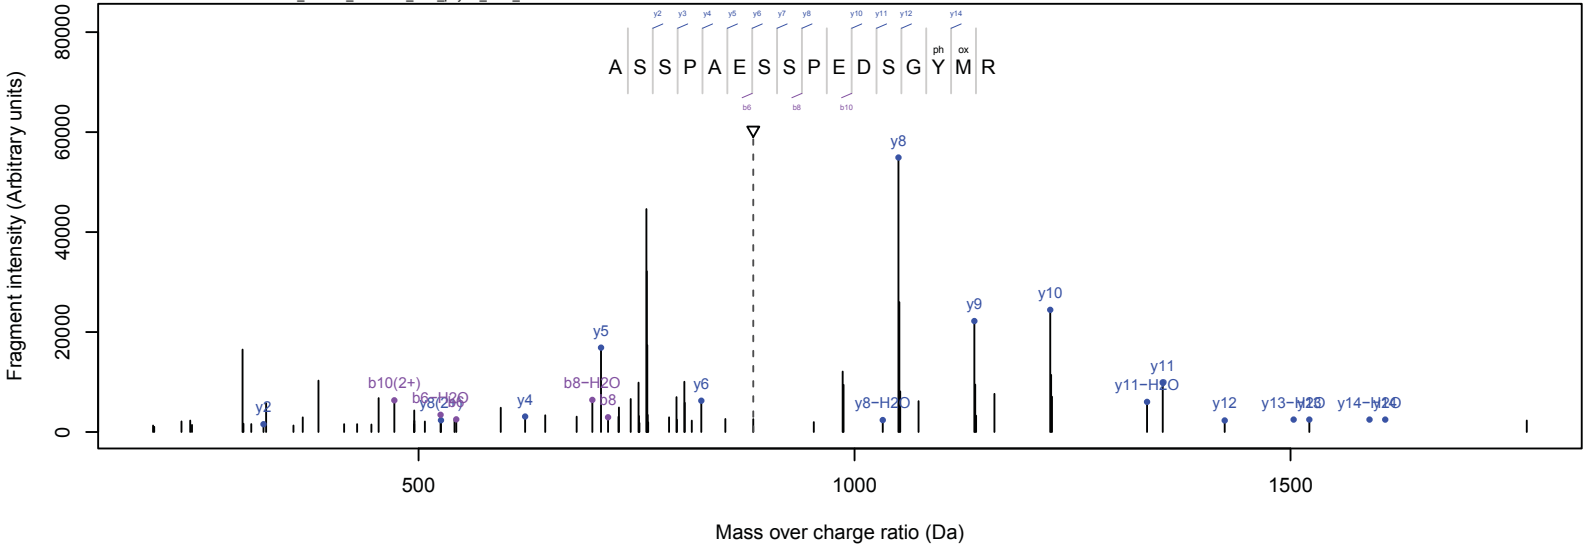

NLDY(ph)VATSIHEAVTK-2+

Source : QE1\_140612\_OPL1013\_CVA\_phosphoproteomic\_landscape\_AML\_B Scan : 30626

Andromeda score : 94.973

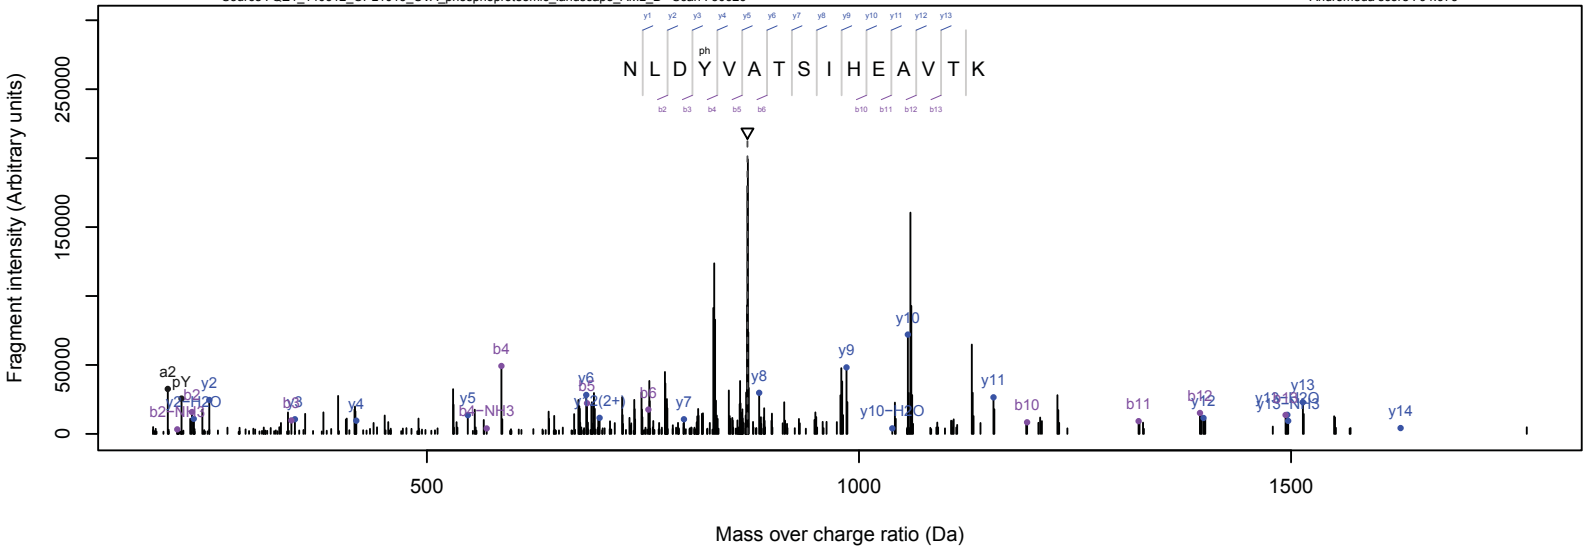

GAGSAM(ox)STDAY(ph)PKNPHLR-3+

Source : QE1\_140612\_OPL1013\_CVA\_phosphoproteomic\_landscape\_AML\_C Scan : 10032

Andromeda score : 94.922

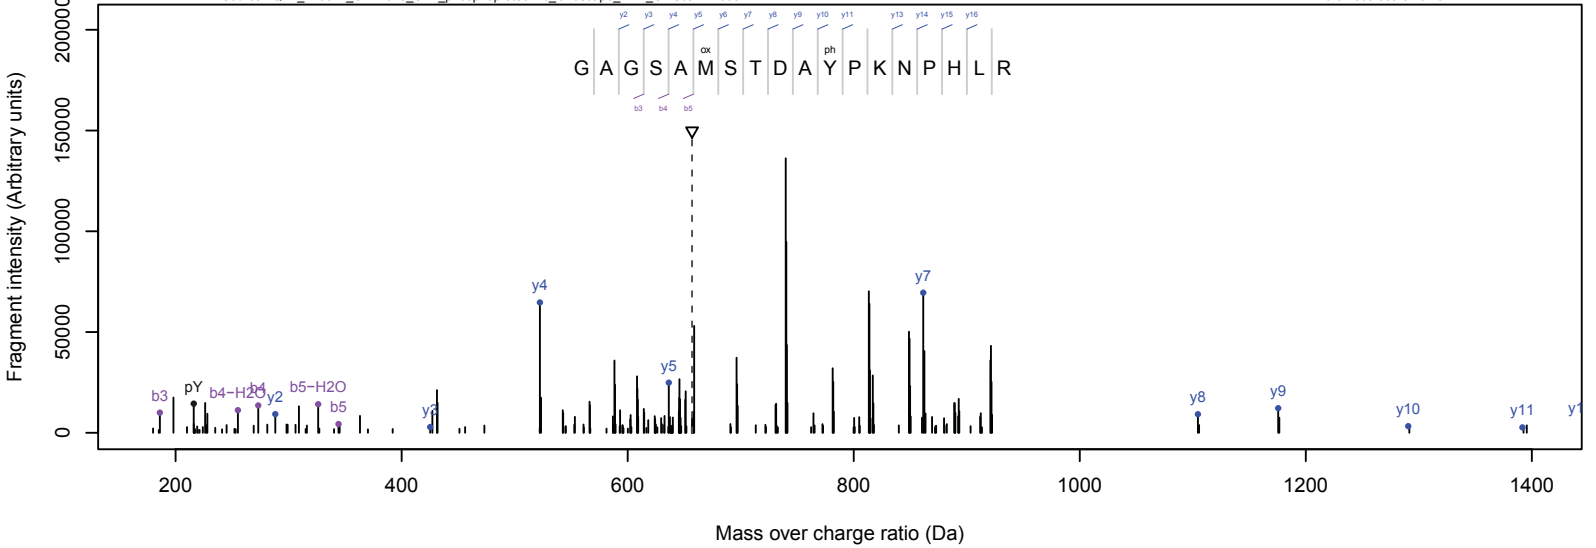

YRPENTPEPVSTSVSHY(ph)GAEPTTVSPCPSSSAK-3+

Source : QE1\_140612\_OPL1013\_CVA\_phosphoproteomic\_landscape\_AML\_B Scan : 20759

Andromeda score : 94.807

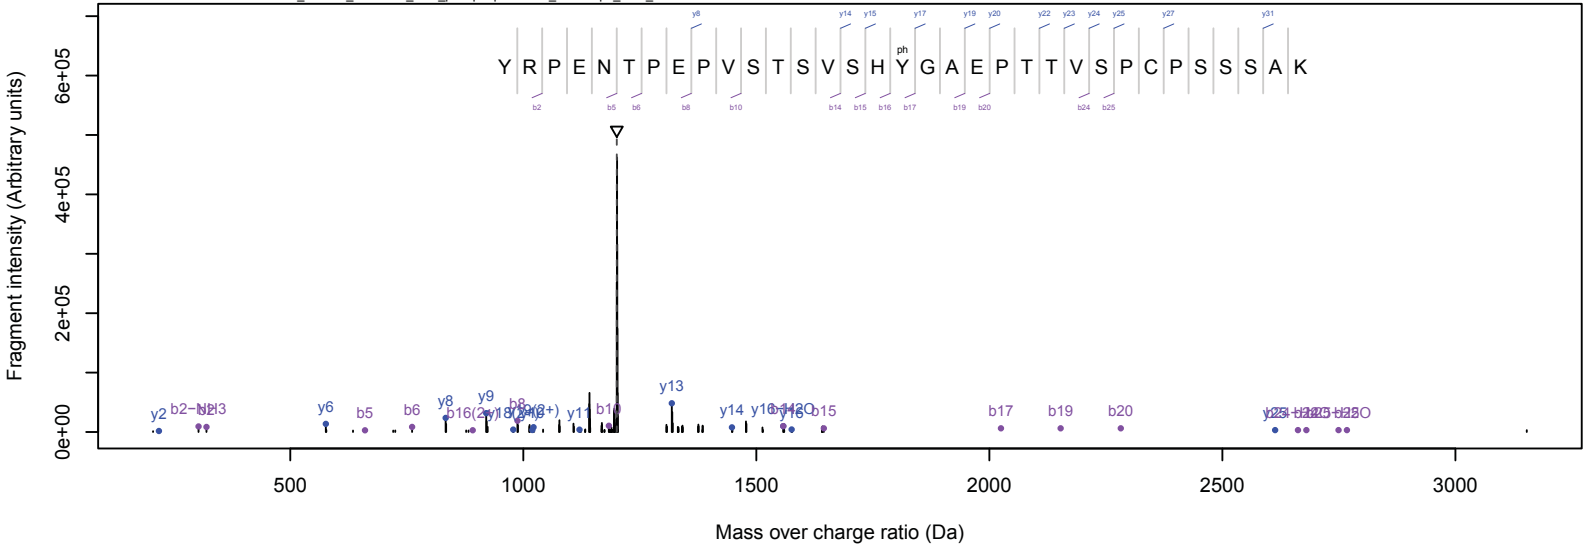

GY(ph)AICGLAWHPTCGR-2+

Source : QE1\_140612\_OPL1013\_CVA\_phosphoproteomic\_landscape\_AML\_B Scan : 29444

Andromeda score : 94.717

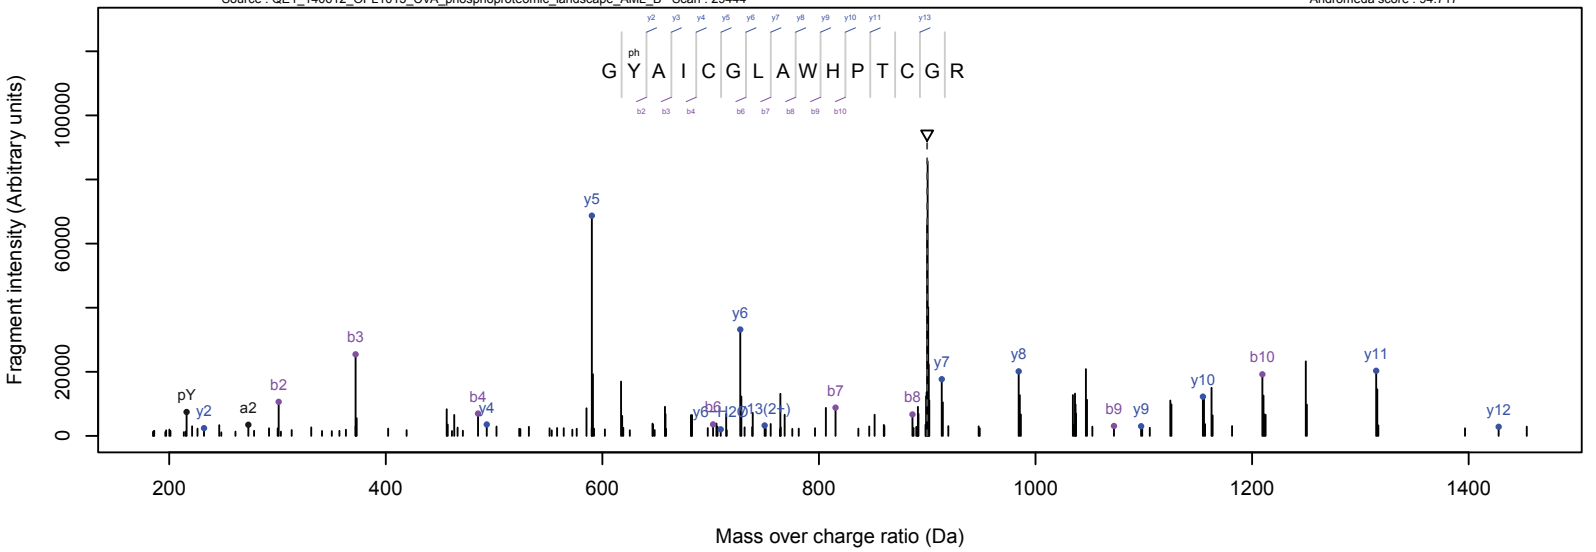

FEDGGY(ph)VVCNTR-2+

Source : QE1\_140822\_OPL1013\_CvA\_pTyrIP\_AML\_cell\_lines\_part2\_E Scan : 10078

Andromeda score : 94.688

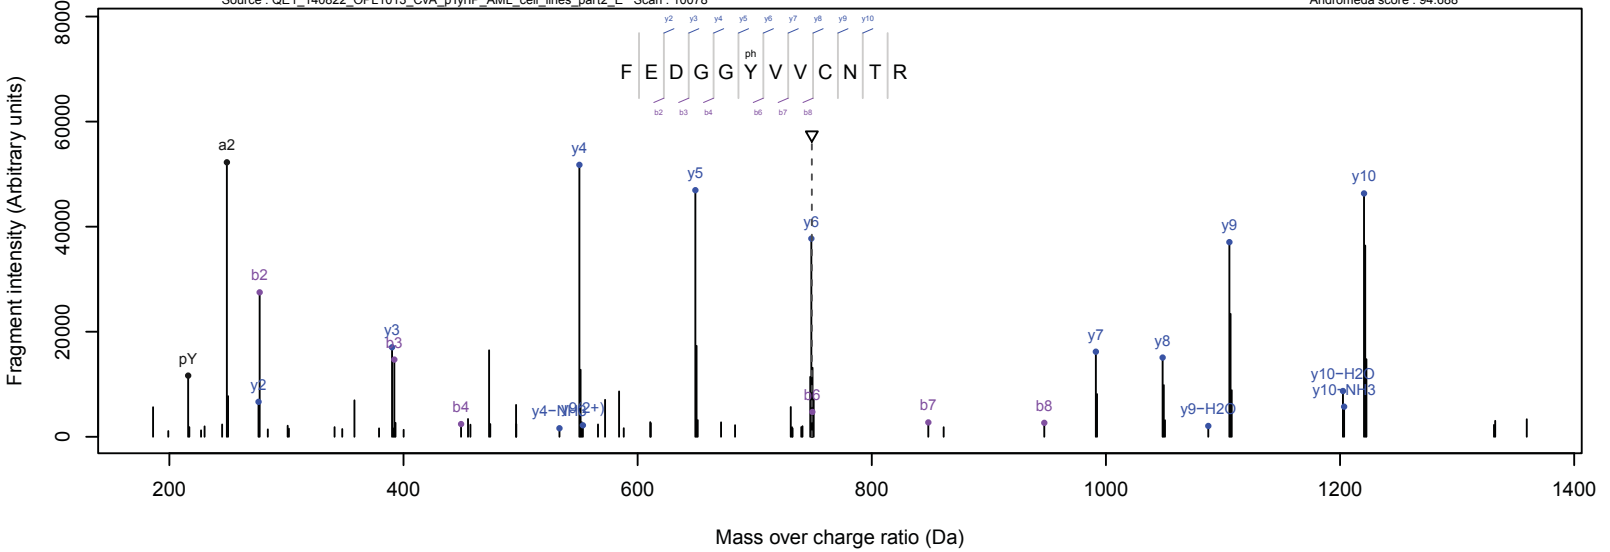

Y(ph)VSLHVR-2+

Source : QE1\_140612\_OPL1013\_CVA\_phosphoproteomic\_landscape\_AML\_C Scan : 11209

Andromeda score : 94.662

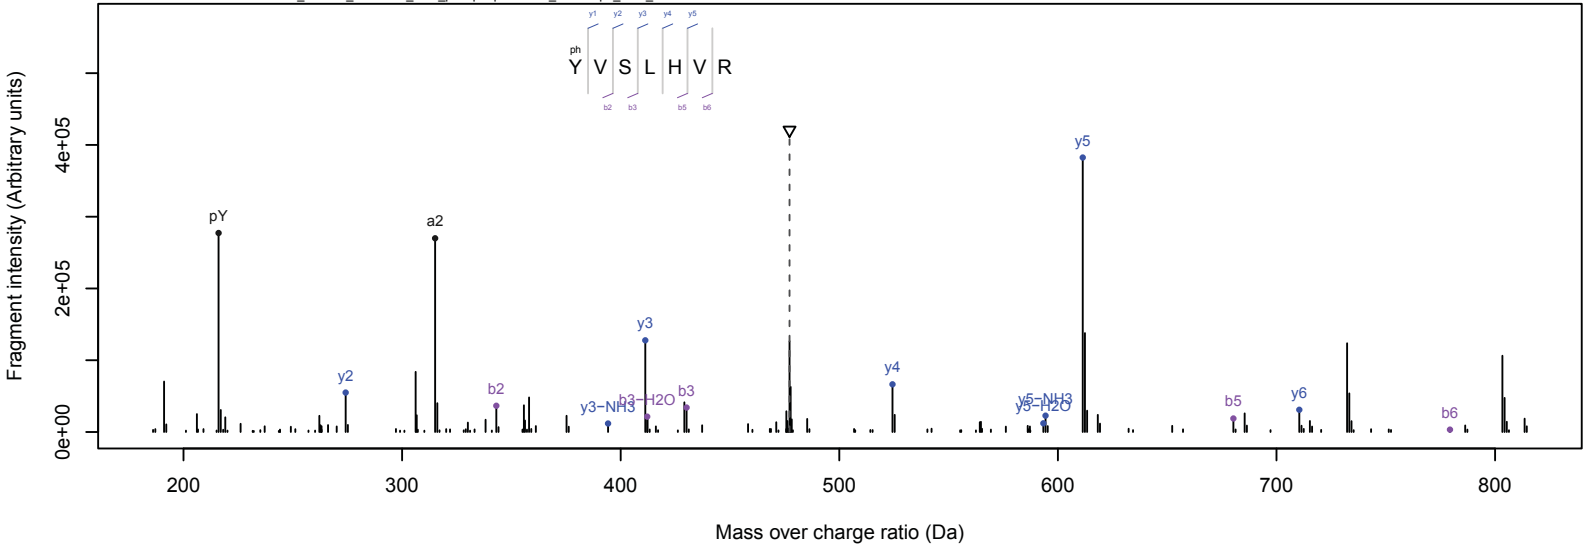

PGQFIHTNWTGHGGTVSSSY(ph)NA-3+

Source : QE1\_140908\_OPL1013\_CvA\_pTyrIP\_AML\_HEL Scan : 25792

Andromeda score : 94.632

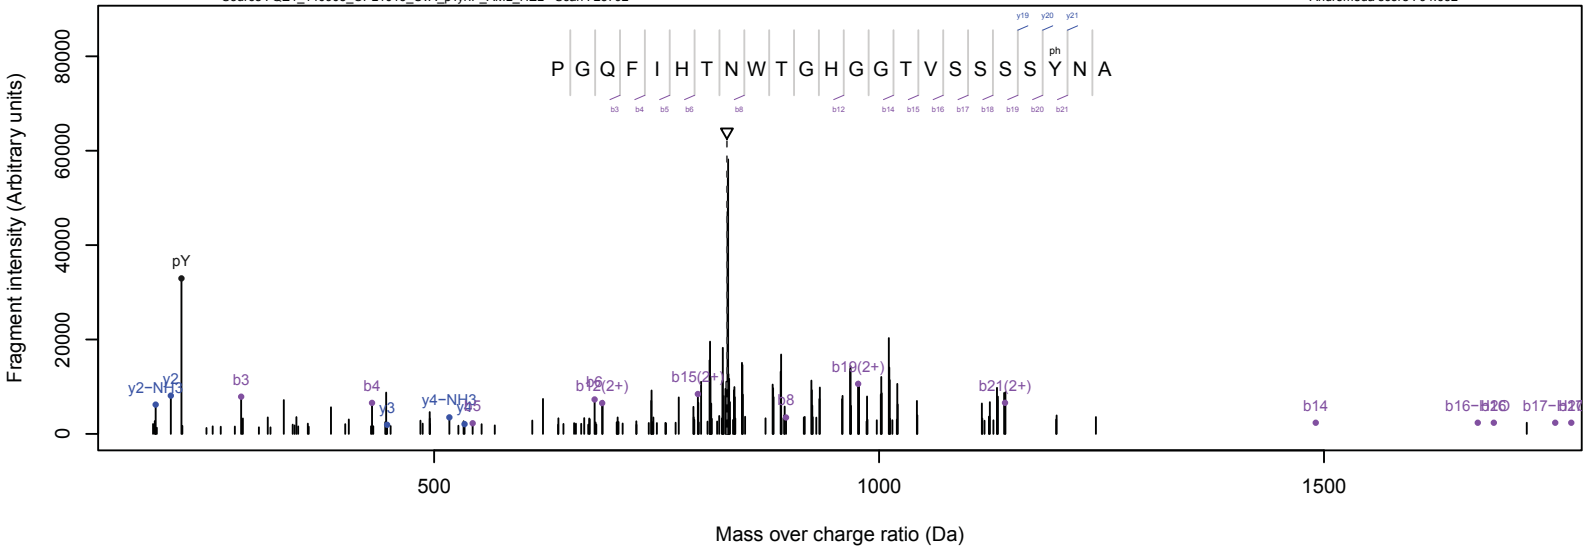

TSGTMNNY(ph)PT(ph)WRRTLLR-3+

Source : QE1\_140612\_OPL1013\_CVA\_phosphoproteomic\_landscape\_AML\_C Scan : 24795

Andromeda score : 94.632

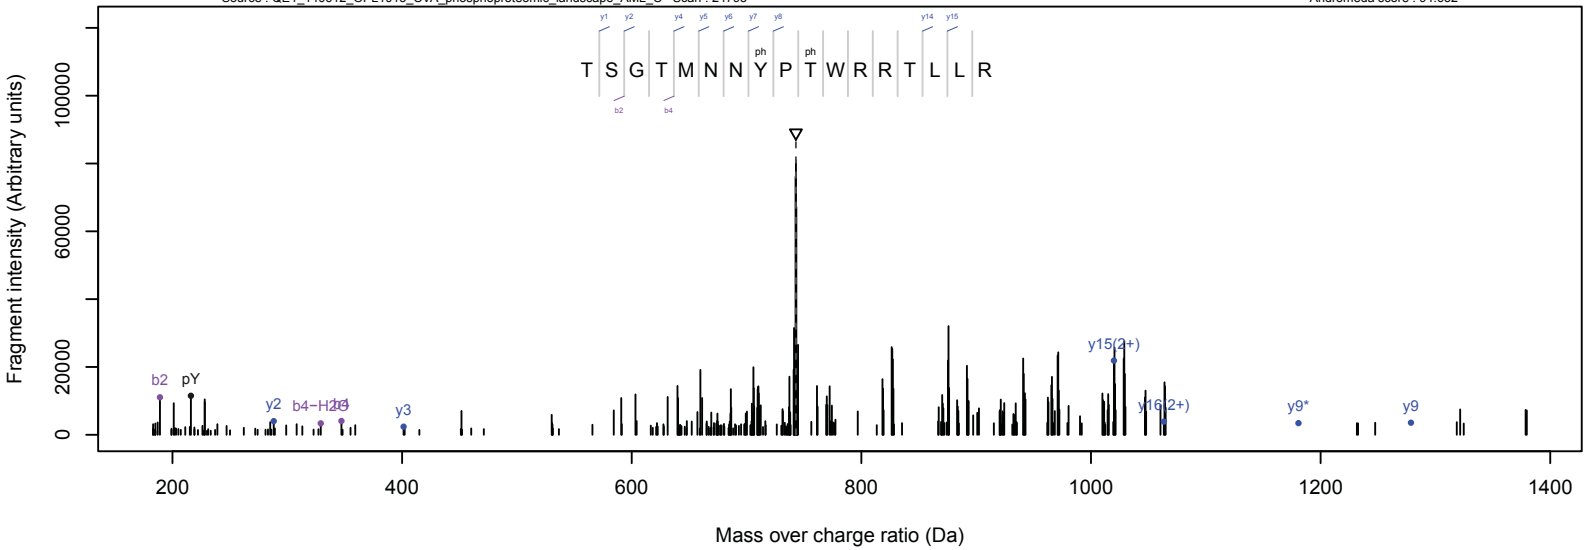

YIANLGHGLY(ph)PDM(ox)DPEHVGAFVDAVHK-4+

Source: QE1\_140612\_OPL1013\_CVA\_phosphoproteomic\_landscape\_AML\_D Scan: 36983

Andromeda score: 94.594

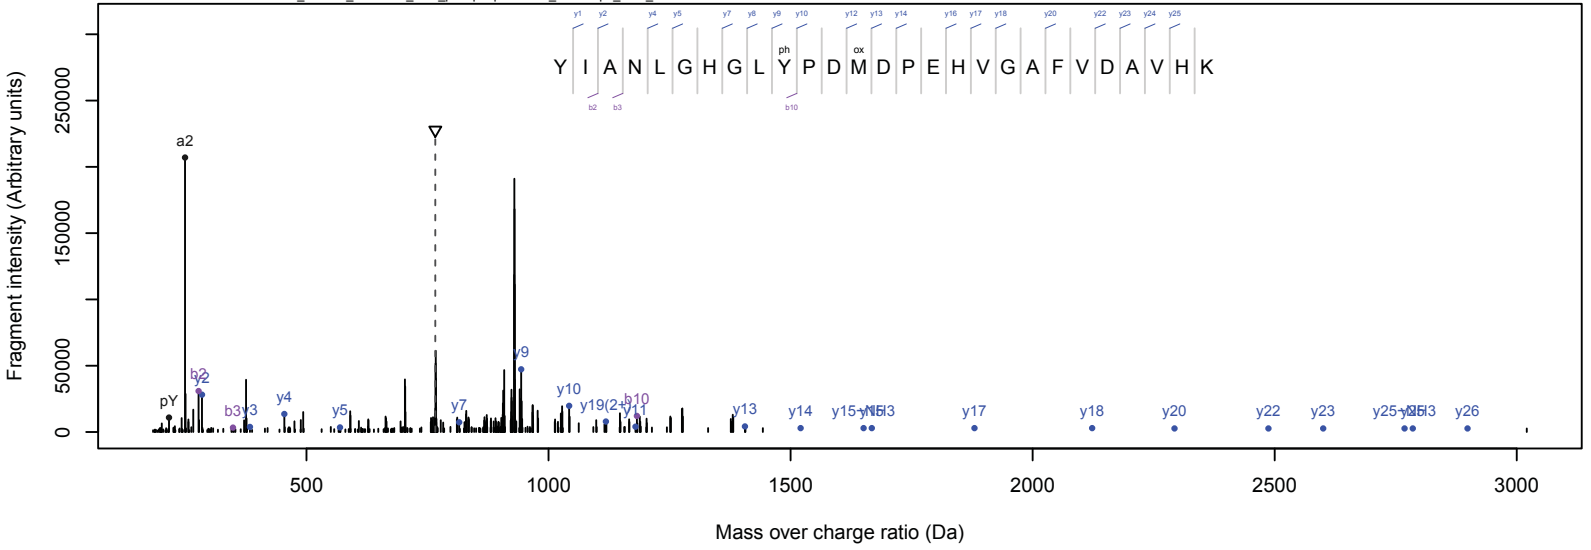

TAGTSFM(ox)M(ox)TPY(ph)VVTR-2+

Source: QE1\_140908\_OPL1013\_CvA\_pTyrIP\_AML\_HEL Scan: 23456

Andromeda score: 94.487

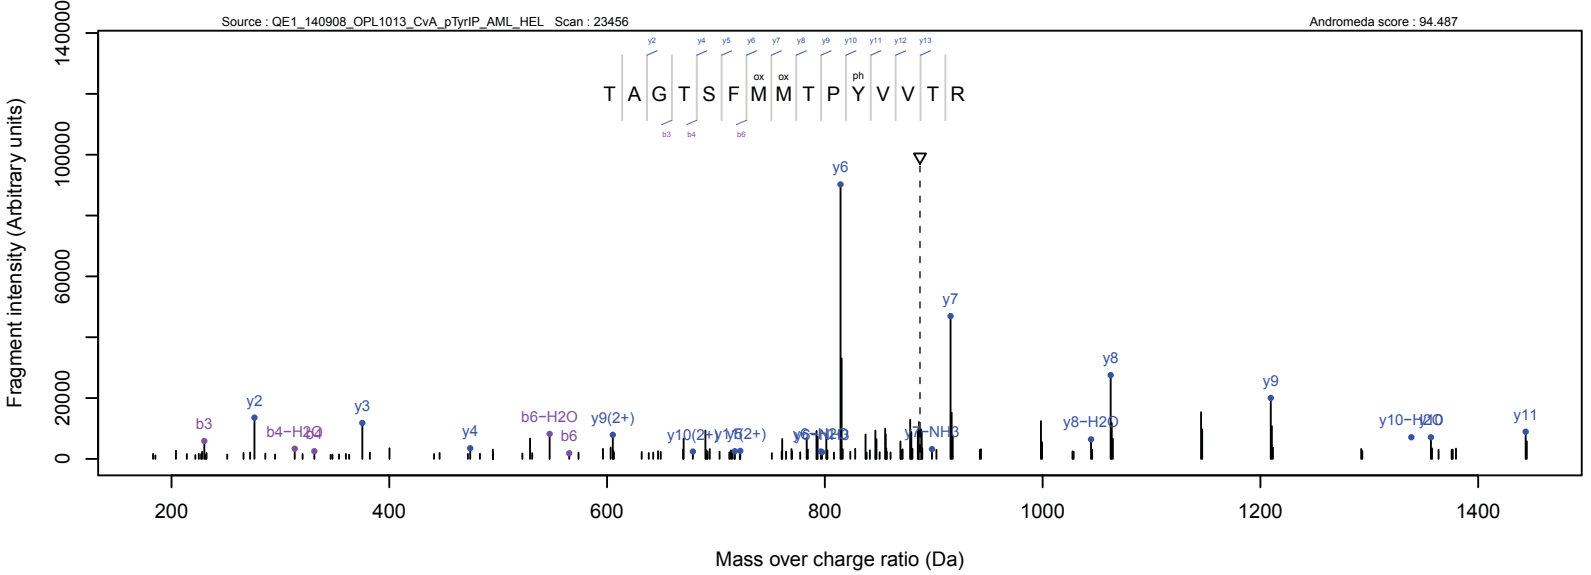

CWDLEY(ph)NKVIR-2+

Source: QE1\_140908\_OPL1013\_CvA\_pTyrIP\_AML\_HEL Scan: 29887

Andromeda score: 94.465

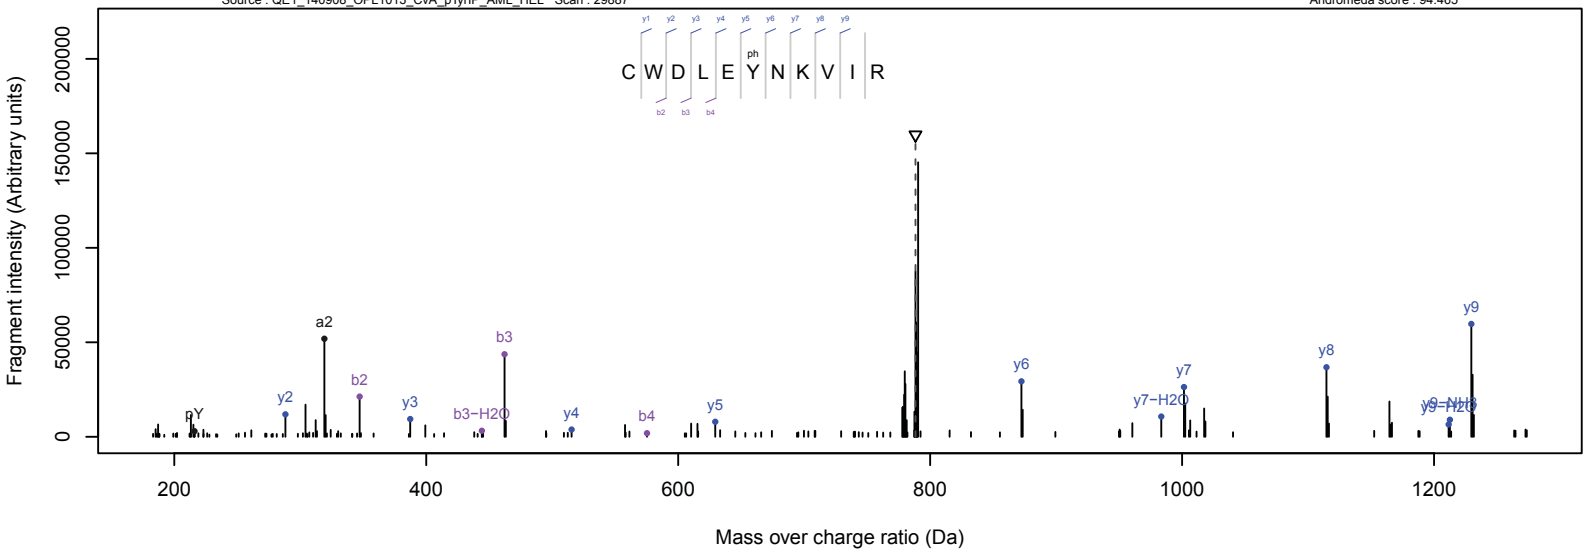



QSRPCMEENELYSSAVTVGPHK-3+

Source : QE1\_140908\_OPL1013\_CvA\_pTyrIP\_AML\_HEL Scan : 22024

Andromeda score : 94.384

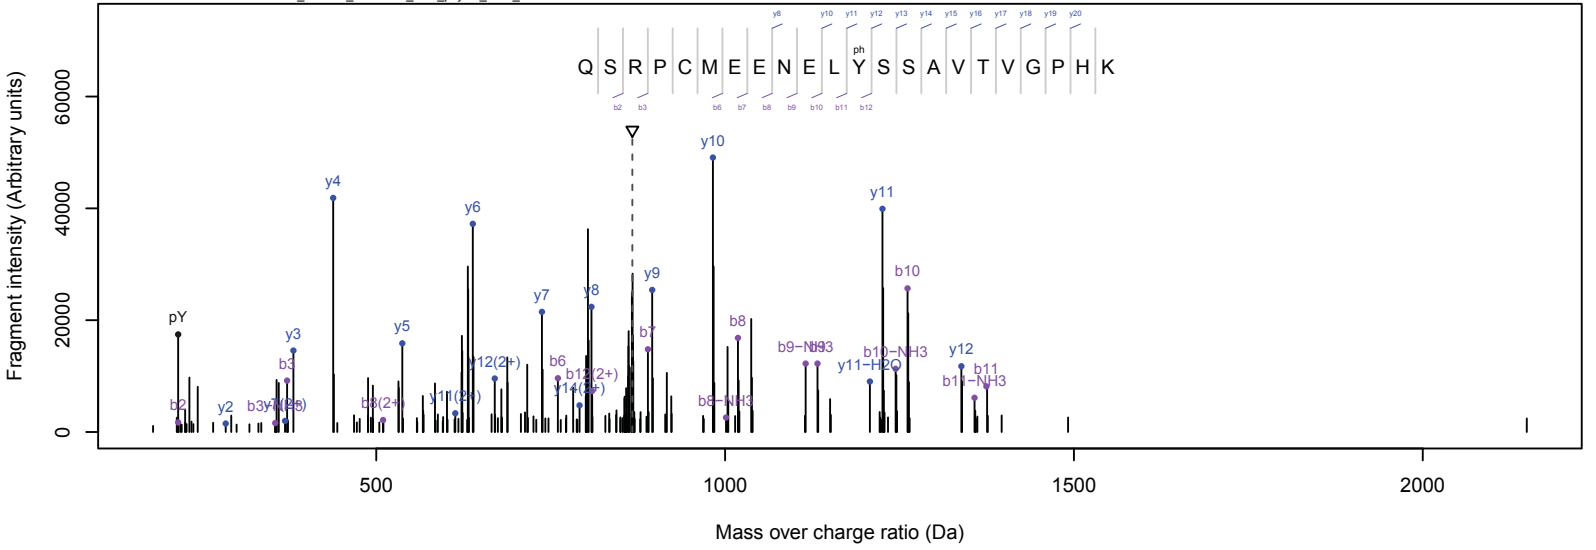

TREYFY(ph)VDHQQLFLDDSK-3+

Source : QE1\_140612\_OPL1013\_CVA\_phosphoproteomic\_landscape\_AML\_C Scan : 36136

Andromeda score : 94.384

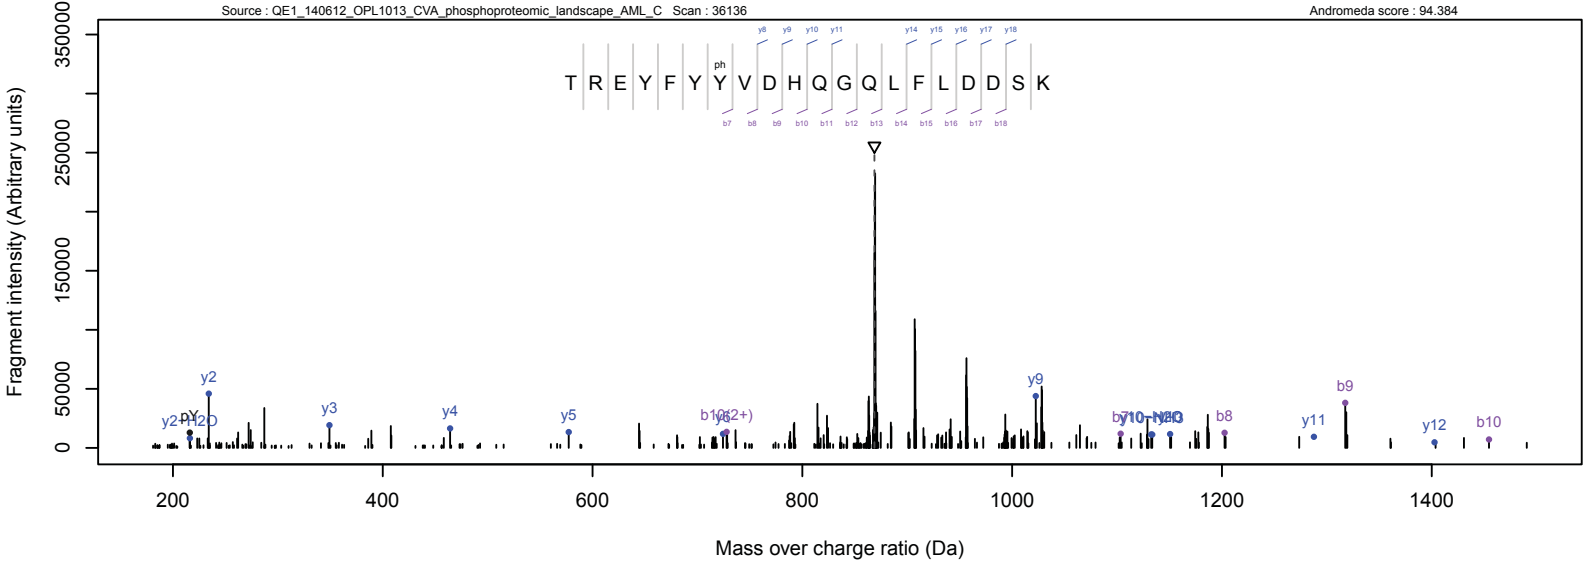

TVEY(ph)HRLDQNVNEAMP(SL)K-3+

Source : QE1\_140908\_OPL1013\_CvA\_pTyrIP\_AML\_Kasumi1 Scan : 16737

Andromeda score : 94.384

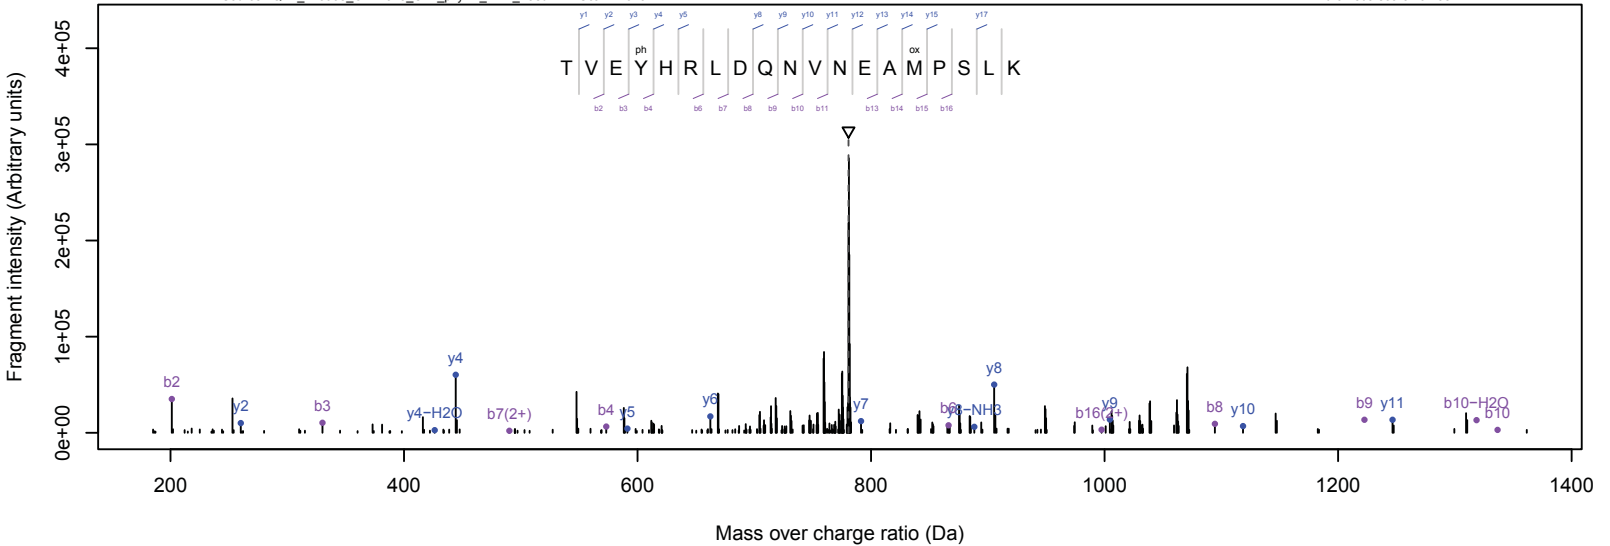

AY(ph)TNFDAER-2+

Source : QE1\_140612\_OPL1013\_CVA\_phosphoproteomic\_landscape\_AML\_C Scan : 9108

Andromeda score : 94.309

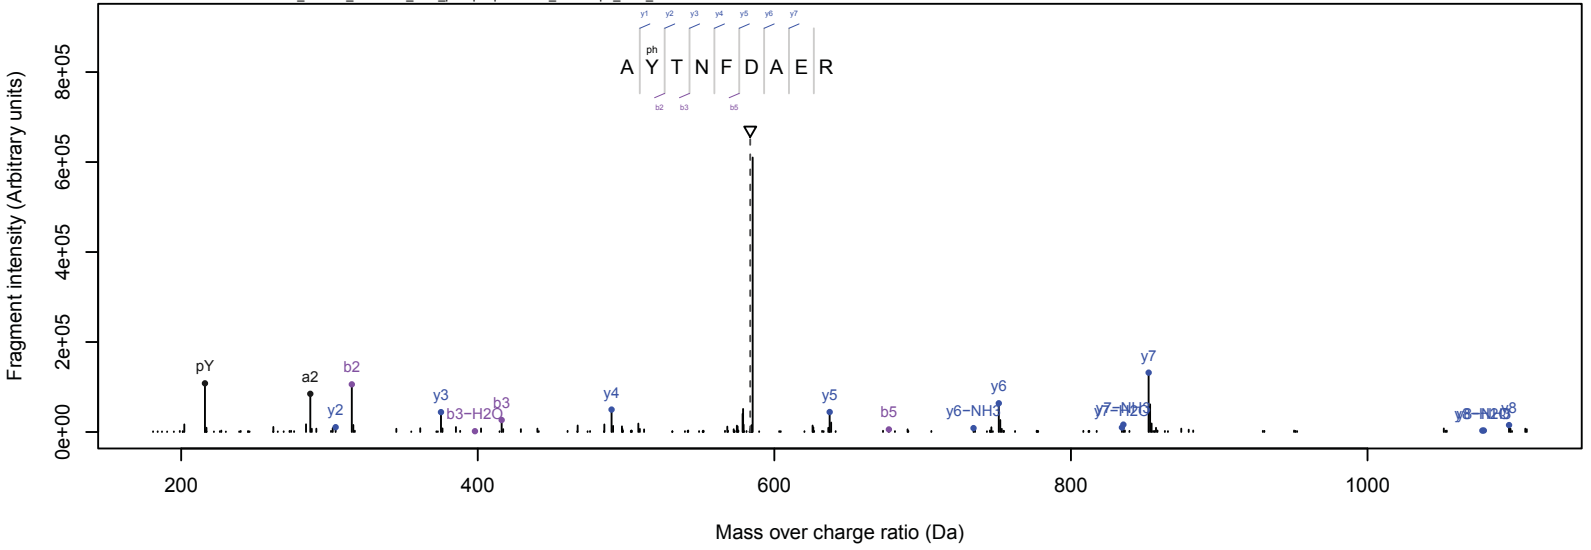

Y(ph)LKVFEPK-2+

Source : QE1\_140612\_OPL1013\_CVA\_phosphoproteomic\_landscape\_AML\_C Scan : 19303

Andromeda score : 94.309

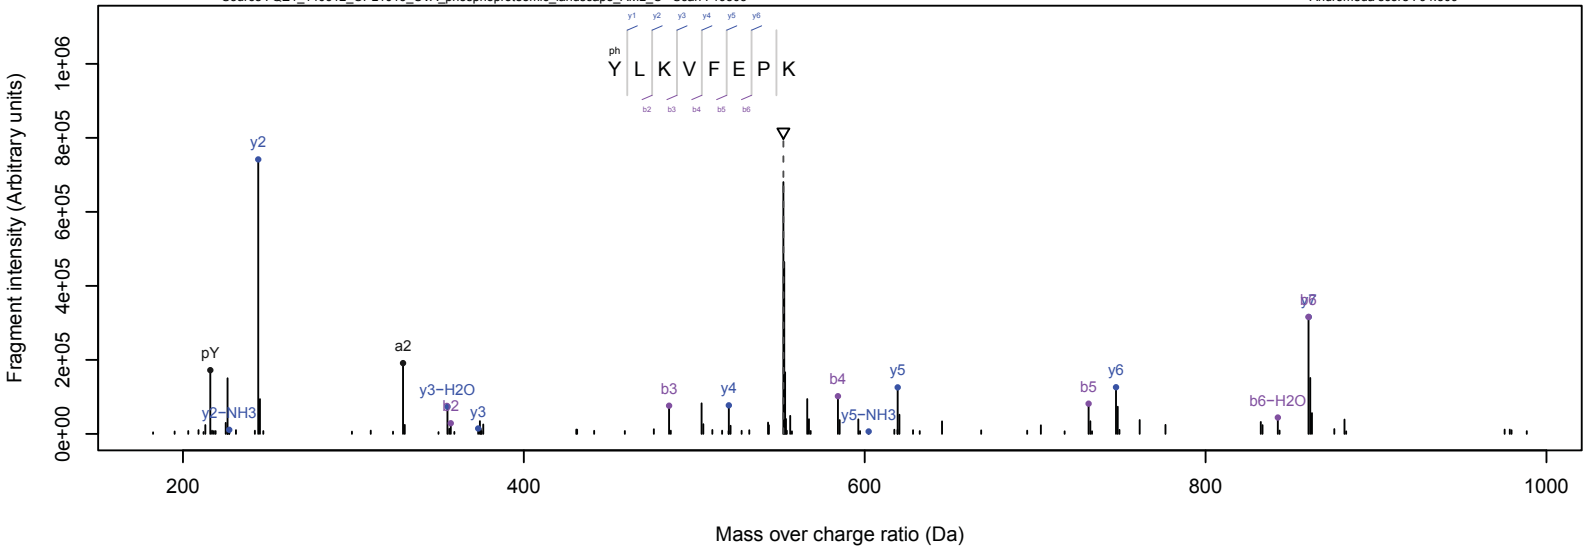

VIESISPDGHEY(ph)IYVDPMQLPYDSR-3+

Source : QE1\_140822\_OPL1013\_CvA\_pTyrIP\_AML\_cell\_lines\_part2\_B Scan : 37329

Andromeda score : 94.301

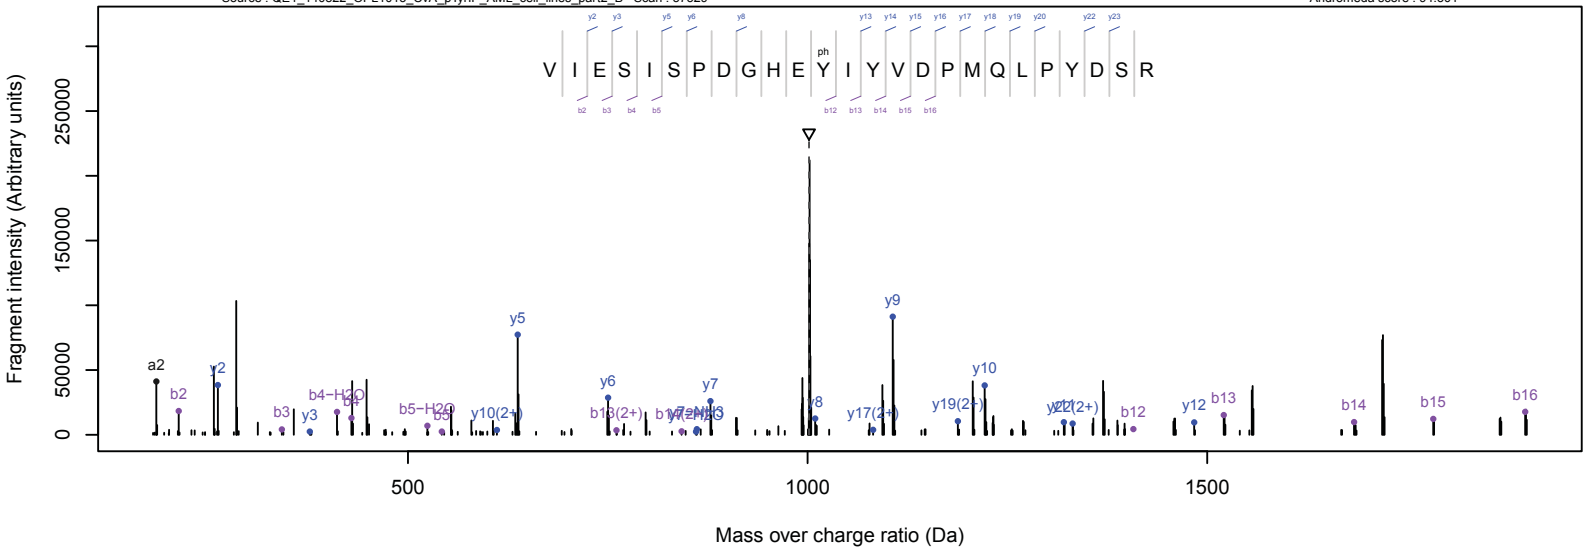

NVSAGTQDVPSPPSDY(ph)VER-2+

Source : QE1\_140612\_OPL1013\_CVA\_phosphoproteomic\_landscape\_AML\_C Scan : 21141

Andromeda score : 94.281

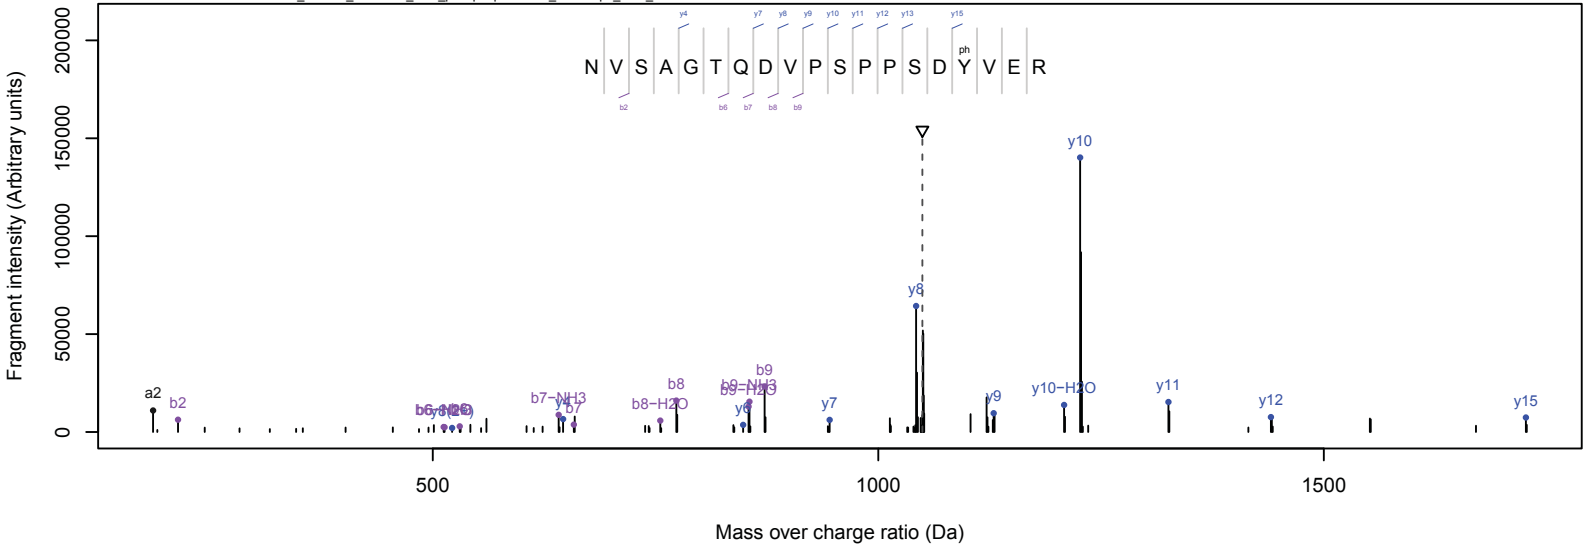

GHKLHY(ph)PMVEYCIPTTSGEDVRDFTK-4+

Source : QE1\_140612\_OPL1013\_CVA\_phosphoproteomic\_landscape\_AML\_C Scan : 30170

Andromeda score : 94.275

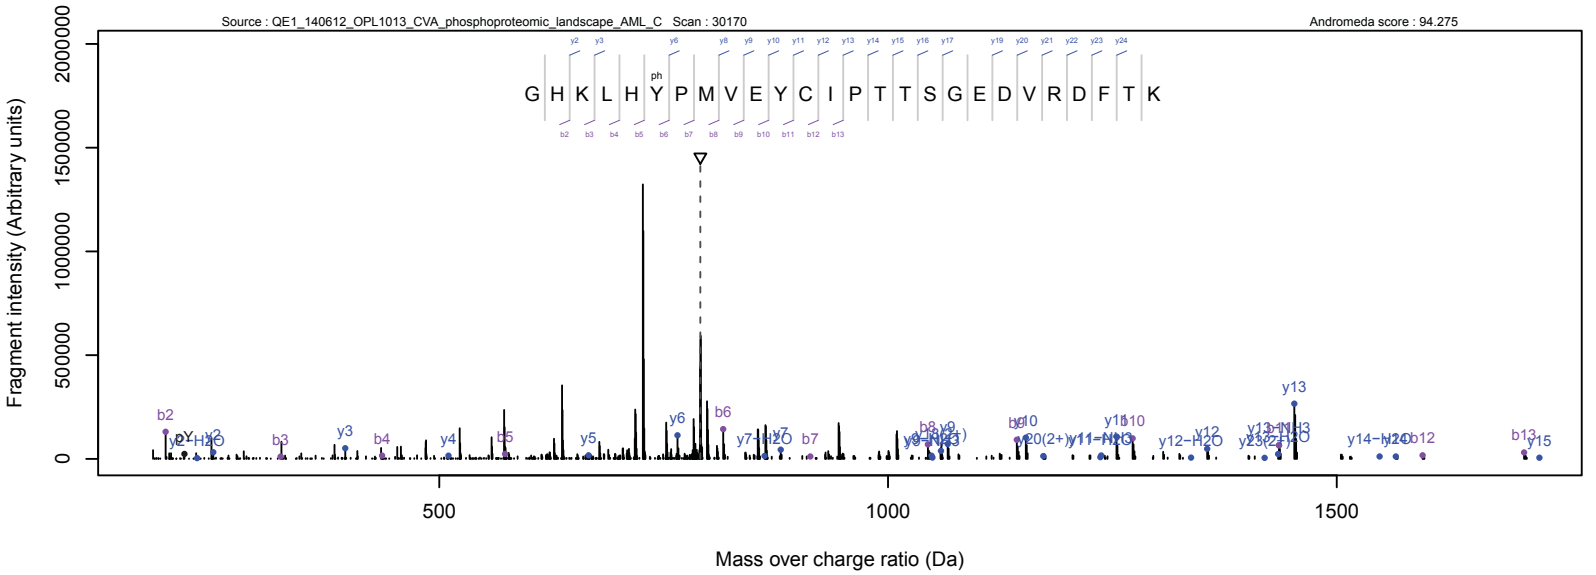

IHDRGPEEKPAQESNY(ph)R-4+

Source : QE1\_140612\_OPL1013\_CVA\_phosphoproteomic\_landscape\_AML\_C Scan : 9212

Andromeda score : 94.203

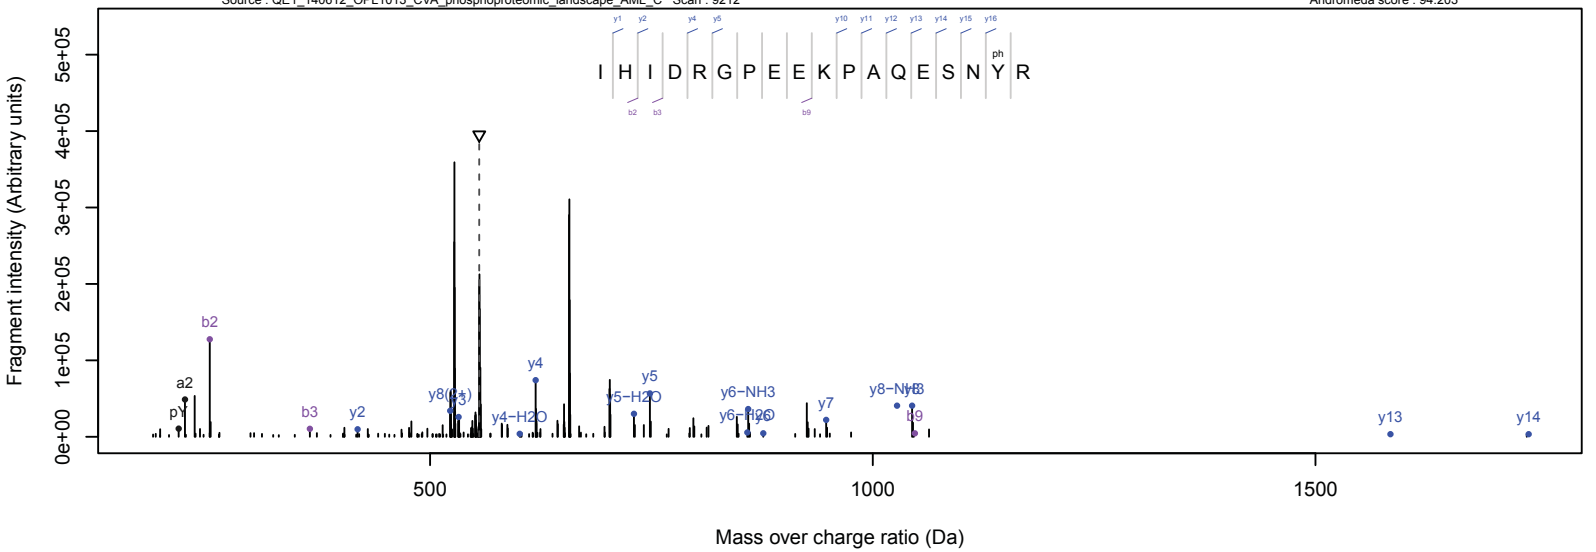



TSIDAY(ph)DNFDNISLAQR-2+

Source : QE1\_140612\_OPL1013\_CVA\_phosphoproteomic\_landscape\_AML\_C Scan : 34948

Andromeda score : 94.203

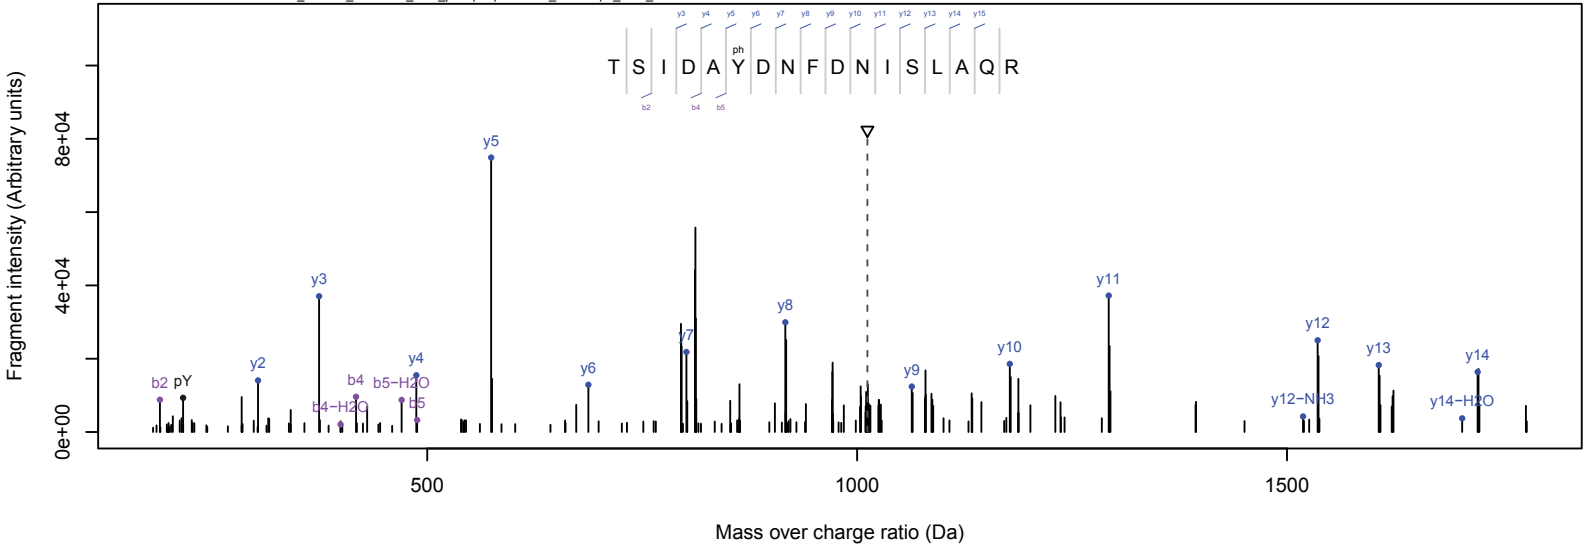

Y(ph)KTILPNPQSR-2+

Source : QE1\_140908\_OPL1013\_CvA\_pTyrIP\_AML\_HEL Scan : 15878

Andromeda score : 94.122

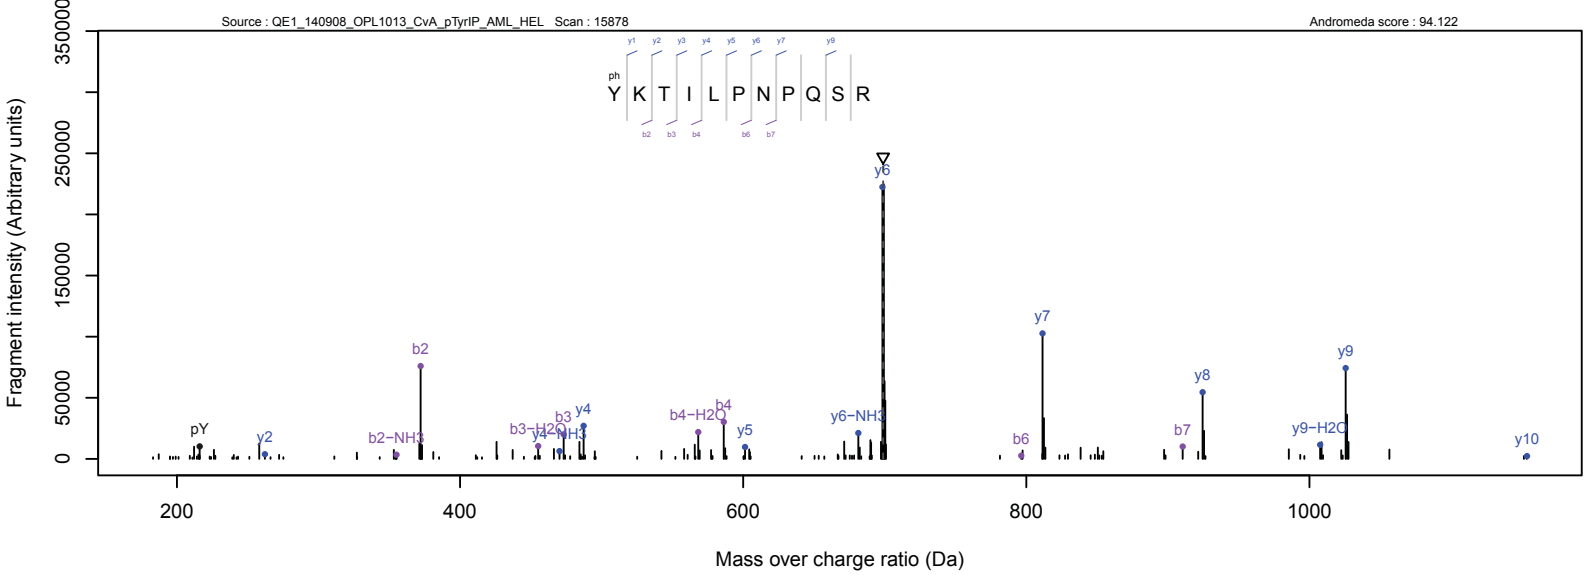

QEDAPVY(ph)LGSFR-2+

Source : QE1\_140612\_OPL1013\_CVA\_phosphoproteomic\_landscape\_AML\_C Scan : 37407

Andromeda score : 94.09

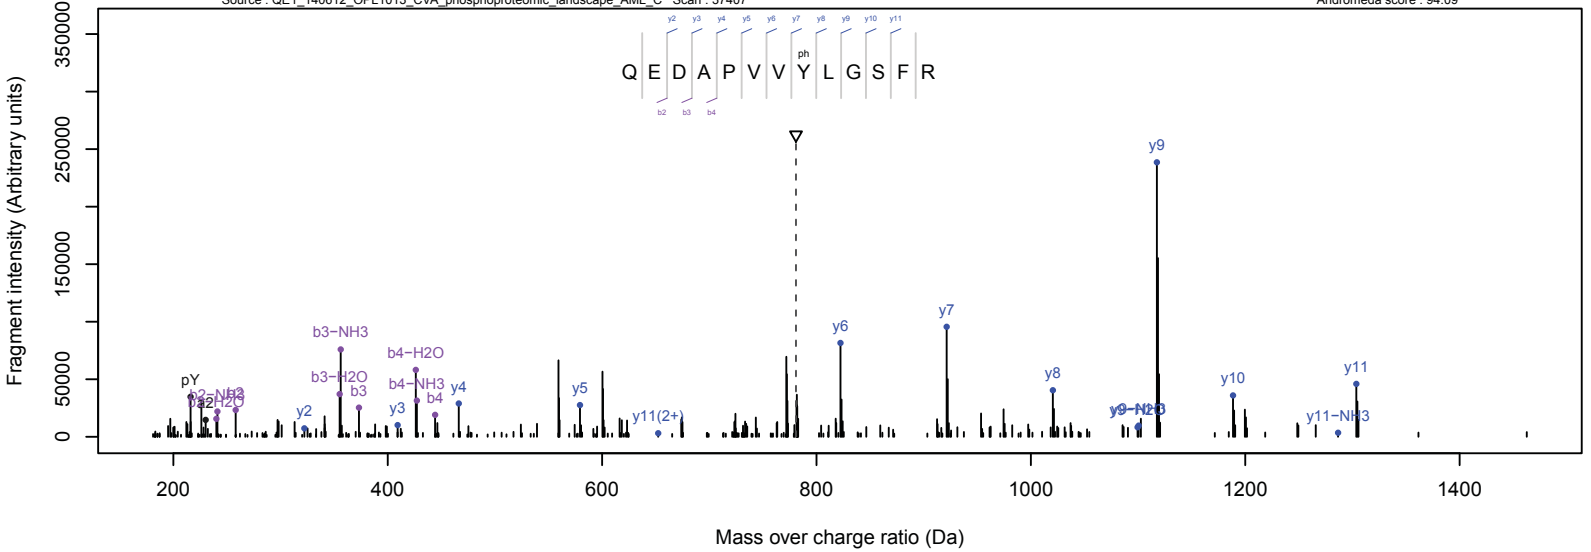

SYLKEFRDY(ph)PPLR-3+

Source : QE1\_140612\_OPL1013\_CVA\_phosphoproteomic\_landscape\_AML\_C Scan : 26192

Andromeda score : 94.023

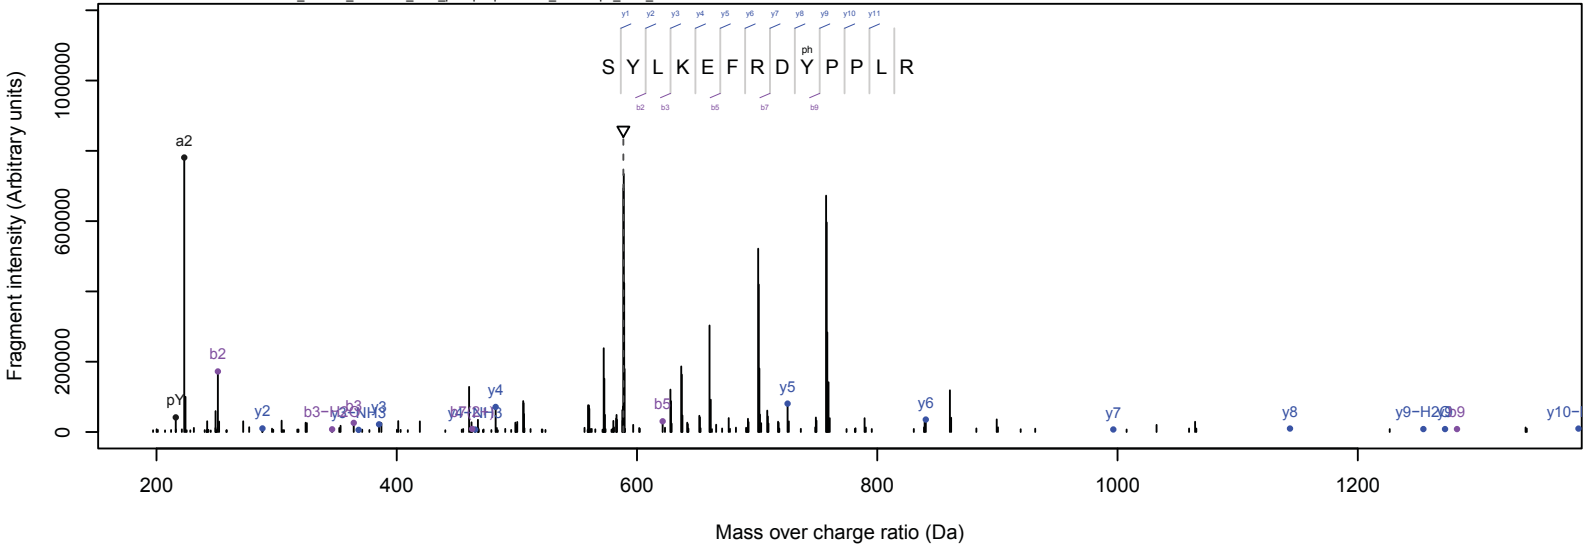

VRVESGY(ph)FSLEK-3+

Source : QE1\_140612\_OPL1013\_CVA\_phosphoproteomic\_landscape\_AML\_C Scan : 23364

Andromeda score : 94.023

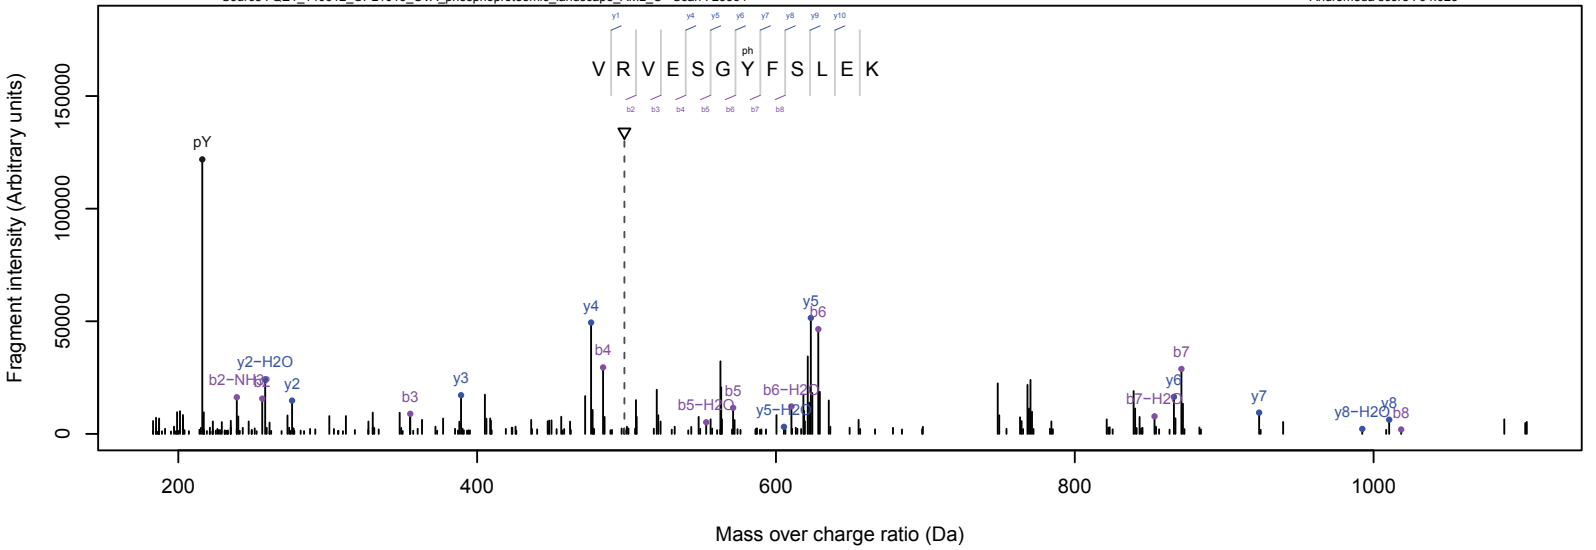

ALSDHHIY(ph)LEGTLKPNMVTTPGHACTQK-5+

Source : QE1\_140908\_OPL1013\_CvA\_pTyrIP\_AML\_HEL Scan : 29161

Andromeda score : 94.019

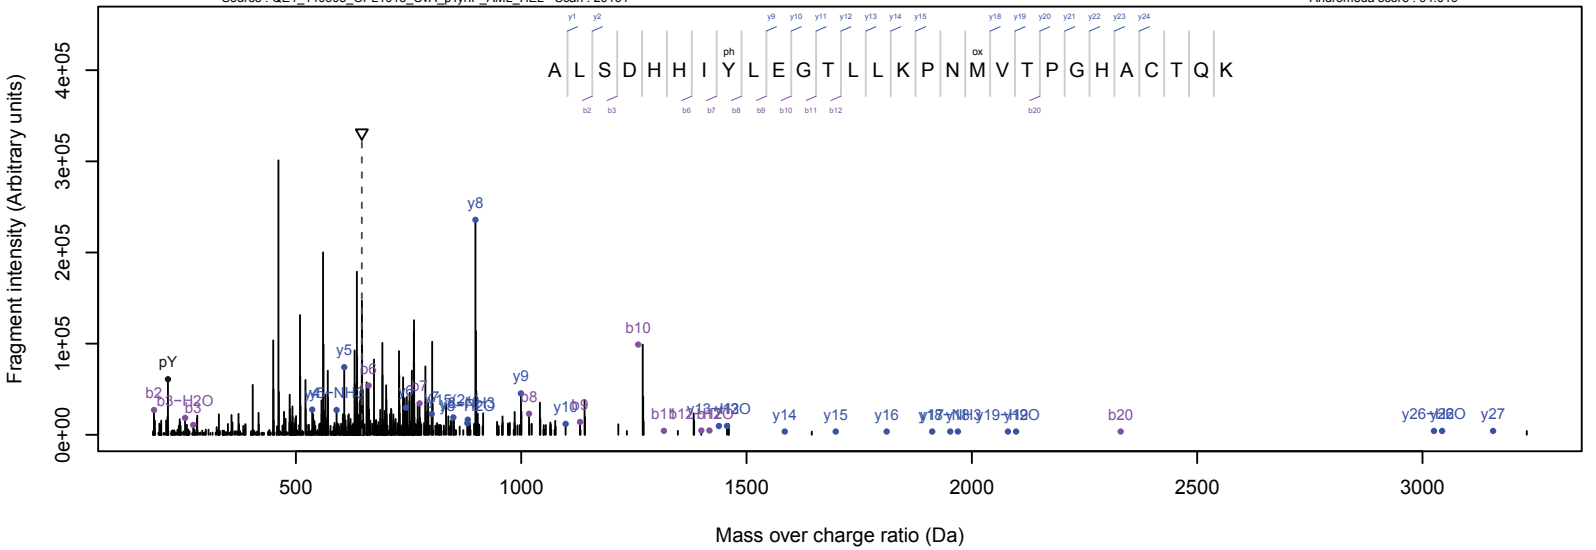

HAHGDQY(ph)KATDFVADR-4+

Source: QE1\_140612\_OPL1013\_CVA\_phosphoproteomic\_landscape\_AML\_C Scan: 10344

Andromeda score: 93.909

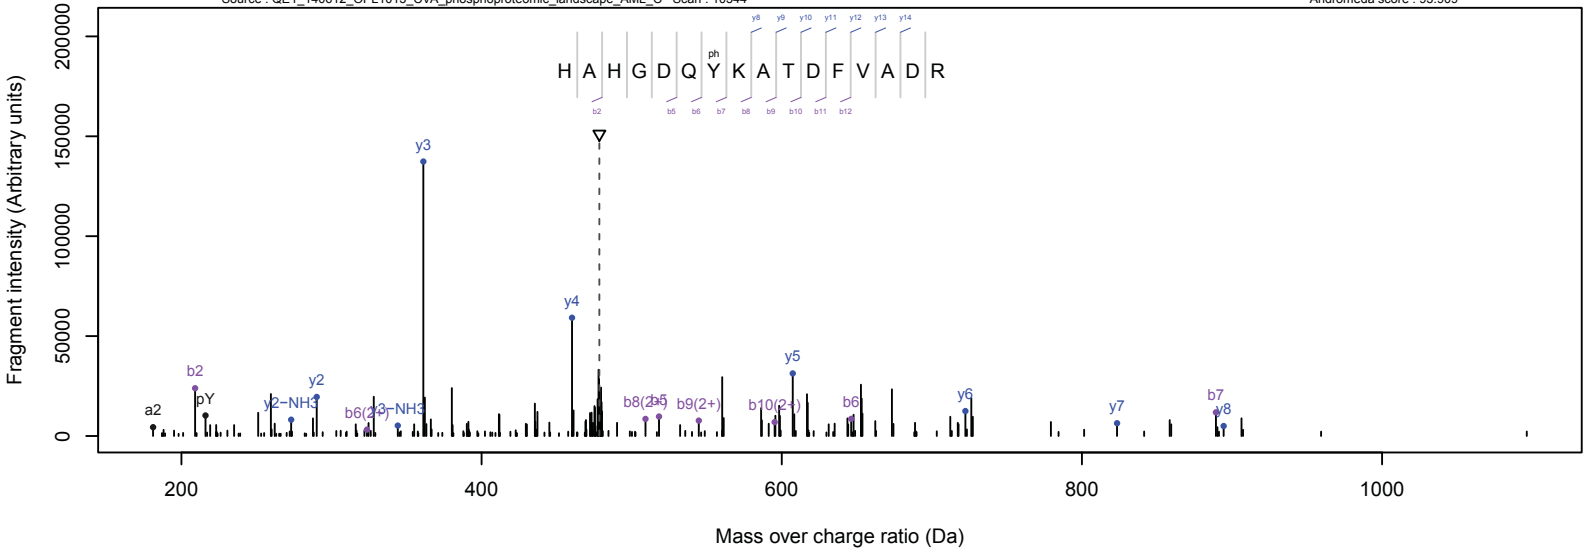

EGTQASEGY(ph)FSQSQEEFAQSEELCAK-3+

Source: QE1\_140908\_OPL1013\_CvA\_pTyrIP\_AML\_HEL Scan: 32767

Andromeda score: 93.876

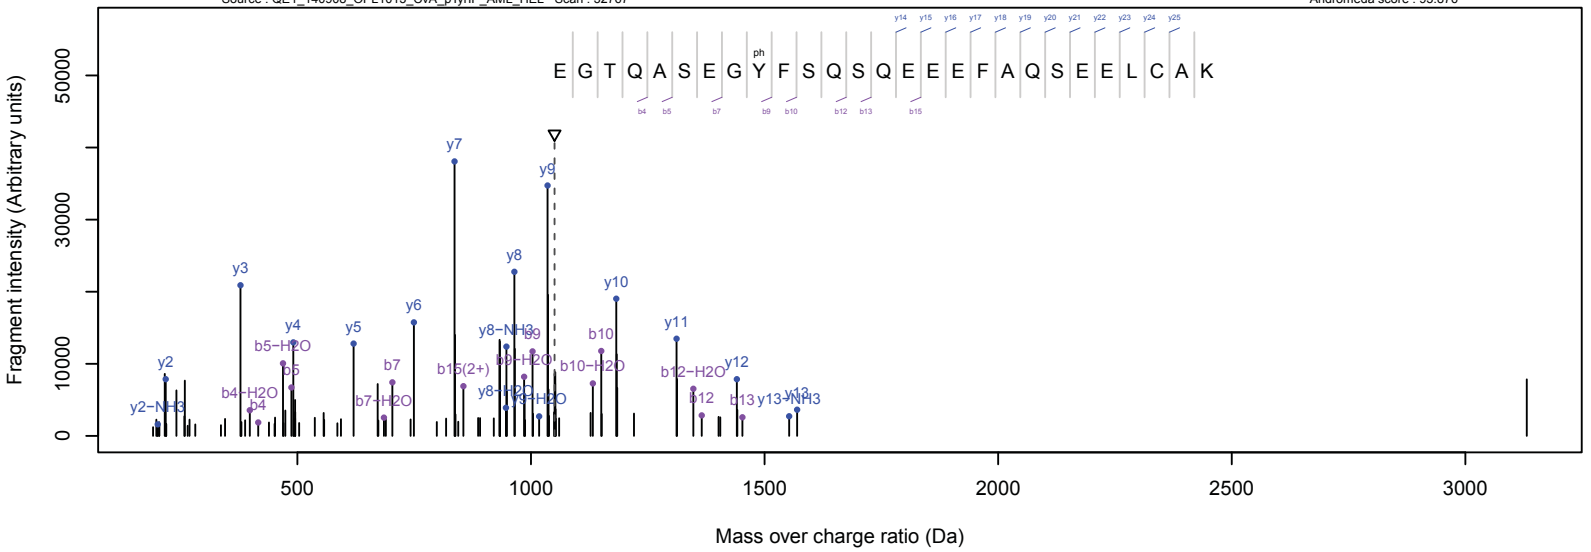

IGEGTY(ph)GTVFK-2+

Source: QE1\_140612\_OPL1013\_CVA\_phosphoproteomic\_landscape\_AML\_D Scan: 20596

Andromeda score: 93.839

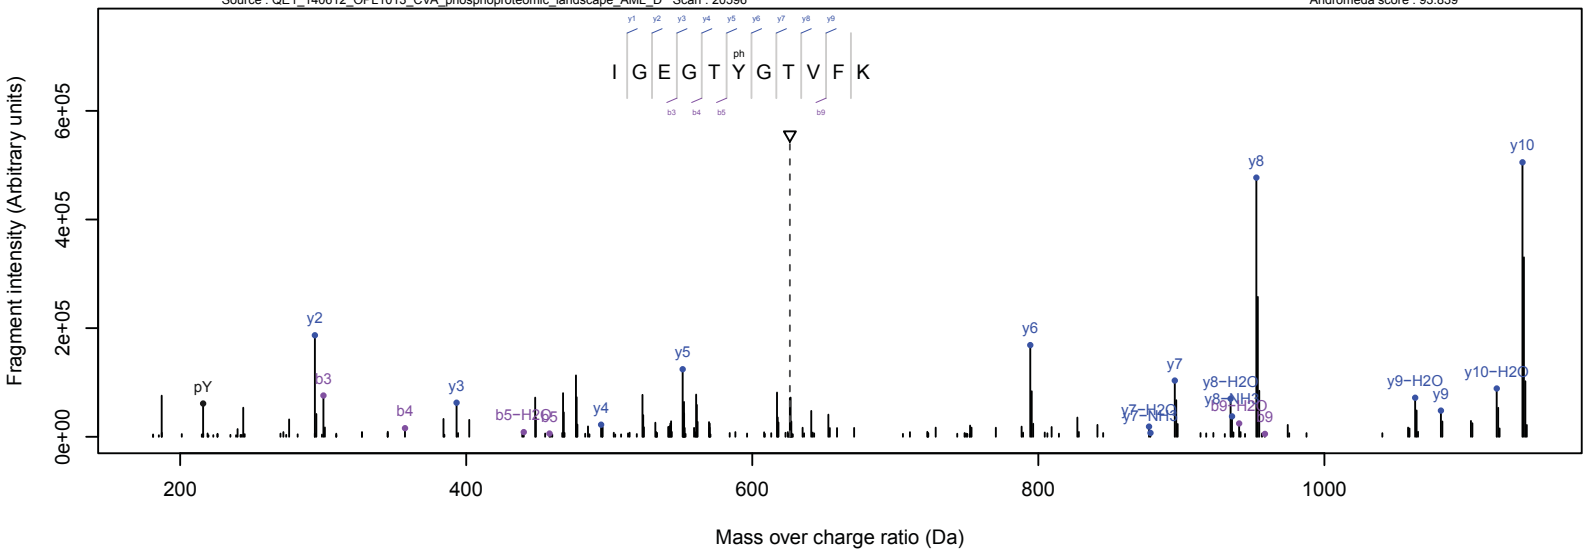

SASDASISSGTHGQY(ph)SILQ TAR-3+

Source : QE1\_140612\_OPL1013\_CVA\_phosphoproteomic\_landscape\_AML\_B Scan : 20857

Andromeda score : 93.804

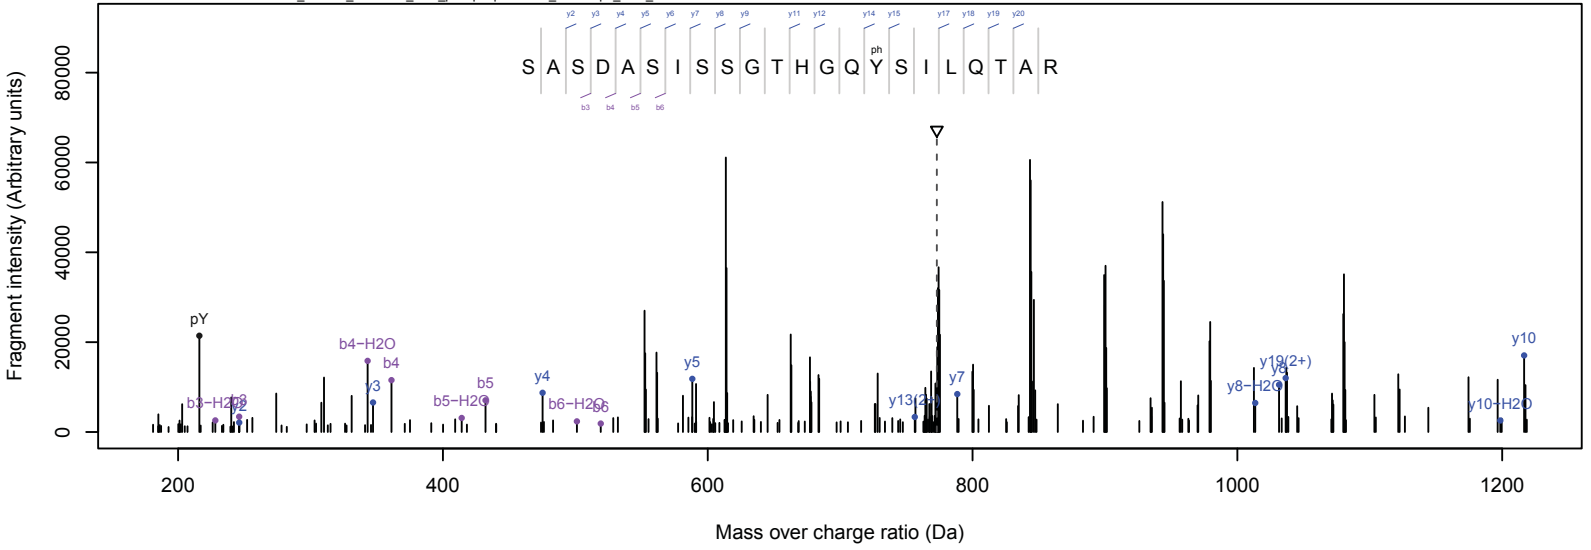

AVSPQSTKPM(ox)AESITY(ph)AAVARH-3+

Source : QE1\_140612\_OPL1013\_CVA\_phosphoproteomic\_landscape\_AML\_C Scan : 18868

Andromeda score : 93.776

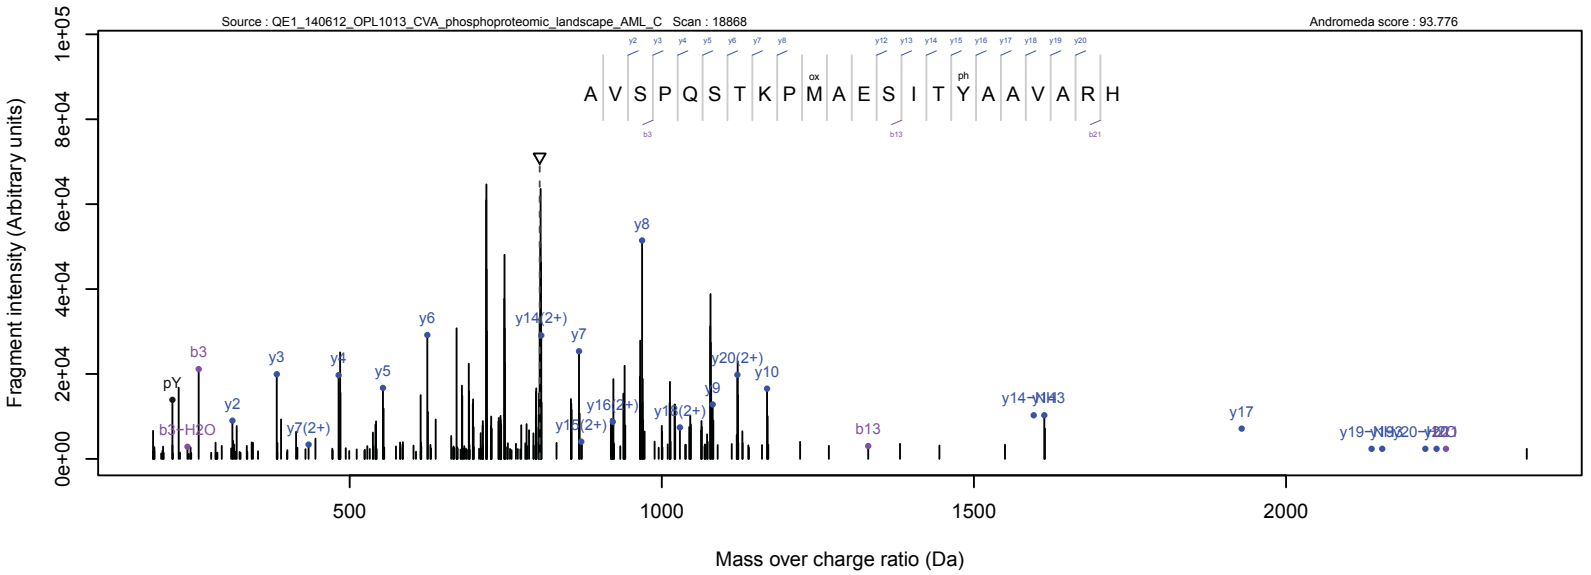

DLPPPPDRPYS(ph)VGAESRPQR-4+

Source : QE1\_140612\_OPL1013\_CVA\_phosphoproteomic\_landscape\_AML\_A Scan : 17858

Andromeda score : 93.776

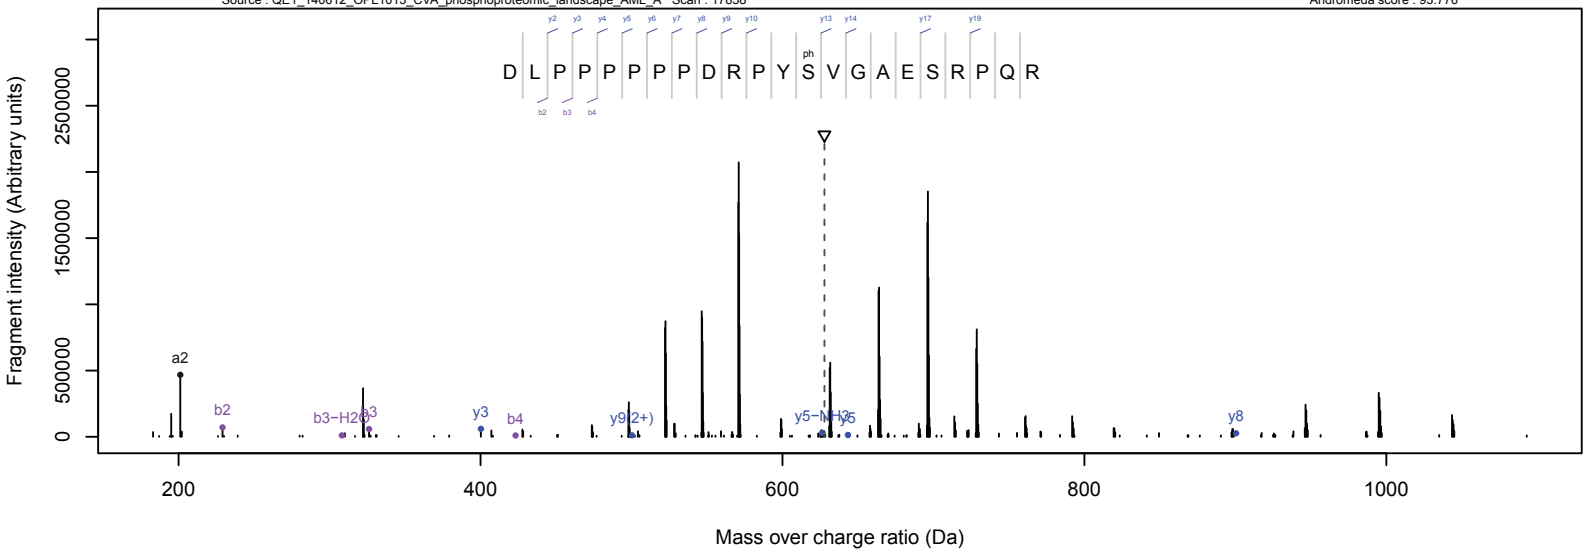

LVTSPPCCIVTSTY(ph)GWTANM(ox)ER-3+

Source : QE1\_140908\_OPL1013\_CvA\_pTyrIP\_AML\_Kasumi1 Scan : 36116

Andromeda score : 93.776

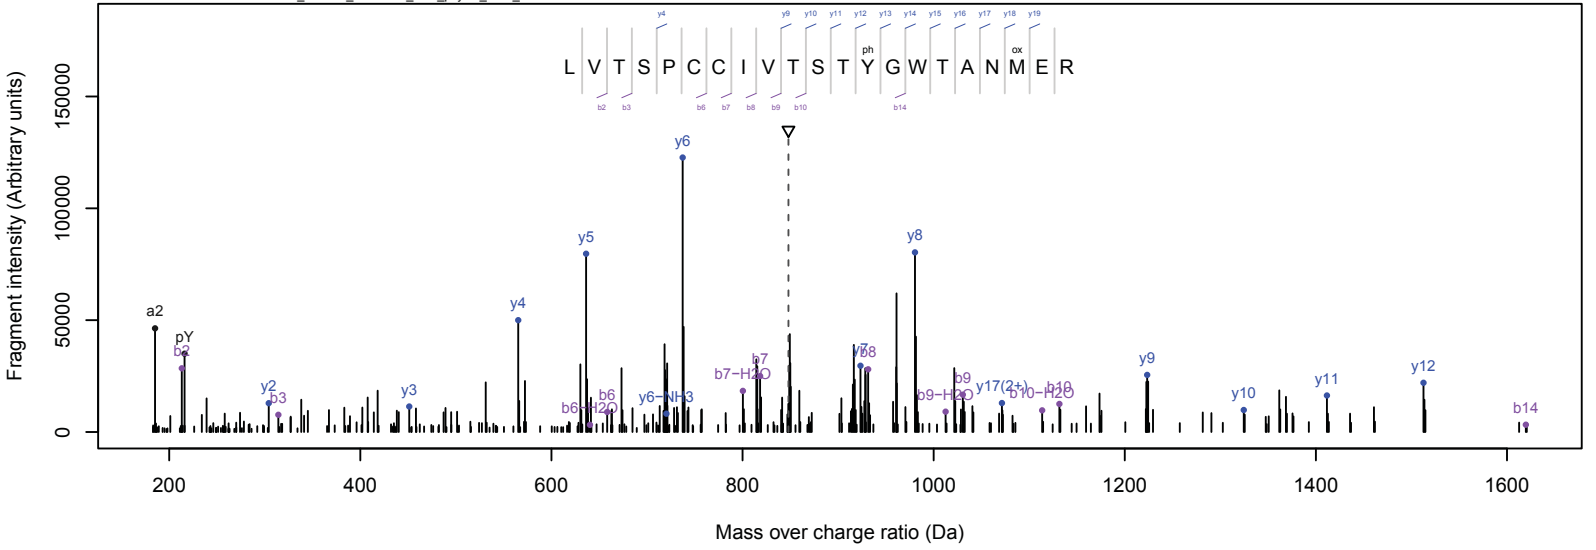

RDYEVDRDY(ph)HFVTSR-4+

Source : QE1\_140612\_OPL1013\_CvA\_phosphoproteomic\_landscape\_AML\_C Scan : 15671

Andromeda score : 93.768

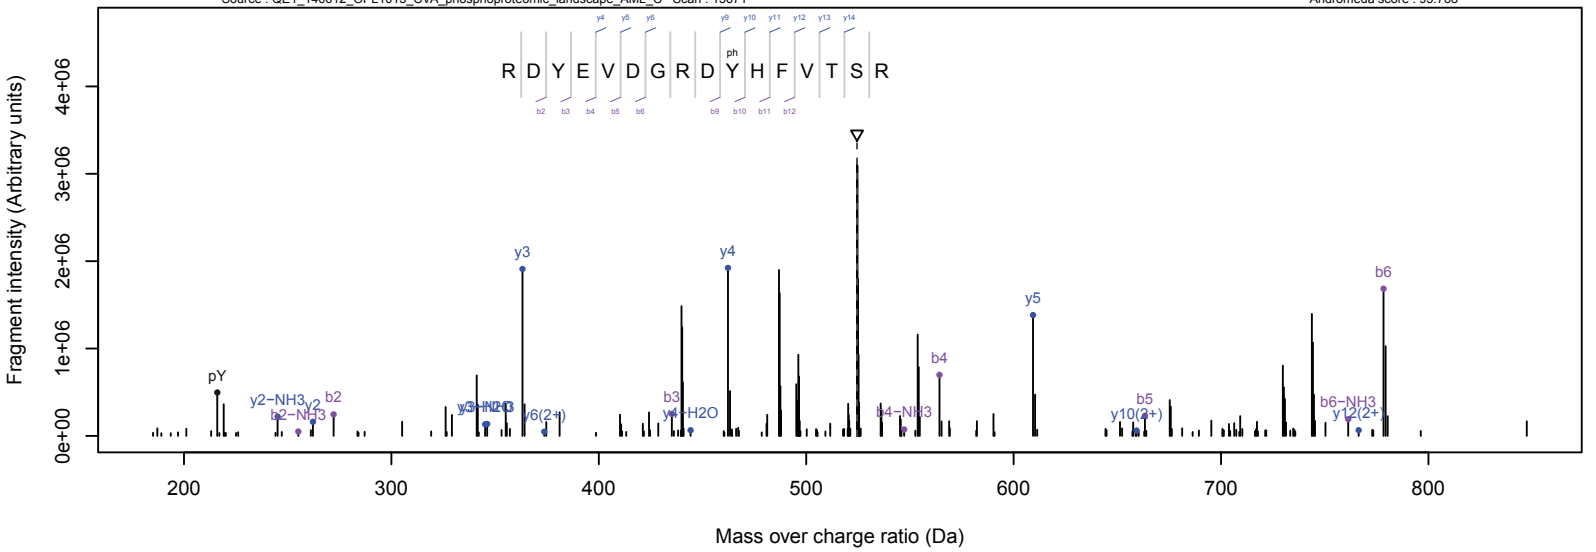

HAY(ph)VSKPCMTR-3+

Source : QE1\_140908\_OPL1013\_CvA\_pTyrIP\_AML\_HEL Scan : 12321

Andromeda score : 93.766

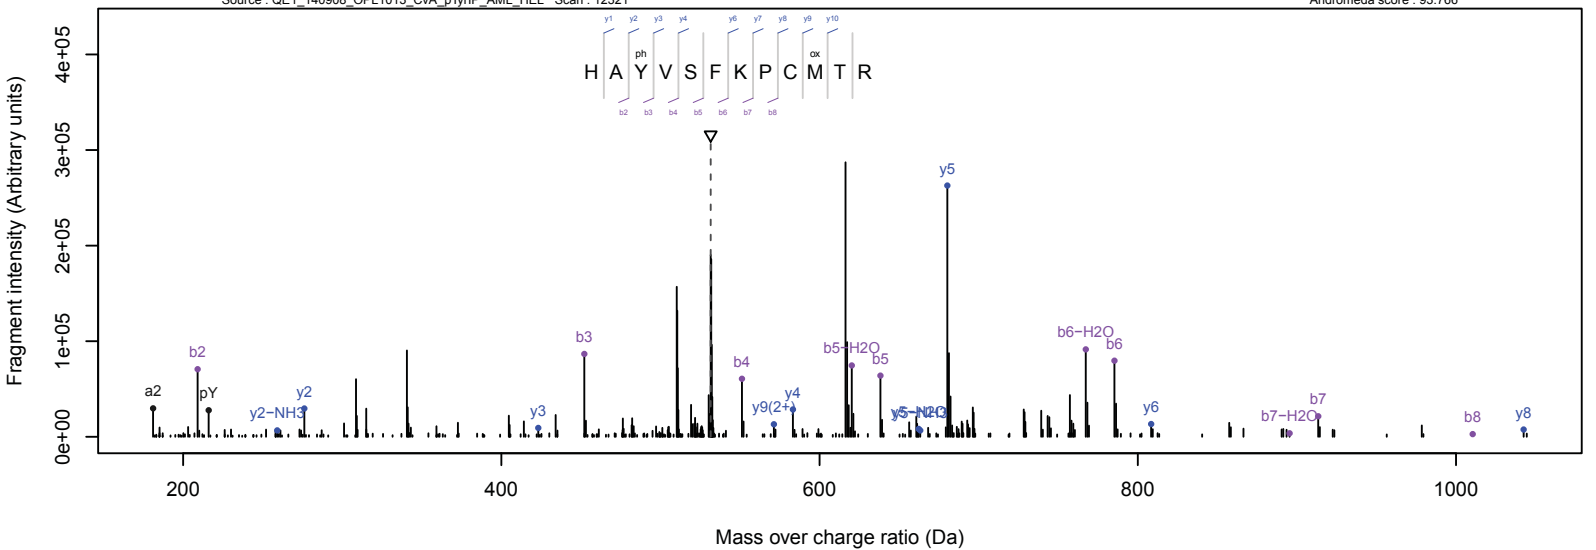

CCCIY(ph)EKPR-3+

Source : Qe1\_141024\_OPL1013\_CvA\_AML\_pTyrIP\_MOLM13 Scan : 6643

Andromeda score : 93.649

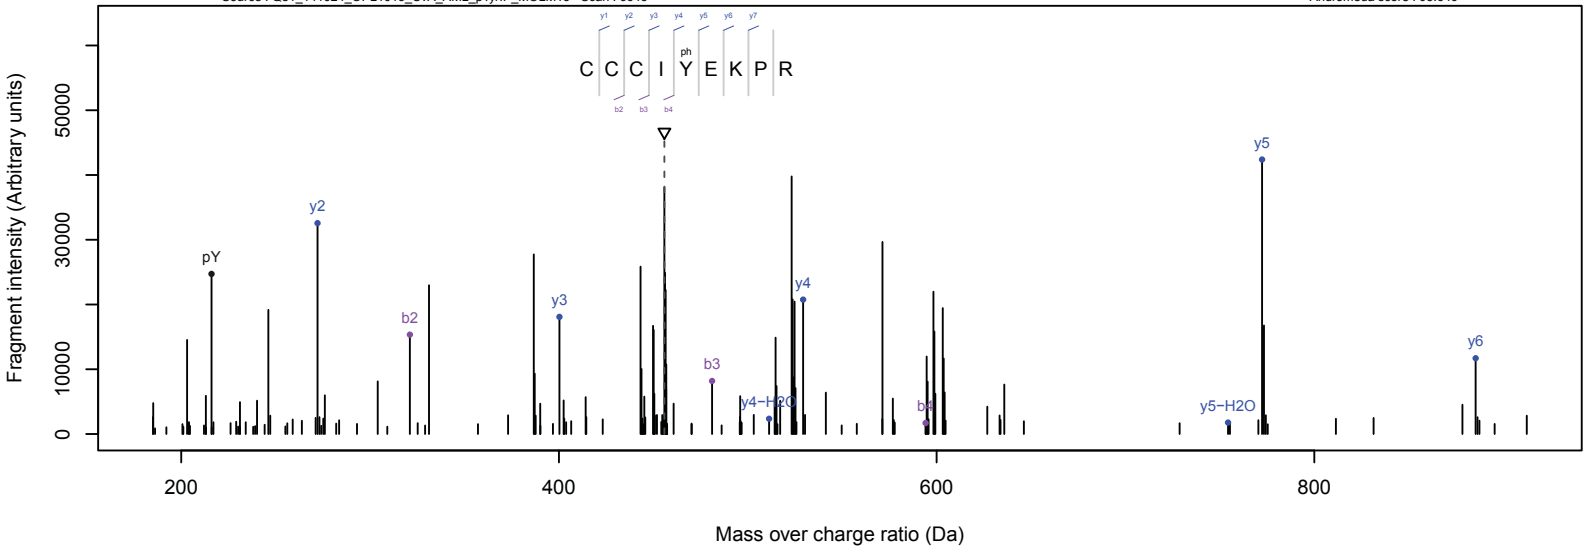

LMTGDTY(ph)TAHAGAK-3+

Source : QE1\_140612\_OPL1013\_CVA\_phosphoproteomic\_landscape\_AML\_E Scan : 7268

Andromeda score : 93.649

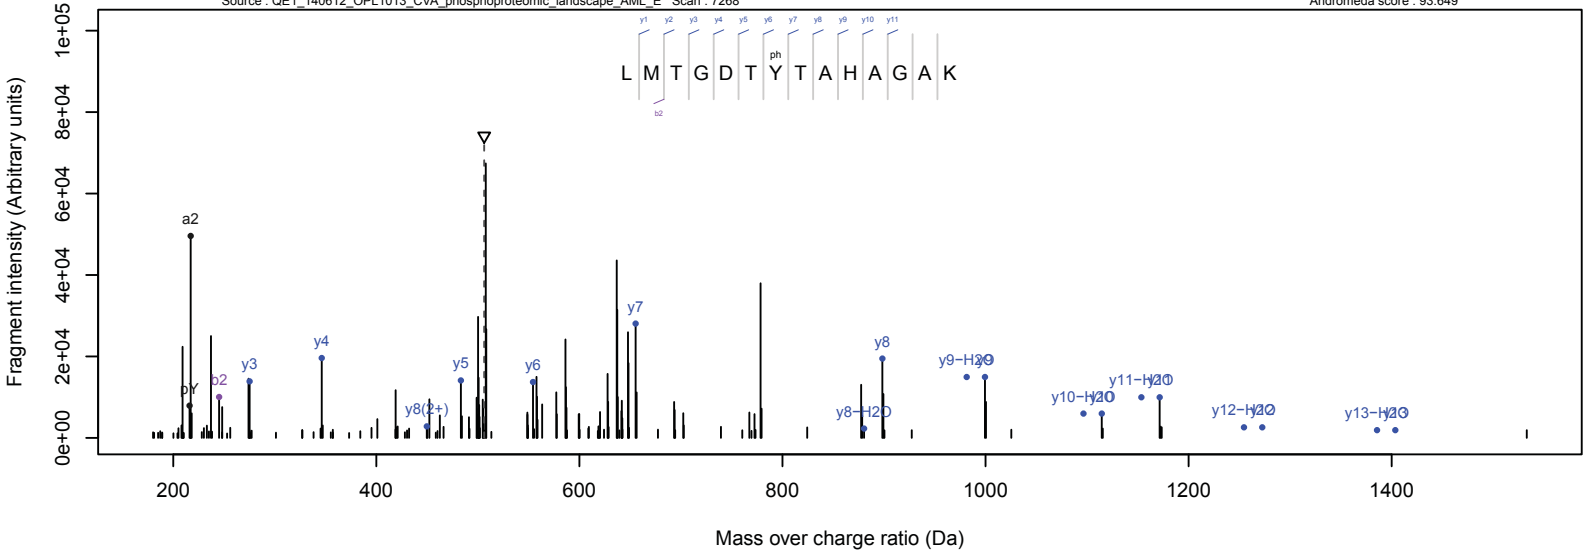

SVIY(ph)HALSQKEANDSDVQPSGAQR-3+

Source : QE1\_140612\_OPL1013\_CVA\_phosphoproteomic\_landscape\_AML\_C Scan : 15916

Andromeda score : 93.633

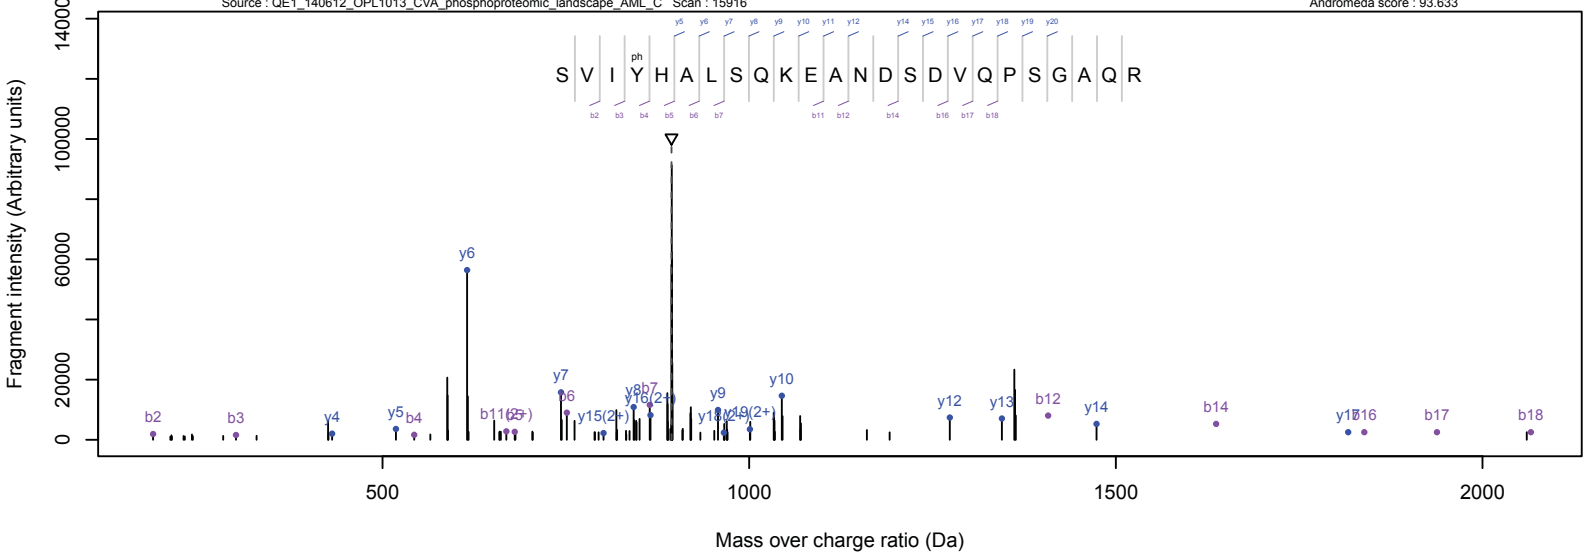

**FGKY(ph)FEIQFSR-3+**

Source: QE1\_140612\_OPL1013\_CVA\_phosphoproteomic\_landscape\_AML\_C Scan: 34030

Andromeda score: 93.614

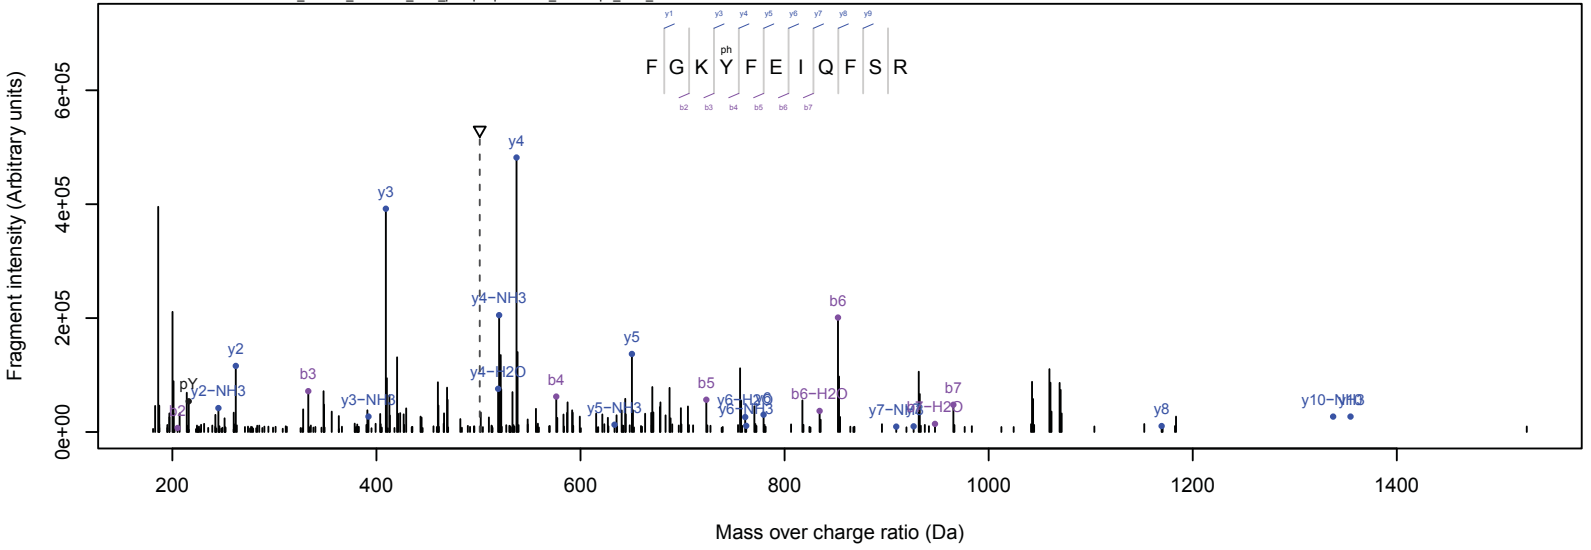

**VSNTQY(ph)HEVMNLEPENTLDQHSFSLPTCR-3+**

Source: QE1\_140612\_OPL1013\_CVA\_phosphoproteomic\_landscape\_AML\_C Scan: 36939

Andromeda score: 93.596

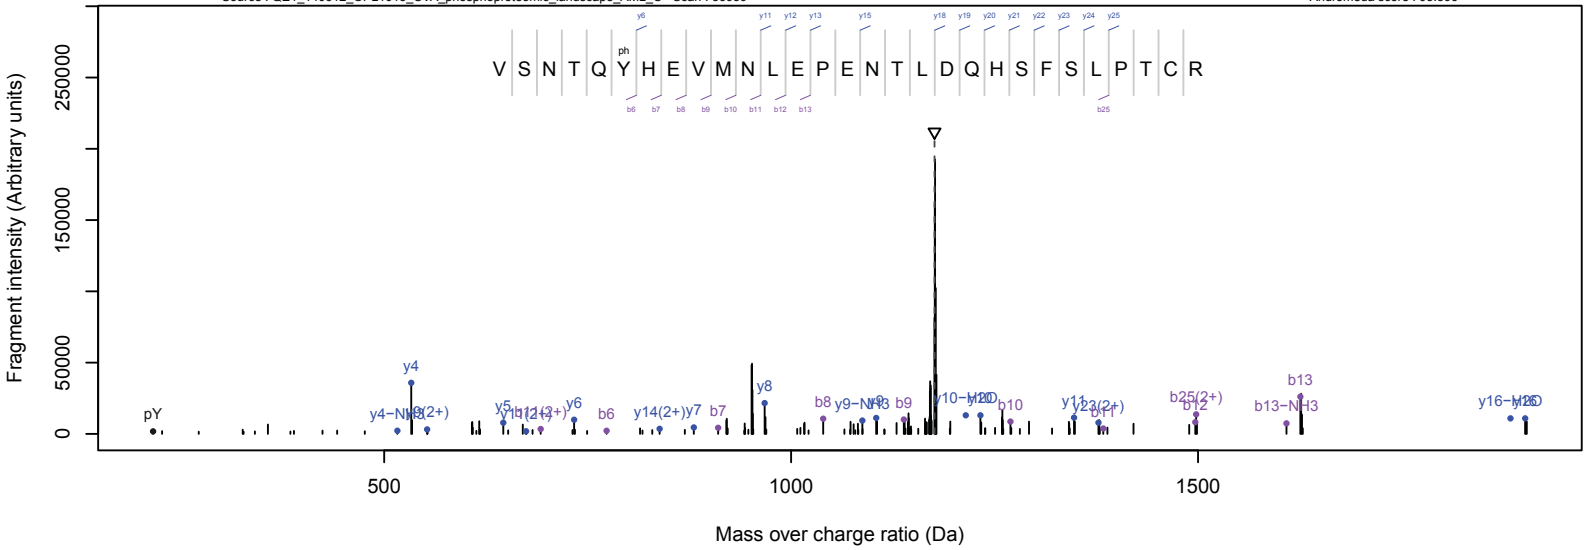

**IGY(ph)PKPALLHSTFFPALQGAQTK-3+**

Source: QE1\_140612\_OPL1013\_CVA\_phosphoproteomic\_landscape\_AML\_C Scan: 41097

Andromeda score: 93.583

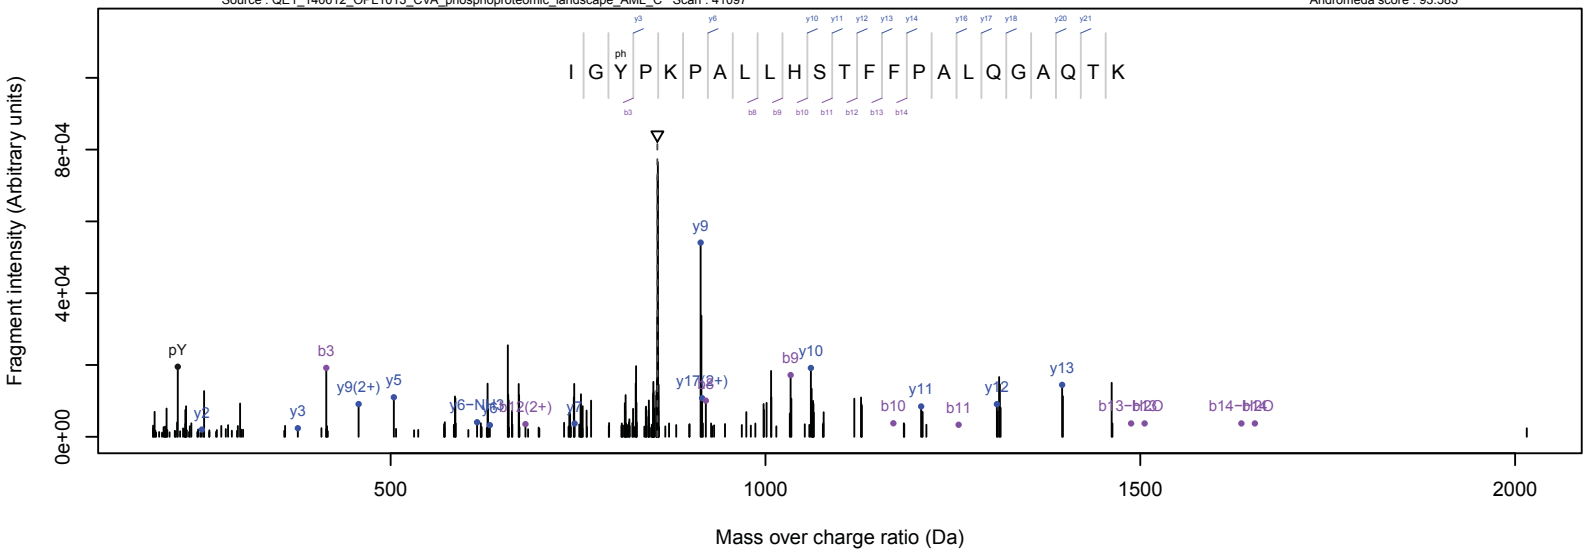

DGY(ph)GSPHHTPPYGPR-3+

Source: QE1\_140612\_OPL1013\_CVA\_phosphoproteomic\_landscape\_AML\_C Scan: 7419

Andromeda score: 93.478

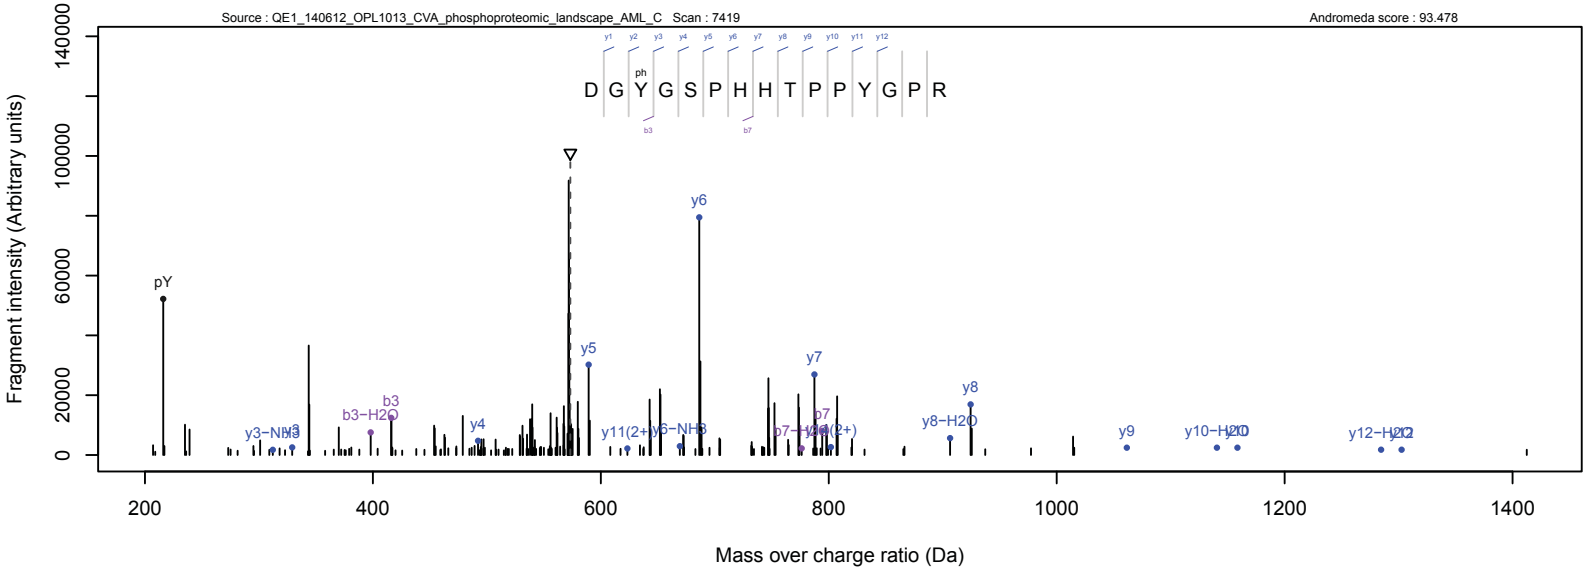

KRNEPNS(ph)AISFR-3+

Source: QE1\_140908\_OPL1013\_Cva\_pTyrIP\_AML\_Kasumi1 Scan: 12847

Andromeda score: 93.478

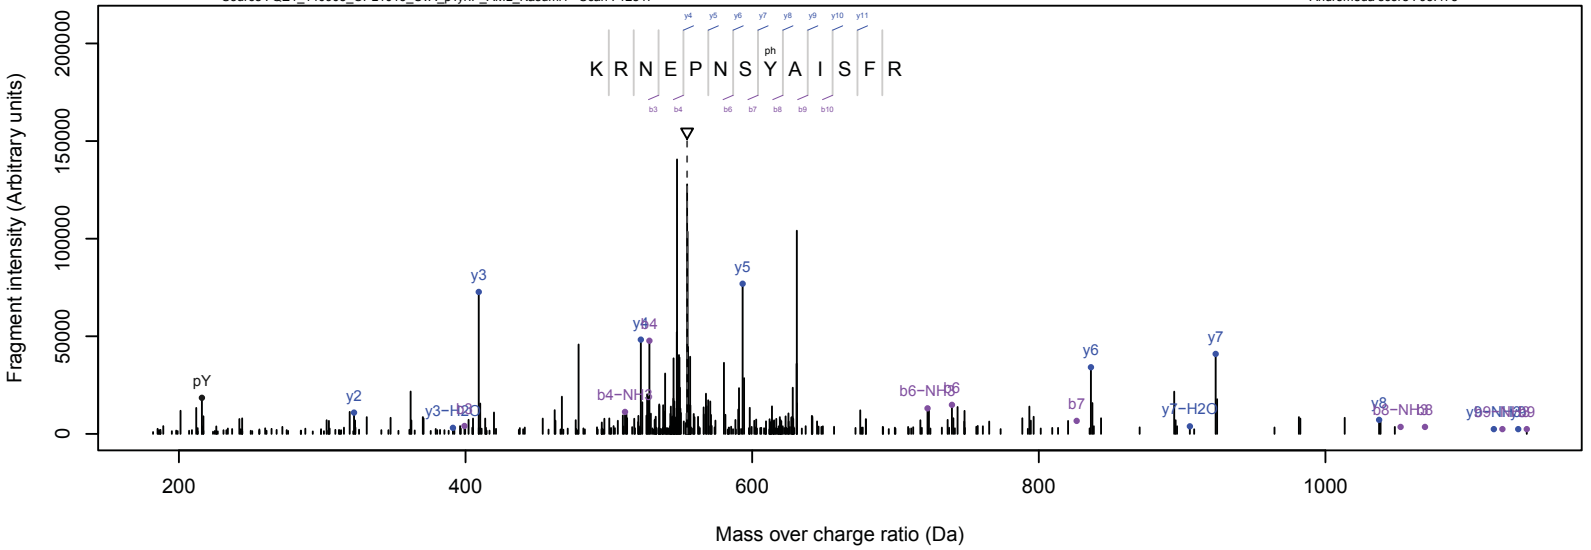

RALEEEKAY(ph)LSSR-3+

Source: QE1\_140612\_OPL1013\_CVA\_phosphoproteomic\_landscape\_AML\_C Scan: 10358

Andromeda score: 93.478

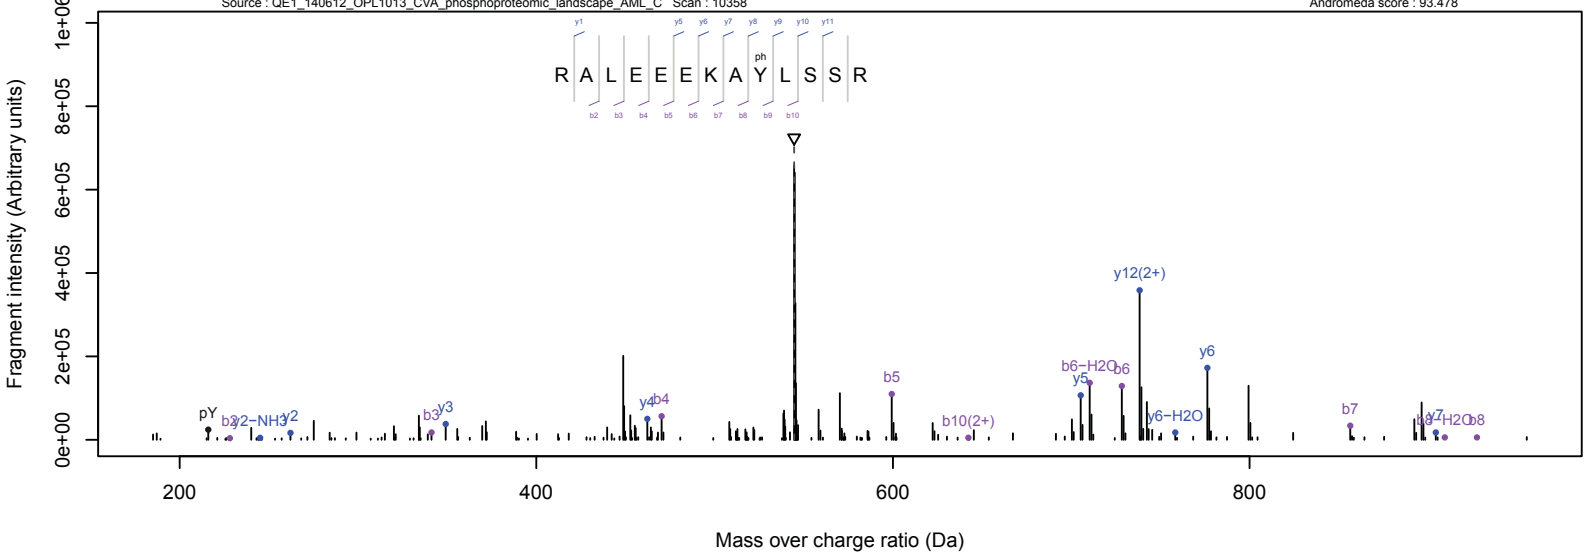



APSVPAEPEY(ph)PKGIR-2+

Source : QE1\_140612\_OPL1013\_CVA\_phosphoproteomic\_landscape\_AML\_C Scan : 18915

Andromeda score : 93.424

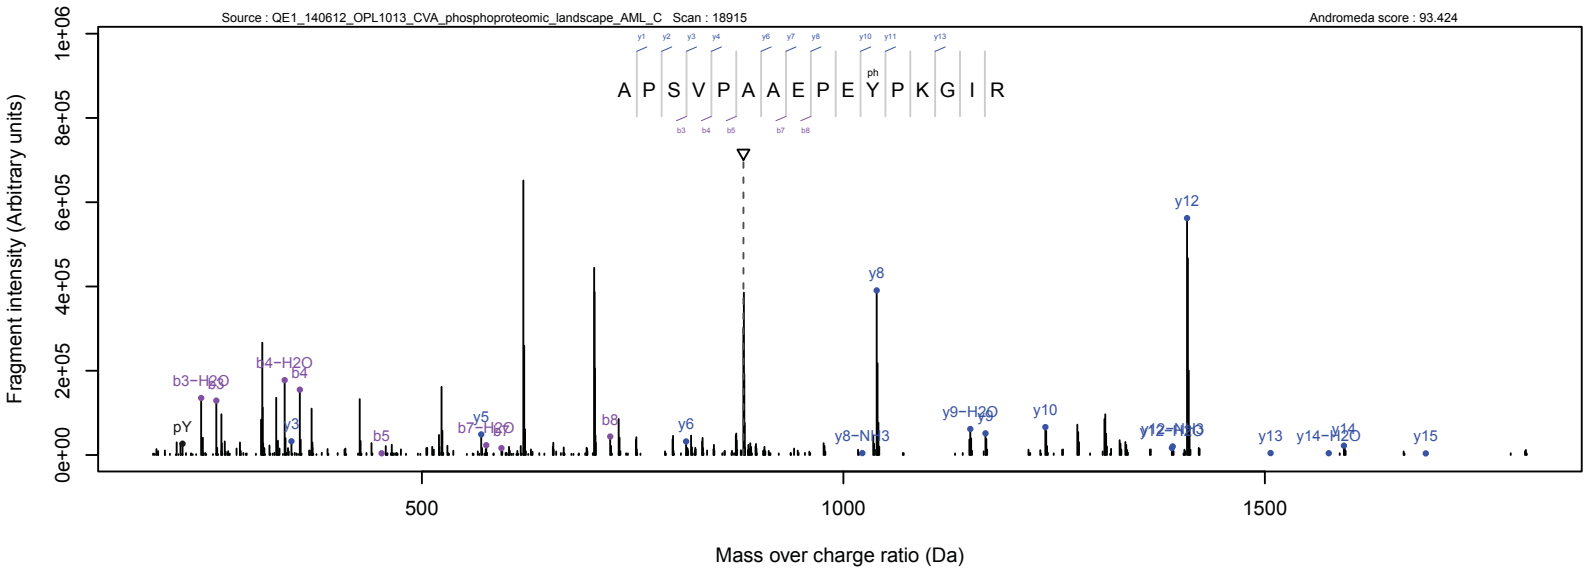

SHY(ph)WPSQQTWCPK-2+

Source : QE1\_140612\_OPL1013\_CVA\_phosphoproteomic\_landscape\_AML\_C Scan : 22993

Andromeda score : 93.424

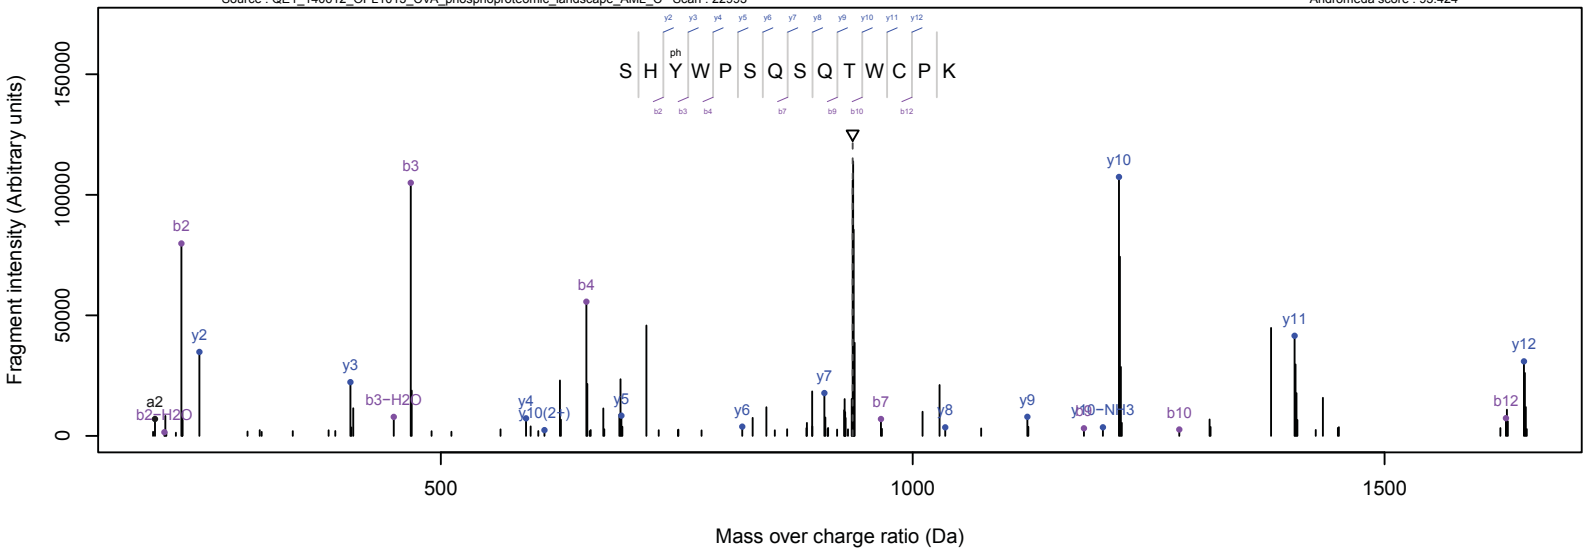

TTDGVY(ph)EGVAIGDR-2+

Source : QE1\_140822\_OPL1013\_CvA\_pTyrIP\_AML\_cell\_lines\_part2\_E Scan : 13678

Andromeda score : 93.424

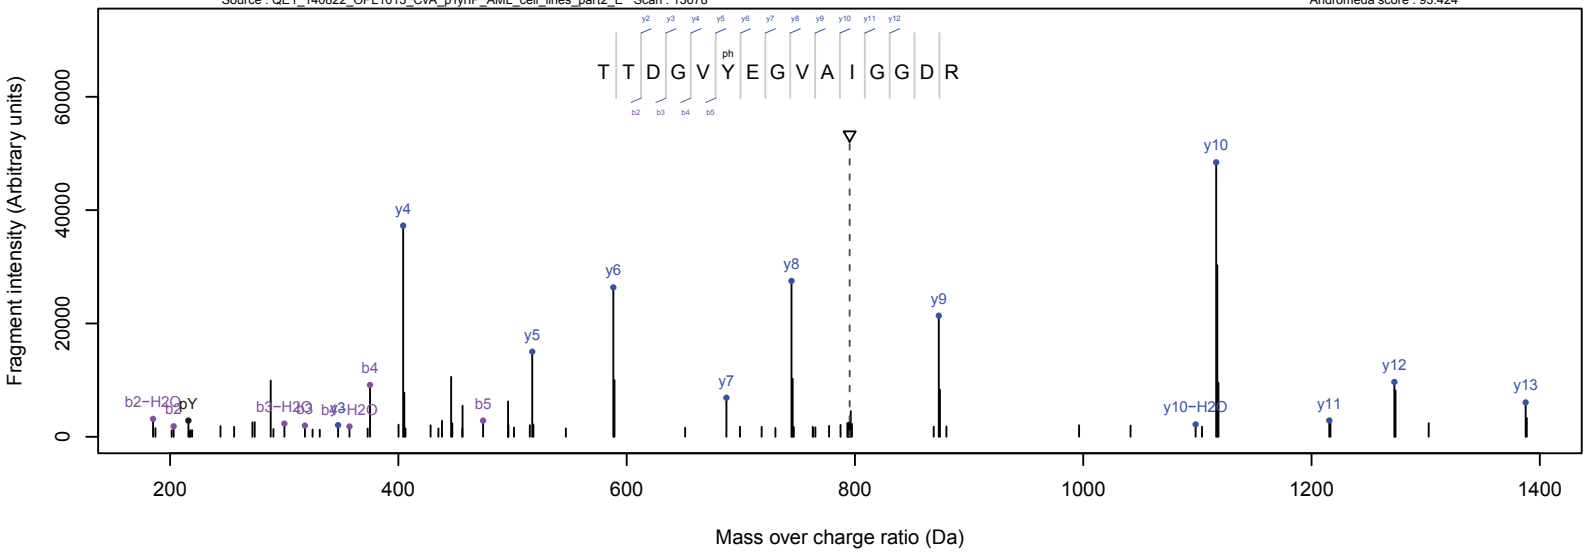

**MSY(ph)YCSGSSDAPSSPAAPR-2+**

Source : QE1\_140612\_OPL1013\_CVA\_phosphoproteomic\_landscape\_AML\_C Scan : 14458

Andromeda score : 93.371

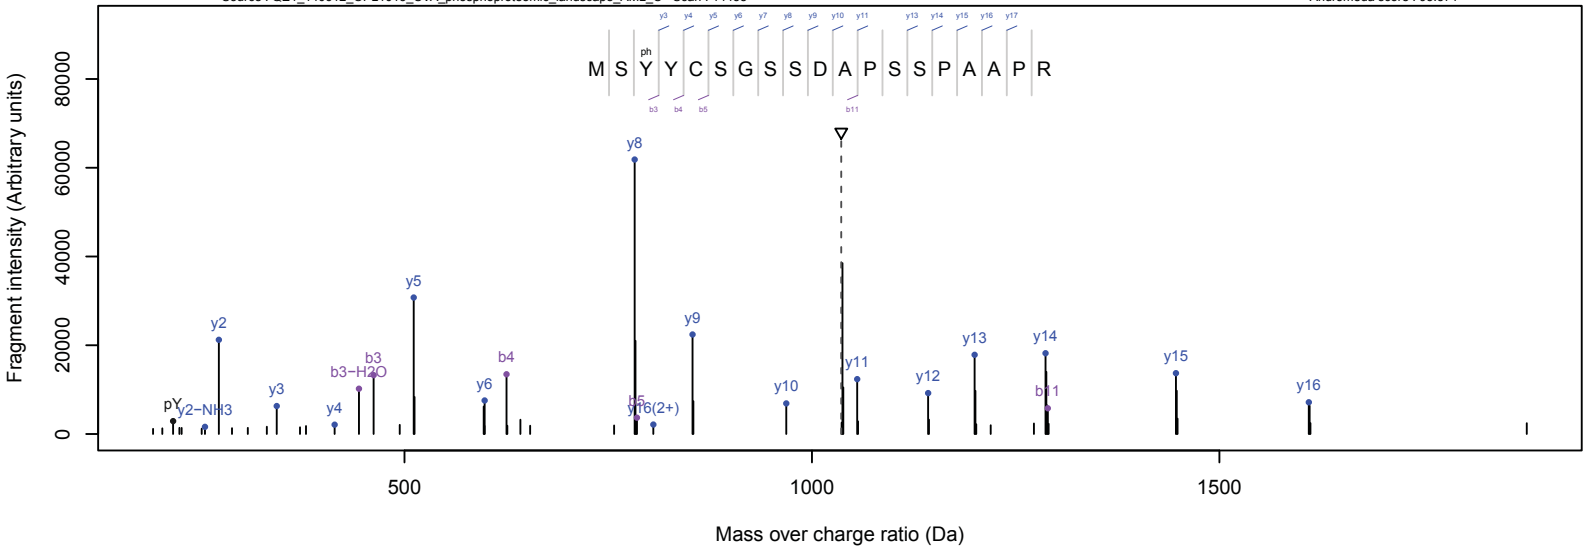

**SQERPGNFY(ph)VSSSIRK-3+**

Source : QE1\_140612\_OPL1013\_CVA\_phosphoproteomic\_landscape\_AML\_A Scan : 16206

Andromeda score : 93.371

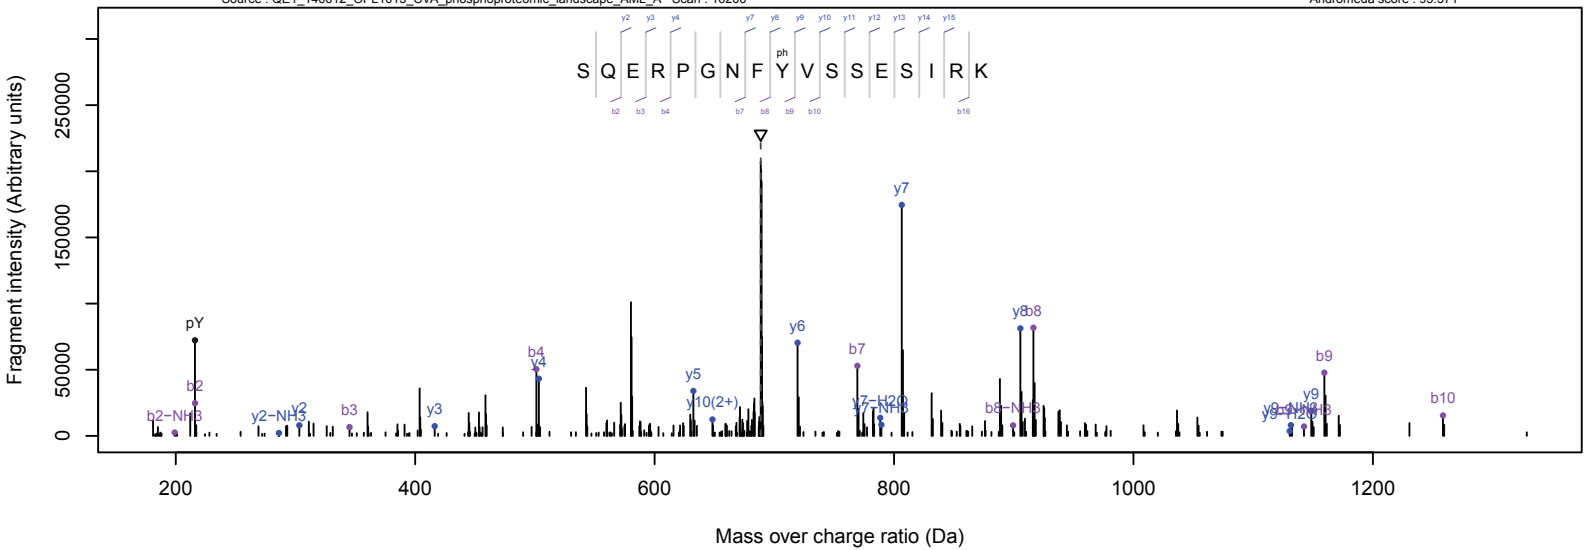

**Y(ph)LKLGAI DVER-2+**

Source : QE1\_140612\_OPL1013\_CVA\_phosphoproteomic\_landscape\_AML\_C Scan : 29663

Andromeda score : 93.348

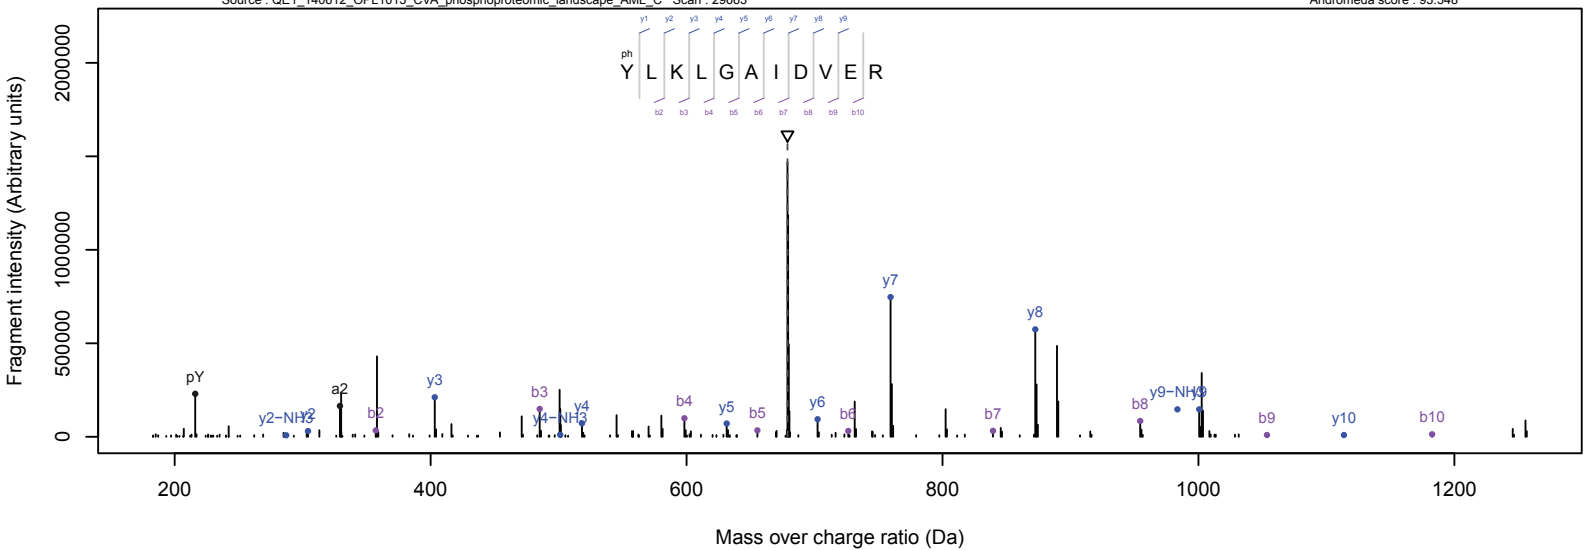

**AKYDTPY(ph)IWR-3+**

Source : QE1\_140612\_OPL1013\_CVA\_phosphoproteomic\_landscape\_AML\_C Scan : 31697

Andromeda score : 93.345

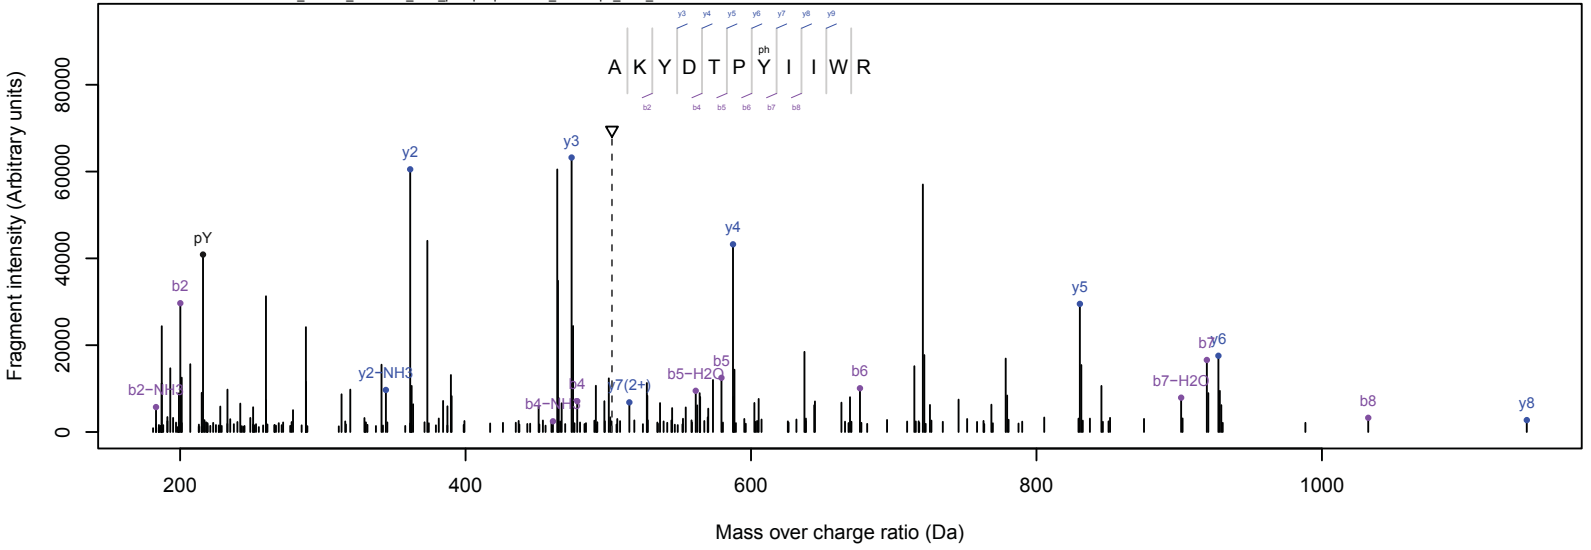

**ALNSIIDVY(ph)HK-2+**

Source : QE1\_140612\_OPL1013\_CVA\_phosphoproteomic\_landscape\_AML\_C Scan : 24716

Andromeda score : 93.345

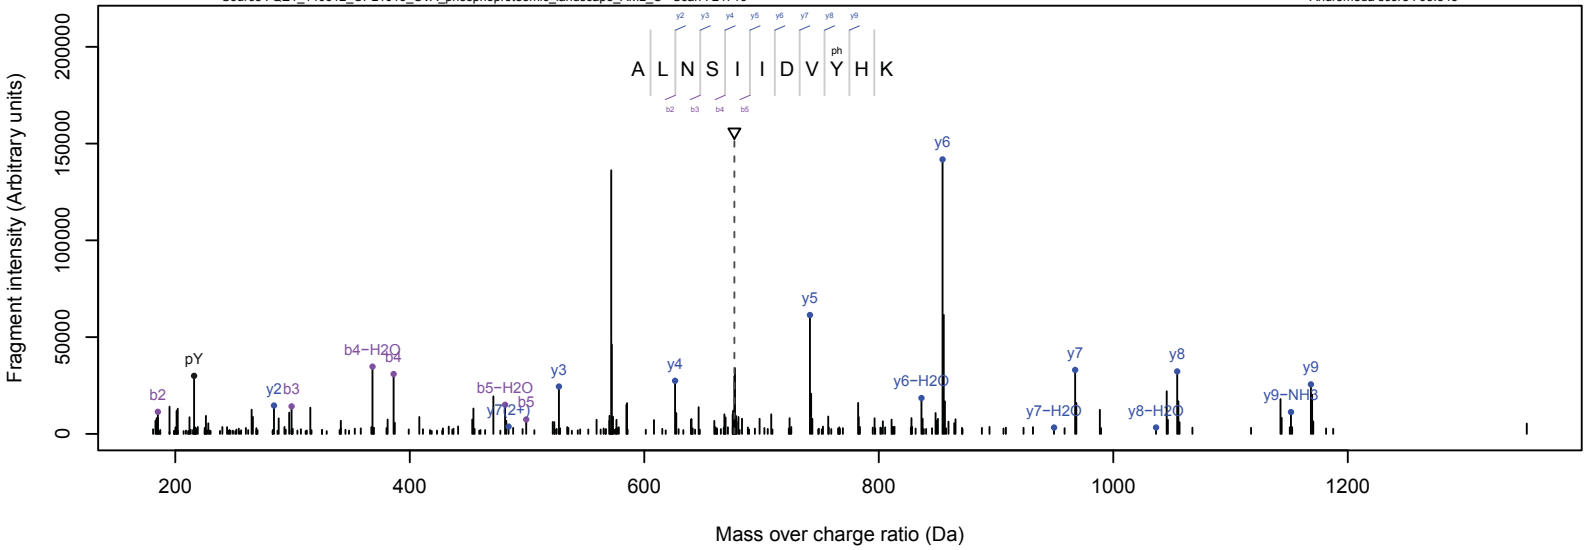

**NY(ph)LFRPPPPYR-3+**

Source : QE1\_140612\_OPL1013\_CVA\_phosphoproteomic\_landscape\_AML\_C Scan : 29058

Andromeda score : 93.345

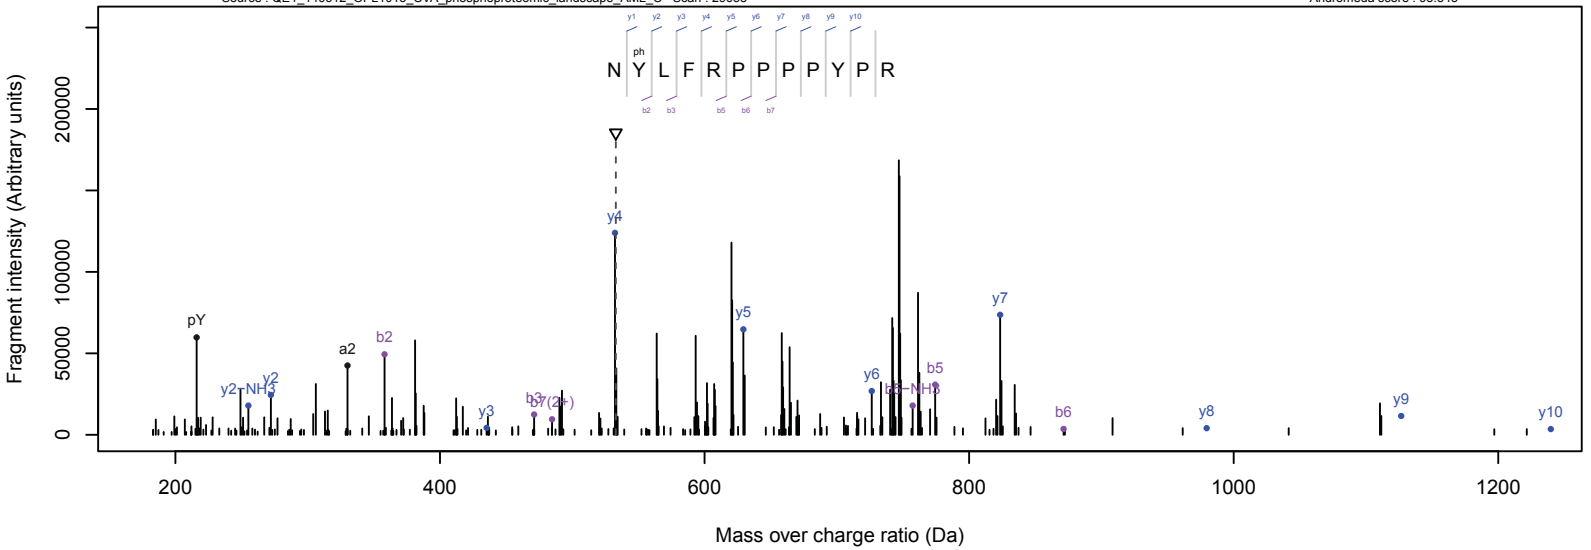

VY(ph)YSYSQISHK-2+

Source : QE1\_140612\_OPL1013\_CVA\_phosphoproteomic\_landscape\_AML\_C Scan : 14293

Andromeda score : 93.345

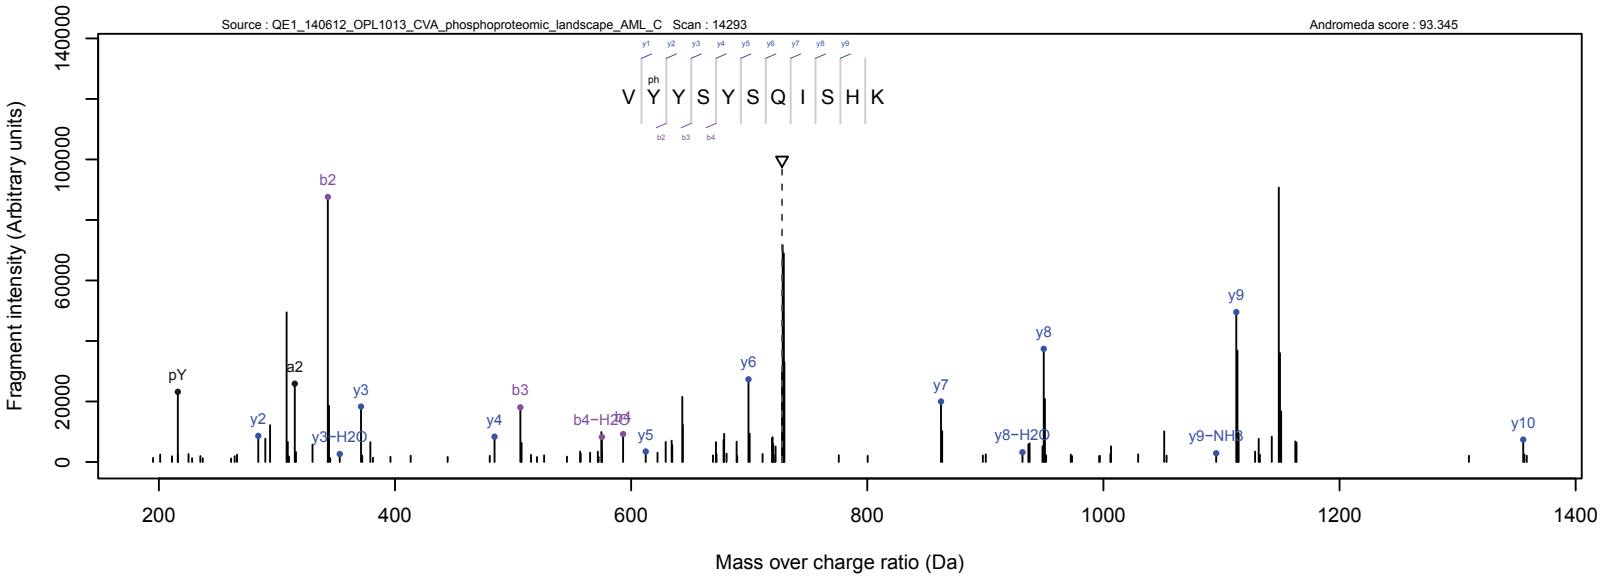

DAHSTPY(ph)YYAR-3+

Source : QE1\_140612\_OPL1013\_CVA\_phosphoproteomic\_landscape\_AML\_C Scan : 9465

Andromeda score : 93.325

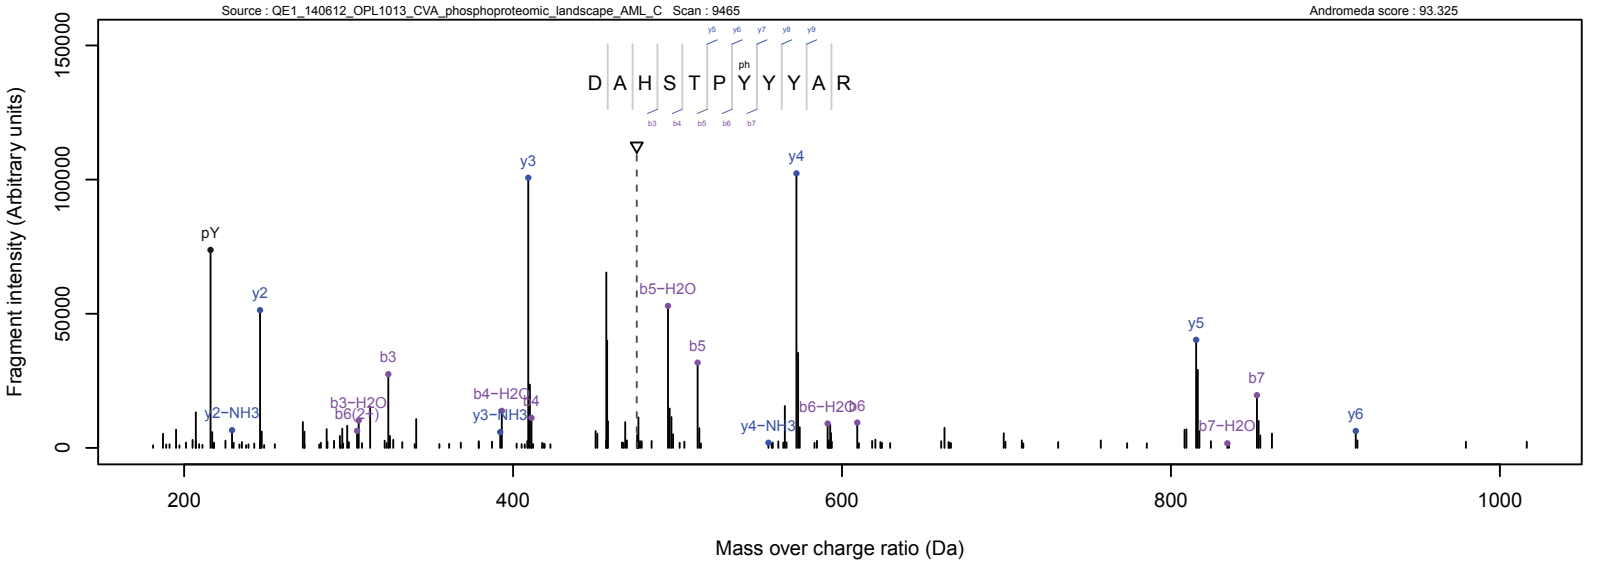

Y(ph)KGTAFTLLNGEQAEAAINAFHQSR-3+

Source : QE1\_140612\_OPL1013\_CVA\_phosphoproteomic\_landscape\_AML\_C Scan : 45412

Andromeda score : 93.278

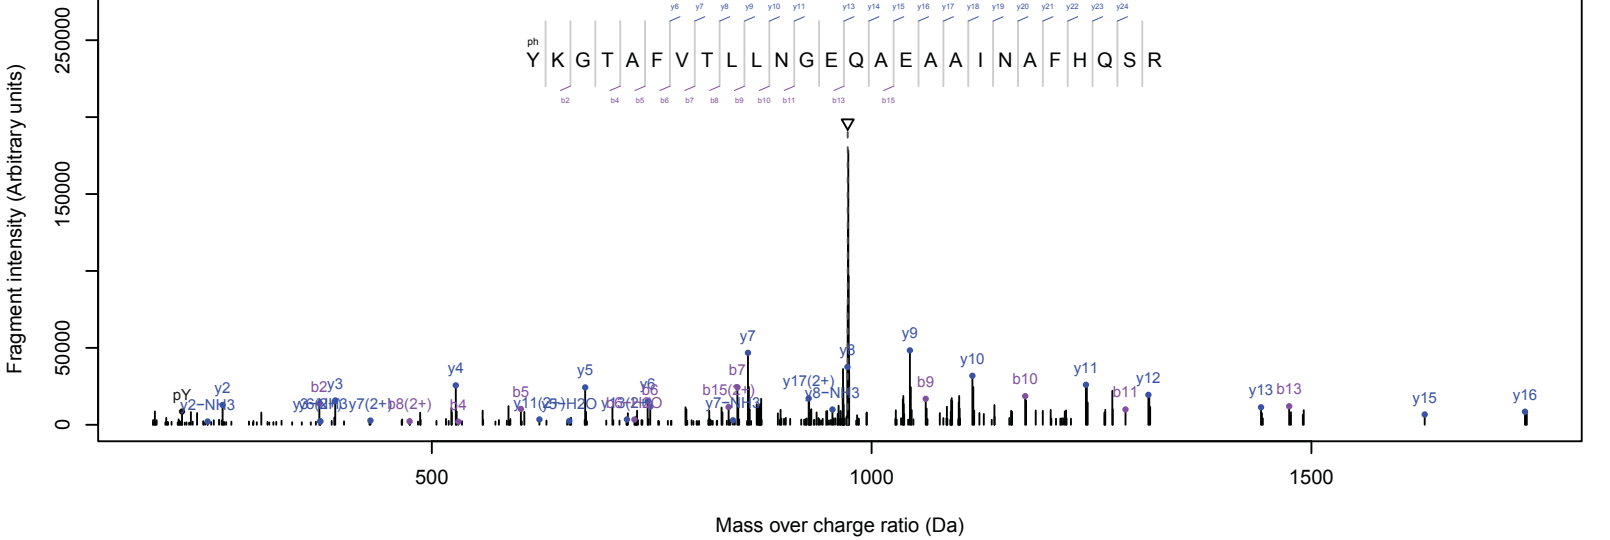

**KVYFHT(ph)DAAQAVGK-3+**

Source: QE1\_140612\_OPL1013\_CVA\_phosphoproteomic\_landscape\_AML\_C Scan: 13673

Andromeda score: 93.237

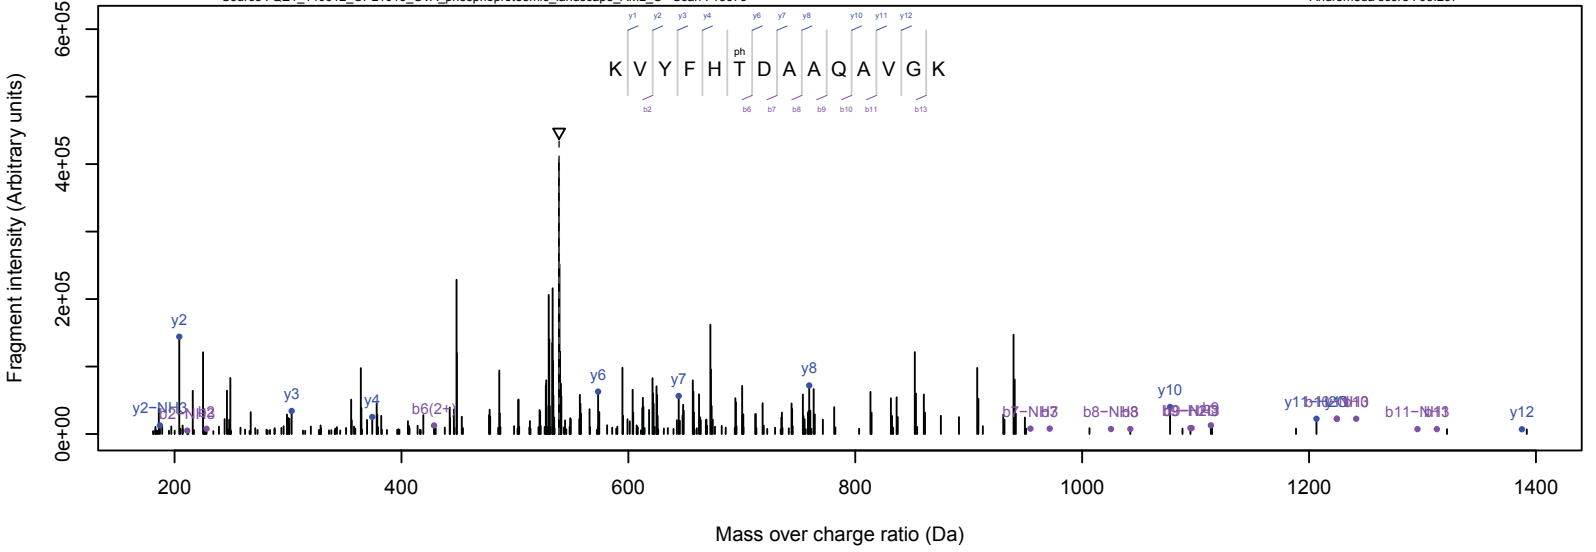

**MVSISNY(ph)PLSAALTCCK-2+**

Source: QE1\_140908\_OPL1013\_CvA\_pTyrIP\_AML\_OCI\_AML3 Scan: 42508

Andromeda score: 93.226

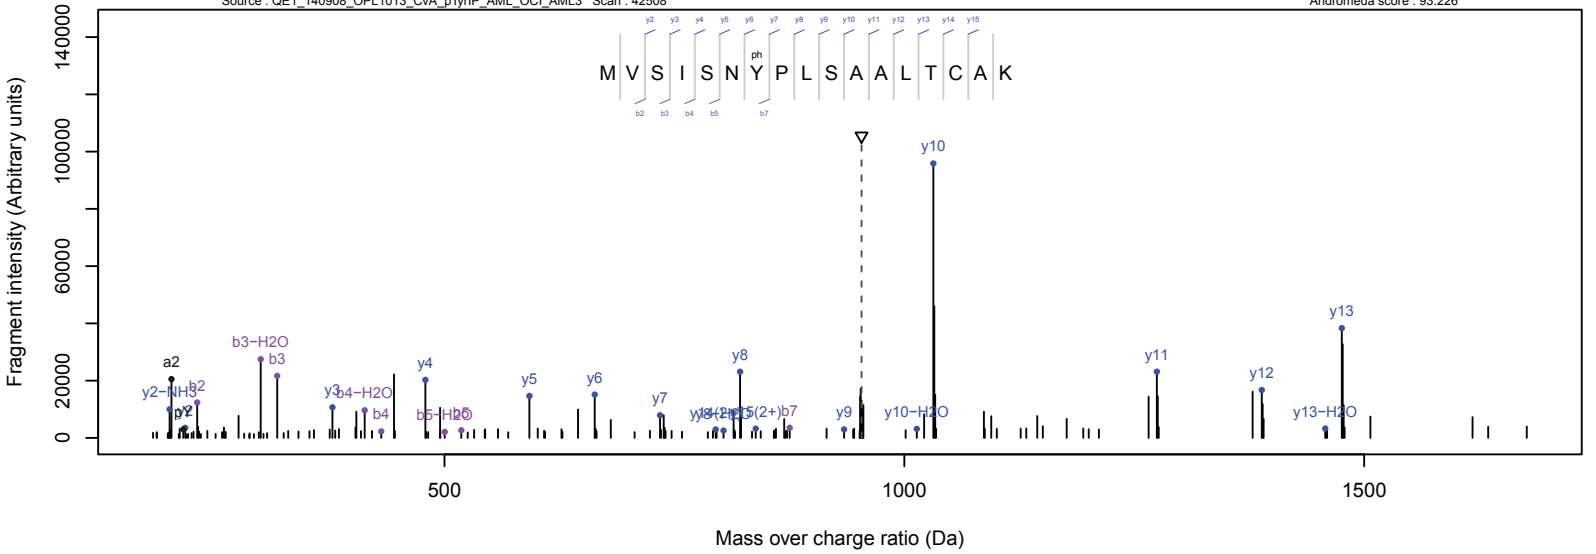

**ASPGHSPHY(ph)FAASPTSPNALPPARK-4+**

Source: QE1\_140612\_OPL1013\_CVA\_phosphoproteomic\_landscape\_AML\_C Scan: 17025

Andromeda score: 93.21

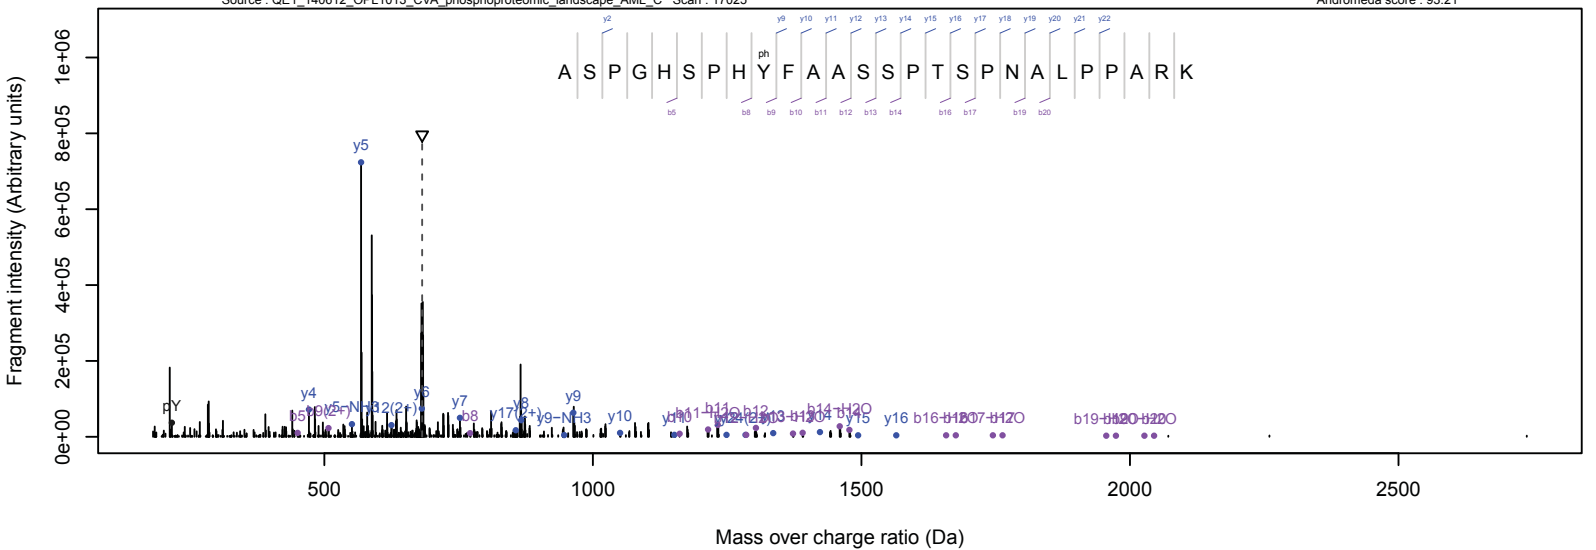

AMSDY(ph)WVVGK-2+

Source : QE1\_140612\_OPL1013\_CVA\_phosphoproteomic\_landscape\_AML\_B Scan : 29476

Andromeda score : 93.096

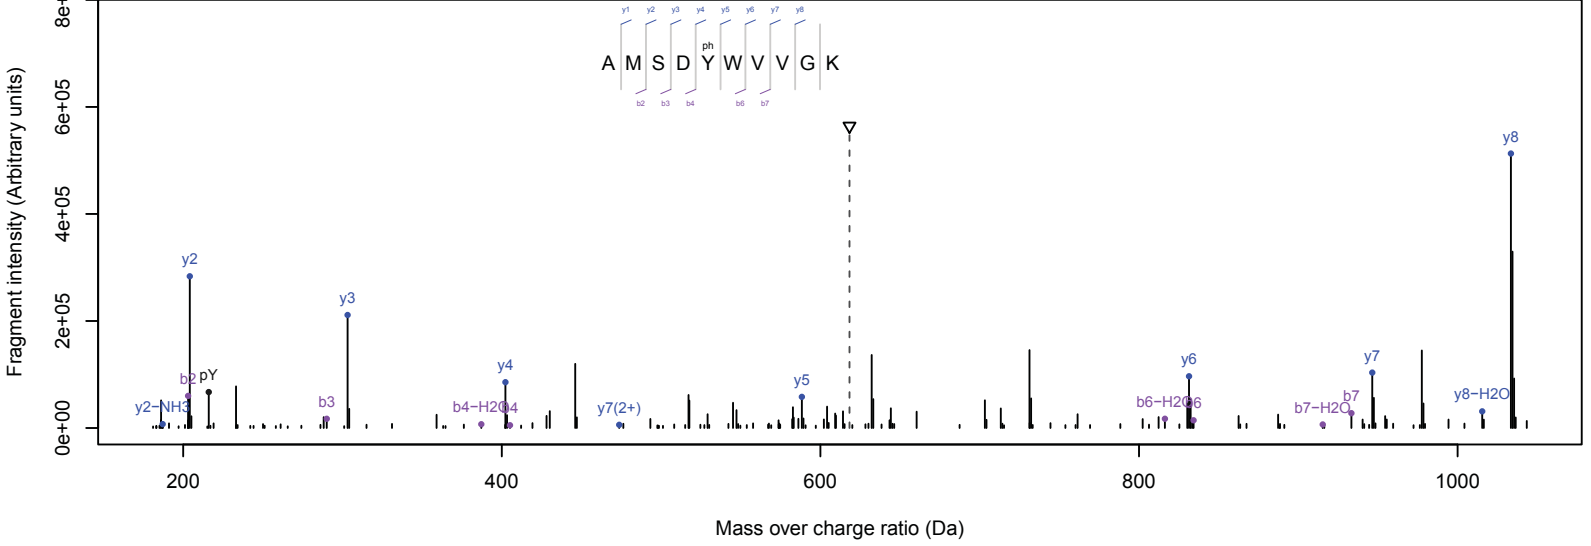

GY(ph)AFVTFCTK-2+

Source : QE1\_140612\_OPL1013\_CVA\_phosphoproteomic\_landscape\_AML\_D Scan : 30862

Andromeda score : 93.096

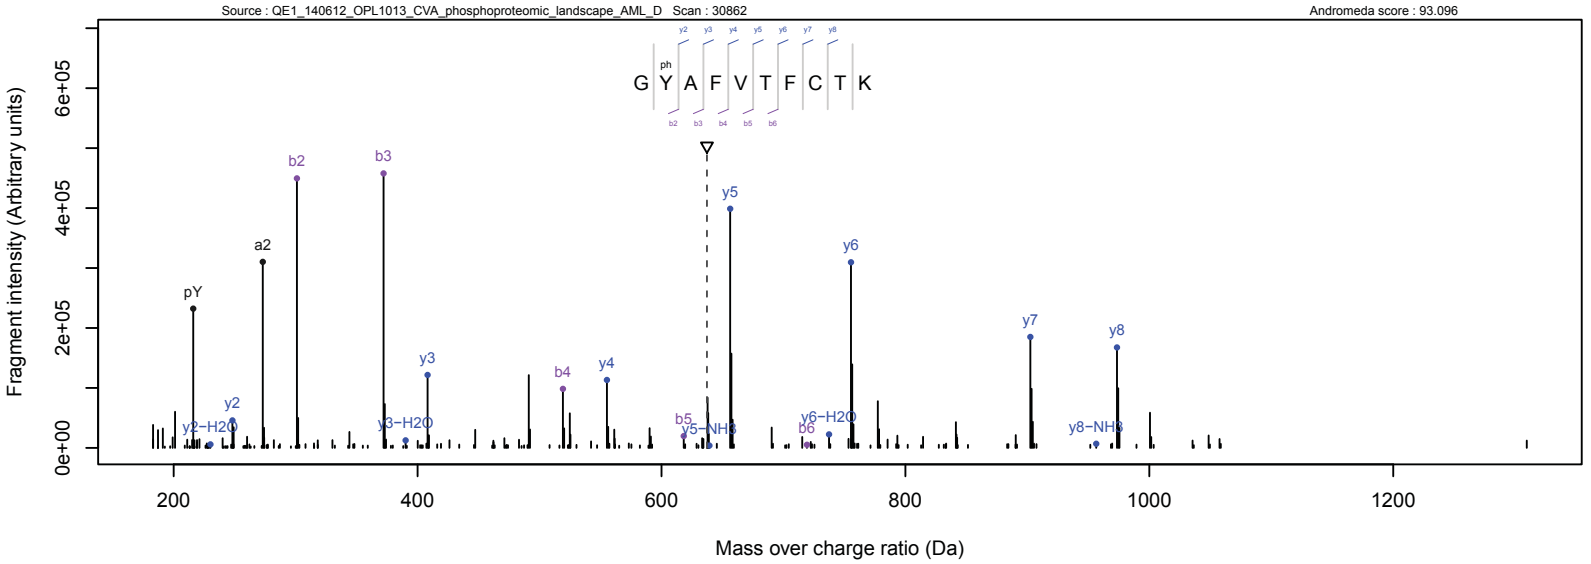

NGY(ph)ELSPAAANFTR-2+

Source : QE1\_140612\_OPL1013\_CVA\_phosphoproteomic\_landscape\_AML\_C Scan : 27847

Andromeda score : 92.952

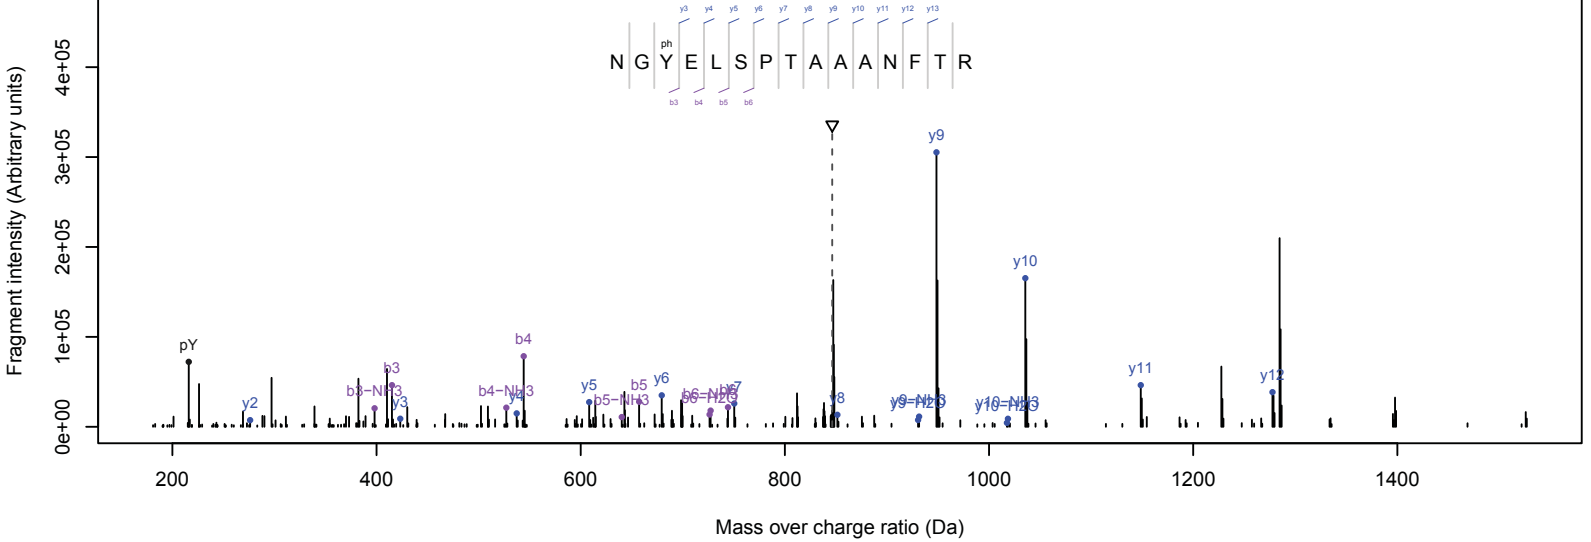

ATVSHY(ph)ECLSLER-3+

Source : QE1\_140612\_OPL1013\_CVA\_phosphoproteomic\_landscape\_AML\_C Scan : 19040

Andromeda score : 92.939

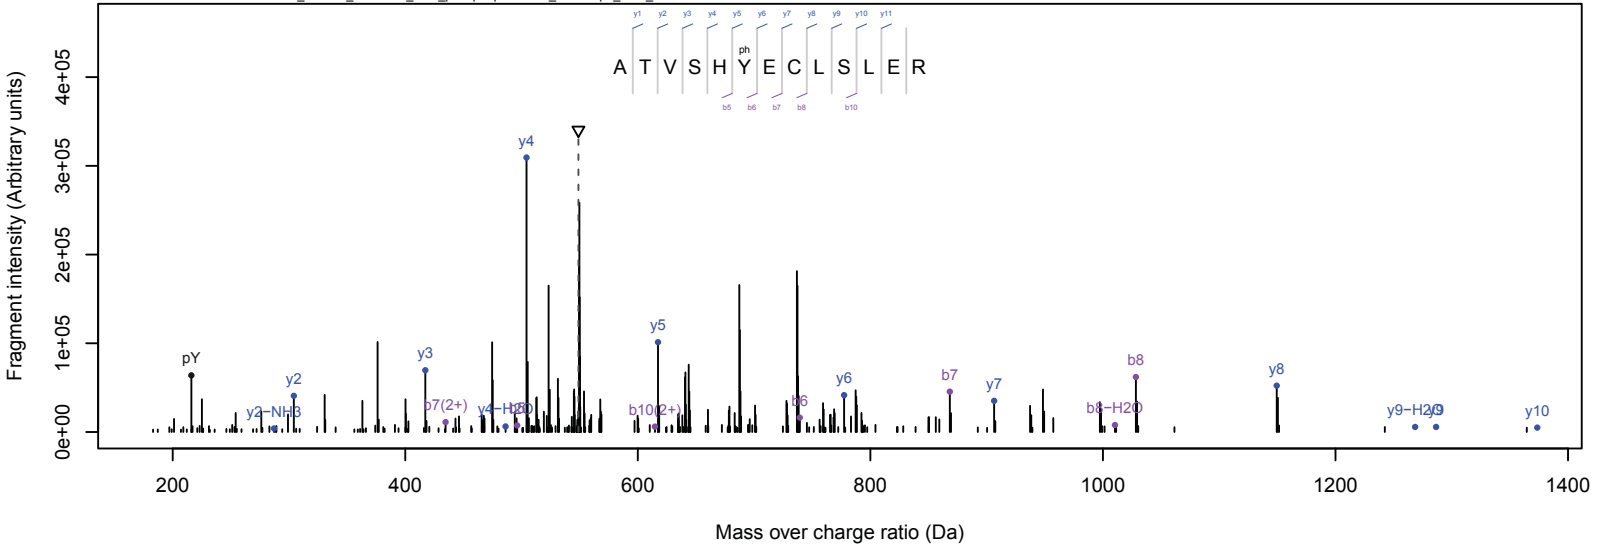

GY(ph)VSCALGCPYEGK-2+

Source : QE1\_140612\_OPL1013\_CVA\_phosphoproteomic\_landscape\_AML\_D Scan : 20709

Andromeda score : 92.939

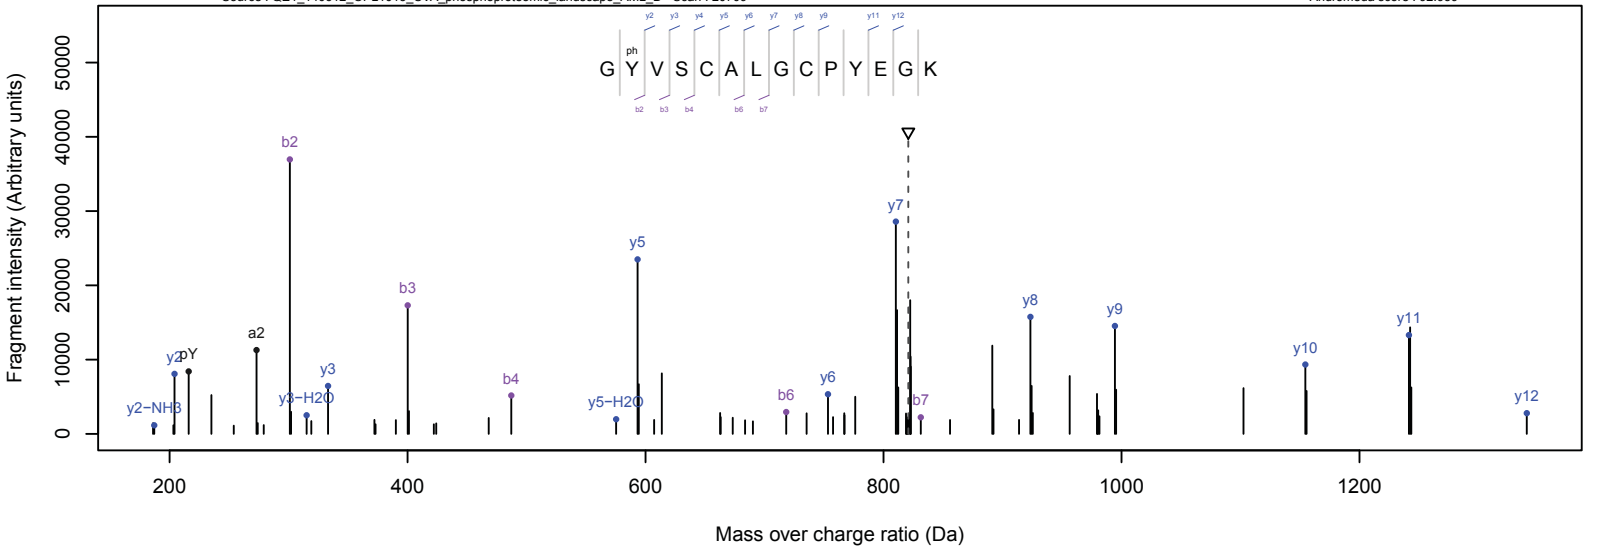

SYDVP P P P M E P D H P F Y S N I S K-3+

Source : QE1\_140612\_OPL1013\_CVA\_phosphoproteomic\_landscape\_AML\_C Scan : 33071

Andromeda score : 92.932

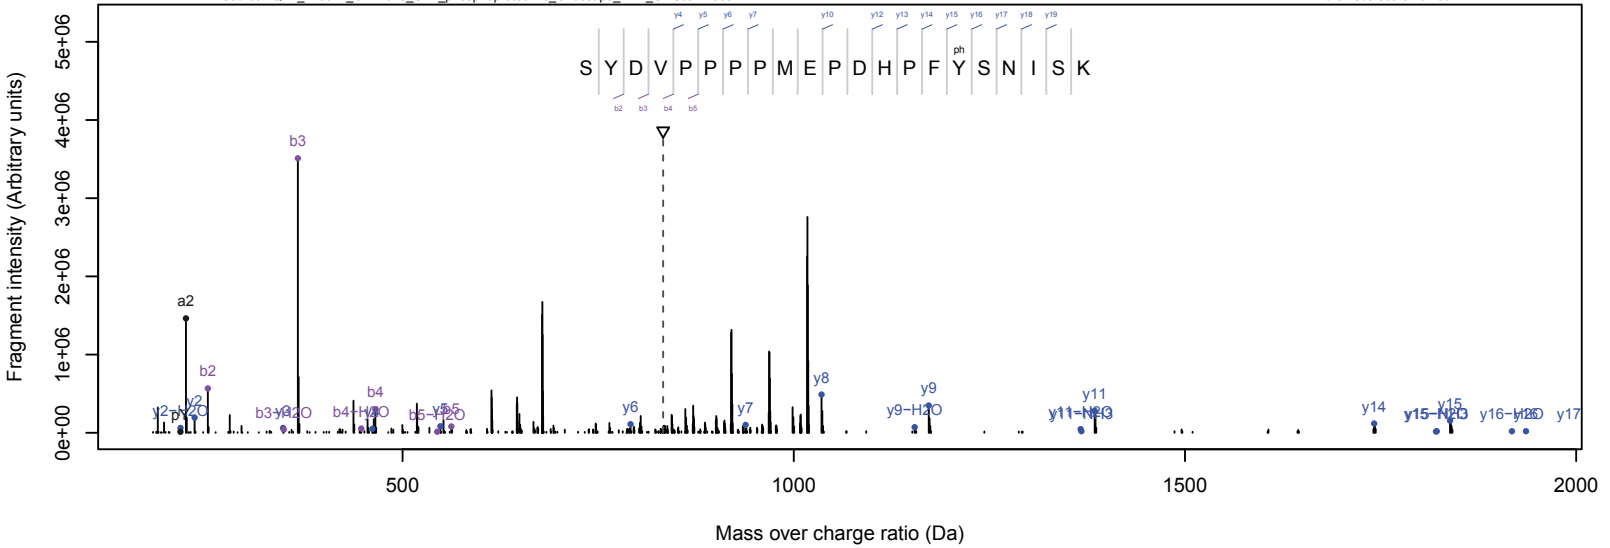

**Y(ph)LSFTPPEKDGFPSTPALNAK-3+**

Source: QE1\_140612\_OPL1013\_CVA\_phosphoproteomic\_landscape\_AML\_C Scan: 36710

Andromeda score: 92.932

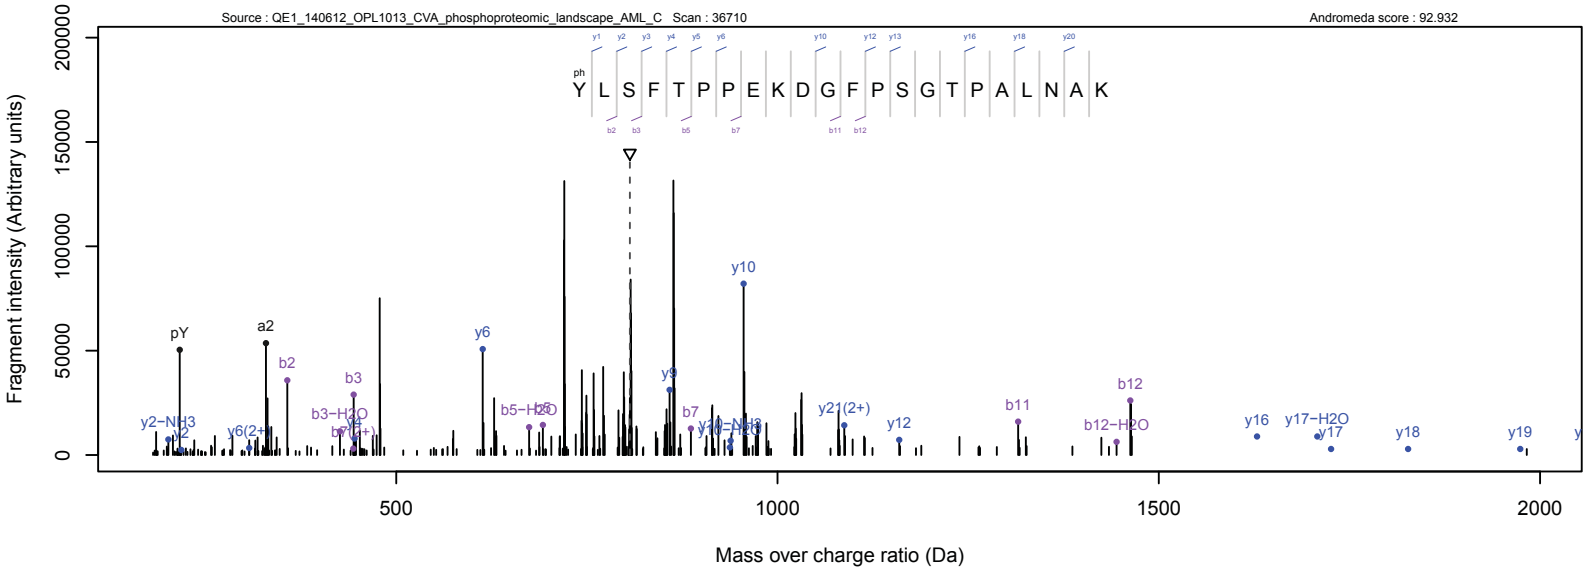

**AAVPSGASTGIY(ph)EALERDNDK-3+**

Source: QE1\_140908\_OPL1013\_CvA\_pTyrIP\_AML\_HEL Scan: 36334

Andromeda score: 92.913

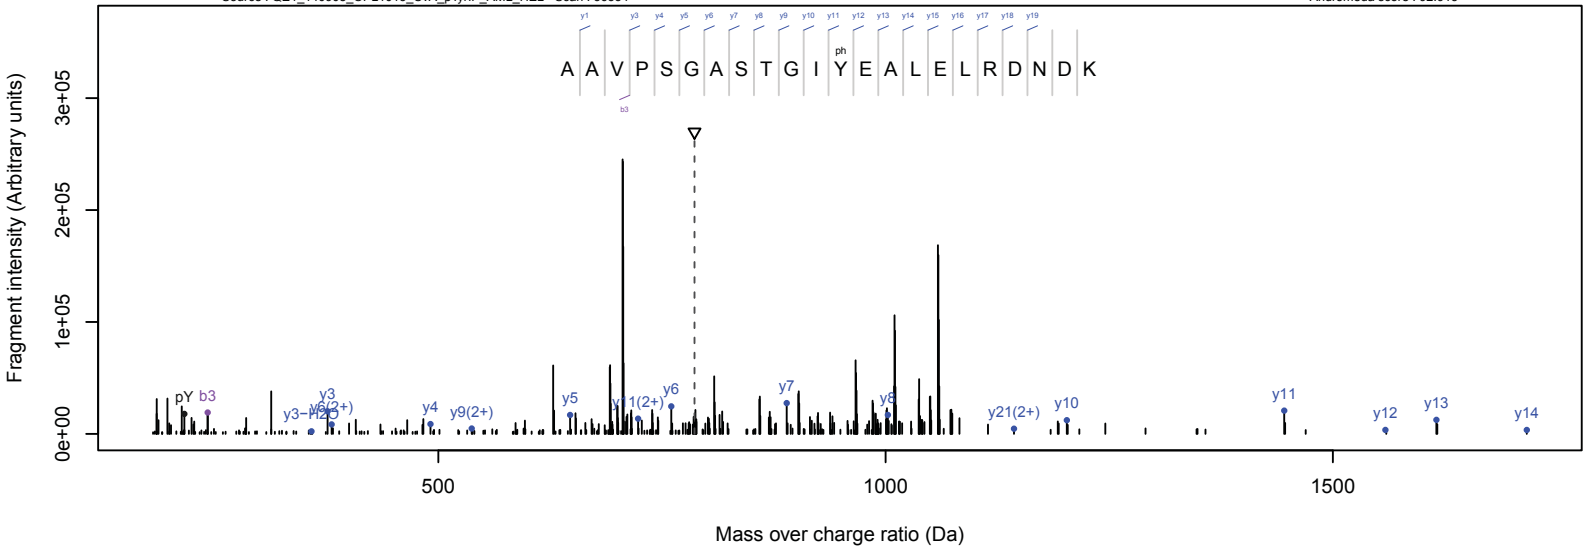

**KPESPY(ph)GNLCDAPDSPRPVK-3+**

Source: QE1\_140612\_OPL1013\_CVA\_phosphoproteomic\_landscape\_AML\_B Scan: 14475

Andromeda score: 92.897

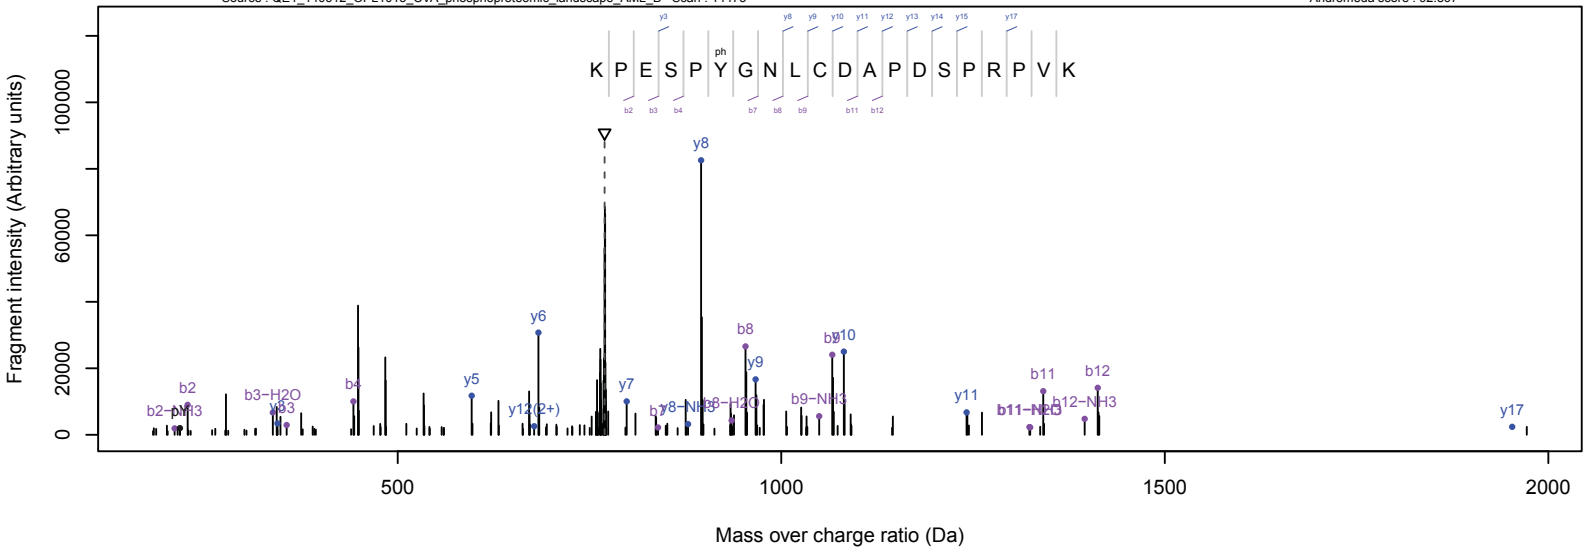



YTNL<sup>ph</sup>SYIGEGAYGMVCSAYD<sup>ph</sup>NVNKVR-3+

Source : QE1\_140612\_OPL1013\_CVA\_phosphoproteomic\_landscape\_AML\_A Scan : 42578

Andromeda score : 92.886

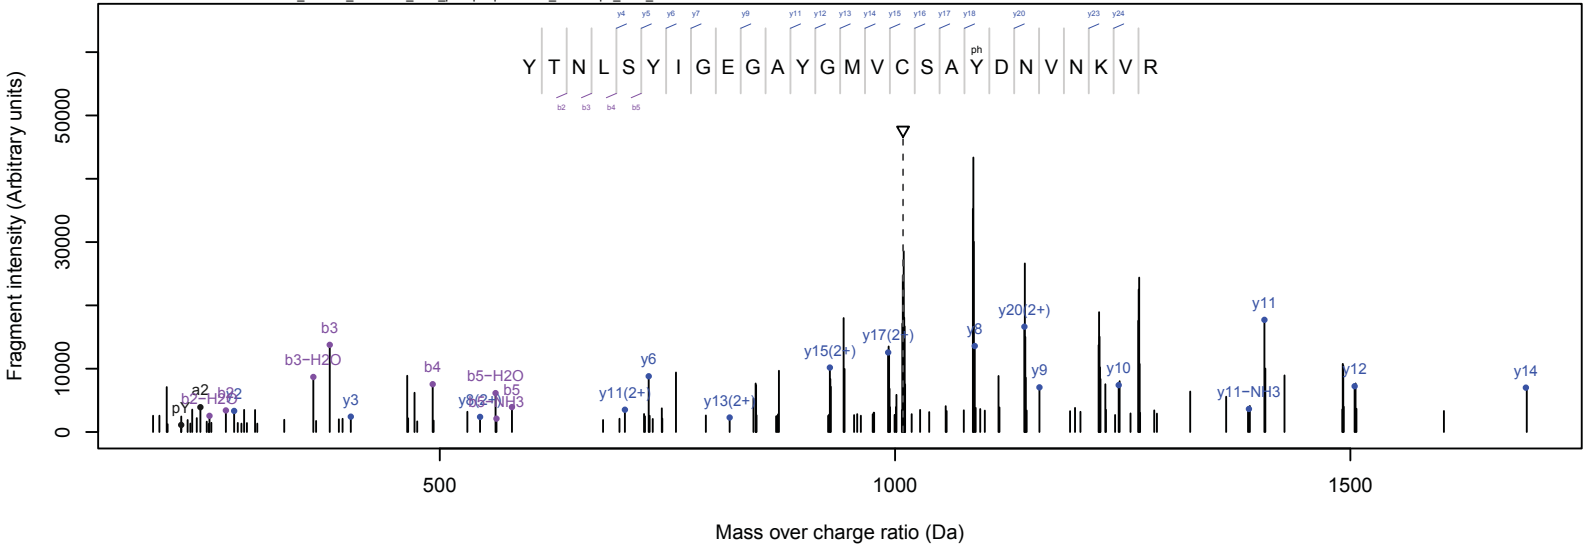

GY<sup>ph</sup>AFVQYSNER-2+

Source : QE1\_140612\_OPL1013\_CVA\_phosphoproteomic\_landscape\_AML\_B Scan : 18888

Andromeda score : 92.866

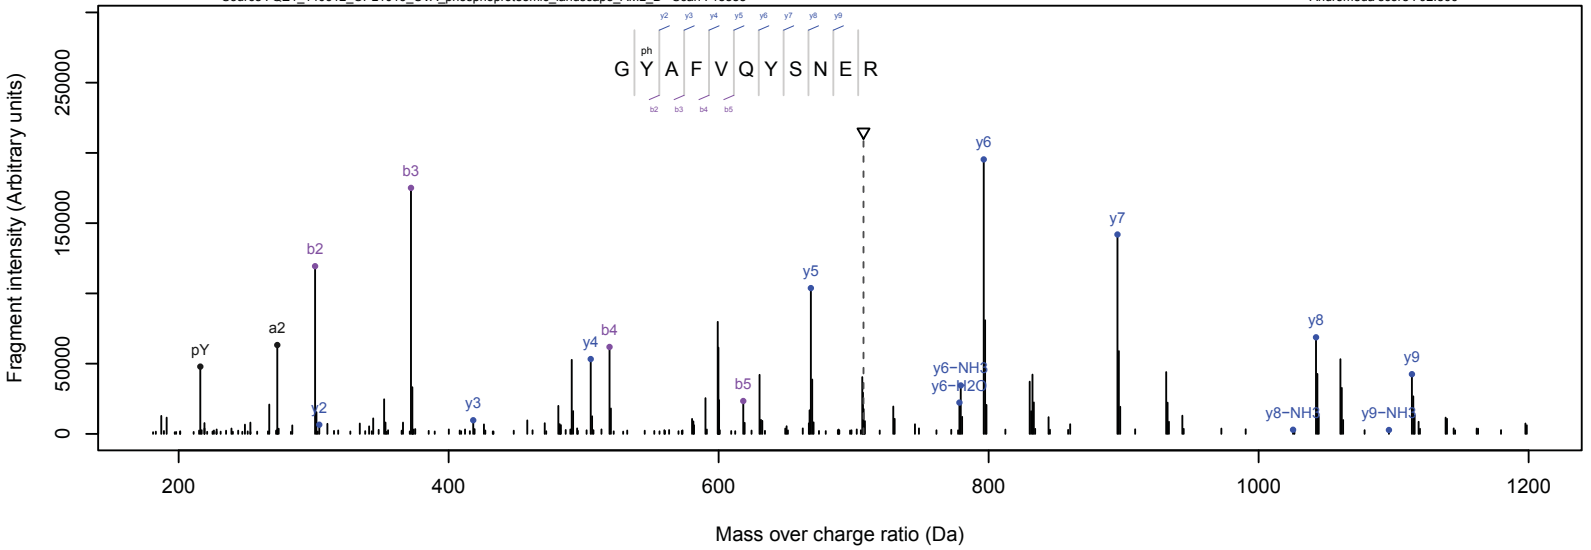

SRQPSY<sup>ph</sup>VPAPLRK-3+

Source : QE1\_140612\_OPL1013\_CVA\_phosphoproteomic\_landscape\_AML\_C Scan : 12029

Andromeda score : 92.856

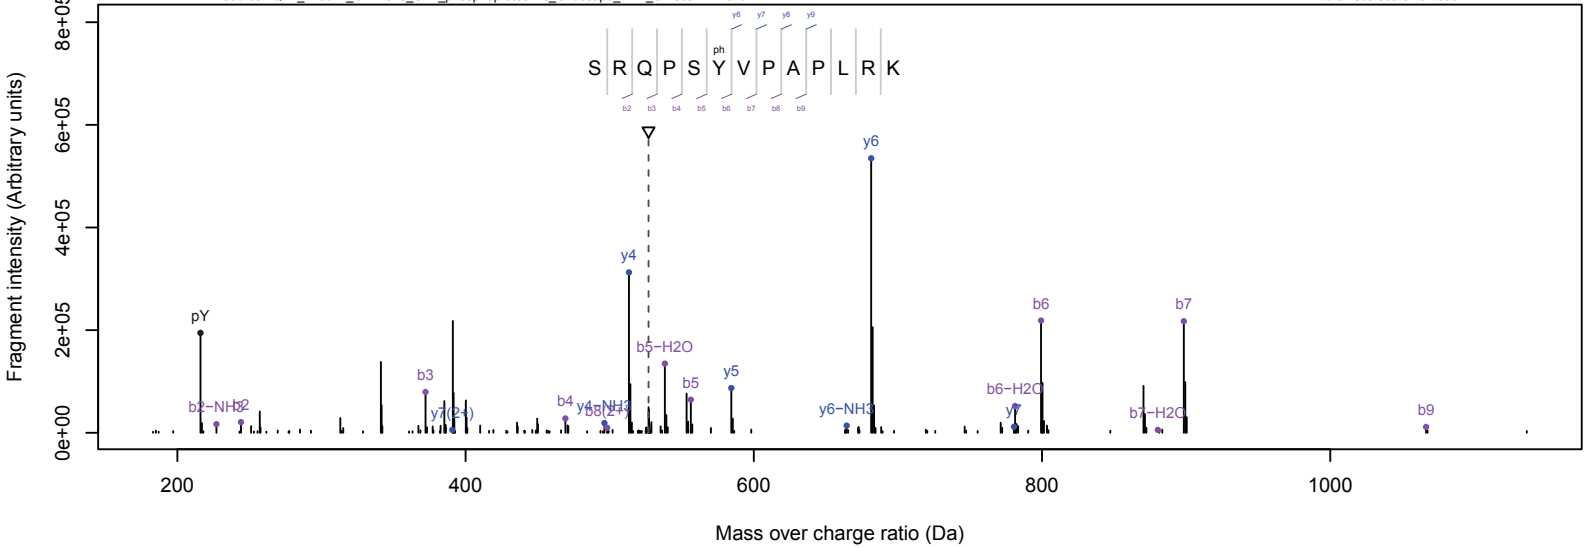

TEMQDNTY(ph)PEILR-2+

Source : QE1\_140612\_OPL1013\_CVA\_phosphoproteomic\_landscape\_AML\_B Scan : 25675

Andromeda score : 92.856

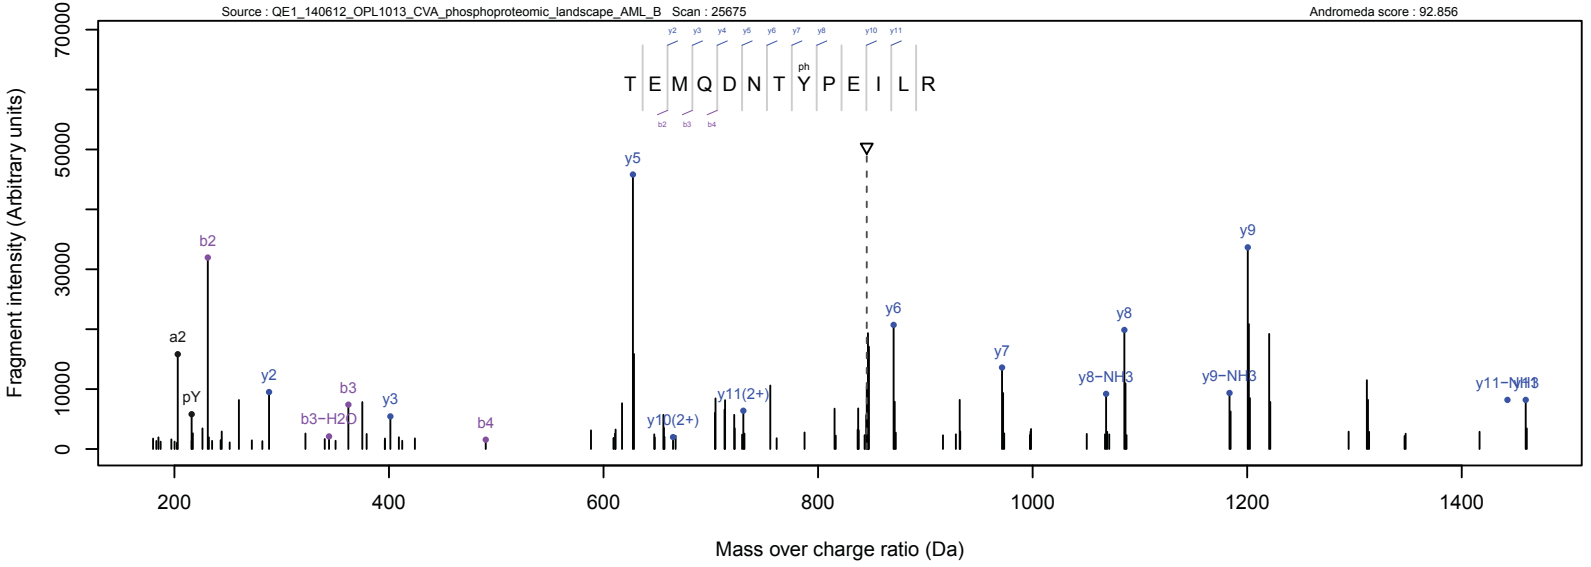

VKGEY(ph)DVTVPK-2+

Source : QE1\_140612\_OPL1013\_CVA\_phosphoproteomic\_landscape\_AML\_C Scan : 10756

Andromeda score : 92.856

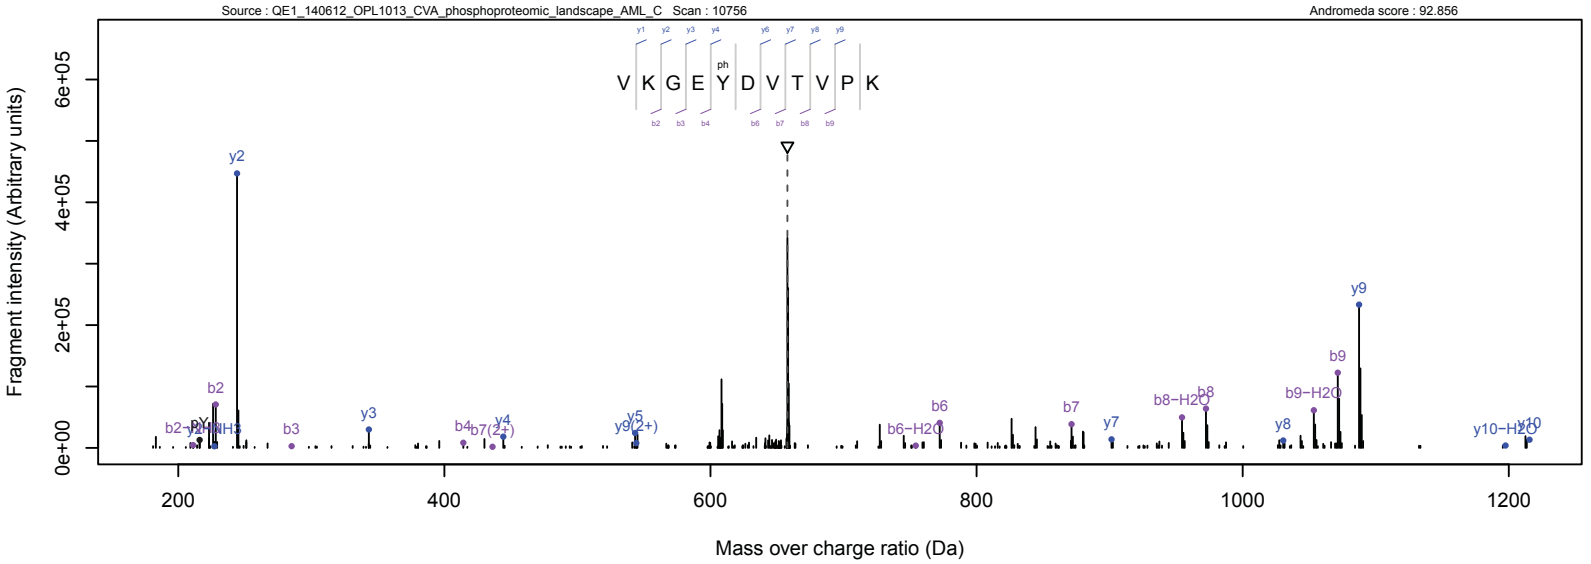

LCDFGSATTISHY(ph)PDYSWSAQR-3+

Source : QE1\_140612\_OPL1013\_CVA\_phosphoproteomic\_landscape\_AML\_C Scan : 33132

Andromeda score : 92.792

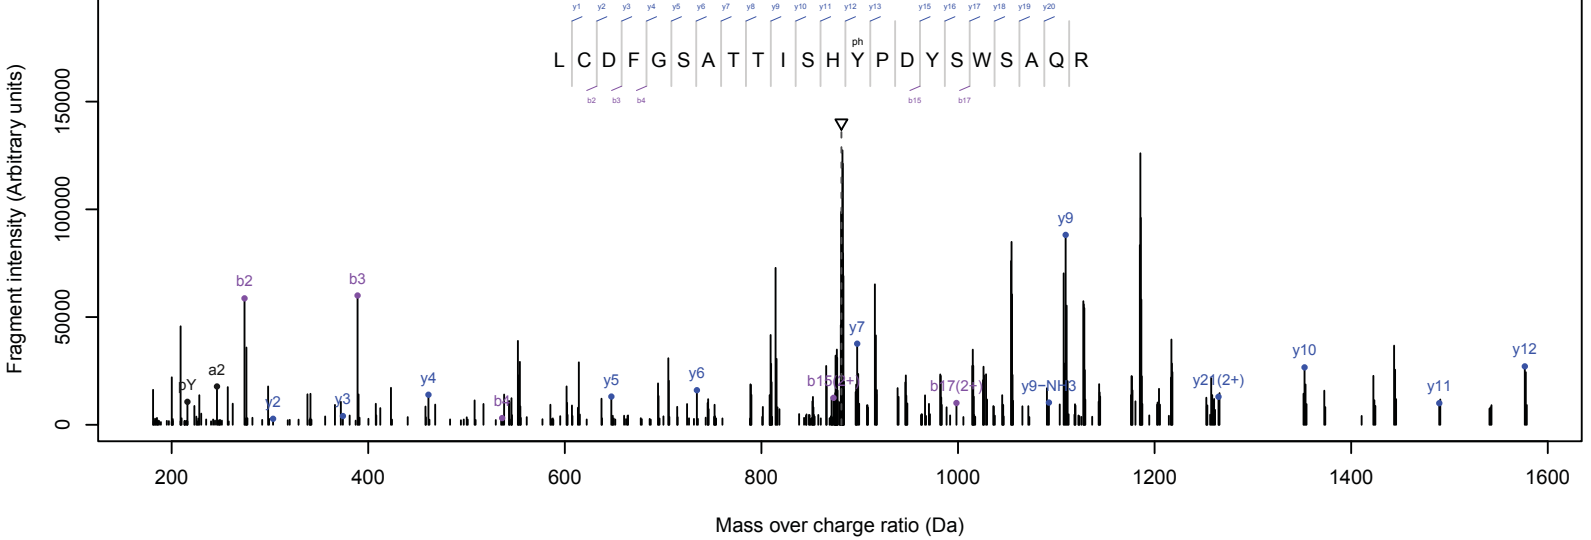

**KTVTAMDVVY(ph)ALKR-3+**

Source : QE1\_140612\_OPL1013\_CVA\_phosphoproteomic\_landscape\_AML\_C Scan : 35240

Andromeda score : 92.773

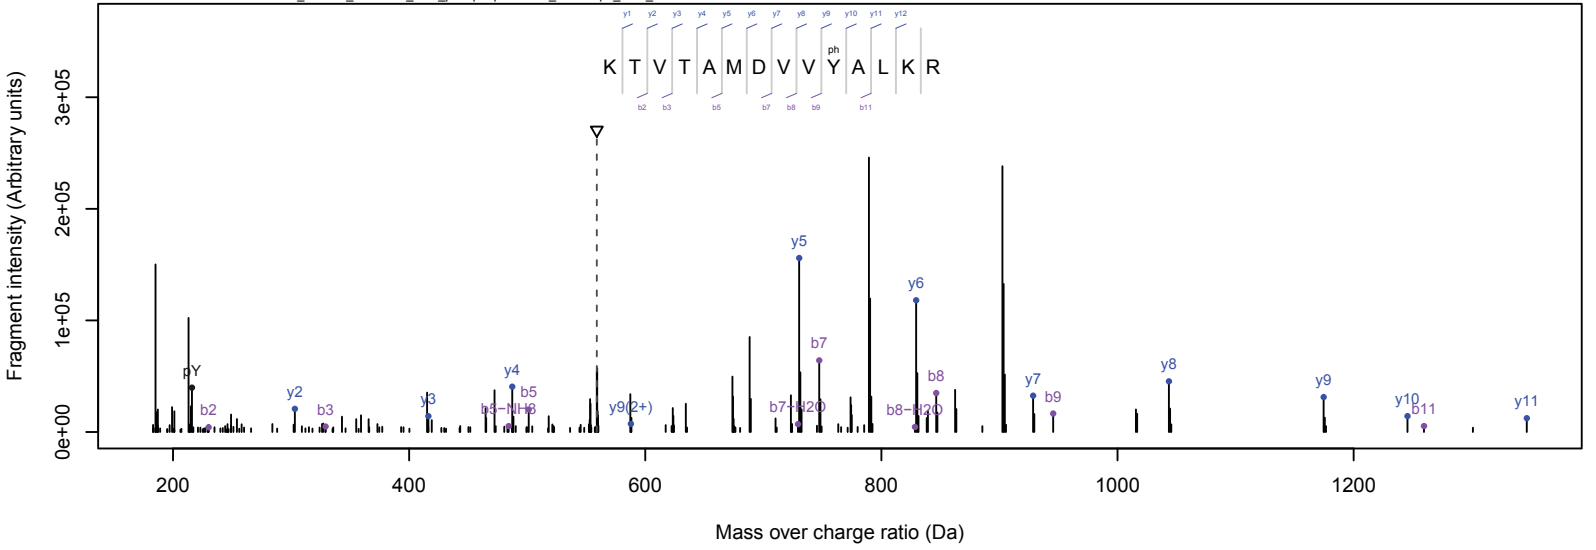

**FPY(ph)HLIK-2+**

Source : QE1\_140612\_OPL1013\_CVA\_phosphoproteomic\_landscape\_AML\_C Scan : 21507

Andromeda score : 92.692

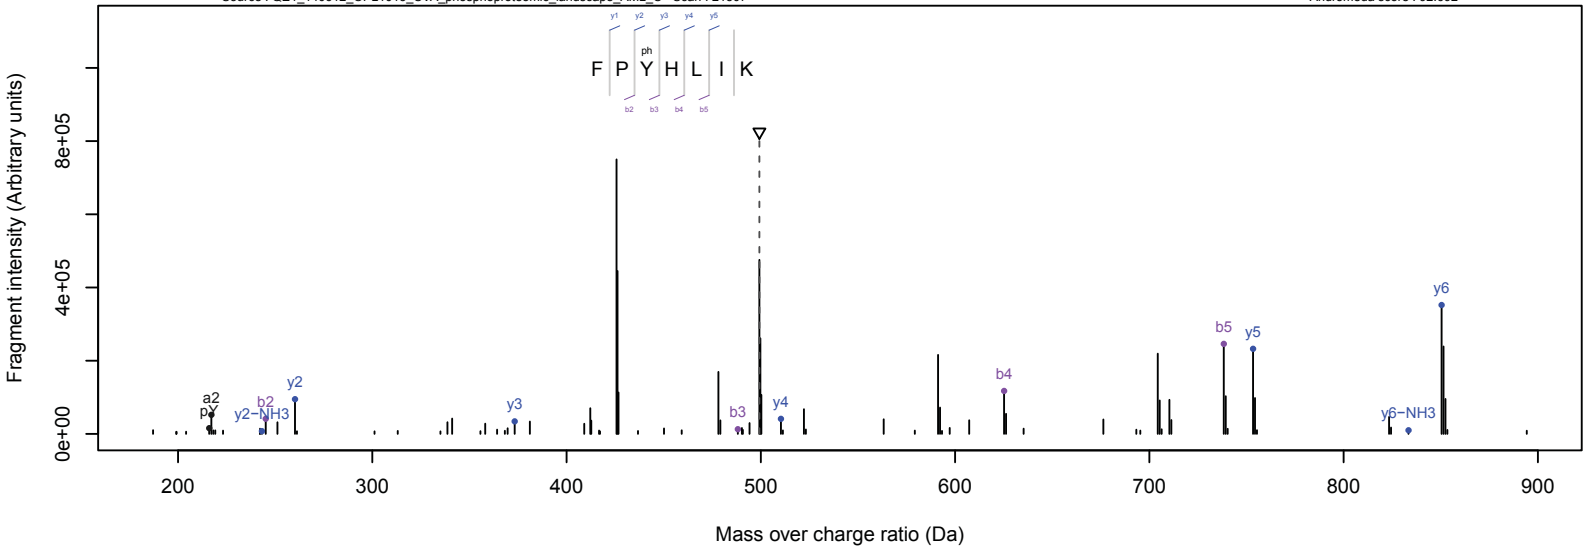

**FSLSQESSYIATQY(ph)SLRPR-3+**

Source : QE1\_140612\_OPL1013\_CVA\_phosphoproteomic\_landscape\_AML\_B Scan : 34518

Andromeda score : 92.679

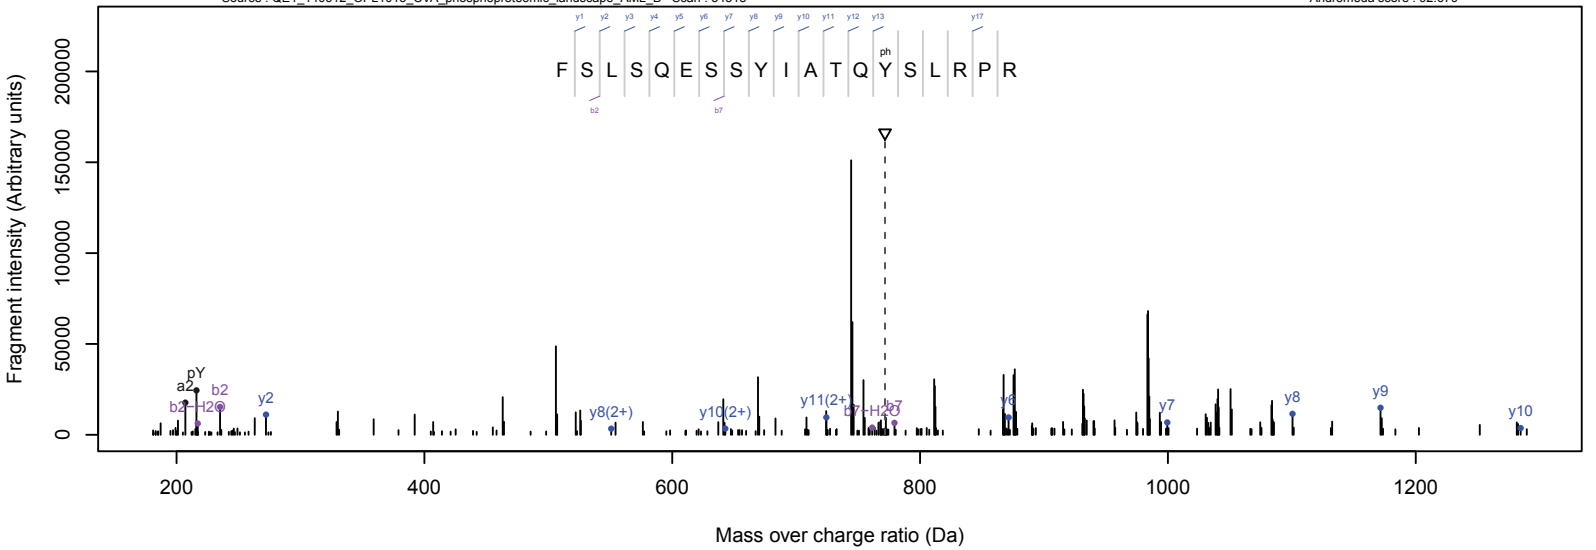

**RIEELGLLNQY(ph)RK-3+**

Source : QE1\_140612\_OPL1013\_CVA\_phosphoproteomic\_landscape\_AML\_C Scan : 28471

Andromeda score : 92.65

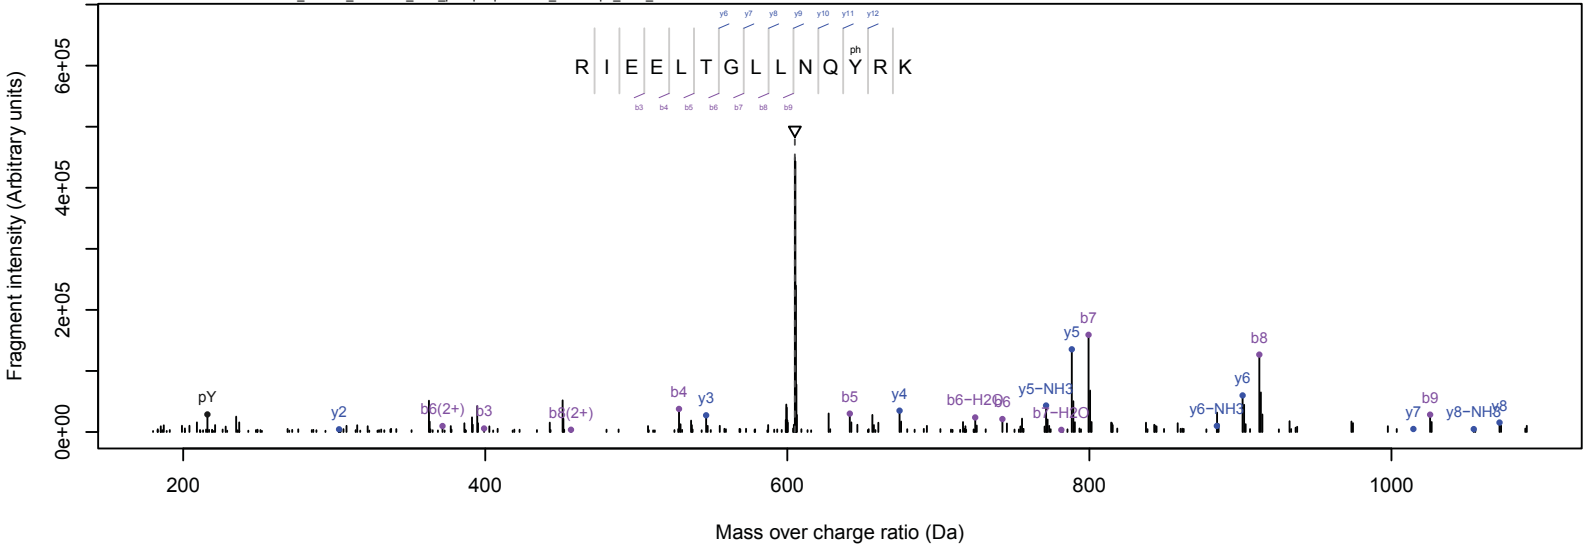

**TKESGEY(ph)AISIK-2+**

Source : QE1\_140612\_OPL1013\_CVA\_phosphoproteomic\_landscape\_AML\_C Scan : 11977

Andromeda score : 92.65

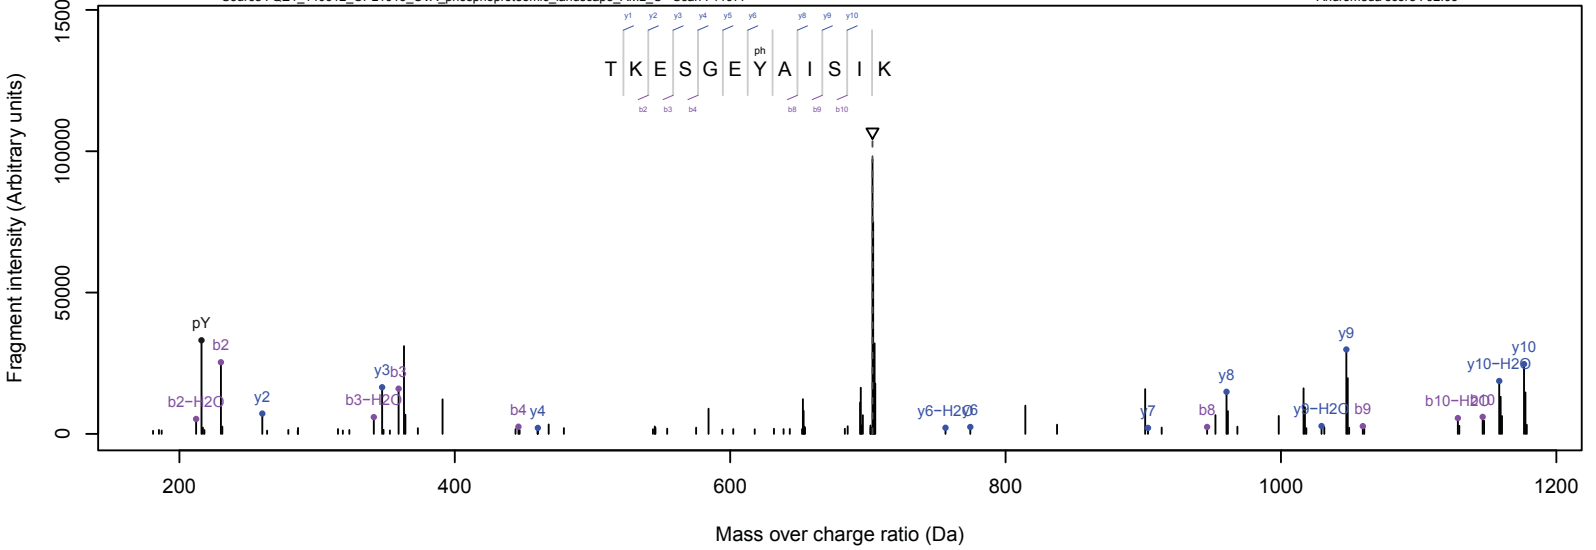

**KLAAVTY(ph)NGVDNKNK-3+**

Source : QE1\_140612\_OPL1013\_CVA\_phosphoproteomic\_landscape\_AML\_B Scan : 7742

Andromeda score : 92.633

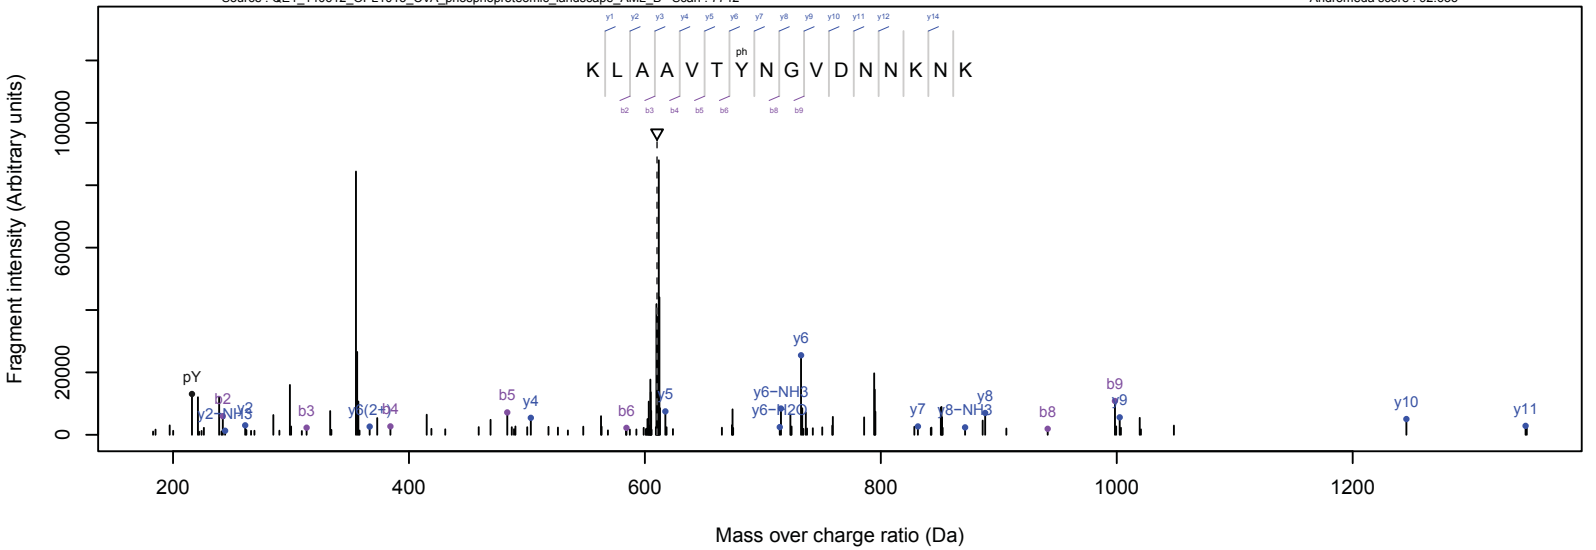

**QGGQQLSFPENY(ph)QTLPK-2+**

Source: QE1\_140612\_OPL1013\_CVA\_phosphoproteomic\_landscape\_AML\_C Scan: 30912

Andromeda score: 92.633

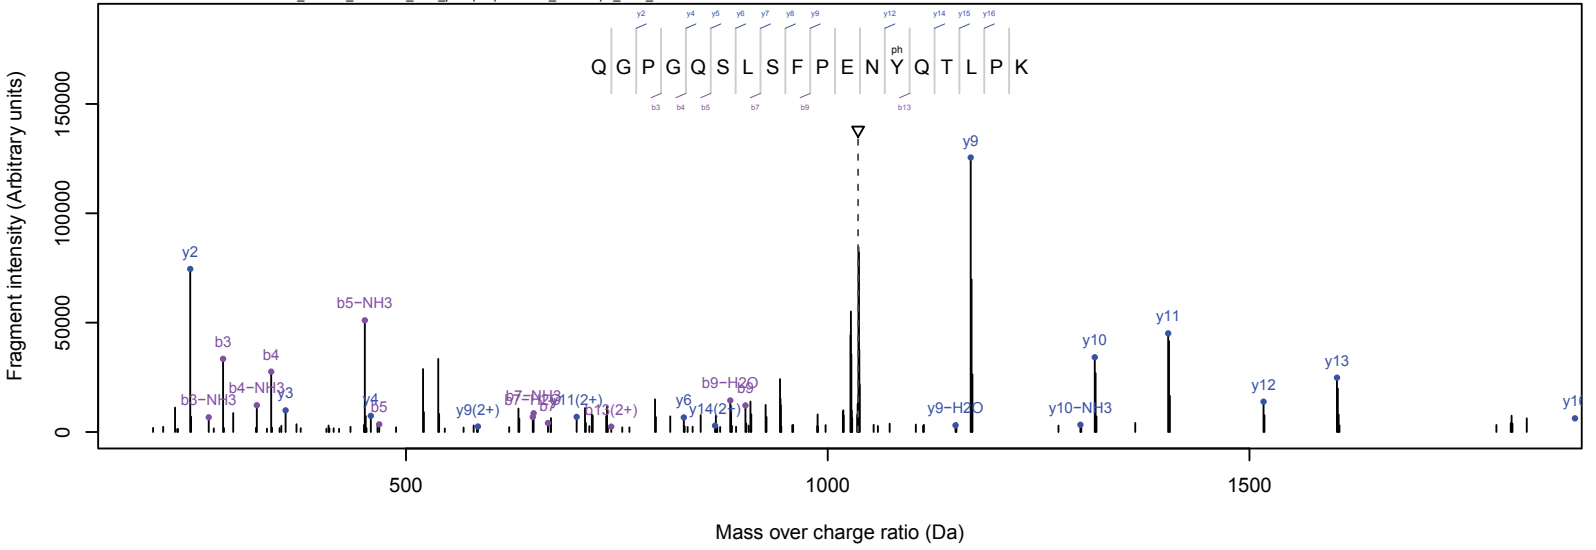

**KTTTNPY(ph)VLM(ox)VLYKDK-3+**

Source: QE1\_140612\_OPL1013\_CVA\_phosphoproteomic\_landscape\_AML\_D Scan: 28397

Andromeda score: 92.39

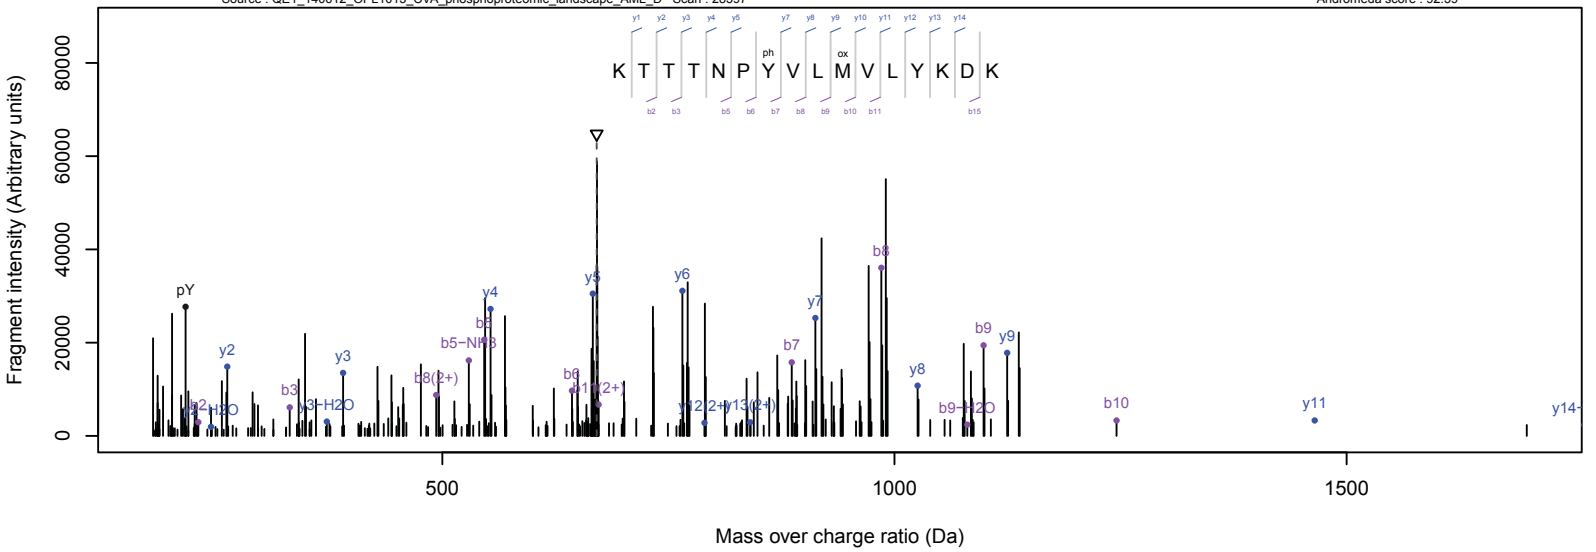

**SDQSY(ph)VISFVVPNQK-2+**

Source: QE1\_140612\_OPL1013\_CVA\_phosphoproteomic\_landscape\_AML\_C Scan: 38483

Andromeda score: 92.38

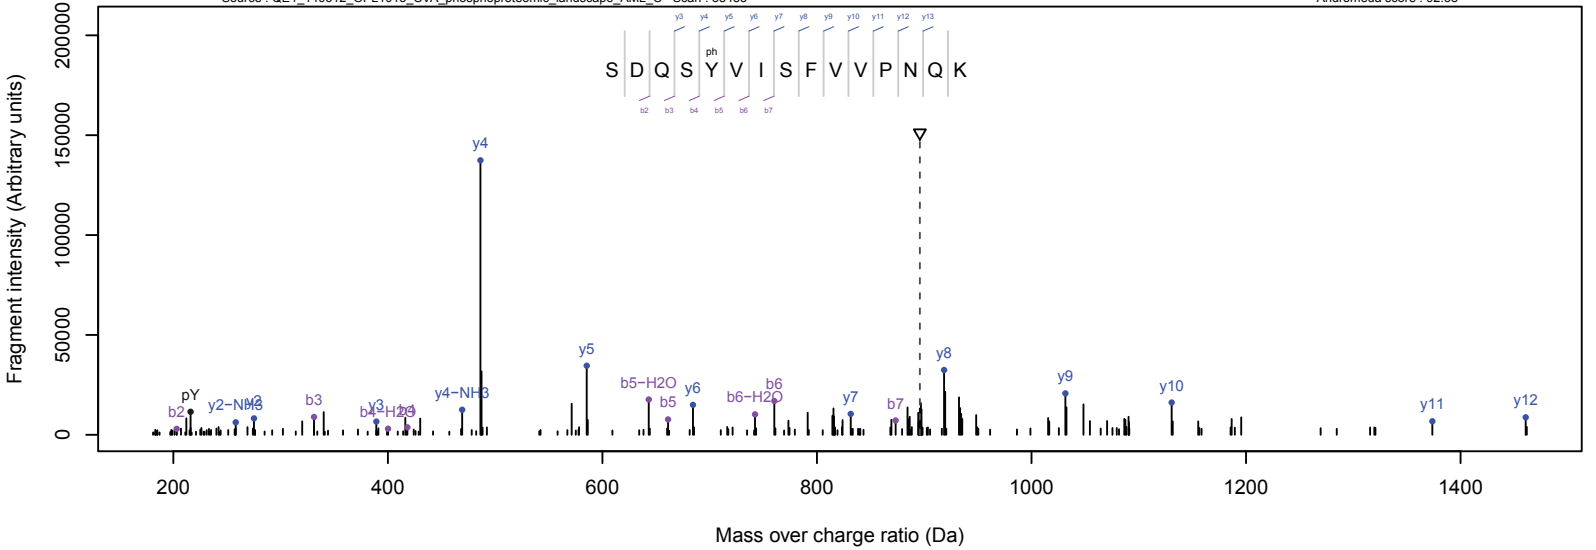

**TMQFEPSTMVY(ph)DACR-2+**

Source : QE1\_140612\_OPL1013\_CVA\_phosphoproteomic\_landscape\_AML\_C Scan : 33861

Andromeda score : 92.38

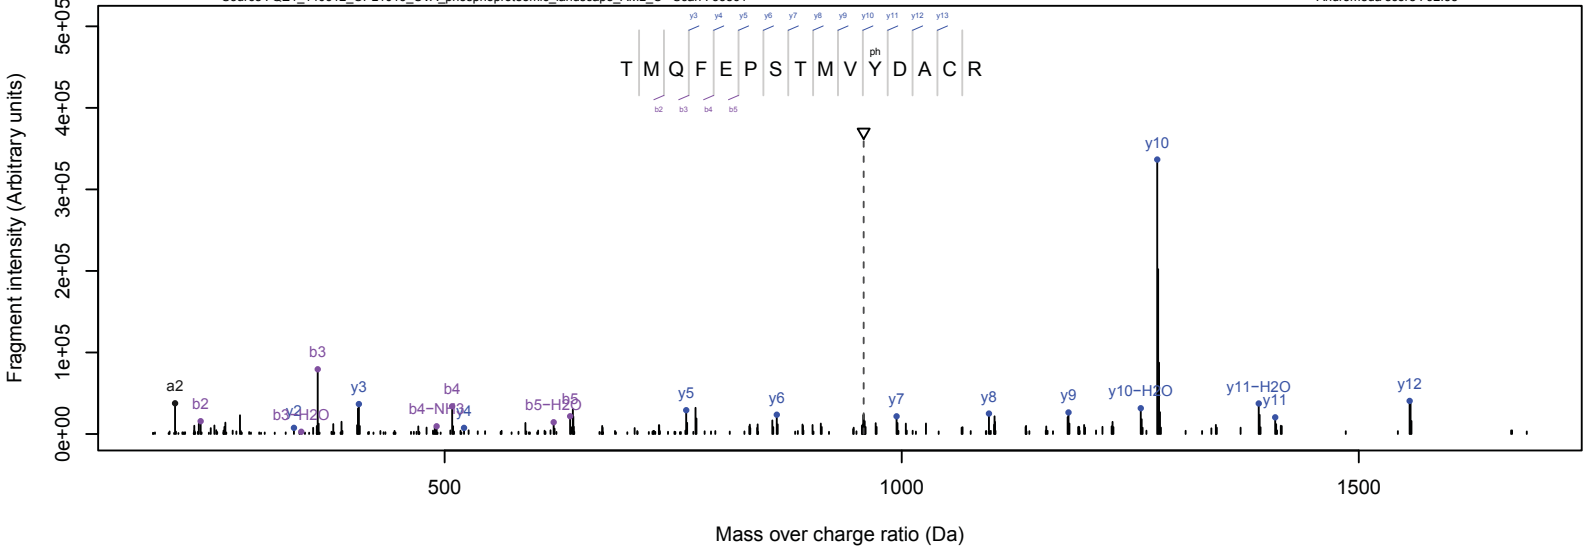

**TTTNPY(ph)VLM(ox)VLYKDK-2+**

Source : QE1\_140612\_OPL1013\_CVA\_phosphoproteomic\_landscape\_AML\_D Scan : 33597

Andromeda score : 92.38

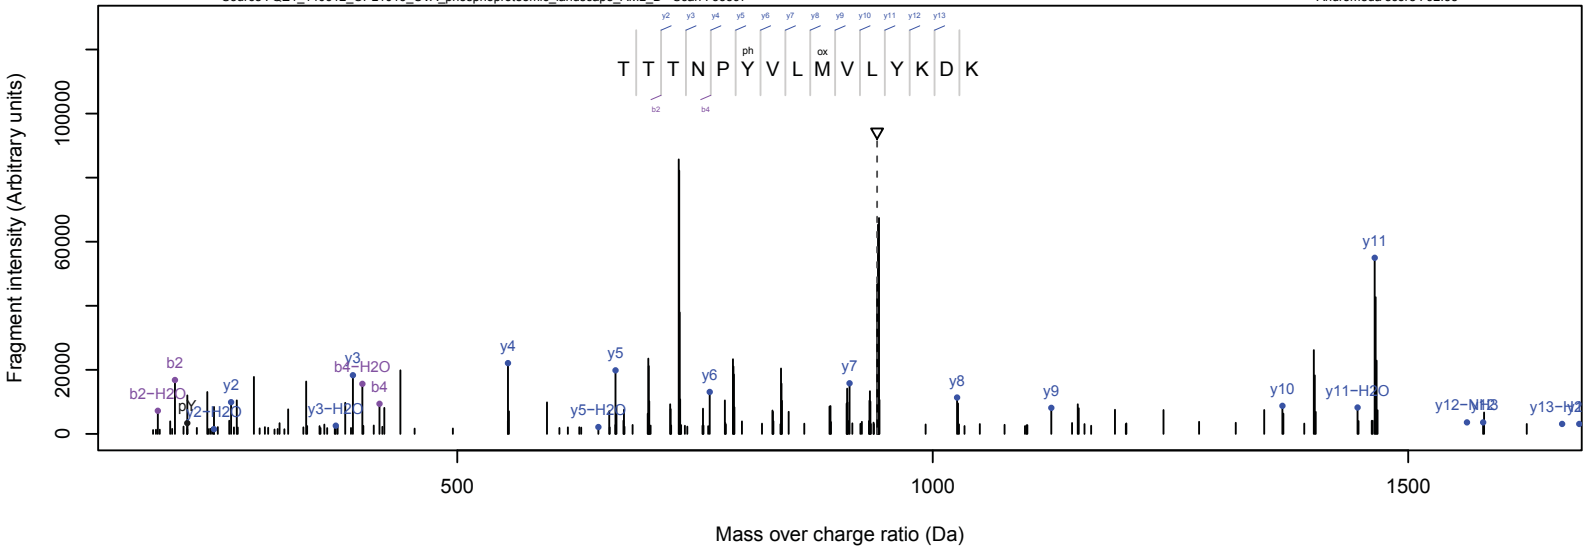

**Y(ph)EDICPSTHNM DVPNIK-3+**

Source : QE1\_140612\_OPL1013\_CVA\_phosphoproteomic\_landscape\_AML\_C Scan : 25577

Andromeda score : 92.38

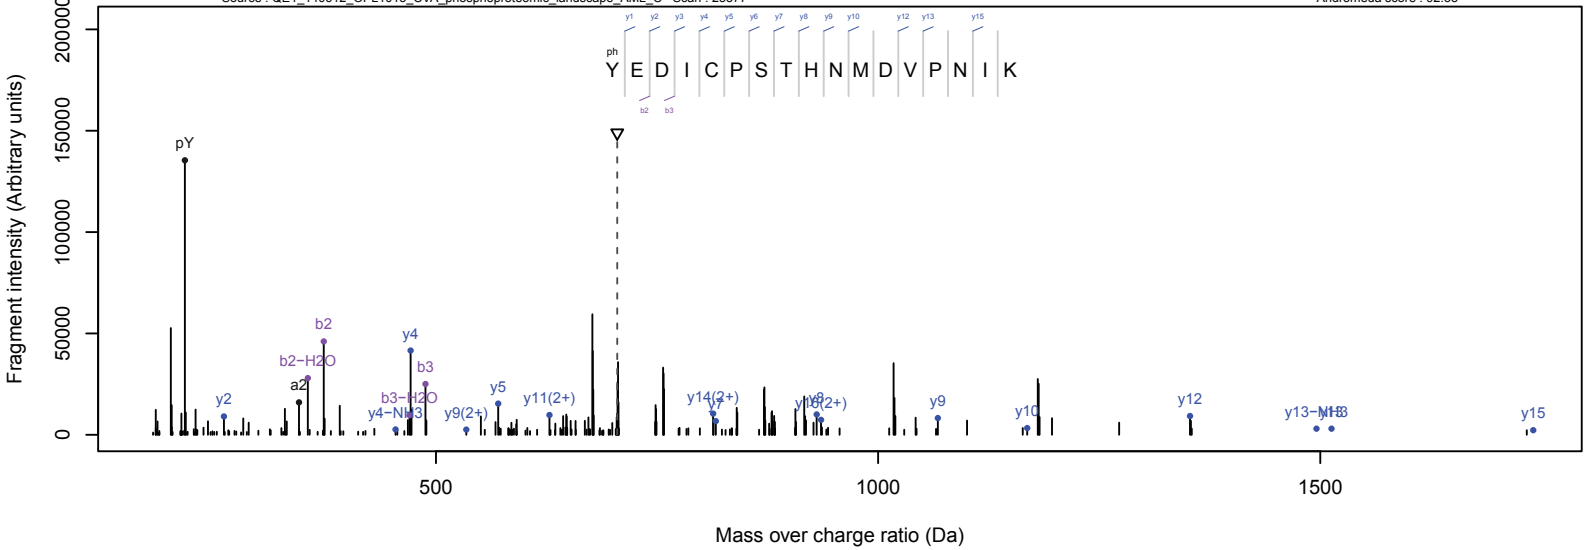

Y(ph)ESLTDP SKLD S G K E L K-3+

Source : QE1\_140612\_OPL1013\_CVA\_phosphoproteomic\_landscape\_AML\_D Scan : 19537

Andromeda score : 92.38

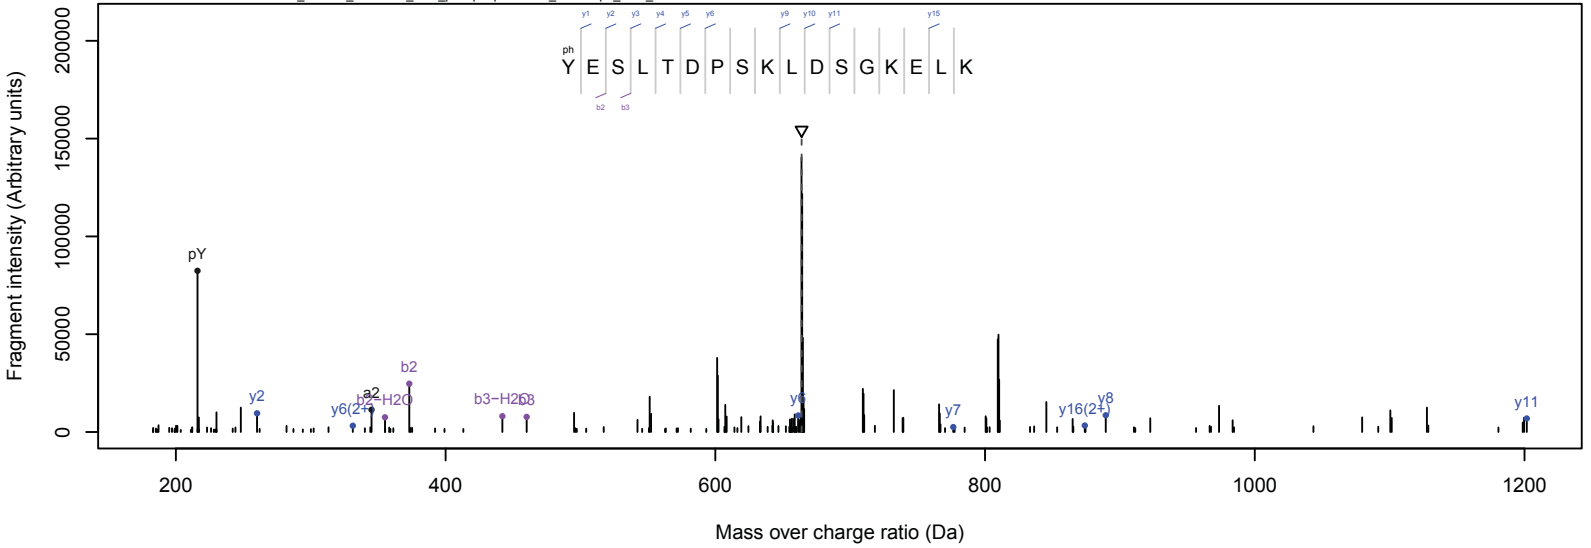

SQLSVFEVVP GT D Q V D H A A V K E Y S R-3+

Source : QE1\_140612\_OPL1013\_CVA\_phosphoproteomic\_landscape\_AML\_B Scan : 36145

Andromeda score : 92.349

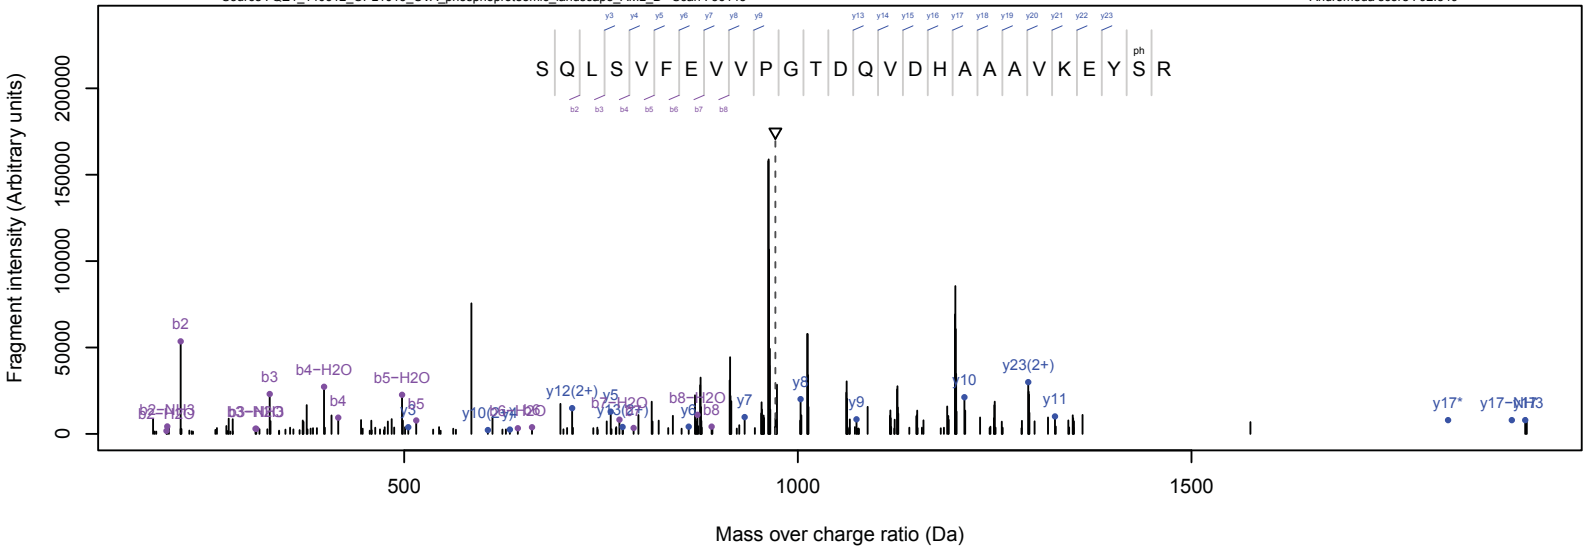

Y(ph)SSGYSSAEQ V N Q D V S R-2+

Source : QE1\_140908\_OPL1013\_CvA\_pTyrIP\_AML\_Kasumi6 Scan : 15290

Andromeda score : 92.264

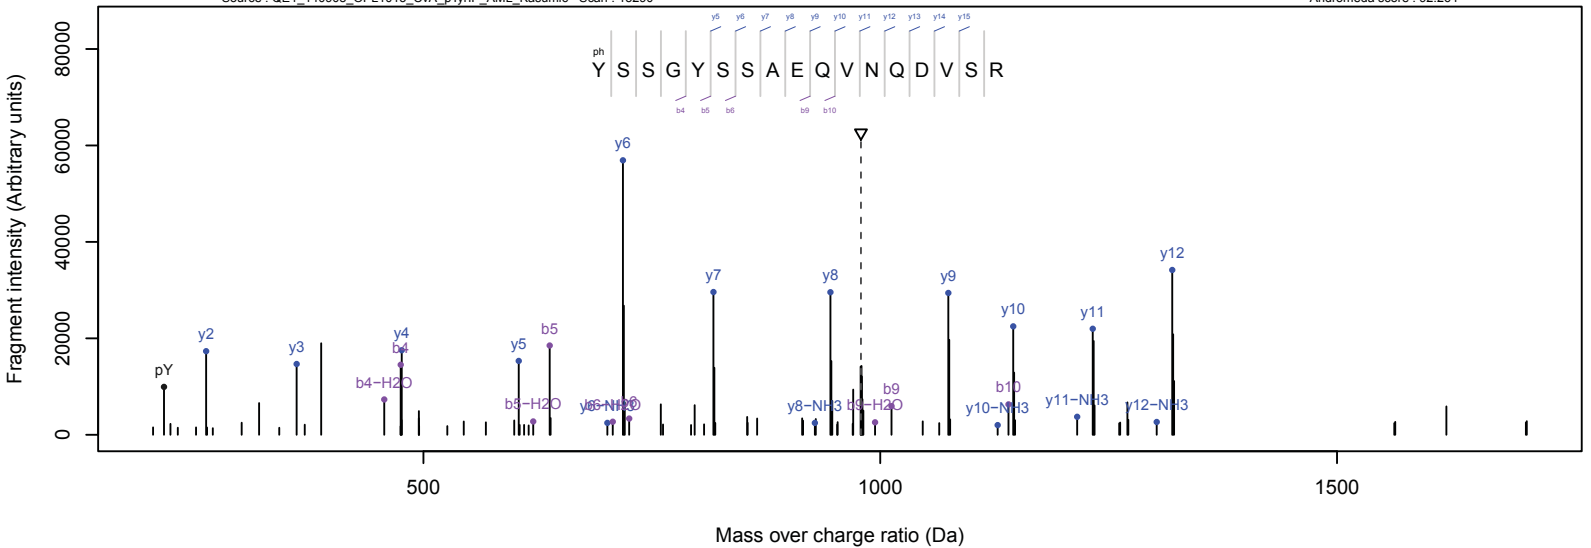

DGRGY(ph)VPATIK-2+

Source : QE1\_140612\_OPL1013\_CVA\_phosphoproteomic\_landscape\_AML\_C Scan : 10923

Andromeda score : 92.247

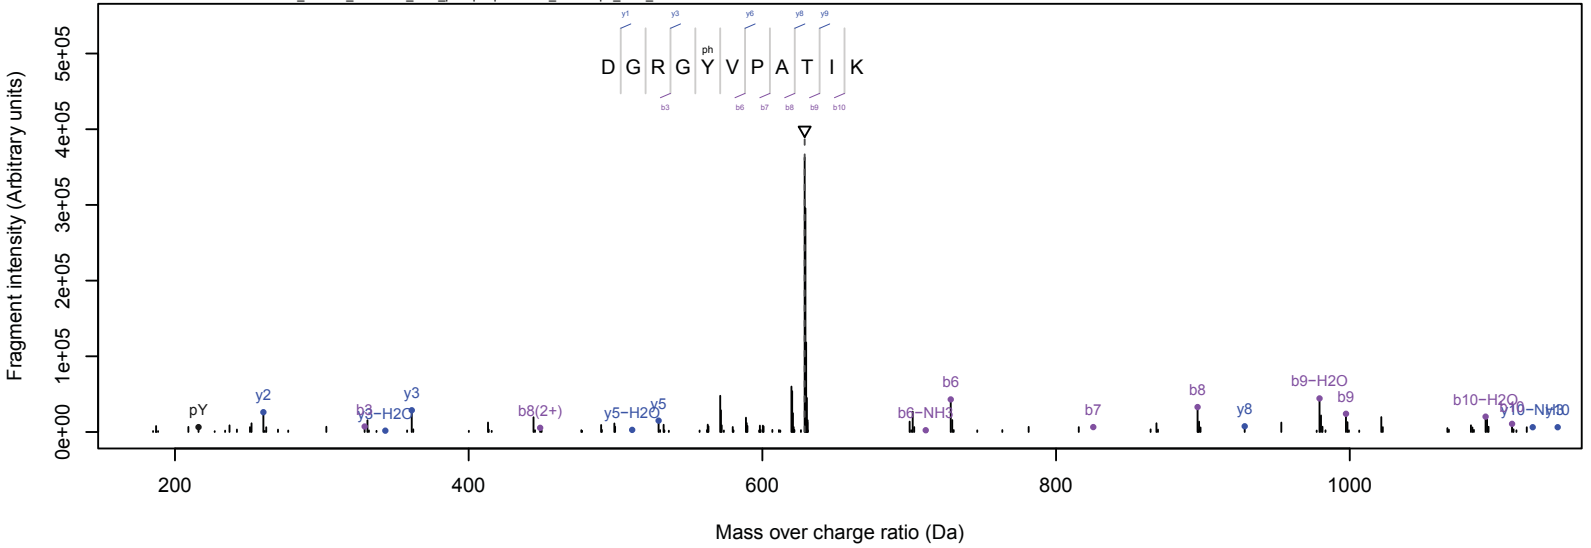

ASSQPTVSGNTSLTTHQYVSSG(ph)PSLQNSFIK-3+

Source : QE1\_140612\_OPL1013\_CVA\_phosphoproteomic\_landscape\_AML\_C Scan : 32957

Andromeda score : 92.231

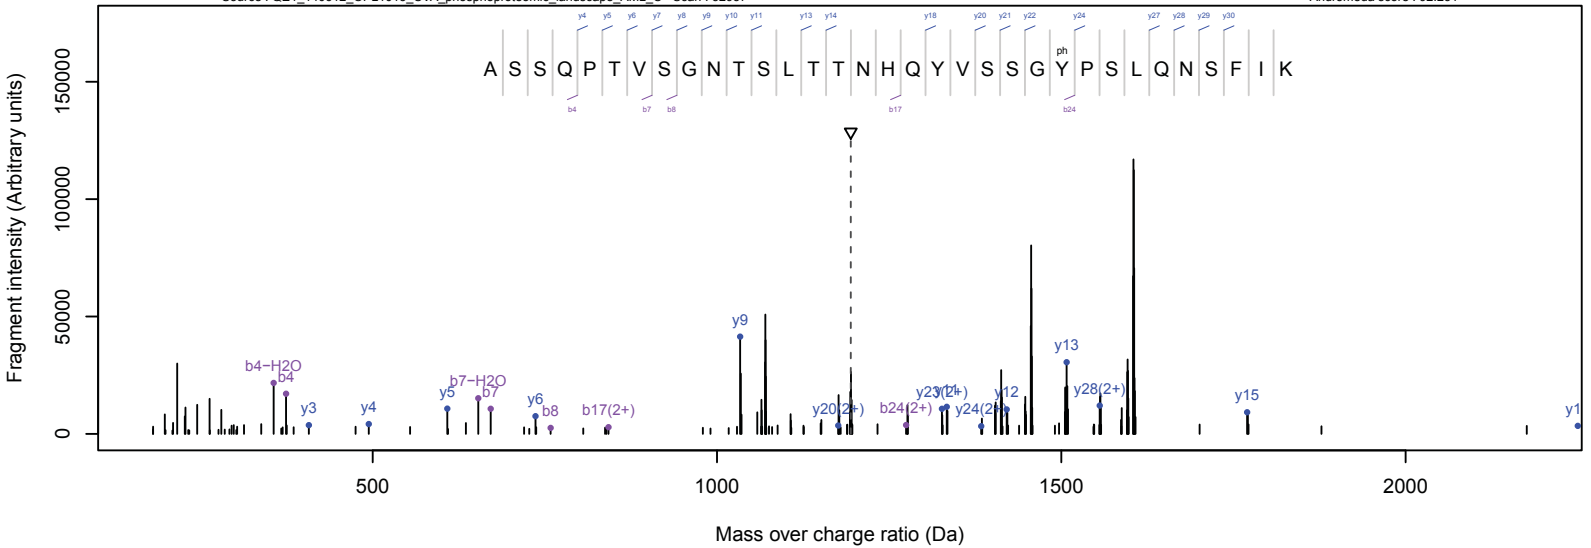

LYQEIIISYF(DK)GK-3+

Source : QE1\_140612\_OPL1013\_CVA\_phosphoproteomic\_landscape\_AML\_C Scan : 38442

Andromeda score : 92.151

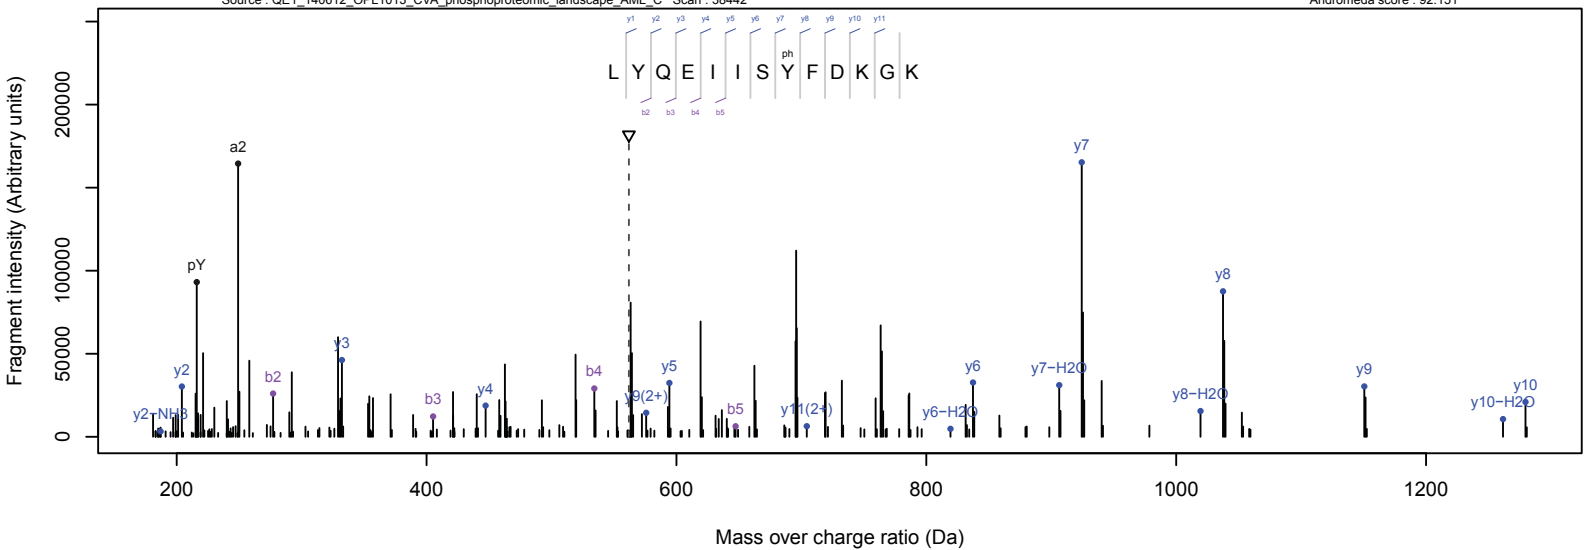



TVY(ph)CNVHKHEPLVLFCE~~S~~CDTLTCR-4+

Source : QE1\_140908\_OPL1013\_CVA\_pTyrIP\_AML\_HEL Scan : 33013

Andromeda score : 92.147

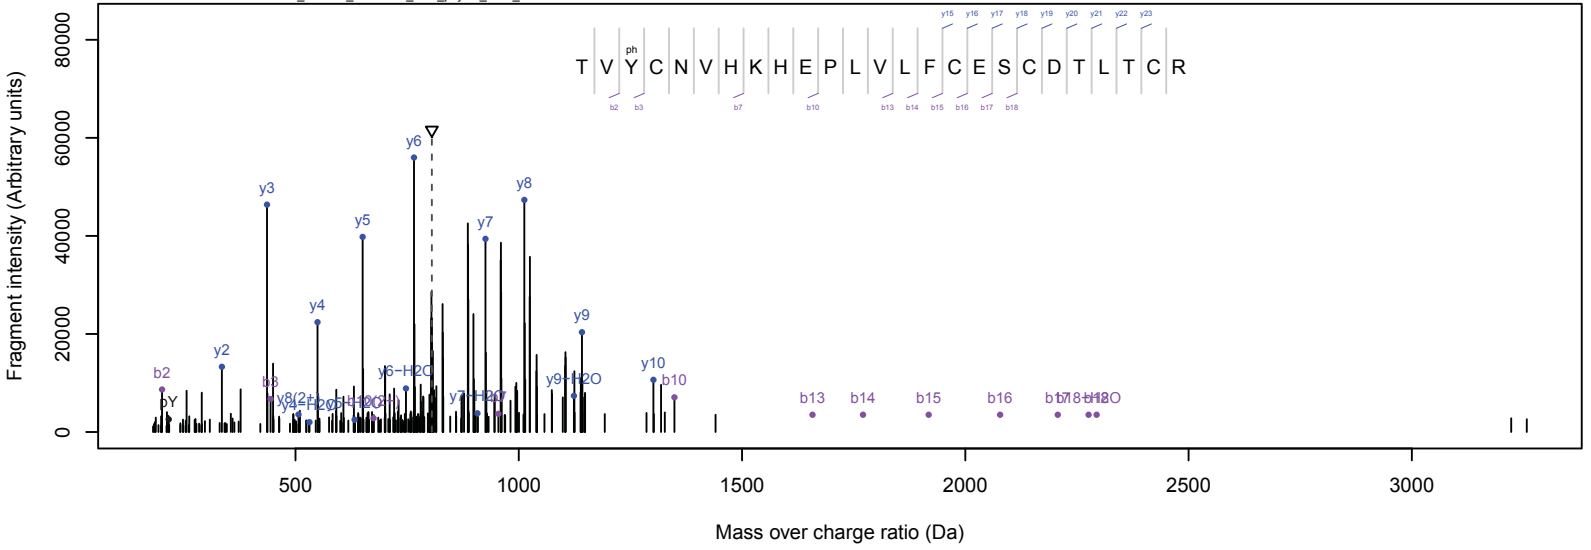

DVIINQEGEY(ph)IK-2+

Source : QE1\_140612\_OPL1013\_CVA\_phosphoproteomic\_landscape\_AML\_D Scan : 23808

Andromeda score : 91.961

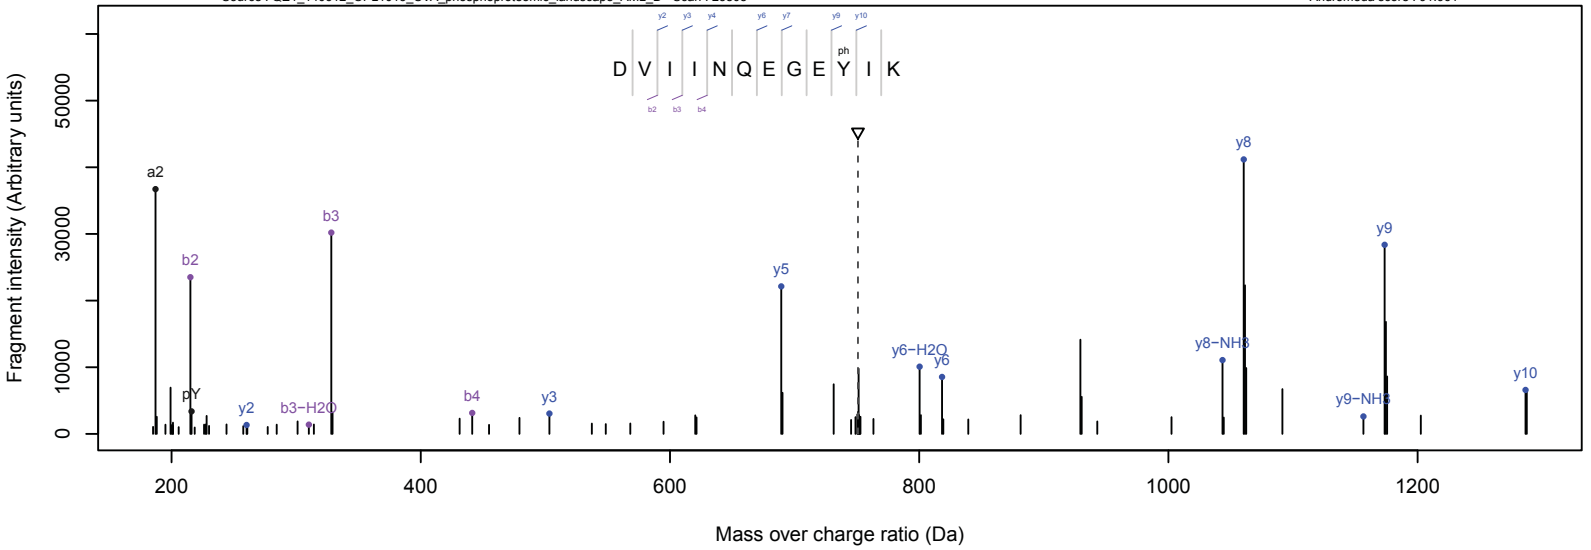

HVY(ph)LDEPIKIGR-3+

Source : QE1\_140612\_OPL1013\_CVA\_phosphoproteomic\_landscape\_AML\_B Scan : 26778

Andromeda score : 91.961

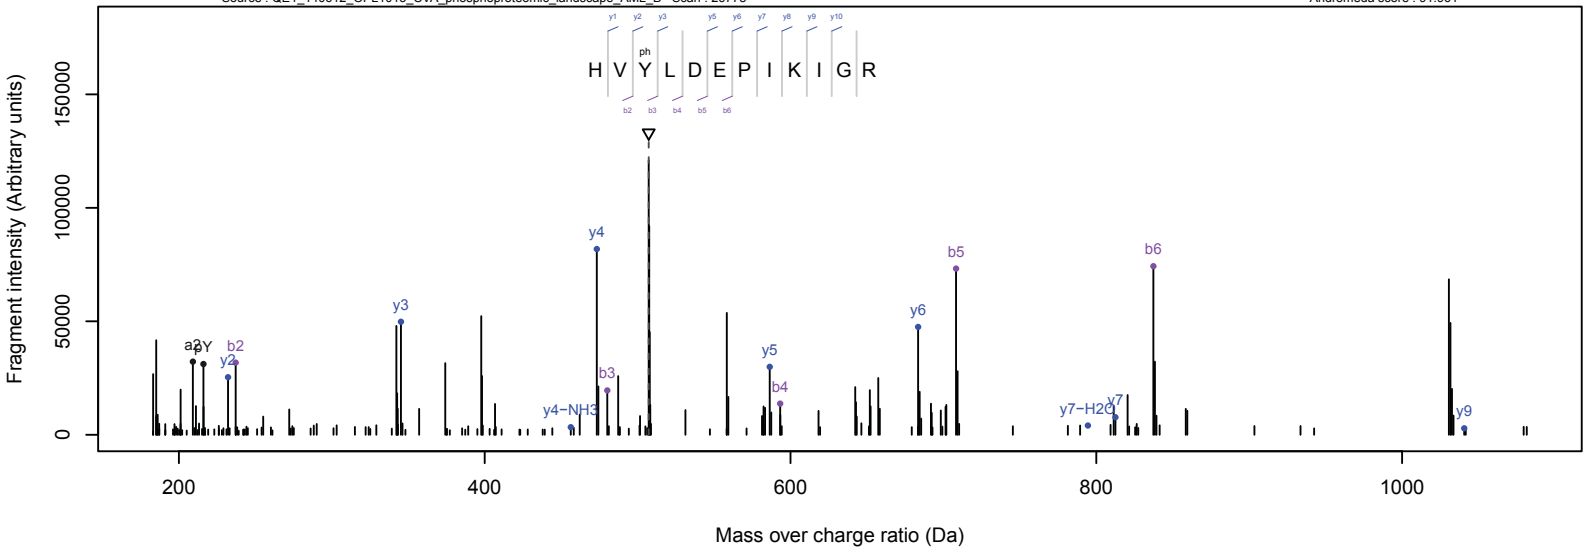

HQY(ph)YNLK-2+

Source : QE1\_140612\_OPL1013\_CVA\_phosphoproteomic\_landscape\_AML\_D Scan : 7603

Andromeda score : 91.906

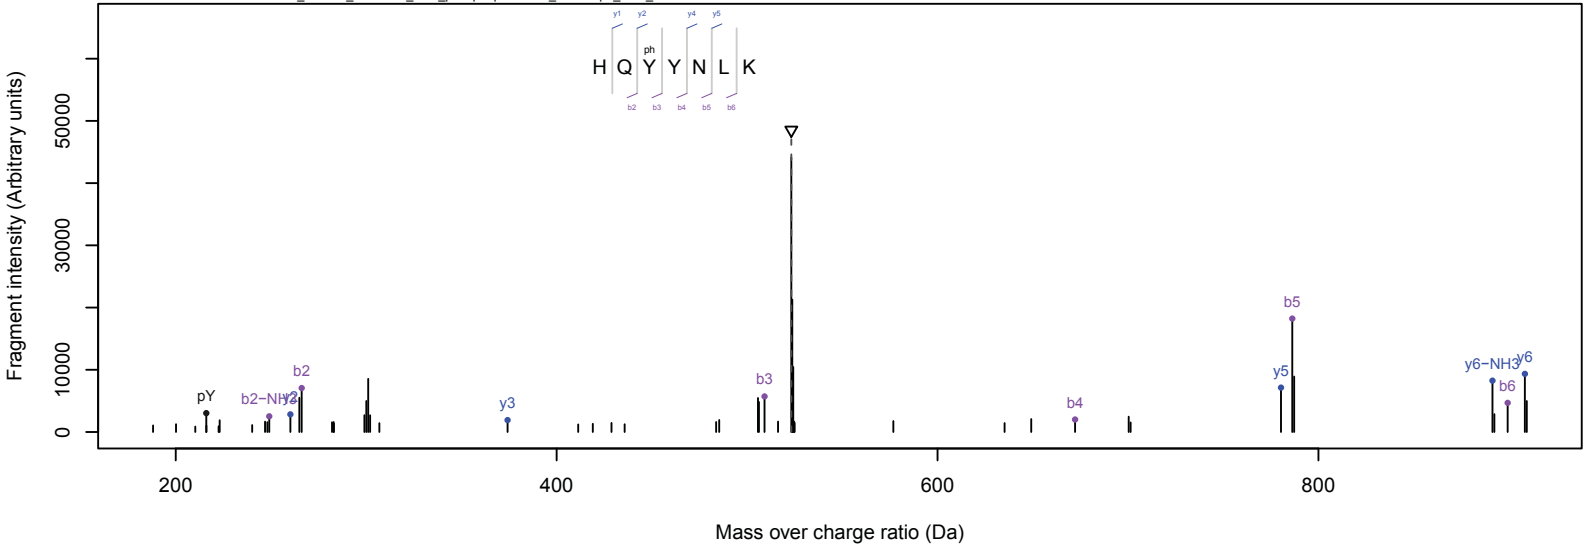

WTCCALLAGSEY(ph)LK-2+

Source : QE1\_140612\_OPL1013\_CVA\_phosphoproteomic\_landscape\_AML\_B Scan : 37231

Andromeda score : 91.845

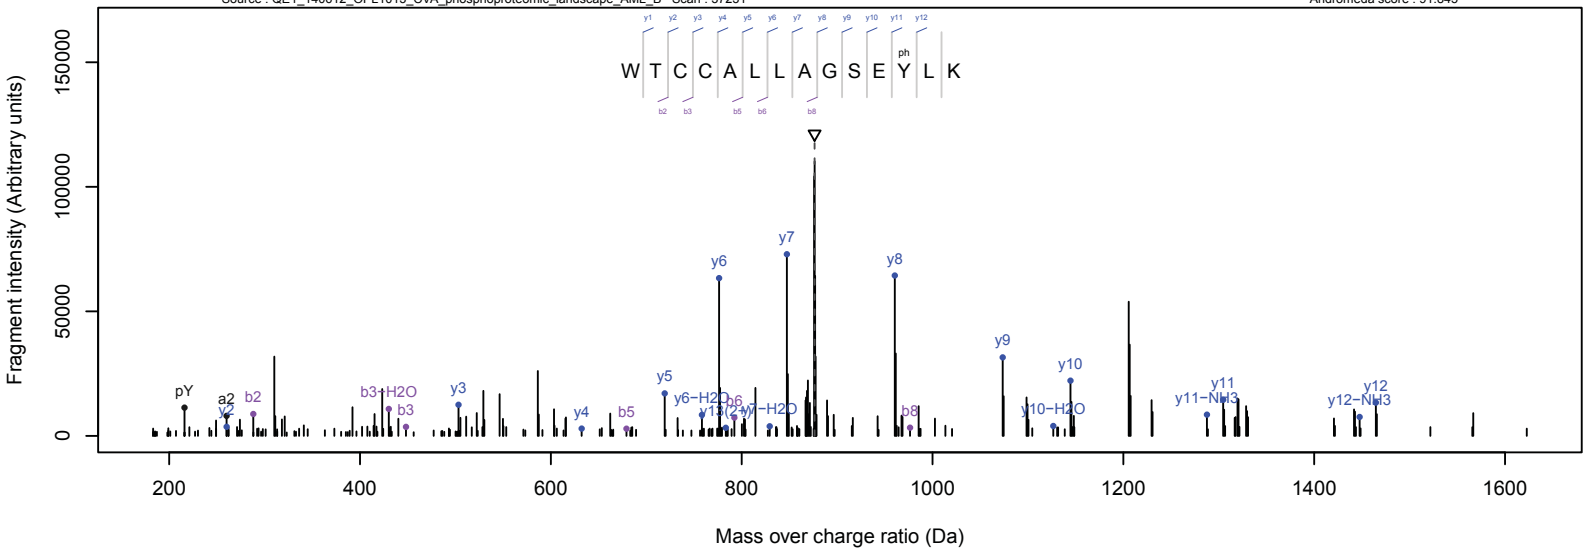

FACNGTVIEHPEY(ph)GEVIQLQGDQR-3+

Source : QE1\_140612\_OPL1013\_CVA\_phosphoproteomic\_landscape\_AML\_C Scan : 31721

Andromeda score : 91.808

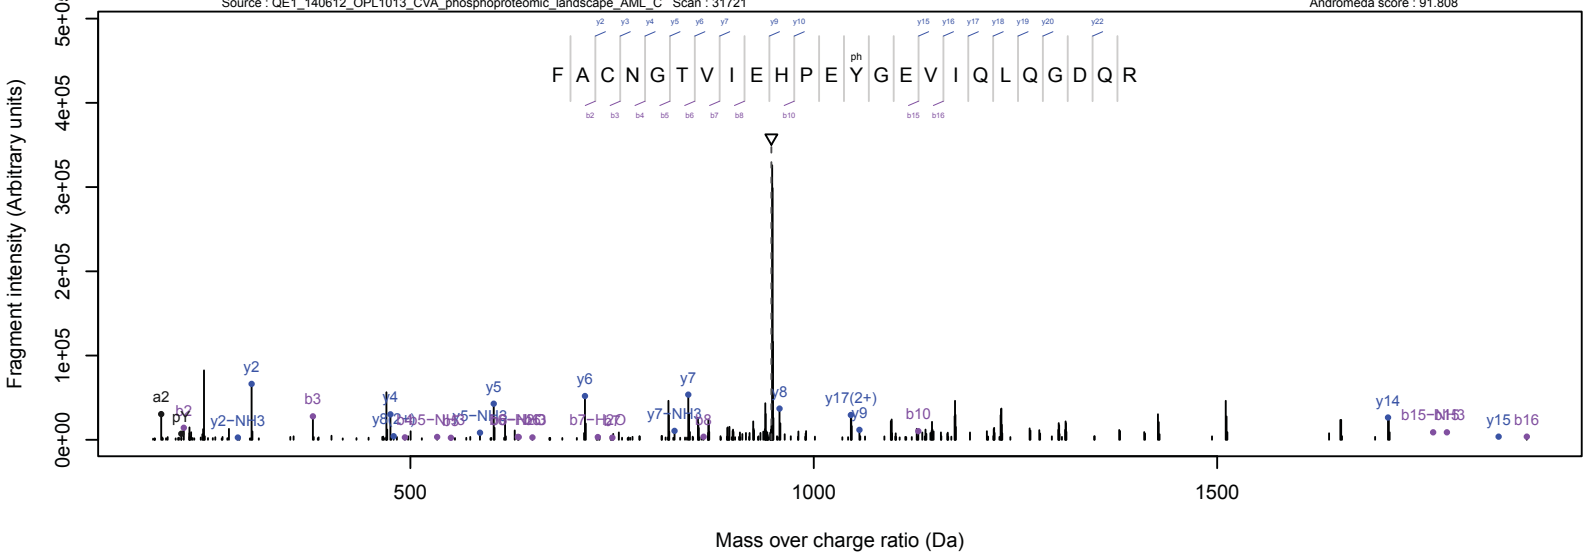

**SY(ph)IYSGSHDGHINIWDSSETGENDSFAGK-4+**

Source : QE1\_140908\_OPL1013\_CvA\_pTyrIP\_AML\_HEL Scan : 30399

Andromeda score : 91.767

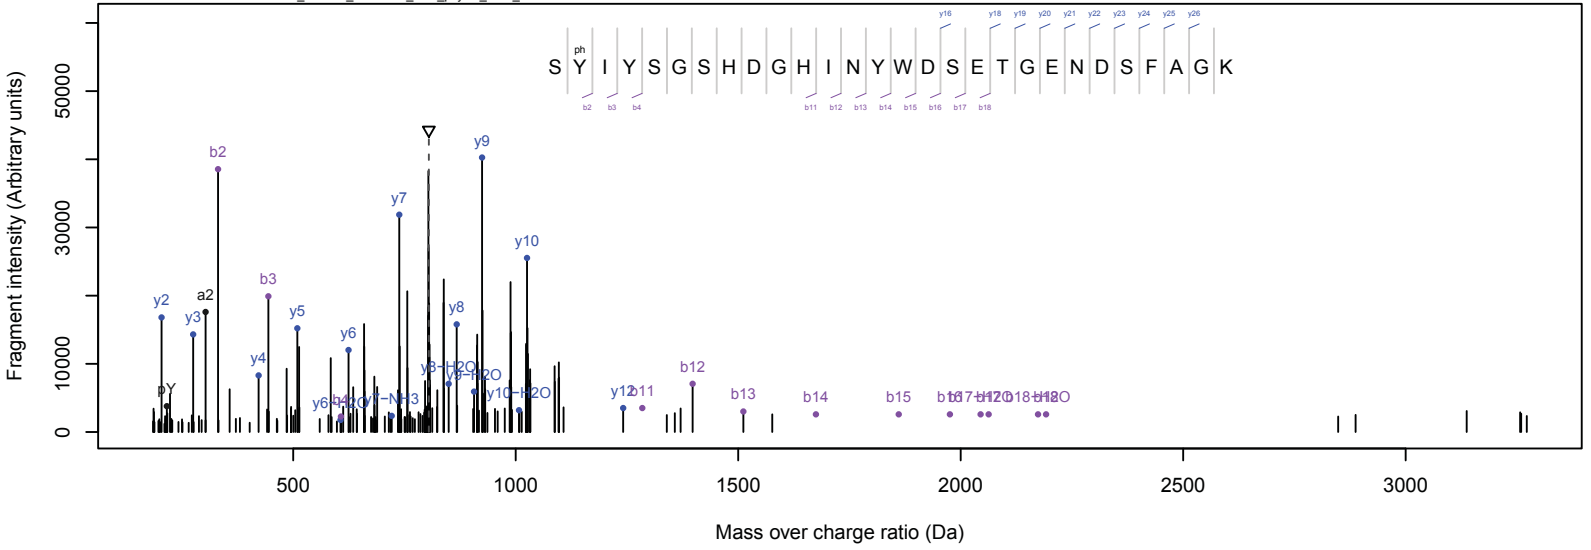

**AGGSHQEQQPPYPSYNSNY(ph)WNSTAR-3+**

Source : QE1\_140612\_OPL1013\_CVA\_phosphoproteomic\_landscape\_AML\_C Scan : 22618

Andromeda score : 91.733

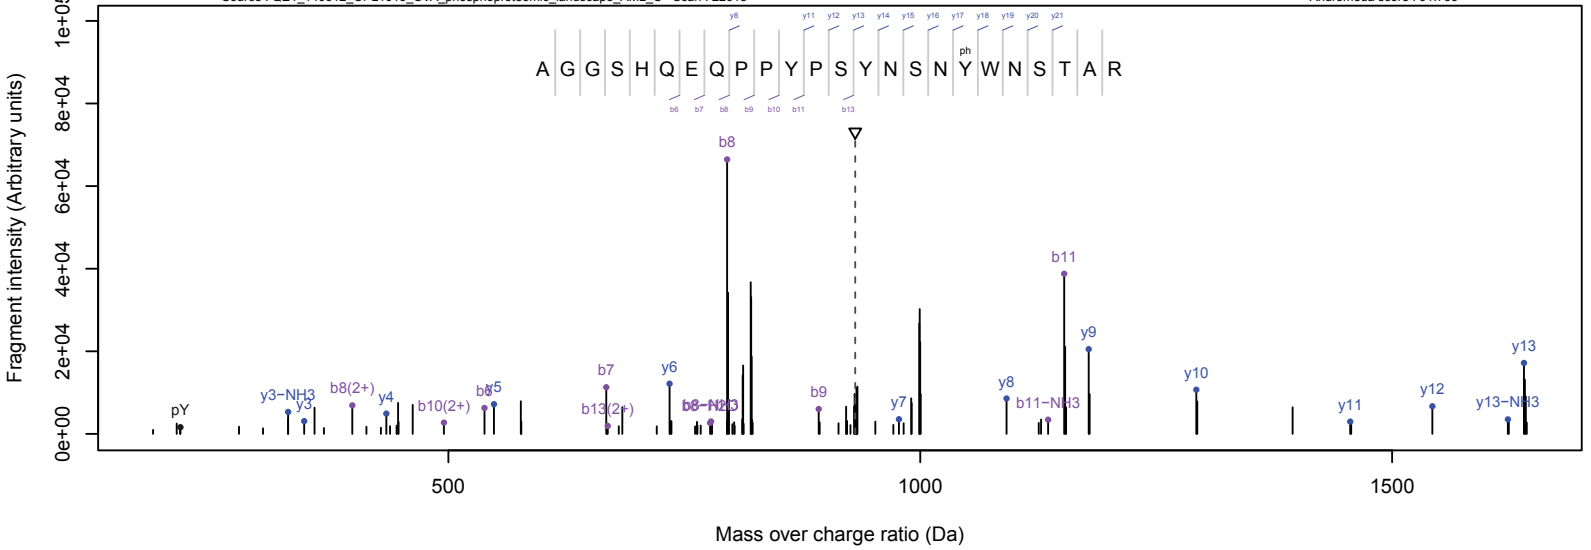

**FALPSPQHILGLPLVQGHIYLSAR-3+**

Source : QE1\_140822\_OPL1013\_CvA\_pTyrIP\_AML\_cell\_lines\_part2\_E Scan : 40935

Andromeda score : 91.733

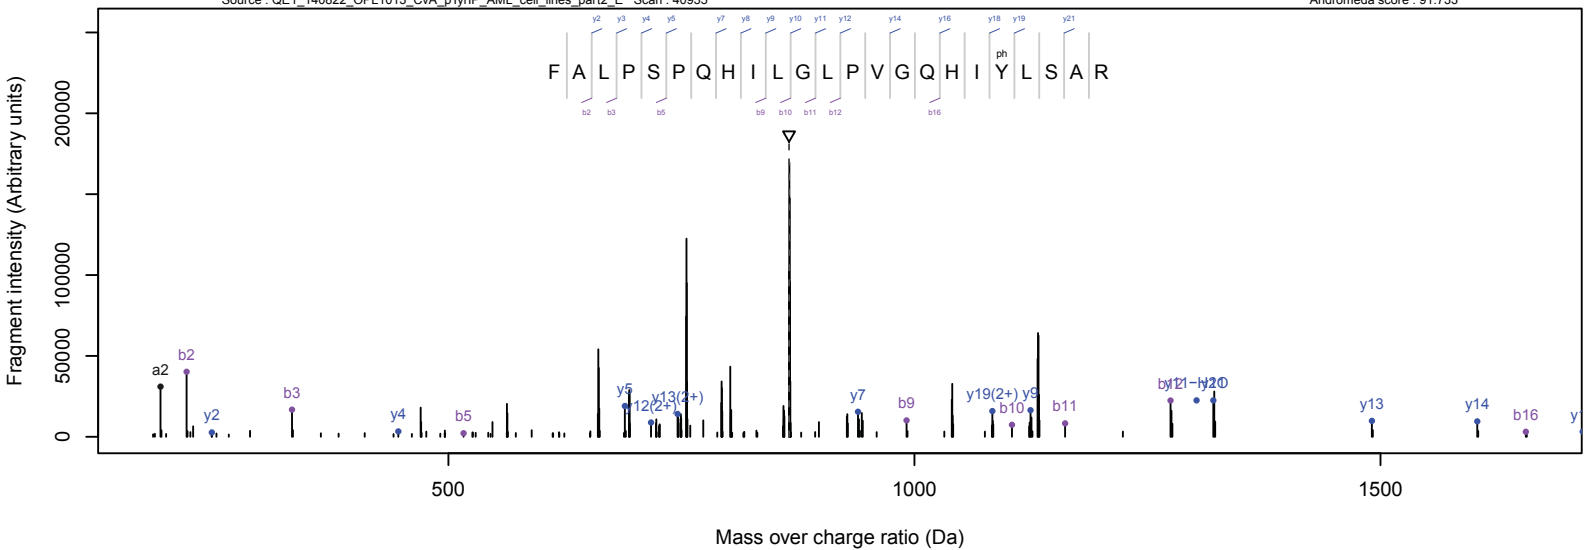

SAVGHEY(ph)VAEVEKHSSTDAAK-4+

Source : QE1\_140612\_OPL1013\_CVA\_phosphoproteomic\_landscape\_AML\_B Scan : 11579

Andromeda score : 91.733

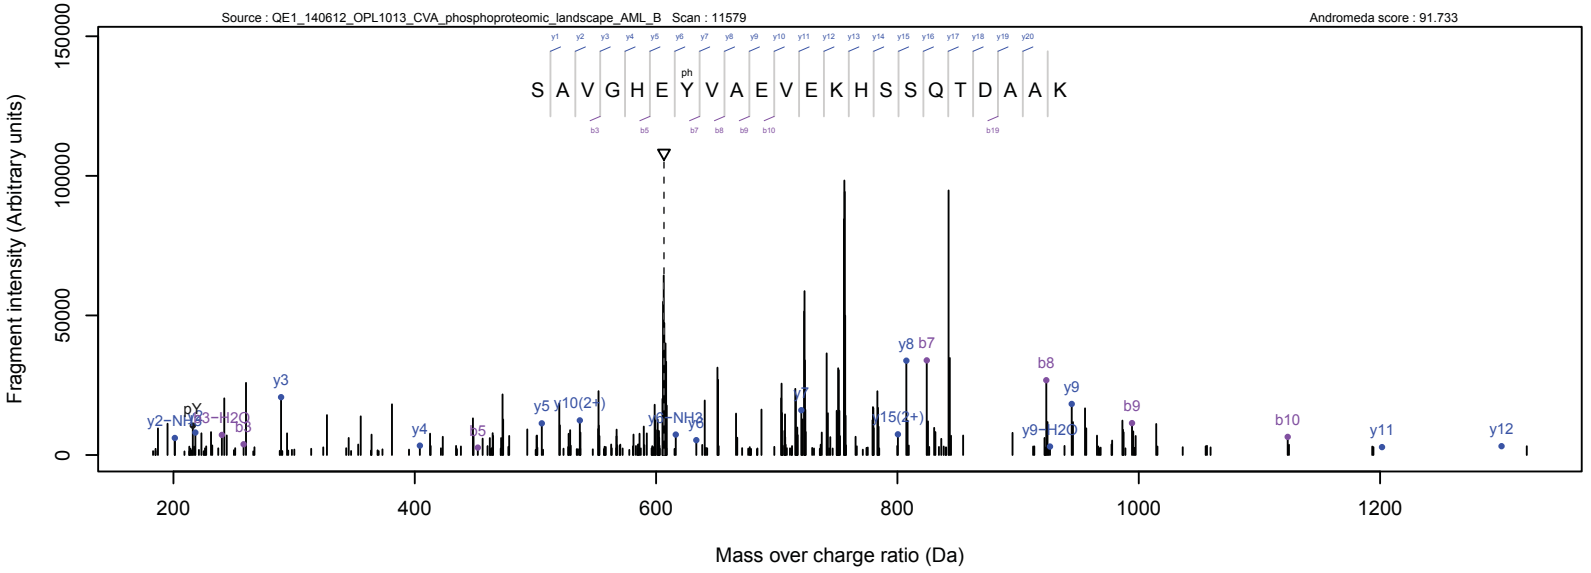

DSPFLAEHKY(ph)PTLP GK-3+

Source : QE1\_140612\_OPL1013\_CVA\_phosphoproteomic\_landscape\_AML\_C Scan : 25625

Andromeda score : 91.657

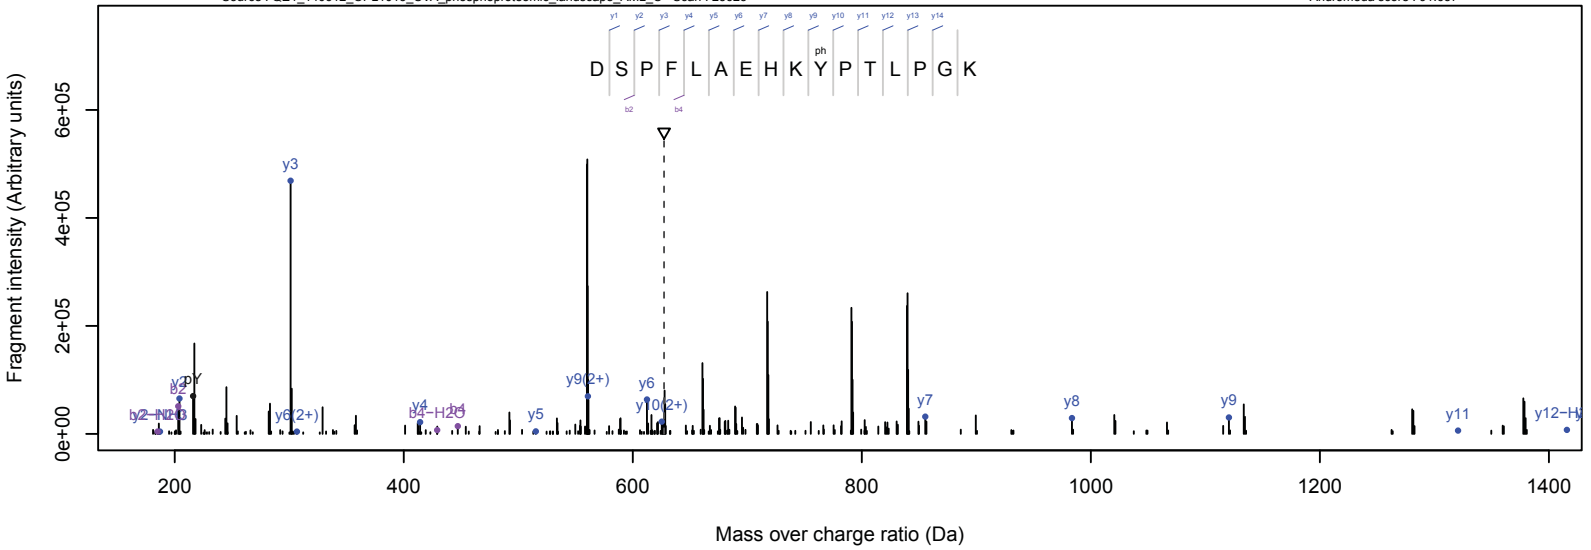

SVVCPCASMPWGP NY(ph)R-2+

Source : QE1\_140612\_OPL1013\_CVA\_phosphoproteomic\_landscape\_AML\_C Scan : 41536

Andromeda score : 91.622

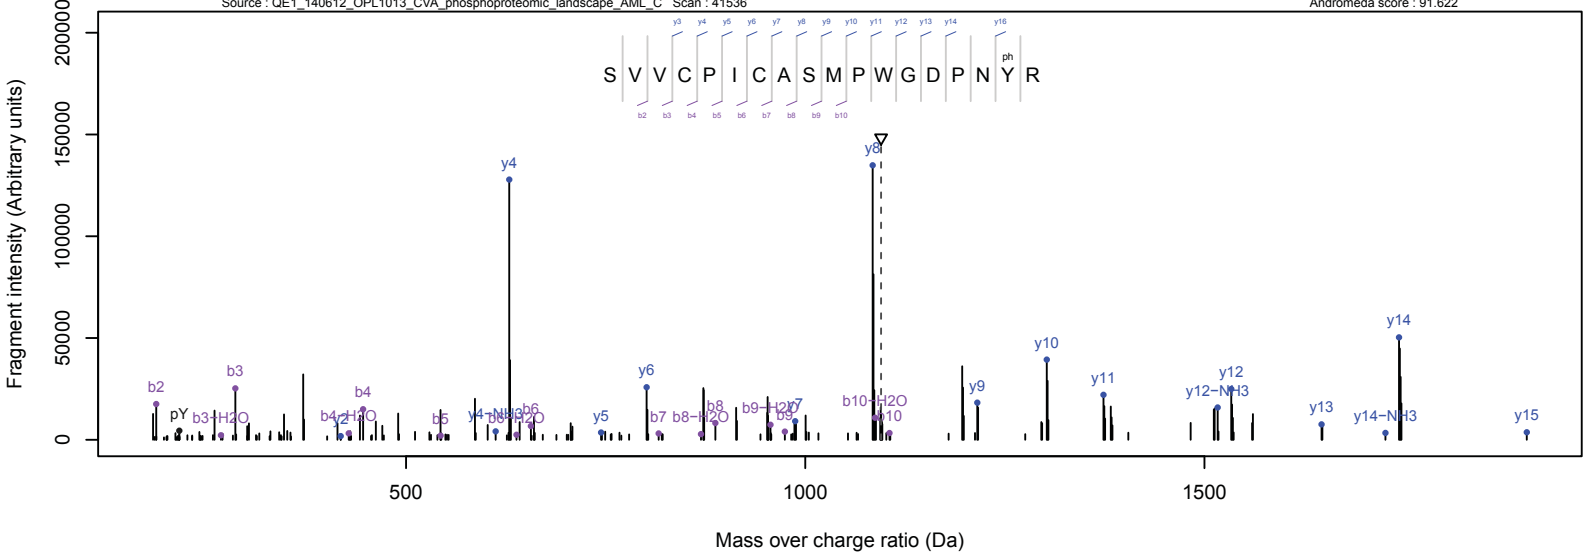

**IGDLTGY(ph)CTNPNR-2+**

Source : QE1\_140612\_OPL1013\_CVA\_phosphoproteomic\_landscape\_AML\_C Scan : 14756

Andromeda score : 91.62

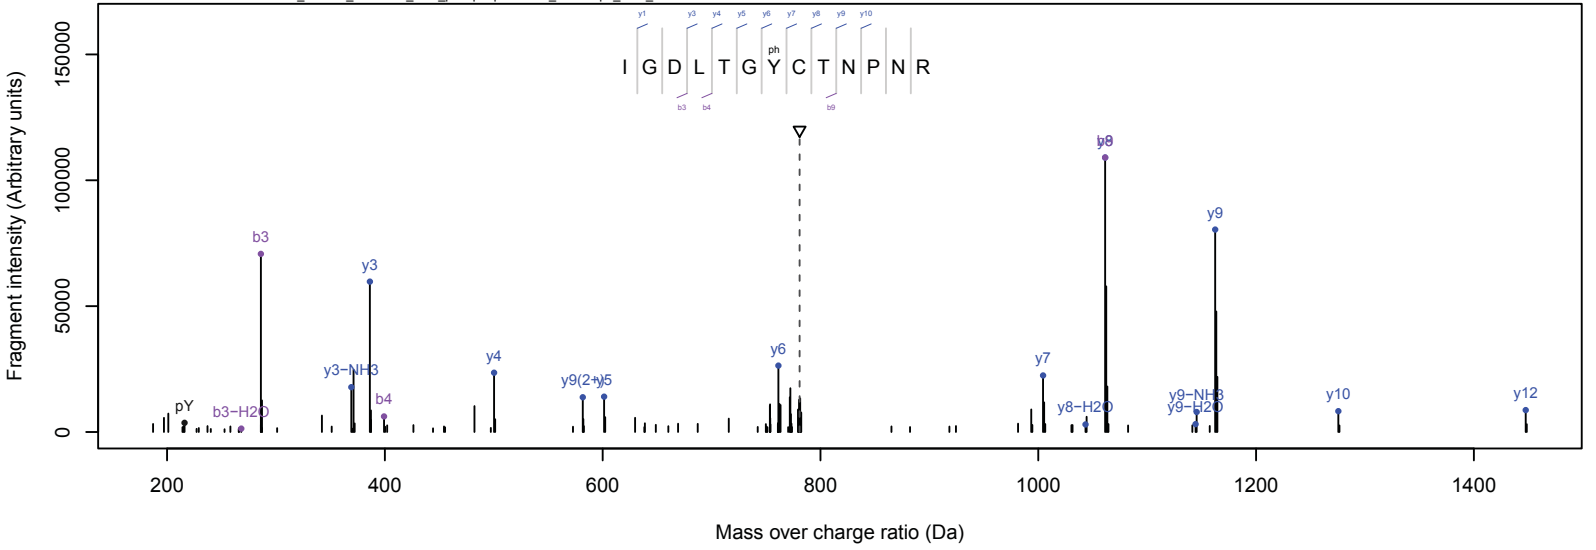

**LCVLEY(ph)QGKYILK-2+**

Source : QE1\_140612\_OPL1013\_CVA\_phosphoproteomic\_landscape\_AML\_A Scan : 32413

Andromeda score : 91.62

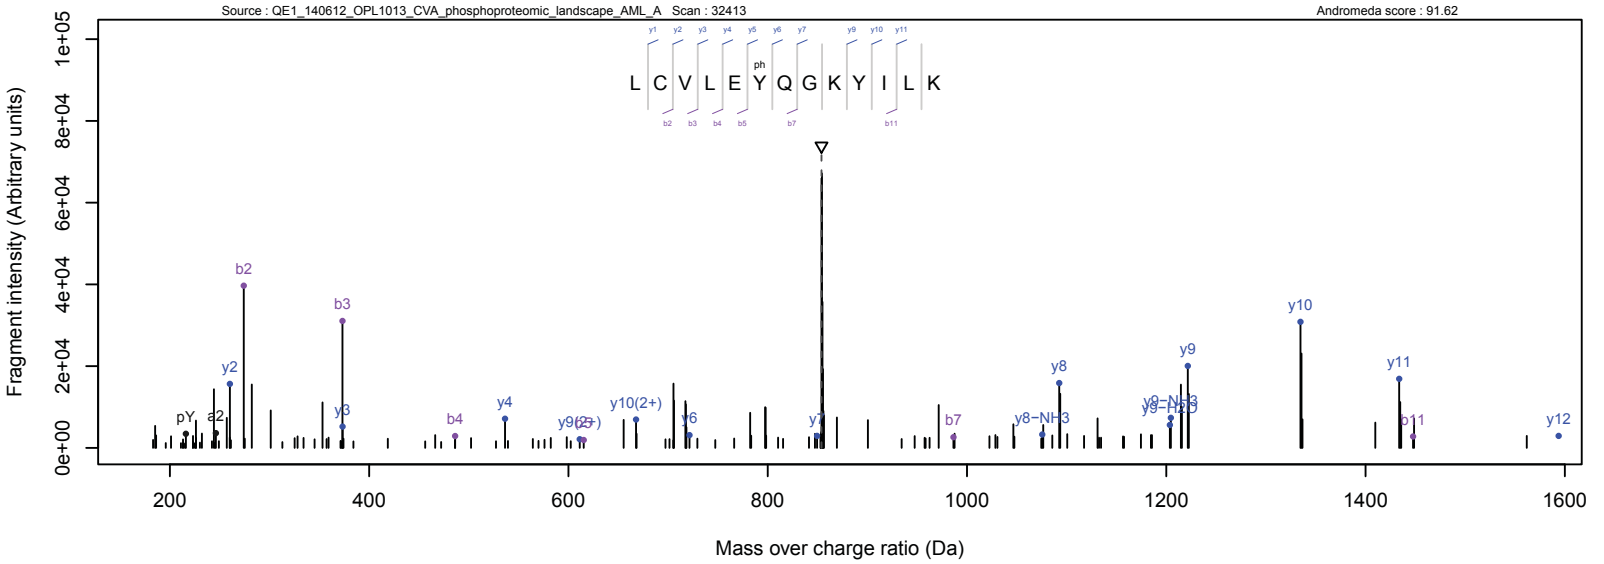

**NPY(ph)YGGESASITPLEDLYK-2+**

Source : QE1\_140612\_OPL1013\_CVA\_phosphoproteomic\_landscape\_AML\_D Scan : 42038

Andromeda score : 91.589

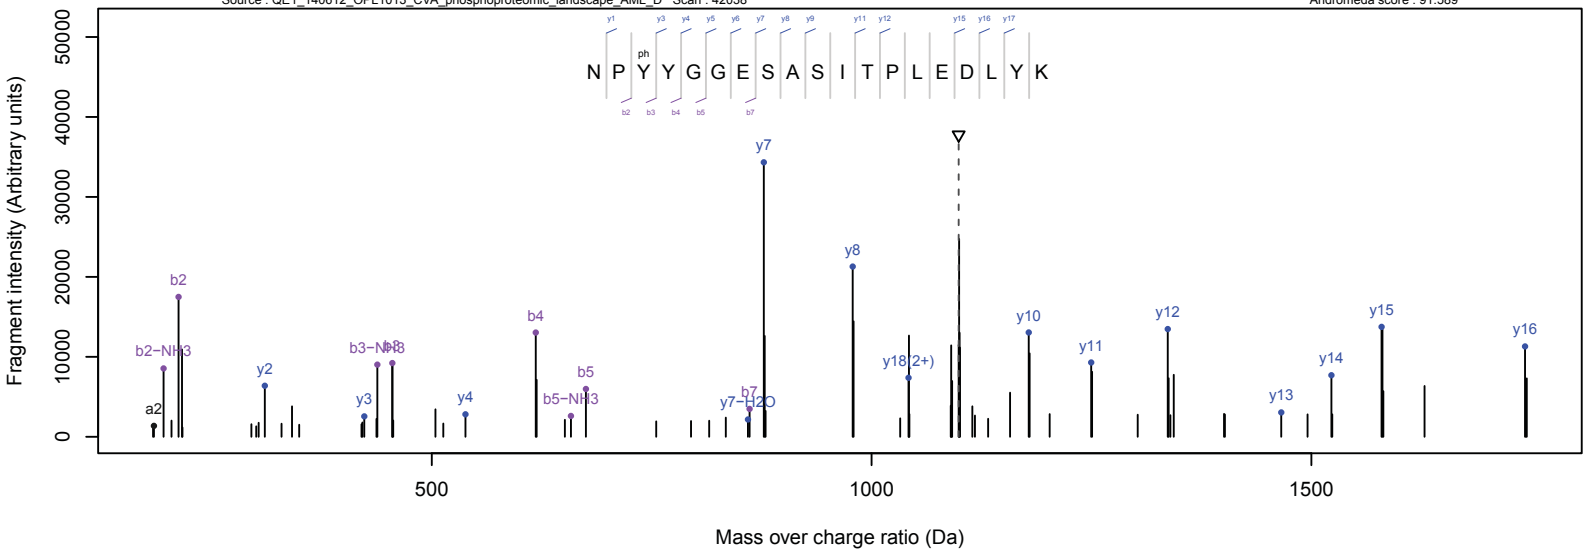

Y(ph)IPLPQR-2+

Source : QE1\_140612\_OPL1013\_CVA\_phosphoproteomic\_landscape\_AML\_B Scan : 17775

Andromeda score : 91.584

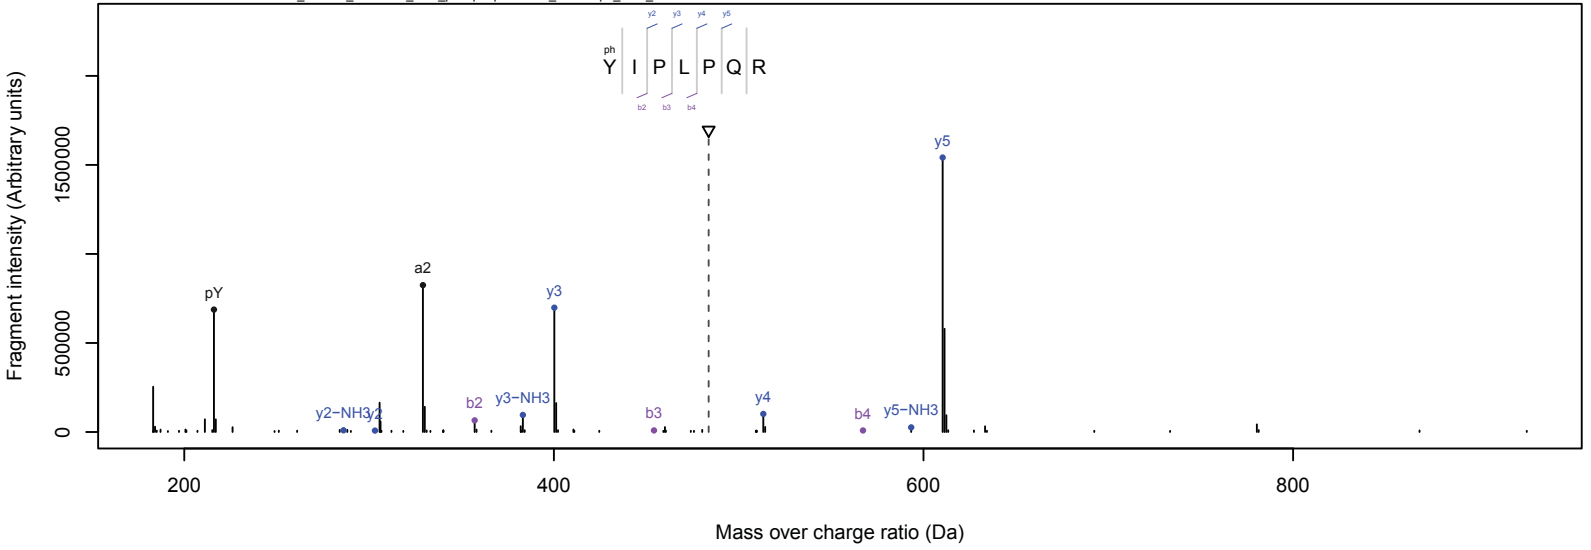

(ac)SETAPAETATPAPVEKS(ph)PAKK-3+

Source : QE1\_140908\_OPL1013\_CvA\_pTyrIP\_AML\_ML2 Scan : 13584

Andromeda score : 91.556

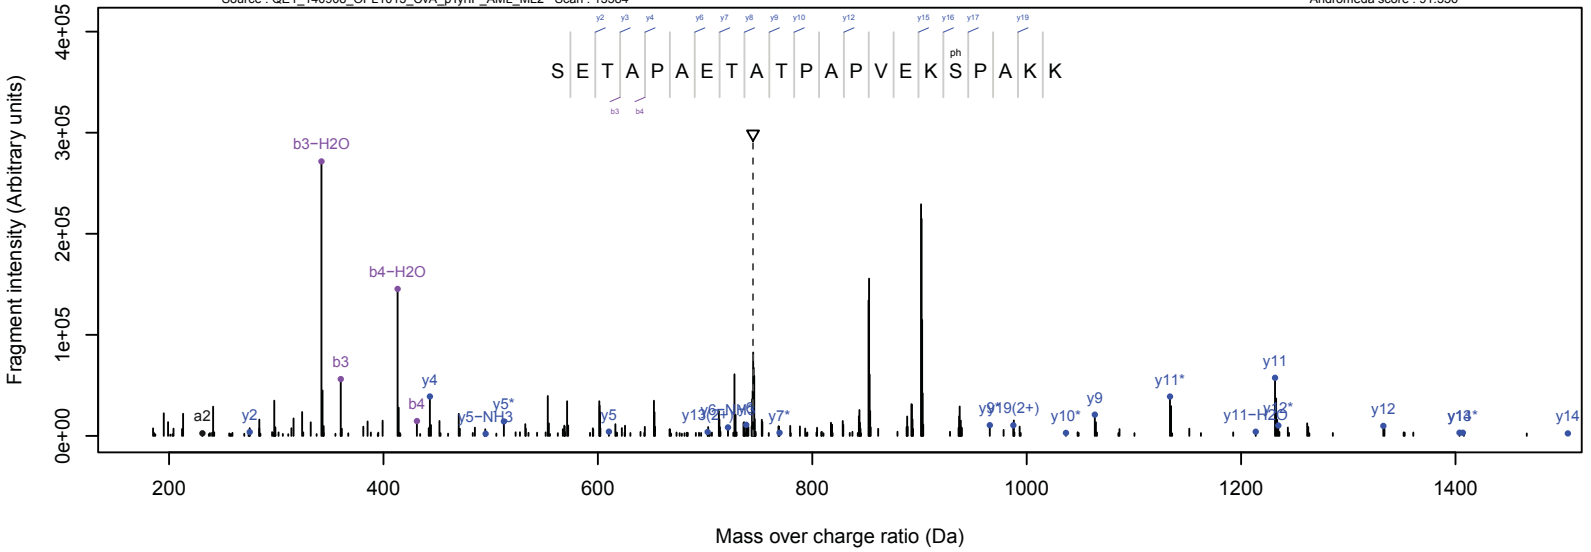

WYAPECINYY(ph)K-2+

Source : QE1\_140908\_OPL1013\_CvA\_pTyrIP\_AML\_ML2 Scan : 33273

Andromeda score : 91.549

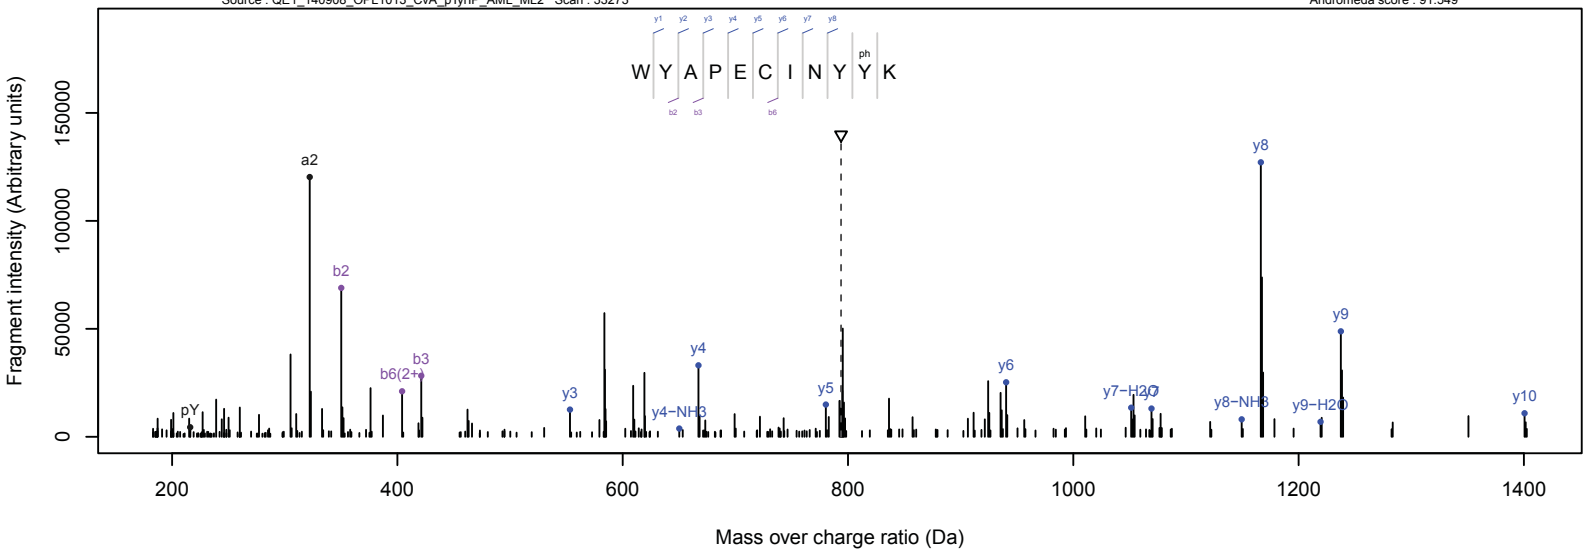

**DLPIHACSYGIIHDPACVVY(ph)CNTSKK-4+**

Source : QE1\_140612\_OPL1013\_CVA\_phosphoproteomic\_landscape\_AML\_B Scan : 29036

Andromeda score : 91.416

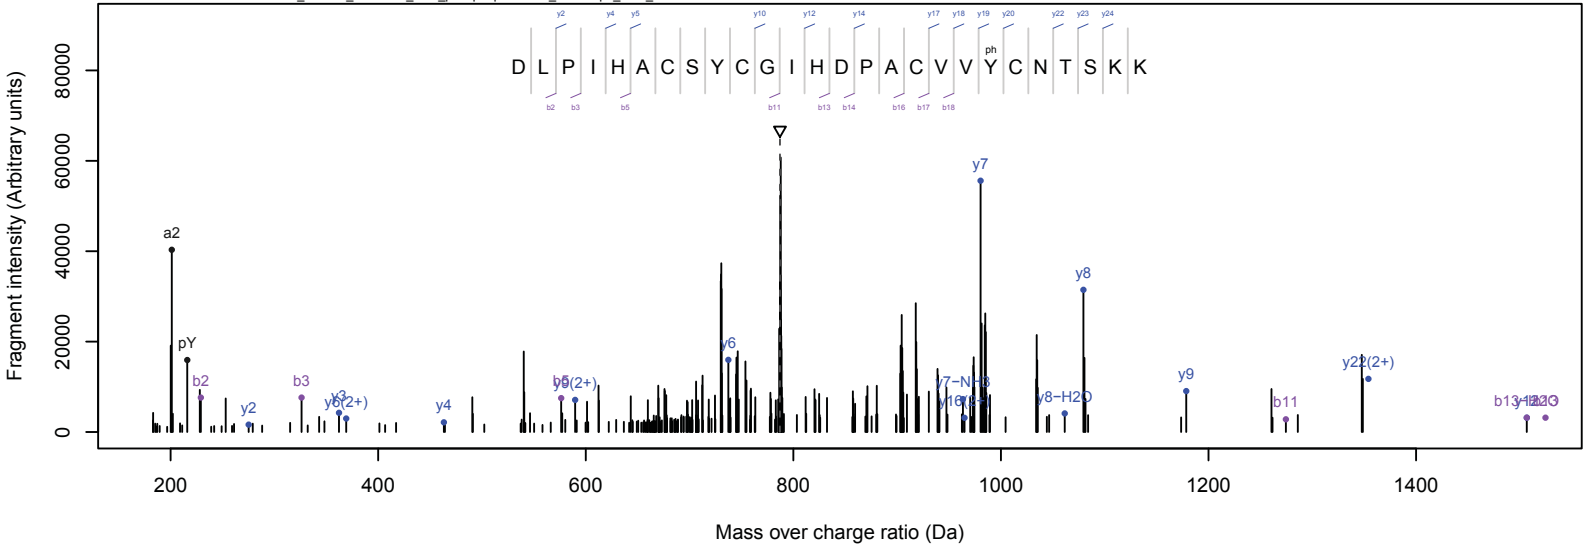

**FY(ph)FHPISDLPPPEPYVQTTK-3+**

Source : QE1\_140612\_OPL1013\_CVA\_phosphoproteomic\_landscape\_AML\_C Scan : 42819

Andromeda score : 91.414

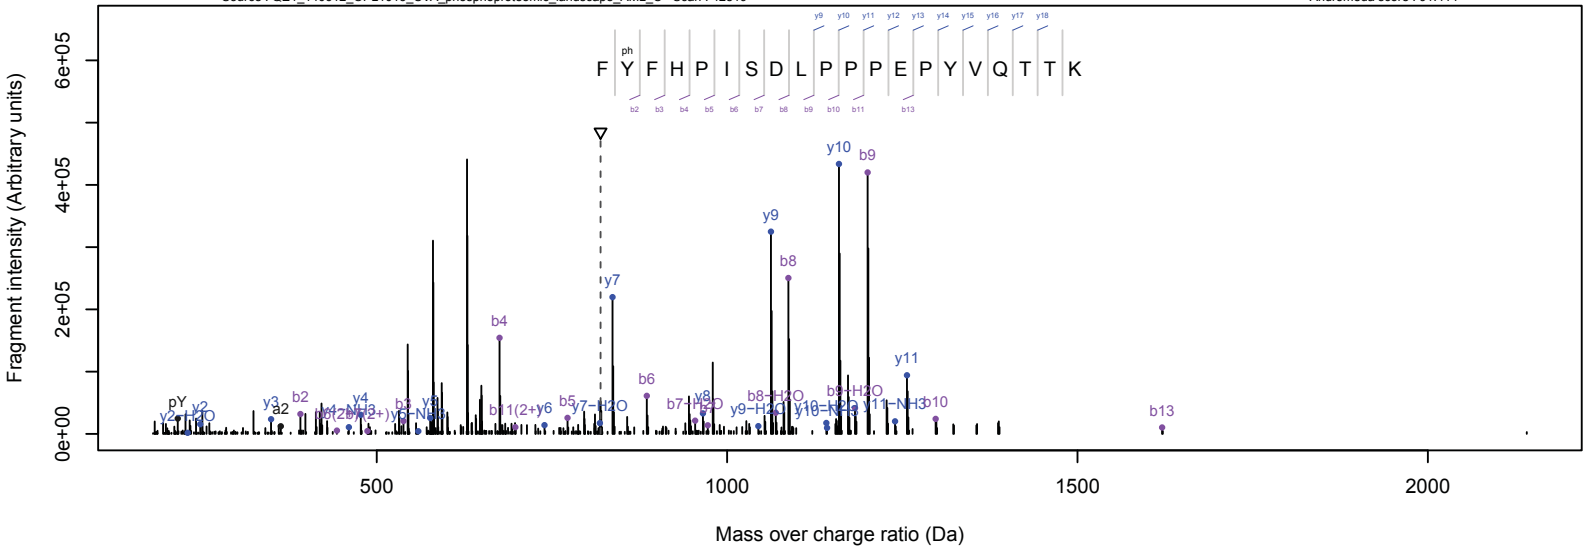

**FKVDLT(ph)PYPTISSINKR-3+**

Source : QE1\_140612\_OPL1013\_CVA\_phosphoproteomic\_landscape\_AML\_B Scan : 32211

Andromeda score : 91.401

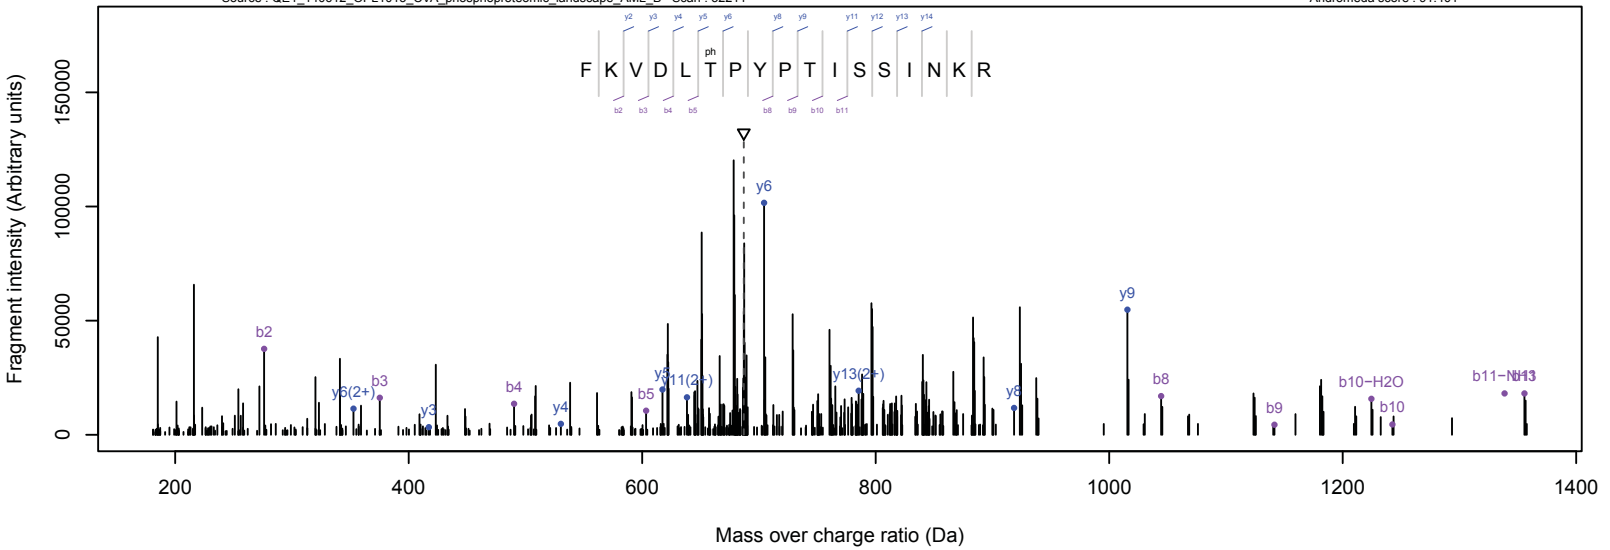





LAY(ph)QELQIDR-2+

Source: QE1\_140612\_OPL1013\_CVA\_phosphoproteomic\_landscape\_AML\_B Scan: 21308

Andromeda score: 91.313

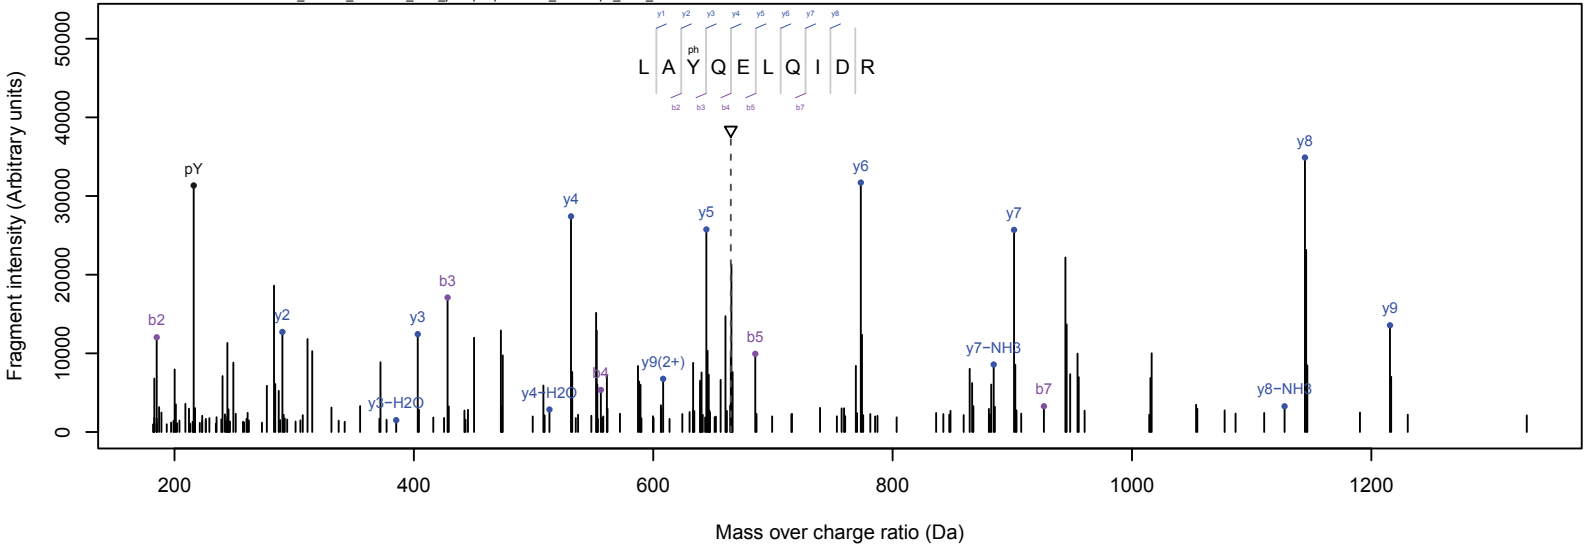

DY(ph)SNFDQEFLEK-2+

Source: QE1\_140612\_OPL1013\_CVA\_phosphoproteomic\_landscape\_AML\_C Scan: 33142

Andromeda score: 91.307

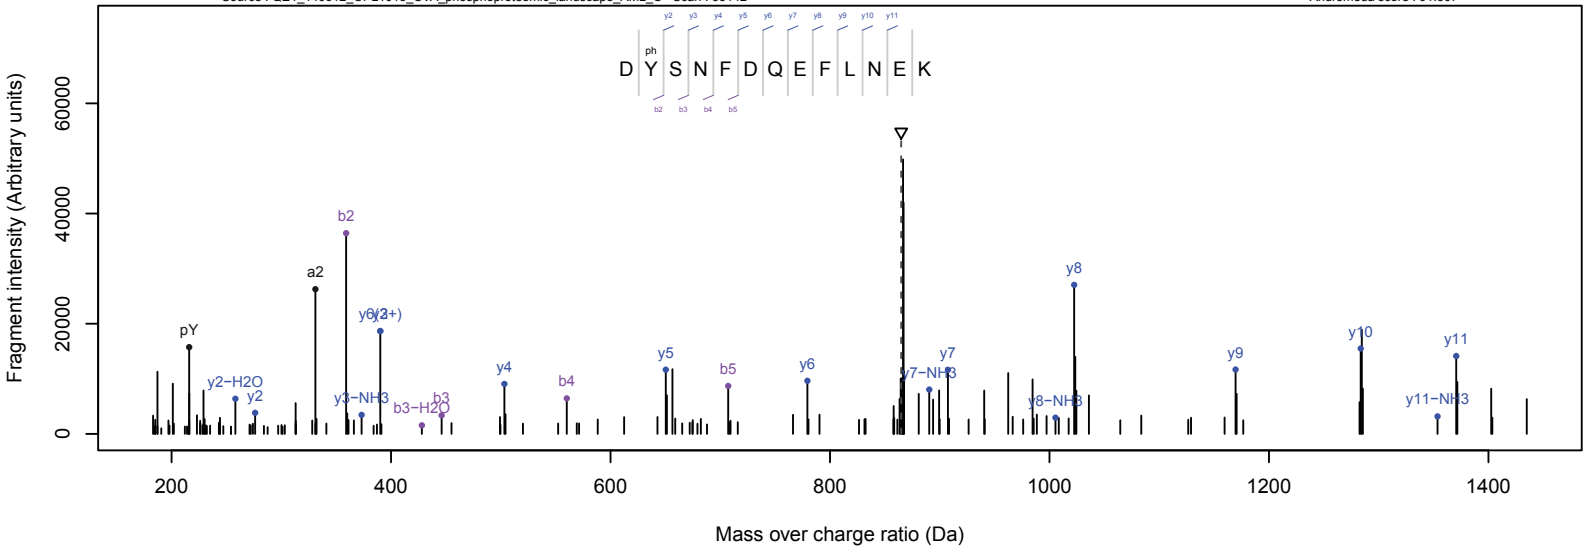

VLVLSAGGRDEGNY(ph)LDDALVR-3+

Source: QE1\_140612\_OPL1013\_CVA\_phosphoproteomic\_landscape\_AML\_C Scan: 38343

Andromeda score: 91.276

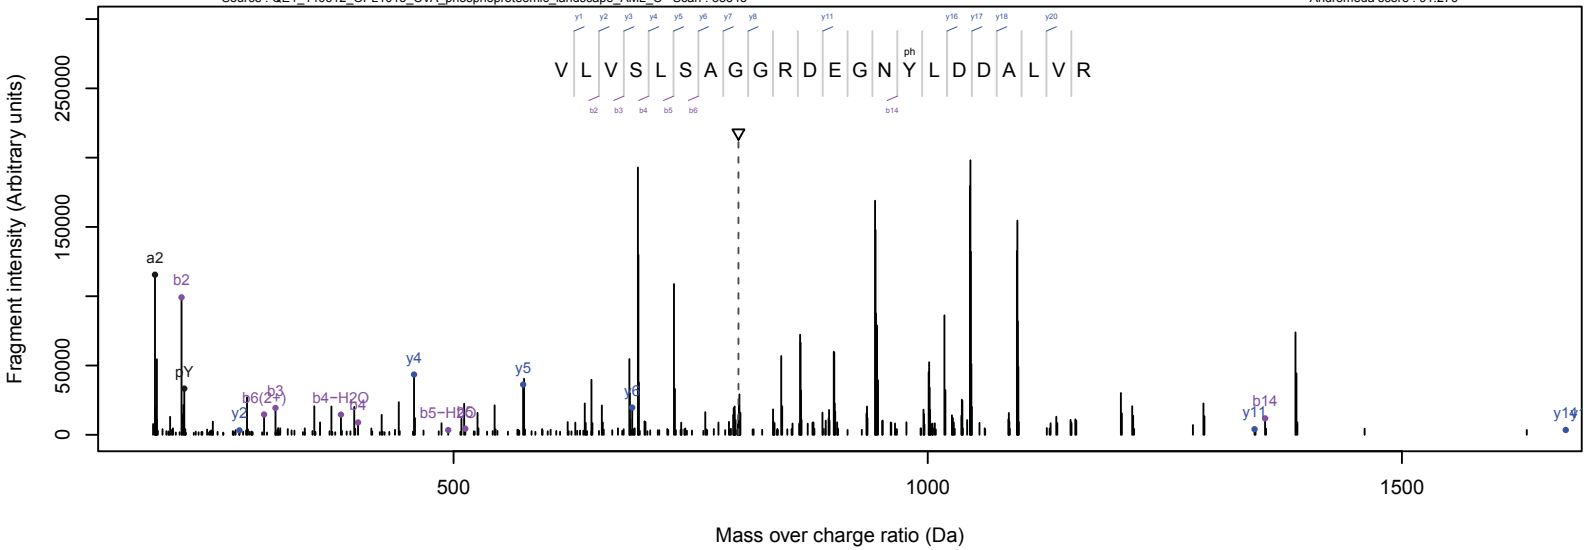

Y(ph)FLRPPVHHLFFQTLIPDKDTR-5+

Source : QE1\_140612\_OPL1013\_CVA\_phosphoproteomic\_landscape\_AML\_C Scan : 43797

Andromeda score : 91.276

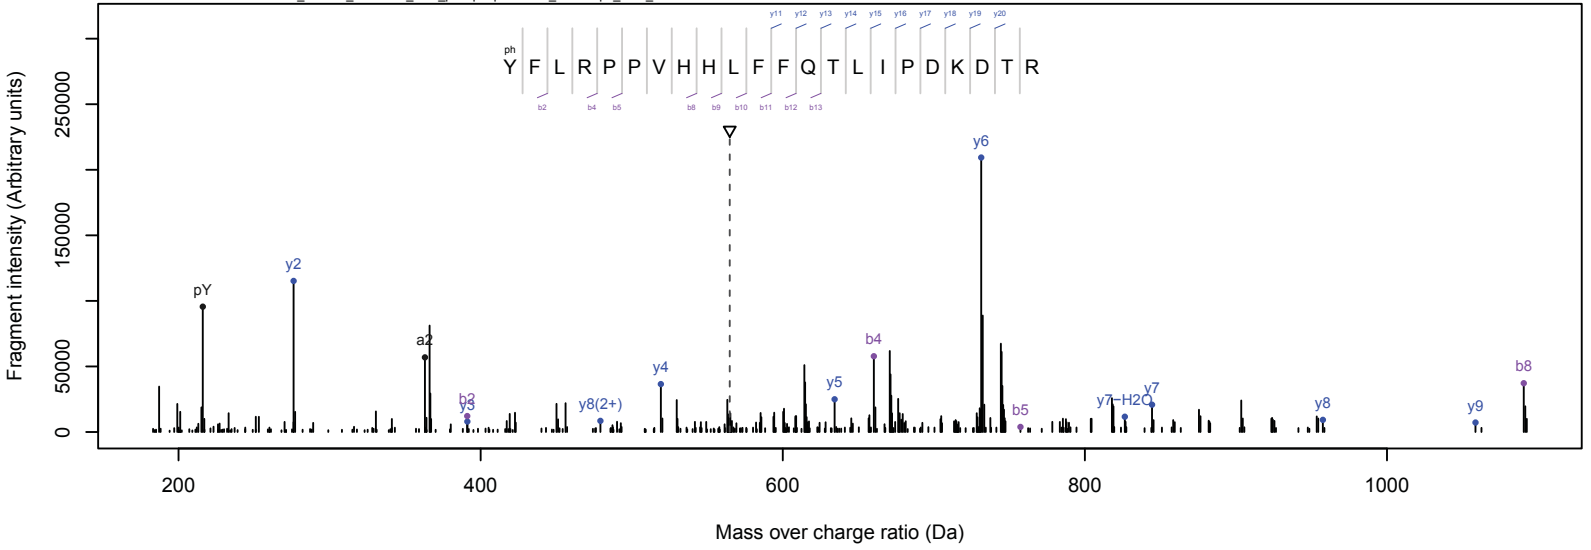

Y(ph)KYPNISCELLTSDV SQMND R-3+

Source : QE1\_140612\_OPL1013\_CVA\_phosphoproteomic\_landscape\_AML\_B Scan : 35869

Andromeda score : 91.276

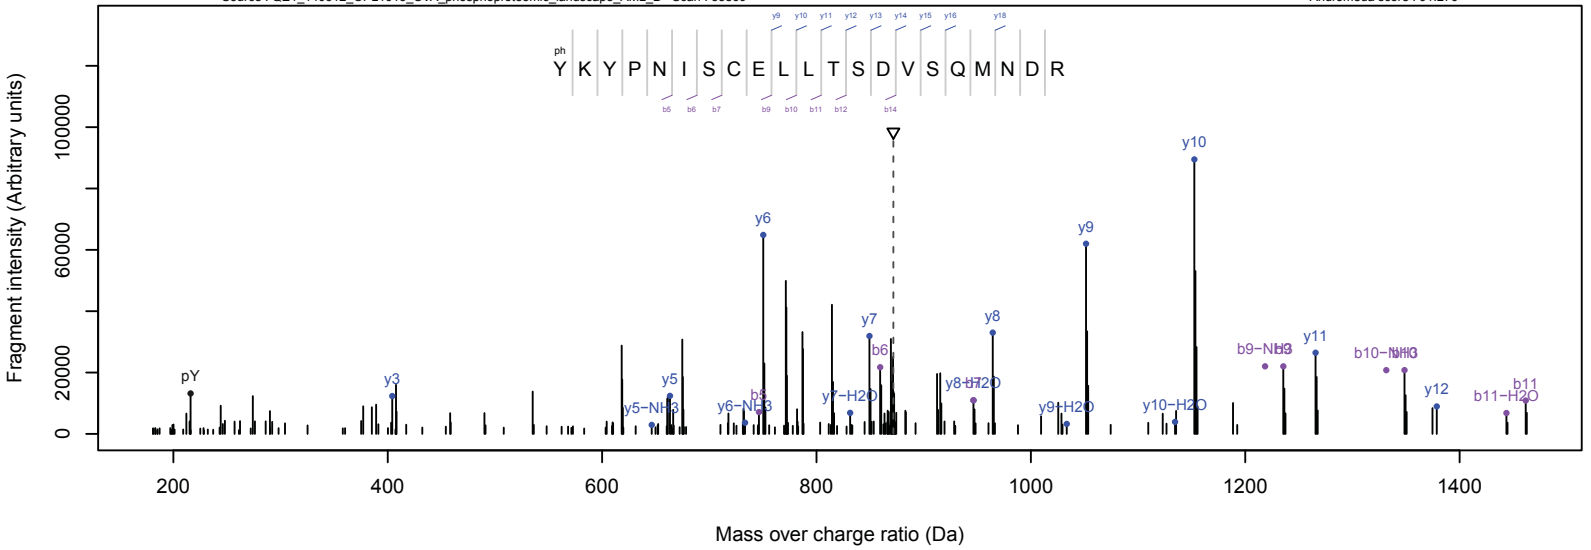

STFSTLQELVDHY(ph)KKGNDGLCQK-4+

Source : QE1\_140908\_OPL1013\_CvA\_pTyrIP\_AML\_ML2 Scan : 35328

Andromeda score : 91.238

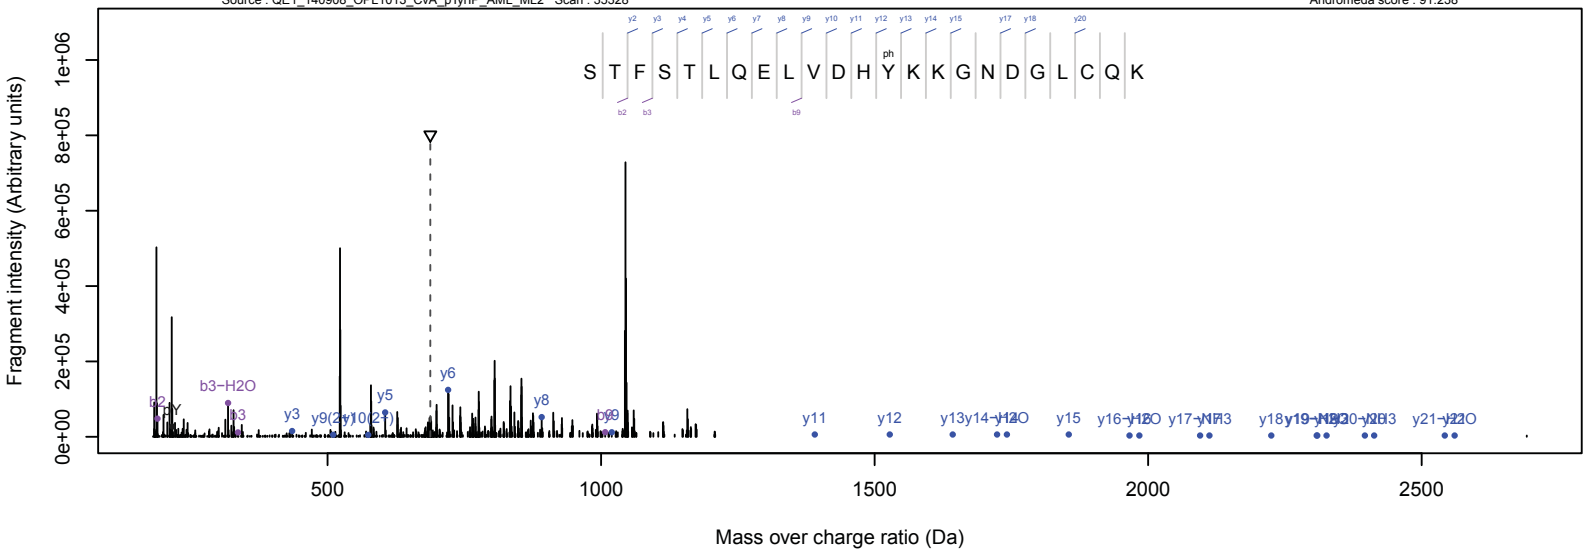

LY(ph)TLVLVLPQR-2+

Source : QE1\_140612\_OPL1013\_CVA\_phosphoproteomic\_landscape\_AML\_D Scan : 46858

Andromeda score : 91.123

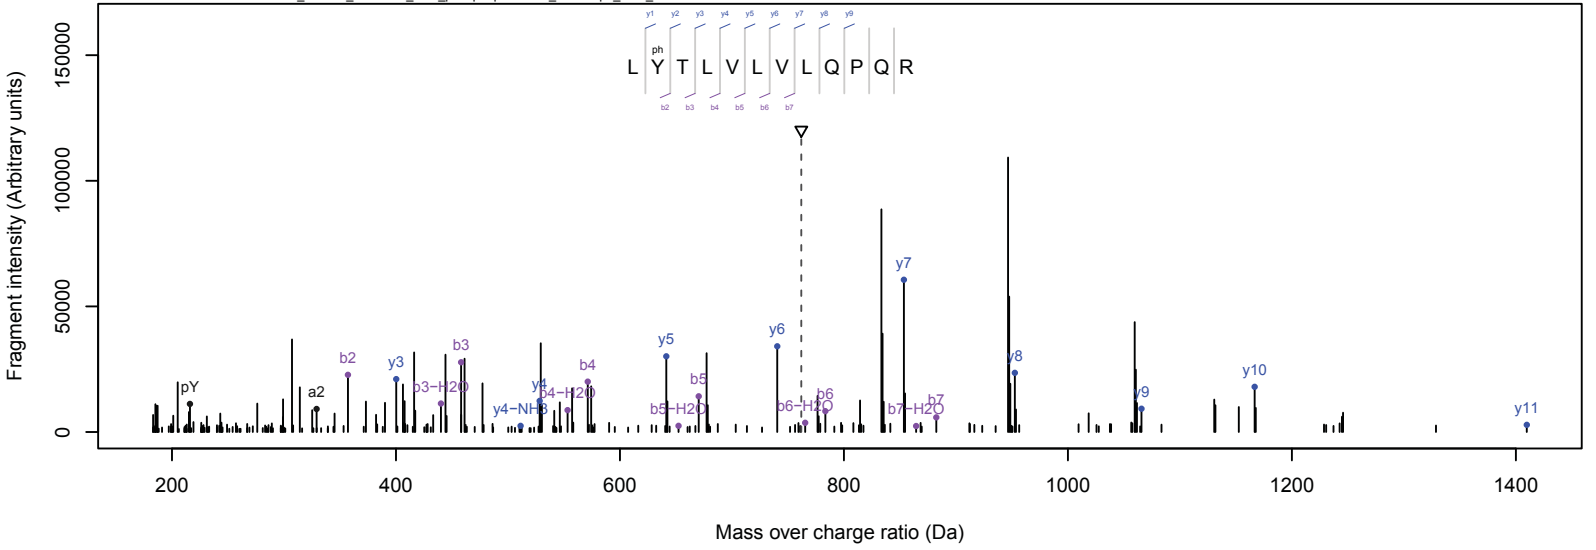

STVLQQY(ph)NR-2+

Source : QE1\_140822\_OPL1013\_CvA\_pTyrIP\_AML\_cell\_lines\_part2\_B Scan : 5282

Andromeda score : 91.087

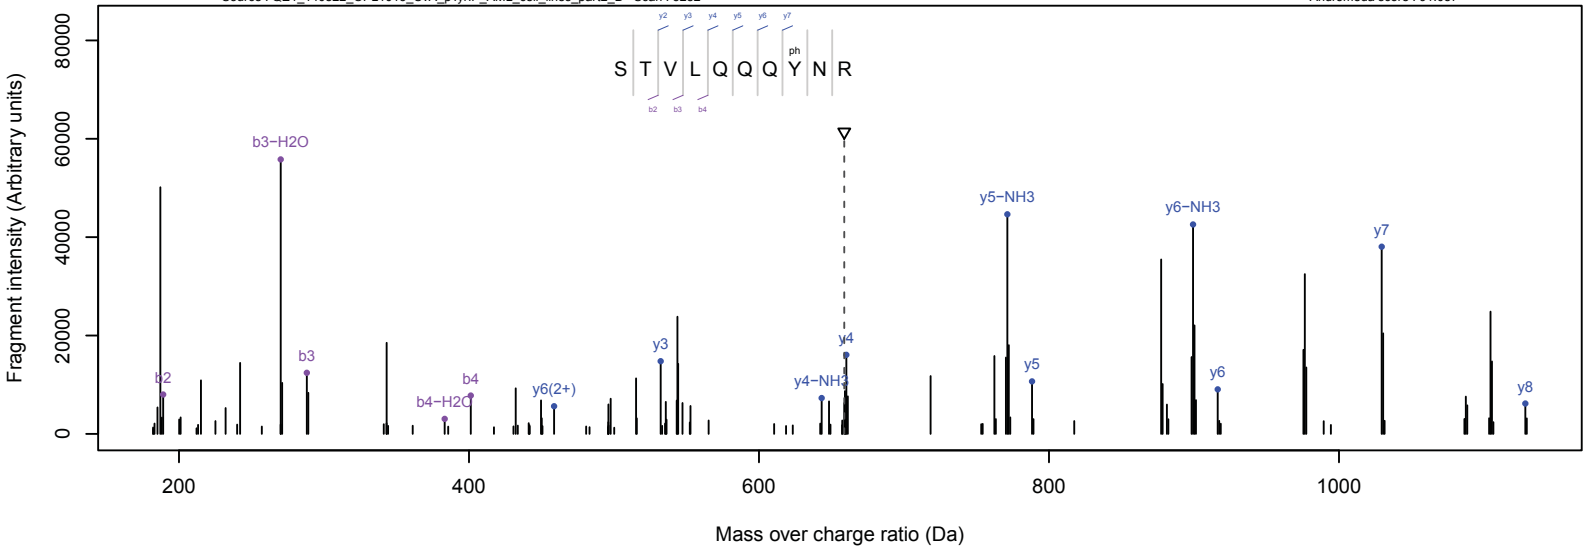

IY(ph)DLNIPAFVK-2+

Source : QE1\_140612\_OPL1013\_CVA\_phosphoproteomic\_landscape\_AML\_B Scan : 43355

Andromeda score : 90.913

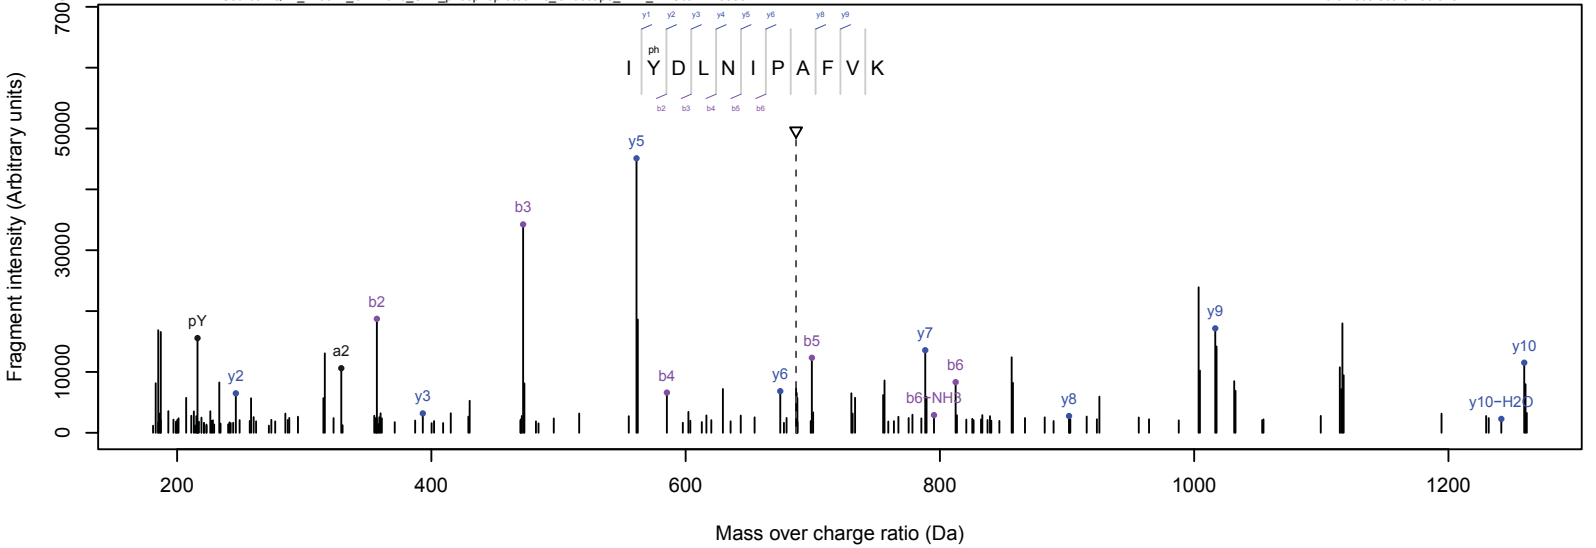

KEETY(ph)NDLIK-2+

Source : QE1\_140908\_OPL1013\_CvA\_pTyrIP\_AML\_Kasumi6 Scan : 13993

Andromeda score : 90.913

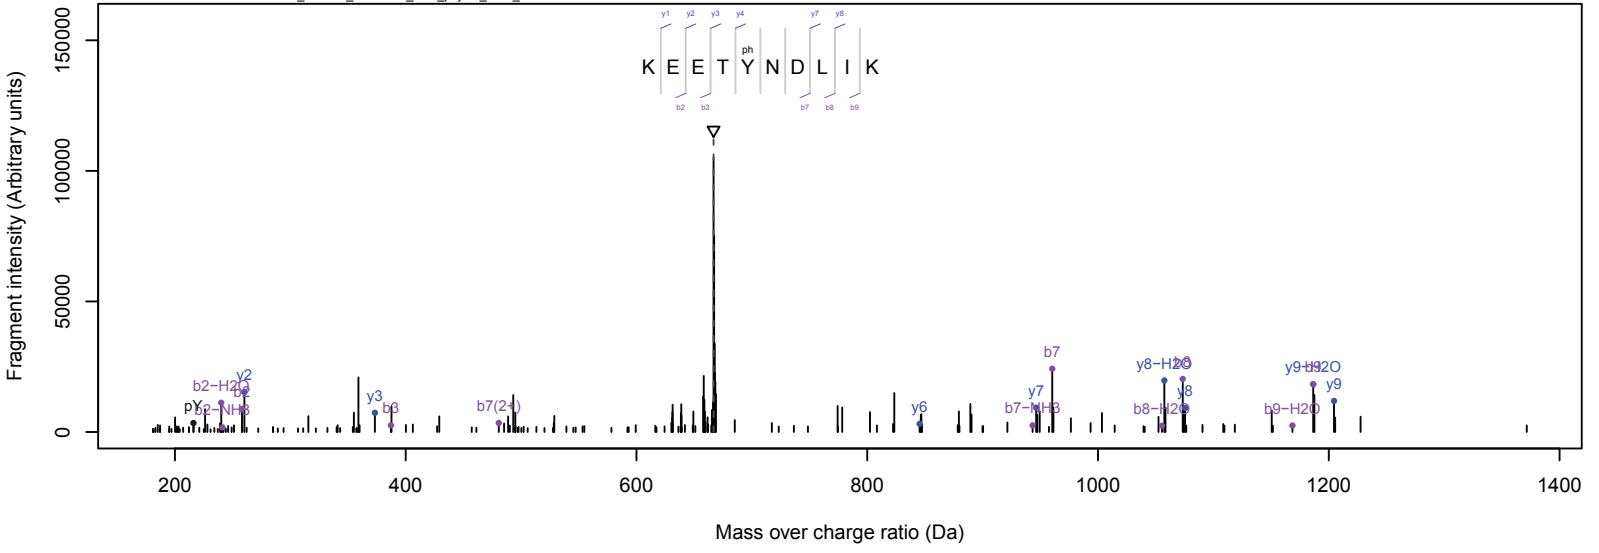

IGEGTYGVVY(ph)KAR-2+

Source : QE1\_140908\_OPL1013\_CvA\_pTyrIP\_AML\_ML2 Scan : 17188

Andromeda score : 90.861

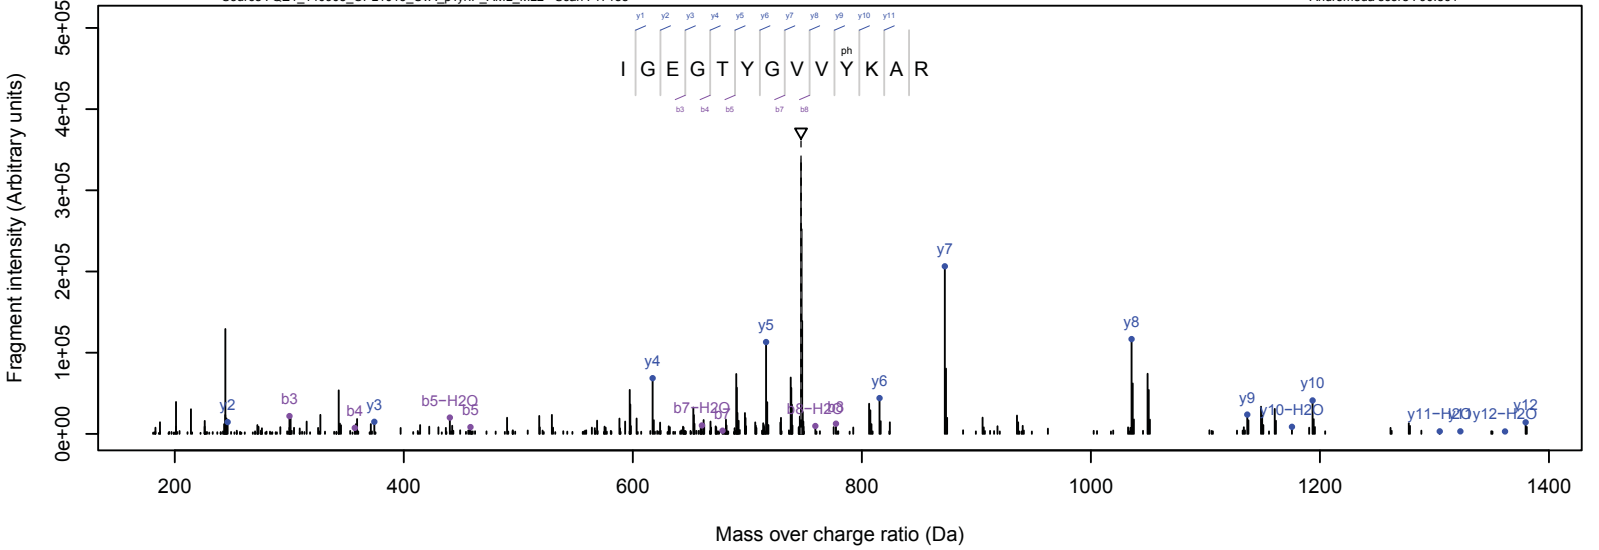

LCAGSAY(ph)HKEPWK-3+

Source : QE1\_140612\_OPL1013\_CVA\_phosphoproteomic\_landscape\_AML\_C Scan : 10868

Andromeda score : 90.861

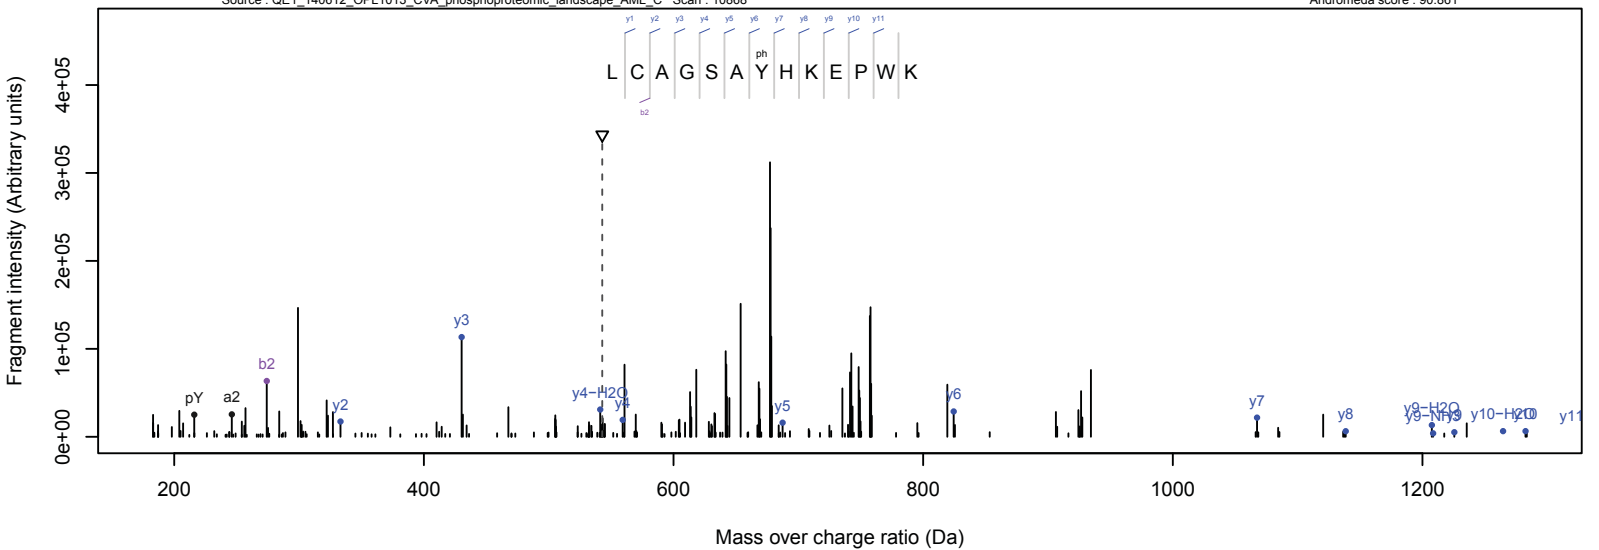

**LGHGY(ph)HTLEDQALYNR-3+**

Source : QE1\_140612\_OPL1013\_CVA\_phosphoproteomic\_landscape\_AML\_C Scan : 18989

Andromeda score : 90.853

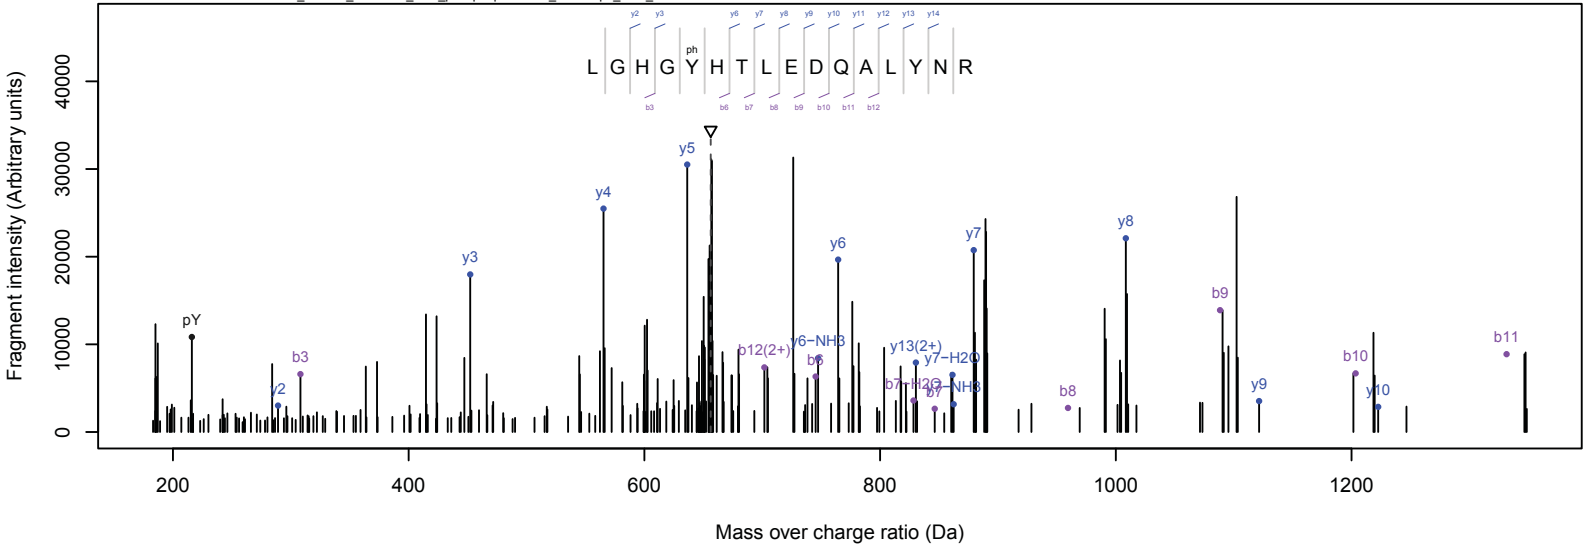

**VVQDTY(ph)QIMK-2+**

Source : QE1\_140612\_OPL1013\_CVA\_phosphoproteomic\_landscape\_AML\_C Scan : 14900

Andromeda score : 90.827

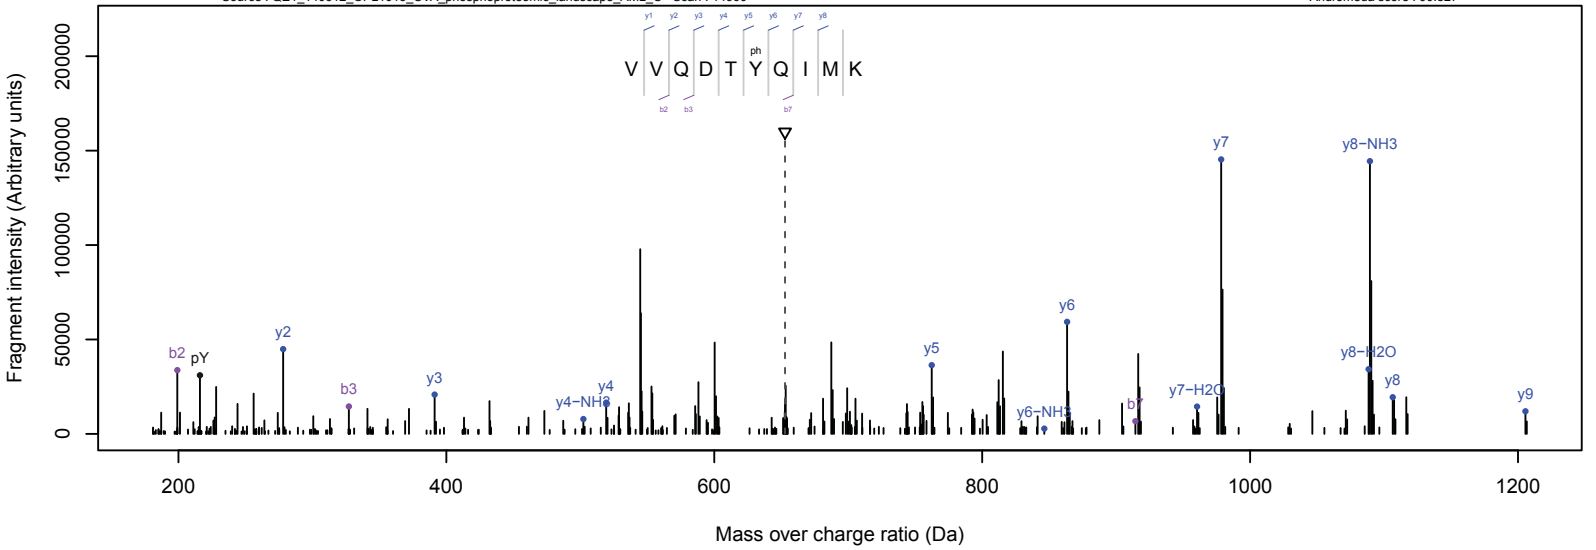

**NSLQNL S Q Y P M M R-2+**

Source : QE1\_140612\_OPL1013\_CVA\_phosphoproteomic\_landscape\_AML\_B Scan : 21245

Andromeda score : 90.793

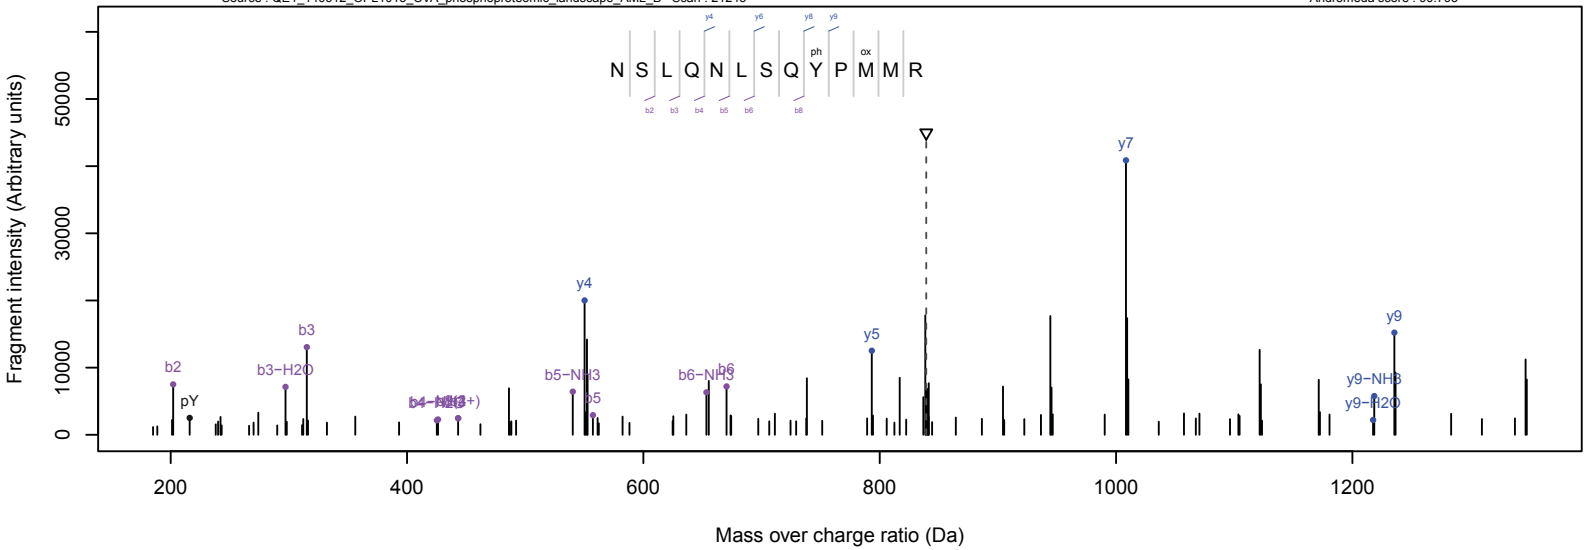





Y(ph)YADGEDAYAMK-2+

Source : QE1\_140612\_OPL1013\_CVA\_phosphoproteomic\_landscape\_AML\_C Scan : 15389

Andromeda score : 90.614

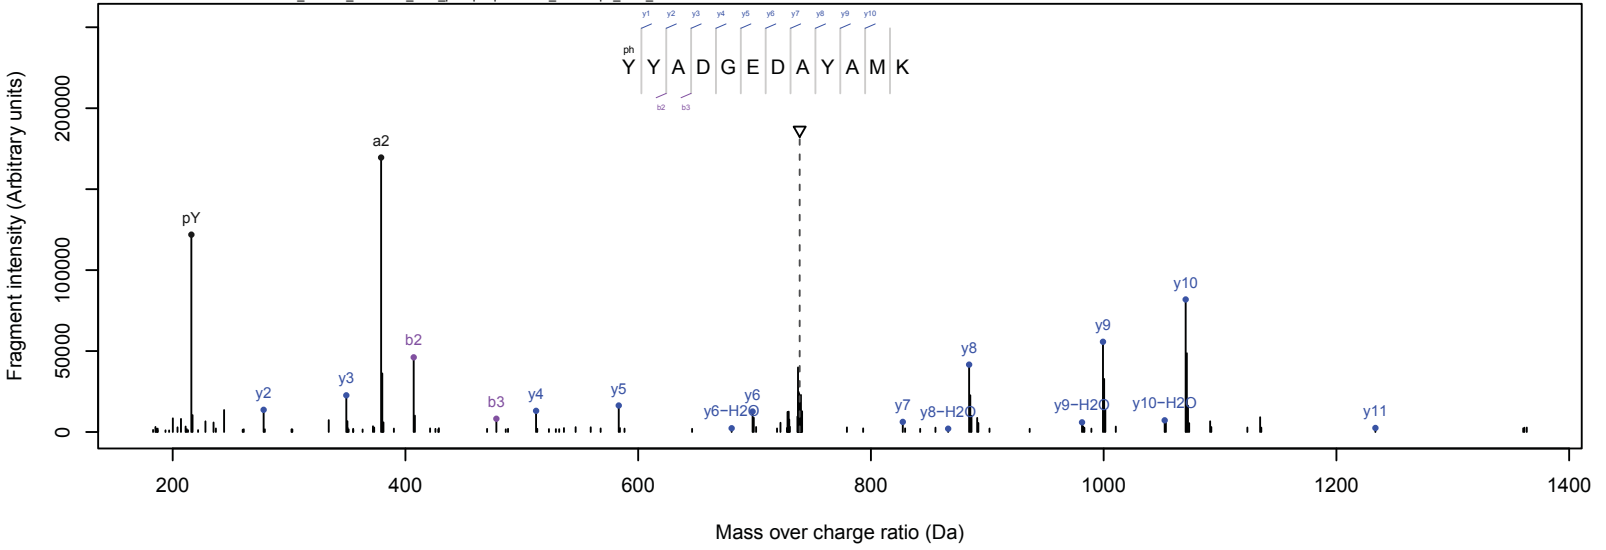

IHTGKPY(ph)ACLECGKR-4+

Source : QE1\_140612\_OPL1013\_CVA\_phosphoproteomic\_landscape\_AML\_A Scan : 8444

Andromeda score : 90.561

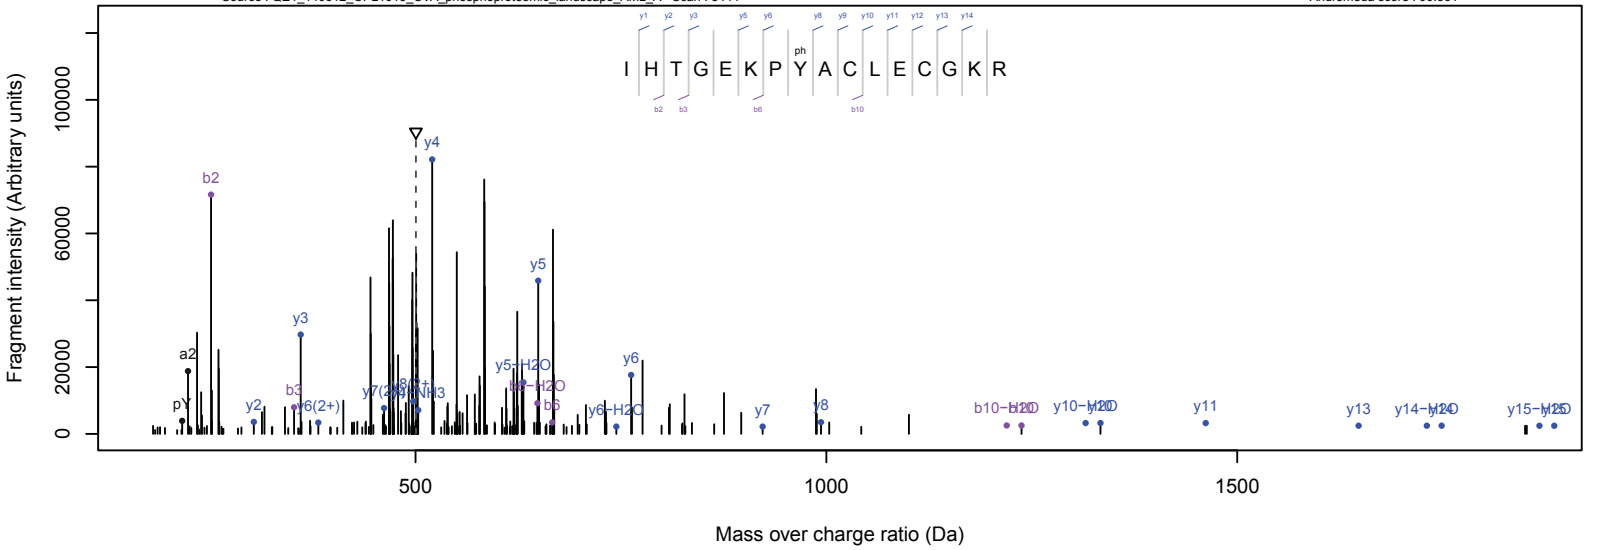

INQLQVPAVSLYP SRK-2+

Source : QE1\_140612\_OPL1013\_CVA\_phosphoproteomic\_landscape\_AML\_C Scan : 31294

Andromeda score : 90.561

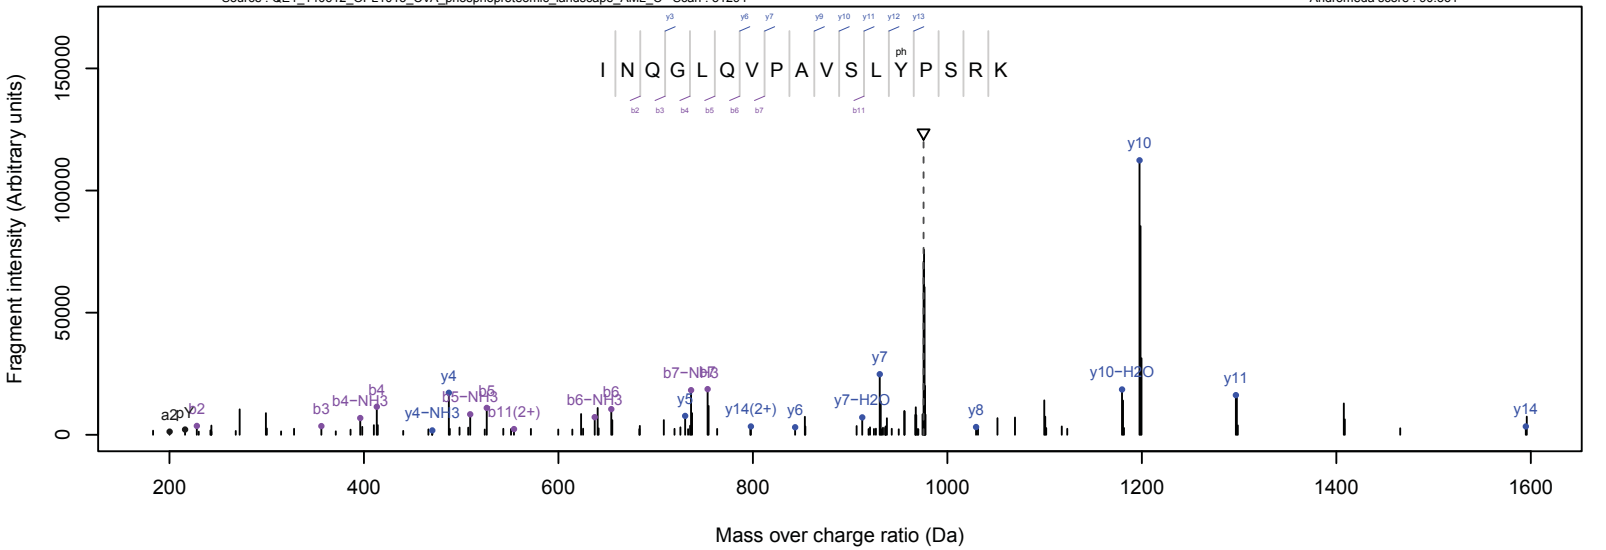



YKRPGYGAY(ph)DAFK-3+

Source : QE1\_140612\_OPL1013\_CVA\_phosphoproteomic\_landscape\_AML\_A Scan : 14291

Andromeda score : 90.476

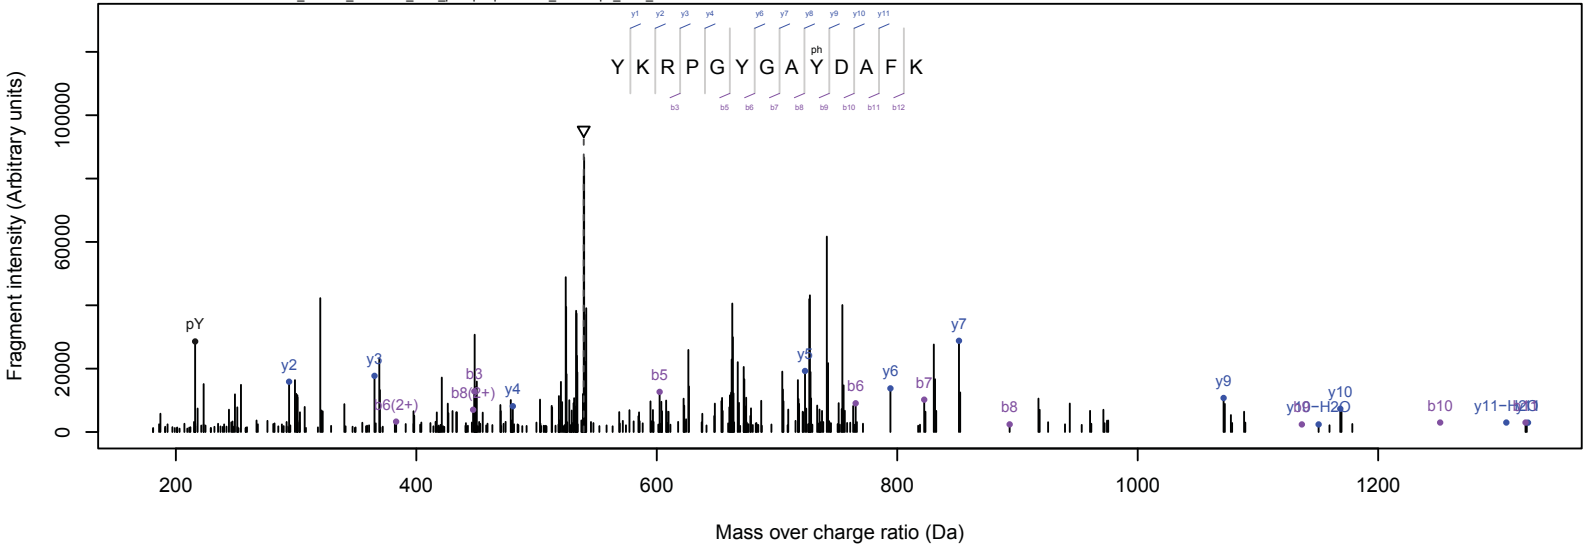

LILDVQSPHPLLNSPY(ph)ENVCK-3+

Source : QE1\_140612\_OPL1013\_CVA\_phosphoproteomic\_landscape\_AML\_C Scan : 40632

Andromeda score : 90.475

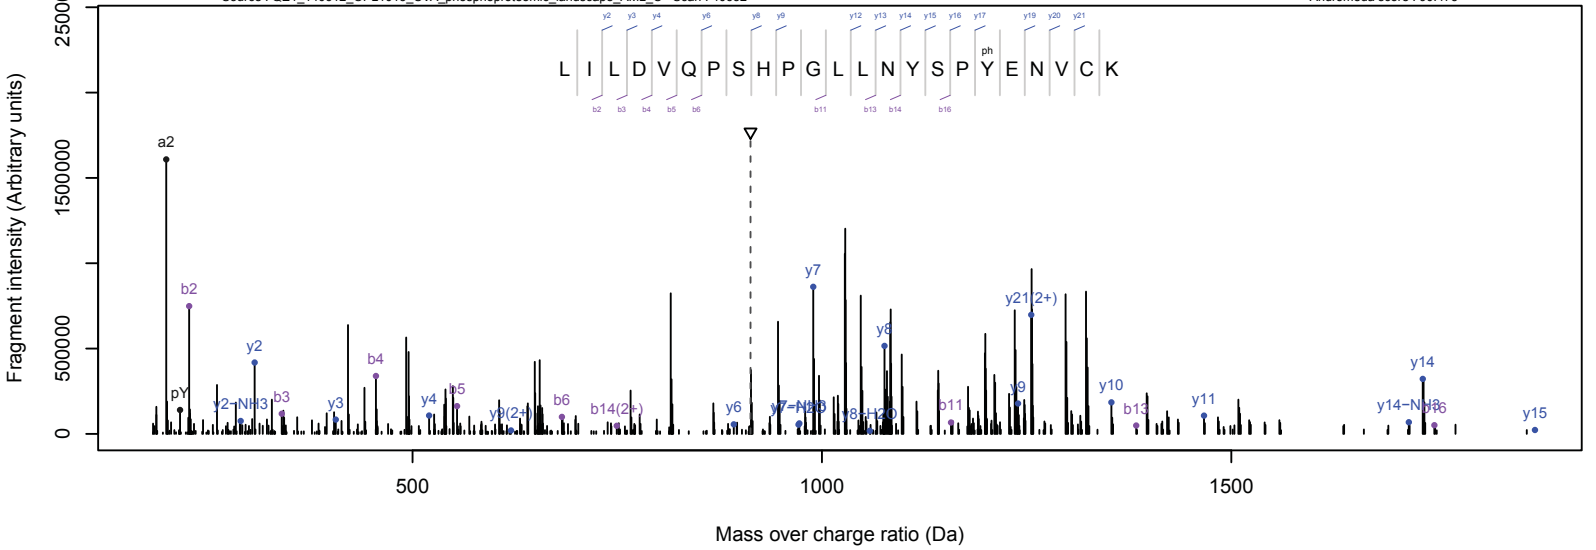

RLEPVSDAIY(ph)DSKAPNASNLK-3+

Source : QE1\_140612\_OPL1013\_CVA\_phosphoproteomic\_landscape\_AML\_D Scan : 28201

Andromeda score : 90.475

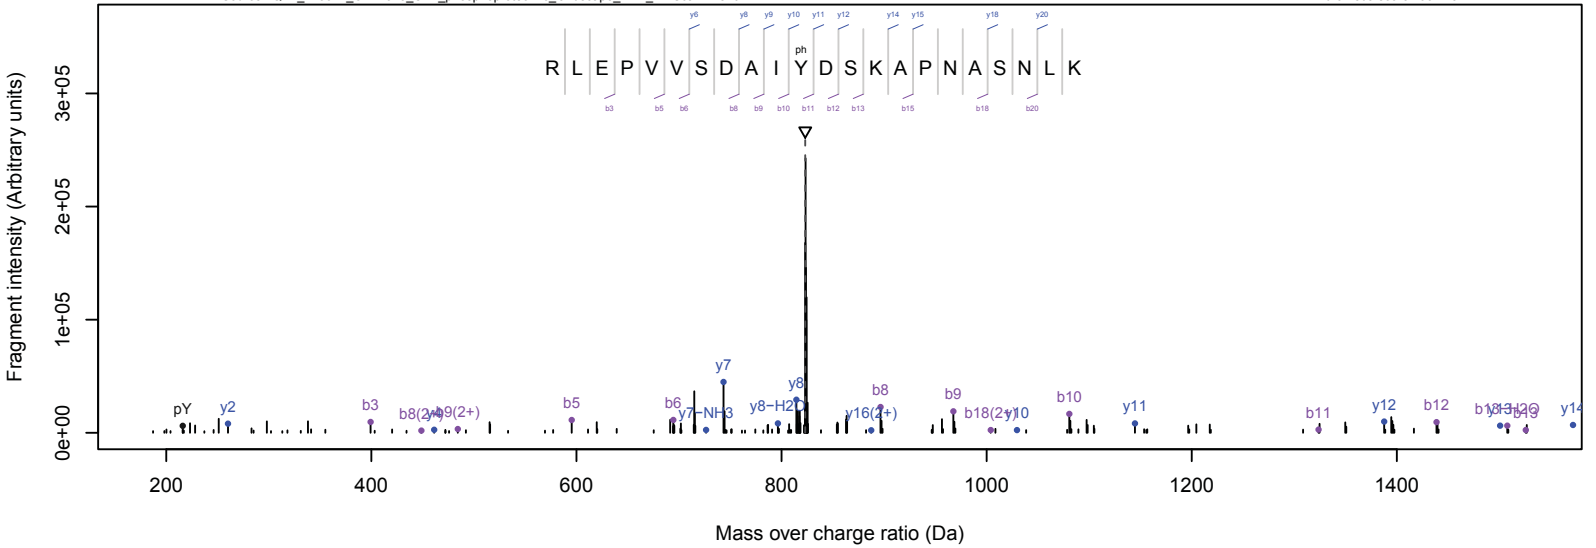

**DAAHMLQANKTY(ph)GCVPVANKR-3+**

Source : QE1\_140612\_OPL1013\_CVA\_phosphoproteomic\_landscape\_AML\_B Scan : 17183

Andromeda score : 90.464

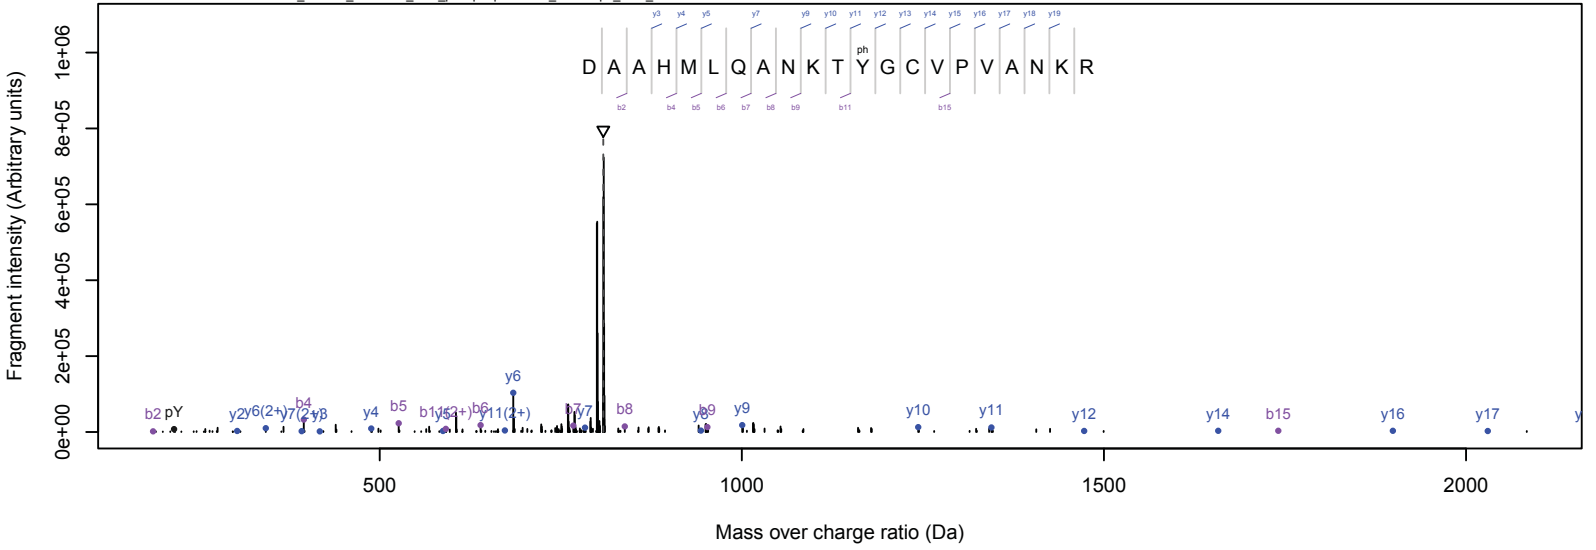

**NSNYCLPSYATYKNYDYSEPR-3+**

Source : QE1\_140908\_OPL1013\_CvA\_pTyrIP\_AML\_Kasumi1 Scan : 27720

Andromeda score : 90.464

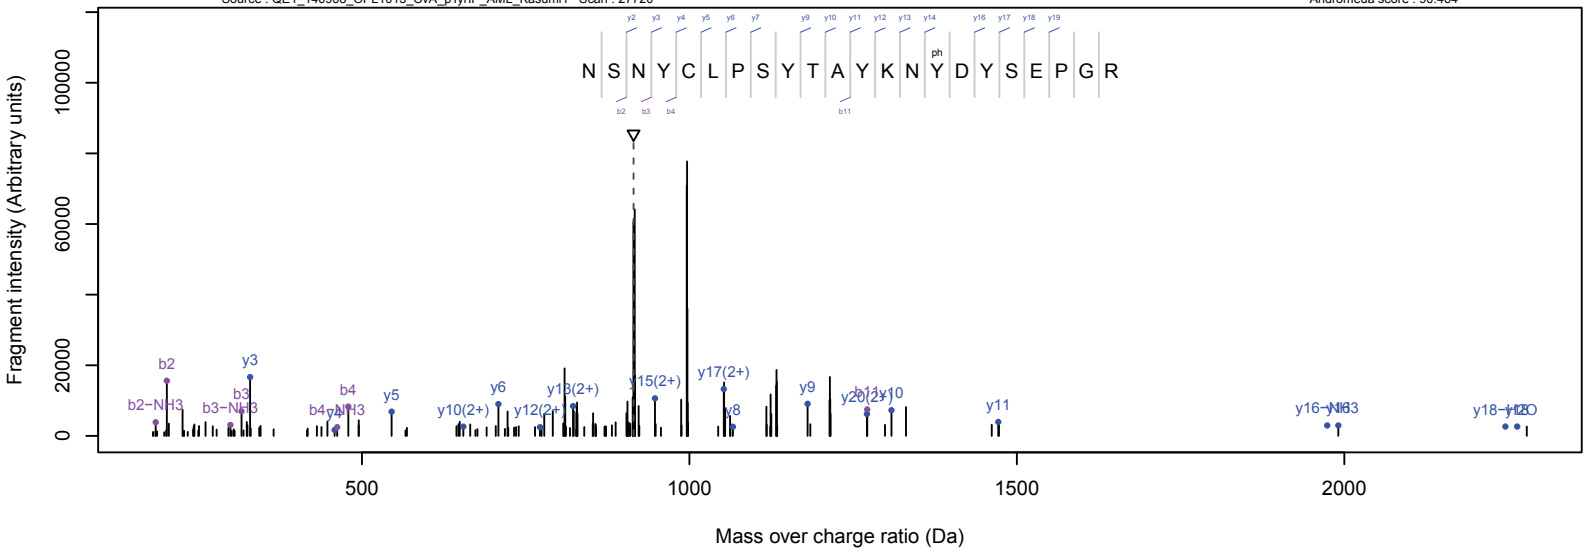

**TLDGIFSEQVAMGYS(ph)HSLVIAR-3+**

Source : QE1\_140612\_OPL1013\_CVA\_phosphoproteomic\_landscape\_AML\_C Scan : 40709

Andromeda score : 90.464

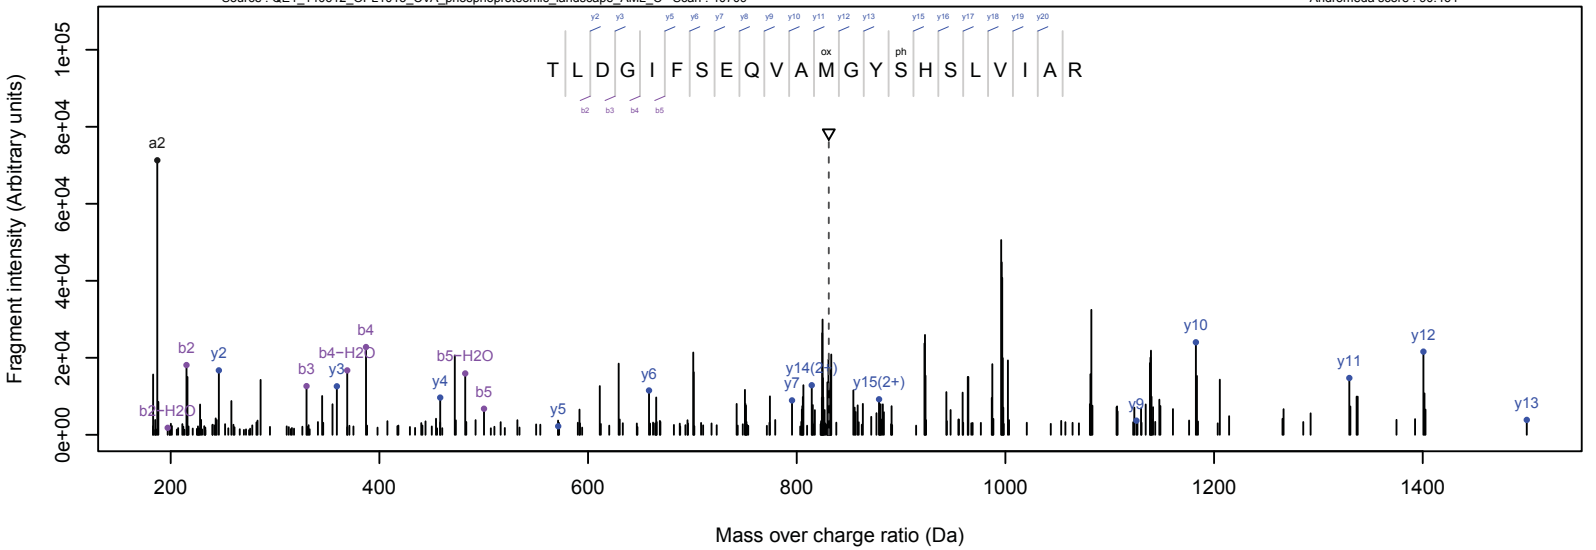

GKNY(ph)PIMNLHER-3+

Source : QE1\_140612\_OPL1013\_CVA\_phosphoproteomic\_landscape\_AML\_B Scan : 13768

Andromeda score : 90.412

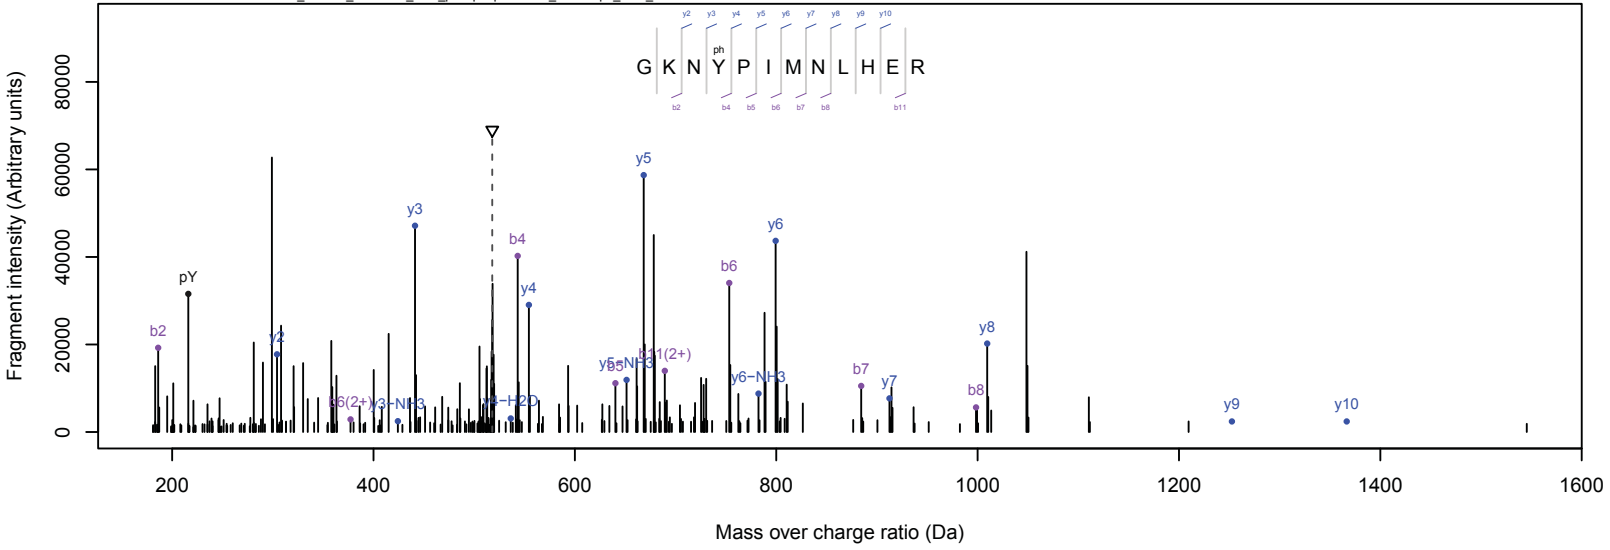

GYFEYIEENKYS(ph)R-2+

Source : QE1\_140612\_OPL1013\_CVA\_phosphoproteomic\_landscape\_AML\_C Scan : 26910

Andromeda score : 90.412

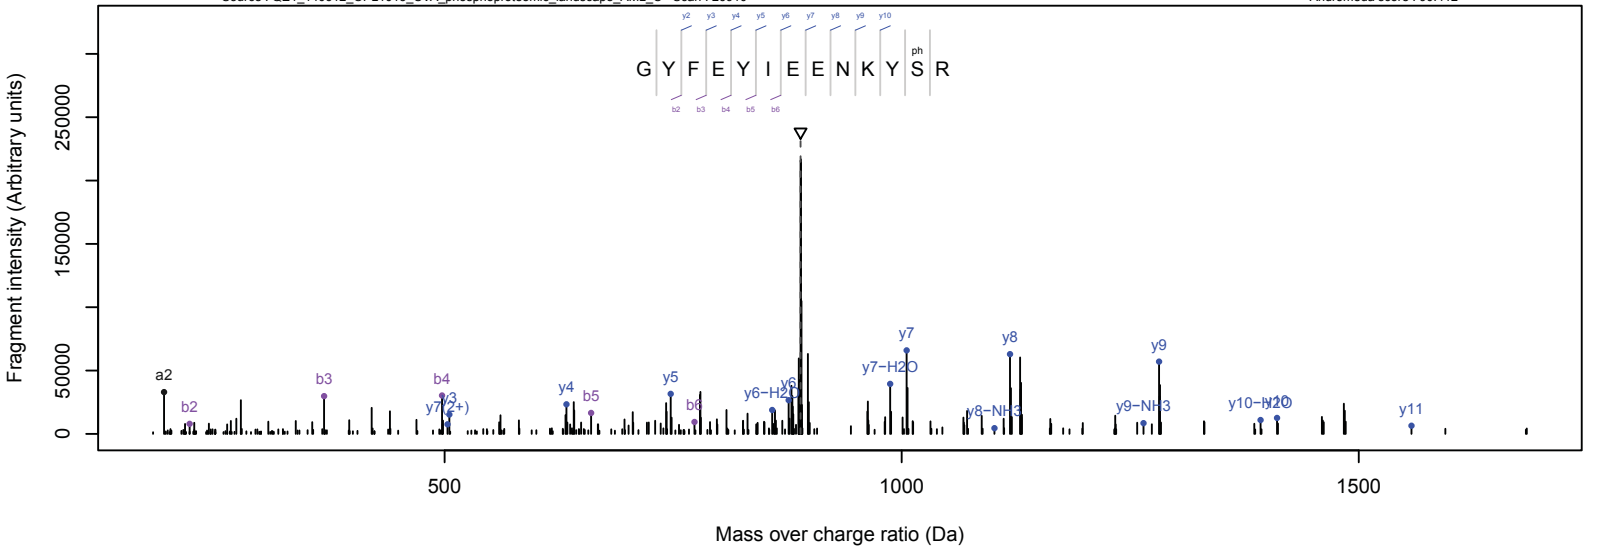

PM(ox)AESITY(ph)AAVAR-2+

Source : QE1\_140612\_OPL1013\_CVA\_phosphoproteomic\_landscape\_AML\_C Scan : 24110

Andromeda score : 90.412

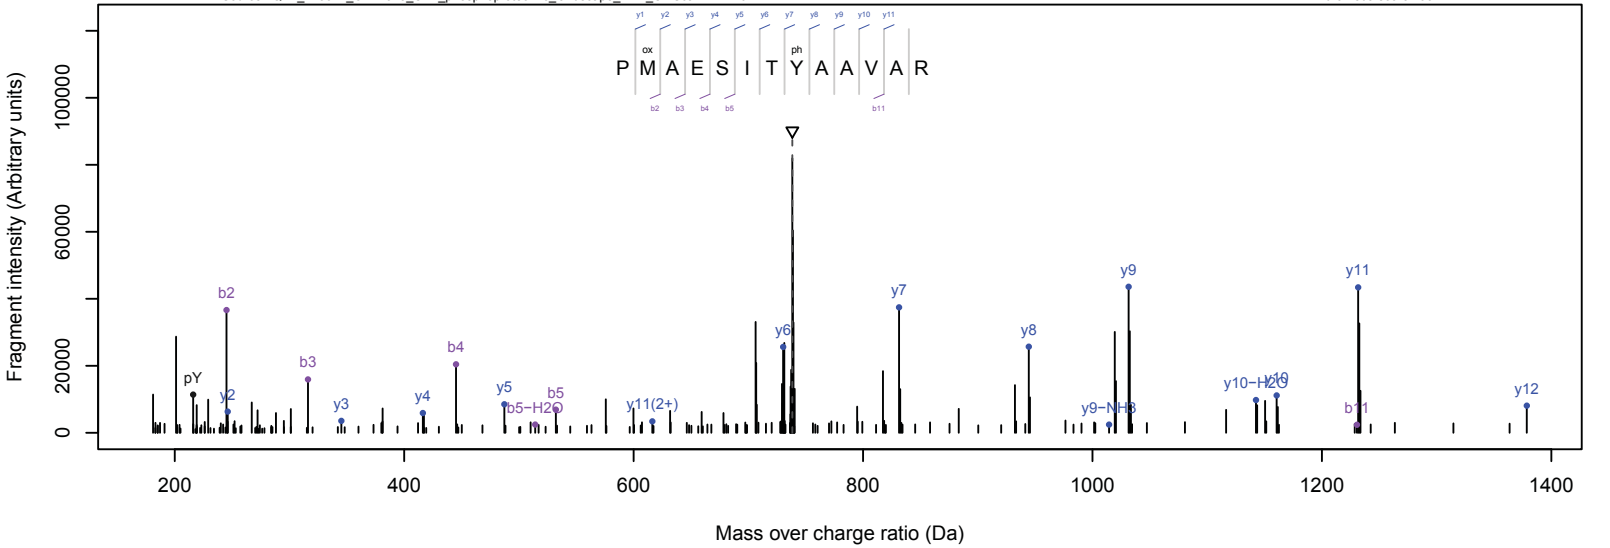

Y(ph)HTVNGHNCEVRK-3+

Source : QE1\_140612\_OPL1013\_CVA\_phosphoproteomic\_landscape\_AML\_D Scan : 3436

Andromeda score : 90.412

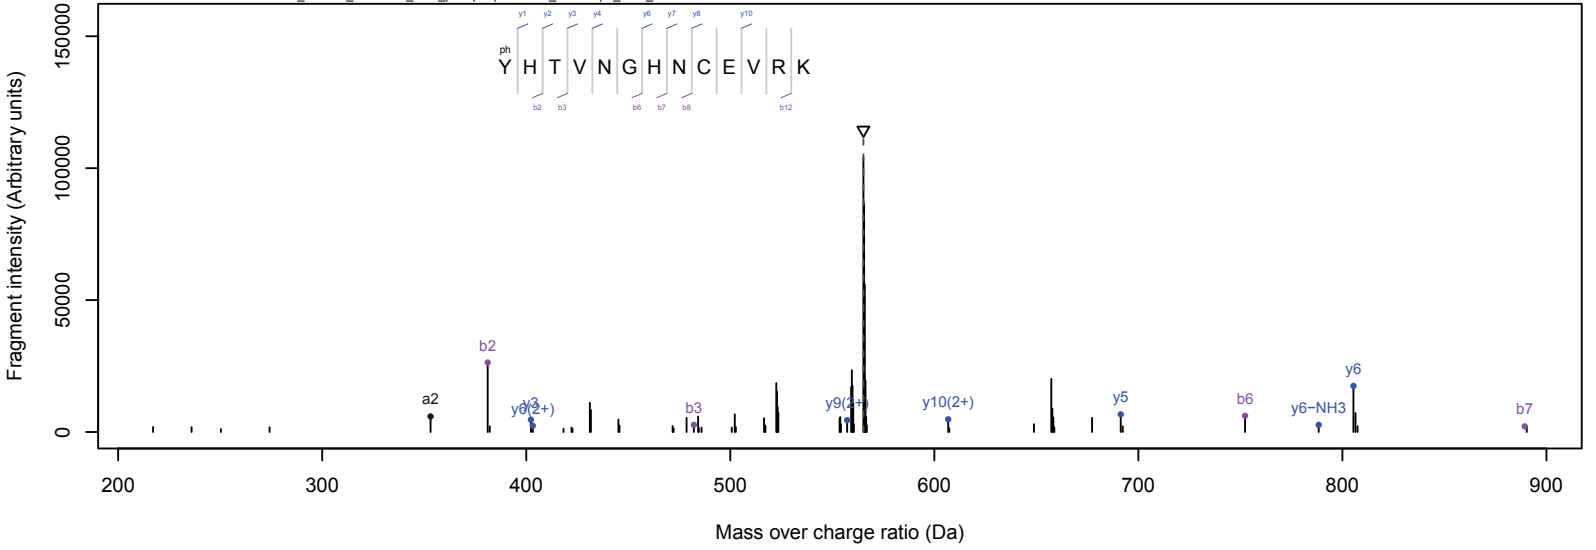

LPQFKEEPPKNYVGTNMG-3+

Source : QE1\_140612\_OPL1013\_CVA\_phosphoproteomic\_landscape\_AML\_C Scan : 20045

Andromeda score : 90.385

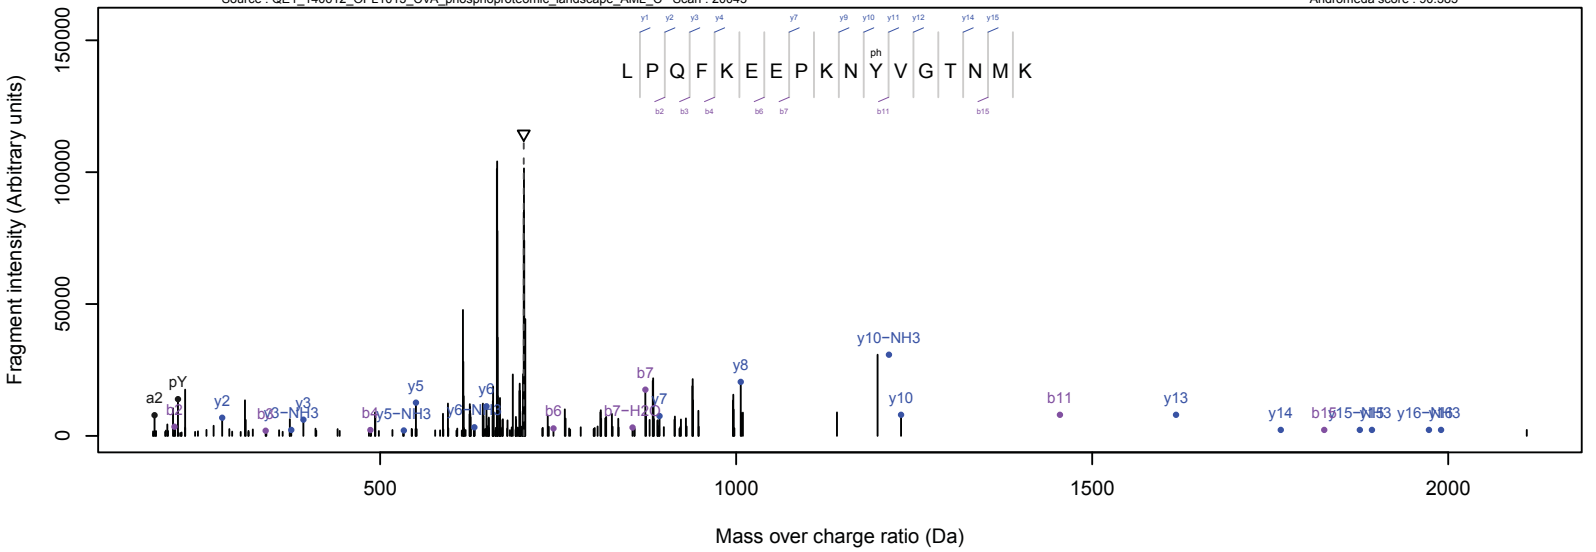

LQAYHTQTTPLEIYRKR-3+

Source : QE1\_140612\_OPL1013\_CVA\_phosphoproteomic\_landscape\_AML\_C Scan : 21330

Andromeda score : 90.385

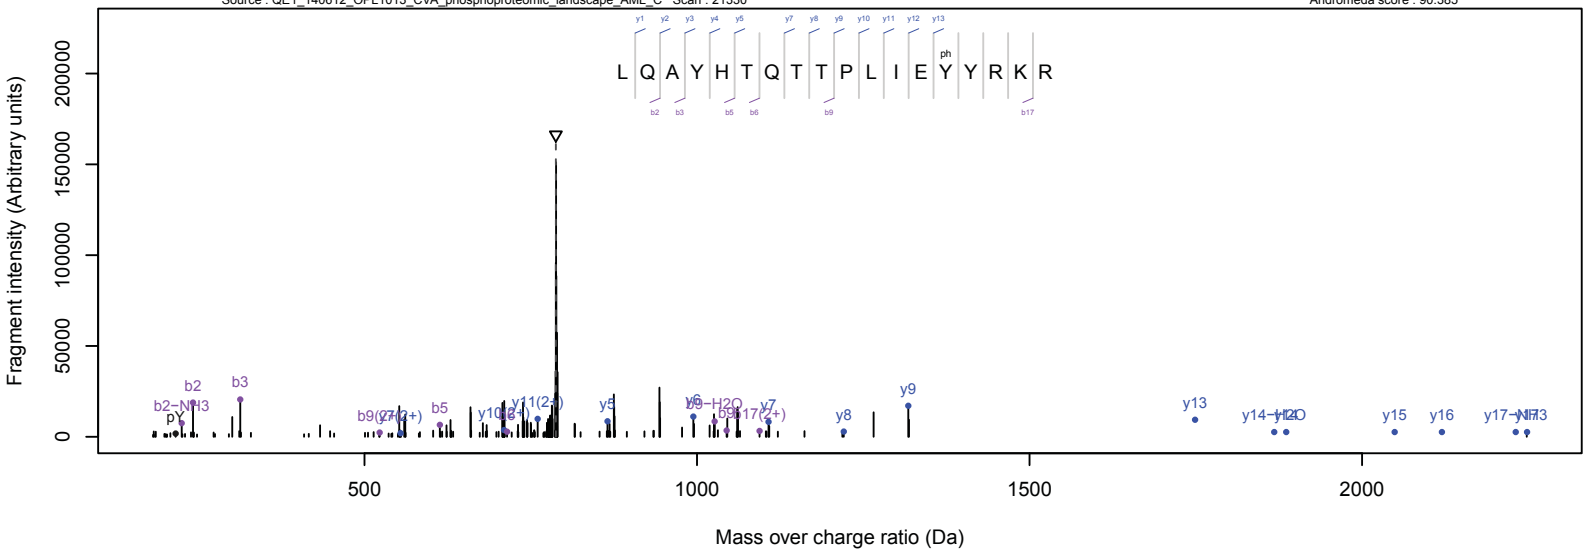

MKGDY(ph)DVTVPKVEGEIK-3+

Source : QE1\_140612\_OPL1013\_CVA\_phosphoproteomic\_landscape\_AML\_C Scan : 22655

Andromeda score : 90.385

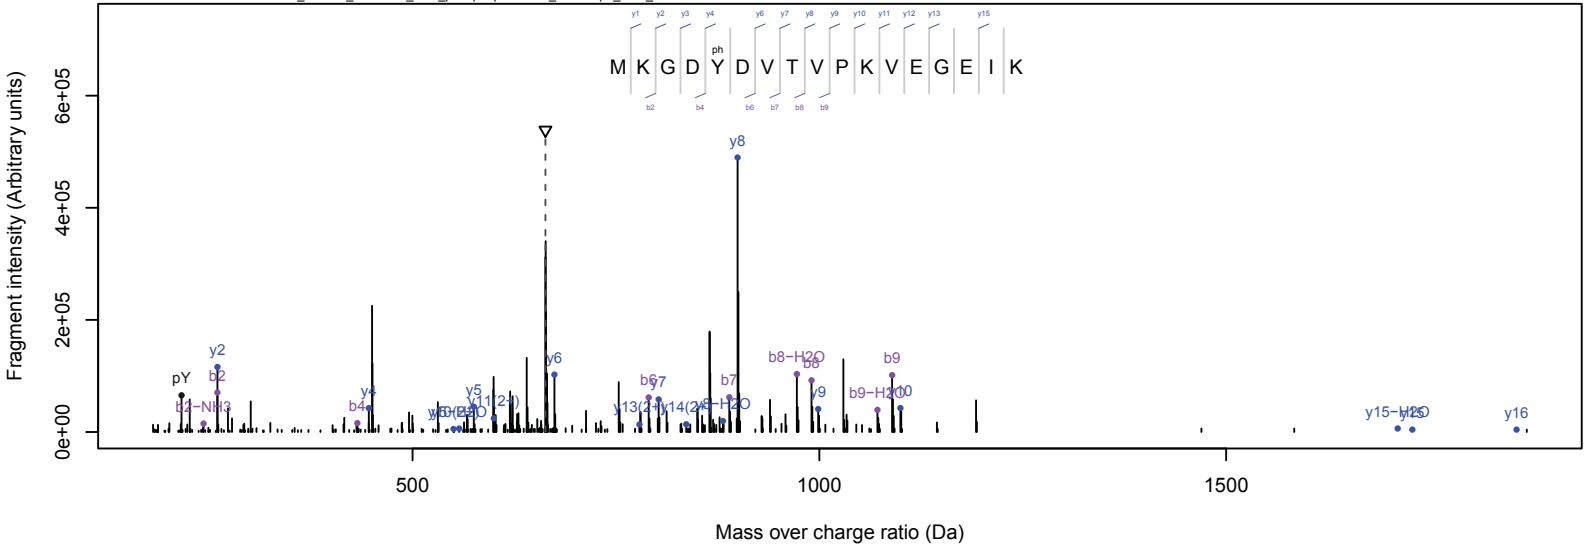

LNY(ph)LDPR-2+

Source : QE1\_140822\_OPL1013\_CvA\_pTyrIP\_AML\_cell\_lines\_part2\_E Scan : 9774

Andromeda score : 90.37

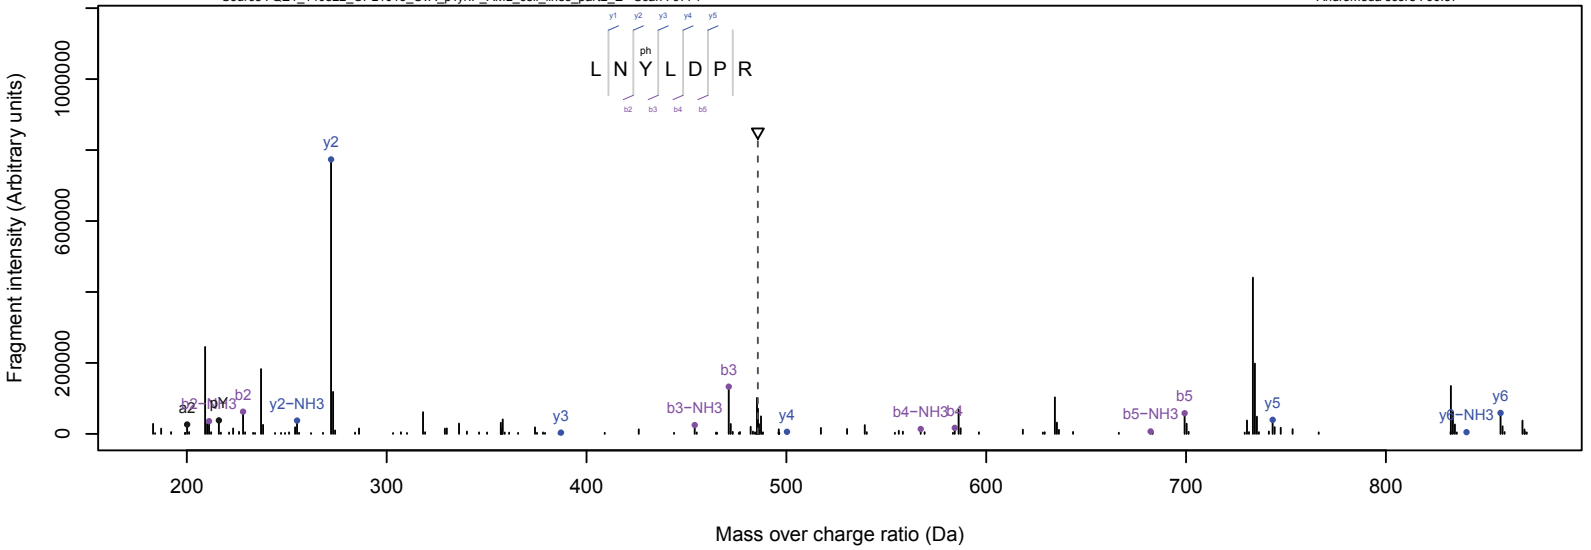

LAFATHGTAFDKRPY<sup>ph</sup>HR-5+

Source : QE1\_140612\_OPL1013\_CVA\_phosphoproteomic\_landscape\_AML\_C Scan : 15323

Andromeda score : 90.348

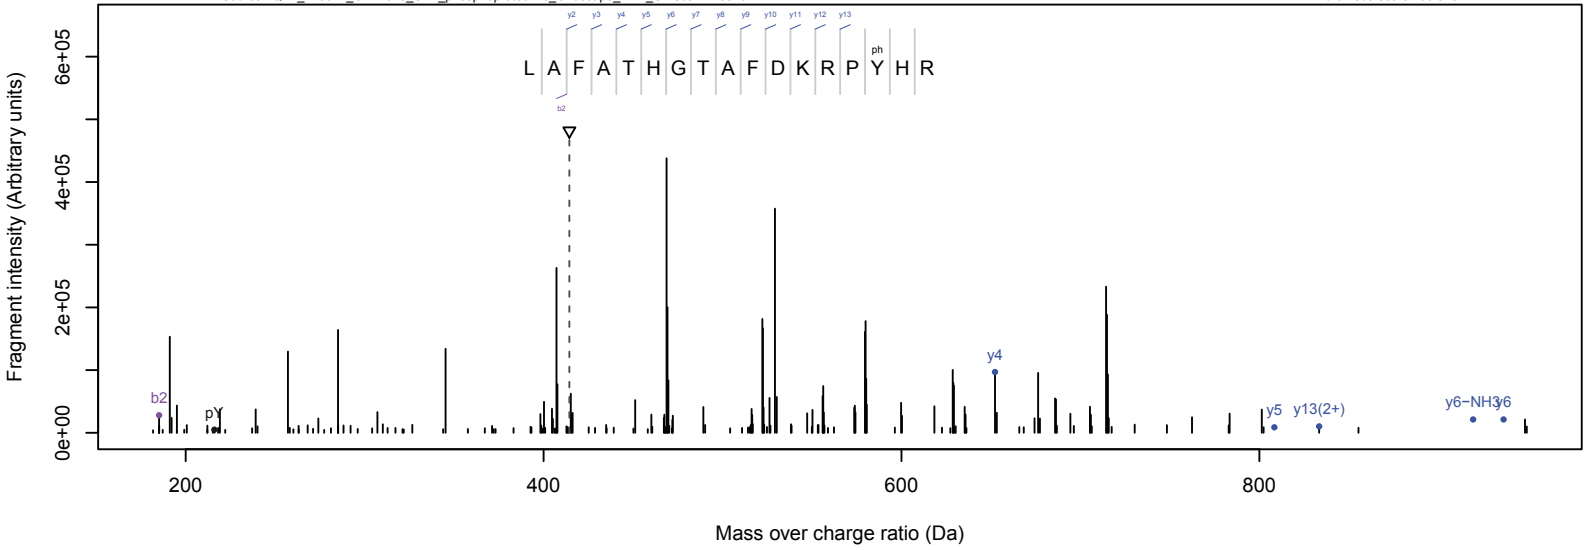

NAEDCLY(ph)ELPENIR-2+

Source: QE1\_140612\_OPL1013\_CVA\_phosphoproteomic\_landscape\_AML\_B Scan: 32679

Andromeda score: 90.348

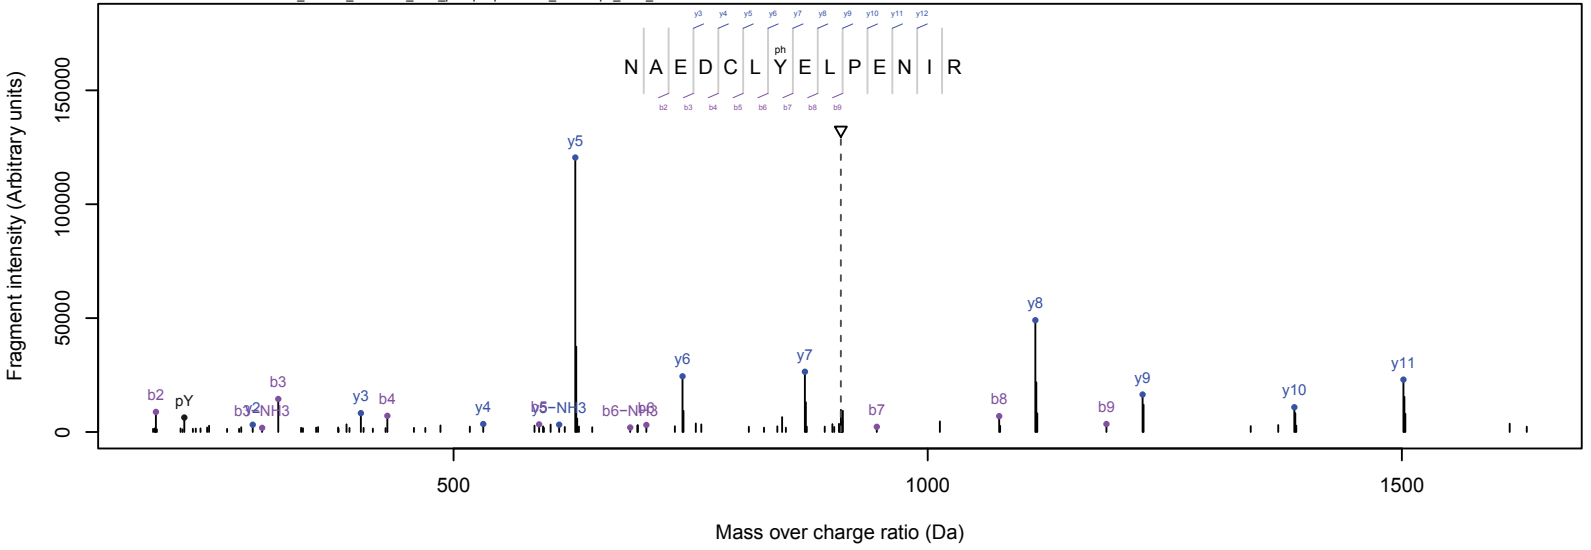

Y(ph)TVQDESHSEWVSCVR-3+

Source: QE1\_140612\_OPL1013\_CVA\_phosphoproteomic\_landscape\_AML\_C Scan: 21176

Andromeda score: 90.348

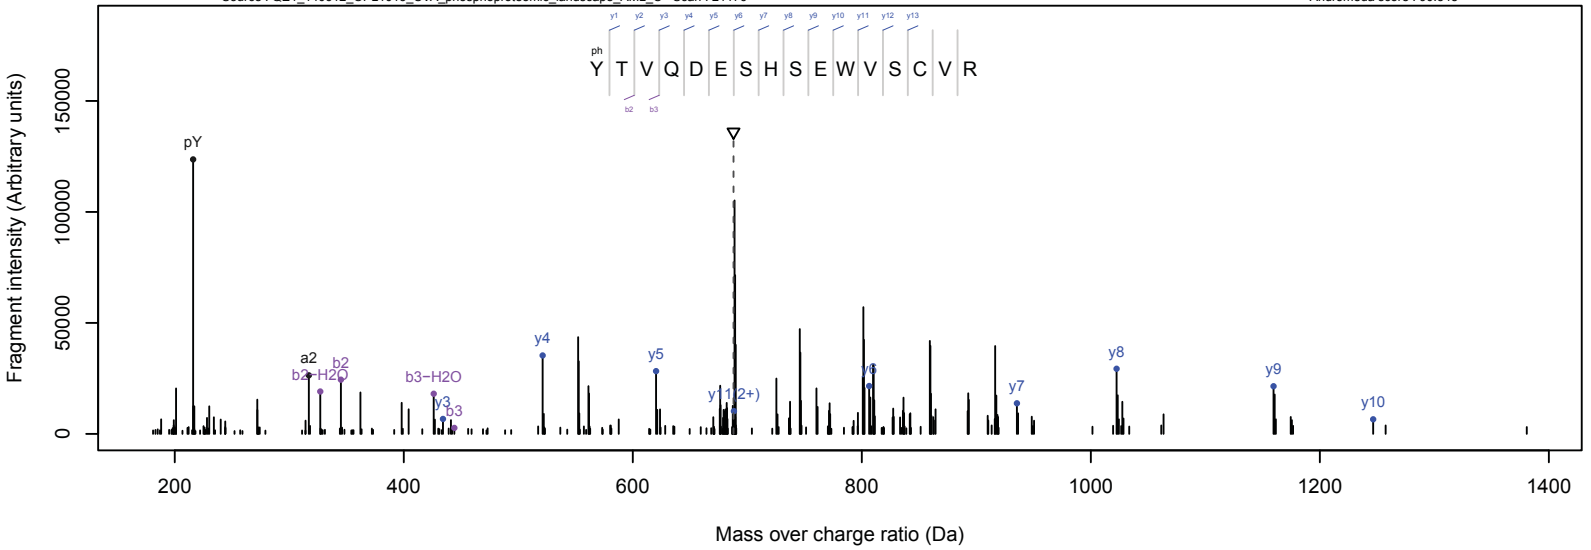

AKWY(ph)PEVR-2+

Source: QE1\_140612\_OPL1013\_CVA\_phosphoproteomic\_landscape\_AML\_B Scan: 14845

Andromeda score: 90.15

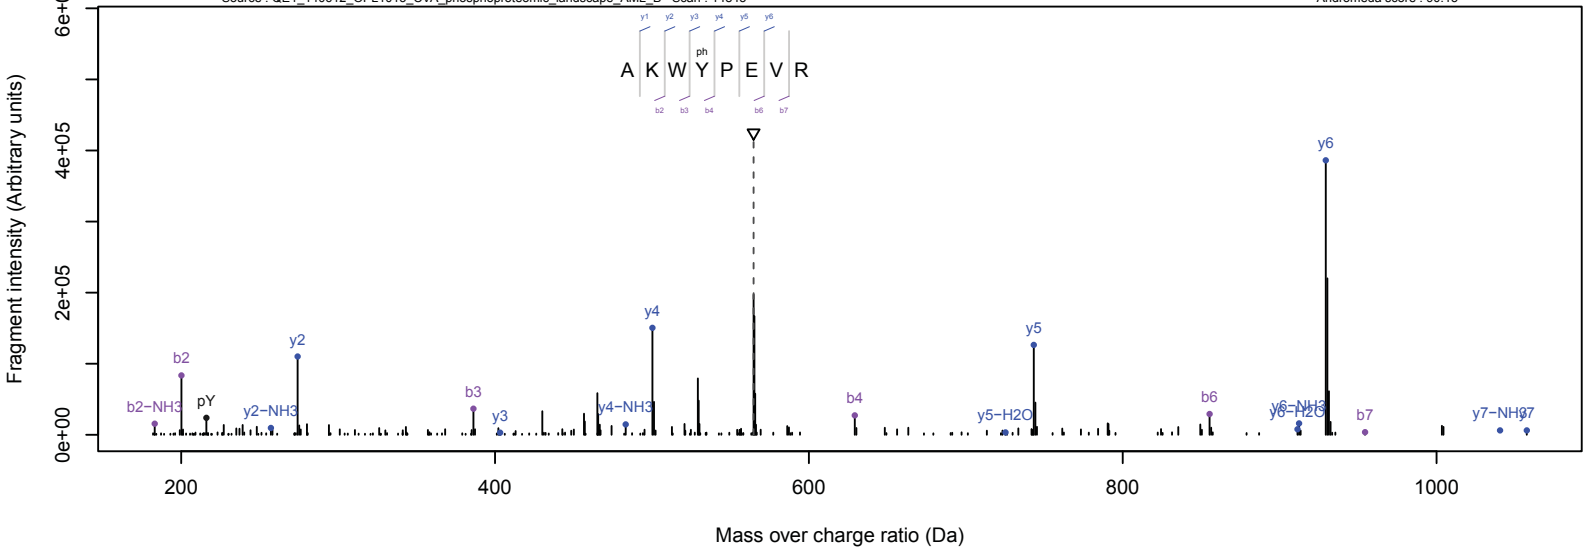

GRGEY(ph)FAIK-3+

Source : QE1\_140908\_OPL1013\_CvA\_pTyrIP\_AML\_HEL Scan : 15824

Andromeda score : 90.15

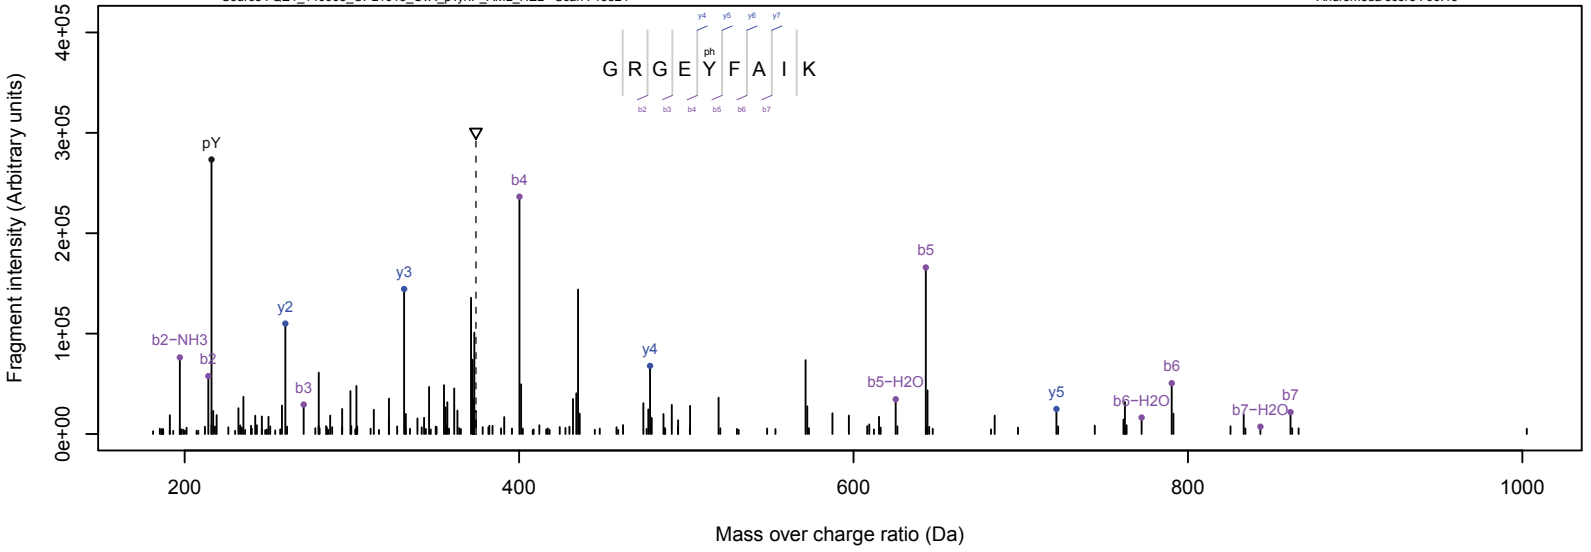

HMY(ph)HSLYLK-2+

Source : QE1\_140612\_OPL1013\_CVA\_phosphoproteomic\_landscape\_AML\_C Scan : 13400

Andromeda score : 90.15

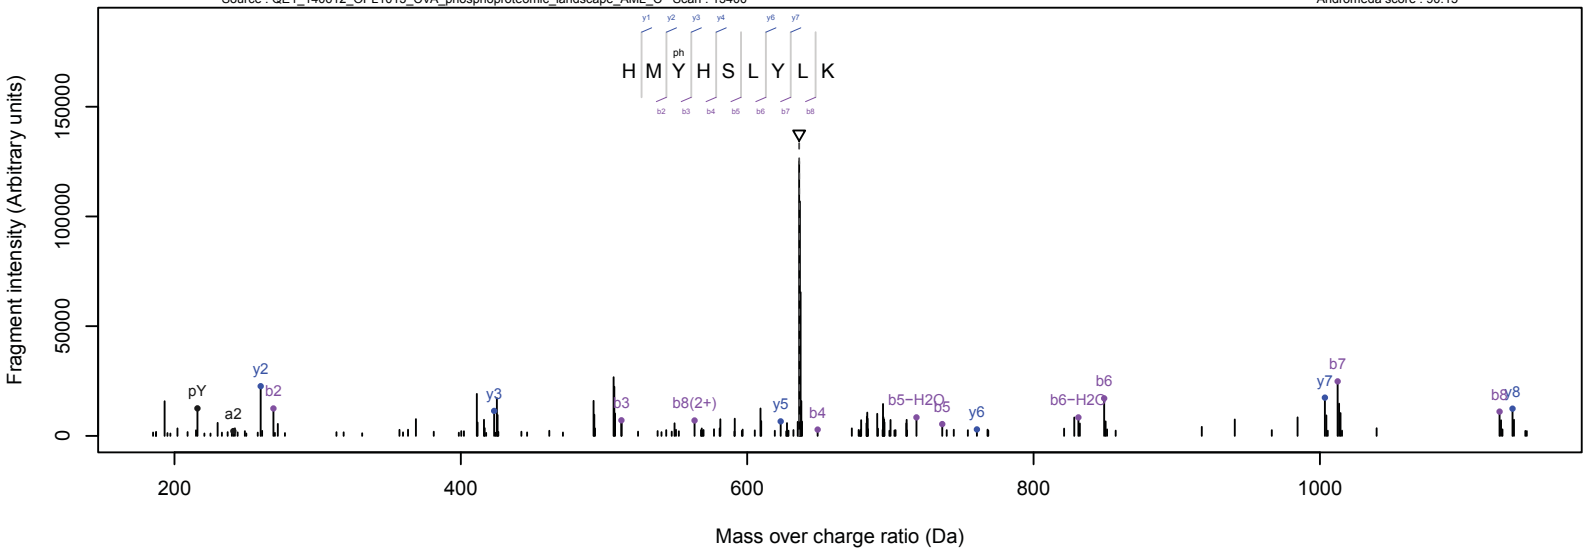

LY(ph)MVLITTK-2+

Source : QE1\_140612\_OPL1013\_CVA\_phosphoproteomic\_landscape\_AML\_B Scan : 36659

Andromeda score : 90.15

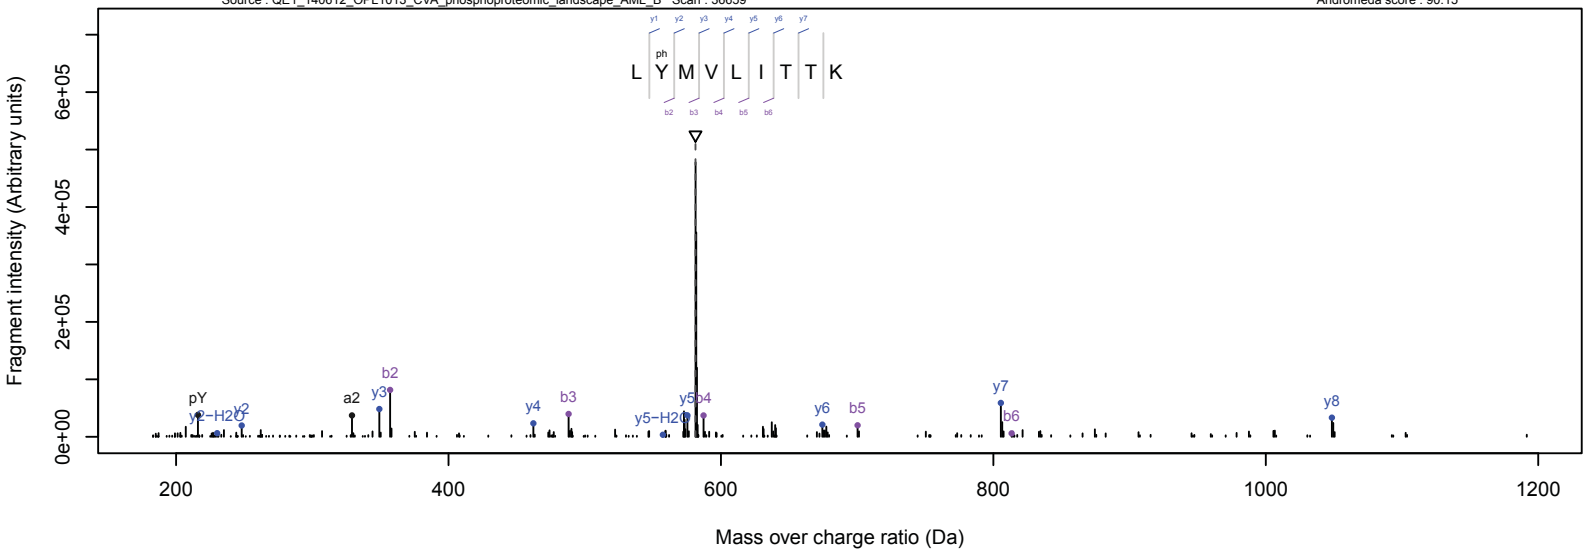

Y(ph)LATCADDR-2+

Source : QE1\_140822\_OPL1013\_CVA\_pTyrIP\_AML\_cell\_lines\_part2\_E Scan : 4453

Andromeda score : 90.15

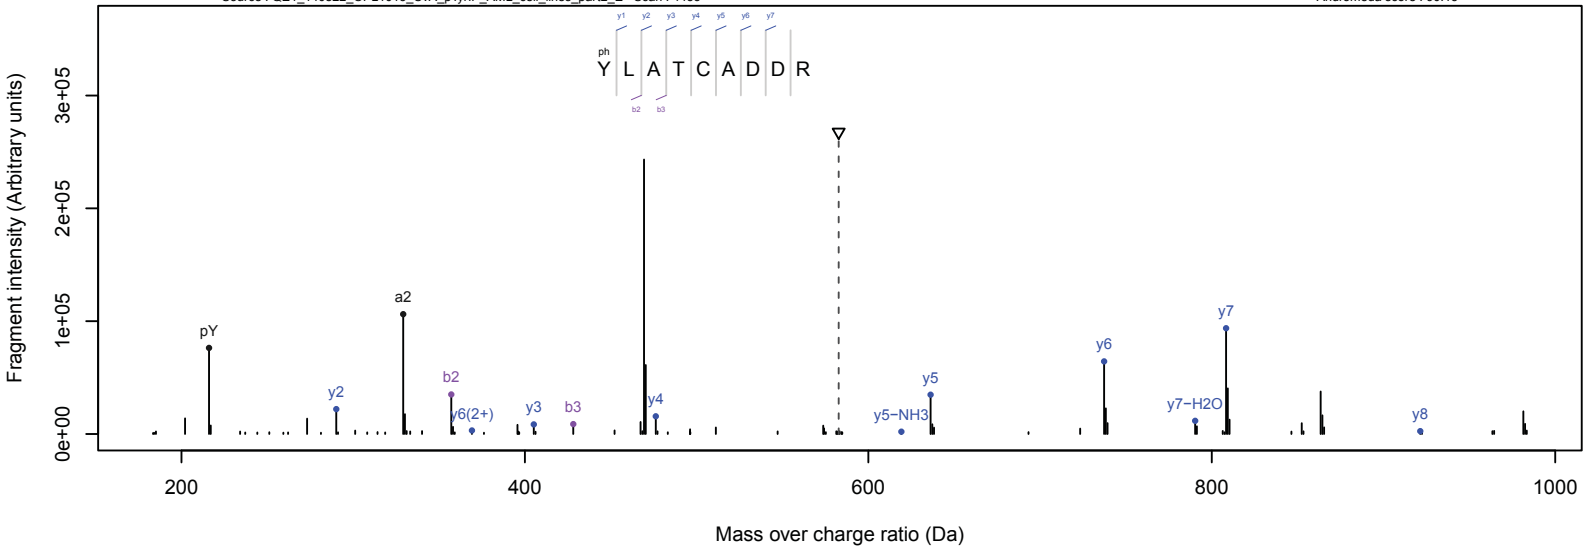

MHGDY(ph)TLTLR-2+

Source : QE1\_140612\_OPL1013\_CVA\_phosphoproteomic\_landscape\_AML\_B Scan : 17358

Andromeda score : 90.05

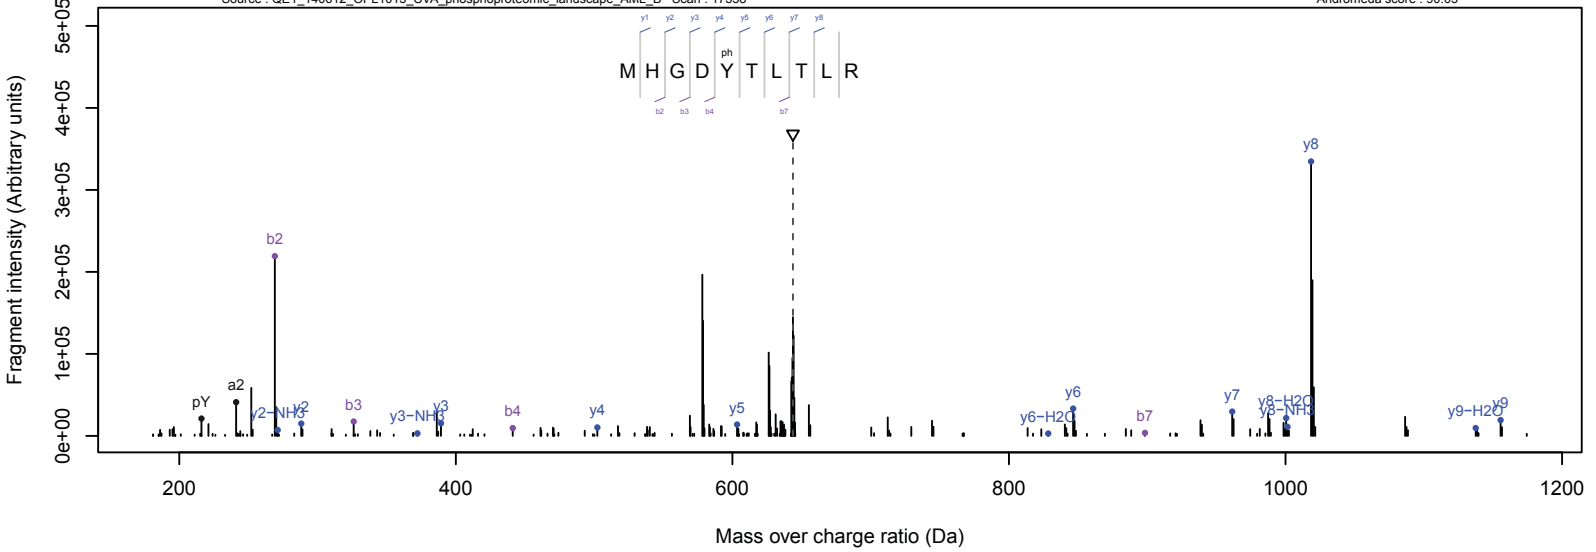

Y(ph)KFVATGHGK-2+

Source : QE1\_140612\_OPL1013\_CVA\_phosphoproteomic\_landscape\_AML\_D Scan : 4977

Andromeda score : 90.05

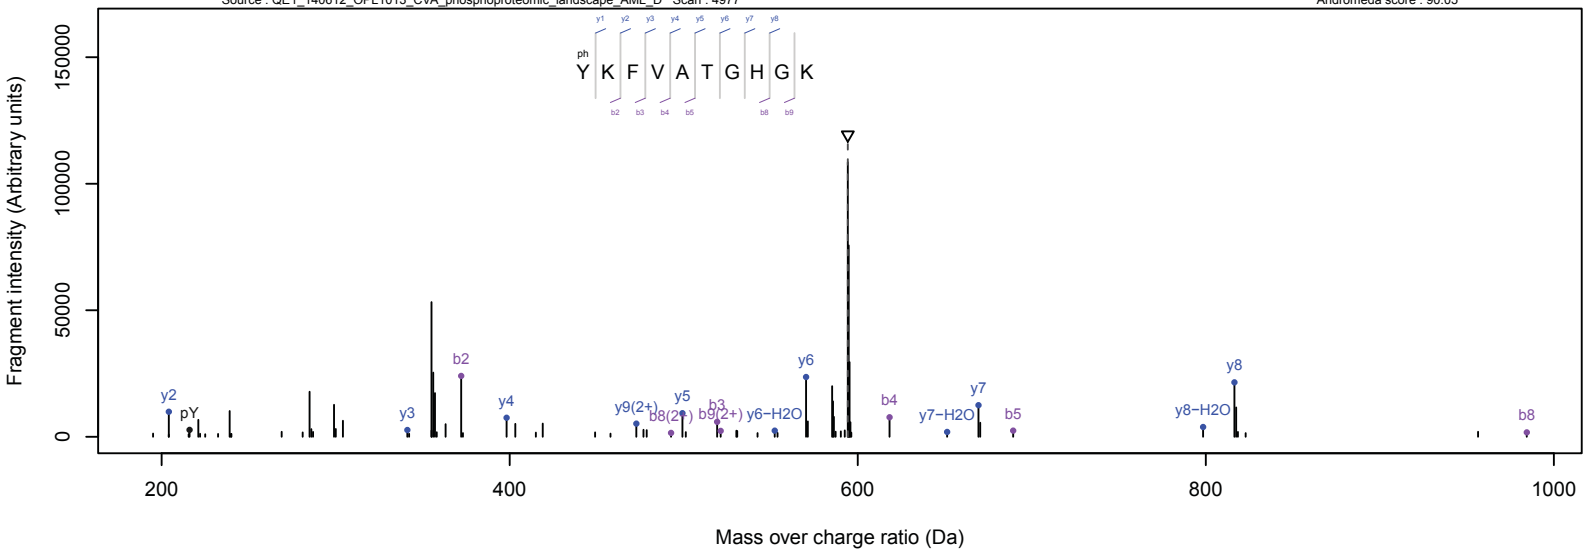



ANVAVVSGAPLQGQLVARPS(ph)SINYM(ox)VAPVTGNDVGIR-3+

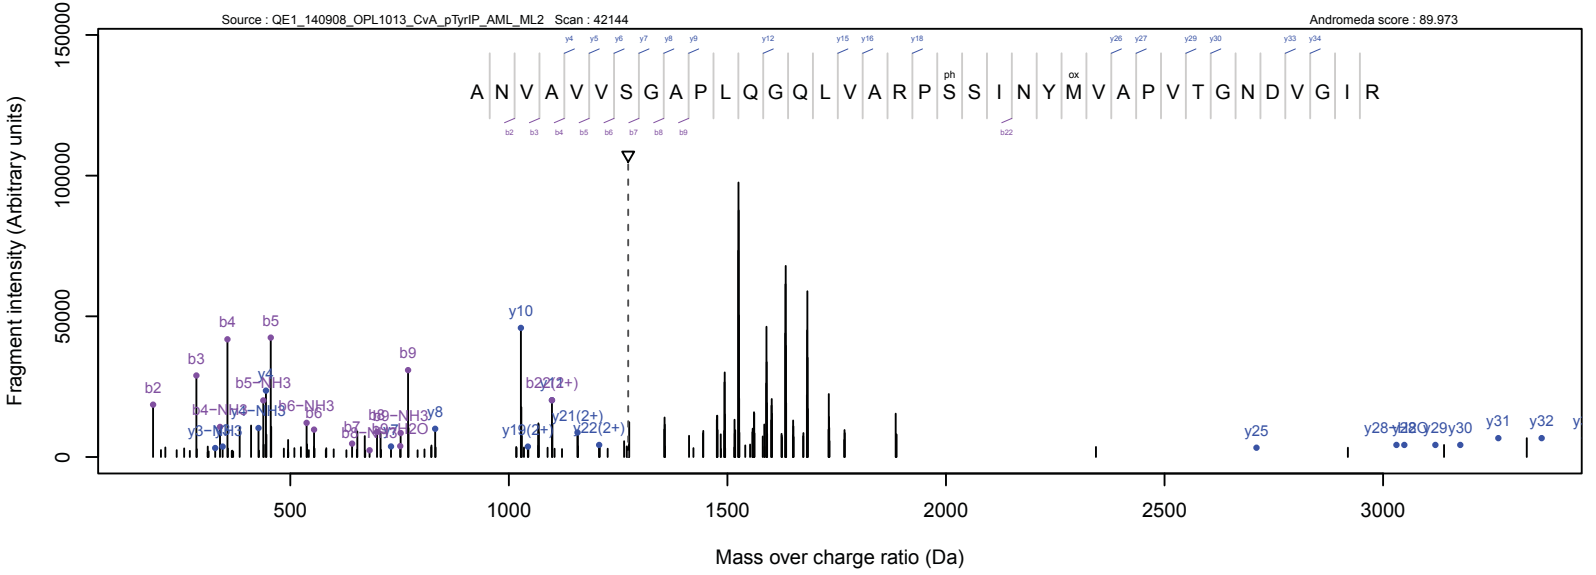

SLEVGTVMTLFY(ph)SKK-2+

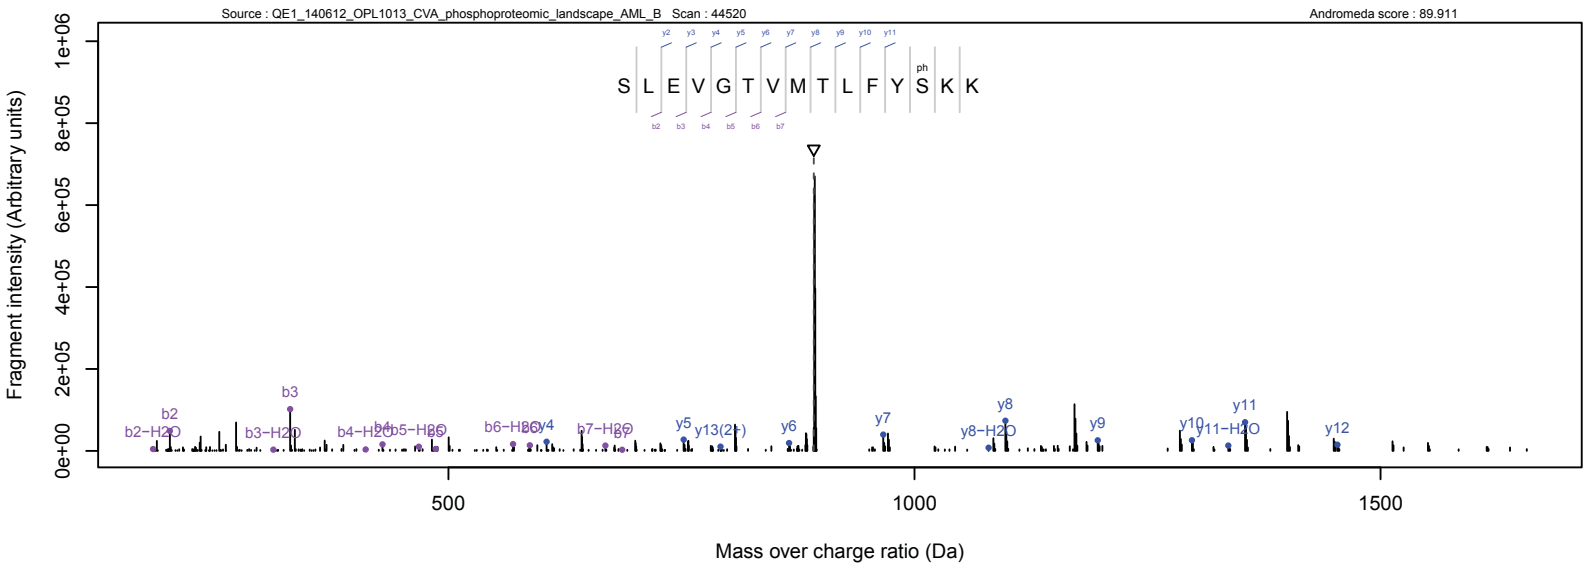

TEY(ph)RLIVENLSSR-3+

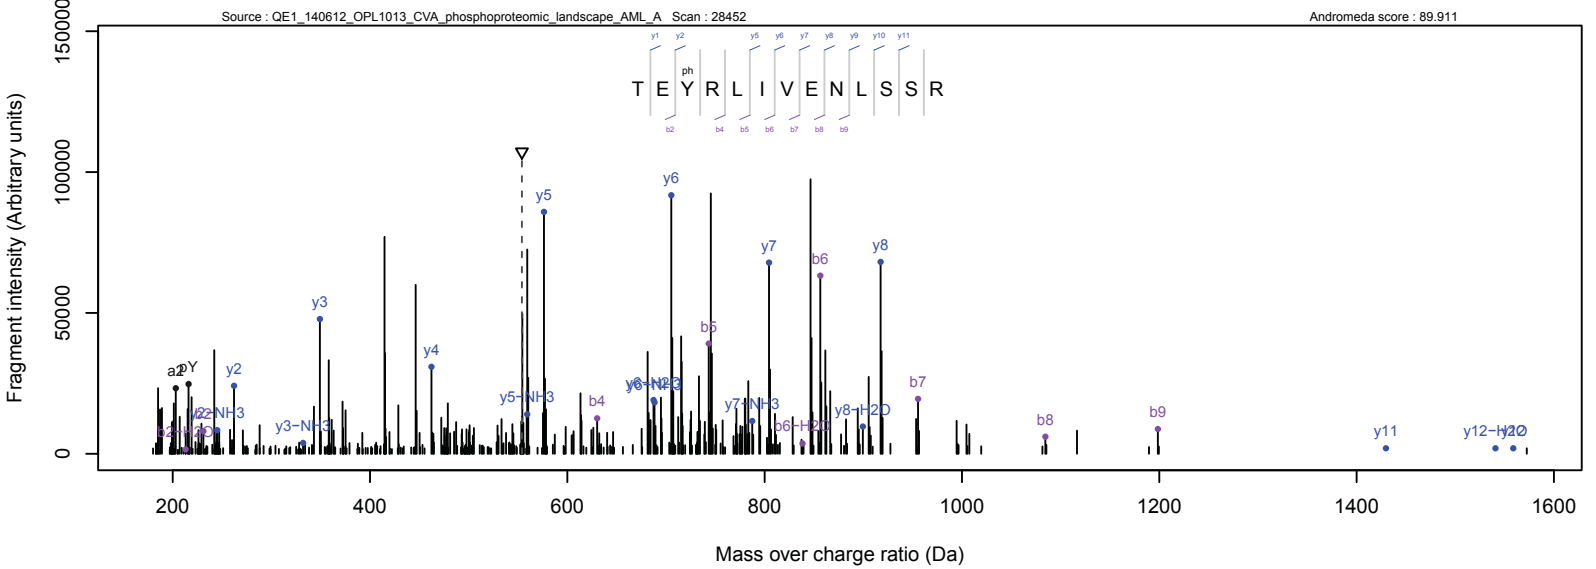



GSLSTDKDTAY(ph)GSFQNGHGIKR-4+

Source : QE1\_140612\_OPL1013\_CVA\_phosphoproteomic\_landscape\_AML\_B Scan : 11806

Andromeda score : 89.663

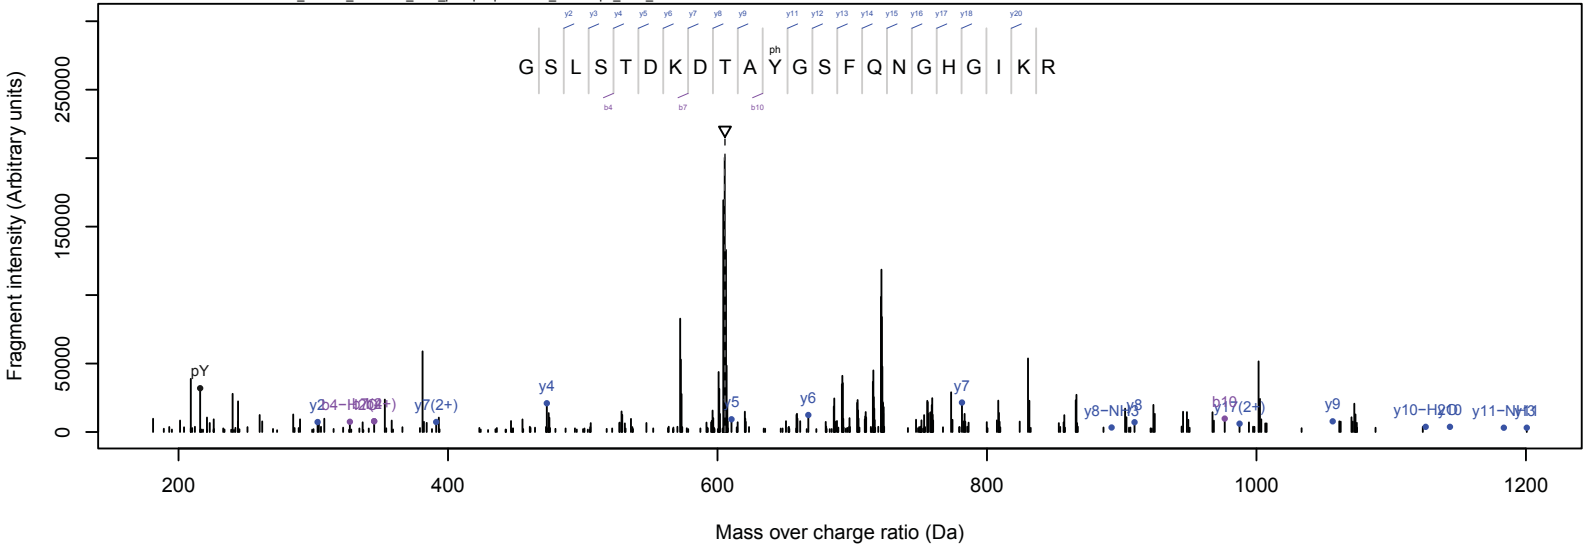

STGSVDY(ph)LALDFQPSSPSPHRK-3+

Source : QE1\_140612\_OPL1013\_CVA\_phosphoproteomic\_landscape\_AML\_A Scan : 30471

Andromeda score : 89.663

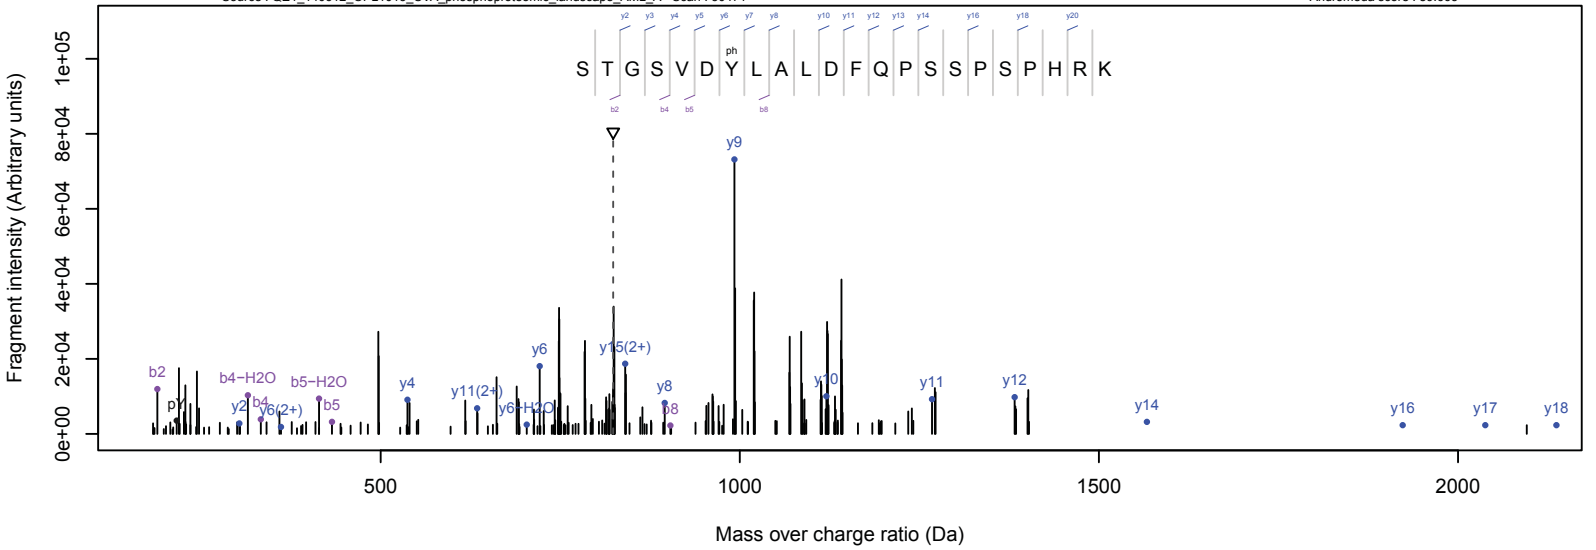

Y(ph)SLLPFANESGTSAAAEVNR-2+

Source : QE1\_140612\_OPL1013\_CVA\_phosphoproteomic\_landscape\_AML\_C Scan : 39190

Andromeda score : 89.663

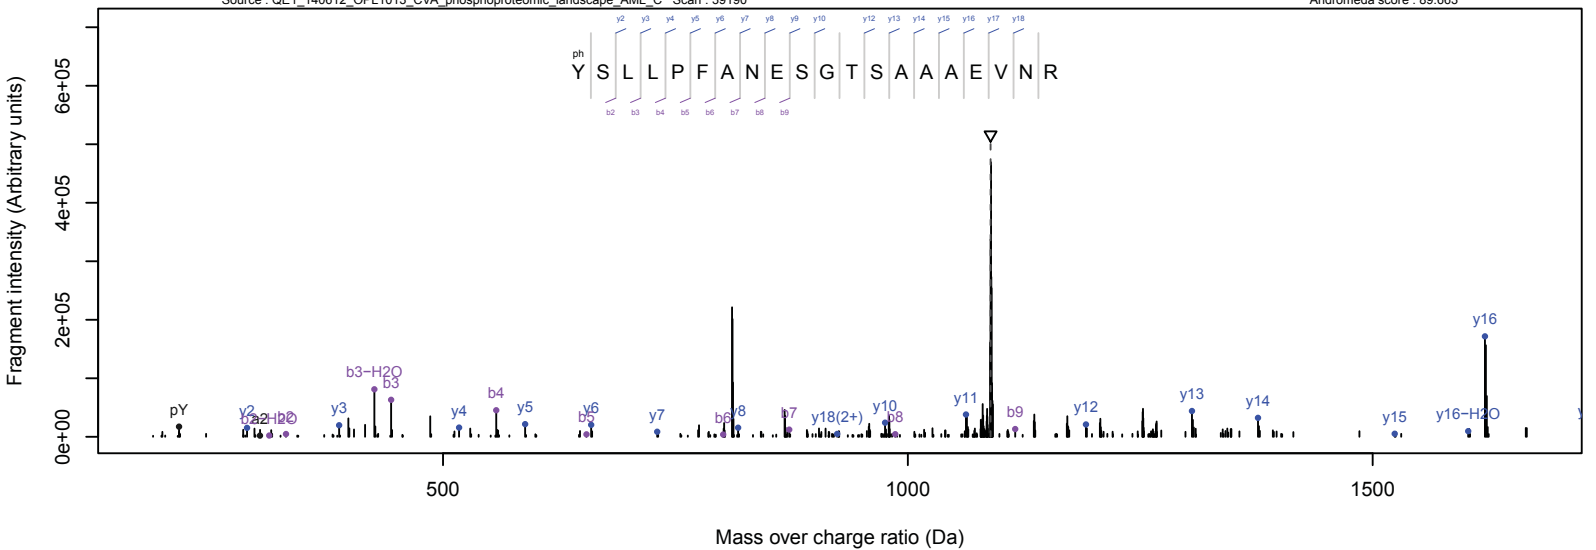

ALPQDDHY(ph)VMQEHR-3+

Source : QE1\_140612\_OPL1013\_CVA\_phosphoproteomic\_landscape\_AML\_B Scan : 12025

Andromeda score : 89.624

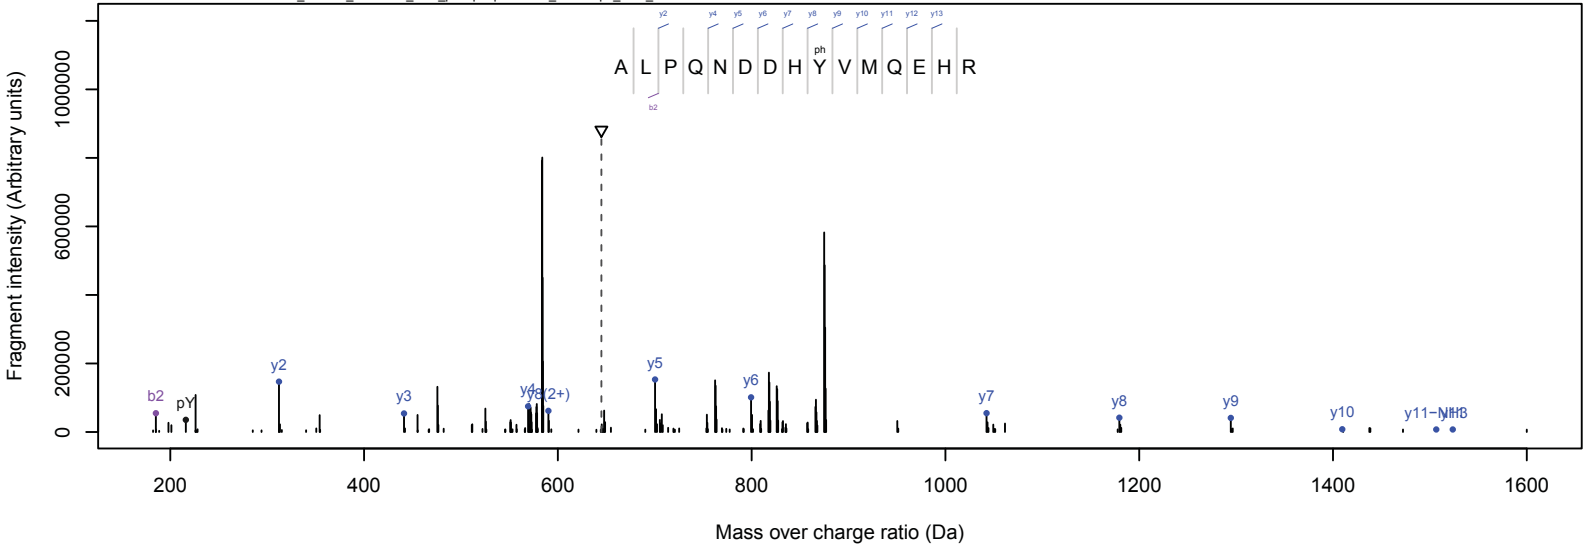

ALPQDDHY(ph)VM(ox)QEHR-3+

Source : QE1\_140908\_OPL1013\_CvA\_pTyrIP\_AML\_Kasumi6 Scan : 9460

Andromeda score : 89.624

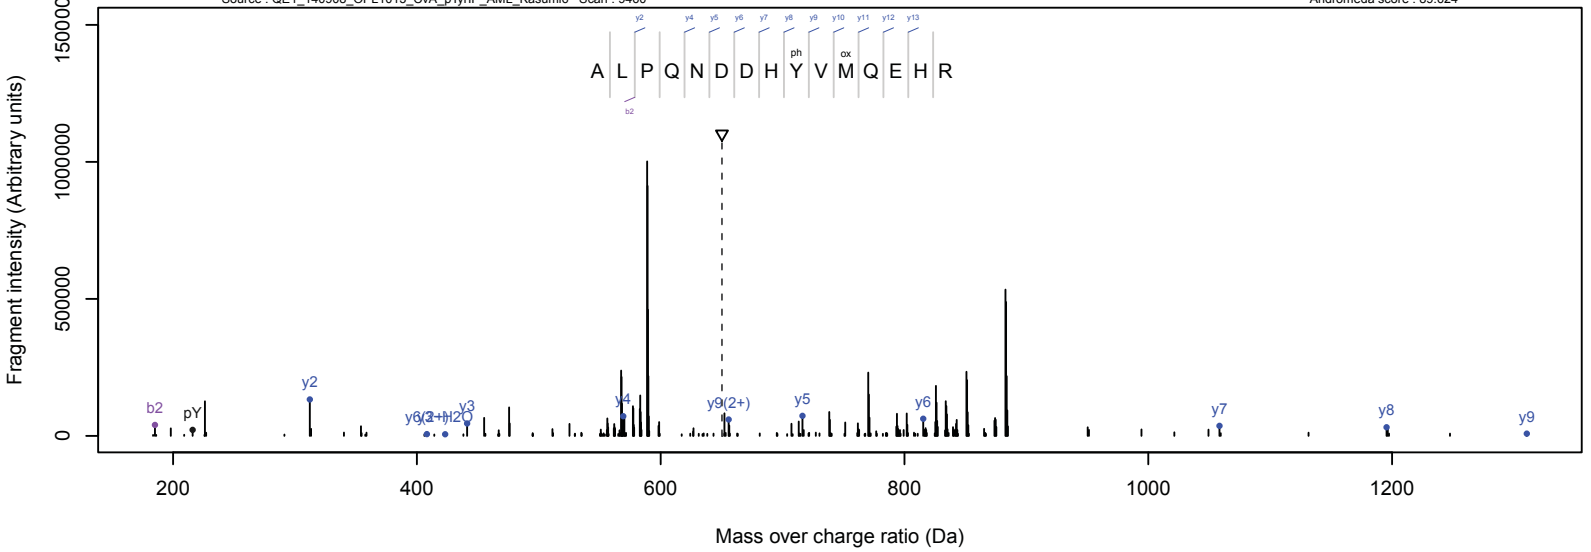

ARPEY(ph)M(ox)LPVHFYGR-3+

Source : QE1\_140908\_OPL1013\_CvA\_pTyrIP\_AML\_Kasumi1 Scan : 26308

Andromeda score : 89.624

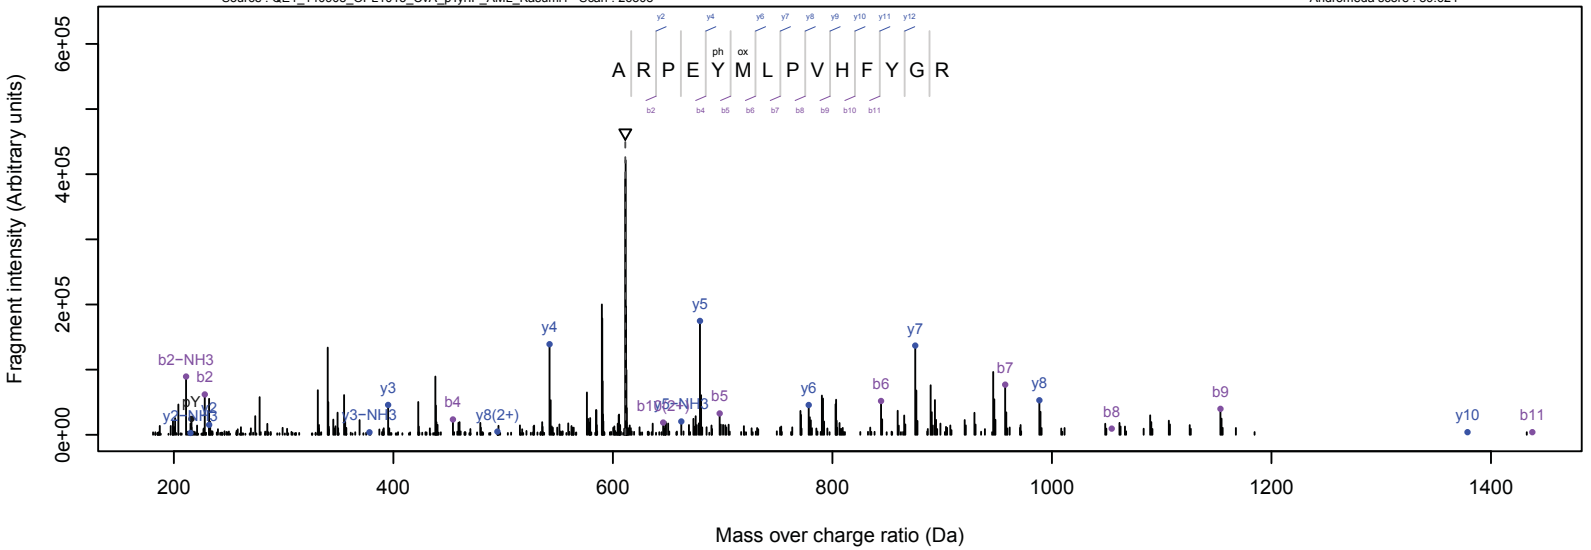

KQPALDVL(ph)DVMK-2+

Source : QE1\_140612\_OPL1013\_CVA\_phosphoproteomic\_landscape\_AML\_A Scan : 43654

Andromeda score : 89.624

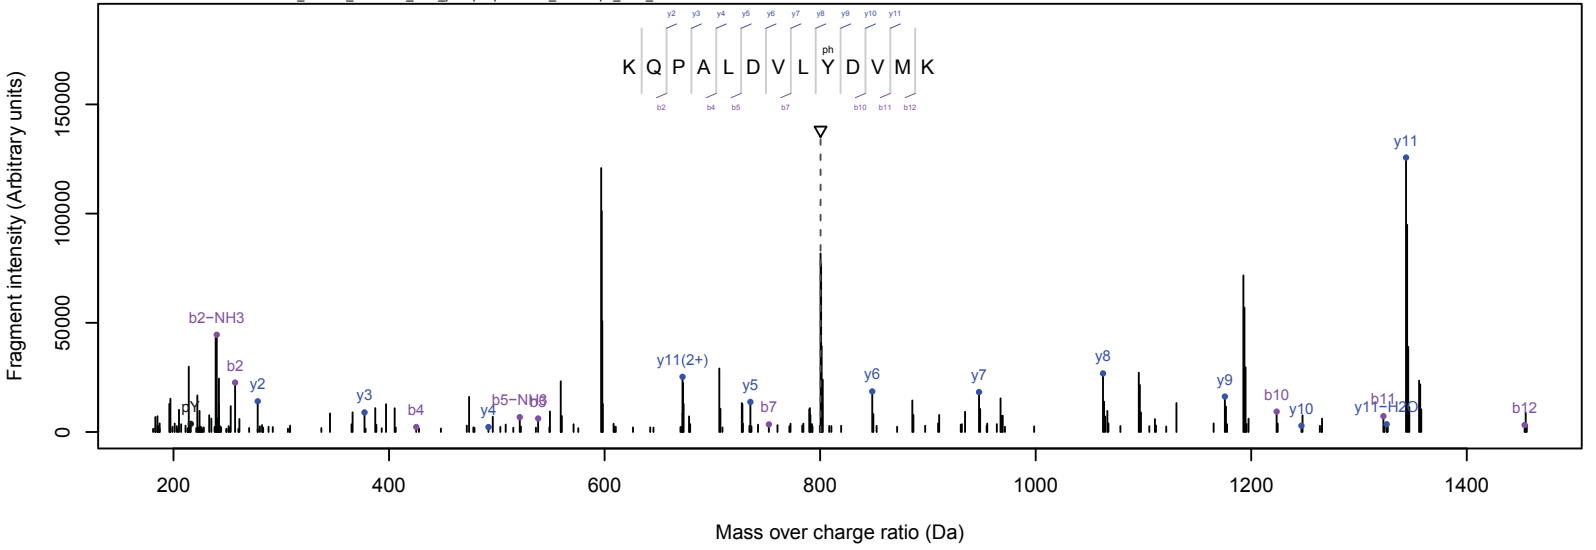

MY(ph)LFYGNK-2+

Source : QE1\_140612\_OPL1013\_CVA\_phosphoproteomic\_landscape\_AML\_C Scan : 28845

Andromeda score : 89.55

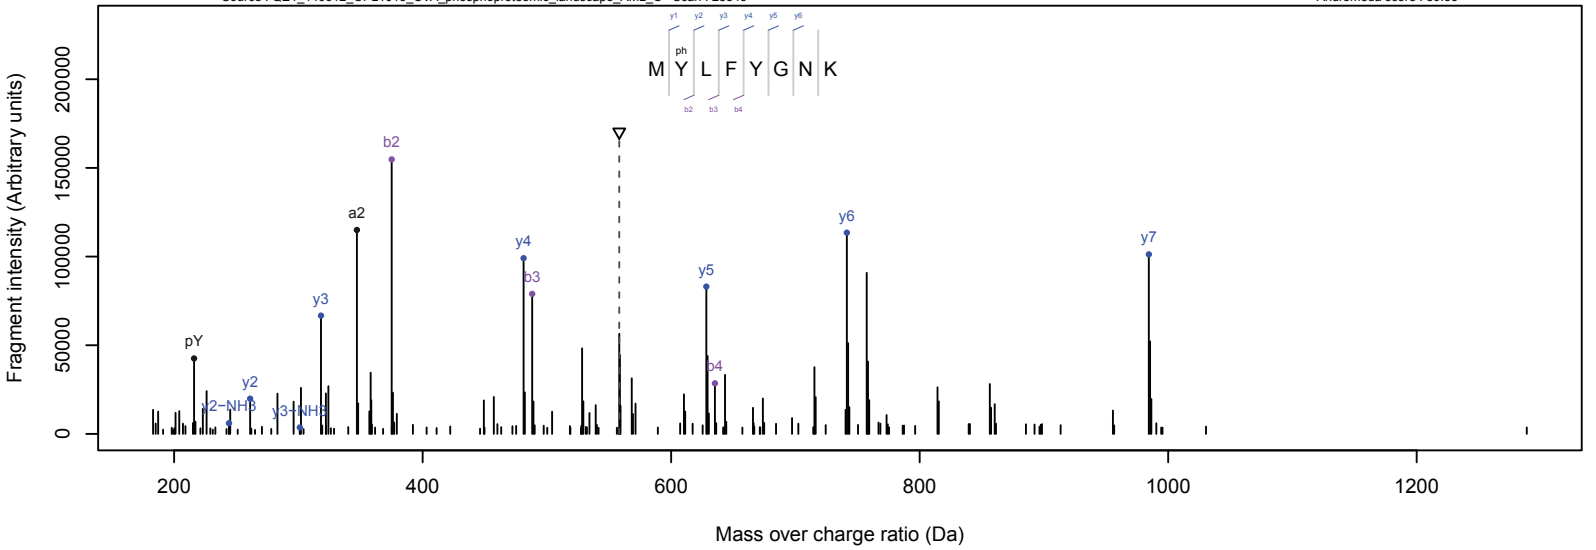

CCLTY(ph)CFNKPEDK-3+

Source : QE1\_140612\_OPL1013\_CVA\_phosphoproteomic\_landscape\_AML\_C Scan : 17689

Andromeda score : 89.507

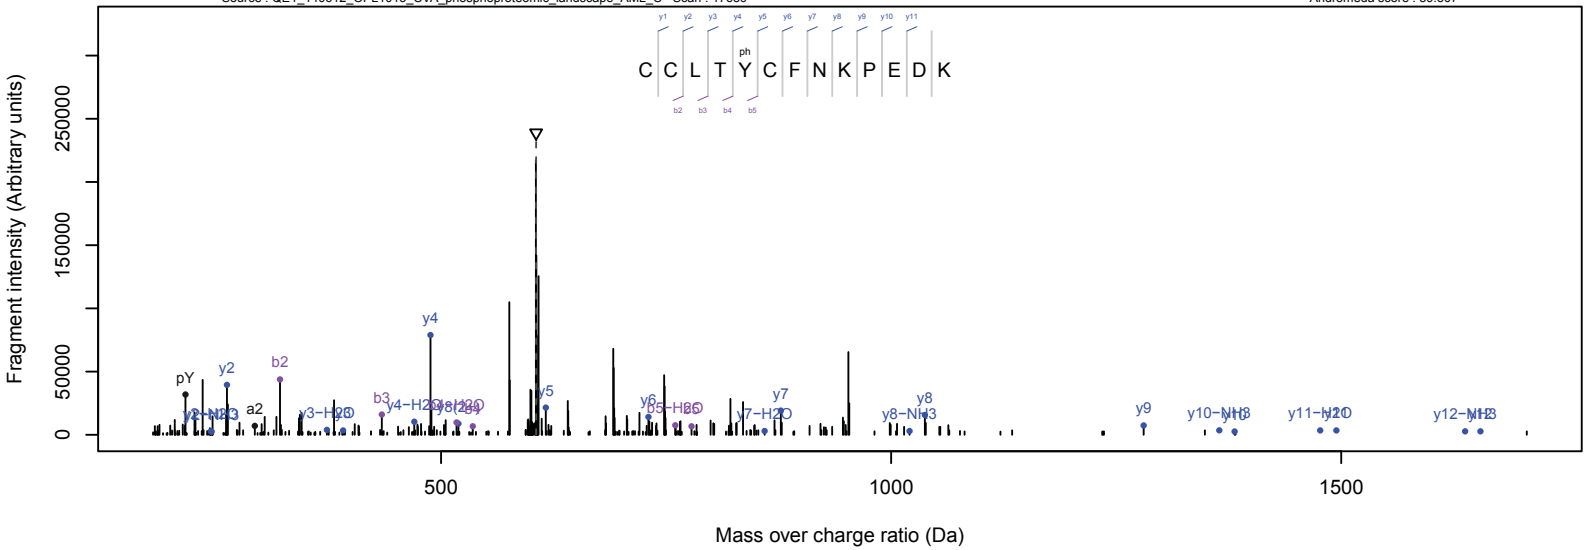

DYGHSSRDDY(ph)PSR-3+

Source : QE1\_140612\_OPL1013\_CVA\_phosphoproteomic\_landscape\_AML\_C Scan : 3583

Andromeda score : 89.507

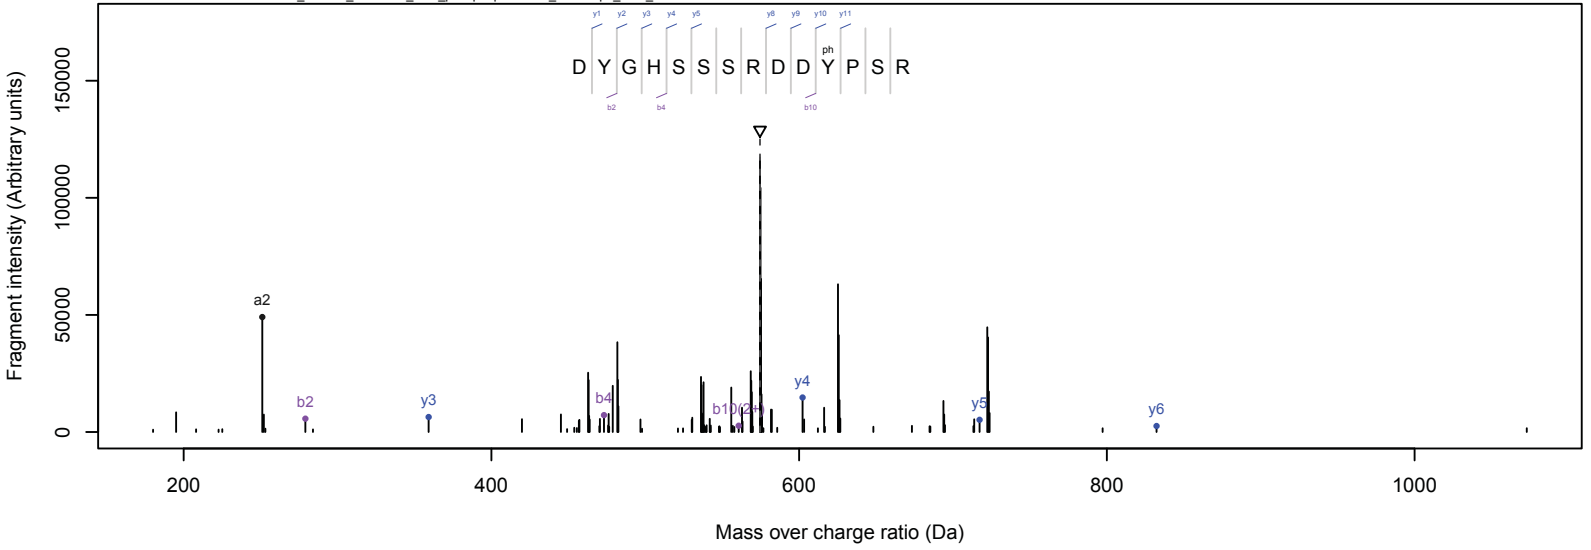

FMDY(ph)VQLHSTDK-2+

Source : QE1\_140612\_OPL1013\_CVA\_phosphoproteomic\_landscape\_AML\_D Scan : 22495

Andromeda score : 89.507

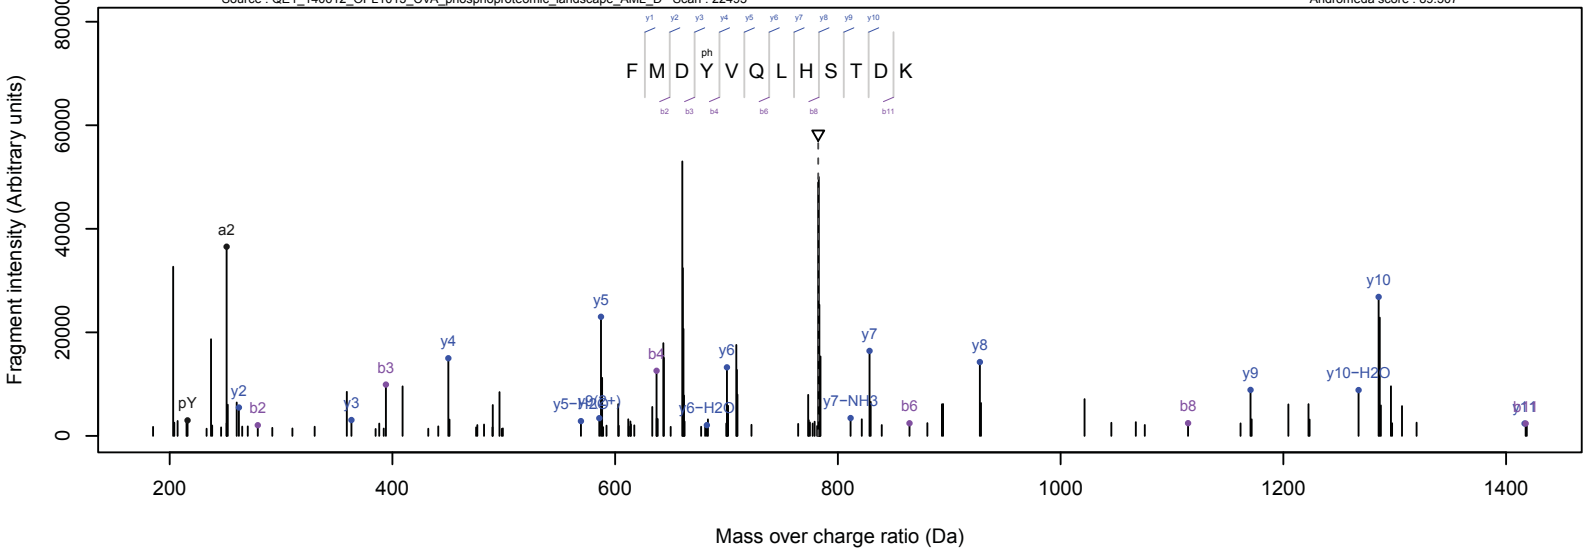

VEAM(ox)KQY(ph)QEEIQELNEVAR-3+

Source : QE1\_140612\_OPL1013\_CVA\_phosphoproteomic\_landscape\_AML\_B Scan : 29926

Andromeda score : 89.507

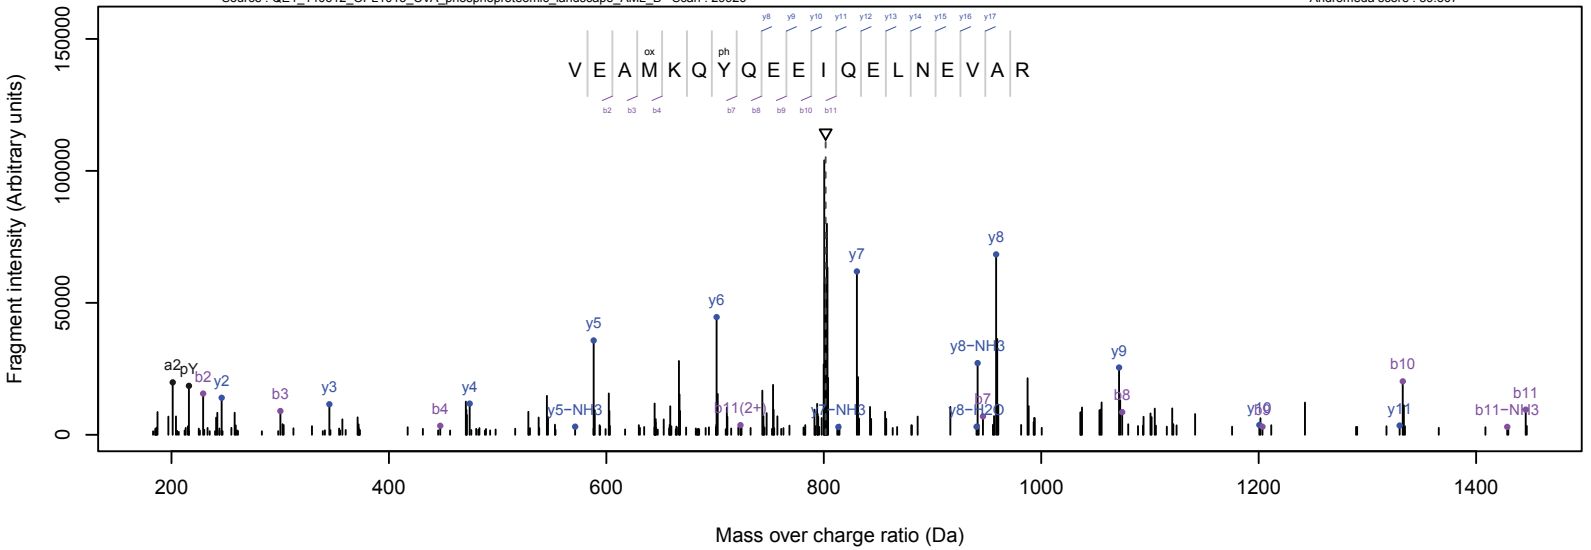

HTQPY(ph)TIYTNHLYVYPK-3+

Source : QE1\_140612\_OPL1013\_CVA\_phosphoproteomic\_landscape\_AML\_C Scan : 26450

Andromeda score : 89.502

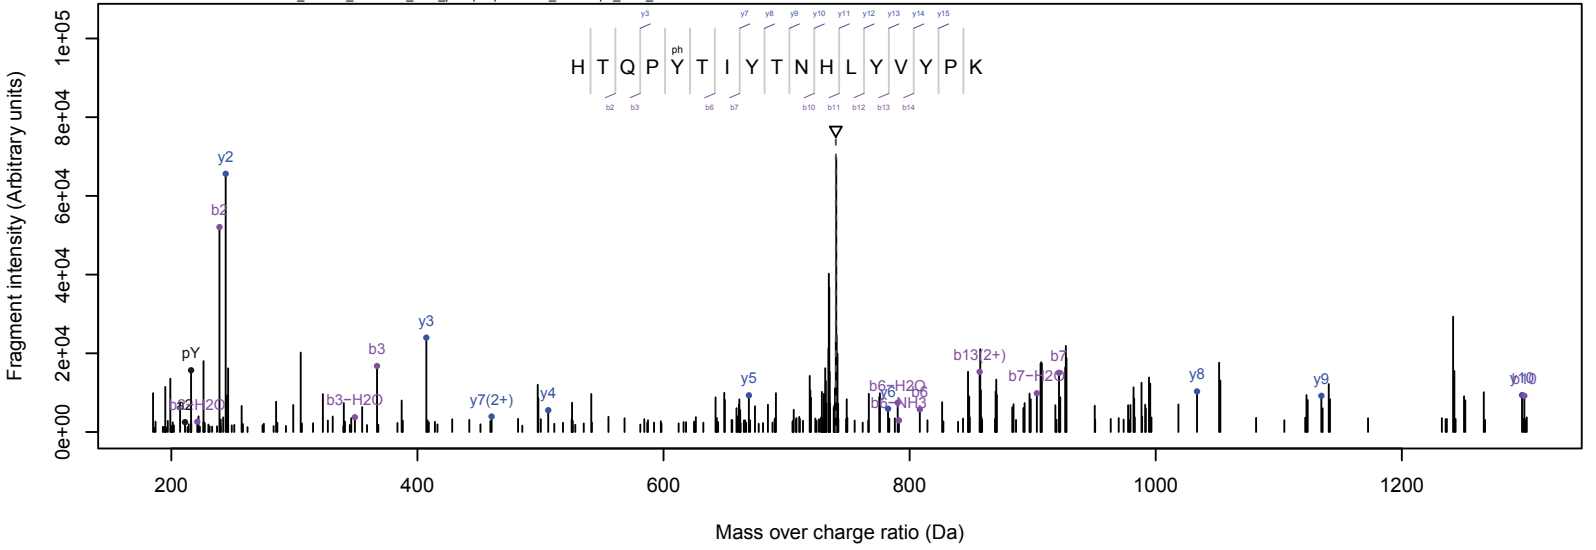

AEFAEY(ph)AS(ph)VDRNKK-3+

Source : QE1\_140612\_OPL1013\_CVA\_phosphoproteomic\_landscape\_AML\_B Scan : 9633

Andromeda score : 89.468

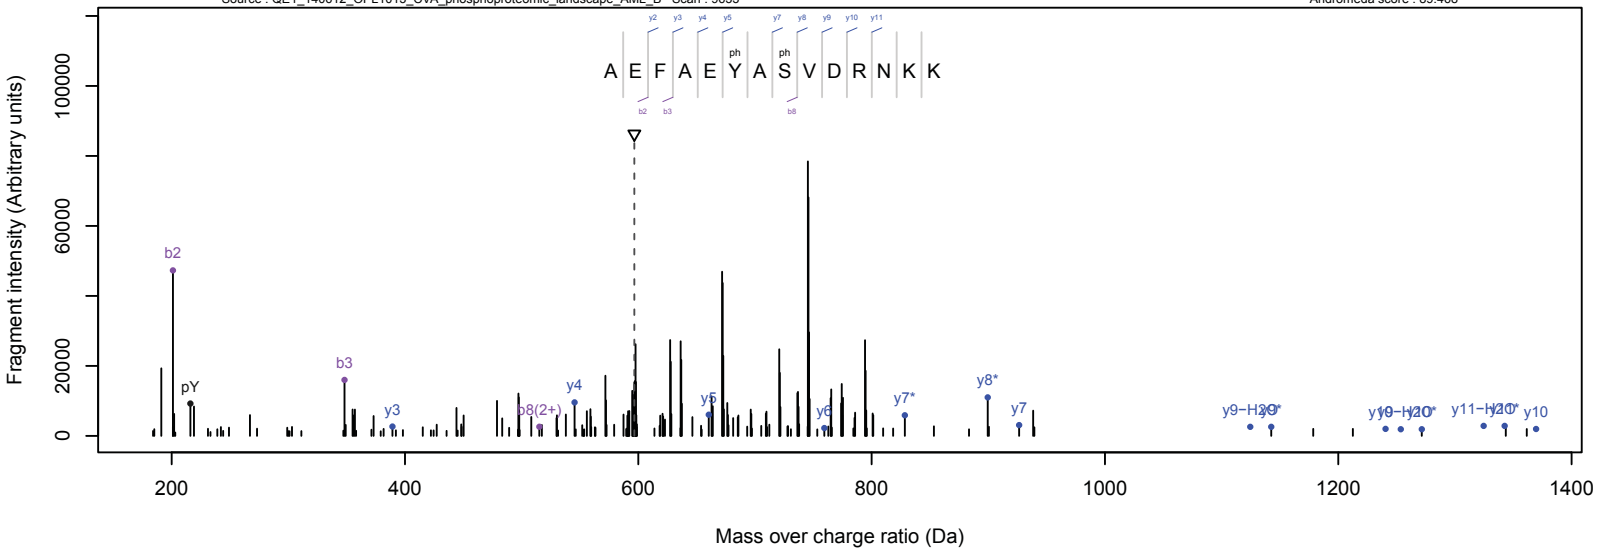

ILPARPIKESEY(ph)ADTHYFK-4+

Source : QE1\_140612\_OPL1013\_CVA\_phosphoproteomic\_landscape\_AML\_B Scan : 24087

Andromeda score : 89.468

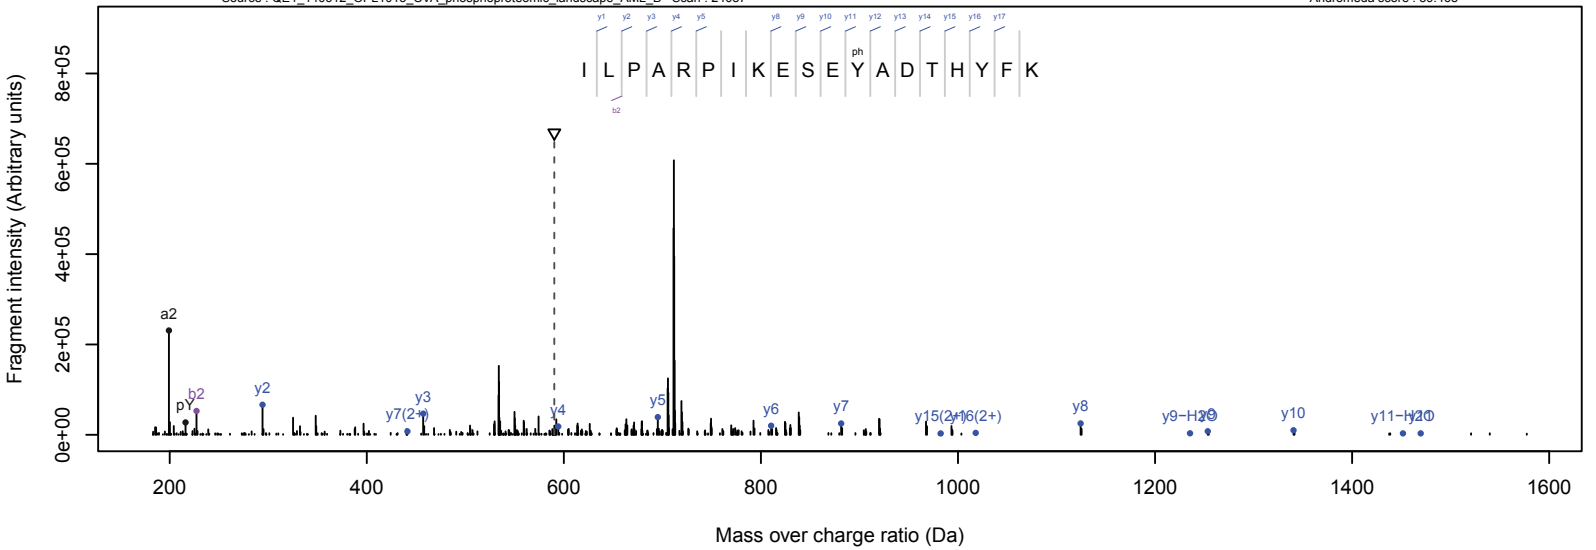

LSSAY(ph)LLGVPGEQPD<sup>2+</sup>

Source : QE1\_140612\_OPL1013\_CVA\_phosphoproteomic\_landscape\_AML\_A Scan : 33916

Andromeda score : 89.468

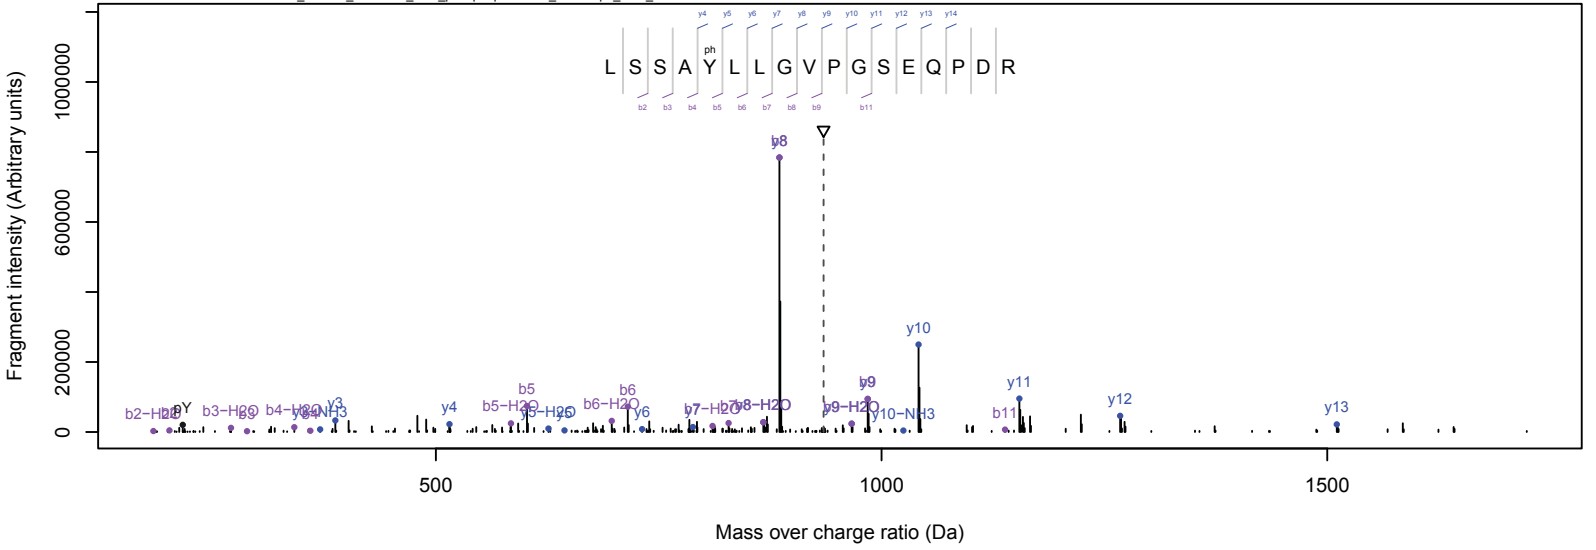

LLSVVPEGYS(ph)VK<sup>2+</sup>

Source : QE1\_140612\_OPL1013\_CVA\_phosphoproteomic\_landscape\_AML\_A Scan : 36307

Andromeda score : 89.46

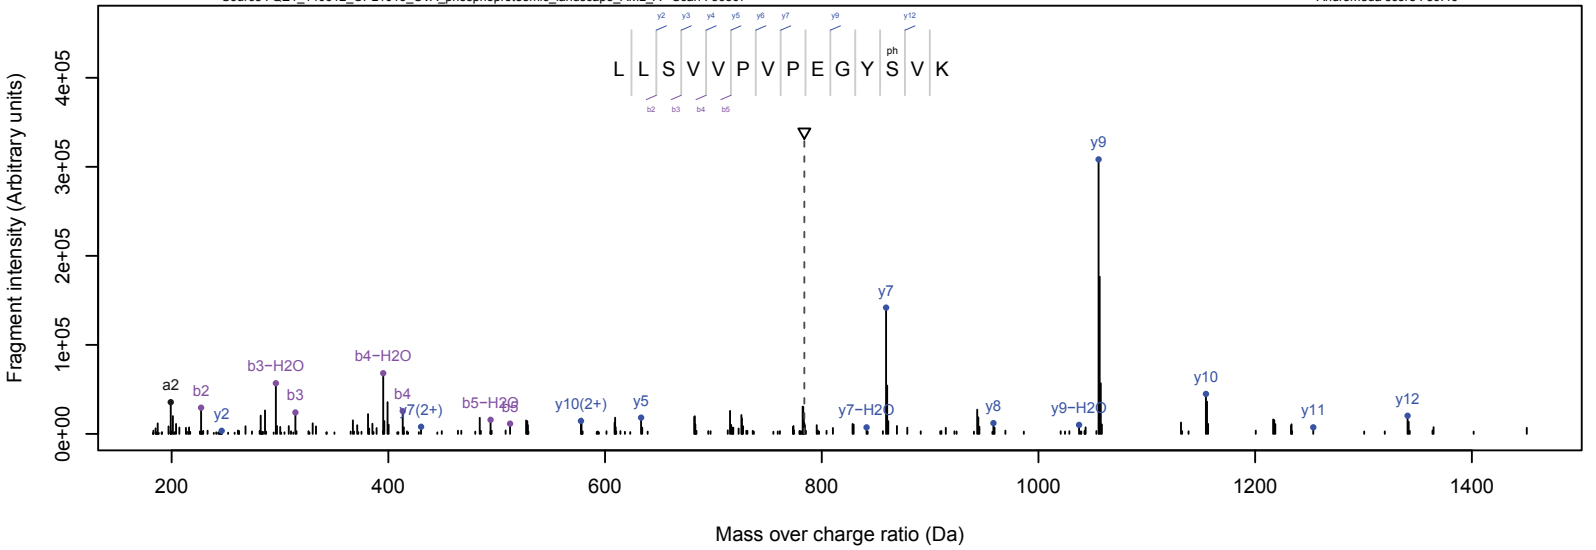

AFVGNQLPFGFTY(ph)YSNRR<sup>3+</sup>

Source : QE1\_140612\_OPL1013\_CVA\_phosphoproteomic\_landscape\_AML\_C Scan : 45655

Andromeda score : 89.374

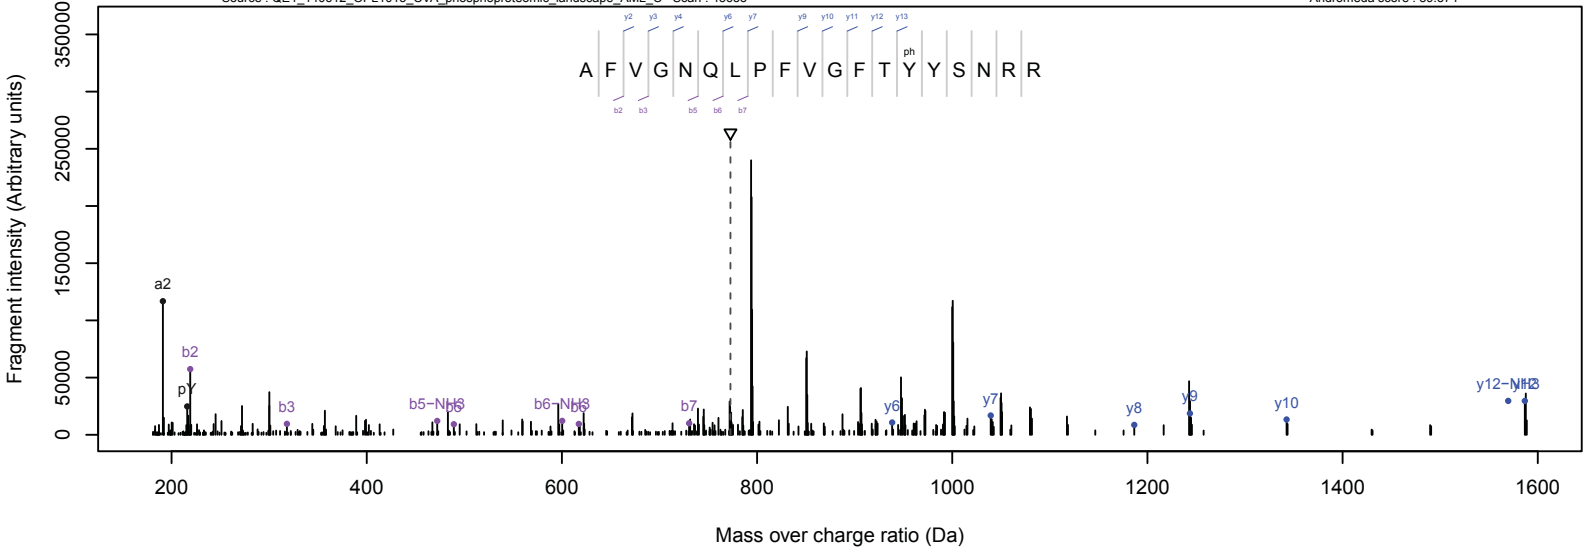



IRNY(ph)YFCSLPR-2+

Source : QE1\_140612\_OPL1013\_CVA\_phosphoproteomic\_landscape\_AML\_C Scan : 26610

Andromeda score : 89.356

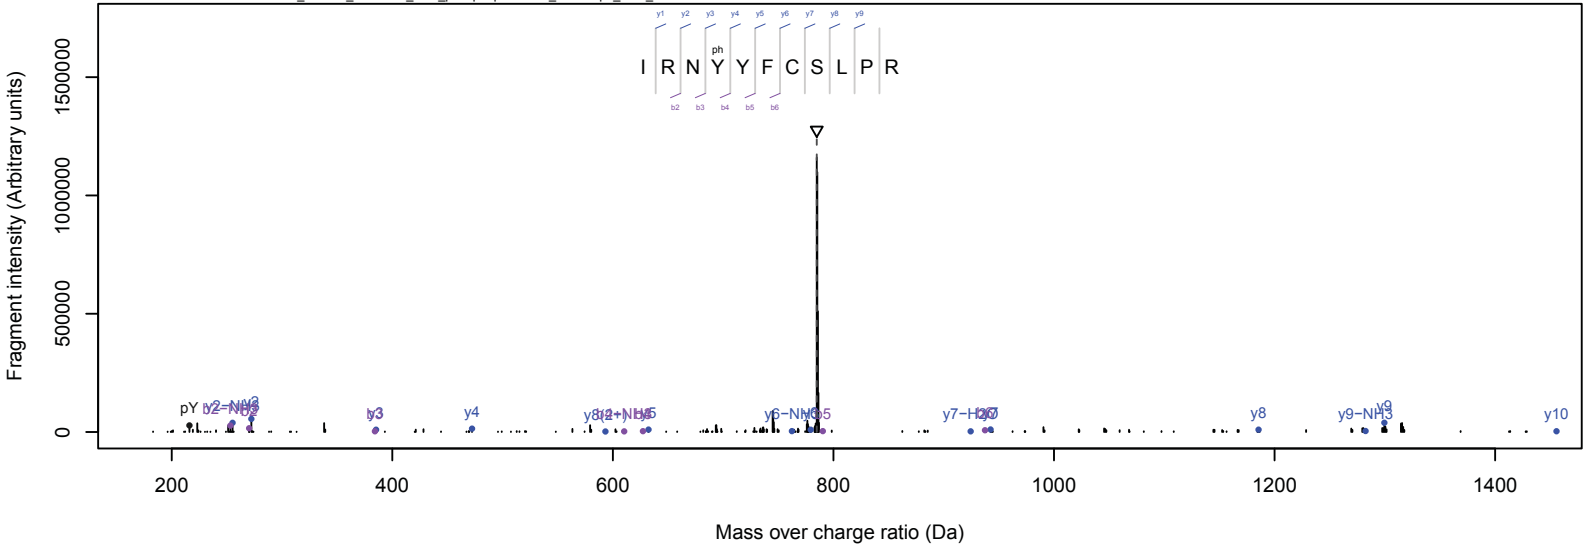

IEEFVY(ph)EKLDR-2+

Source : QE1\_140612\_OPL1013\_CVA\_phosphoproteomic\_landscape\_AML\_B Scan : 23414

Andromeda score : 89.301

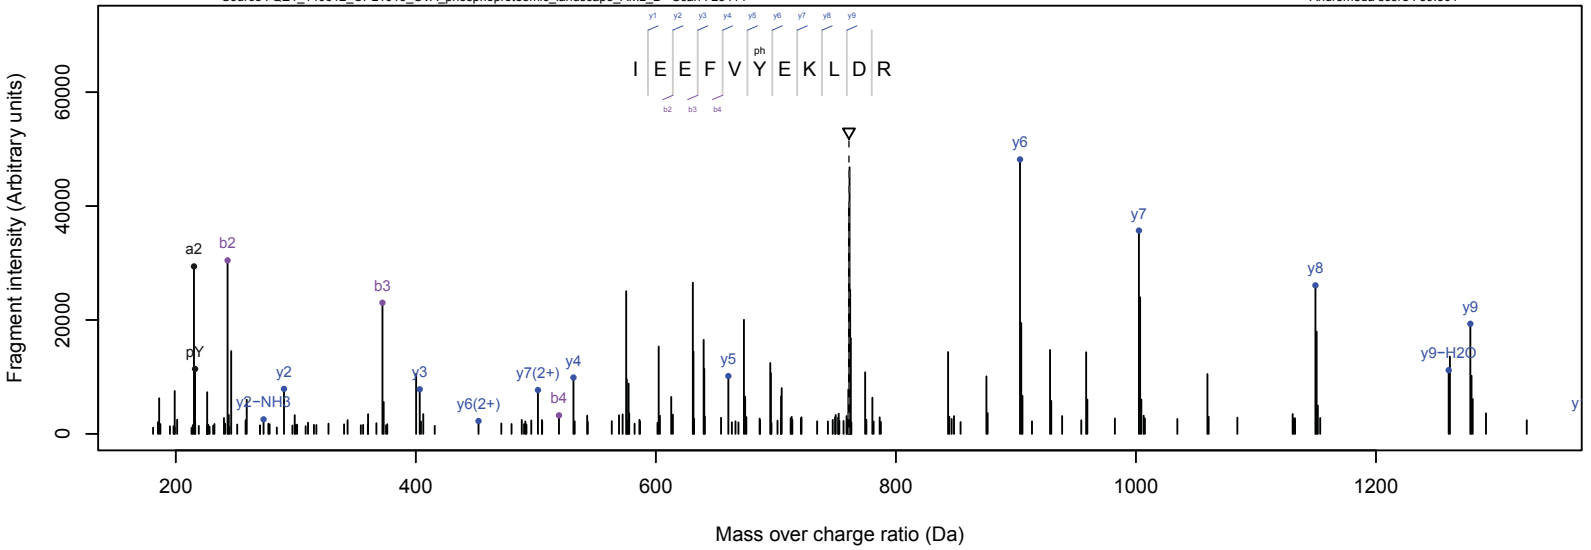

LTTPY(ph)GDLNHLVSATM(ox)SGVTCLR-3+

Source : QE1\_140612\_OPL1013\_CVA\_phosphoproteomic\_landscape\_AML\_B Scan : 41296

Andromeda score : 89.272

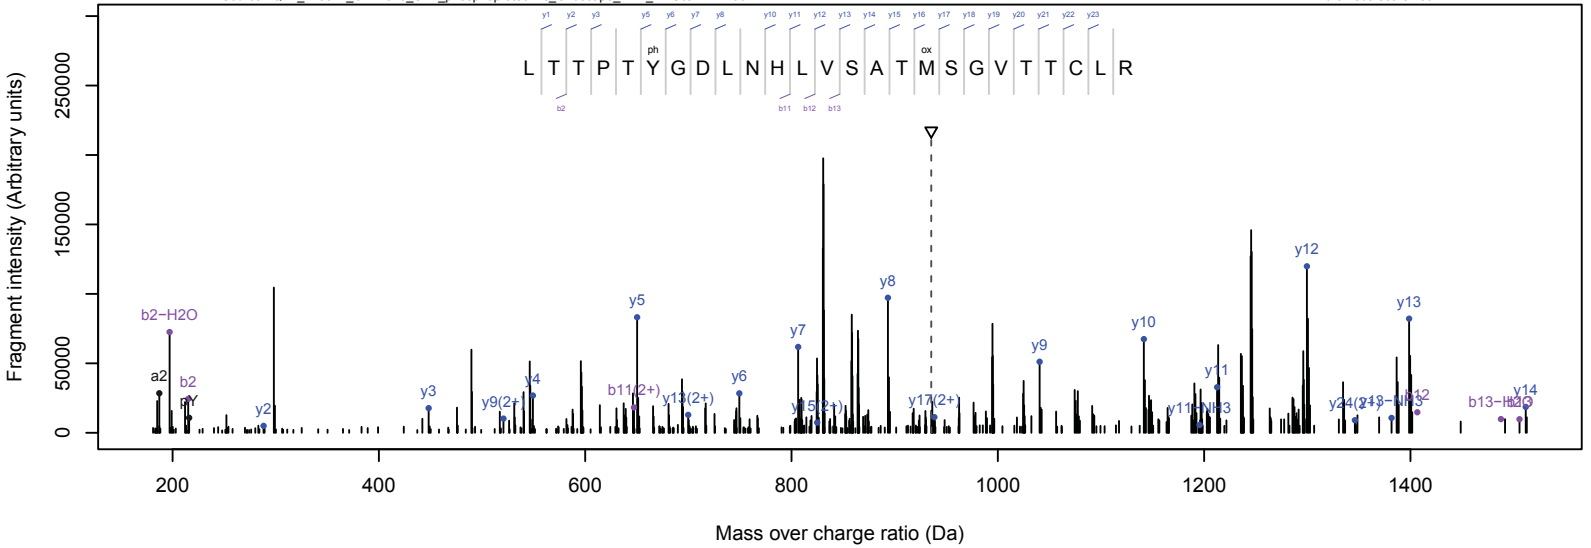

**RGKHEY(ph)TNIK-2+**

Source : QE1\_140612\_OPL1013\_CVA\_phosphoproteomic\_landscape\_AML\_D Scan : 3504

Andromeda score : 89.266

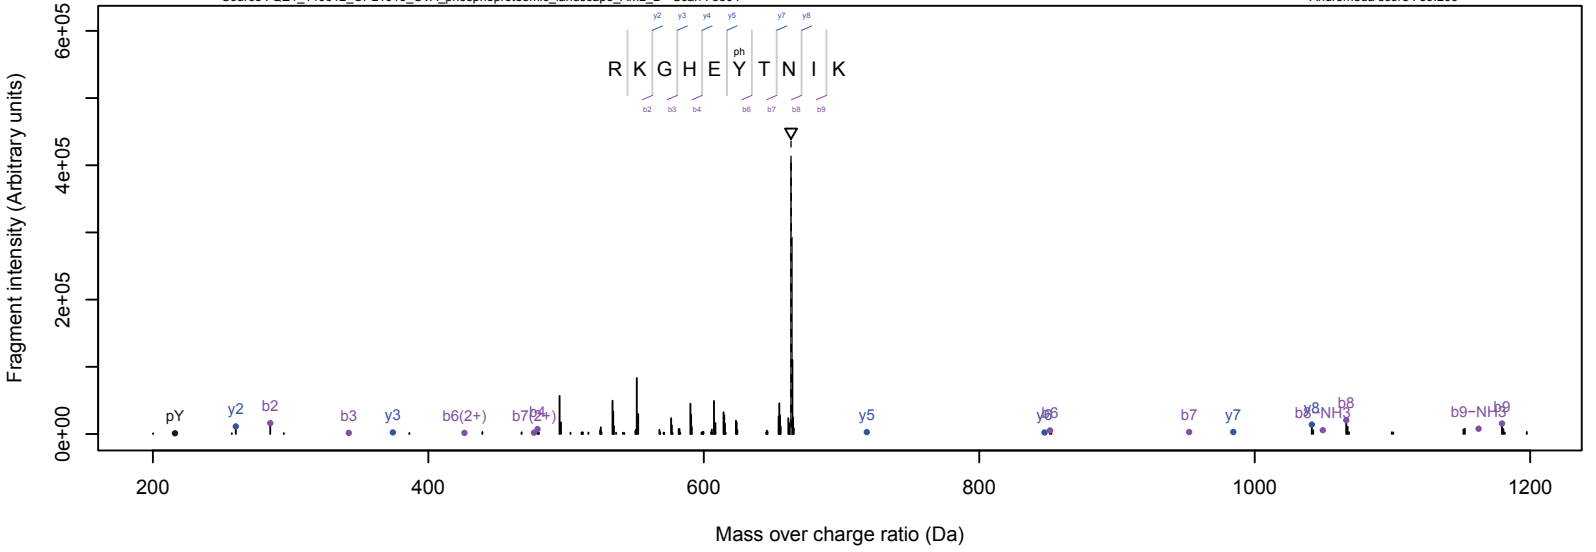

**KLY(ph)ESLLVGS L P D M N K-3+**

Source : QE1\_140612\_OPL1013\_CVA\_phosphoproteomic\_landscape\_AML\_C Scan : 39622

Andromeda score : 89.232

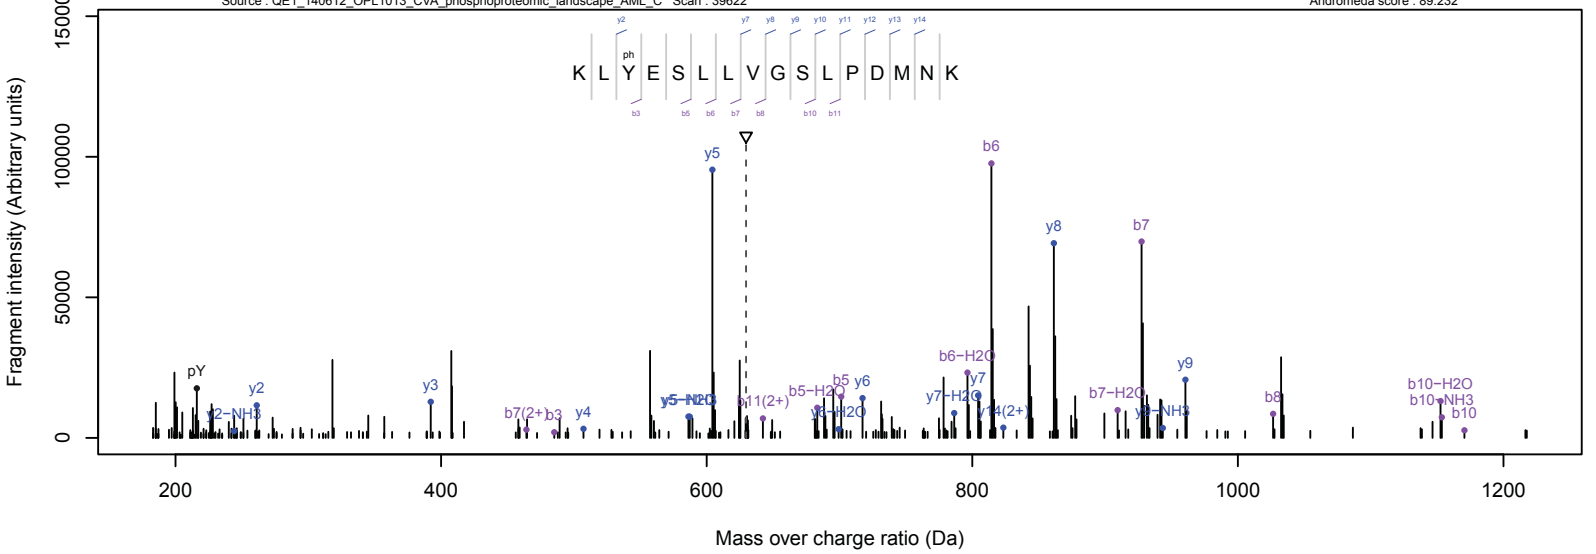

**SLKY(ph)PYVAVMLK-2+**

Source : QE1\_140612\_OPL1013\_CVA\_phosphoproteomic\_landscape\_AML\_B Scan : 33428

Andromeda score : 89.231

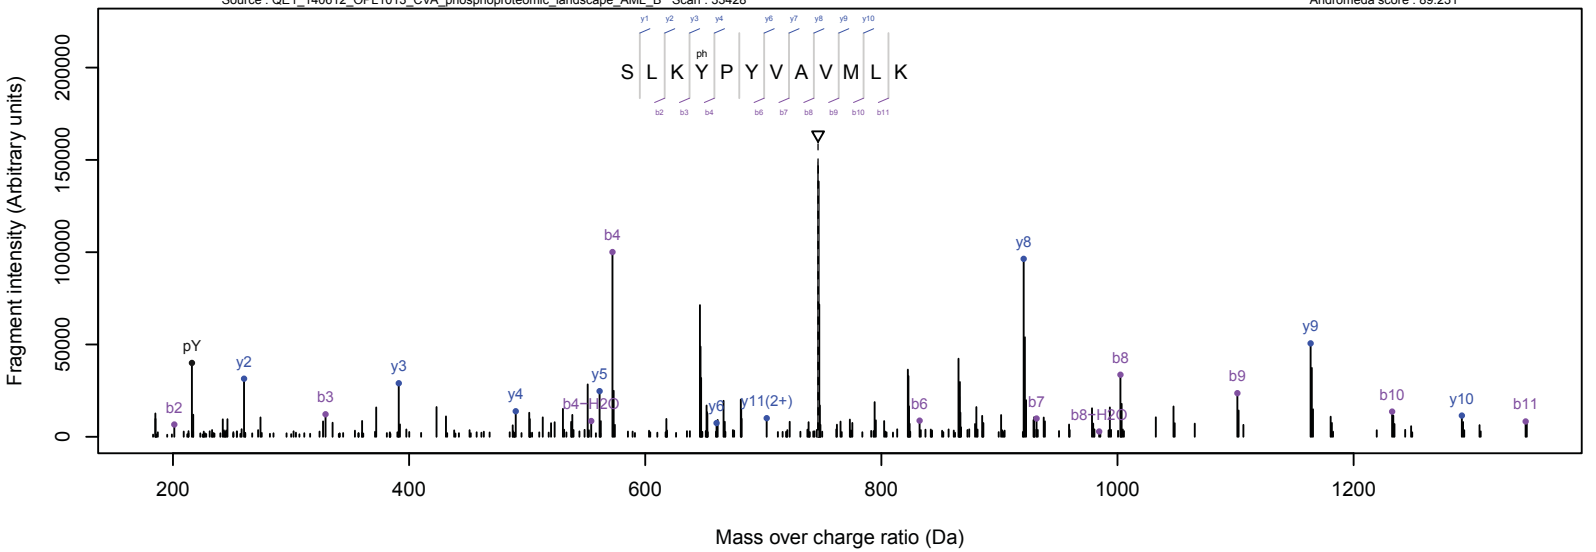

YTY(ph)SEWHSFTQPR-3+

Source : QE1\_140612\_OPL1013\_CVA\_phosphoproteomic\_landscape\_AML\_C Scan : 23975

Andromeda score : 89.231

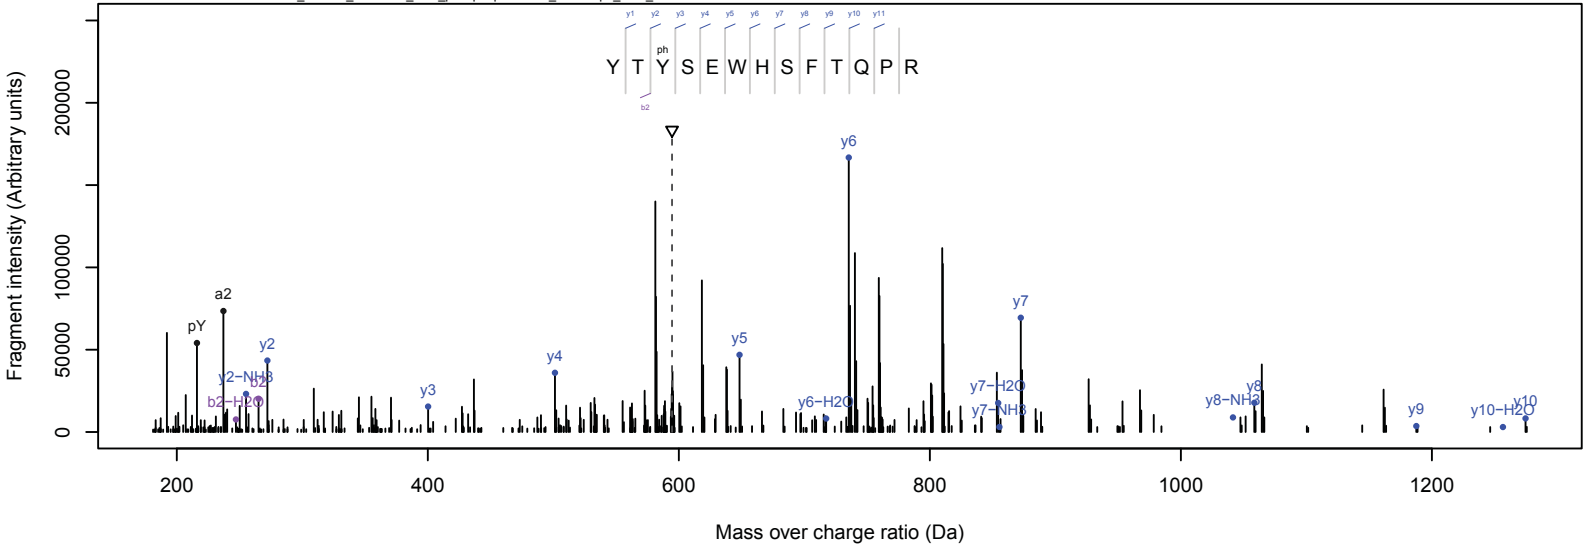

ATLY(ph)VTAIEDR-2+

Source : QE1\_140612\_OPL1013\_CVA\_phosphoproteomic\_landscape\_AML\_D Scan : 27476

Andromeda score : 89.189

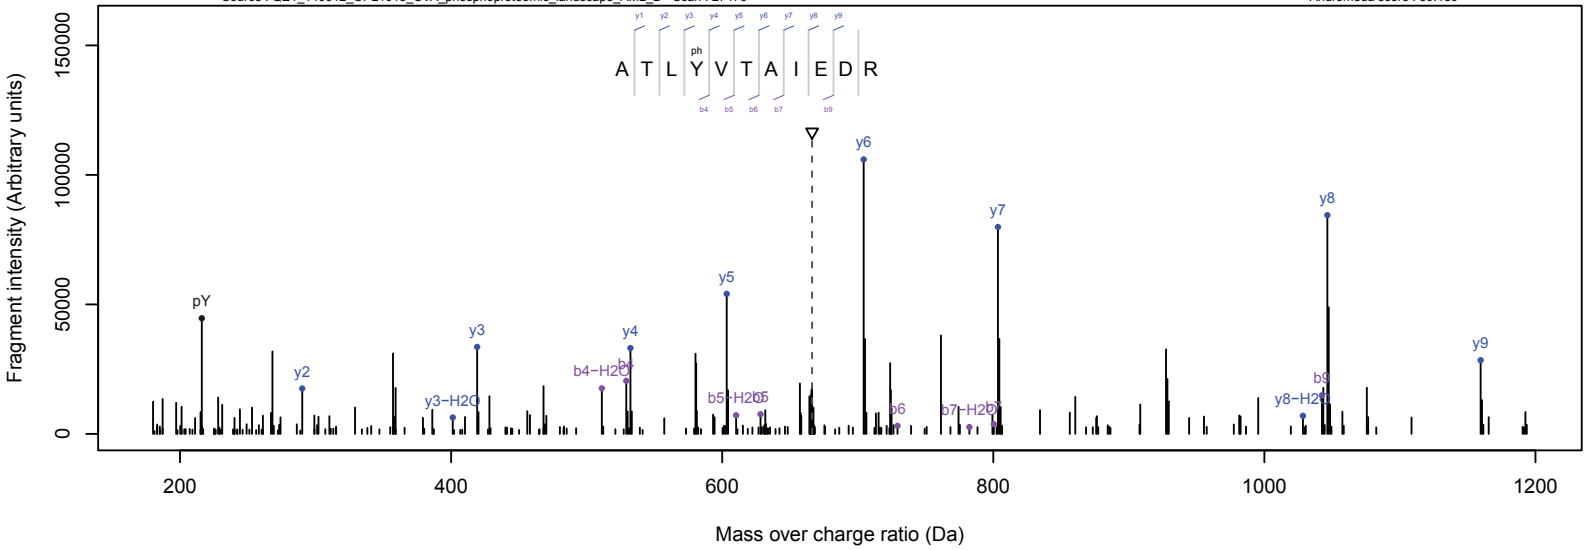

SDGHVY(ph)HTVHK-3+

Source : QE1\_140822\_OPL1013\_CvA\_pTyrIP\_AML\_cell\_lines\_part2\_E Scan : 2621

Andromeda score : 89.189

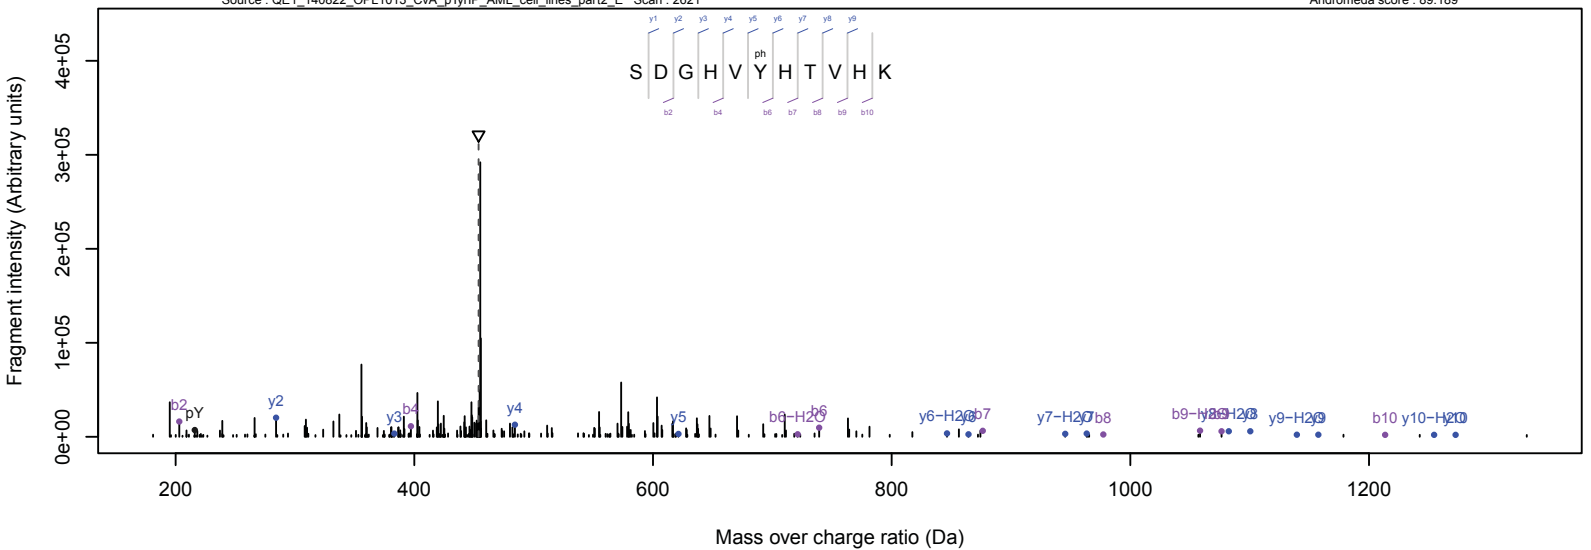

SSTETCY(ph)SAIPK-2+

Source : QE1\_140612\_OPL1013\_CVA\_phosphoproteomic\_landscape\_AML\_C Scan : 9969

Andromeda score : 89.189

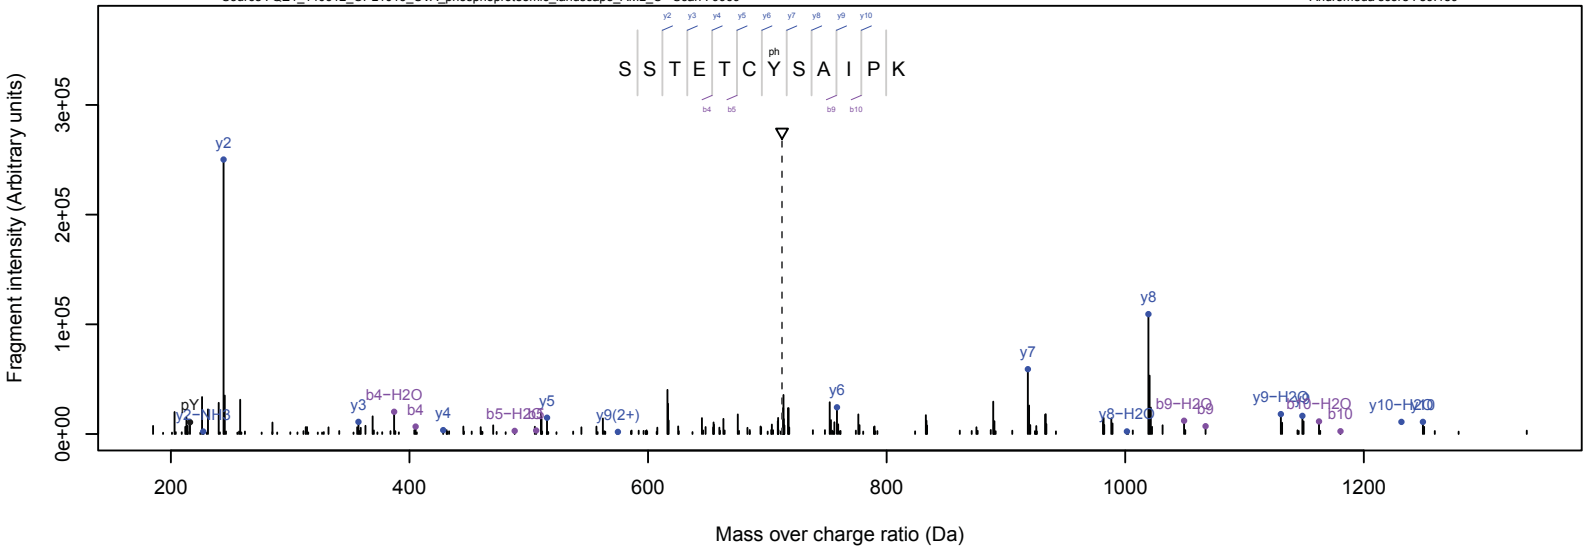

SESVVY(ph)ADIR-2+

Source : QE1\_140612\_OPL1013\_CVA\_phosphoproteomic\_landscape\_AML\_C Scan : 21596

Andromeda score : 89.171

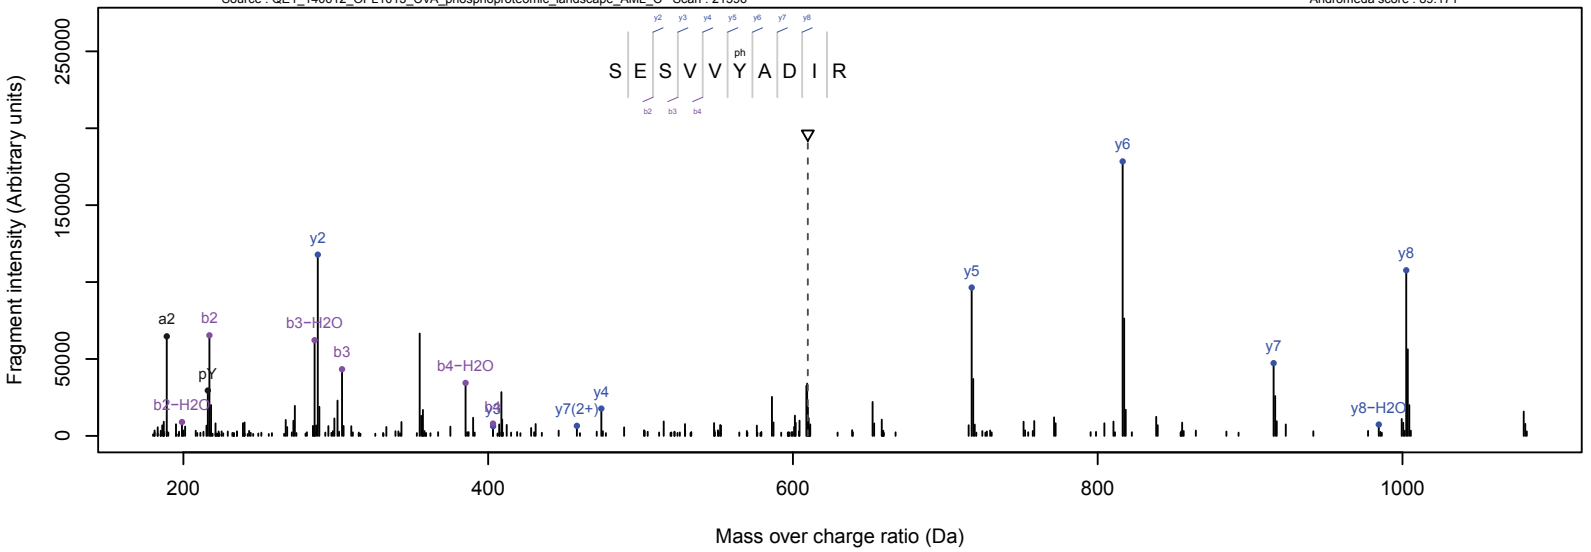

SHEGETAY(ph)IR-2+

Source : QE1\_140822\_OPL1013\_CvA\_pTyrIP\_AML\_cell\_lines\_part2\_B Scan : 3705

Andromeda score : 89.171

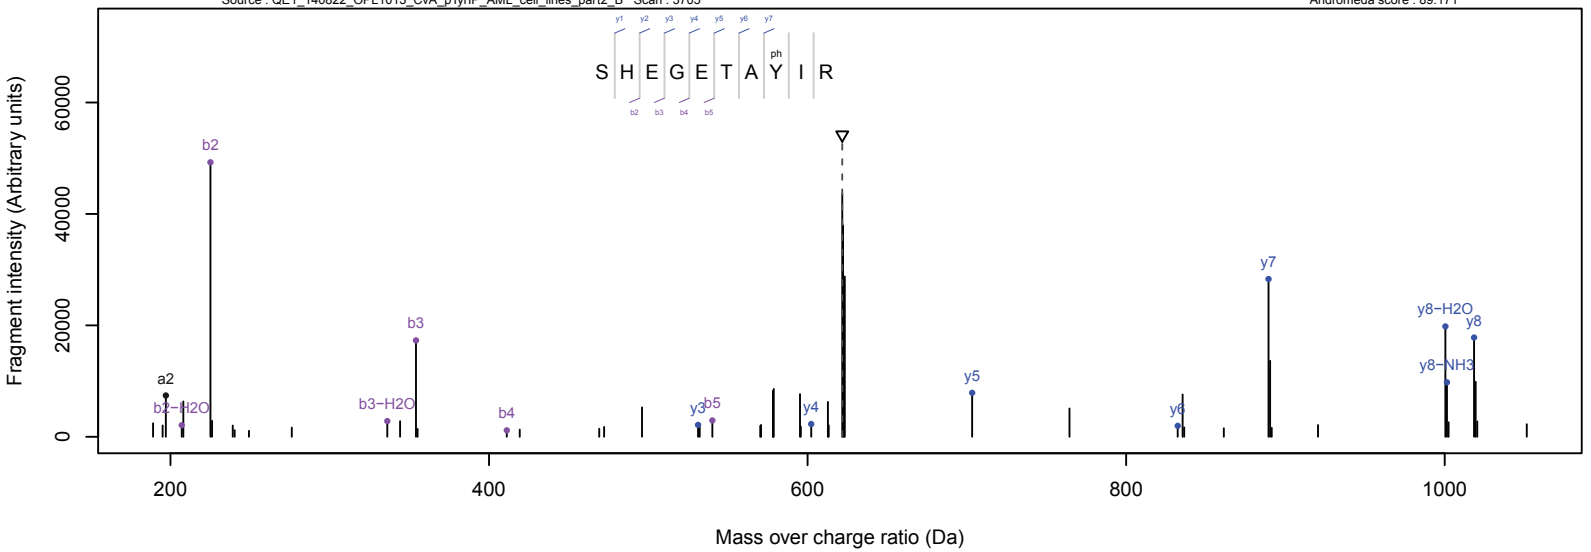

LRAIY(ph)TIMR-3+

Source : QE1\_140612\_OPL1013\_CVA\_phosphoproteomic\_landscape\_AML\_C Scan : 25414

Andromeda score : 89.08

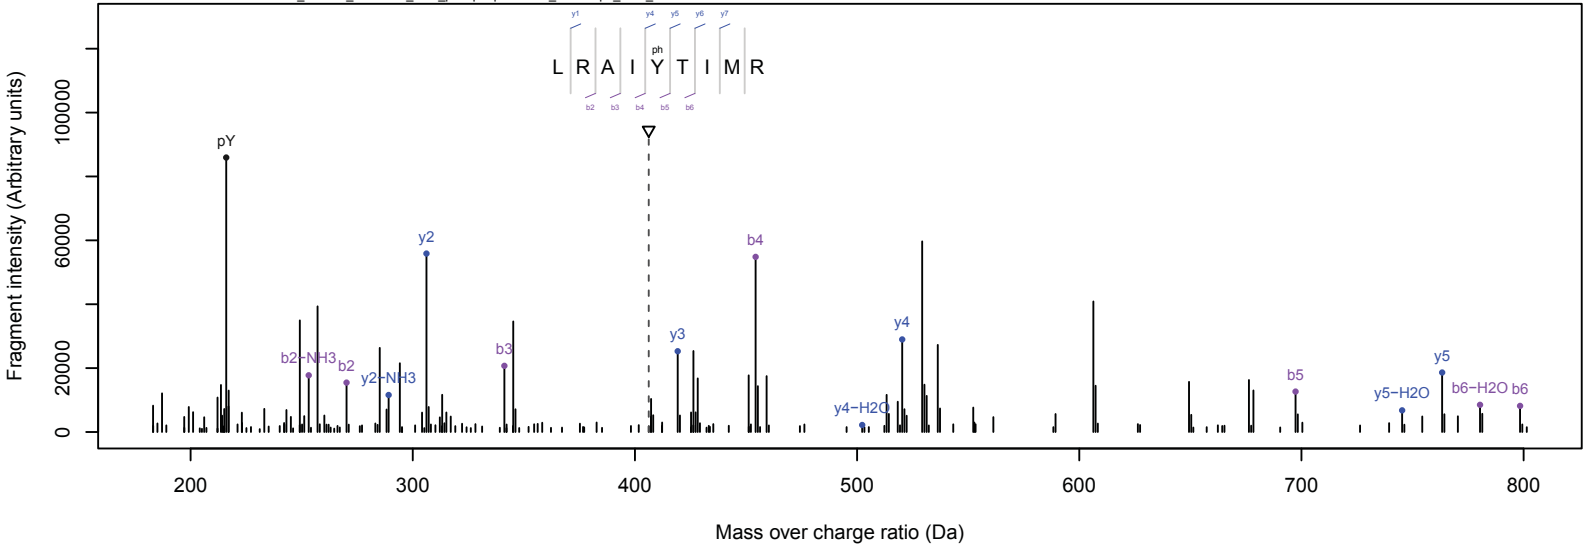

Y(ph)VAQAGLEPLASGDPSASASHAGITGSR-3+

Source : QE1\_140612\_OPL1013\_CVA\_phosphoproteomic\_landscape\_AML\_C Scan : 29282

Andromeda score : 89.055

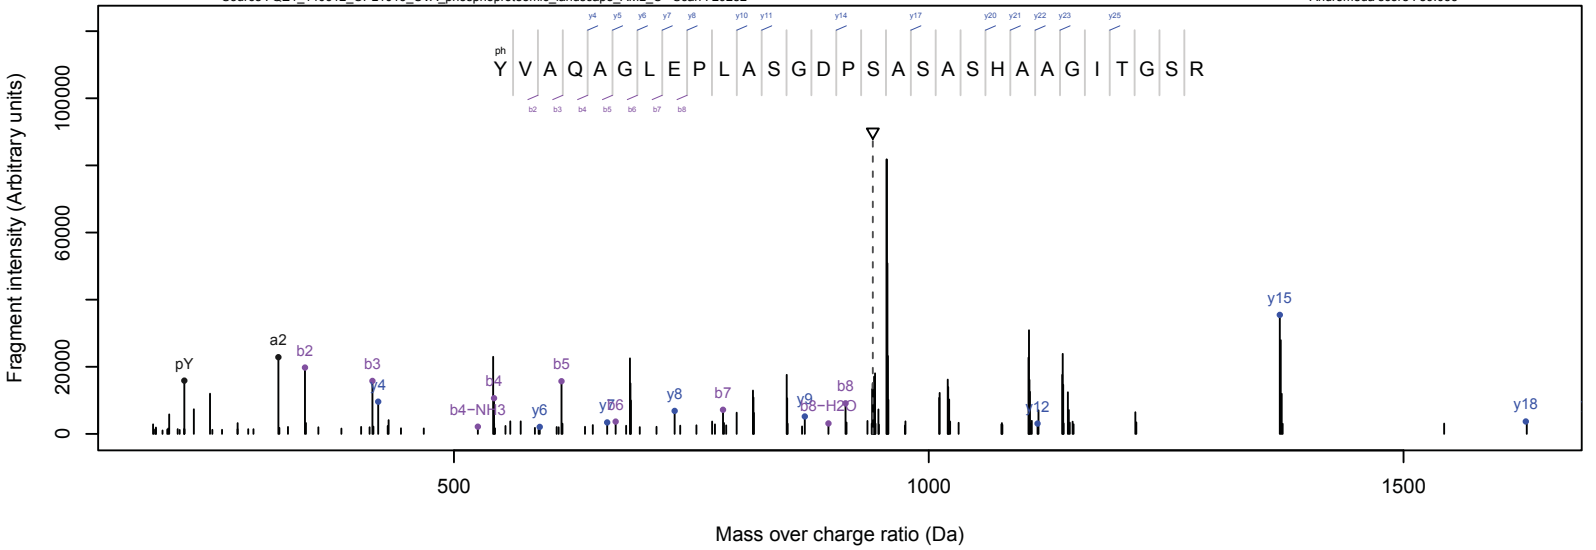

(ac)ARDY(ph)DHLFK-3+

Source : QE1\_140612\_OPL1013\_CVA\_phosphoproteomic\_landscape\_AML\_C Scan : 17915

Andromeda score : 89.047

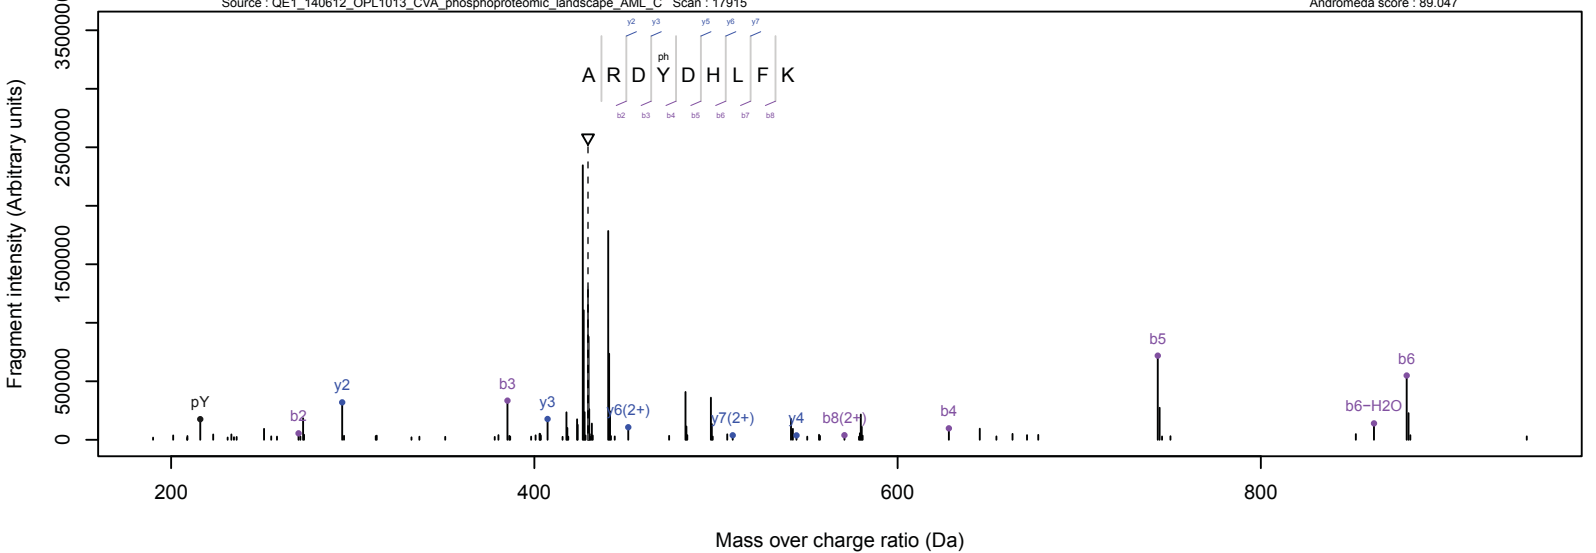

**NPRPVTYQFHPNLDYYKAR-4+**

Source : QE1\_140612\_OPL1013\_CVA\_phosphoproteomic\_landscape\_AML\_C Scan : 25020

Andromeda score : 88.983

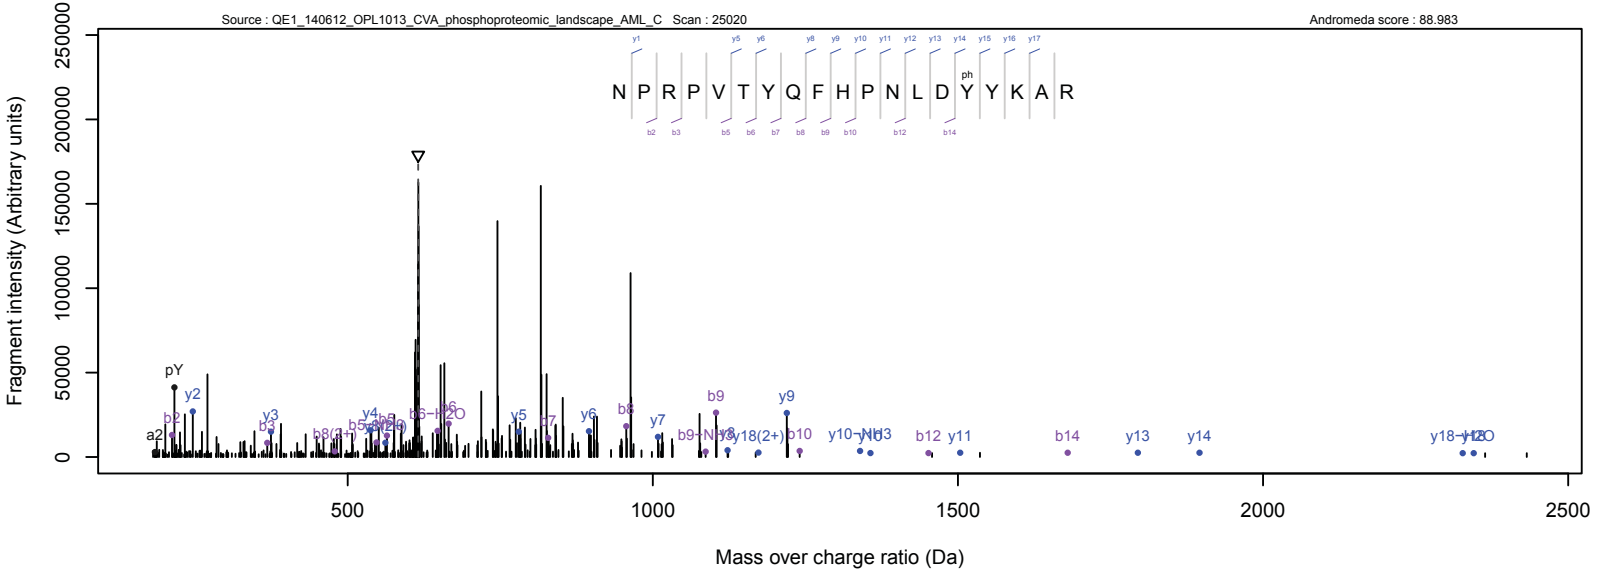

**NVDFNY(ph)ATKDKFTDSAIAMNSK-3+**

Source : QE1\_140612\_OPL1013\_CVA\_phosphoproteomic\_landscape\_AML\_A Scan : 29051

Andromeda score : 88.976

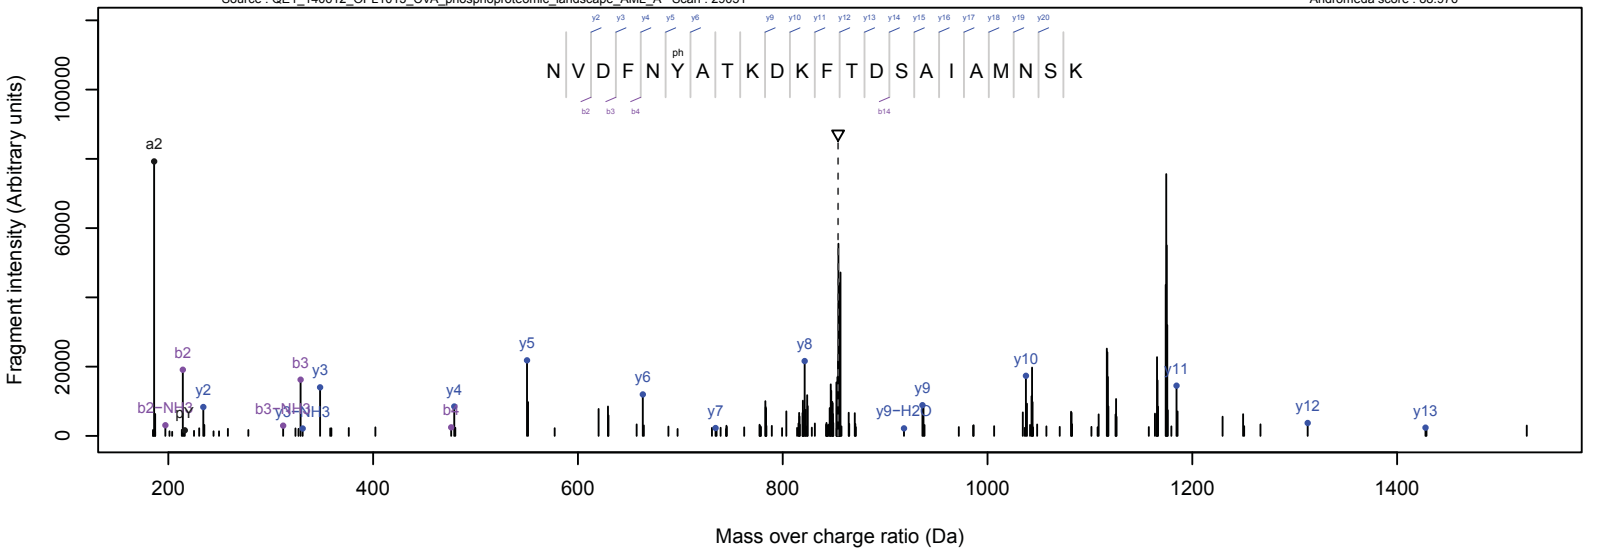

**SISVPGSGHAMADTY(ph)AVVQKR-4+**

Source : QE1\_140908\_OPL1013\_CvA\_pTyrIP\_AML\_HEL Scan : 26545

Andromeda score : 88.945

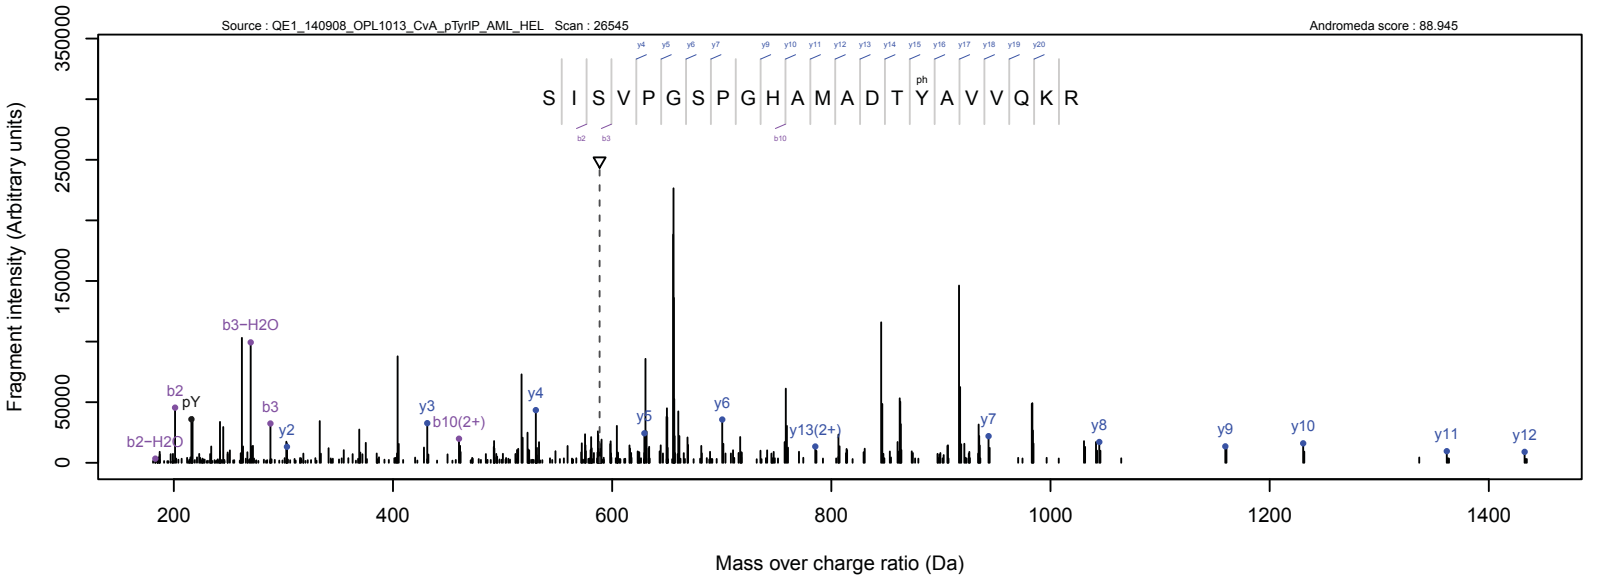

**NRLY(ph)QAIQR-3+**

Source : QE1\_140612\_OPL1013\_CVA\_phosphoproteomic\_landscape\_AML\_B Scan : 9430

Andromeda score : 88.819

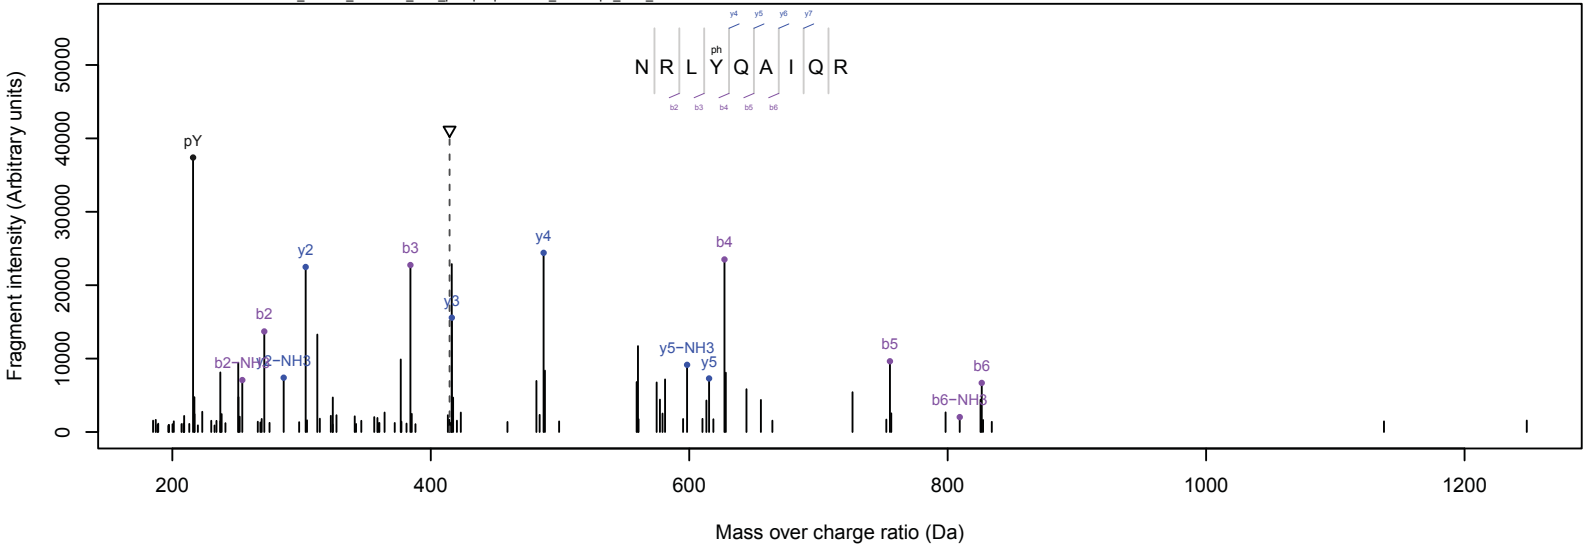

**SHTPNPASY(ph)MVPSSASTSVNNPVSQTPSSGQVIQK-3+**

Source : QE1\_140612\_OPL1013\_CVA\_phosphoproteomic\_landscape\_AML\_C Scan : 30944

Andromeda score : 88.814

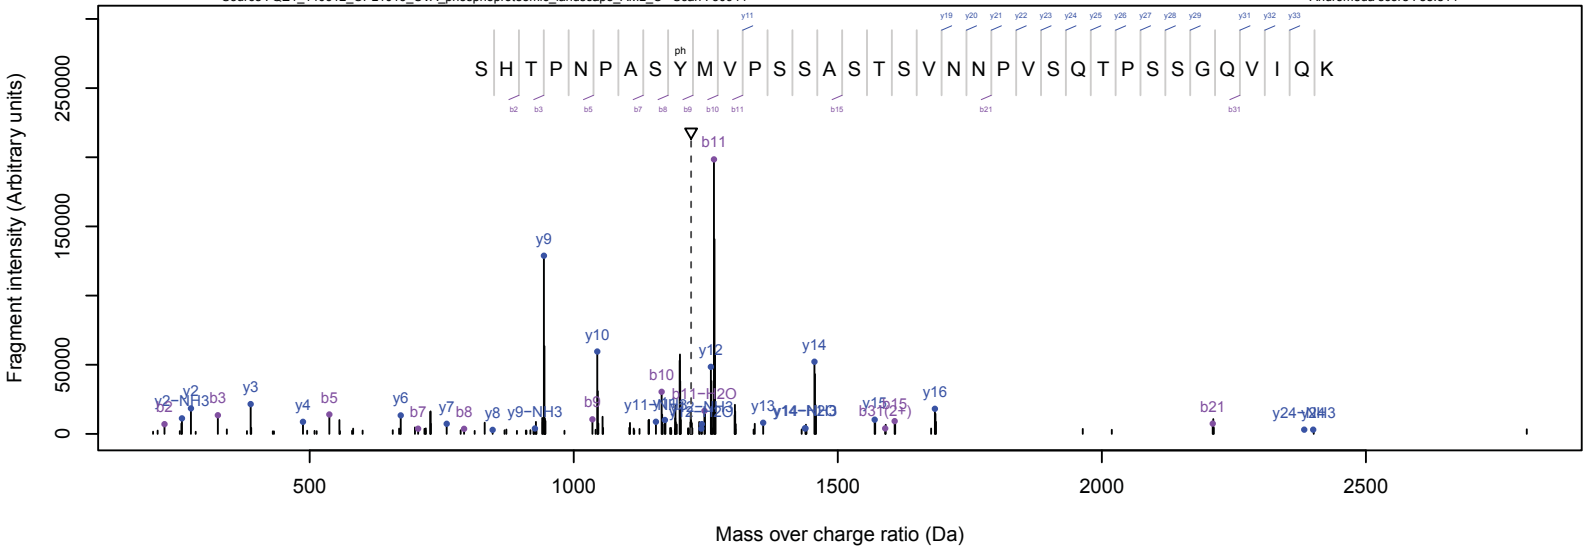

**AGNKGY(ph)AYTFITEDQAR-2+**

Source : QE1\_140612\_OPL1013\_CVA\_phosphoproteomic\_landscape\_AML\_B Scan : 23596

Andromeda score : 88.781

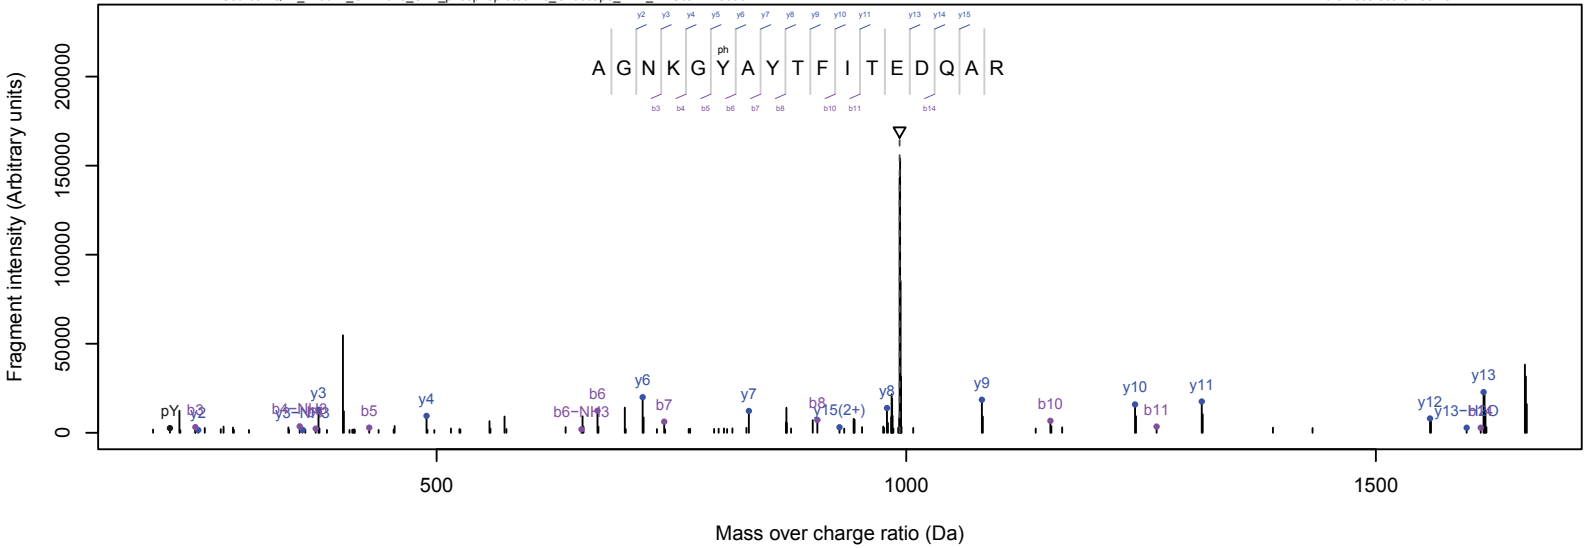

**HMAGLKVY(ph)NVDGPSNNATGQSR-3+**

Source : QE1\_140612\_OPL1013\_CVA\_phosphoproteomic\_landscape\_AML\_B Scan : 15983

Andromeda score : 88.768

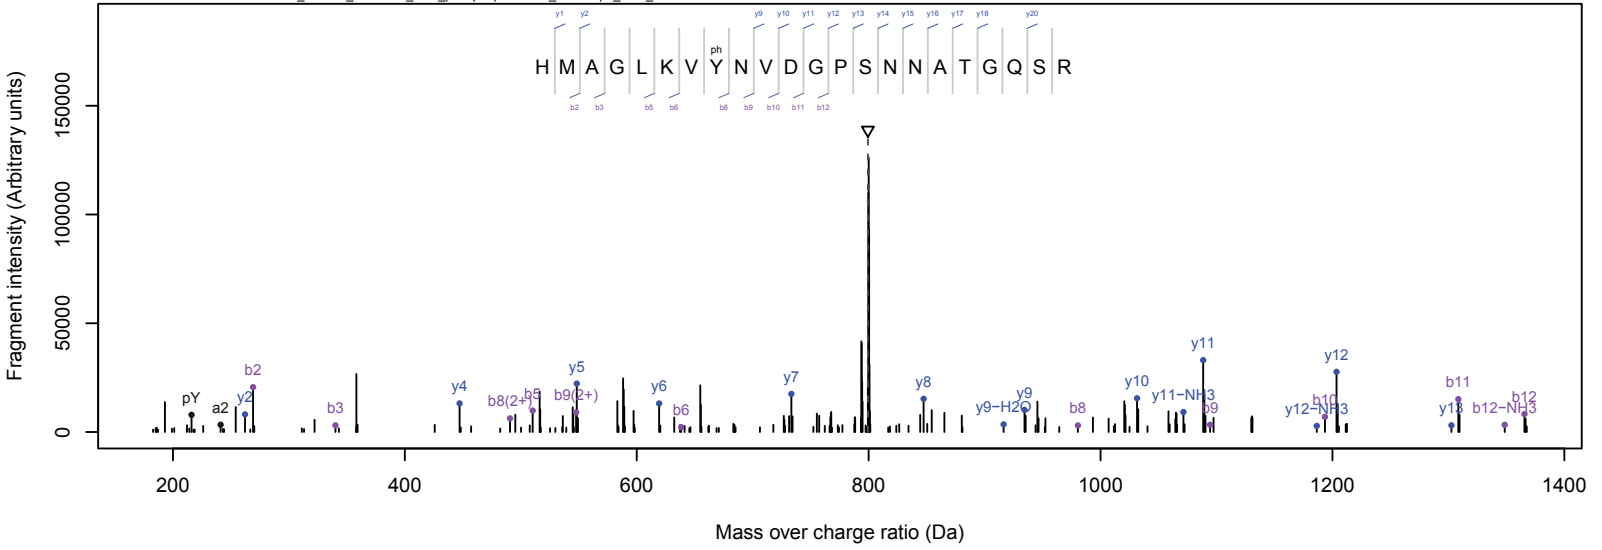

**TPLPLCQQAMDY(ph)R-2+**

Source : QE1\_140908\_OPL1013\_CvA\_pTyrIP\_AML\_HEL Scan : 27567

Andromeda score : 88.768

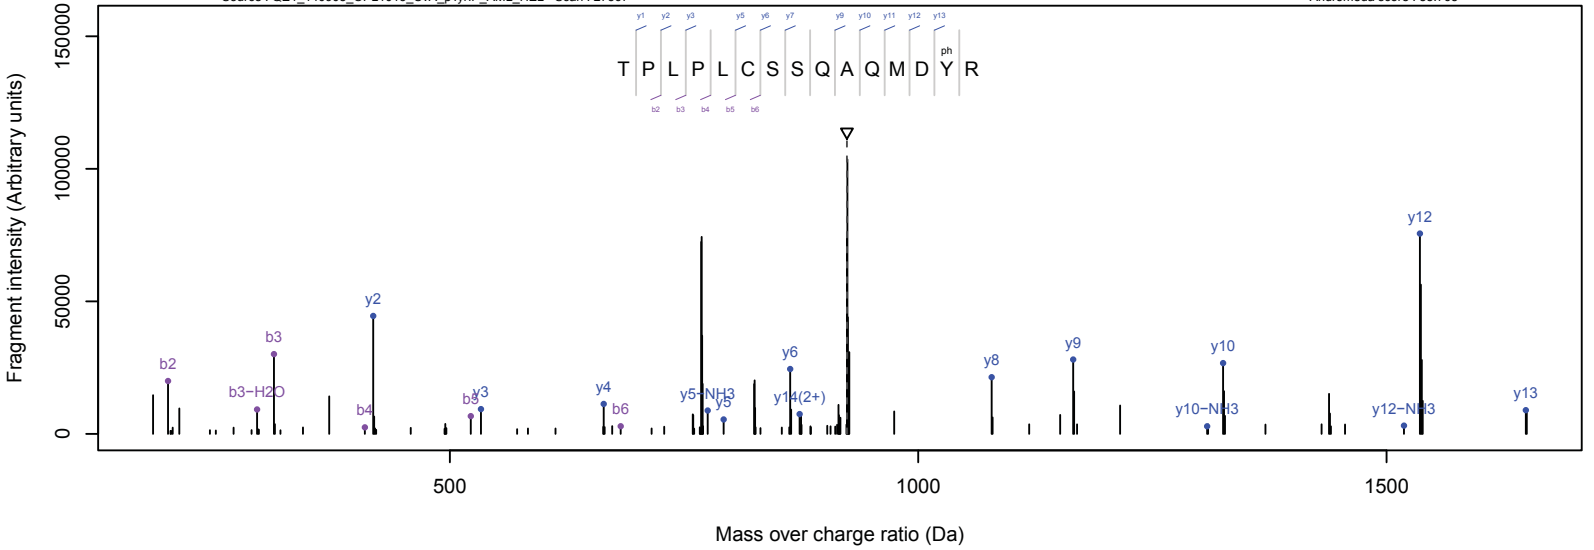

**Y(ph)RGLPAPGSPADKK-3+**

Source : QE1\_140612\_OPL1013\_CVA\_phosphoproteomic\_landscape\_AML\_B Scan : 10065

Andromeda score : 88.768

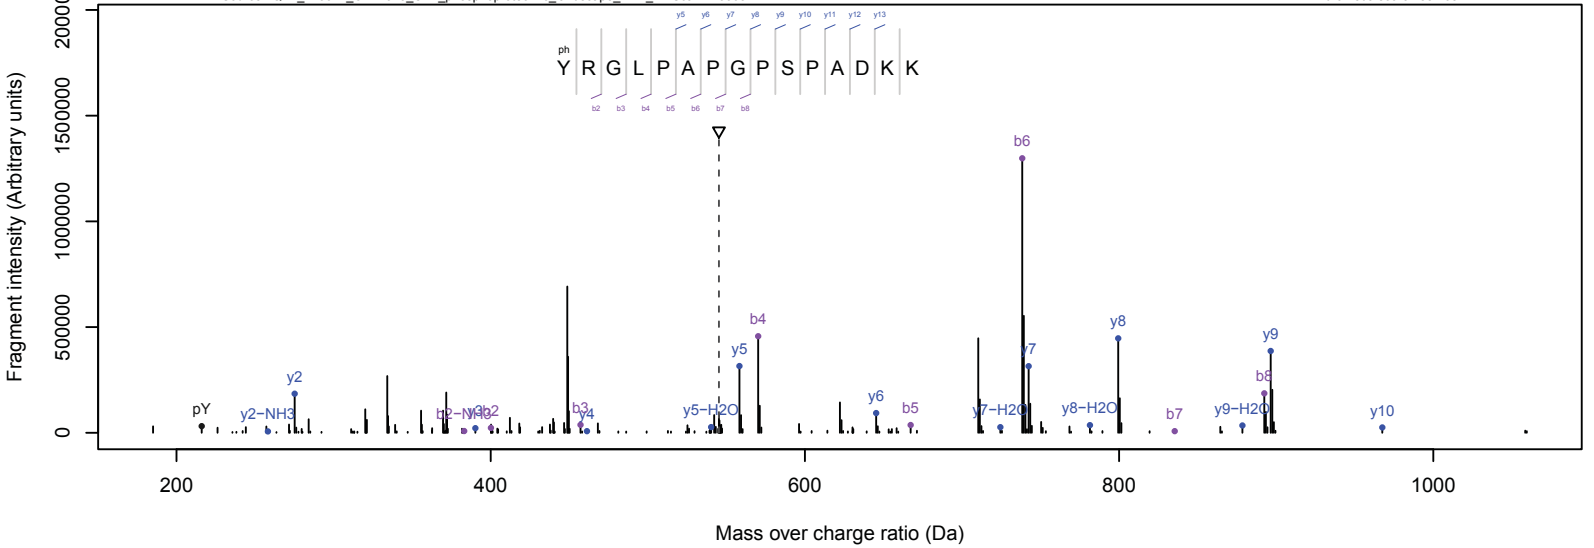



Y(ph)VSLITS(ph)YQPFSLK-2+

Source : QE1\_140612\_OPL1013\_CVA\_phosphoproteomic\_landscape\_AML\_C Scan : 46938

Andromeda score : 88.768

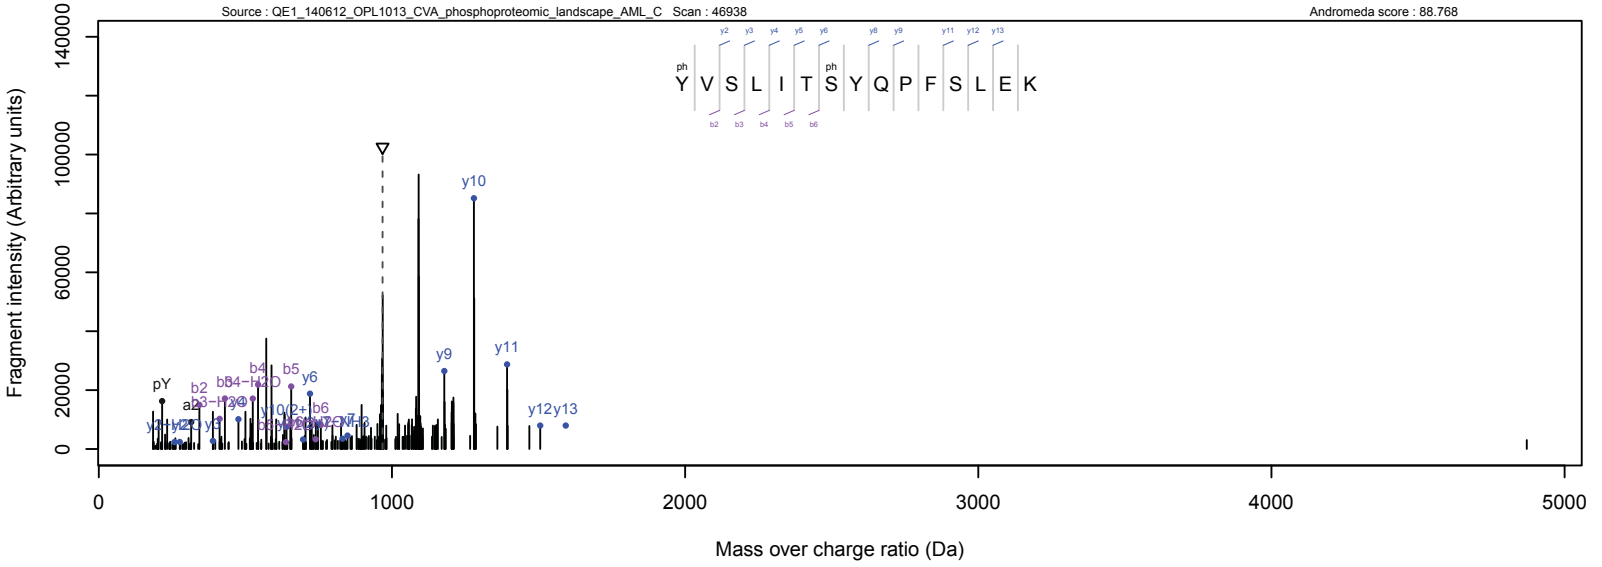

AY(ph)AYLFK-2+

Source : QE1\_140612\_OPL1013\_CVA\_phosphoproteomic\_landscape\_AML\_C Scan : 24758

Andromeda score : 88.734

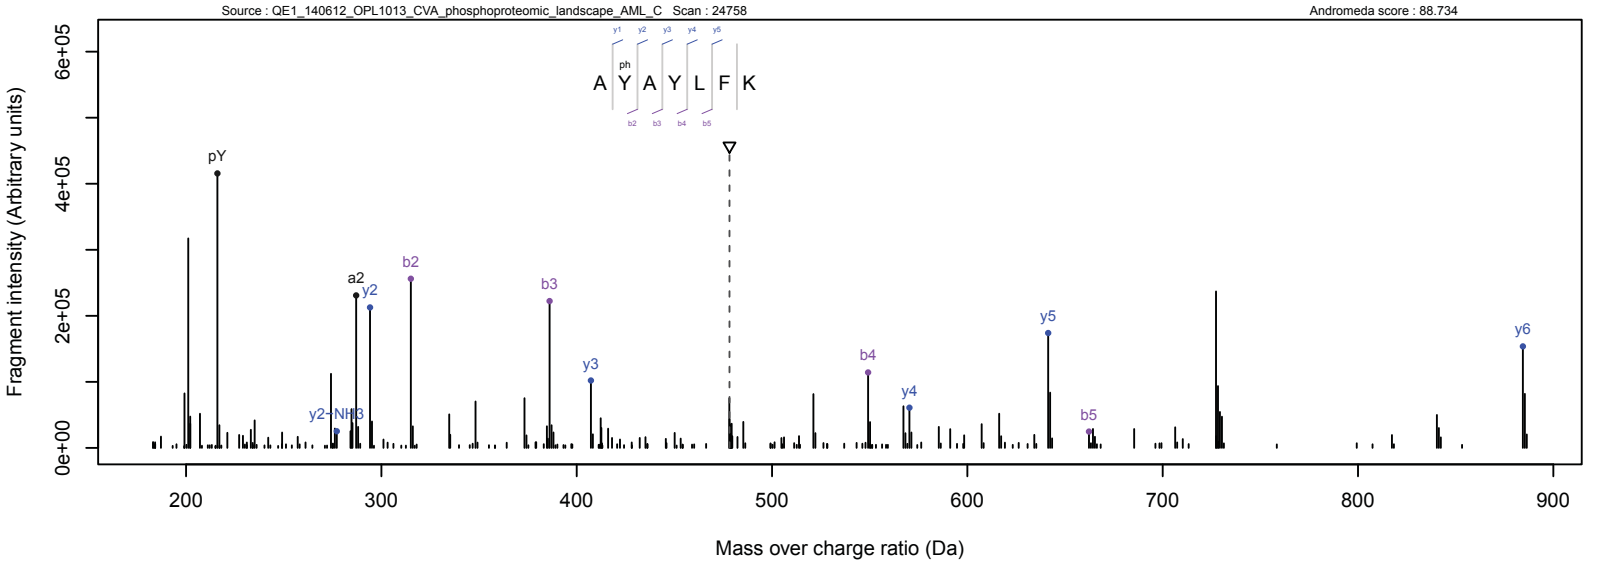

HRLDLGEDY(ph)PSGK-3+

Source : QE1\_140908\_OPL1013\_CvA\_pTyrIP\_AML\_HEL Scan : 11584

Andromeda score : 88.706

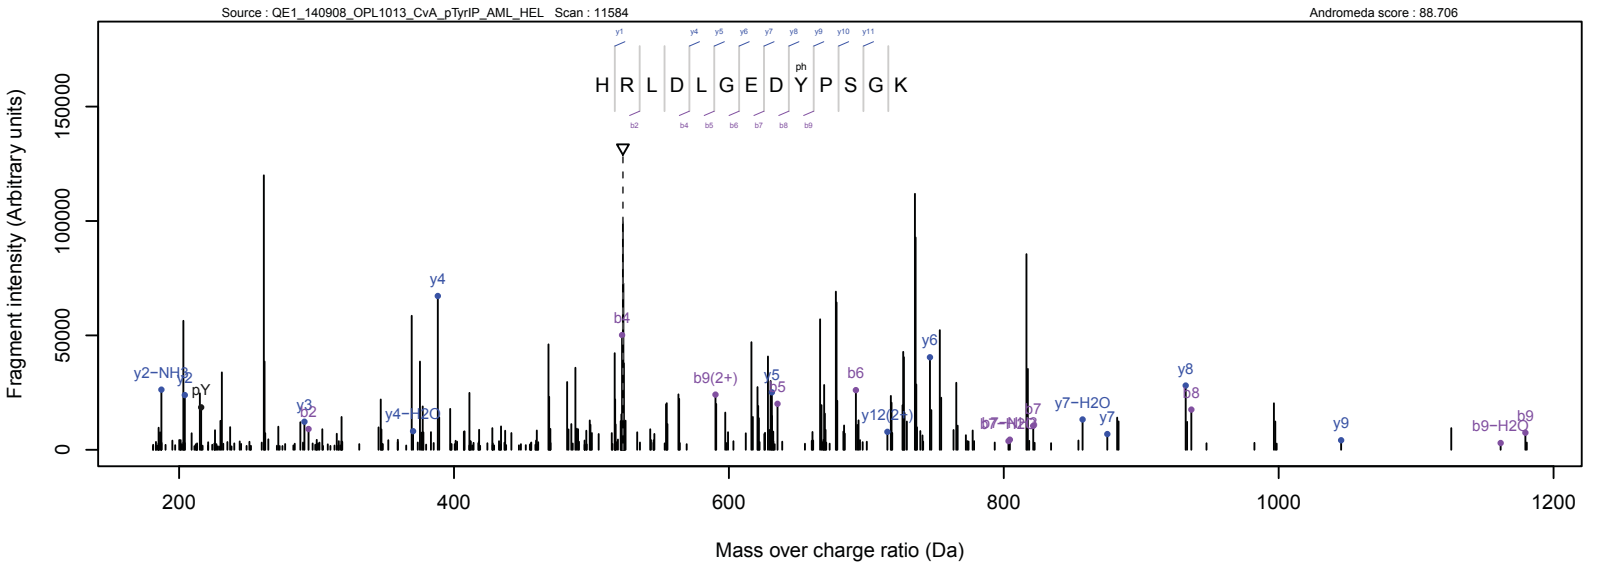

PLHKY(ph)PVWLWK-3+

Source : QE1\_140612\_OPL1013\_CVA\_phosphoproteomic\_landscape\_AML\_C Scan : 31696

Andromeda score : 88.596

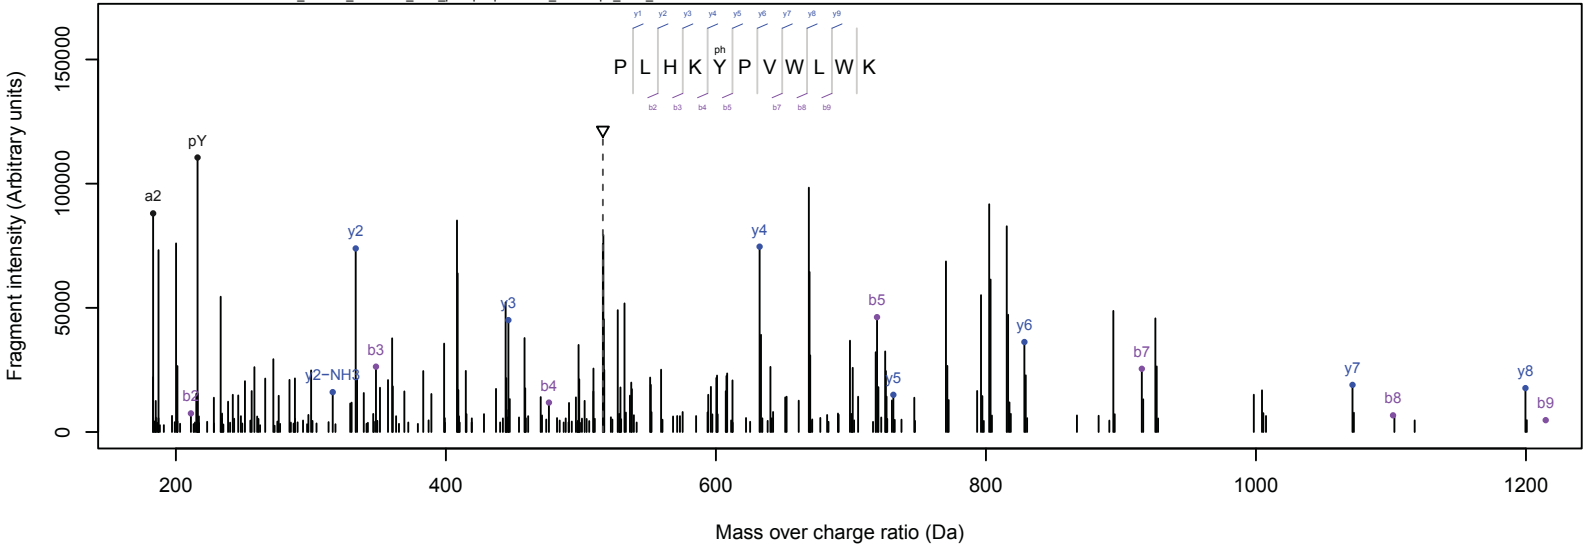

ATGSY(ph)IAGTNGNSNGLVPMRL-2+

Source : QE1\_140612\_OPL1013\_CVA\_phosphoproteomic\_landscape\_AML\_A Scan : 36556

Andromeda score : 88.574

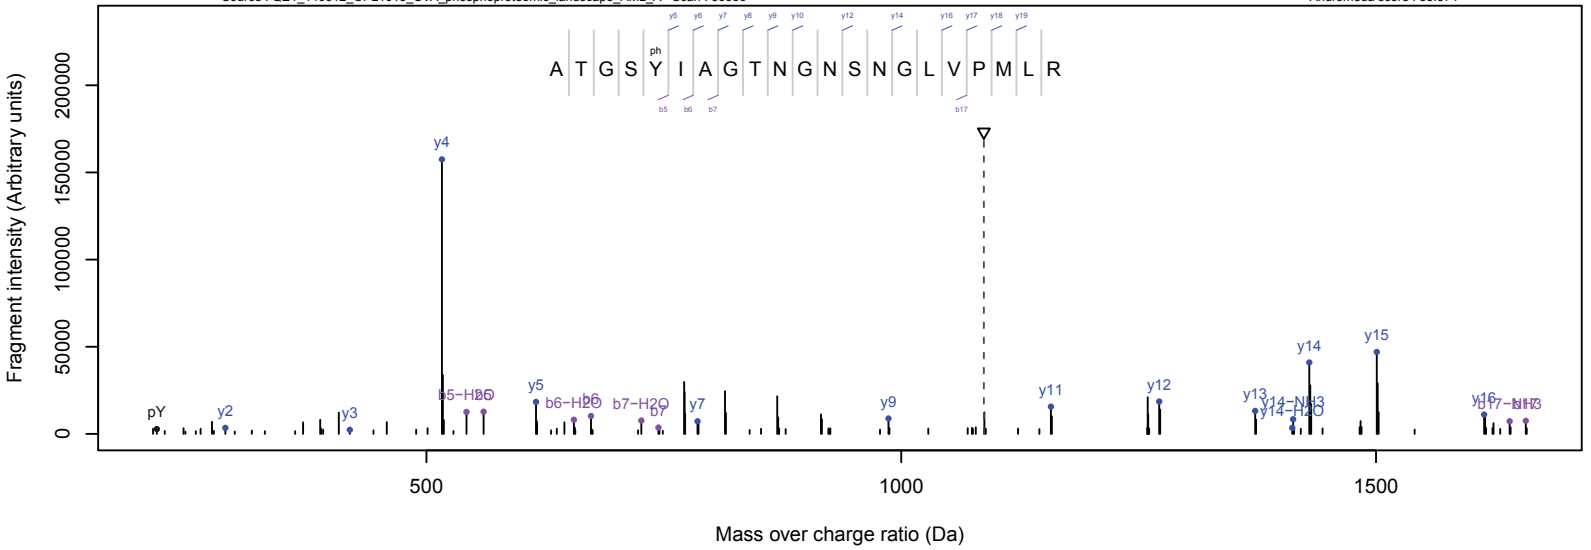

GNKDY(ph)HLQTCGSLAYAAPELIQGK-3+

Source : QE1\_140612\_OPL1013\_CVA\_phosphoproteomic\_landscape\_AML\_C Scan : 31470

Andromeda score : 88.573

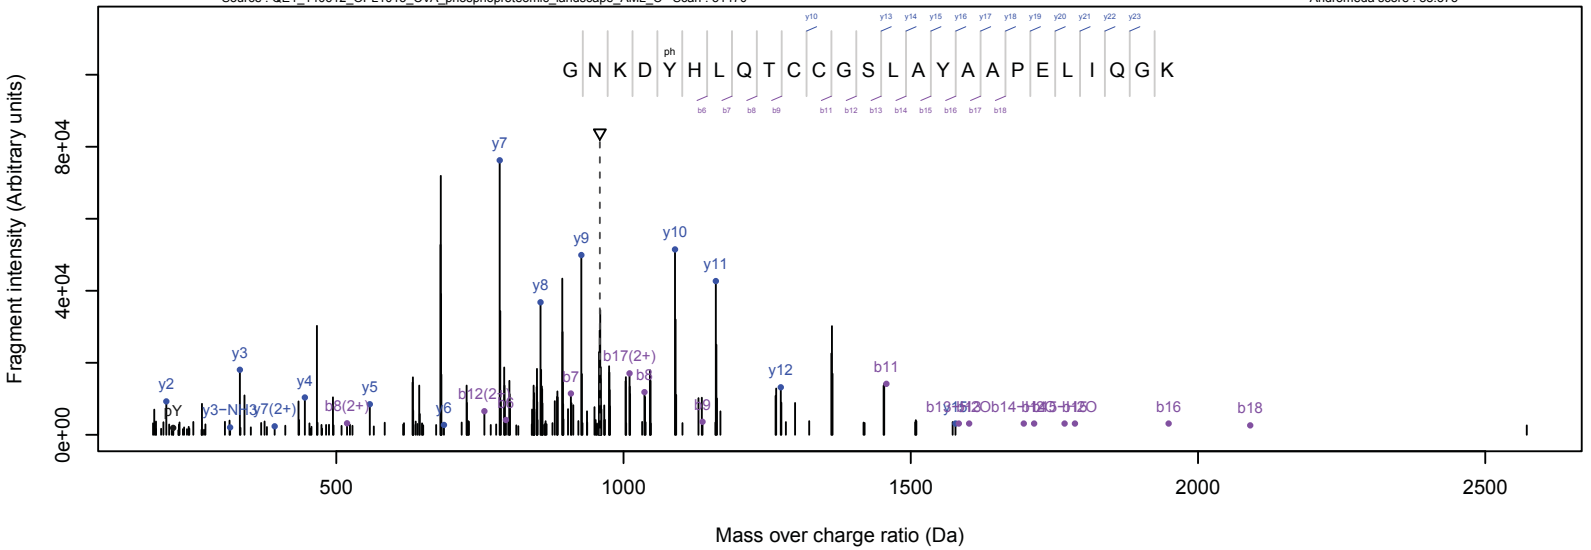

**AALGY(ph)DYKGETEKHESQR-3+**

Source : QE1\_140908\_OPL1013\_CvA\_pTyrIP\_AML\_HL60 Scan : 8673

Andromeda score : 88.565

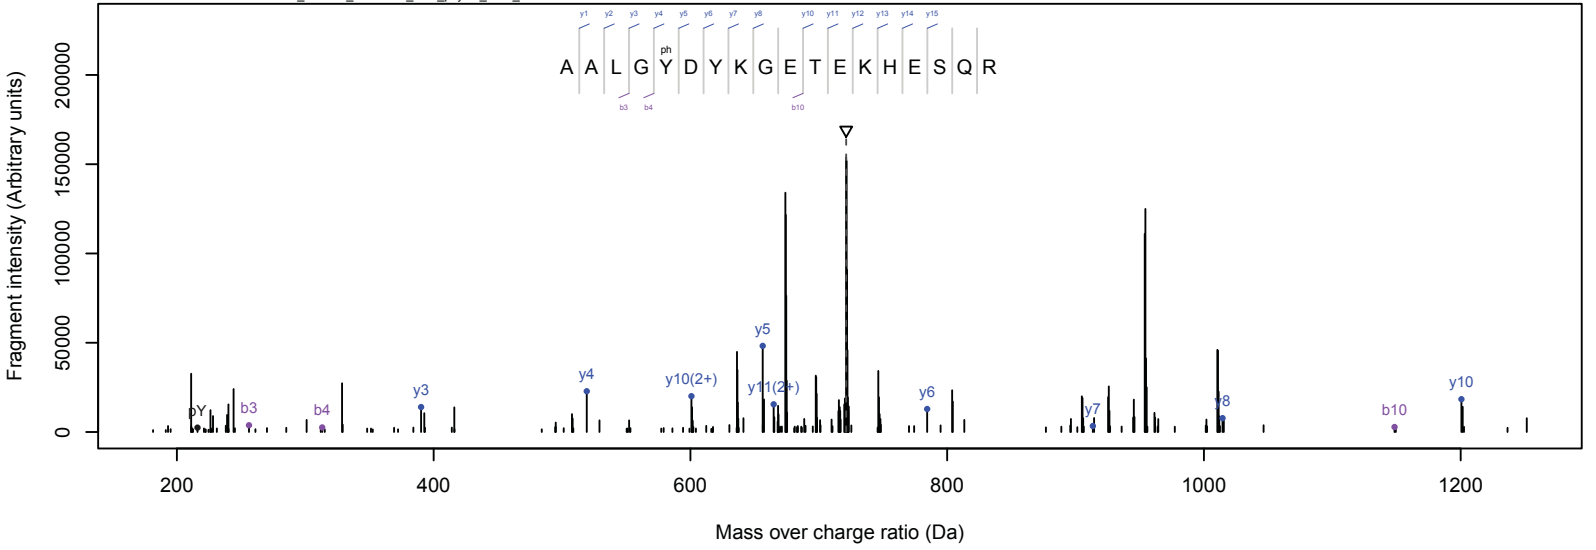

**LTSECVSSNPY(ph)SKPSSK-3+**

Source : QE1\_140612\_OPL1013\_CvA\_phosphoproteomic\_landscape\_AML\_C Scan : 6052

Andromeda score : 88.565

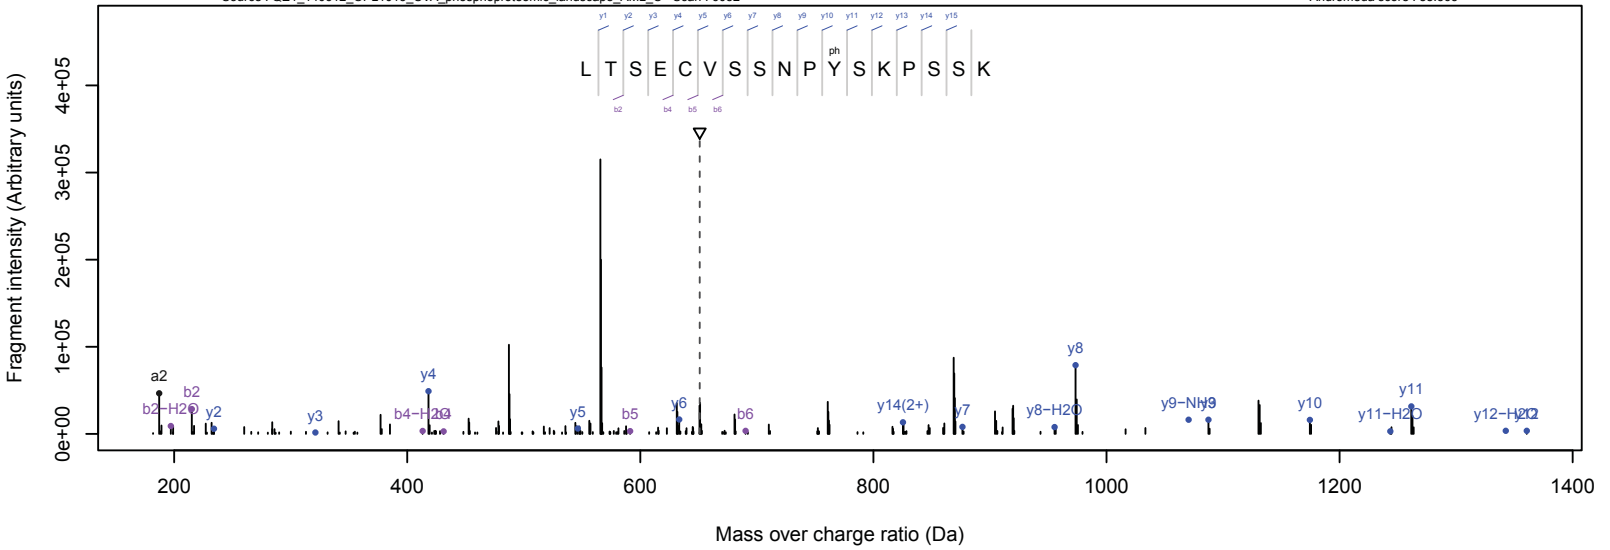

**NQGGYGGSSSSSY(ph)GSGR-2+**

Source : QE1\_140822\_OPL1013\_CvA\_pTyrIP\_AML\_cell\_lines\_part2\_B Scan : 2805

Andromeda score : 88.565

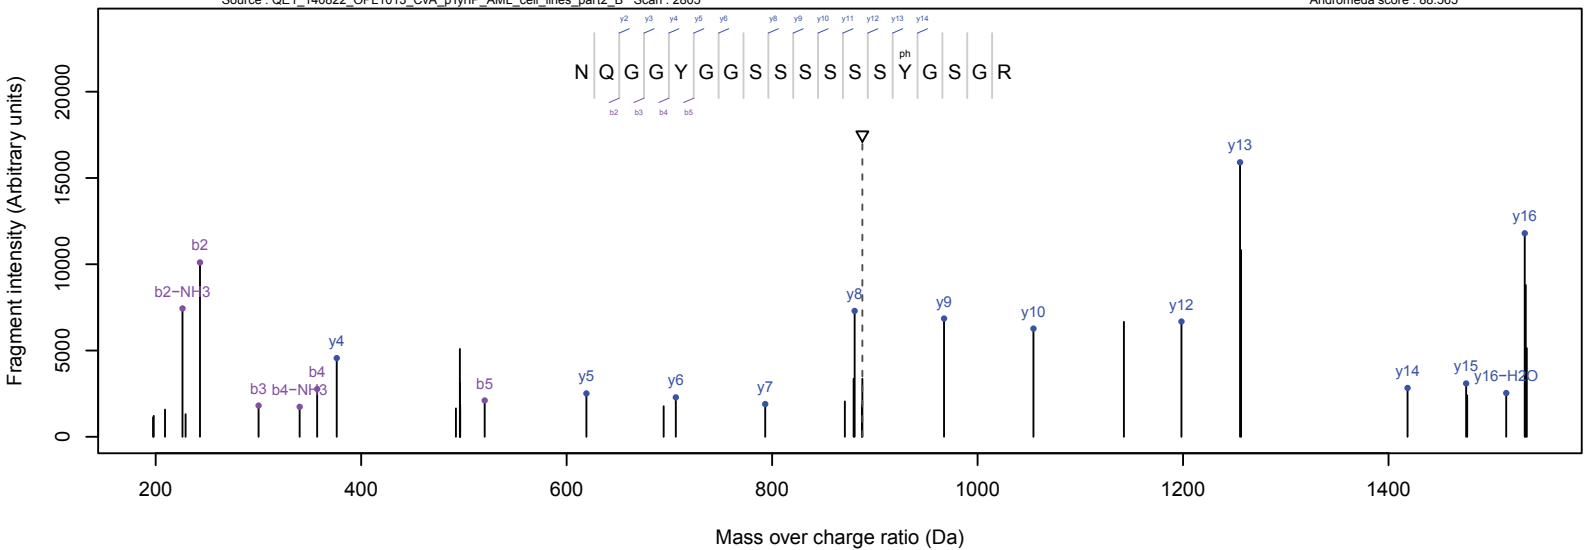

KPGY(ph)IHSGATTSTM<sup>3+</sup>

Source : QE1\_140612\_OPL1013\_CVA\_phosphoproteomic\_landscape\_AML\_C Scan : 5888

Andromeda score : 88.561

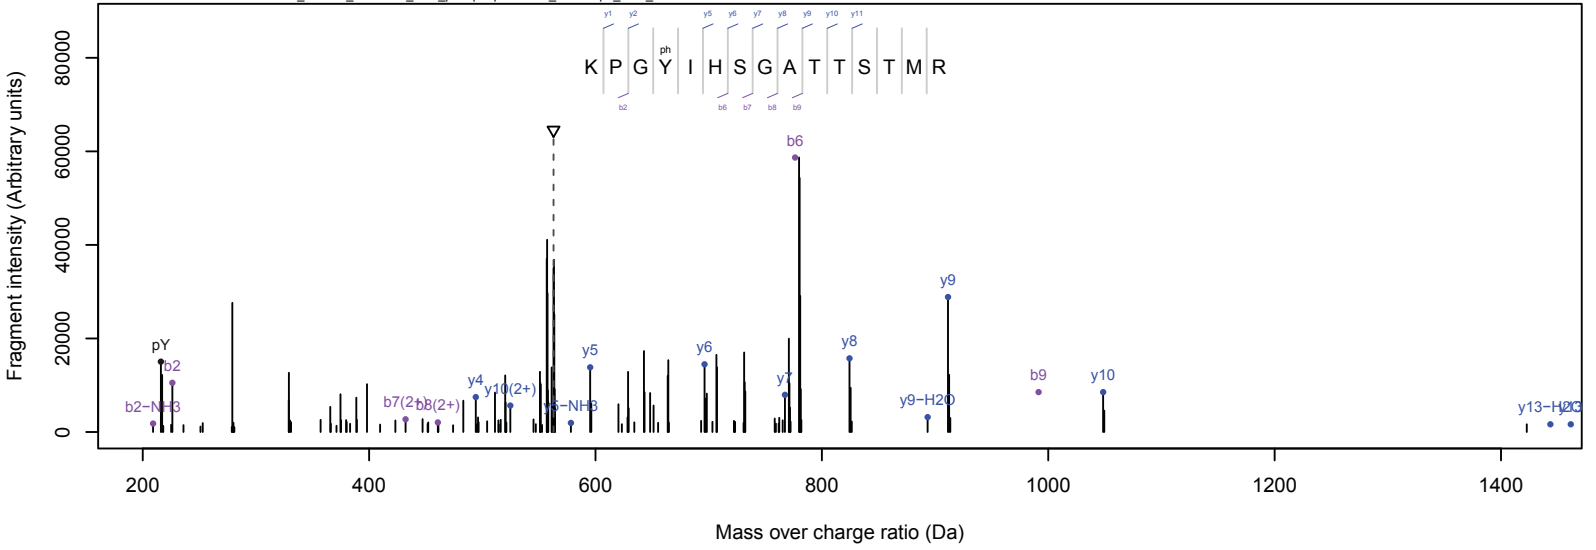

SFY(ph)PEEVSSMLTK<sup>2+</sup>

Source : QE1\_140612\_OPL1013\_CVA\_phosphoproteomic\_landscape\_AML\_D Scan : 41930

Andromeda score : 88.561

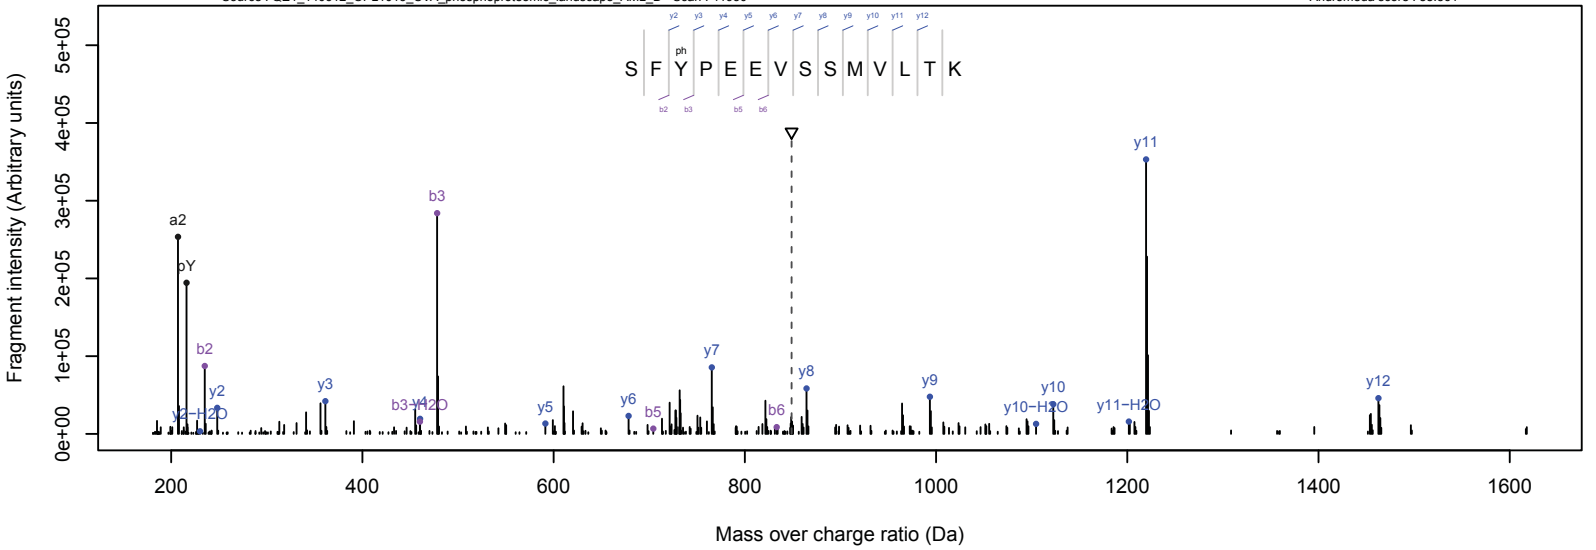

DIICQIAY(ph)AR<sup>2+</sup>

Source : QE1\_140612\_OPL1013\_CVA\_phosphoproteomic\_landscape\_AML\_C Scan : 31415

Andromeda score : 88.495

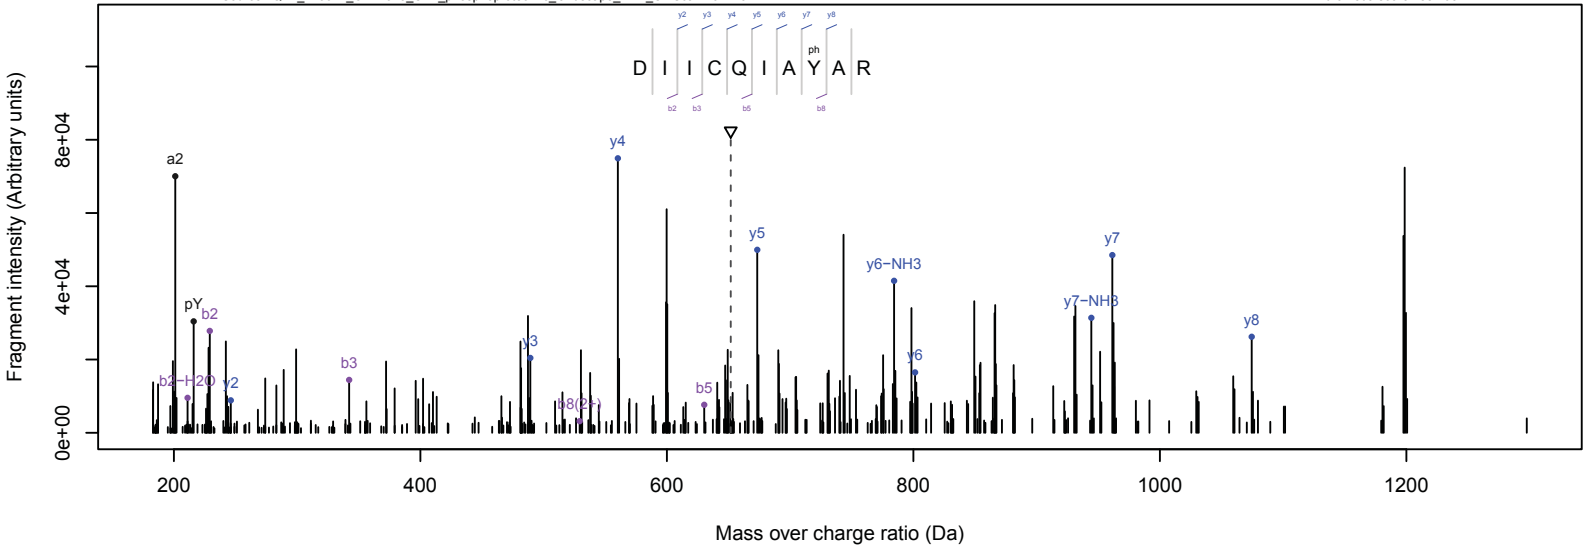

VRPCVV(ph)GGADIGQQIR-3+

Source : QE1\_140612\_OPL1013\_CVA\_phosphoproteomic\_landscape\_AML\_C Scan : 23956

Andromeda score : 88.427

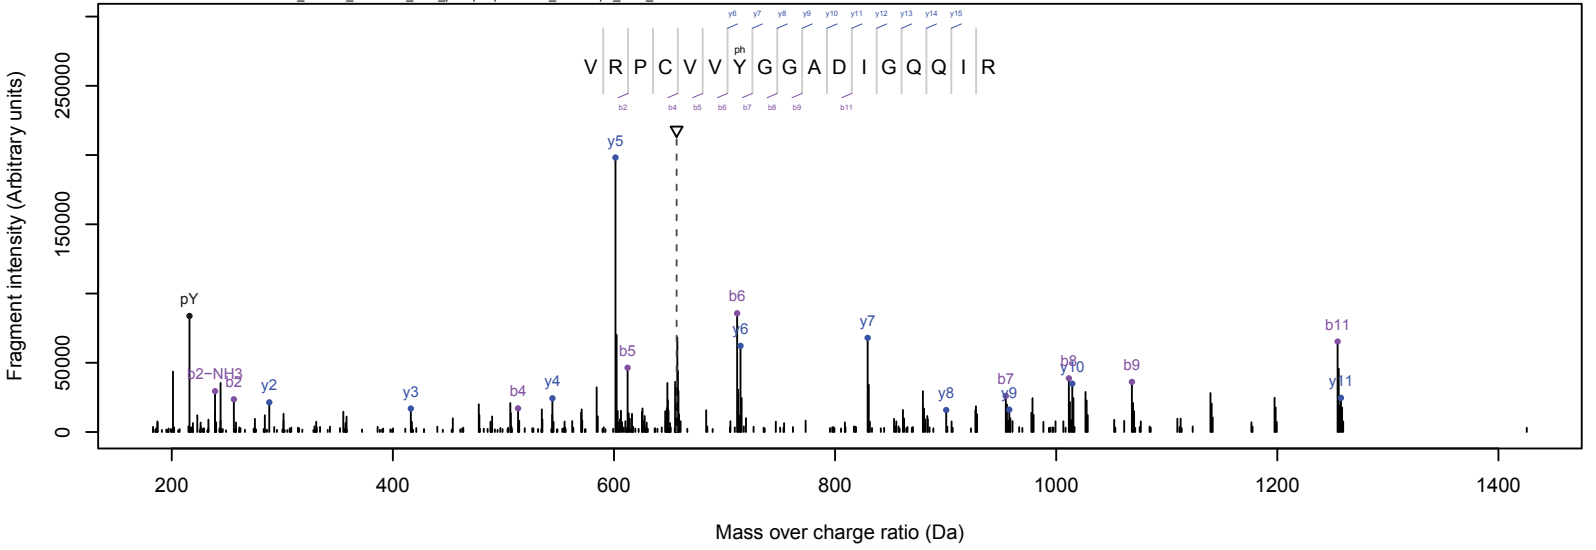

DKLNPTPSIY(ph)LENKR-3+

Source : QE1\_140908\_OPL1013\_CvA\_pTyrIP\_AML\_HEL Scan : 24780

Andromeda score : 88.385

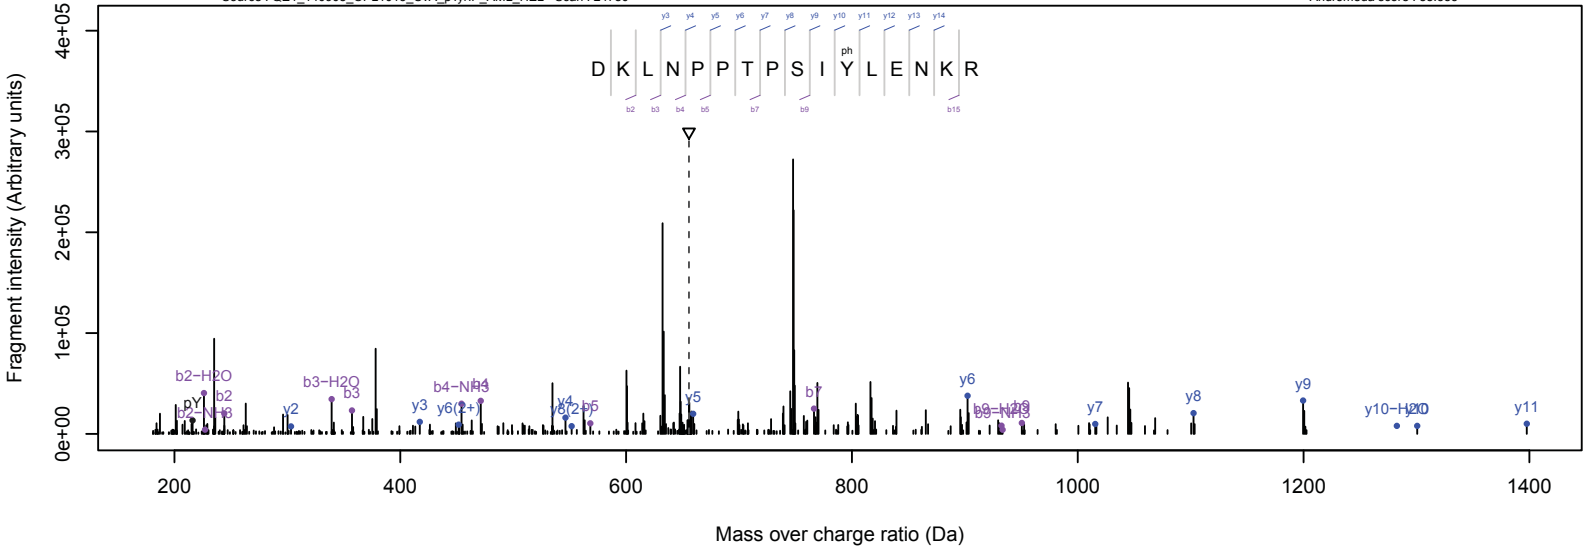

NM(ox)AEQIIQEIYS(ph)QIQSK-3+

Source : QE1\_140822\_OPL1013\_CvA\_pTyrIP\_AML\_cell\_lines\_part2\_E Scan : 42409

Andromeda score : 88.385

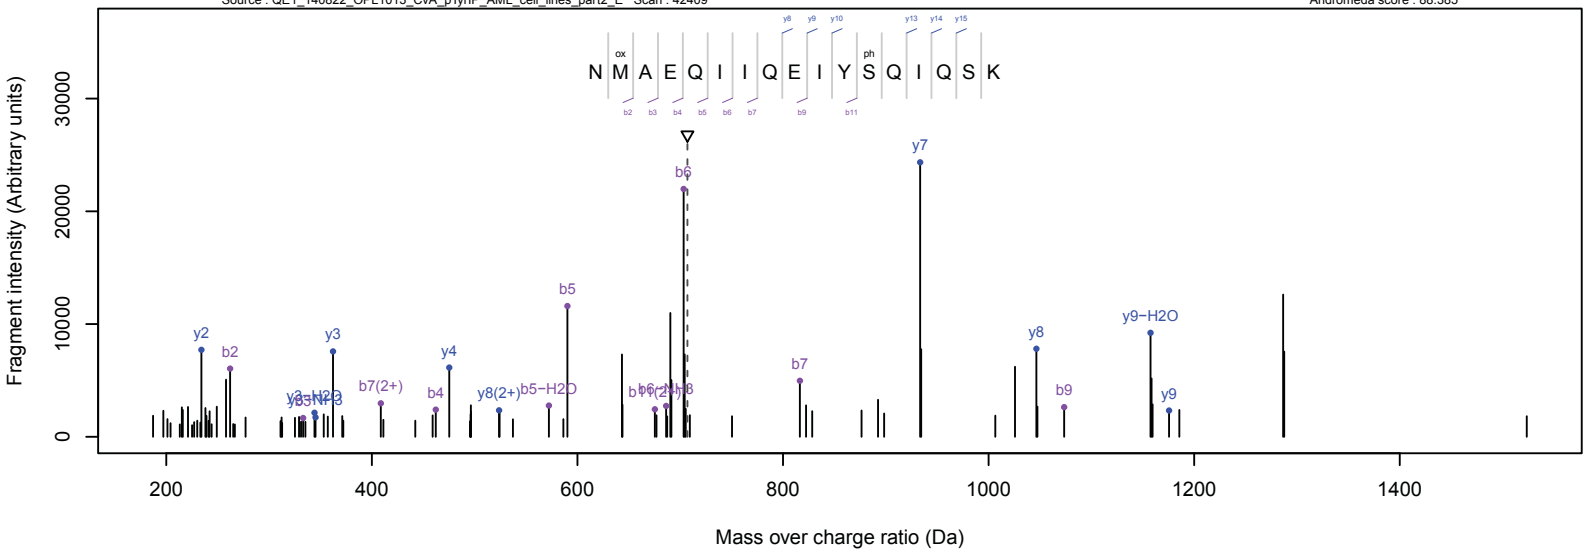

TTAAHSLVGTPTYMSPER-2+

Source : QE1\_140612\_OPL1013\_CVA\_phosphoproteomic\_landscape\_AML\_C Scan : 24786

Andromeda score : 88.385

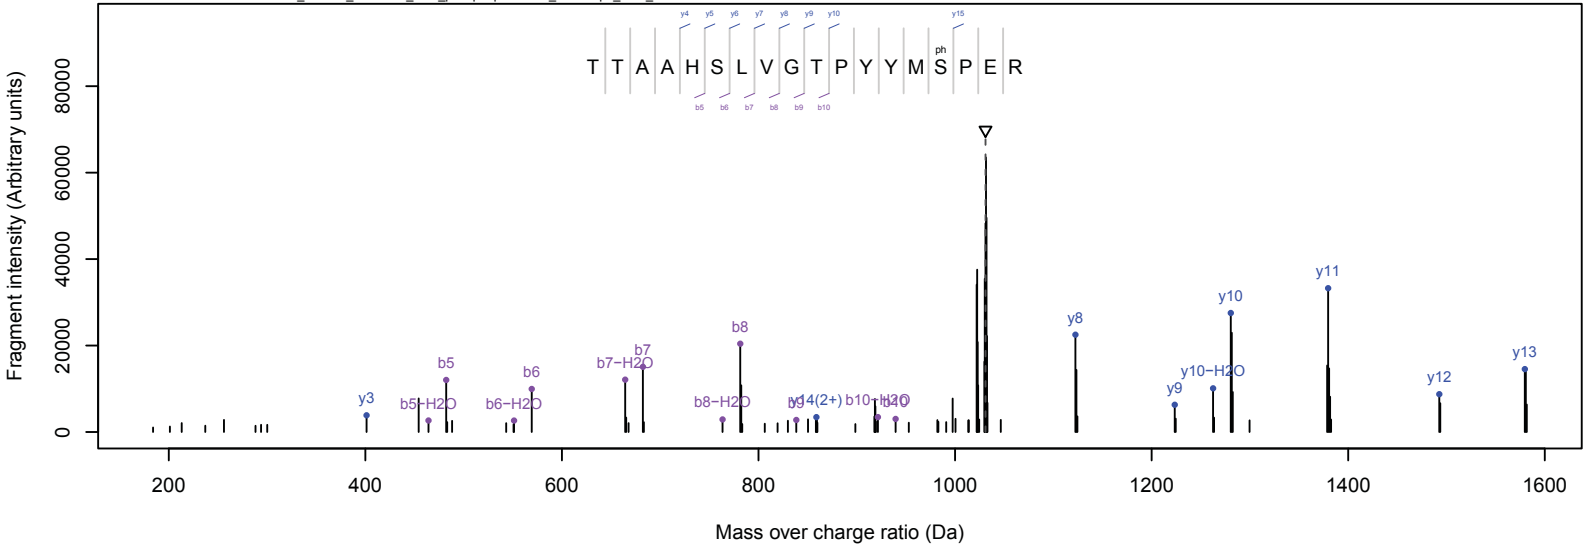

DGHLSPERDHLLEGLYAK-4+

Source : QE1\_140908\_OPL1013\_CvA\_pTyrIP\_AML\_HEL Scan : 19229

Andromeda score : 88.283

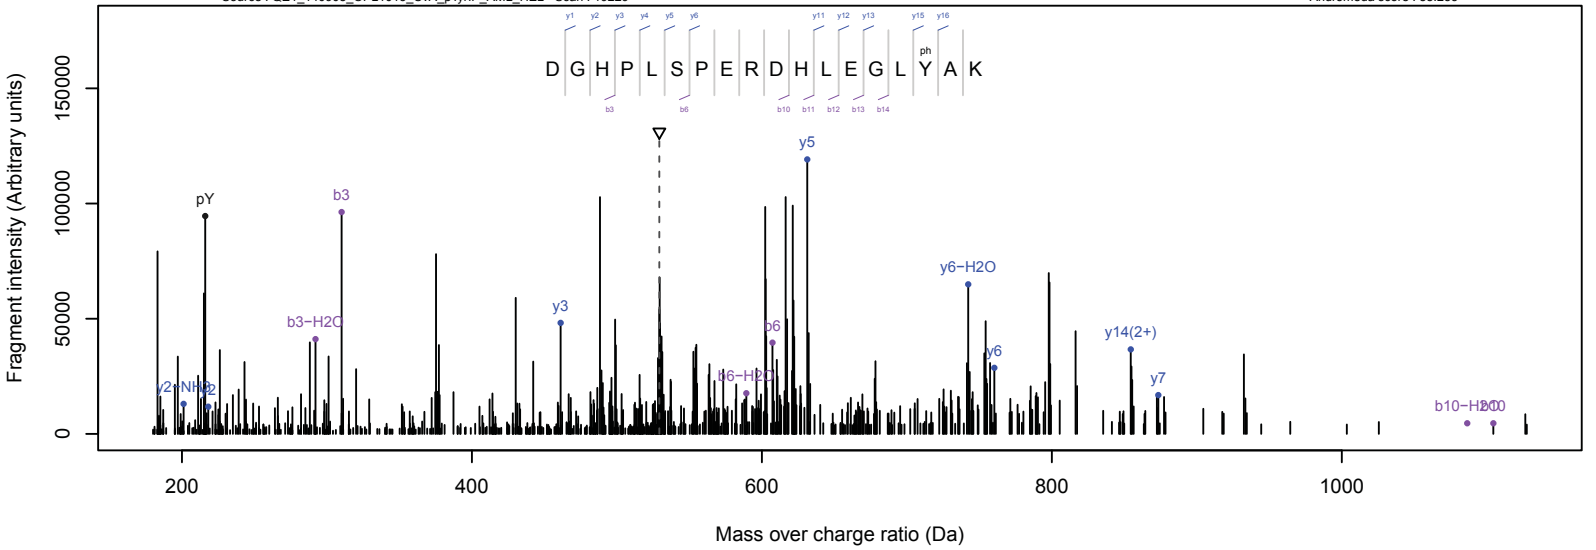

IY(ph)ERPSTTCSKPKR-3+

Source : QE1\_140612\_OPL1013\_CVA\_phosphoproteomic\_landscape\_AML\_B Scan : 3661

Andromeda score : 88.282

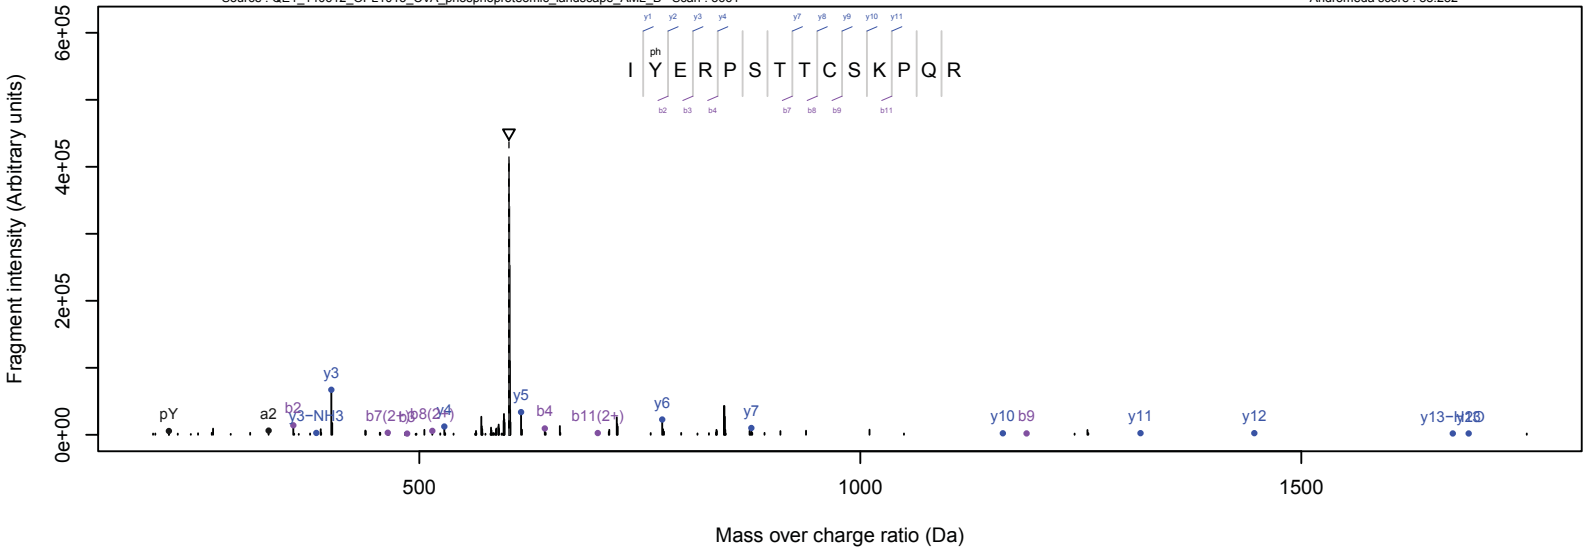

(ac)SETAPAAPAAPAEK(ph)PVK-2+

Source : QE1\_140908\_OPL1013\_CvA\_pTyrIP\_AML\_HL60 Scan : 19415

Andromeda score : 88.244

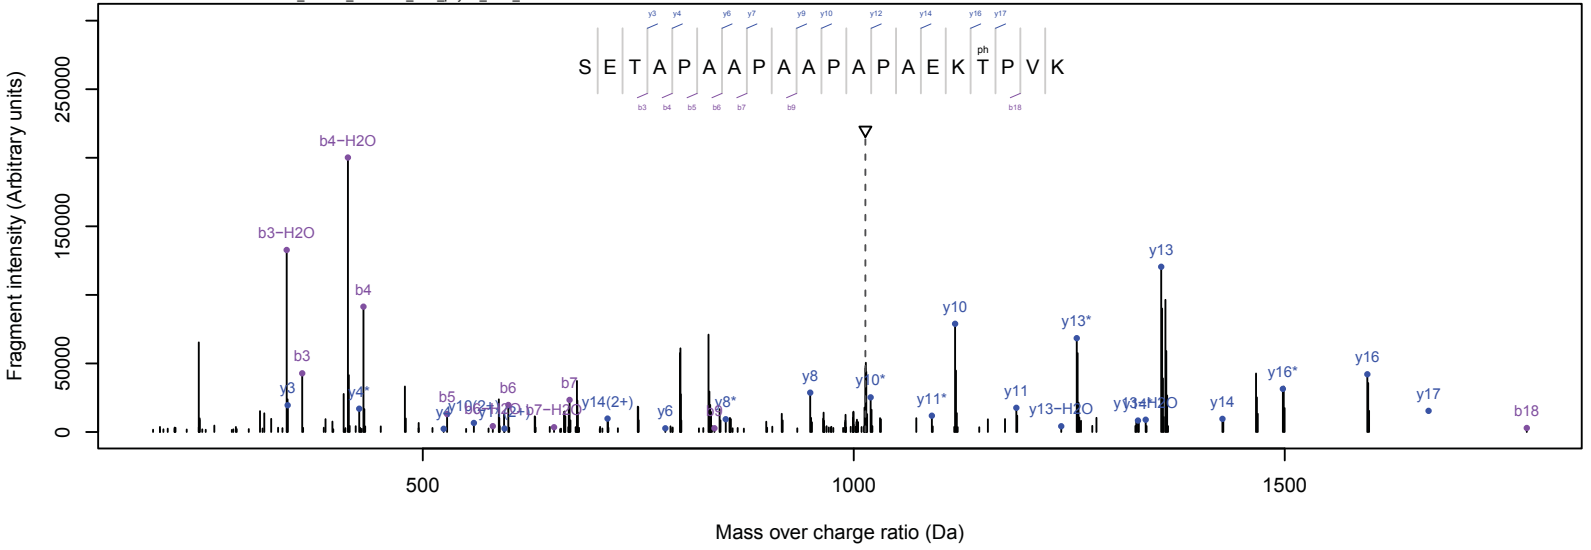

EMNTEAEKLSYS(ph)MPISIEFQR-3+

Source : QE1\_140612\_OPL1013\_CVA\_phosphoproteomic\_landscape\_AML\_B Scan : 35622

Andromeda score : 88.239

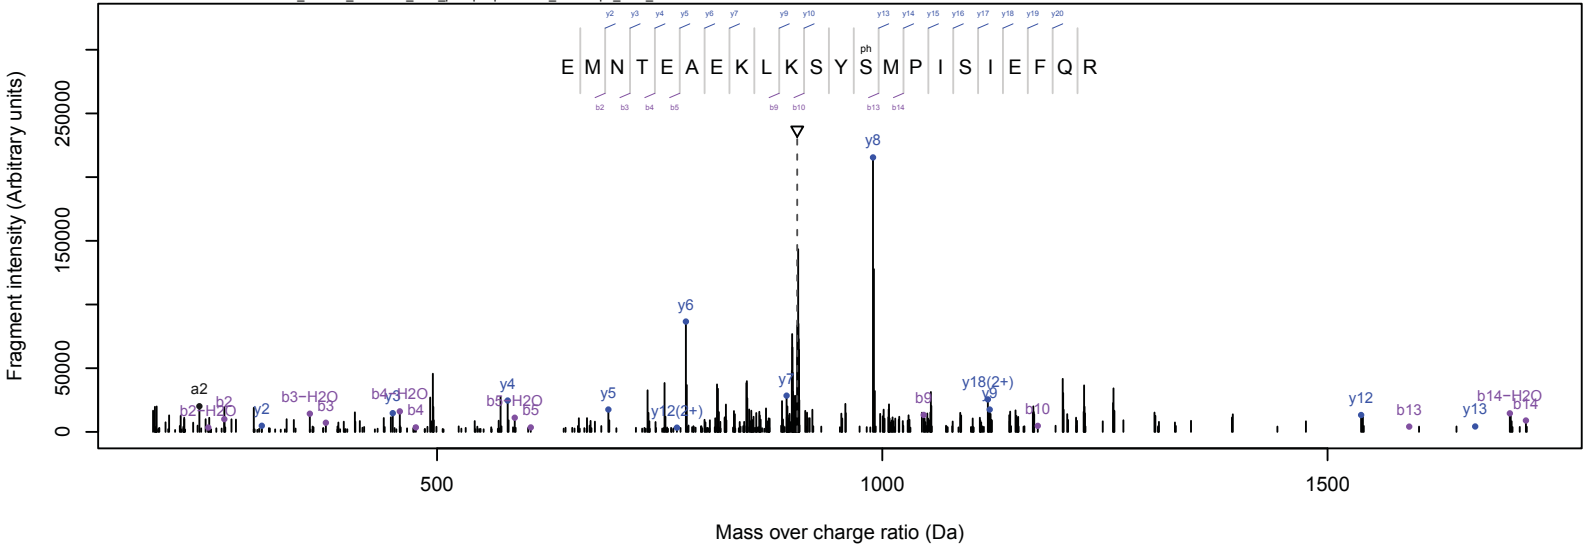

MQAYSNPGYS(ph)SSFPSTGLEPSCK-3+

Source : QE1\_140612\_OPL1013\_CVA\_phosphoproteomic\_landscape\_AML\_C Scan : 33446

Andromeda score : 88.239

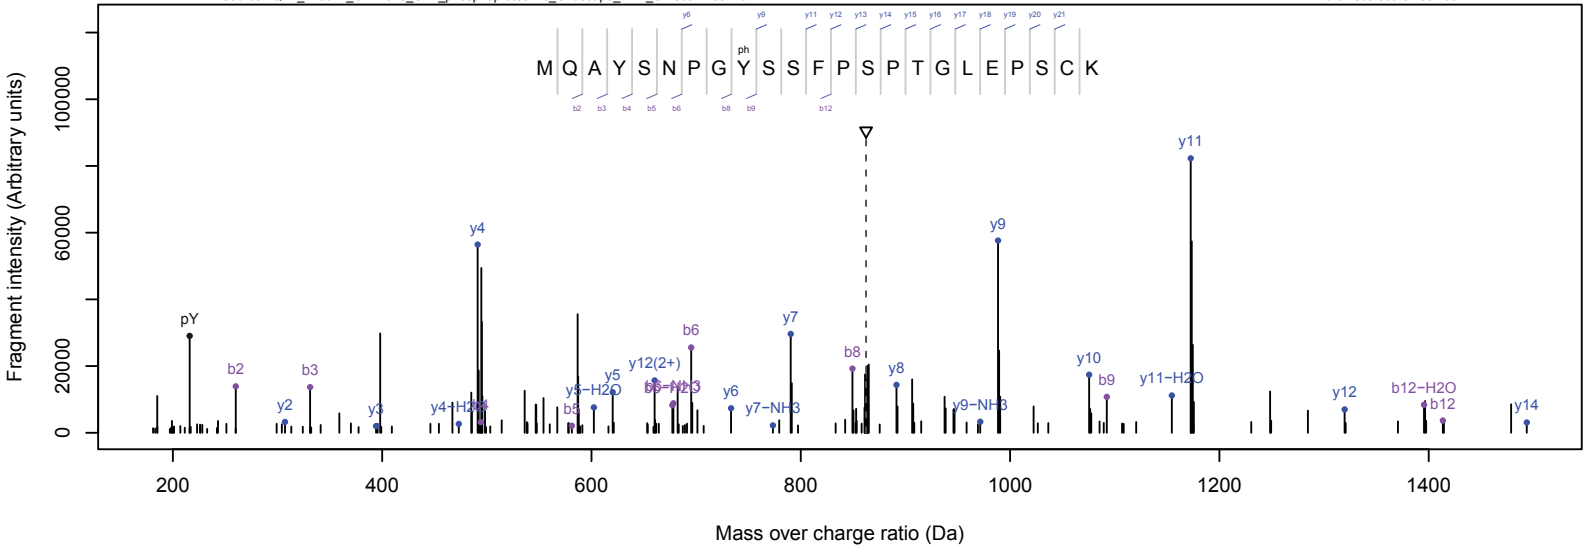

Y(ph)KVFATGHGKYEK-3+

Source : QE1\_140612\_OPL1013\_CVA\_phosphoproteomic\_landscape\_AML\_B Scan : 6281

Andromeda score : 88.163

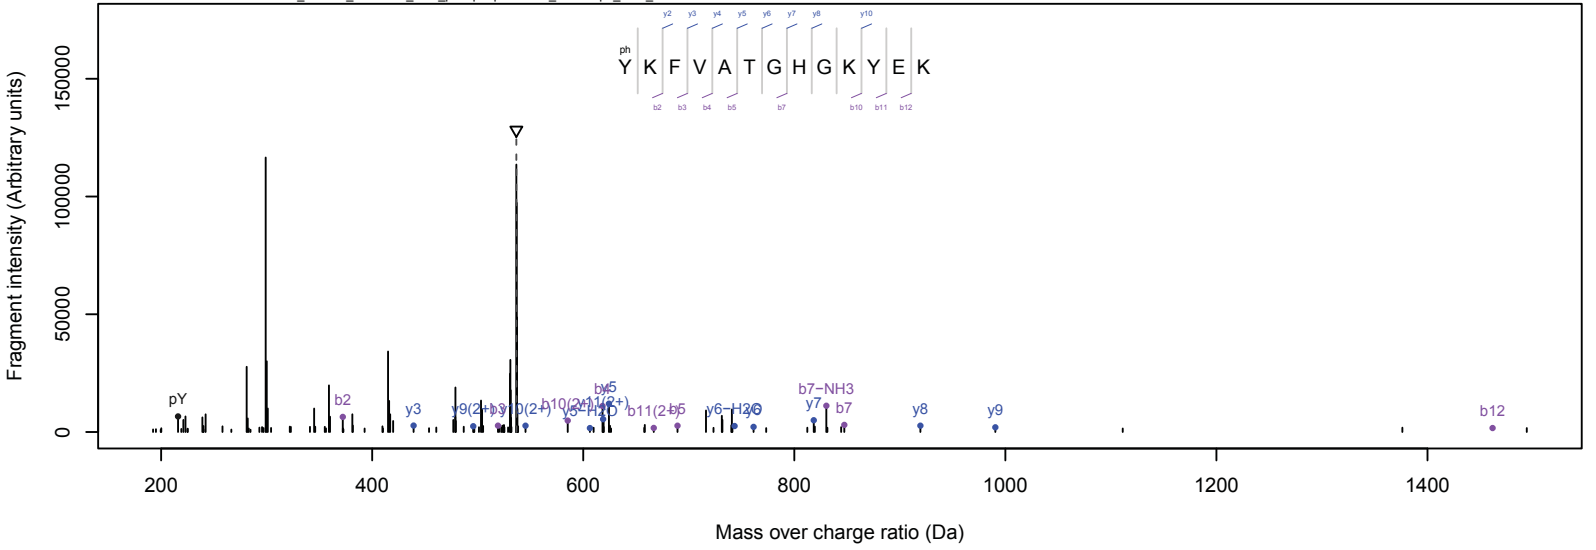

APLSQLY(ph)FCR-2+

Source : QE1\_140612\_OPL1013\_CVA\_phosphoproteomic\_landscape\_AML\_C Scan : 30907

Andromeda score : 88.134

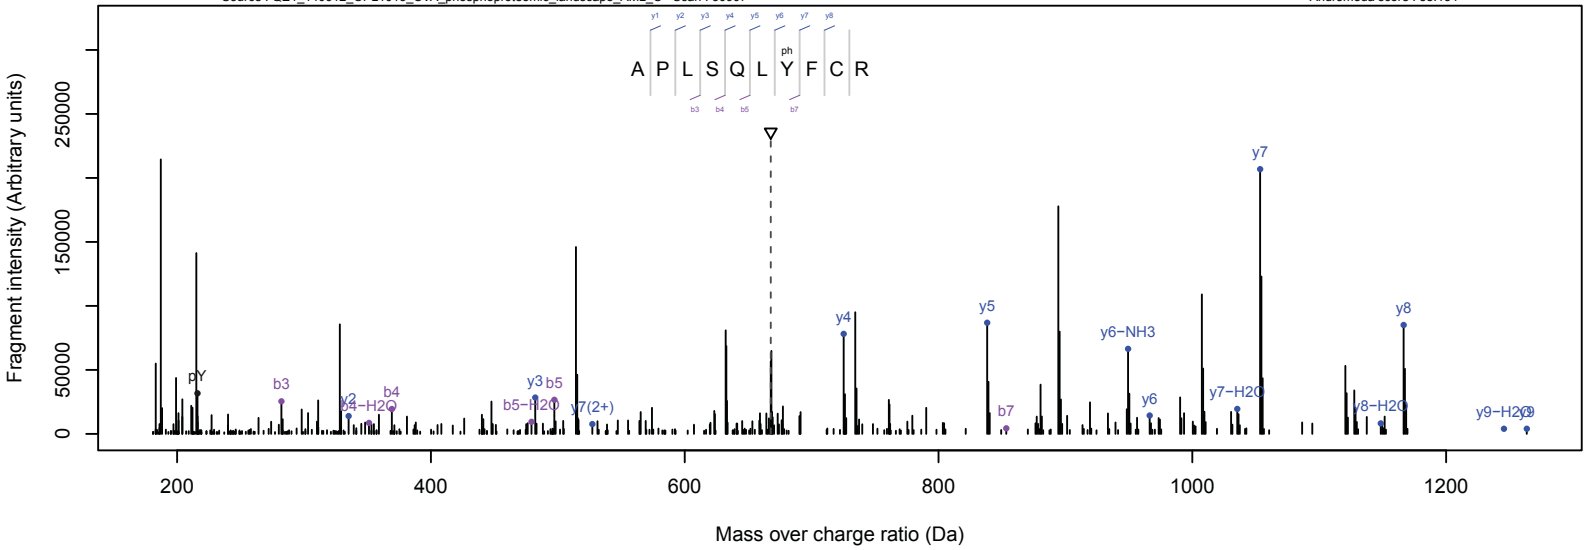

GNLREY(ph)LQAR-3+

Source : QE1\_140612\_OPL1013\_CVA\_phosphoproteomic\_landscape\_AML\_B Scan : 15819

Andromeda score : 88.134

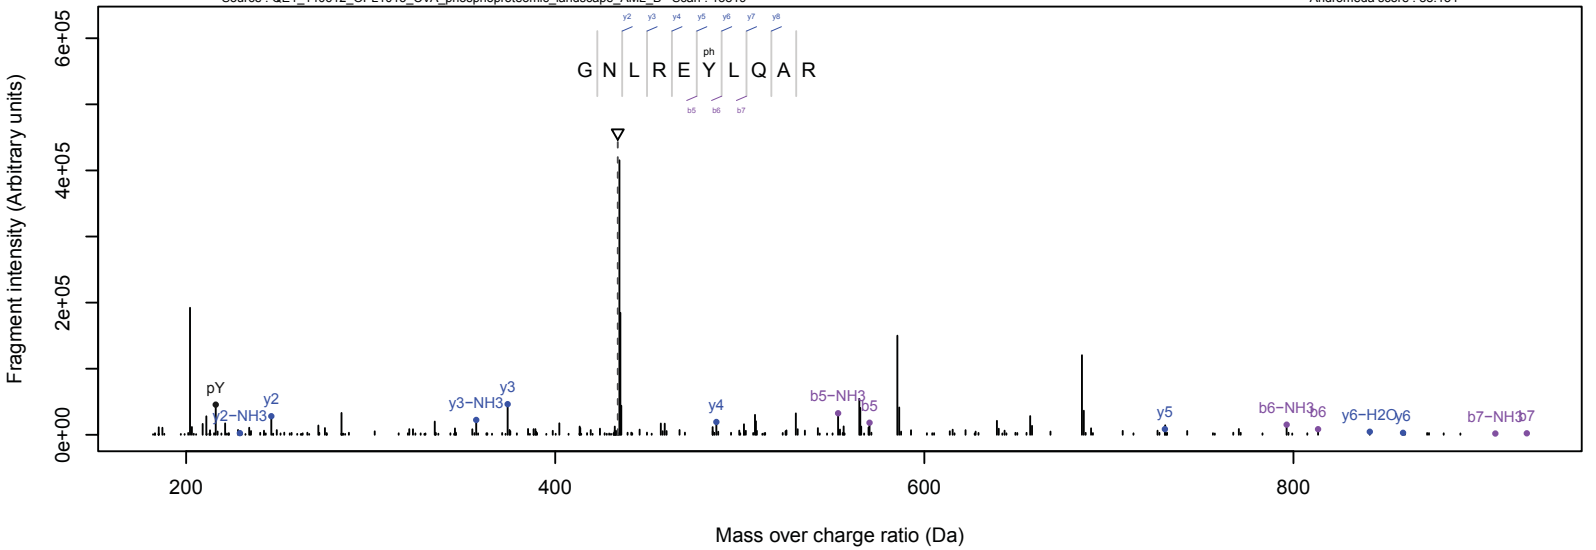



IAGY(ph)VTHLMK-2+

Source : QE1\_140612\_OPL1013\_CVA\_phosphoproteomic\_landscape\_AML\_A Scan : 19059

Andromeda score : 88.134

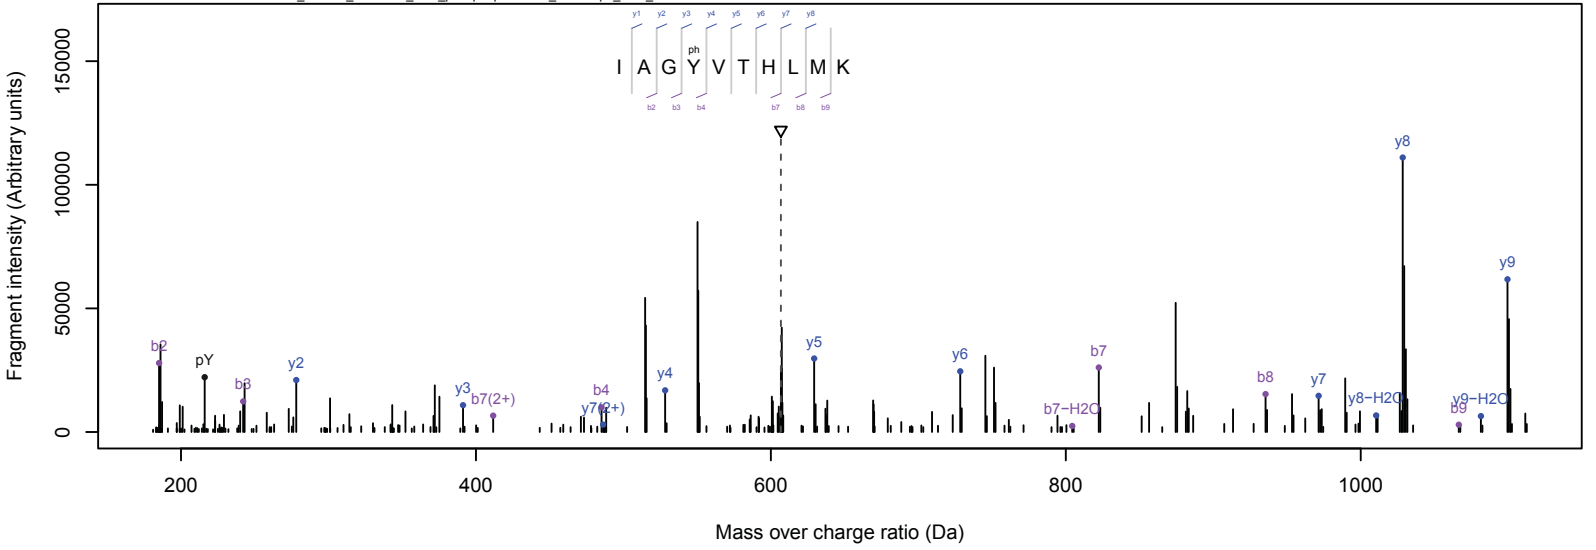

(ac)ATLKDQLIY(ph)NLLKEEQTPQNK-3+

Source : QE1\_140822\_OPL1013\_CvA\_pTyrIP\_AML\_cell\_lines\_part2\_E Scan : 40926

Andromeda score : 88.09

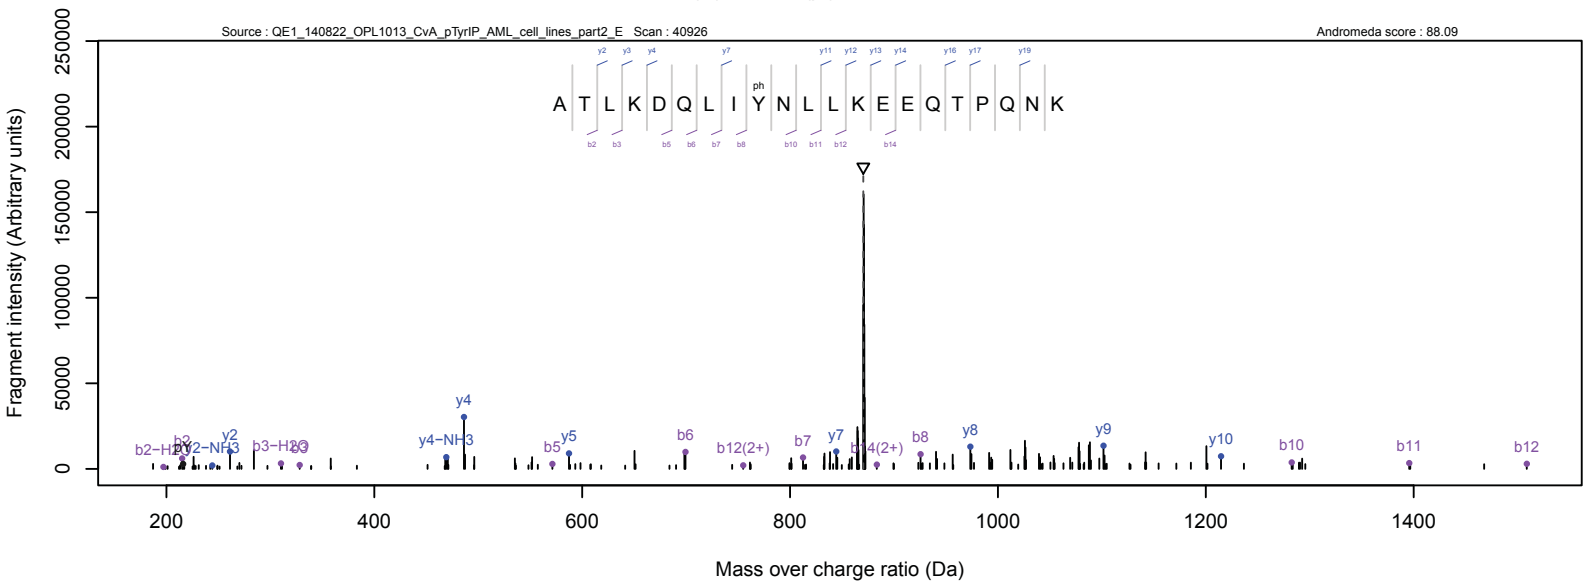

AVEY(ph)LLMGIPGDR-2+

Source : QE1\_140612\_OPL1013\_CVA\_phosphoproteomic\_landscape\_AML\_B Scan : 42704

Andromeda score : 88.075

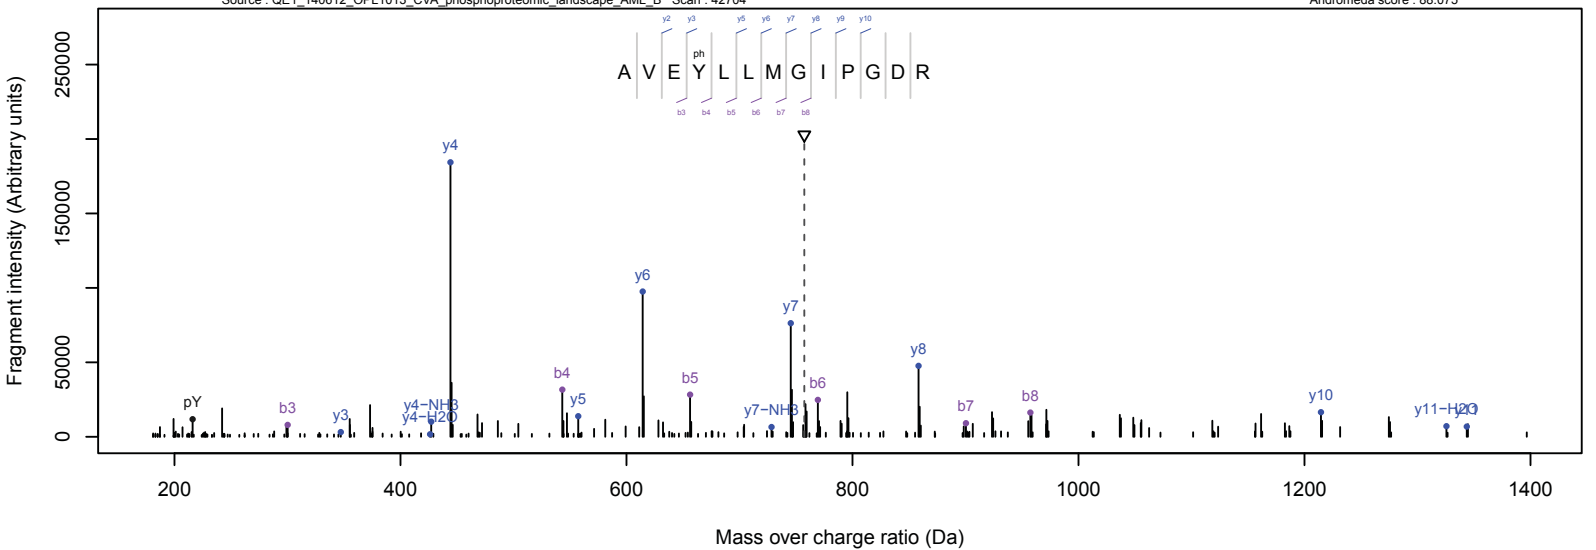

VGSGAY(ph)EQVVIK-2+

Source : QE1\_140612\_OPL1013\_CVA\_phosphoproteomic\_landscape\_AML\_B Scan : 13513

Andromeda score : 88.075

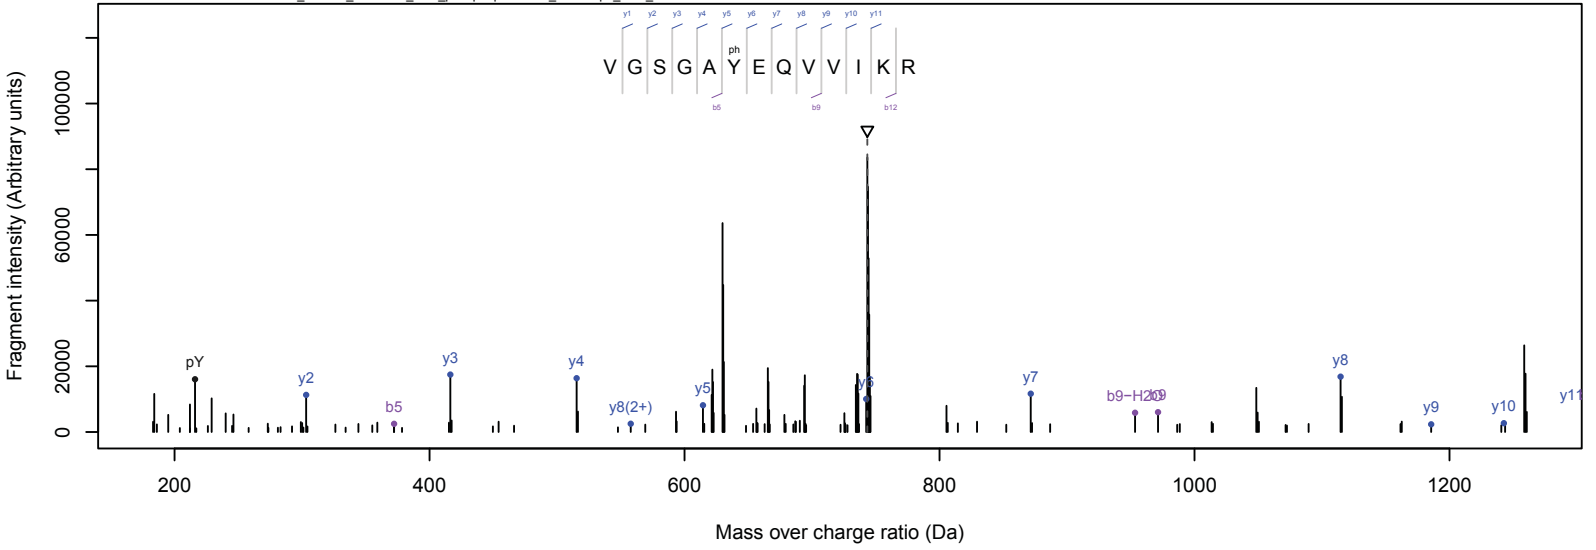

Y(ph)QTLPLGR-2+

Source : QE1\_140612\_OPL1013\_CVA\_phosphoproteomic\_landscape\_AML\_C Scan : 6434

Andromeda score : 88.029

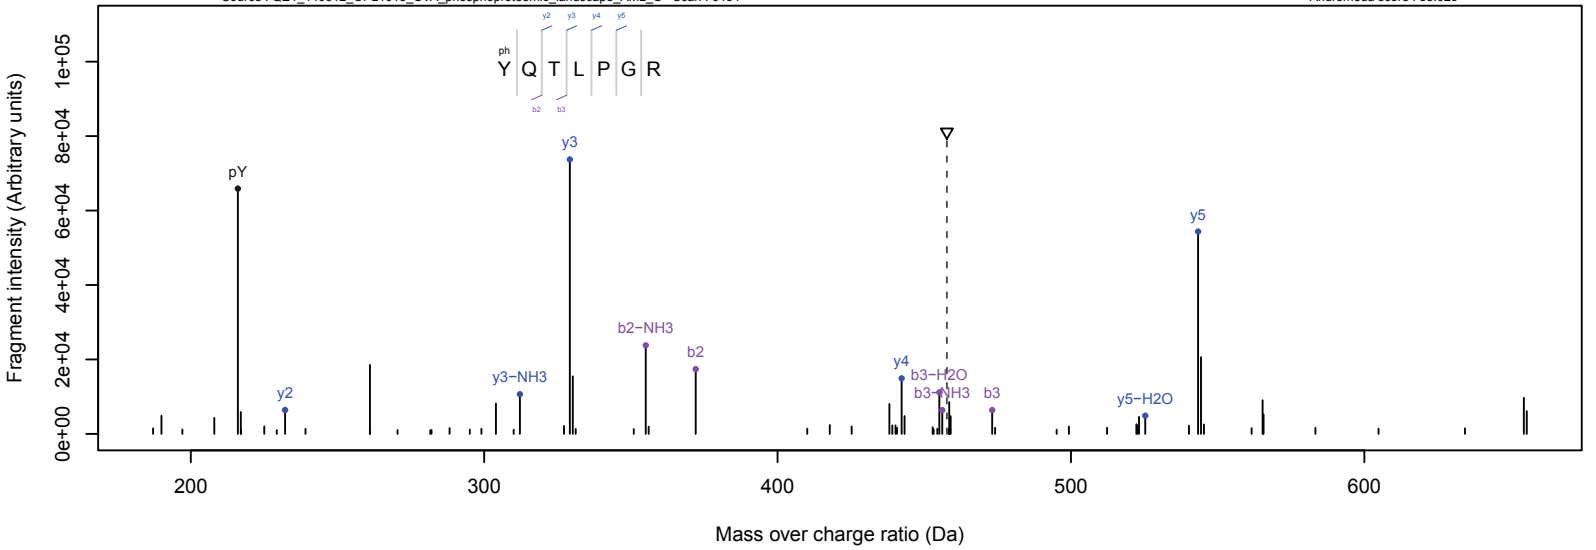

EKVWY(ph)HVCSSR-3+

Source : QE1\_140612\_OPL1013\_CVA\_phosphoproteomic\_landscape\_AML\_B Scan : 12773

Andromeda score : 88.021

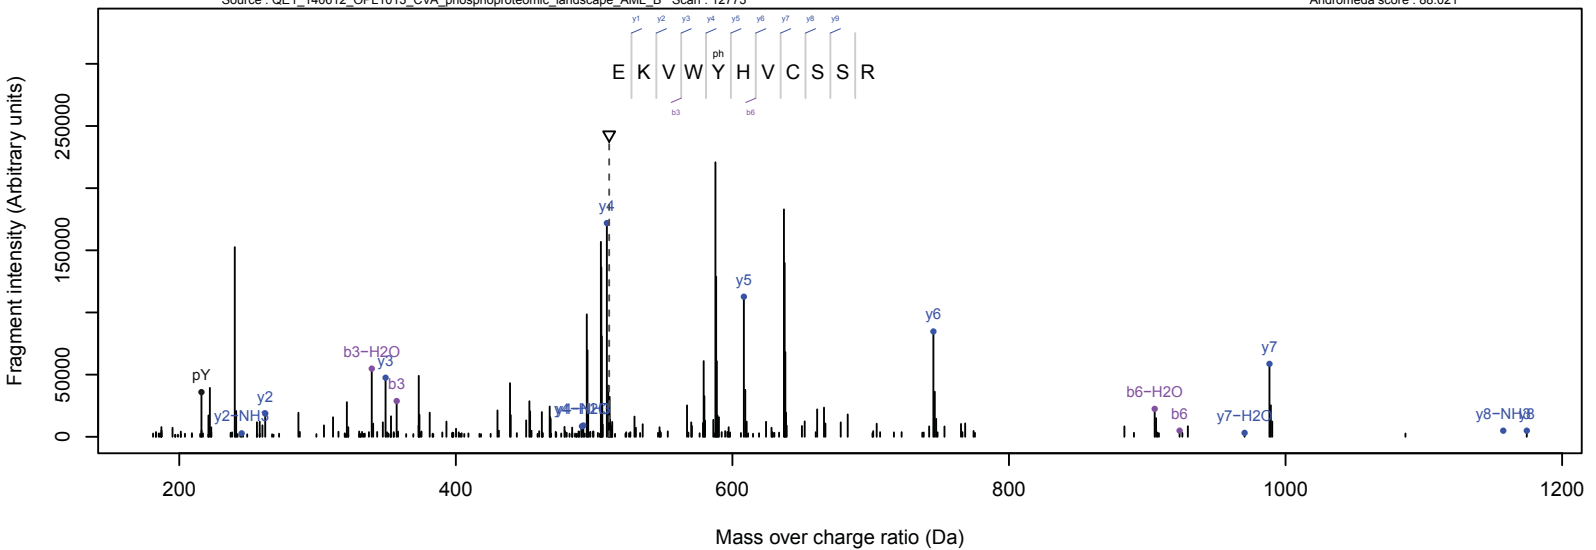

REFEVY(ph)GPIKR-3+

Source: QE1\_140908\_OPL1013\_CVA\_pTyrIP\_AML\_HL60 Scan: 18786

Andromeda score: 88.021

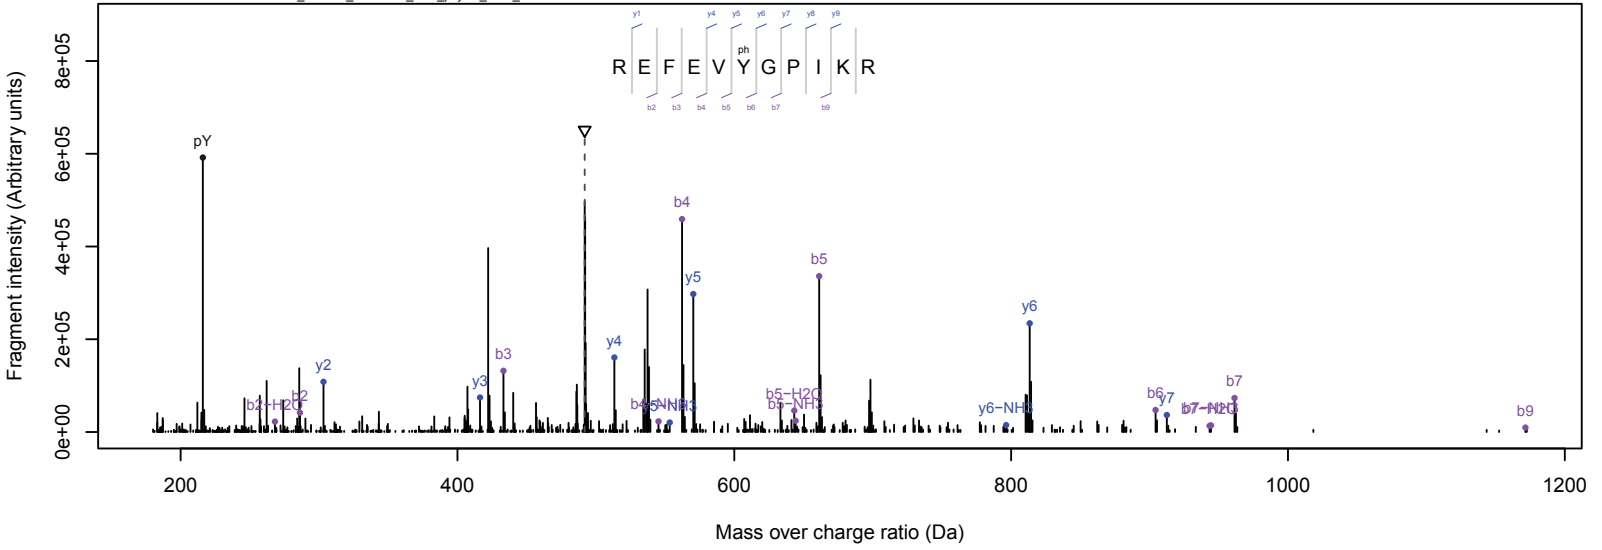

YTY(ph)NGATSVMSR-2+

Source: QE1\_140612\_OPL1013\_CVA\_phosphoproteomic\_landscape\_AML\_D Scan: 14090

Andromeda score: 87.863

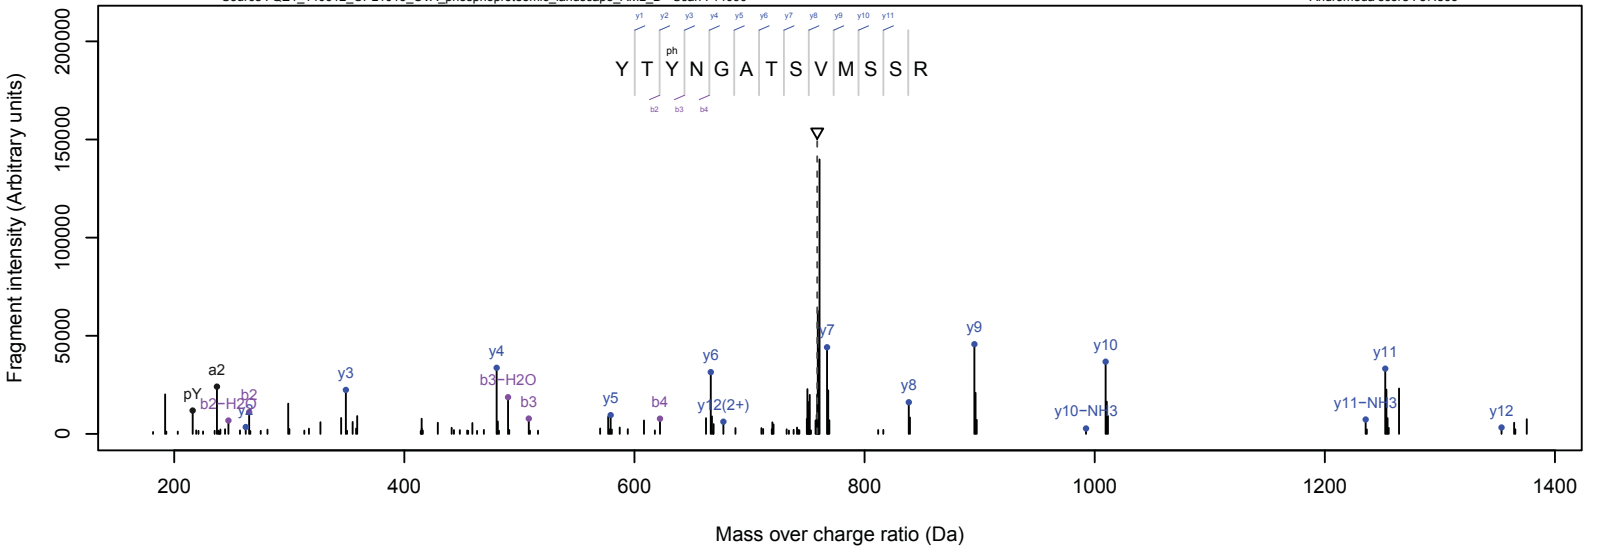

RPDQIHSVY(ph)ITPGADLPVQGALEPLEEDGQPPGAK-4+

Source: QE1\_140612\_OPL1013\_CVA\_phosphoproteomic\_landscape\_AML\_C Scan: 43000

Andromeda score: 87.842

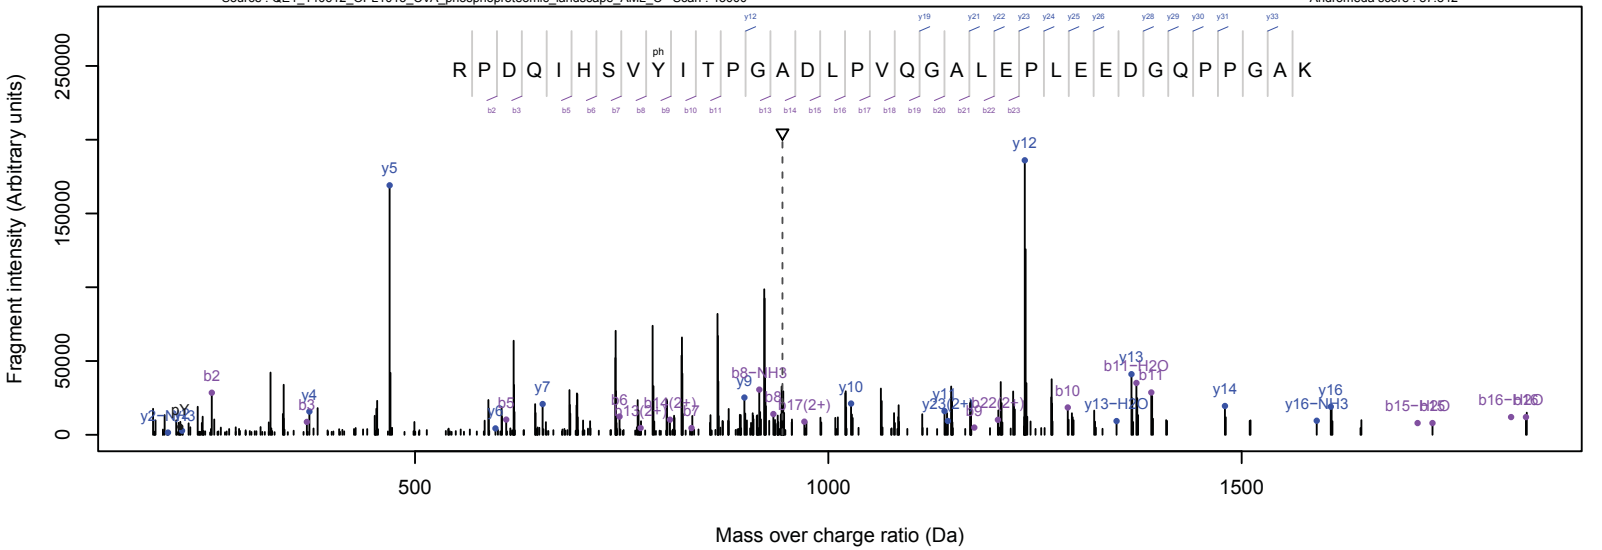

**YFVLEDGILHY(ph)ATTR-3+**

Source : QE1\_140612\_OPL1013\_CVA\_phosphoproteomic\_landscape\_AML\_C Scan : 42874

Andromeda score : 87.824

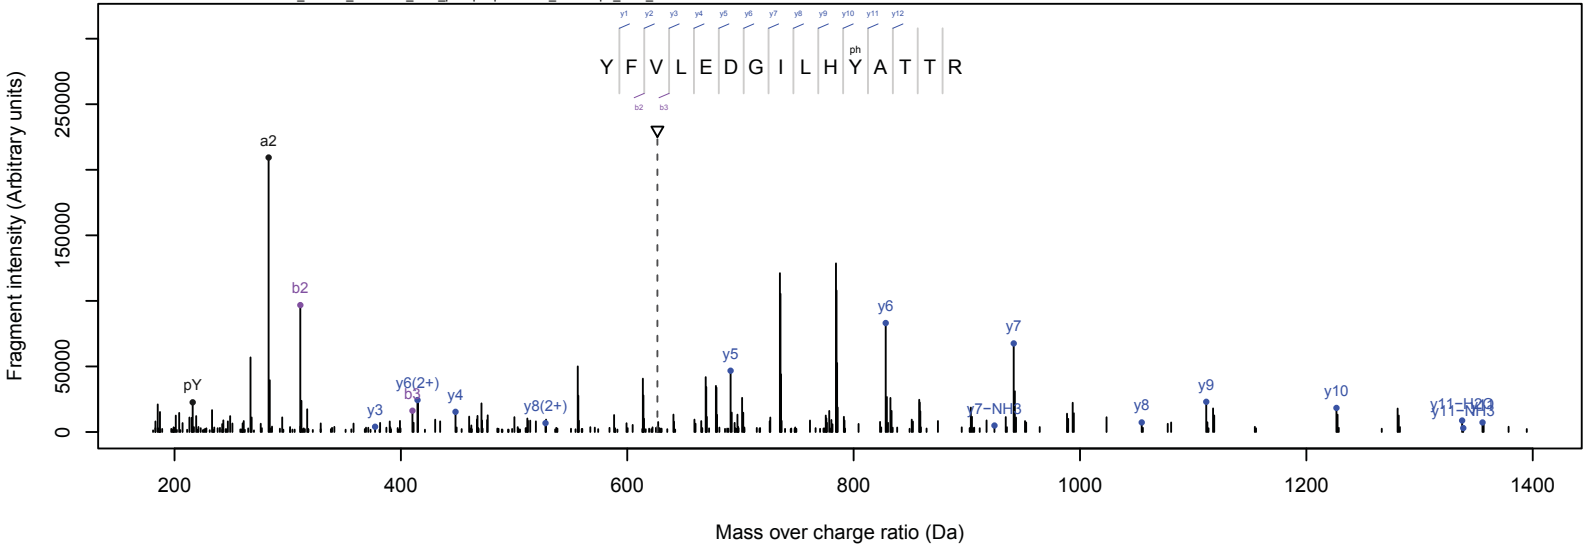

**KAQDCY(ph)FMK-2+**

Source : Qe1\_141024\_OPL1013\_CvA\_AML\_pTyrIP\_MOLM13 Scan : 13215

Andromeda score : 87.789

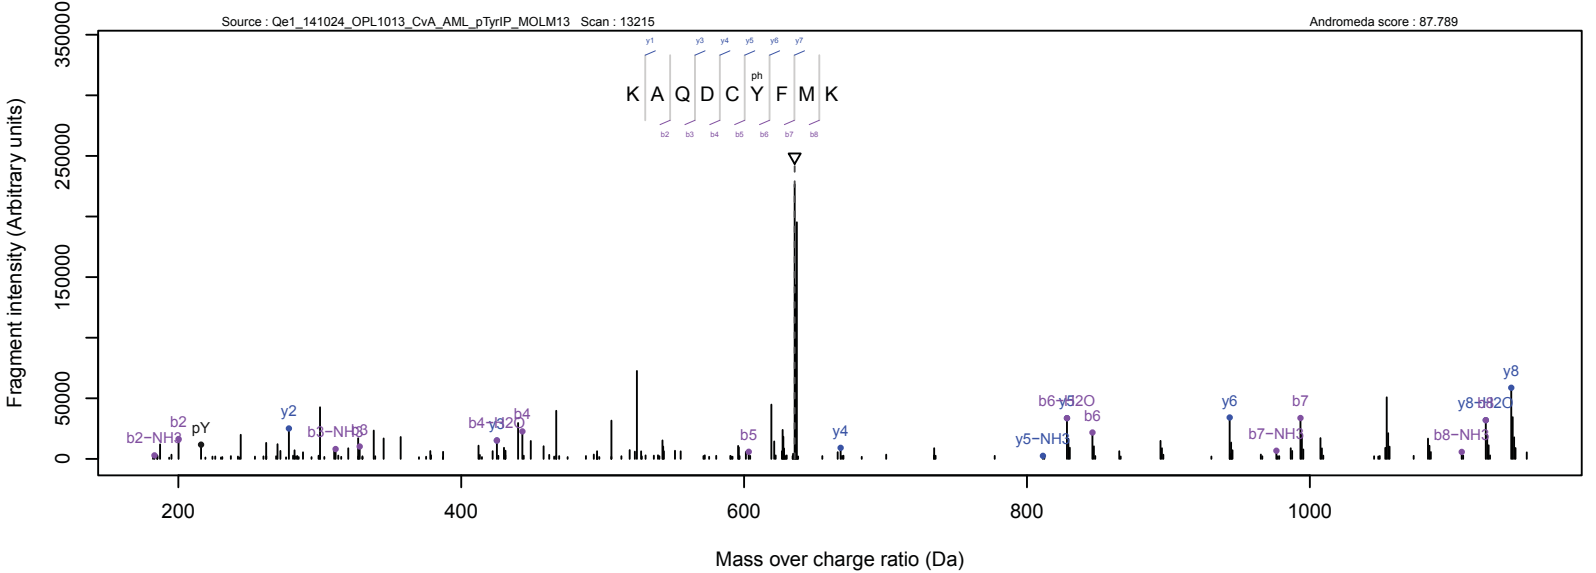

**RHQSLSPNHPPQLGQSVGSQNDAY(ph)DVPR-4+**

Source : QE1\_140908\_OPL1013\_CvA\_pTyrIP\_AML\_OCI\_AML3 Scan : 20005

Andromeda score : 87.739

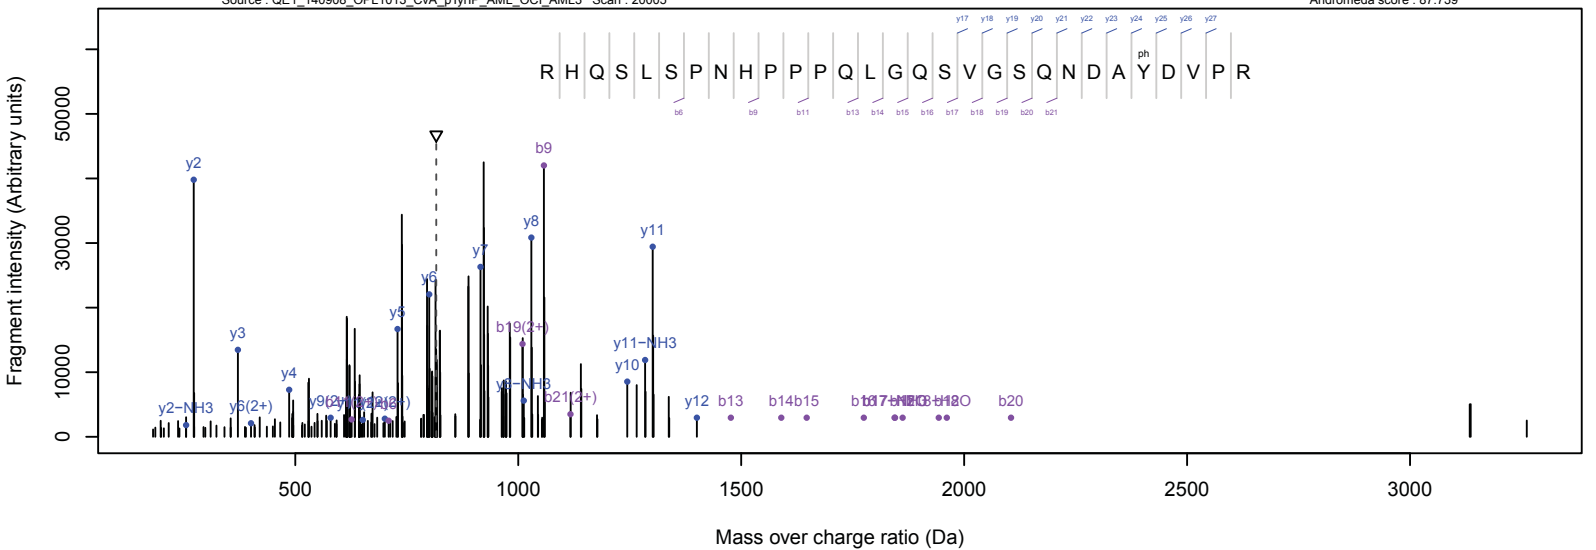

EATPY(ph)VKKGSPVSEIGWETPPPEspr-3+

Source : QE1\_140612\_OPL1013\_CVA\_phosphoproteomic\_landscape\_AML\_C Scan : 28638

Andromeda score : 87.72

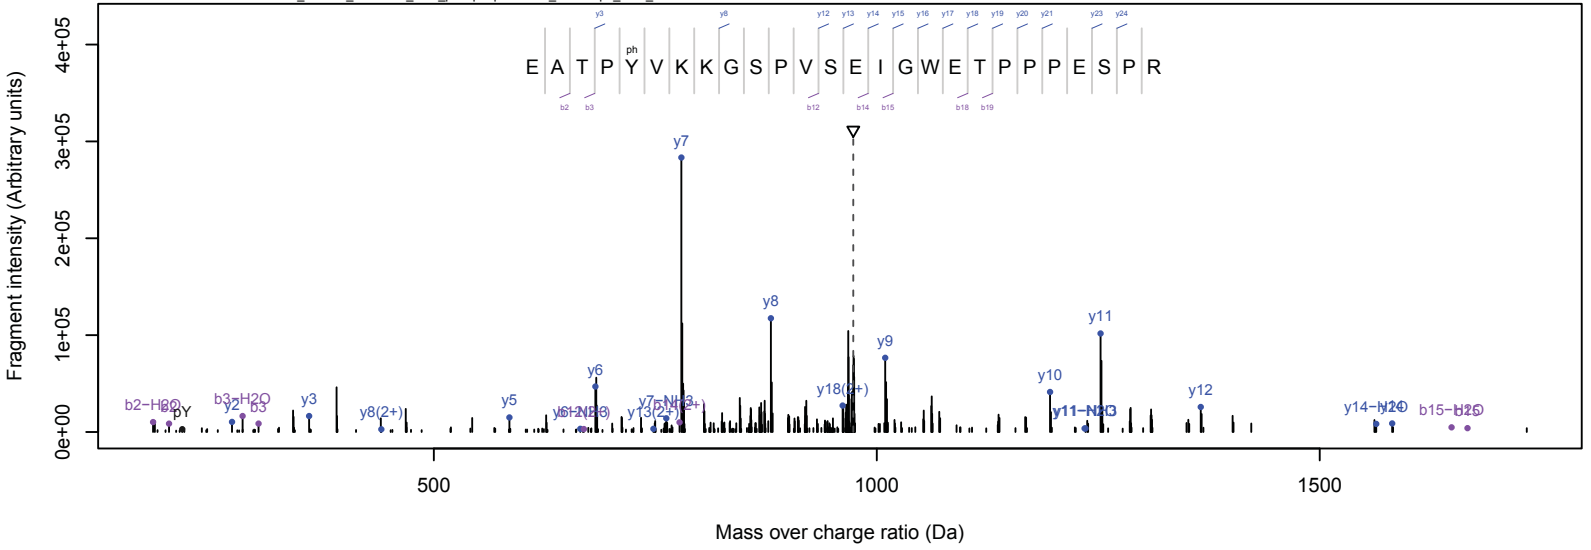

GY(ph)ISIPVIHEQNVTRPAAQPSFHQAQK-4+

Source : QE1\_140612\_OPL1013\_CVA\_phosphoproteomic\_landscape\_AML\_C Scan : 29650

Andromeda score : 87.72

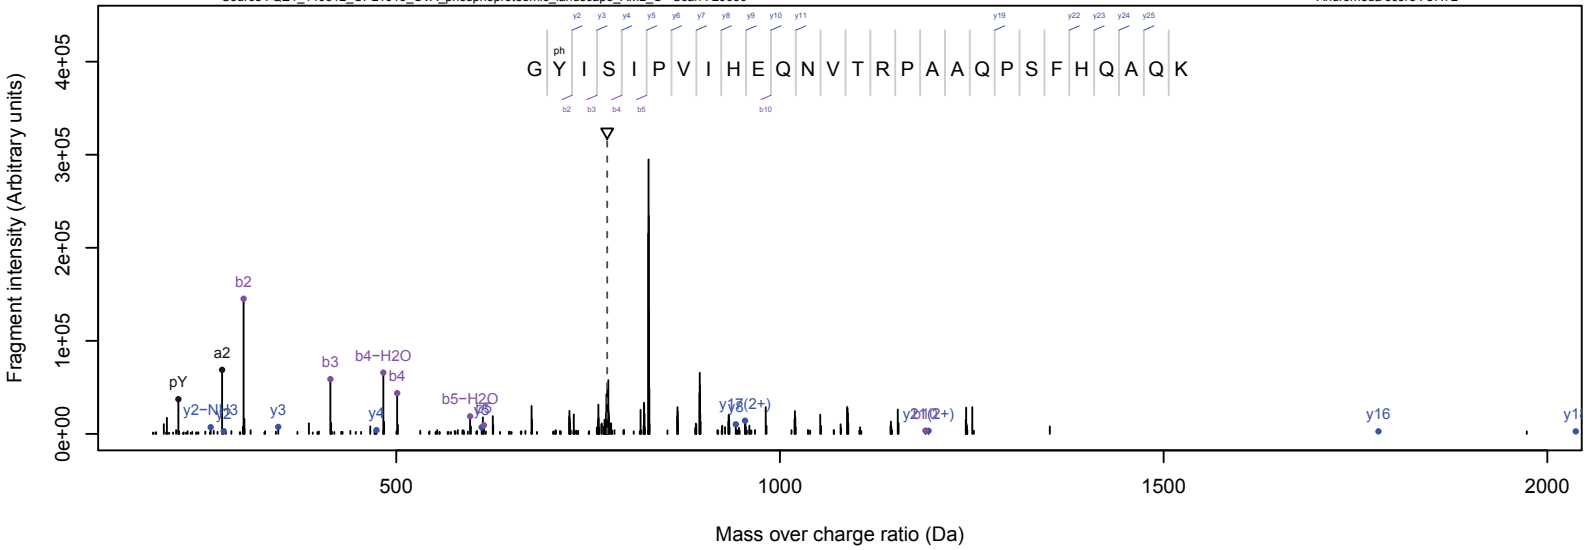

FY(ph)DKMQNAESGR-3+

Source : QE1\_140612\_OPL1013\_CVA\_phosphoproteomic\_landscape\_AML\_B Scan : 7348

Andromeda score : 87.719

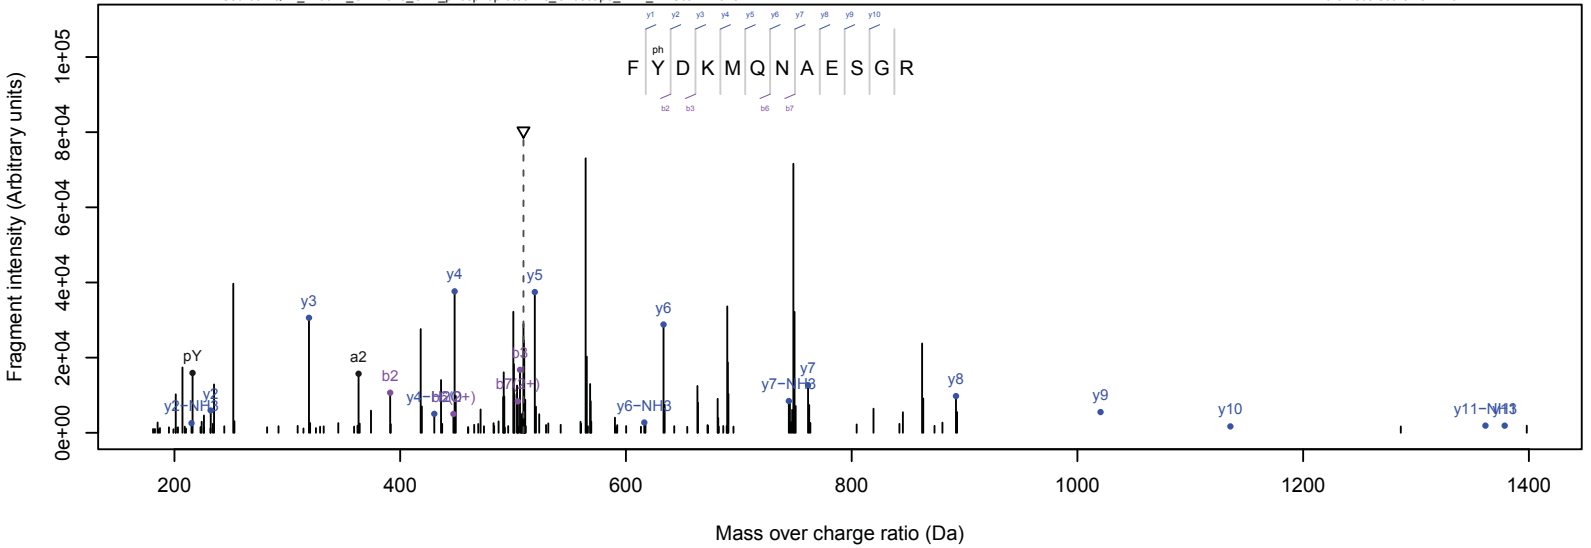

AMGDY(ph)LIVGVHTDEEIAK-3+

Source : QE1\_140612\_OPL1013\_CVA\_phosphoproteomic\_landscape\_AML\_D Scan : 47888

Andromeda score : 87.676

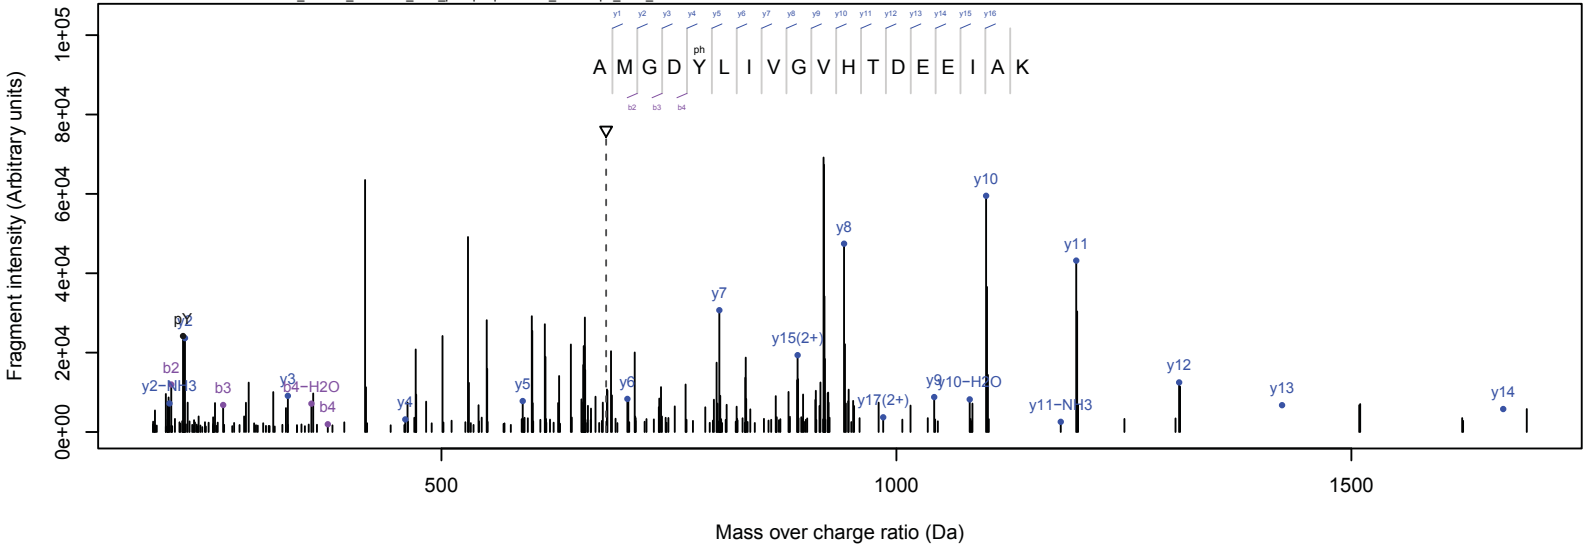

LDHY(ph)AIKFPLTTESAMK-3+

Source : QE1\_140612\_OPL1013\_CVA\_phosphoproteomic\_landscape\_AML\_C Scan : 38839

Andromeda score : 87.676

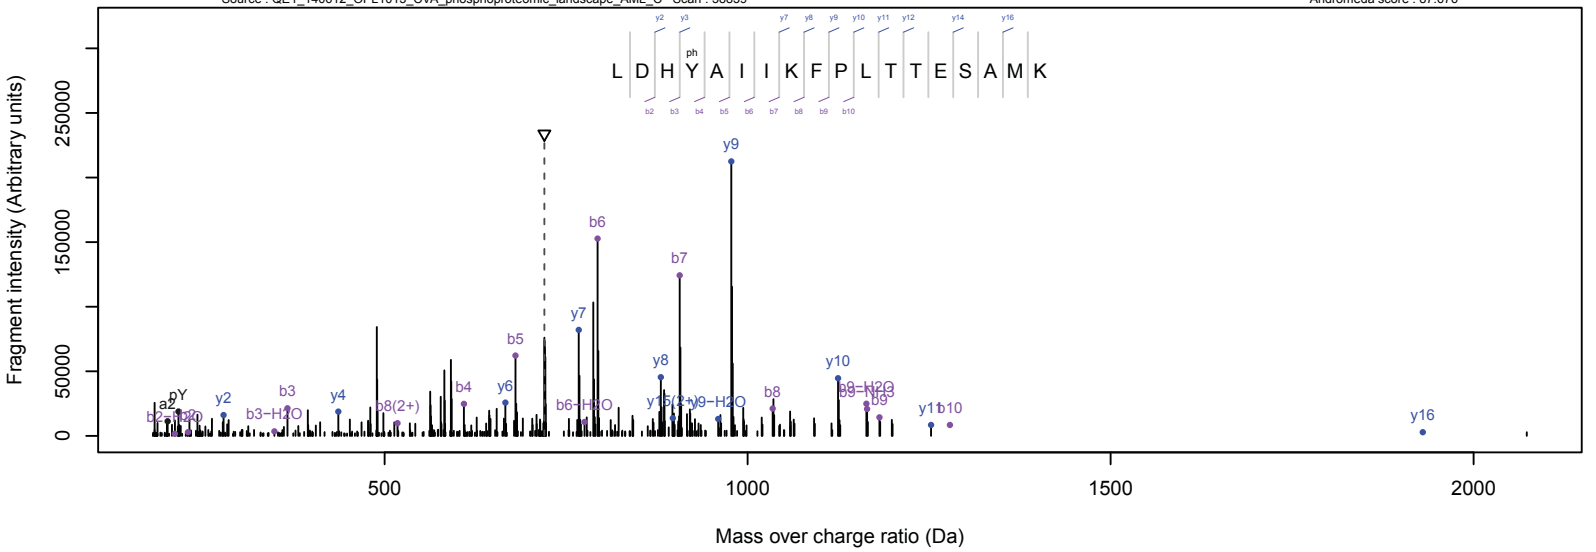

LEAVSHTSDMHRGYADSPSK-4+

Source : QE1\_140612\_OPL1013\_CVA\_phosphoproteomic\_landscape\_AML\_C Scan : 7005

Andromeda score : 87.676

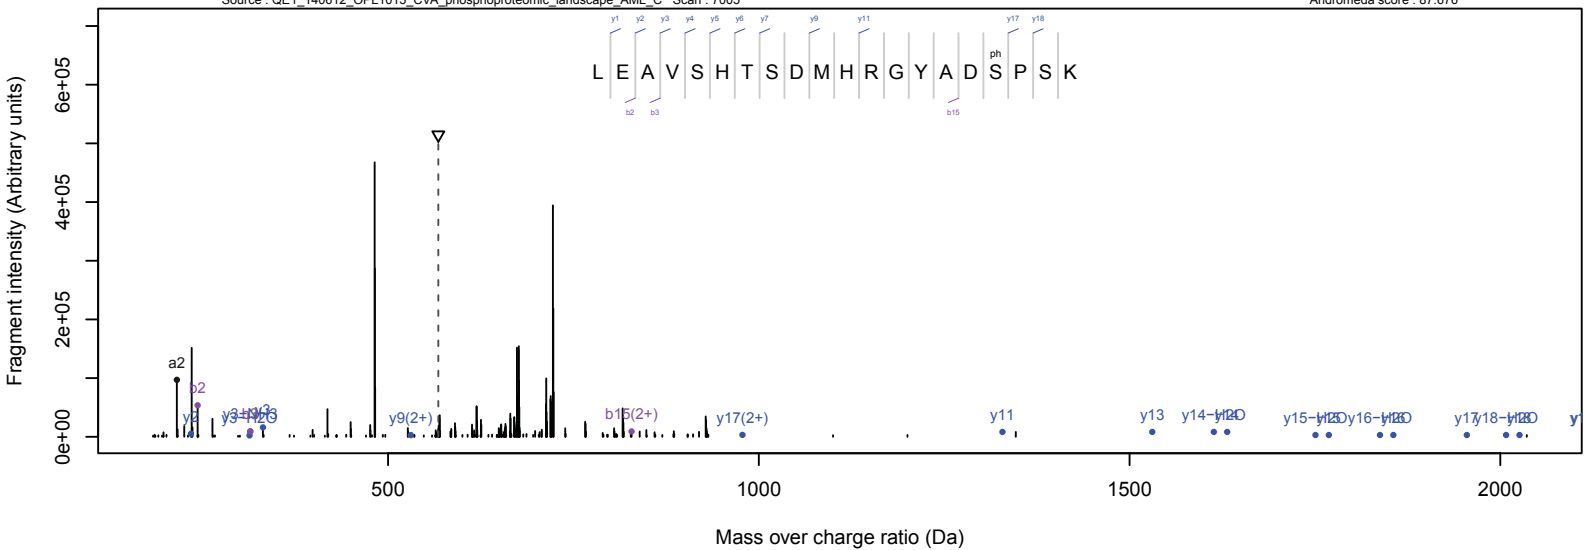

NASCY(ph)FDIEWR-2+

Source : QE1\_140612\_OPL1013\_CVA\_phosphoproteomic\_landscape\_AML\_B Scan : 39296

Andromeda score : 87.667

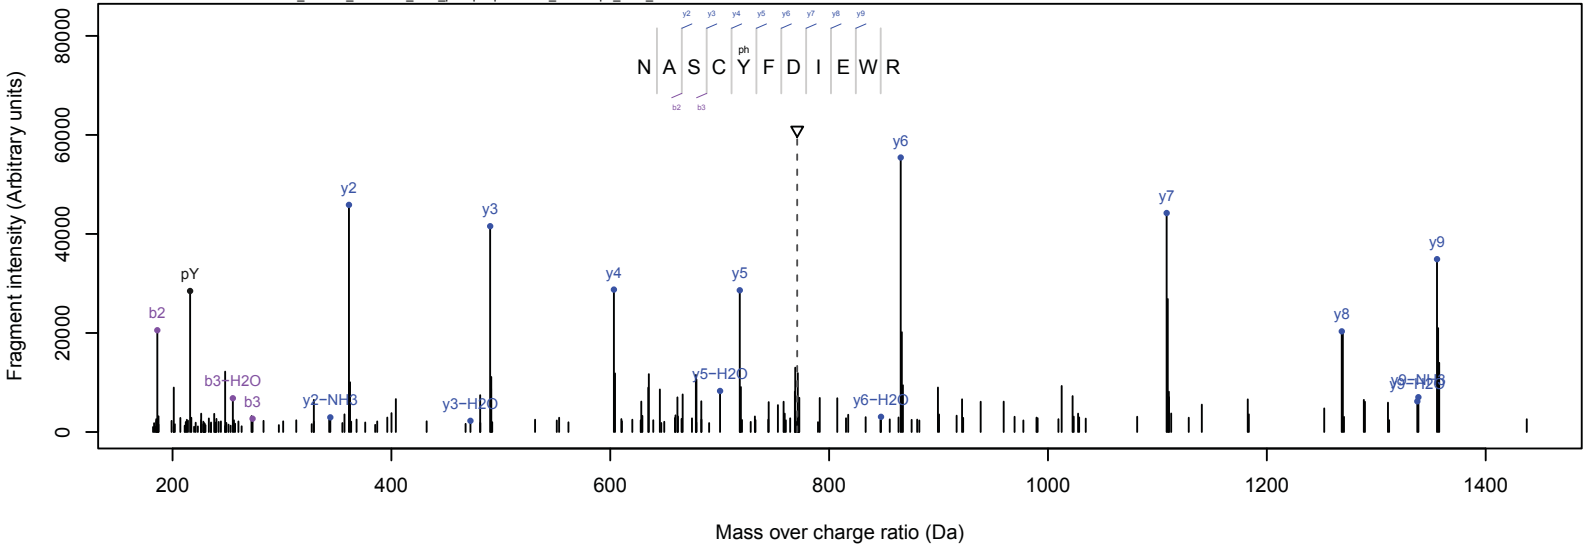

M(ox)VVNEGSDDGGQSVY(ph)HVLHLVLR-4+

Source : QE1\_140908\_OPL1013\_CvA\_pTyrIP\_AML\_Kasumi1 Scan : 22119

Andromeda score : 87.652

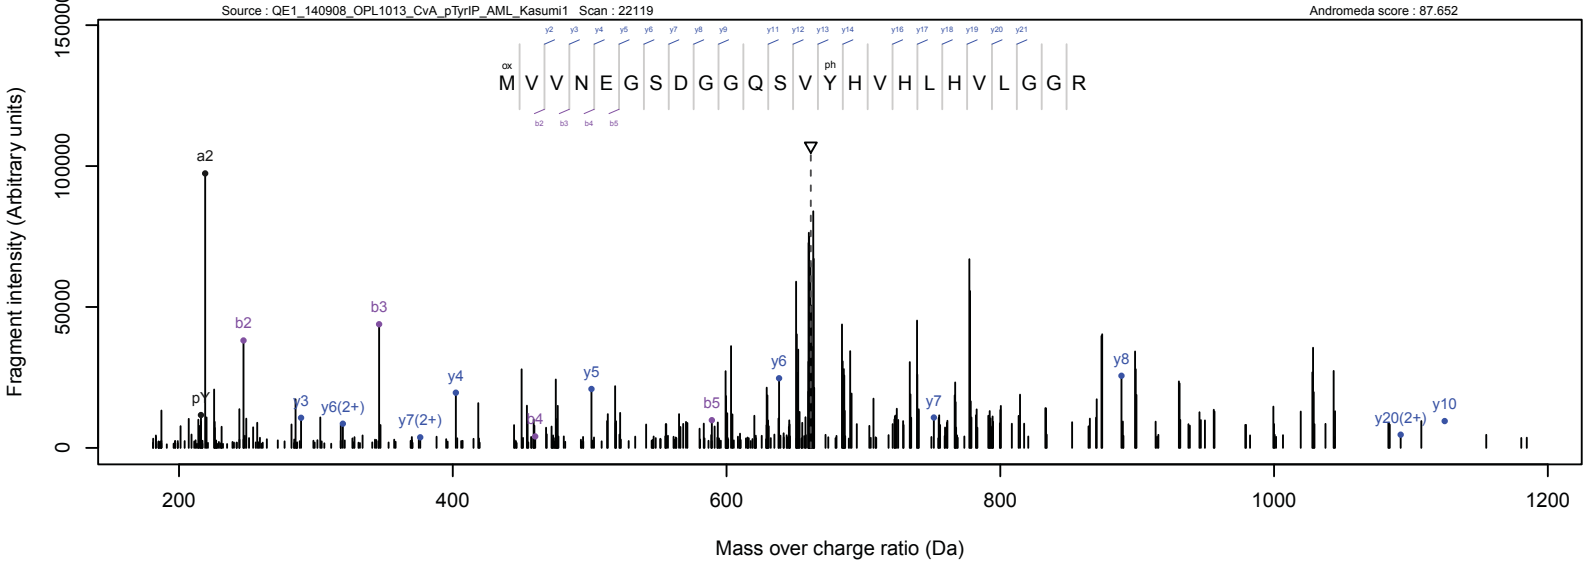

SAVY(ph)PLLYR-2+

Source : QE1\_140612\_OPL1013\_CVA\_phosphoproteomic\_landscape\_AML\_B Scan : 28568

Andromeda score : 87.639

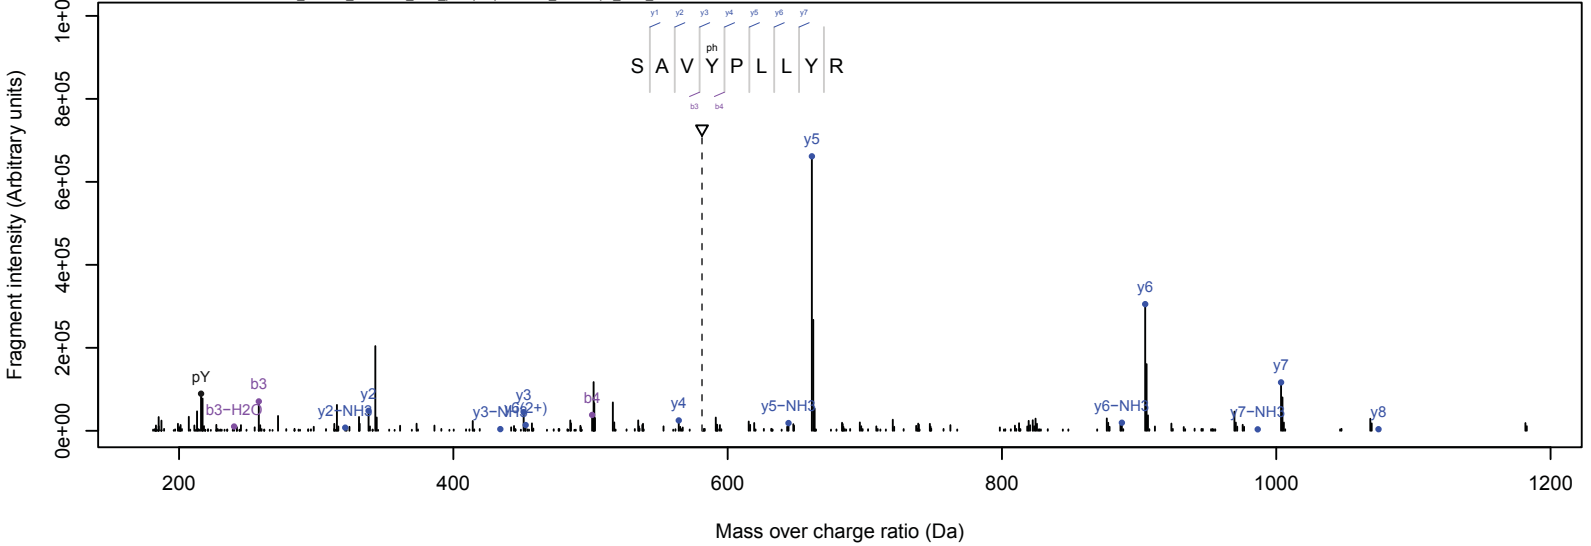

**FKSHPSLSTTNQQMSPIIQSGSSKPSPIYISSYSSPAR-4+**

Source : QE1\_140612\_OPL1013\_CVA\_phosphoproteomic\_landscape\_AML\_C Scan : 31710

Andromeda score : 87.544

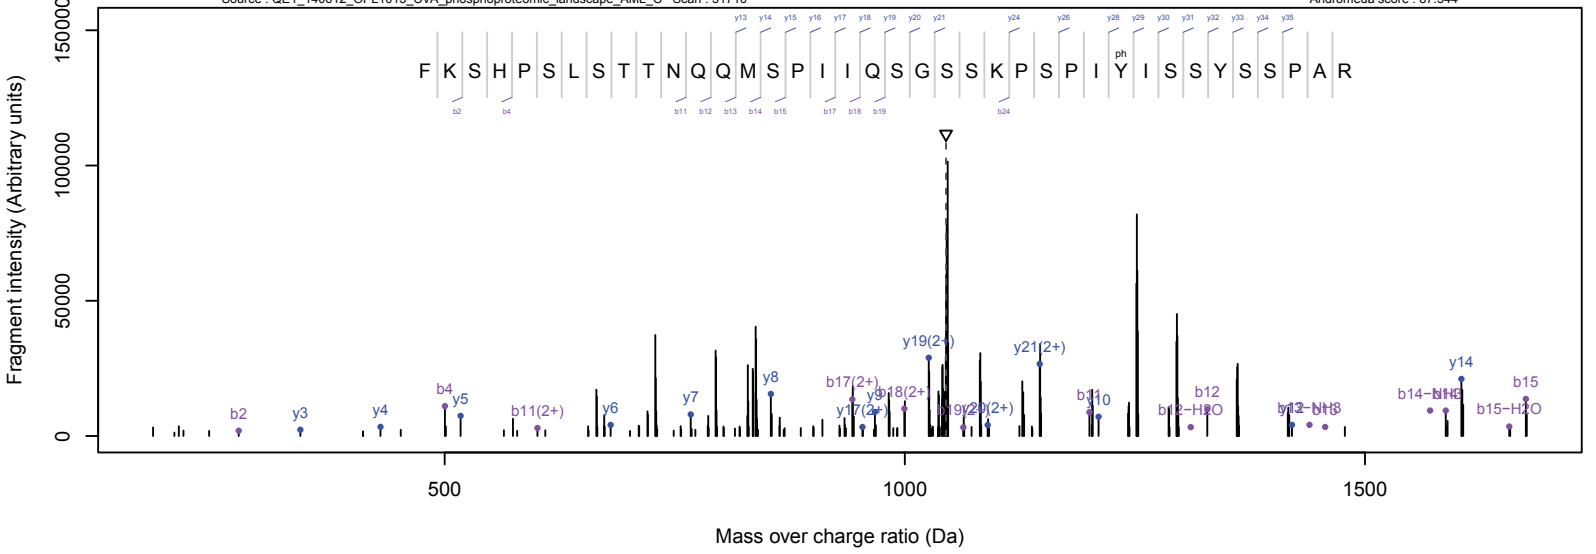

**ALY(ph)STAMESIQGEAR-2+**

Source : QE1\_140612\_OPL1013\_CVA\_phosphoproteomic\_landscape\_AML\_C Scan : 28176

Andromeda score : 87.519

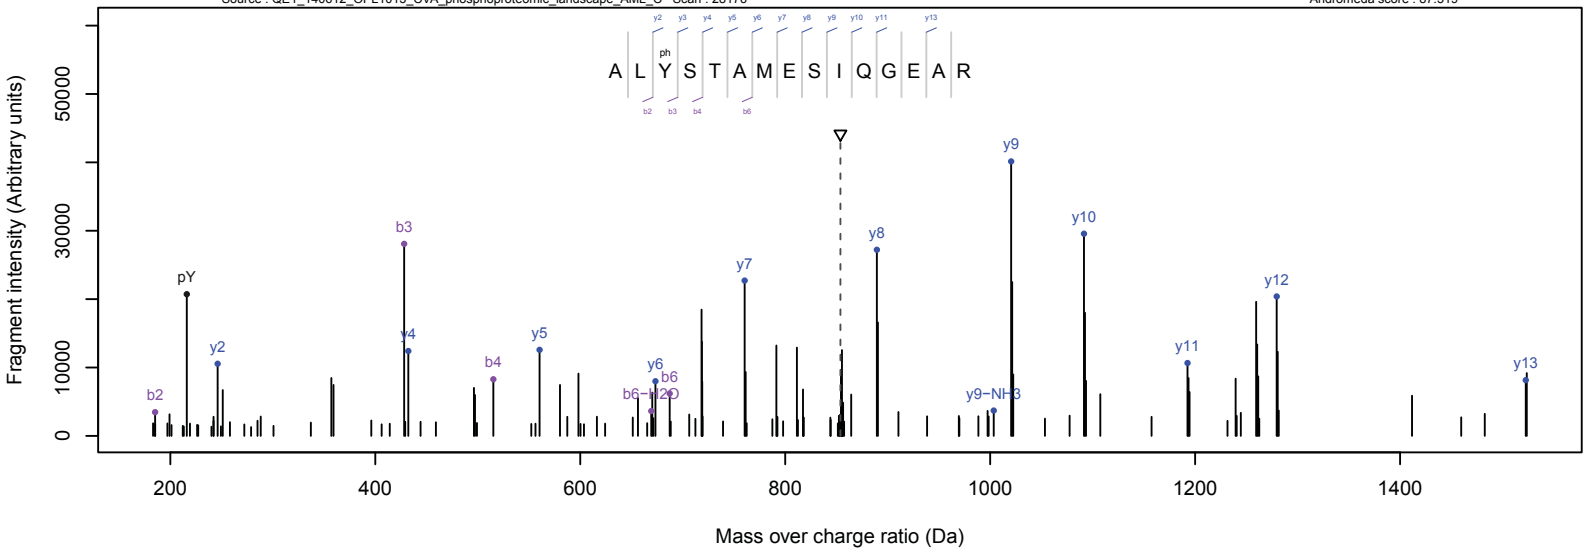

**AYADSY(ph)YYEDGGMKPR-3+**

Source : QE1\_140612\_OPL1013\_CVA\_phosphoproteomic\_landscape\_AML\_A Scan : 17654

Andromeda score : 87.519

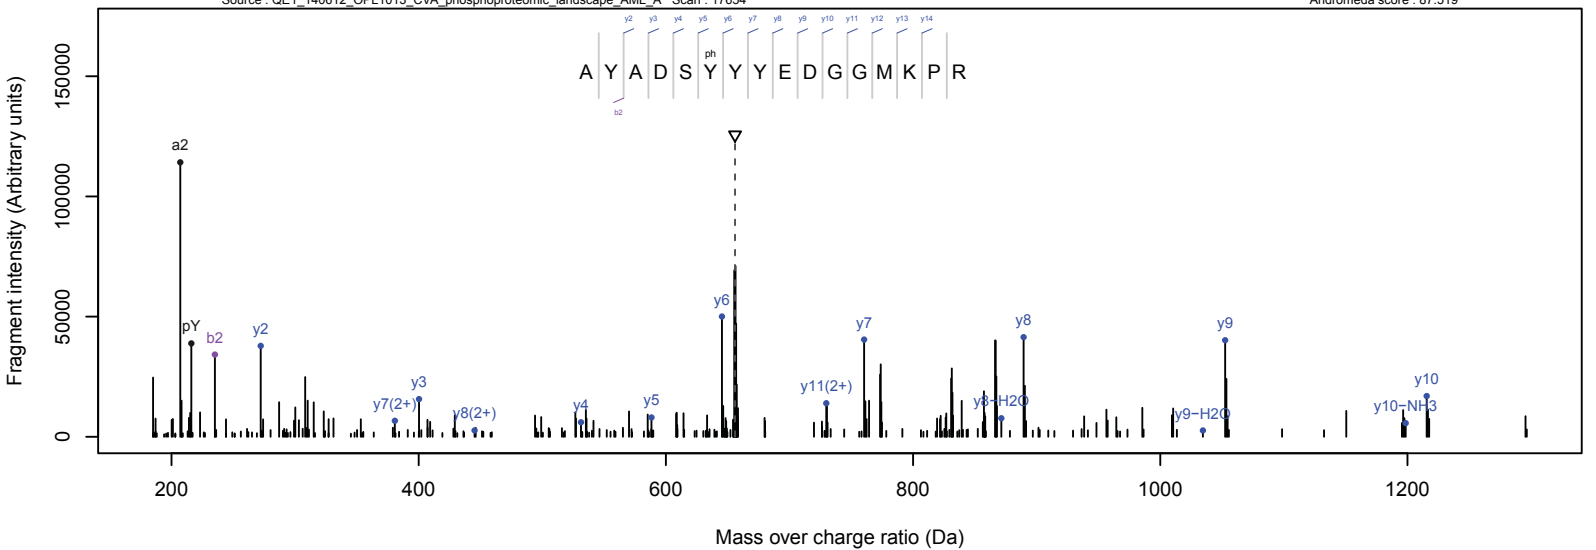



DHGLLIY(ph)HIPQVEPR-3+

Source: QE1\_140612\_OPL1013\_CVA\_phosphoproteomic\_landscape\_AML\_C Scan: 35136

Andromeda score: 87.519

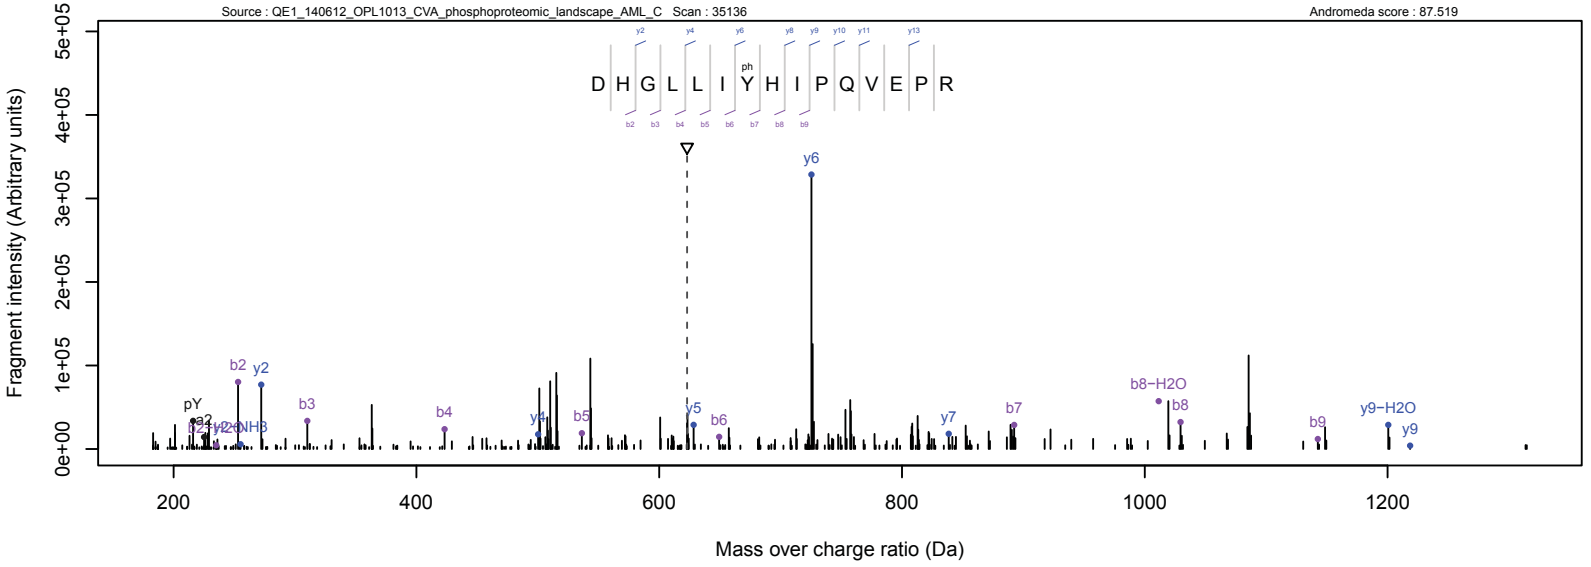

SYEEHIPY(ph)THMNGGK-3+

Source: QE1\_140612\_OPL1013\_CVA\_phosphoproteomic\_landscape\_AML\_C Scan: 13438

Andromeda score: 87.519

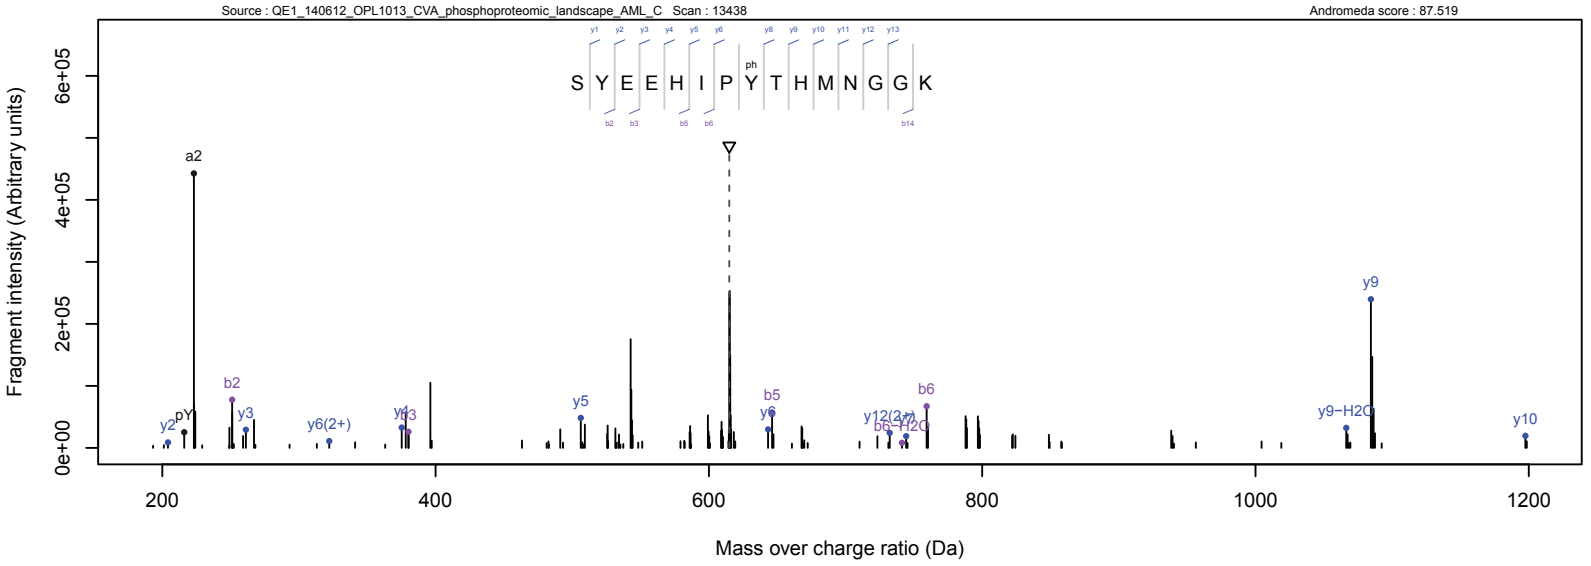

MSELQTY(ph)VDSLKAENLVLSSTNLR-3+

Source: QE1\_140612\_OPL1013\_CVA\_phosphoproteomic\_landscape\_AML\_D Scan: 46951

Andromeda score: 87.511

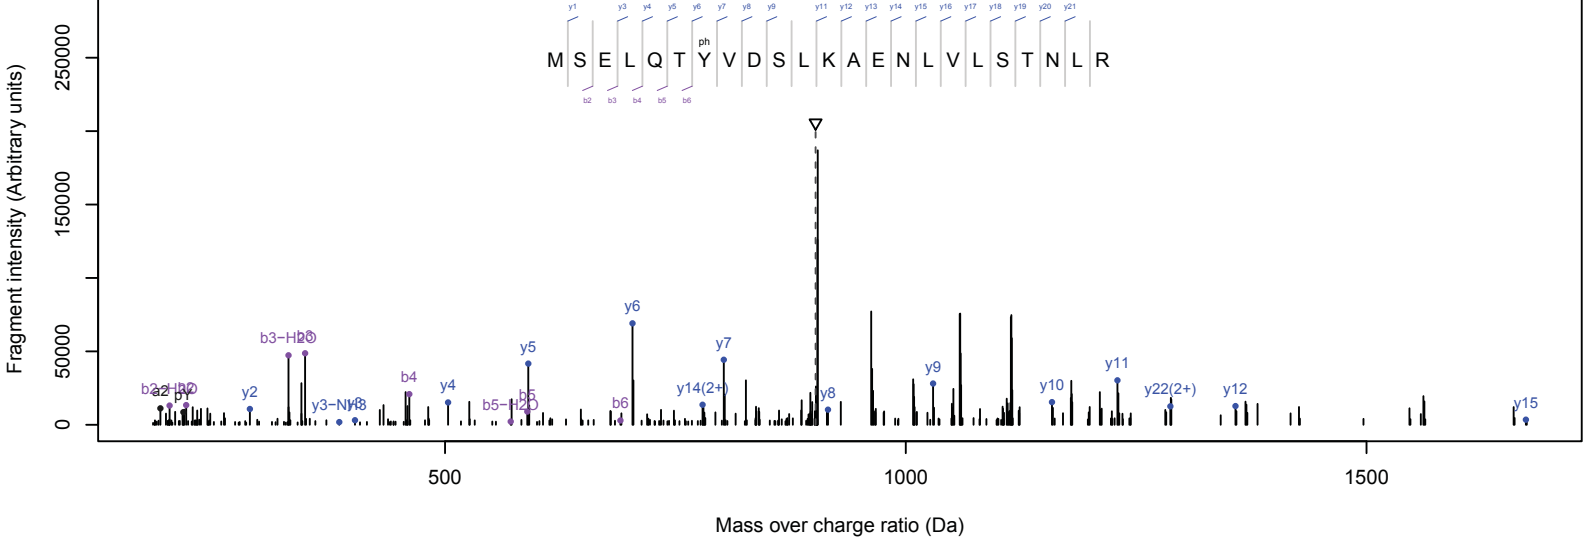

**TTVQGQVY(ph)FLHTQTGVSTWHDPR-3+**

Source: QE1\_140612\_OPL1013\_CVA\_phosphoproteomic\_landscape\_AML\_C Scan: 31973

Andromeda score: 87.511

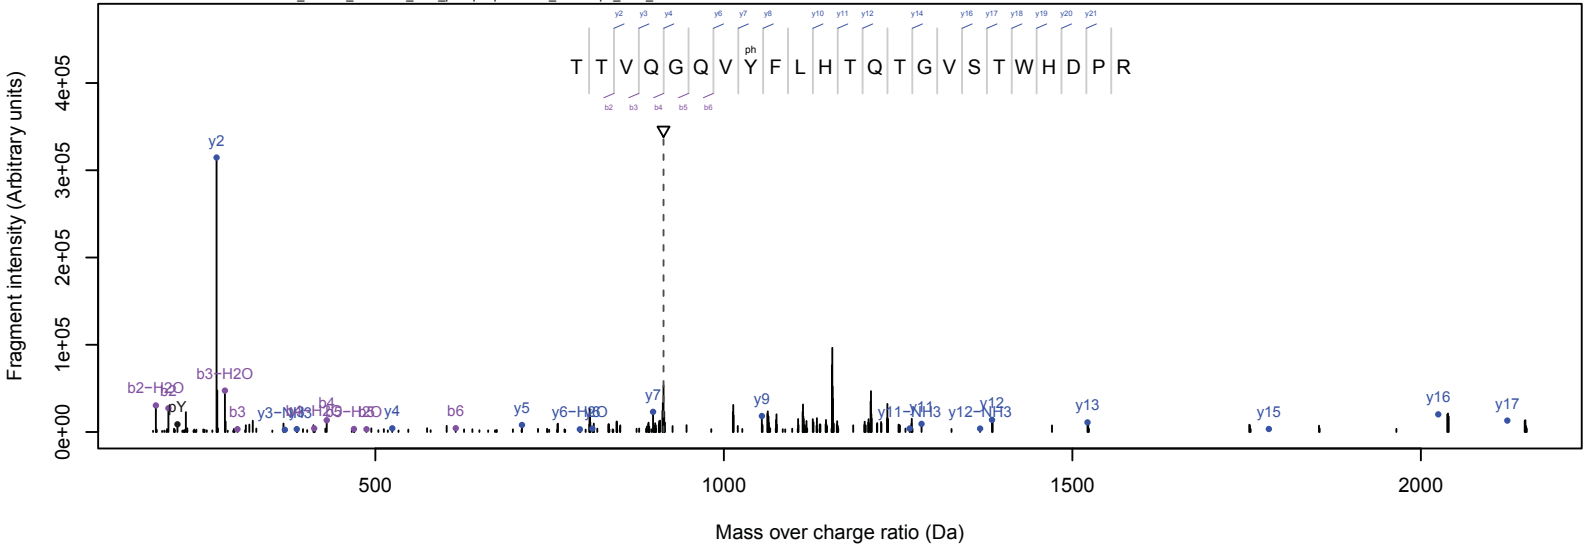

**SDIY(ph)VCMISFAHNVAAGK-3+**

Source: QE1\_140908\_OPL1013\_CvA\_pTyrIP\_AML\_HEL Scan: 44350

Andromeda score: 87.411

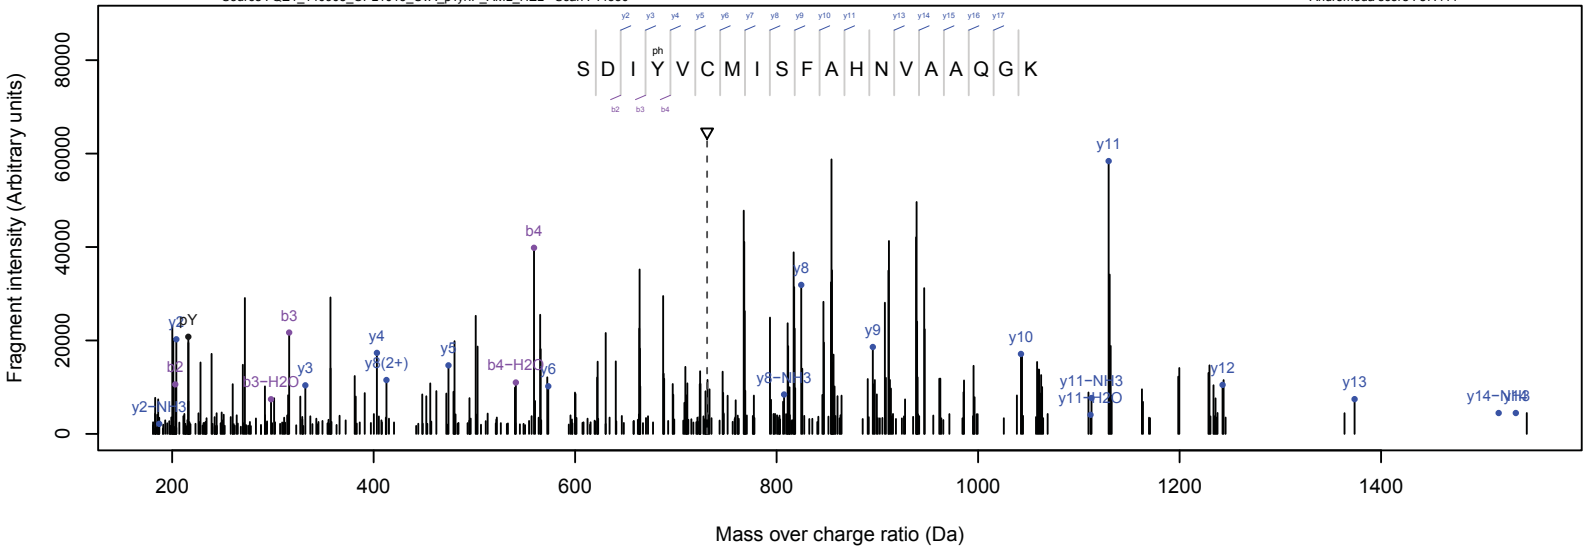

**YAPSGFY(ph)IASGDVSGK-2+**

Source: QE1\_140612\_OPL1013\_CVA\_phosphoproteomic\_landscape\_AML\_A Scan: 29629

Andromeda score: 87.388

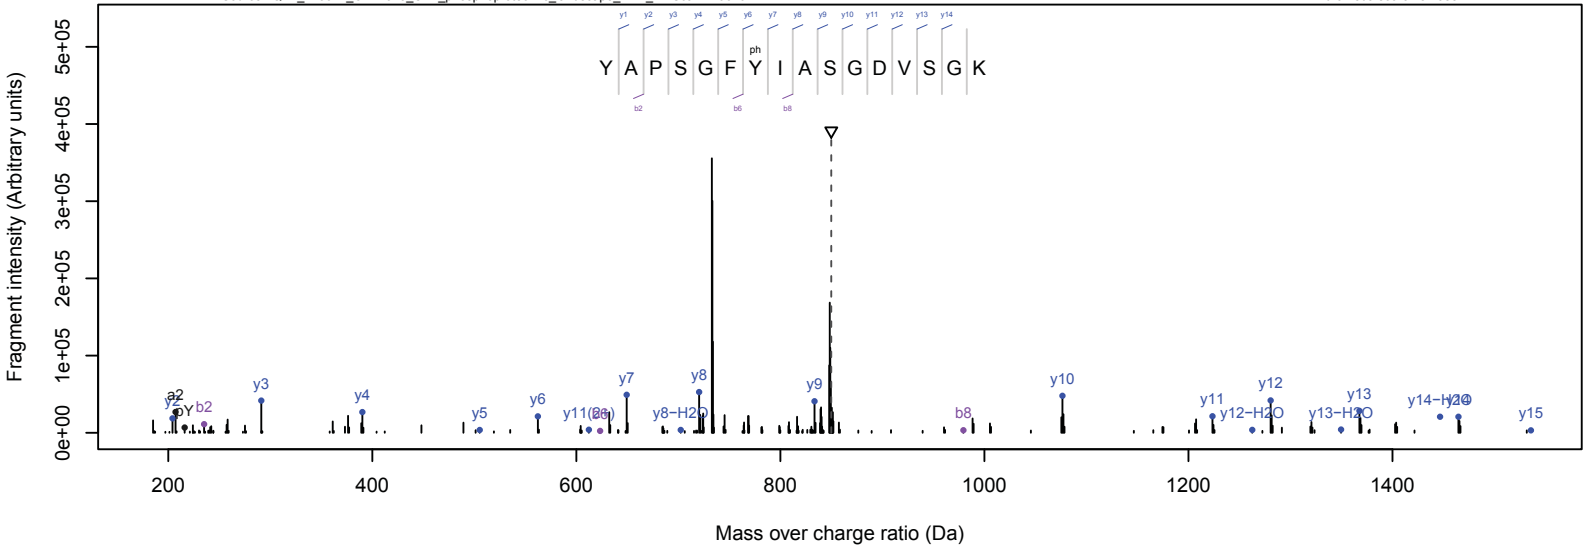

VVNPYY(ph)LR-2+

Source : QE1\_140822\_OPL1013\_CvA\_pTyrIP\_AML\_cell\_lines\_part2\_E Scan : 16129

Andromeda score : 87.323

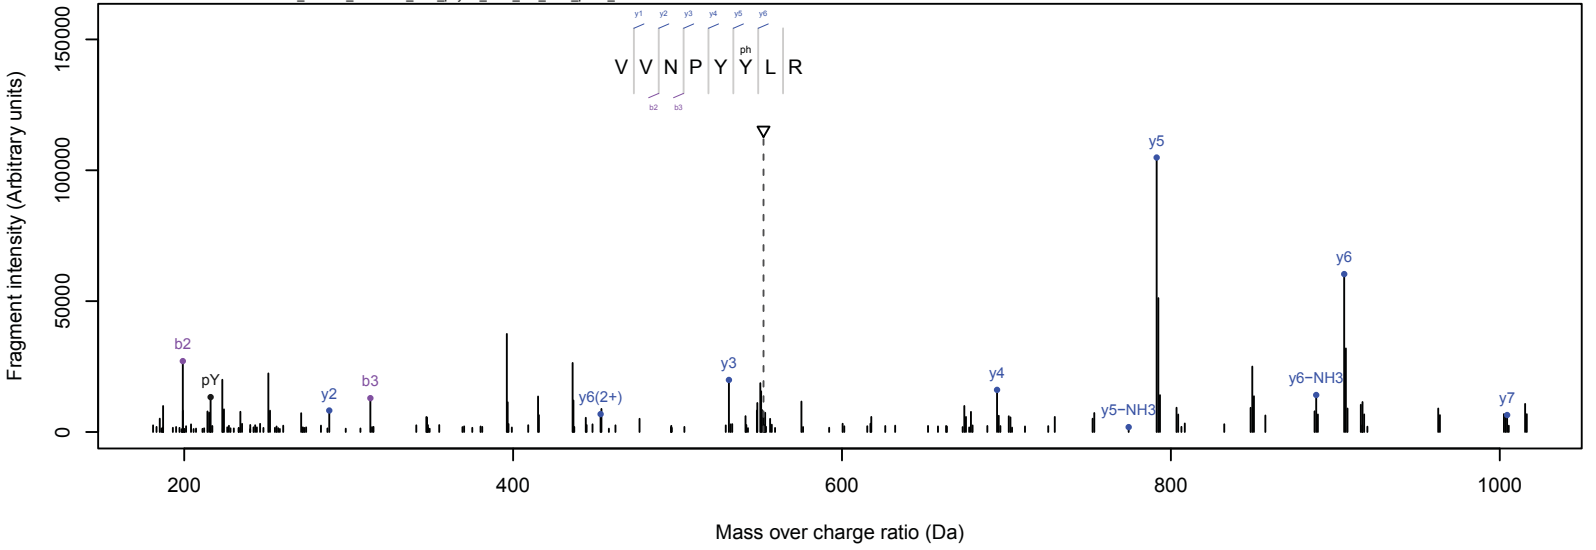

GDGPWYY(ph)ETIDKELIDHSPK-3+

Source : QE1\_140908\_OPL1013\_CvA\_pTyrIP\_AML\_ML2 Scan : 45360

Andromeda score : 87.319

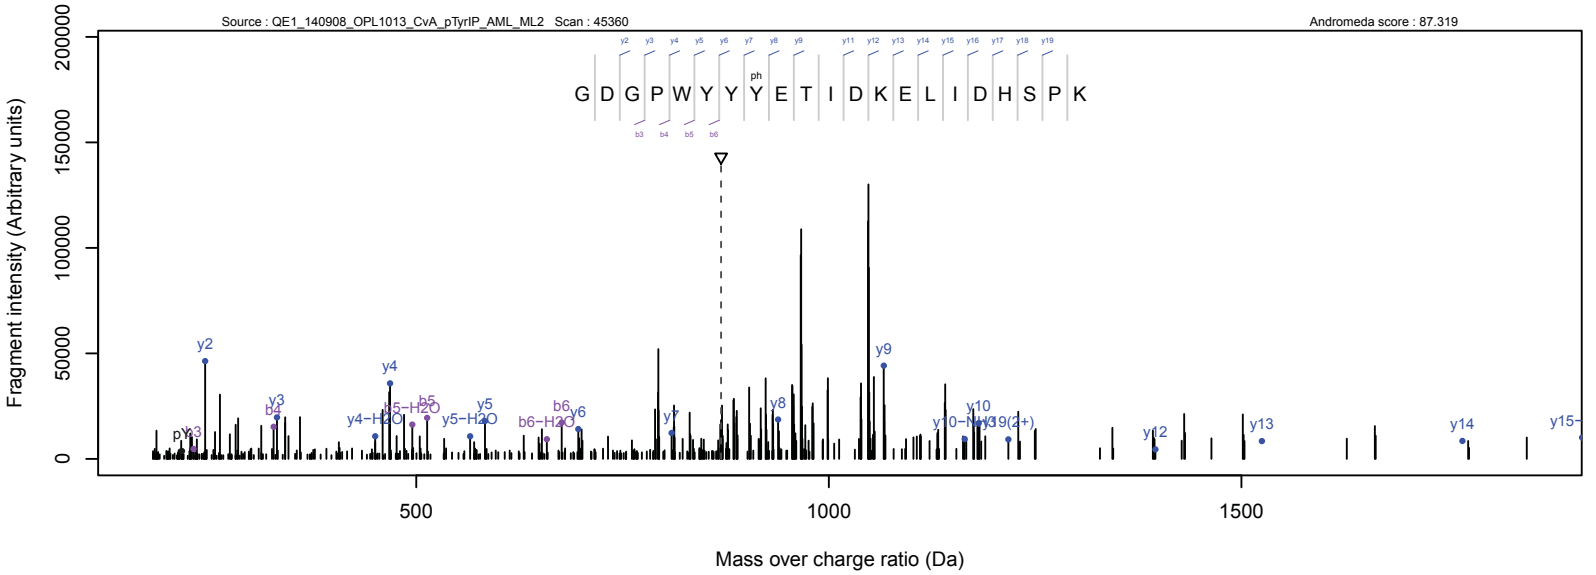

DMPY(ph)QPFISK-2+

Source : QE1\_140612\_OPL1013\_CVA\_phosphoproteomic\_landscape\_AML\_C Scan : 19782

Andromeda score : 87.258

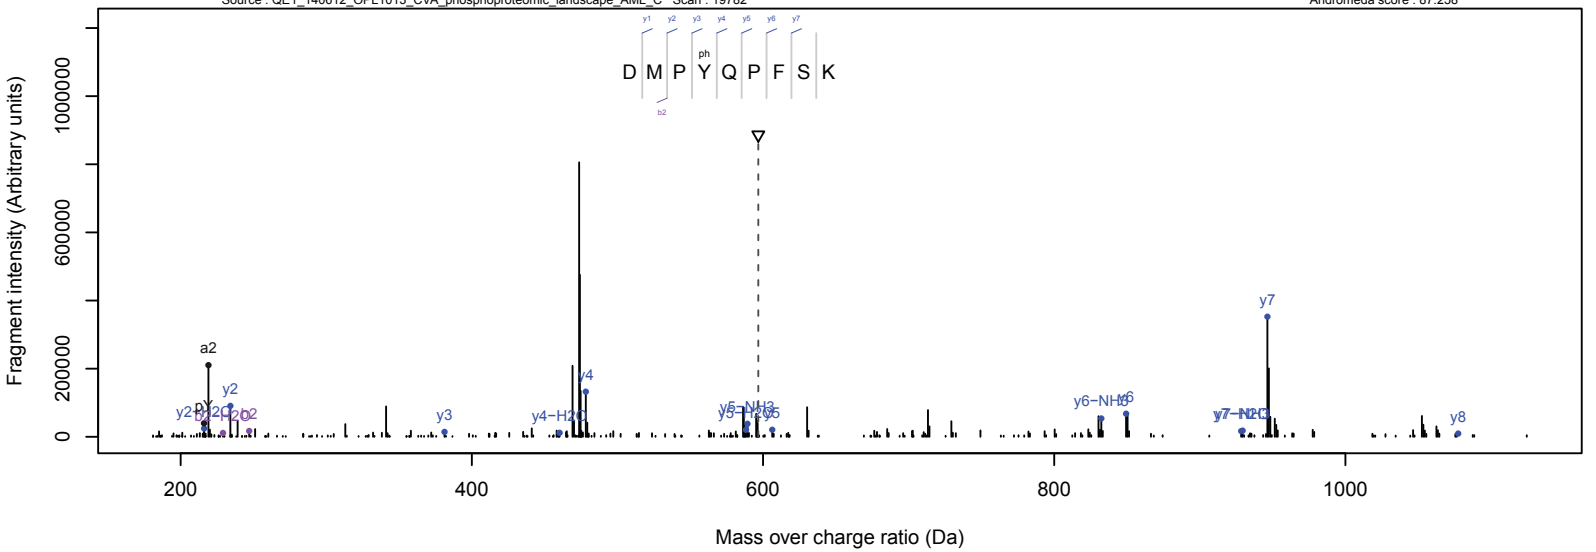

LTHVY(ph)DLCK-2+

Source : QE1\_140908\_OPL1013\_CvA\_pTyrIP\_AML\_HEL Scan : 14014

Andromeda score : 87.258

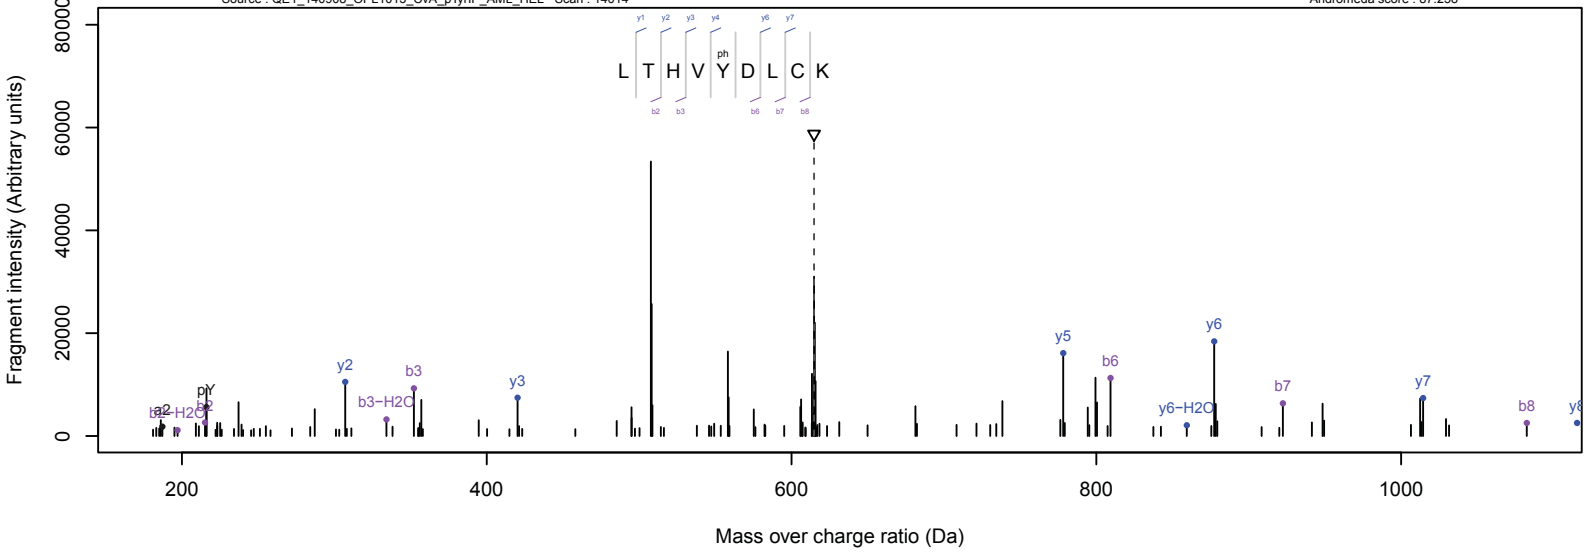

NPLQGY(ph)YQVR-2+

Source : QE1\_140822\_OPL1013\_CvA\_pTyrIP\_AML\_cell\_lines\_part2\_B Scan : 14178

Andromeda score : 87.258

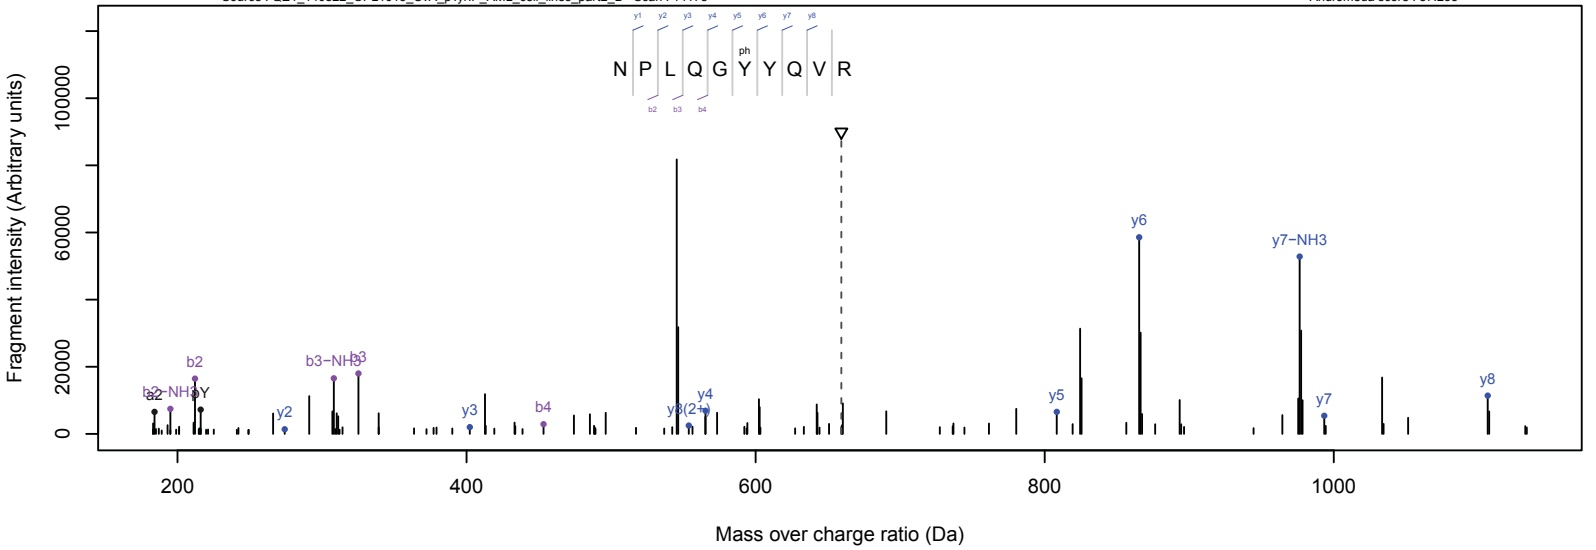

(ac)AGY(ph)KPVAIQTYPI LG EK-2+

Source : QE1\_140612\_OPL1013\_CVA\_phosphoproteomic\_landscape\_AML\_C Scan : 38212

Andromeda score : 87.24

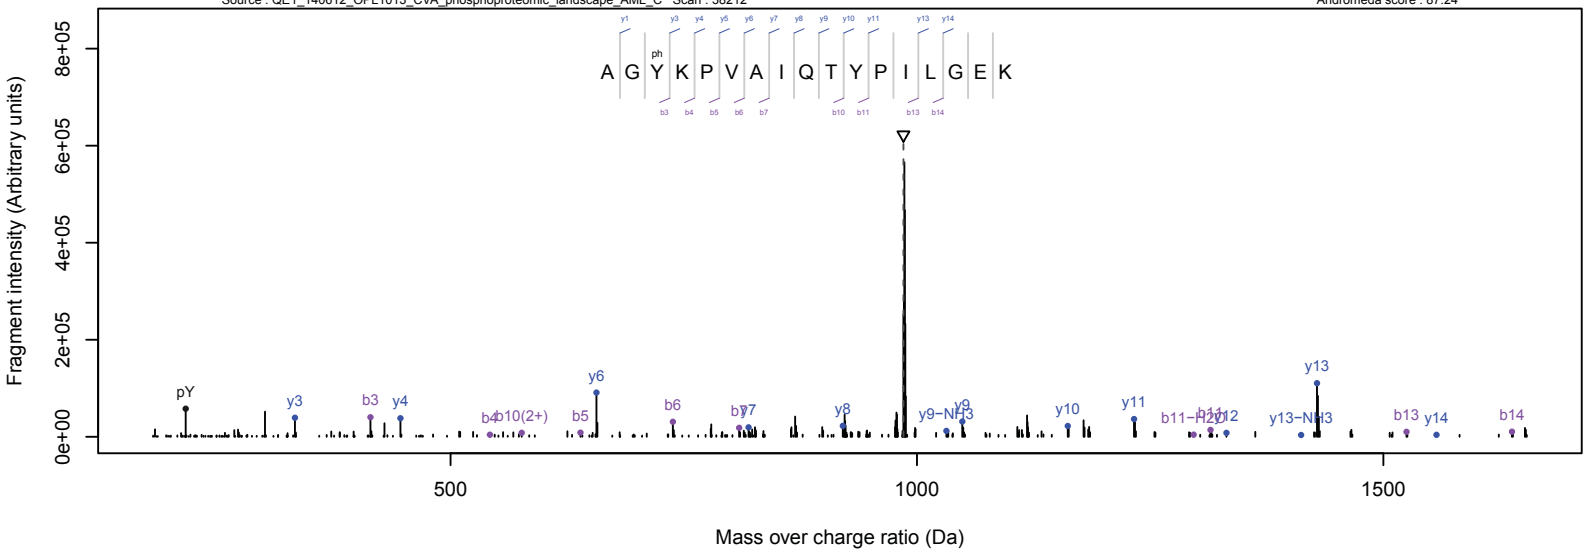

VNFDDY(ph)TVNLGGLKDHK-3+

Source : QE1\_140612\_OPL1013\_CVA\_phosphoproteomic\_landscape\_AML\_B Scan : 34696

Andromeda score : 87.24

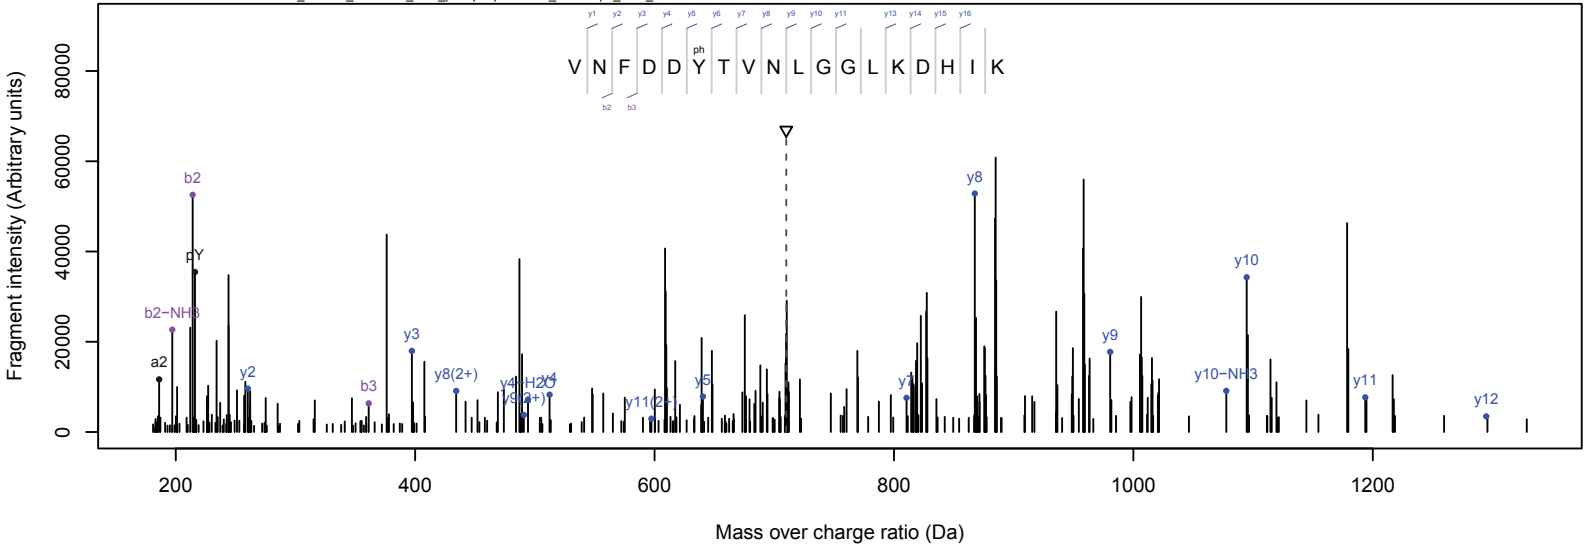

SEVERPASIPLSSGY(ph)STASSDSTPR-3+

Source : QE1\_140612\_OPL1013\_CVA\_phosphoproteomic\_landscape\_AML\_C Scan : 21754

Andromeda score : 87.196

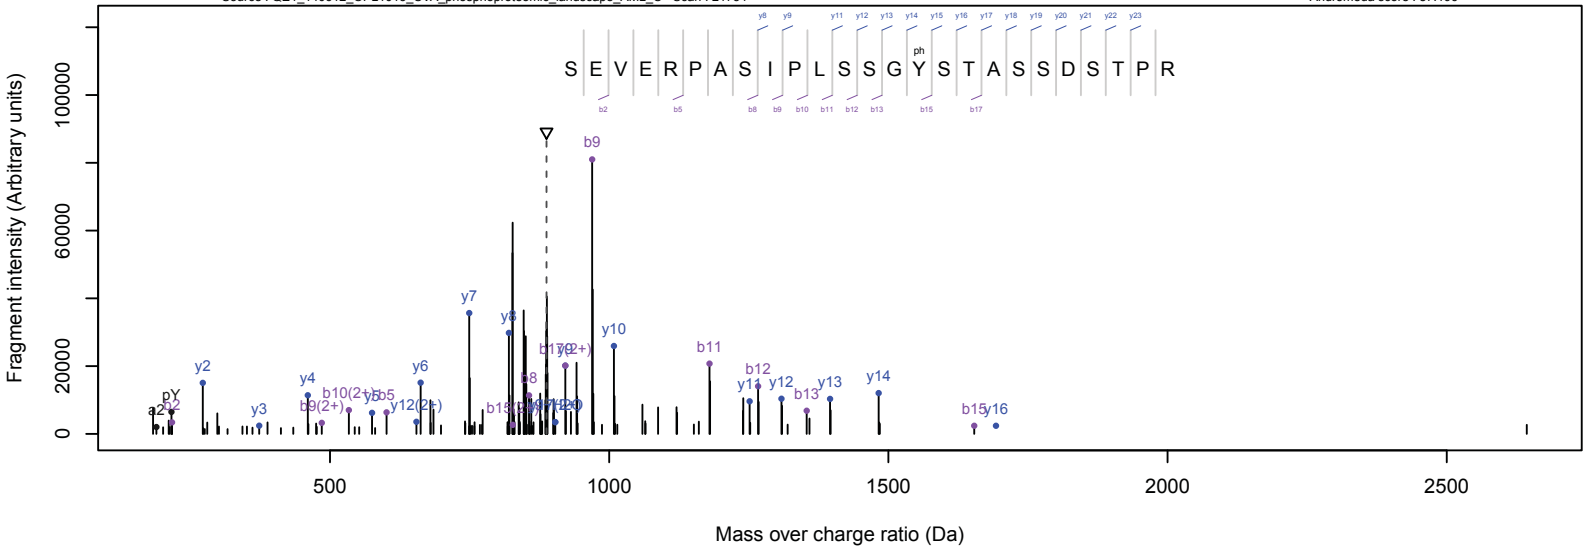

DIMSDSNY(ph)VVR-2+

Source : QE1\_140612\_OPL1013\_CVA\_phosphoproteomic\_landscape\_AML\_C Scan : 34340

Andromeda score : 87.184

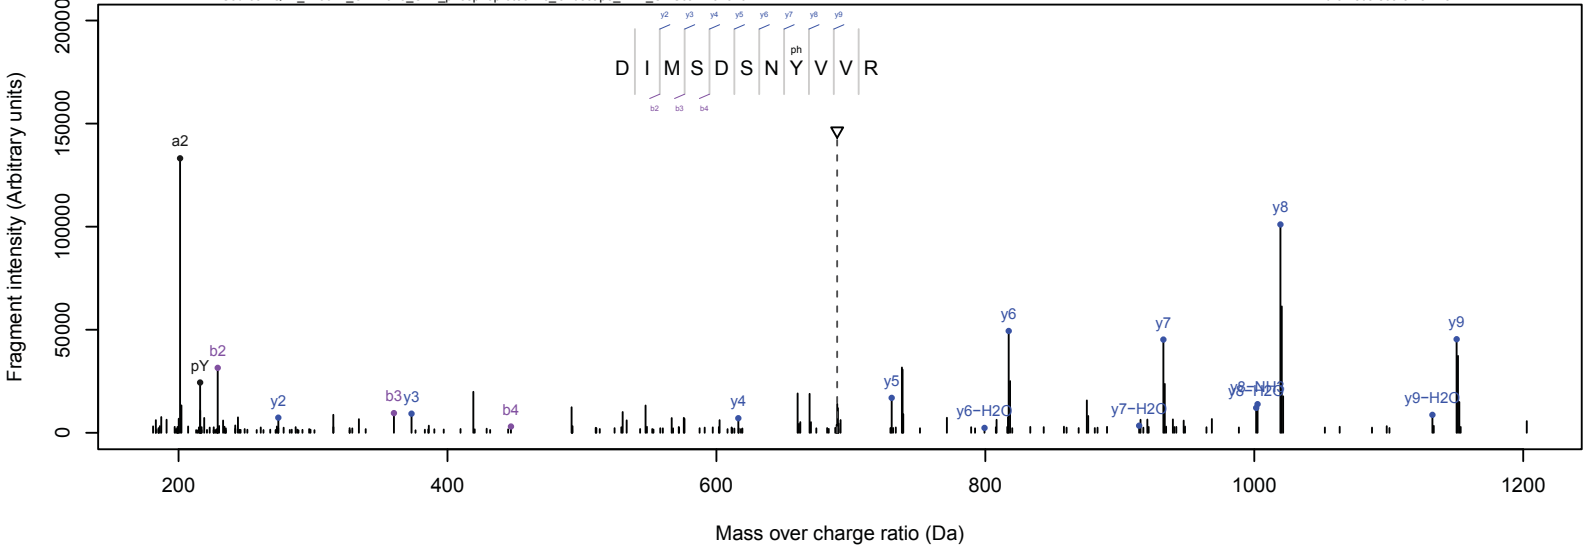

IY(ph)QFTAASPK-2+

Source : QE1\_140612\_OPL1013\_CVA\_phosphoproteomic\_landscape\_AML\_B Scan : 15488

Andromeda score : 87.184

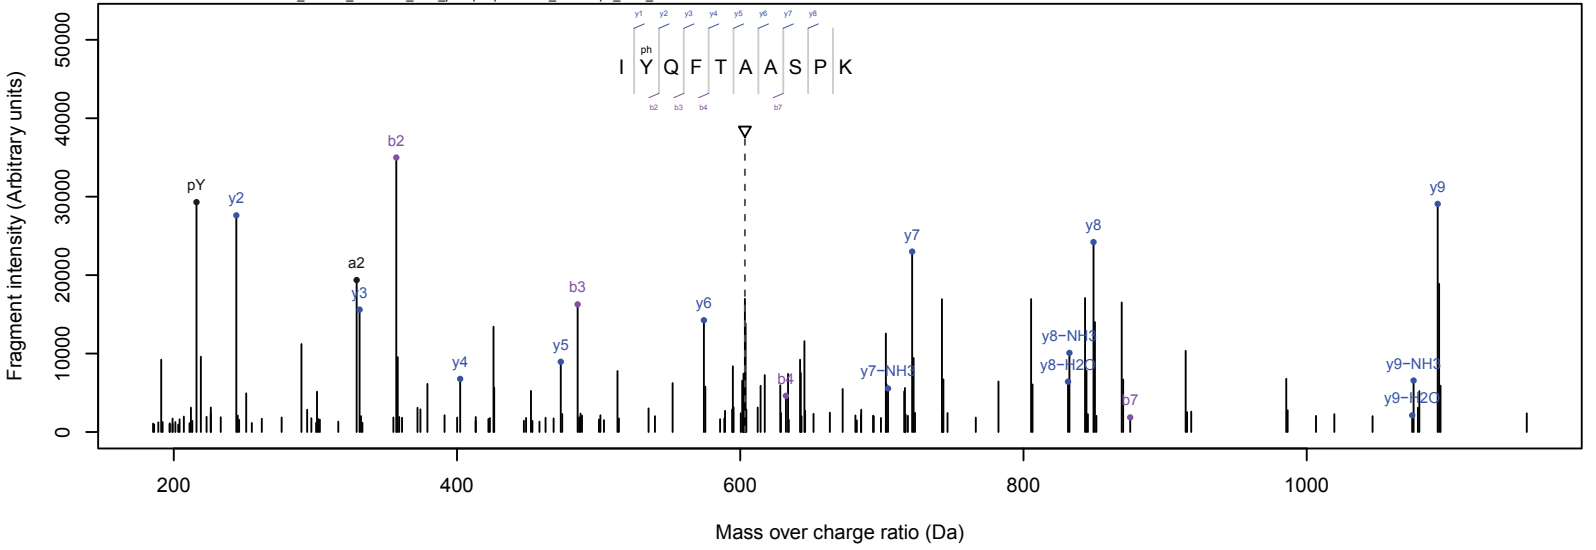

VVEATAY(ph)GLIK-2+

Source : QE1\_140908\_OPL1013\_CvA\_pTyrIP\_AML\_Kasumi1 Scan : 24576

Andromeda score : 87.184

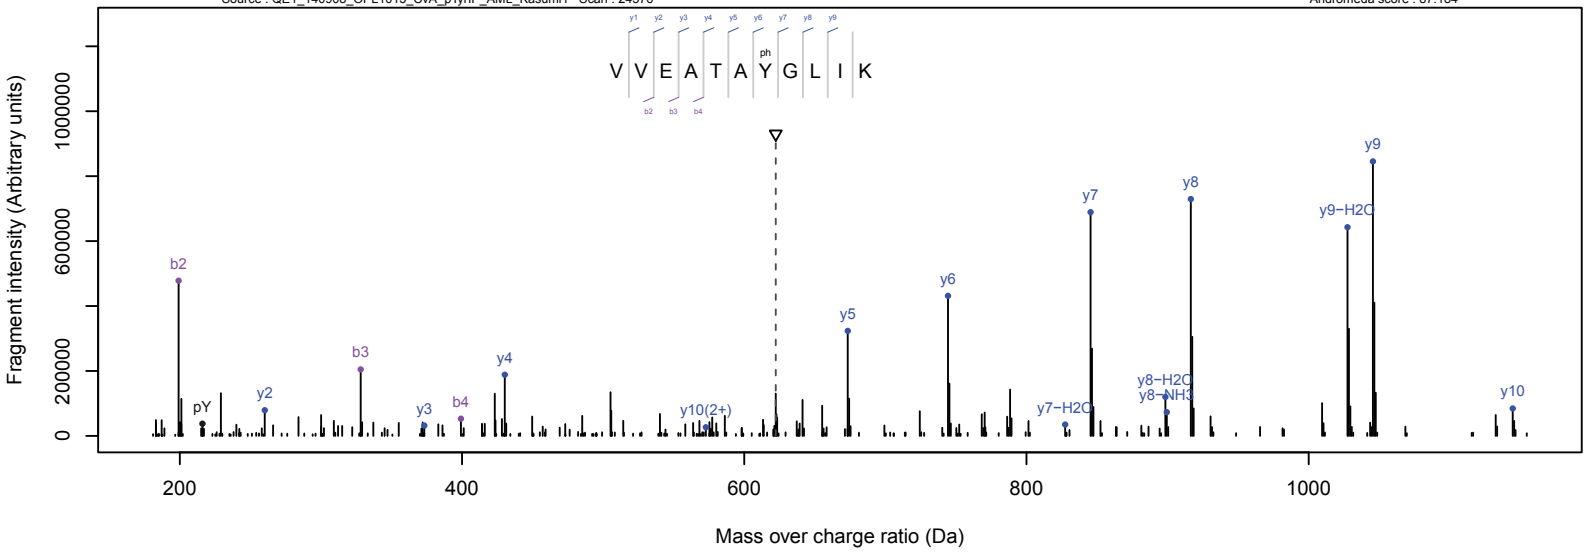

IY(ph)YVDHFTR-3+

Source : QE1\_140612\_OPL1013\_CVA\_phosphoproteomic\_landscape\_AML\_C Scan : 21841

Andromeda score : 87.149

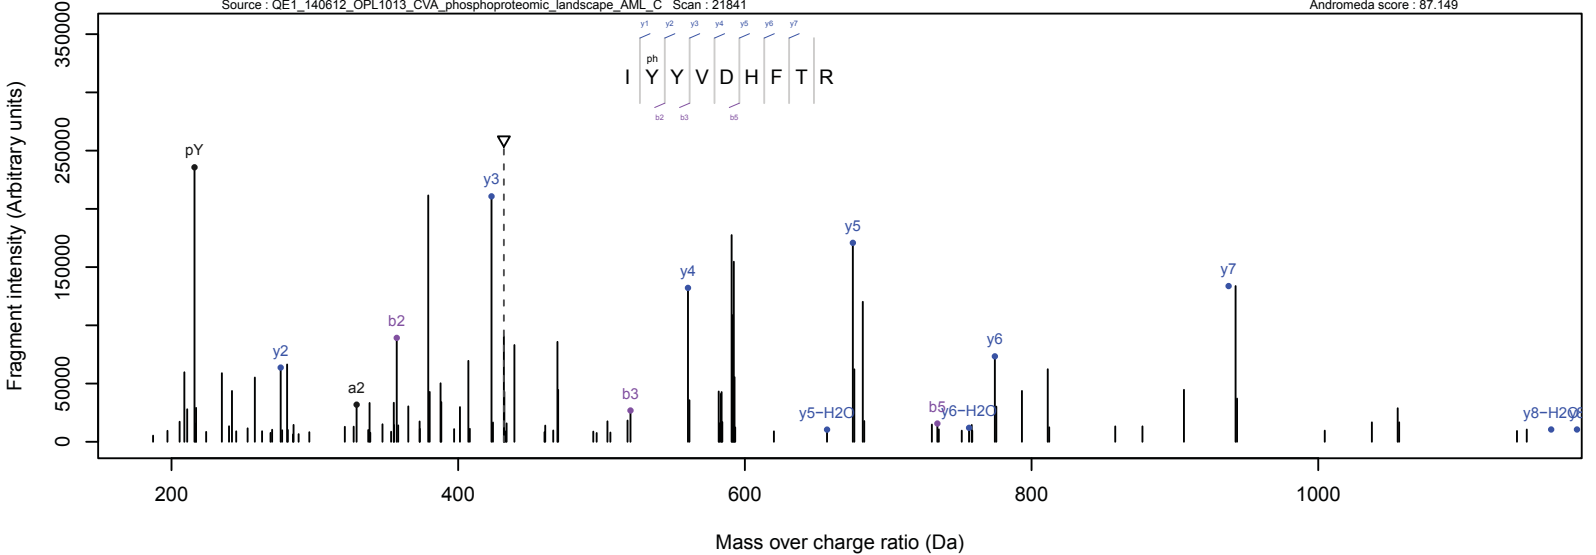

RS(ph)DYQLTIEPLLEQEAADGAAPQLTASR-3+

Source : QE1\_140612\_OPL1013\_CVA\_phosphoproteomic\_landscape\_AML\_B Scan : 44285

Andromeda score : 87.091

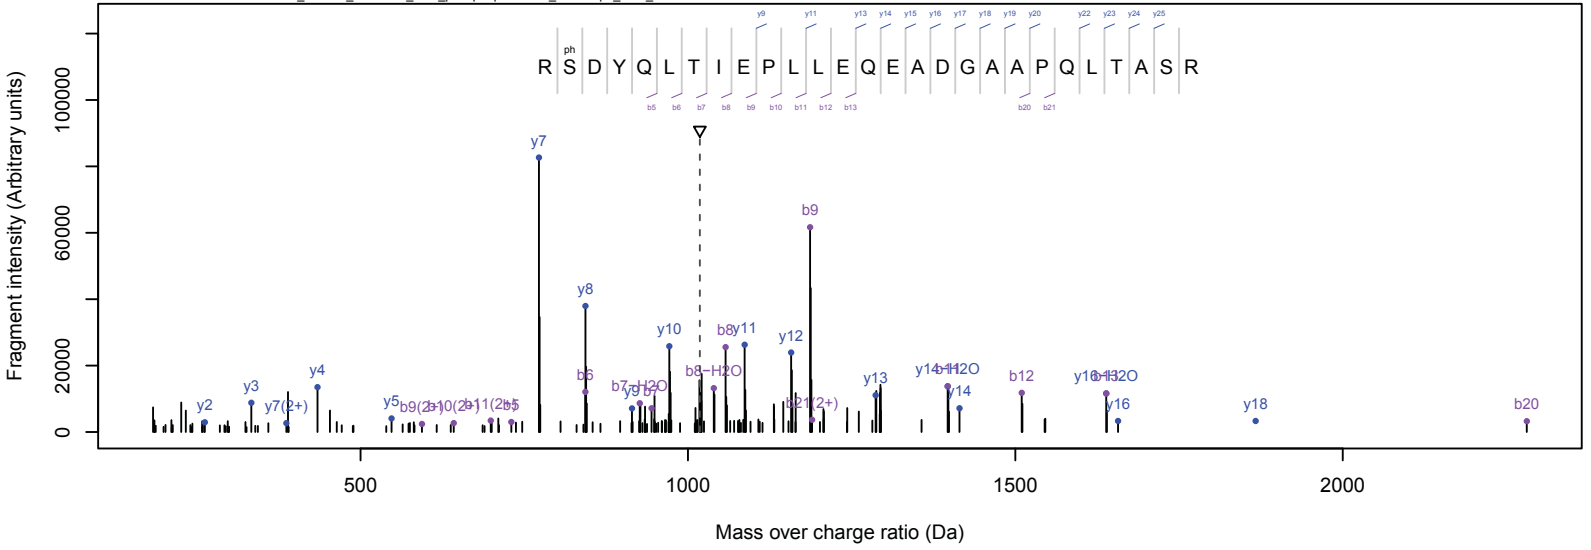

IKPSSS(ph)ANAAY(ph)SLAARPLVPK-3+

Source : QE1\_140612\_OPL1013\_CVA\_phosphoproteomic\_landscape\_AML\_A Scan : 36250

Andromeda score : 87.052

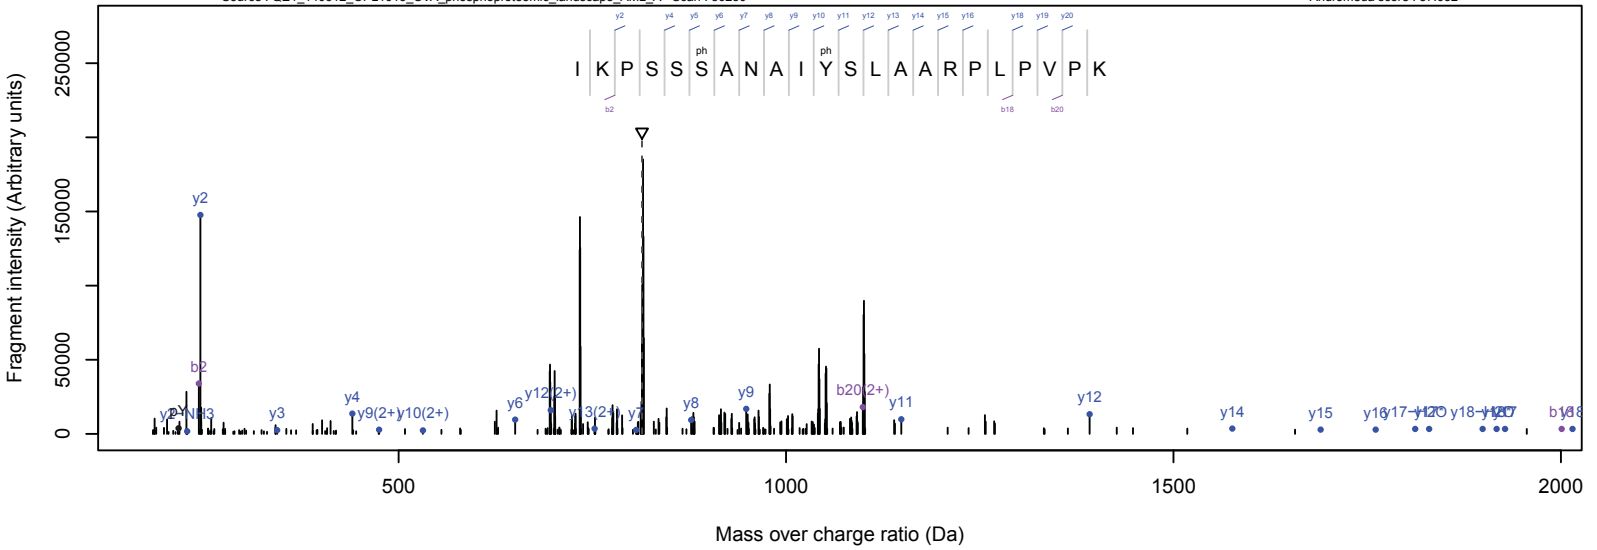

LITGATSPTVLY(ph)VSGGNTQVIAYSEHR-3+

Source : QE1\_140908\_OPL1013\_CvA\_pTyrIP\_AML\_Kasumi6 Scan : 39224

Andromeda score : 87.052

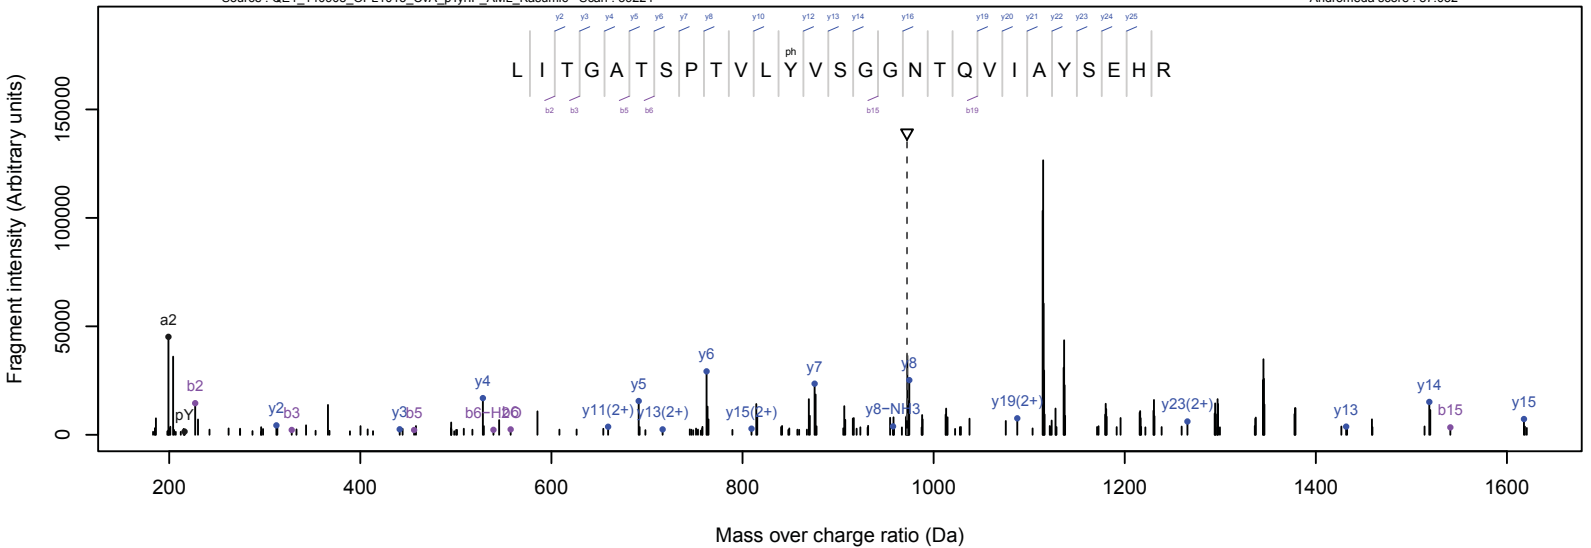

VY(ph)FQSPPGAAGEGPGADDEGPVR-3+

Source : QE1\_140612\_OPL1013\_CVA\_phosphoproteomic\_landscape\_AML\_C Scan : 26634

Andromeda score : 86.946

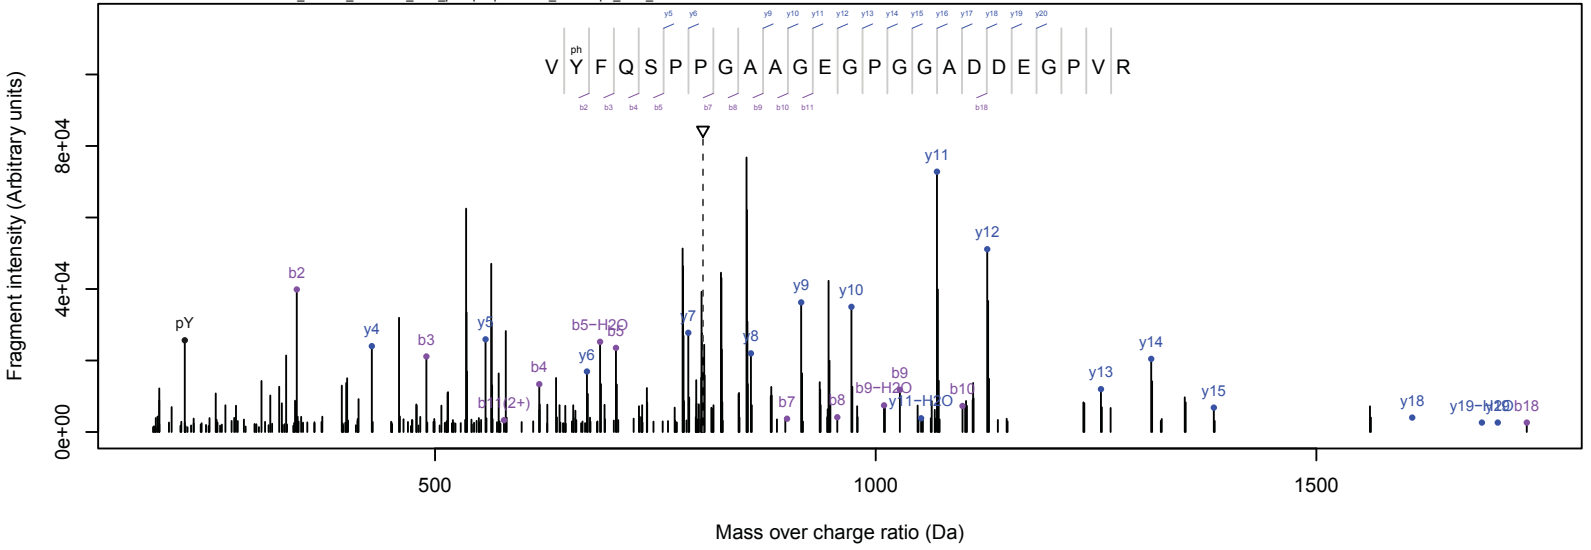

AY(ph)TVVGGPPGPPVR-2+

Source : QE1\_140612\_OPL1013\_CVA\_phosphoproteomic\_landscape\_AML\_B Scan : 21331

Andromeda score : 86.944

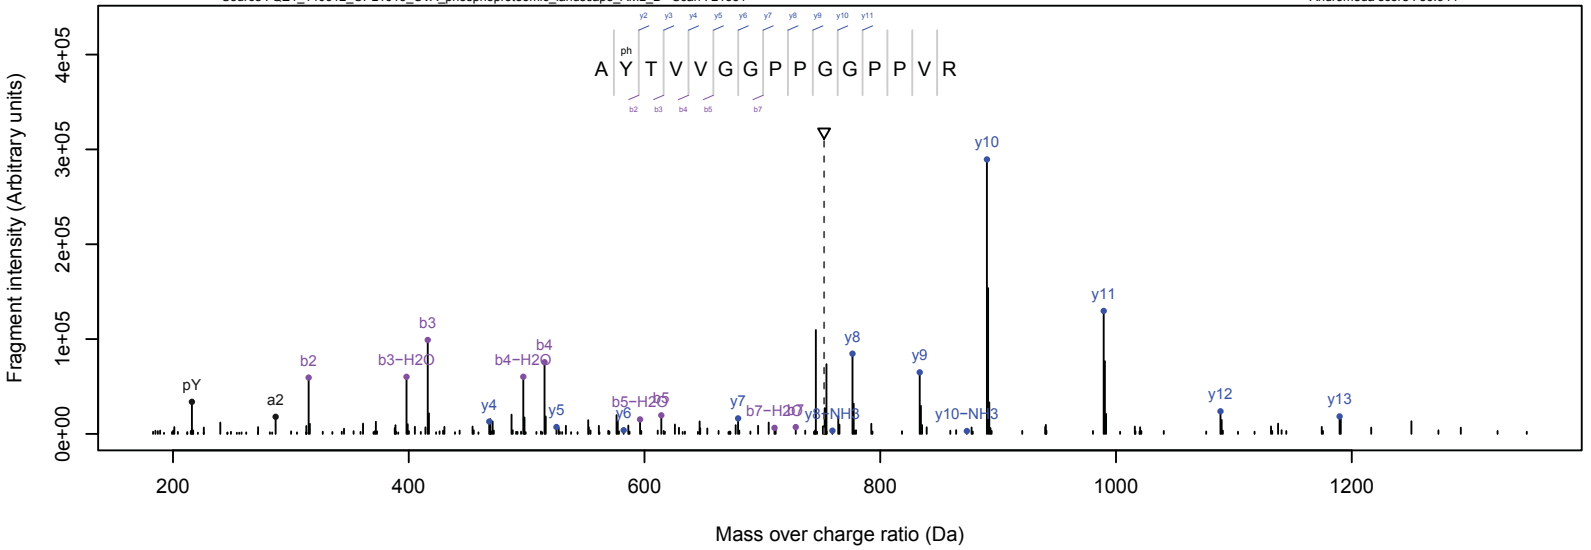

LYTLVY(ph)VPVTFK-2+

Source : QE1\_140612\_OPL1013\_CVA\_phosphoproteomic\_landscape\_AML\_C Scan : 47067

Andromeda score : 86.944

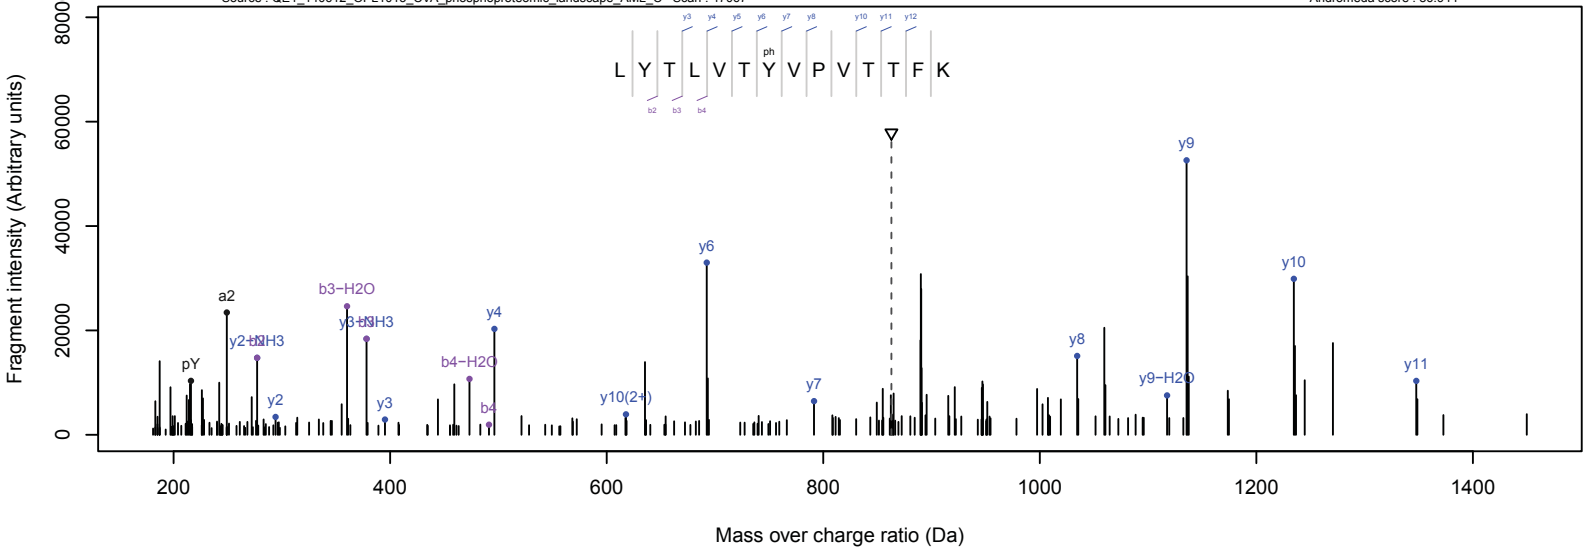



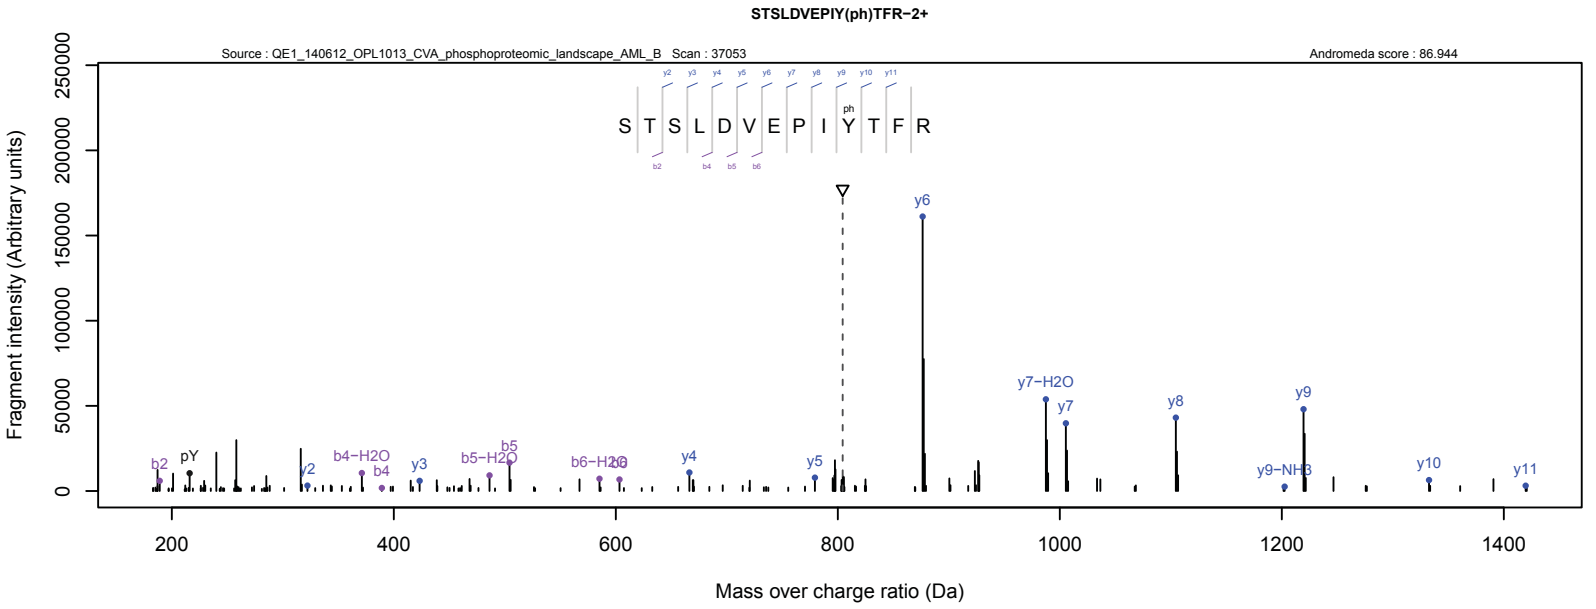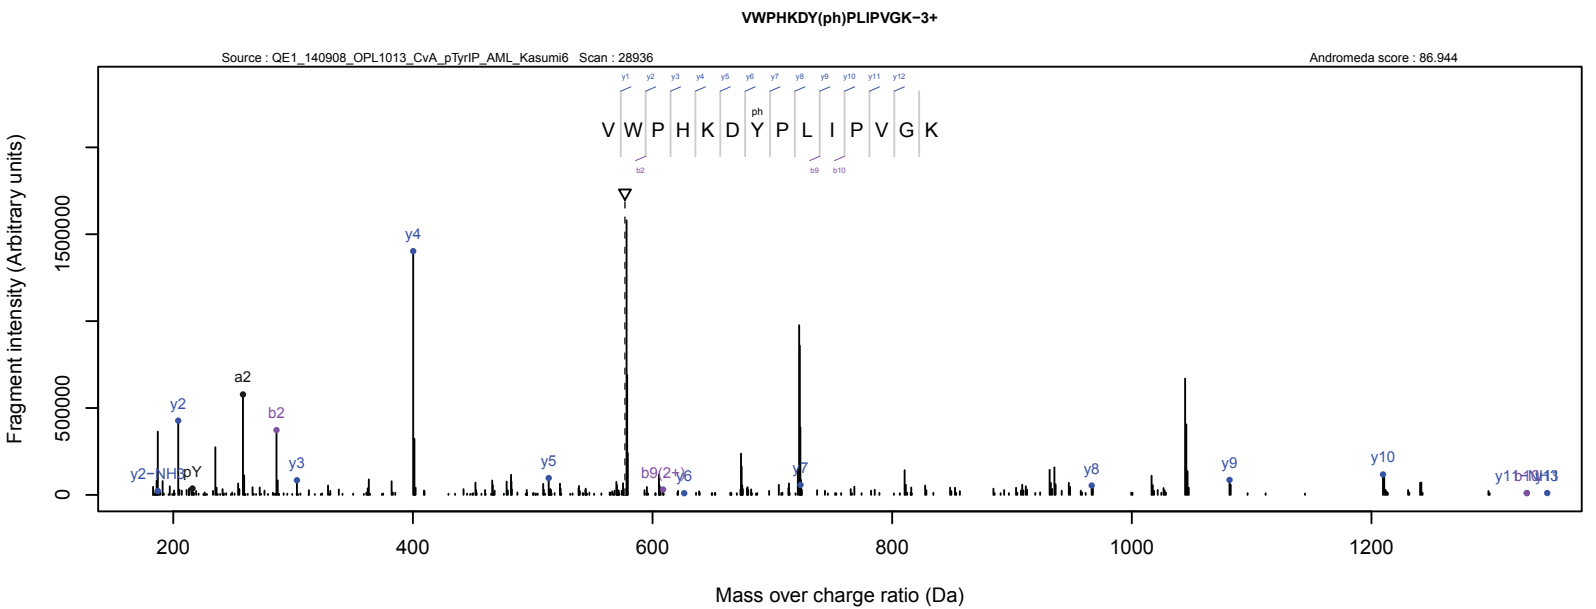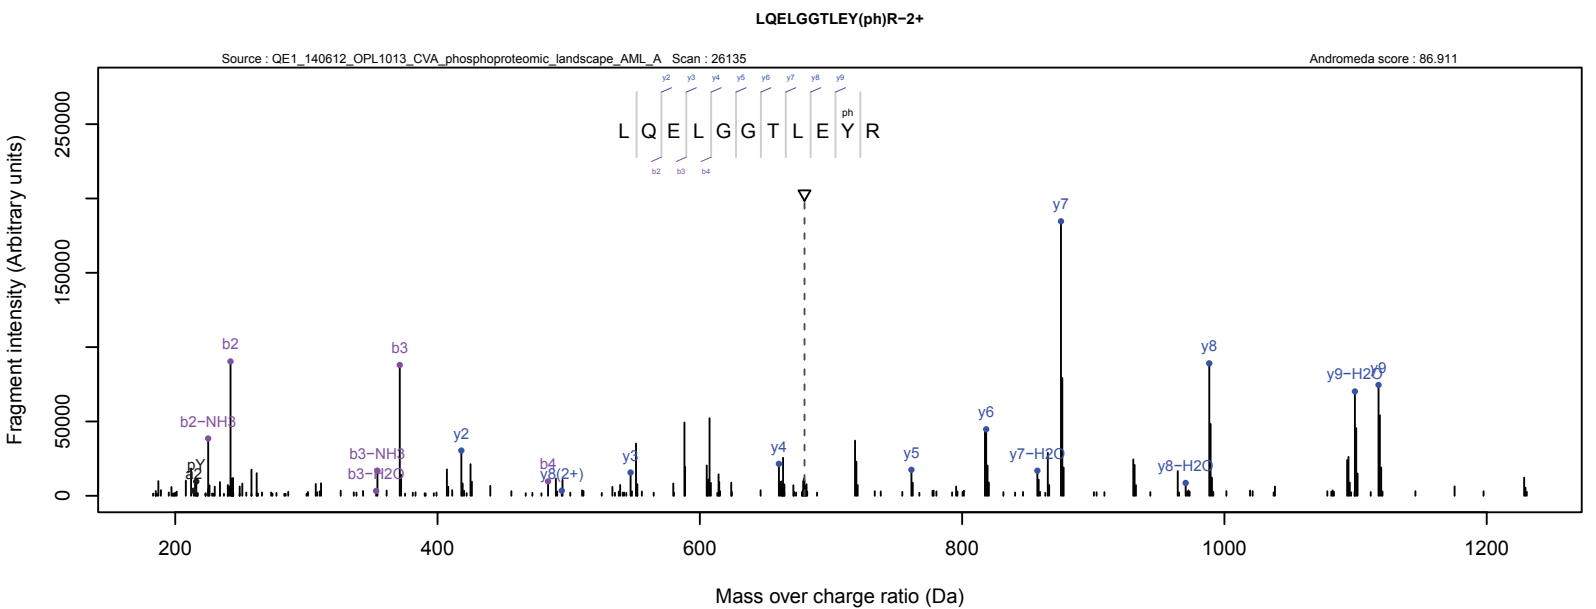

ACRFPY(ph)HLIK-3+

Source : QE1\_140612\_OPL1013\_CVA\_phosphoproteomic\_landscape\_AML\_C Scan : 20535

Andromeda score : 86.898

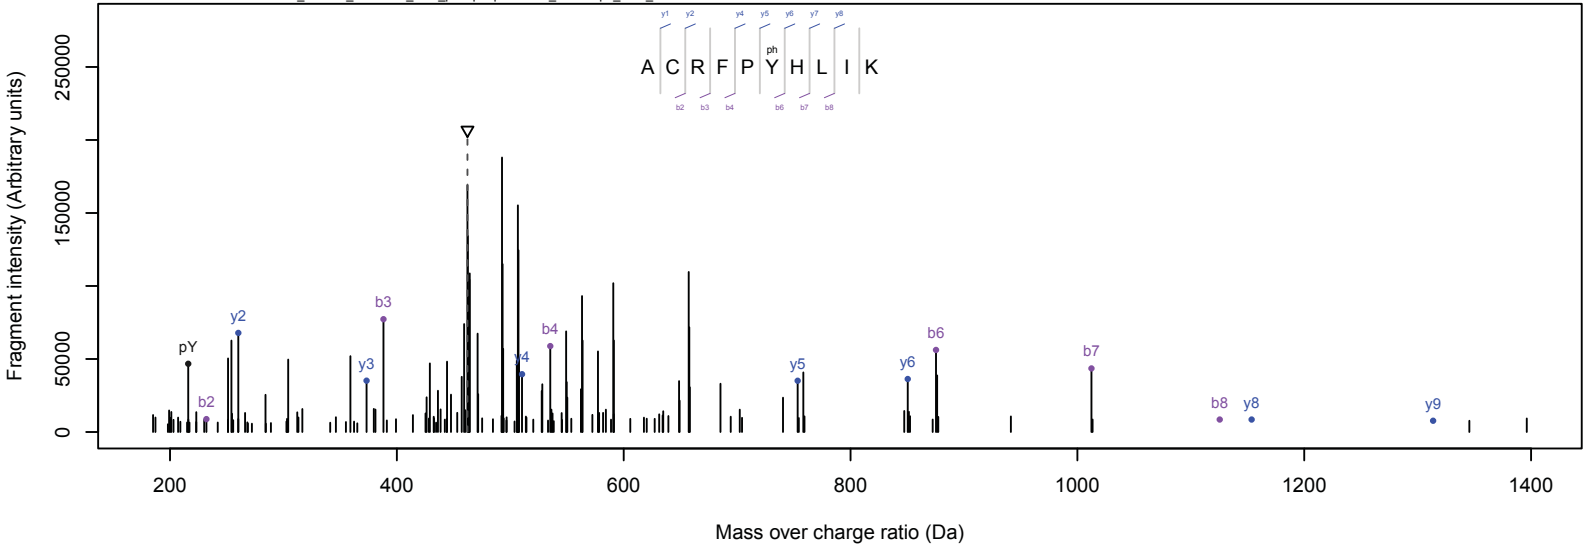

VIY(ph)SQPSAR-2+

Source : Qe1\_141024\_OPL1013\_CvA\_AML\_pTyrIP\_MOLM13 Scan : 6230

Andromeda score : 86.898

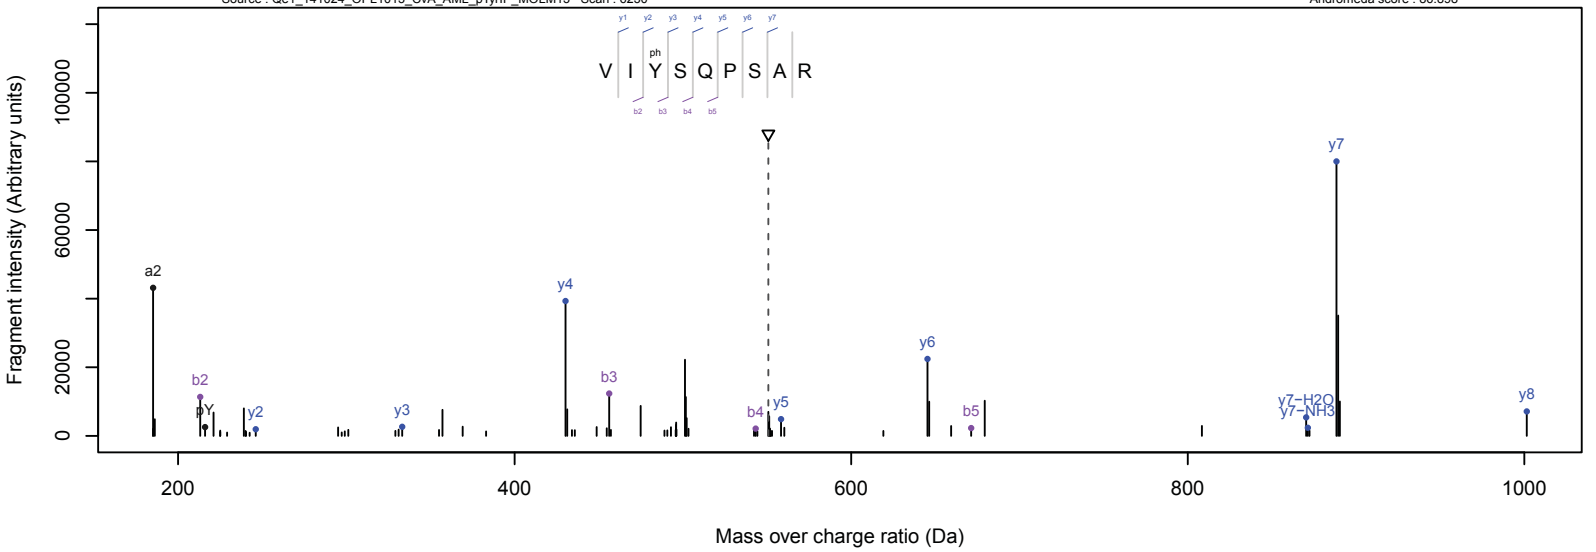

YAGEVY(ph)GMIR-2+

Source : QE1\_140612\_OPL1013\_CVA\_phosphoproteomic\_landscape\_AML\_B Scan : 22301

Andromeda score : 86.898

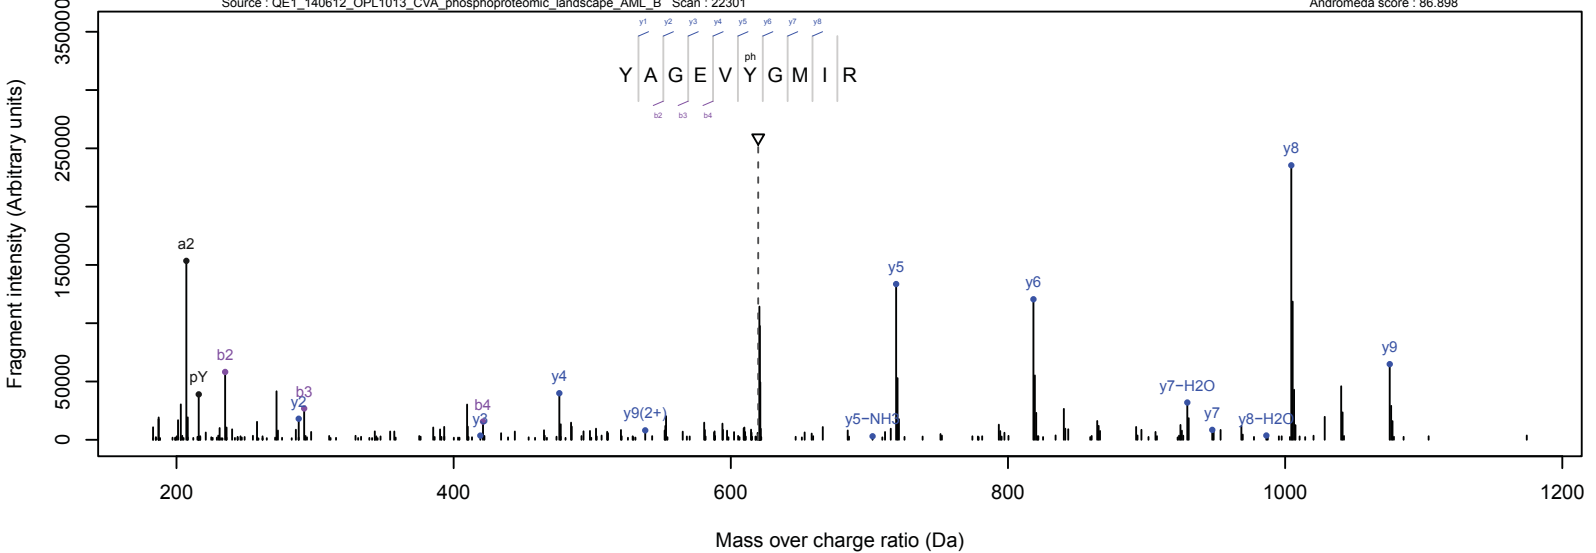

ATFY(ph)LNVLQQR-2+

Source : QE1\_140612\_OPL1013\_CVA\_phosphoproteomic\_landscape\_AML\_C Scan : 38941

Andromeda score : 86.879

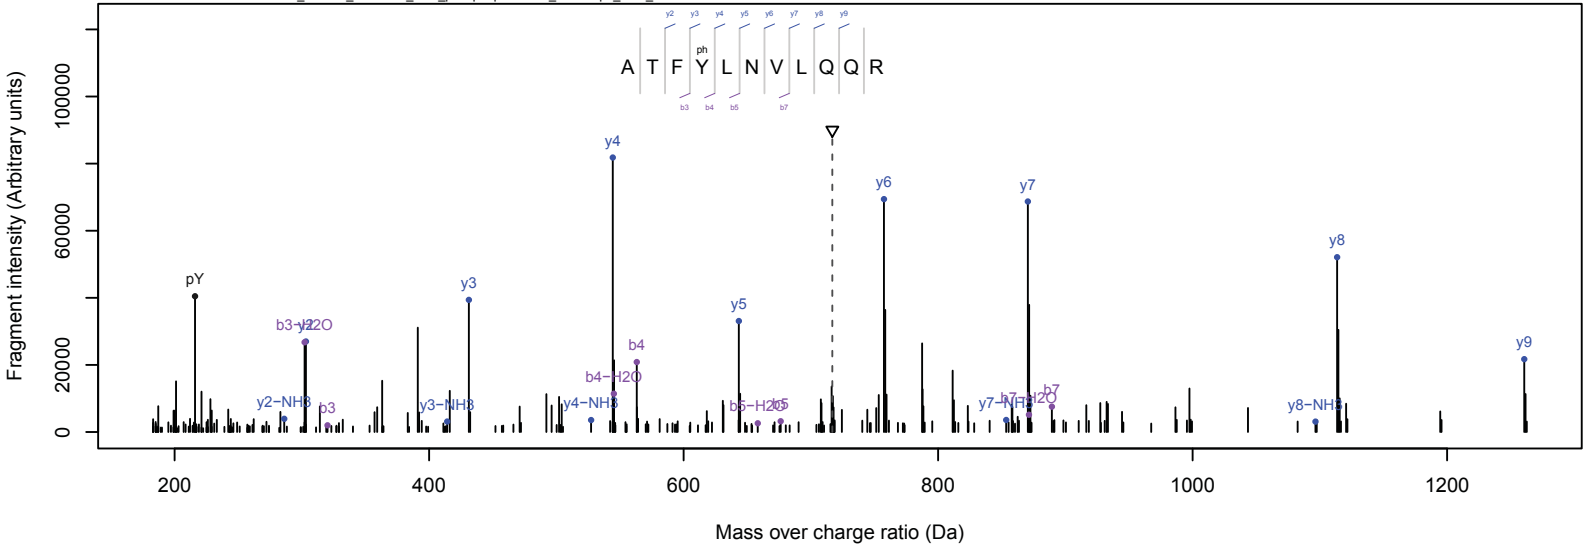

IVSSSDVGHDEY(ph)STQSLVK-3+

Source : QE1\_140908\_OPL1013\_CvA\_pTyrIP\_AML\_Kasumi1 Scan : 19009

Andromeda score : 86.8

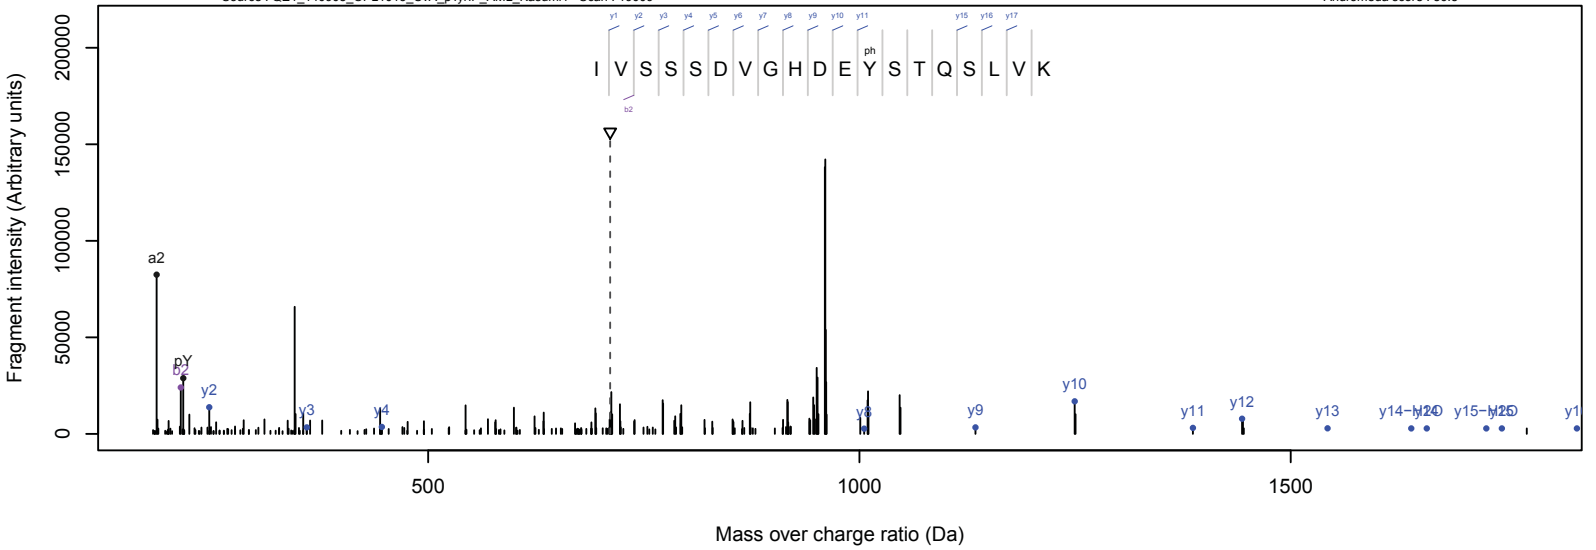

NIDDGTSRYPYSHALVAGIDRY(ph)PR-4+

Source : QE1\_140908\_OPL1013\_CvA\_pTyrIP\_AML\_HL60 Scan : 27292

Andromeda score : 86.791

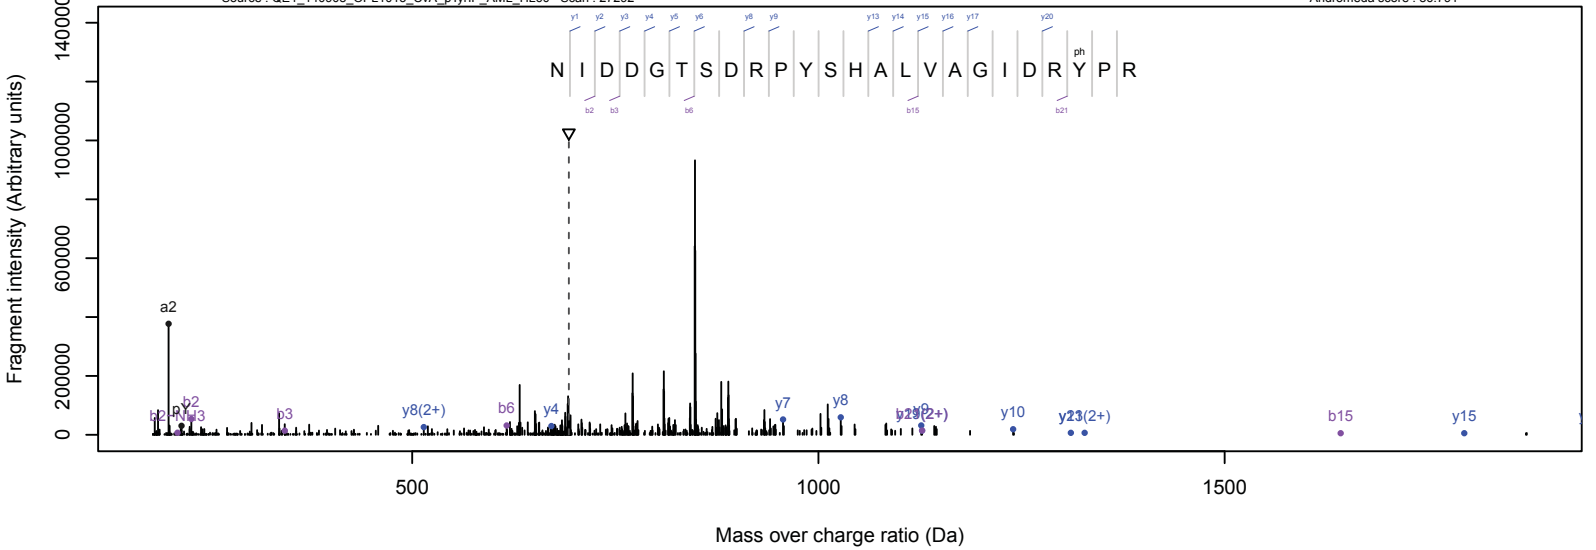

**LDDR<sup>VY</sup>(ph)AMCQIK-3+**

Source : QE1\_140612\_OPL1013\_CVA\_phosphoproteomic\_landscape\_AML\_D Scan : 21238

Andromeda score : 86.772

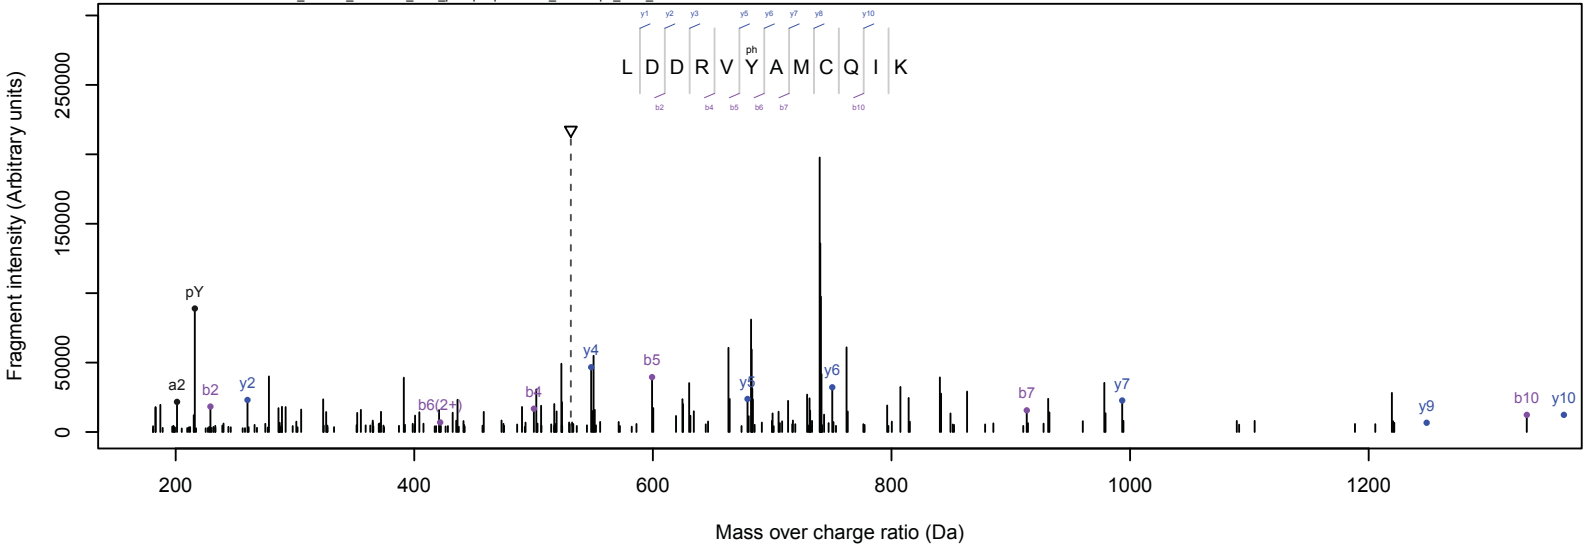

**MLLEEE<sup>Y</sup>YL<sup>SK</sup>K-3+**

Source : QE1\_140612\_OPL1013\_CVA\_phosphoproteomic\_landscape\_AML\_C Scan : 30032

Andromeda score : 86.772

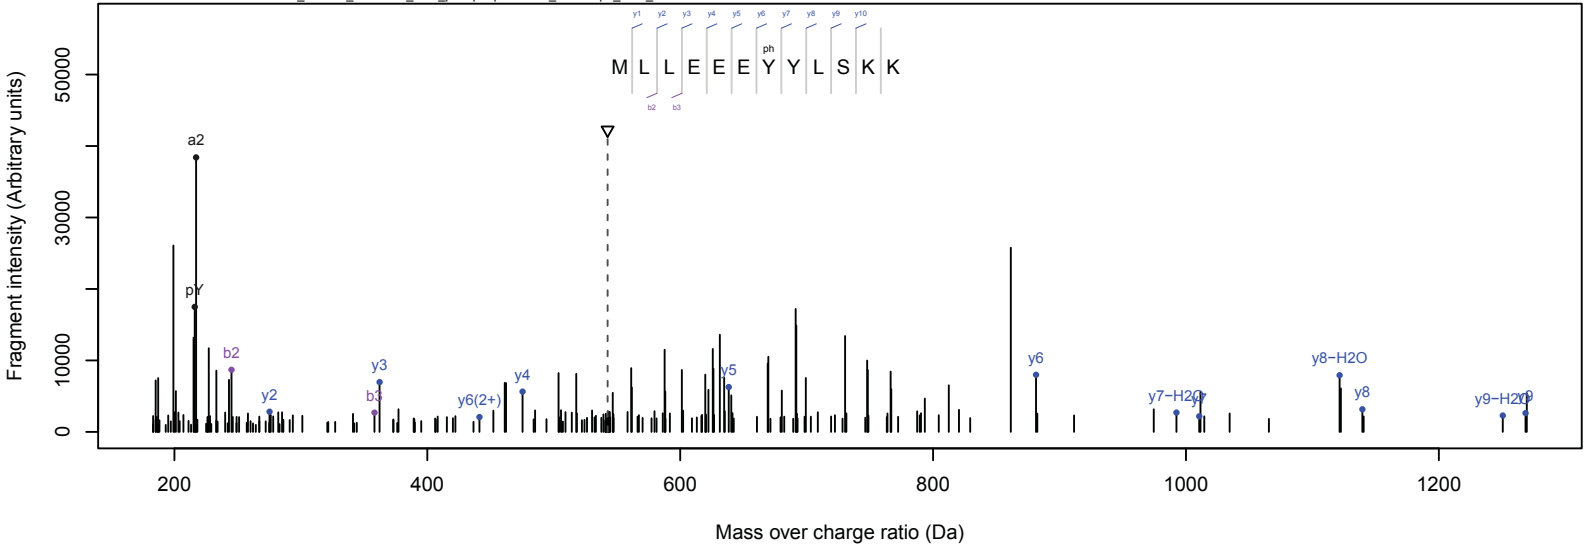

**Y(ph)GLFKEEN<sup>P</sup>YA<sup>R</sup>-3+**

Source : QE1\_140612\_OPL1013\_CVA\_phosphoproteomic\_landscape\_AML\_C Scan : 20061

Andromeda score : 86.772

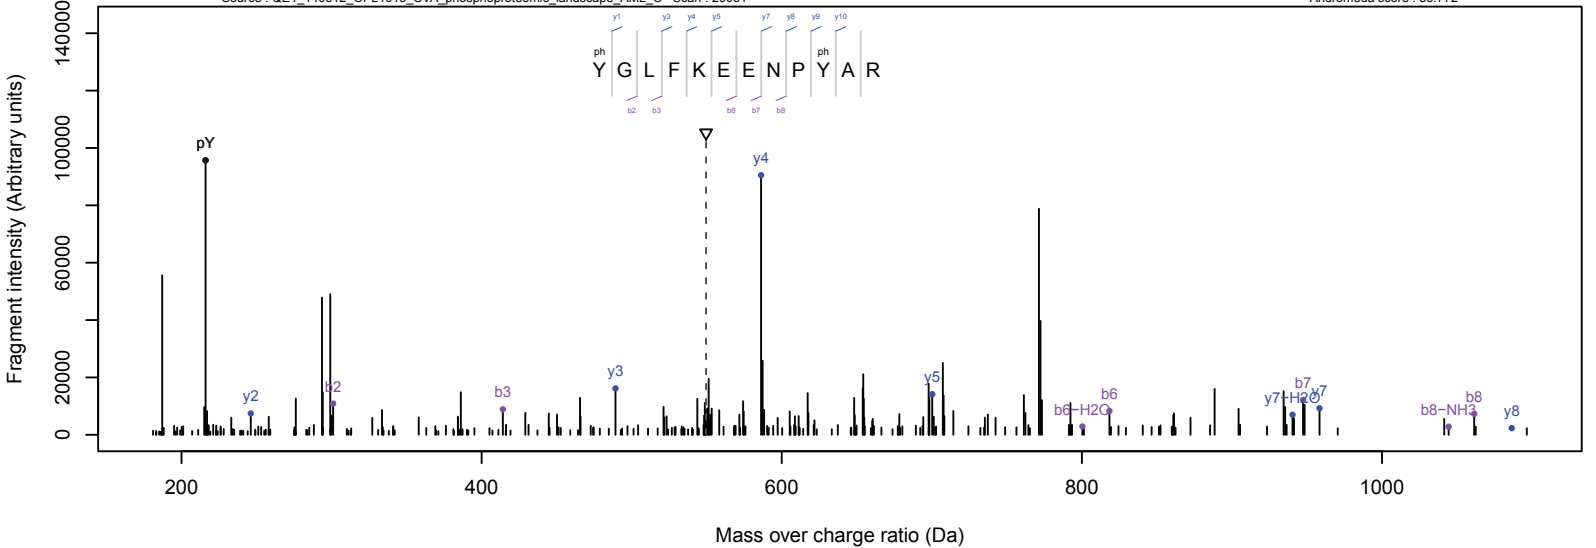

IYQY(ph)QSR-2+

Source : QE1\_140822\_OPL1013\_CvA\_pTyrIP\_AML\_cell\_lines\_part2\_B Scan : 11704

Andromeda score : 86.67

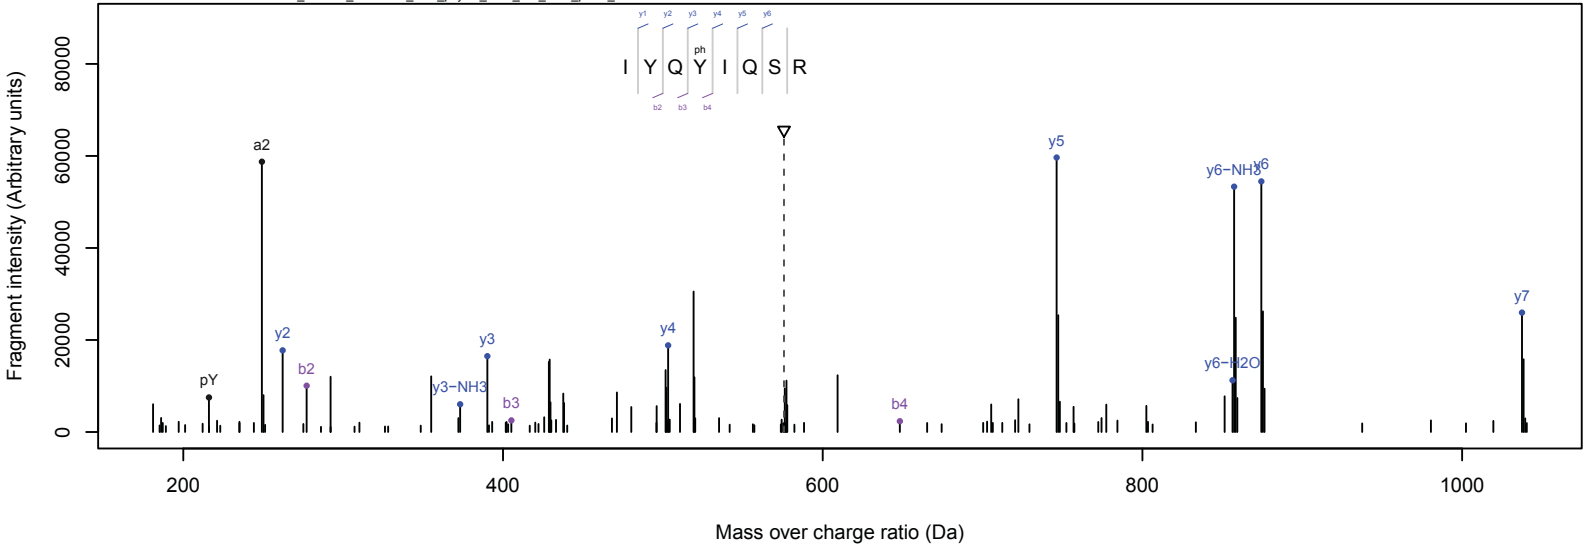

GEPQDLSGQEATNNEY(ph)SEIKIPK-3+

Source : QE1\_140908\_OPL1013\_CvA\_pTyrIP\_AML\_OCI\_AML3 Scan : 26796

Andromeda score : 86.557

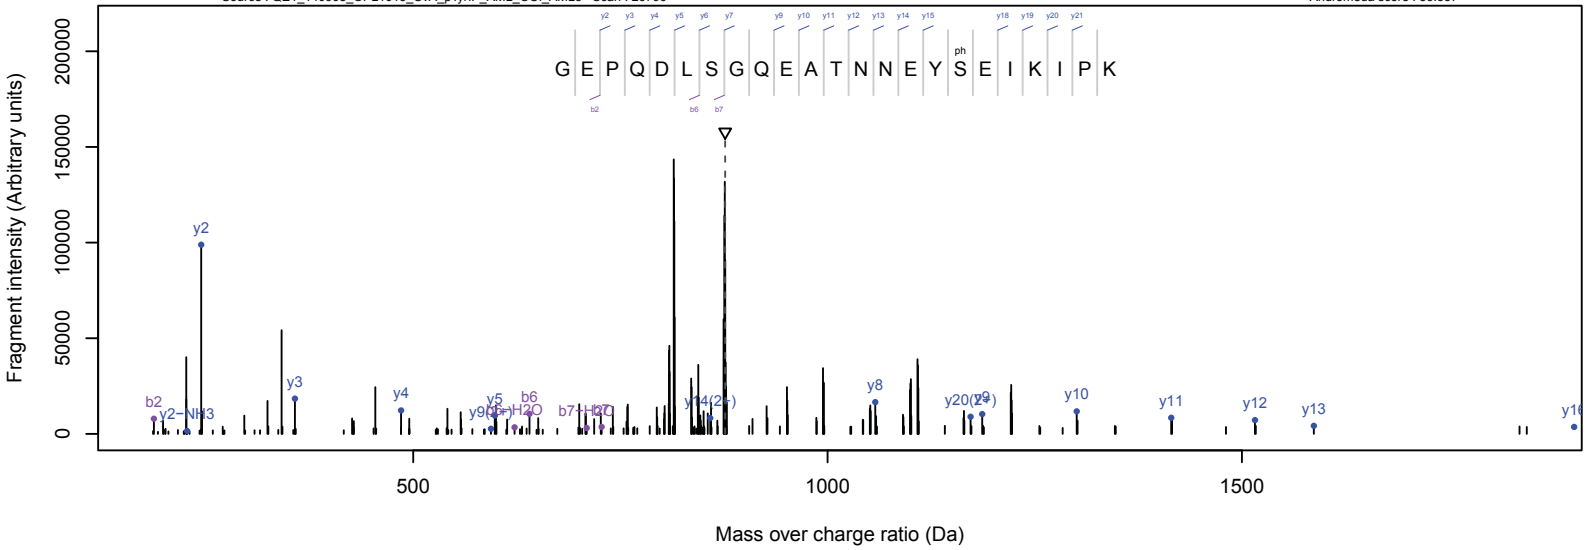

LFPQLQT(ph)YVPYRPHPPQLR-3+

Source : QE1\_140612\_OPL1013\_CVA\_phosphoproteomic\_landscape\_AML\_C Scan : 37386

Andromeda score : 86.557

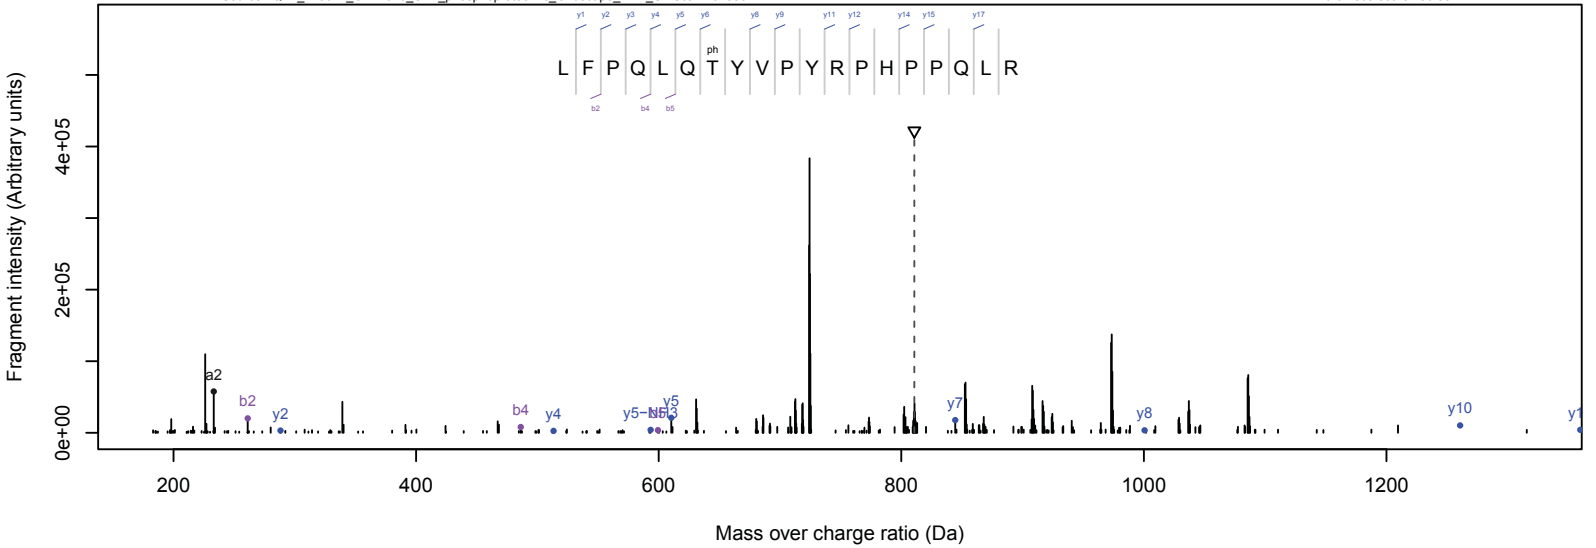

TPLPLCSS(ph)QAQM DYRR-3+

Source : QE1\_140908\_OPL1013\_CvA\_pTyrIP\_AML\_HEL Scan : 18502

Andromeda score : 86.497

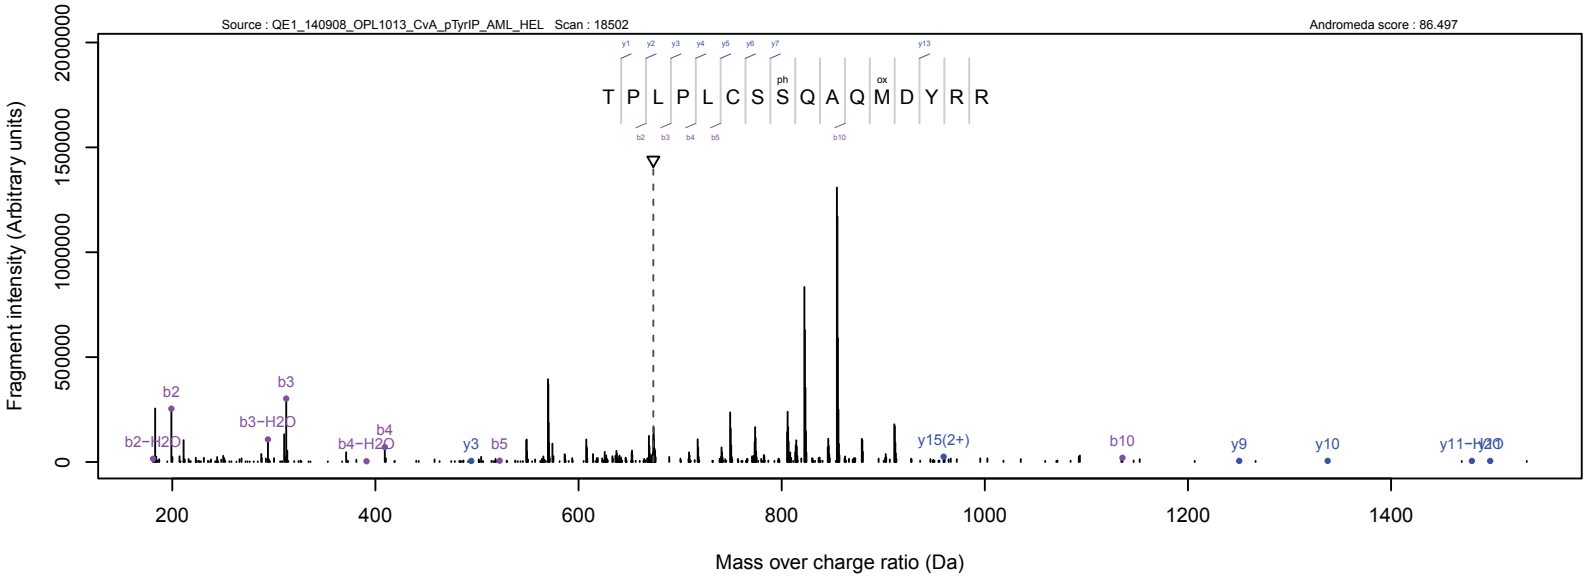

VVLPSY(ph)EEALSLPSK-2+

Source : QE1\_140612\_OPL1013\_CVA\_phosphoproteomic\_landscape\_AML\_C Scan : 36824

Andromeda score : 86.497

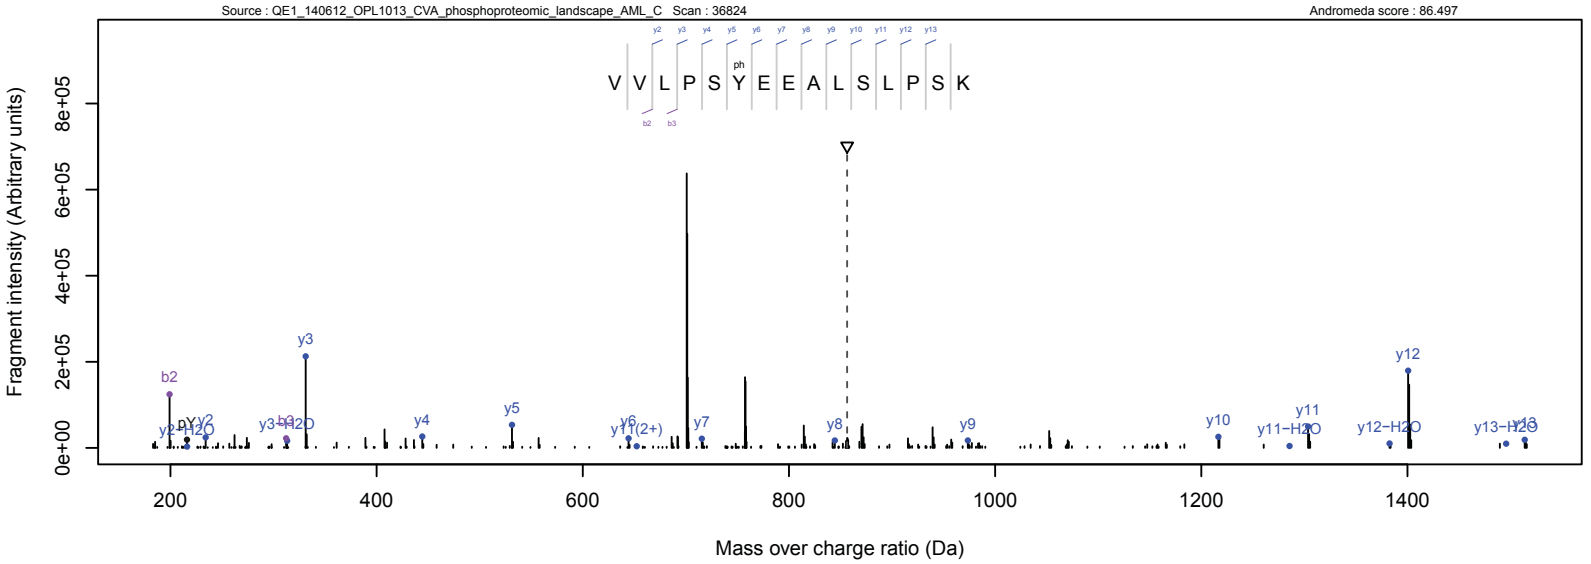

SDGHVY(ph)HTVHKDSGLYK-3+

Source : QE1\_140612\_OPL1013\_CVA\_phosphoproteomic\_landscape\_AML\_C Scan : 6573

Andromeda score : 86.488

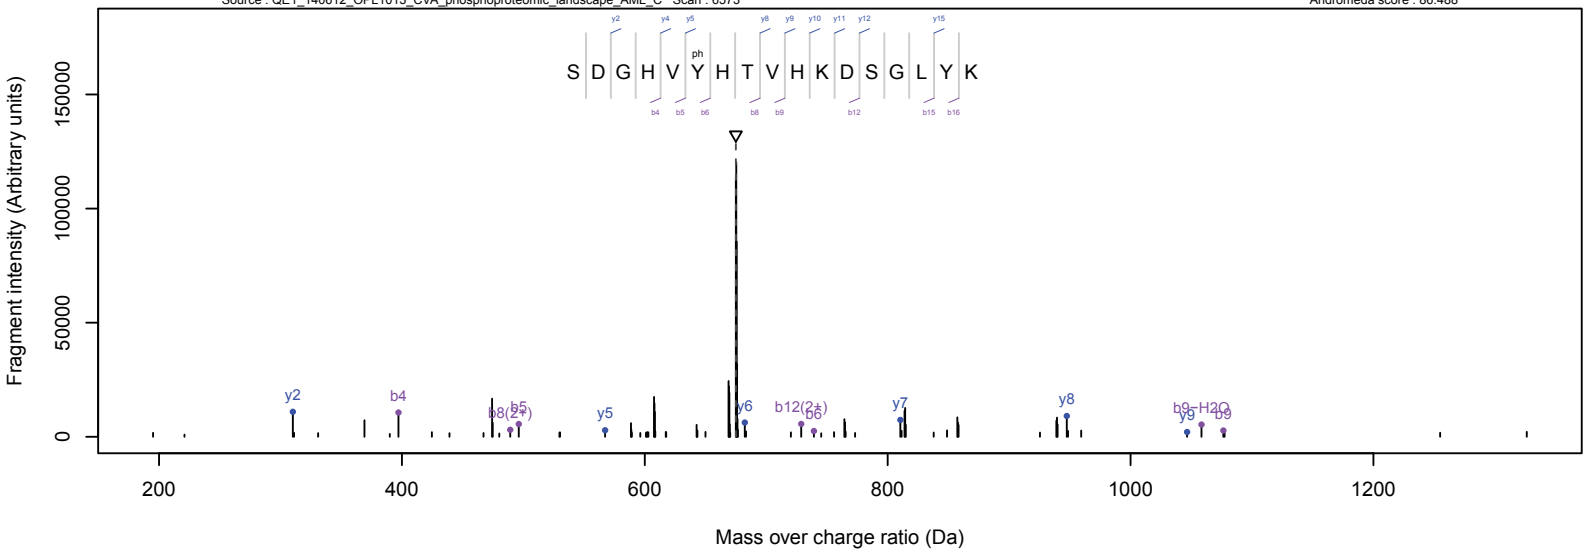

LSPGS(ph)YPTVIQQQNATSQR-2+

Source : QE1\_140612\_OPL1013\_CVA\_phosphoproteomic\_landscape\_AML\_C Scan : 20120

Andromeda score : 86.453

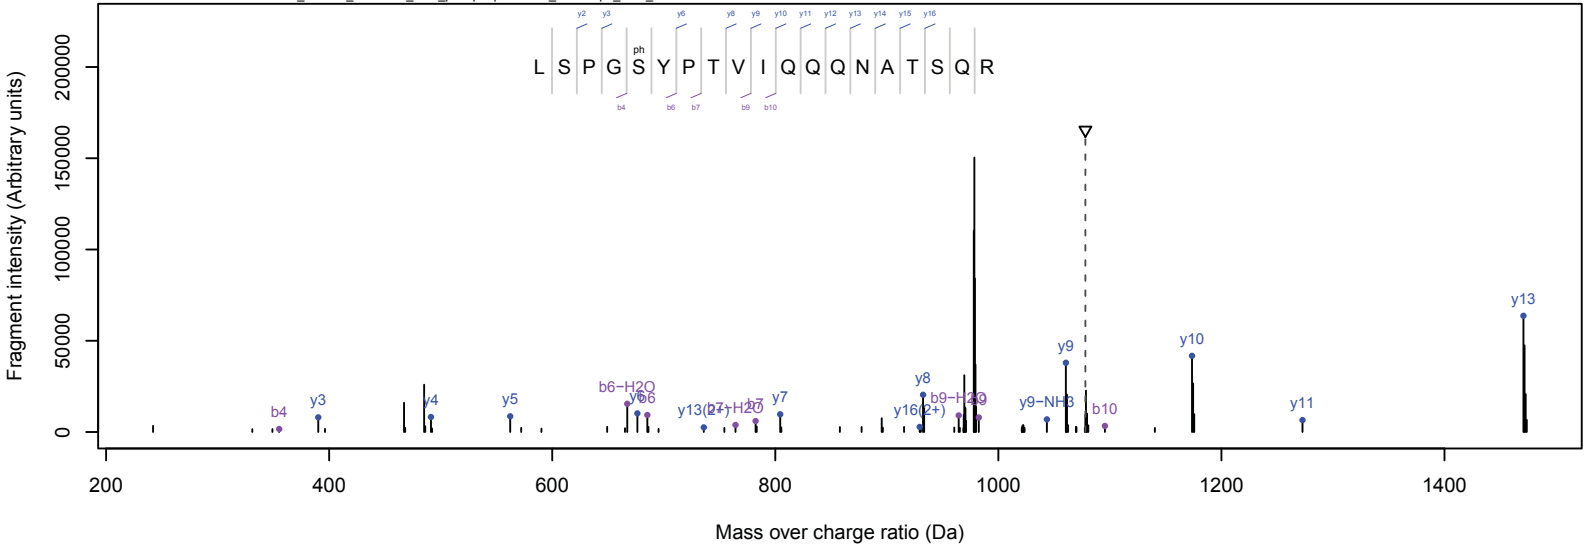

RNSIY(ph)EASSLYGISAM(x)DGVPTLHPR-3+

Source : QE1\_140908\_OPL1013\_CvA\_pTyrIP\_AML\_HEL Scan : 43891

Andromeda score : 86.449

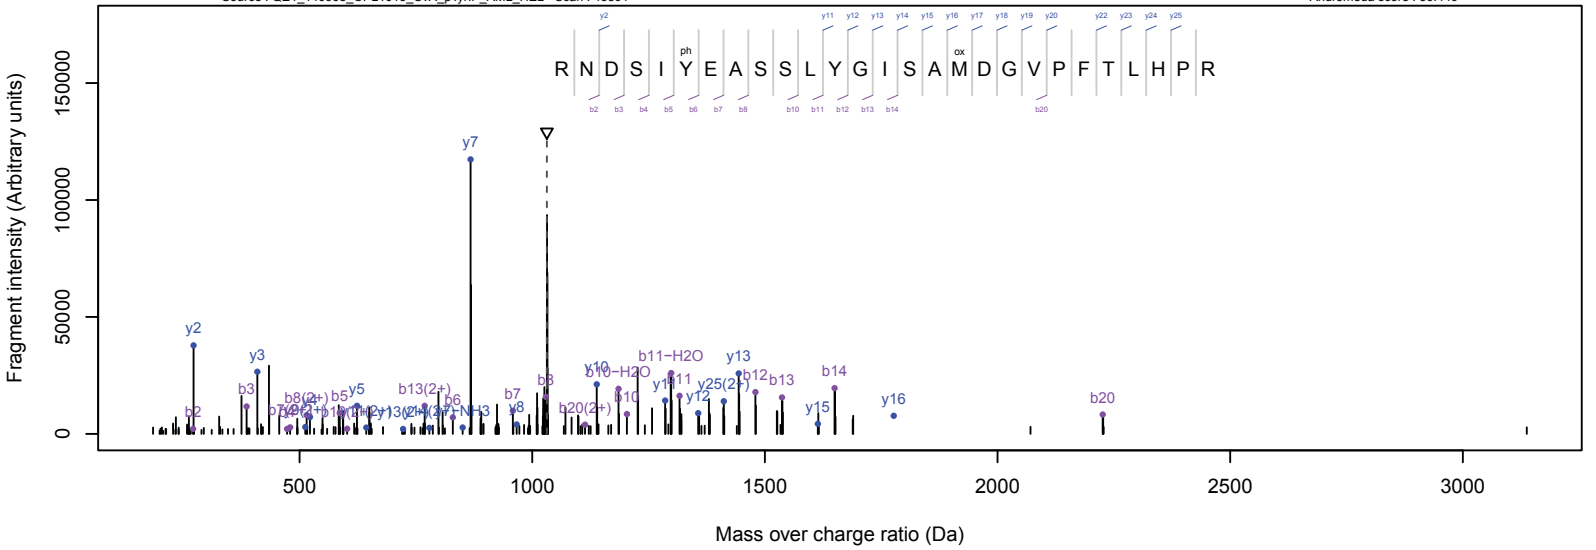

IKLDGY(ph)ELPSSLPVPPSHR-4+

Source : QE1\_140612\_OPL1013\_CVA\_phosphoproteomic\_landscape\_AML\_C Scan : 36218

Andromeda score : 86.357

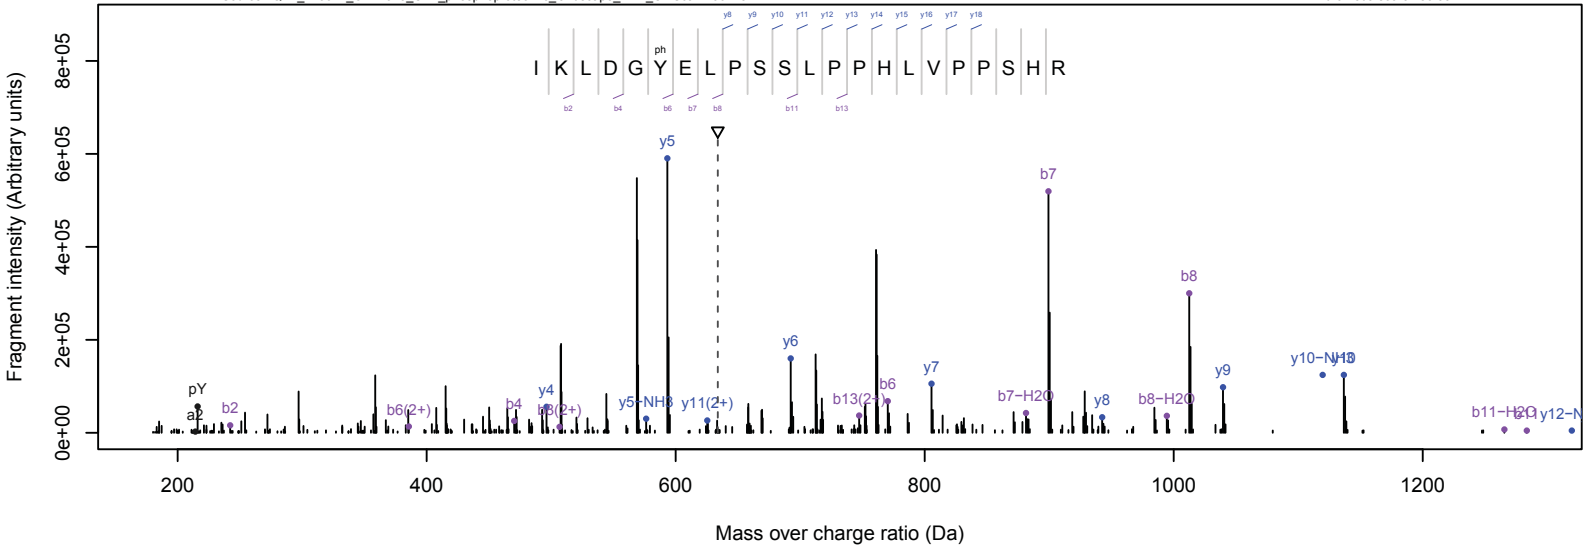





SGENQSVDKKSDTIPIPIPNGVVVTNNSGY(ph)ITNGYM(ox)GK-3+

Source : QE1\_140908\_OPL1013\_CvA\_pTyrIP\_AML\_HEL Scan : 34190

Andromeda score : 86.191

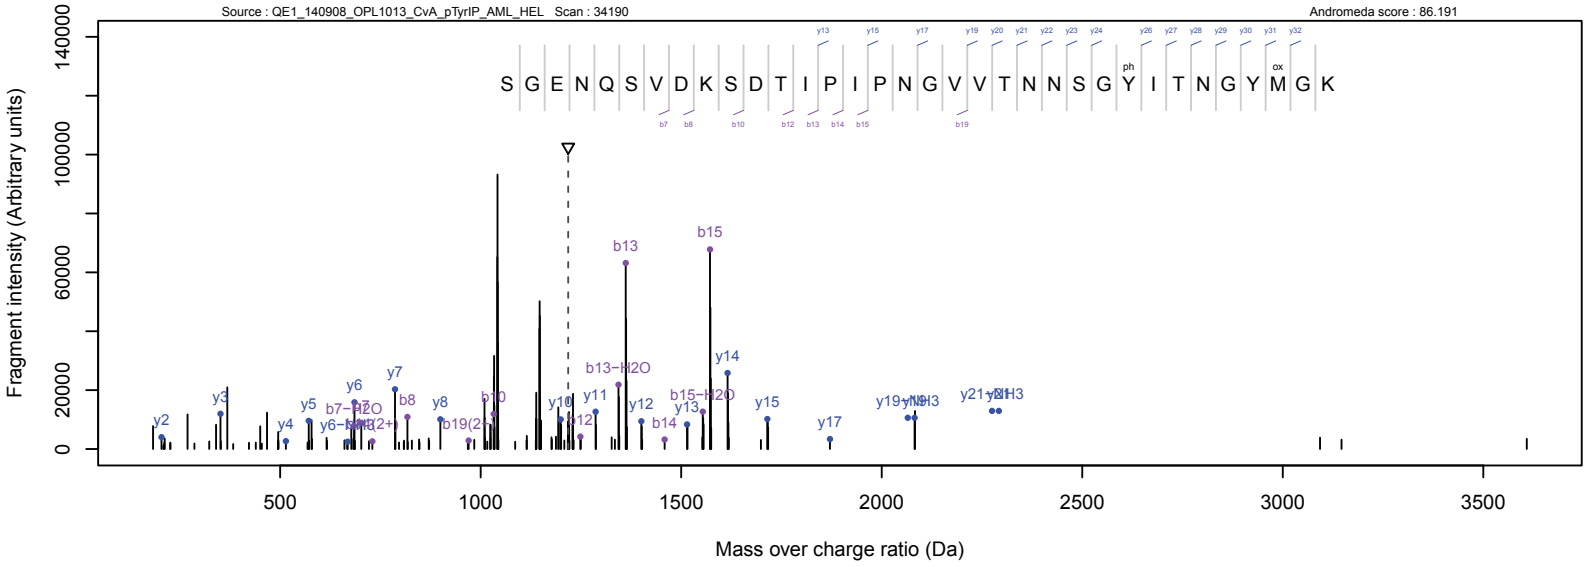

DY(ph)TNLPSSSR-2+

Source : QE1\_140908\_OPL1013\_CvA\_pTyrIP\_AML\_Kasumi6 Scan : 10242

Andromeda score : 86.014

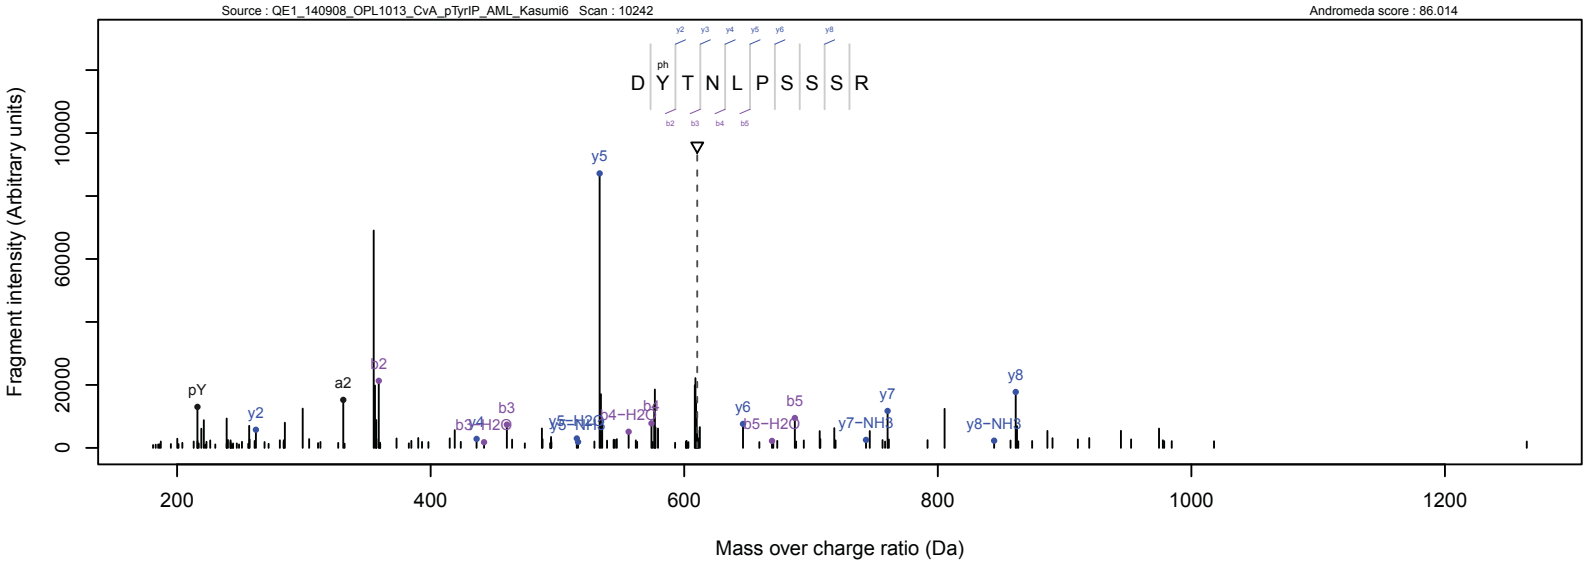

KGVL DGYGAR-2+

Source : QE1\_140612\_OPL1013\_CVA\_phosphoproteomic\_landscape\_AML\_C Scan : 7976

Andromeda score : 86.014

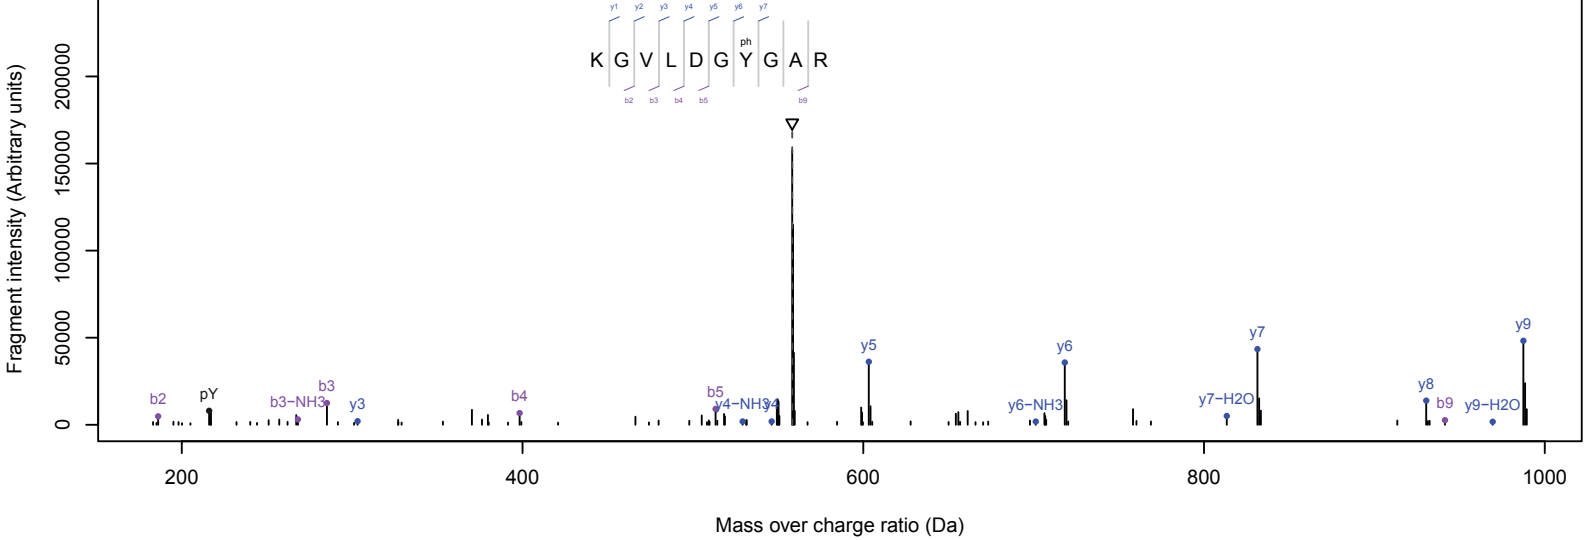



LPPYPYS(ph)SPSLVLPTQPHTPK-3+

Source : QE1\_140612\_OPL1013\_CVA\_phosphoproteomic\_landscape\_AML\_C Scan : 35674

Andromeda score : 85.937

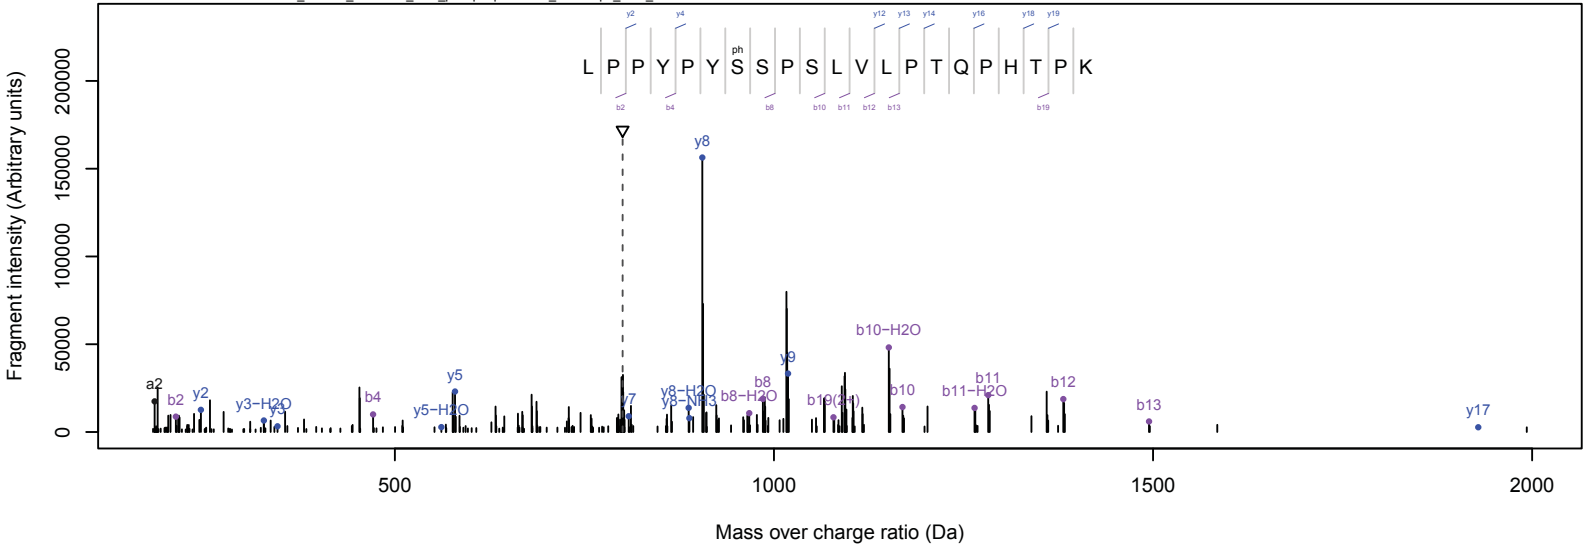

VSSTHY(ph)Y(ph)LLPERPSYLER-3+

Source : QE1\_140908\_OPL1013\_CvA\_pTyrIP\_AML\_Kasumi1 Scan : 29869

Andromeda score : 85.937

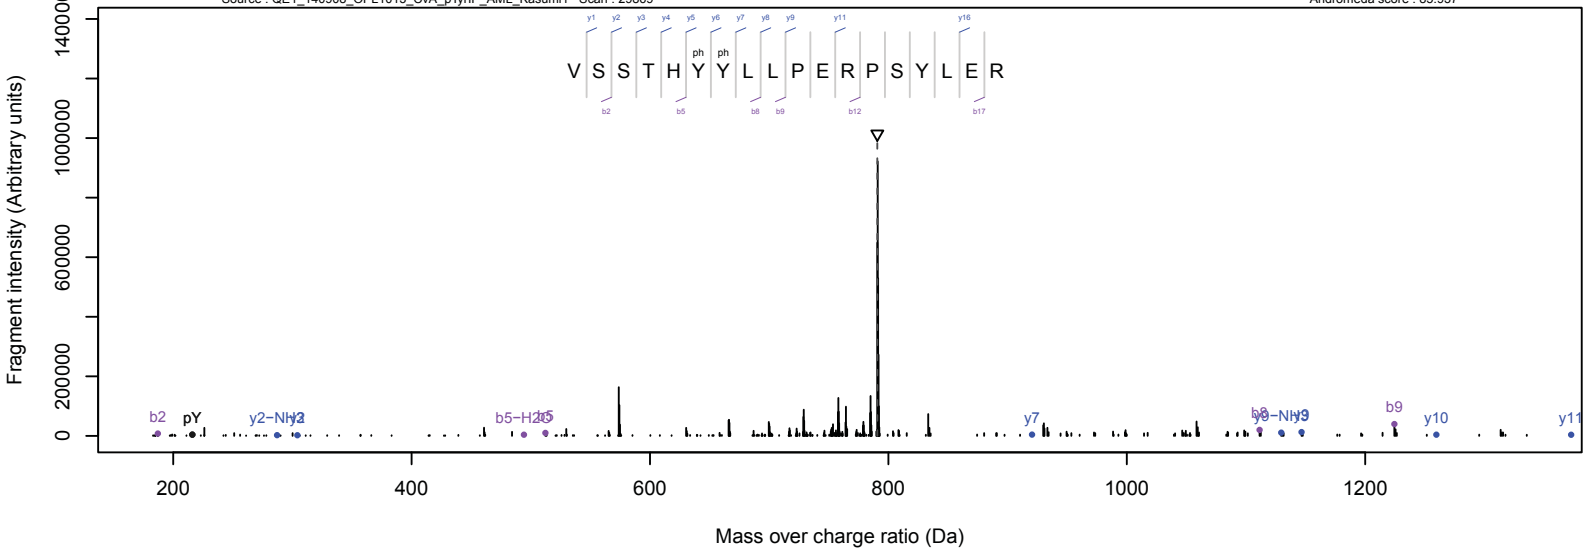

SVSSPWLPQDGFDPSPDY(ph)AEPMDAVVKPR-3+

Source : QE1\_140612\_OPL1013\_CVA\_phosphoproteomic\_landscape\_AML\_B Scan : 45845

Andromeda score : 85.849

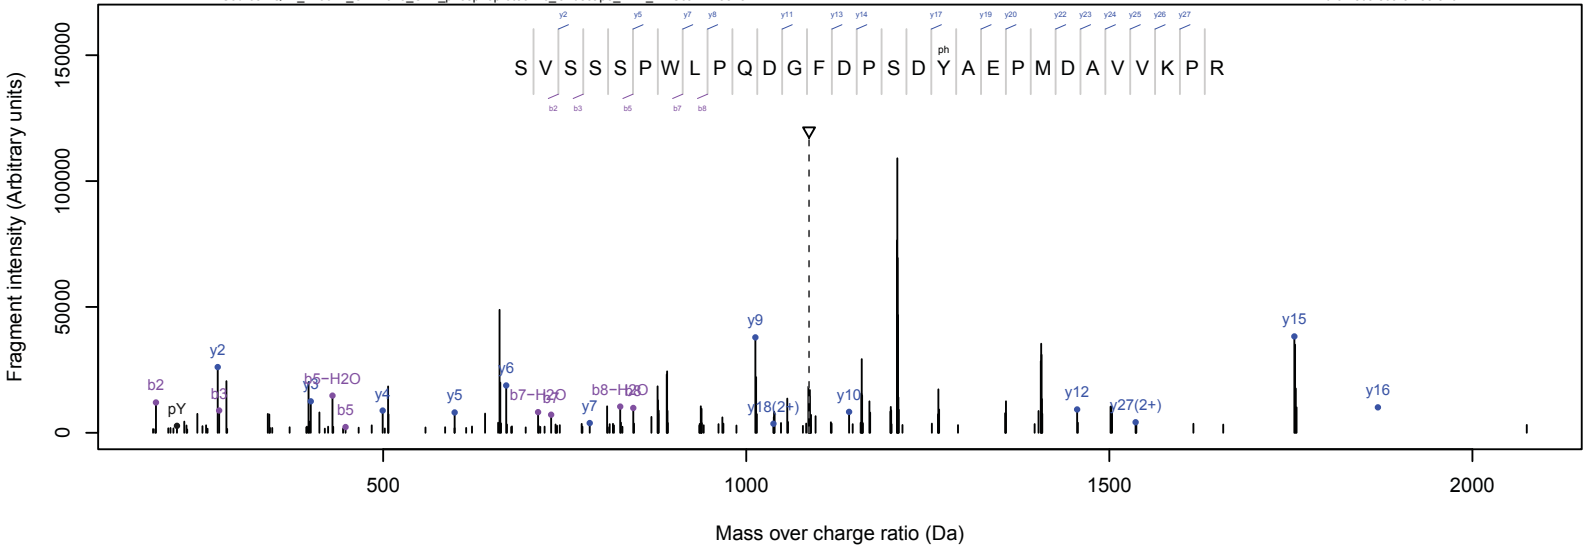

VKPY(ph)VHGGPPQDLSVHLWYAGPMER-4+

Source : QE1\_140612\_OPL1013\_CVA\_phosphoproteomic\_landscape\_AML\_B Scan : 36633

Andromeda score : 85.849

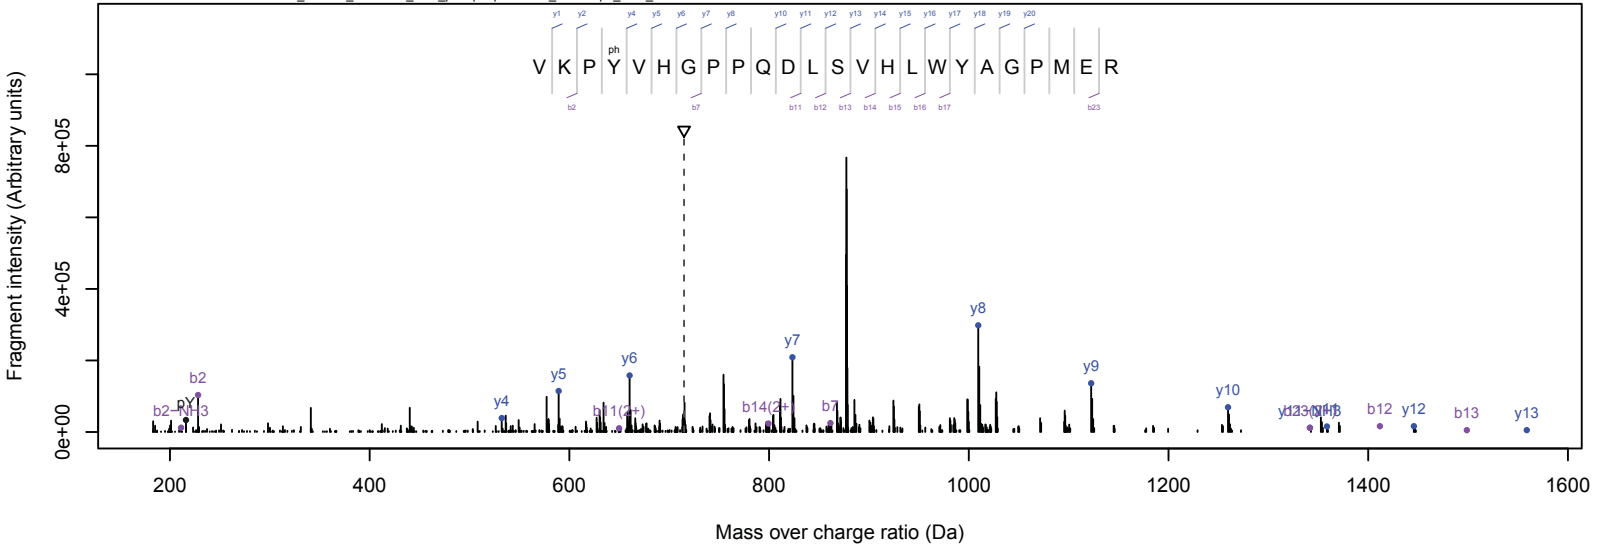

LKTY(ph)YVFG R-2+

Source : QE1\_140612\_OPL1013\_CVA\_phosphoproteomic\_landscape\_AML\_B Scan : 22289

Andromeda score : 85.807

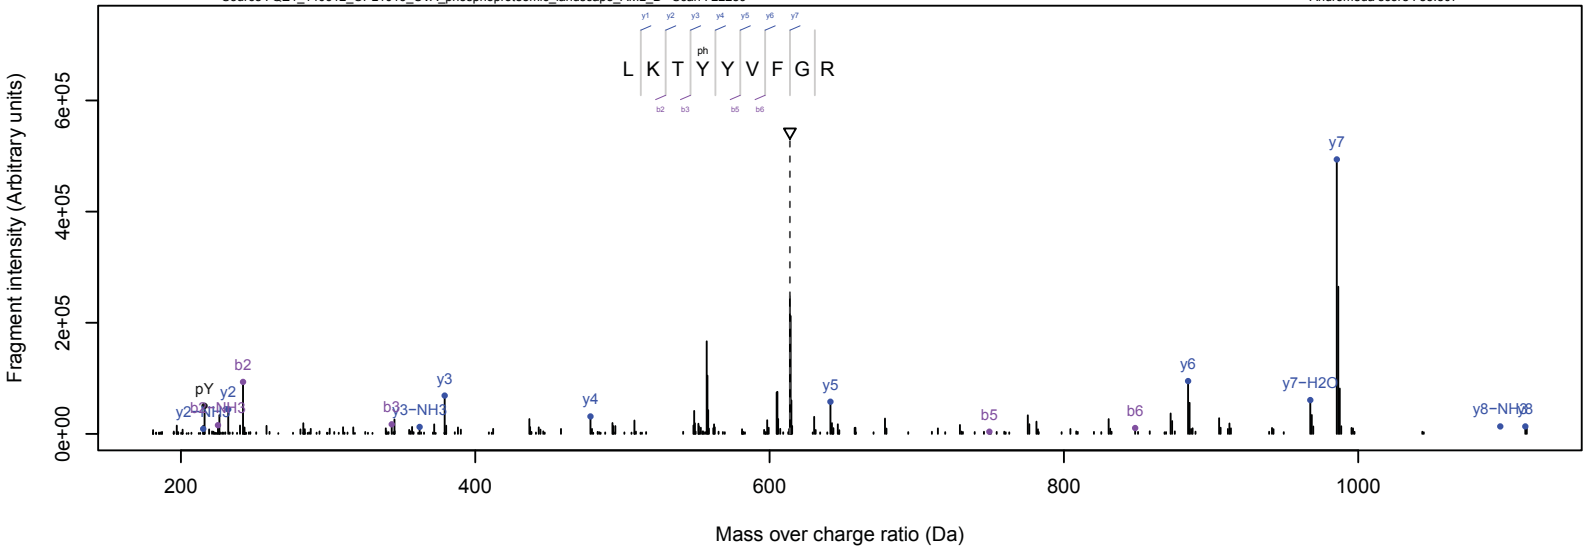

VLPQDKEY(ph)YK-3+

Source : QE1\_140908\_OPL1013\_CvA\_pTyrIP\_AML\_HEL Scan : 9199

Andromeda score : 85.807

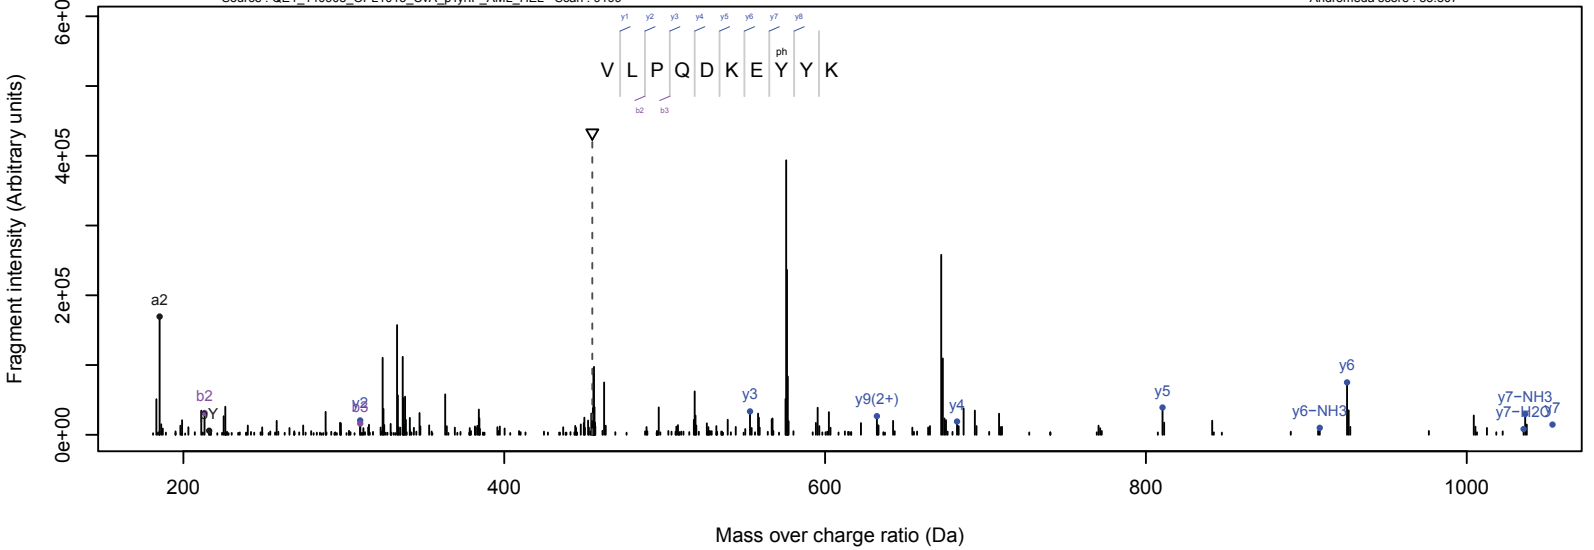

**GQQIY(ph)YHKF-2+**

Source: QE1\_140612\_OPL1013\_CVA\_phosphoproteomic\_landscape\_AML\_B Scan: 13290

Andromeda score: 85.676

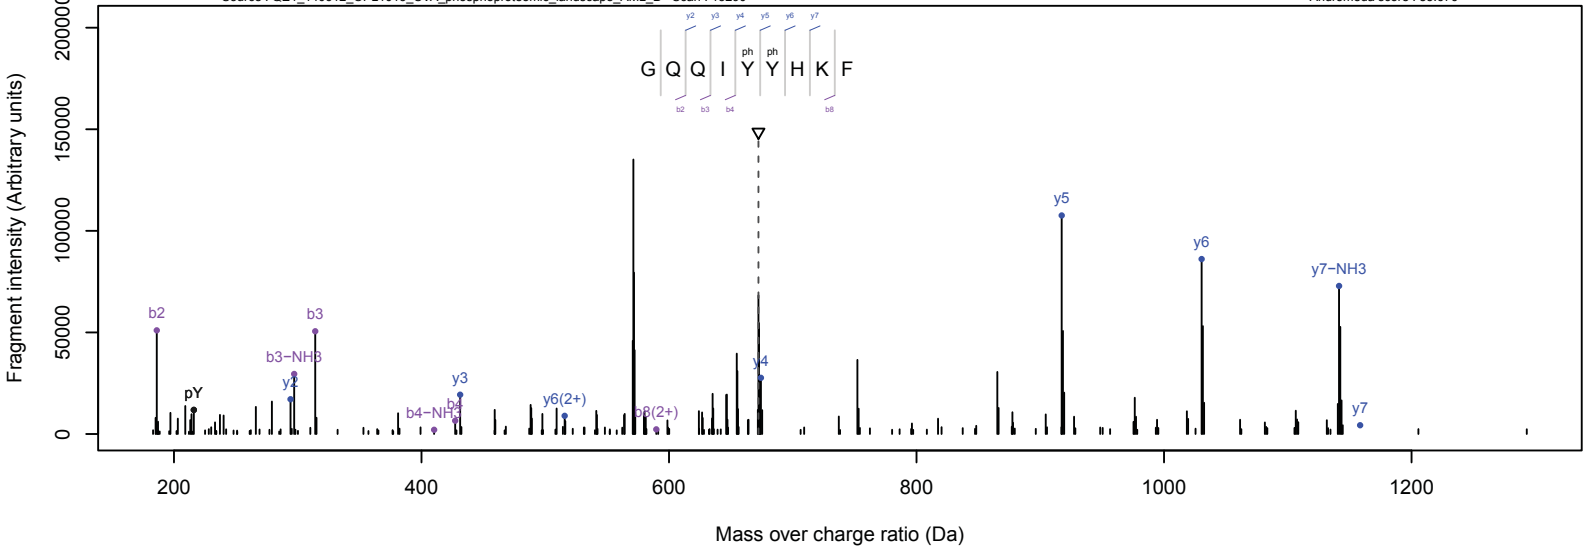

**SNY(ph)YSFIK-2+**

Source: QE1\_140612\_OPL1013\_CVA\_phosphoproteomic\_landscape\_AML\_C Scan: 24614

Andromeda score: 85.676

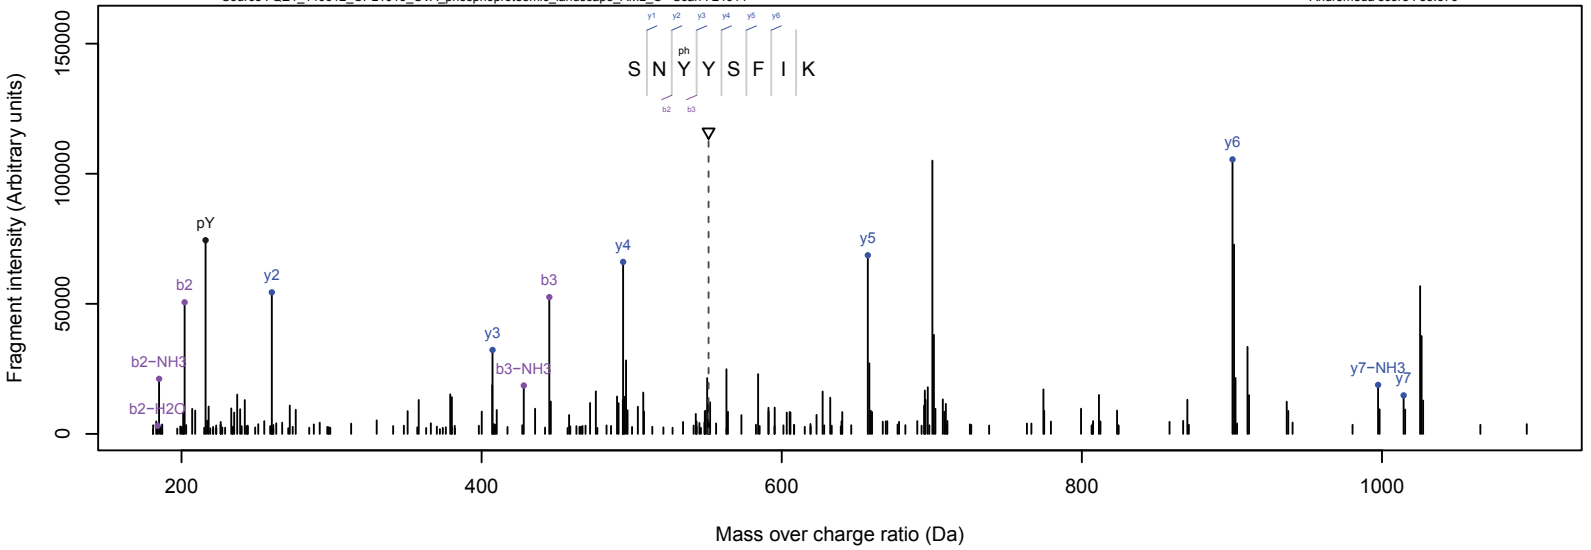

**SLY(ph)TSMARPLPR-3+**

Source: QE1\_140612\_OPL1013\_CVA\_phosphoproteomic\_landscape\_AML\_C Scan: 26401

Andromeda score: 85.672

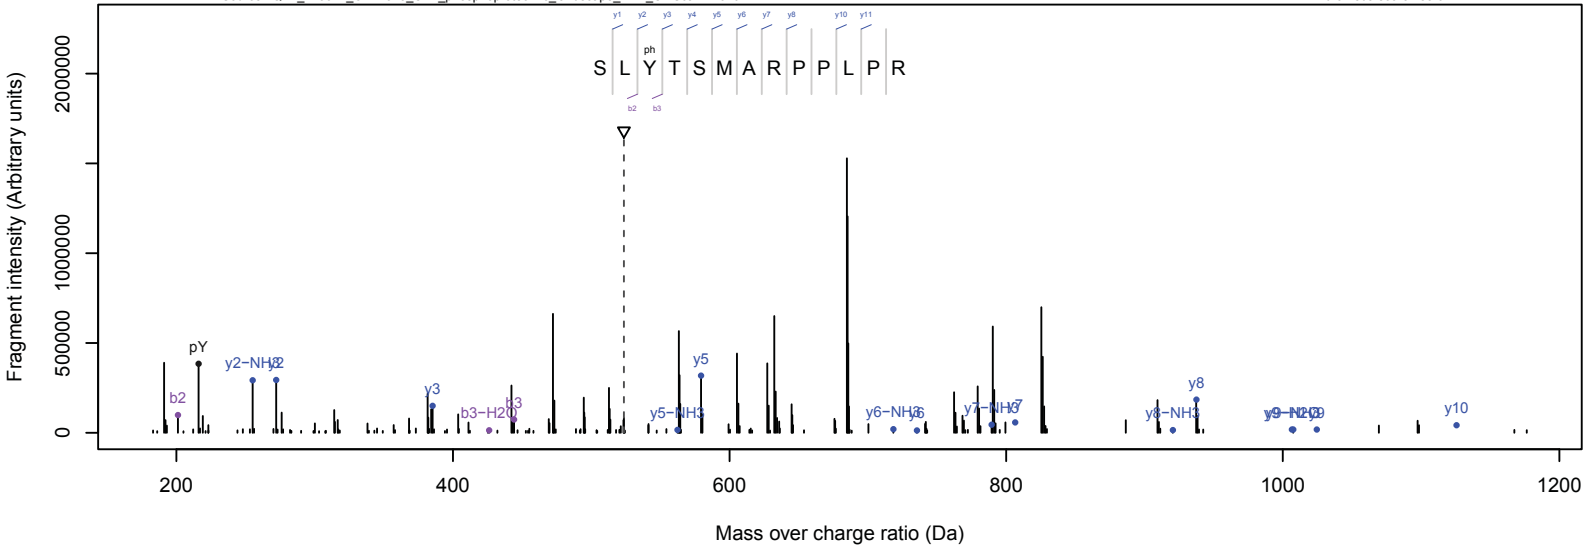

**RGGHRRPDSSTLHTDDGYM(ox)PM(ox)SPGVAPVPSGR-5+**

Source : QE1\_140908\_OPL1013\_CvA\_pTyrIP\_AML\_ML2 Scan : 13611

Andromeda score : 85.615

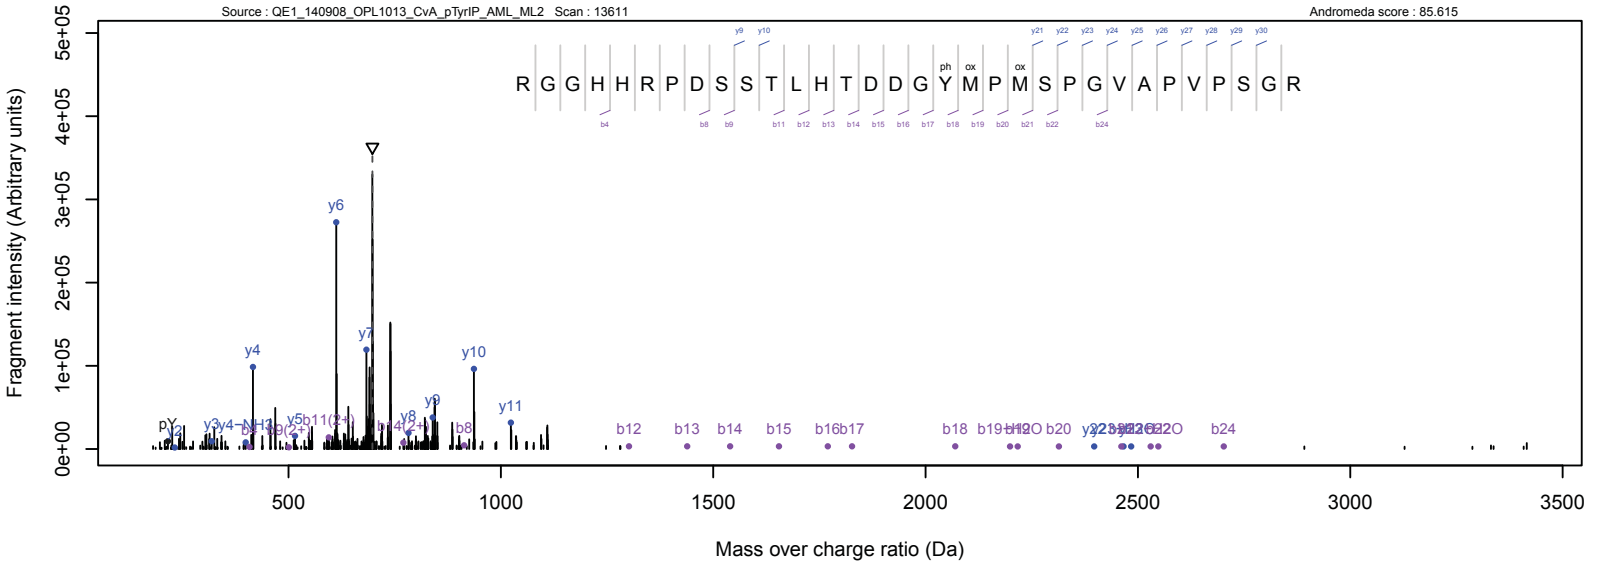

**GPPQLPAVQPSGPIINMEETRPEGSYFS(ph)K-3+**

Source : QE1\_140612\_OPL1013\_CvA\_phosphoproteomic\_landscape\_AML\_C Scan : 35234

Andromeda score : 85.595

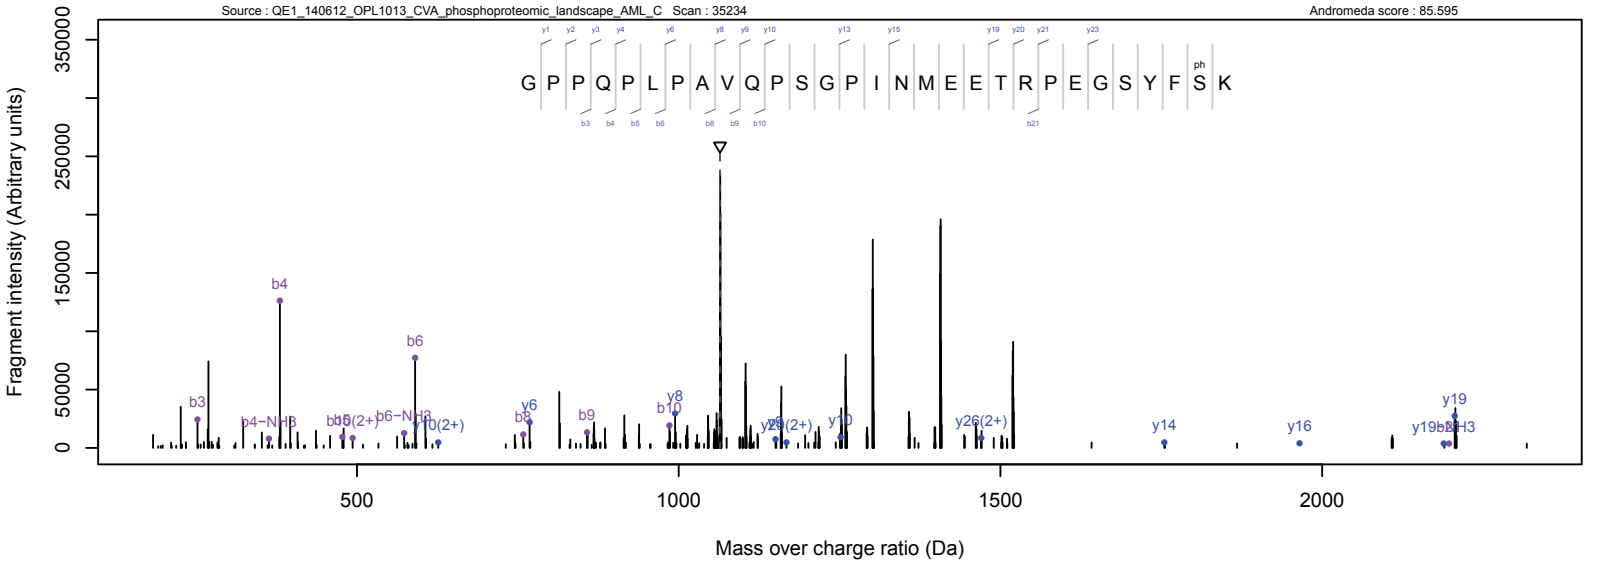

**EEPIIITEYMAK-3+**

Source : QE1\_140822\_OPL1013\_CvA\_pTyrIP\_AML\_cell\_lines\_part2\_B Scan : 40162

Andromeda score : 85.554

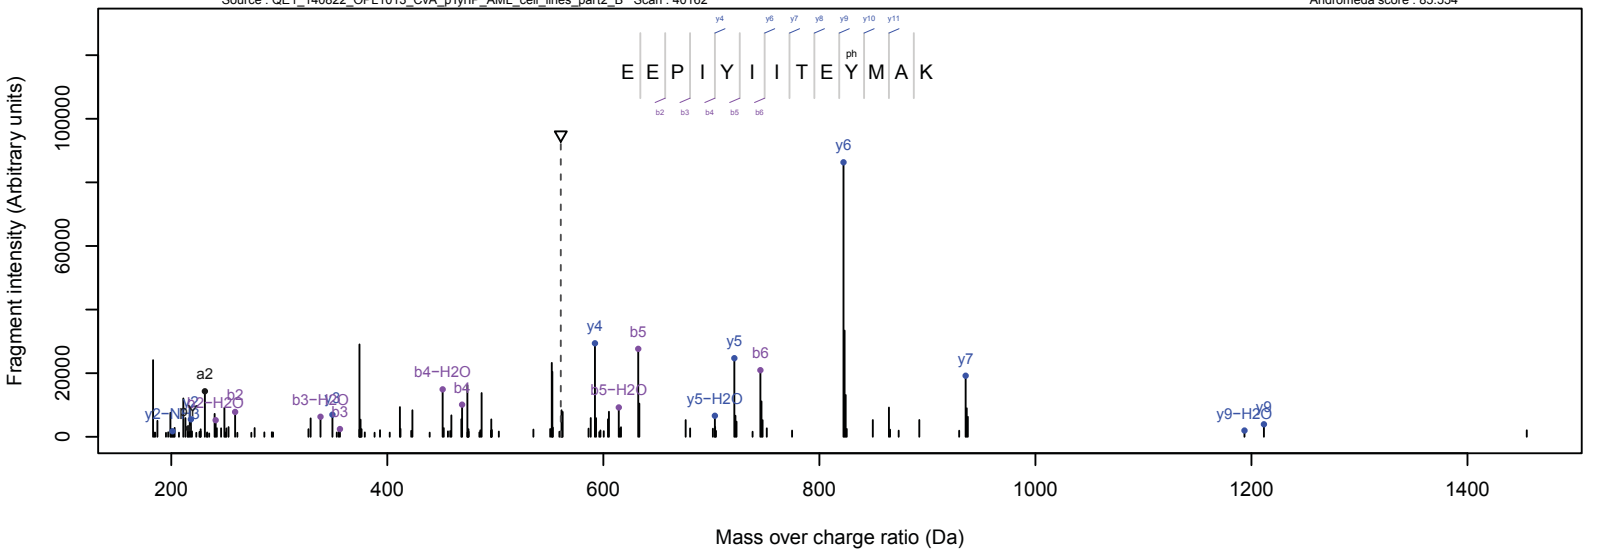

HFNVNTDY(ph)QNPVR-2+

Source : QE1\_140612\_OPL1013\_CVA\_phosphoproteomic\_landscape\_AML\_C Scan : 15030

Andromeda score : 85.554

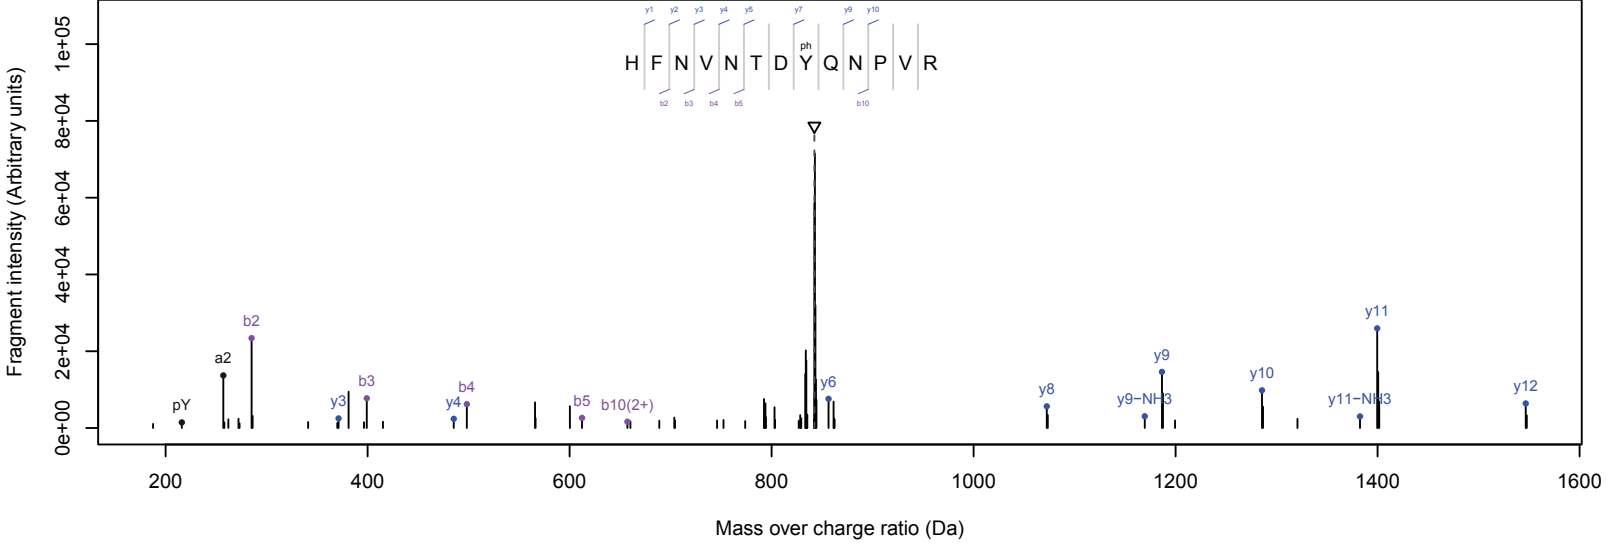

LNRY(ph)PASSLVVVR-3+

Source : QE1\_140612\_OPL1013\_CVA\_phosphoproteomic\_landscape\_AML\_C Scan : 23399

Andromeda score : 85.536

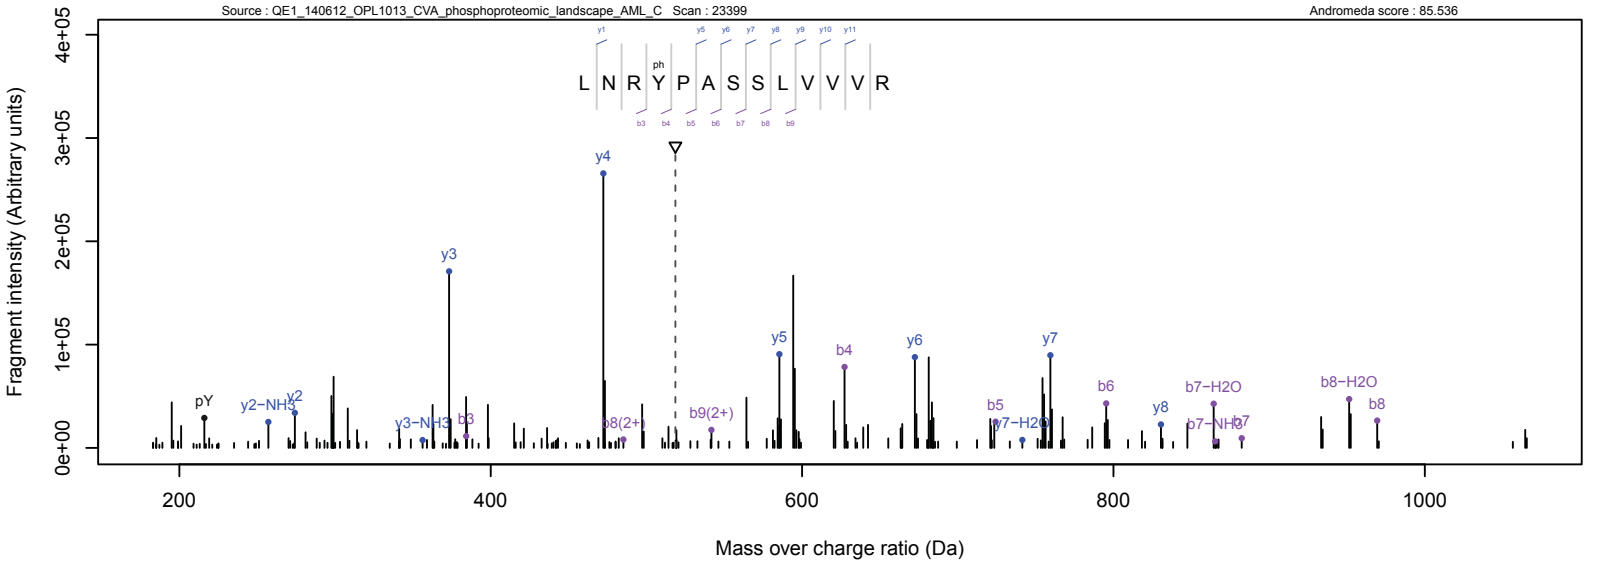

LHLY(ph)NSLTR-2+

Source : QE1\_140612\_OPL1013\_CVA\_phosphoproteomic\_landscape\_AML\_A Scan : 18077

Andromeda score : 85.533

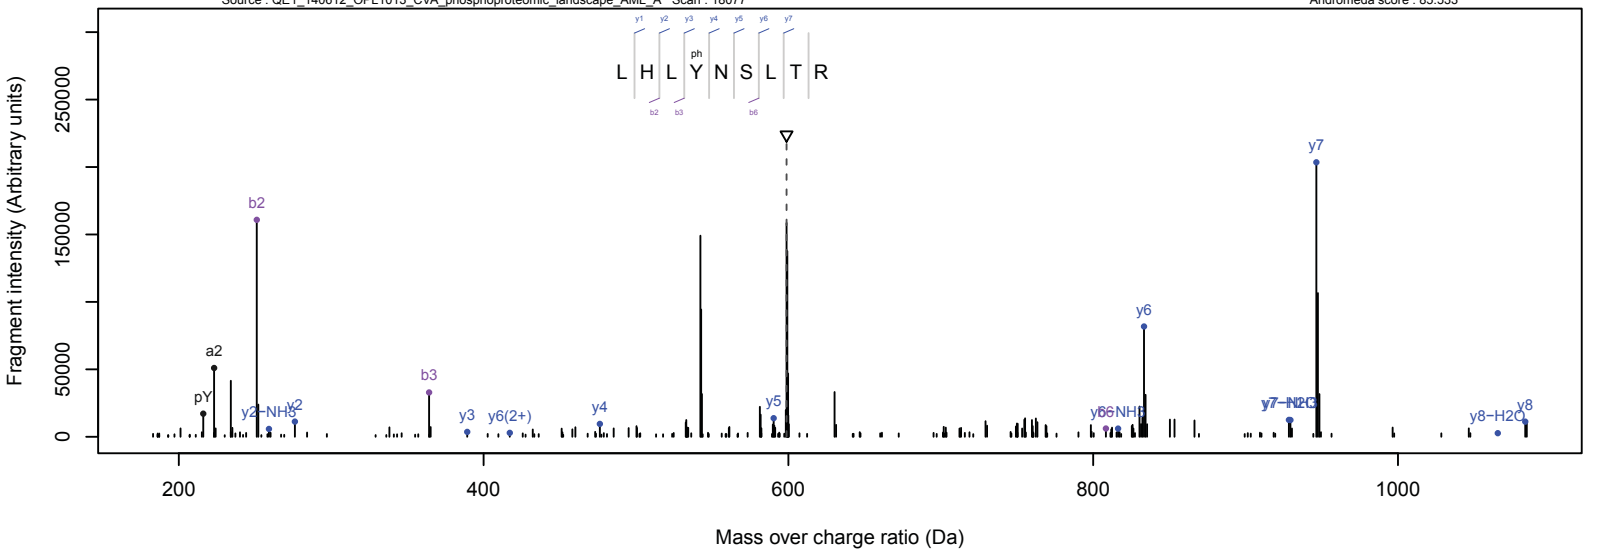

(ac)SSMNPEY(ph)DYLFK-2+

Source : QE1\_140612\_OPL1013\_CVA\_phosphoproteomic\_landscape\_AML\_C Scan : 42985

Andromeda score : 85.522

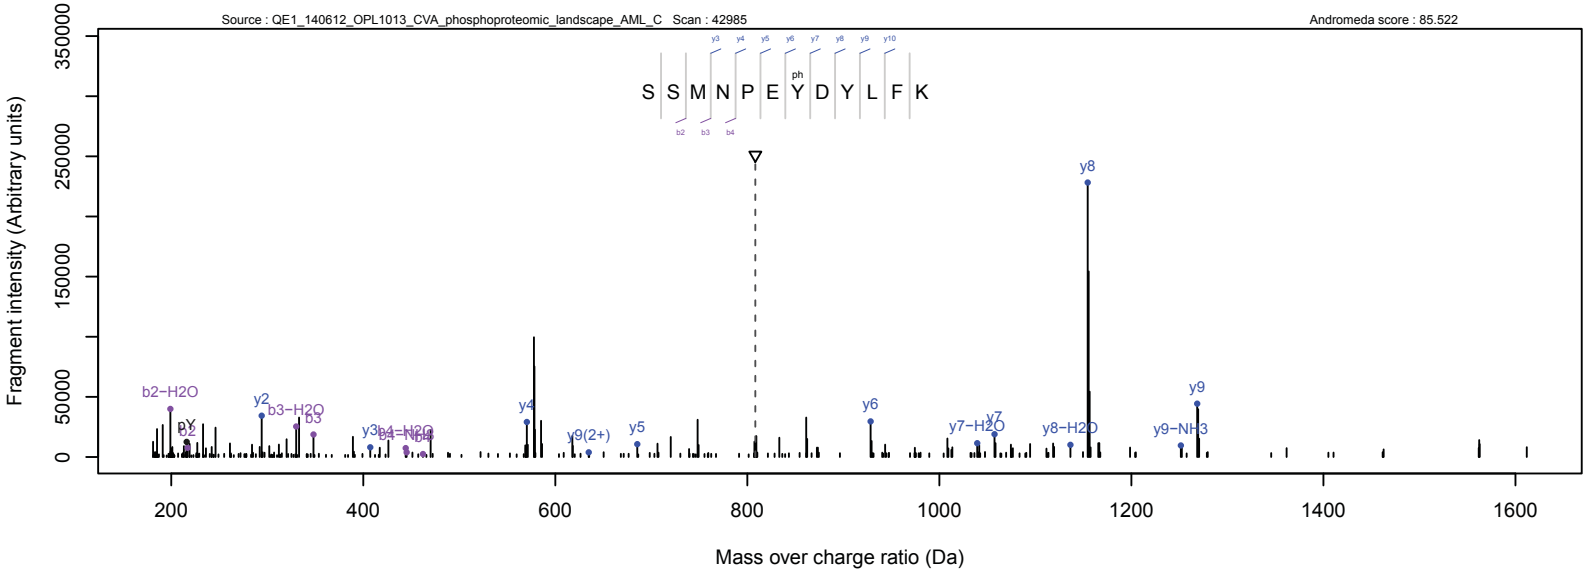

DAGY(ph)EFDICTSVQK-2+

Source : QE1\_140612\_OPL1013\_CVA\_phosphoproteomic\_landscape\_AML\_B Scan : 46870

Andromeda score : 85.493

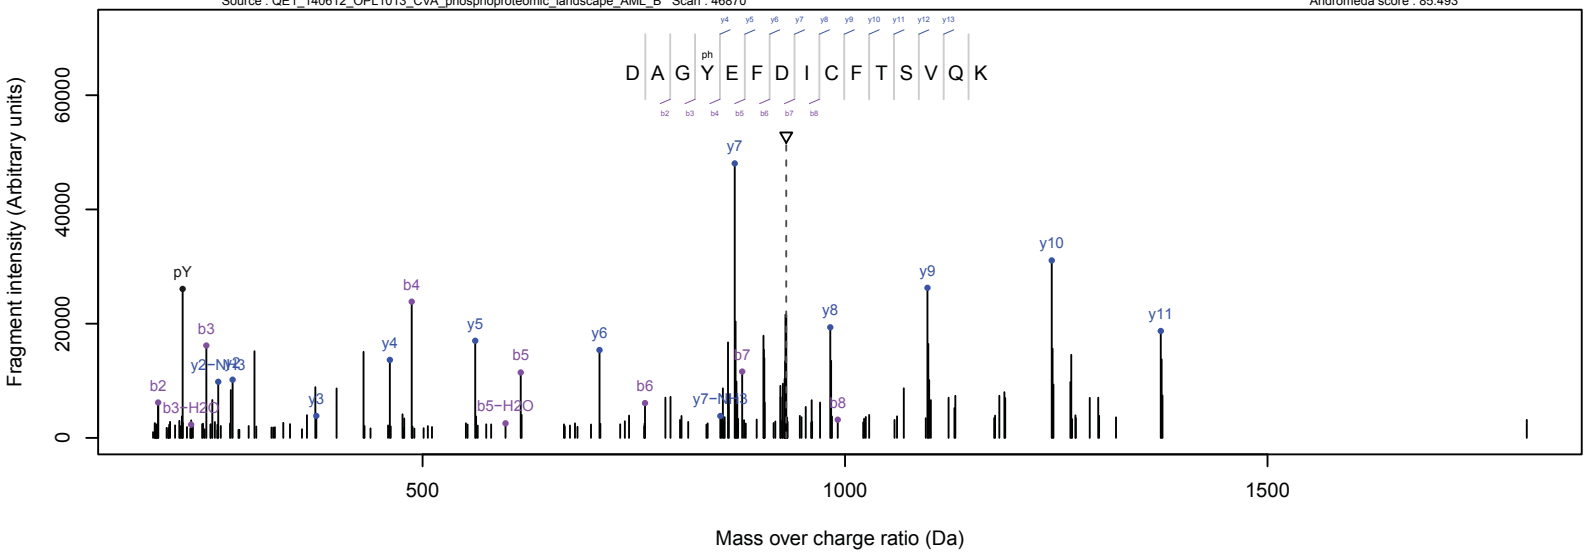

LGPNYLHIPVNC(ph)PYRAR-3+

Source : QE1\_140612\_OPL1013\_CVA\_phosphoproteomic\_landscape\_AML\_C Scan : 29004

Andromeda score : 85.493

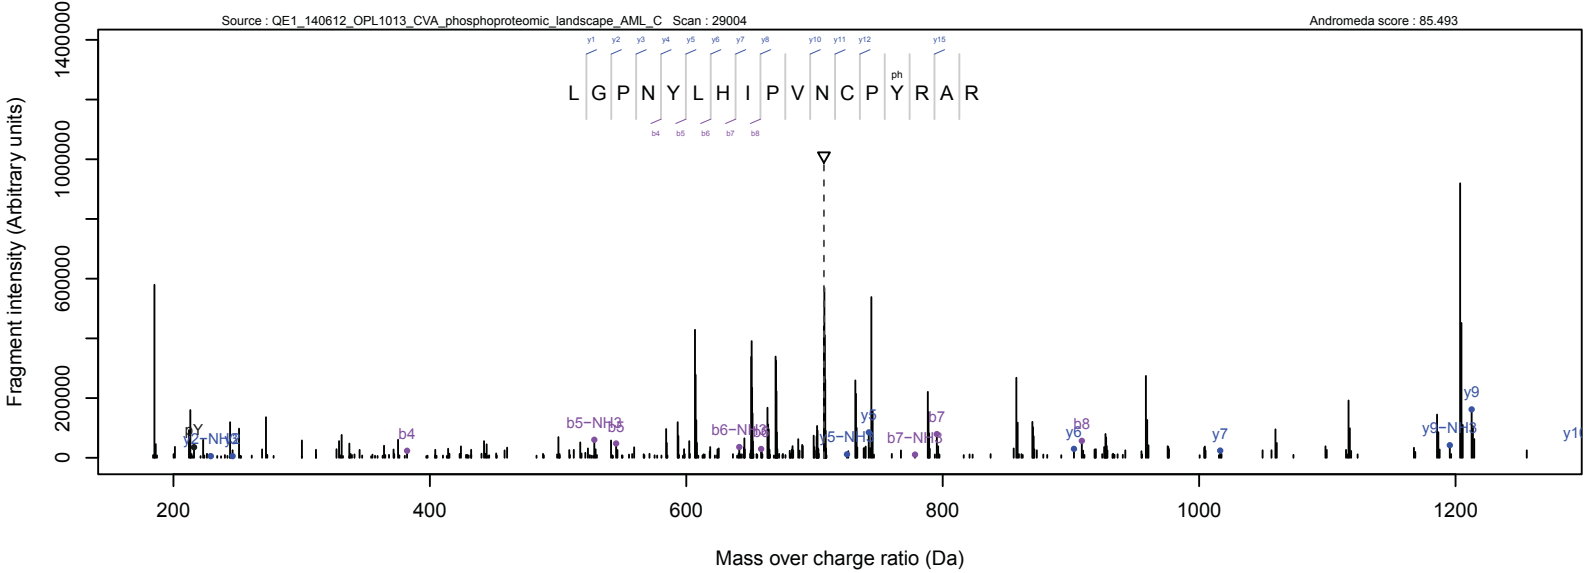



LY(ph)EWISIDKDEAGAK-3+

Source: QE1\_140612\_OPL1013\_CVA\_phosphoproteomic\_landscape\_AML\_C Scan: 30459

Andromeda score: 85.493

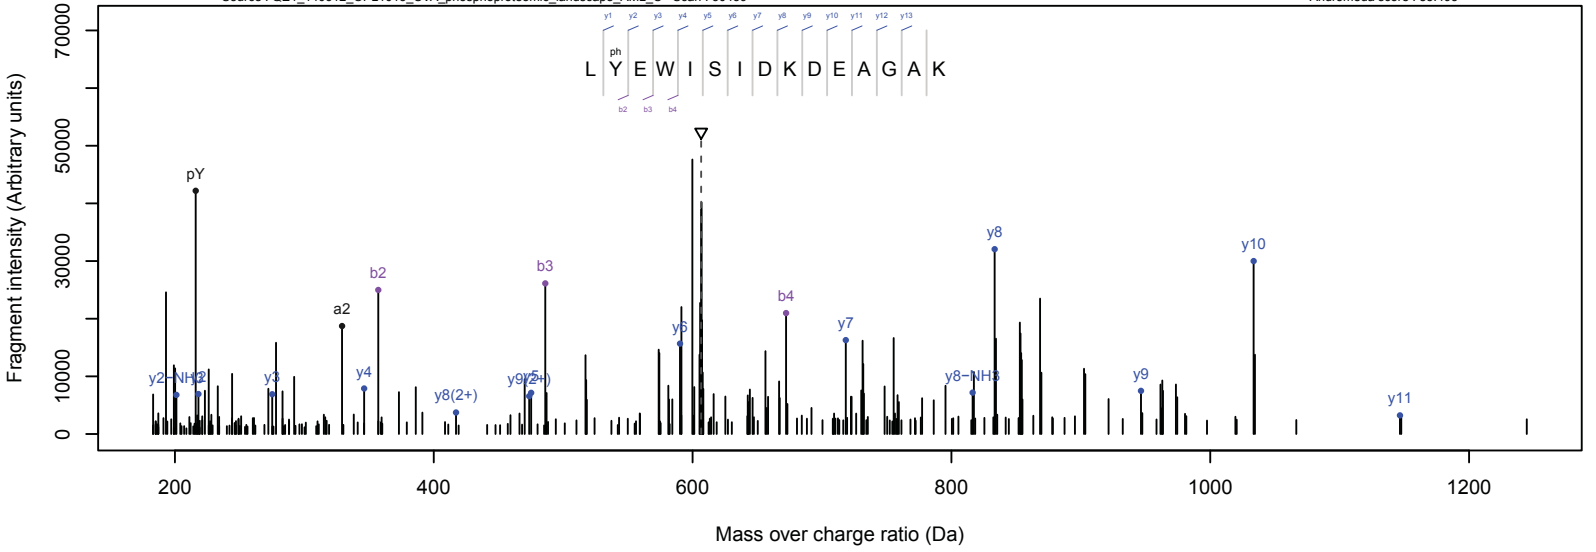

SAYDSTMETMNY(ph)AQIR-2+

Source: QE1\_140612\_OPL1013\_CVA\_phosphoproteomic\_landscape\_AML\_D Scan: 27820

Andromeda score: 85.493

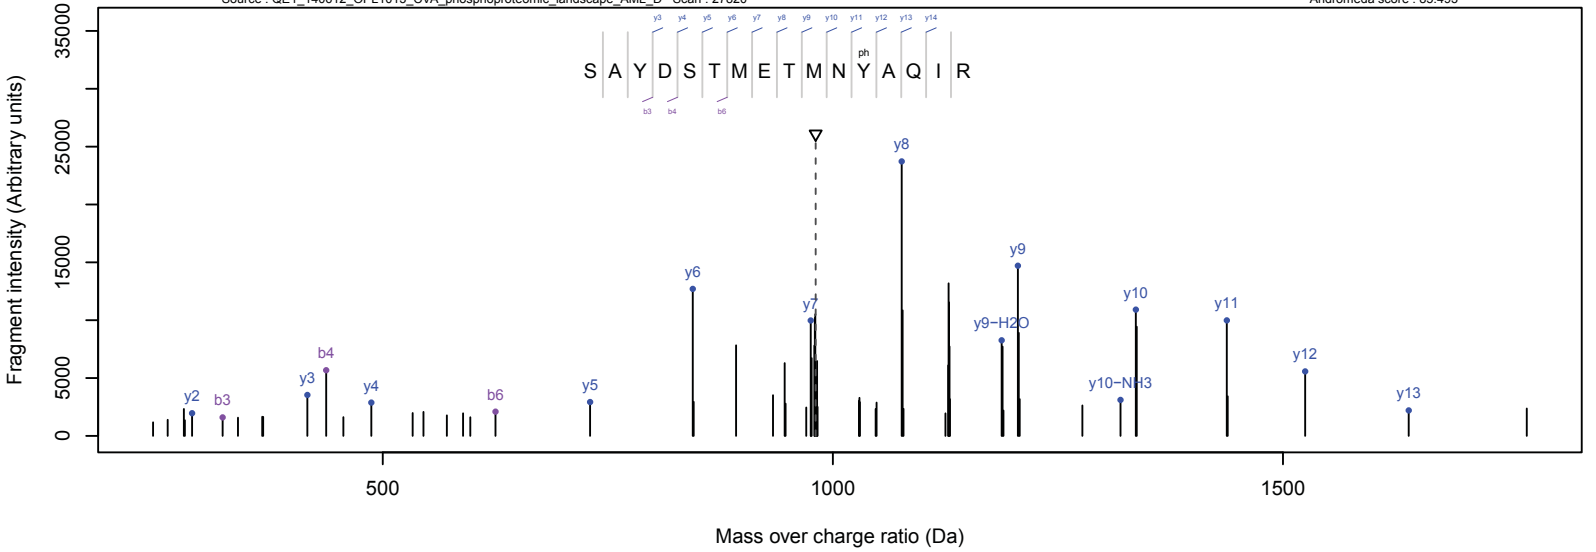

AYALCVLY(ph)RNCVYTYR-3+

Source: QE1\_140612\_OPL1013\_CVA\_phosphoproteomic\_landscape\_AML\_B Scan: 34680

Andromeda score: 85.469

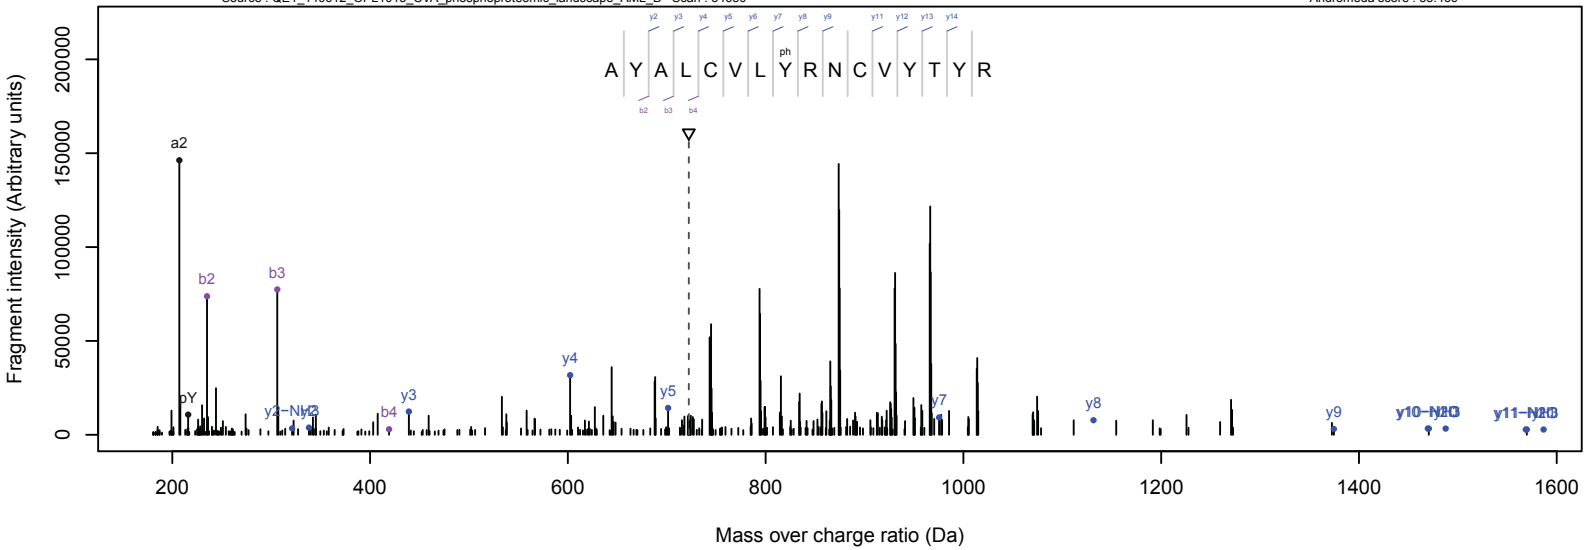

**IRNHQLYCNDCY(ph)LR-3+**

Source : QE1\_140612\_OPL1013\_CVA\_phosphoproteomic\_landscape\_AML\_C Scan : 13420

Andromeda score : 85.45

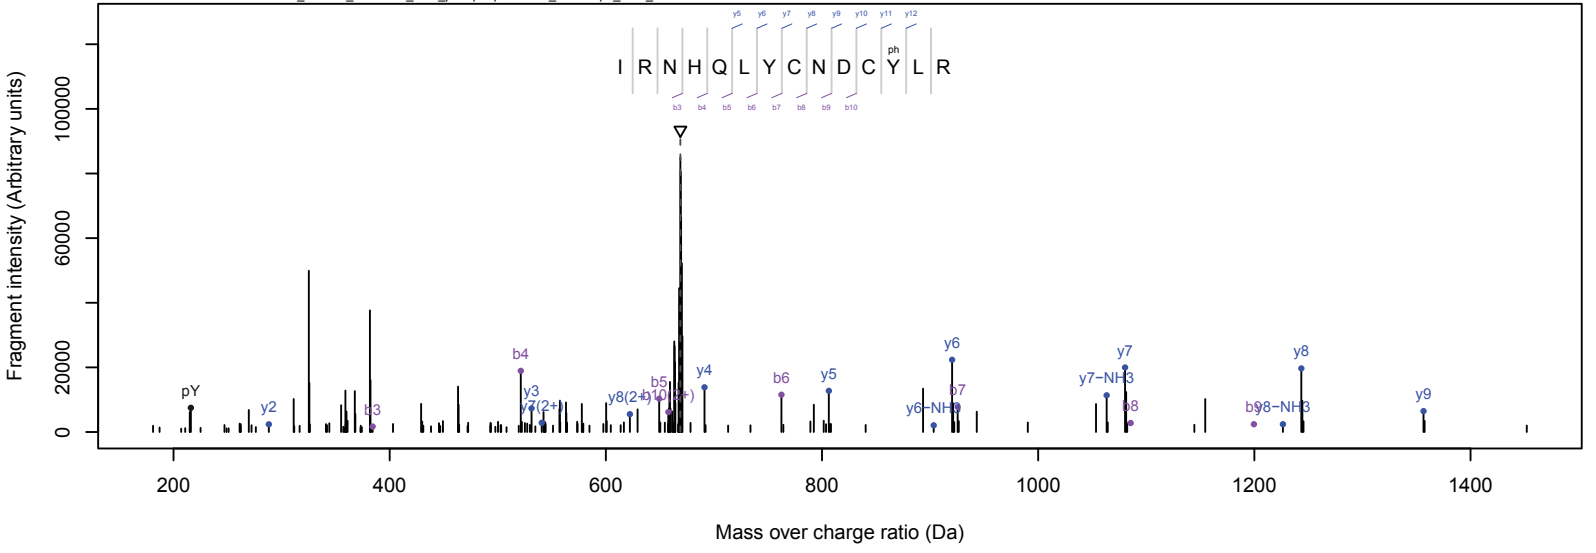

**LQY(ph)FRDHINDIIK-2+**

Source : QE1\_140612\_OPL1013\_CVA\_phosphoproteomic\_landscape\_AML\_C Scan : 28037

Andromeda score : 85.45

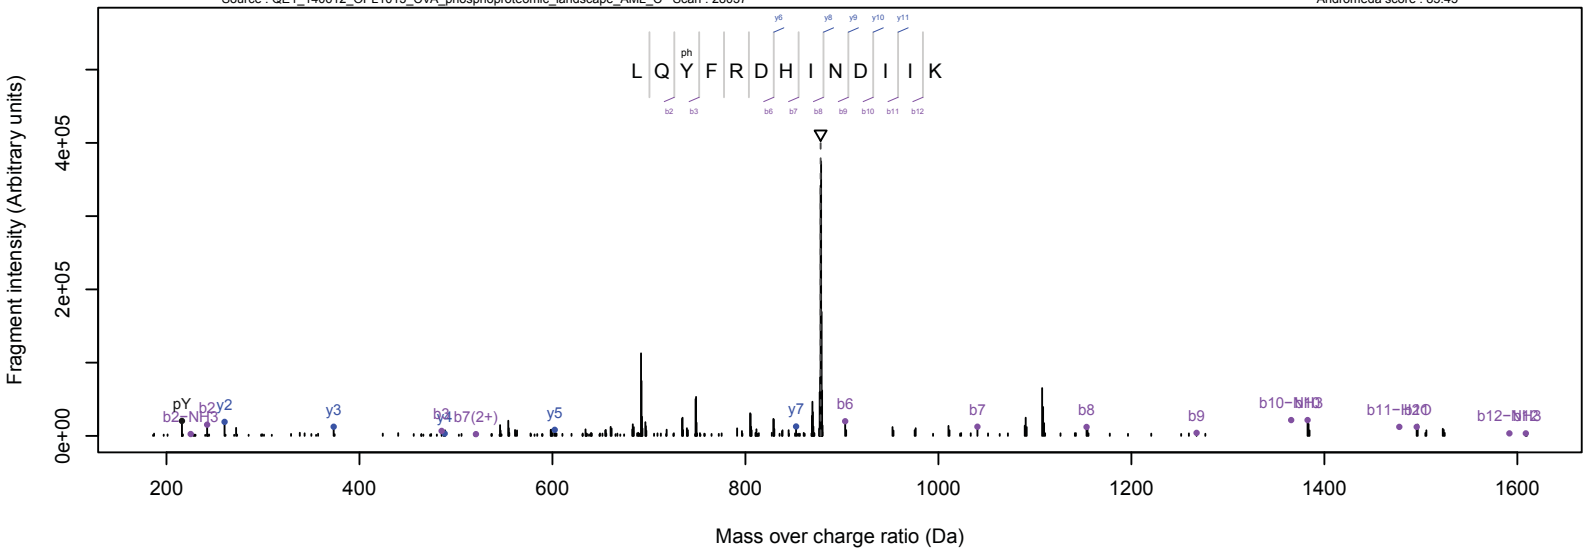

**VVDNSALGNSPY(ph)HRAPR-3+**

Source : QE1\_140612\_OPL1013\_CVA\_phosphoproteomic\_landscape\_AML\_C Scan : 8885

Andromeda score : 85.362

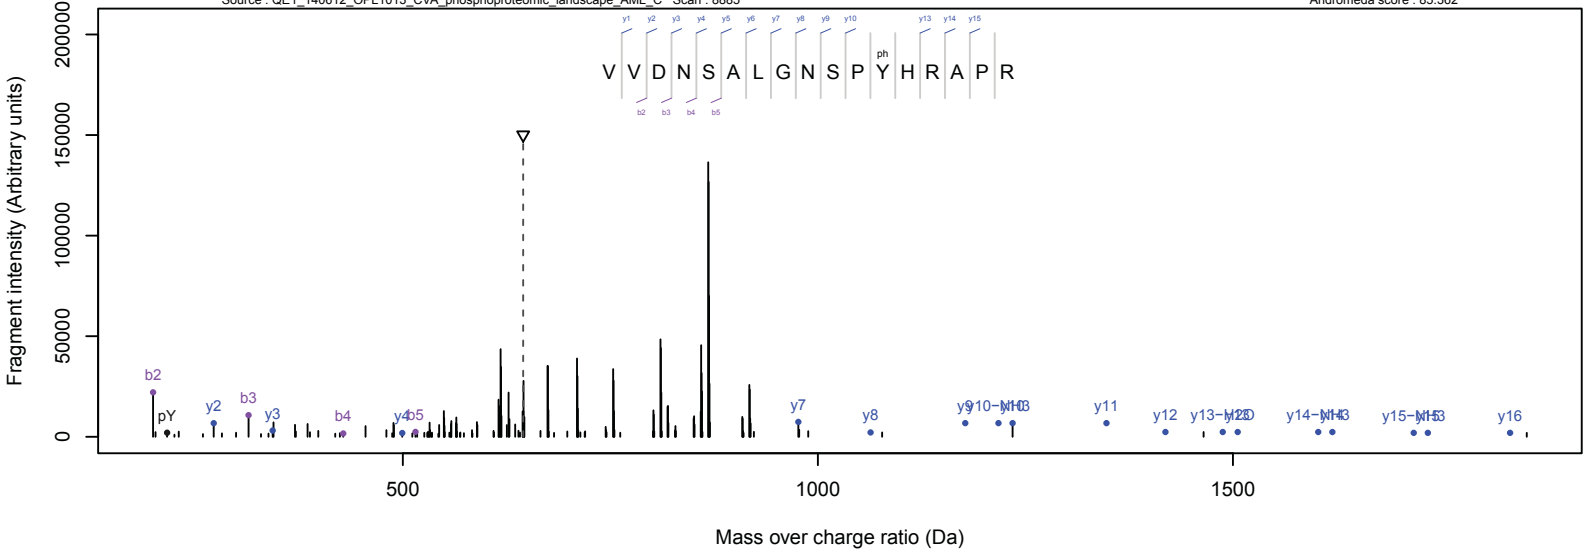

**FVVYNY(ph)MAGR-2+**

Source: QE1\_140612\_OPL1013\_CVA\_phosphoproteomic\_landscape\_AML\_C Scan: 32985

Andromeda score: 85.355

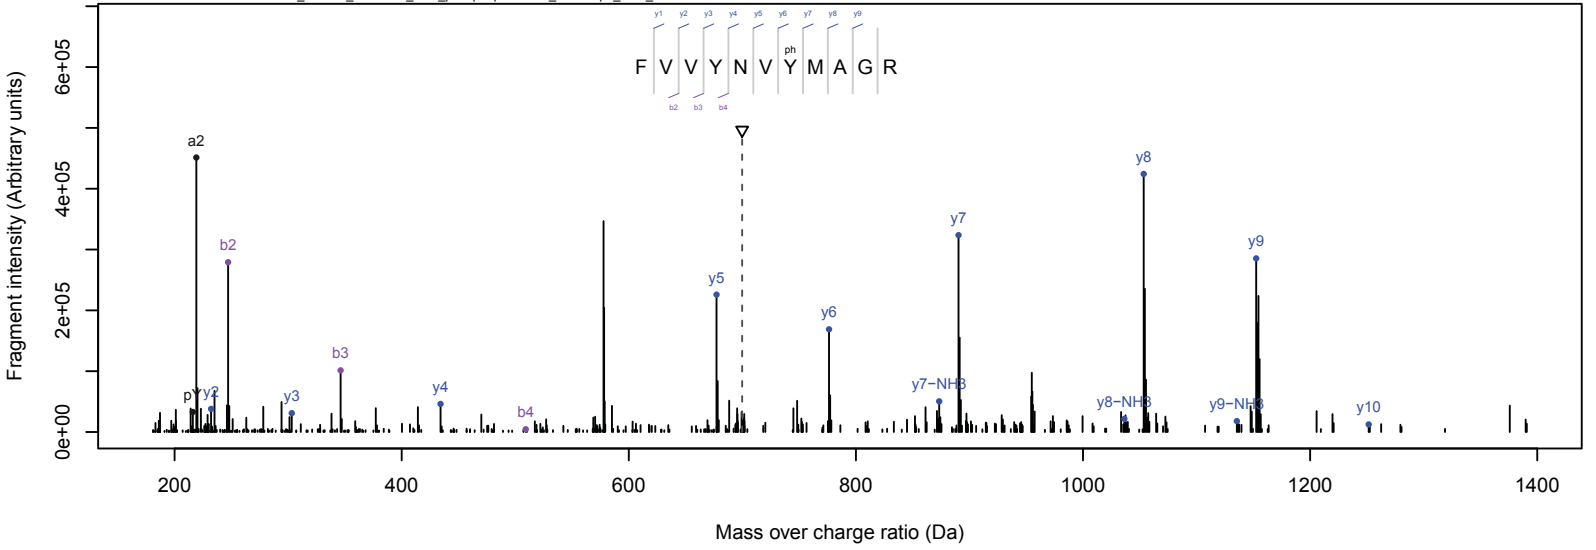

**GGY(ph)LQGNVNGR-2+**

Source: QE1\_140612\_OPL1013\_CVA\_phosphoproteomic\_landscape\_AML\_C Scan: 7144

Andromeda score: 85.355

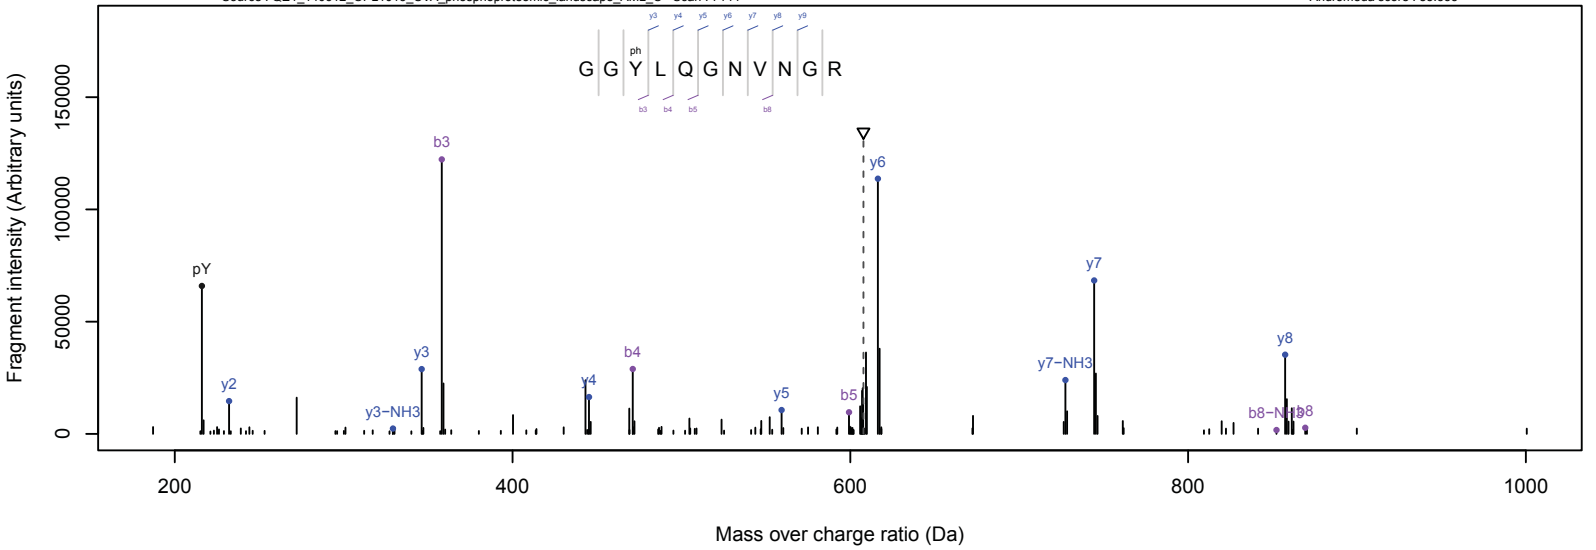

**CSVLNSEEIHY(ph)VIK-2+**

Source: QE1\_140612\_OPL1013\_CVA\_phosphoproteomic\_landscape\_AML\_A Scan: 32051

Andromeda score: 85.271

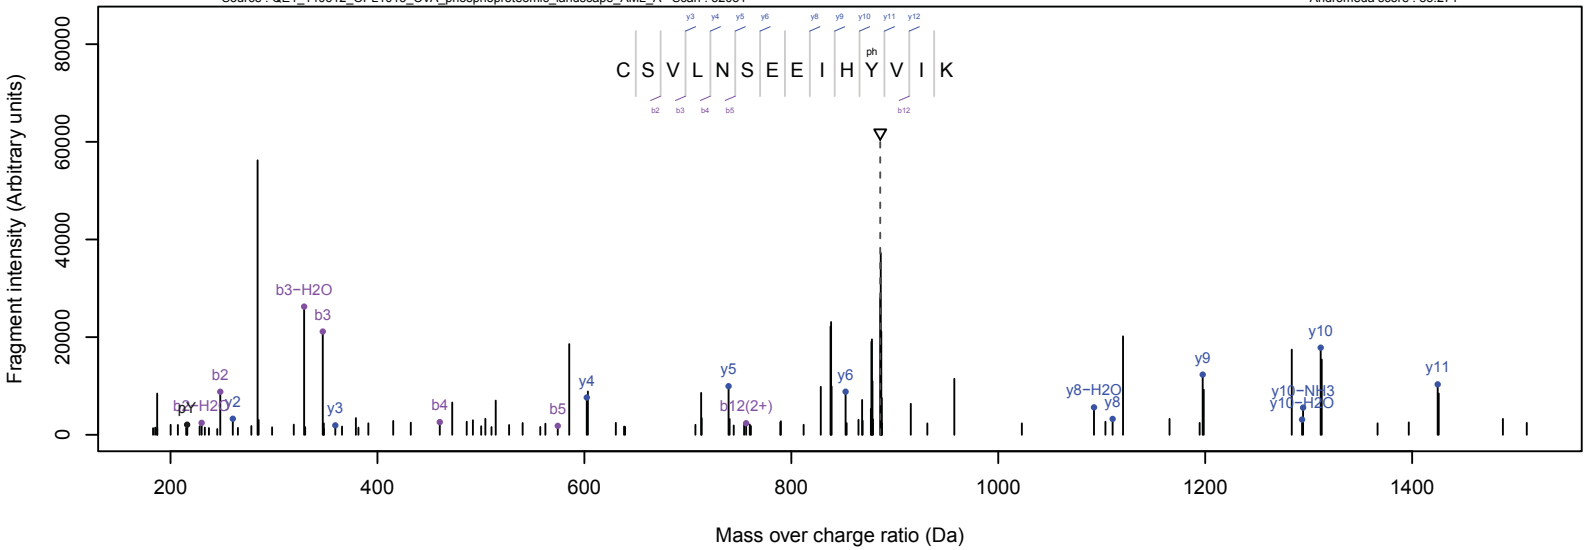

ARDKYGNEGY(ph)IPSNYVTGK-3+

Source : QE1\_140612\_OPL1013\_CVA\_phosphoproteomic\_landscape\_AML\_C Scan : 17594

Andromeda score : 85.185

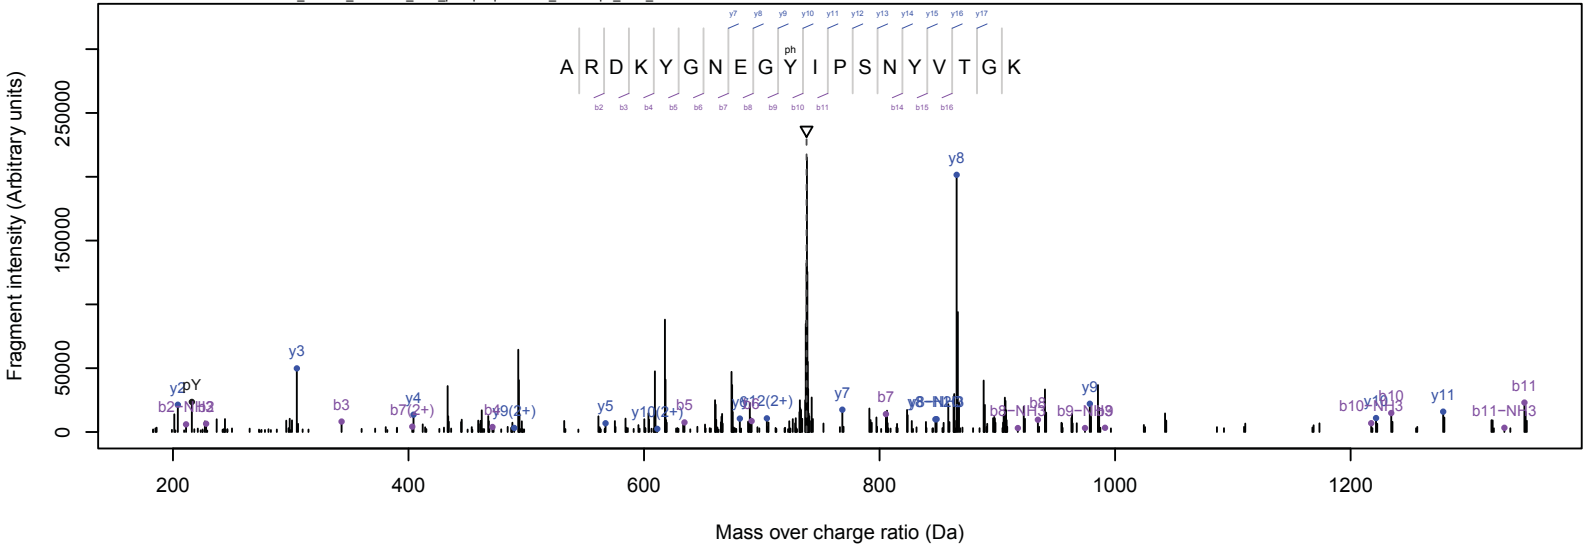

KSGNY(ph)FFLDD-2+

Source : QE1\_140612\_OPL1013\_CVA\_phosphoproteomic\_landscape\_AML\_C Scan : 33757

Andromeda score : 85.154

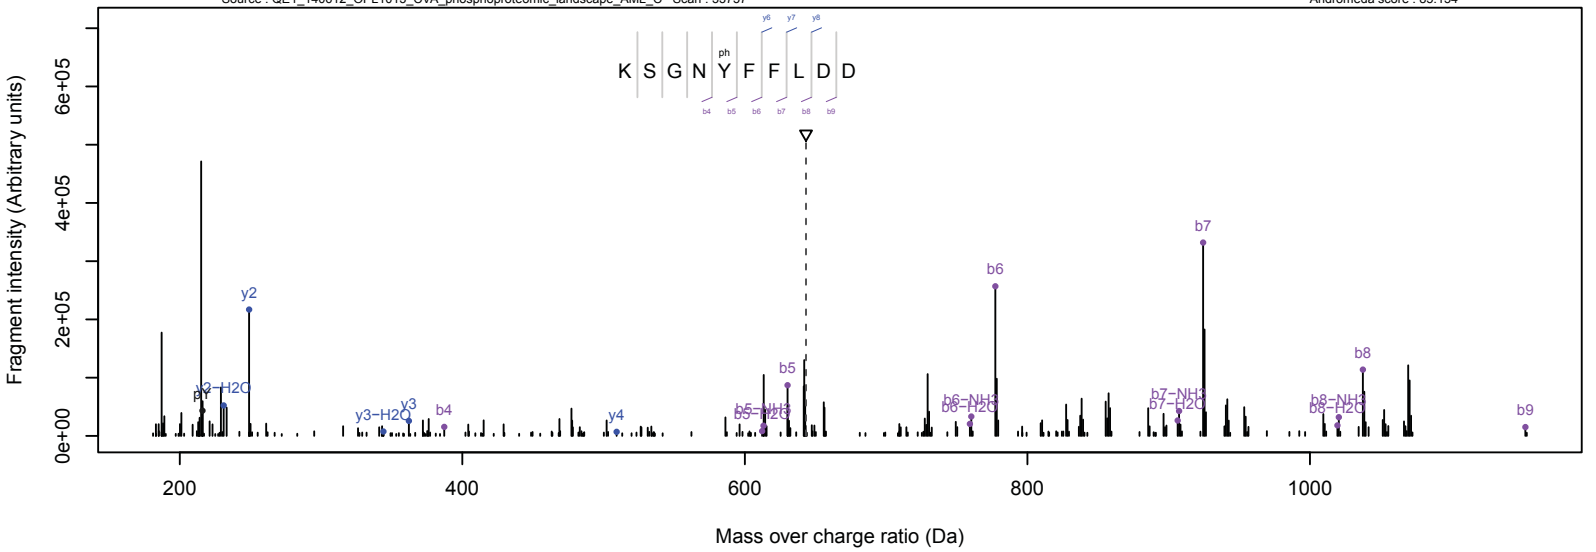

ALQY(ph)ACGNALVCDNVEDARR-3+

Source : QE1\_140908\_OPL1013\_CvA\_pTyrIP\_AML\_HL60 Scan : 25802

Andromeda score : 85.087

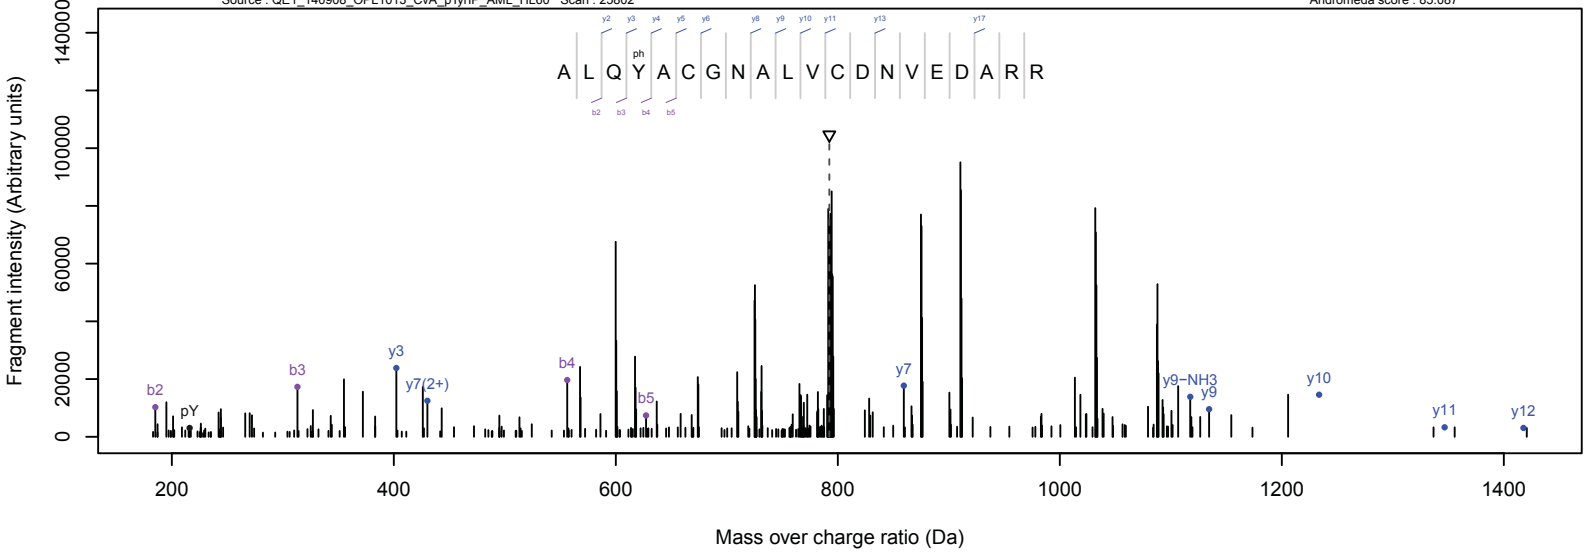

**M(ox)TLDLSIY(ph)ETPSM(ox)GLLDKK-3+**

Source : QE1\_140908\_OPL1013\_CVA\_pTyrIP\_AML\_HL60 Scan : 38398

Andromeda score : 85.087

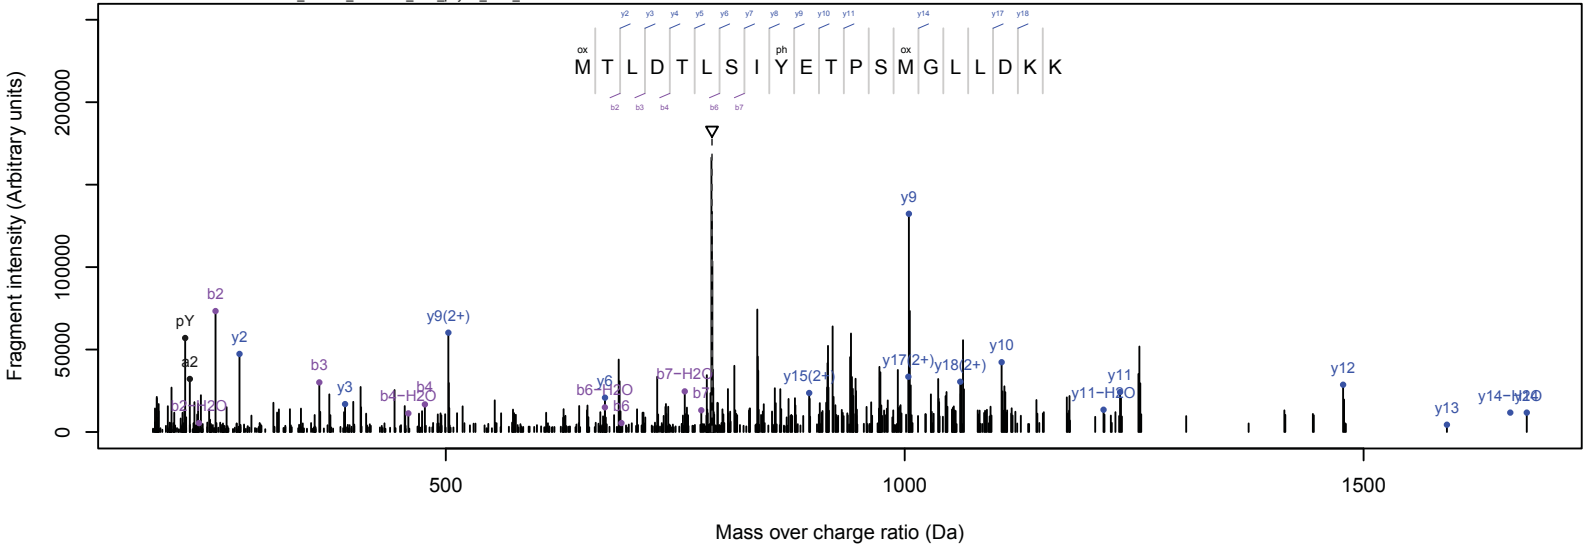

**RLTSECVSSNPY(ph)SKPSSK-3+**

Source : QE1\_140612\_OPL1013\_CVA\_phosphoproteomic\_landscape\_AML\_C Scan : 6085

Andromeda score : 85.087

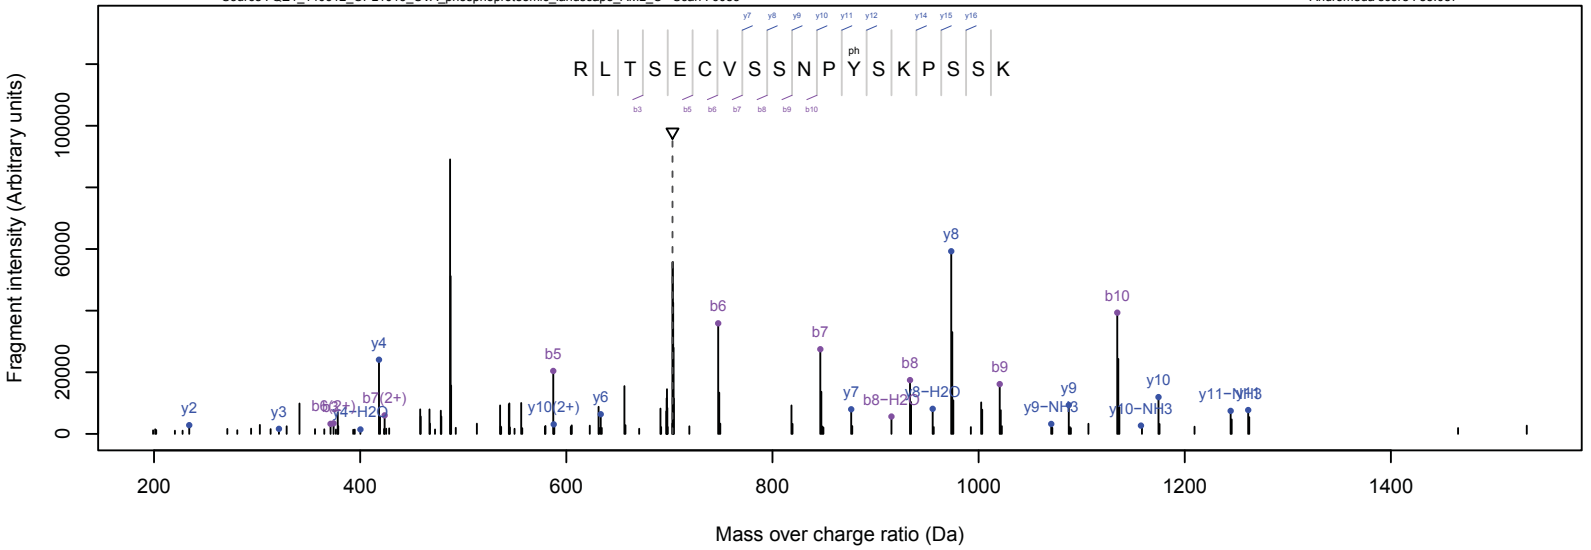

**DQQNLPY(ph)GVTPASPSGHSQGR-3+**

Source : QE1\_140612\_OPL1013\_CVA\_phosphoproteomic\_landscape\_AML\_C Scan : 16088

Andromeda score : 85.062

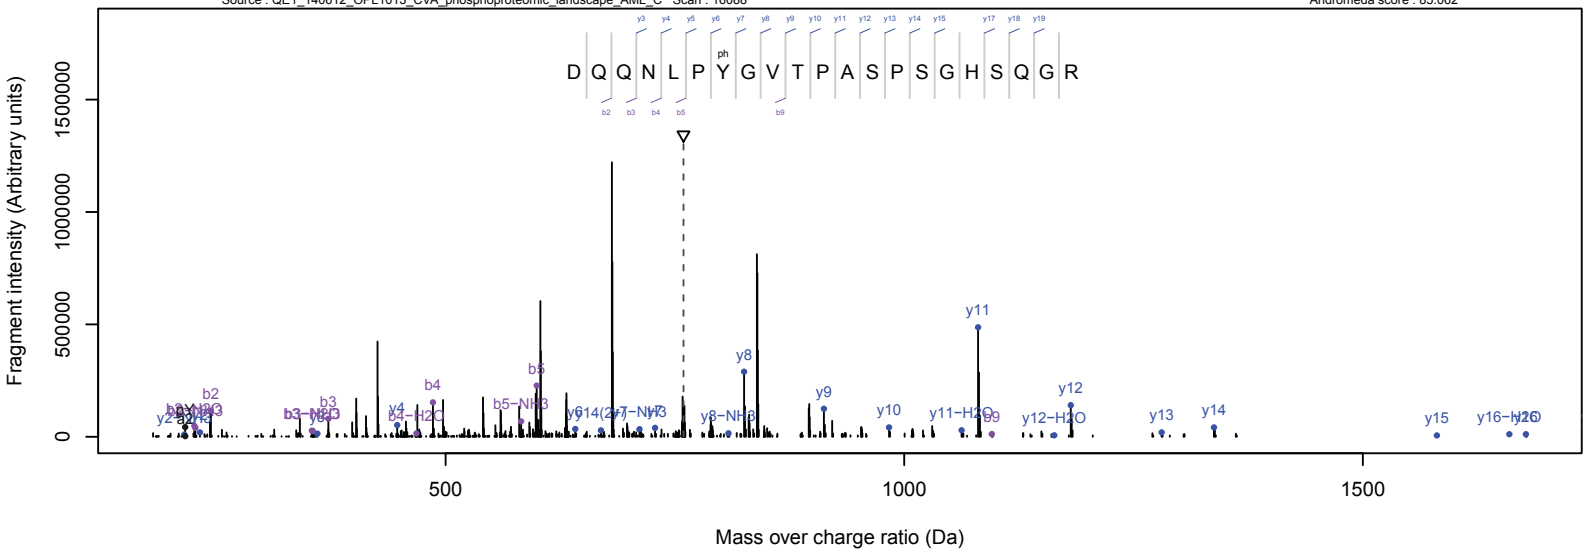

EVPEDSNNFDGSHVYM(ox)HSDY(ph)NVYR-4+

Source : QE1\_140908\_OPL1013\_CvA\_pTyrIP\_AML\_HEL Scan : 22840

Andromeda score : 85.062

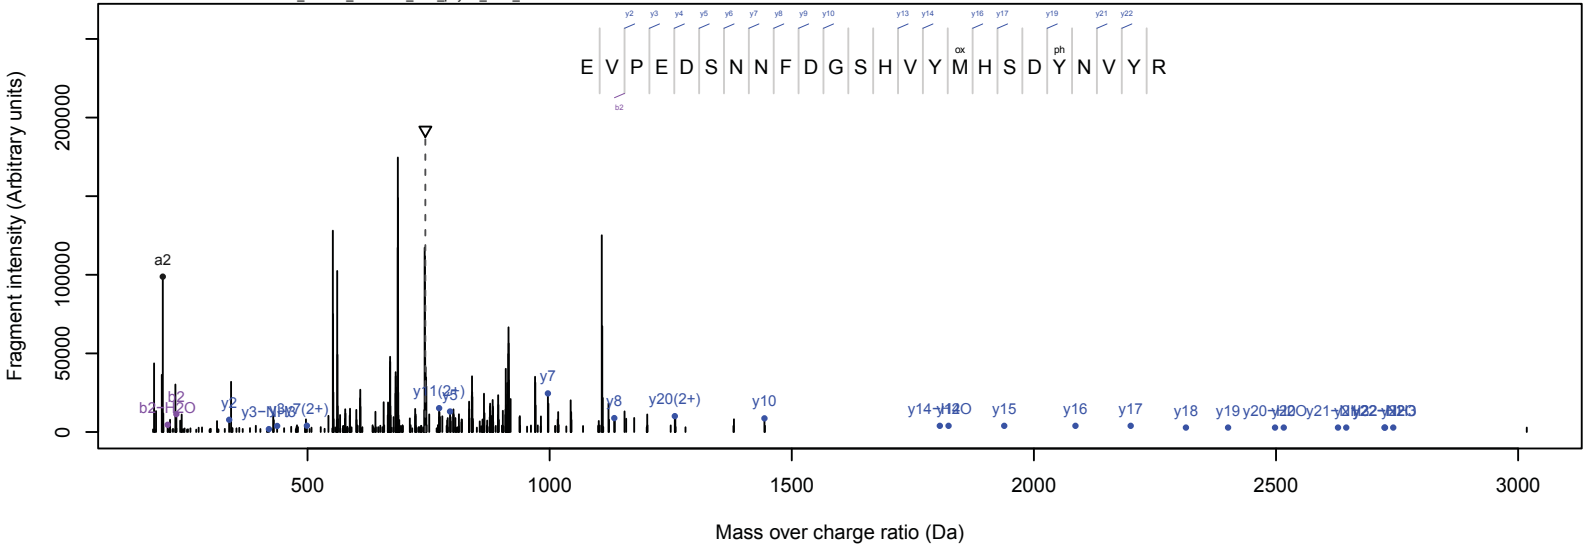

TDGCHAY(ph)LSKNSLDCEIVSAK-3+

Source : QE1\_140612\_OPL1013\_CVA\_phosphoproteomic\_landscape\_AML\_C Scan : 22648

Andromeda score : 85.062

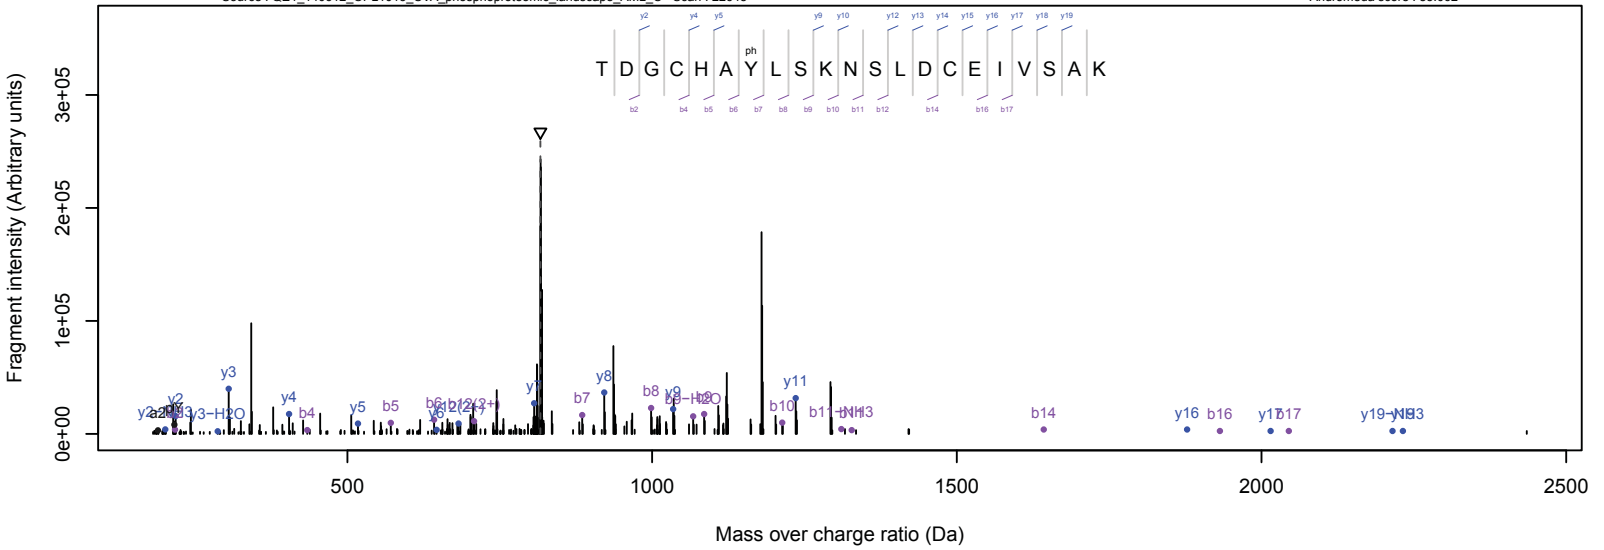

GSTAGGCRNY(ph)PATFWVNPQFK-3+

Source : QE1\_140612\_OPL1013\_CVA\_phosphoproteomic\_landscape\_AML\_B Scan : 34641

Andromeda score : 84.946

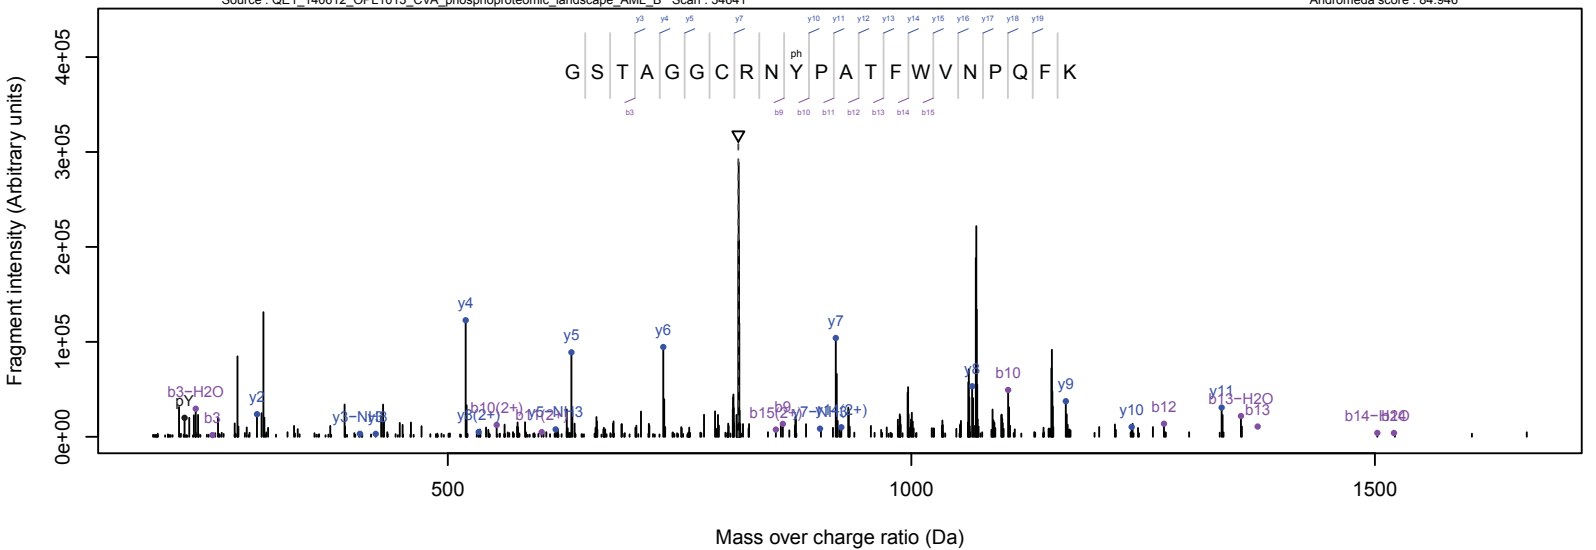



**AEEAAASAY(ph)YNPGNPHNVYMPPTSQPPPPYPPEDEKK-4+**

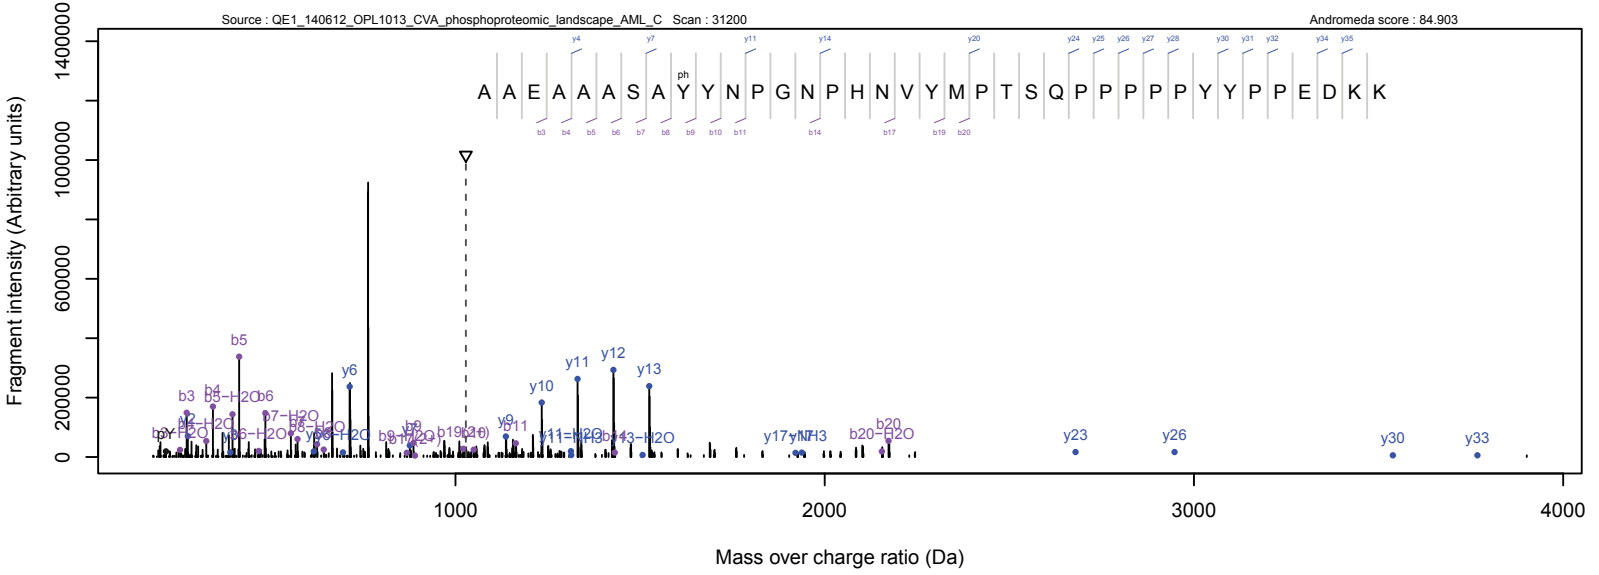

**NHVHQLHTY(ph)YQLGR-4+**

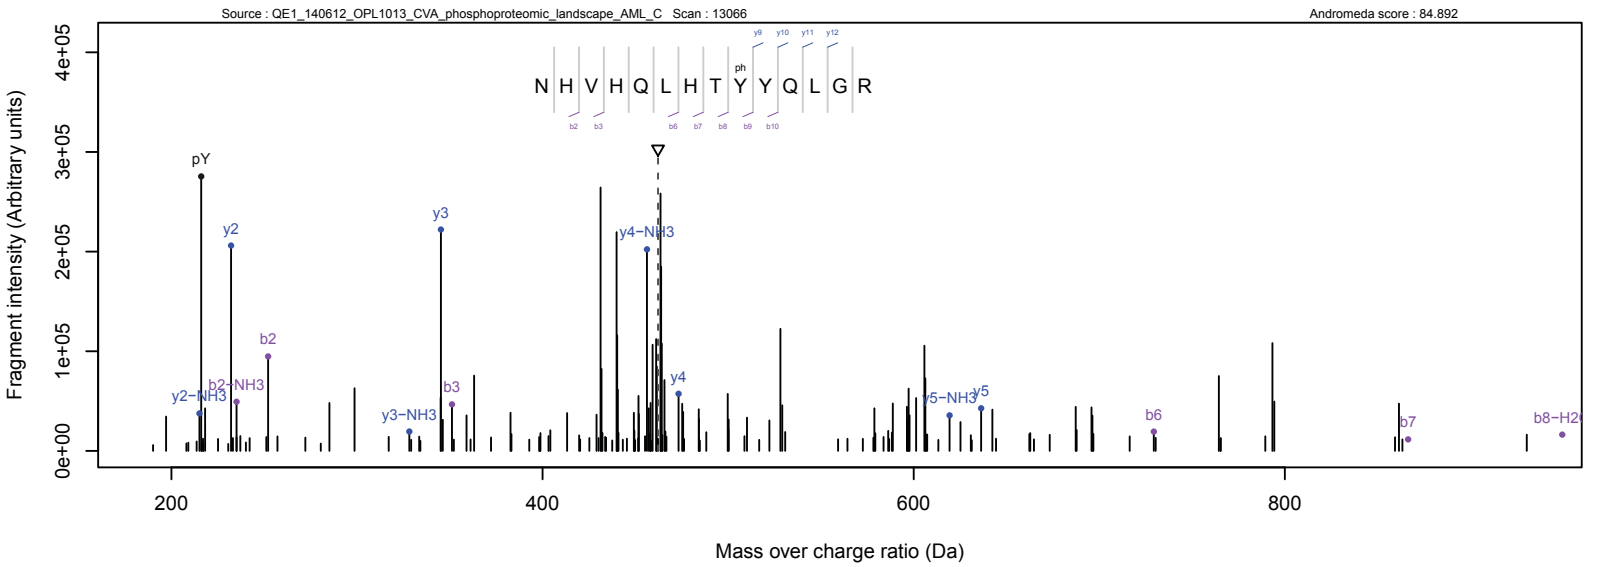

**TVEY(ph)LHSQGVVHR-3+**

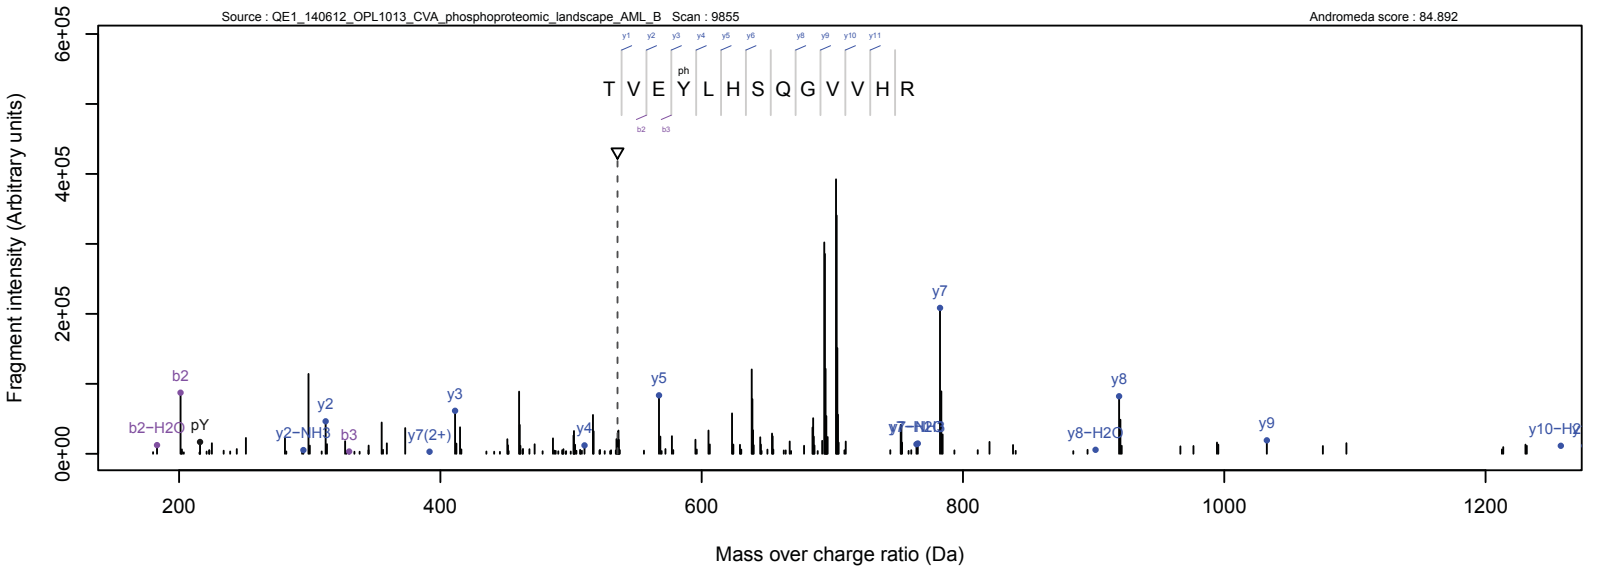



**QKSY(ph)TLVVAK-2+**

Source : QE1\_140612\_OPL1013\_CVA\_phosphoproteomic\_landscape\_AML\_C Scan : 10001

Andromeda score : 84.882

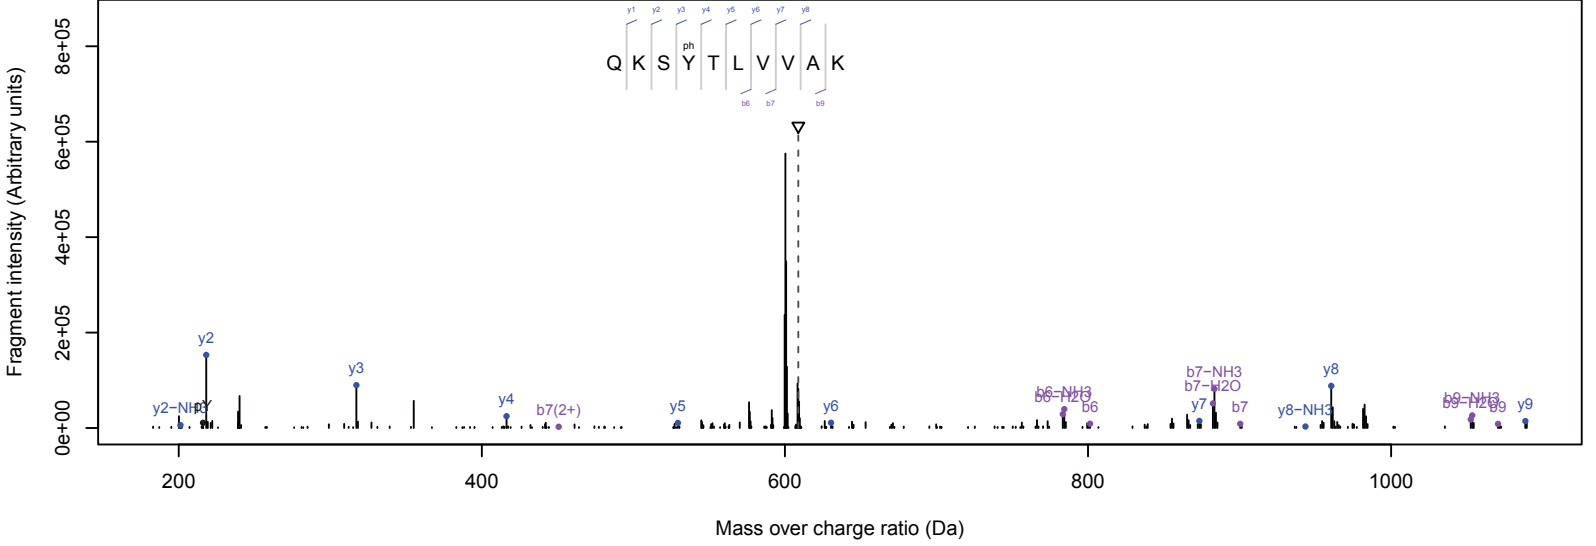

**INQLQVPAVSLY(ph)PSR-2+**

Source : QE1\_140612\_OPL1013\_CVA\_phosphoproteomic\_landscape\_AML\_C Scan : 35873

Andromeda score : 84.859

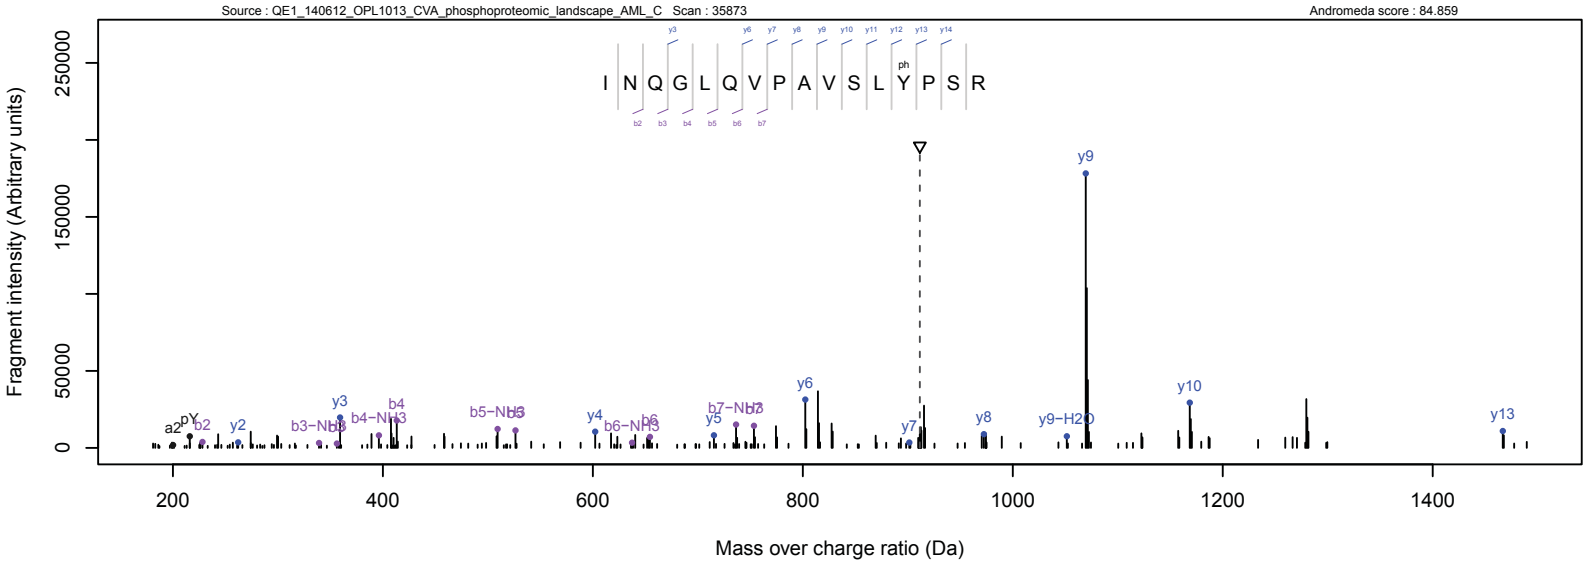

**SAANLEY(ph)LK-2+**

Source : QE1\_140612\_OPL1013\_CVA\_phosphoproteomic\_landscape\_AML\_B Scan : 16673

Andromeda score : 84.817

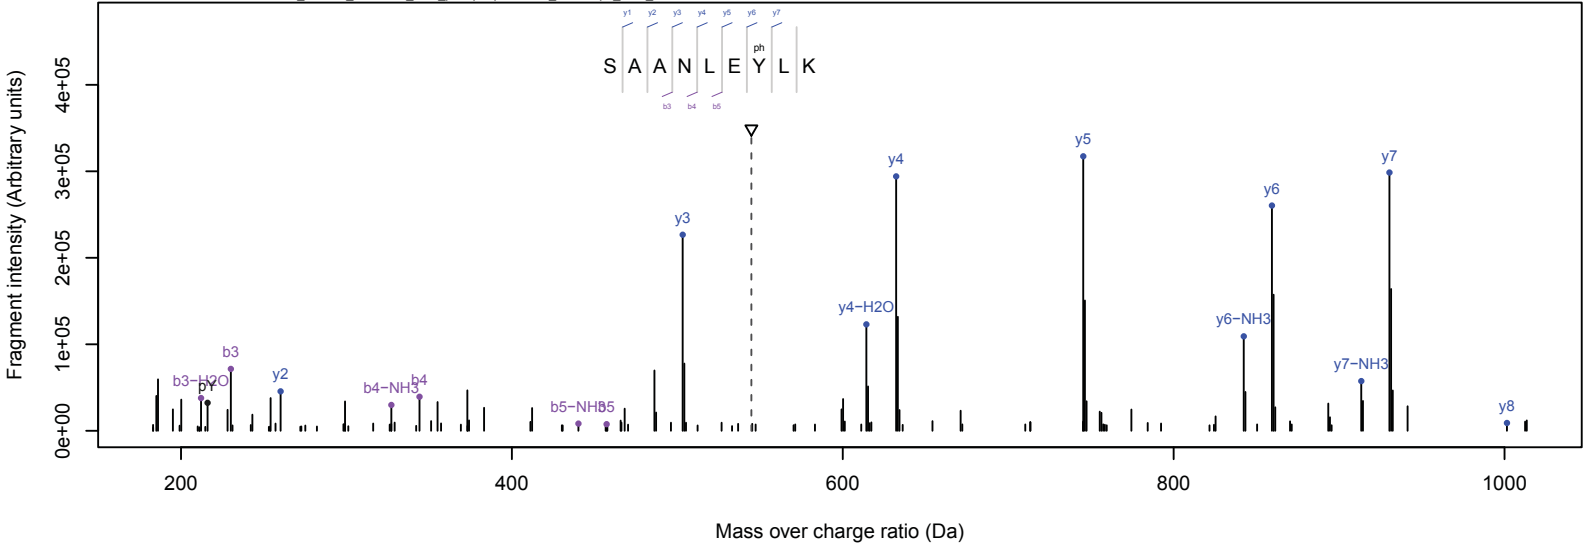

**GPLDGSFY(ph)AQVQRPPR-3+**

Source : QE1\_140612\_OPL1013\_CVA\_phosphoproteomic\_landscape\_AML\_C Scan : 16933

Andromeda score : 84.759

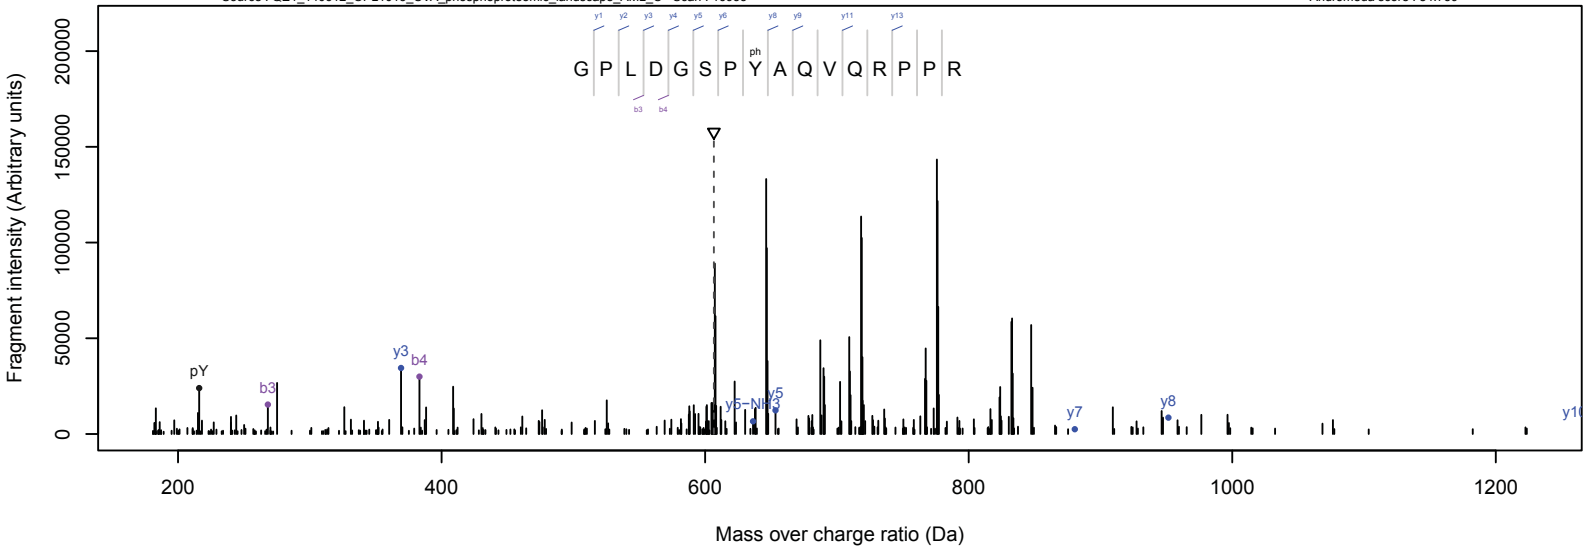

**KGY(ph)DAPLCNLLLFK-2+**

Source : QE1\_140612\_OPL1013\_CVA\_phosphoproteomic\_landscape\_AML\_A Scan : 46212

Andromeda score : 84.759

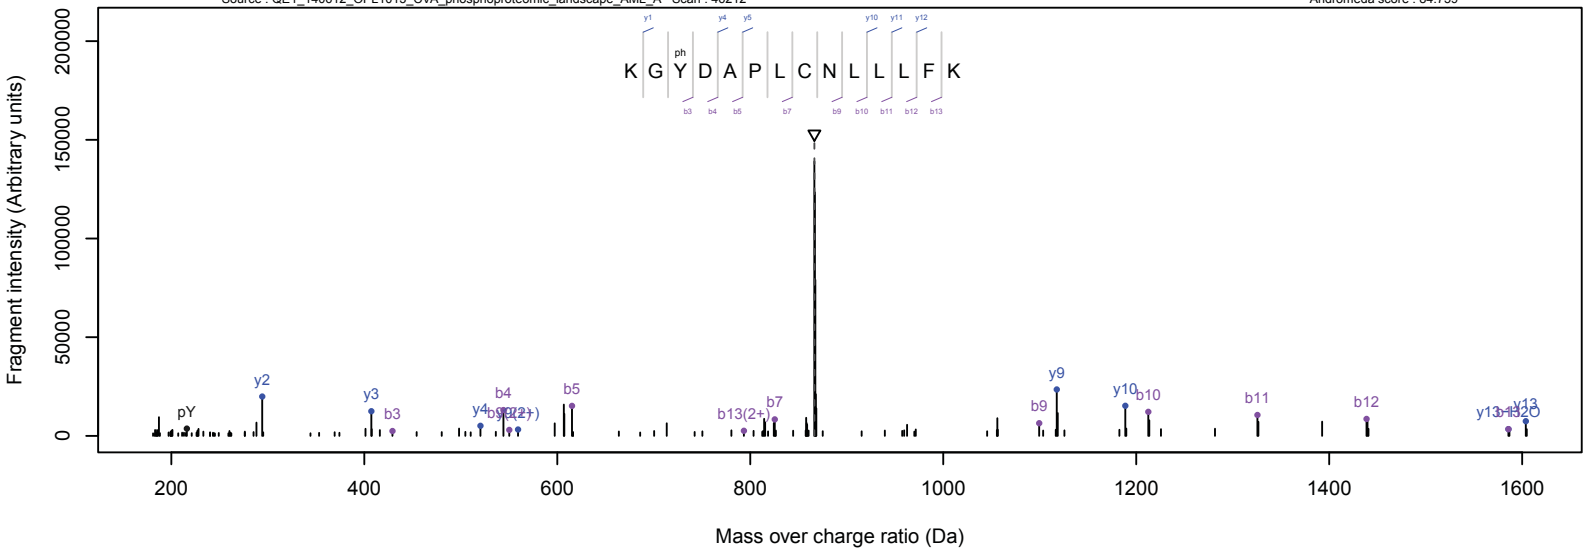

**IALHTALNNP(ph)YYLK-3+**

Source : QE1\_140612\_OPL1013\_CVA\_phosphoproteomic\_landscape\_AML\_C Scan : 34039

Andromeda score : 84.753

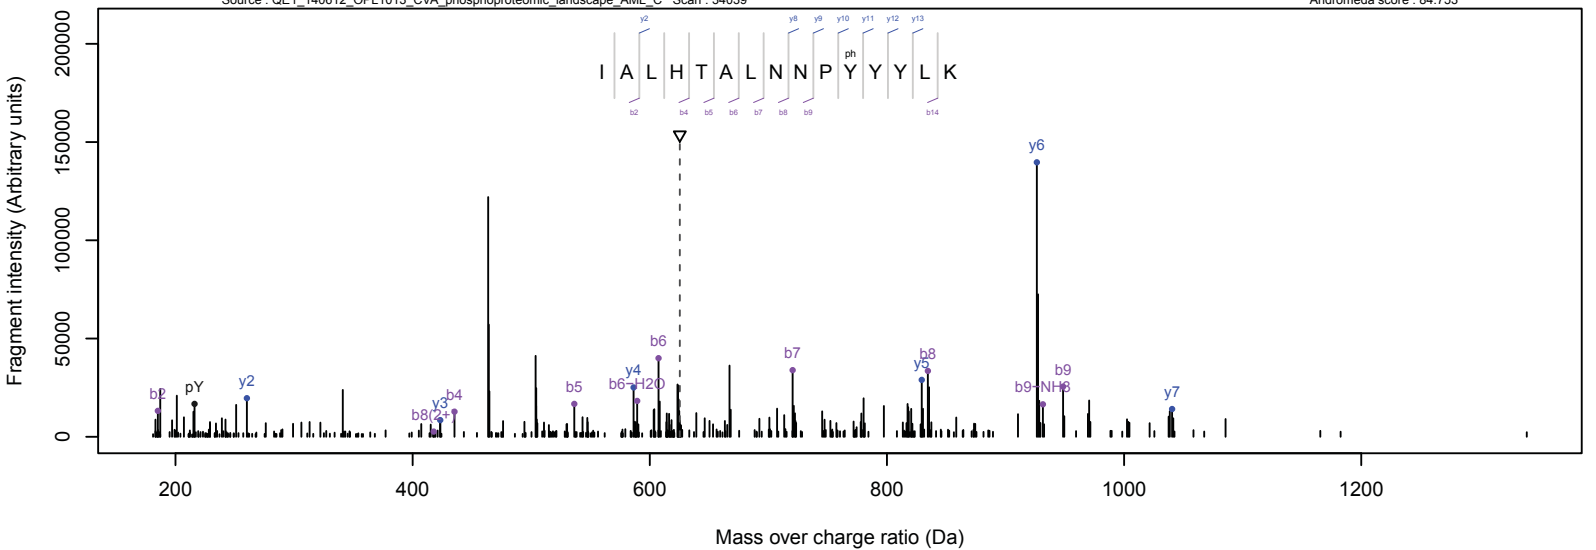

**TY(ph)CYLLPTFAFAHK-2+**

Source : QE1\_140612\_OPL1013\_CVA\_phosphoproteomic\_landscape\_AML\_C Scan : 45436

Andromeda score : 84.753

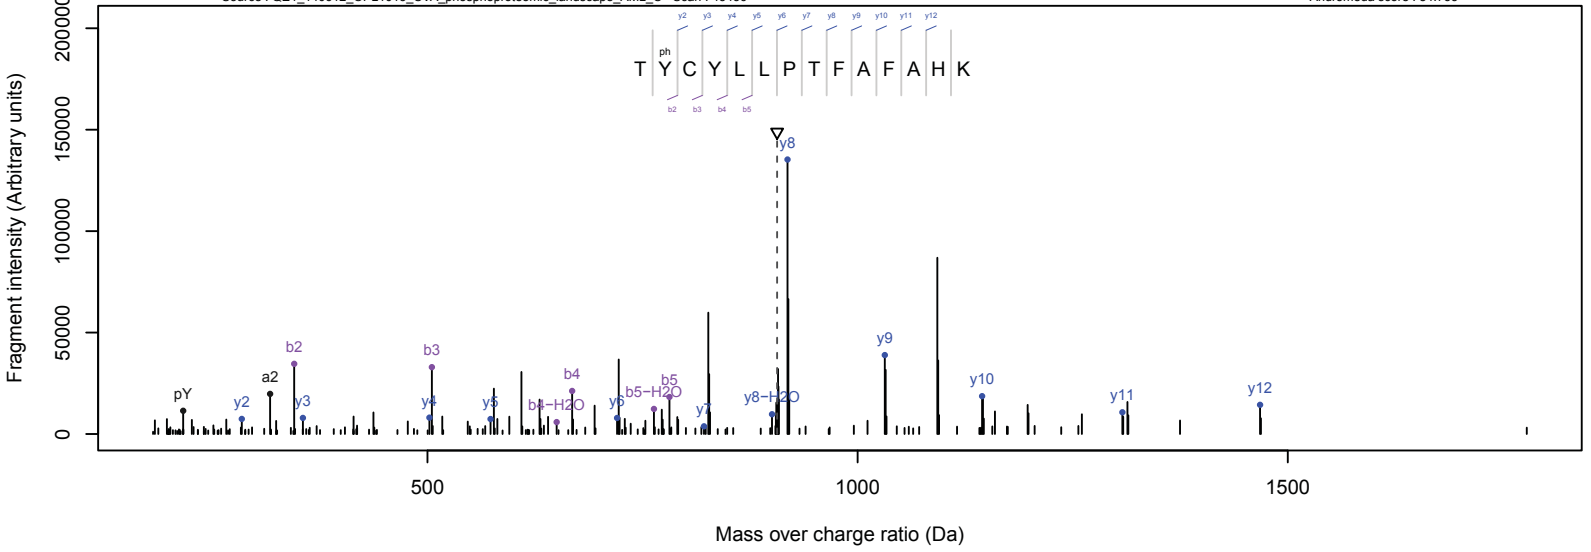

**Y(ph)FPTQALNFAFKDK-2+**

Source : QE1\_140612\_OPL1013\_CVA\_phosphoproteomic\_landscape\_AML\_C Scan : 40852

Andromeda score : 84.753

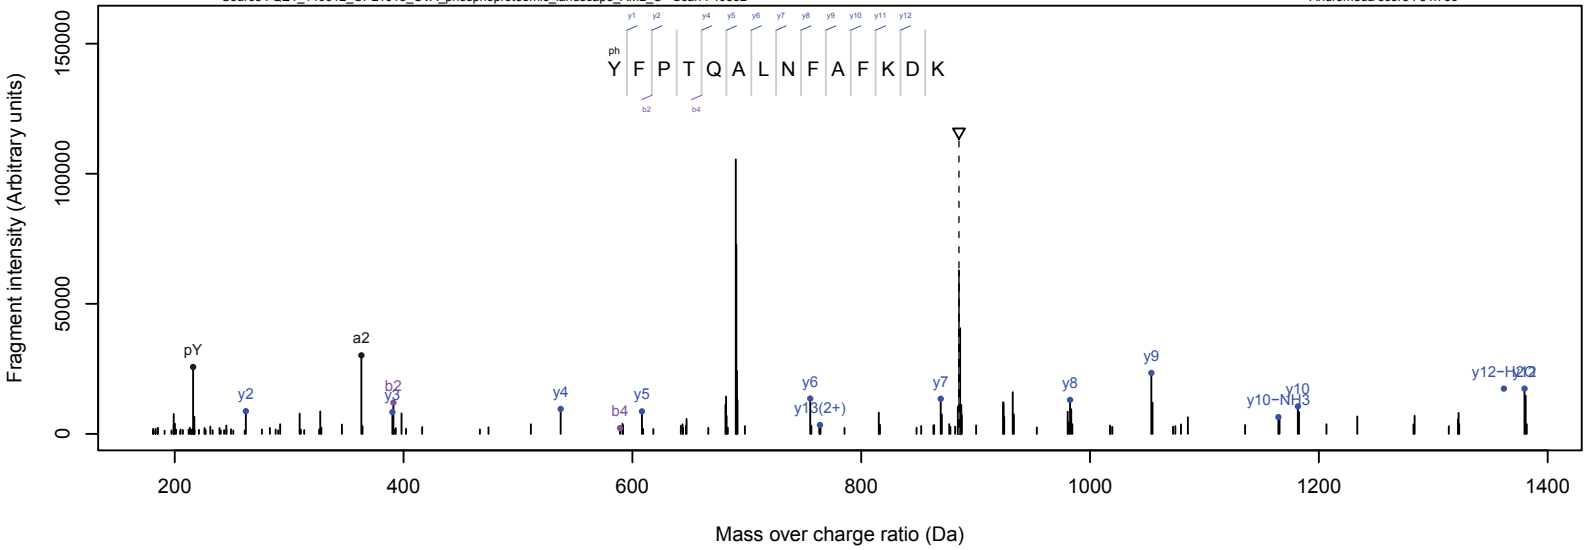

**AIY(ph)SIVLK-2+**

Source : QE1\_140612\_OPL1013\_CVA\_phosphoproteomic\_landscape\_AML\_B Scan : 29032

Andromeda score : 84.743

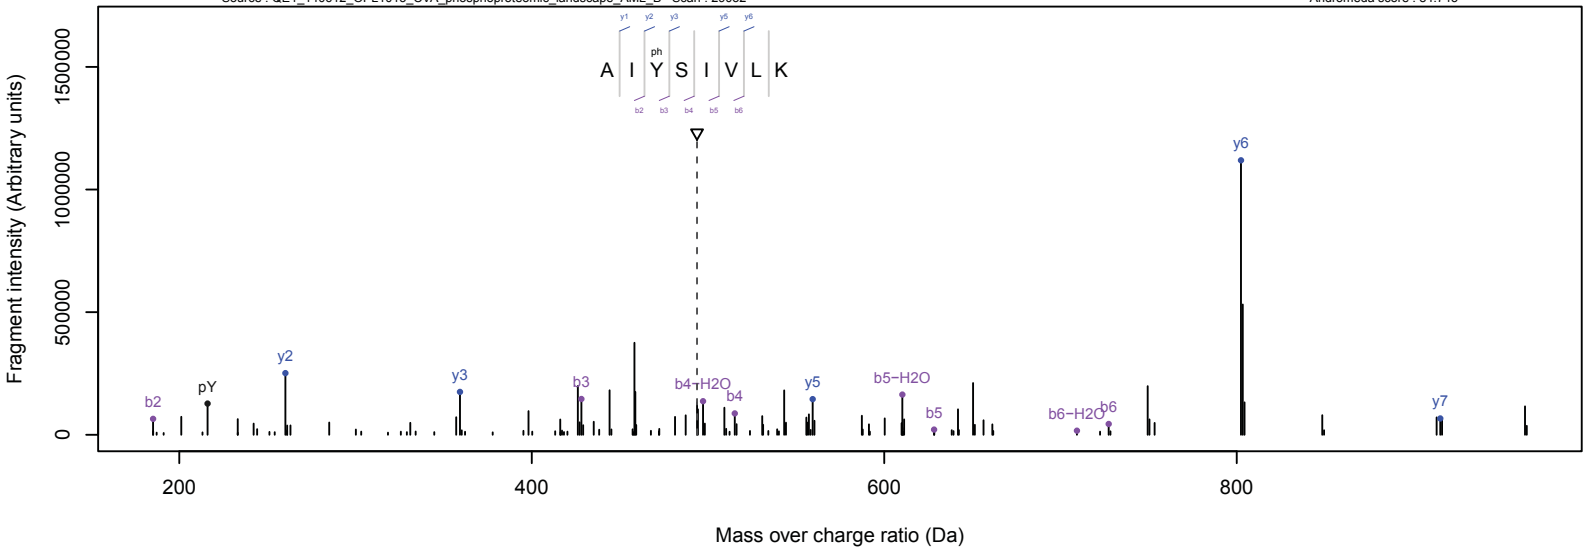

LNPQY(ph)PMFR-2+

Source: QE1\_140612\_OPL1013\_CVA\_phosphoproteomic\_landscape\_AML\_D Scan: 24686

Andromeda score: 84.743

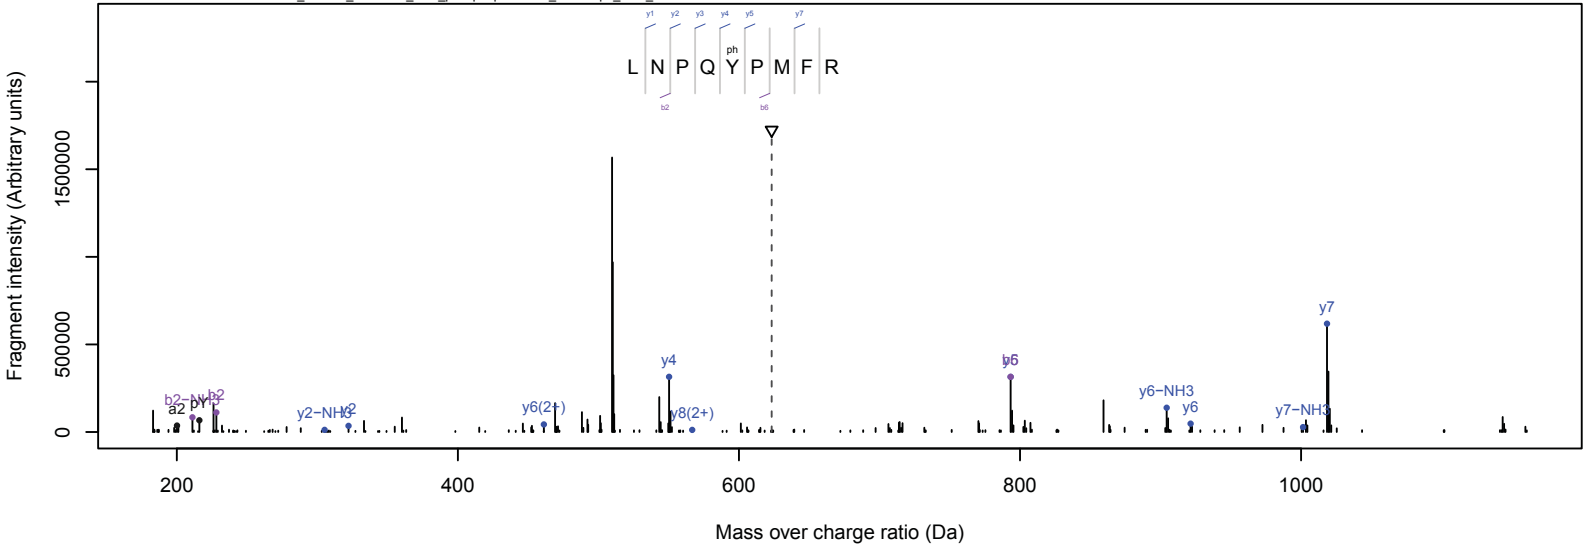

KGGS(ph)YSQAASSDSAQGS(DM)SLTACK-3+

Source: QE1\_140908\_OPL1013\_CvA\_pTyrIP\_AML\_Kasumi6 Scan: 9368

Andromeda score: 84.68

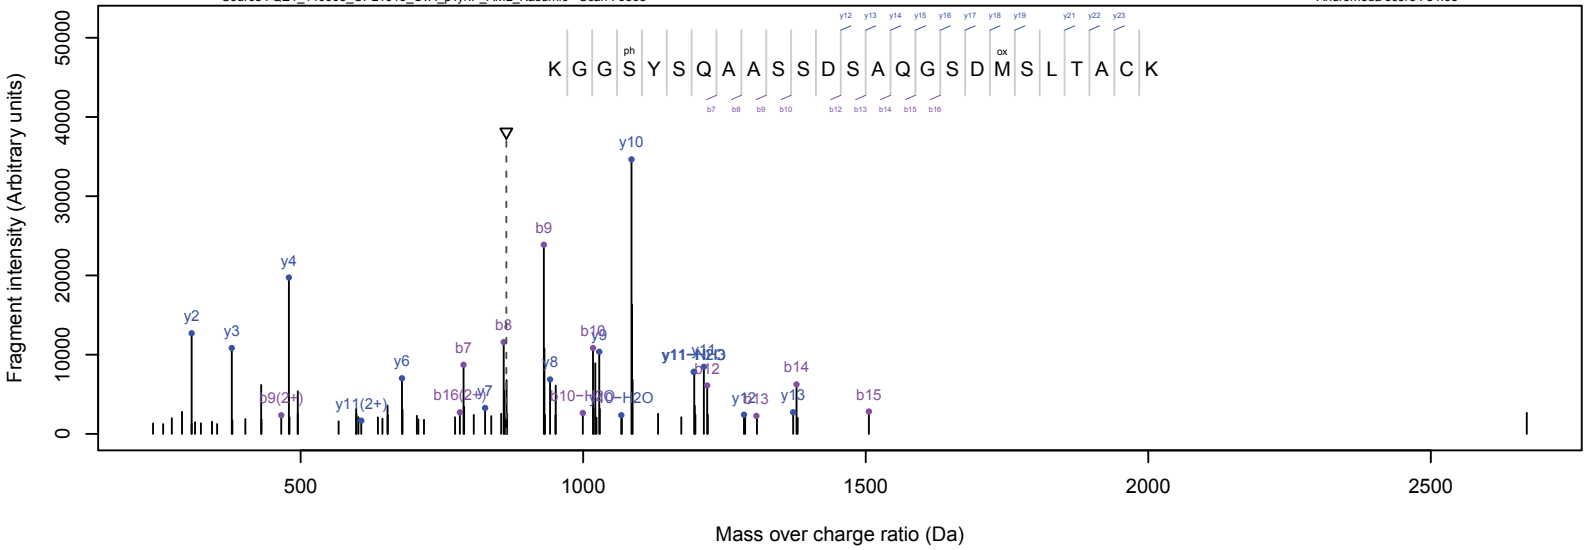

NGPY(ph)RQLFHPEQLITGKEDAANNYAR-4+

Source: QE1\_140612\_OPL1013\_CVA\_phosphoproteomic\_landscape\_AML\_C Scan: 31587

Andromeda score: 84.68

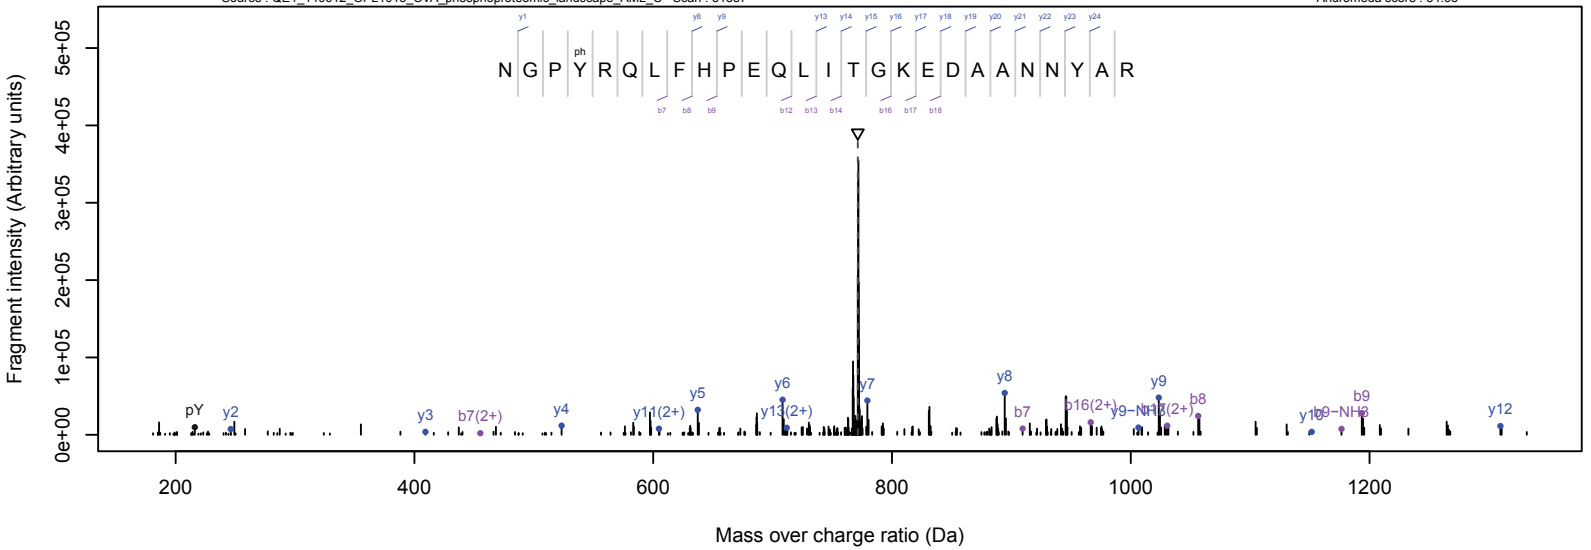

TGVAGEDM<sup>ph</sup>QD<sup>ph</sup>NSGT<sup>ph</sup>Y<sup>ph</sup>GK

Source : QE1\_140612\_OPL1013\_CVA\_phosphoproteomic\_landscape\_AML\_C Scan : 7590

Andromeda score : 84.653

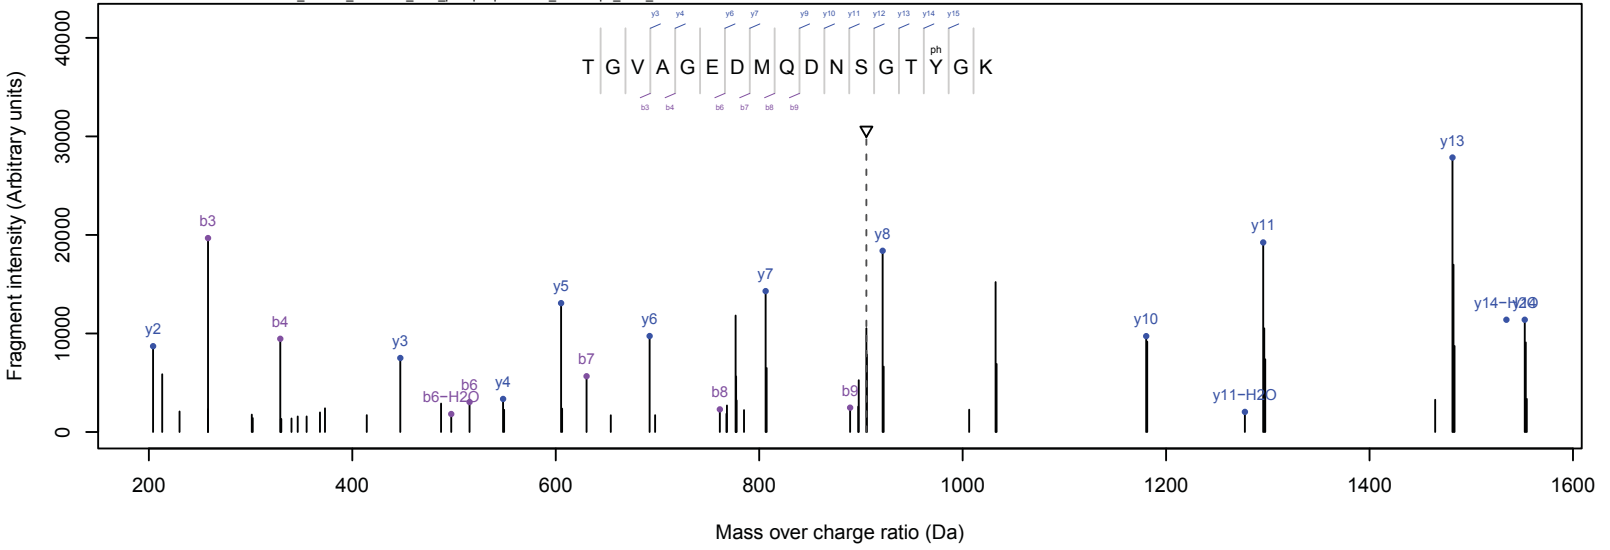

ESYSV<sup>ph</sup>Y<sup>ph</sup>VYK

Source : QE1\_140612\_OPL1013\_CVA\_phosphoproteomic\_landscape\_AML\_A Scan : 19289

Andromeda score : 84.615

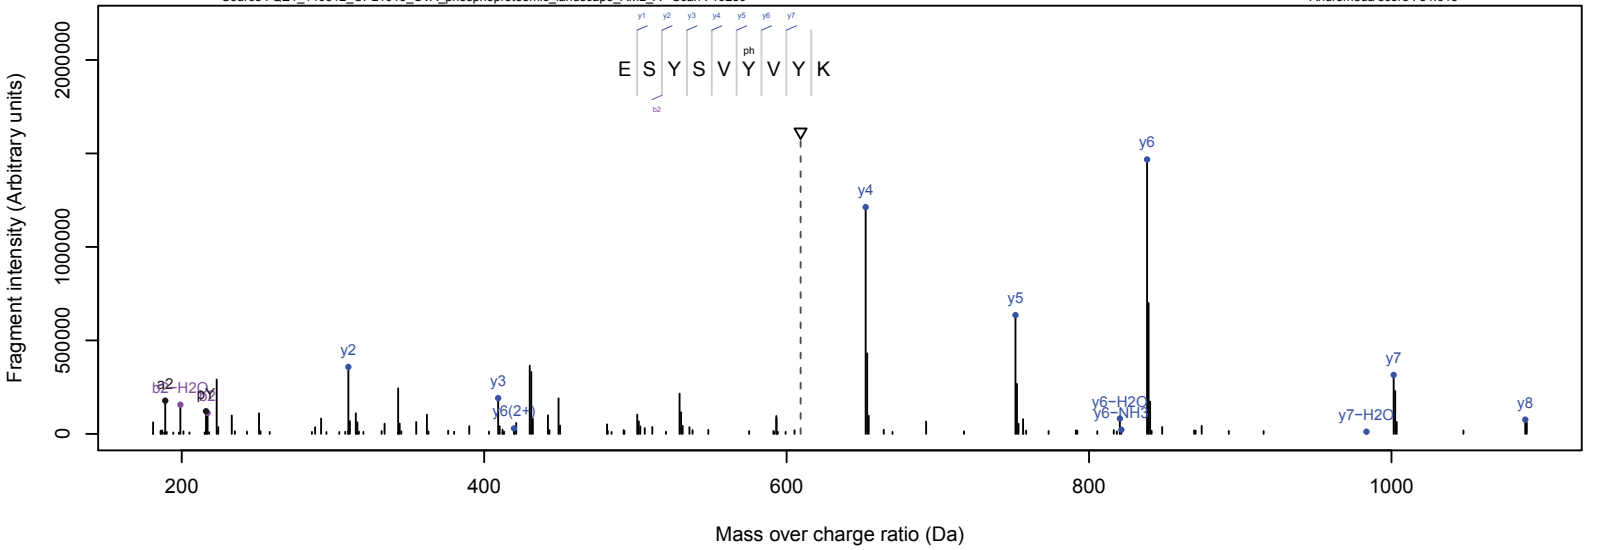

LLSAE<sup>ph</sup>Y<sup>ph</sup>AHR

Source : QE1\_140612\_OPL1013\_CVA\_phosphoproteomic\_landscape\_AML\_E Scan : 8521

Andromeda score : 84.615

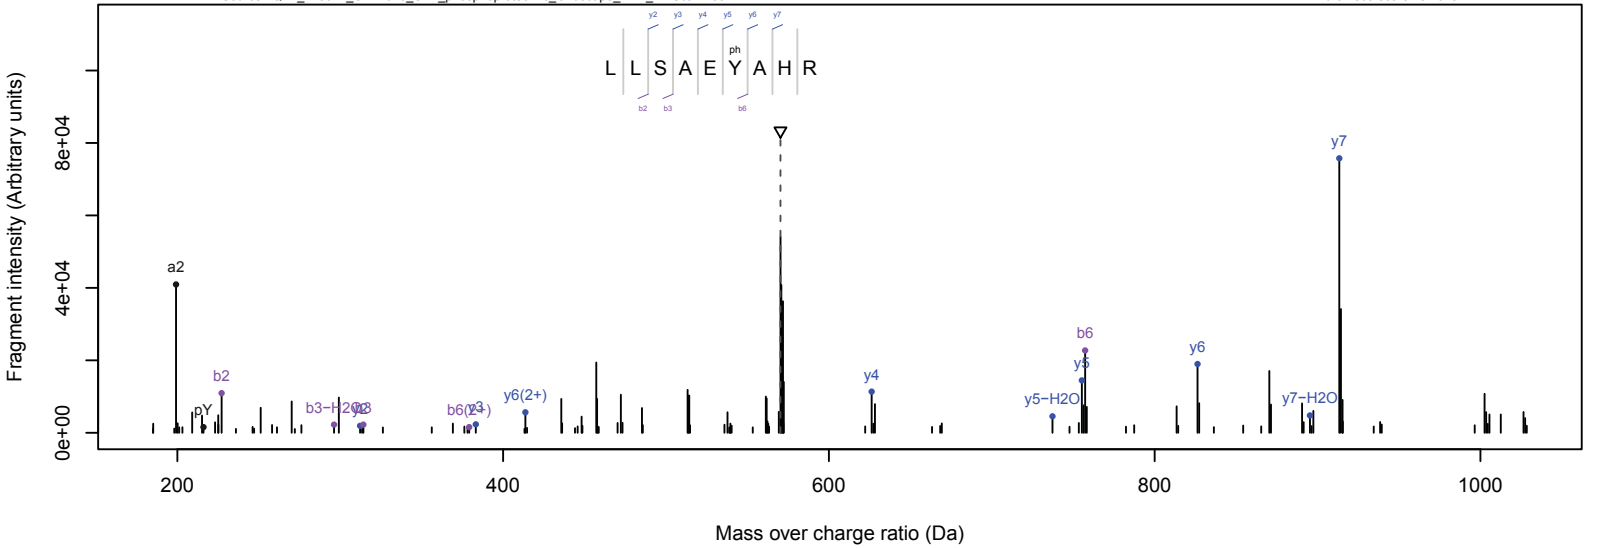

VEGDNIY(ph)VR-2+

Source : QE1\_140612\_OPL1013\_CVA\_phosphoproteomic\_landscape\_AML\_B Scan : 11956

Andromeda score : 84.615

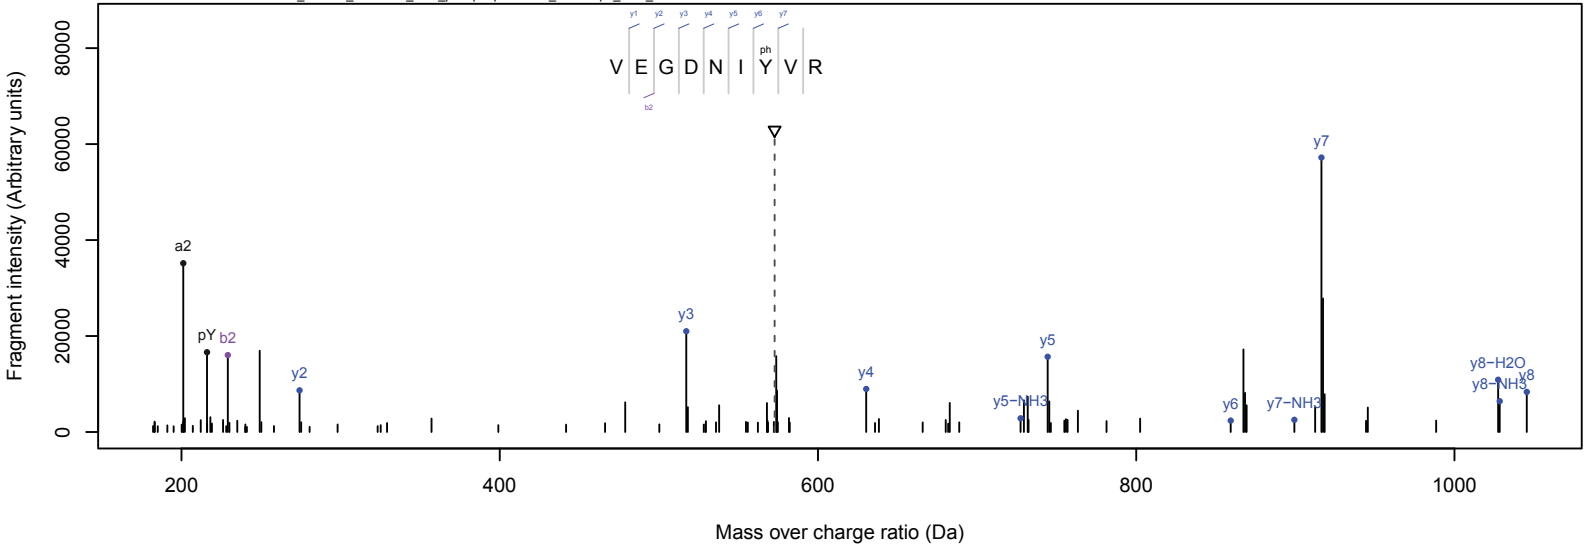

GSY(ph)GLDLEAVR-2+

Source : QE1\_140612\_OPL1013\_CVA\_phosphoproteomic\_landscape\_AML\_C Scan : 28151

Andromeda score : 84.605

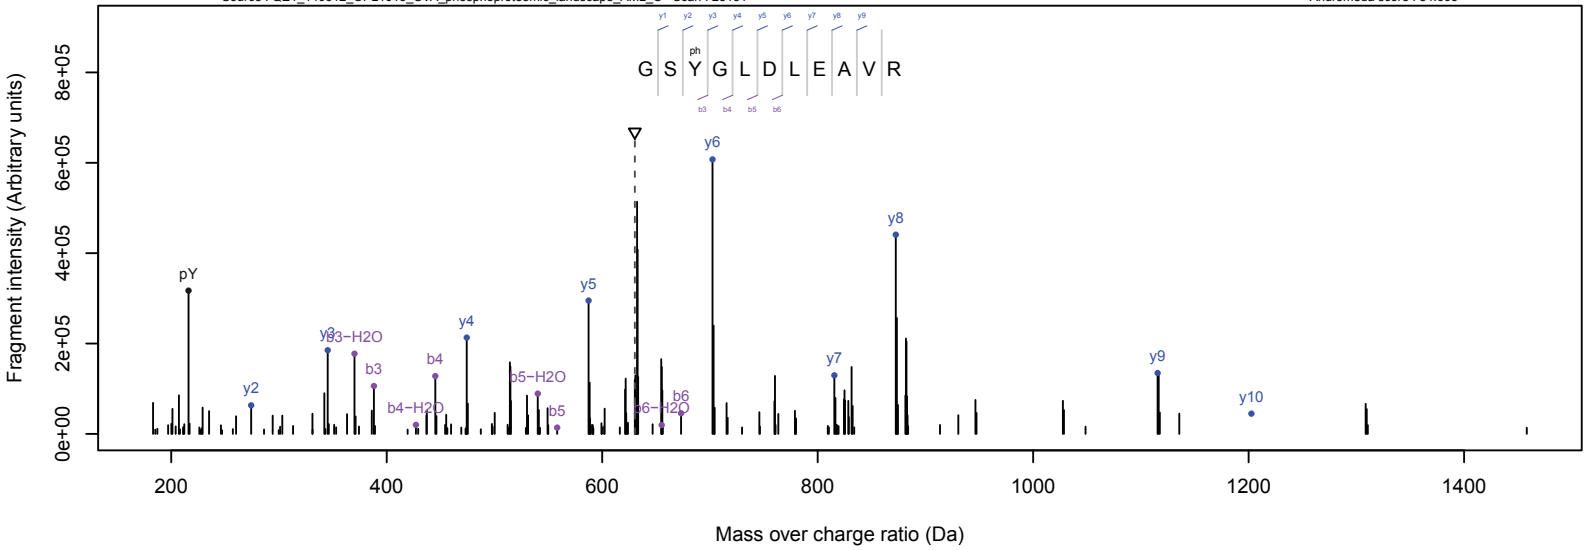

GHSPTSSLVQPSQY(ph)QLSQM(ox)TFHK-4+

Source : QE1\_140908\_OPL1013\_CvA\_pTyrIP\_AML\_HEL Scan : 23569

Andromeda score : 84.602

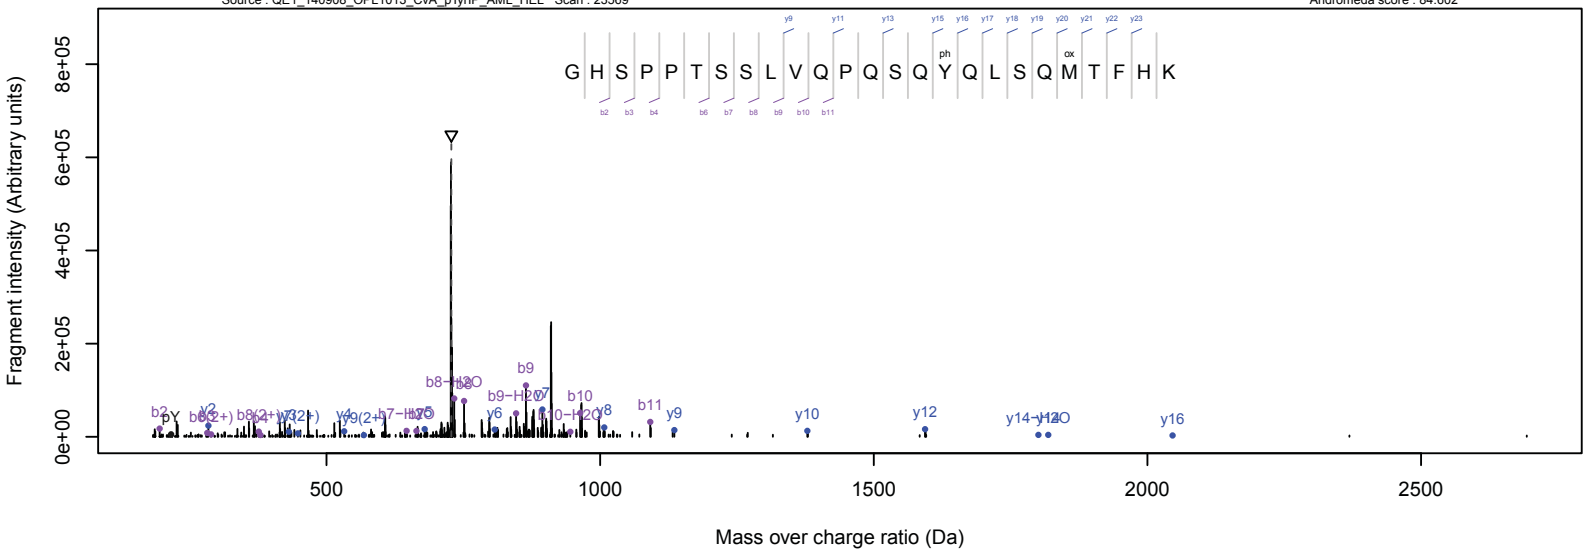

**NPCPTPY(ph)HHQMPPPHSDTVEFYQR-4+**

Source : QE1\_140612\_OPL1013\_CVA\_phosphoproteomic\_landscape\_AML\_B Scan : 19878

Andromeda score : 84.602

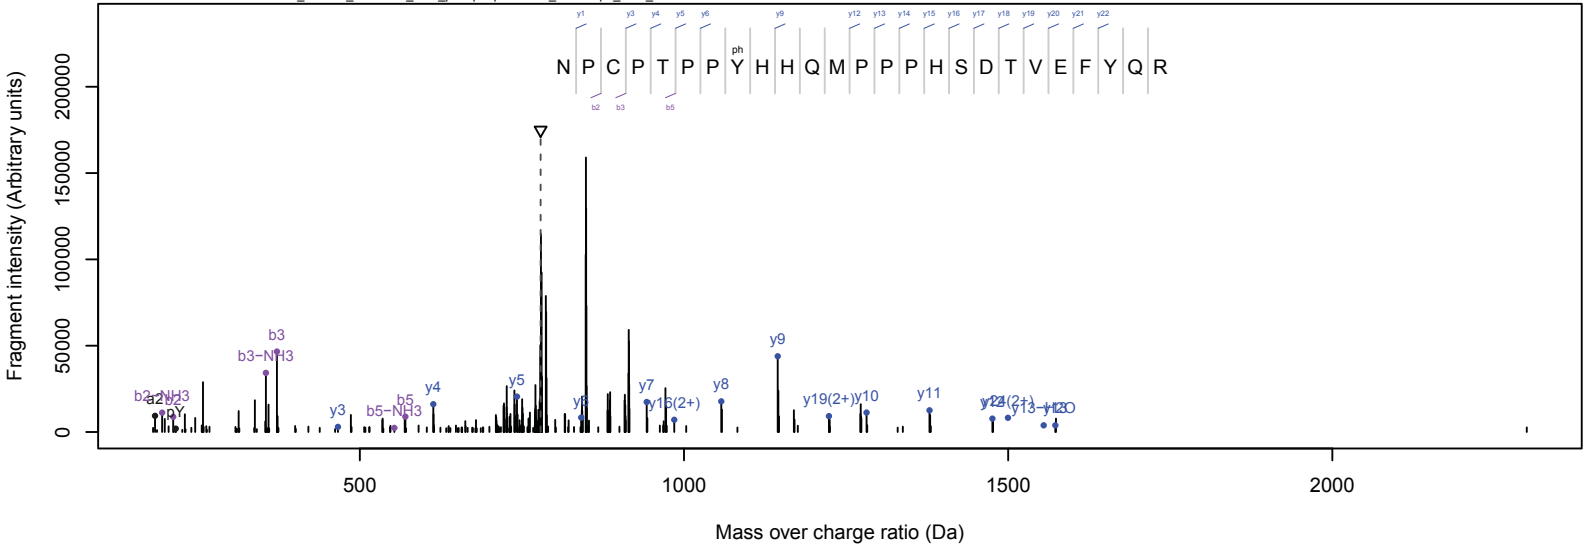

**SHIKEELMHGEEADAVY(ph)ESMAHLSTDLMLK-5+**

Source : QE1\_140908\_OPL1013\_CvA\_pTyrIP\_AML\_ML2 Scan : 47149

Andromeda score : 84.561

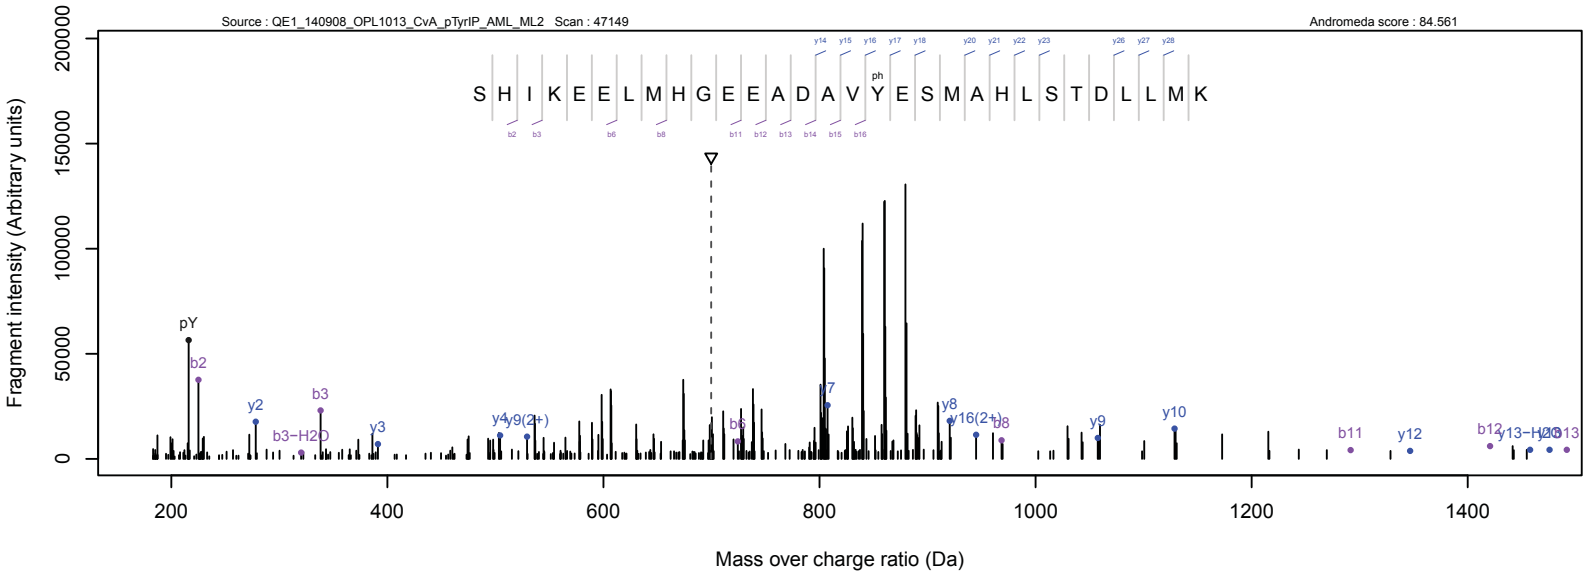

**RFICSPDCSANY(ph)SK-2+**

Source : QE1\_140612\_OPL1013\_CVA\_phosphoproteomic\_landscape\_AML\_C Scan : 23016

Andromeda score : 84.508

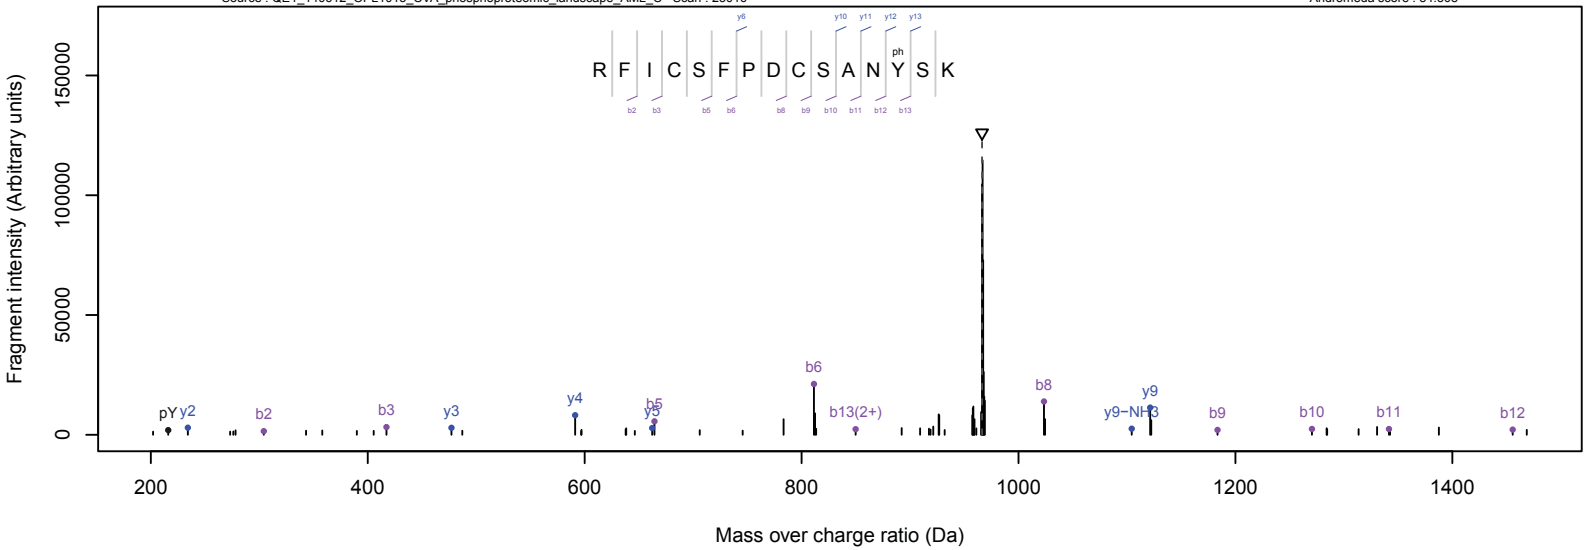

T(ph)SSKHKEDVY(ph)ENLHTK-4+

Source : QE1\_140908\_OPL1013\_CvA\_pTyrIP\_AML\_OCI\_AML3 Scan : 5578

Andromeda score : 84.508

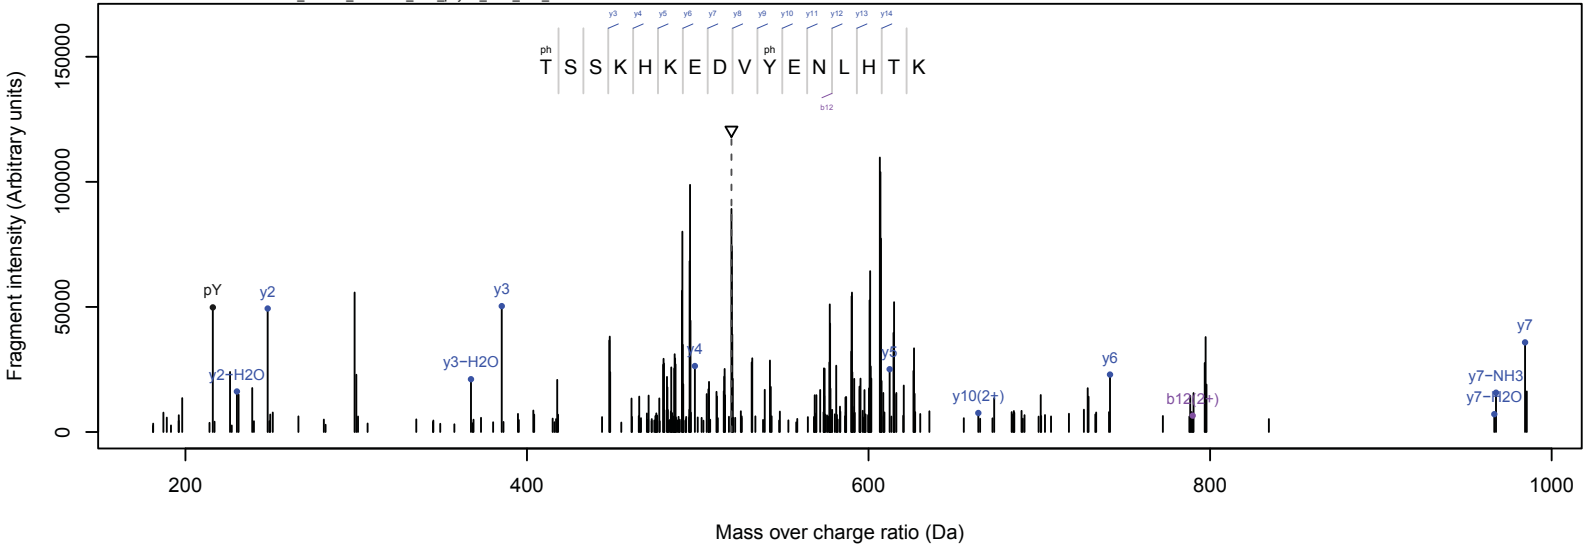

Y(ph)FTTNKGEIFELK-3+

Source : QE1\_140612\_OPL1013\_CvA\_phosphoproteomic\_landscape\_AML\_C Scan : 24680

Andromeda score : 84.508

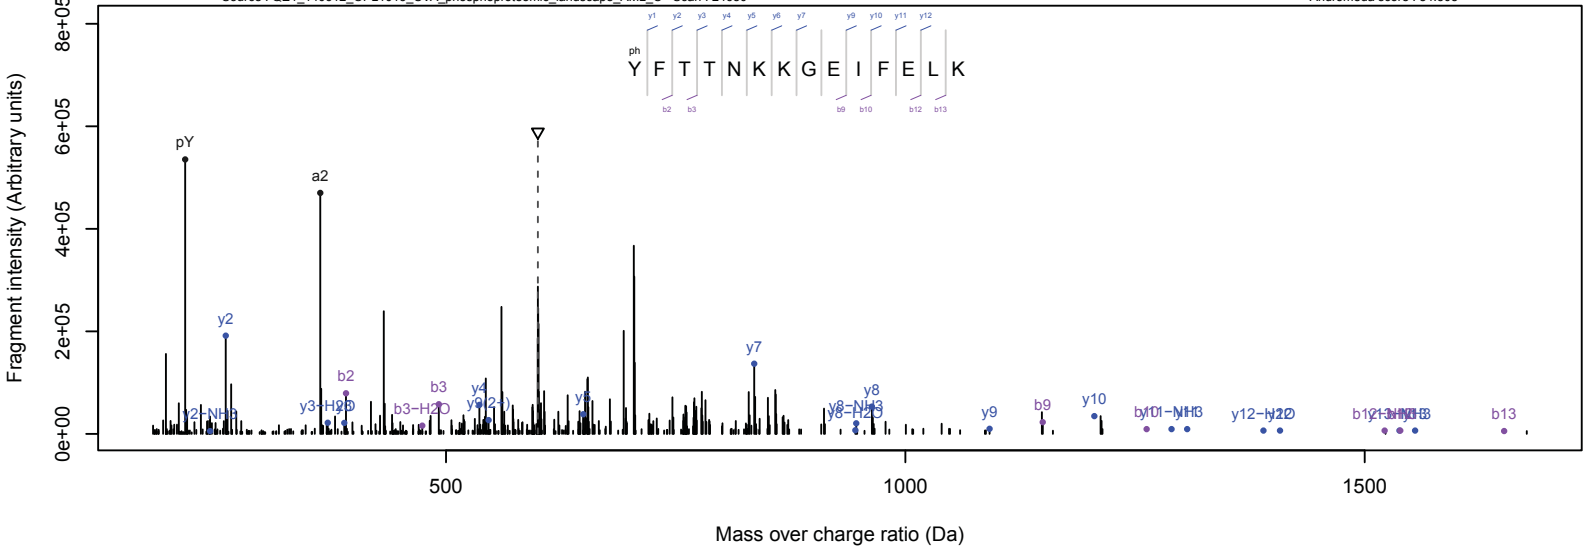

MVVESAY(ph)EVIK-2+

Source : QE1\_140612\_OPL1013\_CvA\_phosphoproteomic\_landscape\_AML\_B Scan : 27442

Andromeda score : 84.479

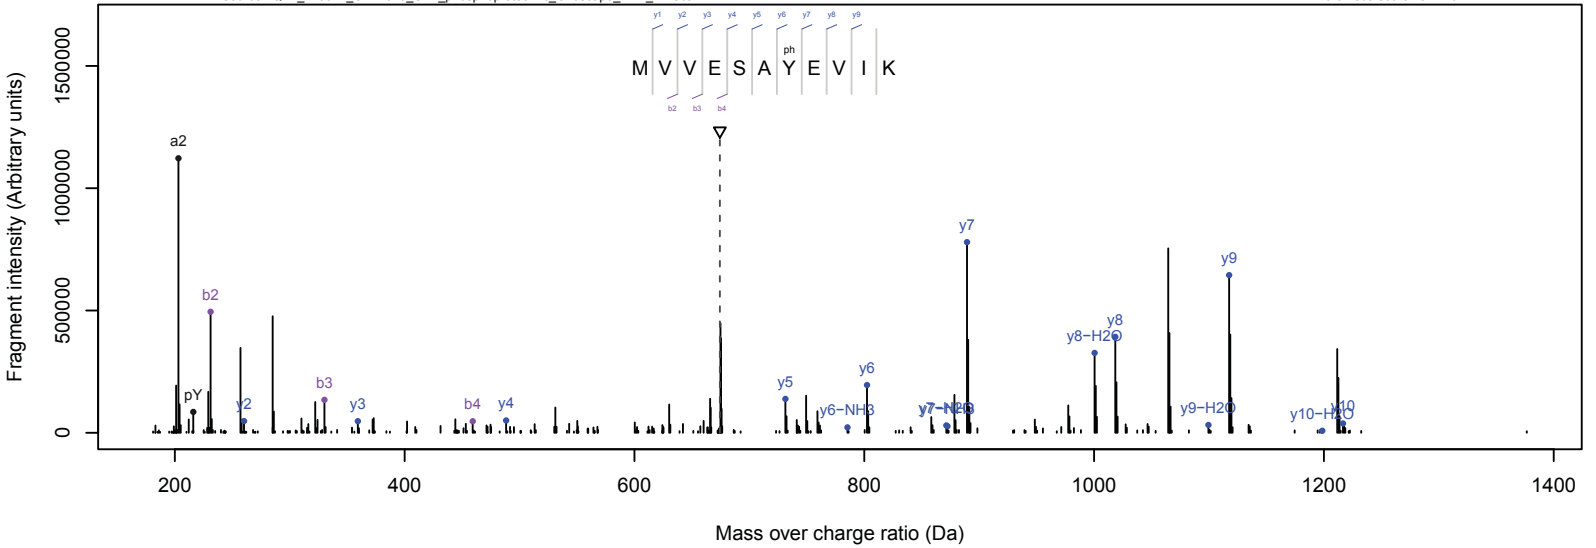



**KLDY(ph)GQHVVAGTPGR-3+**

Source : QE1\_140612\_OPL1013\_CVA\_phosphoproteomic\_landscape\_AML\_A Scan : 10698

Andromeda score : 84.41

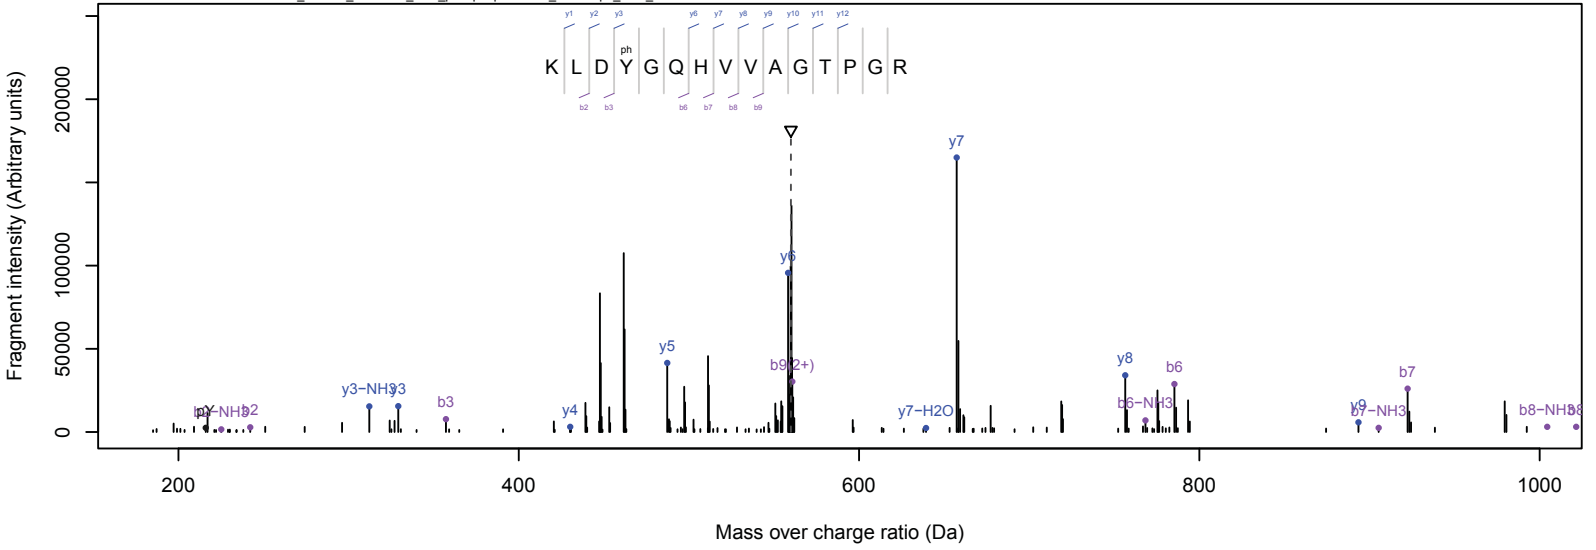

**SLY(ph)SFIKGDTSGLDYRK-3+**

Source : QE1\_140612\_OPL1013\_CVA\_phosphoproteomic\_landscape\_AML\_C Scan : 27069

Andromeda score : 84.41

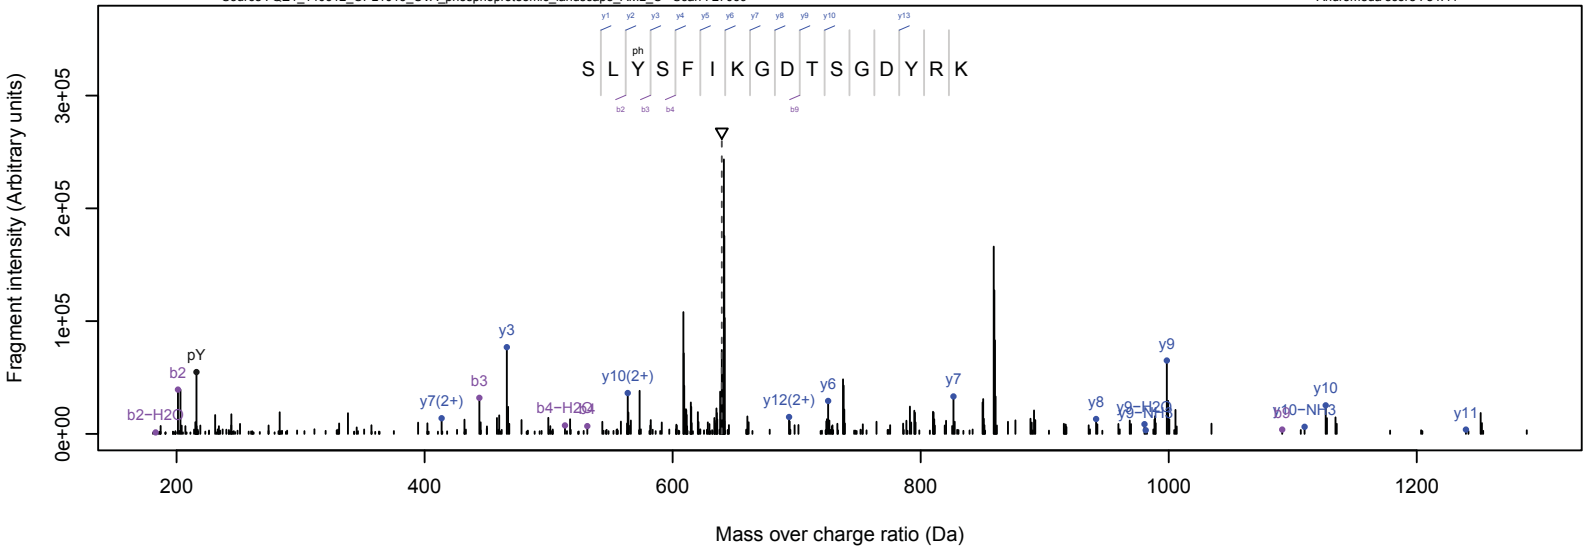

**M(ox)TQNPY(ph)YNLQGISHR-3+**

Source : QE1\_140612\_OPL1013\_CVA\_phosphoproteomic\_landscape\_AML\_D Scan : 19341

Andromeda score : 84.375

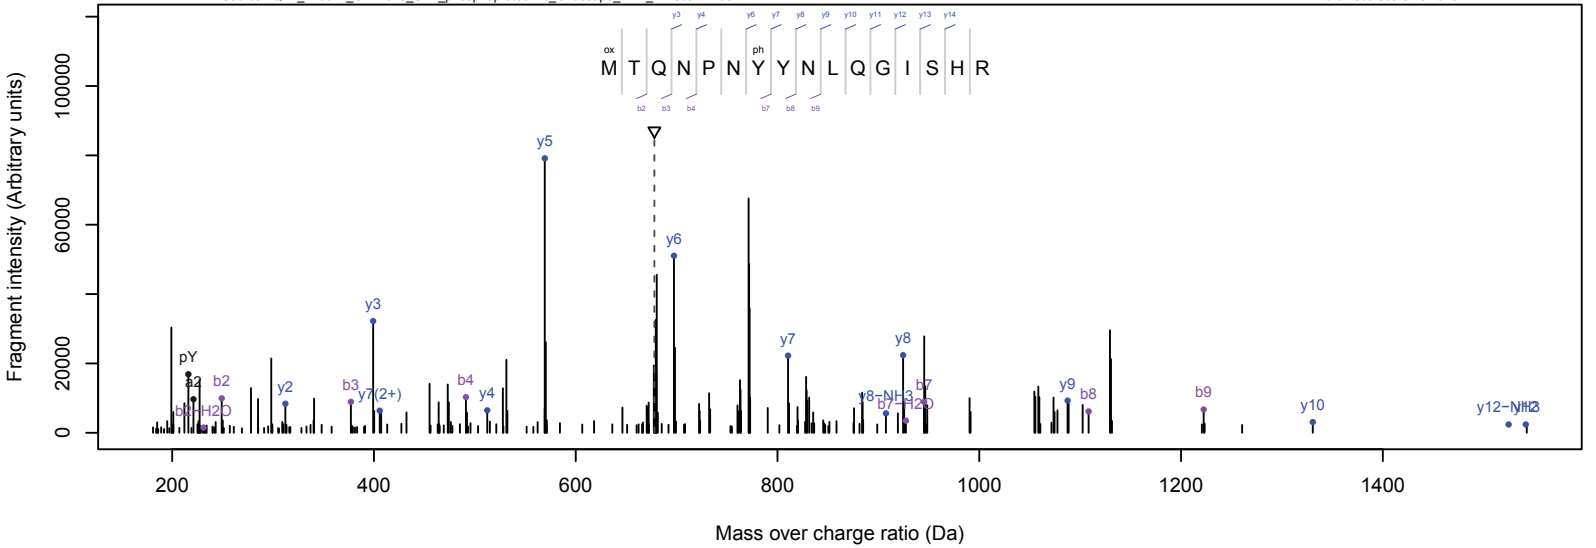



Y(ph)LADLPTLEDHQK-2+

Source : QE1\_140612\_OPL1013\_CVA\_phosphoproteomic\_landscape\_AML\_D Scan : 28216

Andromeda score : 84.365

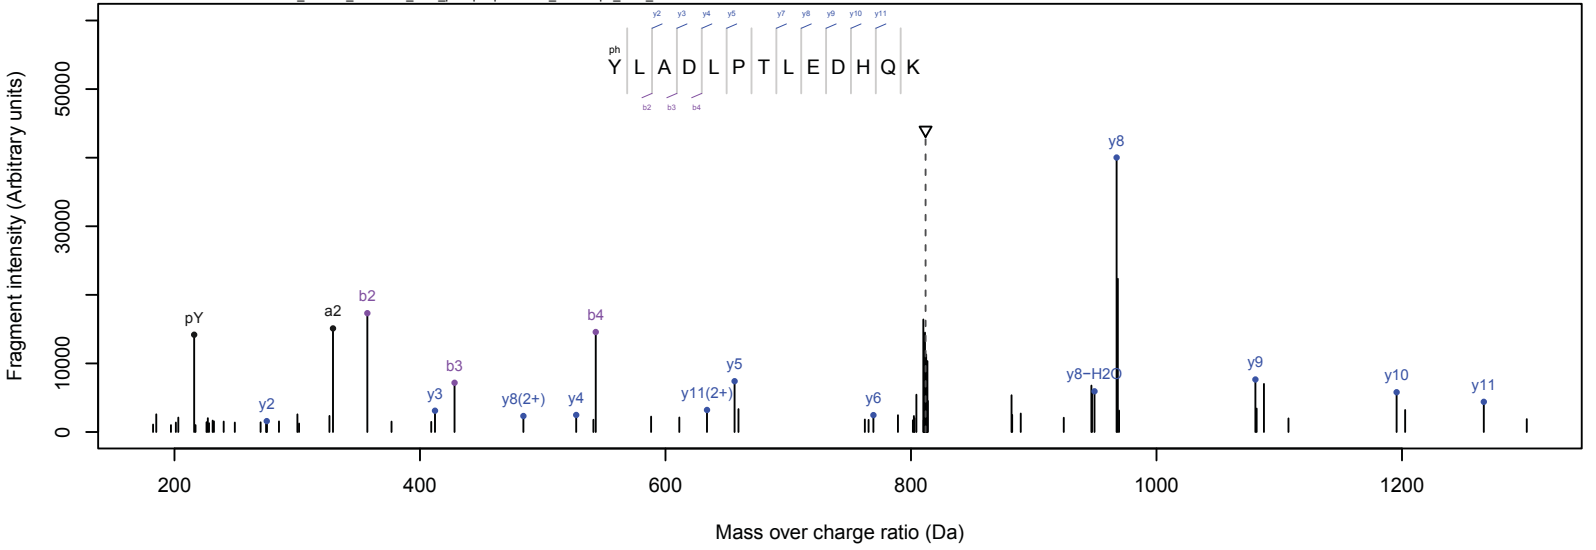

Y(ph)TISSALNLMQICK-2+

Source : QE1\_140612\_OPL1013\_CVA\_phosphoproteomic\_landscape\_AML\_A Scan : 43254

Andromeda score : 84.365

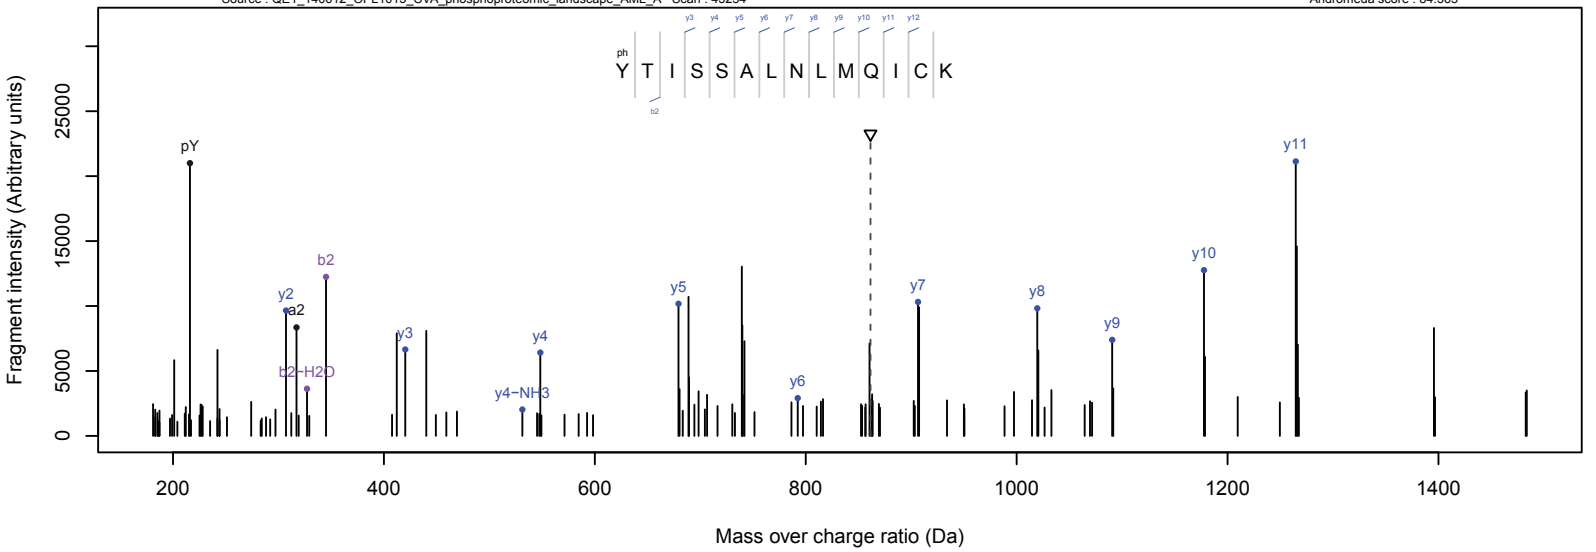

Y(ph)FACLMR-2+

Source : QE1\_140612\_OPL1013\_CVA\_phosphoproteomic\_landscape\_AML\_C Scan : 26061

Andromeda score : 84.359

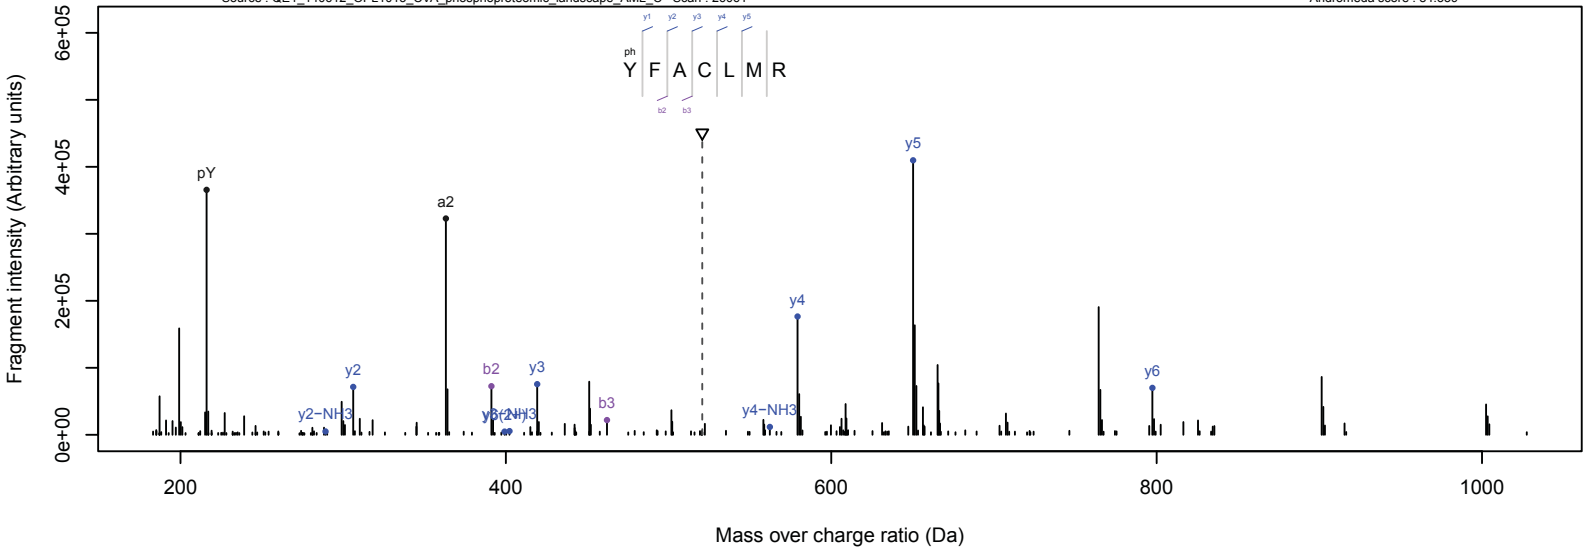

IGVVGGCQEY(ph)TGAPYFAAISALK-2+

Source : QE1\_140822\_OPL1013\_CVA\_pTyrIP\_AML\_cell\_lines\_part2\_F Scan : 42947

Andromeda score : 84.327

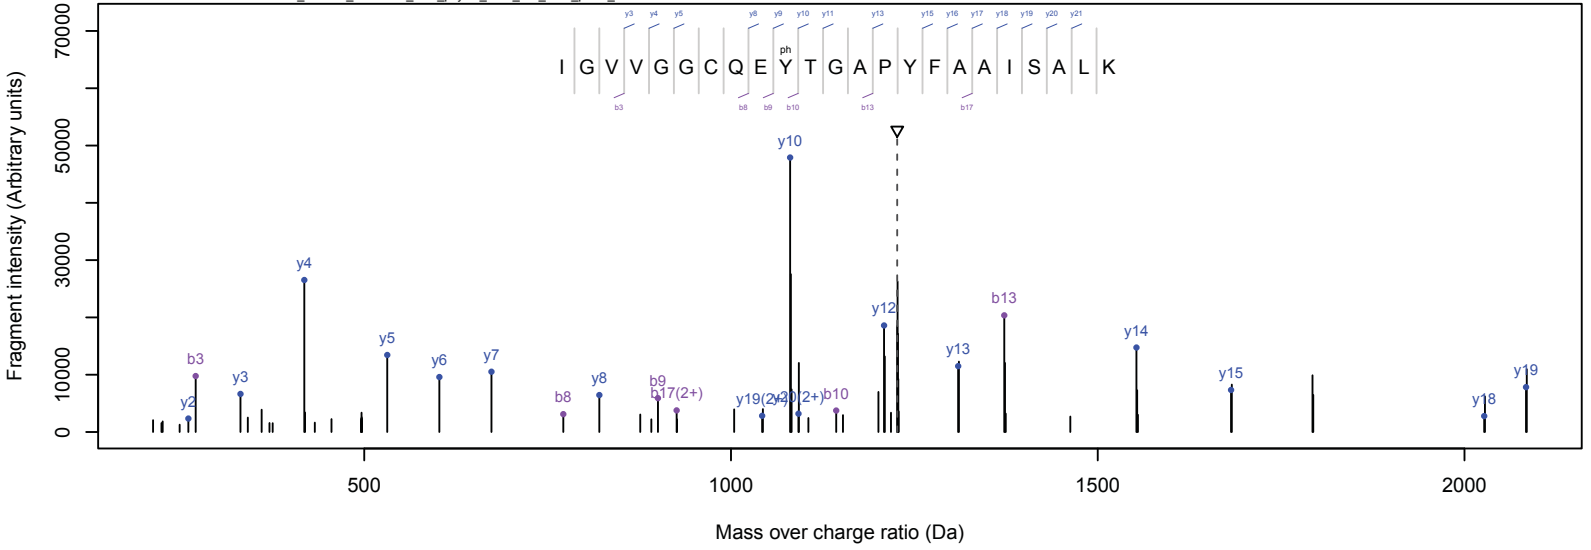

IKERPALNAQGGIY(ph)VINPEMGR-3+

Source : QE1\_140612\_OPL1013\_CVA\_phosphoproteomic\_landscape\_AML\_C Scan : 29507

Andromeda score : 84.327

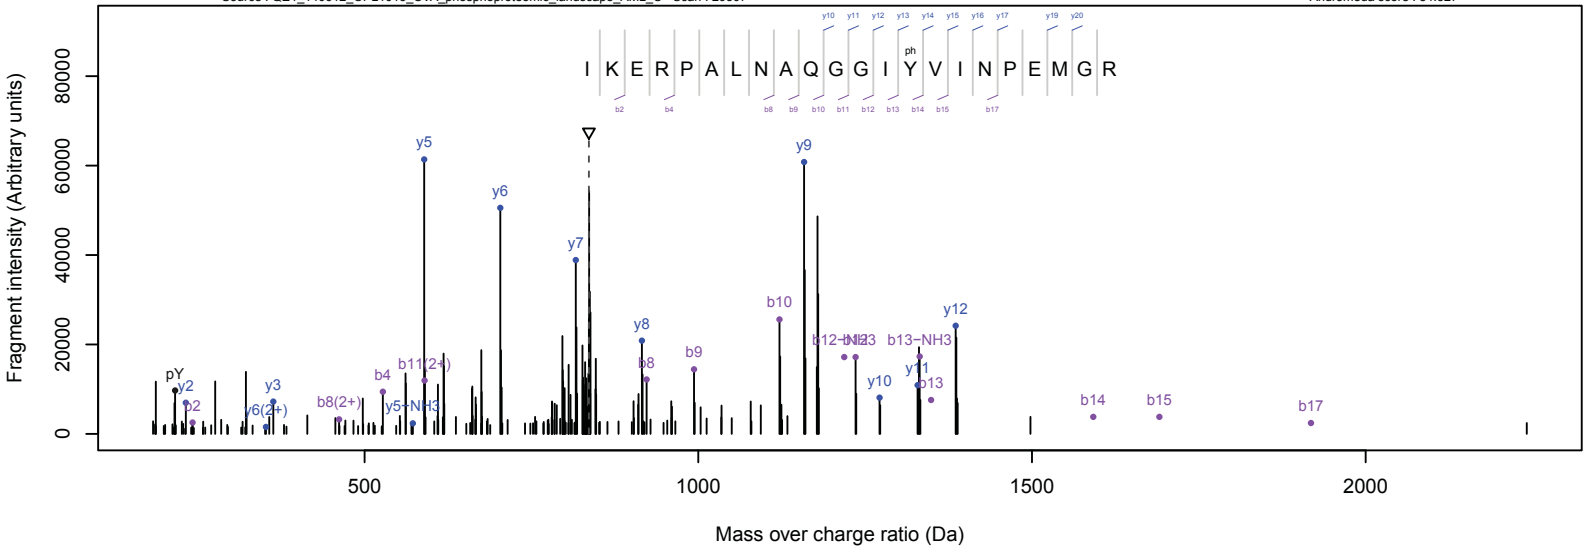

DNSTMGY(ph)MAAK-2+

Source : QE1\_140612\_OPL1013\_CVA\_phosphoproteomic\_landscape\_AML\_C Scan : 9400

Andromeda score : 84.31

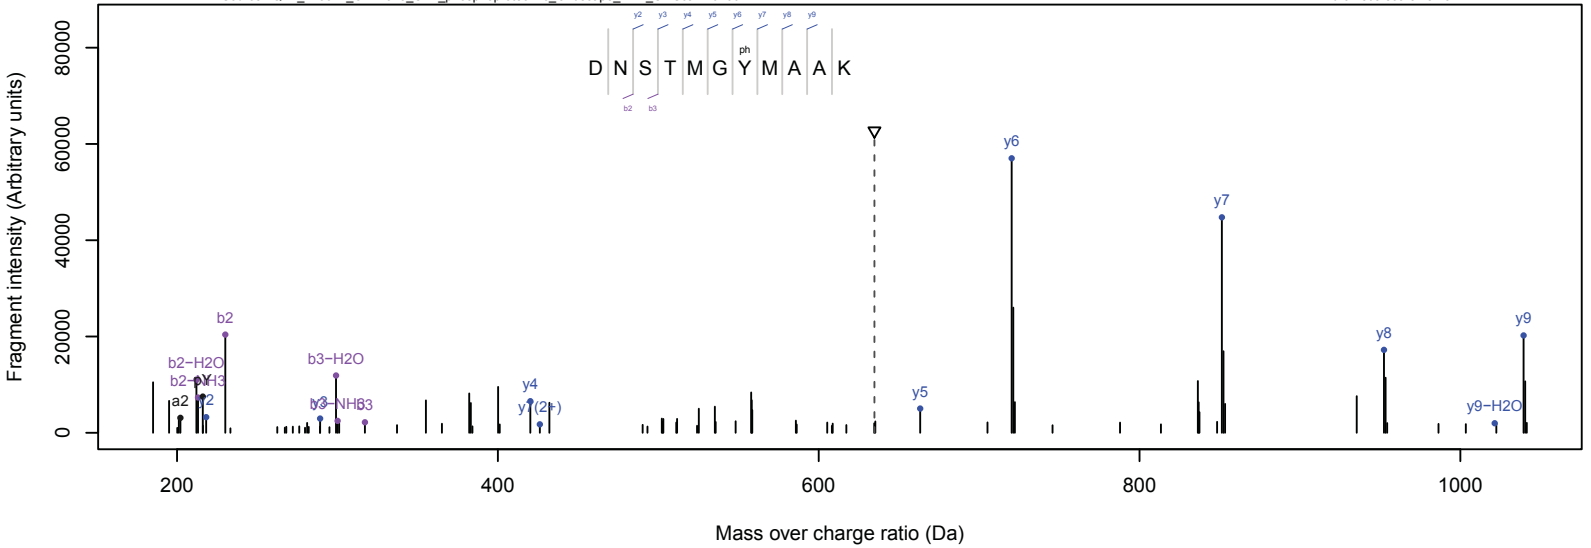

YKPAVNQIECHPY(ph)LTQEK-3+

Source : QE1\_140612\_OPL1013\_CVA\_phosphoproteomic\_landscape\_AML\_B Scan : 19158

Andromeda score : 84.309

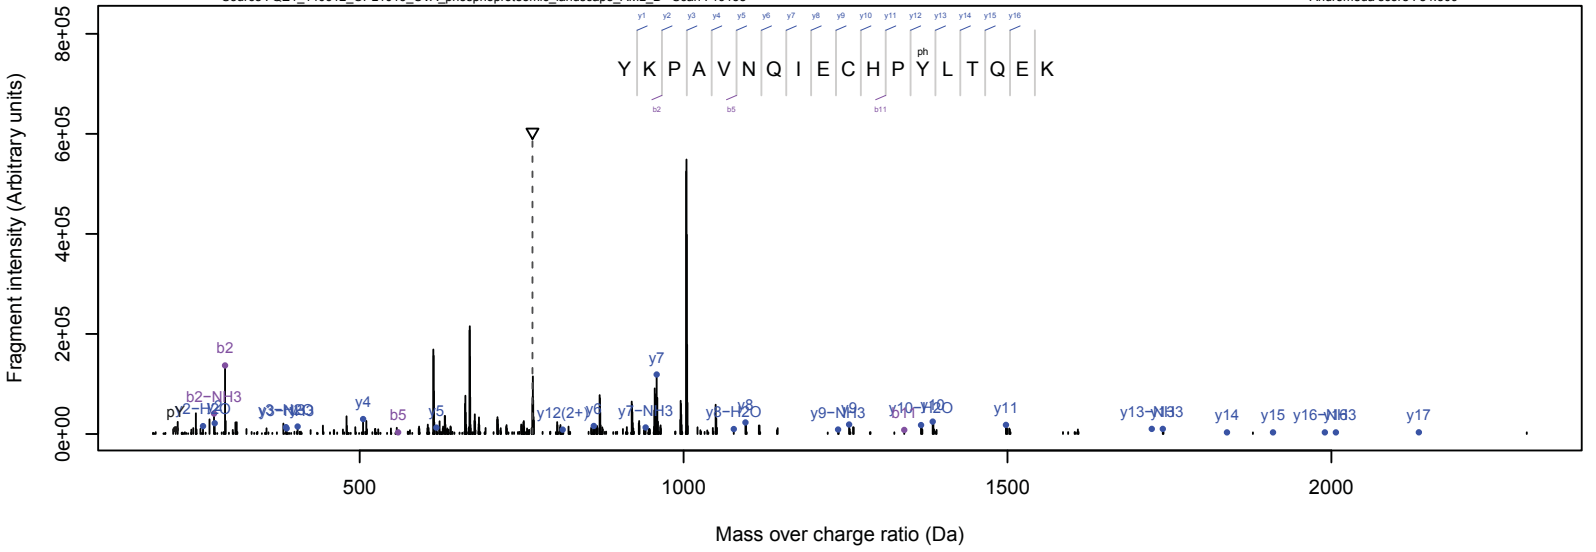

HLDLTHEY(ph)DIPK-3+

Source : QE1\_140612\_OPL1013\_CVA\_phosphoproteomic\_landscape\_AML\_C Scan : 18698

Andromeda score : 84.297

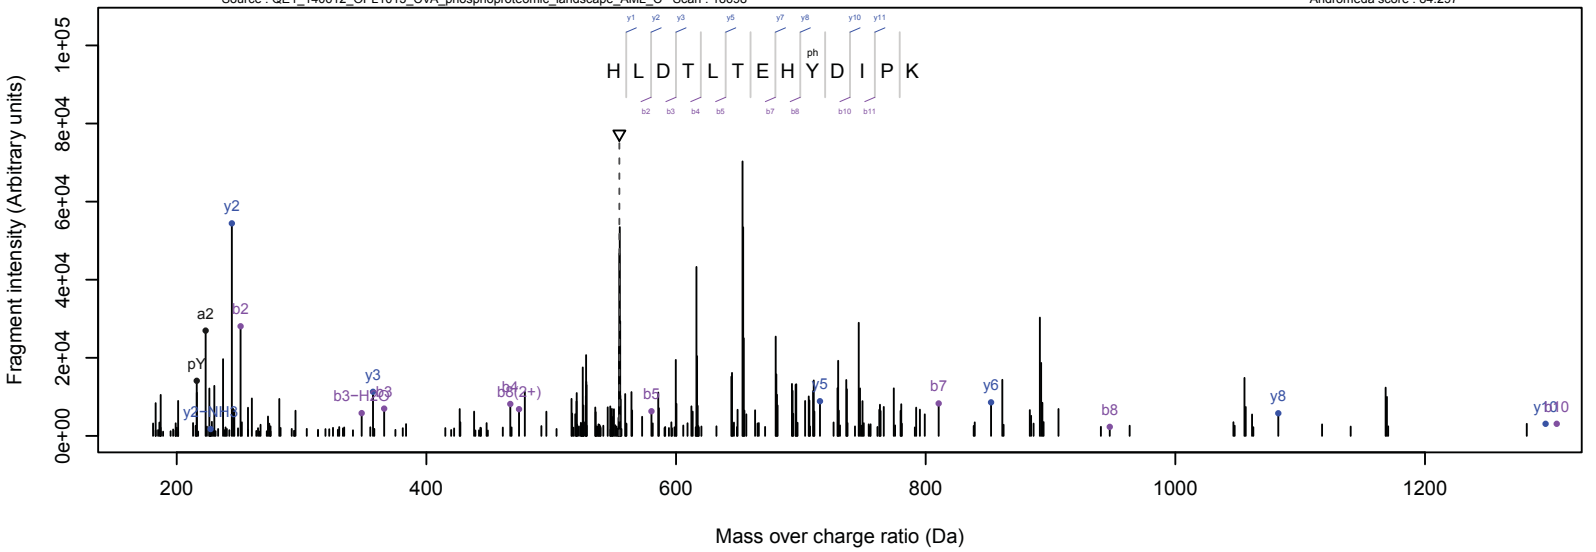

LQSGMVPNQY(ph)NPLR-2+

Source : QE1\_140612\_OPL1013\_CVA\_phosphoproteomic\_landscape\_AML\_C Scan : 26691

Andromeda score : 84.173

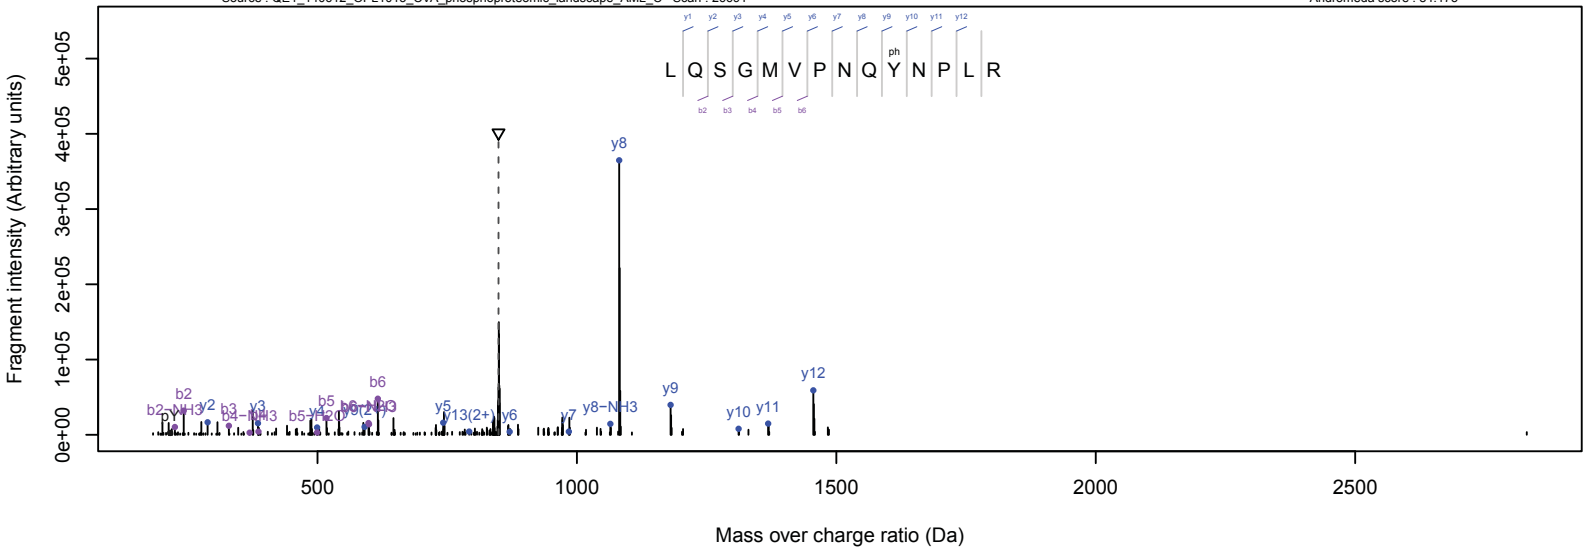

(ac)ATAPYNY(ph)SYIFK-2+

Source: QE1\_140612\_OPL1013\_CVA\_phosphoproteomic\_landscape\_AML\_C Scan: 41586

Andromeda score: 84.169

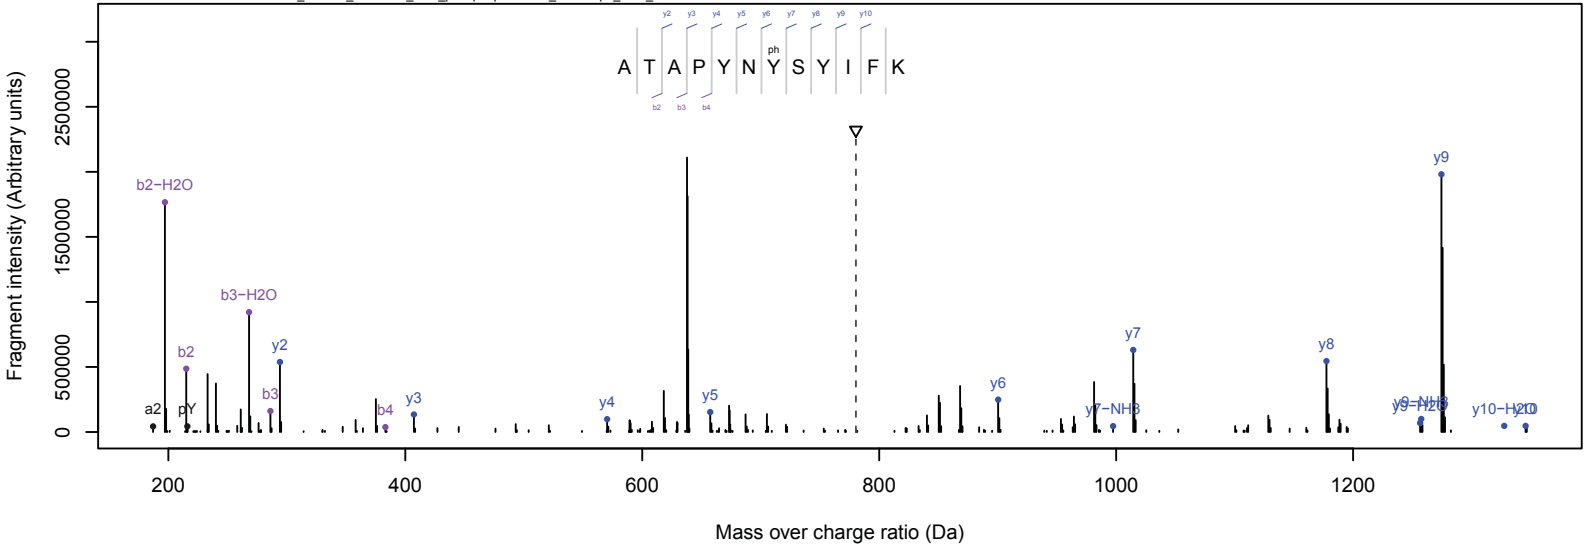

QEEEEAAQQGPVVVSPASDY(ph)KDKYSHLIGK-4+

Source: QE1\_140612\_OPL1013\_CVA\_phosphoproteomic\_landscape\_AML\_C Scan: 24122

Andromeda score: 84.169

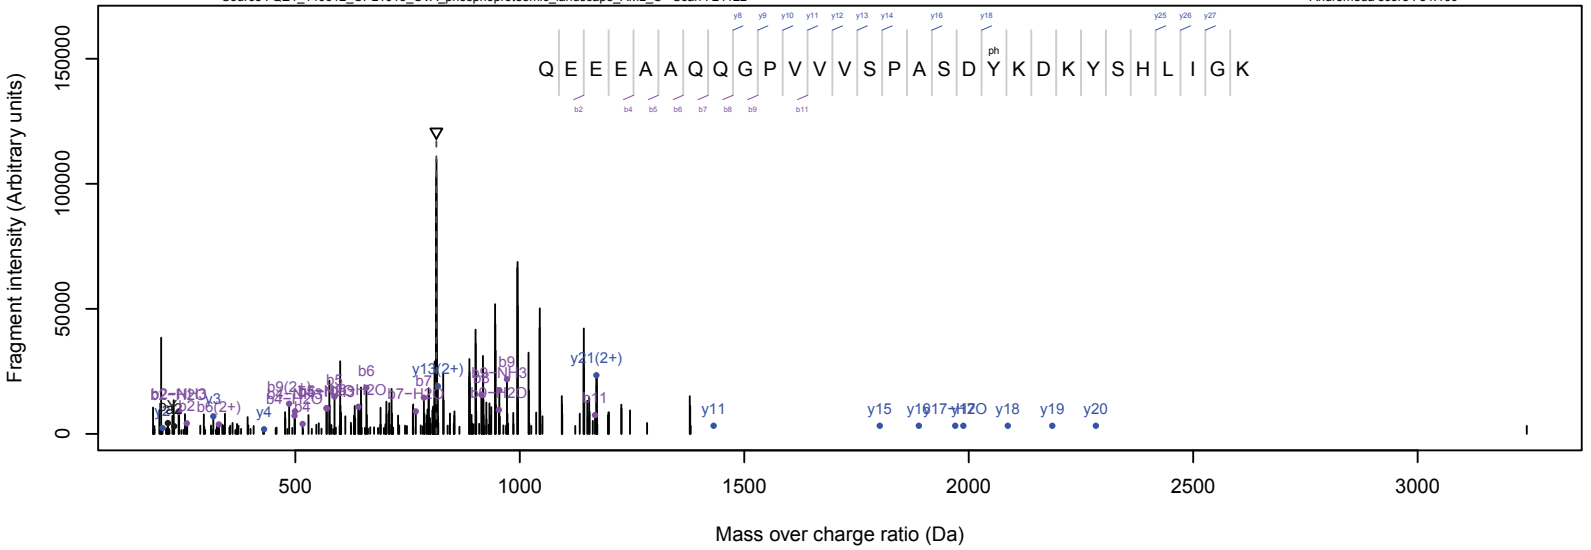

YQGHVGASLIVGGVDLTGPQLYGVHPHGS(ph)YSR-4+

Source: QE1\_140612\_OPL1013\_CVA\_phosphoproteomic\_landscape\_AML\_C Scan: 38168

Andromeda score: 84.011

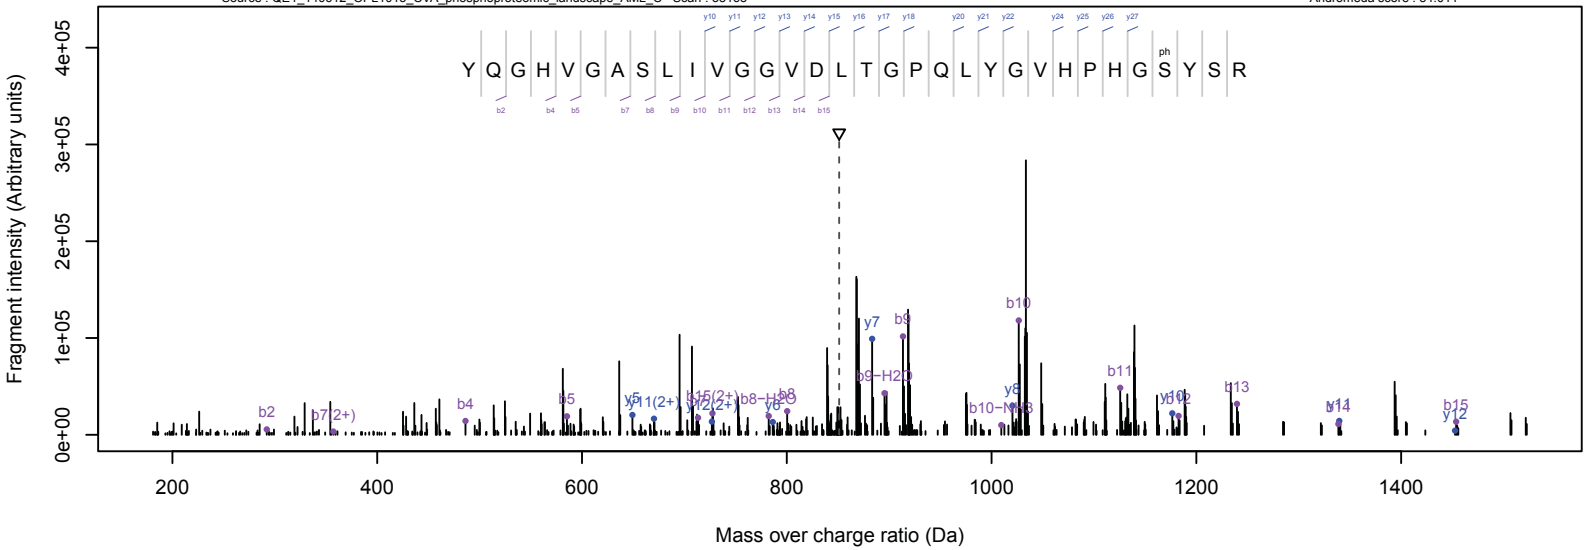

(ac)AAY(ph)KLVLR-2+

Source : QE1\_140612\_OPL1013\_CVA\_phosphoproteomic\_landscape\_AML\_C Scan : 36176

Andromeda score : 83.948

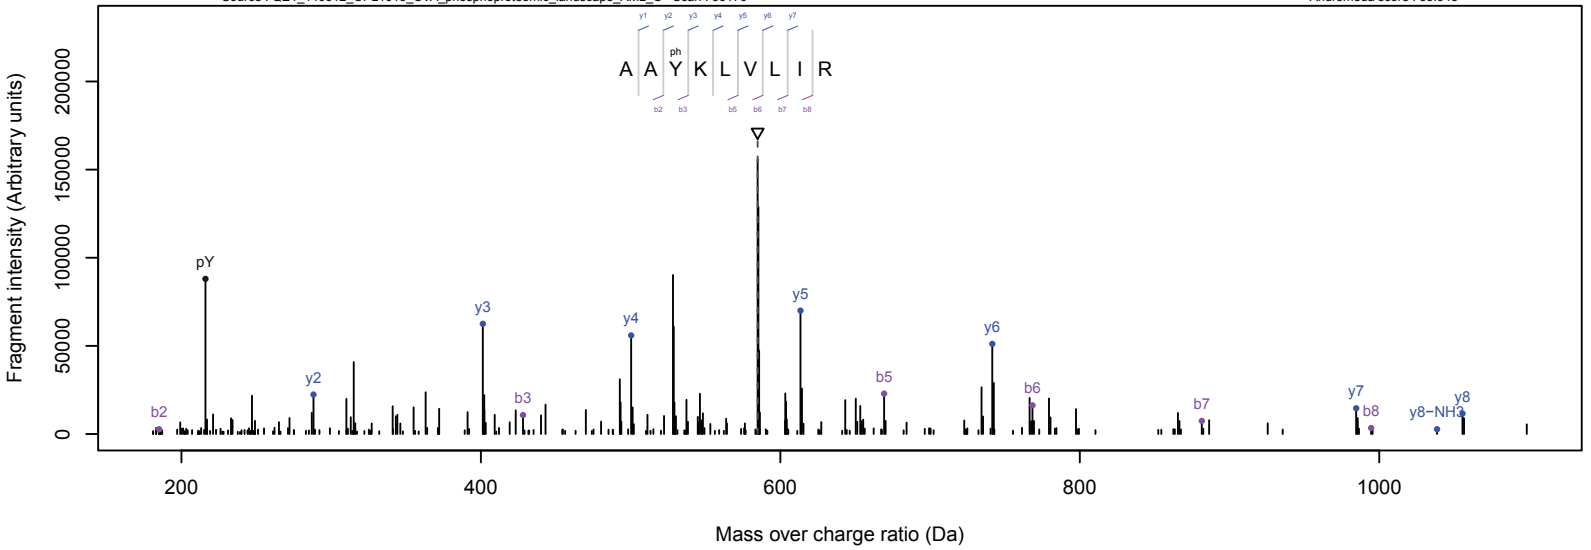

YDTPY(ph)IWR-2+

Source : QE1\_140822\_OPL1013\_CvA\_pTyrIP\_AML\_cell\_lines\_part2\_E Scan : 29168

Andromeda score : 83.948

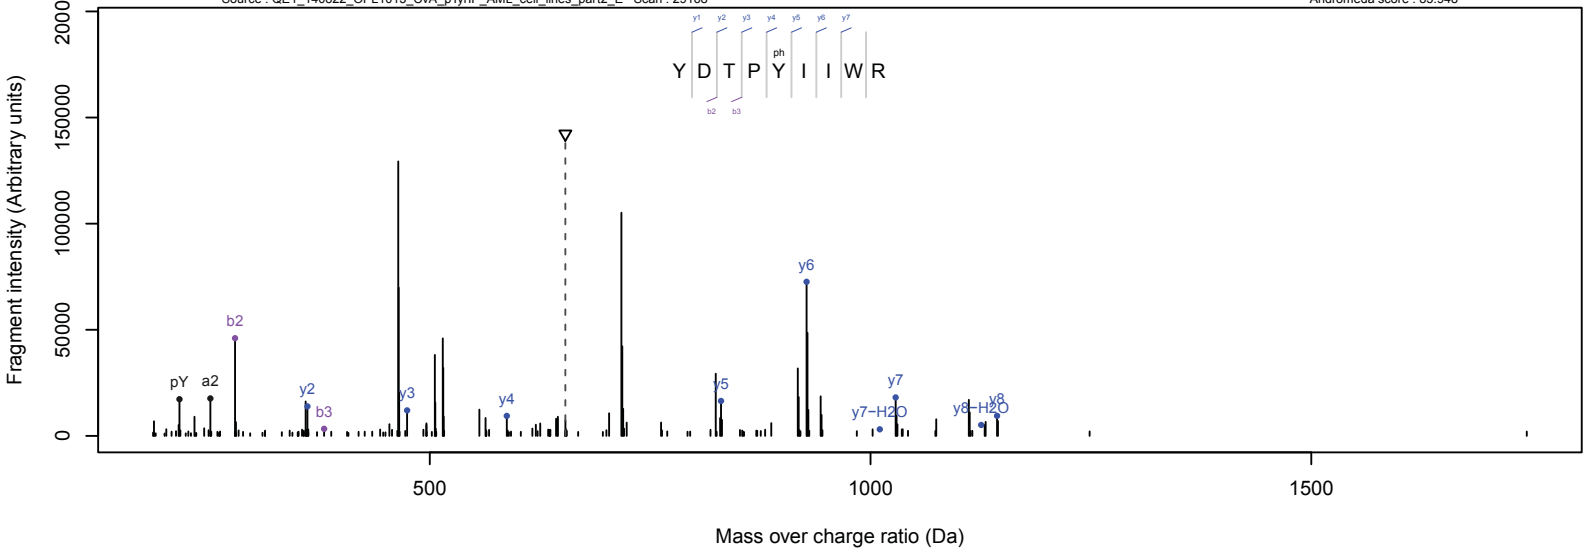

(ac)M(ox)NPEY(ph)DYLFK-2+

Source : QE1\_140612\_OPL1013\_CVA\_phosphoproteomic\_landscape\_AML\_C Scan : 46024

Andromeda score : 83.862

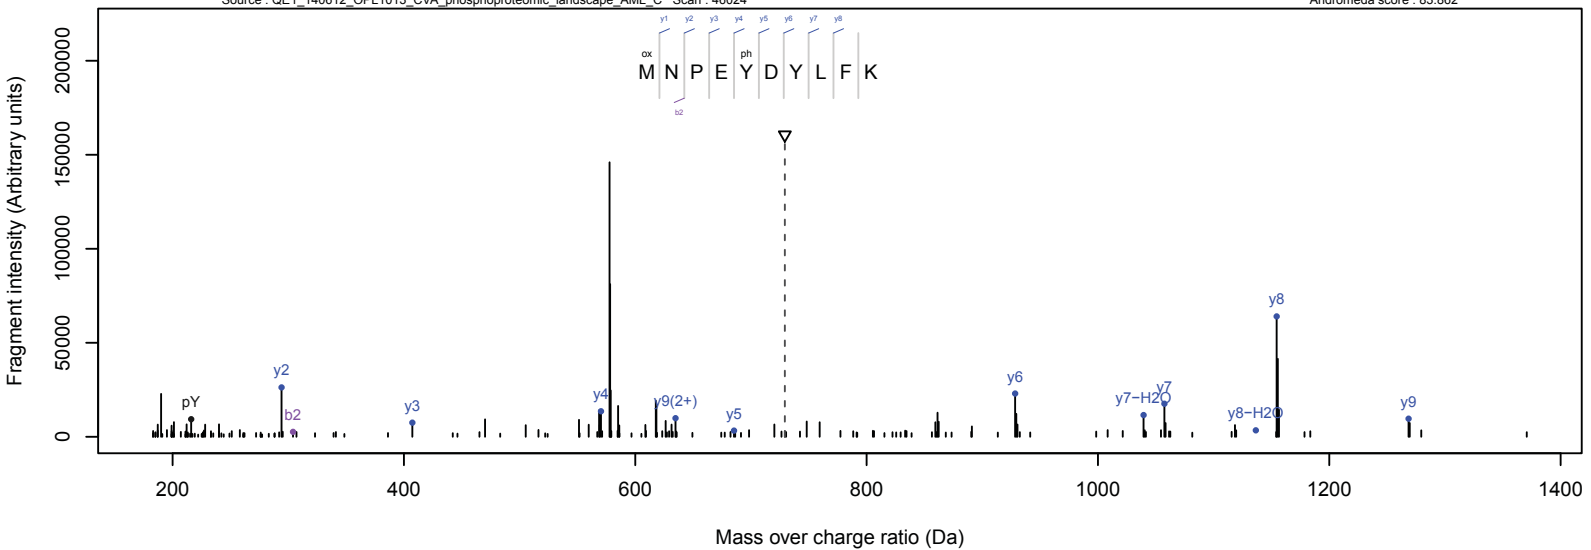

VAQLEQVY(ph)IR-2+

Source : QE1\_140612\_OPL1013\_CVA\_phosphoproteomic\_landscape\_AML\_C Scan : 24670

Andromeda score : 83.862

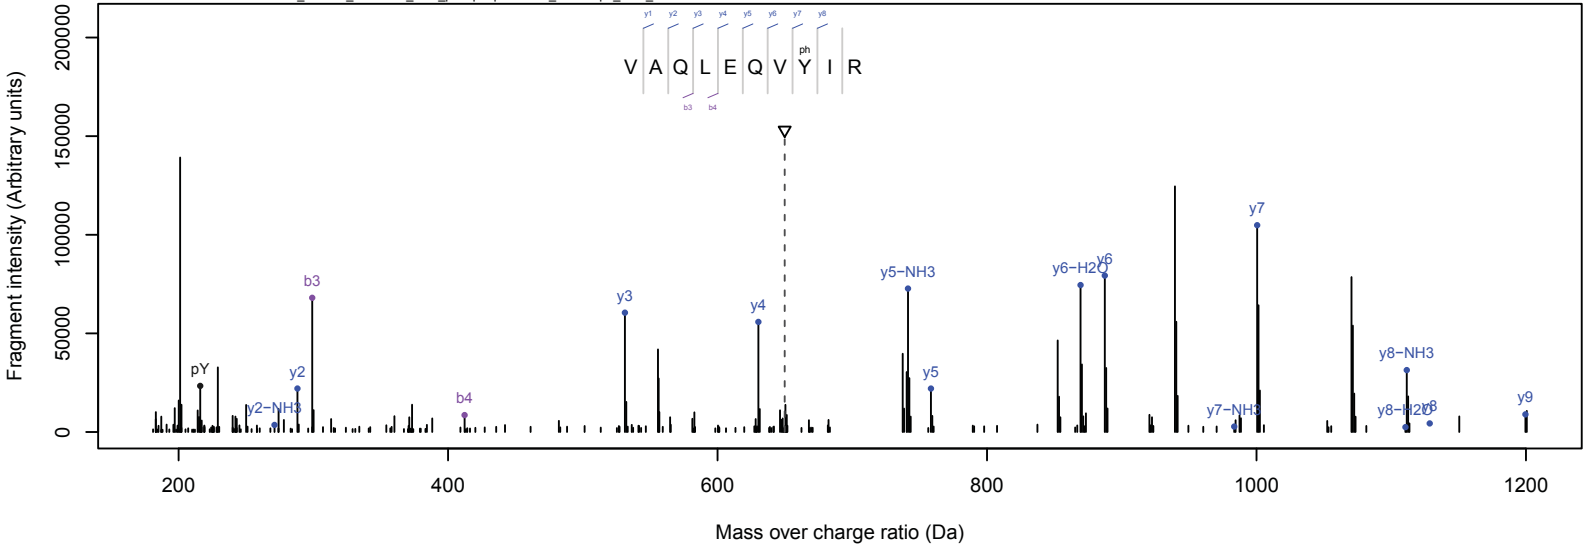

Y(ph)YMLNIEAAK-2+

Source : QE1\_140612\_OPL1013\_CVA\_phosphoproteomic\_landscape\_AML\_C Scan : 30960

Andromeda score : 83.862

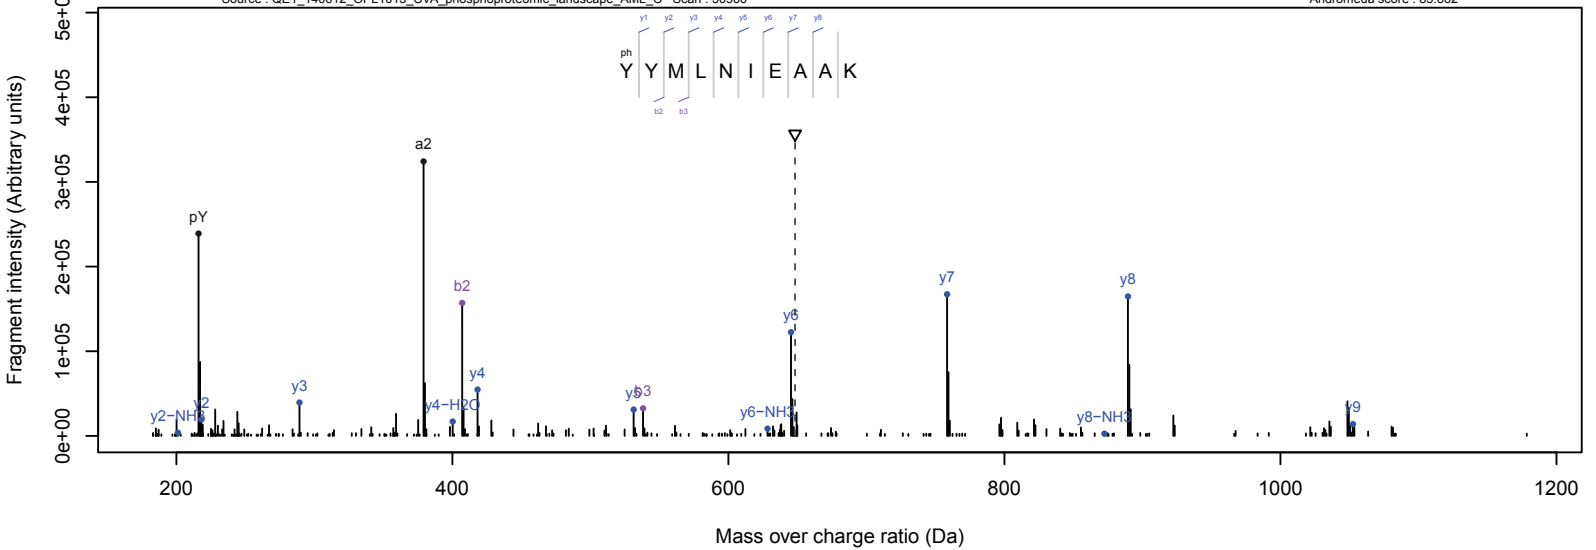

TSSESIY(ph)SRPGSSIPGSPGHTIYAK-3+

Source : QE1\_140612\_OPL1013\_CVA\_phosphoproteomic\_landscape\_AML\_B Scan : 20034

Andromeda score : 83.826

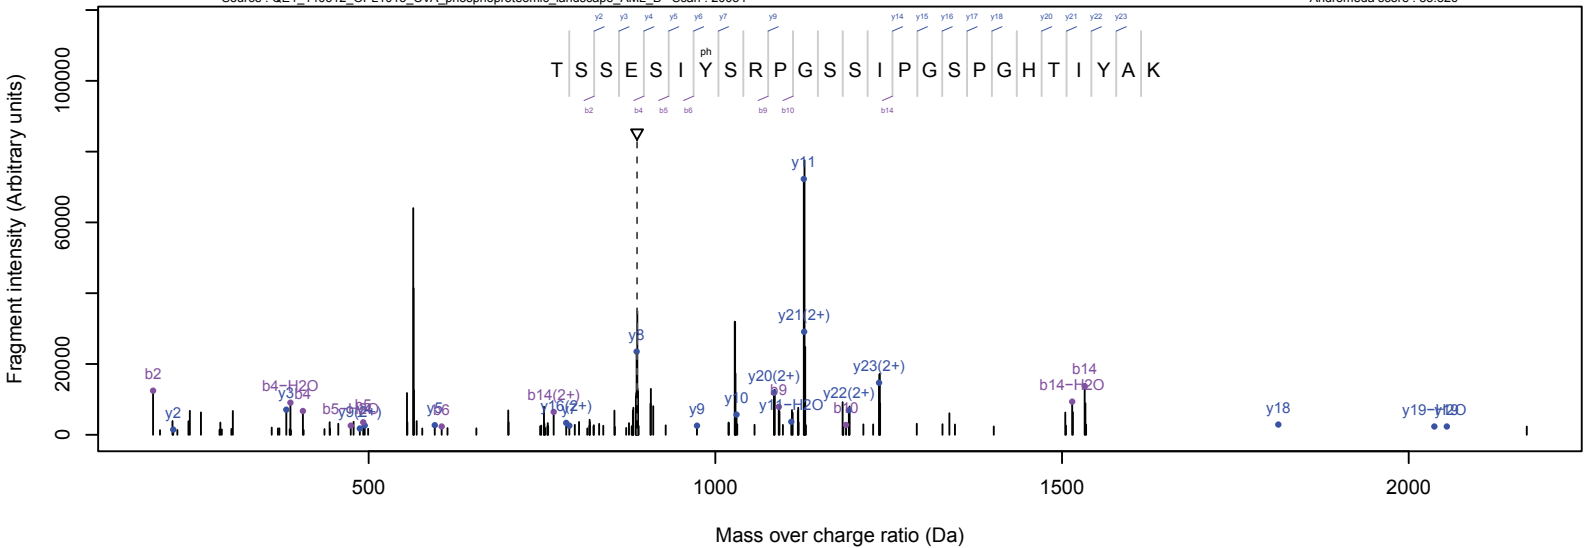



LNEVLY(ph)PPLRPSQAR-3+

Source : QE1\_140612\_OPL1013\_CVA\_phosphoproteomic\_landscape\_AML\_C Scan : 28951

Andromeda score : 83.823

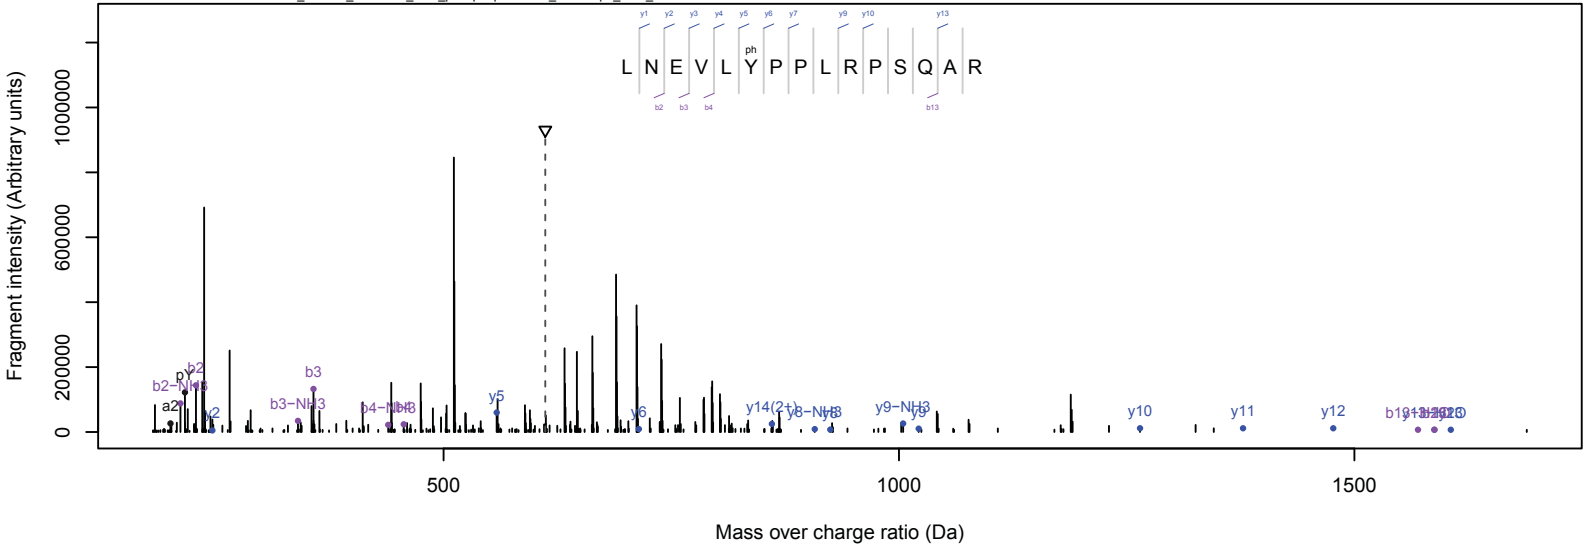

THY(ph)SNIEANESEEV-3+

Source : QE1\_140612\_OPL1013\_CVA\_phosphoproteomic\_landscape\_AML\_C Scan : 9204

Andromeda score : 83.823

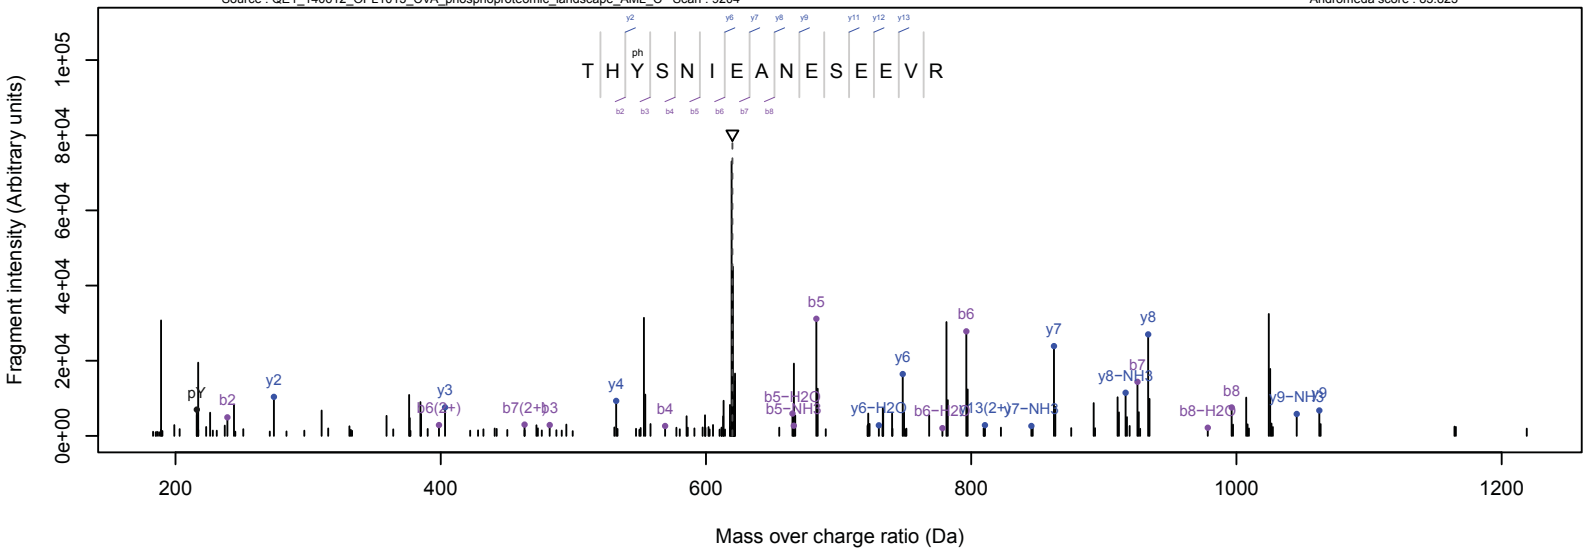

Y(ph)ENVPLIGR-2+

Source : QE1\_140822\_OPL1013\_CvA\_pTyrIP\_AML\_cell\_lines\_part2\_E Scan : 19078

Andromeda score : 83.783

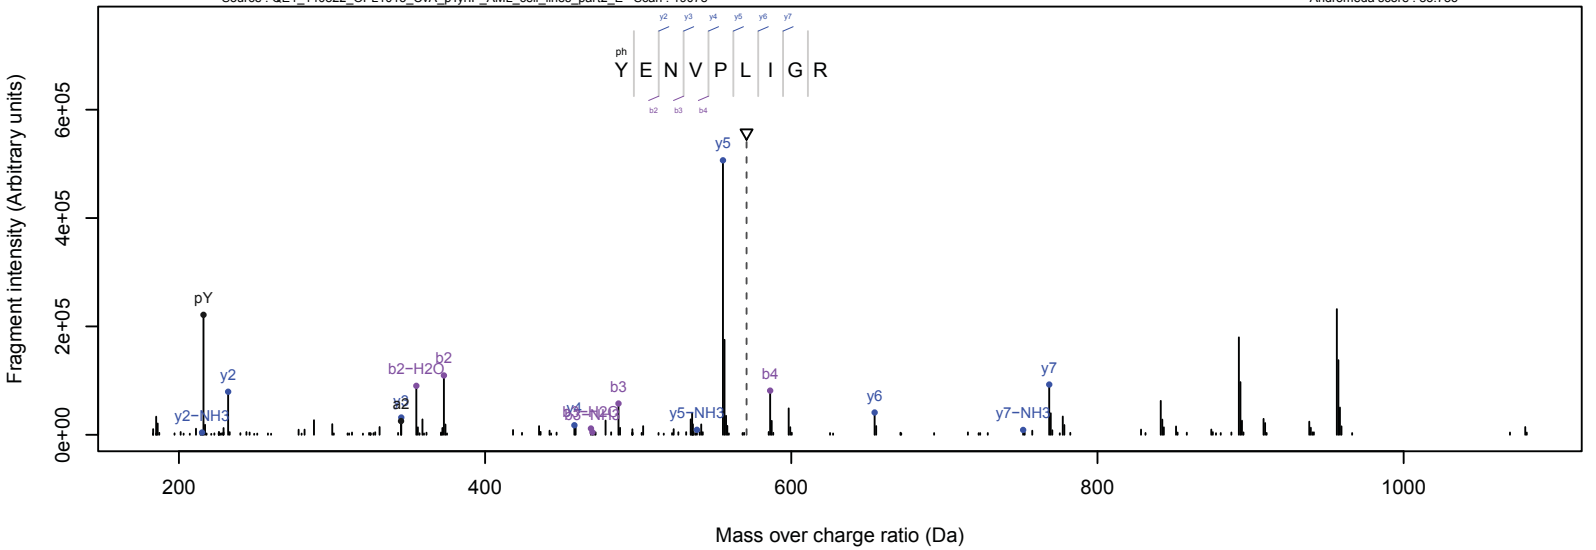

**TFQY(ph)LSFYVDKNVLQR-3+**

Source : QE1\_140612\_OPL1013\_CVA\_phosphoproteomic\_landscape\_AML\_C Scan : 44947

Andromeda score : 83.758

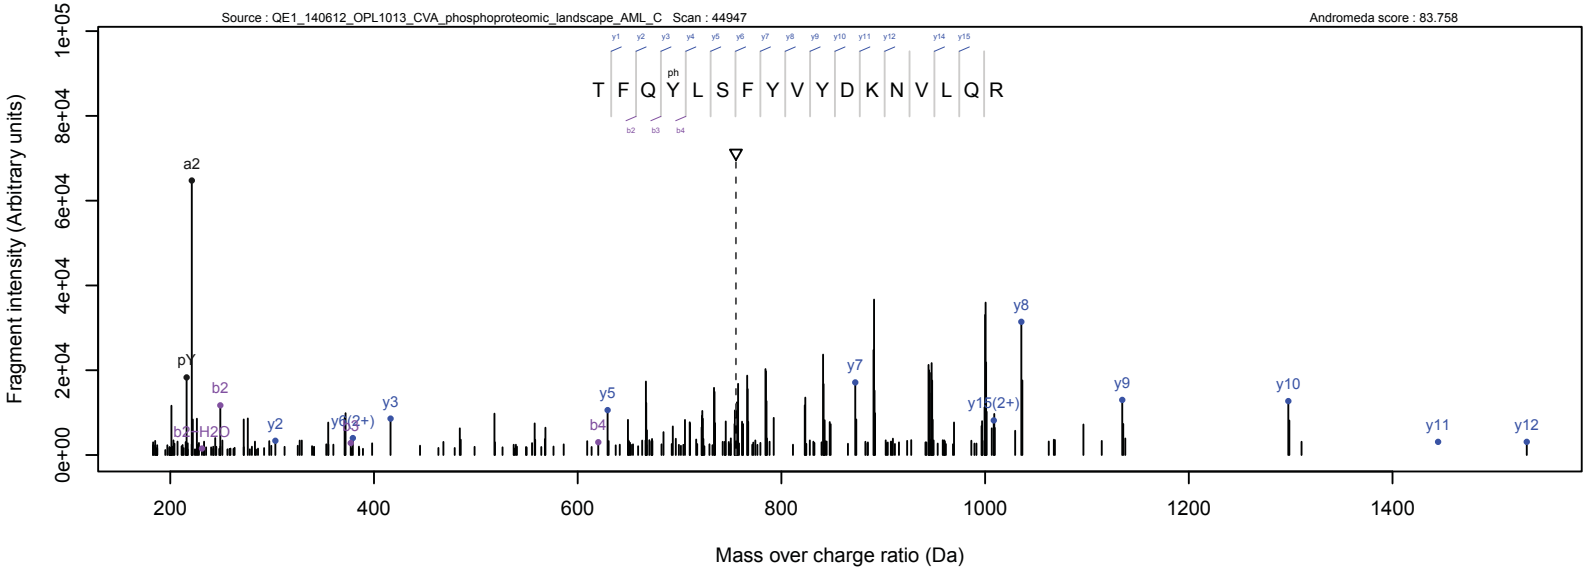

**YSDHAGPAIPSVVAY(ph)PK-2+**

Source : QE1\_140612\_OPL1013\_CVA\_phosphoproteomic\_landscape\_AML\_C Scan : 27024

Andromeda score : 83.758

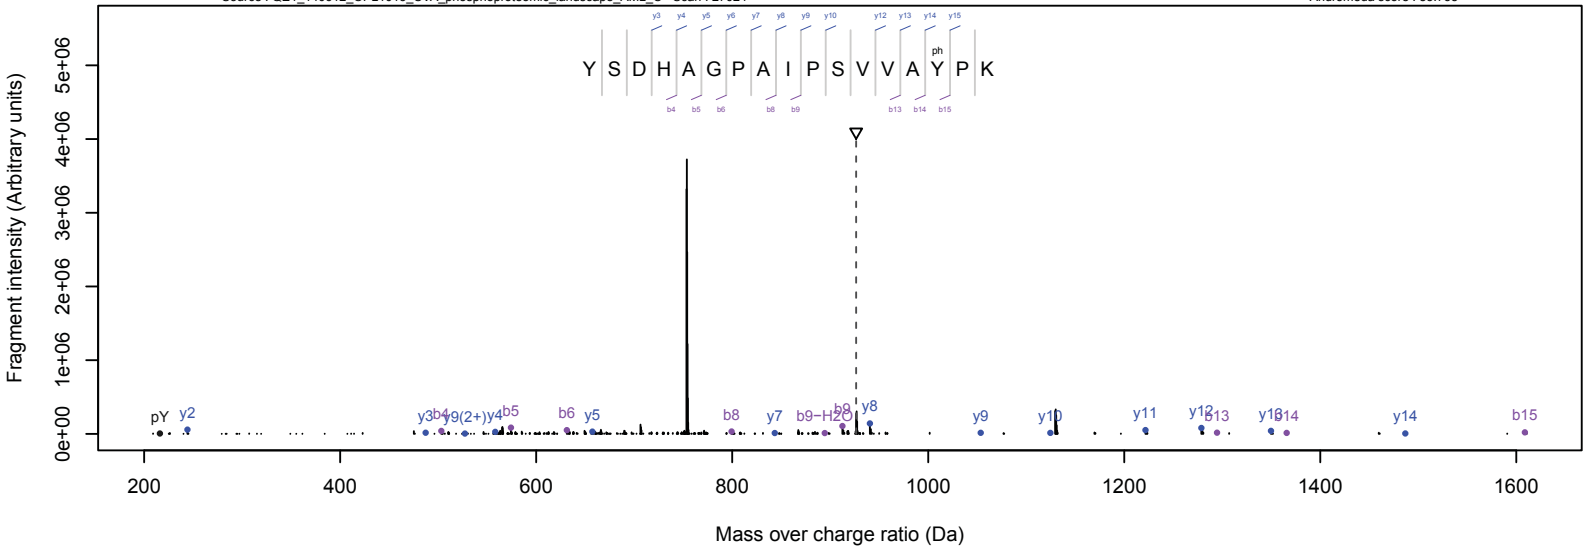

**DTYHPMSEYPTYPHTHGR-4+**

Source : QE1\_140612\_OPL1013\_CVA\_phosphoproteomic\_landscape\_AML\_C Scan : 12453

Andromeda score : 83.751

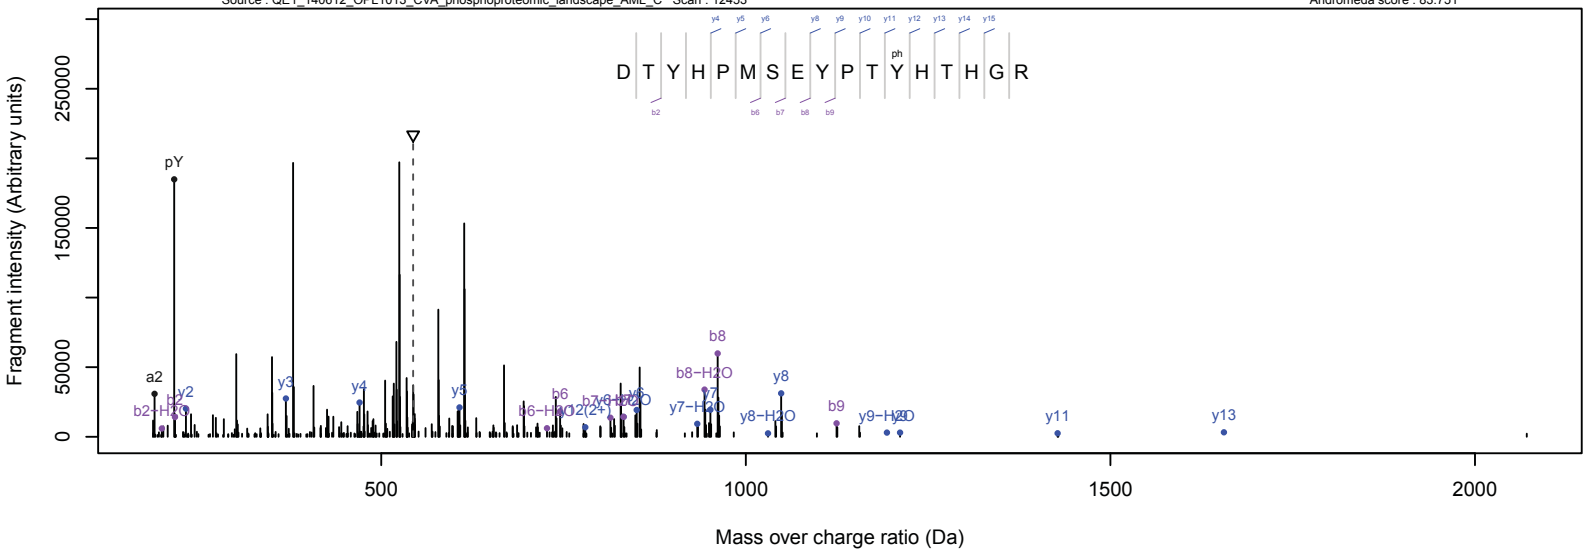

**IKVY(ph)NTSGAVTPQDDLSEFTSK-3+**

Source : QE1\_140612\_OPL1013\_CVA\_phosphoproteomic\_landscape\_AML\_C Scan : 31124

Andromeda score : 83.727

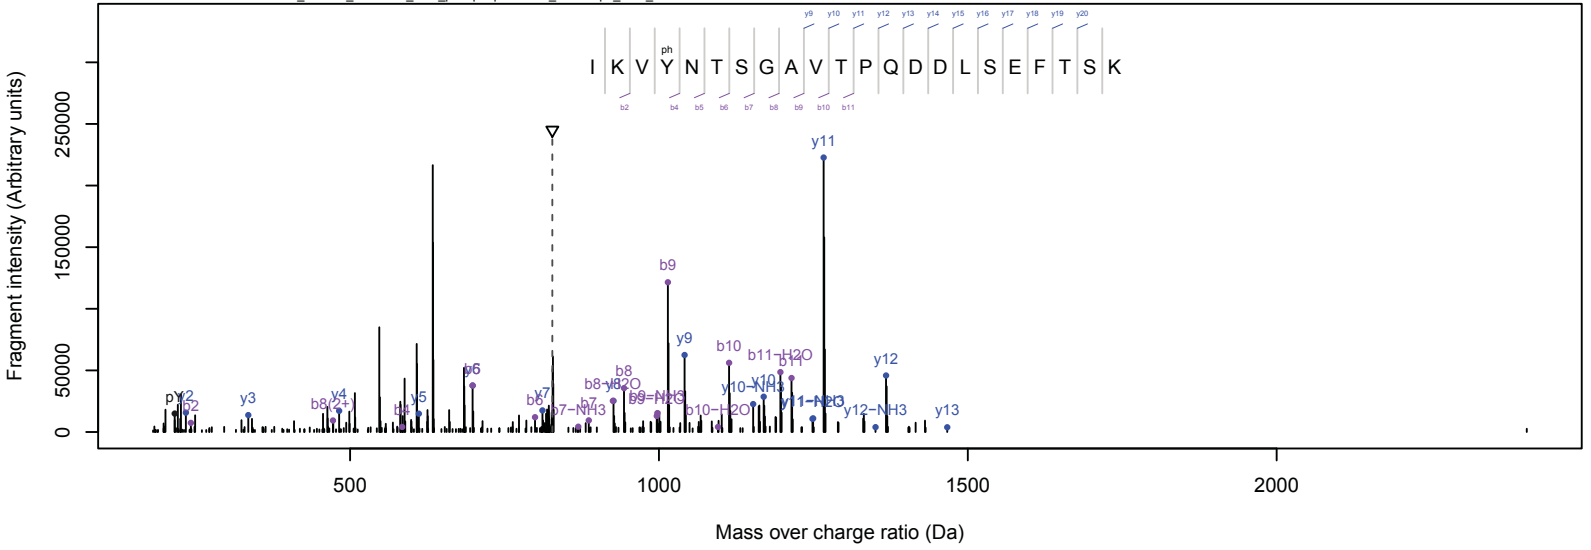

**KVDATDASYPNVTCVHY(ph)LK-3+**

Source : QE1\_140612\_OPL1013\_CVA\_phosphoproteomic\_landscape\_AML\_B Scan : 22598

Andromeda score : 83.723

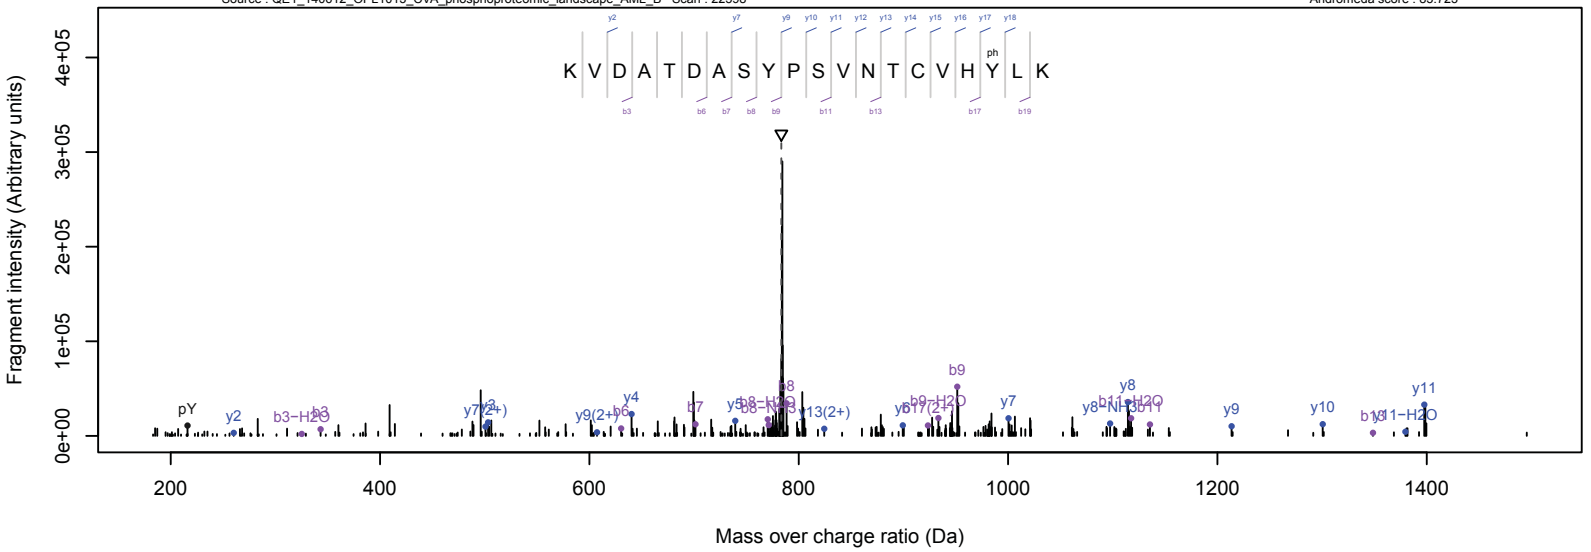

**EVTPY(ph)IKKPSLVSDLPWEGAAPQSPSFSGSEDSGSPK-3+**

Source : QE1\_140612\_OPL1013\_CVA\_phosphoproteomic\_landscape\_AML\_C Scan : 42089

Andromeda score : 83.693

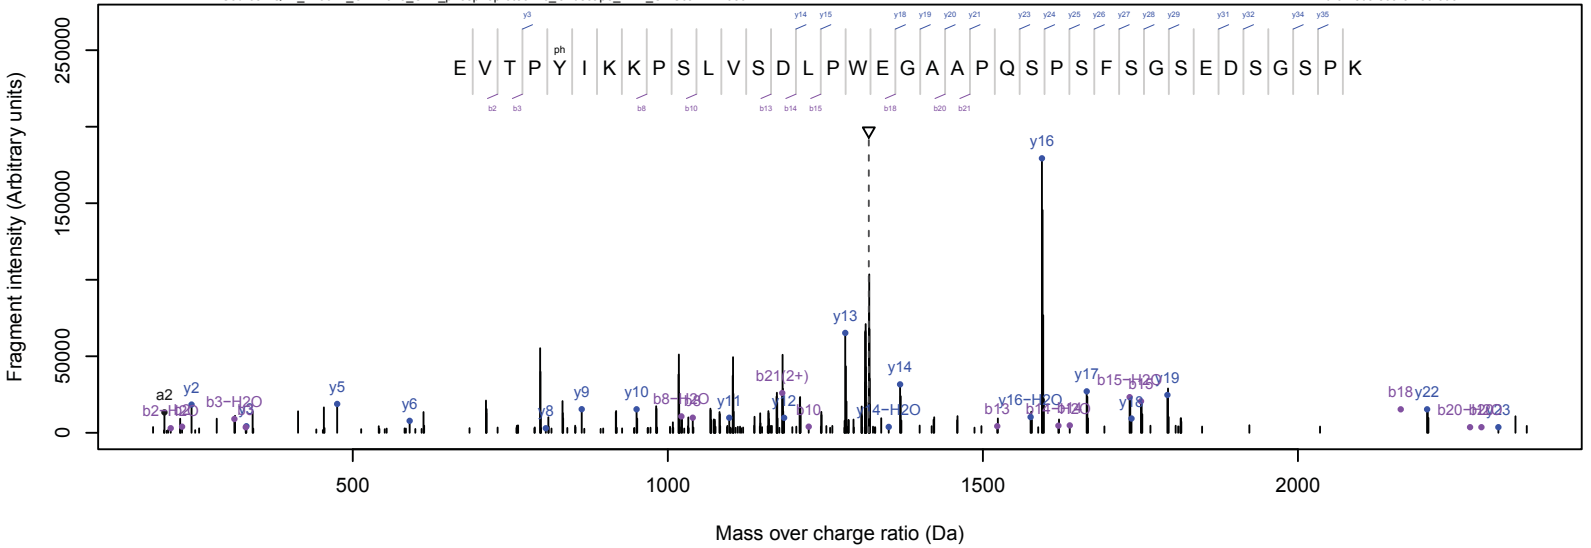

IHTGEKPYLCIHCGK-3+

Source : QE1\_140612\_OPL1013\_CVA\_phosphoproteomic\_landscape\_AML\_A Scan : 13257

Andromeda score : 83.692

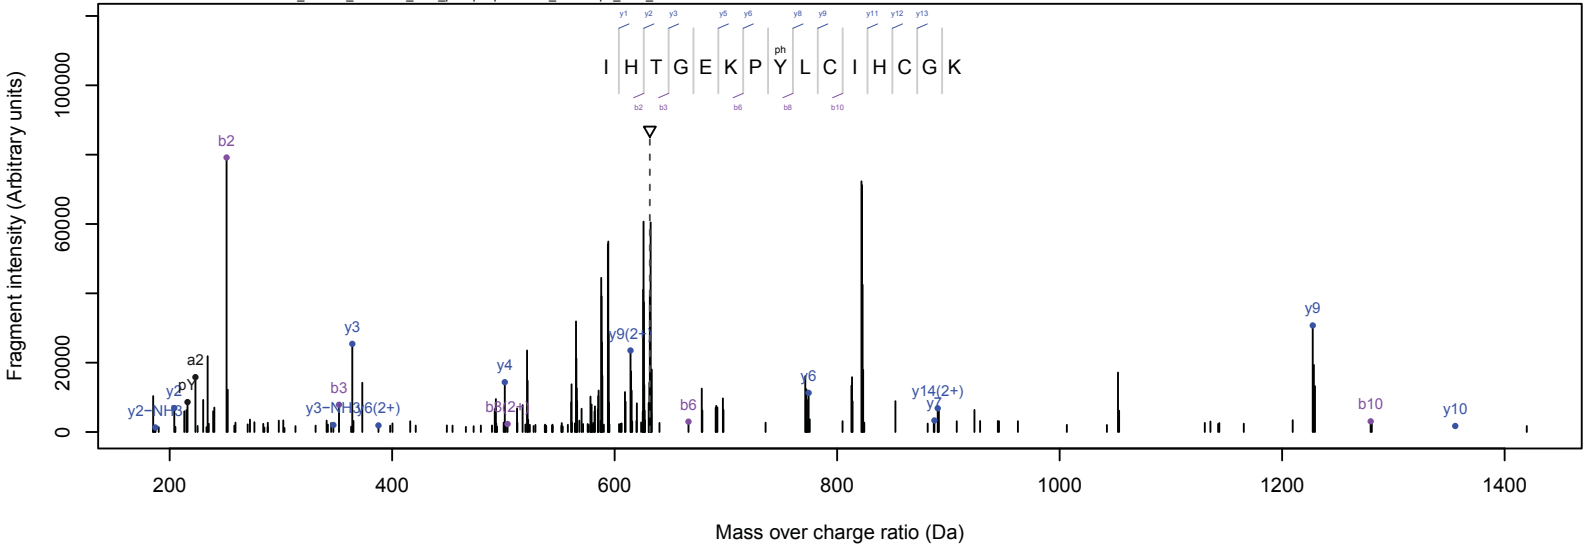

SSGEIVYCGQVFEK-2+

Source : QE1\_140612\_OPL1013\_CVA\_phosphoproteomic\_landscape\_AML\_A Scan : 25423

Andromeda score : 83.692

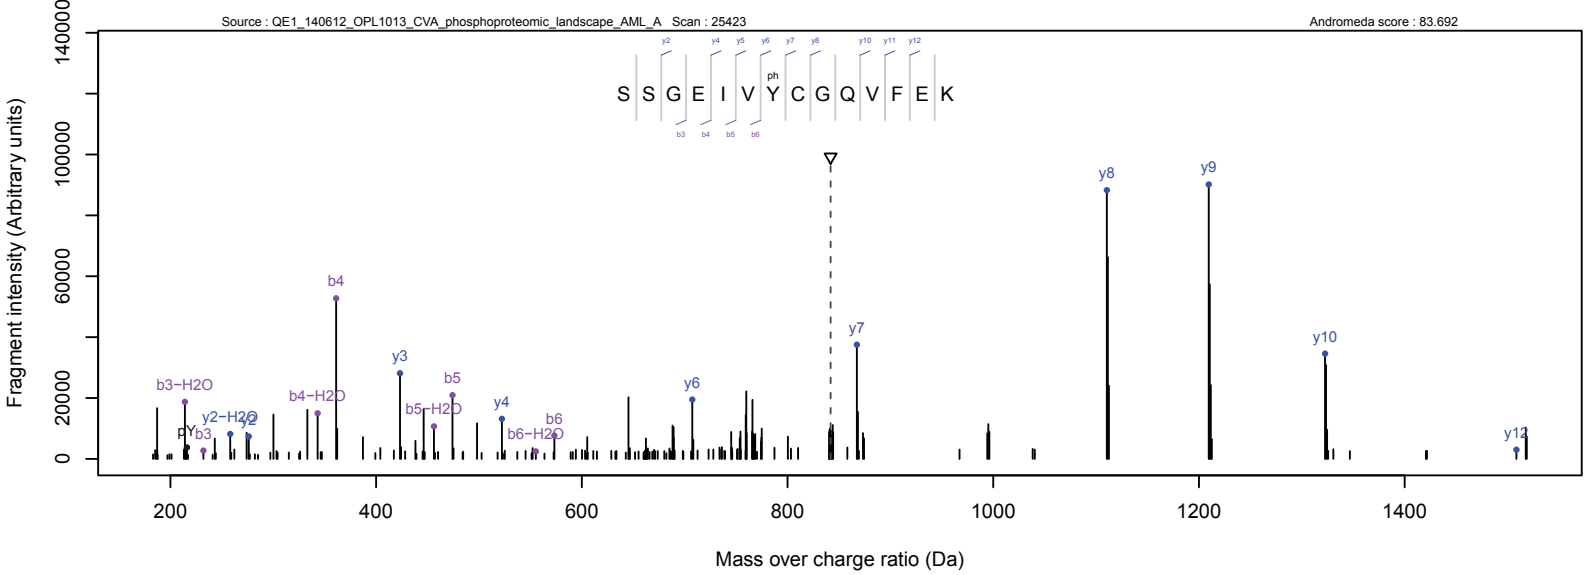

KYNYTLLR-2+

Source : QE1\_140612\_OPL1013\_CVA\_phosphoproteomic\_landscape\_AML\_B Scan : 15351

Andromeda score : 83.647

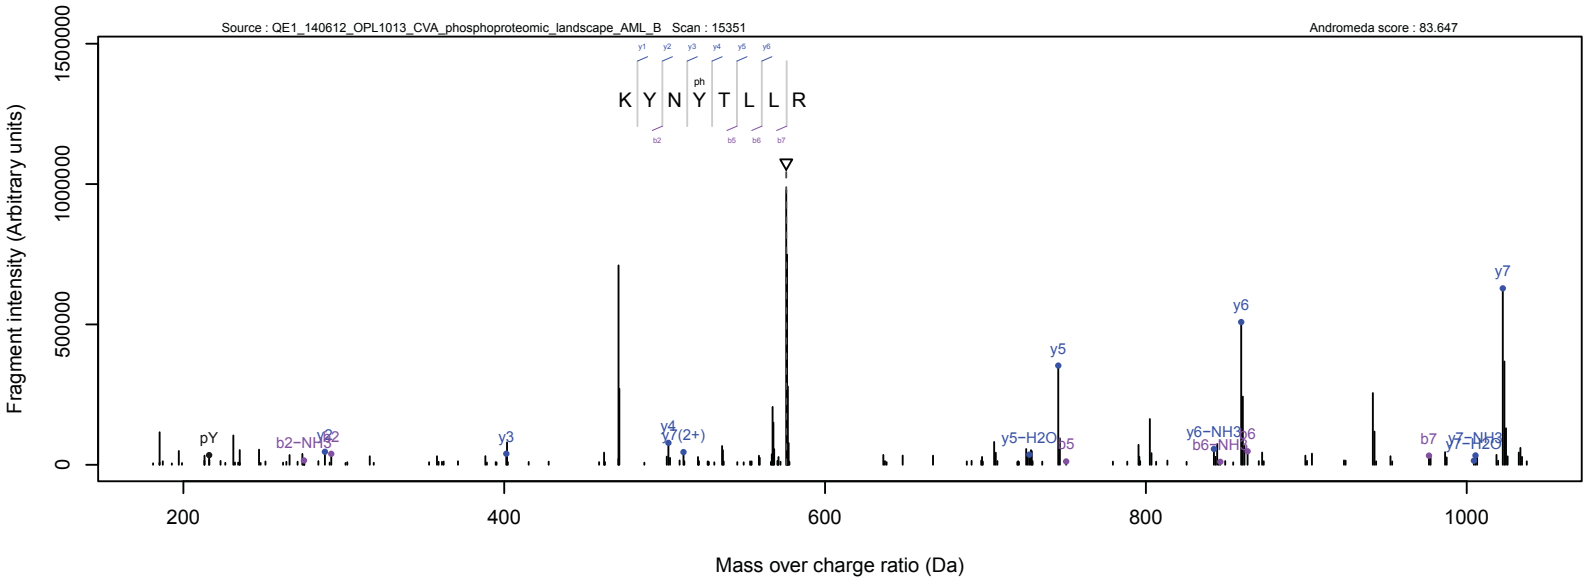

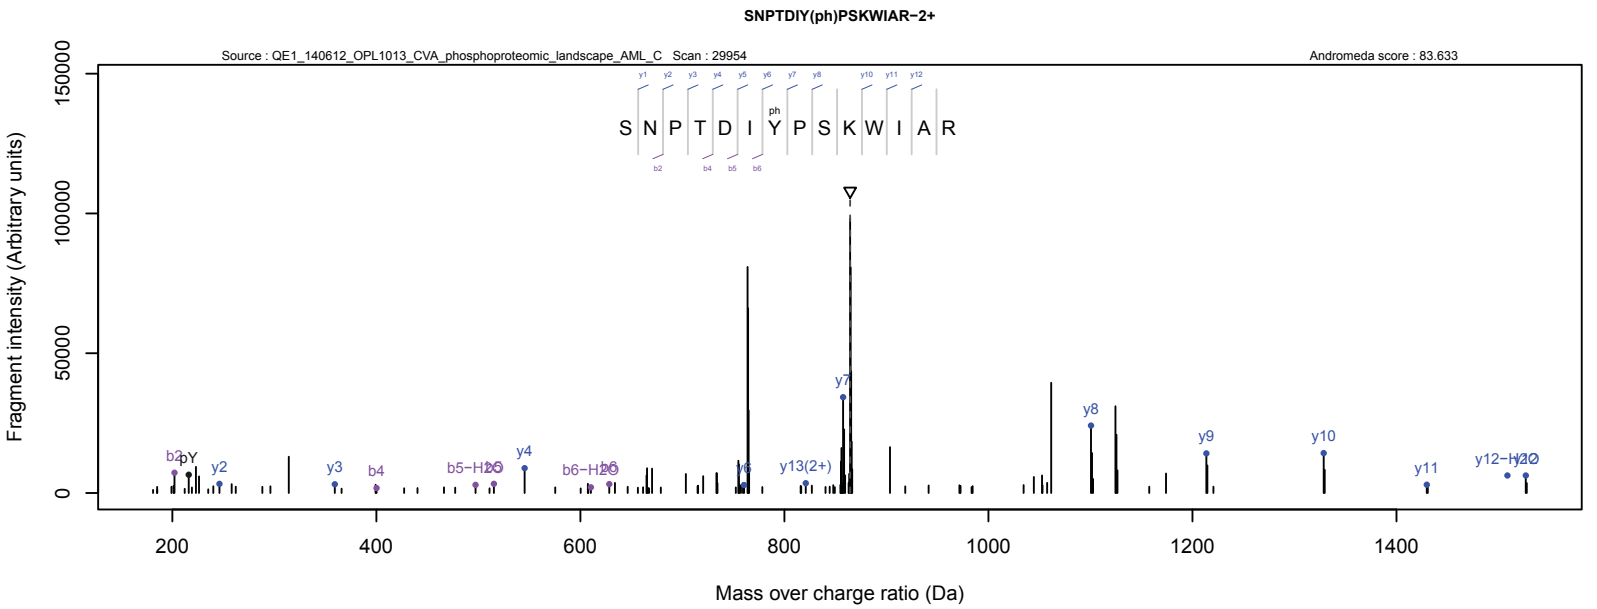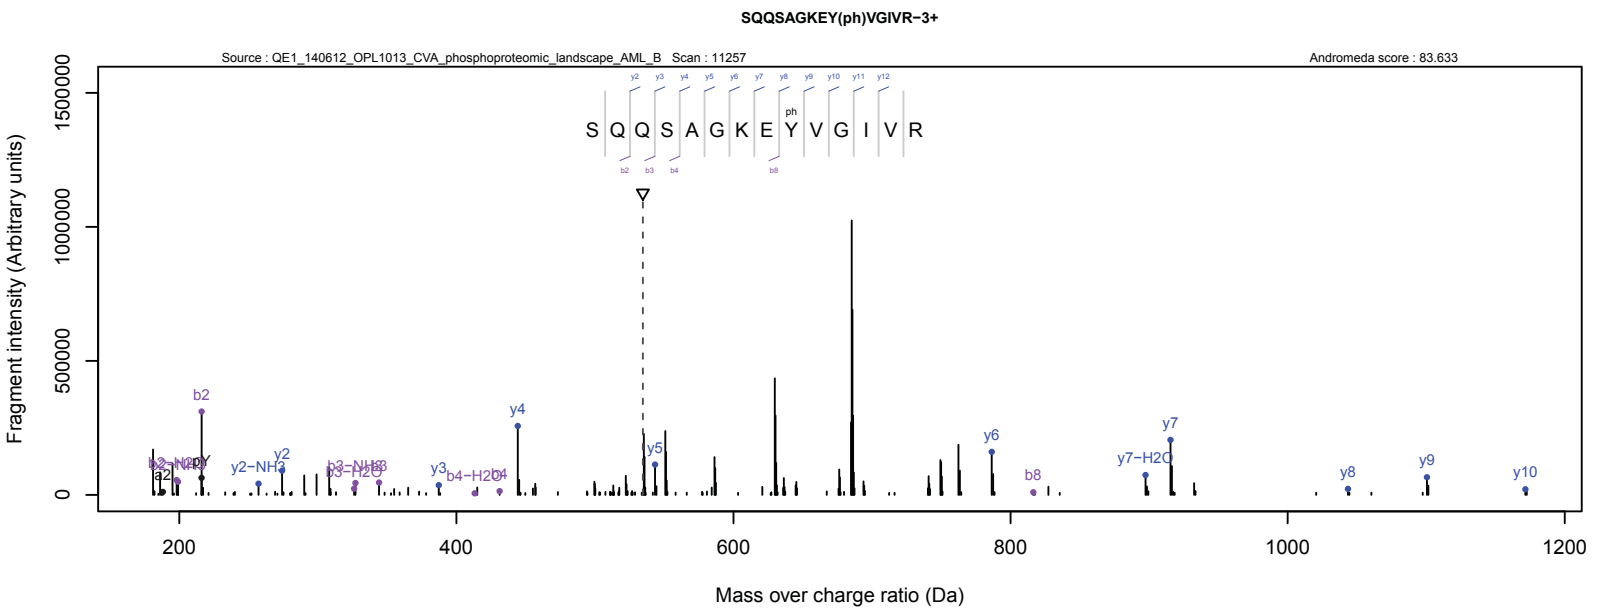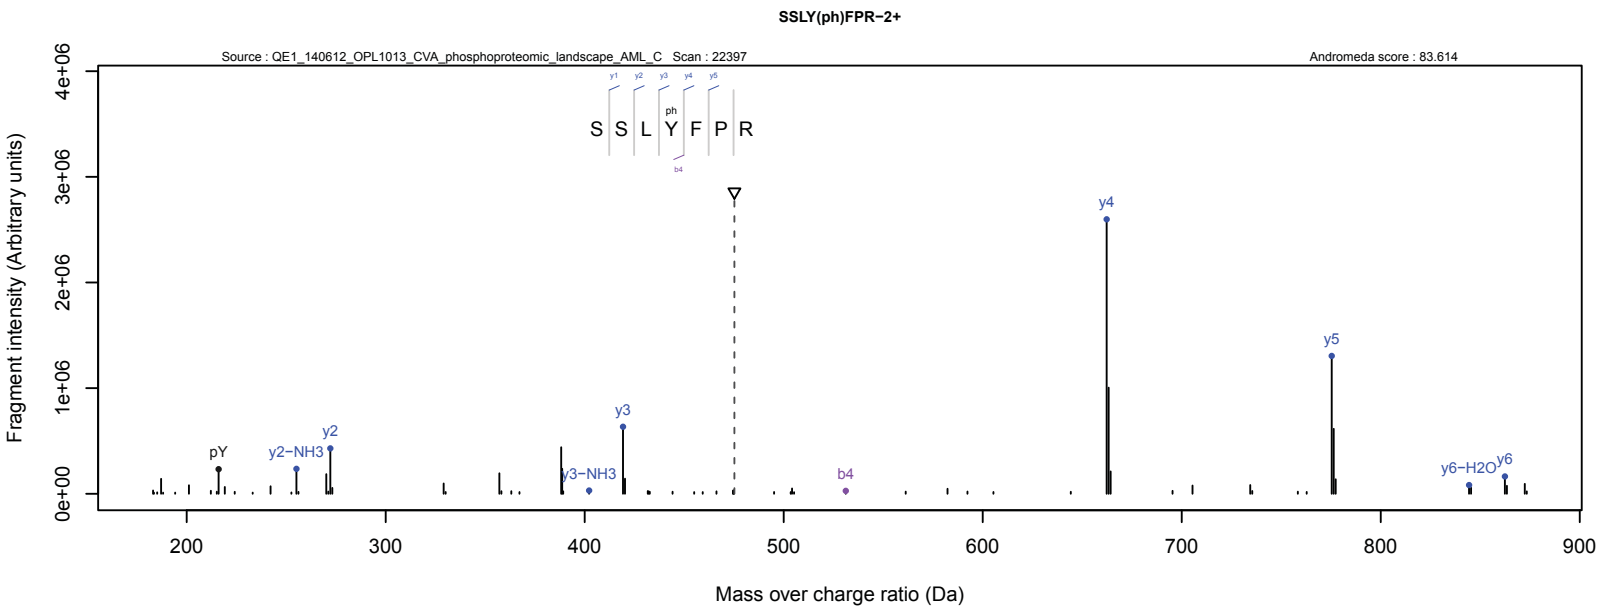

**ALSTANENDGY(ph)VDM(ox)SSFNAFESK-3+**

Source : QE1\_140822\_OPL1013\_CvA\_pTyrIP\_AML\_cell\_lines\_part2\_B Scan : 27308

Andromeda score : 83.602

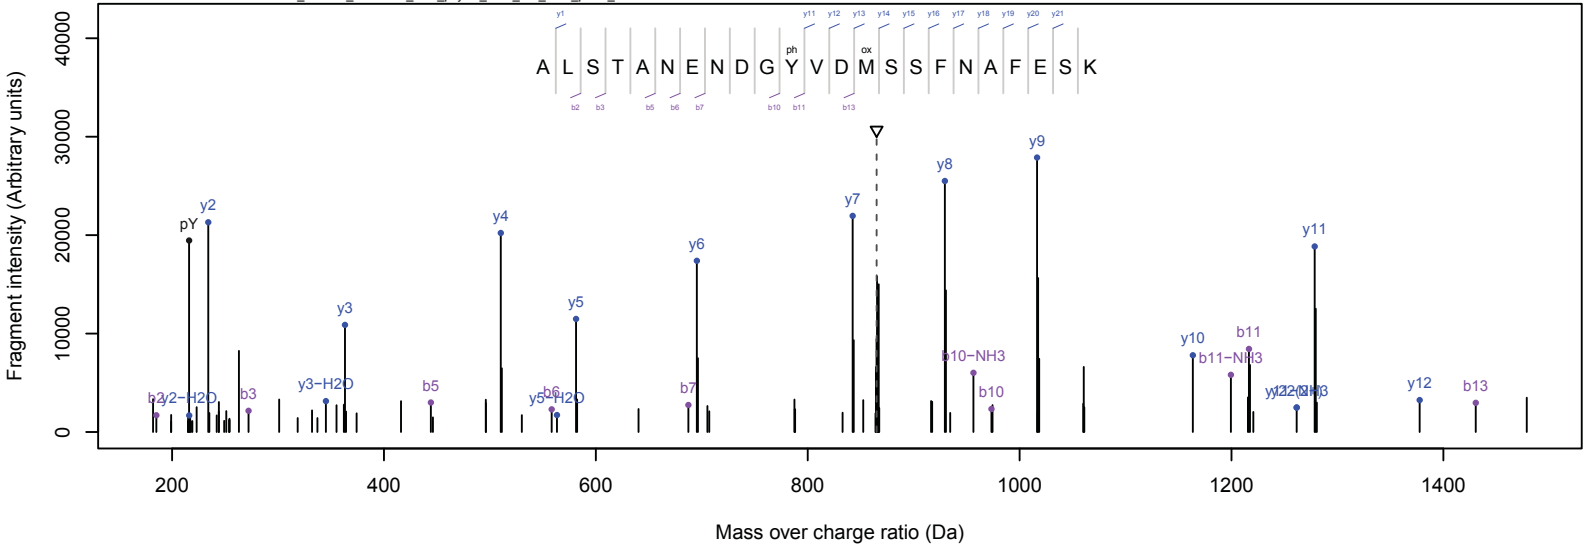

**ALY(ph)DTFSAFGNILSCK-2+**

Source : QE1\_140822\_OPL1013\_CvA\_pTyrIP\_AML\_cell\_lines\_part2\_E Scan : 44293

Andromeda score : 83.54

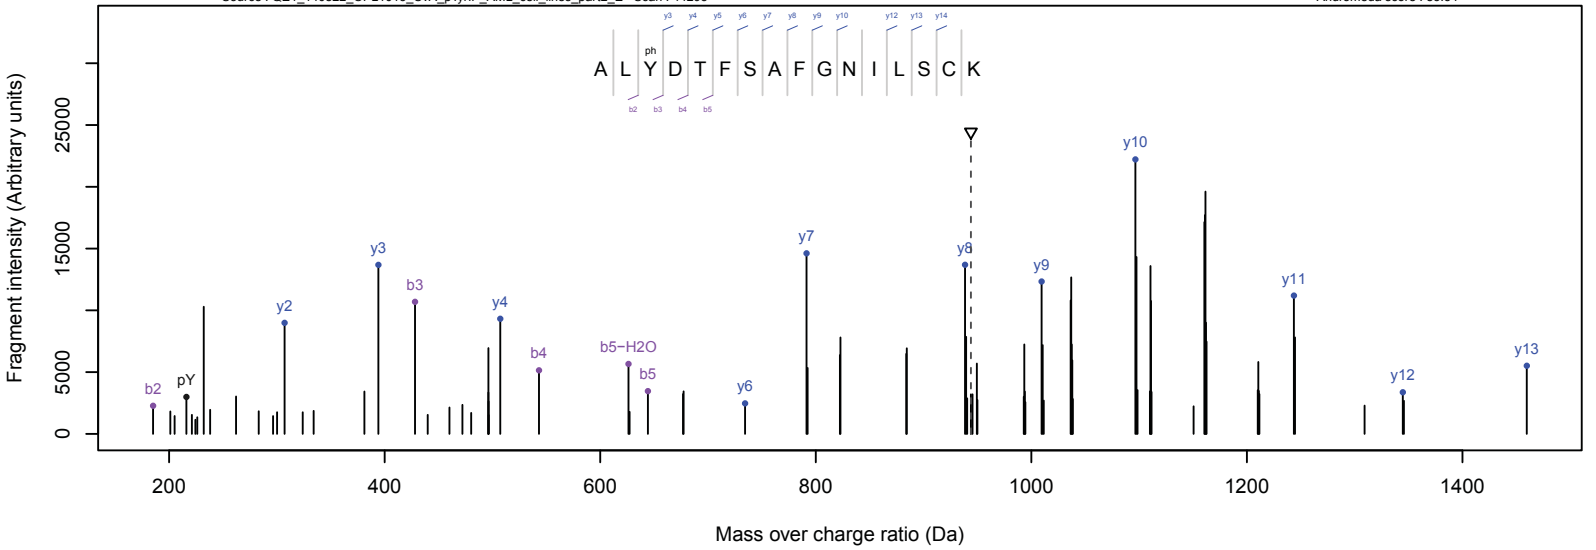

**GAVEAELDPVEY(ph)TLRK-3+**

Source : QE1\_140612\_OPL1013\_CvA\_phosphoproteomic\_landscape\_AML\_C Scan : 36152

Andromeda score : 83.54

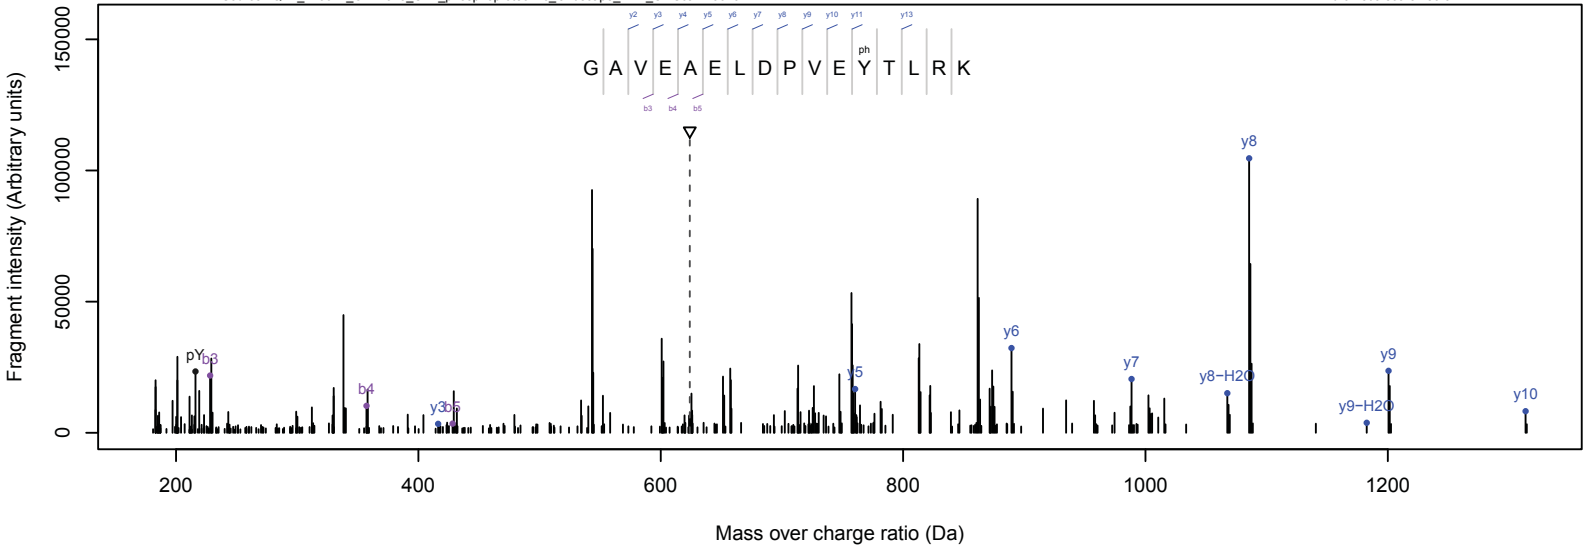

**IEKIGEGT(ph)YGVVYKGR-3+**

Source : QE1\_140908\_OPL1013\_CvA\_pTyrIP\_AML\_Kasumi1 Scan : 16517

Andromeda score : 83.54

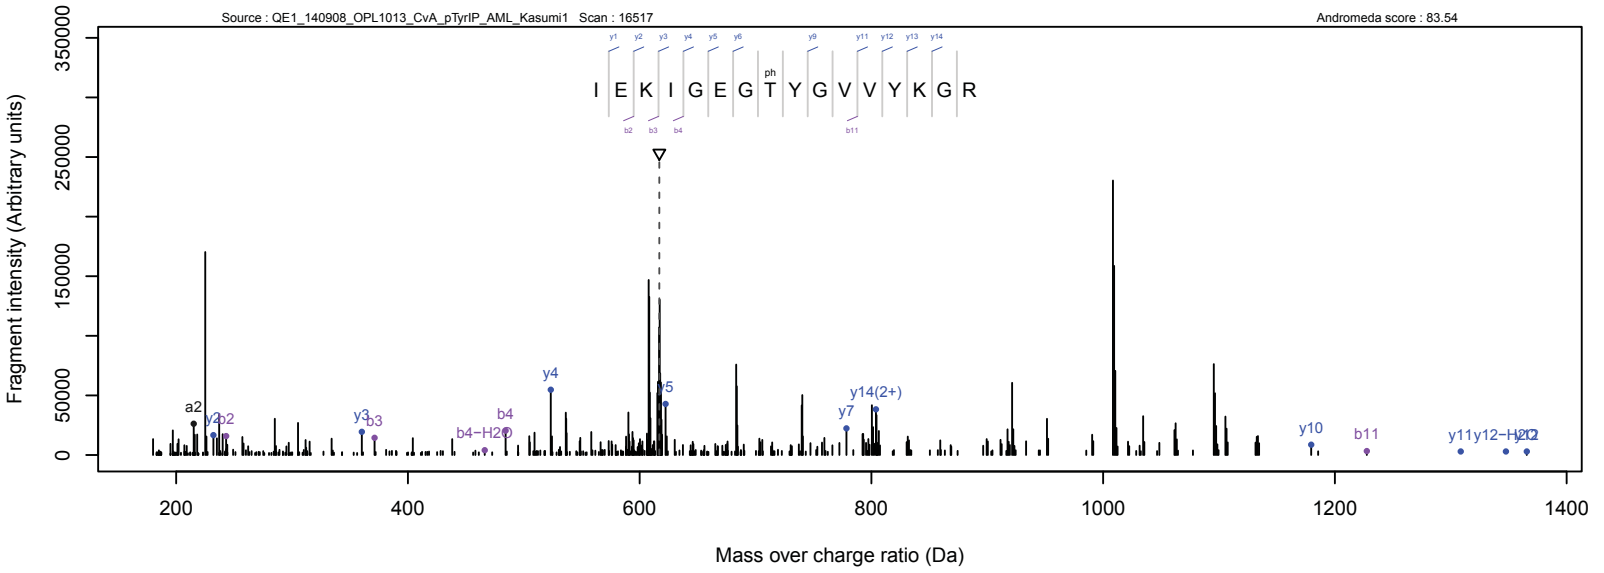

**LGAQSVY(ph)HLHIHLGGR-4+**

Source : QE1\_140612\_OPL1013\_CVA\_phosphoproteomic\_landscape\_AML\_C Scan : 27320

Andromeda score : 83.54

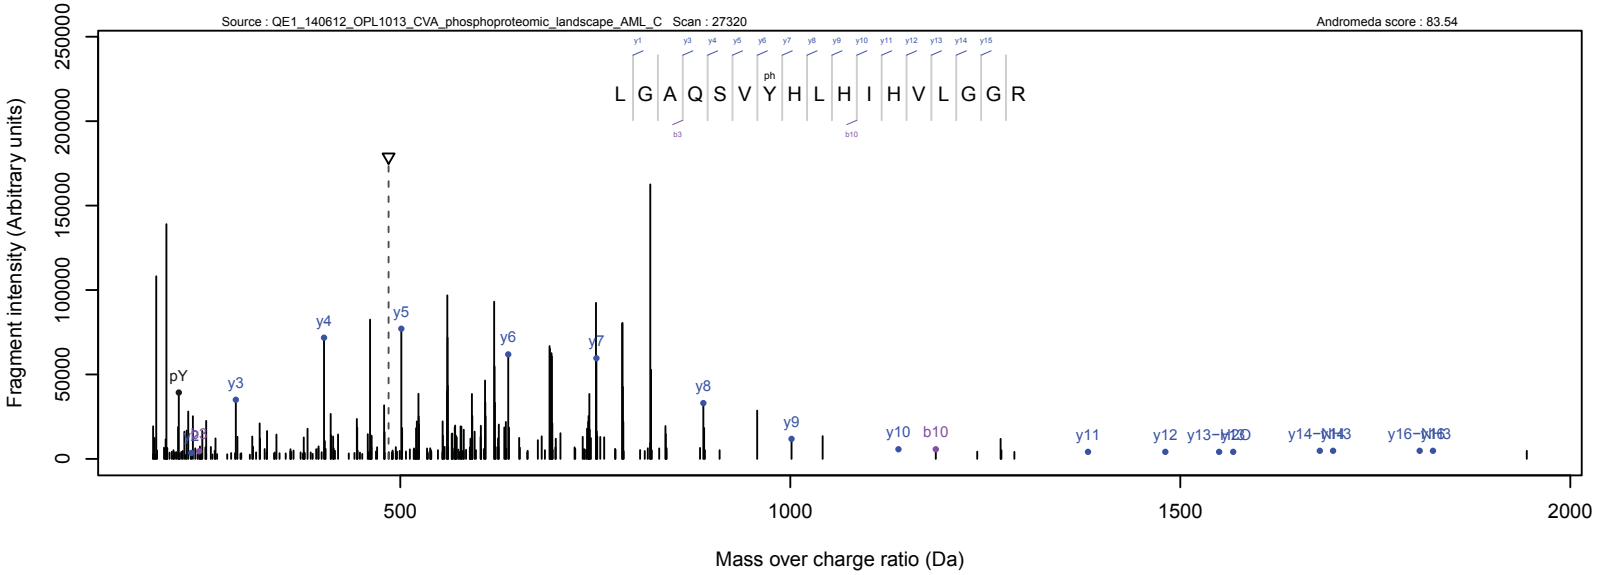

**LQLHESQKD(ph)YKTGFGGK-4+**

Source : QE1\_140612\_OPL1013\_CVA\_phosphoproteomic\_landscape\_AML\_C Scan : 10024

Andromeda score : 83.54

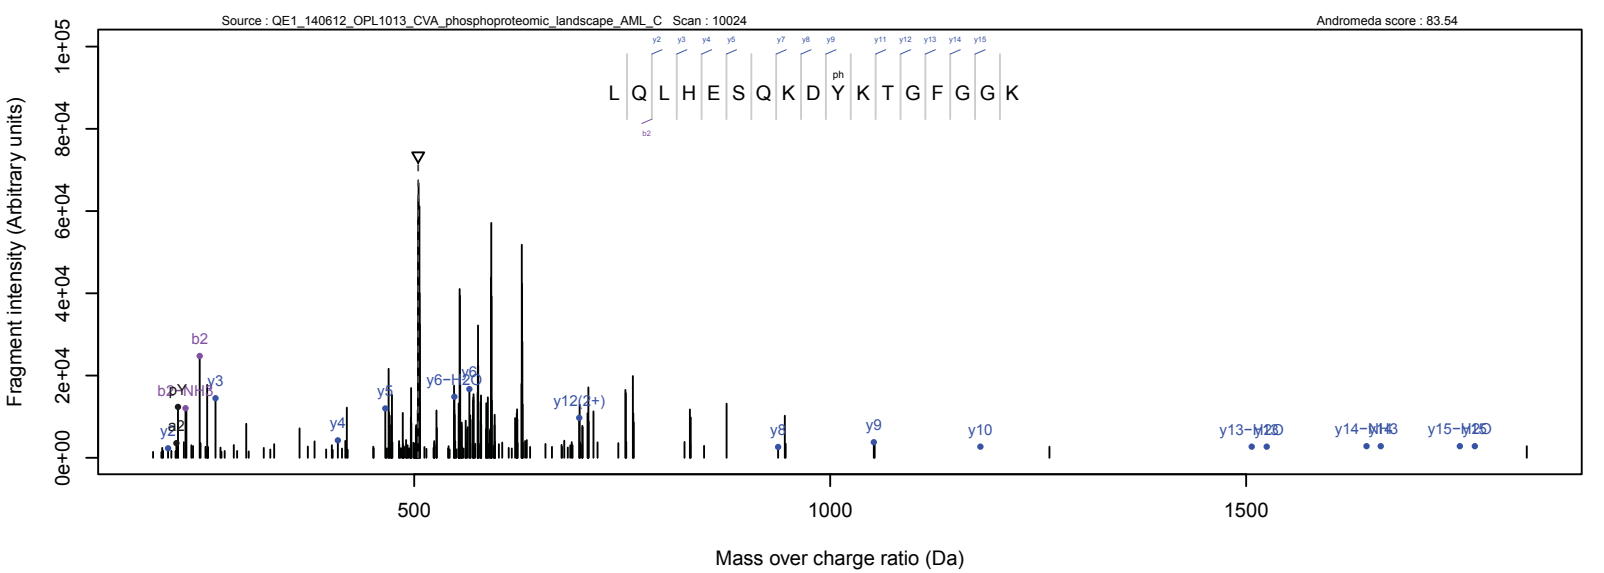

YG<sup>(ph)</sup>L<sup>(ph)</sup>S<sup>(ph)</sup>L<sup>(ph)</sup>P<sup>(ph)</sup>K<sup>(ph)</sup>M<sup>(ph)</sup>K<sup>(ph)</sup>N<sup>(ph)</sup>N<sup>(ph)</sup>A<sup>(ph)</sup>N<sup>(ph)</sup>L<sup>(ph)</sup>K<sup>(ph)</sup>-3+

Source : QE1\_140612\_OPL1013\_CVA\_phosphoproteomic\_landscape\_AML\_C Scan : 25898

Andromeda score : 83.54

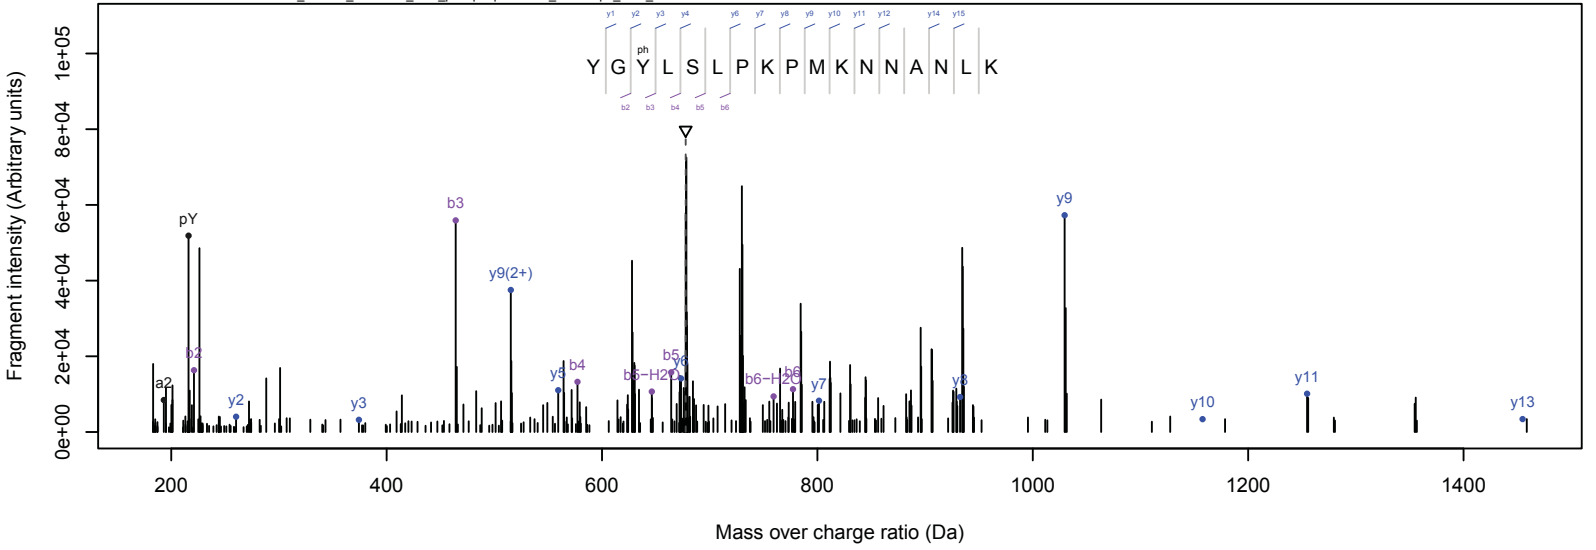

Y<sup>(ph)</sup>P<sup>(ph)</sup>H<sup>(ph)</sup>L<sup>(ph)</sup>G<sup>(ph)</sup>Q<sup>(ph)</sup>K<sup>(ph)</sup>P<sup>(ph)</sup>G<sup>(ph)</sup>G<sup>(ph)</sup>S<sup>(ph)</sup>D<sup>(ph)</sup>F<sup>(ph)</sup>L<sup>(ph)</sup>R<sup>(ph)</sup>K<sup>(ph)</sup>-4+

Source : QE1\_140612\_OPL1013\_CVA\_phosphoproteomic\_landscape\_AML\_C Scan : 17635

Andromeda score : 83.54

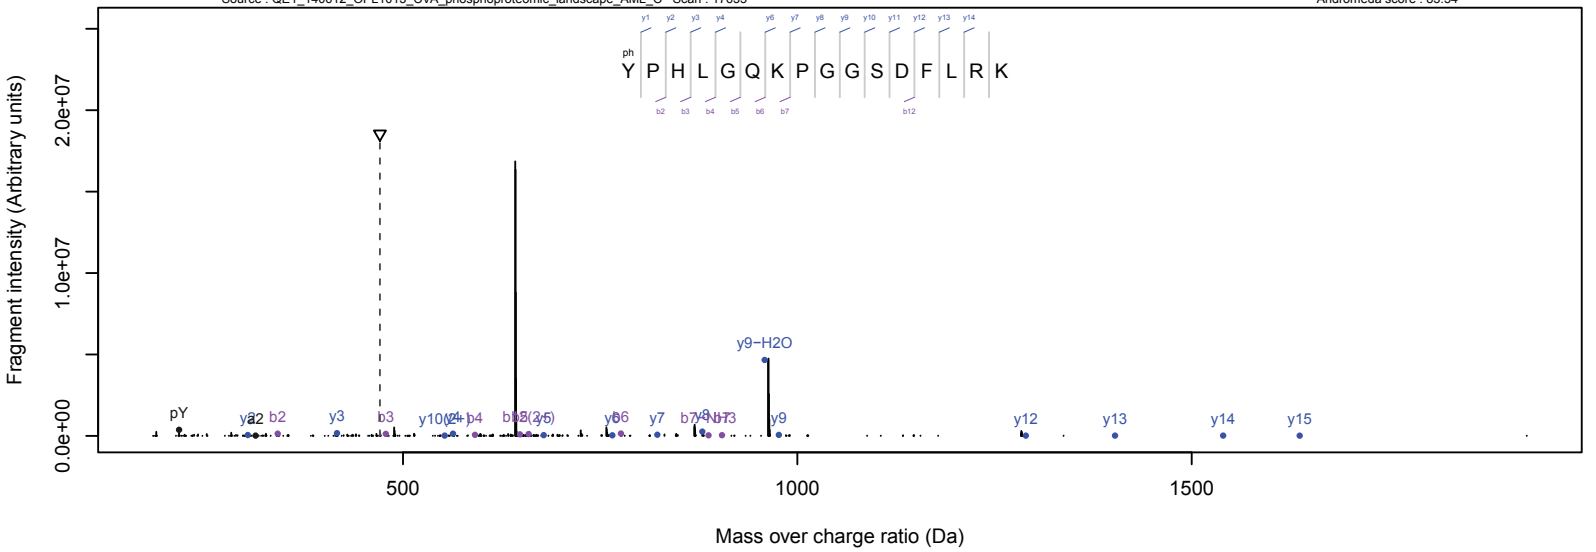

LHISPSN<sup>(ox)</sup>M<sup>(ox)</sup>TNQNTPEY<sup>(ph)</sup>M<sup>(ox)</sup>EK<sup>(ox)</sup>-3+

Source : QE1\_140908\_OPL1013\_CvA\_pTyrIP\_AML\_HEL Scan : 12931

Andromeda score : 83.423

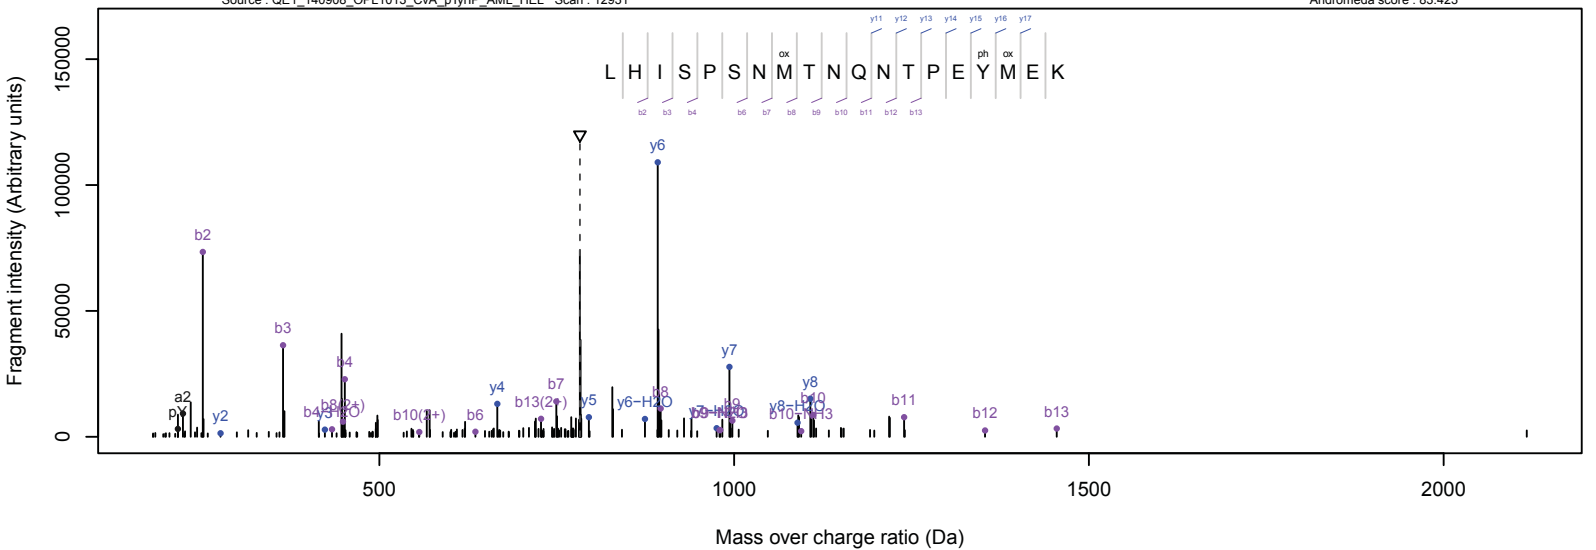



RPMHILLHDAY(ph)MFCIIDK-4+

Source: QE1\_140612\_OPL1013\_CVA\_phosphoproteomic\_landscape\_AML\_B Scan: 43777

Andromeda score: 83.423

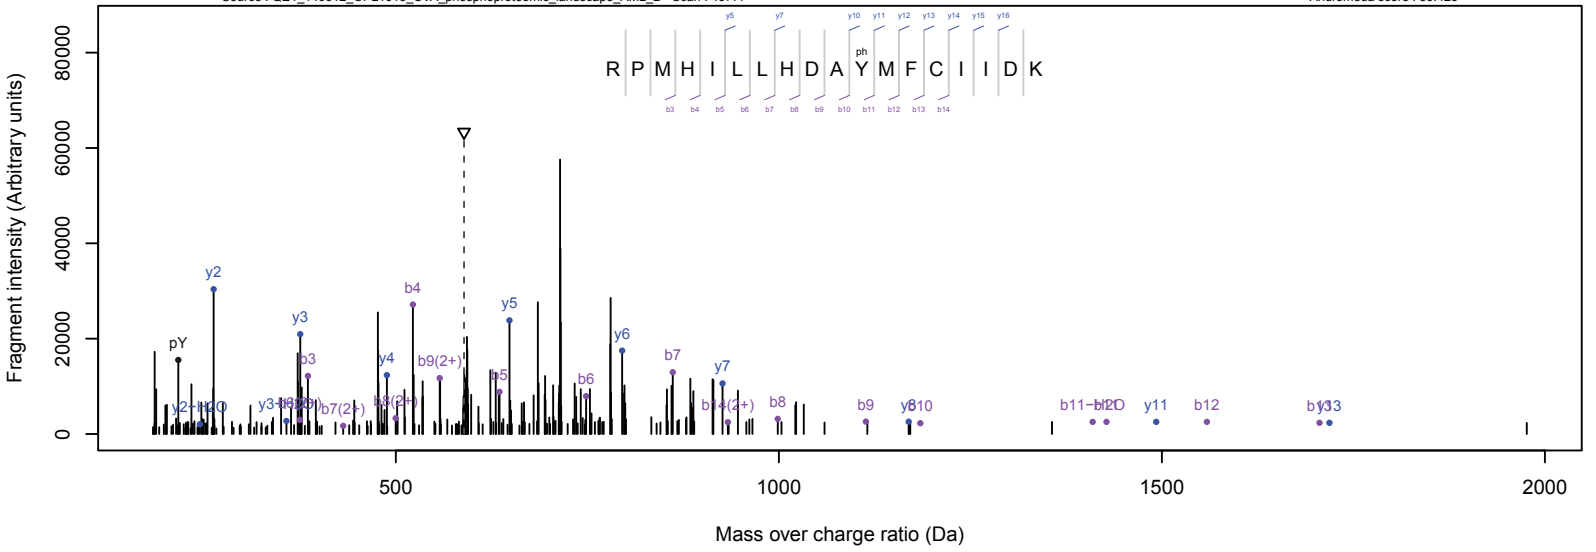

NWPSLEDSSPQEAPSQPATY(ph)SLVNK-3+

Source: QE1\_140822\_OPL1013\_CvA\_pTyrIP\_AML\_cell\_lines\_part2\_E Scan: 29123

Andromeda score: 83.411

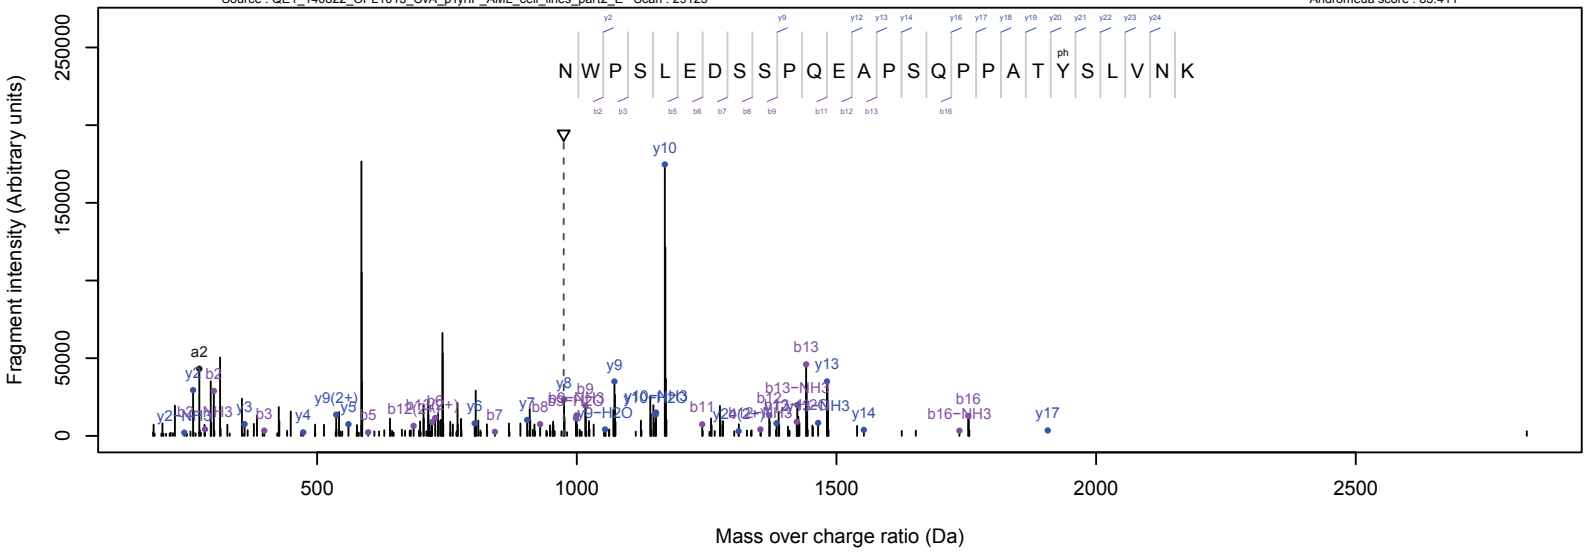

ASLPTLP SQVYDVP TQHR-3+

Source: QE1\_140822\_OPL1013\_CvA\_pTyrIP\_AML\_cell\_lines\_part2\_B Scan: 25670

Andromeda score: 83.404

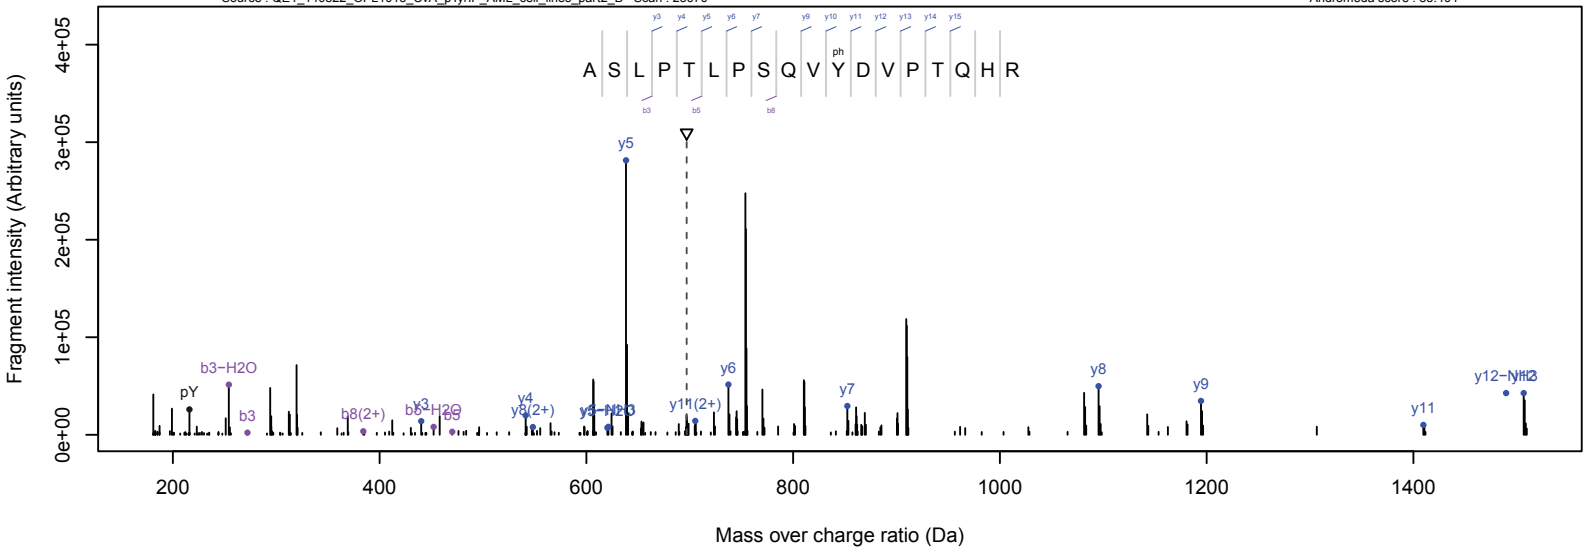

VVQDFIDIFS DY(ph)ANFK-2+

Source : QE1\_140822\_OPL1013\_CVA\_pTyrIP\_AML\_cell\_lines\_part2\_E Scan : 44399

Andromeda score : 83.404

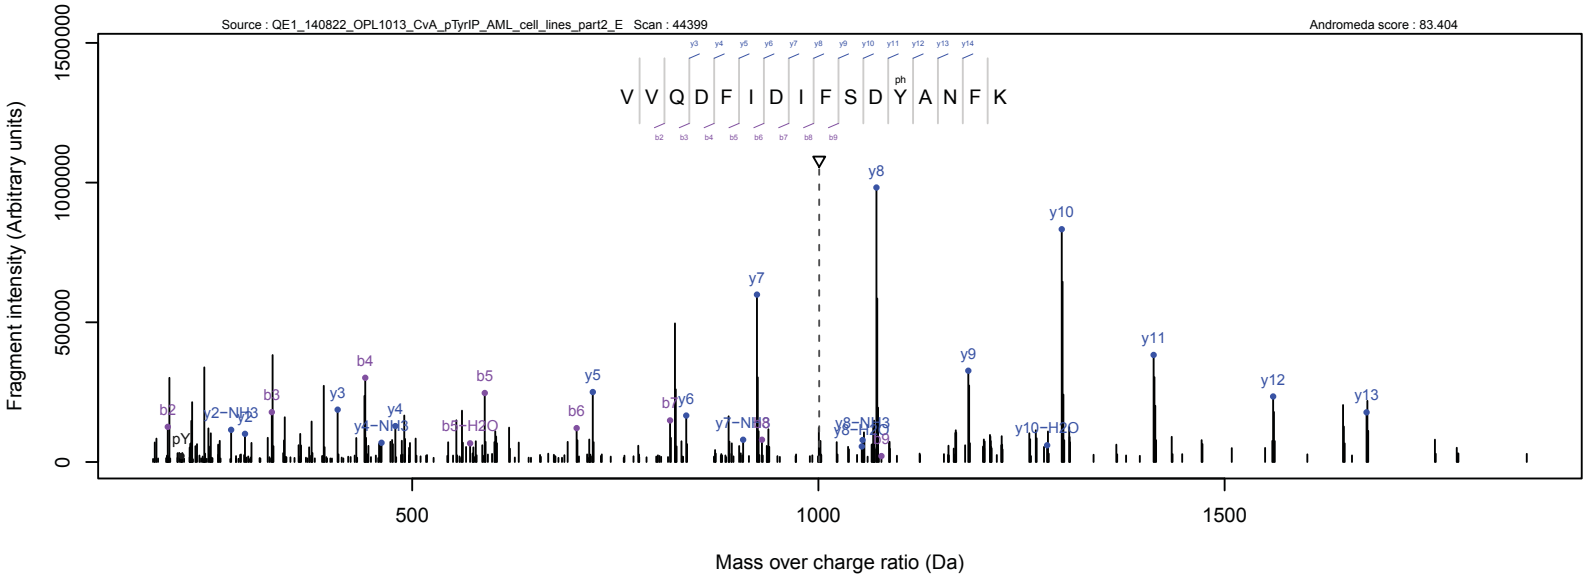

Y(ph)AQVKPDGTYVKPLSNK-3+

Source : QE1\_140612\_OPL1013\_CVA\_phosphoproteomic\_landscape\_AML\_C Scan : 14929

Andromeda score : 83.404

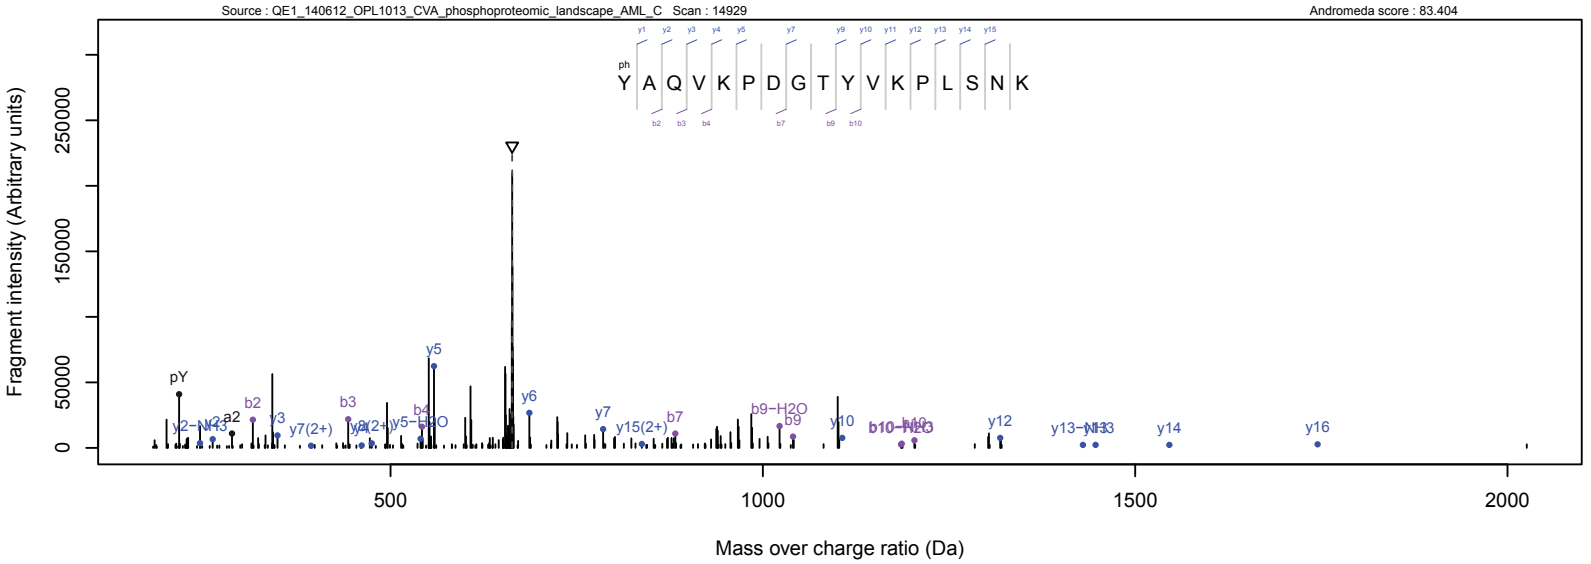

YSSQY(ph)EERLDPFSSFSK-3+

Source : QE1\_140612\_OPL1013\_CVA\_phosphoproteomic\_landscape\_AML\_C Scan : 35173

Andromeda score : 83.404

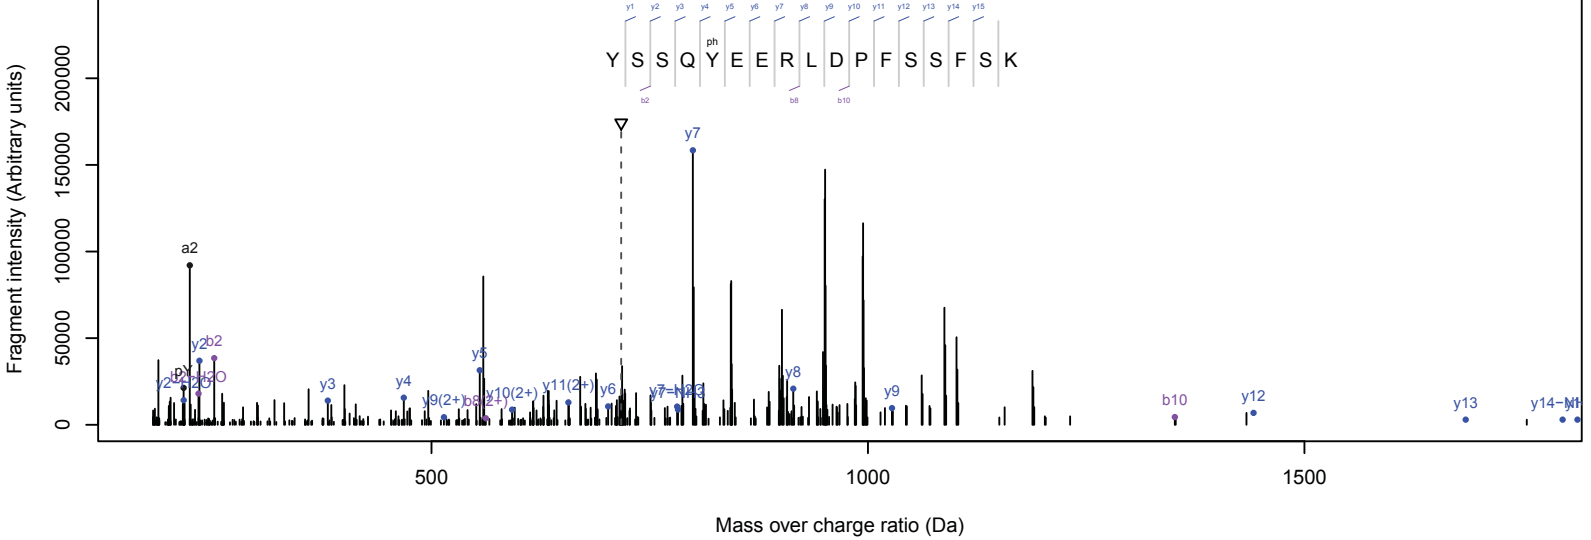

DKLESEMEDAY<sup>ph</sup>HEHQANLLR-4+

Source : QE1\_140612\_OPL1013\_CVA\_phosphoproteomic\_landscape\_AML\_A Scan : 26890

Andromeda score : 83.395

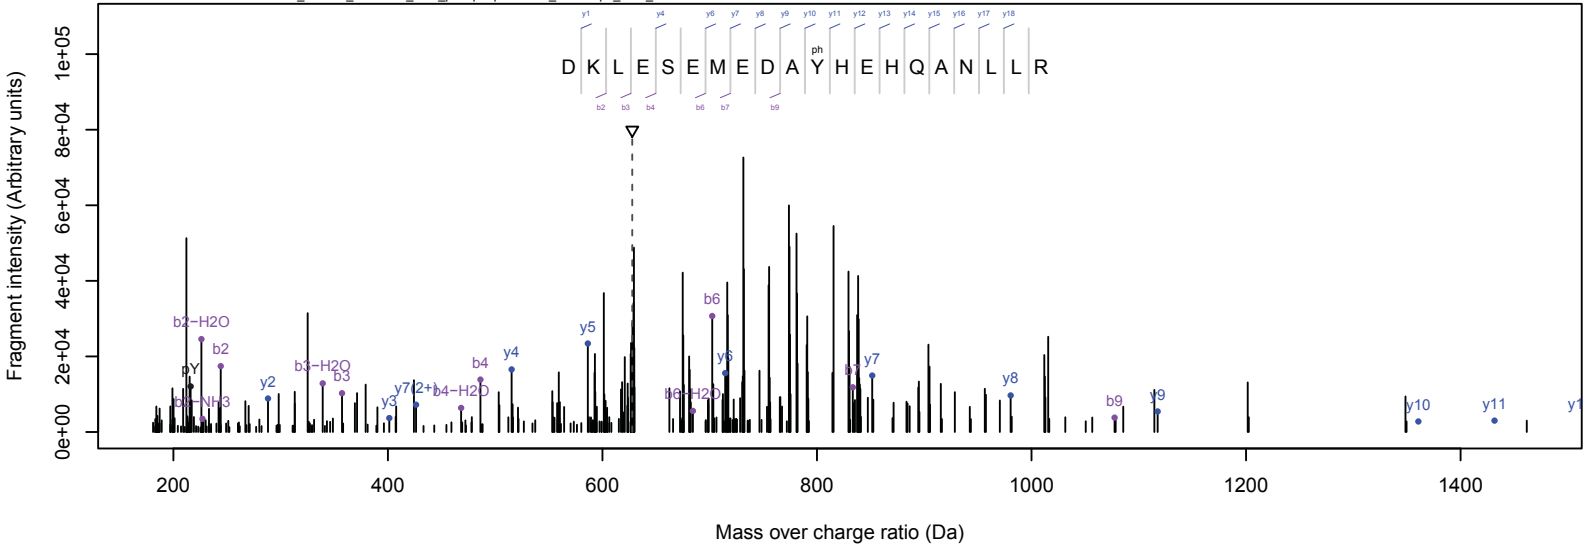

Y<sup>ph</sup>STLHTQSAEPPPPPEPARI-3+

Source : QE1\_140908\_OPL1013\_Cva\_pTyrIP\_AML\_ML2 Scan : 24199

Andromeda score : 83.393

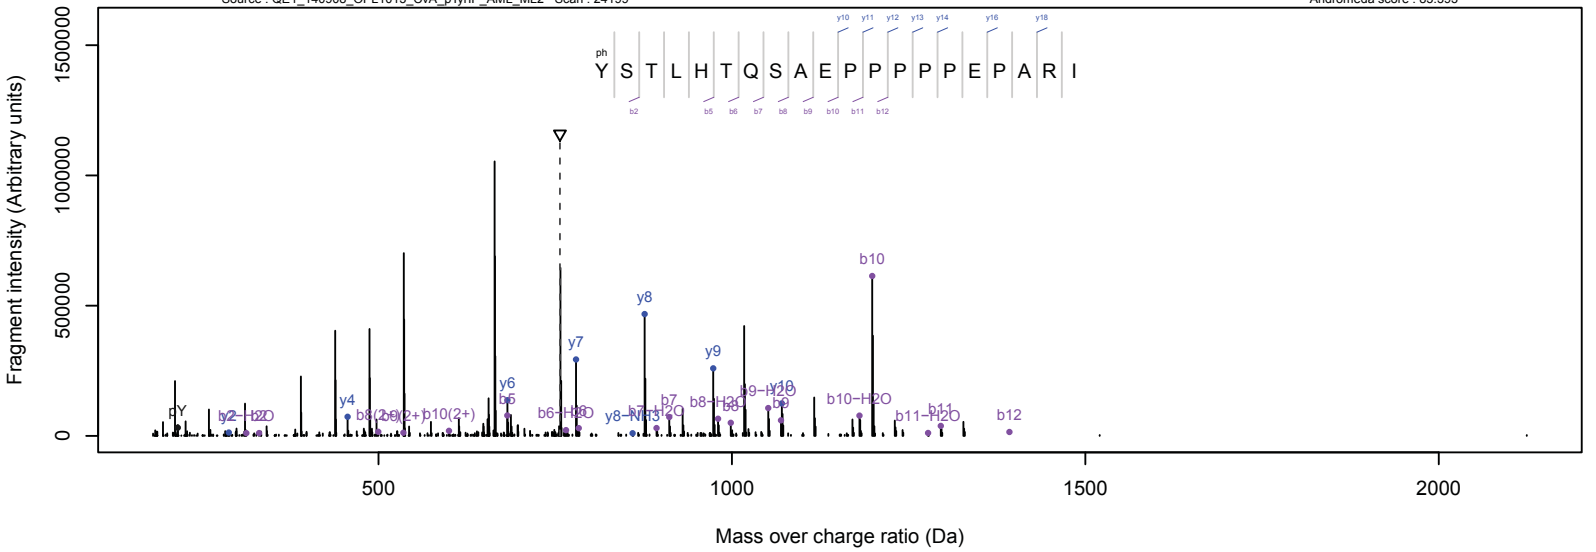

APIFTSEHGKLY<sup>ph</sup>LVR-2+

Source : QE1\_140612\_OPL1013\_CVA\_phosphoproteomic\_landscape\_AML\_C Scan : 29215

Andromeda score : 83.37

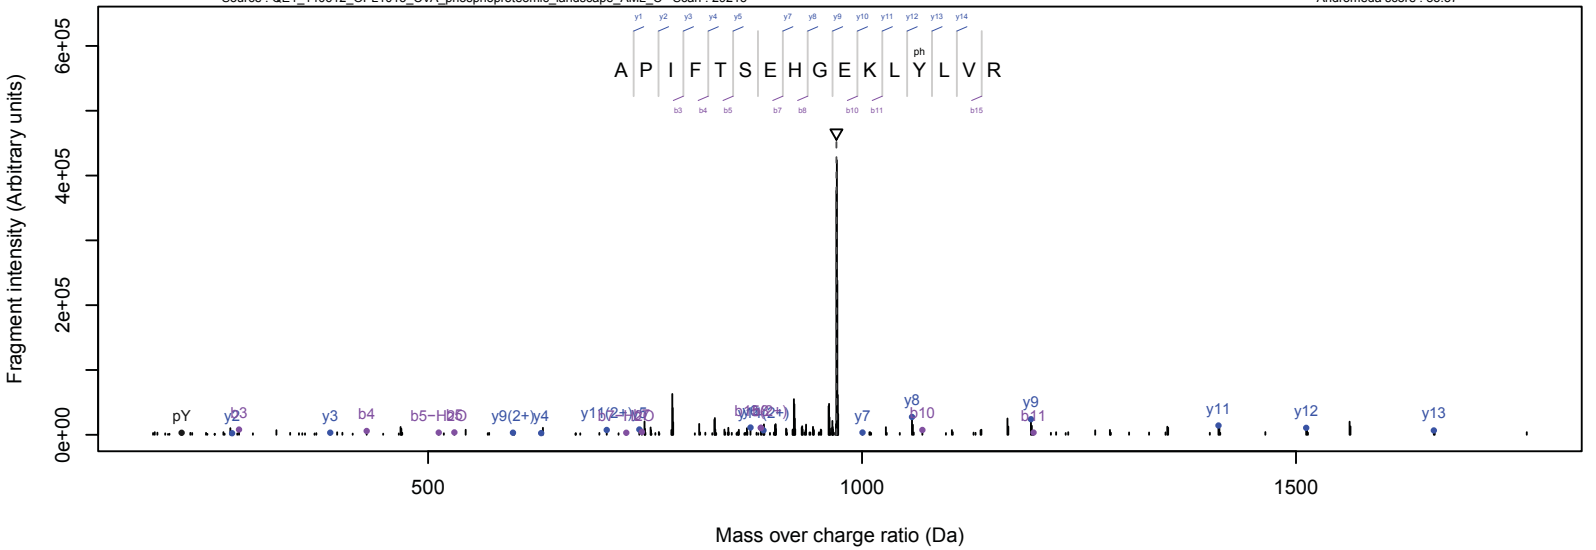

**ENAAALEELLKEYHS(ph)K-3+**

Source : QE1\_140612\_OPL1013\_CVA\_phosphoproteomic\_landscape\_AML\_C Scan : 30884

Andromeda score : 83.37

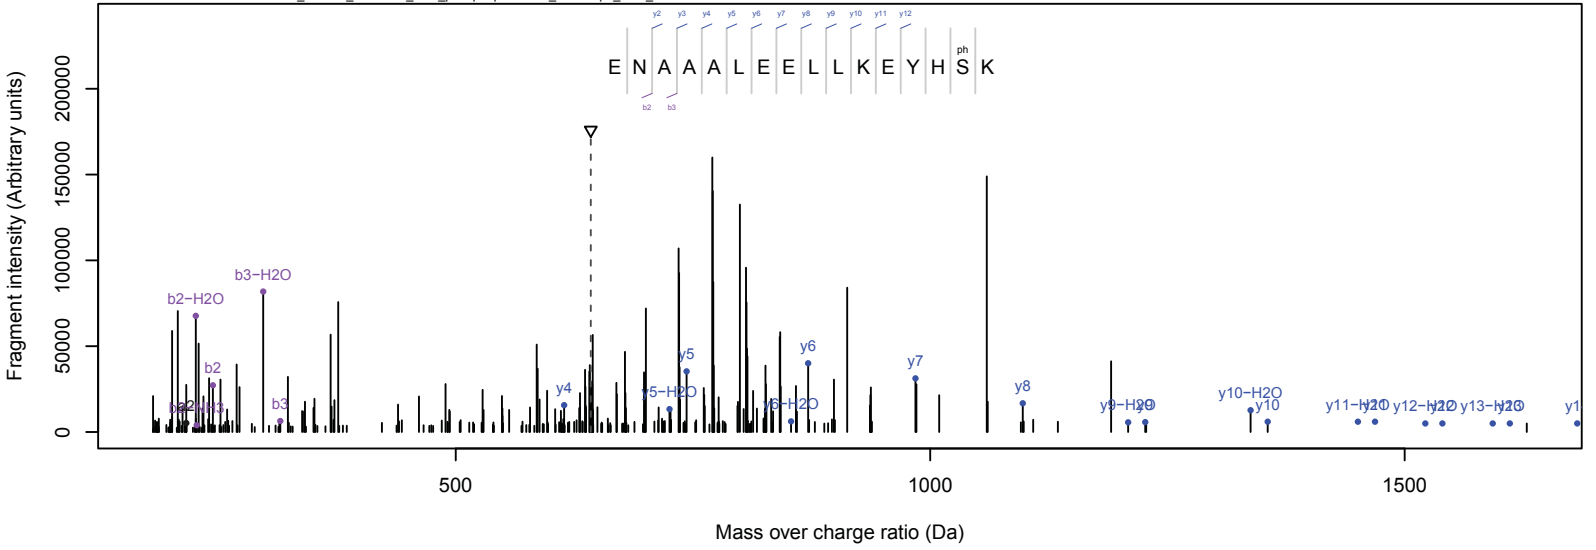

**YKSYSPY(ph)DMLESIRK-3+**

Source : QE1\_140612\_OPL1013\_CVA\_phosphoproteomic\_landscape\_AML\_C Scan : 33008

Andromeda score : 83.37

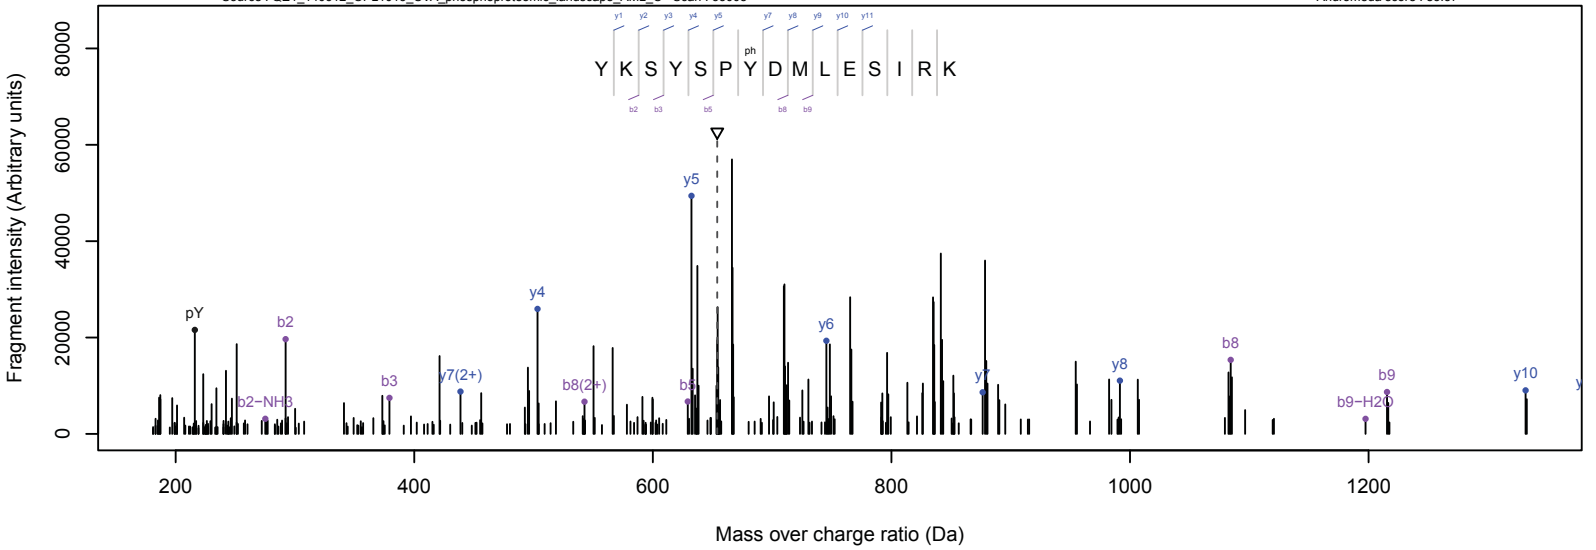

**(ac)AY(ph)AYLFK-1+**

Source : Qe1\_141024\_OPL1013\_CvA\_AML\_pTyrIP\_MOLM13 Scan : 41034

Andromeda score : 83.229

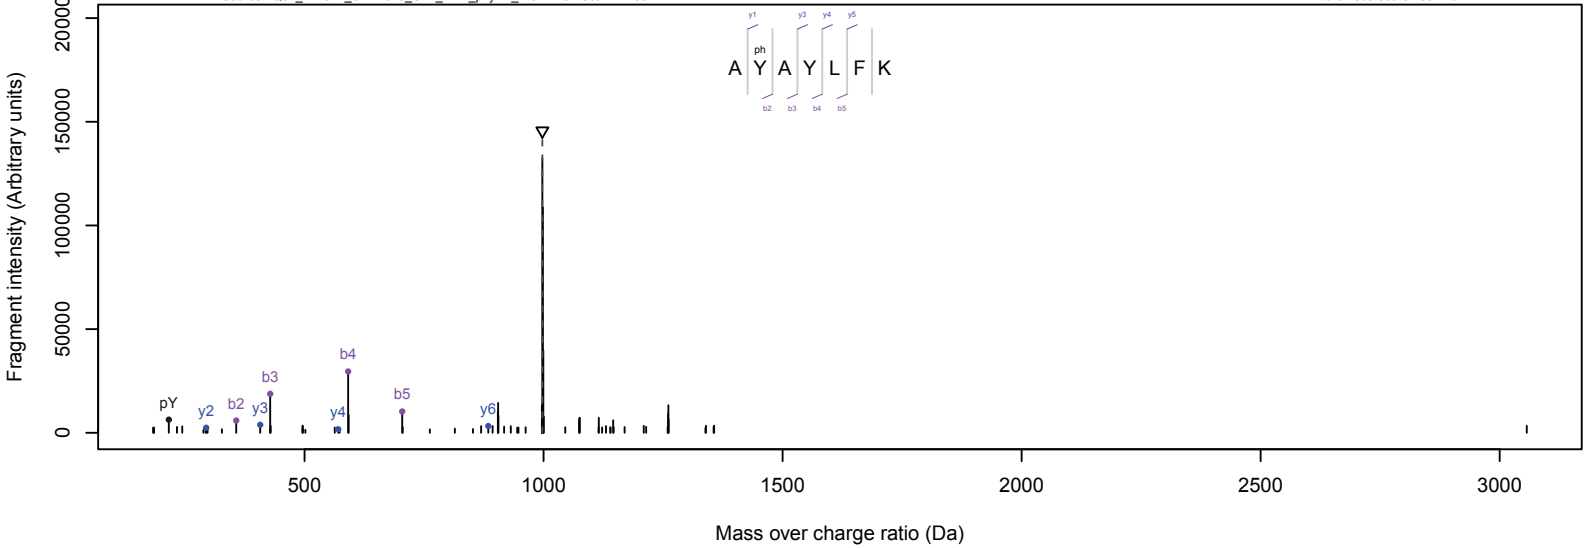

**LMAIQNGRDPNRYIYQQR-3+**

Source : QE1\_140612\_OPL1013\_CVA\_phosphoproteomic\_landscape\_AML\_C Scan : 22337

Andromeda score : 83.229

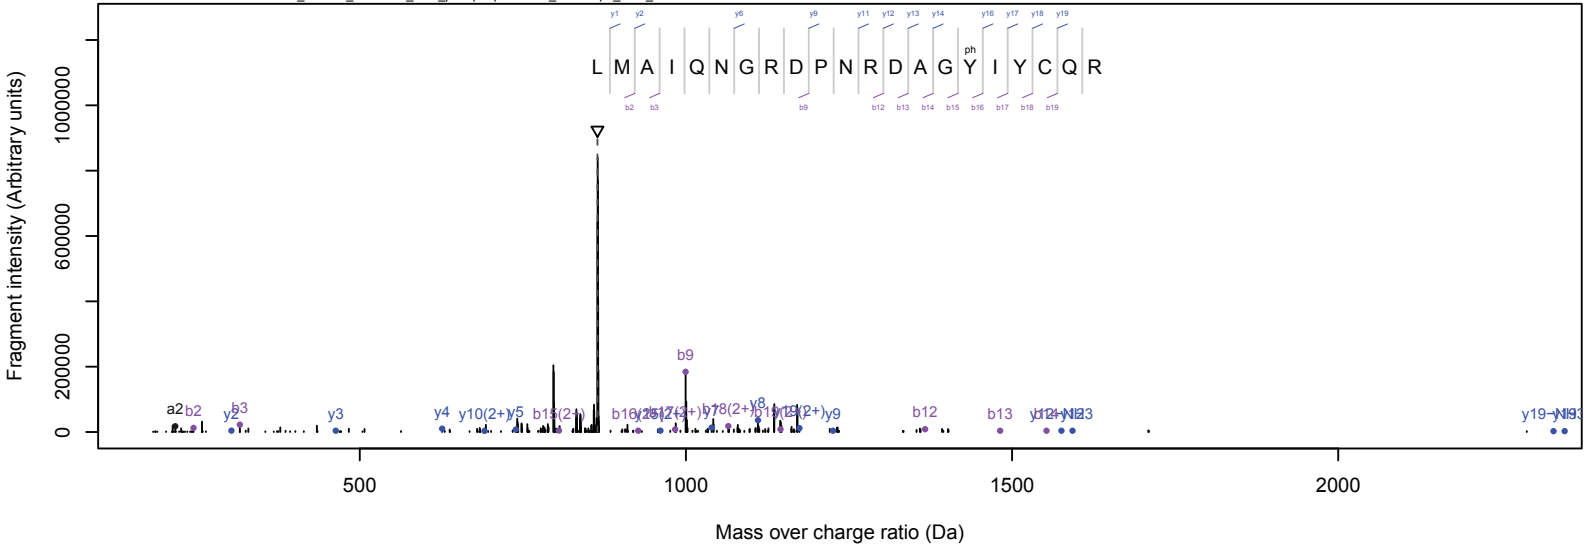

**M(ox)VVESAY(ph)EVIK-2+**

Source : QE1\_140908\_OPL1013\_CvA\_pTyrIP\_AML\_HEL Scan : 23586

Andromeda score : 83.226

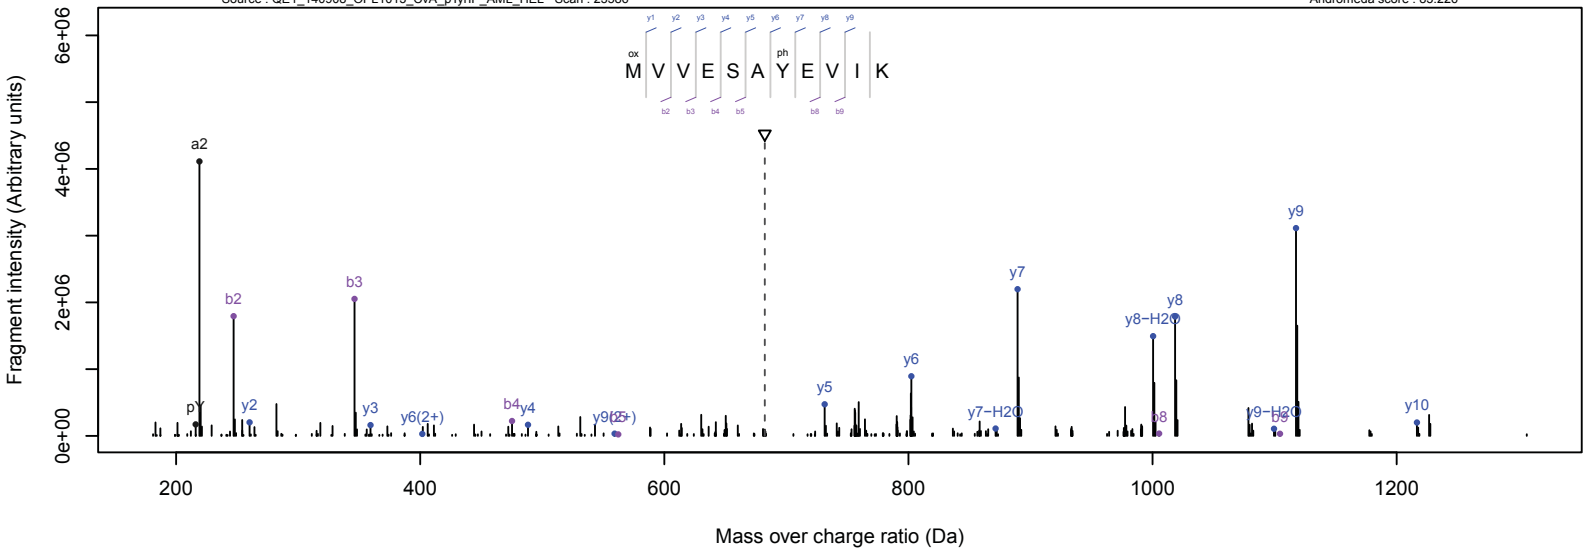

**NDAEEVRY(ph)FLK-2+**

Source : QE1\_140612\_OPL1013\_CVA\_phosphoproteomic\_landscape\_AML\_C Scan : 29298

Andromeda score : 83.214

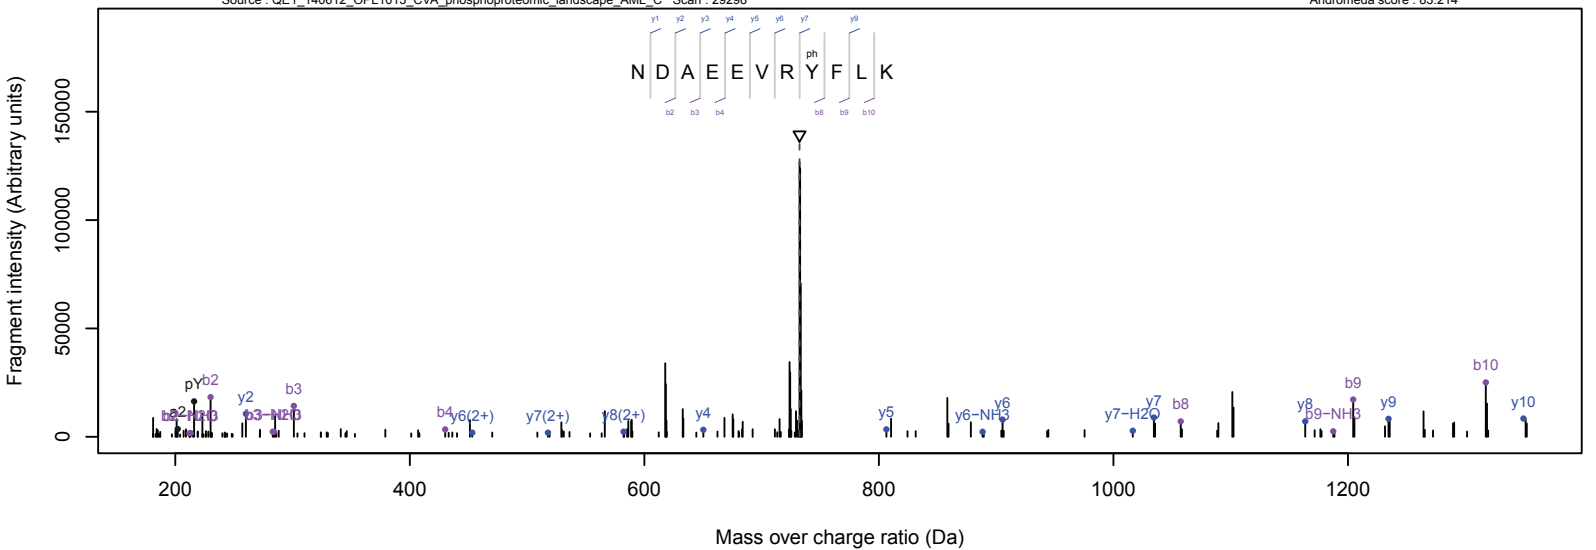

NMAQY(ph)FKK-2+

Source : QE1\_140612\_OPL1013\_CVA\_phosphoproteomic\_landscape\_AML\_B Scan : 10252

Andromeda score : 83.206

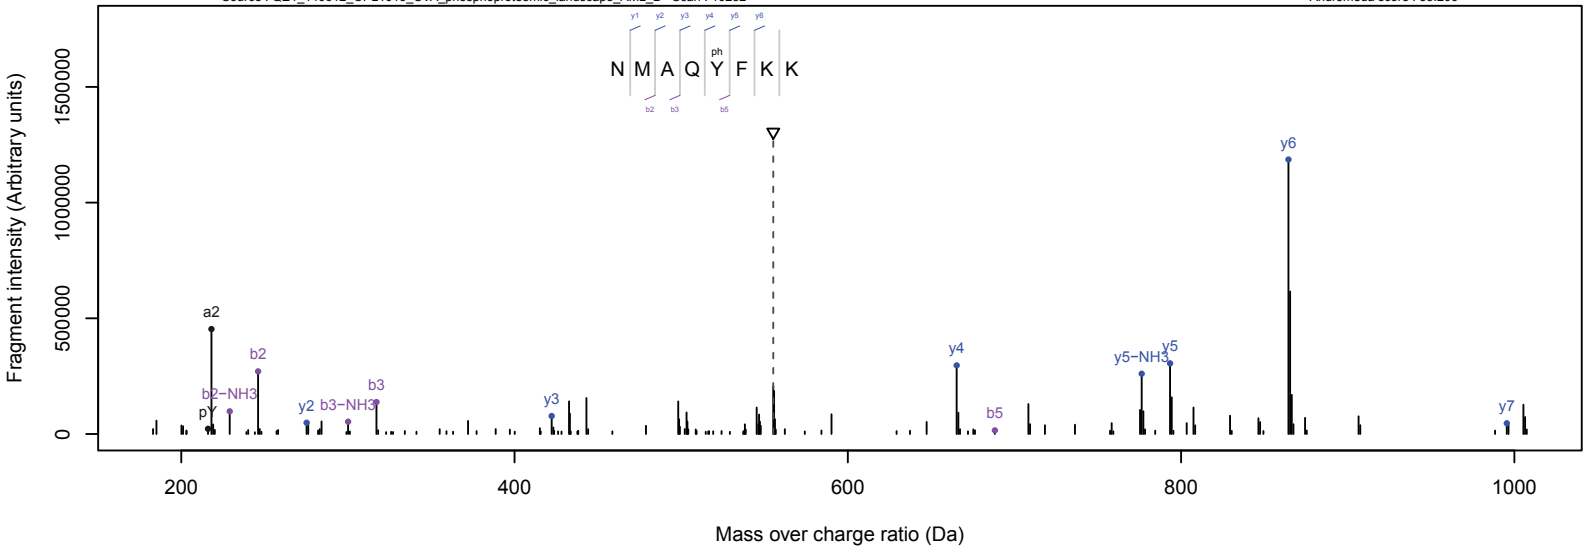

NRYY(ph)YYHR-3+

Source : QE1\_140612\_OPL1013\_CVA\_phosphoproteomic\_landscape\_AML\_D Scan : 7215

Andromeda score : 83.206

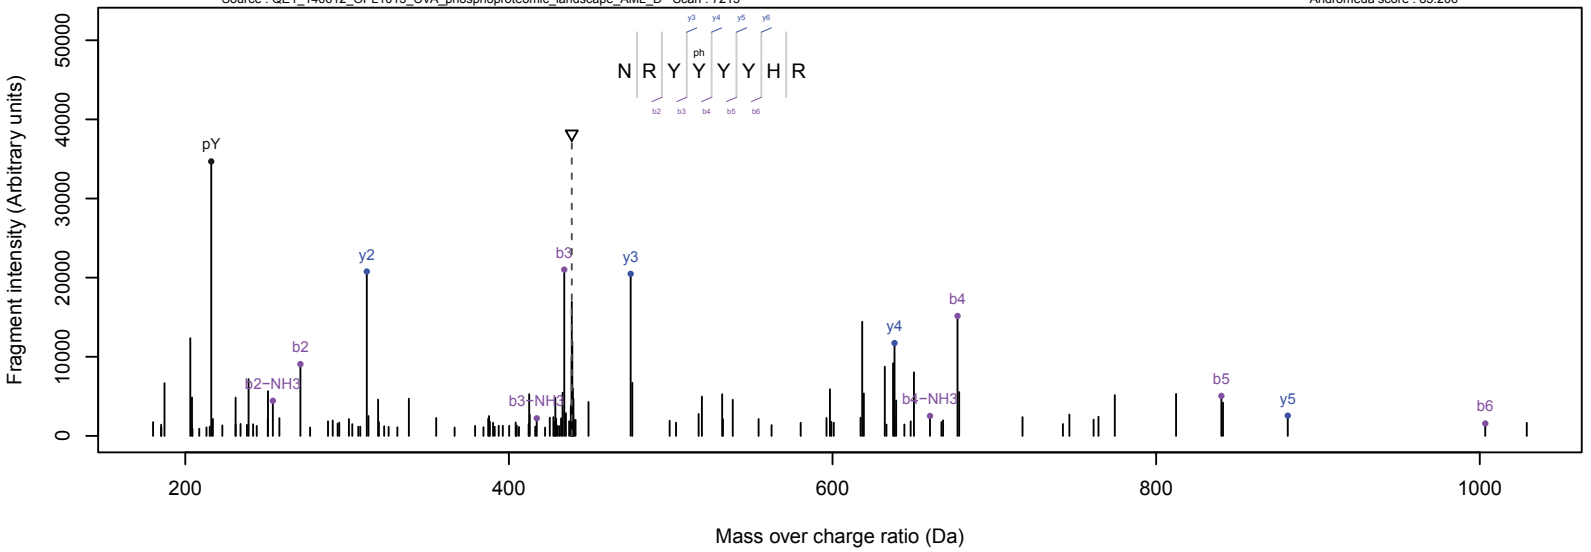

MNTNPSRGPY(ph)HFR-3+

Source : QE1\_140612\_OPL1013\_CVA\_phosphoproteomic\_landscape\_AML\_C Scan : 8689

Andromeda score : 83.204

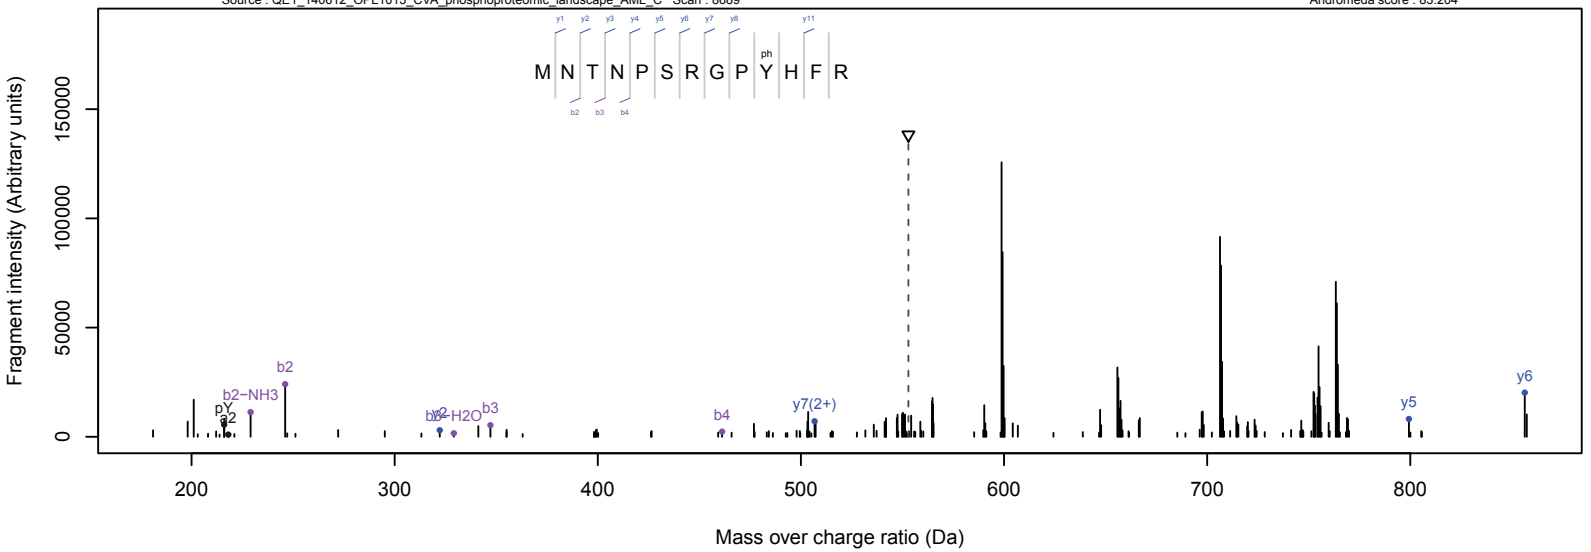

TVNKHGDEIITSTTSNY(ph)ETQTFSSK-3+

Source : QE1\_140908\_OPL1013\_CVA\_pTyrIP\_AML\_HL60 Scan : 20653

Andromeda score : 83.202

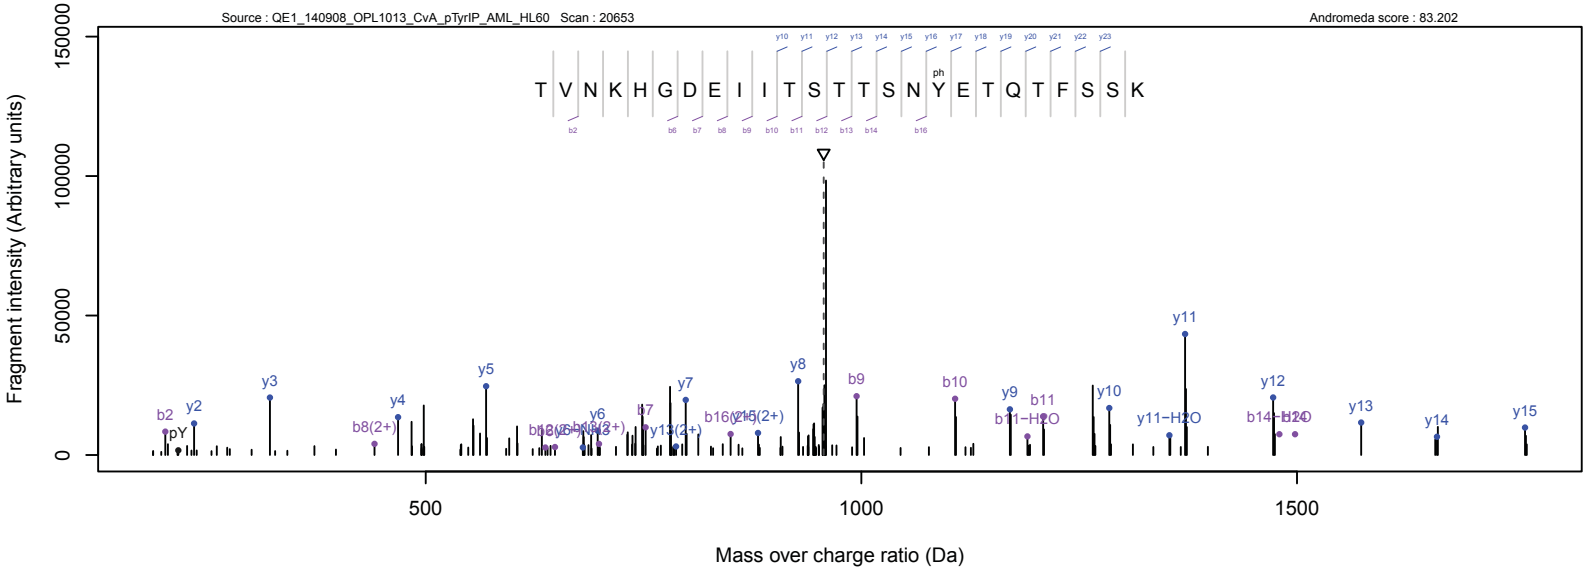

AY(ph)QKQPTIFQNK-2+

Source : QE1\_140612\_OPL1013\_CVA\_phosphoproteomic\_landscape\_AML\_C Scan : 12778

Andromeda score : 83.182

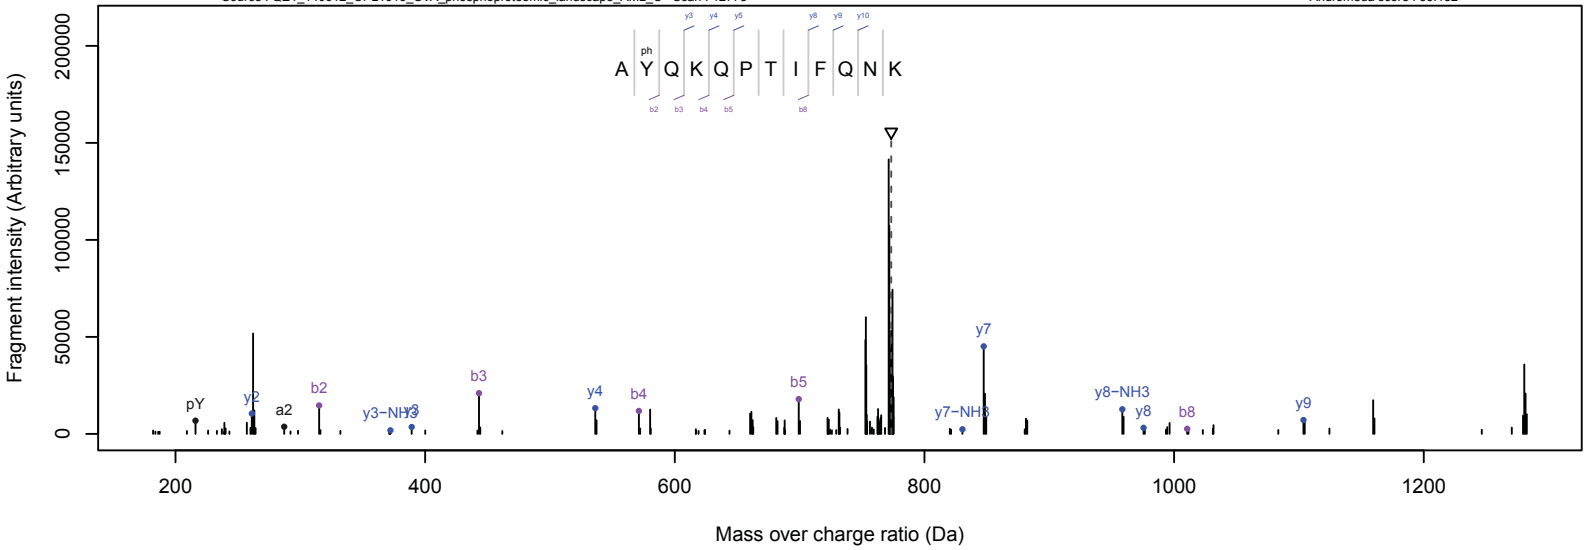

HIGNPEY(ph)LMK-2+

Source : QE1\_140612\_OPL1013\_CVA\_phosphoproteomic\_landscape\_AML\_C Scan : 21316

Andromeda score : 83.182

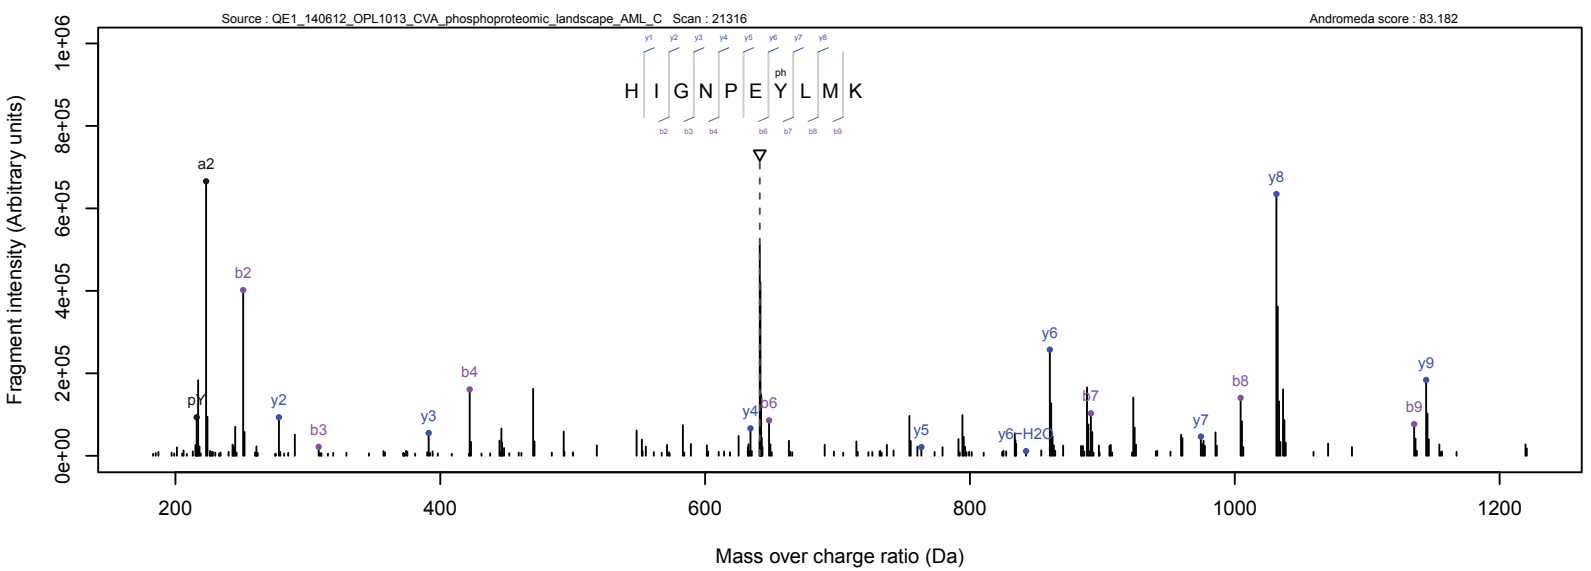

IY(ph)NDDKNTYIR-3+

Source : QE1\_140612\_OPL1013\_CVA\_phosphoproteomic\_landscape\_AML\_D Scan : 9818

Andromeda score : 83.182

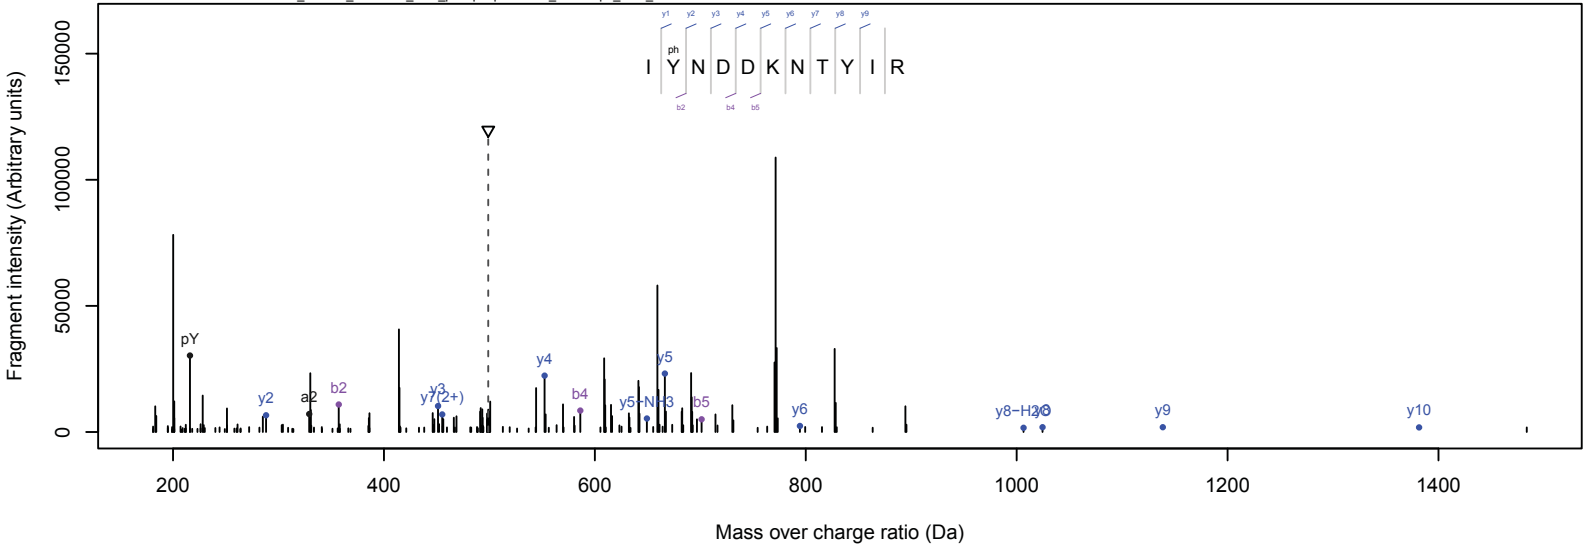

EAPEPM(ox)ELDGPKG(ph)GYIKTELISVSEVHPSR-4+

Source : QE1\_140908\_OPL1013\_CvA\_pTyrIP\_AML\_HEL Scan : 35608

Andromeda score : 83.165

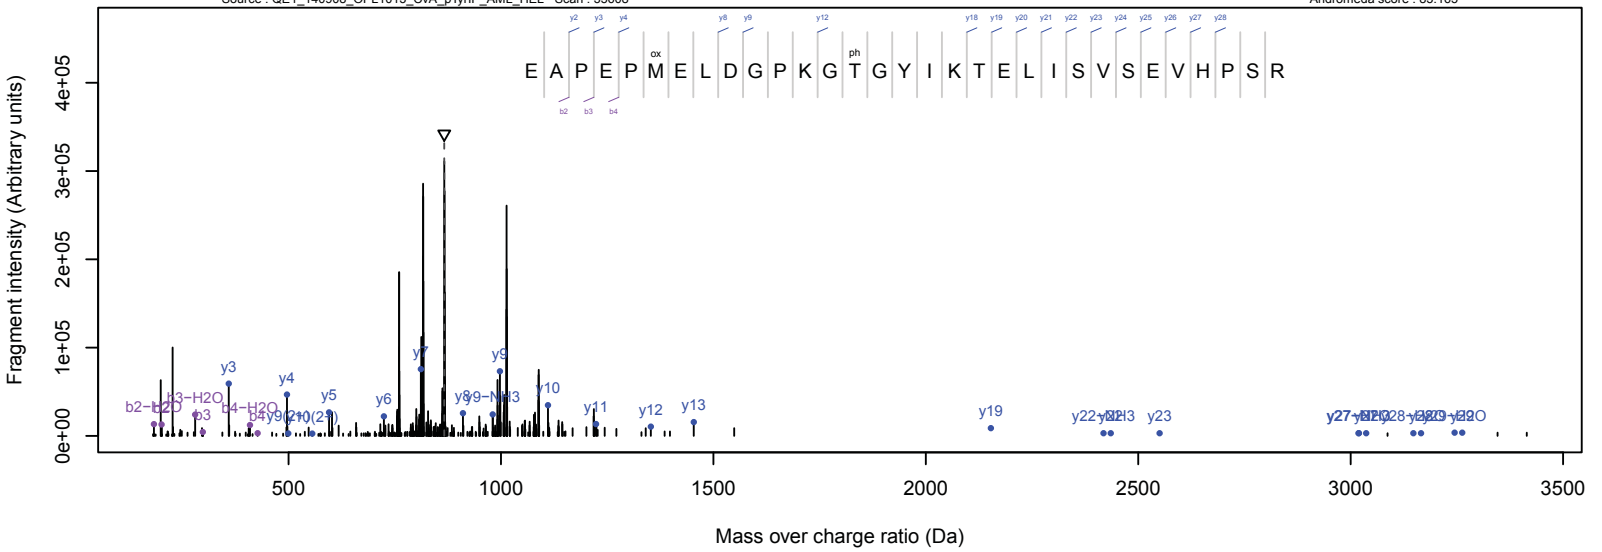

SKGHY(ph)EVTGSDDDETGKLGSGVSLASK-4+

Source : QE1\_140612\_OPL1013\_CVA\_phosphoproteomic\_landscape\_AML\_C Scan : 15763

Andromeda score : 83.165

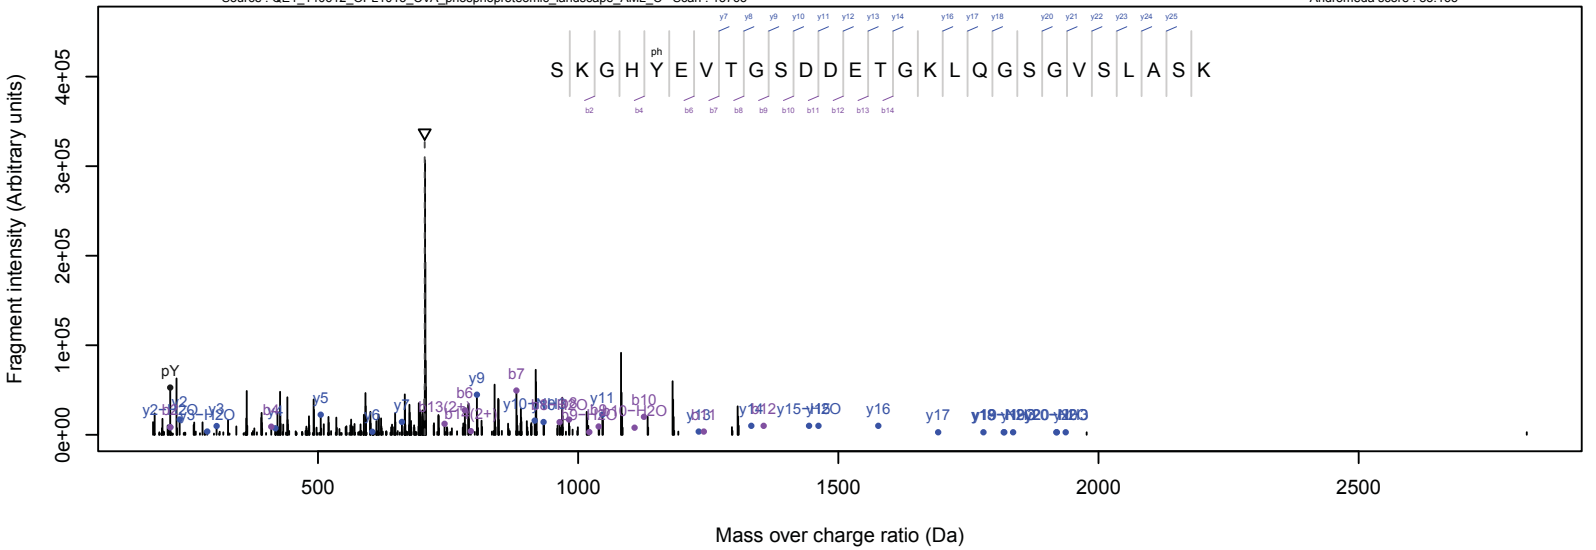



ANHSSHQEDTY(ph)GALDFTLR-3+

Source: QE1\_140908\_OPL1013\_CvA\_pTyrIP\_AML\_OCI\_AML3 Scan: 28557

Andromeda score: 83.115

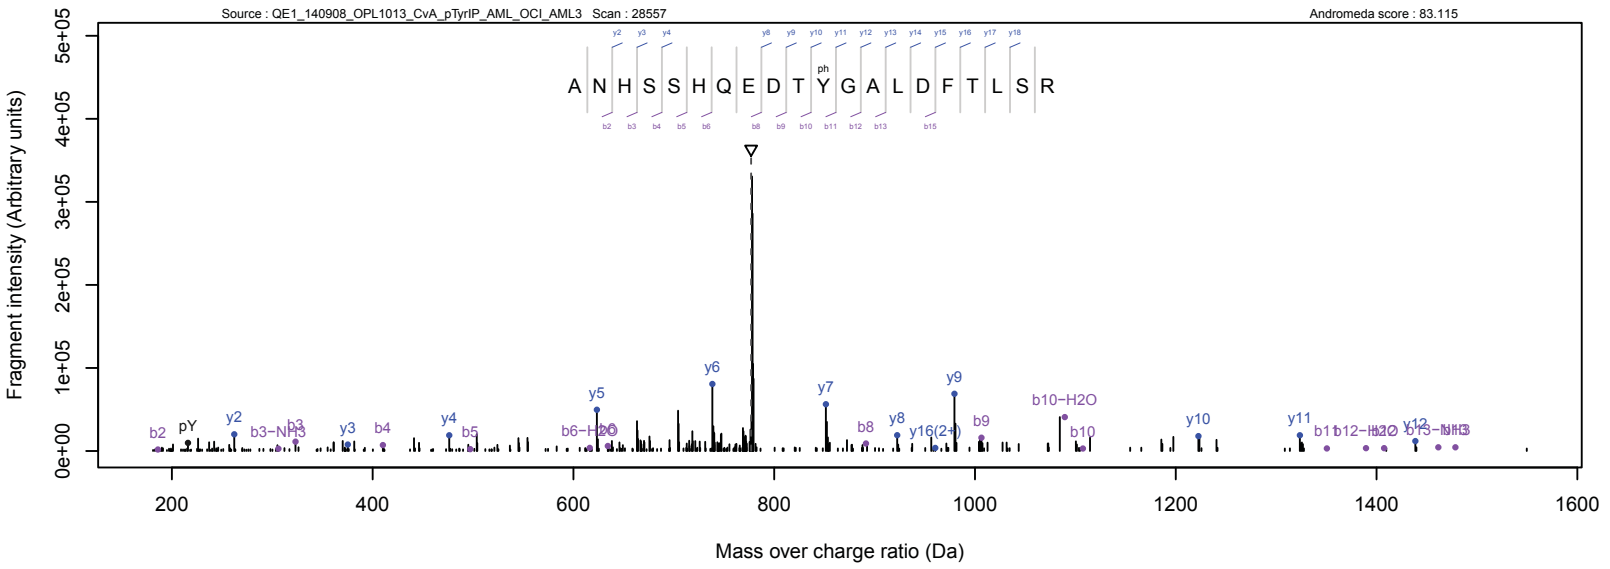

TAAY(ph)WCQSVTELK-2+

Source: QE1\_140612\_OPL1013\_CVA\_phosphoproteomic\_landscape\_AML\_B Scan: 29236

Andromeda score: 83.087

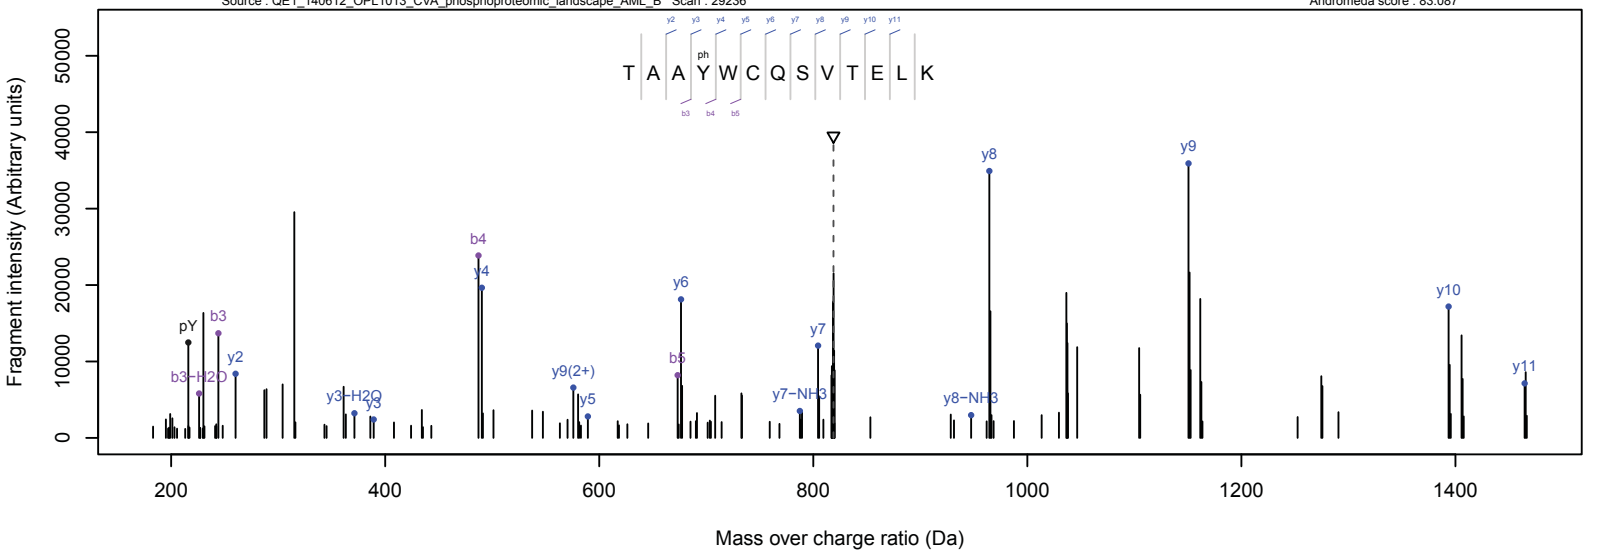

HLTSMATSY(ph)FGK-3+

Source: QE1\_140612\_OPL1013\_CVA\_phosphoproteomic\_landscape\_AML\_C Scan: 19175

Andromeda score: 83.045

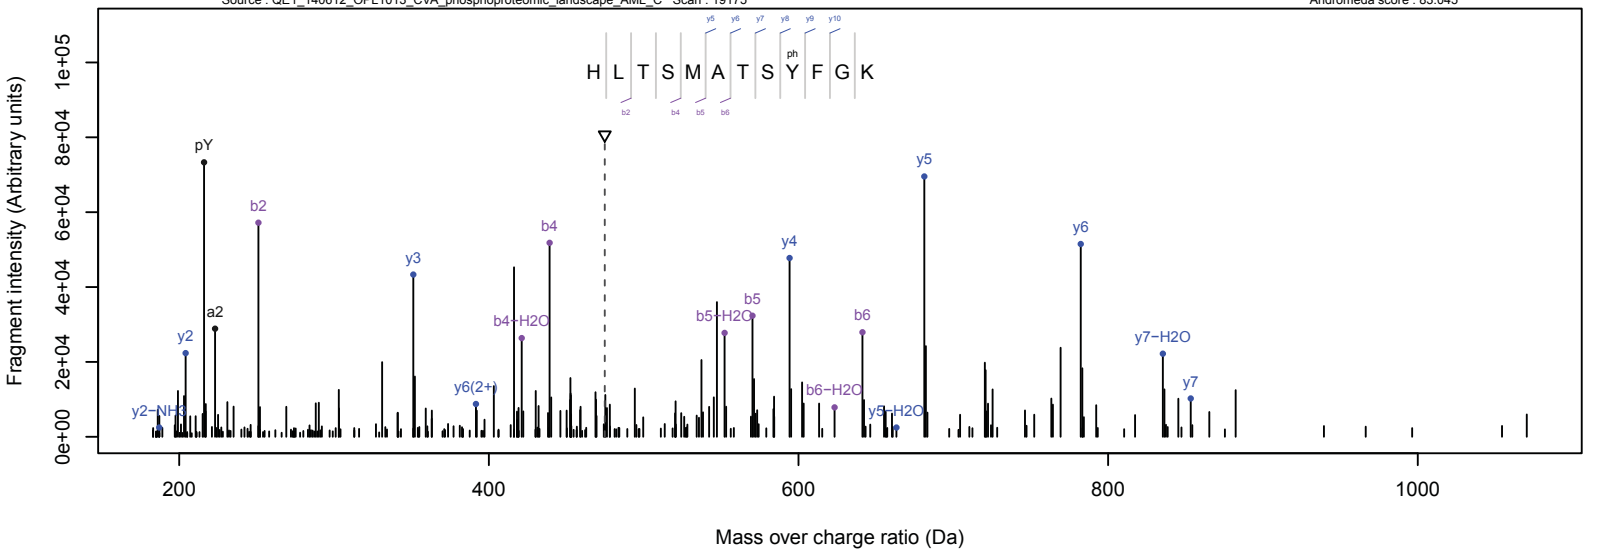

LDSM(ox)KPLEKHY(ph)SVVLPVSHSGFLYK-4+

Source: QE1\_140612\_OPL1013\_CVA\_phosphoproteomic\_landscape\_AML\_A Scan: 31436

Andromeda score: 82.942

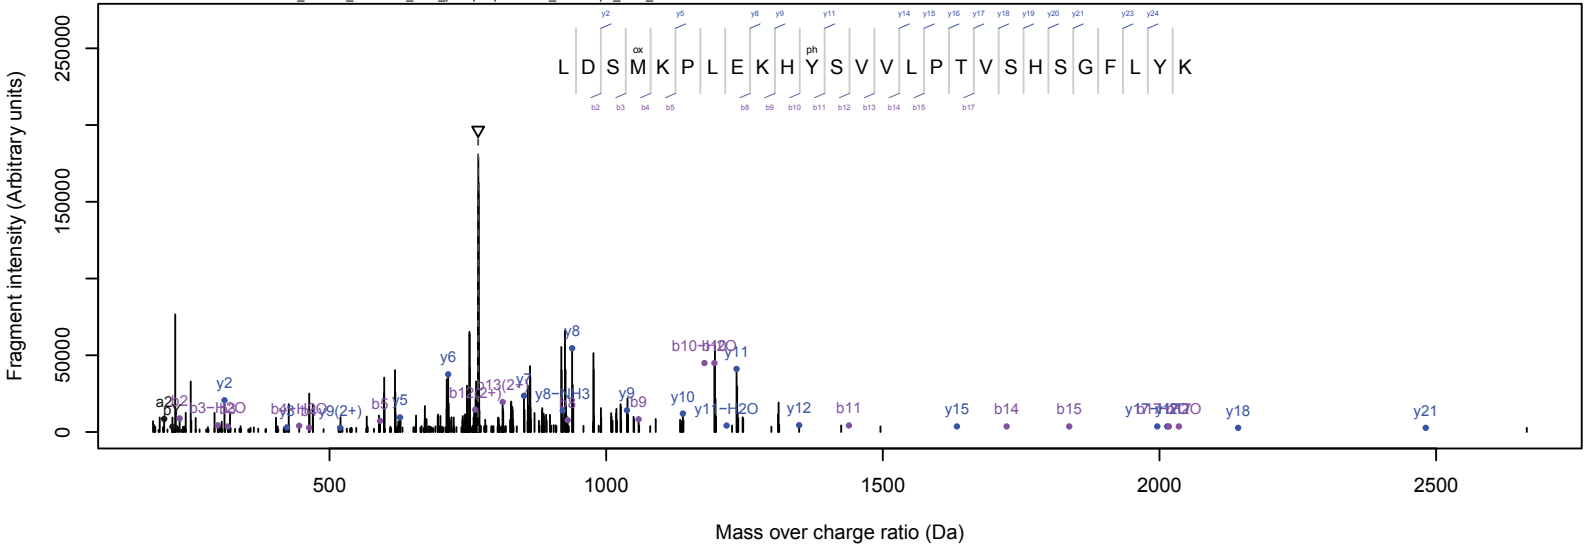

GGMDY(ph)AYIPPPGLQPEPGYAPNQGR-3+

Source: QE1\_140612\_OPL1013\_CVA\_phosphoproteomic\_landscape\_AML\_C Scan: 40707

Andromeda score: 82.89

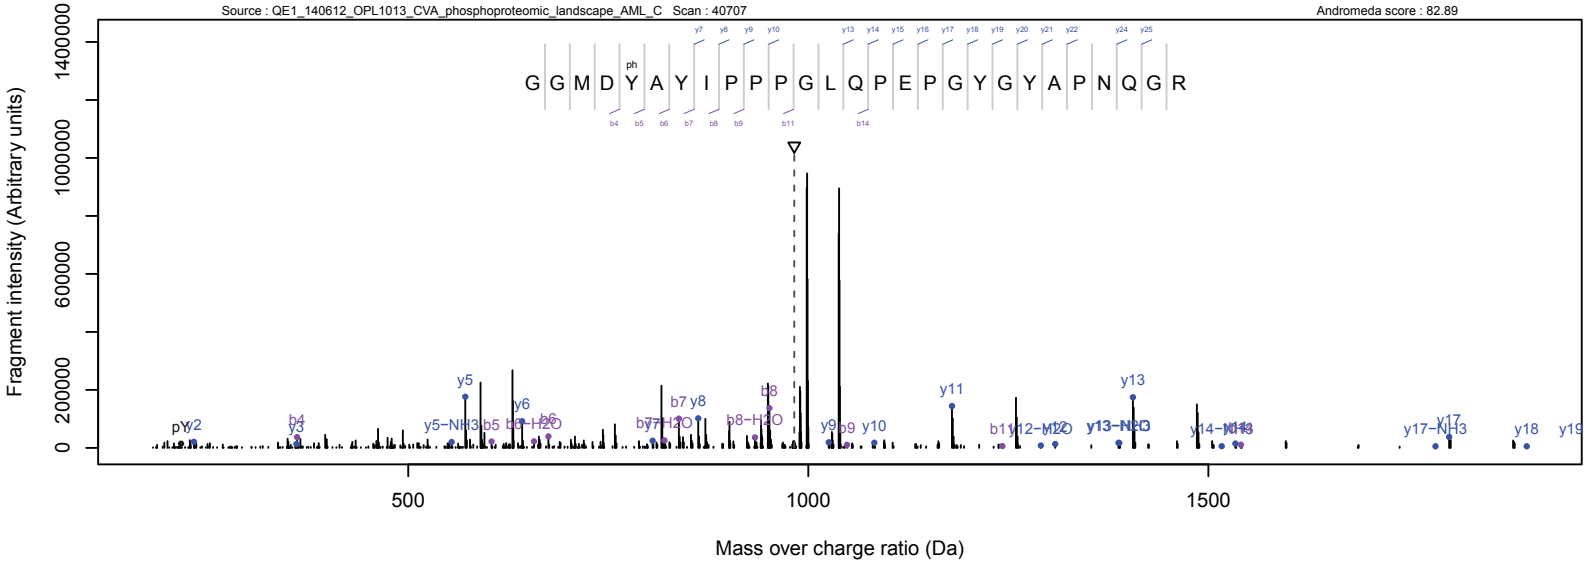

(ac)AMNY(ph)NAKDEVDGGPPCAPGGTAK-3+

Source: QE1\_140612\_OPL1013\_CVA\_phosphoproteomic\_landscape\_AML\_C Scan: 19677

Andromeda score: 82.885

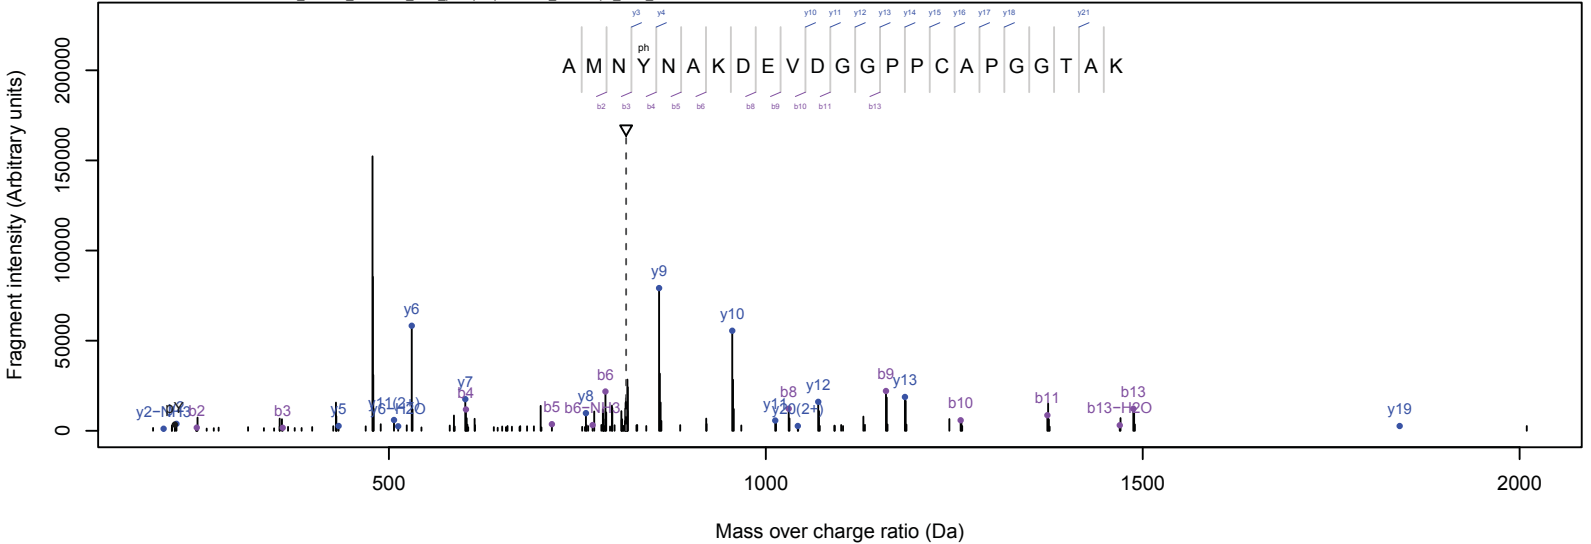

**NPEAEEMKATY(ph)INLKPAR-3+**

Source : QE1\_140612\_OPL1013\_CVA\_phosphoproteomic\_landscape\_AML\_B Scan : 21964

Andromeda score : 82.877

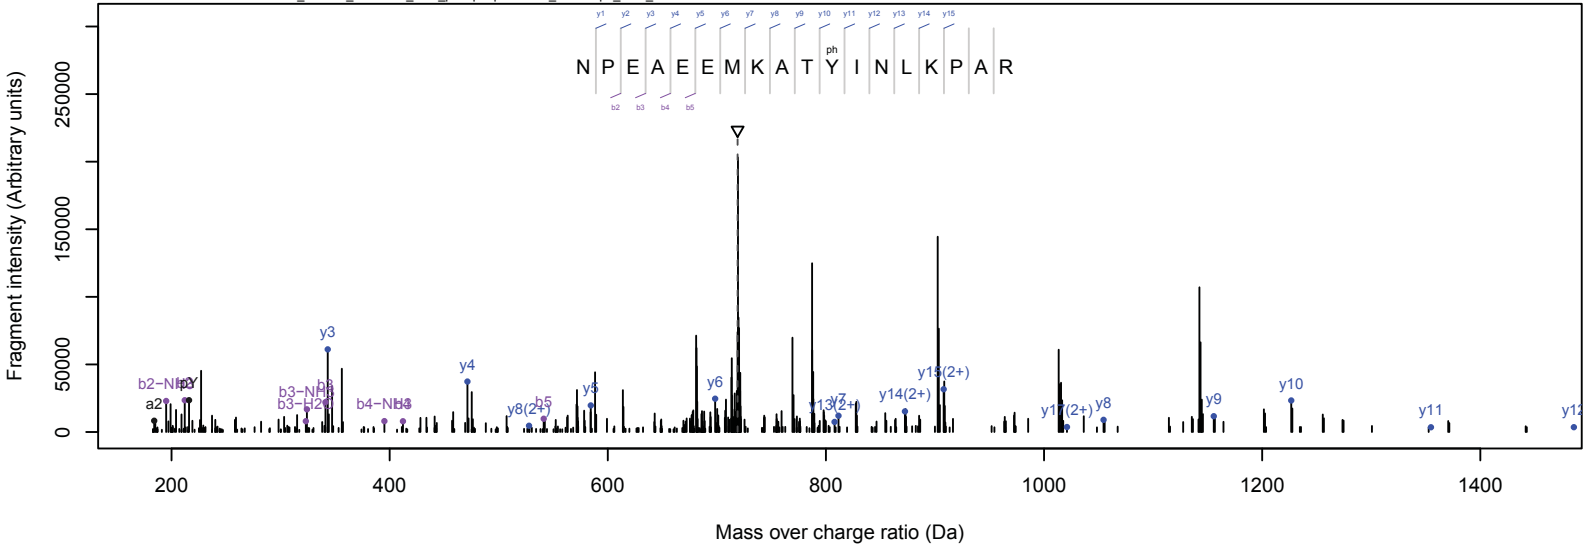

**LNHNLY(ph)EVMSK-3+**

Source : QE1\_140908\_OPL1013\_CvA\_pTyrIP\_AML\_HEL Scan : 19536

Andromeda score : 82.85

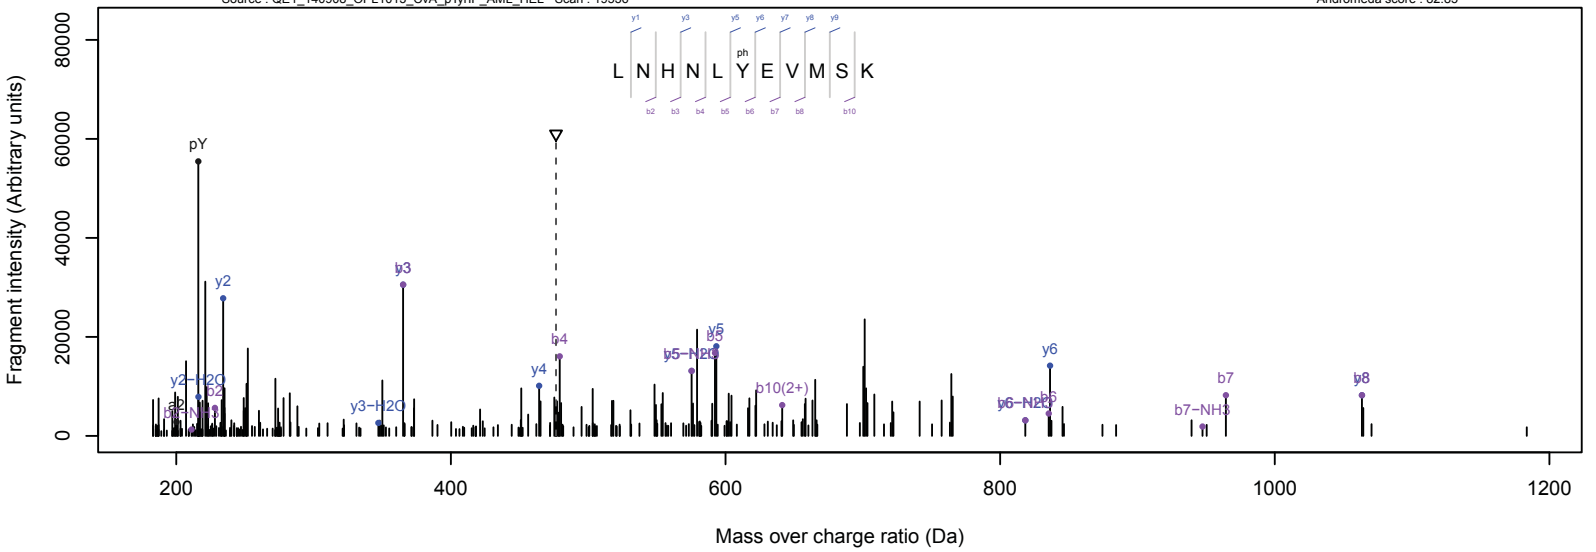

**LAY(ph)VAPTIPR-2+**

Source : QE1\_140612\_OPL1013\_CVA\_phosphoproteomic\_landscape\_AML\_C Scan : 25182

Andromeda score : 82.831

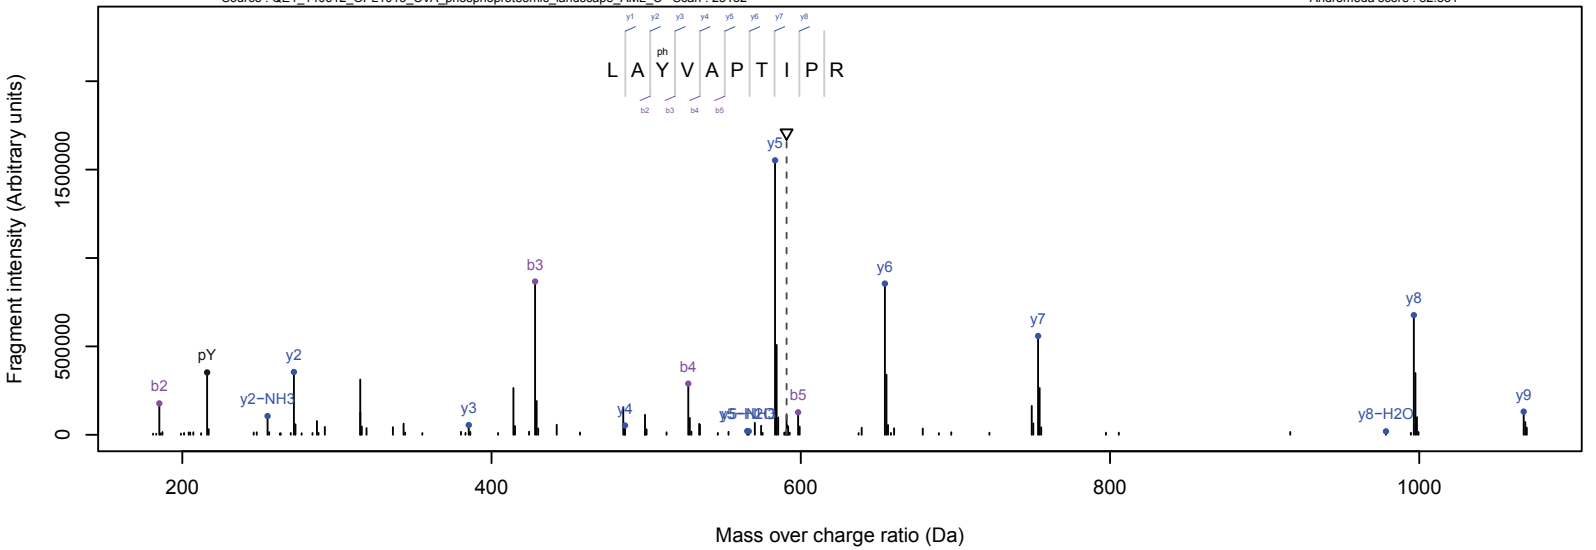

CLHMFLQDEIIDKSY(ph)TPSK-3+

Source: QE1\_140612\_OPL1013\_CVA\_phosphoproteomic\_landscape\_AML\_C Scan: 34906

Andromeda score: 82.765

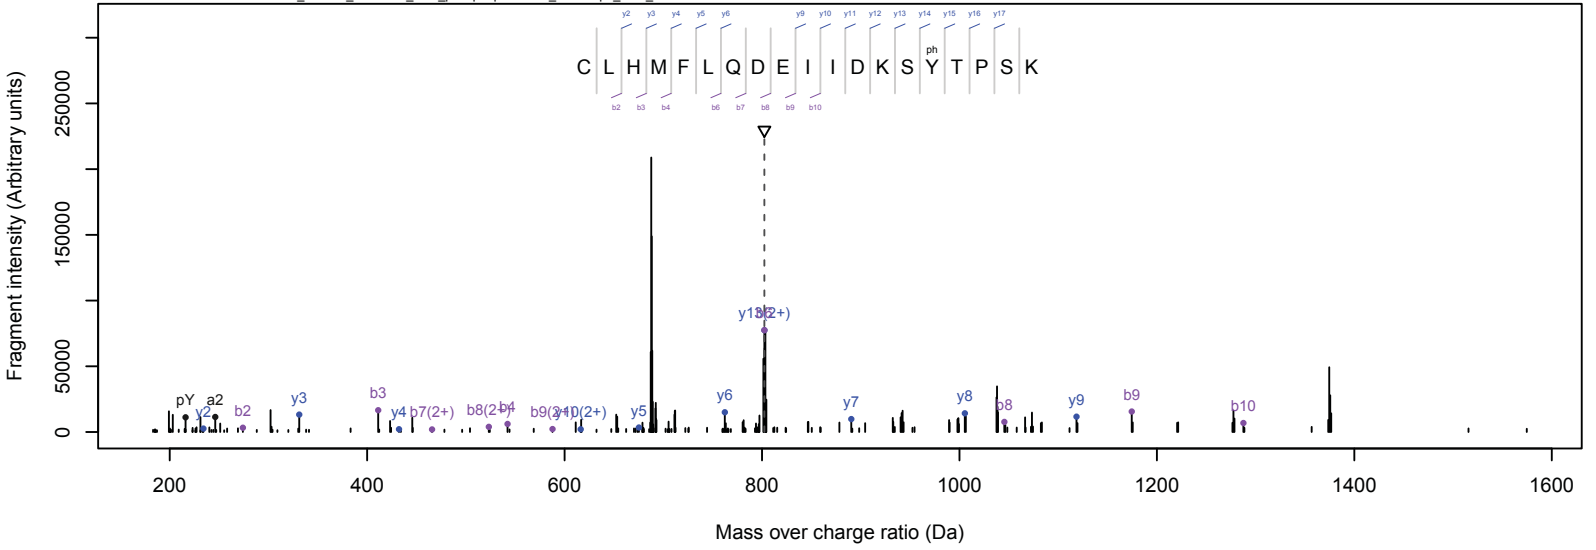

TPAILY(ph)TYSGLR-2+

Source: QE1\_140612\_OPL1013\_CVA\_phosphoproteomic\_landscape\_AML\_B Scan: 36958

Andromeda score: 82.705

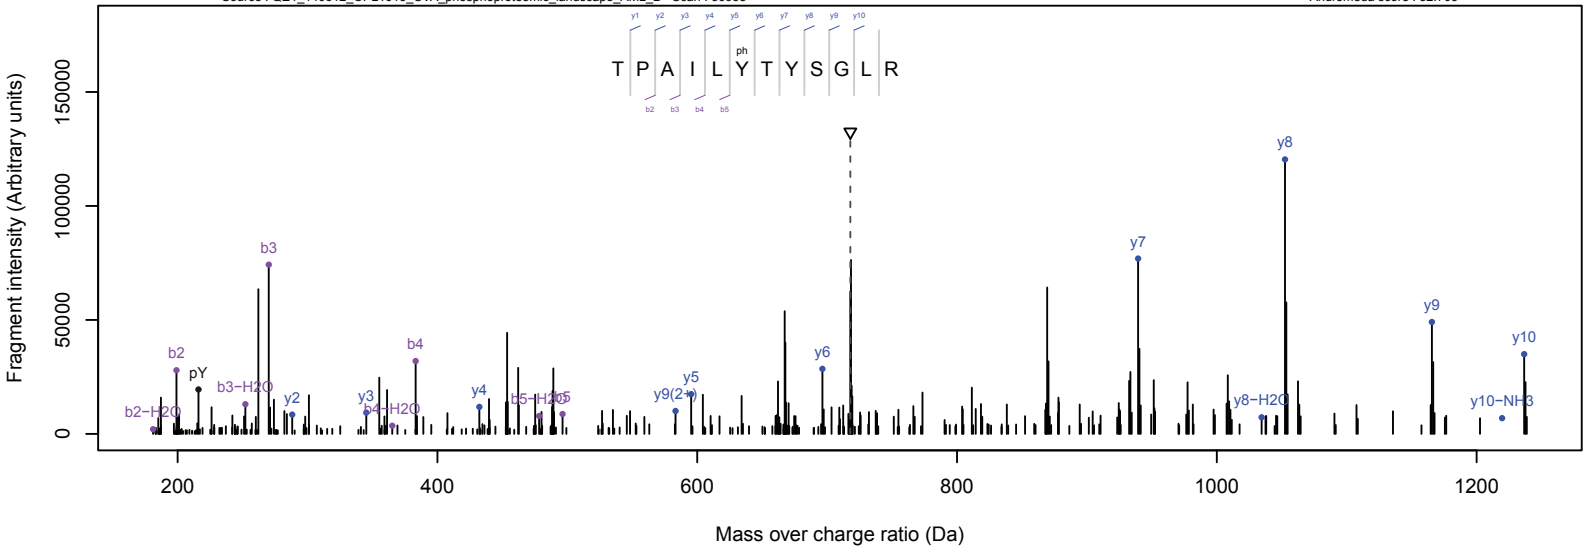

QSY(ph)PNSYSLNRYDV-2+

Source: QE1\_140612\_OPL1013\_CVA\_phosphoproteomic\_landscape\_AML\_C Scan: 26235

Andromeda score: 82.663

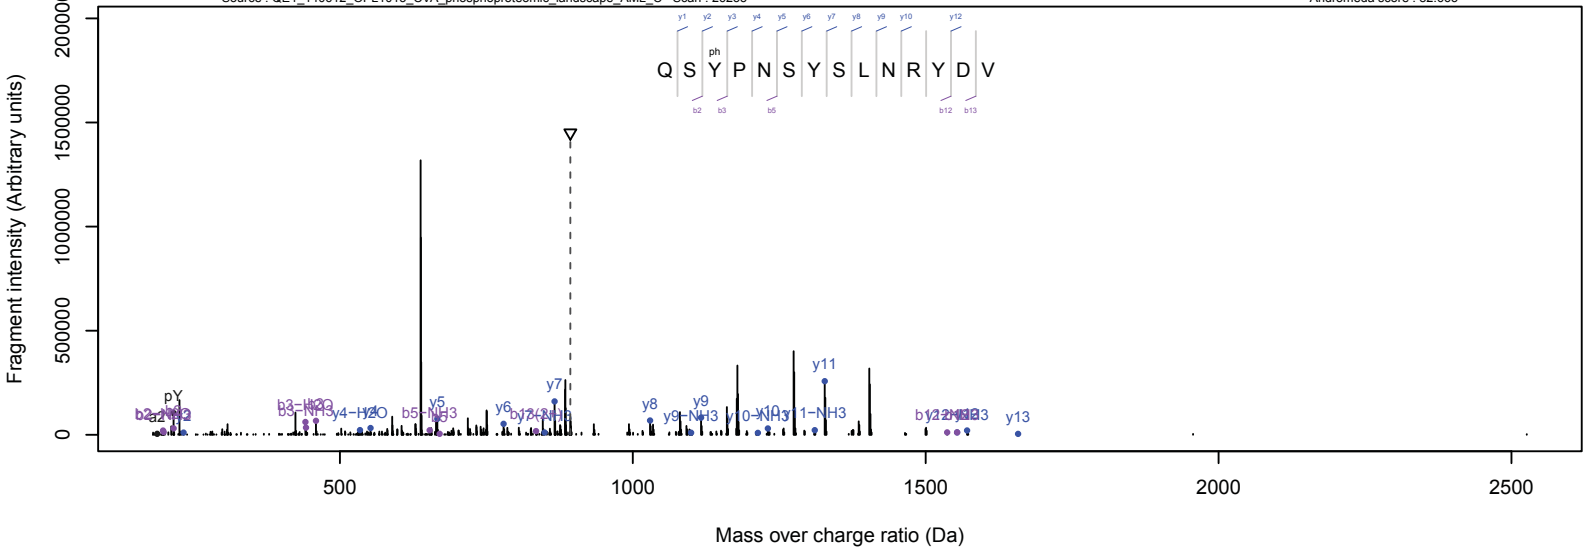

SDGGY(ph)TYDTSDLAAIK-2+

Source : QE1\_140612\_OPL1013\_CVA\_phosphoproteomic\_landscape\_AML\_D Scan : 27016

Andromeda score : 82.663

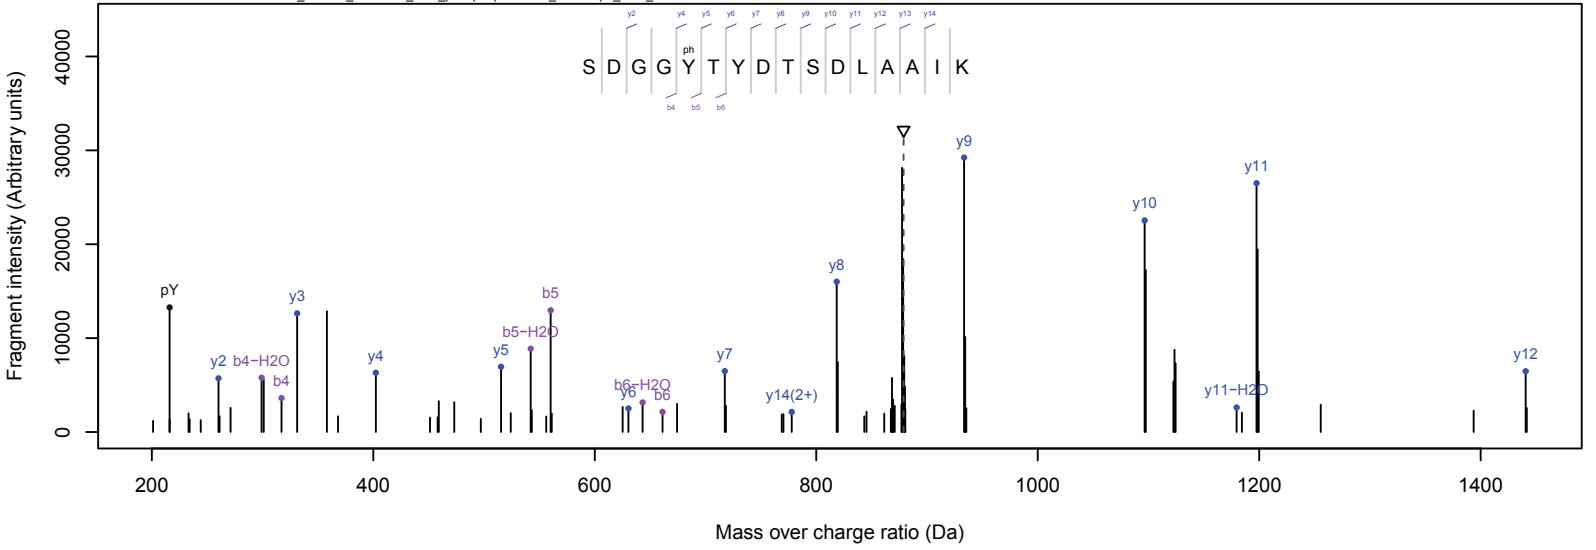

ARPEY(ph)MLPVHFYGR-3+

Source : QE1\_140612\_OPL1013\_CVA\_phosphoproteomic\_landscape\_AML\_B Scan : 32984

Andromeda score : 82.651

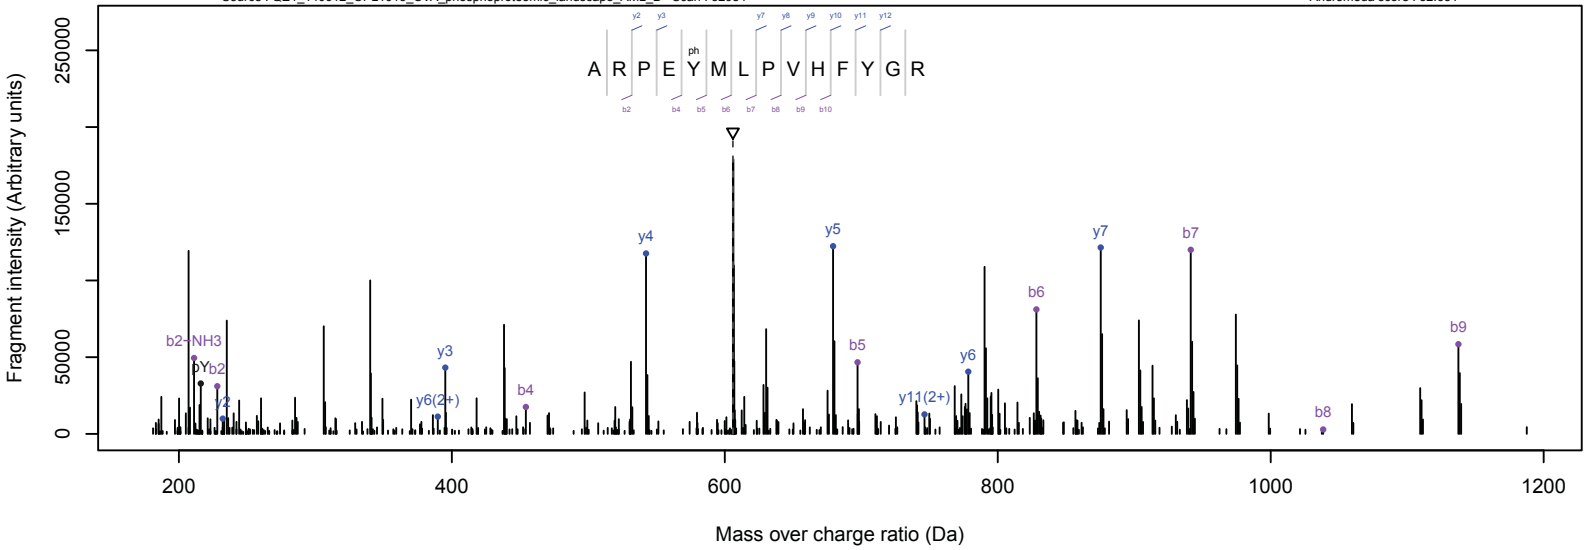

EQLY(ph)STILSHQCQR-2+

Source : QE1\_140908\_OPL1013\_CvA\_pTyrIP\_AML\_OCI\_AML3 Scan : 24056

Andromeda score : 82.651

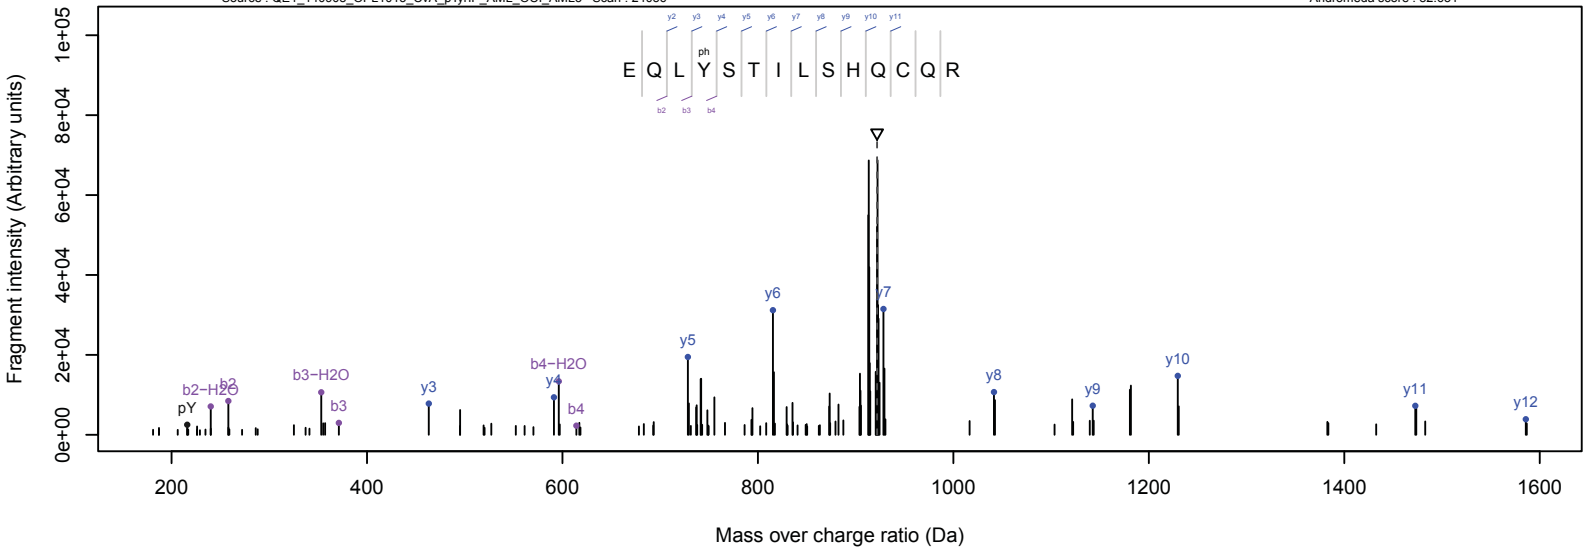

**IKHFDGEDY(ph)TCITFPDLSK-3+**

Source: QE1\_140908\_OPL1013\_CvA\_pTyrIP\_AML\_Kasumi1 Scan: 30510

Andromeda score: 82.609

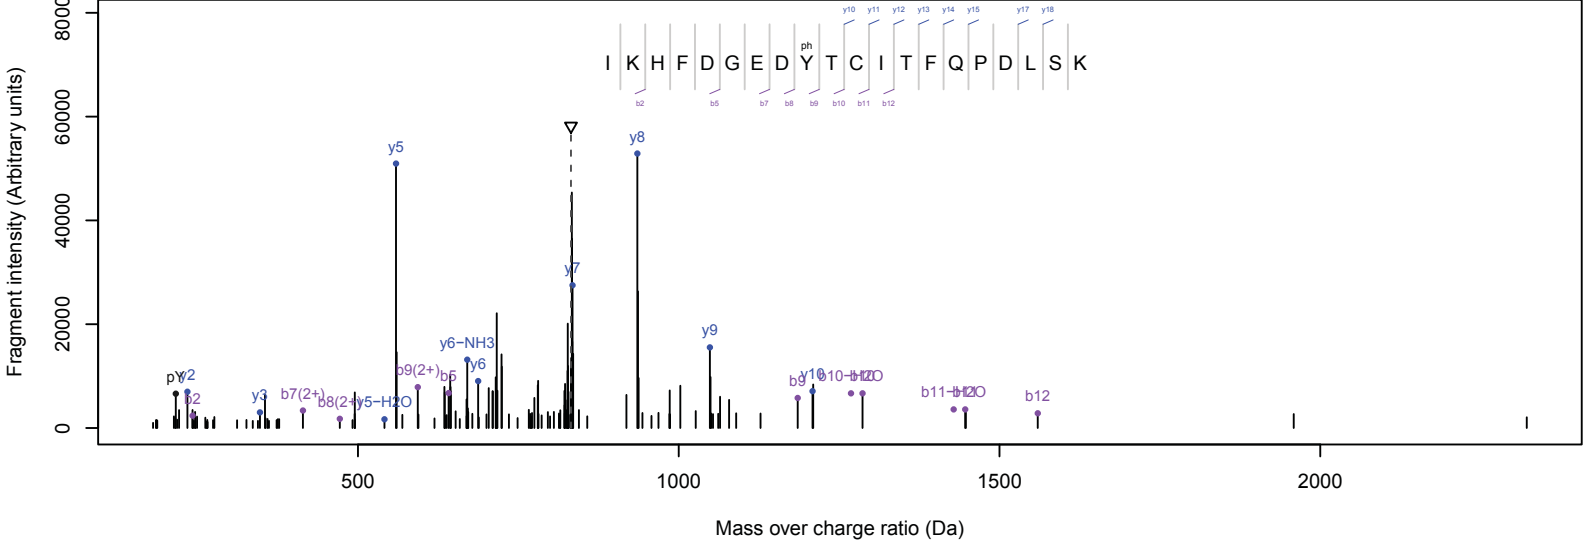

**(ac)SNGY(ph)EDHMAEDCRGDIGR-3+**

Source: QE1\_140612\_OPL1013\_CVA\_phosphoproteomic\_landscape\_AML\_B Scan: 12462

Andromeda score: 82.609

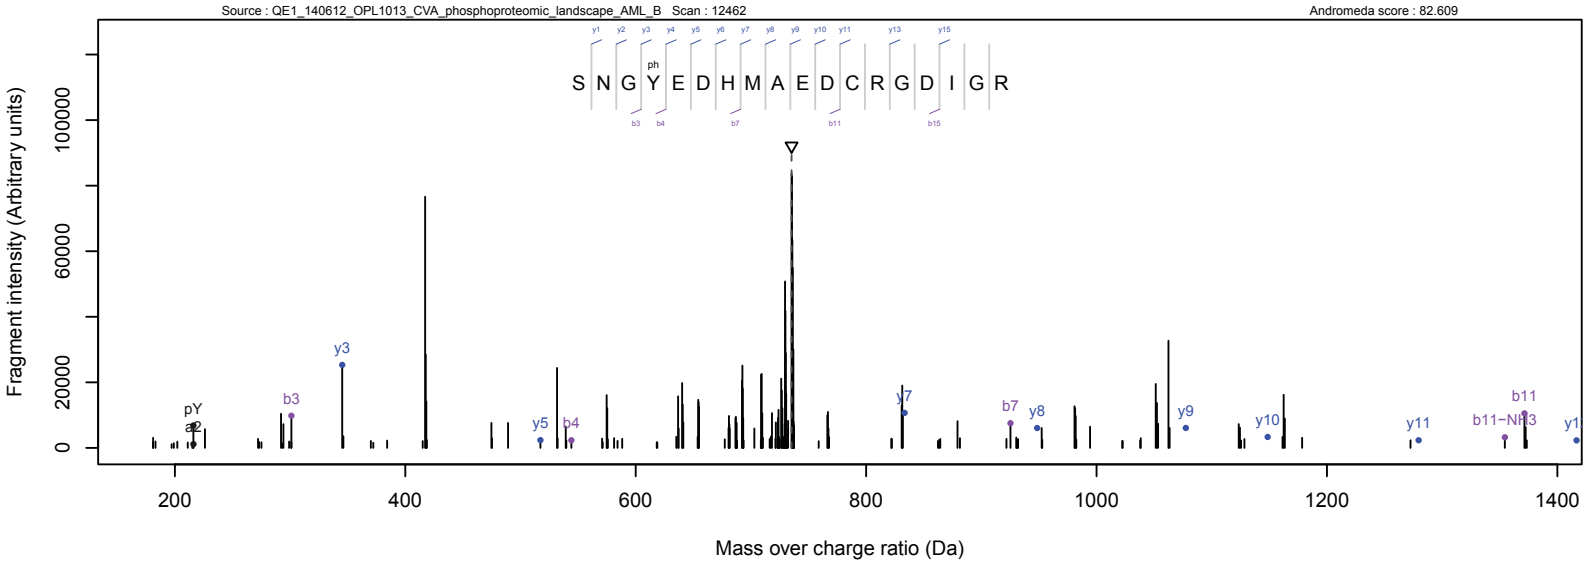

**SSTQM(ax)NSYSDS(ph)GYQEAGSFHNSQNVSK-3+**

Source: QE1\_140908\_OPL1013\_CvA\_pTyrIP\_AML\_Kasumi6 Scan: 14752

Andromeda score: 82.6

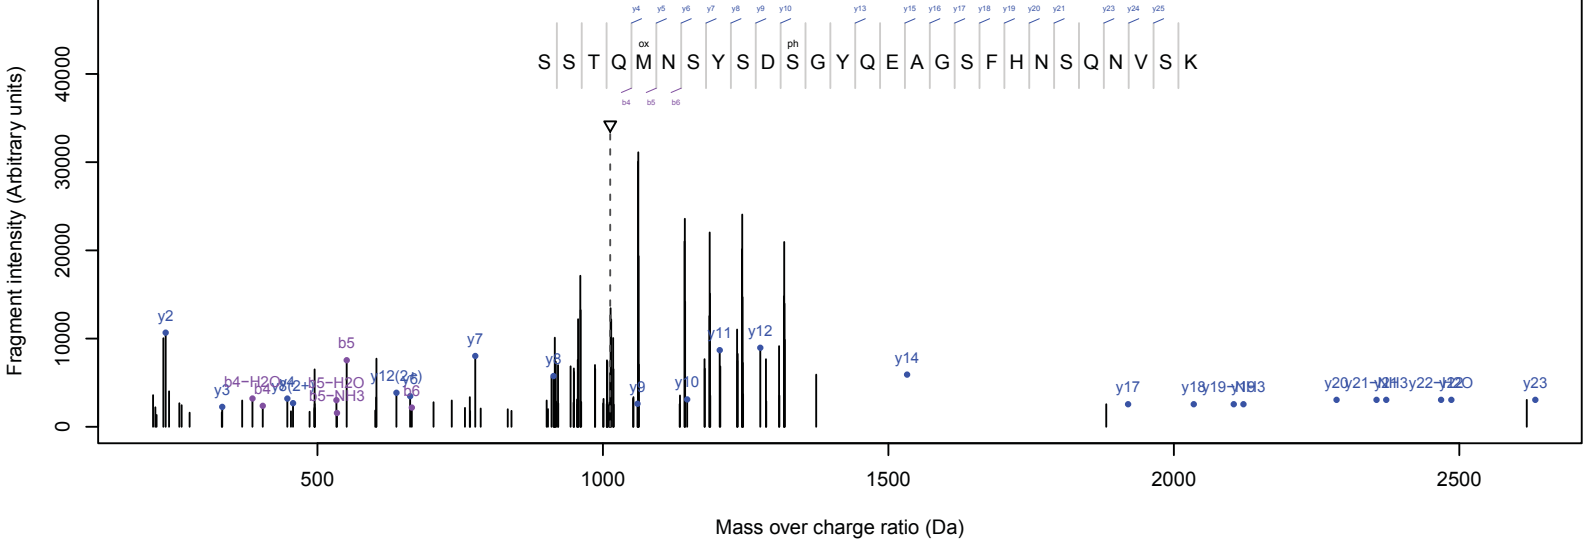

VKVY(ph)QLLVNEQEPCK-2+

Source : QE1\_140612\_OPL1013\_CVA\_phosphoproteomic\_landscape\_AML\_B Scan : 27058

Andromeda score : 82.59

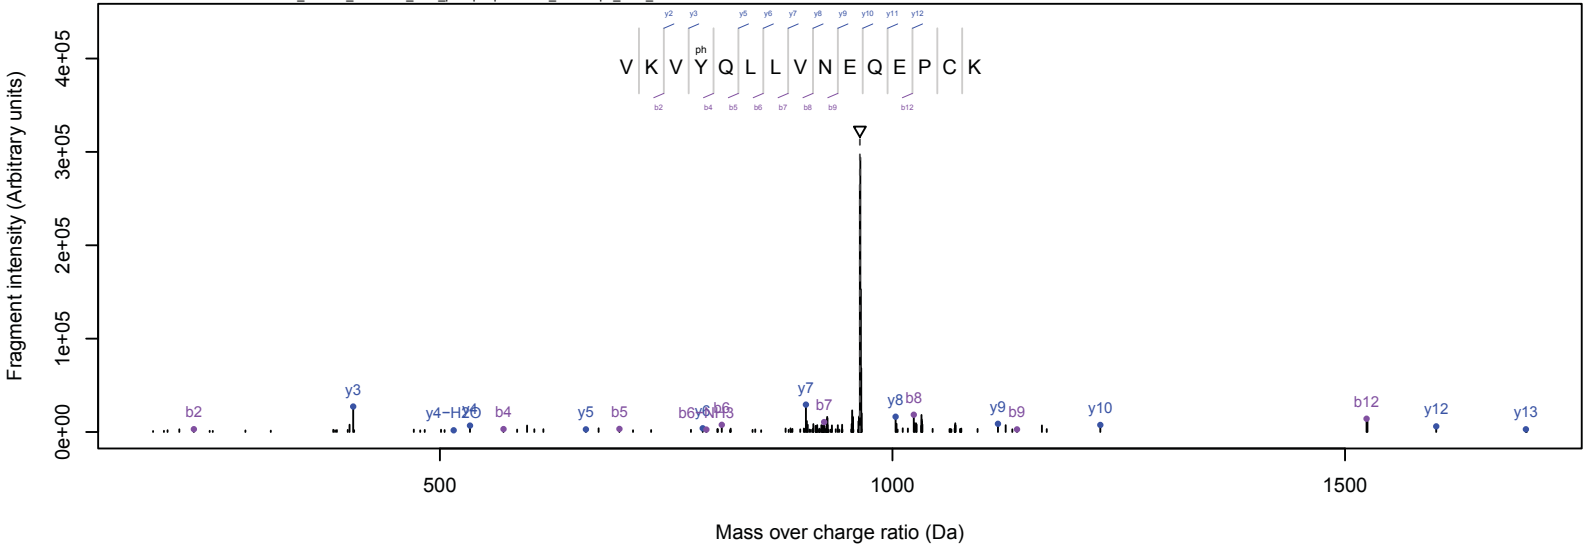

KQY(ph)PISLVLAPTR-2+

Source : QE1\_140612\_OPL1013\_CVA\_phosphoproteomic\_landscape\_AML\_B Scan : 32865

Andromeda score : 82.529

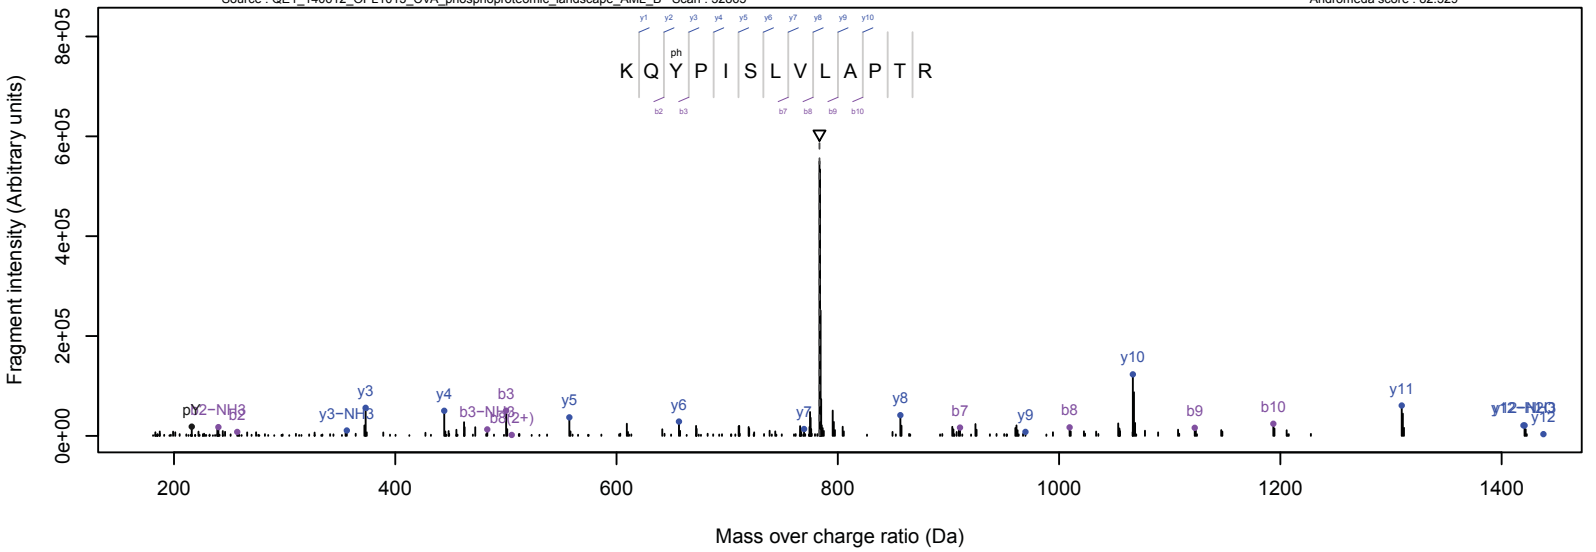

NLQVEY(ph)EQLKDQHLR-2+

Source : QE1\_140612\_OPL1013\_CVA\_phosphoproteomic\_landscape\_AML\_C Scan : 21853

Andromeda score : 82.529

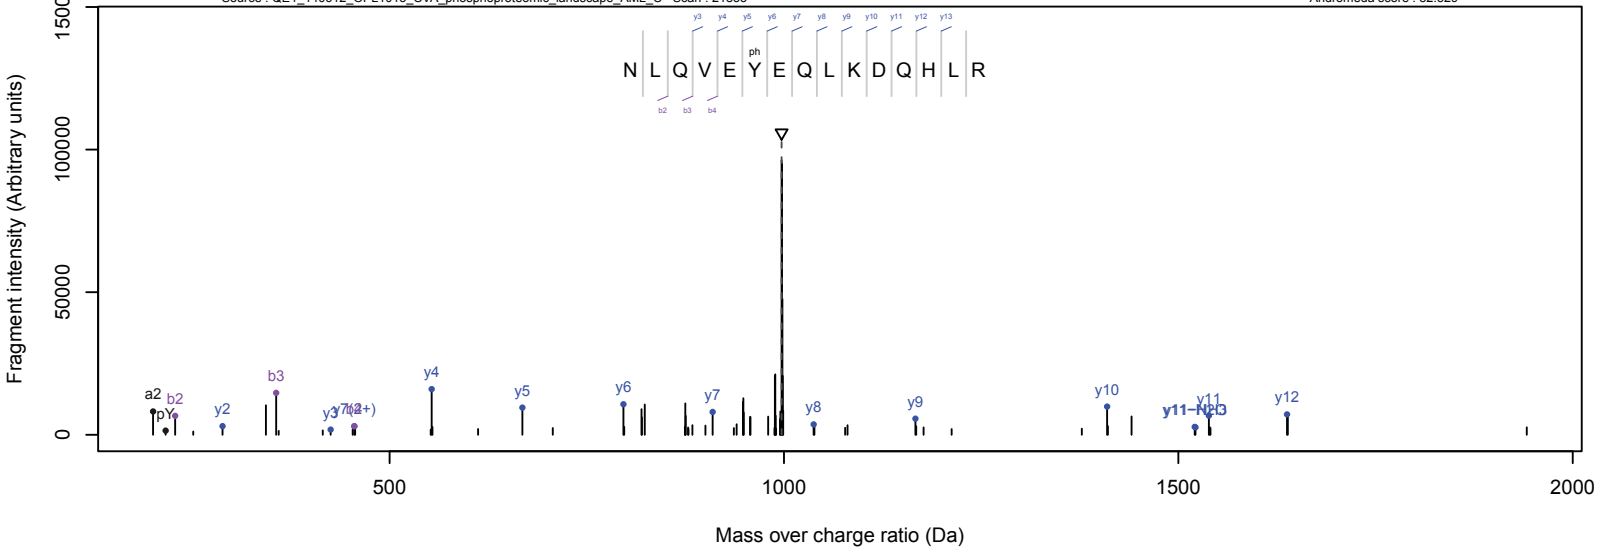





LDDLHTLYHK-3+

Source : QE1\_140612\_OPL1013\_CVA\_phosphoproteomic\_landscape\_AML\_C Scan : 13165

Andromeda score : 82.417

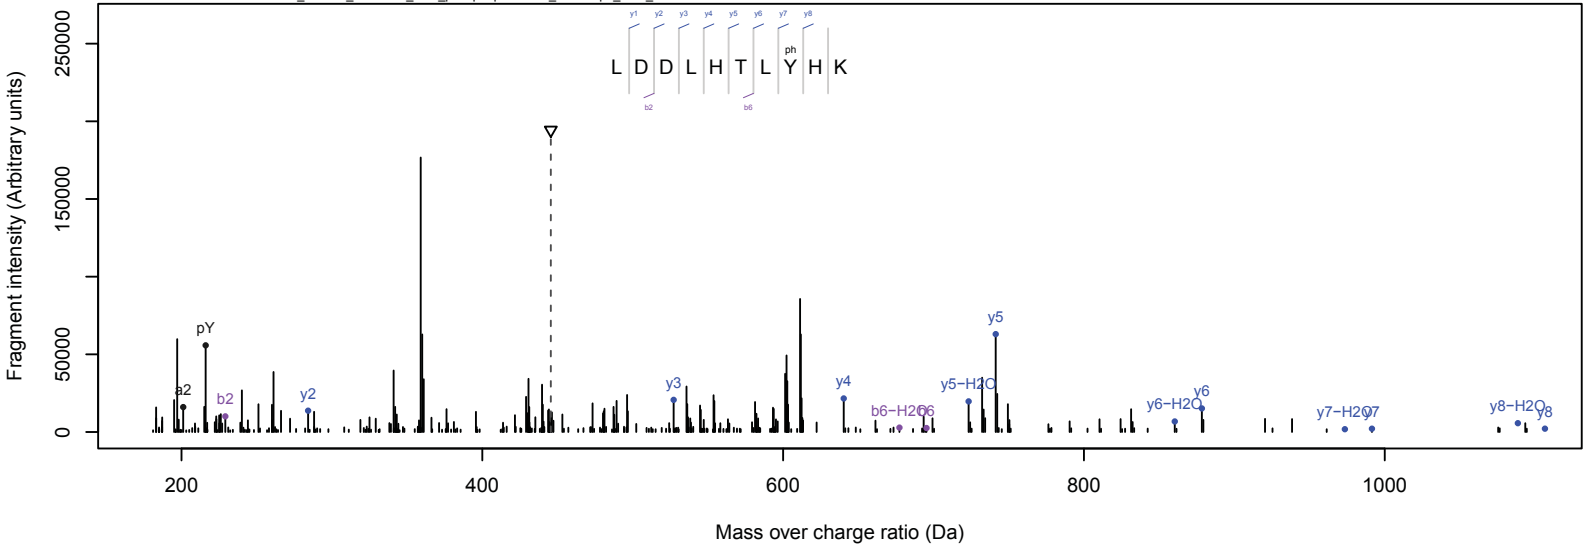

VAYMNPIMAR-2+

Source : QE1\_140612\_OPL1013\_CVA\_phosphoproteomic\_landscape\_AML\_C Scan : 30302

Andromeda score : 82.417

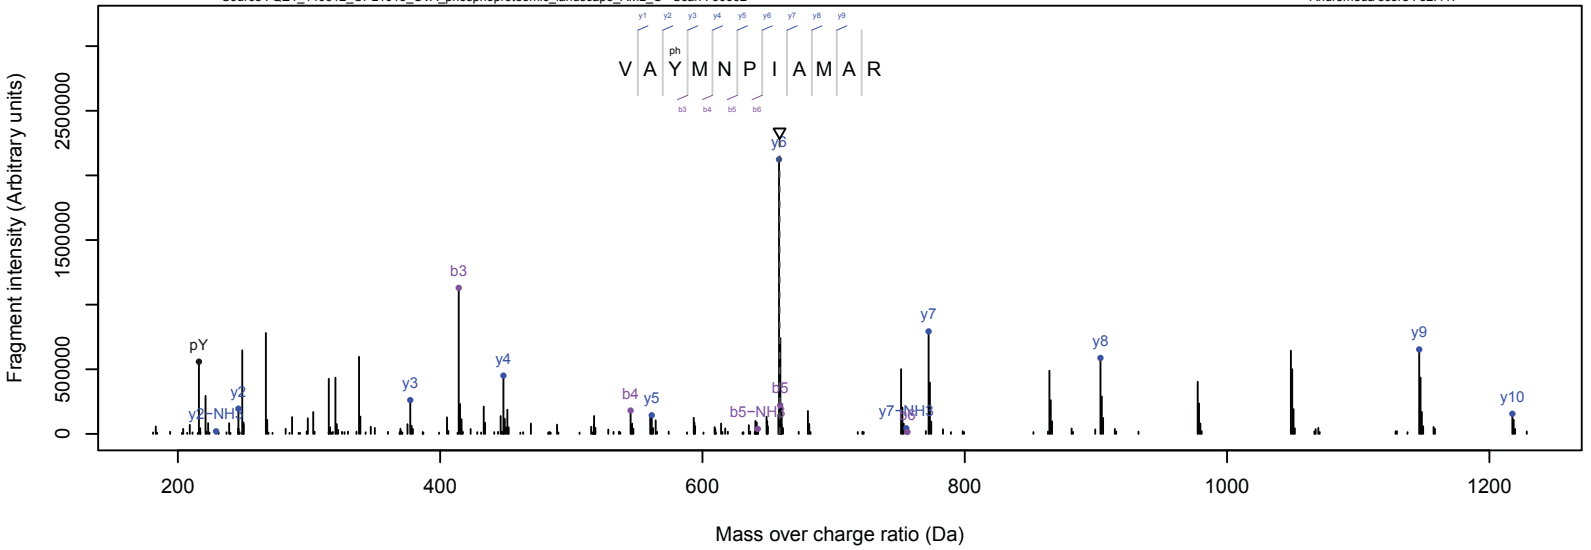

LPYKVLSPVPESTPFTAVLK-3+

Source : QE1\_140612\_OPL1013\_CVA\_phosphoproteomic\_landscape\_AML\_B Scan : 46289

Andromeda score : 82.367

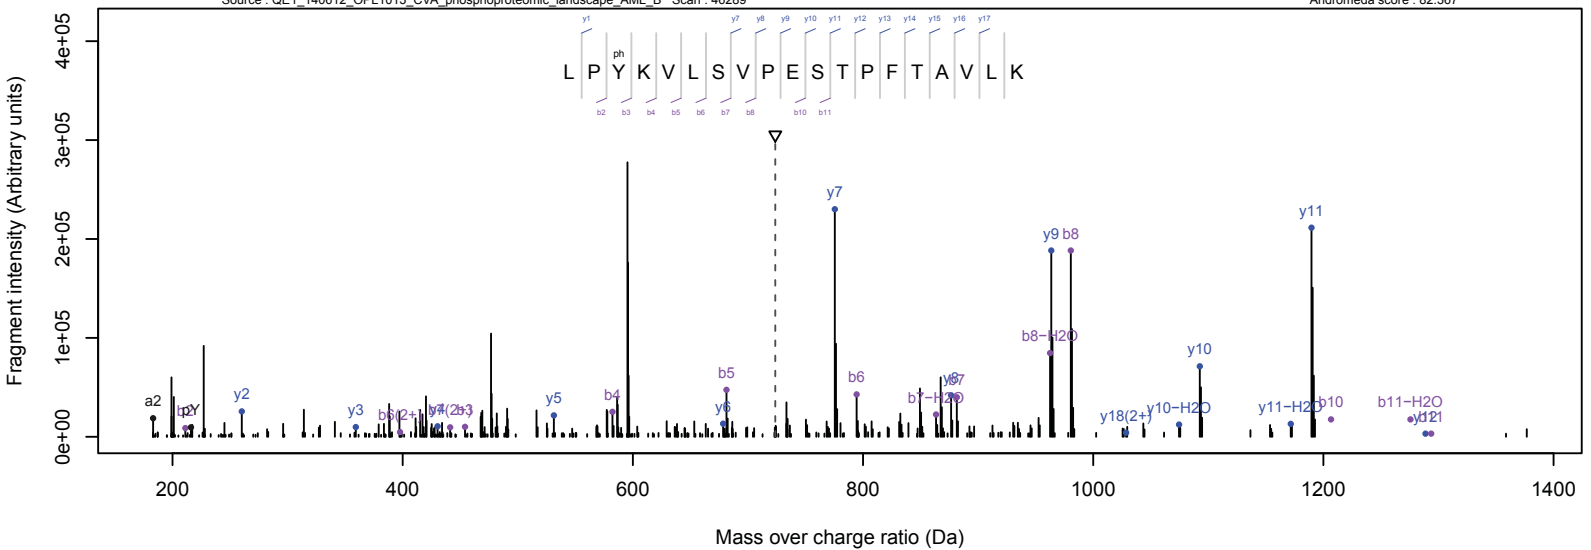

**ANLY(ph)PPSNTPGDALSPPGGGLRPNQGQTKPLPALK-4+**

Source : QE1\_140612\_OPL1013\_CVA\_phosphoproteomic\_landscape\_AML\_C Scan : 32532

Andromeda score : 82.364

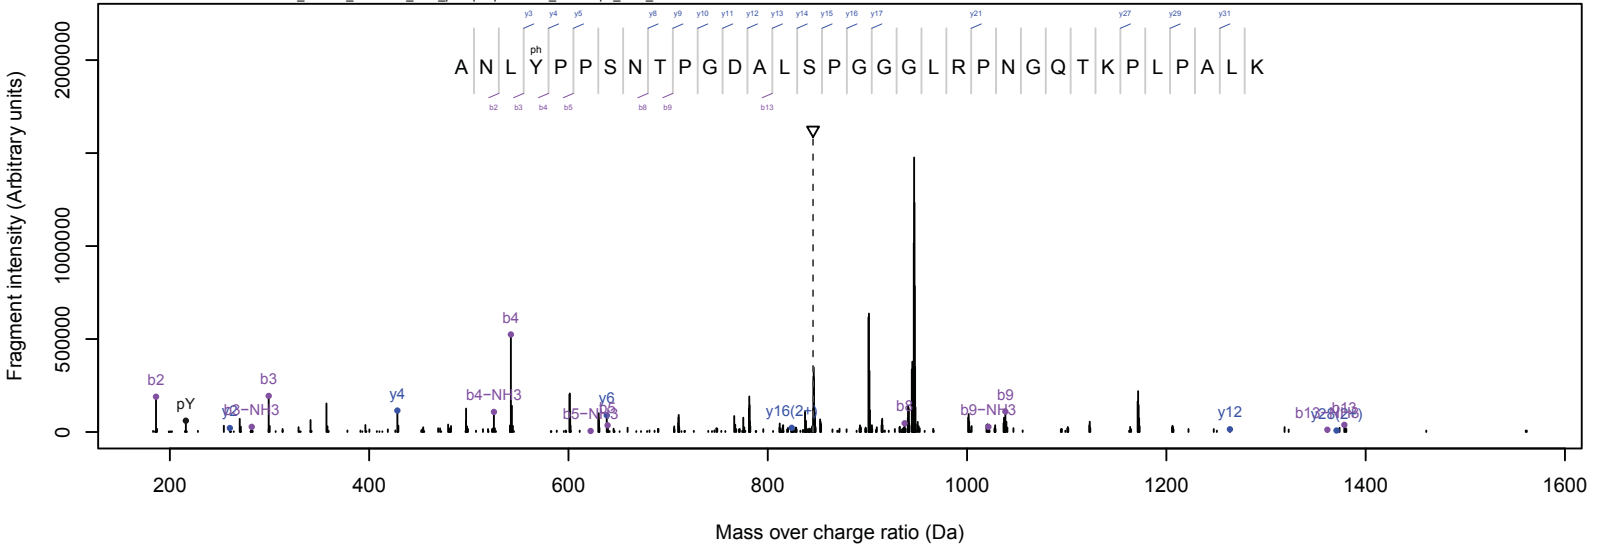

**Y(ph)GIPLAYKK-2+**

Source : QE1\_140612\_OPL1013\_CVA\_phosphoproteomic\_landscape\_AML\_C Scan : 18096

Andromeda score : 82.279

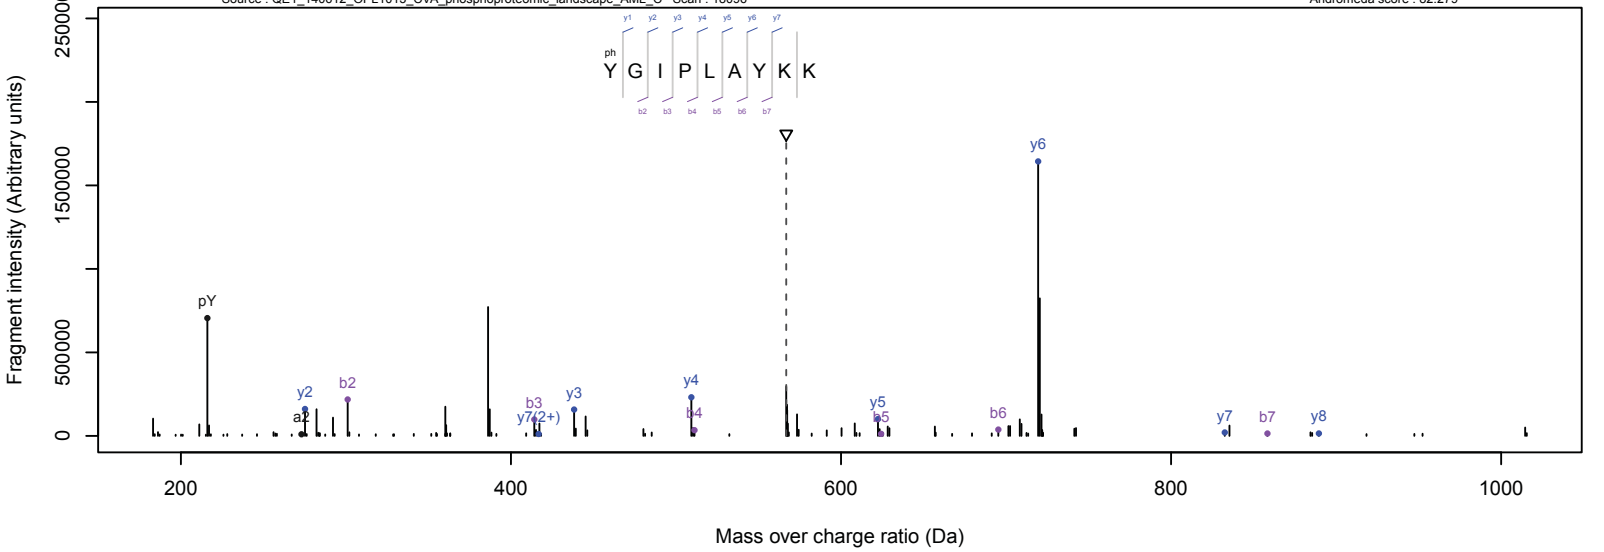

**ISDFGMSREEADGVY(ph)AASGGLR-3+**

Source : QE1\_140908\_OPL1013\_CvA\_pTyrIP\_AML\_HEL Scan : 33486

Andromeda score : 82.267

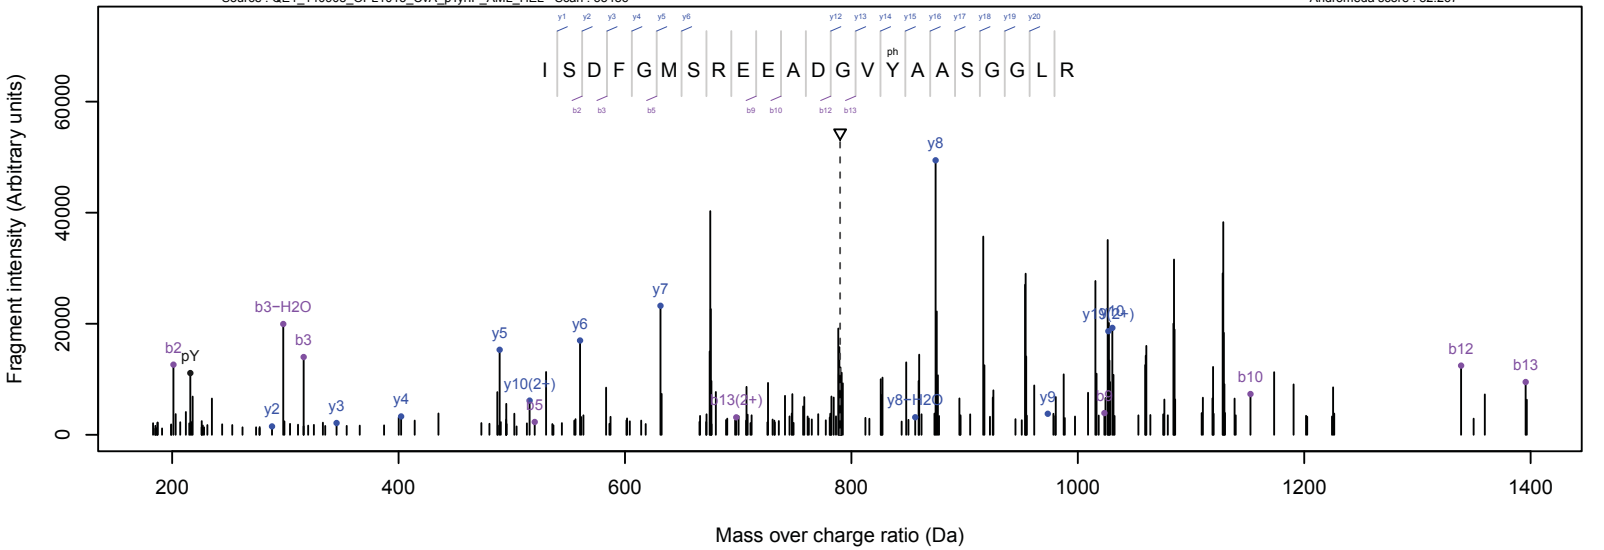

ADY(ph)ACIAENKPT-2+

Source : QE1\_140822\_OPL1013\_CVA\_pTyrIP\_AML\_cell\_lines\_part2\_B Scan : 8186

Andromeda score : 82.202

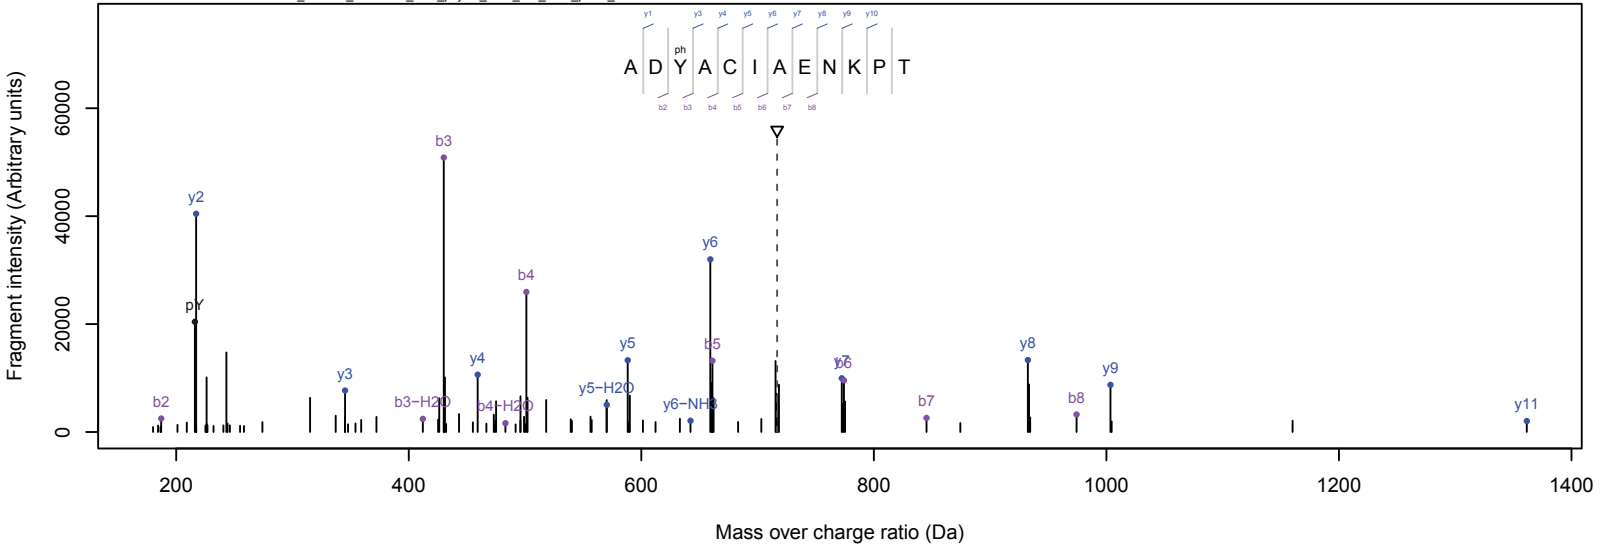

LQYSQDIPSHLADEHALIASY(ph)VAR-3+

Source : QE1\_140612\_OPL1013\_CVA\_phosphoproteomic\_landscape\_AML\_C Scan : 36897

Andromeda score : 82.177

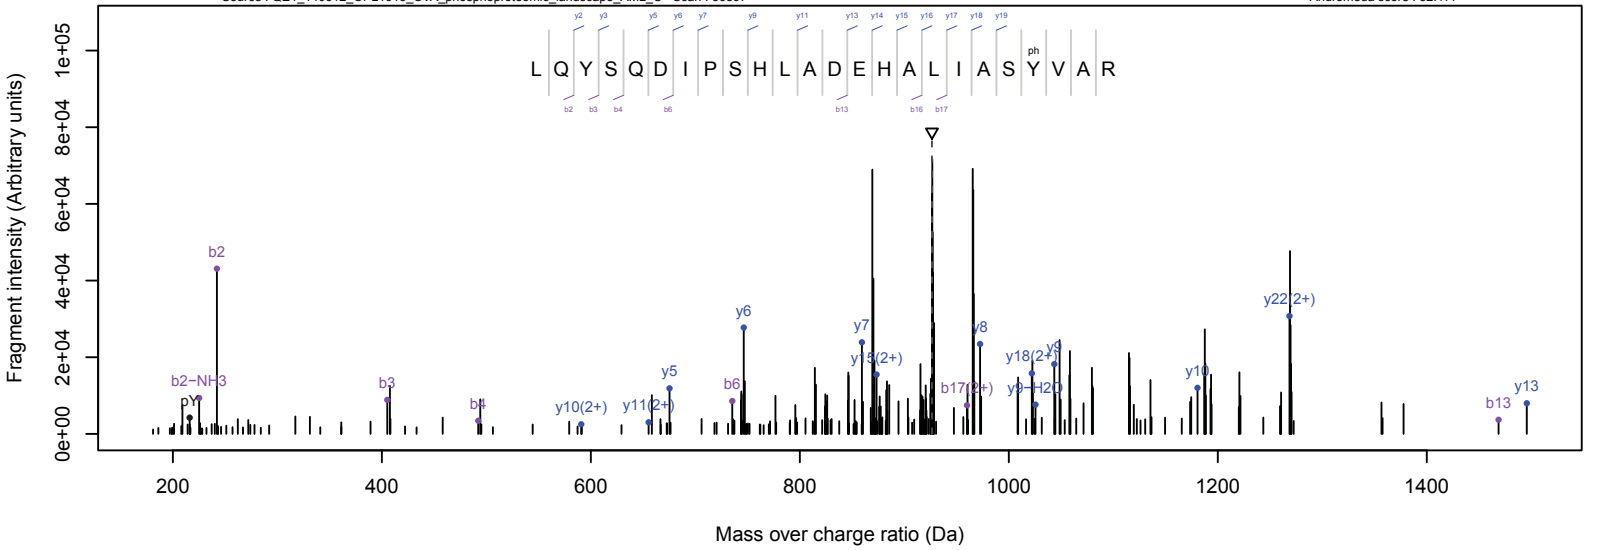

LSSSPCY(ph)YFYQAEDGQHMFHPVNVNR-3+

Source : QE1\_140612\_OPL1013\_CVA\_phosphoproteomic\_landscape\_AML\_B Scan : 42873

Andromeda score : 82.177

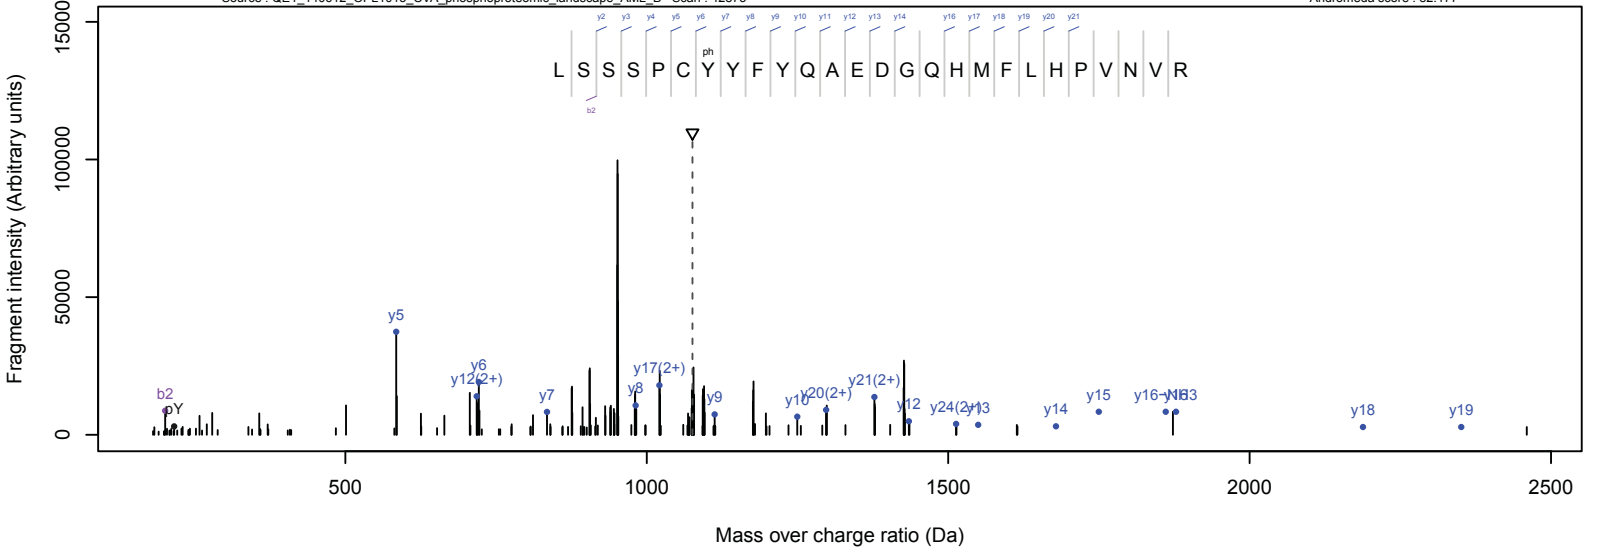

DHLY(ph)LPLEPSYR-2+

Source : QE1\_140908\_OPL1013\_CvA\_pTyrIP\_AML\_HEL Scan : 37517

Andromeda score : 82.069

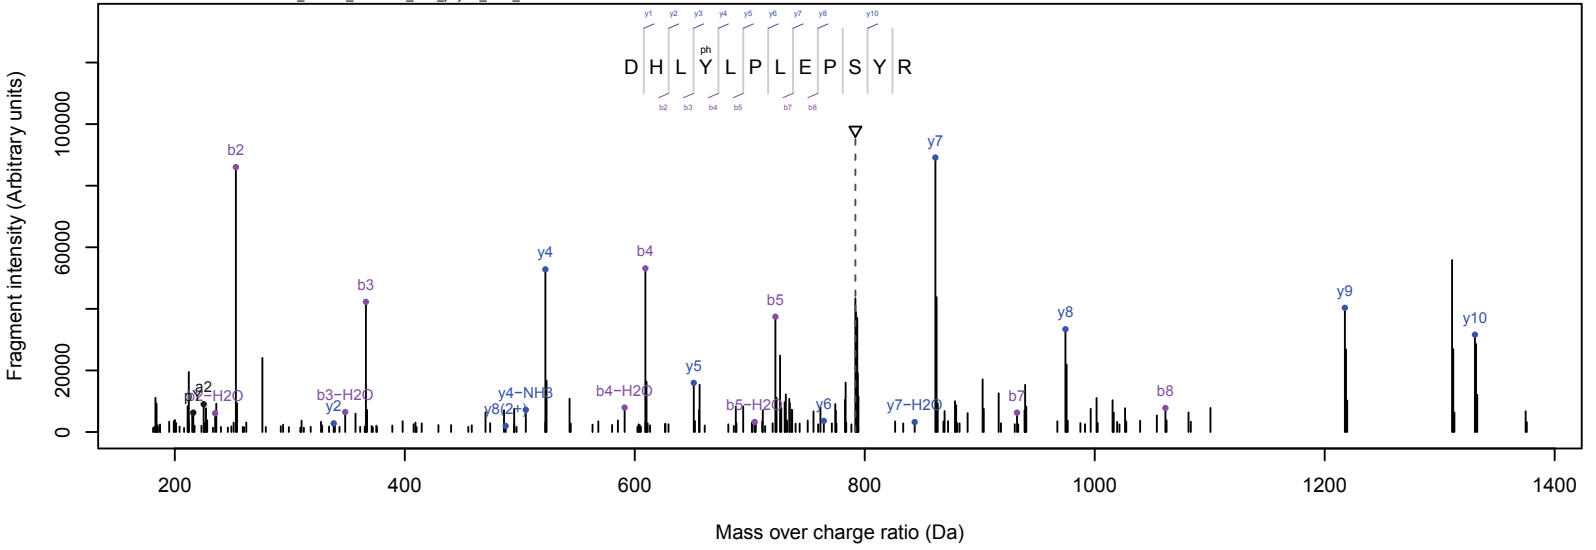

VTDTEY(ph)SEIKHK-3+

Source : QE1\_140822\_OPL1013\_CvA\_pTyrIP\_AML\_cell\_lines\_part2\_B Scan : 7474

Andromeda score : 82.069

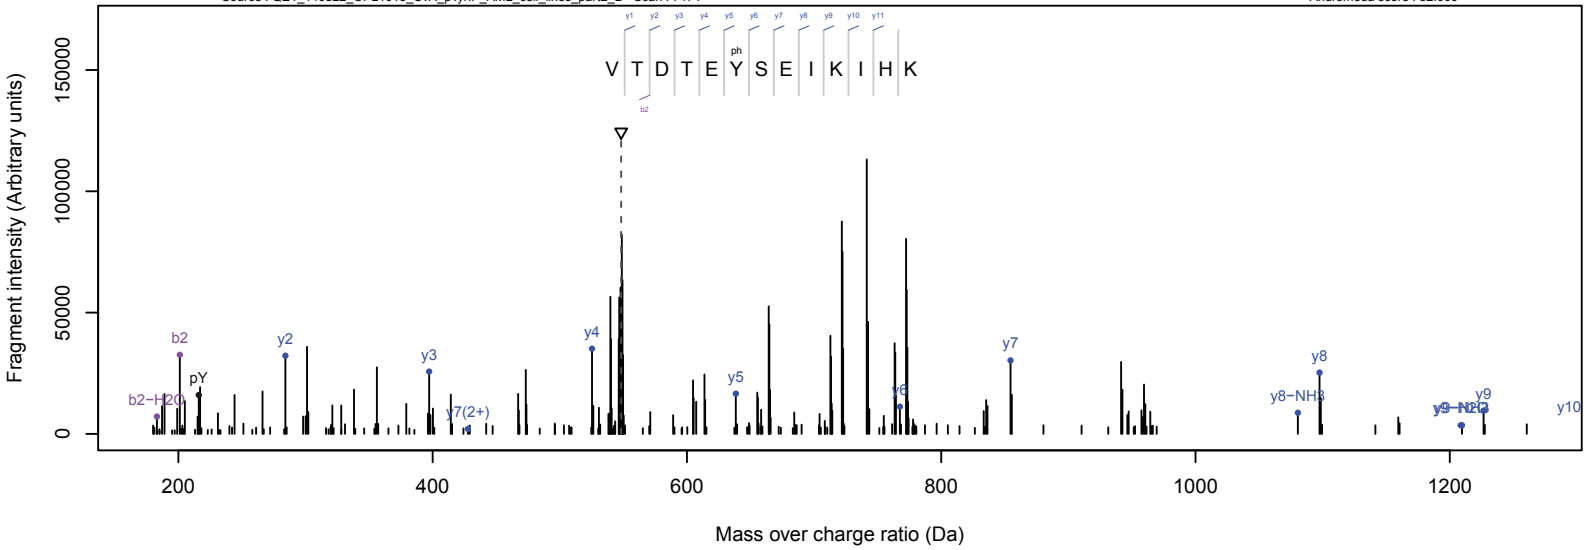

Y(ph)SSNLGNFYER-2+

Source : QE1\_140612\_OPL1013\_CvA\_phosphoproteomic\_landscape\_AML\_C Scan : 20932

Andromeda score : 82.069

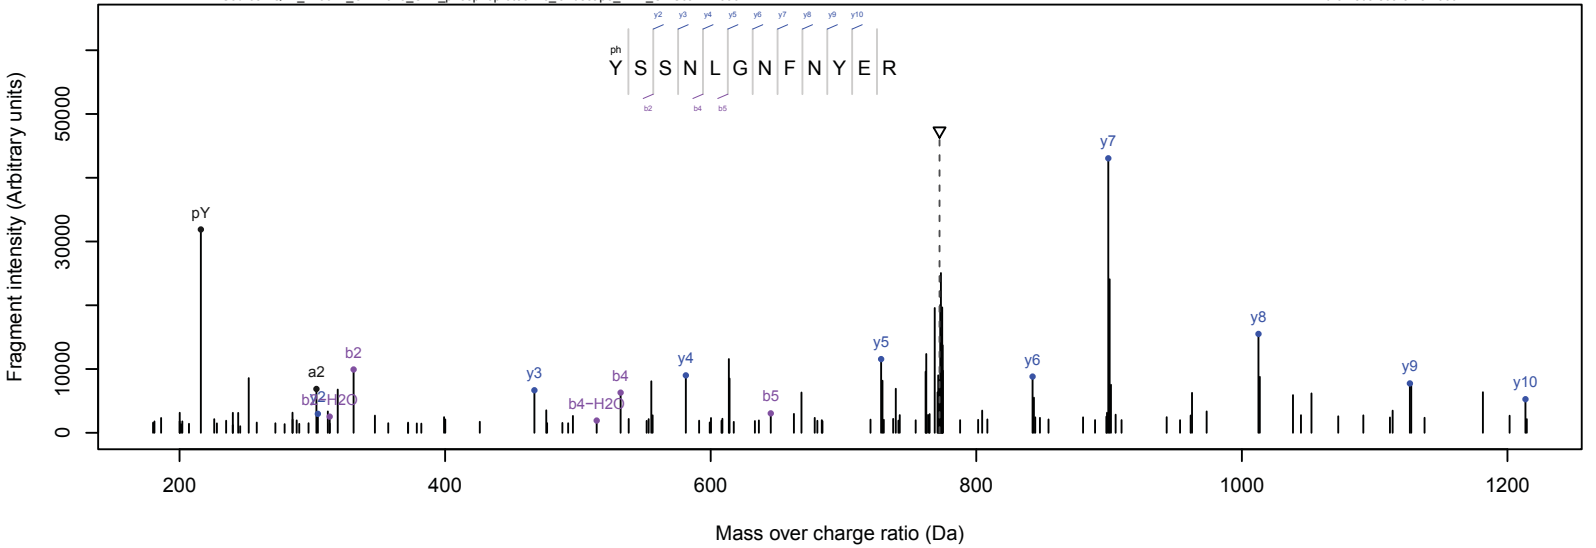

SVNVEQTFHY(ph)NWLIIYHLK-3+

Source: QE1\_140612\_OPL1013\_CVA\_phosphoproteomic\_landscape\_AML\_C Scan: 41476

Andromeda score: 82.01

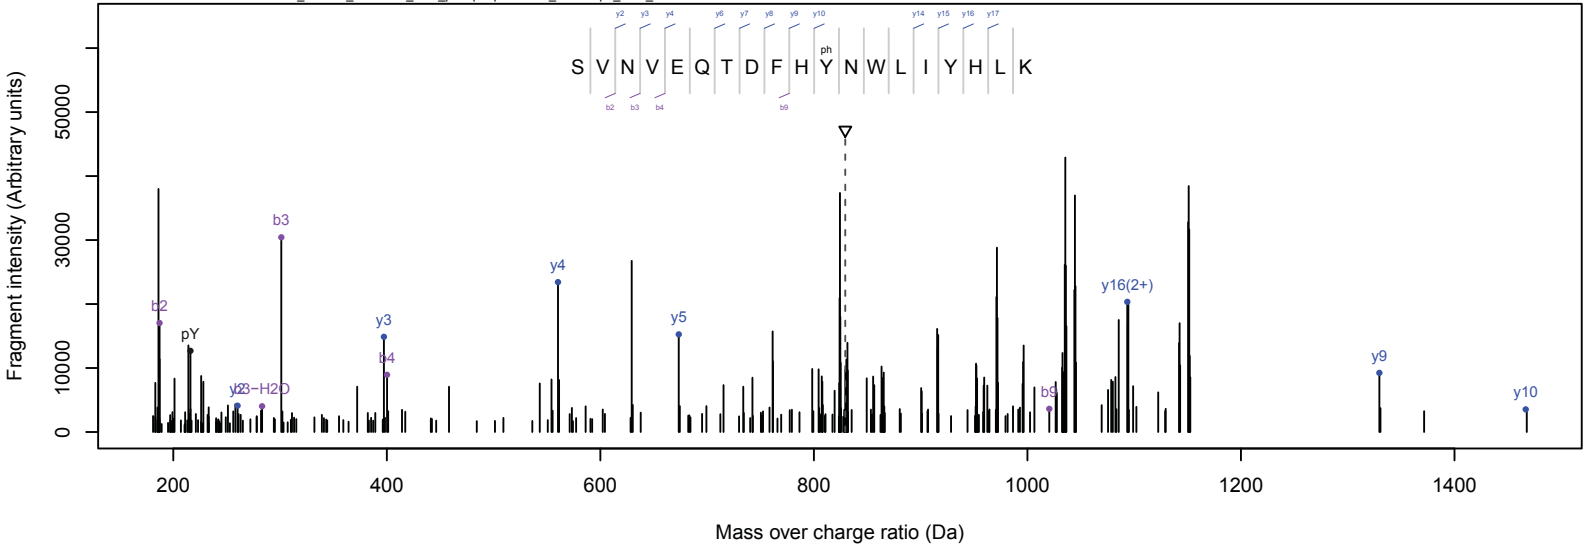

GY(ph)AQDQTQEFLLR-2+

Source: QE1\_140612\_OPL1013\_CVA\_phosphoproteomic\_landscape\_AML\_A Scan: 20472

Andromeda score: 81.92

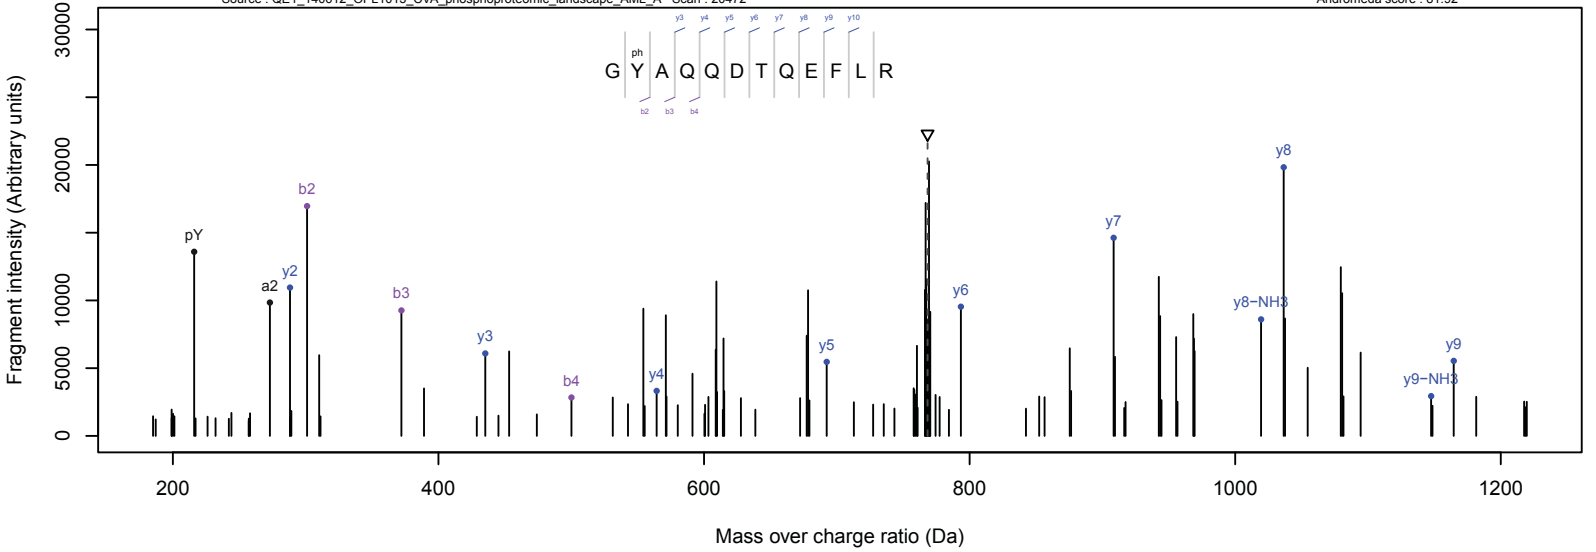

LKADGLIY(ph)CLK-2+

Source: QE1\_140612\_OPL1013\_CVA\_phosphoproteomic\_landscape\_AML\_B Scan: 30826

Andromeda score: 81.92

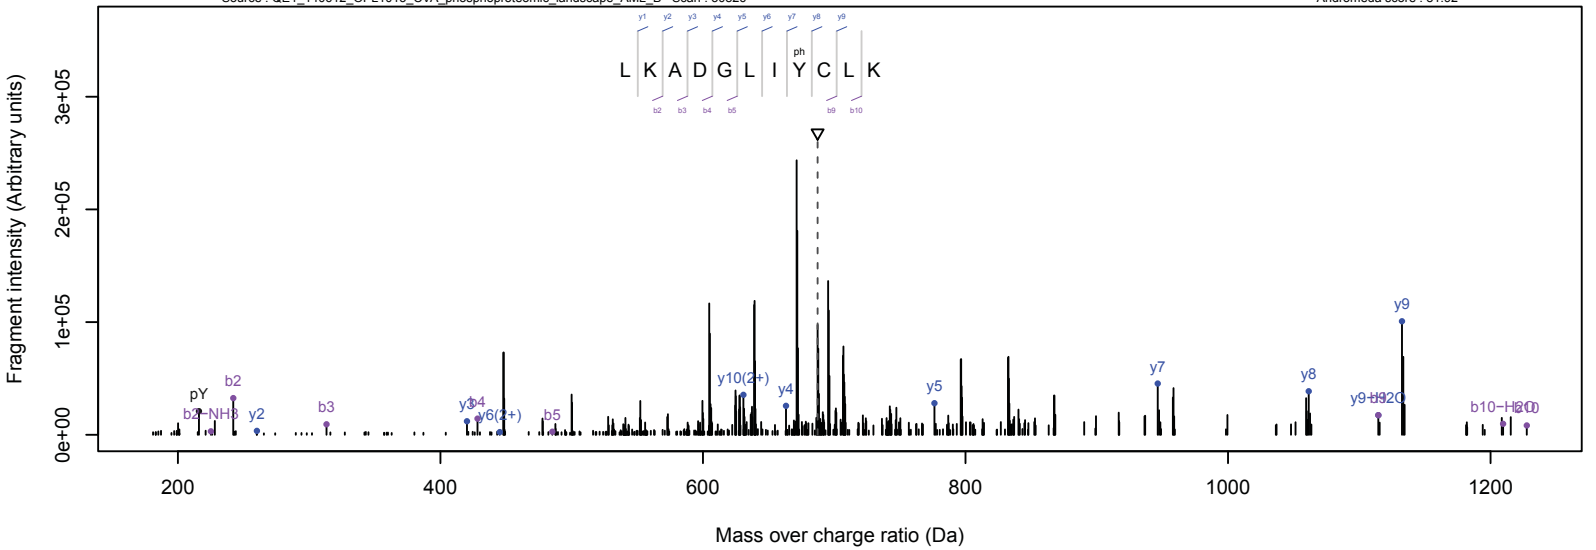

LYDAY(ph)ELKHALK-3+

Source : QE1\_140612\_OPL1013\_CVA\_phosphoproteomic\_landscape\_AML\_C Scan : 24724

Andromeda score : 81.92

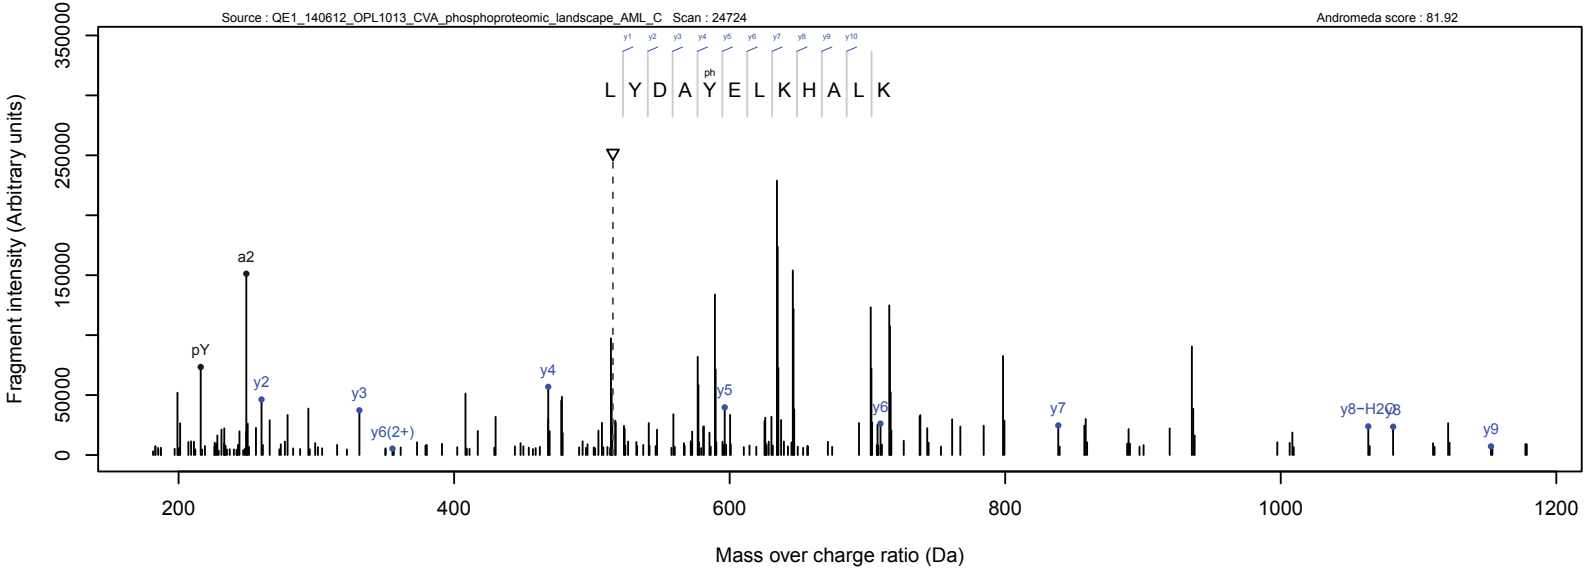

SYQQSSVQ(ph)LYR-2+

Source : QE1\_140612\_OPL1013\_CVA\_phosphoproteomic\_landscape\_AML\_D Scan : 28207

Andromeda score : 81.92

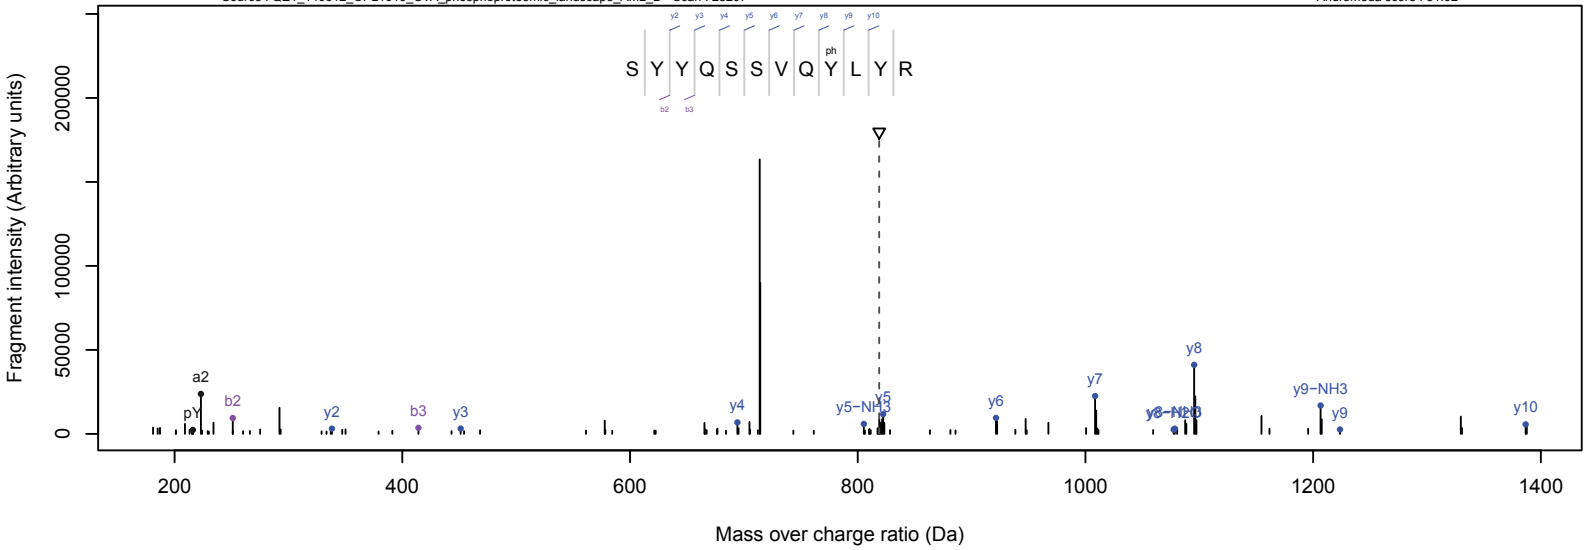

LMY(ph)FKDPLDAFAR-3+

Source : QE1\_140612\_OPL1013\_CVA\_phosphoproteomic\_landscape\_AML\_C Scan : 47326

Andromeda score : 81.904

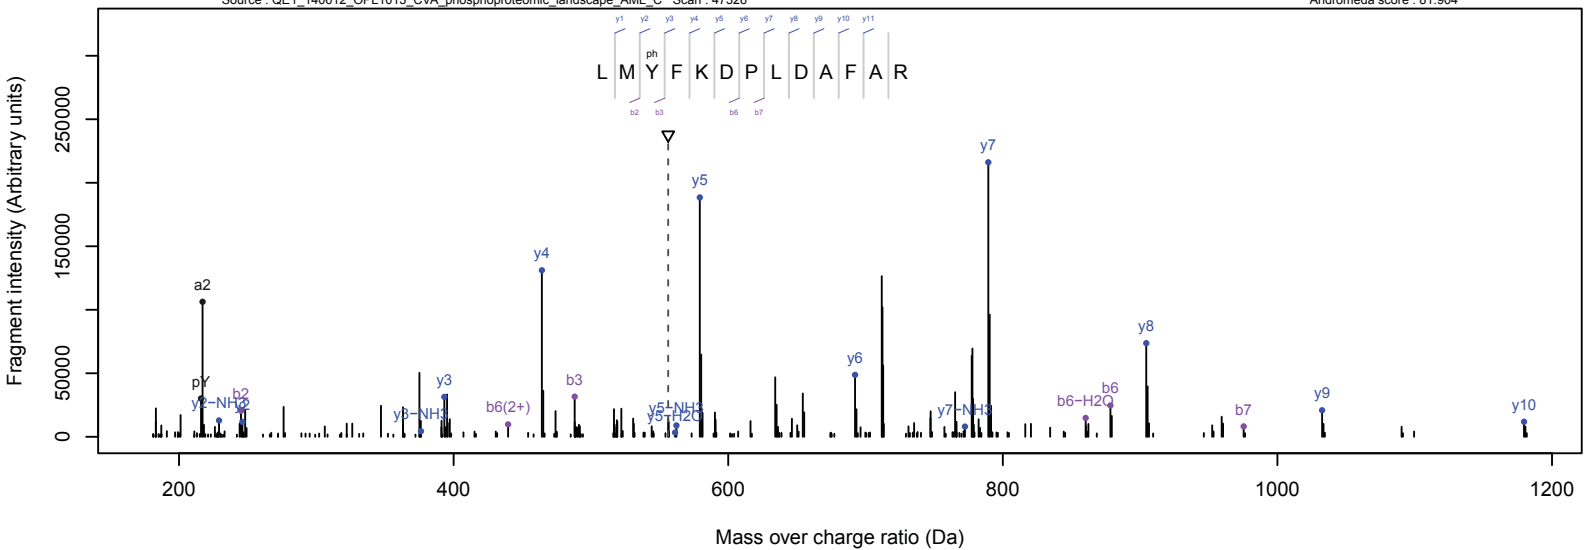

SWHDVQSSAY(ph)KK-3+

Source : QE1\_140612\_OPL1013\_CVA\_phosphoproteomic\_landscape\_AML\_B Scan : 10327

Andromeda score : 81.904

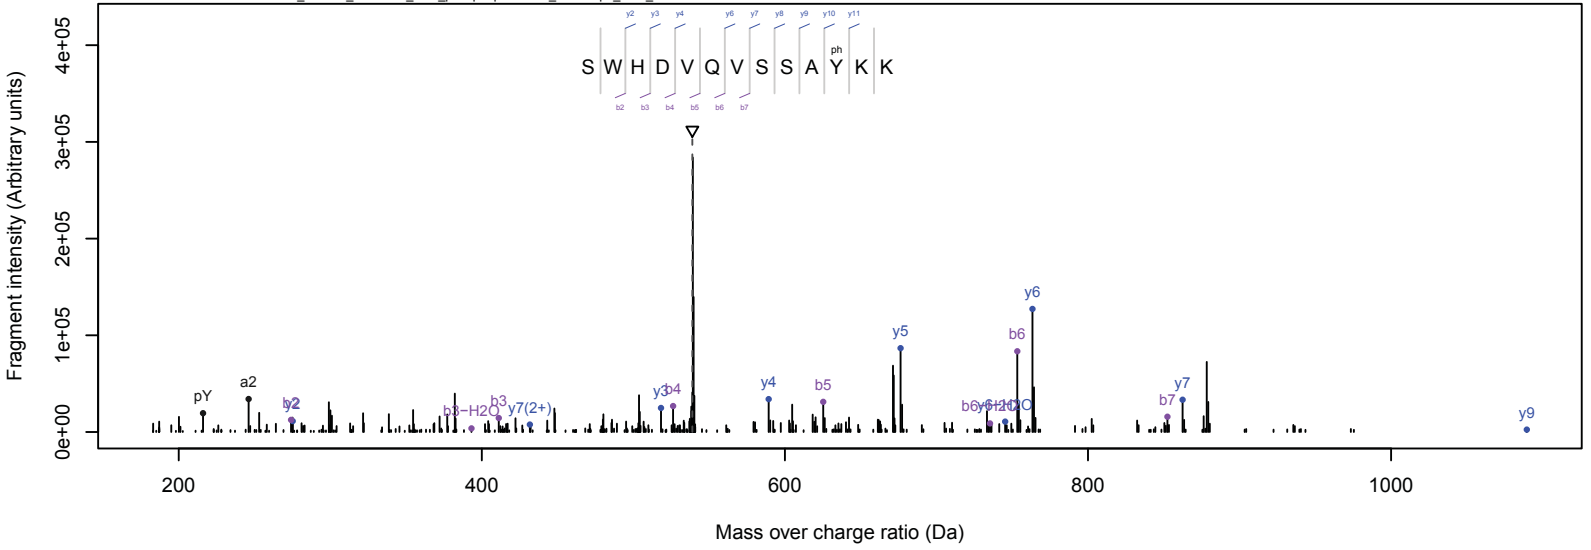

VVYENAY(ph)GQFIGPHR-2+

Source : QE1\_140612\_OPL1013\_CVA\_phosphoproteomic\_landscape\_AML\_C Scan : 23500

Andromeda score : 81.904

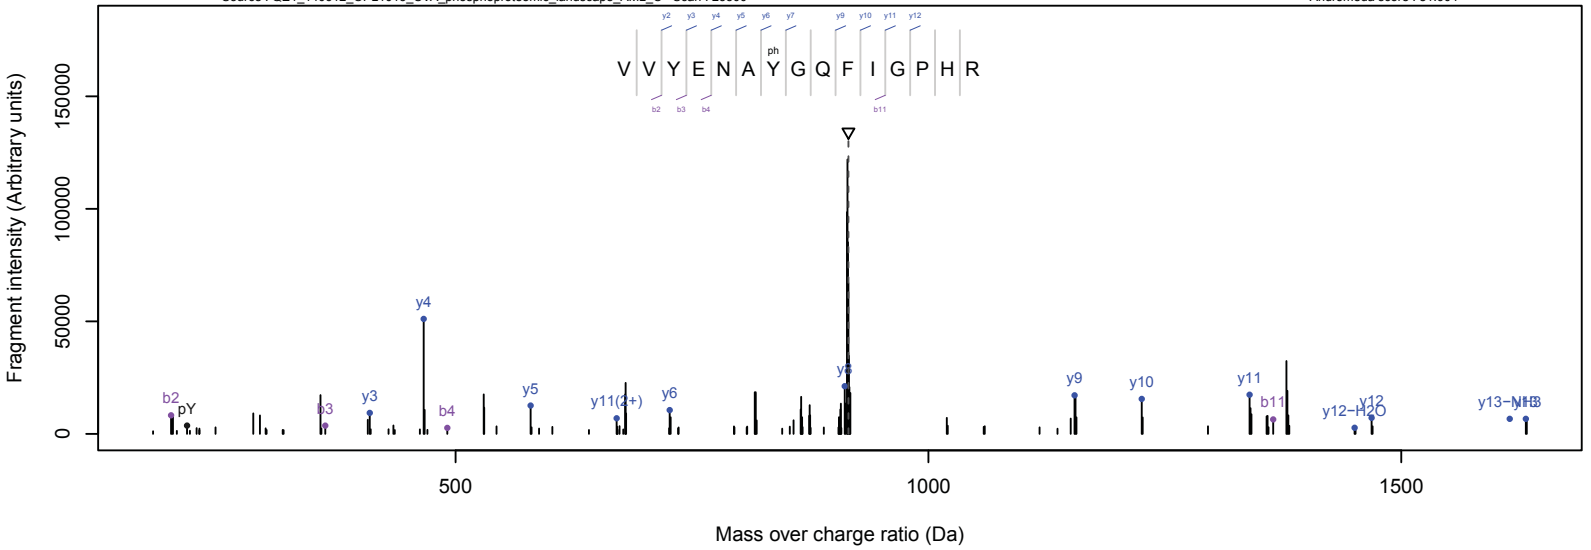

DTLSNPQSPQSPYNS(ph)PKPQHK-3+

Source : QE1\_140612\_OPL1013\_CVA\_phosphoproteomic\_landscape\_AML\_C Scan : 9086

Andromeda score : 81.807

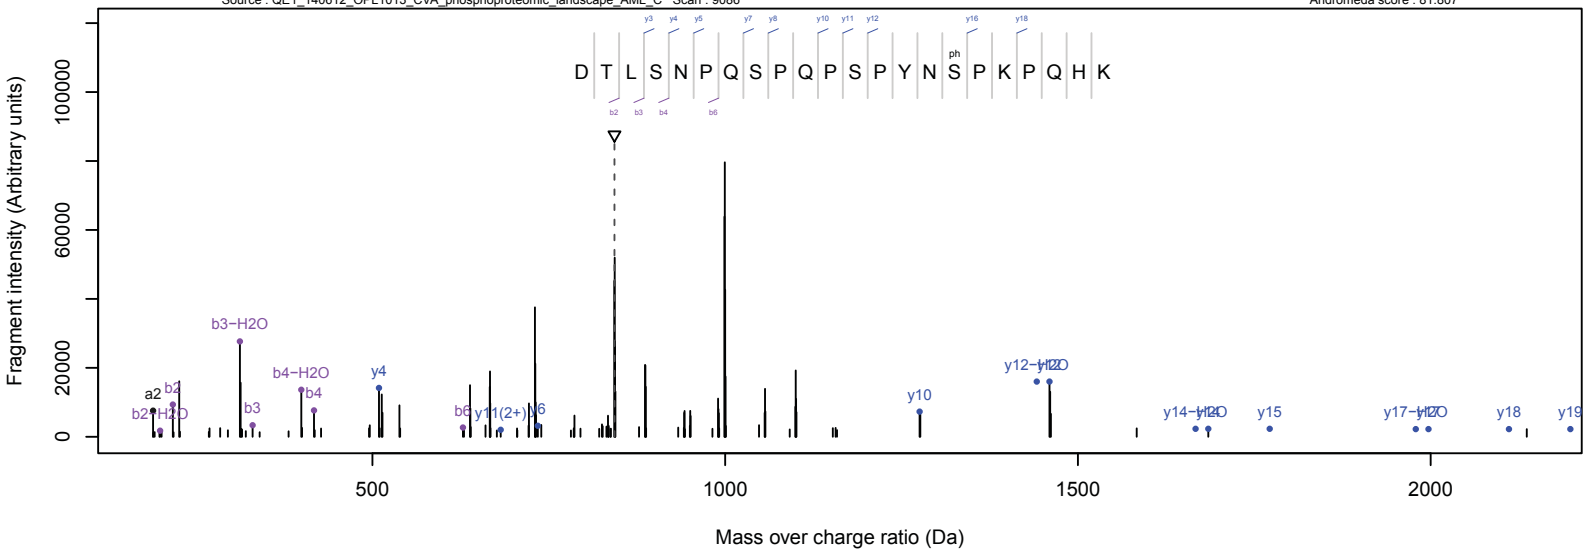

**FVETSPGLDPNASV(ph)QPLKK-3+**

Source : QE1\_140612\_OPL1013\_CVA\_phosphoproteomic\_landscape\_AML\_B Scan : 27030

Andromeda score : 81.807

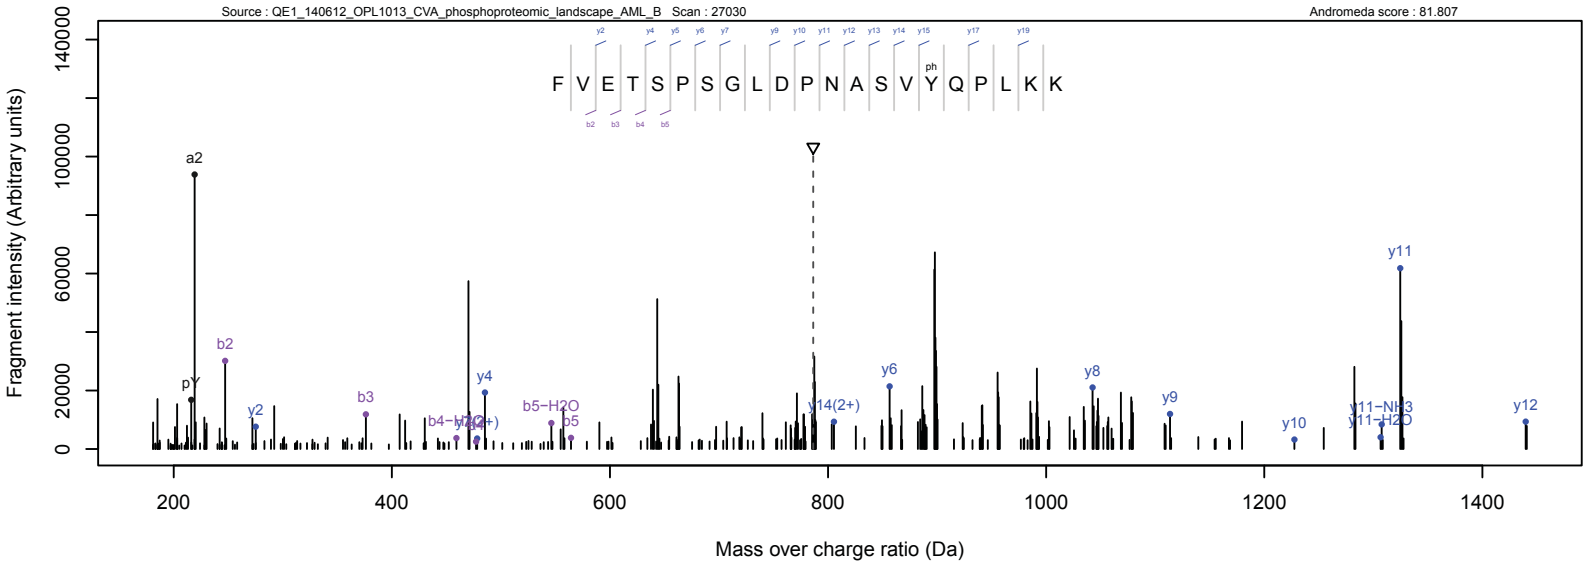

**FLADY(ph)KR-2+**

Source : QE1\_140612\_OPL1013\_CVA\_phosphoproteomic\_landscape\_AML\_C Scan : 7949

Andromeda score : 81.784

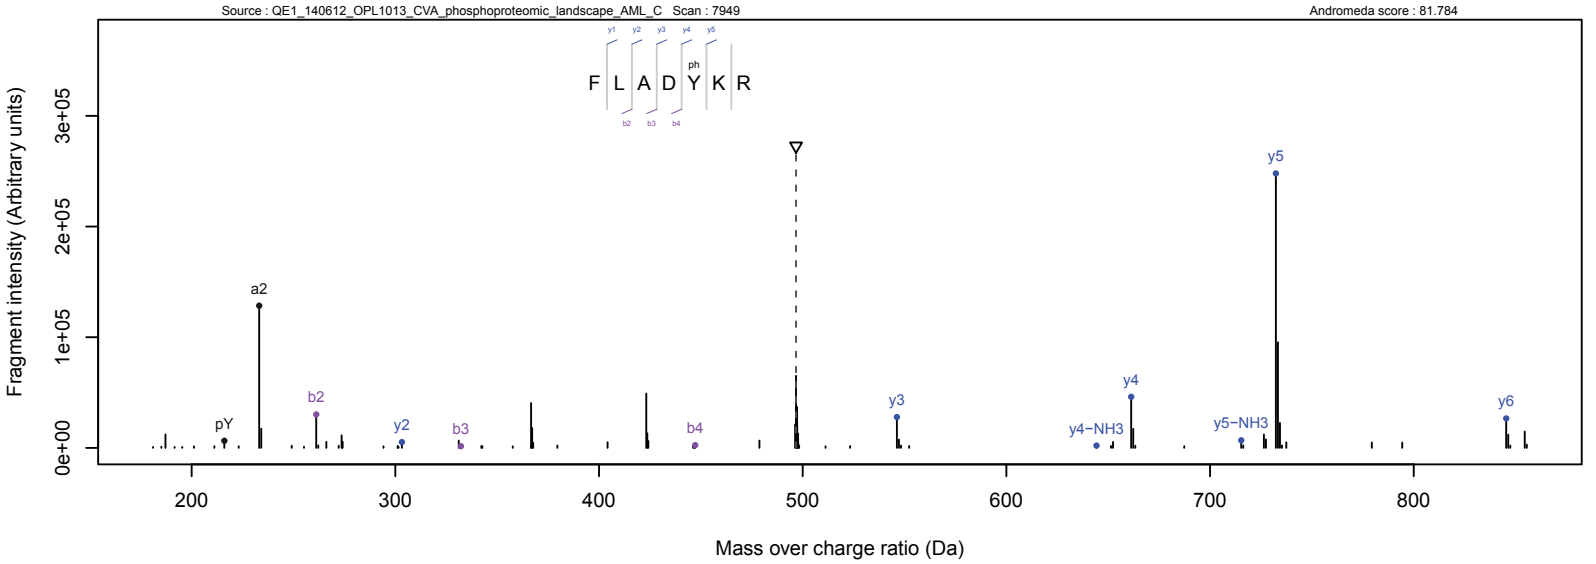

**QGS GSS QP M E V Q E G Y G F G S G D D P Y S S A E P H V S G V K-4+**

Source : QE1\_140908\_OPL1013\_CvA\_pTyrIP\_AML\_Kasumi1 Scan : 24695

Andromeda score : 81.718

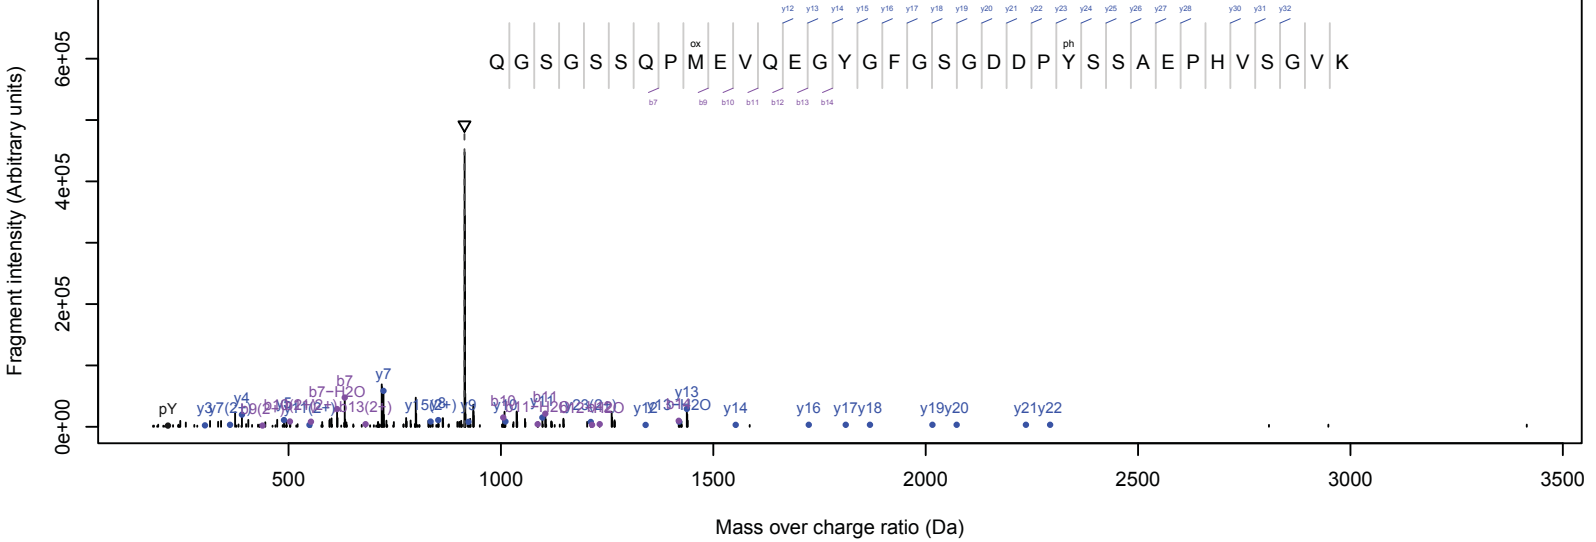



GQLNY(ph)PLPDFSK-2+

Source : QE1\_140612\_OPL1013\_CVA\_phosphoproteomic\_landscape\_AML\_B Scan : 30567

Andromeda score : 81.709

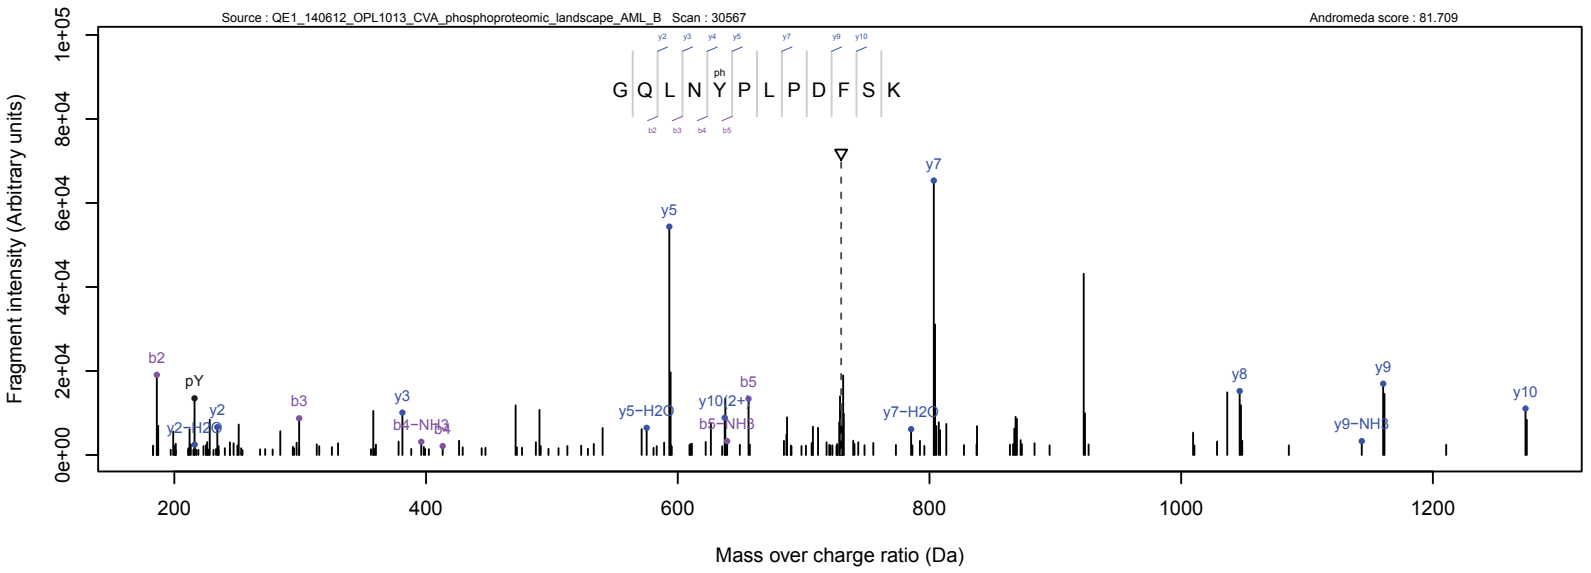

HLWDY(ph)TFGPEK-2+

Source : QE1\_140612\_OPL1013\_CVA\_phosphoproteomic\_landscape\_AML\_B Scan : 33023

Andromeda score : 81.709

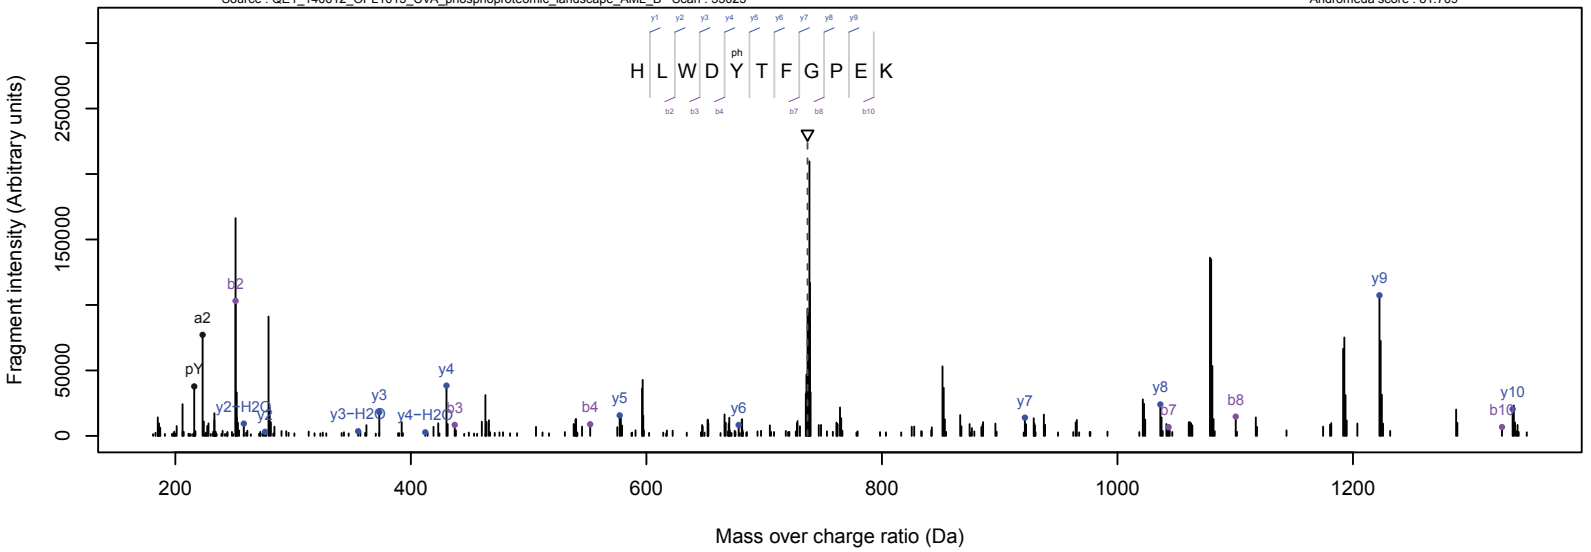

IPEQTY(ph)ITLK-2+

Source : QE1\_140612\_OPL1013\_CVA\_phosphoproteomic\_landscape\_AML\_D Scan : 25196

Andromeda score : 81.709

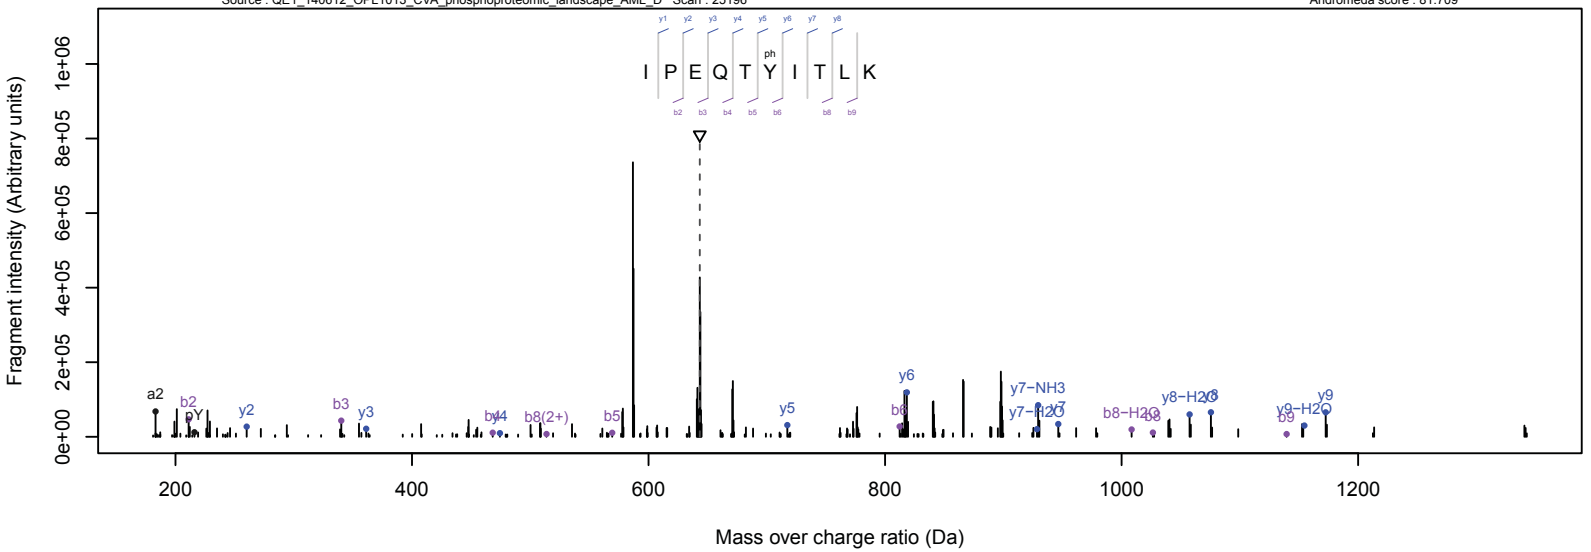

**NNPLY(ph)DTTNKVK-2+**

Source : QE1\_140612\_OPL1013\_CVA\_phosphoproteomic\_landscape\_AML\_B Scan : 13429

Andromeda score : 81.709

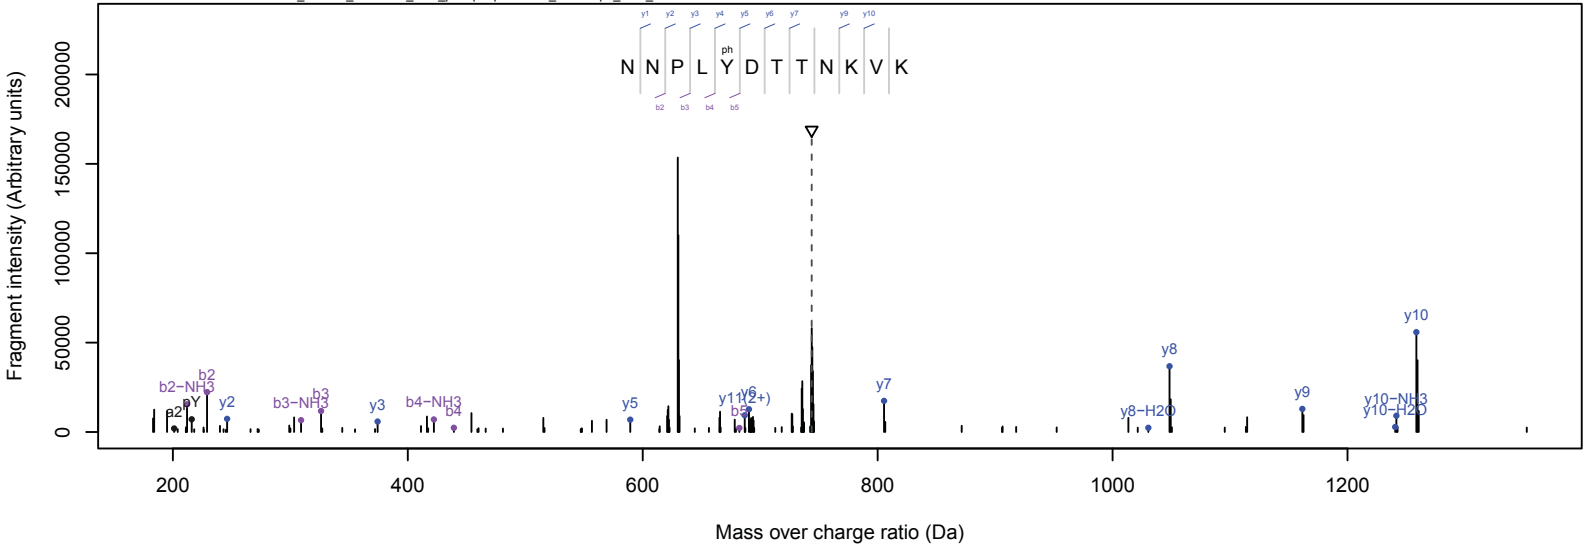

**LSHSSGY(ph)AQLNTYSR-3+**

Source : QE1\_140612\_OPL1013\_CVA\_phosphoproteomic\_landscape\_AML\_C Scan : 11460

Andromeda score : 81.703

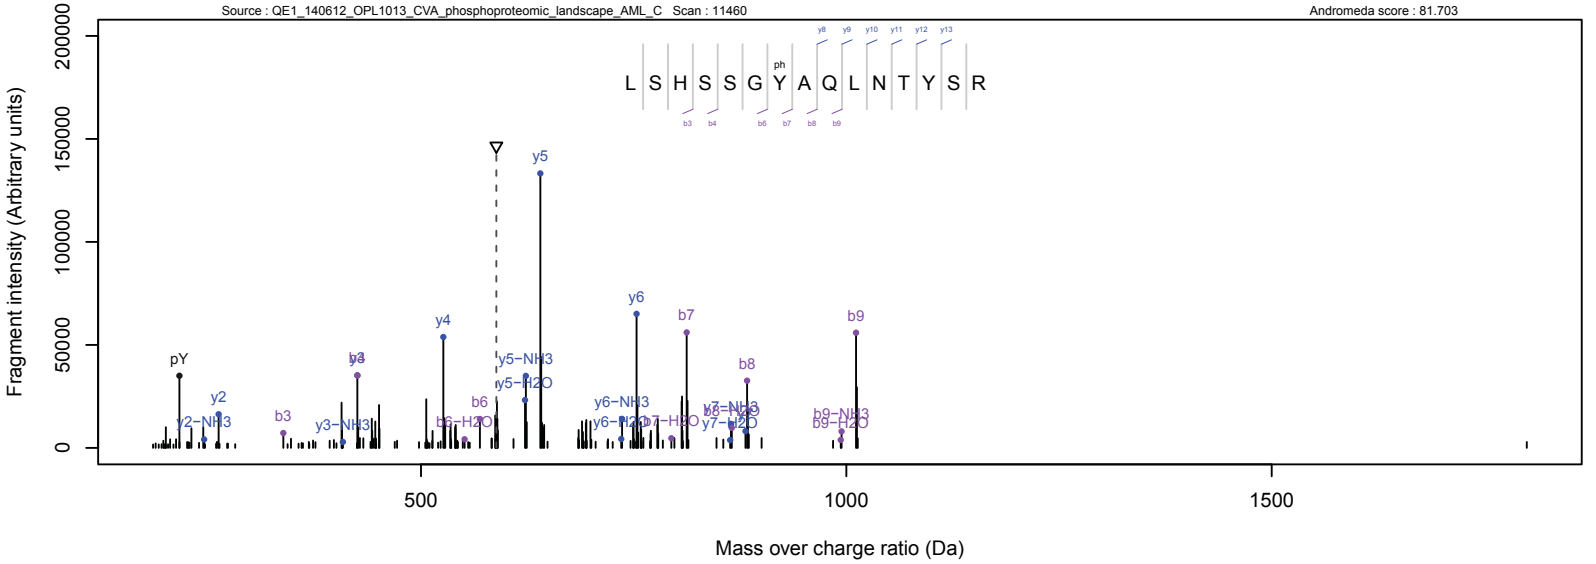

**VSSQGNLIPARPAPAPPLY(ph)SSLT-2+**

Source : QE1\_140612\_OPL1013\_CVA\_phosphoproteomic\_landscape\_AML\_C Scan : 38562

Andromeda score : 81.696

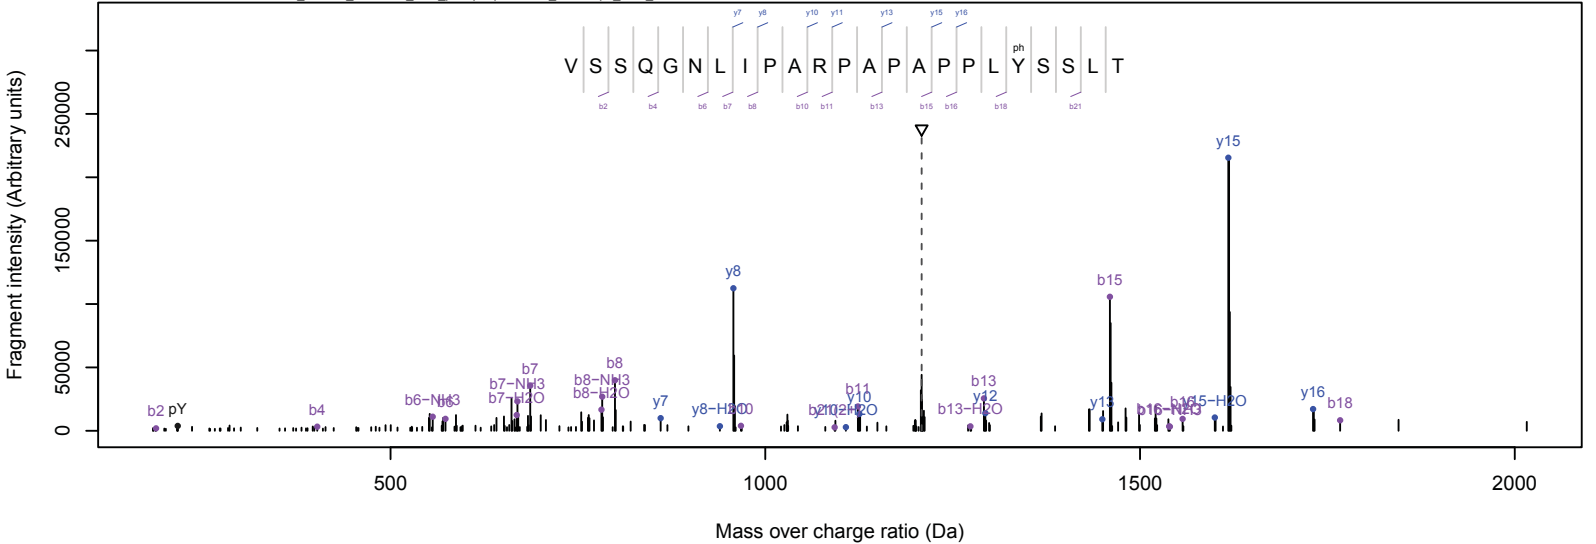



IVSLPECFNSPY(ph)GAK-2+

Source : QE1\_140612\_OPL1013\_CVA\_phosphoproteomic\_landscape\_AML\_A Scan : 31617

Andromeda score : 81.632

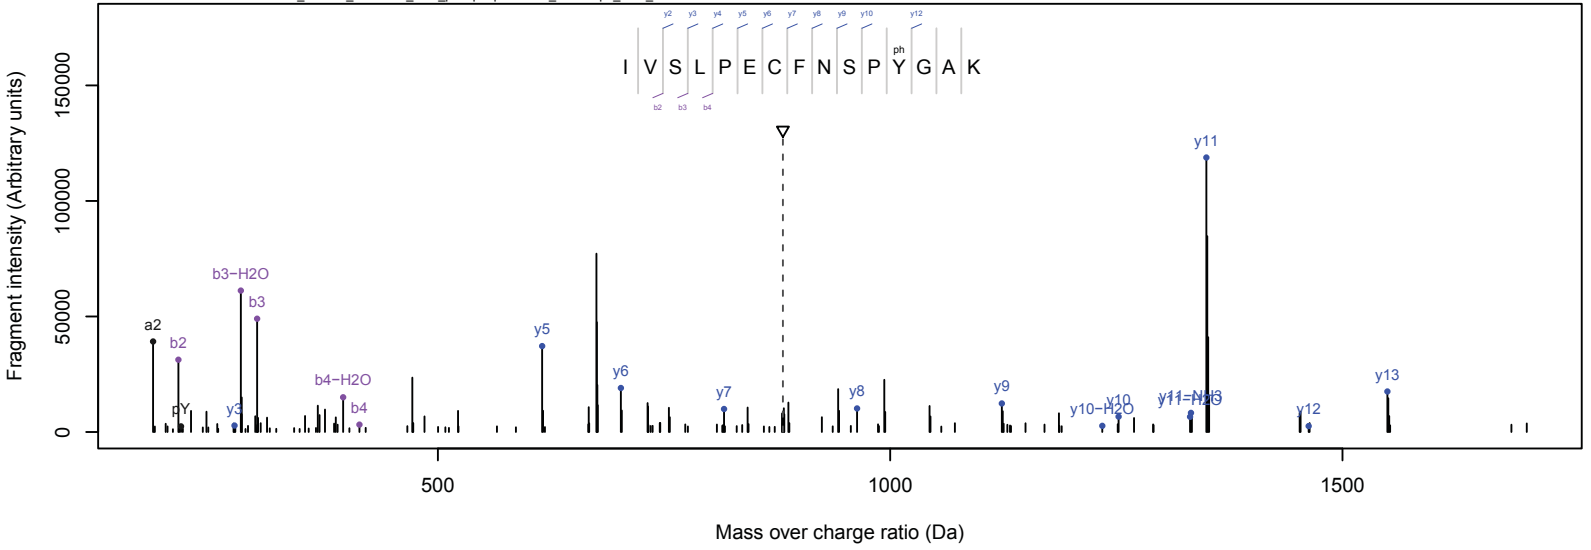

PWSQHY(ph)HQGY-2+

Source : QE1\_140612\_OPL1013\_CVA\_phosphoproteomic\_landscape\_AML\_C Scan : 13500

Andromeda score : 81.625

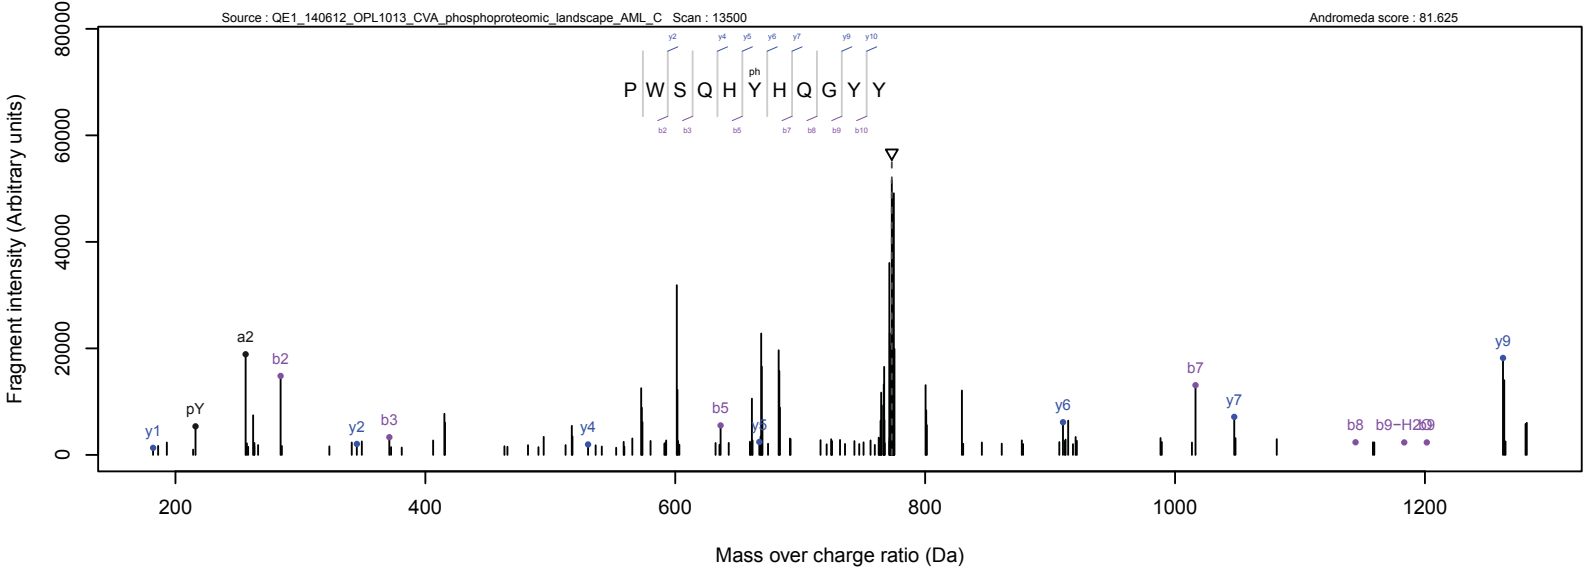

AAEVLVY(ph)GAPPGR-2+

Source : QE1\_140612\_OPL1013\_CVA\_phosphoproteomic\_landscape\_AML\_C Scan : 21061

Andromeda score : 81.565

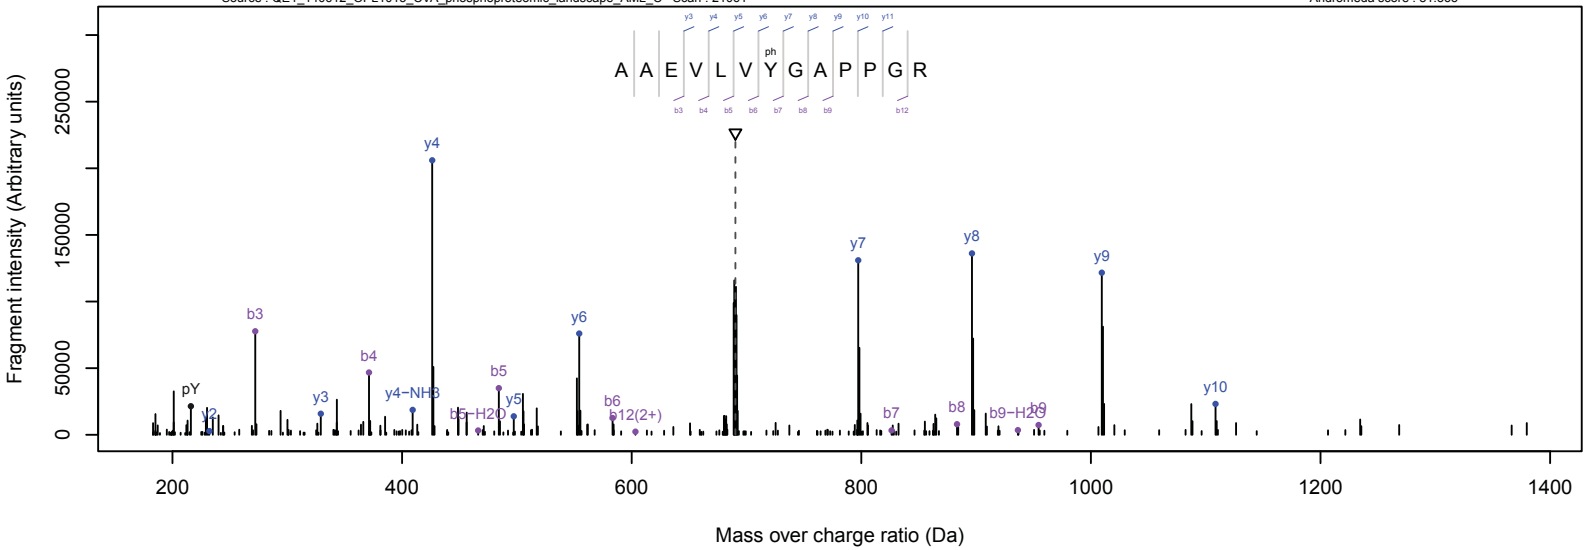



VY(ph)ALTHGIFSGPAISR-3+

Source : QE1\_140612\_OPL1013\_CVA\_phosphoproteomic\_landscape\_AML\_B Scan : 40363

Andromeda score : 81.51

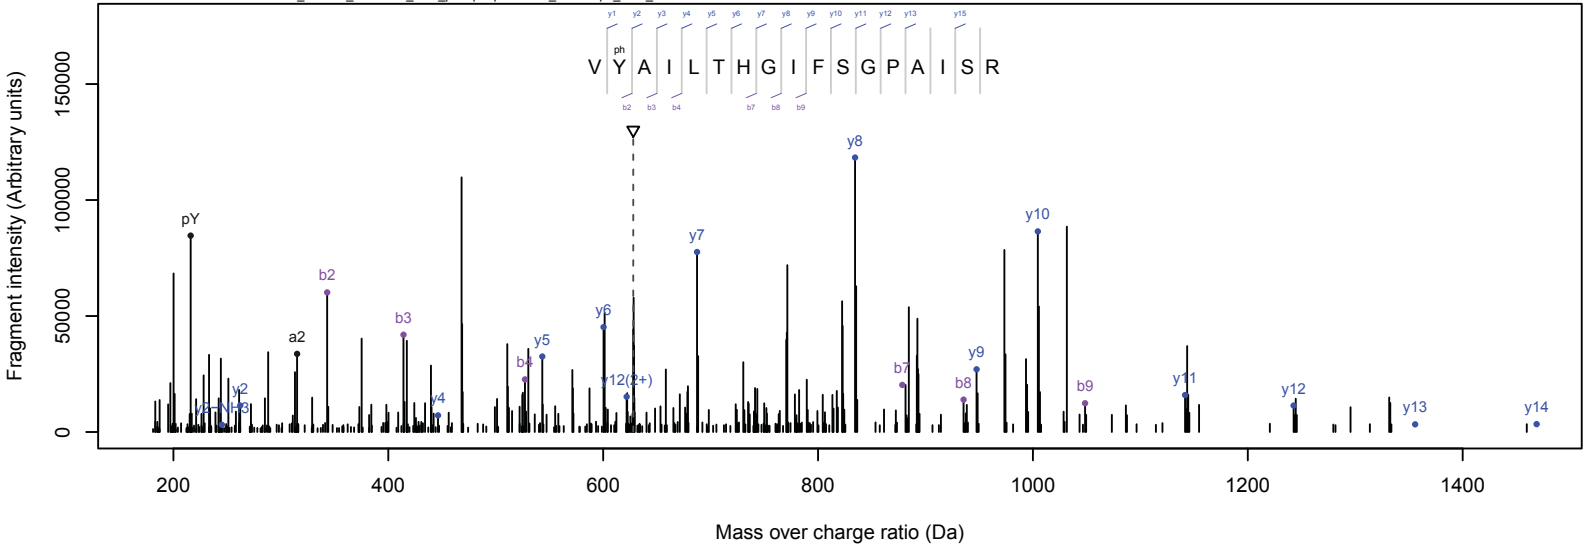

(ac)M(ox)Y(ph)TAIPQSGSPFP GSVQDPLHVWR-3+

Source : QE1\_140908\_OPL1013\_CvA\_pTyrIP\_AML\_Kasumi6 Scan : 47099

Andromeda score : 81.477

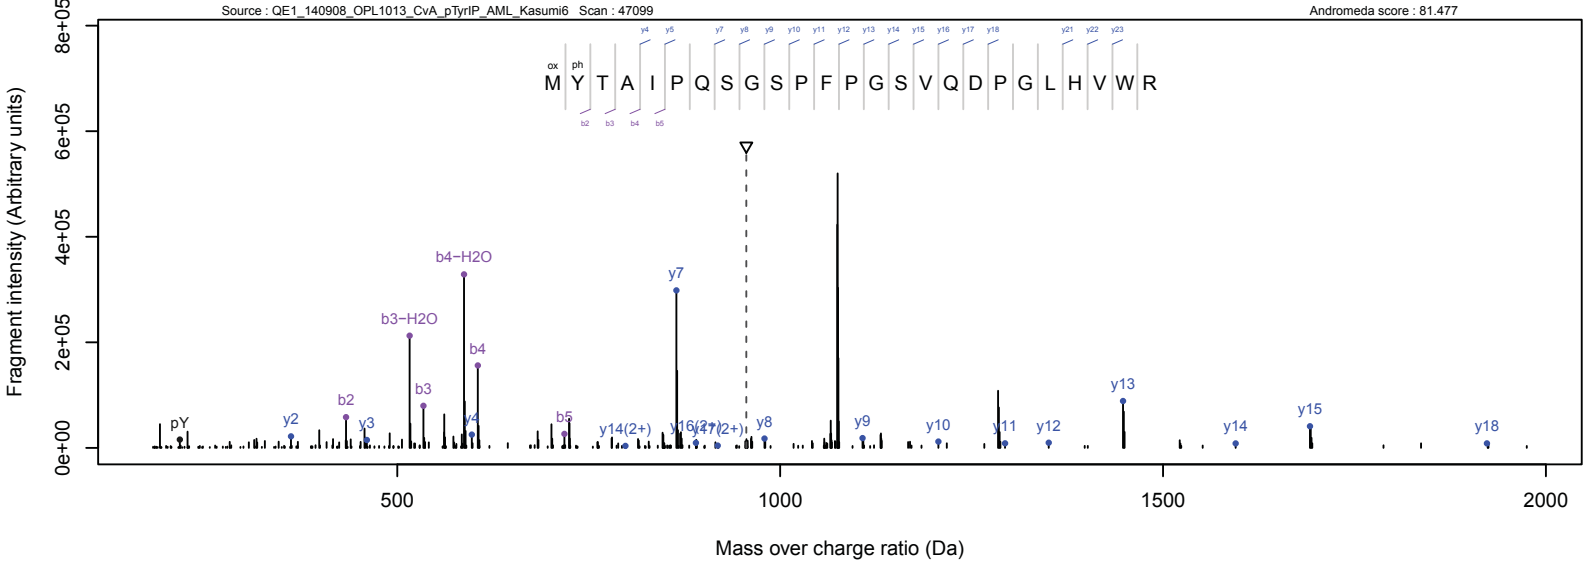

SLLSHEFQDETDEETLY(ph)SSKH-3+

Source : QE1\_140612\_OPL1013\_CVA\_phosphoproteomic\_landscape\_AML\_C Scan : 29763

Andromeda score : 81.477

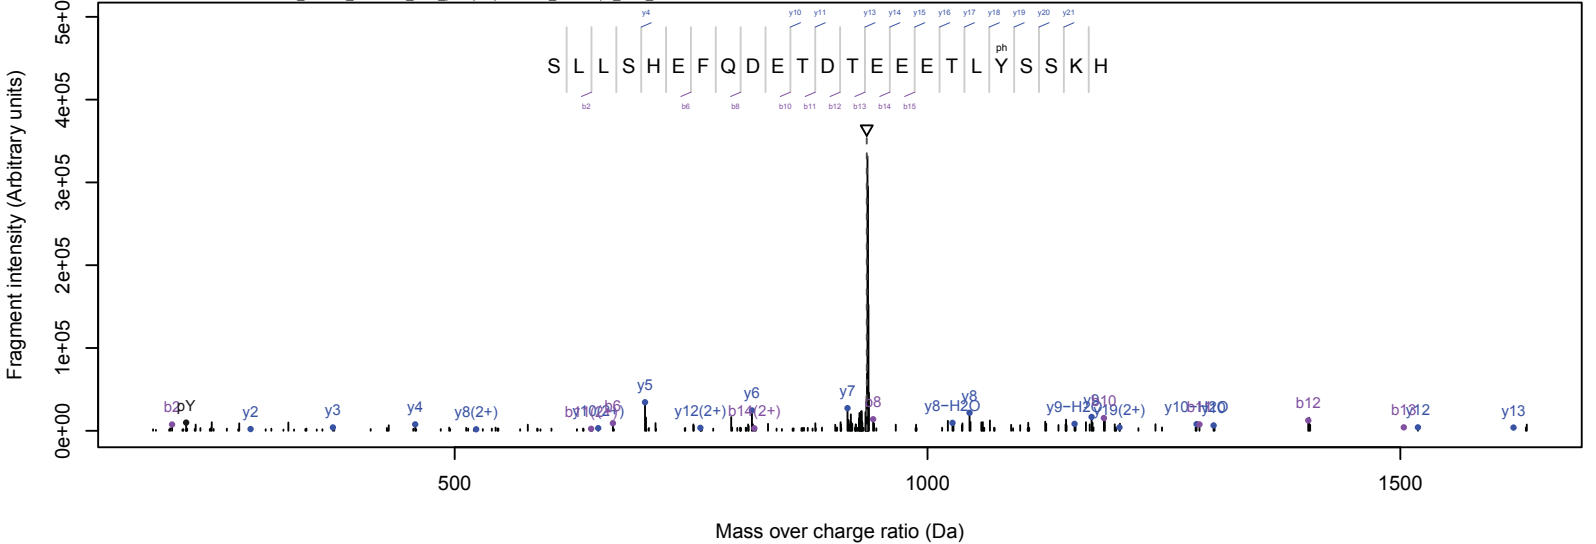



**KNPDDY(ph)TPVNIIDGAHAQR-3+**

Source : QE1\_140612\_OPL1013\_CVA\_phosphoproteomic\_landscape\_AML\_B Scan : 15064

Andromeda score : 81.316

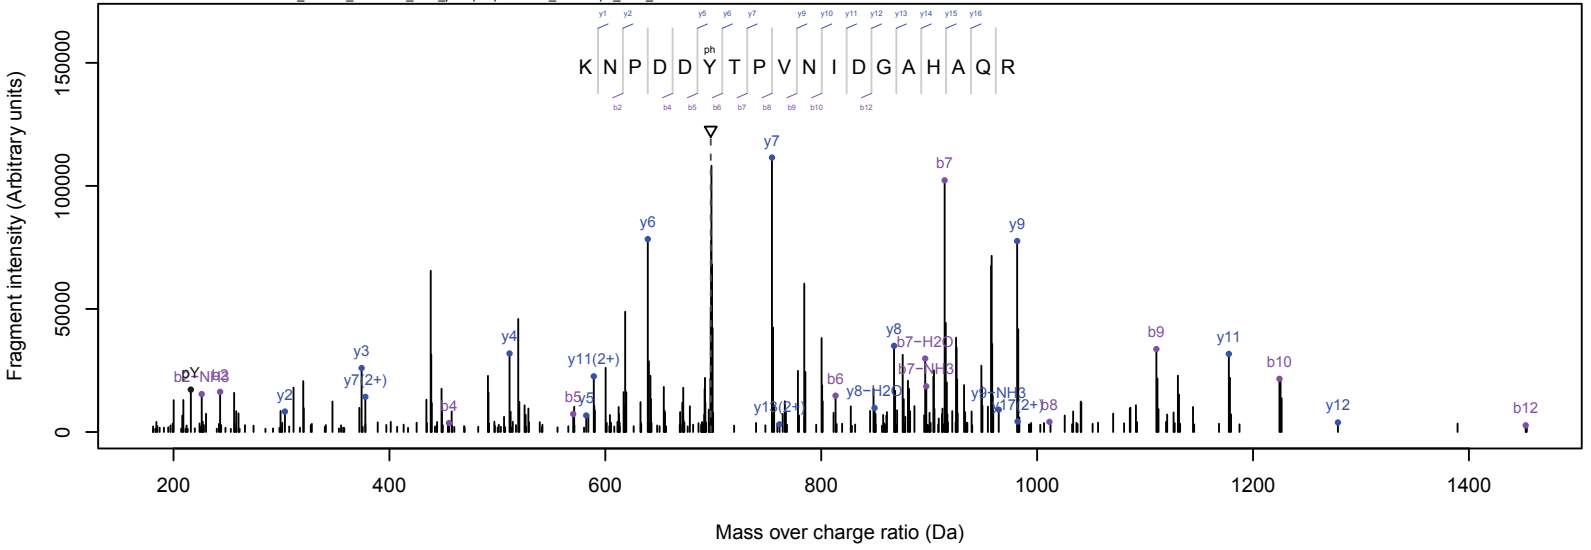

**KCT(ph)SGGYRYDDMLVVPPIIENTPEEK-3+**

Source : QE1\_140612\_OPL1013\_CVA\_phosphoproteomic\_landscape\_AML\_B Scan : 41449

Andromeda score : 81.315

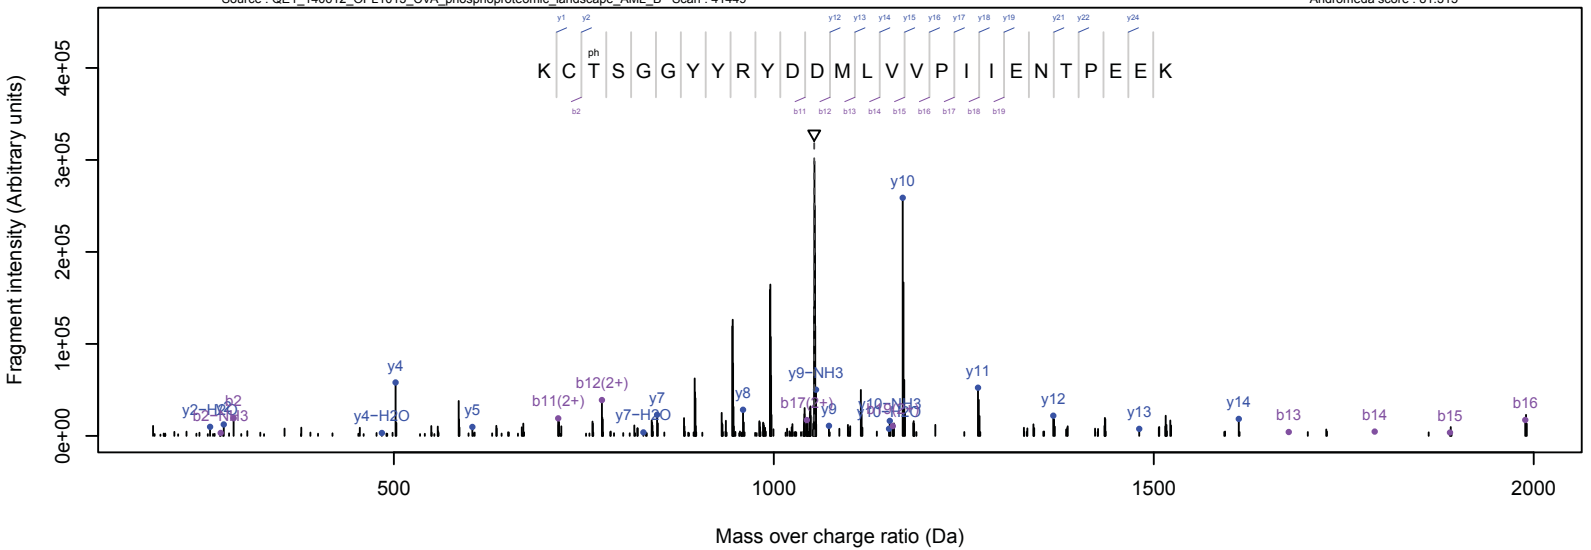

**LFSSQY(ph)GK-2+**

Source : QE1\_140612\_OPL1013\_CVA\_phosphoproteomic\_landscape\_AML\_B Scan : 8365

Andromeda score : 81.296

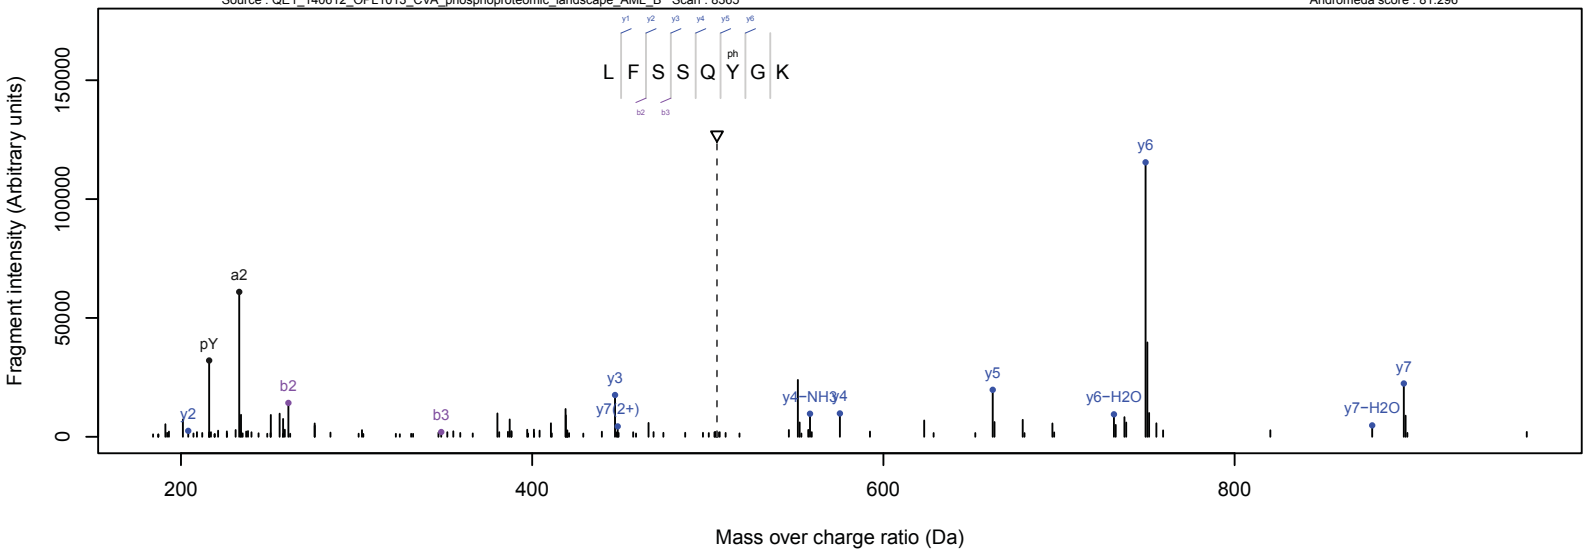



TGY(ph)LGFVR-2+

Source : QE1\_140612\_OPL1013\_CVA\_phosphoproteomic\_landscape\_AML\_C Scan : 25434

Andromeda score : 81.191

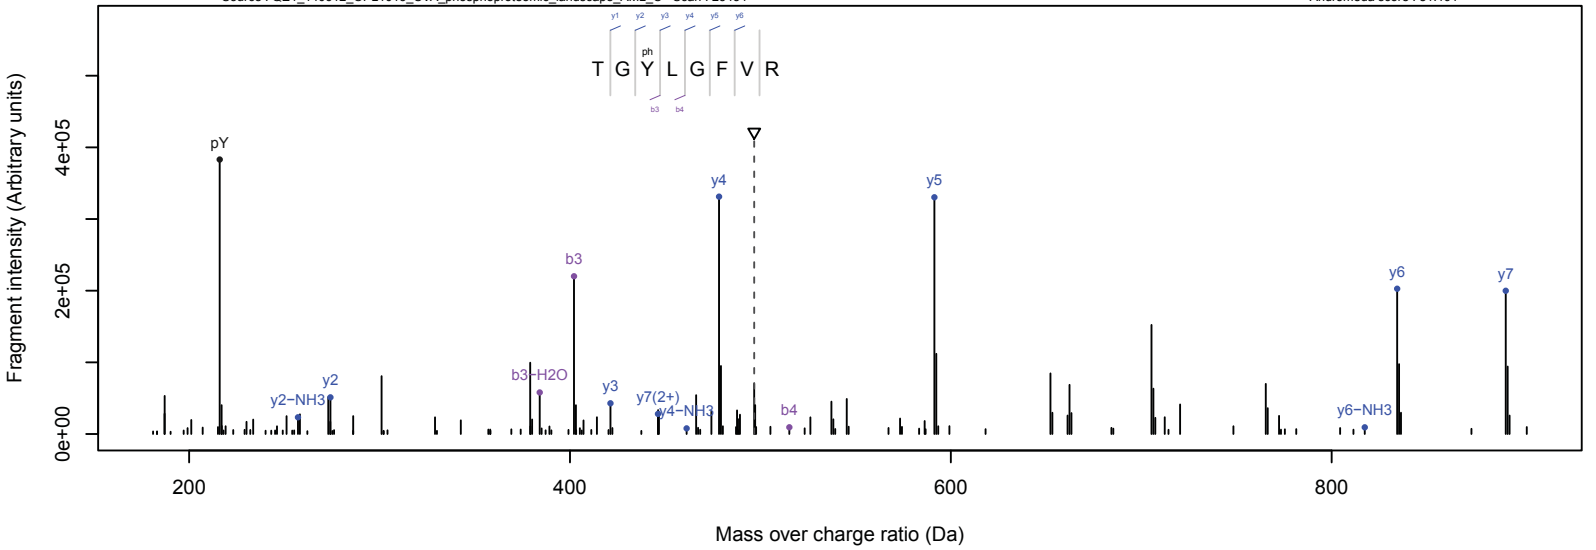

TRDY(ph)LIK-2+

Source : QE1\_140612\_OPL1013\_CVA\_phosphoproteomic\_landscape\_AML\_B Scan : 9339

Andromeda score : 81.191

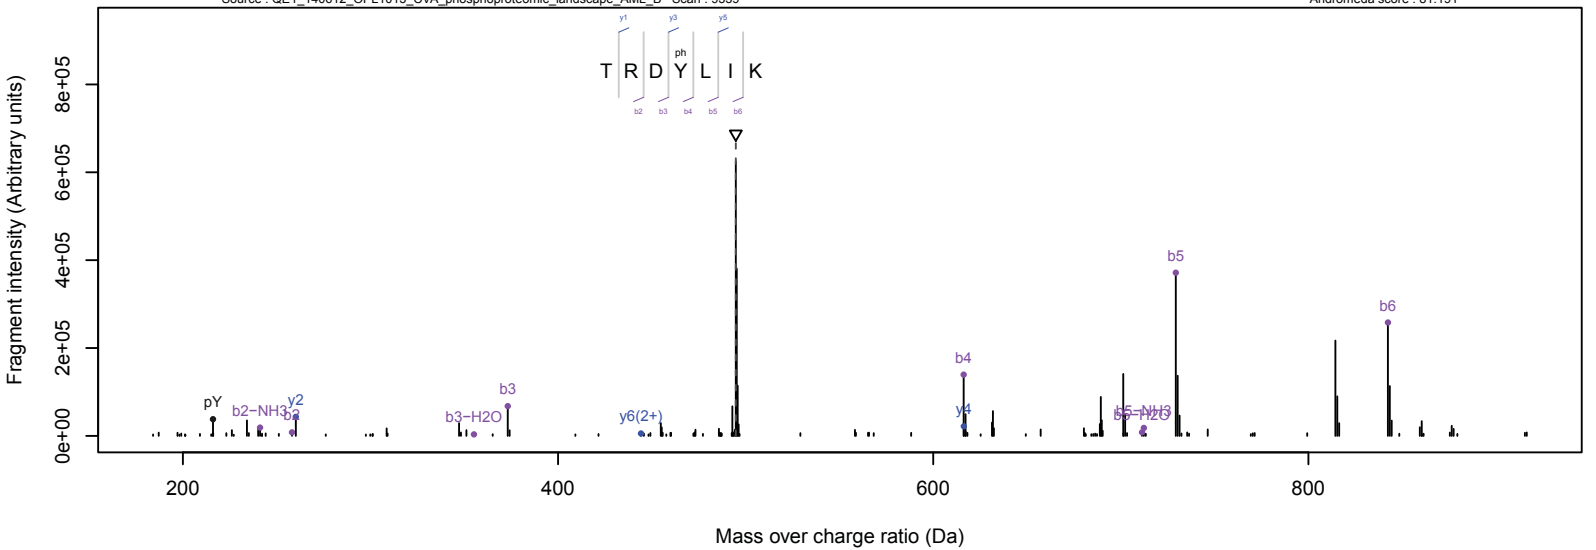

QKPATETSMNTASHSLCEQTMVNSENTY(ph)SSGSSFPVK-4+

Source : QE1\_140612\_OPL1013\_CVA\_phosphoproteomic\_landscape\_AML\_B Scan : 27850

Andromeda score : 81.18

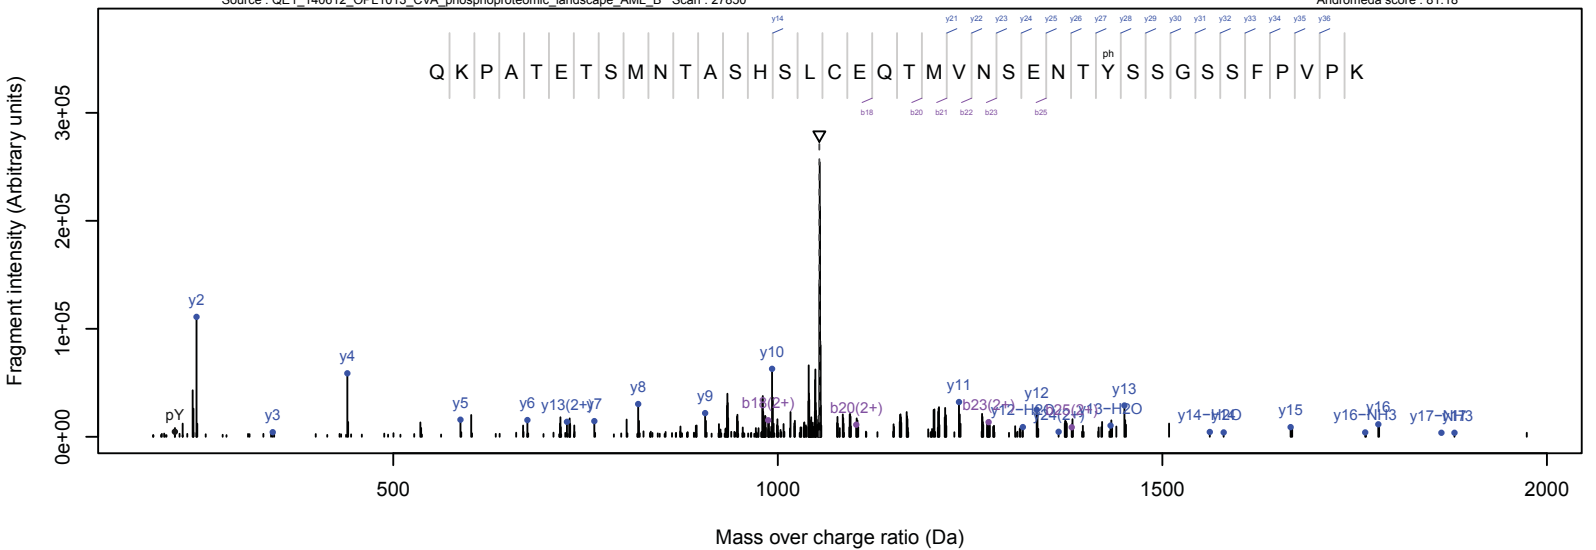



TQILAASYELHKFY(ph)HDAK-3+

Source: QE1\_140612\_OPL1013\_CVA\_phosphoproteomic\_landscape\_AML\_B Scan: 27405

Andromeda score: 81.157

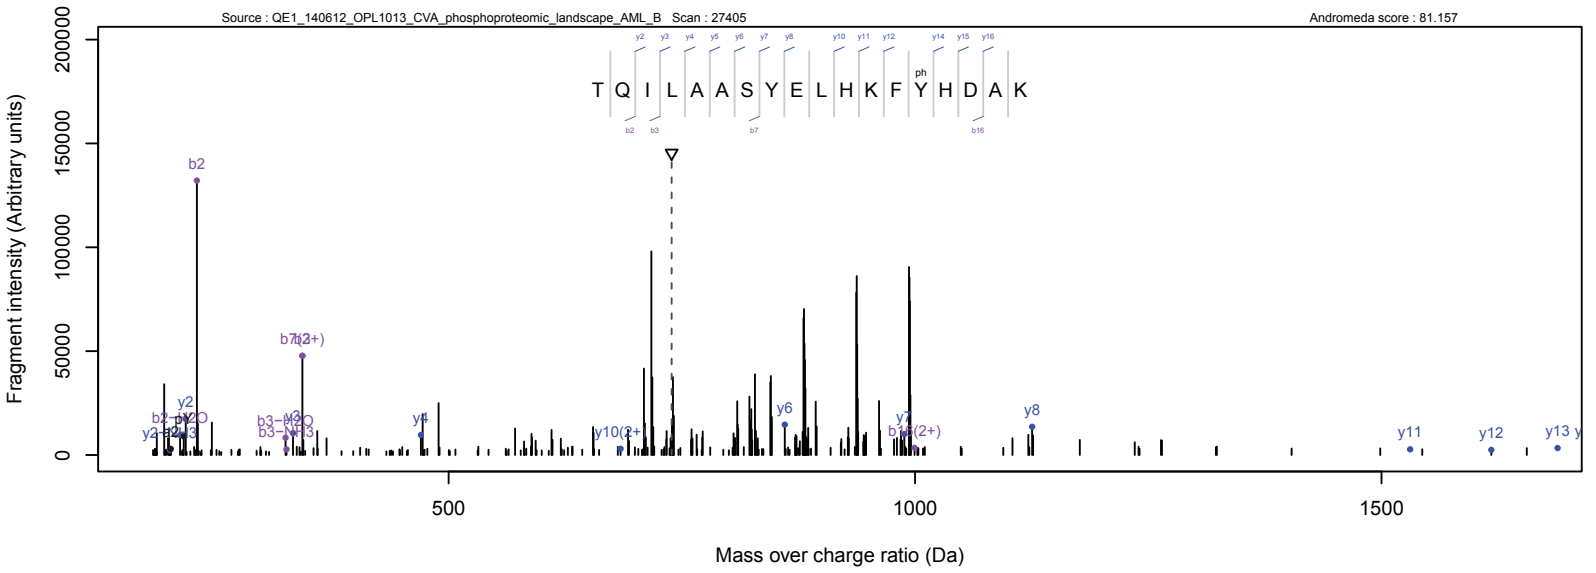

HKPNY(ph)FKPK-3+

Source: QE1\_140612\_OPL1013\_CVA\_phosphoproteomic\_landscape\_AML\_C Scan: 10228

Andromeda score: 81.099

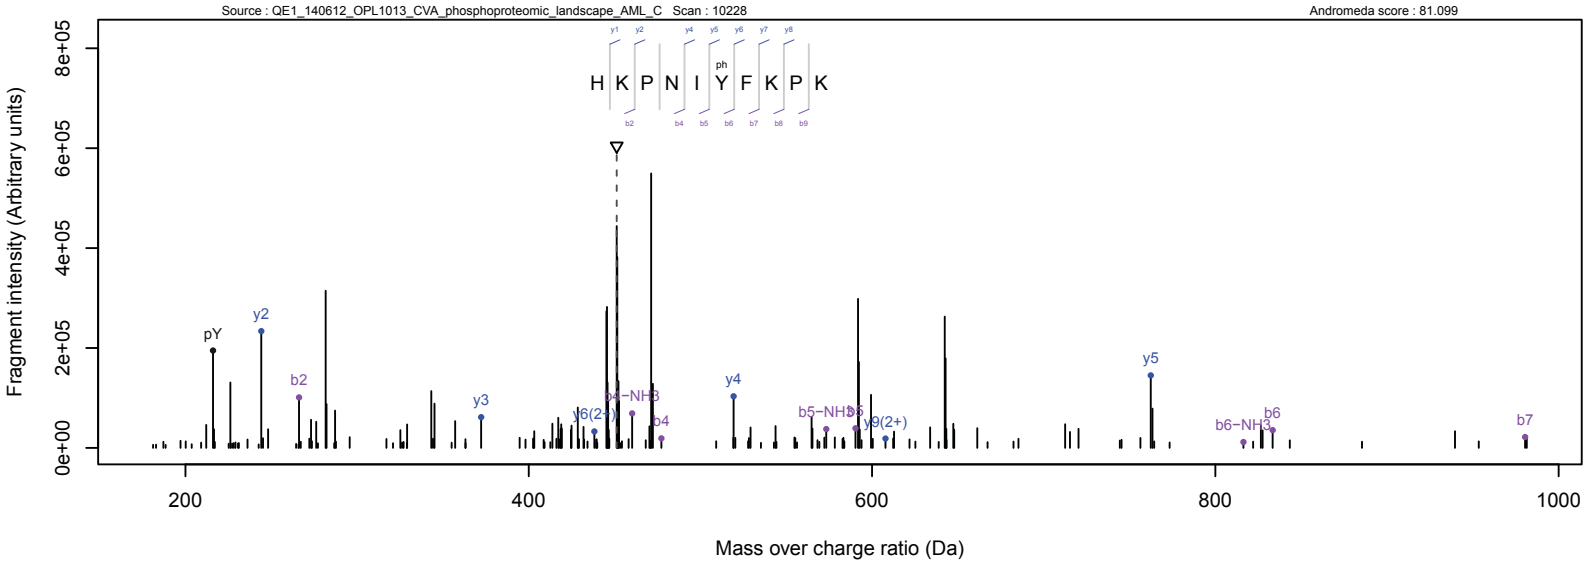

Y(ph)HHGLSALKPIR-3+

Source: QE1\_140612\_OPL1013\_CVA\_phosphoproteomic\_landscape\_AML\_C Scan: 13565

Andromeda score: 81.09

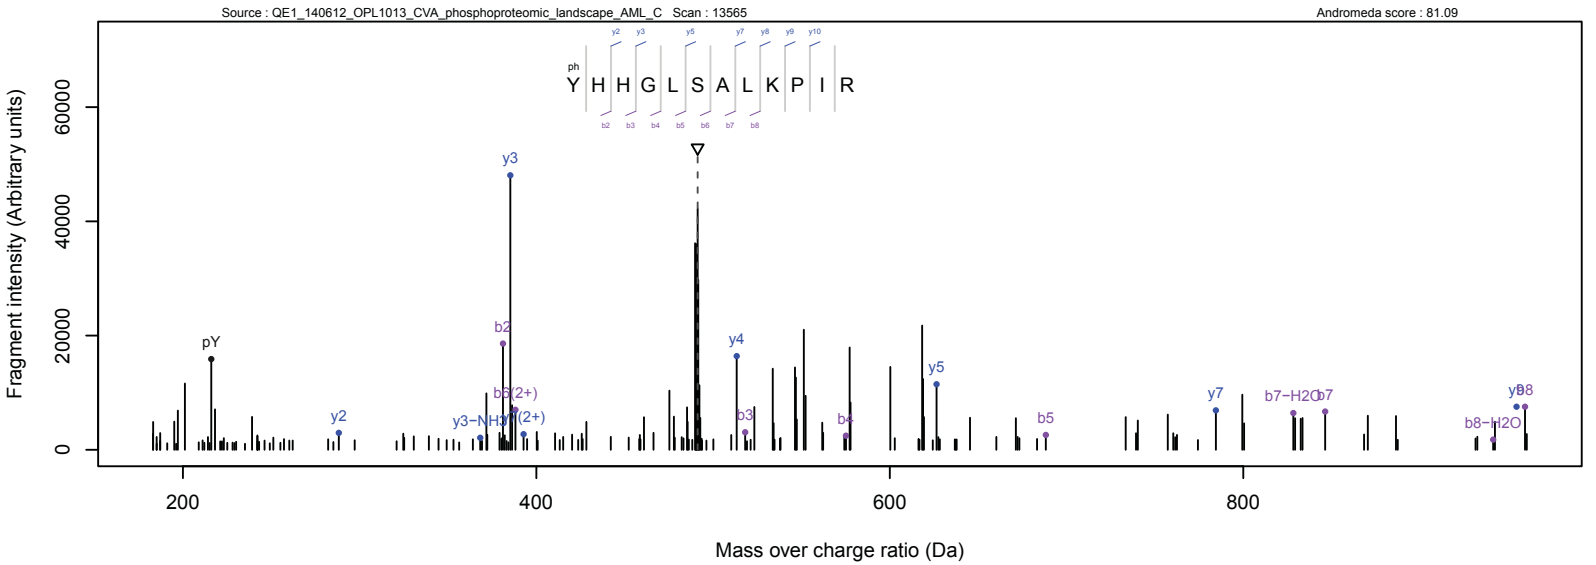

SISLY(ph)YTGEK-2+

Source : QE1\_140908\_OPL1013\_CvA\_pTyrIP\_AML\_HEL Scan : 23890

Andromeda score : 81.017

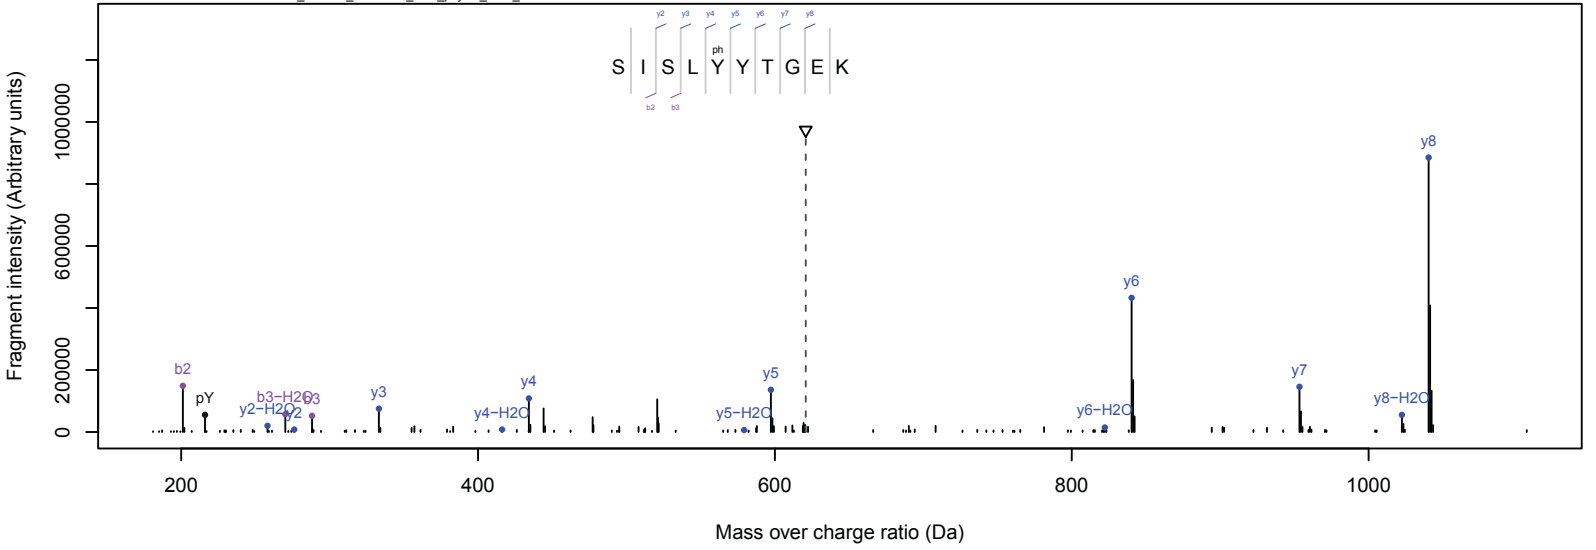

SVFGGLVNY(ph)FK-2+

Source : QE1\_140612\_OPL1013\_CvA\_phosphoproteomic\_landscape\_AML\_C Scan : 44632

Andromeda score : 81.017

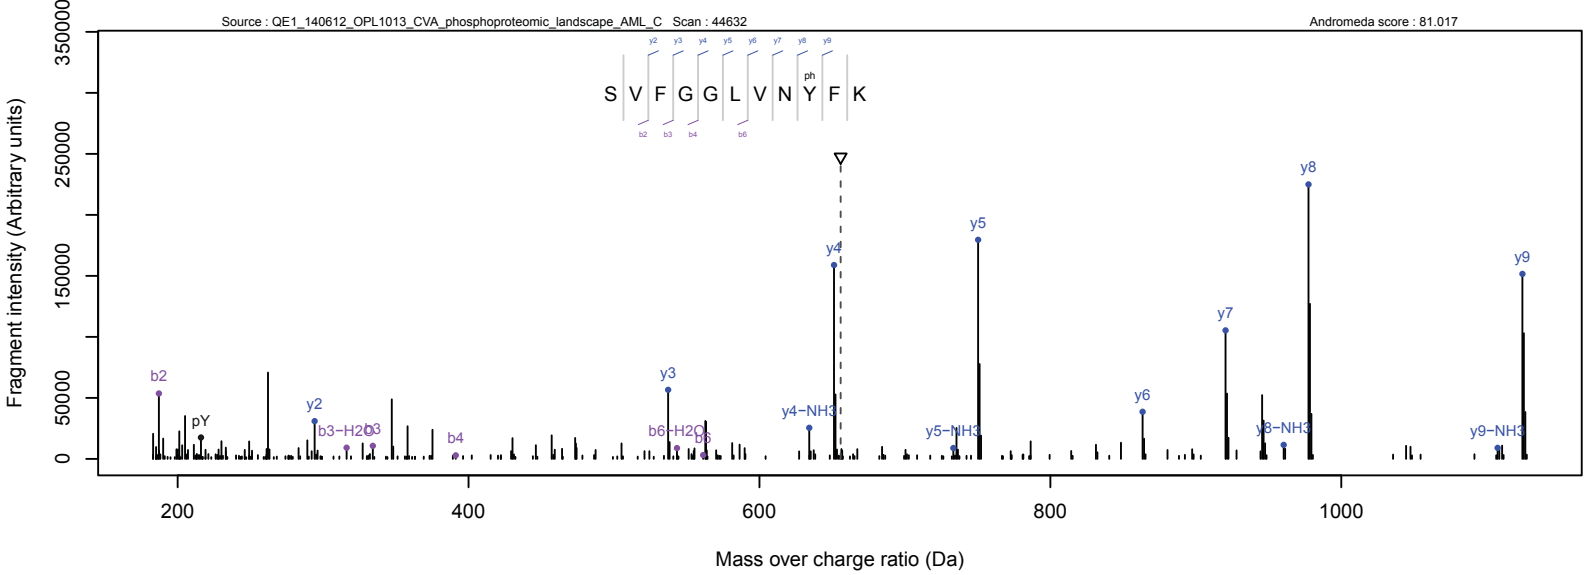

VLAPY(ph)ARPIFLR-3+

Source : QE1\_140822\_OPL1013\_CvA\_pTyrIP\_AML\_cell\_lines\_part2\_E Scan : 26883

Andromeda score : 81.017

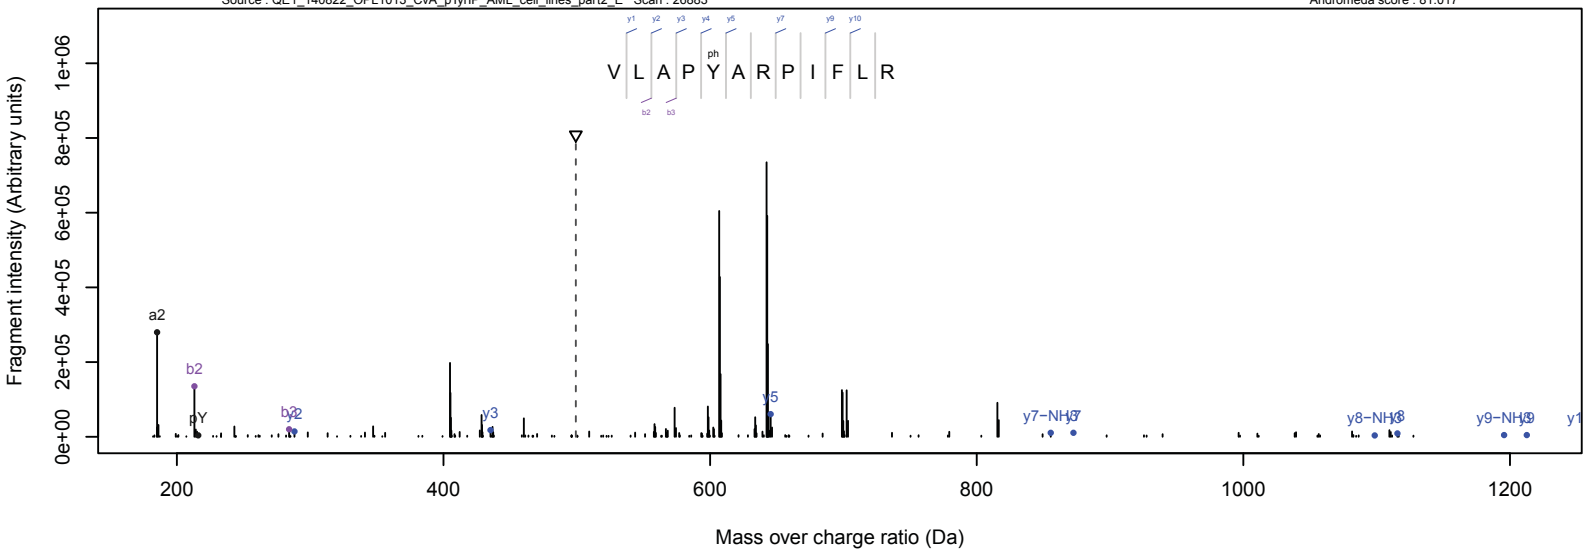

VLLPEY(ph)GGTK-2+

Source : QE1\_140612\_OPL1013\_CVA\_phosphoproteomic\_landscape\_AML\_A Scan : 18172

Andromeda score : 81.017

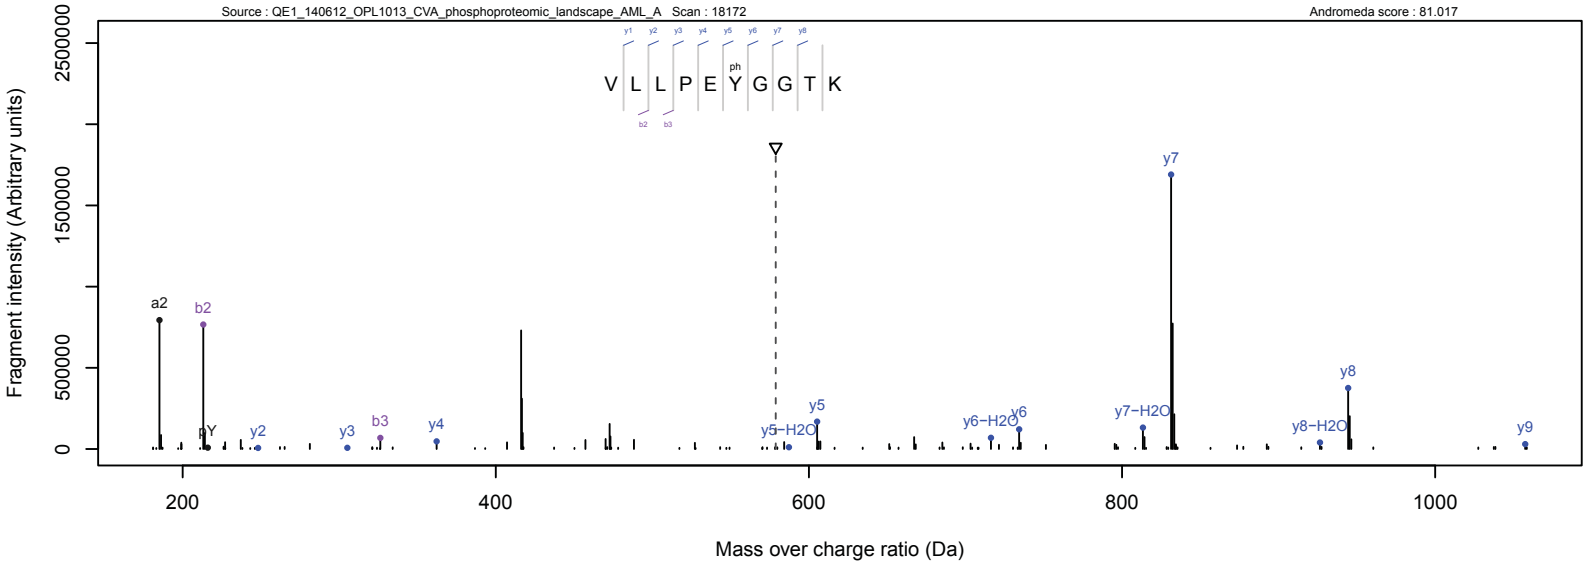

VY(ph)VGNLGNGNK-2+

Source : Qe1\_141024\_OPL1013\_CvA\_AML\_pTyriP\_MOLM13 Scan : 13629

Andromeda score : 81.017

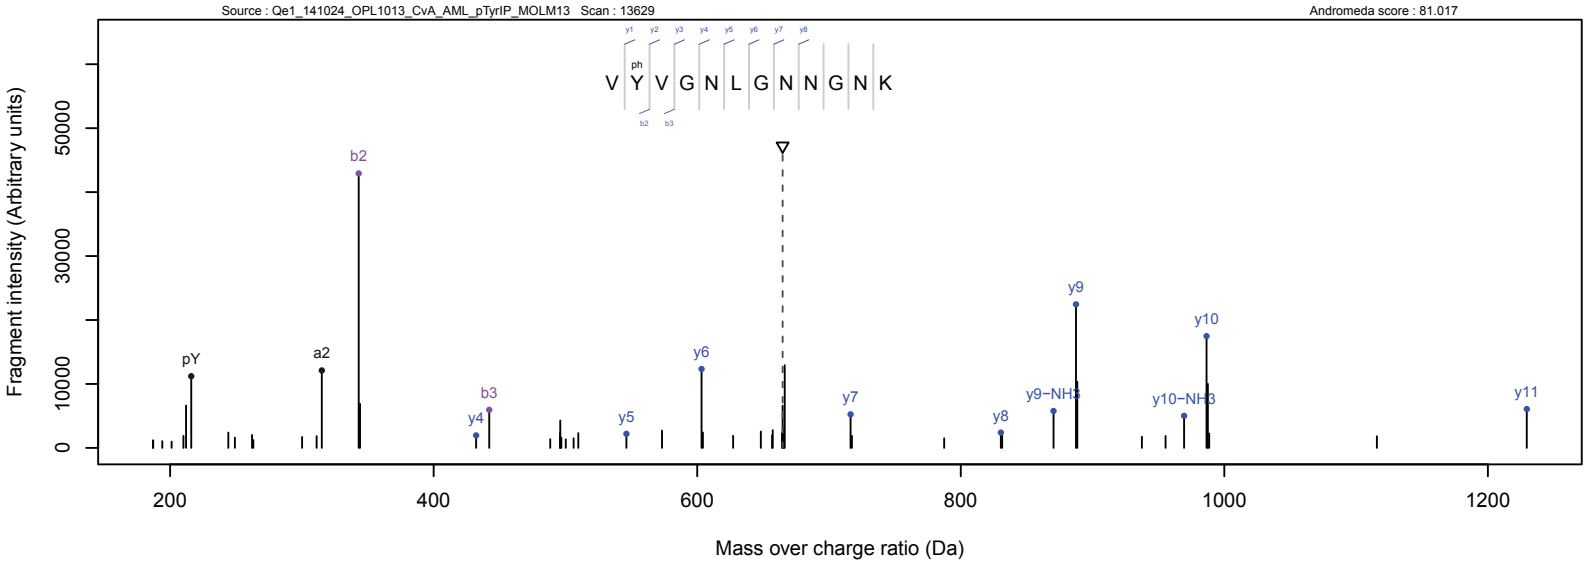

RGFFCDQPYEPVSPY(ph)SCK-3+

Source : QE1\_140612\_OPL1013\_CVA\_phosphoproteomic\_landscape\_AML\_A Scan : 34405

Andromeda score : 81.016

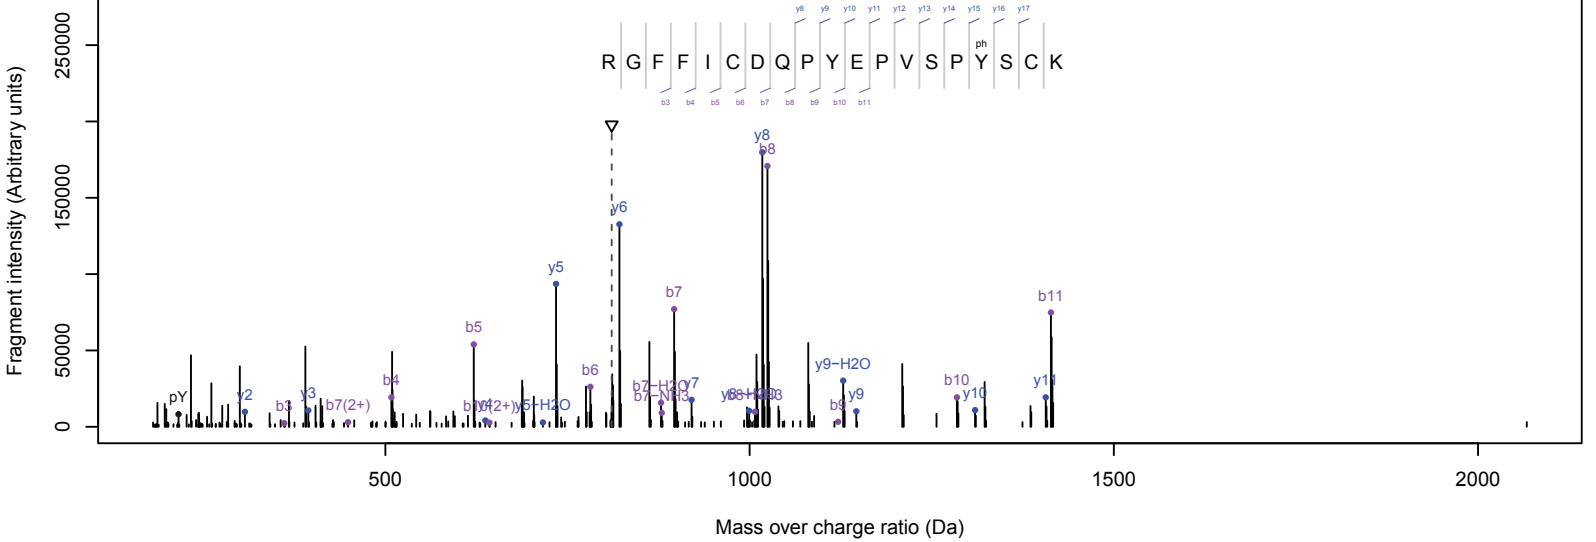

EIEKVY(ph)LDNK-2+

Source : QE1\_140612\_OPL1013\_CVA\_phosphoproteomic\_landscape\_AML\_C Scan : 12927

Andromeda score : 81.002

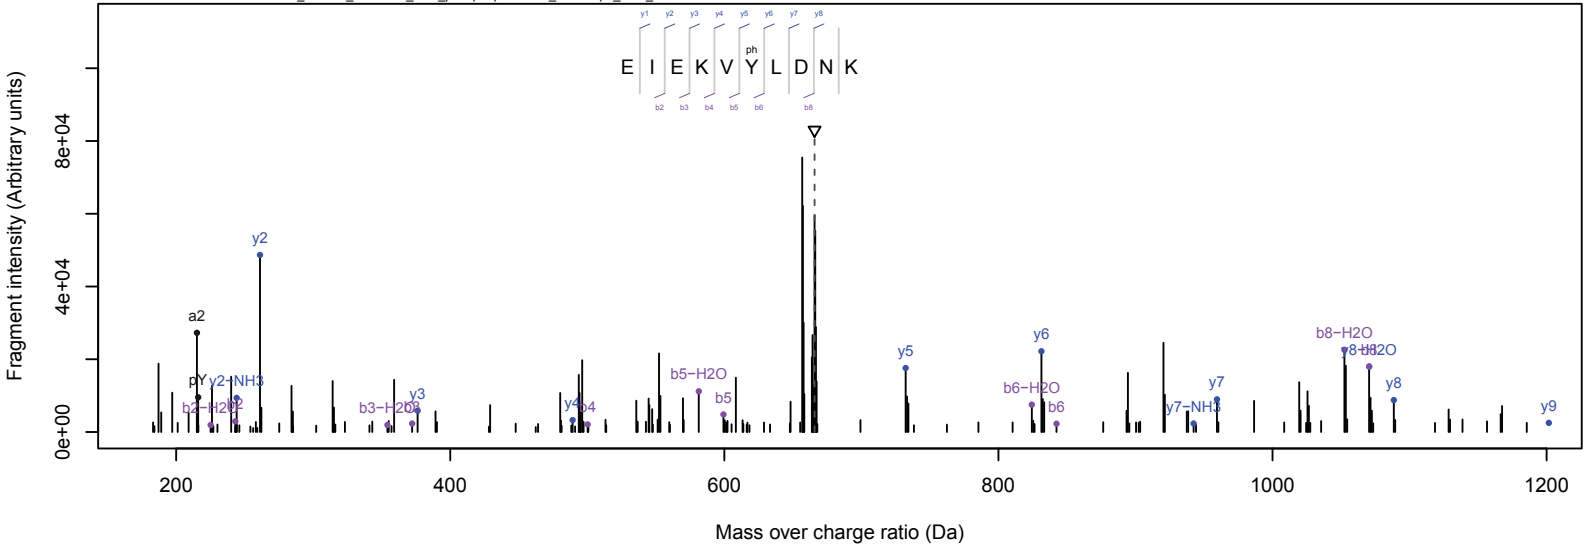

ADGGAEY(ph)ATYQTK-2+

Source : QE1\_140908\_OPL1013\_CvA\_pTyrIP\_AML\_ML2 Scan : 7079

Andromeda score : 80.96

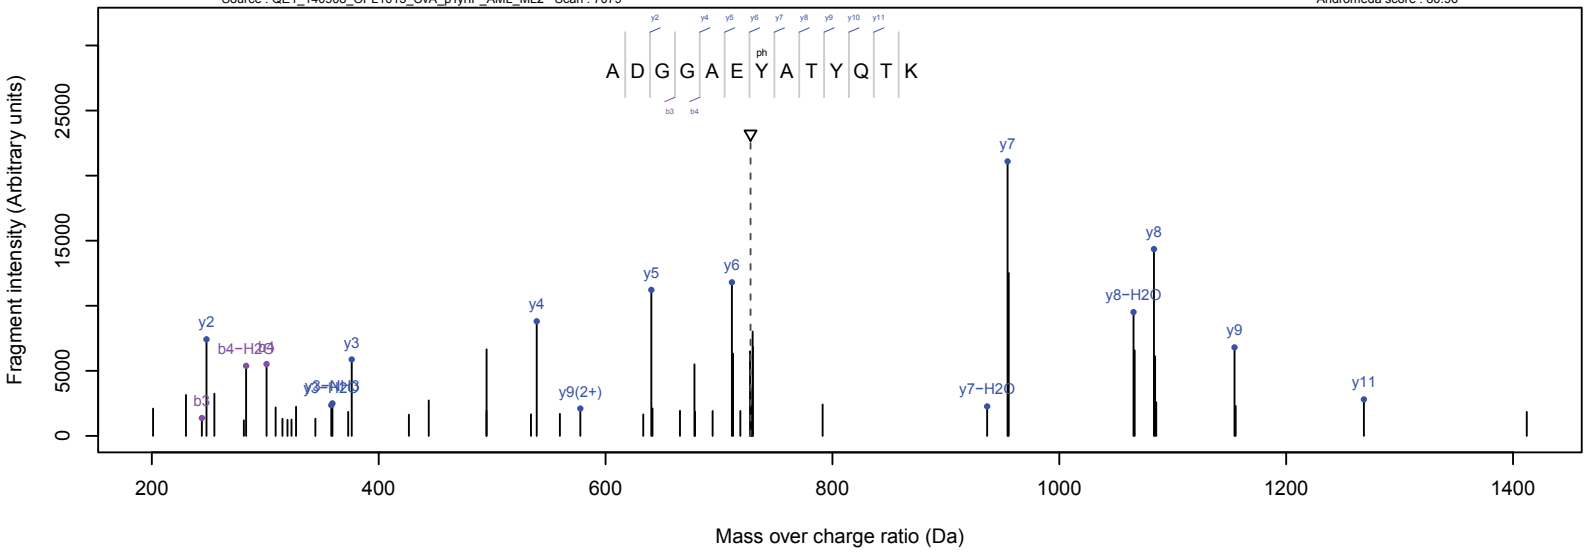

VFNPY(ph)EFKFSR-3+

Source : QE1\_140612\_OPL1013\_CVA\_phosphoproteomic\_landscape\_AML\_C Scan : 37713

Andromeda score : 80.96

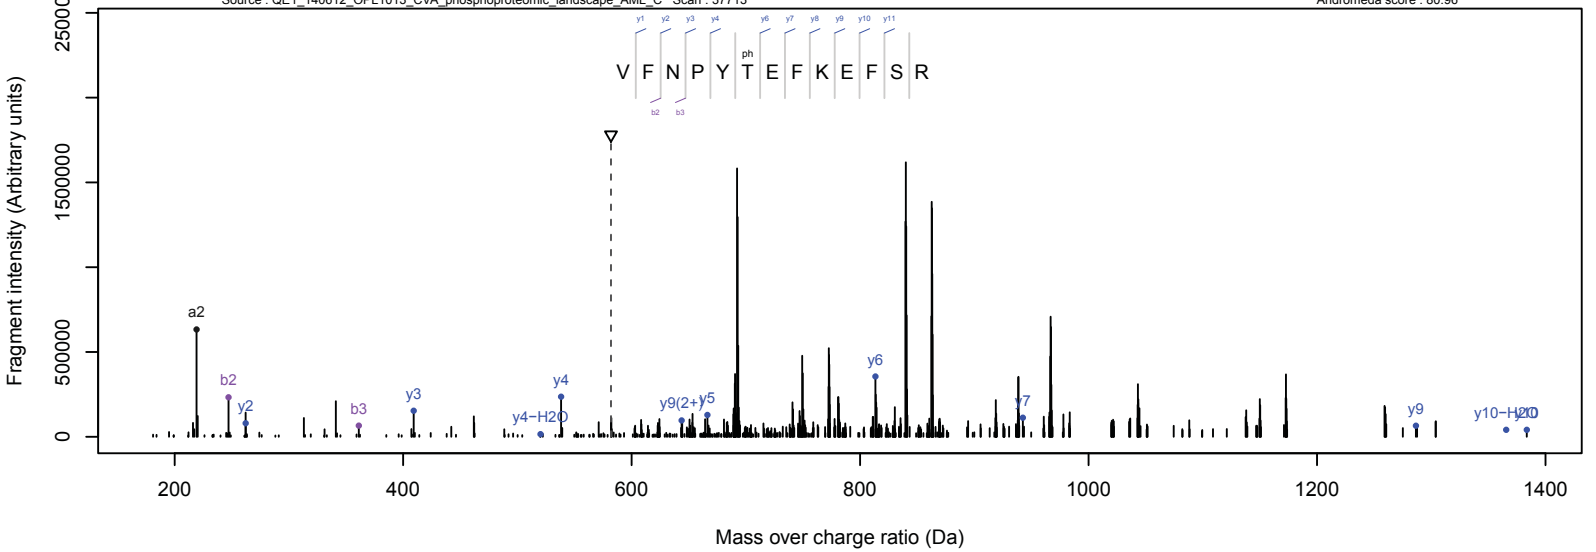

DKPANVQPY(ph)LYGSKPLNIAYSHIYSSYR-4+

Source : QE1\_140612\_OPL1013\_CVA\_phosphoproteomic\_landscape\_AML\_B Scan : 38583

Andromeda score : 80.943

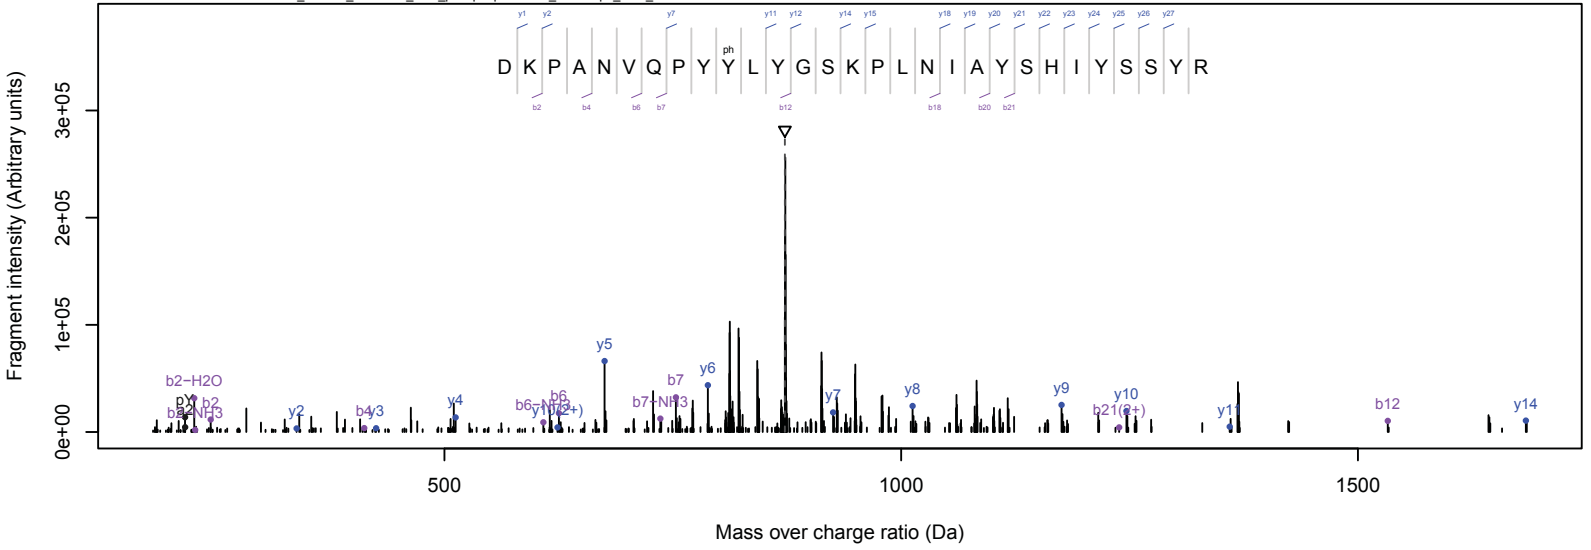

TAPVQAPPAPVIVTETPEPAMTSGVY(ph)RPPGAR-4+

Source : QE1\_140612\_OPL1013\_CVA\_phosphoproteomic\_landscape\_AML\_C Scan : 37474

Andromeda score : 80.943

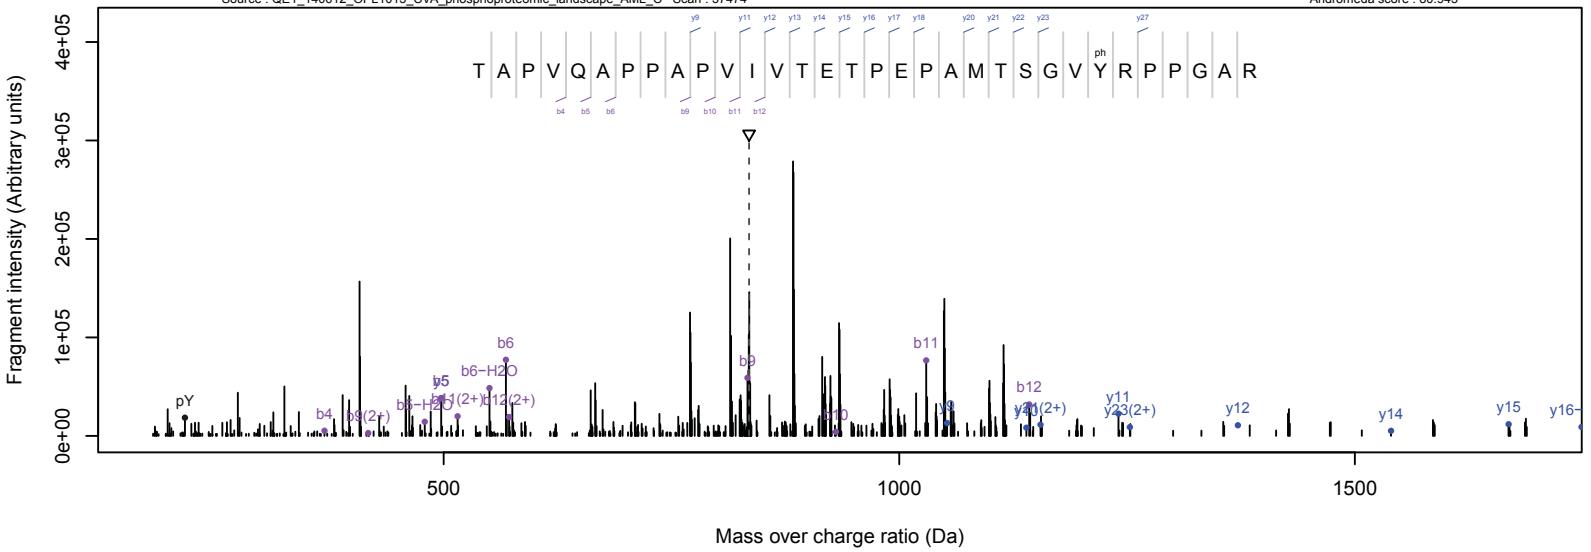

VQPNEAVYTK-2+

Source : QE1\_140822\_OPL1013\_CvA\_pTyrIP\_AML\_cell\_lines\_part2\_E Scan : 4877

Andromeda score : 80.916

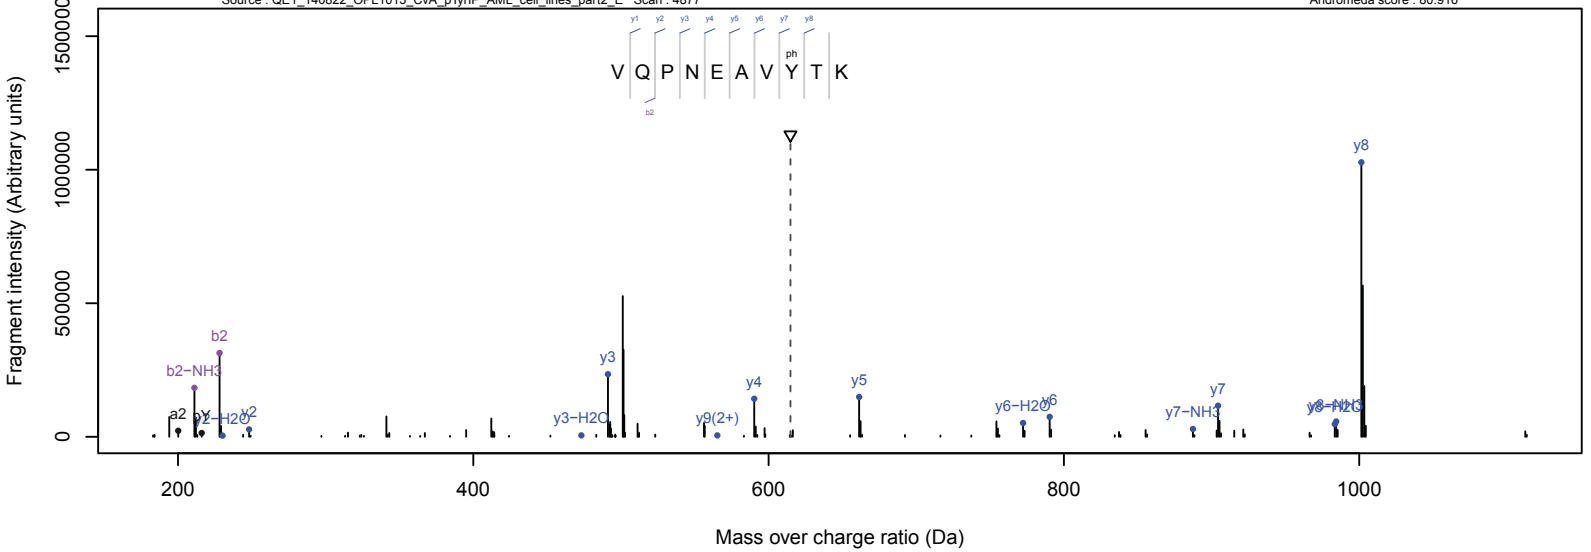

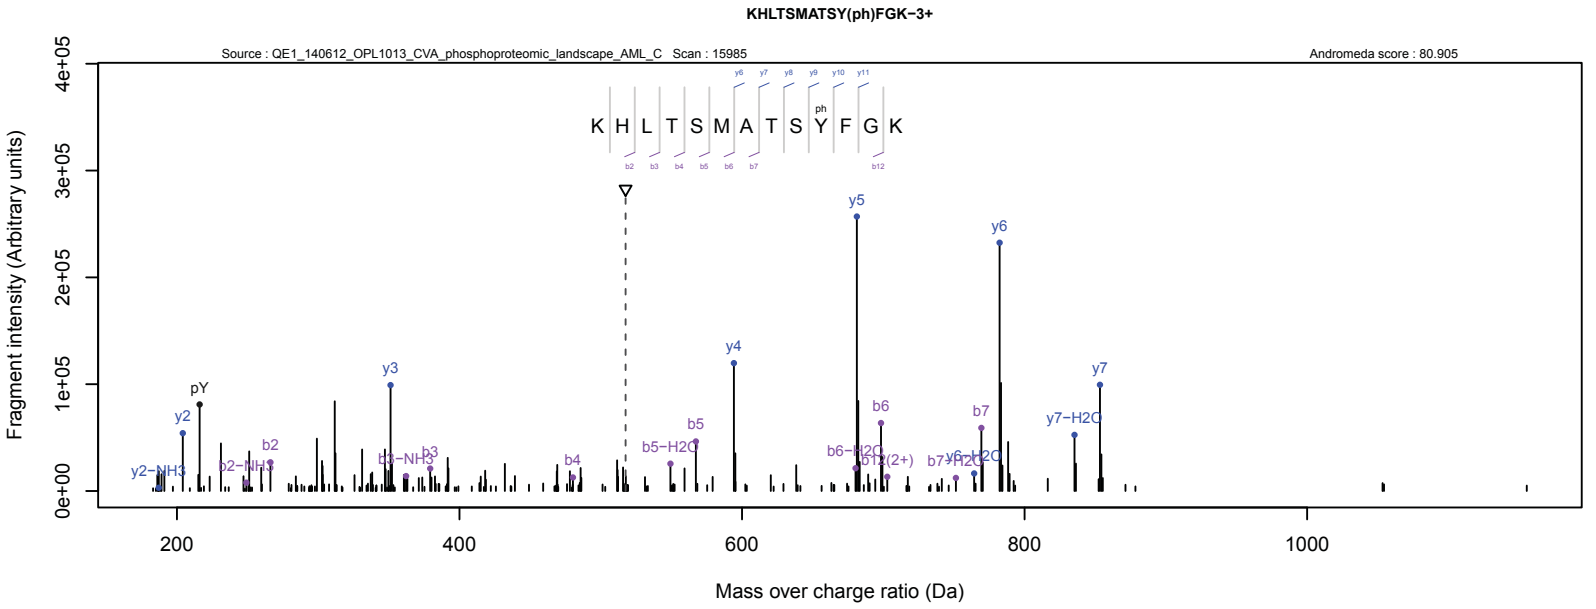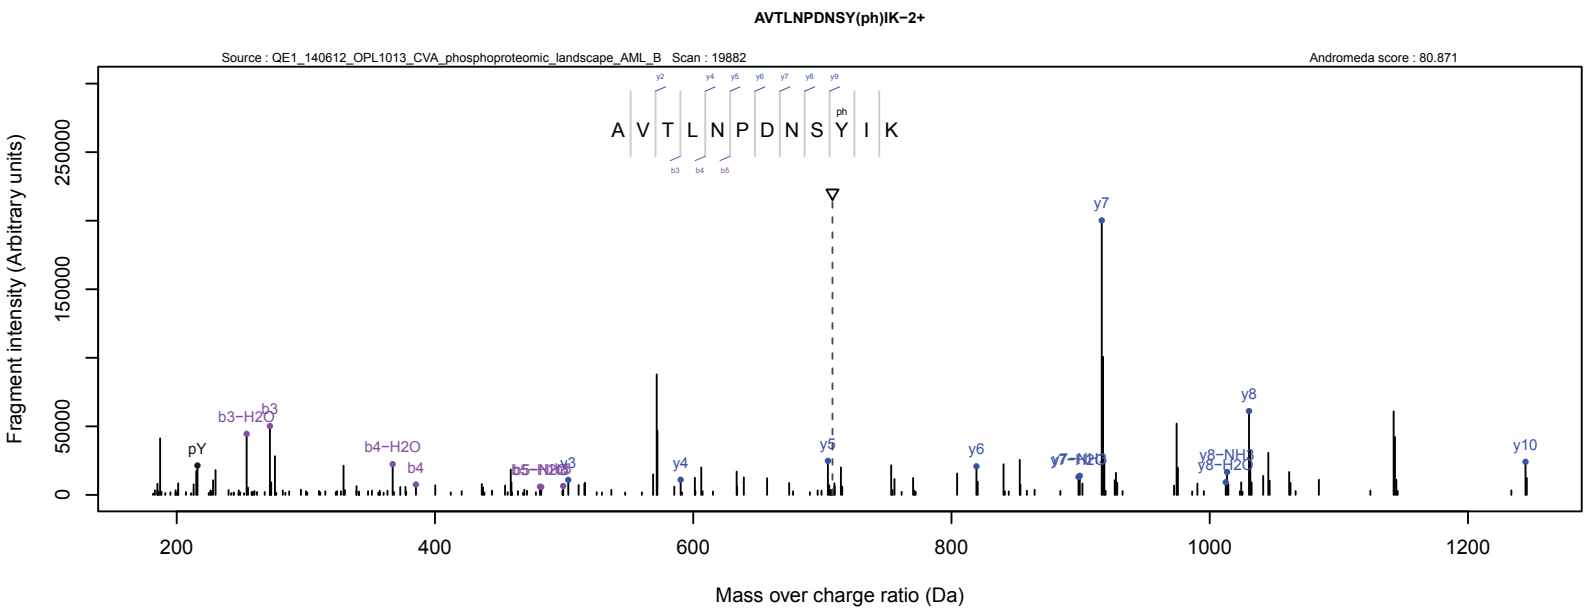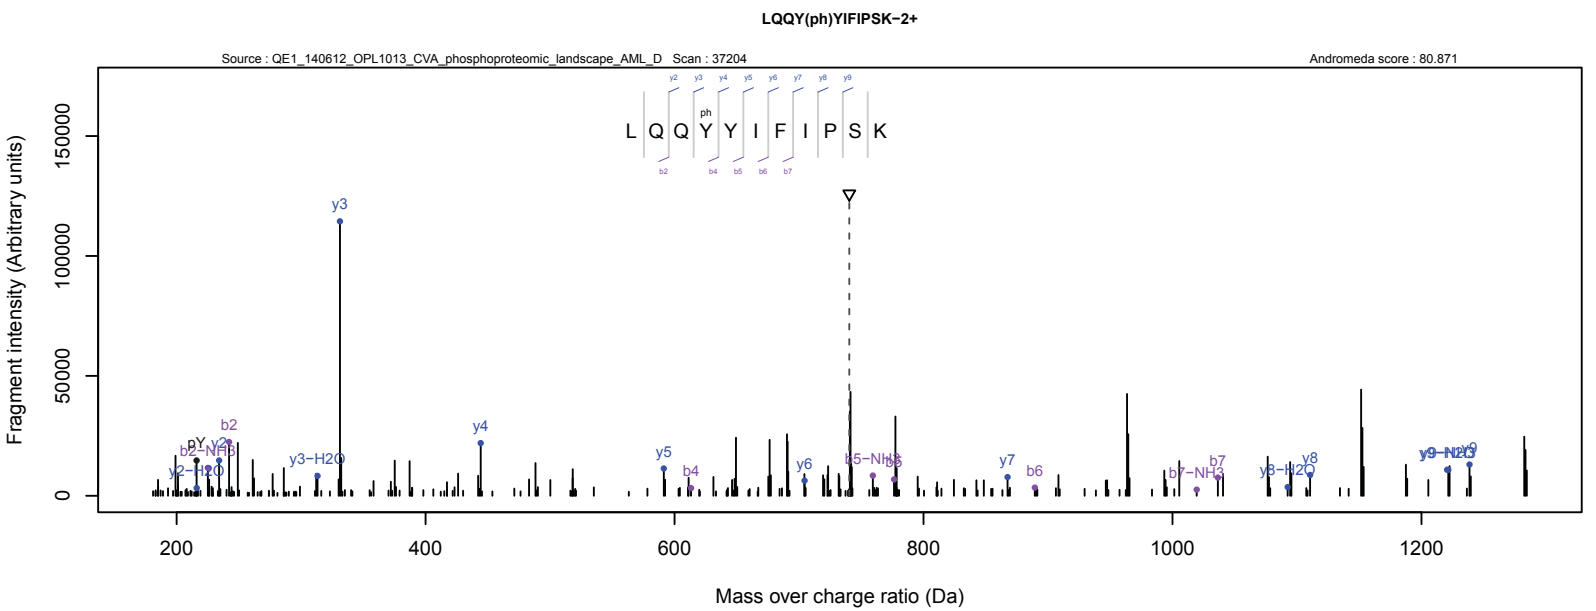



KFSLDY(ph)LALDFNSASPAPMQQK-3+

Source : QE1\_140822\_OPL1013\_CVA\_pTyrIP\_AML\_cell\_lines\_part2\_B Scan : 42157

Andromeda score : 80.844

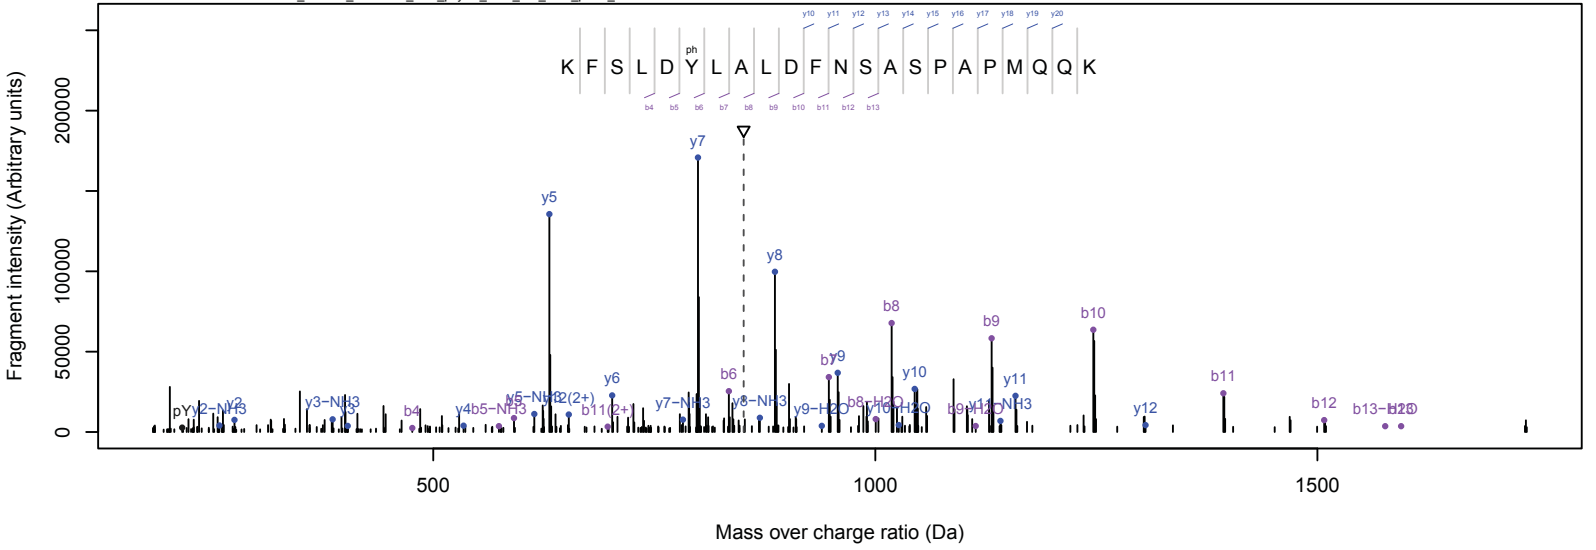

Y(ph)YDAIACLK-2+

Source : QE1\_140612\_OPL1013\_CVA\_phosphoproteomic\_landscape\_AML\_D Scan : 24389

Andromeda score : 80.755

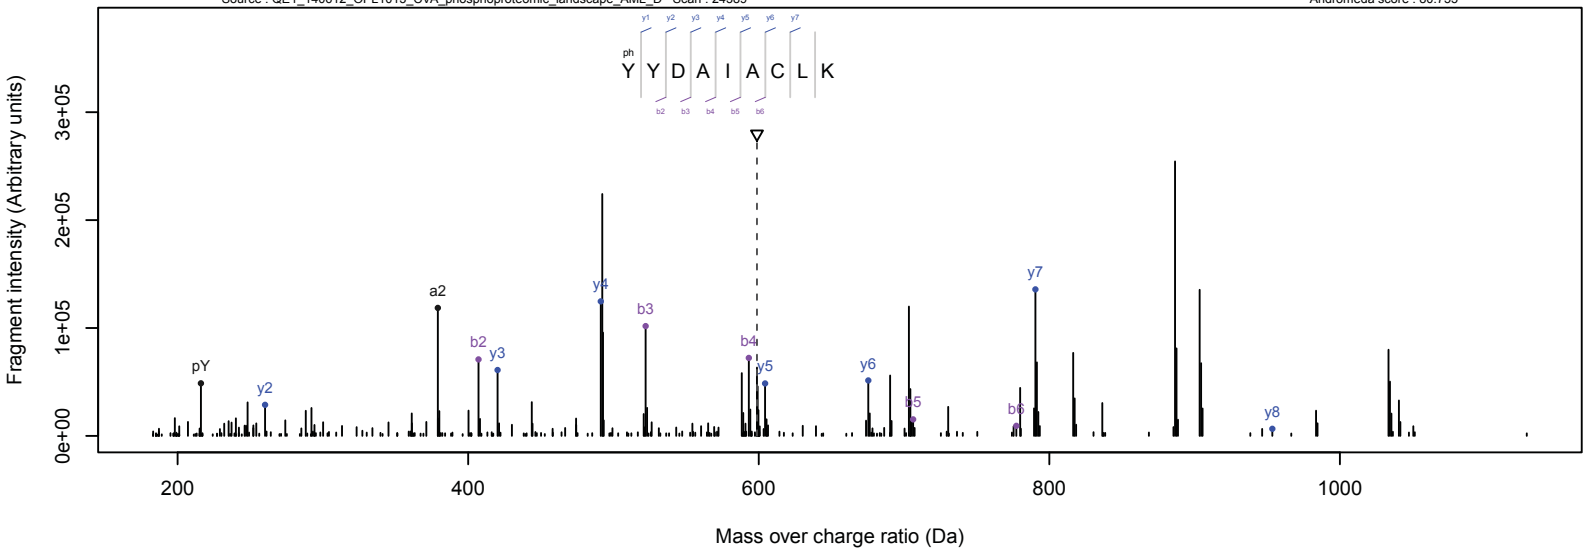

VNDKRFY(ph)PESSYK-3+

Source : QE1\_140612\_OPL1013\_CVA\_phosphoproteomic\_landscape\_AML\_C Scan : 10206

Andromeda score : 80.746

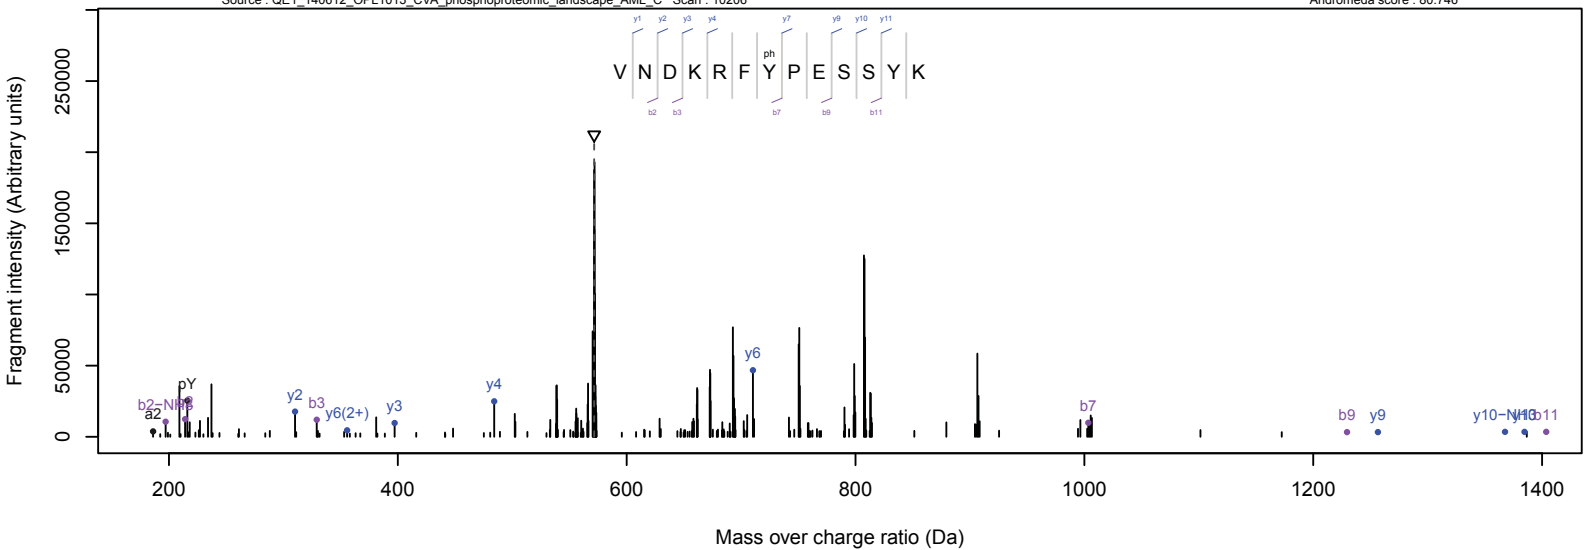

HATNTVY(ph)ETTCTPIISK-3+

Source : QE1\_140612\_OPL1013\_CVA\_phosphoproteomic\_landscape\_AML\_B Scan : 11695

Andromeda score : 80.738

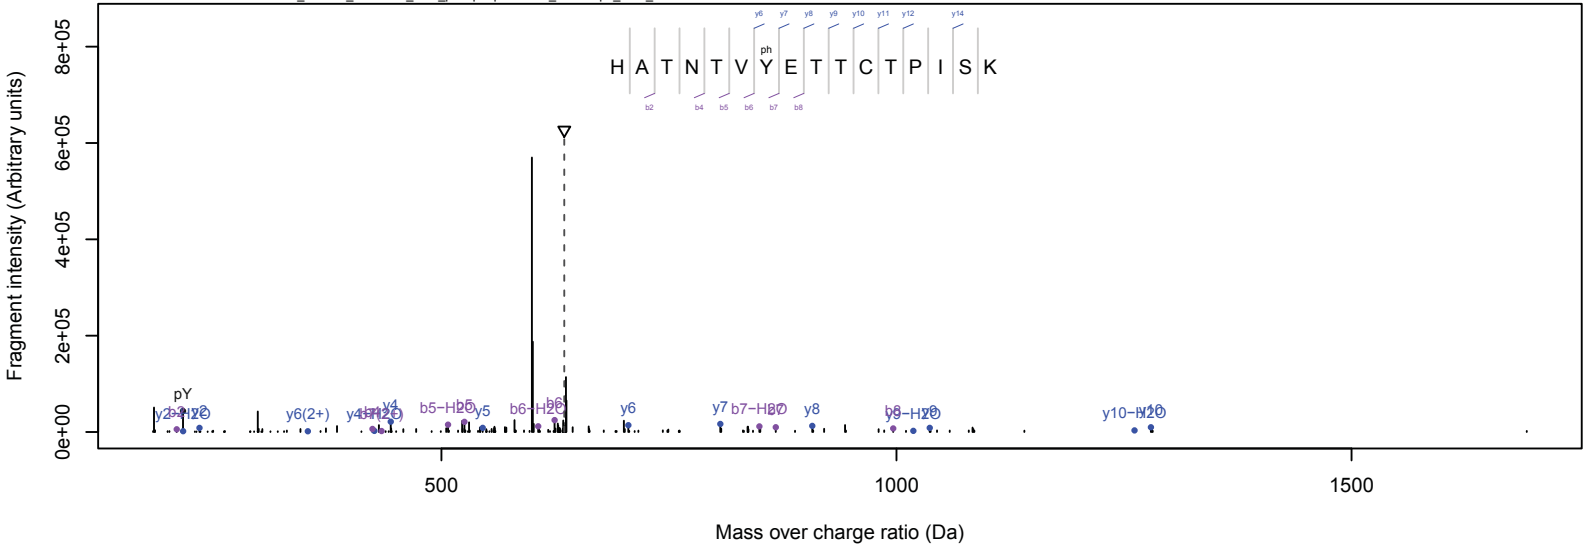

VKHQVEY(ph)LGLKENIR-4+

Source : QE1\_140612\_OPL1013\_CVA\_phosphoproteomic\_landscape\_AML\_C Scan : 17629

Andromeda score : 80.738

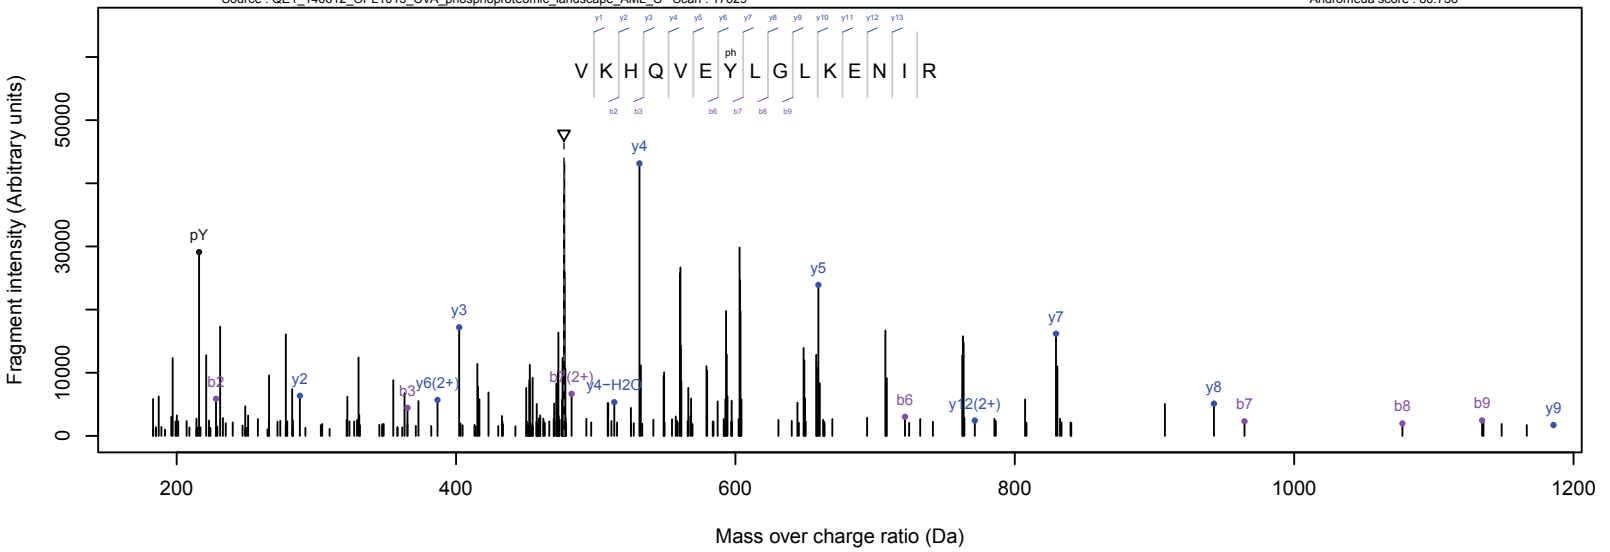

AEVEY(ph)YYRR-2+

Source : QE1\_140612\_OPL1013\_CVA\_phosphoproteomic\_landscape\_AML\_B Scan : 13709

Andromeda score : 80.706

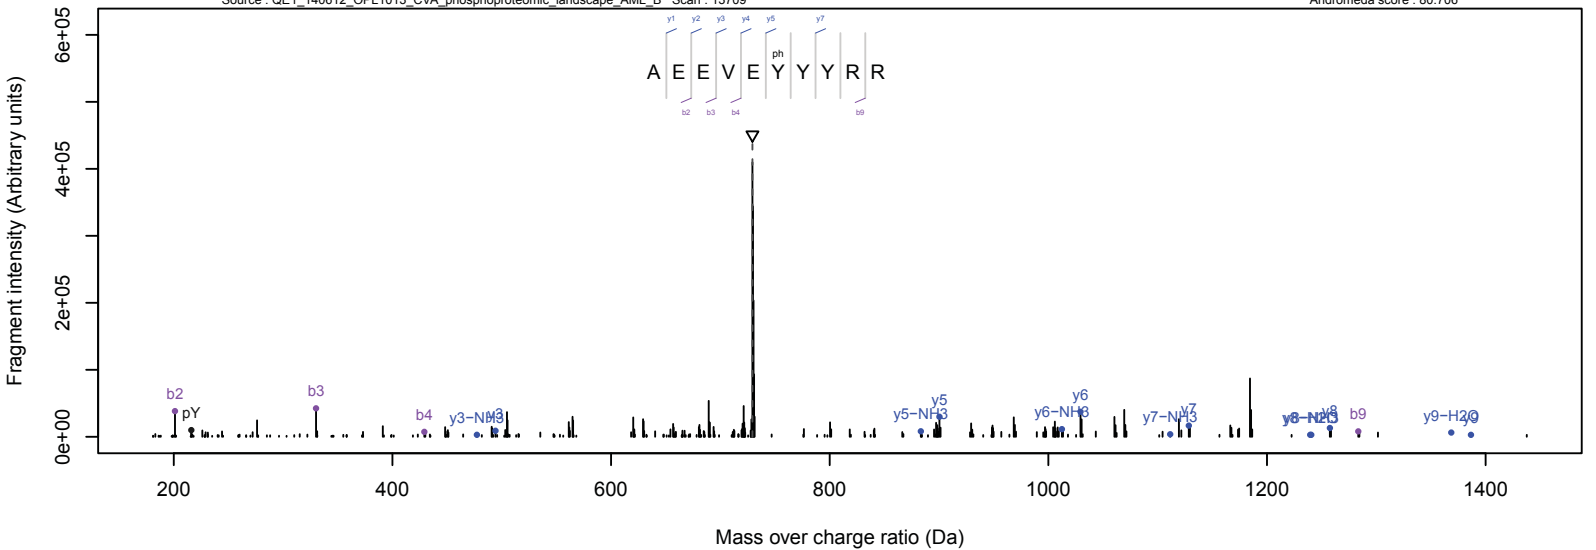

ELEKLY(ph)QERK-3+

Source: QE1\_140908\_OPL1013\_CVA\_pTyrIP\_AML\_HL60 Scan: 7622

Andromeda score: 80.706

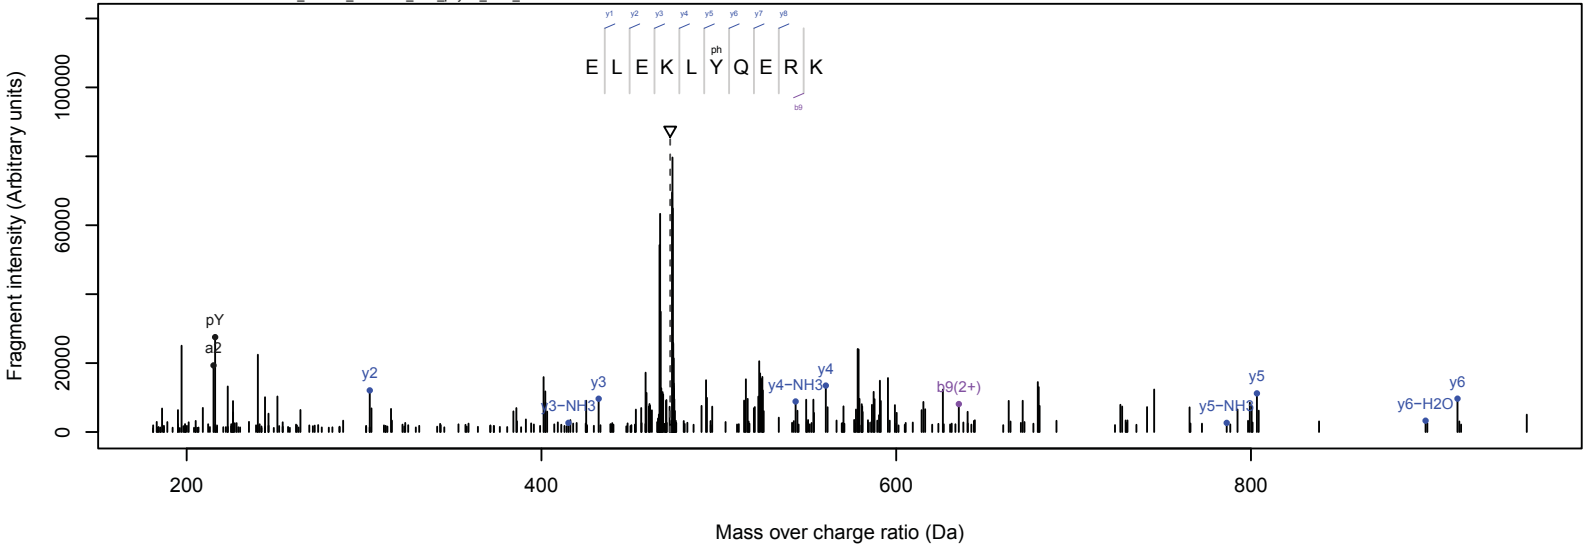

Y(ph)RAQLLEPSK-3+

Source: QE1\_140612\_OPL1013\_CVA\_phosphoproteomic\_landscape\_AML\_A Scan: 11091

Andromeda score: 80.706

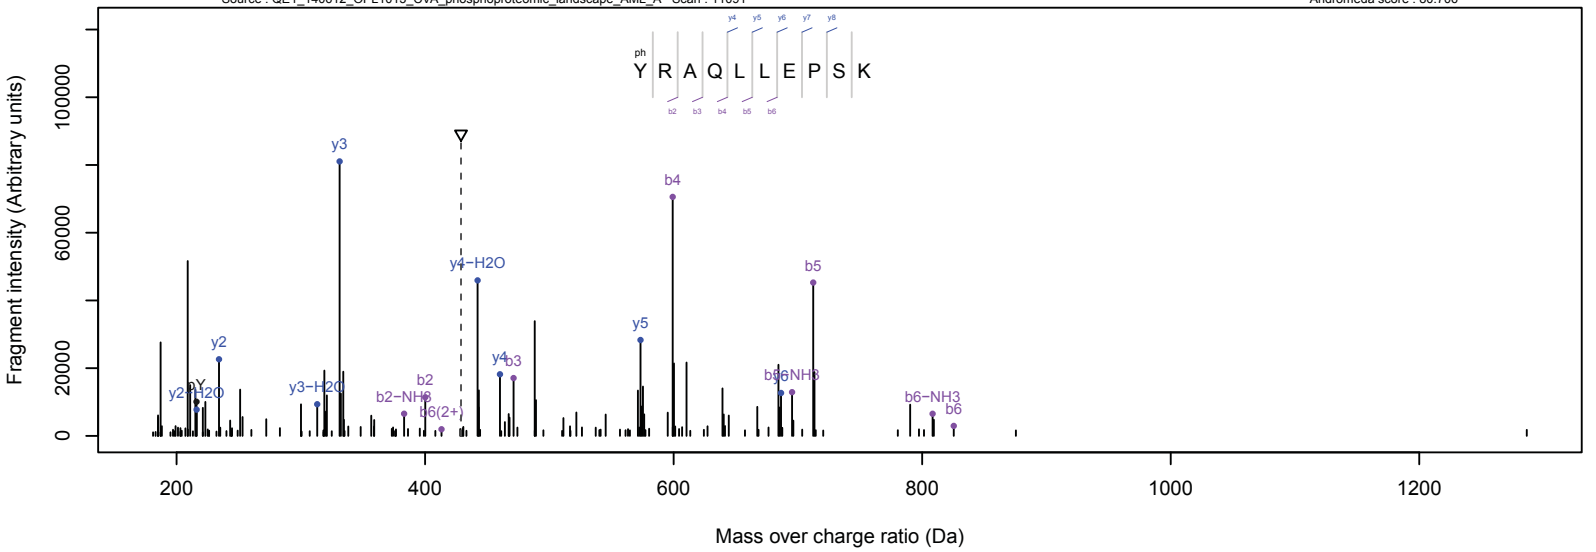

NLASGEVGFPPSDAVKPCPCVPKPVDS(ph)CQPWYAGAM(ox)ER-4+

Source: QE1\_140612\_OPL1013\_CVA\_phosphoproteomic\_landscape\_AML\_C Scan: 43509

Andromeda score: 80.693

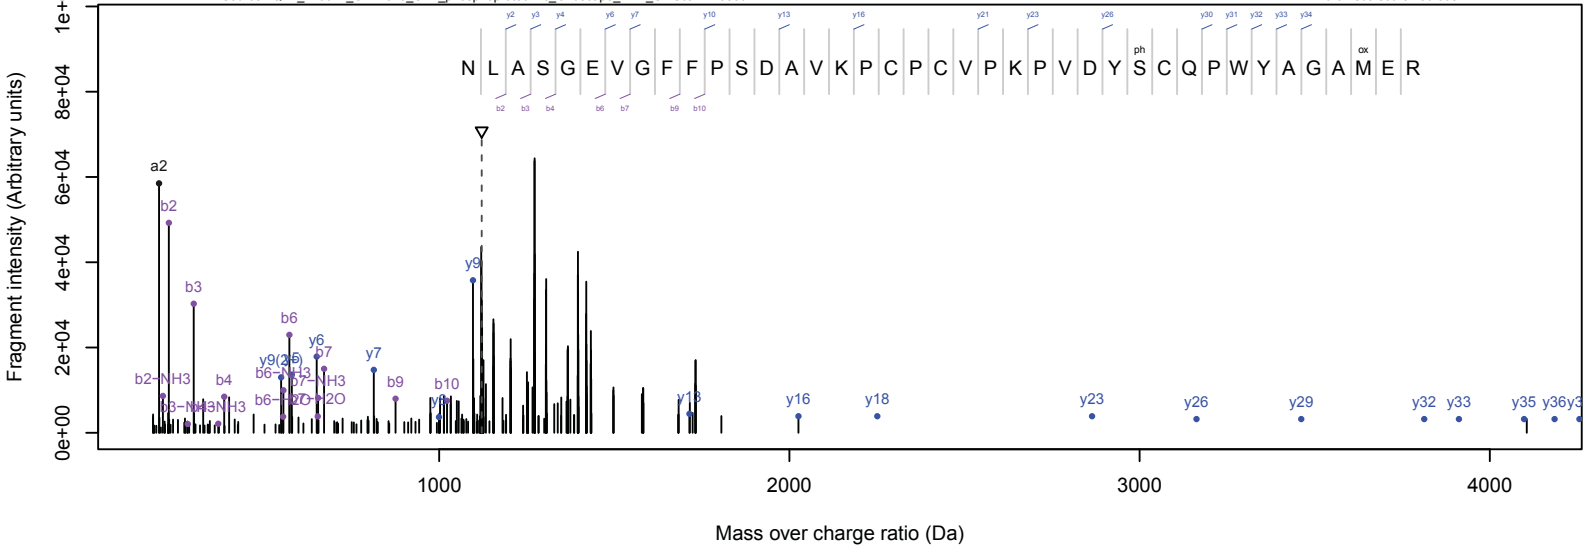

**QATADRDPAQLQHVQPAAGQDFASAGWQPGT(ph)EYDNNVVLKK-4+**

Source : QE1\_140908\_OPL1013\_CvA\_pTyrIP\_AML\_HEL Scan : 32501

Andromeda score : 80.693

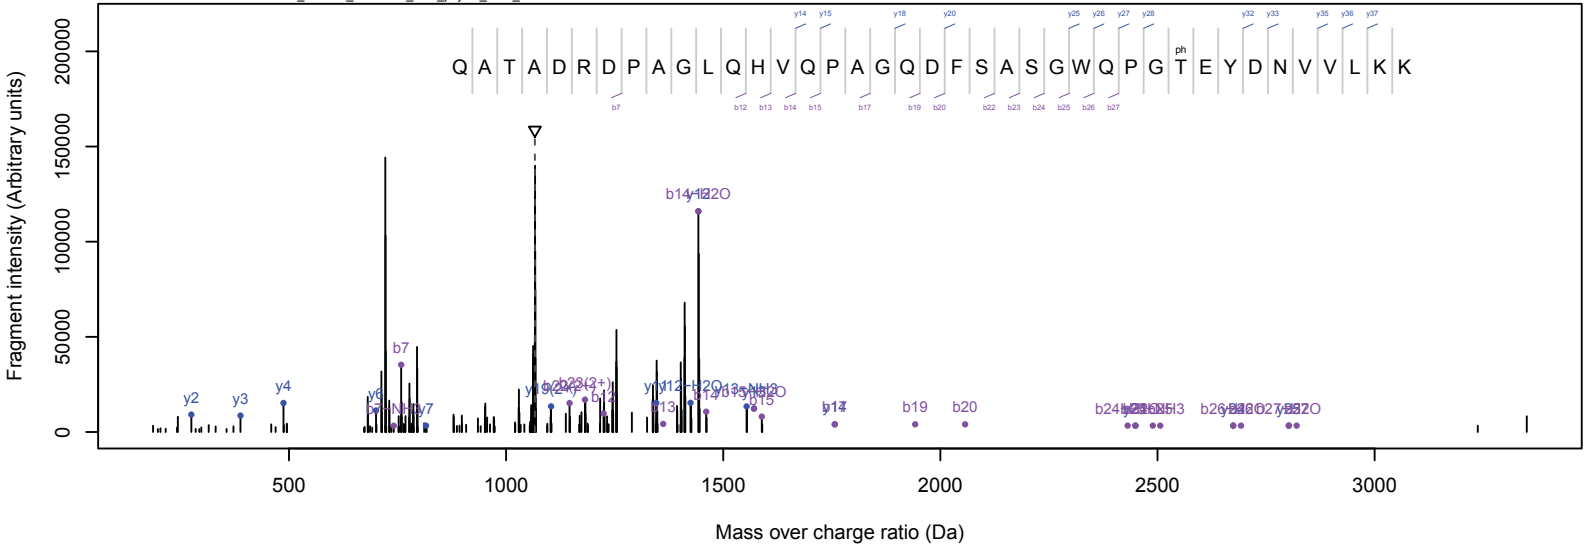

**QDY(ph)CSICLQYK-2+**

Source : QE1\_140612\_OPL1013\_CVA\_phosphoproteomic\_landscape\_AML\_D Scan : 22950

Andromeda score : 80.69

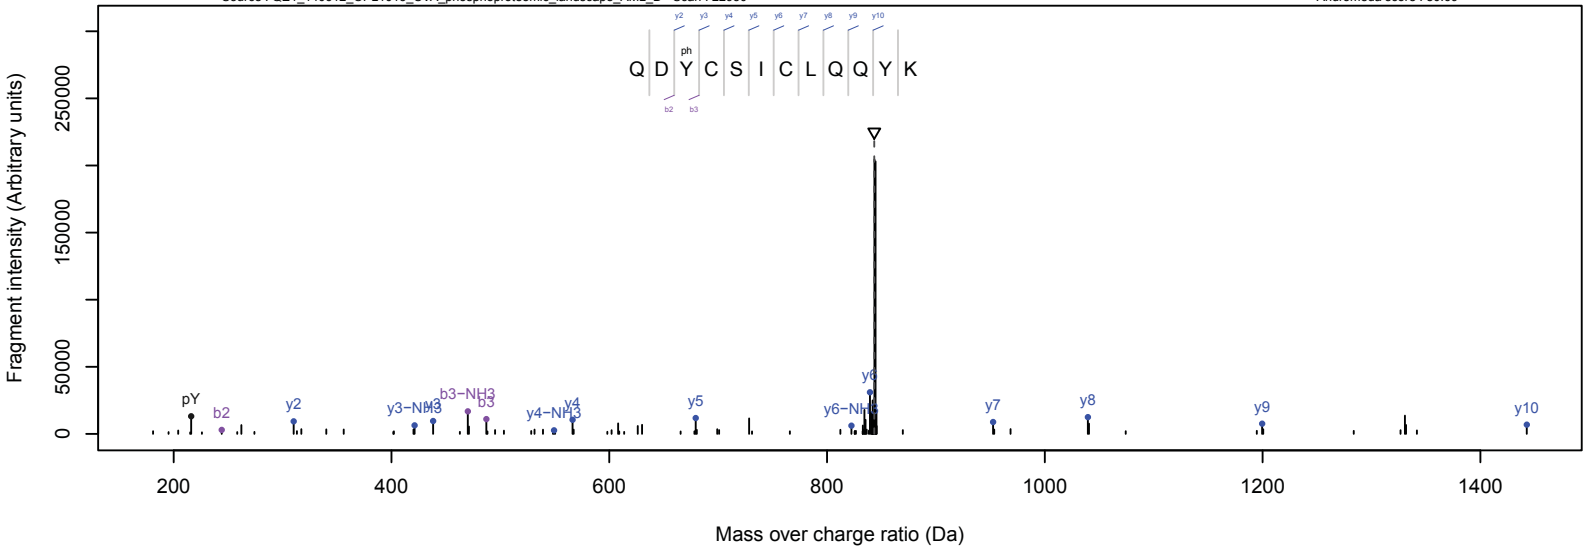

**Y(ph)IVPSQDLRPYK-2+**

Source : QE1\_140612\_OPL1013\_CVA\_phosphoproteomic\_landscape\_AML\_C Scan : 23665

Andromeda score : 80.69

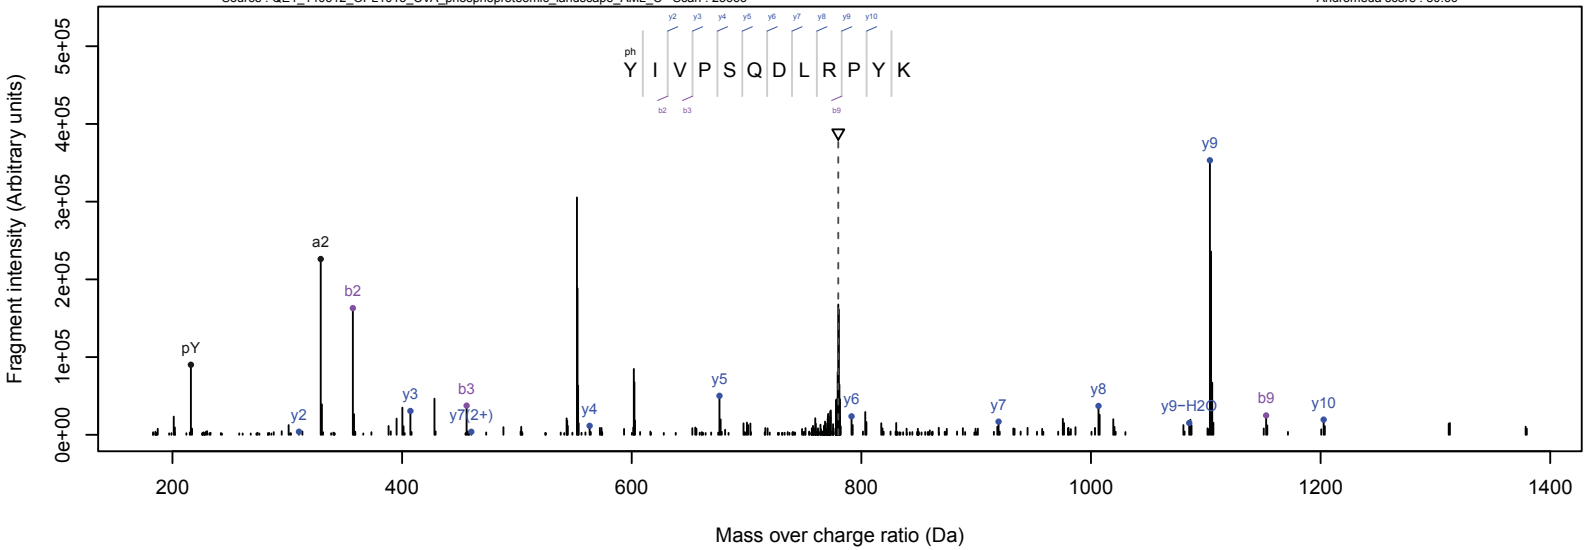

SDPY(ph)HVIK-2+

Source : QE1\_140612\_OPL1013\_CVA\_phosphoproteomic\_landscape\_AML\_C Scan : 11405

Andromeda score : 80.688

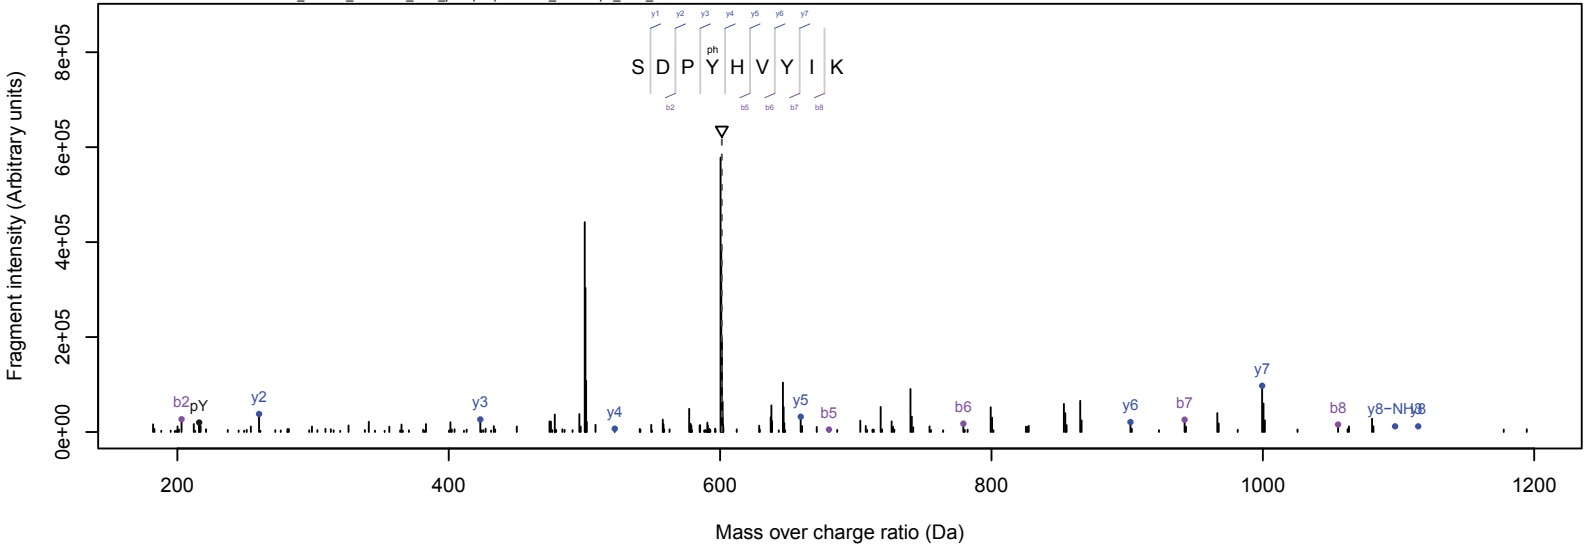

GLATSLQNDLQEVPKLYPEFPKDMCEK-4+

Source : QE1\_140612\_OPL1013\_CVA\_phosphoproteomic\_landscape\_AML\_C Scan : 45943

Andromeda score : 80.664

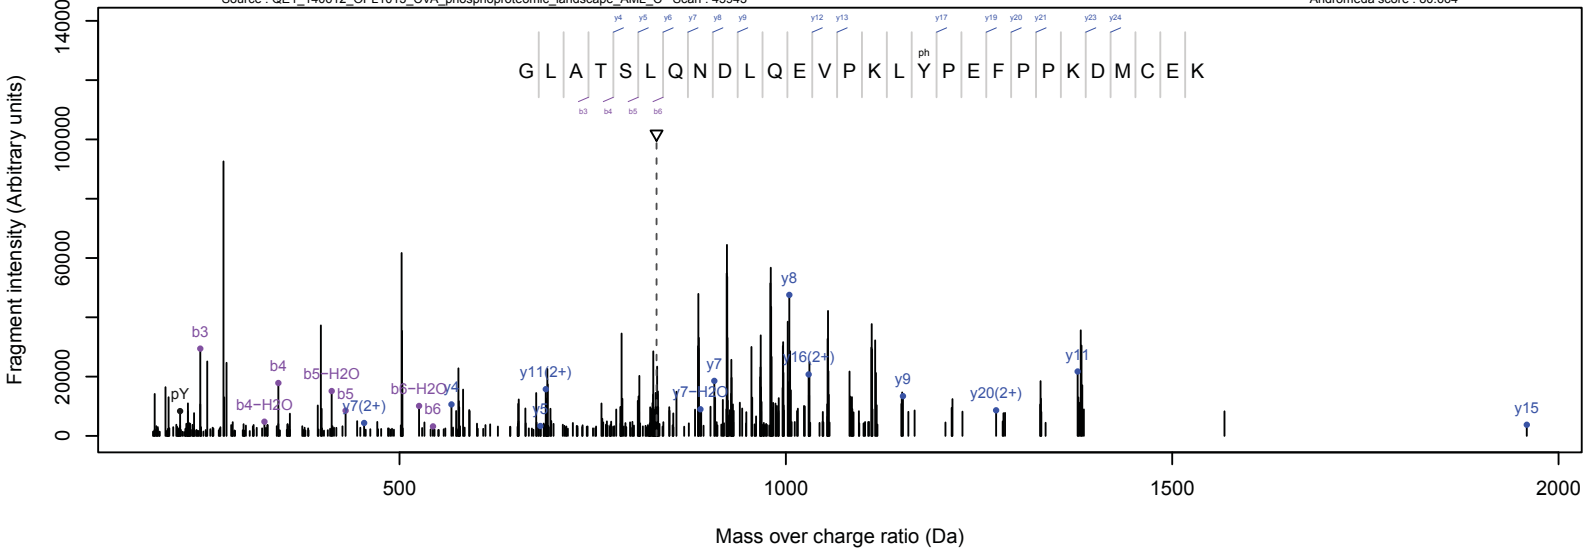

KLEDNY(ph)CEITGMNTLLSAPIHTQMQQK-3+

Source : QE1\_140612\_OPL1013\_CVA\_phosphoproteomic\_landscape\_AML\_C Scan : 38844

Andromeda score : 80.664

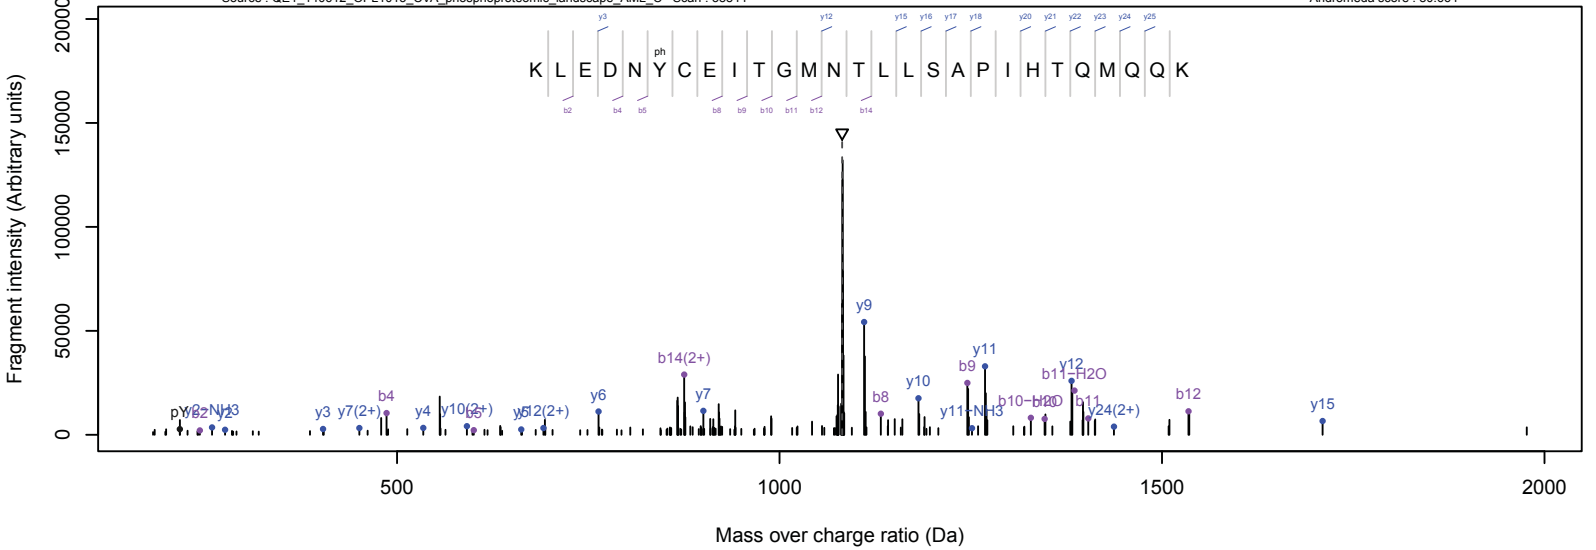

HT(ph)YLPLEVCNIVAGQR-3+

Source : QE1\_140612\_OPL1013\_CVA\_phosphoproteomic\_landscape\_AML\_C Scan : 39478

Andromeda score : 80.632

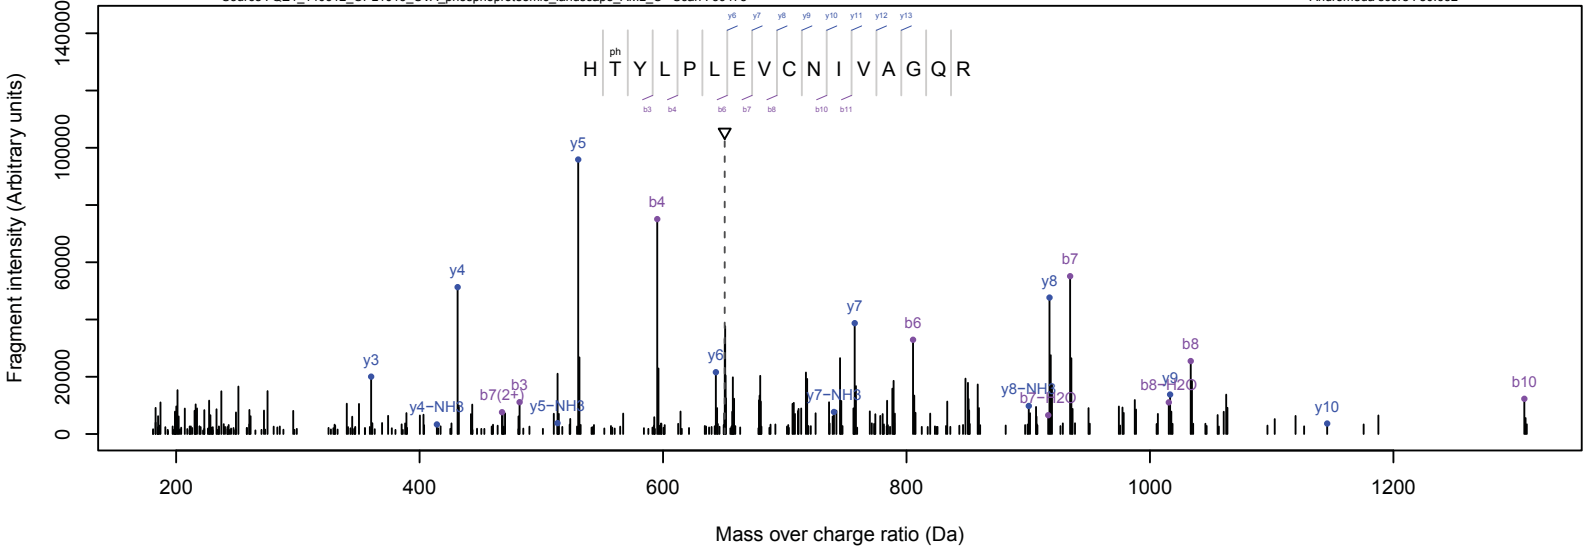

IFTPAVSAVY(ph)STVTQVAR-2+

Source : QE1\_140612\_OPL1013\_CVA\_phosphoproteomic\_landscape\_AML\_B Scan : 46129

Andromeda score : 80.596

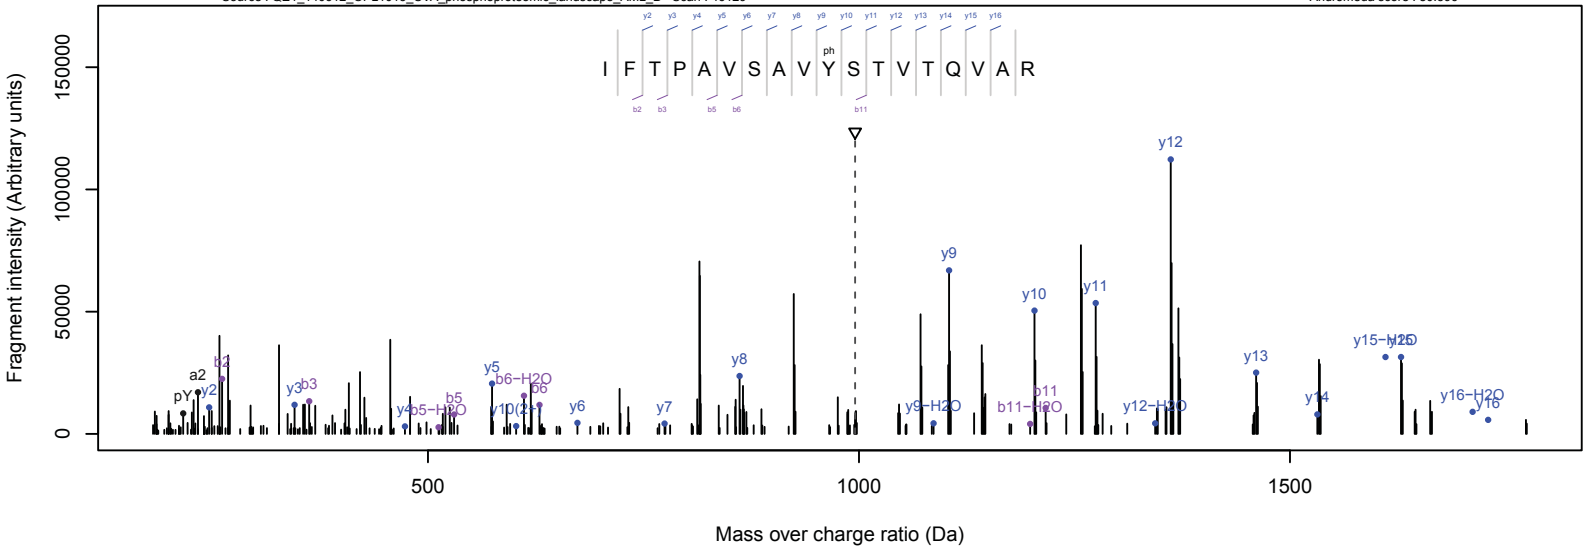

LHTLEEEKEELAQYQKWDK-4+

Source : QE1\_140908\_OPL1013\_CvA\_pTyrIP\_AML\_HEL Scan : 27178

Andromeda score : 80.596

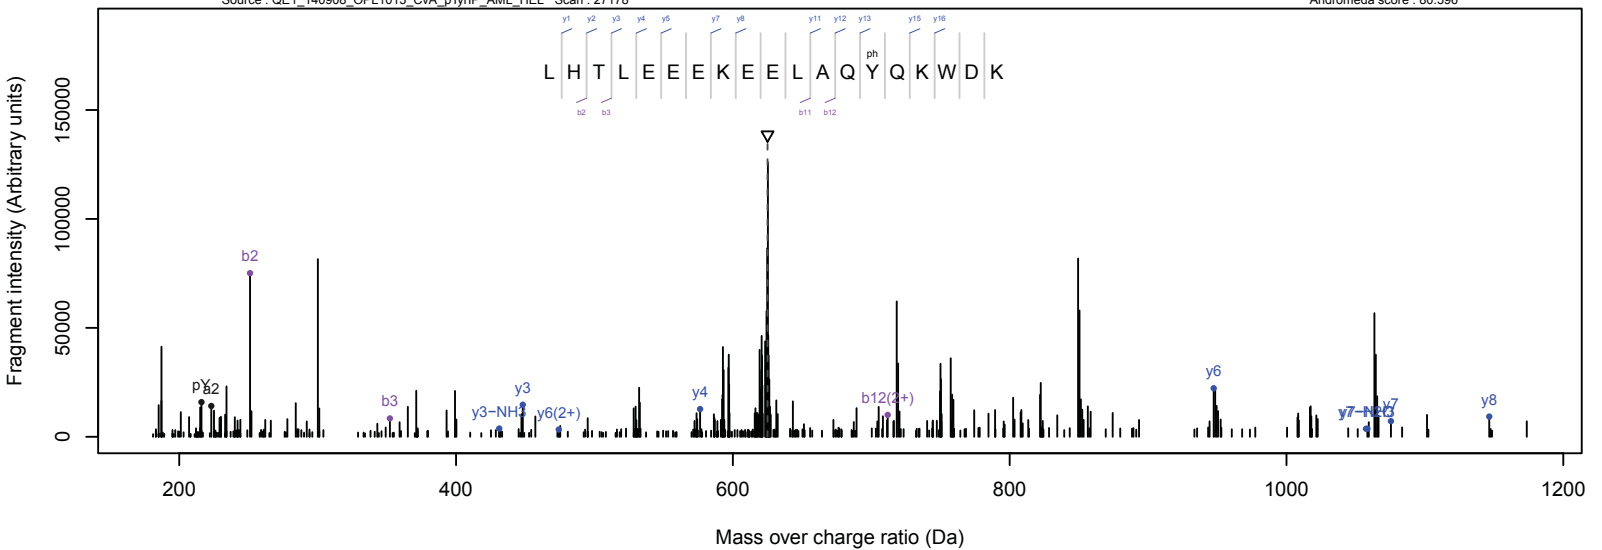

**RSTSTLY(ph)SQFQTAESNR-3+**

Source : QE1\_140612\_OPL1013\_CVA\_phosphoproteomic\_landscape\_AML\_C Scan : 19555

Andromeda score : 80.596

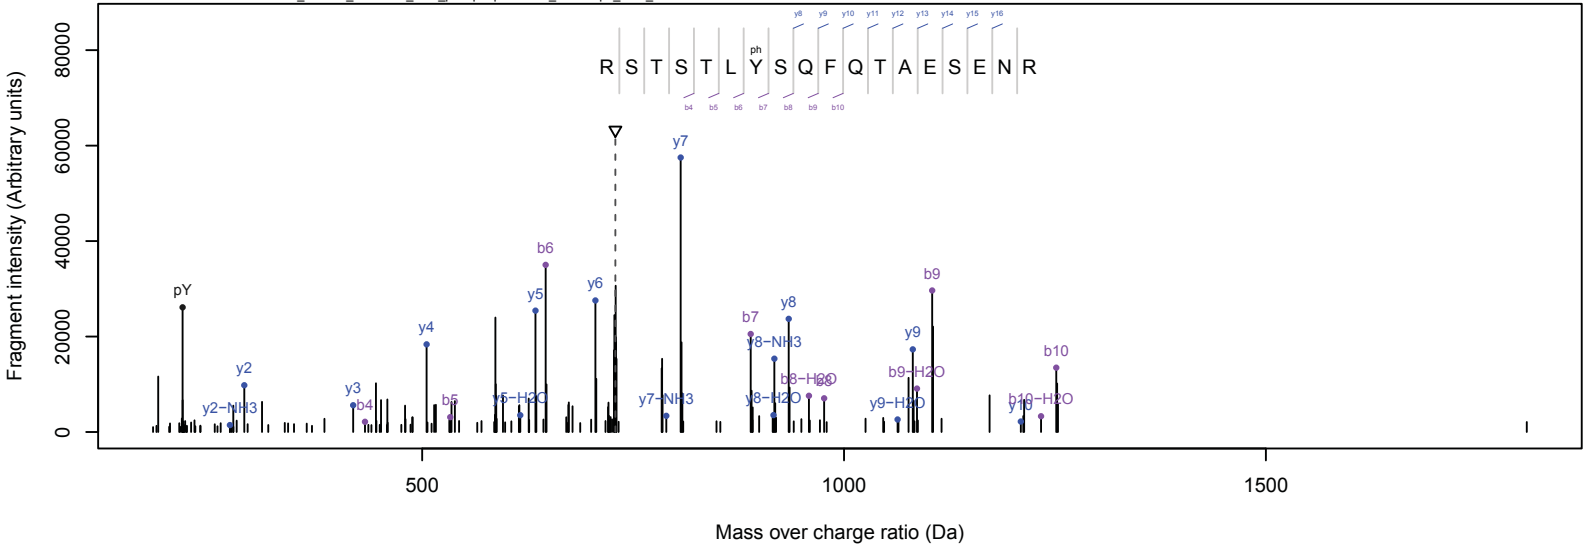

**LYIQNY(ph)TSAVPGTCLTIR-2+**

Source : QE1\_140612\_OPL1013\_CVA\_phosphoproteomic\_landscape\_AML\_C Scan : 39667

Andromeda score : 80.585

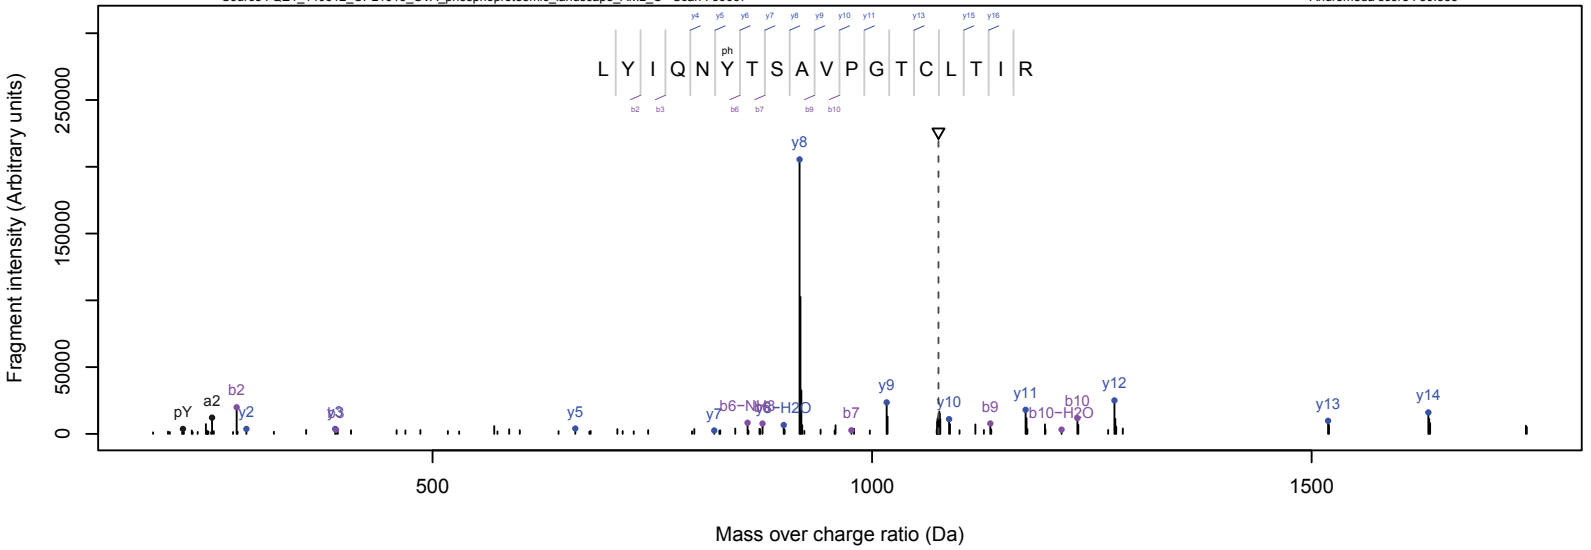

**SHTGEKPY(ph)VCEHEGCKN-3+**

Source : QE1\_140612\_OPL1013\_CVA\_phosphoproteomic\_landscape\_AML\_D Scan : 3806

Andromeda score : 80.545

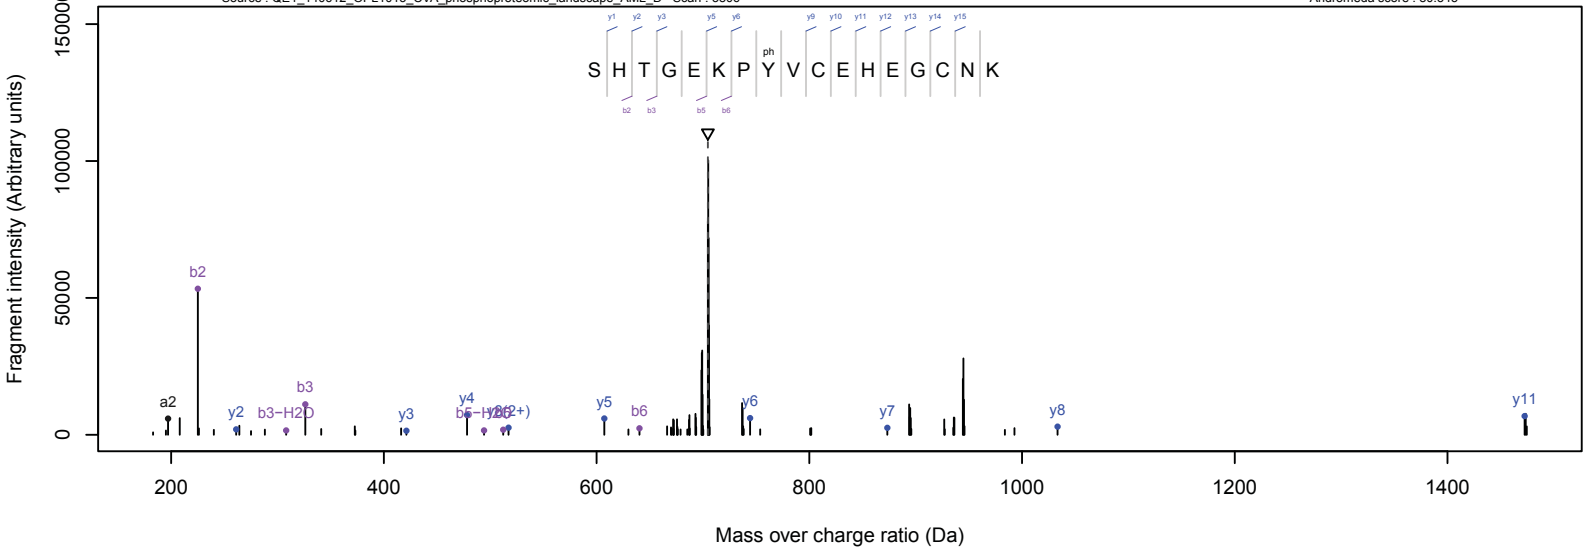

DHPALNY(ph)NIVSGPPSHK-3+

Source : Qe1\_141024\_OPL1013\_CvA\_AML\_pTyrIP\_MOLM13 Scan : 20244

Andromeda score : 80.361

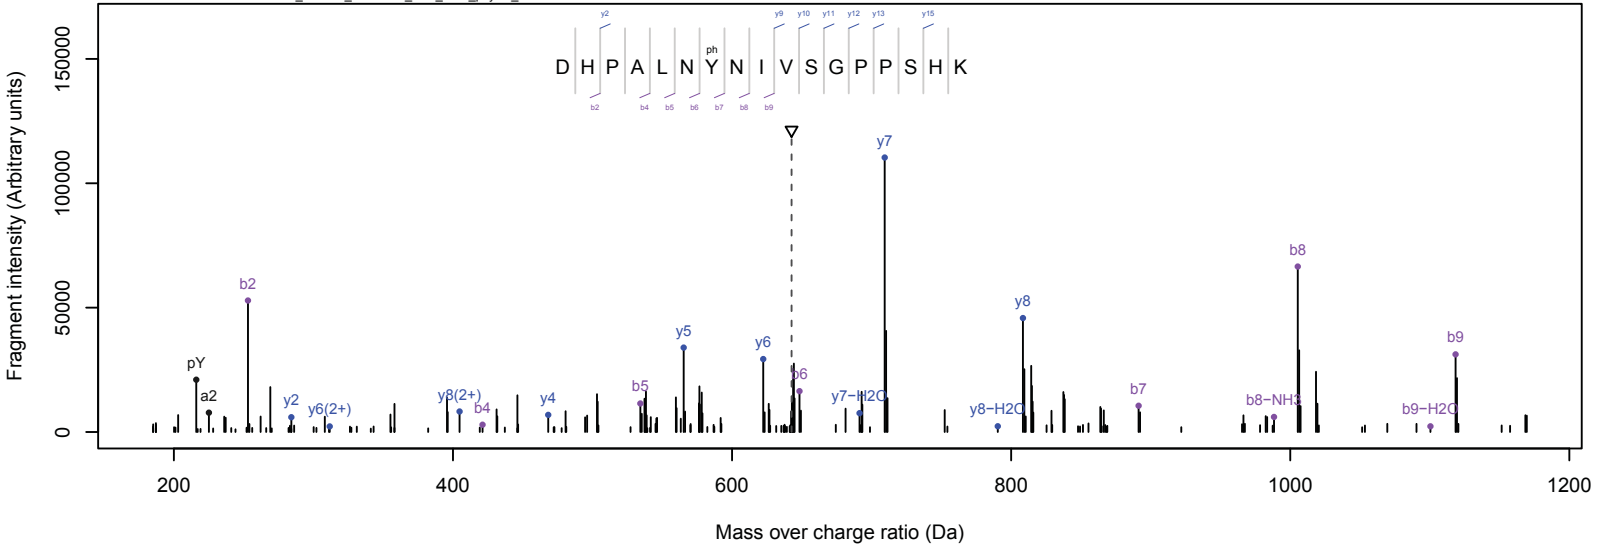

KVEEPSIY(ph)ESVR-2+

Source : QE1\_140612\_OPL1013\_CVA\_phosphoproteomic\_landscape\_AML\_C Scan : 15725

Andromeda score : 80.318

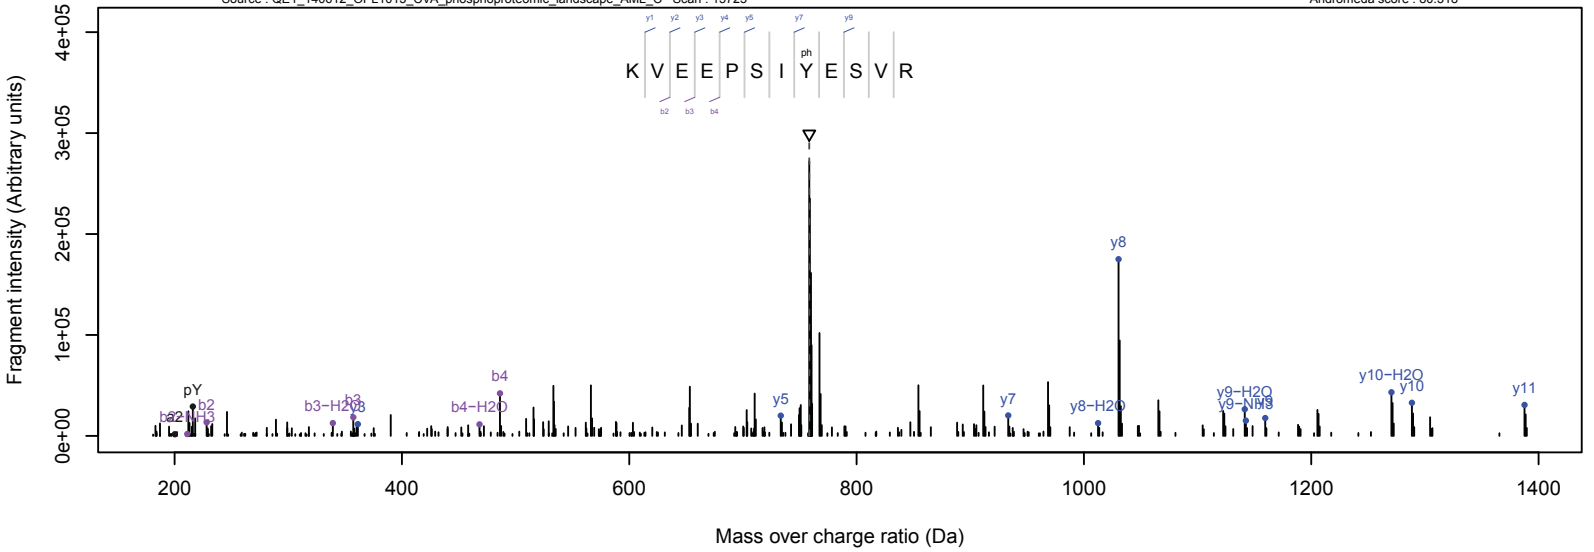

QFTLPPNLGQY(ph)HR-2+

Source : QE1\_140612\_OPL1013\_CVA\_phosphoproteomic\_landscape\_AML\_C Scan : 29343

Andromeda score : 80.318

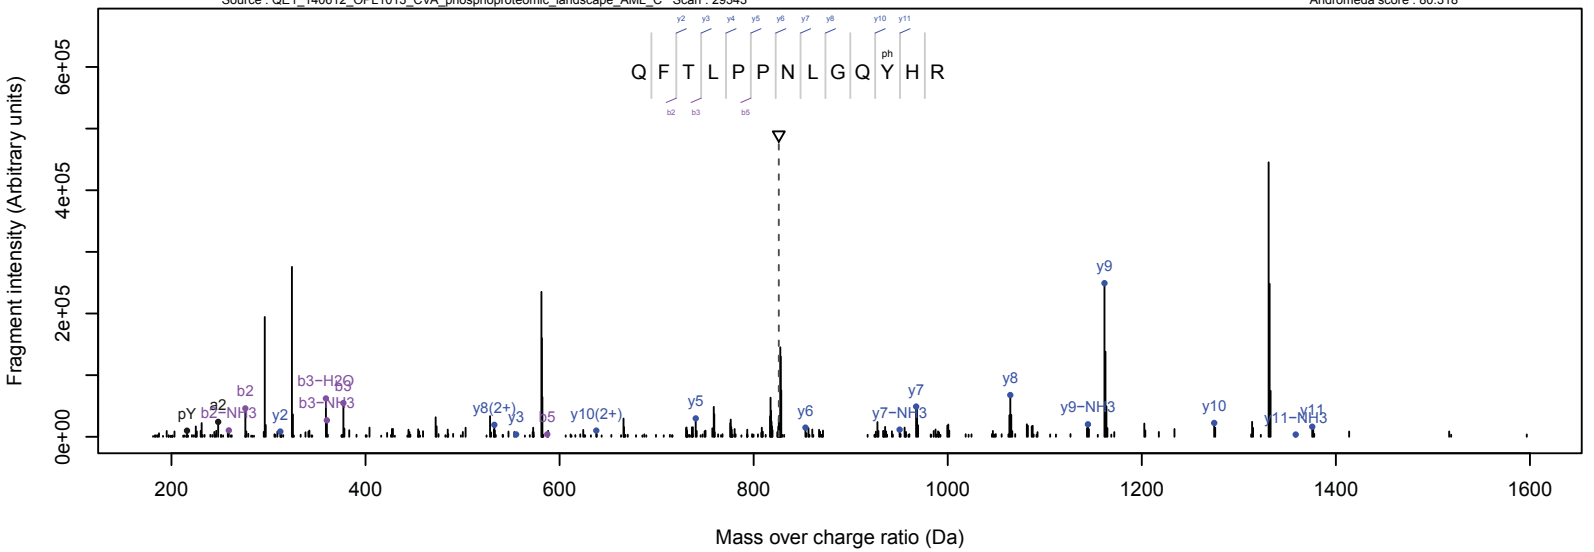



**GPTSYY(ph)YMLPMK-2+**

Source : QE1\_140612\_OPL1013\_CVA\_phosphoproteomic\_landscape\_AML\_B Scan : 36426

Andromeda score : 80.245

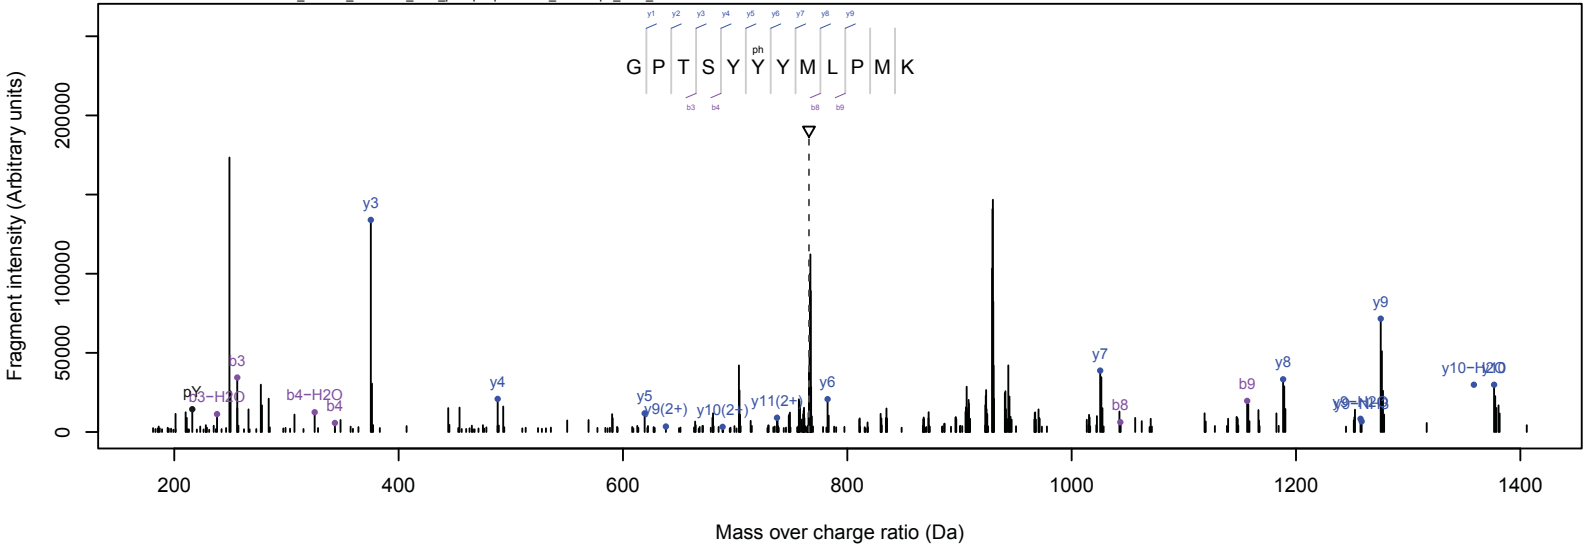

**NHQLYCNDY(ph)LR-2+**

Source : QE1\_140612\_OPL1013\_CVA\_phosphoproteomic\_landscape\_AML\_C Scan : 13744

Andromeda score : 80.245

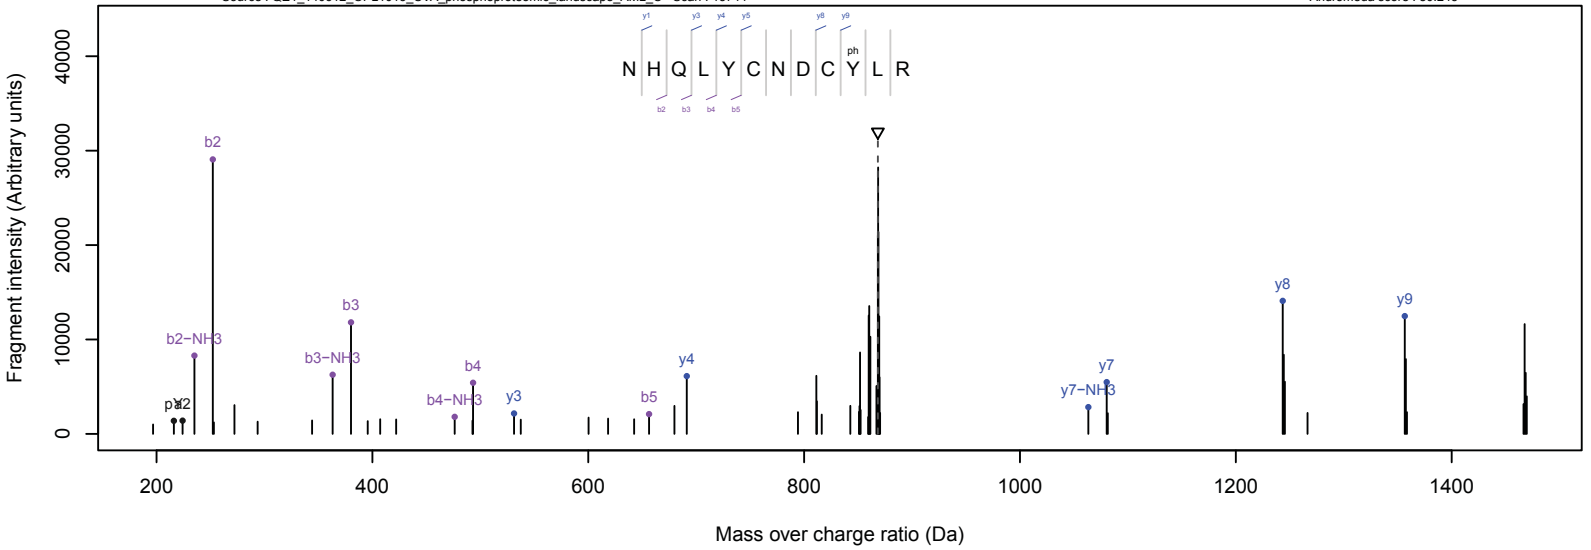

**FIEAGQY(ph)NNHLYGTSVQSVR-3+**

Source : QE1\_140612\_OPL1013\_CVA\_phosphoproteomic\_landscape\_AML\_C Scan : 24447

Andromeda score : 80.236

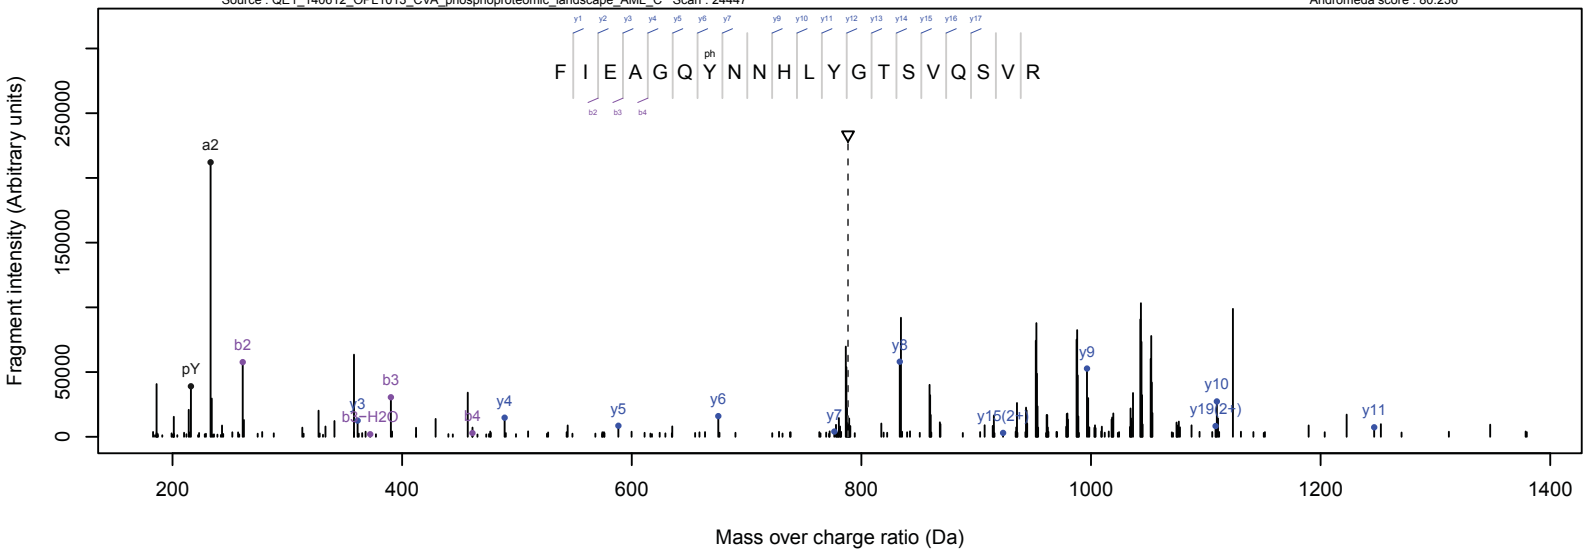

HIY(ph)YITGETKDQVANSAFVER-3+

Source : QE1\_140612\_OPL1013\_CVA\_phosphoproteomic\_landscape\_AML\_B Scan : 26931

Andromeda score : 80.236

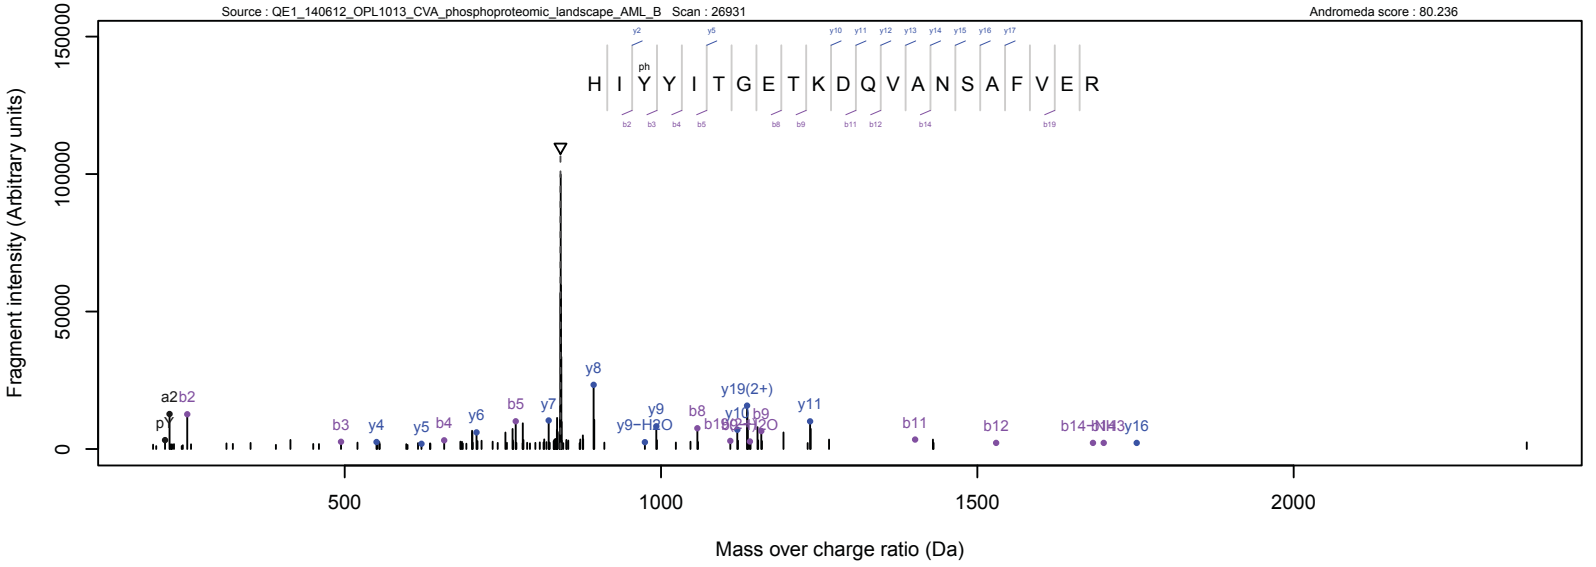

KVPTVSRPYS(ph)FIEFDTFIQK-3+

Source : QE1\_140612\_OPL1013\_CVA\_phosphoproteomic\_landscape\_AML\_C Scan : 42587

Andromeda score : 80.236

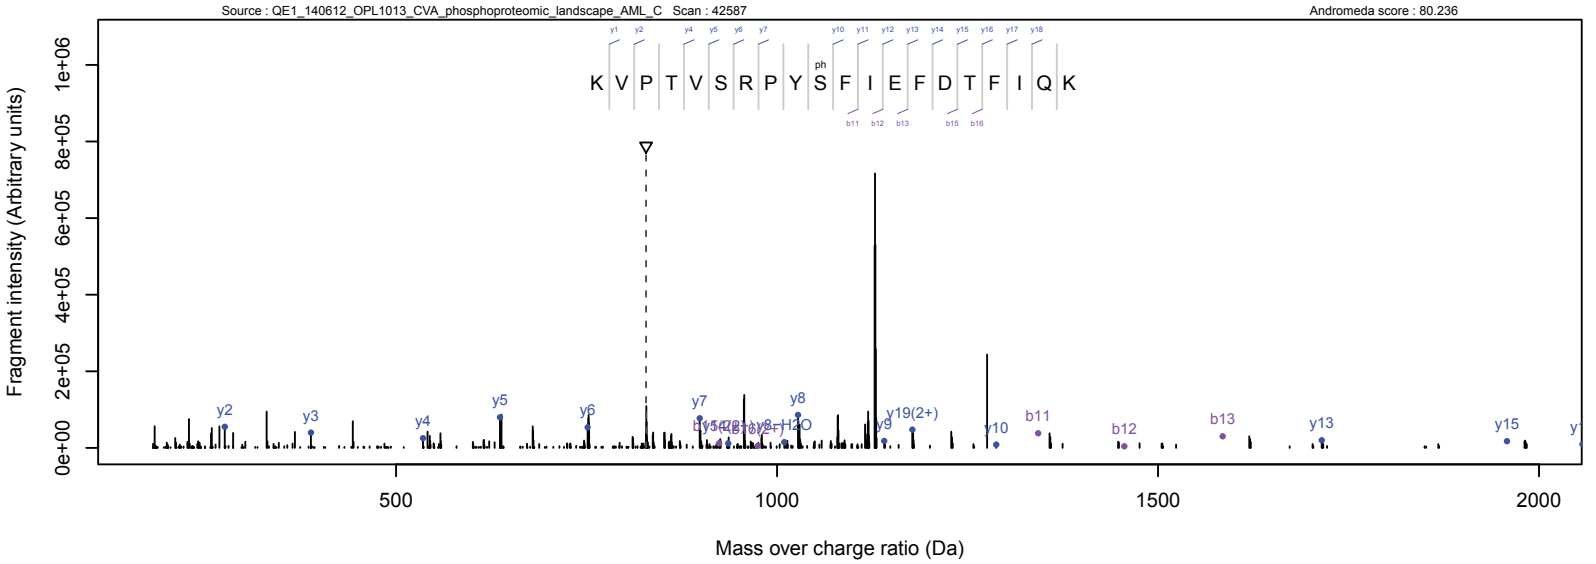

LALGSFFDDGPIY(ph)TSCSK-2+

Source : QE1\_140612\_OPL1013\_CVA\_phosphoproteomic\_landscape\_AML\_C Scan : 46955

Andromeda score : 80.236

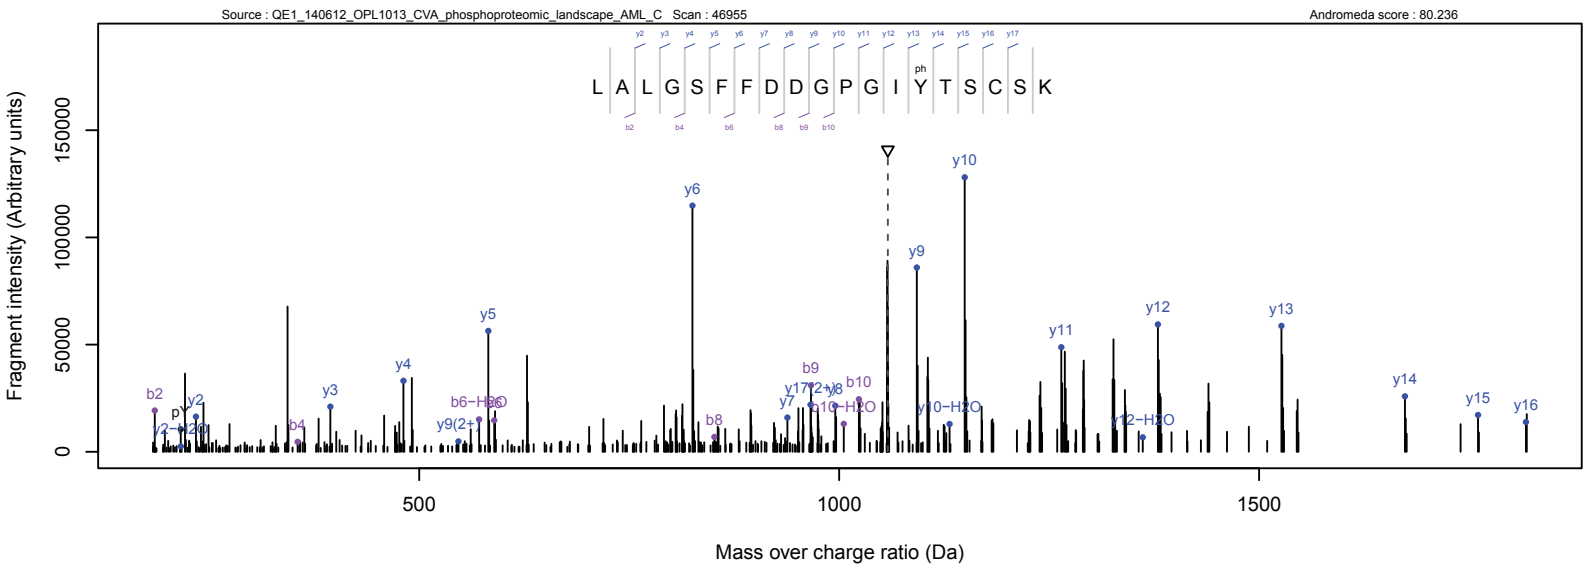



**TYDATTHFETTCDDIKNIY<sup>ph</sup>KR-4+**

Source : QE1\_140612\_OPL1013\_CVA\_phosphoproteomic\_landscape\_AML\_C Scan : 23086

Andromeda score : 80.142

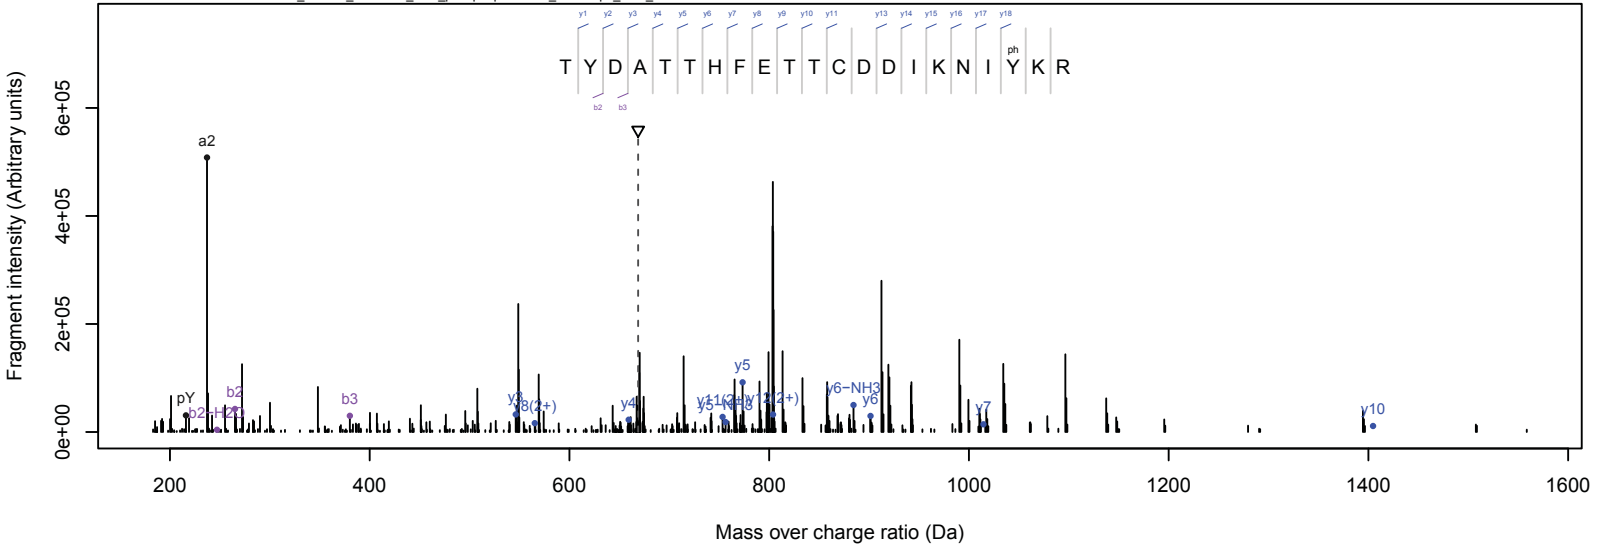

**VTQEQYELY<sup>ph</sup>CEM<sup>ox</sup>GSTFQLCK-3+**

Source : QE1\_140908\_OPL1013\_CvA\_pTyrIP\_AML\_Kasumi1 Scan : 31127

Andromeda score : 80.142

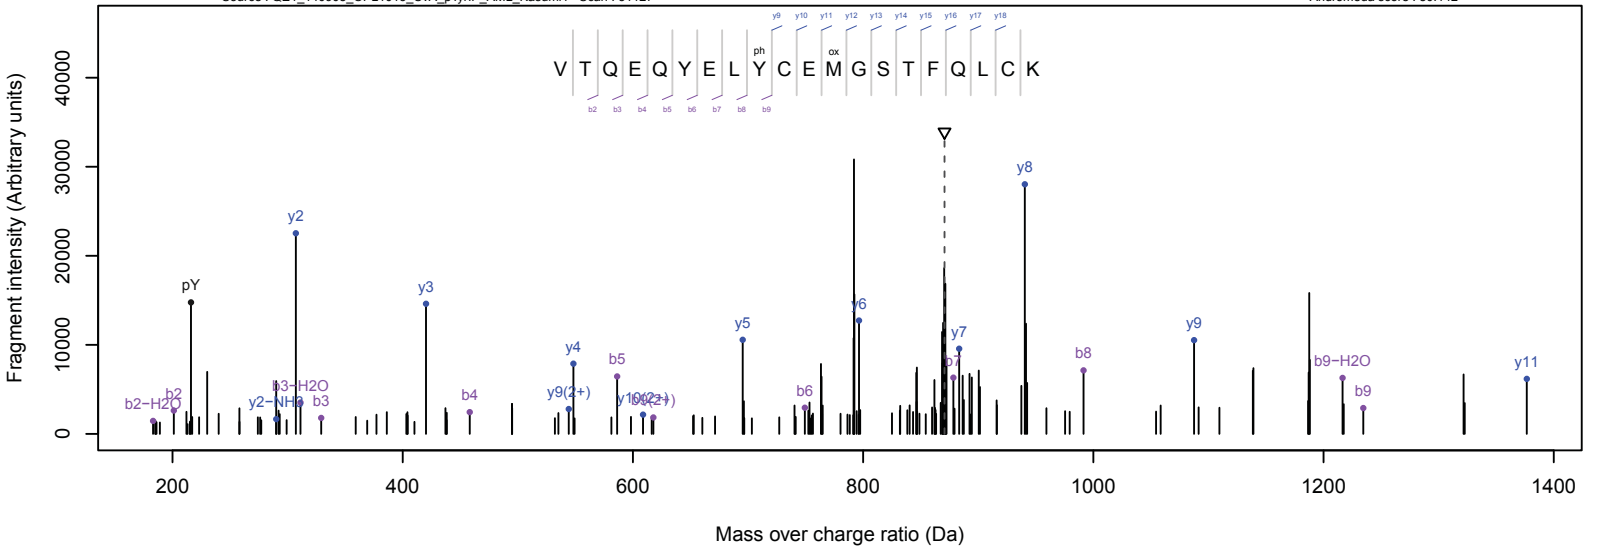

**FILREDPAY<sup>ph</sup>LHYYPAGAEDPLGAIHLR-4+**

Source : QE1\_140612\_OPL1013\_CVA\_phosphoproteomic\_landscape\_AML\_C Scan : 46667

Andromeda score : 80.117

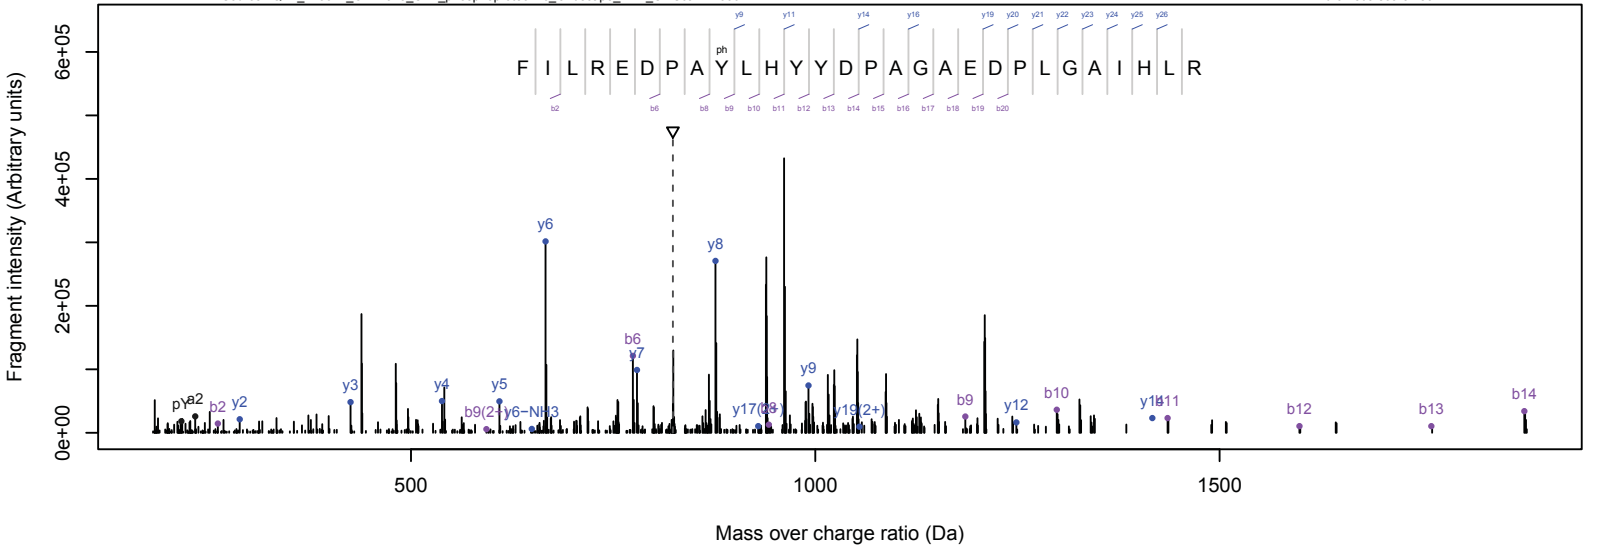

Y(ph)SAELHVAHWNSAK-3+

Source : QE1\_140908\_OPL1013\_CVA\_pTyrIP\_AML\_HEL Scan : 16979

Andromeda score : 80.102

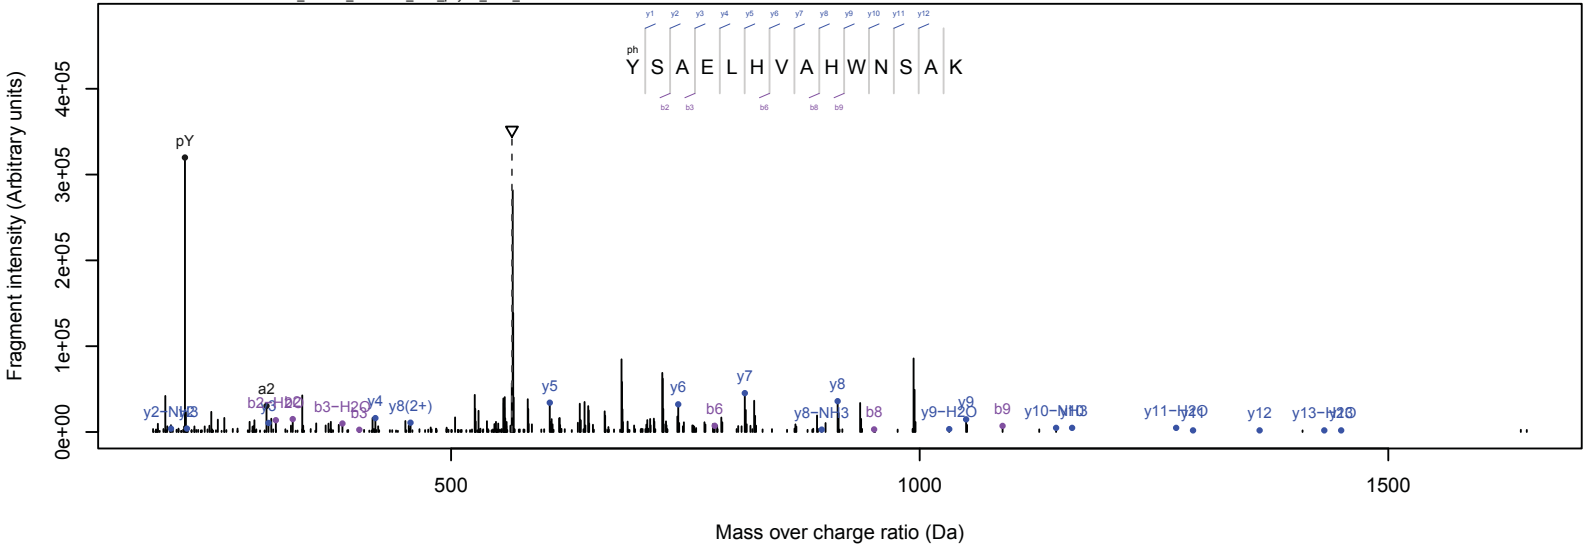

GGYDGYRPSFSNTPSG(ph)TQSQFSAPR-3+

Source : QE1\_140612\_OPL1013\_CVA\_phosphoproteomic\_landscape\_AML\_B Scan : 26543

Andromeda score : 80.02

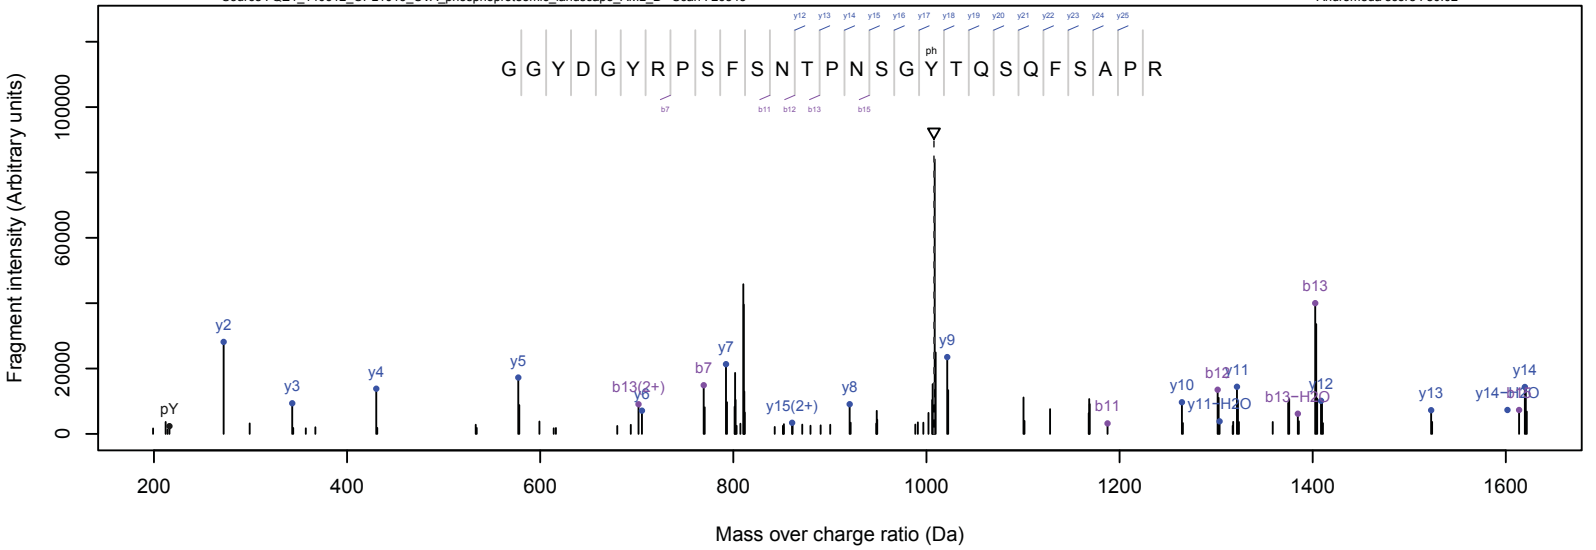

ESGQQY(ph)FSIISPK-2+

Source : QE1\_140612\_OPL1013\_CVA\_phosphoproteomic\_landscape\_AML\_B Scan : 30706

Andromeda score : 79.886

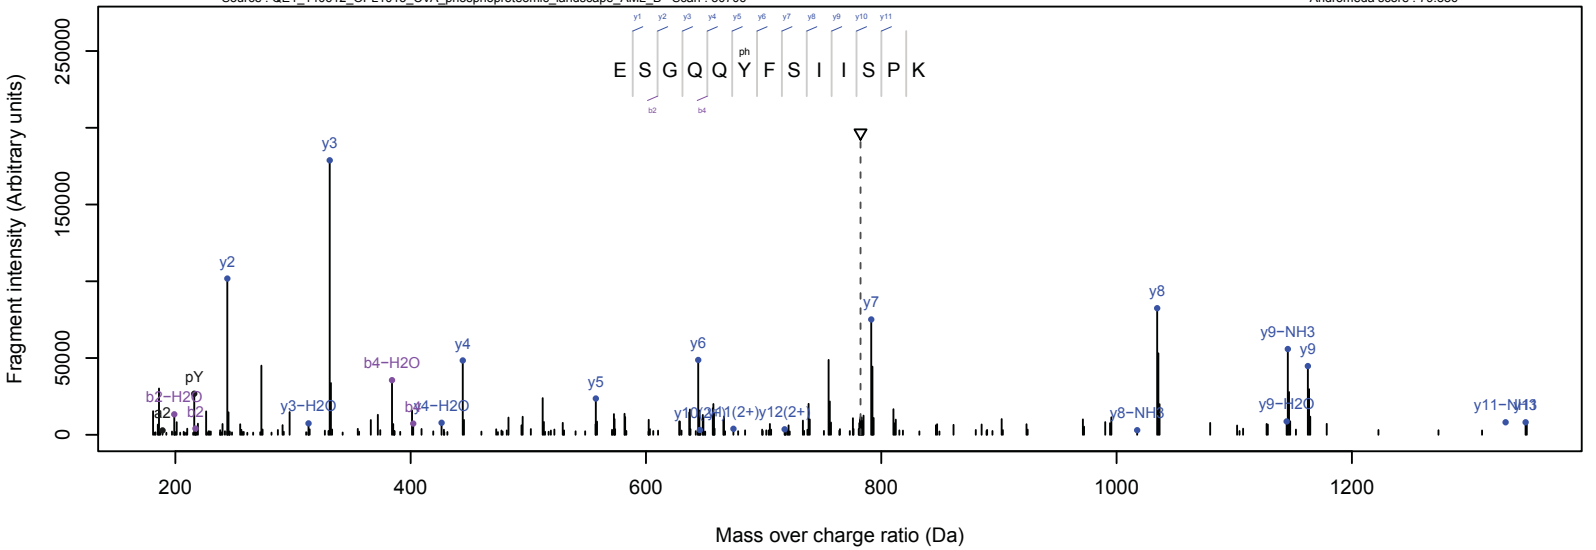

**VSLEEIY(ph)SGCTK-2+**

Source : QE1\_140612\_OPL1013\_CVA\_phosphoproteomic\_landscape\_AML\_C Scan : 22194

Andromeda score : 79.886

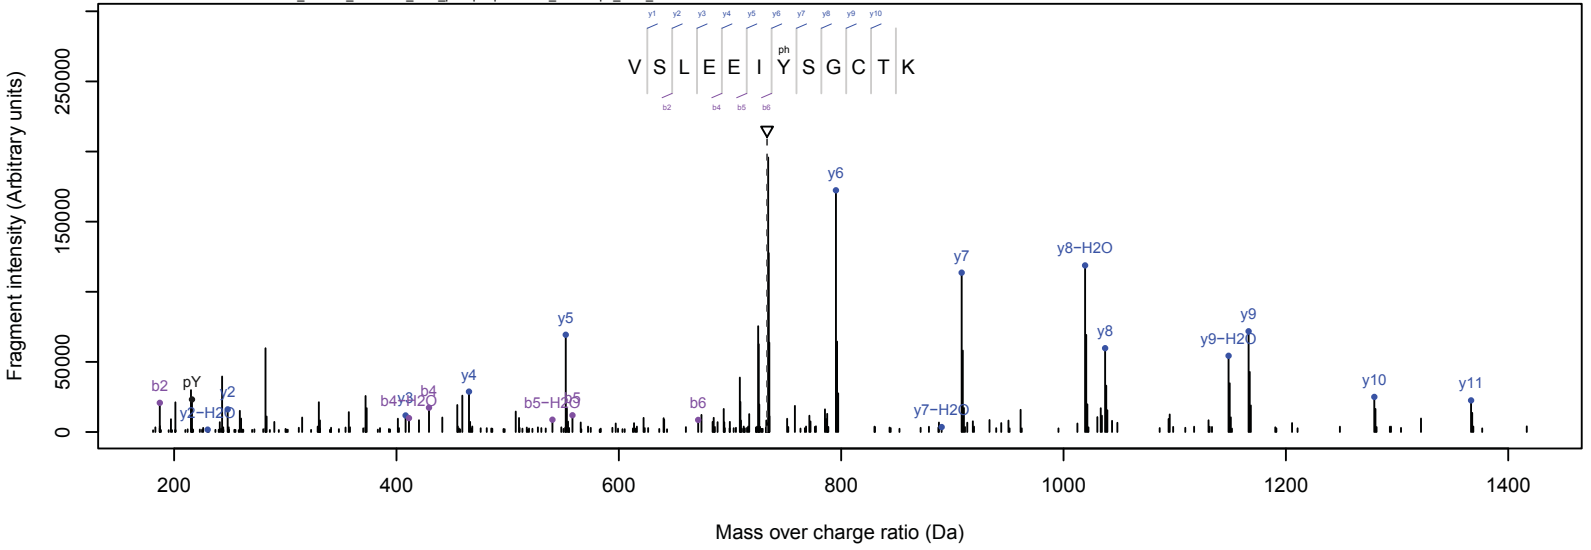

**DSSTCPGDYVLSVSENSR-2+**

Source : QE1\_140612\_OPL1013\_CVA\_phosphoproteomic\_landscape\_AML\_B Scan : 26436

Andromeda score : 79.88

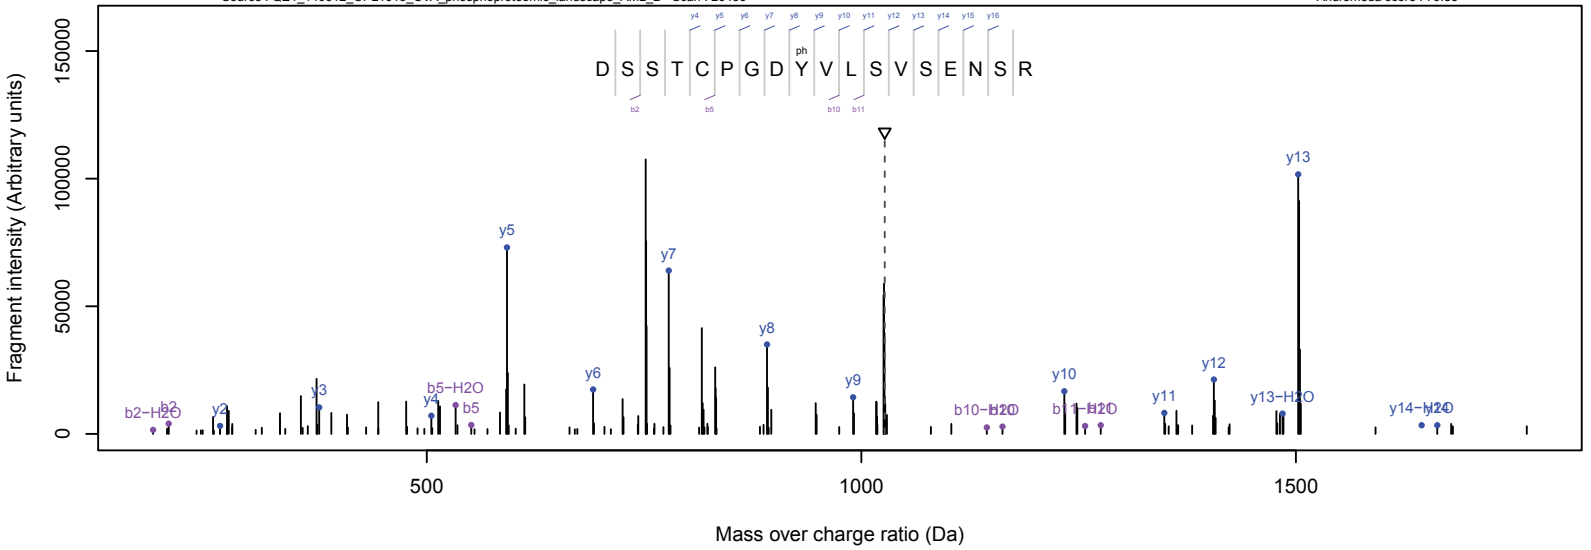

**GASQAGM(ox)TGY(ph)GM(ox)PR-2+**

Source : QE1\_140822\_OPL1013\_CvA\_pTyrIP\_AML\_cell\_lines\_part2\_B Scan : 6137

Andromeda score : 79.875

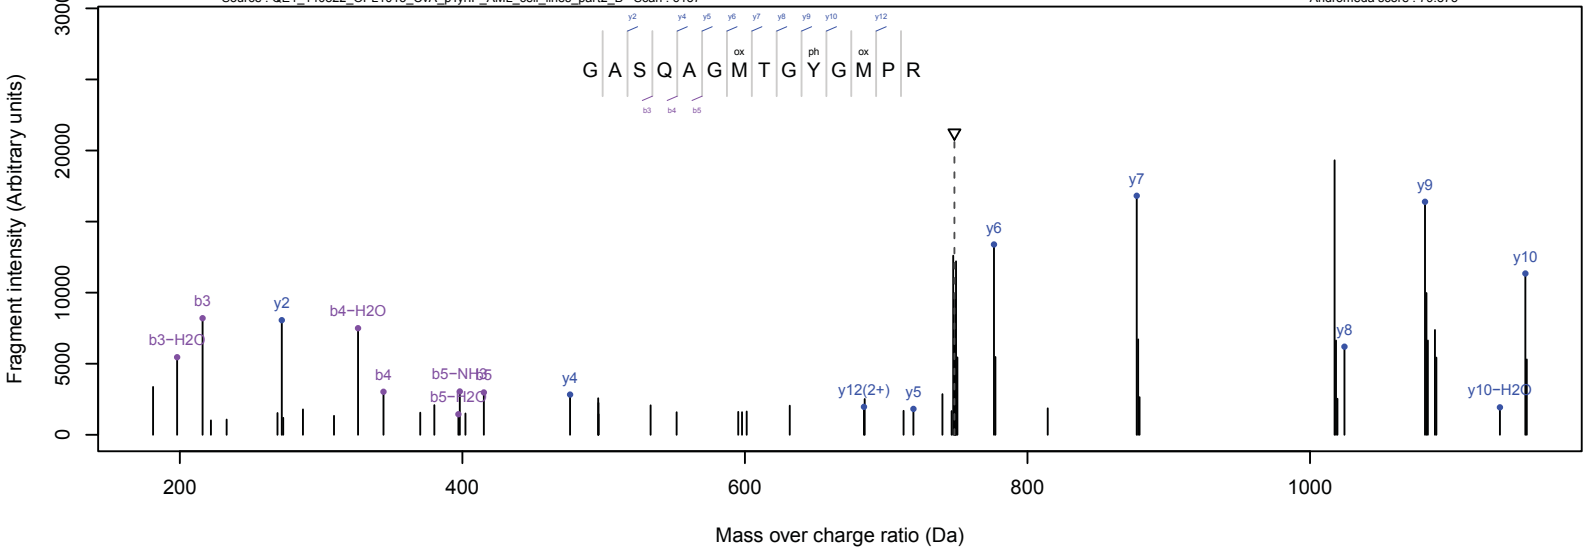

**NVESTNSNAY(ph)TQR-2+**

Source : QE1\_140822\_OPL1013\_CvA\_pTyrIP\_AML\_cell\_lines\_part2\_B Scan : 2904

Andromeda score : 79.875

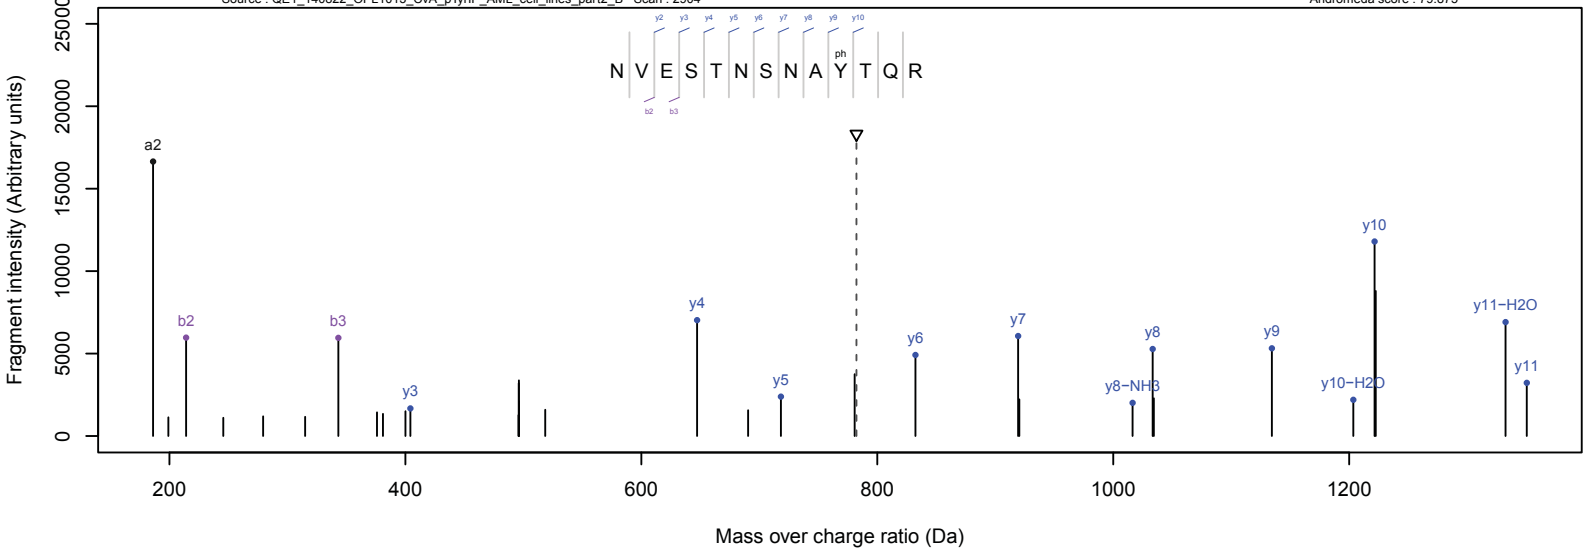

**(ac)SY(ph)GRPPDVEGMTSLK-2+**

Source : QE1\_140612\_OPL1013\_CVA\_phosphoproteomic\_landscape\_AML\_C Scan : 27709

Andromeda score : 79.837

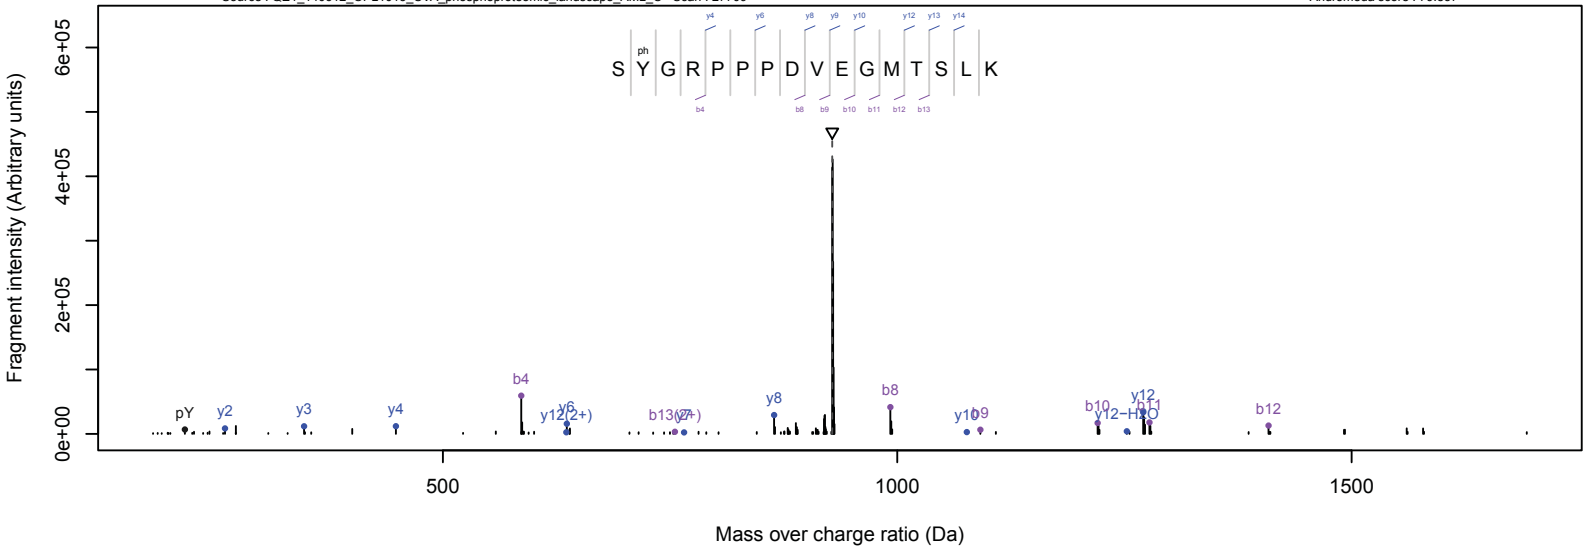

**S(ph)YVILSFENNGDYMDM(ox)K-2+**

Source : QE1\_140822\_OPL1013\_CvA\_pTyrIP\_AML\_cell\_lines\_part2\_B Scan : 34648

Andromeda score : 79.837

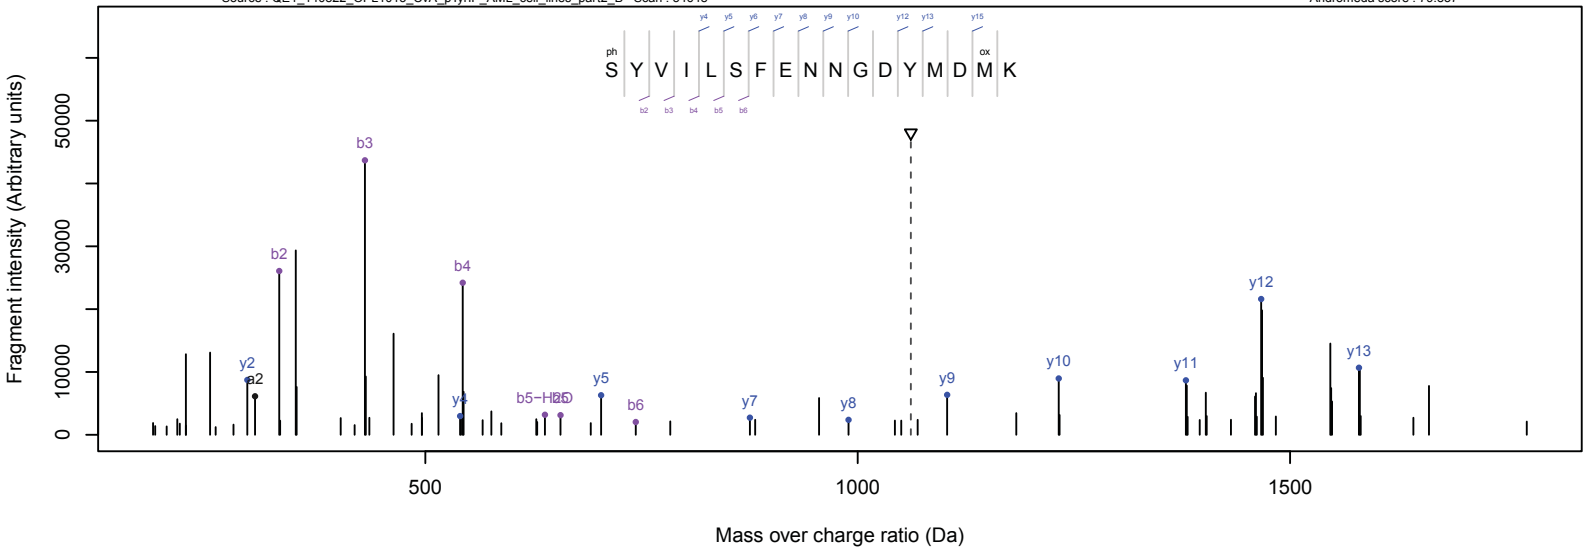

**INKSESVVY(ph)ADIR-3+**

Source : QE1\_140612\_OPL1013\_CVA\_phosphoproteomic\_landscape\_AML\_C Scan : 16677

Andromeda score : 79.804

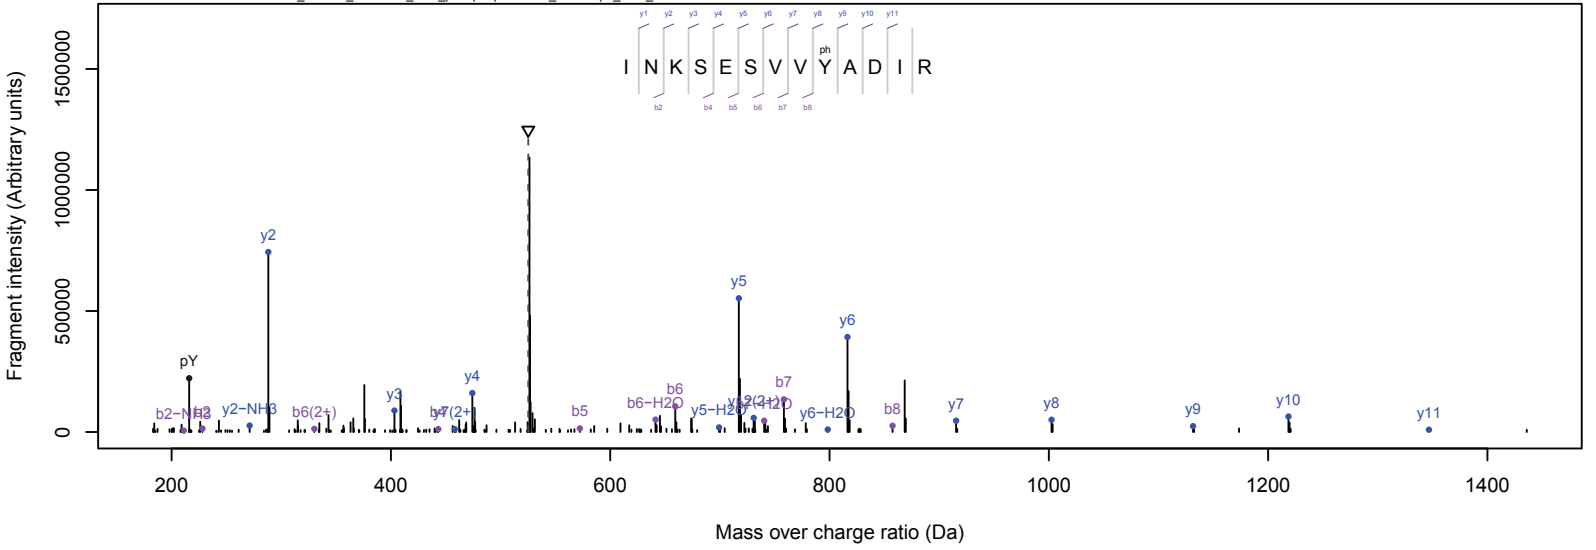

**IY(ph)ESHVGISSHEGK-3+**

Source : QE1\_140908\_OPL1013\_CvA\_pTyrIP\_AML\_Kasumi1 Scan : 6665

Andromeda score : 79.804

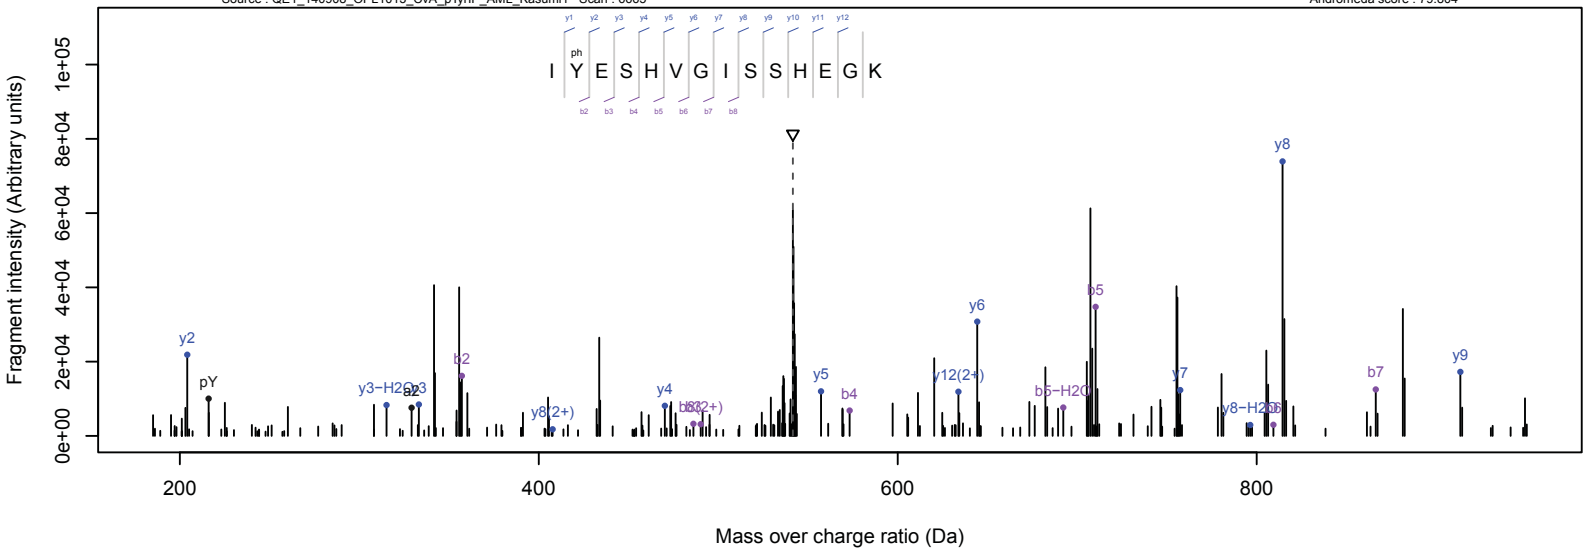

**FLENGSQEDLLHGNGSTY(ph)LASNSTSAPNWK-3+**

Source : QE1\_140612\_OPL1013\_CVA\_phosphoproteomic\_landscape\_AML\_C Scan : 35872

Andromeda score : 79.782

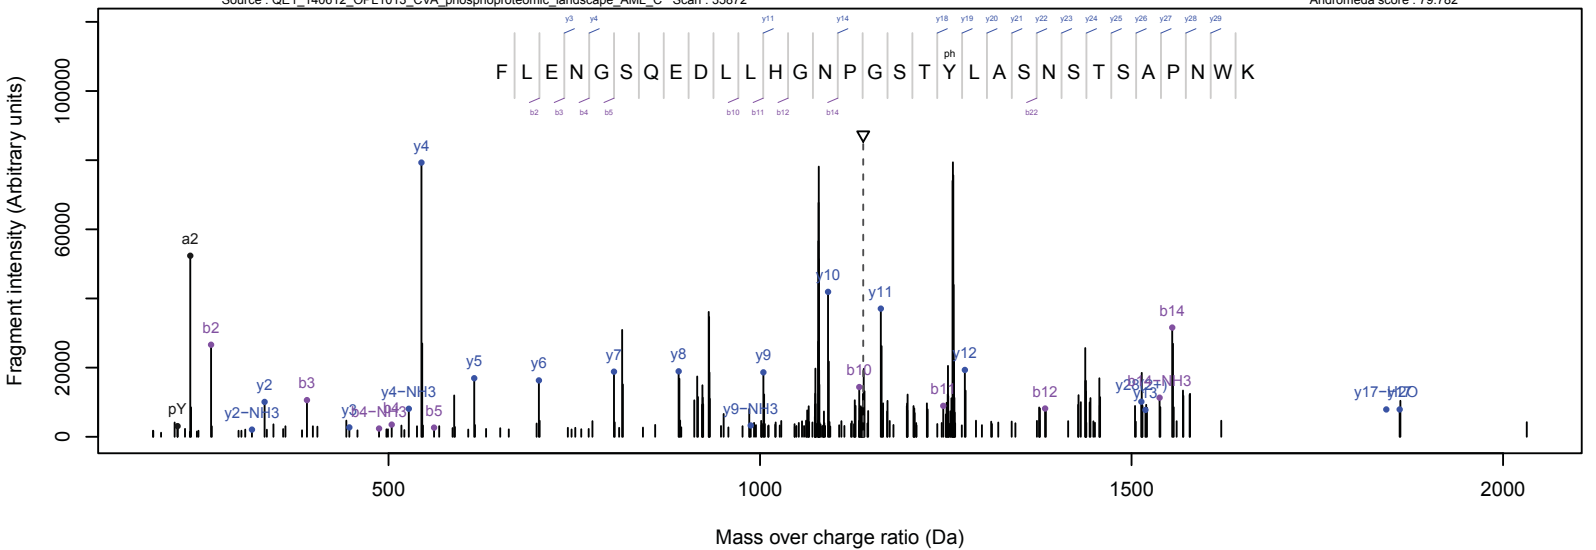





LG IPEY FNF A K

Source : QE1\_140908\_OPL1013\_CVA\_pTyrIP\_AML\_HEL Scan : 44228

Andromeda score : 79.659

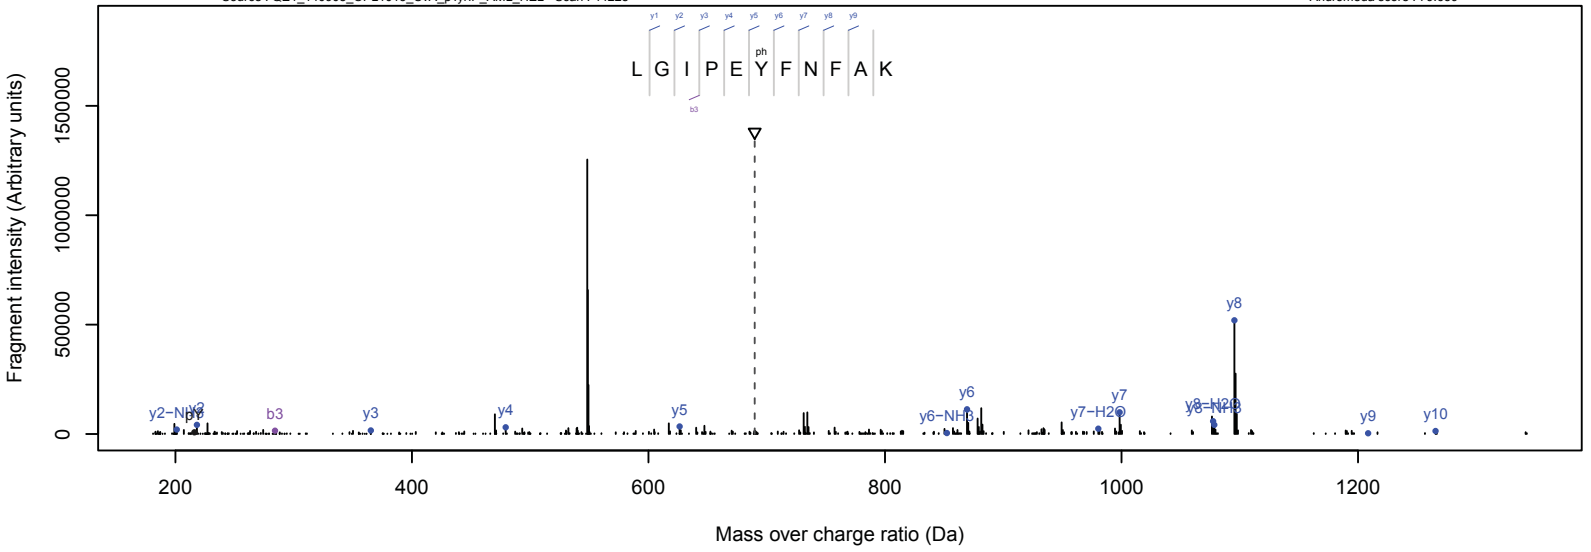

V I L D Y N T A H N K

Source : QE1\_140612\_OPL1013\_CVA\_phosphoproteomic\_landscape\_AML\_B Scan : 10006

Andromeda score : 79.659

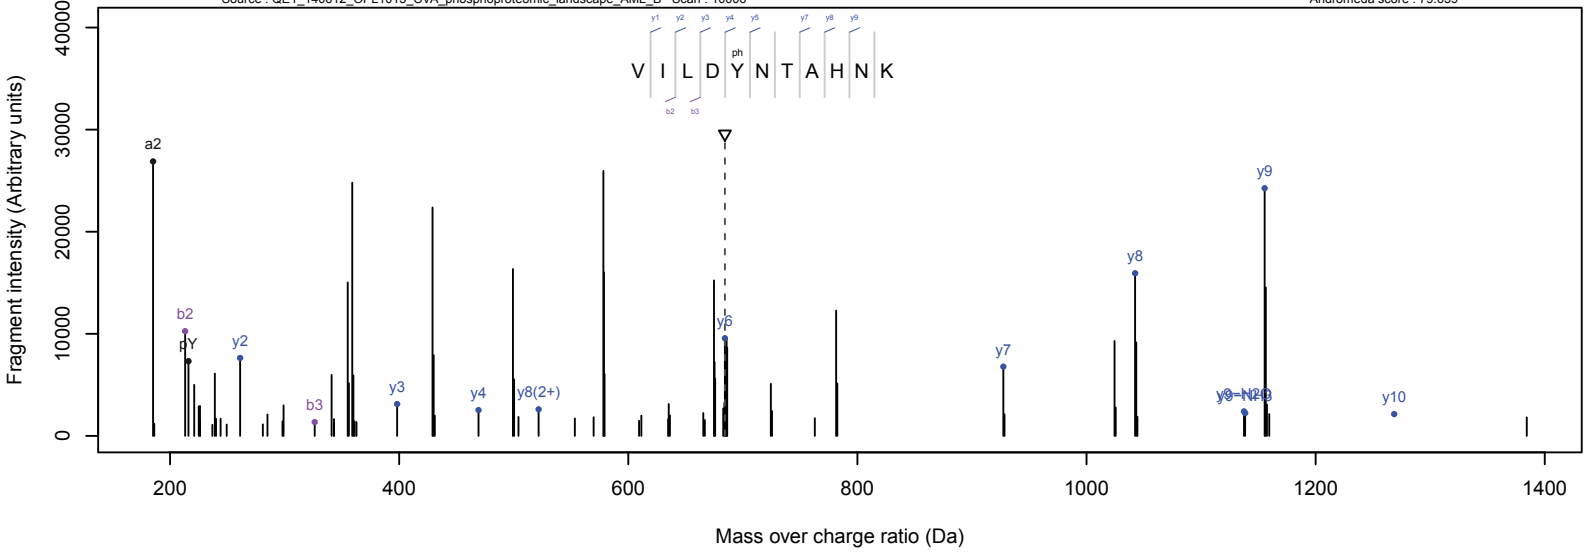

V Q T Q Q Y Y P H V R

Source : QE1\_140612\_OPL1013\_CVA\_phosphoproteomic\_landscape\_AML\_C Scan : 9829

Andromeda score : 79.659

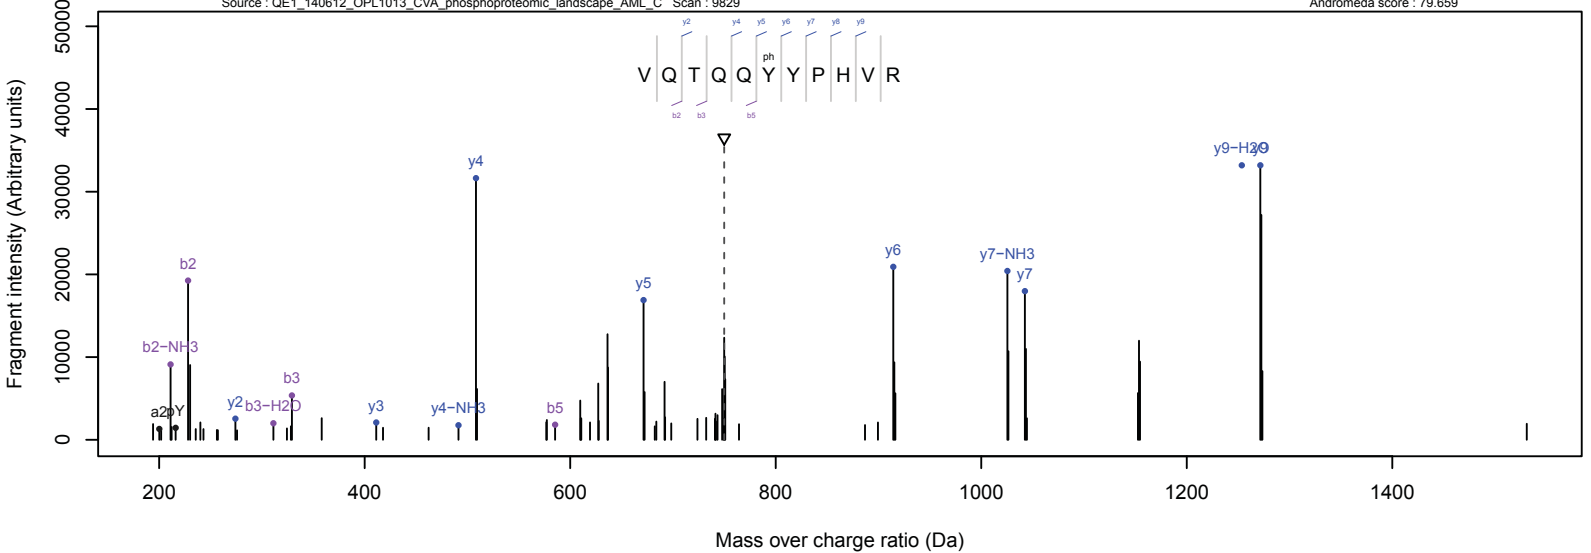

YLSLHDNKY(ph)IR-3+

Source: QE1\_140612\_OPL1013\_CVA\_phosphoproteomic\_landscape\_AML\_A Scan: 15920

Andromeda score: 79.659

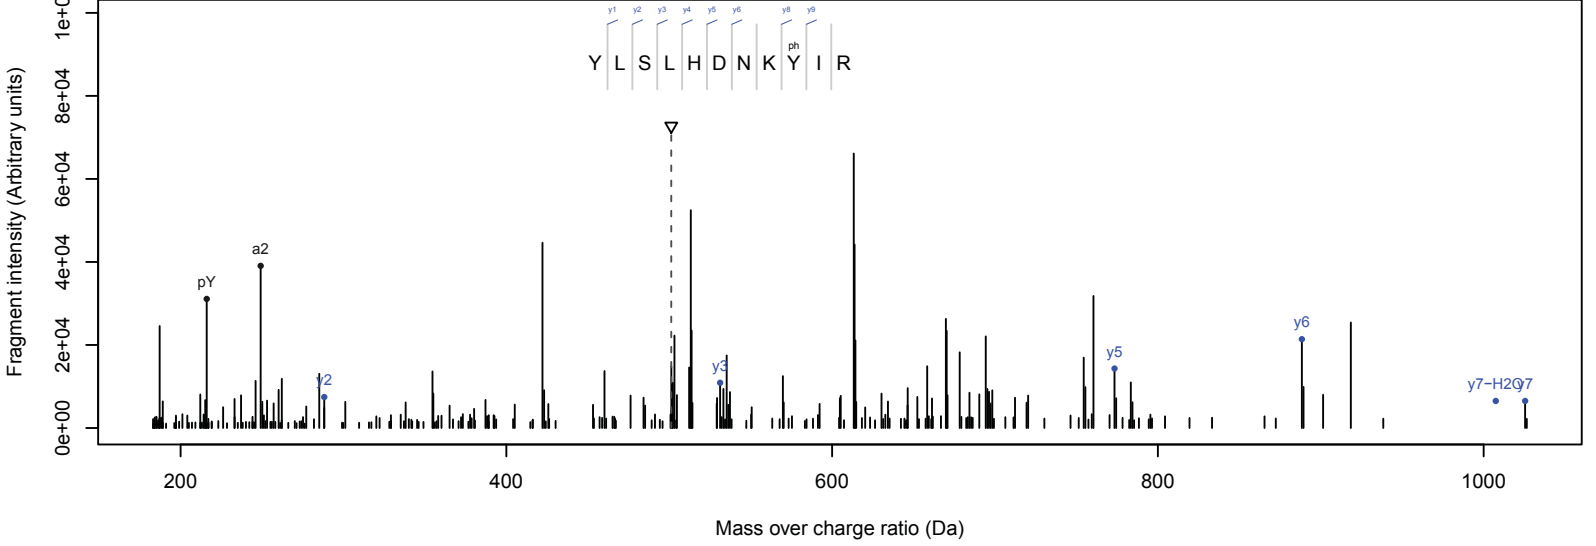

EALGTPGAANLY(ph)QVFIK-2+

Source: QE1\_140612\_OPL1013\_CVA\_phosphoproteomic\_landscape\_AML\_B Scan: 43588

Andromeda score: 79.652

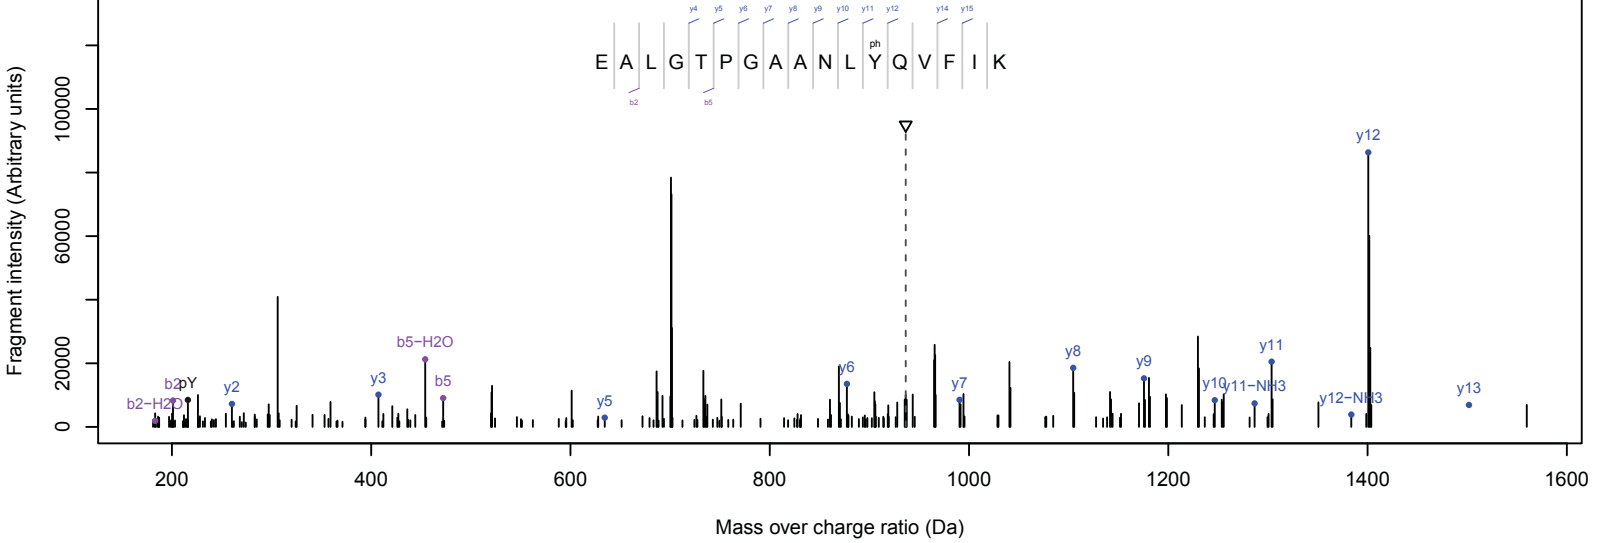

QQQY(ph)KFLPSELRDEH-3+

Source: QE1\_140612\_OPL1013\_CVA\_phosphoproteomic\_landscape\_AML\_B Scan: 21747

Andromeda score: 79.652

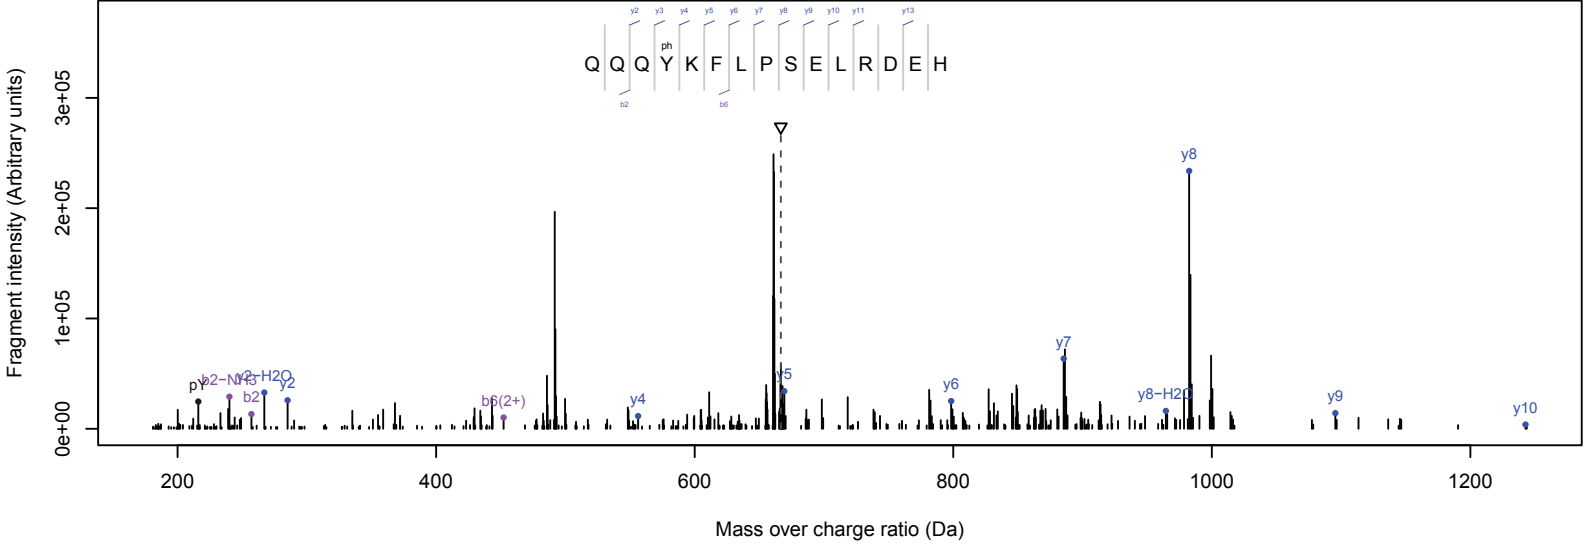

SLMELVEYY(ph)KHHSLK-3+

Source : QE1\_140612\_OPL1013\_CVA\_phosphoproteomic\_landscape\_AML\_C Scan : 39057

Andromeda score : 79.652

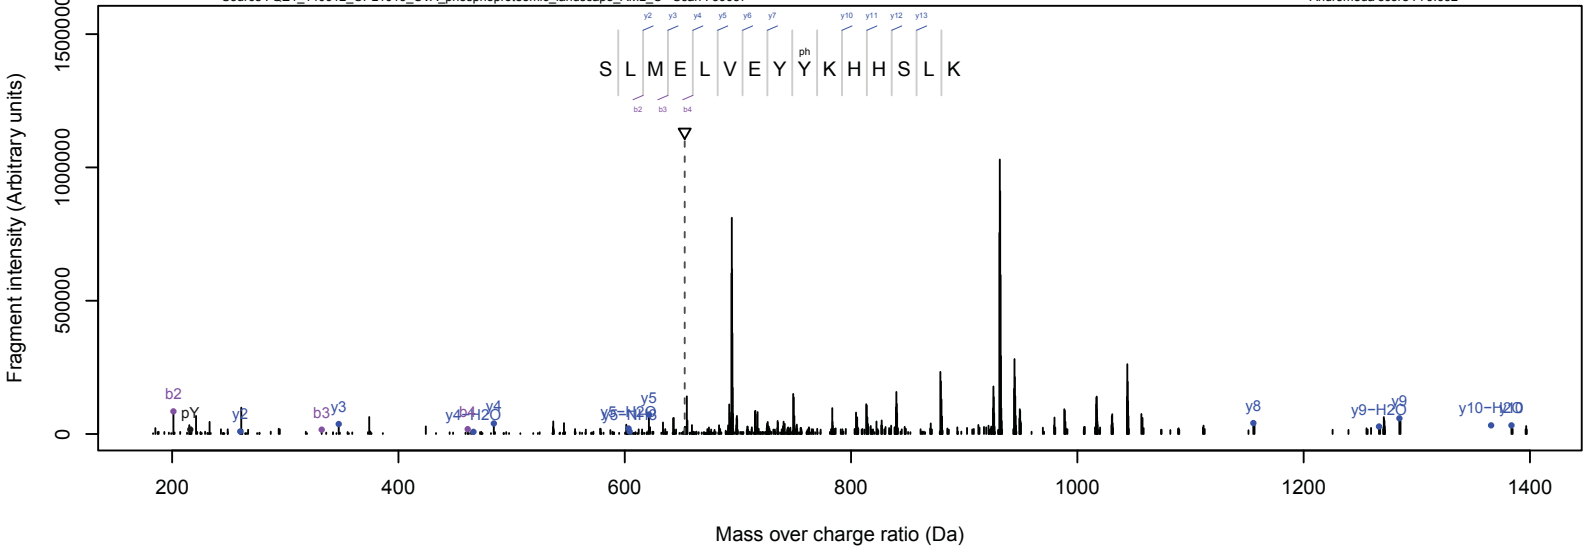

Y(ph)LTMDLLTALEGNR-2+

Source : QE1\_140612\_OPL1013\_CVA\_phosphoproteomic\_landscape\_AML\_B Scan : 45865

Andromeda score : 79.652

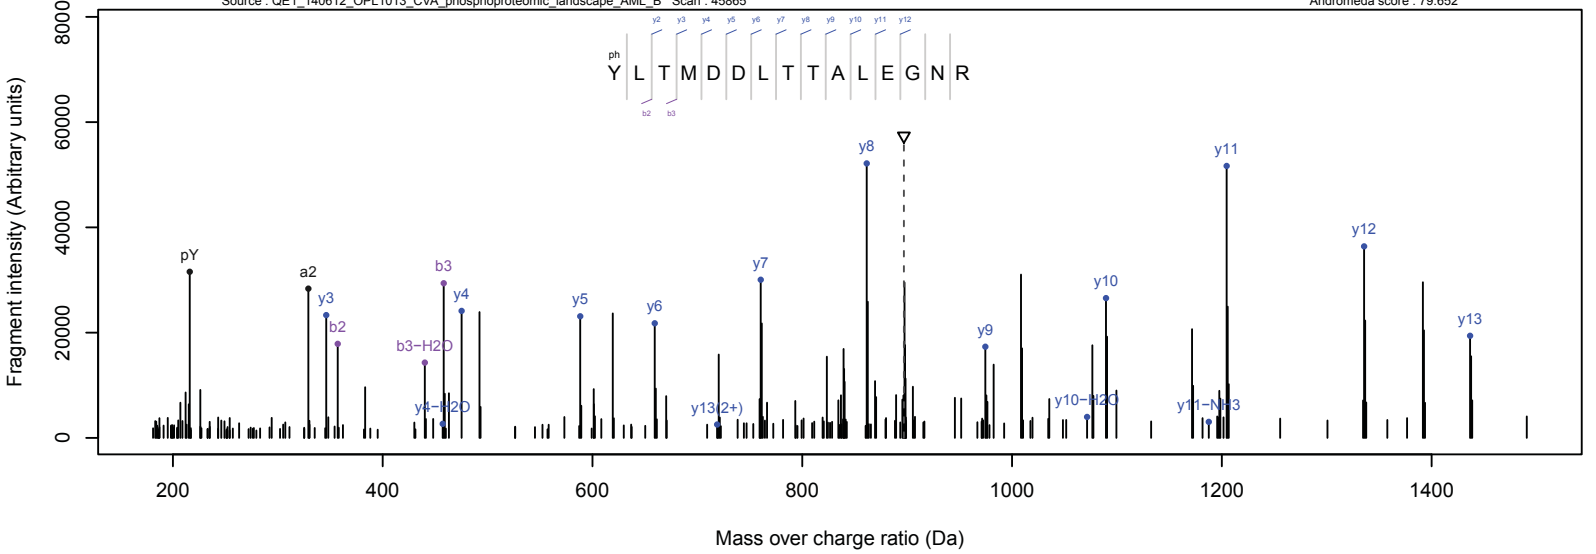

SNGYEEAY(ph)SVFKK-2+

Source : QE1\_140612\_OPL1013\_CVA\_phosphoproteomic\_landscape\_AML\_D Scan : 22641

Andromeda score : 79.614

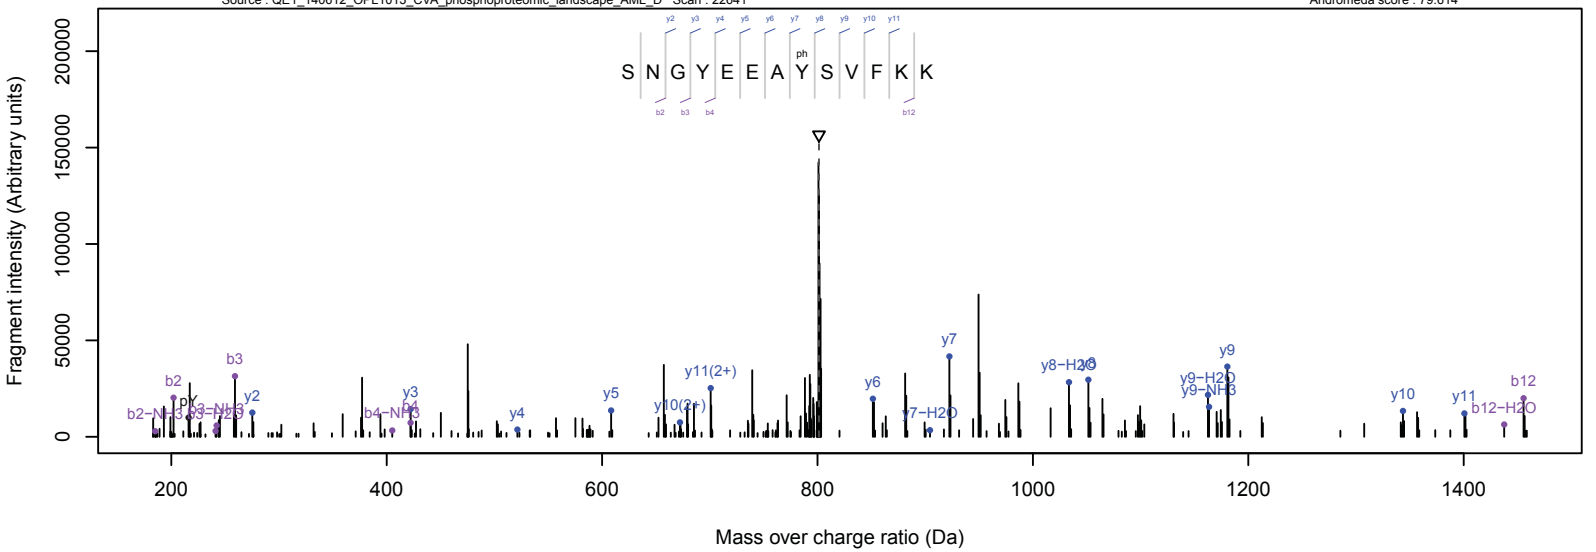

**Y(ph)PYVCHAE LNAIMNK-3+**

Source : QE1\_140612\_OPL1013\_CVA\_phosphoproteomic\_landscape\_AML\_B Scan : 29335

Andromeda score : 79.614

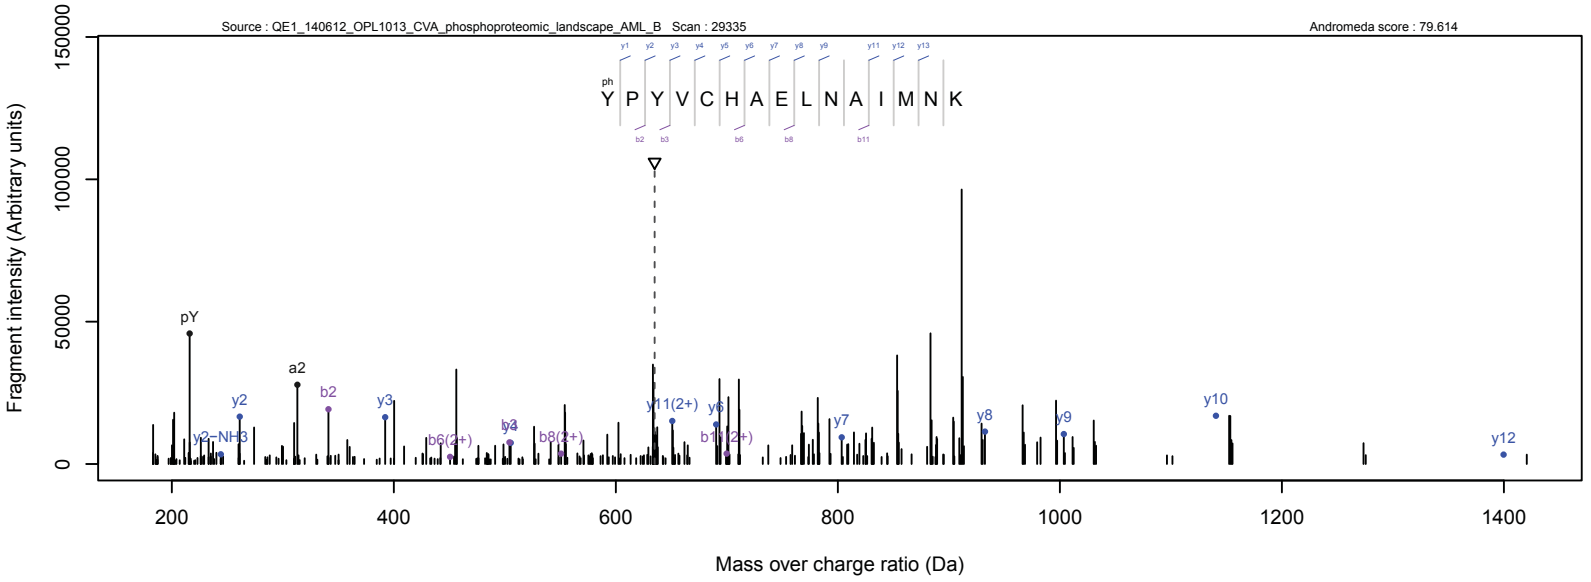

**ALEKNPDEFY(ph)YK-3+**

Source : QE1\_140612\_OPL1013\_CVA\_phosphoproteomic\_landscape\_AML\_C Scan : 17435

Andromeda score : 79.492

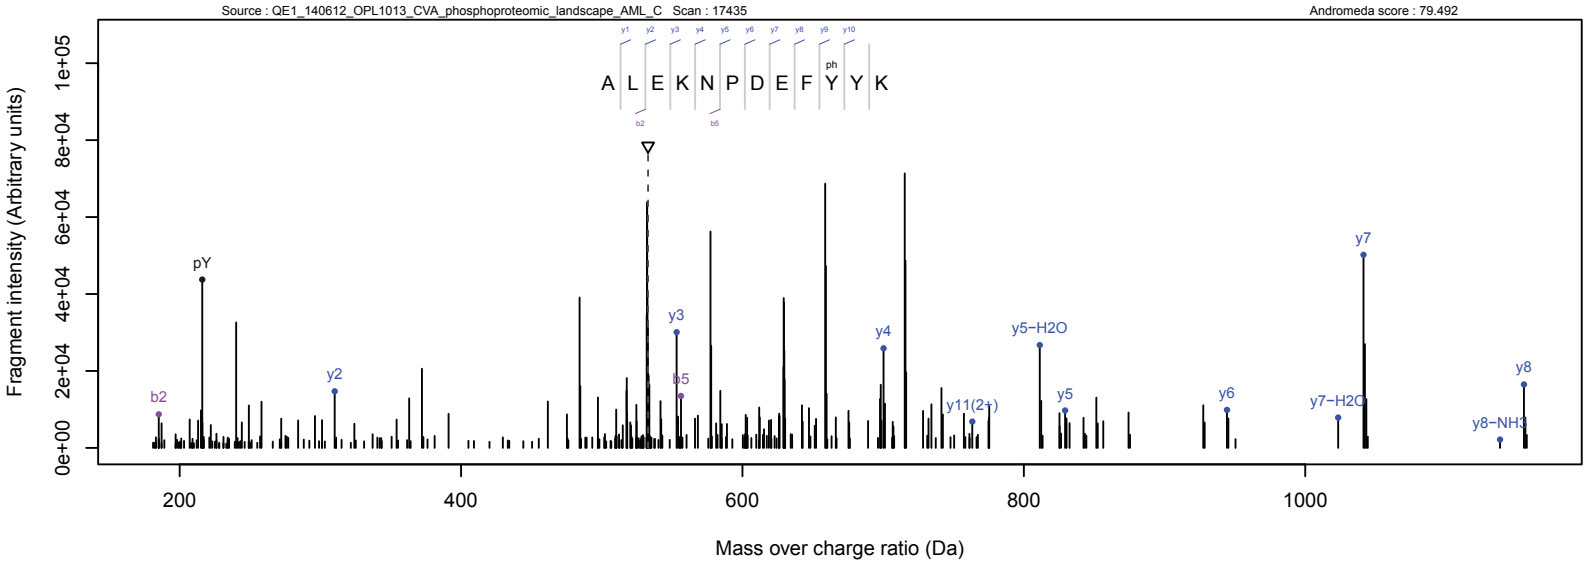

**DMPY(ph)QPFSGDR-3+**

Source : QE1\_140612\_OPL1013\_CVA\_phosphoproteomic\_landscape\_AML\_C Scan : 16415

Andromeda score : 79.492

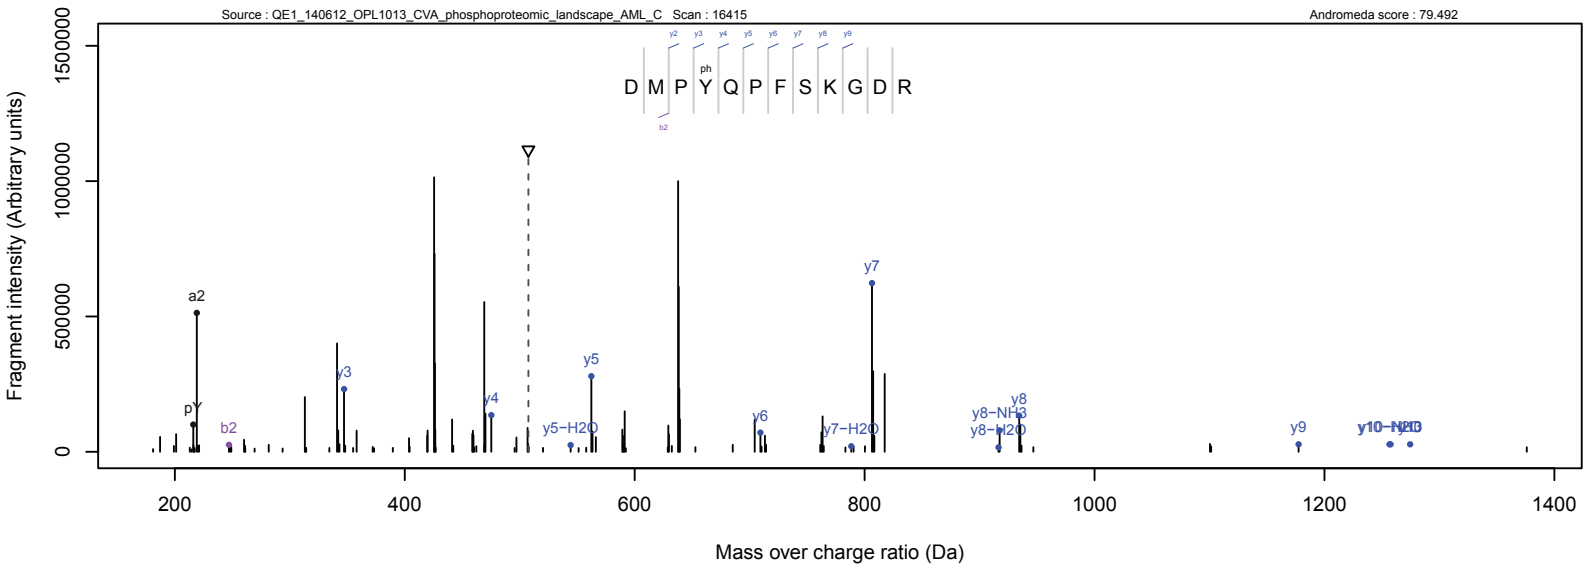

**LDNGGY(ph)YITTR-2+**

Source : QE1\_140612\_OPL1013\_CVA\_phosphoproteomic\_landscape\_AML\_C Scan : 16026

Andromeda score : 79.492

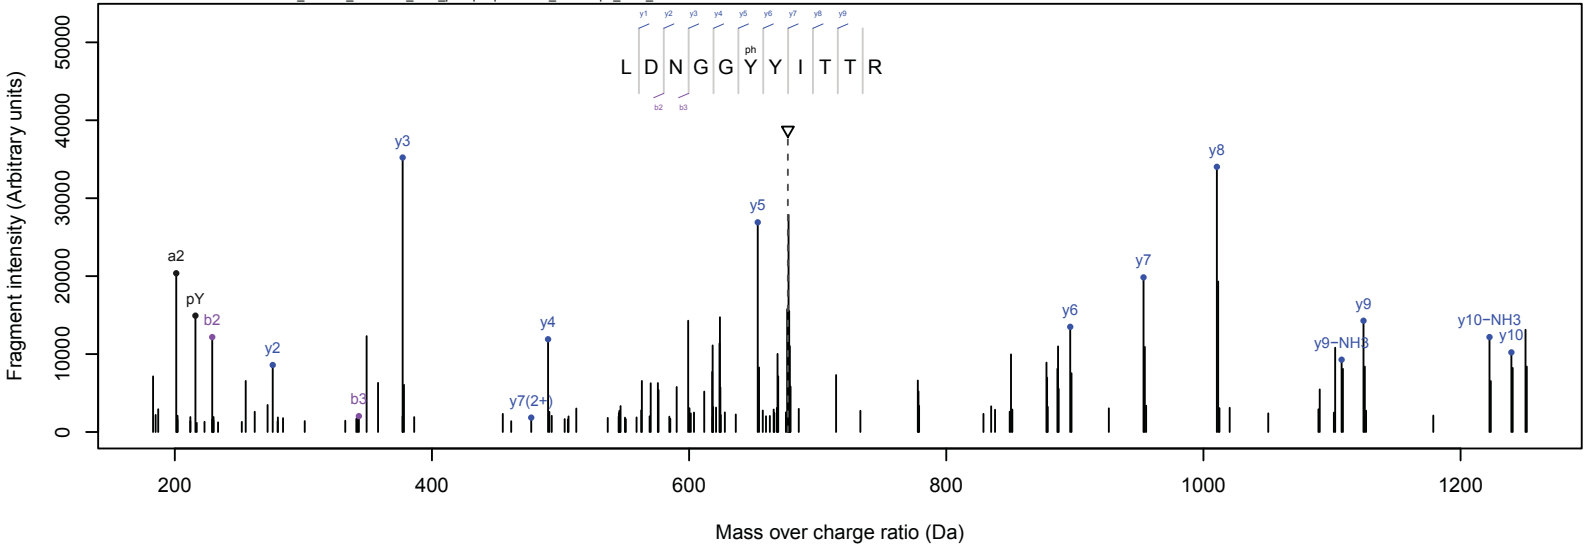

**NKPLFFADKLY(ph)K-3+**

Source : QE1\_140612\_OPL1013\_CVA\_phosphoproteomic\_landscape\_AML\_B Scan : 27204

Andromeda score : 79.492

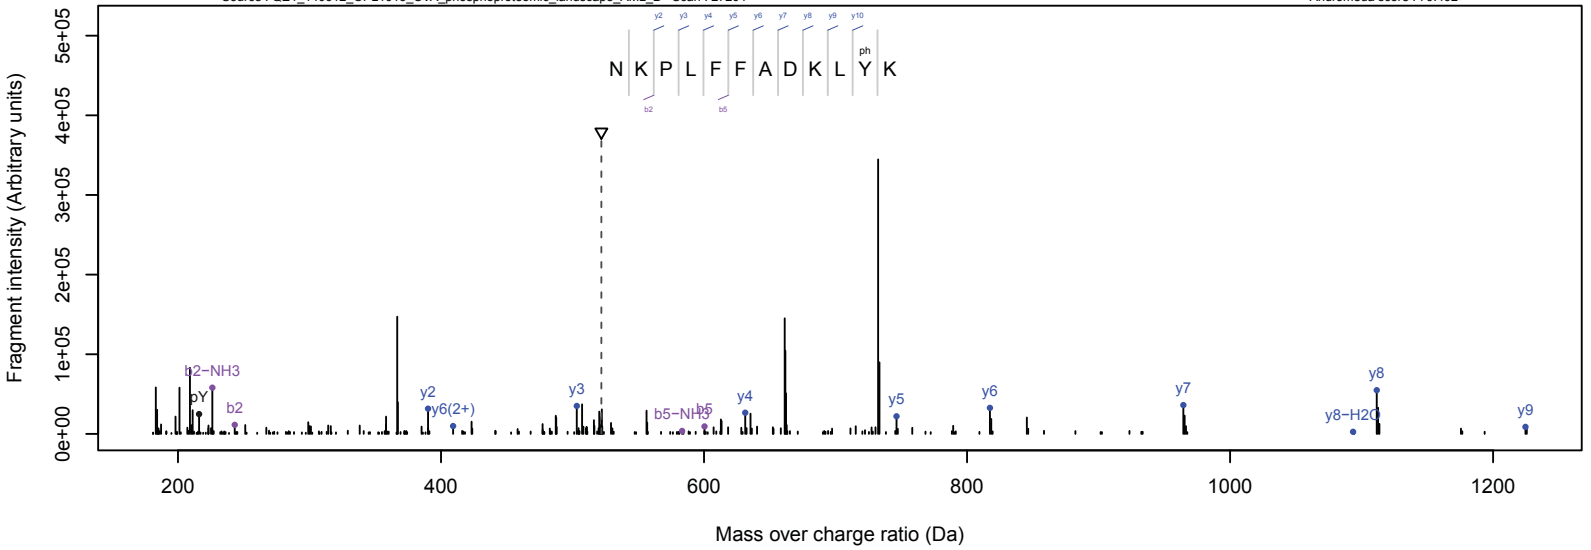

**TVTAMDVVY(ph)ALK-2+**

Source : QE1\_140612\_OPL1013\_CVA\_phosphoproteomic\_landscape\_AML\_A Scan : 44074

Andromeda score : 79.492

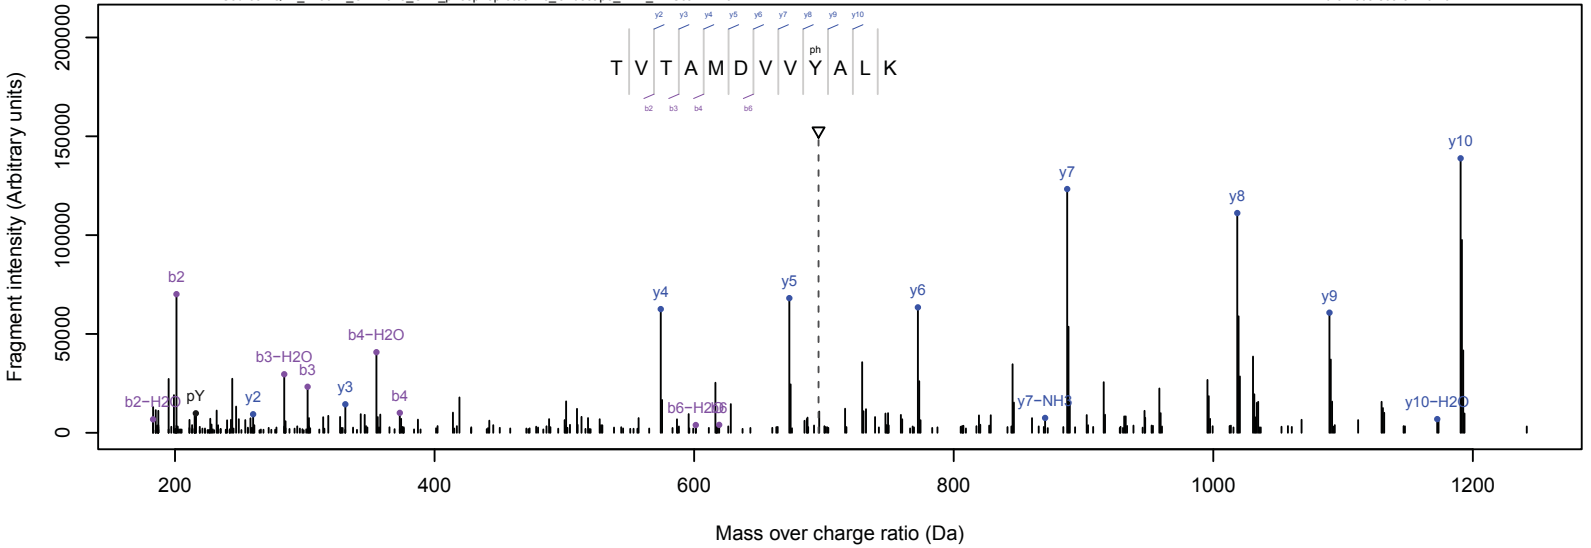

**KSEY(ph)FELK-2+**

Source: QE1\_140612\_OPL1013\_CVA\_phosphoproteomic\_landscape\_AML\_C Scan: 15088

Andromeda score: 79.489

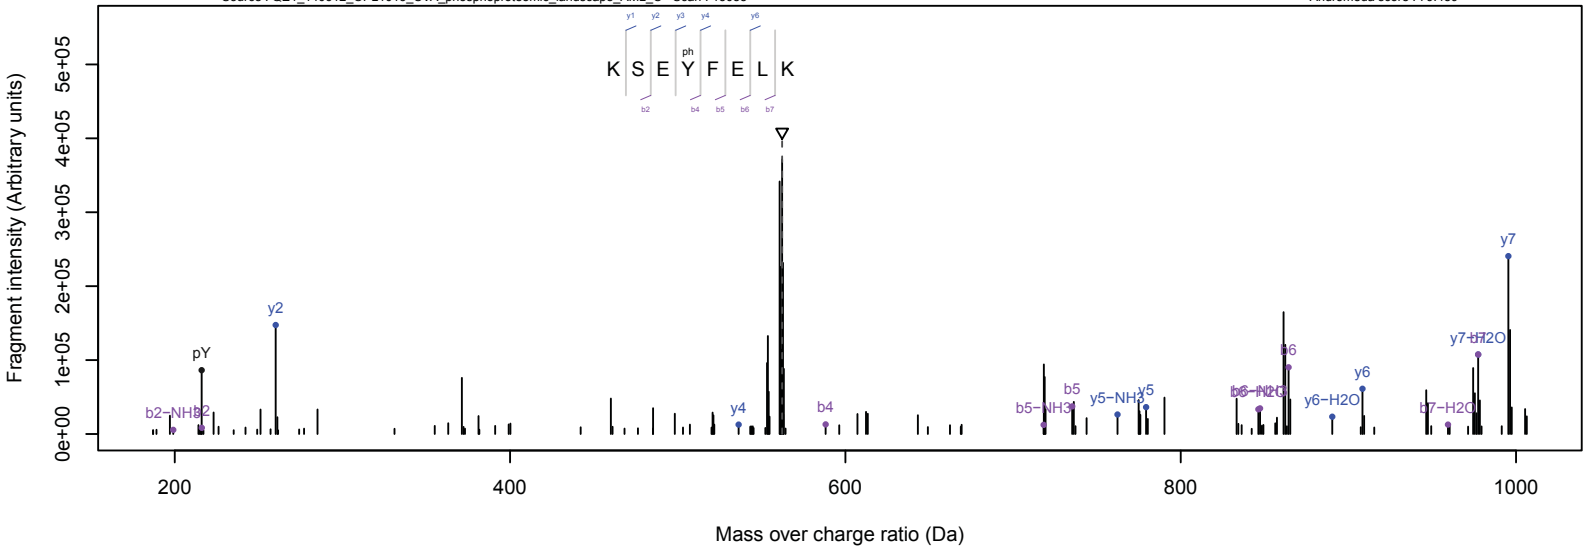

**LKAYEDQTKPVL EY YQK-3+**

Source: QE1\_140612\_OPL1013\_CVA\_phosphoproteomic\_landscape\_AML\_C Scan: 21219

Andromeda score: 79.489

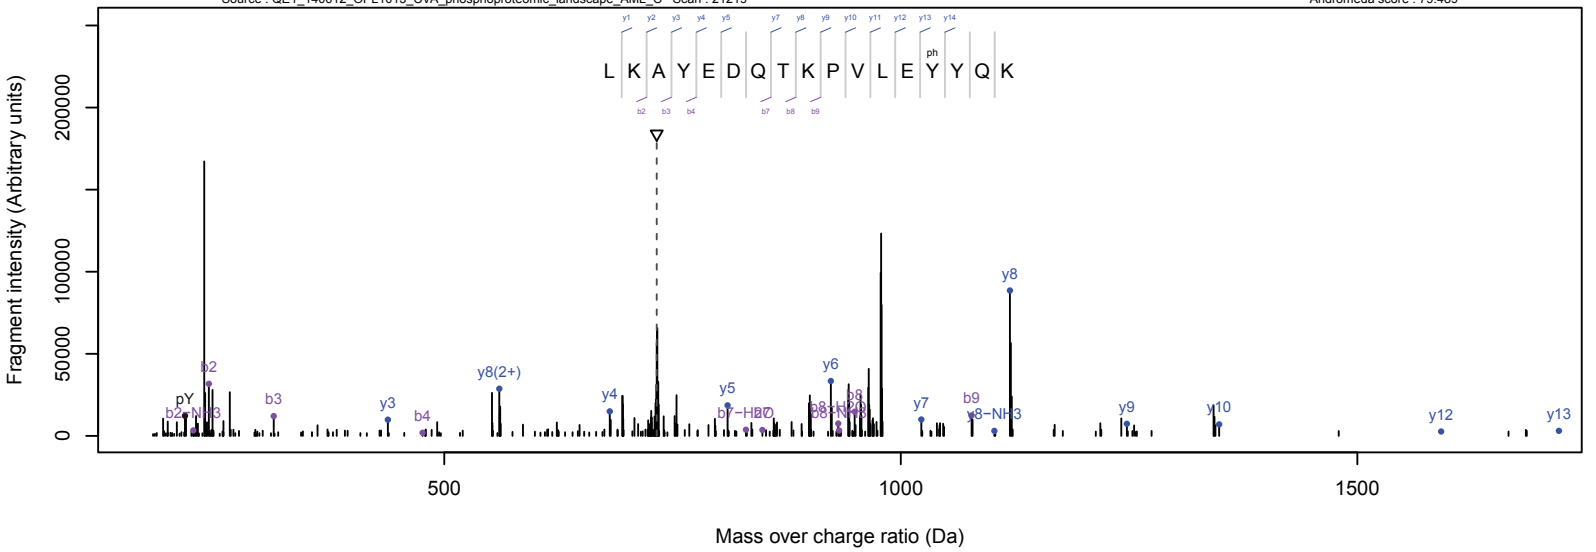

**VY(ph)INMPGRG-2+**

Source: QE1\_140908\_OPL1013\_CvA\_pTyrIP\_AML\_Kasumi6 Scan: 22948

Andromeda score: 79.474

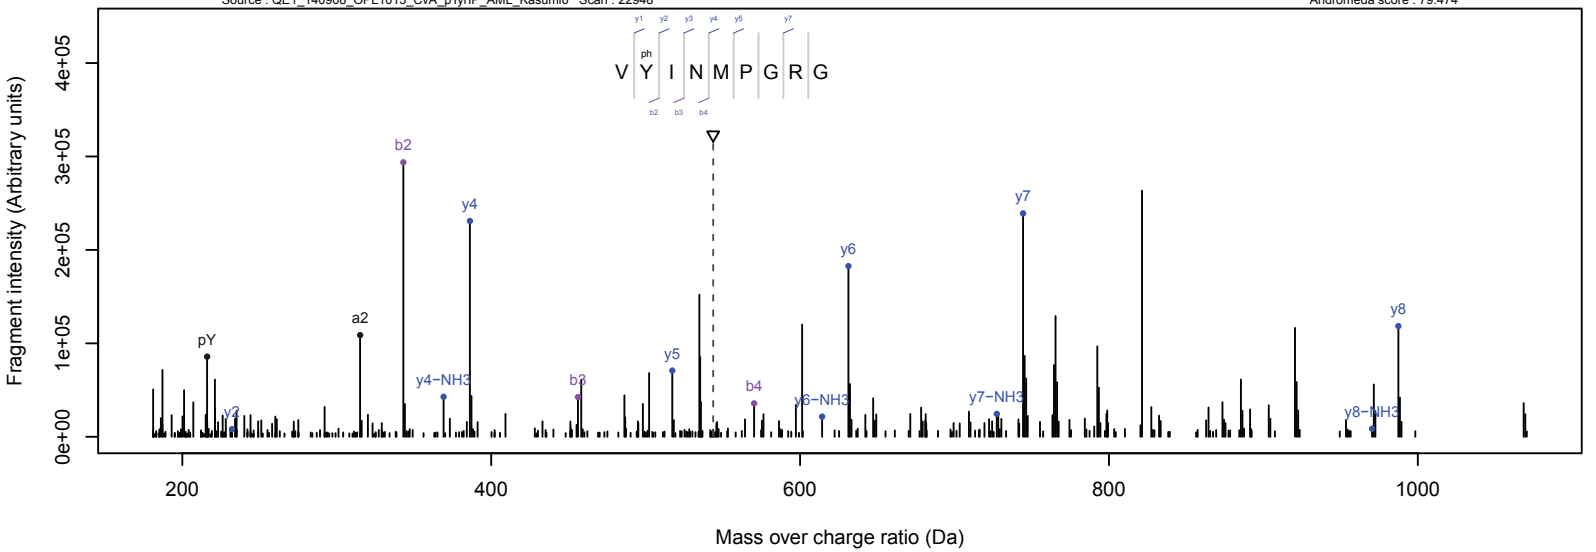

NHSPSFNSTIY(ph)EVIGK-3+

Source : QE1\_140822\_OPL1013\_CVA\_pTyrIP\_AML\_cell\_lines\_part2\_B Scan : 27382

Andromeda score : 79.471

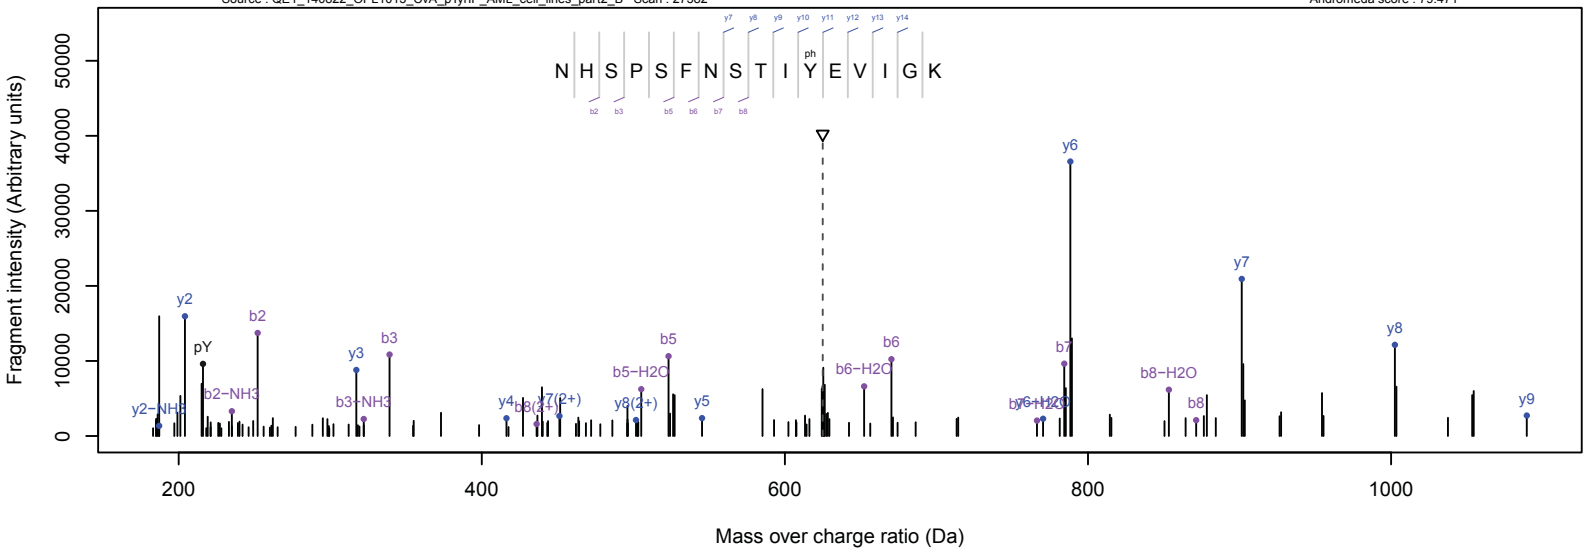

DY(ph)LHYIR-2+

Source : QE1\_140612\_OPL1013\_CVA\_phosphoproteomic\_landscape\_AML\_C Scan : 17470

Andromeda score : 79.469

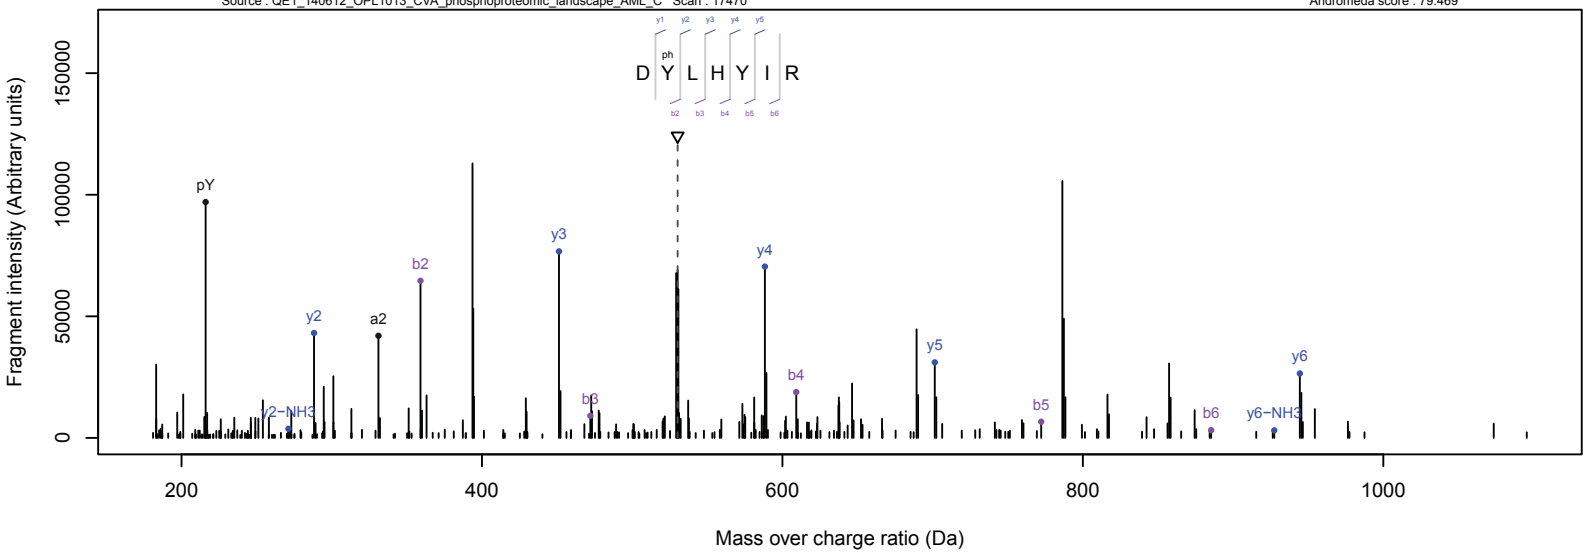

LAY(ph)IAHPK-2+

Source : QE1\_140612\_OPL1013\_CVA\_phosphoproteomic\_landscape\_AML\_C Scan : 8074

Andromeda score : 79.469

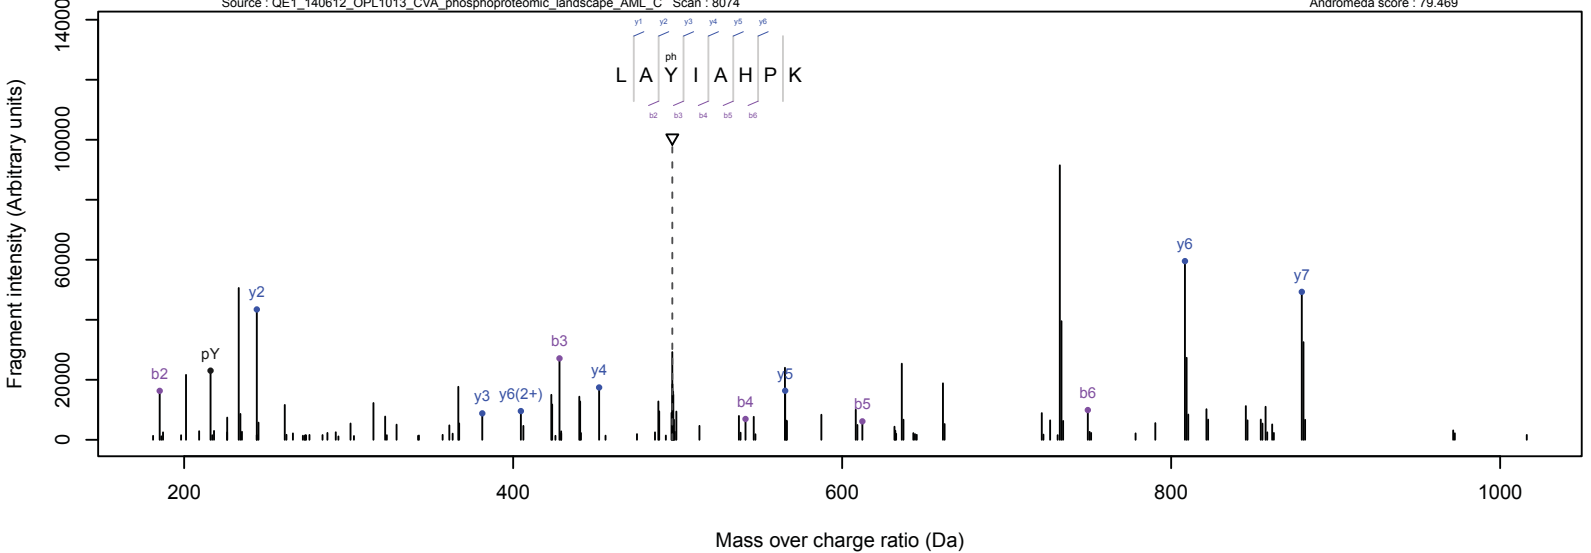



ALY(ph)PVIPR-2+

Source: QE1\_140612\_OPL1013\_CVA\_phosphoproteomic\_landscape\_AML\_B Scan: 26351

Andromeda score: 79.451

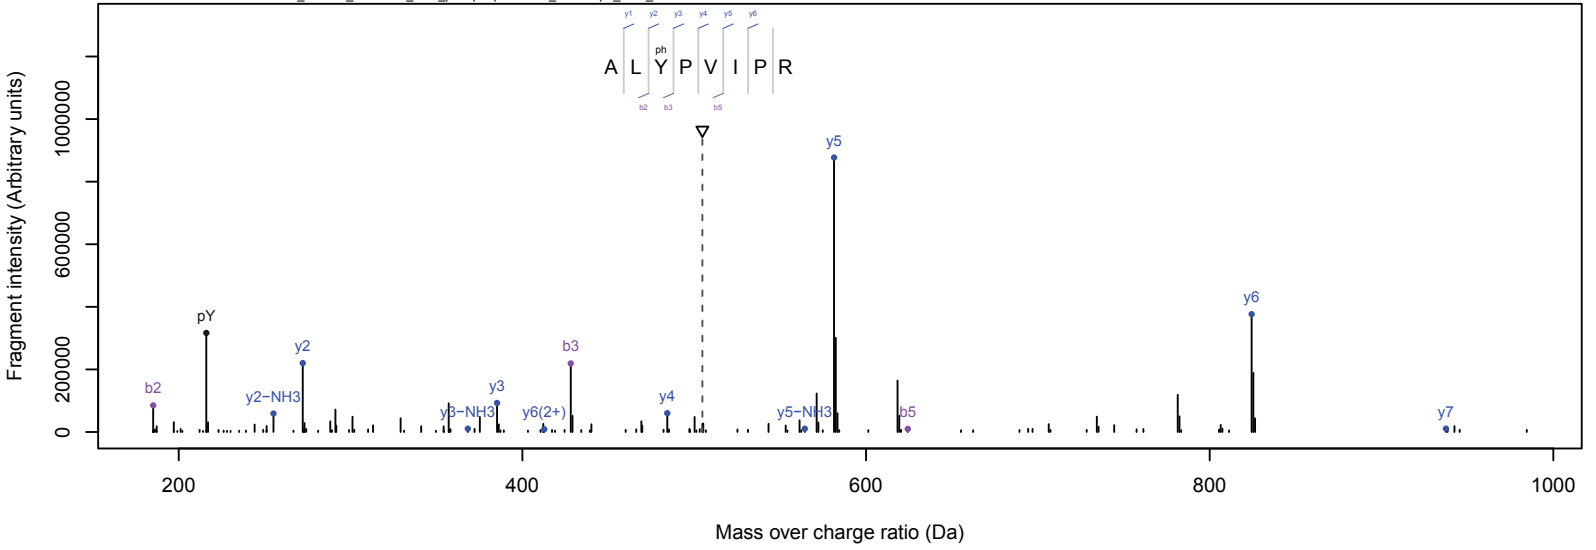

DGVY(ph)FLYEALHGPPK-3+

Source: QE1\_140612\_OPL1013\_CVA\_phosphoproteomic\_landscape\_AML\_B Scan: 42494

Andromeda score: 79.346

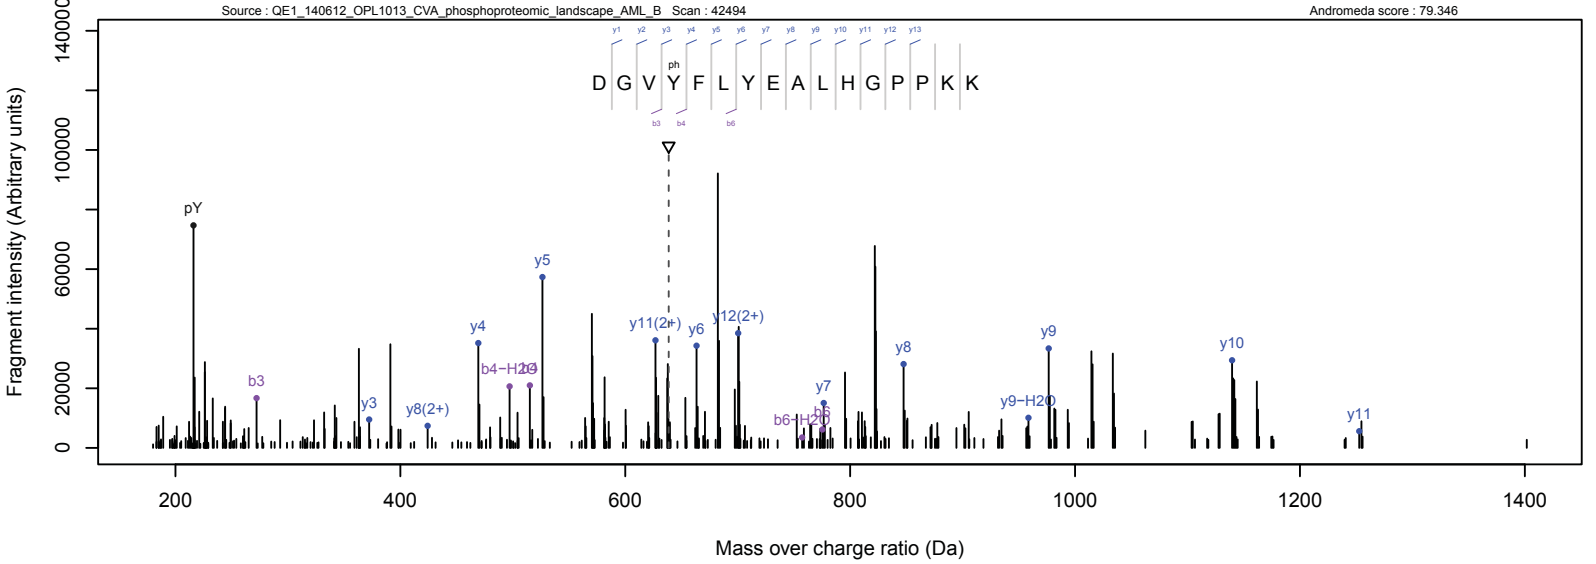

NIETINTFHQYS(ph)VK-3+

Source: QE1\_140612\_OPL1013\_CVA\_phosphoproteomic\_landscape\_AML\_C Scan: 38587

Andromeda score: 79.346

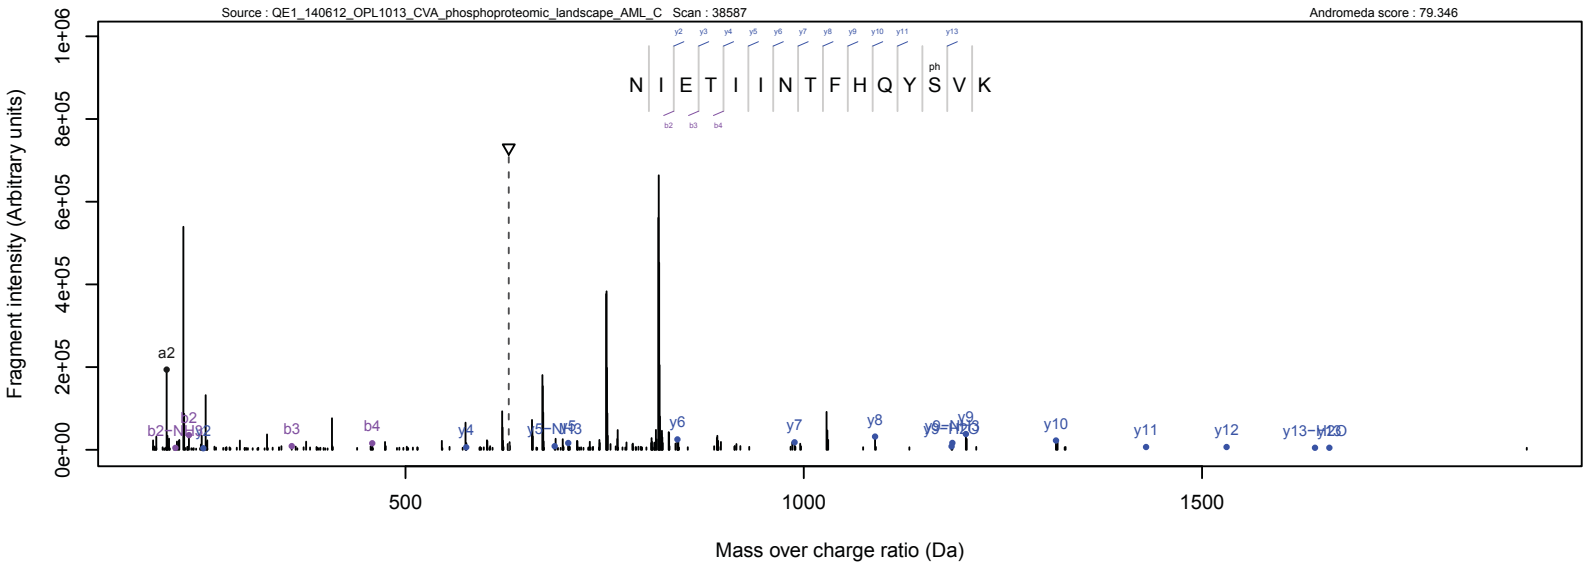

SLRY(ph)FEEESKDLAVR-3+

Source : QE1\_140612\_OPL1013\_CVA\_phosphoproteomic\_landscape\_AML\_C Scan : 26964

Andromeda score : 79.317

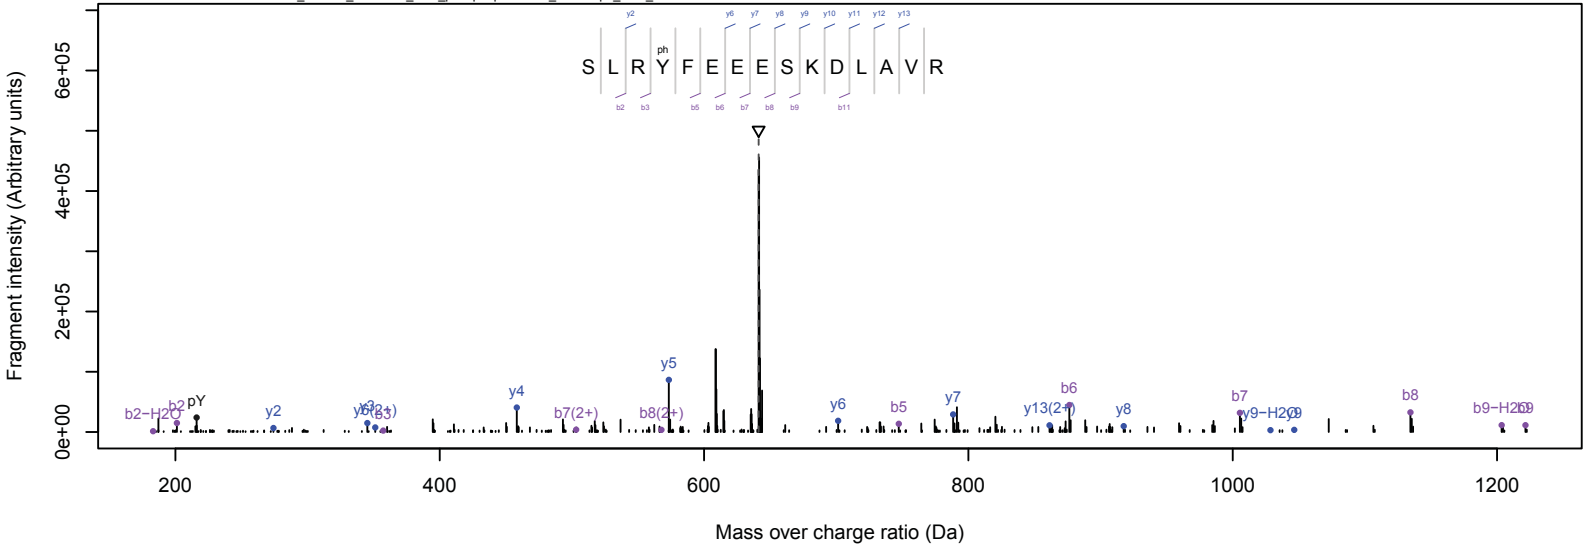

TAGRFDVY(ph)FISPQGLK-3+

Source : QE1\_140612\_OPL1013\_CVA\_phosphoproteomic\_landscape\_AML\_C Scan : 39541

Andromeda score : 79.317

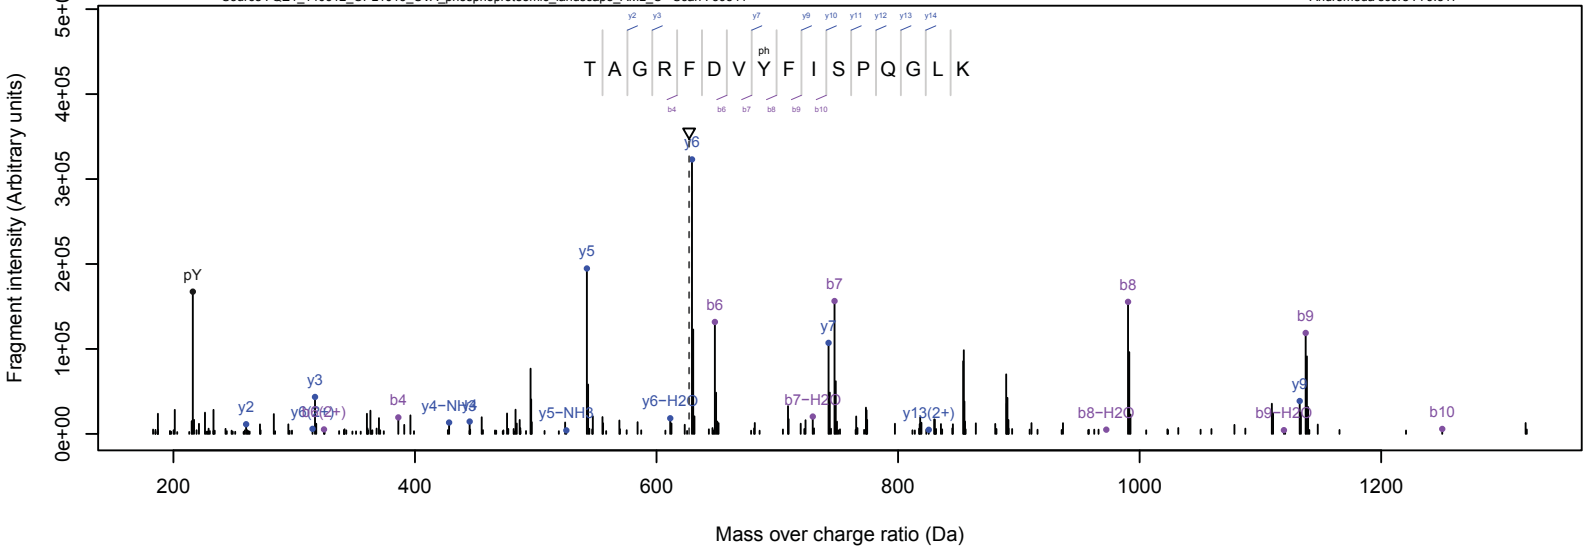

TDGCHAYLISK-2+

Source : QE1\_140822\_OPL1013\_CvA\_pTyrIP\_AML\_cell\_lines\_part2\_B Scan : 3296

Andromeda score : 79.286

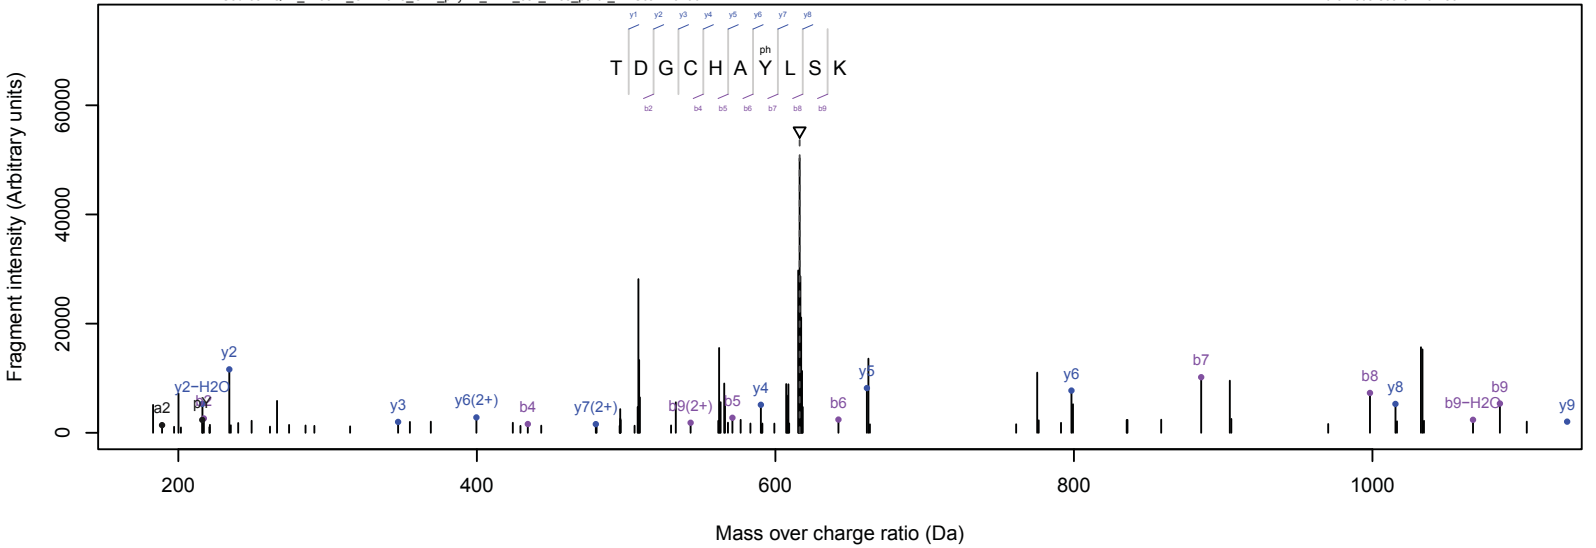

**AQQGLY(ph)QVGPSPQFQSPPAK-3+**

Source: QE1\_140908\_OPL1013\_CVA\_pTyrIP\_AML\_OCI\_AML3 Scan: 29216

Andromeda score: 79.237

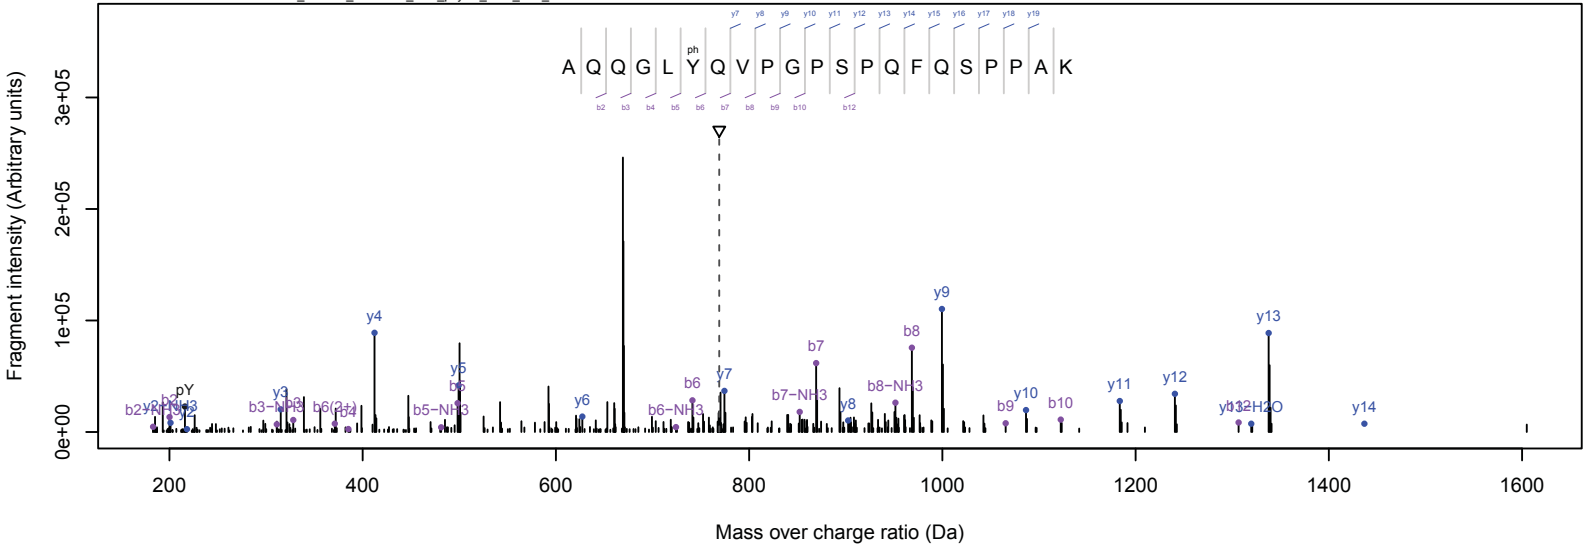

**AMY(ph)PDYFAK-2+**

Source: QE1\_140612\_OPL1013\_CVA\_phosphoproteomic\_landscape\_AML\_C Scan: 25403

Andromeda score: 79.148

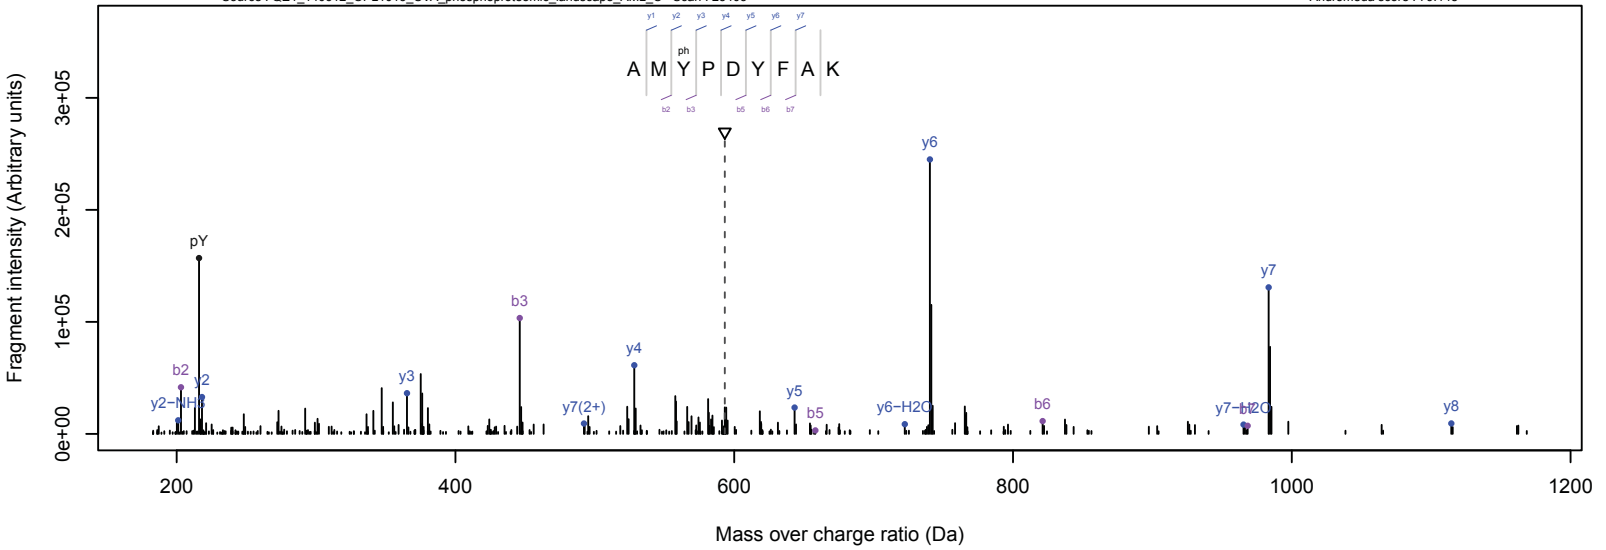

**NFLY(ph)AWCGKR-2+**

Source: QE1\_140612\_OPL1013\_CVA\_phosphoproteomic\_landscape\_AML\_A Scan: 29810

Andromeda score: 79.148

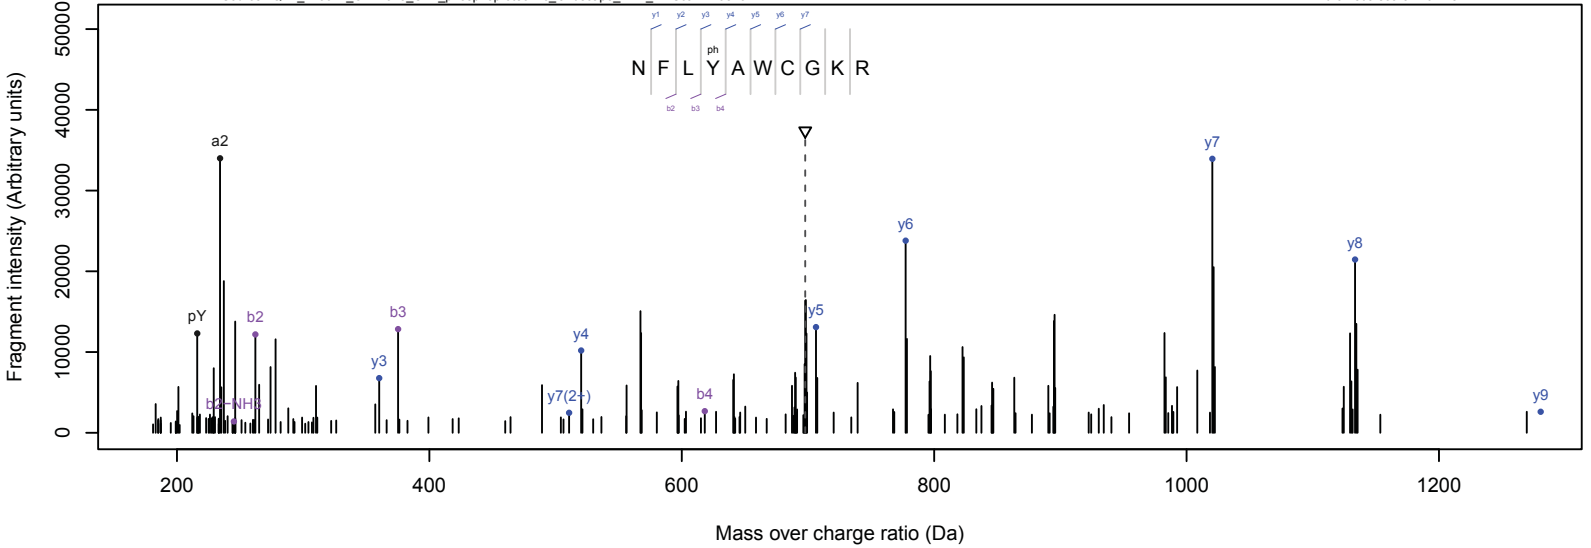

SENEDIY(ph)YK-2+

Source : QE1\_140612\_OPL1013\_CVA\_phosphoproteomic\_landscape\_AML\_C Scan : 9004

Andromeda score : 79.148

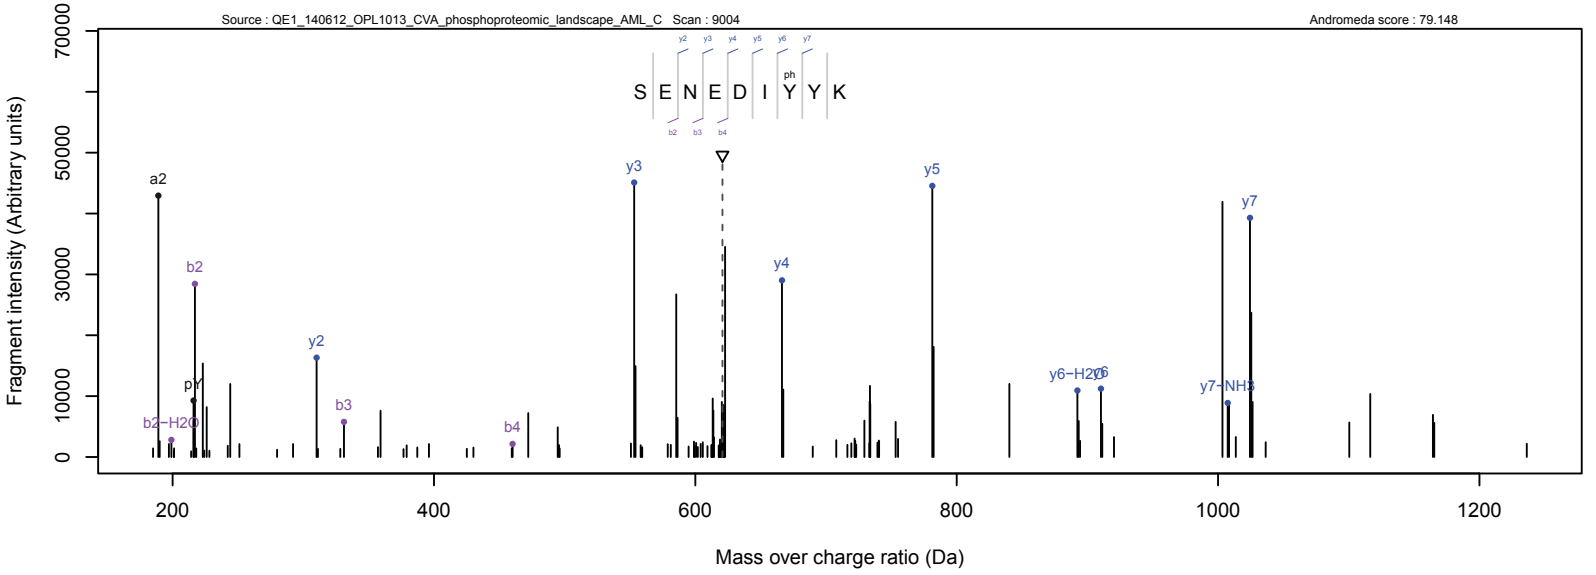

Y(ph)NLPWCDR-2+

Source : QE1\_140612\_OPL1013\_CVA\_phosphoproteomic\_landscape\_AML\_D Scan : 23735

Andromeda score : 79.148

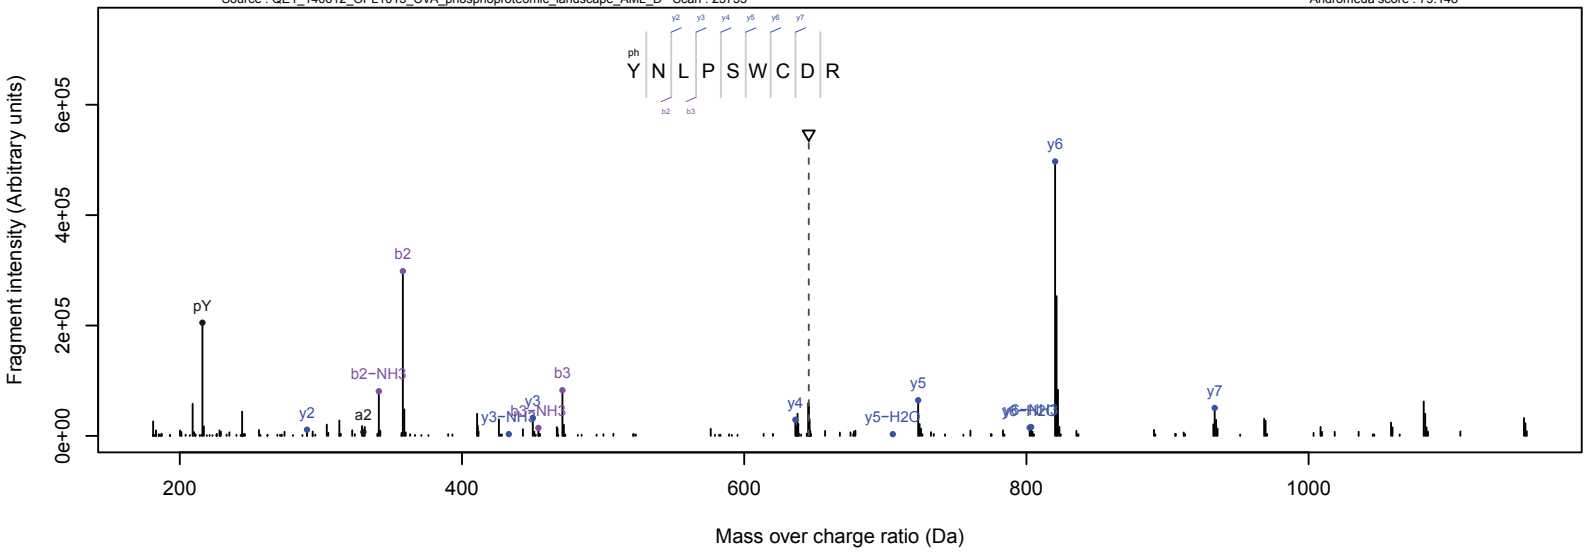

(ac)TY(ph)AYLFK-2+

Source : QE1\_140612\_OPL1013\_CVA\_phosphoproteomic\_landscape\_AML\_C Scan : 37614

Andromeda score : 79.116

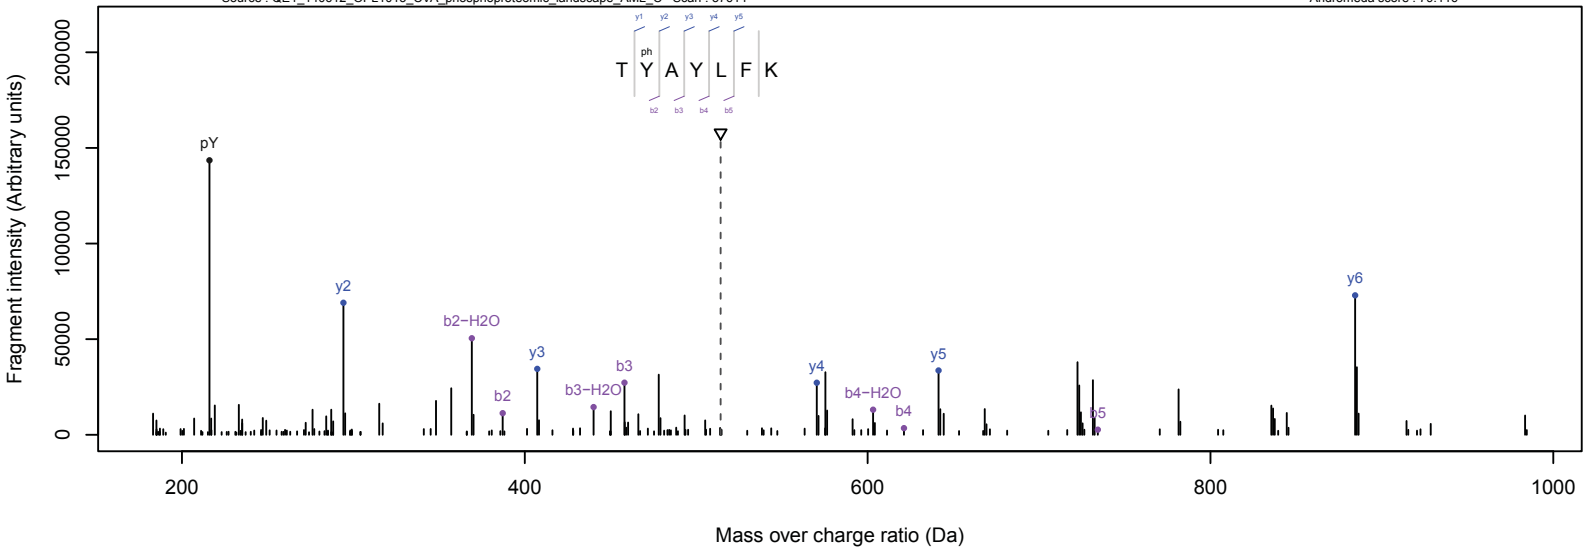

**KEDALLYQSK-2+**

Source : QE1\_140908\_OPL1013\_CvA\_pTyrIP\_AML\_Kasumi6 Scan : 11463

Andromeda score : 79.089

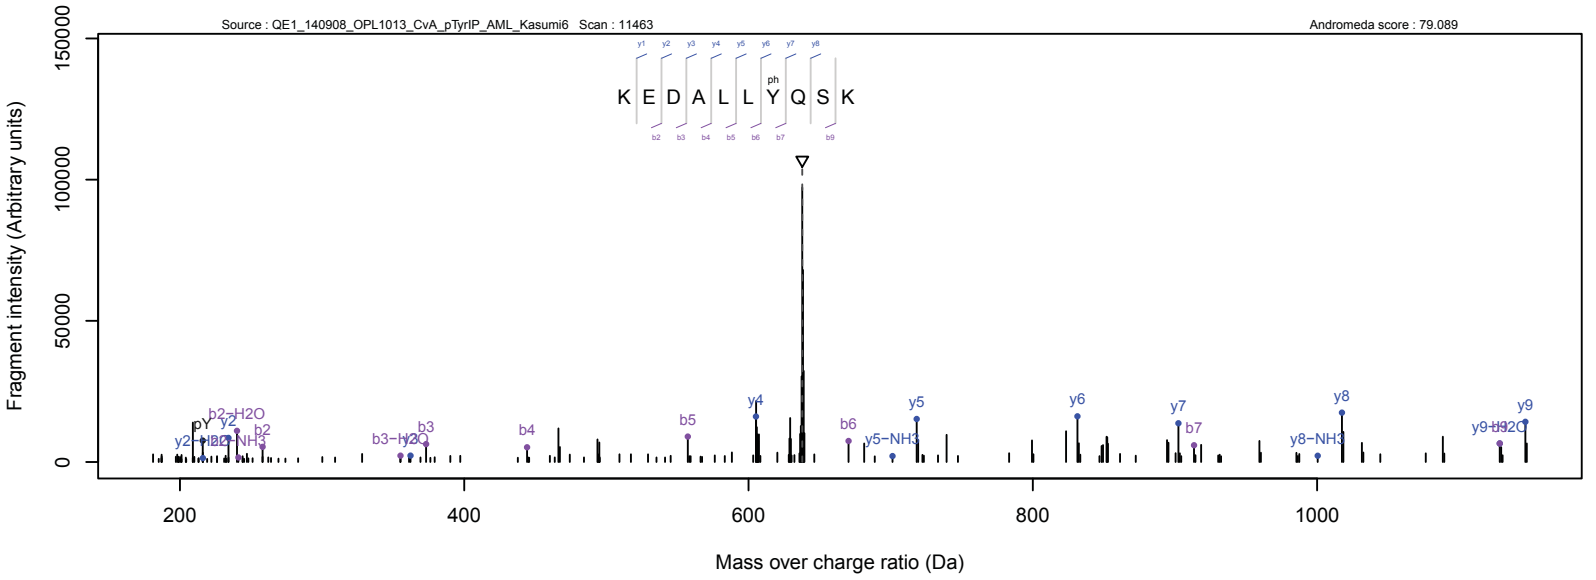

**VLPQDKEY(Y)KVK-2+**

Source : QE1\_140908\_OPL1013\_CvA\_pTyrIP\_AML\_HEL Scan : 11081

Andromeda score : 79.089

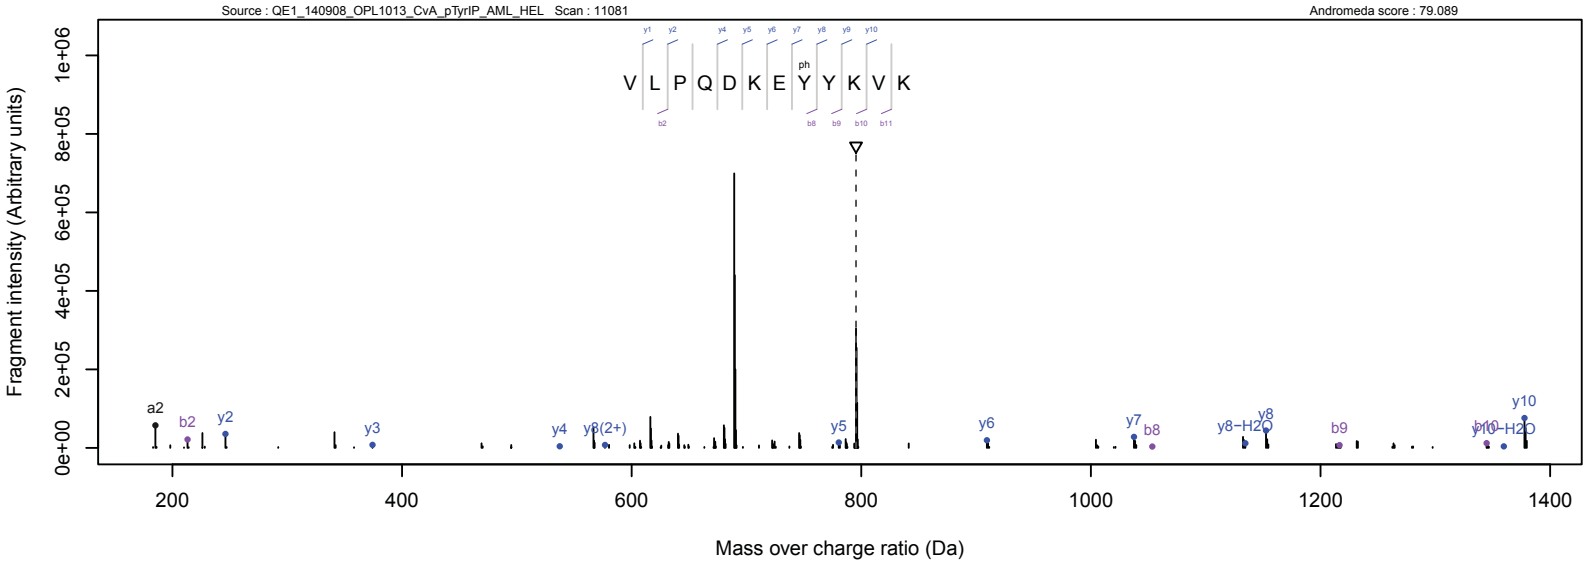

**THFDY(ph)QFGYR-2+**

Source : QE1\_140612\_OPL1013\_CVA\_phosphoproteomic\_landscape\_AML\_F Scan : 21258

Andromeda score : 79.07

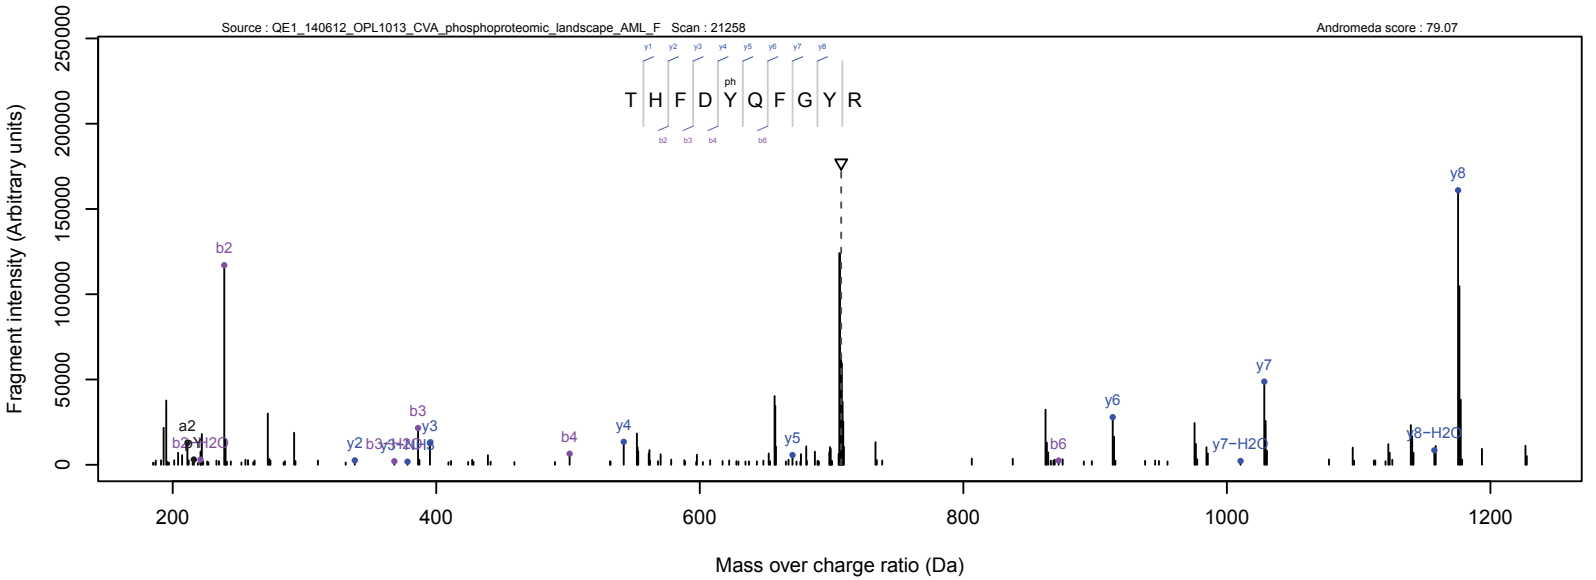

VHQLY(ph)ETIQR-2+

Source : QE1\_140612\_OPL1013\_CVA\_phosphoproteomic\_landscape\_AML\_A Scan : 12138

Andromeda score : 79.07

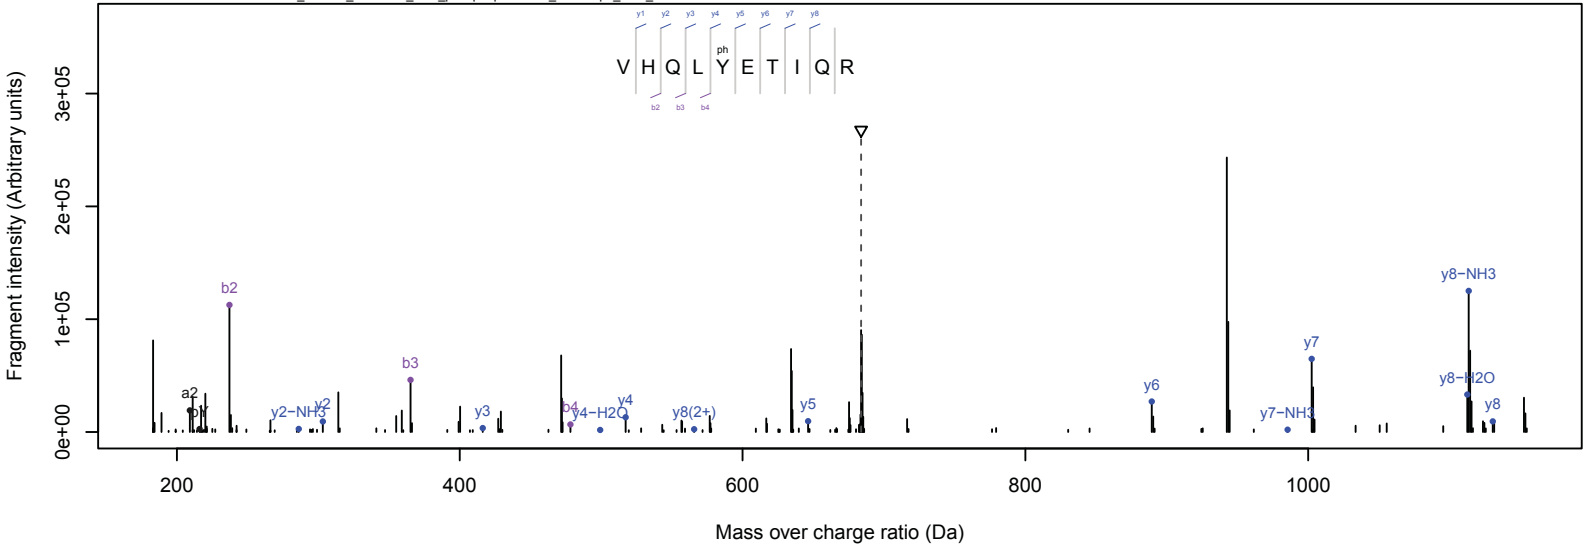

QGAPPAAGGGALVELTPTPGGLALVSPYHT(ph)HR-3+

Source : QE1\_140612\_OPL1013\_CVA\_phosphoproteomic\_landscape\_AML\_C Scan : 40404

Andromeda score : 79.054

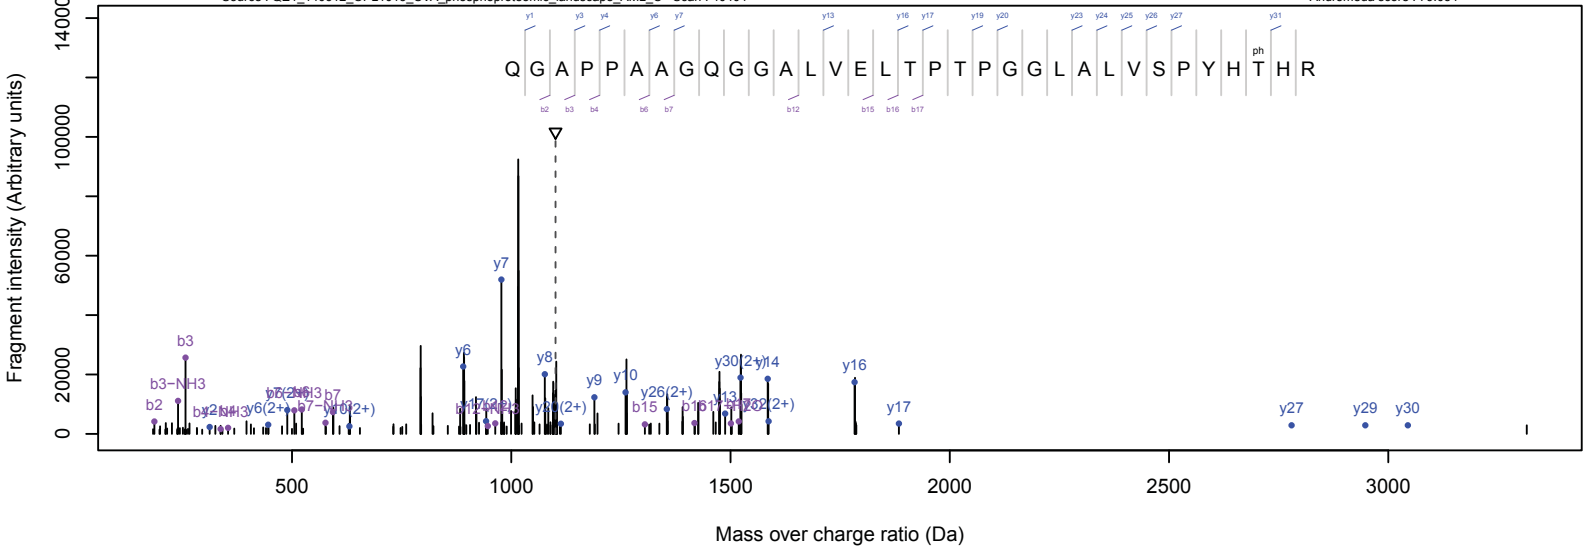

DLVSCAY(ph)QVAR-2+

Source : QE1\_140612\_OPL1013\_CVA\_phosphoproteomic\_landscape\_AML\_B Scan : 25894

Andromeda score : 79.036

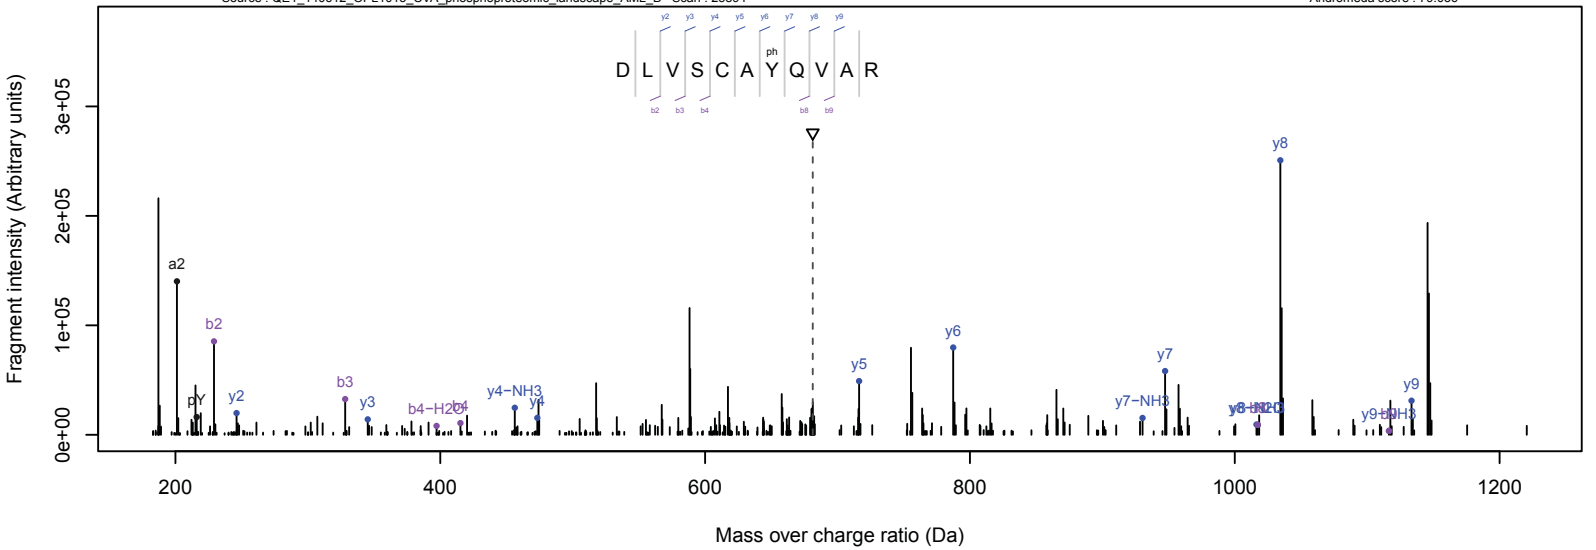

**YHGHSM(ox)SDPGVSY(ph)R-3+**

Source : QE1\_140908\_OPL1013\_CVA\_pTyrIP\_AML\_Kasumi6 Scan : 4509

Andromeda score : 78.985

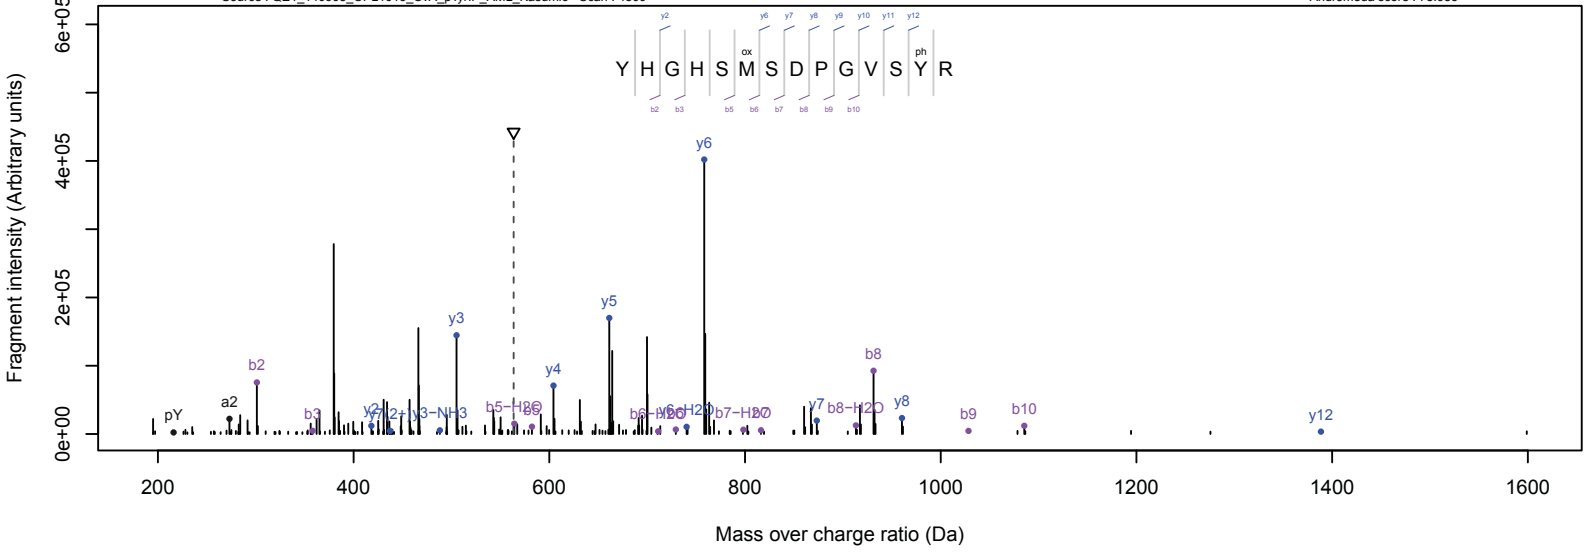

**HIY(ph)PAVEFLGPCEQGER-2+**

Source : QE1\_140612\_OPL1013\_CVA\_phosphoproteomic\_landscape\_AML\_C Scan : 33704

Andromeda score : 78.95

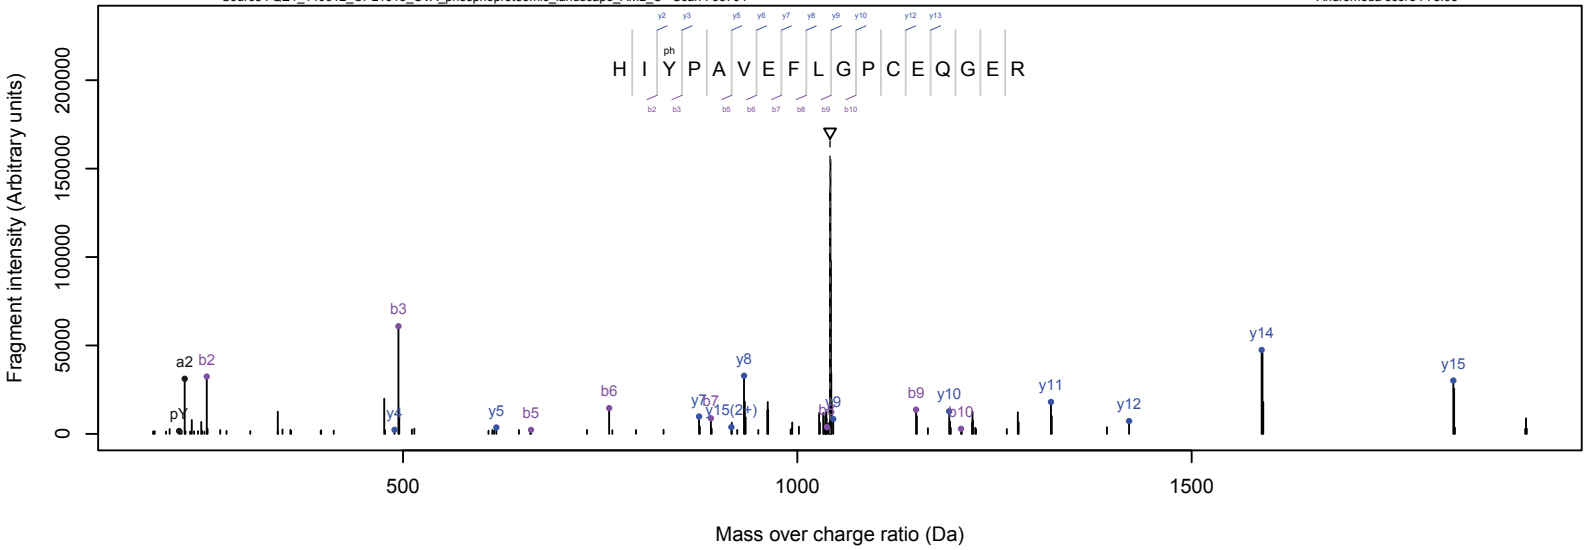

**YECLAEEIKIGDY(ph)LR-2+**

Source : QE1\_140612\_OPL1013\_CVA\_phosphoproteomic\_landscape\_AML\_C Scan : 42700

Andromeda score : 78.95

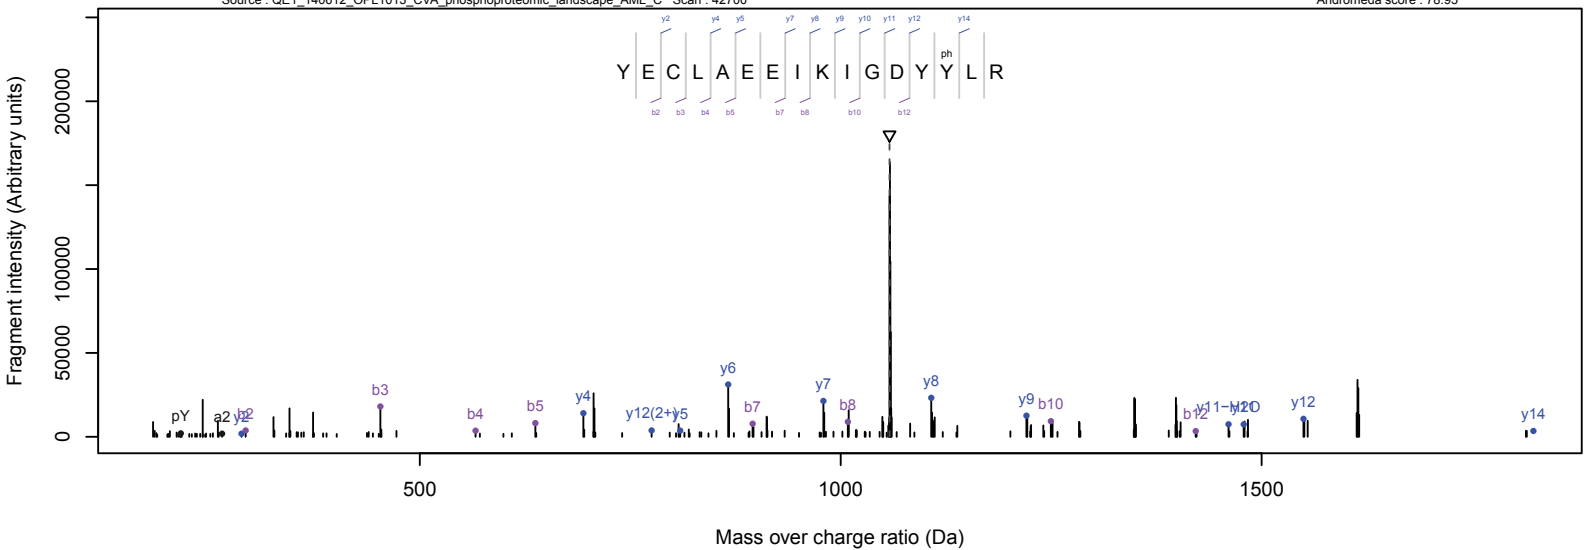

**KDTETV(ph)SEVR-3+**

Source : QE1\_140908\_OPL1013\_CVA\_pTyrIP\_AML\_Kasumi6 Scan : 7844

Andromeda score : 78.903

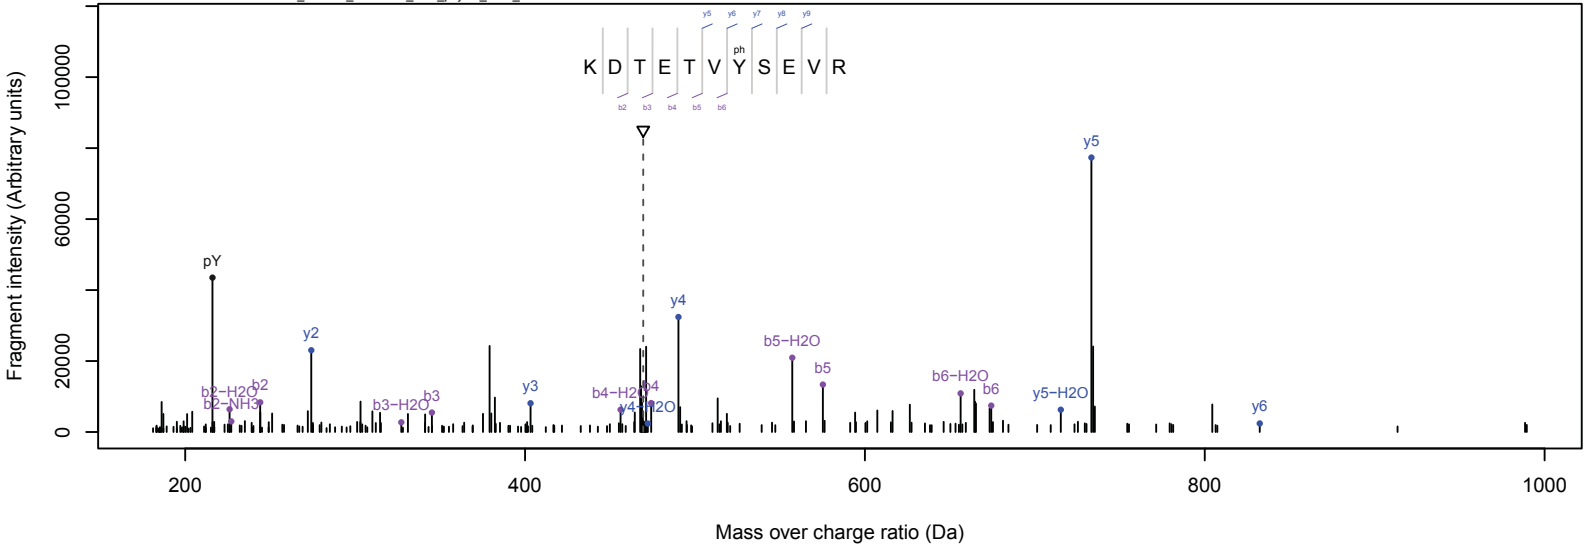

**Y(ph)FRMPELVDFR-3+**

Source : QE1\_140612\_OPL1013\_CVA\_phosphoproteomic\_landscape\_AML\_C Scan : 44103

Andromeda score : 78.903

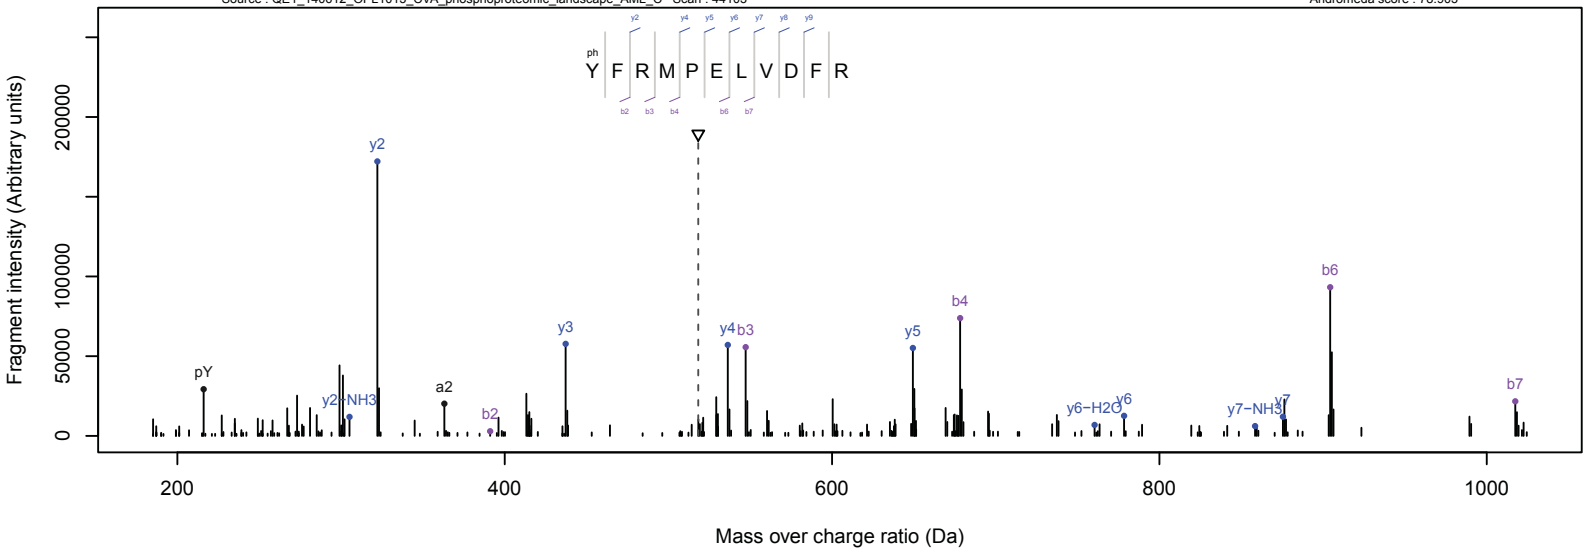

**INIIYHNTASNTFR-2+**

Source : QE1\_140612\_OPL1013\_CVA\_phosphoproteomic\_landscape\_AML\_B Scan : 15996

Andromeda score : 78.814

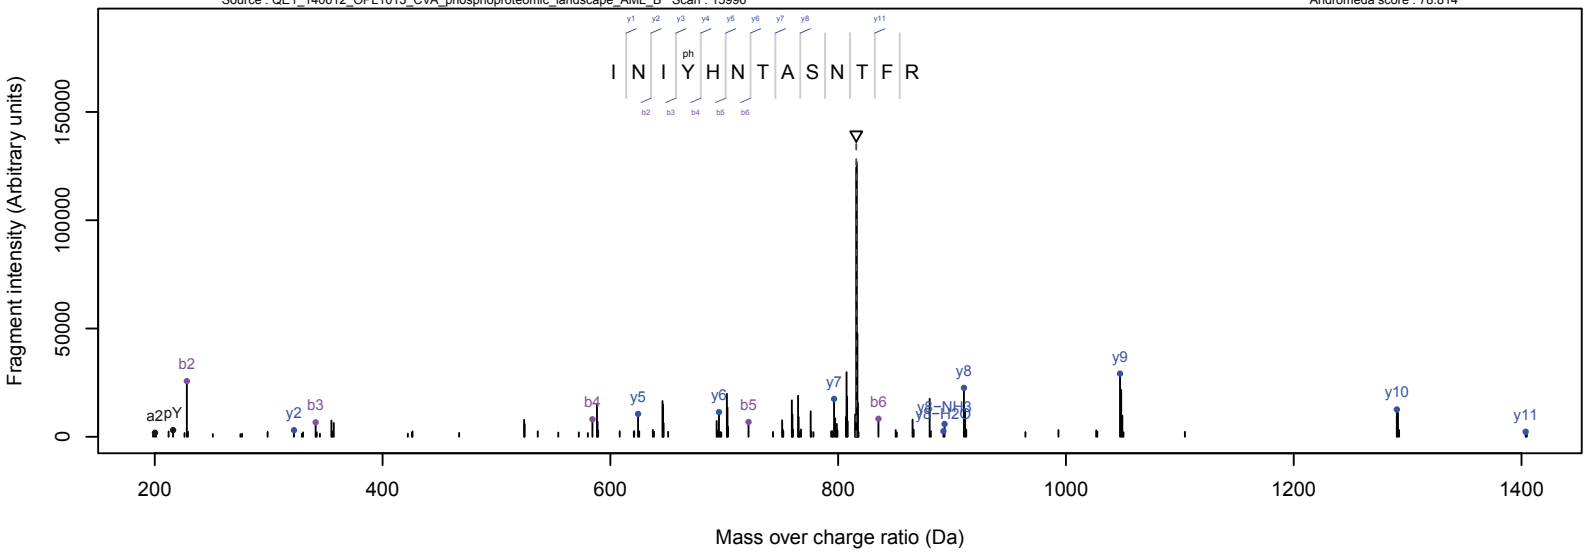



VADWTGATY(ph)QDKR-3+

Source : QE1\_140612\_OPL1013\_CVA\_phosphoproteomic\_landscape\_AML\_C Scan : 10926

Andromeda score : 78.814

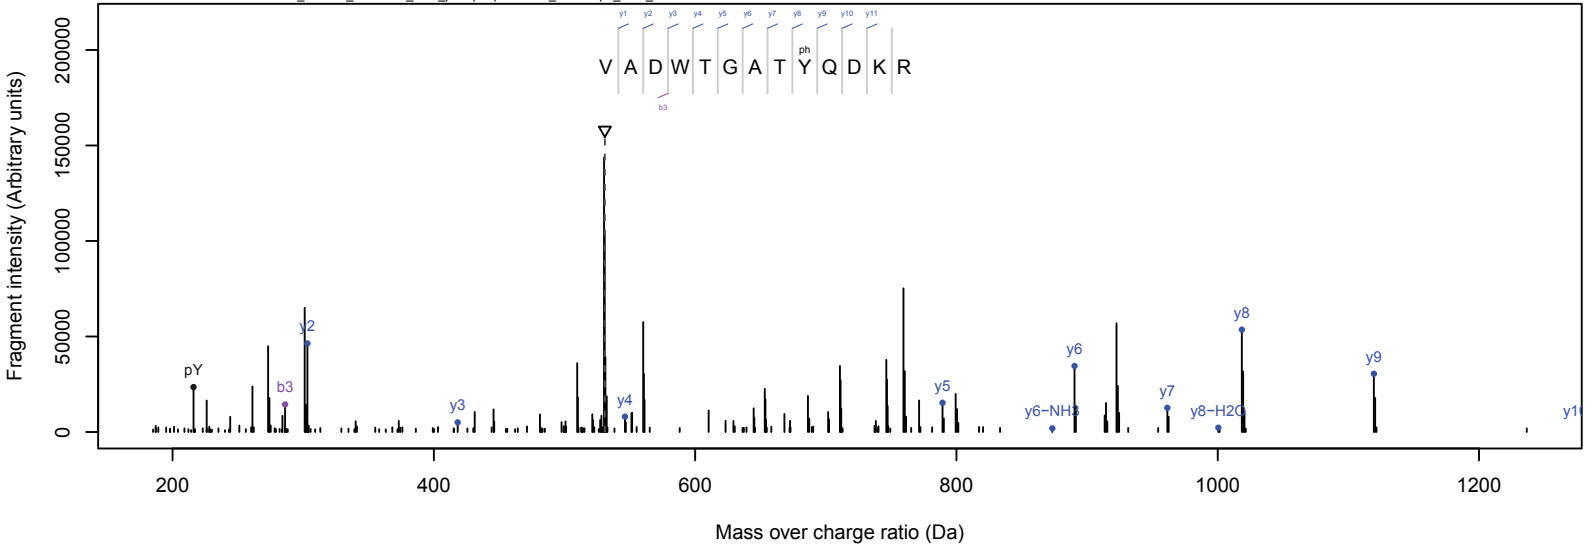

IY(ph)SFNSTNDSSGPANLDK-2+

Source : QE1\_140612\_OPL1013\_CVA\_phosphoproteomic\_landscape\_AML\_B Scan : 20670

Andromeda score : 78.78

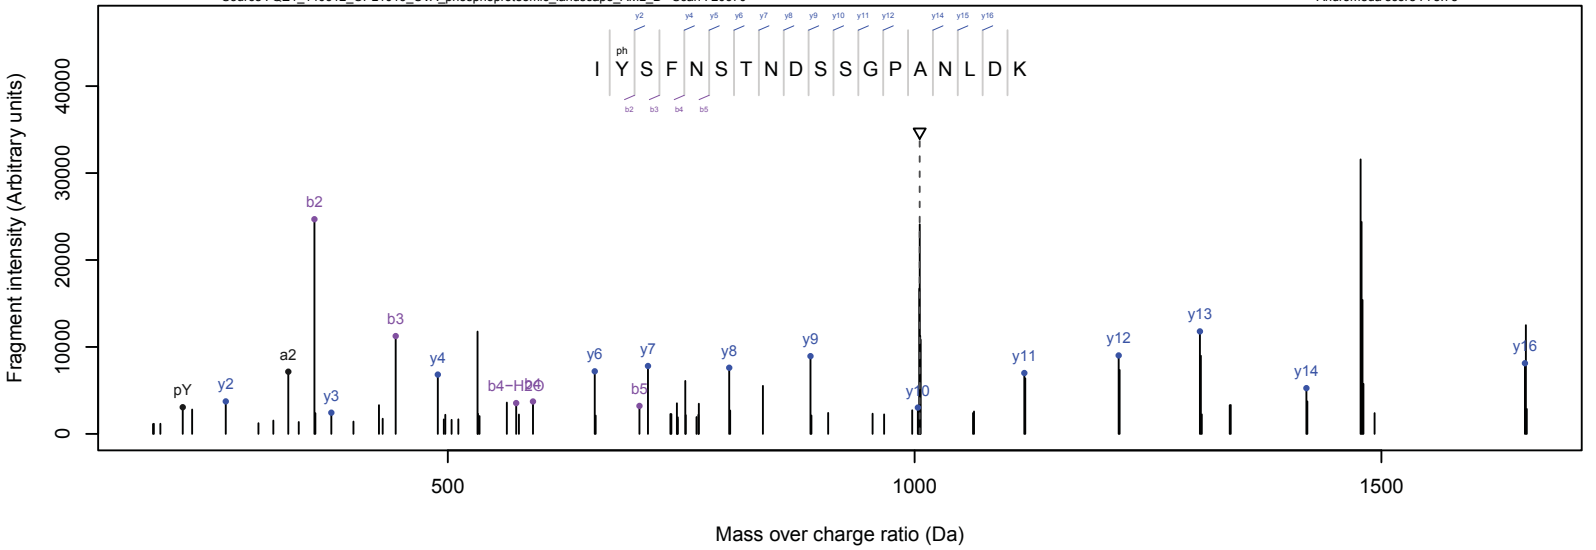

(ac)SETAPAAPAAPAEK(ph)PVKK-3+

Source : QE1\_140908\_OPL1013\_CvA\_pTyrIP\_AML\_HL60 Scan : 15543

Andromeda score : 78.752

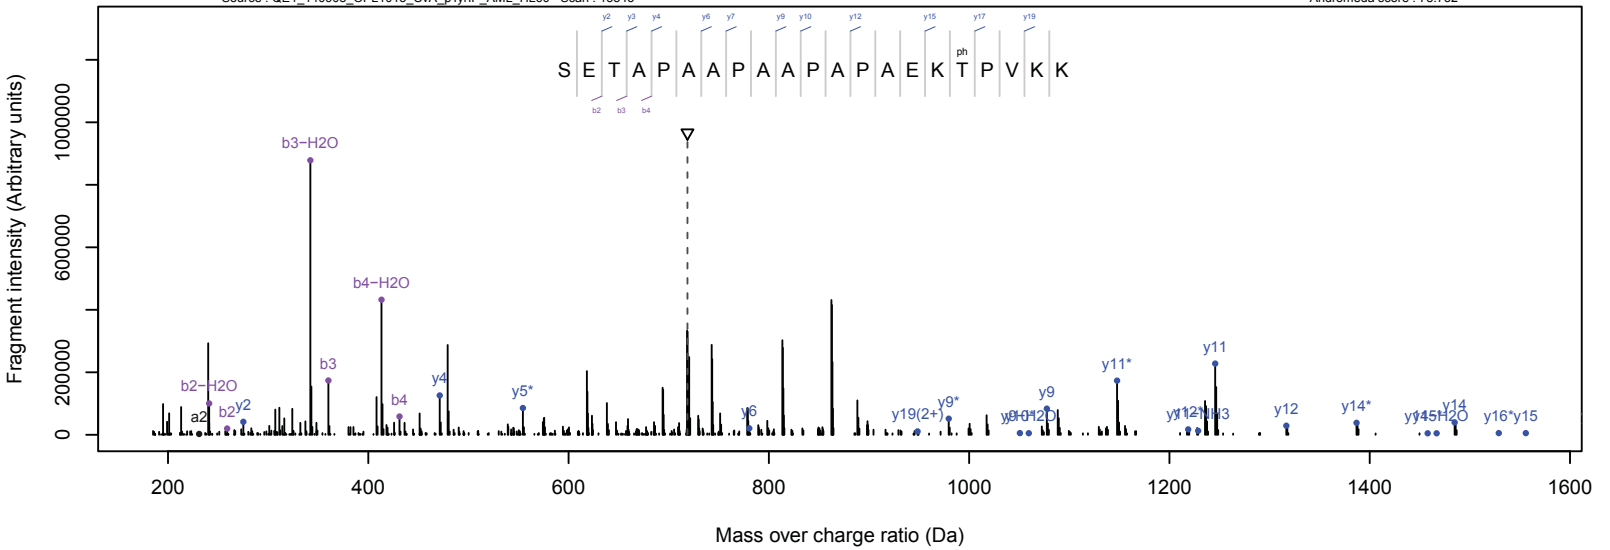

**KPHASVGT<sup>ph</sup>HGYMAPEVLQK-3+**

Source : QE1\_140612\_OPL1013\_CVA\_phosphoproteomic\_landscape\_AML\_C Scan : 15169

Andromeda score : 78.708

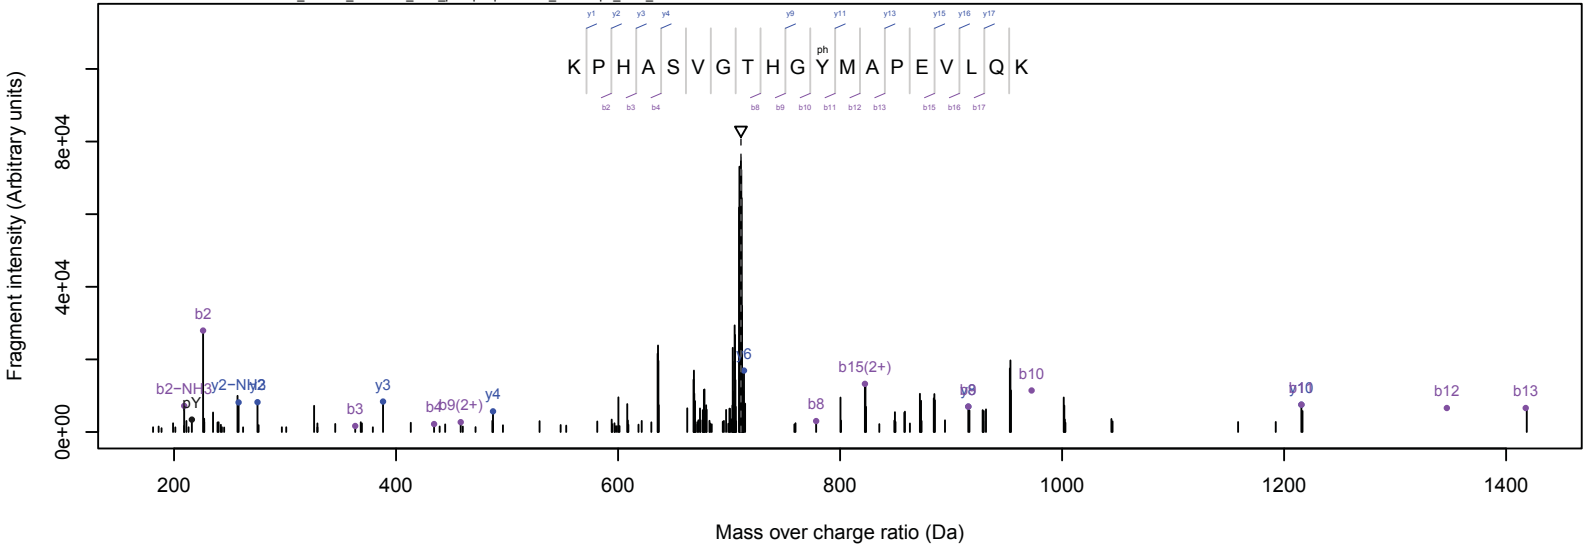

**LNVVYTEDHVFS<sup>ph</sup>SDYYSPLR-3+**

Source : QE1\_140612\_OPL1013\_CVA\_phosphoproteomic\_landscape\_AML\_C Scan : 39988

Andromeda score : 78.708

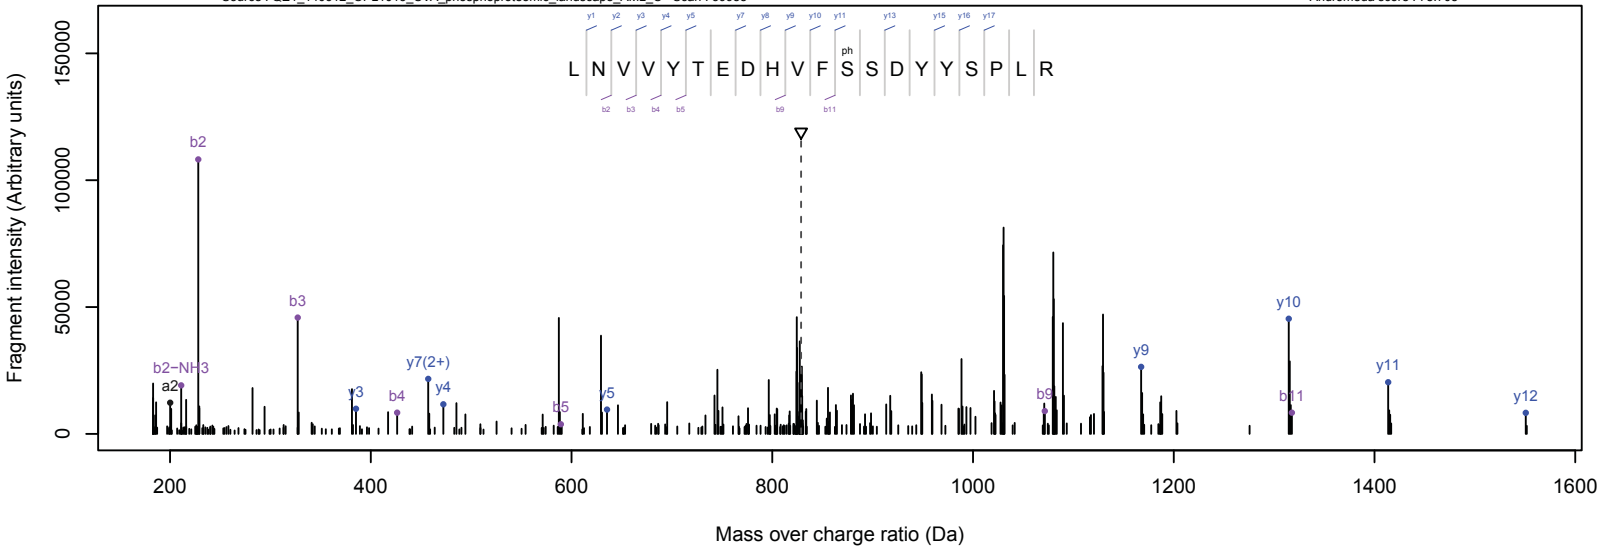

**KLDMGGY<sup>ph</sup>YITTR-2+**

Source : QE1\_140612\_OPL1013\_CVA\_phosphoproteomic\_landscape\_AML\_C Scan : 22852

Andromeda score : 78.69

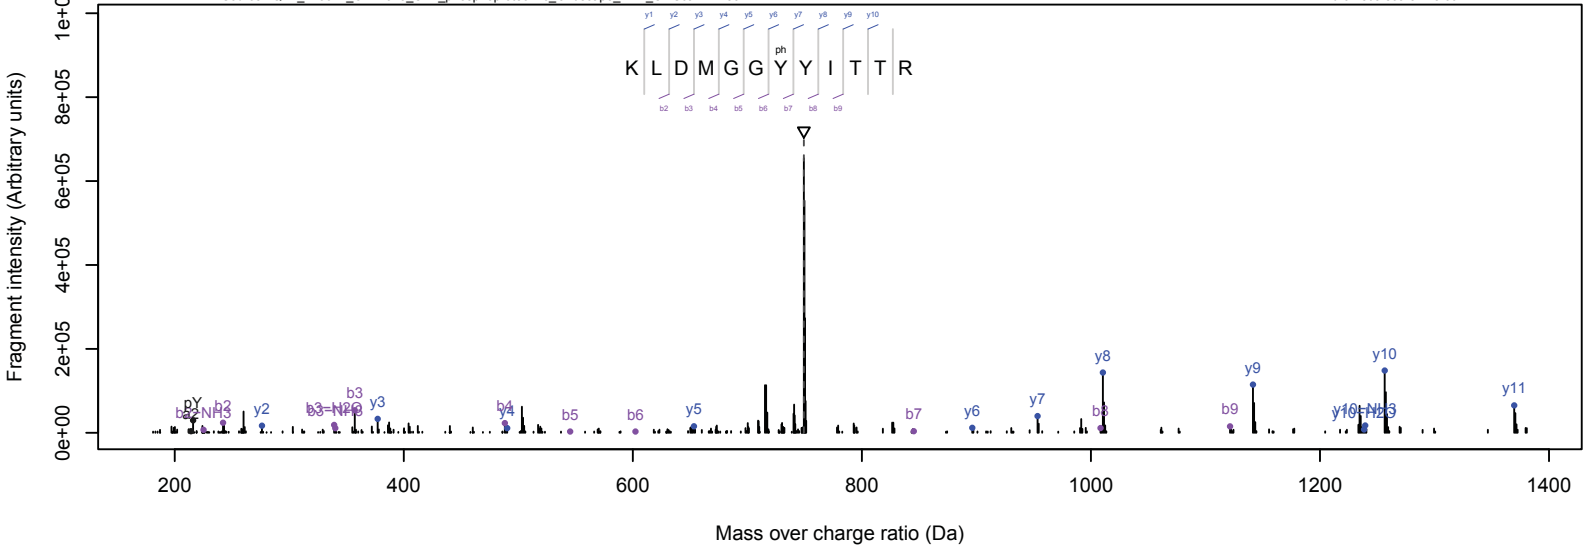

**LDAPVDY(ph)FYRPETQHR-4+**

Source : QE1\_140612\_OPL1013\_CVA\_phosphoproteomic\_landscape\_AML\_C Scan : 29829

Andromeda score : 78.69

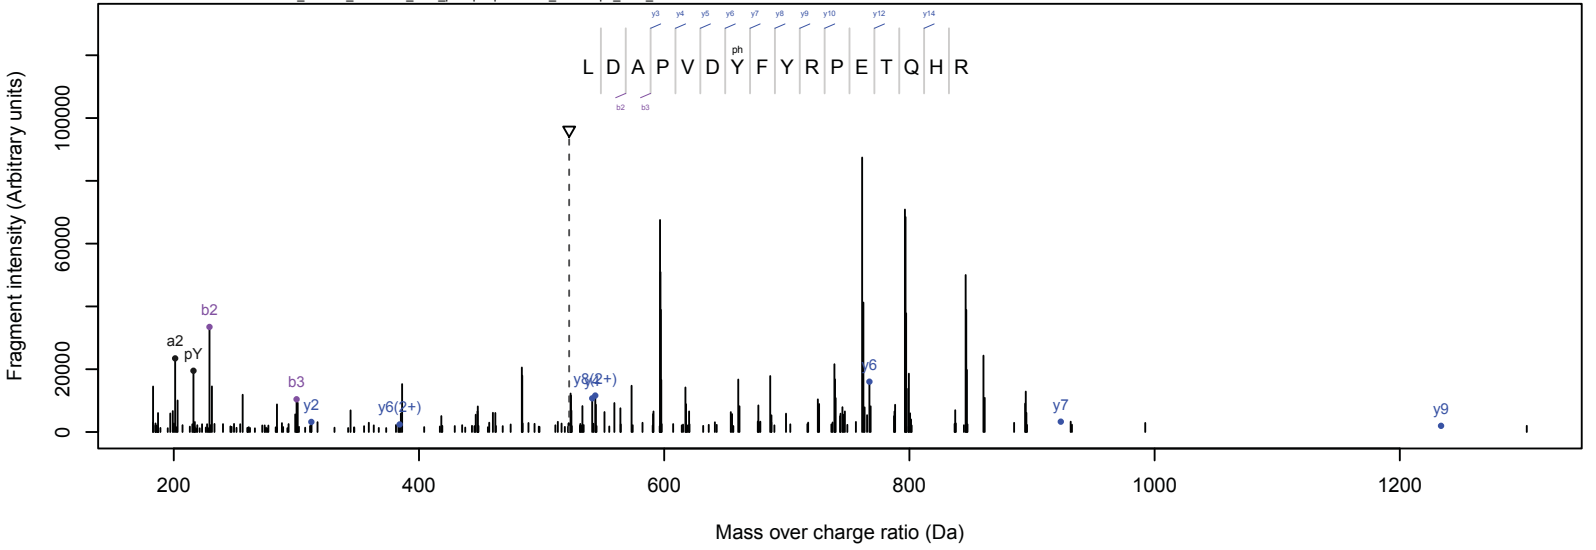

**QELVNQKDCPY(ph)MCAYK-3+**

Source : QE1\_140612\_OPL1013\_CVA\_phosphoproteomic\_landscape\_AML\_C Scan : 18329

Andromeda score : 78.69

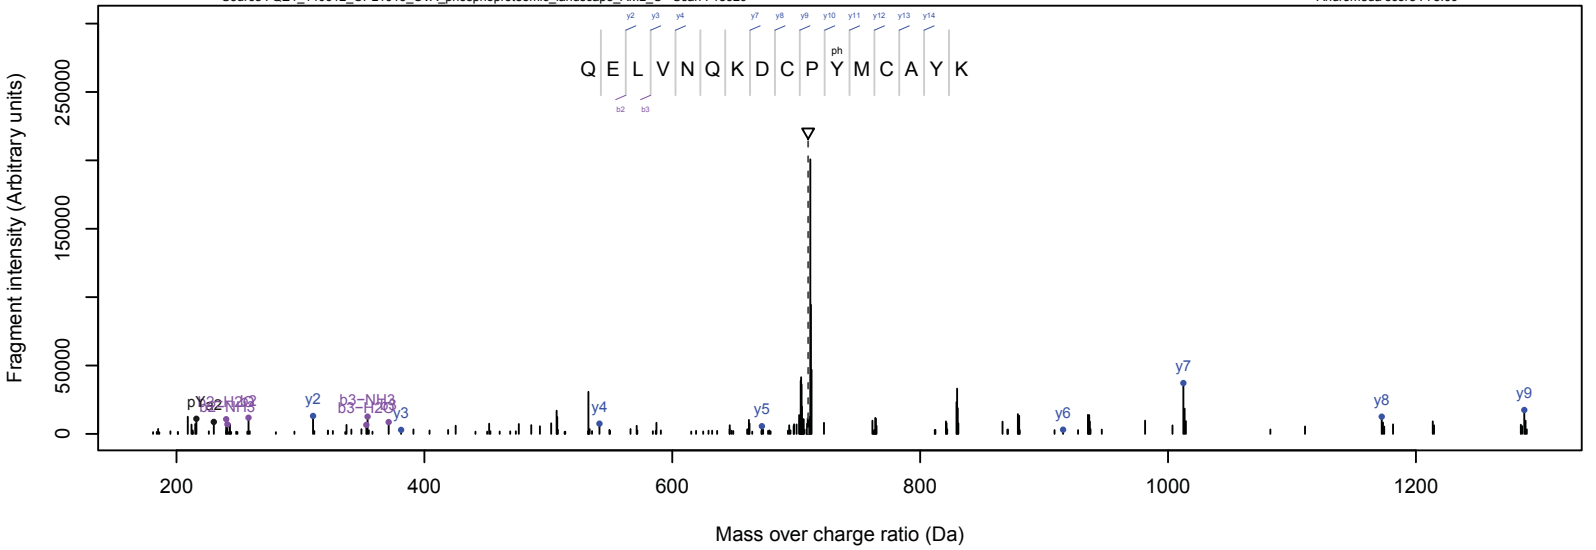

**WM(ox)AIESLNY(ph)SVYTK-2+**

Source : QE1\_140908\_OPL1013\_CvA\_pTyrIP\_AML\_HEL Scan : 37717

Andromeda score : 78.69

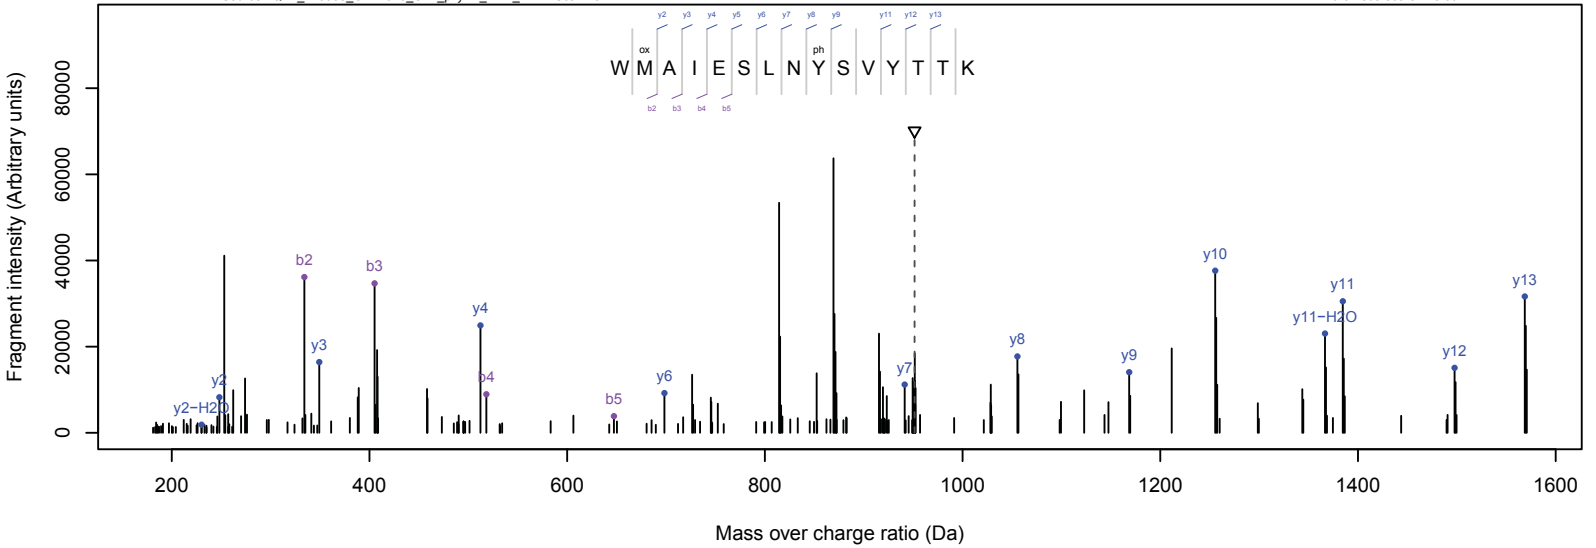

**DKFALESENISEPY(ph)FTNRR-3+**

Source : QE1\_140612\_OPL1013\_CVA\_phosphoproteomic\_landscape\_AML\_C Scan : 29345

Andromeda score : 78.674

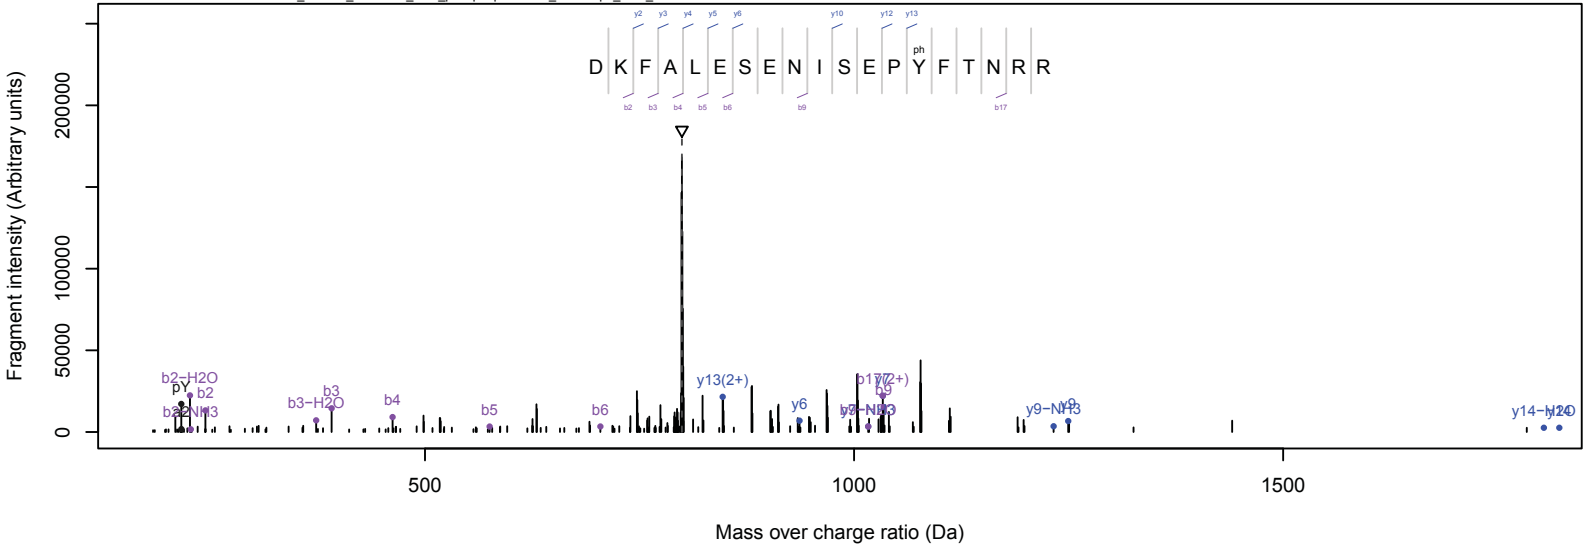

**QIQEHEQDSALREQLSGYK R-4+**

Source : QE1\_140612\_OPL1013\_CVA\_phosphoproteomic\_landscape\_AML\_C Scan : 13564

Andromeda score : 78.674

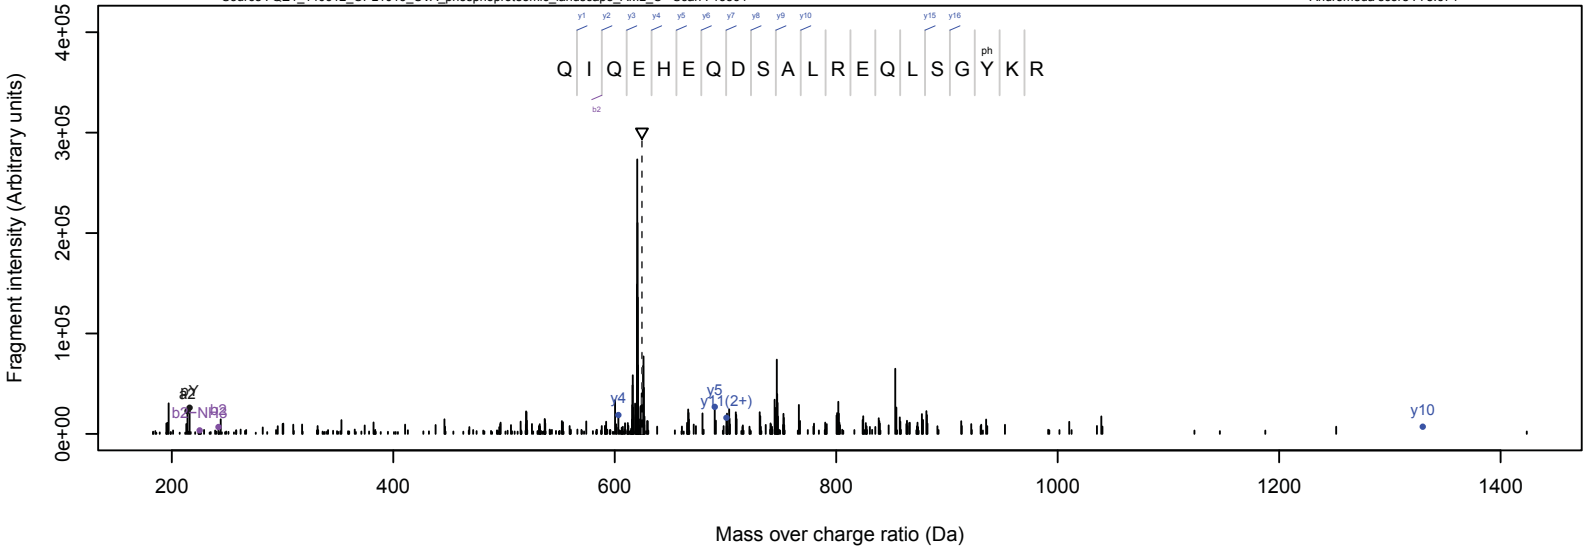

**SYKAPYTCGGDSQY(ph)VLM(ox)SSPVGR-3+**

Source : QE1\_140908\_OPL1013\_CvA\_pTyrIP\_AML\_Kasumi6 Scan : 27605

Andromeda score : 78.645

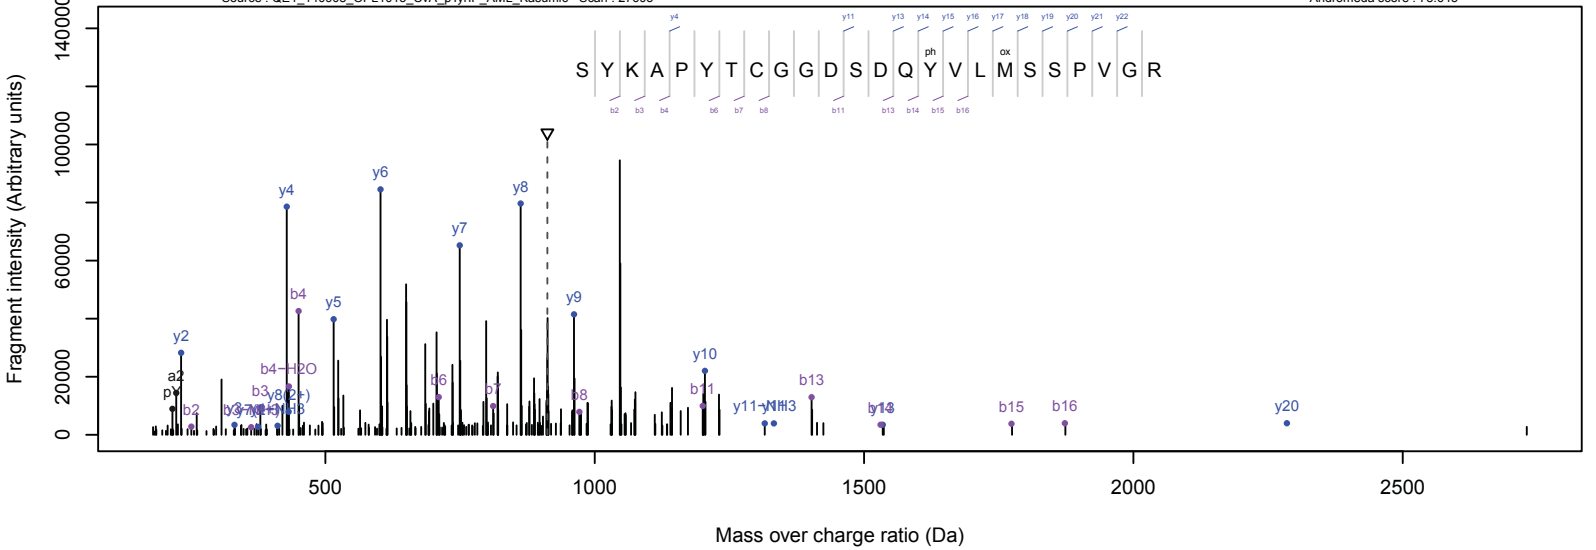

IY(ph)YSEETSSDQGNEDDEEPEKVVSSSTELHSNEK-4+

Source : QE1\_140612\_OPL1013\_CVA\_phosphoproteomic\_landscape\_AML\_D Scan : 17709

Andromeda score : 78.642

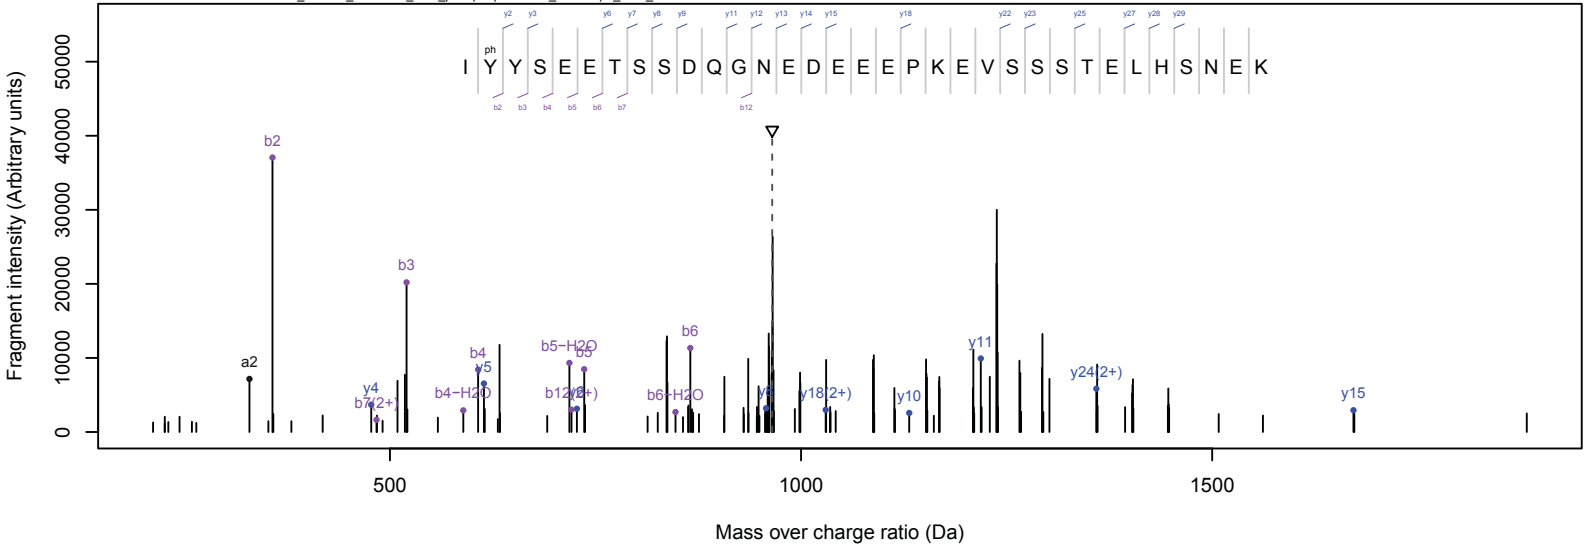

EFRDY(ph)PPLR-2+

Source : QE1\_140612\_OPL1013\_CVA\_phosphoproteomic\_landscape\_AML\_C Scan : 17001

Andromeda score : 78.61

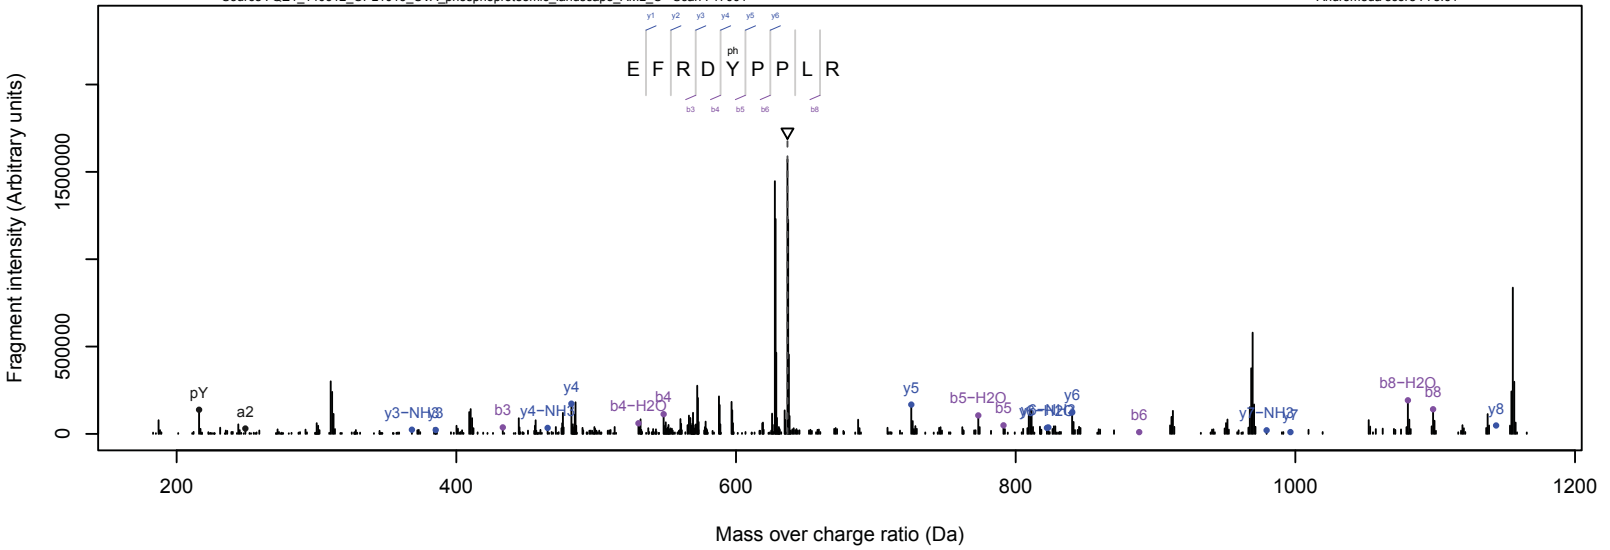

VGNGETPM(ox)IGDKVYVHYK-3+

Source : QE1\_140908\_OPL1013\_CvA\_pTyrIP\_AML\_HEL Scan : 21496

Andromeda score : 78.554

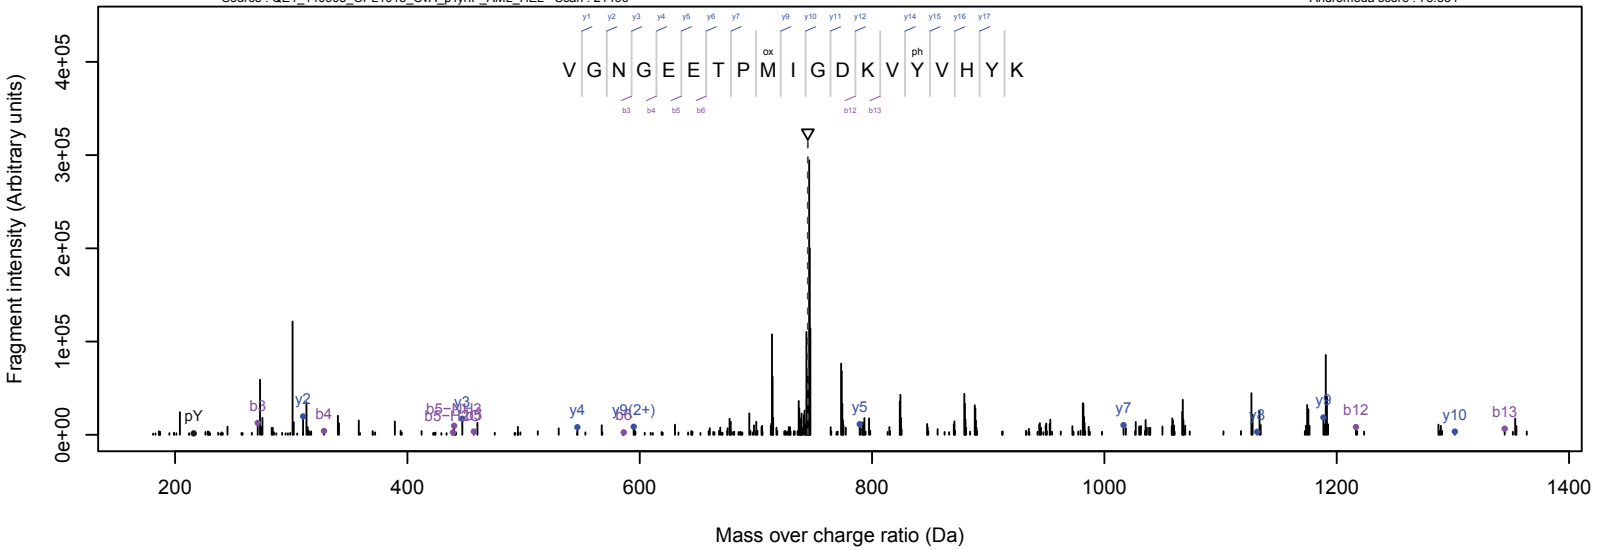



**GHNGKIY(ph)PYLVMNDACLTER-3+**

Source : QE1\_140612\_OPL1013\_CVA\_phosphoproteomic\_landscape\_AML\_D Scan : 32137

Andromeda score : 78.456

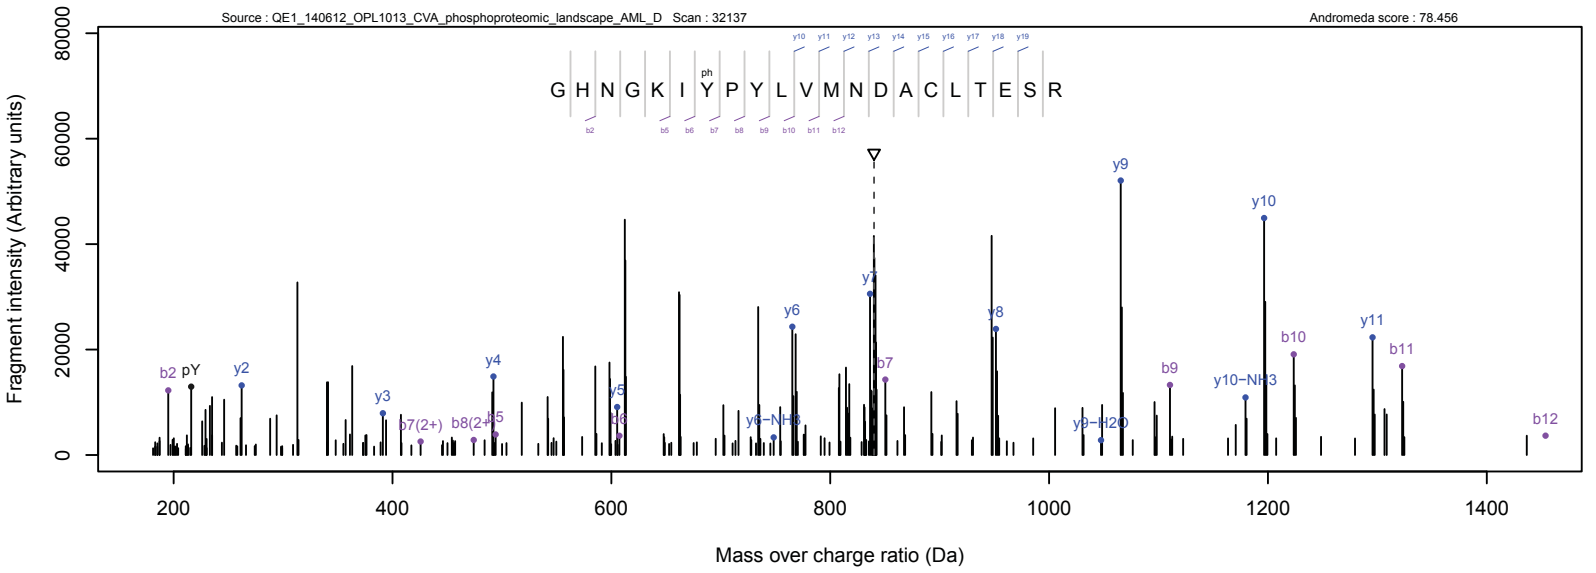

**PSSINY(ph)M(ox)VAPVTGNDVGIRR-3+**

Source : QE1\_140908\_OPL1013\_CvA\_pTyrIP\_AML\_ML2 Scan : 25370

Andromeda score : 78.456

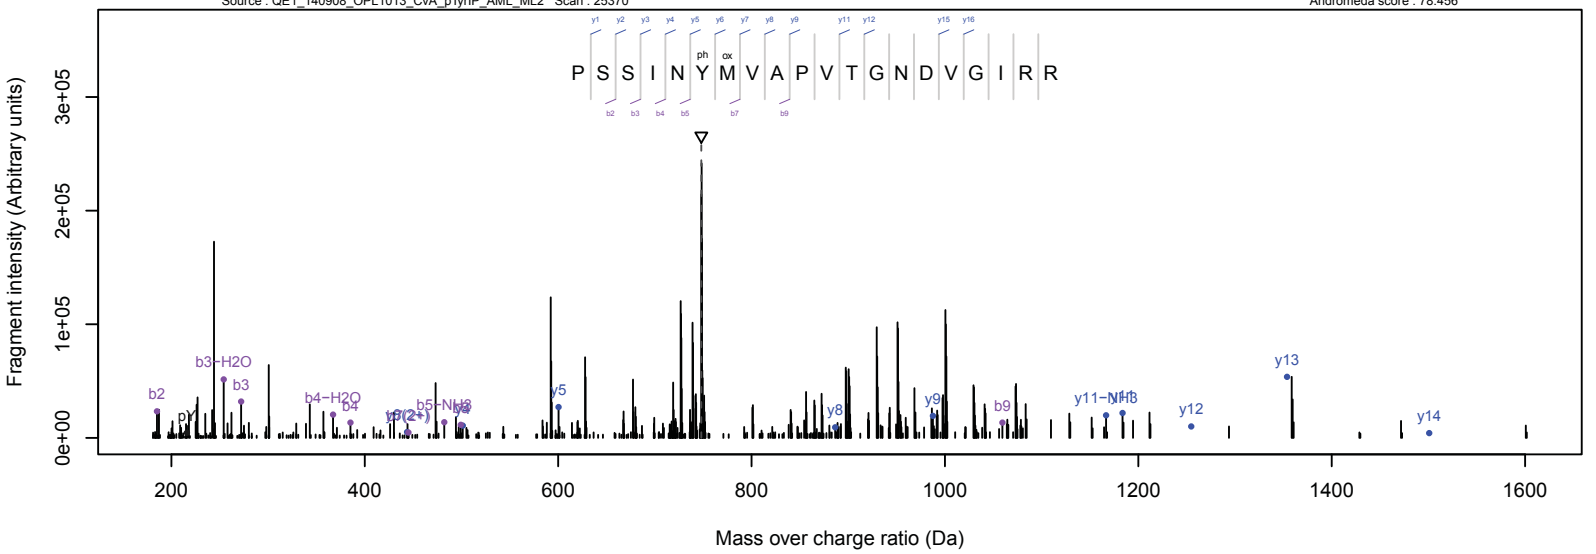

**TSSISGPLSPAYTGQVPYNYNQLLEGR-3+**

Source : QE1\_140612\_OPL1013\_CVA\_phosphoproteomic\_landscape\_AML\_C Scan : 37714

Andromeda score : 78.451

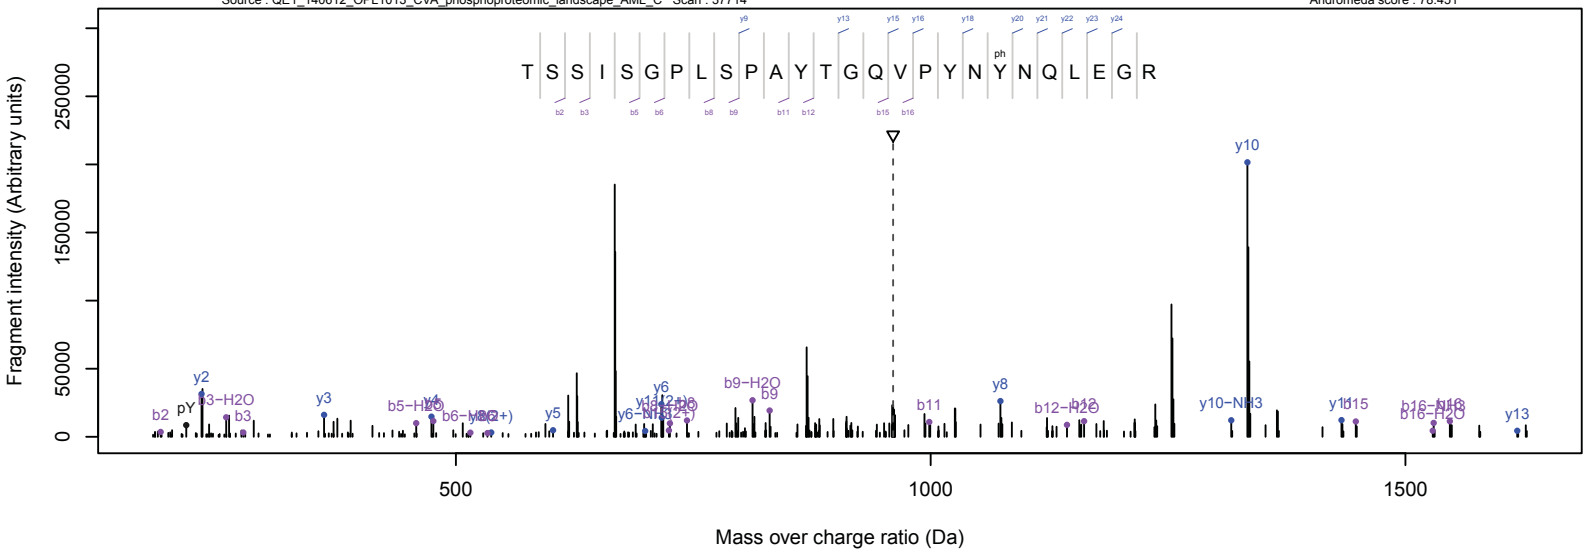

IDHY(ph)LGKEMVQLMVLRL-3+

Source : QE1\_140612\_OPL1013\_CVA\_phosphoproteomic\_landscape\_AML\_C Scan : 43624

Andromeda score : 78.441

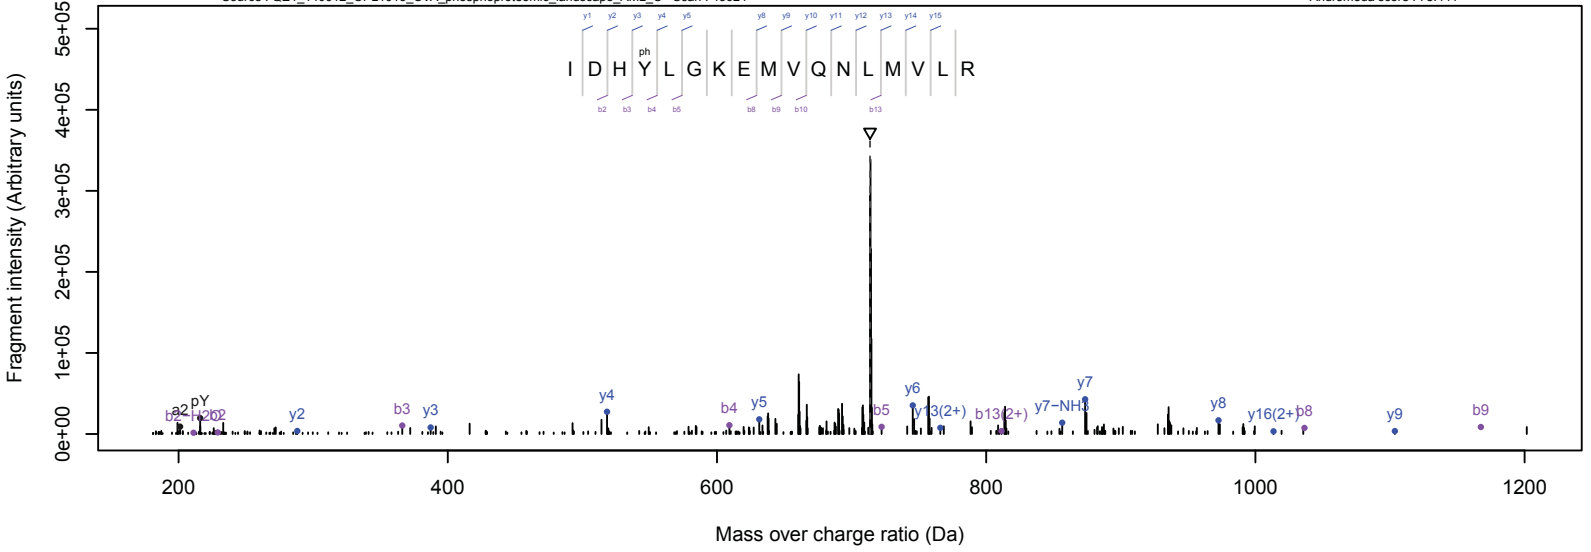

EESTY(ph)LPLTSM(ox)QPTEAM(ox)GEEPSRAE-3+

Source : QE1\_140908\_OPL1013\_CvA\_pTyrIP\_AML\_Kasumi6 Scan : 29201

Andromeda score : 78.428

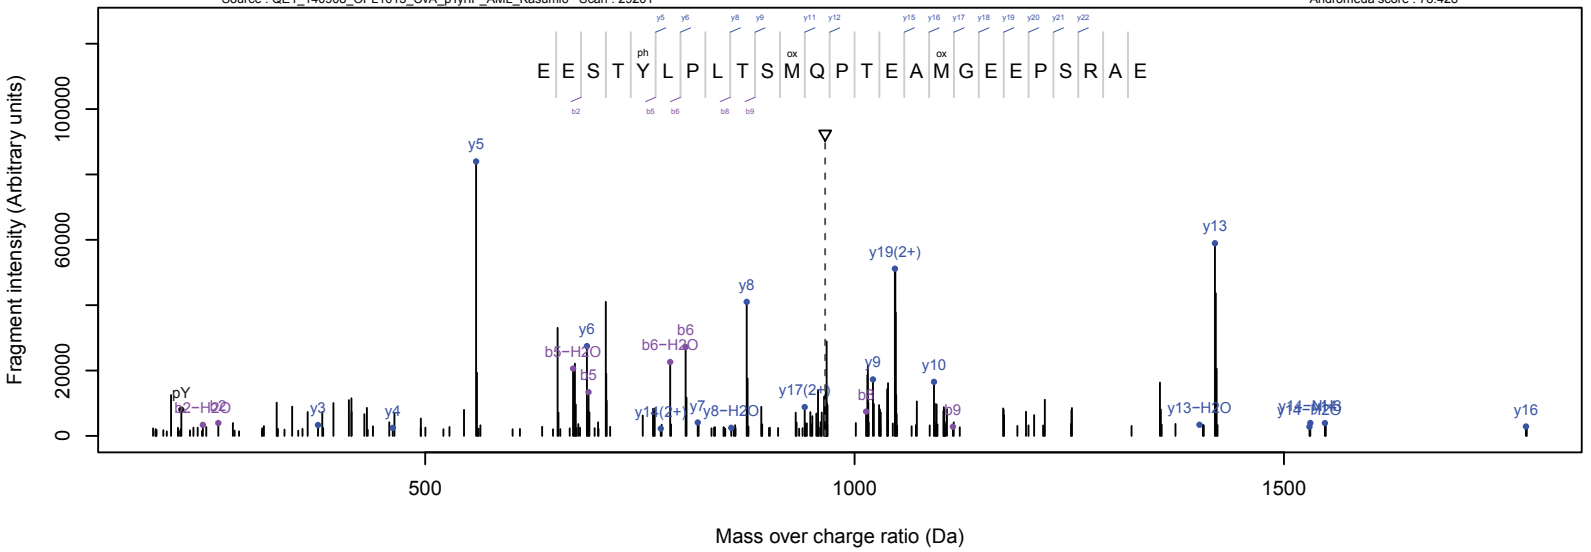

HSQHLPAKVEFGVY(ESGPRK)-4+

Source : QE1\_140612\_OPL1013\_CVA\_phosphoproteomic\_landscape\_AML\_C Scan : 17540

Andromeda score : 78.419

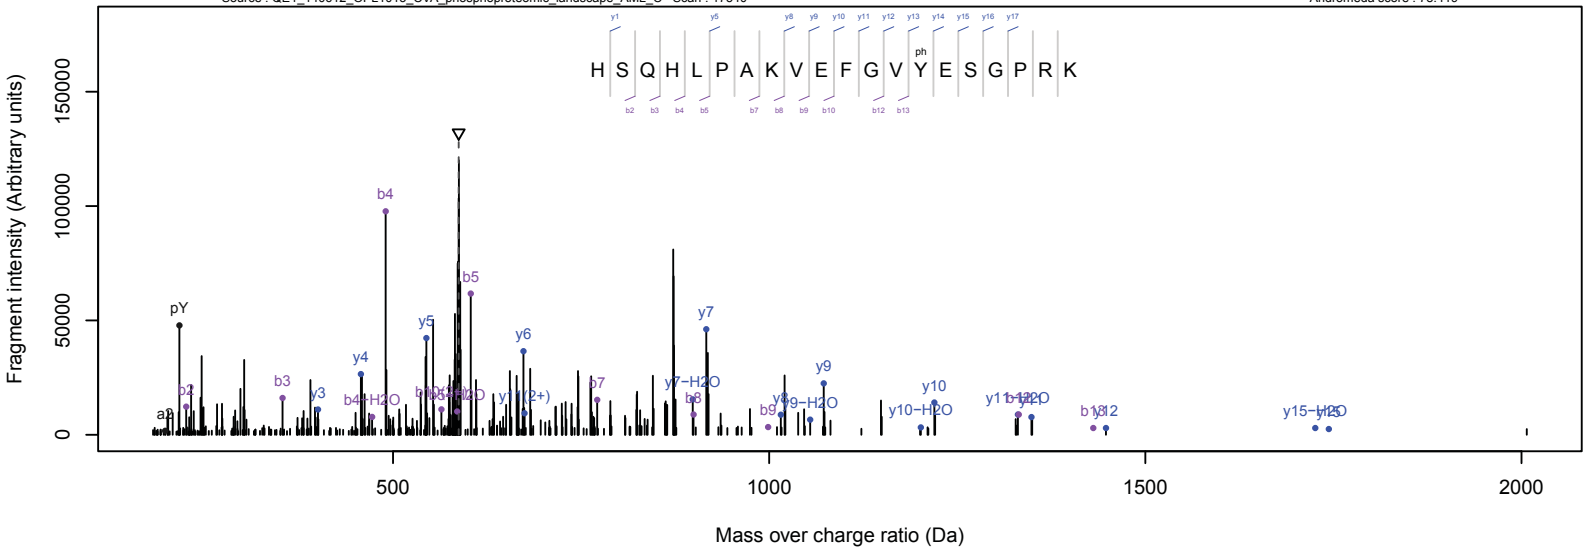



SRDYNP(ph)NYSDSISPFNK-3+

Source : QE1\_140612\_OPL1013\_CVA\_phosphoproteomic\_landscape\_AML\_C Scan : 26687

Andromeda score : 78.358

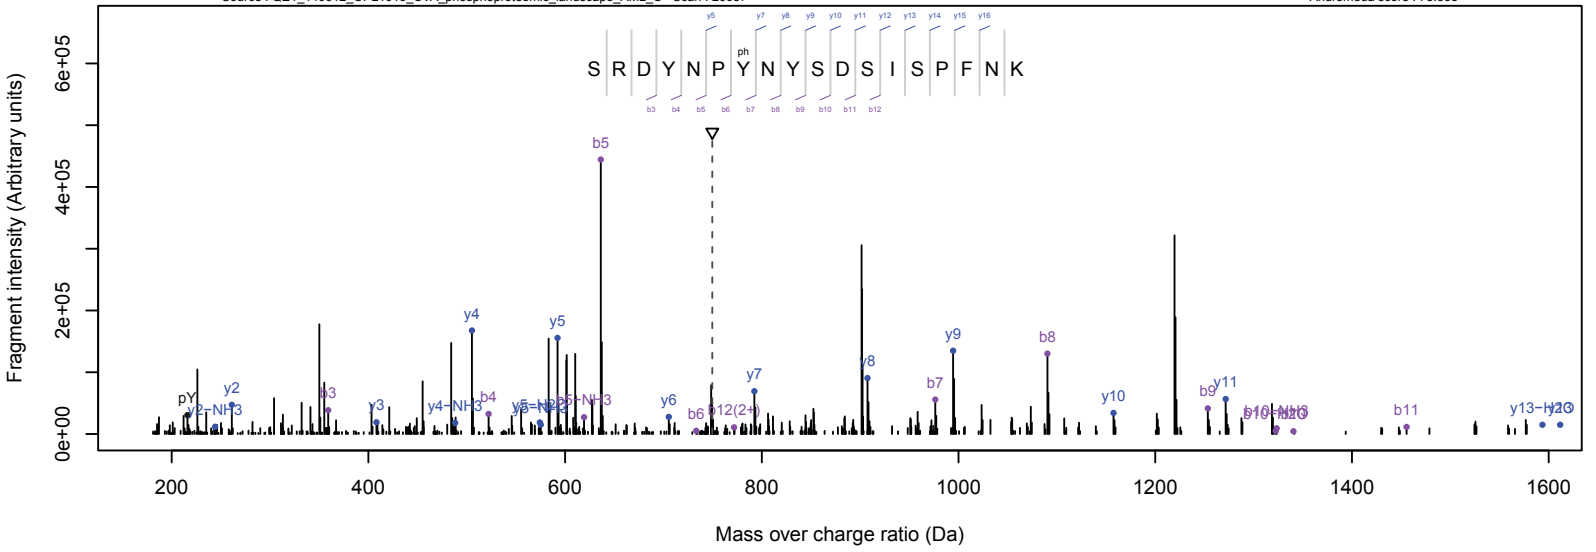

(ac)AKAY(ph)DHLFK-2+

Source : QE1\_140612\_OPL1013\_CVA\_phosphoproteomic\_landscape\_AML\_C Scan : 18228

Andromeda score : 78.342

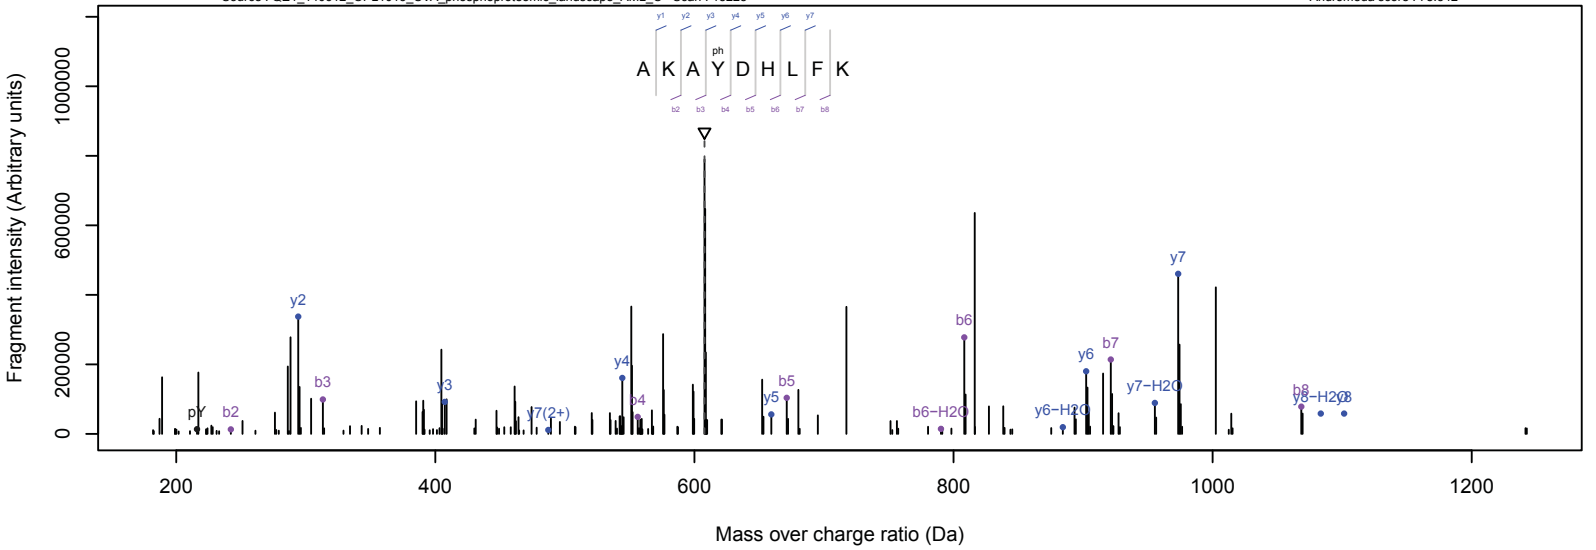

KIY(ph)NGDYR-2+

Source : QE1\_140908\_OPL1013\_CvA\_pTyrIP\_AML\_ML2 Scan : 8748

Andromeda score : 78.342

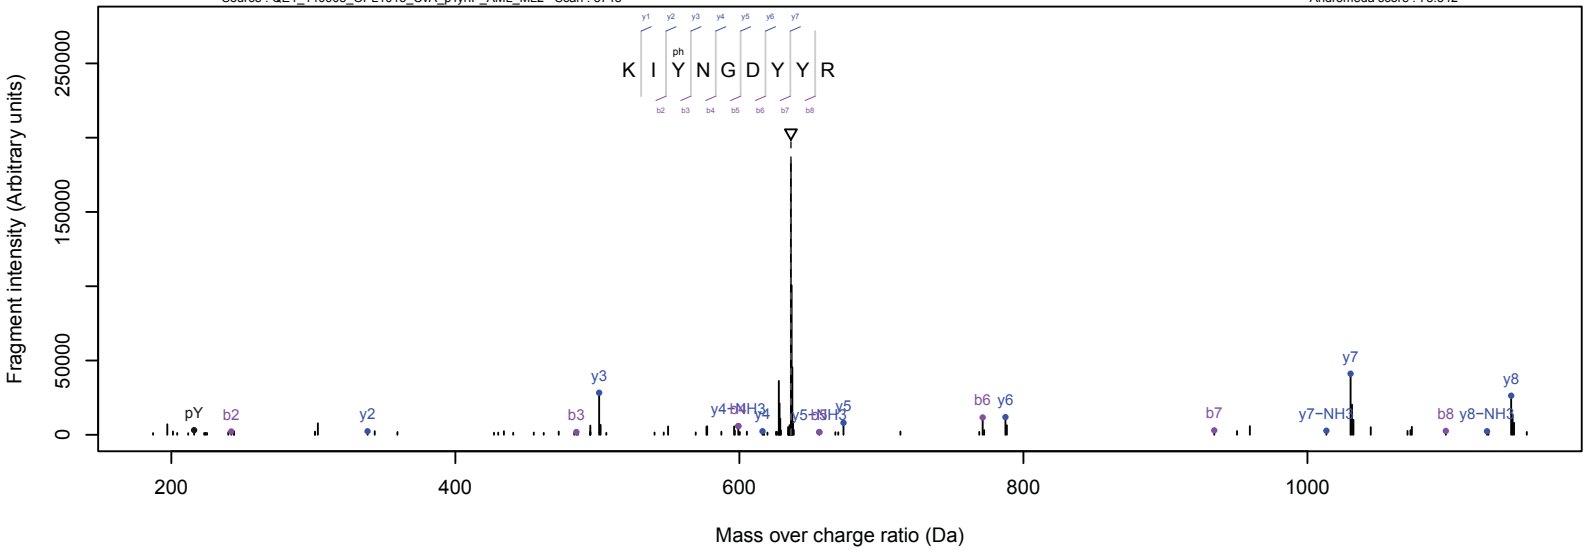

LLFNPSGPYQK-2+

Source: QE1\_140612\_OPL1013\_CVA\_phosphoproteomic\_landscape\_AML\_C Scan: 27132

Andromeda score: 78.342

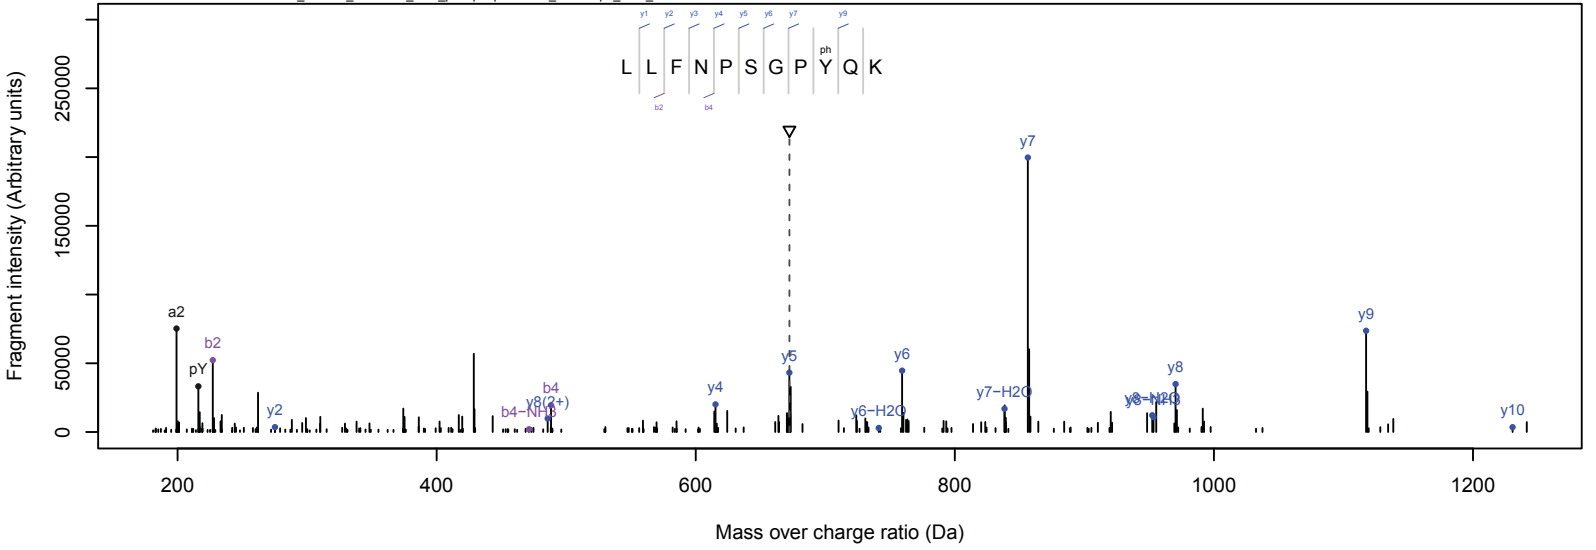

LY(ph)QVPNPQAAPR-2+

Source: QE1\_140908\_OPL1013\_CvA\_pTyrIP\_AML\_OCI\_AML3 Scan: 18569

Andromeda score: 78.342

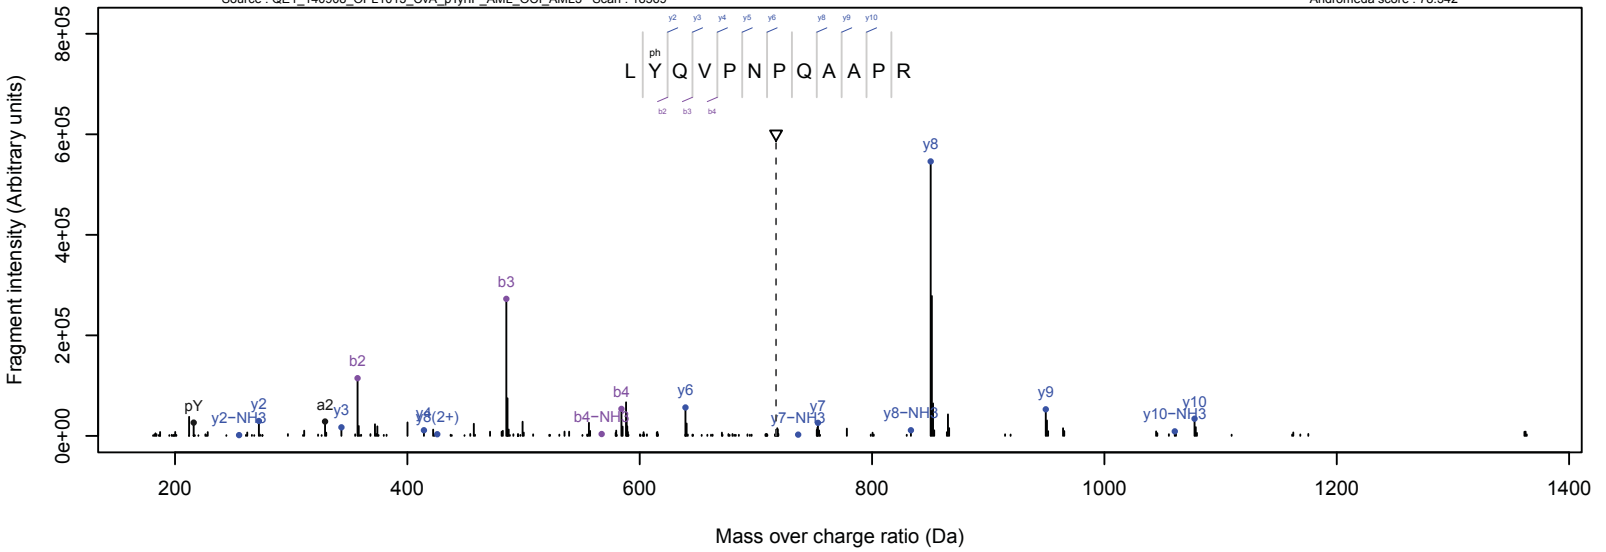

(ac)M(ox)EAIKY(ph)DFK-2+

Source: QE1\_140908\_OPL1013\_CvA\_pTyrIP\_AML\_OCI\_AML3 Scan: 23242

Andromeda score: 78.342

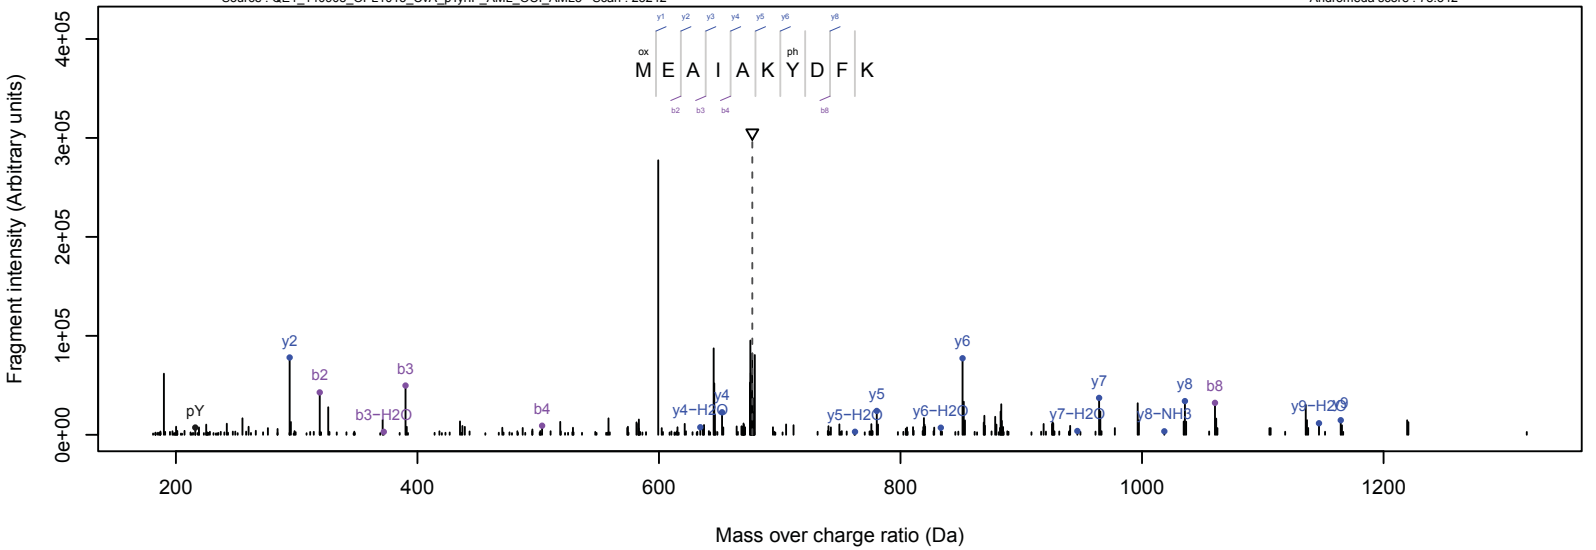

NY(ph)PELNNQYNR-2+

Source : QE1\_140612\_OPL1013\_CVA\_phosphoproteomic\_landscape\_AML\_C Scan : 11567

Andromeda score : 78.342

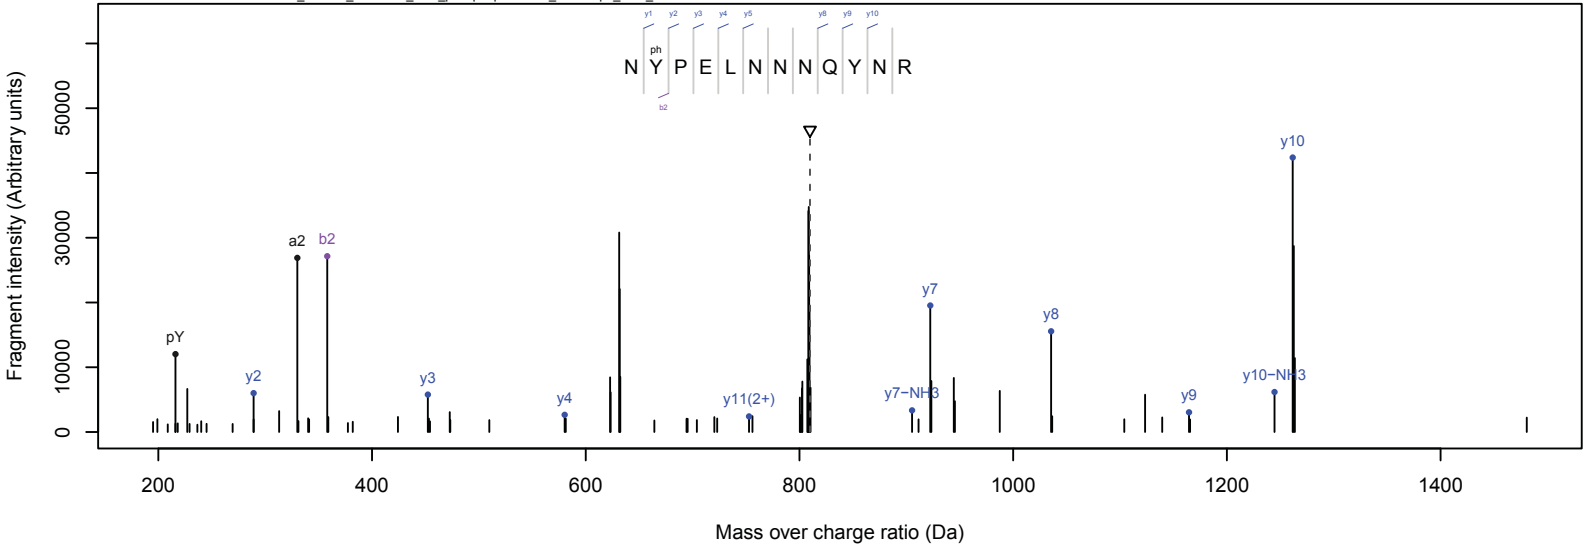

VESGY(ph)FSLEK-2+

Source : QE1\_140612\_OPL1013\_CVA\_phosphoproteomic\_landscape\_AML\_C Scan : 20789

Andromeda score : 78.342

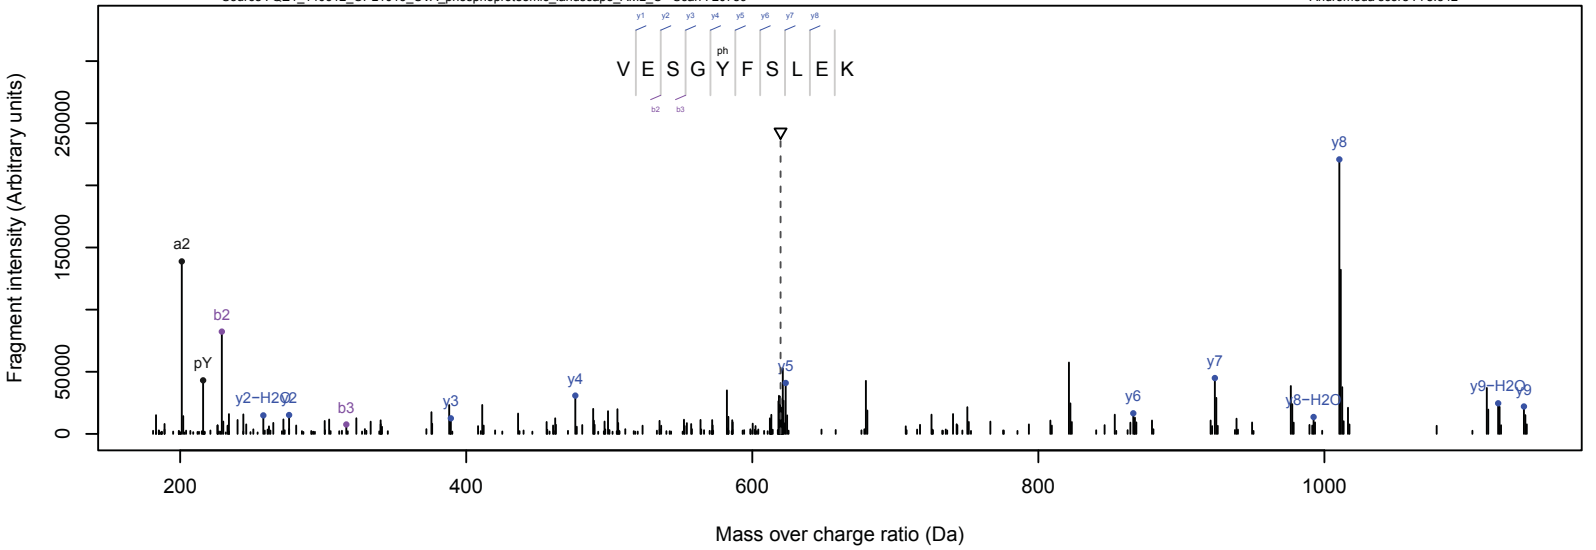

IWRDY(ph)VAPTANLDQK-2+

Source : QE1\_140612\_OPL1013\_CVA\_phosphoproteomic\_landscape\_AML\_C Scan : 26219

Andromeda score : 78.326

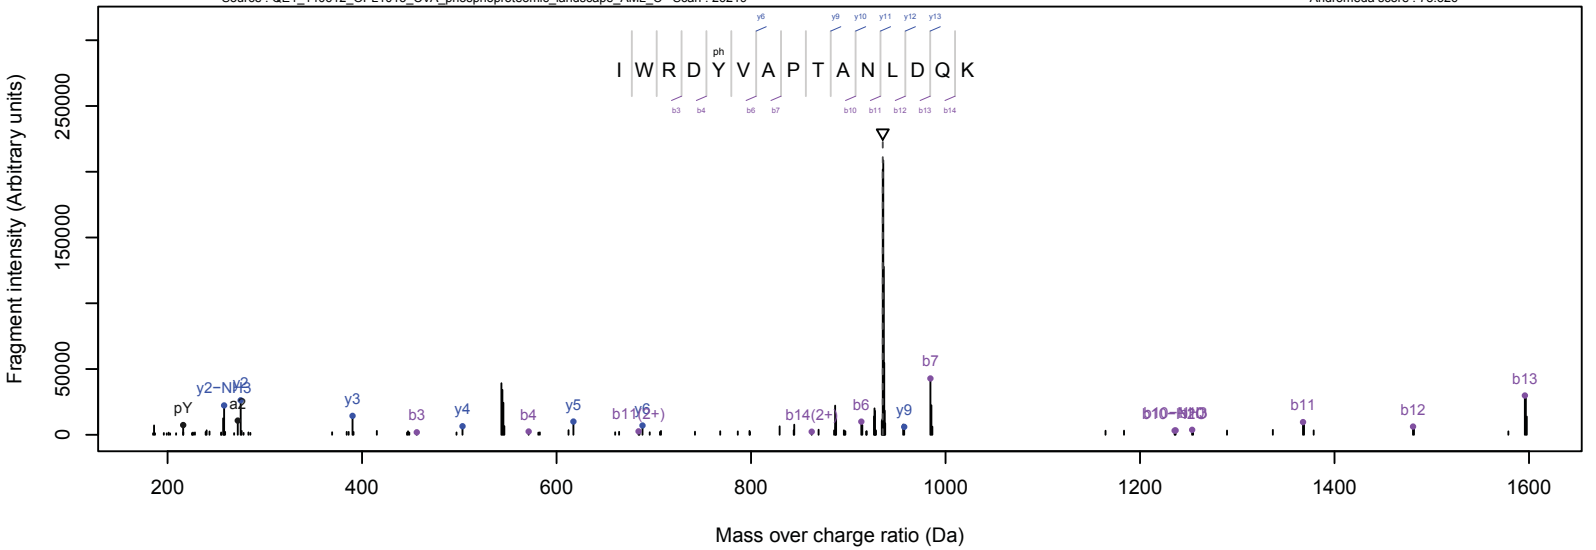

**GSPHY(ph)FSPFRPY-2+**

Source : QE1\_140612\_OPL1013\_CVA\_phosphoproteomic\_landscape\_AML\_C Scan : 30515

Andromeda score : 78.324

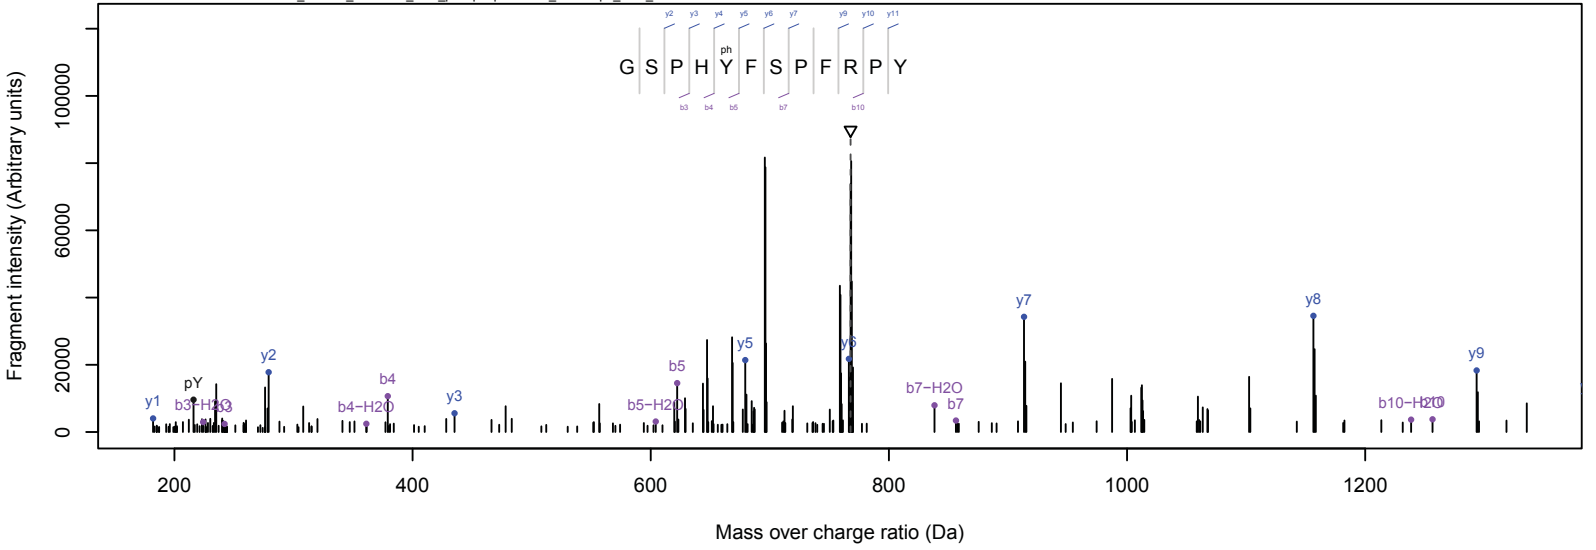

**MAPPQNQWPNY(ph)EEKPHMHTDSNHSSIAIQR-5+**

Source : QE1\_140612\_OPL1013\_CVA\_phosphoproteomic\_landscape\_AML\_C Scan : 20889

Andromeda score : 78.319

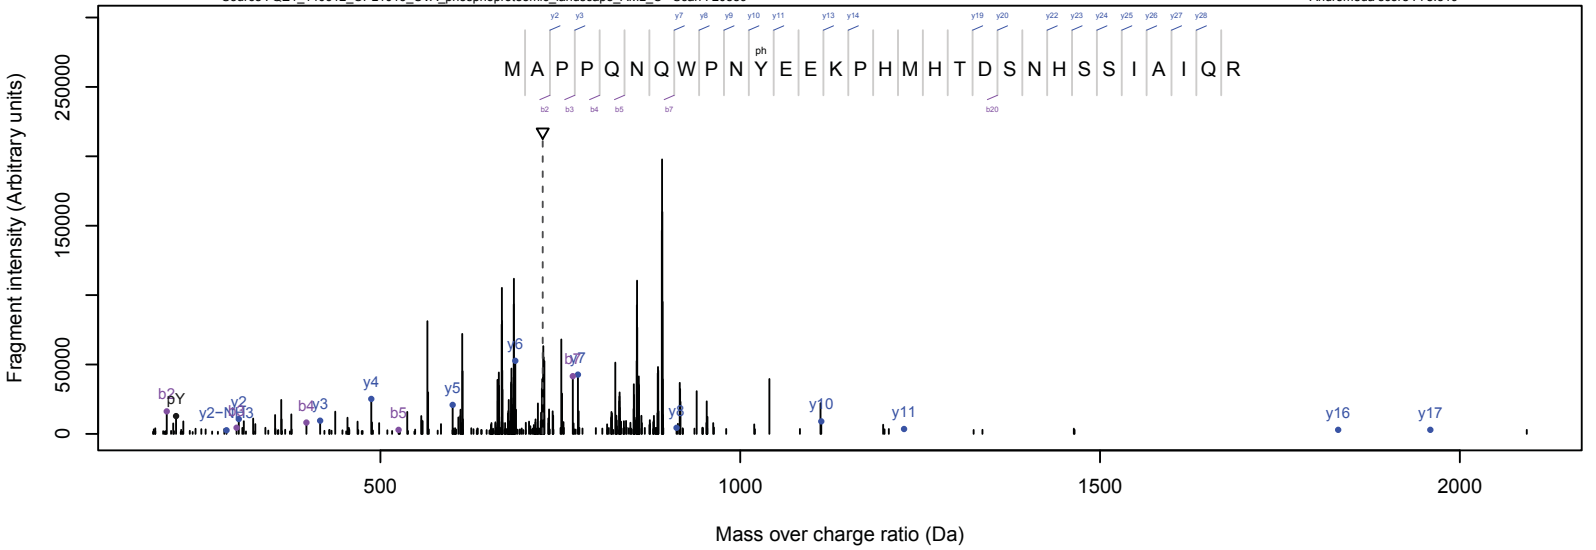

**TLSFGSDLNYAT(ph)REDAPIGPHLQSMPEQIR-4+**

Source : QE1\_140908\_OPL1013\_CvA\_pTyrIP\_AML\_Kasumi1 Scan : 38919

Andromeda score : 78.319

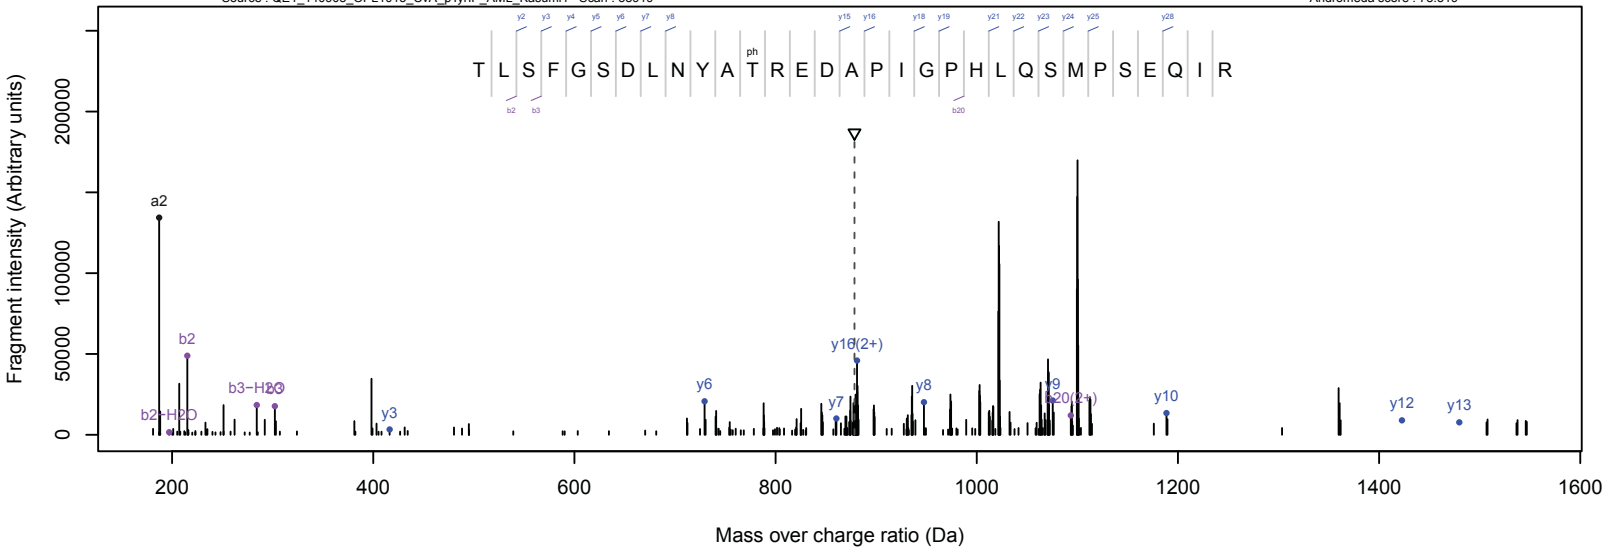

**FCNTEDEET(ph)MYLRRPEGIER-3+**

Source : QE1\_140612\_OPL1013\_CVA\_phosphoproteomic\_landscape\_AML\_C Scan : 23172

Andromeda score : 78.272

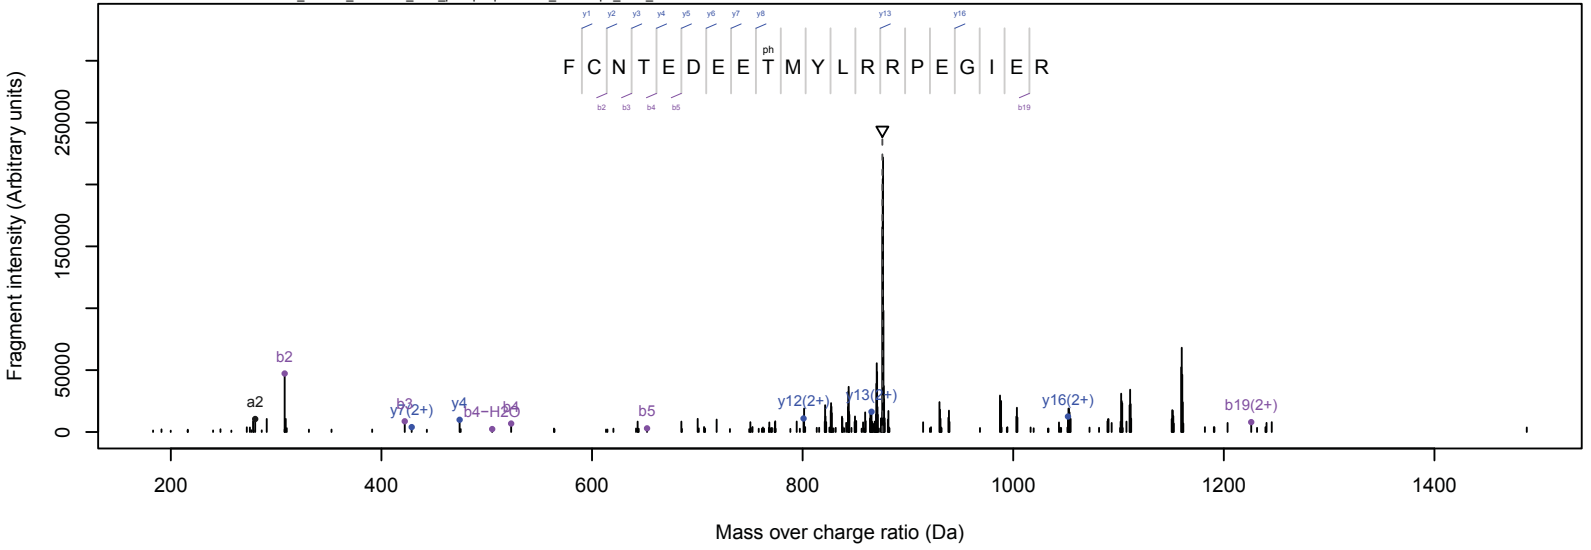

**LEAVPLEFGDY(ph)HPLKPIVTESK-3+**

Source : QE1\_140612\_OPL1013\_CVA\_phosphoproteomic\_landscape\_AML\_B Scan : 39903

Andromeda score : 78.272

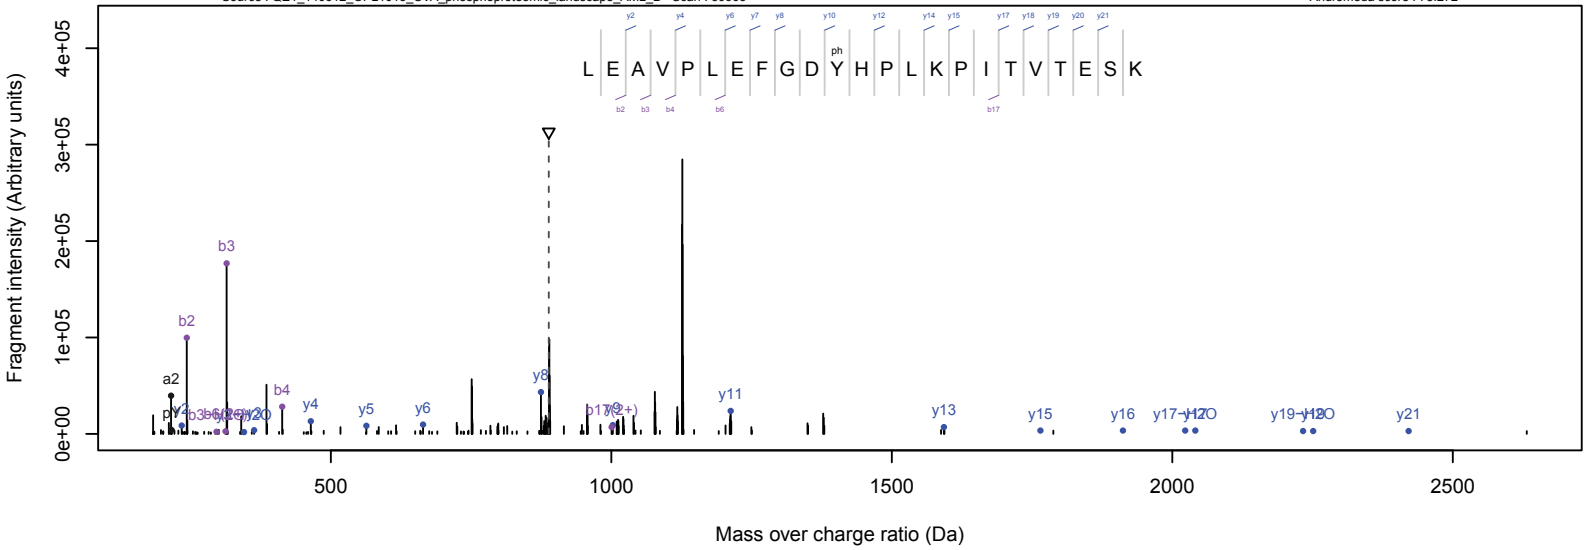

**GY(ph)IDLSKR-2+**

Source : QE1\_140612\_OPL1013\_CVA\_phosphoproteomic\_landscape\_AML\_D Scan : 10780

Andromeda score : 78.149

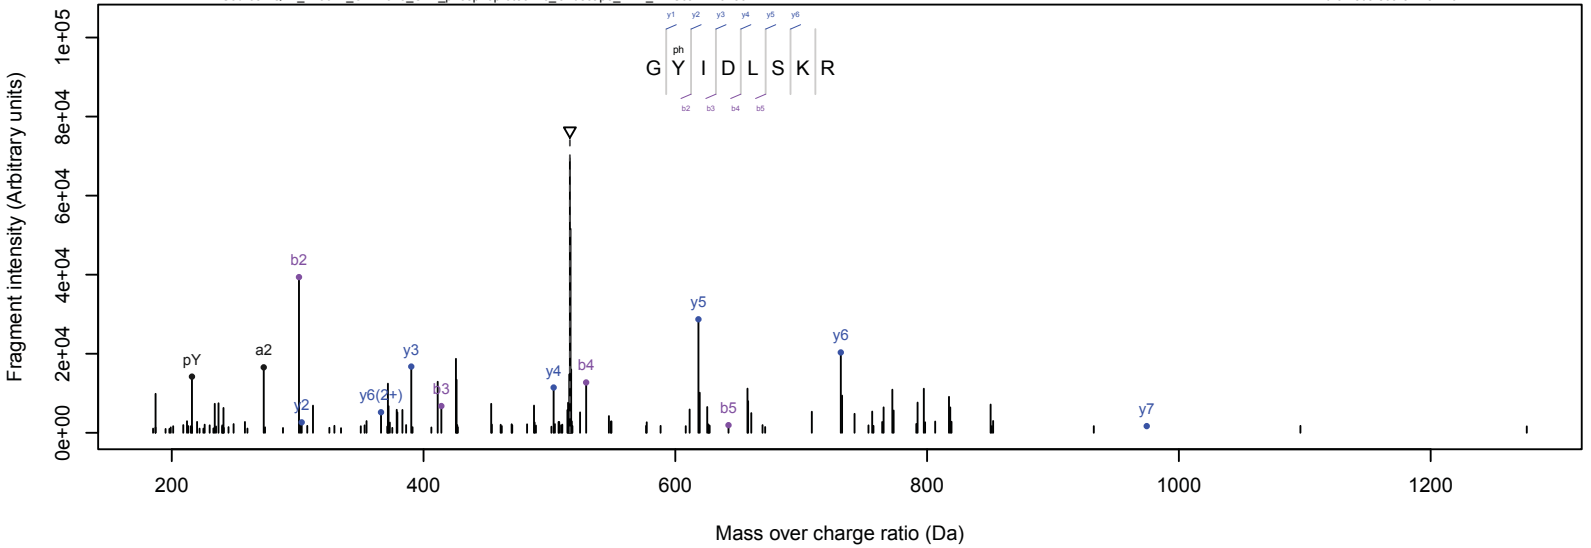

GTQADY(ph)AEVK-2+

Source : QE1\_140822\_OPL1013\_CVA\_pTyrIP\_AML\_cell\_lines\_part2\_B Scan : 3688

Andromeda score : 78.136

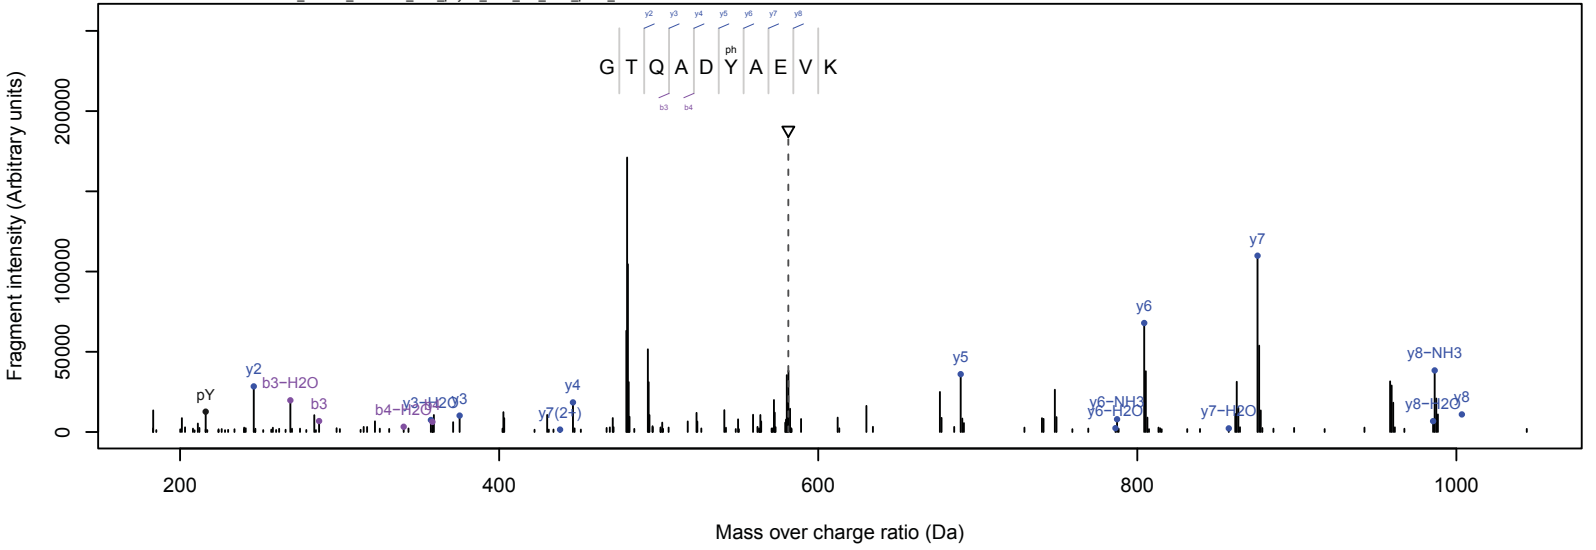

SYLY(ph)PSTLVR-2+

Source : QE1\_140612\_OPL1013\_CVA\_phosphoproteomic\_landscape\_AML\_B Scan : 29990

Andromeda score : 78.136

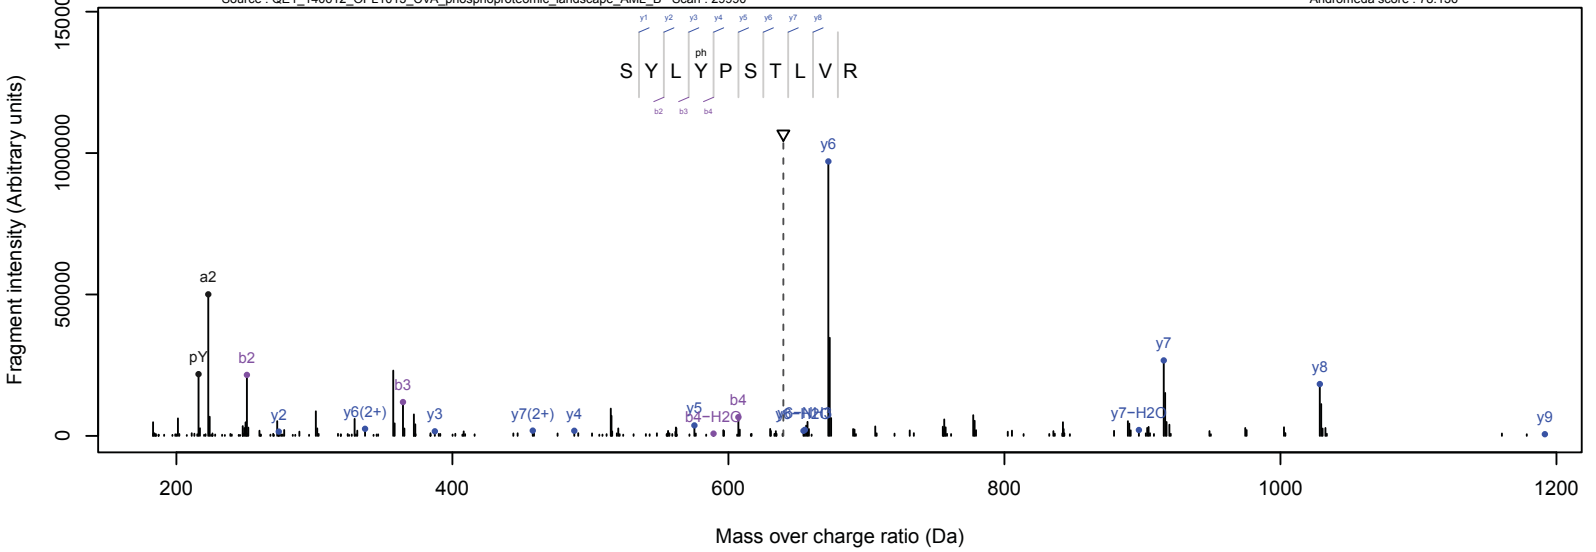

GLLALGDY(ph)MNVQCHACIGGTNVGEDIR-3+

Source : QE1\_140612\_OPL1013\_CVA\_phosphoproteomic\_landscape\_AML\_B Scan : 42837

Andromeda score : 78.128

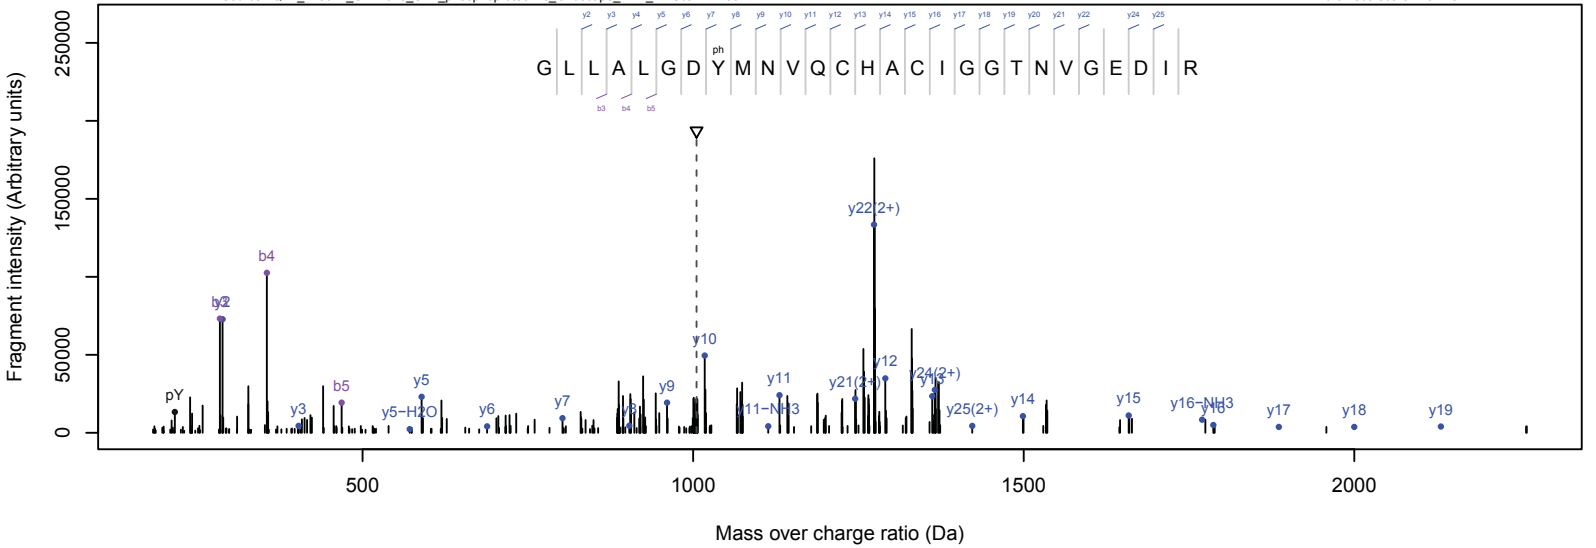

**IQQY(ph)ISHR-2+**

Source : QE1\_140822\_OPL1013\_CVA\_pTyrIP\_AML\_cell\_lines\_part2\_E Scan : 3615

Andromeda score : 78.113

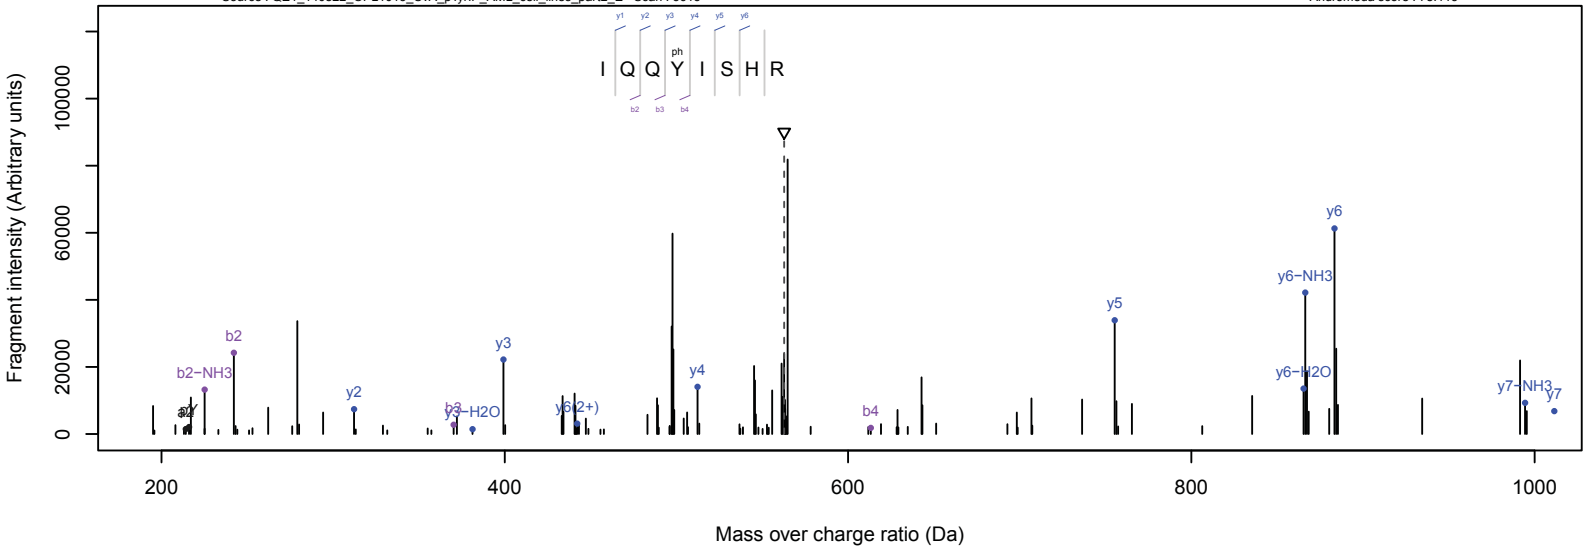

**GGSGSHNWGTVKDELTESPK(ph)IQK-4+**

Source : QE1\_140612\_OPL1013\_CVA\_phosphoproteomic\_landscape\_AML\_C Scan : 23448

Andromeda score : 78.098

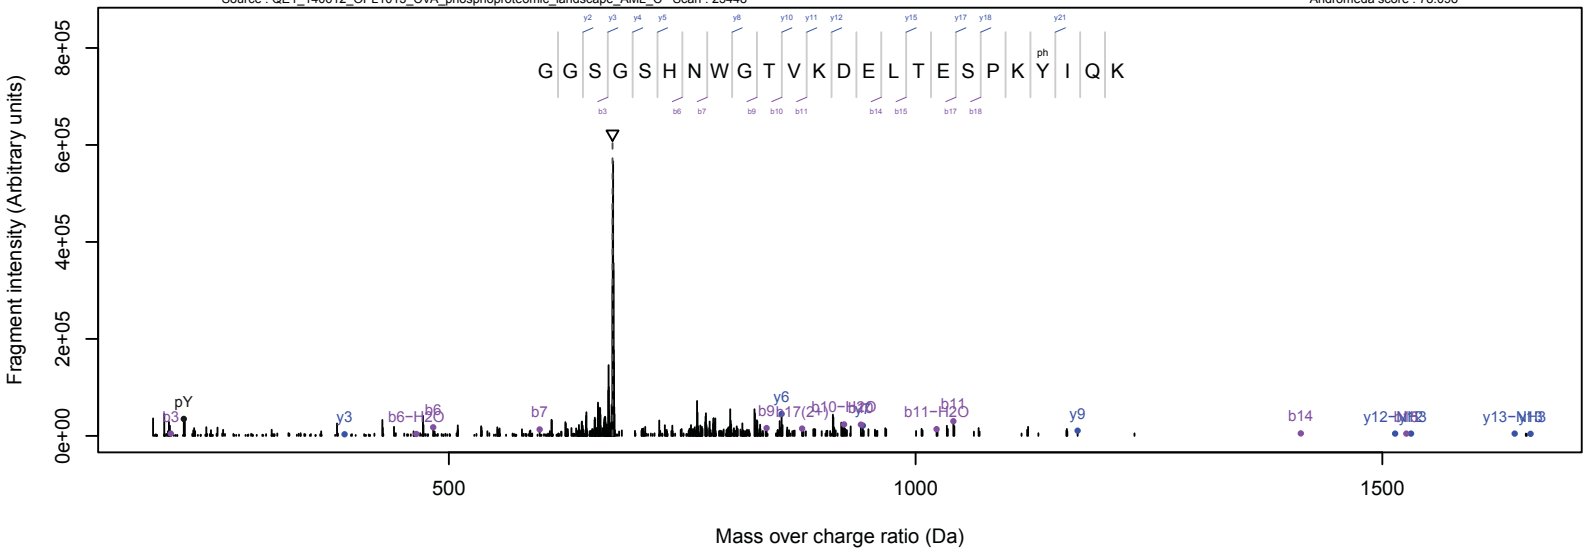

**LREPVL(ph)SPPSAVFVEPNRNEYLELK-3+**

Source : QE1\_140612\_OPL1013\_CVA\_phosphoproteomic\_landscape\_AML\_B Scan : 41577

Andromeda score : 78.098

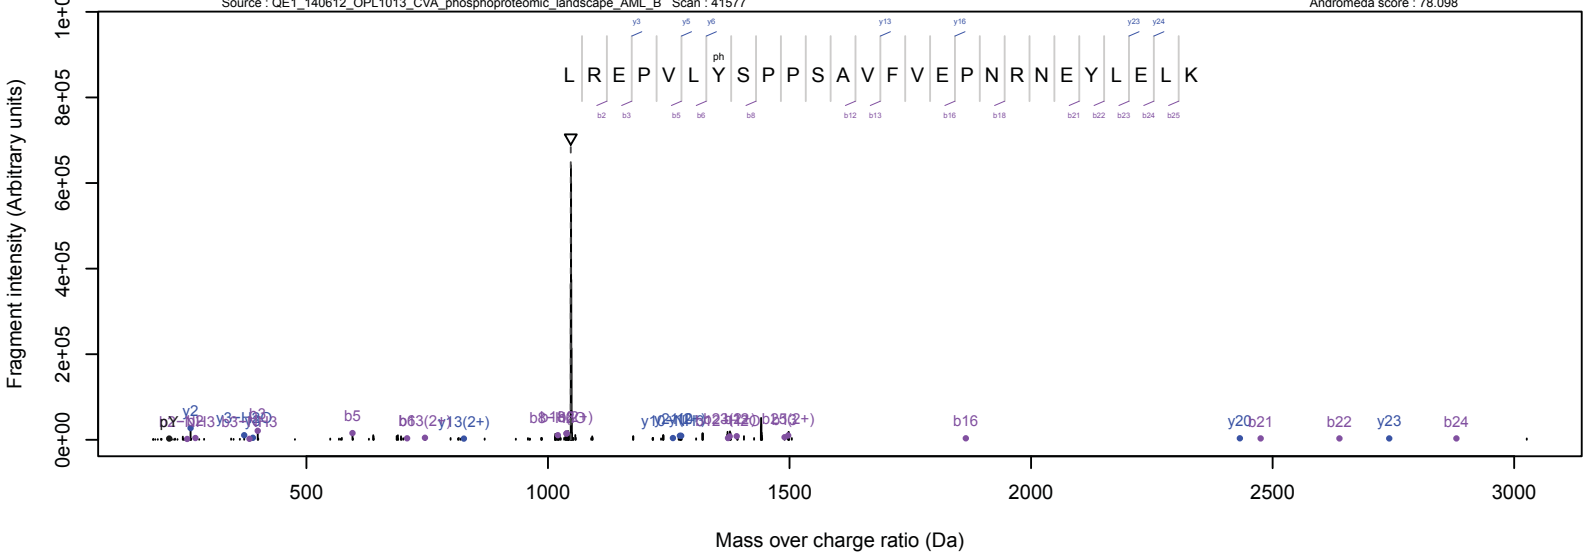

QKY(ph)FELEVR-2+

Source : QE1\_140612\_OPL1013\_CVA\_phosphoproteomic\_landscape\_AML\_C Scan : 22773

Andromeda score : 78.098

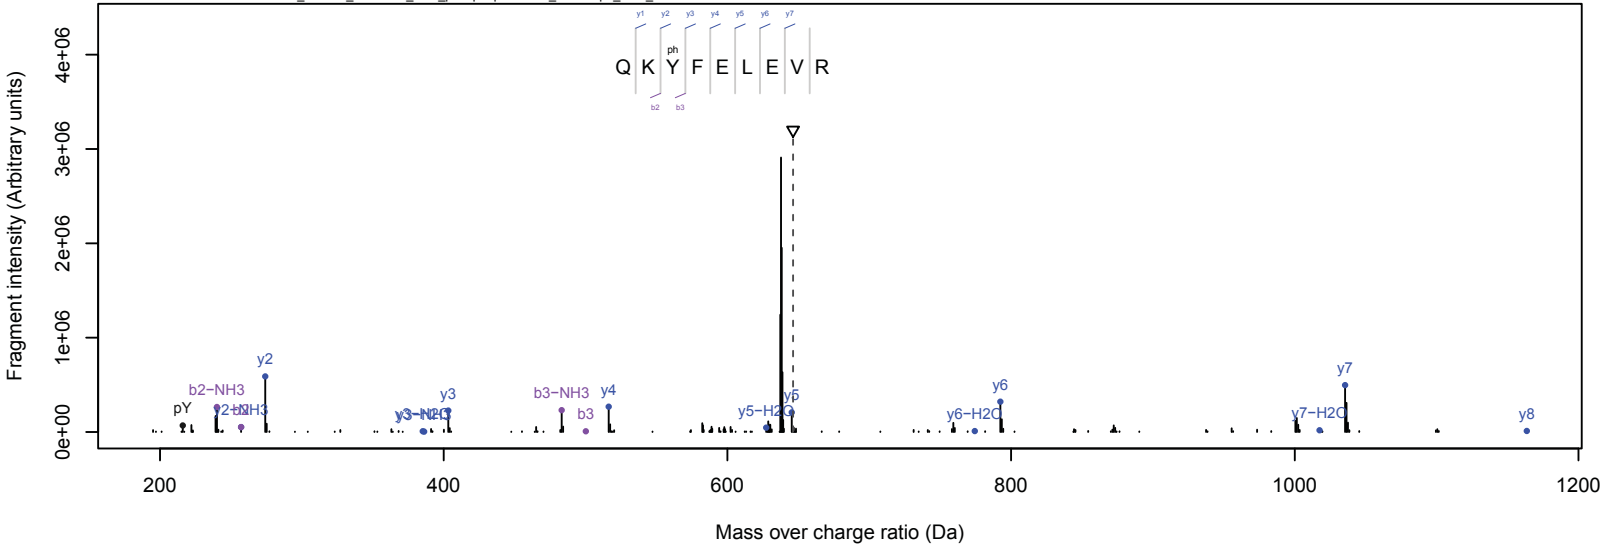

VSGDYGHPVYIQDGPQSPPIY(ph)YKV-3+

Source : QE1\_140612\_OPL1013\_CVA\_phosphoproteomic\_landscape\_AML\_C Scan : 37994

Andromeda score : 78.098

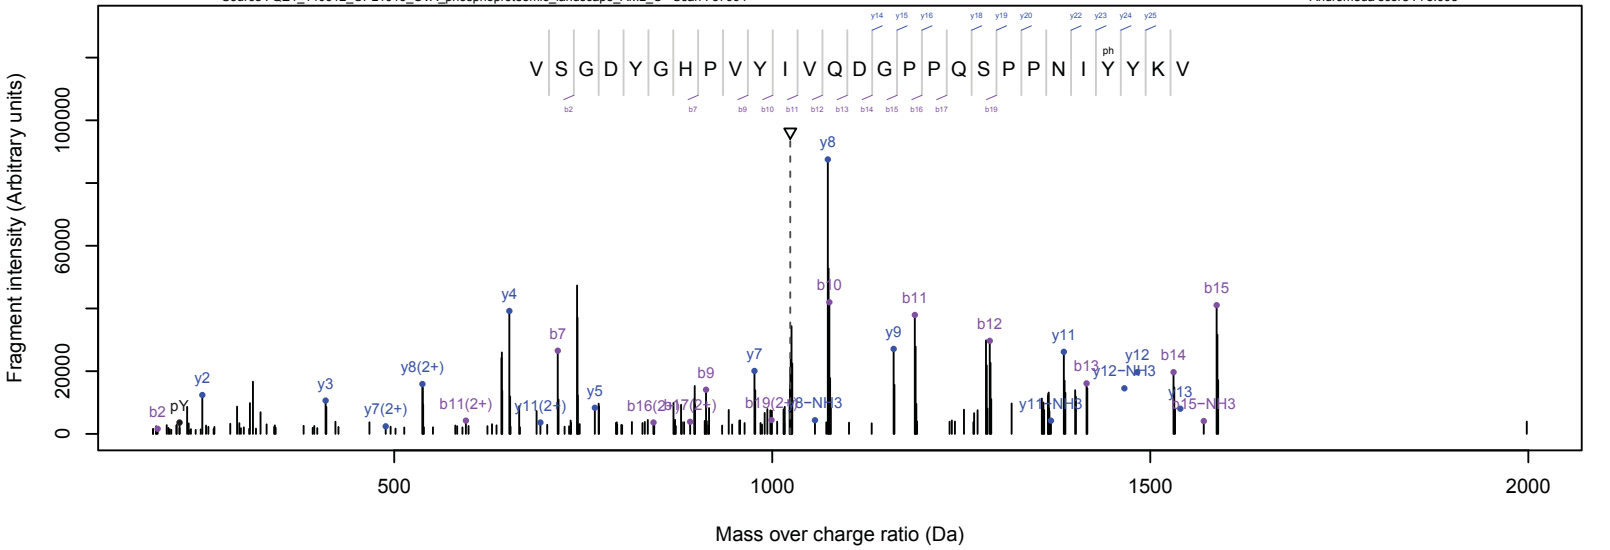

MEIATKEPMNP I K Q Y V K-3+

Source : QE1\_140612\_OPL1013\_CVA\_phosphoproteomic\_landscape\_AML\_C Scan : 23173

Andromeda score : 78.078

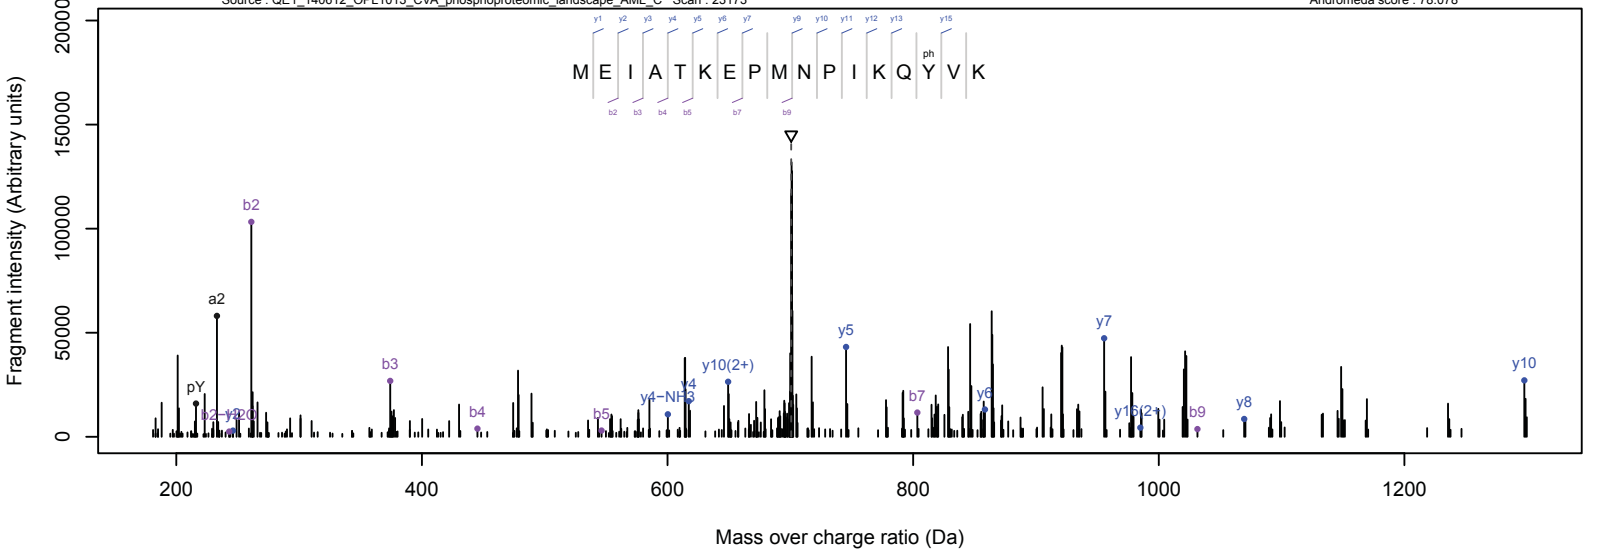



QPGTPTSPY(ph)SAHEINK-3+

Source : QE1\_140612\_OPL1013\_CVA\_phosphoproteomic\_landscape\_AML\_B Scan : 11135

Andromeda score : 78.078

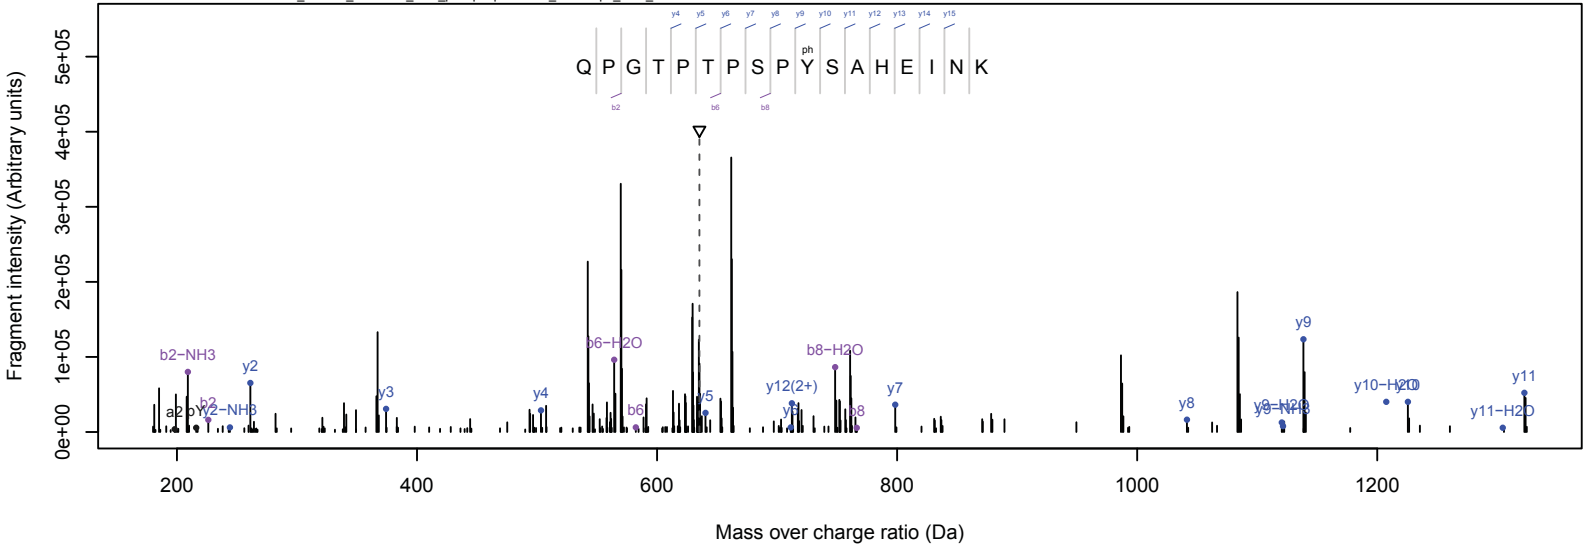

SLSSSSIGSNST(ph)YLTSK-2+

Source : QE1\_140822\_OPL1013\_CvA\_pTyrIP\_AML\_cell\_lines\_part2\_B Scan : 14221

Andromeda score : 78.078

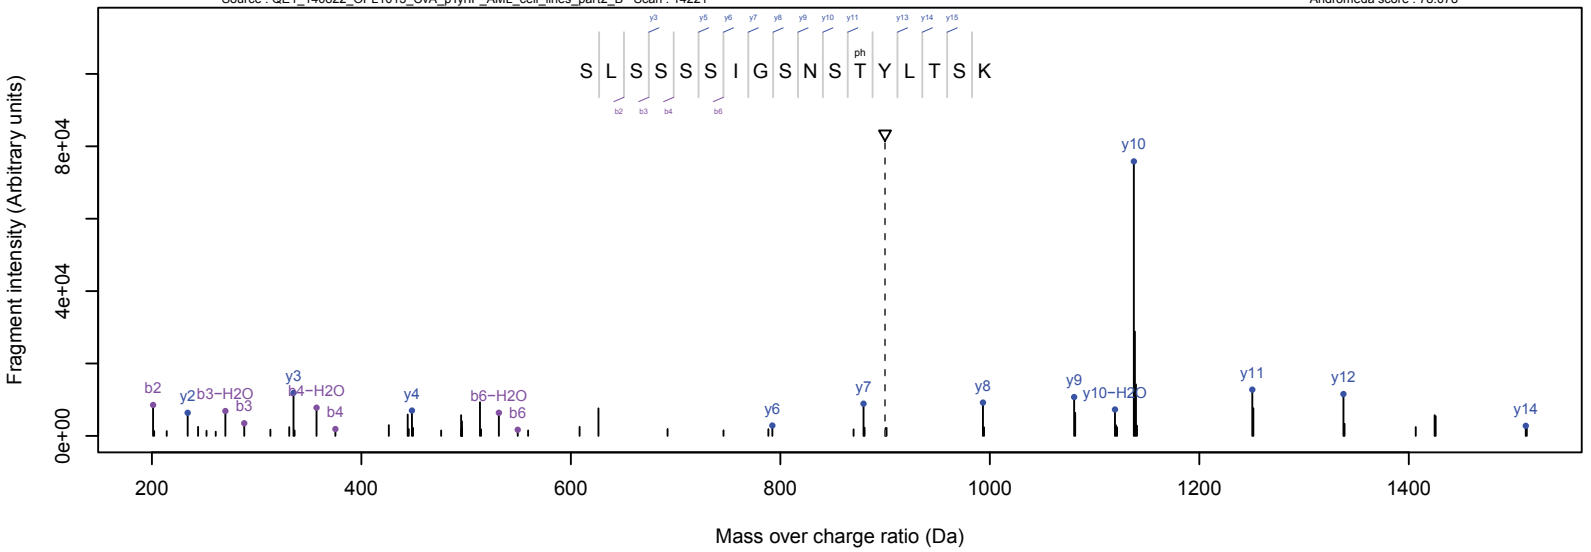

TLSPGDSFSTFDTPY(ph)CR-2+

Source : QE1\_140612\_OPL1013\_CVA\_phosphoproteomic\_landscape\_AML\_C Scan : 32787

Andromeda score : 78.078

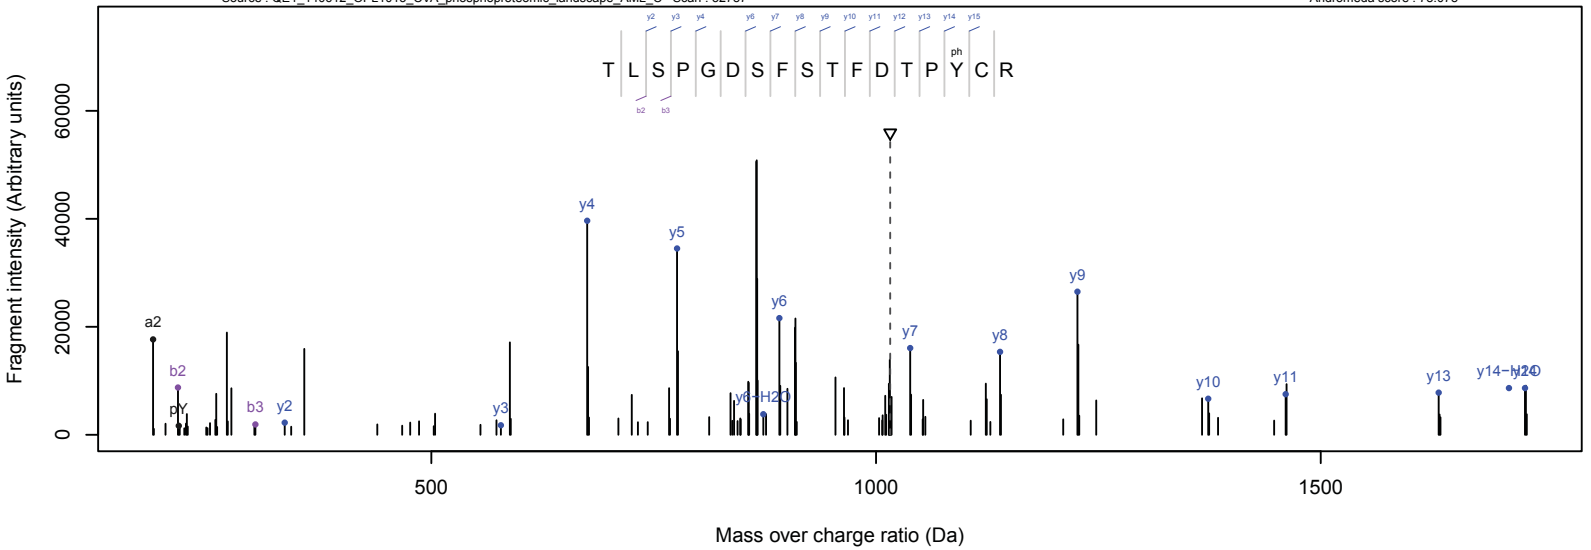

Y(ph)LHQNRVPAEPLSSLLSASHNQLSHTDLELHQR-5+

Source : QE1\_140612\_OPL1013\_CVA\_phosphoproteomic\_landscape\_AML\_C Scan : 31957

Andromeda score : 77.995

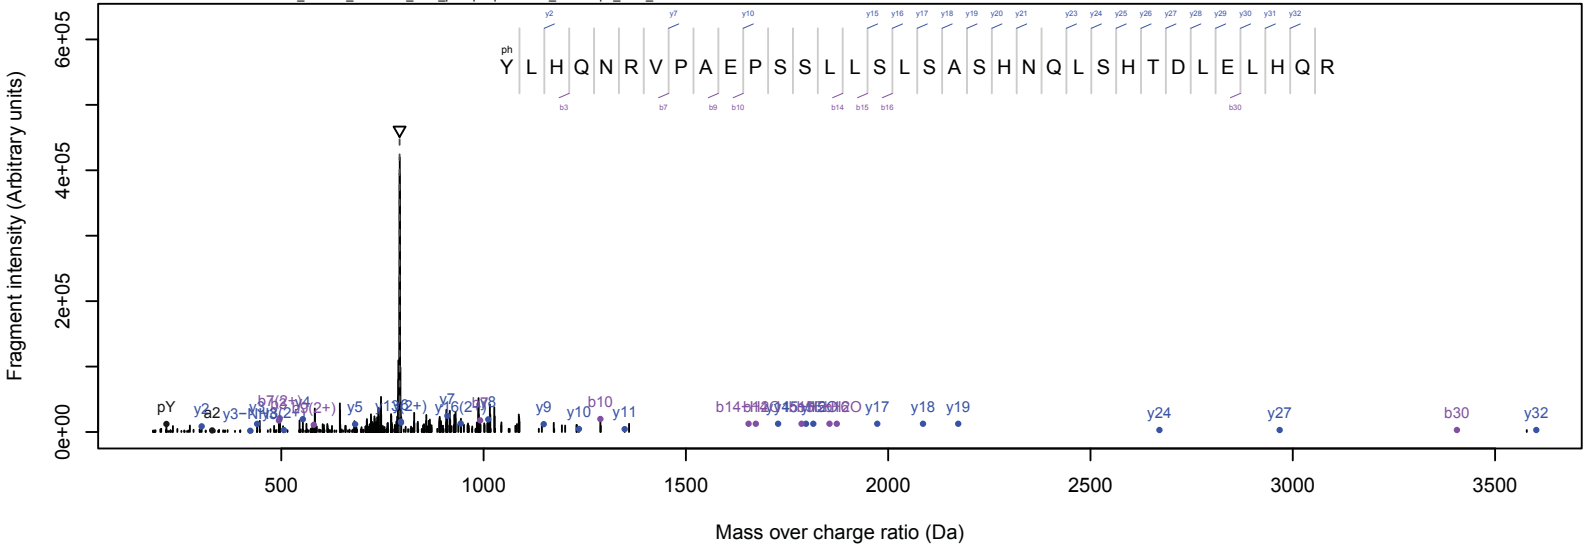

FMDLY(ph)PCSAELK-2+

Source : QE1\_140612\_OPL1013\_CVA\_phosphoproteomic\_landscape\_AML\_A Scan : 37799

Andromeda score : 77.894

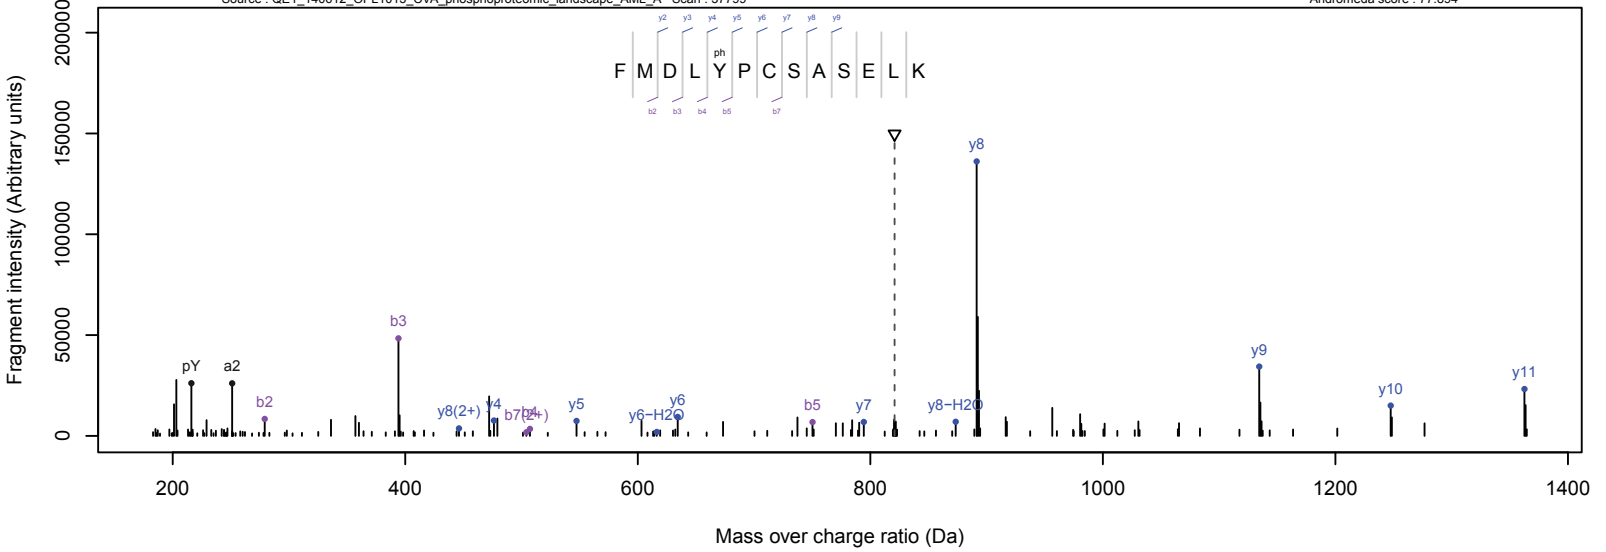

NLVPGESVYGEKR-3+

Source : QE1\_140612\_OPL1013\_CVA\_phosphoproteomic\_landscape\_AML\_B Scan : 13645

Andromeda score : 77.894

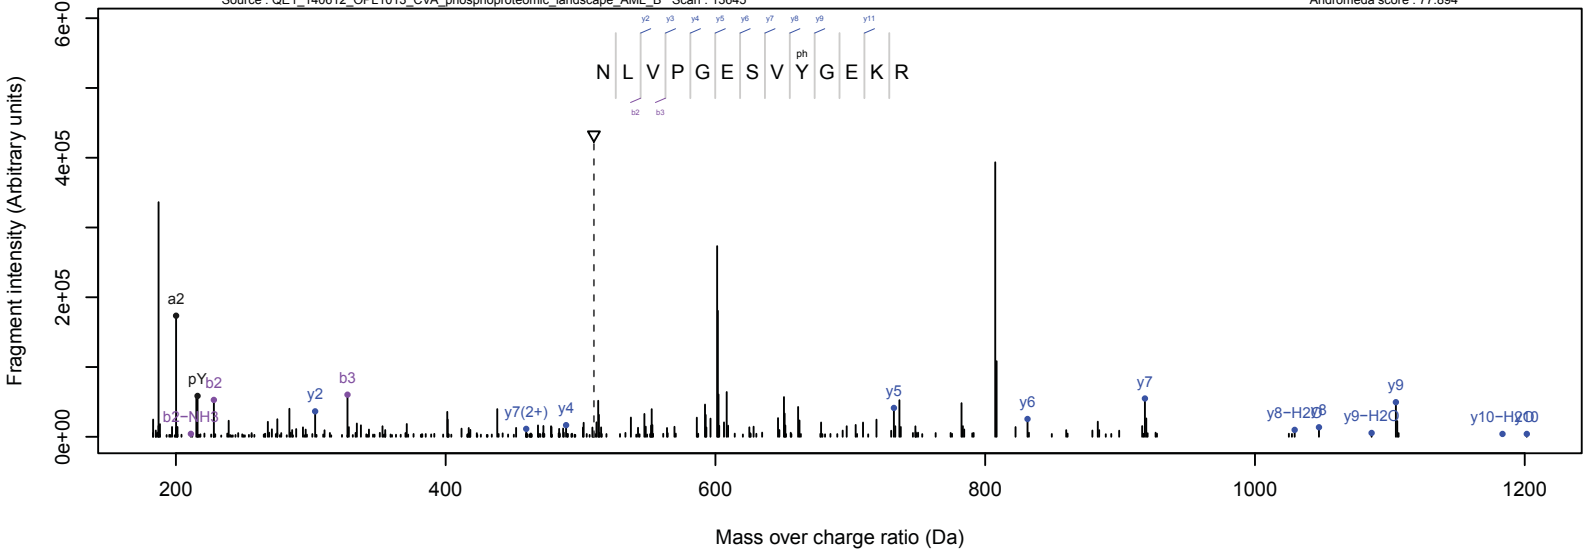

LHAVVTKEPIY(ph)ITEFM(ox)AK-3+

Source : QE1\_140822\_OPL1013\_CVA\_pTyrIP\_AML\_cell\_lines\_part2\_E Scan : 44315

Andromeda score : 77.871

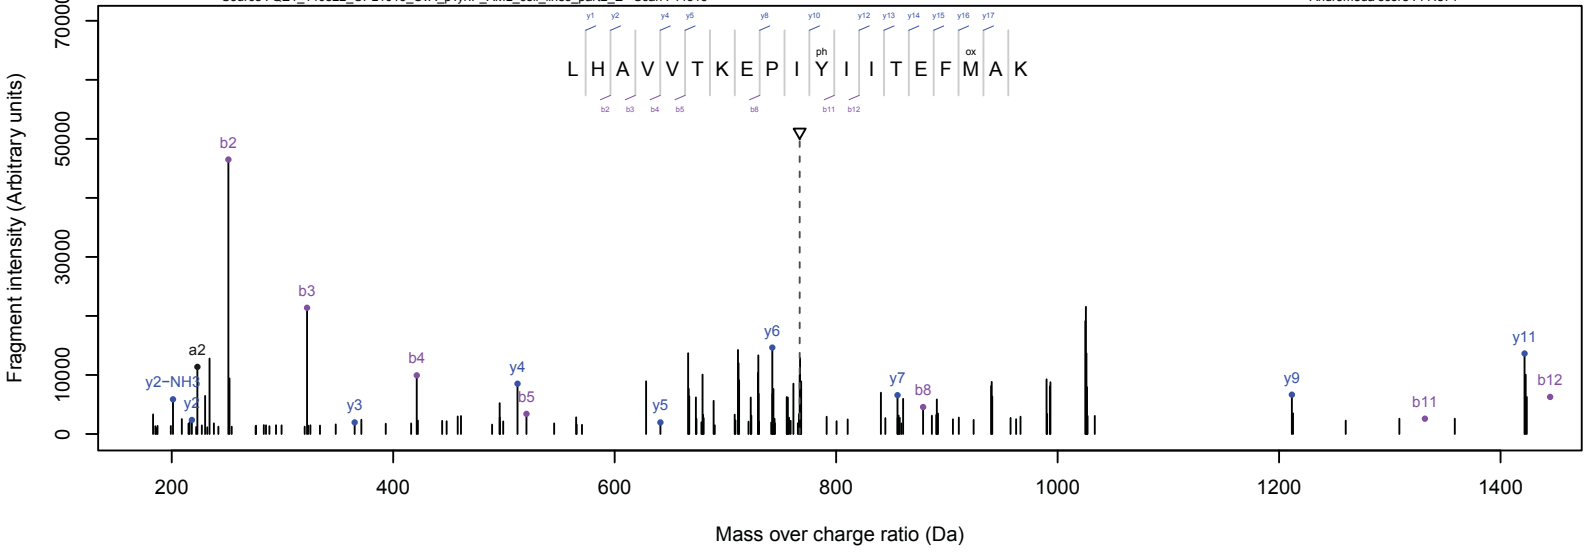

DSQNGAIAPGHVSVIRPPQNL(ph)PENIVPSFSPGSPGR-4+

Source : QE1\_140612\_OPL1013\_CVA\_phosphoproteomic\_landscape\_AML\_B Scan : 43936

Andromeda score : 77.868

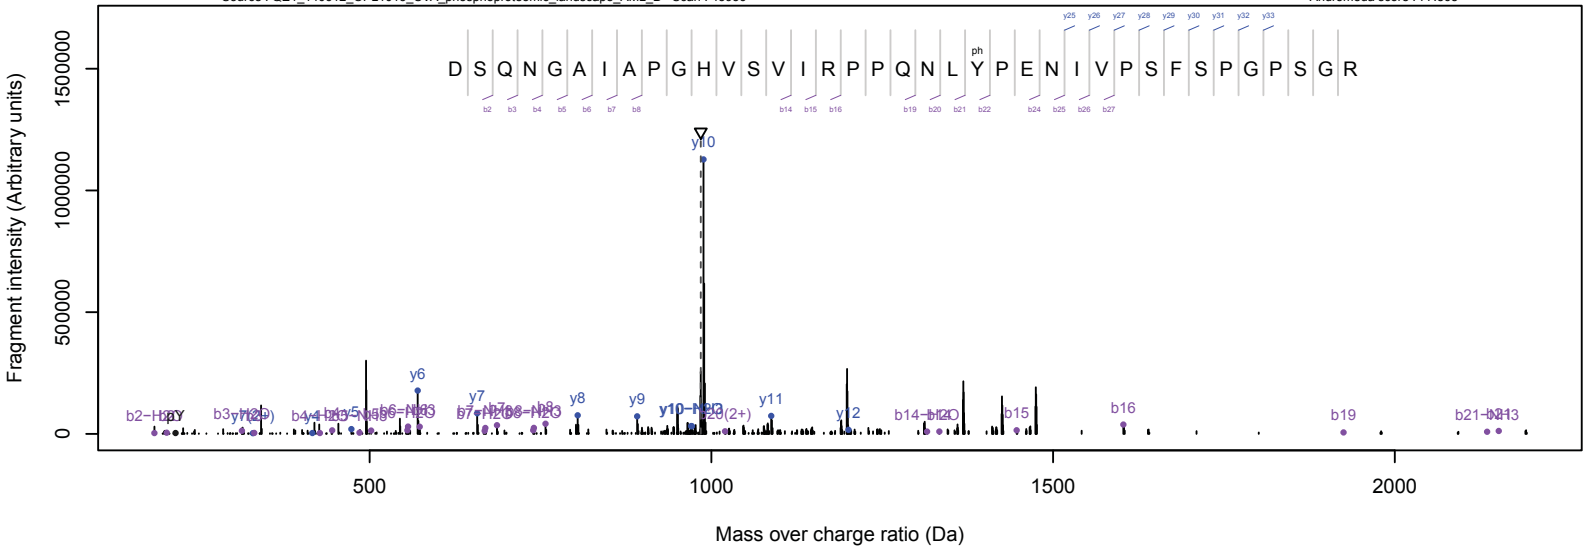

EKENGCVLETLCAGCSLNLG(ph)VYR-3+

Source : QE1\_140612\_OPL1013\_CVA\_phosphoproteomic\_landscape\_AML\_B Scan : 44192

Andromeda score : 77.838

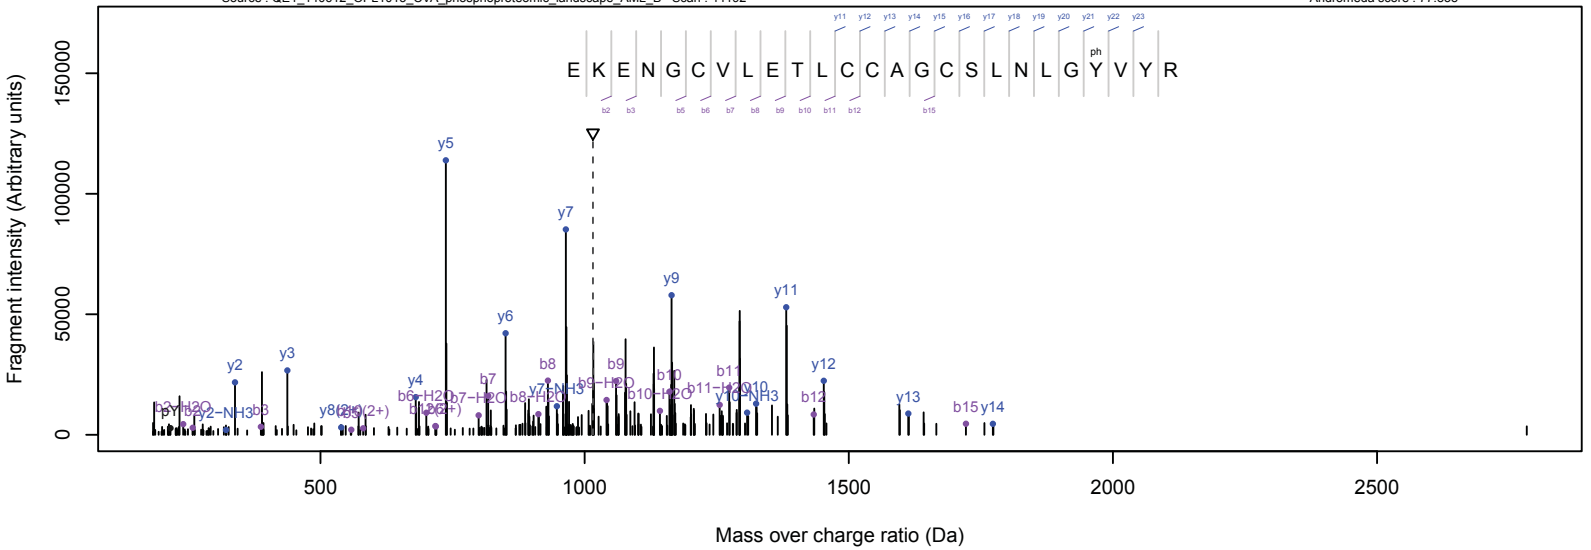

**DRFDGY(ph)VFLDNK-2+**

Source : QE1\_140612\_OPL1013\_CVA\_phosphoproteomic\_landscape\_AML\_C Scan : 30783

Andromeda score : 77.776

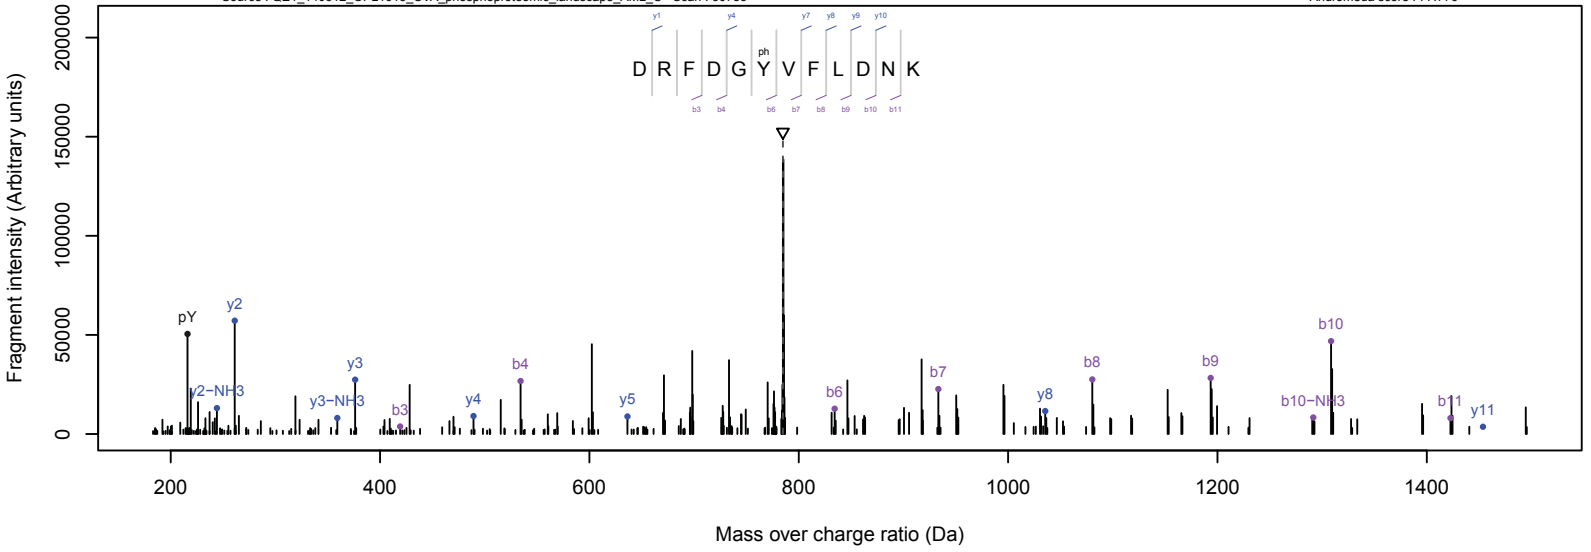

**FEQIY(ph)LSKPTHWER-3+**

Source : QE1\_140908\_OPL1013\_CvA\_pTyrIP\_AML\_Kasumi1 Scan : 27481

Andromeda score : 77.776

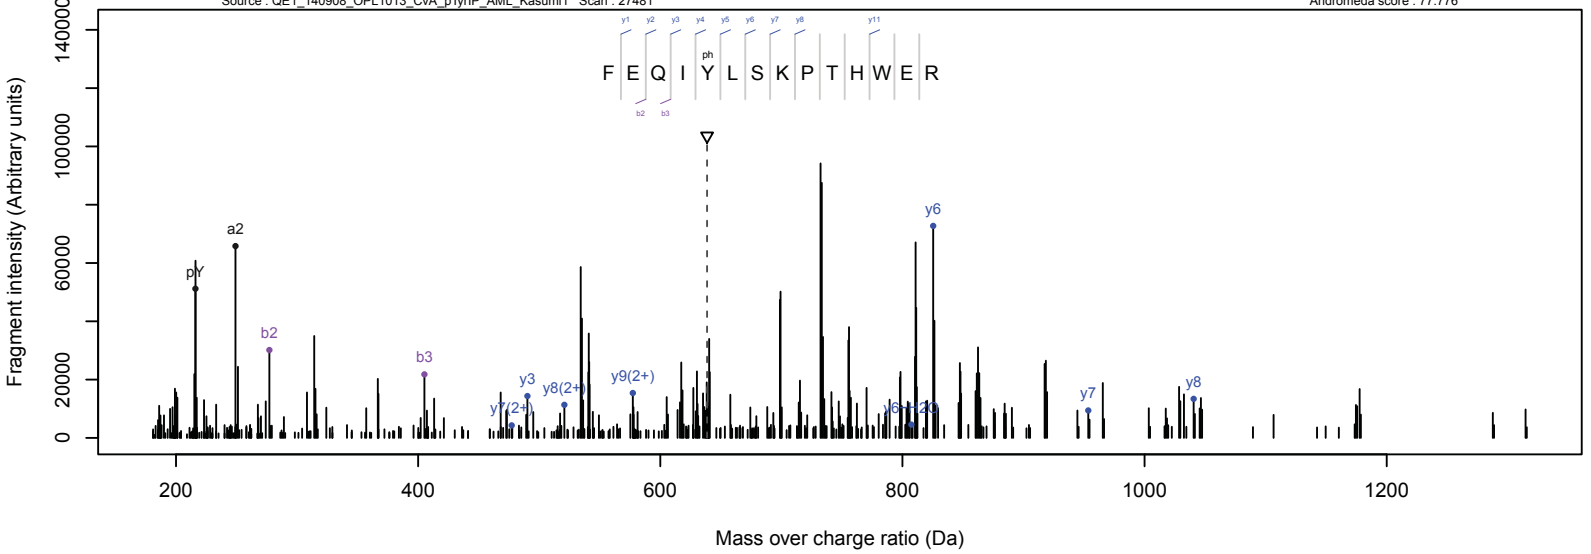

**GEFTY(ph)YEIQDNTGK-2+**

Source : QE1\_140612\_OPL1013\_CVA\_phosphoproteomic\_landscape\_AML\_D Scan : 24598

Andromeda score : 77.776

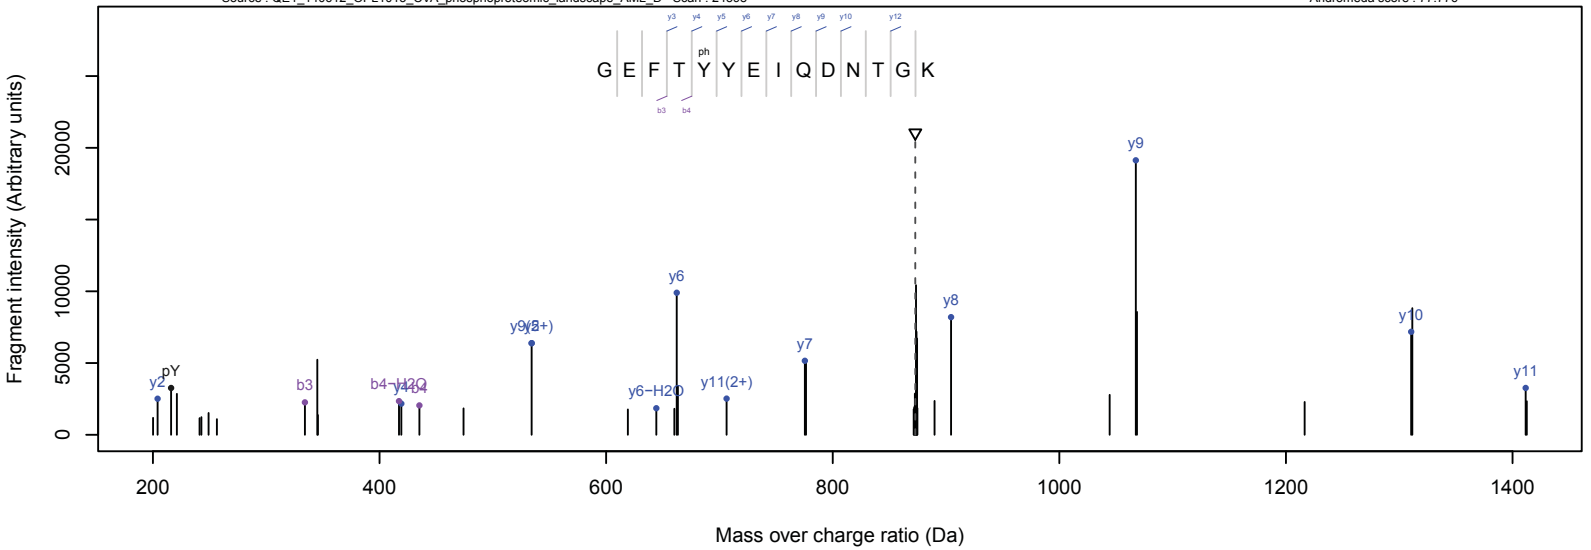

ISLESEY(ph)EKIKDSK-3+

Source : QE1\_140612\_OPL1013\_CVA\_phosphoproteomic\_landscape\_AML\_A Scan : 20723

Andromeda score : 77.776

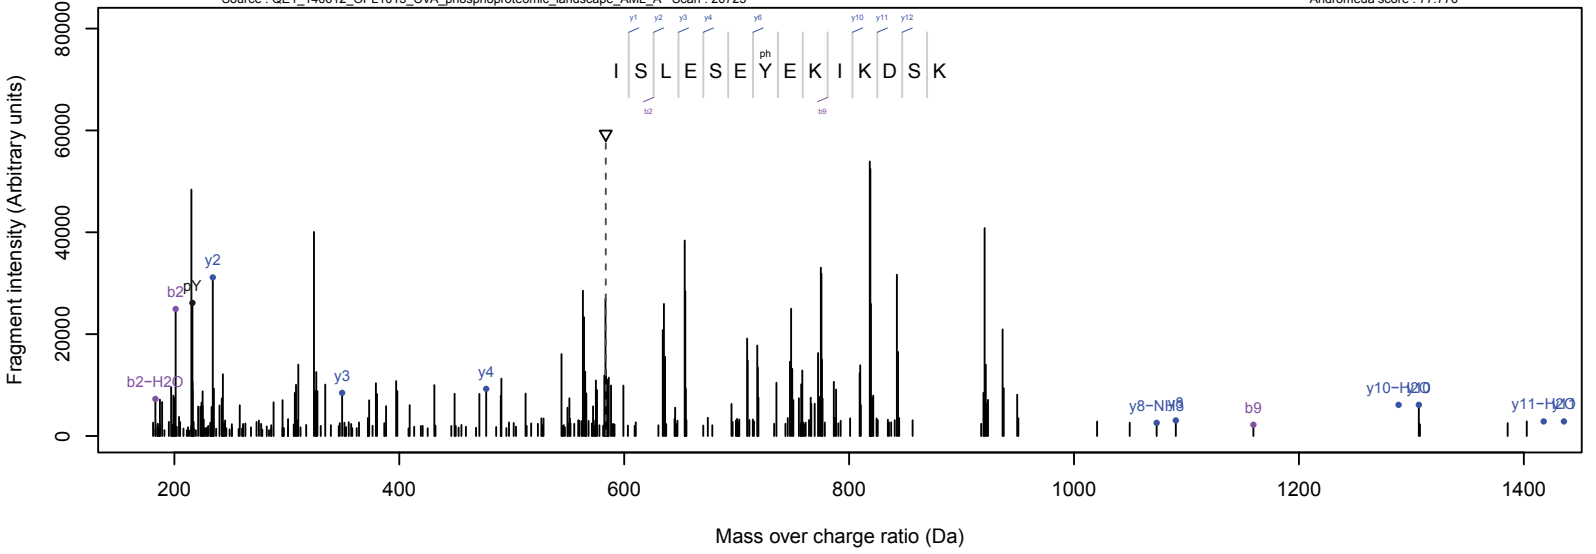

NISMSVEGDY(ph)TYLR-2+

Source : QE1\_140612\_OPL1013\_CVA\_phosphoproteomic\_landscape\_AML\_D Scan : 32904

Andromeda score : 77.776

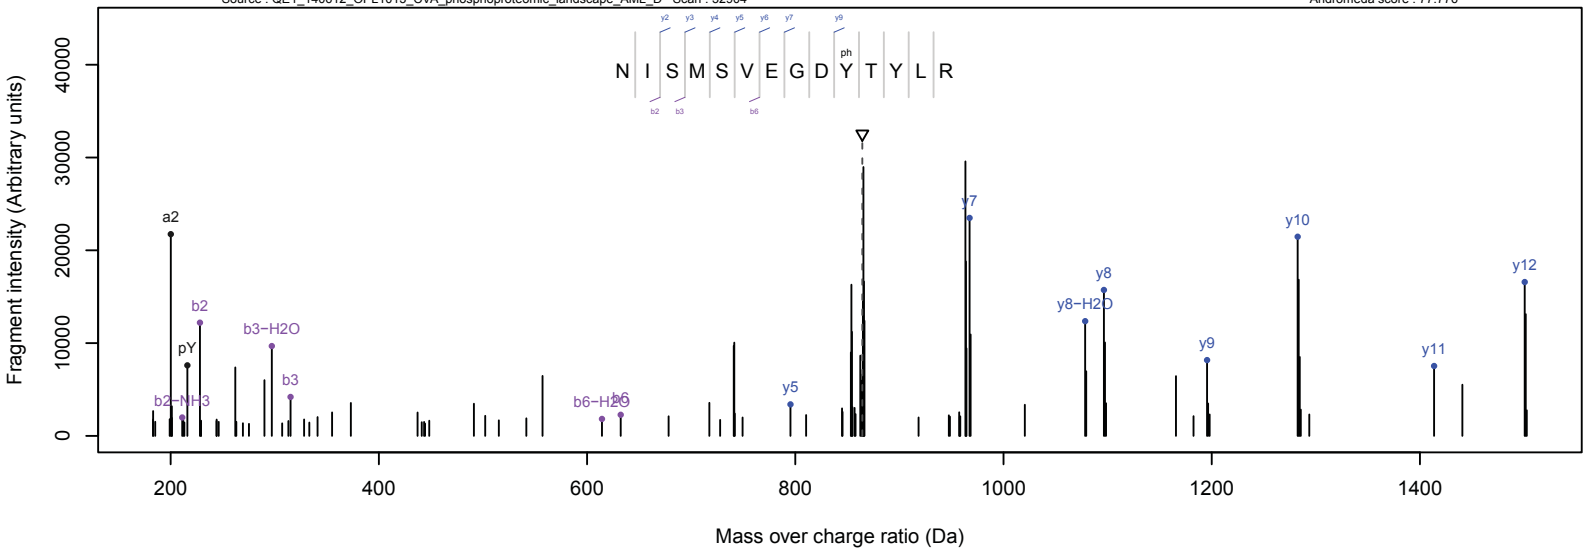

SKGY(ph)GFVSFYNK-2+

Source : QE1\_140612\_OPL1013\_CVA\_phosphoproteomic\_landscape\_AML\_C Scan : 25024

Andromeda score : 77.776

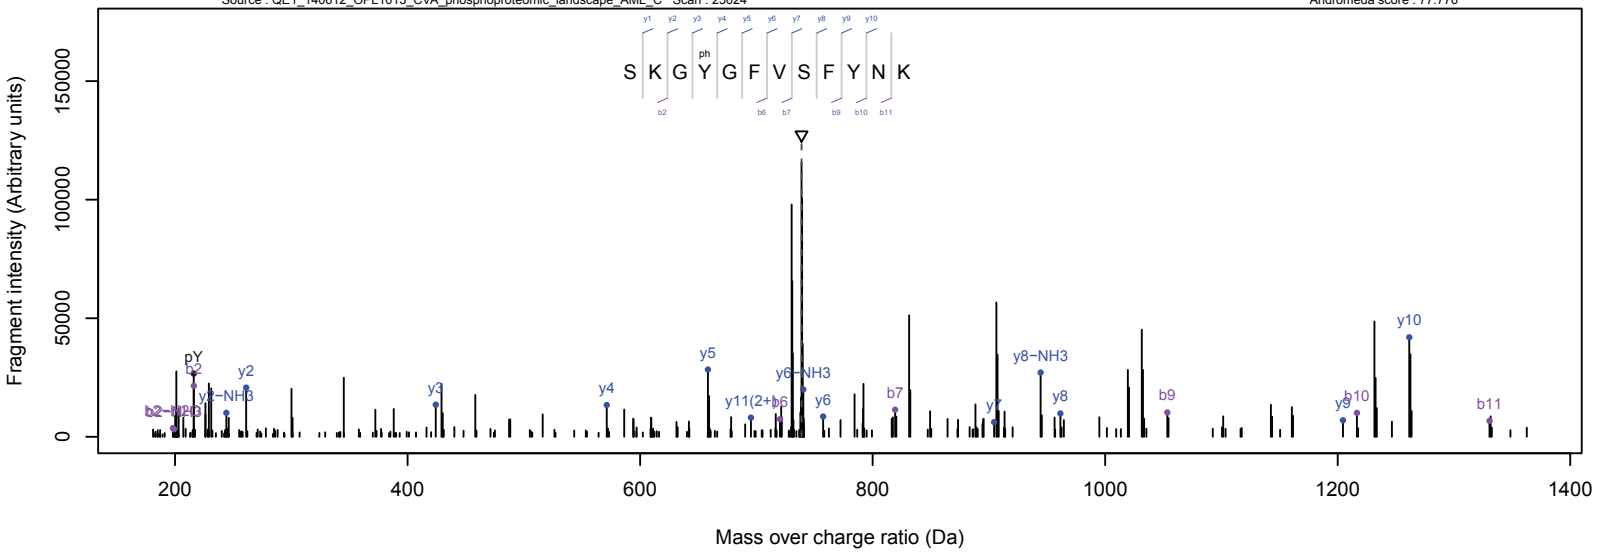

**TLSFGSDLNY(ph)ATR-2+**

Source : QE1\_140908\_OPL1013\_CVA\_pTyrIP\_AML\_Kasumi1 Scan : 30170

Andromeda score : 77.776

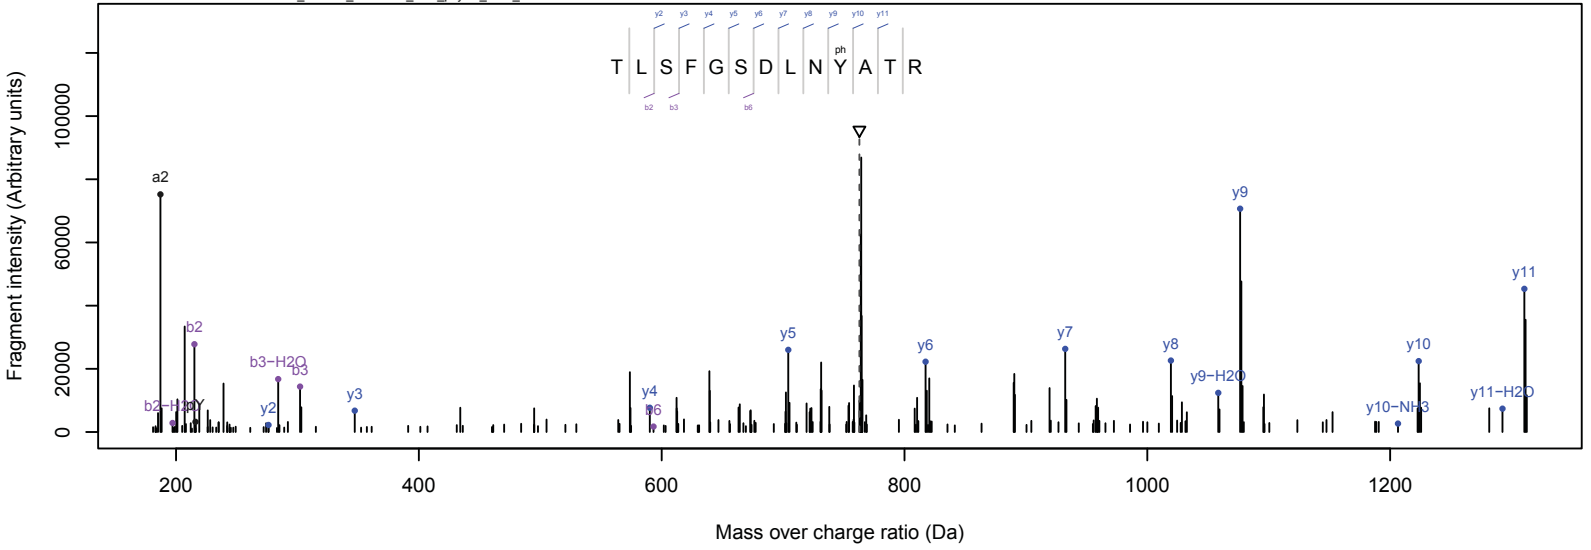

**VIQY(ph)LAYASSHK-2+**

Source : QE1\_140612\_OPL1013\_CVA\_phosphoproteomic\_landscape\_AML\_F Scan : 27241

Andromeda score : 77.776

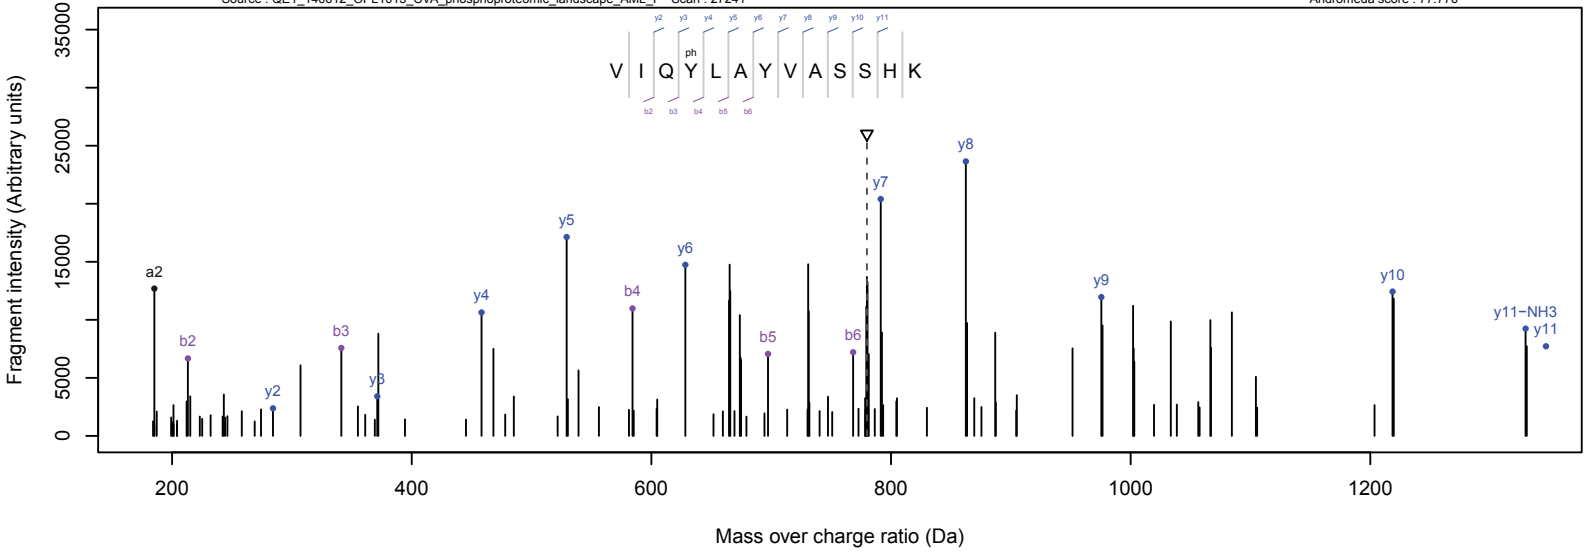

**DQEVAGRDY(ph)HFVSR-3+**

Source : QE1\_140612\_OPL1013\_CVA\_phosphoproteomic\_landscape\_AML\_B Scan : 11377

Andromeda score : 77.746

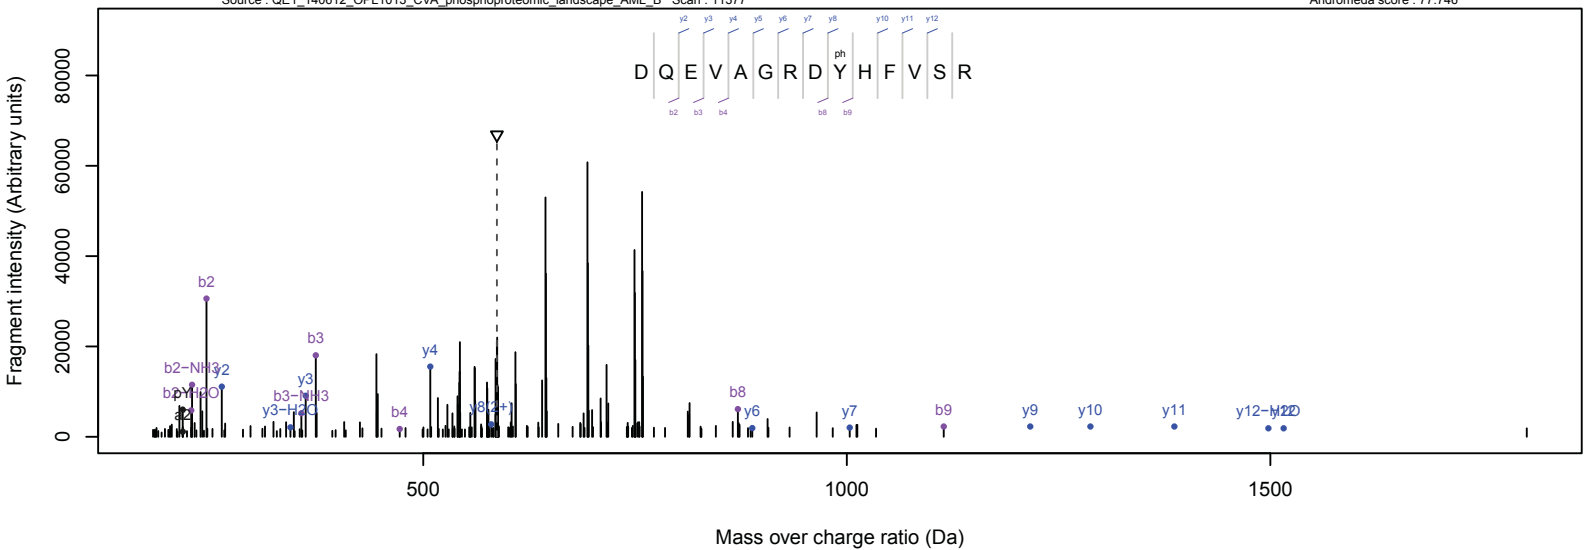

**DSNIPGSDY(ph)INANYIK-2+**

Source : QE1\_140612\_OPL1013\_CVA\_phosphoproteomic\_landscape\_AML\_A Scan : 32992

Andromeda score : 77.746

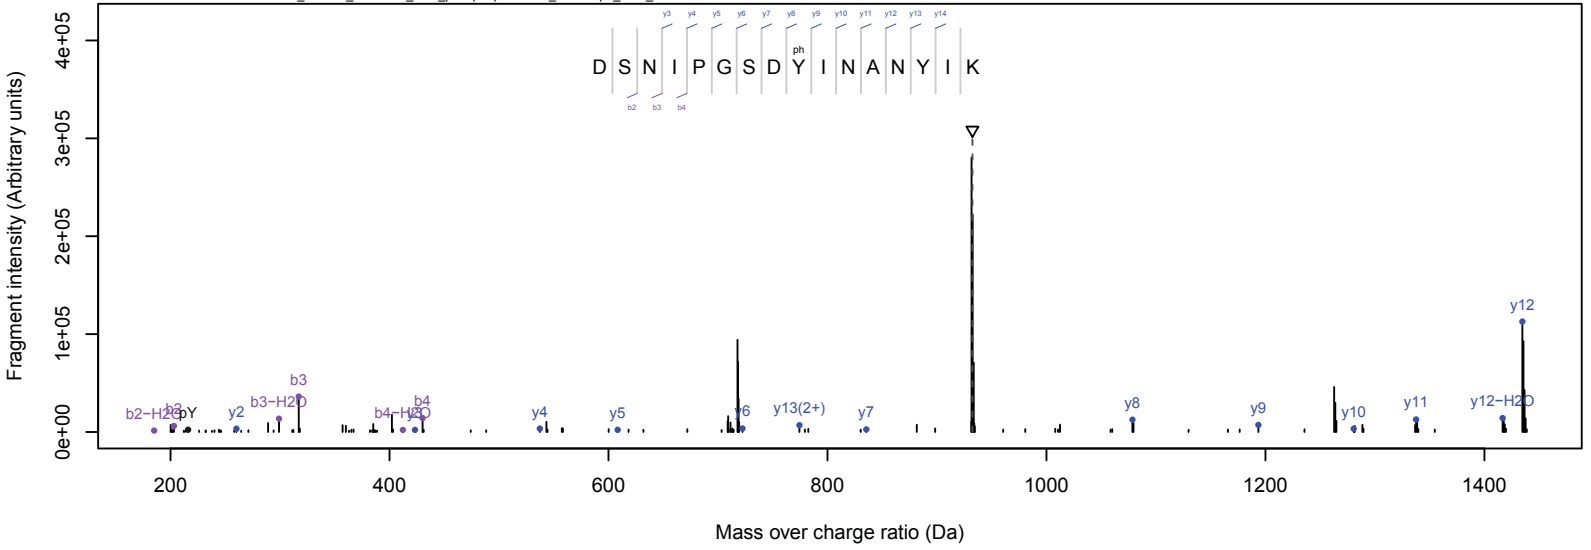

**KGPCAVSSNPY(ph)AFK-2+**

Source : QE1\_140908\_OPL1013\_Cva\_pTyrIP\_AML\_OCI\_AML3 Scan : 13993

Andromeda score : 77.746

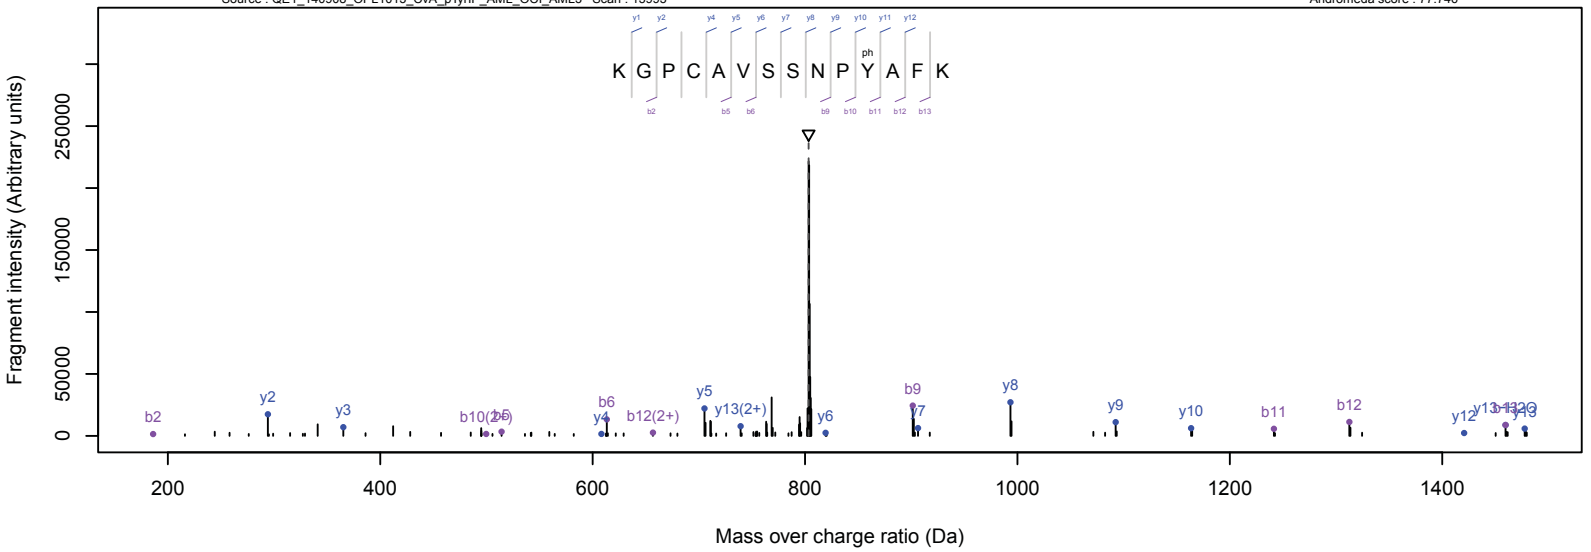

**GLQLKLDY(ph)R-2+**

Source : QE1\_140612\_OPL1013\_CVA\_phosphoproteomic\_landscape\_AML\_C Scan : 23962

Andromeda score : 77.744

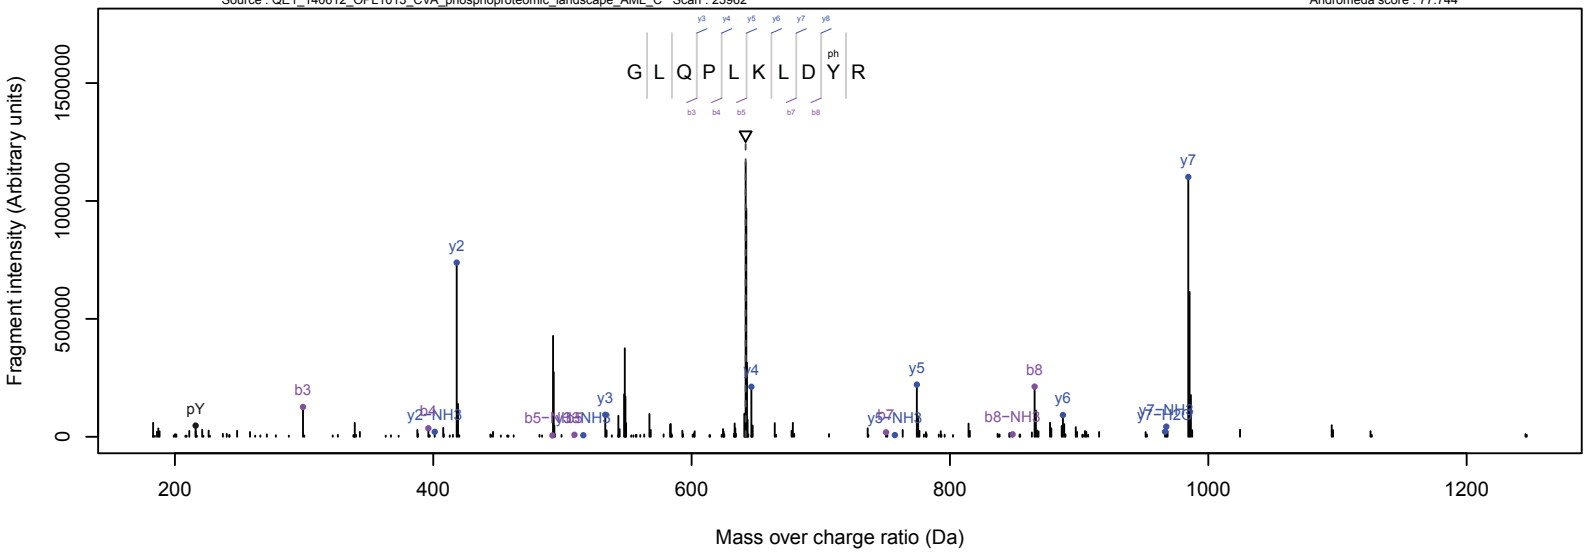

(ac)M(ox)YHS(ph)LSETRHPLQPEEQEVGIDPLSSYSNK-4+

Source : QE1\_140908\_OPL1013\_CvA\_pTyrIP\_AML\_HEL Scan : 33817

Andromeda score : 77.731

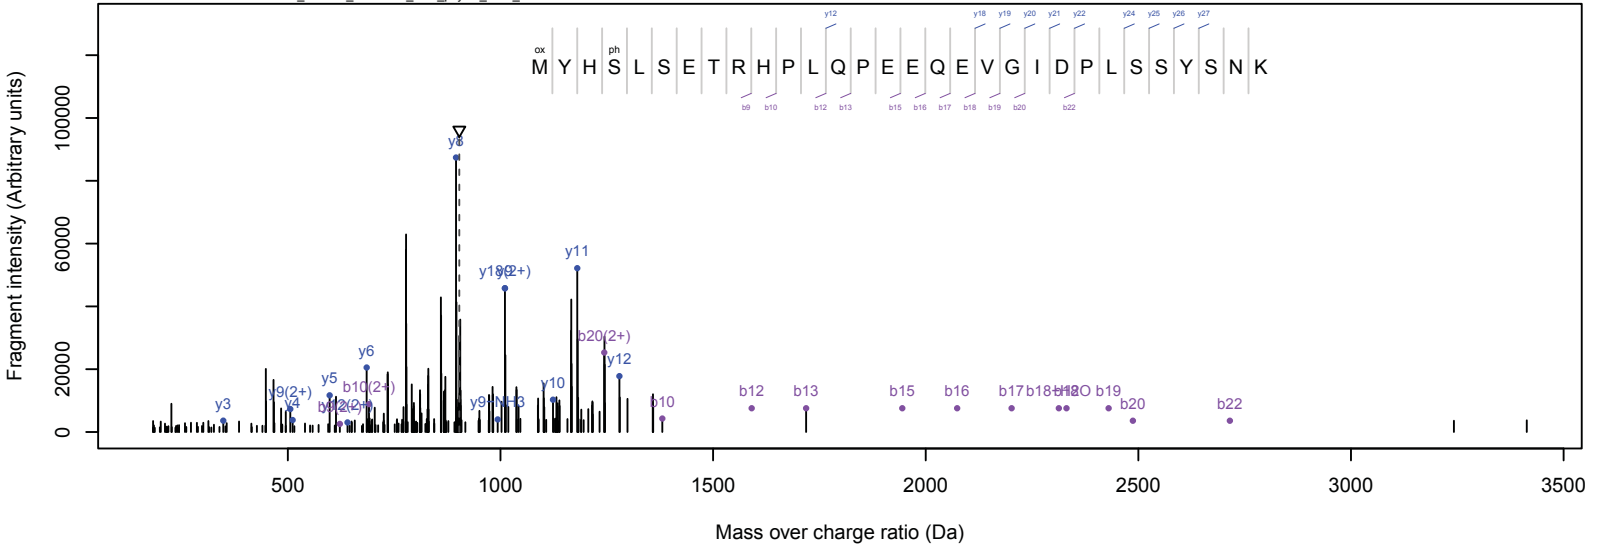

AAVPSGASTGIY(ph)EALELRDNDKTR-4+

Source : QE1\_140908\_OPL1013\_CvA\_pTyrIP\_AML\_HEL Scan : 33219

Andromeda score : 77.689

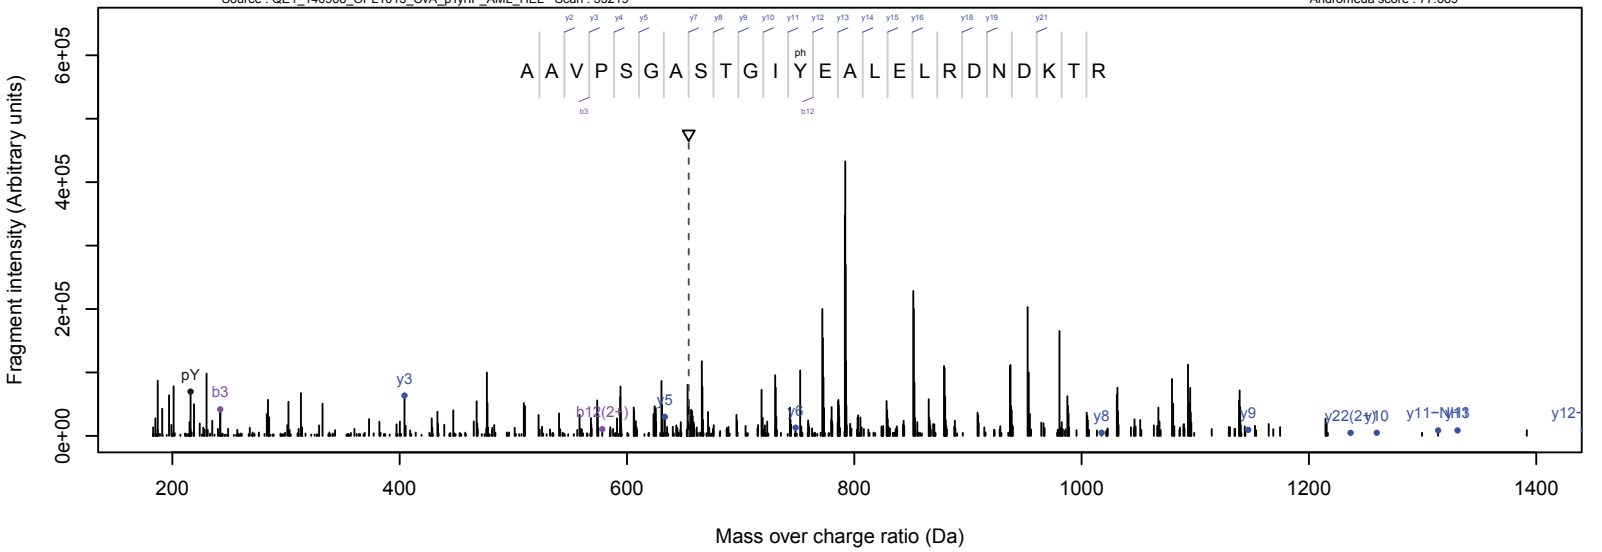

MCY(ph)AIQAESK-2+

Source : QE1\_140612\_OPL1013\_CVA\_phosphoproteomic\_landscape\_AML\_B Scan : 20399

Andromeda score : 77.674

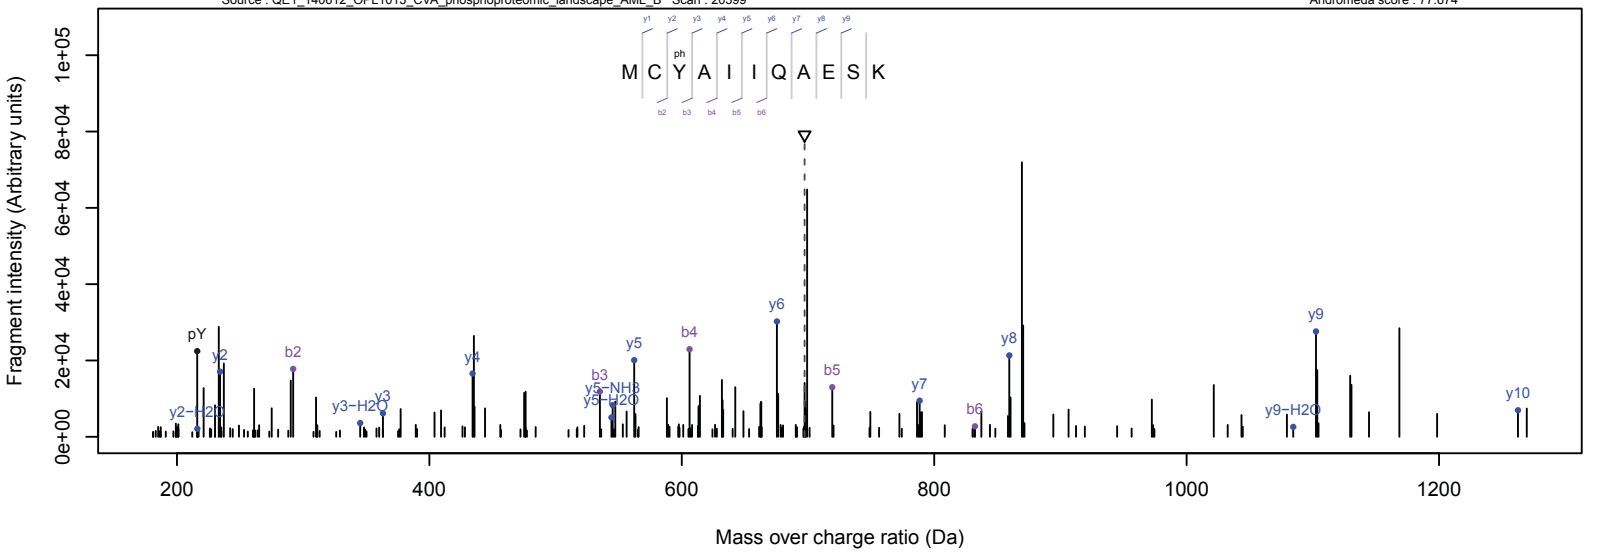



VY(ph)TKTDGLVAVHPK-3+

Source: QE1\_140612\_OPL1013\_CVA\_phosphoproteomic\_landscape\_AML\_B Scan: 13528

Andromeda score: 77.664

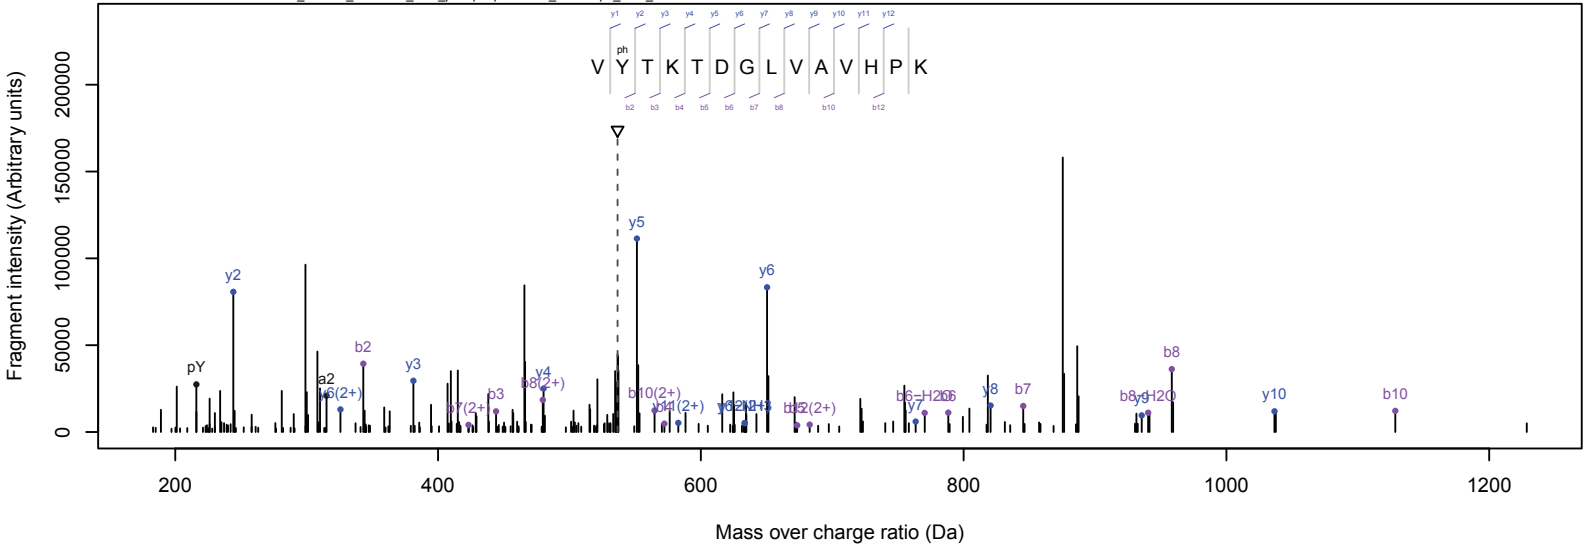

AA Y(ph)QVAALPK-2+

Source: QE1\_140612\_OPL1013\_CVA\_phosphoproteomic\_landscape\_AML\_D Scan: 16824

Andromeda score: 77.662

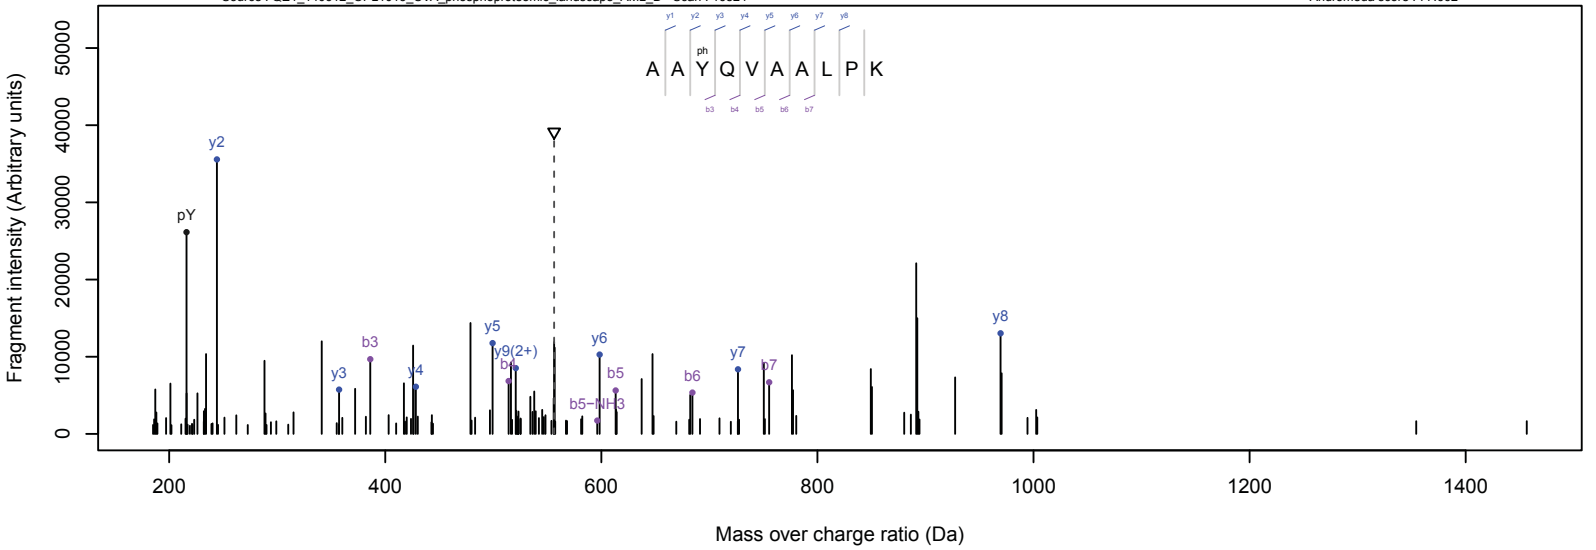

AF Y(ph)VPAQYVK-2+

Source: QE1\_140612\_OPL1013\_CVA\_phosphoproteomic\_landscape\_AML\_C Scan: 30182

Andromeda score: 77.662

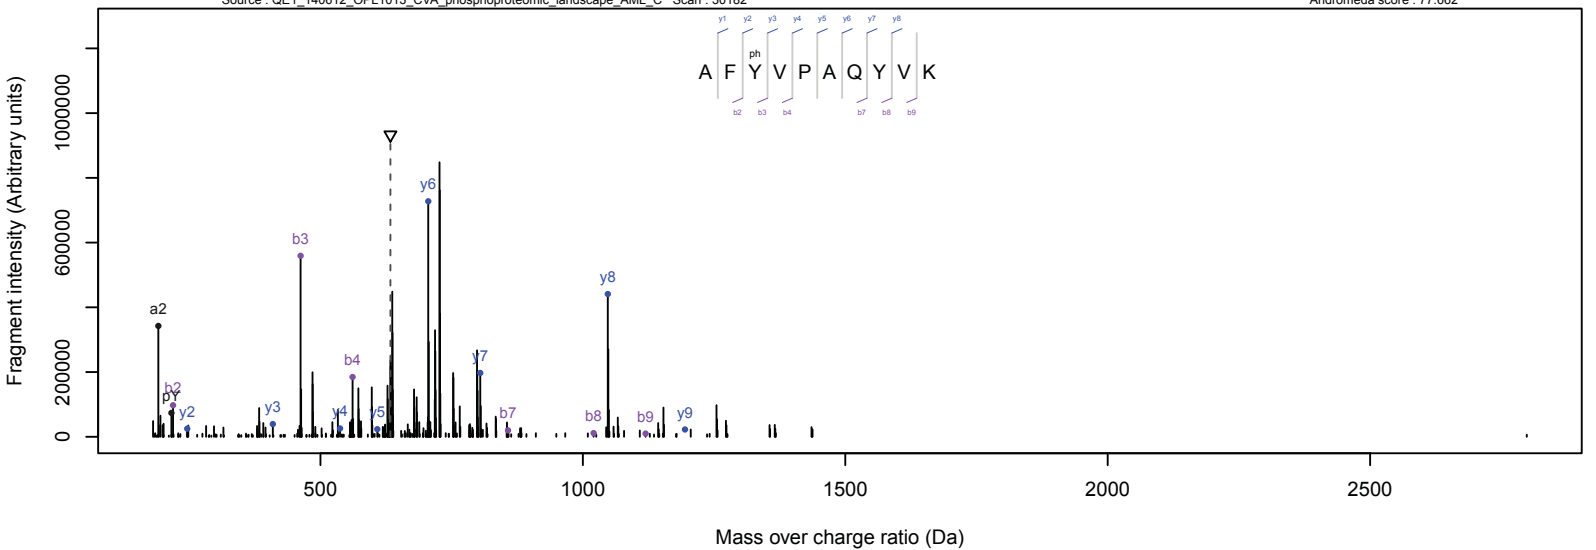

**GY(ph)GFVSFFNK-2+**

Source : QE1\_140612\_OPL1013\_CVA\_phosphoproteomic\_landscape\_AML\_B Scan : 41356

Andromeda score : 77.662

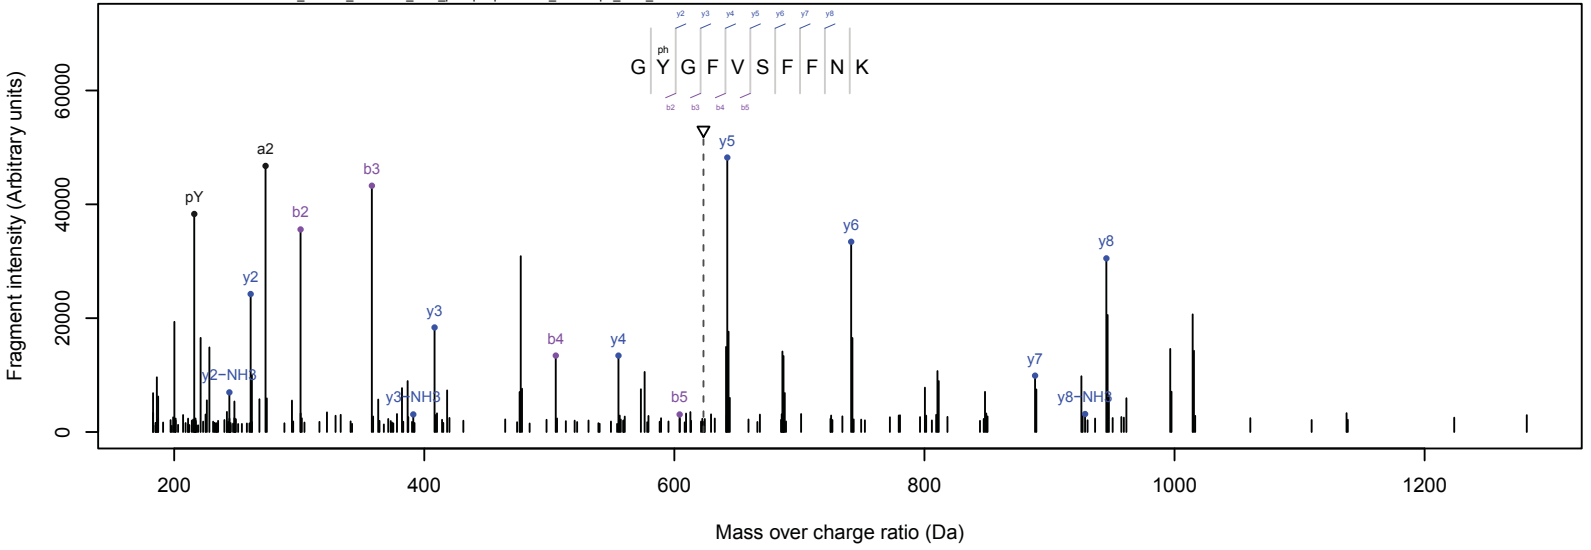

**MKGY(ph)PHWPAR-2+**

Source : QE1\_140612\_OPL1013\_CVA\_phosphoproteomic\_landscape\_AML\_B Scan : 13420

Andromeda score : 77.662

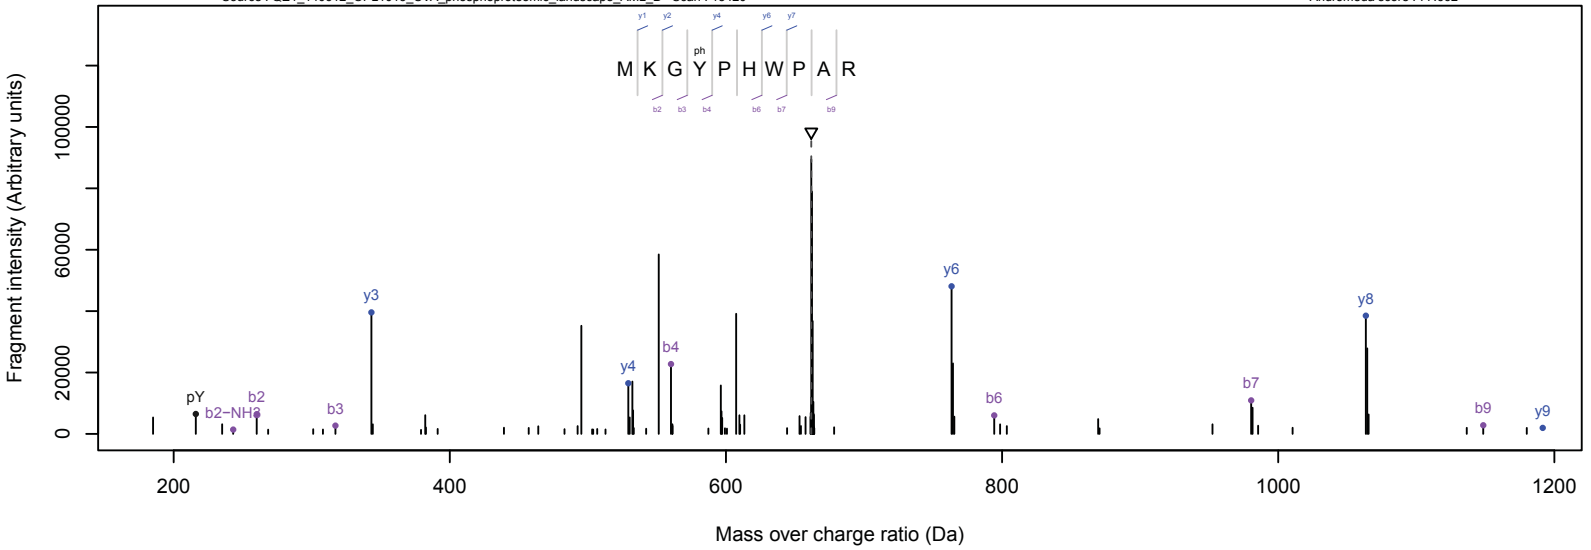

**QY(ph)VSLHMNR-2+**

Source : QE1\_140612\_OPL1013\_CVA\_phosphoproteomic\_landscape\_AML\_C Scan : 10835

Andromeda score : 77.662

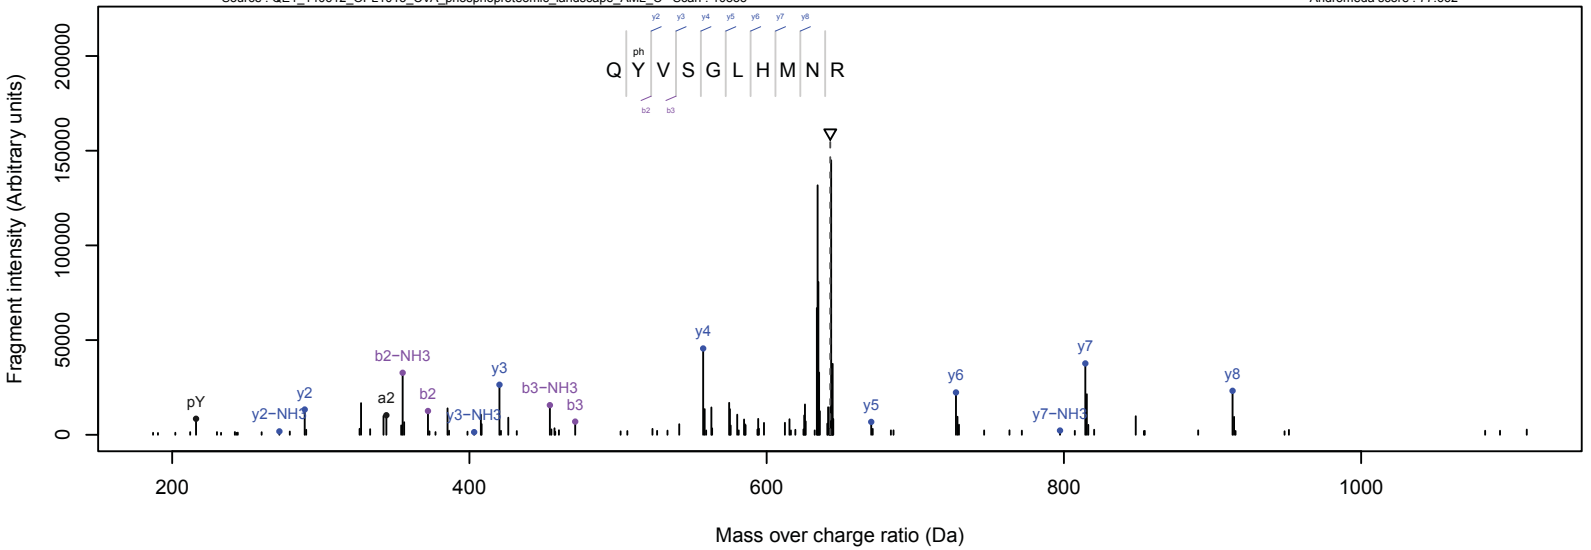

**Y(ph)LVLLYNNANR-2+**

Source : QE1\_140612\_OPL1013\_CVA\_phosphoproteomic\_landscape\_AML\_C Scan : 36871

Andromeda score : 77.662

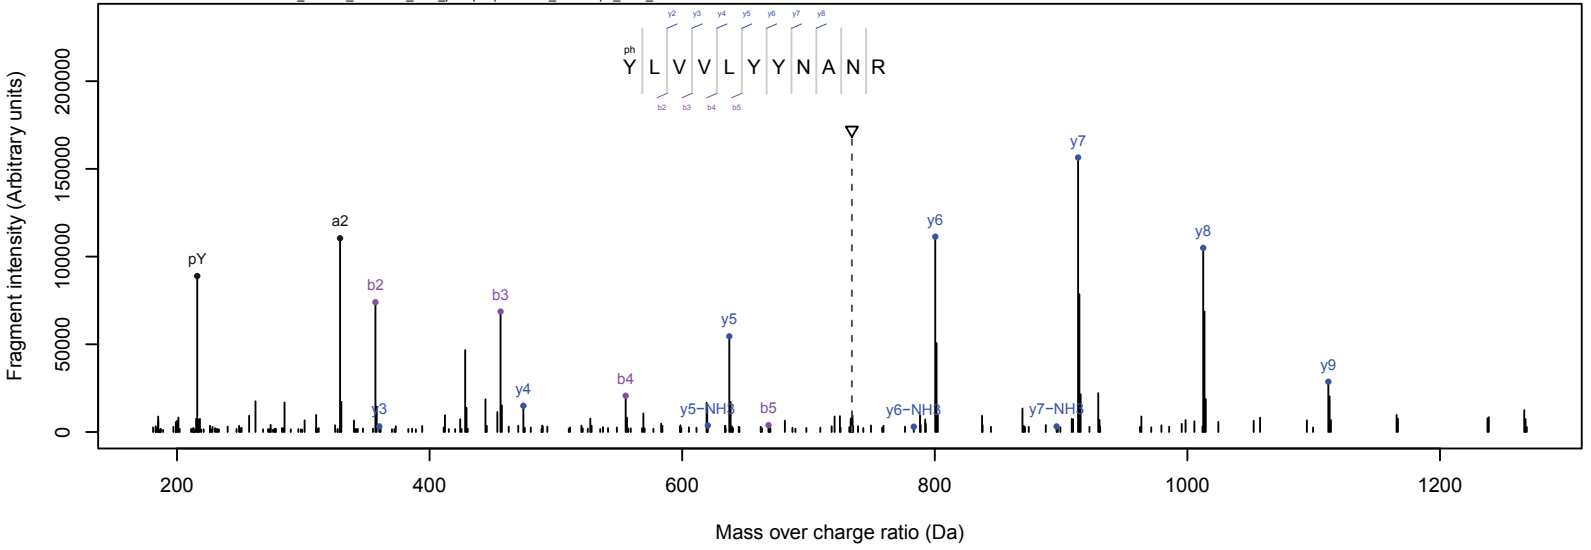

**M(ox)SY(ph)YCSGSSDAPSSPAAPRPASK-3+**

Source : QE1\_140612\_OPL1013\_CVA\_phosphoproteomic\_landscape\_AML\_C Scan : 12702

Andromeda score : 77.576

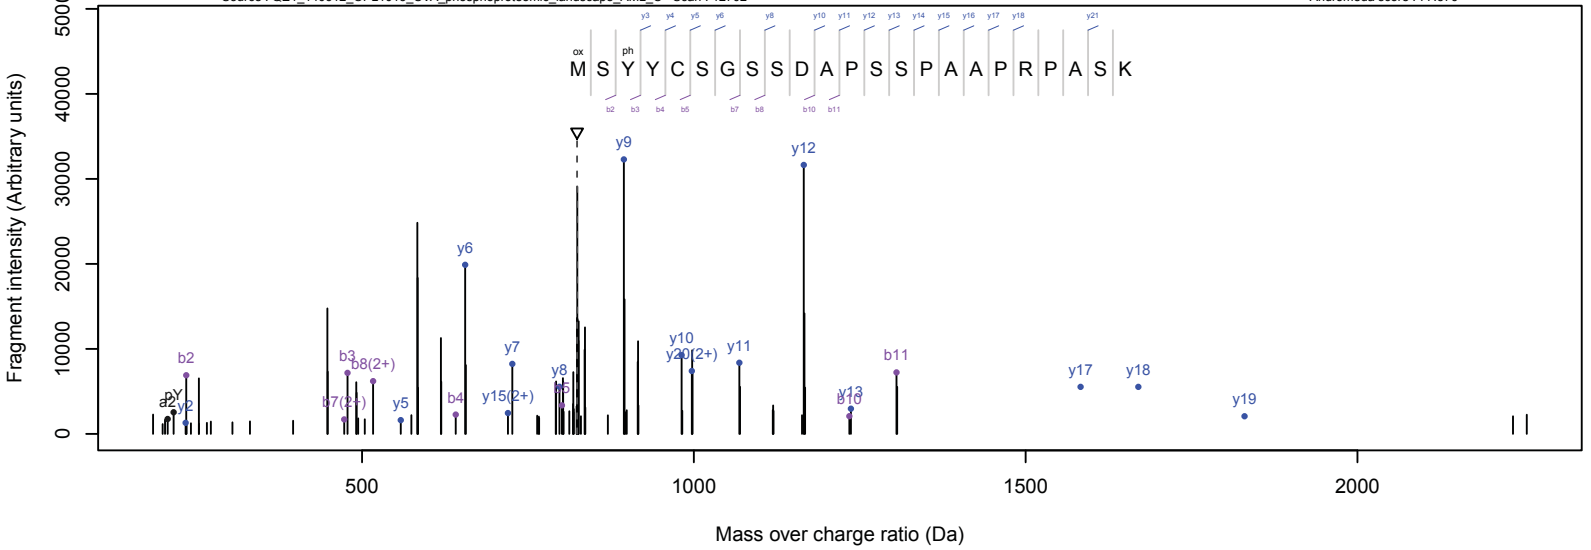

**RPPSSSSSSASSY(ph)GRPIELDK-3+**

Source : QE1\_140612\_OPL1013\_CVA\_phosphoproteomic\_landscape\_AML\_C Scan : 12151

Andromeda score : 77.576

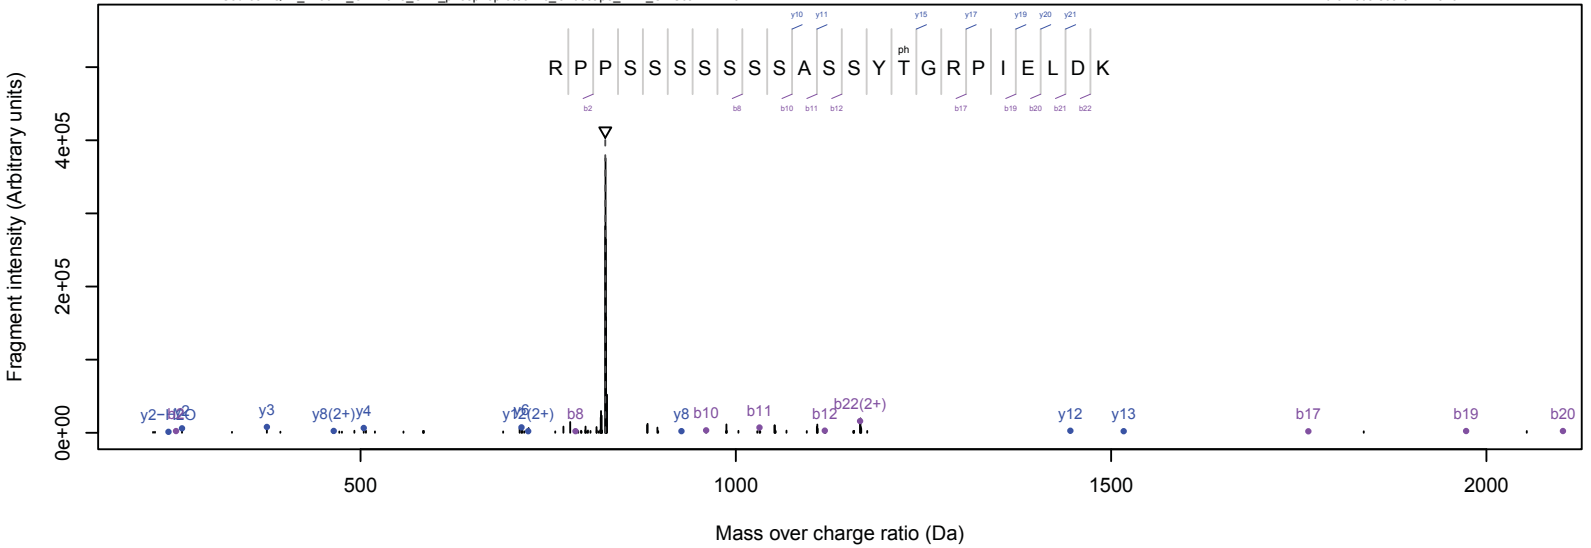

SGPKPFSAPK(ph)SPSPK-3+

Source : QE1\_140908\_OPL1013\_CvA\_pTyrIP\_AML\_OCI\_AML3 Scan : 12872

Andromeda score : 77.576

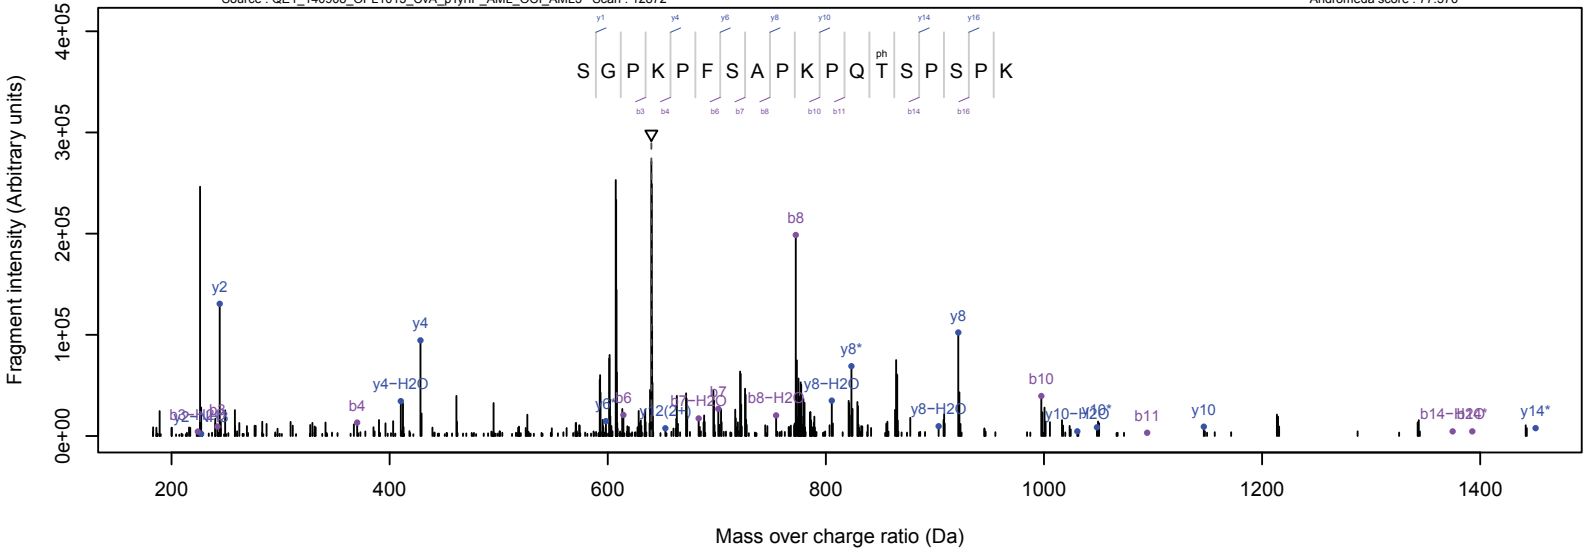

EFGDLLVDNM(ox)DVPATPLSAY(ph)QIPR-3+

Source : QE1\_140822\_OPL1013\_CvA\_pTyrIP\_AML\_cell\_lines\_part2\_E Scan : 43338

Andromeda score : 77.575

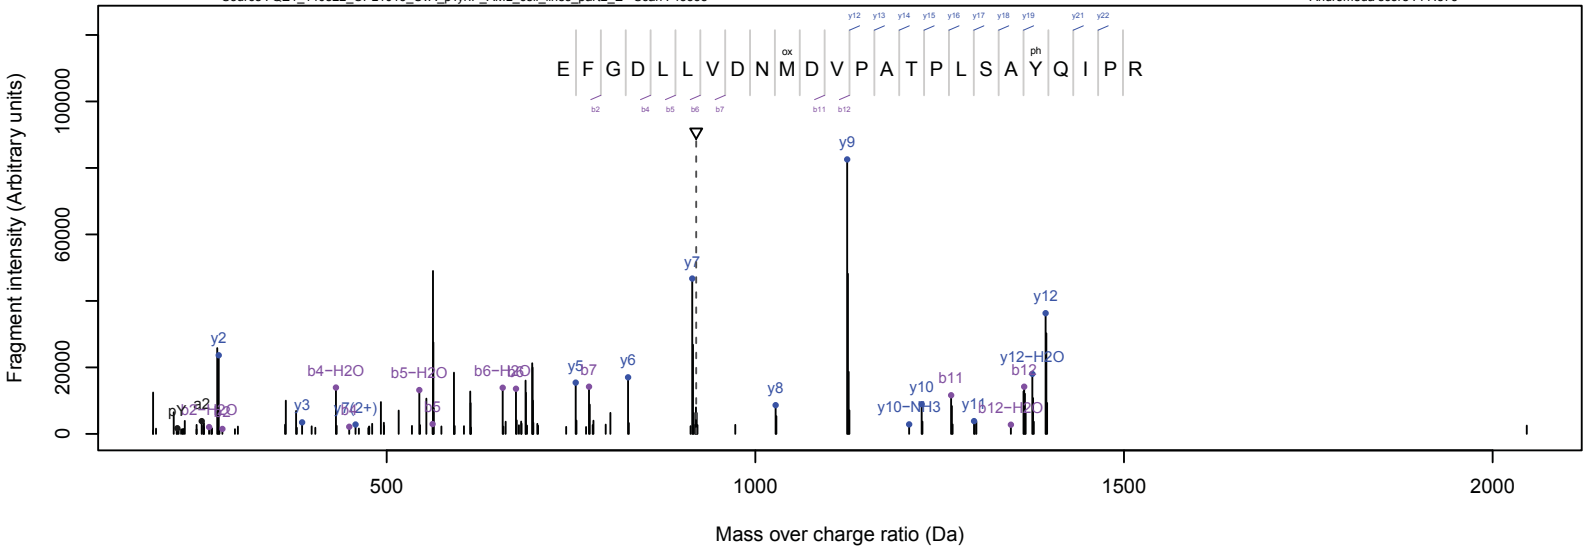

RVPNAY(ph)DKTALALEVGE L V K-3+

Source : QE1\_140612\_OPL1013\_CVA\_phosphoproteomic\_landscape\_AML\_A Scan : 37616

Andromeda score : 77.575

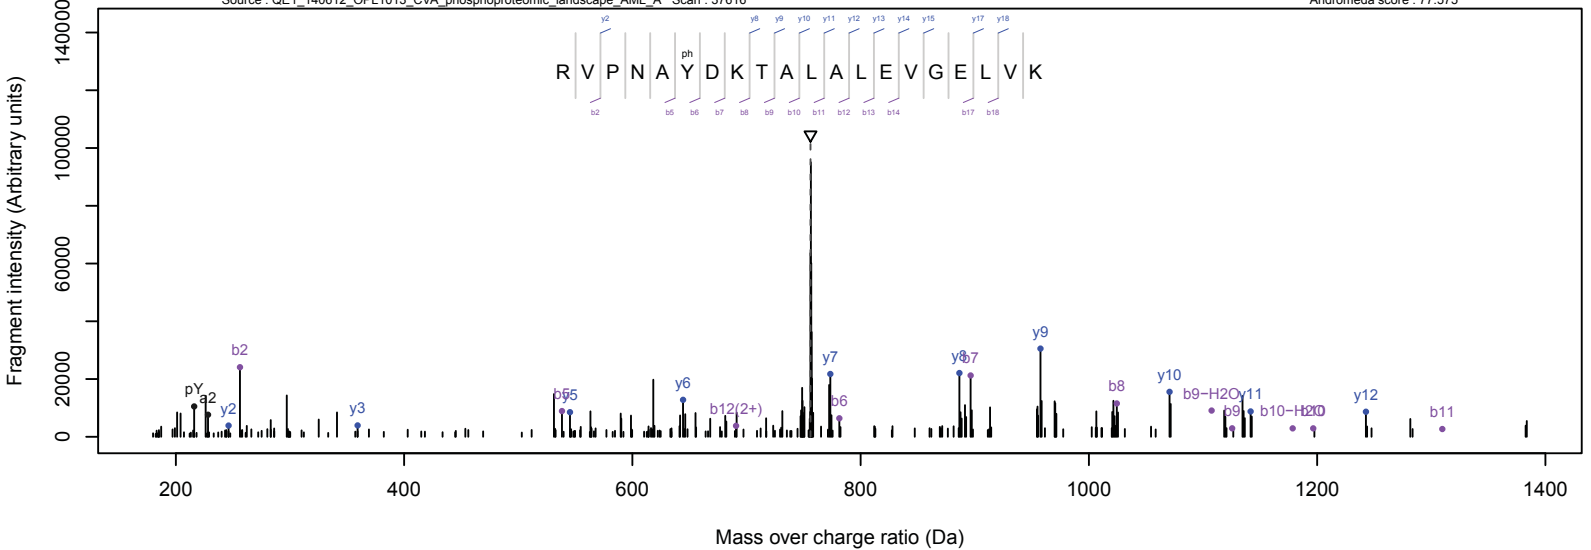

DIHHIDY(ph)YK-3+

Source : QE1\_140612\_OPL1013\_CVA\_phosphoproteomic\_landscape\_AML\_B Scan : 10213

Andromeda score : 77.533

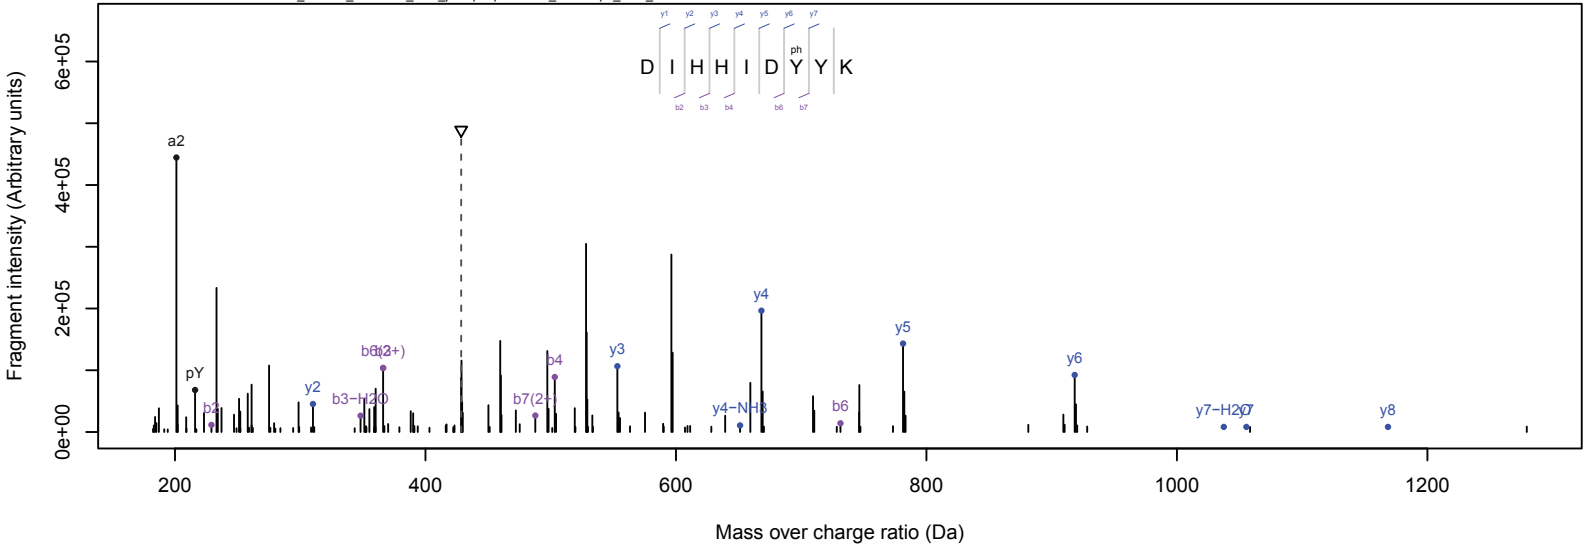

SLGNILQAKPT(ph)SSPAKGGPPQK-3+

Source : QE1\_140908\_OPL1013\_CvA\_pTyrIP\_AML\_HL60 Scan : 22279

Andromeda score : 77.445

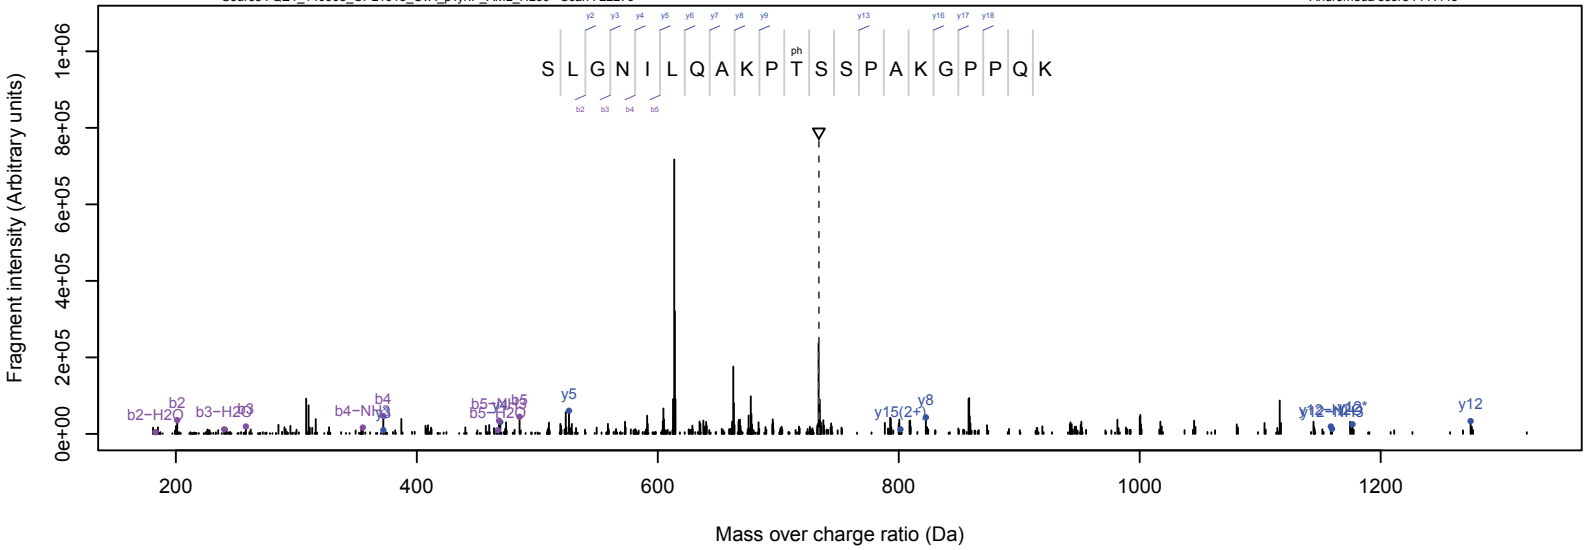

Y(ph)ILTPGLAEQPGQAEHQPEsplNETQR-3+

Source : QE1\_140908\_OPL1013\_CvA\_pTyrIP\_AML\_ML2 Scan : 33911

Andromeda score : 77.445

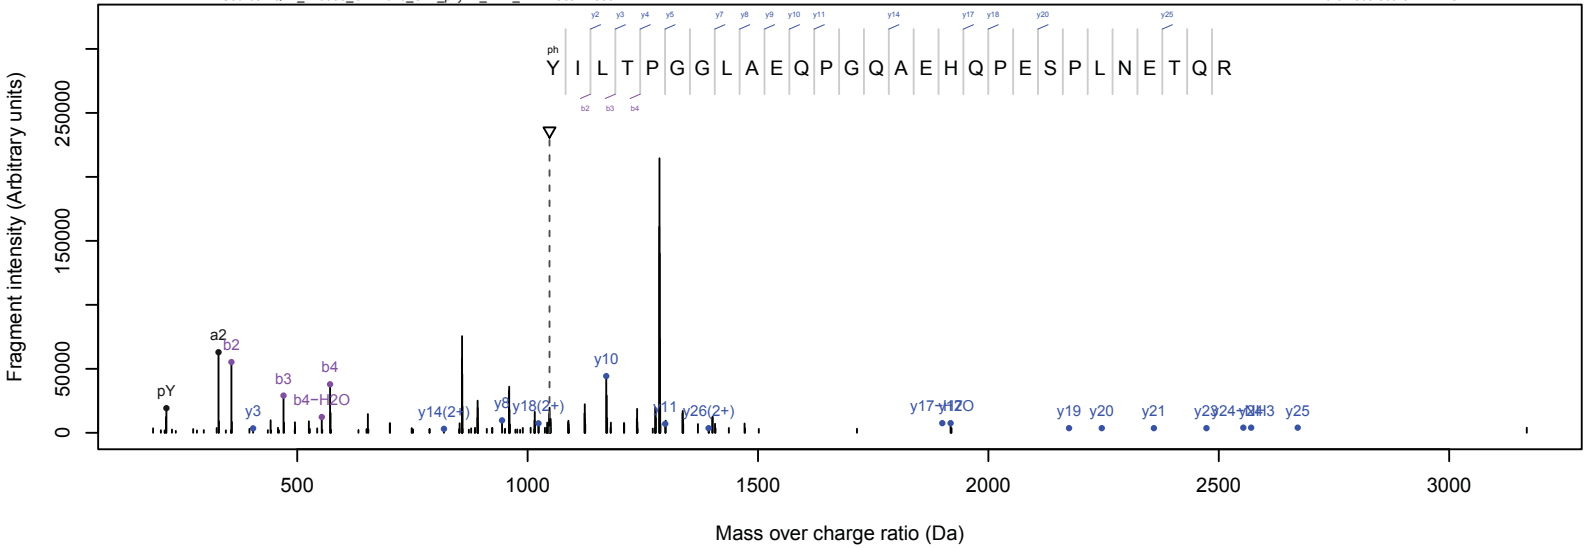

YKPY(ph)EEALLQAEAPR-3+

Source: QE1\_140908\_OPL1013\_CVA\_pTyrIP\_AML\_Kasumi1 Scan: 26237

Andromeda score: 77.42

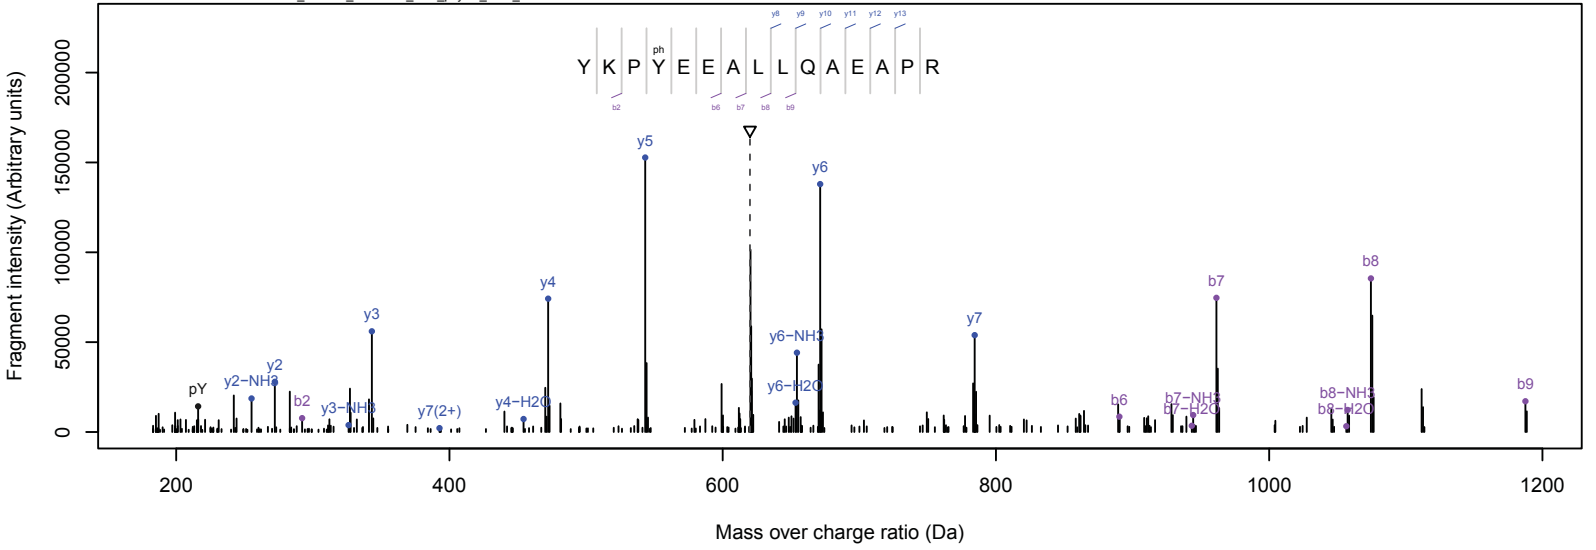

KIEDY(ph)FHCK-2+

Source: QE1\_140612\_OPL1013\_CVA\_phosphoproteomic\_landscape\_AML\_A Scan: 14322

Andromeda score: 77.288

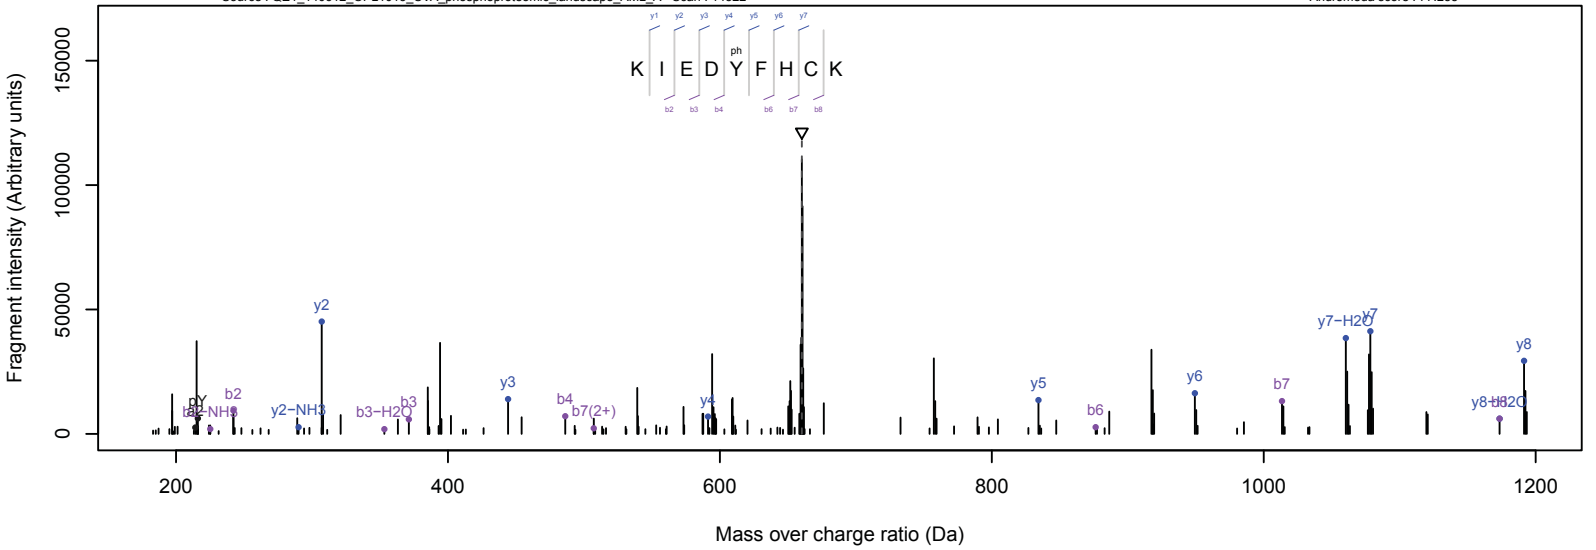

LY(ph)GLGTGVAQK-2+

Source: QE1\_140612\_OPL1013\_CVA\_phosphoproteomic\_landscape\_AML\_D Scan: 17519

Andromeda score: 77.288

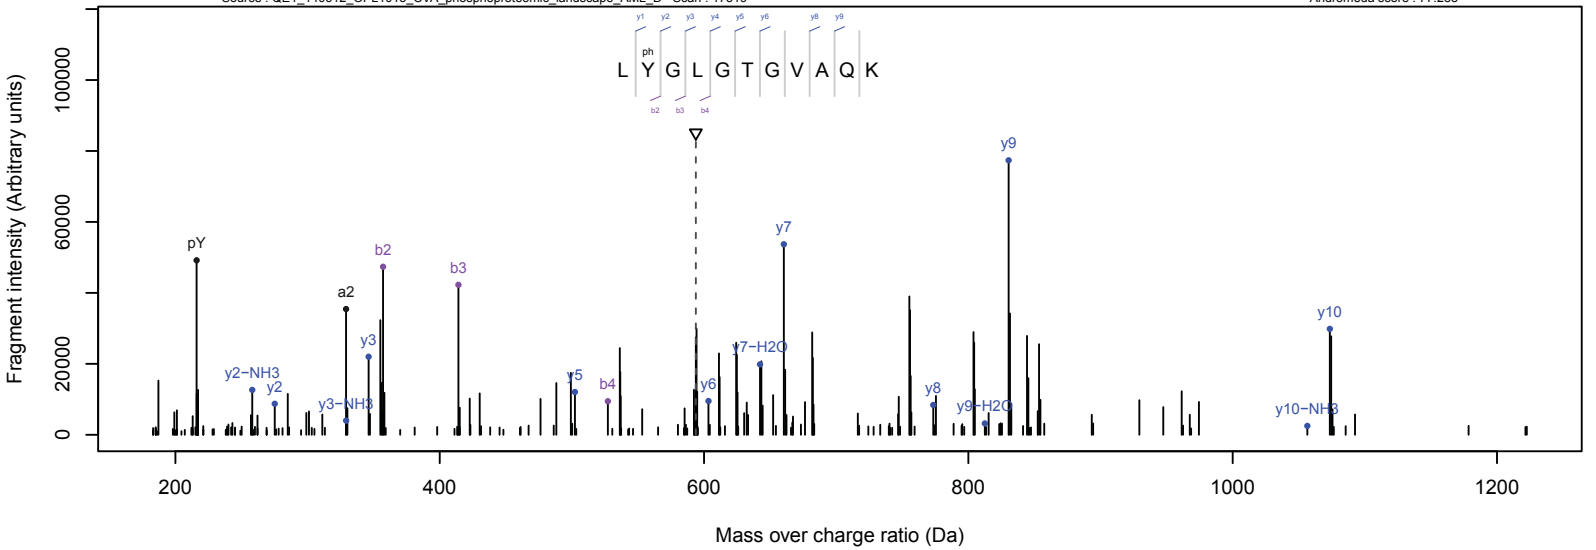

**NPGY(ph)IKLR-2+**

Source : QE1\_140612\_OPL1013\_CVA\_phosphoproteomic\_landscape\_AML\_C Scan : 11662

Andromeda score : 77.282

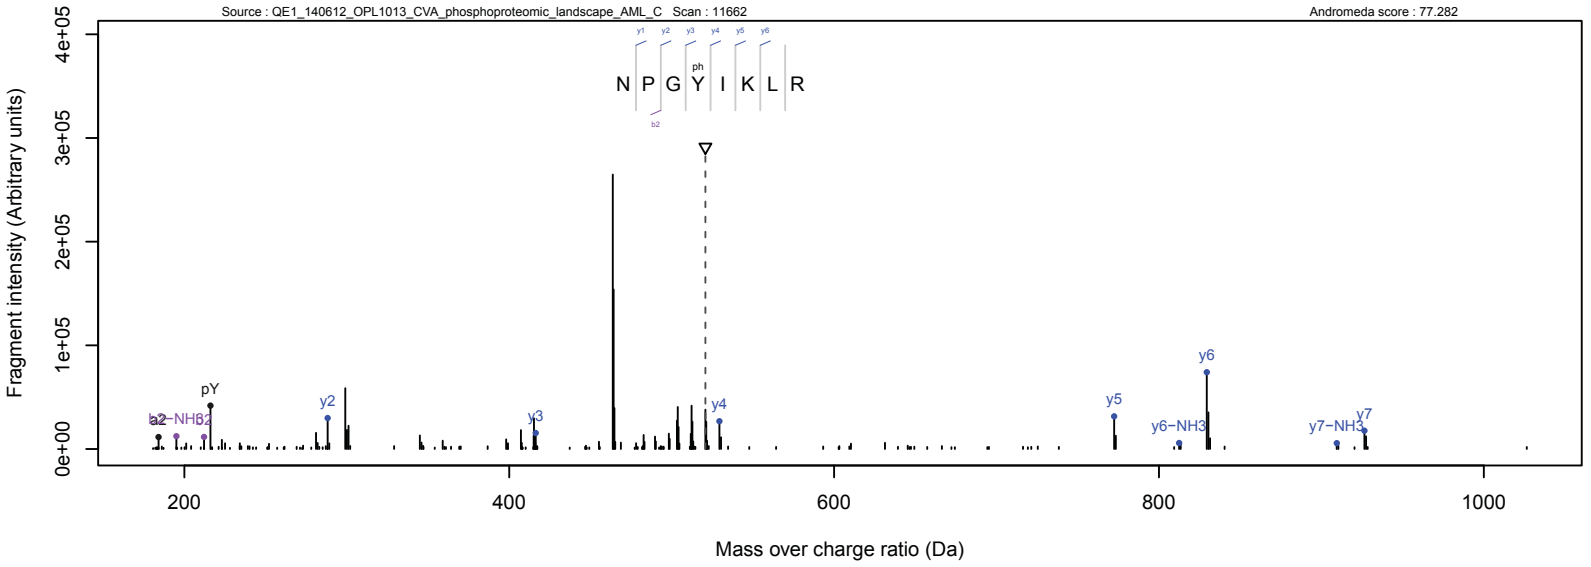

**AKNIY(ph)DILPWR-2+**

Source : QE1\_140612\_OPL1013\_CVA\_phosphoproteomic\_landscape\_AML\_B Scan : 39695

Andromeda score : 77.279

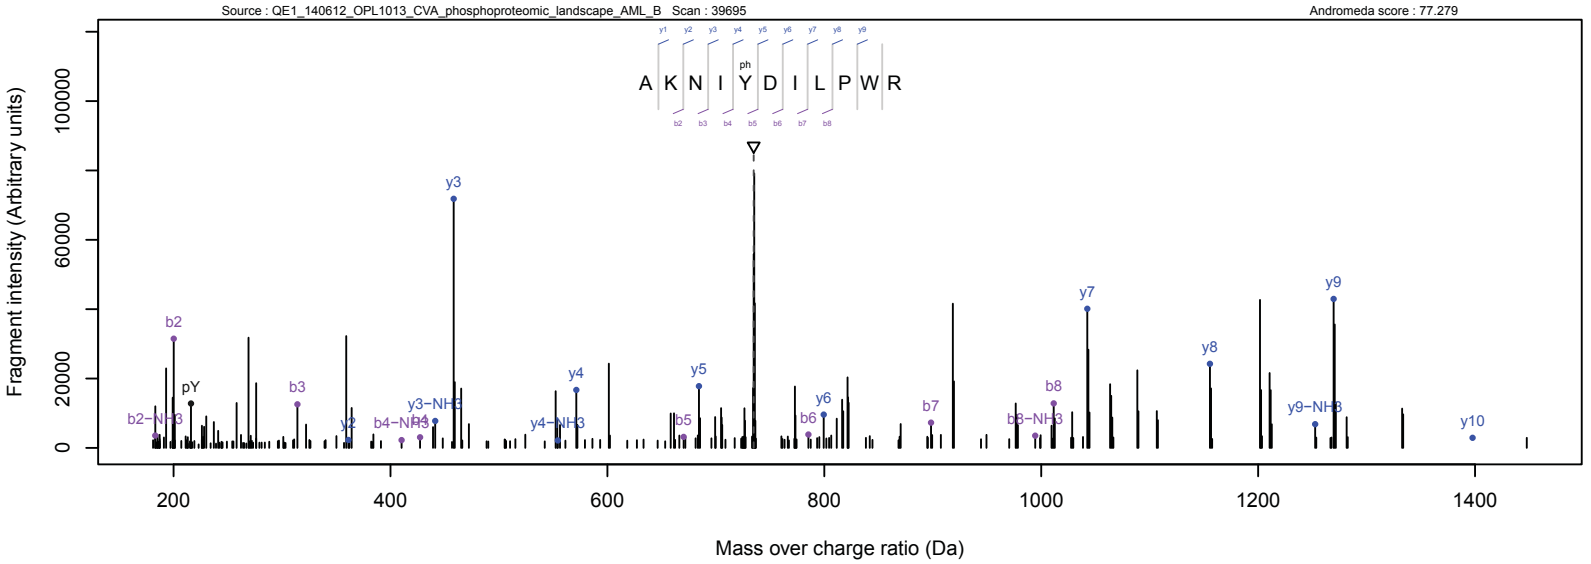

**SAVLQPGCPSVGIHSGY(ph)VNAQLEK-3+**

Source : QE1\_140908\_OPL1013\_CvA\_pTyrIP\_AML\_HEL Scan : 32395

Andromeda score : 77.241

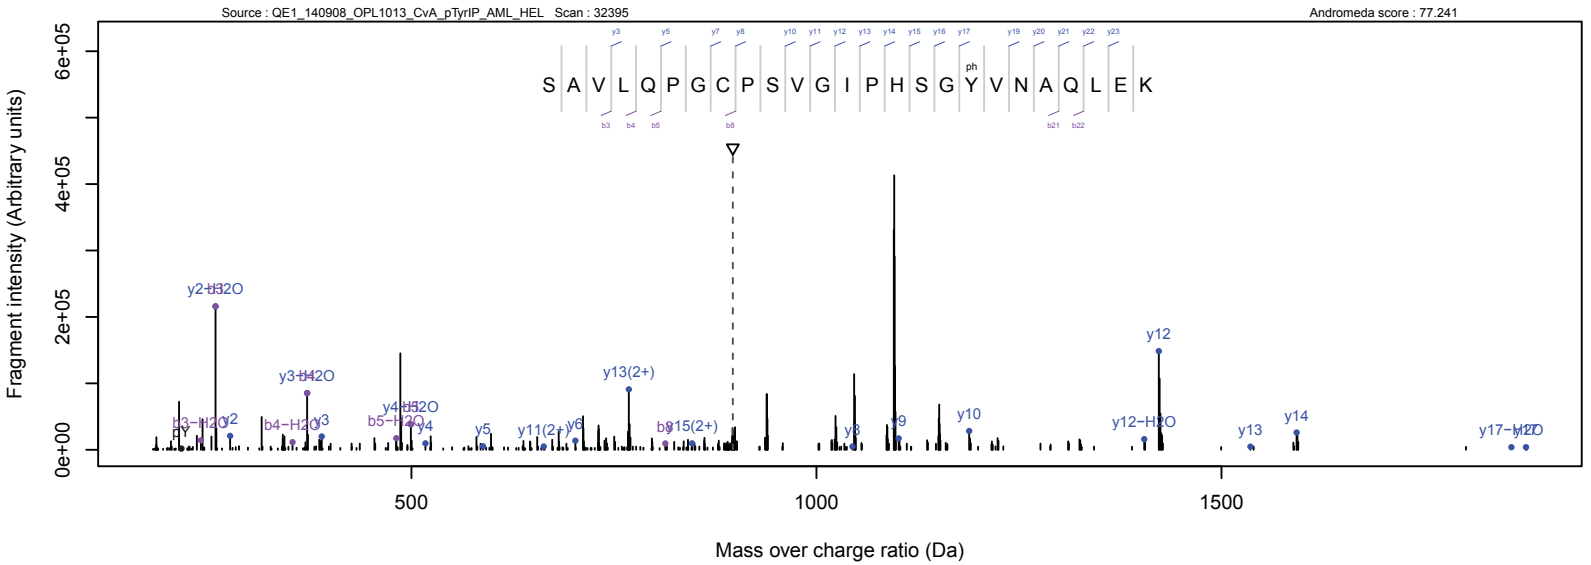

ASHHIY(ph)PYSSQDDEEWRPVMR-4+

Source: QE1\_140612\_OPL1013\_CVA\_phosphoproteomic\_landscape\_AML\_B Scan: 30677

Andromeda score: 77.221

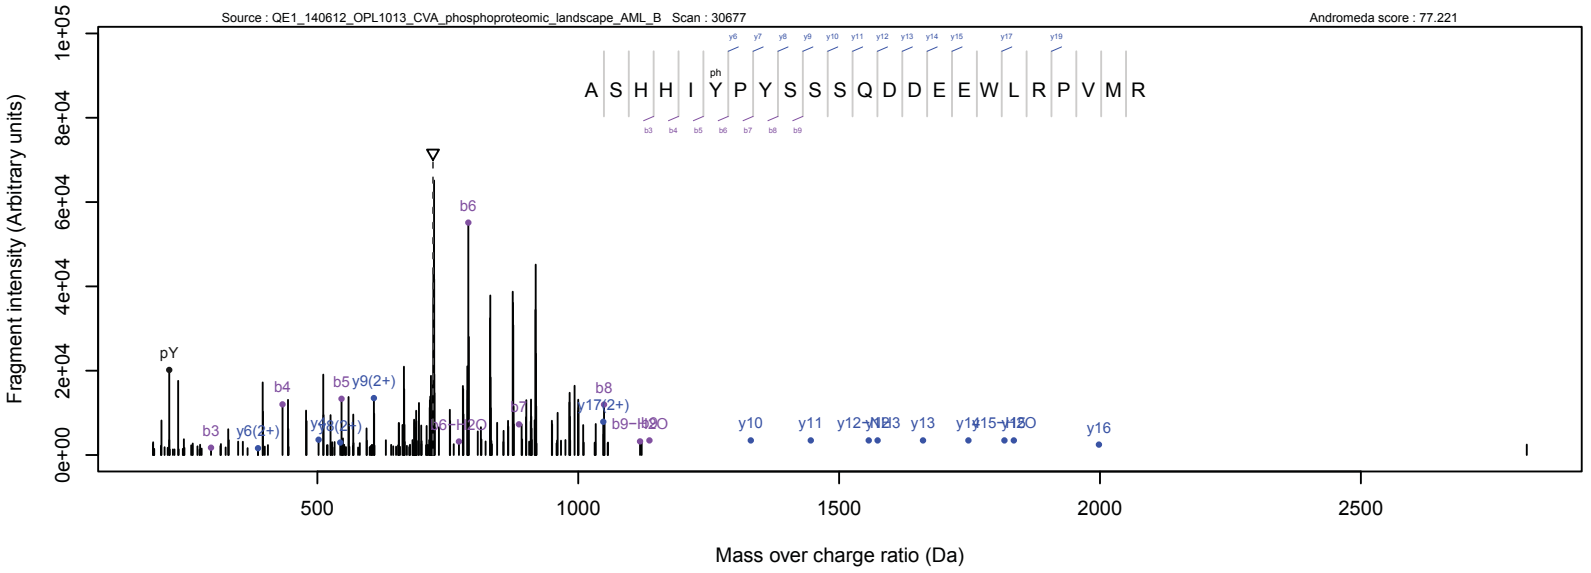

HY(ph)TGPGDQTVNPNQNGFVR-2+

Source: QE1\_140908\_OPL1013\_CvA\_pTyrIP\_AML\_HL60 Scan: 20537

Andromeda score: 77.221

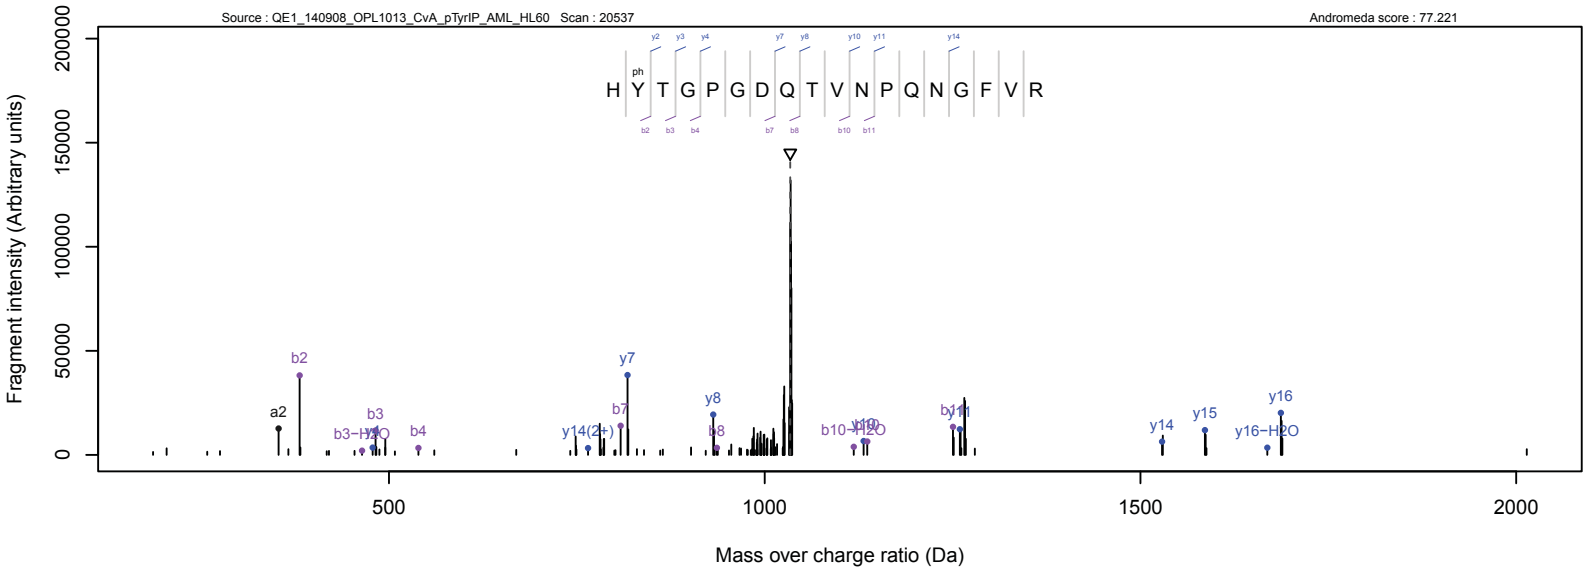

RRQEELNNQLFLYDTHQNLRL-4+

Source: QE1\_140612\_OPL1013\_CVA\_phosphoproteomic\_landscape\_AML\_A Scan: 25949

Andromeda score: 77.221

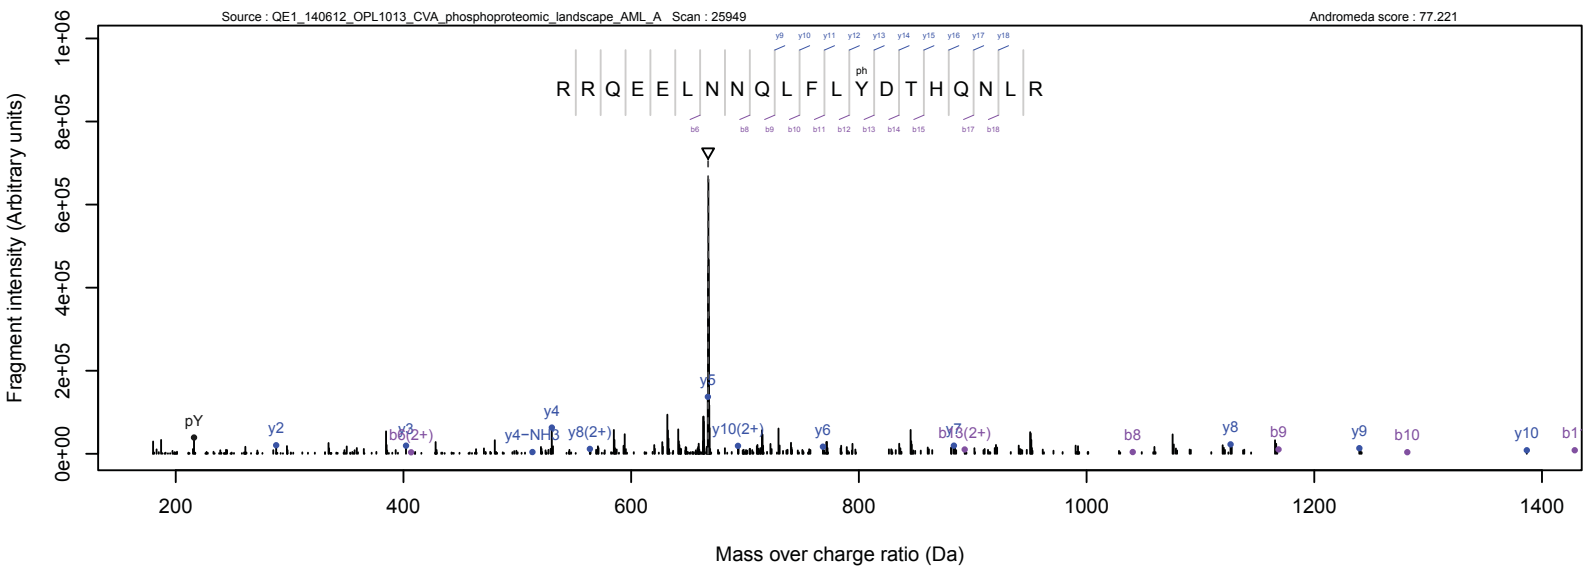



GTVY(ph)FKEGK-2+

Source: QE1\_140612\_OPL1013\_CVA\_phosphoproteomic\_landscape\_AML\_D Scan: 8594

Andromeda score: 77.192

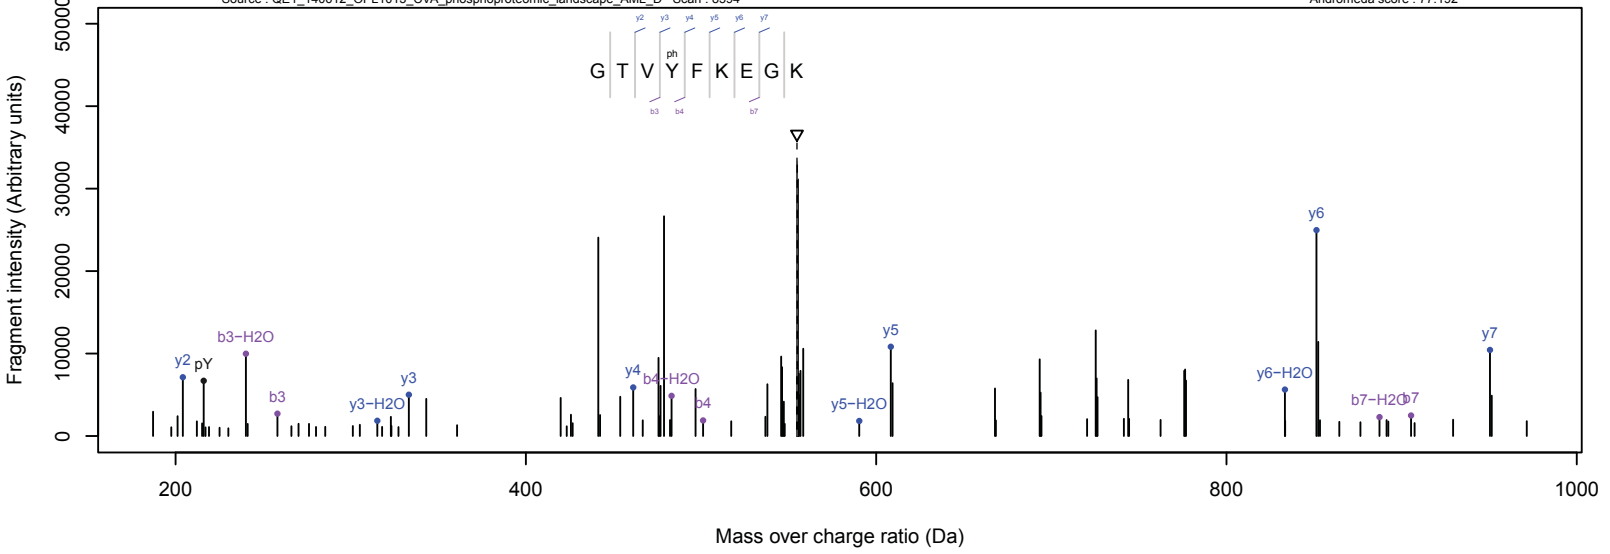

SLTY(ph)LSILR-2+

Source: QE1\_140612\_OPL1013\_CVA\_phosphoproteomic\_landscape\_AML\_B Scan: 38779

Andromeda score: 77.192

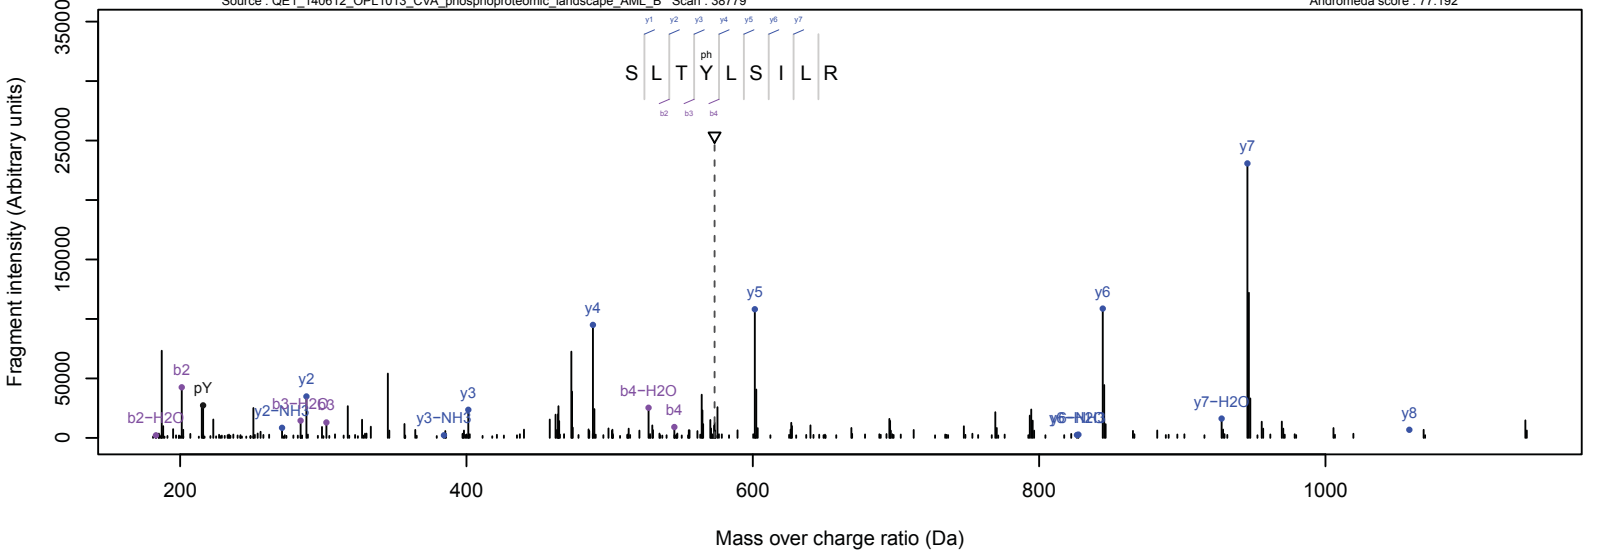

AVGSPSTQLY(ph)MVR-2+

Source: QE1\_140612\_OPL1013\_CVA\_phosphoproteomic\_landscape\_AML\_C Scan: 24885

Andromeda score: 77.185

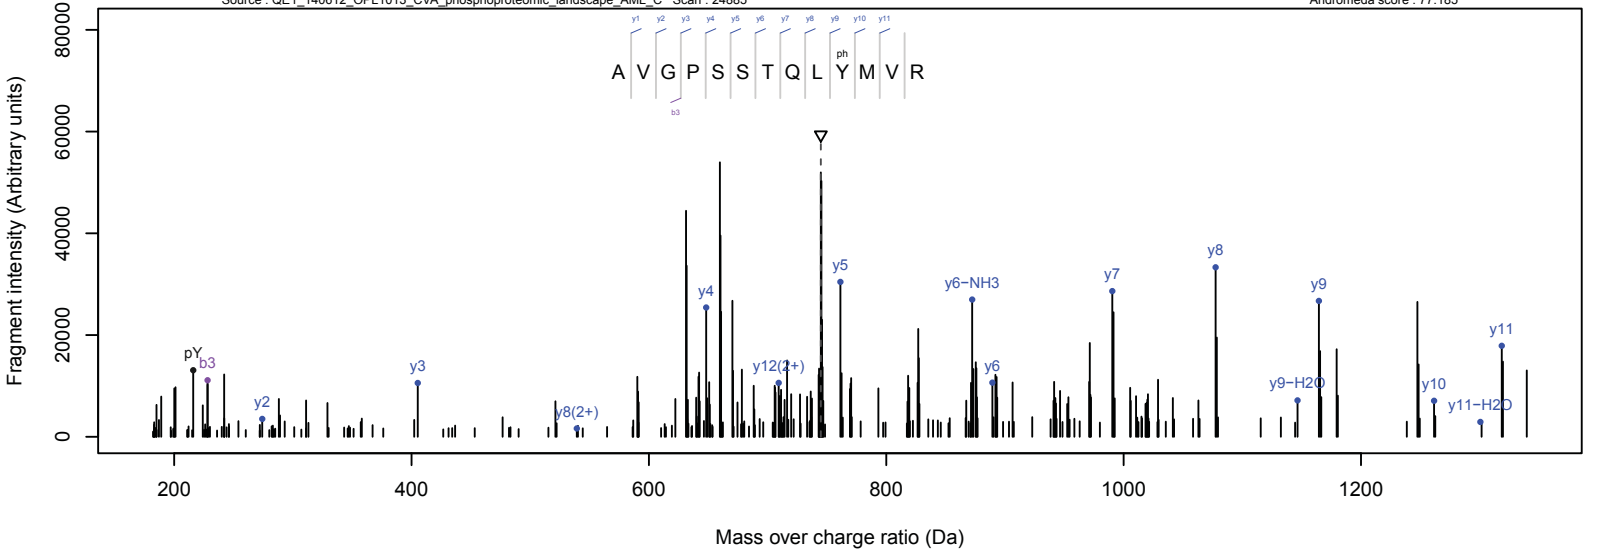

IGAFGY(ph)M(ox)ECSAK-2+

Source : QE1\_140612\_OPL1013\_CVA\_phosphoproteomic\_landscape\_AML\_D Scan : 15850

Andromeda score : 77.185

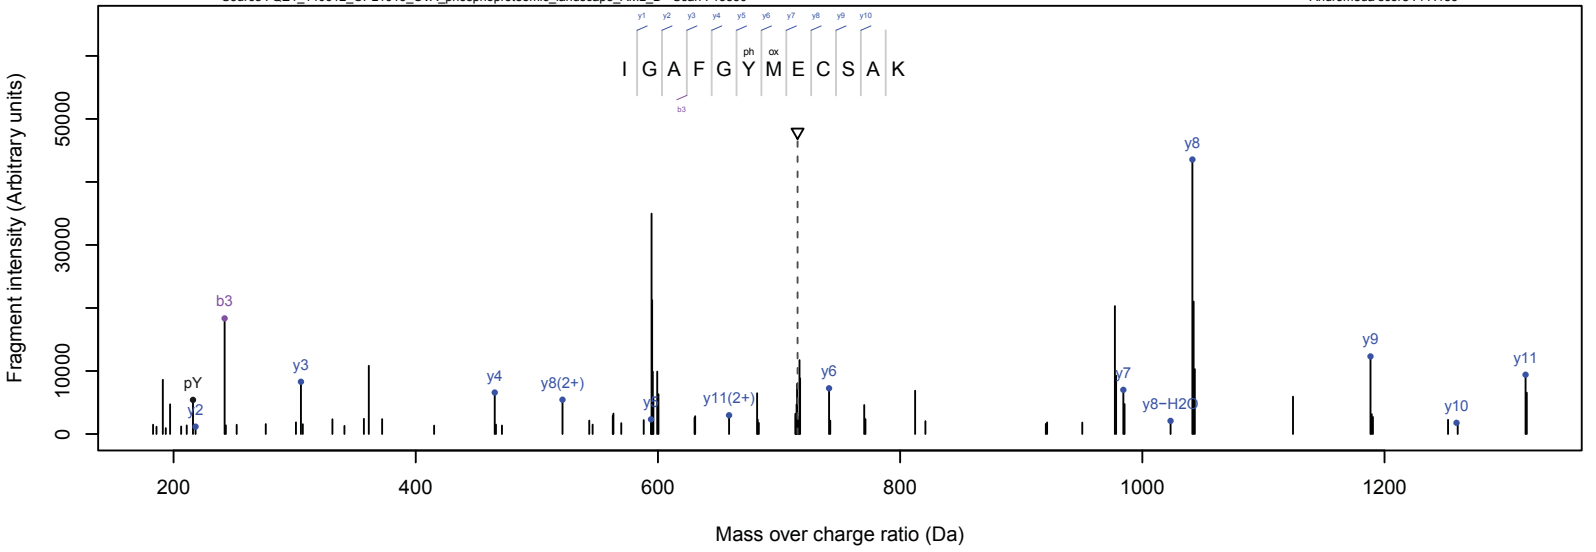

NIVHNYS(ph)EAEIK-2+

Source : QE1\_140612\_OPL1013\_CVA\_phosphoproteomic\_landscape\_AML\_C Scan : 11276

Andromeda score : 77.185

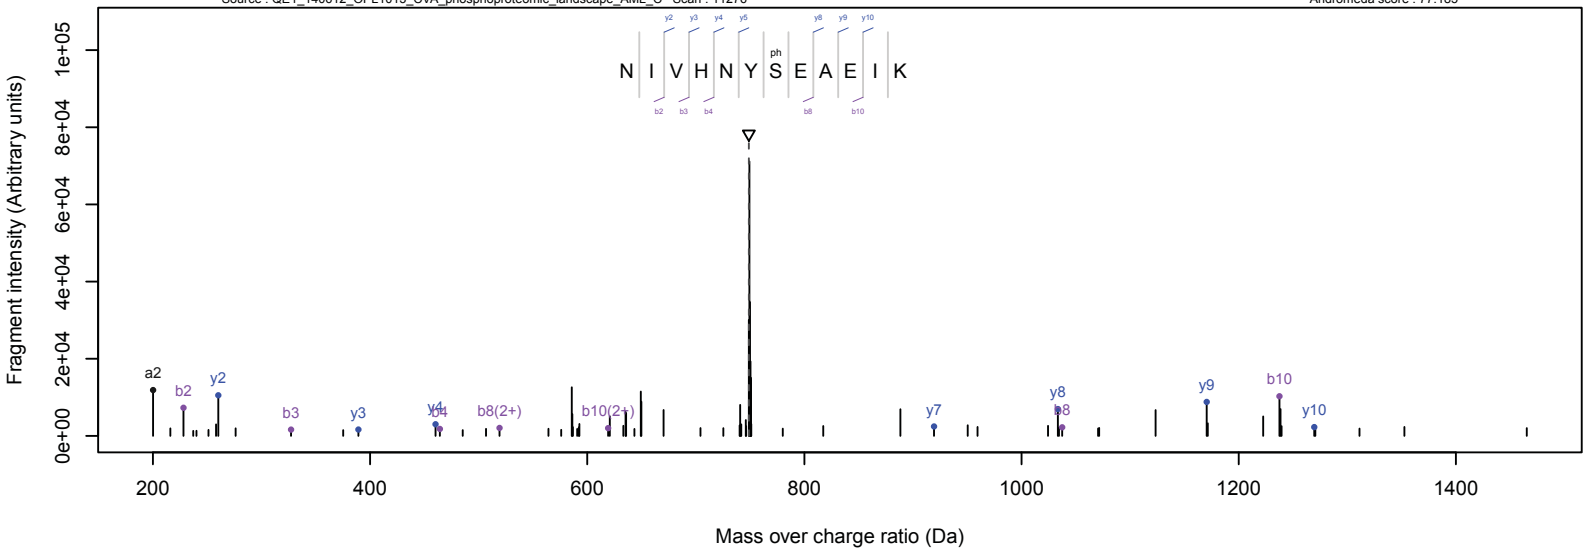

SYSPY(ph)DMLESIR-2+

Source : QE1\_140612\_OPL1013\_CVA\_phosphoproteomic\_landscape\_AML\_C Scan : 41465

Andromeda score : 77.185

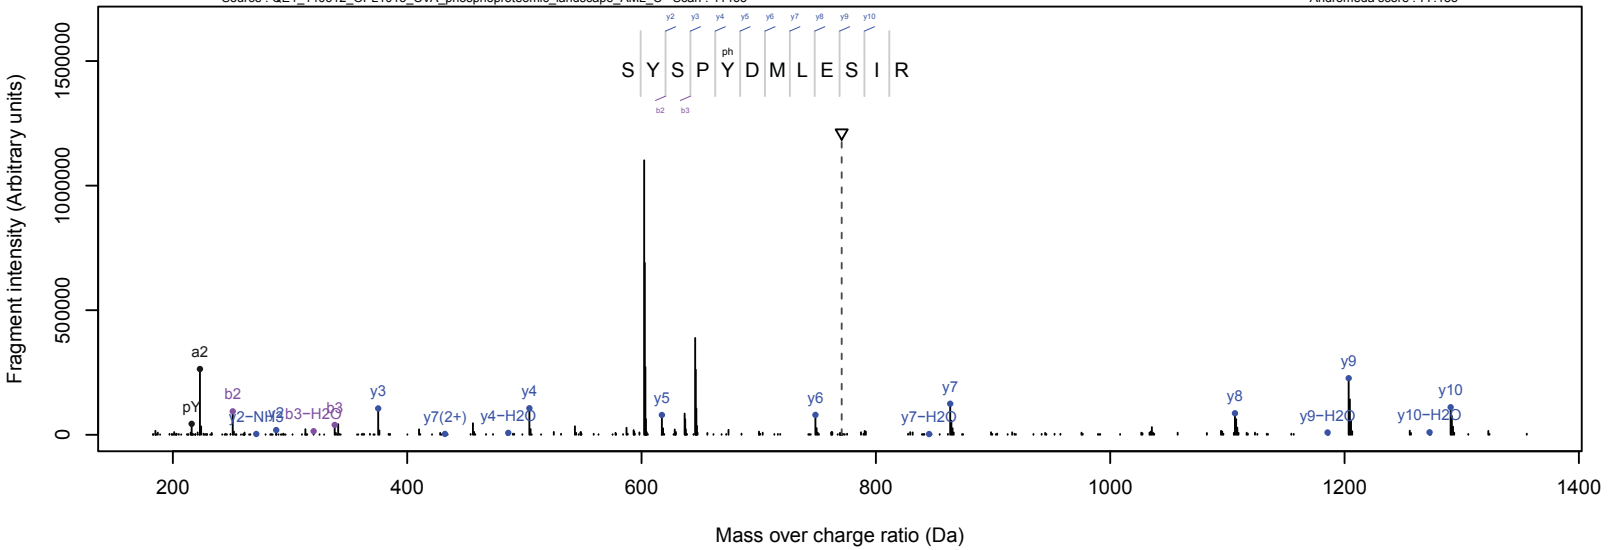

**GAFSEEYKRLDEDLAAY(ph)CR-3+**

Source : QE1\_140612\_OPL1013\_CVA\_phosphoproteomic\_landscape\_AML\_C Scan : 32841

Andromeda score : 77.08

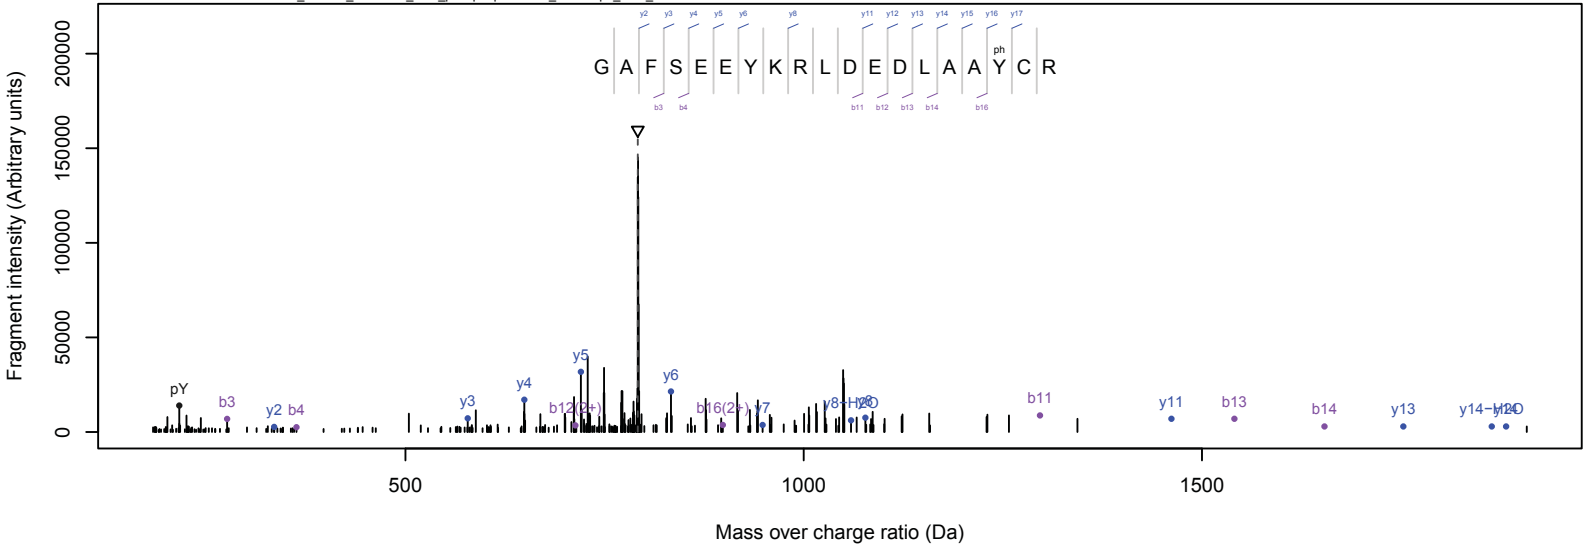

**LHAVVTKEPIY(ph)ITEFMAK-3+**

Source : QE1\_140822\_OPL1013\_CvA\_pTyrIP\_AML\_cell\_lines\_part2\_E Scan : 45561

Andromeda score : 77.08

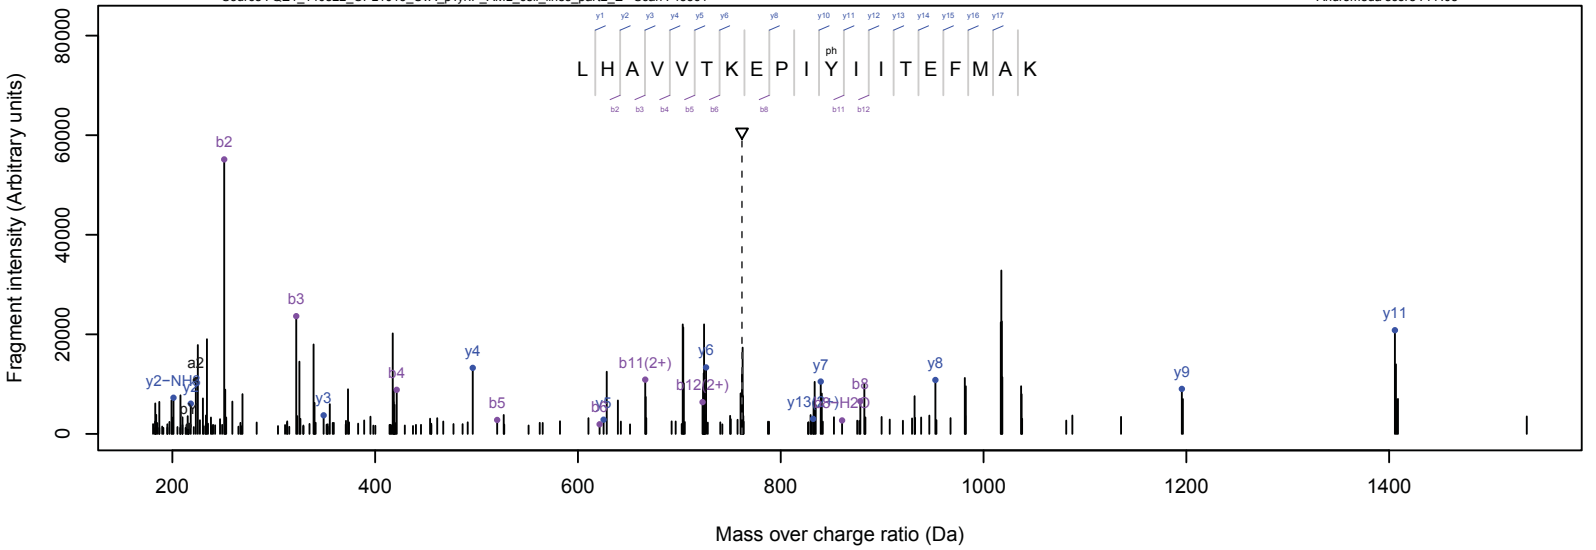

**Y(ph)KYGYEIPVDM(ox)LCK-2+**

Source : QE1\_140908\_OPL1013\_CvA\_pTyrIP\_AML\_OCI\_AML3 Scan : 32354

Andromeda score : 77.068

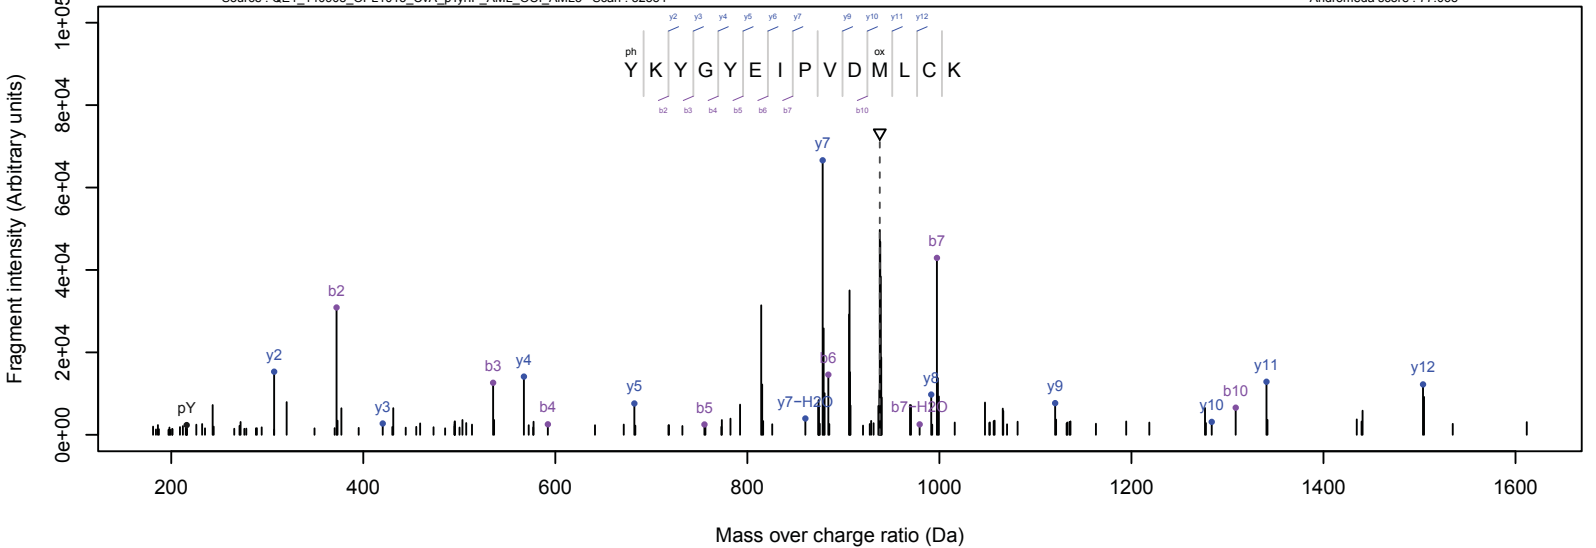

**AELSY(ph)LVDRPR-3+**

Source : QE1\_140612\_OPL1013\_CVA\_phosphoproteomic\_landscape\_AML\_B Scan : 23563

Andromeda score : 77.062

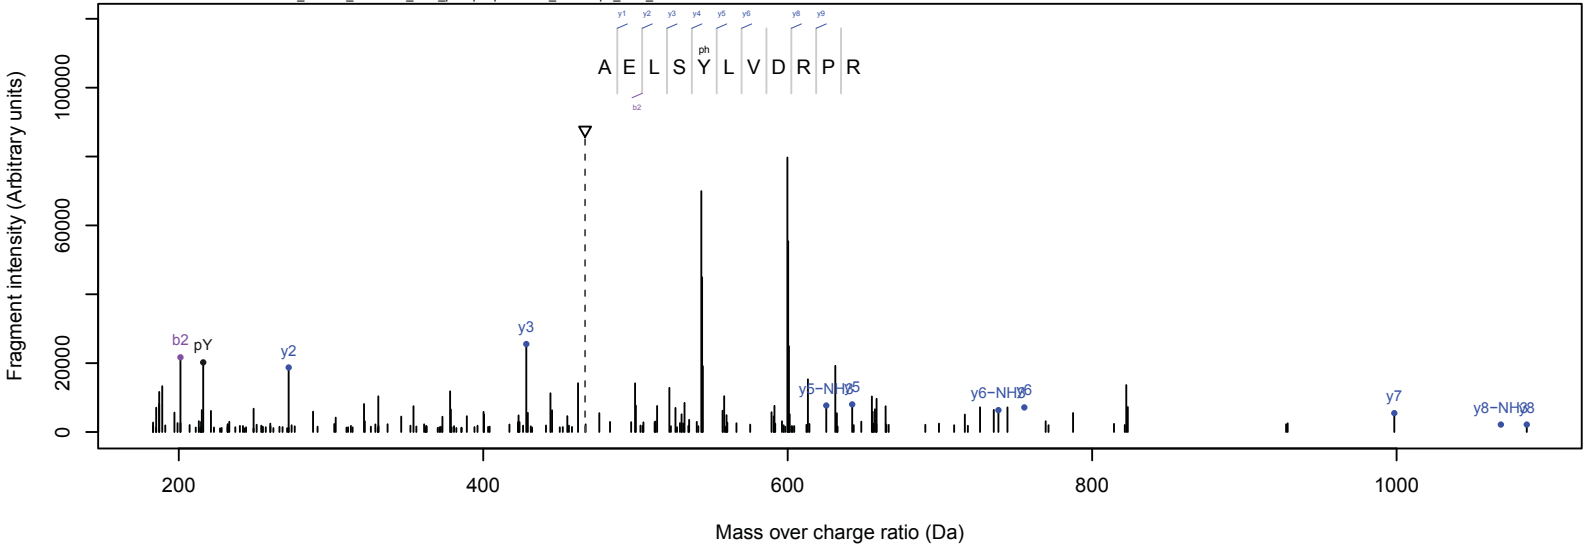

**KIPELY(ph)KPIFR-3+**

Source : QE1\_140612\_OPL1013\_CVA\_phosphoproteomic\_landscape\_AML\_C Scan : 27901

Andromeda score : 77.062

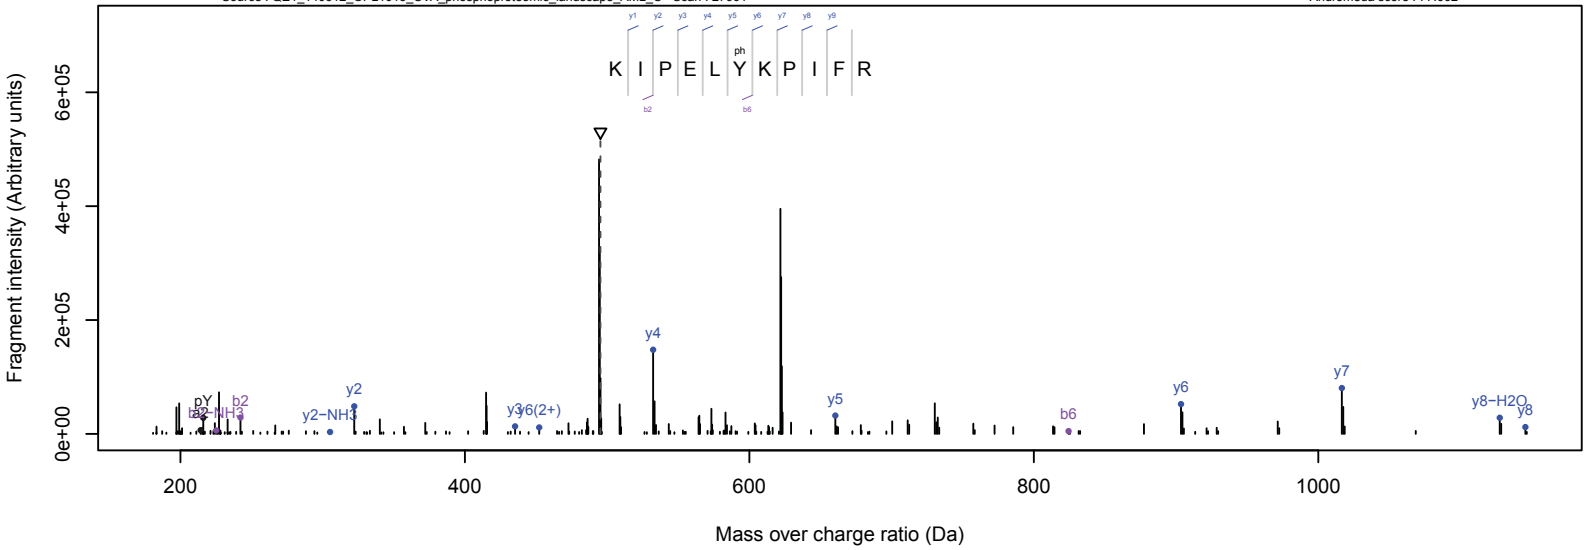

**Y(ph)AYLVFYR-2+**

Source : QE1\_140612\_OPL1013\_CVA\_phosphoproteomic\_landscape\_AML\_C Scan : 36114

Andromeda score : 77.058

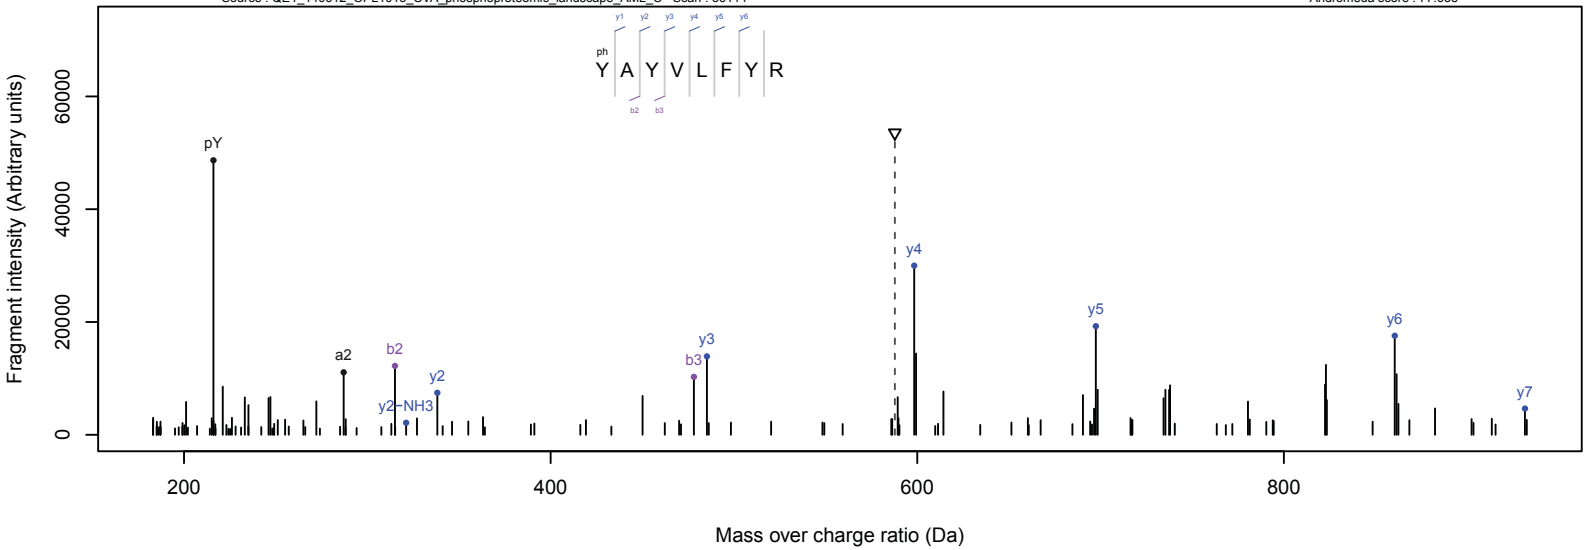

**AAGYDLYSAYDY(ph)TIPPMEK-2+**

Source : QE1\_140612\_OPL1013\_CVA\_phosphoproteomic\_landscape\_AML\_D Scan : 41608

Andromeda score : 77.031

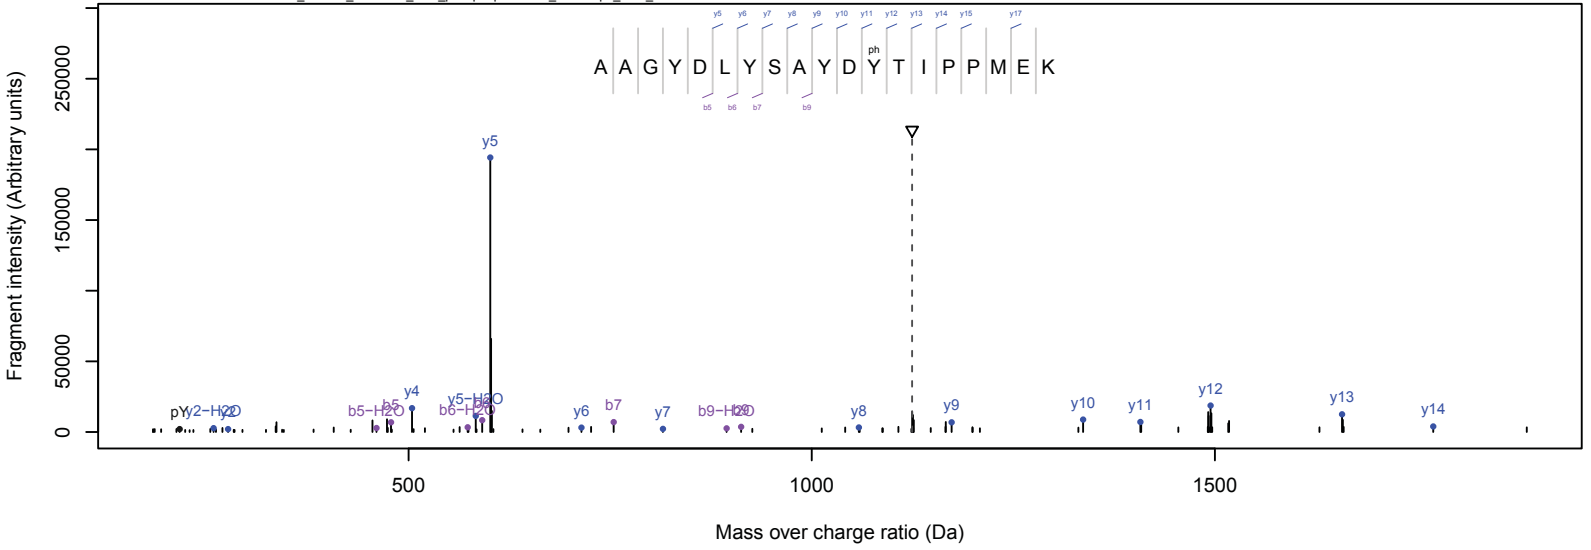

**PCSEETPAIS(ph)PSKR-3+**

Source : QE1\_140908\_OPL1013\_CvA\_pTyrIP\_AML\_HL60 Scan : 9636

Andromeda score : 77.031

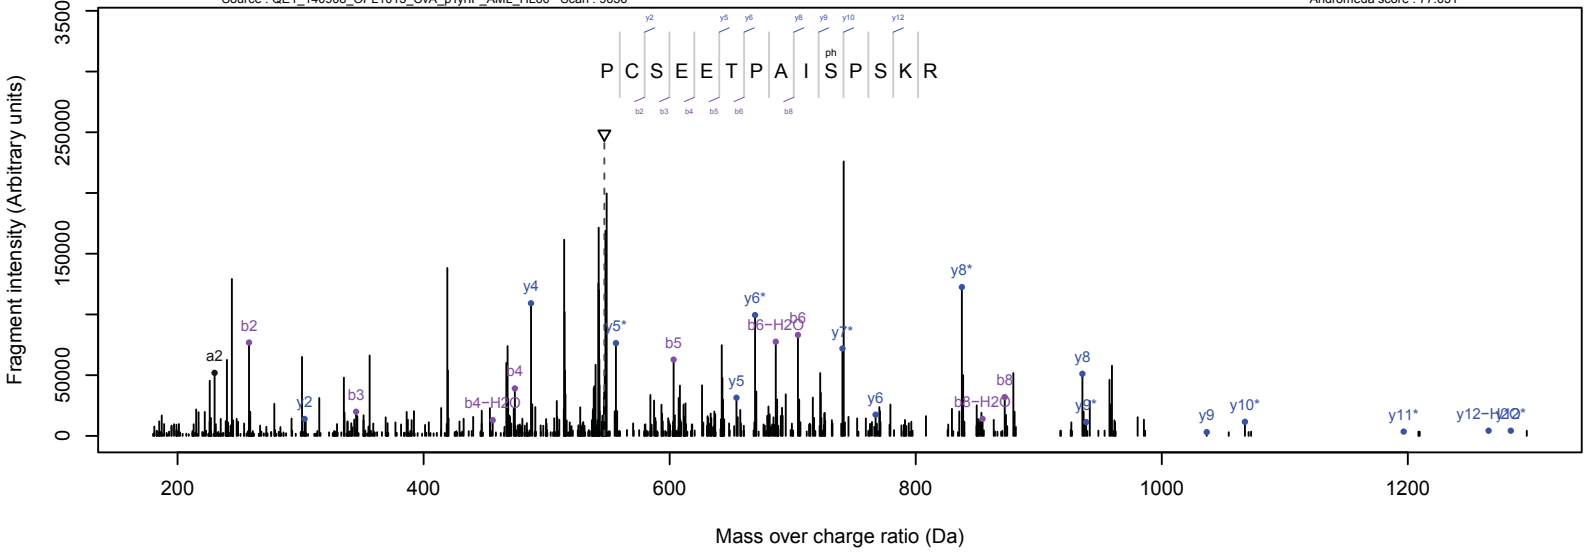

**RPHTPTGIY(ph)MGRPTYGSSR-4+**

Source : QE1\_140612\_OPL1013\_CVA\_phosphoproteomic\_landscape\_AML\_C Scan : 17495

Andromeda score : 77.031

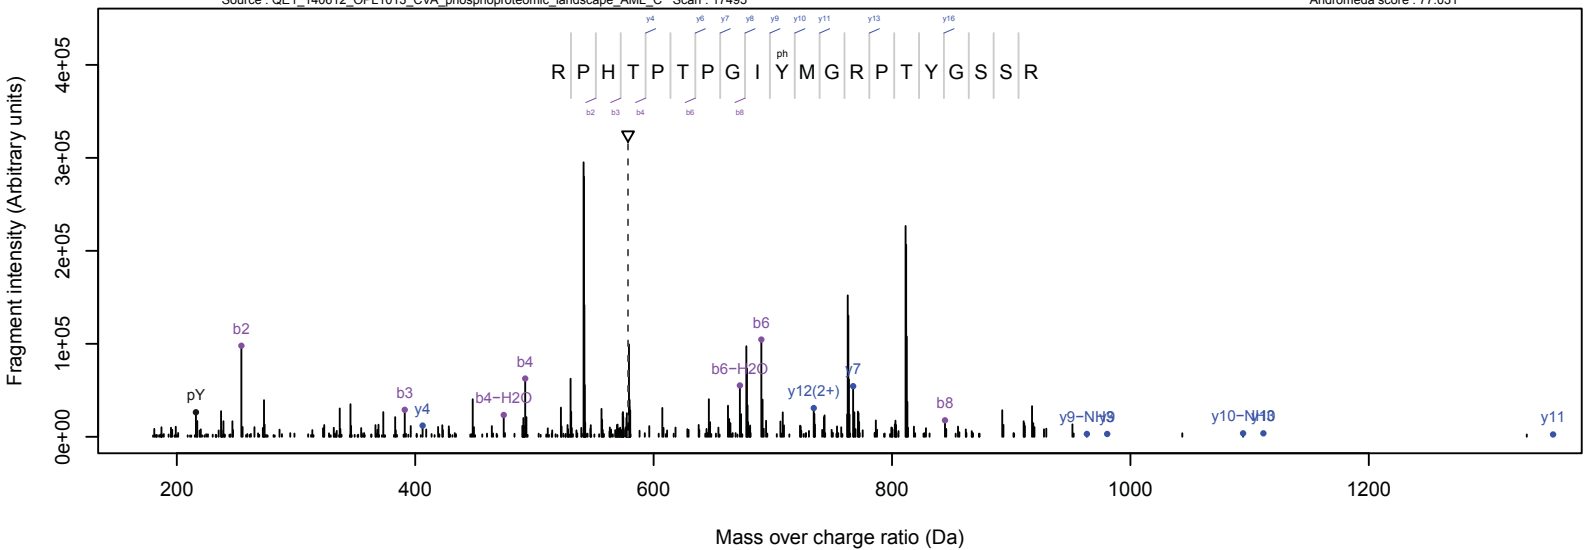

AKHDELTY(ph)F-2+

Source : QE1\_140612\_OPL1013\_CVA\_phosphoproteomic\_landscape\_AML\_C Scan : 19971

Andromeda score : 76.943

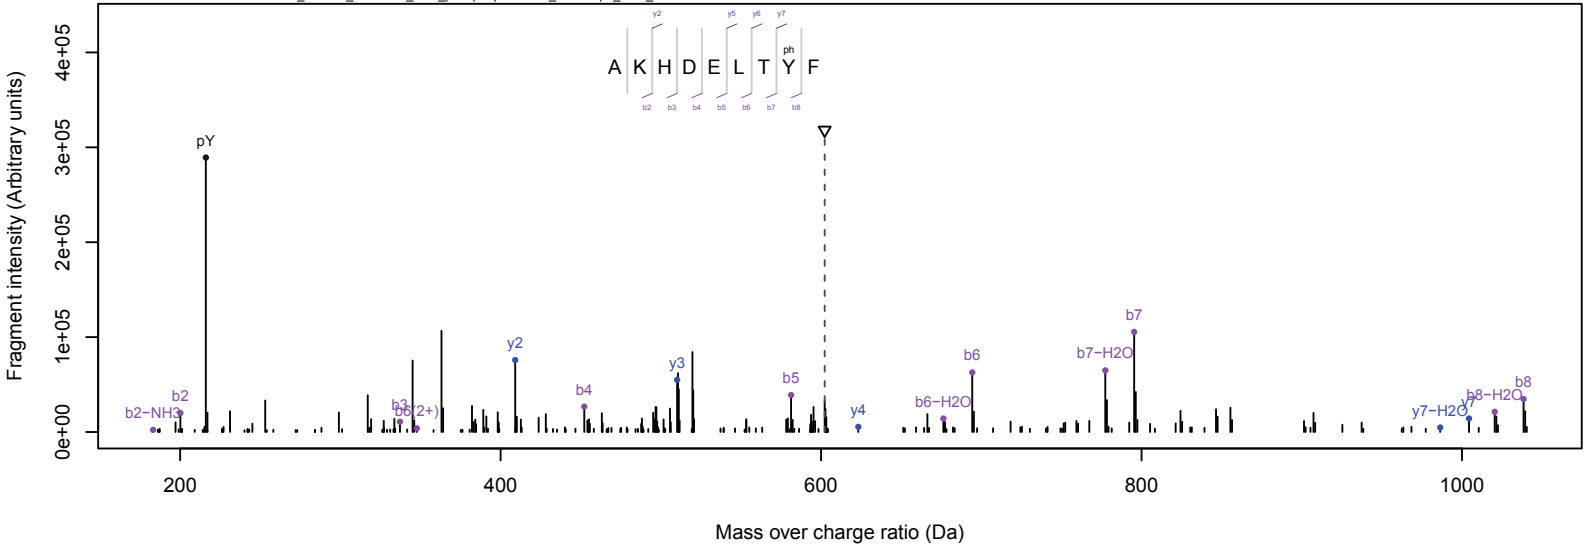

RLNY(ph)QTPGMR-3+

Source : QE1\_140612\_OPL1013\_CVA\_phosphoproteomic\_landscape\_AML\_C Scan : 8973

Andromeda score : 76.943

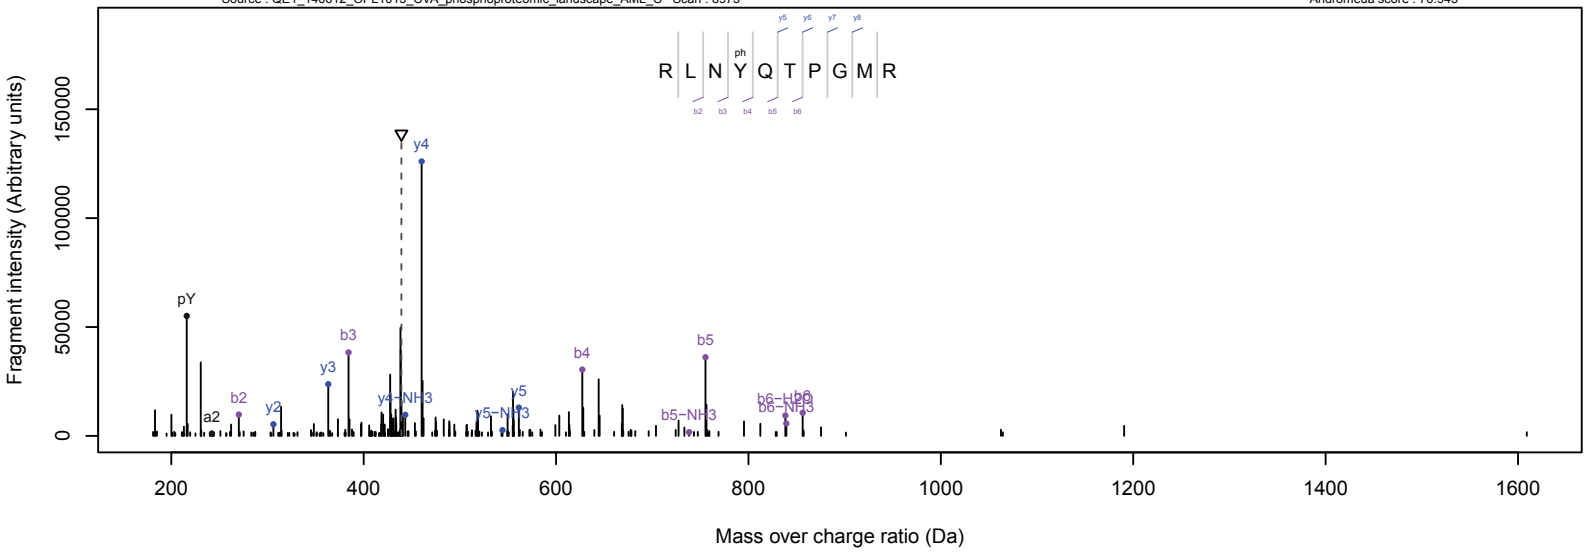

IY(ph)ISNTFSPSK-2+

Source : QE1\_140908\_OPL1013\_CvA\_pTyrIP\_AML\_Kasumi1 Scan : 25343

Andromeda score : 76.942

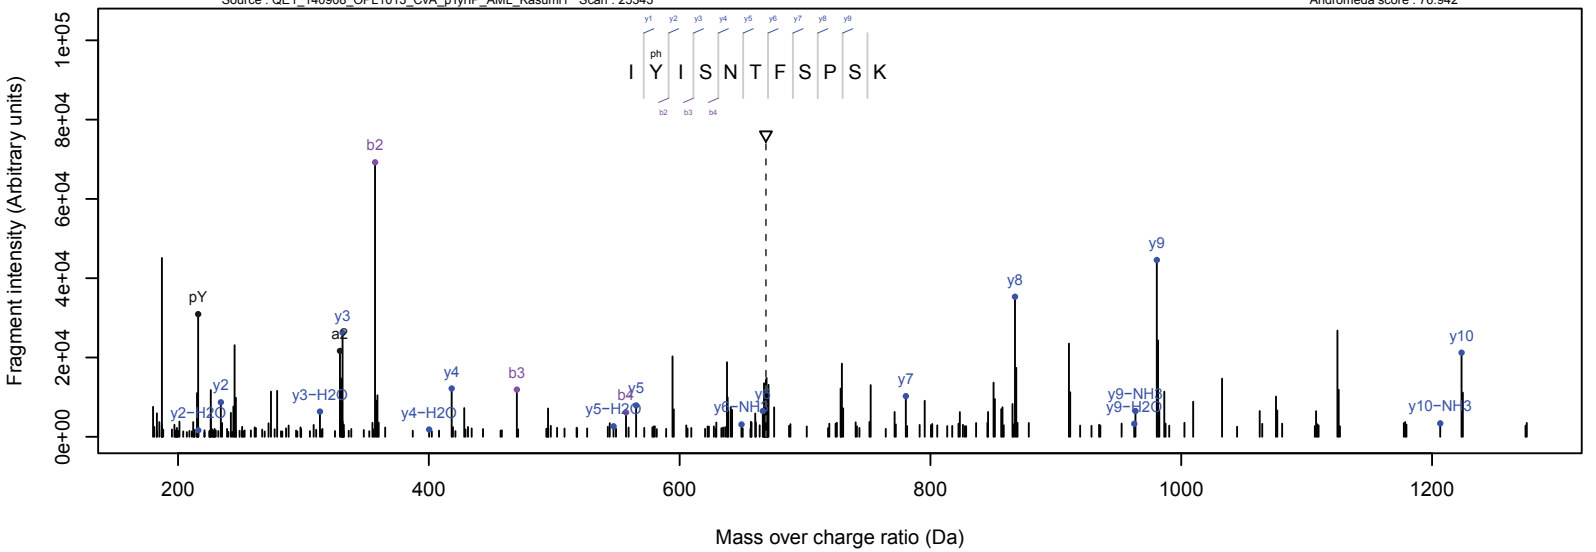

**IQGEY(ph)TLTLR-2+**

Source: QE1\_140612\_OPL1013\_CVA\_phosphoproteomic\_landscape\_AML\_A Scan: 23457

Andromeda score: 76.927

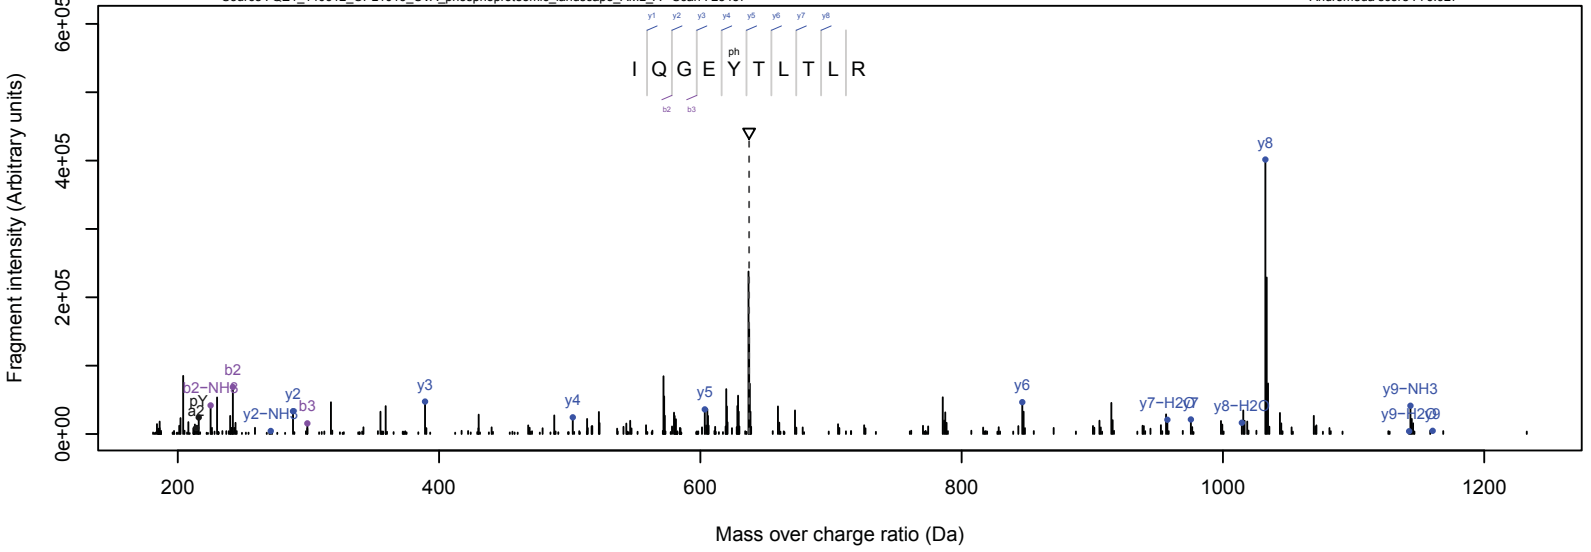

**ELNY(ph)FAK-2+**

Source: QE1\_140822\_OPL1013\_CvA\_pTyrIP\_AML\_cell\_lines\_part2\_B Scan: 10608

Andromeda score: 76.847

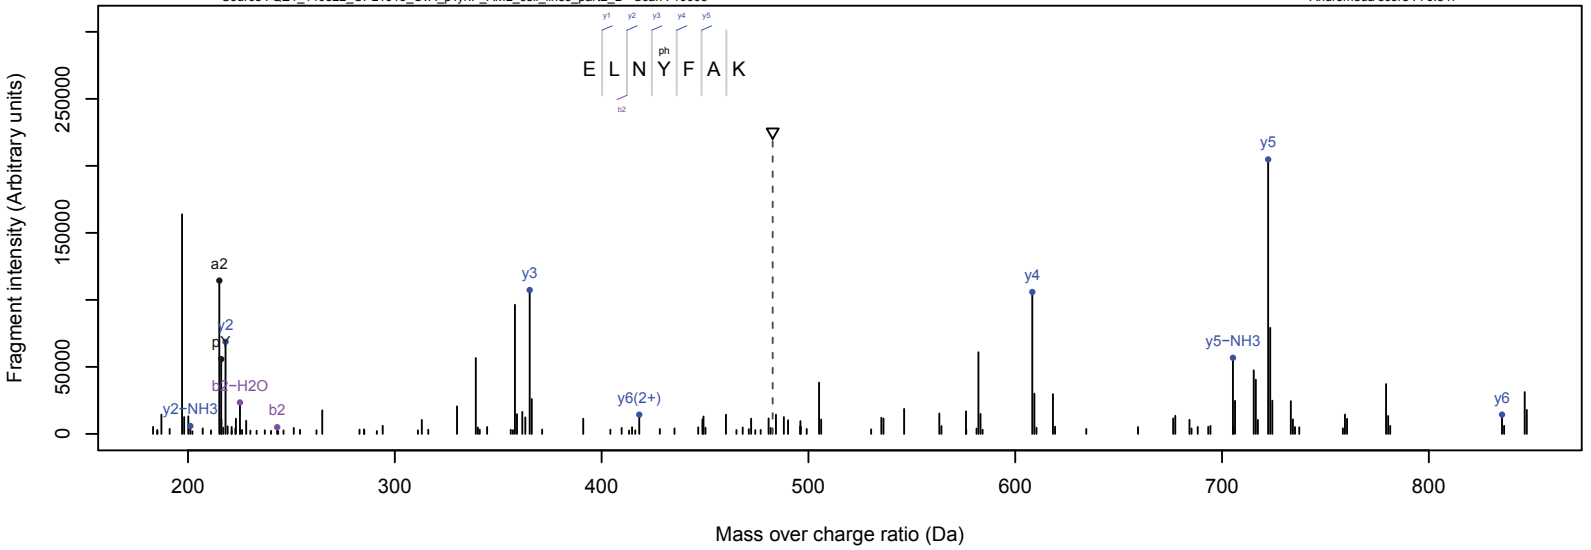

**LNVAY(ph)FR-2+**

Source: QE1\_140612\_OPL1013\_CVA\_phosphoproteomic\_landscape\_AML\_D Scan: 24743

Andromeda score: 76.847

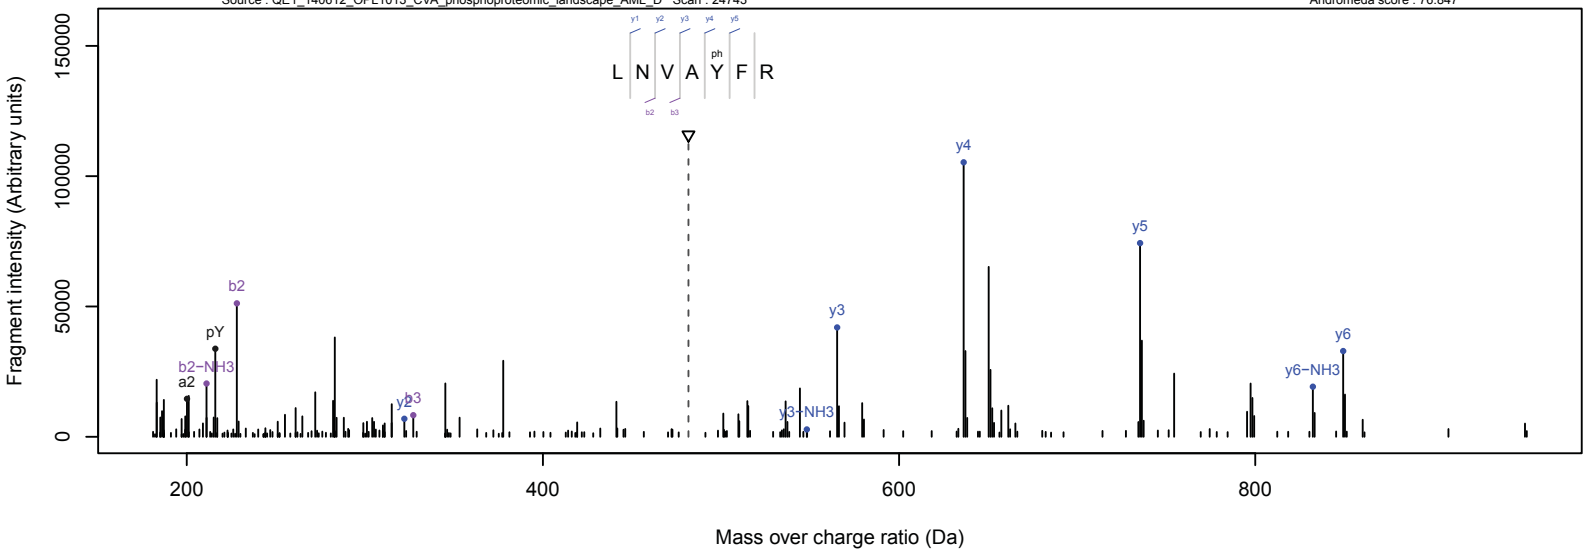

**FNSGSSDDVRY(ph)VNAFK-2+**

Source : QE1\_140612\_OPL1013\_CVA\_phosphoproteomic\_landscape\_AML\_C Scan : 22620

Andromeda score : 76.82

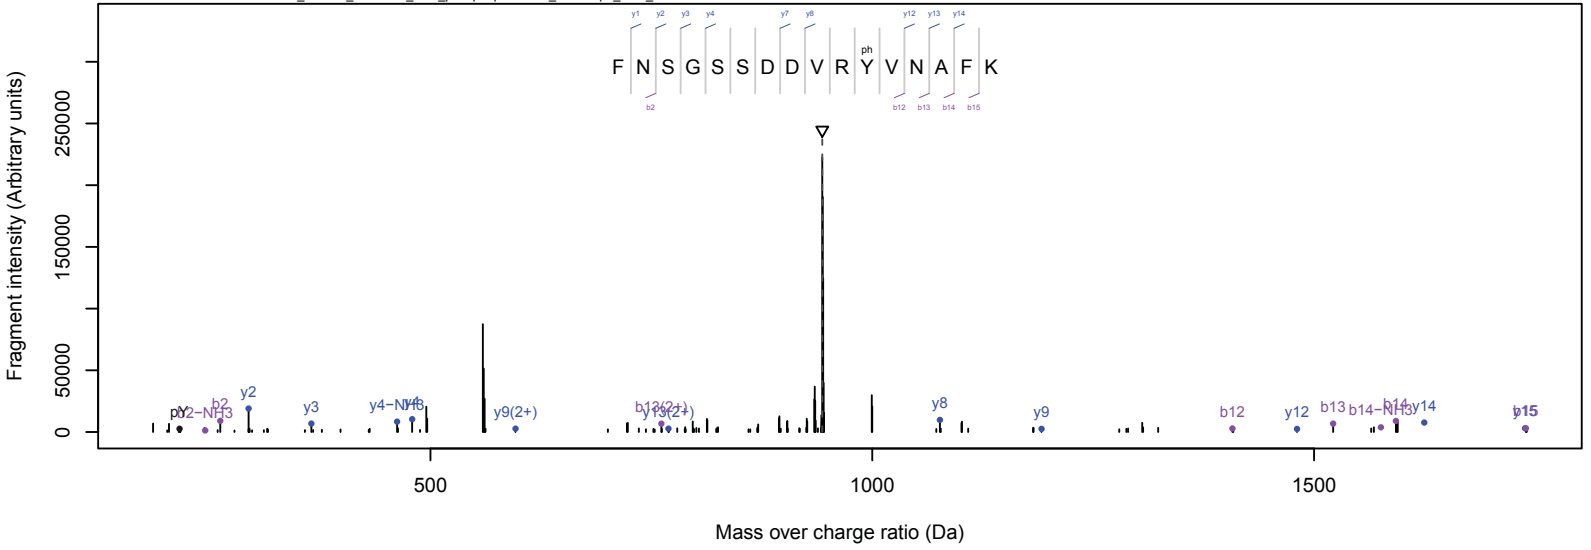

**IMPVKQPY(ph)YLQTQDPK-2+**

Source : QE1\_140612\_OPL1013\_CVA\_phosphoproteomic\_landscape\_AML\_B Scan : 30073

Andromeda score : 76.82

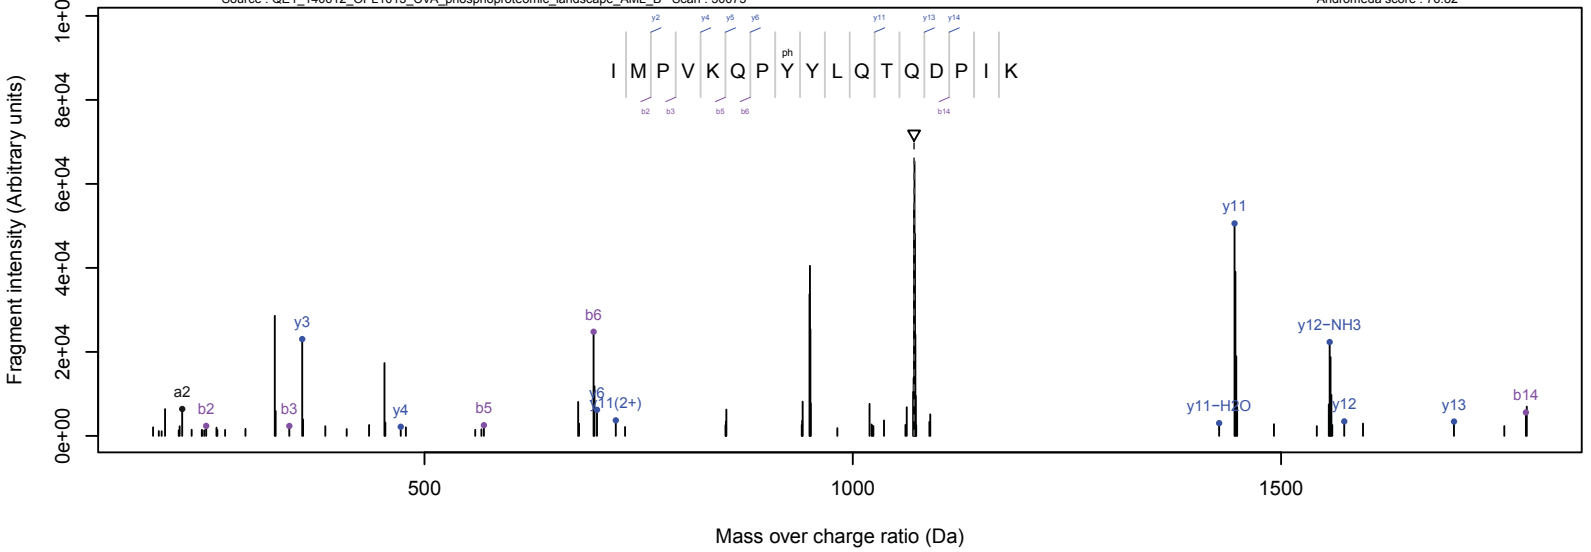

**KEPVDEDLY(ph)PEHYRK-4+**

Source : QE1\_140612\_OPL1013\_CVA\_phosphoproteomic\_landscape\_AML\_B Scan : 13608

Andromeda score : 76.82

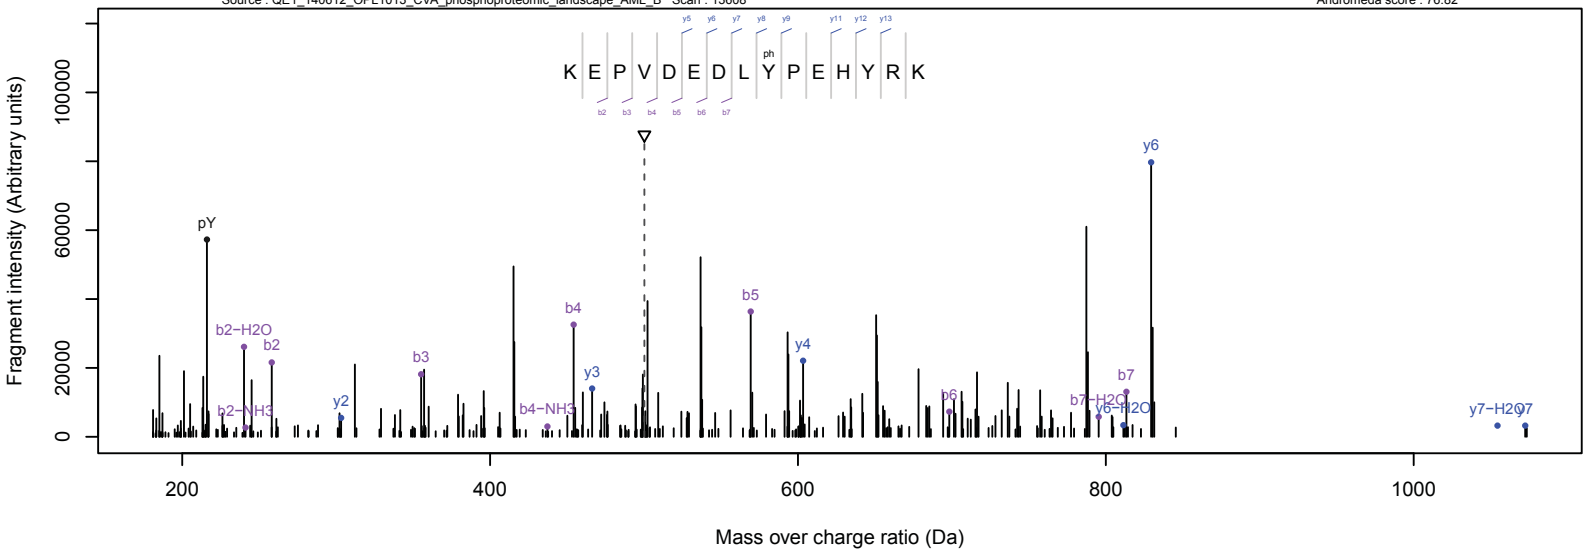



KEQGT(ph)YALSLIYGK-2+

Source : QE1\_140612\_OPL1013\_CVA\_phosphoproteomic\_landscape\_AML\_B Scan : 31058

Andromeda score : 76.82

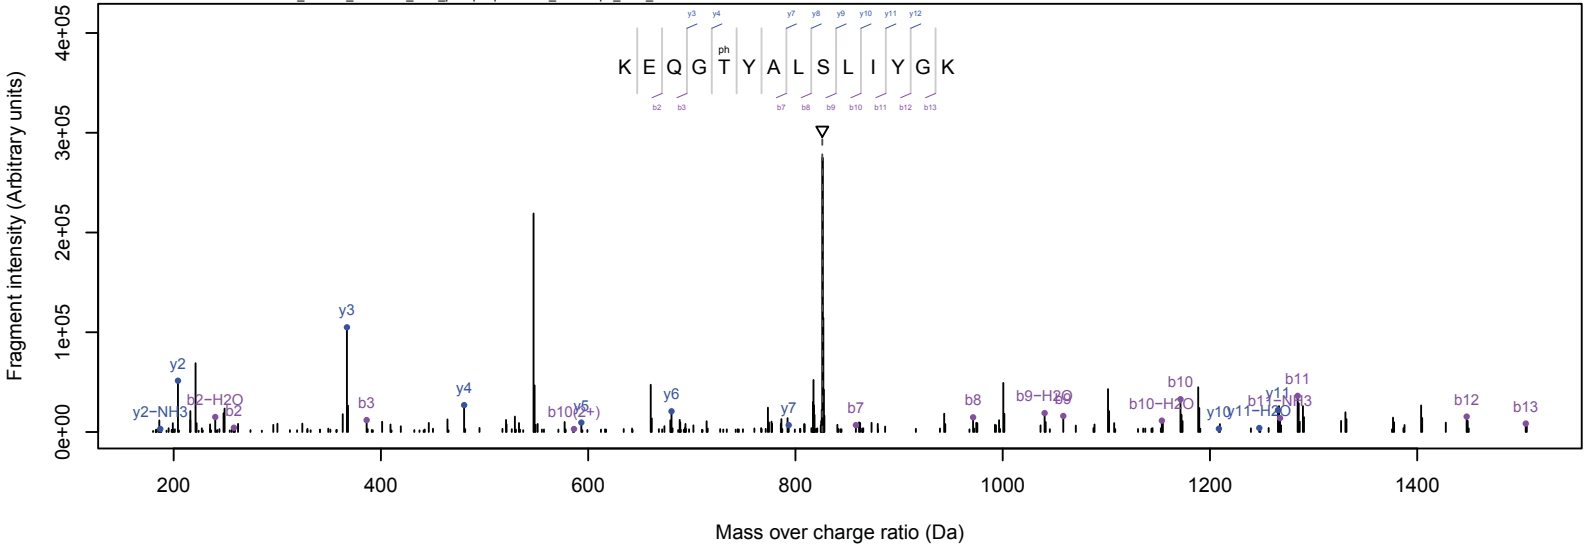

NGMLPASYGPGEQNGTGGY<sup>ph</sup>QR-2+

Source : QE1\_140612\_OPL1013\_CVA\_phosphoproteomic\_landscape\_AML\_C Scan : 22747

Andromeda score : 76.817

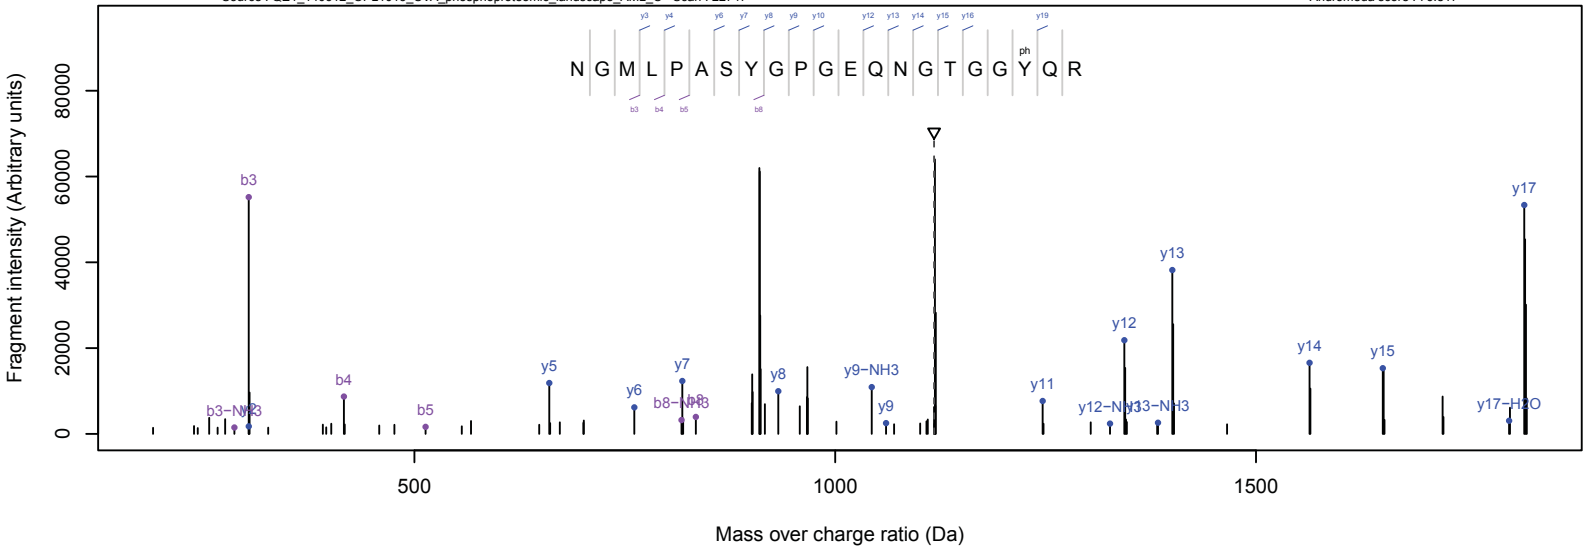

Y<sup>ph</sup>RSASSASSLFS<sup>ph</sup>SPSS<sup>ph</sup>T<sup>ph</sup>LFSSSR-3+

Source : QE1\_140612\_OPL1013\_CVA\_phosphoproteomic\_landscape\_AML\_C Scan : 37537

Andromeda score : 76.807

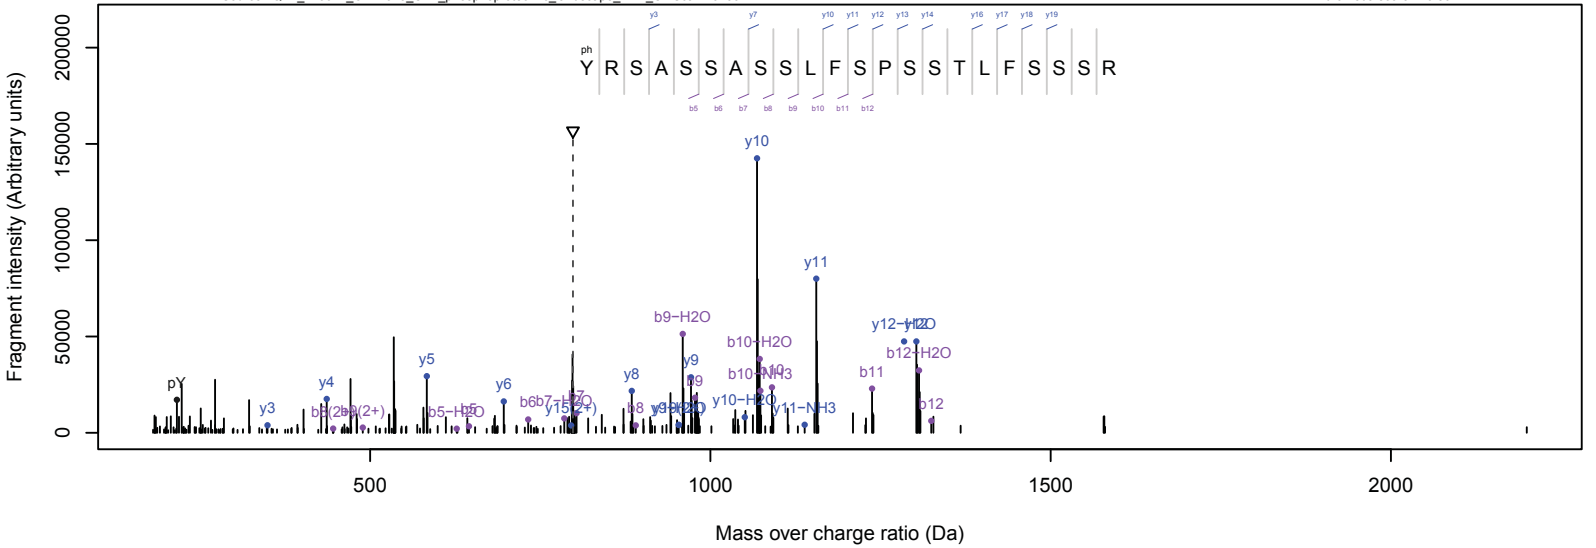

**AILS M N G L S Y G V I R-2+**

Source : QE1\_140612\_OPL1013\_CVA\_phosphoproteomic\_landscape\_AML\_C Scan : 42319

Andromeda score : 76.759

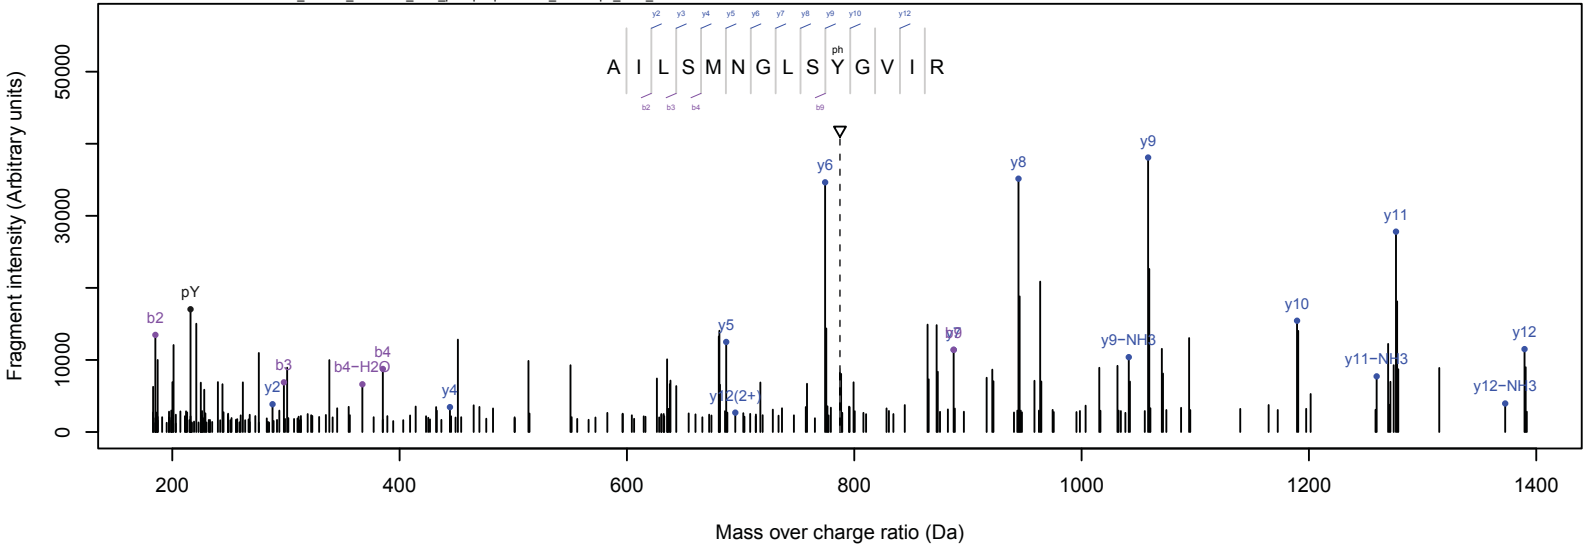

**NIY(ph)VLQELDNP GAK-2+**

Source : QE1\_140822\_OPL1013\_CvA\_pTyrIP\_AML\_cell\_lines\_part2\_E Scan : 30097

Andromeda score : 76.759

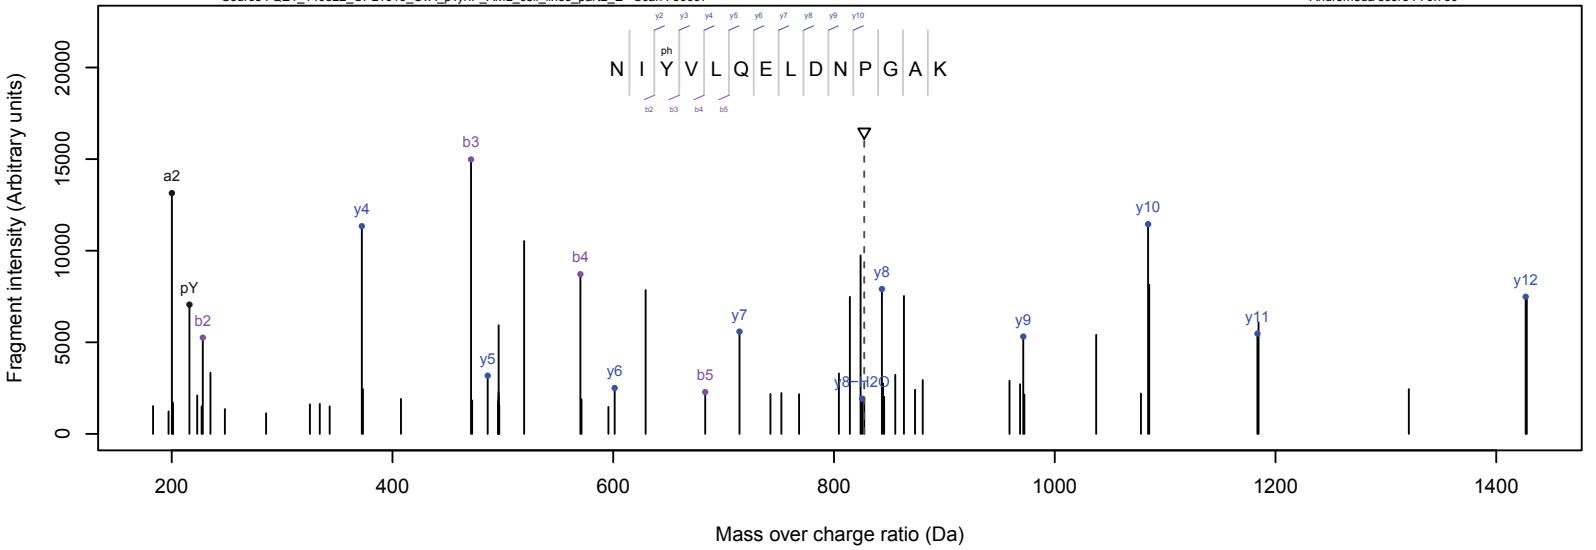

**Y(ph)VASV L G L T P S P R-2+**

Source : QE1\_140612\_OPL1013\_CVA\_phosphoproteomic\_landscape\_AML\_B Scan : 33816

Andromeda score : 76.728

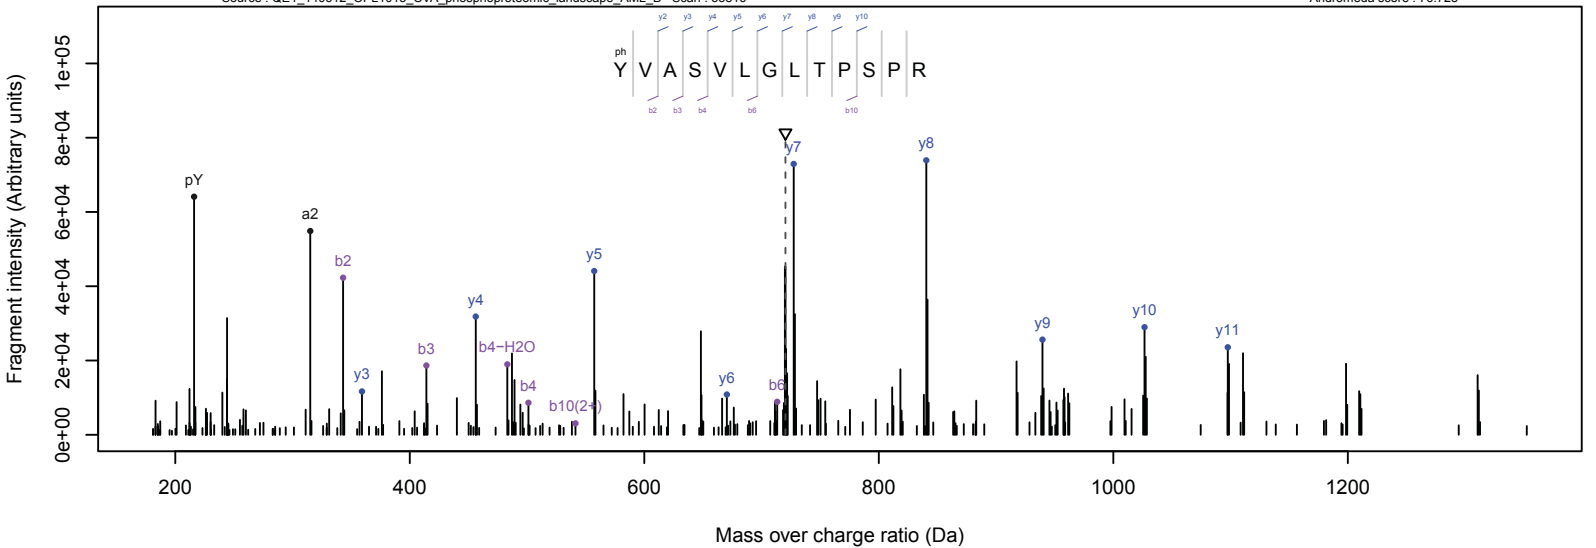

ESYSIY(ph)VYK-2+

Source : QE1\_140822\_OPL1013\_CvA\_pTyrIP\_AML\_cell\_lines\_part2\_E Scan : 17362

Andromeda score : 76.679

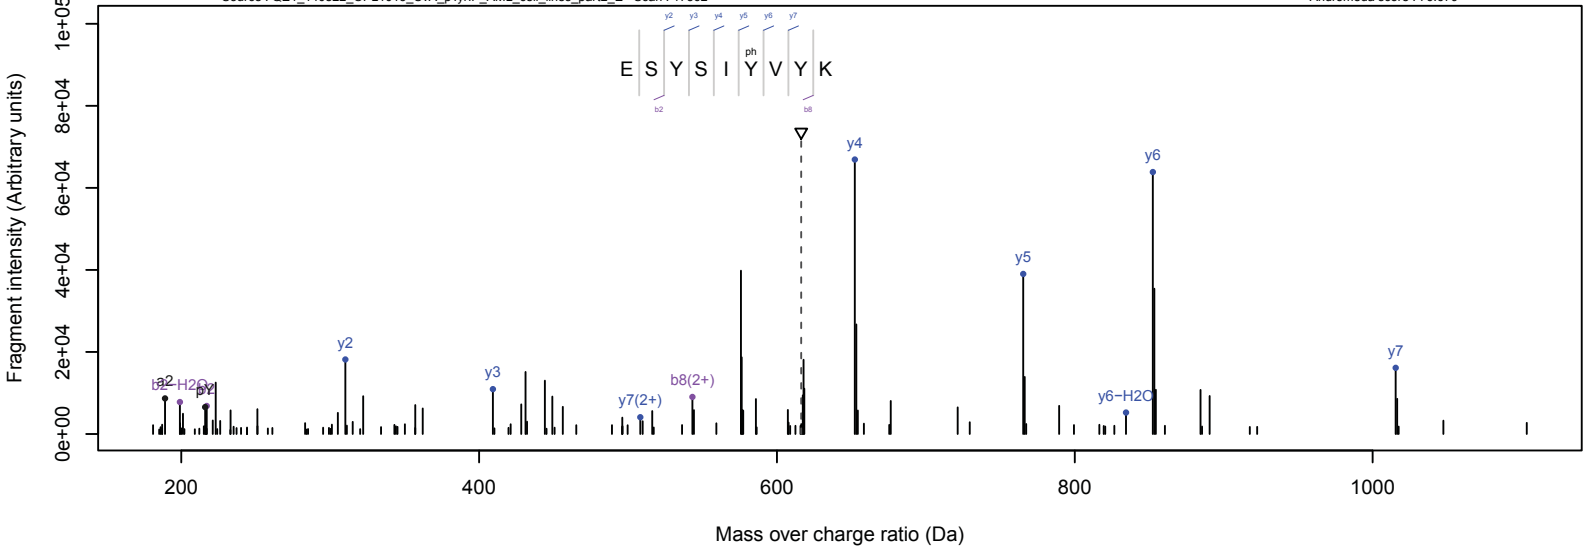

HY(ph)CAIADAK-2+

Source : QE1\_140822\_OPL1013\_CvA\_pTyrIP\_AML\_cell\_lines\_part2\_B Scan : 3644

Andromeda score : 76.679

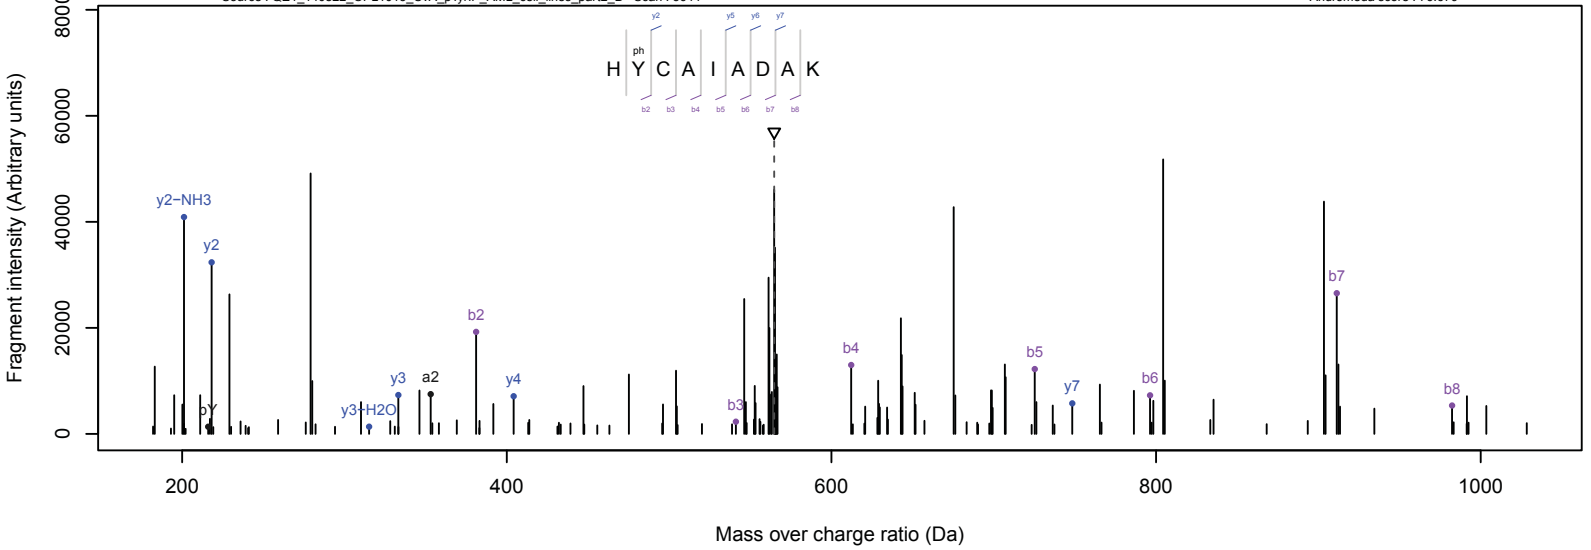

IMEY(ph)YEKK-2+

Source : QE1\_140612\_OPL1013\_CvA\_phosphoproteomic\_landscape\_AML\_D Scan : 8422

Andromeda score : 76.605

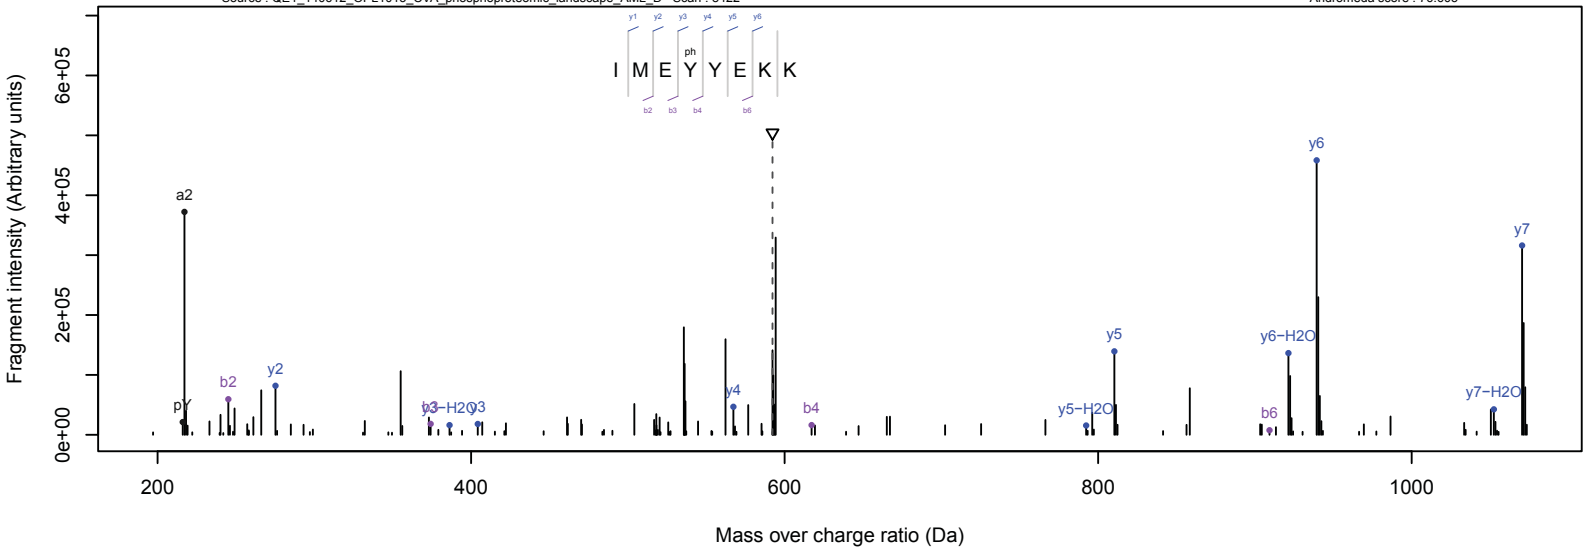

**YHQVSLFYNELHYVEK-3+**

Source : QE1\_140612\_OPL1013\_CVA\_phosphoproteomic\_landscape\_AML\_C Scan : 36057

Andromeda score : 76.586

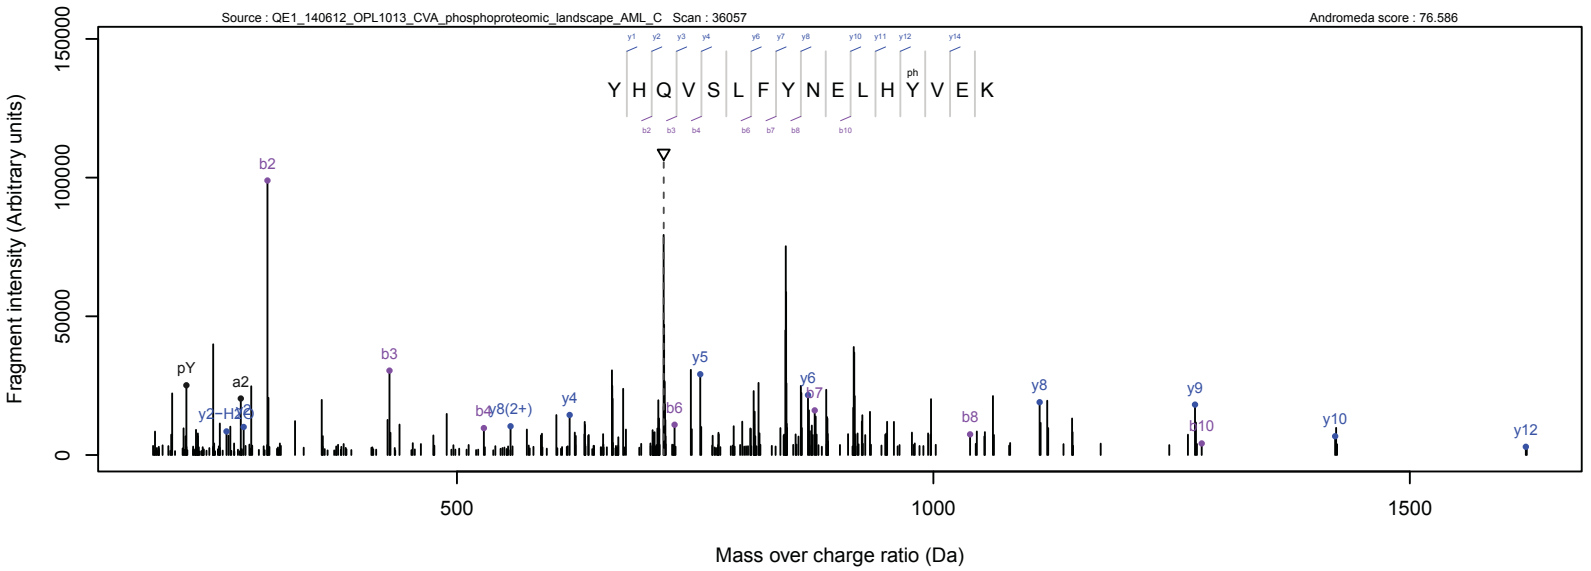

**ASFSHDFTYLVSGSEDKYVYIWSITYHDLISK-4+**

Source : QE1\_140612\_OPL1013\_CVA\_phosphoproteomic\_landscape\_AML\_C Scan : 47360

Andromeda score : 76.573

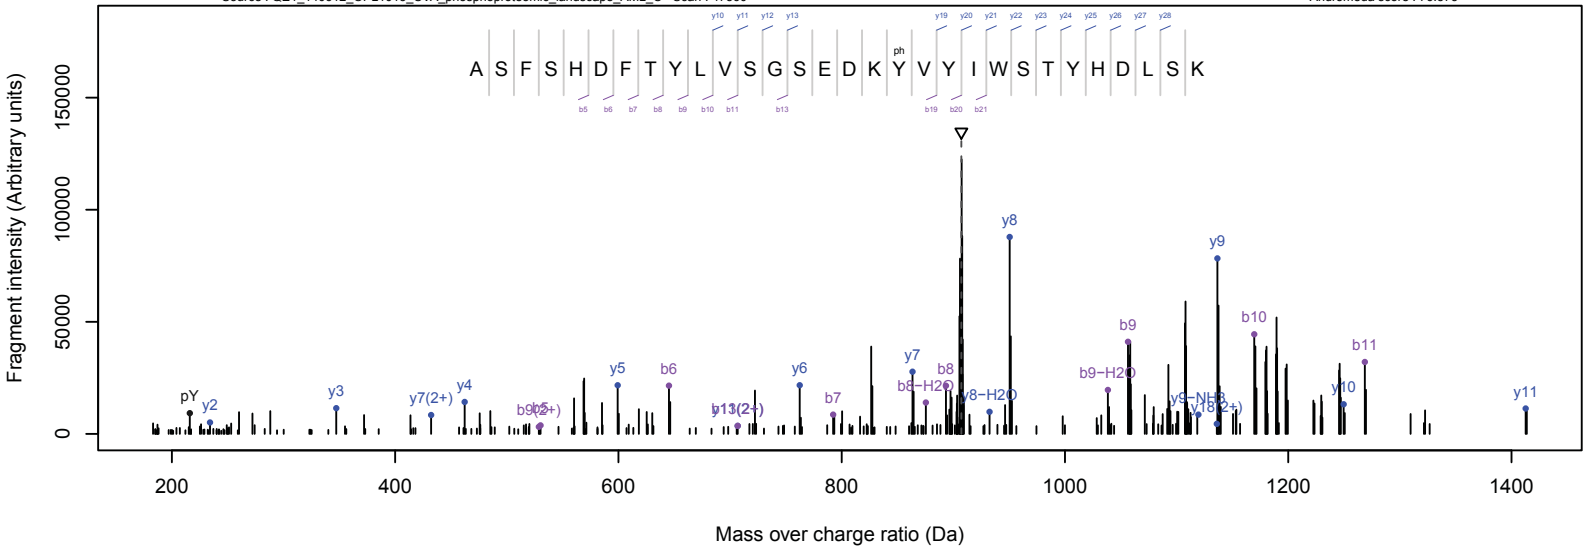

**VPADQSPAGSGAYEDVAGGAQTGGGLGFNLR-3+**

Source : QE1\_140908\_OPL1013\_CvA\_pTyrIP\_AML\_HEL Scan : 37728

Andromeda score : 76.573

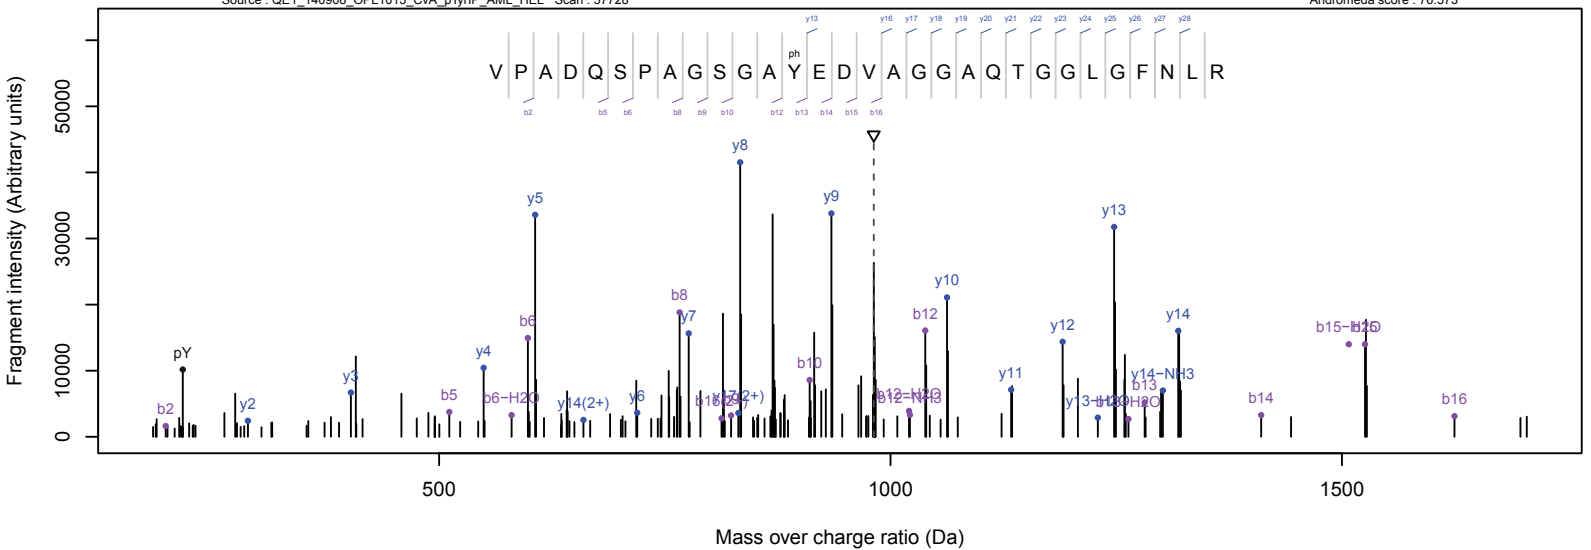



Y(ph)CFVDKYK-2+

Source : QE1\_140612\_OPL1013\_CVA\_phosphoproteomic\_landscape\_AML\_D Scan : 14758

Andromeda score : 76.478

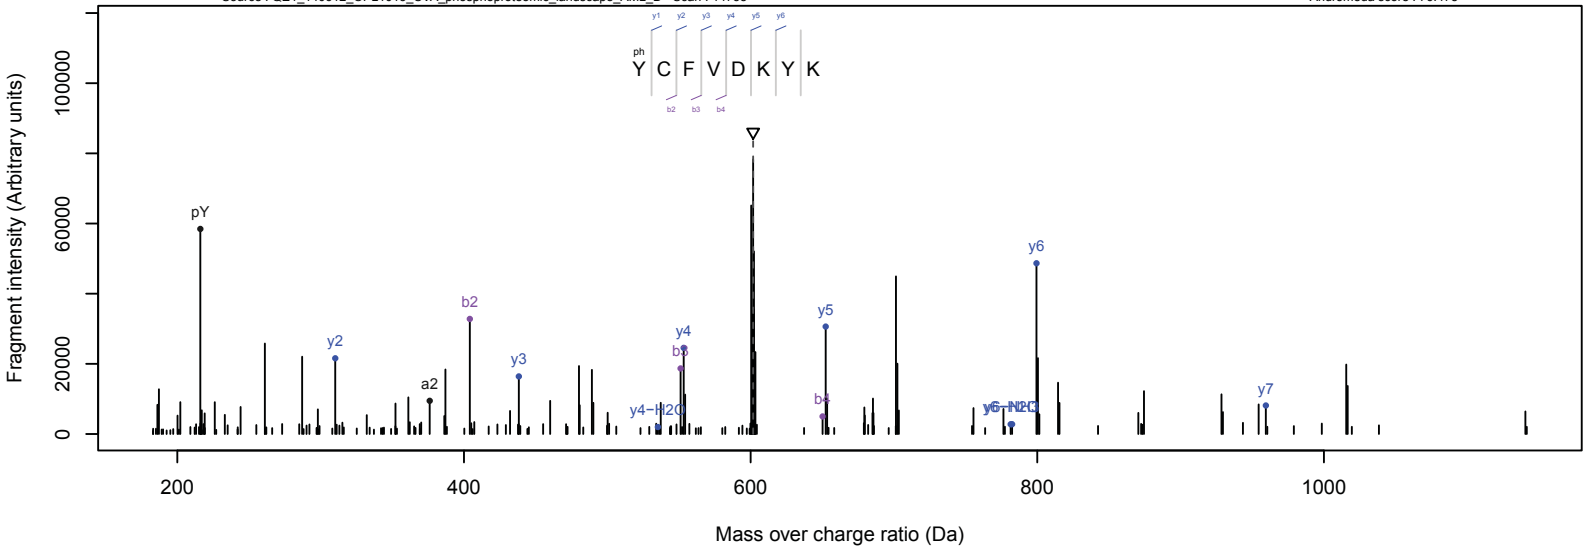

MAHAMNEY(ph)PDSCAVLVR-3+

Source : QE1\_140612\_OPL1013\_CVA\_phosphoproteomic\_landscape\_AML\_D Scan : 22731

Andromeda score : 76.341

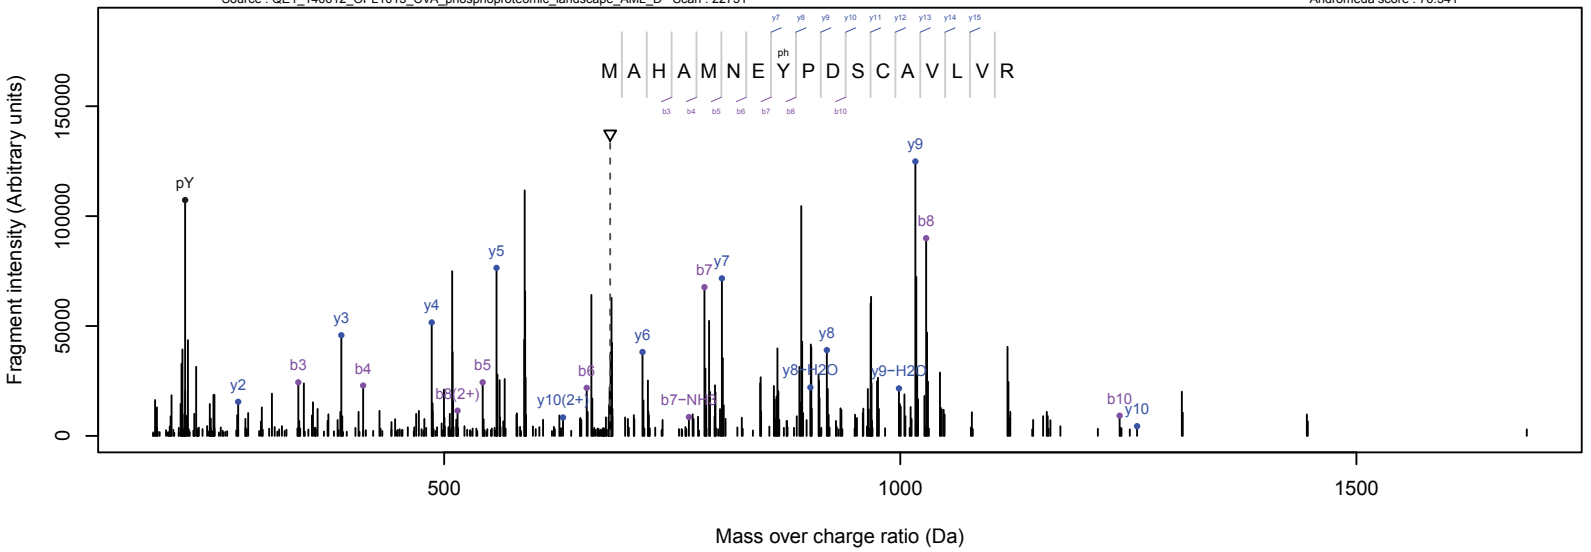

SRDPAY(ph)ELLITGGTYA-2+

Source : QE1\_140908\_OPL1013\_CvA\_pTyrIP\_AML\_Kasumi1 Scan : 41002

Andromeda score : 76.341

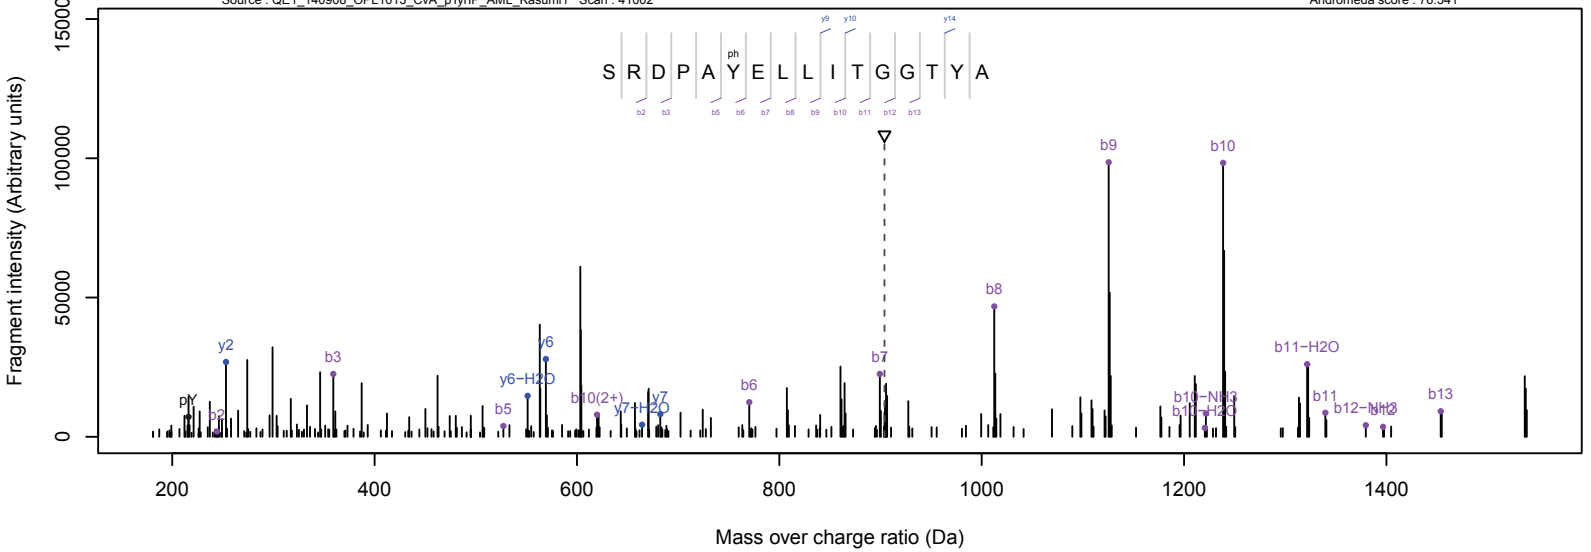

TY(ph)PSLLQGEYNNRHPNIK-4+

Source : QE1\_140612\_OPL1013\_CVA\_phosphoproteomic\_landscape\_AML\_C Scan : 21573

Andromeda score : 76.341

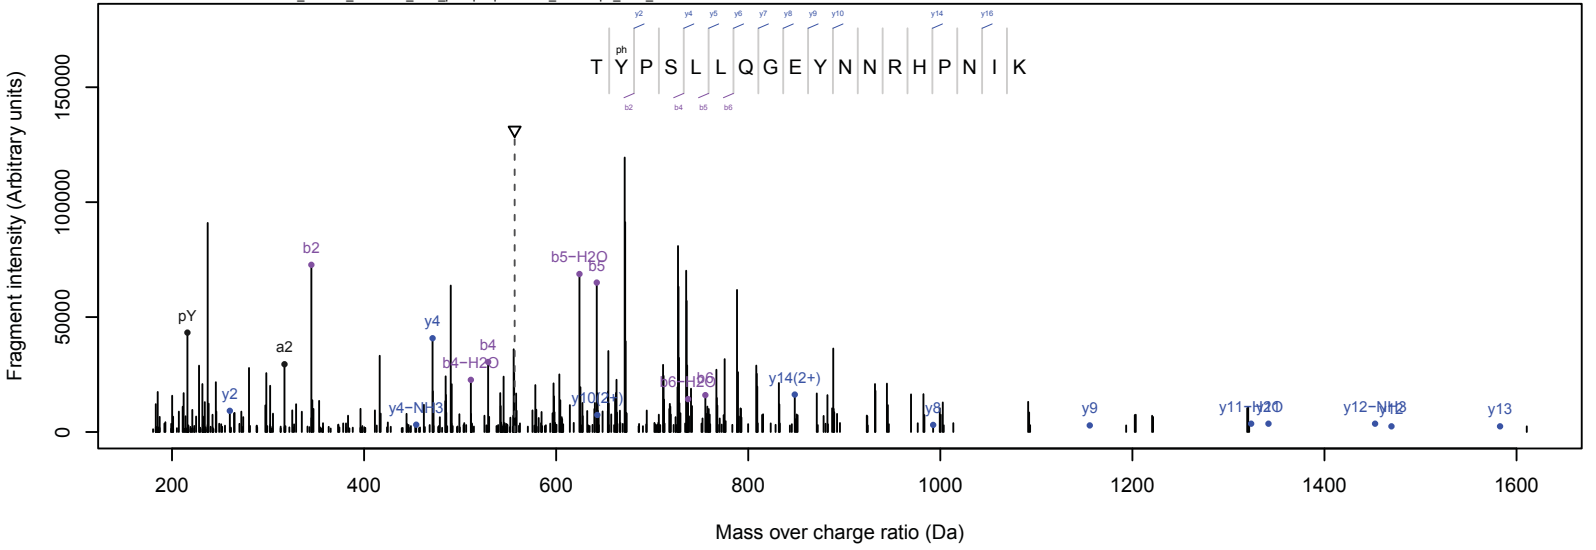

YRGQY(ph)NTYPIK-3+

Source : QE1\_140612\_OPL1013\_CVA\_phosphoproteomic\_landscape\_AML\_B Scan : 11171

Andromeda score : 76.332

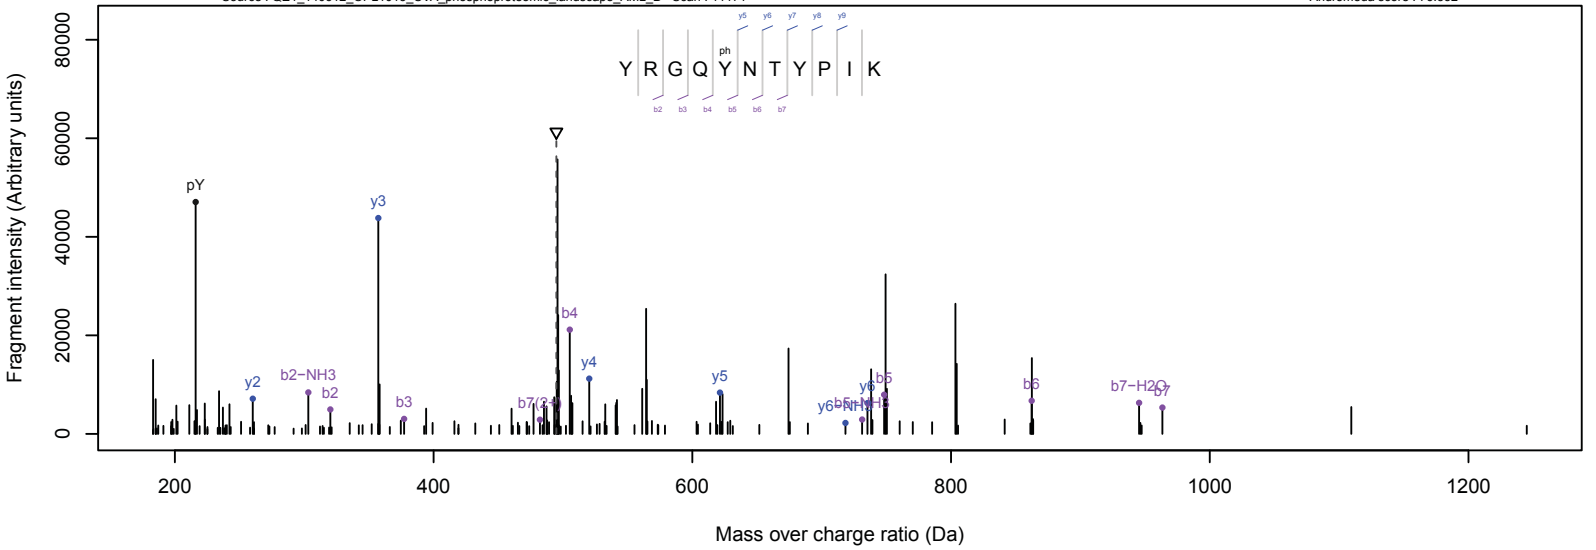

ADGY(ph)EPPVESV-2+

Source : QE1\_140822\_OPL1013\_CvA\_pTyrIP\_AML\_cell\_lines\_part2\_E Scan : 14119

Andromeda score : 76.326

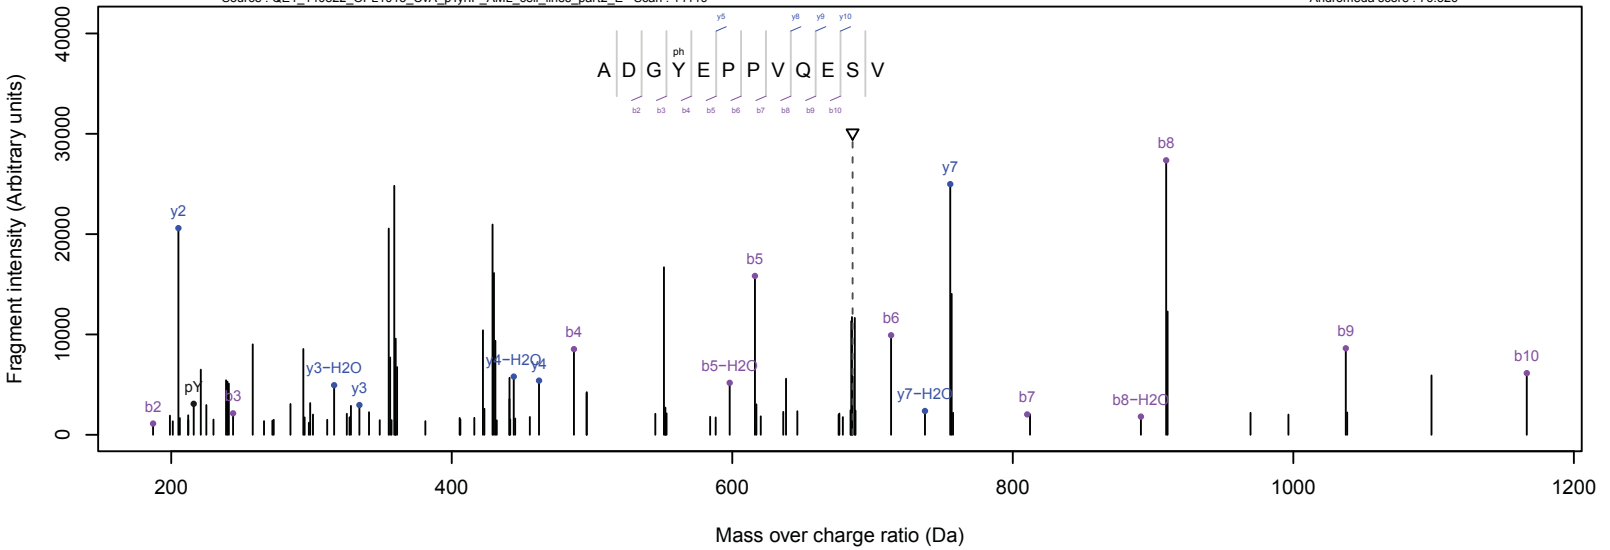

TQTTPVSPAPQTEERLPSSPV(ph)EDAASFK-3+

Source : QE1\_140612\_OPL1013\_CVA\_phosphoproteomic\_landscape\_AML\_E Scan : 32204

Andromeda score : 76.31

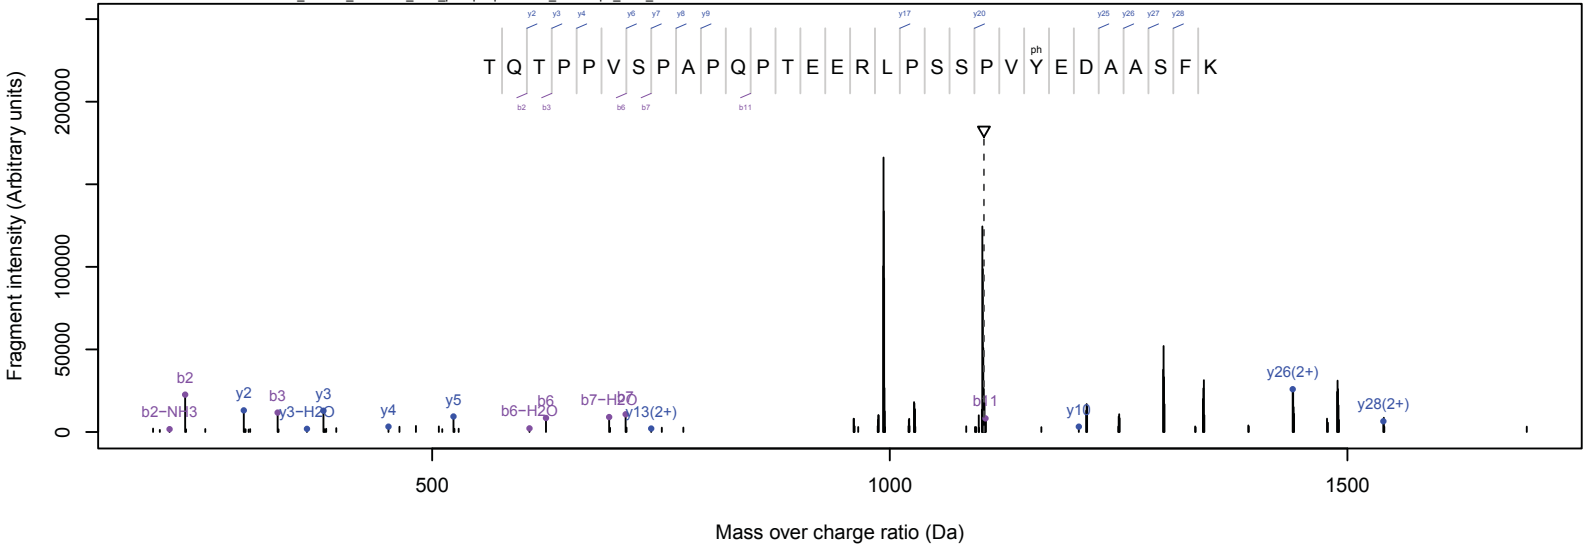

HEIPYY(ph)EFQSLQTEICSQNK-3+

Source : QE1\_140612\_OPL1013\_CVA\_phosphoproteomic\_landscape\_AML\_B Scan : 38004

Andromeda score : 76.301

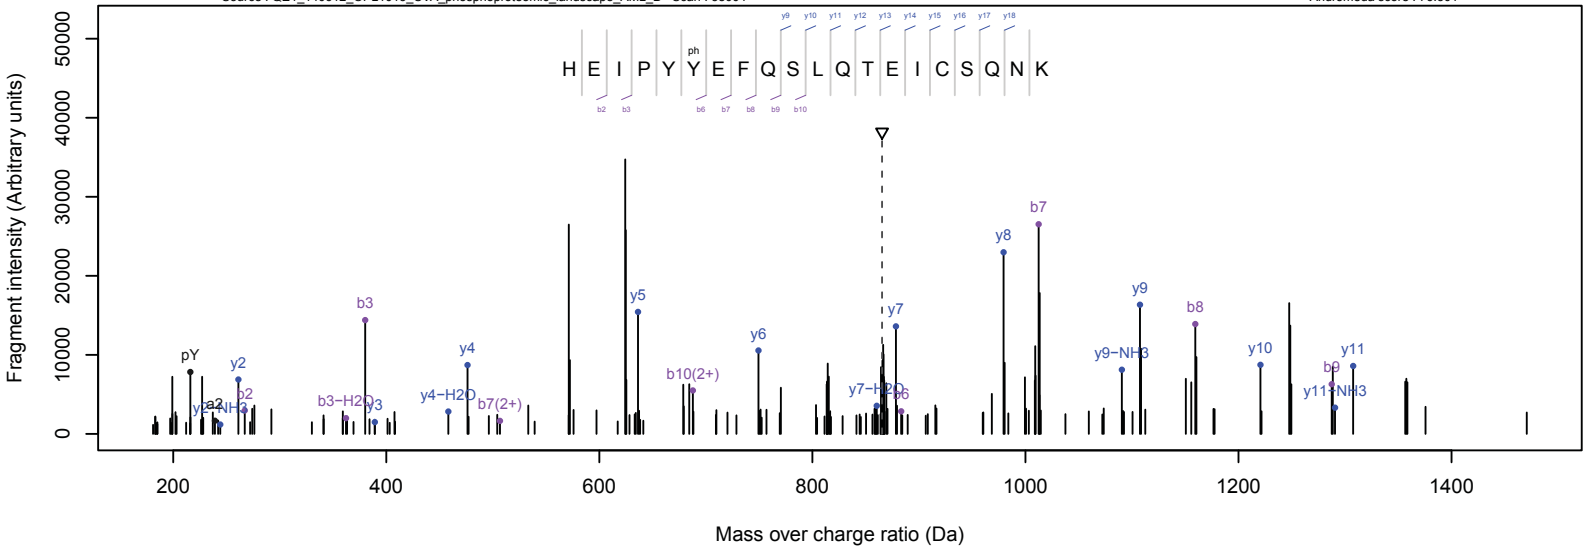

IY(ph)LKDLYPFTVNTSNQGSR-3+

Source : QE1\_140612\_OPL1013\_CVA\_phosphoproteomic\_landscape\_AML\_C Scan : 42635

Andromeda score : 76.301

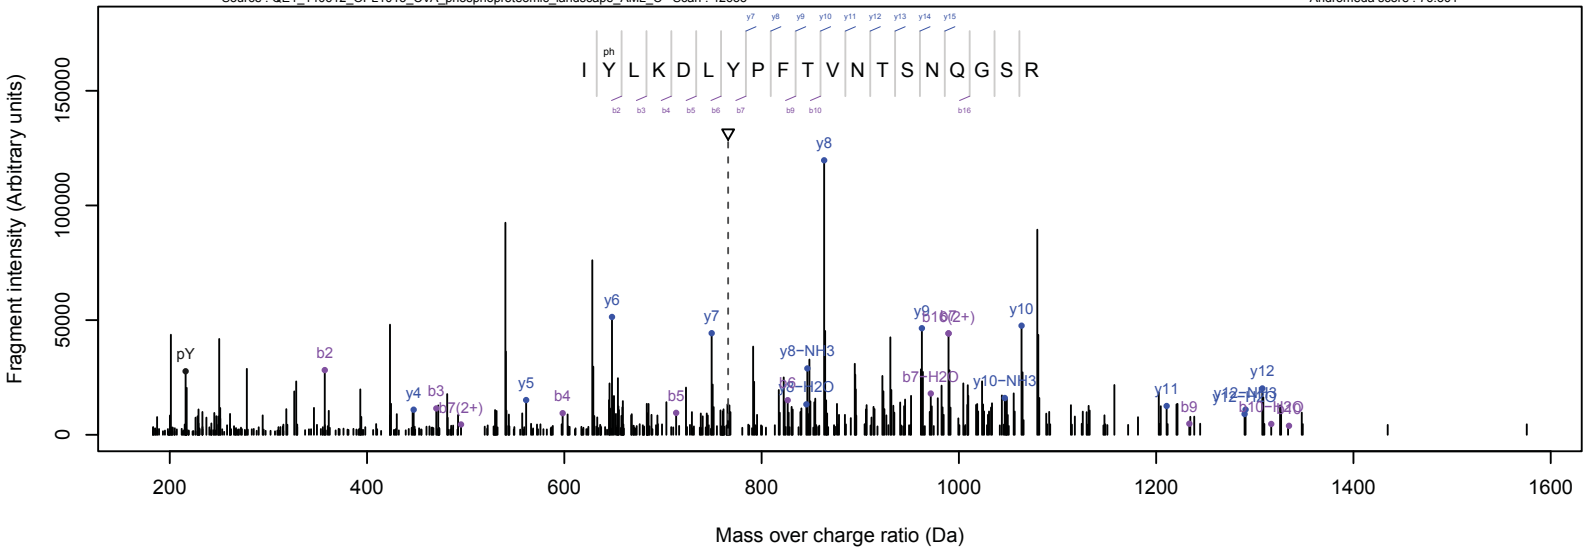



LSSATANALY(ph)SSNLRDDTK-3+

Source : QE1\_140908\_OPL1013\_CvA\_pTyrIP\_AML\_OCI\_AML3 Scan : 21139

Andromeda score : 76.301

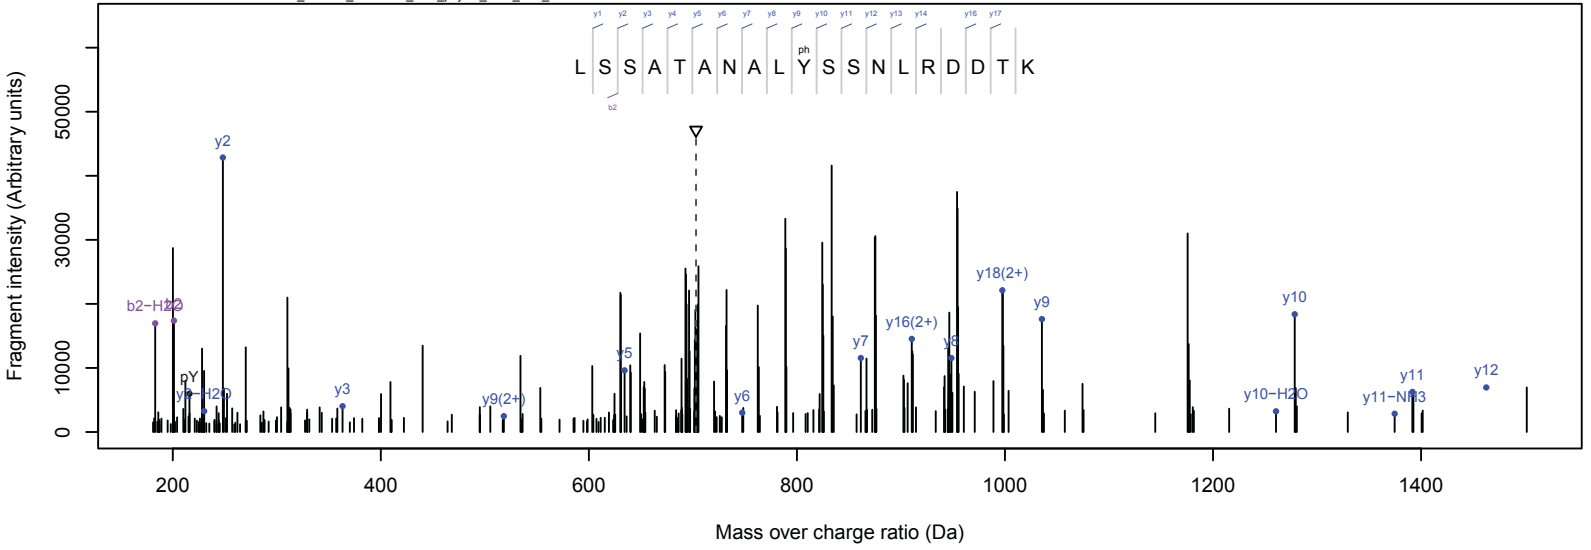

VRQY(ph)LDQQYQSALFWADK-3+

Source : QE1\_140612\_OPL1013\_CvA\_phosphoproteomic\_landscape\_AML\_B Scan : 36784

Andromeda score : 76.301

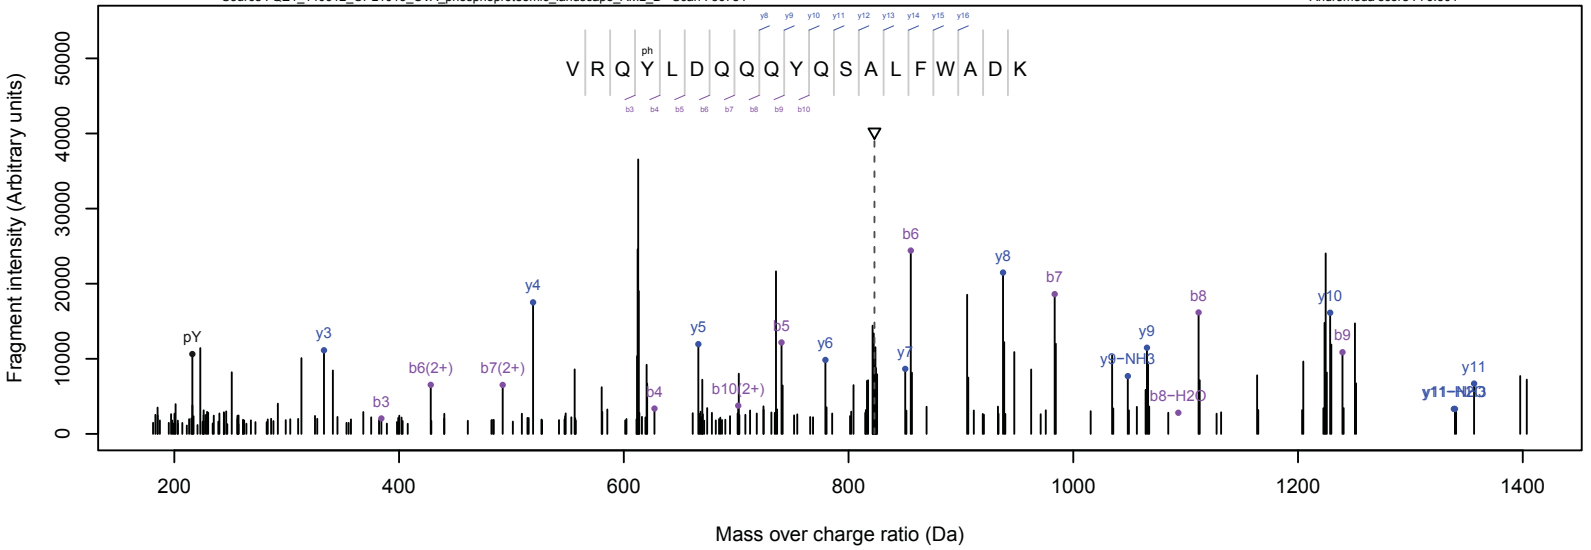

YHY(ph)EPHSVHG VHGPPALSGSPVISDISLIR-4+

Source : QE1\_140612\_OPL1013\_CvA\_phosphoproteomic\_landscape\_AML\_B Scan : 36344

Andromeda score : 76.294

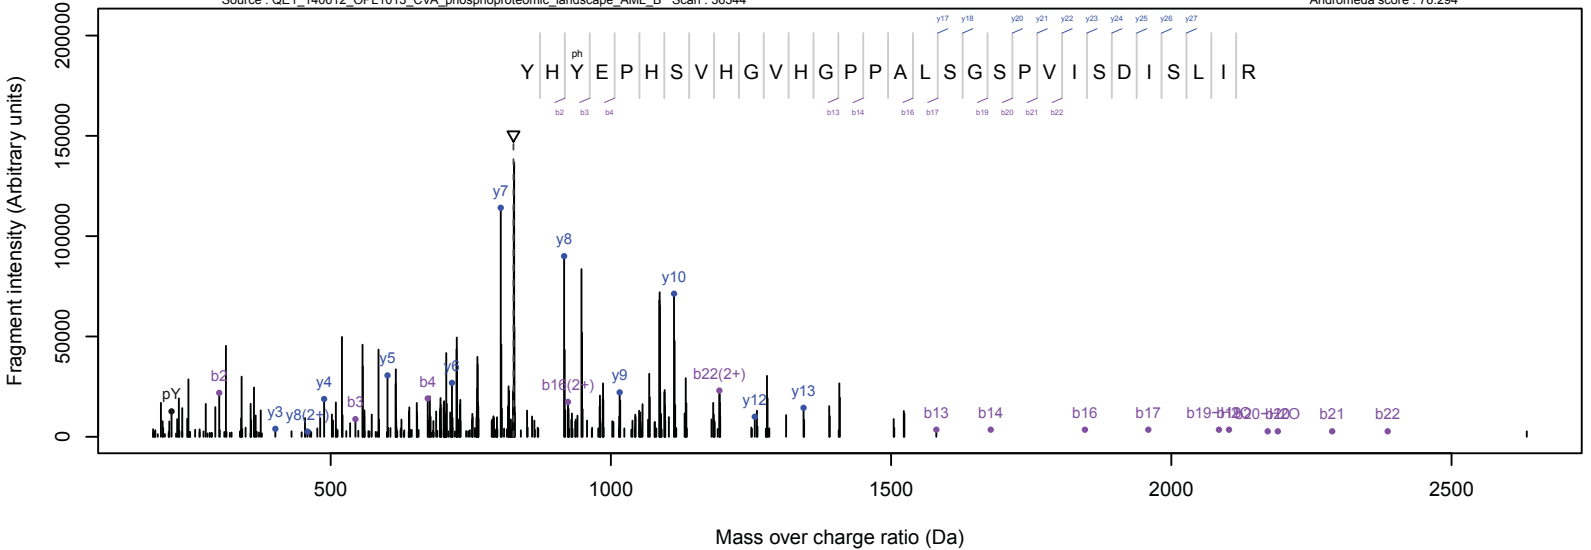

NIY(ph)YLCAPNR-2+

Source : QE1\_140612\_OPL1013\_CVA\_phosphoproteomic\_landscape\_AML\_D Scan : 23992

Andromeda score : 76.228

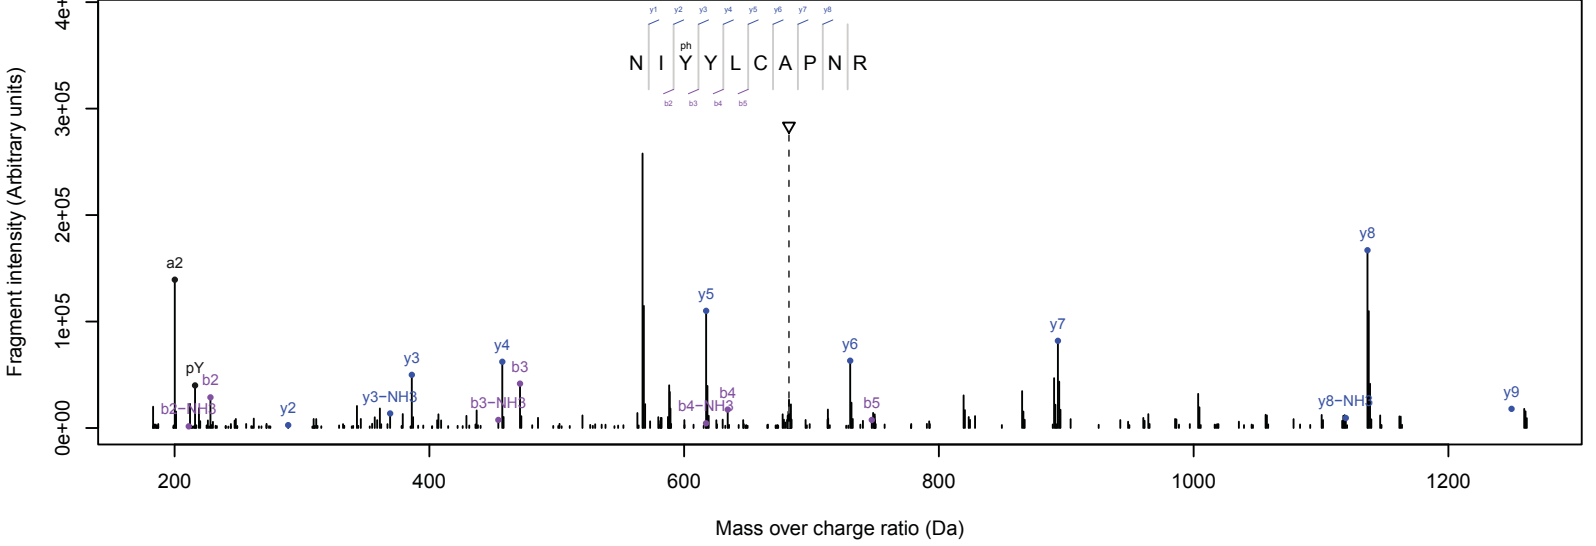

WTPIQY(ph)FNKK-2+

Source : QE1\_140612\_OPL1013\_CVA\_phosphoproteomic\_landscape\_AML\_C Scan : 32908

Andromeda score : 76.228

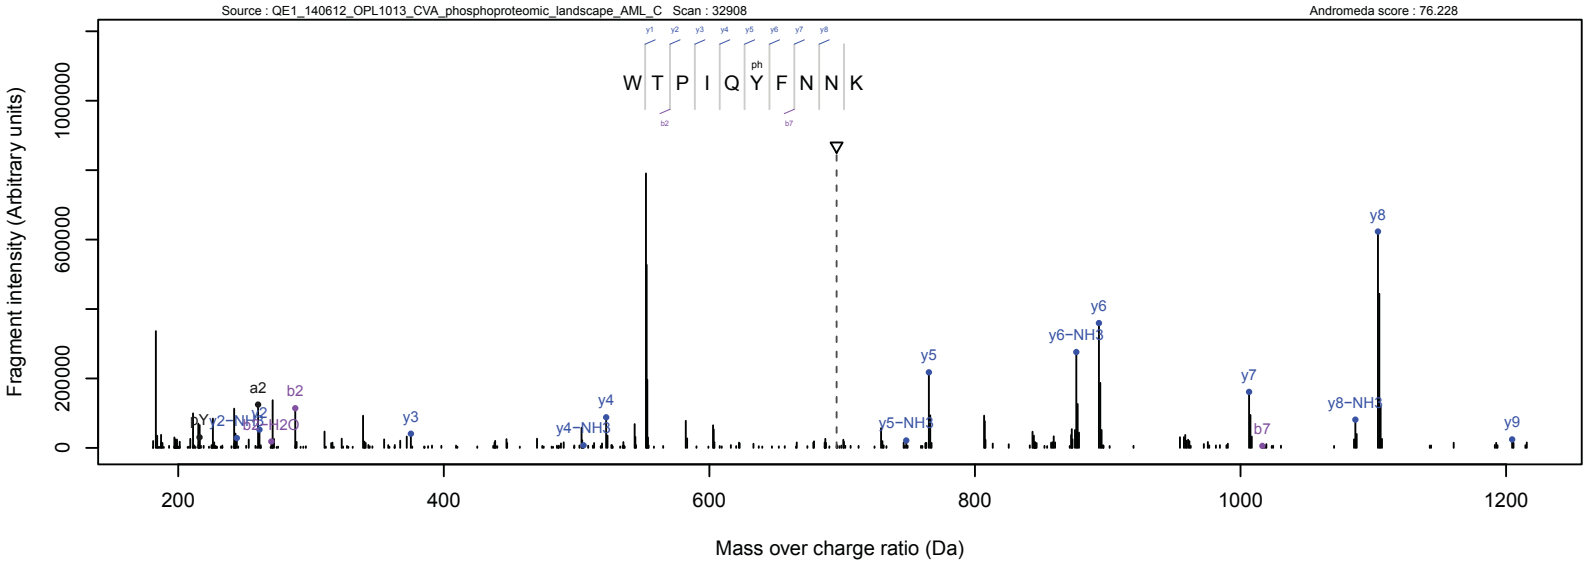

Y(ph)IDQEELNK-2+

Source : QE1\_140612\_OPL1013\_CVA\_phosphoproteomic\_landscape\_AML\_D Scan : 9501

Andromeda score : 76.221

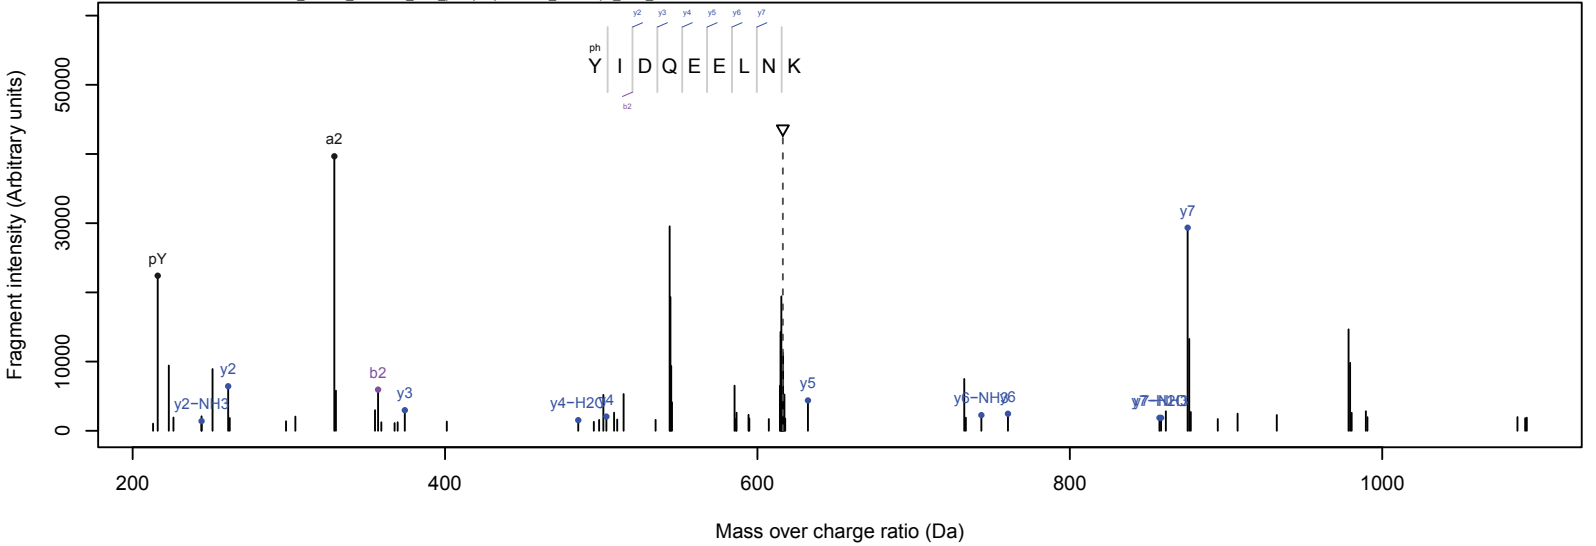

ALSTANENDGY(ph)VDMSSFNAFESK-2+

Source : QE1\_140822\_OPL1013\_CvA\_pTyrIP\_AML\_cell\_lines\_part2\_B Scan : 30173

Andromeda score : 76.21

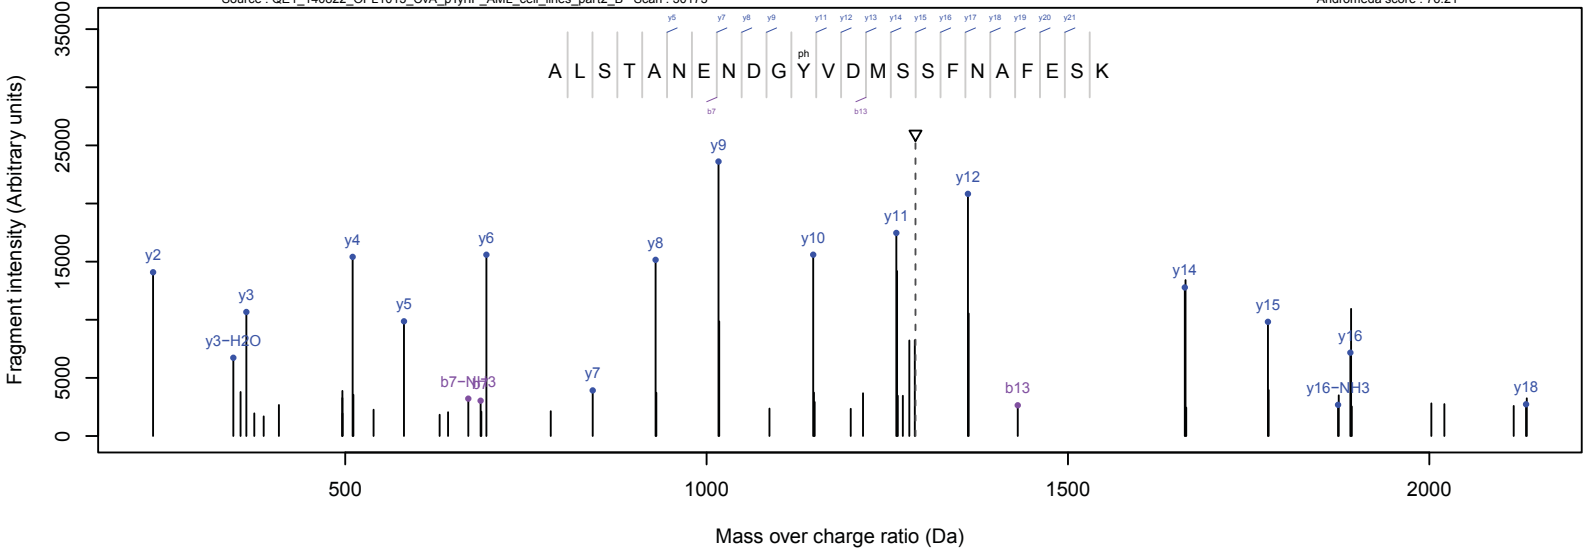

YSYDESQGEIYR(ph)IEHLDK-3+

Source : QE1\_140612\_OPL1013\_CVA\_phosphoproteomic\_landscape\_AML\_C Scan : 34028

Andromeda score : 76.21

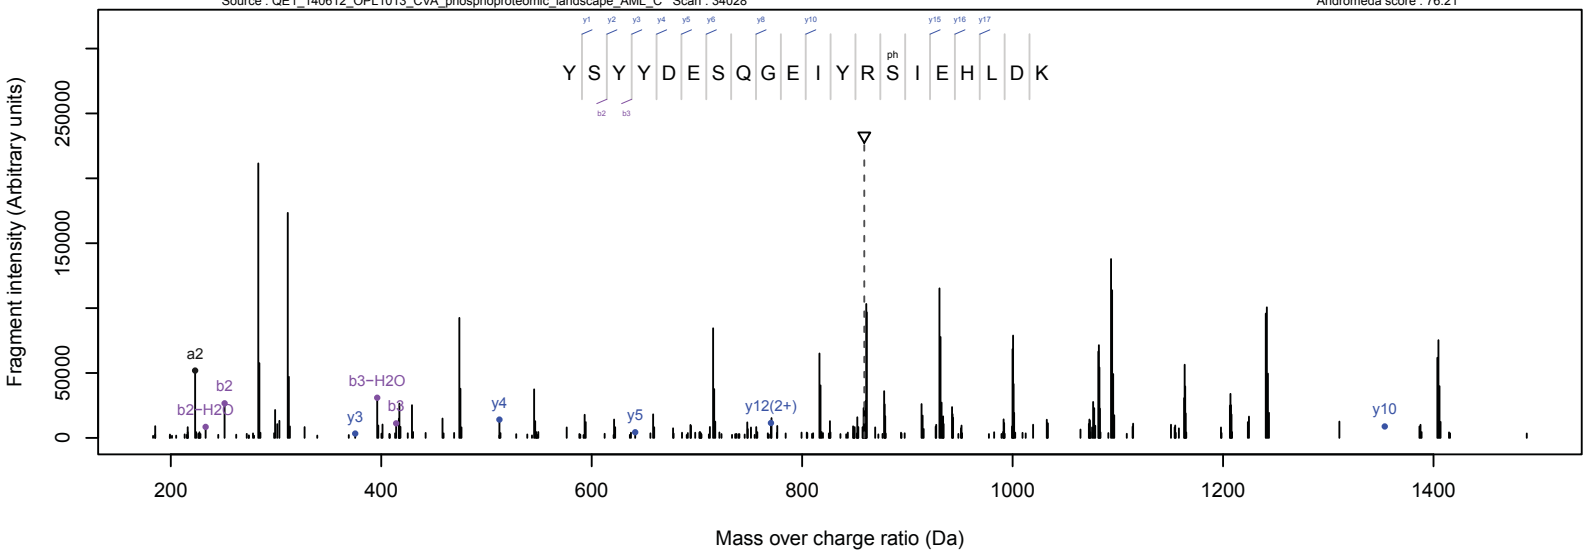

NHPSFY(ph)VFNHR-3+

Source : QE1\_140612\_OPL1013\_CVA\_phosphoproteomic\_landscape\_AML\_C Scan : 20056

Andromeda score : 76.165

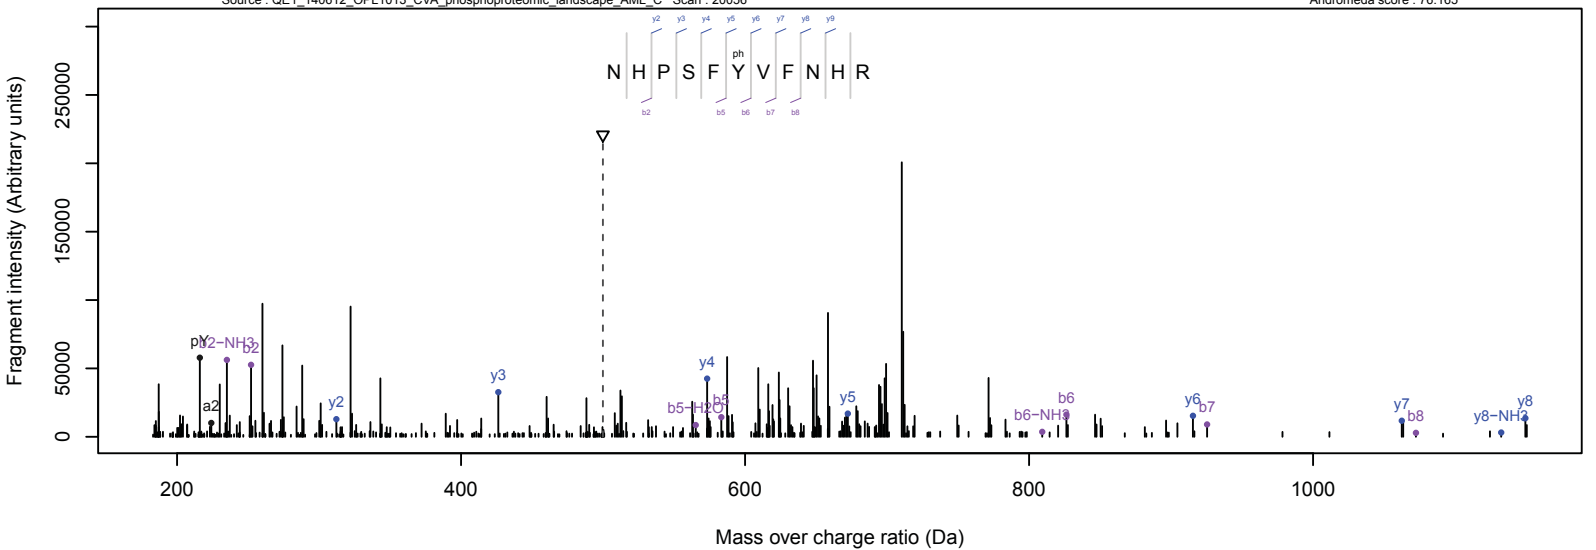



SPFIY(ph)SPIAHNR-2+

Source : Qe1\_141024\_OPL1013\_CvA\_AML\_pTyrIP\_MOLM13 Scan : 30646

Andromeda score : 76.073

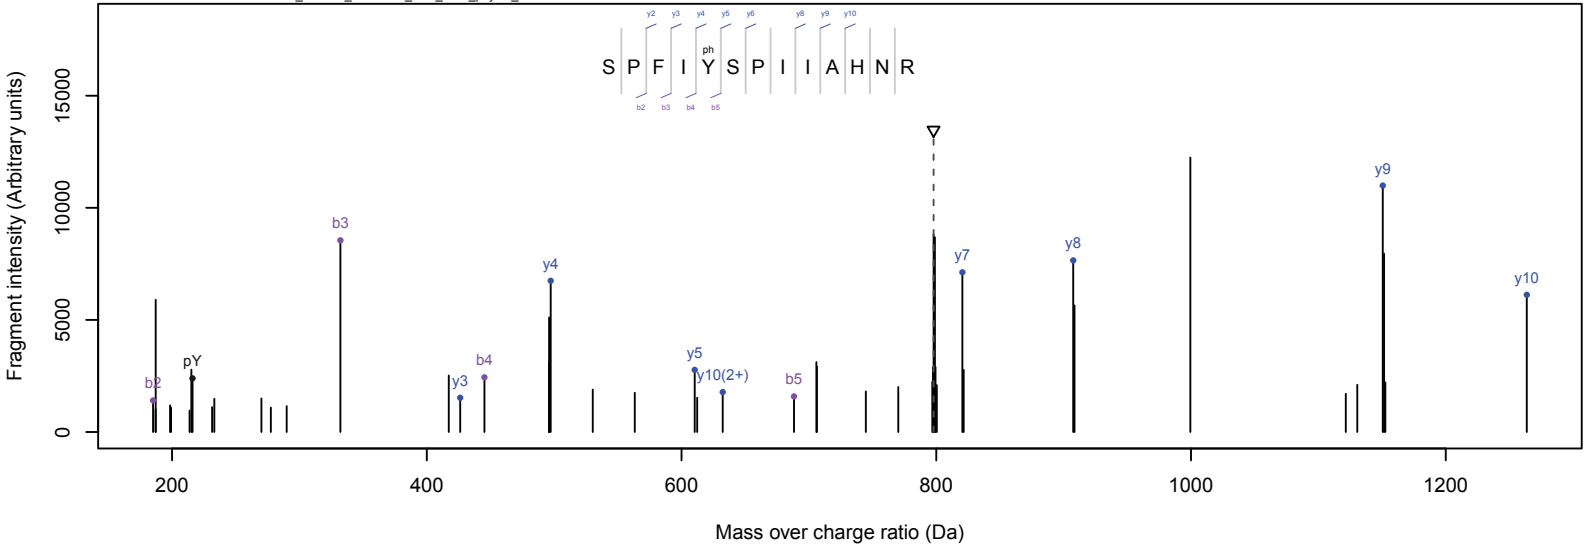

TCSDDVVDY(ph)FKR-2+

Source : QE1\_140612\_OPL1013\_CVA\_phosphoproteomic\_landscape\_AML\_C Scan : 22084

Andromeda score : 76.073

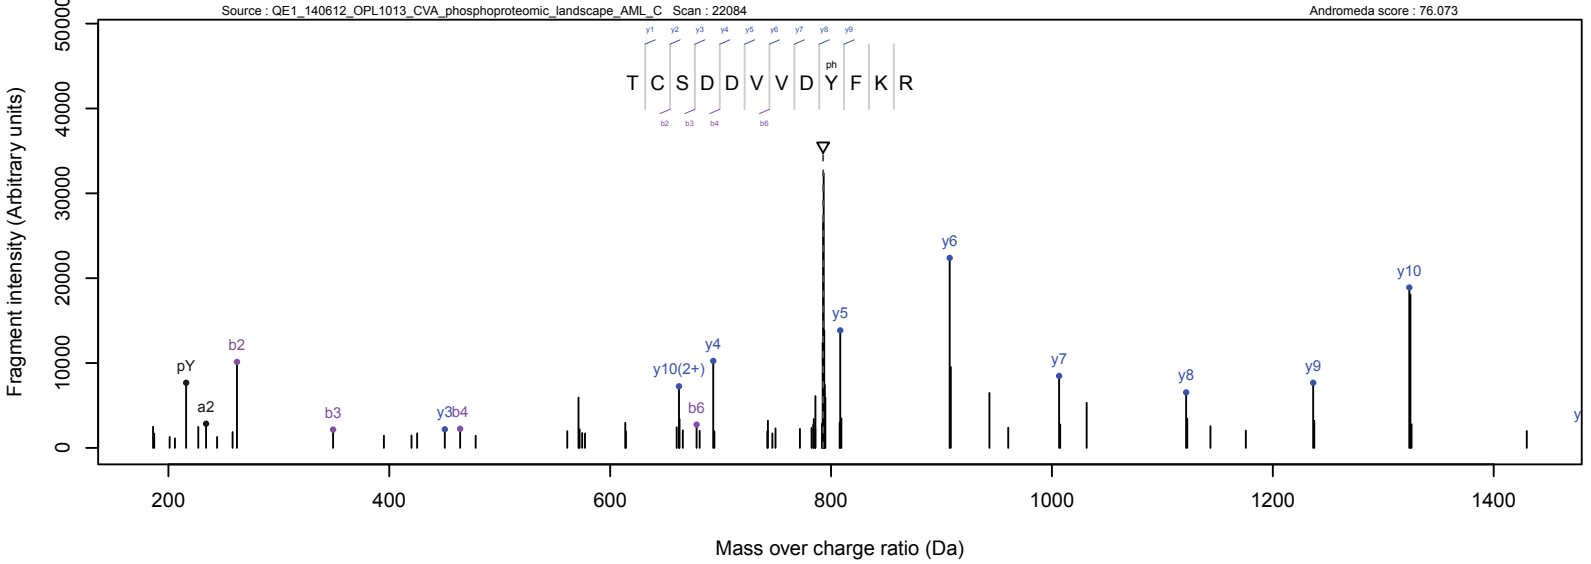

VGKTY(ph)ELLNCDK-3+

Source : QE1\_140612\_OPL1013\_CVA\_phosphoproteomic\_landscape\_AML\_B Scan : 13790

Andromeda score : 76.073

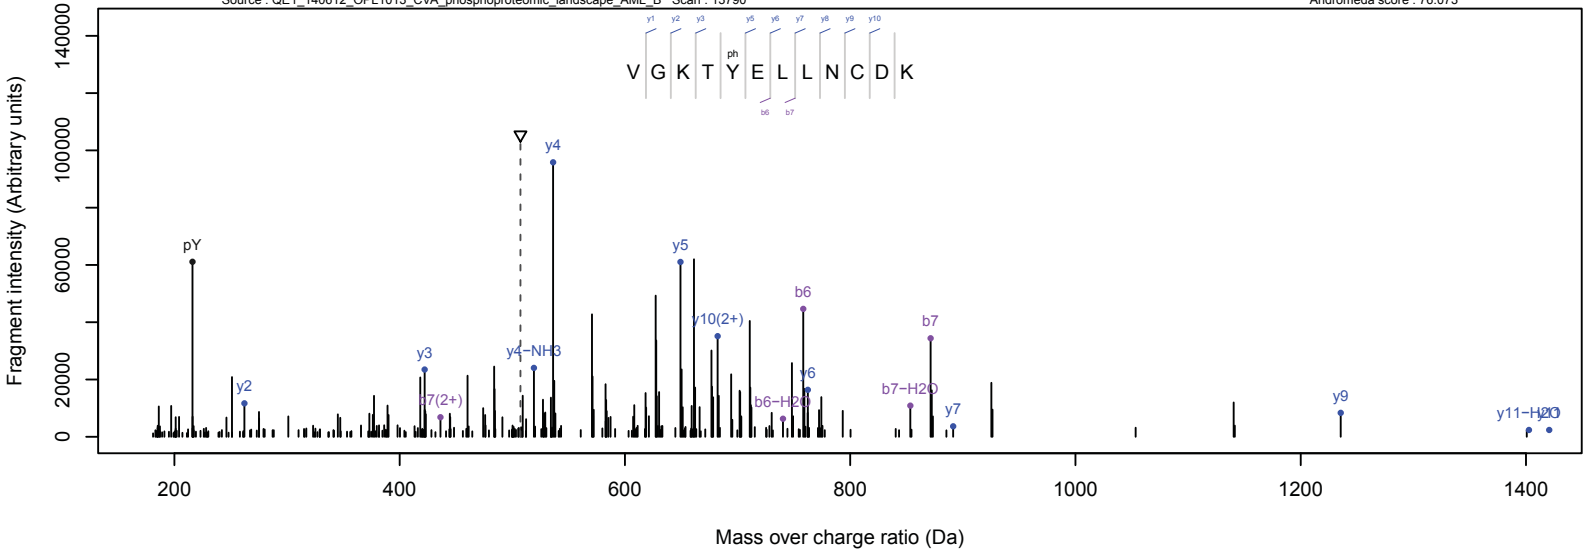

YYADGEDAY(ph)AM(ox)KR-2+

Source : QE1\_140908\_OPL1013\_CVA\_pTyrIP\_AML\_Kasumi6 Scan : 8199

Andromeda score : 76.073

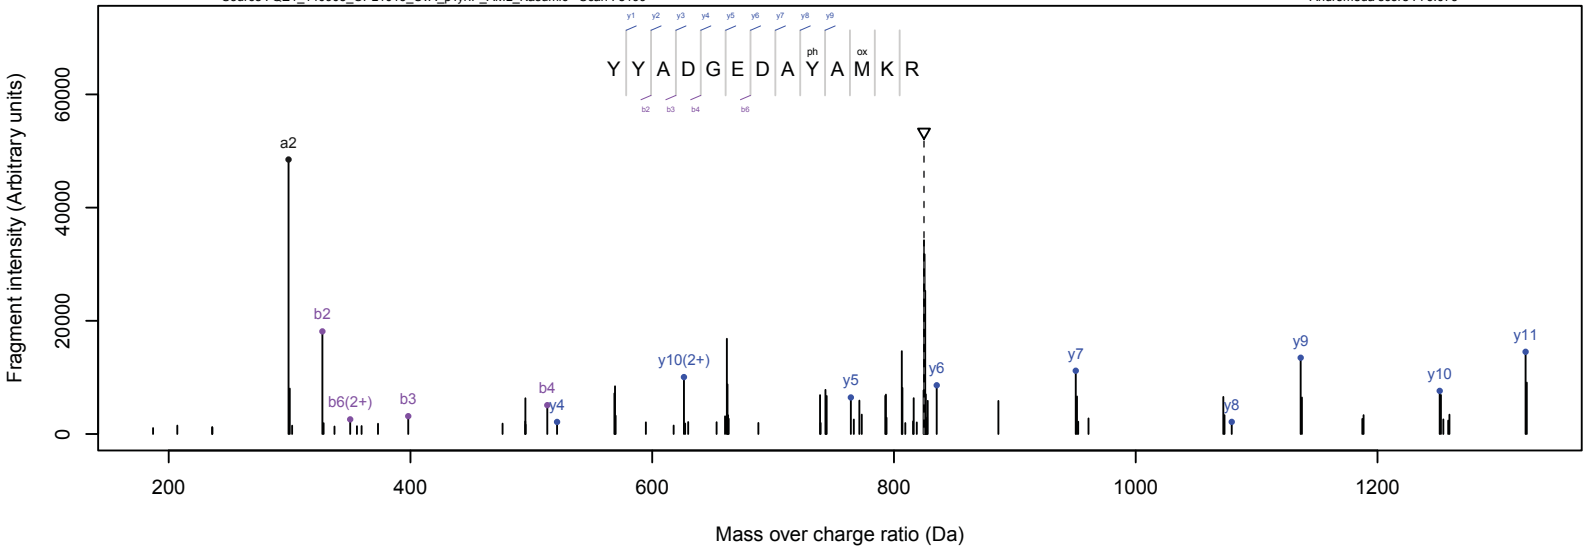

LY(ph)ANMFER-2+

Source : QE1\_140612\_OPL1013\_CVA\_phosphoproteomic\_landscape\_AML\_B Scan : 24067

Andromeda score : 76.064

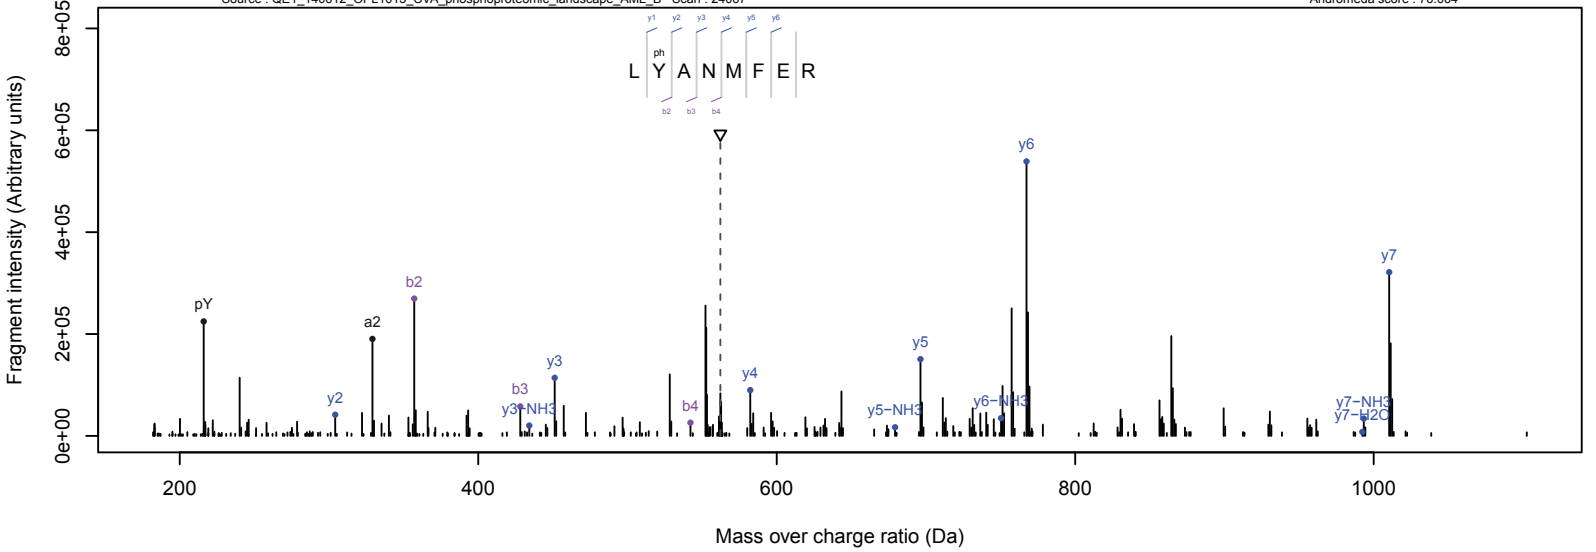

NILSSADY(ph)VERGQEHVK-3+

Source : QE1\_140612\_OPL1013\_CVA\_phosphoproteomic\_landscape\_AML\_C Scan : 21046

Andromeda score : 76.051

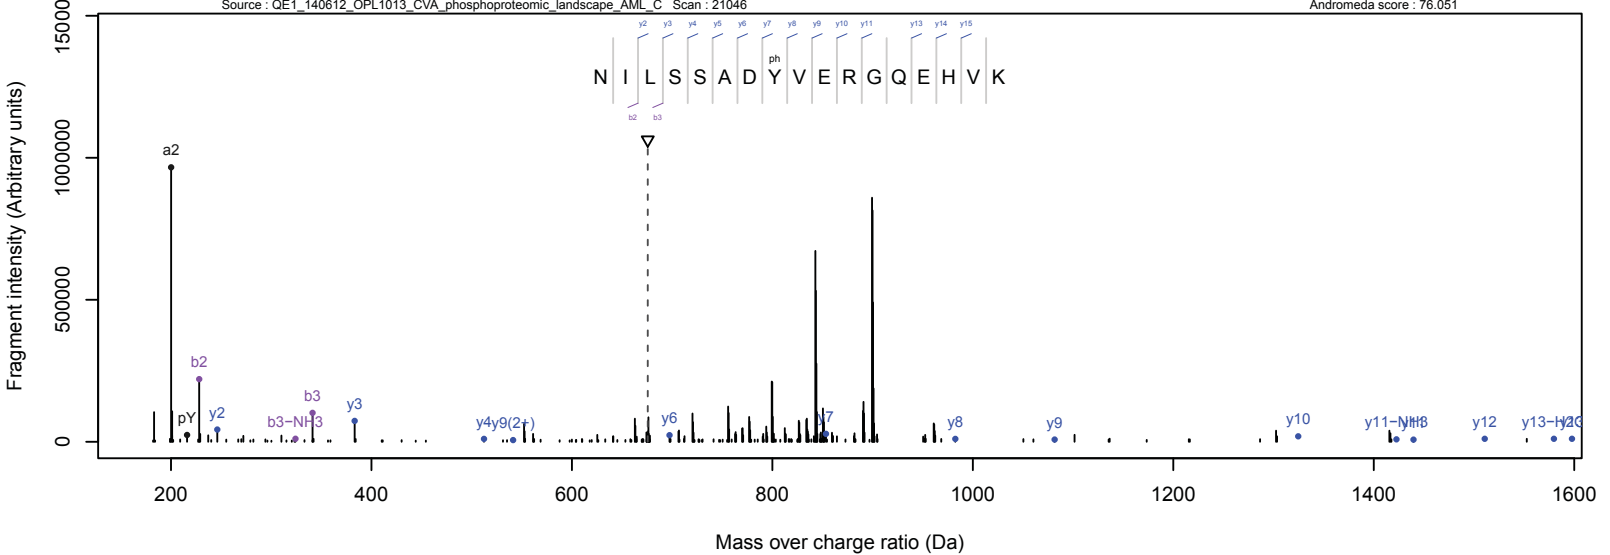

Y(ph)HGWIVQK-2+

Source: QE1\_140612\_OPL1013\_CVA\_phosphoproteomic\_landscape\_AML\_C Scan: 13480

Andromeda score: 76.035

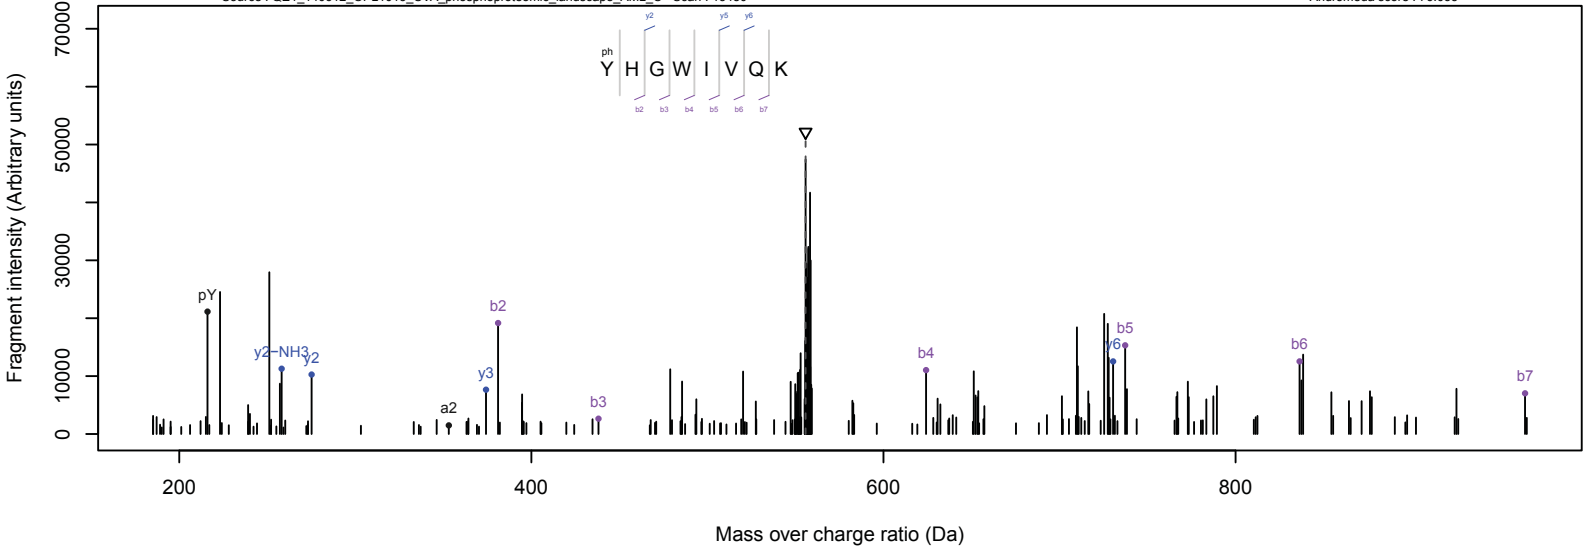

SYSPYDY(ph)QPCLAGPNQDFHSK-3+

Source: QE1\_140612\_OPL1013\_CVA\_phosphoproteomic\_landscape\_AML\_B Scan: 26480

Andromeda score: 76.015

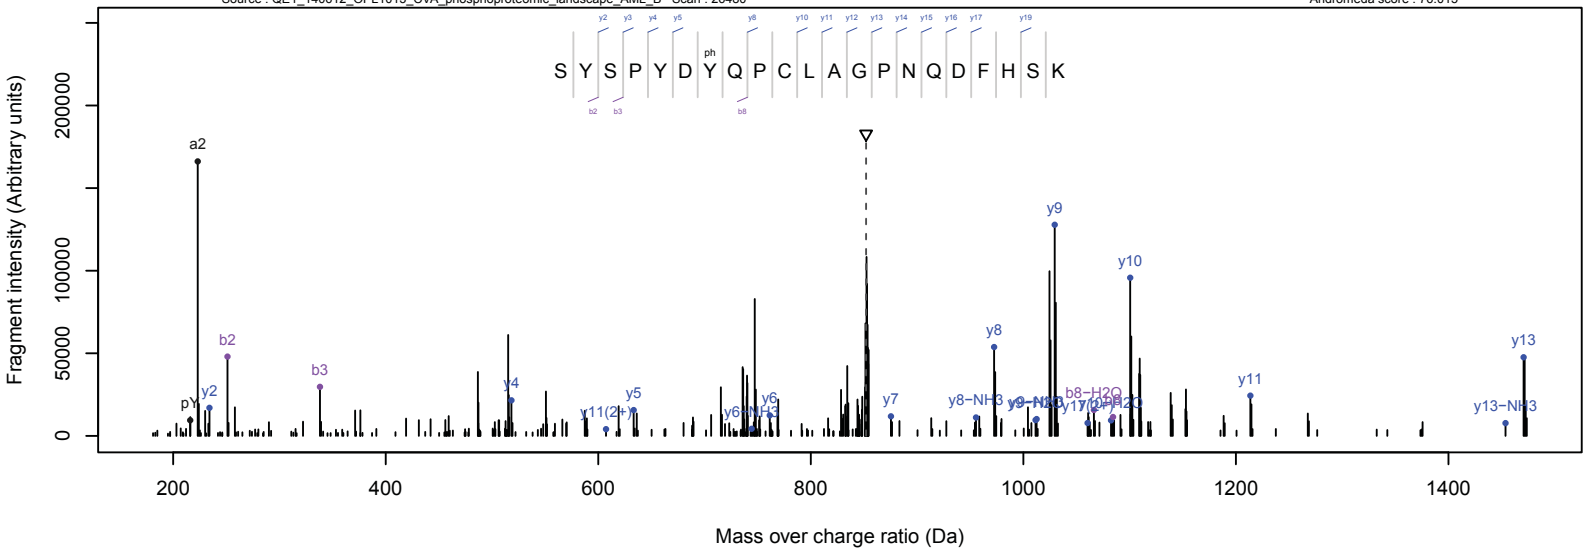

CSTY(ph)FLR-2+

Source: QE1\_140612\_OPL1013\_CVA\_phosphoproteomic\_landscape\_AML\_C Scan: 18184

Andromeda score: 75.972

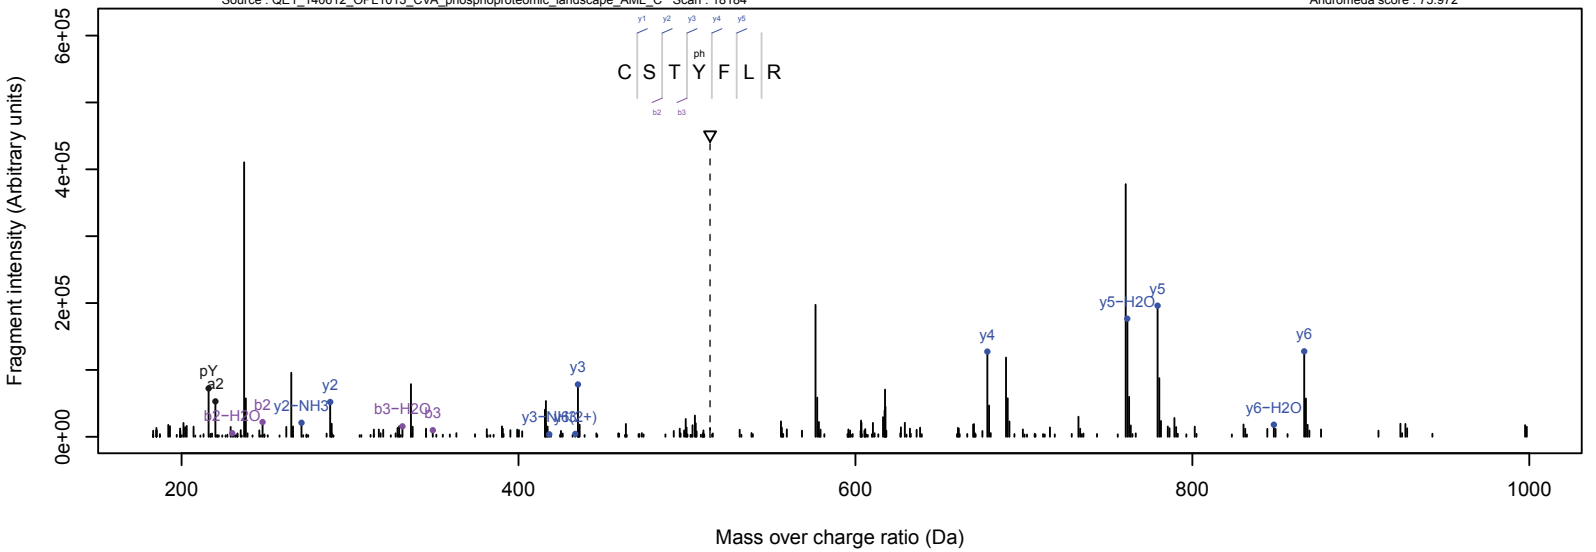

SESVVY(ph)ADIRK-2+

Source : QE1\_140612\_OPL1013\_CVA\_phosphoproteomic\_landscape\_AML\_C Scan : 12818

Andromeda score : 75.941

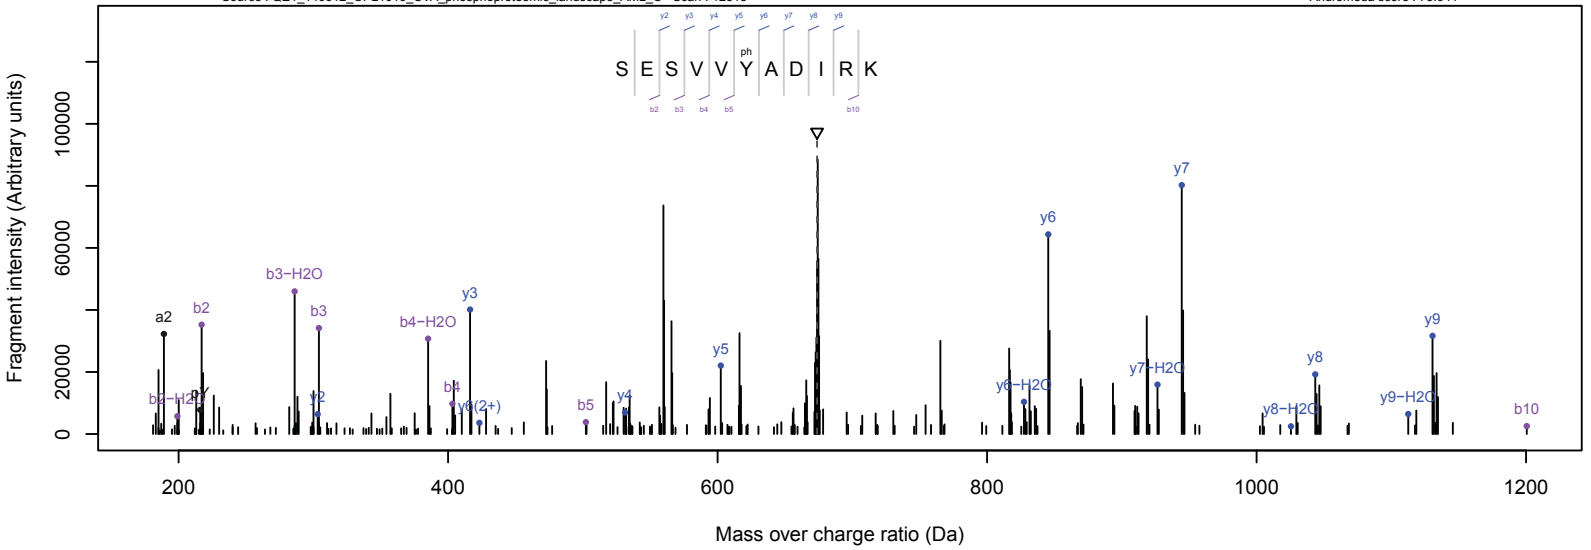

Y(ph)YPPGGSQHLISRPVSK-3+

Source : QE1\_140612\_OPL1013\_CVA\_phosphoproteomic\_landscape\_AML\_C Scan : 15945

Andromeda score : 75.911

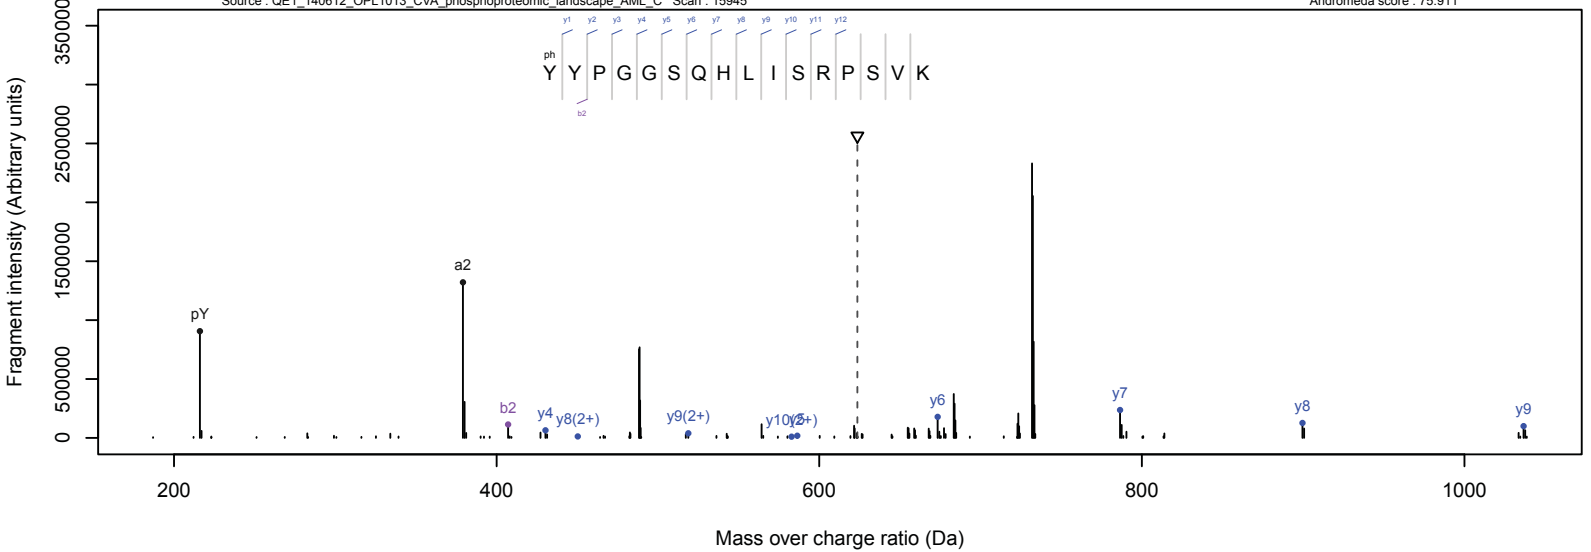

EITFFQTHPY(ph)FR-3+

Source : QE1\_140822\_OPL1013\_CvA\_pTyrIP\_AML\_cell\_lines\_part2\_E Scan : 29100

Andromeda score : 75.819

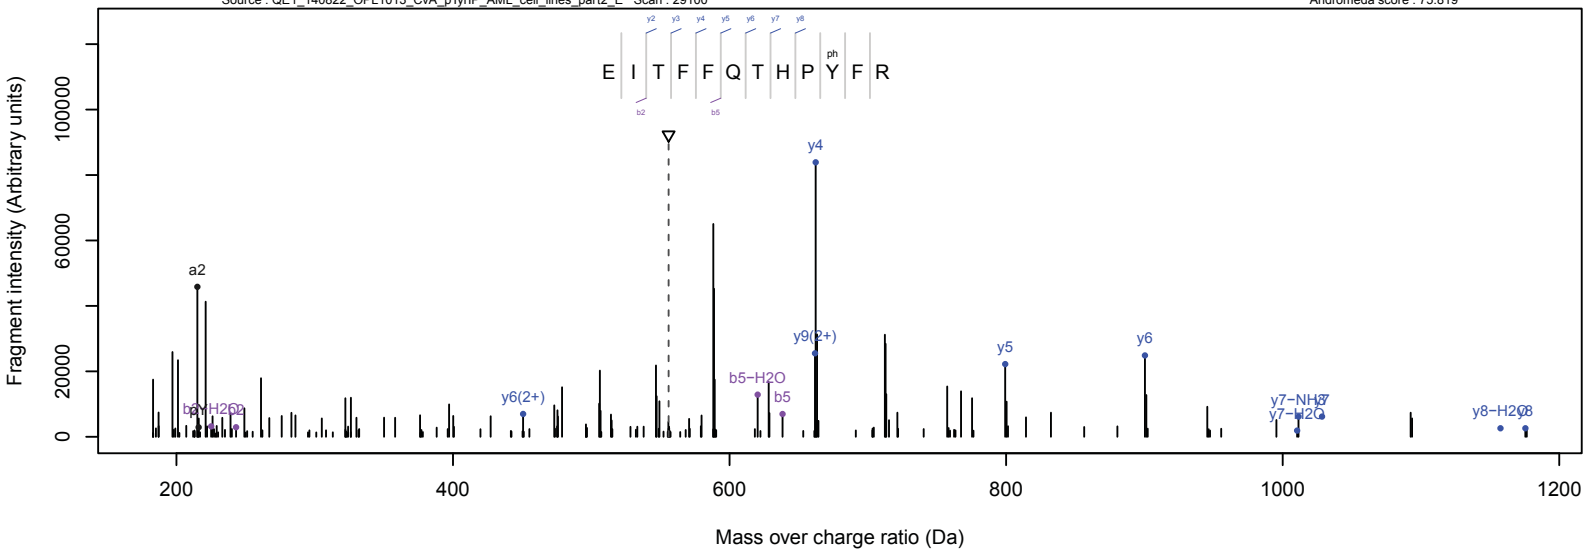



TPNSTLPPAGRPSEEPEDYEAIQTLNREEEK-4+

Source : QE1\_140612\_OPL1013\_CVA\_phosphoproteomic\_landscape\_AML\_B Scan : 28932

Andromeda score : 75.766

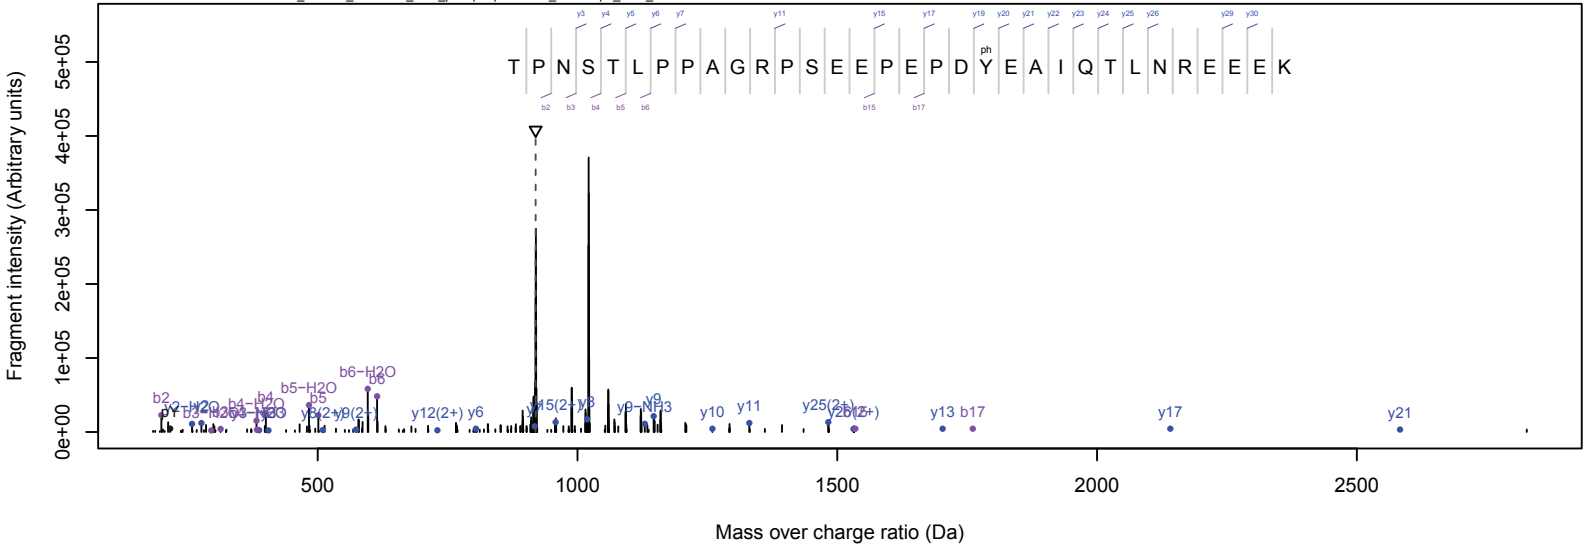

ASALIDRPAPYFER-2+

Source : QE1\_140612\_OPL1013\_CVA\_phosphoproteomic\_landscape\_AML\_C Scan : 25335

Andromeda score : 75.764

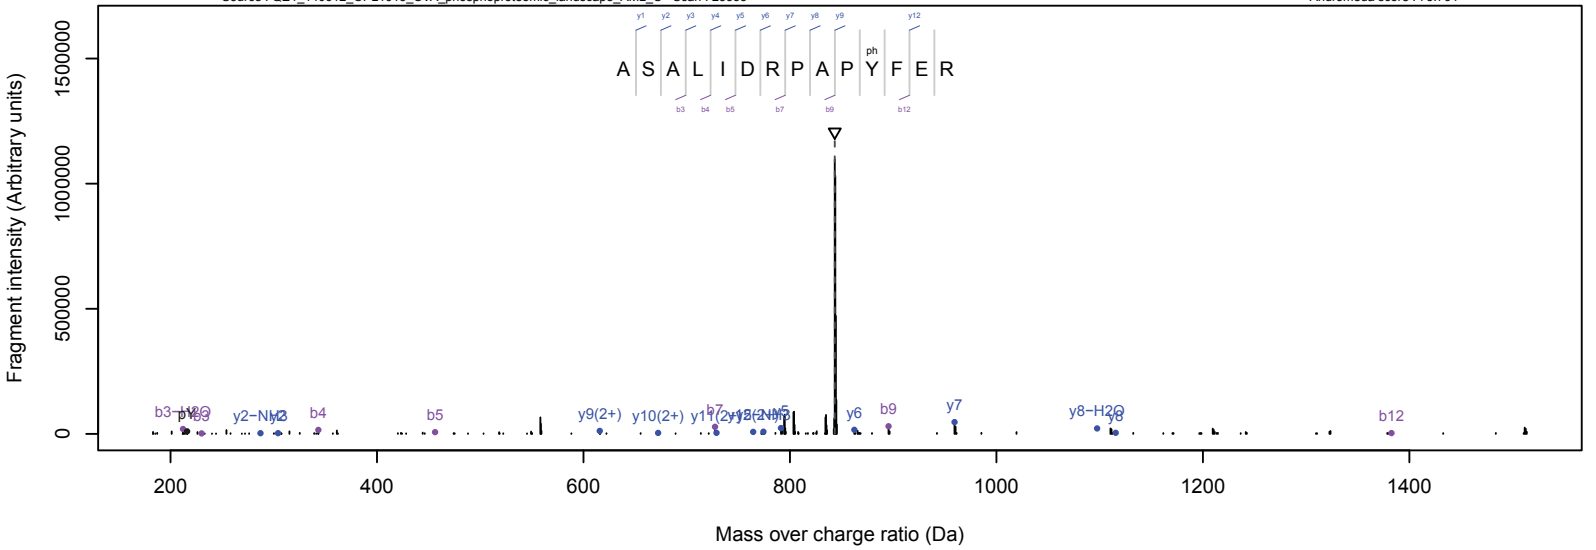

NSTASYLKNYPLYR-2+

Source : QE1\_140612\_OPL1013\_CVA\_phosphoproteomic\_landscape\_AML\_B Scan : 21512

Andromeda score : 75.764

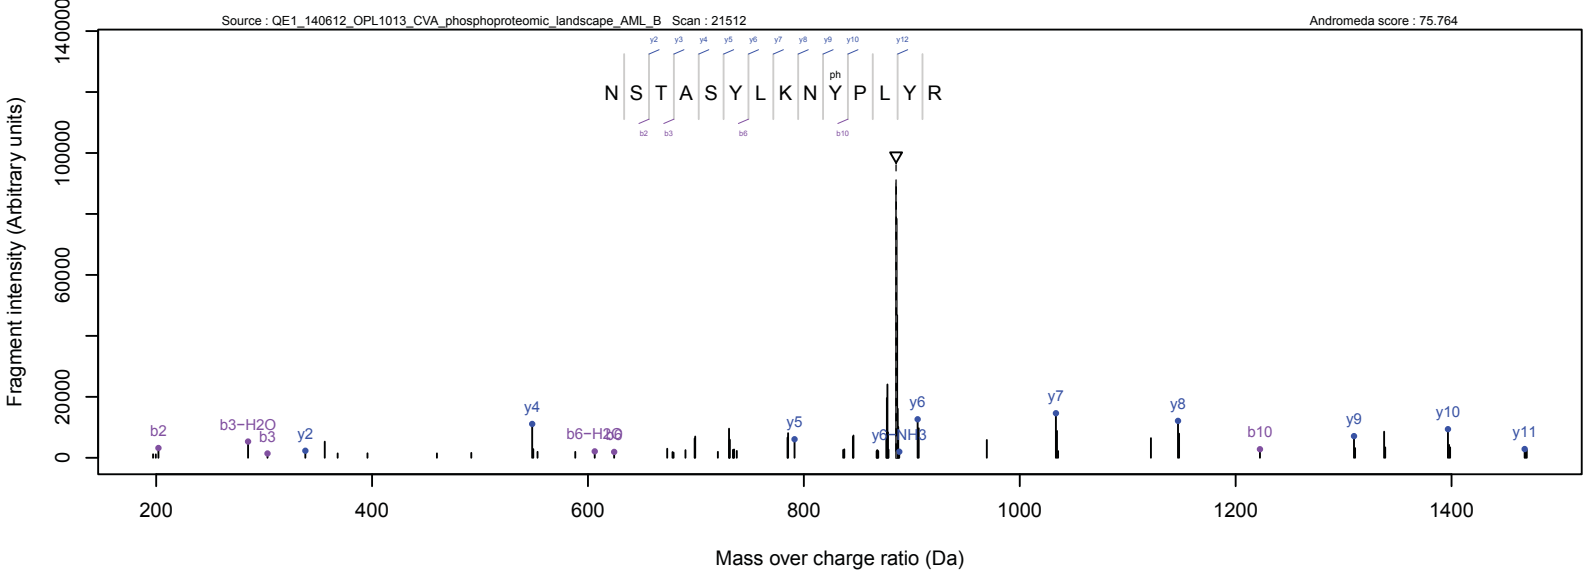

YLSLSPKSYKY(ph)SPK-3+

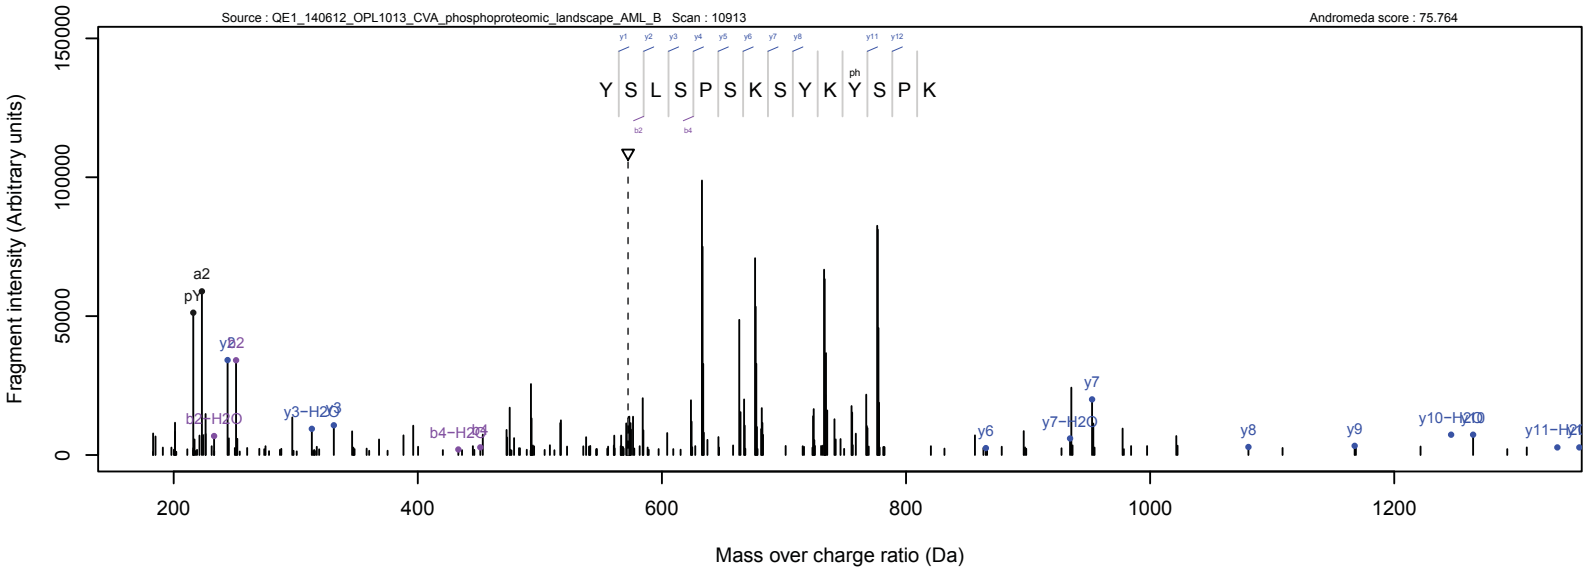

LHGPTETSSCSGAAPTVEEMDEELHYAS(ph)LNFHGM(ox)NPSK-4+

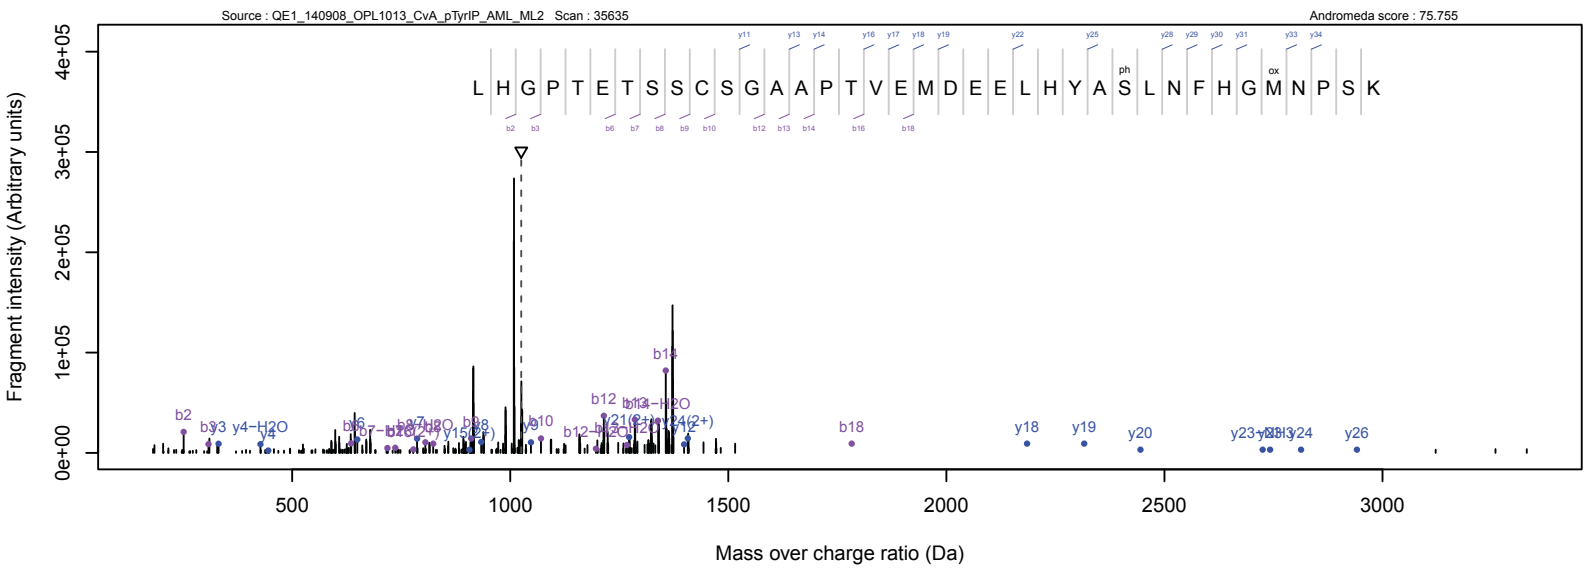

DY(ph)YFALAHTVR-2+

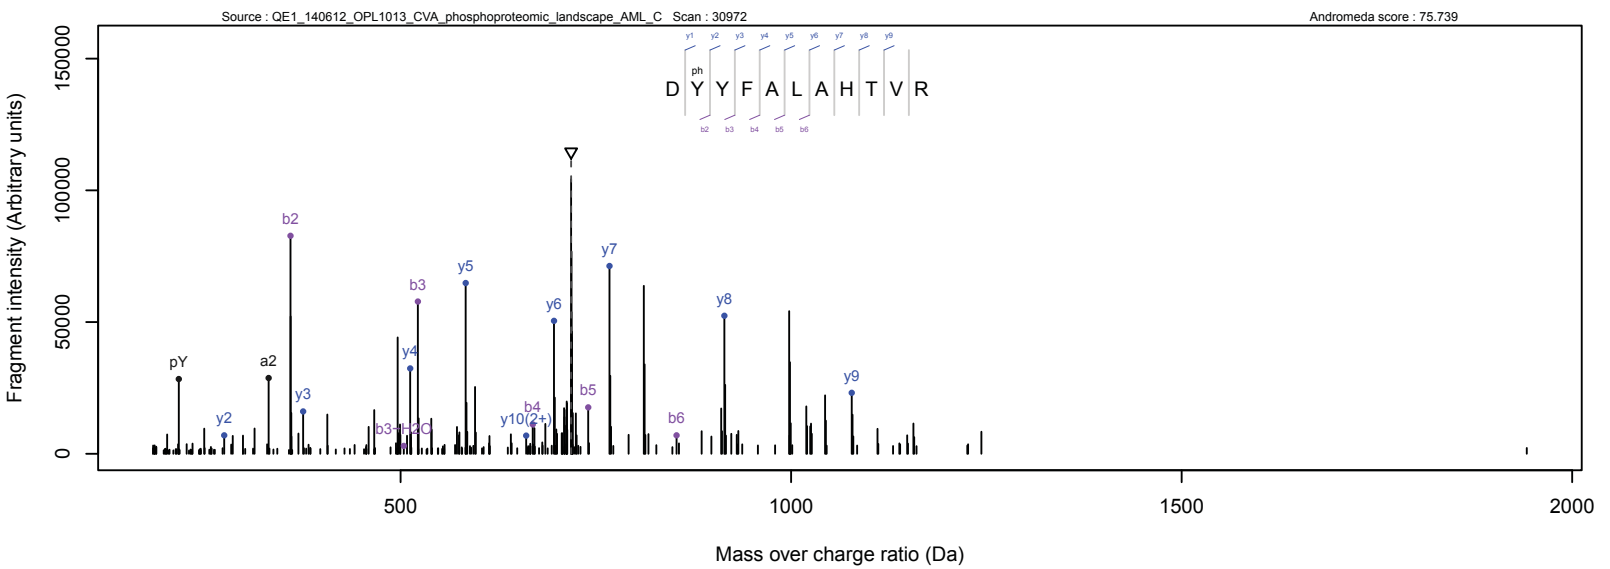

Y(ph)NKPAFLK-2+

Source : QE1\_140612\_OPL1013\_CVA\_phosphoproteomic\_landscape\_AML\_A Scan : 13258

Andromeda score : 75.738

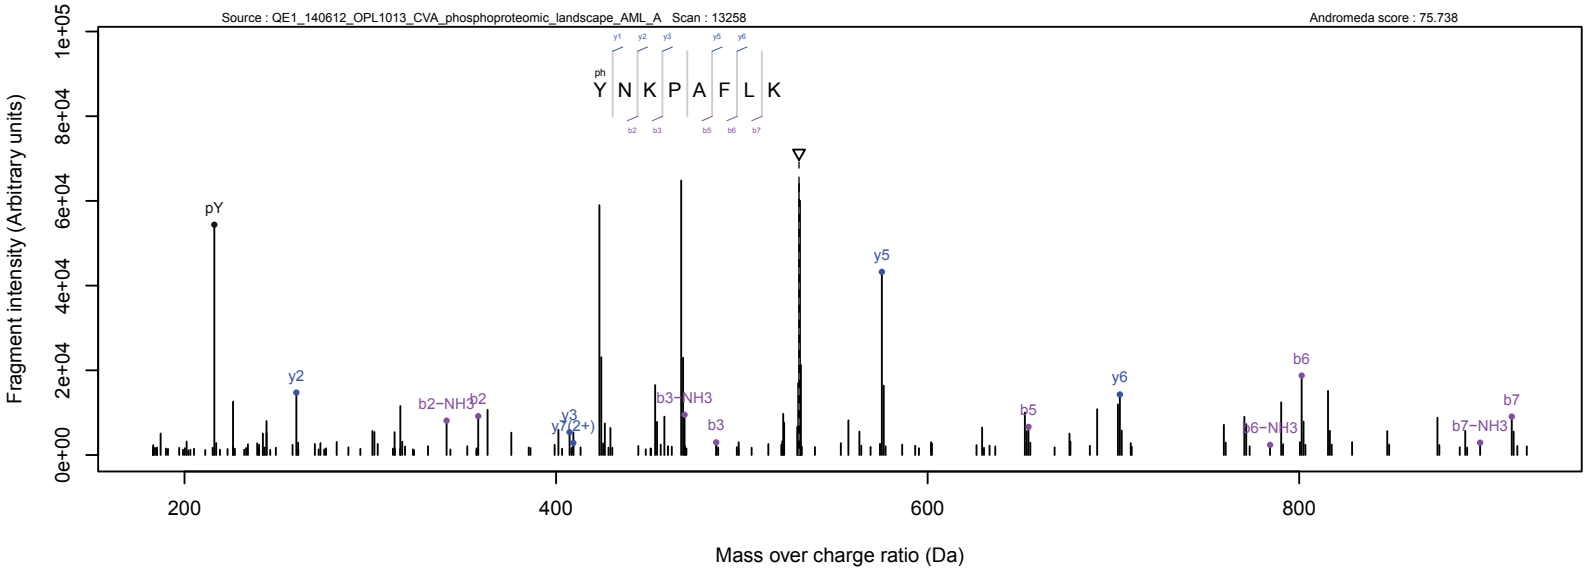

SSGS(ph)PYGGGYSGGGGYGSR-2+

Source : QE1\_140908\_OPL1013\_CvA\_pTyrIP\_AML\_Kasumi6 Scan : 13996

Andromeda score : 75.695

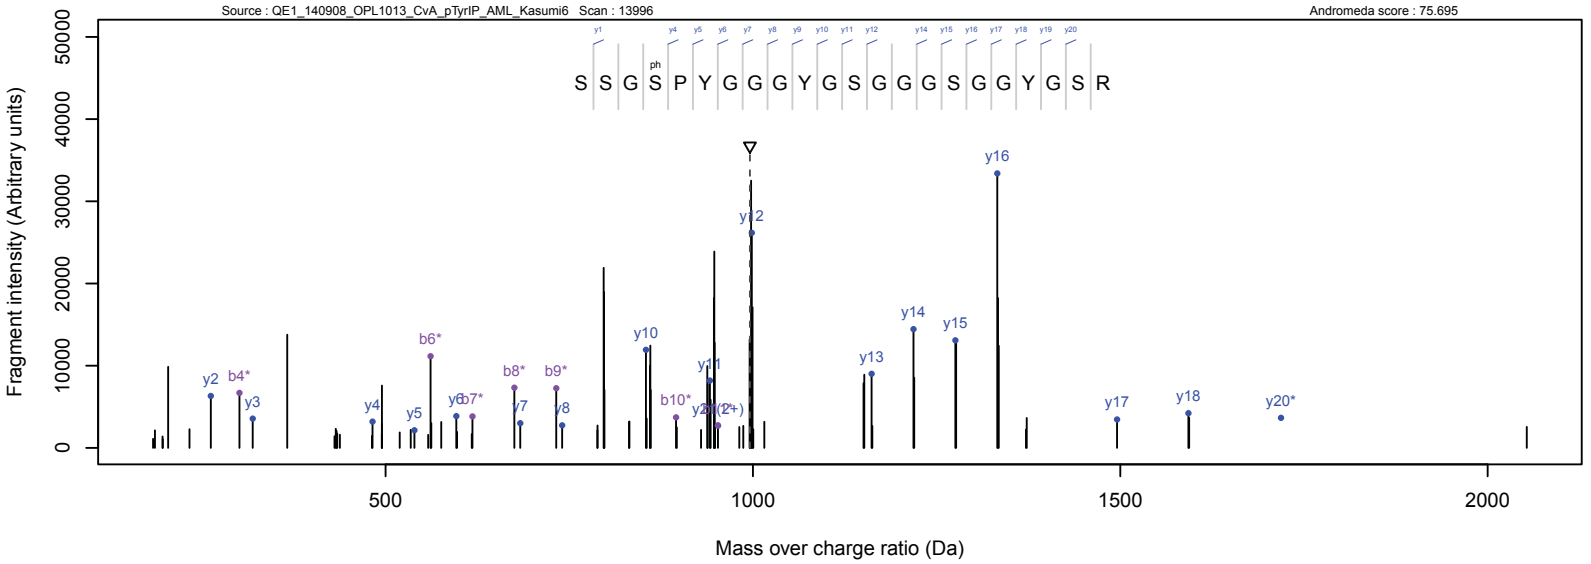

M(ox)VSISNY(ph)PLSAALTC AK-2+

Source : QE1\_140908\_OPL1013\_CvA\_pTyrIP\_AML\_HL60 Scan : 39793

Andromeda score : 75.682

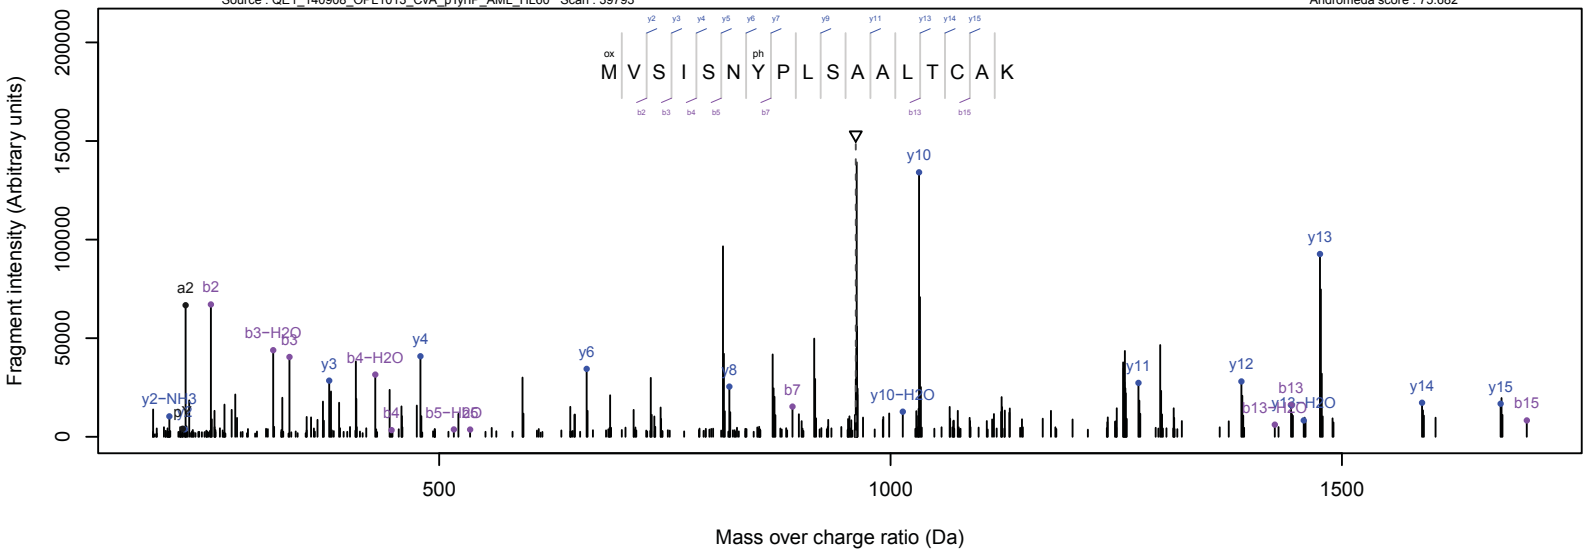

**DMGTTDGPY(ph)FEK-2+**

Source: QE1\_140612\_OPL1013\_CVA\_phosphoproteomic\_landscape\_AML\_C Scan: 17945

Andromeda score: 75.589

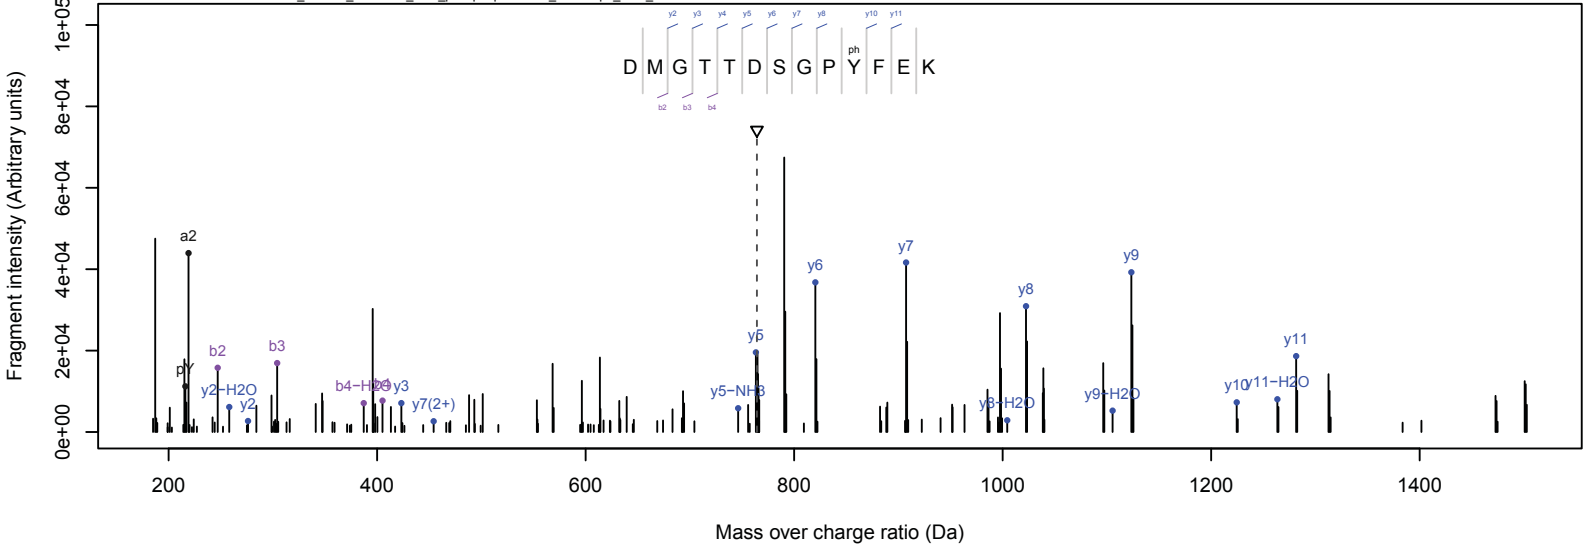

**LGQSDPAPLQHQMIDIYQK-3+**

Source: QE1\_140612\_OPL1013\_CVA\_phosphoproteomic\_landscape\_AML\_A Scan: 22271

Andromeda score: 75.548

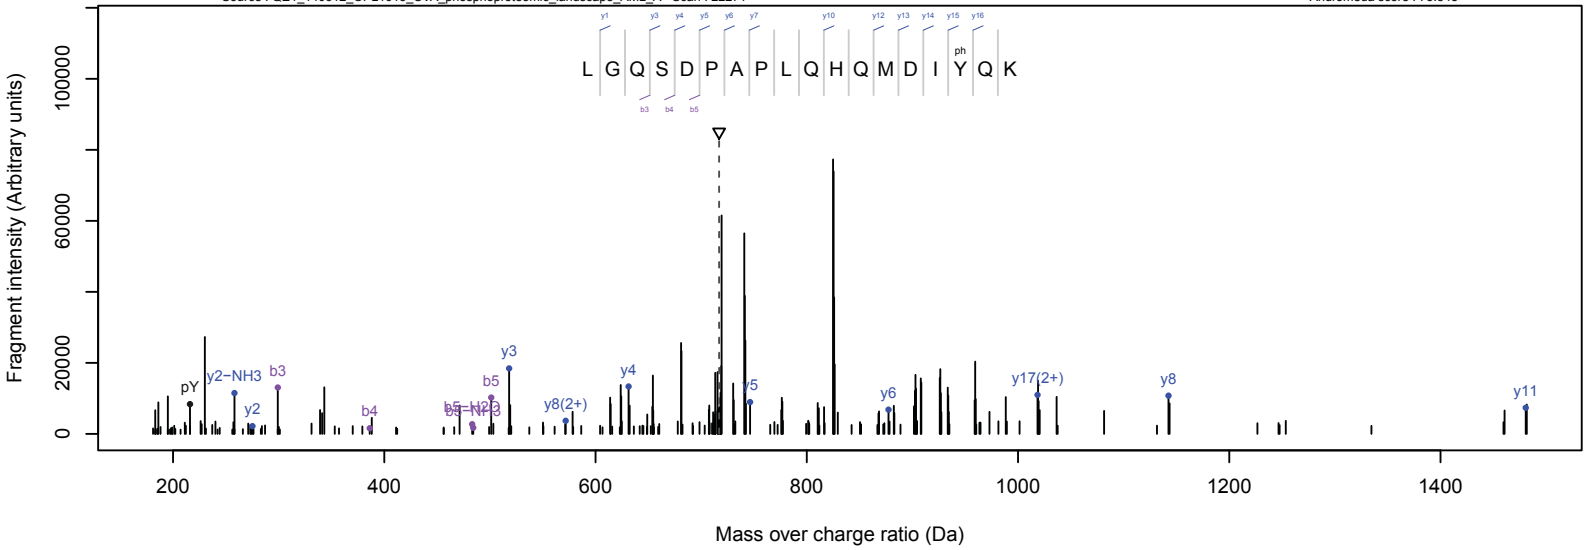

**MTTNIYEHIGYATLLR-2+**

Source: QE1\_140612\_OPL1013\_CVA\_phosphoproteomic\_landscape\_AML\_C Scan: 39528

Andromeda score: 75.548

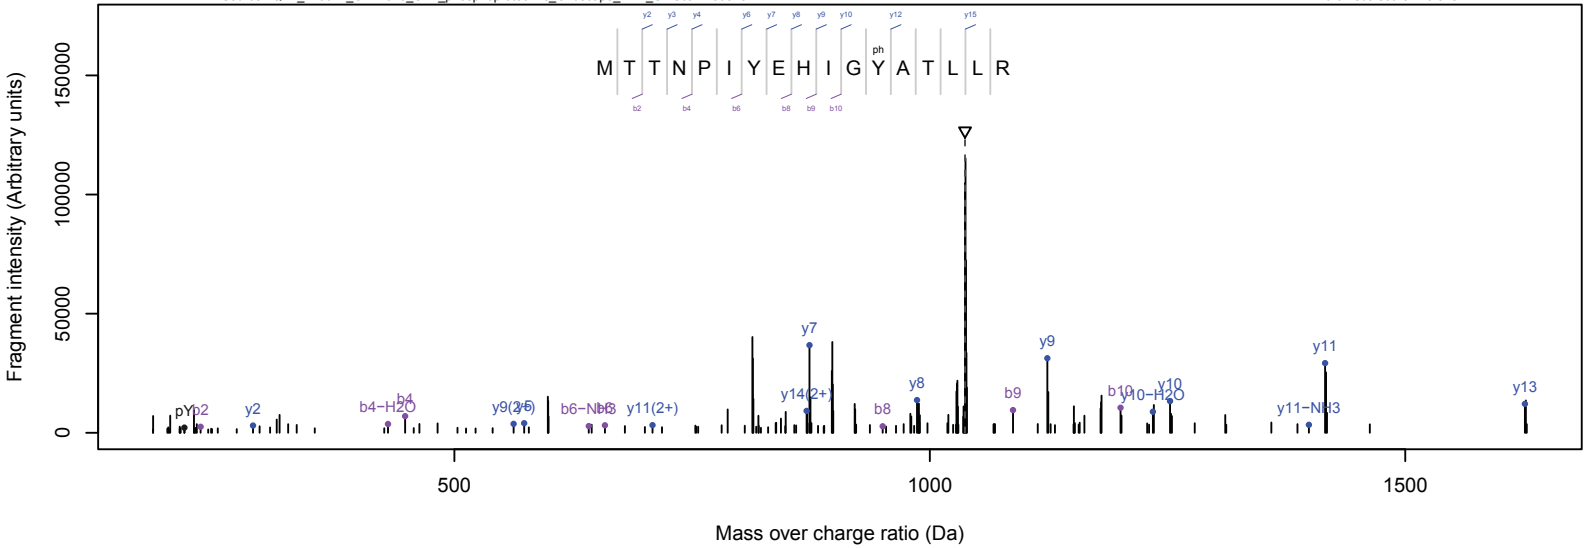

NASTFEDVTQVSSAYQK-2+

Source : QE1\_140612\_OPL1013\_CVA\_phosphoproteomic\_landscape\_AML\_C Scan : 22546

Andromeda score : 75.548

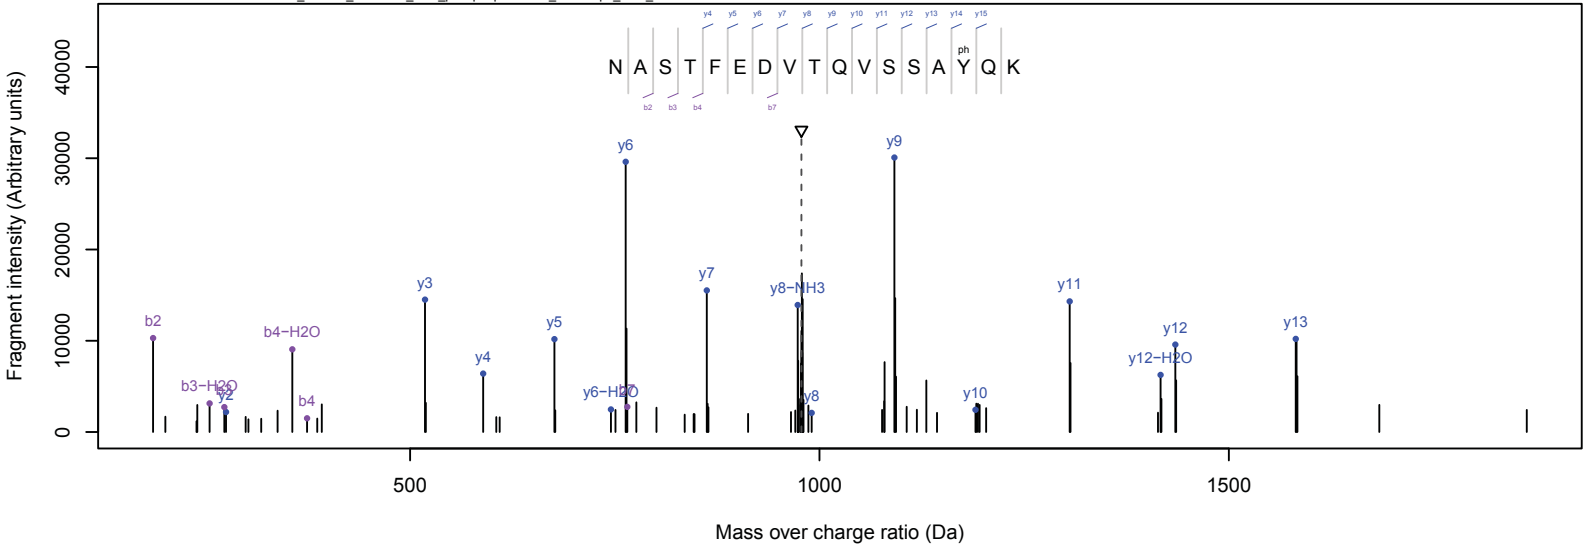

FACNGTVIEHPEYGEVILQLQGDRK-3+

Source : QE1\_140612\_OPL1013\_CVA\_phosphoproteomic\_landscape\_AML\_C Scan : 28661

Andromeda score : 75.539

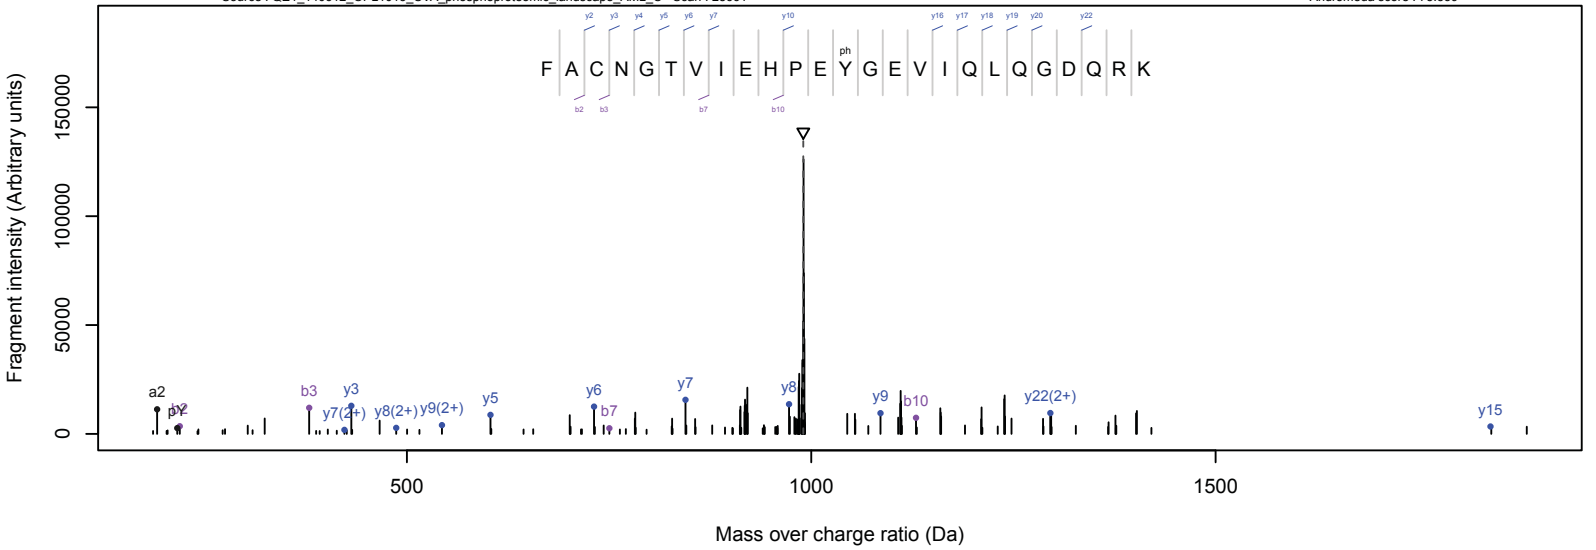

VAQGIREEEVS YQLAFNKQELR-3+

Source : QE1\_140612\_OPL1013\_CVA\_phosphoproteomic\_landscape\_AML\_C Scan : 28906

Andromeda score : 75.539

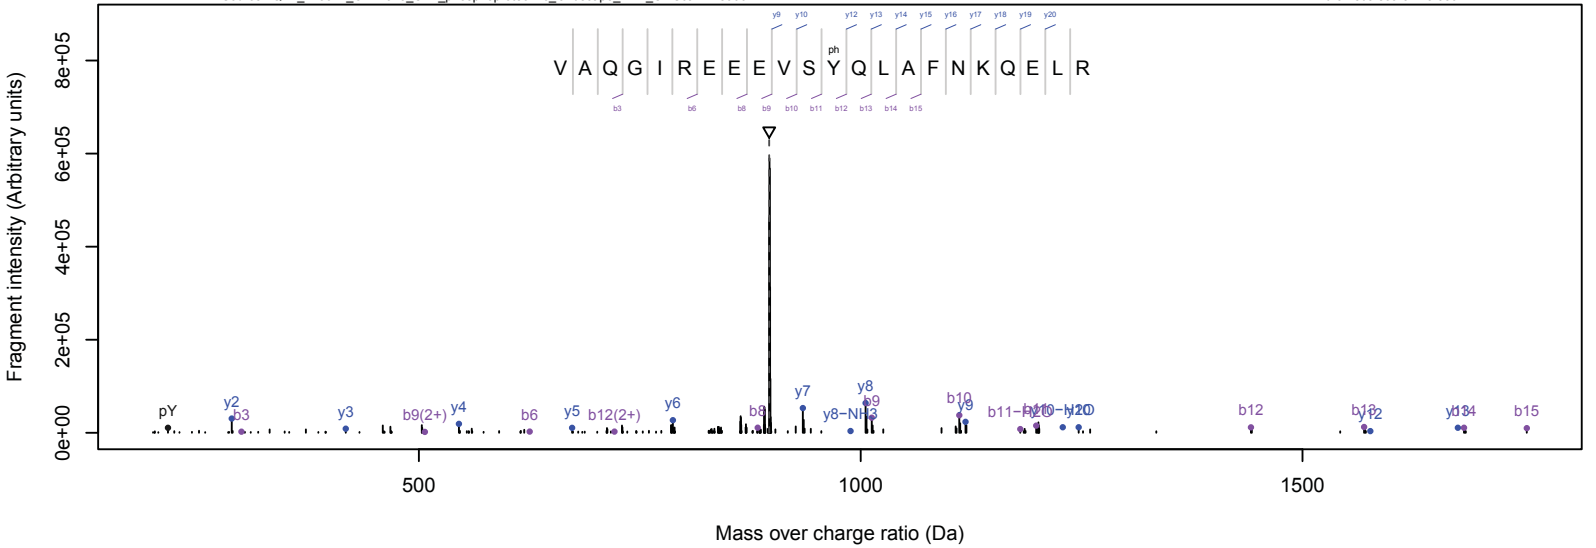

**QGSSSQPM(ox)EVQEGYFGSGDDPYSS(ph)AEPHVSQVKR-4+**

Source : QE1\_140908\_OPL1013\_CvA\_pTyrIP\_AML\_HL60 Scan : 24653

Andromeda score : 75.536

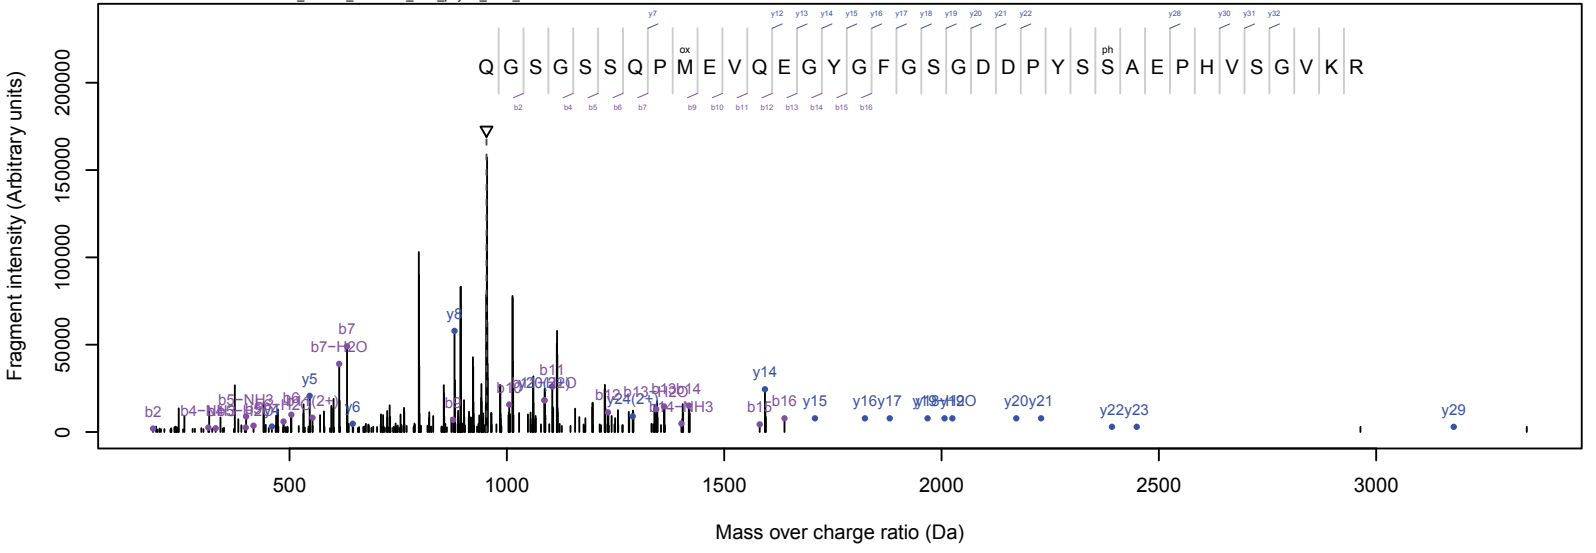

**LKETGY(ph)VVERPSTTK-3+**

Source : QE1\_140612\_OPL1013\_CVA\_phosphoproteomic\_landscape\_AML\_B Scan : 9372

Andromeda score : 75.535

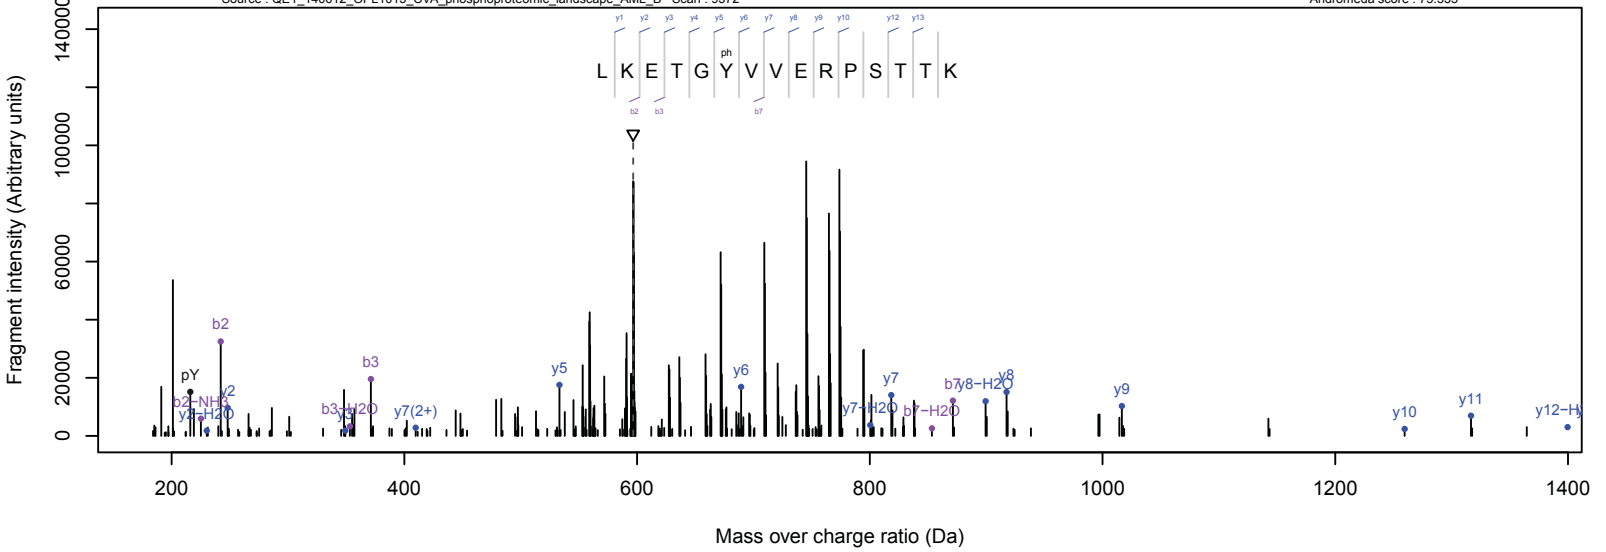

**KVVALYDYM(ox)PM(ox)NANDLQLR-3+**

Source : QE1\_140908\_OPL1013\_CvA\_pTyrIP\_AML\_Kasumi1 Scan : 31936

Andromeda score : 75.533

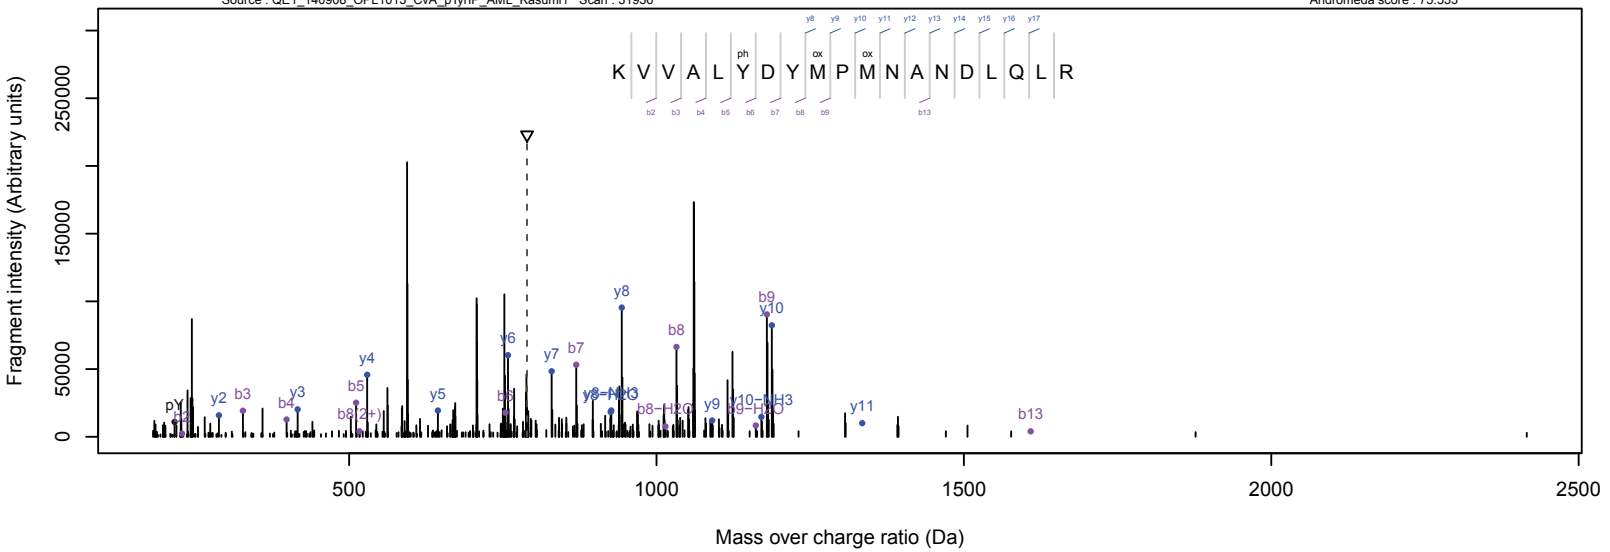

LLAQQSLNQQY(ph)LNHPPPVS<sup>R</sup>-3+

Source : QE1\_140612\_OPL1013\_CVA\_phosphoproteomic\_landscape\_AML\_A Scan : 25351

Andromeda score : 75.533

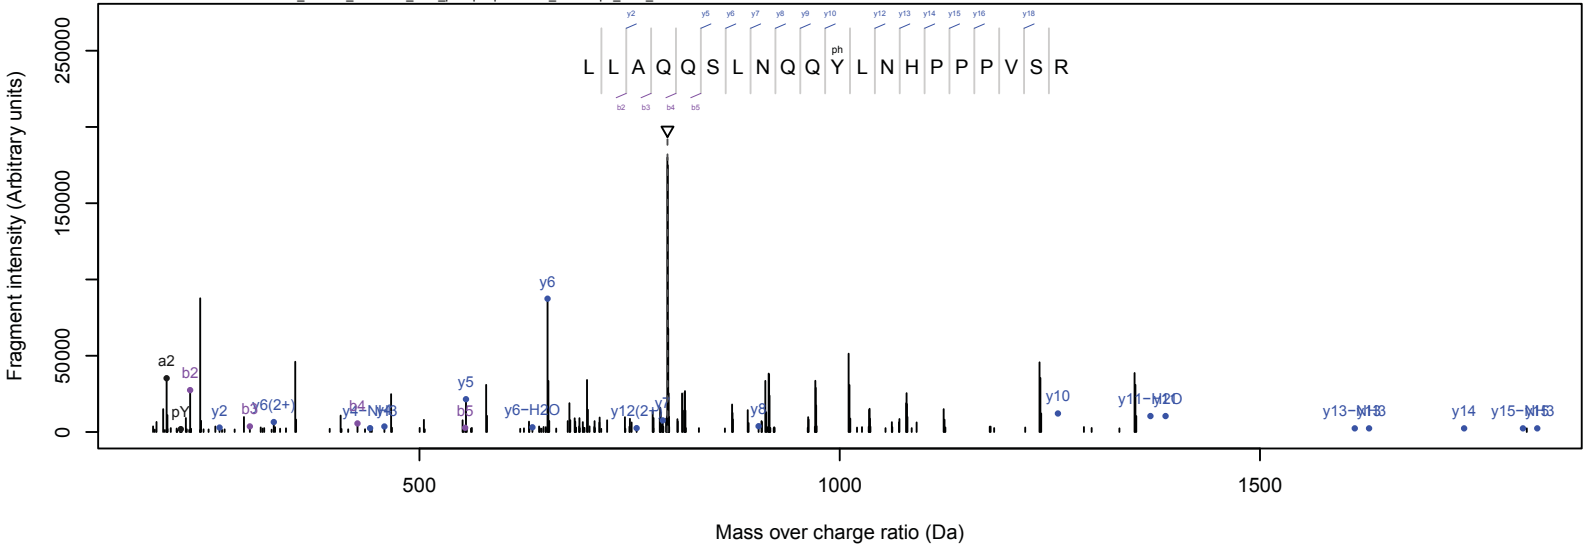

SLPMNY(ph)YTFYHVQEQLP<sup>R</sup>-3+

Source : QE1\_140612\_OPL1013\_CVA\_phosphoproteomic\_landscape\_AML\_D Scan : 46534

Andromeda score : 75.533

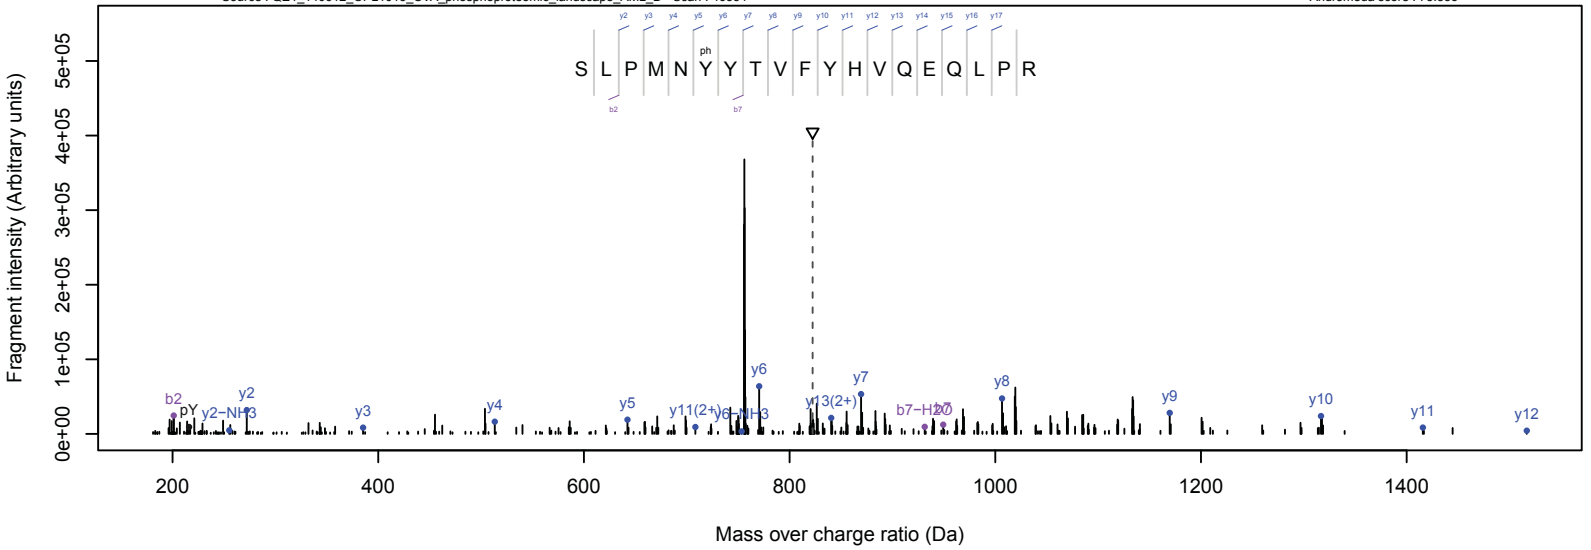

VKGEY(ph)DMTPKLEGLD<sup>LK</sup>-3+

Source : QE1\_140612\_OPL1013\_CVA\_phosphoproteomic\_landscape\_AML\_C Scan : 26323

Andromeda score : 75.533

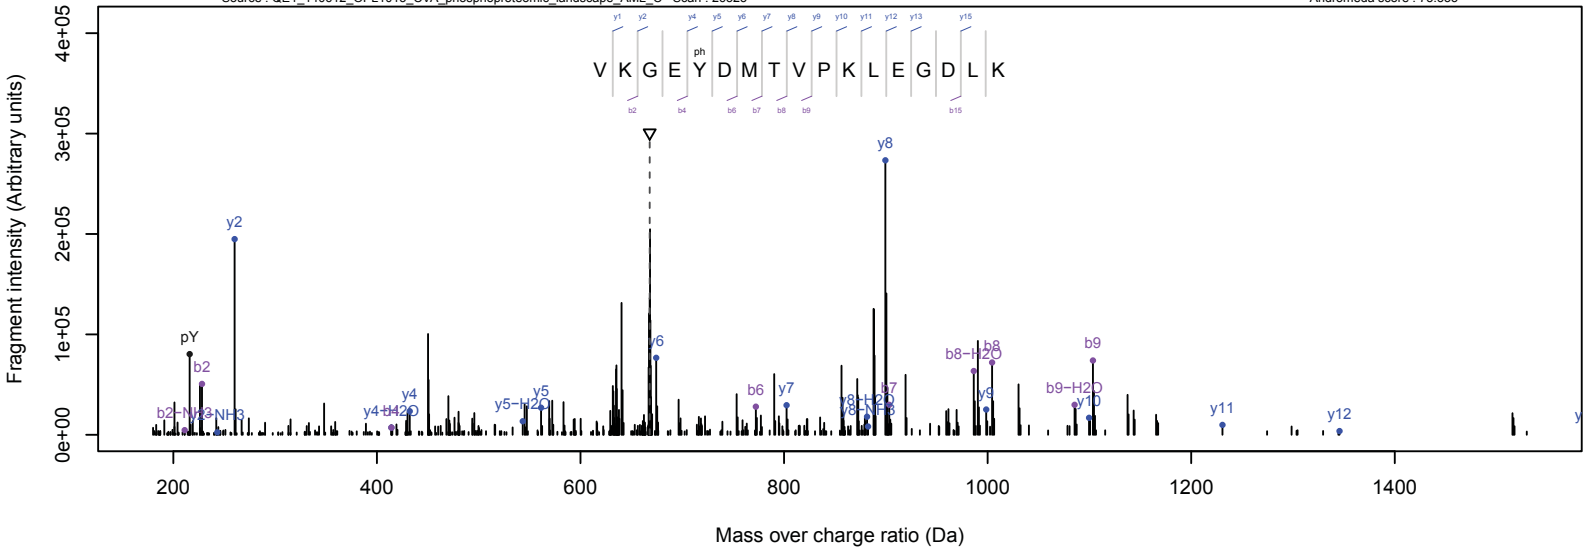

REPGY(ph)TPPGAGNQNP PGMY PVTGPK-3+

Source : QE1\_140612\_OPL1013\_CVA\_phosphoproteomic\_landscape\_AML\_C Scan : 22537

Andromeda score : 75.529

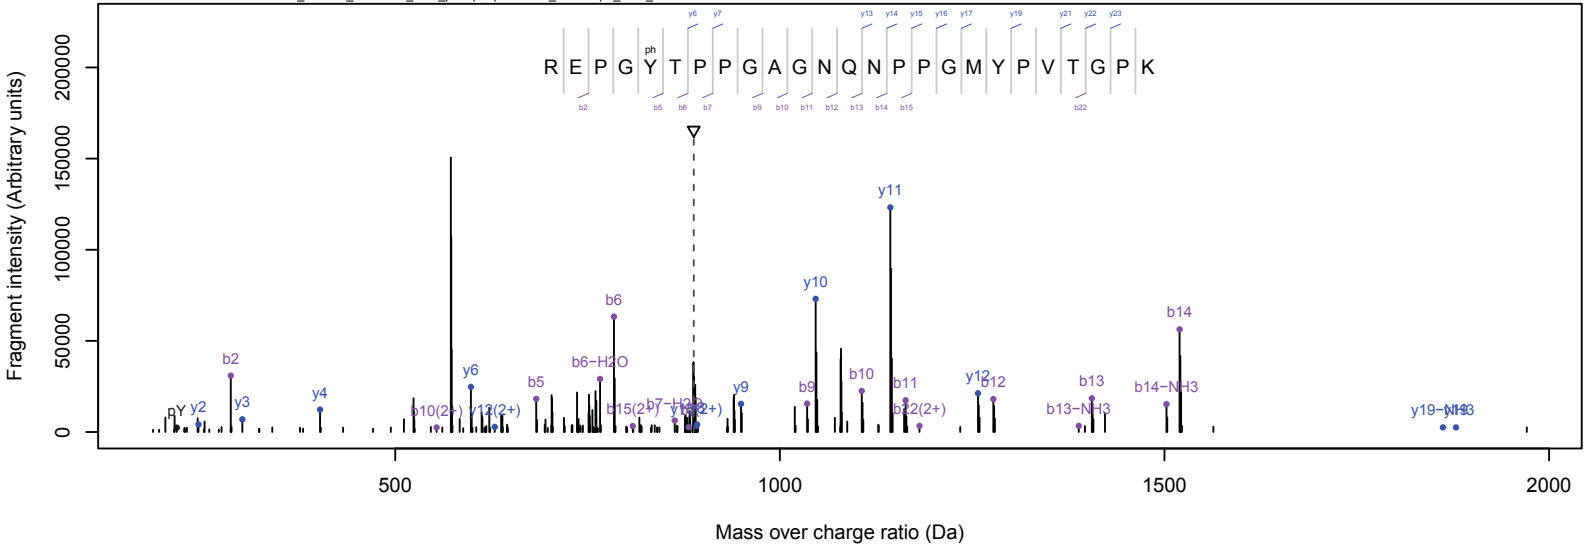

NSNTVY(ph)CKLESCPSR-3+

Source : QE1\_140612\_OPL1013\_CVA\_phosphoproteomic\_landscape\_AML\_B Scan : 10128

Andromeda score : 75.445

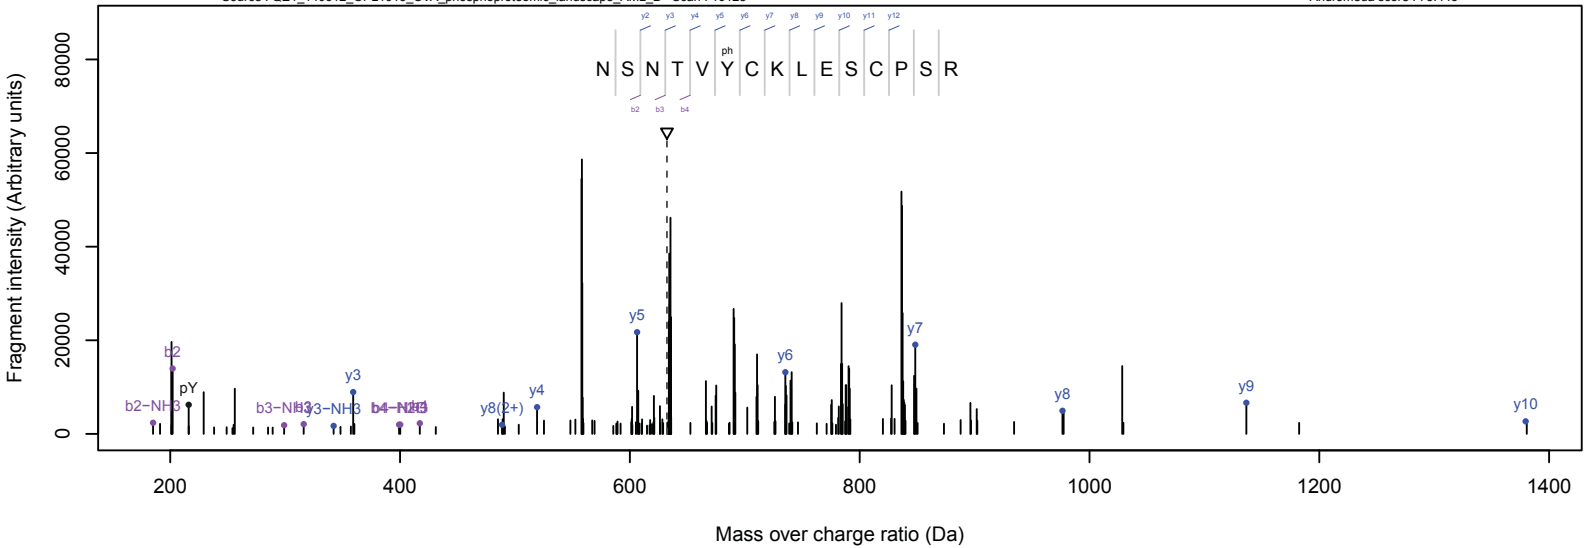

TGNSSPGAVY(ph)LANQAK-2+

Source : QE1\_140612\_OPL1013\_CVA\_phosphoproteomic\_landscape\_AML\_C Scan : 25811

Andromeda score : 75.376

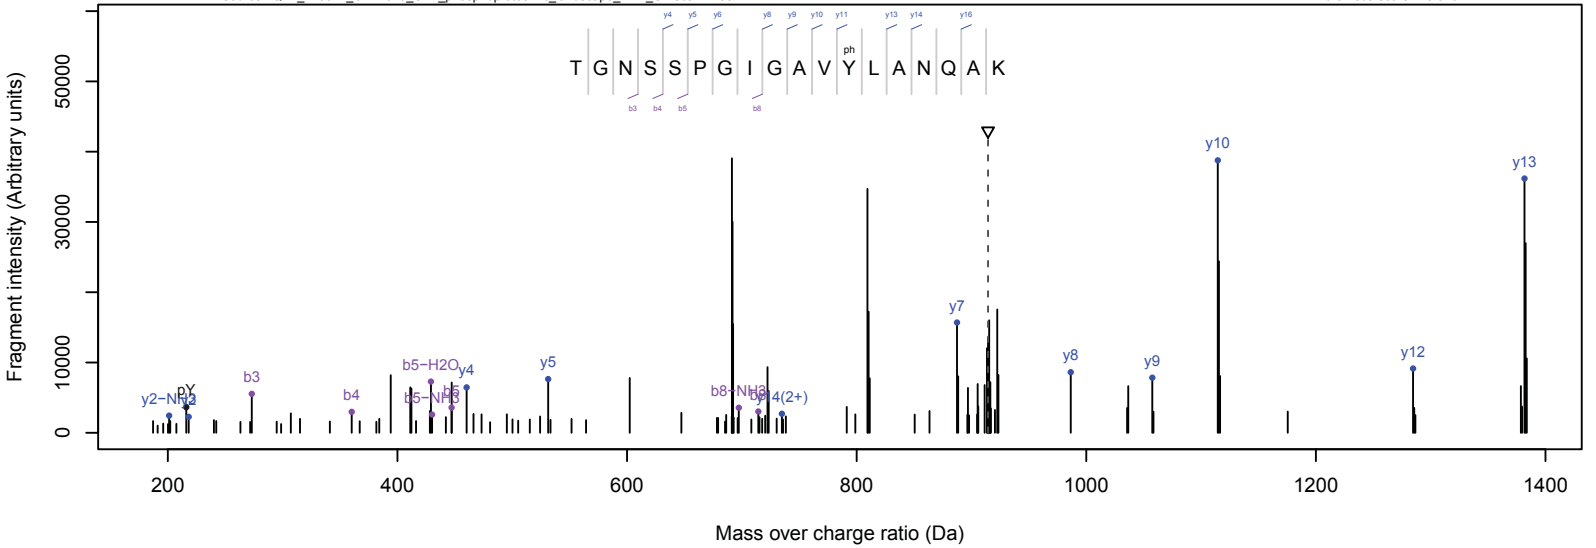



VQEY(ph)PTLKVPYETLNK-2+

Source : QE1\_140612\_OPL1013\_CVA\_phosphoproteomic\_landscape\_AML\_B Scan : 29668

Andromeda score : 75.376

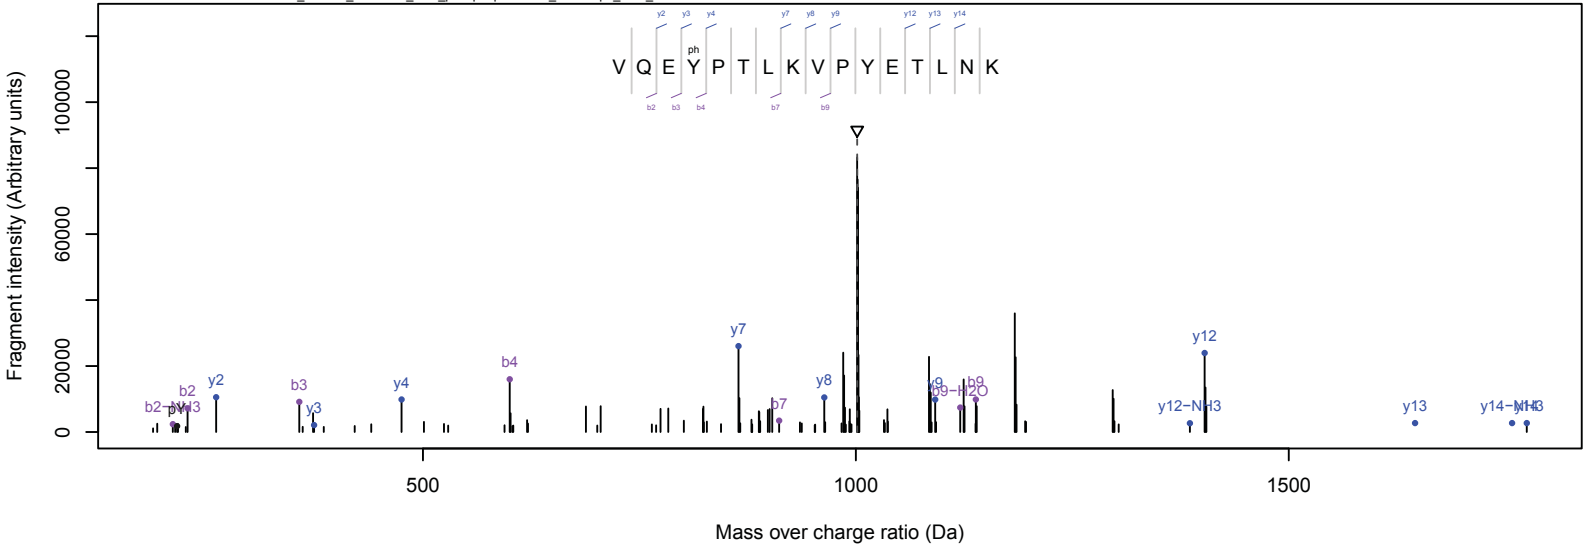

KLDSPG(ph)AAETYLK-2+

Source : QE1\_140612\_OPL1013\_CVA\_phosphoproteomic\_landscape\_AML\_D Scan : 26672

Andromeda score : 75.316

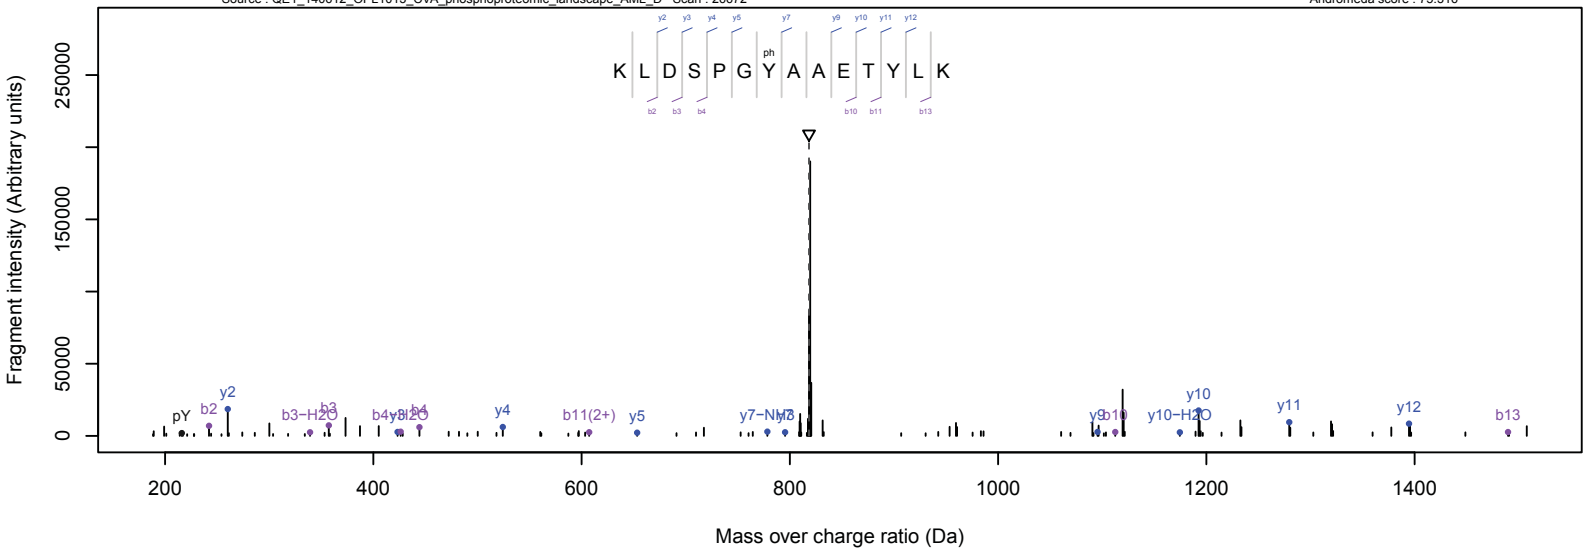

RKQY(ph)PISLV LAPTR-3+

Source : QE1\_140612\_OPL1013\_CVA\_phosphoproteomic\_landscape\_AML\_B Scan : 27937

Andromeda score : 75.316

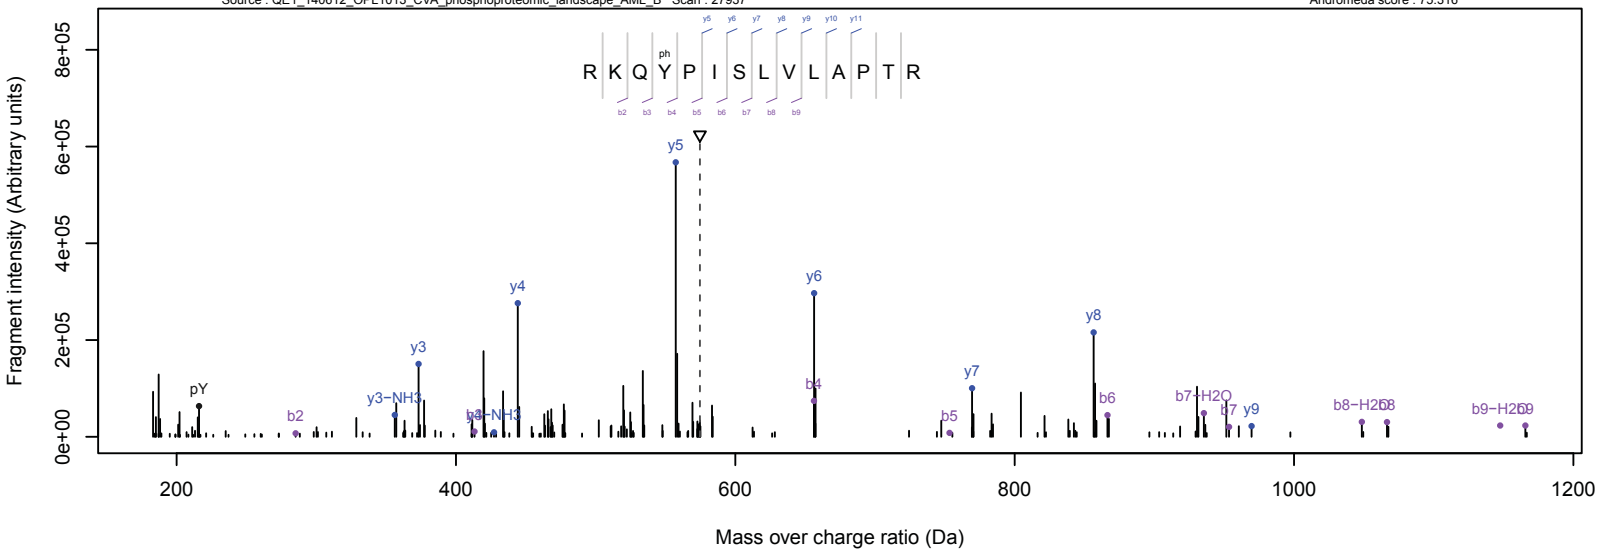

RTPVQPNPIVY(ph)MMK-2+

Source : QE1\_140612\_OPL1013\_CVA\_phosphoproteomic\_landscape\_AML\_C Scan : 34904

Andromeda score : 75.316

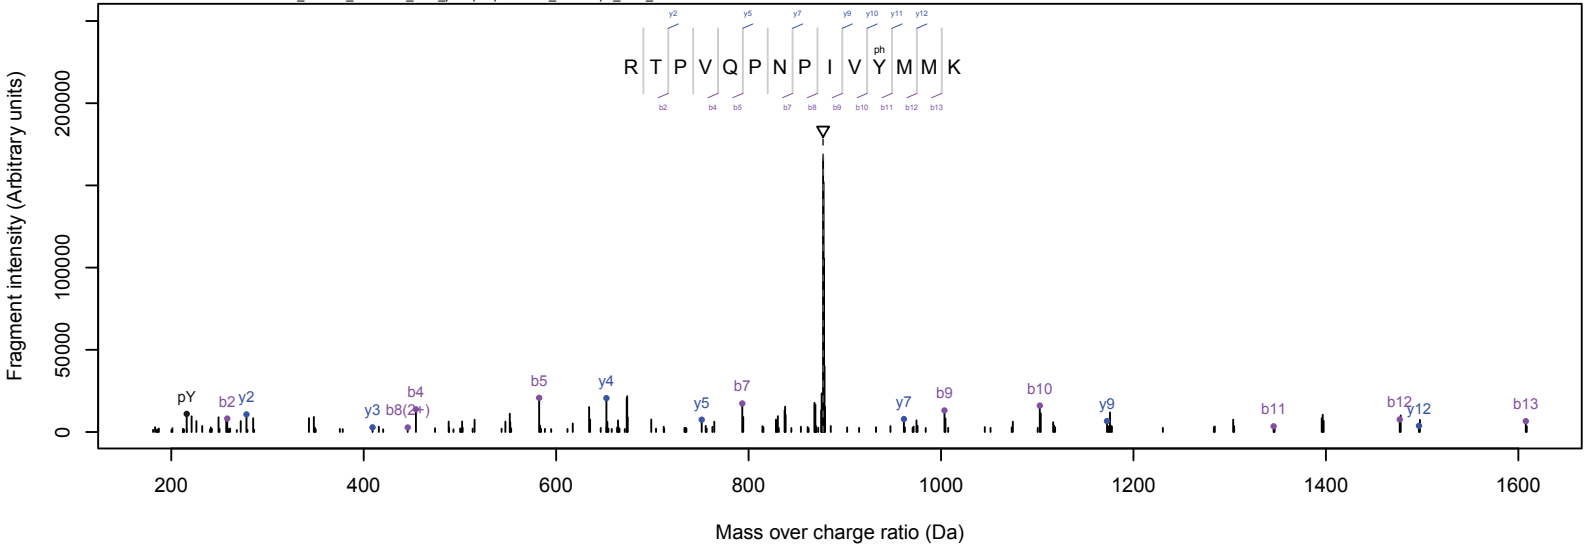

ILY(ph)PNVR-2+

Source : QE1\_140612\_OPL1013\_CVA\_phosphoproteomic\_landscape\_AML\_C Scan : 16451

Andromeda score : 75.311

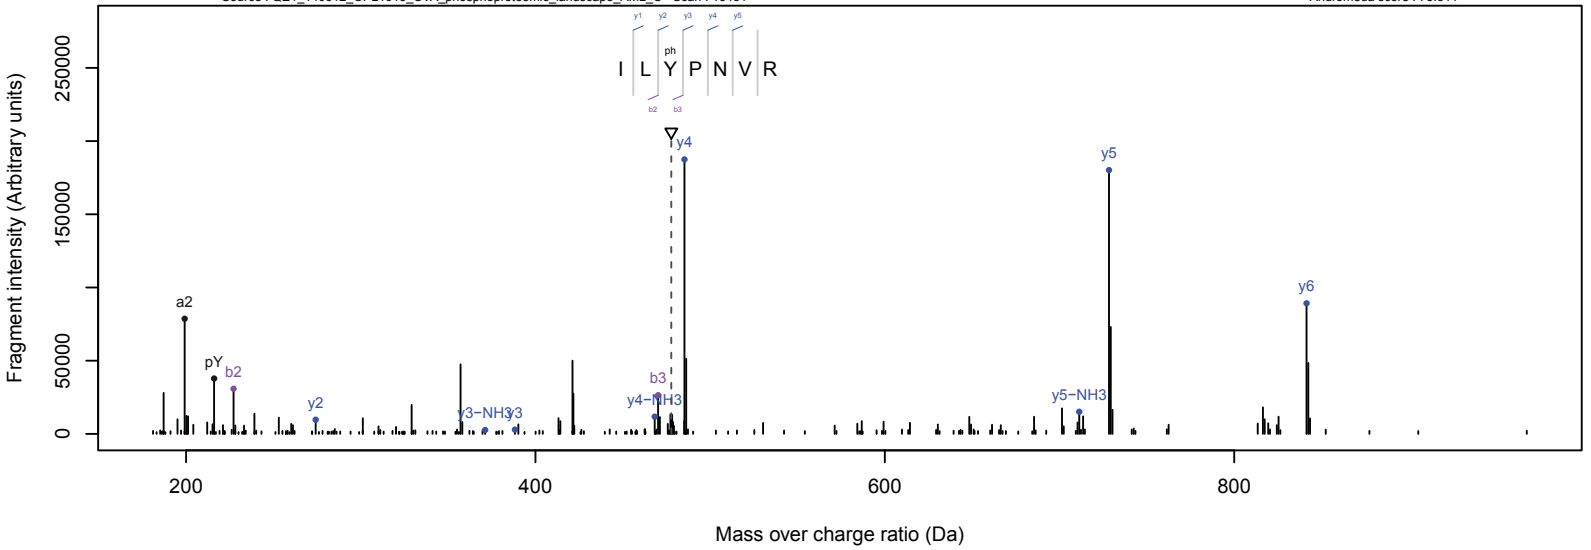

IY(ph)FLLVR-2+

Source : QE1\_140612\_OPL1013\_CVA\_phosphoproteomic\_landscape\_AML\_B Scan : 44224

Andromeda score : 75.311

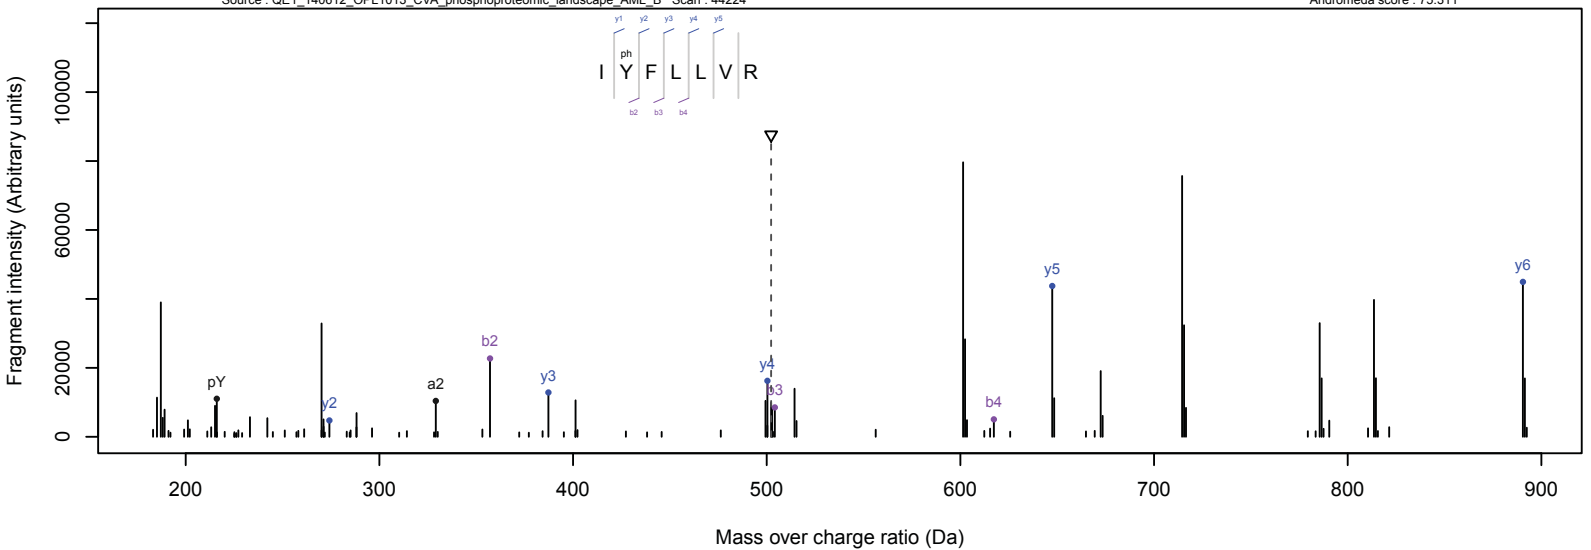

**Y(ph)AFVMFK-2+**

Source : QE1\_140612\_OPL1013\_CVA\_phosphoproteomic\_landscape\_AML\_D Scan : 34460

Andromeda score : 75.311

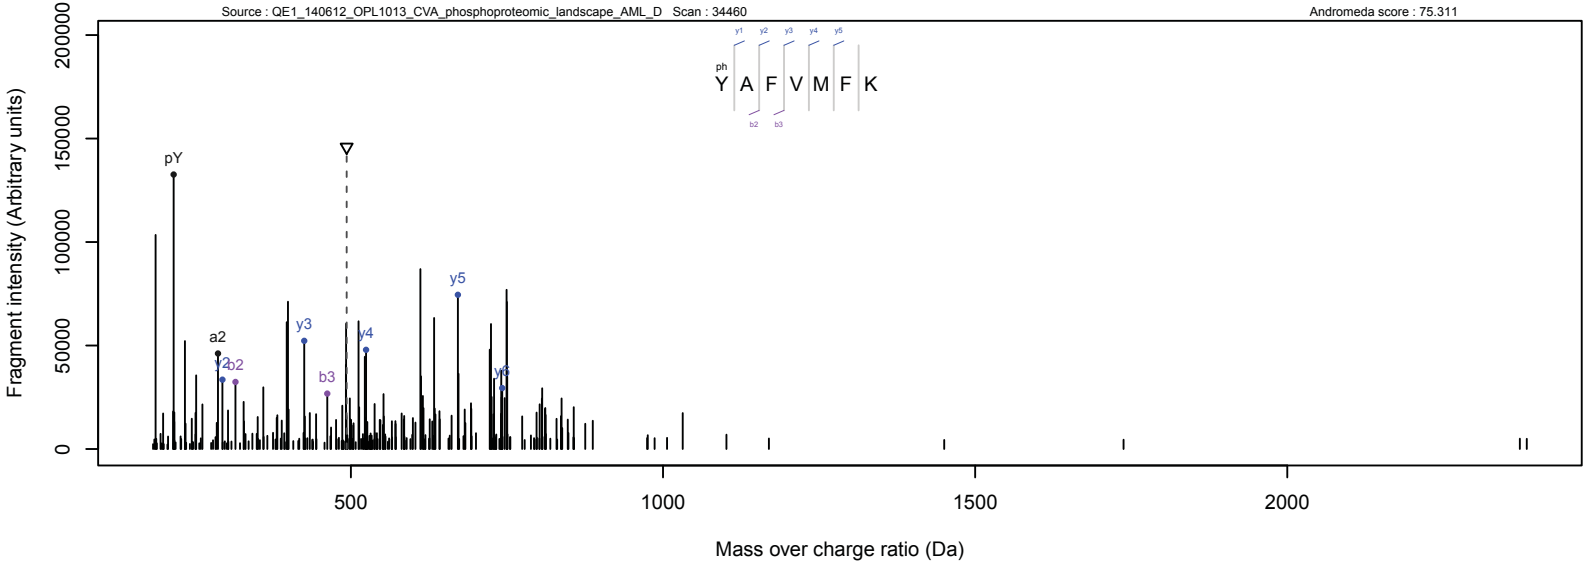

**(ac)ALAGCPDSFLHHPY(ph)YQDKVEQTPR-3+**

Source : QE1\_140612\_OPL1013\_CVA\_phosphoproteomic\_landscape\_AML\_C Scan : 32274

Andromeda score : 75.3

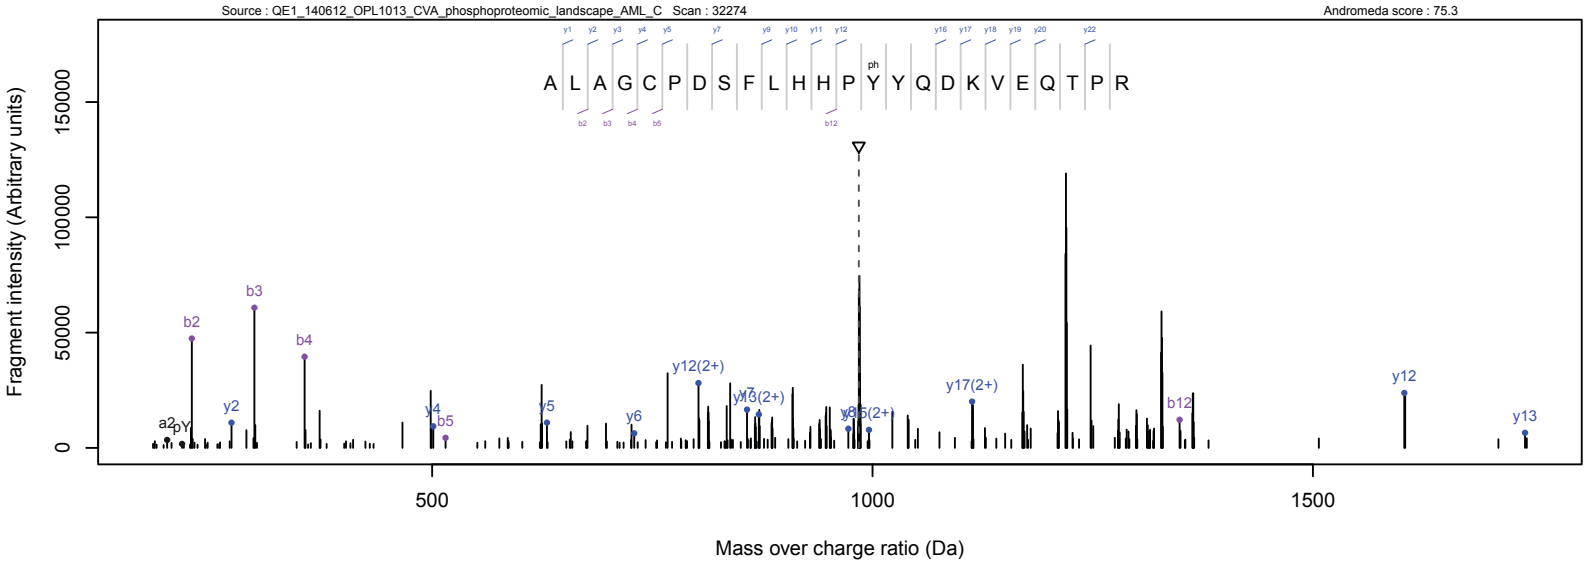

**GALGGY(ph)YDTR-2+**

Source : QE1\_140612\_OPL1013\_CVA\_phosphoproteomic\_landscape\_AML\_D Scan : 12627

Andromeda score : 75.229

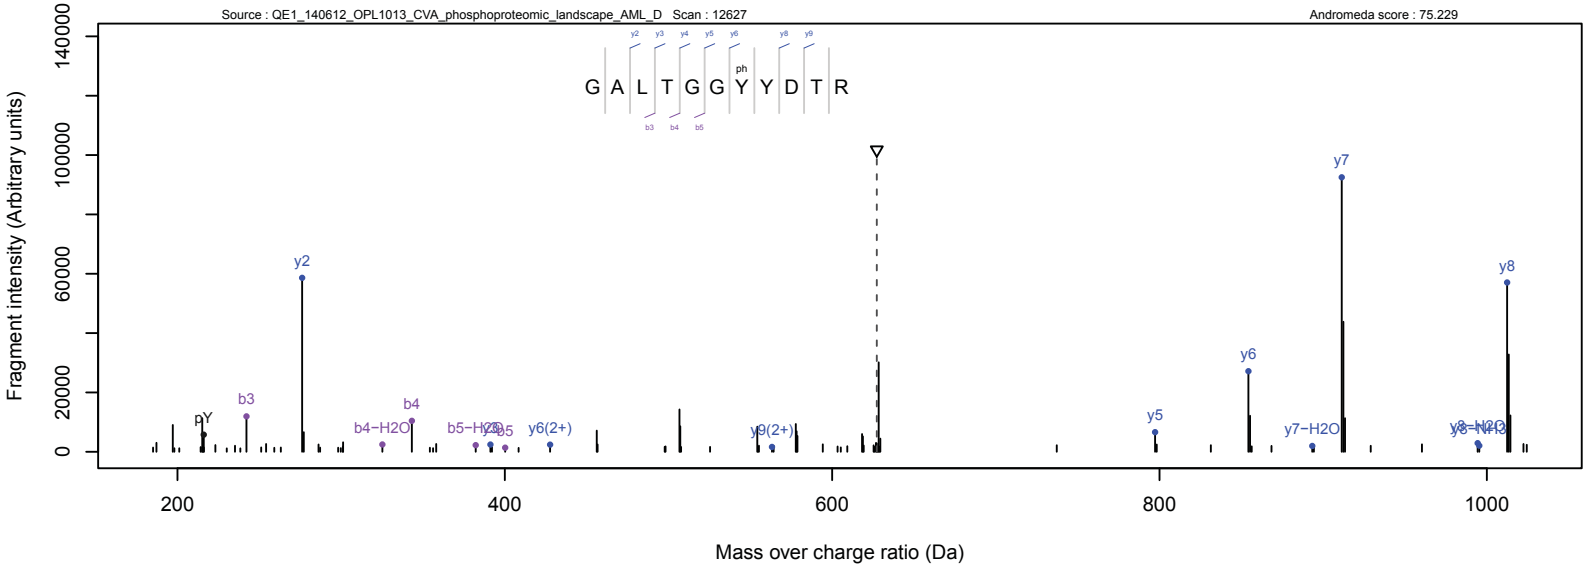

NY(ph)MPLAFSDK-2+

Source : QE1\_140612\_OPL1013\_CVA\_phosphoproteomic\_landscape\_AML\_C Scan : 29532

Andromeda score : 75.229

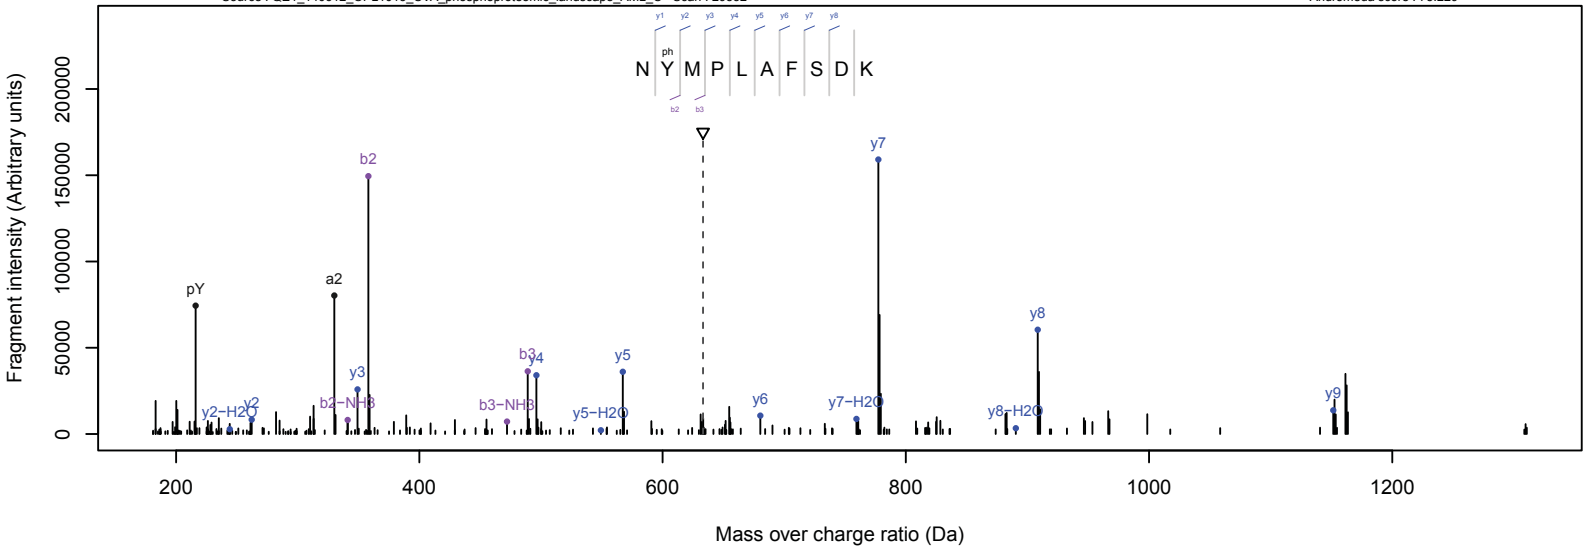

DVY(ph)LSPR-2+

Source : QE1\_140612\_OPL1013\_CVA\_phosphoproteomic\_landscape\_AML\_C Scan : 12691

Andromeda score : 75.109

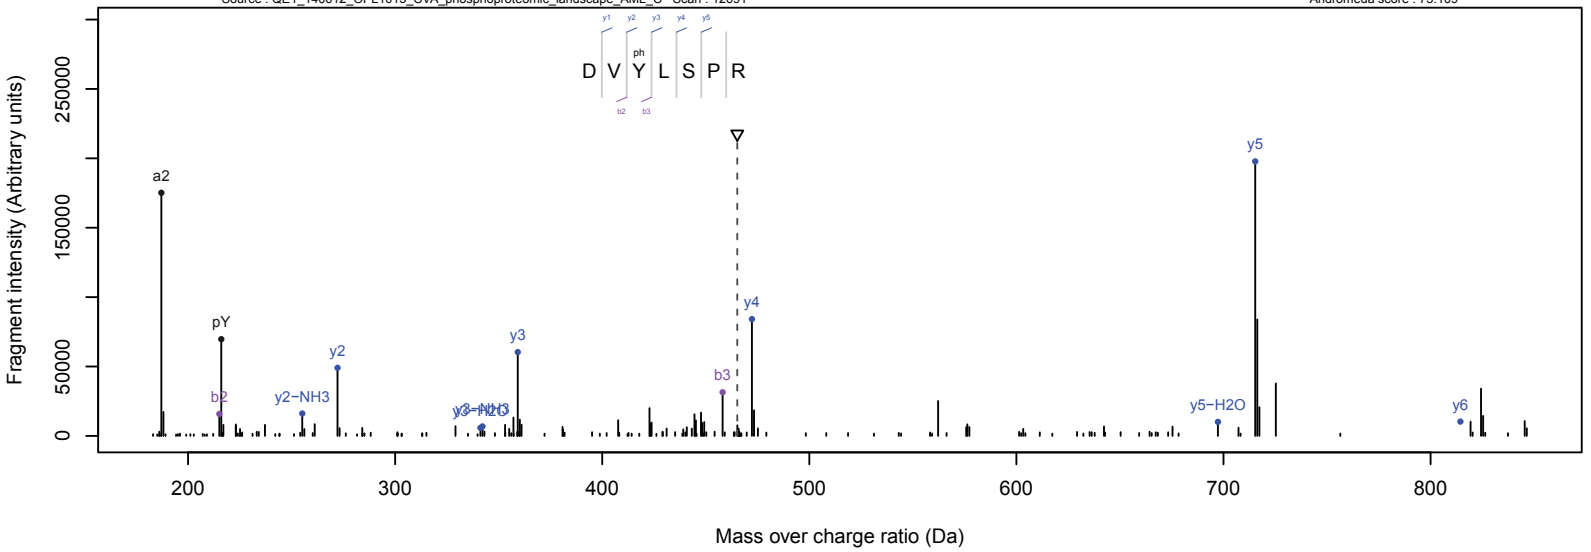

Y(ph)QIINGLR-2+

Source : QE1\_140612\_OPL1013\_CVA\_phosphoproteomic\_landscape\_AML\_C Scan : 20722

Andromeda score : 75.109

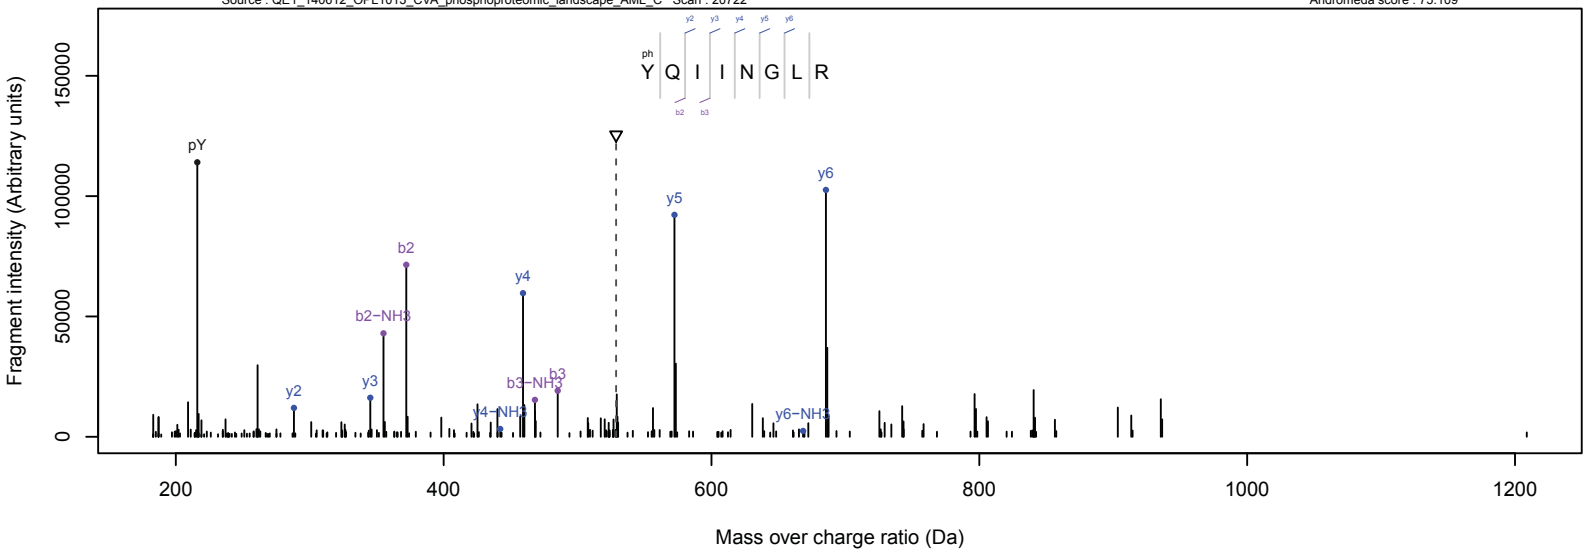

AIRDGVEASINHEKGYVQSK-4+

Source : QE1\_140612\_OPL1013\_CVA\_phosphoproteomic\_landscape\_AML\_B Scan : 21198

Andromeda score : 75.064

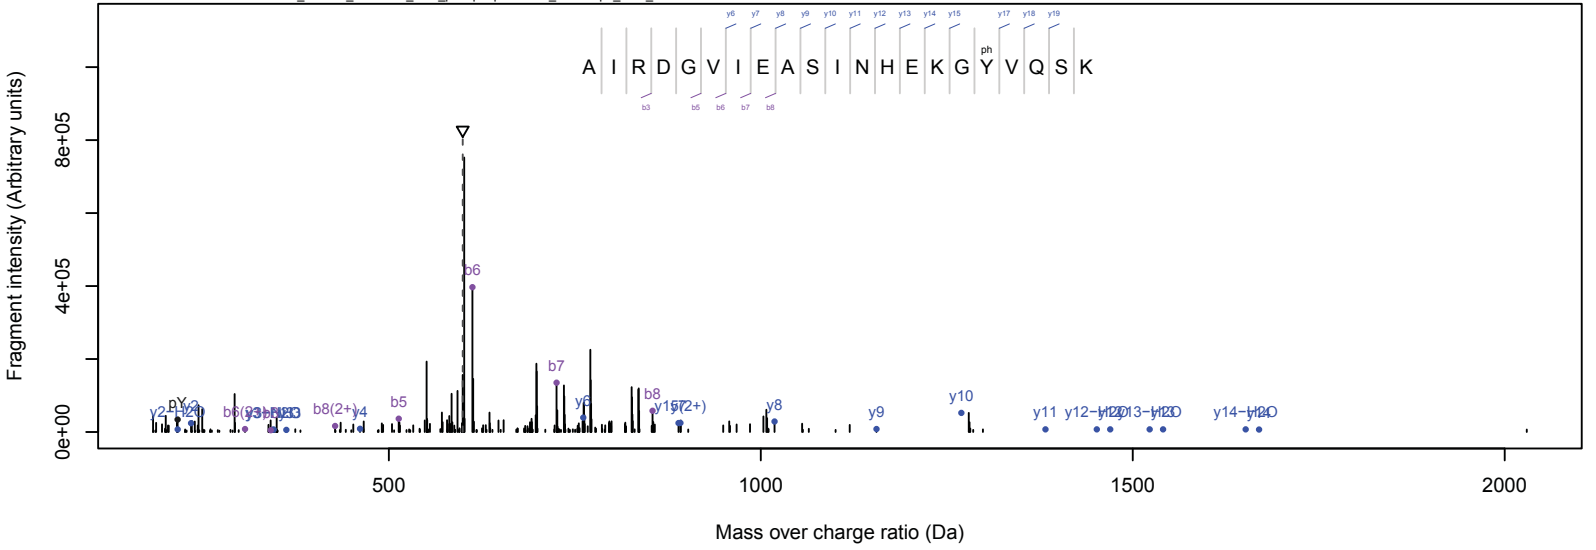

AWNESDLVAYEKKPSQTASYER-3+

Source : QE1\_140612\_OPL1013\_CVA\_phosphoproteomic\_landscape\_AML\_C Scan : 22561

Andromeda score : 75.064

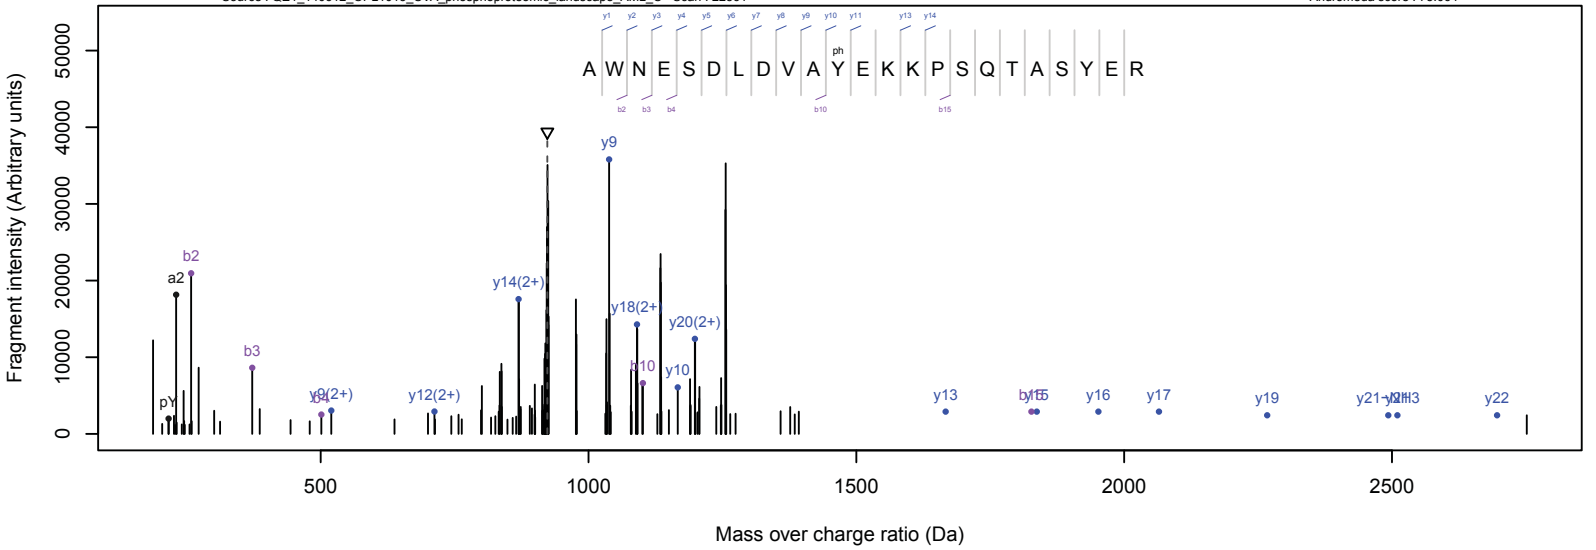

DIQY(ph)LKDSLALGKTEEEALK-3+

Source : QE1\_140612\_OPL1013\_CVA\_phosphoproteomic\_landscape\_AML\_A Scan : 35707

Andromeda score : 75.064

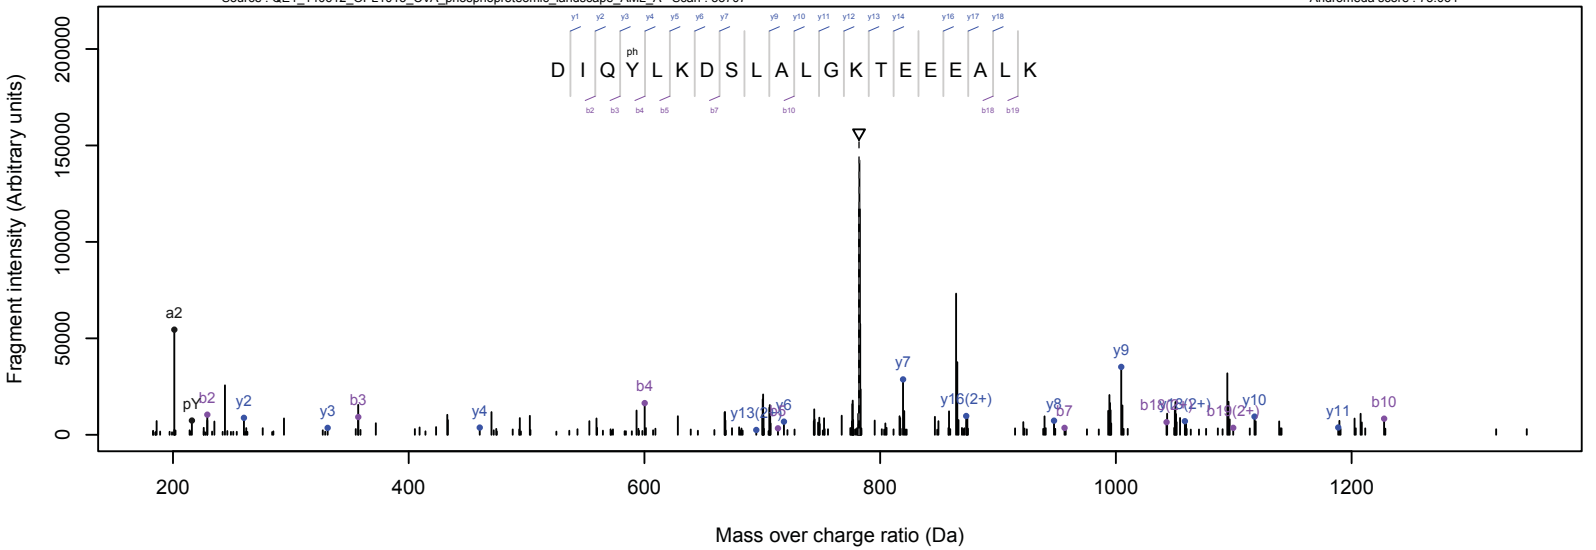

IYYHLDGQETPYLVKLP LPAER-3+

Source : QE1\_140612\_OPL1013\_CVA\_phosphoproteomic\_landscape\_AML\_C Scan : 43294

Andromeda score : 75.064

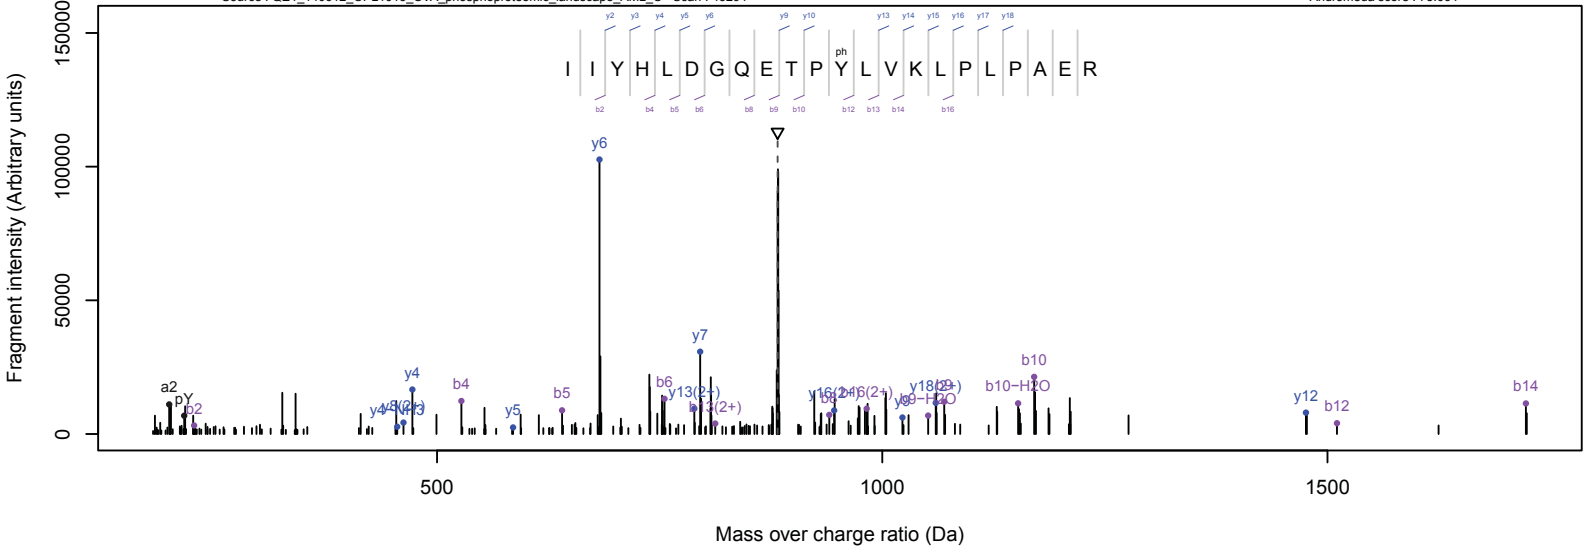

AA Y(ph)YPPSQI AQLRPSR-2+

Source : QE1\_140612\_OPL1013\_CVA\_phosphoproteomic\_landscape\_AML\_C Scan : 26915

Andromeda score : 75.018

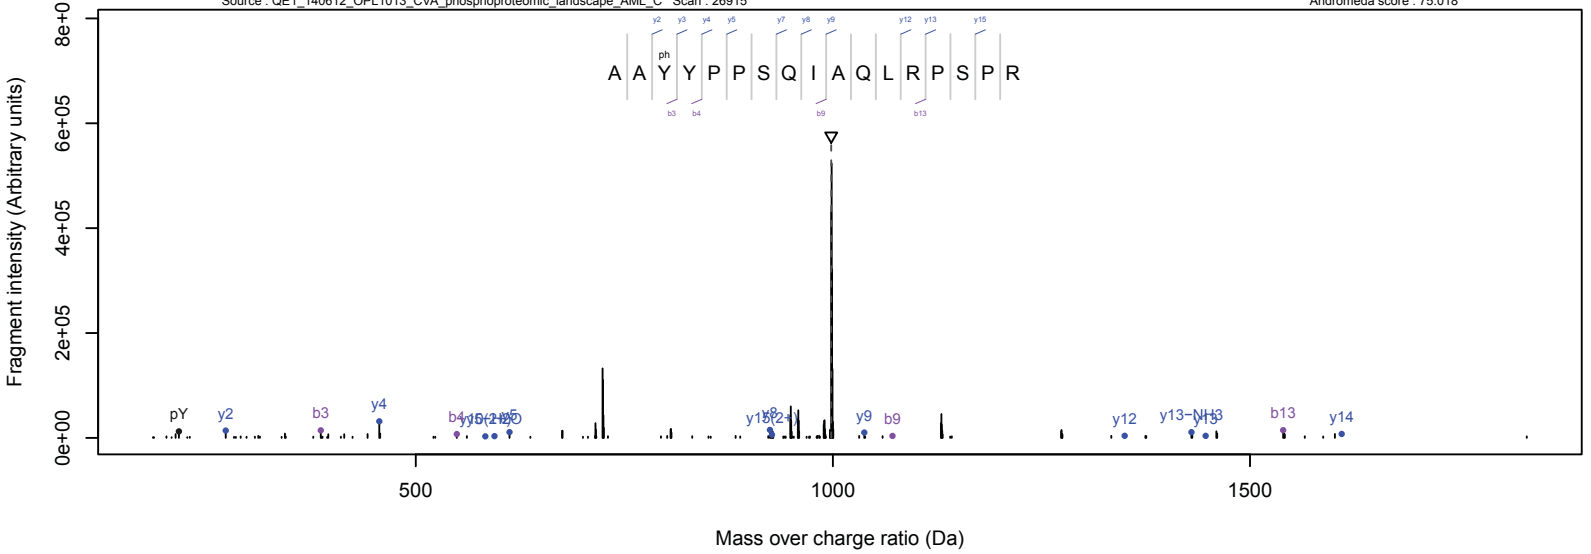

Y(ph)YVTIIDAPGHRDFIK-2+

Source : QE1\_140612\_OPL1013\_CVA\_phosphoproteomic\_landscape\_AML\_B Scan : 32227

Andromeda score : 75.018

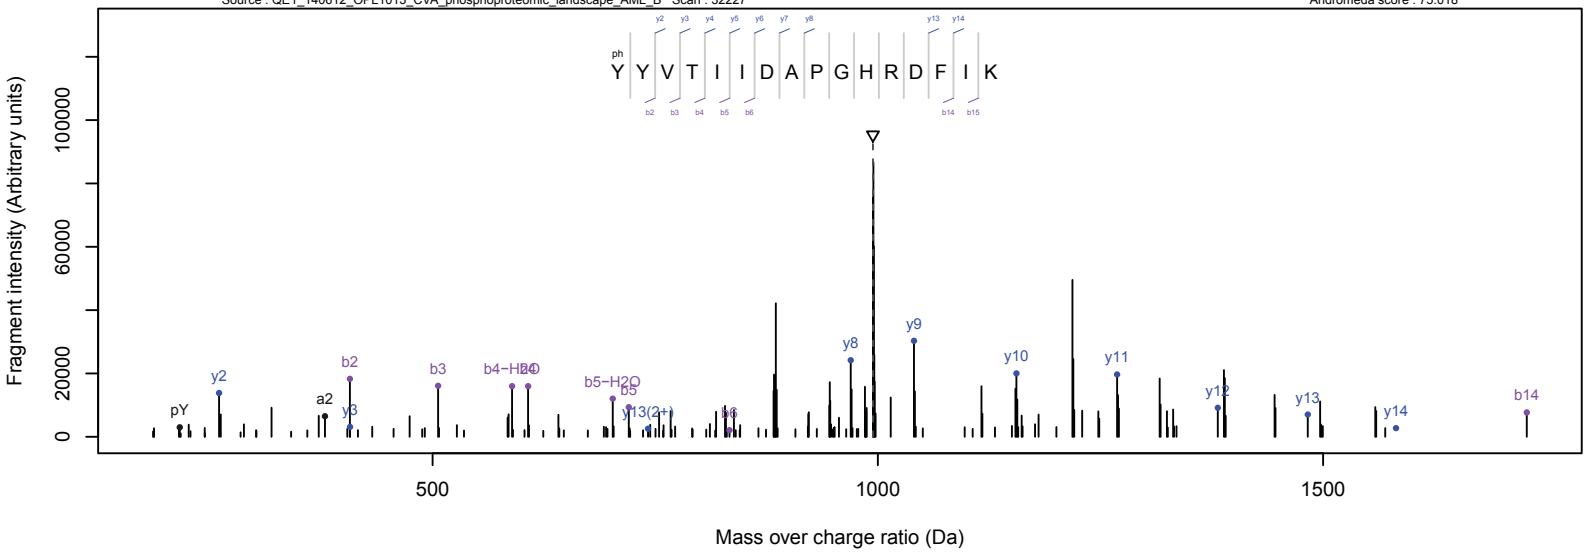

**AQSSLG(ph)PLMR-2+**

Source: QE1\_140612\_OPL1013\_CVA\_phosphoproteomic\_landscape\_AML\_C Scan: 37783

Andromeda score: 74.987

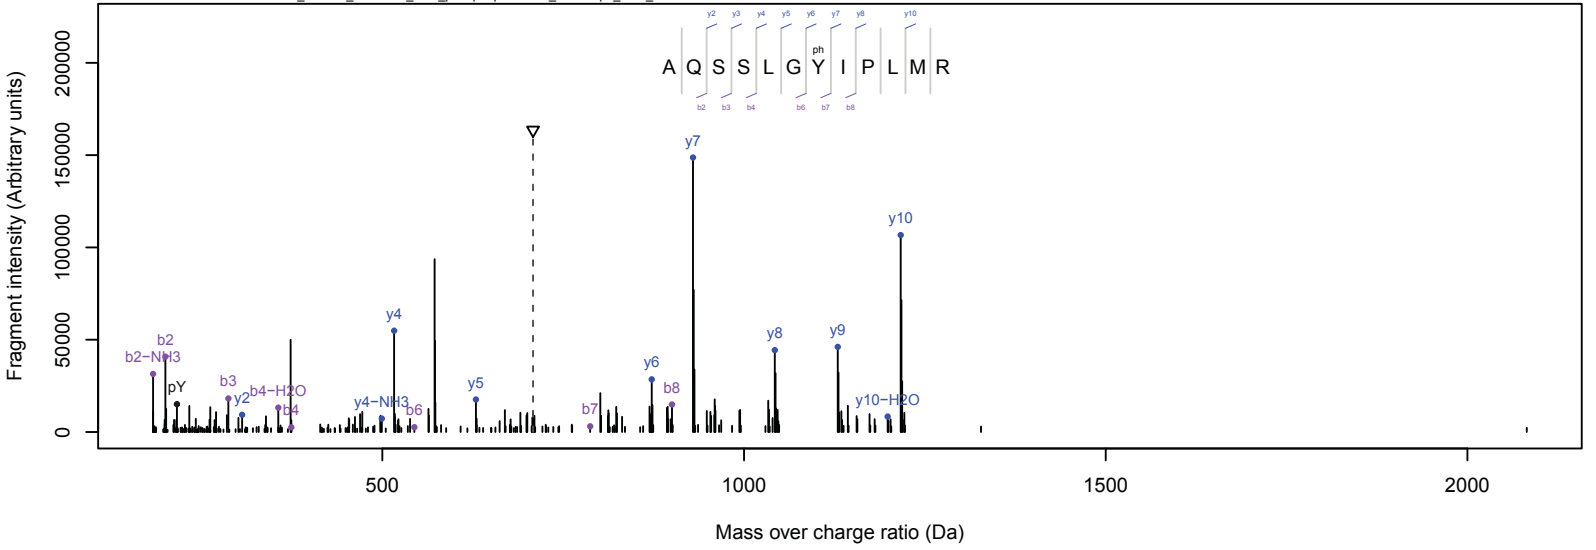

**ELKDPDQLY(ph)TTLK-2+**

Source: QE1\_140612\_OPL1013\_CVA\_phosphoproteomic\_landscape\_AML\_C Scan: 23424

Andromeda score: 74.987

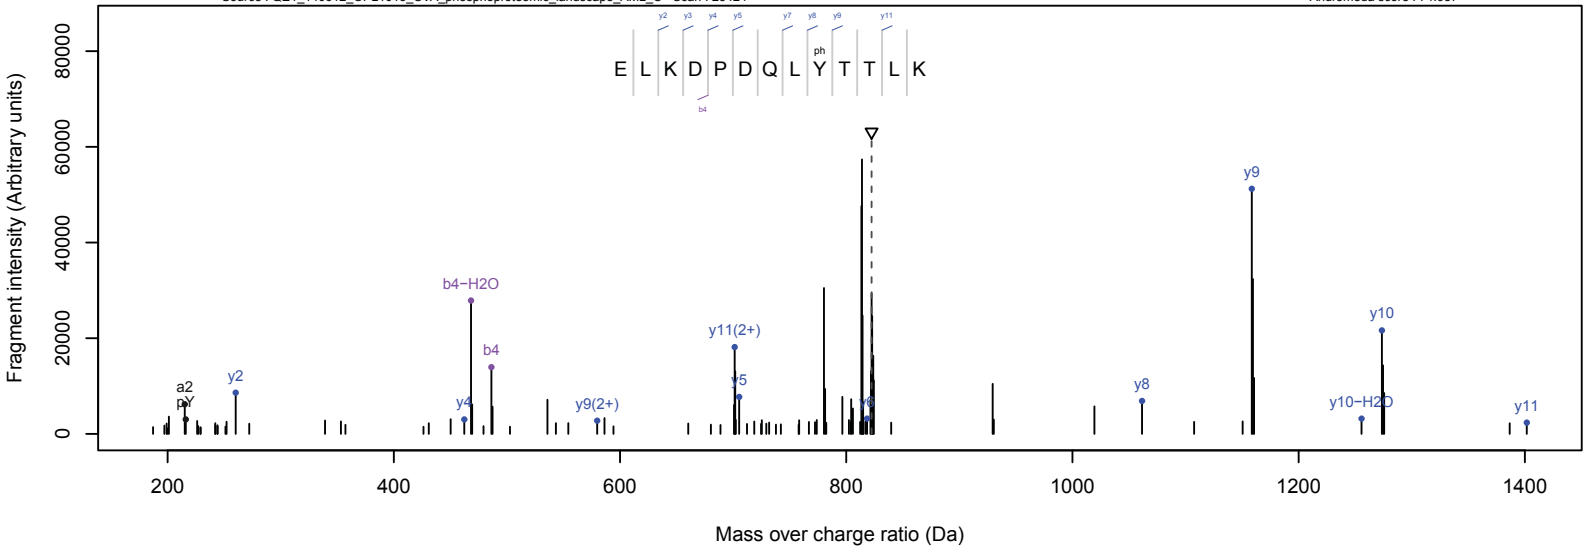

**GCLVTASADKY(ph)VK-2+**

Source: QE1\_140612\_OPL1013\_CVA\_phosphoproteomic\_landscape\_AML\_B Scan: 14117

Andromeda score: 74.987

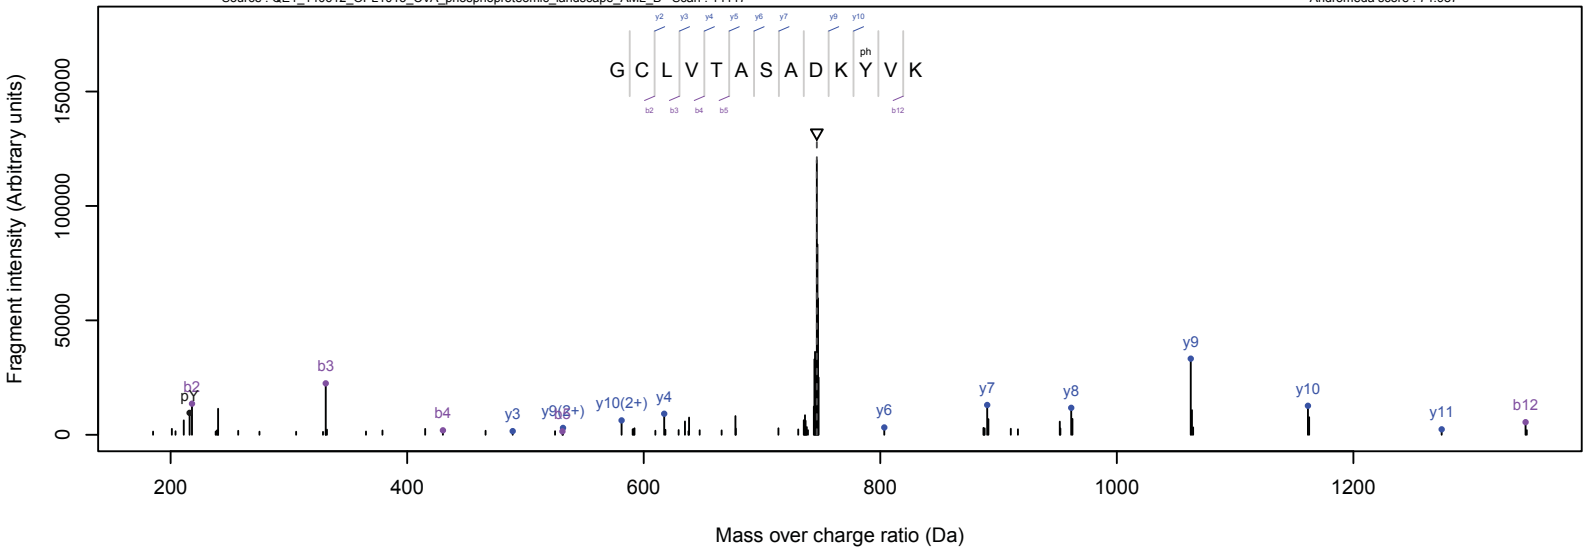

**MNGALPSDAVG(ph)R-2+**

Source : QE1\_140612\_OPL1013\_CVA\_phosphoproteomic\_landscape\_AML\_C Scan : 19122

Andromeda score : 74.987

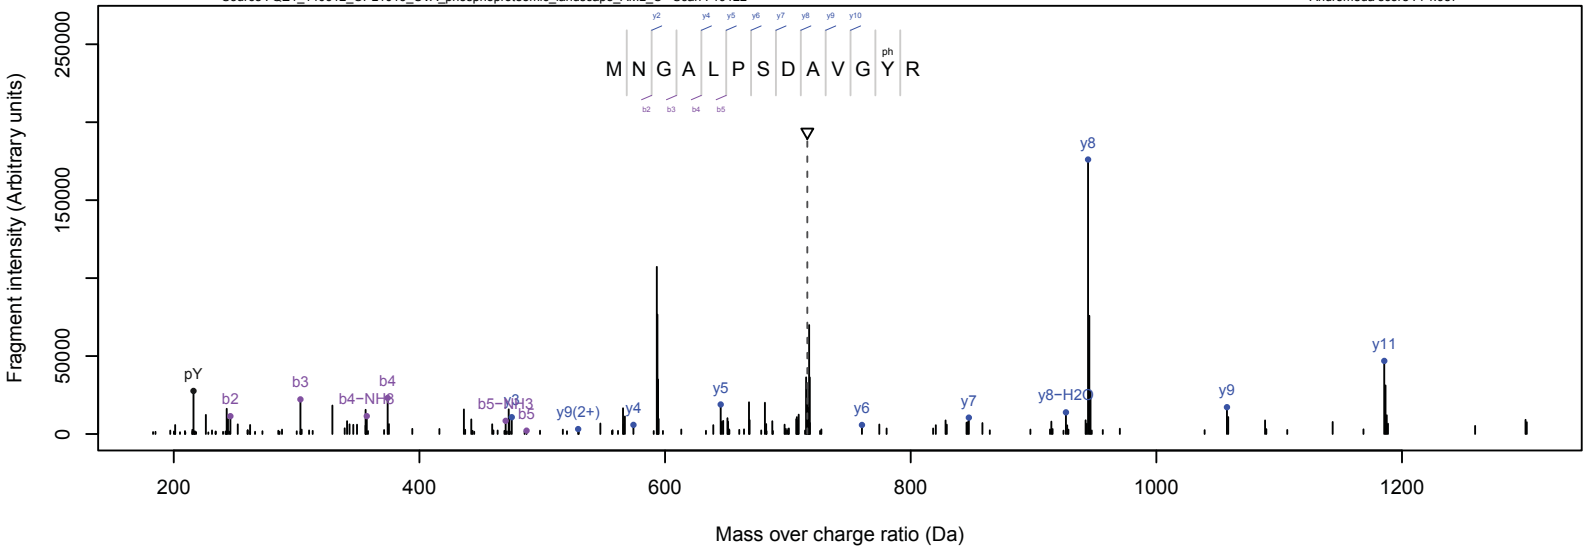

**NFYDSPEKIY(ph)ER-3+**

Source : QE1\_140908\_OPL1013\_CvA\_pTyrIP\_AML\_ML2 Scan : 21660

Andromeda score : 74.987

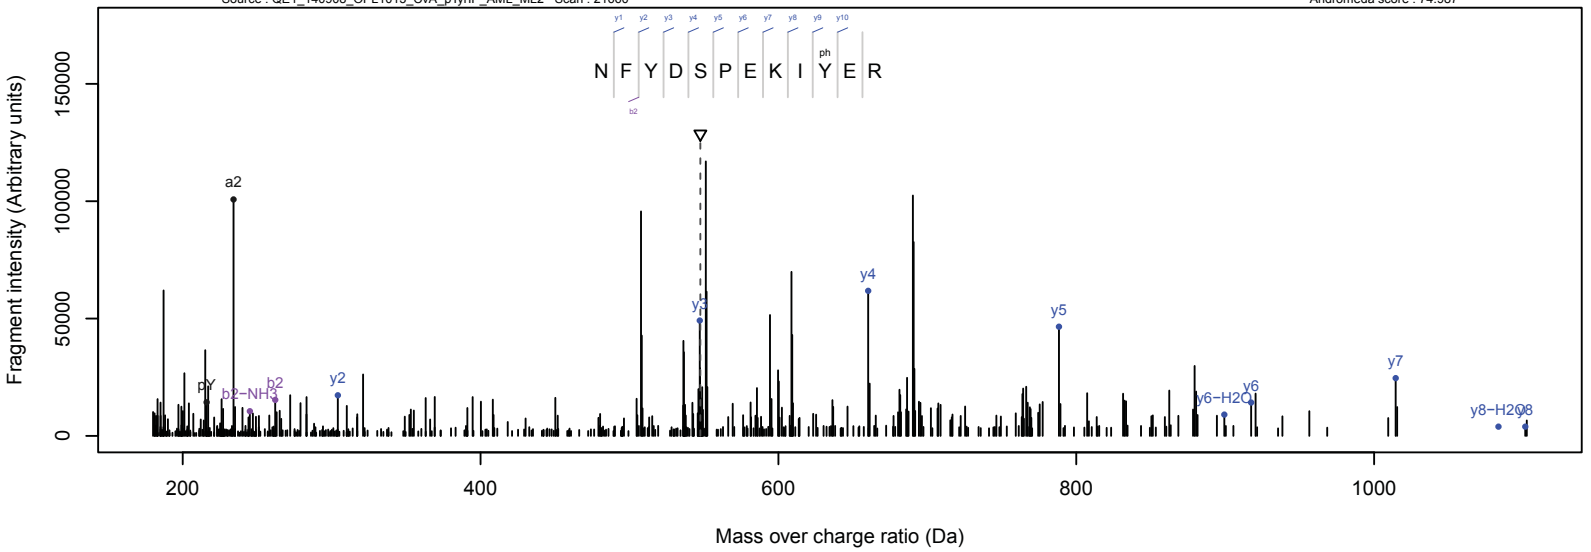

**NDVVGTTY(ph)LHLSK-2+**

Source : QE1\_140908\_OPL1013\_CvA\_pTyrIP\_AML\_Kasumi1 Scan : 22345

Andromeda score : 74.966

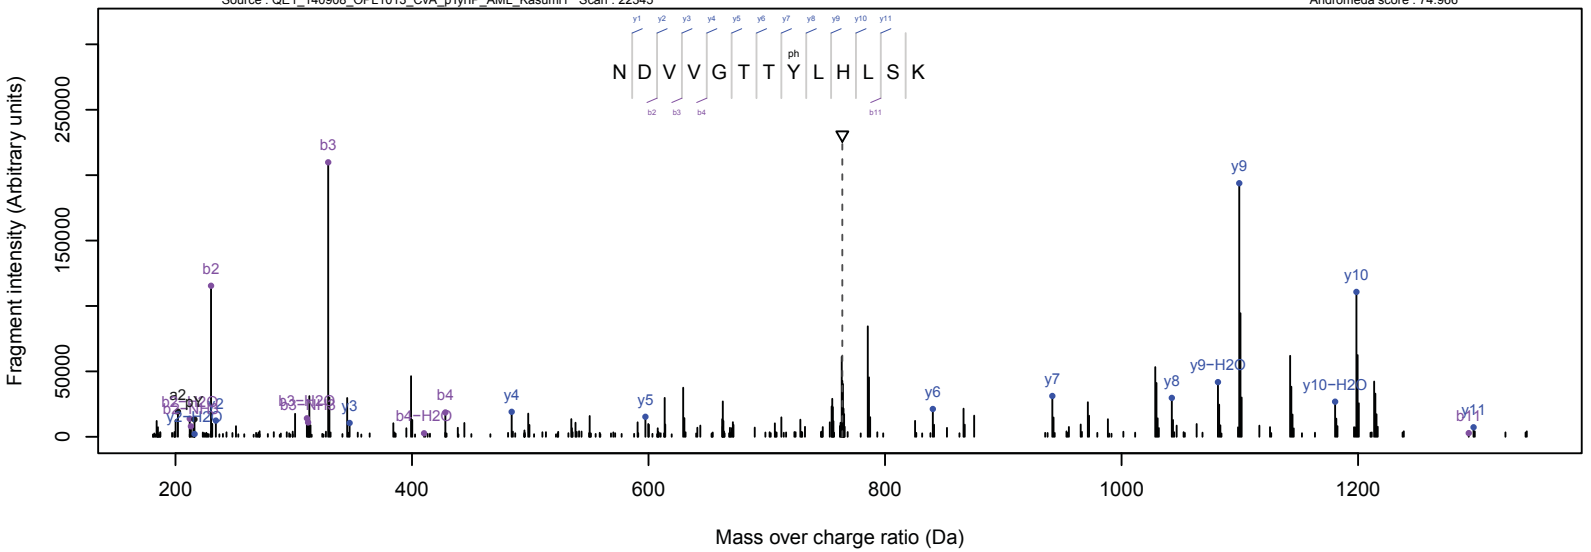



RLKVY(ph)HAWK-3+

Source : QE1\_140612\_OPL1013\_CVA\_phosphoproteomic\_landscape\_AML\_C Scan : 10357

Andromeda score : 74.92

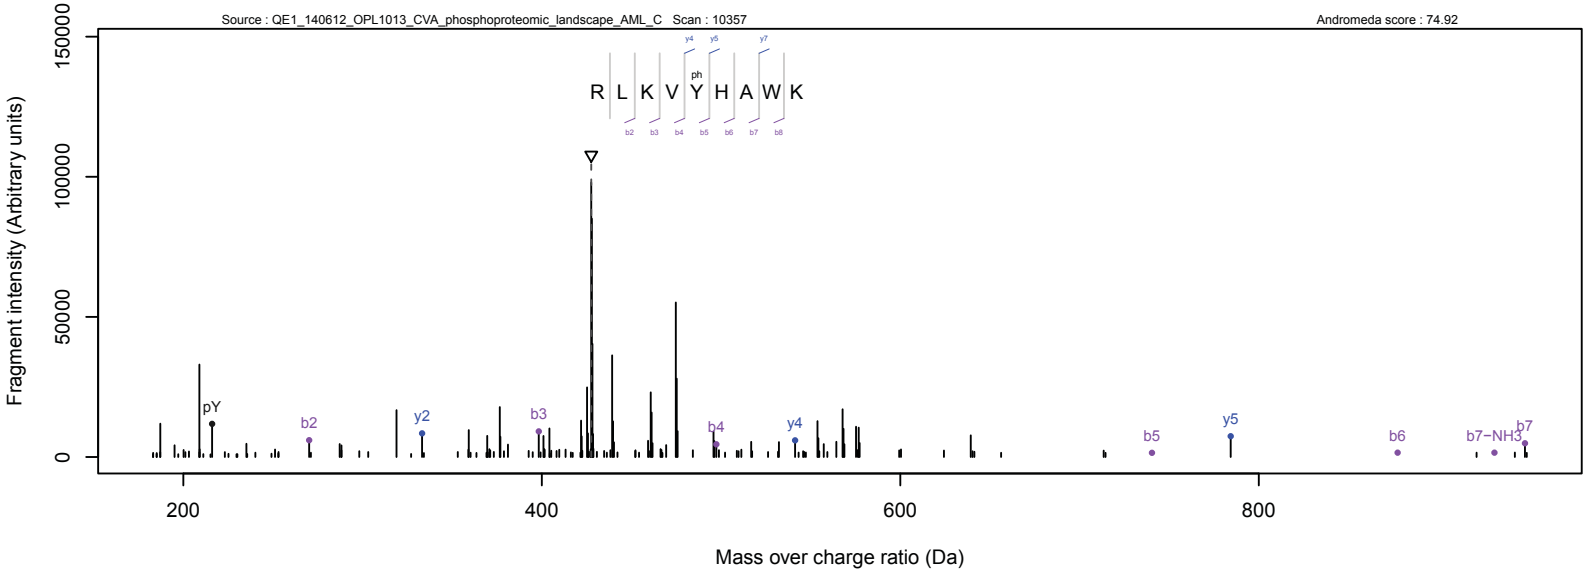

GSHGHTQGGY(ph)SSVSGGVRPPVGNR-4+

Source : QE1\_140612\_OPL1013\_CVA\_phosphoproteomic\_landscape\_AML\_C Scan : 9009

Andromeda score : 74.905

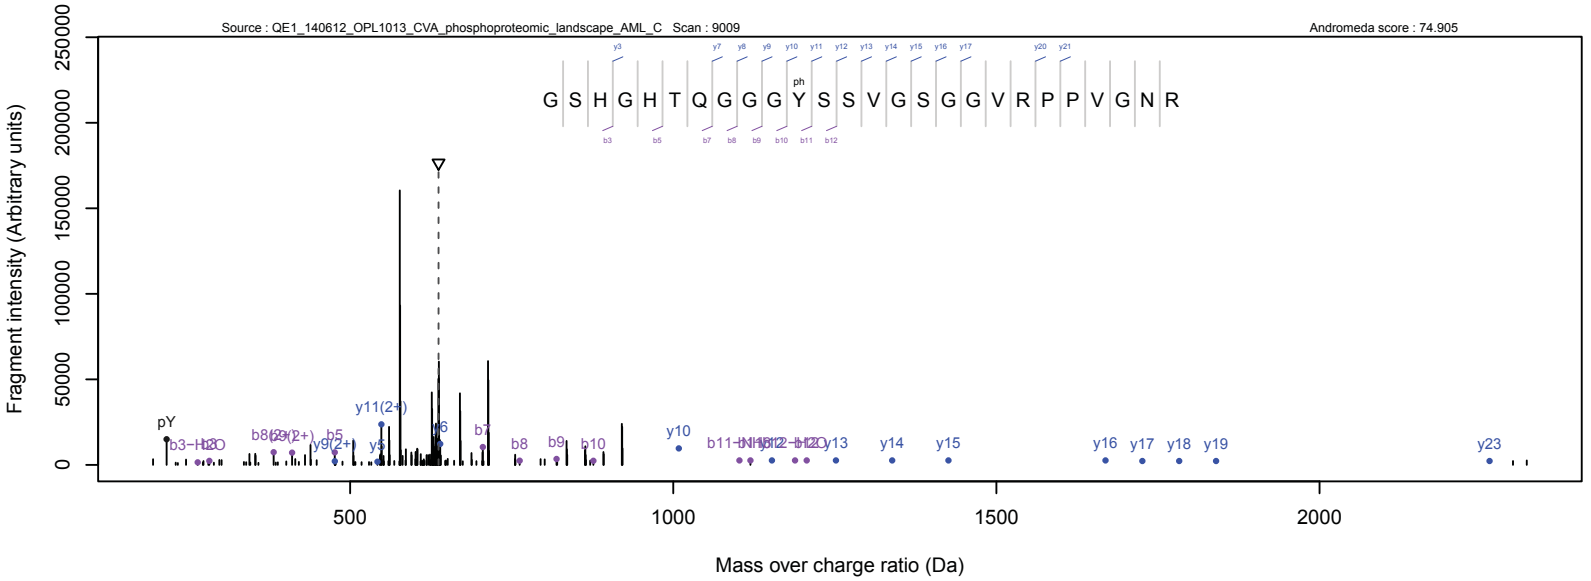

ALLNNSHY(ph)YHMAHGK-4+

Source : QE1\_140612\_OPL1013\_CVA\_phosphoproteomic\_landscape\_AML\_C Scan : 12098

Andromeda score : 74.853

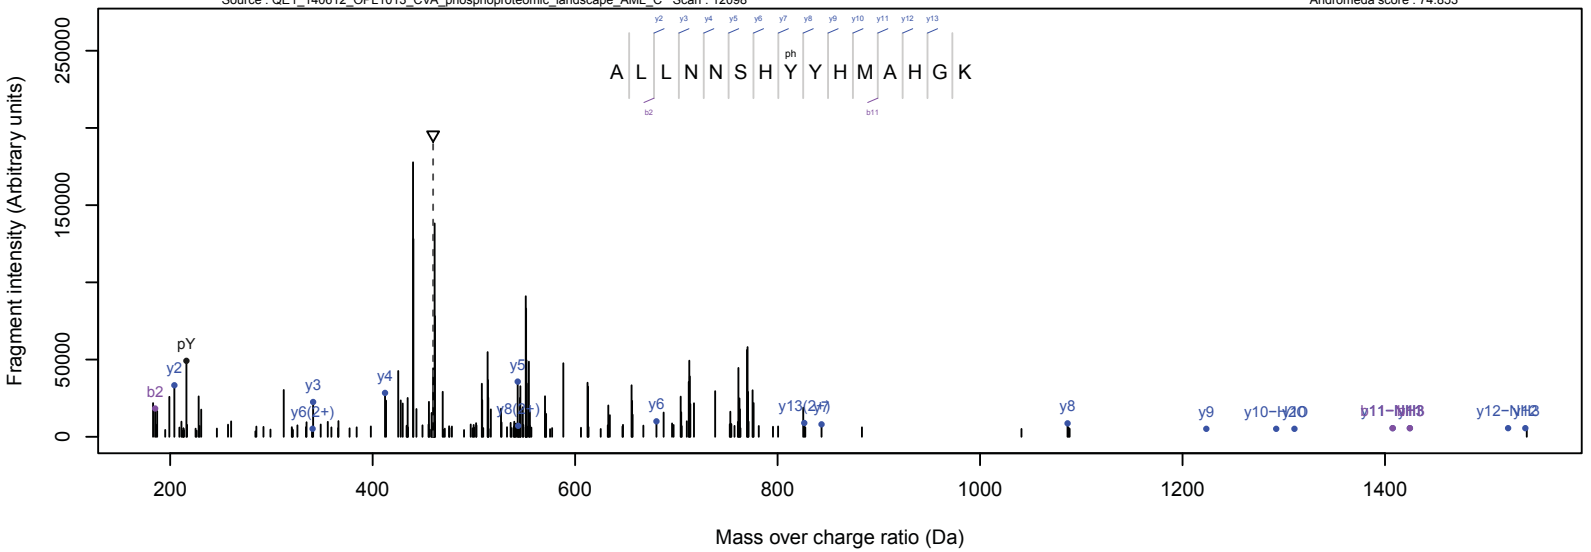

GMDY(ph)RDWVR-2+

Source: QE1\_140612\_OPL1013\_CVA\_phosphoproteomic\_landscape\_AML\_C Scan: 22785

Andromeda score: 74.849

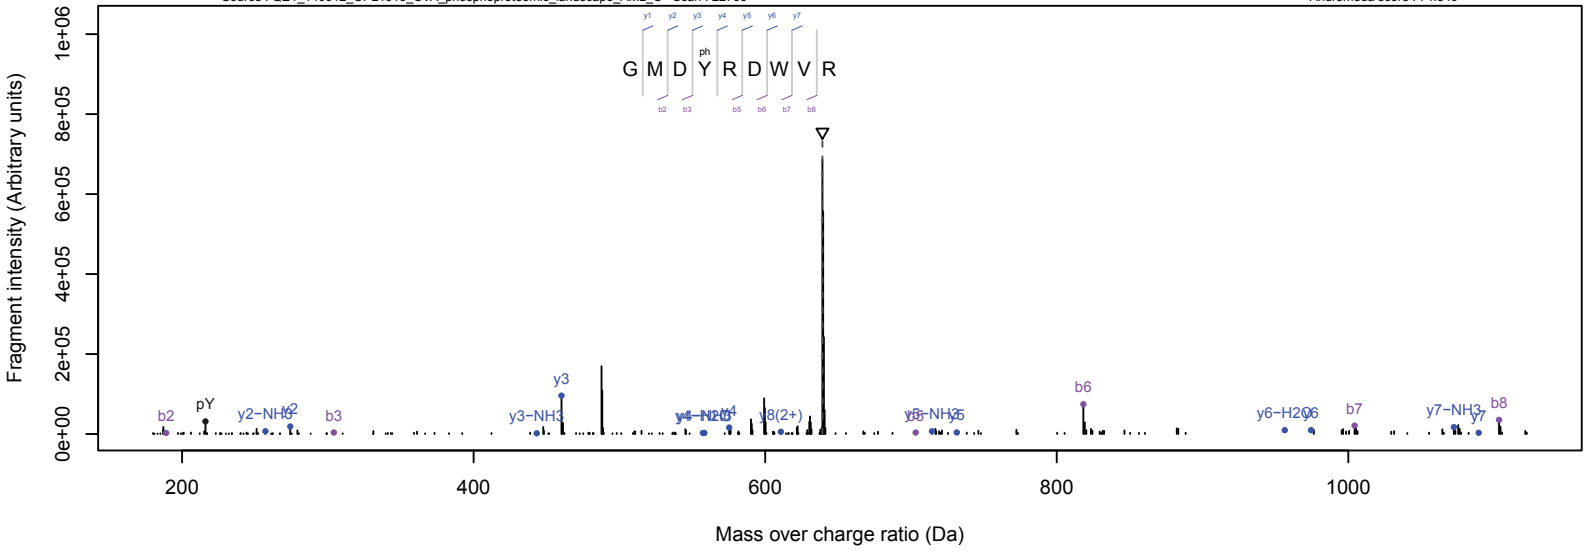

(ac)AAGGGGSCDPLAPAGVPCAFSPHS(ph)QAYFALASTDGHLR-3+

Source: QE1\_140612\_OPL1013\_CVA\_phosphoproteomic\_landscape\_AML\_D Scan: 46619

Andromeda score: 74.81

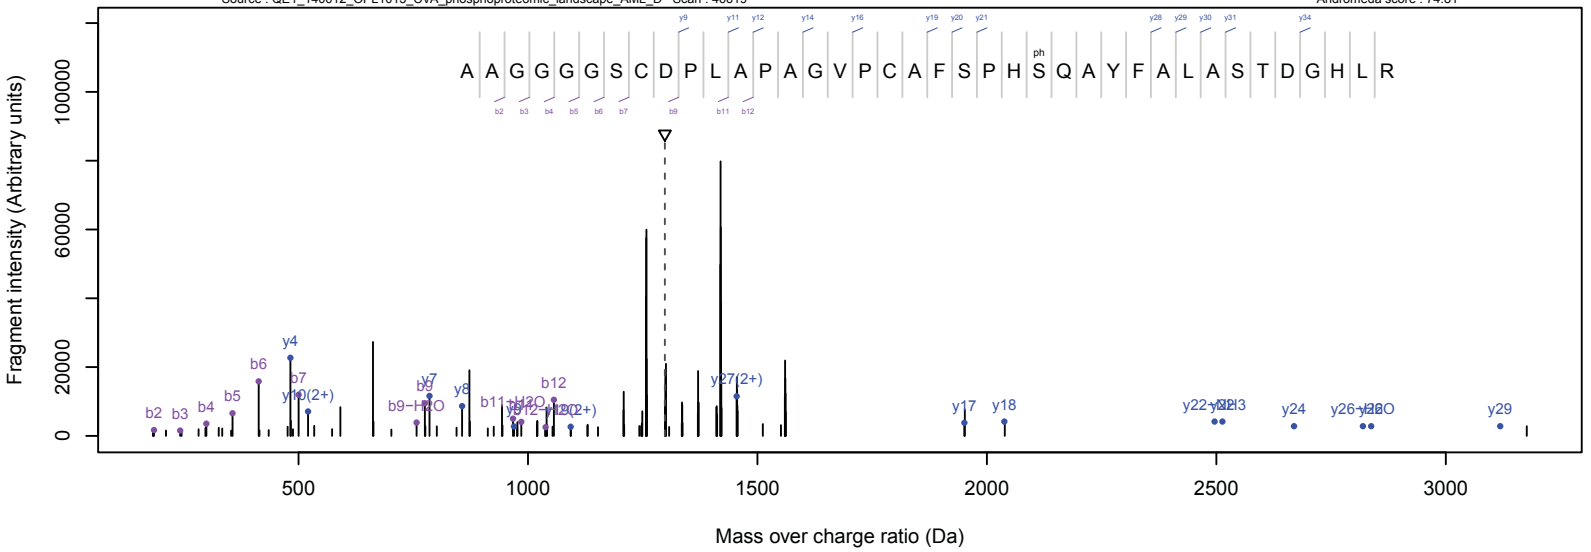

CY(ph)GFVTMSTAEATK-2+

Source: QE1\_140612\_OPL1013\_CVA\_phosphoproteomic\_landscape\_AML\_A Scan: 27598

Andromeda score: 74.789

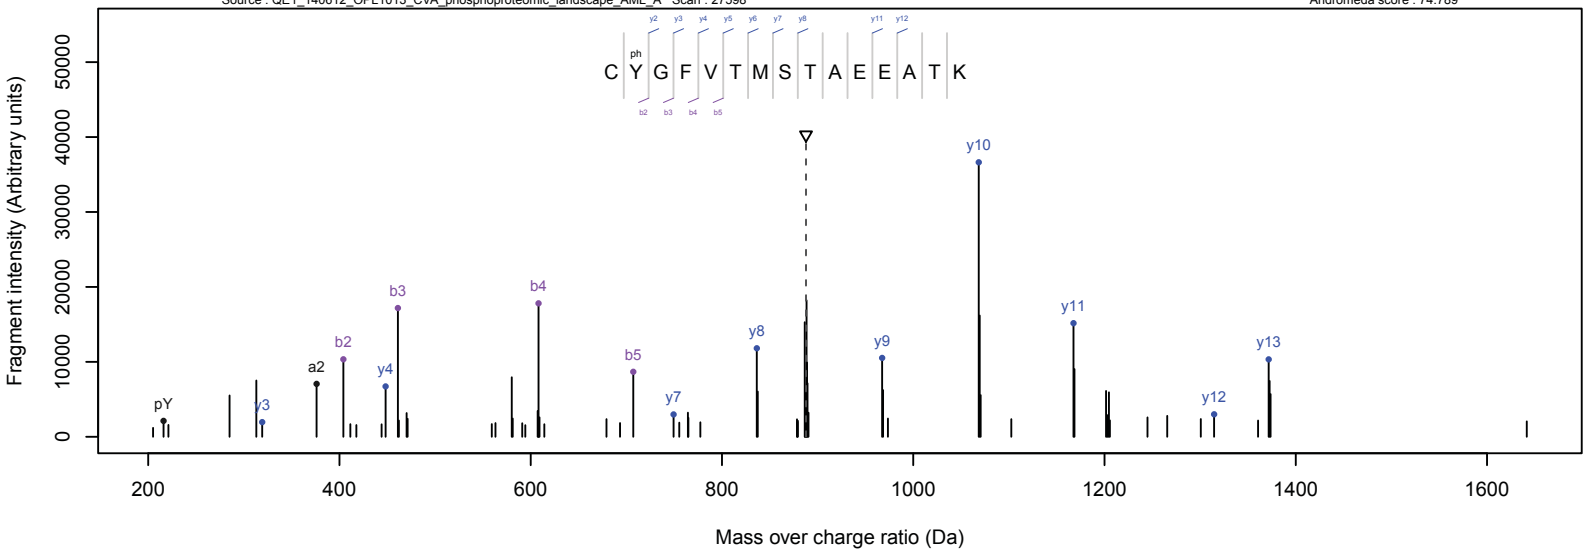

LY(ph)VPVKEYPDFNFVGR-2+

Source : QE1\_140612\_OPL1013\_CVA\_phosphoproteomic\_landscape\_AML\_D Scan : 42864

Andromeda score : 74.789

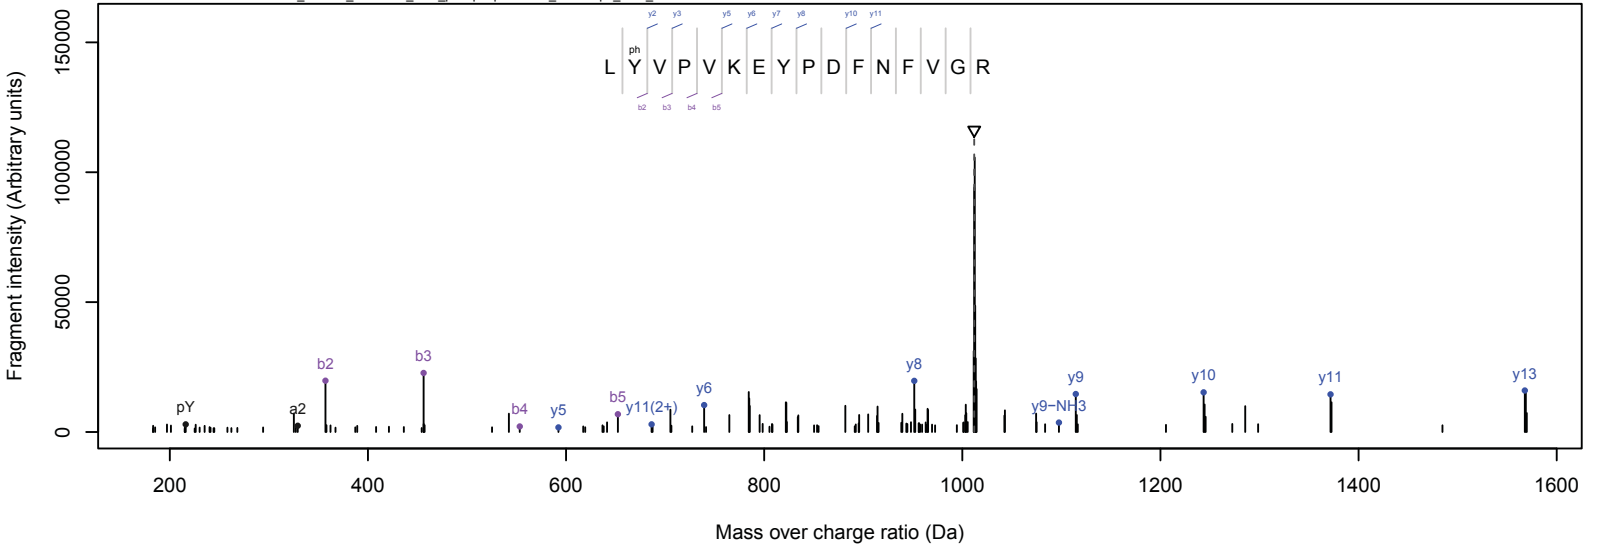

KAY(ph)SFCGTVEYMAPEVVR-3+

Source : QE1\_140612\_OPL1013\_CVA\_phosphoproteomic\_landscape\_AML\_B Scan : 33808

Andromeda score : 74.776

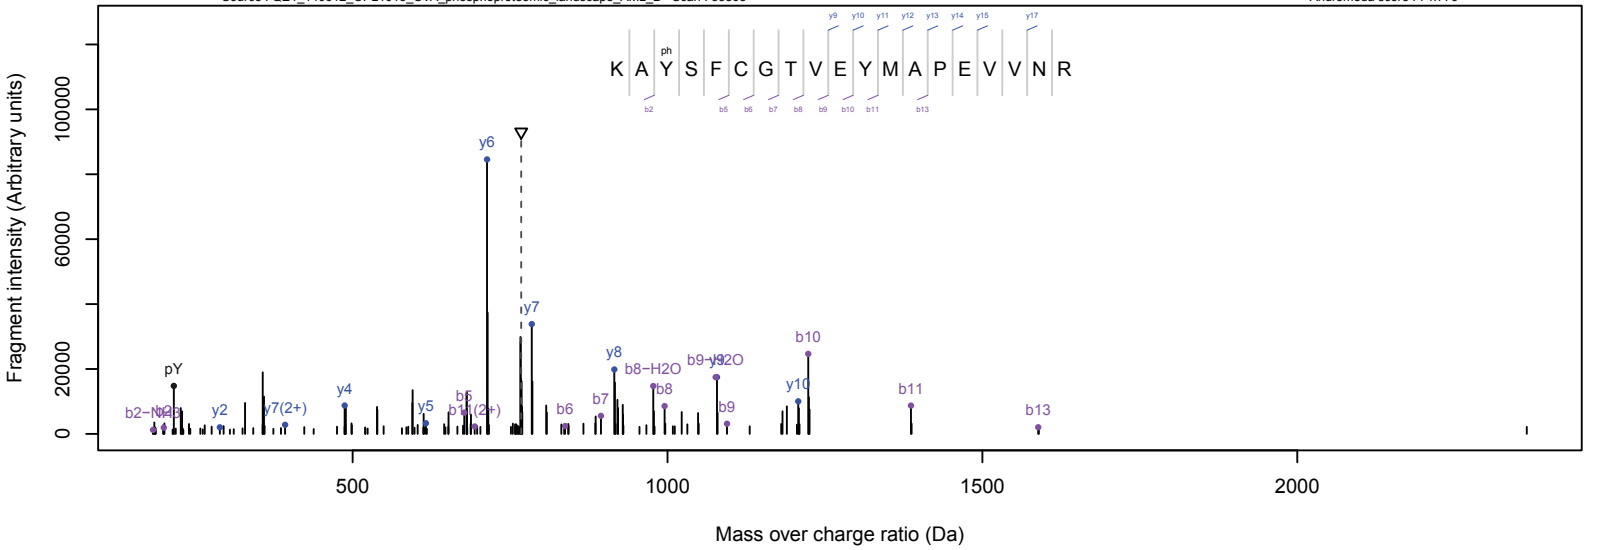

QGGY(ph)SMHQLQGNKEYGSEKK-4+

Source : QE1\_140612\_OPL1013\_CVA\_phosphoproteomic\_landscape\_AML\_C Scan : 7010

Andromeda score : 74.776

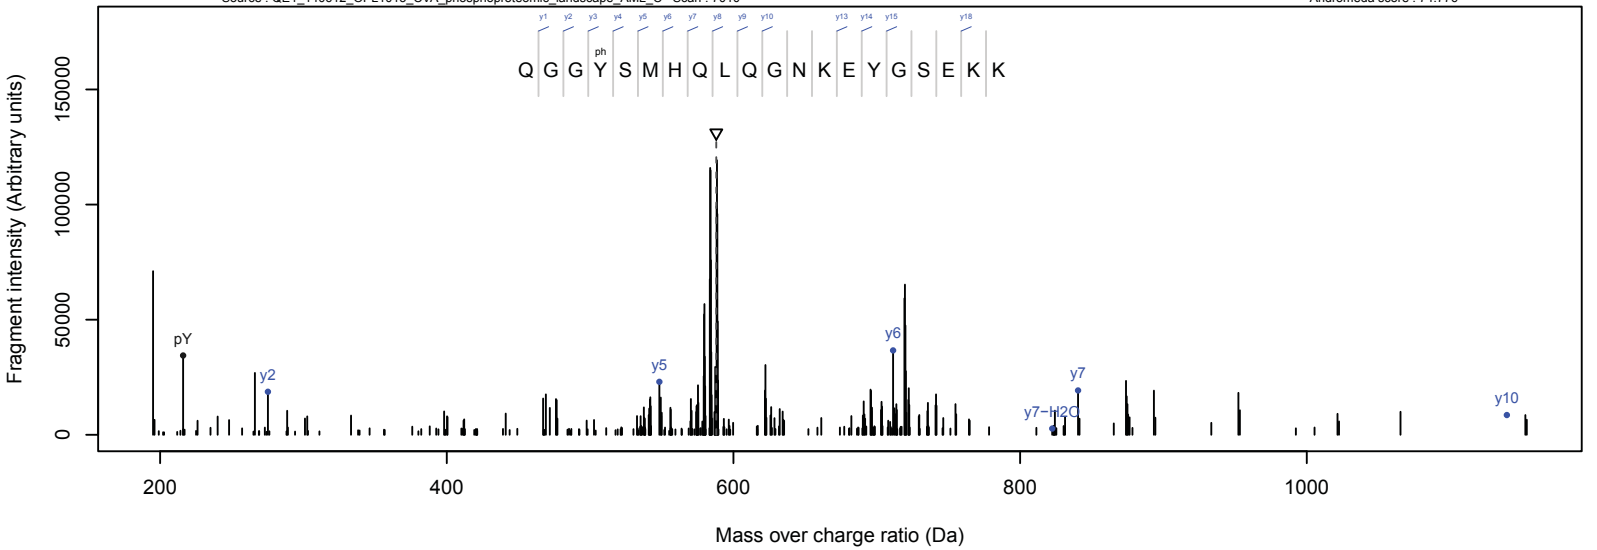



VSDSNAY(ph)IGVTYK-2+

Source: QE1\_140822\_OPL1013\_CvA\_pTyrIP\_AML\_cell\_lines\_part2\_B Scan: 14219

Andromeda score: 74.649

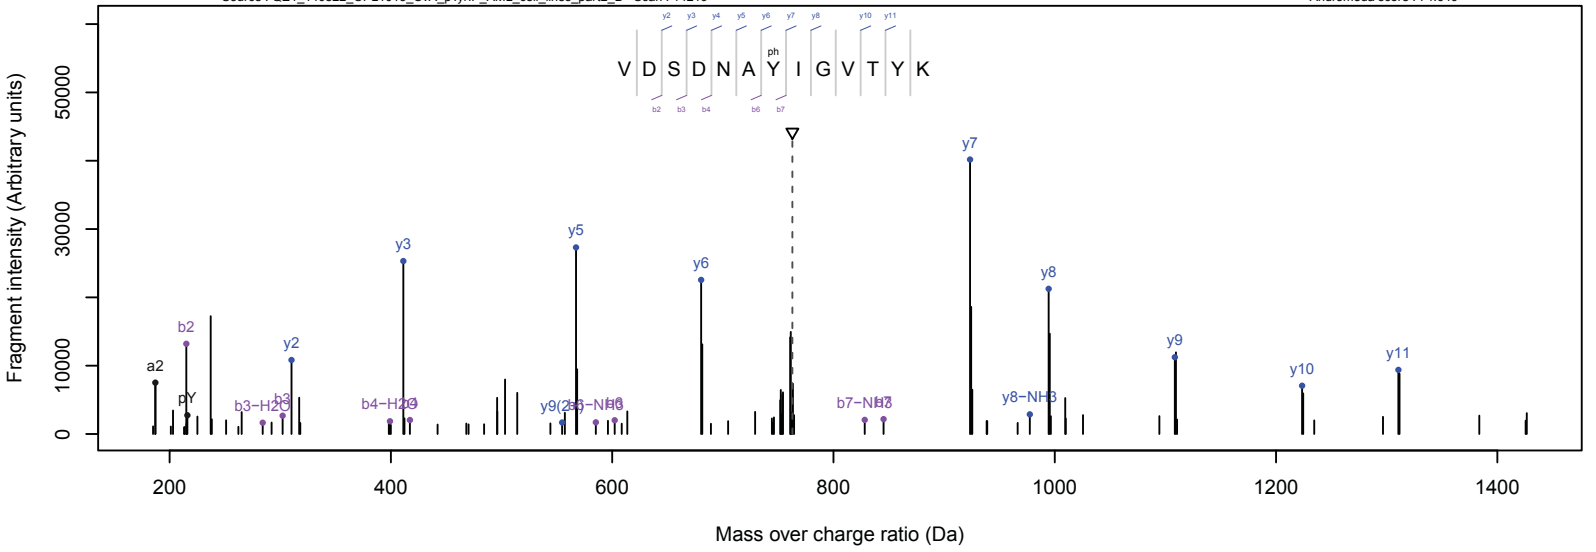

IHLRDY(ph)VEDDVNMAIR-3+

Source: QE1\_140612\_OPL1013\_CVA\_phosphoproteomic\_landscape\_AML\_B Scan: 36032

Andromeda score: 74.618

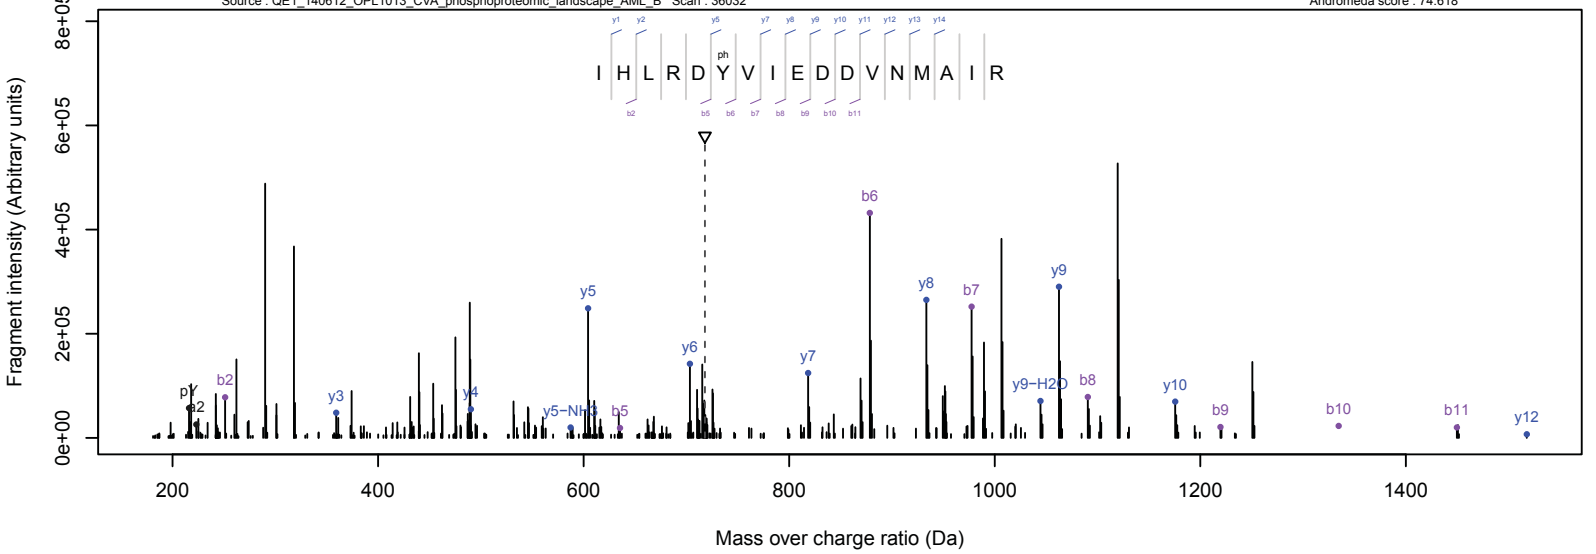

TPAGHVY(ph)EYIPHLGHMCK-4+

Source: QE1\_140612\_OPL1013\_CVA\_phosphoproteomic\_landscape\_AML\_B Scan: 27577

Andromeda score: 74.618

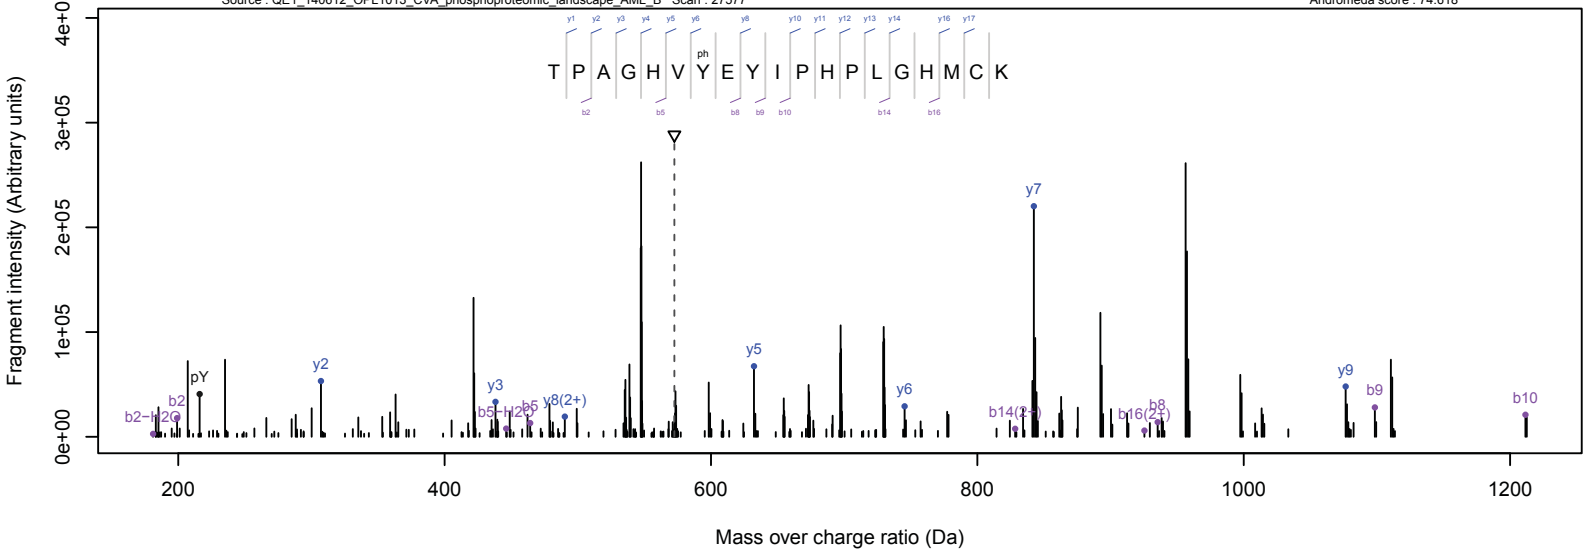

GVCTEAGMY(ph)ALR-2+

Source : QE1\_140612\_OPL1013\_CVA\_phosphoproteomic\_landscape\_AML\_C Scan : 21971

Andromeda score : 74.611

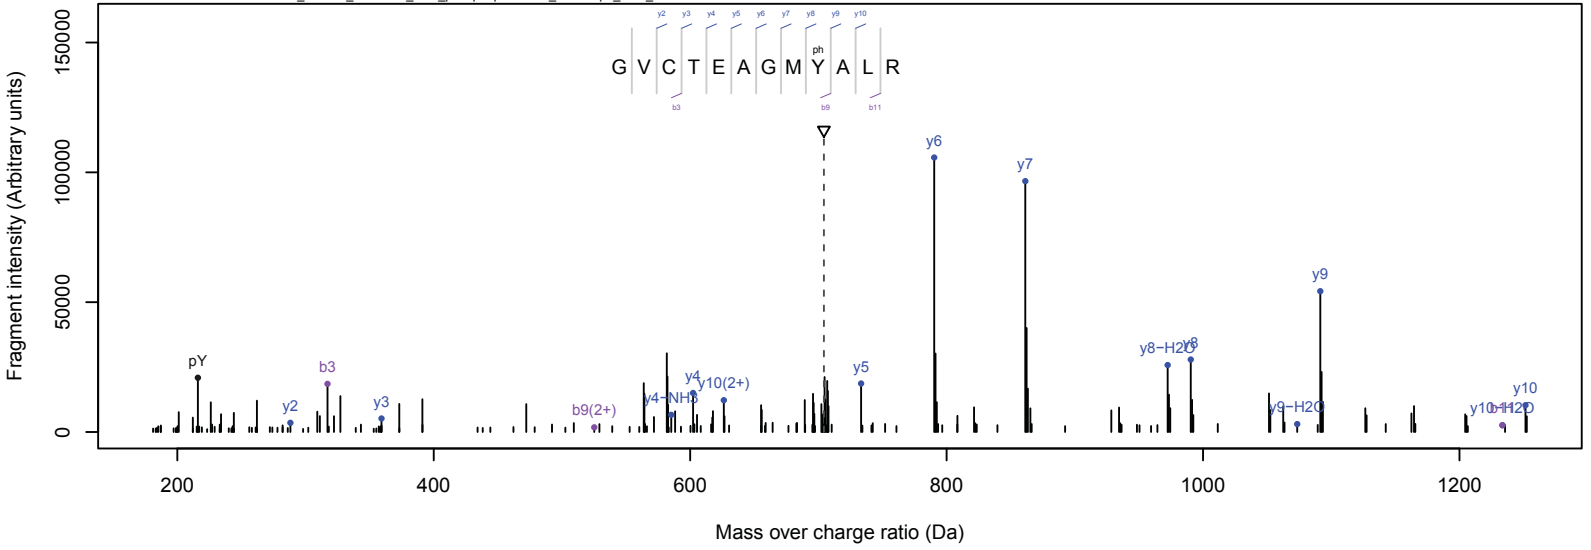

EQKVY(ph)YSYSQISHK-3+

Source : QE1\_140612\_OPL1013\_CVA\_phosphoproteomic\_landscape\_AML\_C Scan : 13017

Andromeda score : 74.587

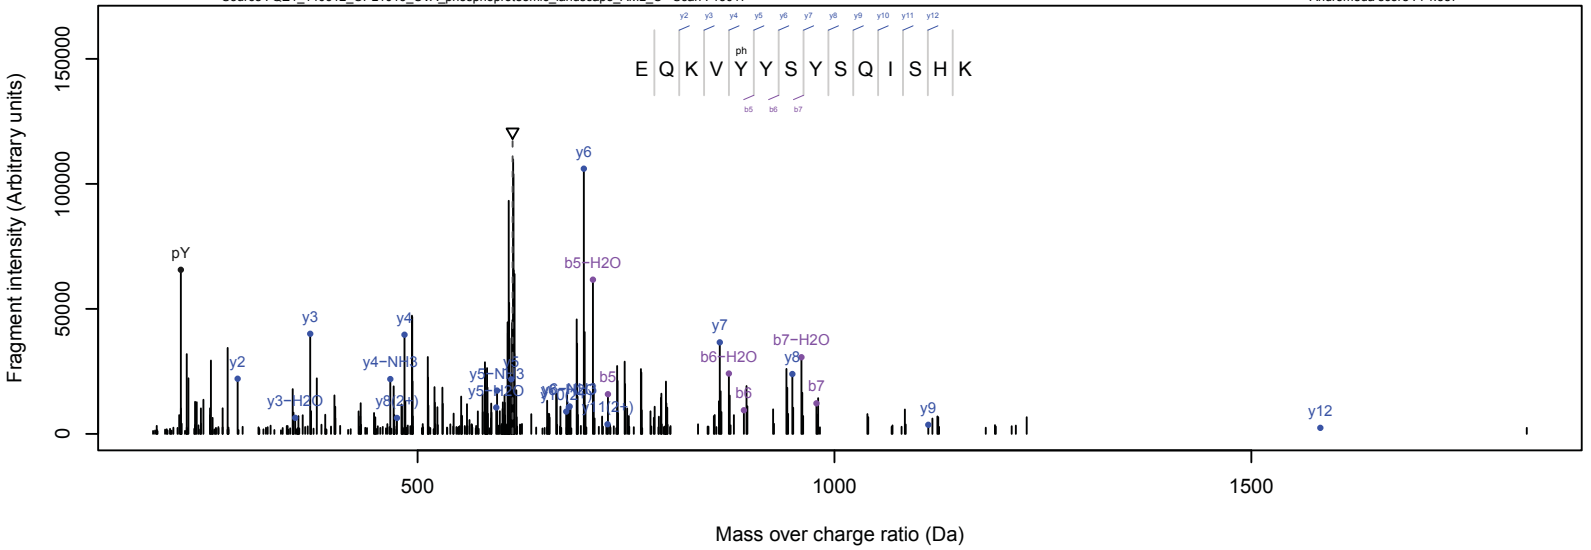

M(ox)GSGIQY(ph)GDAALR-2+

Source : QE1\_140612\_OPL1013\_CVA\_phosphoproteomic\_landscape\_AML\_C Scan : 15930

Andromeda score : 74.537

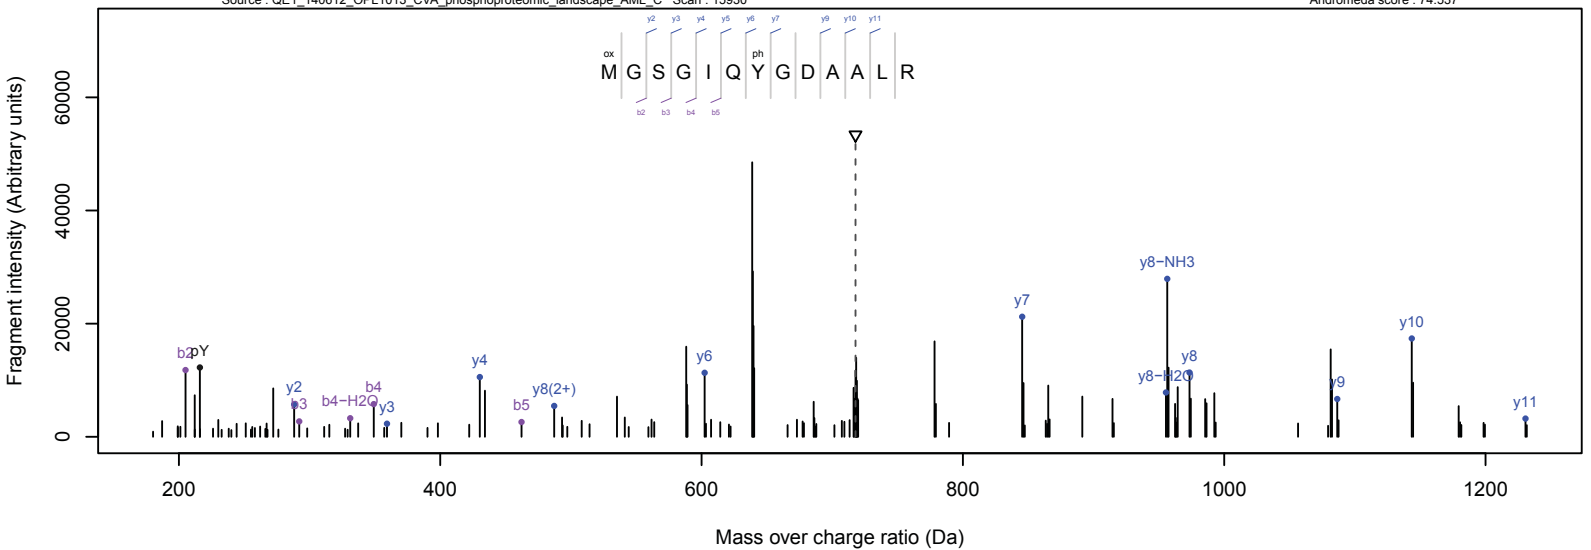

**DNSTMGY(ph)MMAK-2+**

Source : QE1\_140612\_OPL1013\_CVA\_phosphoproteomic\_landscape\_AML\_B Scan : 17224

Andromeda score : 74.53

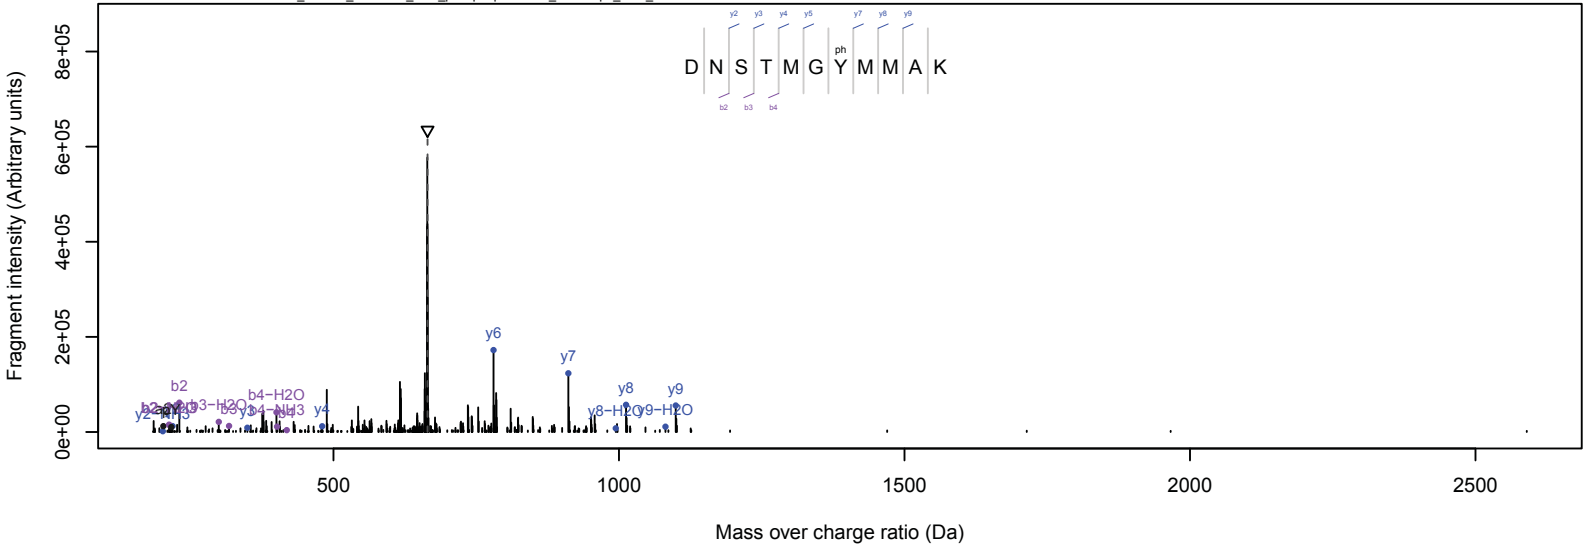

**NKLDHY(ph)AIK-3+**

Source : QE1\_140612\_OPL1013\_CVA\_phosphoproteomic\_landscape\_AML\_C Scan : 14973

Andromeda score : 74.53

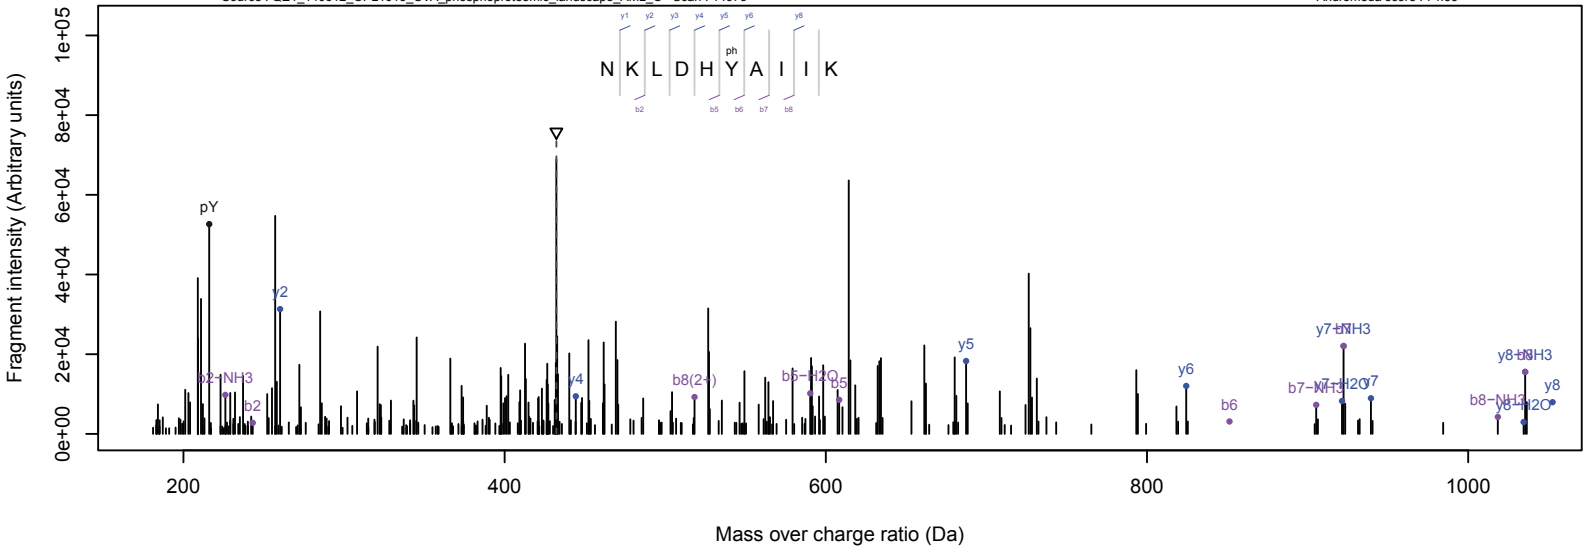

**FHALGPIY(ph)YR-3+**

Source : QE1\_140612\_OPL1013\_CVA\_phosphoproteomic\_landscape\_AML\_C Scan : 29498

Andromeda score : 74.464

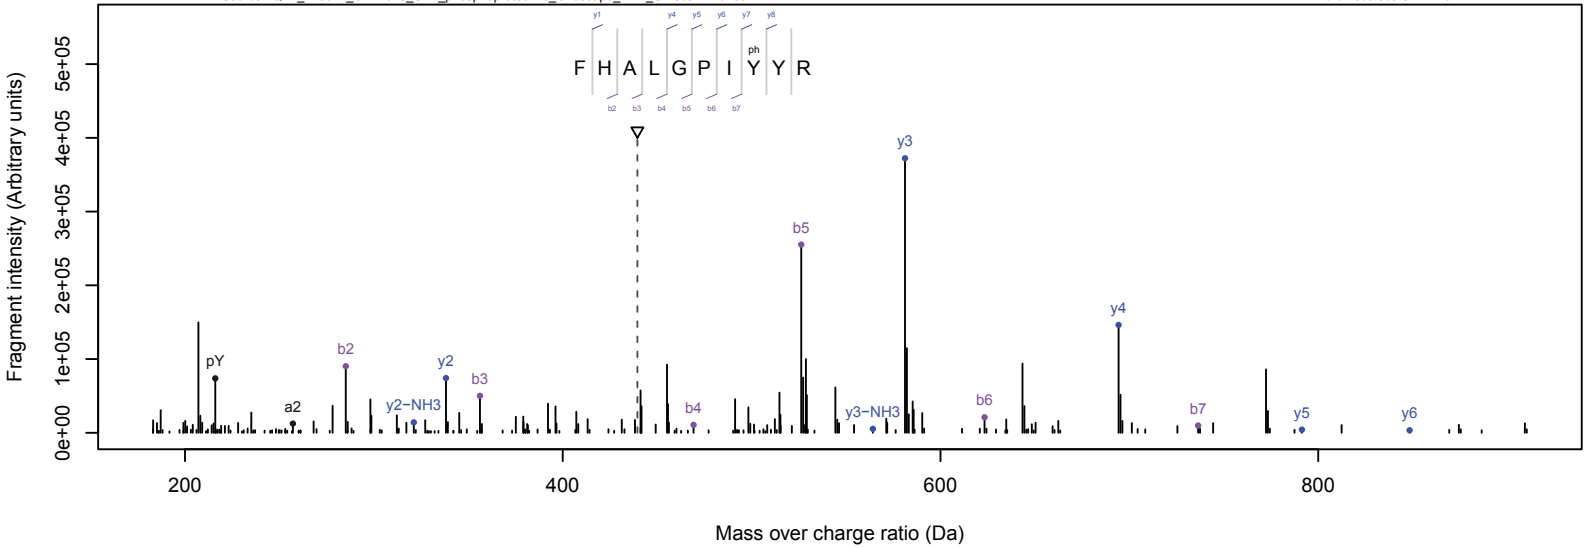

LILSPY(ph)EHK-2+

Source : QE1\_140612\_OPL1013\_CVA\_phosphoproteomic\_landscape\_AML\_C Scan : 15748

Andromeda score : 74.464

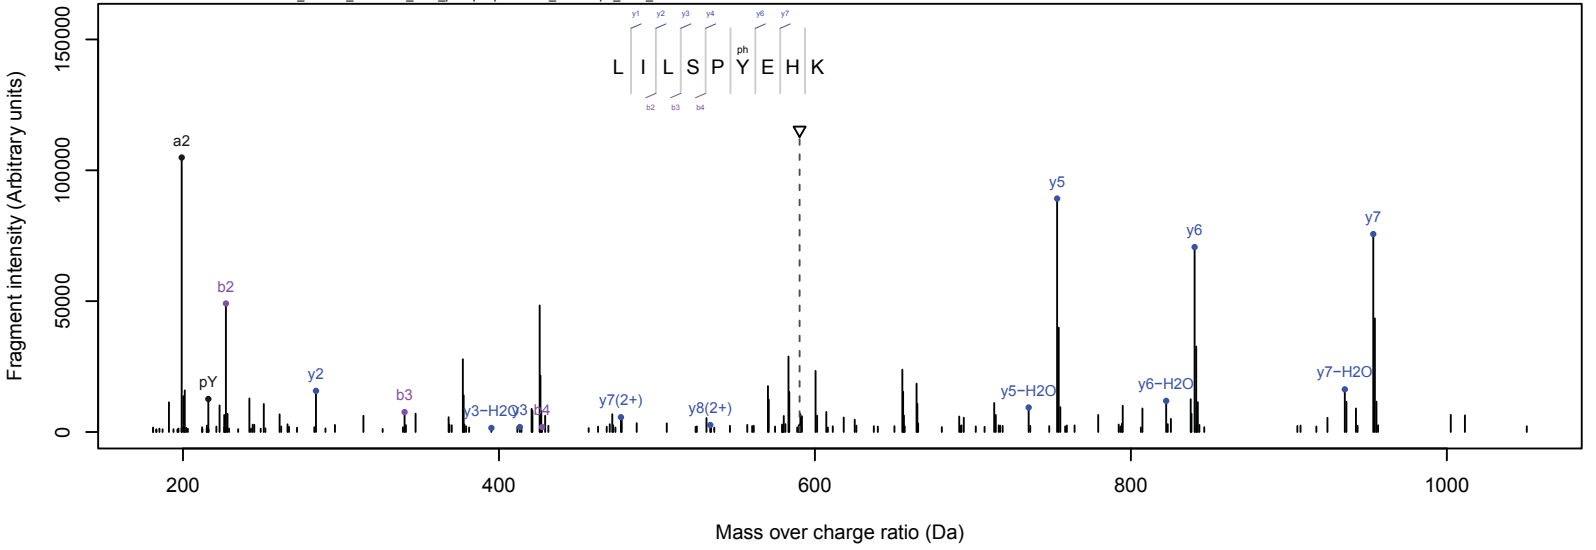

LY(ph)EQLSGK-2+

Source : Qe1\_141024\_OPL1013\_CvA\_AML\_pTyriP\_MOLM13 Scan : 10128

Andromeda score : 74.464

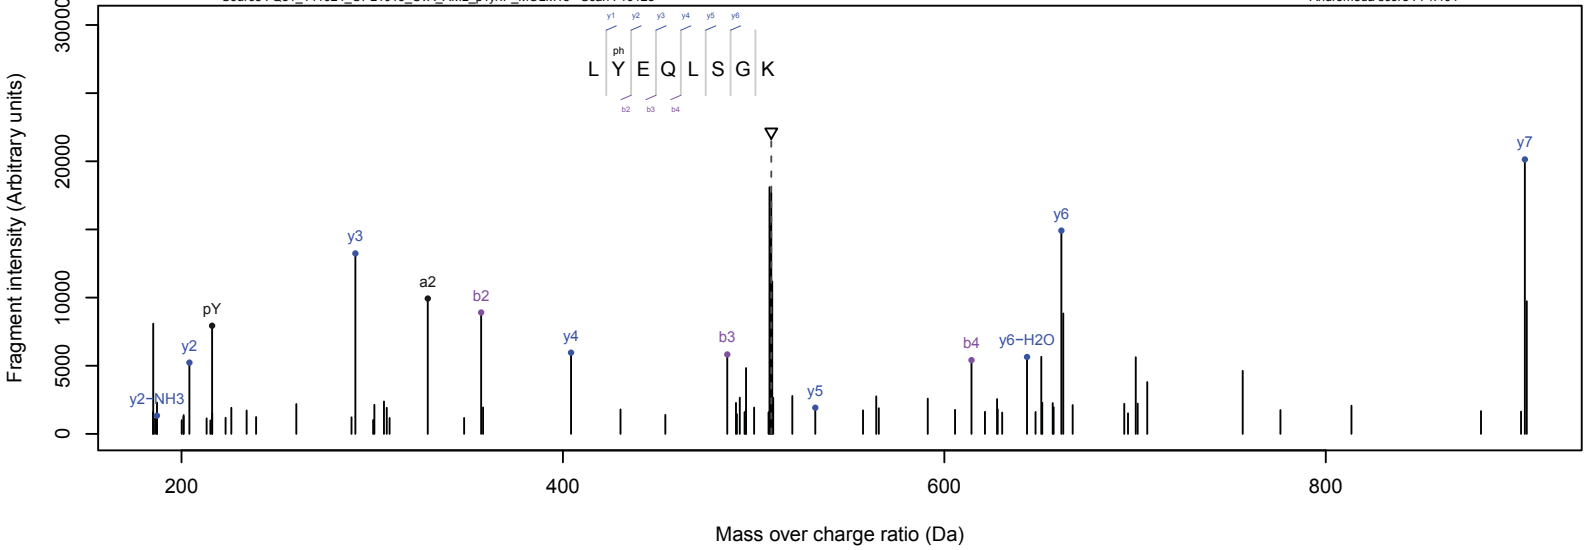

ISLSPFSTDSAY(ph)EWK-2+

Source : QE1\_140612\_OPL1013\_CVA\_phosphoproteomic\_landscape\_AML\_B Scan : 41048

Andromeda score : 74.428

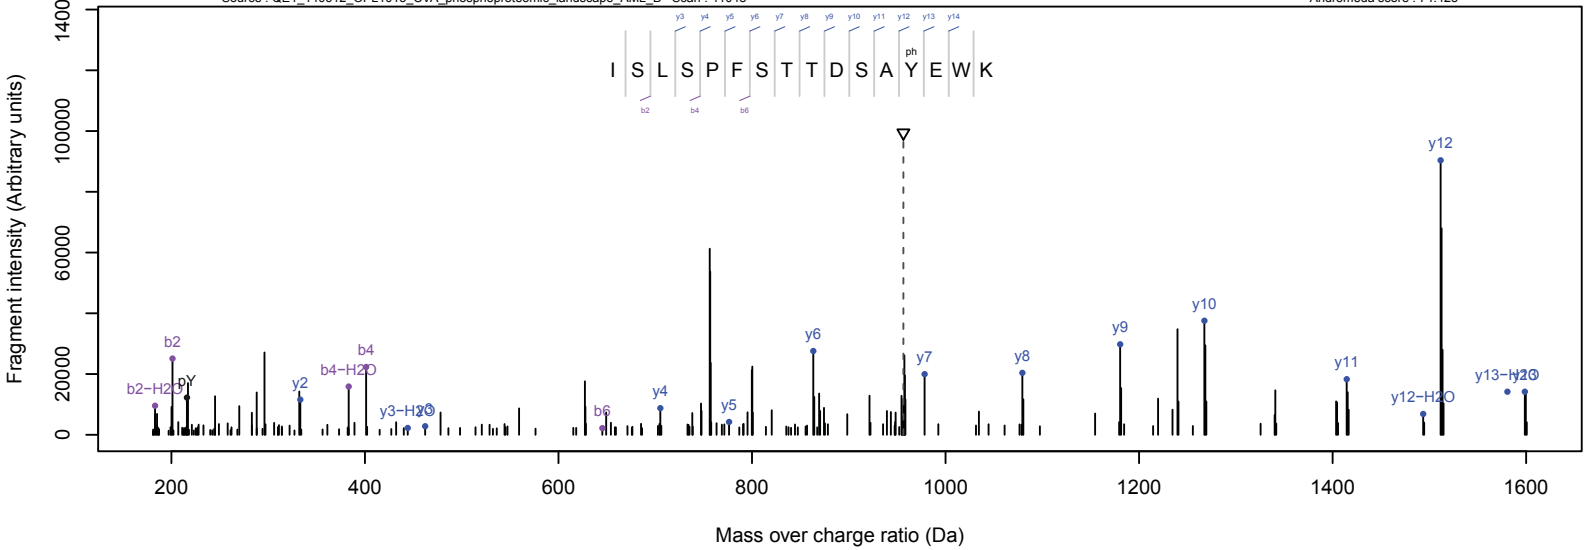



ANY(ph)WWLR-2+

Source: QE1\_140612\_OPL1013\_CVA\_phosphoproteomic\_landscape\_AML\_D Scan: 35272

Andromeda score: 74.415

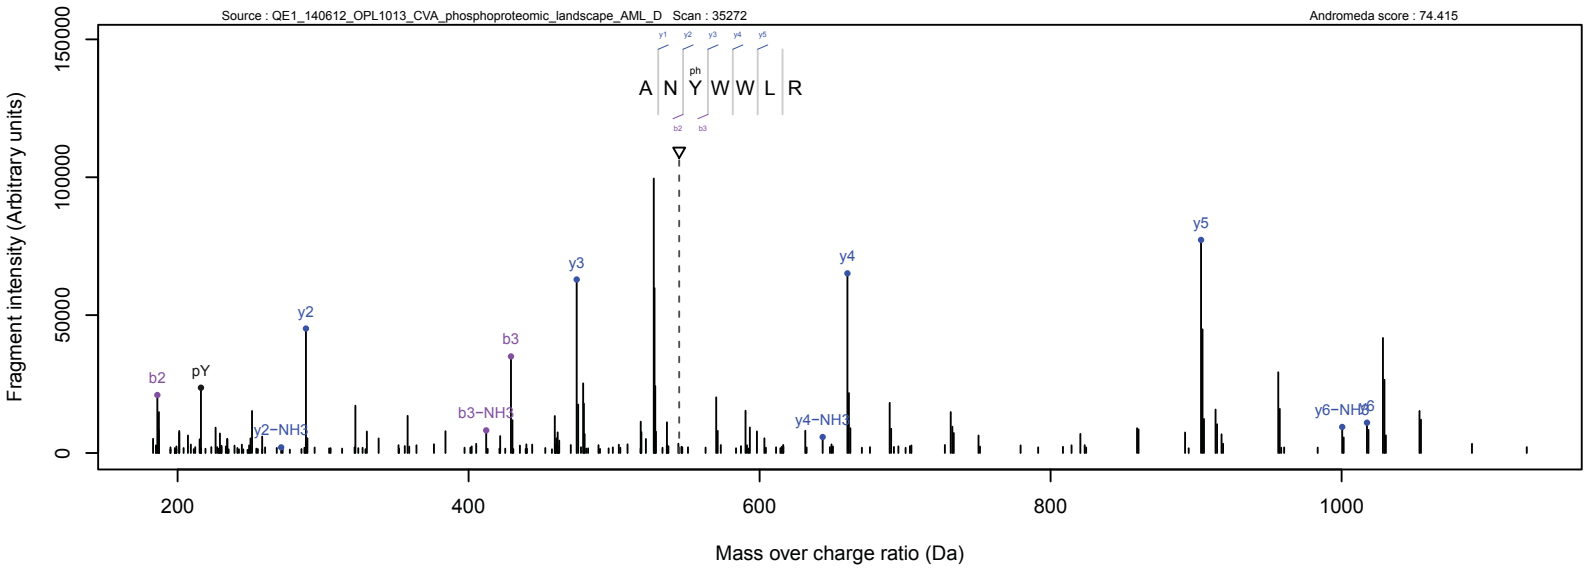

FAVPTY(ph)AAK-2+

Source: QE1\_140612\_OPL1013\_CVA\_phosphoproteomic\_landscape\_AML\_C Scan: 18652

Andromeda score: 74.376

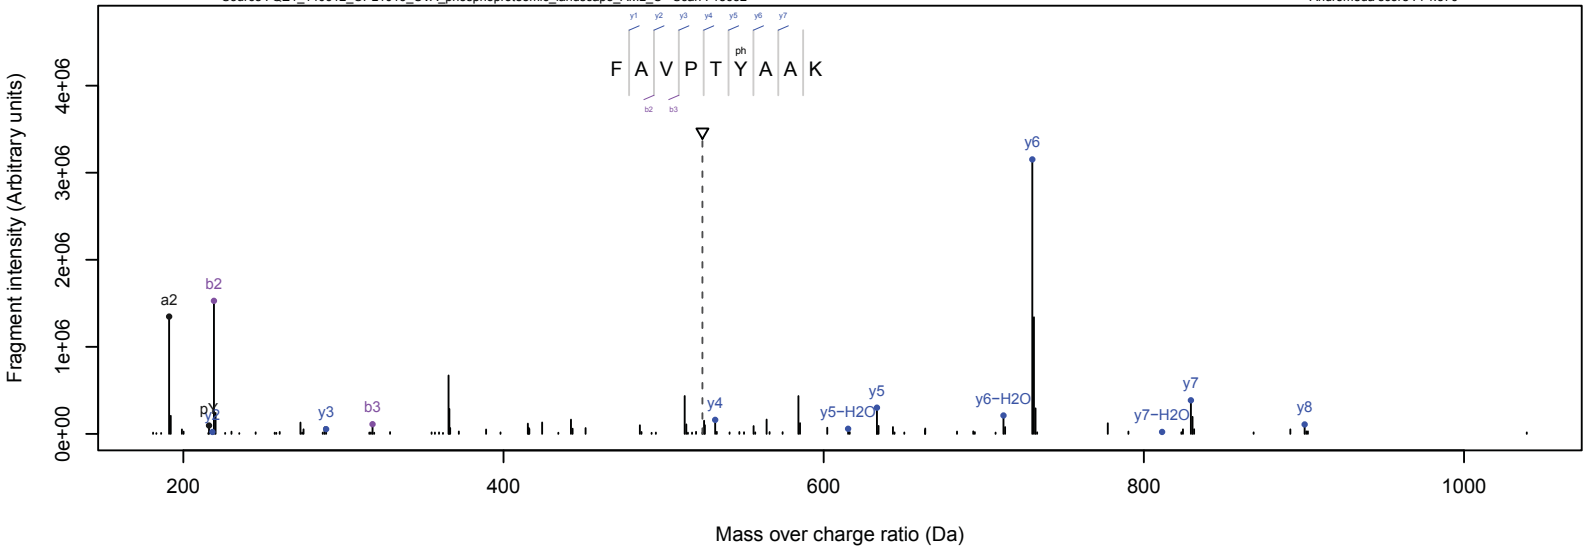

GLATSLQNDLQEVKLYPEFPK-3+

Source: QE1\_140612\_OPL1013\_CVA\_phosphoproteomic\_landscape\_AML\_C Scan: 47824

Andromeda score: 74.364

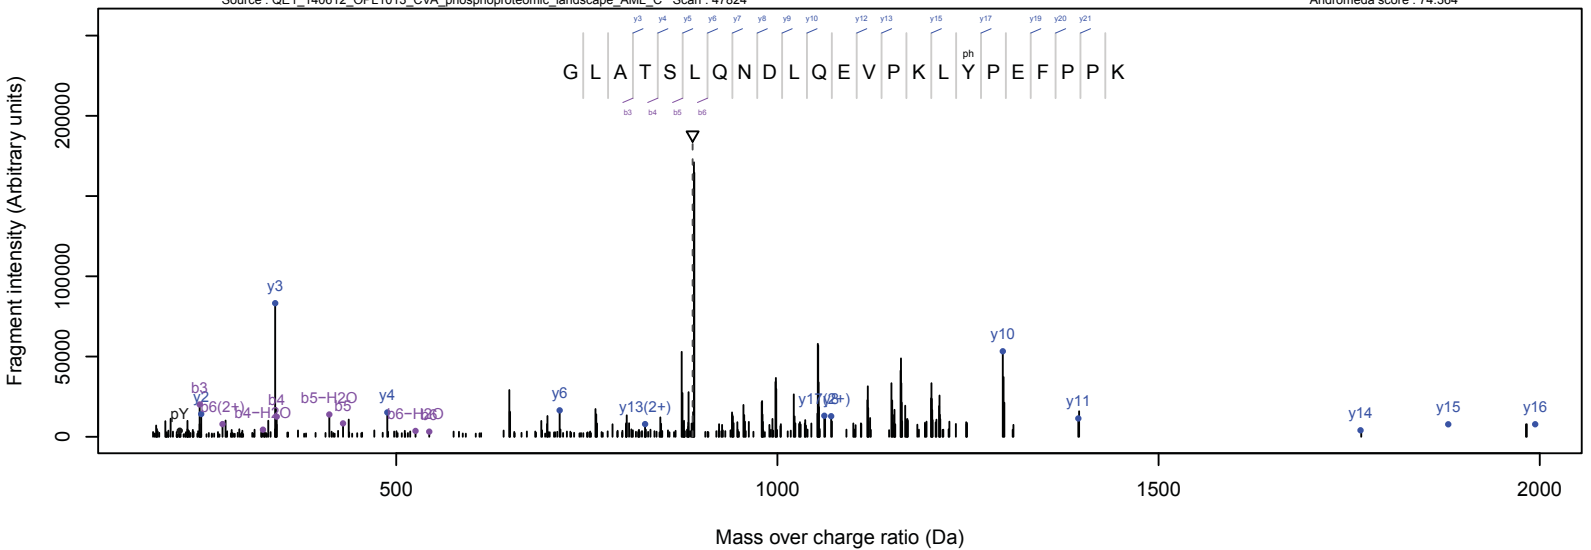

**IKY(ph)YALCAPPGNSDPEQLKK-3+**

Source : QE1\_140612\_OPL1013\_CVA\_phosphoproteomic\_landscape\_AML\_B Scan : 22497

Andromeda score : 74.364

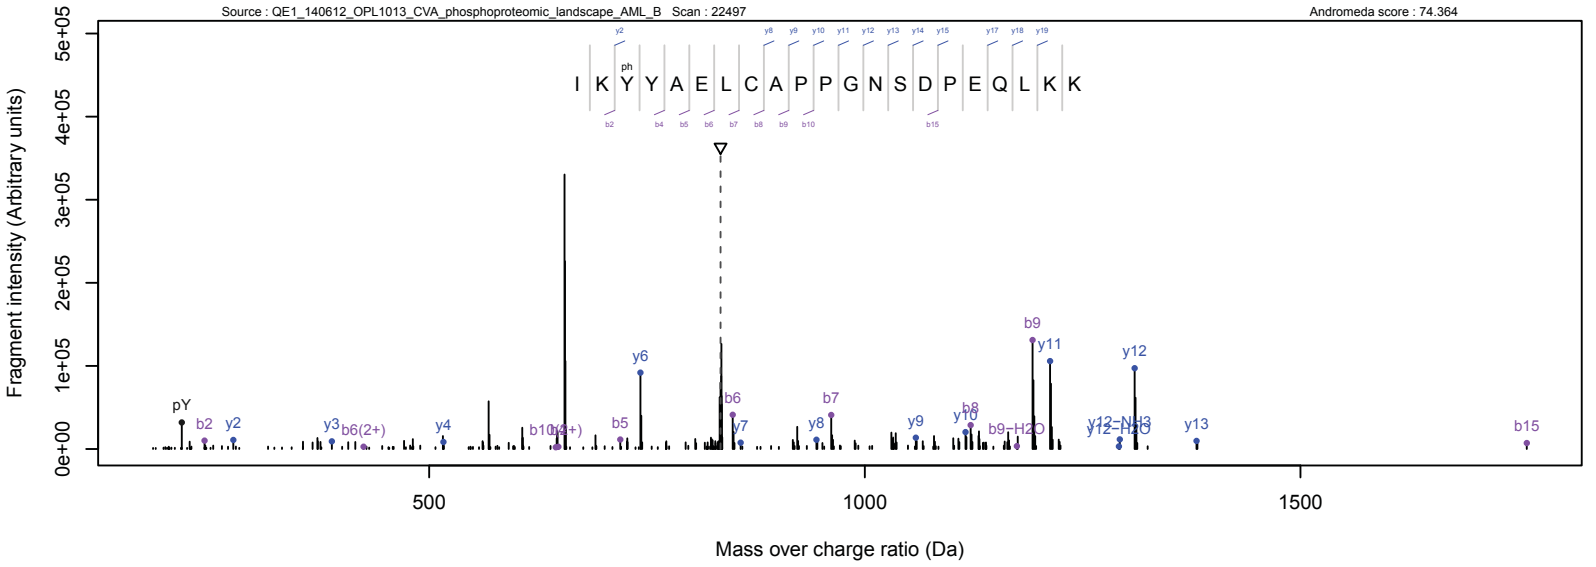

**LGSPDY(ph)GNSALLSLPGYRPTTR-3+**

Source : QE1\_140612\_OPL1013\_CVA\_phosphoproteomic\_landscape\_AML\_B Scan : 36406

Andromeda score : 74.364

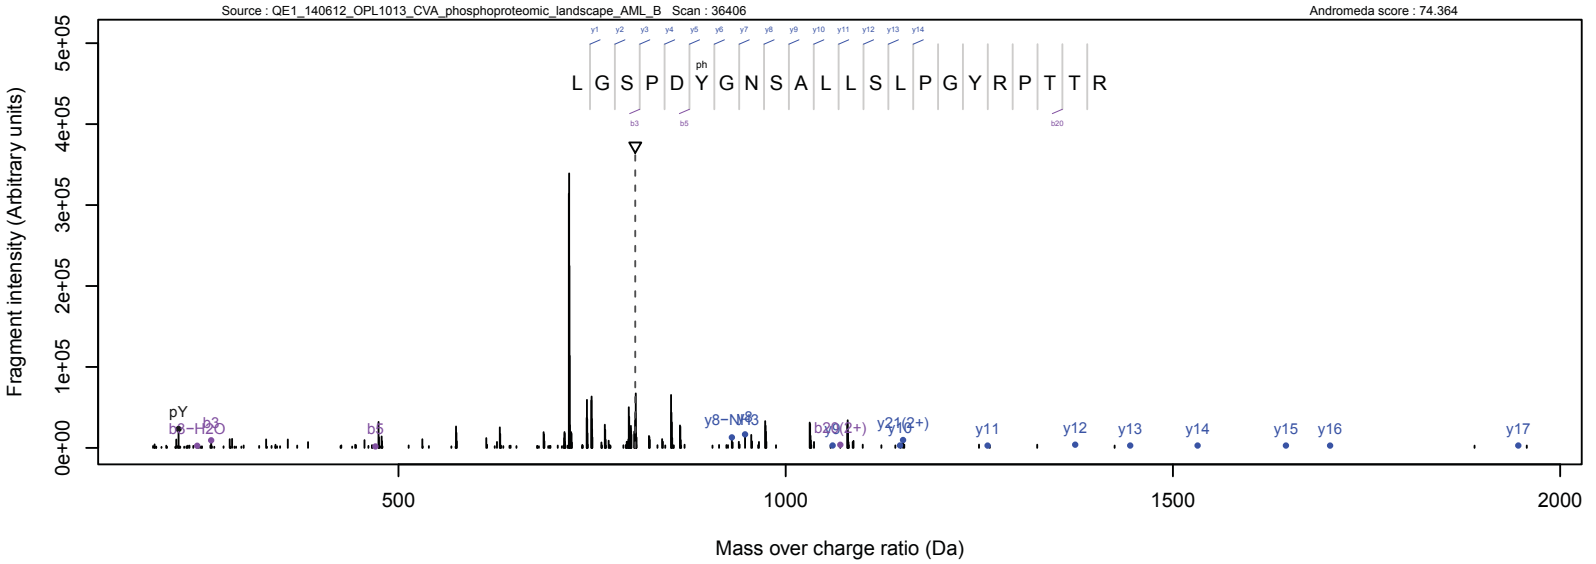

**LPDYKPYPMY(ph)PATTSLVNVVPK-3+**

Source : QE1\_140612\_OPL1013\_CVA\_phosphoproteomic\_landscape\_AML\_C Scan : 43618

Andromeda score : 74.364

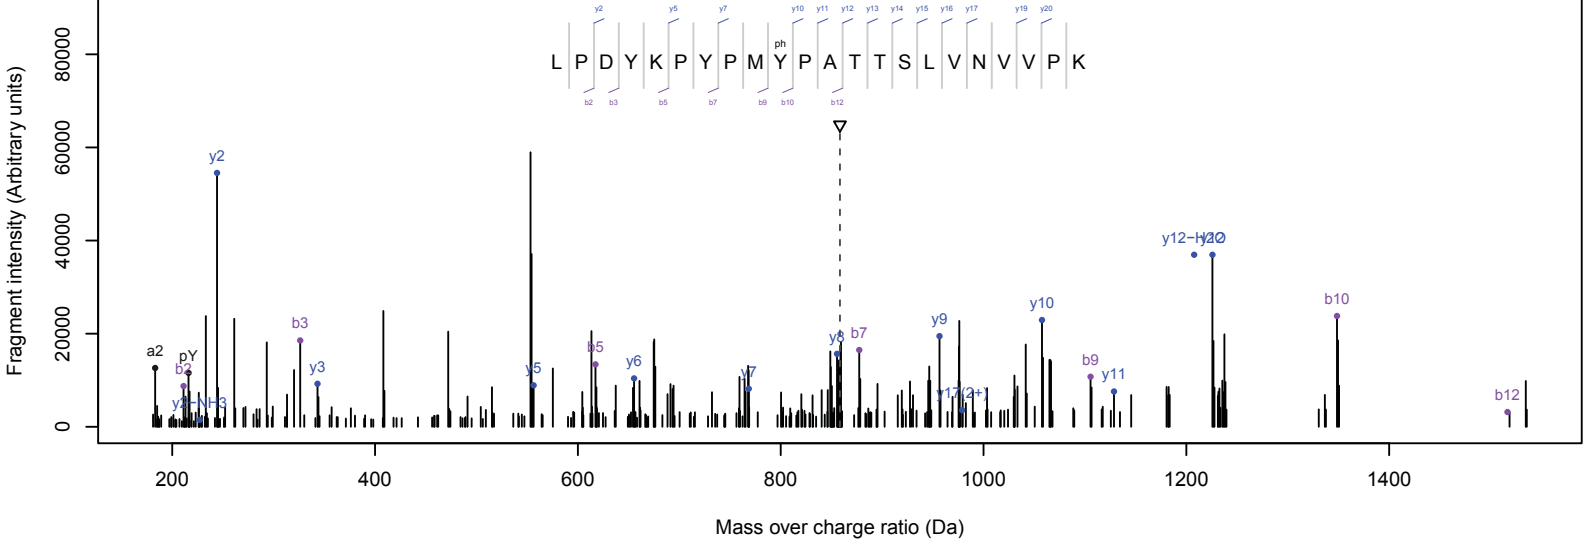

**YAMQLHEDCY(ph)KFWWSNGHQLCEER-4+**

Source : QE1\_140612\_OPL1013\_CVA\_phosphoproteomic\_landscape\_AML\_C Scan : 28351

Andromeda score : 74.364

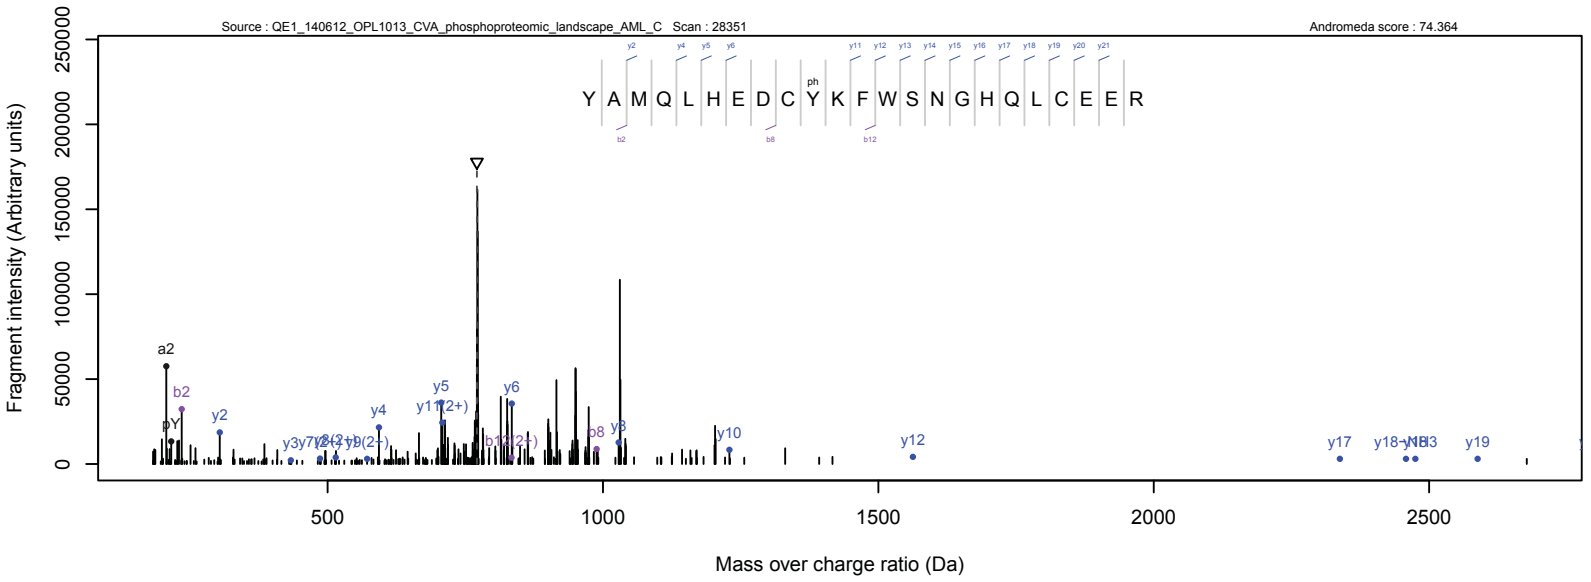

**IRY(ph)ESLTDP SKLD SGK-3+**

Source : QE1\_140908\_OPL1013\_CvA\_pTyrIP\_AML\_HEL Scan : 19062

Andromeda score : 74.338

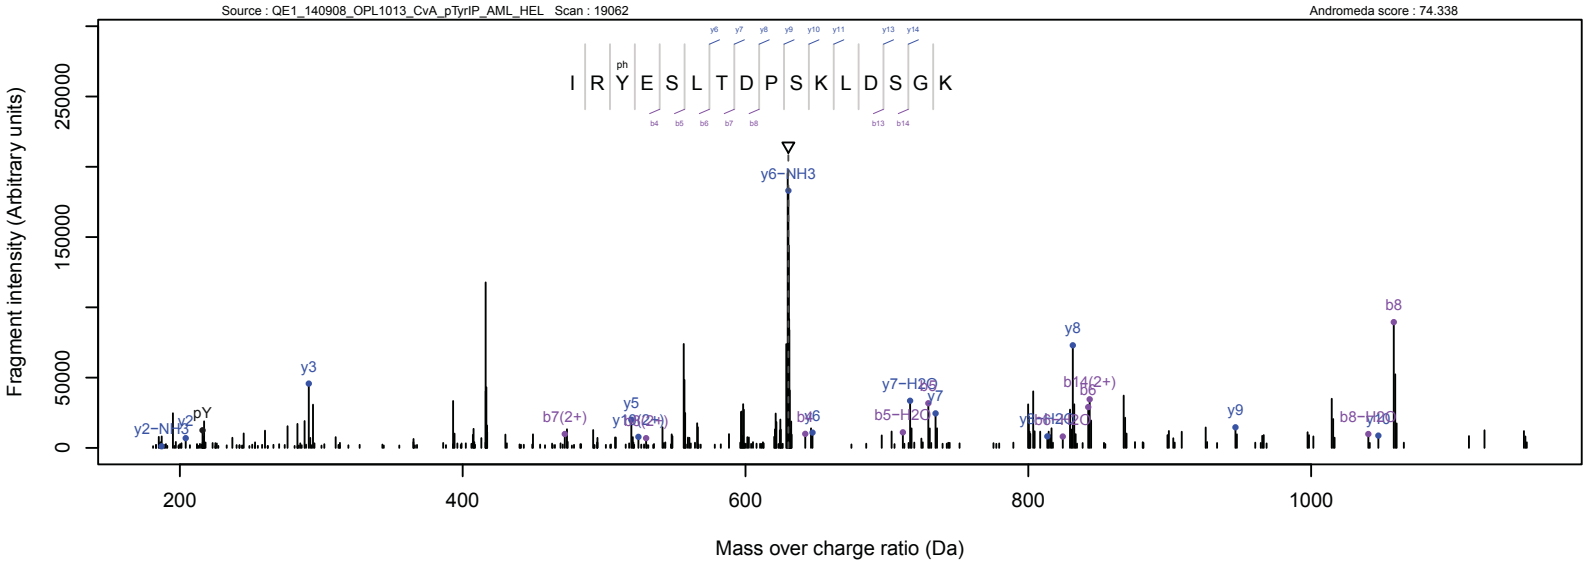

**ATY(ph)DKLCK-2+**

Source : QE1\_140822\_OPL1013\_CvA\_pTyrIP\_AML\_cell\_lines\_part2\_B Scan : 3046

Andromeda score : 74.301

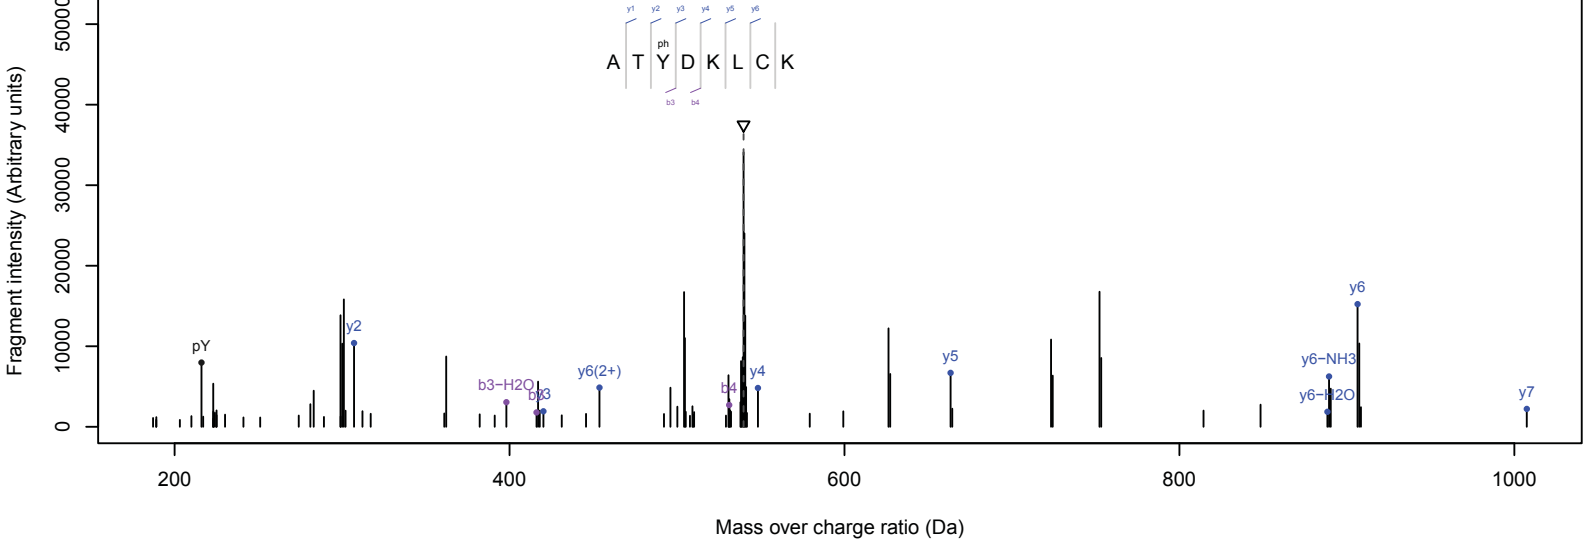

(ac)TEY(ph)KLVVVVGAGGVGK-2+

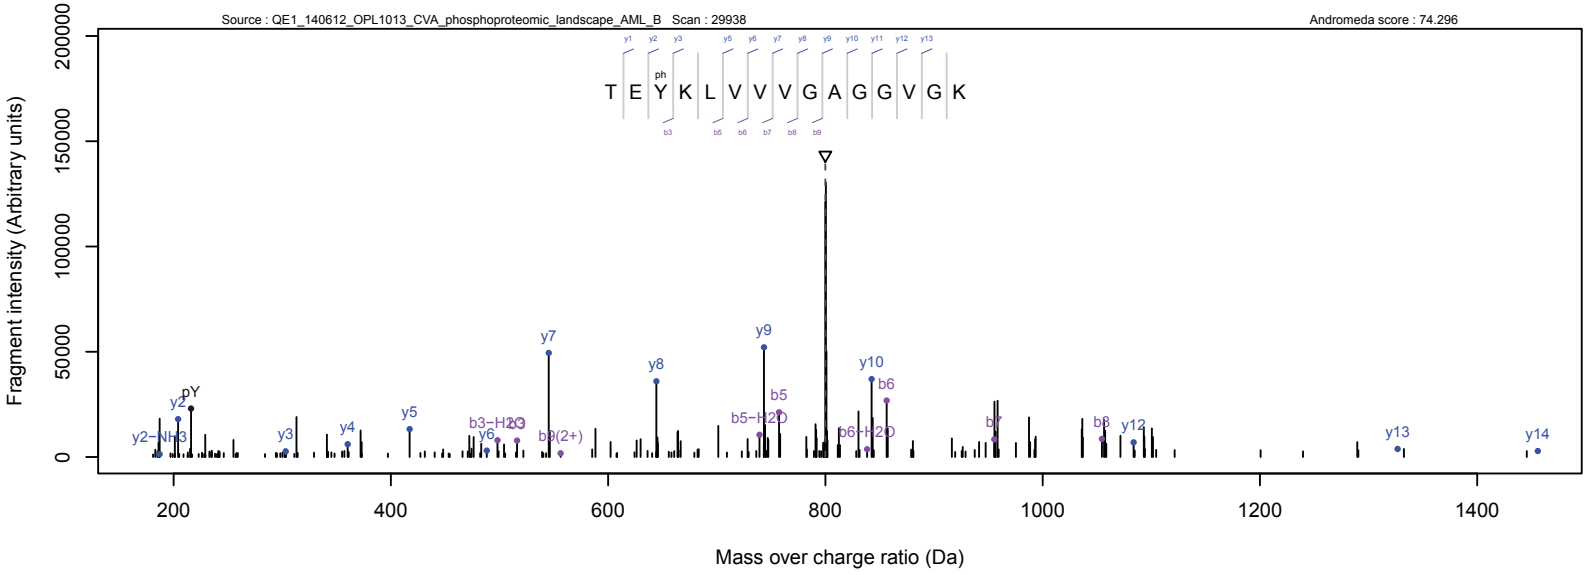

EY(ph)VRGPLVTFIDEVDSEEAPQAAK-3+

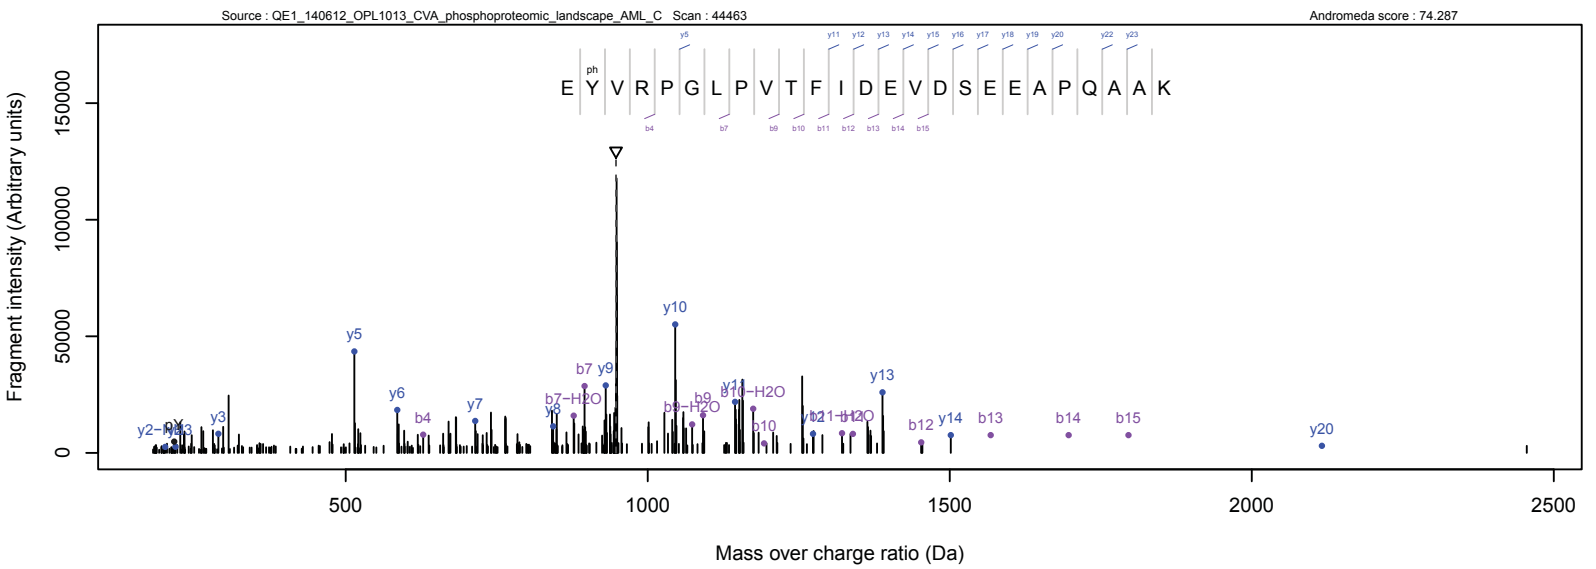

Y(ph)KQALLQYK-2+

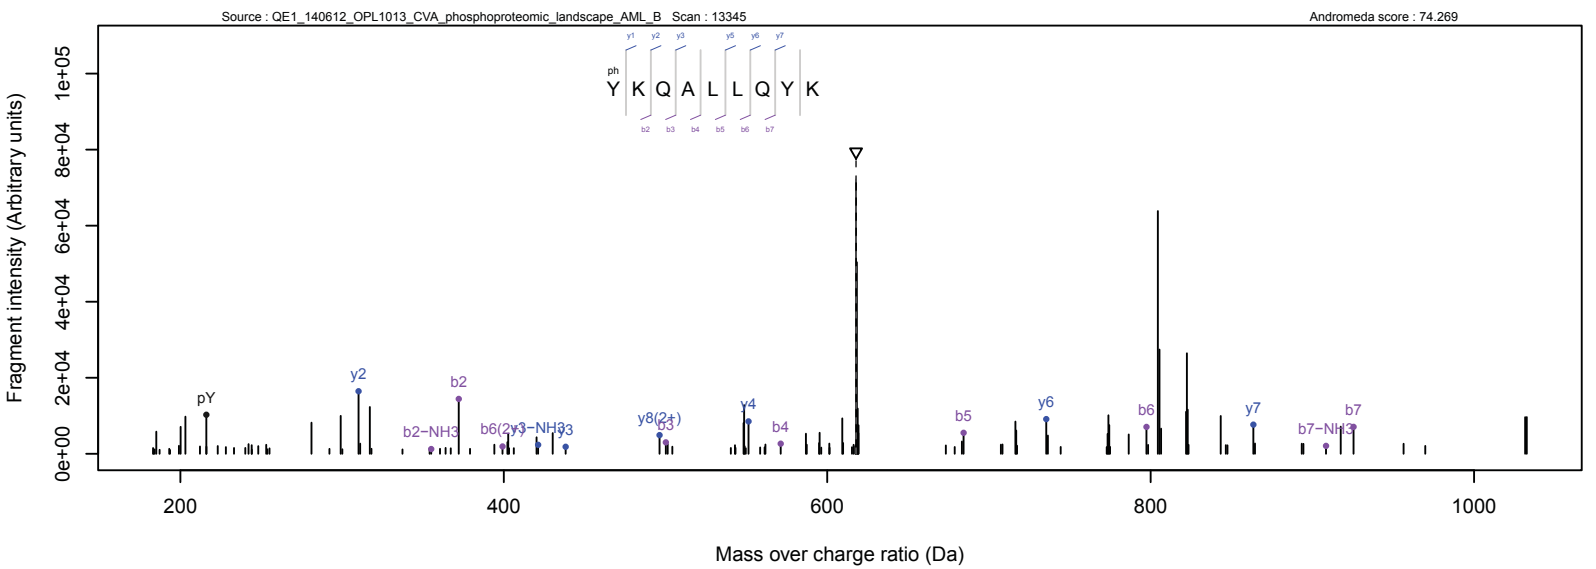

Y(ph)HNVGLSK-2+

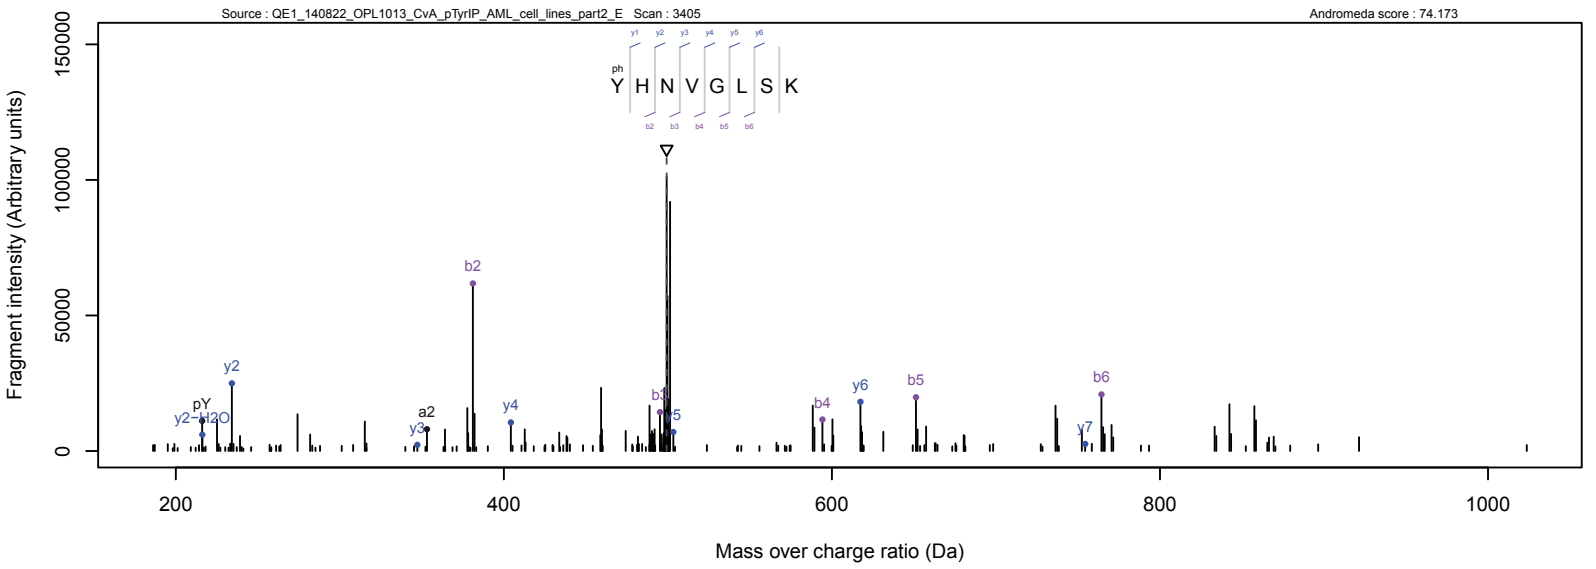

SEKPLY(ph)YSFVDKPVAYK-3+

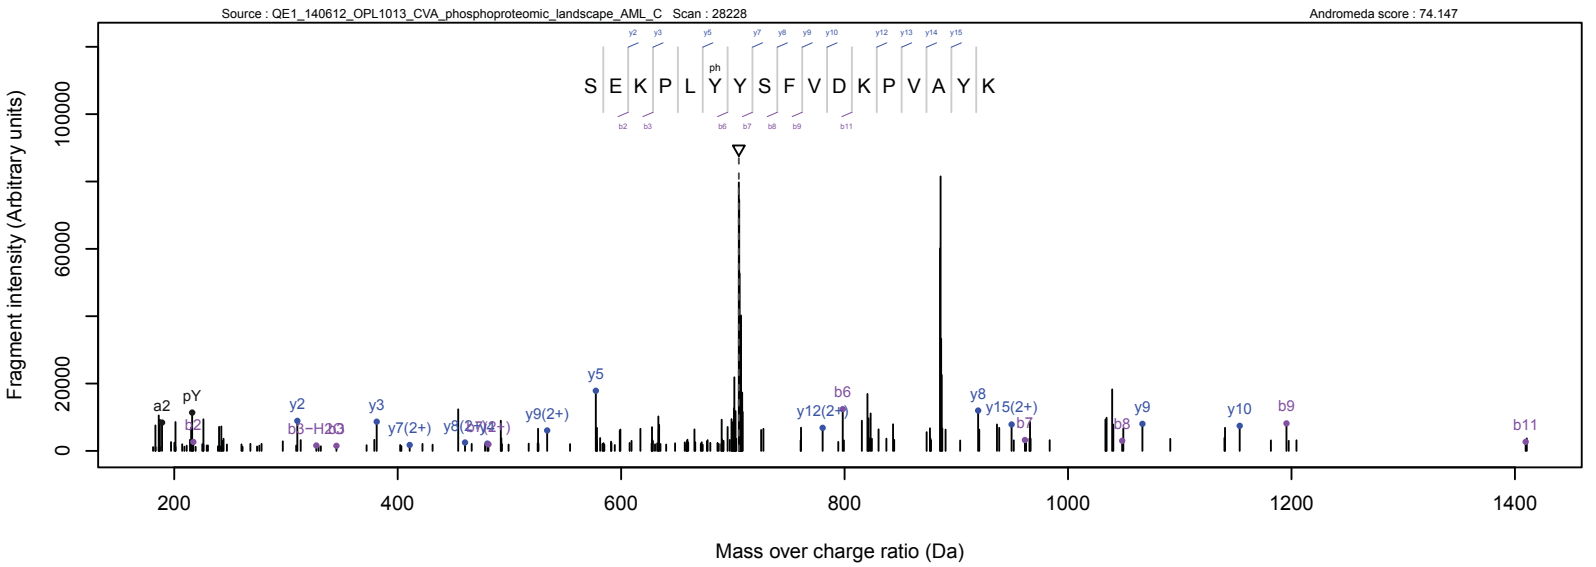

LNPYPTSPHPPLY(ph)PGRR-3+

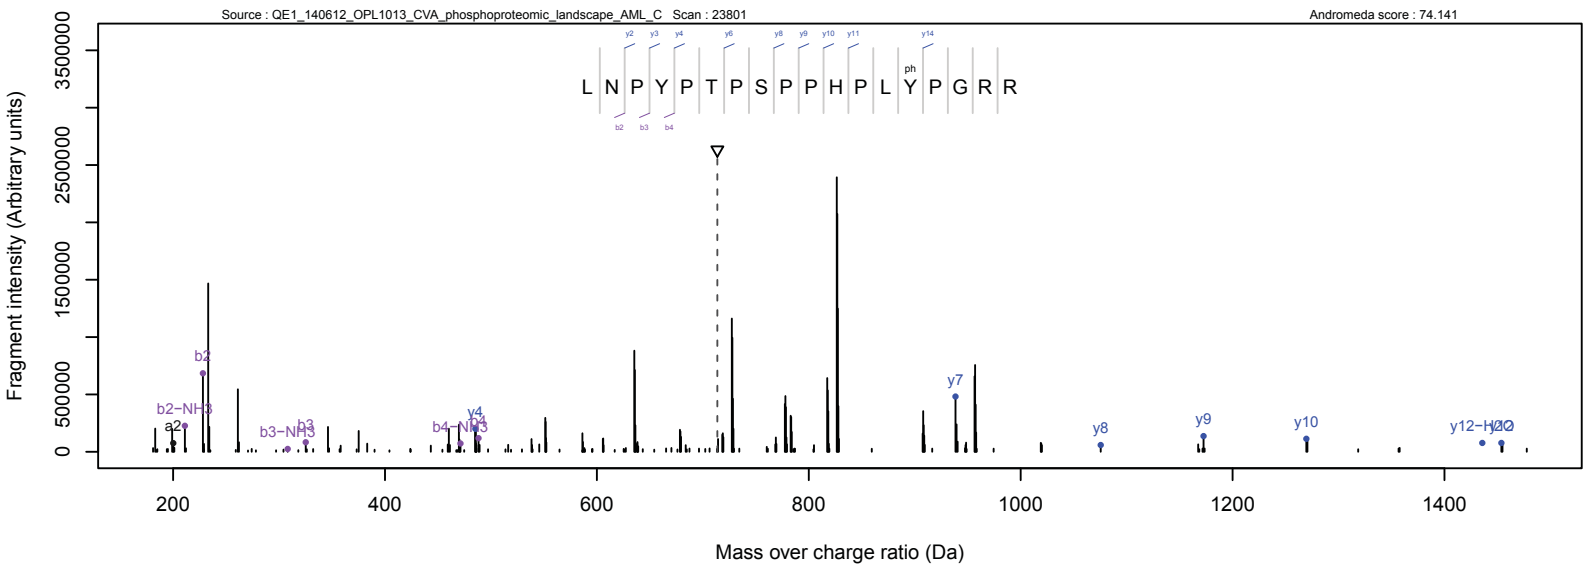



GY(ph)TSIFNMETQQR-2+

Source : QE1\_140612\_OPL1013\_CVA\_phosphoproteomic\_landscape\_AML\_B Scan : 29595

Andromeda score : 73.927

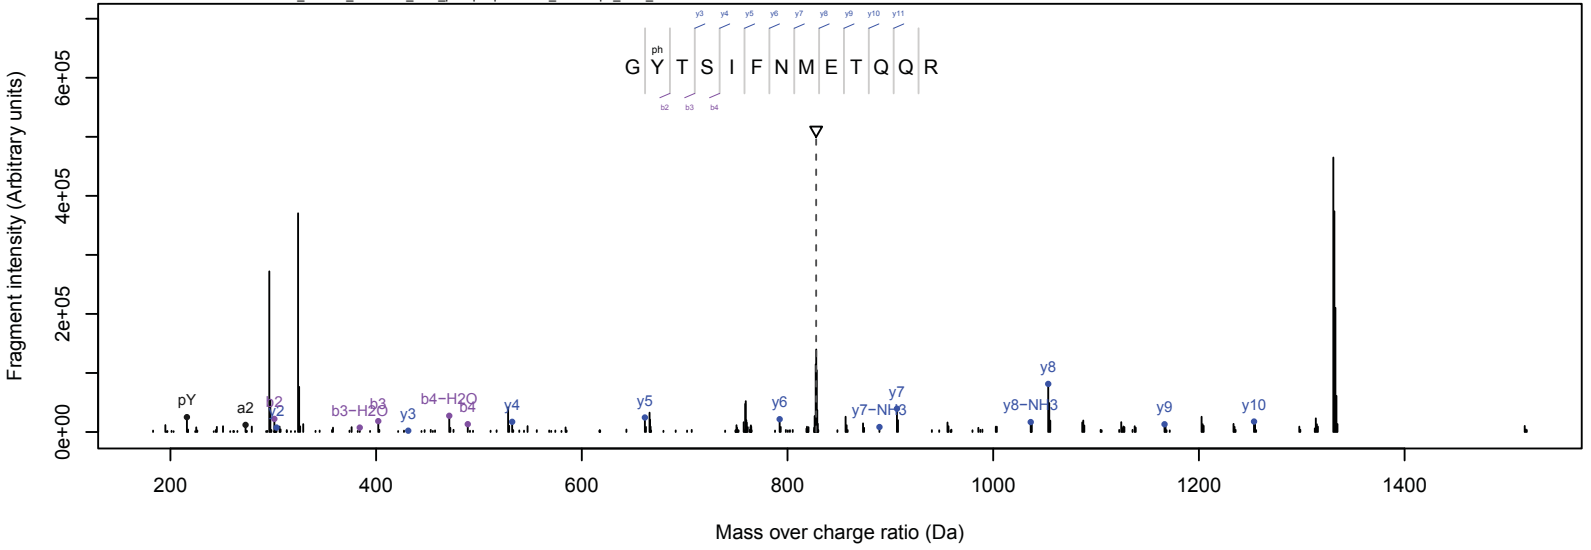

SGDITY(ph)GQFAQLYR-2+

Source : QE1\_140612\_OPL1013\_CVA\_phosphoproteomic\_landscape\_AML\_B Scan : 32950

Andromeda score : 73.927

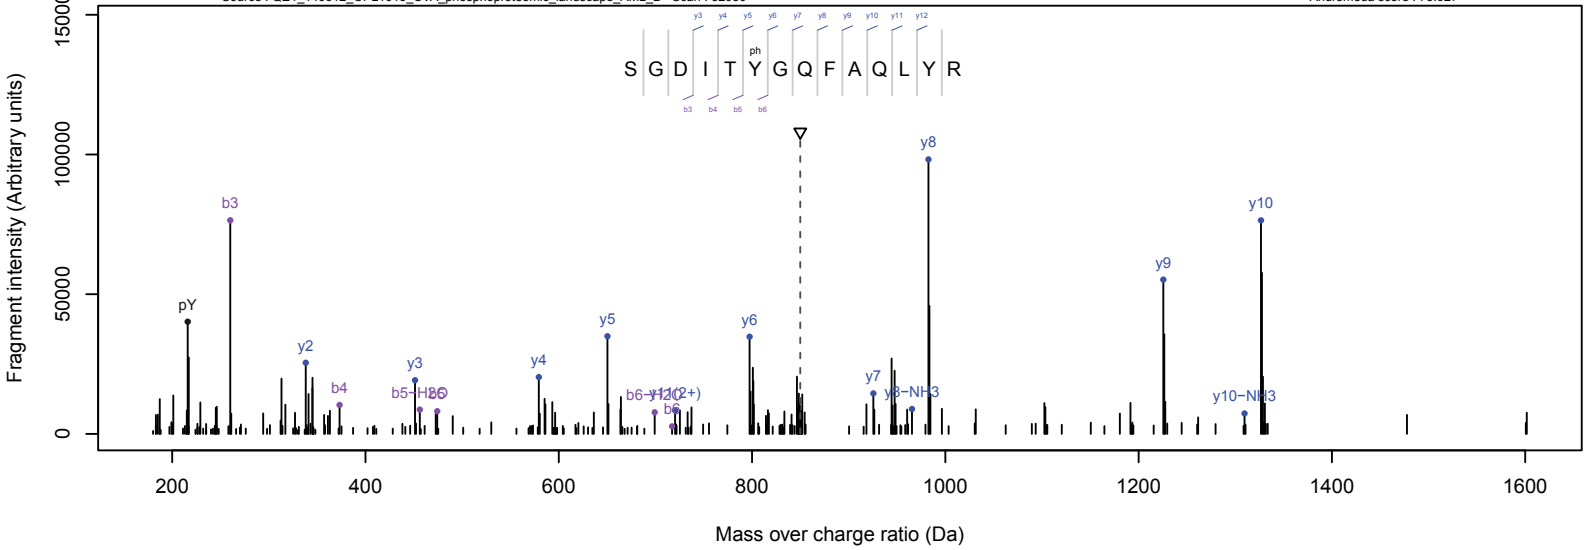

MRDCY(ph)CTVNLDEEVR-3+

Source : QE1\_140612\_OPL1013\_CVA\_phosphoproteomic\_landscape\_AML\_C Scan : 29508

Andromeda score : 73.918

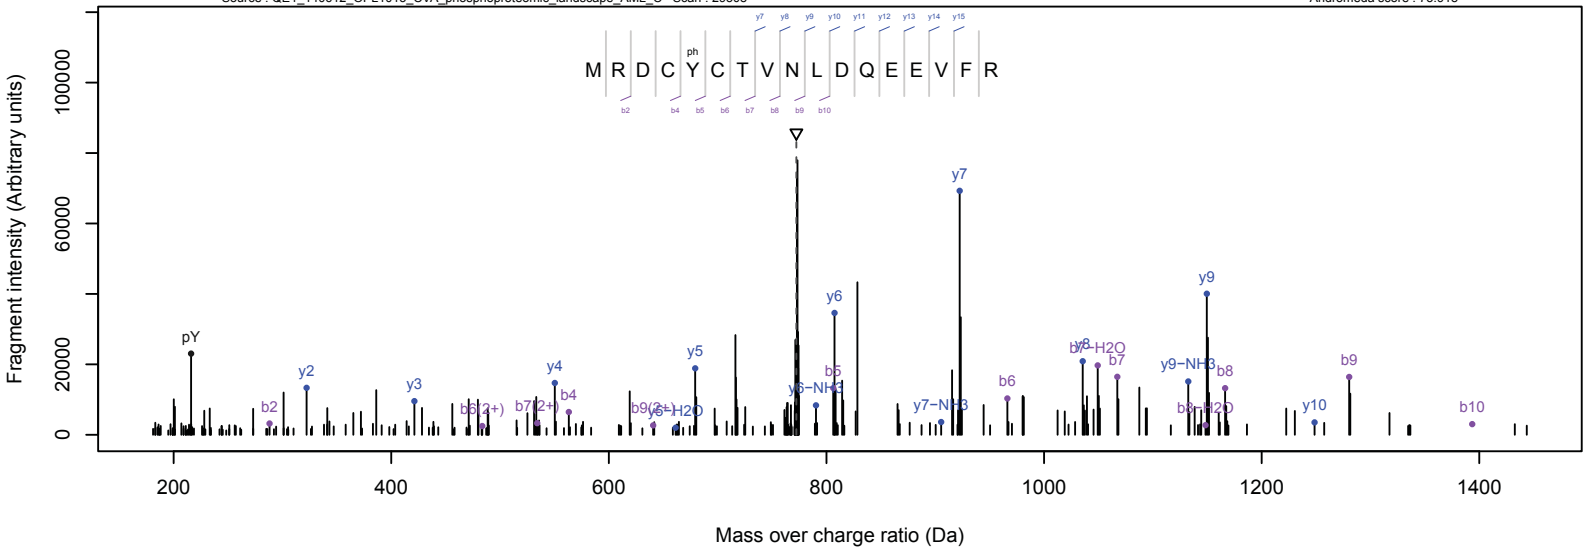

VFPGSTEDY(ph)NLIVIER-2+

Source : QE1\_140612\_OPL1013\_CVA\_phosphoproteomic\_landscape\_AML\_B Scan : 40509

Andromeda score : 73.918

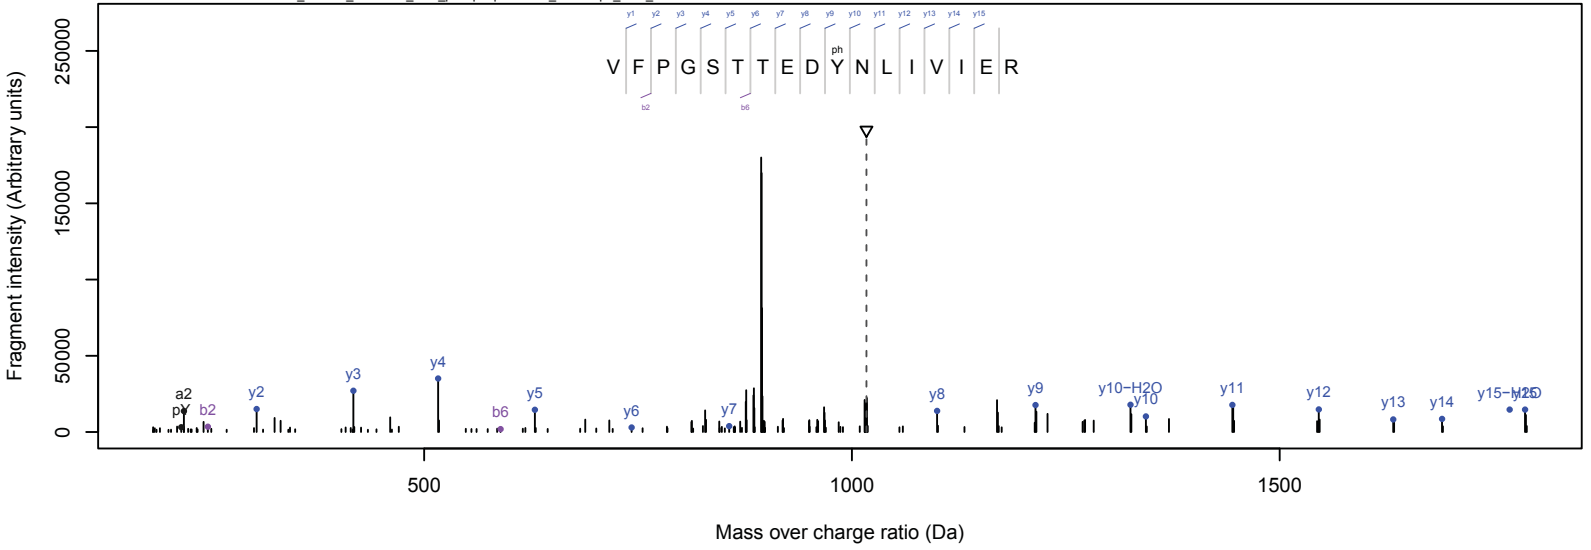

EGFIPSNY(ph)VAK-2+

Source : QE1\_140822\_OPL1013\_CvA\_pTyrIP\_AML\_cell\_lines\_part2\_B Scan : 19776

Andromeda score : 73.9

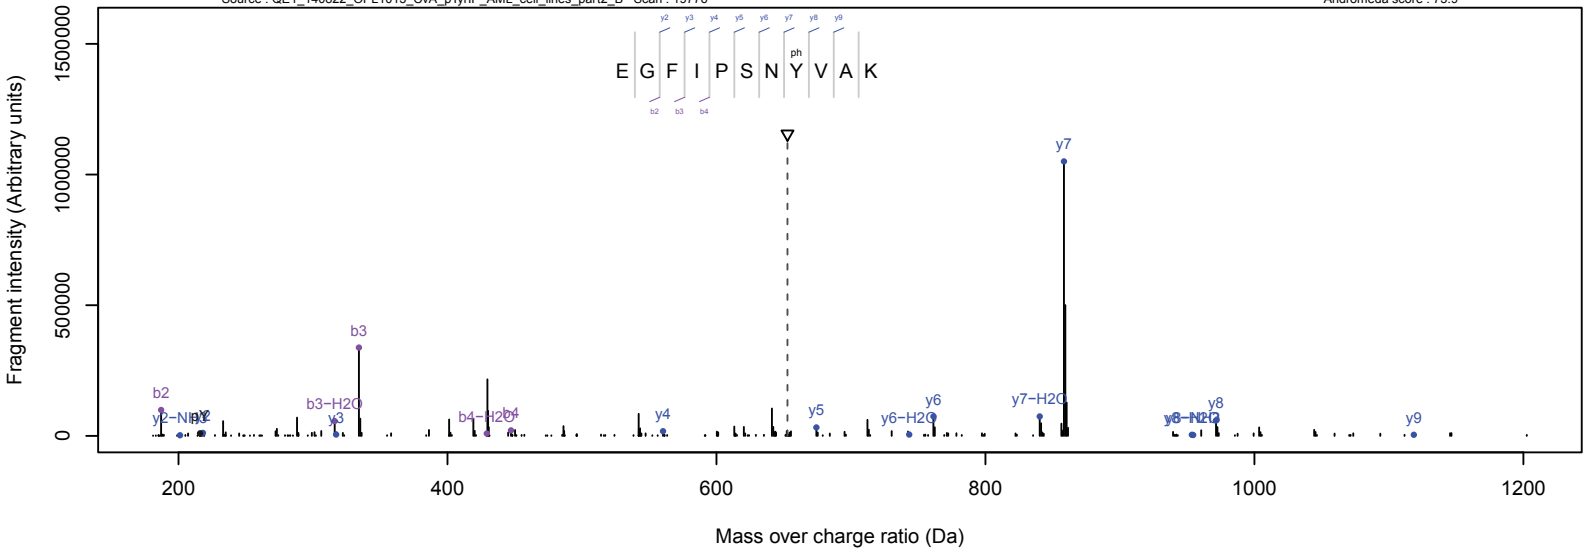

AAAQY(ph)YLGNFR-2+

Source : QE1\_140612\_OPL1013\_CVA\_phosphoproteomic\_landscape\_AML\_C Scan : 26887

Andromeda score : 73.887

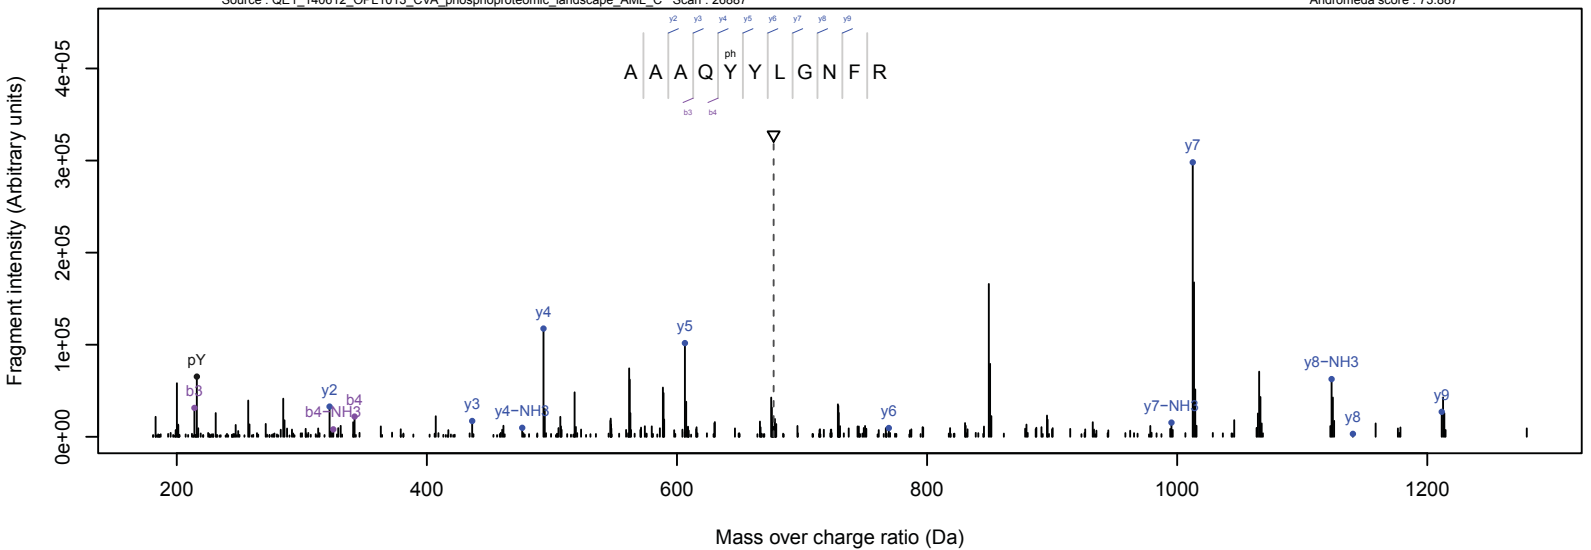



**AQIPEGDY(ph)LSYR-2+**

Source : QE1\_140612\_OPL1013\_CVA\_phosphoproteomic\_landscape\_AML\_C Scan : 24259

Andromeda score : 73.881

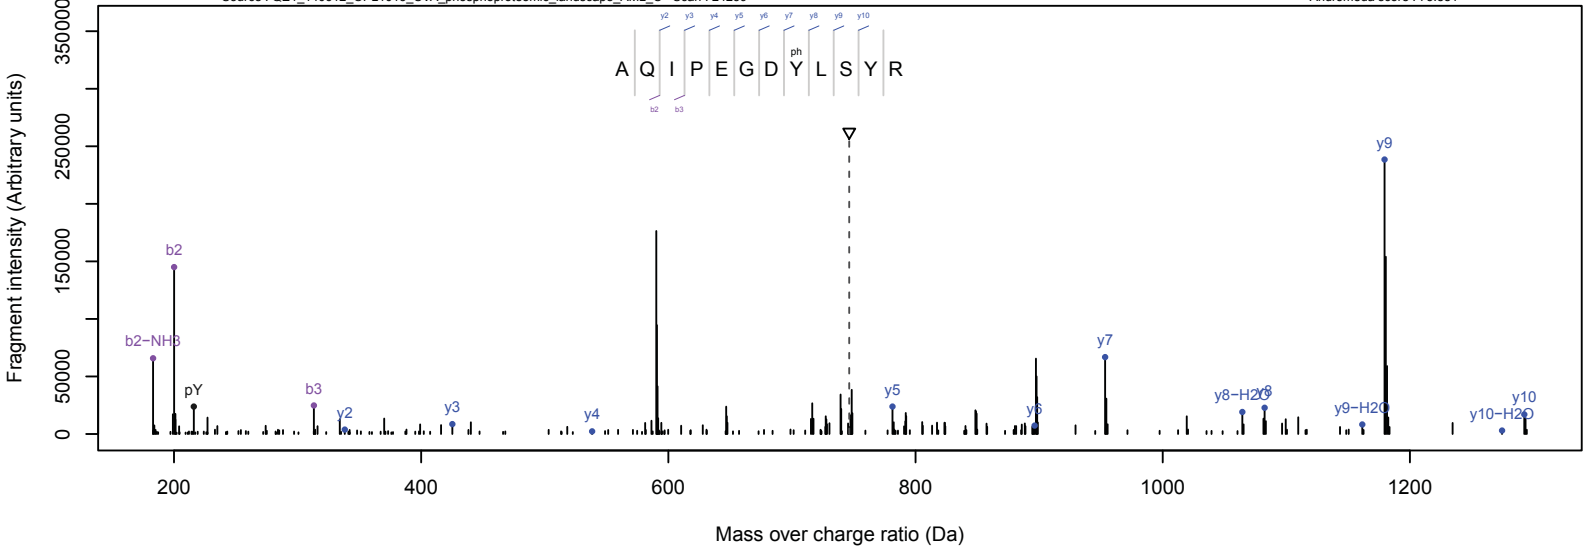

**EKGYP(h)IDLSK-2+**

Source : QE1\_140612\_OPL1013\_CVA\_phosphoproteomic\_landscape\_AML\_D Scan : 10494

Andromeda score : 73.841

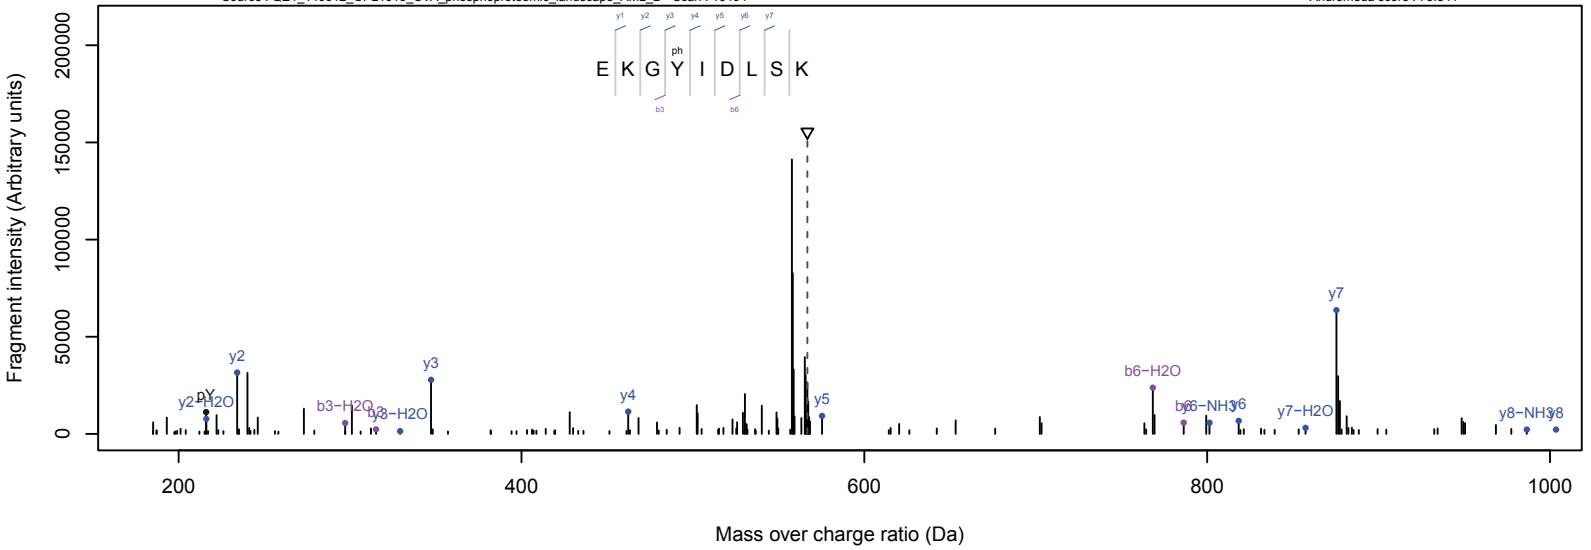

**IHTGKPY(ph)VCSVCGK-3+**

Source : QE1\_140612\_OPL1013\_CVA\_phosphoproteomic\_landscape\_AML\_A Scan : 9112

Andromeda score : 73.834

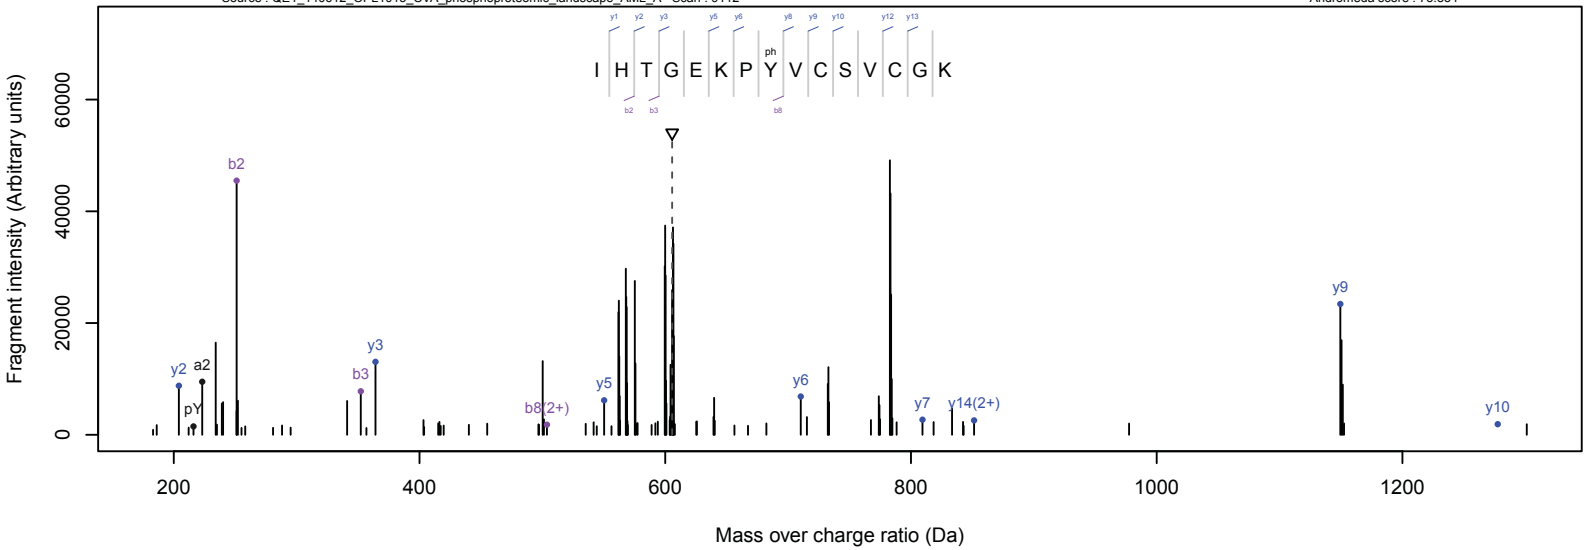

LTY(ph)LLQNSLGGSAK-2+

Source : QE1\_140612\_OPL1013\_CVA\_phosphoproteomic\_landscape\_AML\_A Scan : 29758

Andromeda score : 73.834

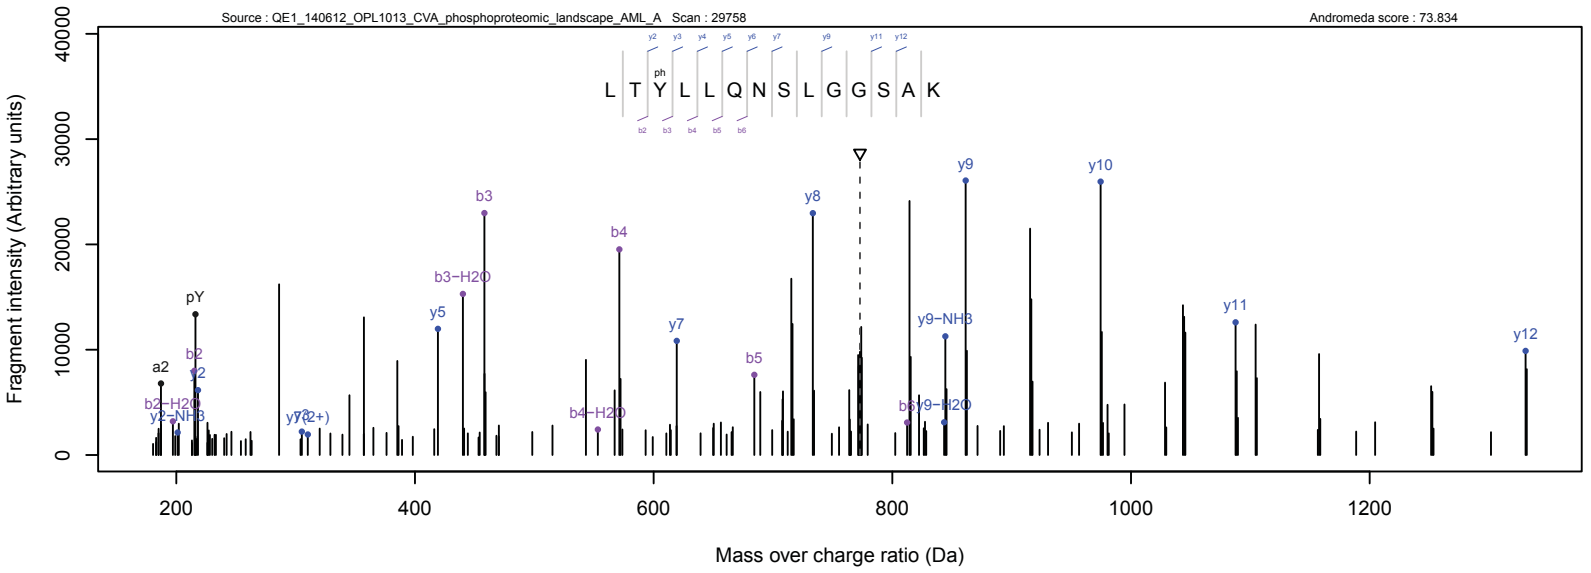

NTNEY(ph)TEGPTVPR-2+

Source : QE1\_140908\_OPL1013\_CvA\_pTyrIP\_AML\_Kasumi6 Scan : 18042

Andromeda score : 73.834

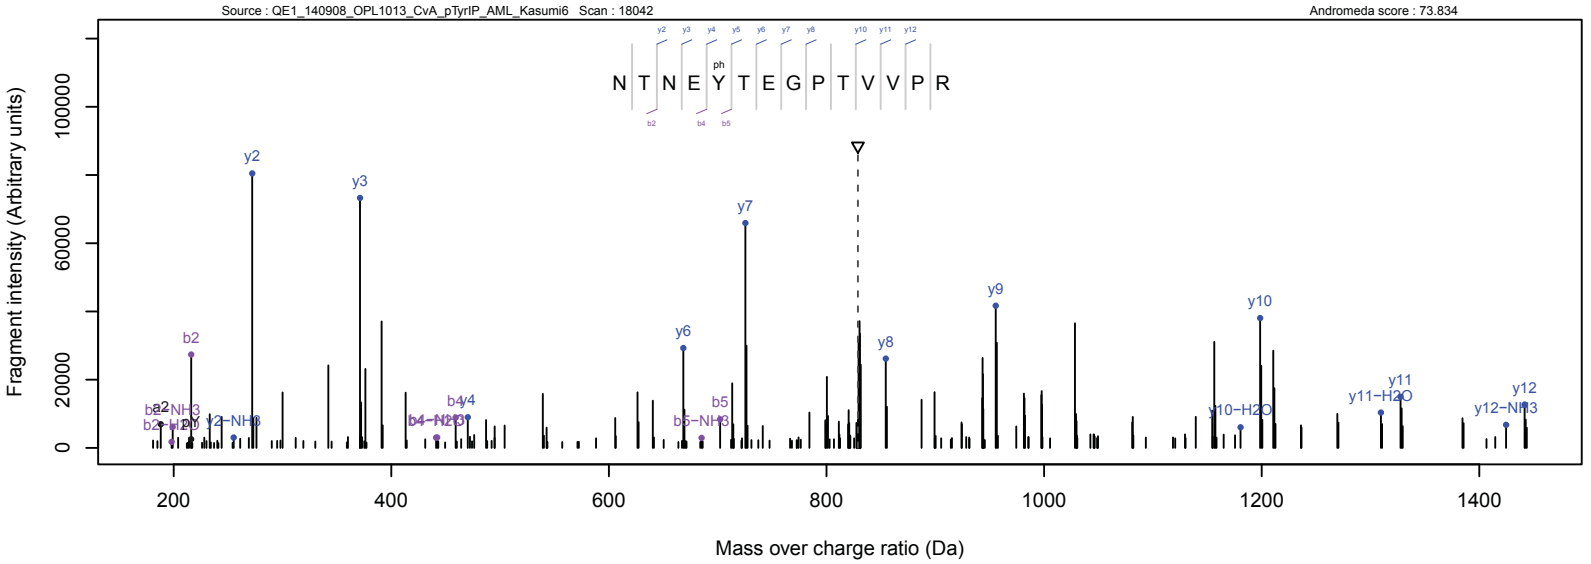

VRPDY(ph)TAQNLDHGK-3+

Source : QE1\_140612\_OPL1013\_CVA\_phosphoproteomic\_landscape\_AML\_E Scan : 7824

Andromeda score : 73.834

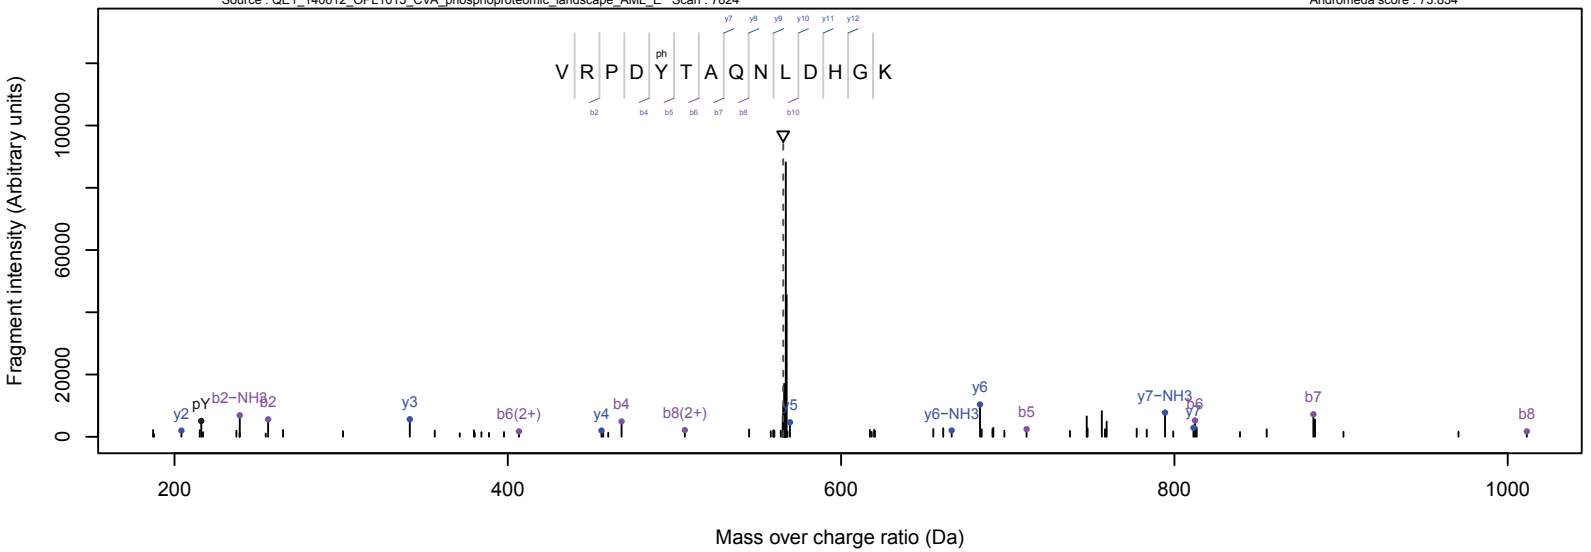

TEVTPAAQVDVLY(ph)SR-2+

Source : QE1\_140612\_OPL1013\_CVA\_phosphoproteomic\_landscape\_AML\_B Scan : 28107

Andromeda score : 73.833

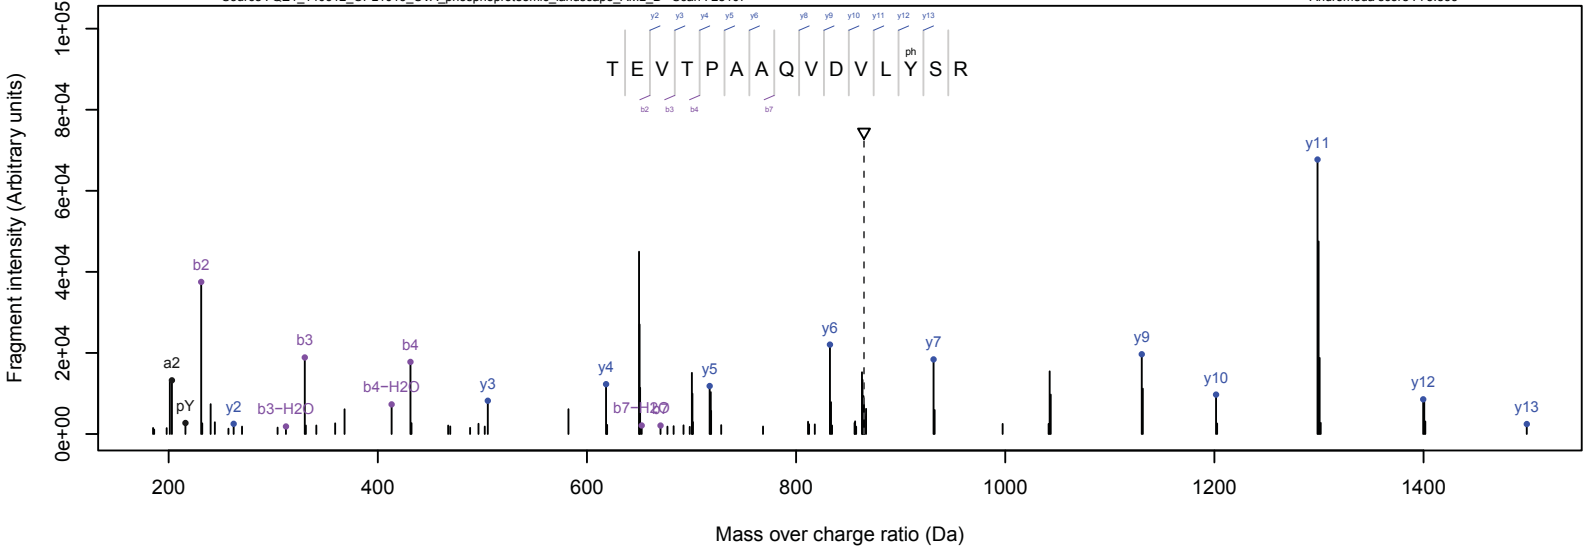

RQEEGY(ph)YSRLEAER-3+

Source : QE1\_140612\_OPL1013\_CVA\_phosphoproteomic\_landscape\_AML\_C Scan : 11424

Andromeda score : 73.722

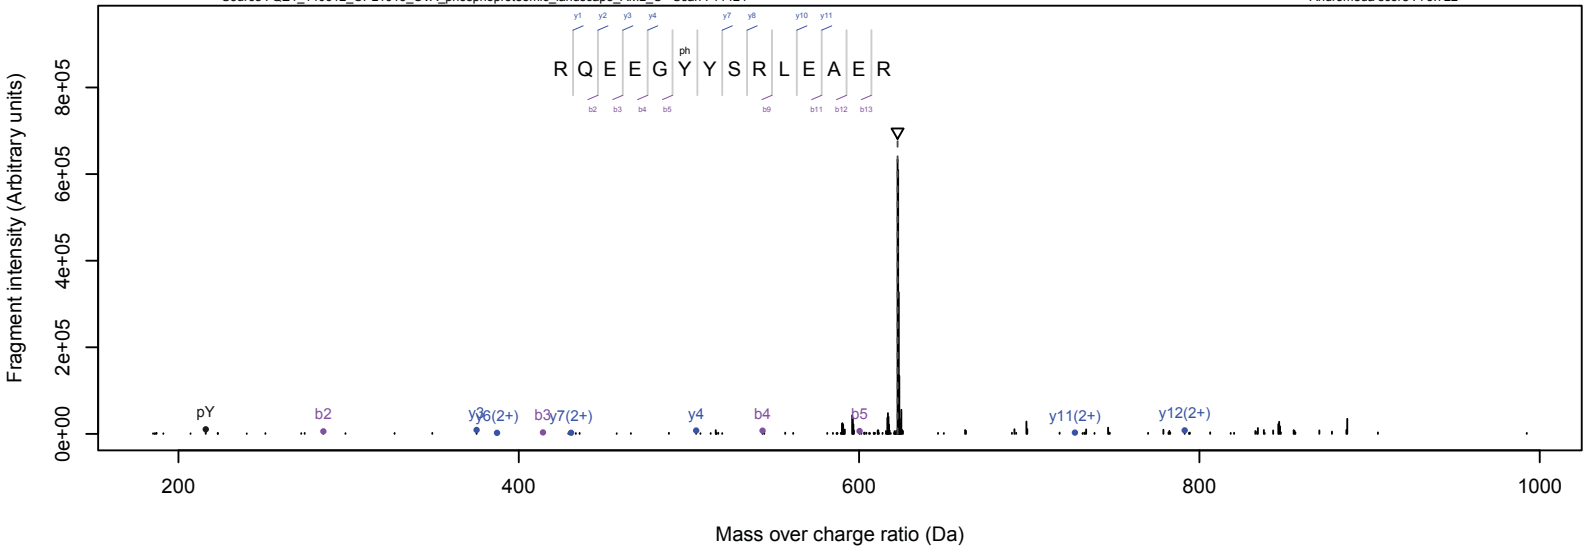

HIDSSPYSPAY(ph)LSPPPESSWR-3+

Source : QE1\_140612\_OPL1013\_CVA\_phosphoproteomic\_landscape\_AML\_C Scan : 33634

Andromeda score : 73.688

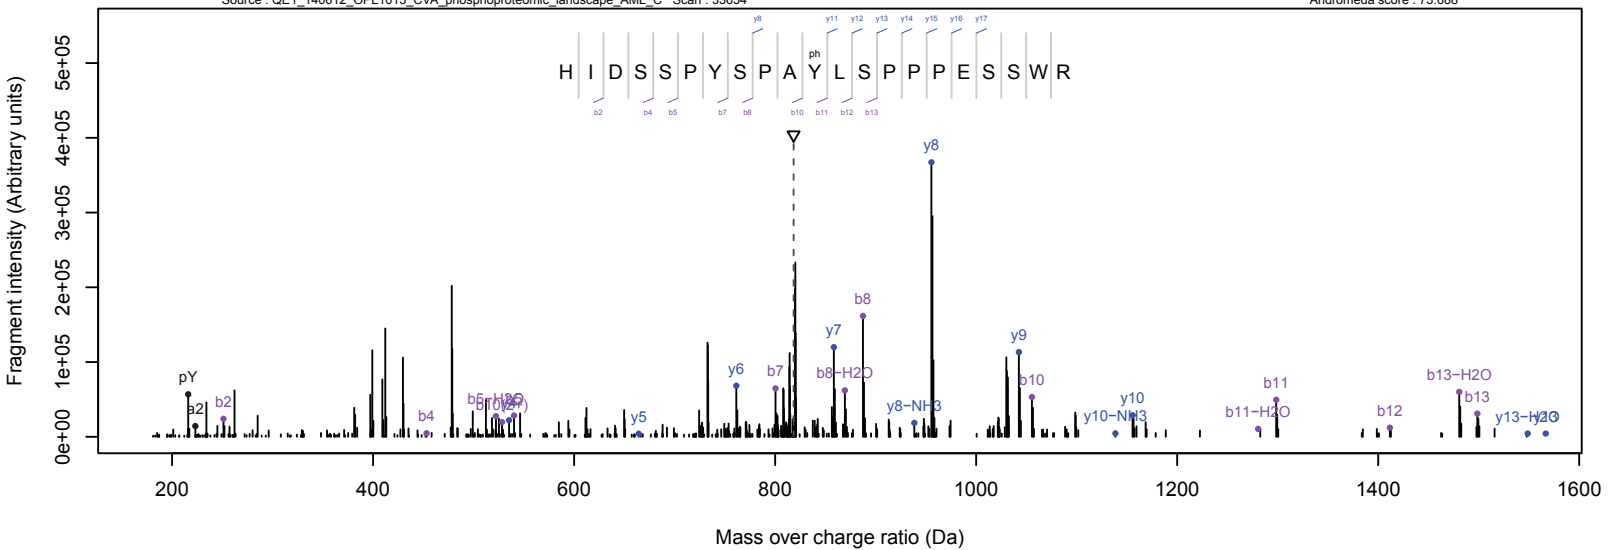

**KYVLENHPTNSNY(ph)QMHLK-4+**

Source : QE1\_140908\_OPL1013\_CvA\_pTyrIP\_AML\_ML2 Scan : 21771

Andromeda score : 73.688

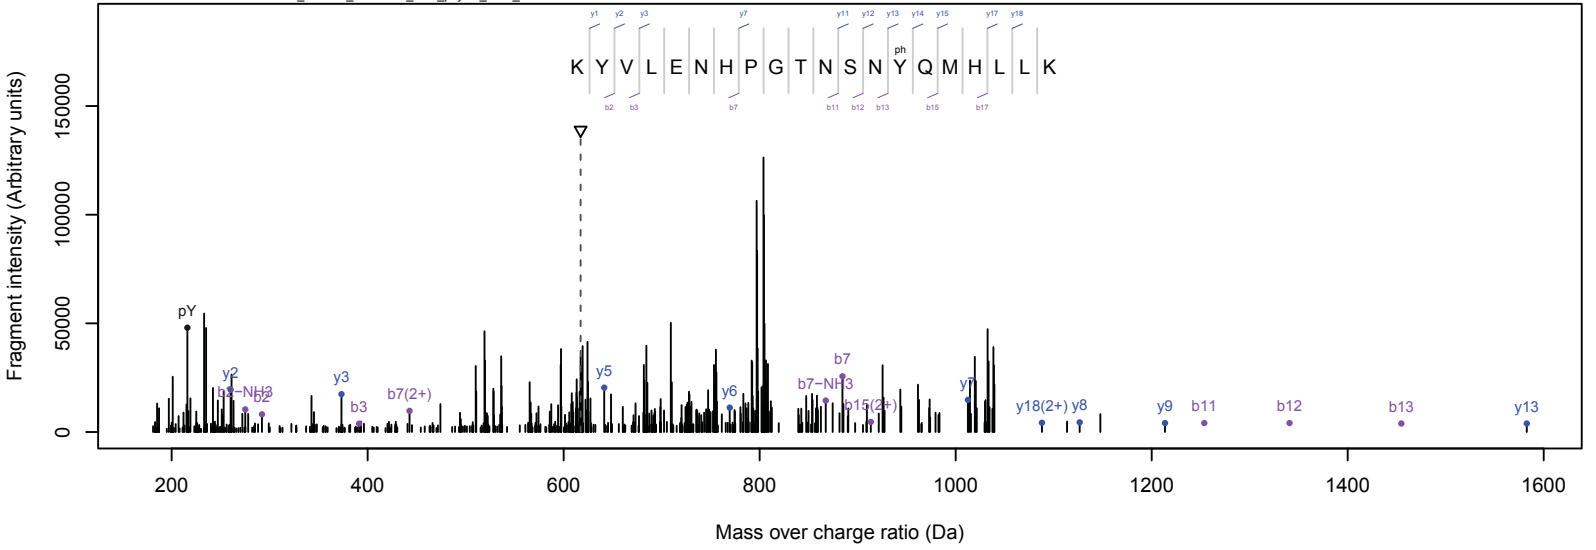

**LHG DYAY(ph)HPLQEMNGEPLAAEK-3+**

Source : QE1\_140612\_OPL1013\_CVA\_phosphoproteomic\_landscape\_AML\_C Scan : 25557

Andromeda score : 73.672

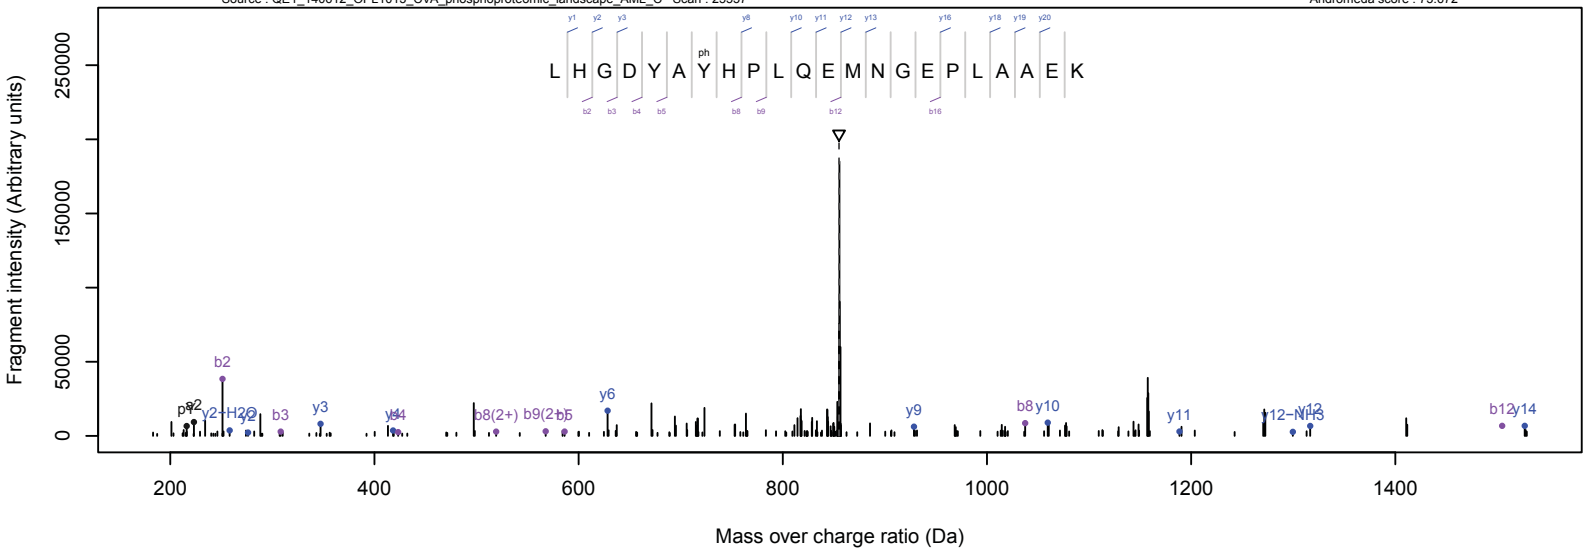

**SGPSAHALYS(ph)QHPSFQTQQA K-4+**

Source : QE1\_140908\_OPL1013\_CvA\_pTyrIP\_AML\_OCI\_AML3 Scan : 12539

Andromeda score : 73.672

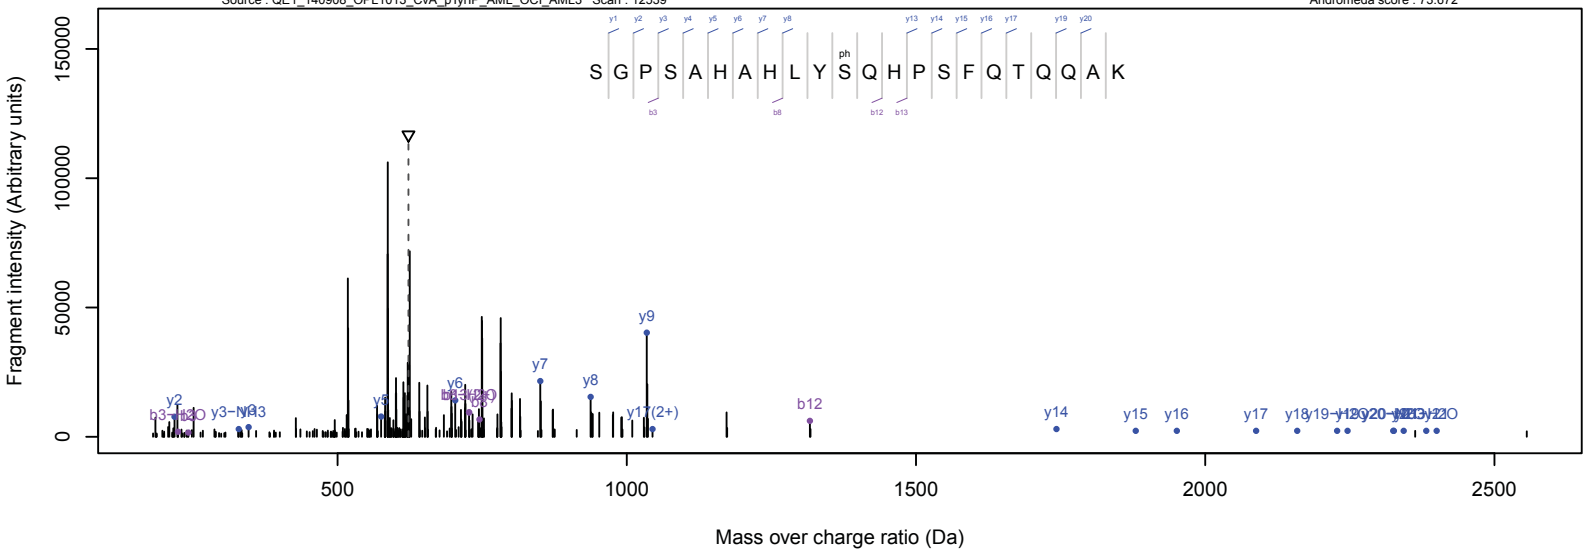

AFGY(ph)YGPLR-2+

Source : QE1\_140908\_OPL1013\_CvA\_pTyrIP\_AML\_HL60 Scan : 30689

Andromeda score : 73.665

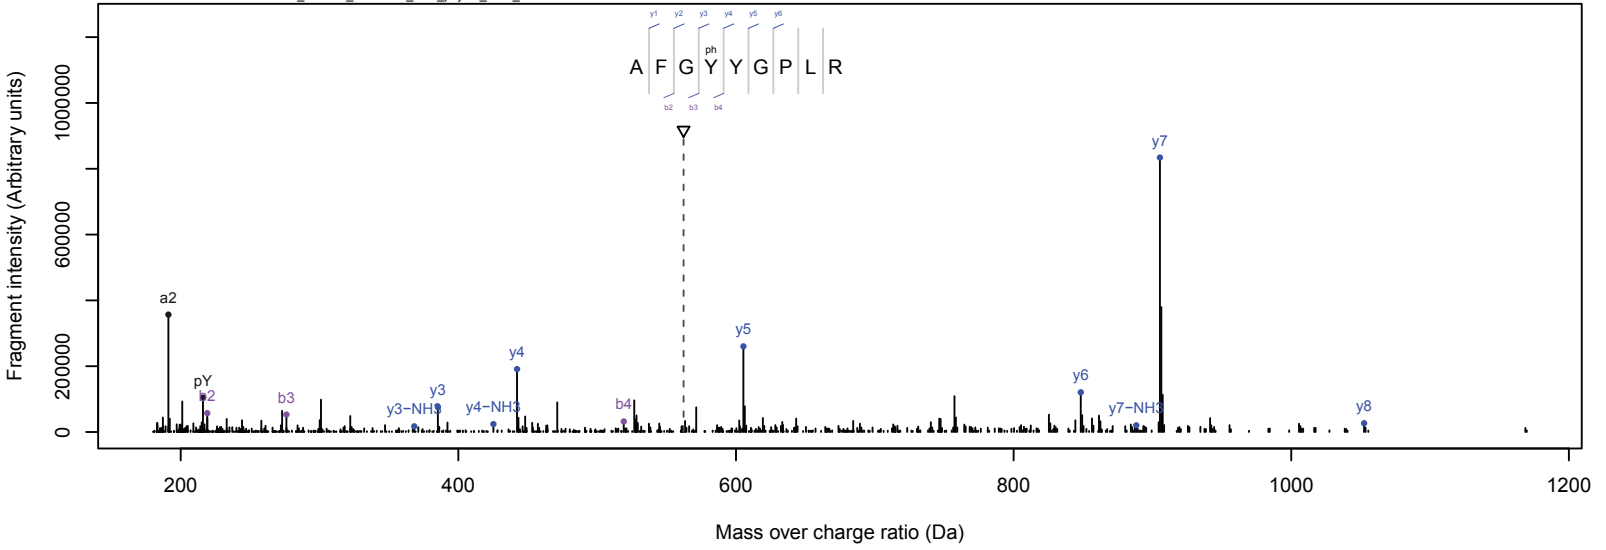

YNHPKNLLY(ph)QK-3+

Source : QE1\_140612\_OPL1013\_CVA\_phosphoproteomic\_landscape\_AML\_C Scan : 12690

Andromeda score : 73.632

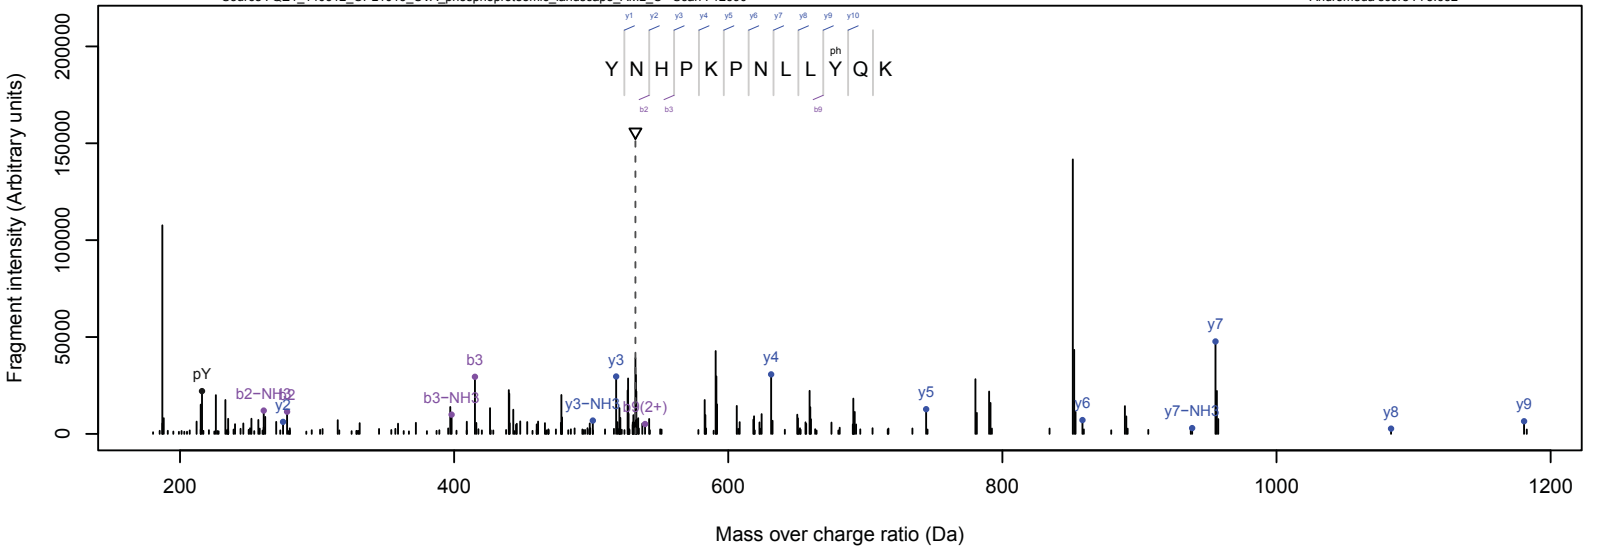

APDFVY(ph)APR-2+

Source : QE1\_140822\_OPL1013\_CvA\_pTyrIP\_AML\_cell\_lines\_part2\_B Scan : 28235

Andromeda score : 73.499

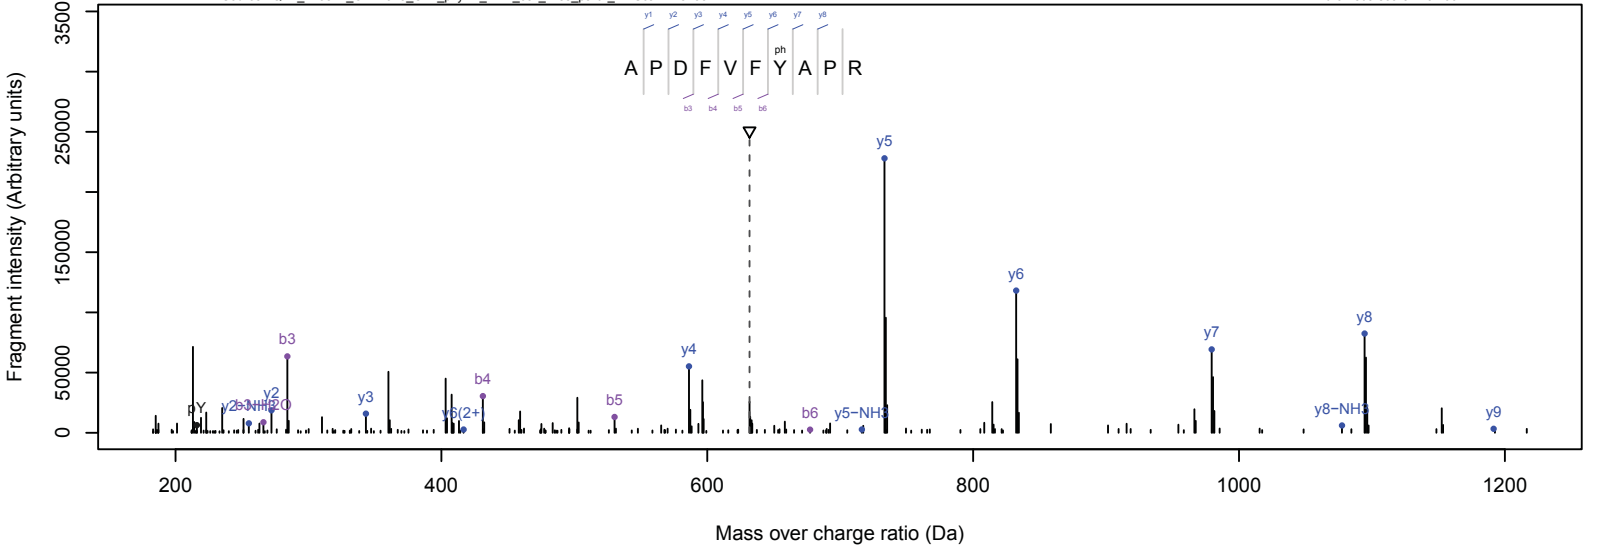

**SYQY(ph)LVESIR-2+**

Source: QE1\_140822\_OPL1013\_CvA\_pTyrIP\_AML\_cell\_lines\_part2\_B Scan: 24467

Andromeda score: 73.499

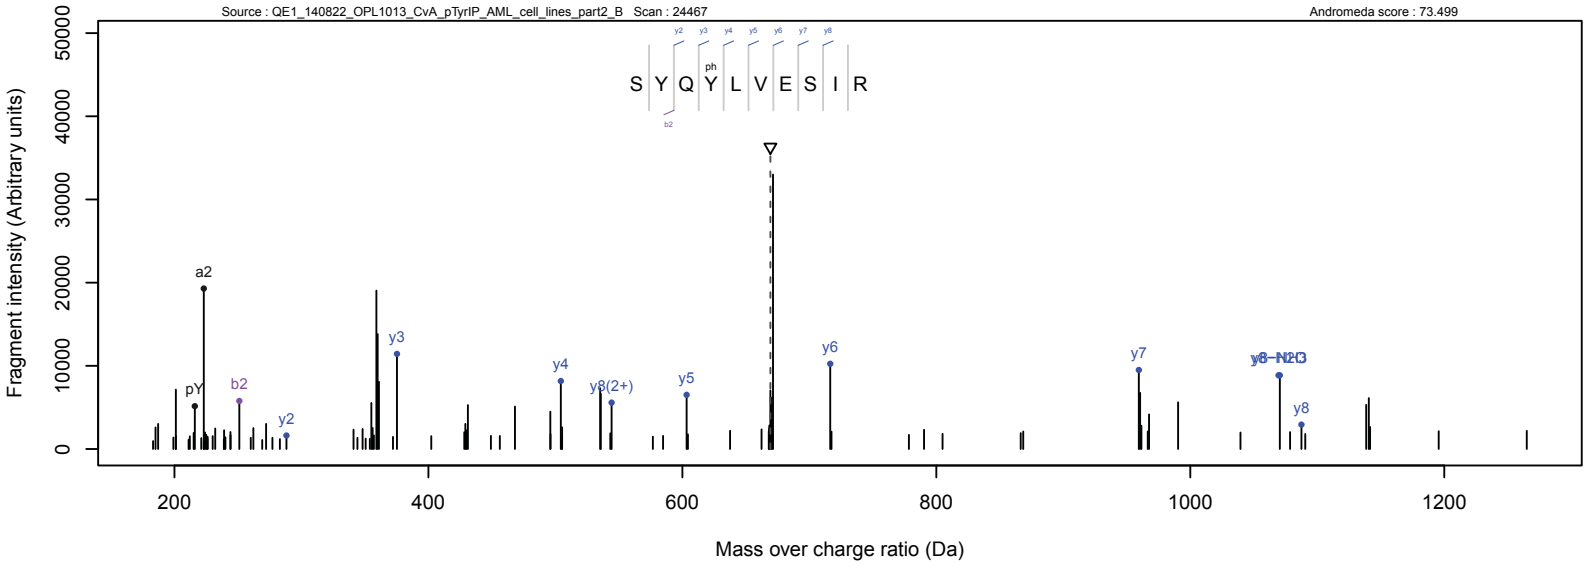

**Y(ph)RTITTAYR-3+**

Source: QE1\_140612\_OPL1013\_CVA\_phosphoproteomic\_landscape\_AML\_C Scan: 13223

Andromeda score: 73.499

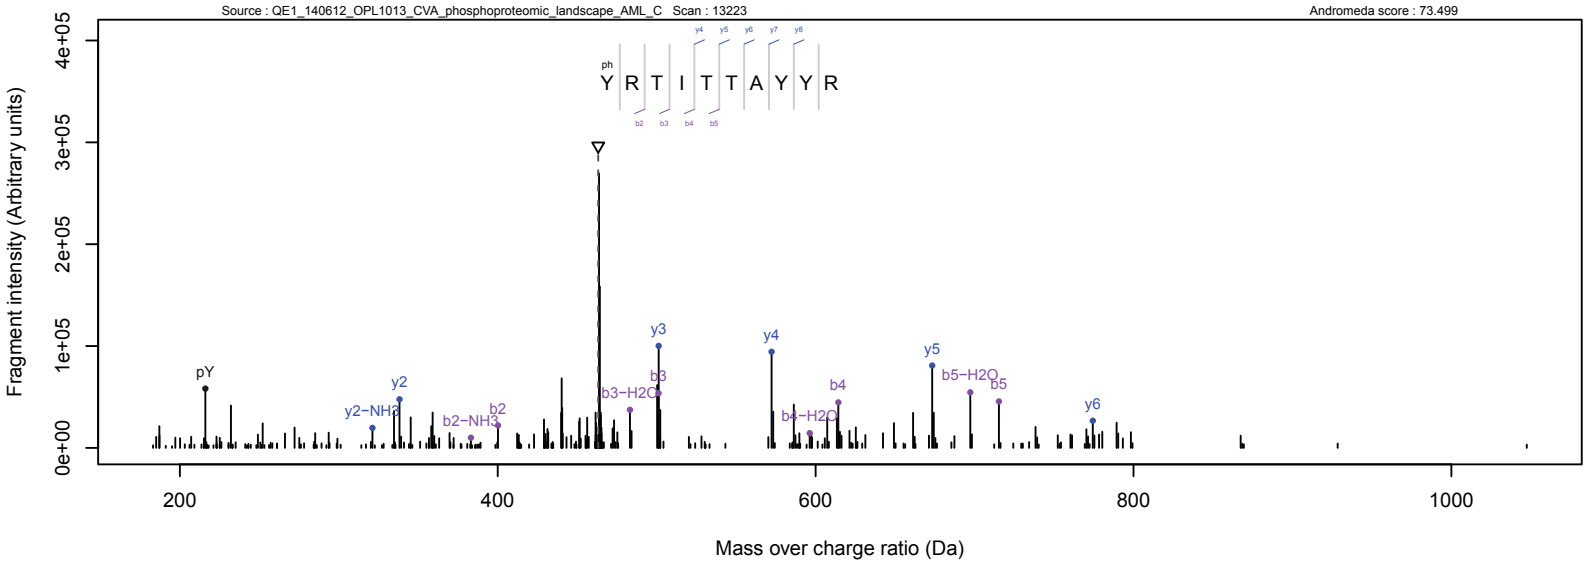

**IY(ph)EPHQLTR-2+**

Source: QE1\_140612\_OPL1013\_CVA\_phosphoproteomic\_landscape\_AML\_B Scan: 18146

Andromeda score: 73.435

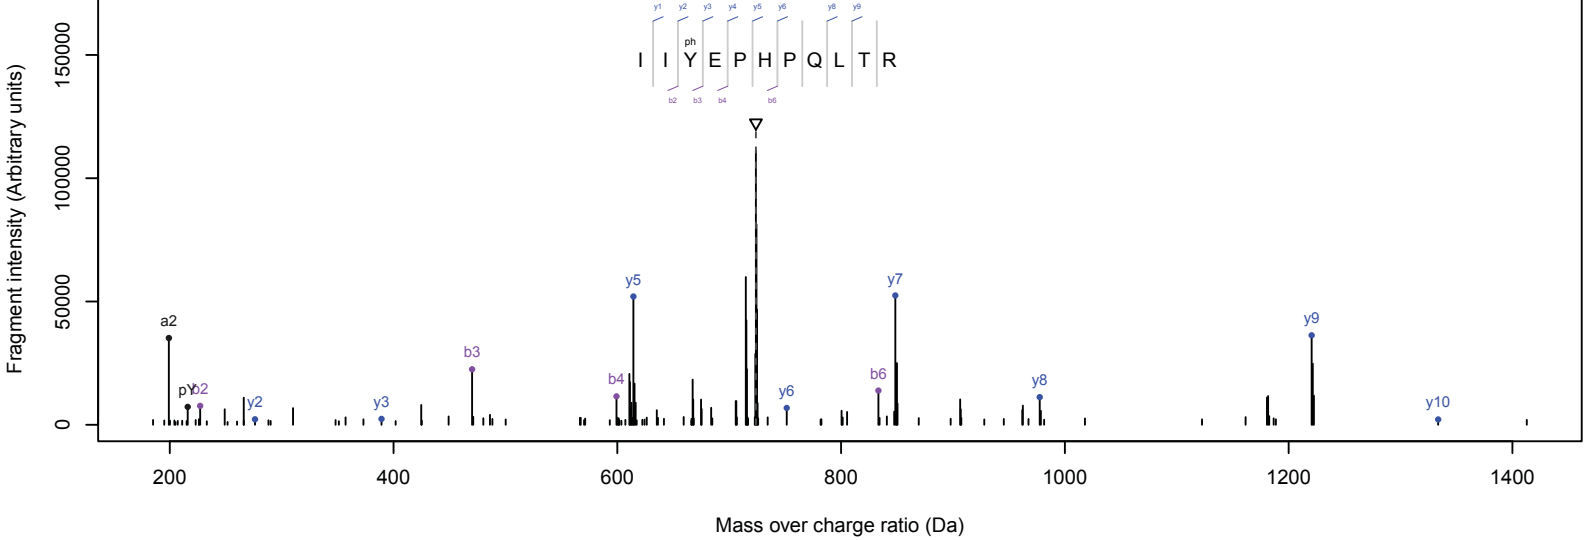

LLPLDKDY(ph)YVVR-3+

Source : QE1\_140908\_OPL1013\_CVA\_pTyrIP\_AML\_HEL Scan : 33501

Andromeda score : 73.435

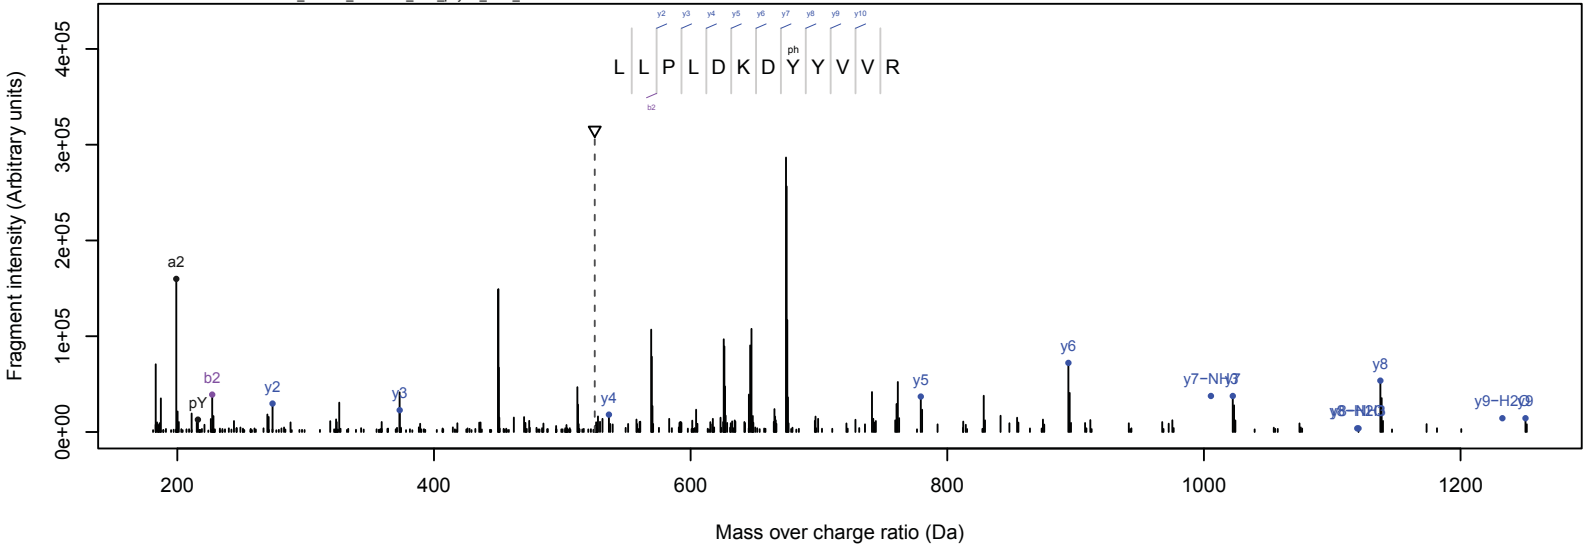

RNKLDHY(ph)AIK-3+

Source : QE1\_140612\_OPL1013\_CVA\_phosphoproteomic\_landscape\_AML\_C Scan : 12680

Andromeda score : 73.435

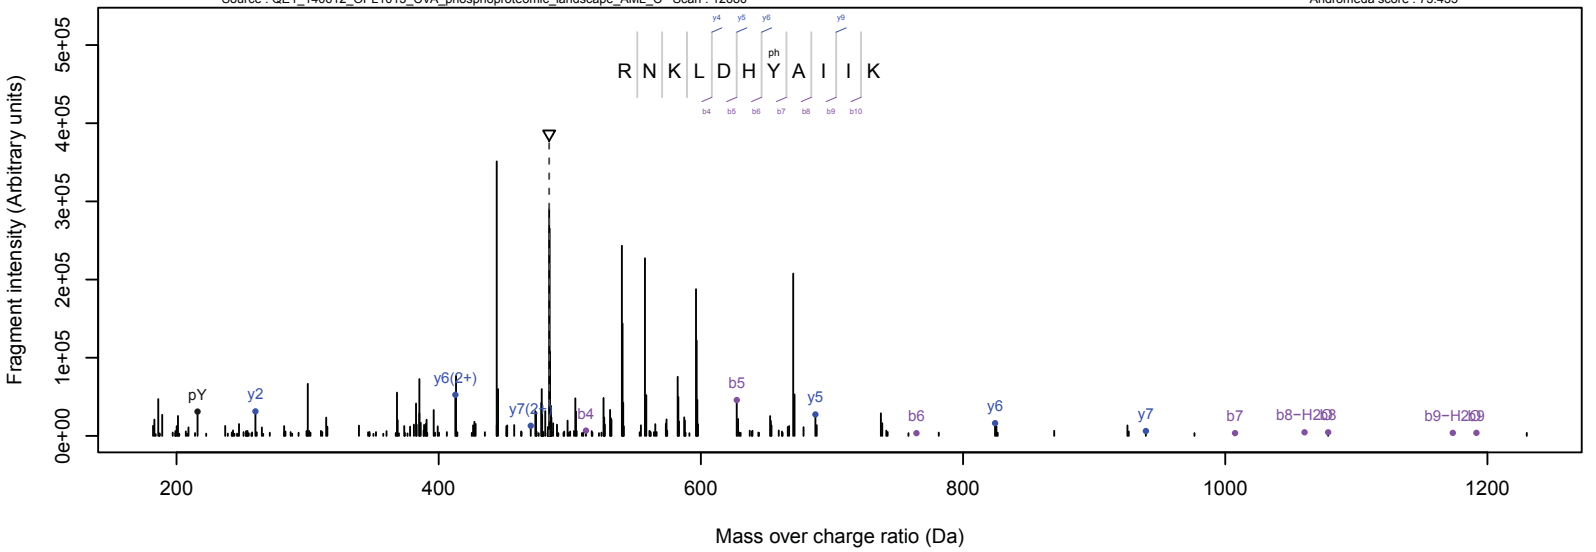

QVQLDAQAQQLQY(ph)GGAVGTVGR-3+

Source : QE1\_140612\_OPL1013\_CVA\_phosphoproteomic\_landscape\_AML\_C Scan : 31581

Andromeda score : 73.404

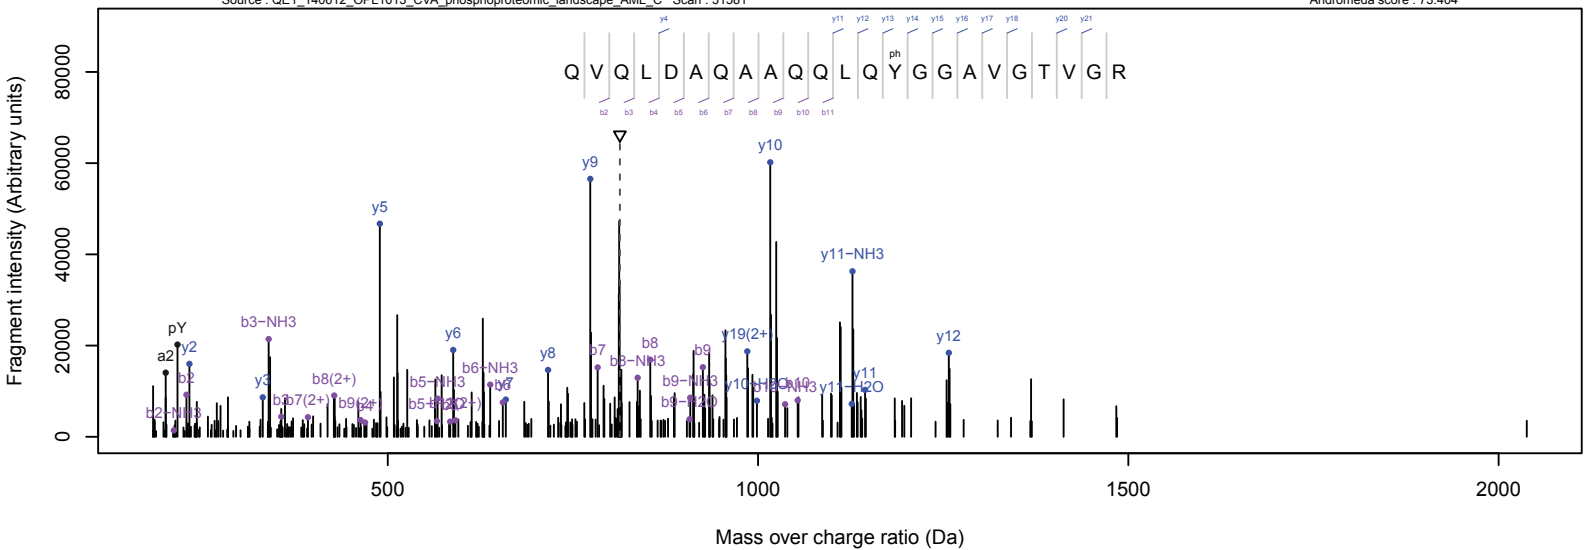

TVQPVAMGPDGLPVDASSVSNNY(ph)IQLGR-3+

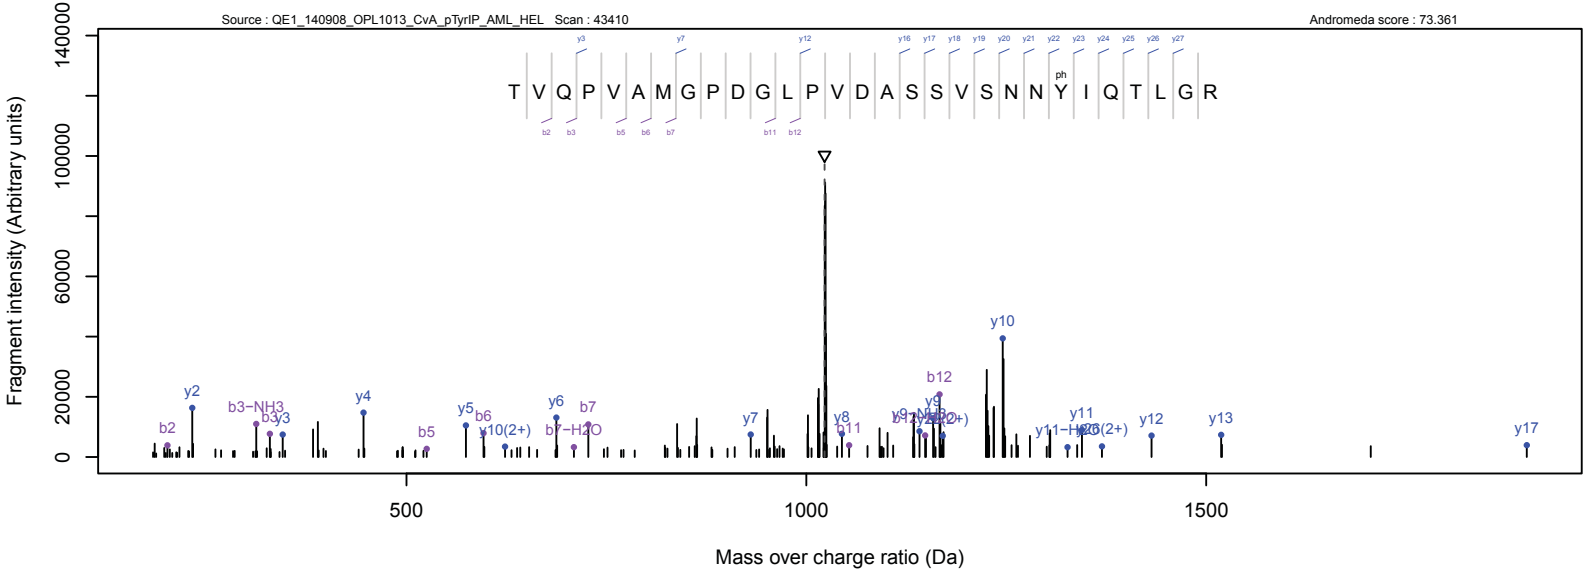

LY(ph)FGALFK-2+

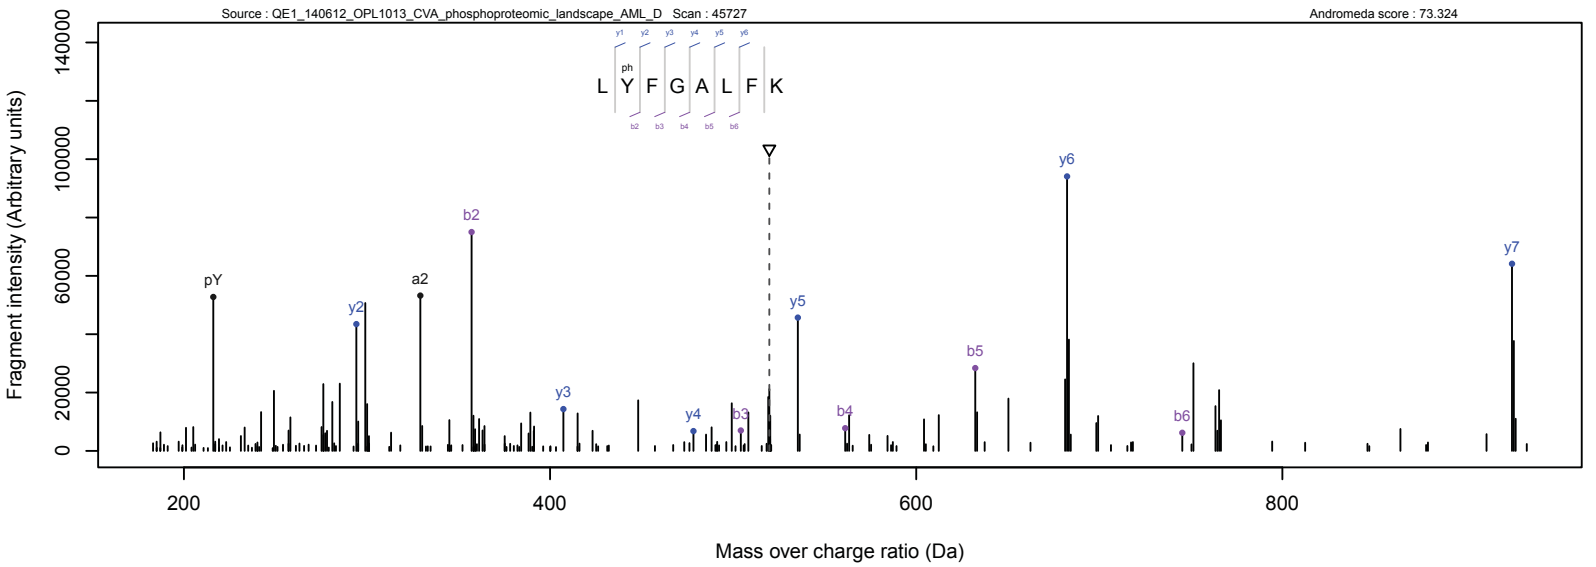

AGYGGSHISG(ph)ATLR-2+

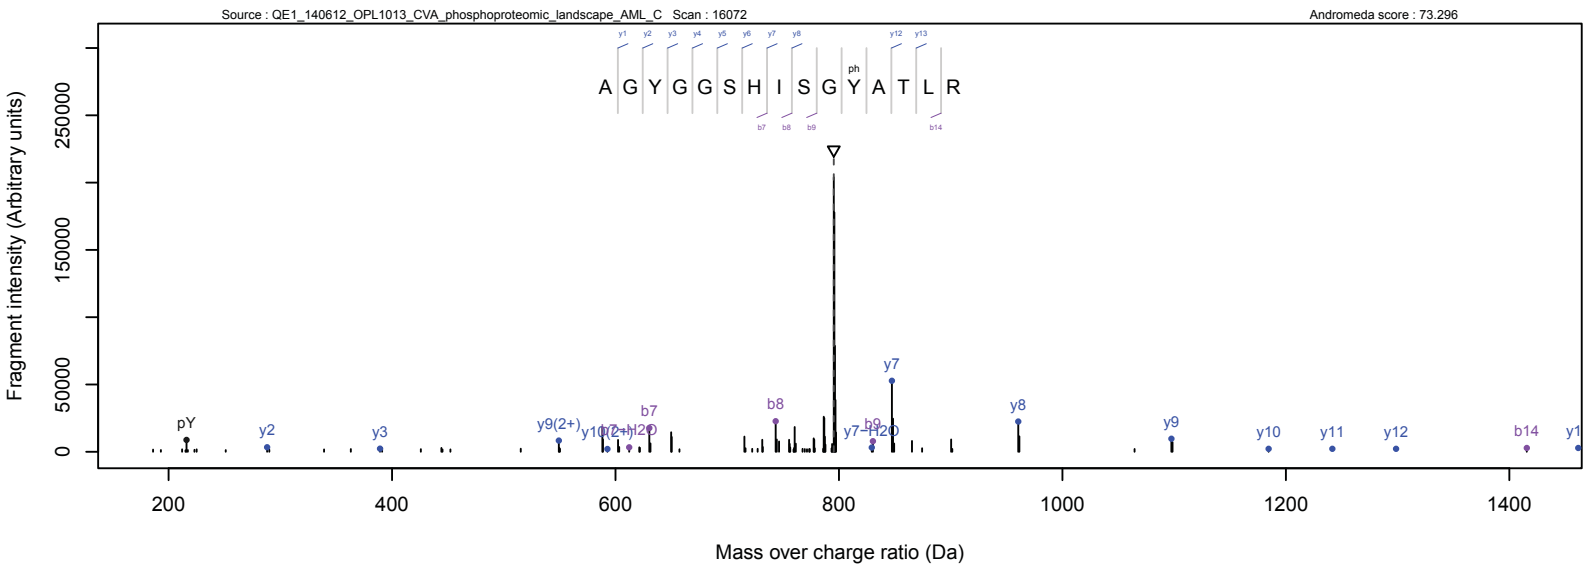



**GHVNCPCCEAIY(ph)SSVSLK-3+**

Source : QE1\_140908\_OPL1013\_CvA\_pTyrIP\_AML\_HEL Scan : 26814

Andromeda score : 73.294

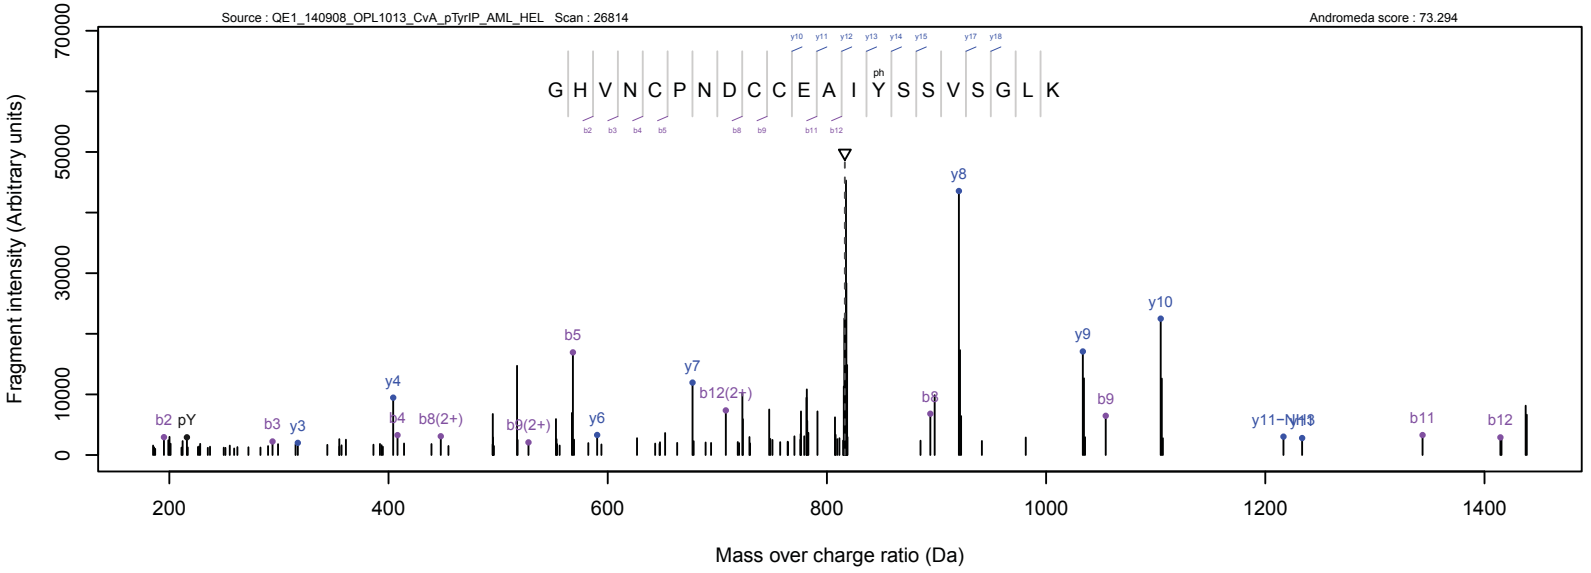

**ALDY(ph)YM(ox)LR-2+**

Source : QE1\_140908\_OPL1013\_CvA\_pTyrIP\_AML\_Kasumi1 Scan : 22066

Andromeda score : 73.248

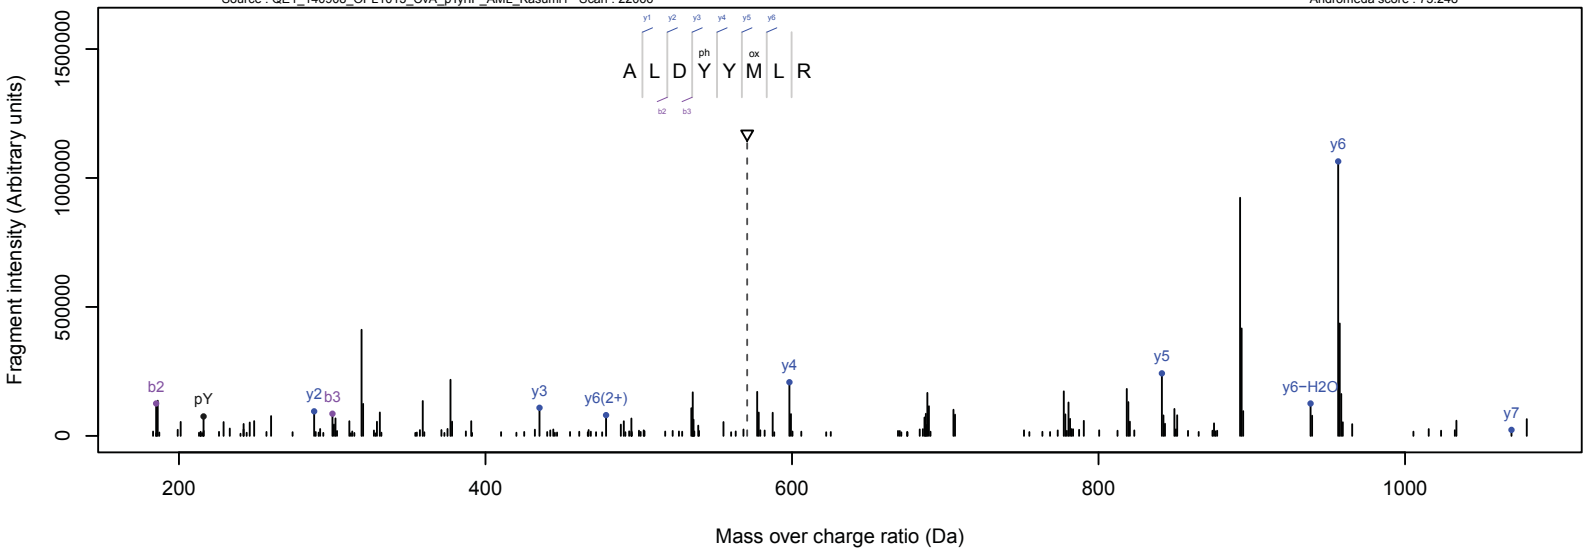

**VVHASGDASY(ph)SAGDSGDAQAQPAFTGIK-3+**

Source : QE1\_140612\_OPL1013\_CvA\_phosphoproteomic\_landscape\_AML\_C Scan : 22220

Andromeda score : 73.213

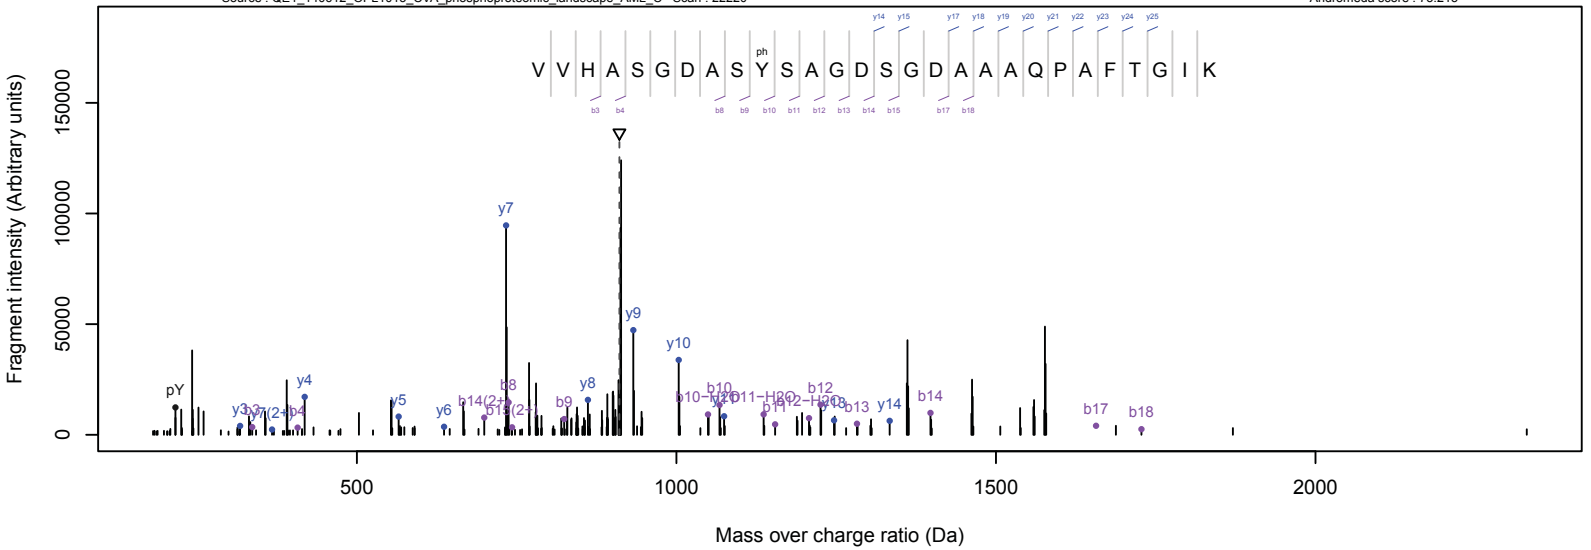

VLESTPNNGY(ph)LYHQIGCCYK-3+

Source : QE1\_140612\_OPL1013\_CVA\_phosphoproteomic\_landscape\_AML\_C Scan : 26636

Andromeda score : 73.168

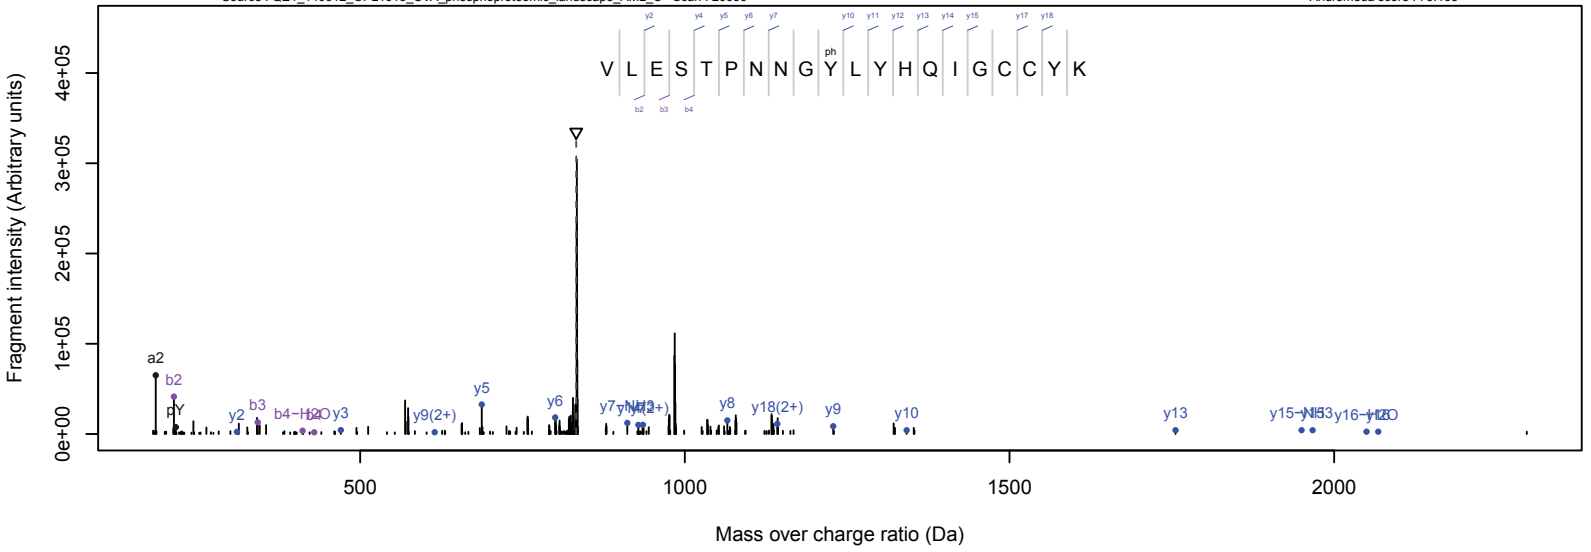

ESTNYPGDY(ph)TLCVSCDGK-2+

Source : QE1\_140612\_OPL1013\_CVA\_phosphoproteomic\_landscape\_AML\_D Scan : 23111

Andromeda score : 73.138

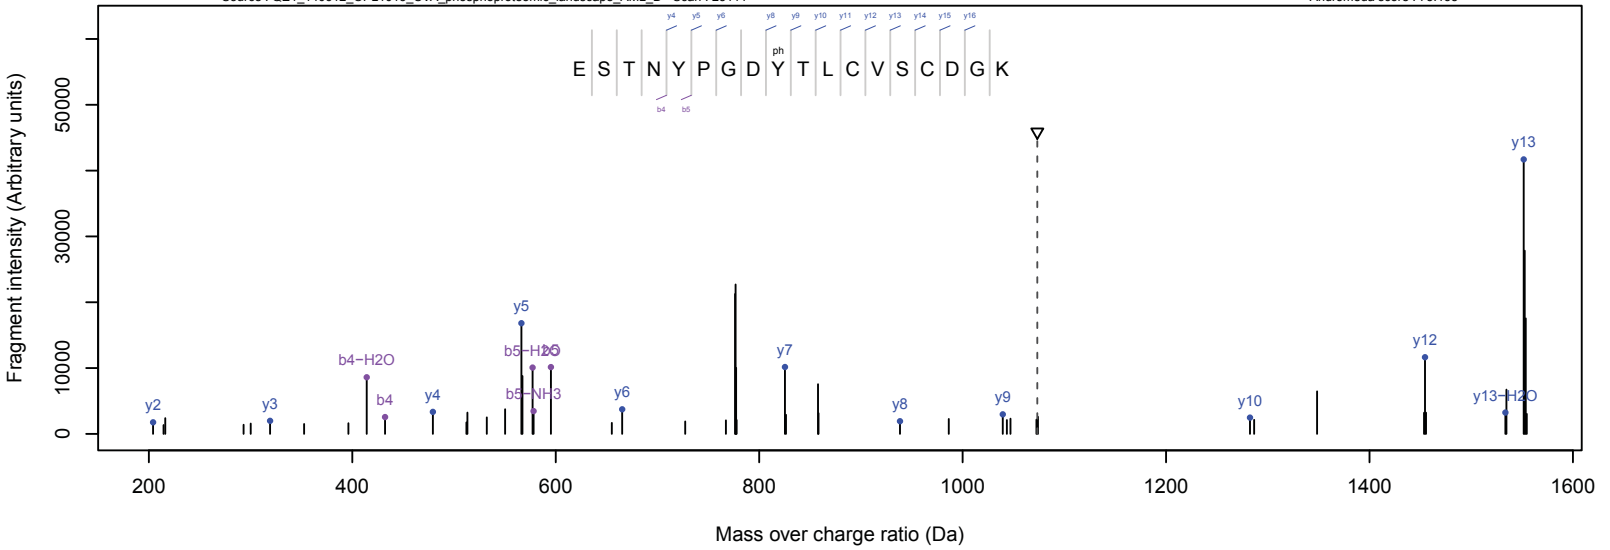

Y(ph)VATLGVEVHPLVFHTNR-3+

Source : QE1\_140908\_OPL1013\_CvA\_pTyrIP\_AML\_Kasumi1 Scan : 34239

Andromeda score : 73.138

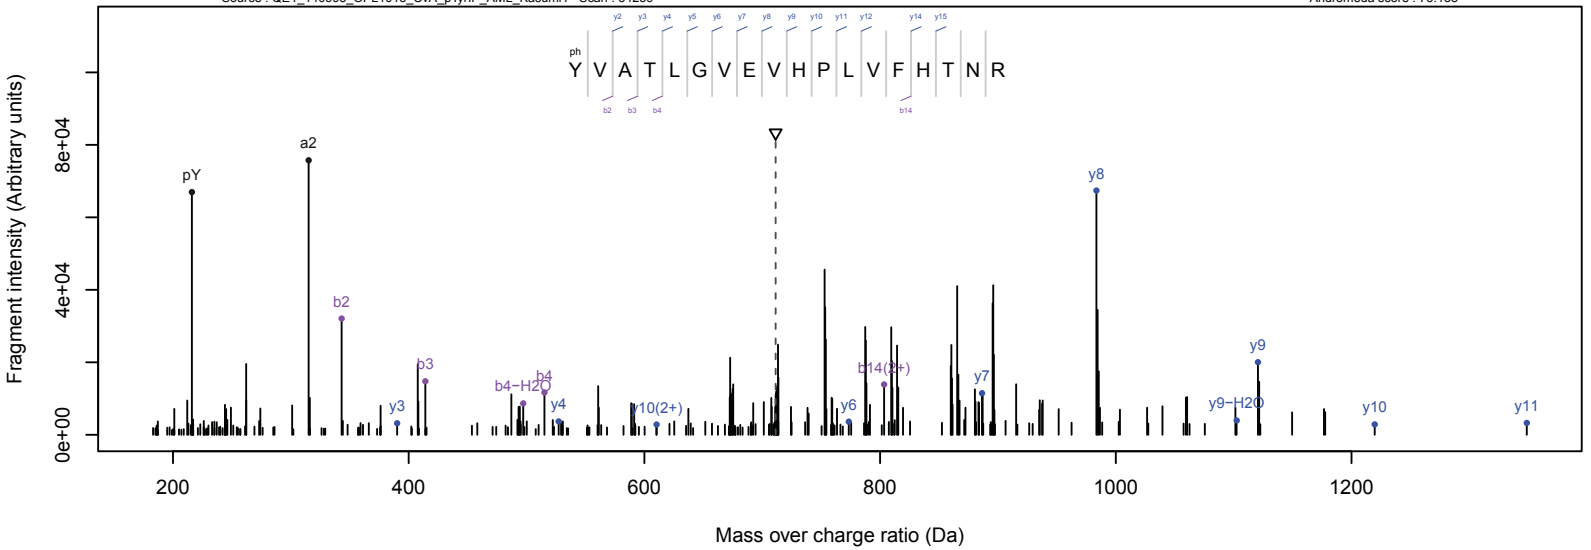

SVFM(ox)PRPQAVGSSNY(ph)ASTSAGLK-3+

Source : QE1\_140612\_OPL1013\_CVA\_phosphoproteomic\_landscape\_AML\_B Scan : 26178

Andromeda score : 73.11

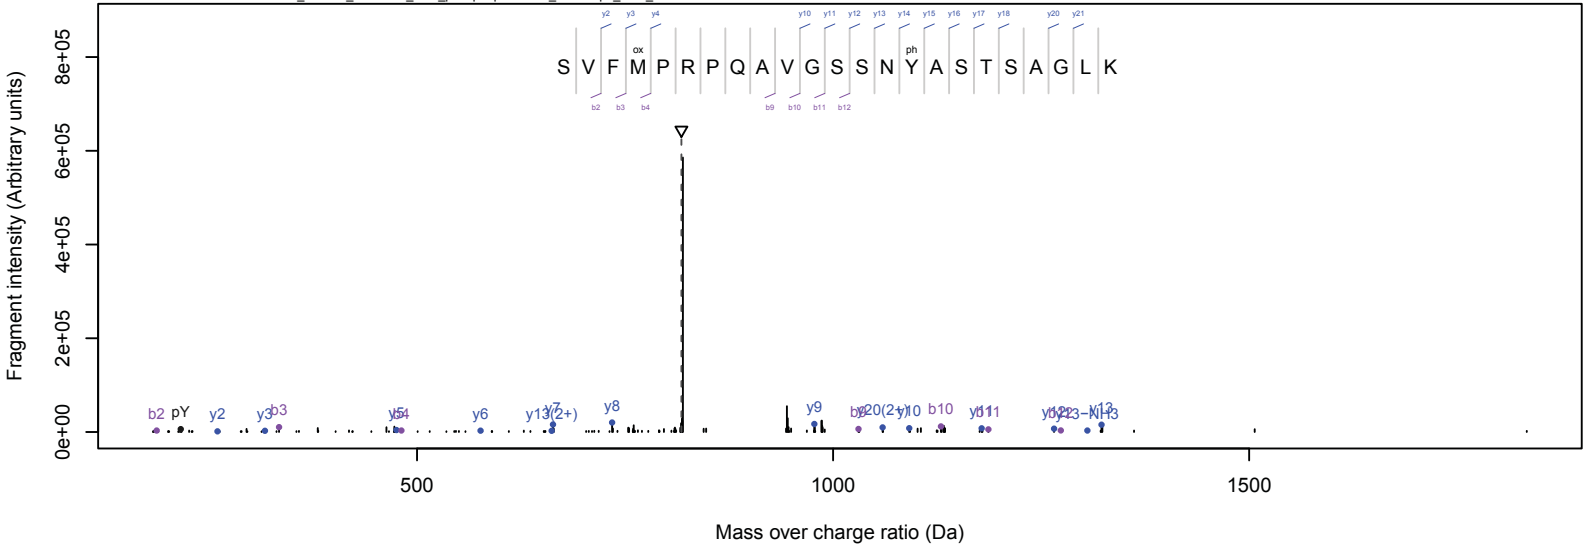

SMSGY(ph)LSGFQAR-2+

Source : Qe1\_141024\_OPL1013\_CvA\_AML\_pTyrIP\_MOLM13 Scan : 29905

Andromeda score : 73.082

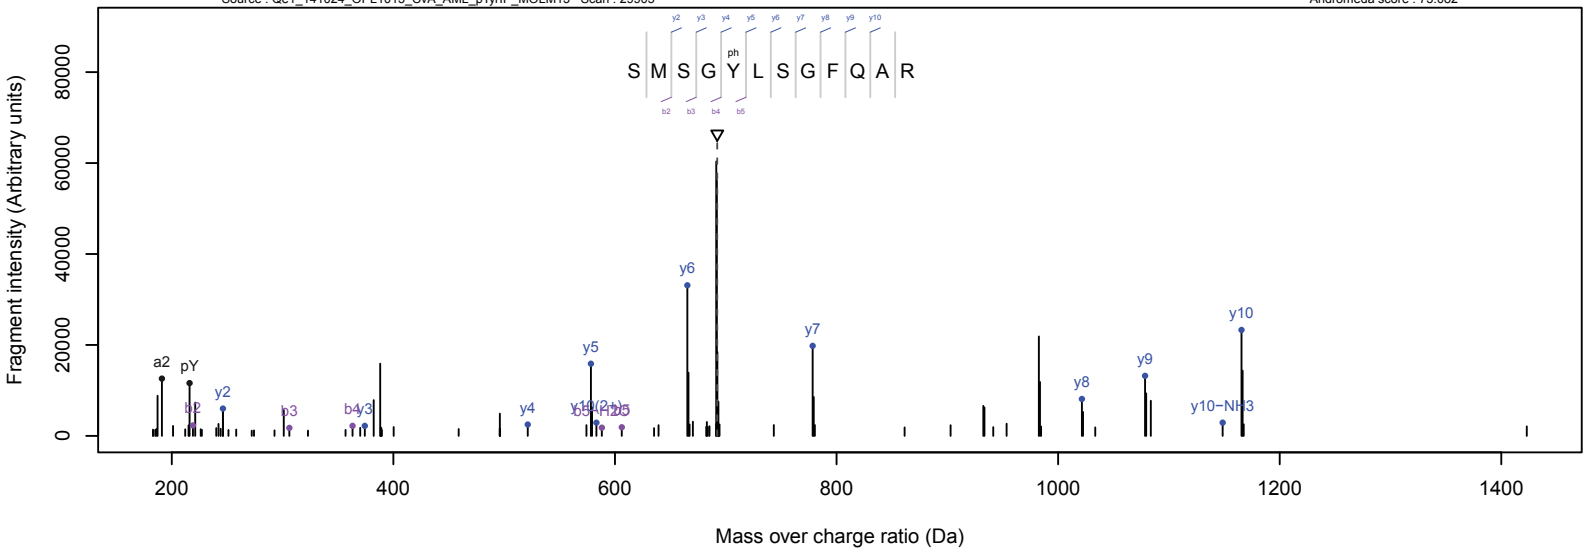

Y(ph)SLADQTS G D Q S P L P P C T P T P P C A E M R-3+

Source : QE1\_140612\_OPL1013\_CVA\_phosphoproteomic\_landscape\_AML\_A Scan : 32654

Andromeda score : 73.072

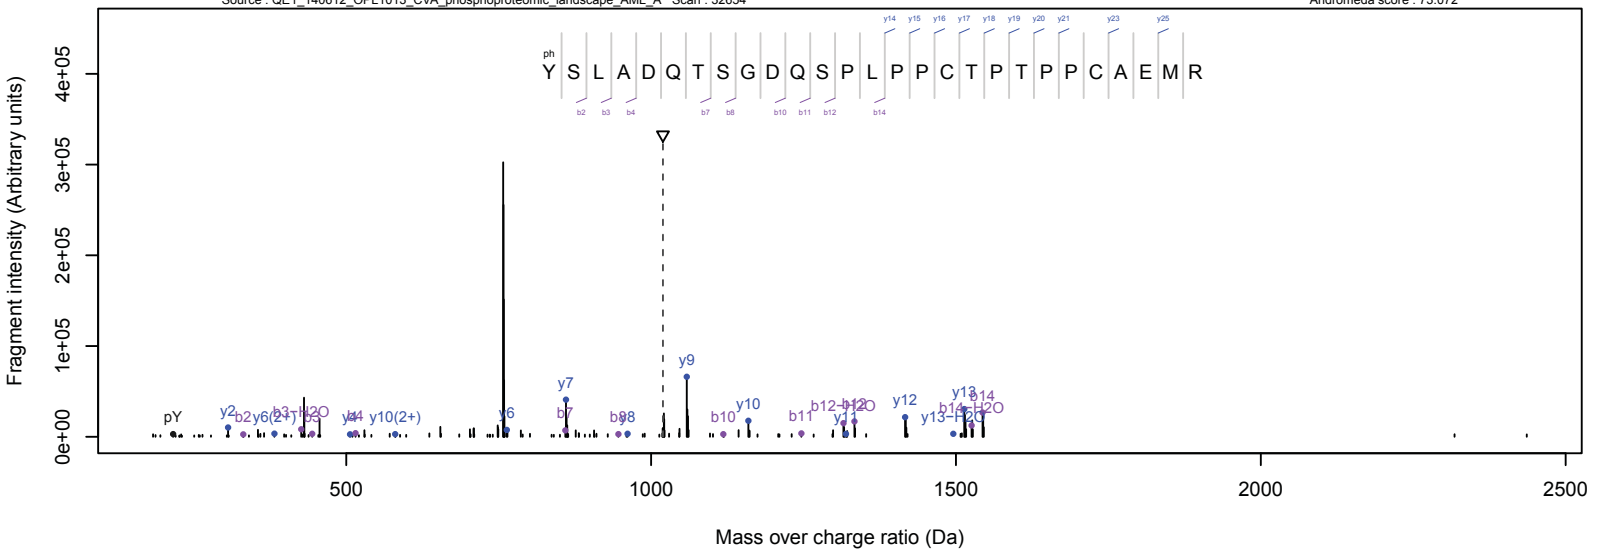

ASGNY(ph)ATVISHNPETKK-3+

Source : QE1\_140612\_OPL1013\_CVA\_phosphoproteomic\_landscape\_AML\_C Scan : 8548

Andromeda score : 73.057

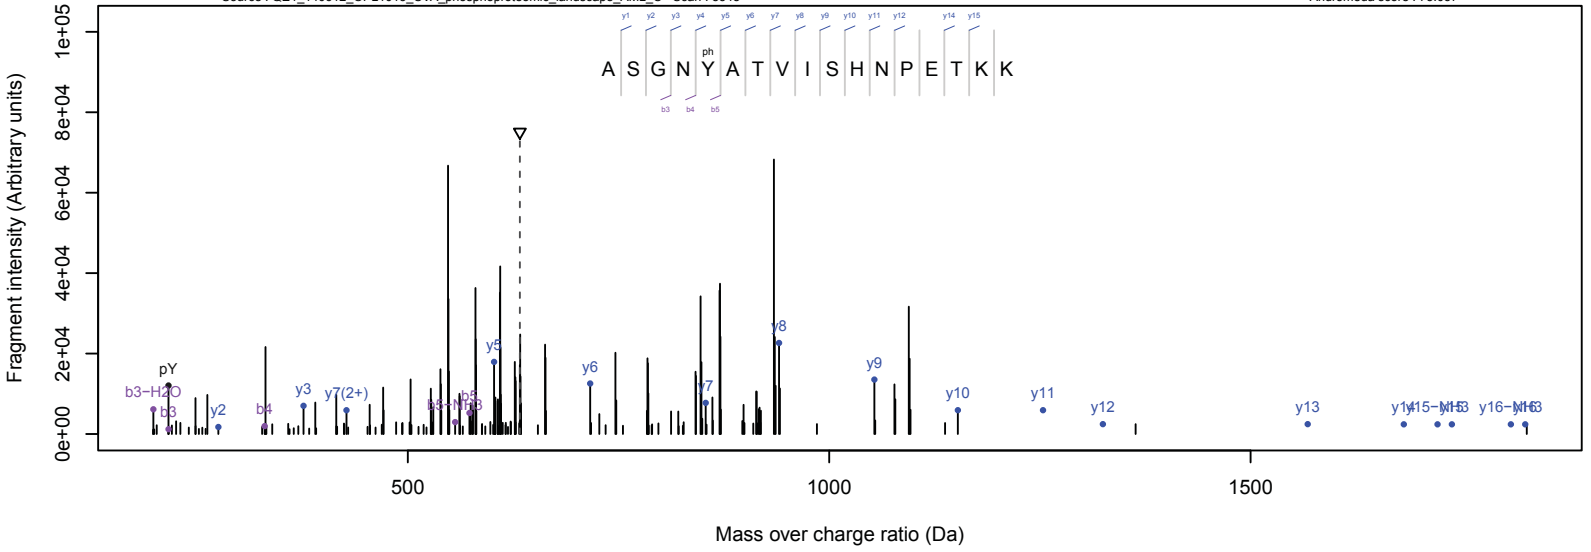

ALY(ph)PFRR-2+

Source : QE1\_140612\_OPL1013\_CVA\_phosphoproteomic\_landscape\_AML\_A Scan : 14817

Andromeda score : 73.039

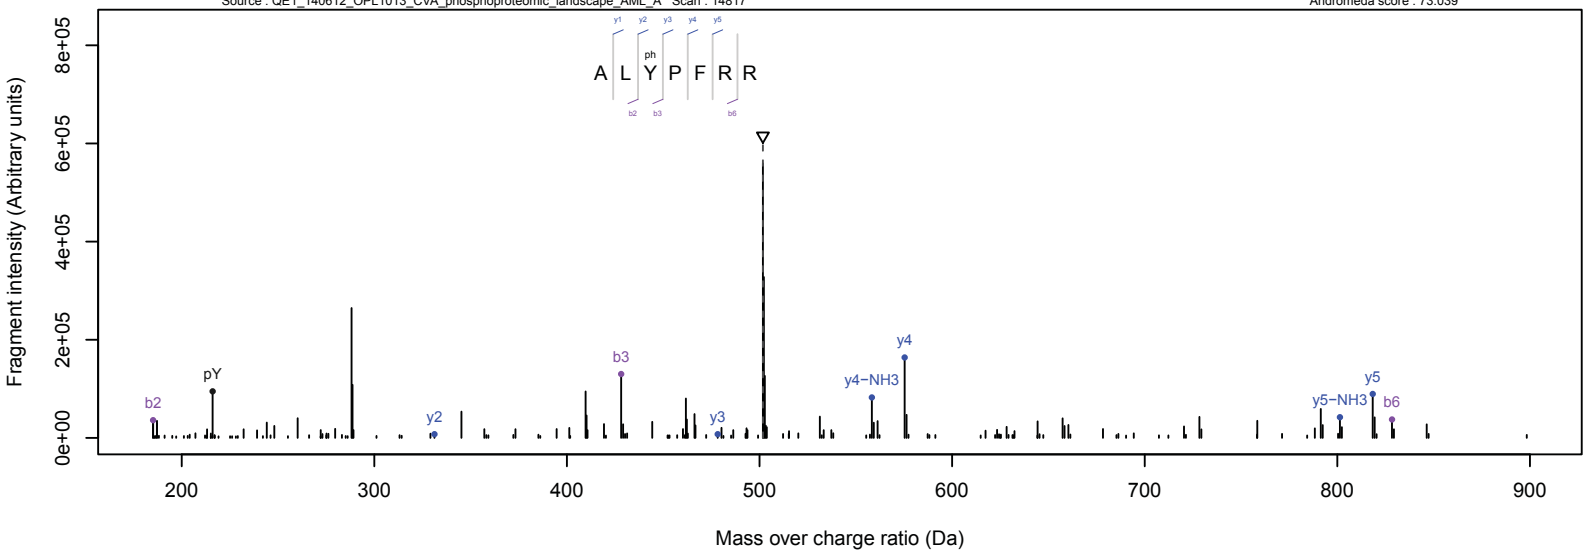

TNEKVELQELNDRFANY(ph)IDK-4+

Source : QE1\_140612\_OPL1013\_CVA\_phosphoproteomic\_landscape\_AML\_C Scan : 35969

Andromeda score : 72.99

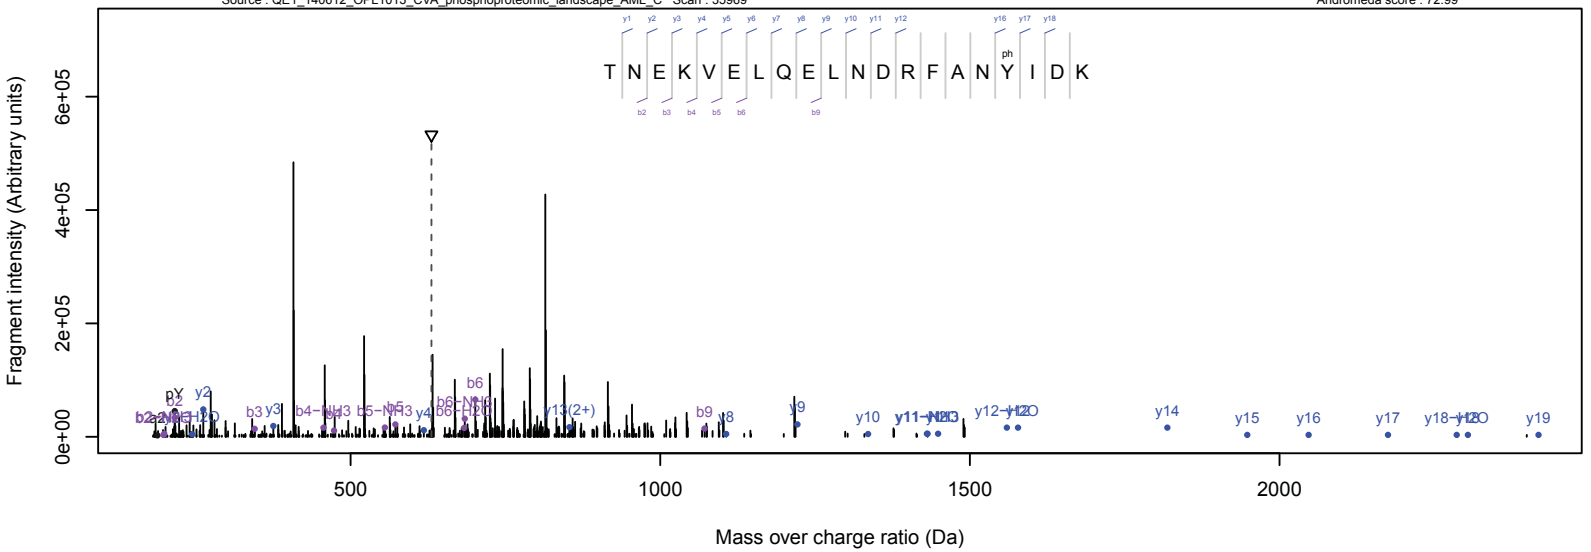

HIY(ph)LLPSGR-2+

Source : QE1\_140612\_OPL1013\_CVA\_phosphoproteomic\_landscape\_AML\_C Scan : 23805

Andromeda score : 72.928

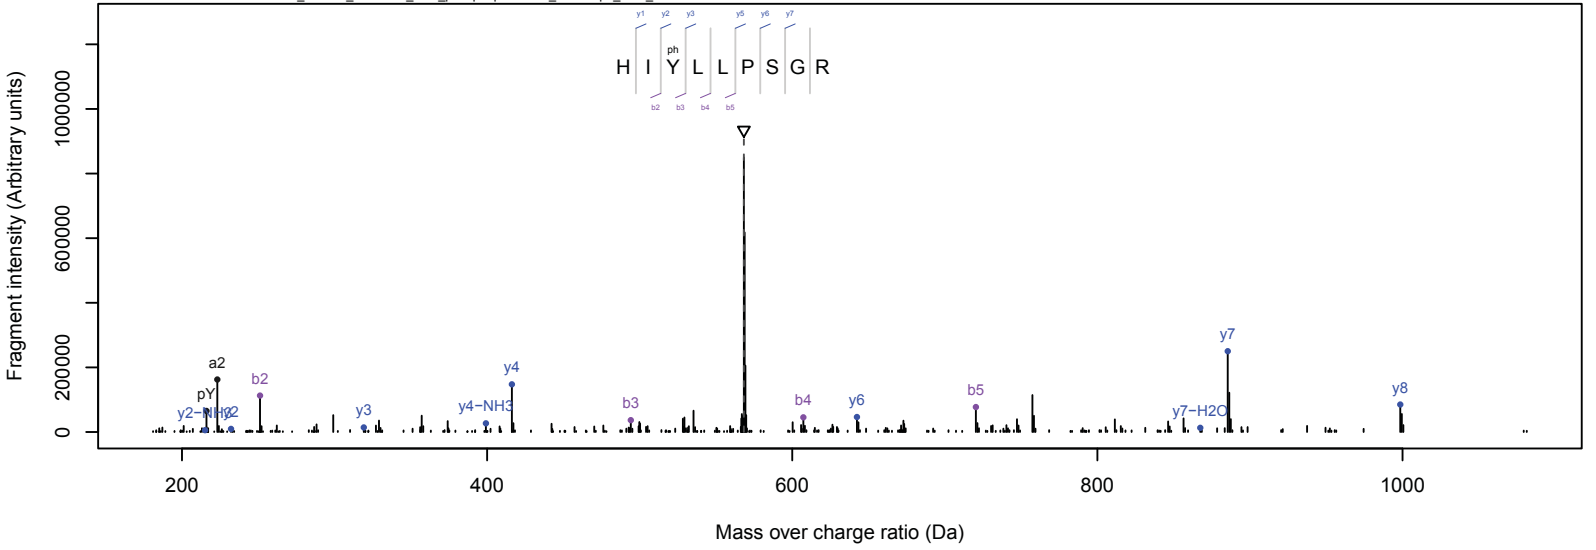

IEY(ph)AKPTR-2+

Source : QE1\_140822\_OPL1013\_CvA\_pTyrIP\_AML\_cell\_lines\_part2\_B Scan : 3045

Andromeda score : 72.928

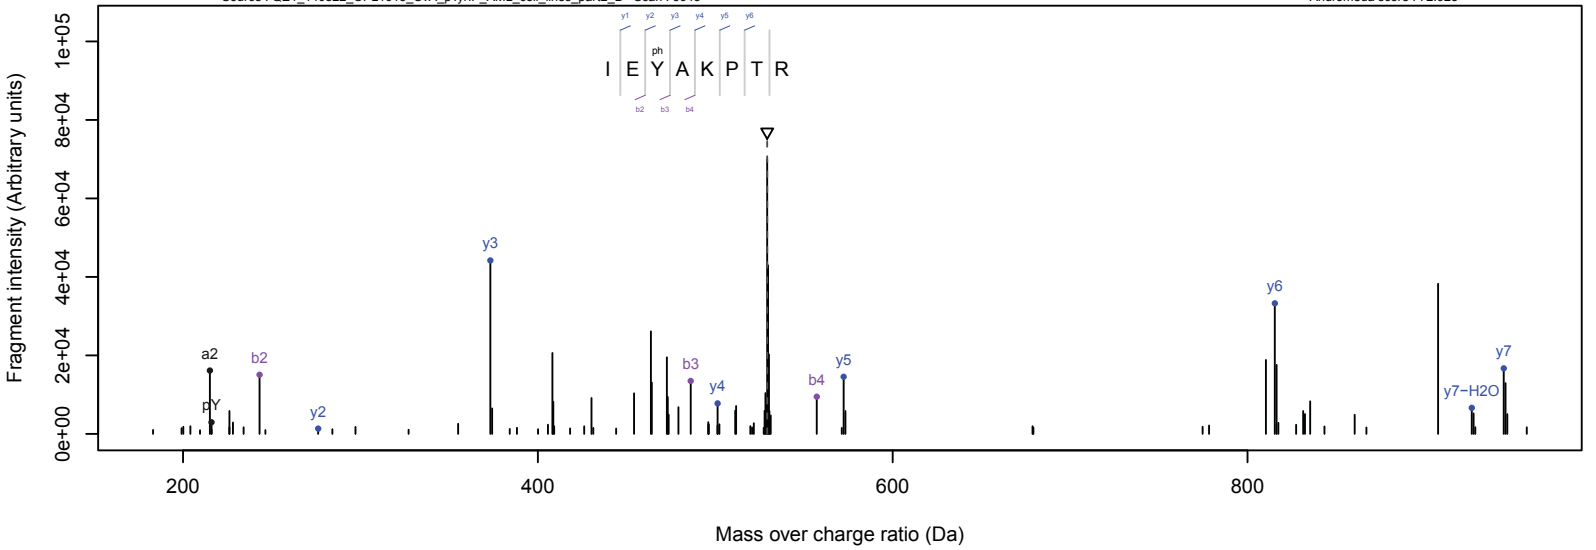

IQNPSAY(ph)AK-2+

Source : QE1\_140612\_OPL1013\_CVA\_phosphoproteomic\_landscape\_AML\_C Scan : 6231

Andromeda score : 72.928

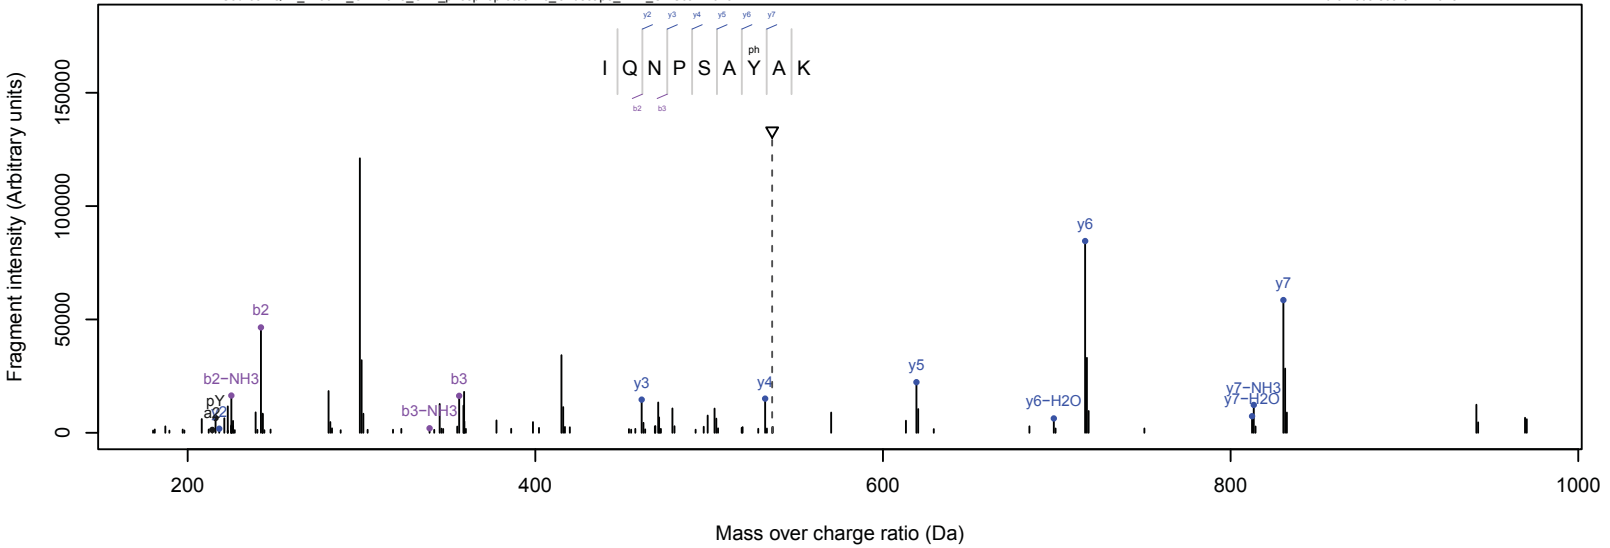

IY(ph)EYVESR-2+

Source: QE1\_140612\_OPL1013\_CVA\_phosphoproteomic\_landscape\_AML\_E Scan: 11120

Andromeda score: 72.928

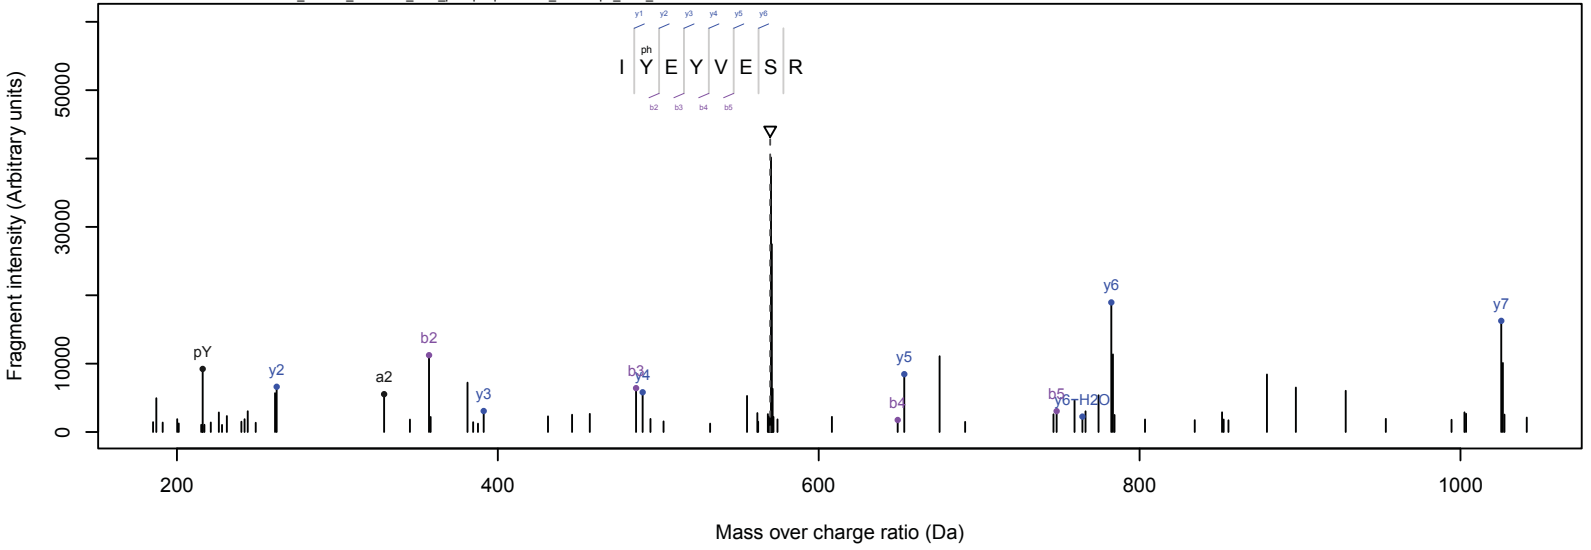

AVIY(ph)NPATQADWTAK-2+

Source: QE1\_140908\_OPL1013\_CvA\_pTyrIP\_AML\_HEL Scan: 29175

Andromeda score: 72.898

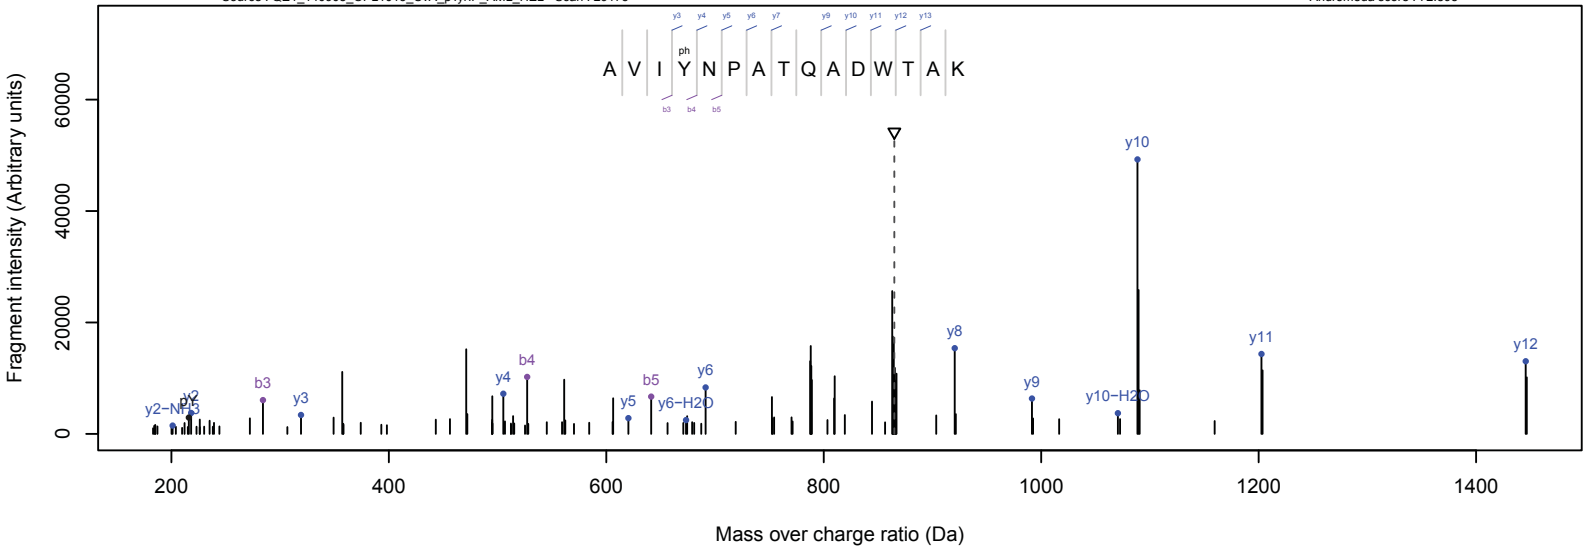

FNECGHVLY(ph)ADIK-2+

Source: QE1\_140908\_OPL1013\_CvA\_pTyrIP\_AML\_Kasumi1 Scan: 22835

Andromeda score: 72.898

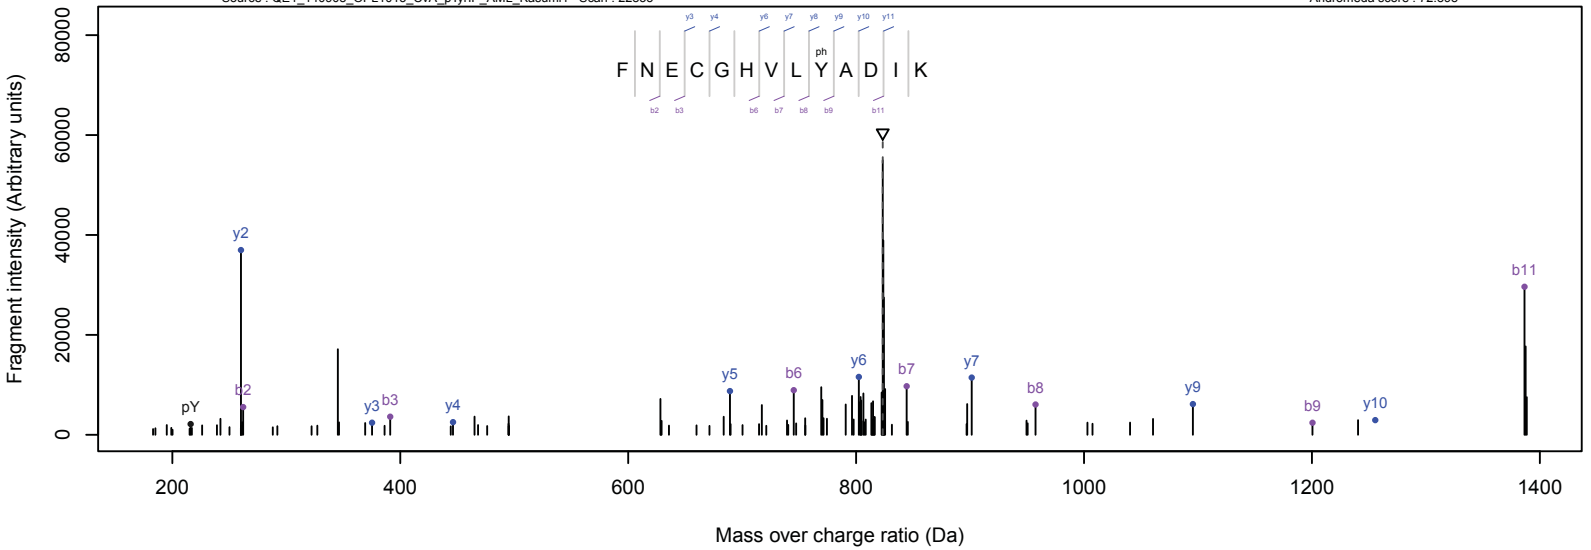

**KEPVDEDLY(ph)PEHYR-3+**

Source : QE1\_140612\_OPL1013\_CVA\_phosphoproteomic\_landscape\_AML\_B Scan : 17285

Andromeda score : 72.898

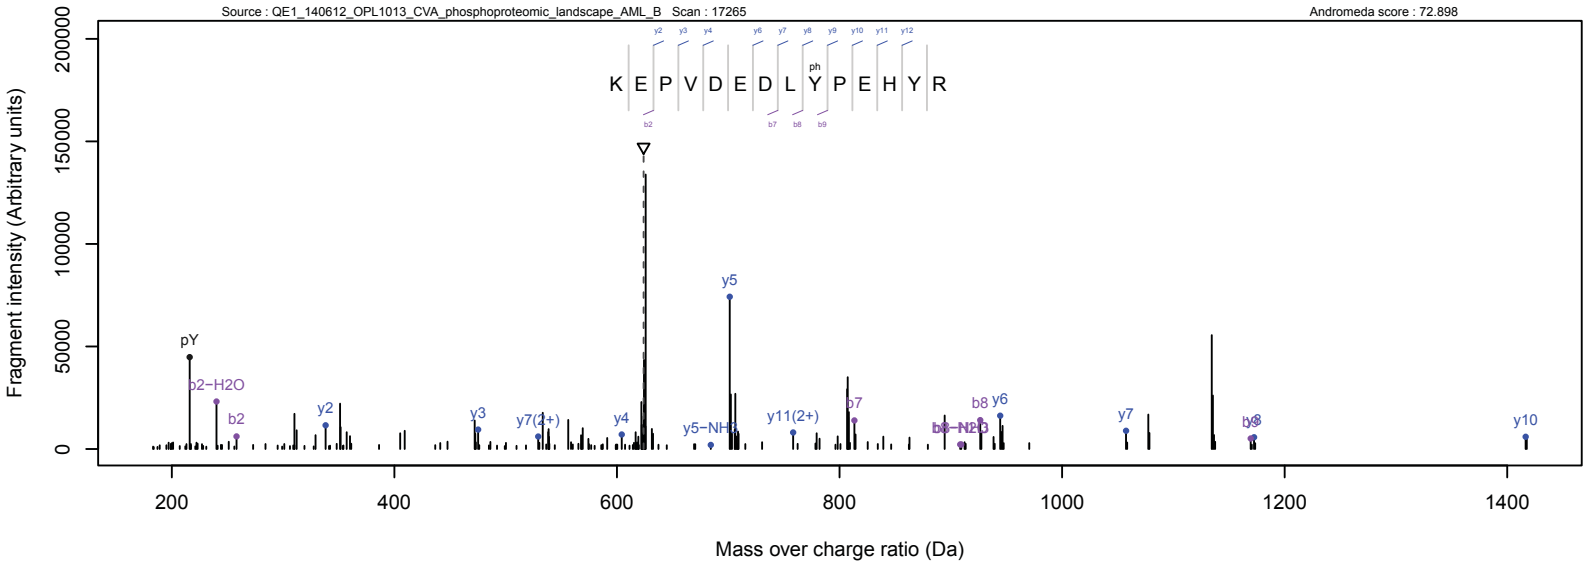

**Y(ph)PHCAVNGLLVAEK-2+**

Source : QE1\_140612\_OPL1013\_CVA\_phosphoproteomic\_landscape\_AML\_B Scan : 23836

Andromeda score : 72.898

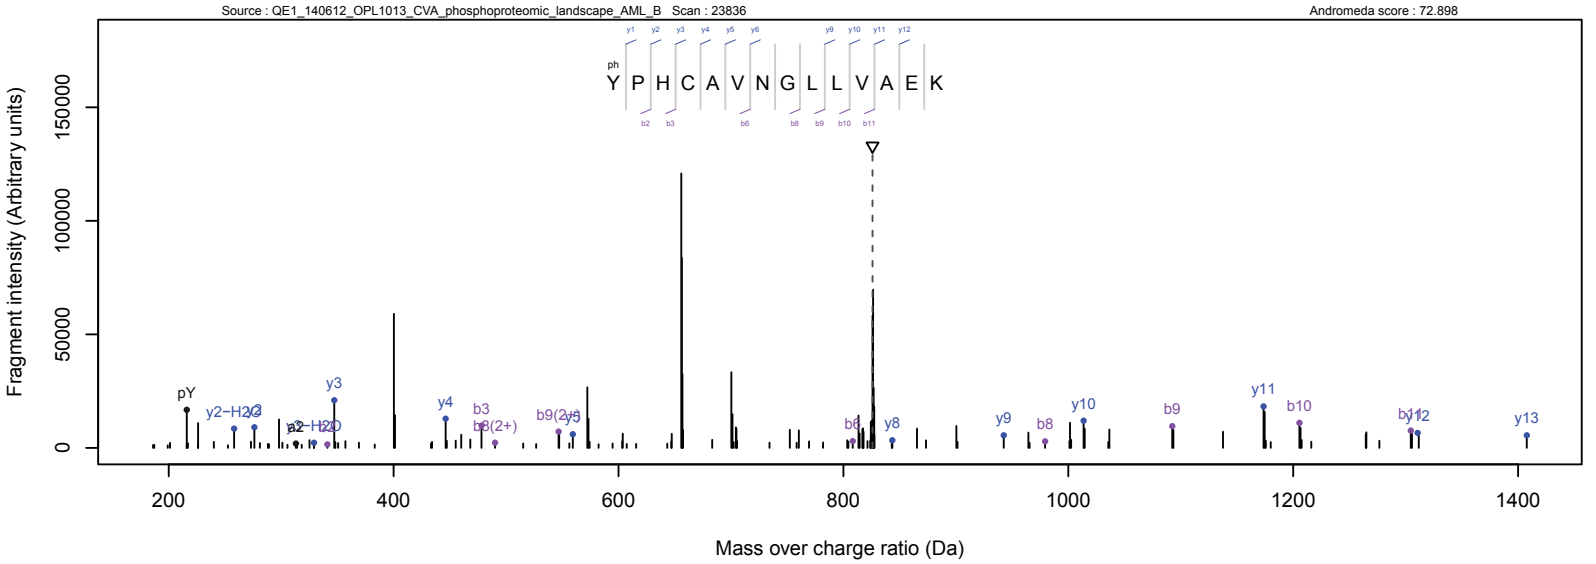

**GILY(ph)CSVALATNK-2+**

Source : QE1\_140612\_OPL1013\_CVA\_phosphoproteomic\_landscape\_AML\_C Scan : 32022

Andromeda score : 72.891

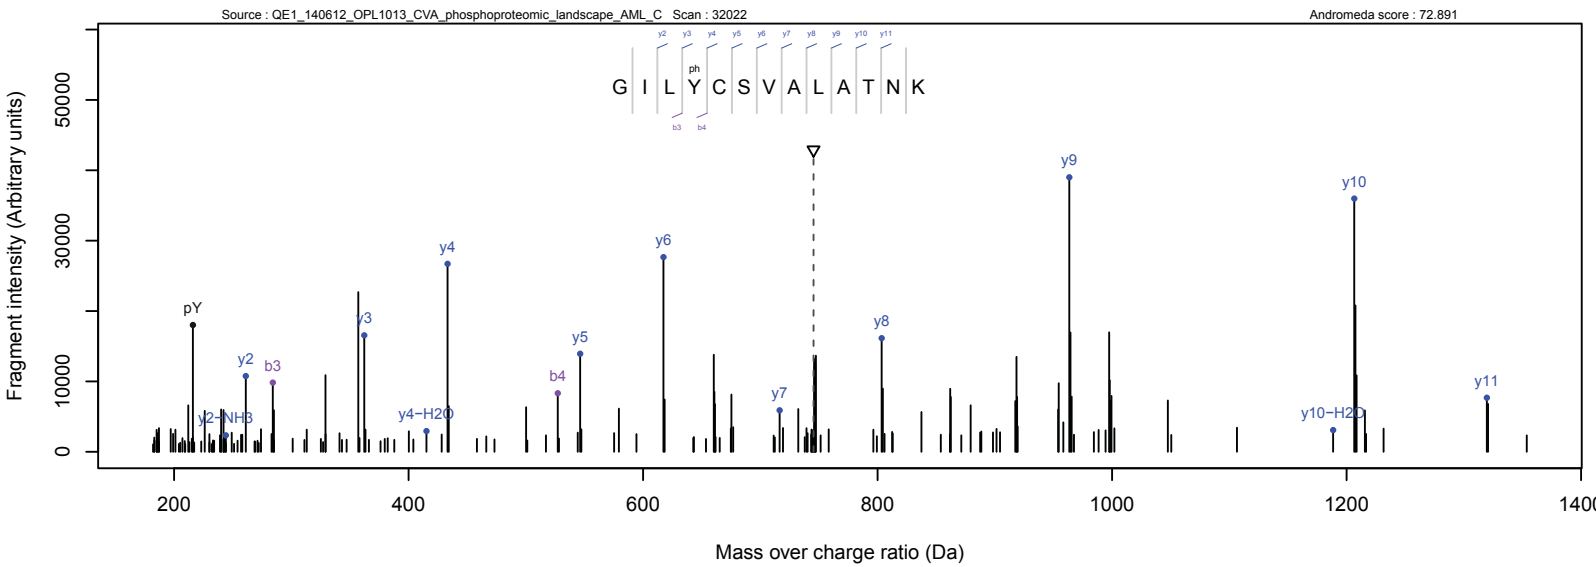

Y(ph)FHLVLPDELAEPK-3+

Source : QE1\_140612\_OPL1013\_CVA\_phosphoproteomic\_landscape\_AML\_C Scan : 43451

Andromeda score : 72.891

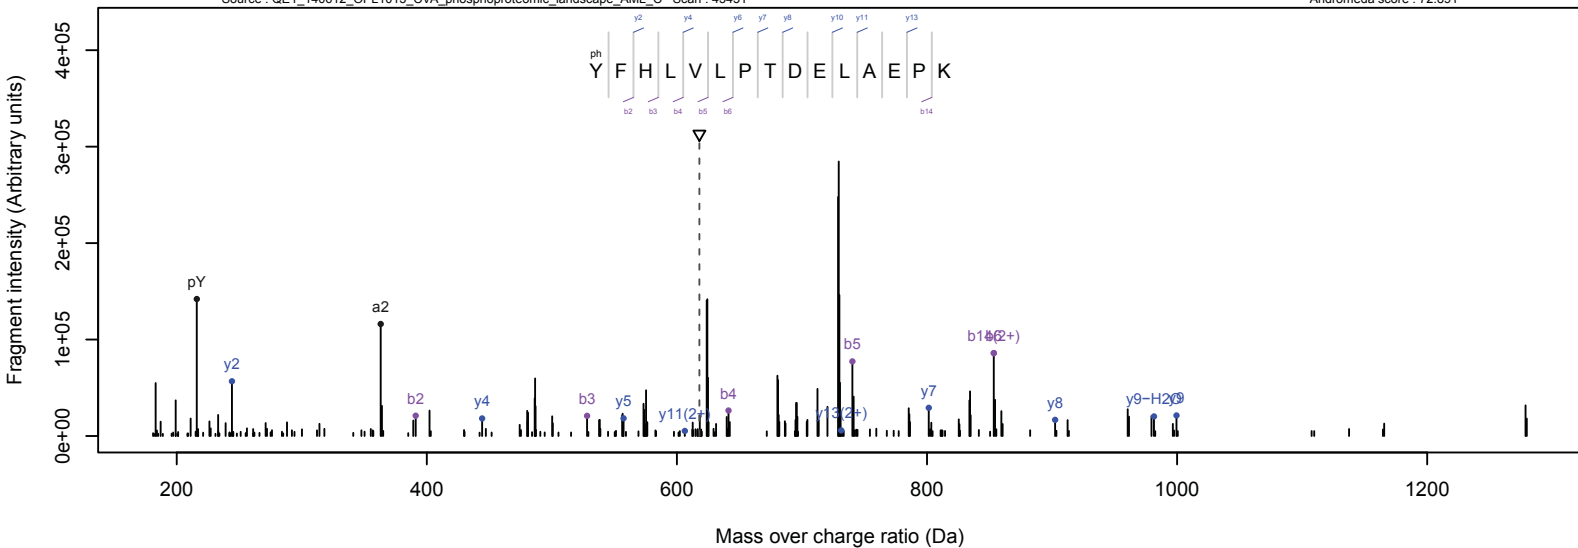

MHY(ph)PGAFTYSPTPTVTSIGIGIGMSAMGSATR-3+

Source : QE1\_140612\_OPL1013\_CVA\_phosphoproteomic\_landscape\_AML\_C Scan : 45155

Andromeda score : 72.791

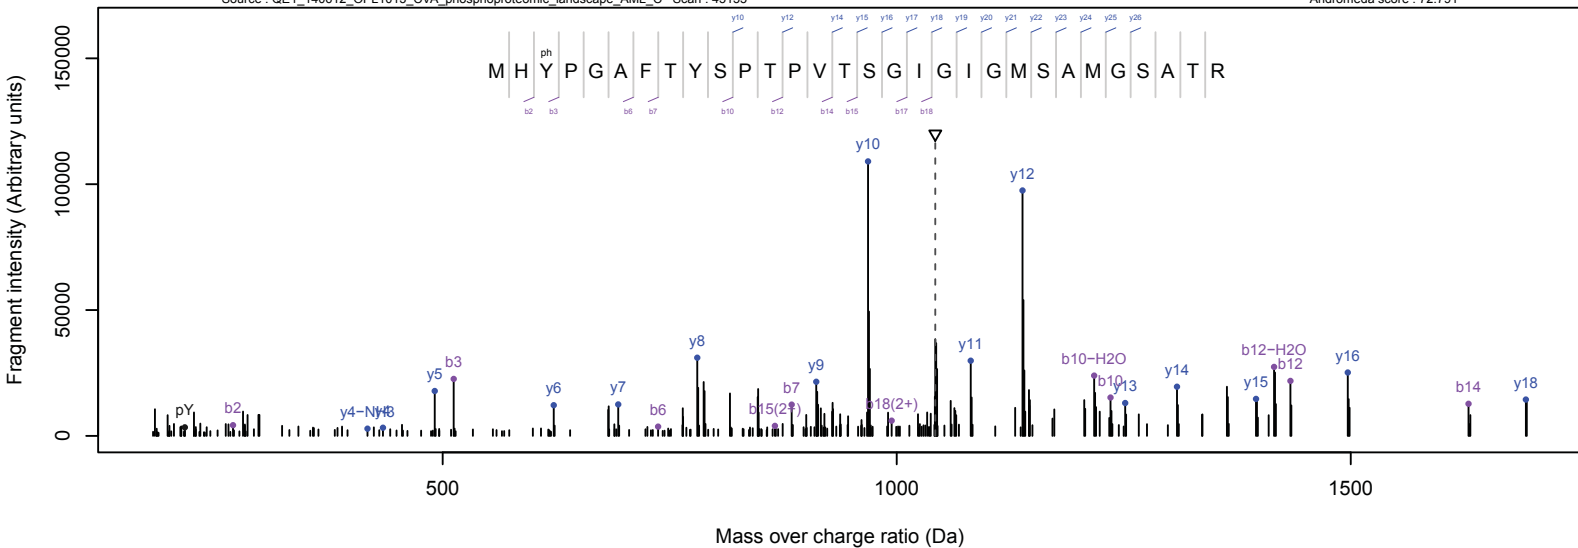

SKPNMNY(ph)DKLSR-3+

Source : QE1\_140612\_OPL1013\_CVA\_phosphoproteomic\_landscape\_AML\_D Scan : 7221

Andromeda score : 72.705

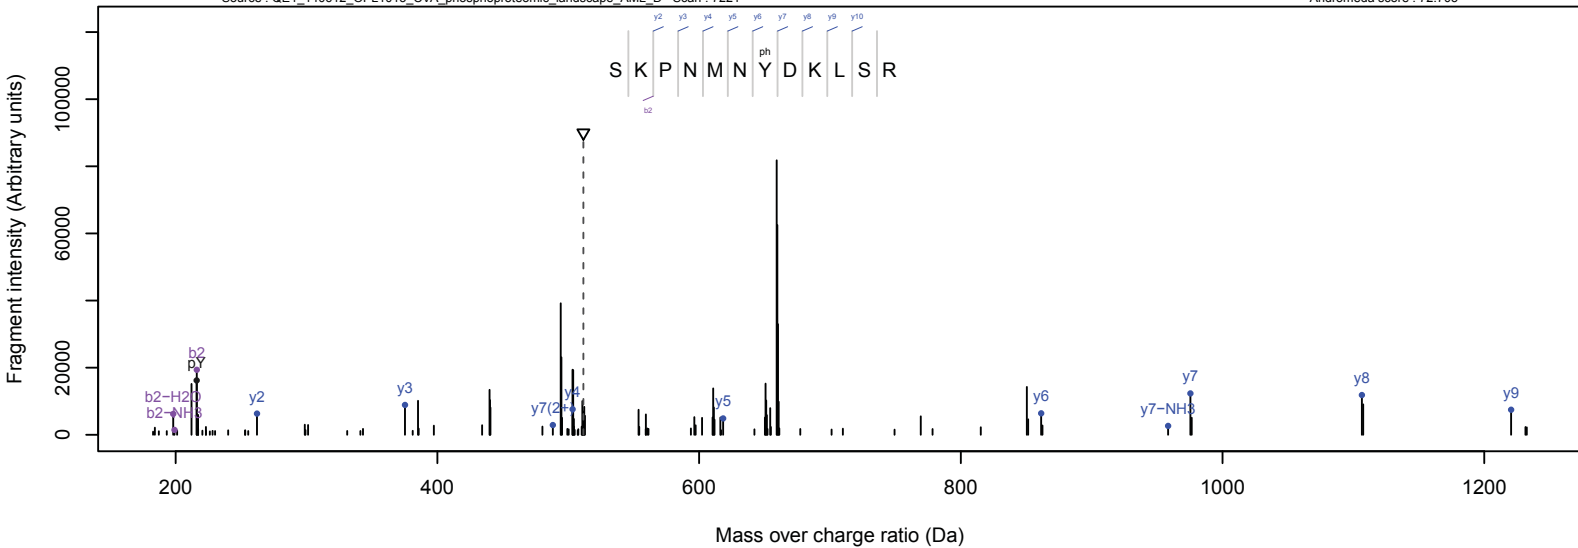



**KVQGGIDIYHLLK-3+**

Source : QE1\_140612\_OPL1013\_CVA\_phosphoproteomic\_landscape\_AML\_C Scan : 32863

Andromeda score : 72.615

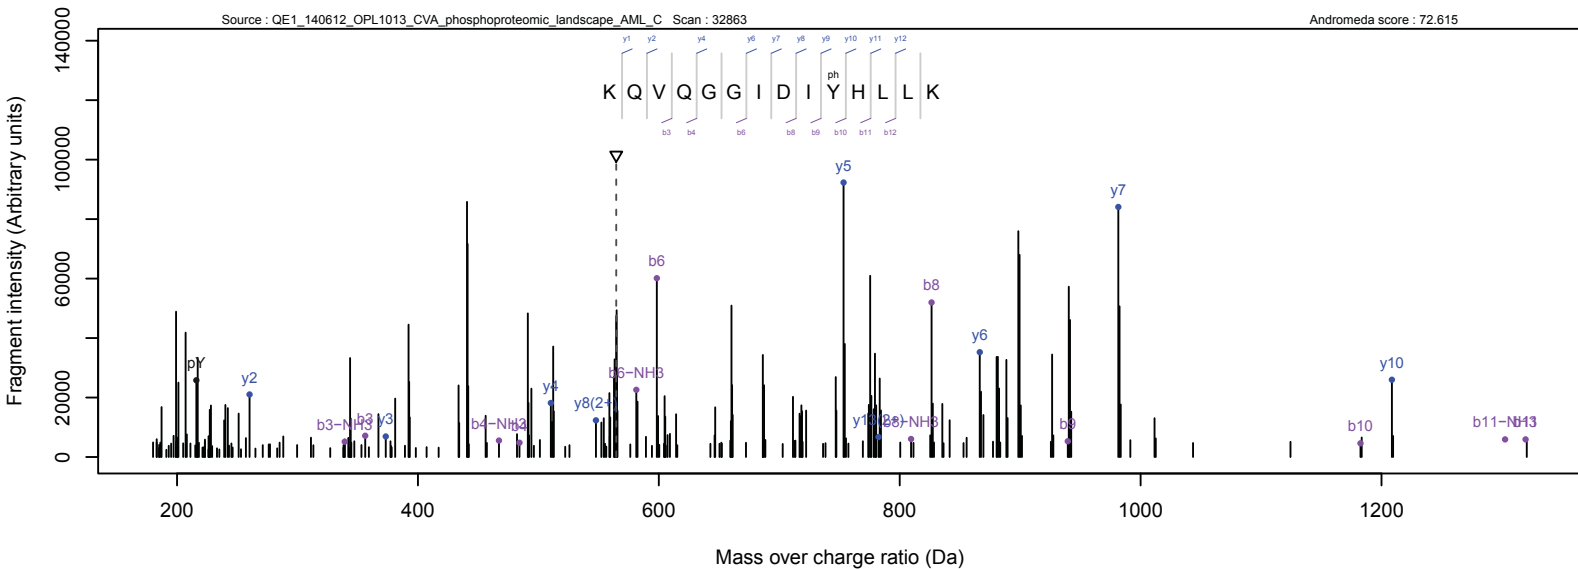

**LNPQCIPYTLQNHYYR-3+**

Source : QE1\_140612\_OPL1013\_CVA\_phosphoproteomic\_landscape\_AML\_C Scan : 30250

Andromeda score : 72.615

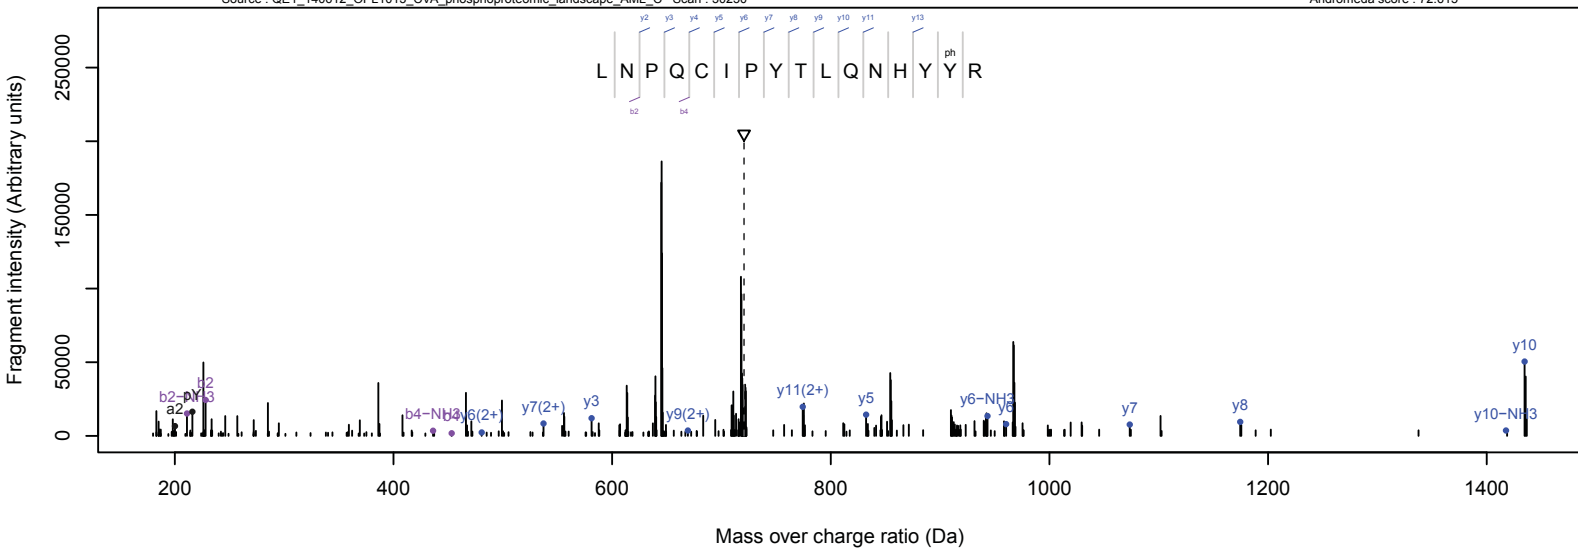

**DKFYHLLAK-2+**

Source : QE1\_140612\_OPL1013\_CVA\_phosphoproteomic\_landscape\_AML\_C Scan : 8280

Andromeda score : 72.607

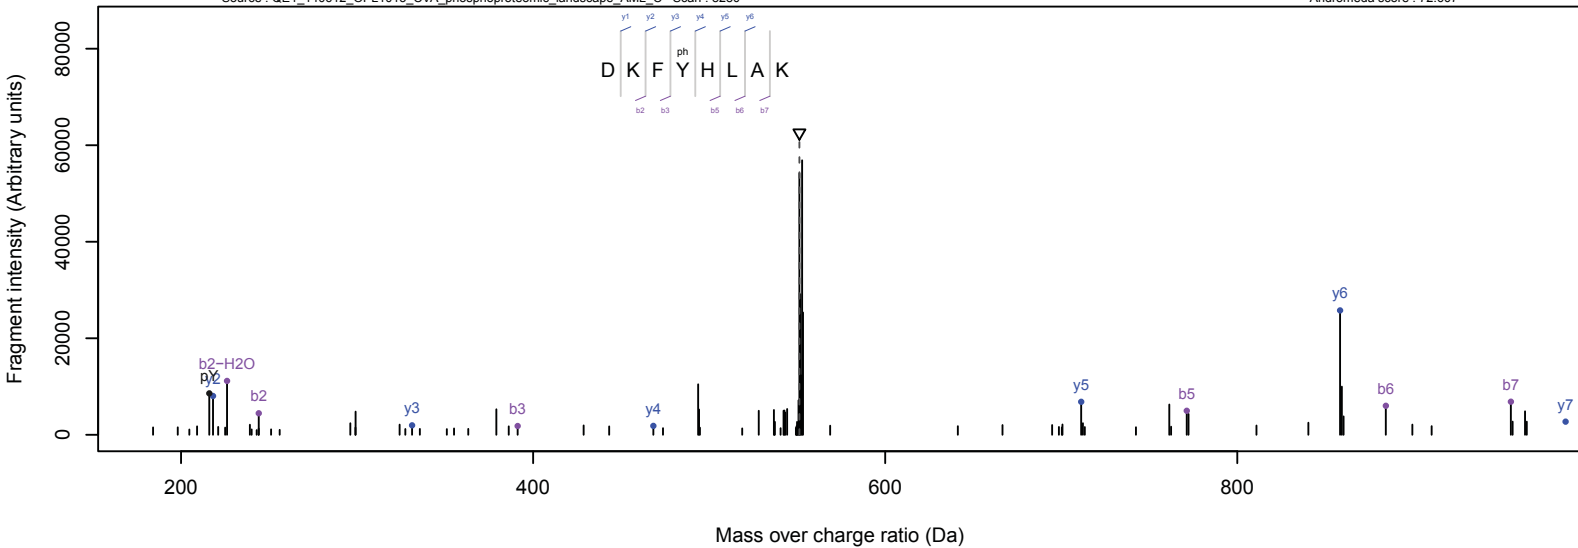

## IM(ox)HNY(ph)DKLK-3+

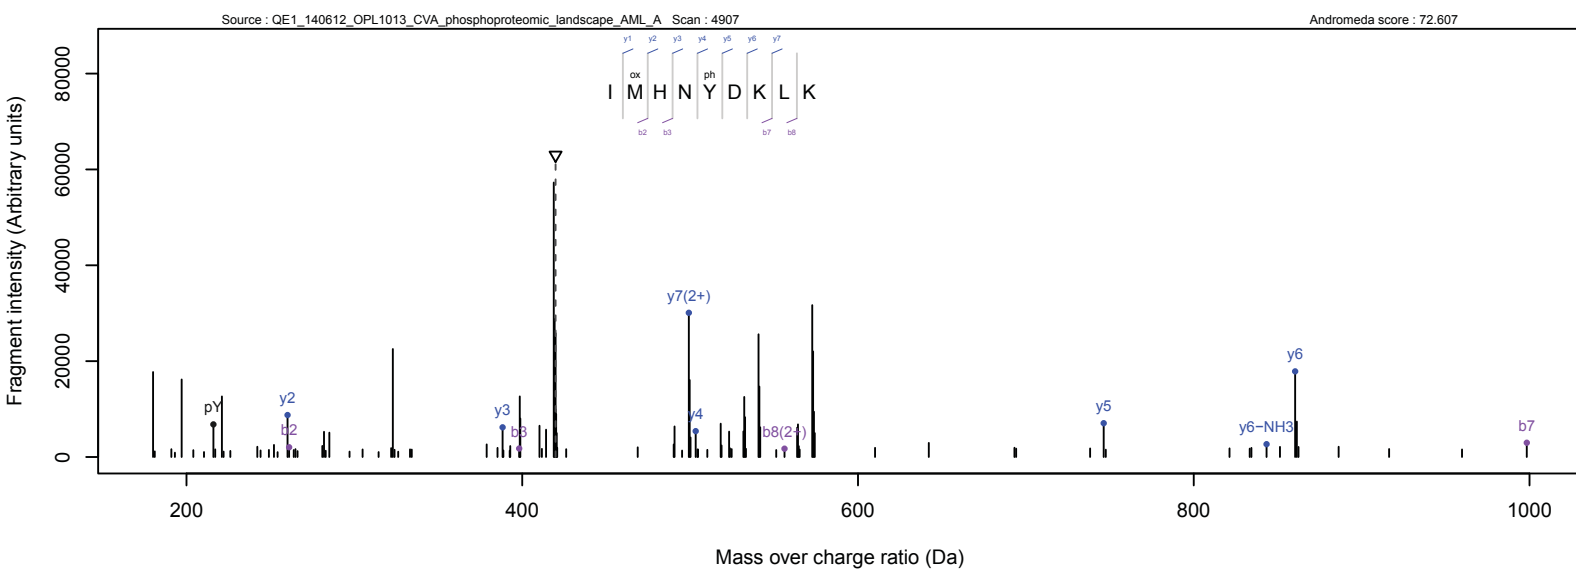

## KKAY(ph)ADFYR-3+

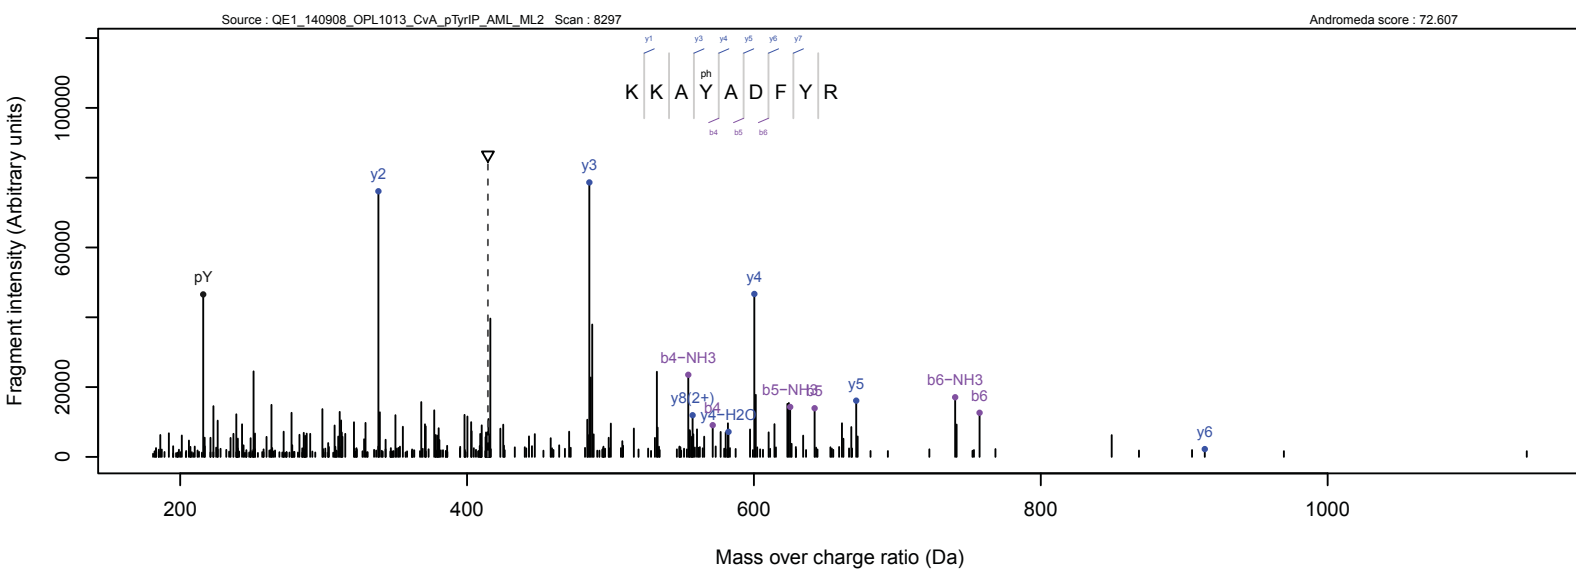

## Y(ph)VALTSLLK-2+

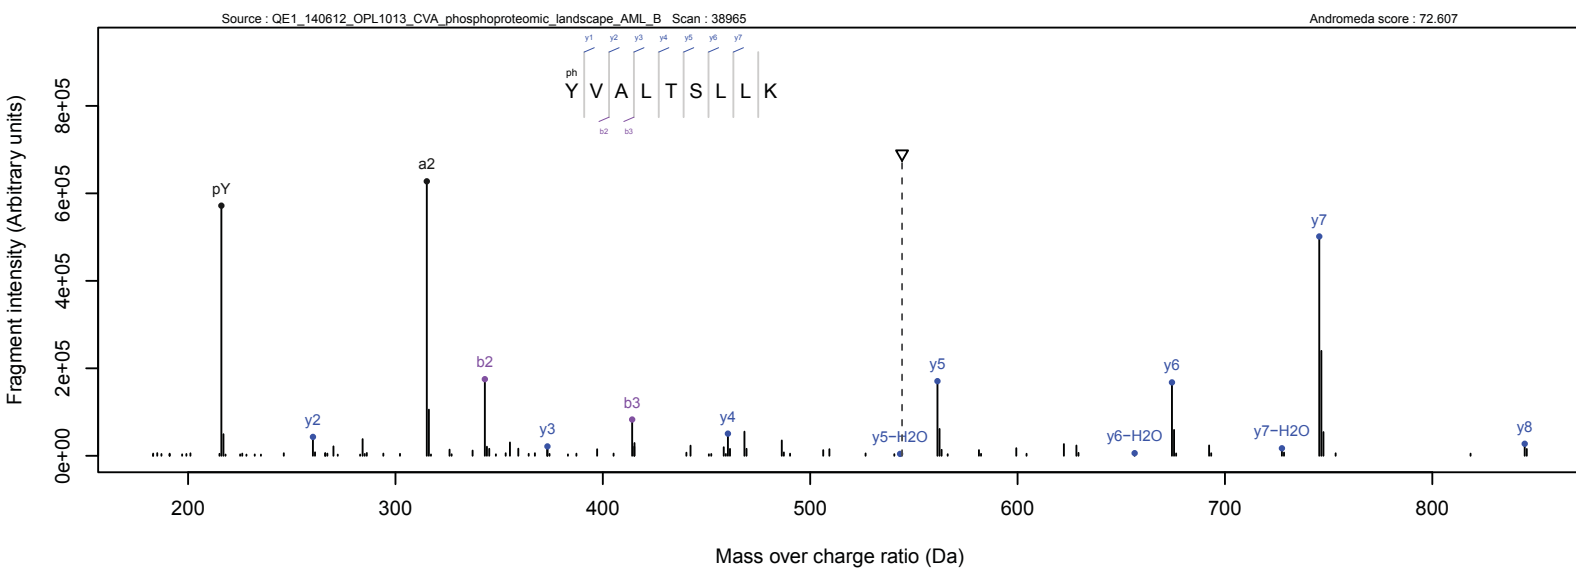



## TWDDDY(ph)V LKR-2+

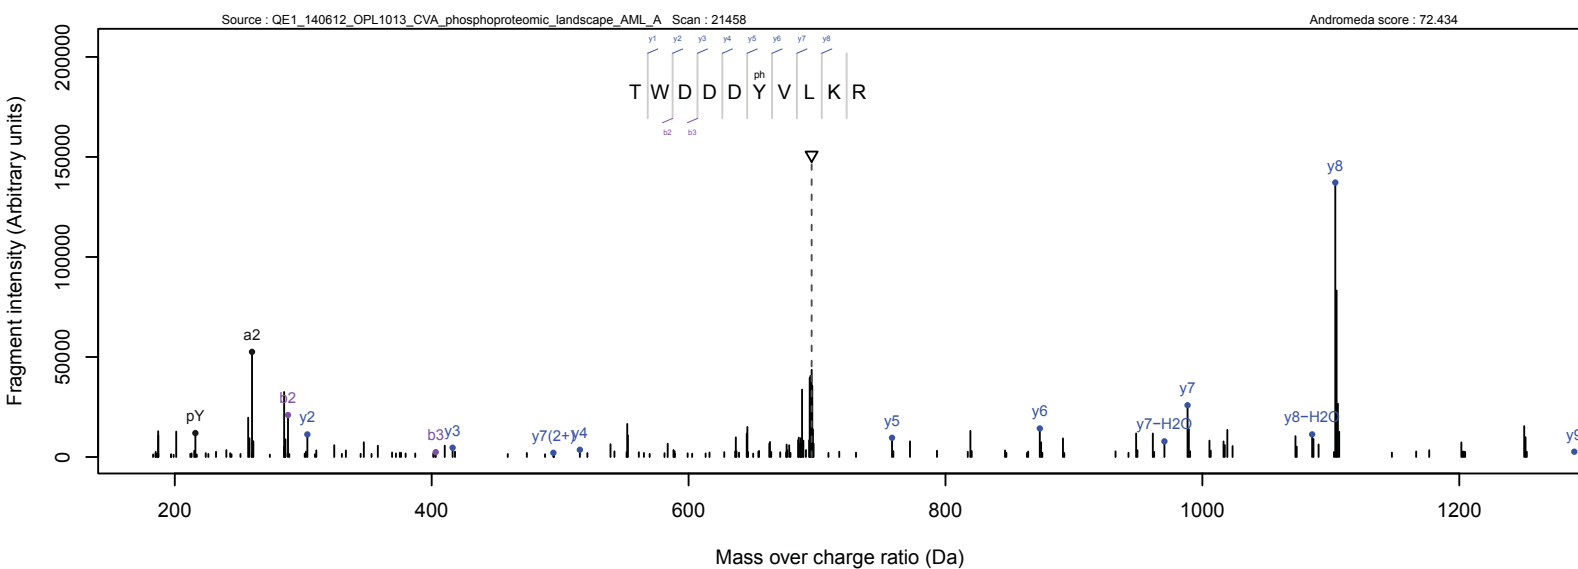

## KAPIFTSEHGKLY LVR-4+

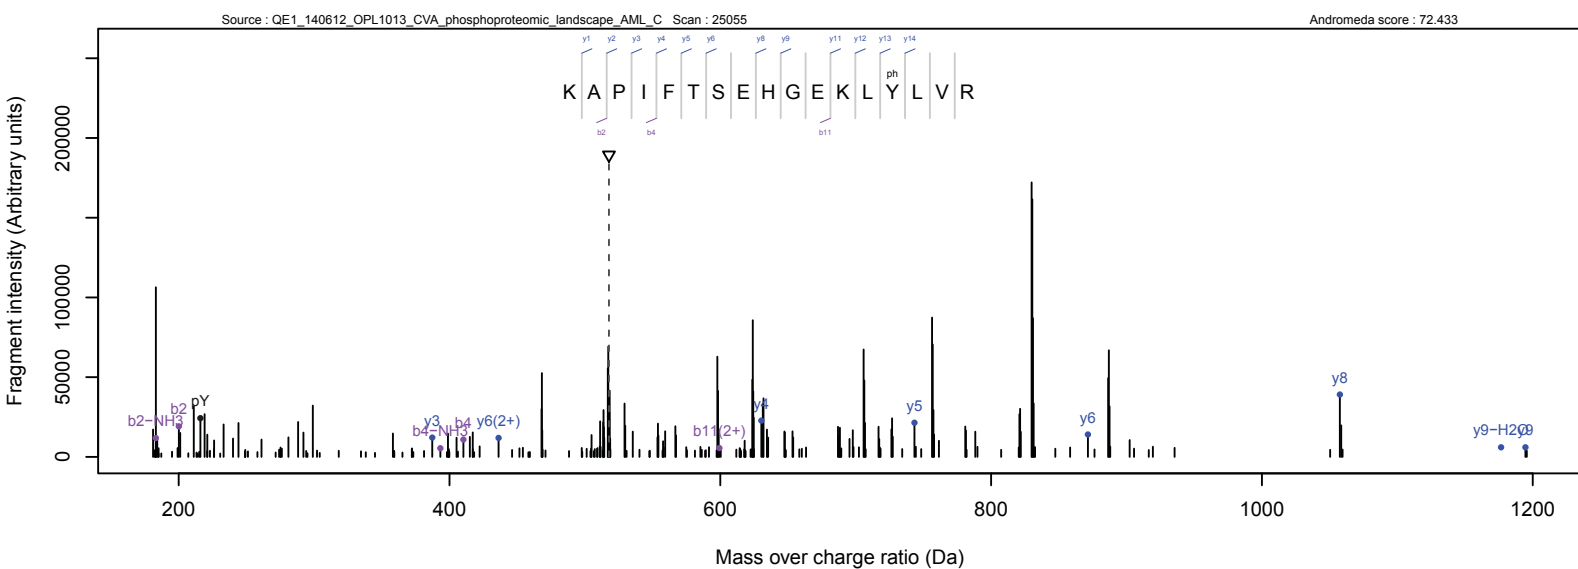

## LCEQLSTVIPNSHVYY R-3+

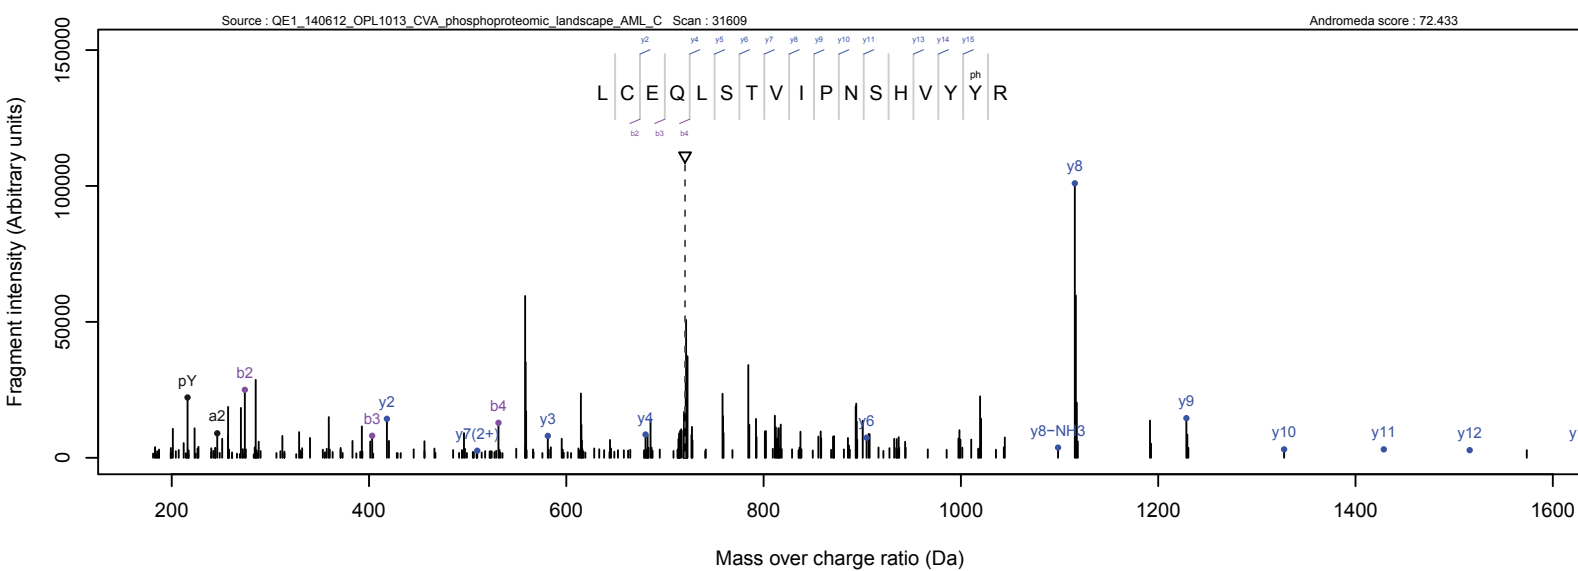

RPAVVY(ph)IGSAGK<sup>4+</sup>

Source : QE1\_140612\_OPL1013\_CVA\_phosphoproteomic\_landscape\_AML\_C Scan : 11855

Andromeda score : 72.433

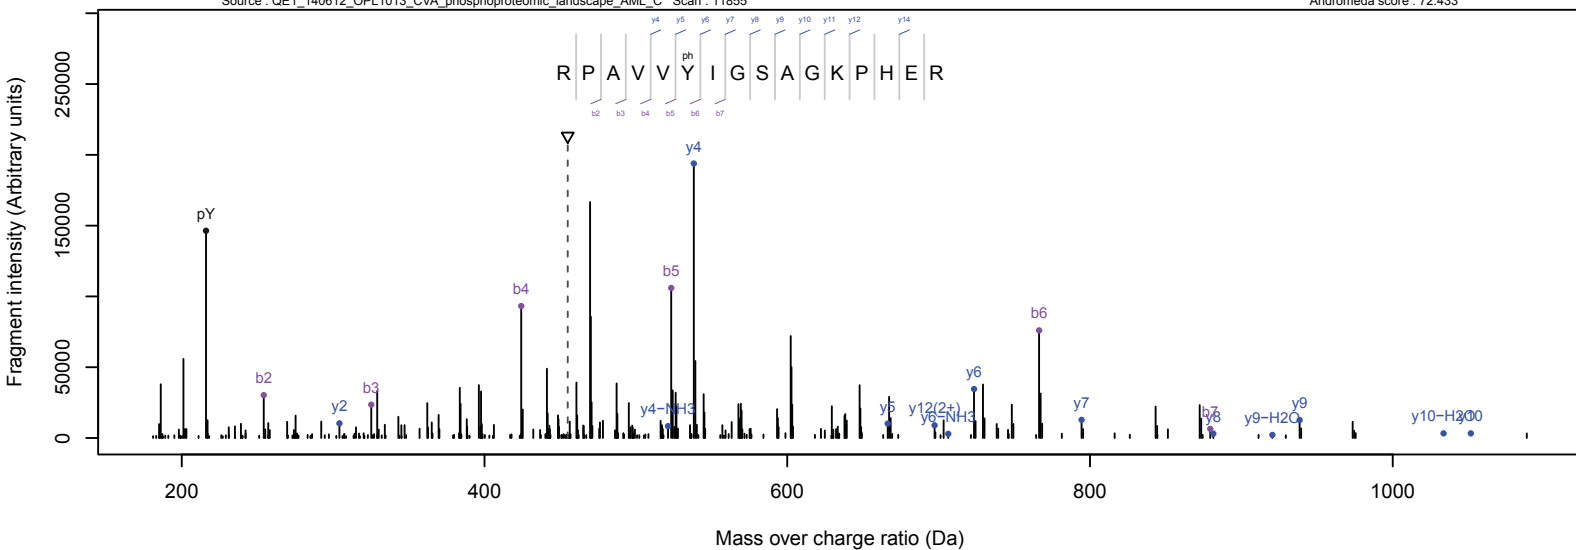DVAY(ph)QYVKK<sup>2+</sup>

Source : QE1\_140612\_OPL1013\_CVA\_phosphoproteomic\_landscape\_AML\_C Scan : 8606

Andromeda score : 72.365

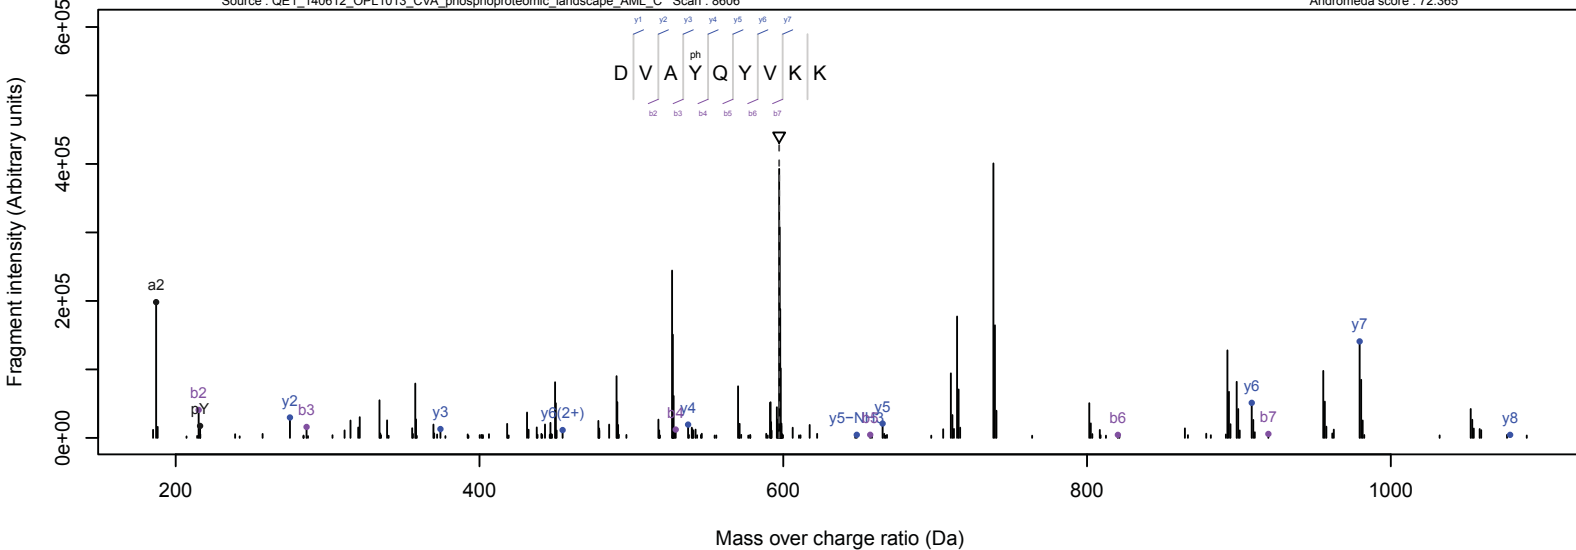DLPPPPPPDRPYS(ph)VGAESR<sup>3+</sup>

Source : QE1\_140612\_OPL1013\_CVA\_phosphoproteomic\_landscape\_AML\_A Scan : 19742

Andromeda score : 72.359

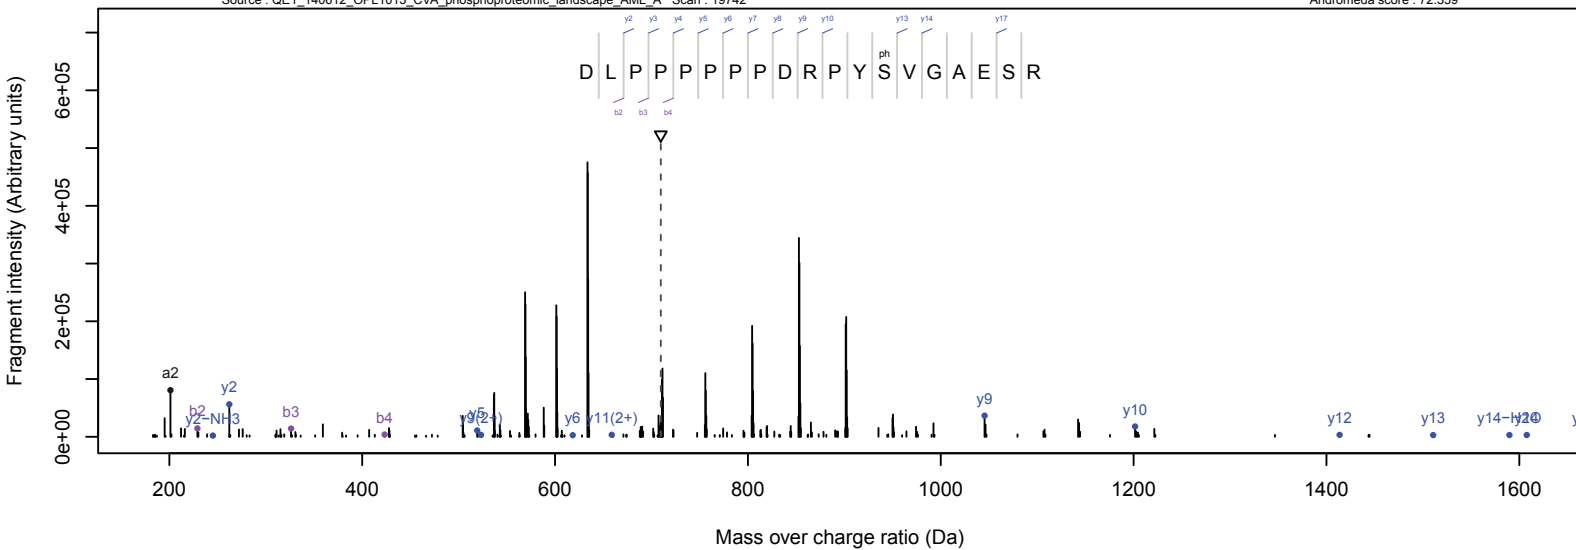

## HY(ph)RGPAGDATVASEKESVM(ox)-3+

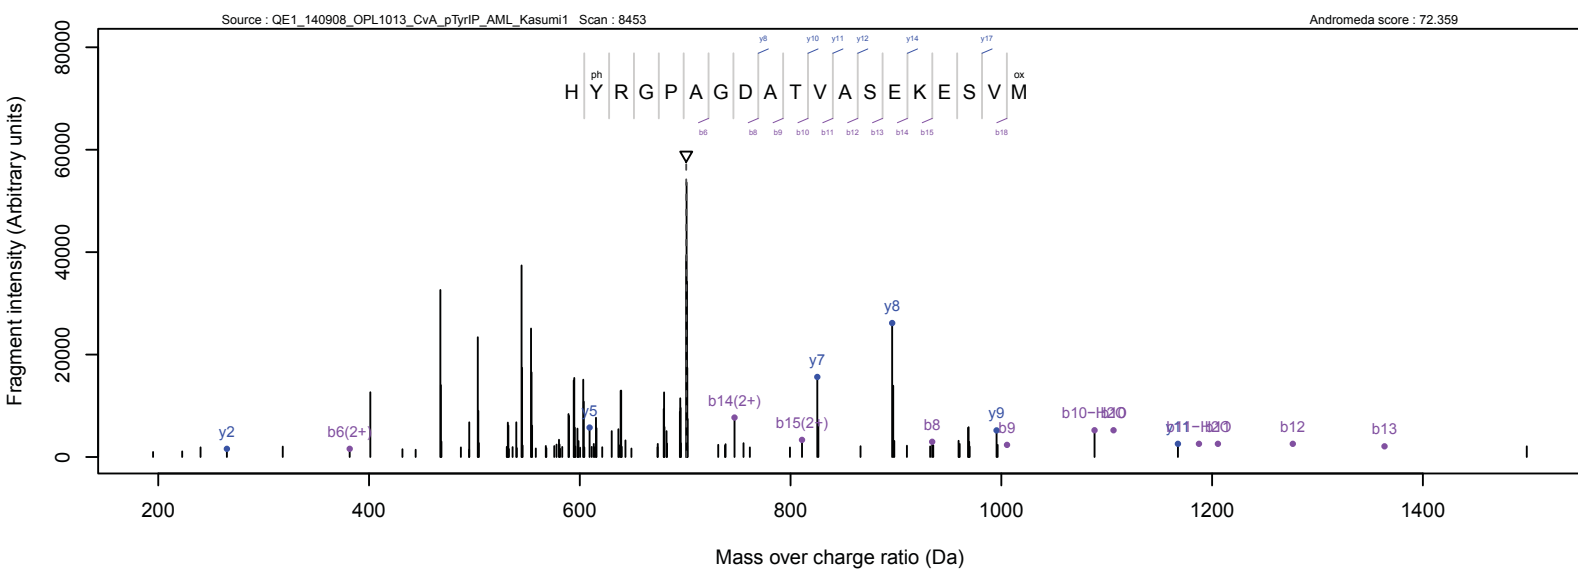

## MQNHGY(ph)ENPTYK-3+

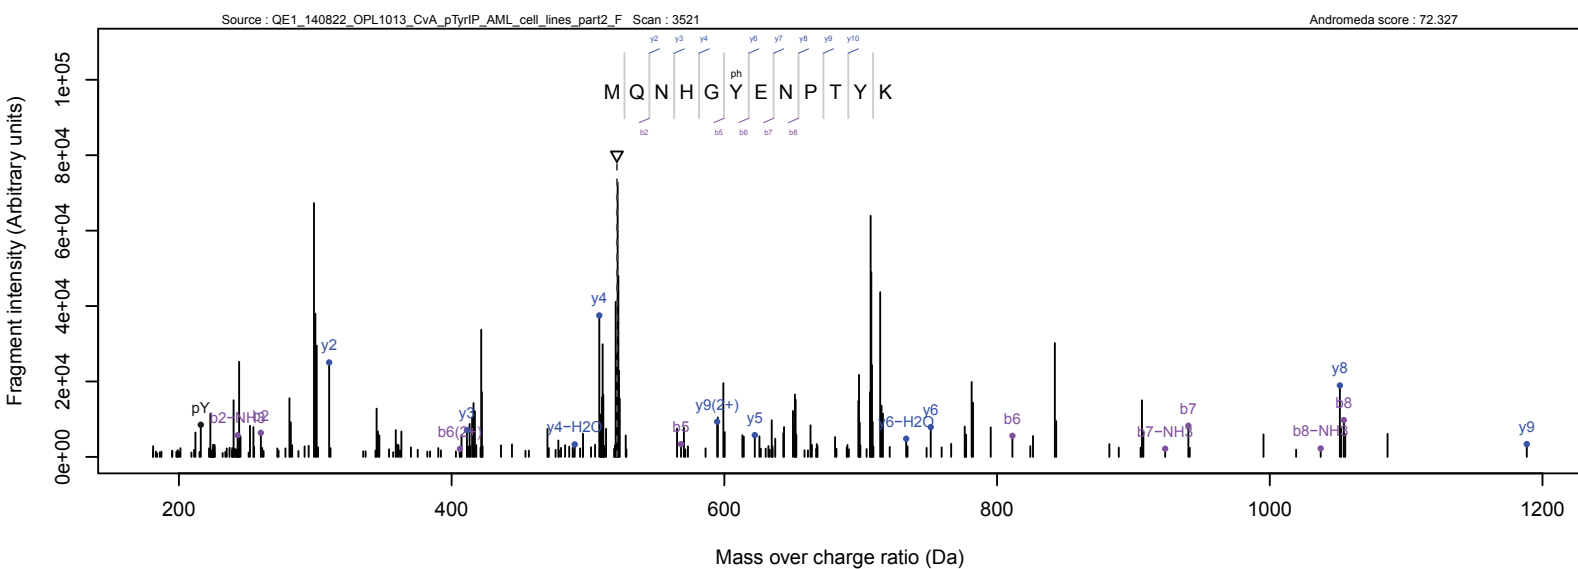

## KY(ph)PGFLLNFFHLLR-3+

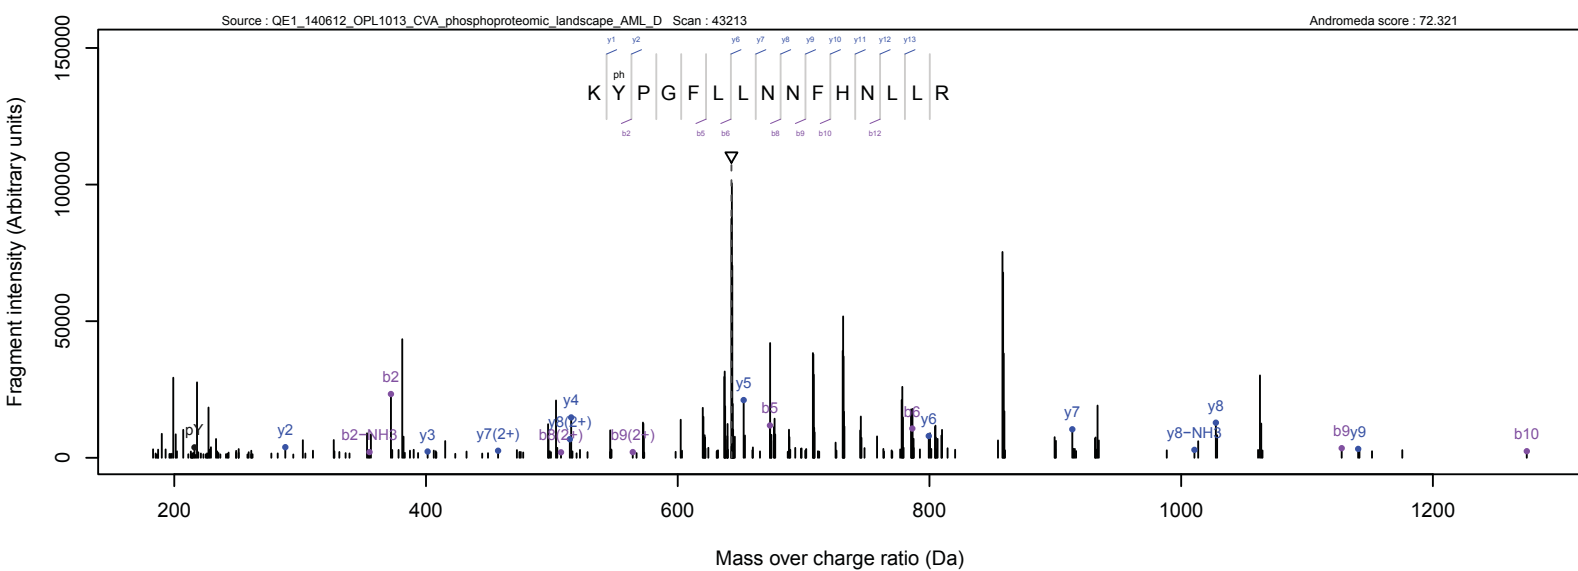

VAQLEQVY(ph)IRGSK-2+

Source : QE1\_140612\_OPL1013\_CVA\_phosphoproteomic\_landscape\_AML\_C Scan : 18149

Andromeda score : 72.321

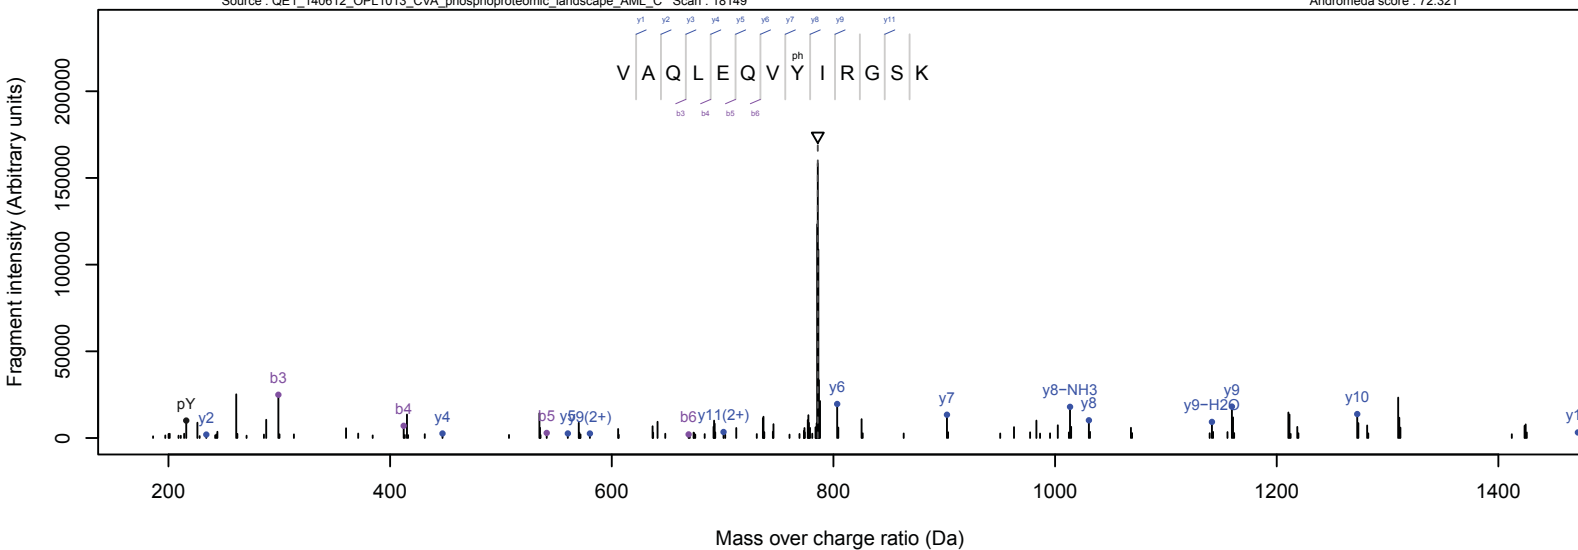

ALPQNDDHY(ph)VM(ox)QEHRK-4+

Source : QE1\_140908\_OPL1013\_CvA\_pTyrIP\_AML\_OCI\_AML3 Scan : 6856

Andromeda score : 72.315

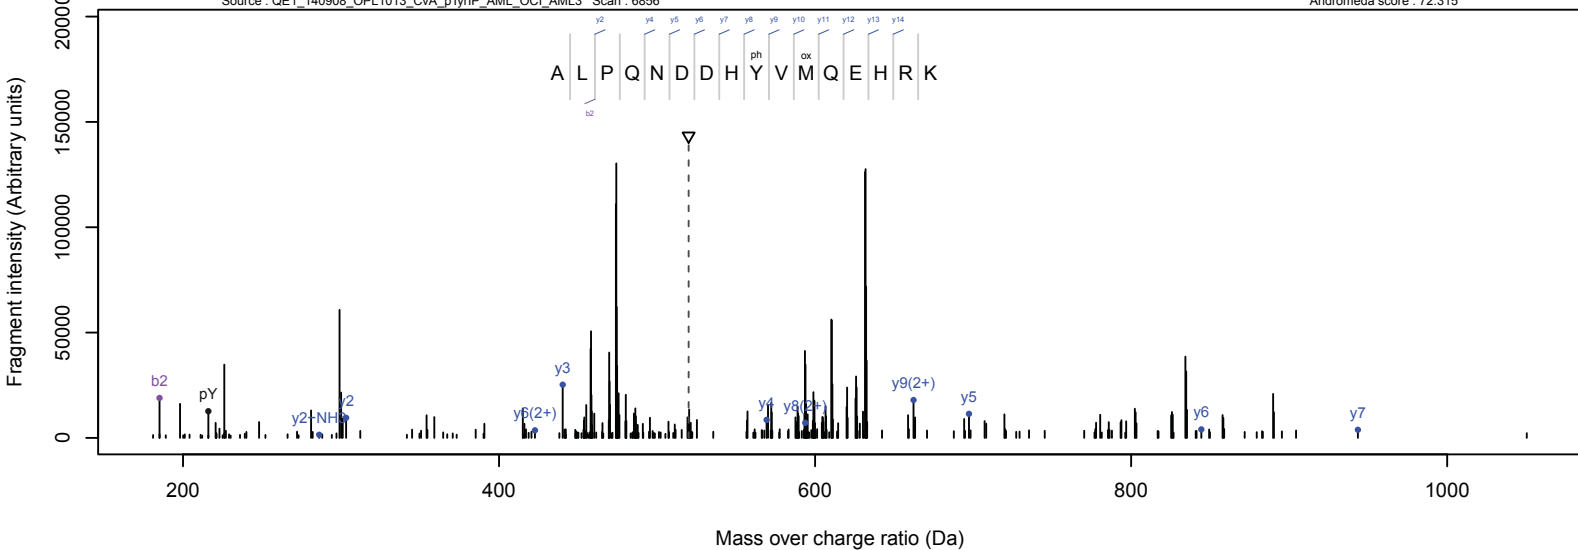

AVNMEPDQYQMGSTK-2+

Source : QE1\_140612\_OPL1013\_CVA\_phosphoproteomic\_landscape\_AML\_C Scan : 14061

Andromeda score : 72.315

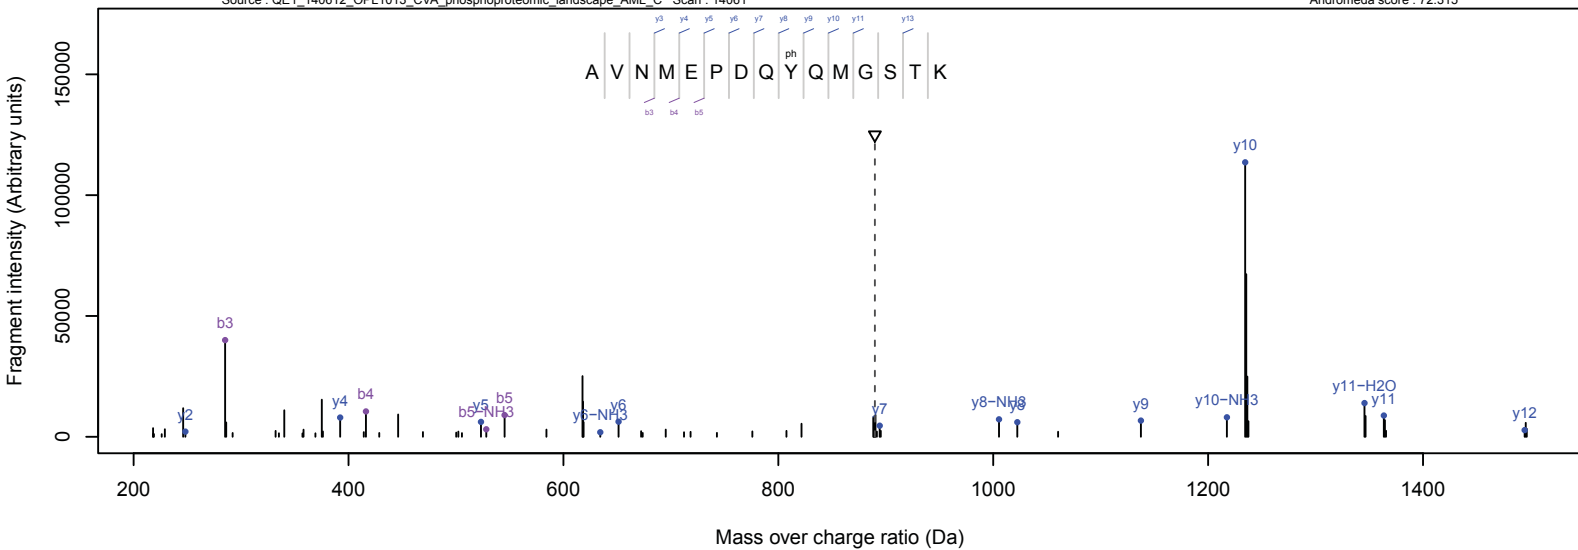

## STVY(ph)PIFSASSVNSK-2+

Source: QE1\_140612\_OPL1013\_CVA\_phosphoproteomic\_landscape\_AML\_C Scan: 28378

Andromeda score: 72.315

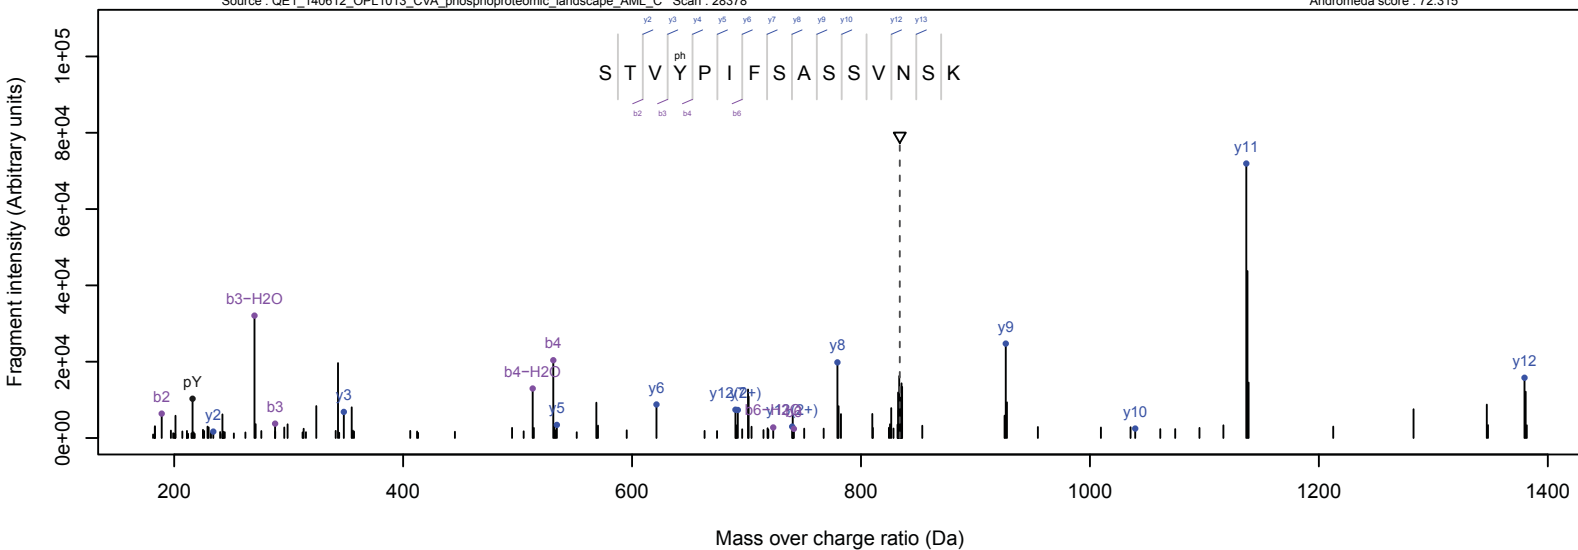

## LSTEHSVSEYHPADG(ph)AFSSNIYTR-4+

Source: QE1\_140612\_OPL1013\_CVA\_phosphoproteomic\_landscape\_AML\_C Scan: 25977

Andromeda score: 72.302

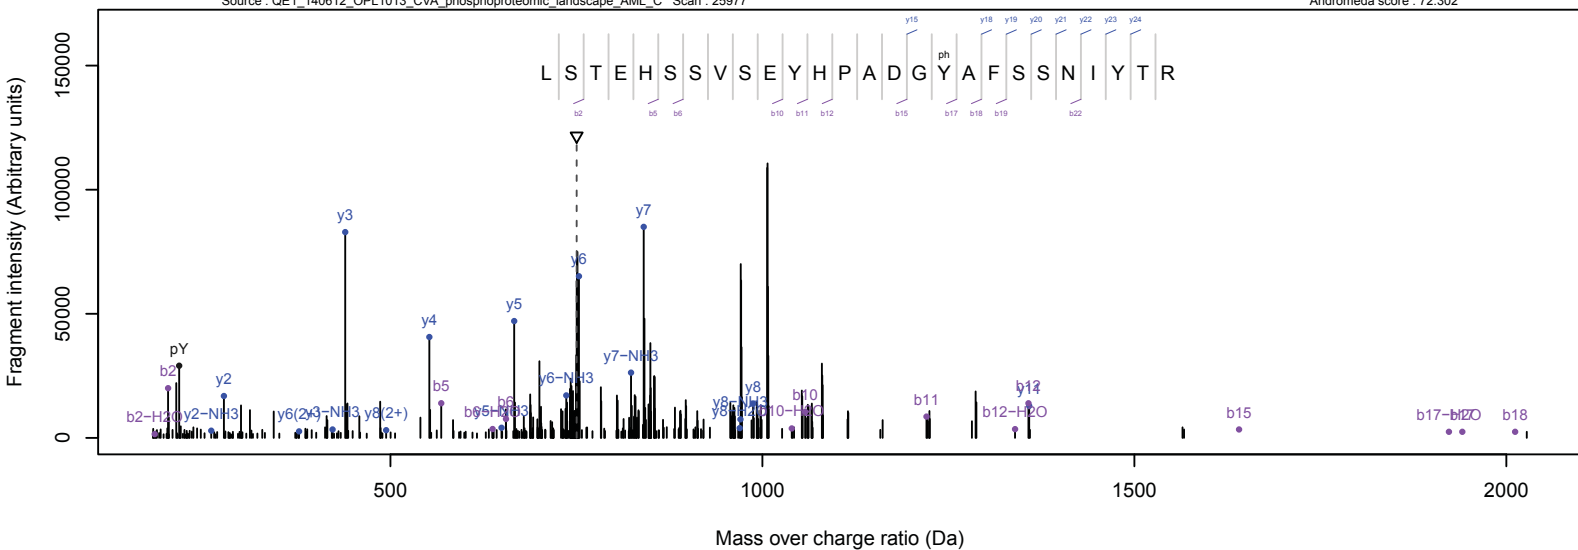

## SQNNIY(ph)SACPR-2+

Source: QE1\_140822\_OPL1013\_CvA\_pTyrIP\_AML\_cell\_lines\_part2\_E Scan: 4585

Andromeda score: 72.29

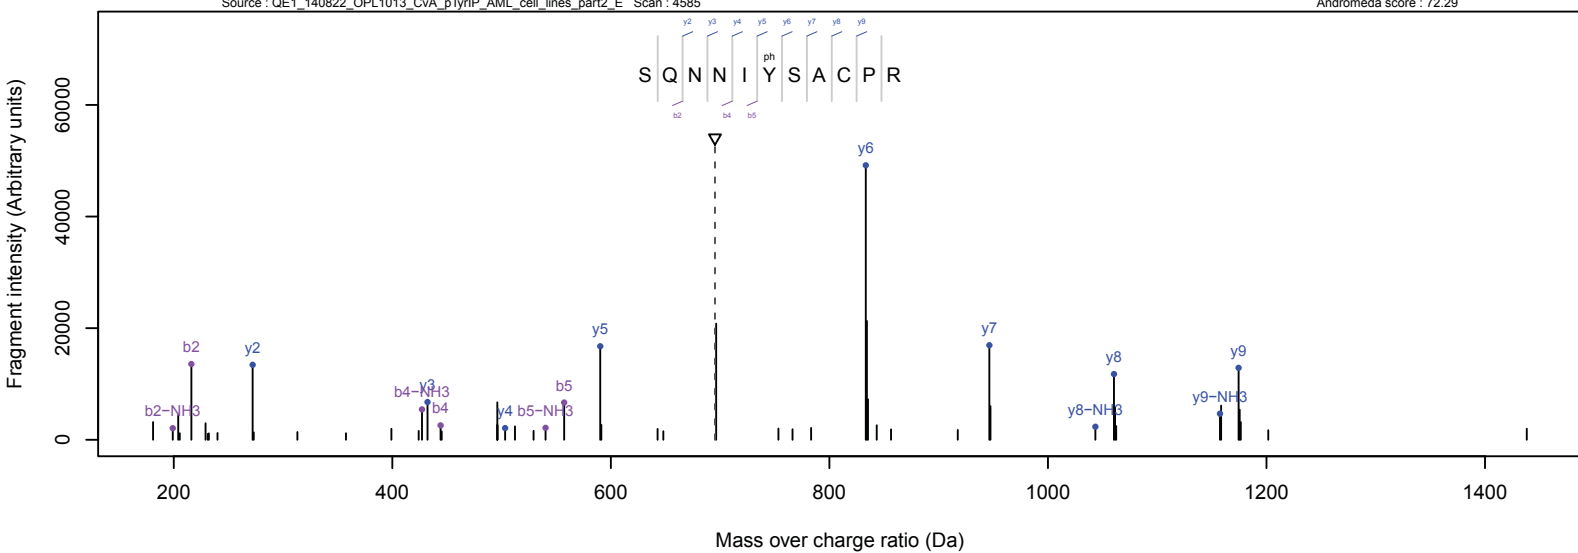



Y(ph)ILAATLDNTLK-2+

Source : QE1\_140612\_OPL1013\_CVA\_phosphoproteomic\_landscape\_AML\_C Scan : 36880

Andromeda score : 72.29

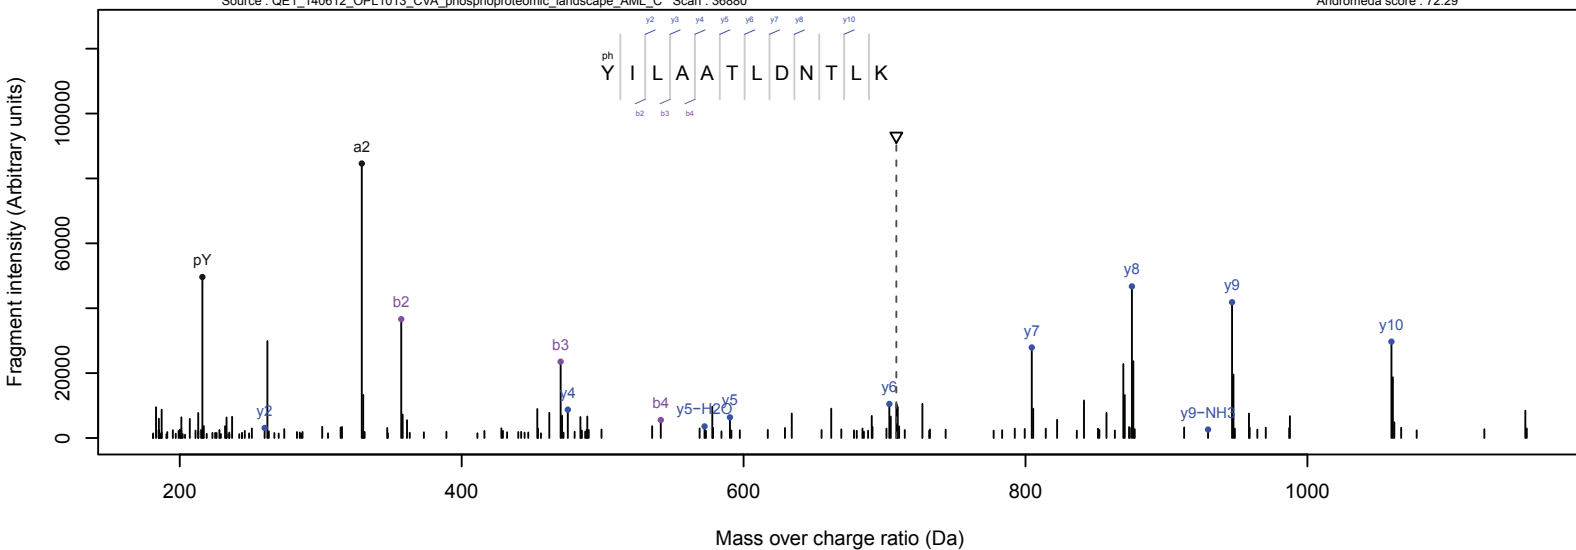

AY(ph)HEQLTVAEITNACFEPANQM(ox)VK-3+

Source : QE1\_140612\_OPL1013\_CVA\_phosphoproteomic\_landscape\_AML\_C Scan : 35244

Andromeda score : 72.271

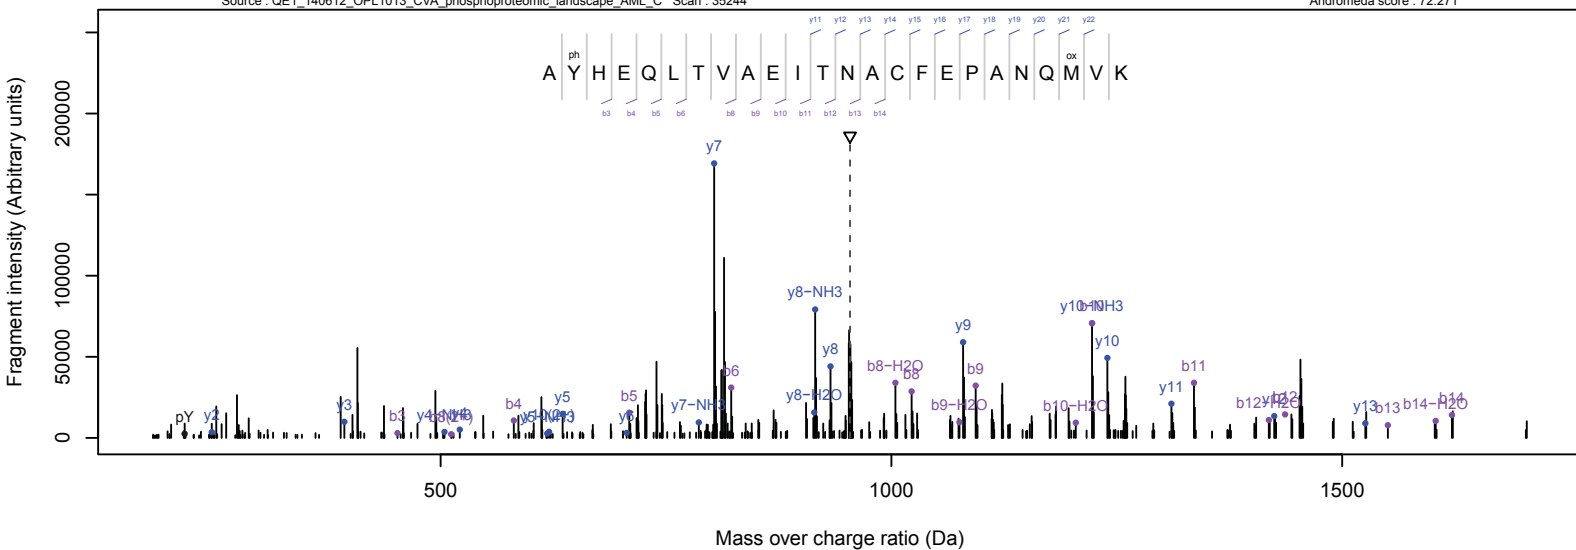

LKY(ph)FDKLN-2+

Source : QE1\_140612\_OPL1013\_CVA\_phosphoproteomic\_landscape\_AML\_C Scan : 17469

Andromeda score : 72.23

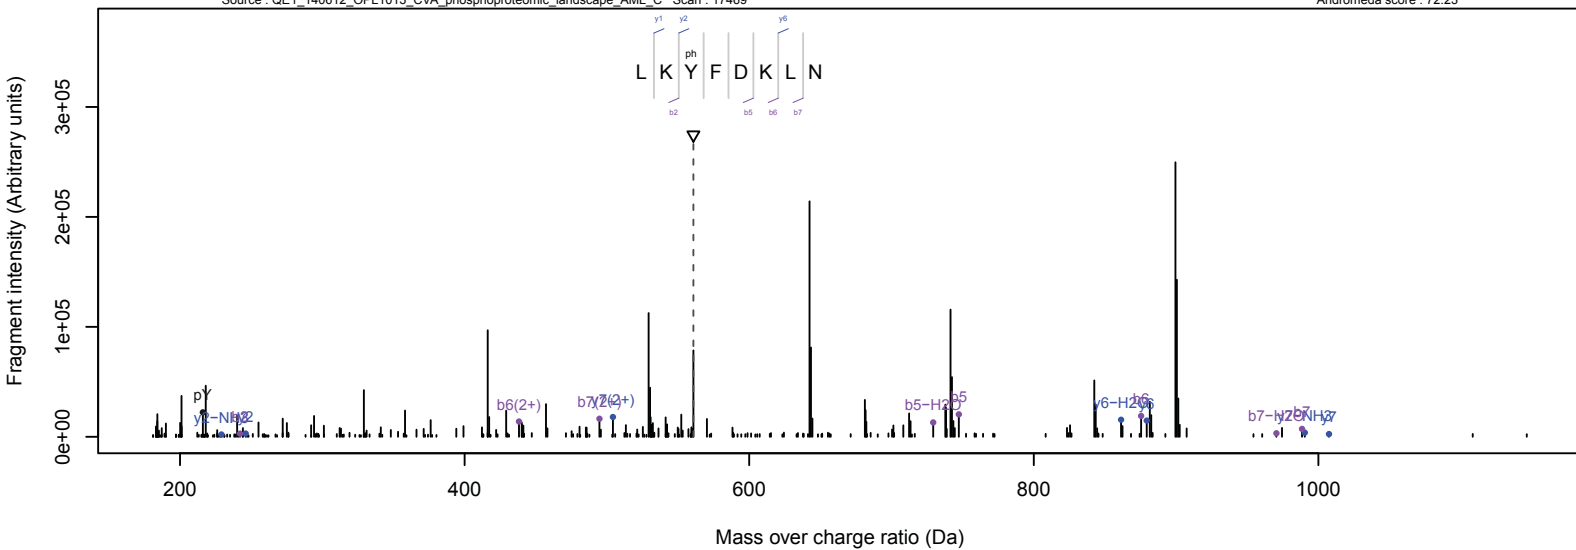

AVPNPVINPYQPAPPSPGYFMAAIPQTQNR-3+

Source : QE1\_140612\_OPL1013\_CVA\_phosphoproteomic\_landscape\_AML\_C Scan : 46995

Andromeda score : 72.228

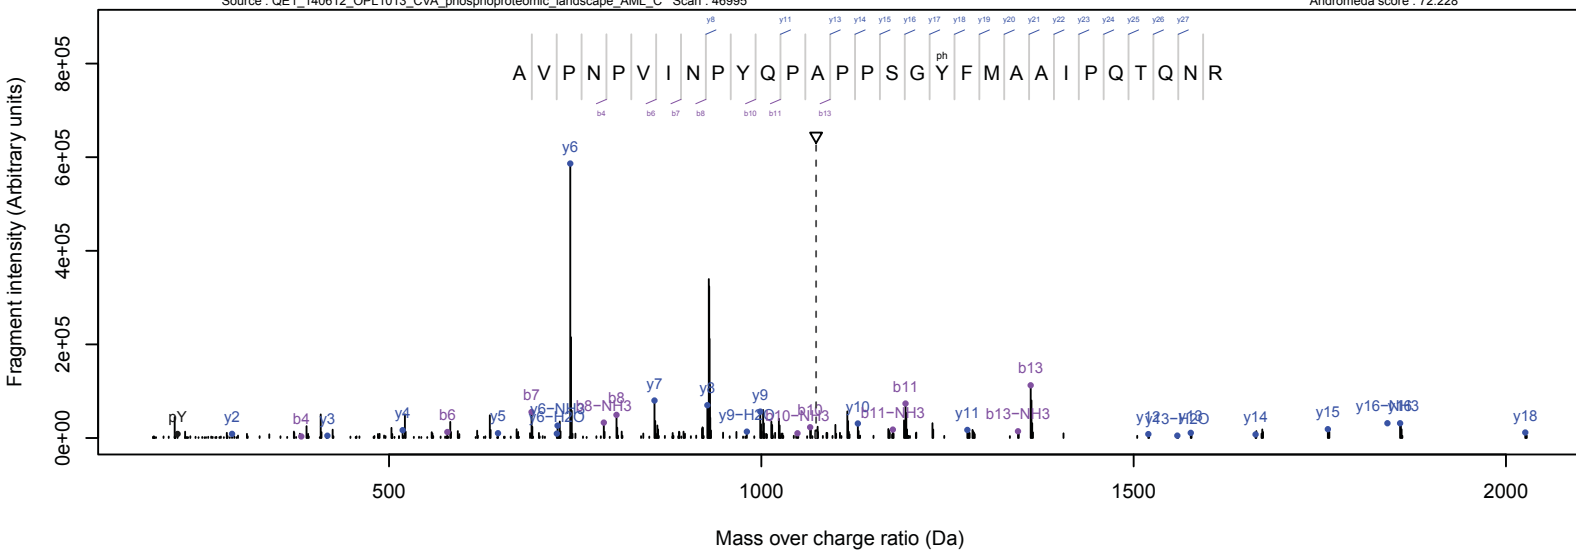

EATQPEPIY(ph)AESTK-2+

Source : QE1\_140908\_OPL1013\_CvA\_pTyrIP\_AML\_OCI\_AML3 Scan : 13638

Andromeda score : 72.209

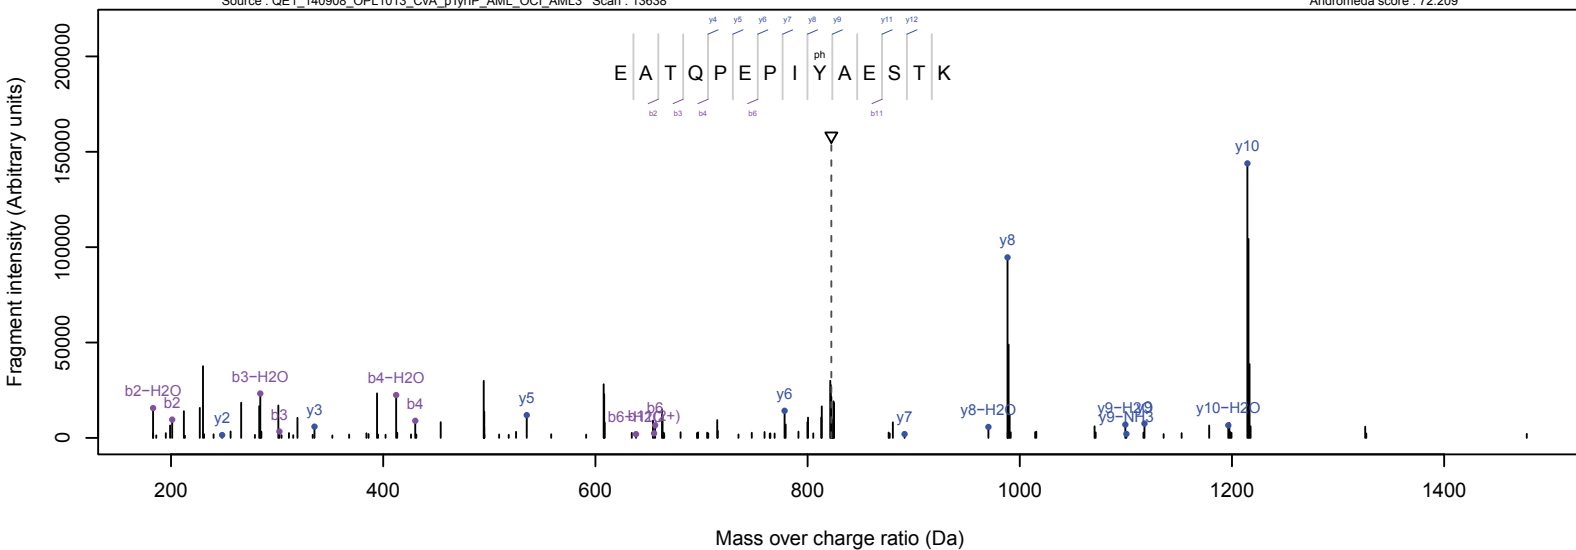

AACLPLPGY(ph)RVR-3+

Source : QE1\_140612\_OPL1013\_CVA\_phosphoproteomic\_landscape\_AML\_C Scan : 24646

Andromeda score : 72.2

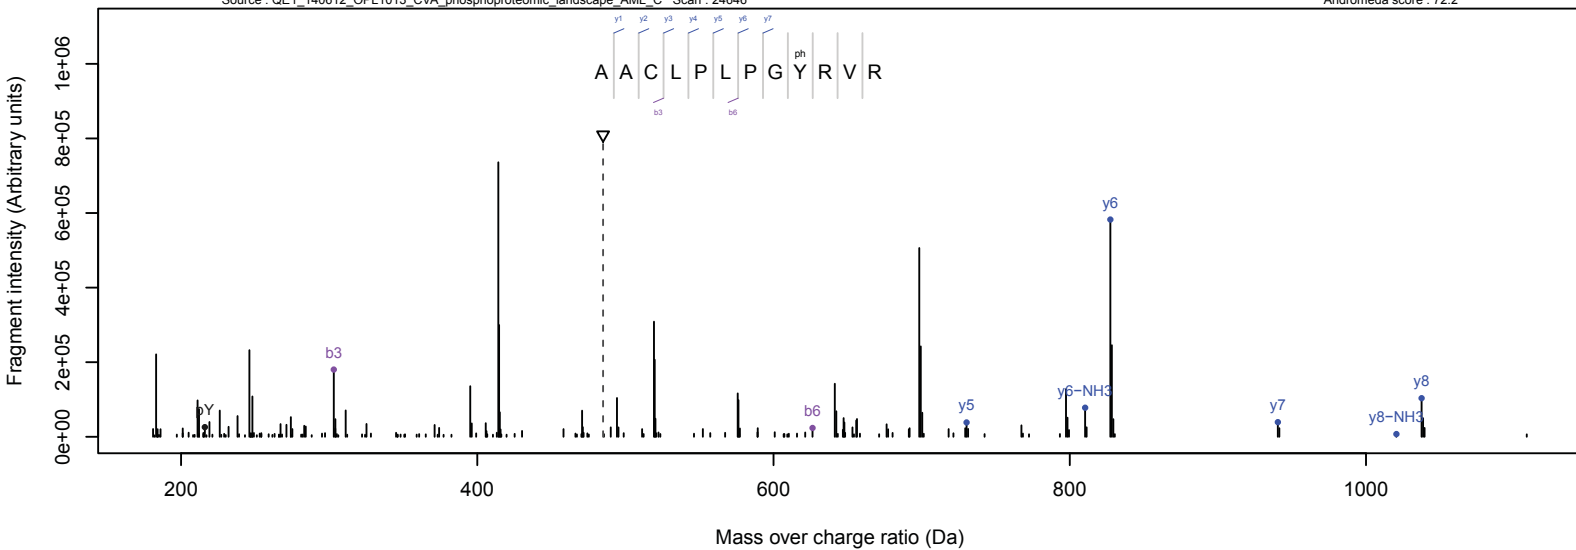



Y(ph)NLPLDIQNR-2+

Source : QE1\_140822\_OPL1013\_CvA\_pTyrIP\_AML\_cell\_lines\_part2\_B Scan : 22297

Andromeda score : 72.096

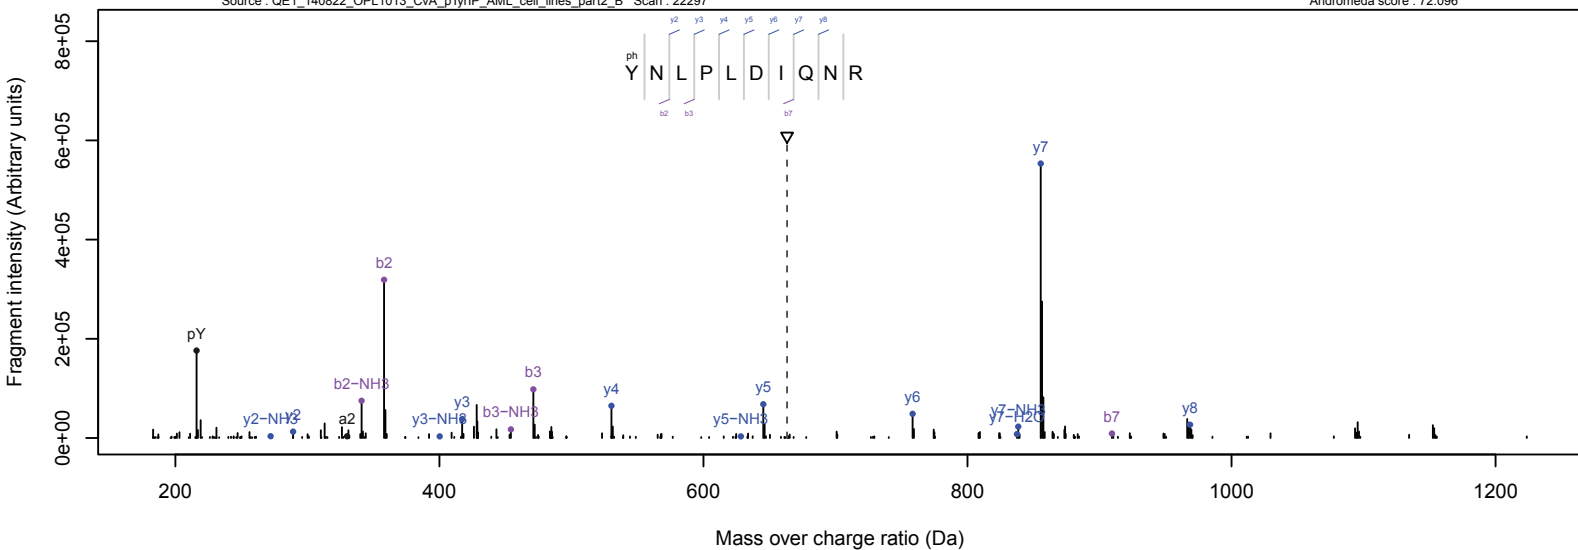

SRPAHSLPPGEDGRVEPY(ph)VDFAEFYR-4+

Source : QE1\_140612\_OPL1013\_CVA\_phosphoproteomic\_landscape\_AML\_C Scan : 35129

Andromeda score : 72.082

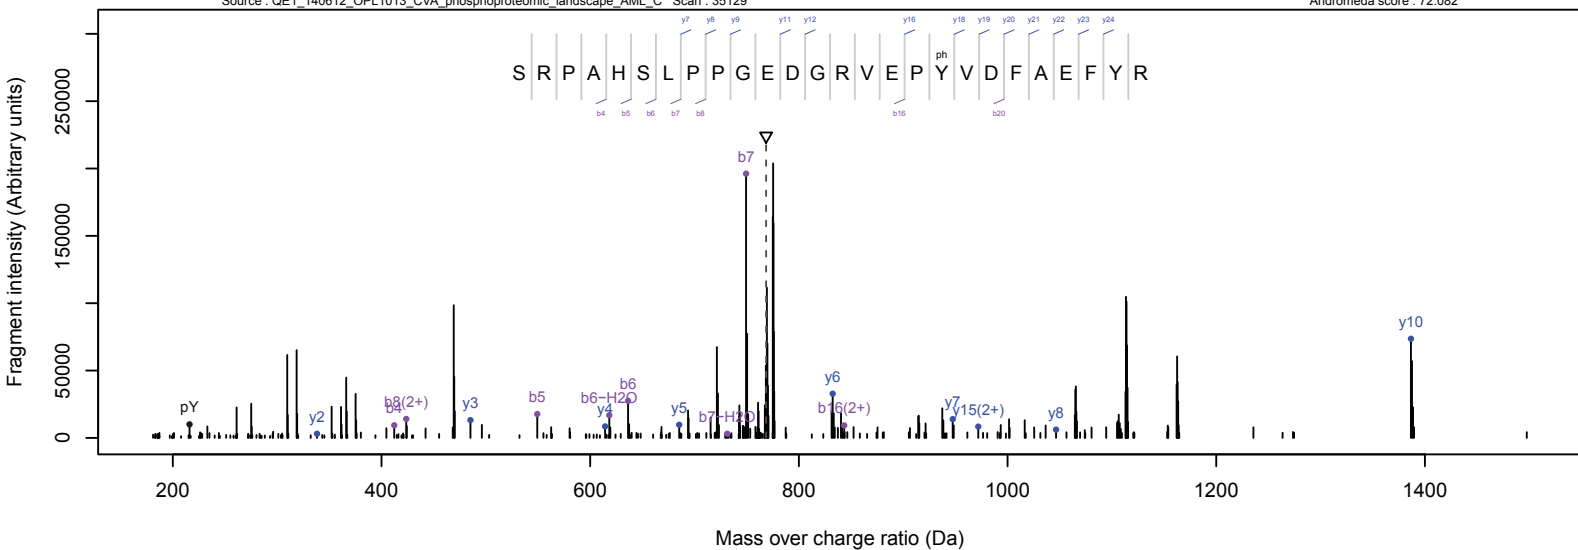

ALSNLEIPGGY(ph)NALR-2+

Source : QE1\_140612\_OPL1013\_CVA\_phosphoproteomic\_landscape\_AML\_C Scan : 33343

Andromeda score : 71.98

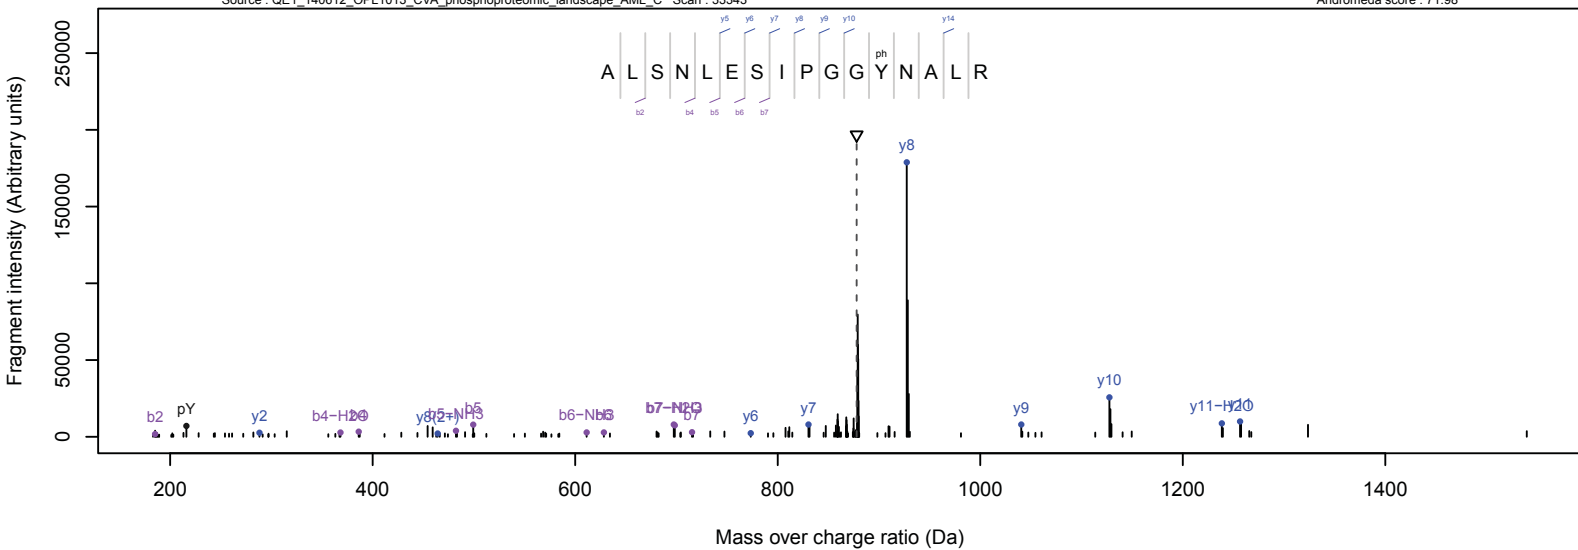

LNERHY(ph)GGLTGLNK-3+

Source : QE1\_140612\_OPL1013\_CVA\_phosphoproteomic\_landscape\_AML\_C Scan : 11819

Andromeda score : 71.98

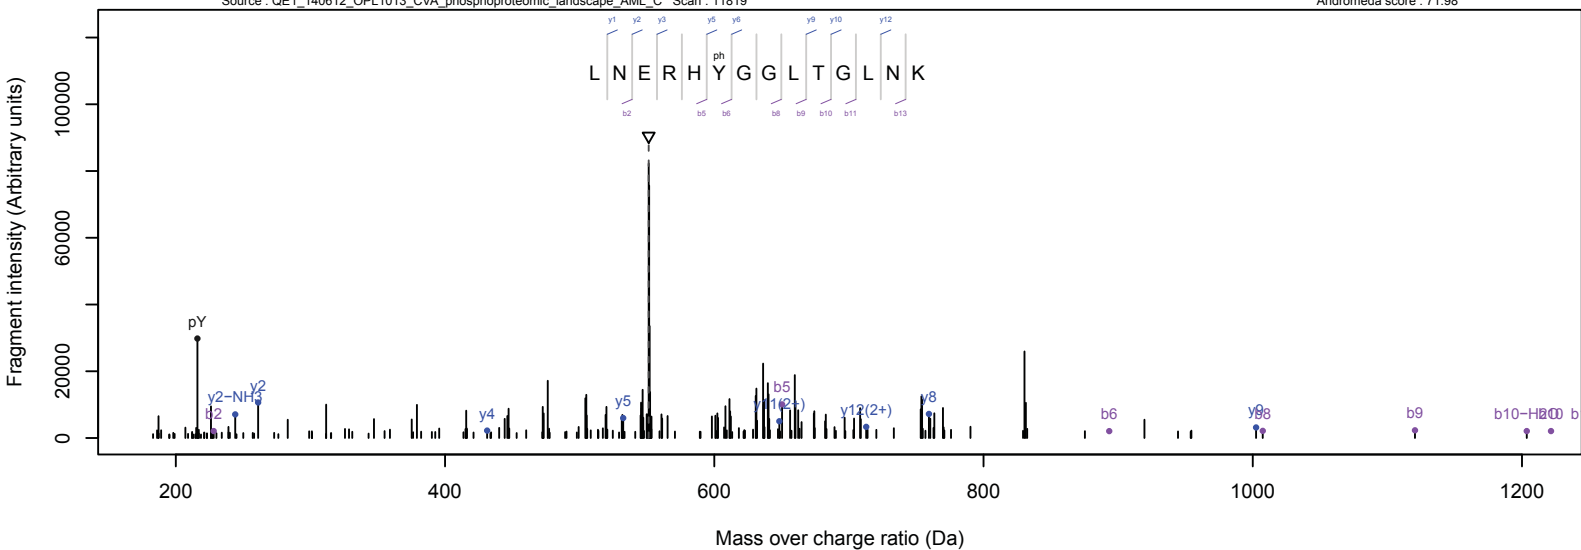

SELAKKEEEAY(ph)FER-3+

Source : QE1\_140612\_OPL1013\_CVA\_phosphoproteomic\_landscape\_AML\_C Scan : 12385

Andromeda score : 71.98

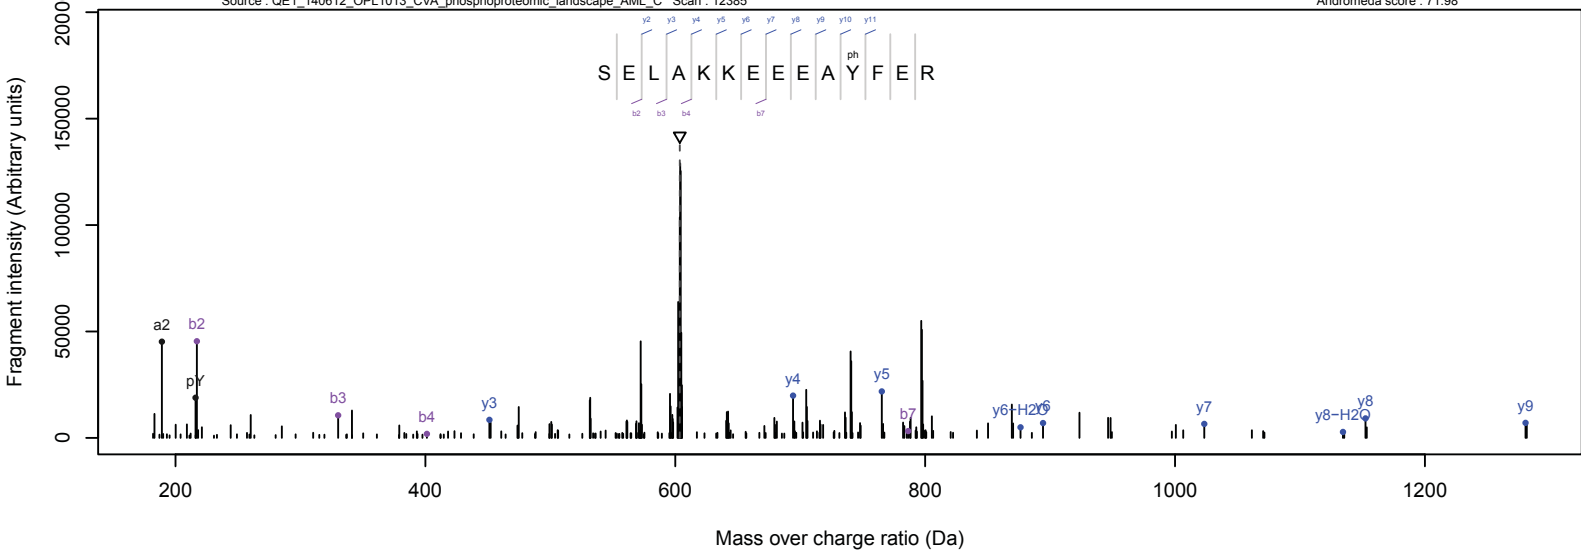

TY(ph)YMSGGLQPPIVFR-2+

Source : QE1\_140612\_OPL1013\_CVA\_phosphoproteomic\_landscape\_AML\_E Scan : 47226

Andromeda score : 71.98

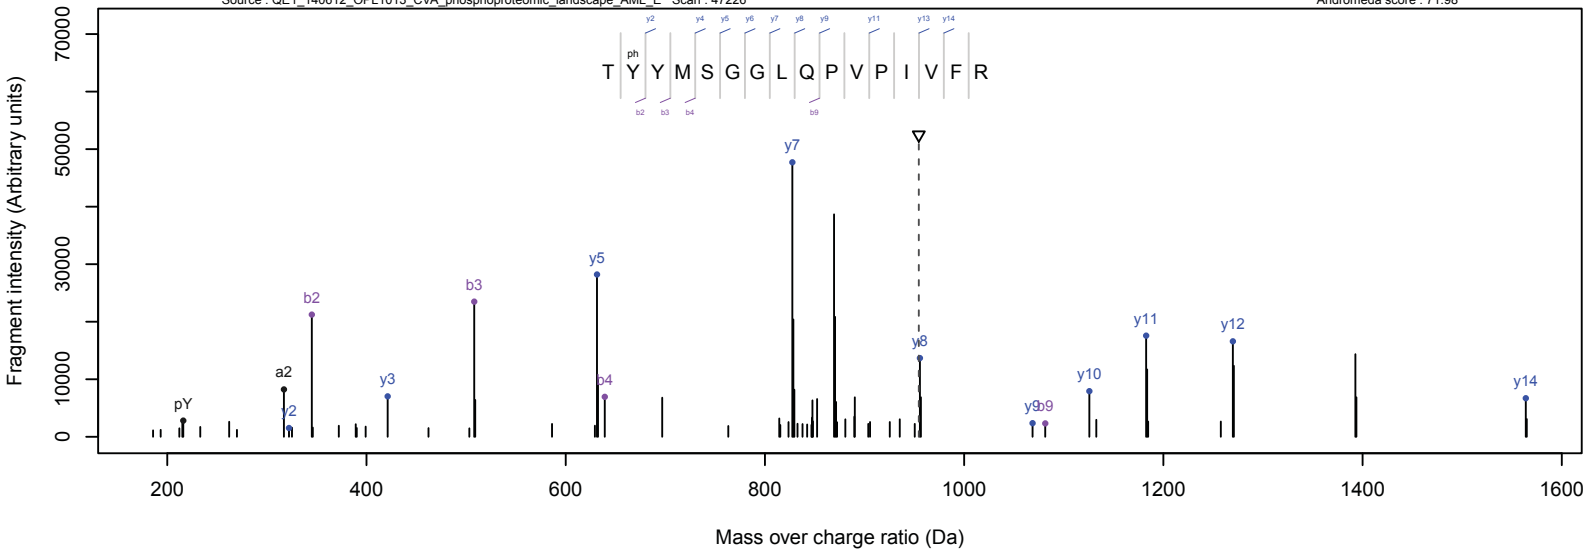



## TYGGCEGPDAMY(ph)VK-2+

Source: QE1\_140612\_OPL1013\_CVA\_phosphoproteomic\_landscape\_AML\_B Scan: 16977

Andromeda score: 71.879

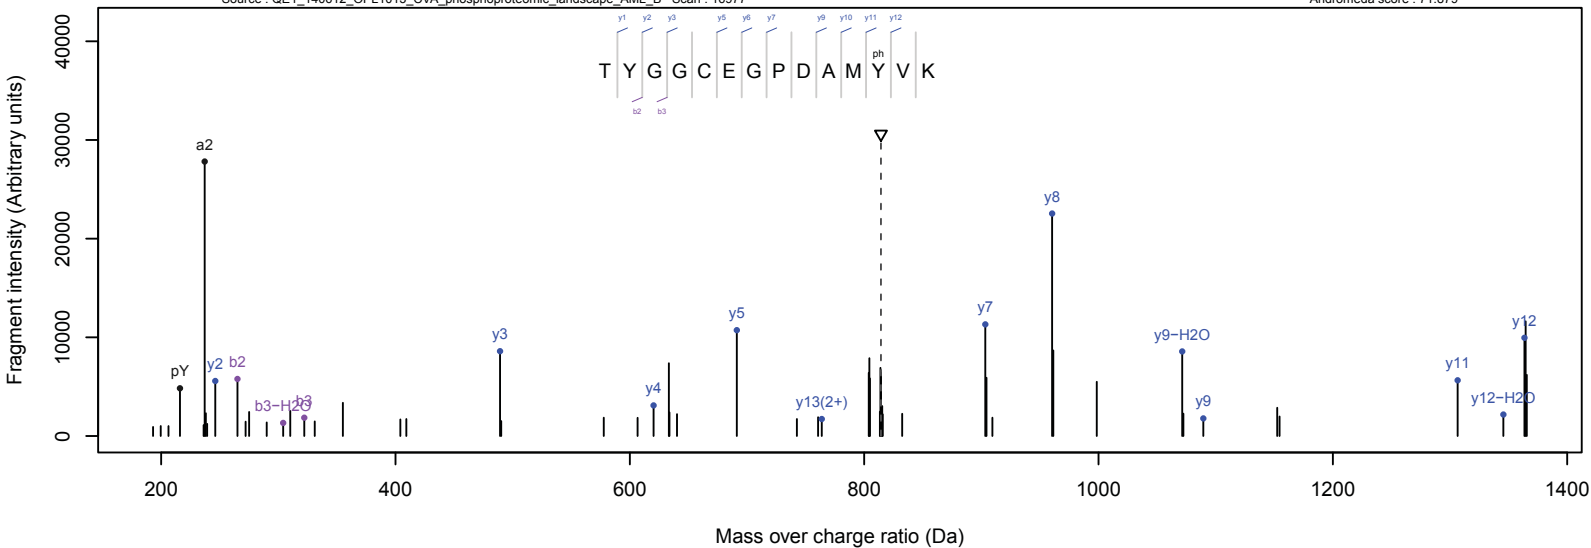

## AMY(ph)VYPNVESPELPK-2+

Source: QE1\_140612\_OPL1013\_CVA\_phosphoproteomic\_landscape\_AML\_A Scan: 34475

Andromeda score: 71.781

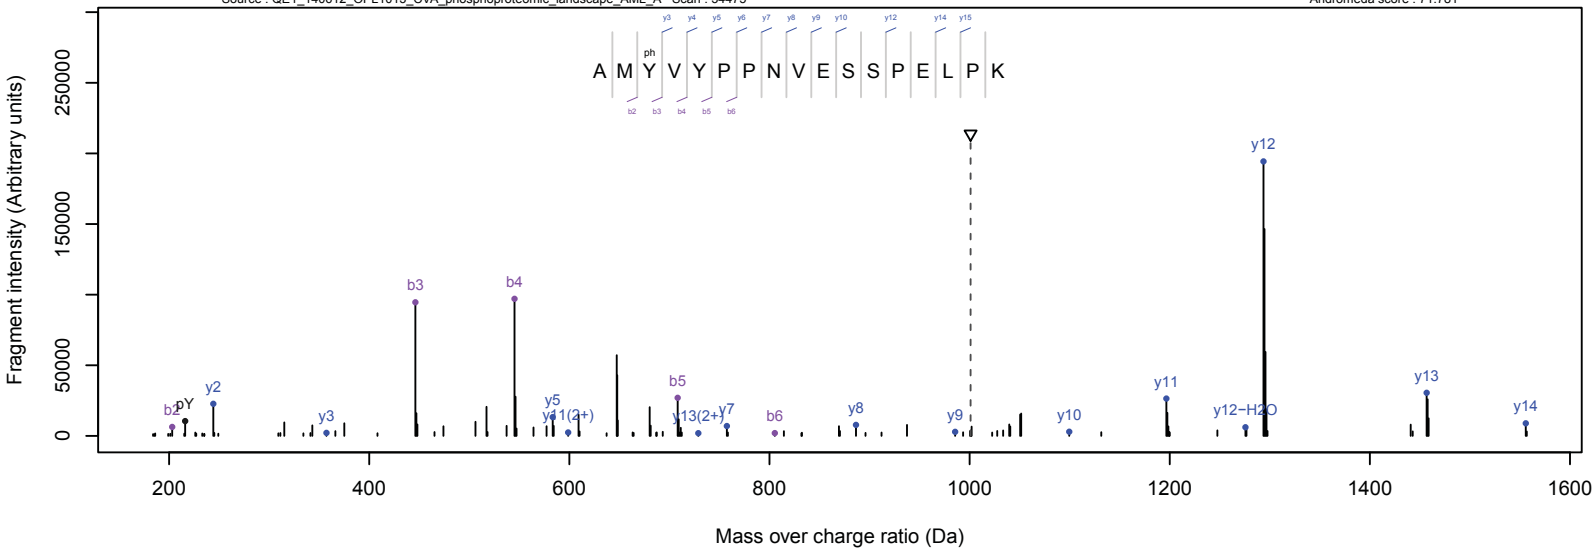

## QHGVNLSPTPPFQQASGYGQHGY(ph)TGYDDLQTGAAGDYSK-4+

Source: QE1\_140612\_OPL1013\_CVA\_phosphoproteomic\_landscape\_AML\_C Scan: 32585

Andromeda score: 71.727

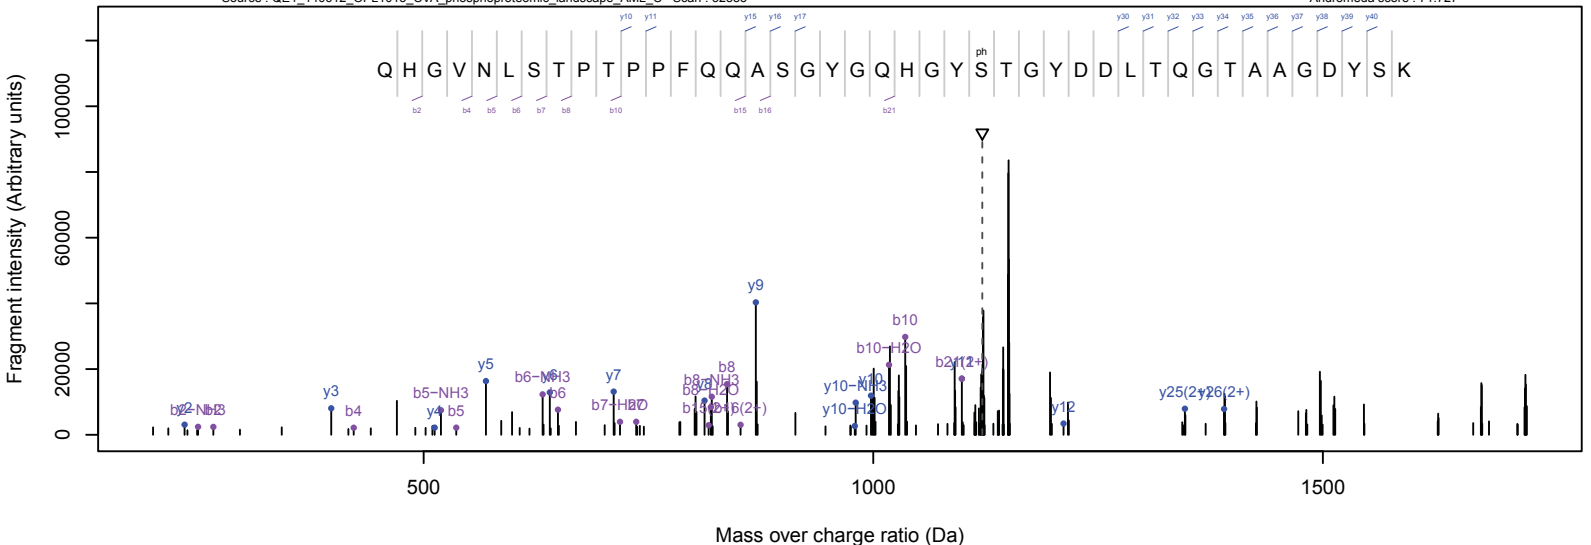

**KQGYNHGQGSYSYSNSYN<sup>ph</sup>PGGGGSDYNYESK-4+**

Source : QE1\_140908\_OPL1013\_CvA\_pTyrIP\_AML\_HL60 Scan : 16754

Andromeda score : 71.727

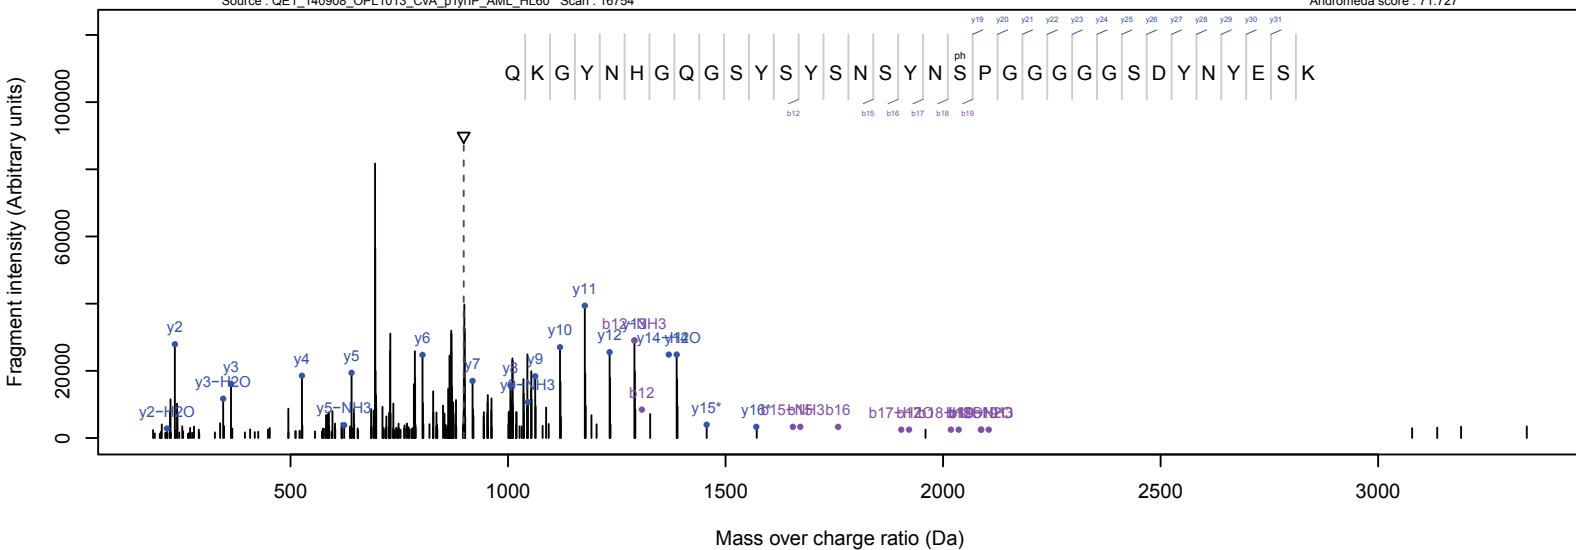

**SGLTGY<sup>ph</sup>IK-2+**

Source : QE1\_140612\_OPL1013\_CVA\_phosphoproteomic\_landscape\_AML\_C Scan : 15354

Andromeda score : 71.692

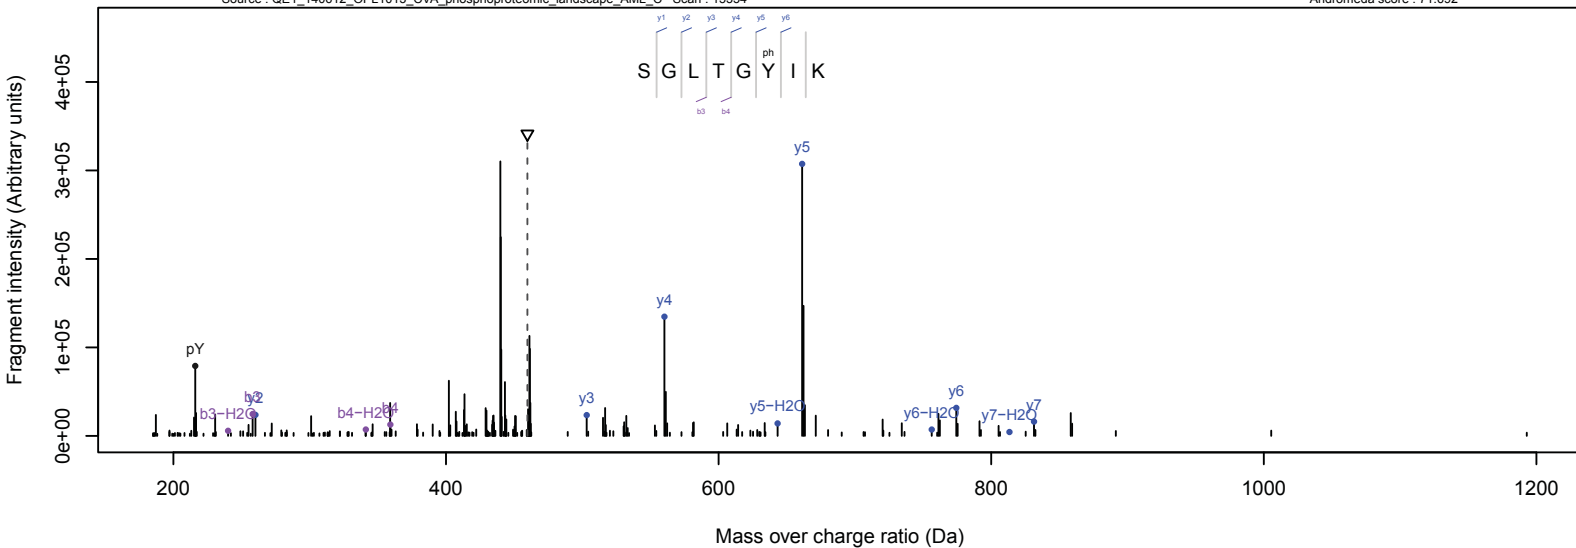

**Y<sup>ph</sup>FEIQFSR-2+**

Source : QE1\_140612\_OPL1013\_CVA\_phosphoproteomic\_landscape\_AML\_C Scan : 34255

Andromeda score : 71.692

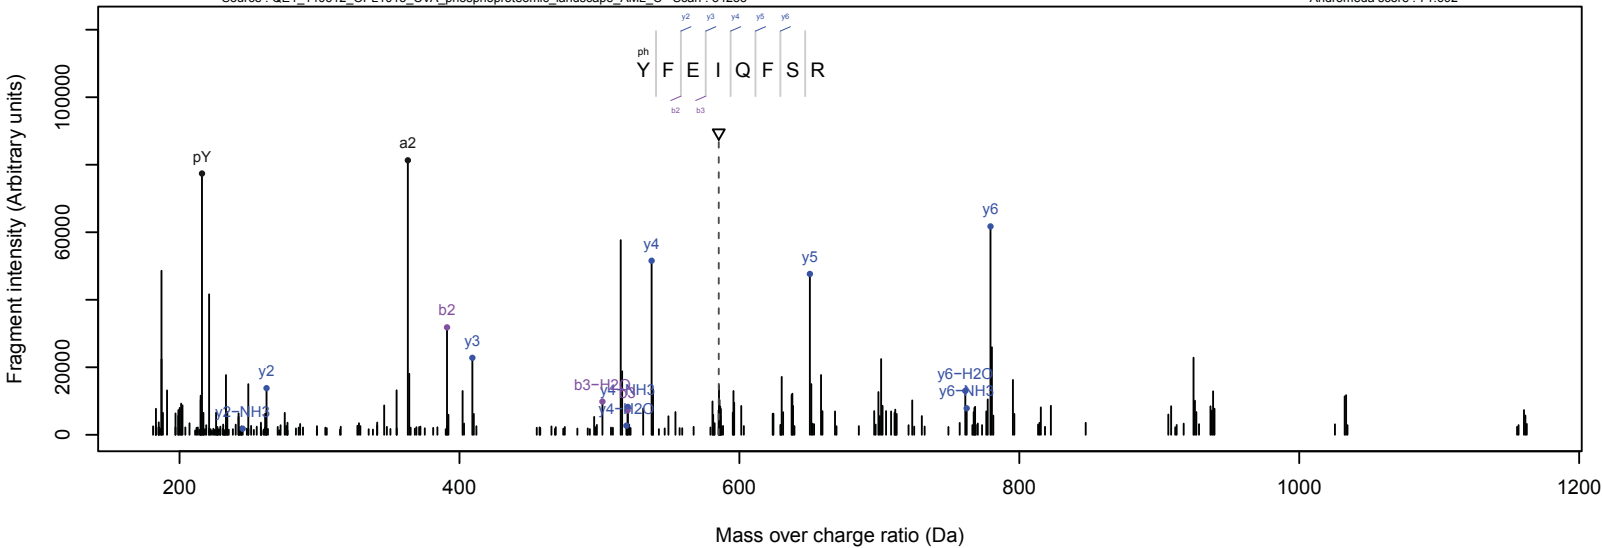



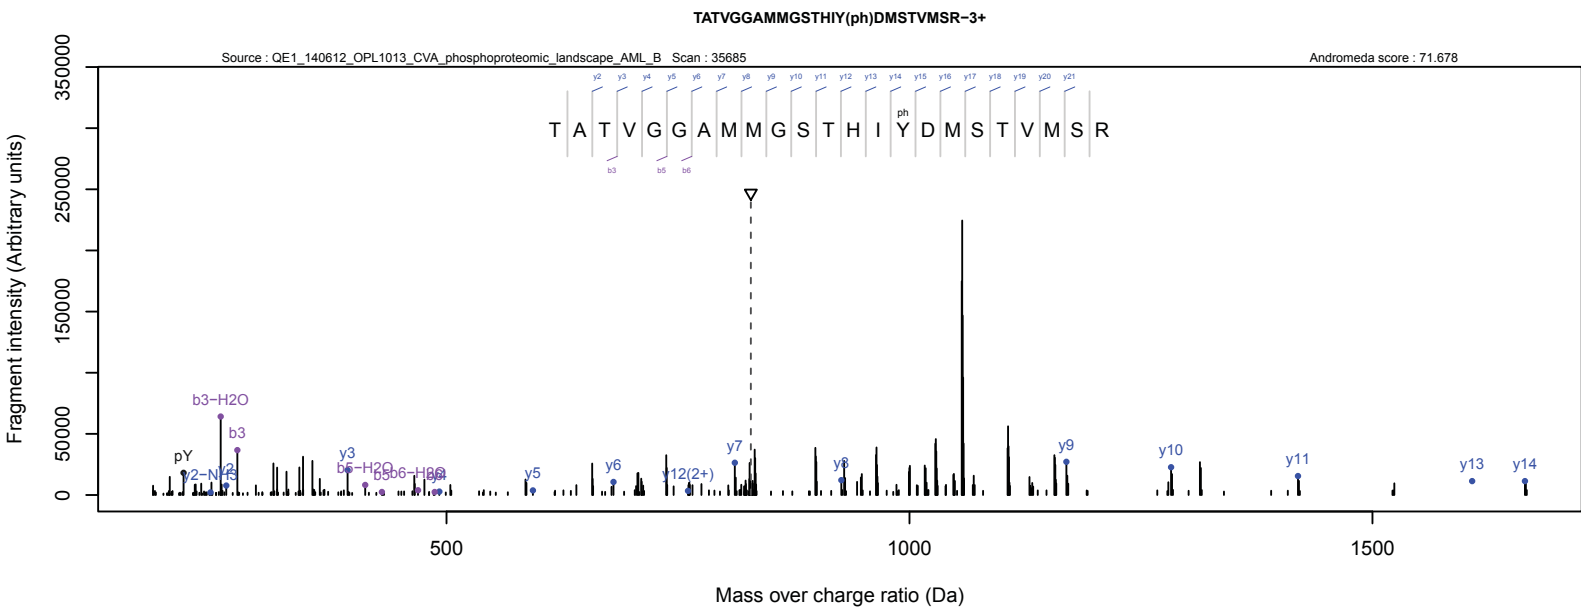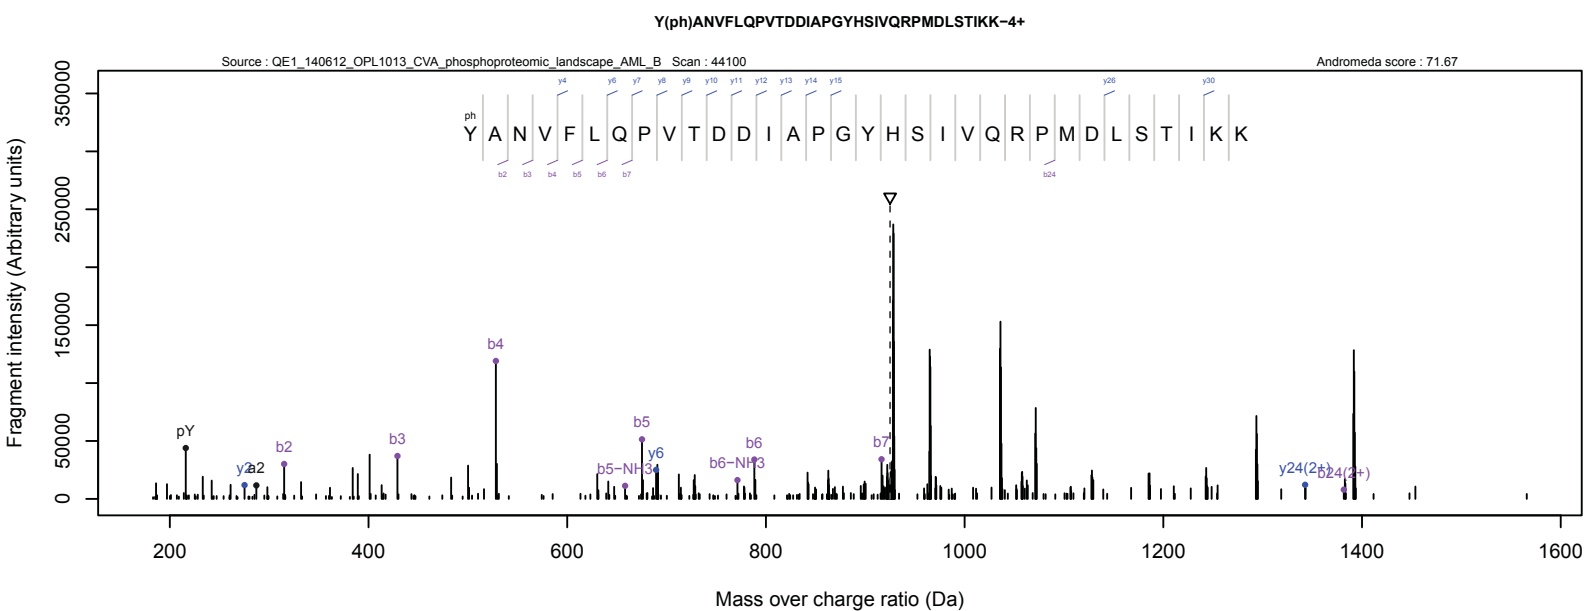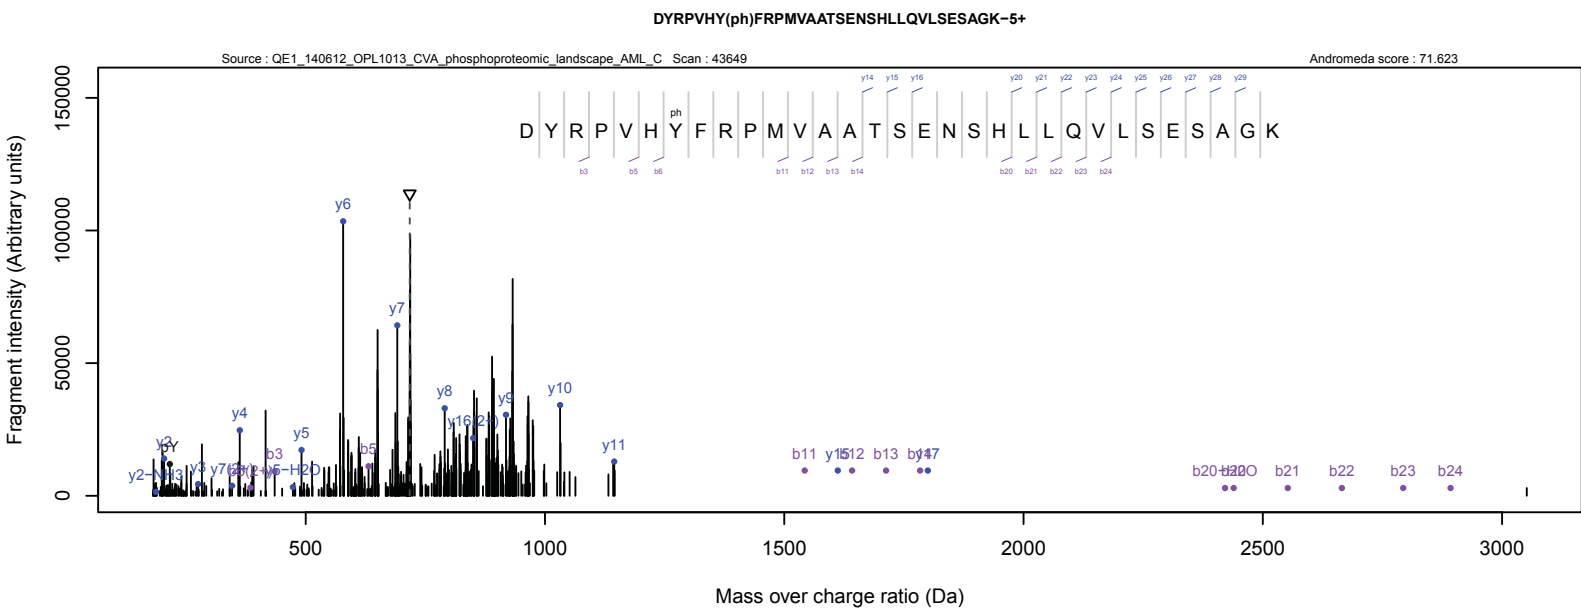

**Y(ph)MLPLDNLK-2+**

Source : QE1\_140612\_OPL1013\_CVA\_phosphoproteomic\_landscape\_AML\_C Scan : 36306

Andromeda score : 71.614

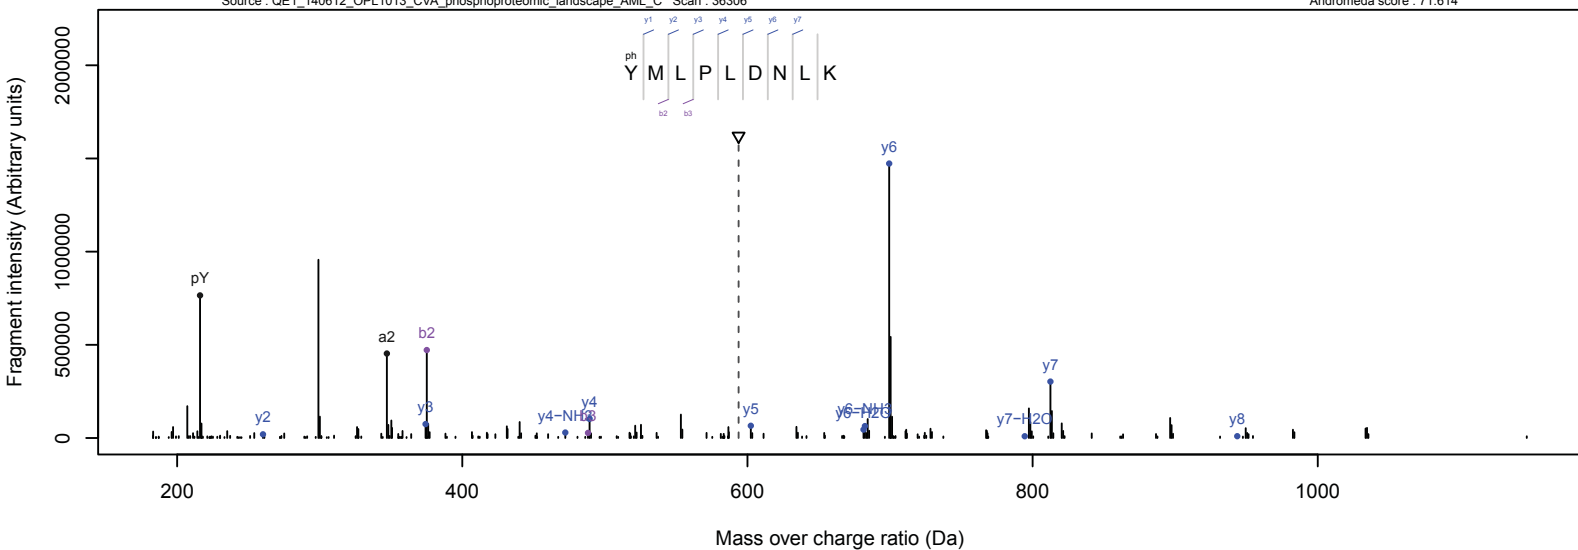

**LCQDY(ph)DTIGPEGSLK-2+**

Source : QE1\_140908\_OPL1013\_CvA\_pTyrIP\_AML\_HEL Scan : 22794

Andromeda score : 71.601

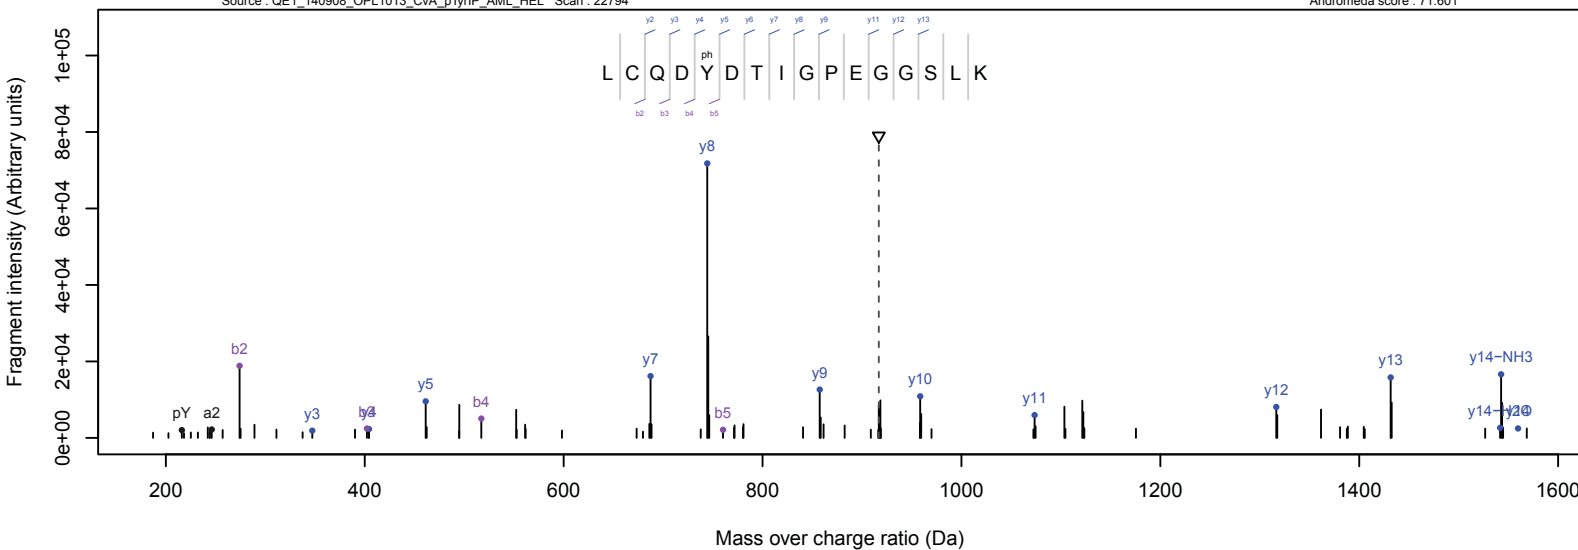

**AKDAALGGHHQAGAQQGDEGEAAGAAADGIAAYS(ph)NYNNGHRK-5+**

Source : QE1\_140908\_OPL1013\_CvA\_pTyrIP\_AML\_HEL Scan : 17931

Andromeda score : 71.583

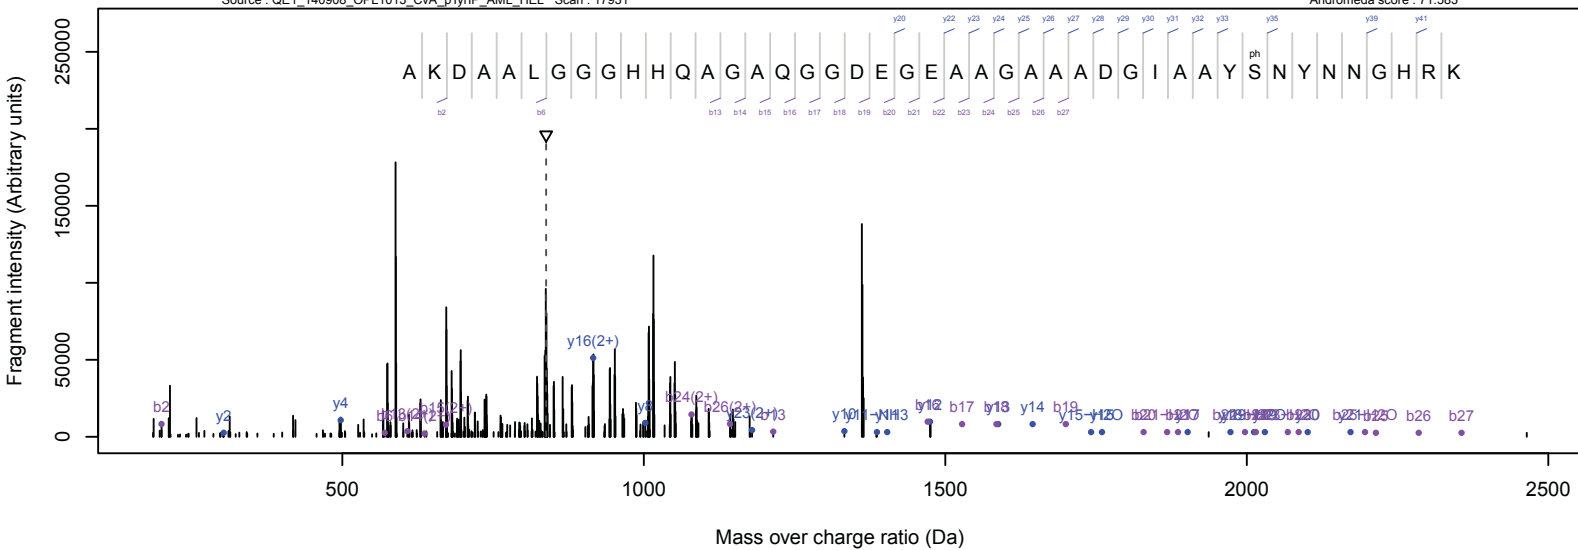

FELSCY(ph)SLAPQIK-2+

Source : QE1\_140612\_OPL1013\_CVA\_phosphoproteomic\_landscape\_AML\_C Scan : 37541

Andromeda score : 71.558

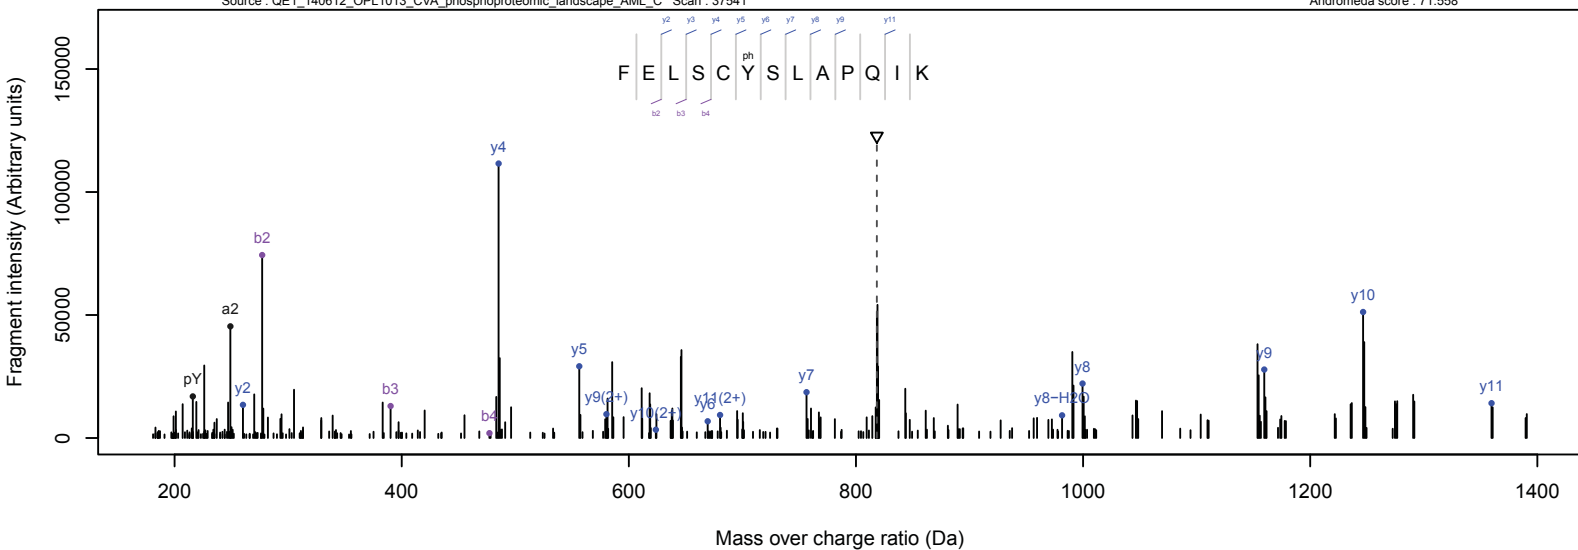

PQWNAITGVY(ph)LYR-2+

Source : QE1\_140822\_OPL1013\_CvA\_pTyrIP\_AML\_cell\_lines\_part2\_B Scan : 33796

Andromeda score : 71.558

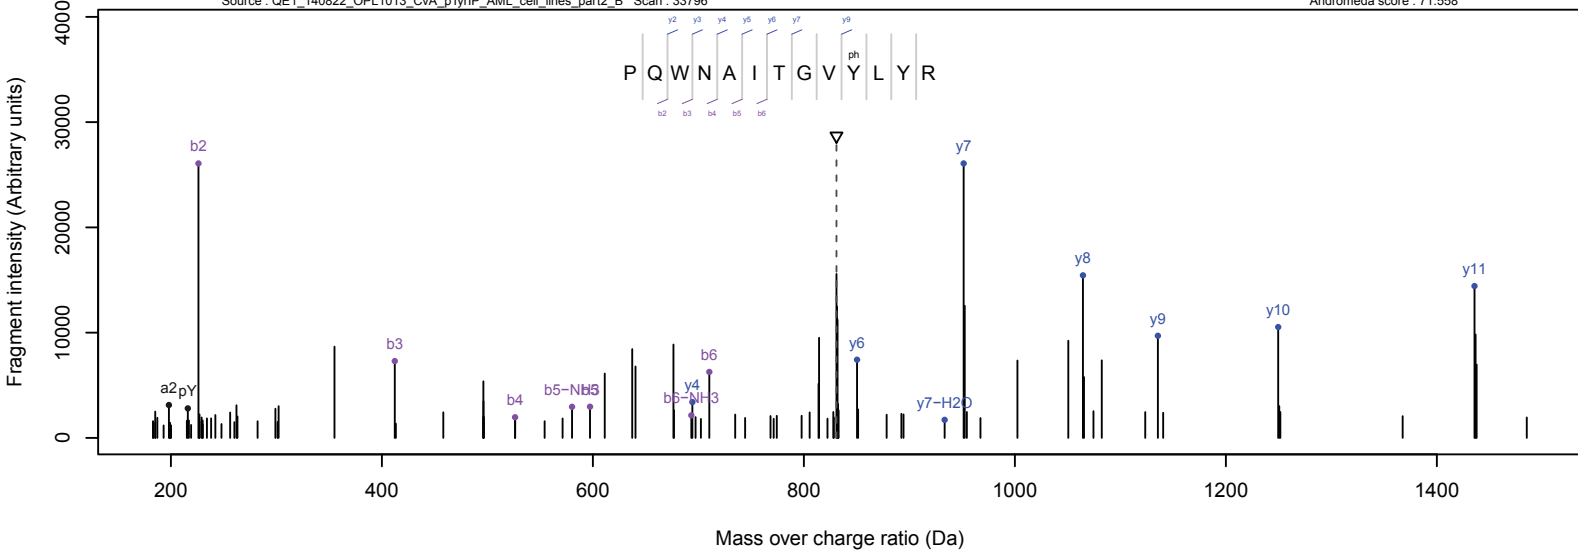

Y(ph)LATSQRPDSSGSH-3+

Source : QE1\_140822\_OPL1013\_CvA\_pTyrIP\_AML\_cell\_lines\_part2\_E Scan : 4511

Andromeda score : 71.513

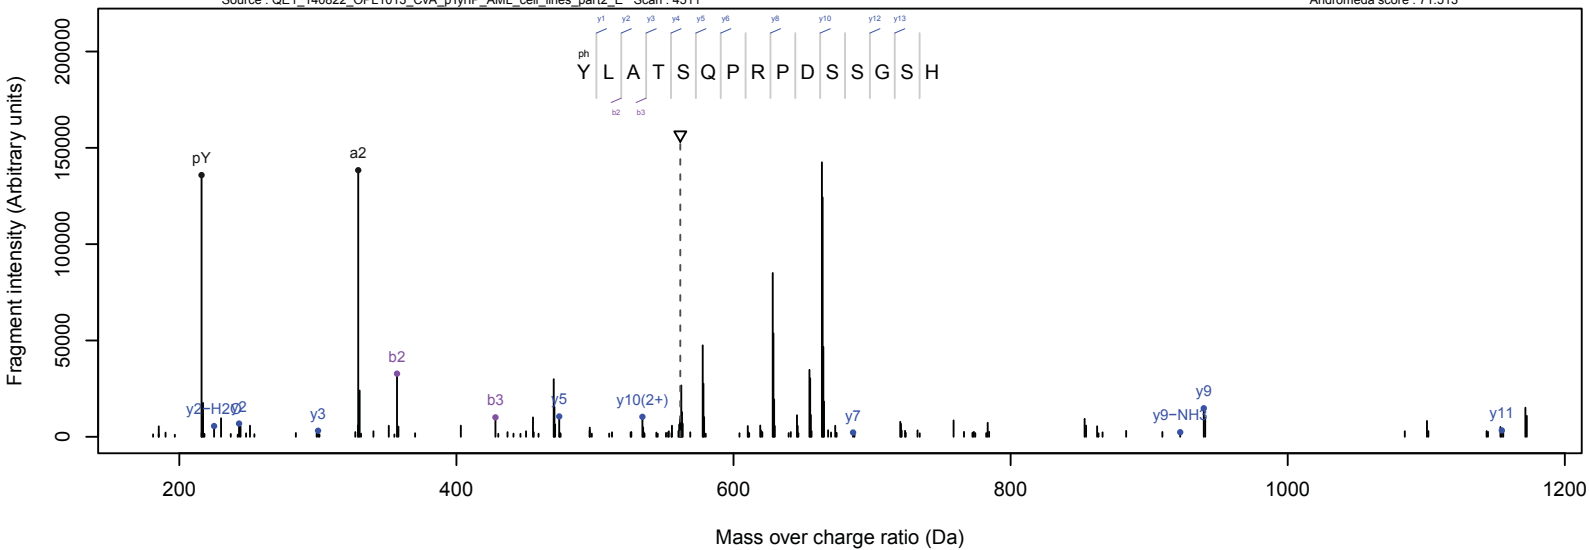

YAGEVY(ph)GM(ox)IR-2+

Source : QE1\_140822\_OPL1013\_CvA\_pTyrIP\_AML\_cell\_lines\_part2\_B Scan : 13084

Andromeda score : 71.451

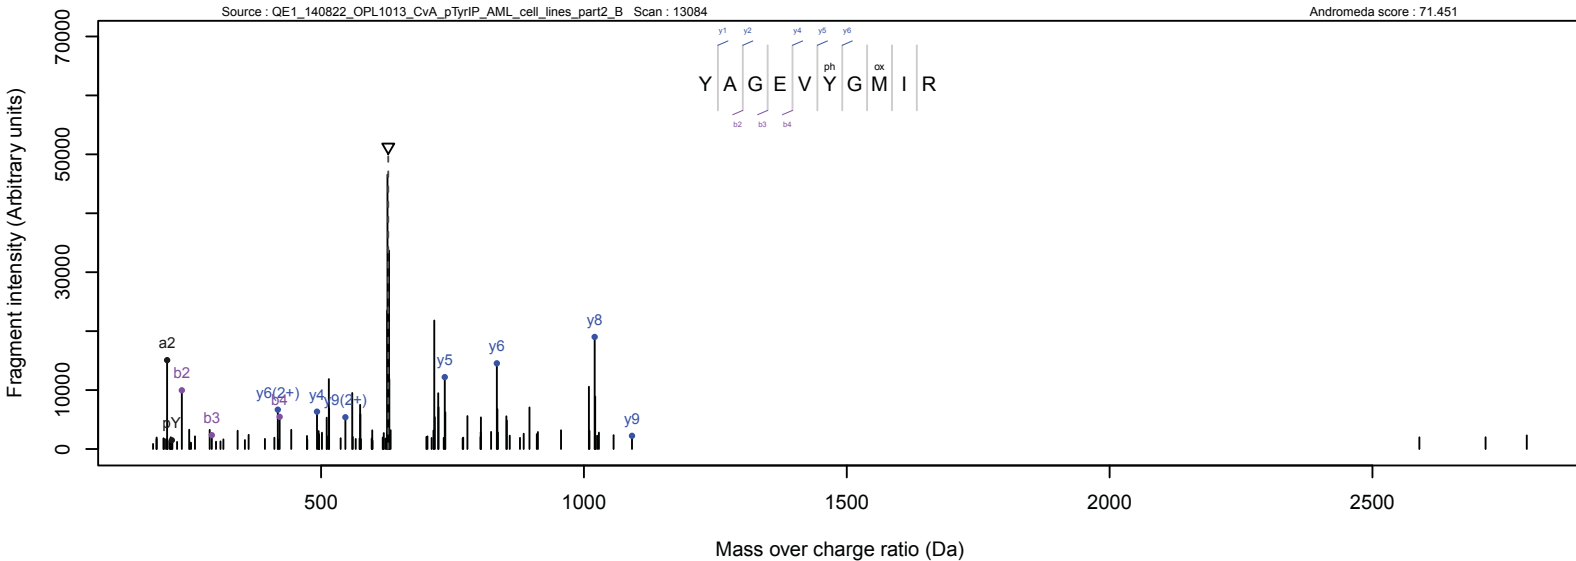

(ac)MFHGIPATPGIGAPGNKPELYEEVKLY(ph)K-4+

Source : QE1\_140612\_OPL1013\_CVA\_phosphoproteomic\_landscape\_AML\_C Scan : 42898

Andromeda score : 71.418

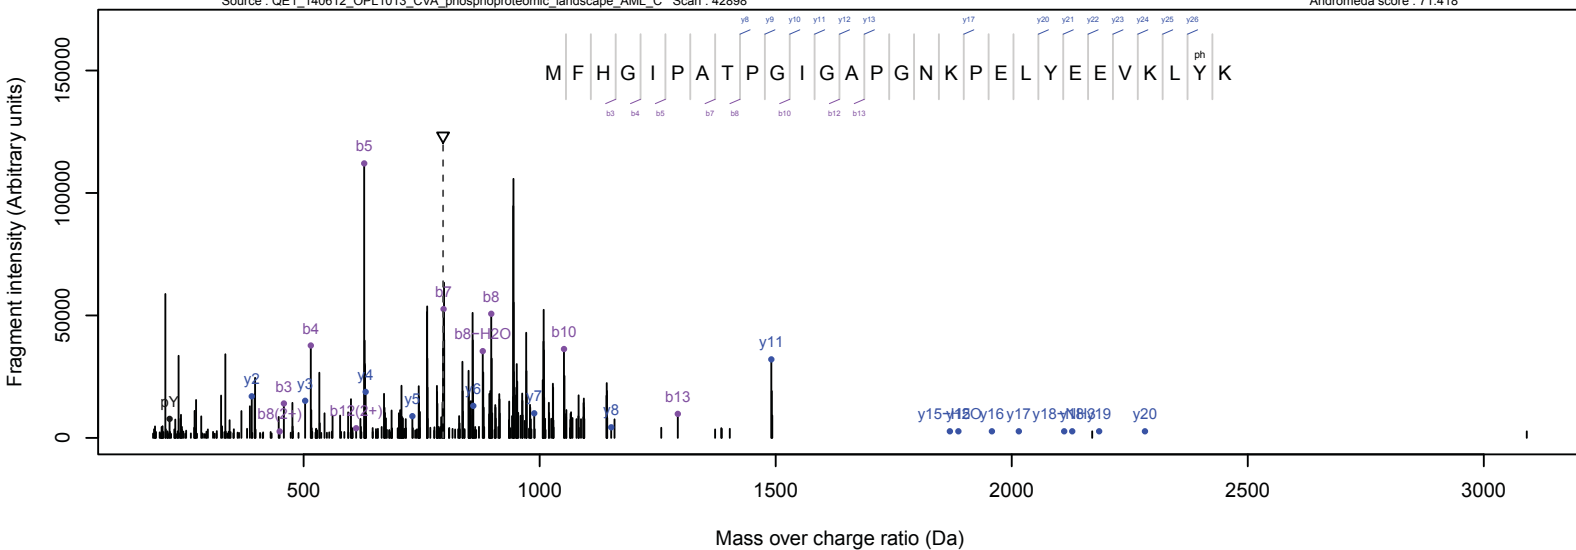

YPHY(ph)FLLK-2+

Source : QE1\_140612\_OPL1013\_CVA\_phosphoproteomic\_landscape\_AML\_A Scan : 33908

Andromeda score : 71.379

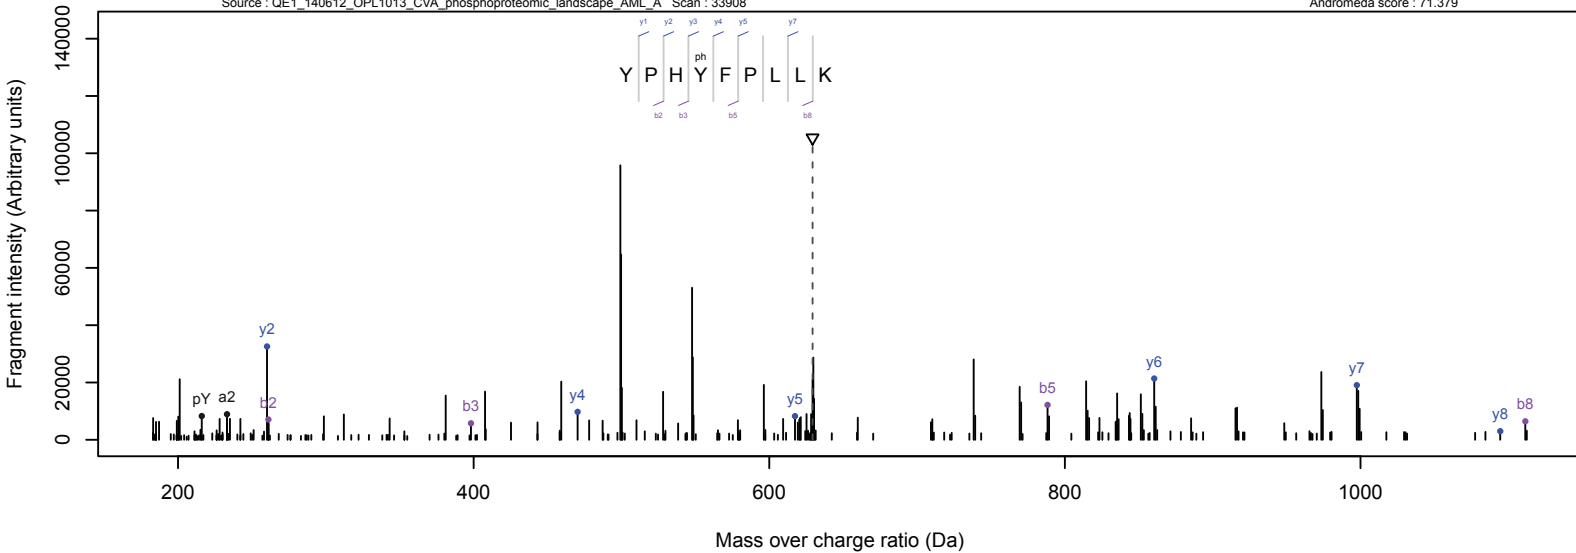

VVALY(ph)DYMPMNANDLQLRK-3+

Source : QE1\_140908\_OPL1013\_CvA\_pTyrIP\_AML\_HEL Scan : 45235

Andromeda score : 71.376

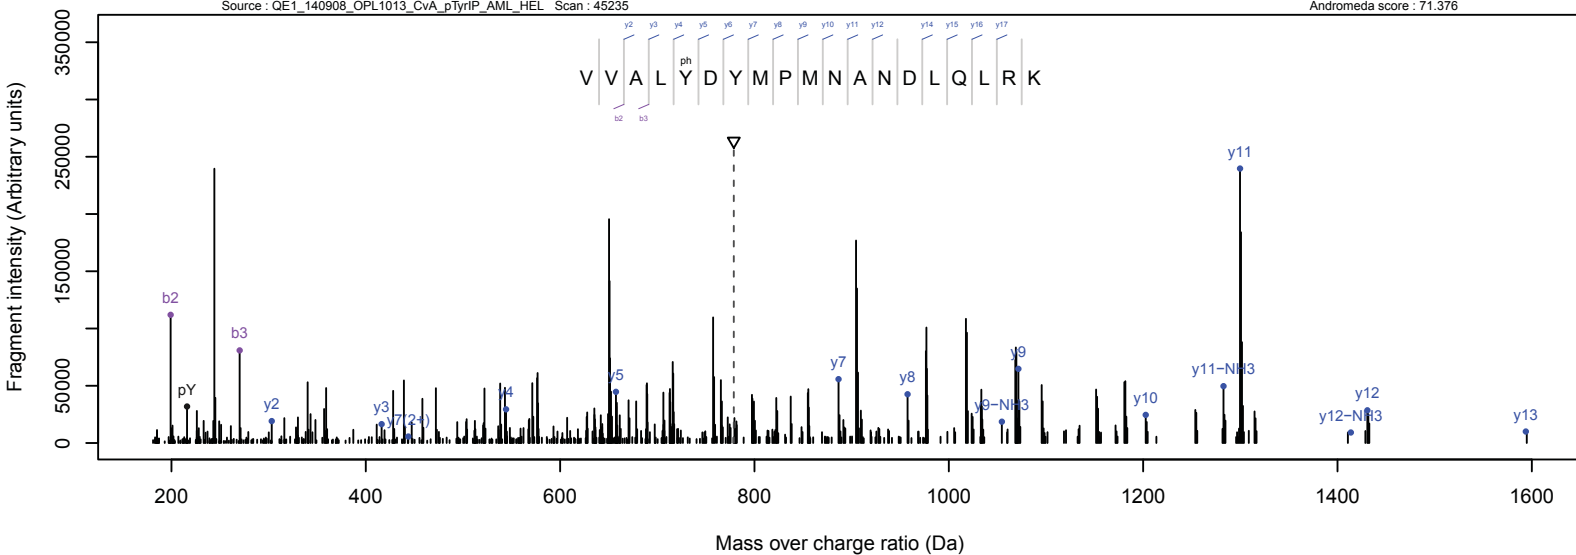

HFNY(ph)DVCQSCFFSGR-3+

Source : QE1\_140612\_OPL1013\_CVA\_phosphoproteomic\_landscape\_AML\_C Scan : 29478

Andromeda score : 71.354

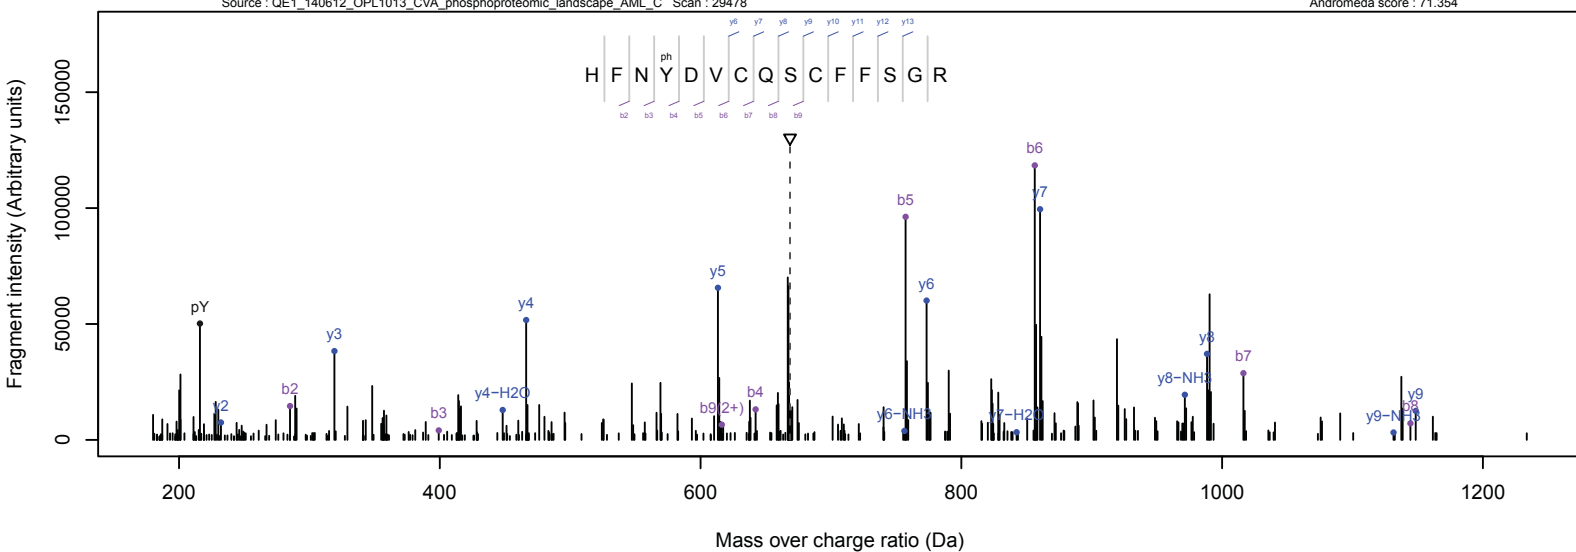

KGQLVY(ph)GQLMEPVNR-2+

Source : QE1\_140612\_OPL1013\_CVA\_phosphoproteomic\_landscape\_AML\_B Scan : 25421

Andromeda score : 71.354

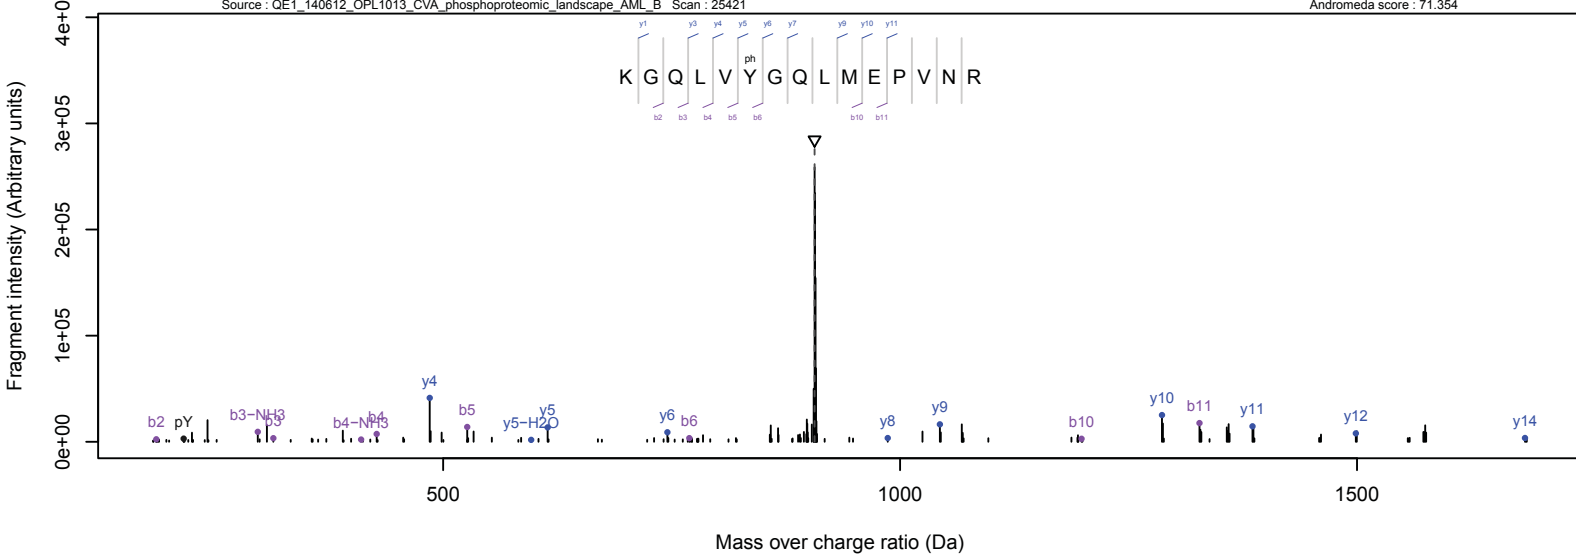

**TKFGY(ph)HIMVEGR-3+**

Source : QE1\_140612\_OPL1013\_CVA\_phosphoproteomic\_landscape\_AML\_C Scan : 25512

Andromeda score : 71.354

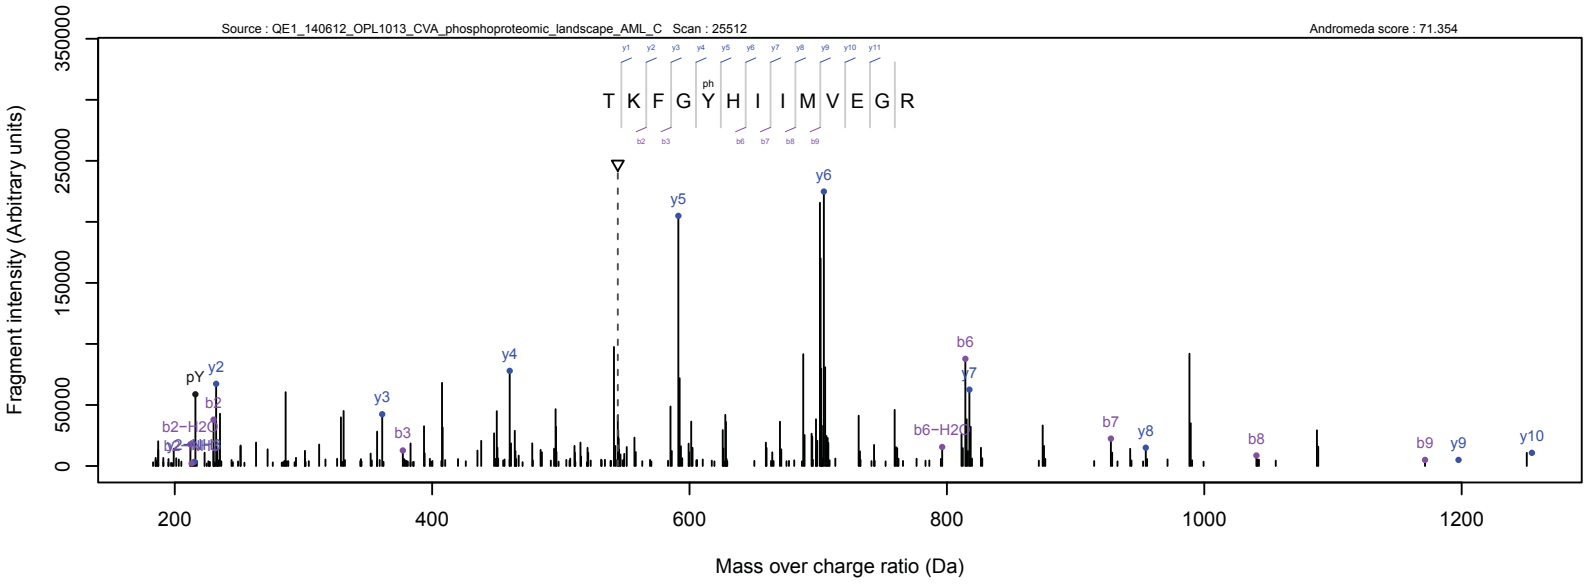

**FSSLSY(ph)K-2+**

Source : QE1\_140612\_OPL1013\_CVA\_phosphoproteomic\_landscape\_AML\_B Scan : 10291

Andromeda score : 71.342

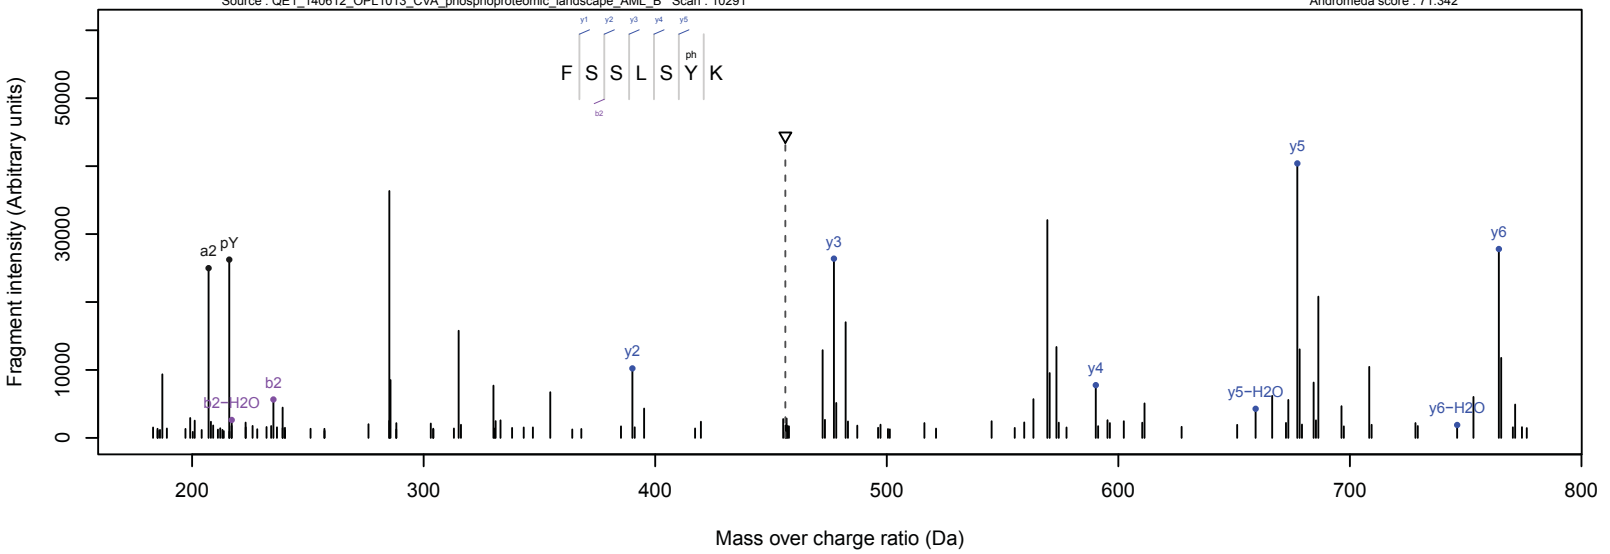

**GT(ph)GYIKTELISVSEV-2+**

Source : QE1\_140822\_OPL1013\_CvA\_pTyrIP\_AML\_cell\_lines\_part2\_E Scan : 30507

Andromeda score : 71.279

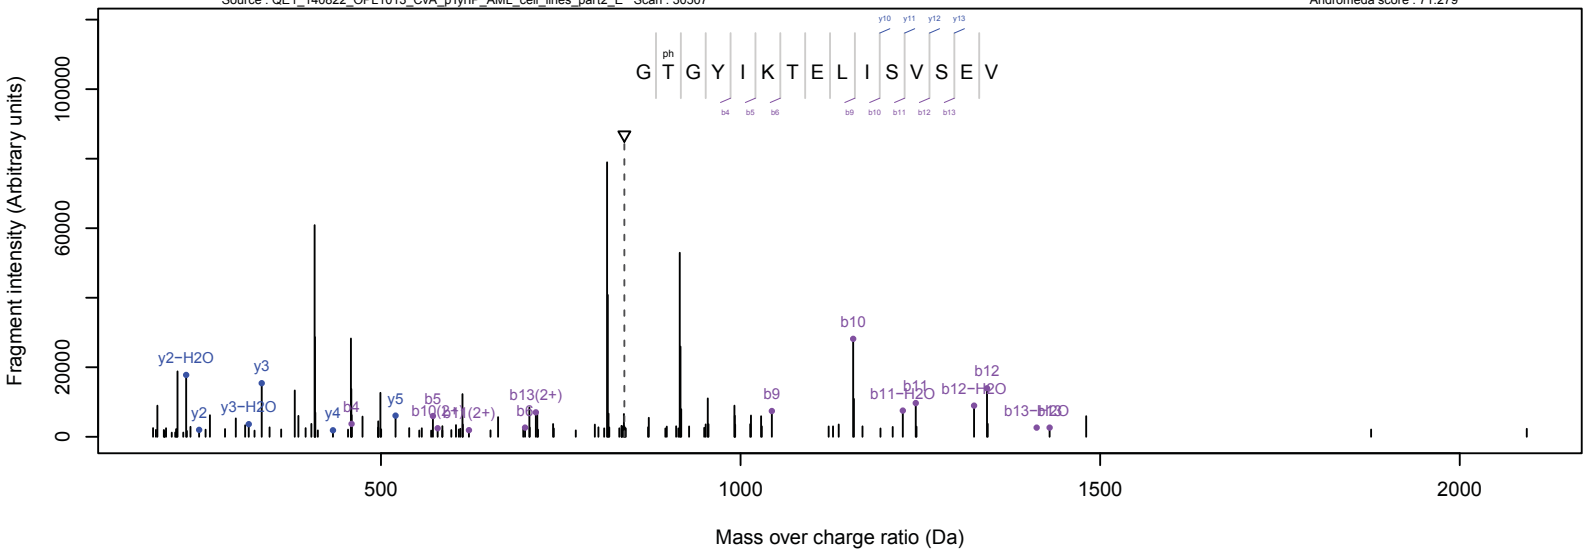

LVNANGEAVY(ph)CKFHVK-3+

Source : QE1\_140612\_OPL1013\_CVA\_phosphoproteomic\_landscape\_AML\_C Scan : 18754

Andromeda score : 71.279

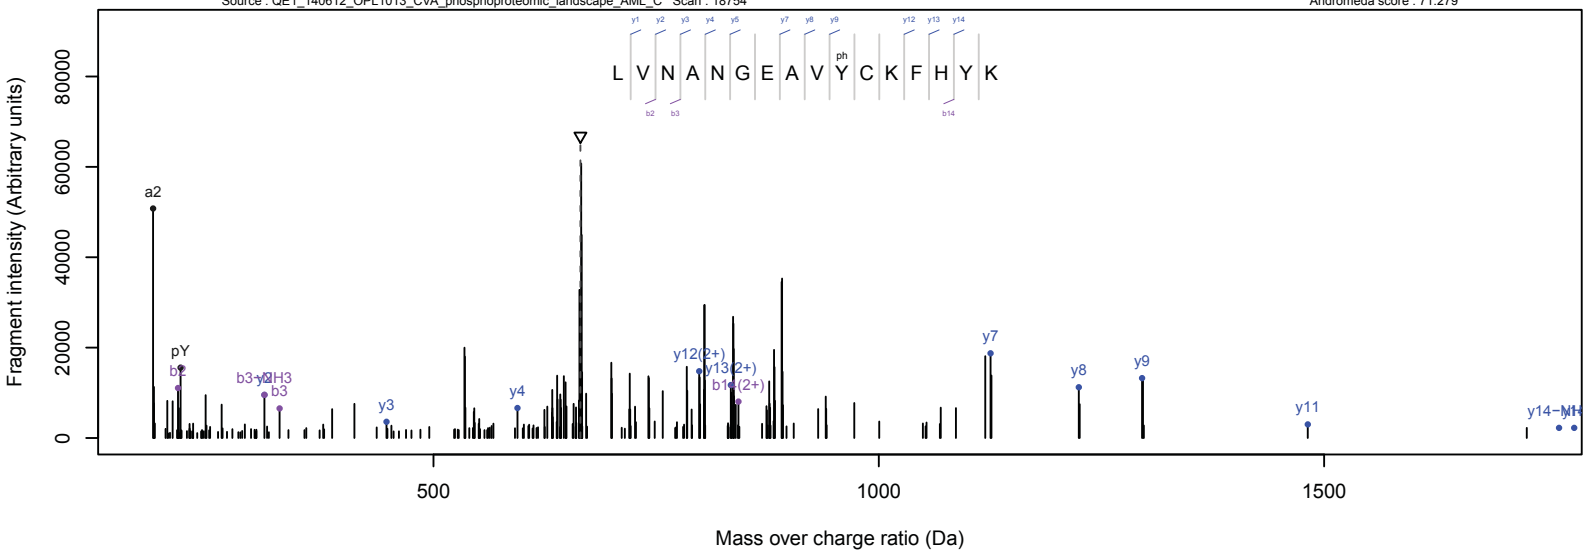

SDVNKEY(ph)YTQNMER-3+

Source : QE1\_140612\_OPL1013\_CVA\_phosphoproteomic\_landscape\_AML\_C Scan : 10103

Andromeda score : 71.279

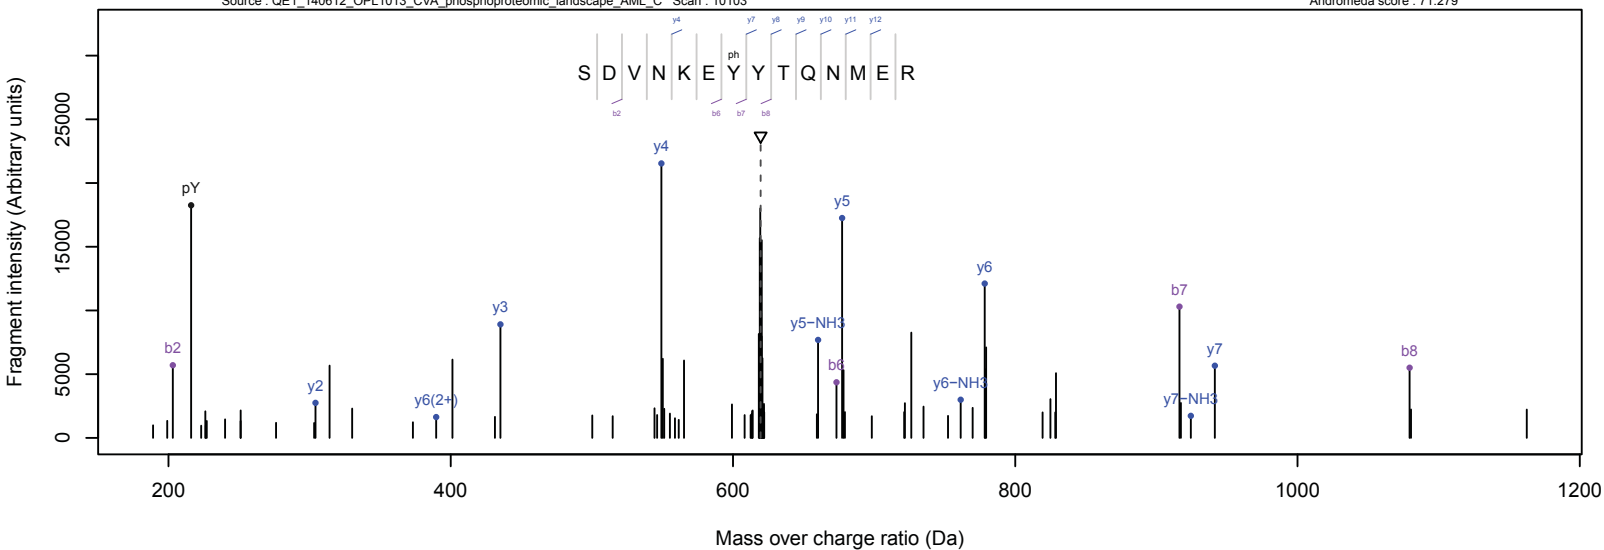

GQTSY(ph)STTSLPPPPSPASQPPLPASHPSQPPVPSLPPR-4+

Source : QE1\_140908\_OPL1013\_CvA\_pTyrIP\_AML\_HL60 Scan : 34971

Andromeda score : 71.267

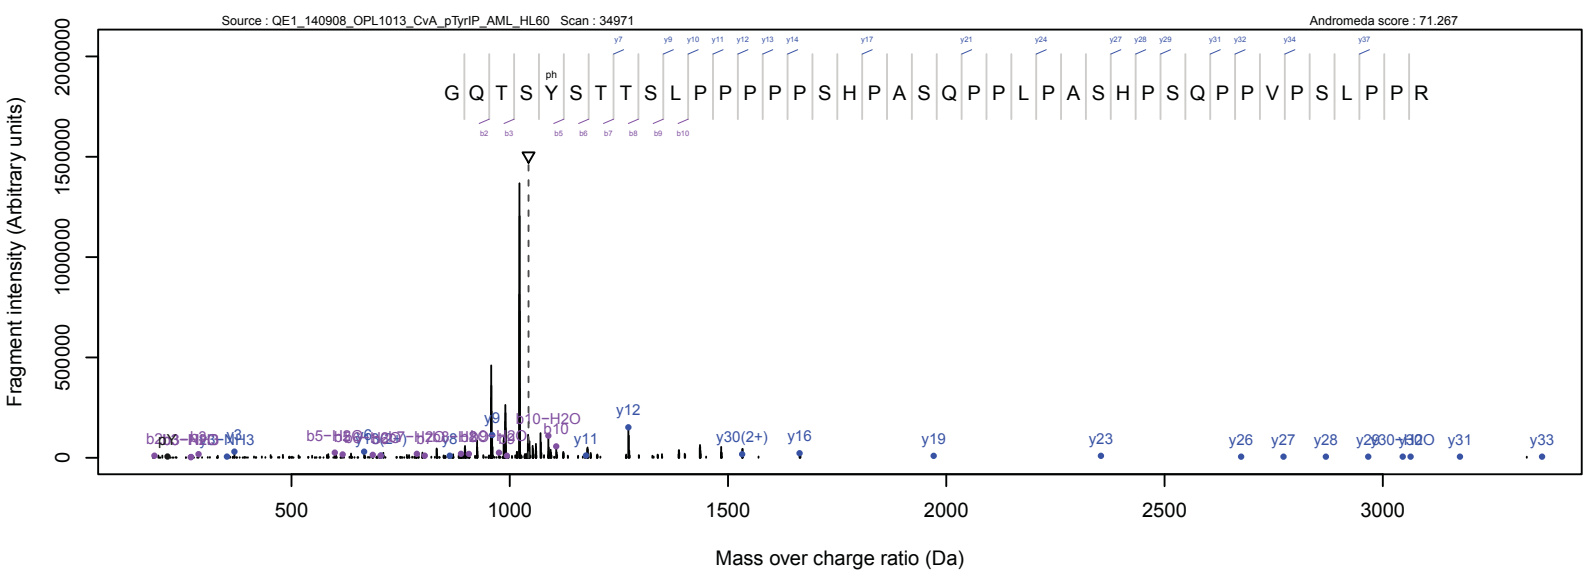

## GQENQLVIP(ph)SDQR-2+

Source : QE1\_140612\_OPL1013\_CVA\_phosphoproteomic\_landscape\_AML\_C Scan : 37972

Andromeda score : 71.263

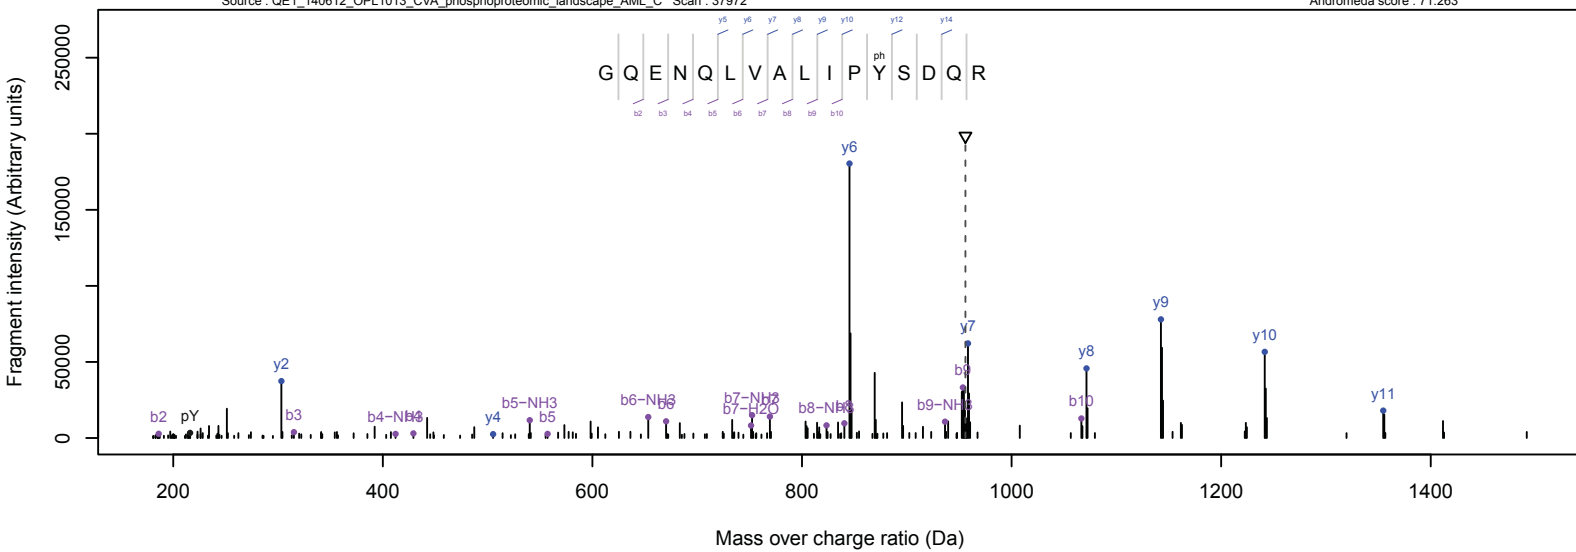

## EYLKGHY(ph)YVPLLR-3+

Source : QE1\_140612\_OPL1013\_CVA\_phosphoproteomic\_landscape\_AML\_C Scan : 30753

Andromeda score : 71.176

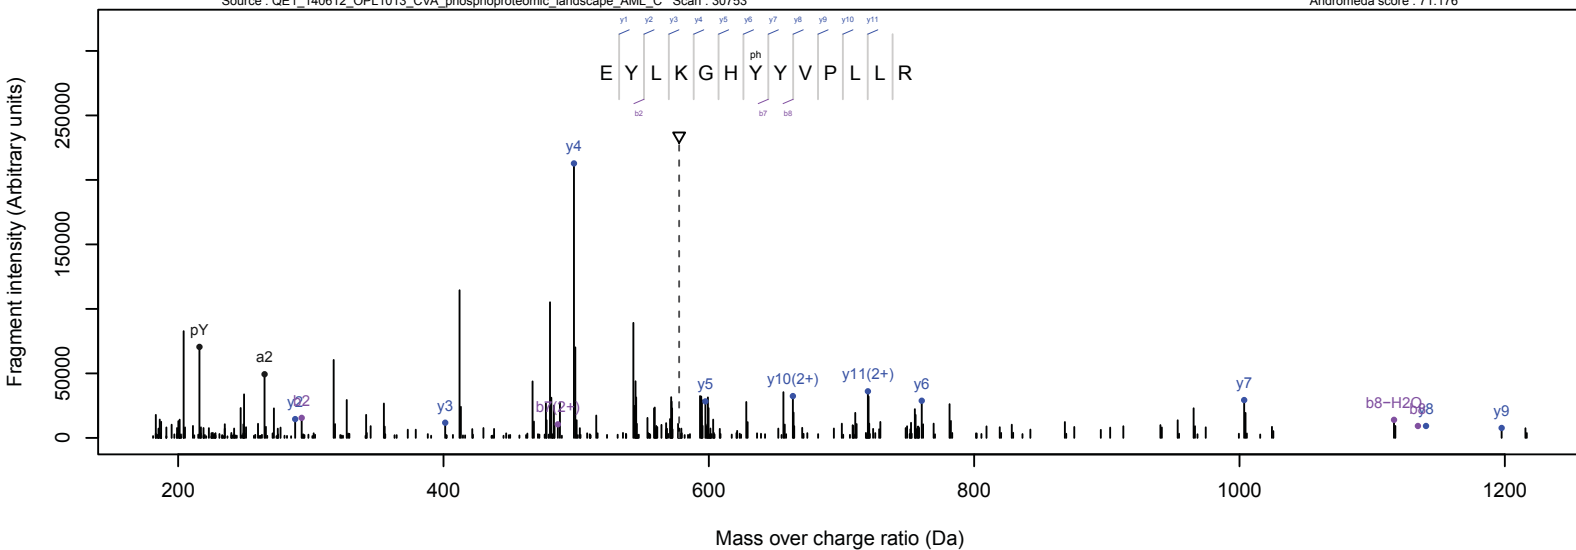

## LY(ph)INHTPPPLSK-3+

Source : QE1\_140612\_OPL1013\_CVA\_phosphoproteomic\_landscape\_AML\_B Scan : 21147

Andromeda score : 71.176

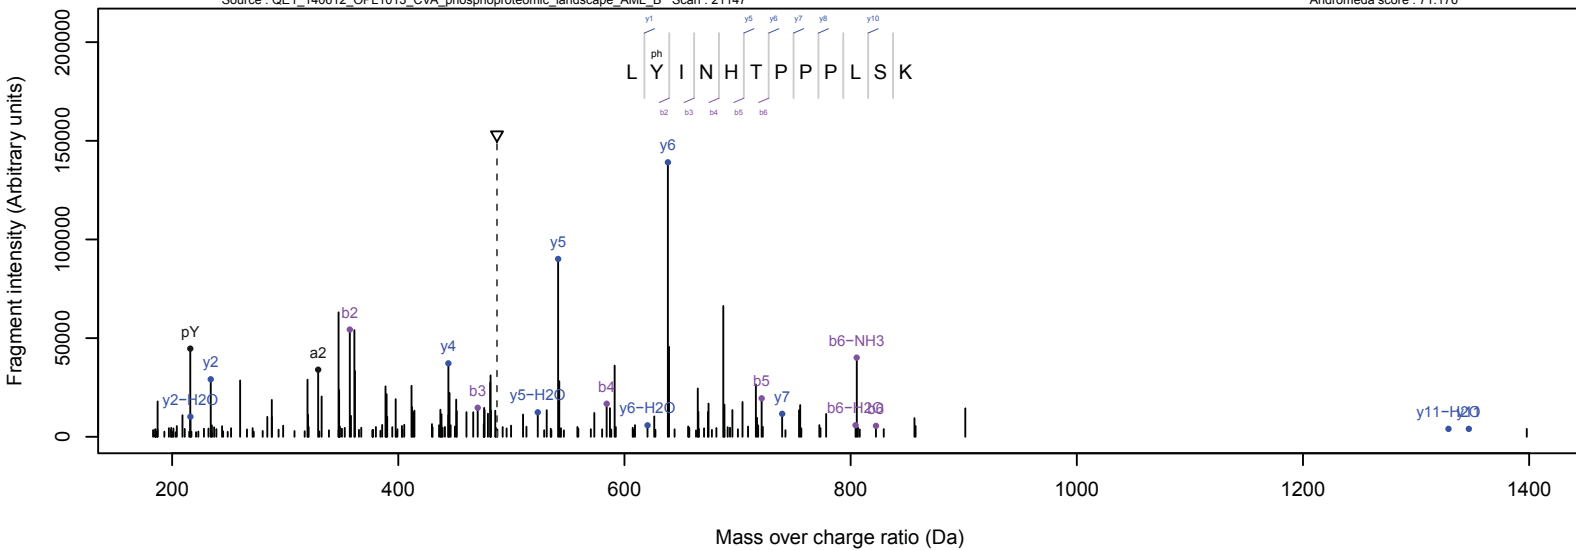



## RLDY(ph)ITAEIKR-3+

Source : QE1\_140612\_OPL1013\_CVA\_phosphoproteomic\_landscape\_AML\_C Scan : 19905

Andromeda score : 71.176

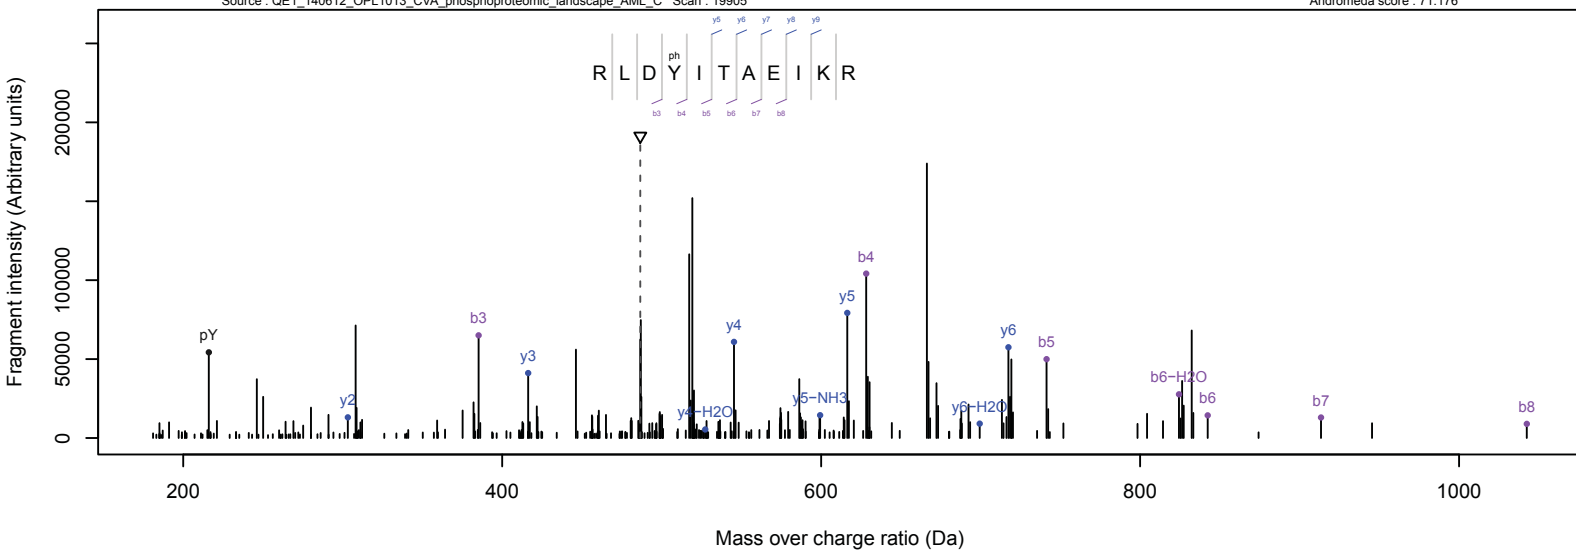

## SEVLY(ph)YTV EK K-2+

Source : QE1\_140612\_OPL1013\_CVA\_phosphoproteomic\_landscape\_AML\_C Scan : 18543

Andromeda score : 71.176

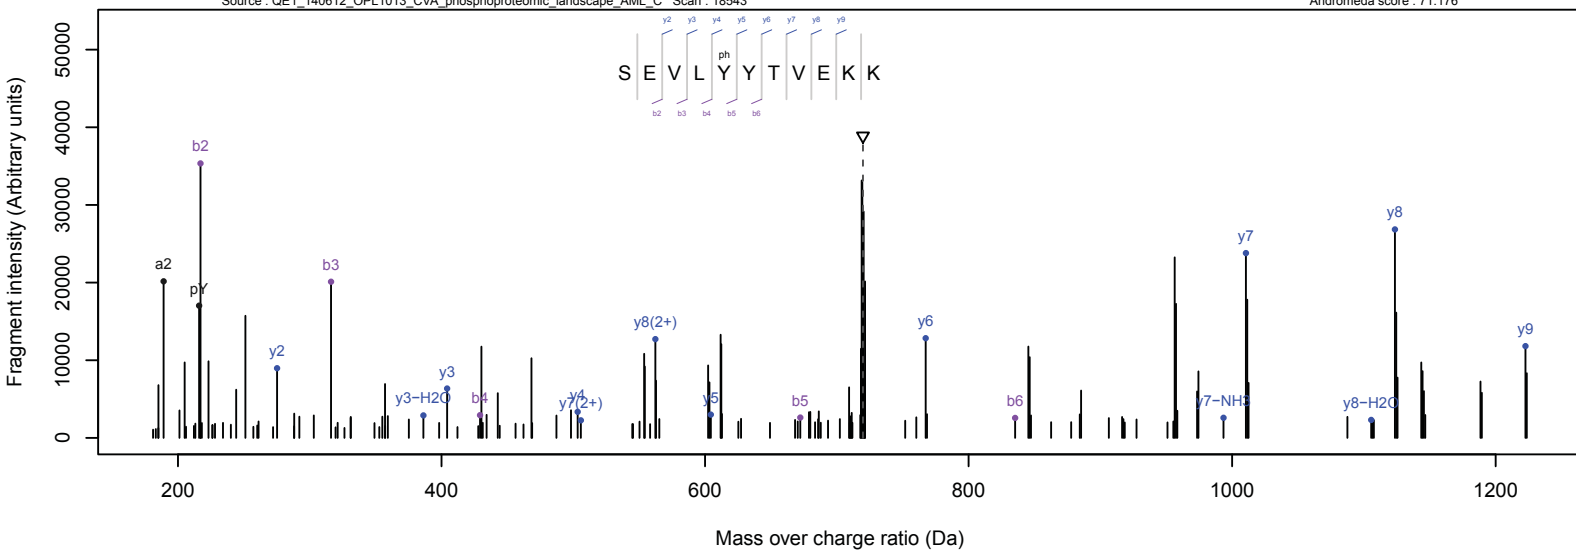

## MCRDY(ph)PQLVLPNF DMLYNHVK-4+

Source : QE1\_140612\_OPL1013\_CVA\_phosphoproteomic\_landscape\_AML\_B Scan : 47456

Andromeda score : 71.148

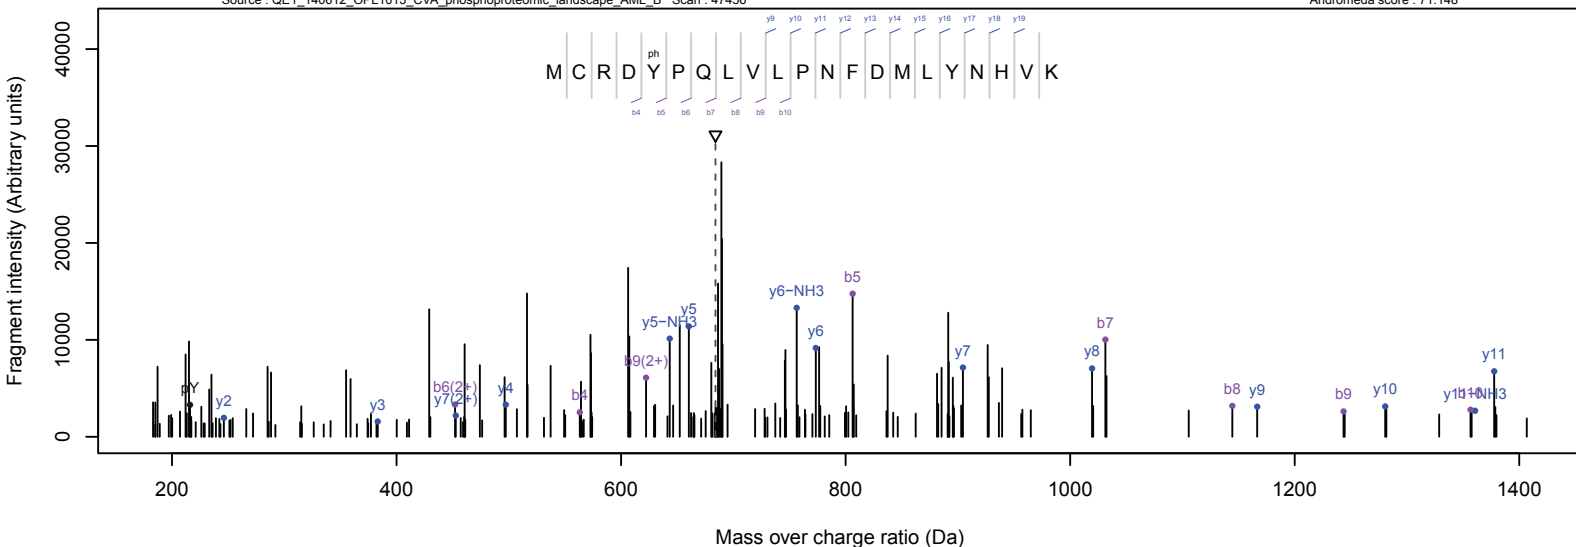

REEETLDTIKQ(ph)YVLCSSR-3+

Source : QE1\_140612\_OPL1013\_CVA\_phosphoproteomic\_landscape\_AML\_B Scan : 28863

Andromeda score : 71.148

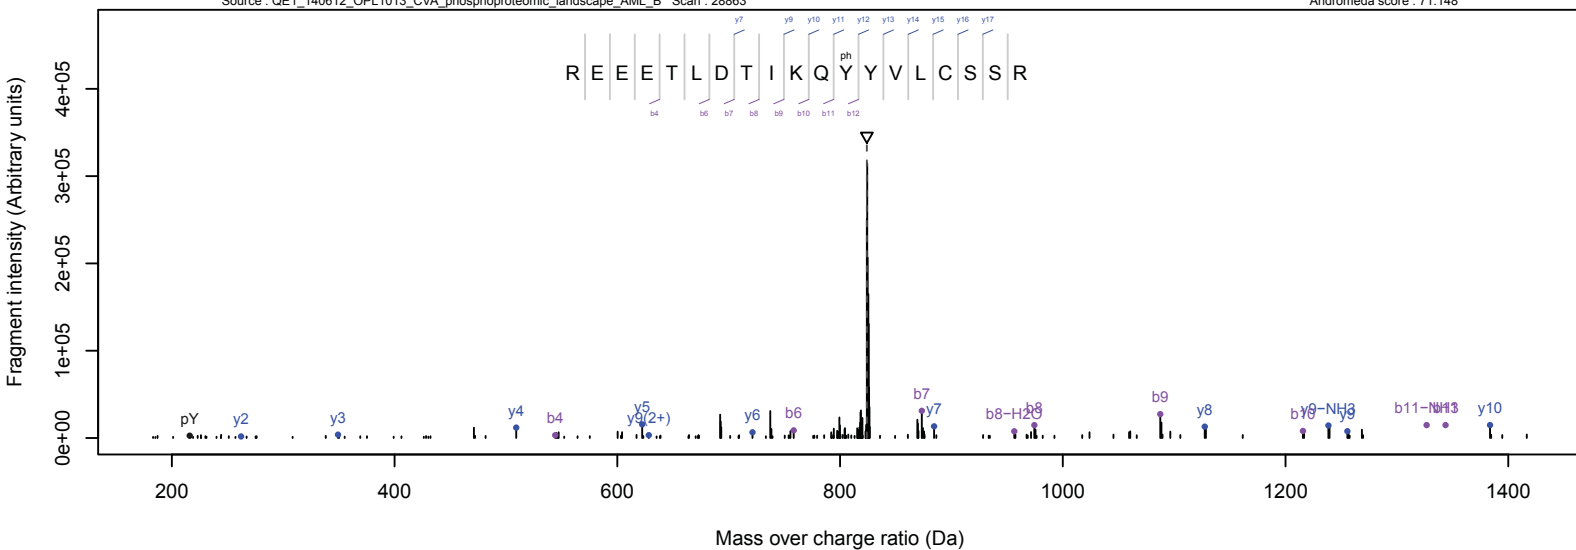

LKATVTPS(ph)PVK GK-3+

Source : QE1\_140908\_OPL1013\_CvA\_pTyrIP\_AML\_HL60 Scan : 9177

Andromeda score : 71.143

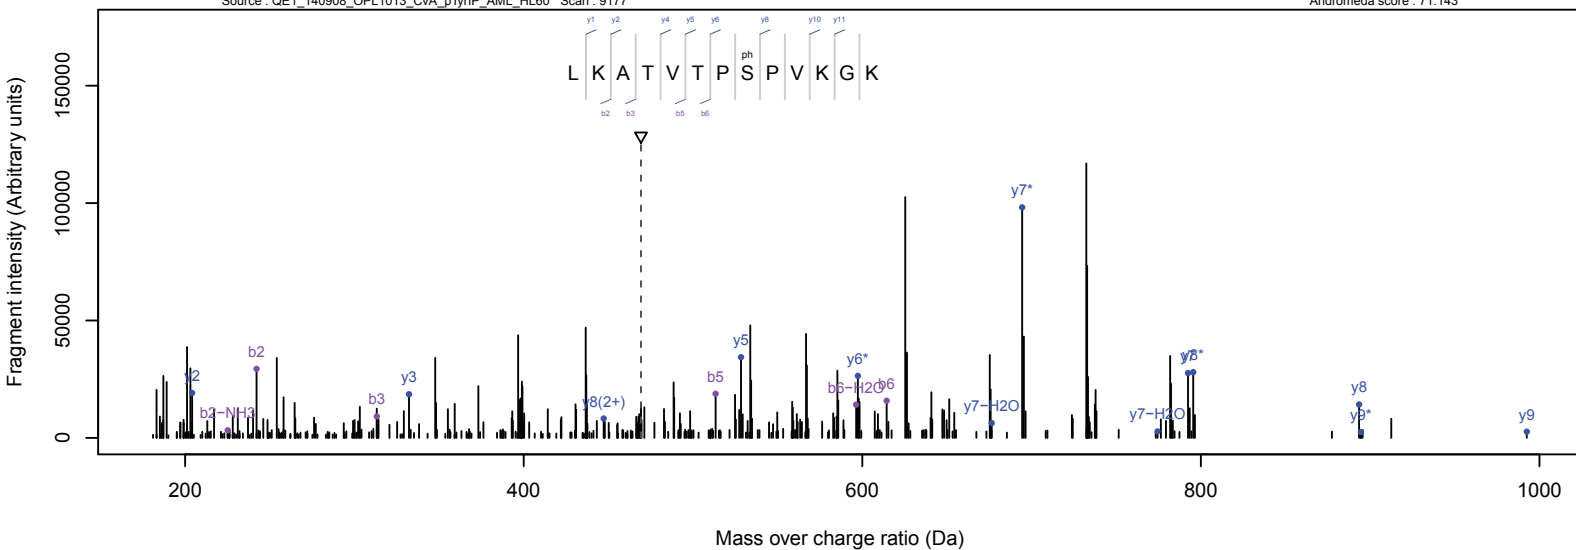

AAEAAASAY(ph)YNGNPHNVYMPYPPPPYPPEDKKTQ-4+

Source : QE1\_140612\_OPL1013\_CVA\_phosphoproteomic\_landscape\_AML\_C Scan : 31174

Andromeda score : 71.119

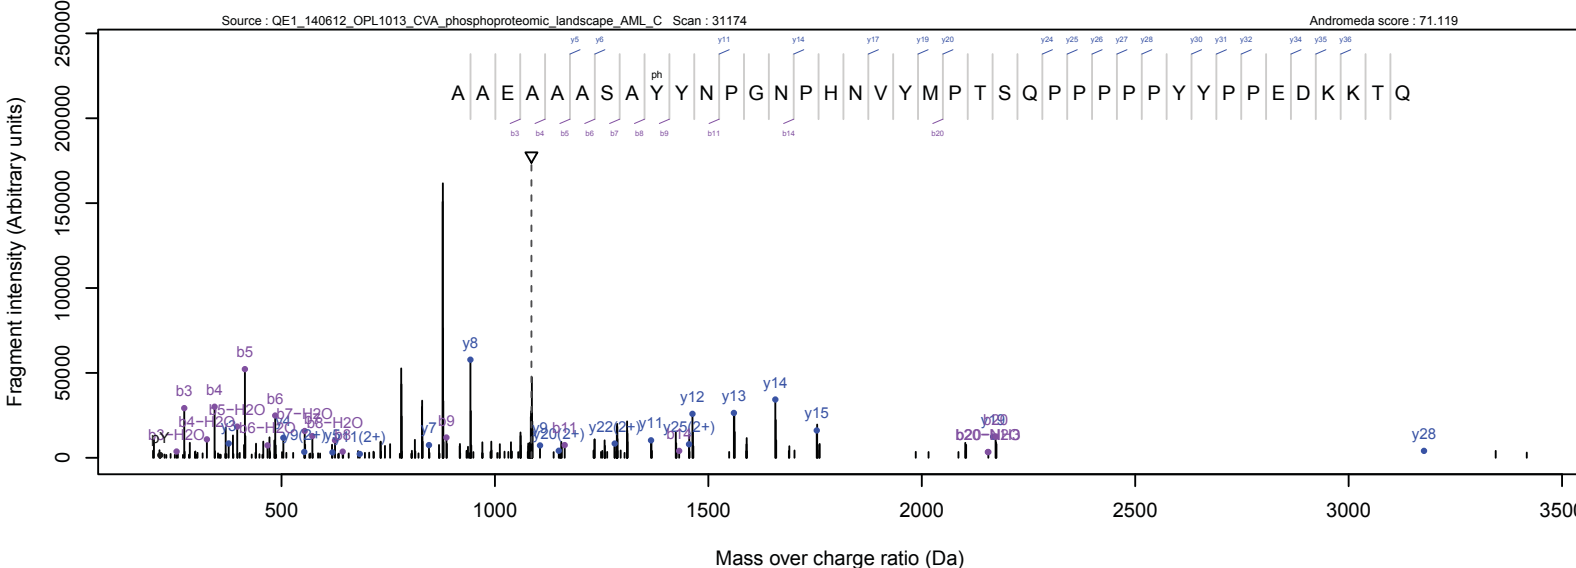

ALY(ph)LEAIQNR-2+

Source : QE1\_140612\_OPL1013\_CVA\_phosphoproteomic\_landscape\_AML\_C Scan : 37301

Andromeda score : 71.085

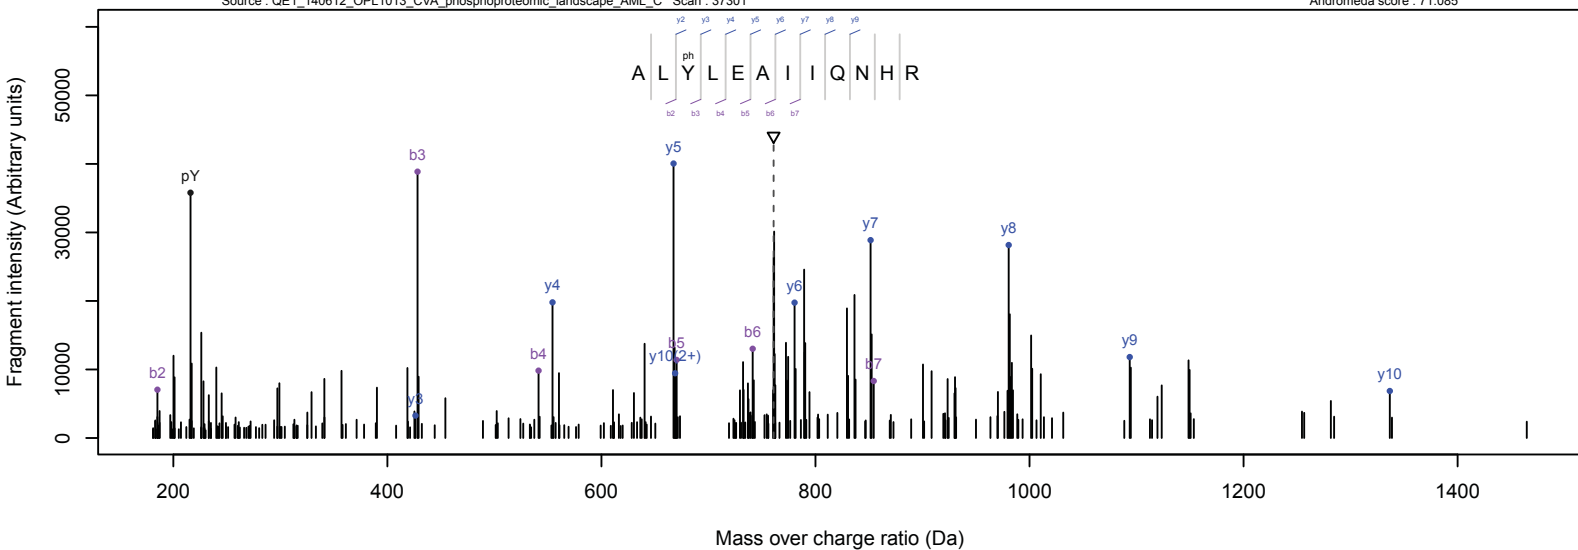

AGAGSATLSMAY(ph)AGAR-2+

Source : QE1\_140612\_OPL1013\_CVA\_phosphoproteomic\_landscape\_AML\_C Scan : 18958

Andromeda score : 71.08

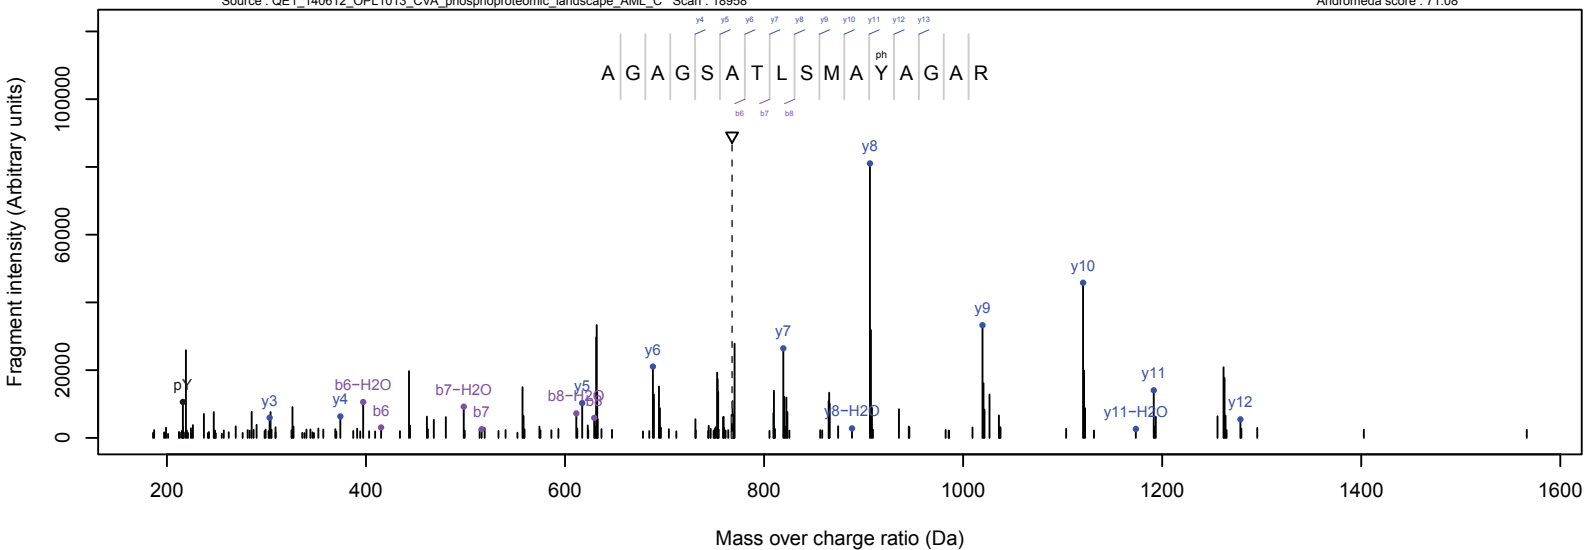

ENEVSTLYKGEY(ph)HR-3+

Source : QE1\_140612\_OPL1013\_CVA\_phosphoproteomic\_landscape\_AML\_C Scan : 12994

Andromeda score : 71.08

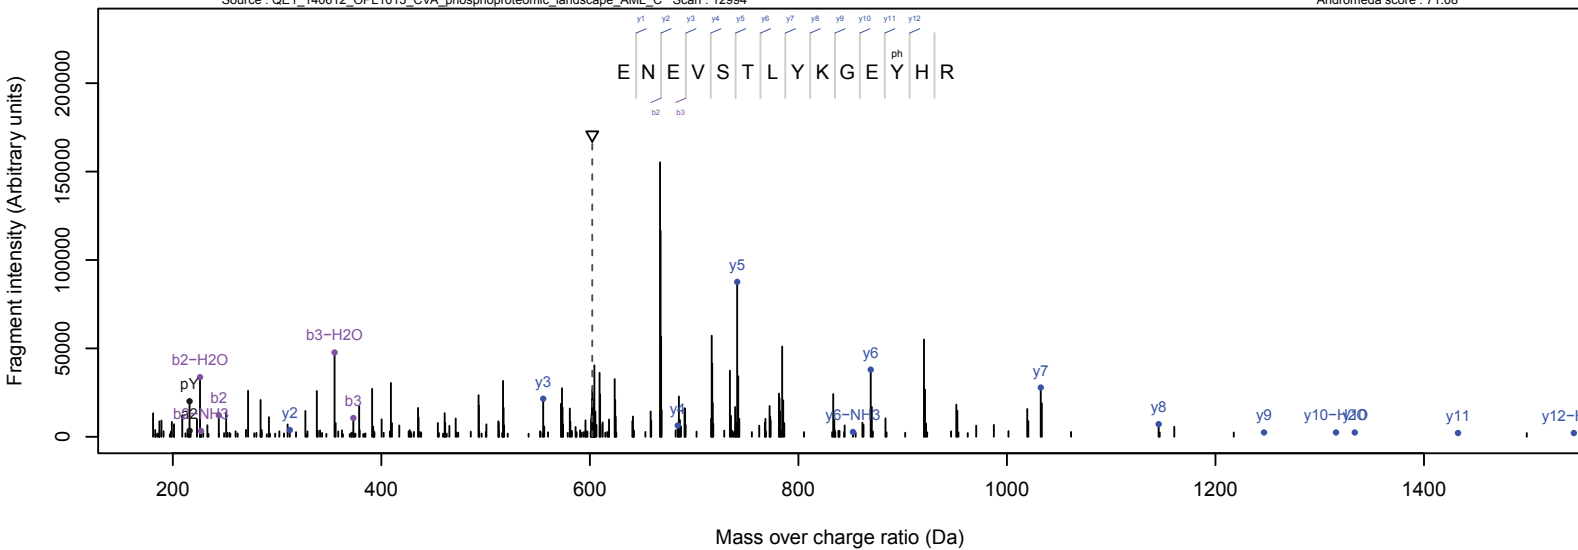

## HNIYVQAINY(ph)PTVPR-3+

Source : QE1\_140612\_OPL1013\_CVA\_phosphoproteomic\_landscape\_AML\_B Scan : 27414

Andromeda score : 71.08

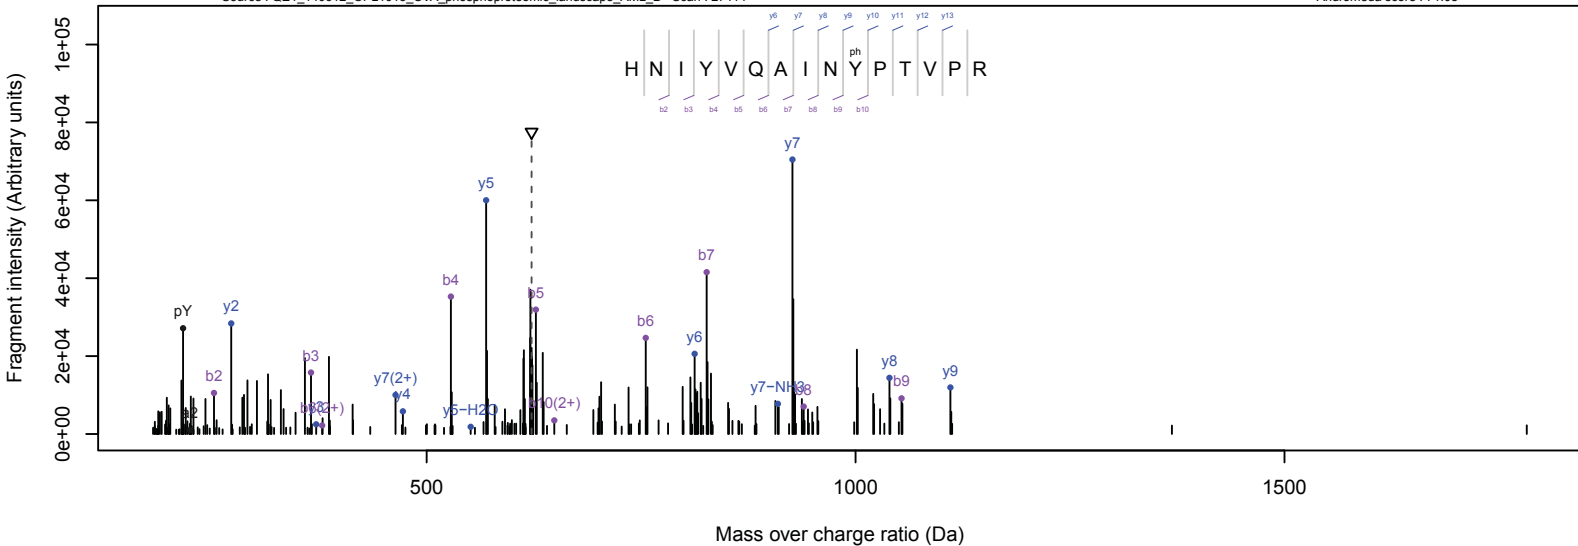

## SYEEHIPY(ph)THMNGGKK-4+

Source : QE1\_140612\_OPL1013\_CVA\_phosphoproteomic\_landscape\_AML\_C Scan : 10864

Andromeda score : 71.08

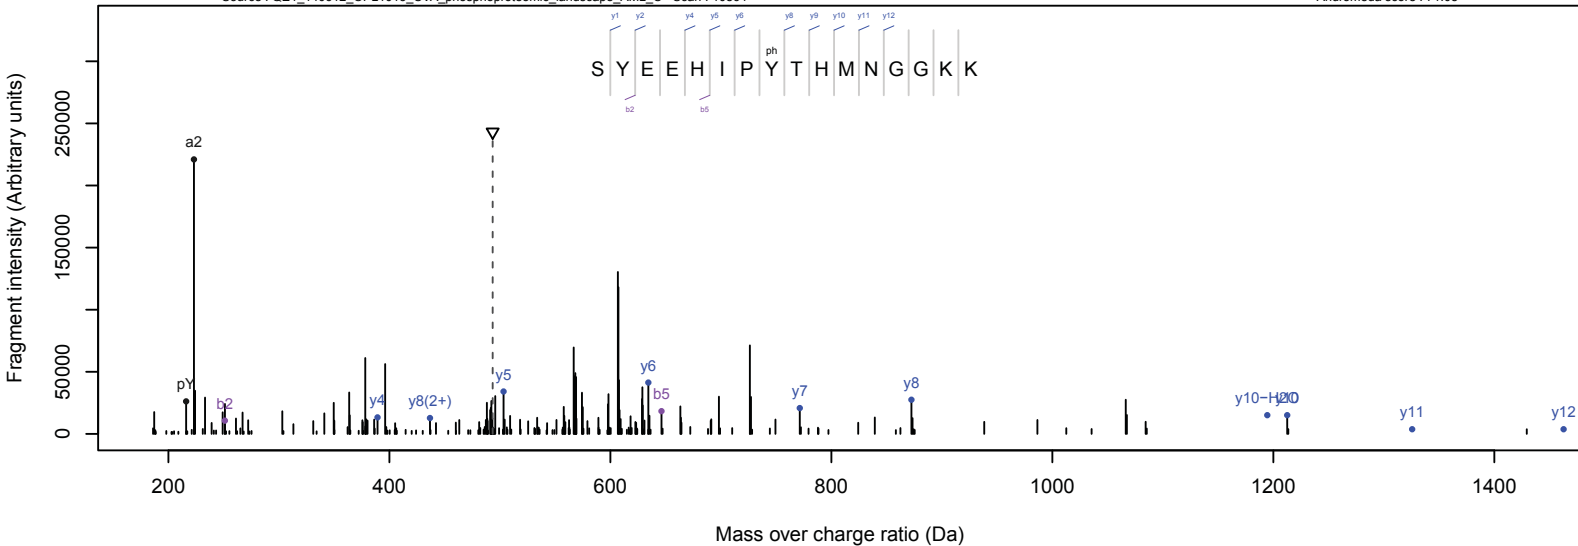

## QADRY(ph)GFIGGSSAEPGPGHPADLIR-4+

Source : QE1\_140612\_OPL1013\_CVA\_phosphoproteomic\_landscape\_AML\_B Scan : 29958

Andromeda score : 71.06

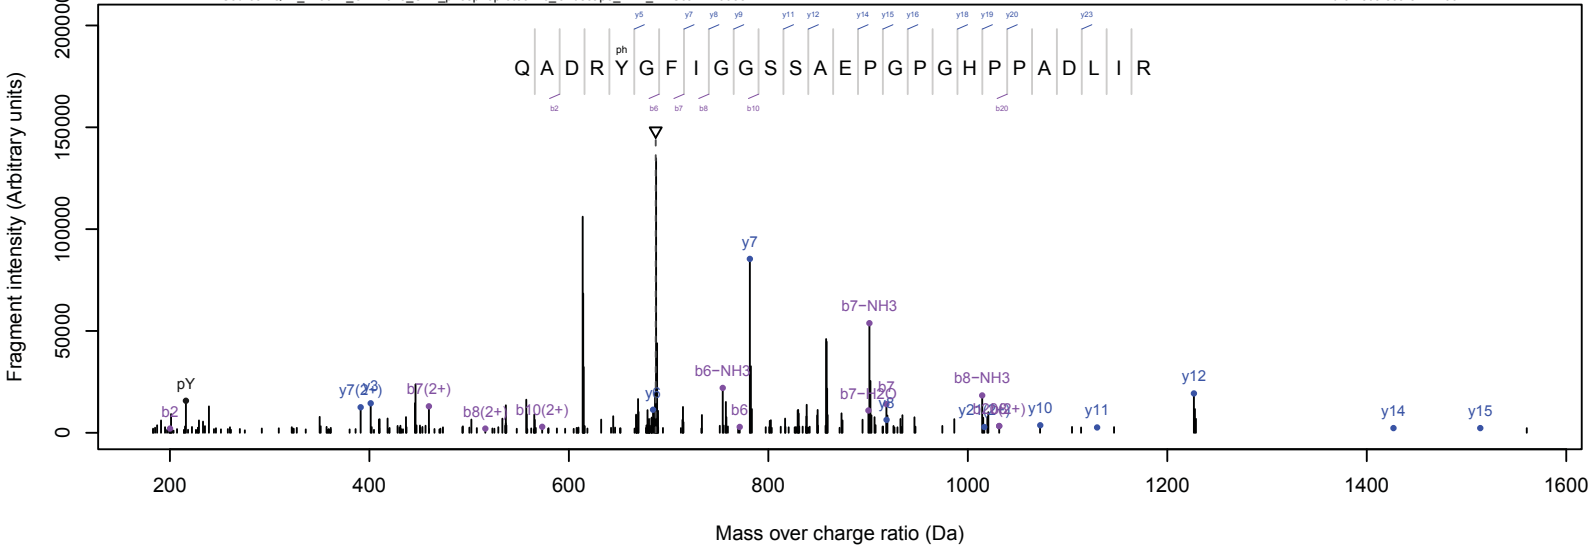



## SSS(ph)PAPADIAQTVQEDLR-2+

Source : QE1\_140908\_OPL1013\_CvA\_pTyrIP\_AML\_HL60 Scan : 44235

Andromeda score : 70.994

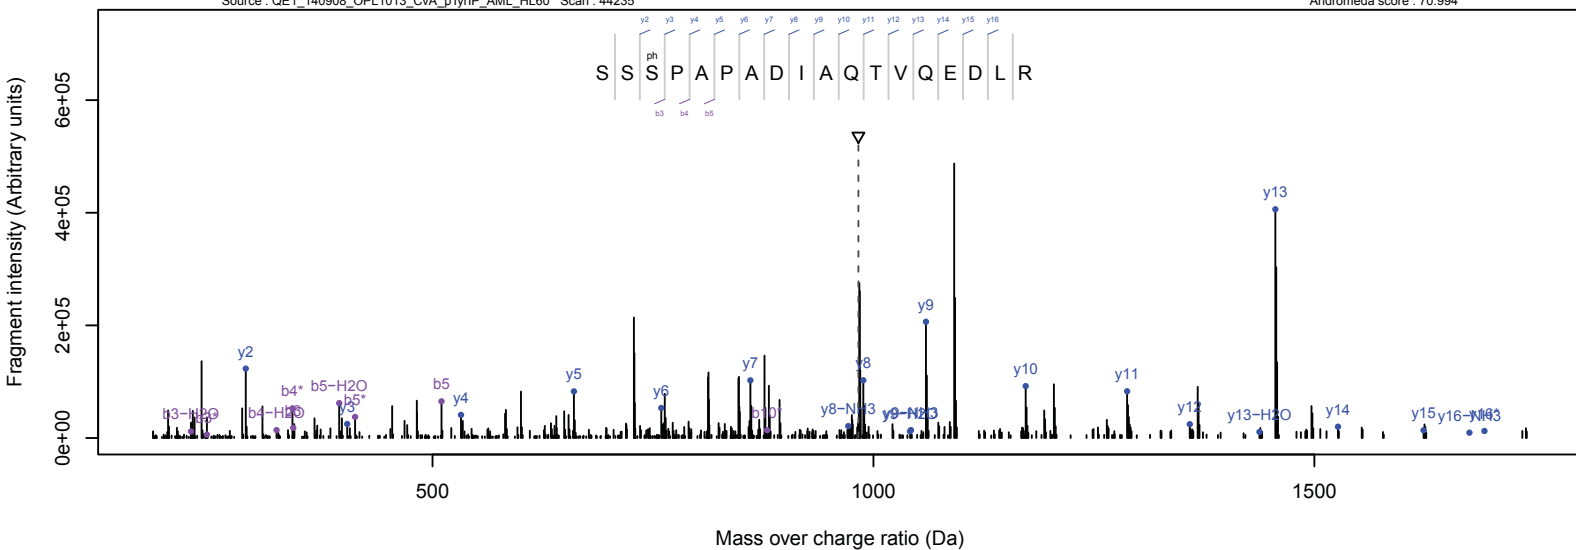

## GHY(ph)QLLLSGR-2+

Source : QE1\_140612\_OPL1013\_CVA\_phosphoproteomic\_landscape\_AML\_A Scan : 19645

Andromeda score : 70.942

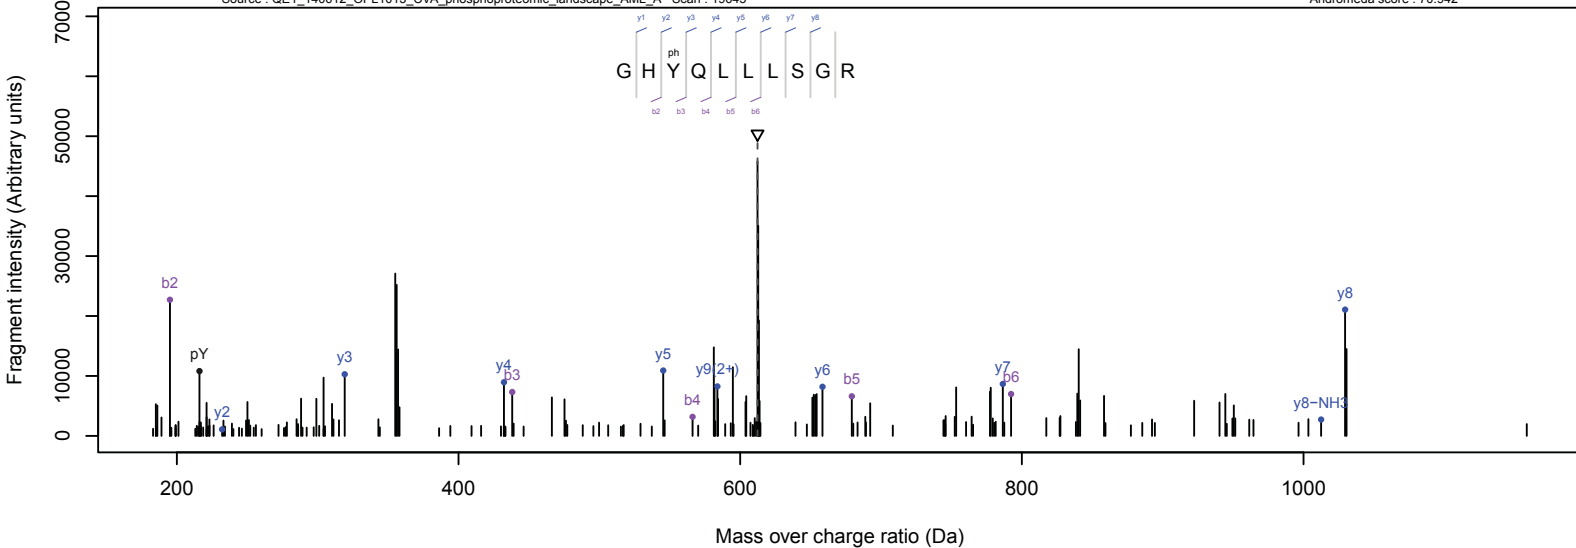

## GTGLSSDY(ph)R-2+

Source : QE1\_140612\_OPL1013\_CVA\_phosphoproteomic\_landscape\_AML\_C Scan : 14626

Andromeda score : 70.942

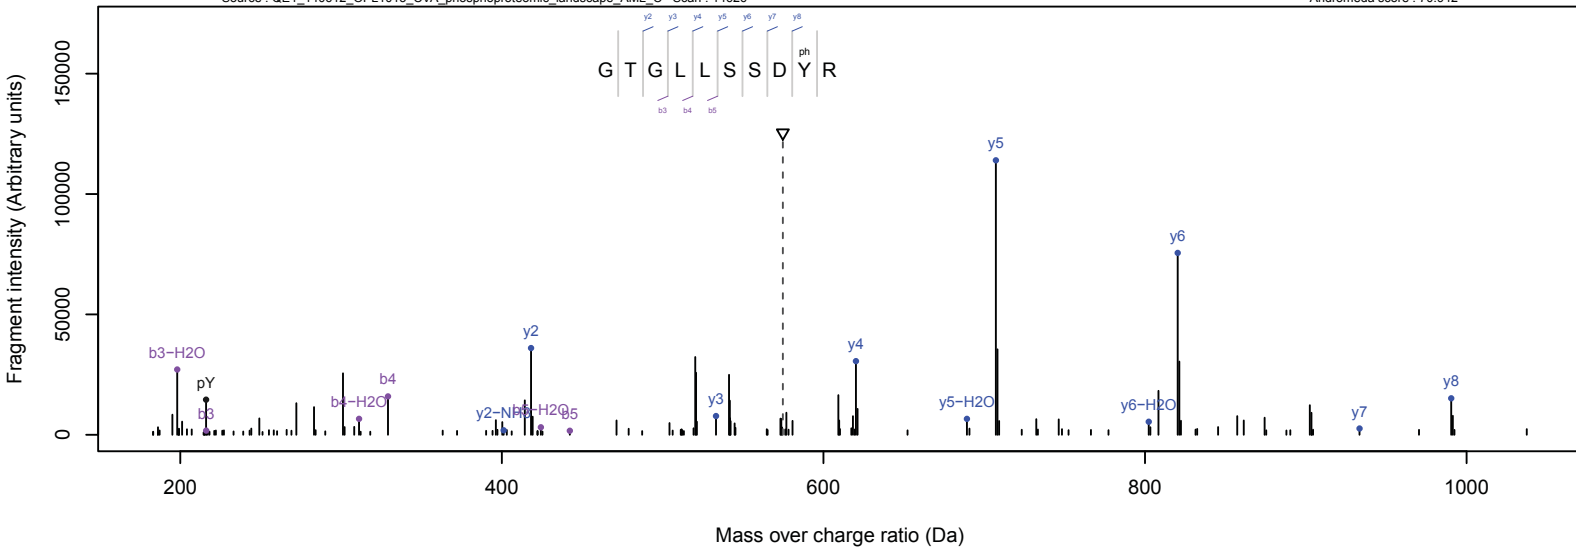

KY(ph)ISITVPSK-3+

Source : QE1\_140612\_OPL1013\_CVA\_phosphoproteomic\_landscape\_AML\_C Scan : 18757

Andromeda score : 70.942

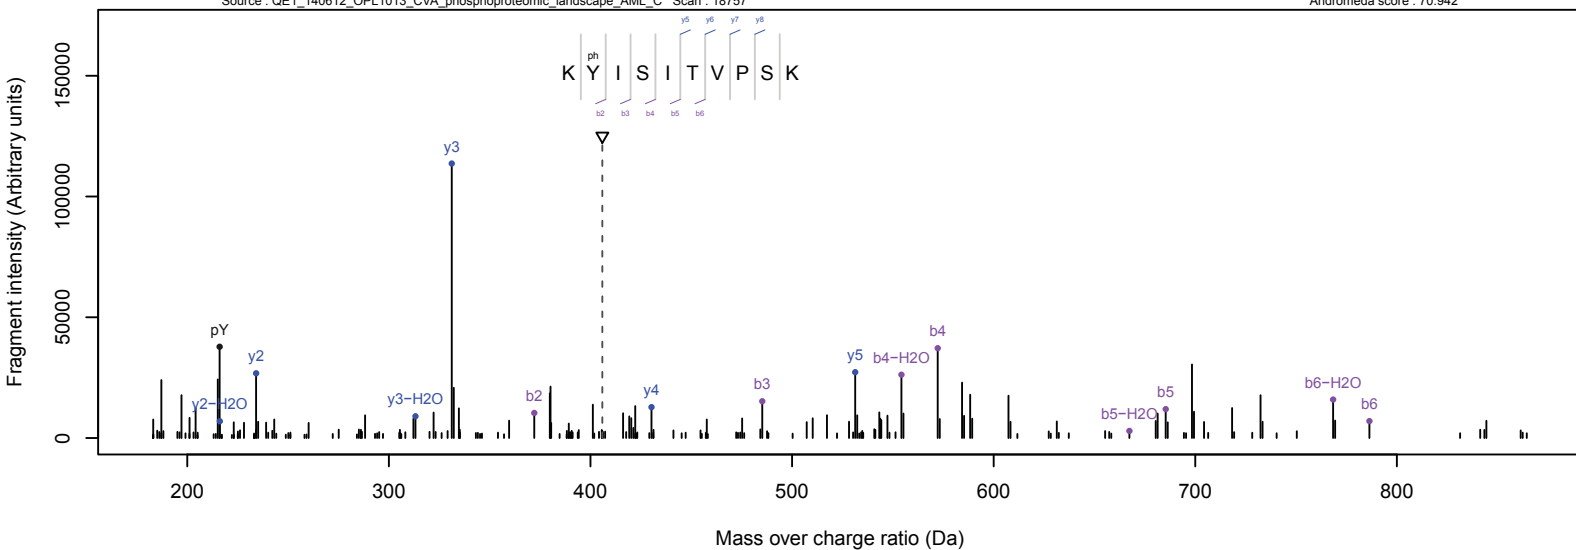

QLKDKQY(ph)FLQR-2+

Source : QE1\_140612\_OPL1013\_CVA\_phosphoproteomic\_landscape\_AML\_C Scan : 18624

Andromeda score : 70.942

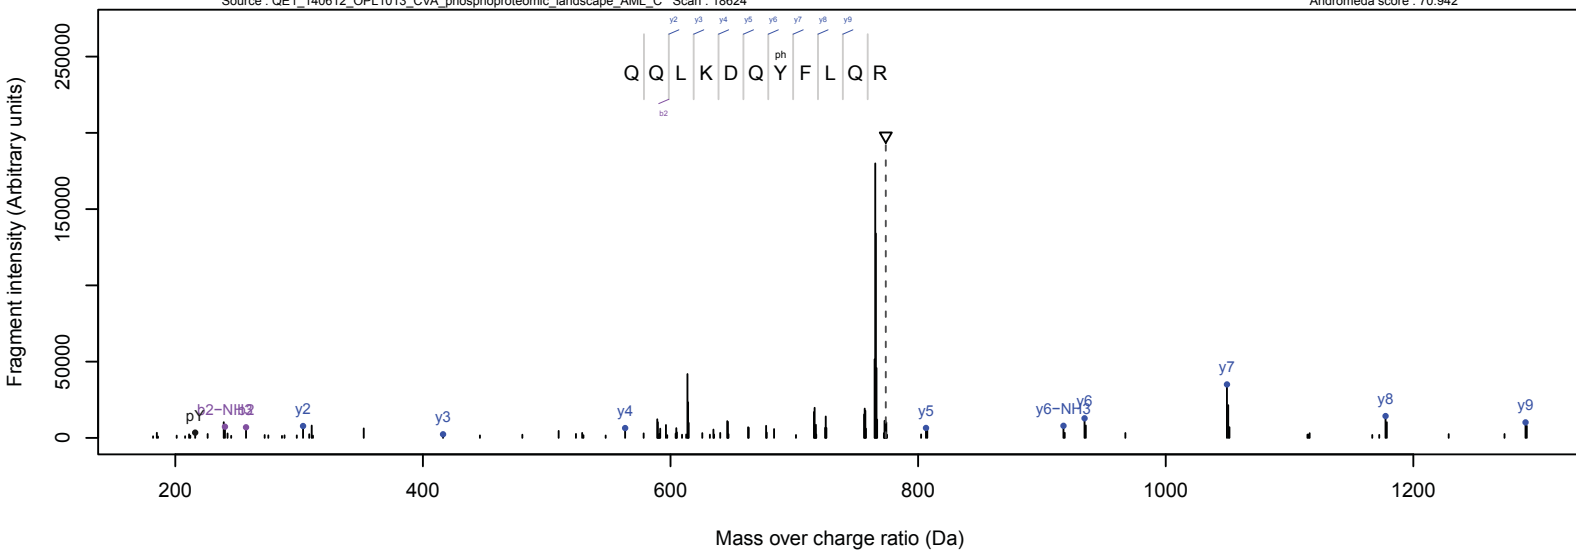

Y(ph)FDSGDYNM(ox)AK-2+

Source : QE1\_140612\_OPL1013\_CVA\_phosphoproteomic\_landscape\_AML\_C Scan : 16627

Andromeda score : 70.942

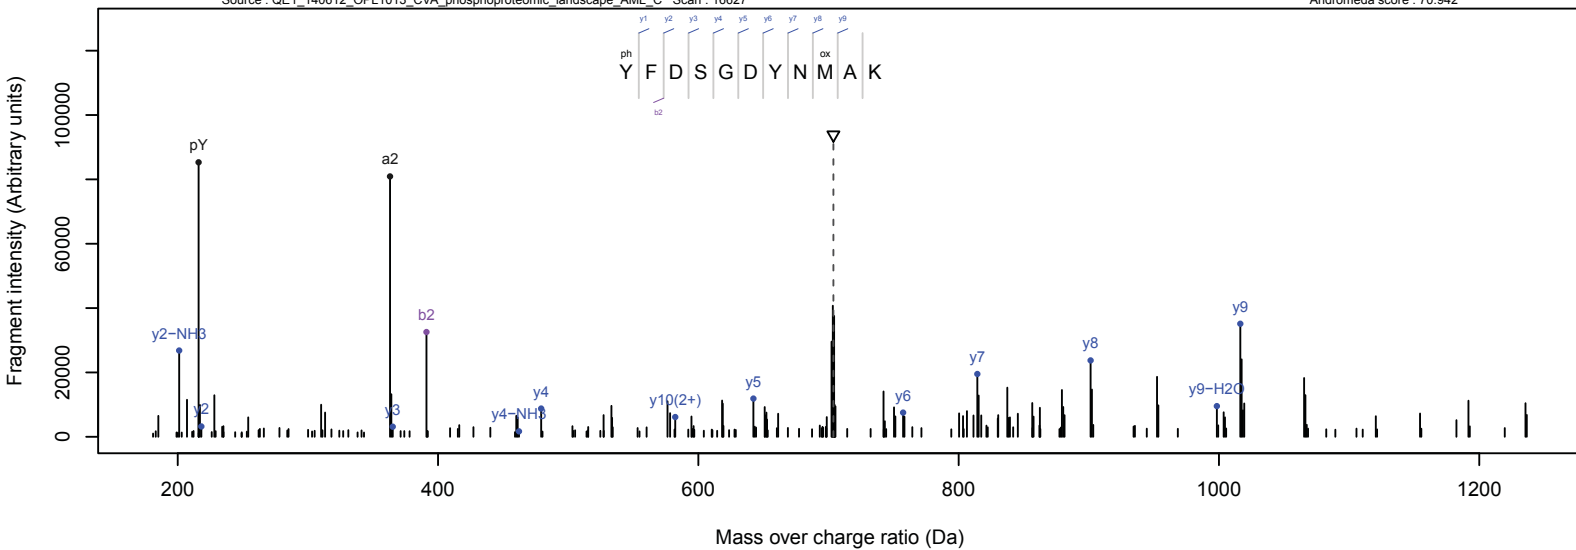

YTG<sup>(ph)</sup>LCR-2+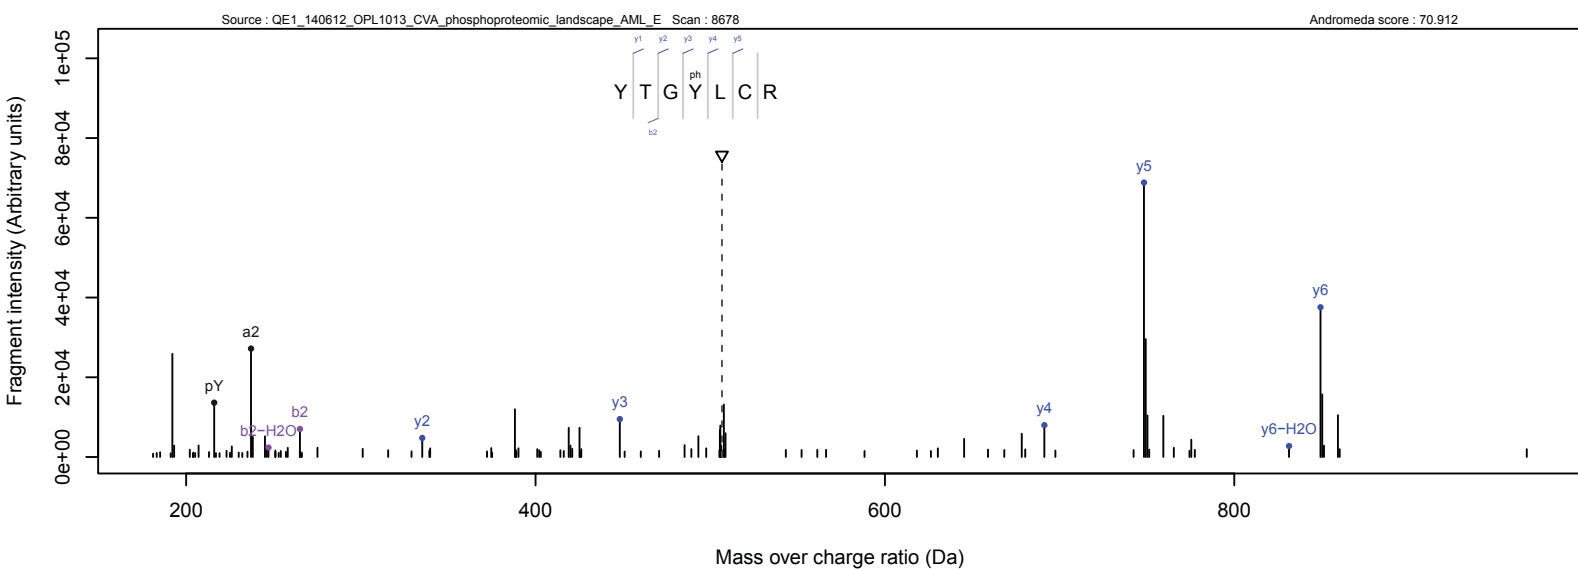HY<sup>(ph)</sup>PVFENPK-2+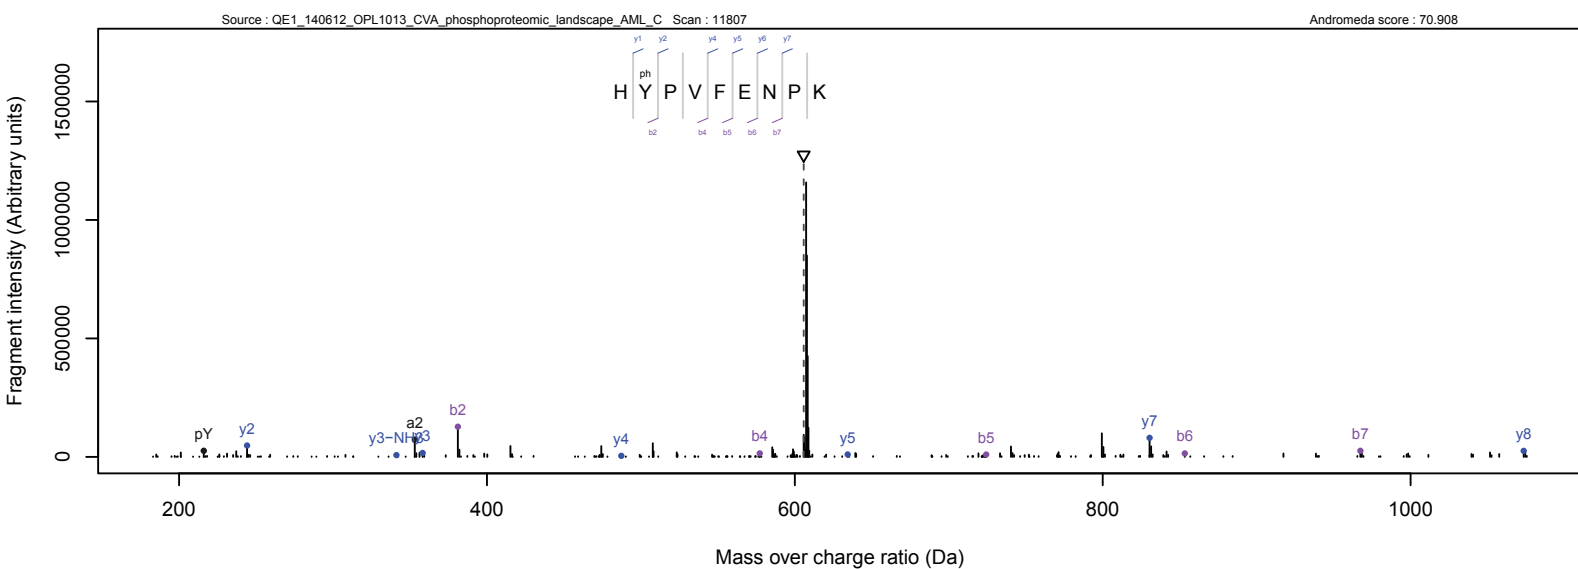IAIY<sup>(ph)</sup>ELLFK-2+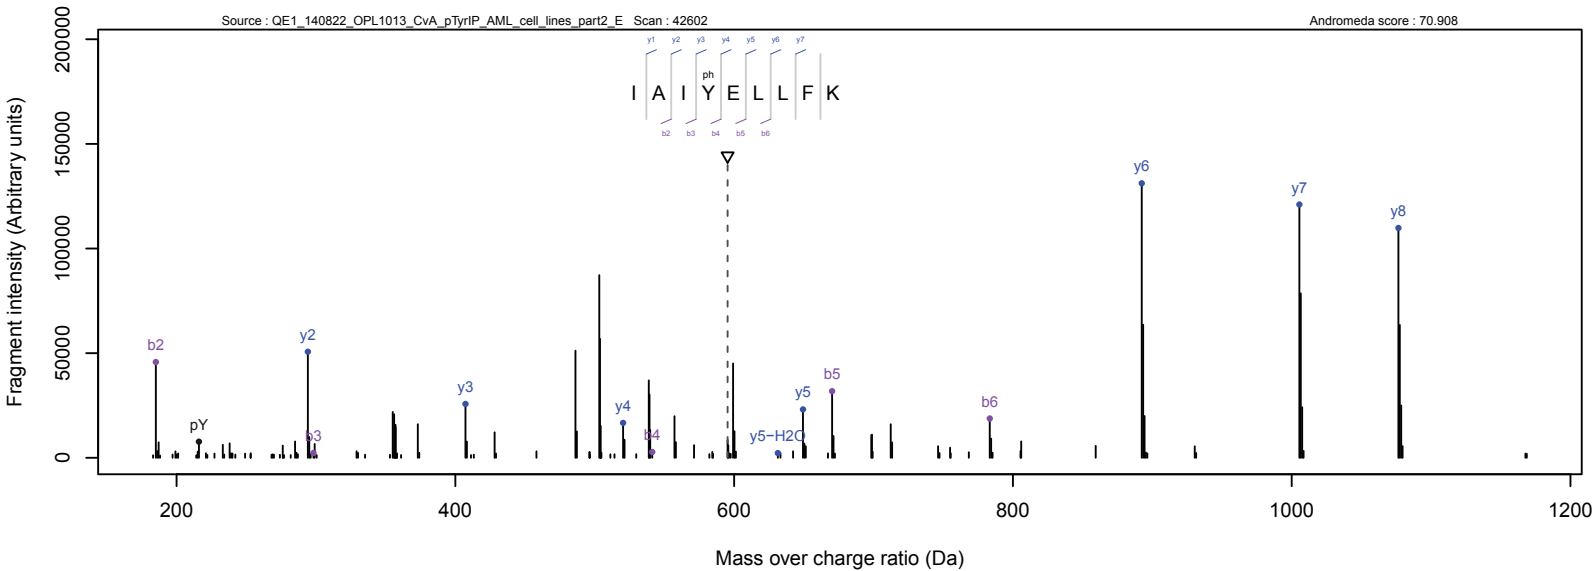



## DHVVEGEPY(ph)AGYDR-2+

Source : QE1\_140908\_OPL1013\_CvA\_pTyrIP\_AML\_Kasumi6 Scan : 14044

Andromeda score : 70.889

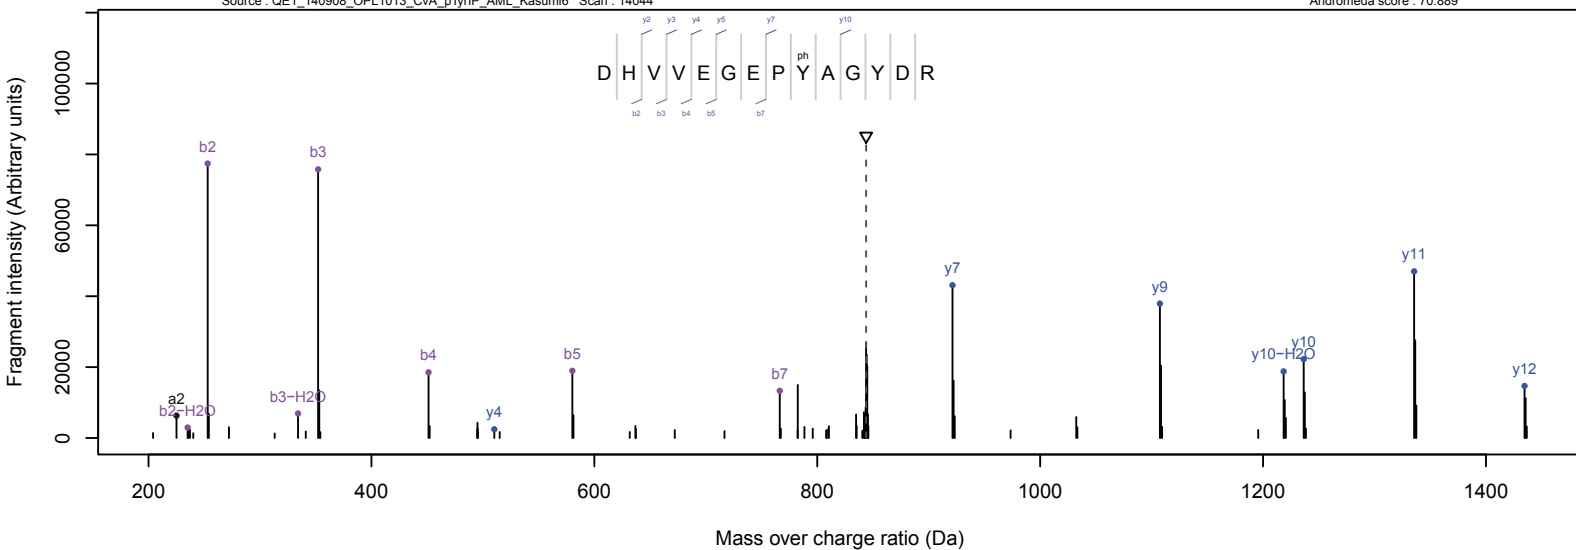

## ISSPHTSLY(ph)VFVR-3+

Source : QE1\_140908\_OPL1013\_CvA\_pTyrIP\_AML\_Kasumi6 Scan : 33320

Andromeda score : 70.889

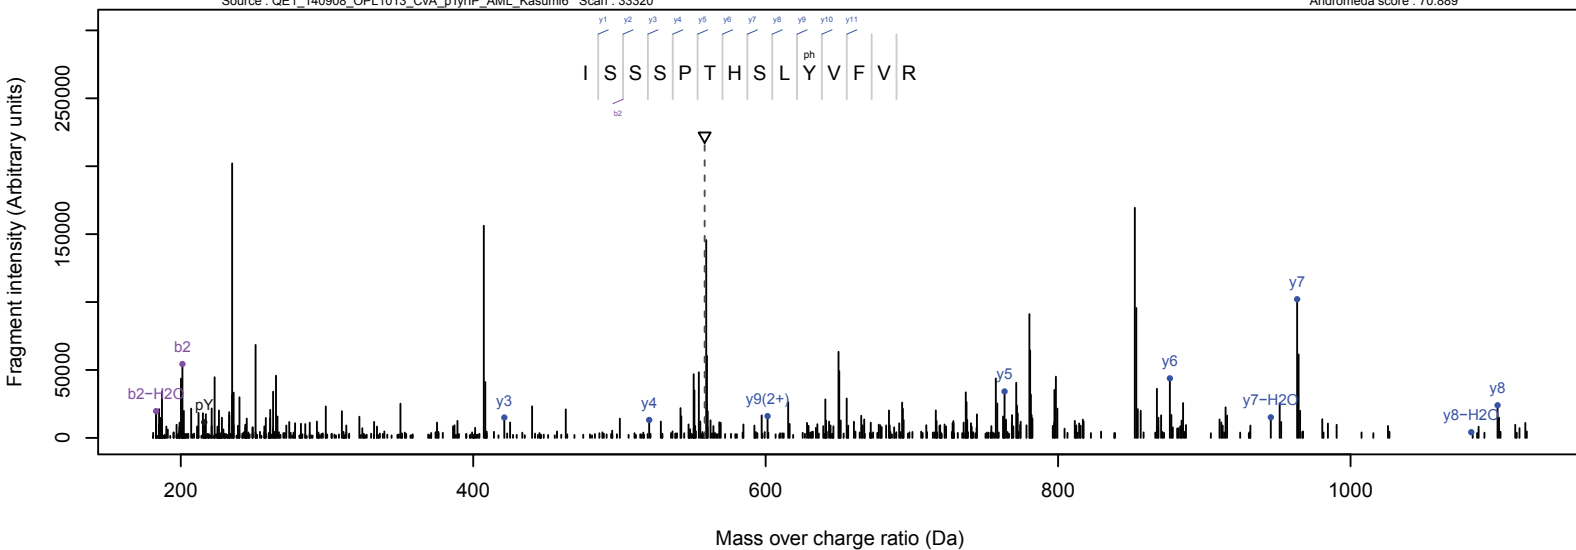

## LAY(ph)INPDLALEEK-2+

Source : QE1\_140908\_OPL1013\_CvA\_pTyrIP\_AML\_HEL Scan : 36687

Andromeda score : 70.889

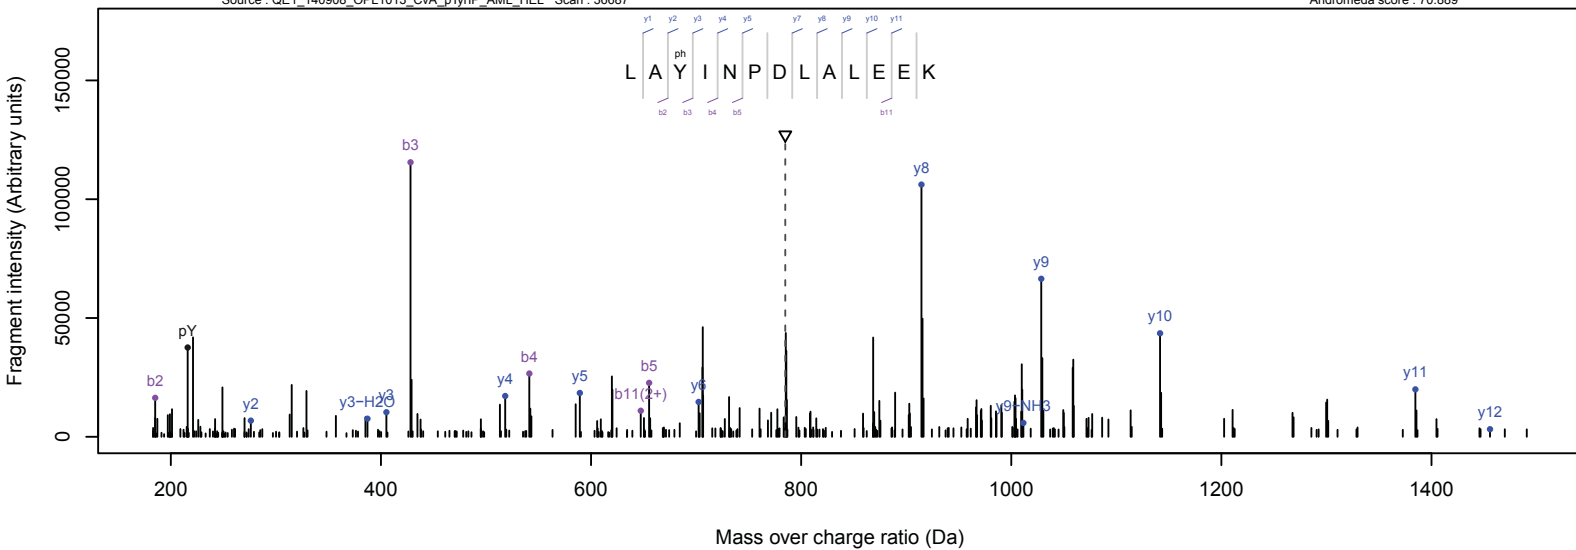

## NY(ph)QVTNSMFGASR-2+

Source : QE1\_140612\_OPL1013\_CVA\_phosphoproteomic\_landscape\_AML\_C Scan : 21467

Andromeda score : 70.889

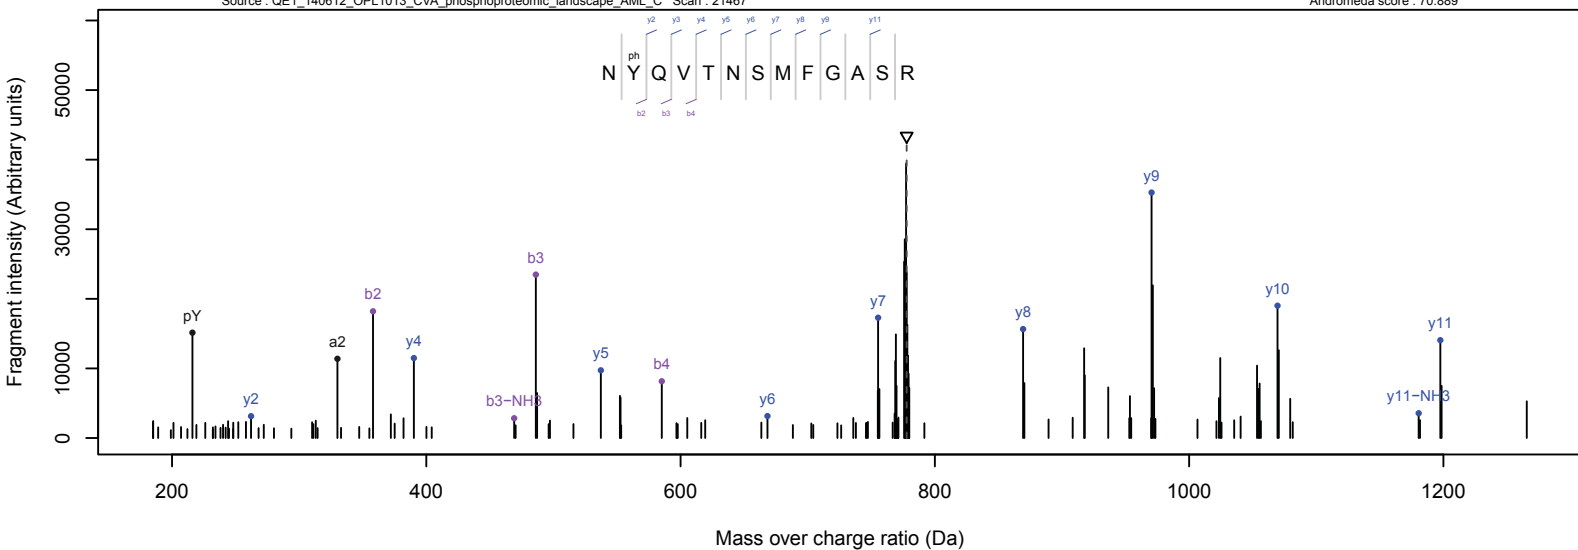

## TECYG(ph)ALGDATR-2+

Source : QE1\_140612\_OPL1013\_CVA\_phosphoproteomic\_landscape\_AML\_B Scan : 18482

Andromeda score : 70.889

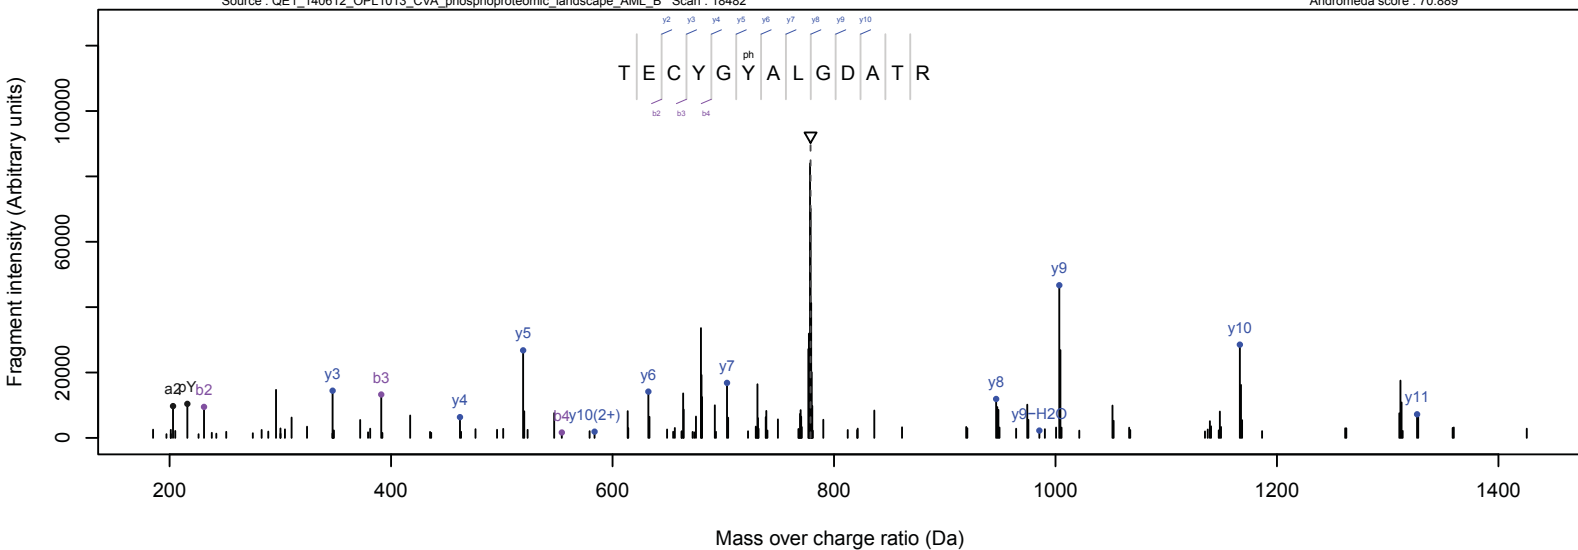

## IQCPNQGEAVY(ph)SSVSLK-2+

Source : QE1\_140908\_OPL1013\_CvA\_pTyrIP\_AML\_Kasumi1 Scan : 25087

Andromeda score : 70.837

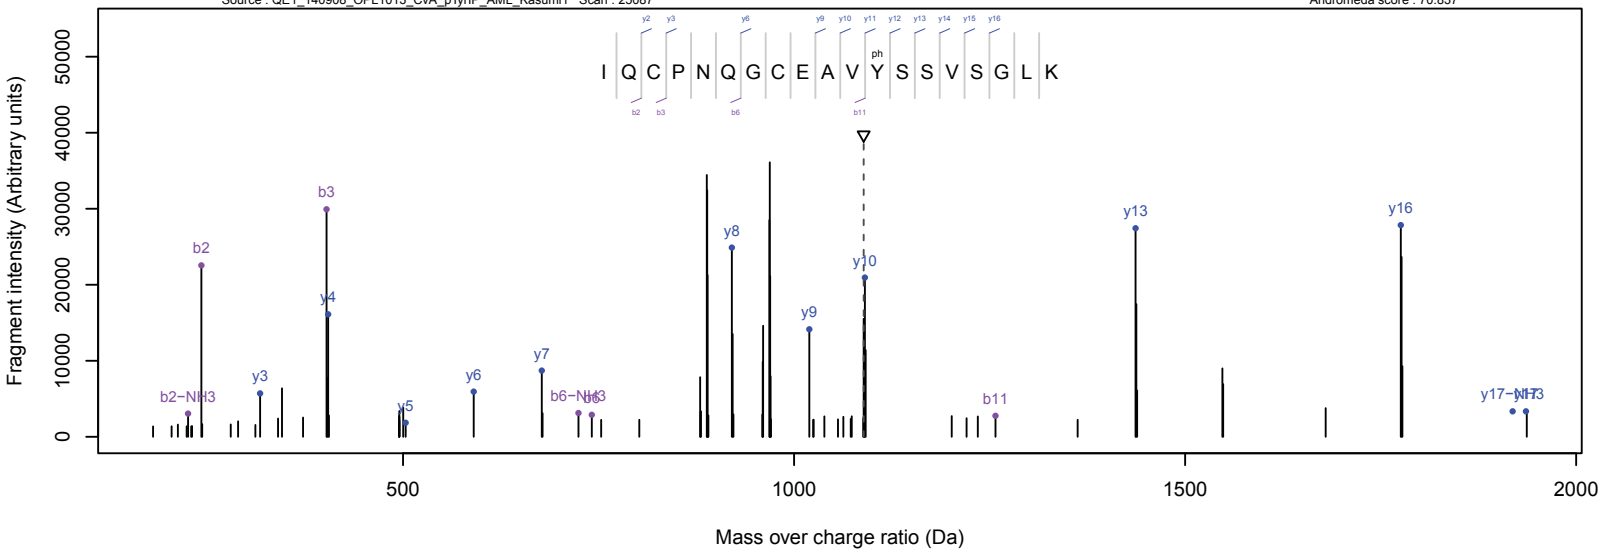

SGRDYS(ph)TVSASPTALSTLK-2+

Source : QE1\_140612\_OPL1013\_CVA\_phosphoproteomic\_landscape\_AML\_B Scan : 23122

Andromeda score : 70.837

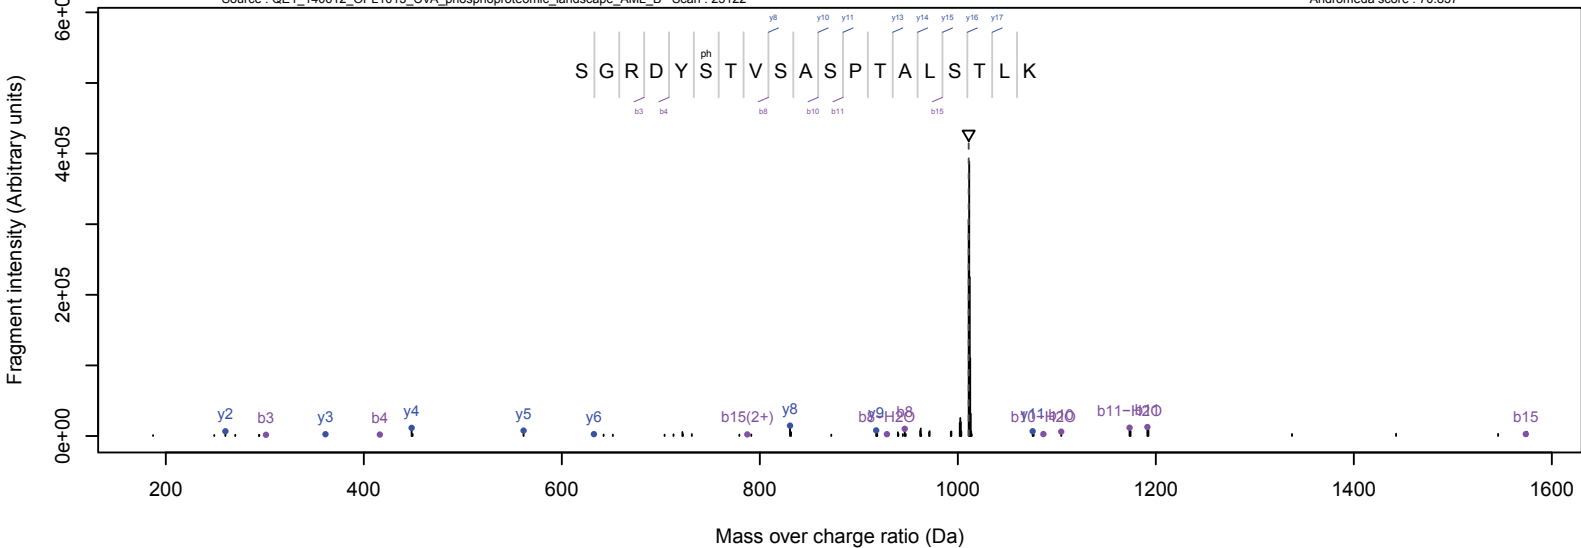

Y(ph)GDGGSTFQSTTGHCVHMR-3+

Source : QE1\_140612\_OPL1013\_CVA\_phosphoproteomic\_landscape\_AML\_C Scan : 12345

Andromeda score : 70.837

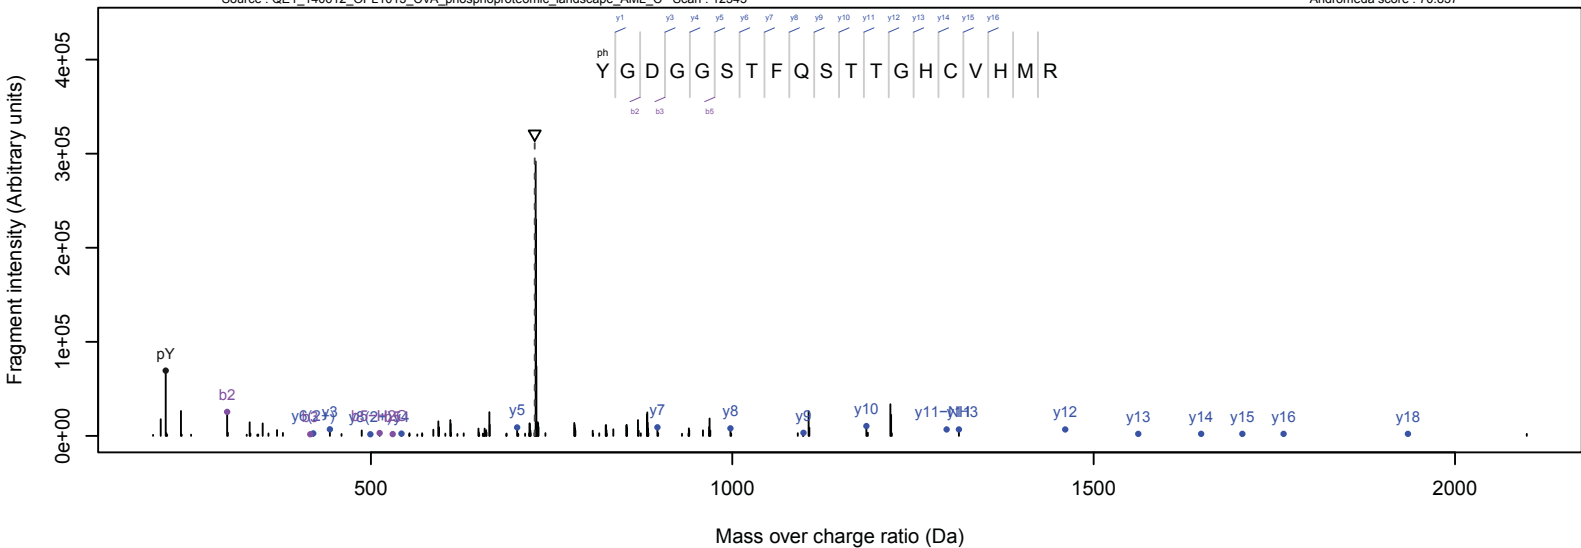

VELQELNDRFANYIDK-2+

Source : QE1\_140612\_OPL1013\_CVA\_phosphoproteomic\_landscape\_AML\_C Scan : 37211

Andromeda score : 70.802

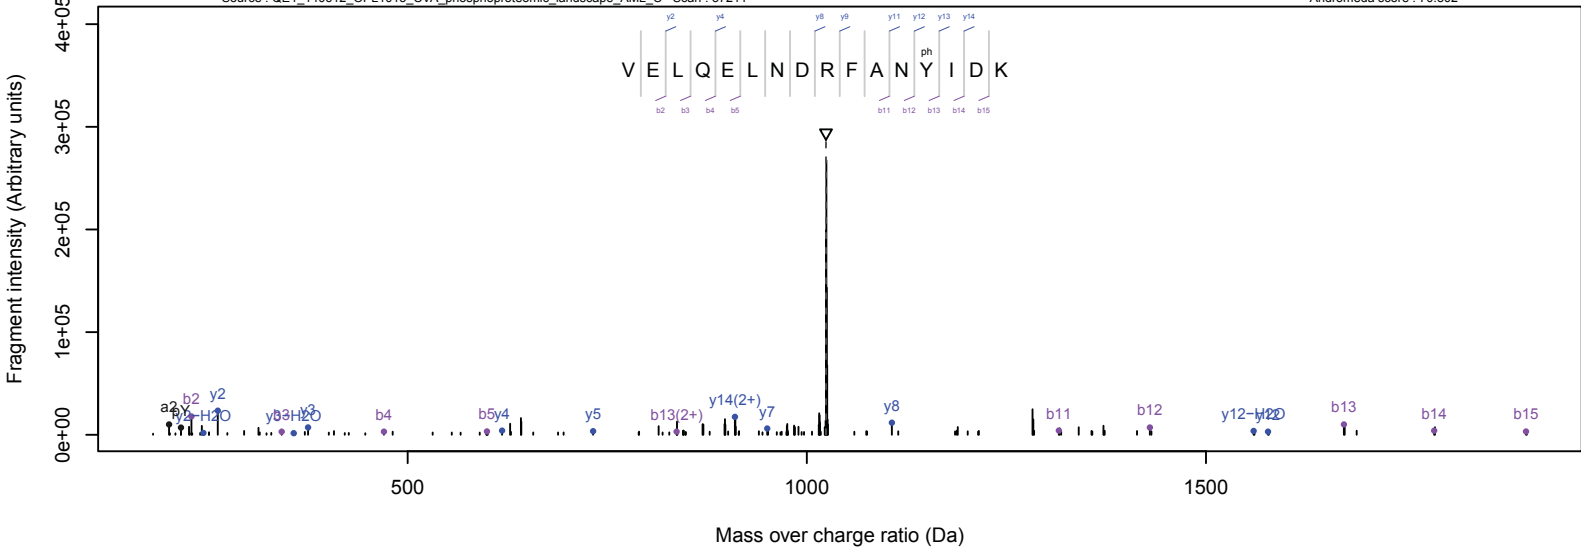

## FLELLPKDSY(ph)YNMLLK-3+

Source : QE1\_140612\_OPL1013\_CVA\_phosphoproteomic\_landscape\_AML\_C Scan : 44356

Andromeda score : 70.783

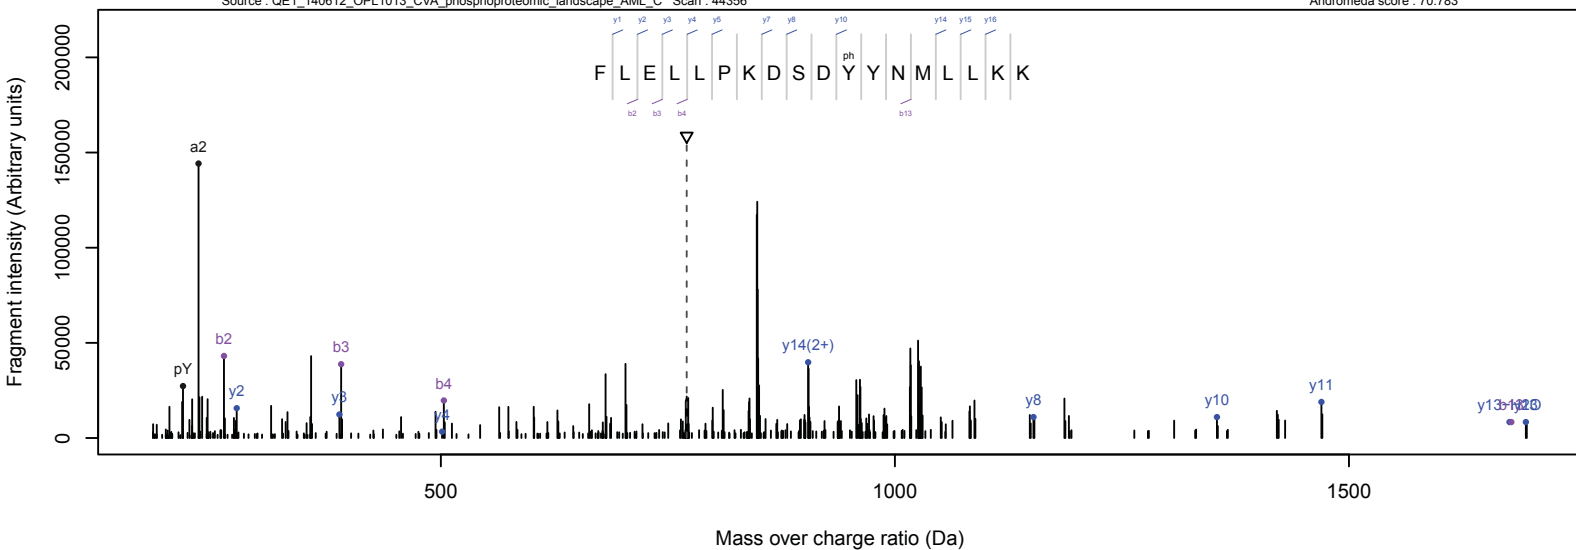

## SMTLPSY(ph)RPAPLVSGDLR-3+

Source : QE1\_140612\_OPL1013\_CVA\_phosphoproteomic\_landscape\_AML\_C Scan : 33283

Andromeda score : 70.783

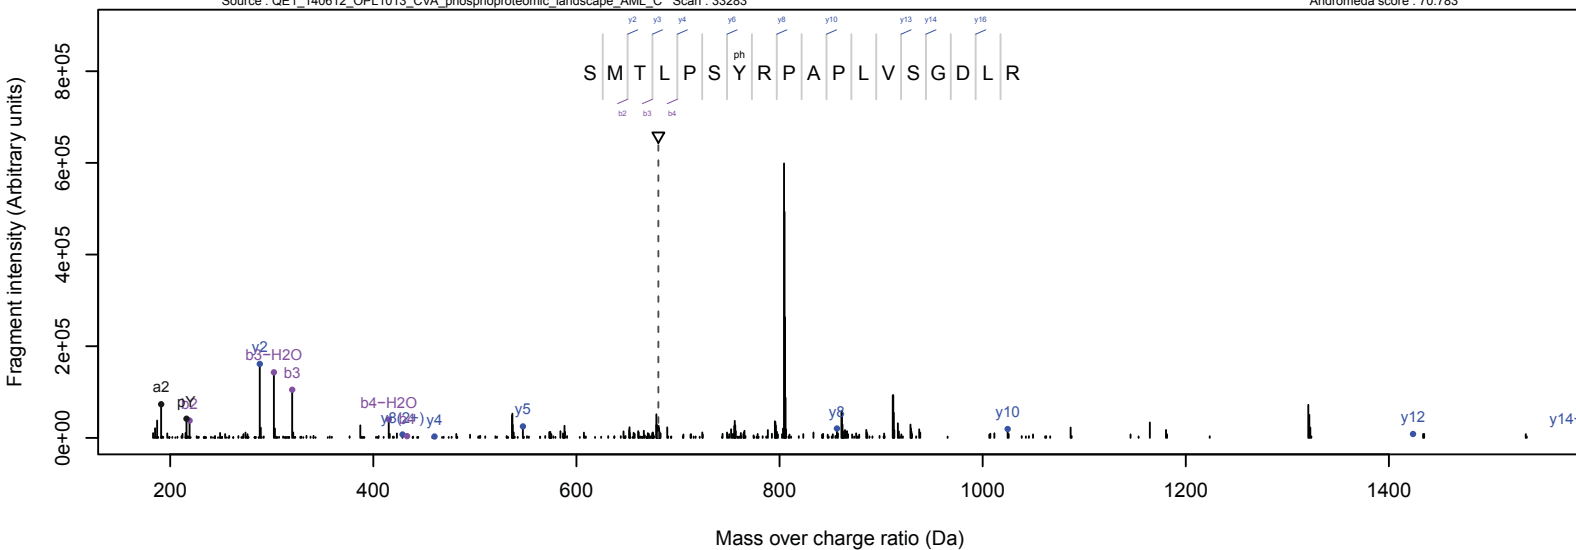

## TADKHKDVIINQEGEY(ph)IK-3+

Source : QE1\_140908\_OPL1013\_CvA\_pTyrIP\_AML\_HEL Scan : 14106

Andromeda score : 70.783

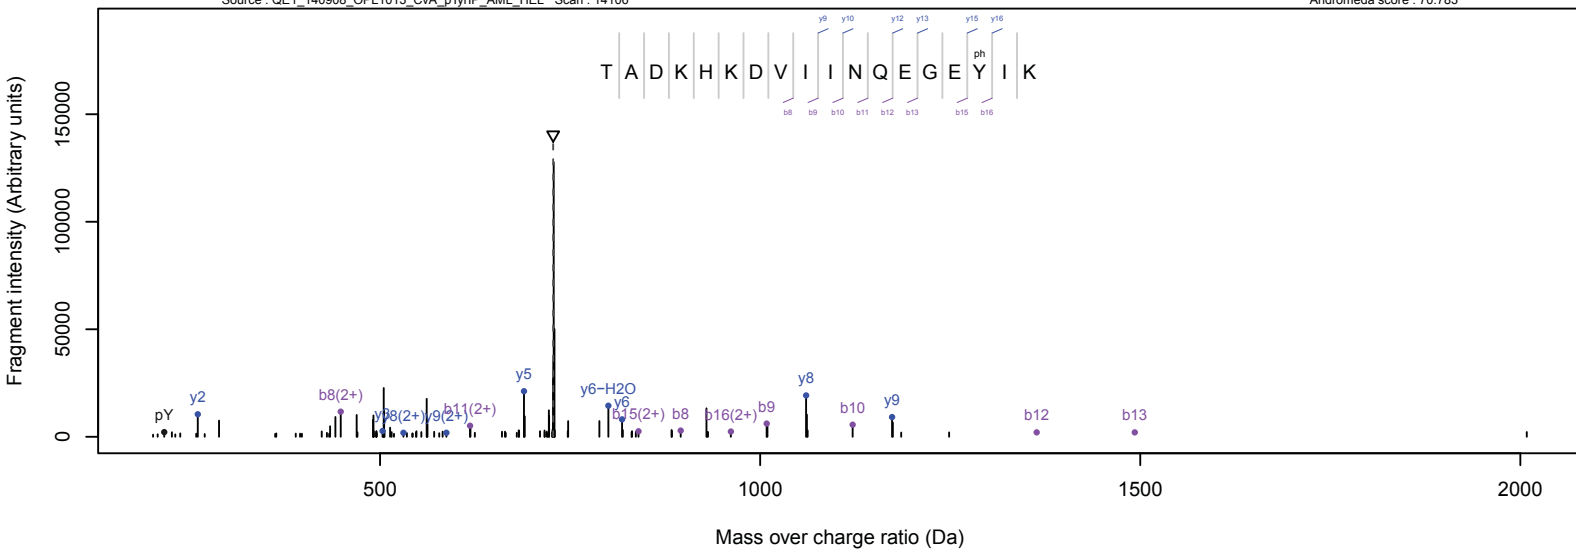

**GFGDGYNGY(ph)GGPGGGNFGGSPGYGGGR-2+**

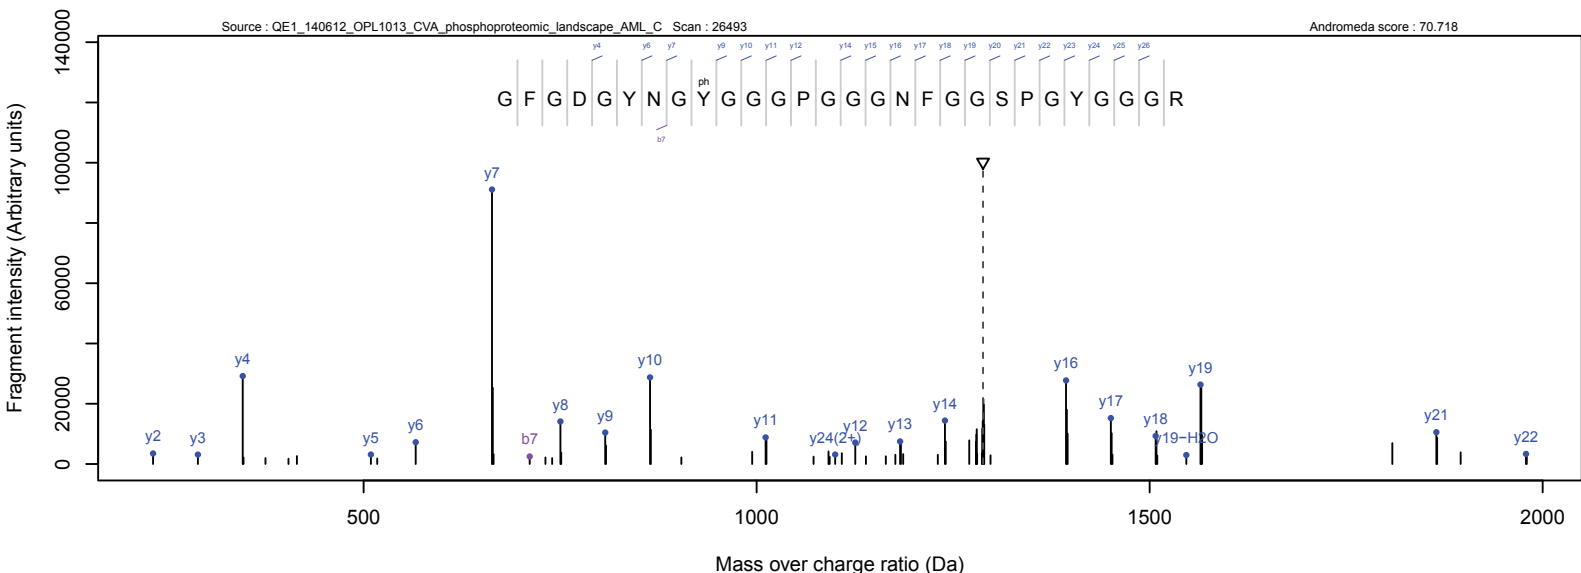

**EVCDGWSLANHEY(ph)FALQHADSSNFYITEK-4+**

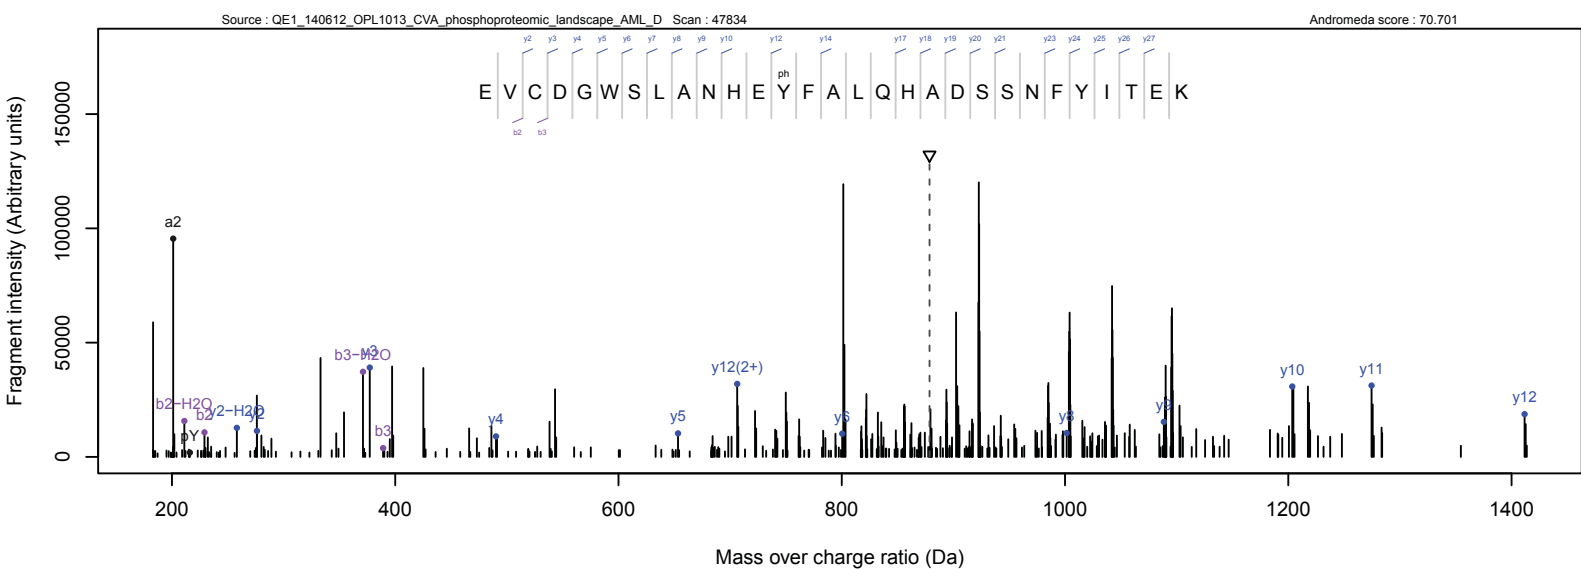

**MNLGVGAYRDDNGKPYVLPVSR-3+**

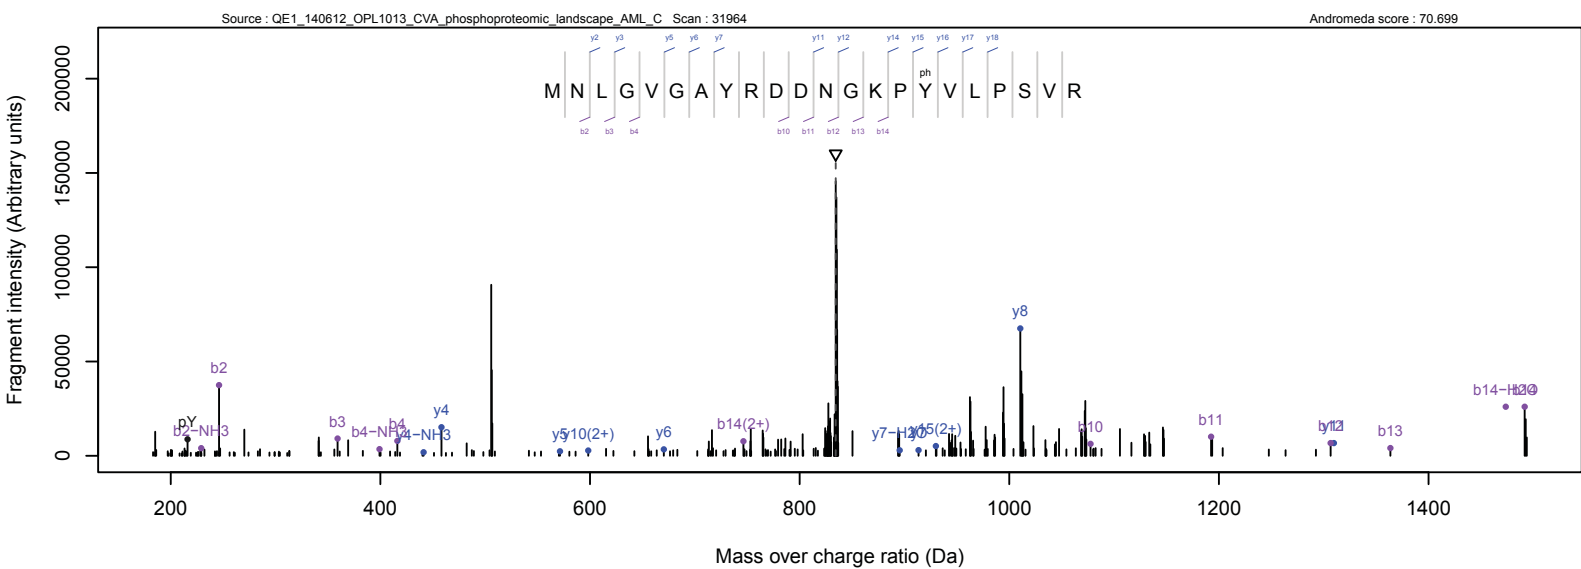

## YMSNTY(ph)EQLSK-2+

Source : QE1\_140612\_OPL1013\_CVA\_phosphoproteomic\_landscape\_AML\_D Scan : 12146

Andromeda score : 70.685

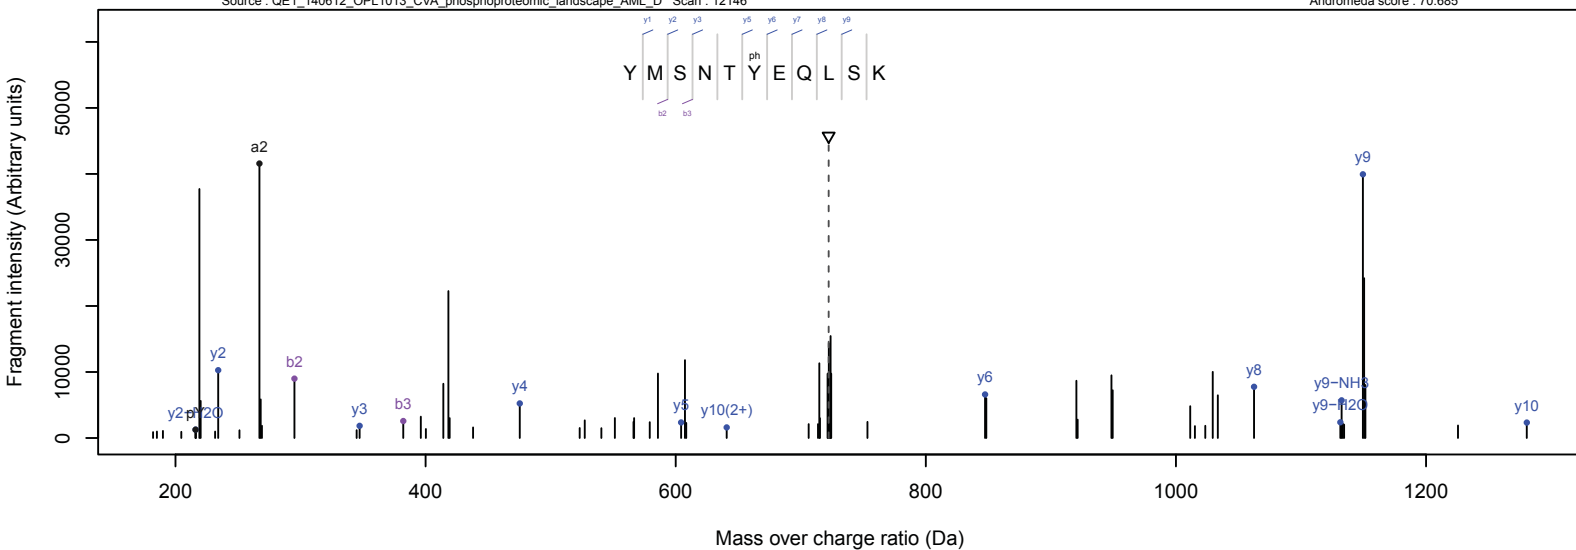

Mass over charge ratio (Da)

## SITNNSDPFLNGGPYHSR-3+

Source : QE1\_140612\_OPL1013\_CVA\_phosphoproteomic\_landscape\_AML\_C Scan : 22256

Andromeda score : 70.555

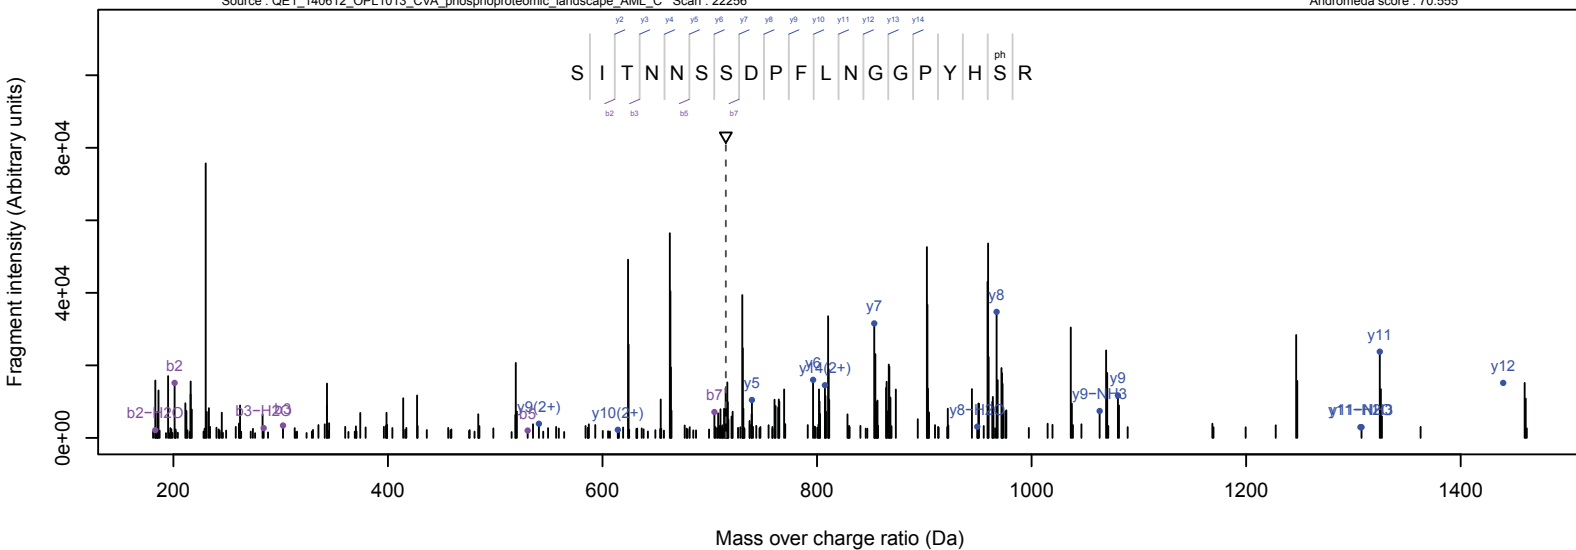

Mass over charge ratio (Da)

## TSFY(ph)LPKDAVK-2+

Source : QE1\_140908\_OPL1013\_CvA\_pTyrIP\_AML\_HEL Scan : 25158

Andromeda score : 70.54

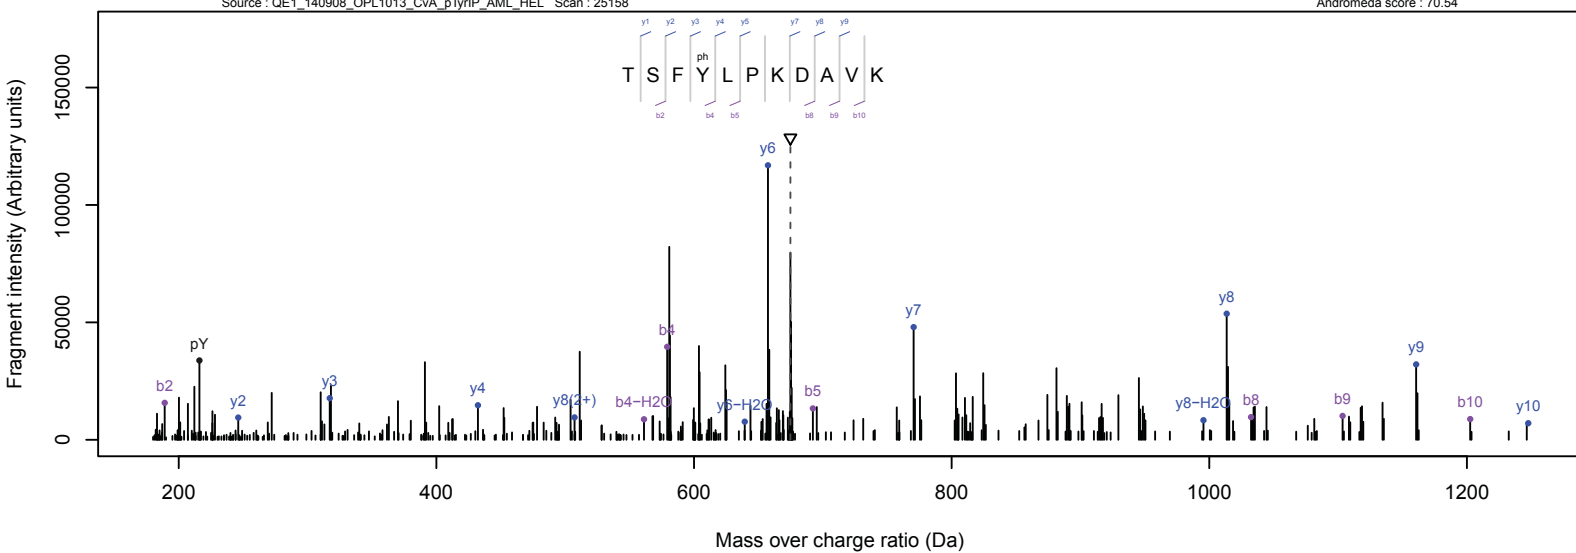

Mass over charge ratio (Da)

**AA Y(ph)LNMS EDP SHP S M A L N T R**

Source : QE1\_140612\_OPL1013\_CVA\_phosphoproteomic\_landscape\_AML\_D Scan : 27763

Andromeda score : 70.538

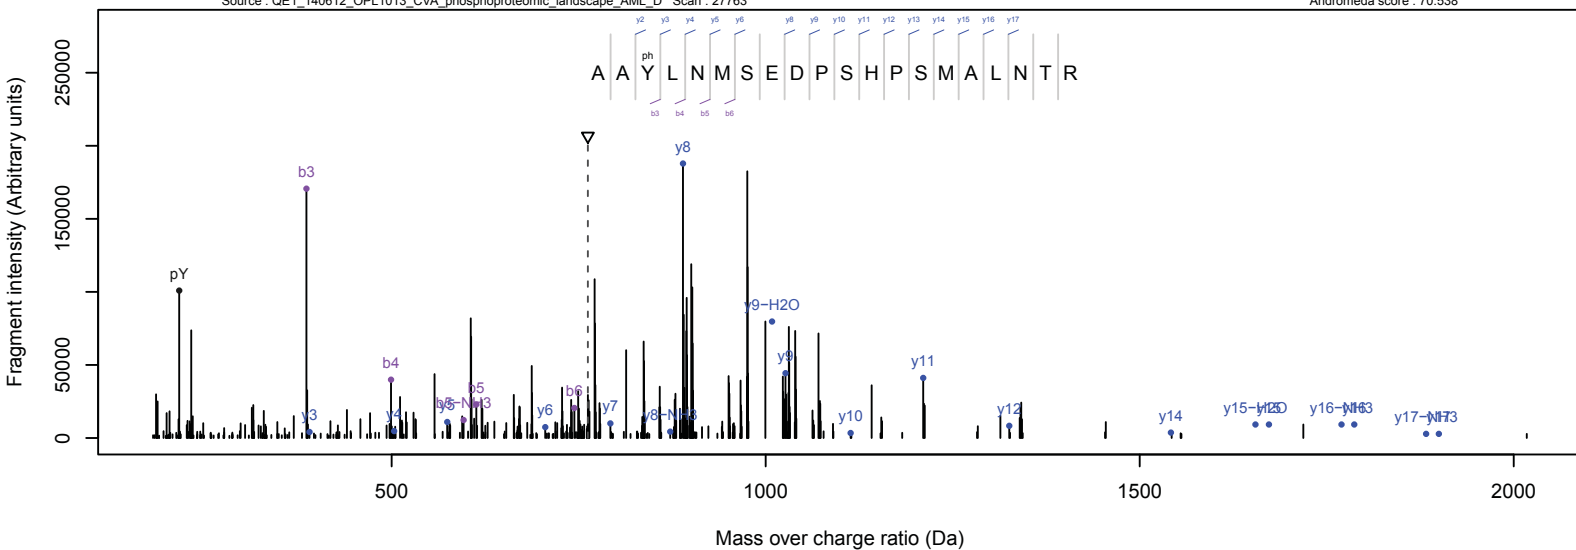

**IEGL Y(ph) P P R**

Source : QE1\_140612\_OPL1013\_CVA\_phosphoproteomic\_landscape\_AML\_C Scan : 24820

Andromeda score : 70.525

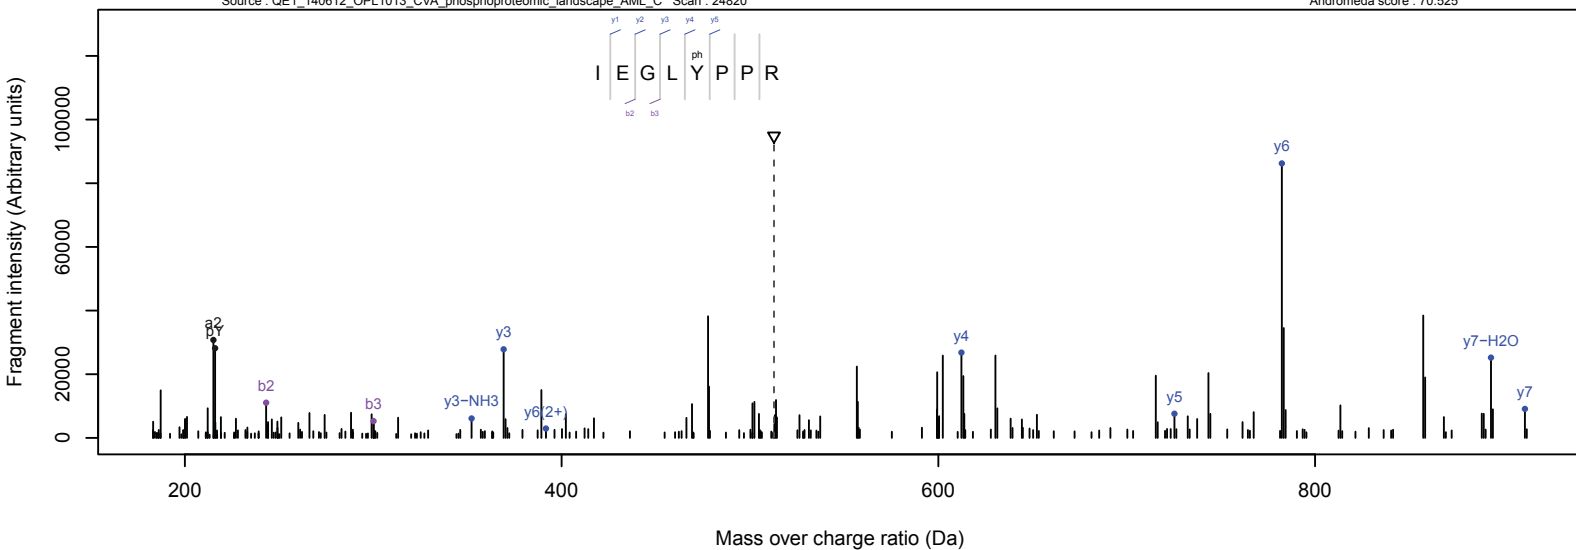

**REEPEAL Y(ph) AAVNKK**

Source : QE1\_140908\_OPL1013\_CvA\_pTyrIP\_AML\_HEL Scan : 16621

Andromeda score : 70.47

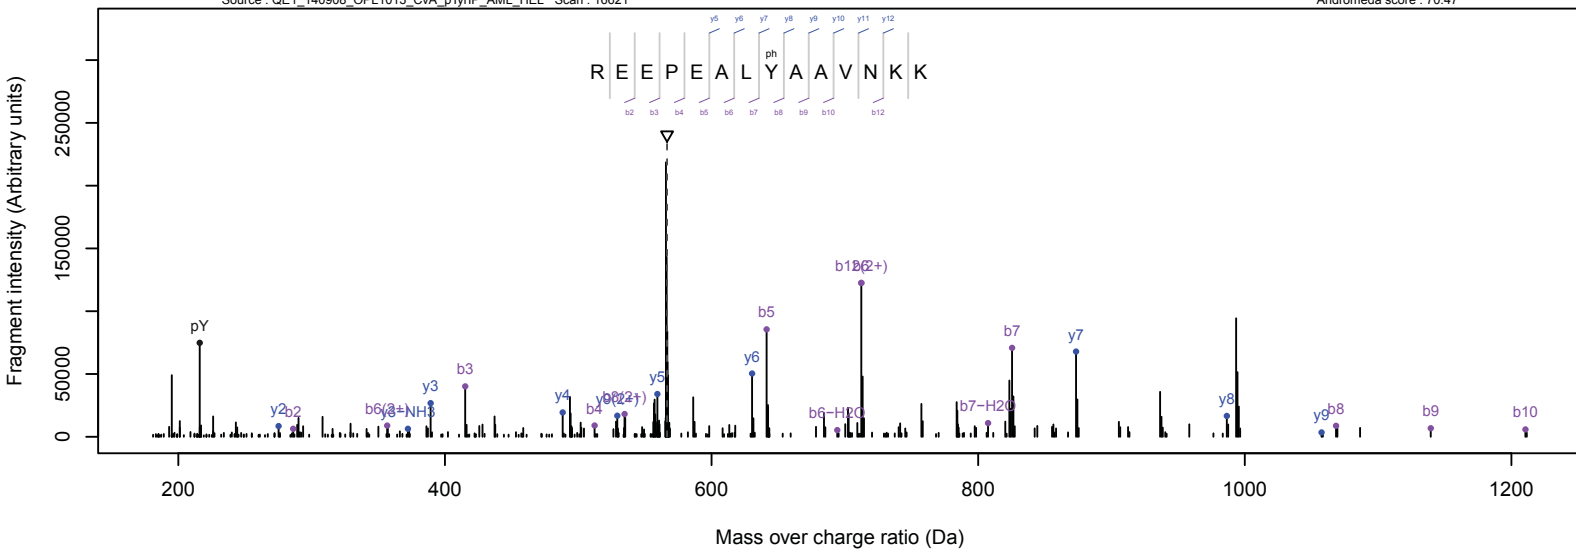

## ELPGPQTEGKAEYASVDR-3+

Source: QE1\_140612\_OPL1013\_CVA\_phosphoproteomic\_landscape\_AML\_B Scan: 47521

Andromeda score: 70.452

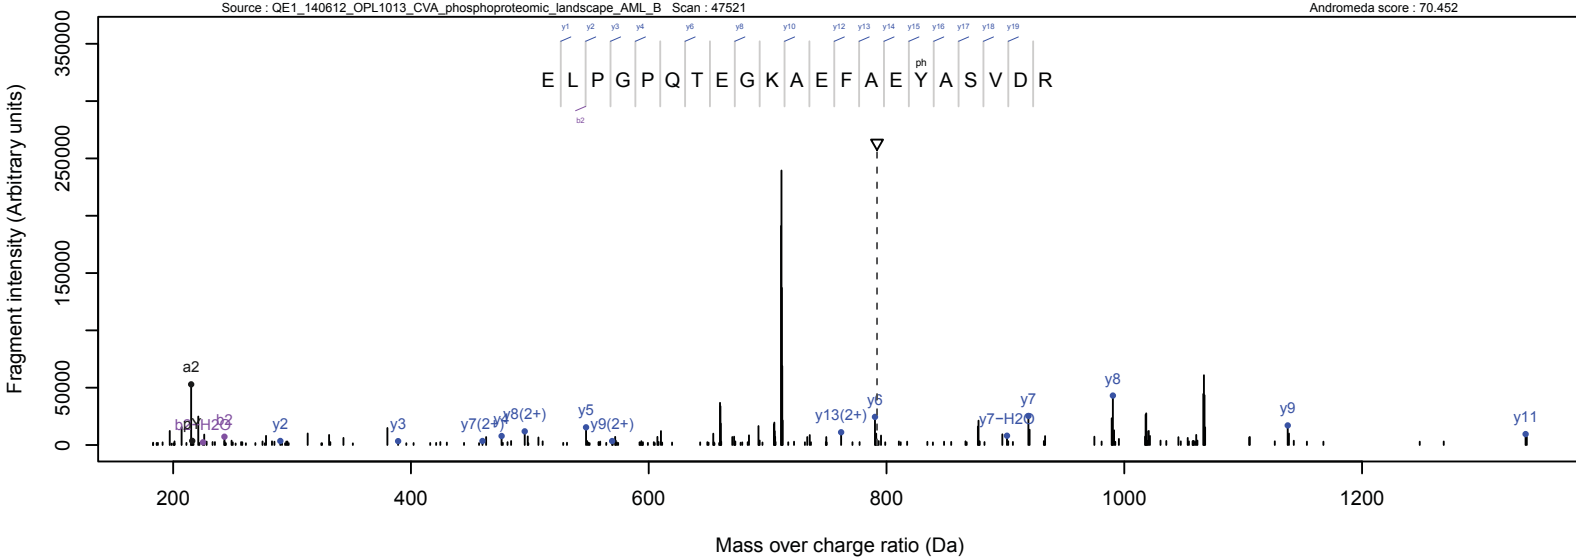

## KNTDKNYLNFVSPDPDVGQK-3+

Source: QE1\_140612\_OPL1013\_CVA\_phosphoproteomic\_landscape\_AML\_C Scan: 39948

Andromeda score: 70.452

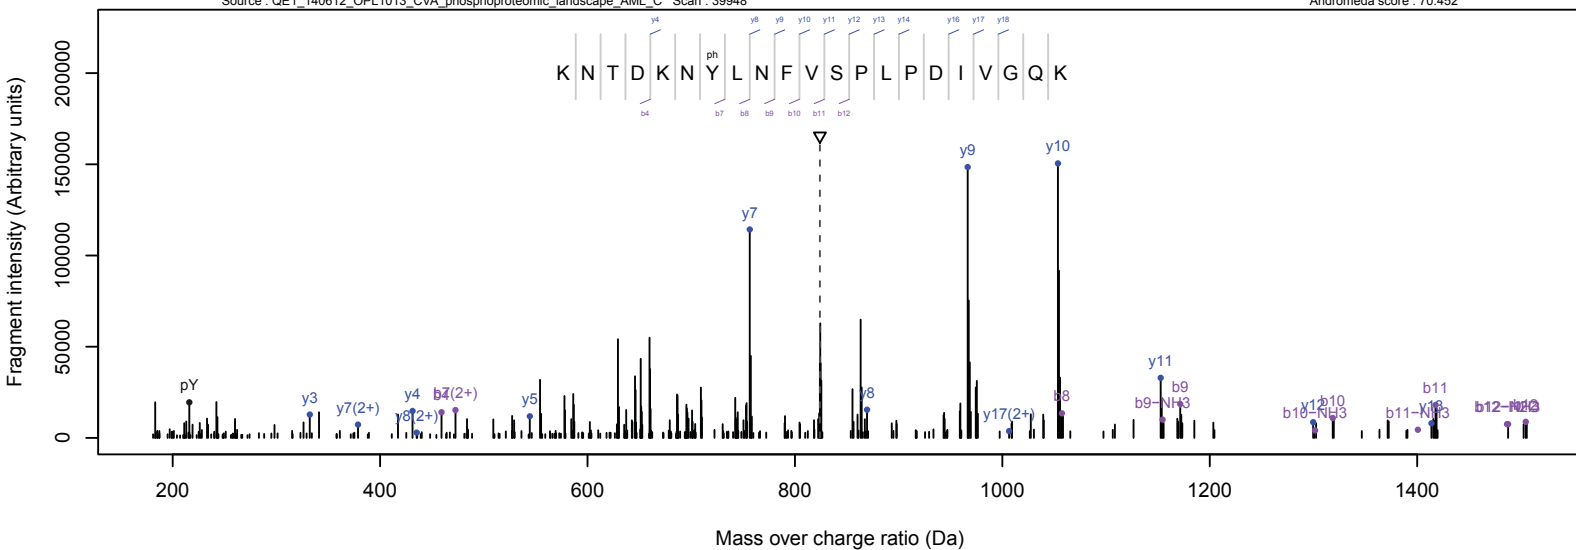

## STAALSGEAASCSPYKAAHSR-3+

Source: QE1\_140612\_OPL1013\_CVA\_phosphoproteomic\_landscape\_AML\_C Scan: 26071

Andromeda score: 70.449

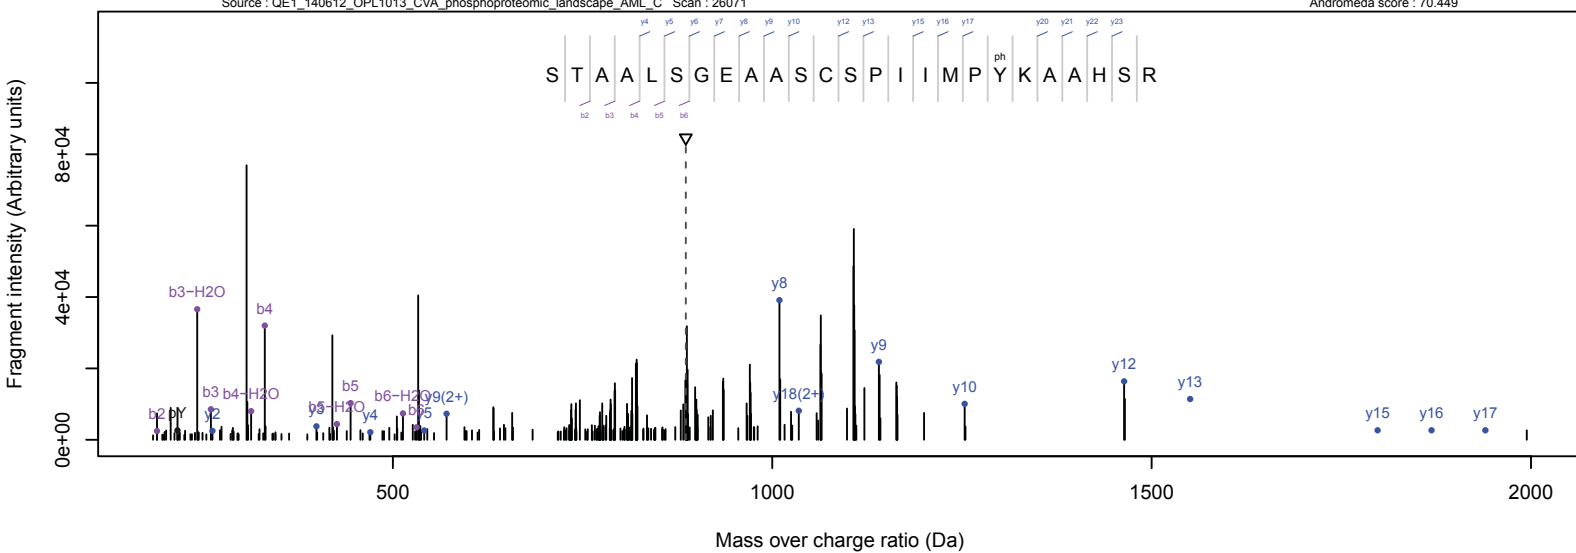



VVLPS(ph)YEEALS LPSK TPEG GPAPPYSEV-3+

Source : QE1\_140908\_OPL1013\_CvA\_pTyrIP\_AML\_HEL Scan : 45592

Andromeda score : 70.449

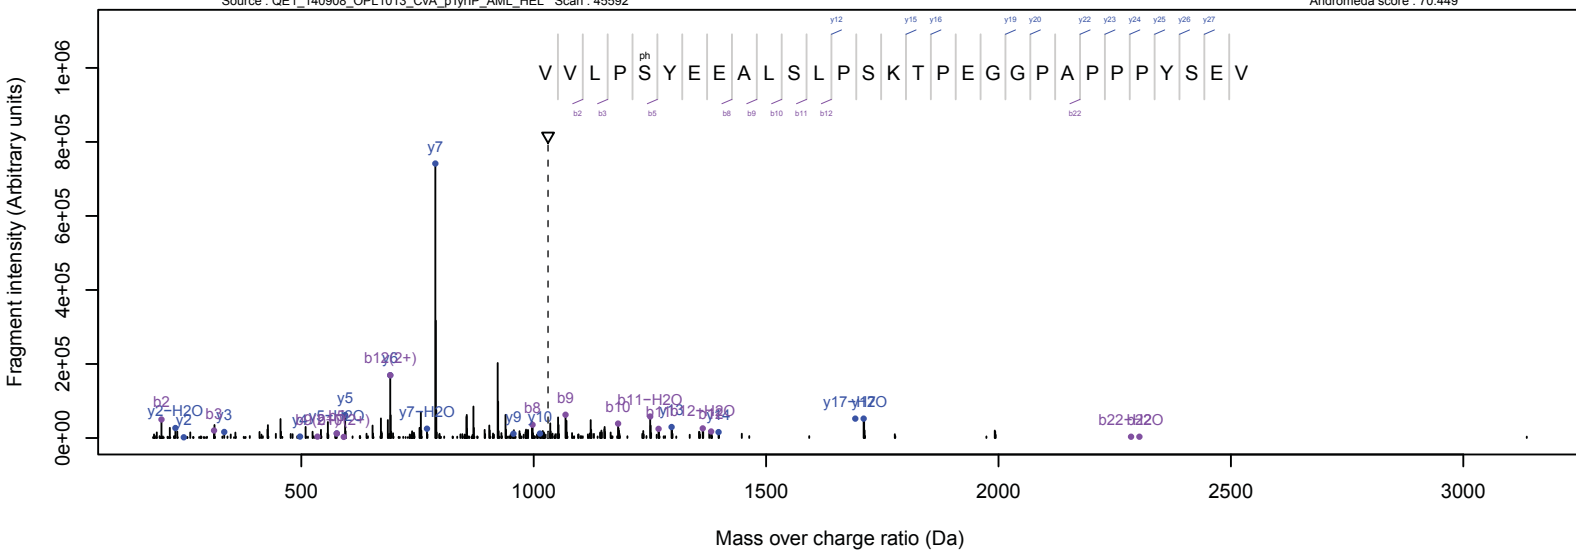

AAPPPGY(ph)HQNGVIR-3+

Source : QE1\_140612\_OPL1013\_CvA\_phosphoproteomic\_landscape\_AML\_C Scan : 10856

Andromeda score : 70.438

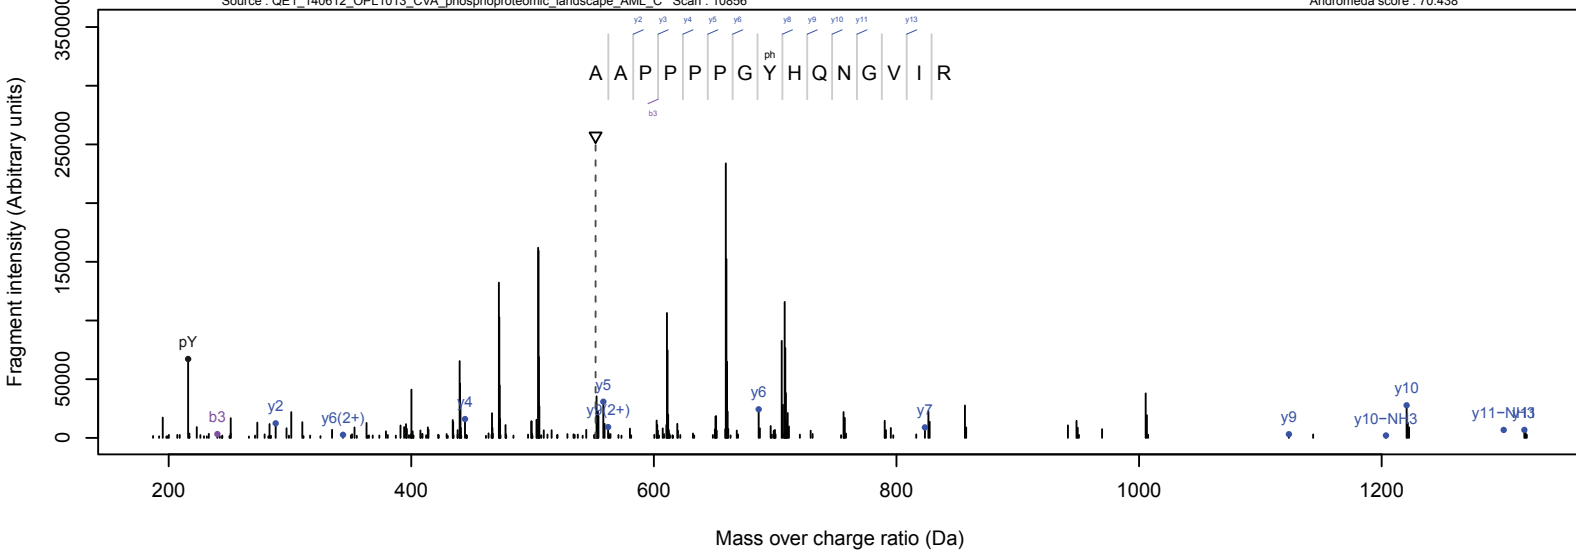

DAYSGAVNLY(ph)HVR-2+

Source : QE1\_140908\_OPL1013\_CvA\_pTyrIP\_AML\_Kasumi1 Scan : 20078

Andromeda score : 70.438

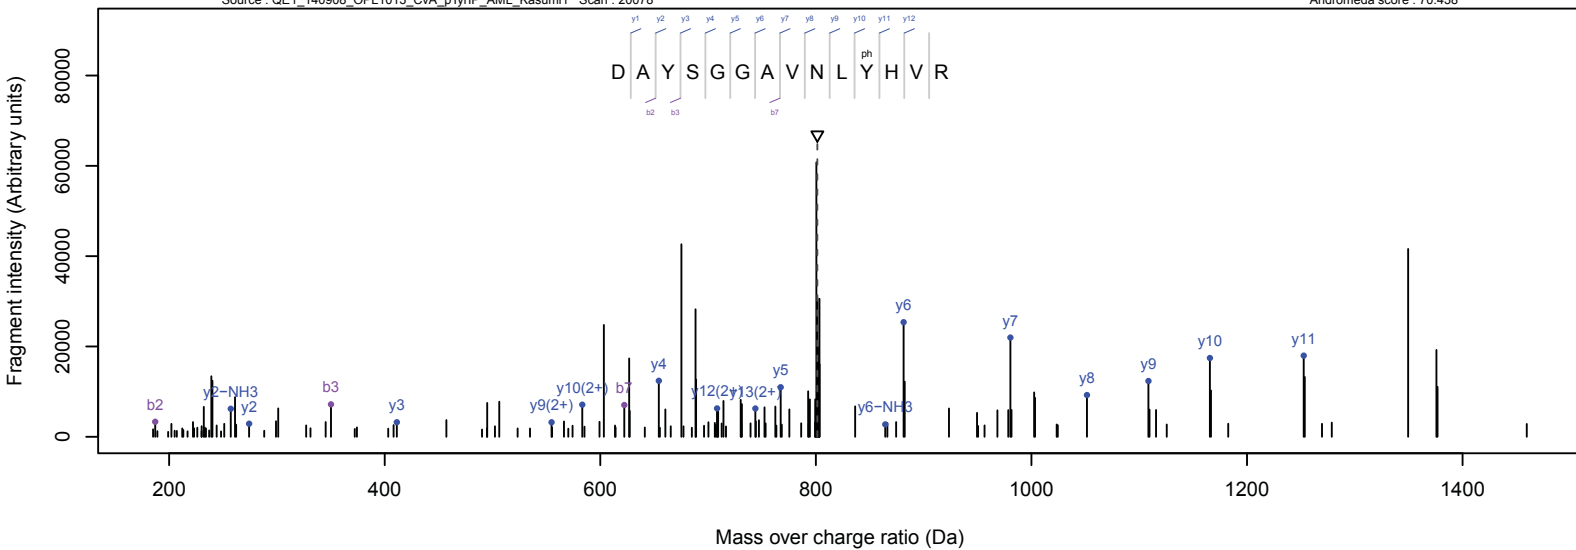

## GDFPGTYVEY(ph)IGR-2+

Source : QE1\_140612\_OPL1013\_CVA\_phosphoproteomic\_landscape\_AML\_A Scan : 36630

Andromeda score : 70.438

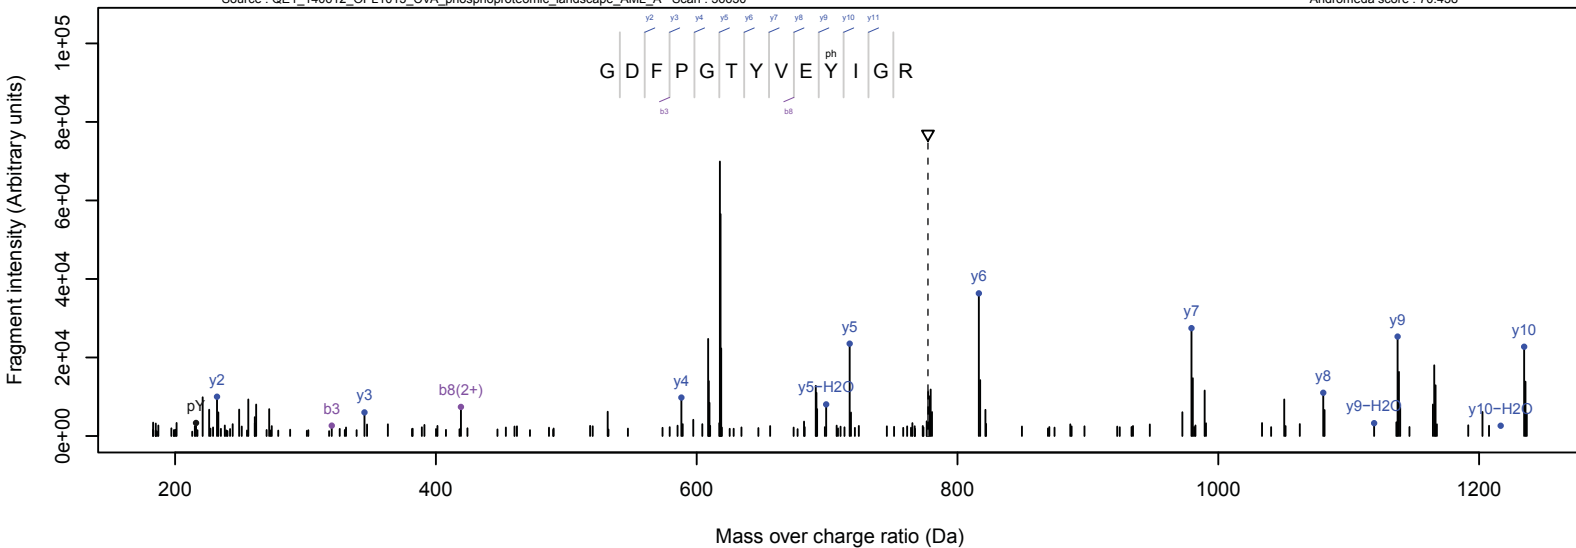

## KSDGIY(ph)IINLK-2+

Source : QE1\_140908\_OPL1013\_CvA\_pTyrIP\_AML\_HEL Scan : 32210

Andromeda score : 70.438

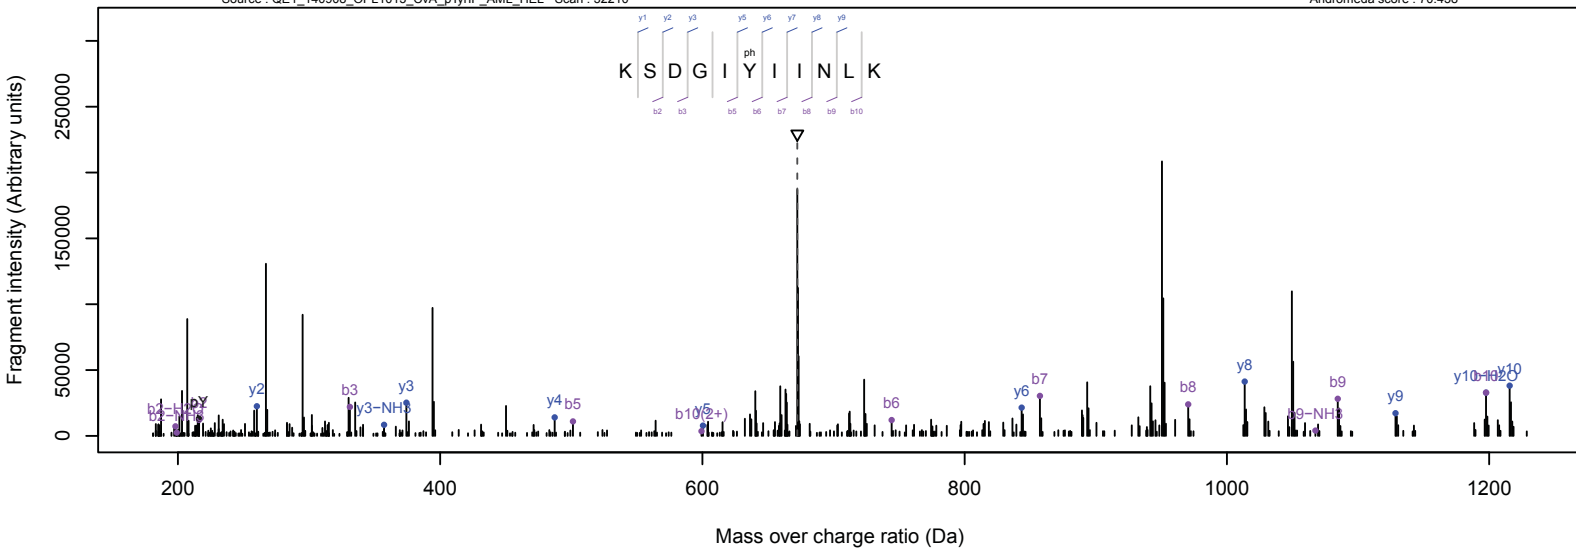

## HIDCAAIY(ph)GNEPEIGEALKEVDVGP GK-3+

Source : QE1\_140612\_OPL1013\_CVA\_phosphoproteomic\_landscape\_AML\_B Scan : 33111

Andromeda score : 70.391

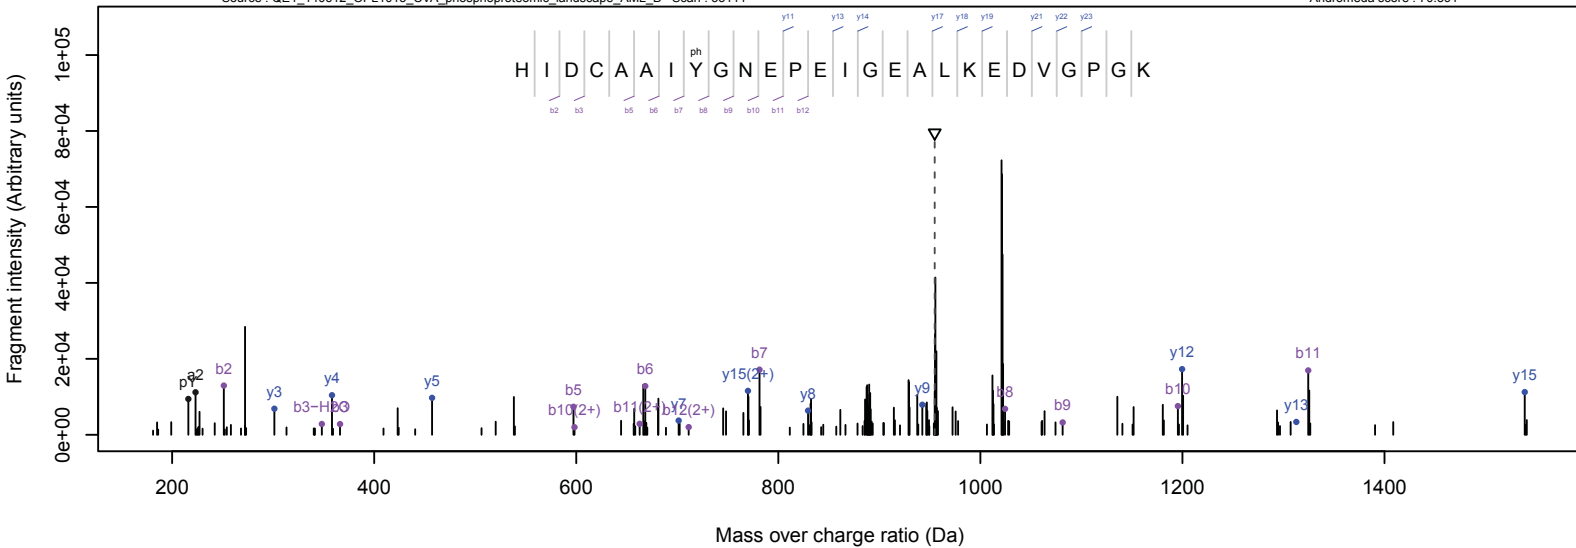

## Y(ph)QLQLRPAQR-3+

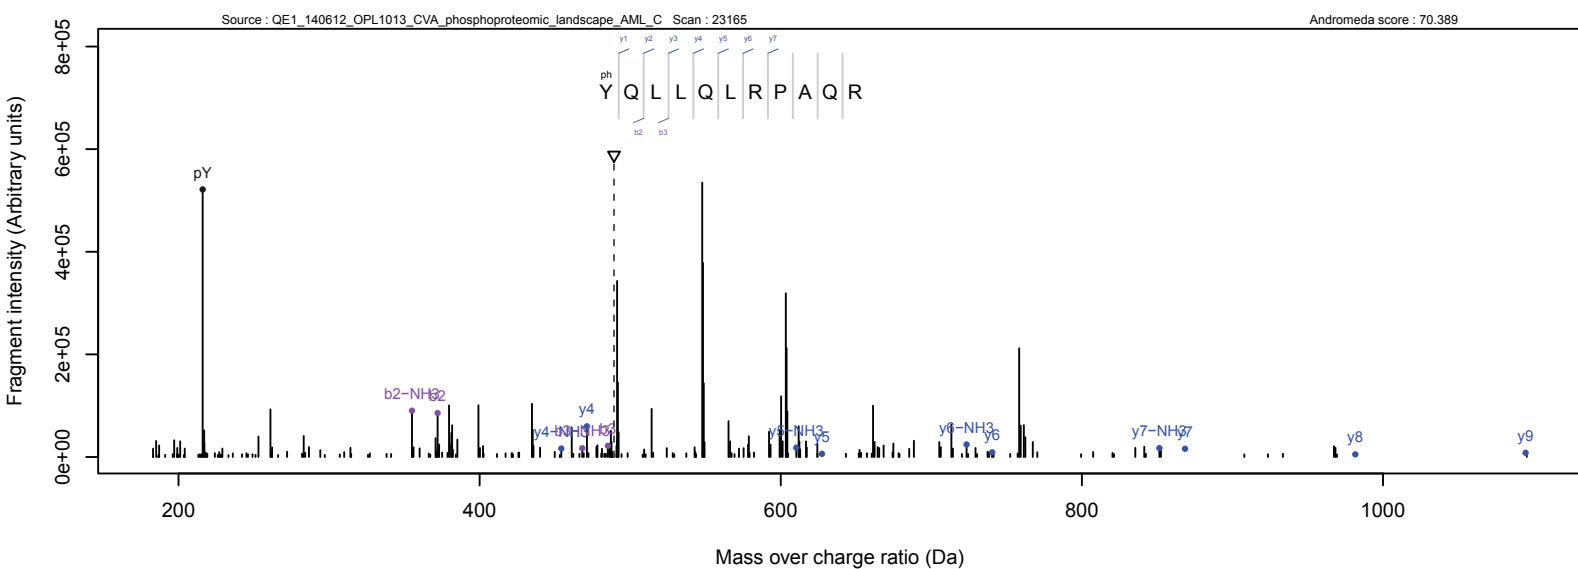

## EGQRPTQPVYQIQNR-3+

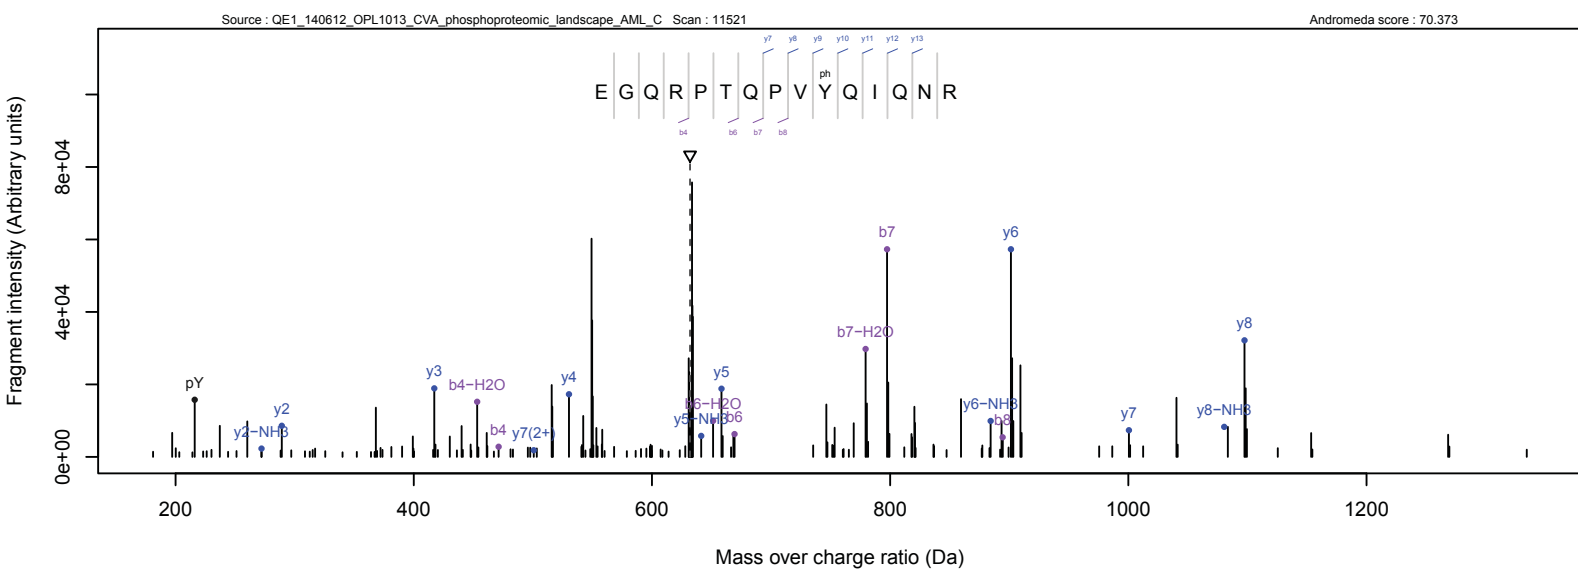

## SAQLWSQLKDEDLETVQAAYLGLK-3+

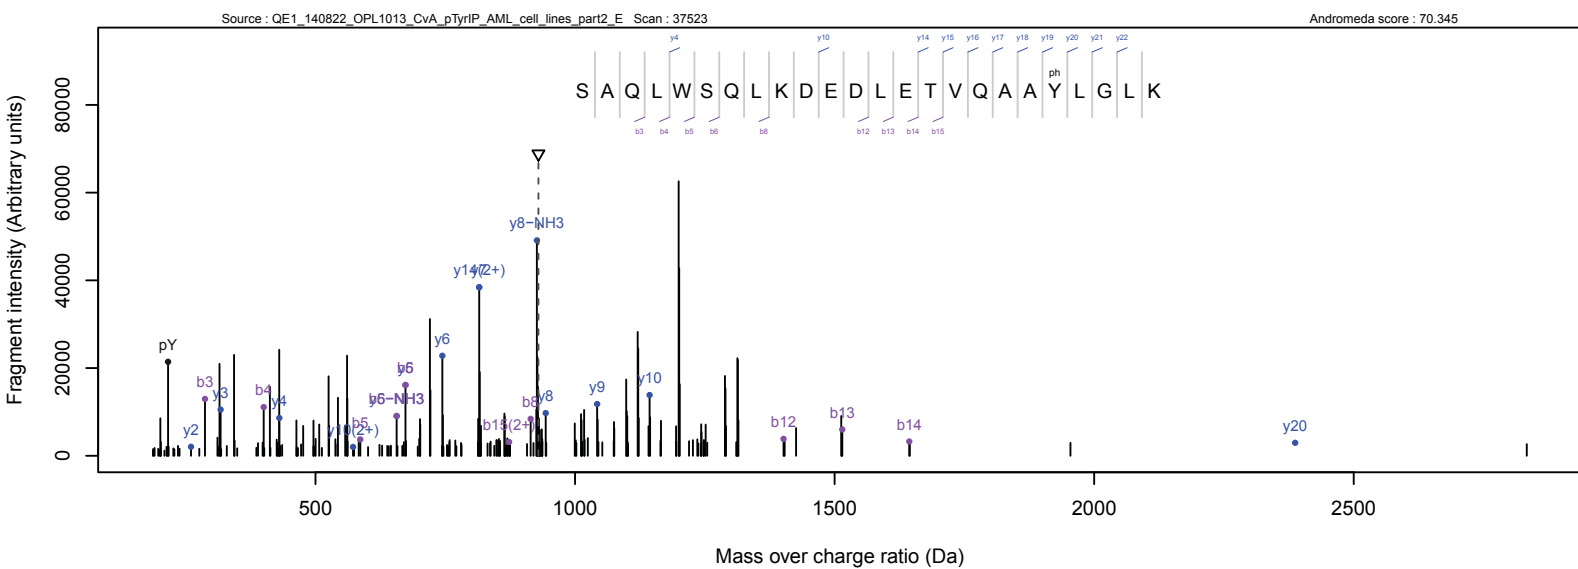



## GKITLY(ph)EDRGFQGR-3+

Source : QE1\_140908\_OPL1013\_CvA\_pTyrIP\_AML\_HEL Scan : 16961

Andromeda score : 70.26

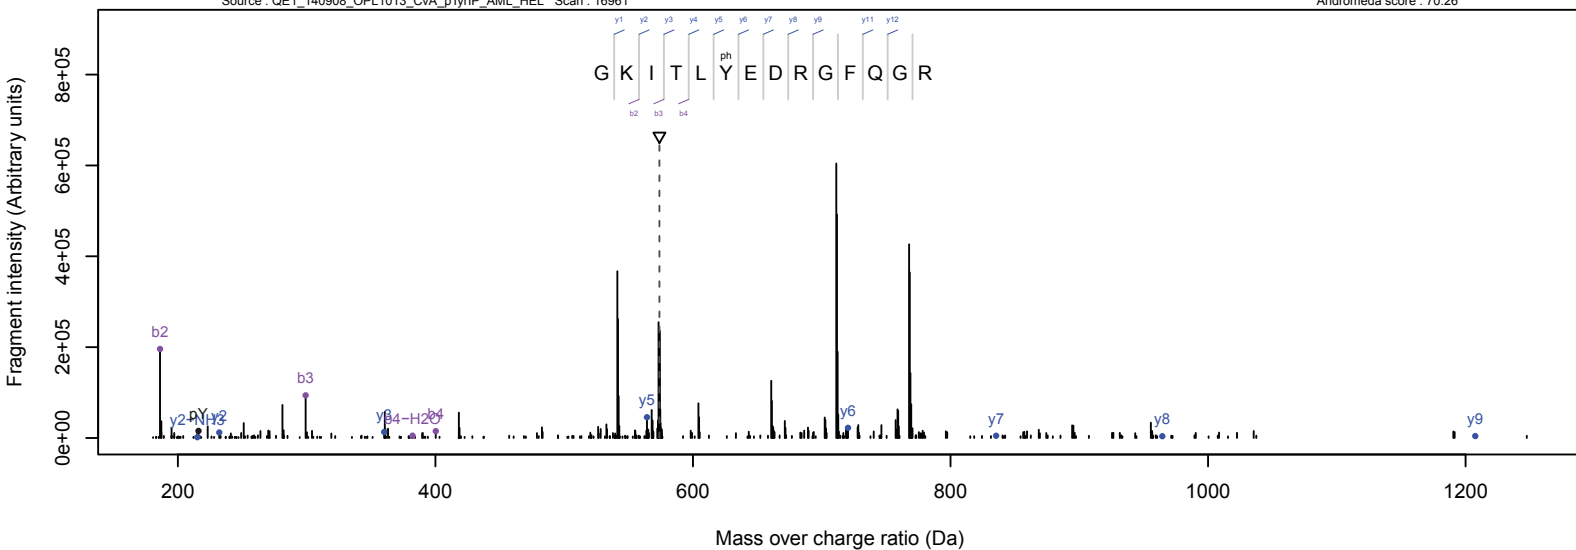

## NLVPM(ox)DPNGLSDPY(ph)VK-2+

Source : QE1\_140908\_OPL1013\_CvA\_pTyrIP\_AML\_HEL Scan : 29643

Andromeda score : 70.197

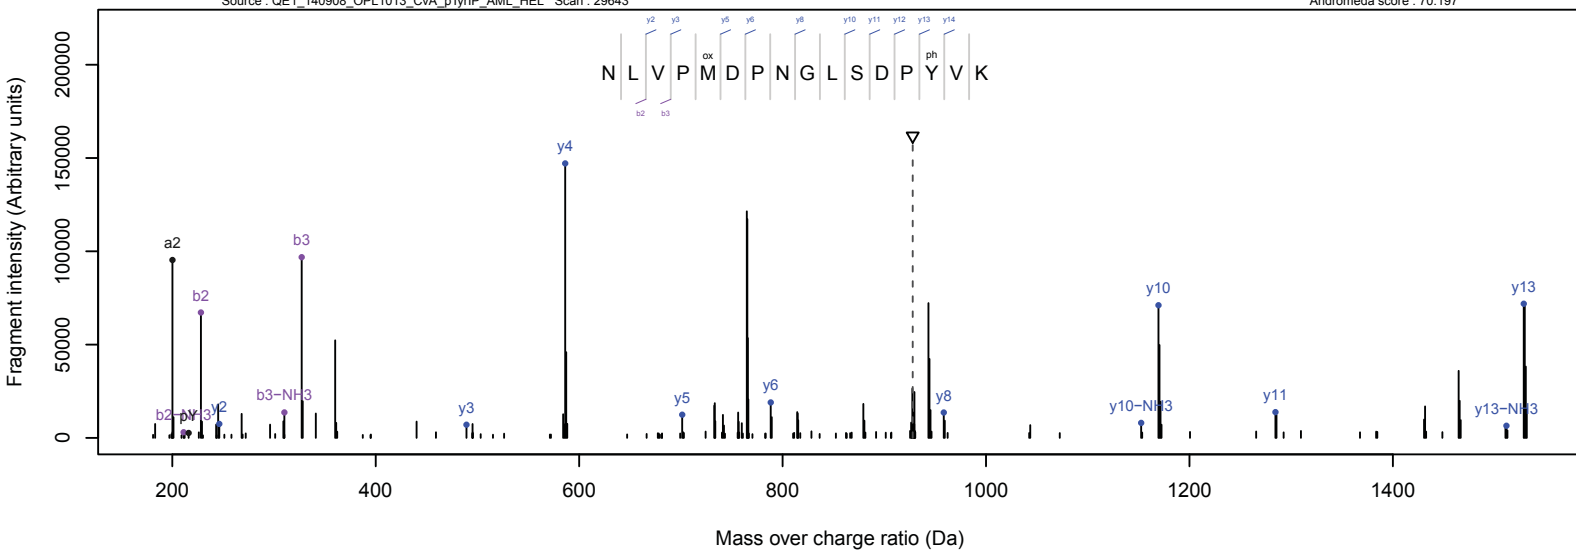

## SIVSGY(ph)STLSTMDR-2+

Source : QE1\_140612\_OPL1013\_CvA\_phosphoproteomic\_landscape\_AML\_C Scan : 26345

Andromeda score : 70.197

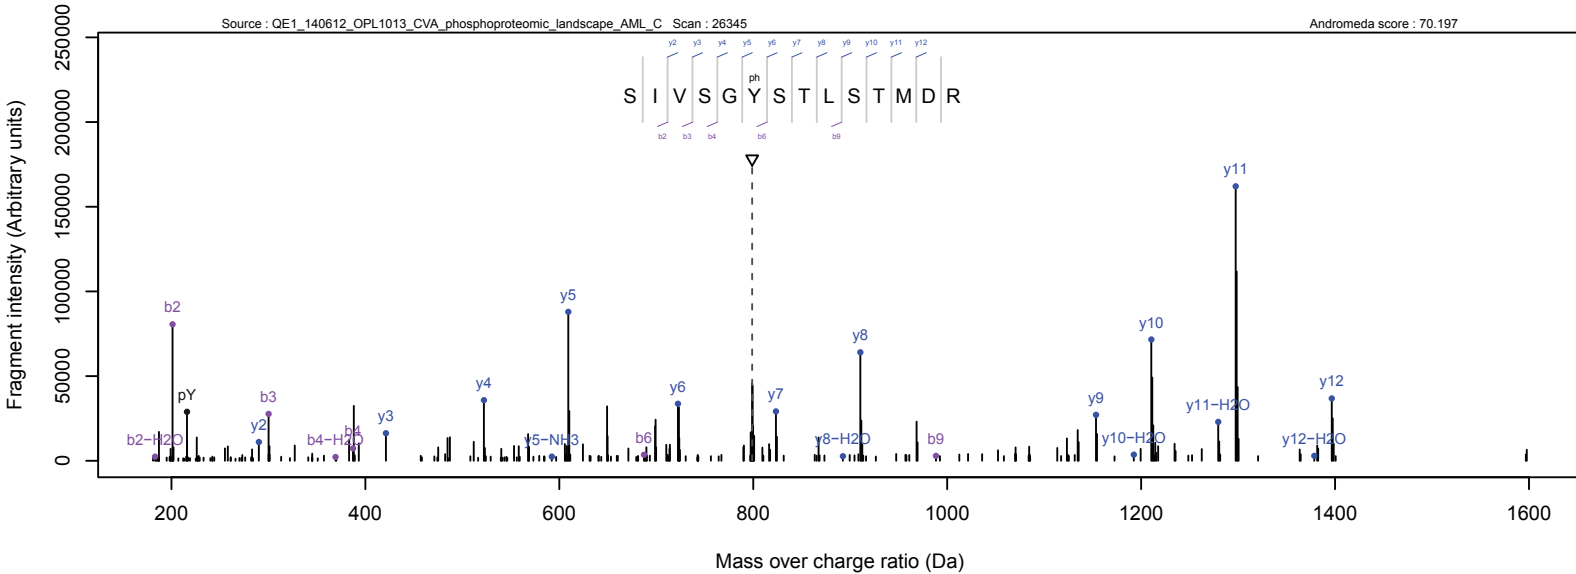

**S(ph)RTYDMIQYYQNDIPY-2+**

Source : QE1\_140612\_OPL1013\_CVA\_phosphoproteomic\_landscape\_AML\_B Scan : 40346

Andromeda score : 70.197

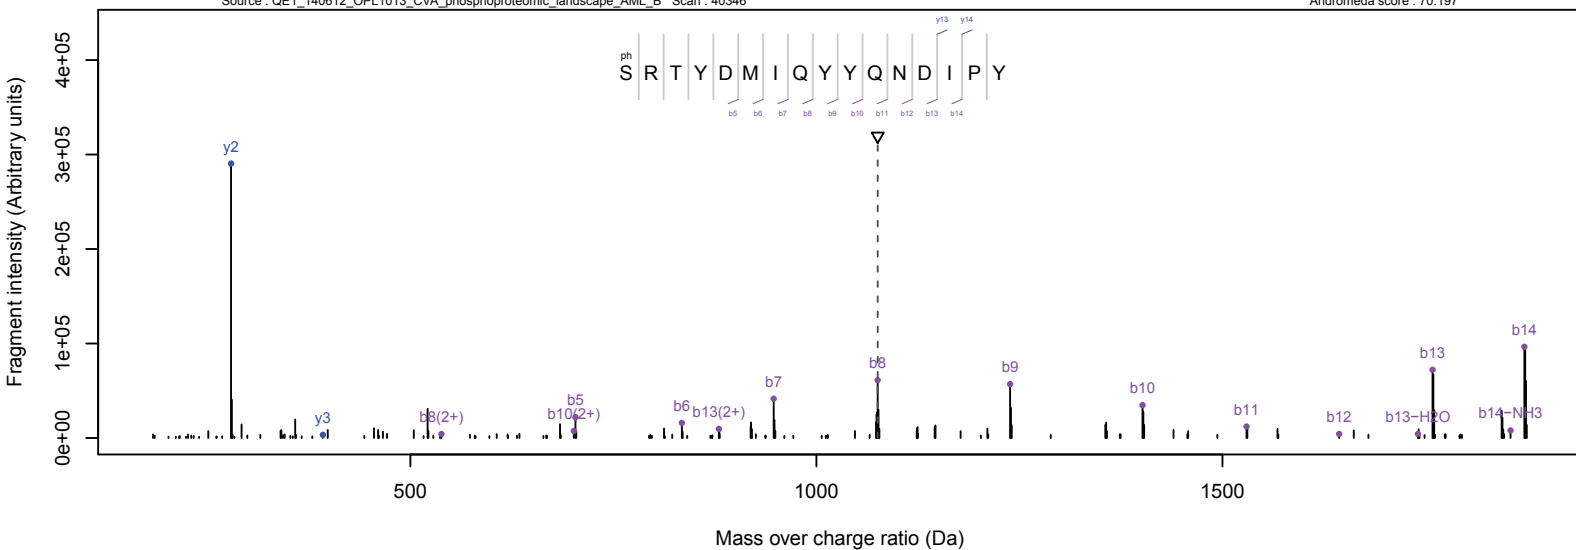

**STGLILDGATHHTTAIPVHDG(ph)VLQQGIVK-3+**

Source : QE1\_140612\_OPL1013\_CVA\_phosphoproteomic\_landscape\_AML\_D Scan : 39086

Andromeda score : 70.145

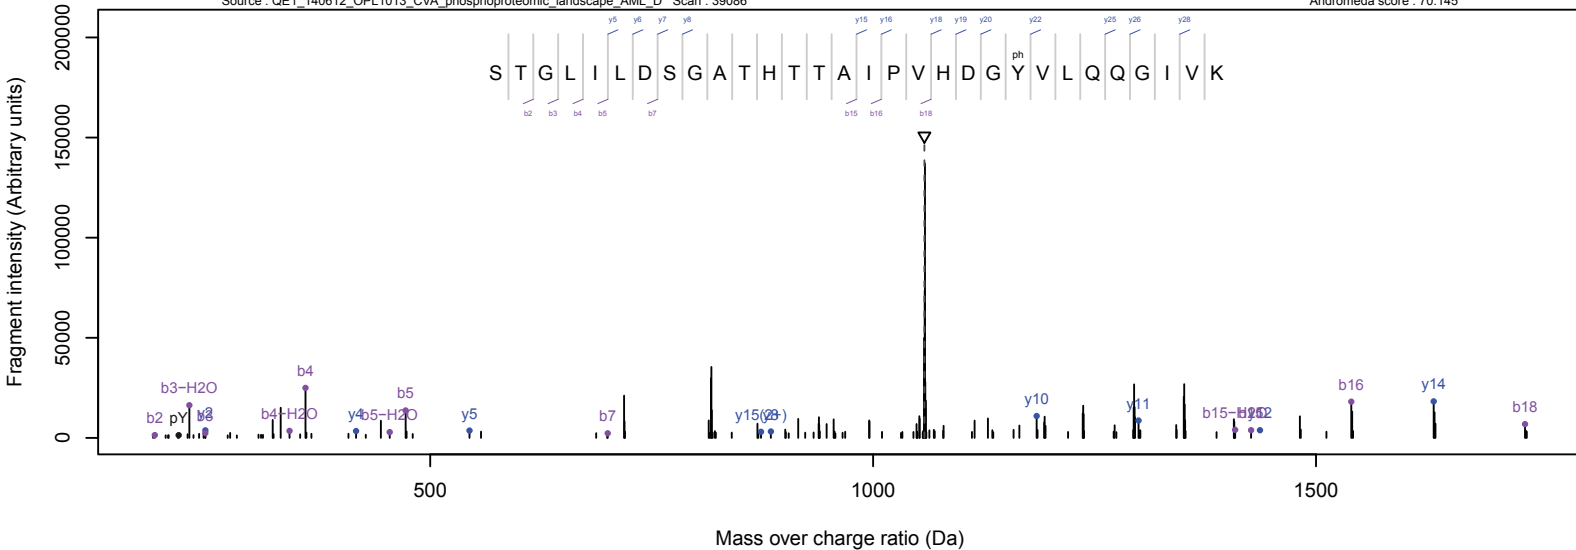

**VFEMS(ph)QDKNLYHNLCTSLFPTIHGNDVVK-5+**

Source : QE1\_140612\_OPL1013\_CVA\_phosphoproteomic\_landscape\_AML\_B Scan : 37612

Andromeda score : 70.145

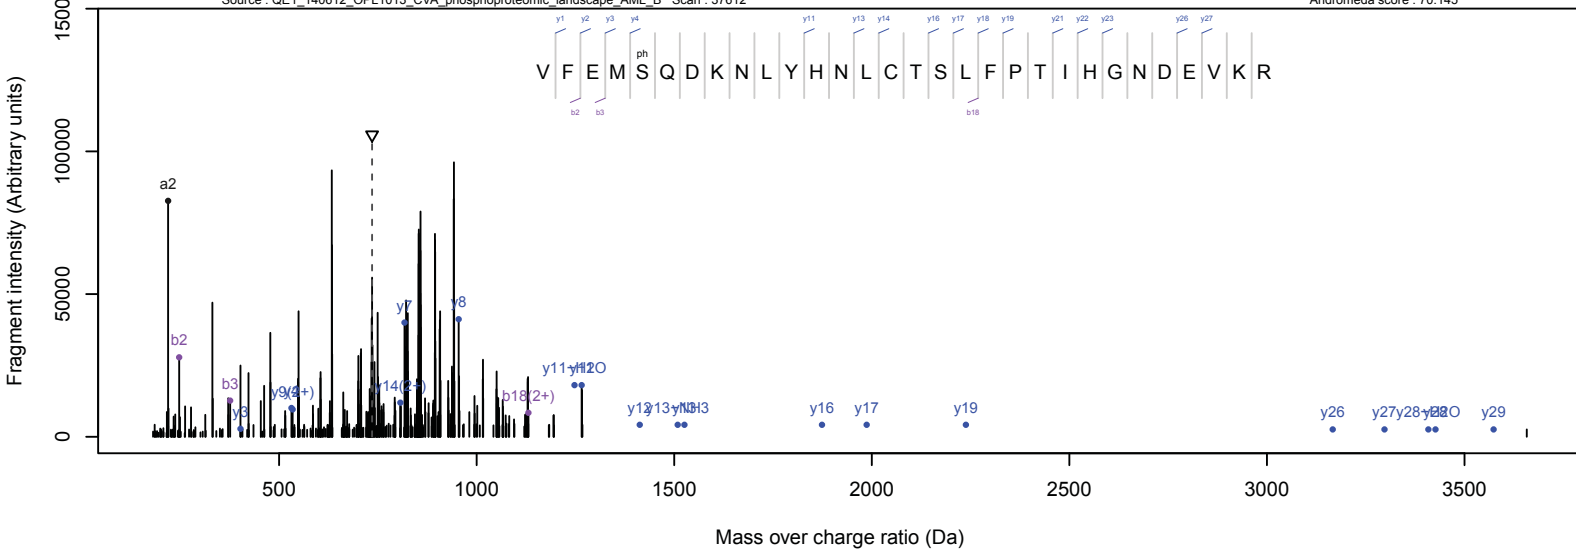

YPNDSVY(ph)ANWMLSPSAK-2+

Source : QE1\_140612\_OPL1013\_CVA\_phosphoproteomic\_landscape\_AML\_C Scan : 38001

Andromeda score : 70.114

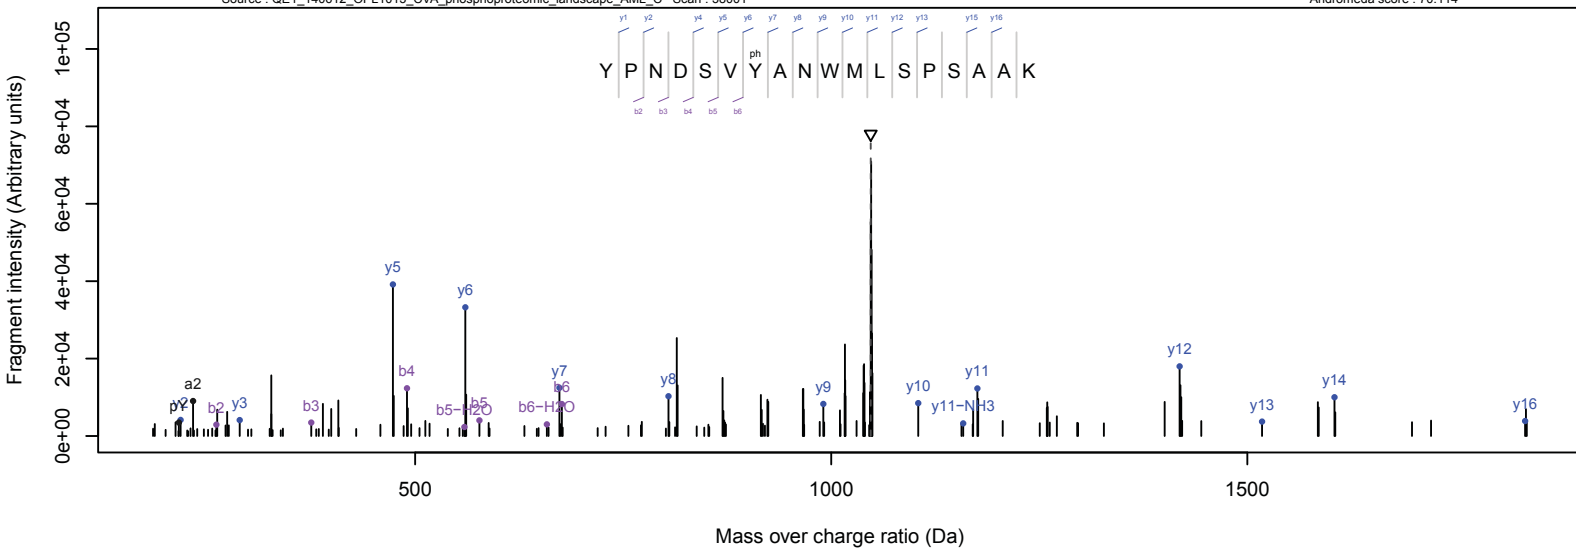

LPEPSCQLATLTSQCLT(ph)YEPTQRPSFR-3+

Source : QE1\_140612\_OPL1013\_CVA\_phosphoproteomic\_landscape\_AML\_F Scan : 39243

Andromeda score : 70.112

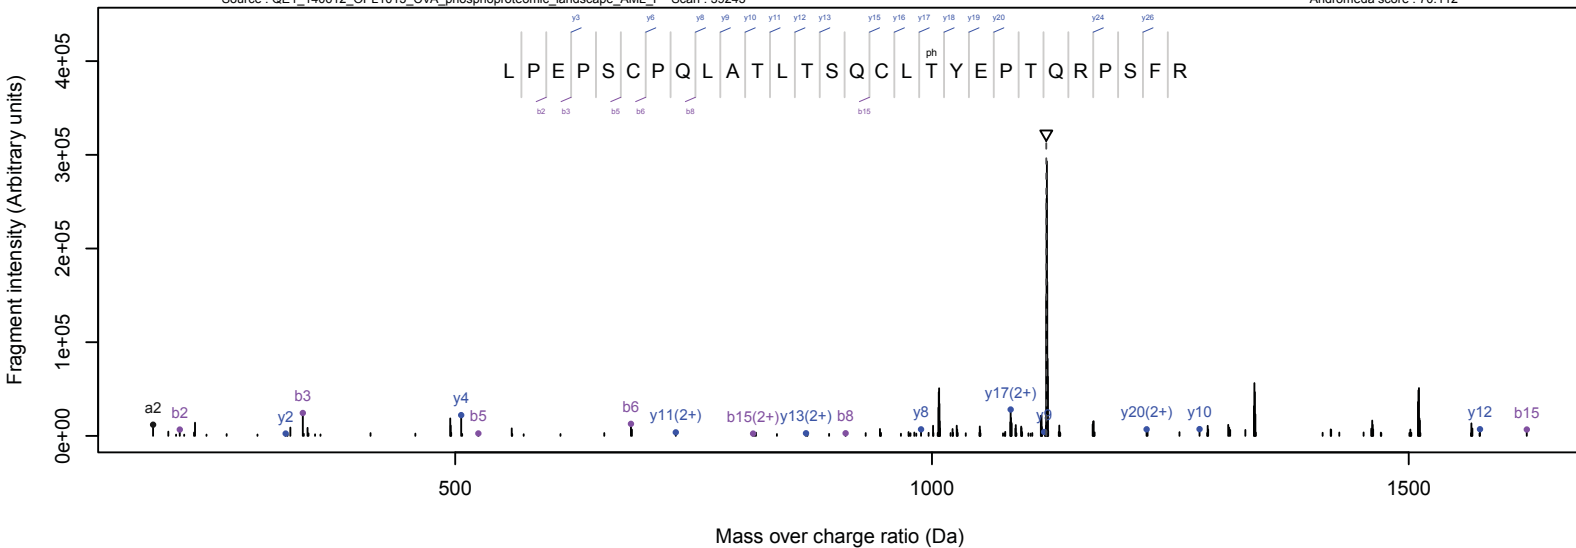

EATKGFYD(K)SSGSWSK-3+

Source : QE1\_140612\_OPL1013\_CVA\_phosphoproteomic\_landscape\_AML\_C Scan : 10747

Andromeda score : 70.094

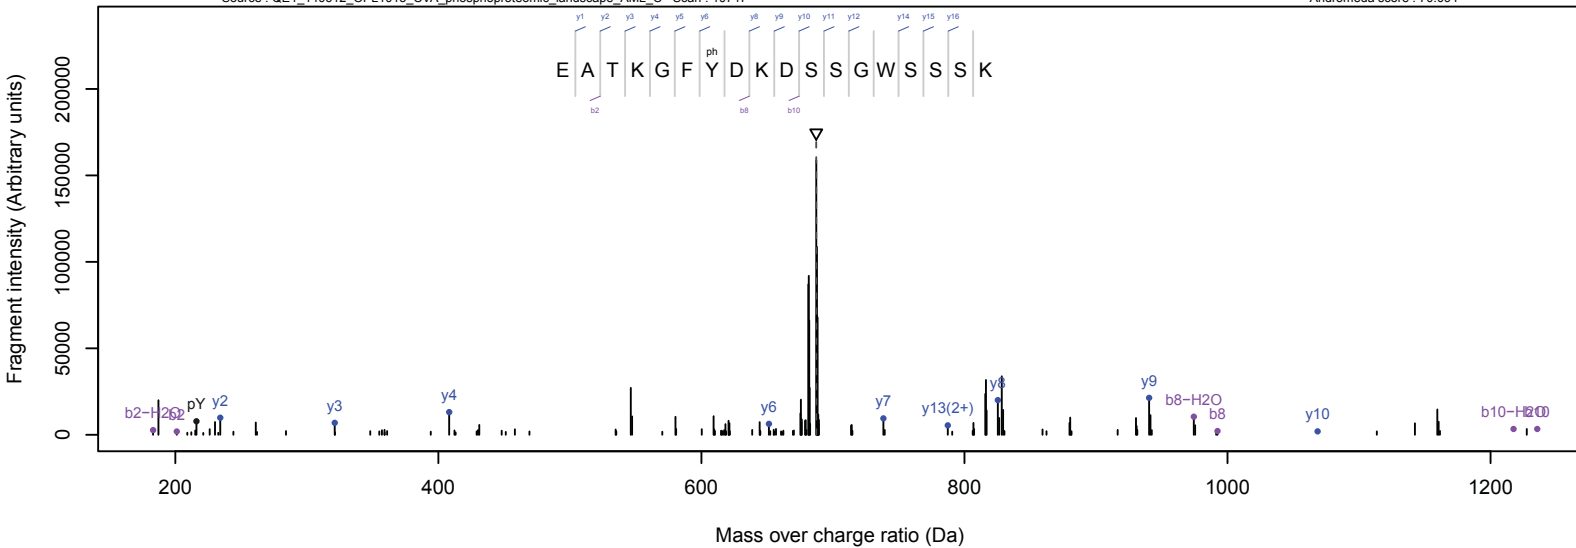

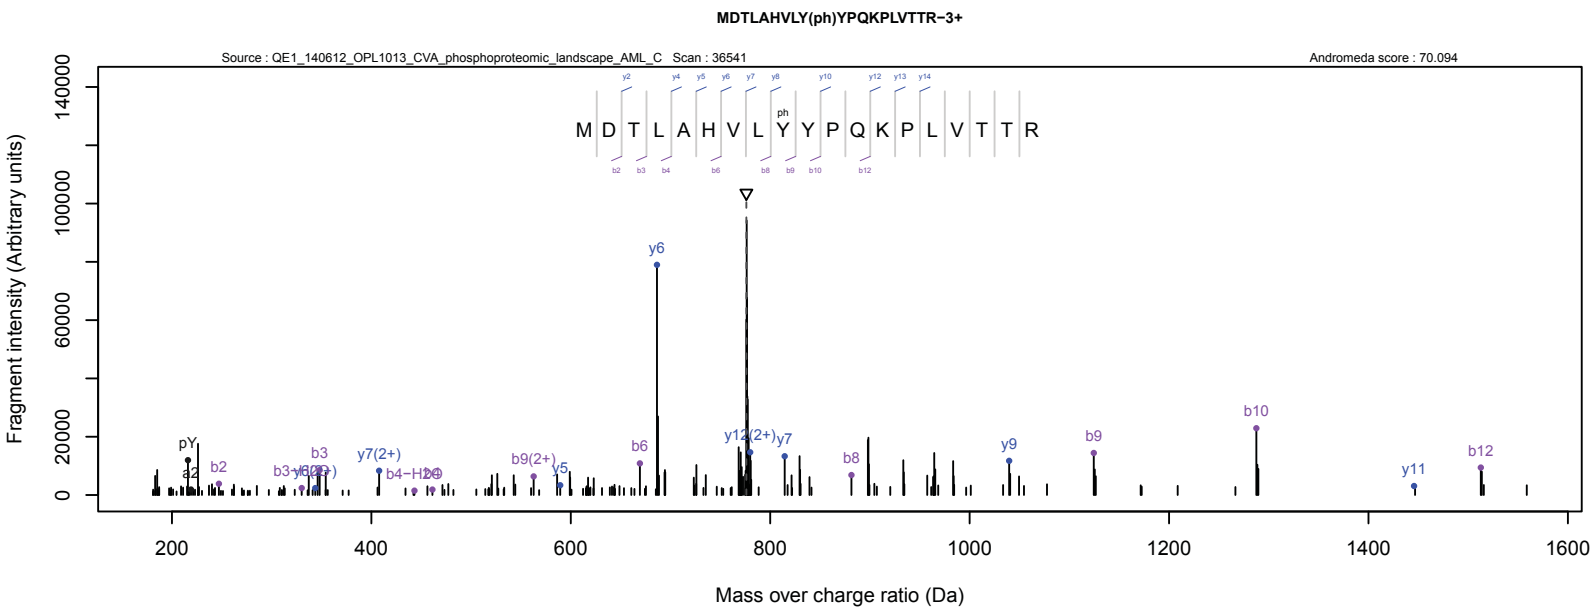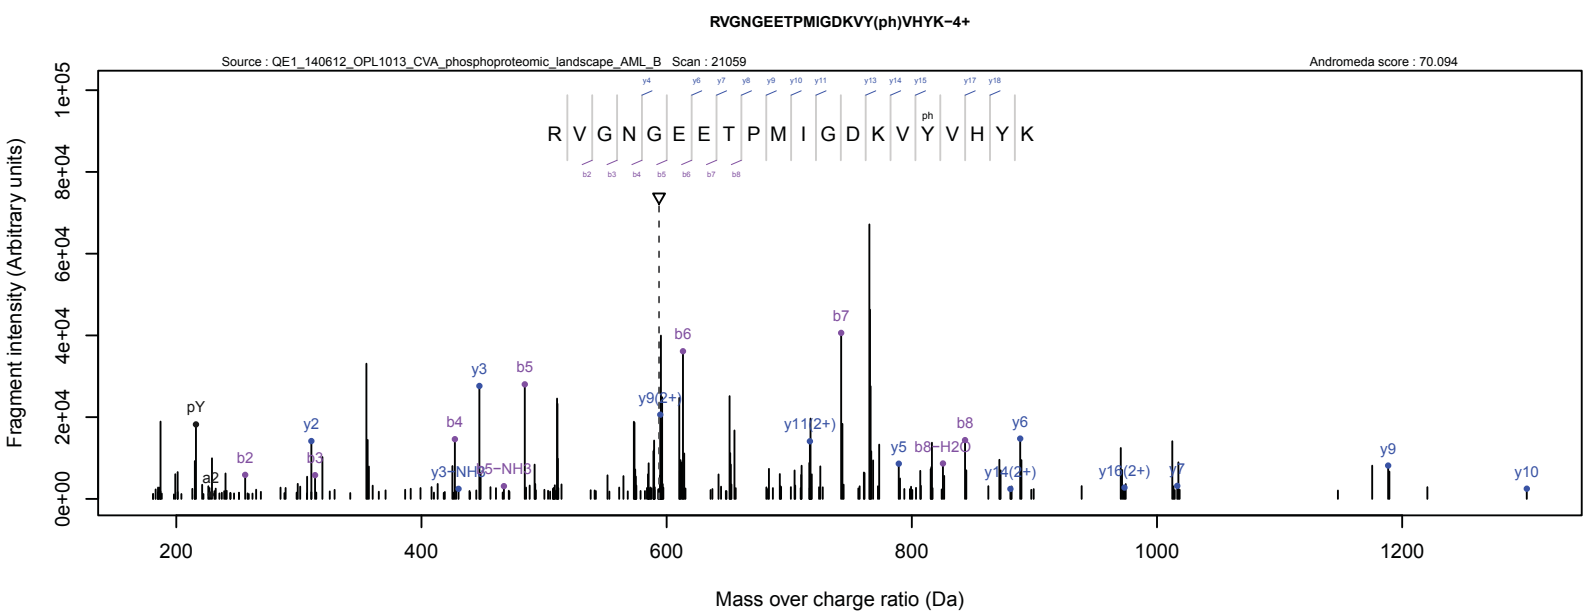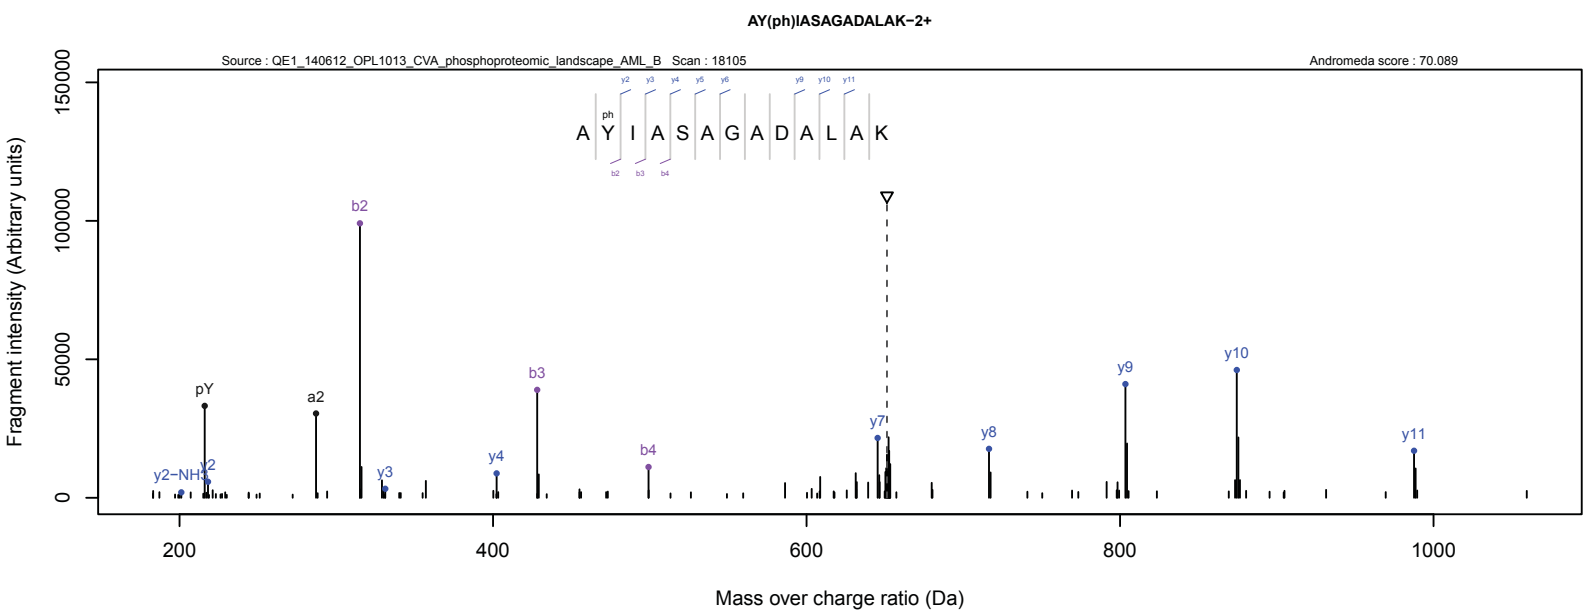



GTHTGVWVGSGETSEALSRDPETLVGYPHSMVGCQR-4+

Source : QE1\_140612\_OPL1013\_CVA\_phosphoproteomic\_landscape\_AML\_A Scan : 47528

Andromeda score : 70.062

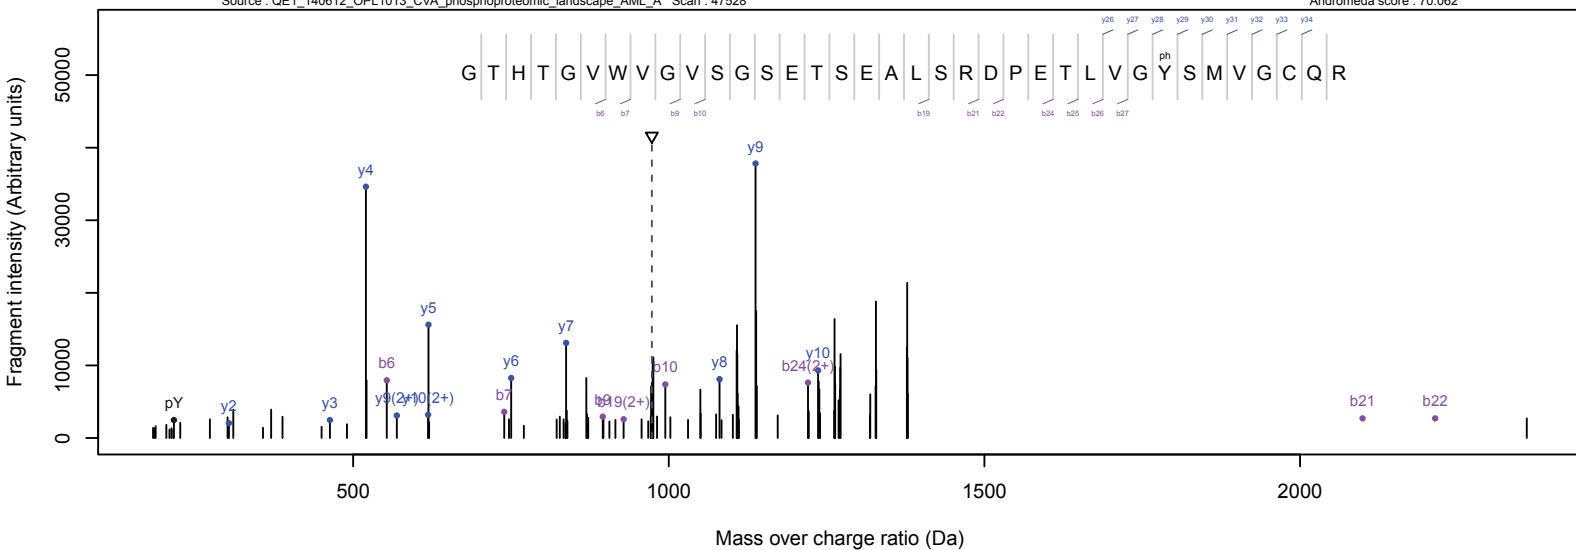

AFQY(V)ETHGEVCPANWTPDPTIKPSPAASK-3+

Source : QE1\_140612\_OPL1013\_CVA\_phosphoproteomic\_landscape\_AML\_C Scan : 31263

Andromeda score : 70.028

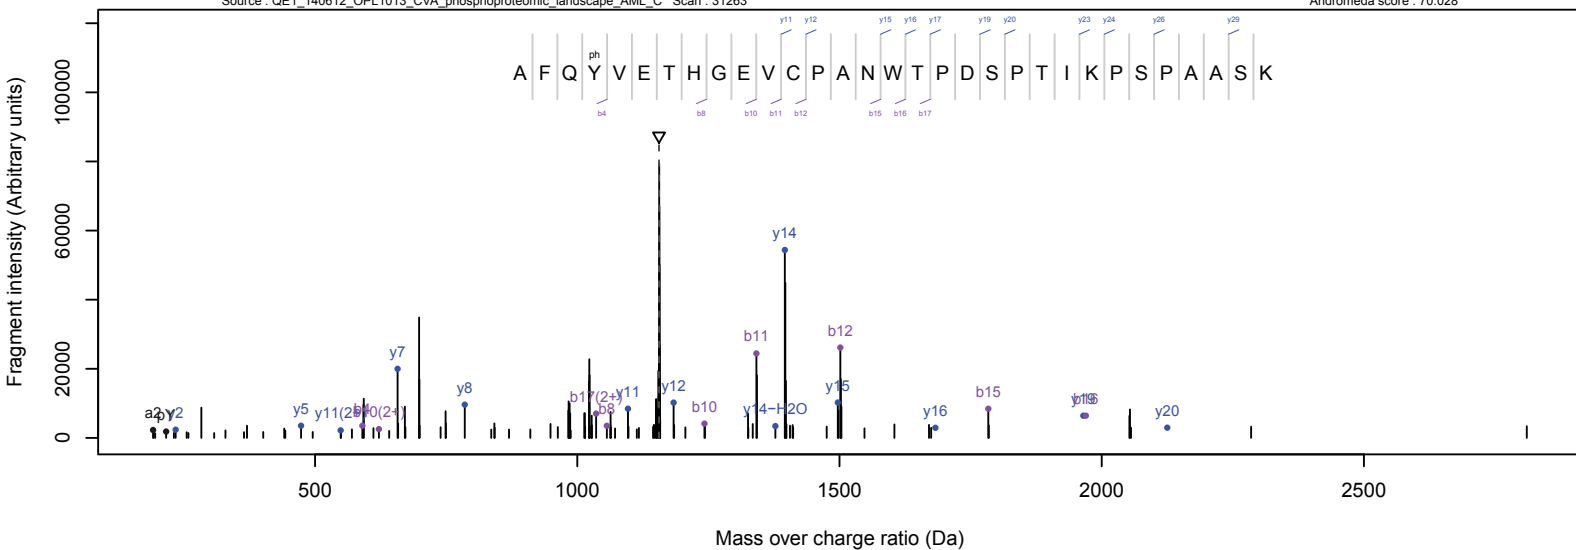

## LKP YFL(ph)DGTGTVTPANASGINDGAAAVVLM(ox)K-3+

Source : QE1\_140612\_OPL1013\_CVA\_phosphoproteomic\_landscape\_AML\_B Scan : 43314

Andromeda score : 70.028

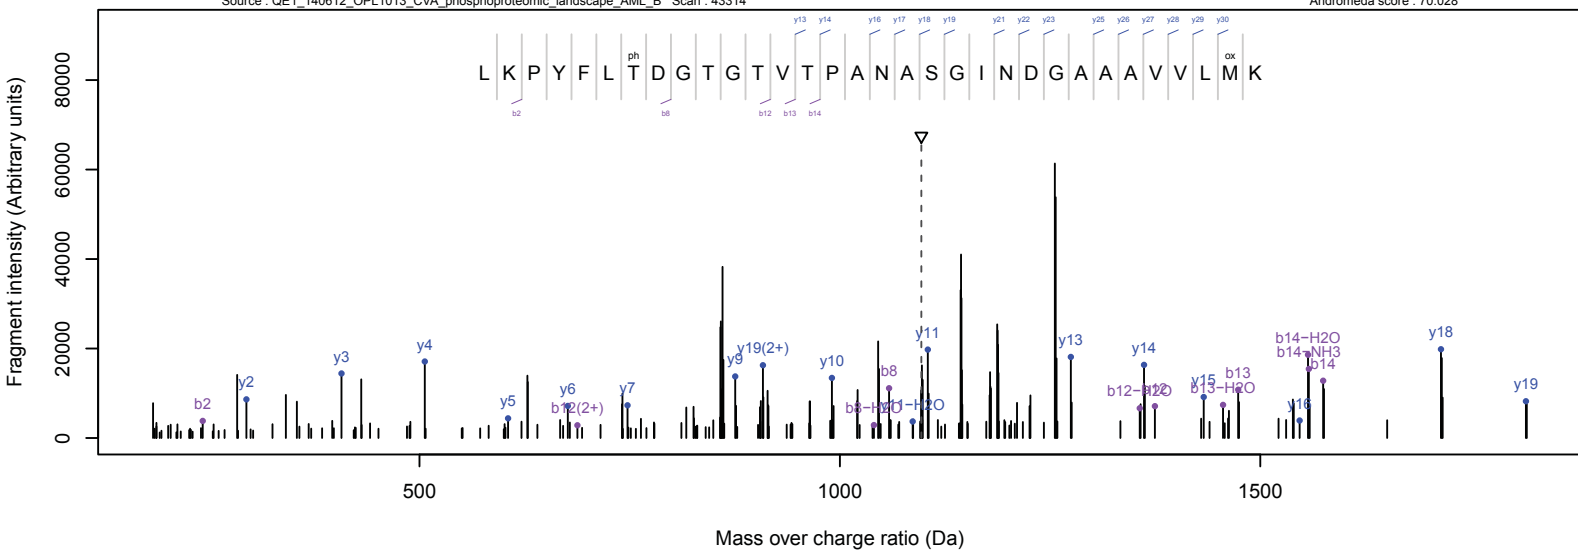

## LSS Y(ph)TECYK-2+

Source : QE1\_140612\_OPL1013\_CVA\_phosphoproteomic\_landscape\_AML\_C Scan : 7149

Andromeda score : 70.028

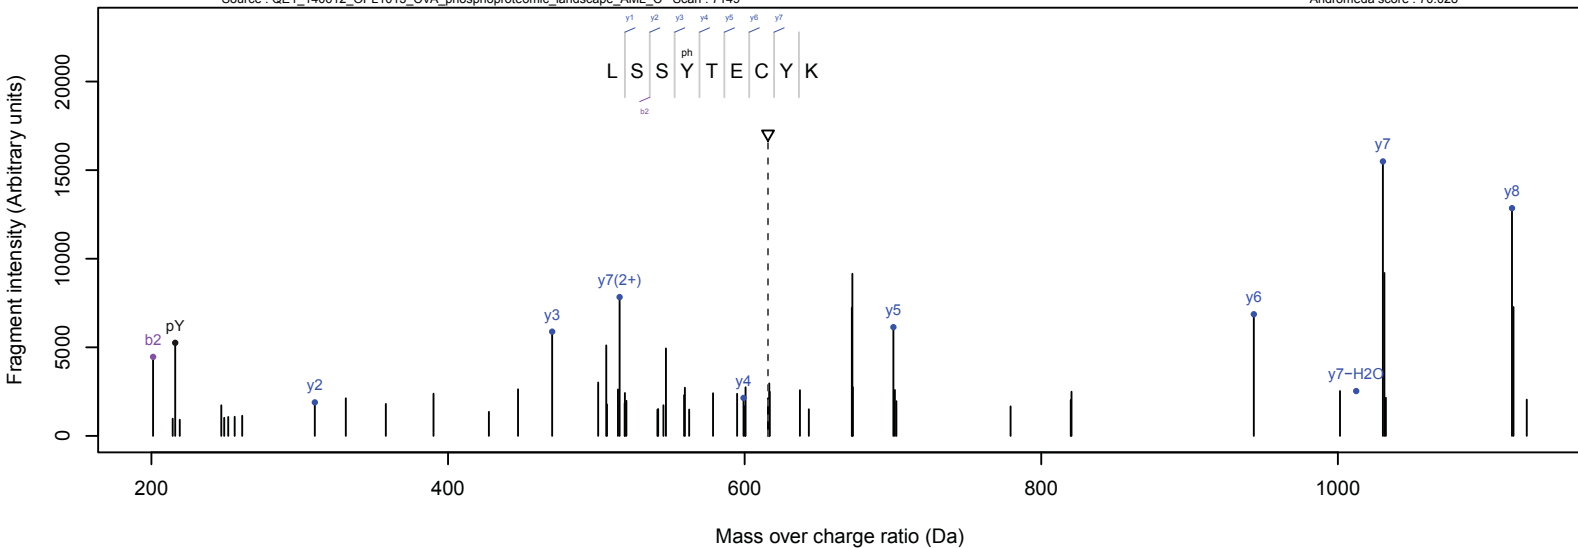

## LYEAGL(ph)YQK-2+

Source : QE1\_140612\_OPL1013\_CVA\_phosphoproteomic\_landscape\_AML\_E Scan : 15908

Andromeda score : 70.028

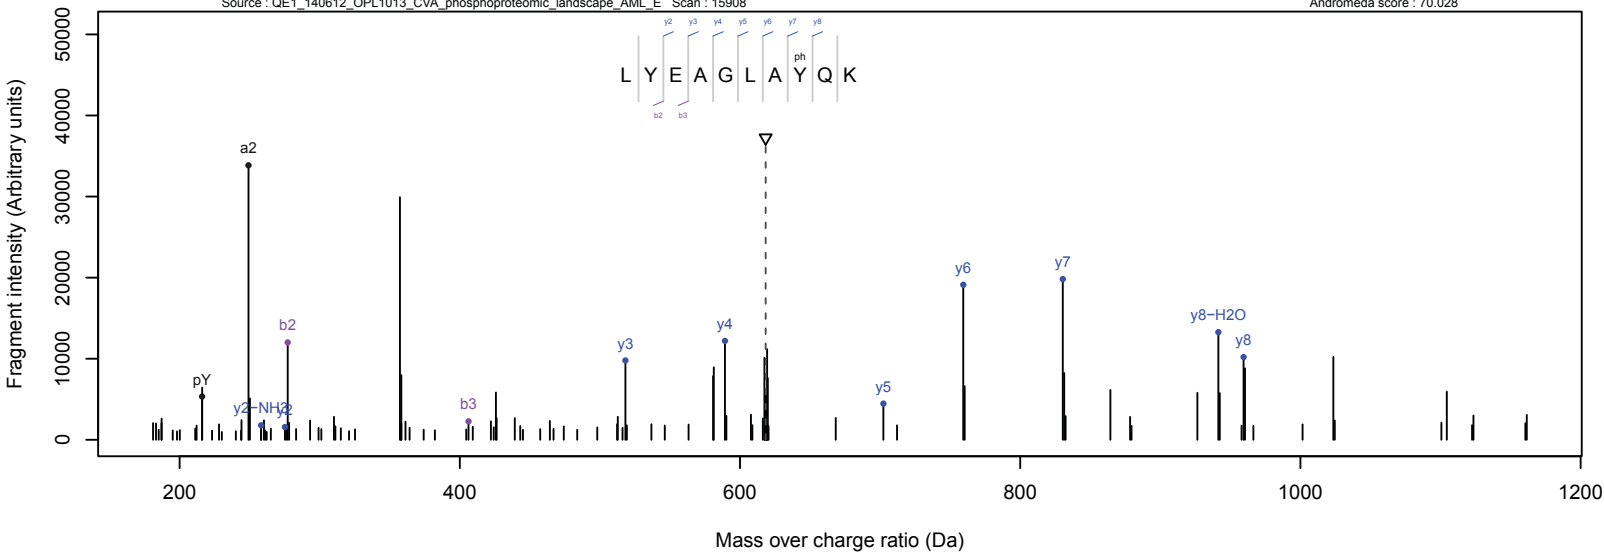

## NKVDDY(ph)IKR-3+

Source: QE1\_140822\_OPL1013\_CVA\_pTyrIP\_AML\_cell\_lines\_part2\_B Scan: 4684

Andromeda score: 70.028

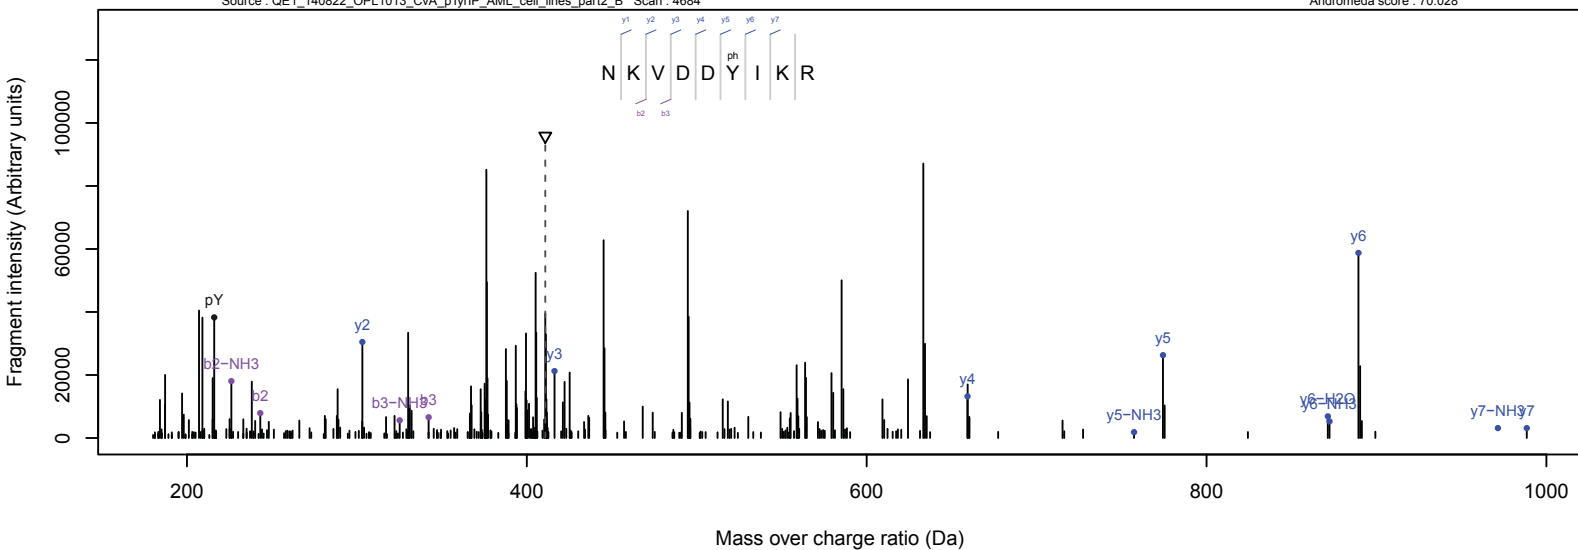

## KPIDY(ph)TVLDDVGHGVK-3+

Source: QE1\_140612\_OPL1013\_CVA\_phosphoproteomic\_landscape\_AML\_B Scan: 28185

Andromeda score: 69.979

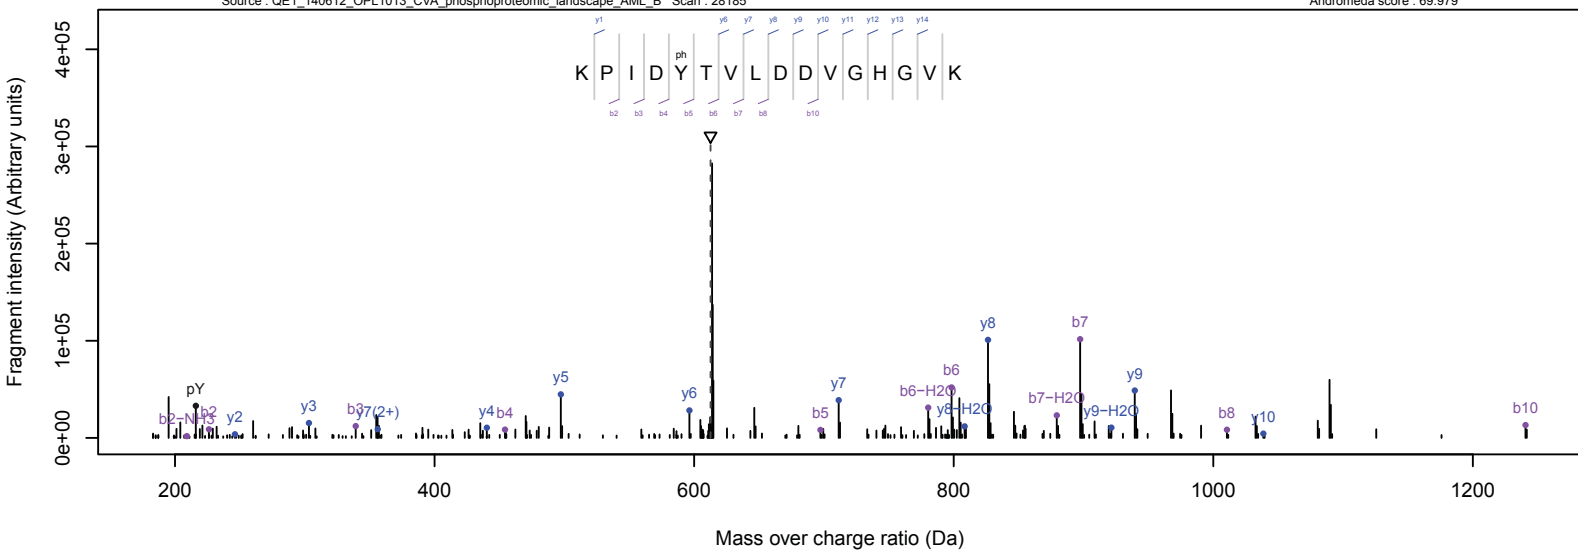

## QQQQLLPGDRKPLYHYGR-4+

Source: QE1\_140612\_OPL1013\_CVA\_phosphoproteomic\_landscape\_AML\_C Scan: 17637

Andromeda score: 69.979

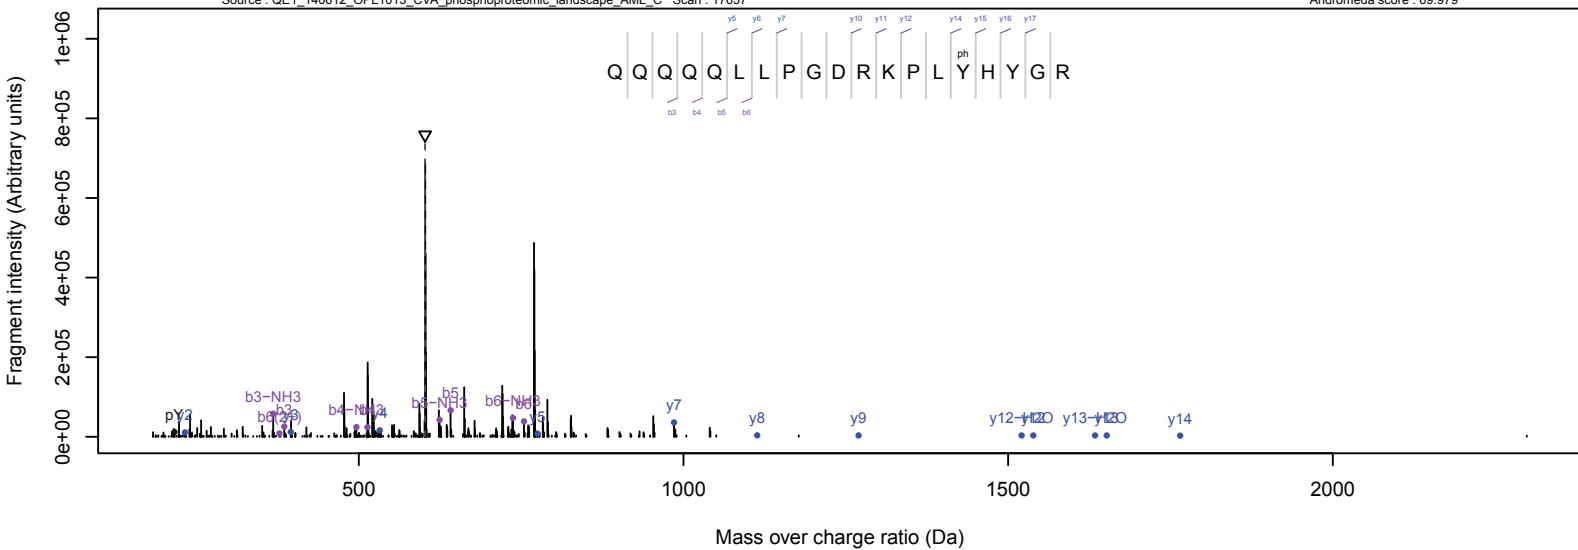

## SQETECTY(ph)FSTPLLLGKK-3+

Source: QE1\_140612\_OPL1013\_CVA\_phosphoproteomic\_landscape\_AML\_C Scan: 35005

Andromeda score: 69.979

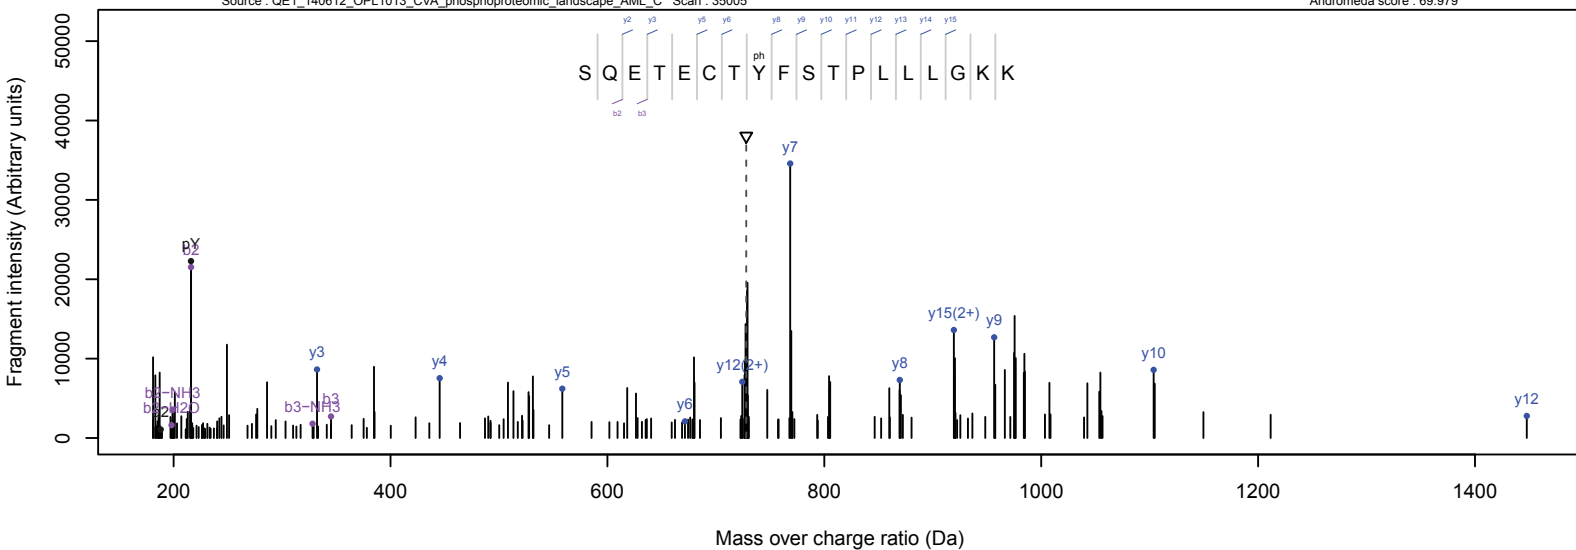

## LCRPCQAAVEY(ph)YIK-2+

Source: QE1\_140612\_OPL1013\_CVA\_phosphoproteomic\_landscape\_AML\_C Scan: 26767

Andromeda score: 69.92

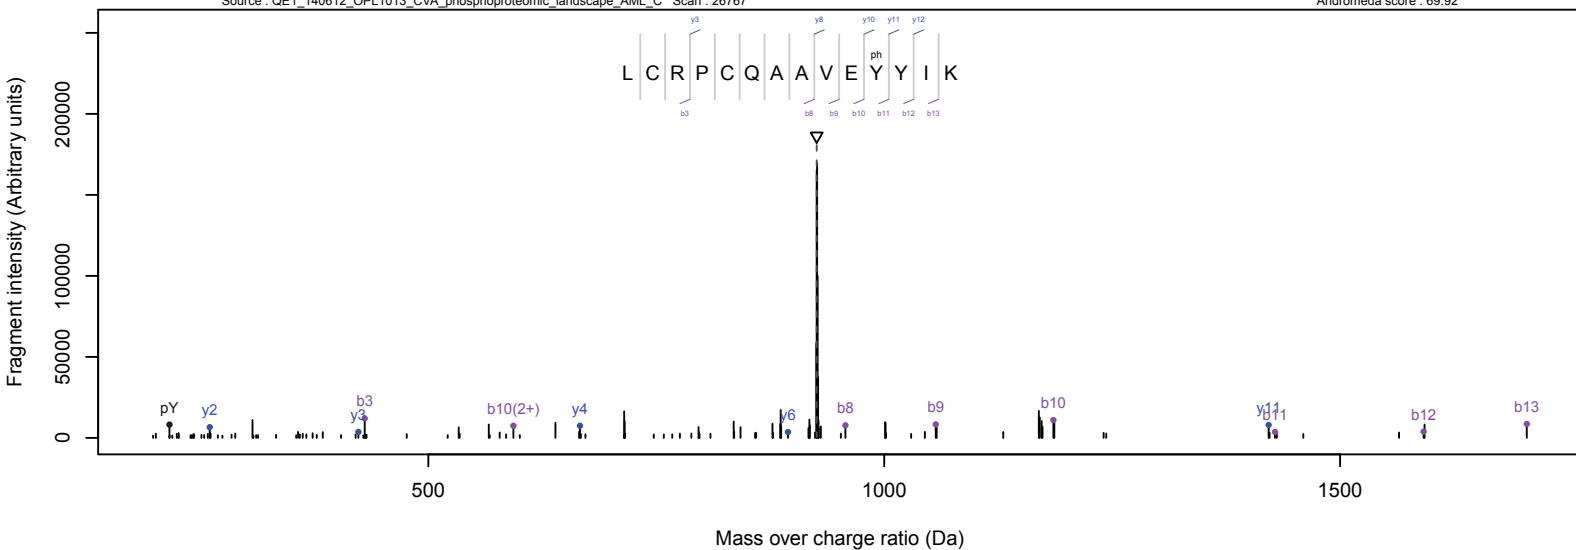

## LLTSY(ph)GFIQCSEK-2+

Source: QE1\_140612\_OPL1013\_CVA\_phosphoproteomic\_landscape\_AML\_D Scan: 31861

Andromeda score: 69.92

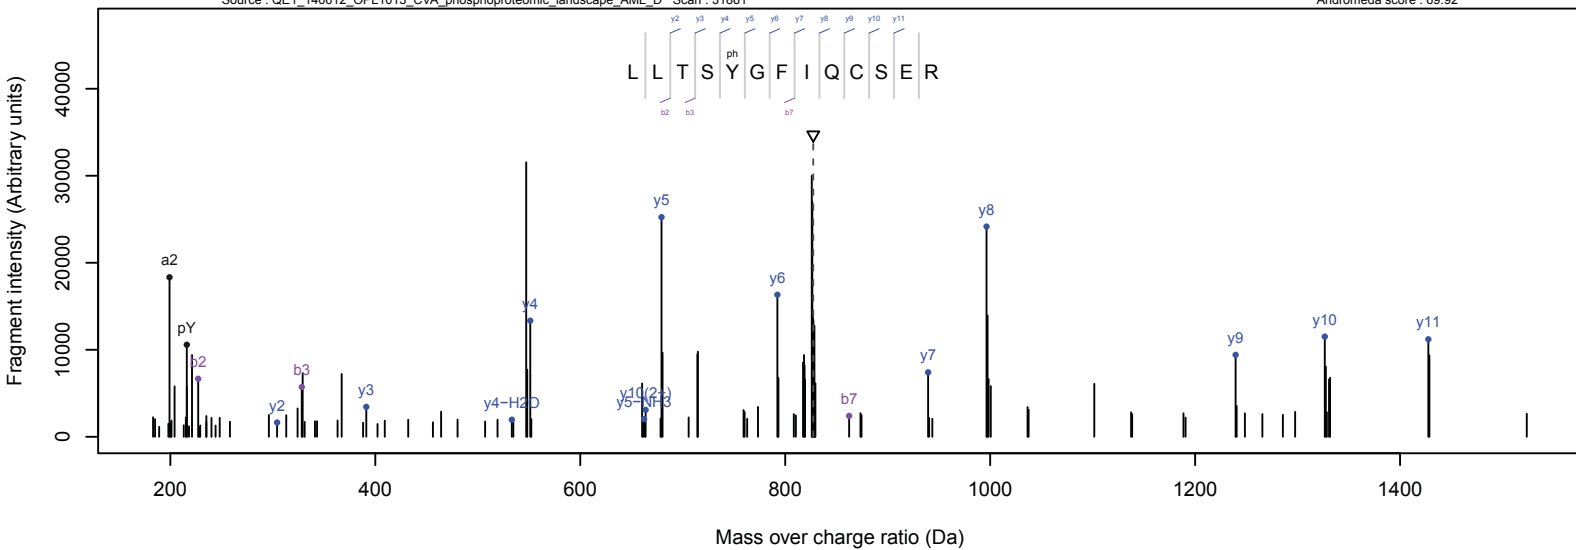

## (ac)SLY(ph)PSLEDLKVDK-2+

Source : QE1\_140612\_OPL1013\_CVA\_phosphoproteomic\_landscape\_AML\_B Scan : 38469

Andromeda score : 69.92

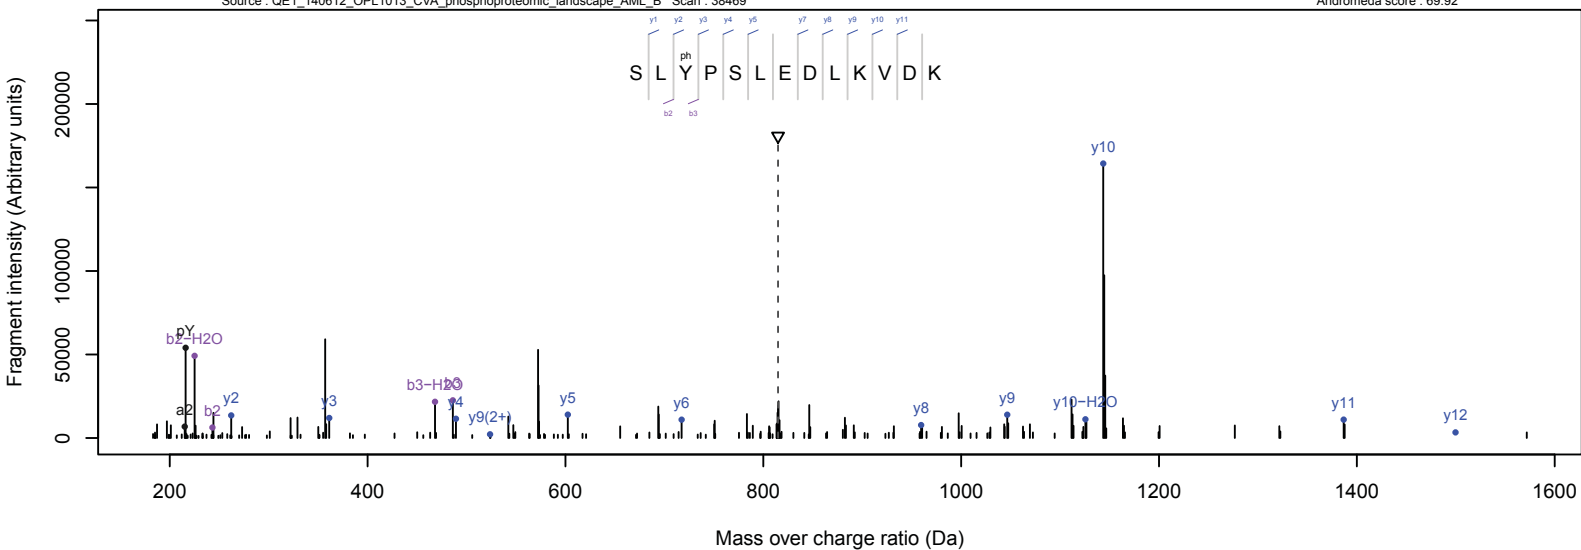

## TQEY(ph)SIFAPLSR-2+

Source : QE1\_140612\_OPL1013\_CVA\_phosphoproteomic\_landscape\_AML\_C Scan : 36774

Andromeda score : 69.92

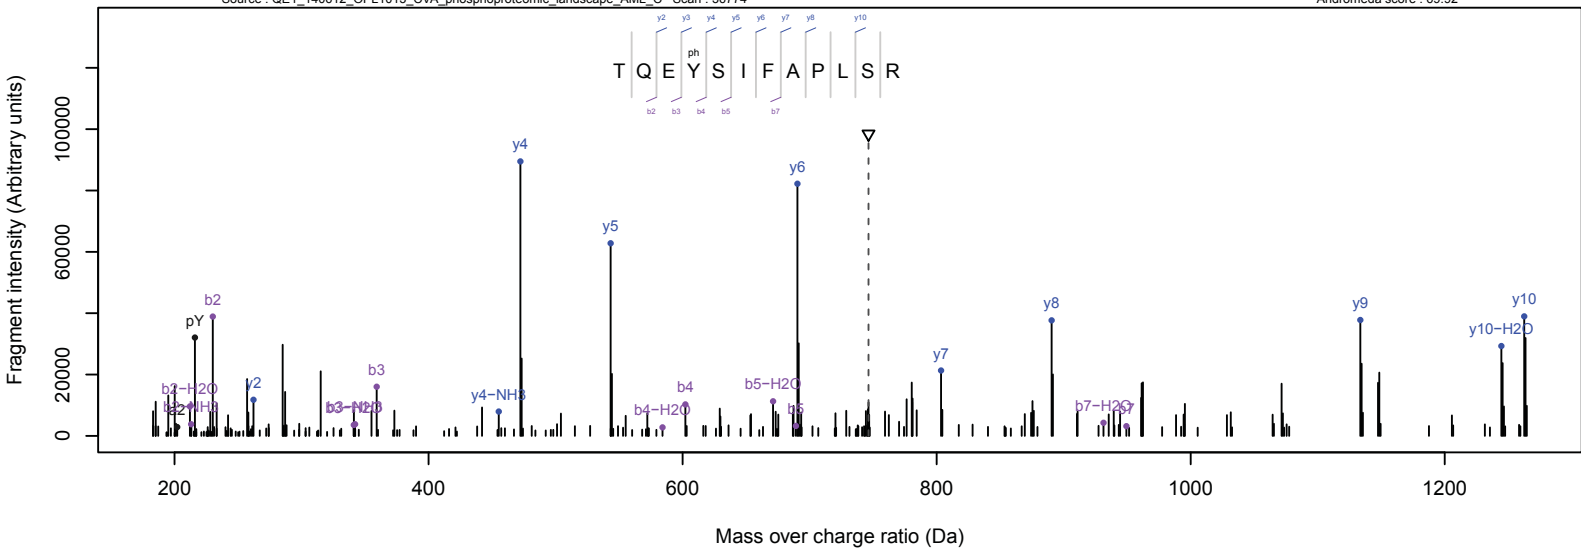

## TSHLQLQPMY(ph)MSK-2+

Source : QE1\_140612\_OPL1013\_CVA\_phosphoproteomic\_landscape\_AML\_B Scan : 23764

Andromeda score : 69.92

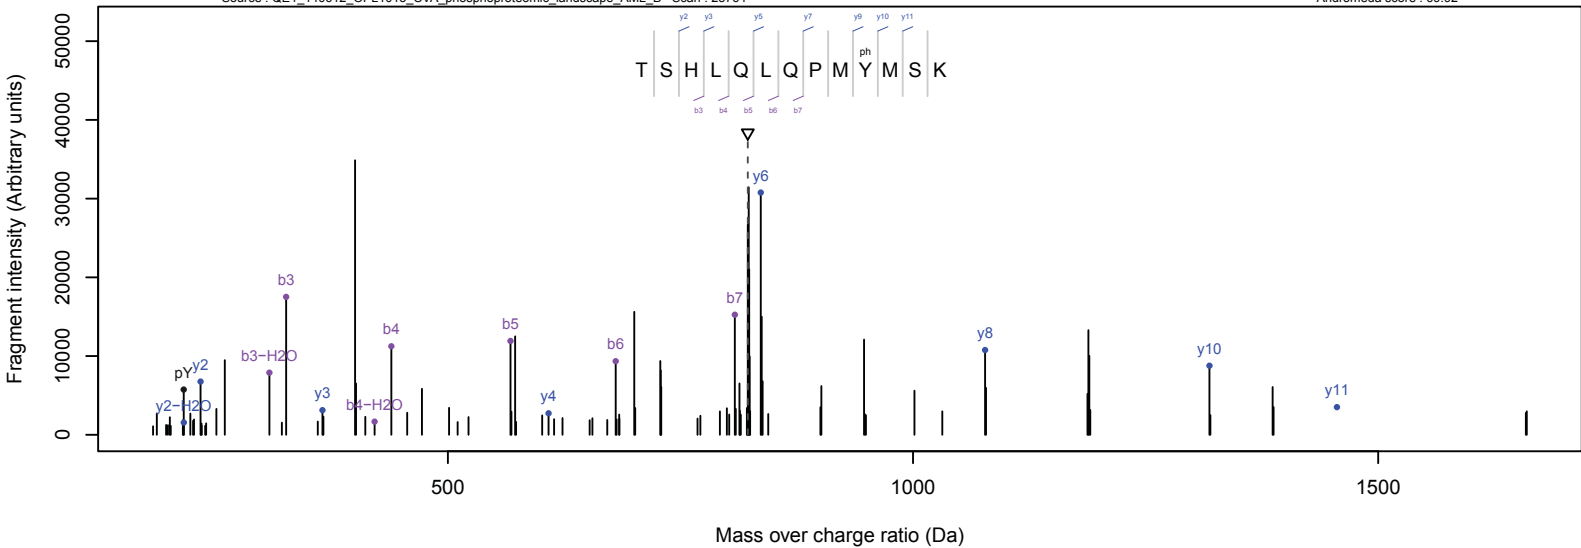

## VSAQY(ph)LSEIEM(ox)AK-2+

Source : QE1\_140612\_OPL1013\_CVA\_phosphoproteomic\_landscape\_AML\_C Scan : 27291

Andromeda score : 69.92

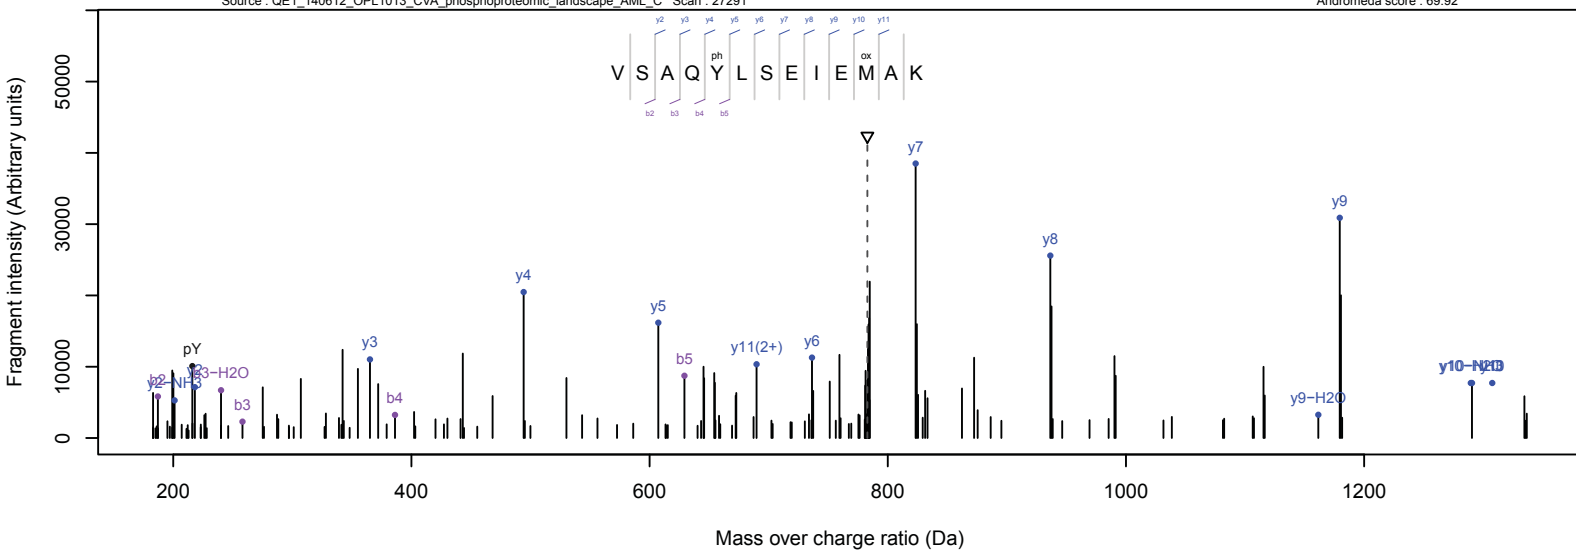

## YALYDATY(ph)ETKESK-3+

Source : QE1\_140908\_OPL1013\_CvA\_pTyrIP\_AML\_HEL Scan : 19228

Andromeda score : 69.878

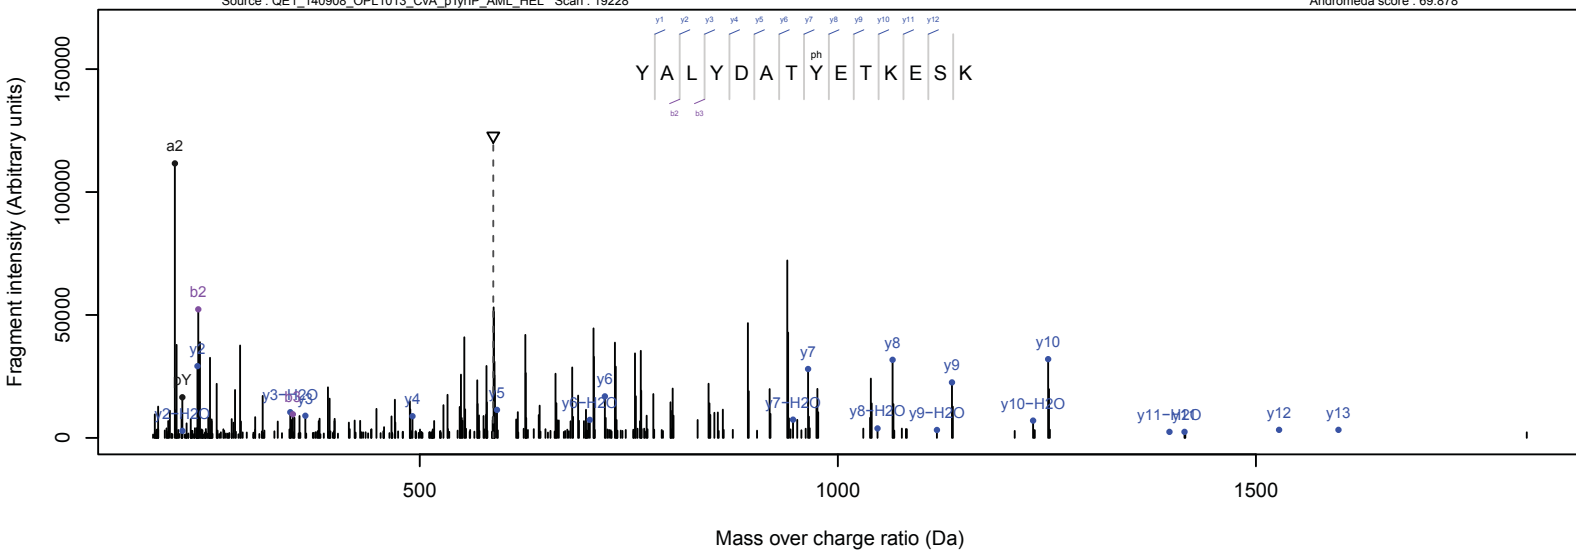

## SLY(ph)YIQQDTK-2+

Source : QE1\_140822\_OPL1013\_CvA\_pTyrIP\_AML\_cell\_lines\_part2\_E Scan : 19701

Andromeda score : 69.864

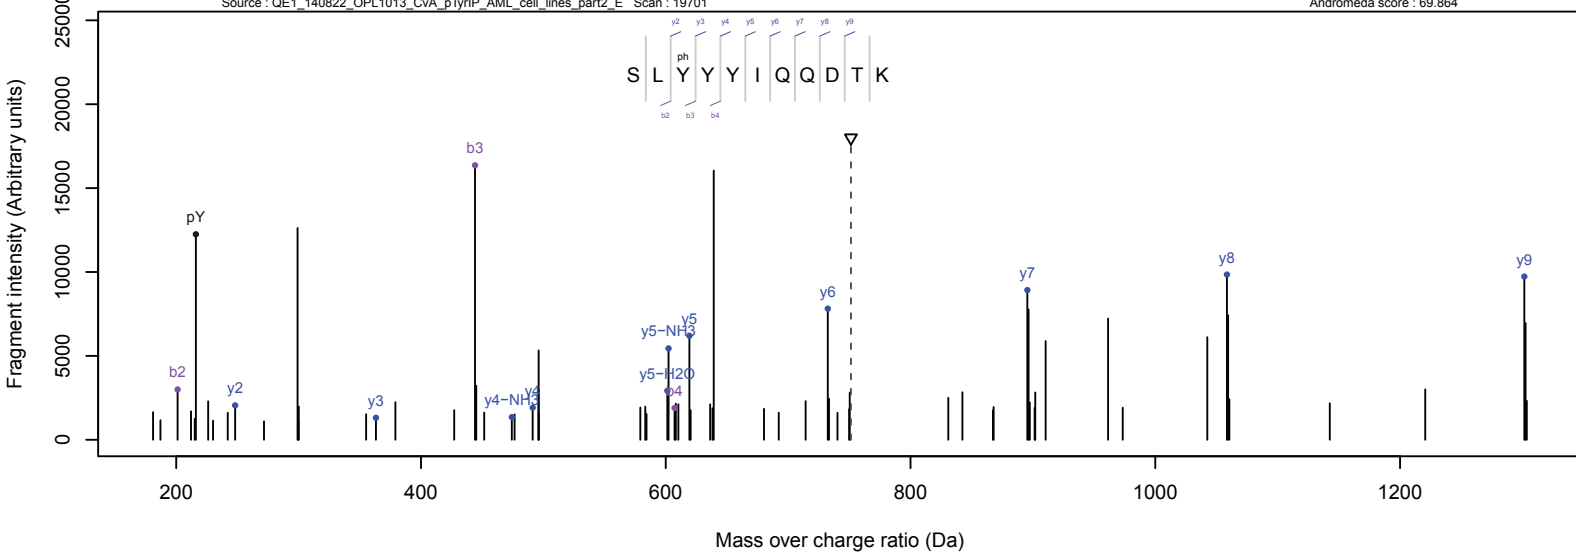

## FY(ph)SFLVLK-2+

Source : QE1\_140612\_OPL1013\_CVA\_phosphoproteomic\_landscape\_AML\_B Scan : 42850

Andromeda score : 69.825

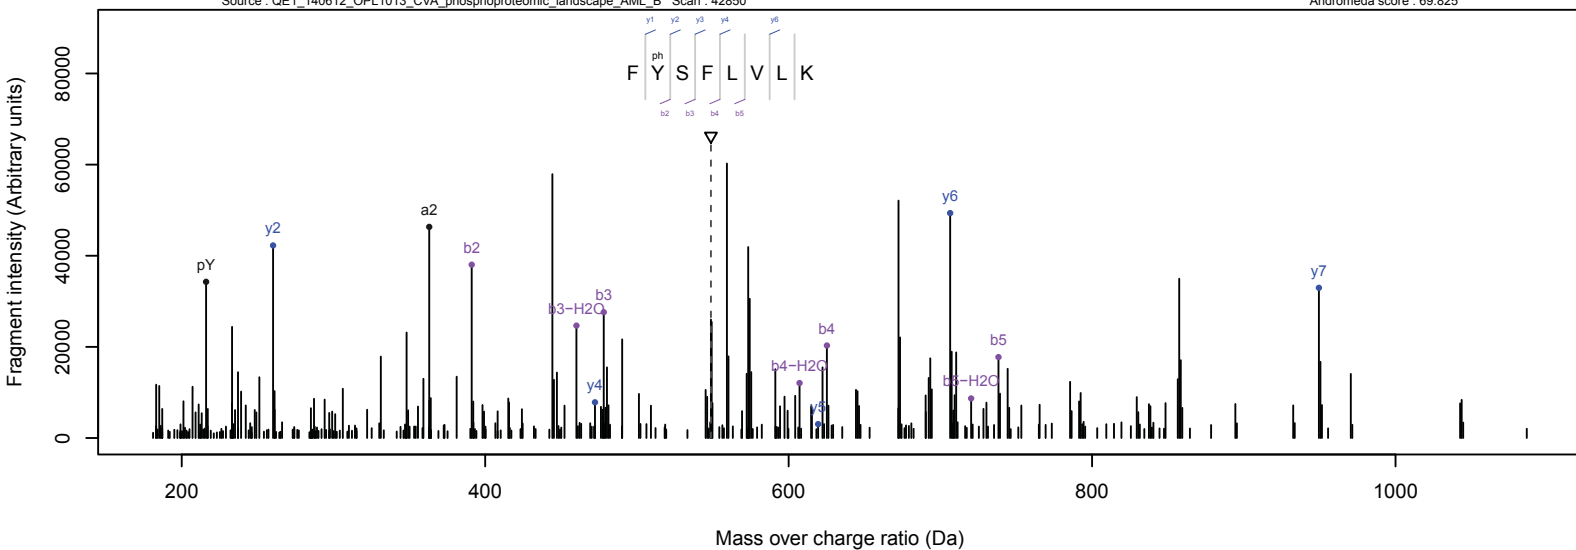

## HGLY(ph)LPTR-2+

Source : QE1\_140612\_OPL1013\_CVA\_phosphoproteomic\_landscape\_AML\_A Scan : 18536

Andromeda score : 69.825

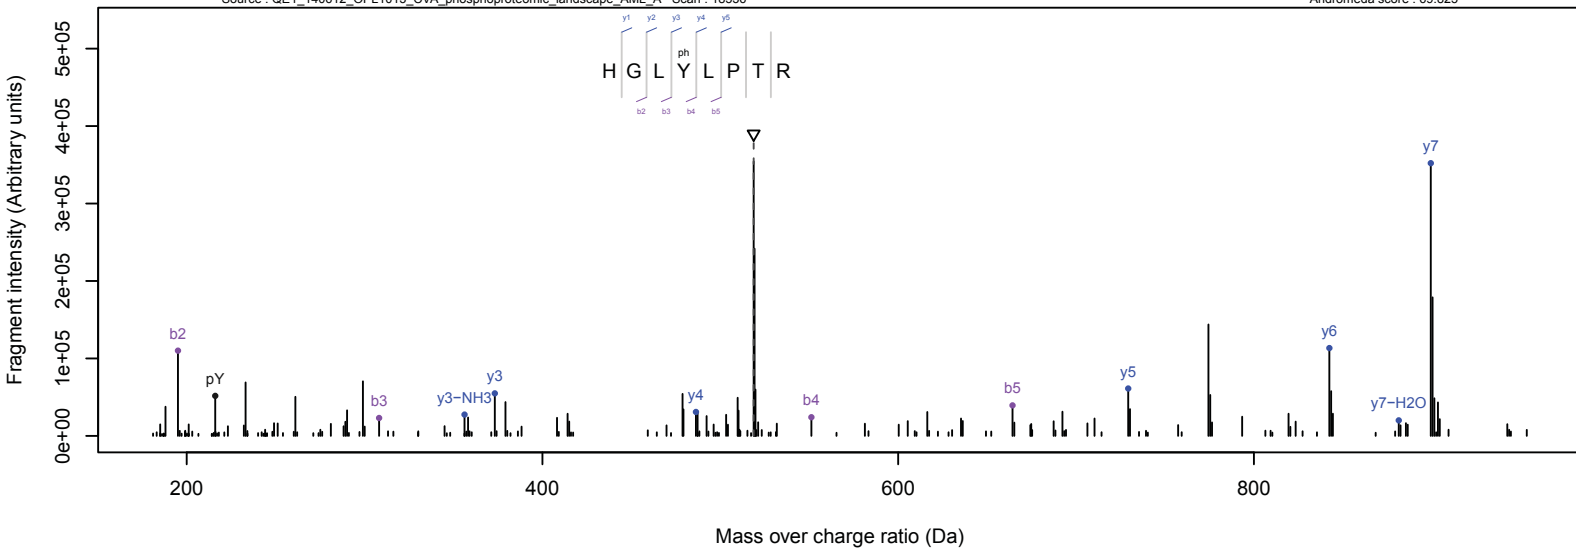

## Y(ph)AFVNWINK-2+

Source : QE1\_140822\_OPL1013\_CvA\_pTyrIP\_AML\_cell\_lines\_part2\_B Scan : 28045

Andromeda score : 69.825

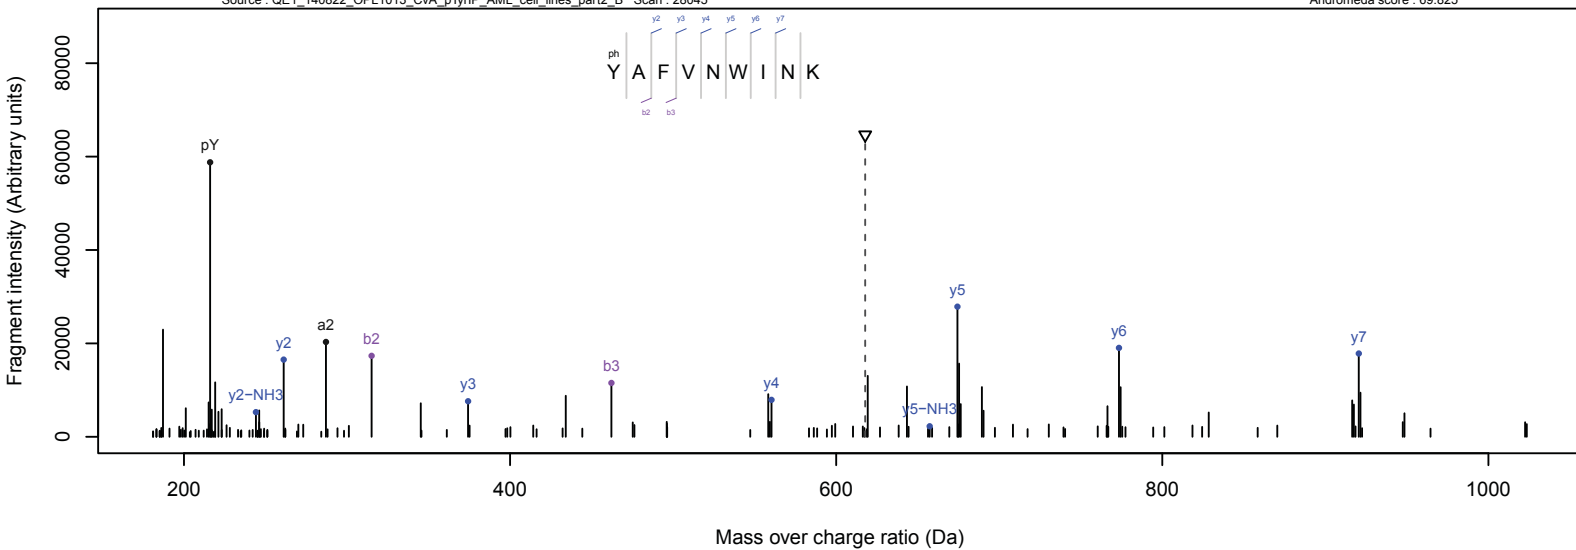

## YY(ph)AVNFPMR-2+

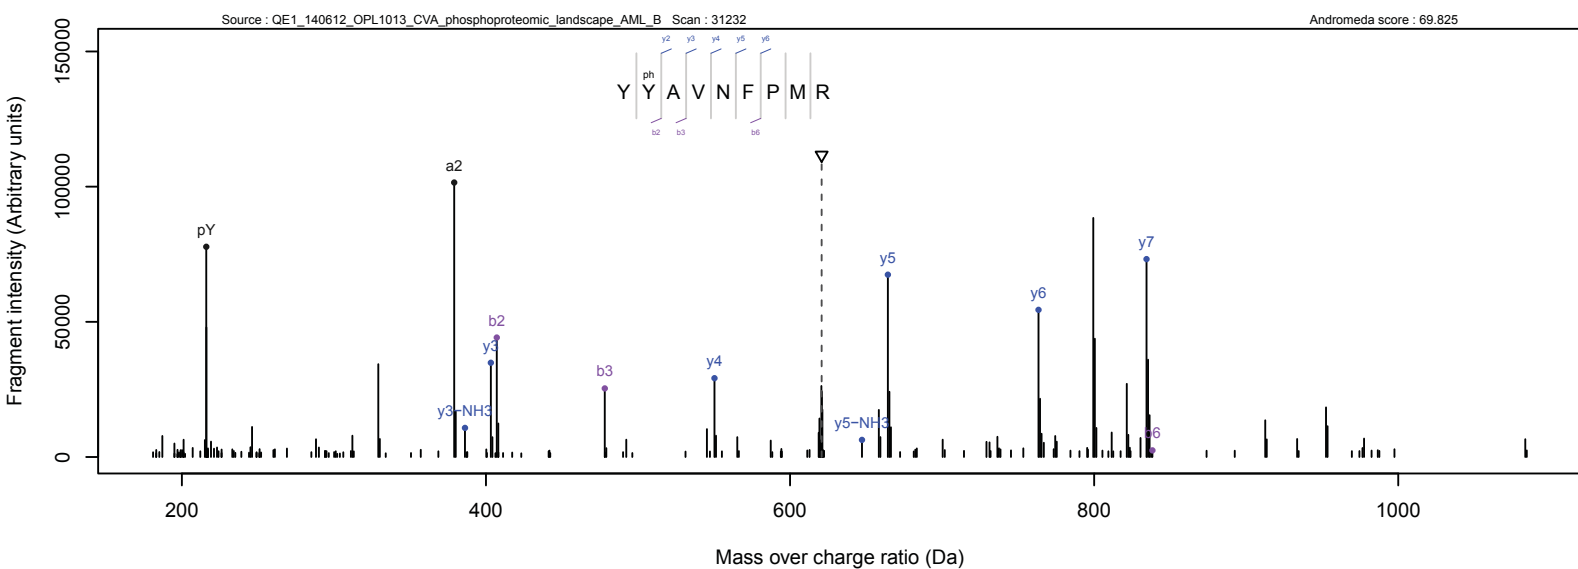

## VPLSAY(ph)ER-2+

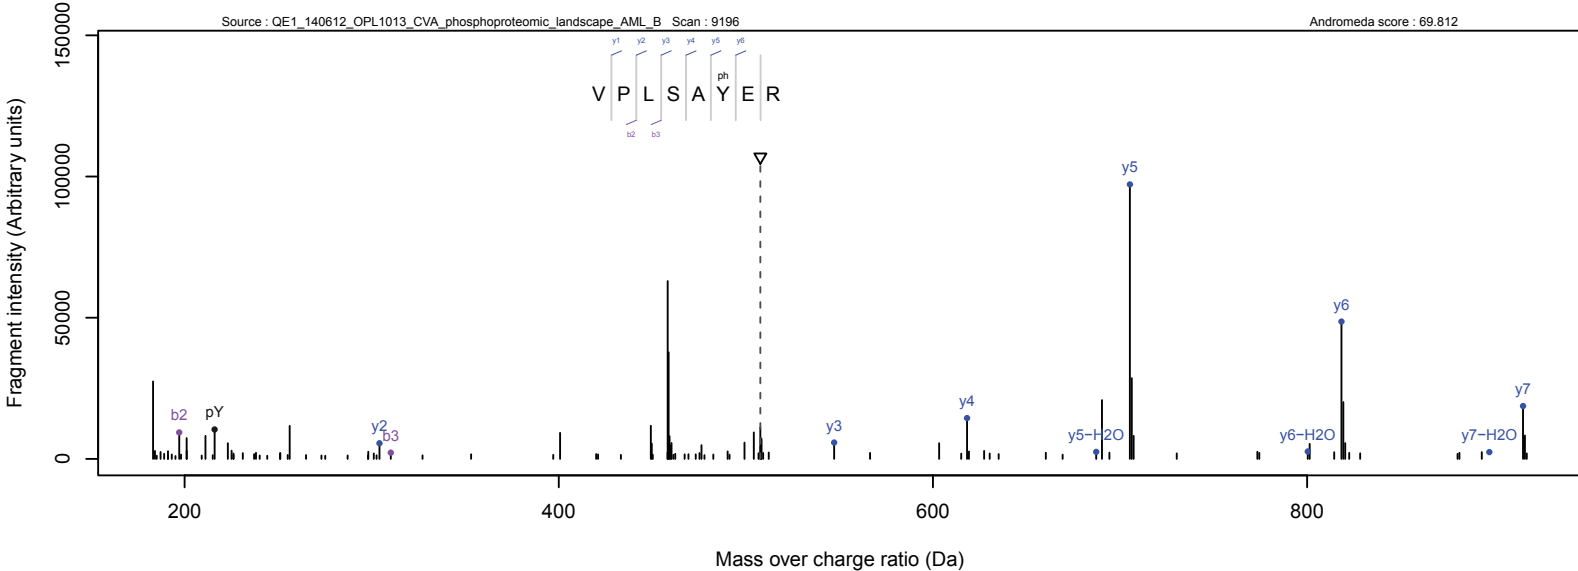

## AGDLEDS(ph)PKRPK-3+

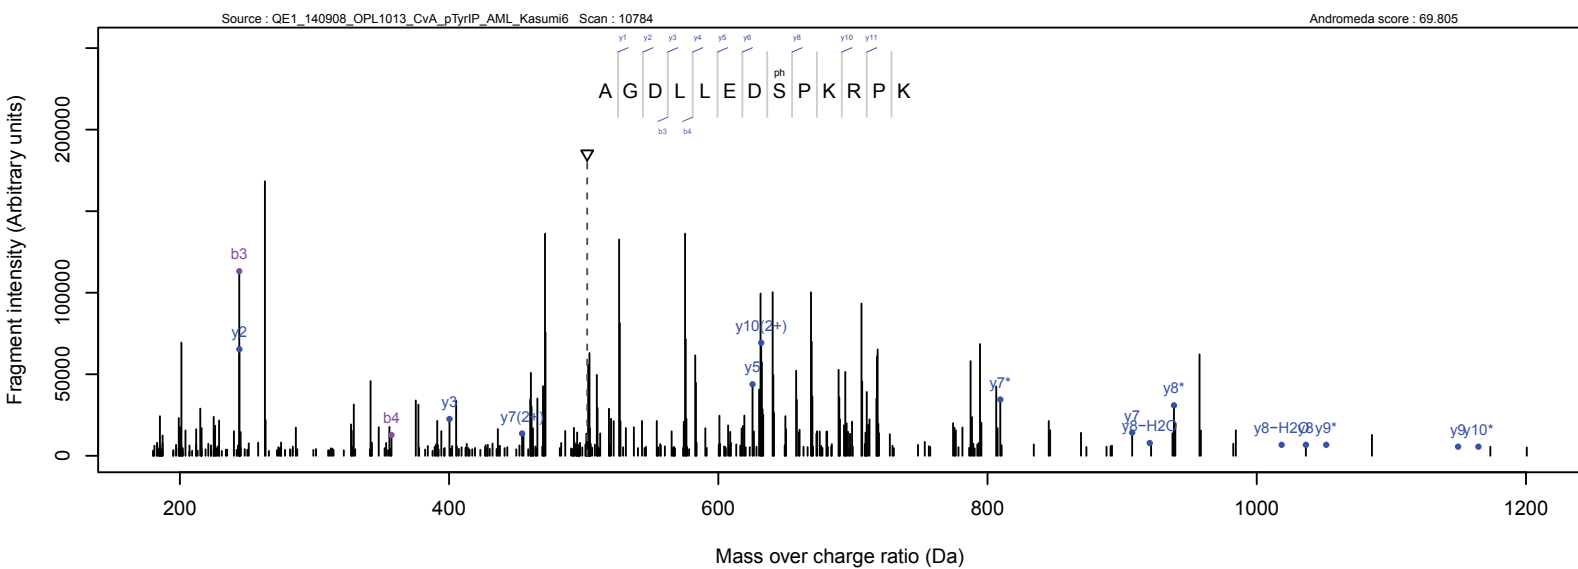



**LGAEVY(ph)HTLK-2+**

Source : QE1\_140612\_OPL1013\_CVA\_phosphoproteomic\_landscape\_AML\_C Scan : 13785

Andromeda score : 69.786

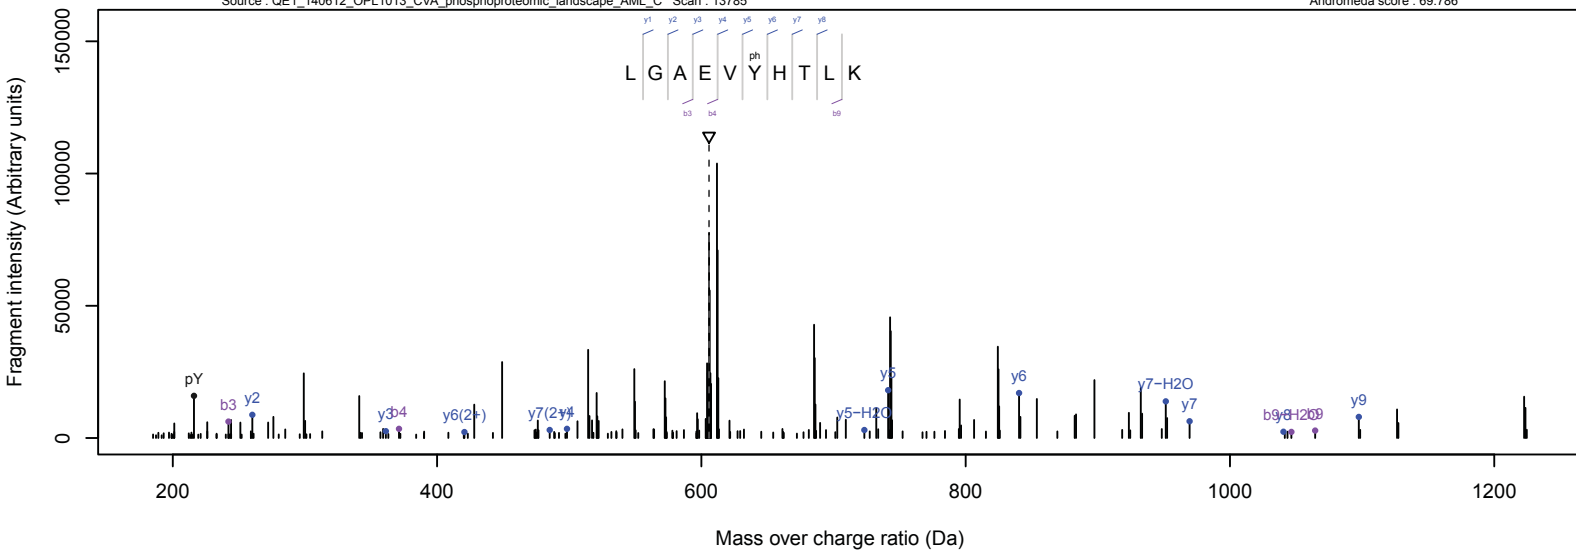

**TLEPVRPPVNDY(ph)VPSPTR-3+**

Source : QE1\_140908\_OPL1013\_CvA\_pTyrIP\_AML\_HL60 Scan : 35811

Andromeda score : 69.779

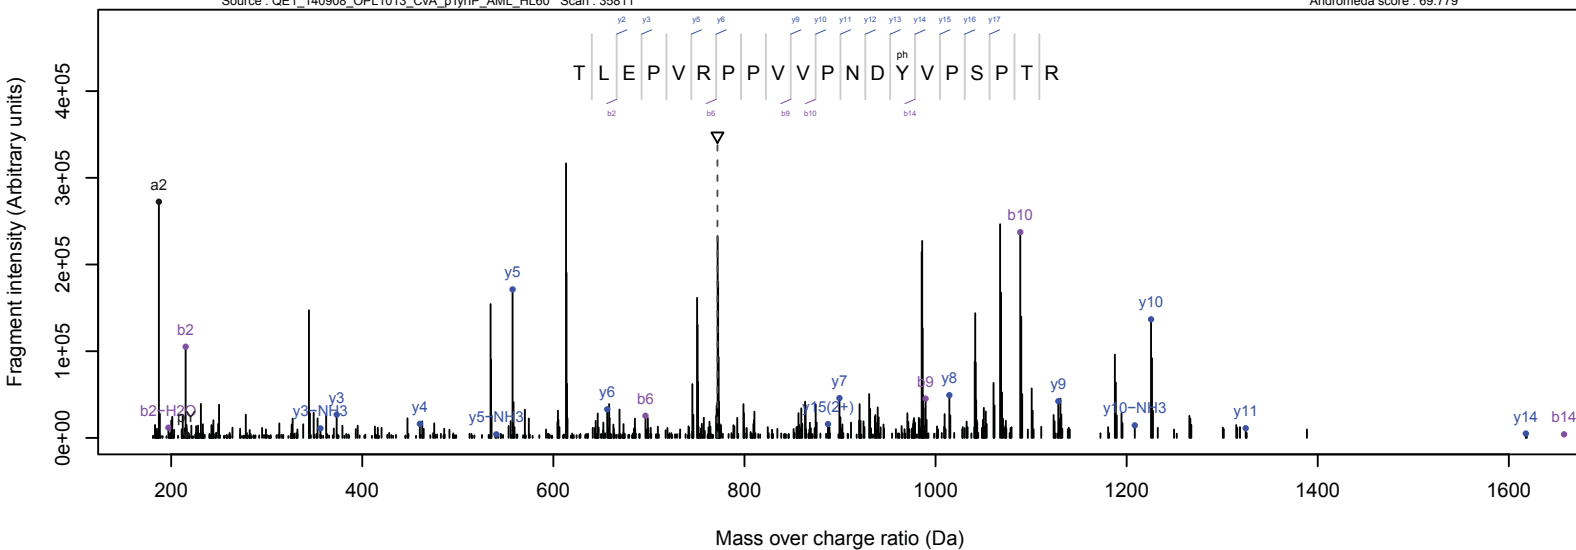

**GYGY(ph)GQGAGTLSTDKGESLGIK-3+**

Source : QE1\_140612\_OPL1013\_CVA\_phosphoproteomic\_landscape\_AML\_C Scan : 22297

Andromeda score : 69.765

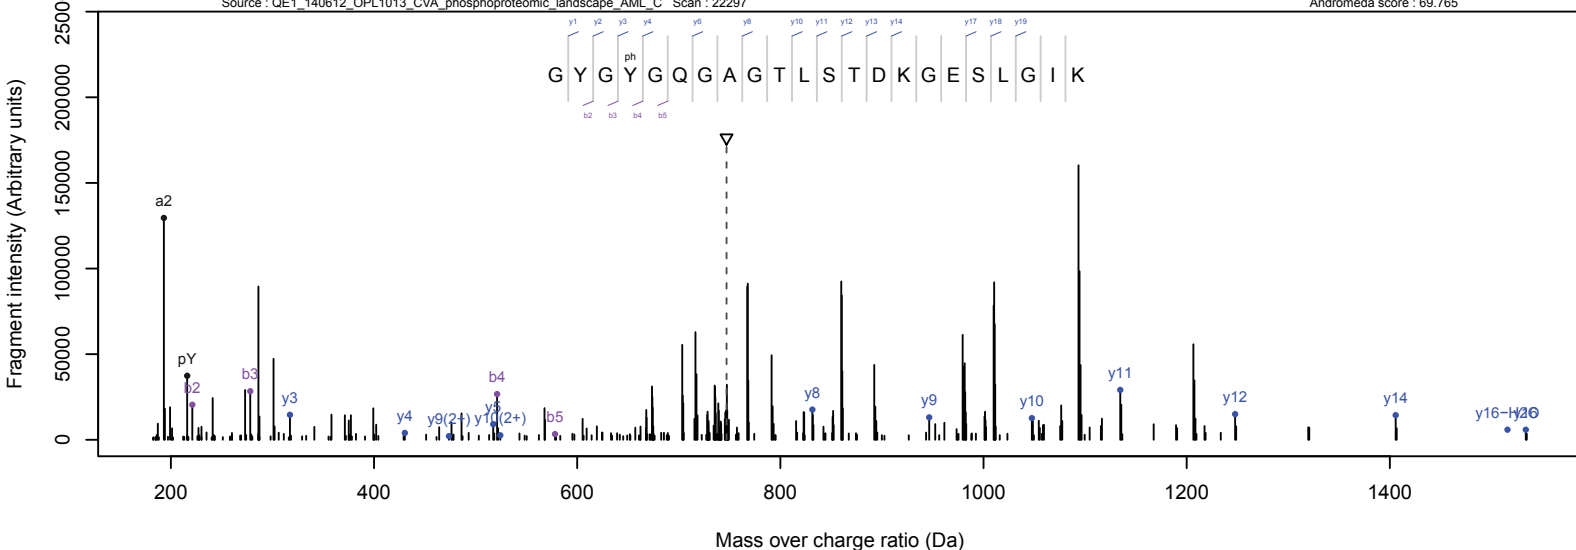

## KDPY(ph)ANMLQR-2+

Source: QE1\_140612\_OPL1013\_CVA\_phosphoproteomic\_landscape\_AML\_C Scan: 19385

Andromeda score: 69.721

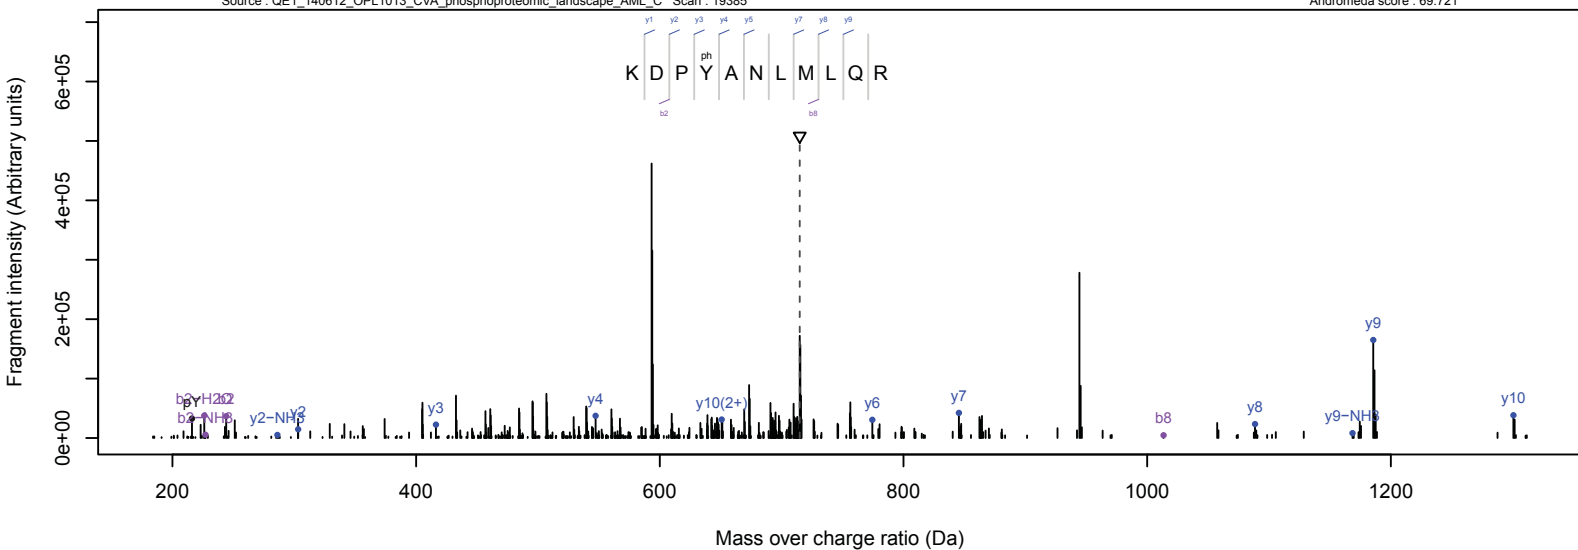

## LVTCTGY(ph)HQVR-3+

Source: QE1\_140612\_OPL1013\_CVA\_phosphoproteomic\_landscape\_AML\_C Scan: 7158

Andromeda score: 69.721

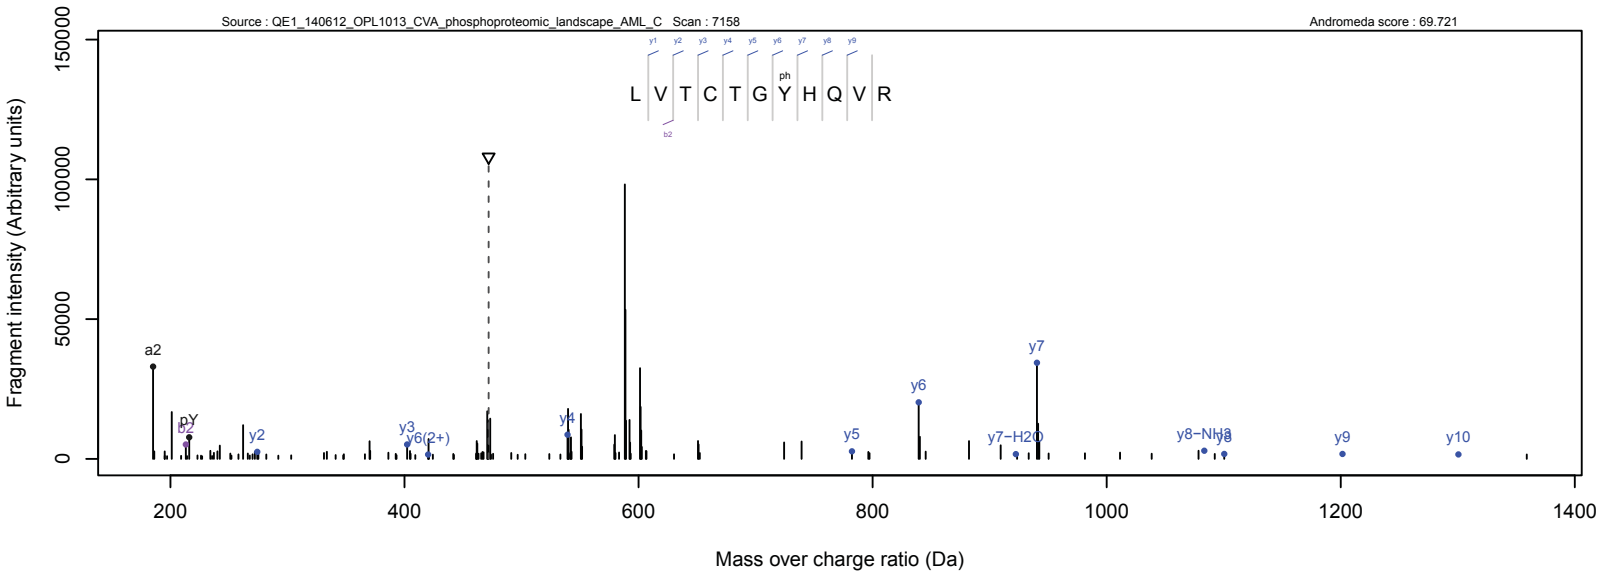

## SSEVEY(ph)INKYR-2+

Source: QE1\_140612\_OPL1013\_CVA\_phosphoproteomic\_landscape\_AML\_C Scan: 15512

Andromeda score: 69.721

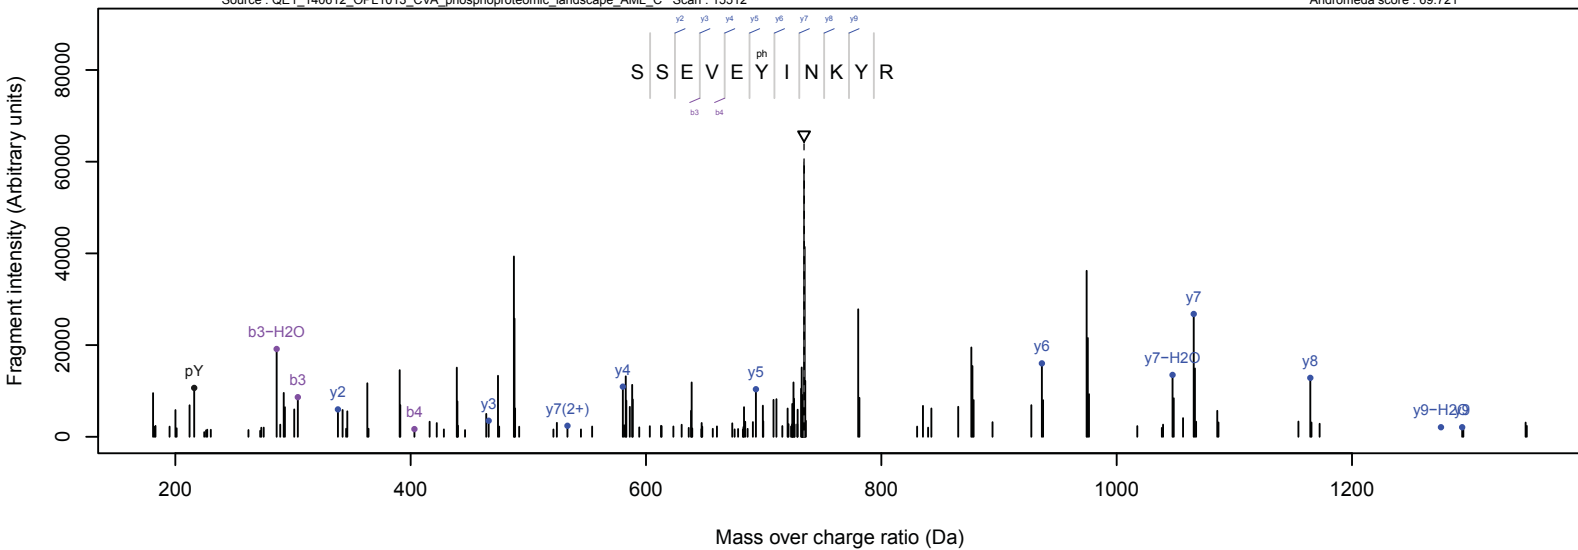

LHY(ph)PTGEVFPFR-3+

Source : QE1\_140612\_OPL1013\_CVA\_phosphoproteomic\_landscape\_AML\_C Scan : 25769

Andromeda score : 69.672

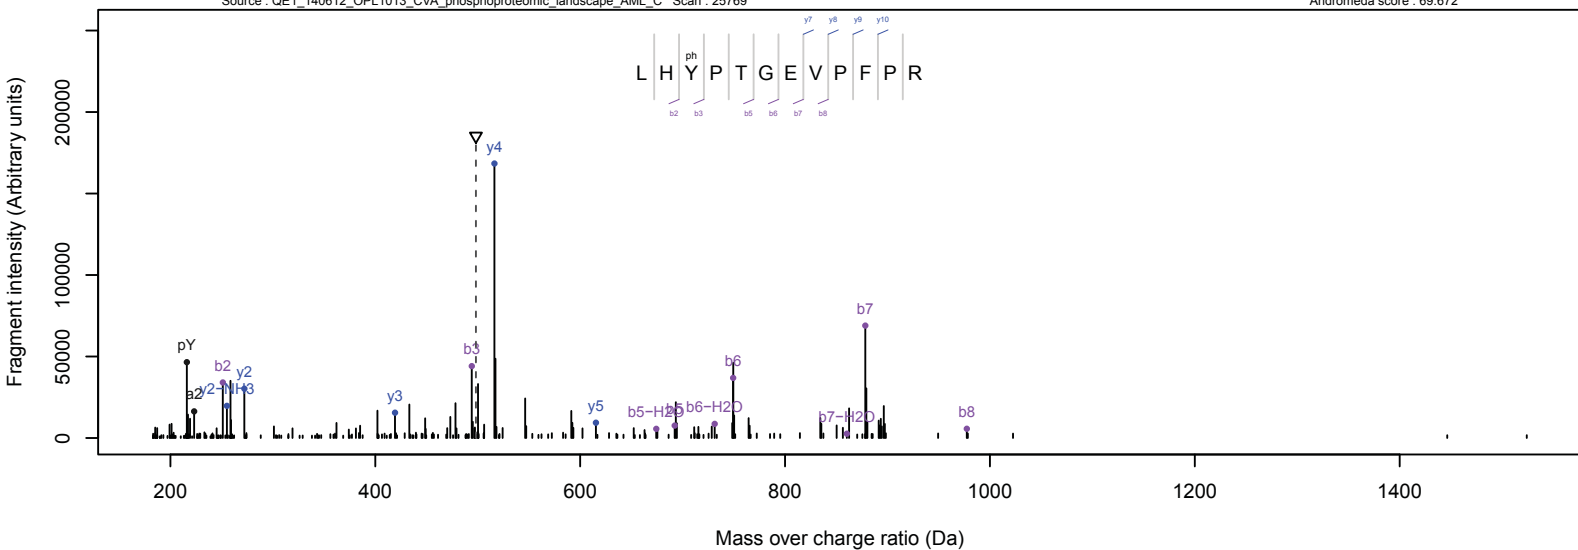

IYEGAY(ph)HVLHK-3+

Source : QE1\_140612\_OPL1013\_CVA\_phosphoproteomic\_landscape\_AML\_C Scan : 13546

Andromeda score : 69.65

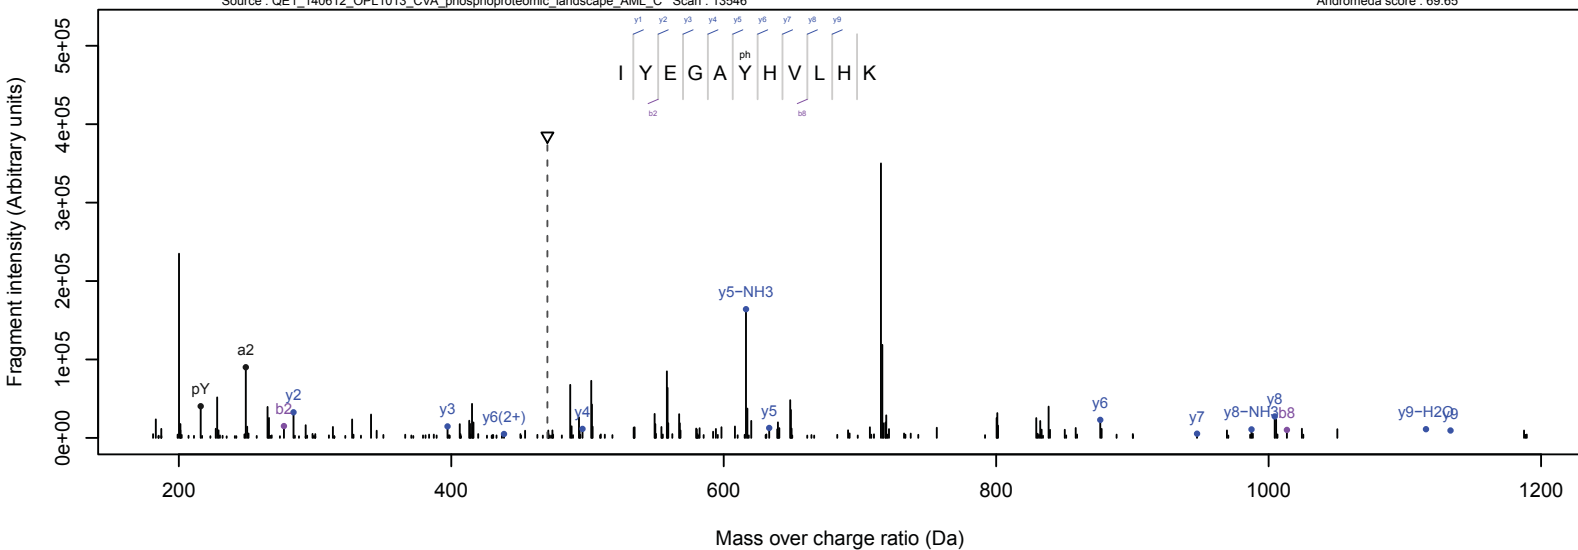

Y(ph)YYDKNIMTK-3+

Source : QE1\_140612\_OPL1013\_CVA\_phosphoproteomic\_landscape\_AML\_B Scan : 15093

Andromeda score : 69.65

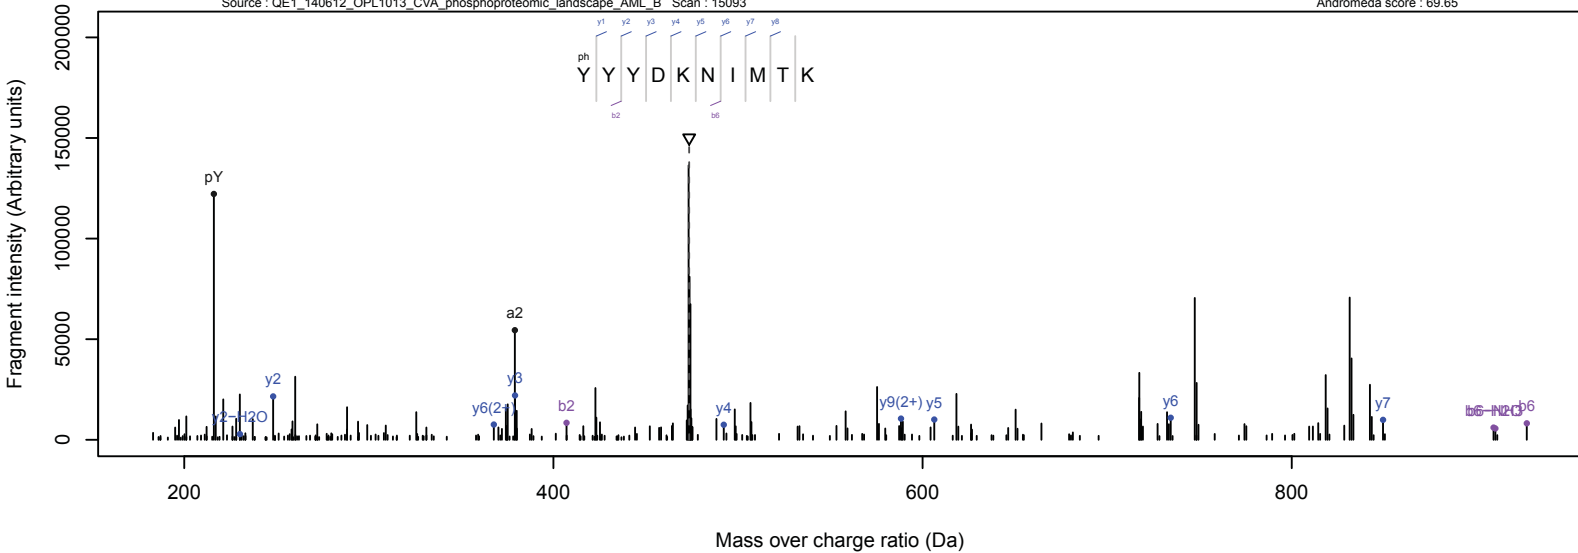



GSVQSFPTSPVEYHSPGLISNSPVLGSGYSYSSGISLSR-3+

Source : QE1\_140612\_OPL1013\_CVA\_phosphoproteomic\_landscape\_AML\_A Scan : 43330

Andromeda score : 69.537

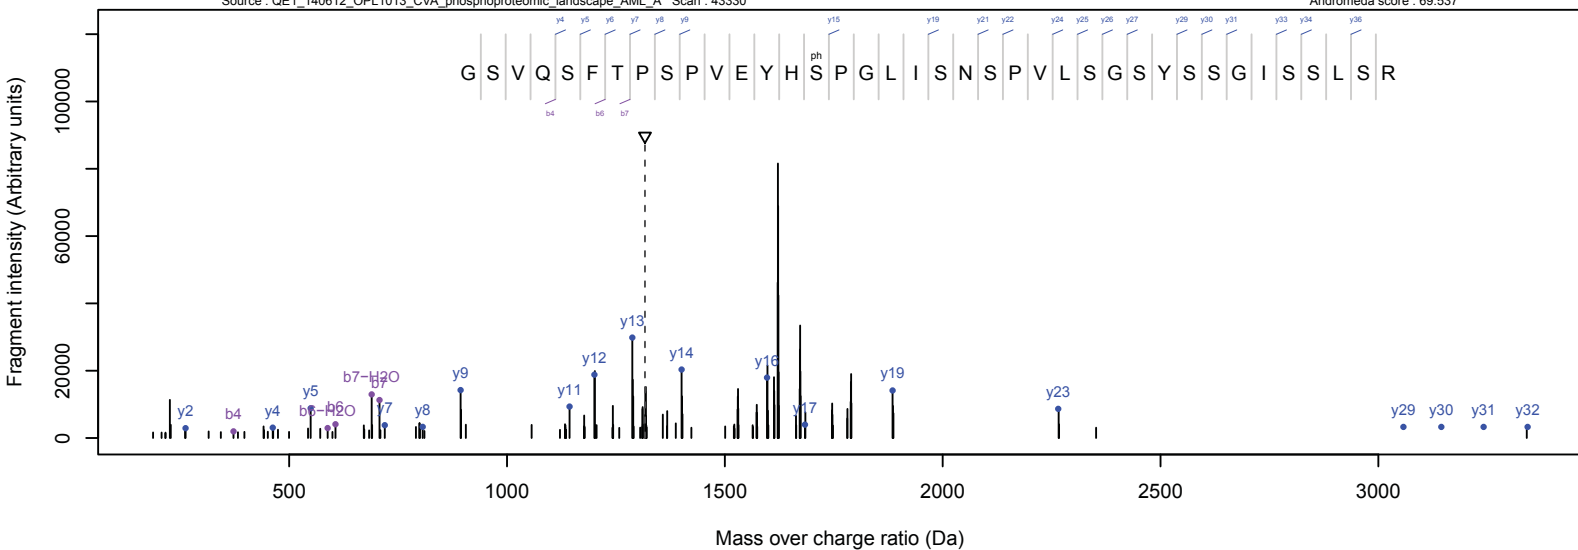

EATQPEPIY(ph)AESTKR-2+

Source : QE1\_140908\_OPL1013\_CvA\_pTyrIP\_AML\_OCI\_AML3 Scan : 11471

Andromeda score : 69.485

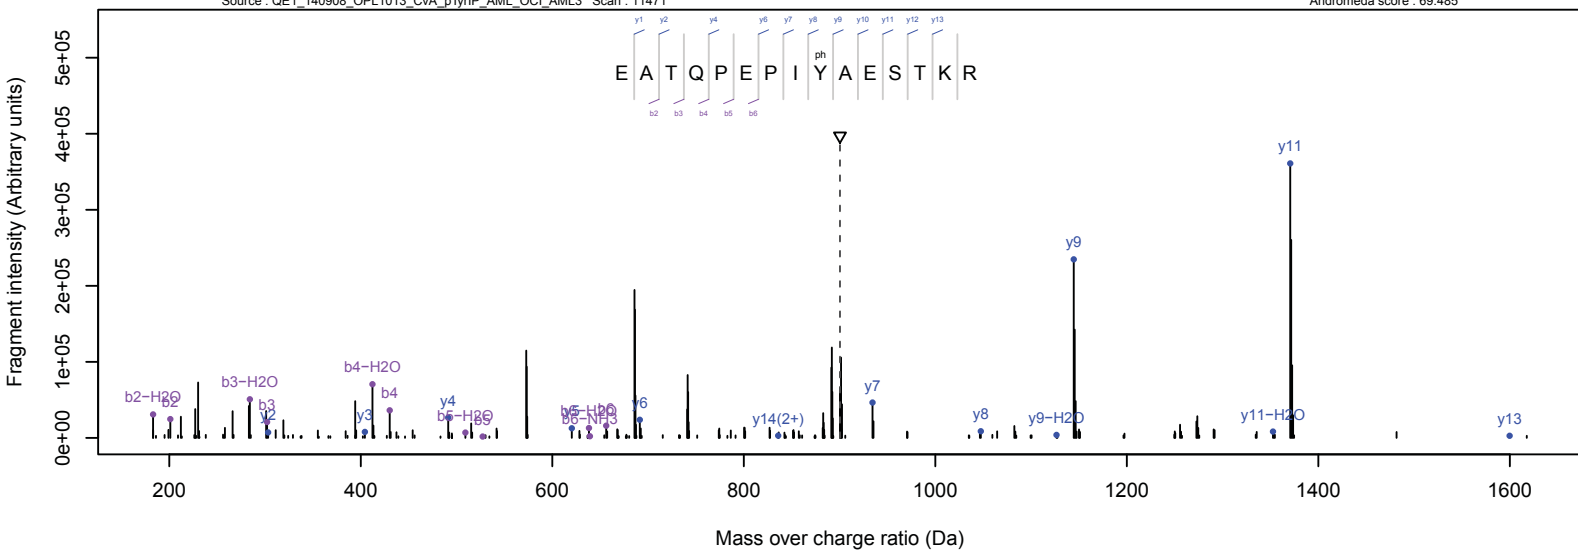

Y(ph)LTILQK-2+

Source : QE1\_140612\_OPL1013\_CVA\_phosphoproteomic\_landscape\_AML\_A Scan : 23782

Andromeda score : 69.383

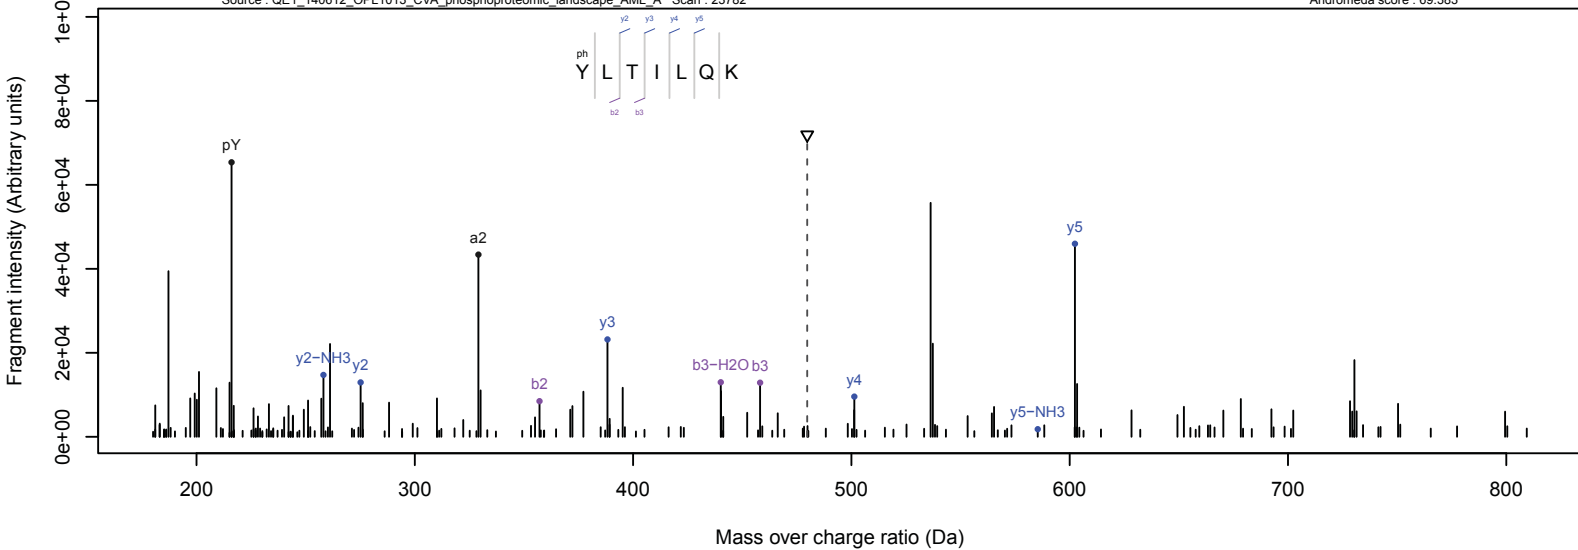

## VKGGHVAQIYAIR-3+

Source: QE1\_140612\_OPL1013\_CVA\_phosphoproteomic\_landscape\_AML\_C Scan: 13560

Andromeda score: 69.352

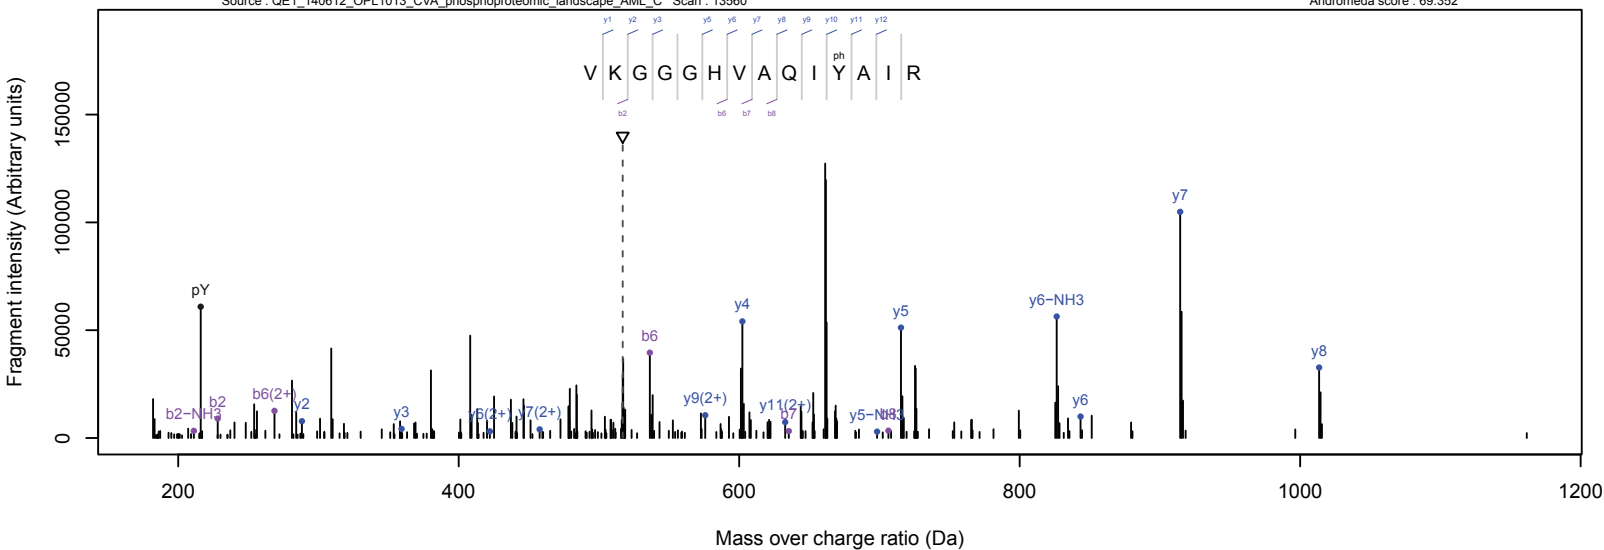

## YQDVYVELSHIK-2+

Source: QE1\_140612\_OPL1013\_CVA\_phosphoproteomic\_landscape\_AML\_B Scan: 27108

Andromeda score: 69.345

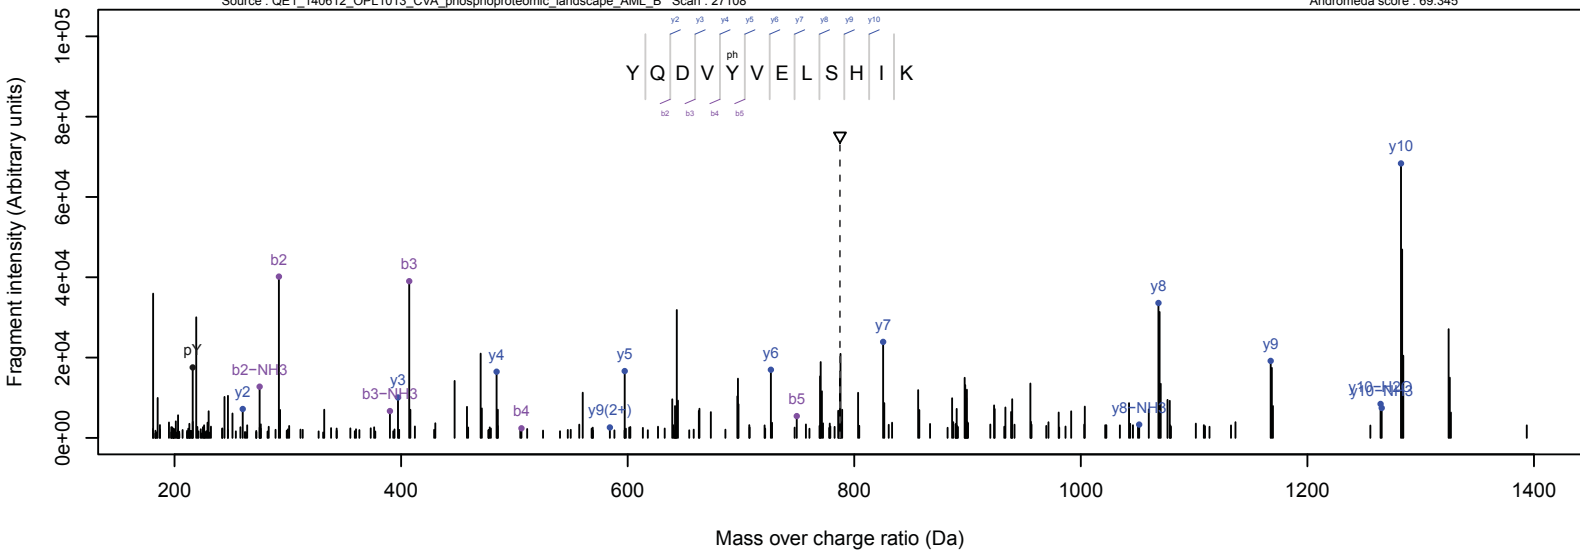

## GKY(ph)GQFSLNPGGR-2+

Source: QE1\_140612\_OPL1013\_CVA\_phosphoproteomic\_landscape\_AML\_B Scan: 15344

Andromeda score: 69.331

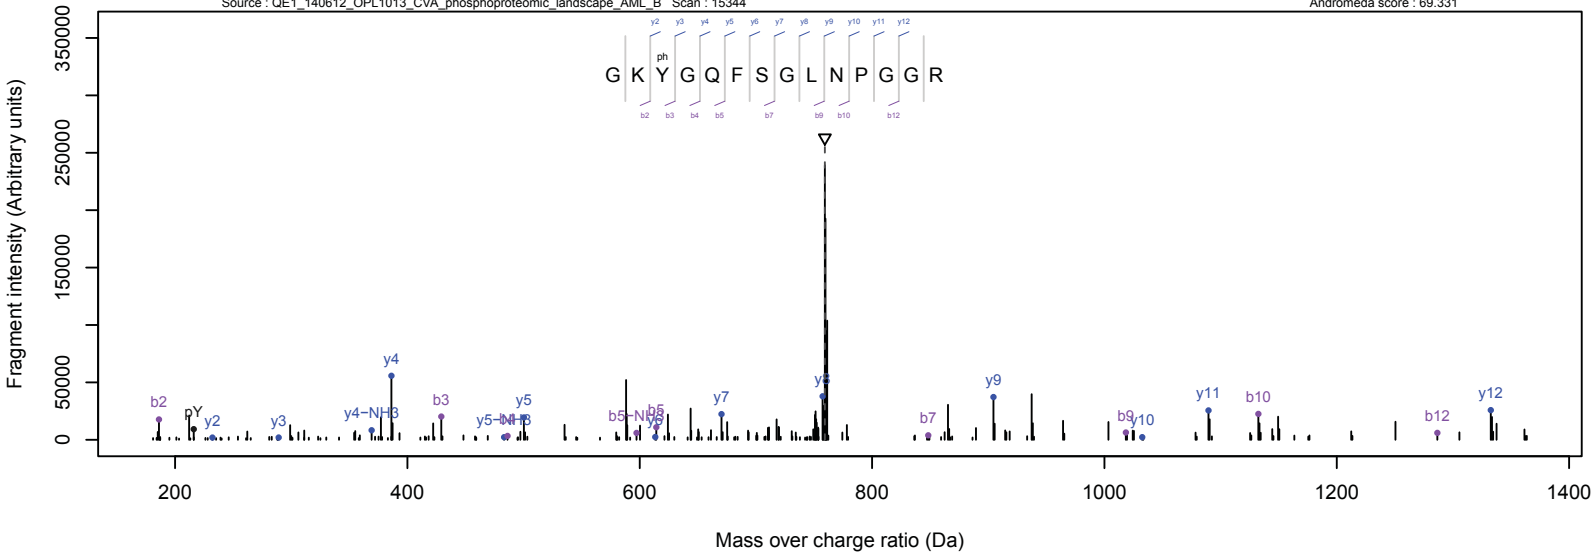

## GLEVTAY(ph)SPLGSSDR-2+

Source: QE1\_140612\_OPL1013\_CVA\_phosphoproteomic\_landscape\_AML\_B Scan: 27444

Andromeda score: 69.331

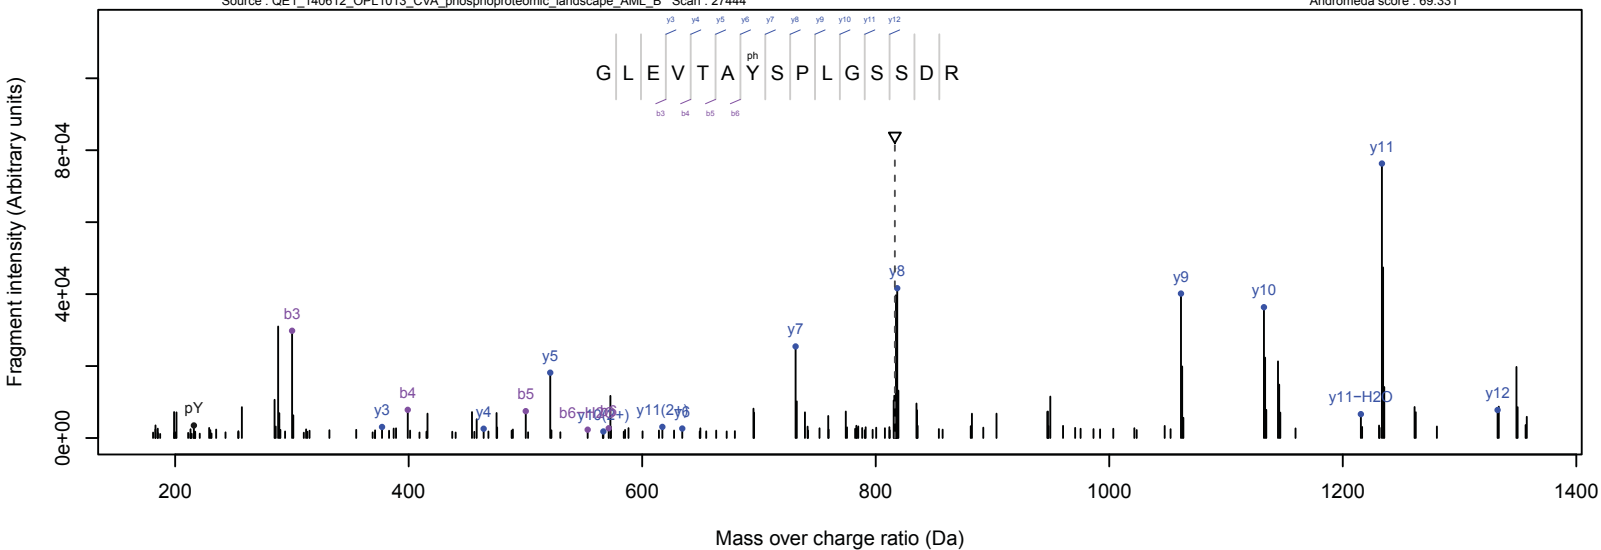

## MLGEALSKNPGY(ph)IKLR-3+

Source: QE1\_140612\_OPL1013\_CVA\_phosphoproteomic\_landscape\_AML\_C Scan: 27618

Andromeda score: 69.331

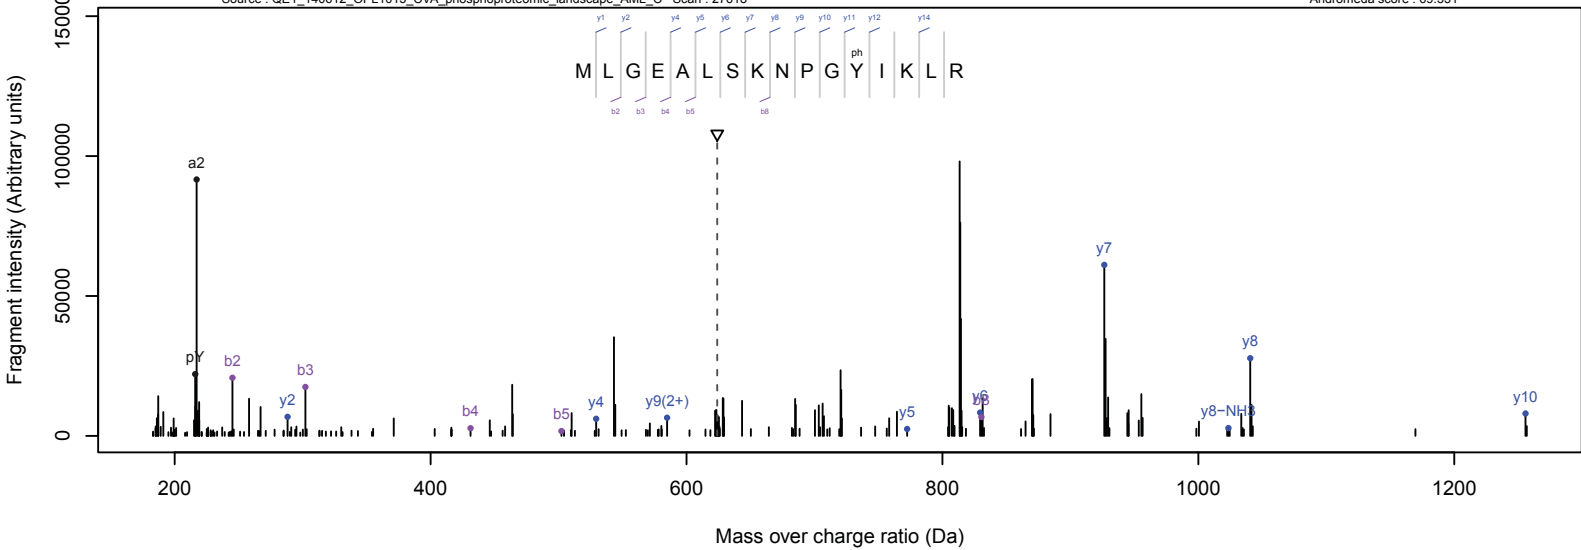

## SLDGEVGTGQY(ph)ATTK-2+

Source: QE1\_140612\_OPL1013\_CVA\_phosphoproteomic\_landscape\_AML\_C Scan: 11116

Andromeda score: 69.331

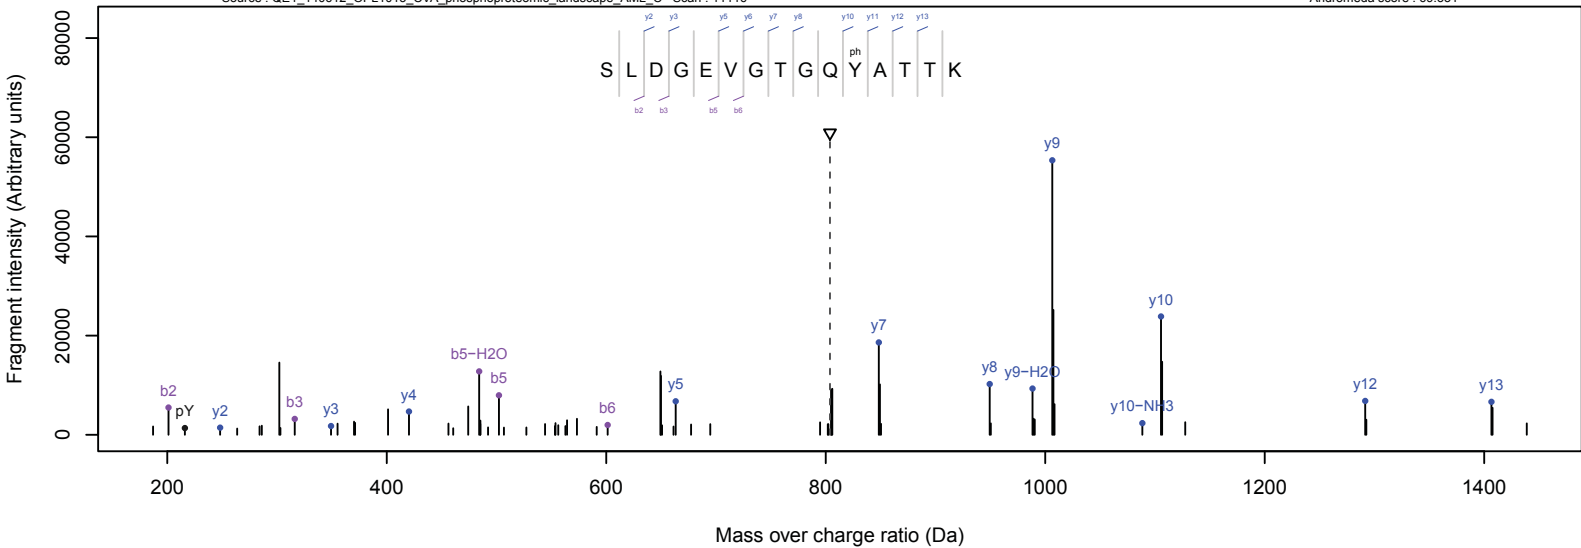

## TACTNFMMPY(ph)VVTR-2+

Source : Qe1\_141024\_OPL1013\_CvA\_AML\_pTyrIP\_MOLM13 Scan : 35509

Andromeda score : 69.331

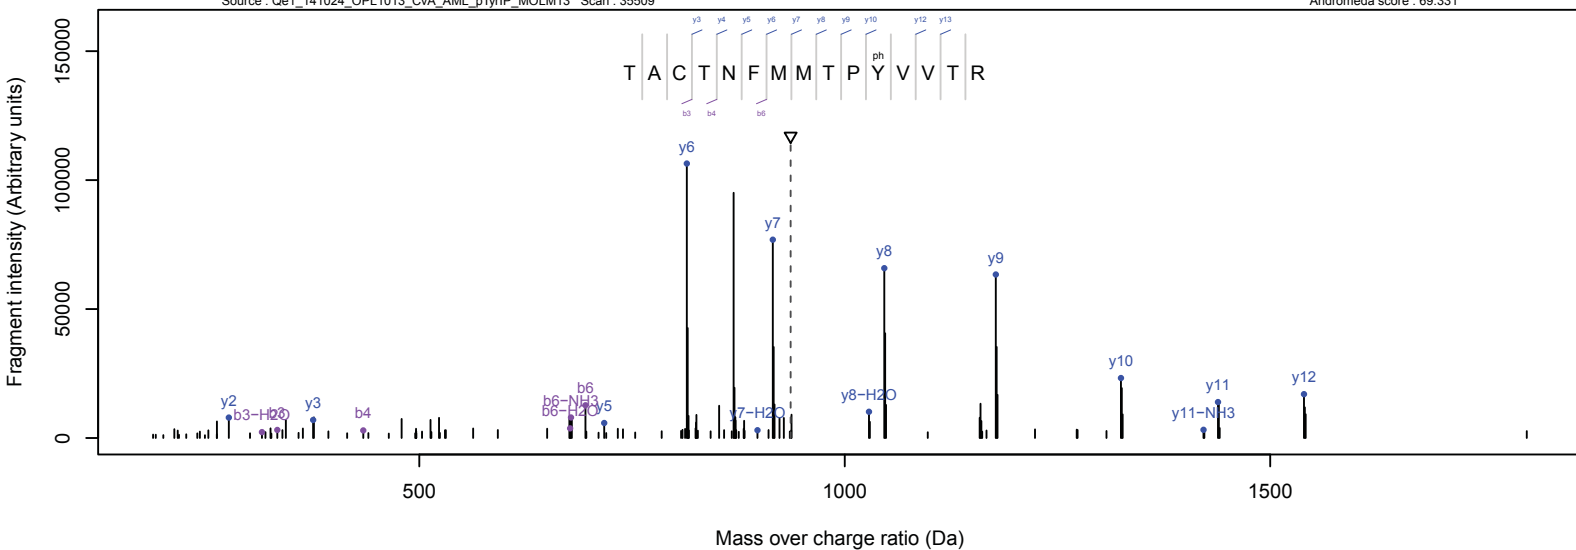

## THSQGGYGSQGYK(ph)NWK-3+

Source : QE1\_140612\_OPL1013\_CVA\_phosphoproteomic\_landscape\_AML\_C Scan : 9846

Andromeda score : 69.331

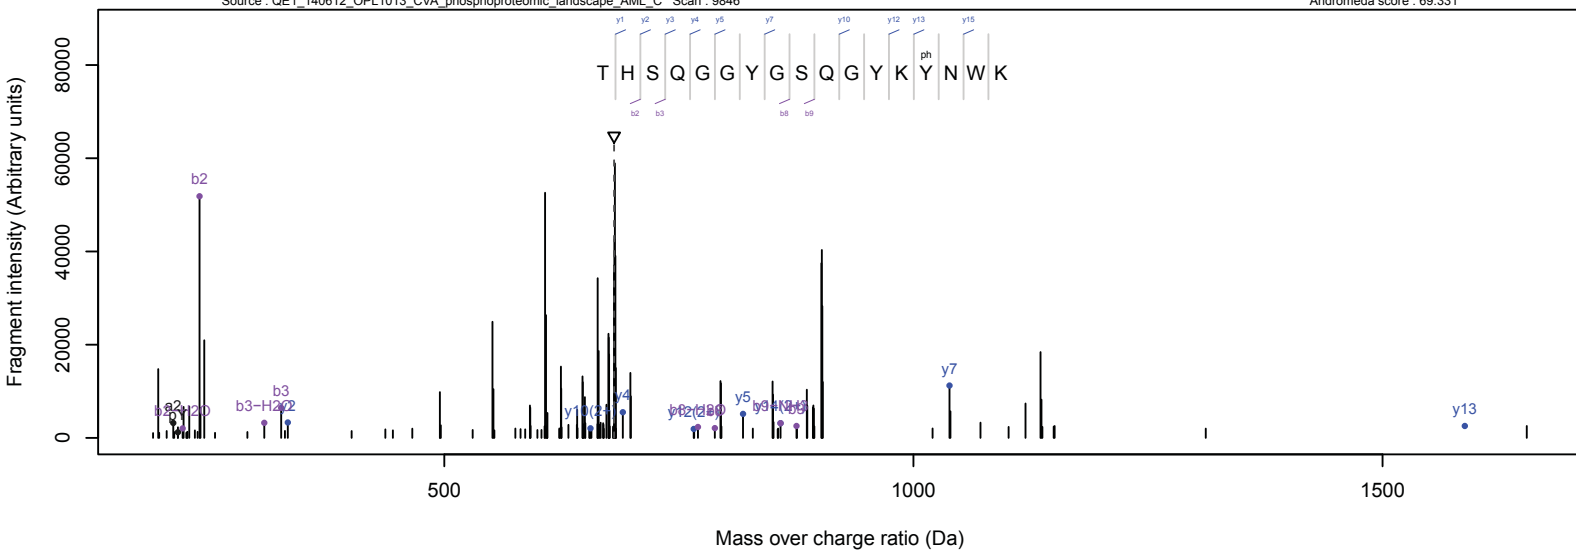

## (ac)ADQIPLY(ph)PVR-2+

Source : QE1\_140612\_OPL1013\_CVA\_phosphoproteomic\_landscape\_AML\_C Scan : 36866

Andromeda score : 69.275

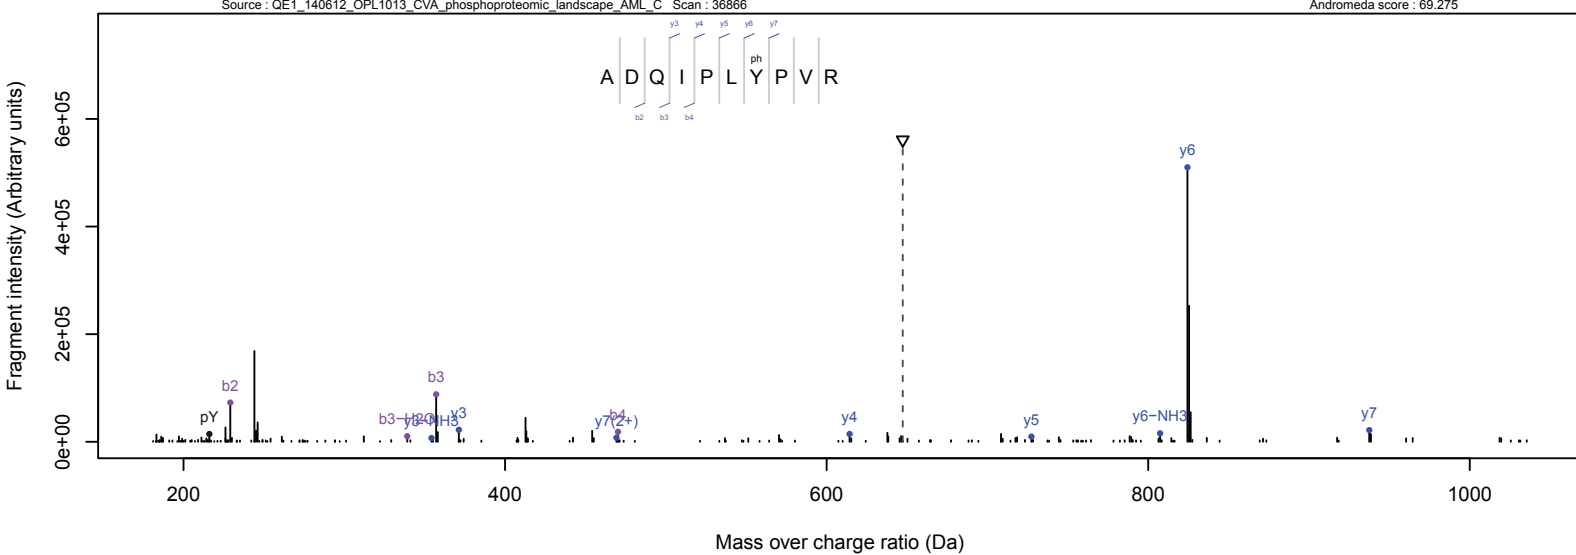



## SIGEY(ph)DVLR-2+

Source: QE1\_140612\_OPL1013\_CVA\_phosphoproteomic\_landscape\_AML\_D Scan: 21986

Andromeda score: 69.275

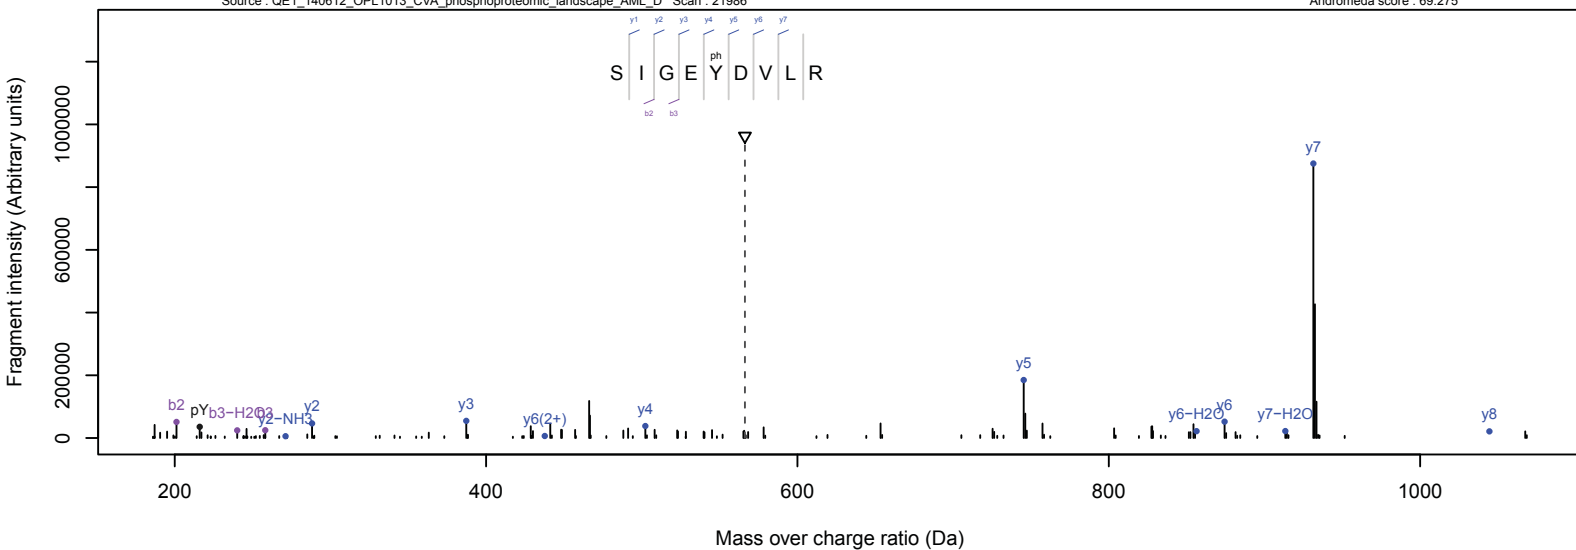

## VQY(ph)VIQGYHK-2+

Source: QE1\_140612\_OPL1013\_CVA\_phosphoproteomic\_landscape\_AML\_E Scan: 12118

Andromeda score: 69.275

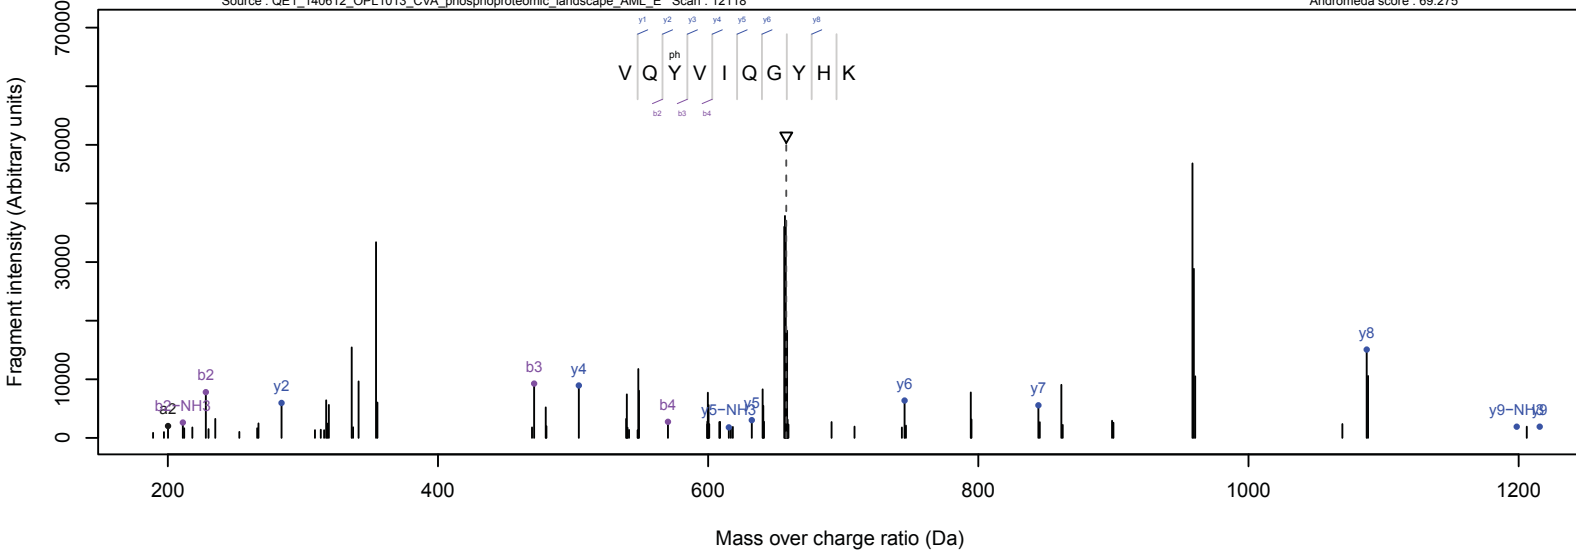

## AEFAEY(ph)AS(ph)VDR-2+

Source: QE1\_140612\_OPL1013\_CVA\_phosphoproteomic\_landscape\_AML\_B Scan: 18374

Andromeda score: 69.261

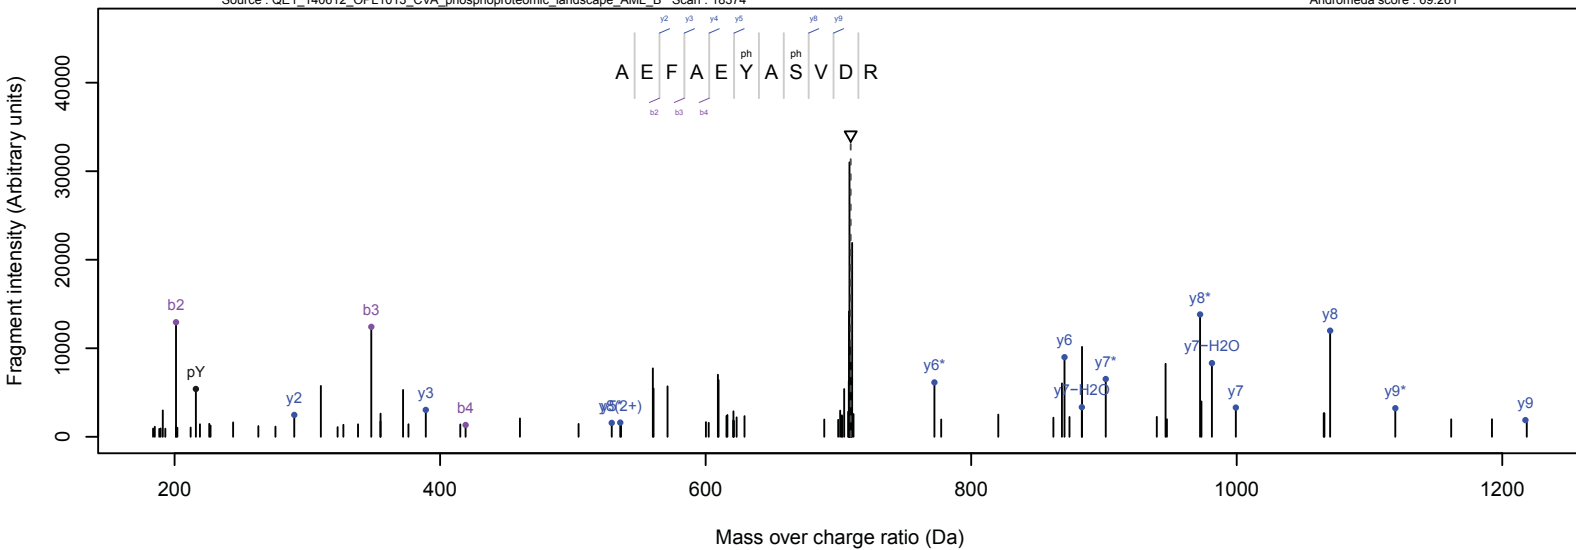

## AKY(ph)FIRDEFLLR

Source : QE1\_140612\_OPL1013\_CVA\_phosphoproteomic\_landscape\_AML\_C Scan : 27166

Andromeda score : 69.261

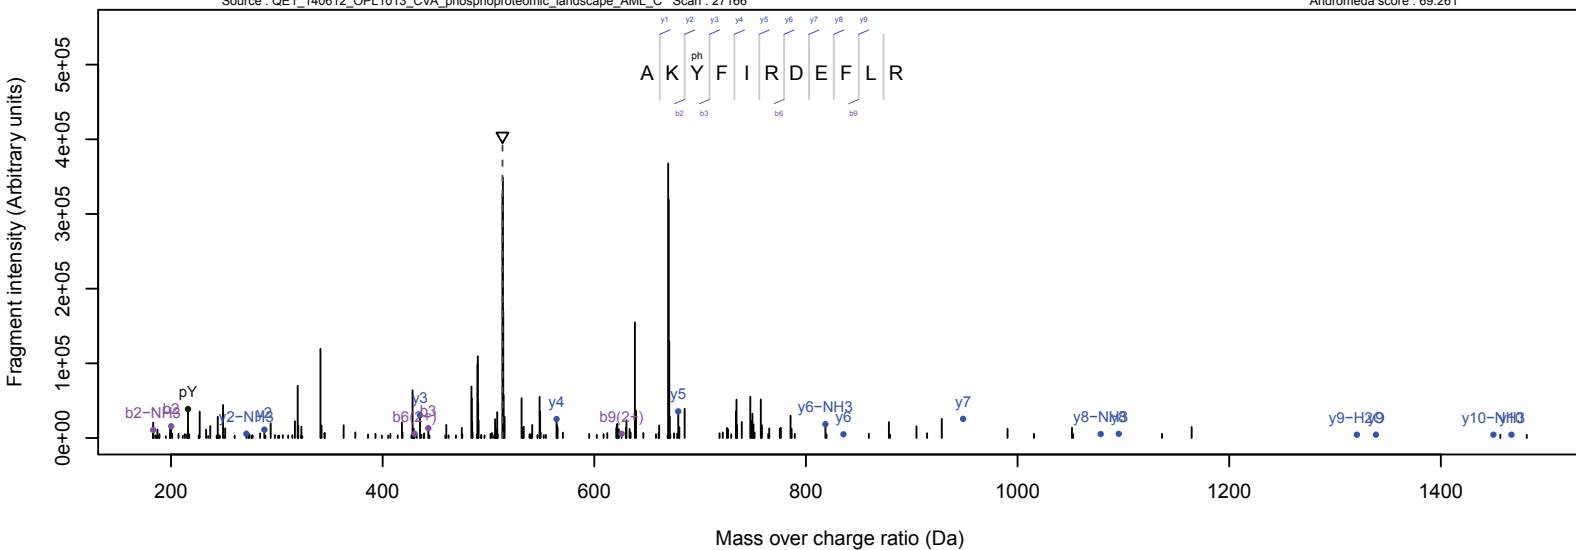

## Y(ph)LSRPLPGDLGSWK

Source : QE1\_140612\_OPL1013\_CVA\_phosphoproteomic\_landscape\_AML\_C Scan : 32380

Andromeda score : 69.261

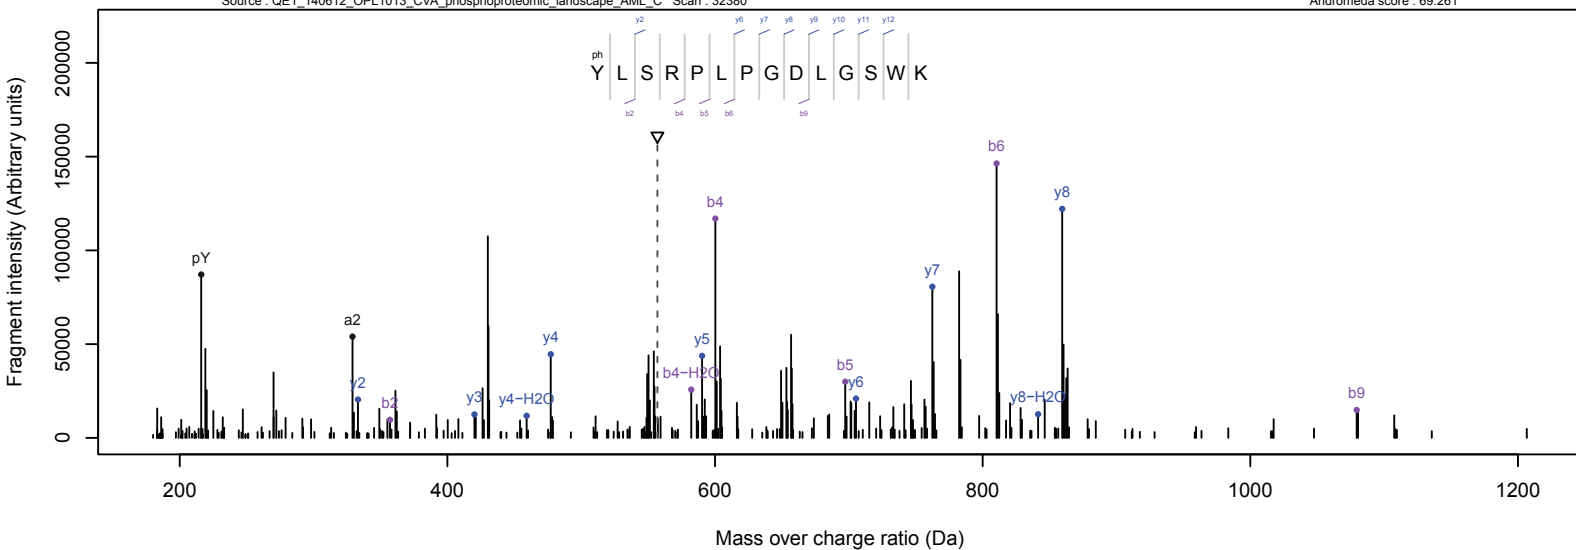

## ESQAKDVEEY(ph)FK

Source : QE1\_140612\_OPL1013\_CVA\_phosphoproteomic\_landscape\_AML\_C Scan : 25714

Andromeda score : 69.258

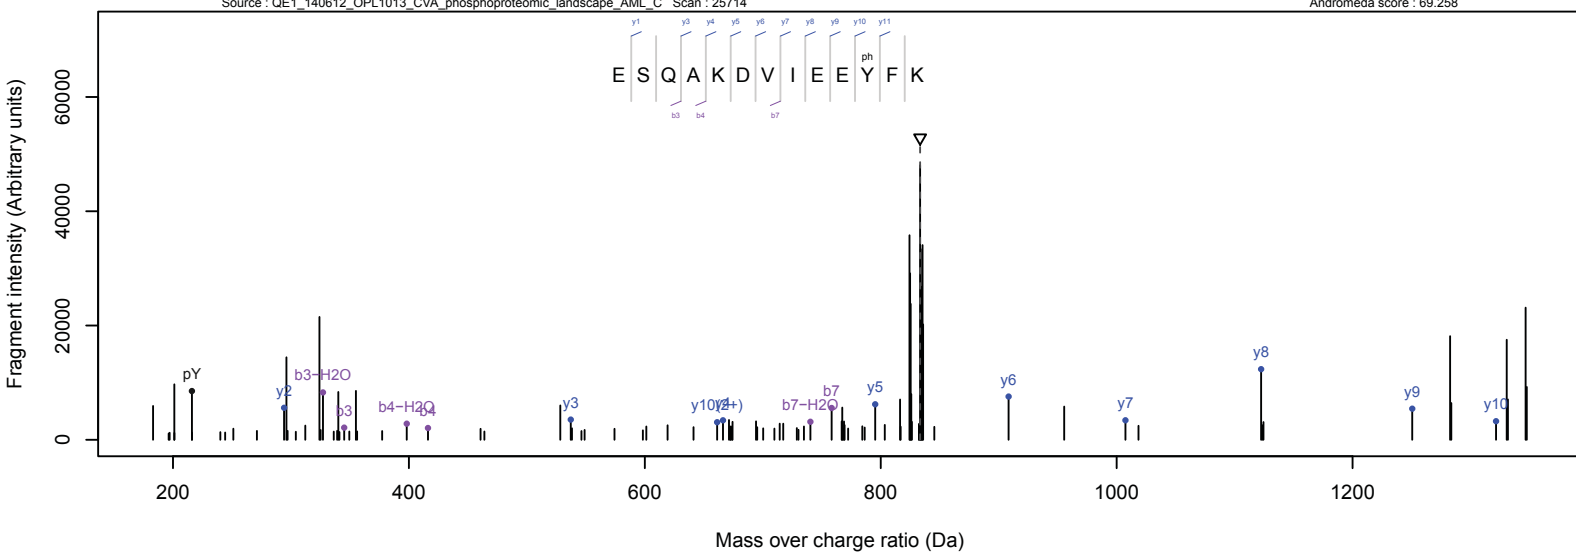

NVMPTLVIPAHYVR-2+

Source: QE1\_140612\_OPL1013\_CVA\_phosphoproteomic\_landscape\_AML\_C Scan: 36661

Andromeda score: 69.258

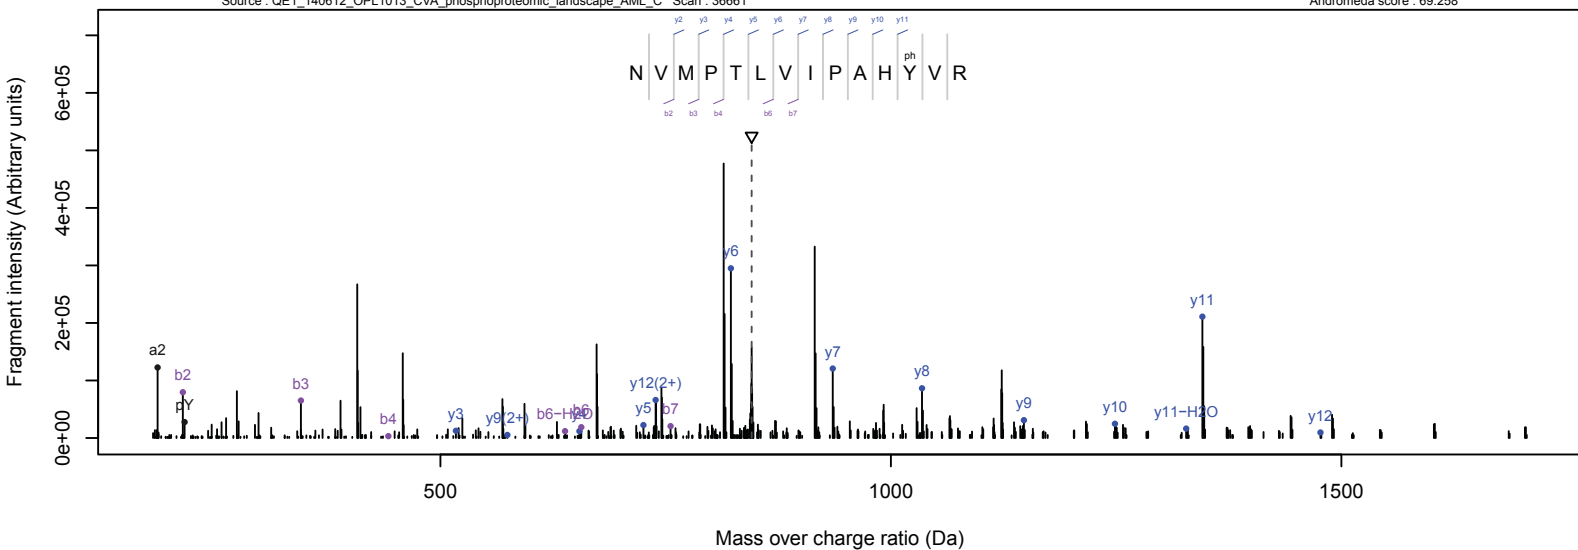

FSTY(ph)TSDKDENKLSAEGGR-3+

Source: QE1\_140612\_OPL1013\_CVA\_phosphoproteomic\_landscape\_AML\_B Scan: 11515

Andromeda score: 69.256

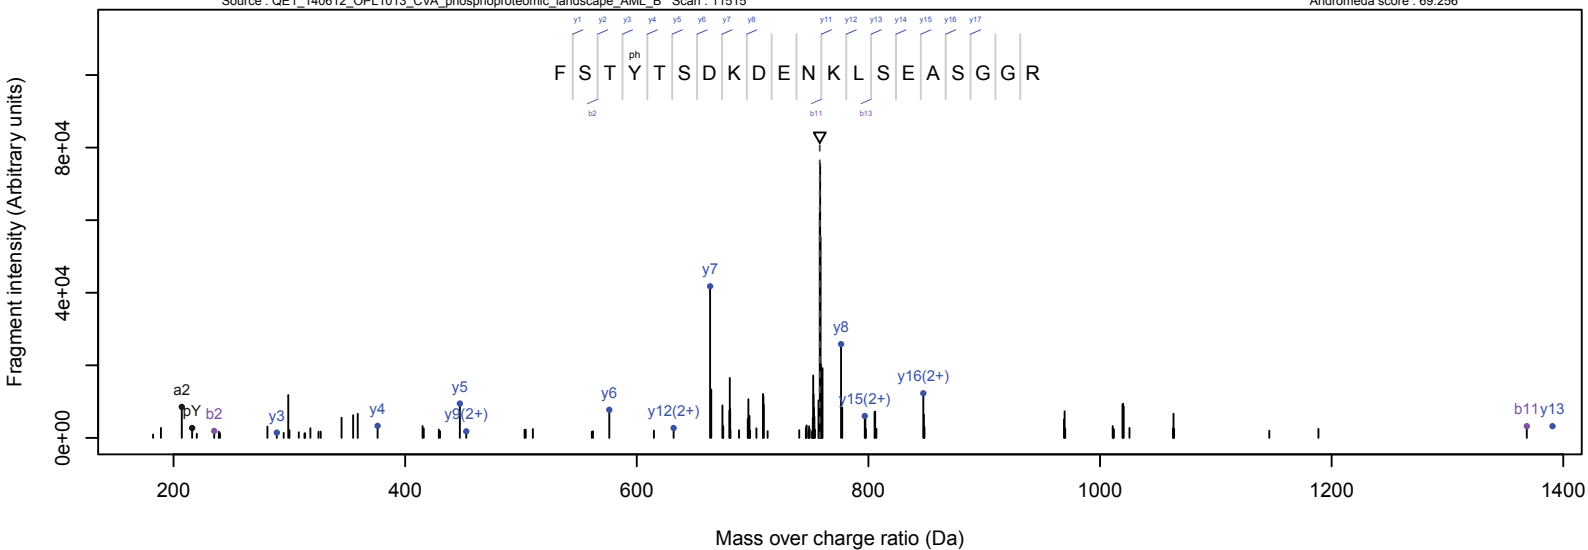

TY(ph)S(ph)LVGQAWPGPLADMAPTRK-3+

Source: QE1\_140612\_OPL1013\_CVA\_phosphoproteomic\_landscape\_AML\_B Scan: 46480

Andromeda score: 69.248

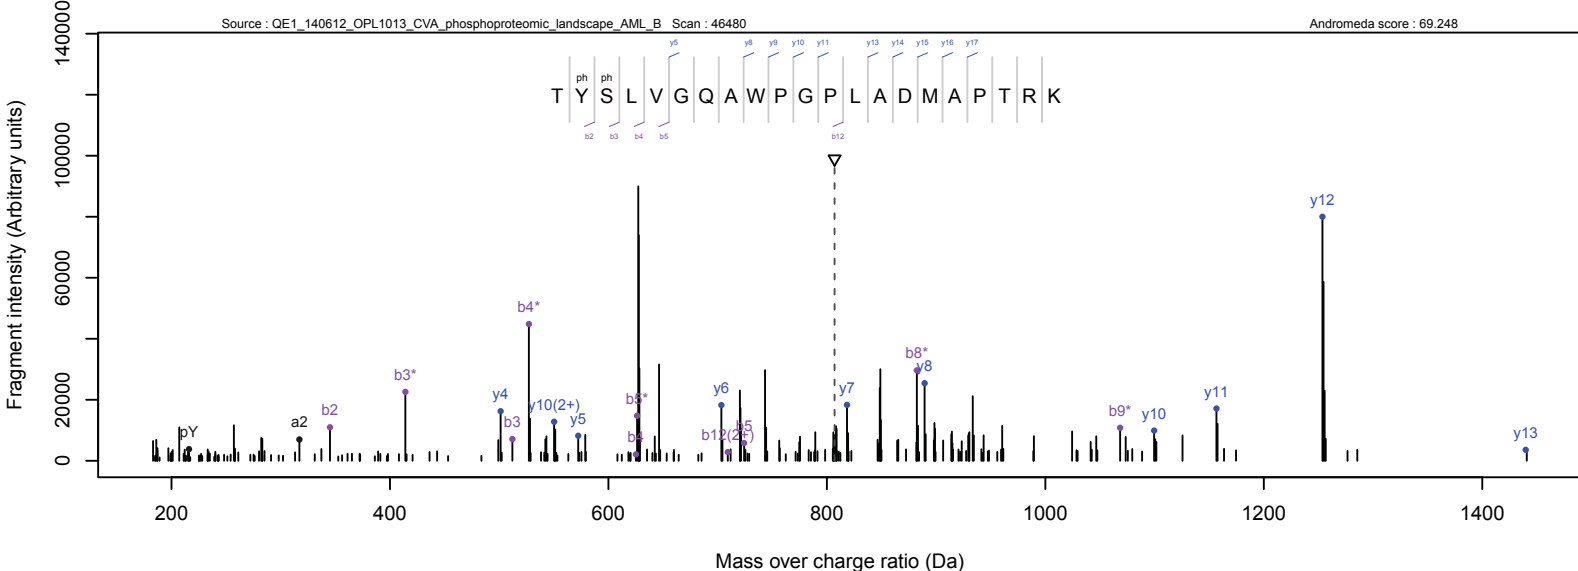

## RSGSGVNPYCGLIIEEAY(ph)GLDKIEFLQSHENQEIYQK-4+

Source : QE1\_140612\_OPL1013\_CVA\_phosphoproteomic\_landscape\_AML\_B Scan : 47149

Andromeda score : 69.244

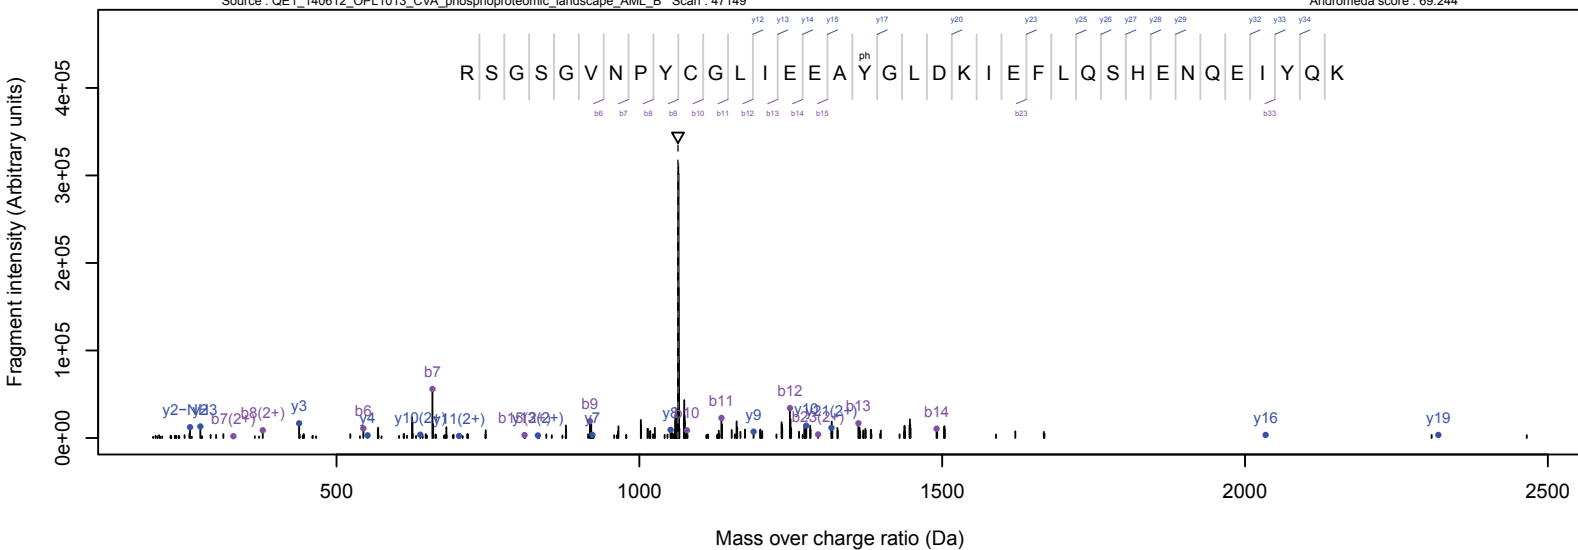

## VGDVY(ph)IPRDR-2+

Source : QE1\_140612\_OPL1013\_CVA\_phosphoproteomic\_landscape\_AML\_A Scan : 13994

Andromeda score : 69.216

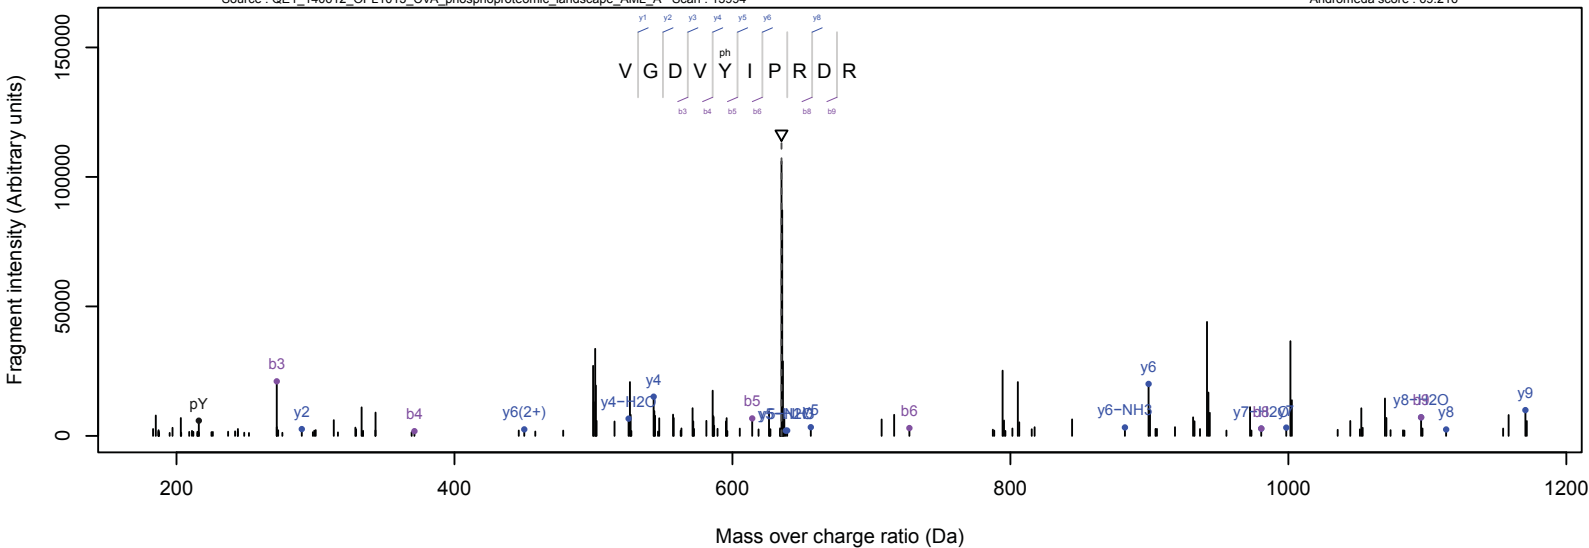

## FANYIDK-2+

Source : QE1\_140612\_OPL1013\_CVA\_phosphoproteomic\_landscape\_AML\_C Scan : 11370

Andromeda score : 69.198

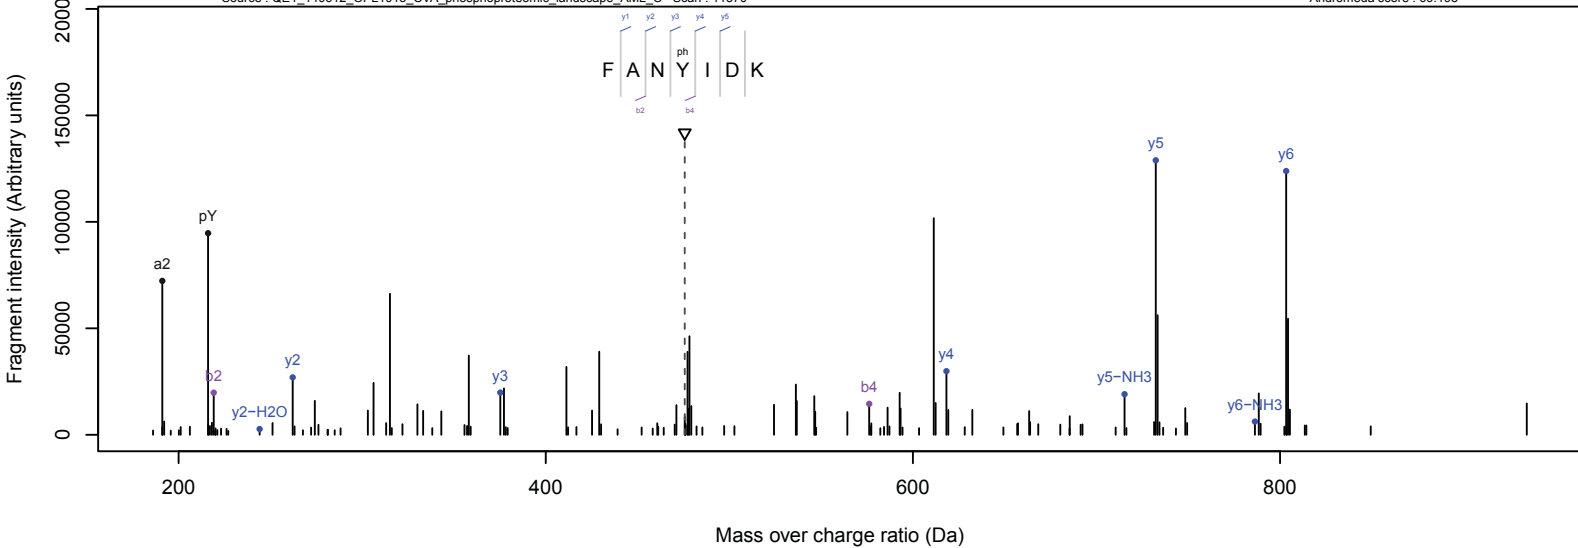

## IEGVY(ph)AR-2+

Source: QE1\_140612\_OPL1013\_CVA\_phosphoproteomic\_landscape\_AML\_A Scan: 10380

Andromeda score: 69.176

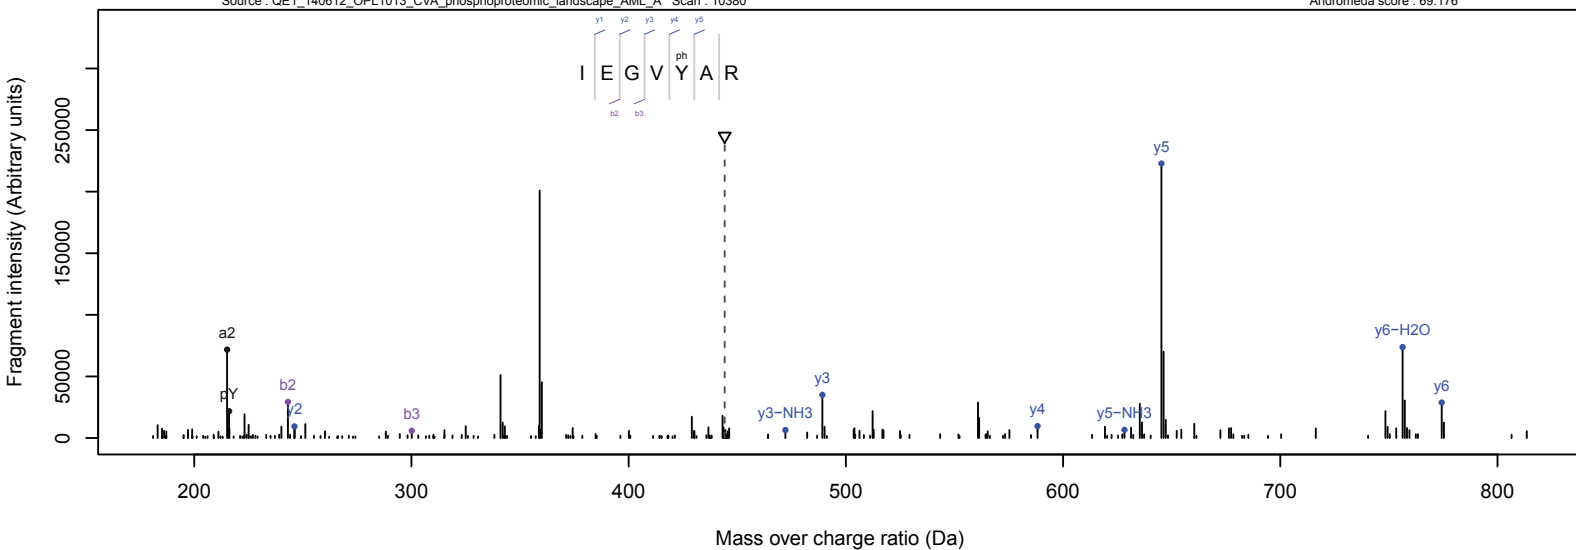

## SMY(ph)PVWK-2+

Source: QE1\_140612\_OPL1013\_CVA\_phosphoproteomic\_landscape\_AML\_B Scan: 23346

Andromeda score: 69.176

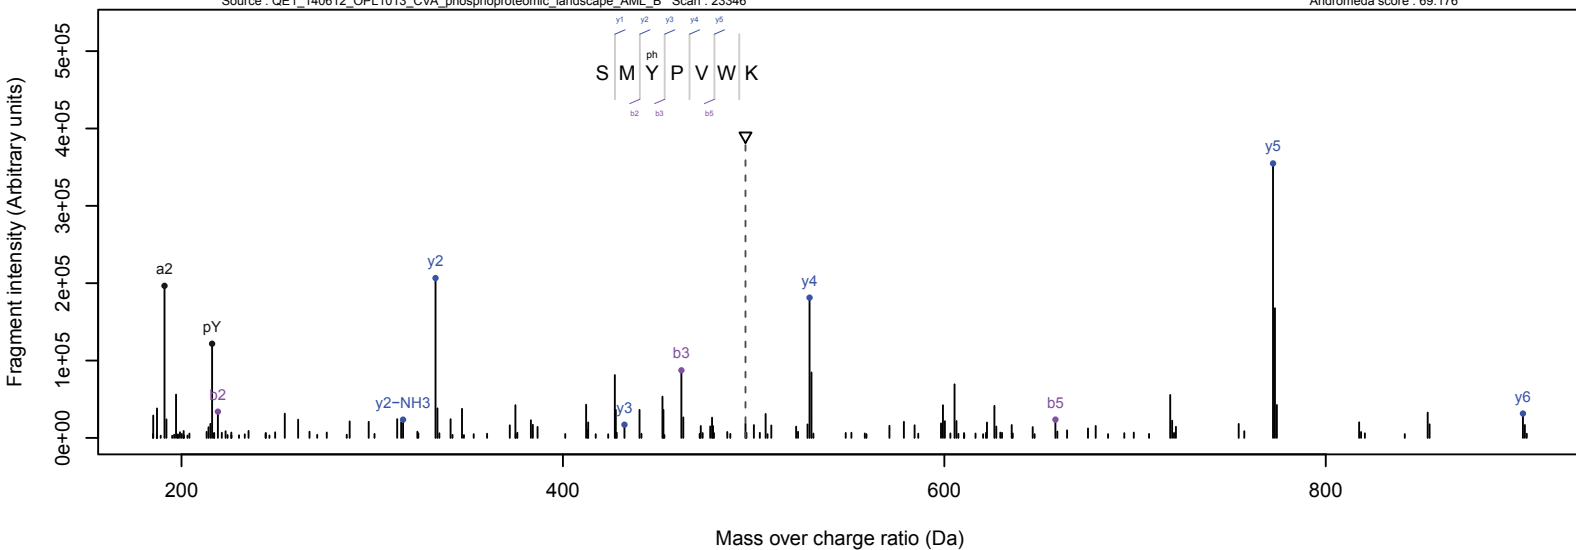

## Y(ph)FM(ox)APLKR-2+

Source: QE1\_140612\_OPL1013\_CVA\_phosphoproteomic\_landscape\_AML\_B Scan: 13835

Andromeda score: 69.176

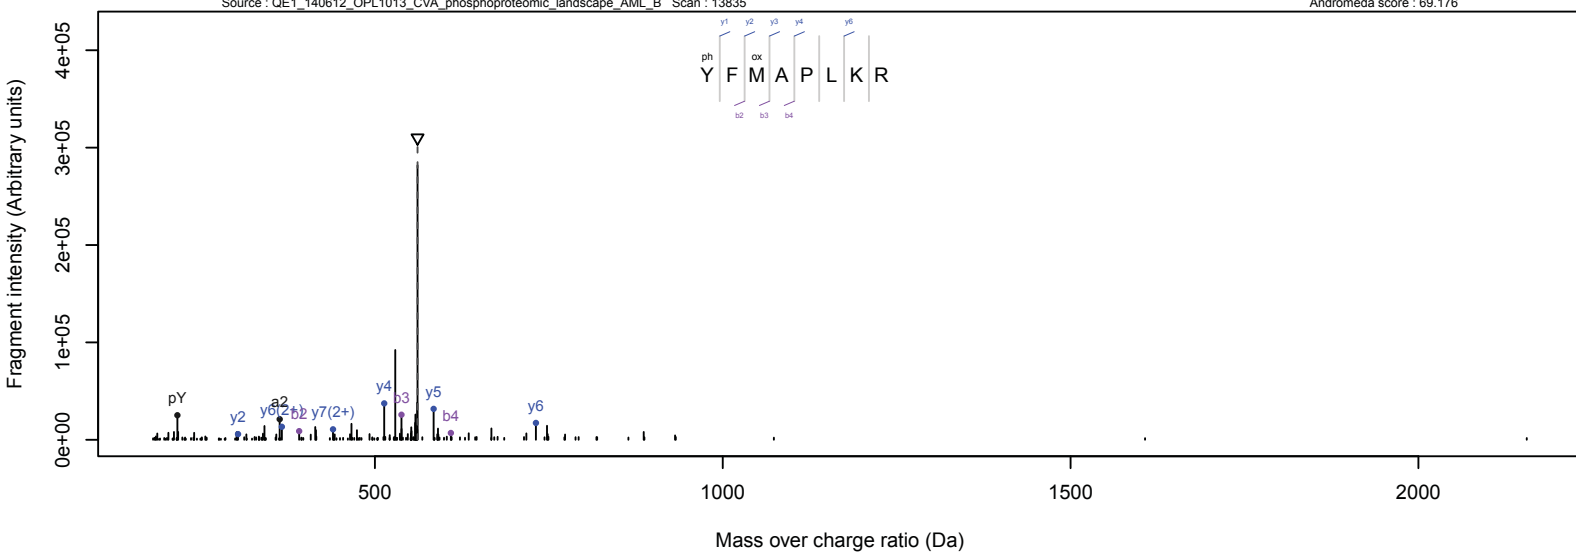

## Y(ph)SPWGMK-2+

Source : QE1\_140612\_OPL1013\_CVA\_phosphoproteomic\_landscape\_AML\_B Scan : 16466

Andromeda score : 69.176

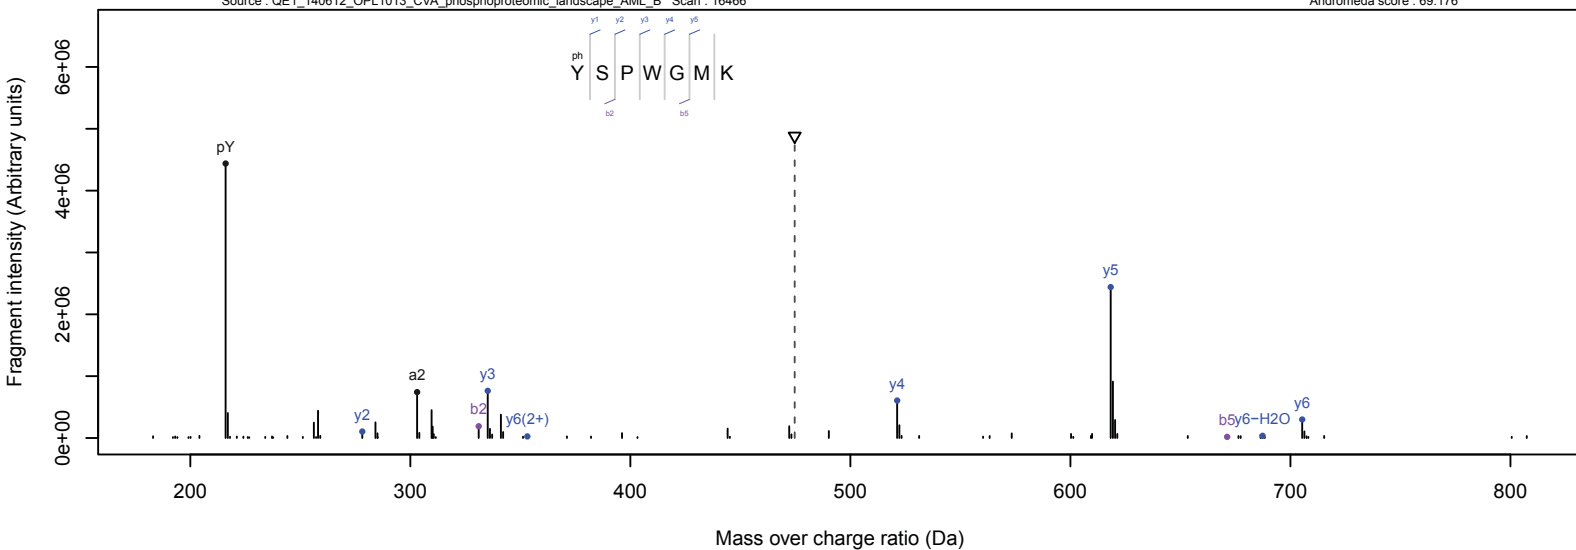

## NRY(ph)GDVPCLDQTR-3+

Source : QE1\_140612\_OPL1013\_CVA\_phosphoproteomic\_landscape\_AML\_C Scan : 15175

Andromeda score : 69.148

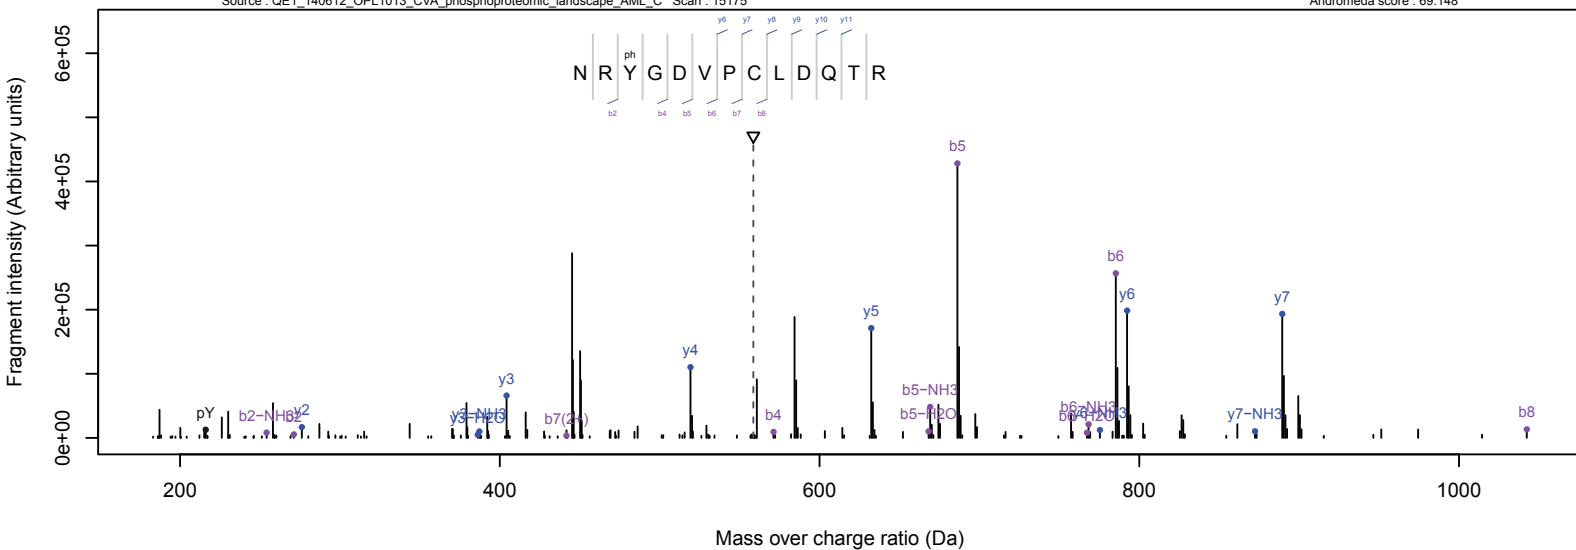

## VY(ph)VGNLGNNGKTELER-3+

Source : QE1\_140612\_OPL1013\_CVA\_phosphoproteomic\_landscape\_AML\_A Scan : 17418

Andromeda score : 69.111

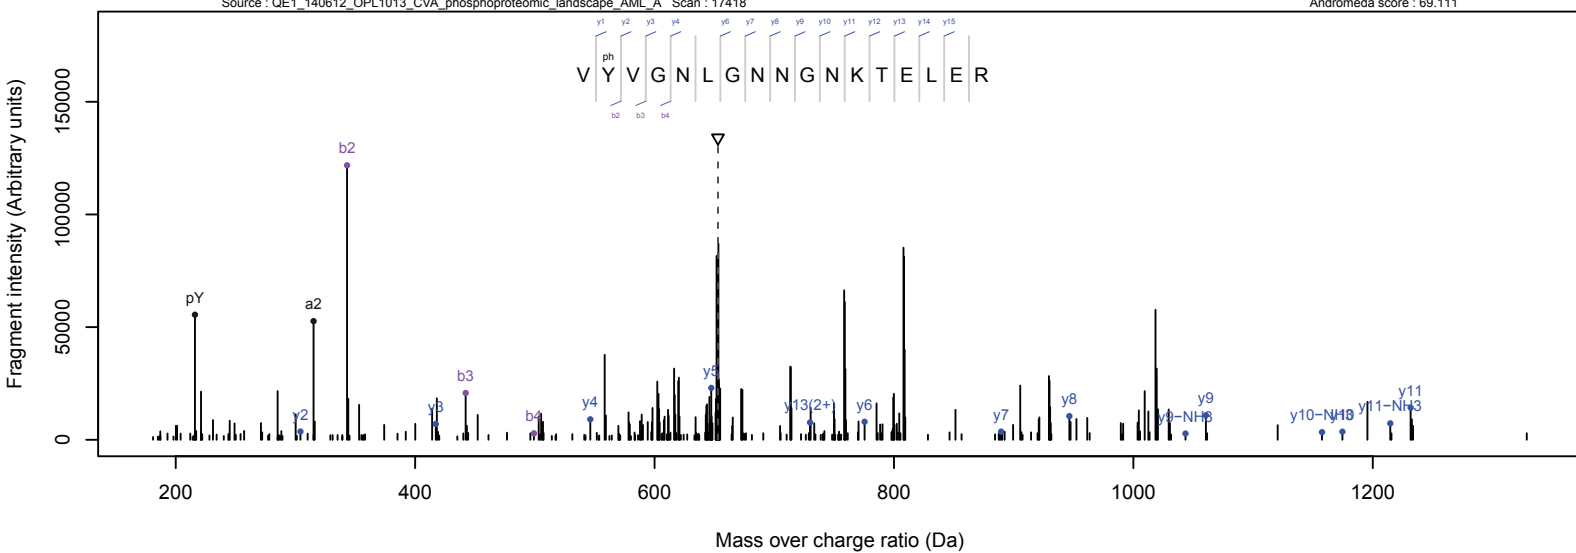

DGGGGGEFYGYM(ox)TM(ox)DRPLSHCGR-3+

Source : QE1\_140908\_OPL1013\_CvA\_pTyrIP\_AML\_ML2 Scan : 19226

Andromeda score : 69.088

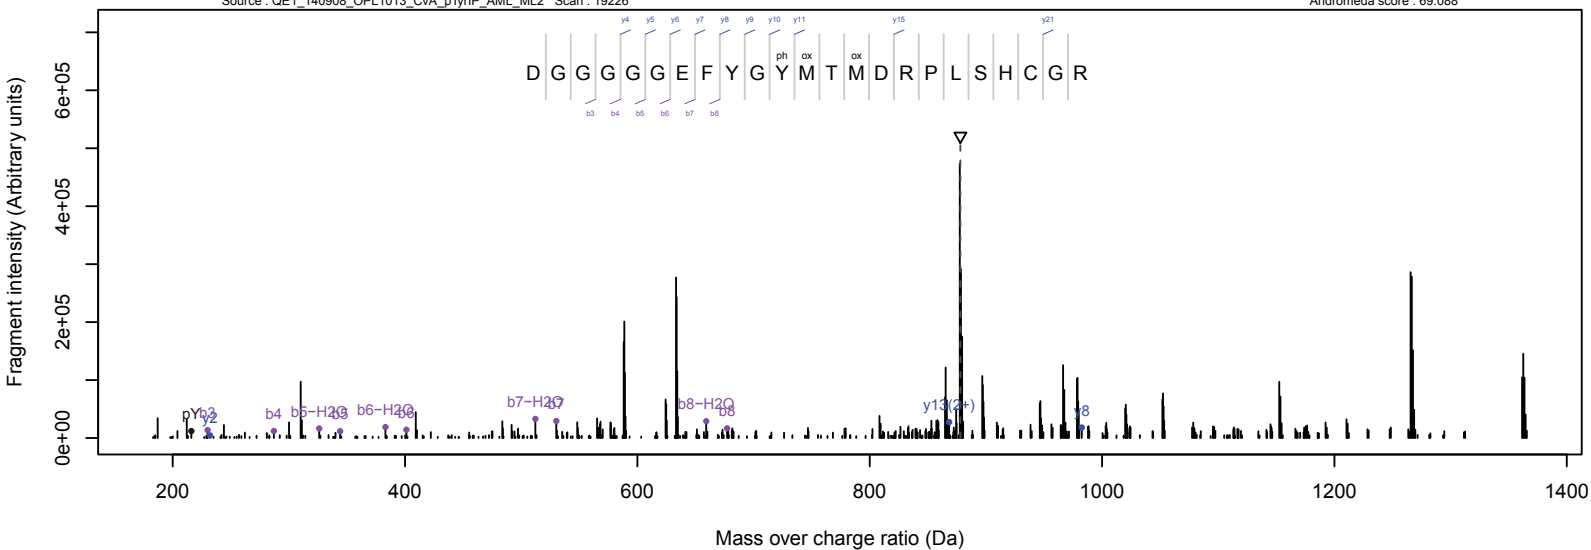

ITLDNAY(ph)MEKCDENILWLDYK-3+

Source : QE1\_140908\_OPL1013\_CvA\_pTyrIP\_AML\_ML2 Scan : 47459

Andromeda score : 69.088

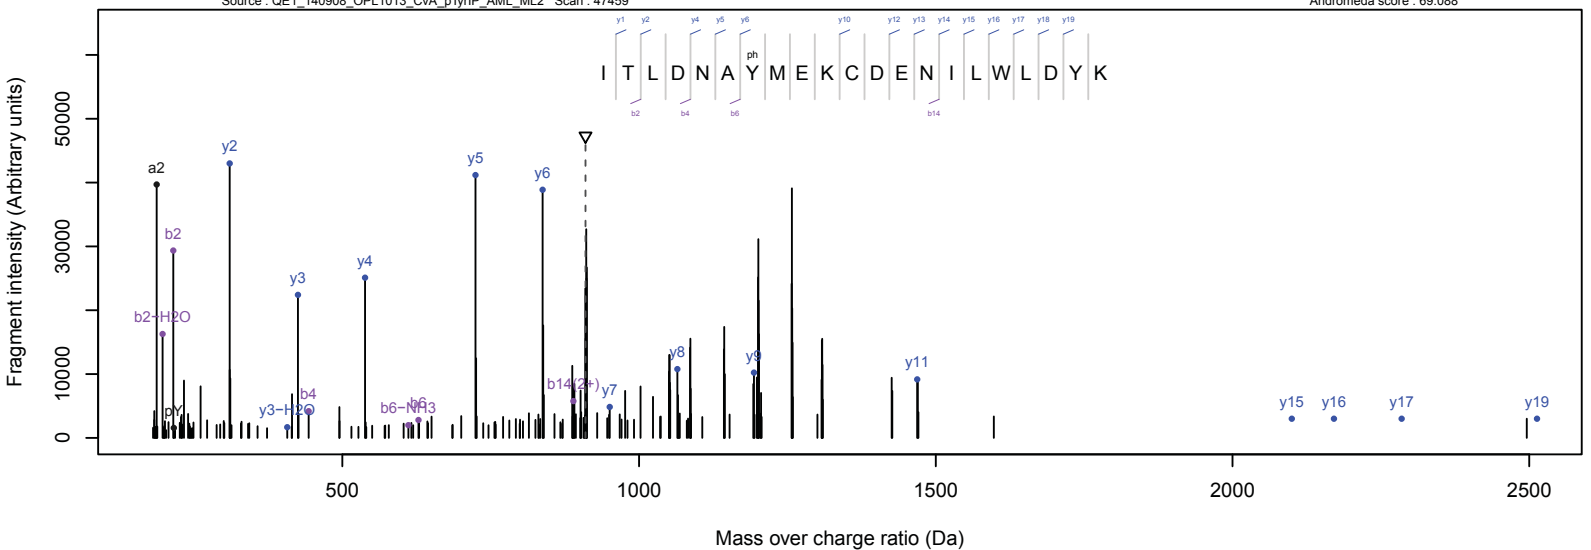

RSY(ph)LELVTSNHHSVQALSWR-4+

Source : QE1\_140612\_OPL1013\_CVA\_phosphoproteomic\_landscape\_AML\_C Scan : 31301

Andromeda score : 69.088

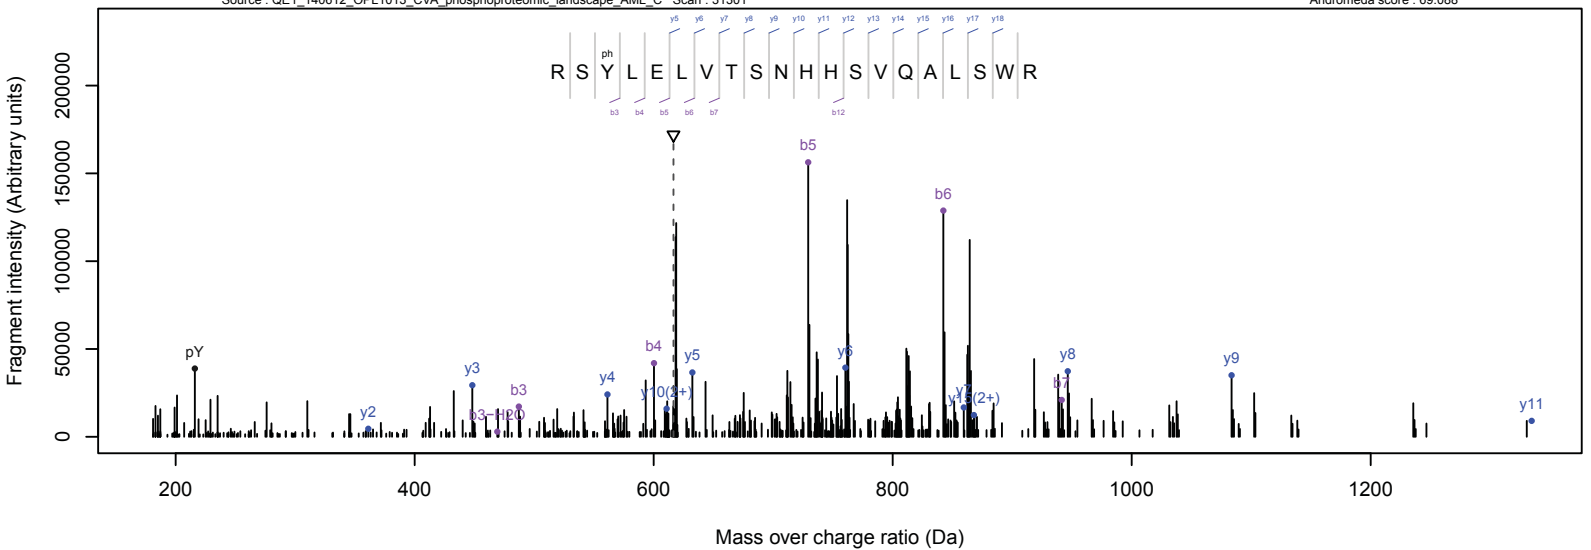

## M(ox)TTNPIY(ph)EHIGYATLLR-3+

Source : QE1\_140908\_OPL1013\_CvA\_pTyrIP\_AML\_HEL Scan : 38637

Andromeda score : 69.081

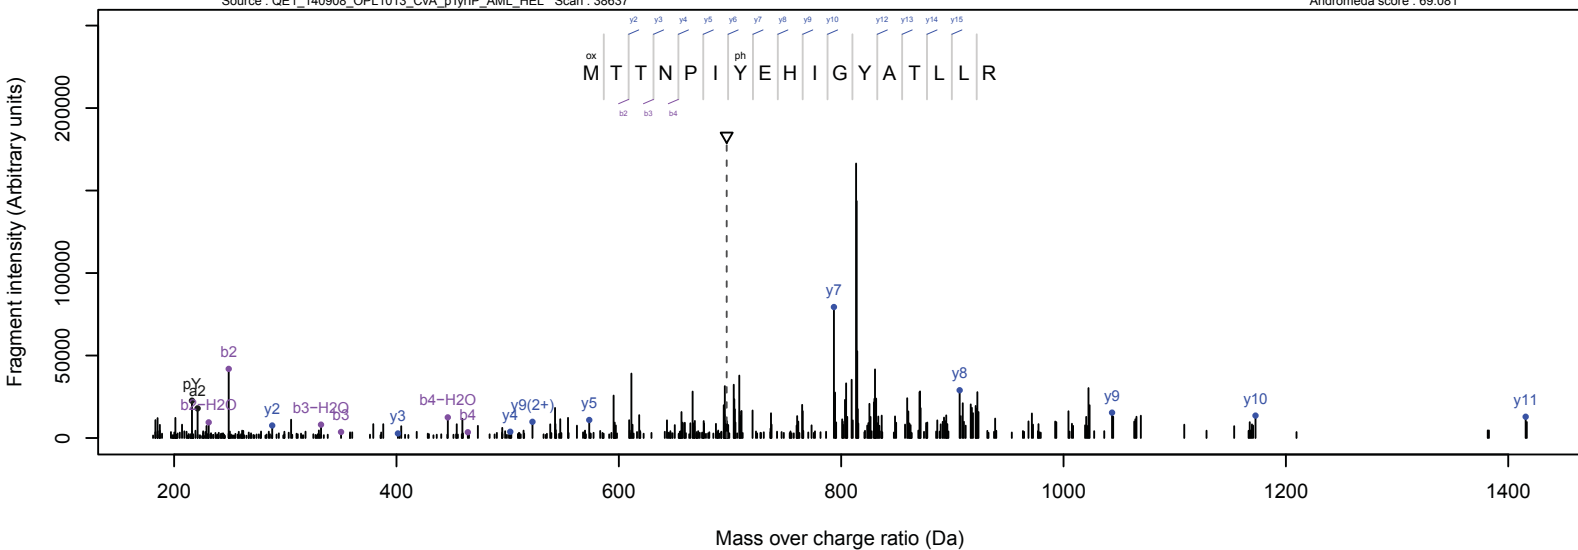

## QLQQEQAY(ph)LLSLQHDHR-4+

Source : QE1\_140612\_OPL1013\_CVA\_phosphoproteomic\_landscape\_AML\_C Scan : 25812

Andromeda score : 69.081

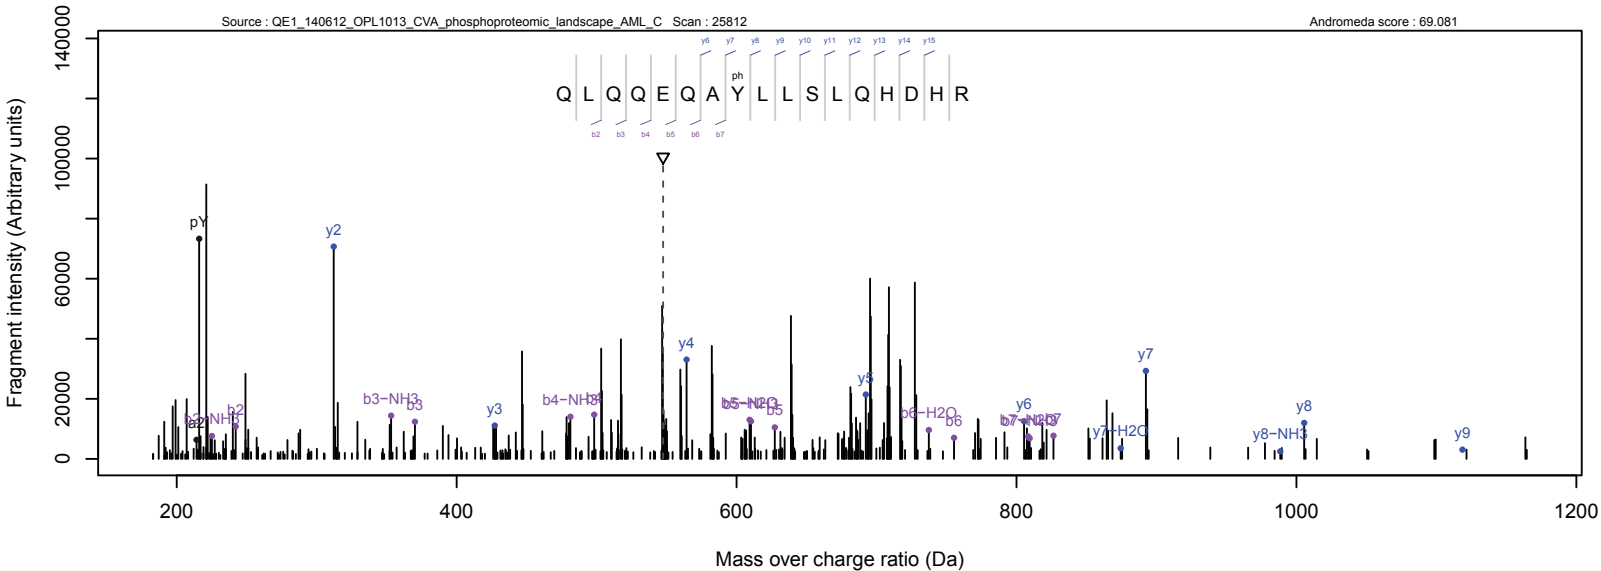

## TKEGVLY(ph)VGSK-2+

Source : QE1\_140908\_OPL1013\_CvA\_pTyrIP\_AML\_HEL Scan : 13412

Andromeda score : 69.03

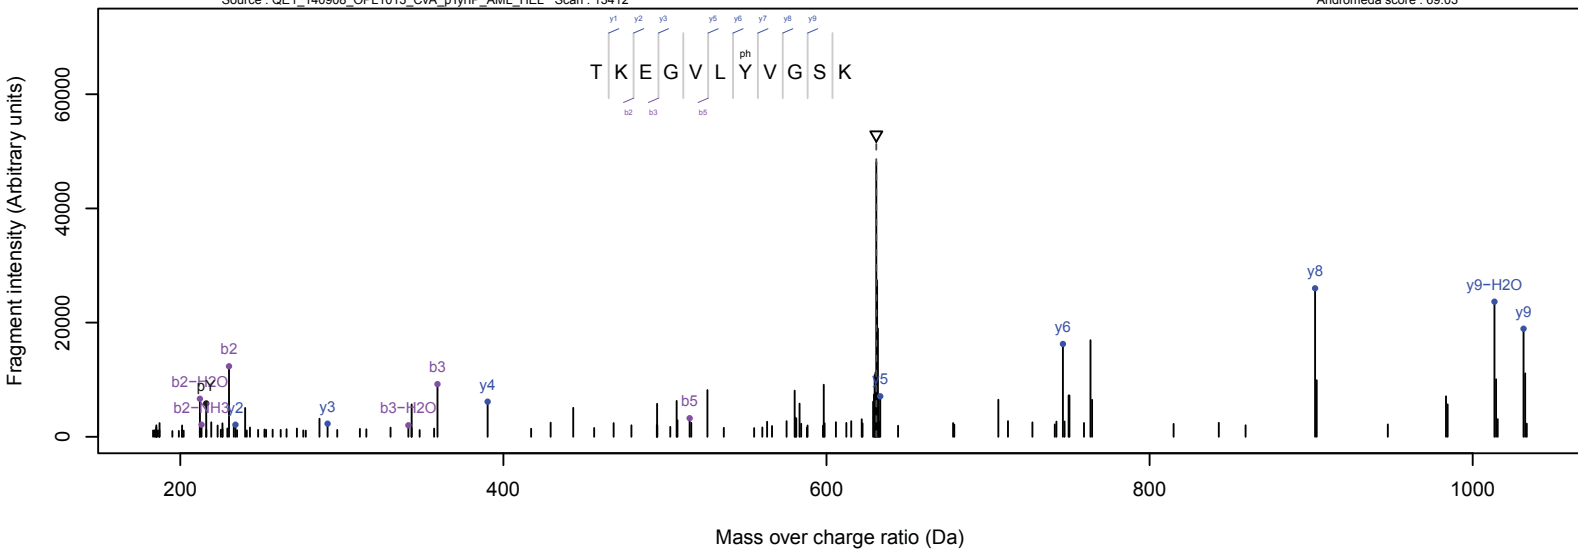



**VHMFEAHSY(ph)IR-3+**

Source : QE1\_140612\_OPL1013\_CVA\_phosphoproteomic\_landscape\_AML\_B Scan : 17838

Andromeda score : 69.03

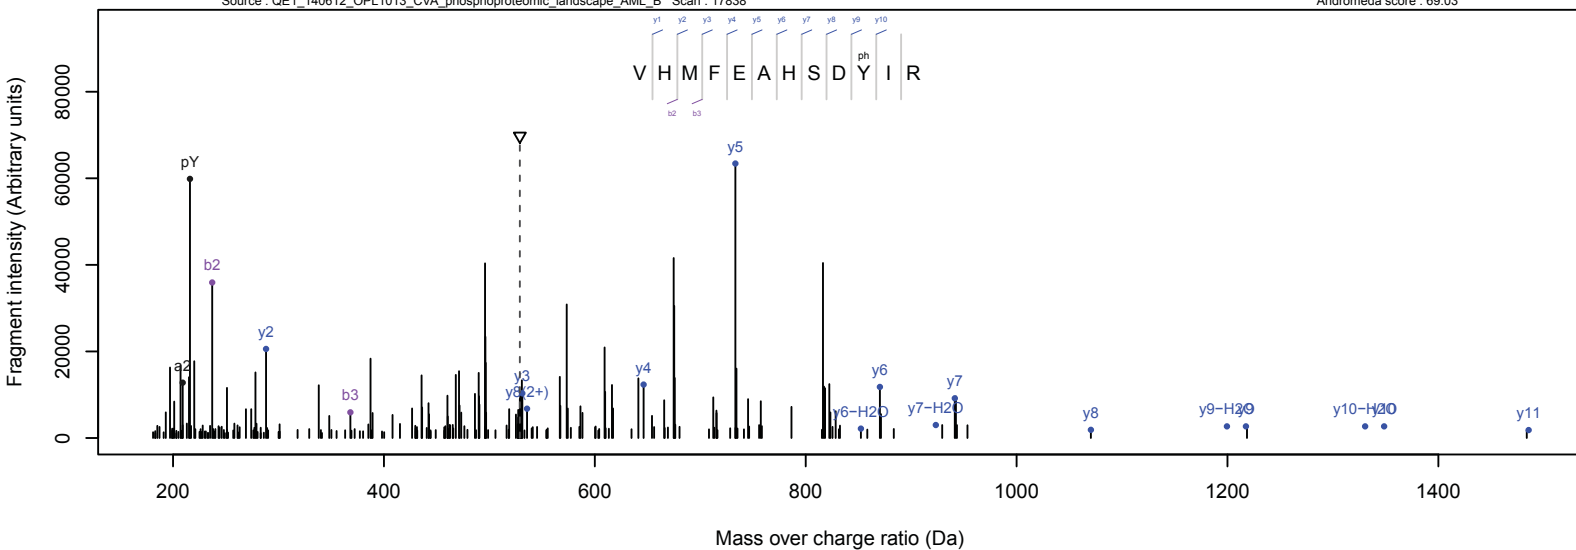

**RVNSSVGFSLQHTSNDP(ph)CFVEFYEHR-4+**

Source : QE1\_140612\_OPL1013\_CVA\_phosphoproteomic\_landscape\_AML\_D Scan : 41634

Andromeda score : 69.016

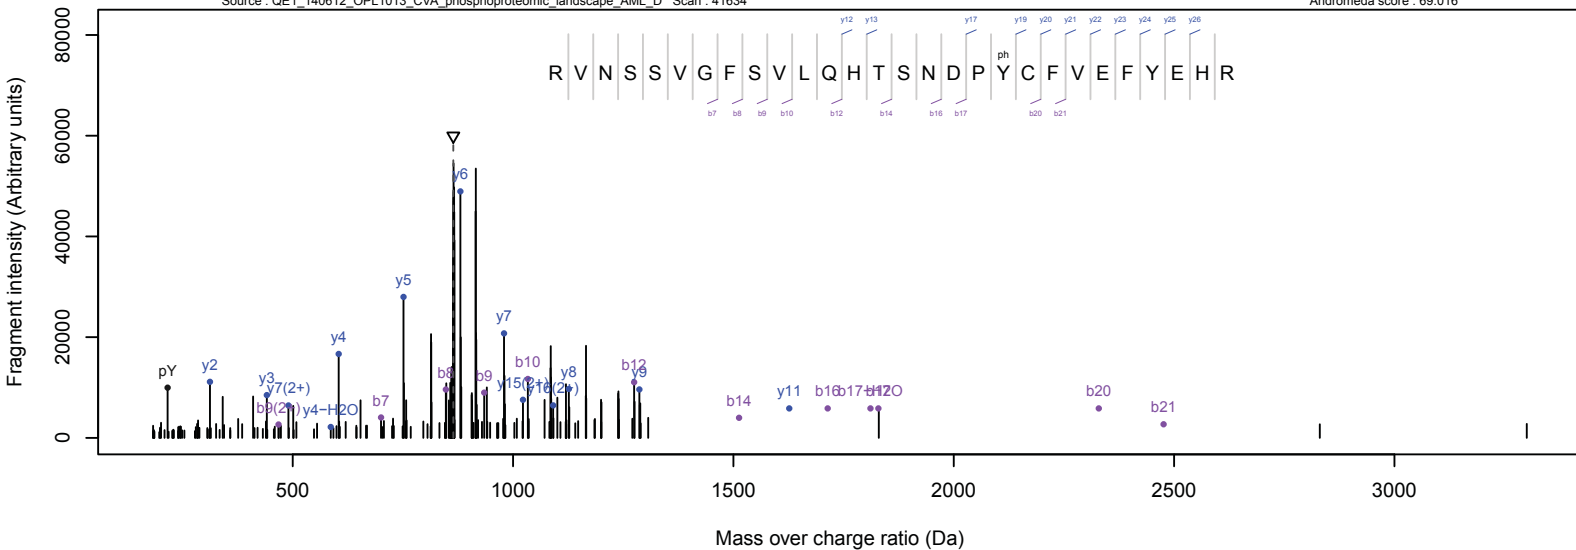

**KKEYPLY(ph)INQTCR-3+**

Source : QE1\_140908\_OPL1013\_CvA\_pTyrIP\_AML\_HEL Scan : 13806

Andromeda score : 68.972

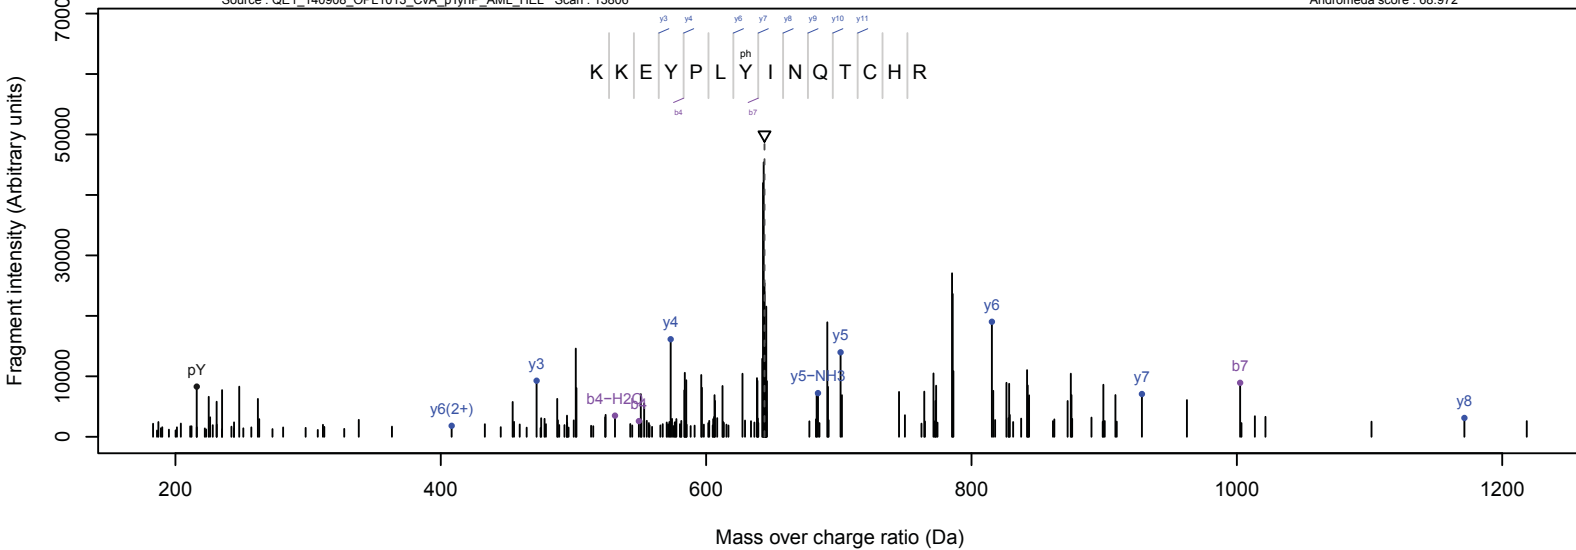

## YVTLSSNGFLLY(ph)HPSINDYIHSTHGK-4+

Source : QE1\_140612\_OPL1013\_CVA\_phosphoproteomic\_landscape\_AML\_C Scan : 39998

Andromeda score : 68.97

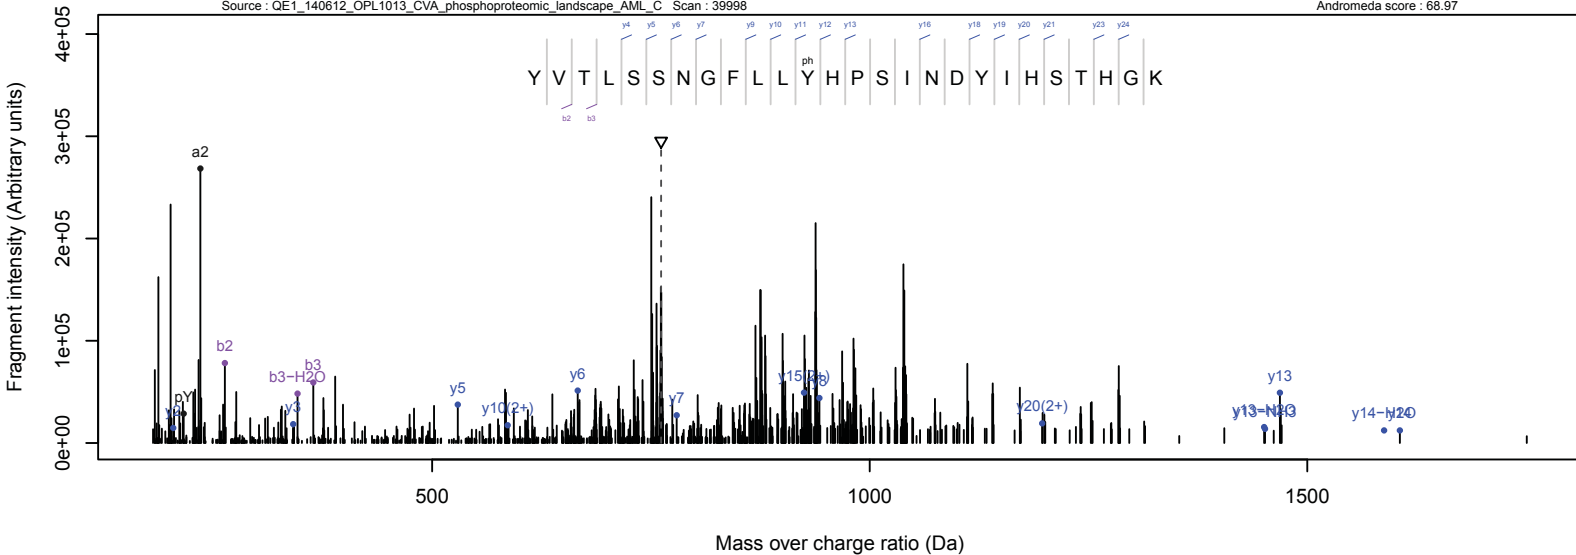

## KSVSSSPWLPQDGFDPSPDY(ph)AEPMDAVVKPR-4+

Source : QE1\_140612\_OPL1013\_CVA\_phosphoproteomic\_landscape\_AML\_B Scan : 42090

Andromeda score : 68.96

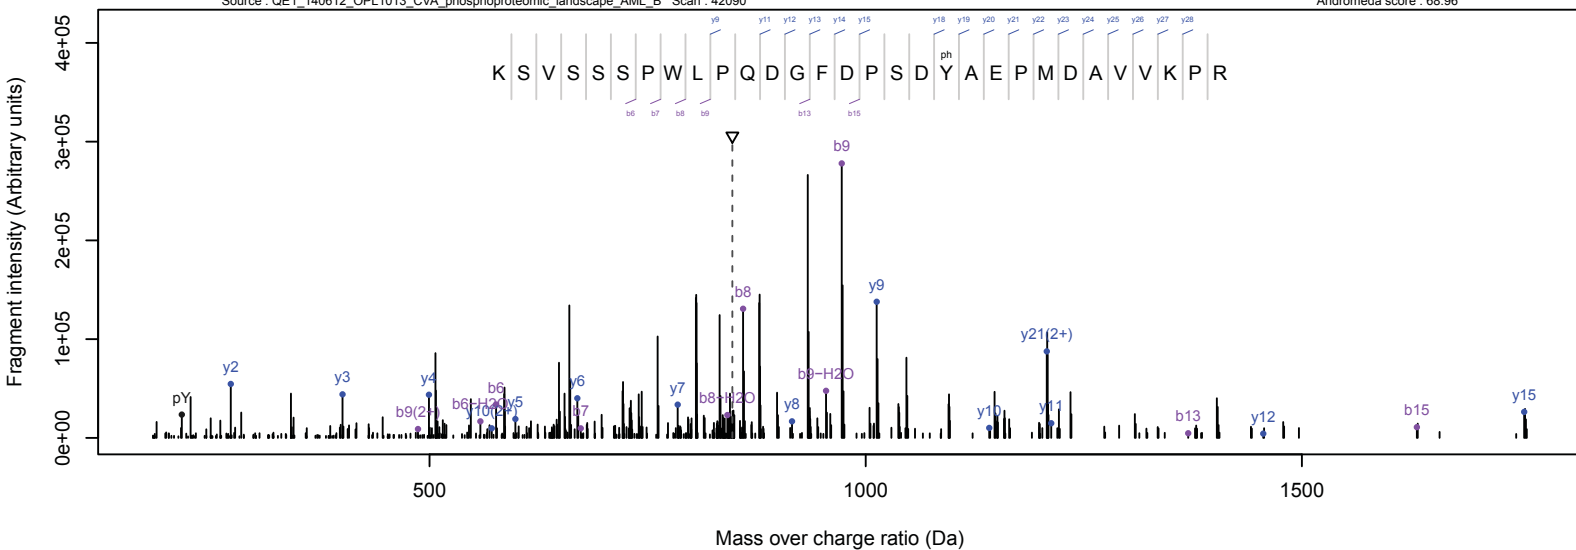

## VNPSDRYHLMPIITPAYPQQNSTY(ph)NVSSTR-4+

Source : QE1\_140612\_OPL1013\_CVA\_phosphoproteomic\_landscape\_AML\_A Scan : 37675

Andromeda score : 68.96

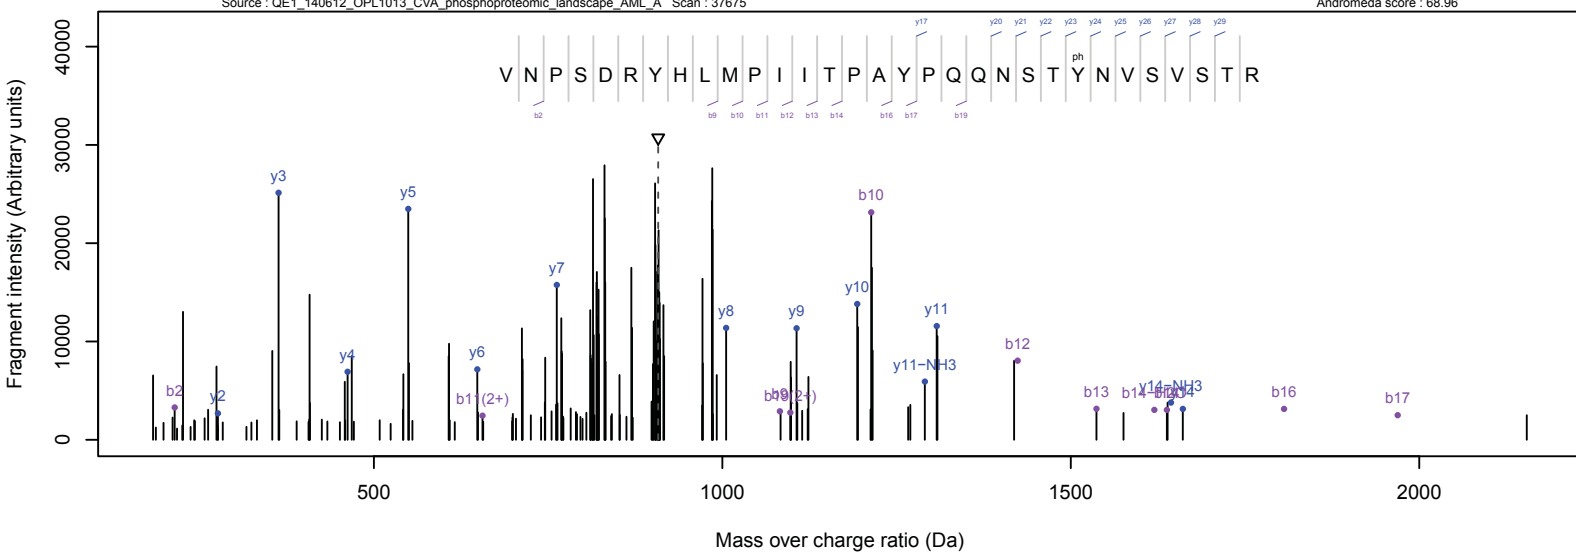

**LDSPY(ph)FR-2+**

Source : QE1\_140612\_OPL1013\_CVA\_phosphoproteomic\_landscape\_AML\_C Scan : 16041

Andromeda score : 68.915

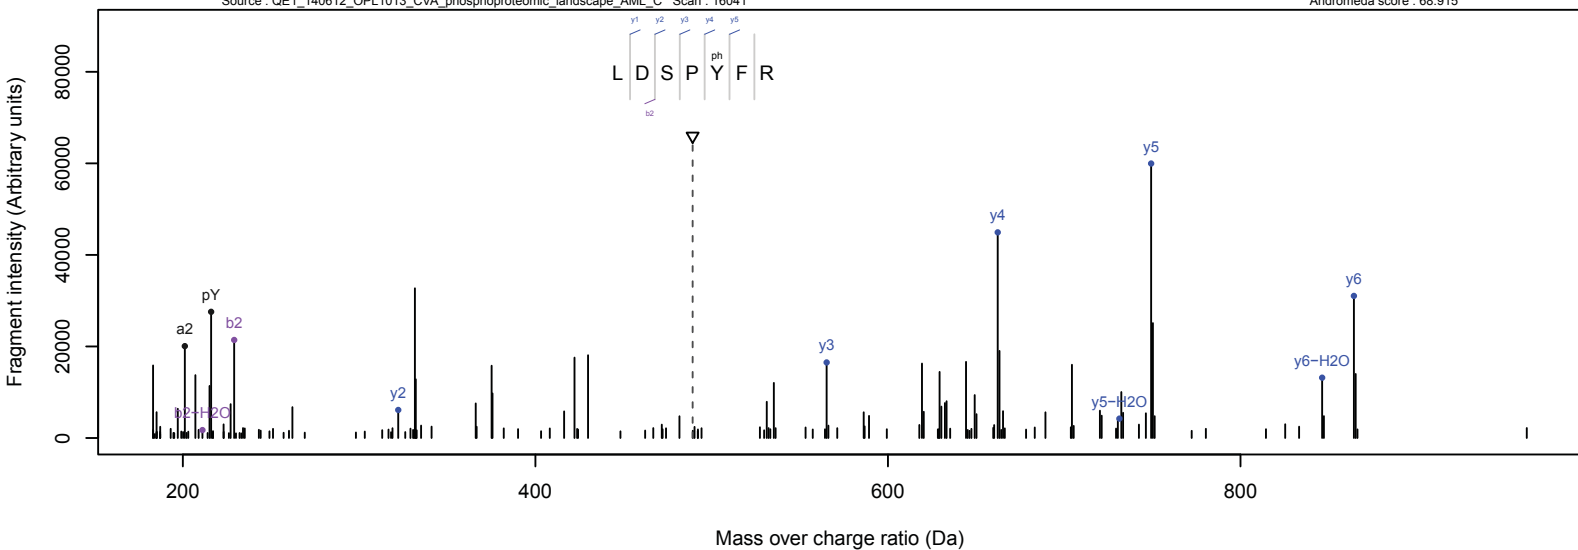

**Y(ph)SAKDYFFK-2+**

Source : QE1\_140612\_OPL1013\_CVA\_phosphoproteomic\_landscape\_AML\_F Scan : 22057

Andromeda score : 68.786

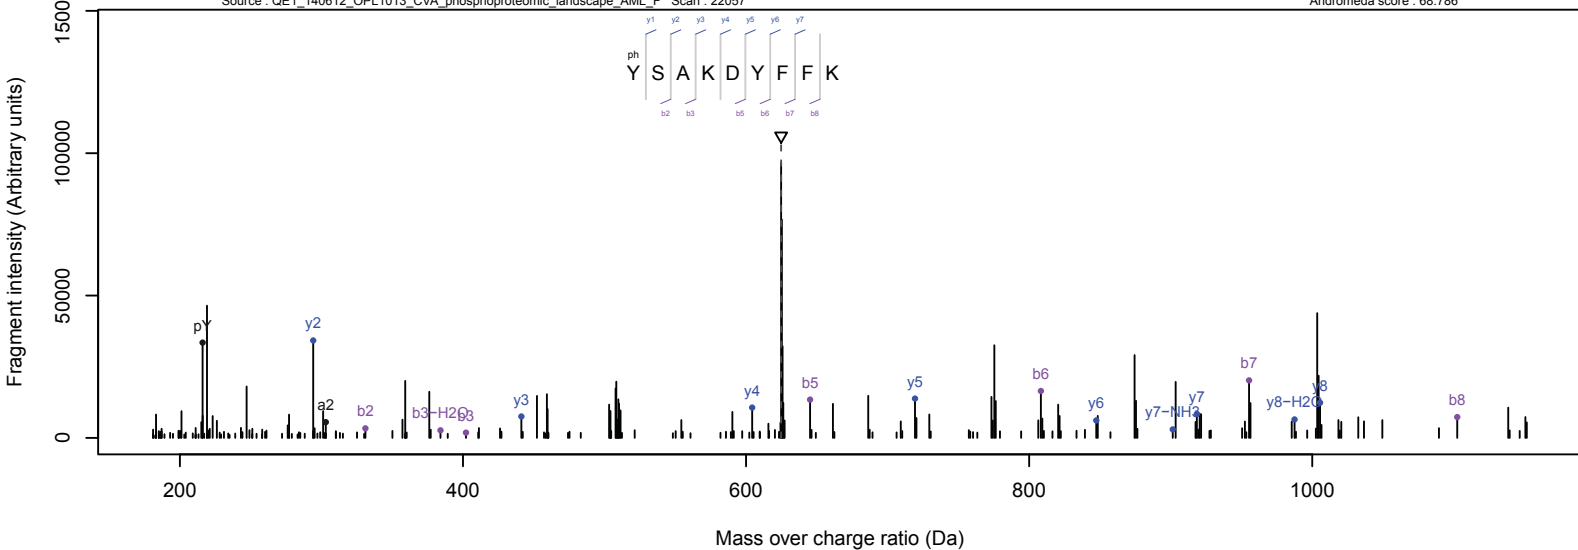

**CSENKLP AELQELPGLSHQYWSAPS DKEGY(ph)SGVGLLSR-4+**

Source : QE1\_140612\_OPL1013\_CVA\_phosphoproteomic\_landscape\_AML\_D Scan : 44931

Andromeda score : 68.763

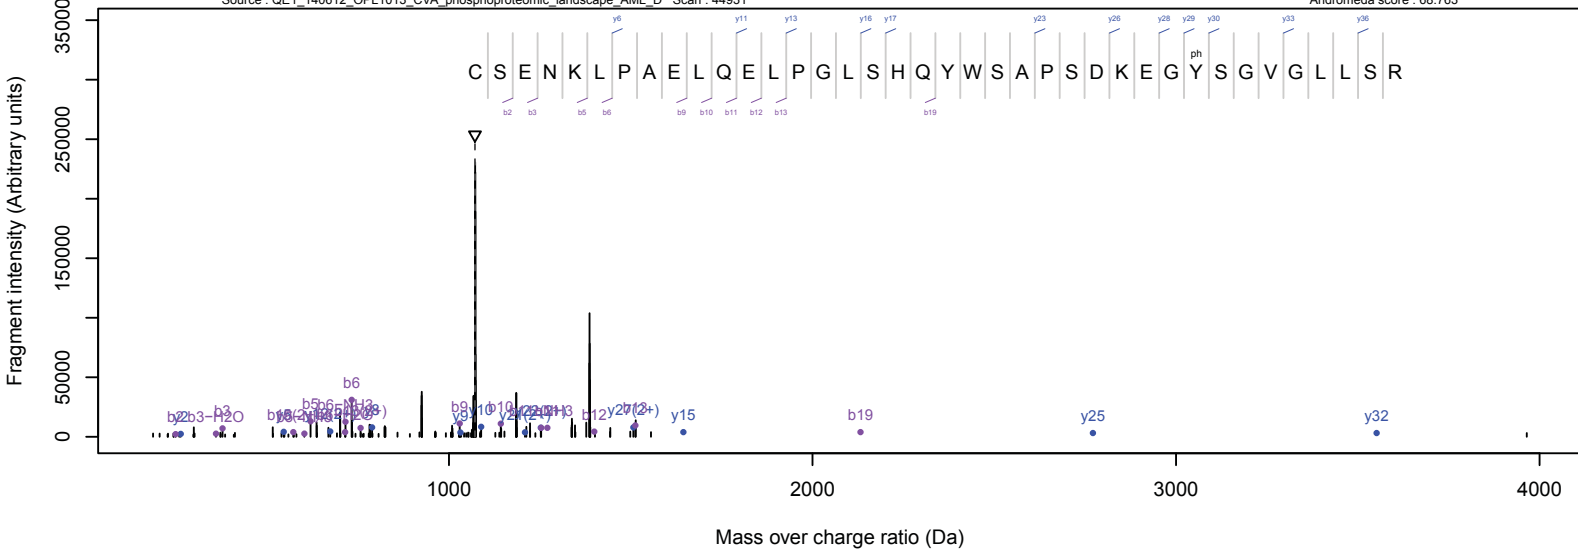

**HFNDPNADAYFTK-2+**

Source : QE1\_140612\_OPL1013\_CVA\_phosphoproteomic\_landscape\_AML\_C Scan : 16942

Andromeda score : 68.751

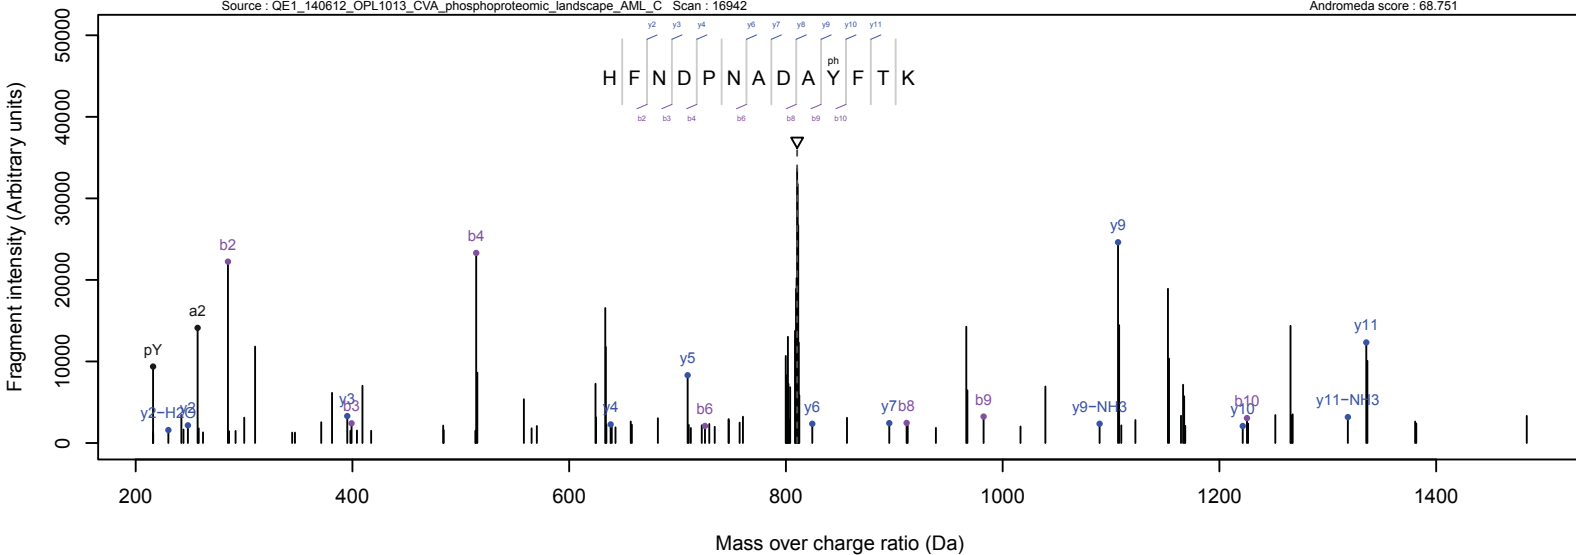

**SSTQAPESQESQEEELHYATLNFGVGRPRPEAR-4+**

Source : QE1\_140908\_OPL1013\_CvA\_pTyrIP\_AML\_HEL Scan : 31301

Andromeda score : 68.728

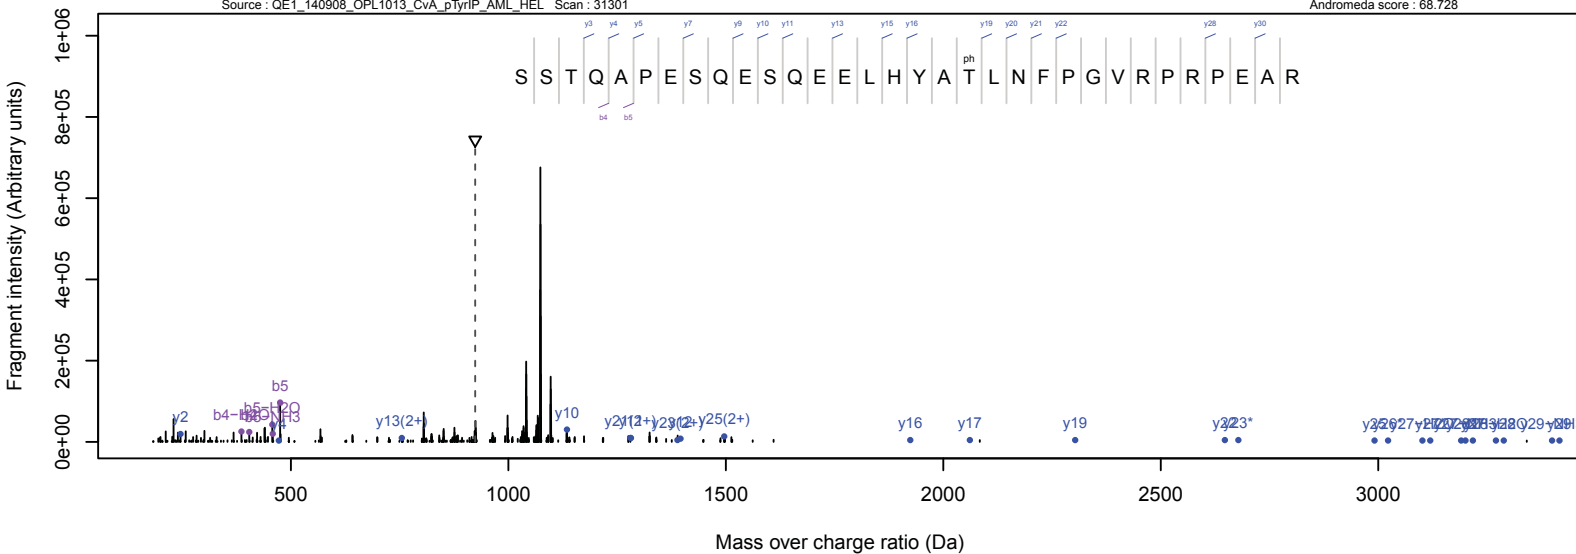

**NFGSYVTHETK-2+**

Source : QE1\_140908\_OPL1013\_CvA\_pTyrIP\_AML\_ML2 Scan : 12176

Andromeda score : 68.676

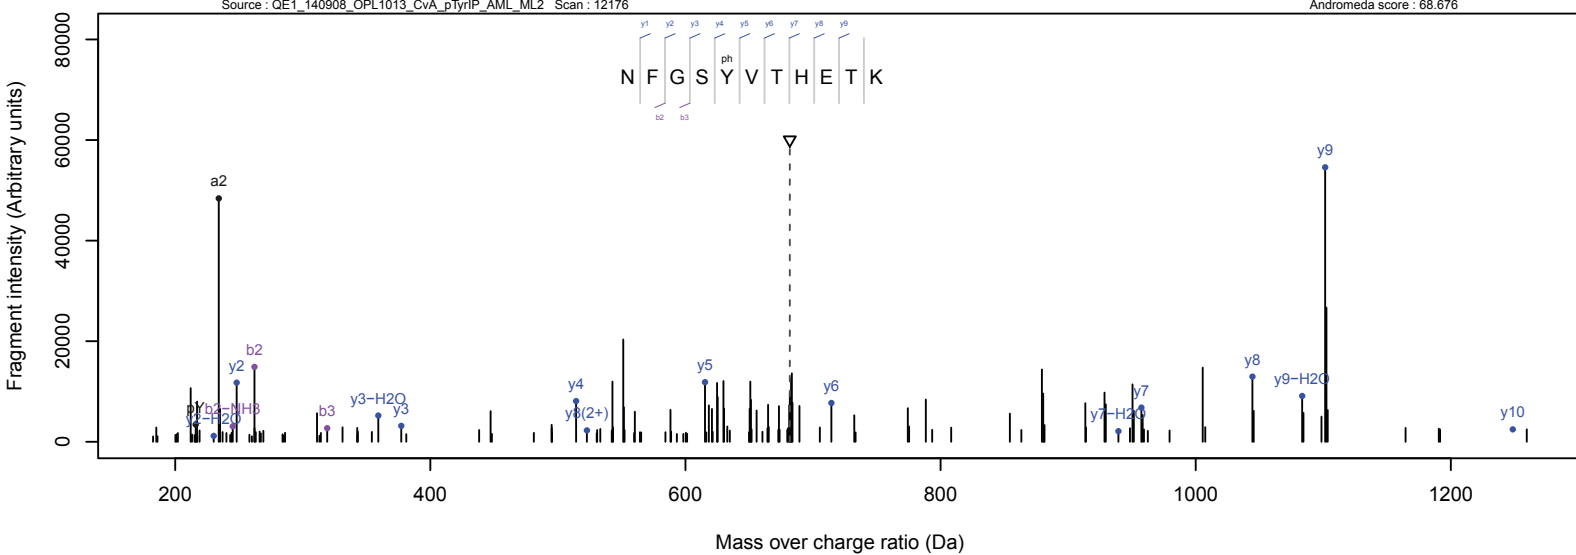

NILSSADY(ph)VER-2+

Source : QE1\_140612\_OPL1013\_CVA\_phosphoproteomic\_landscape\_AML\_C Scan : 23849

Andromeda score : 68.676

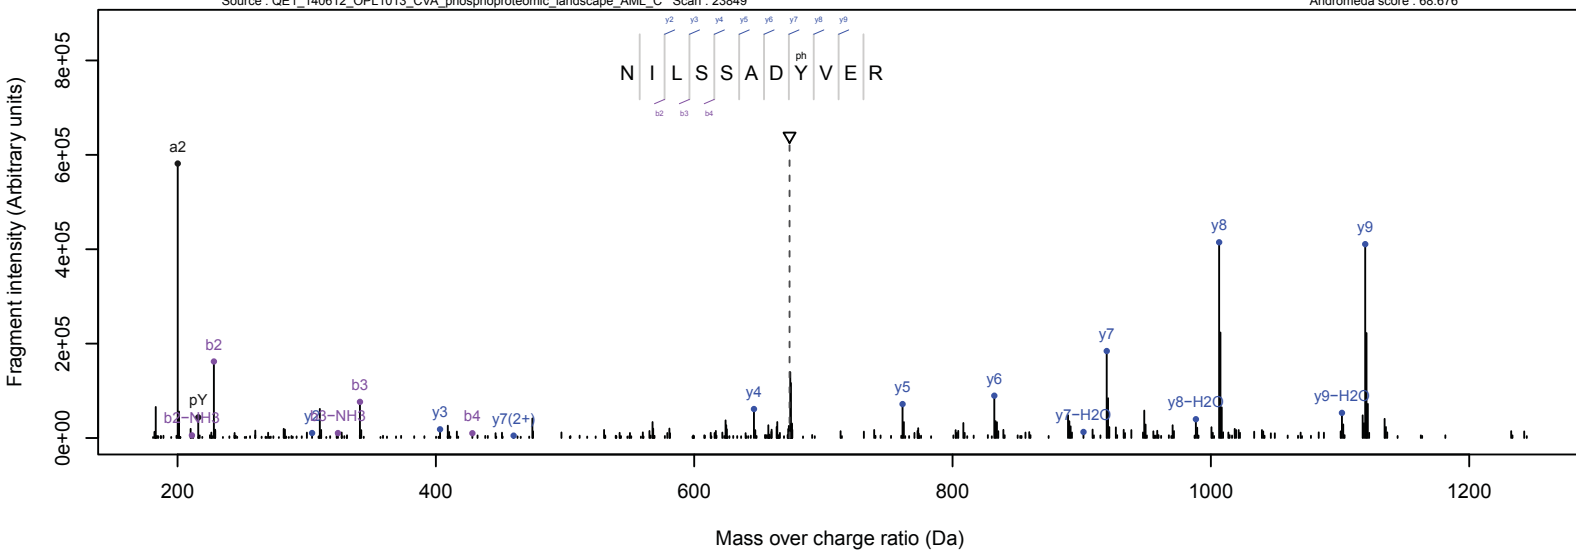

IRPVPEY(ph)QK-2+

Source : QE1\_140612\_OPL1013\_CVA\_phosphoproteomic\_landscape\_AML\_C Scan : 7189

Andromeda score : 68.657

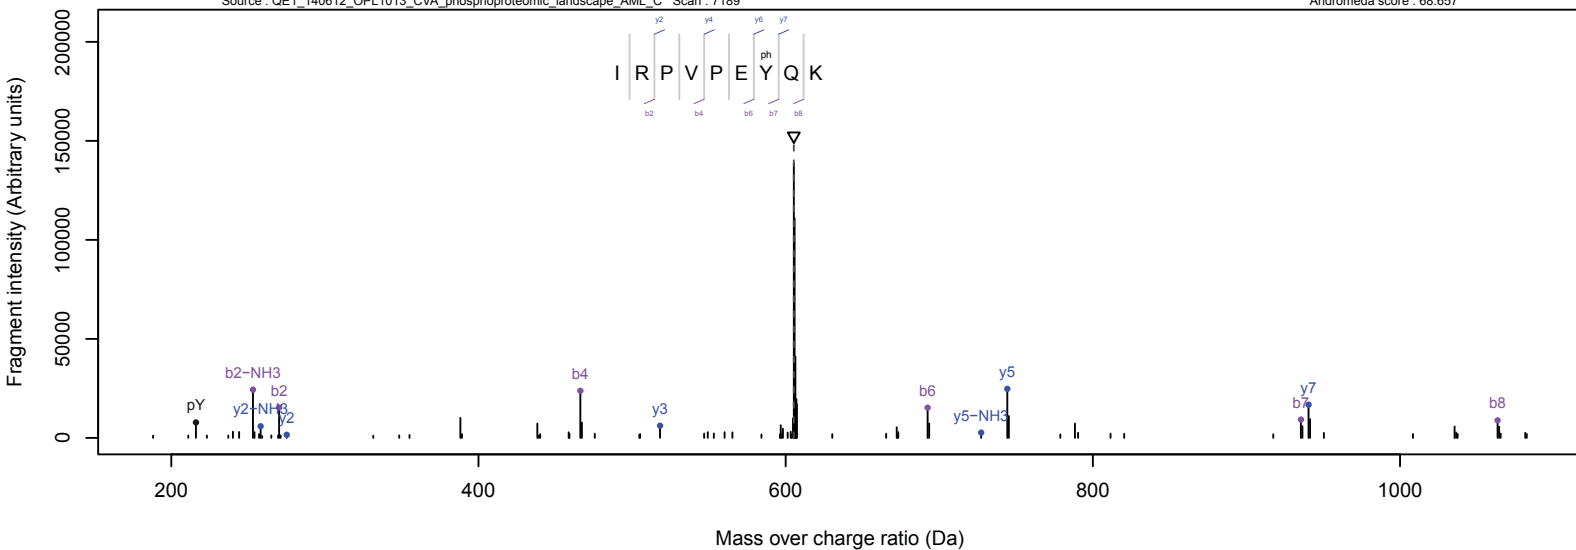

RPSFGY(ph)FIR-3+

Source : QE1\_140612\_OPL1013\_CVA\_phosphoproteomic\_landscape\_AML\_C Scan : 29185

Andromeda score : 68.657

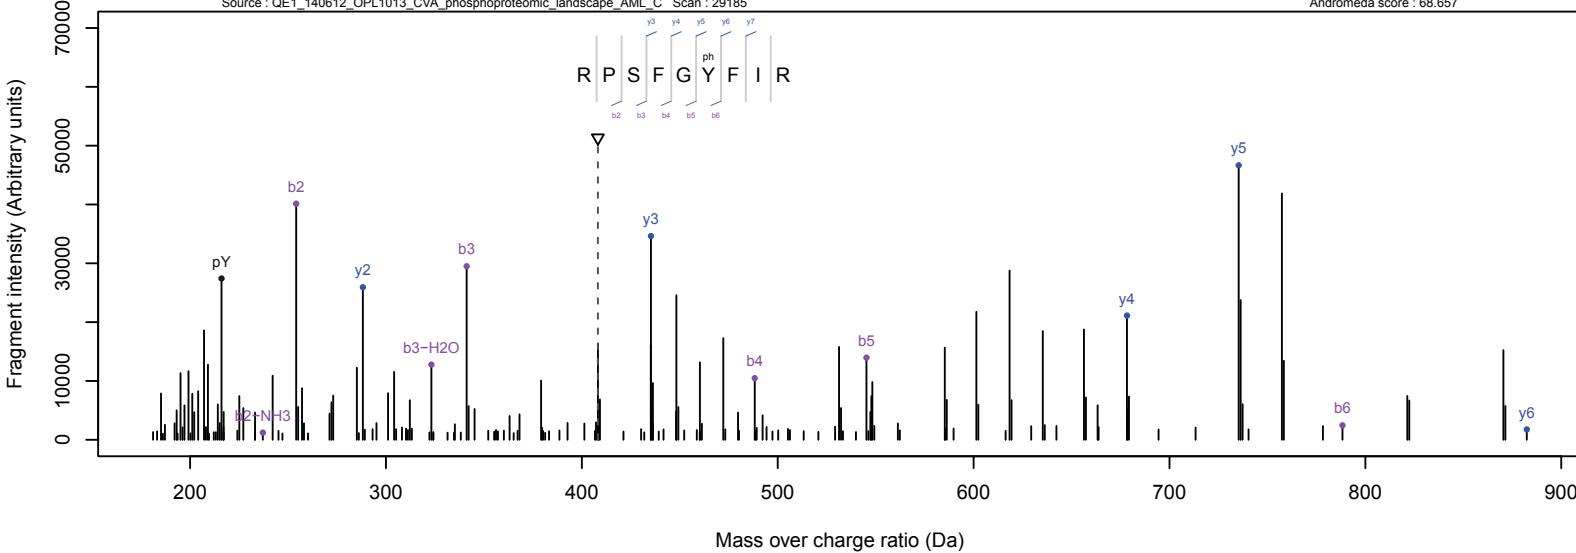

## STCIY(ph)GGAPK-2+

Source : Qe1\_141024\_OPL1013\_CvA\_AML\_pTyrIP\_MOLM13 Scan : 7713

Andromeda score : 68.657

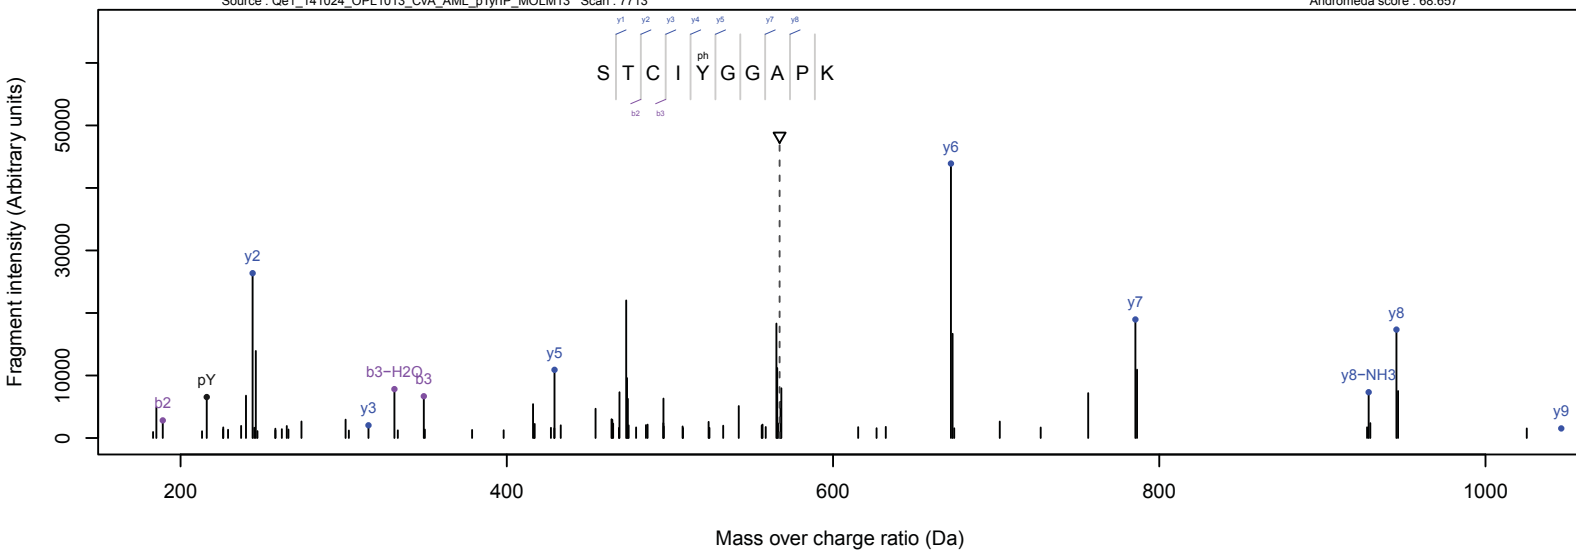

## VY(ph)FKDTHPK-3+

Source : Qe1\_141024\_OPL1013\_CvA\_AML\_pTyrIP\_MOLM13 Scan : 6907

Andromeda score : 68.657

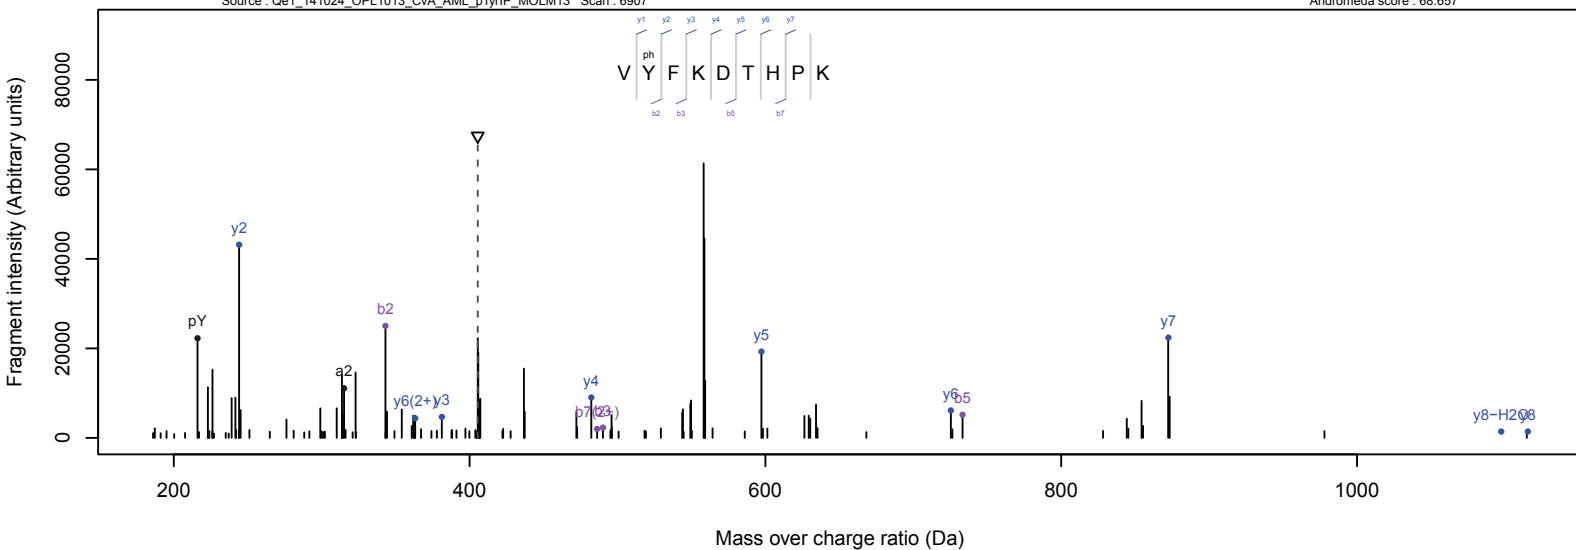

## SKGY(ph)AFIEFASFE DAK-2+

Source : QE1\_140908\_OPL1013\_CvA\_pTyrIP\_AML\_HL60 Scan : 44388

Andromeda score : 68.639

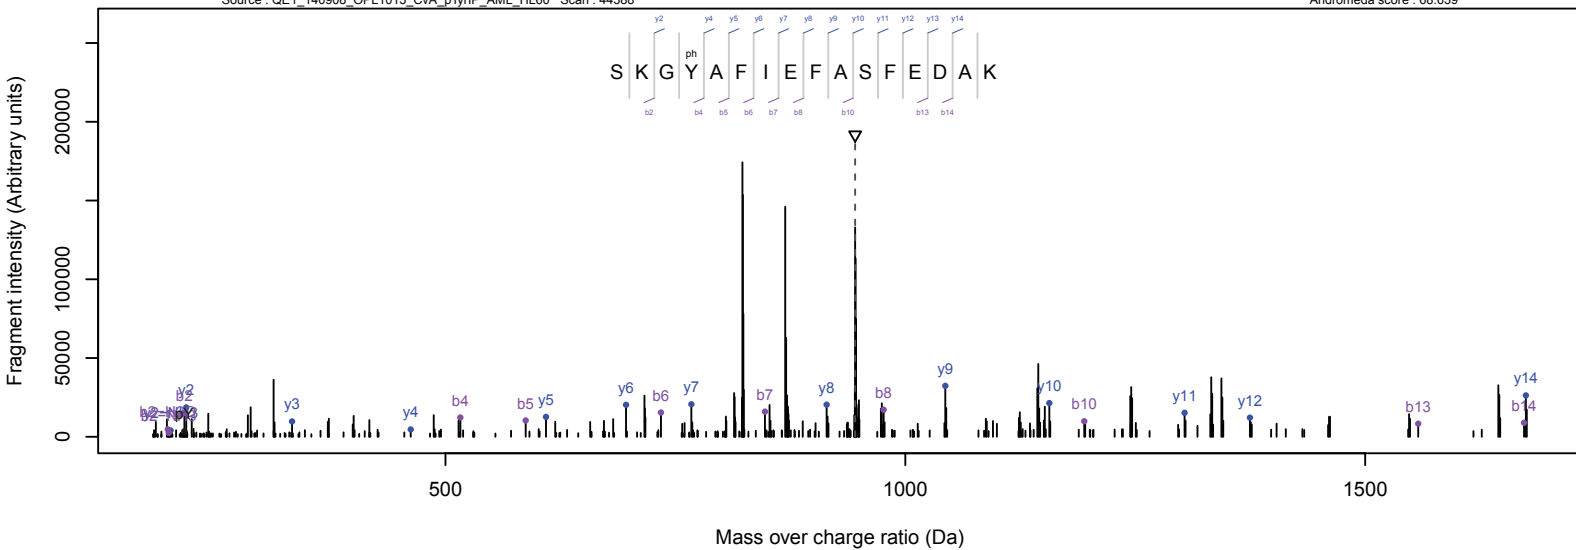

## SY(ph)SMIVNNLLKPISEVGSSK-3+

Source : QE1\_140612\_OPL1013\_CVA\_phosphoproteomic\_landscape\_AML\_A Scan : 44017

Andromeda score : 68.639

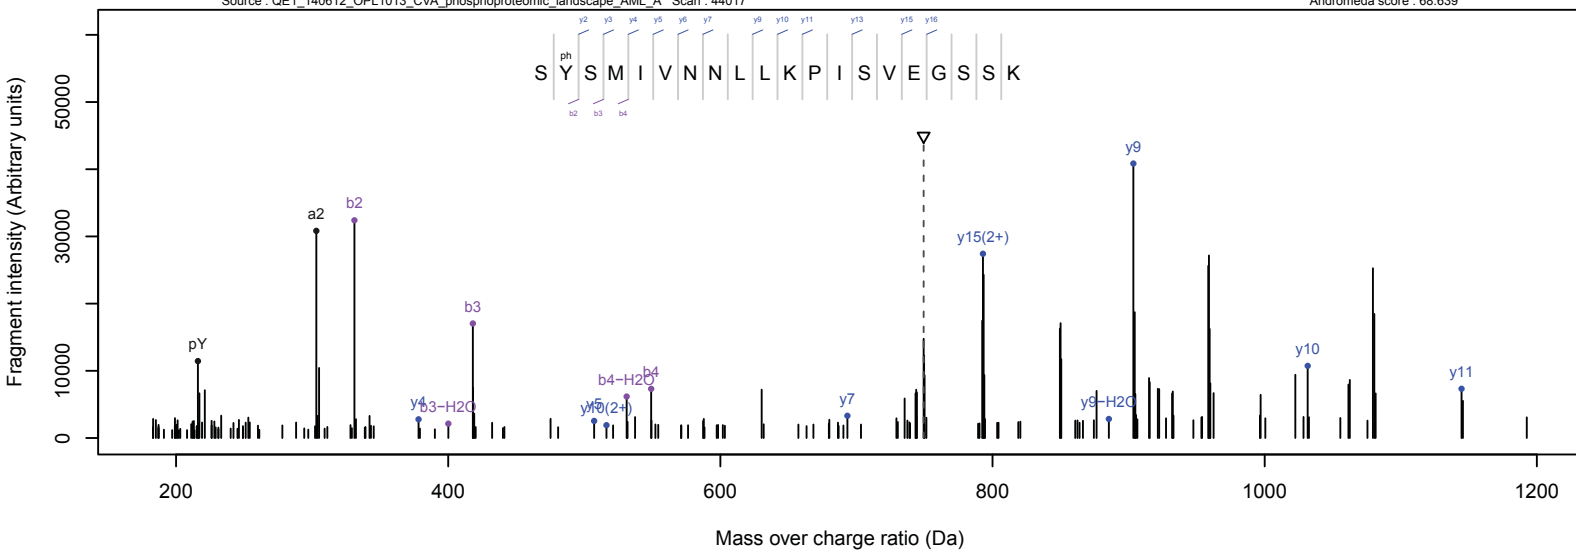

## SNY(ph)NLPMHK-2+

Source : QE1\_140612\_OPL1013\_CVA\_phosphoproteomic\_landscape\_AML\_C Scan : 8986

Andromeda score : 68.557

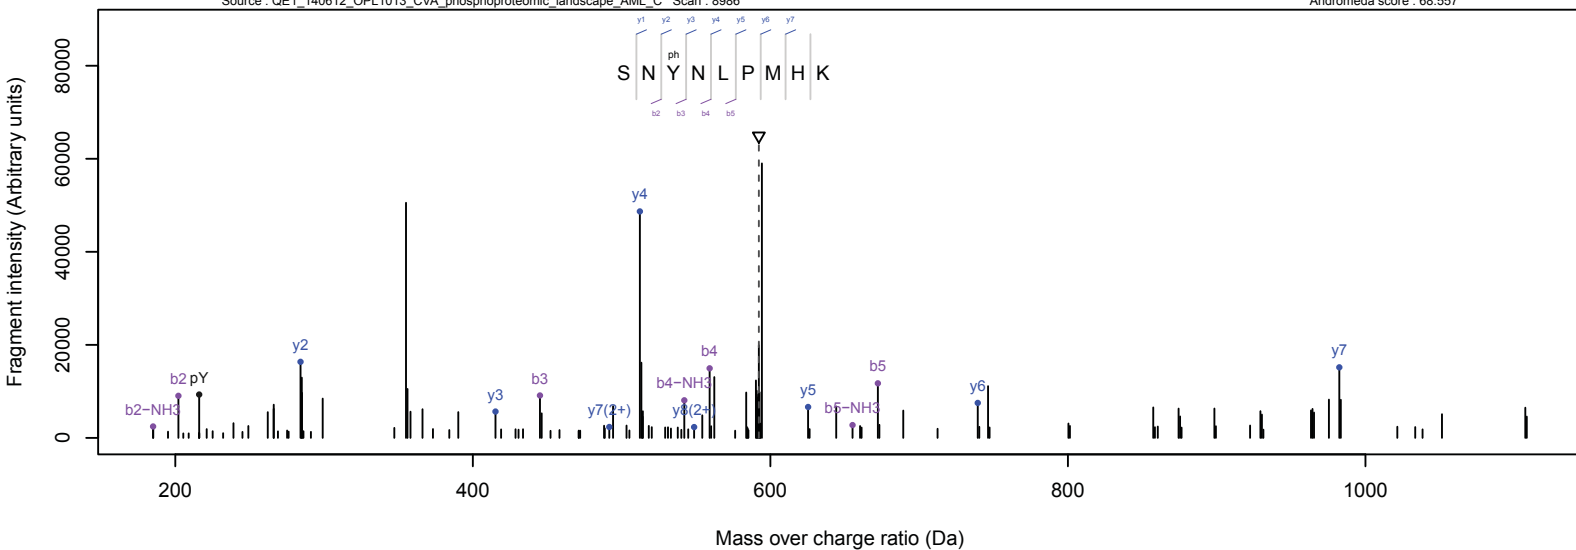

## AYQDY(ph)ILADCK-2+

Source : QE1\_140612\_OPL1013\_CVA\_phosphoproteomic\_landscape\_AML\_B Scan : 24735

Andromeda score : 68.536

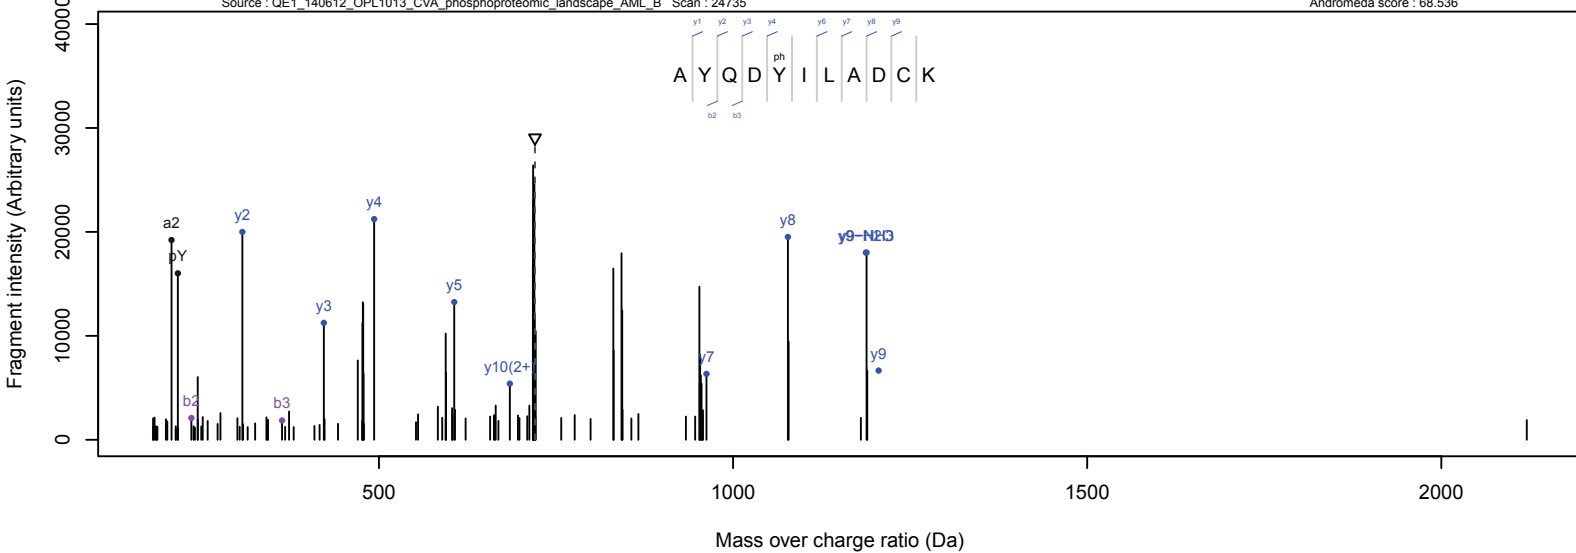

## LGEGTY(ph)ATVYK-2+

Source: QE1\_140612\_OPL1013\_CVA\_phosphoproteomic\_landscape\_AML\_A Scan: 13208

Andromeda score: 68.536

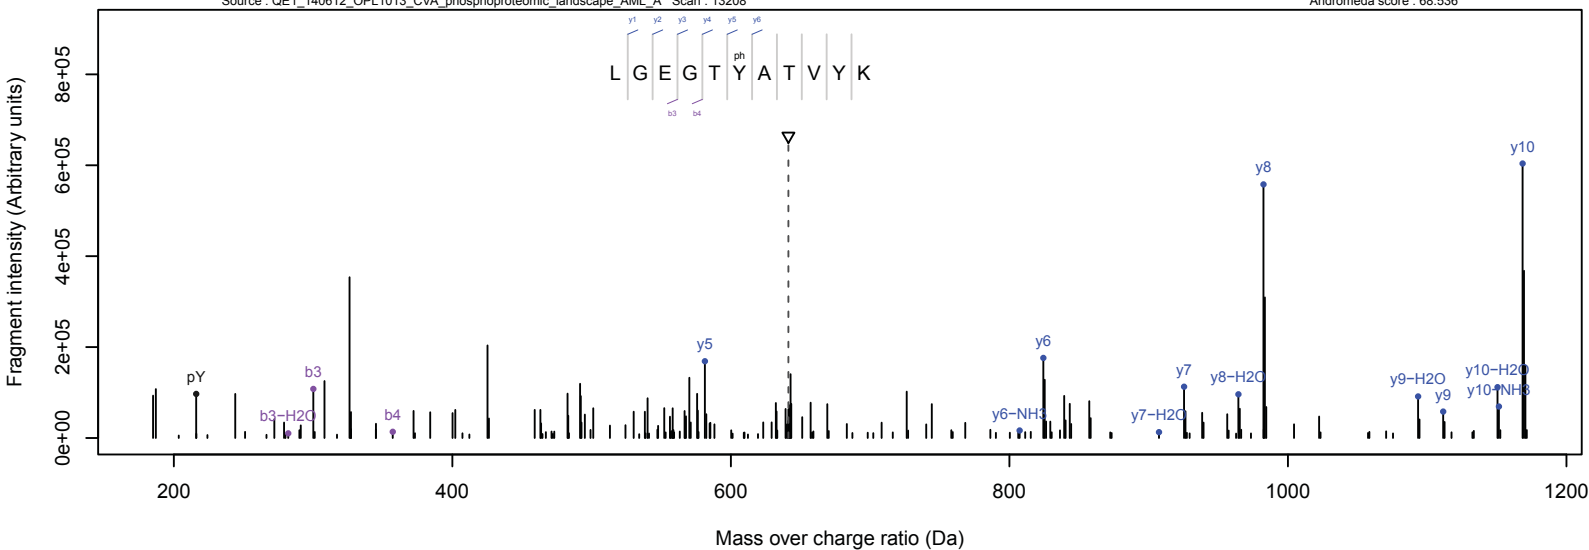

## RGDVIY(ph)ILSK-2+

Source: QE1\_140612\_OPL1013\_CVA\_phosphoproteomic\_landscape\_AML\_C Scan: 29084

Andromeda score: 68.536

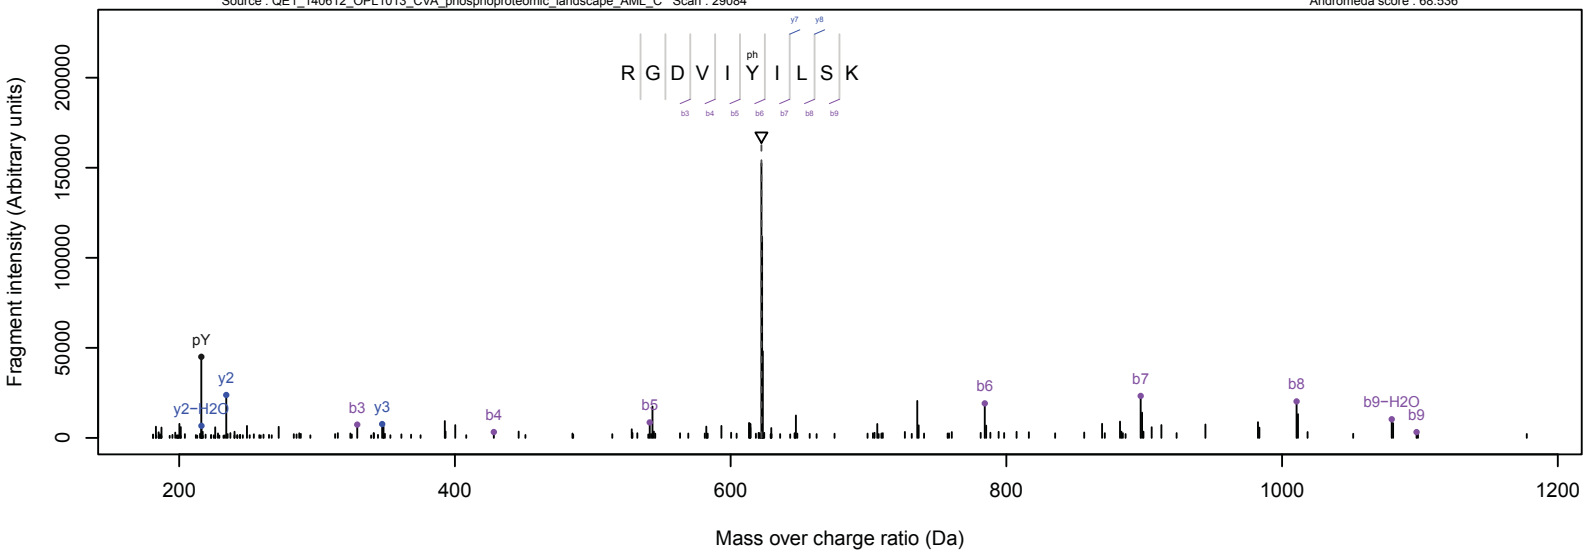

## Y(ph)GALPDQGIK-2+

Source: QE1\_140612\_OPL1013\_CVA\_phosphoproteomic\_landscape\_AML\_B Scan: 15801

Andromeda score: 68.536

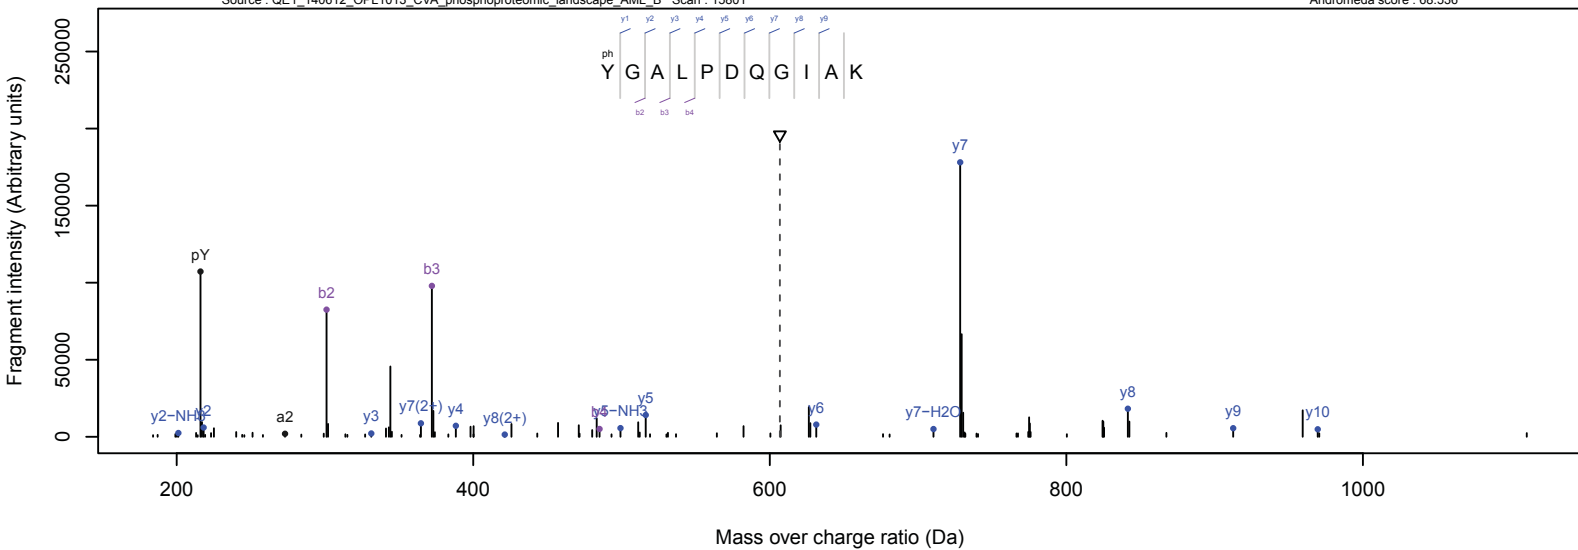



## HVAYGGY(ph)STPEDRRPTLSR-4+

Source: QE1\_140612\_OPL1013\_CVA\_phosphoproteomic\_landscape\_AML\_C Scan: 11693

Andromeda score: 68.525

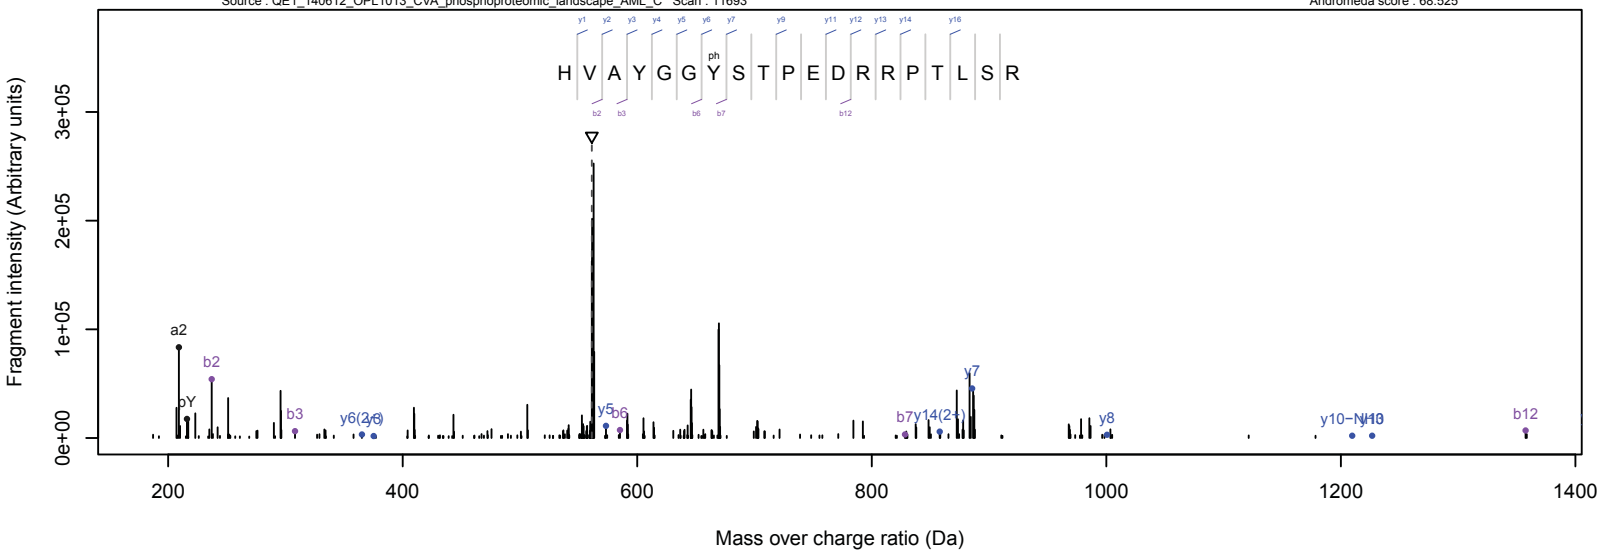

## VLSRPNAQELPSMY(ph)QR-3+

Source: QE1\_140612\_OPL1013\_CVA\_phosphoproteomic\_landscape\_AML\_A Scan: 21272

Andromeda score: 68.481

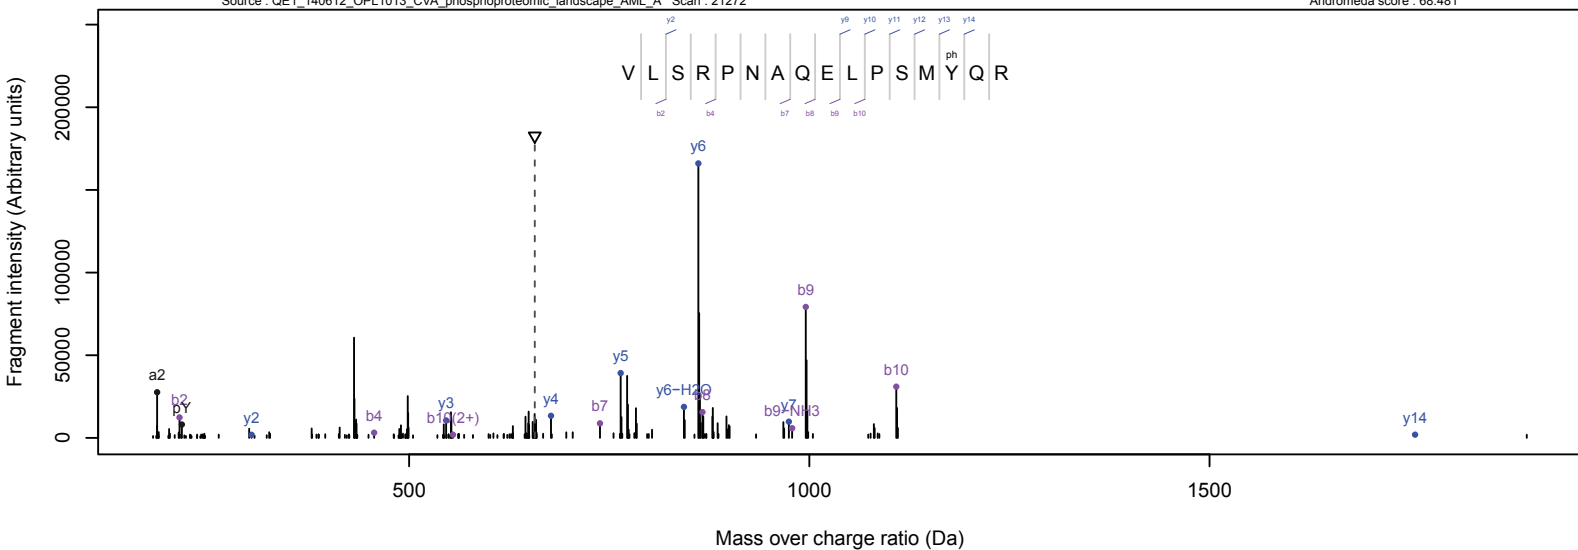

## ELPTEPPYTA(ph)YVGNLPFNTVQGDIDAIFK-3+

Source: QE1\_140612\_OPL1013\_CVA\_phosphoproteomic\_landscape\_AML\_C Scan: 48700

Andromeda score: 68.461

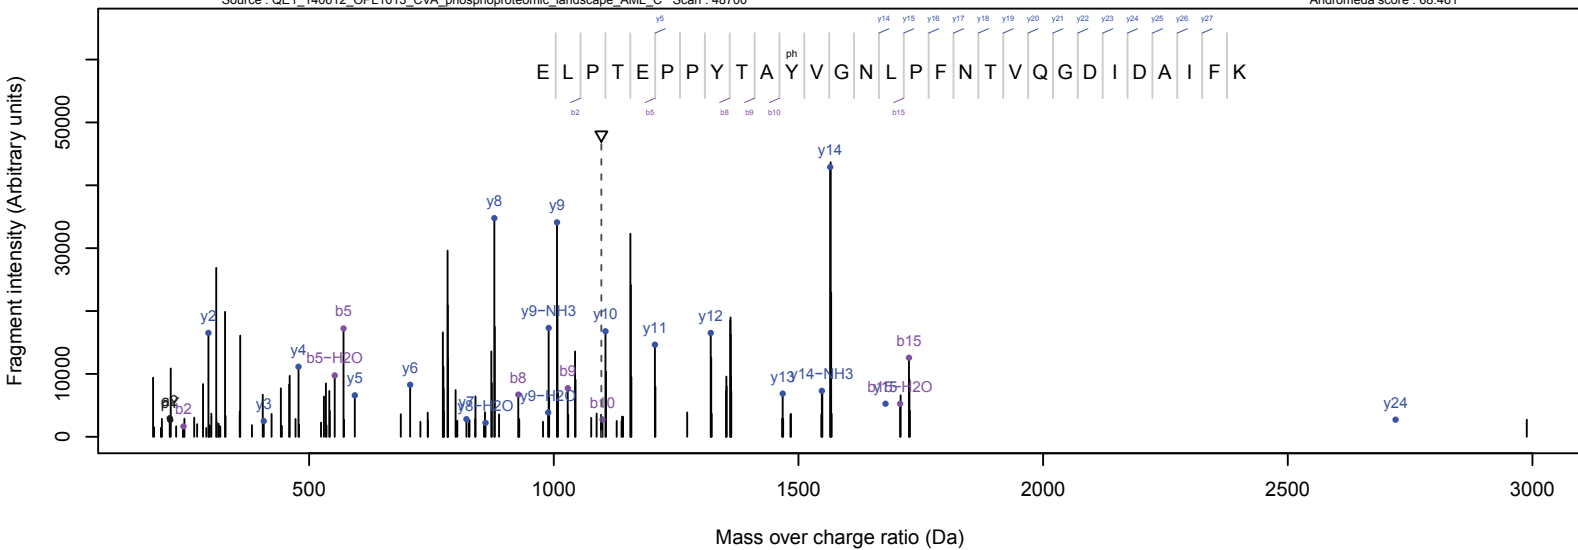

## DSTGIVTSPGTFHQHVPAGY(ph)MDFPK-3+

Source : QE1\_140612\_OPL1013\_CVA\_phosphoproteomic\_landscape\_AML\_B Scan : 34531

Andromeda score : 68.445

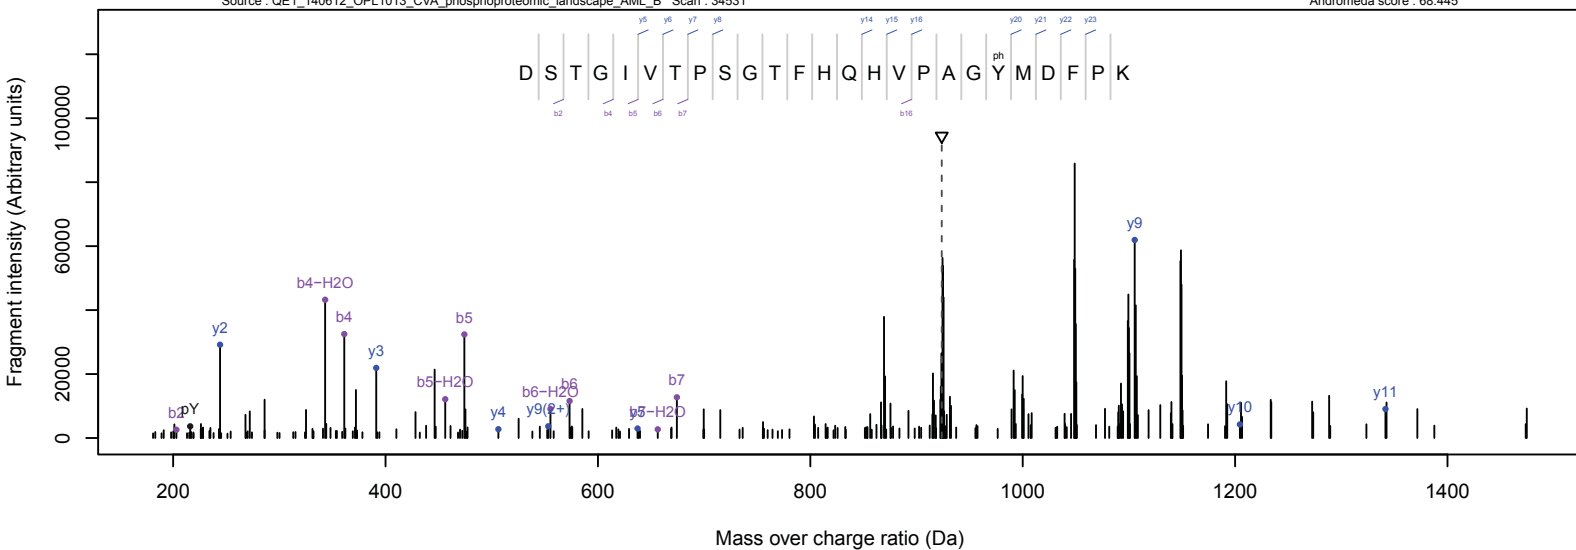

## FEEYGPVIECDIVKDY(ph)AFVHMER-4+

Source : QE1\_140612\_OPL1013\_CVA\_phosphoproteomic\_landscape\_AML\_B Scan : 44223

Andromeda score : 68.445

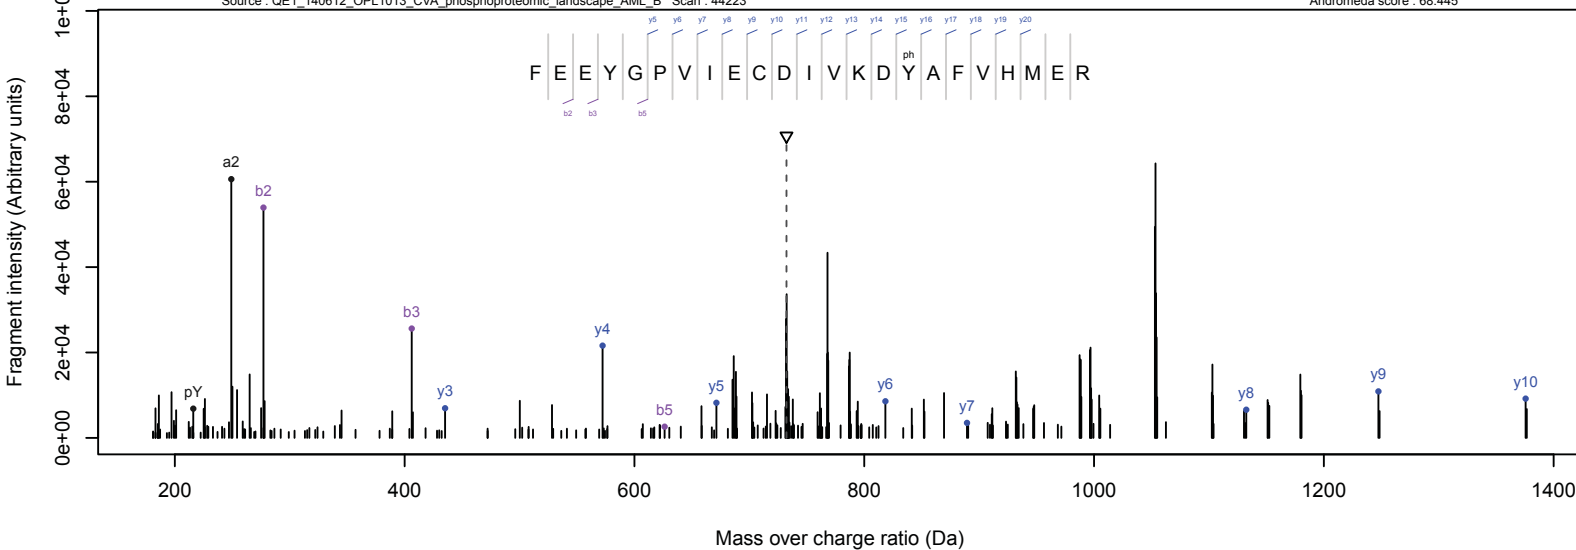

## QDHPSSMGVY(ph)QESGGFSGPGENR-3+

Source : QE1\_140612\_OPL1013\_CVA\_phosphoproteomic\_landscape\_AML\_B Scan : 16959

Andromeda score : 68.445

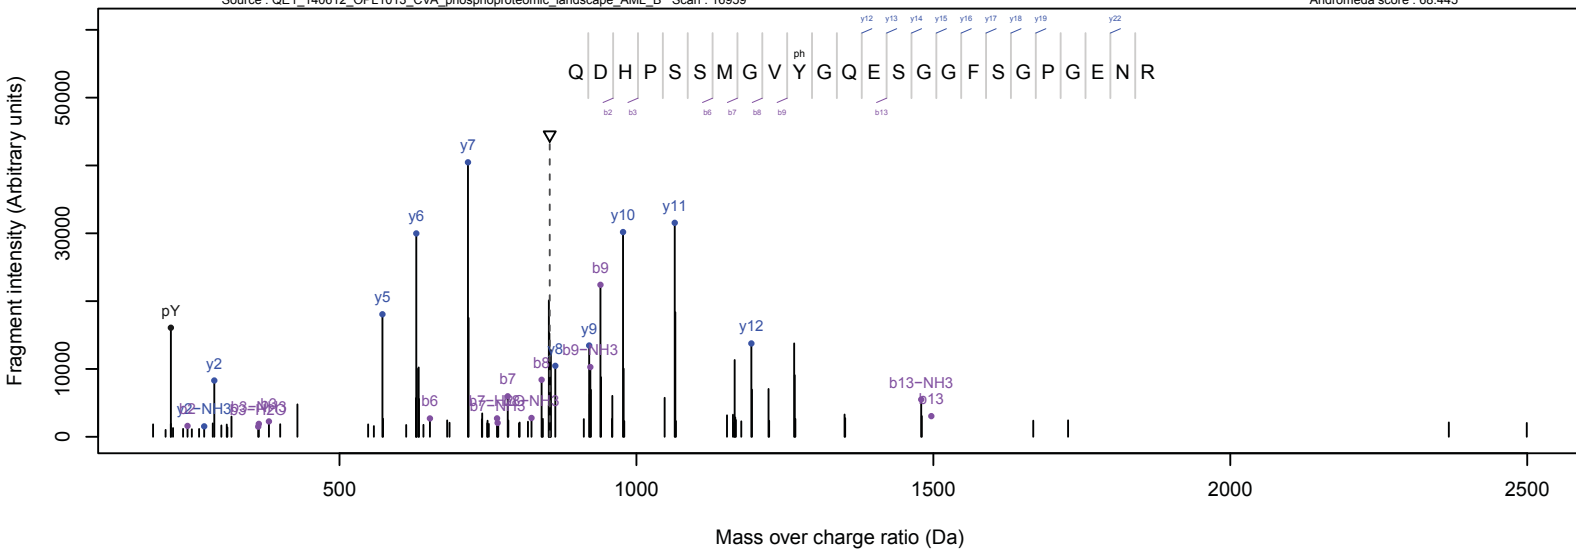

## VKADRDESSPY(ph)AAMLAQDVAQR-3+

Source: QE1\_140612\_OPL1013\_CVA\_phosphoproteomic\_landscape\_AML\_C Scan: 26780

Andromeda score: 68.445

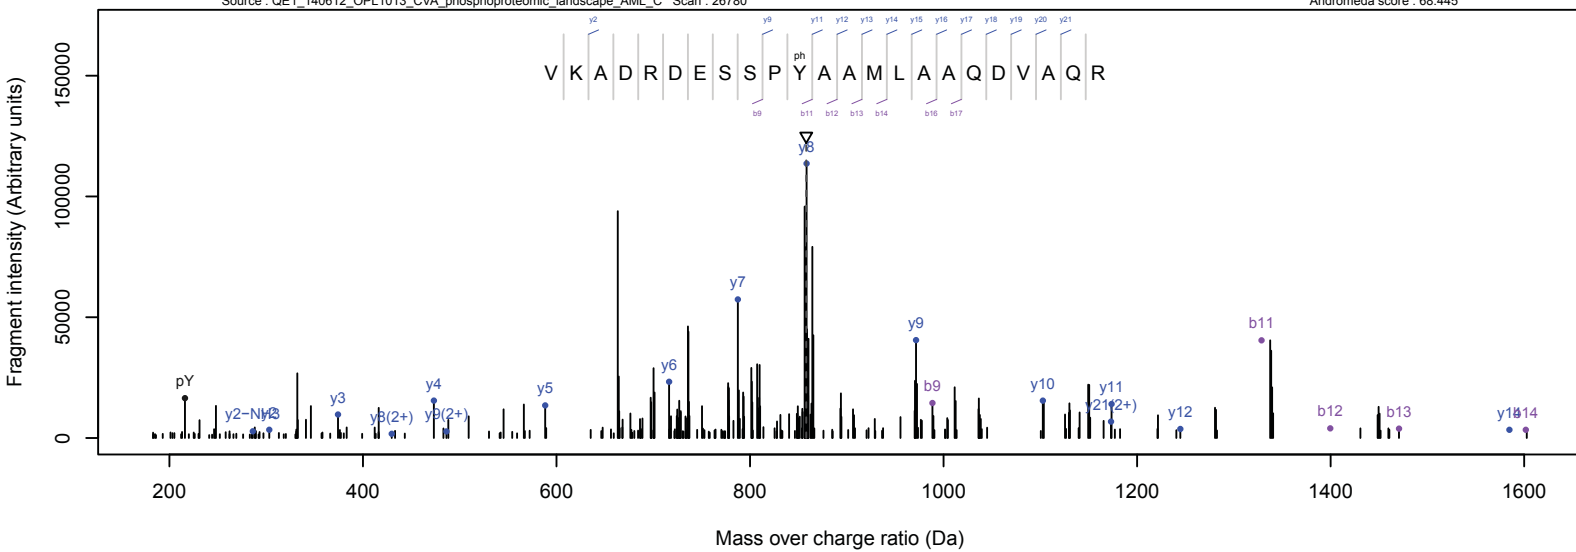

## IAPTKEQLFY(ph)ISQPGSSVVTSLSPGEAVK-3+

Source: QE1\_140612\_OPL1013\_CVA\_phosphoproteomic\_landscape\_AML\_A Scan: 41944

Andromeda score: 68.434

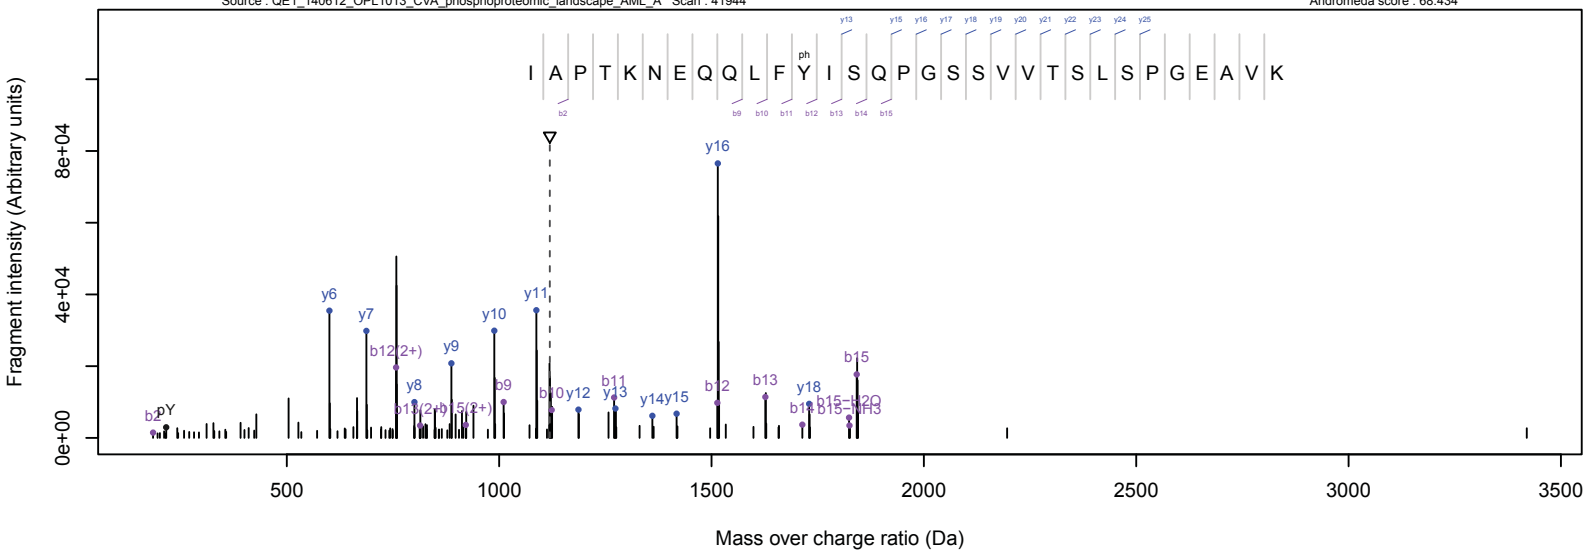

## LPPGEQCEGEDTEYM(ox)T(ph)PSSRPLRLDTSQSSR-4+

Source: QE1\_140908\_OPL1013\_CvA\_pTyrIP\_AML\_Kasumi6 Scan: 22636

Andromeda score: 68.434

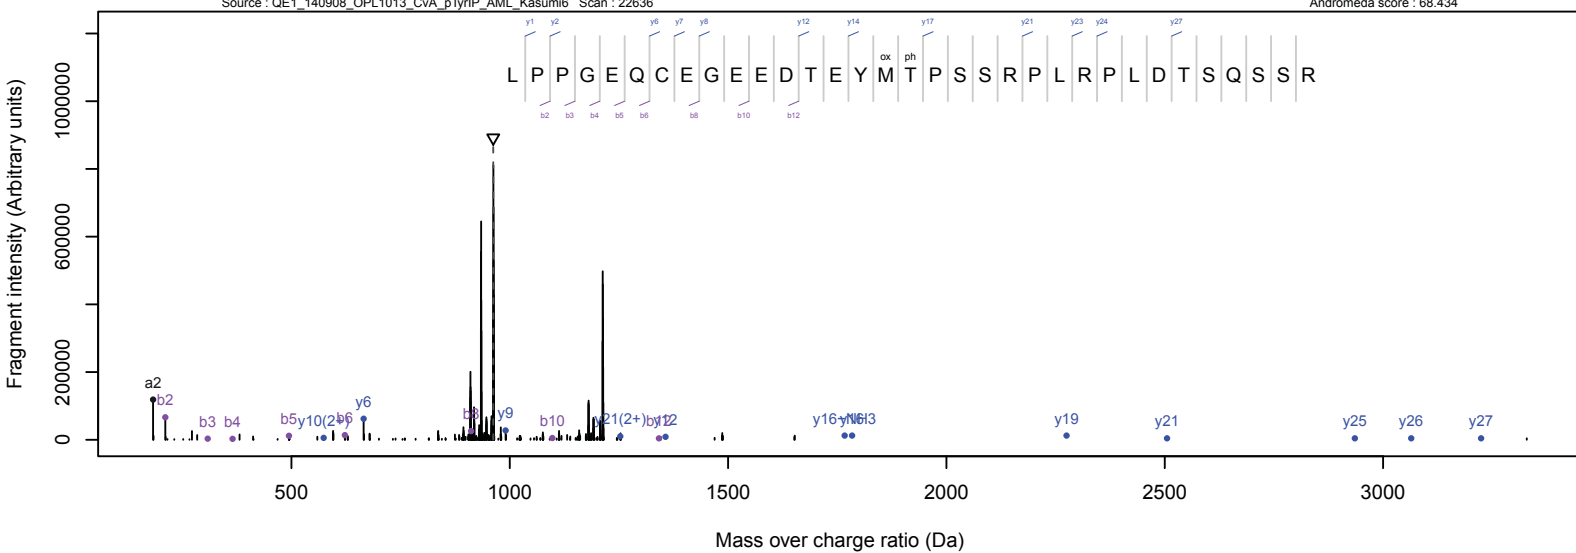

## AHHVY(ph)PSLPTLLRPSR-4+

Source : QE1\_140612\_OPL1013\_CVA\_phosphoproteomic\_landscape\_AML\_C Scan : 27462

Andromeda score : 68.413

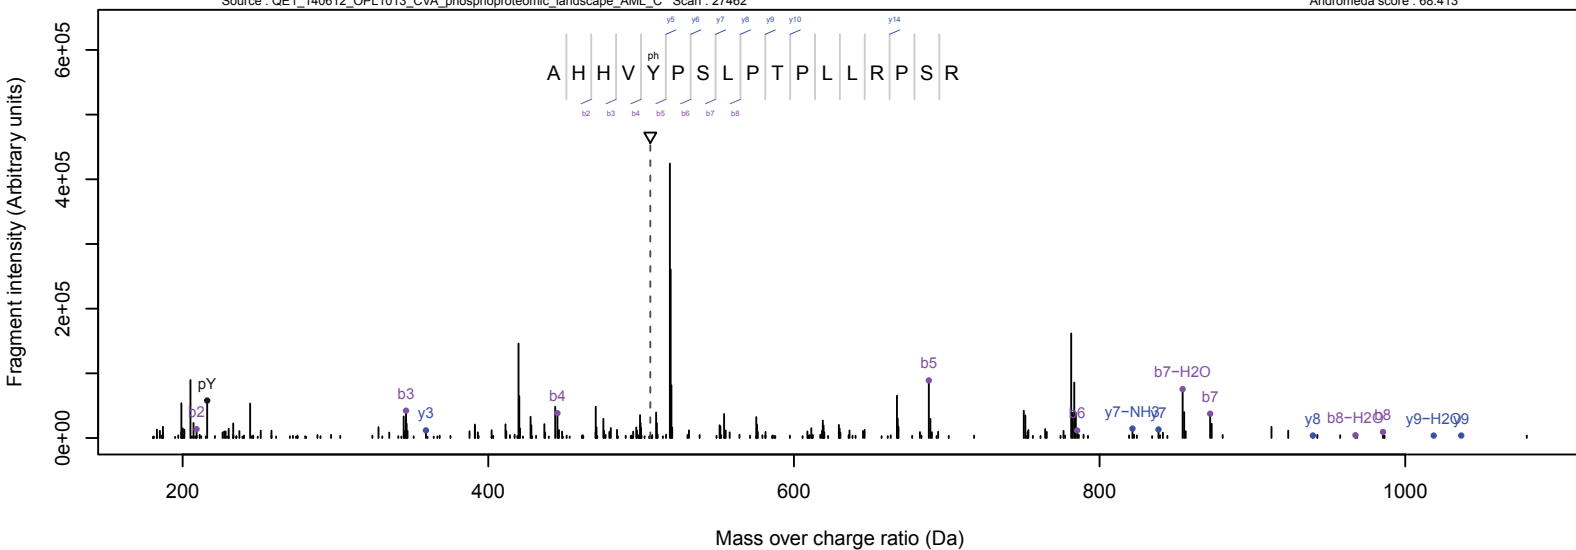

## AKYQY(ph)GGLNSGRPVTTPR-3+

Source : QE1\_140612\_OPL1013\_CVA\_phosphoproteomic\_landscape\_AML\_B Scan : 13148

Andromeda score : 68.41

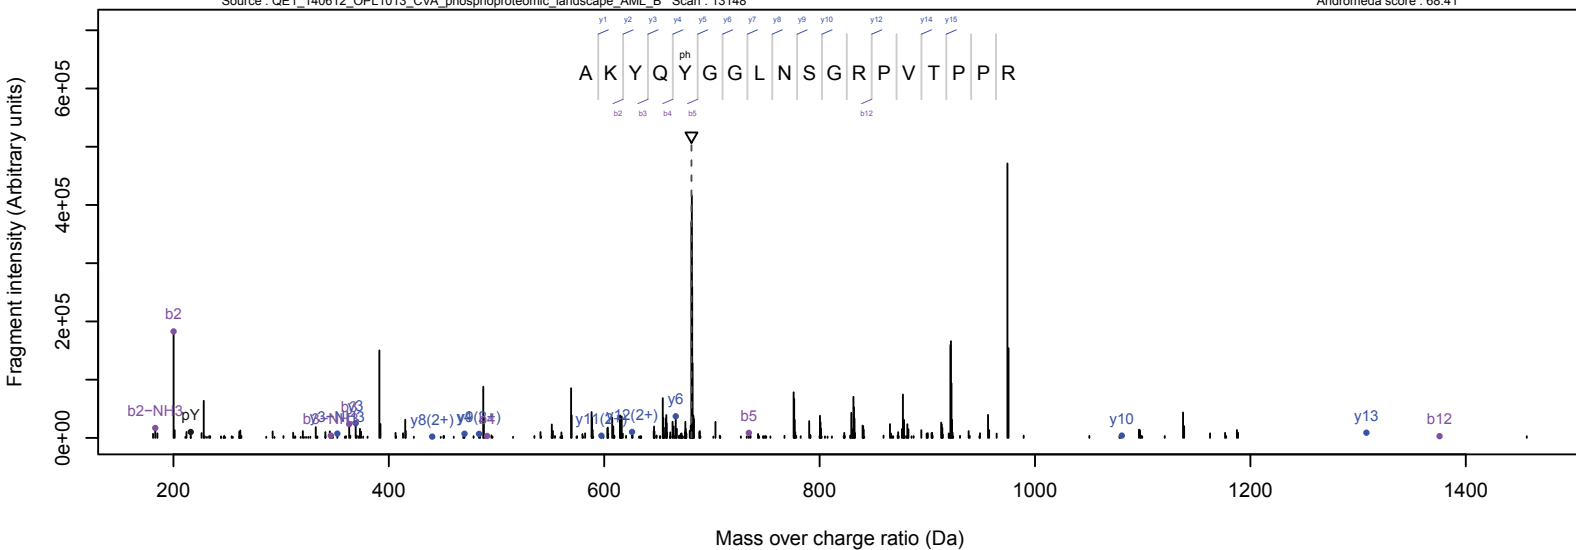

## FVDY(ph)CLQK-2+

Source : QE1\_140612\_OPL1013\_CVA\_phosphoproteomic\_landscape\_AML\_C Scan : 14925

Andromeda score : 68.383

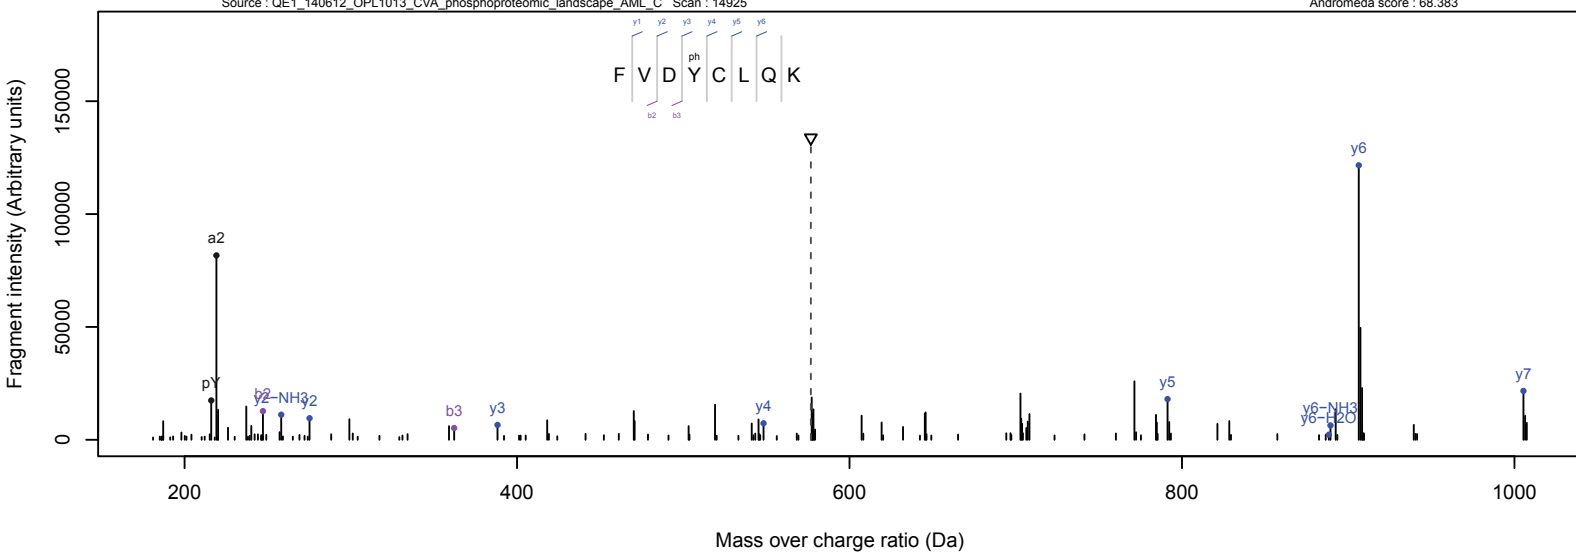

## VIY(ph)DFIEK-2+

Source : QE1\_140612\_OPL1013\_CVA\_phosphoproteomic\_landscape\_AML\_E Scan : 27385

Andromeda score : 68.371

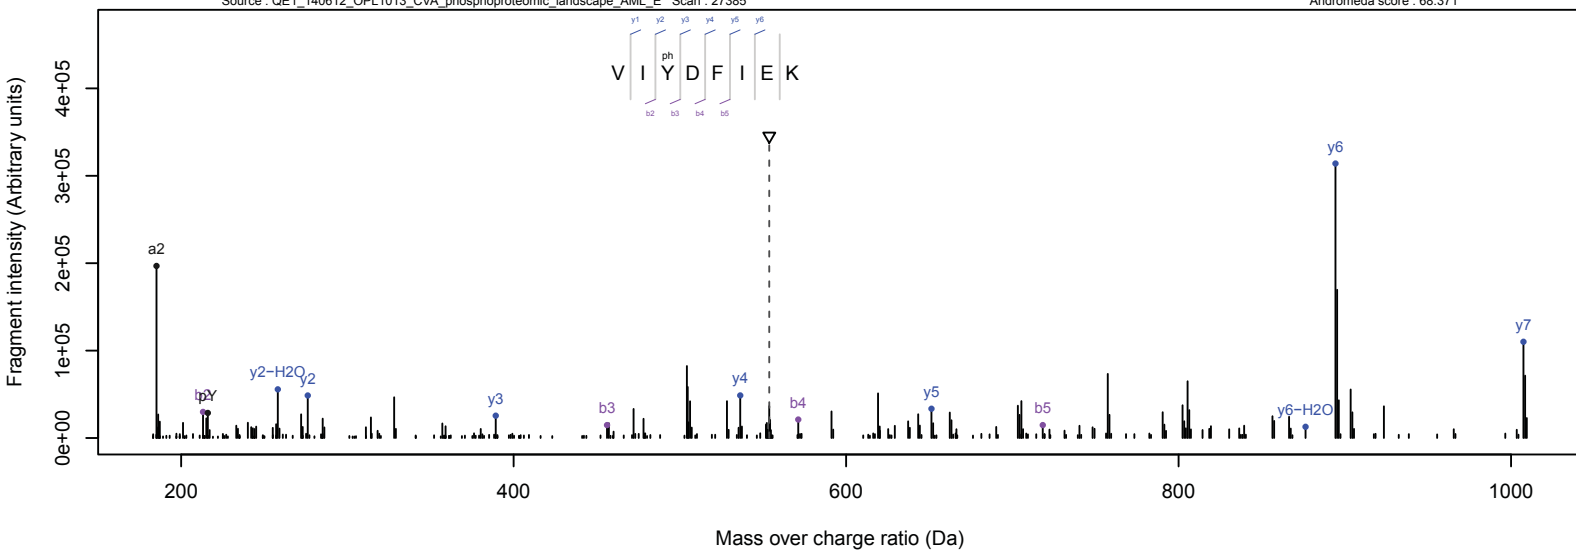

## Y(ph)YVNSLQHR-3+

Source : QE1\_140612\_OPL1013\_CVA\_phosphoproteomic\_landscape\_AML\_B Scan : 9612

Andromeda score : 68.371

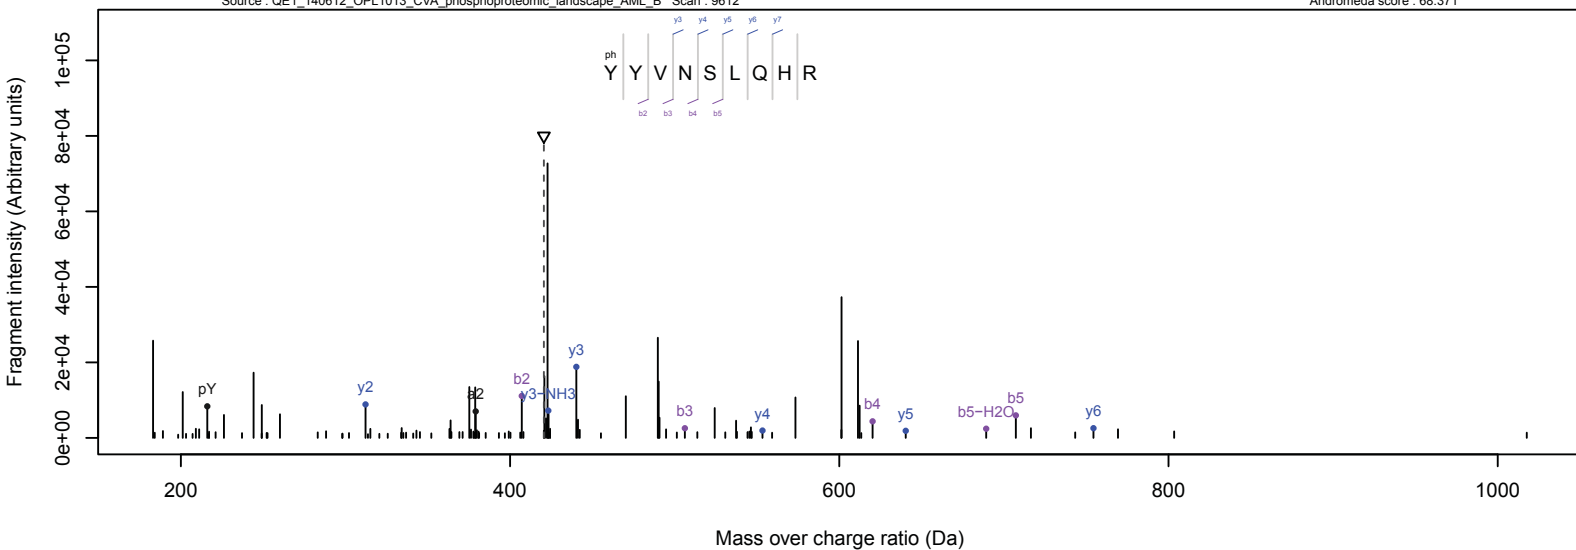

## KRPPGYYSY(ph)LK-3+

Source : QE1\_140612\_OPL1013\_CVA\_phosphoproteomic\_landscape\_AML\_B Scan : 11767

Andromeda score : 68.355

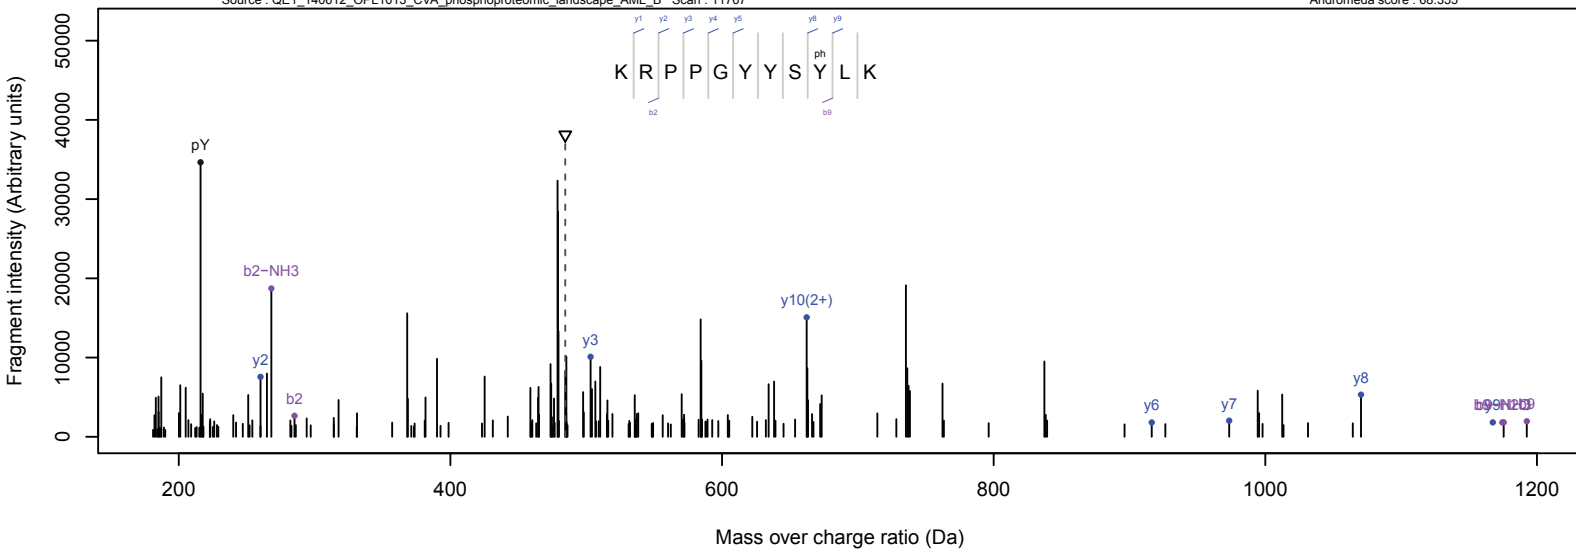

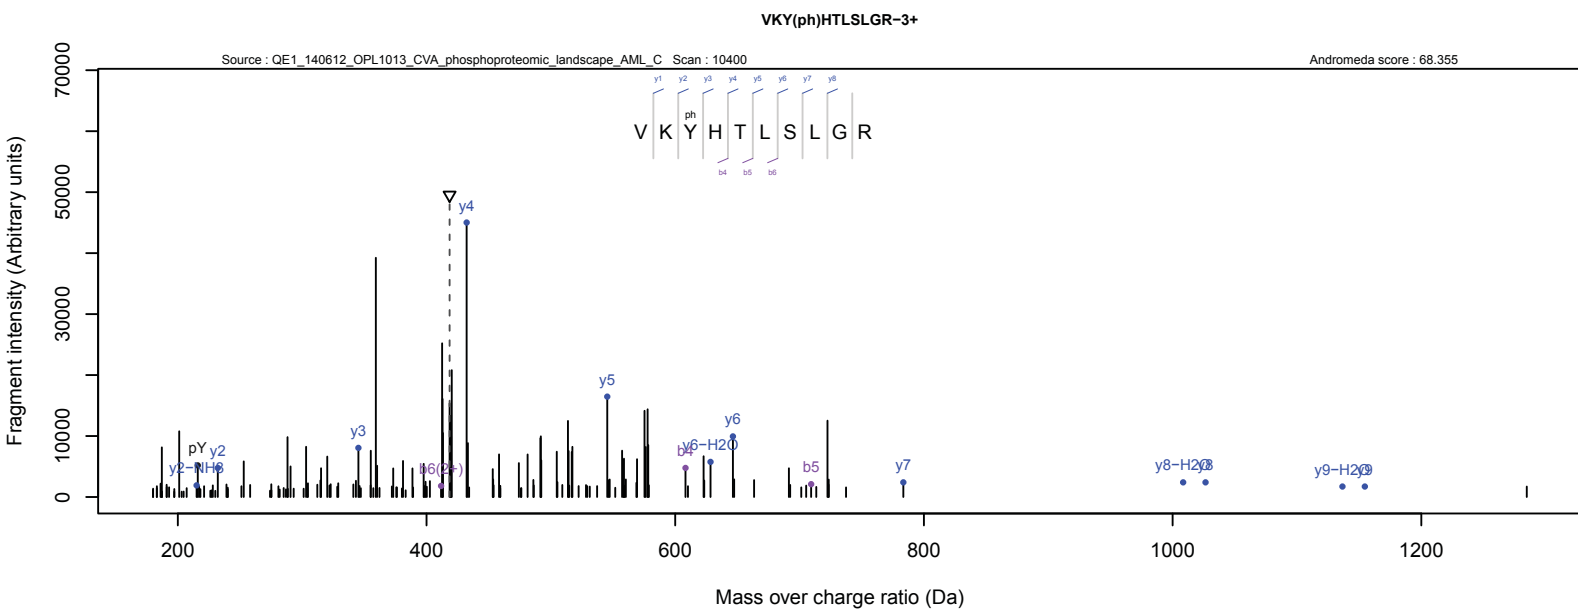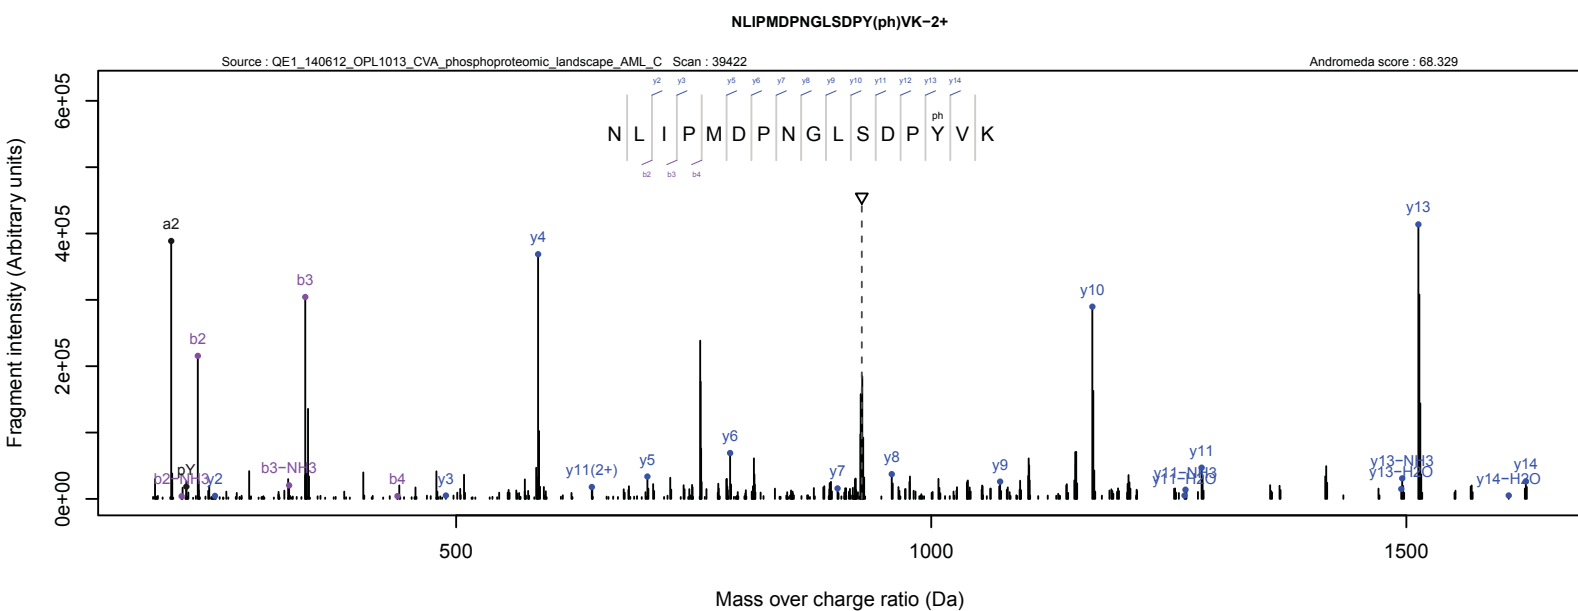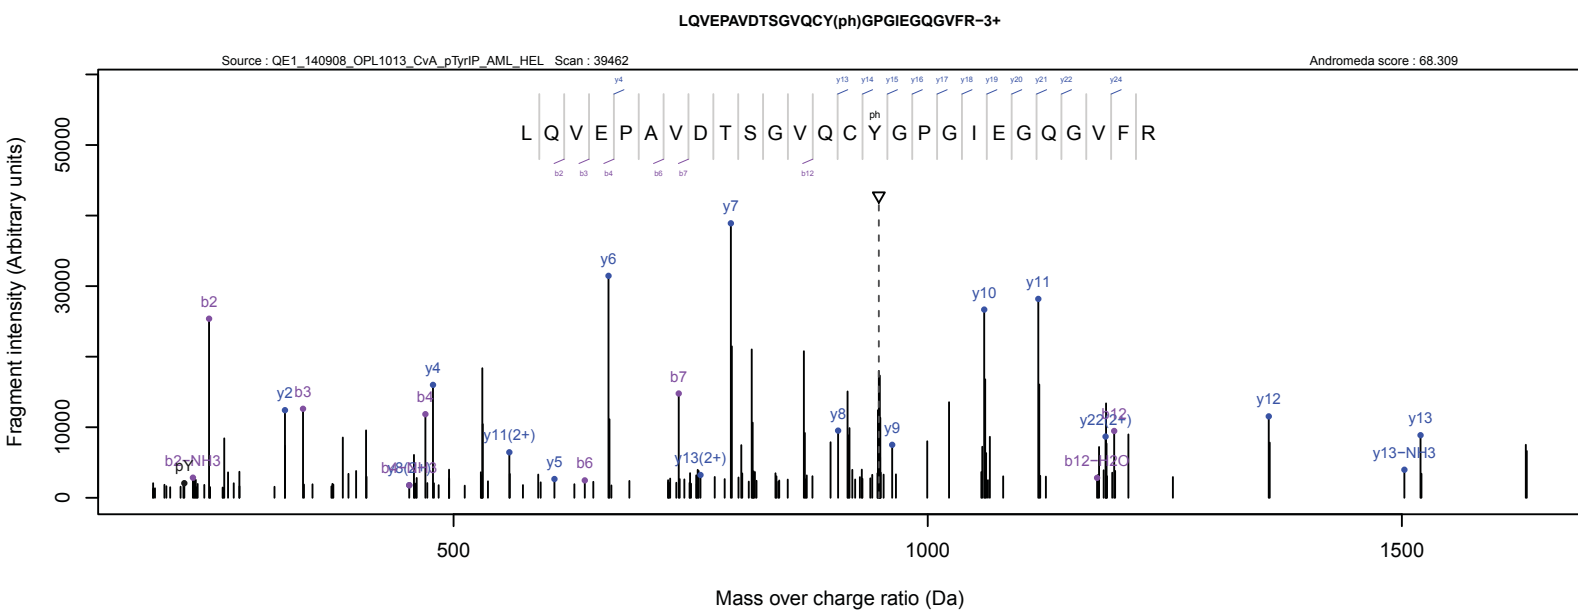

IY(ph)SLSSQPIDHEGIK-3+

Source : QE1\_140612\_OPL1013\_CVA\_phosphoproteomic\_landscape\_AML\_C Scan : 21096

Andromeda score : 68.283

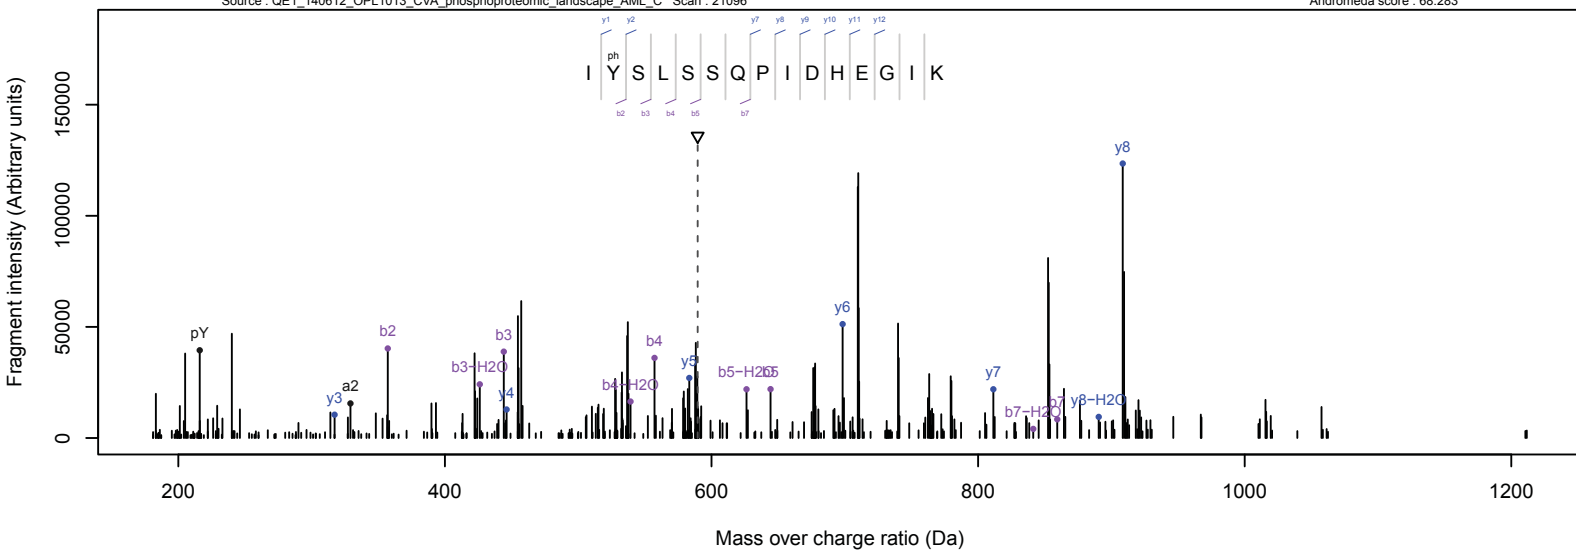

SDDF(ph)TFGSIFLEK-2+

Source : QE1\_140822\_OPL1013\_CvA\_pTyrIP\_AML\_cell\_lines\_part2\_B Scan : 44393

Andromeda score : 68.283

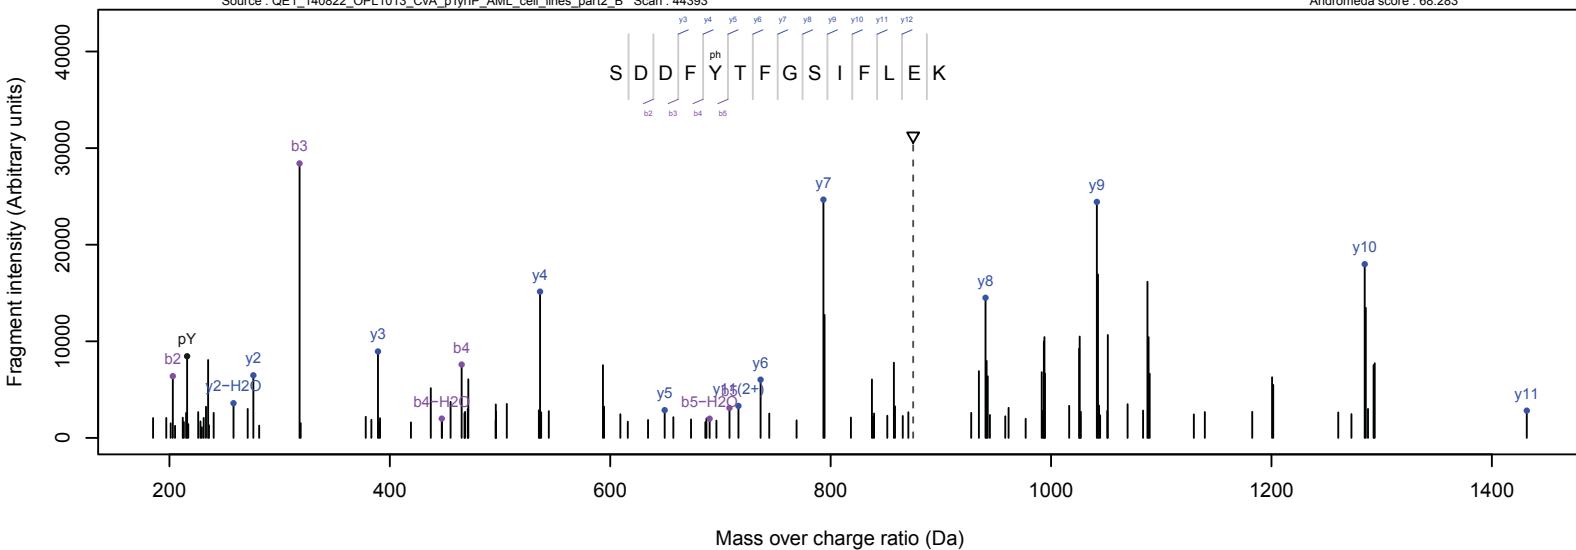

SPASDTY(ph)IVFGEAK-2+

Source : QE1\_140612\_OPL1013\_CVA\_phosphoproteomic\_landscape\_AML\_C Scan : 29502

Andromeda score : 68.283

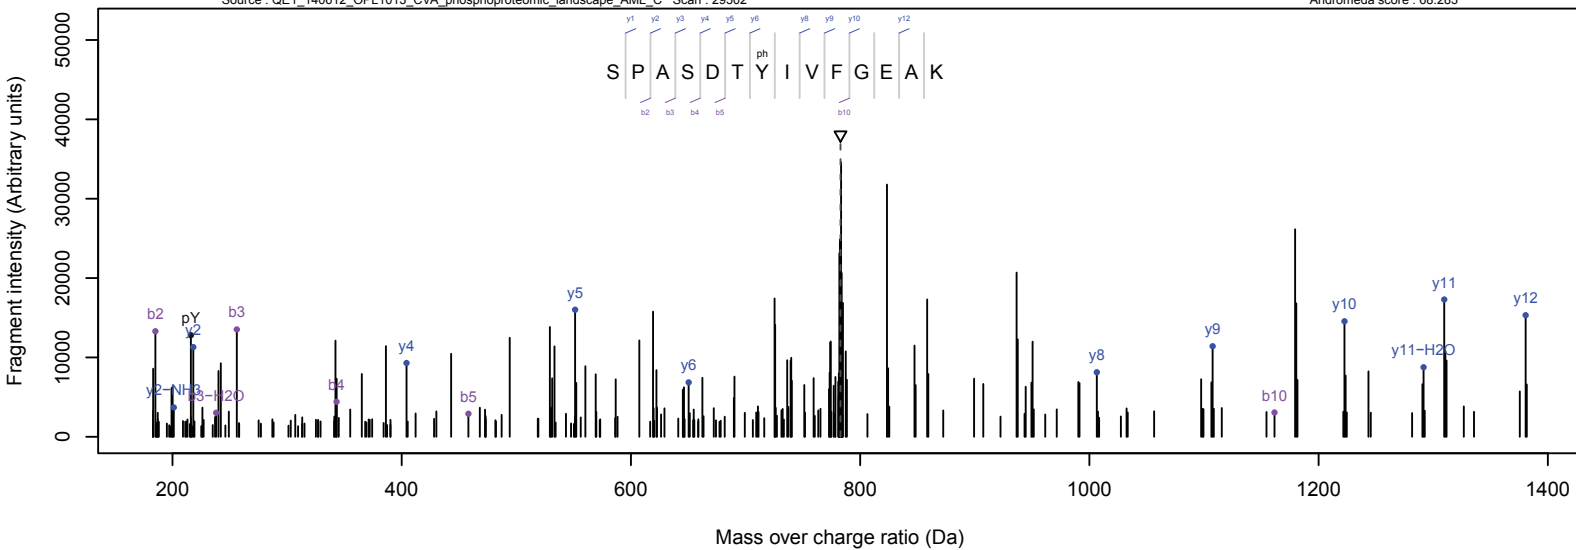

## EFLTIY(ph)EDVKDLK-2+

Source : QE1\_140612\_OPL1013\_CVA\_phosphoproteomic\_landscape\_AML\_B Scan : 40356

Andromeda score : 68.277

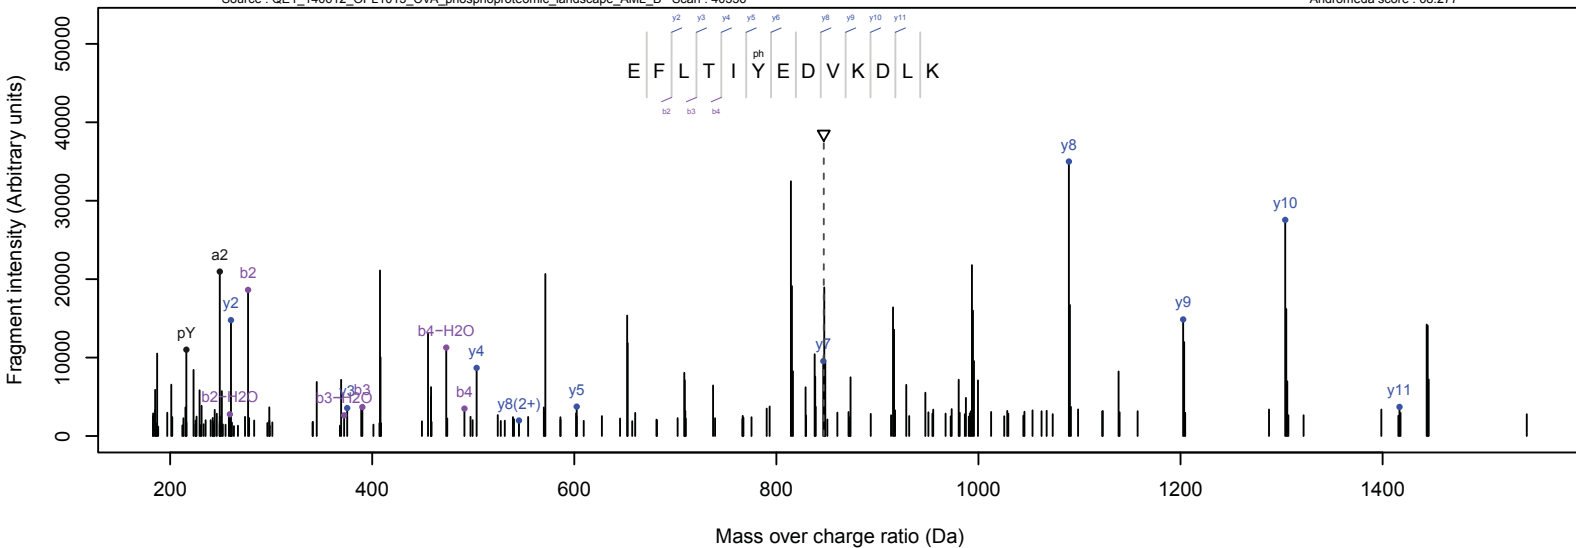

## YSLS(ph)PSKSY(ph)KYSYK-3+

Source : QE1\_140612\_OPL1013\_CVA\_phosphoproteomic\_landscape\_AML\_B Scan : 13289

Andromeda score : 68.277

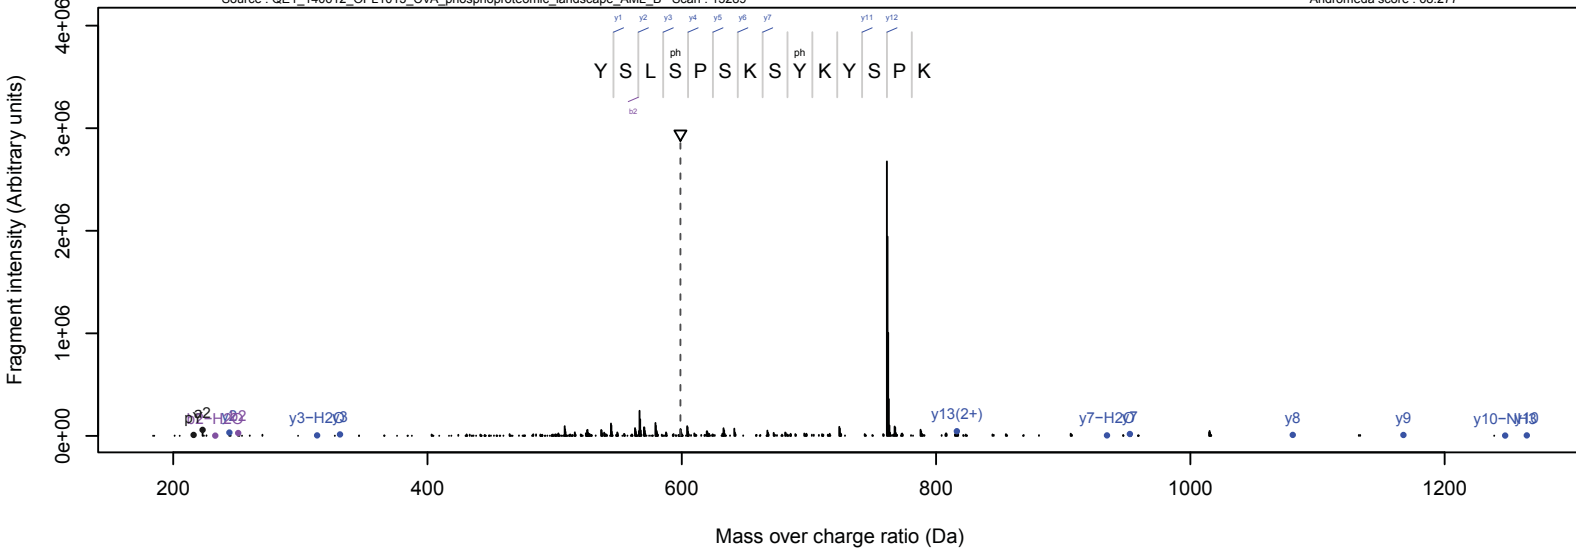

## HHFDQPSVAPGKNYSFTR-4+

Source : QE1\_140612\_OPL1013\_CVA\_phosphoproteomic\_landscape\_AML\_C Scan : 15288

Andromeda score : 68.243

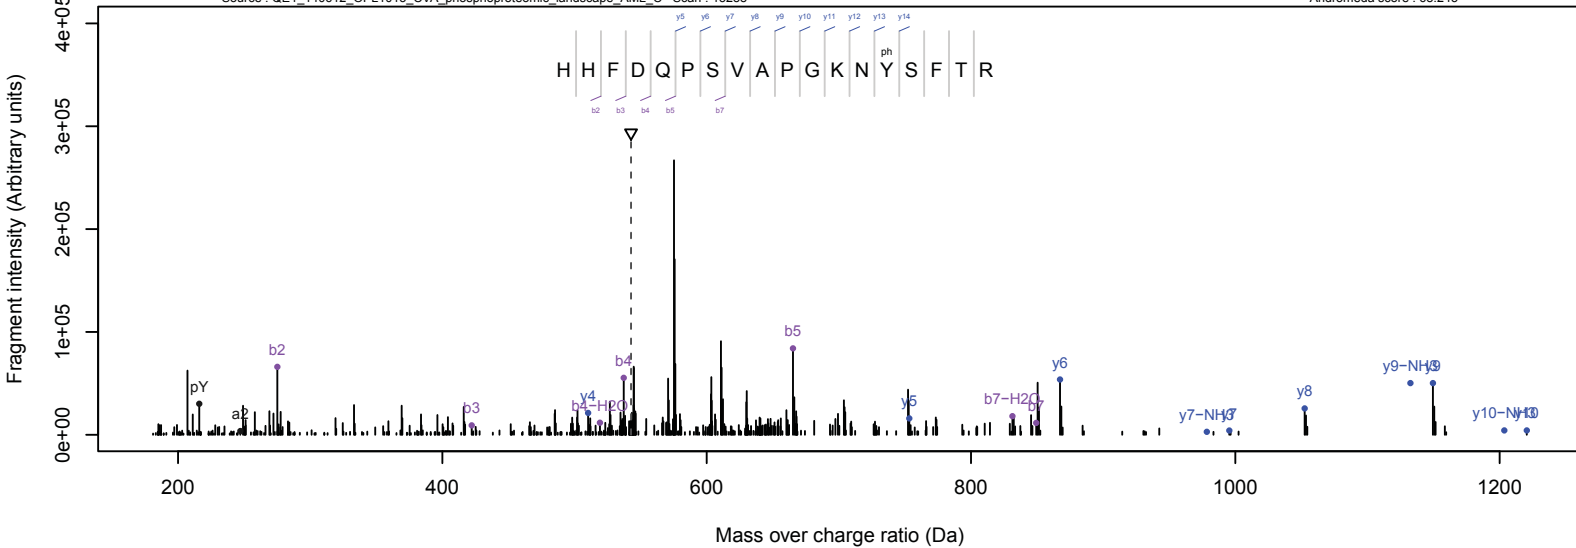



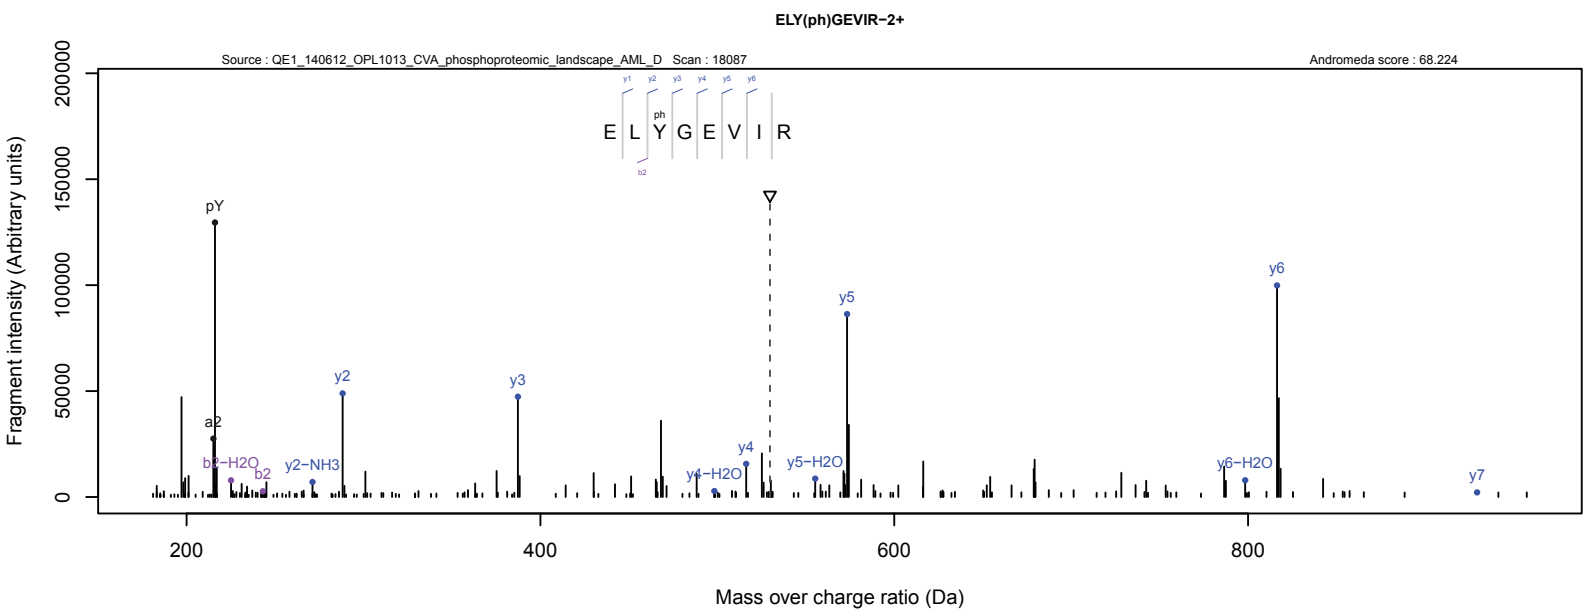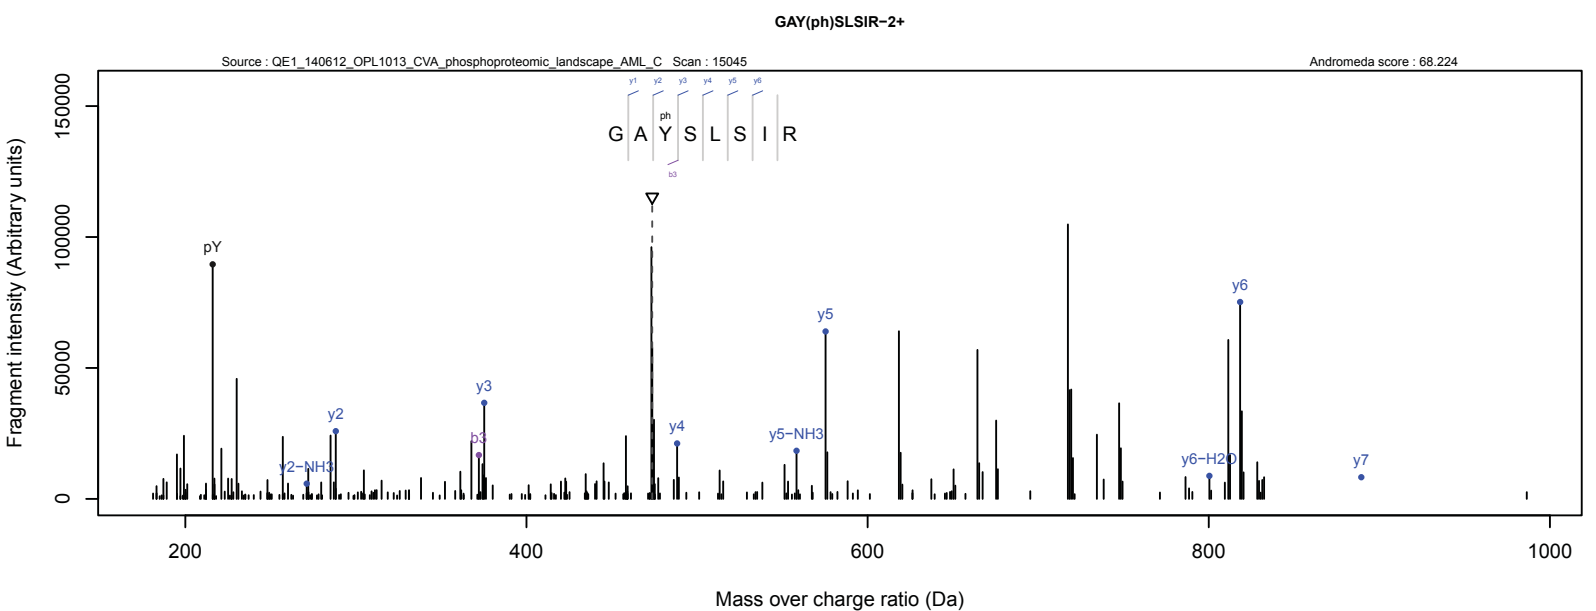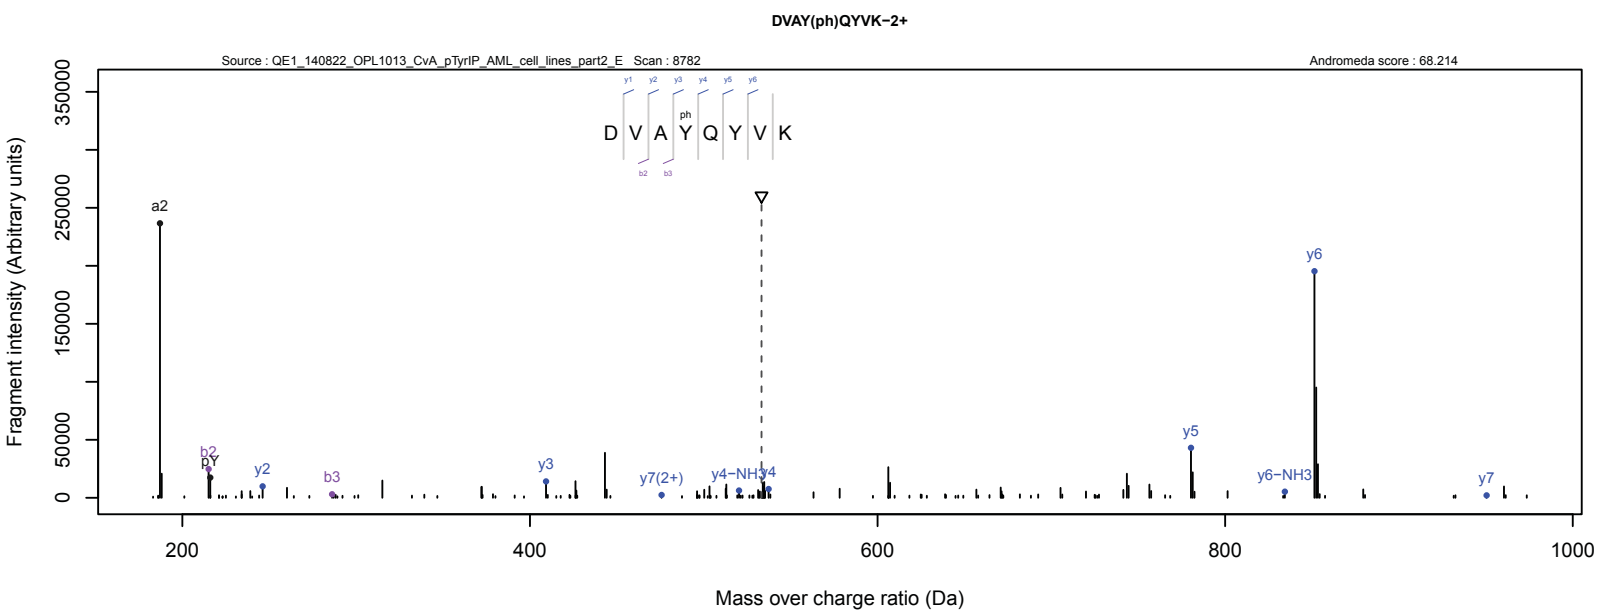

RRPVSVSPSSSQEISENQY(ph)AVICSEK-4+

Source : QE1\_140908\_OPL1013\_CvA\_pTyrIP\_AML\_HEL Scan : 20717

Andromeda score : 68.207

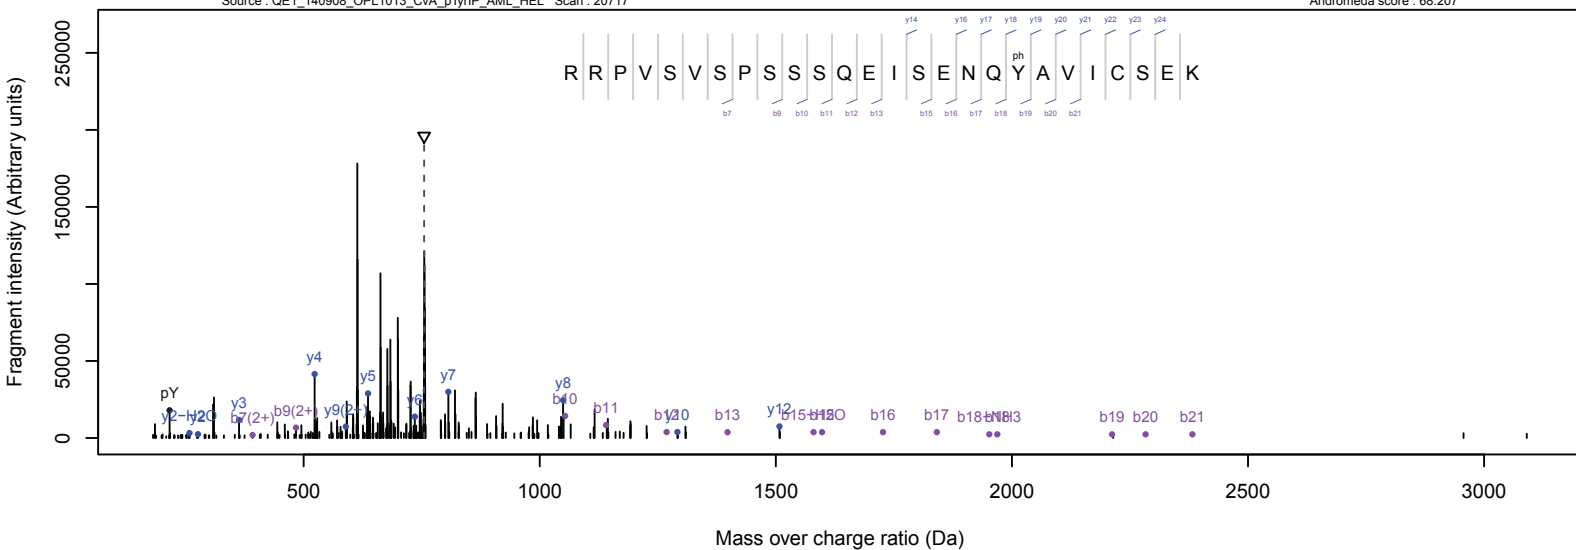

LSAY(ph)VSYGGLLMR-2+

Source : QE1\_140612\_OPL1013\_CvA\_phosphoproteomic\_landscape\_AML\_A Scan : 40034

Andromeda score : 68.171

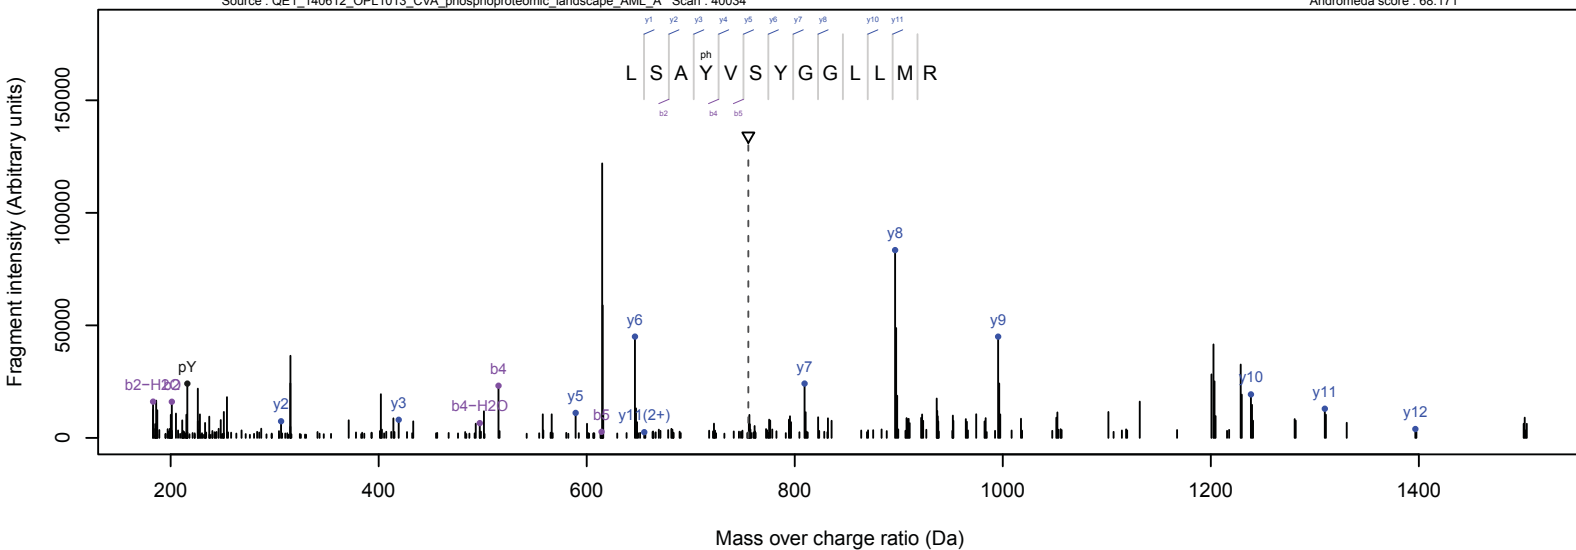

DHVVEGEPYAGYDRHNAEVAAFHLDR-4+

Source : QE1\_140908\_OPL1013\_CvA\_pTyrIP\_AML\_Kasumi1 Scan : 24434

Andromeda score : 68.074

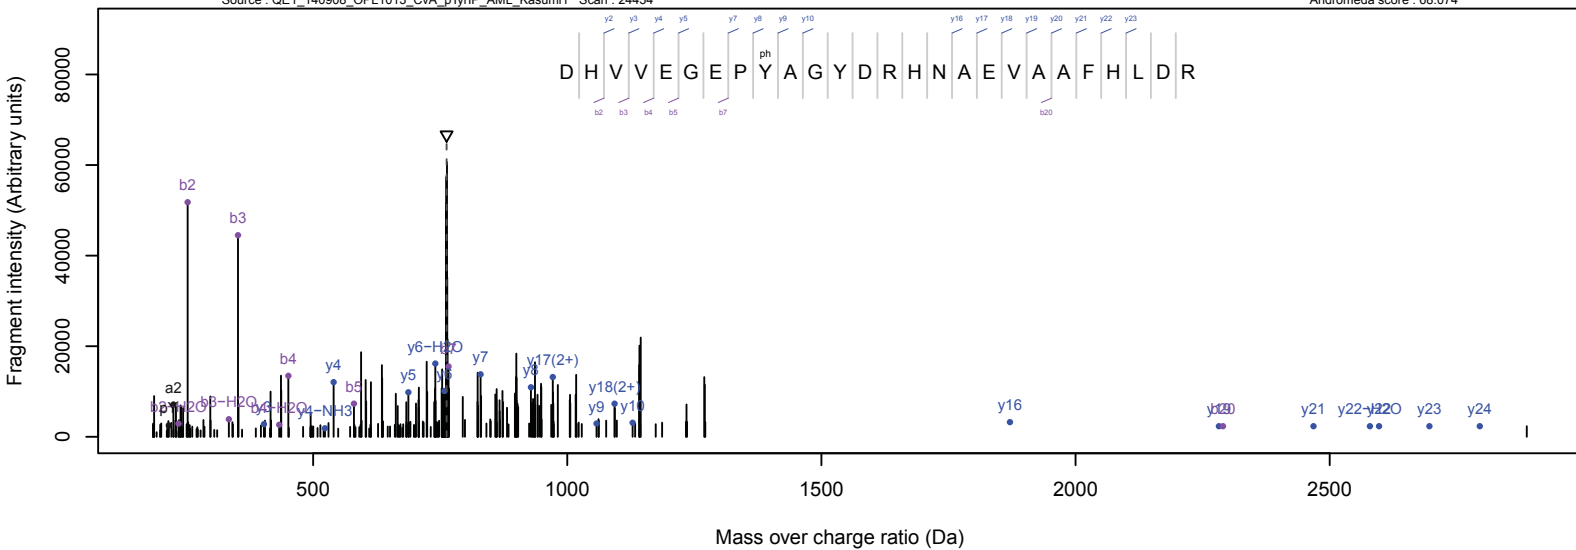

GLLALGDY(ph)MNVQCHACIGGTNVGEDIRK-3+

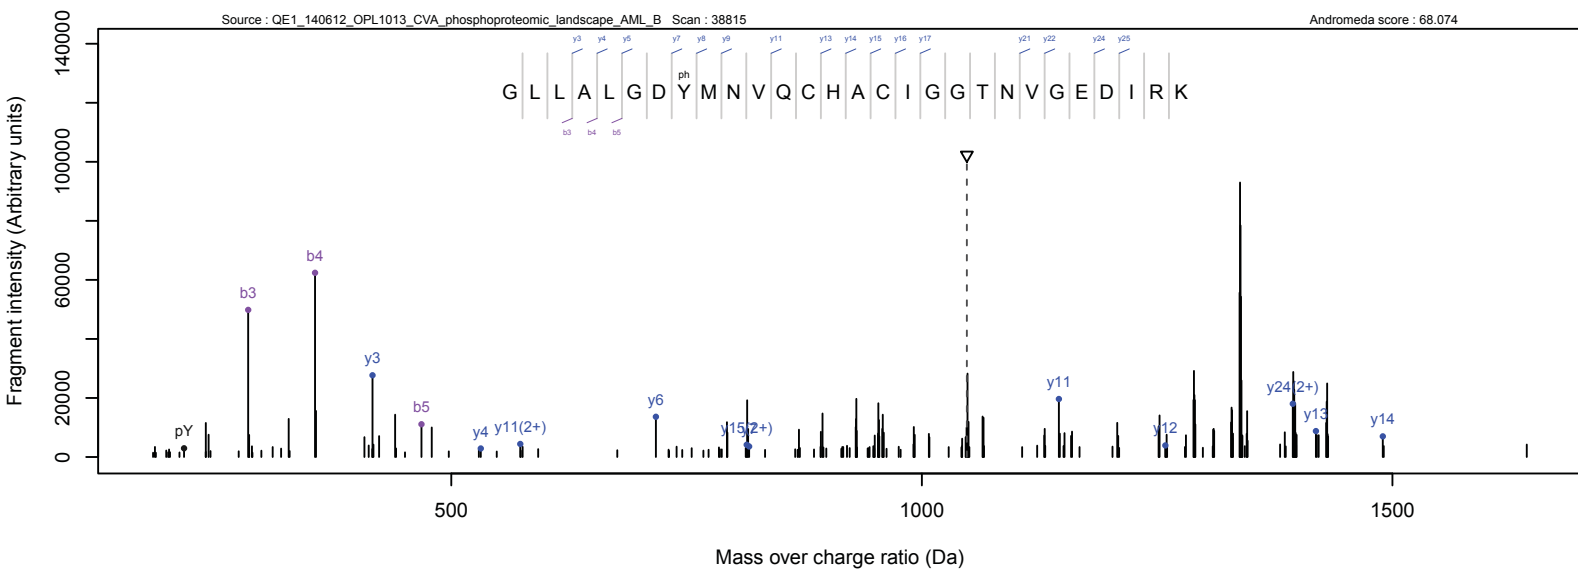

GNECFQKGDY(ph)PQAMK-3+

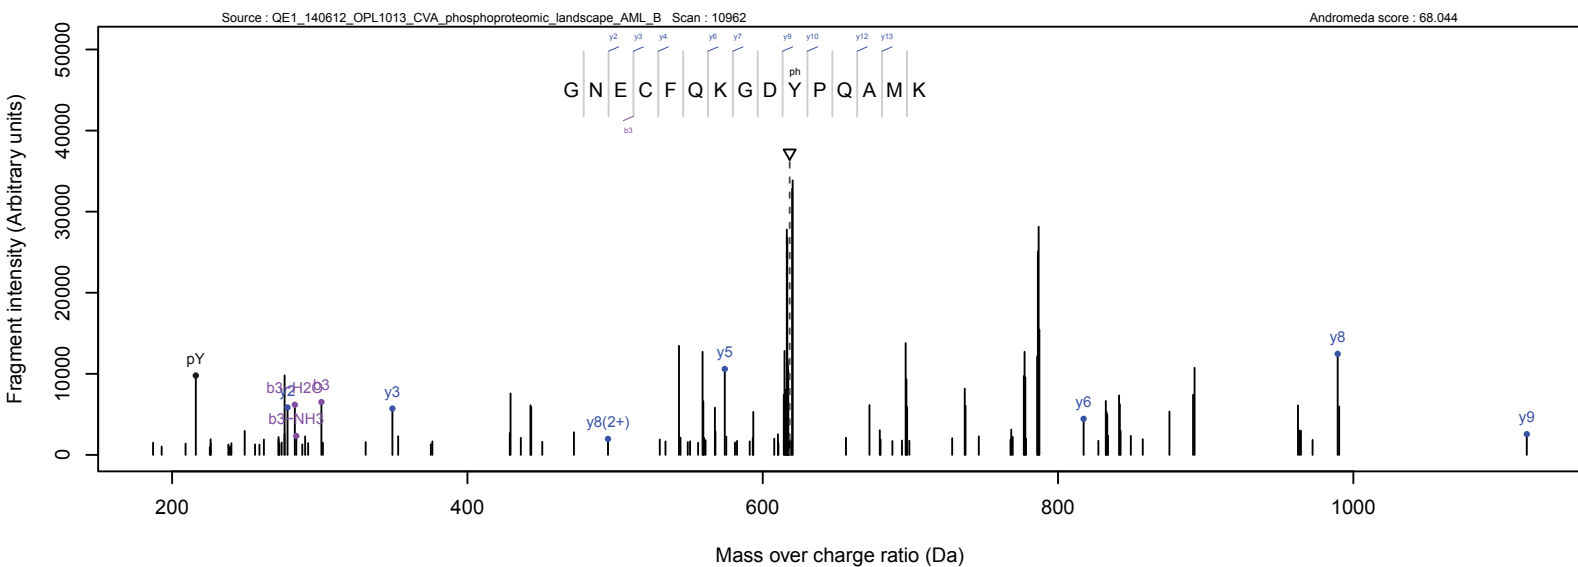

HY(ph)RGPAGDATVASEK-3+

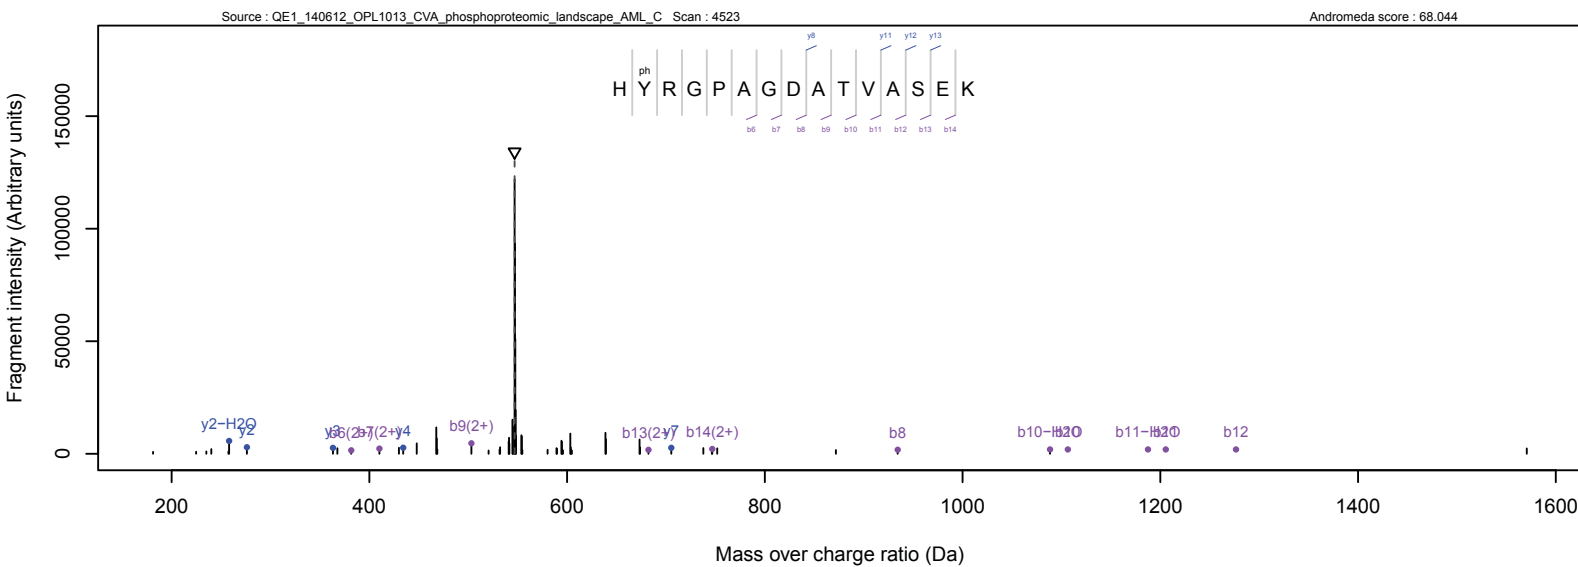

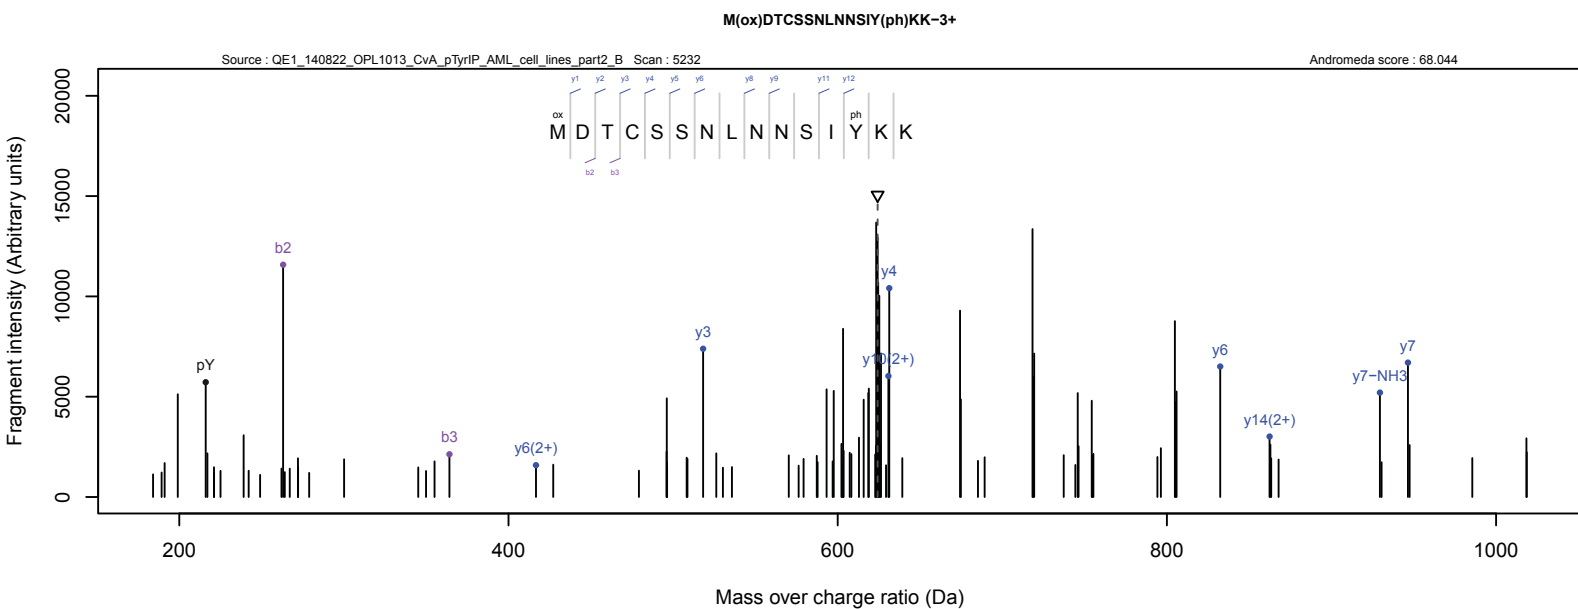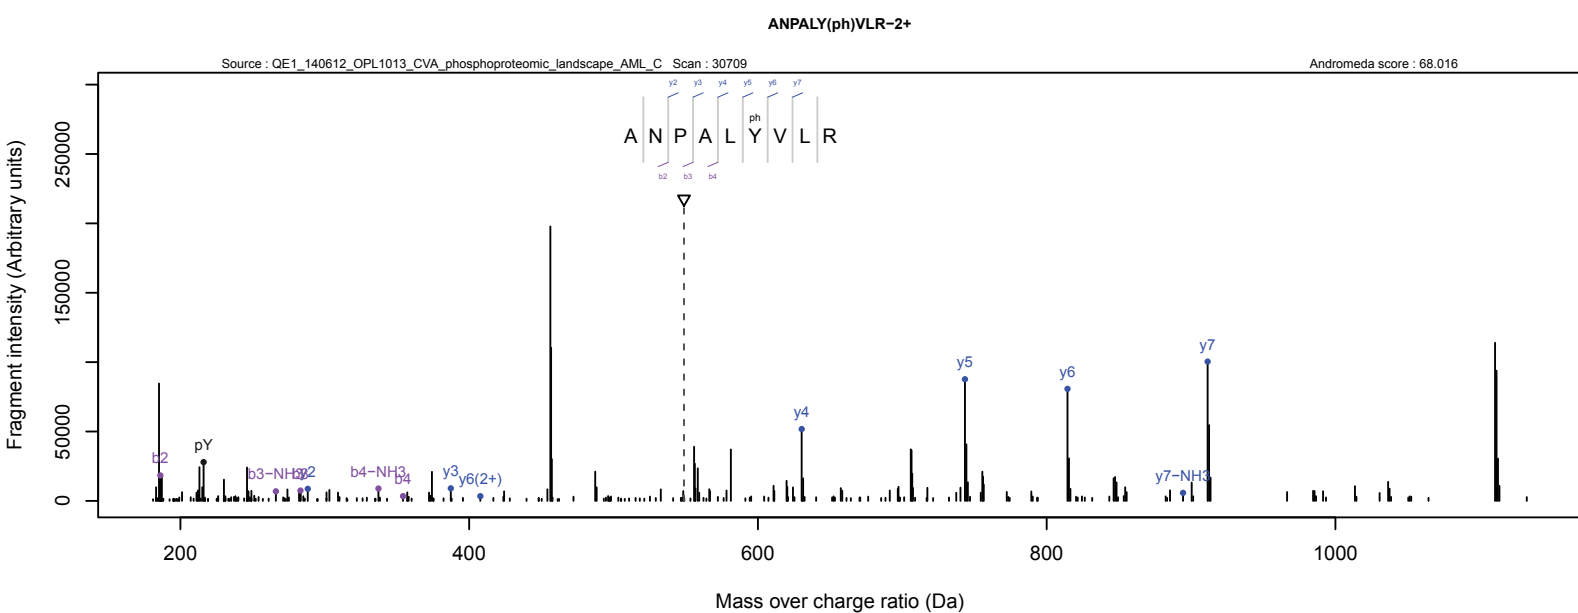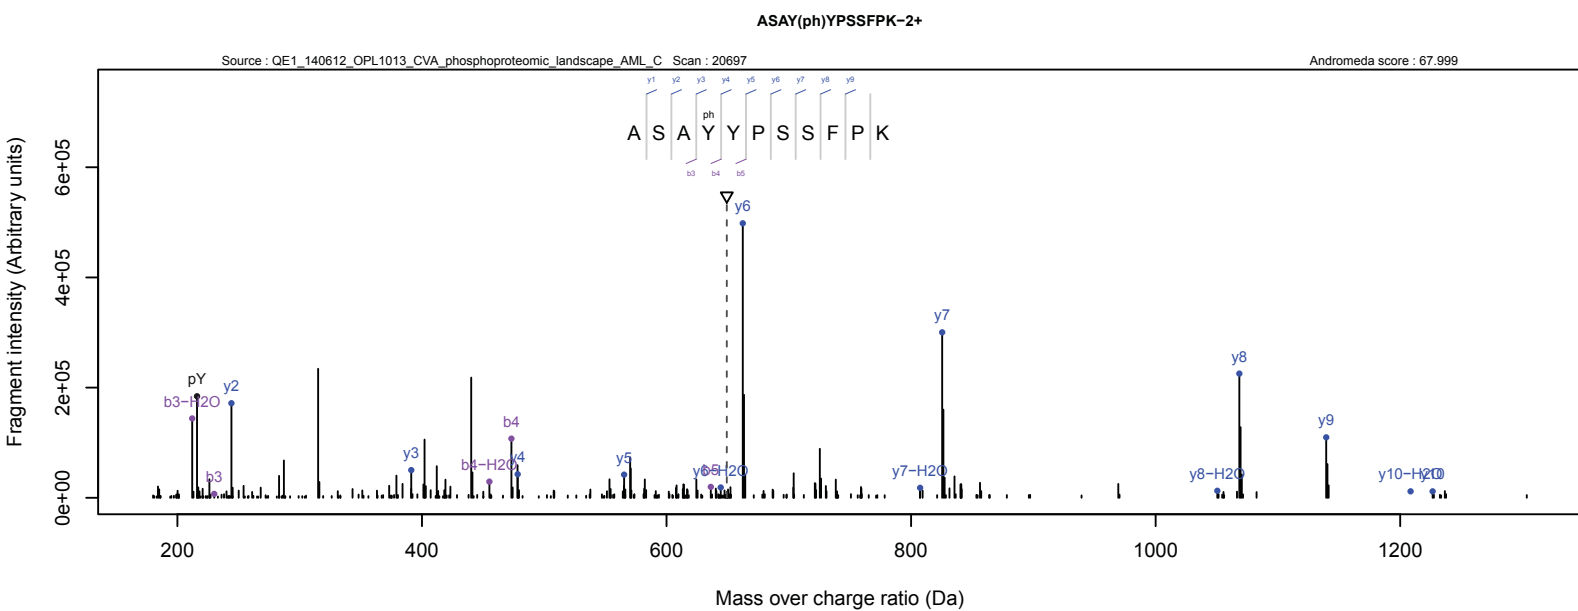

## LHSLLDY(ph)YQAIK-2+

Source : QE1\_140612\_OPL1013\_CVA\_phosphoproteomic\_landscape\_AML\_D Scan : 34181

Andromeda score : 67.997

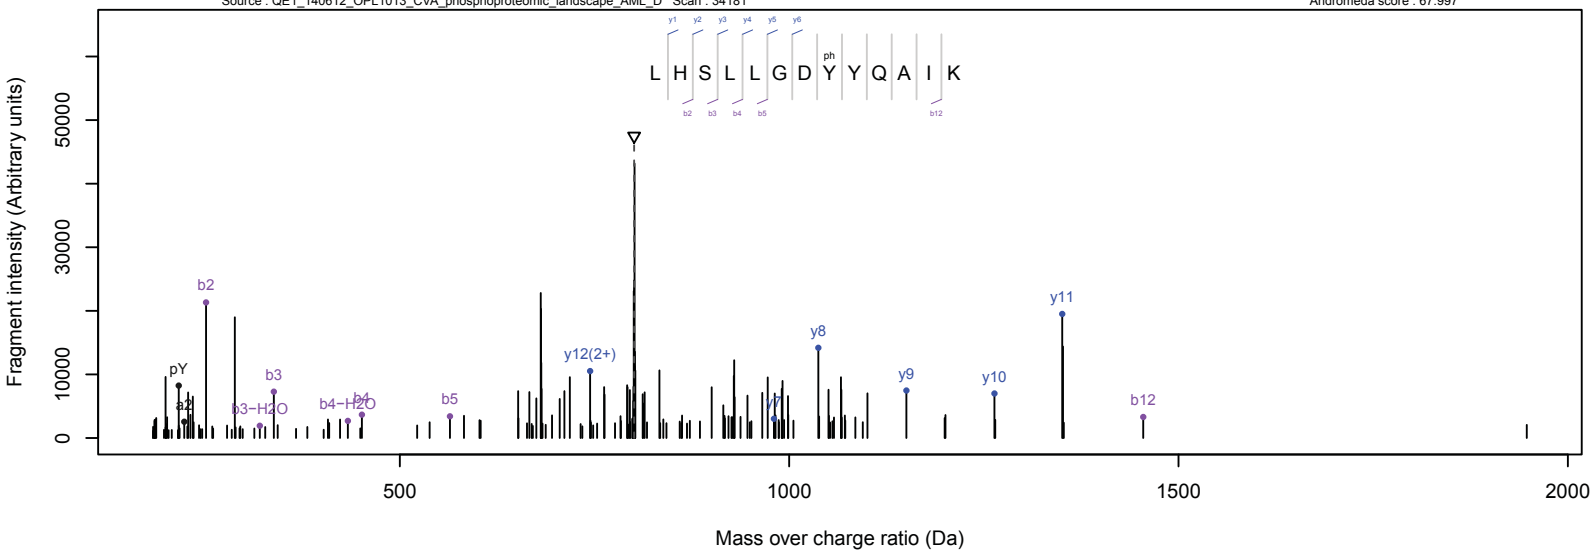

## LLNLY(ph)IKR-3+

Source : QE1\_140612\_OPL1013\_CVA\_phosphoproteomic\_landscape\_AML\_A Scan : 27908

Andromeda score : 67.981

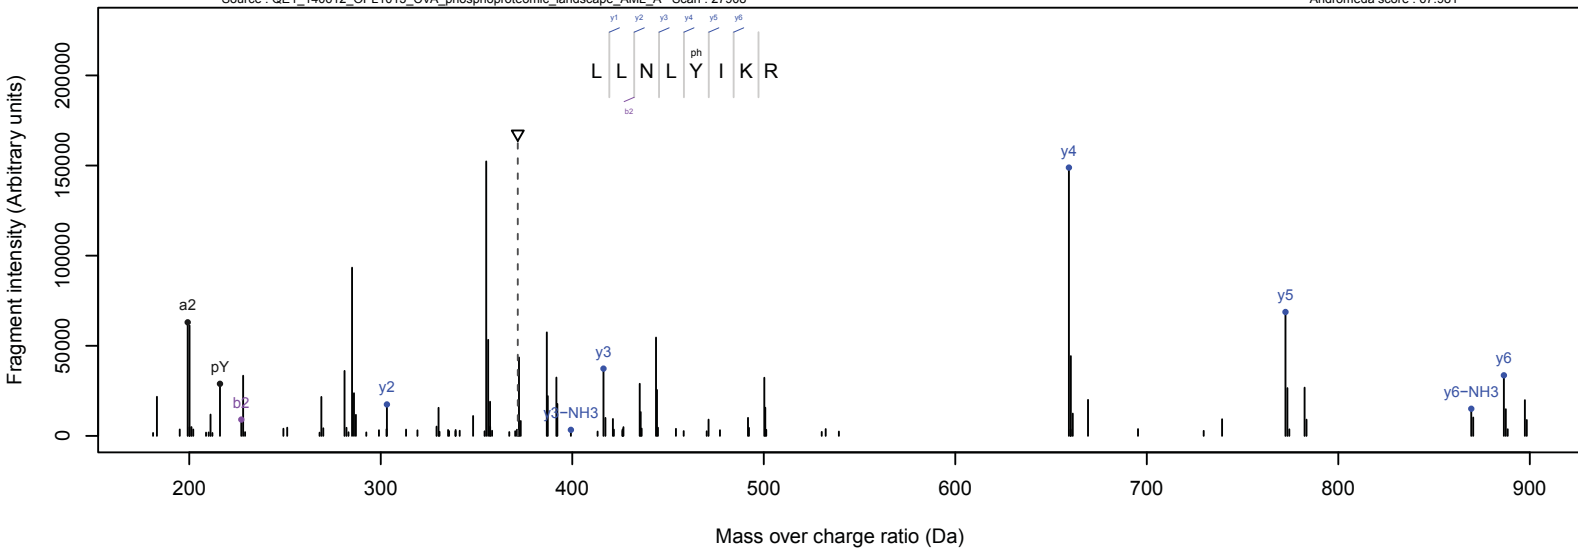

## LM(ox)Y(ph)QELK-2+

Source : QE1\_140822\_OPL1013\_CvA\_pTyrIP\_AML\_cell\_lines\_part2\_E Scan : 6397

Andromeda score : 67.981

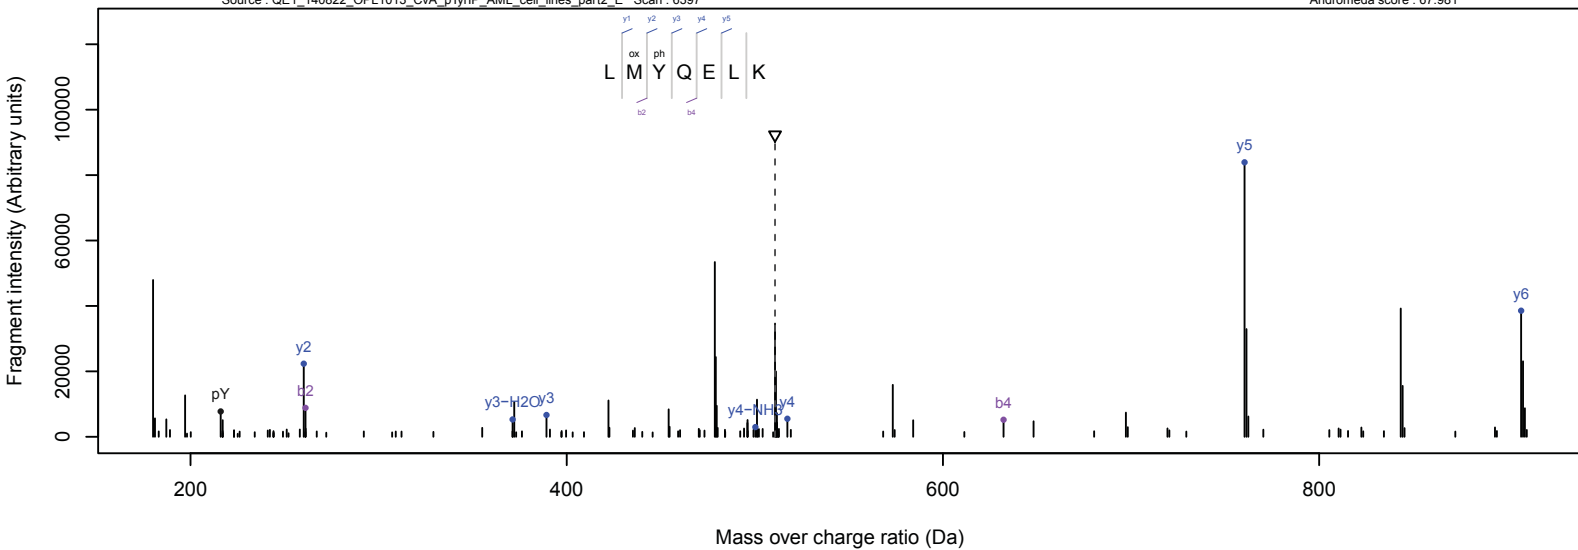

## SY(ph)FTVPR-2+

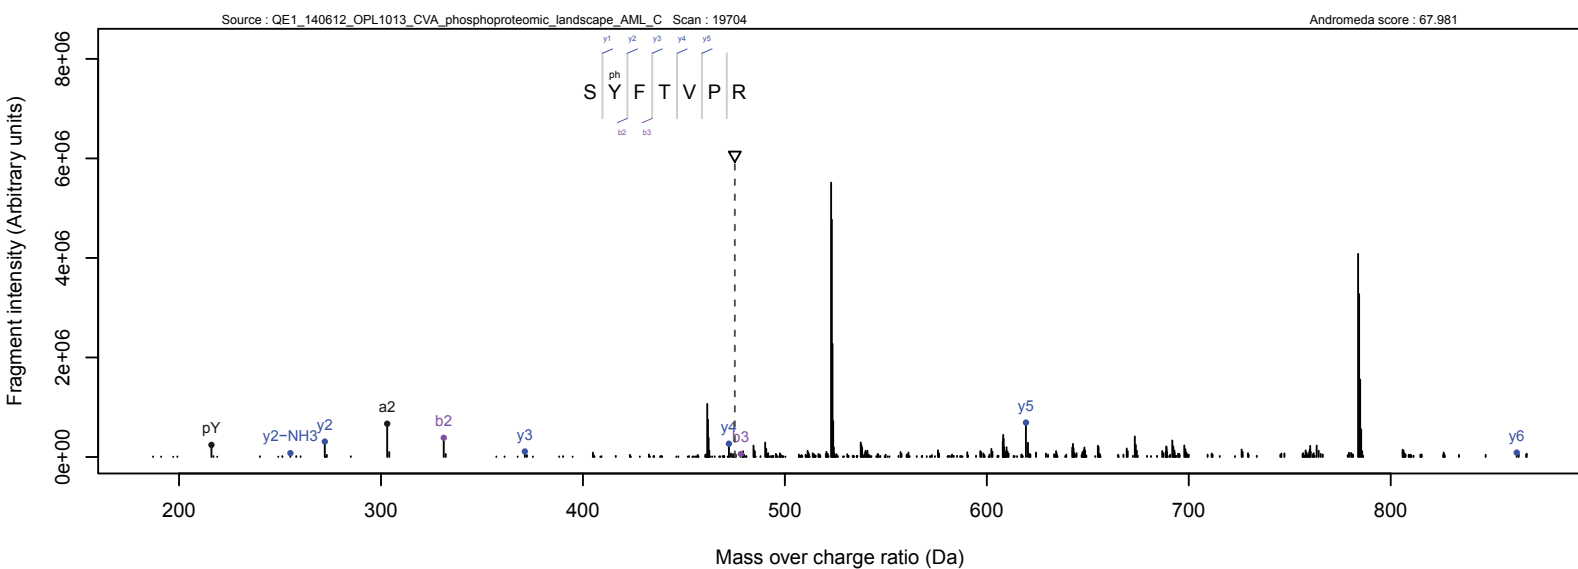

## AIMAHMTVEEIY(ph)KDR-3+

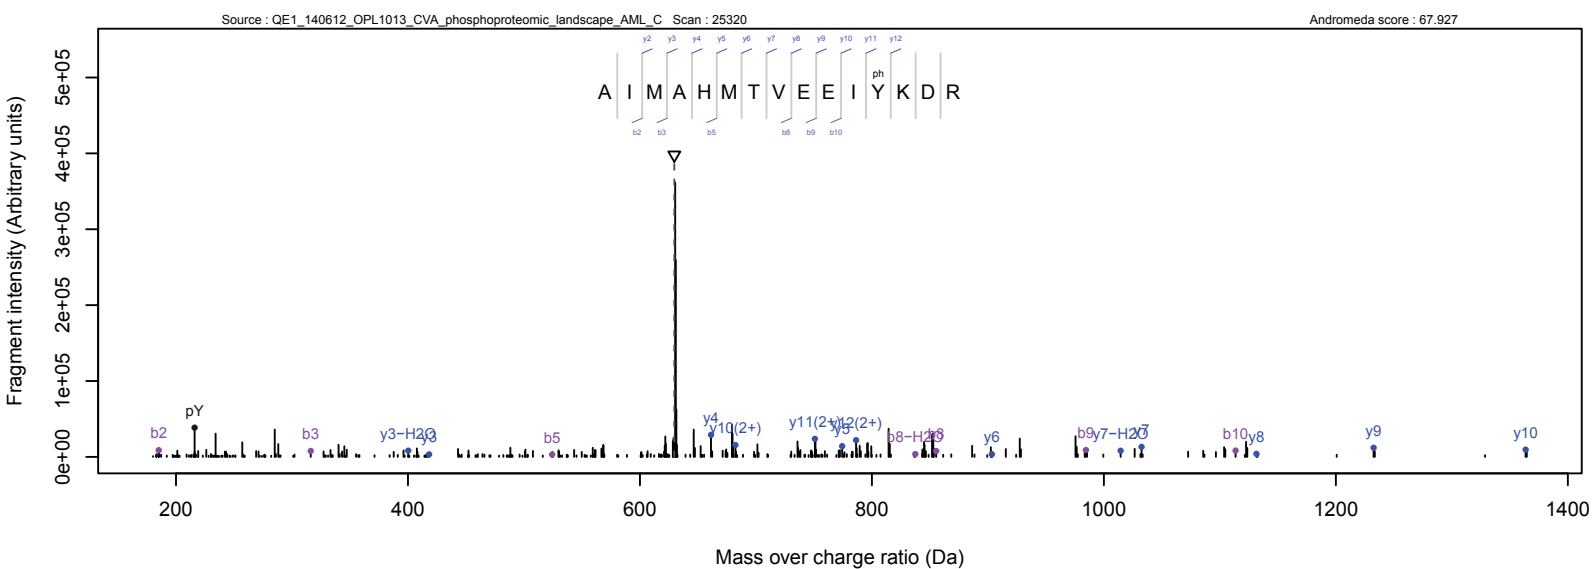

## AFSY(ph)YLPVLPQAPQDGHLLPQPPPPYGHK-4+

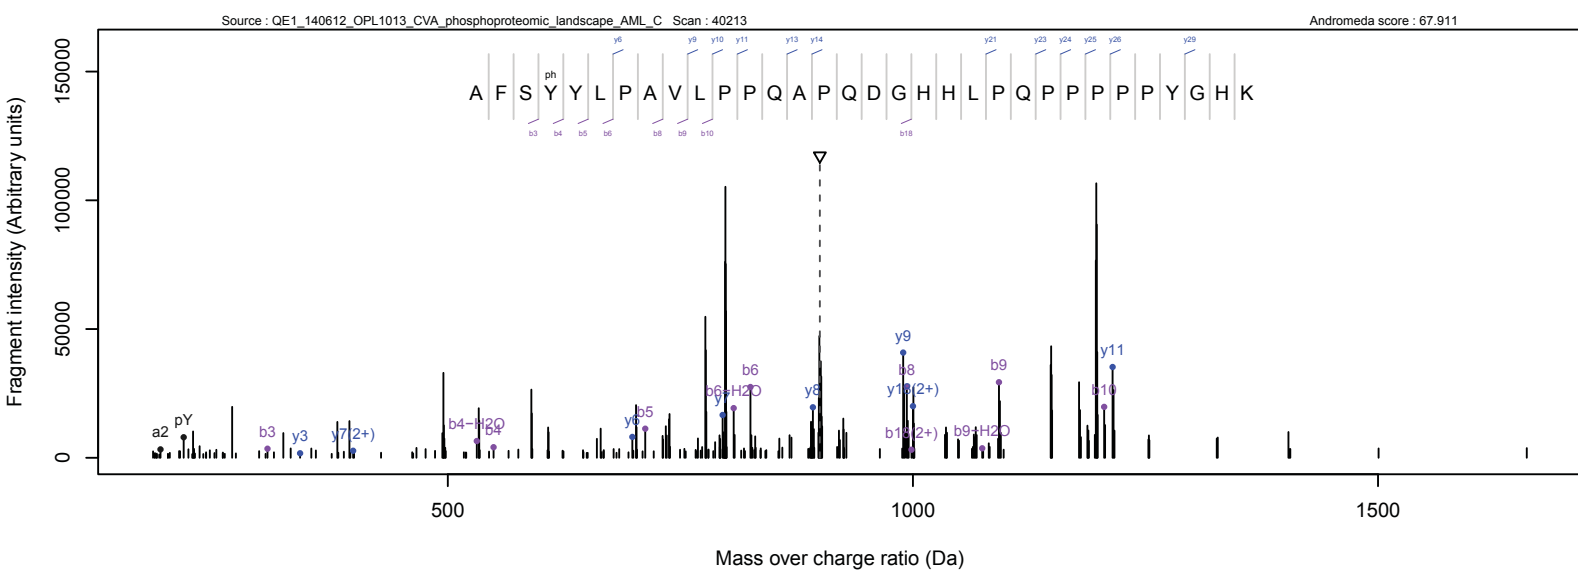



## GICEY(ph)HEKNYAAALETFTEGQK-3+

Source : QE1\_140612\_OPL1013\_CVA\_phosphoproteomic\_landscape\_AML\_B Scan : 32323

Andromeda score : 67.76

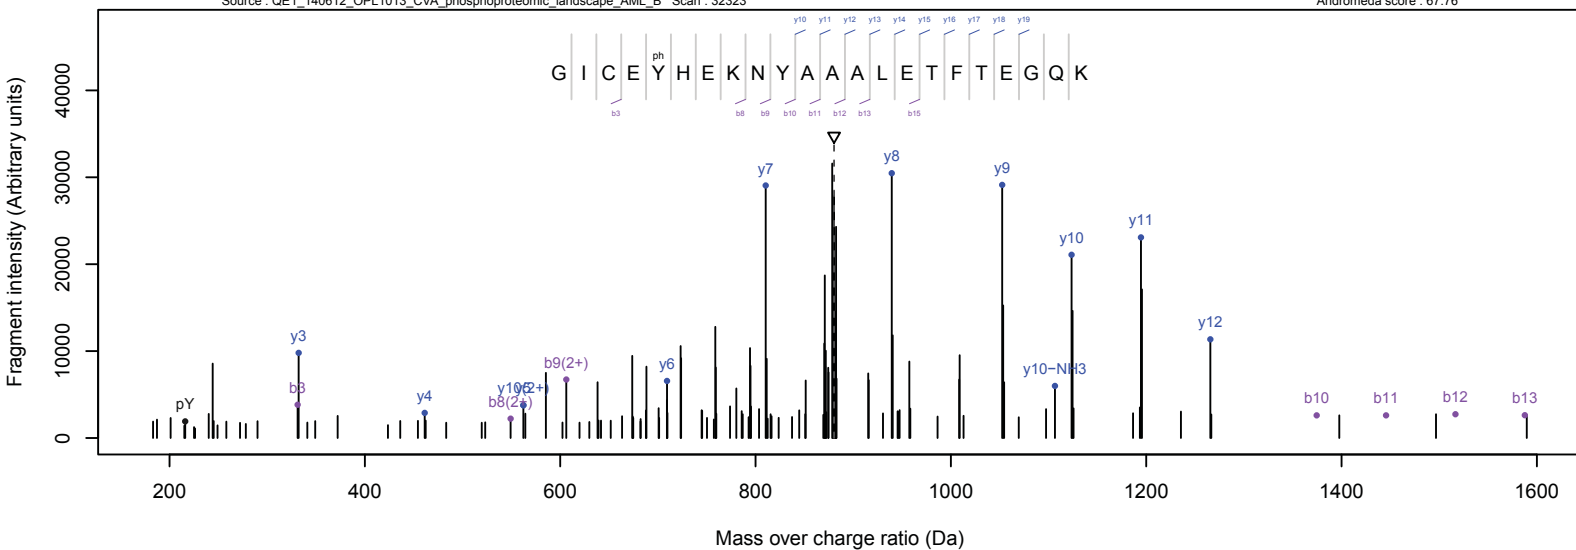

## TLGKDHPAVALNLAVALY(ph)GKR-4+

Source : QE1\_140612\_OPL1013\_CVA\_phosphoproteomic\_landscape\_AML\_C Scan : 33310

Andromeda score : 67.76

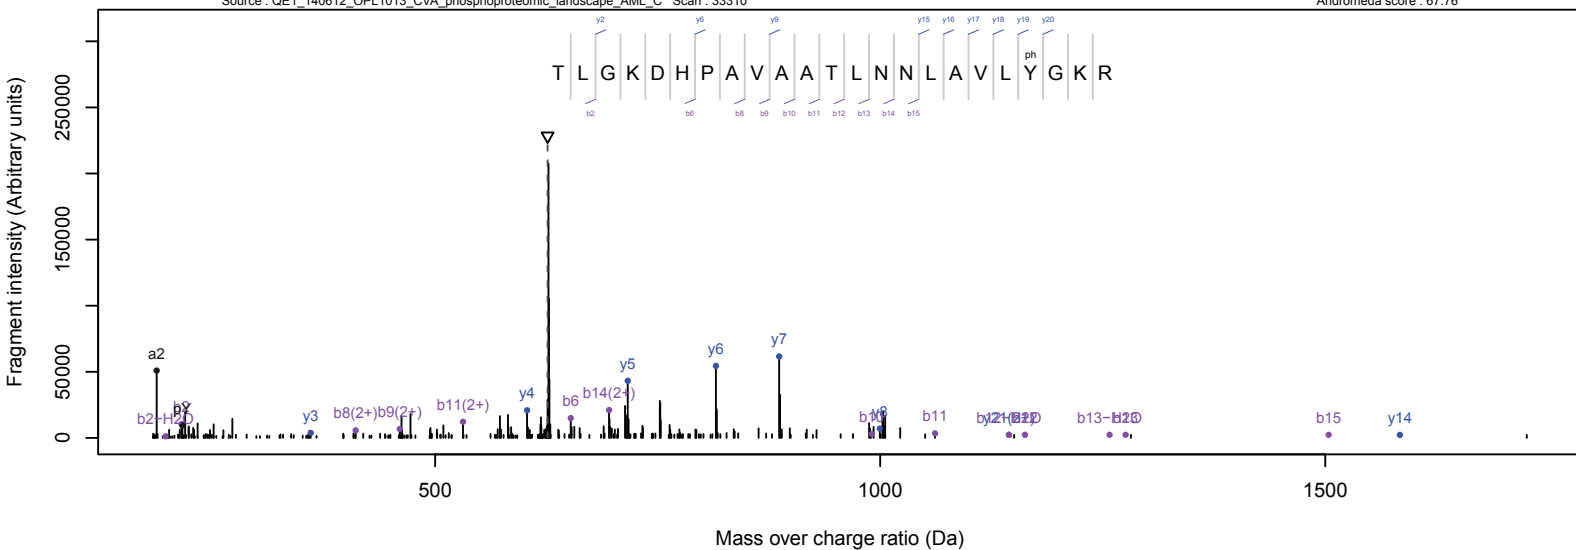

## QHGVNVSVAATPFQQPS(ph)YGSHGYNTGRK-4+

Source : QE1\_140612\_OPL1013\_CVA\_phosphoproteomic\_landscape\_AML\_C Scan : 20737

Andromeda score : 67.728

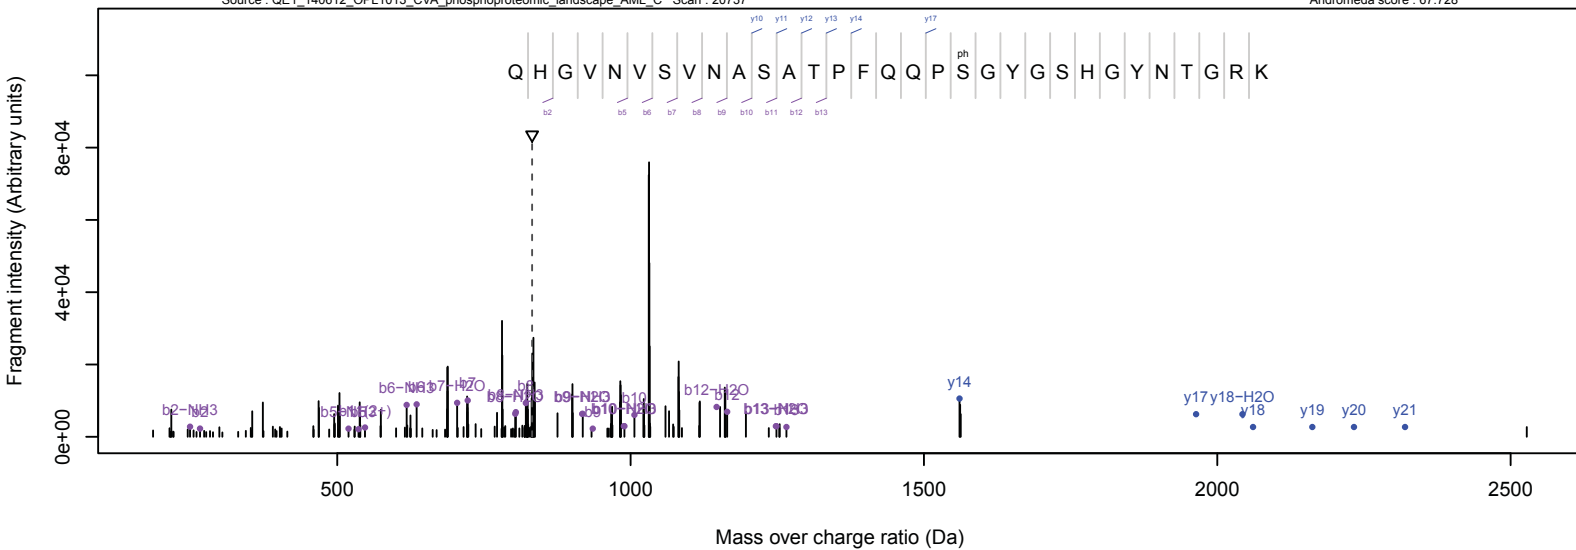



## LAEECY(ph)FLWK-2+

Source : QE1\_140612\_OPL1013\_CVA\_phosphoproteomic\_landscape\_AML\_B Scan : 38178

Andromeda score : 67.704

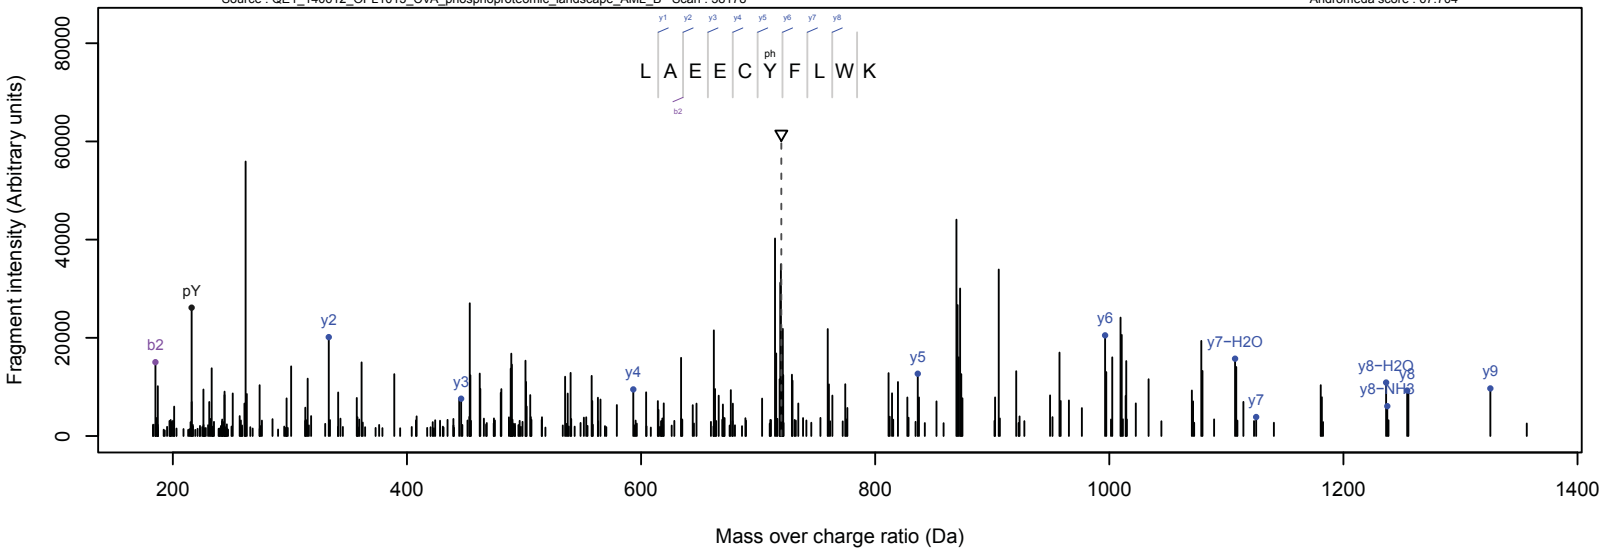

## TY(ph)ELLNCDK-2+

Source : QE1\_140612\_OPL1013\_CVA\_phosphoproteomic\_landscape\_AML\_D Scan : 15062

Andromeda score : 67.704

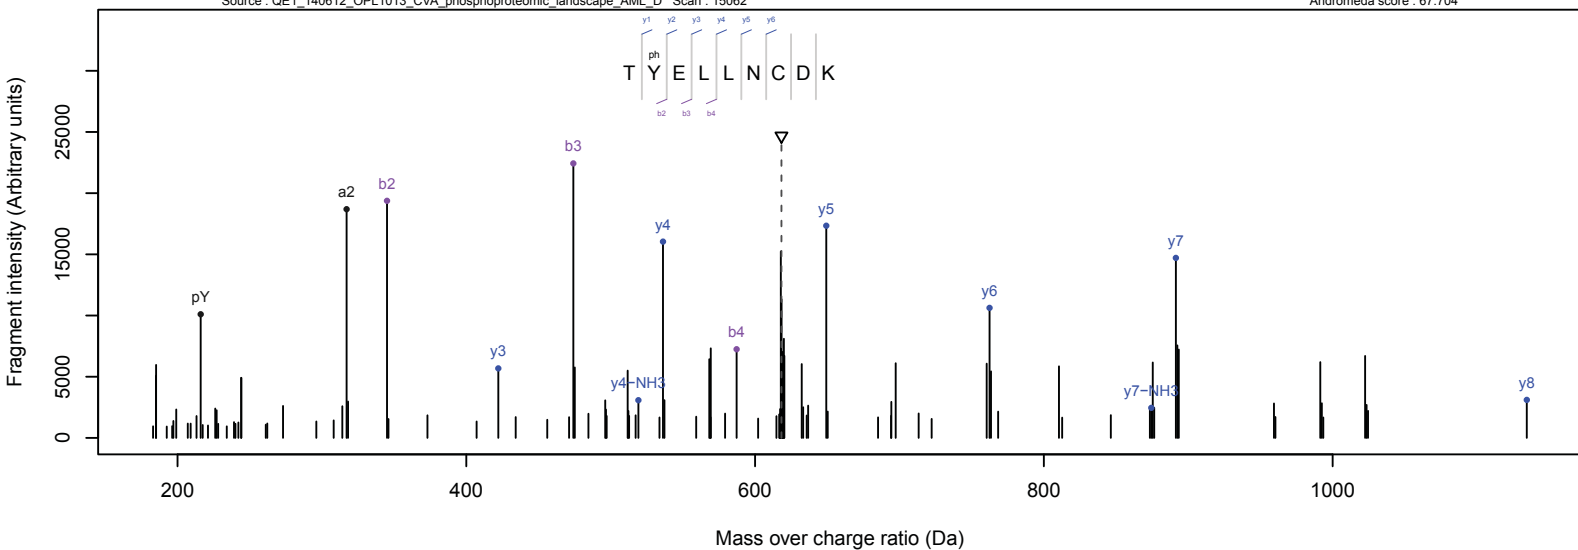

## Y(ph)LSLSPWDKATLSMGR-3+

Source : QE1\_140612\_OPL1013\_CVA\_phosphoproteomic\_landscape\_AML\_C Scan : 40859

Andromeda score : 67.685

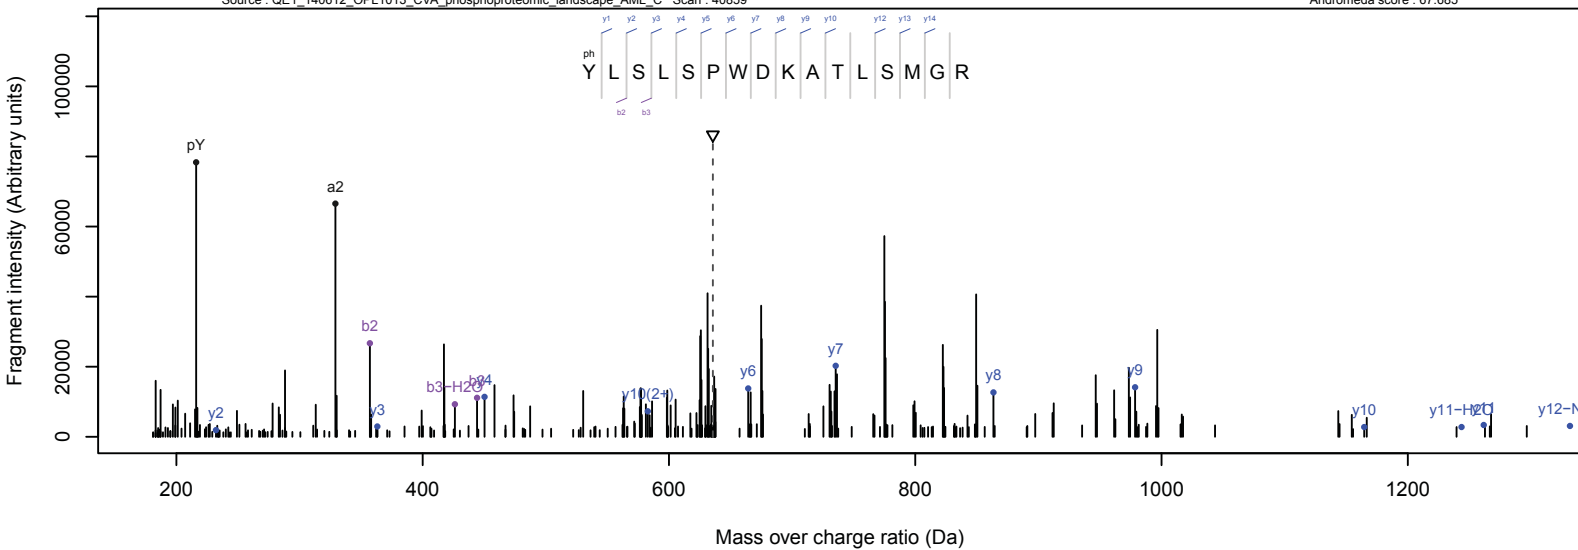

## IKVAGPNGY(ph)AILLAVPGSSDSR-3+

Source : QE1\_140612\_OPL1013\_CVA\_phosphoproteomic\_landscape\_AML\_B Scan : 39806

Andromeda score : 67.668

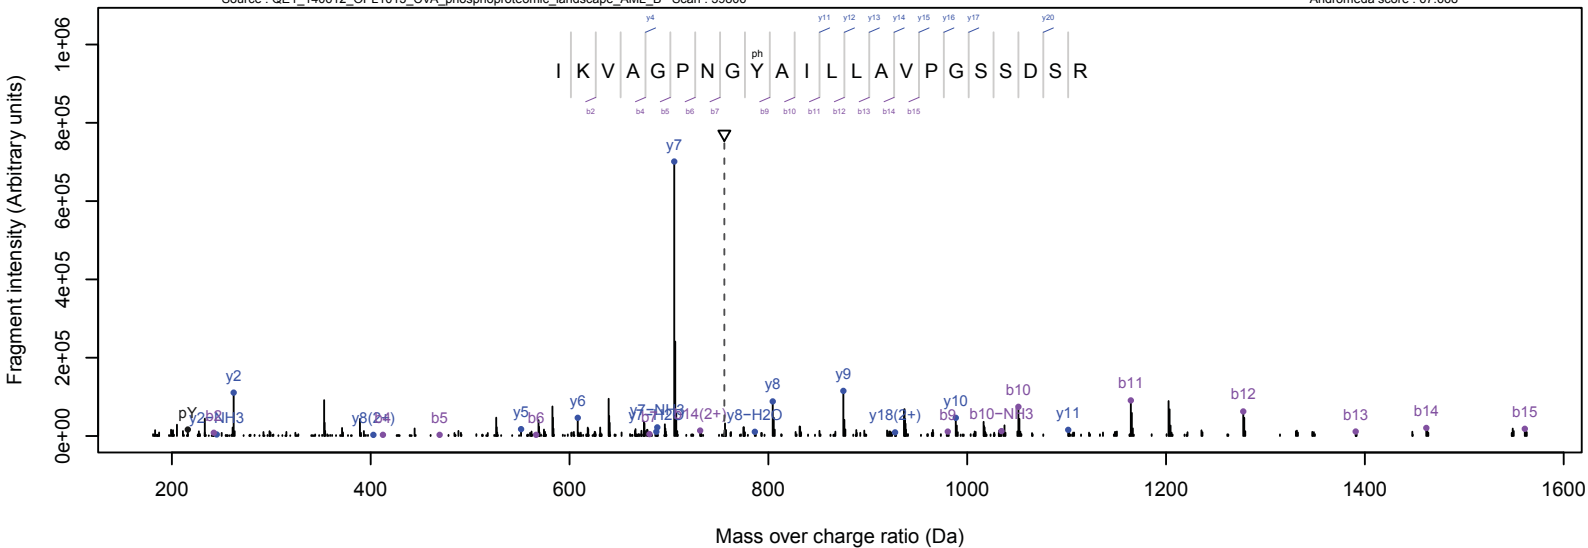

## VTGADVMPY(ph)AK-2+

Source : QE1\_140612\_OPL1013\_CVA\_phosphoproteomic\_landscape\_AML\_E Scan : 20429

Andromeda score : 67.656

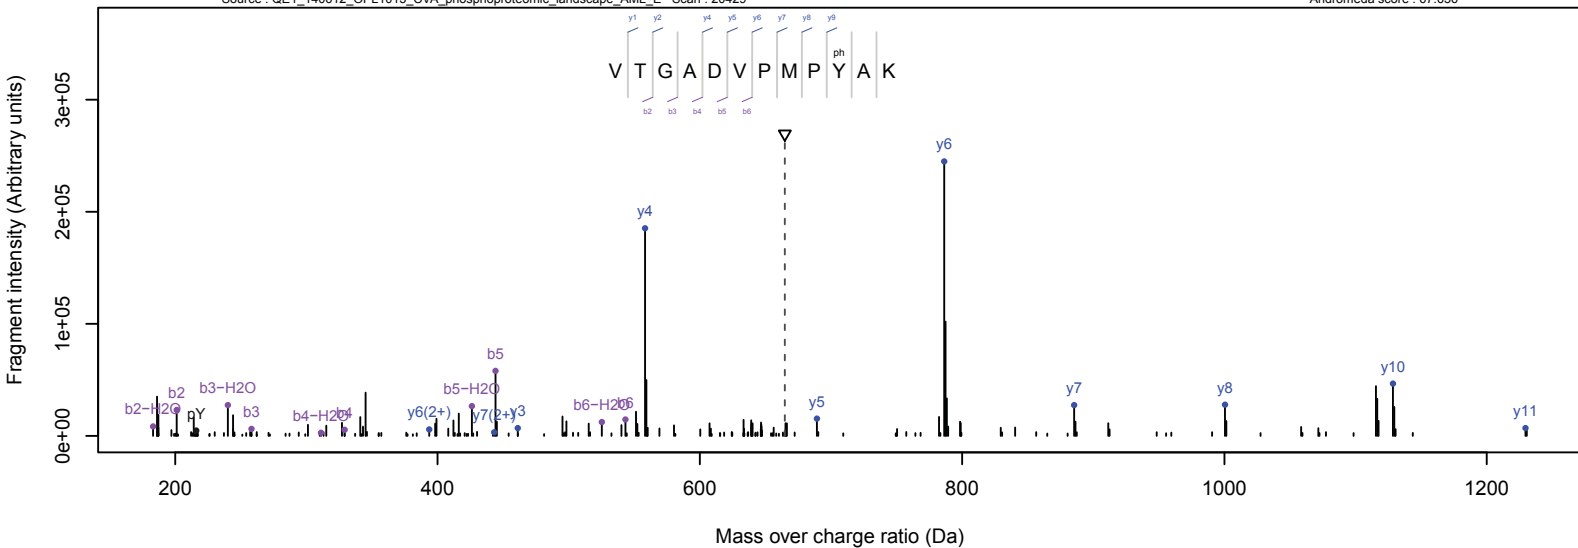

## QATTNVYQVQTGSEY(ph)TDSNHSSLK-3+

Source : QE1\_140908\_OPL1013\_CvA\_pTyrIP\_AML\_HEL Scan : 18250

Andromeda score : 67.655

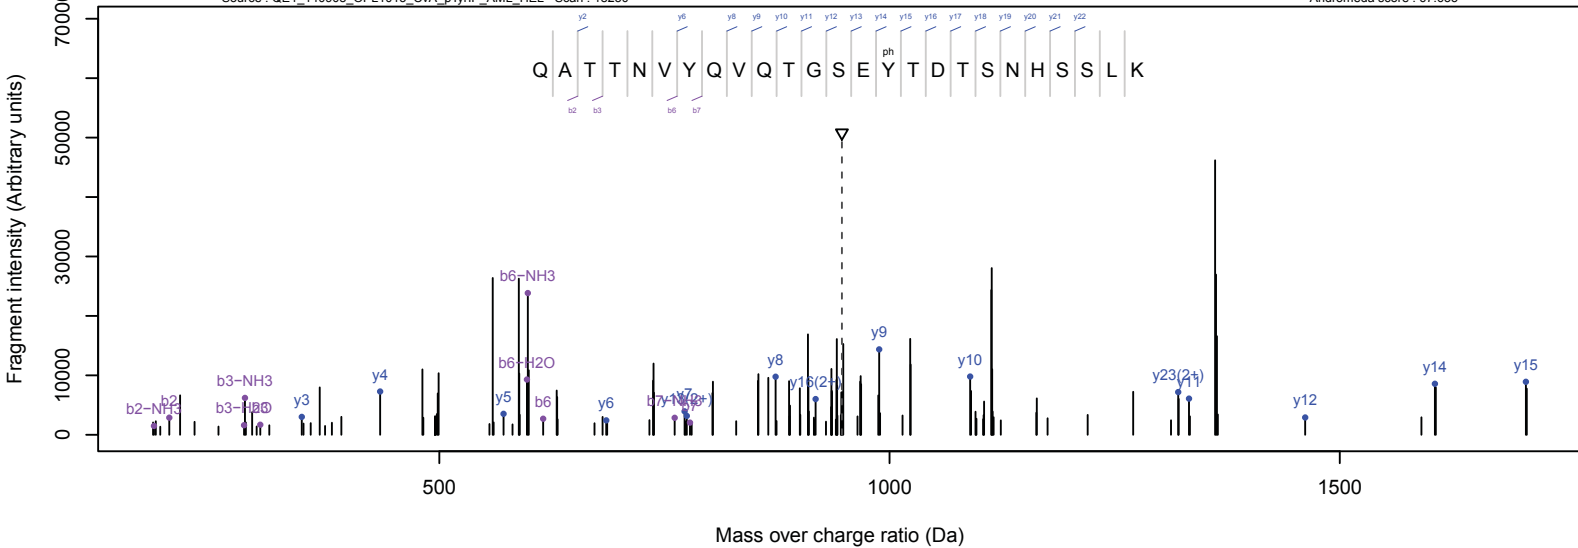

## SKT(ph)PPKSYSTAR-3+

Source : QE1\_140908\_OPL1013\_CvA\_pTyrIP\_AML\_HL60 Scan : 3688

Andromeda score : 67.648

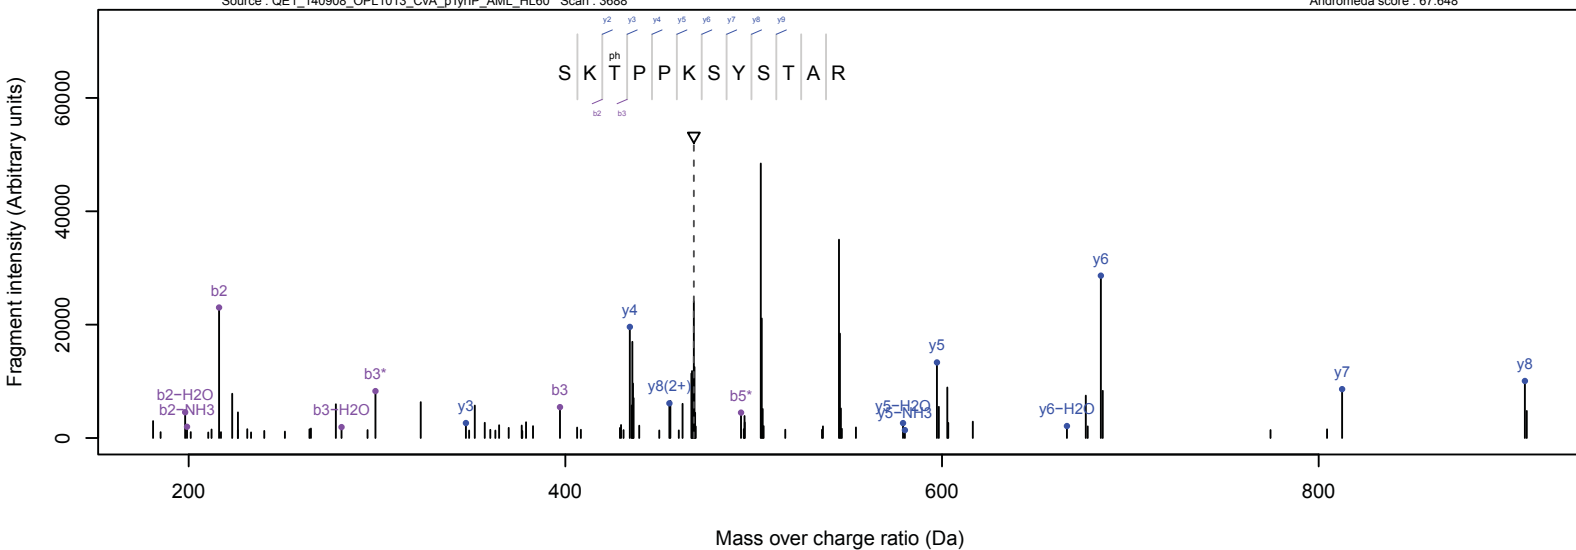

## DYNPY(ph)NYSDSISPFNK-2+

Source : QE1\_140612\_OPL1013\_CVA\_phosphoproteomic\_landscape\_AML\_C Scan : 32737

Andromeda score : 67.646

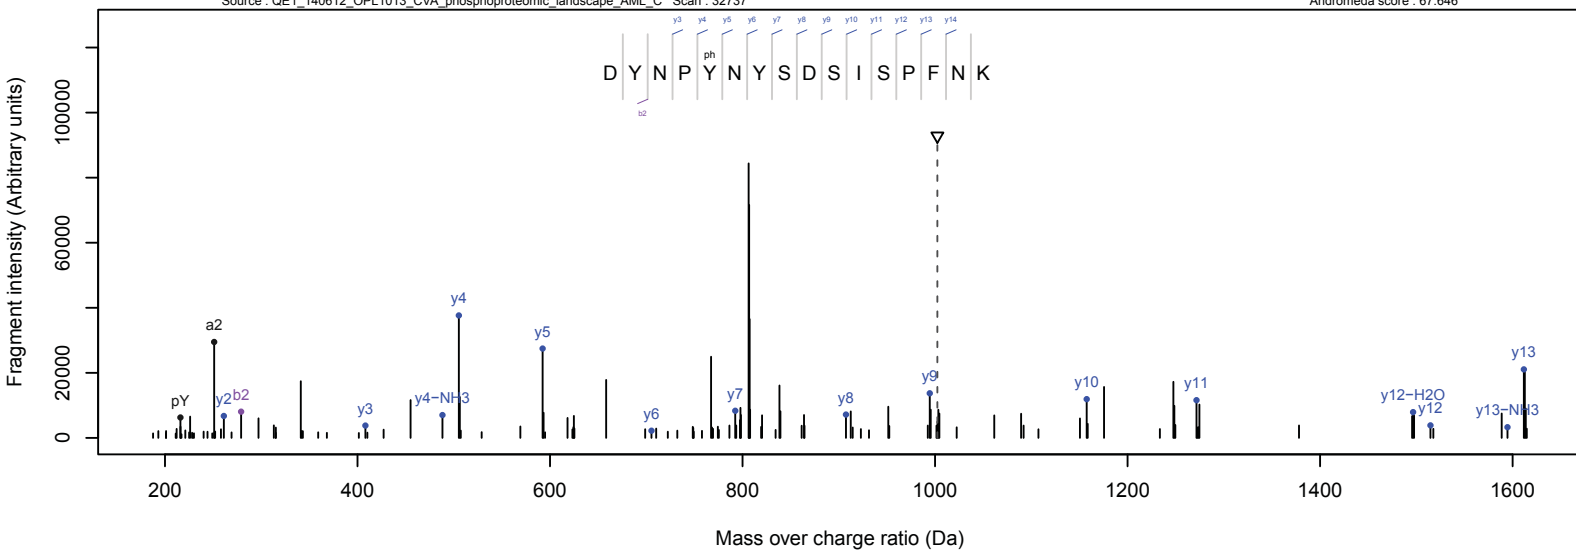

## HINLPLPAPHAQY(ph)AIPNR-3+

Source : QE1\_140612\_OPL1013\_CVA\_phosphoproteomic\_landscape\_AML\_B Scan : 31432

Andromeda score : 67.646

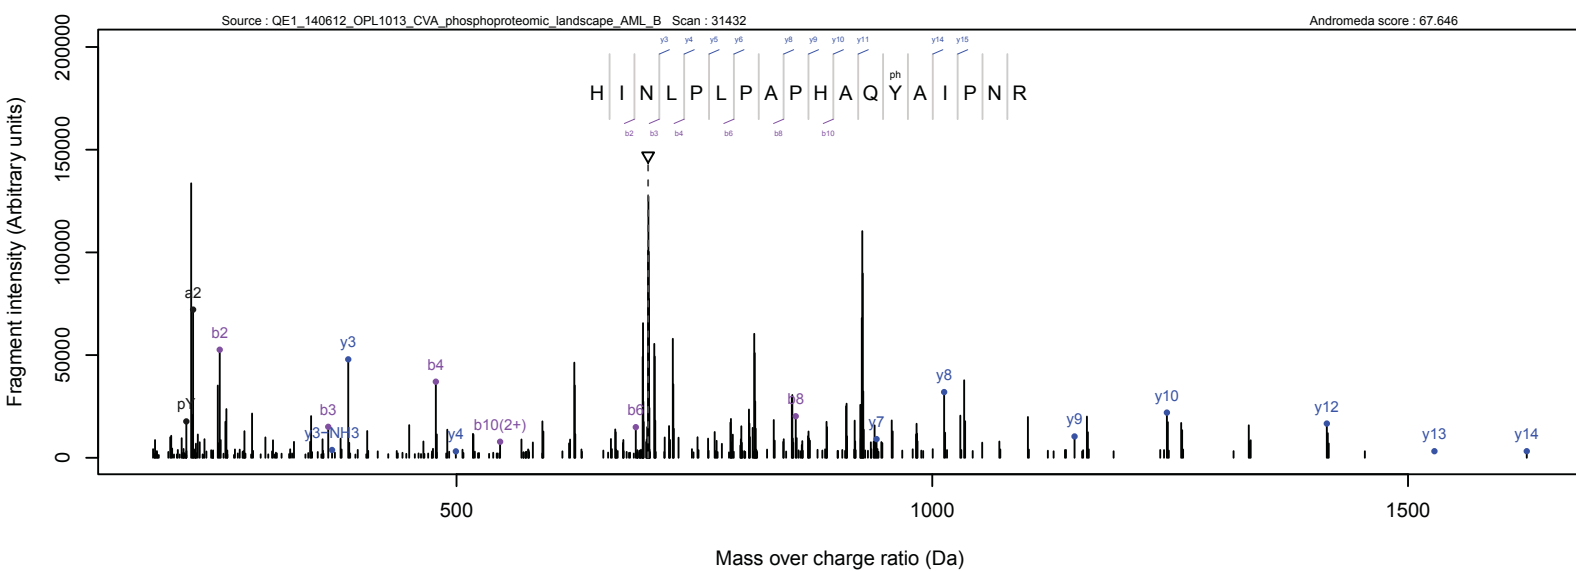

## HTDDEMT(ph)GYVATR-2+

Source: QE1\_140612\_OPL1013\_CVA\_phosphoproteomic\_landscape\_AML\_E Scan: 12131

Andromeda score: 67.646

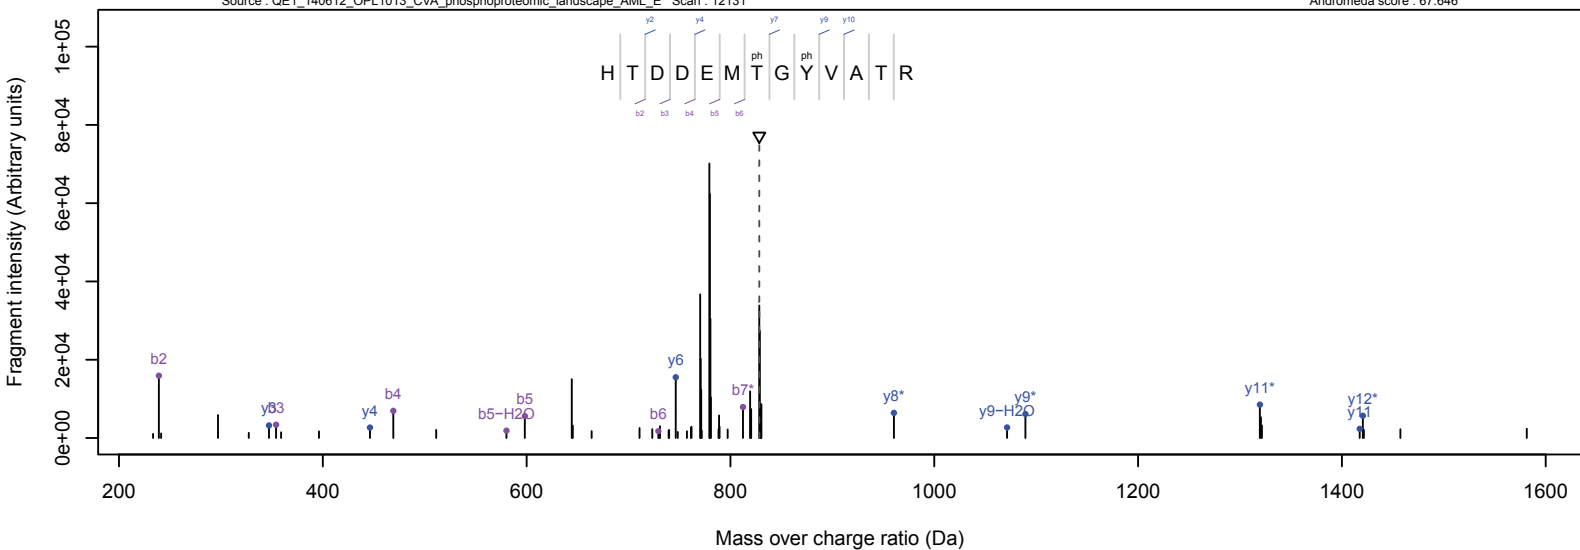

## NLVMPDPNGLSDPY(ph)VK-2+

Source: QE1\_140612\_OPL1013\_CVA\_phosphoproteomic\_landscape\_AML\_C Scan: 35604

Andromeda score: 67.646

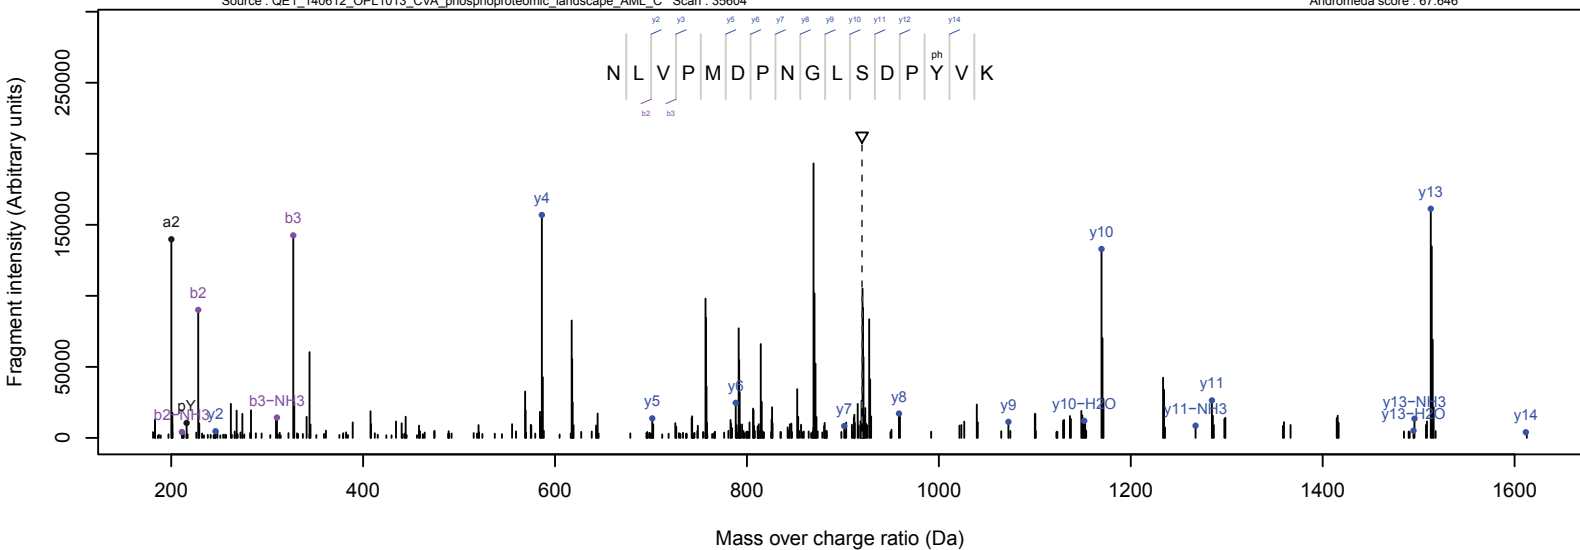

## ITNQVIY(L)NPPIEECR-2+

Source: QE1\_140612\_OPL1013\_CVA\_phosphoproteomic\_landscape\_AML\_B Scan: 36630

Andromeda score: 67.645

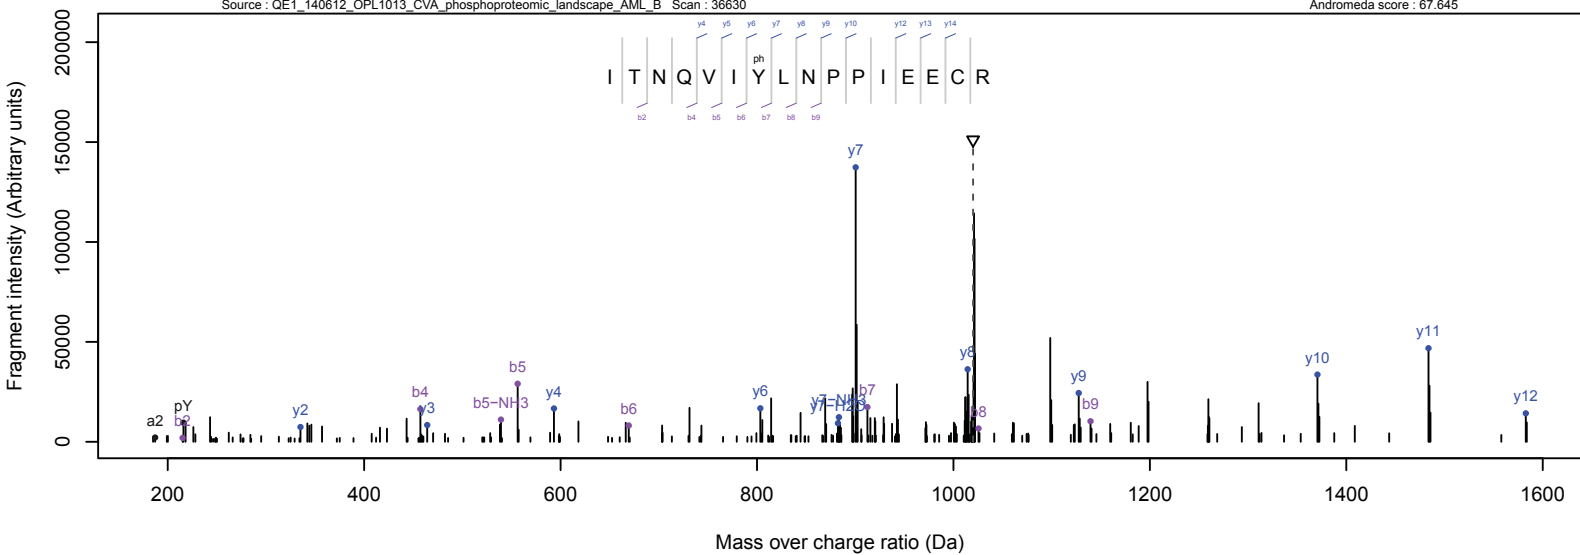

LKQPADCLDGLY(ph)ALMSR-3+

Source: QE1\_140908\_OPL1013\_CvA\_pTyrIP\_AML\_ML2 Scan: 44154

Andromeda score: 67.645

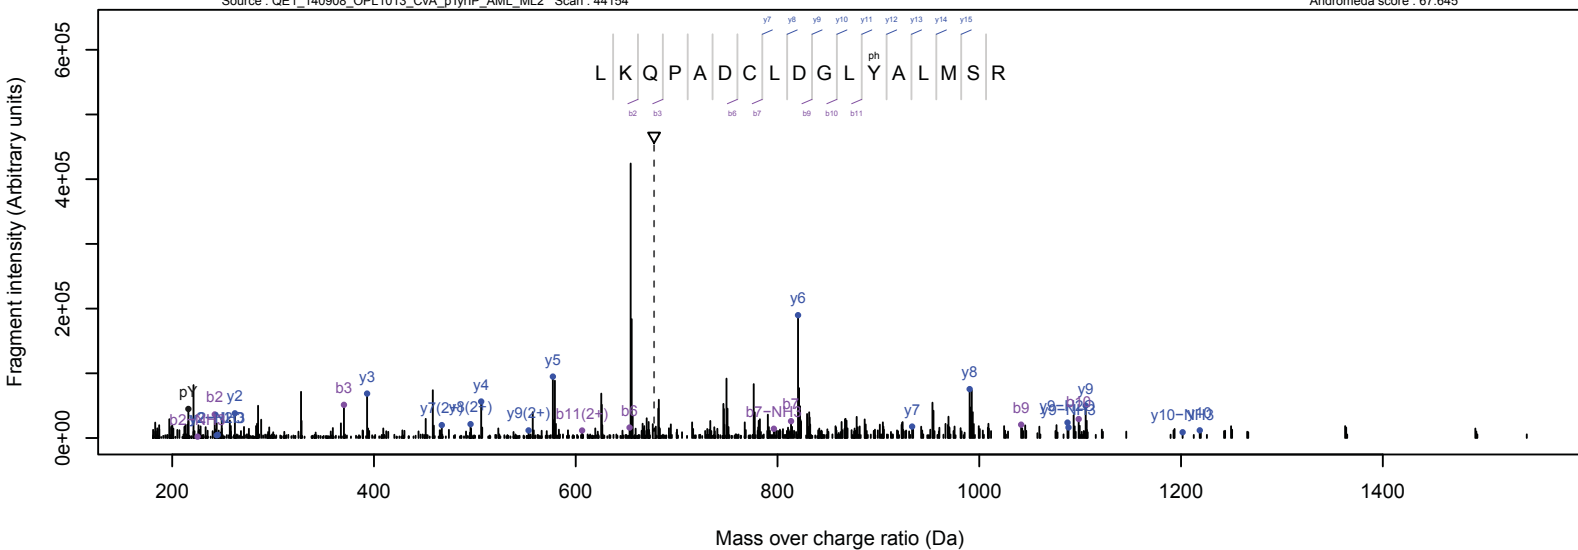

AY(ph)SMILLPAEEEEATLGARPKR-4+

Source: QE1\_140612\_OPL1013\_CVA\_phosphoproteomic\_landscape\_AML\_B Scan: 37222

Andromeda score: 67.579

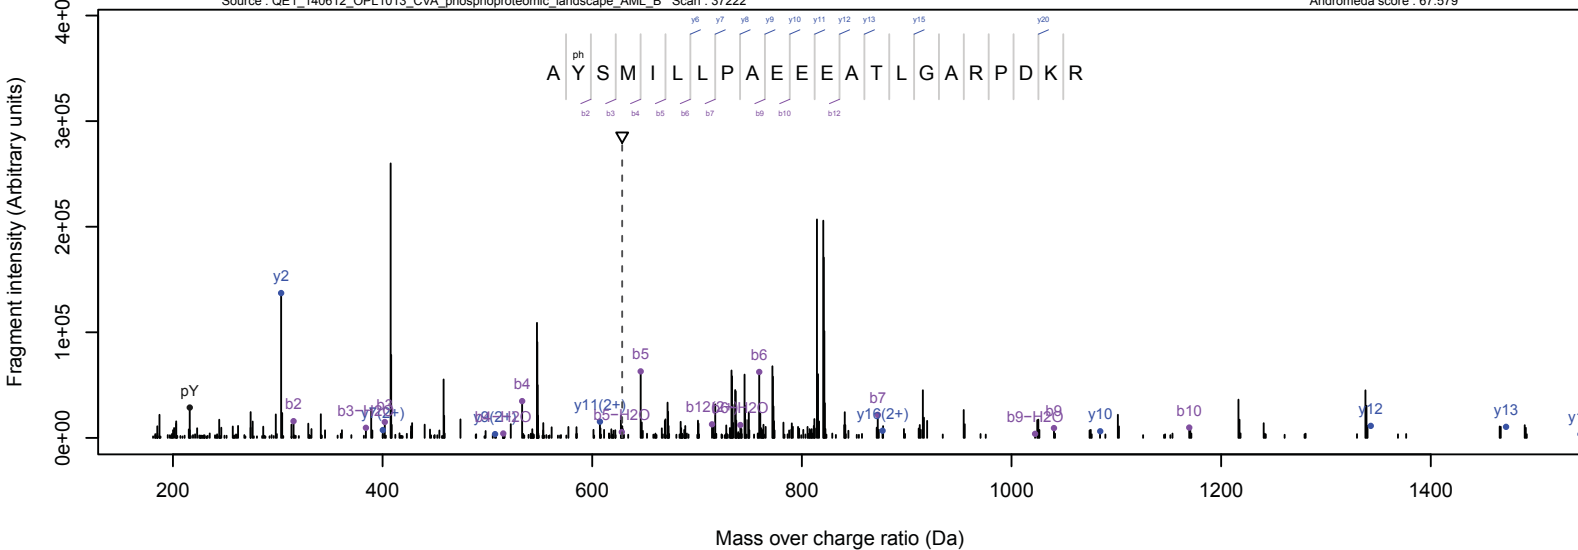

LVTEM(ox)GTY(ph)ATQSALSSSRPTK-3+

Source: QE1\_140908\_OPL1013\_CvA\_pTyrIP\_AML\_HEL Scan: 19003

Andromeda score: 67.579

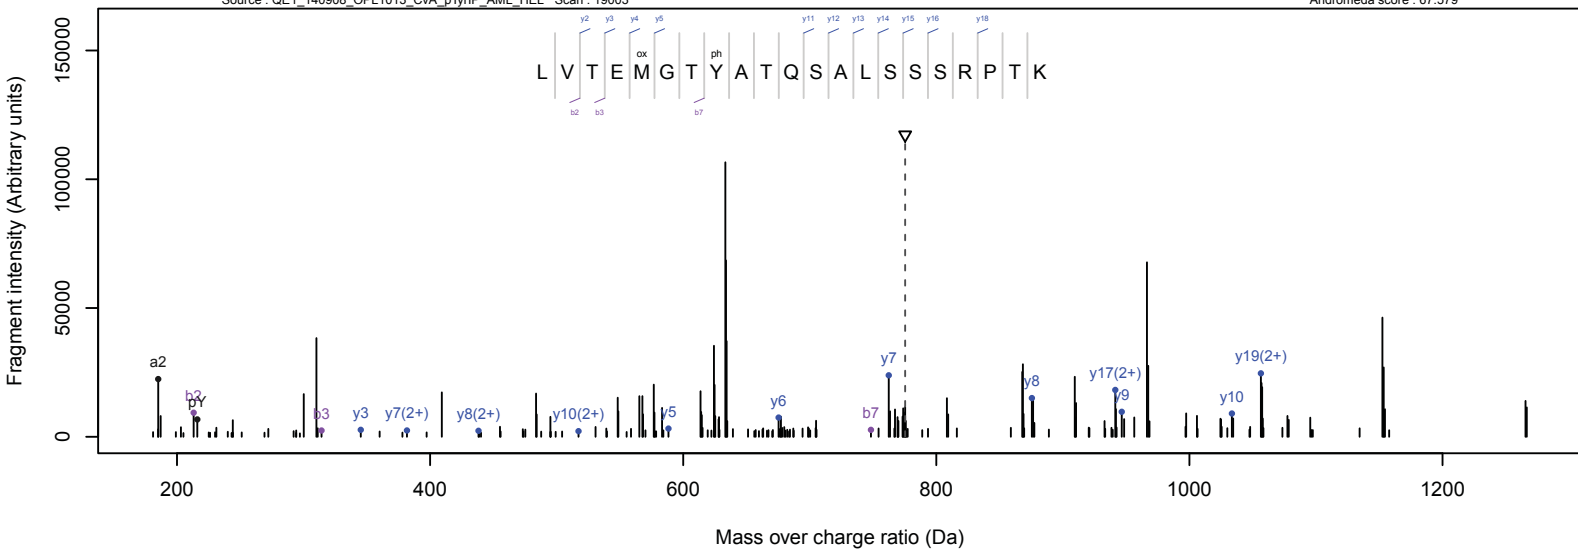

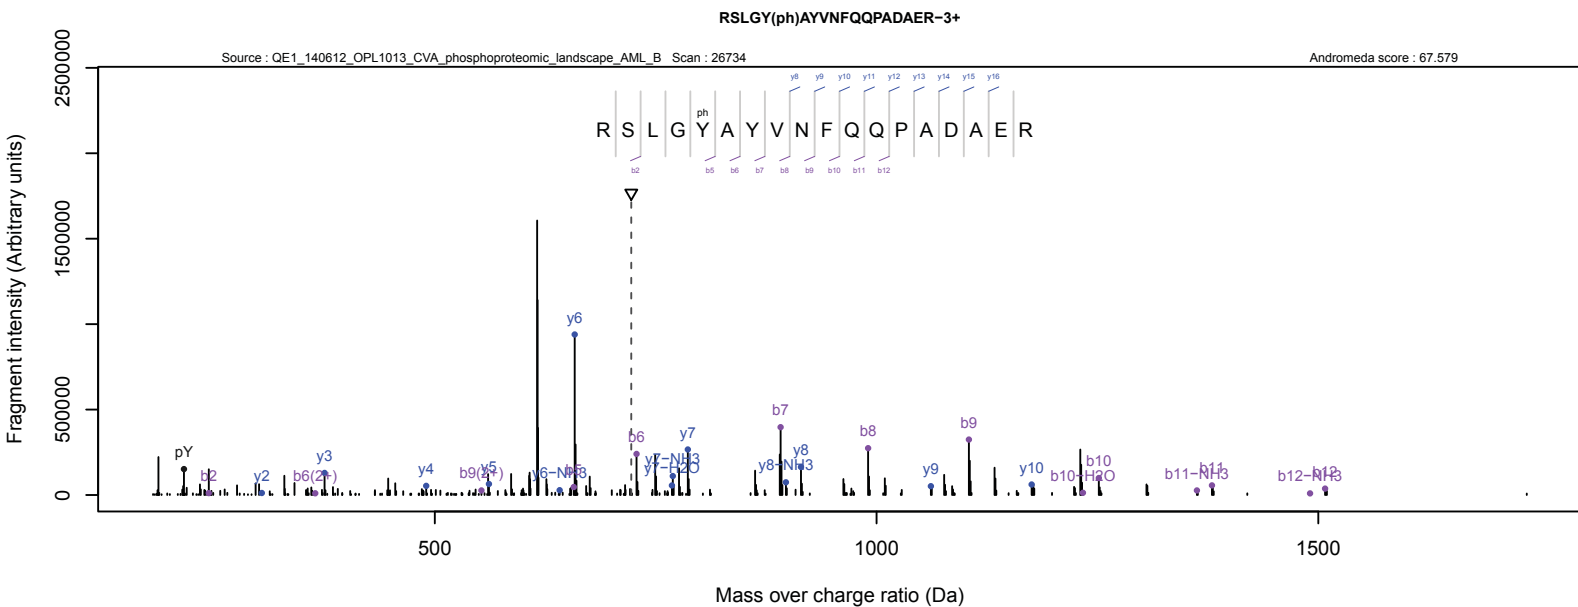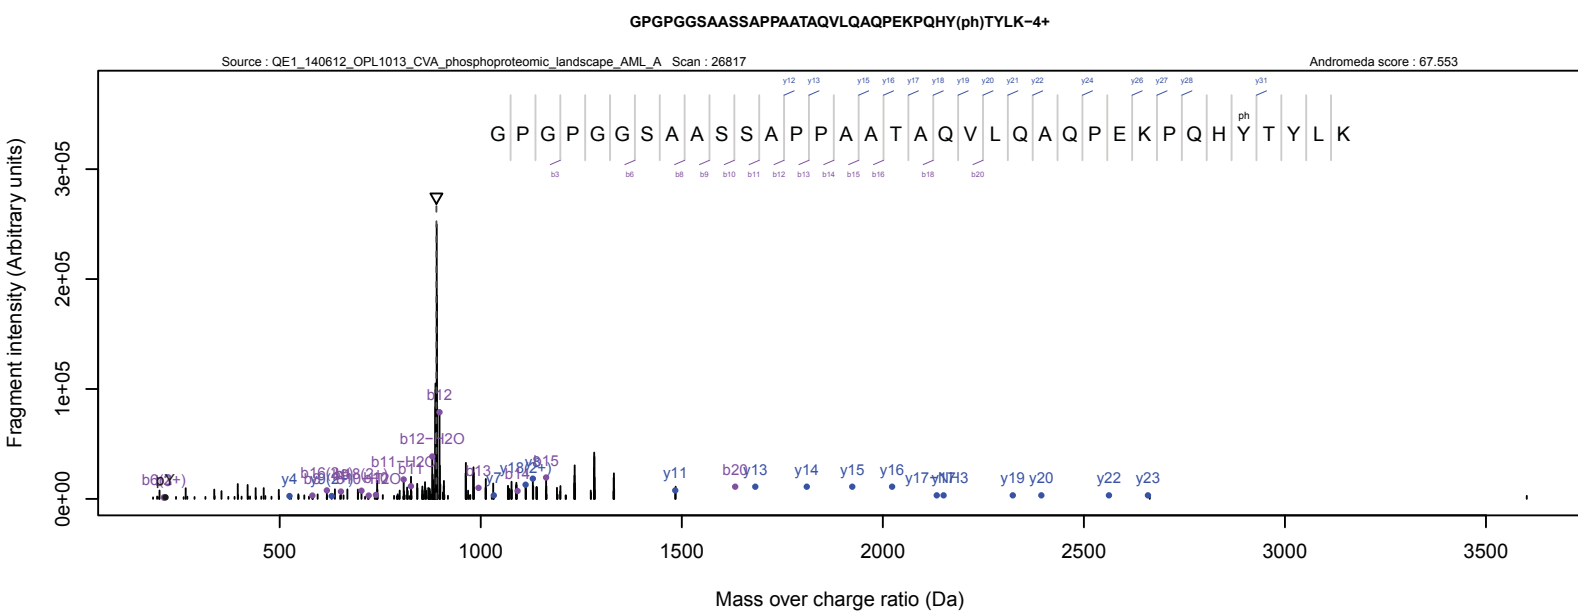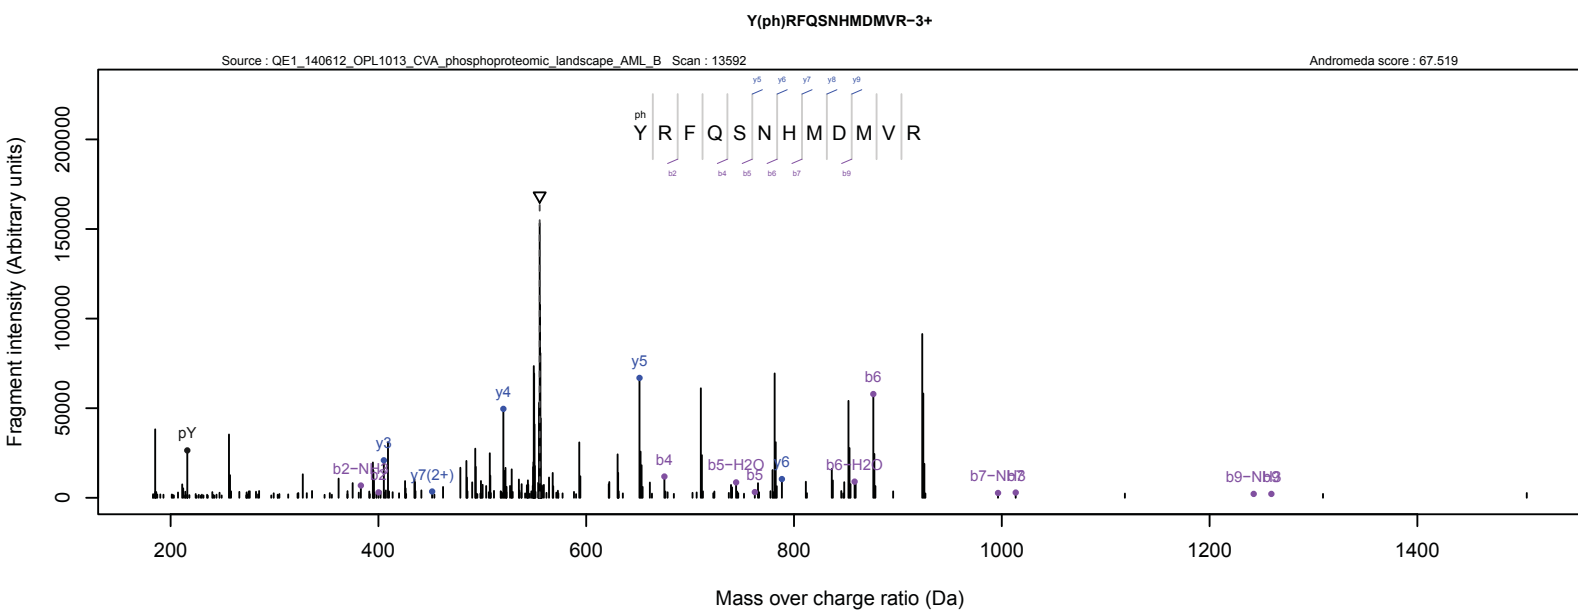

## NILEEGKEILVGDVGGQTVDDPY(ph)ATFVK-3+

Source : QE1\_140822\_OPL1013\_CvA\_pTyrIP\_AML\_cell\_lines\_part2\_B Scan : 42302

Andromeda score : 67.496

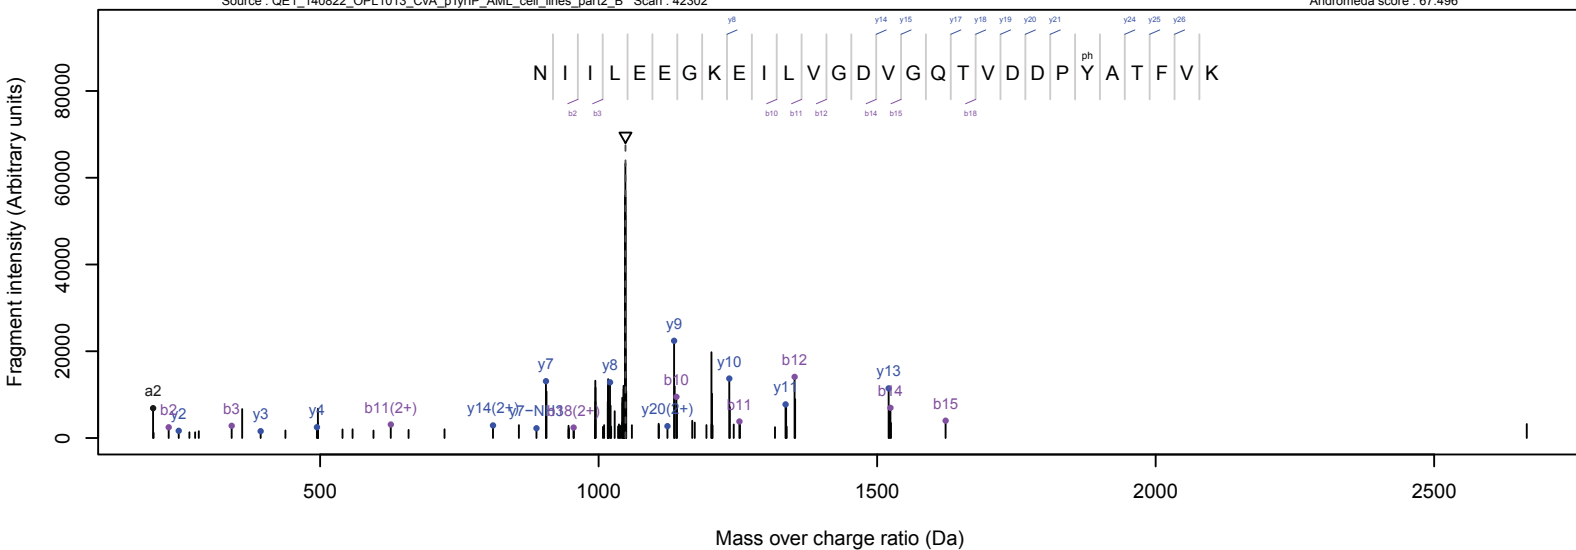

## IAY(ph)FTLPK-2+

Source : QE1\_140612\_OPL1013\_CVA\_phosphoproteomic\_landscape\_AML\_B Scan : 31485

Andromeda score : 67.494

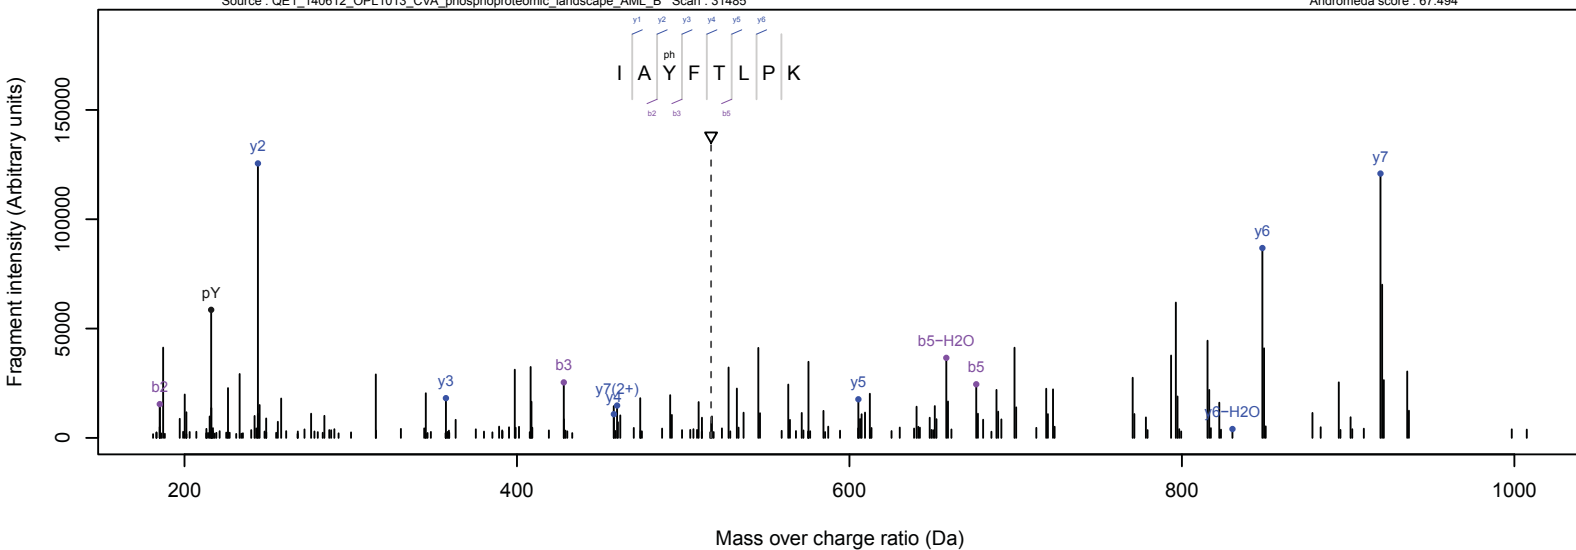

## ELFDDPSY(ph)VNVQNLDKAR-3+

Source : QE1\_140612\_OPL1013\_CVA\_phosphoproteomic\_landscape\_AML\_C Scan : 34879

Andromeda score : 67.418

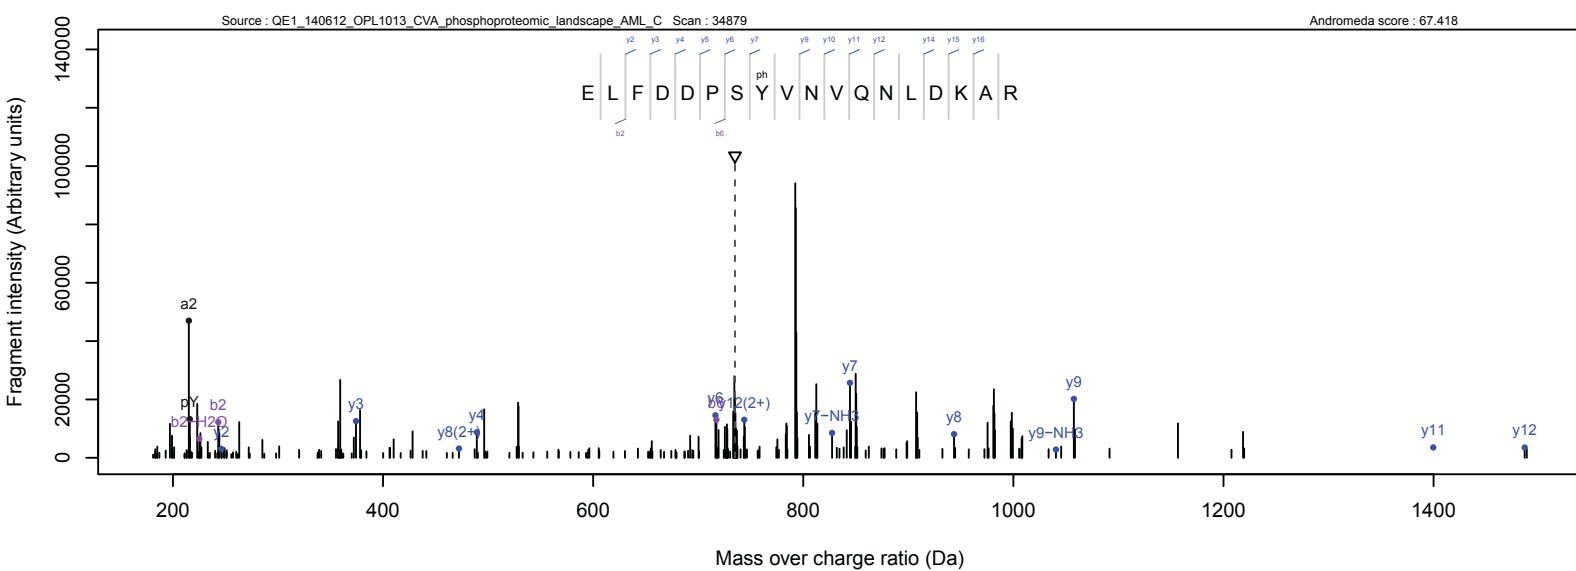

**VGNGEETPMIGDKVY(ph)VHYK-3+**

Source : QE1\_140908\_OPL1013\_CvA\_pTyrIP\_AML\_HEL Scan : 24634

Andromeda score : 67.418

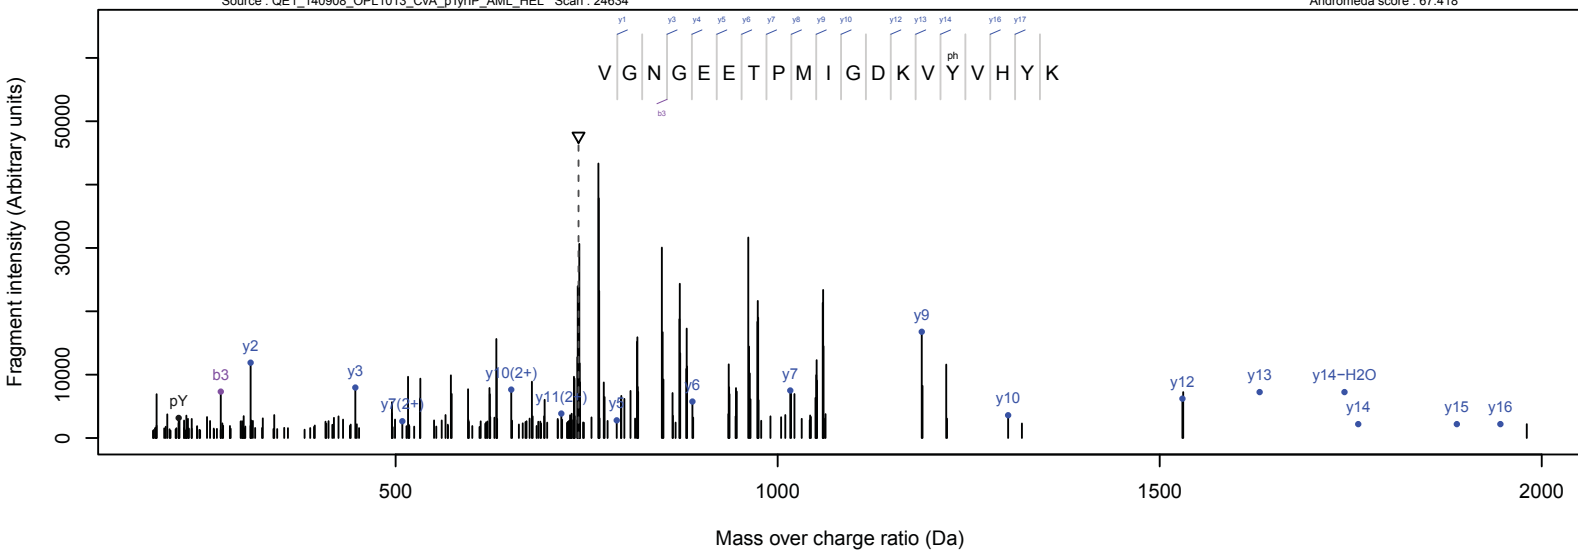

**MVSSYLHHGY(ph)CATAEFAR-3+**

Source : QE1\_140612\_OPL1013\_CVA\_phosphoproteomic\_landscape\_AML\_B Scan : 26747

Andromeda score : 67.396

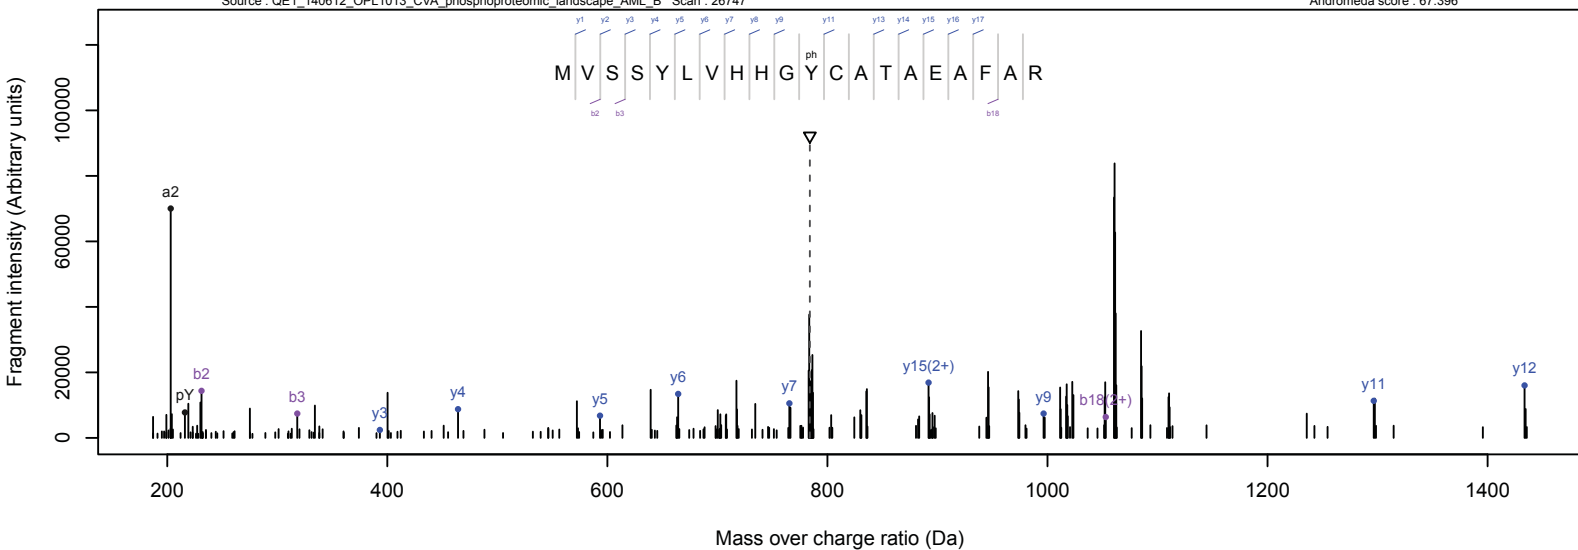

**RGWVLGPNNY(ph)YFASQQQKPEDTTIPSTELAK-4+**

Source : QE1\_140612\_OPL1013\_CVA\_phosphoproteomic\_landscape\_AML\_B Scan : 37423

Andromeda score : 67.396

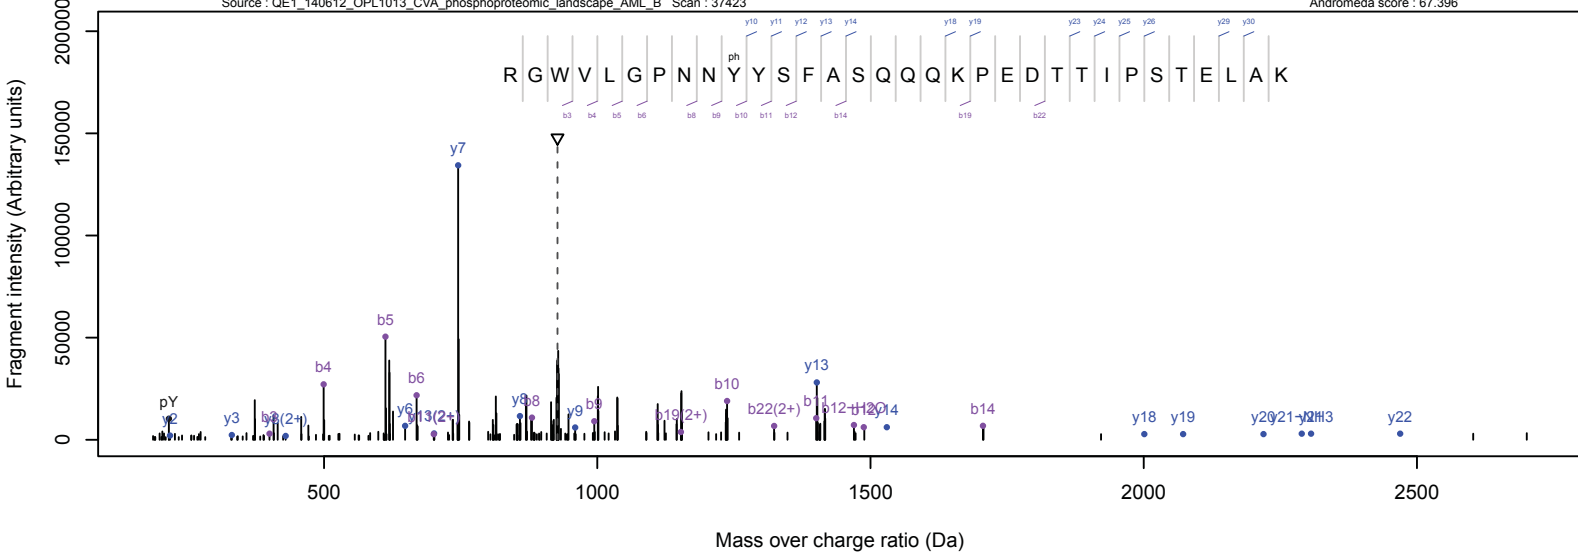



## FNFPAA(ph)FIHHR-3+

Source: QE1\_140612\_OPL1013\_CVA\_phosphoproteomic\_landscape\_AML\_C Scan: 37080

Andromeda score: 67.385

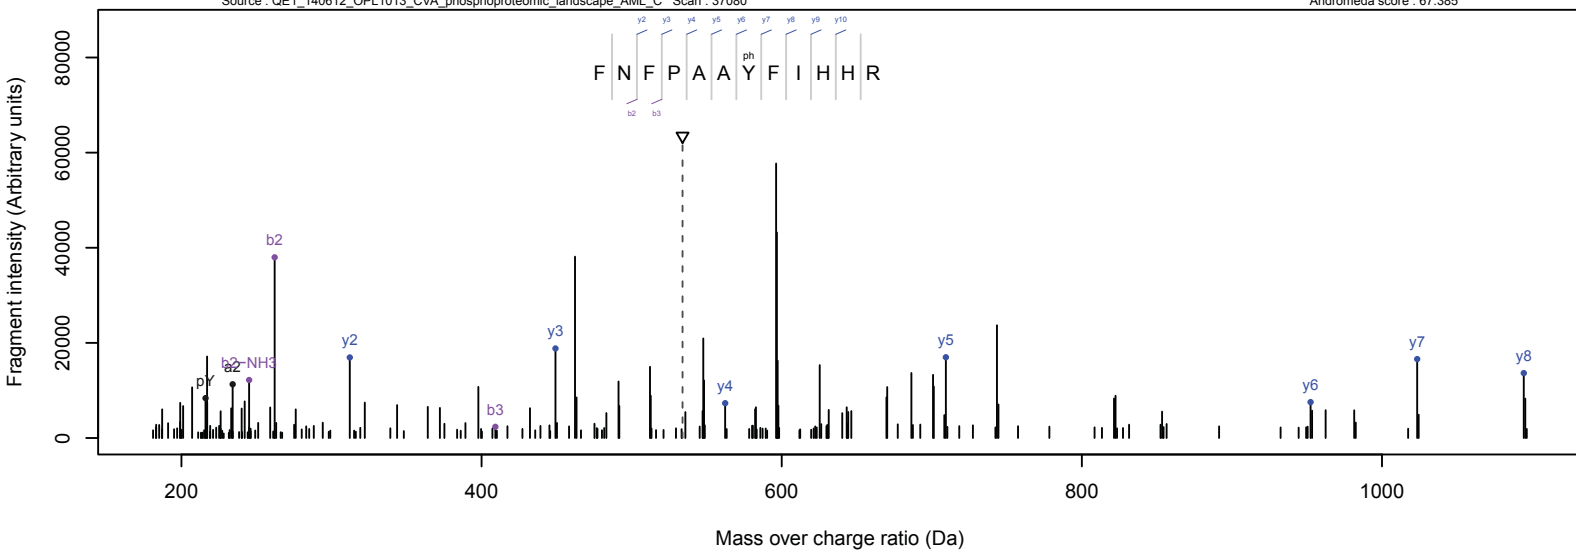

## INNY(ph)LTVPAHK-2+

Source: QE1\_140612\_OPL1013\_CVA\_phosphoproteomic\_landscape\_AML\_C Scan: 15484

Andromeda score: 67.385

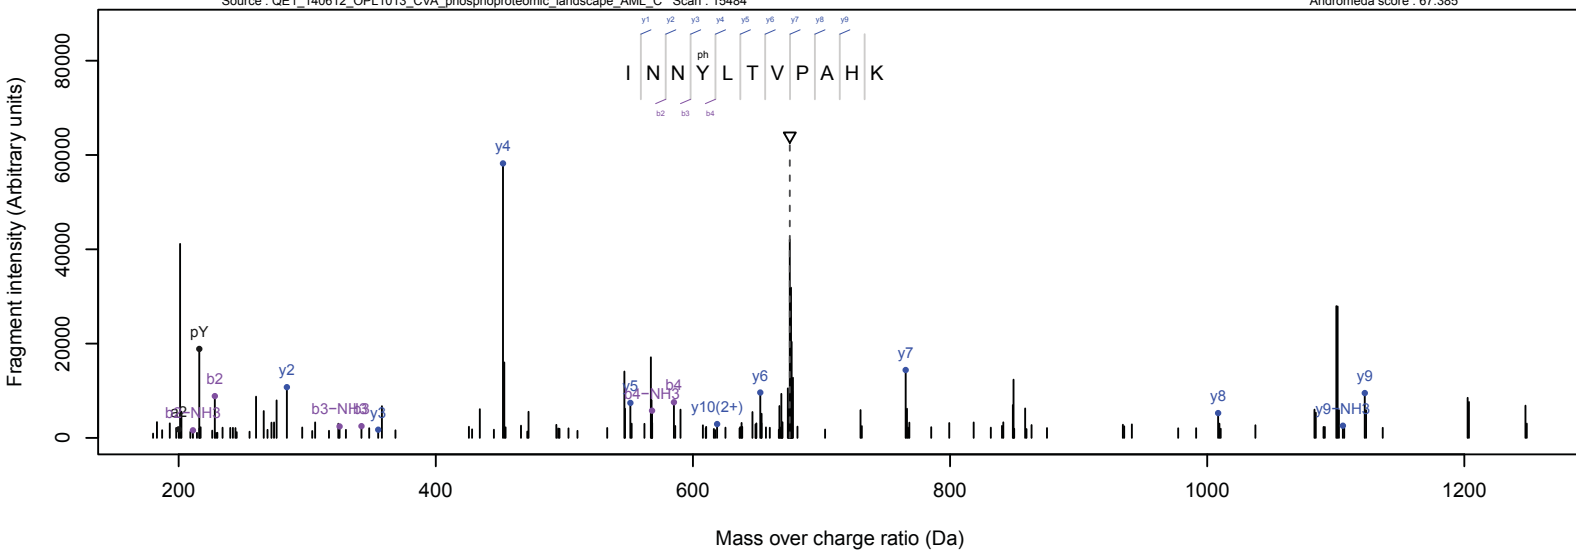

## TLSGMESY(ph)CVR-2+

Source: QE1\_140612\_OPL1013\_CVA\_phosphoproteomic\_landscape\_AML\_C Scan: 15347

Andromeda score: 67.385

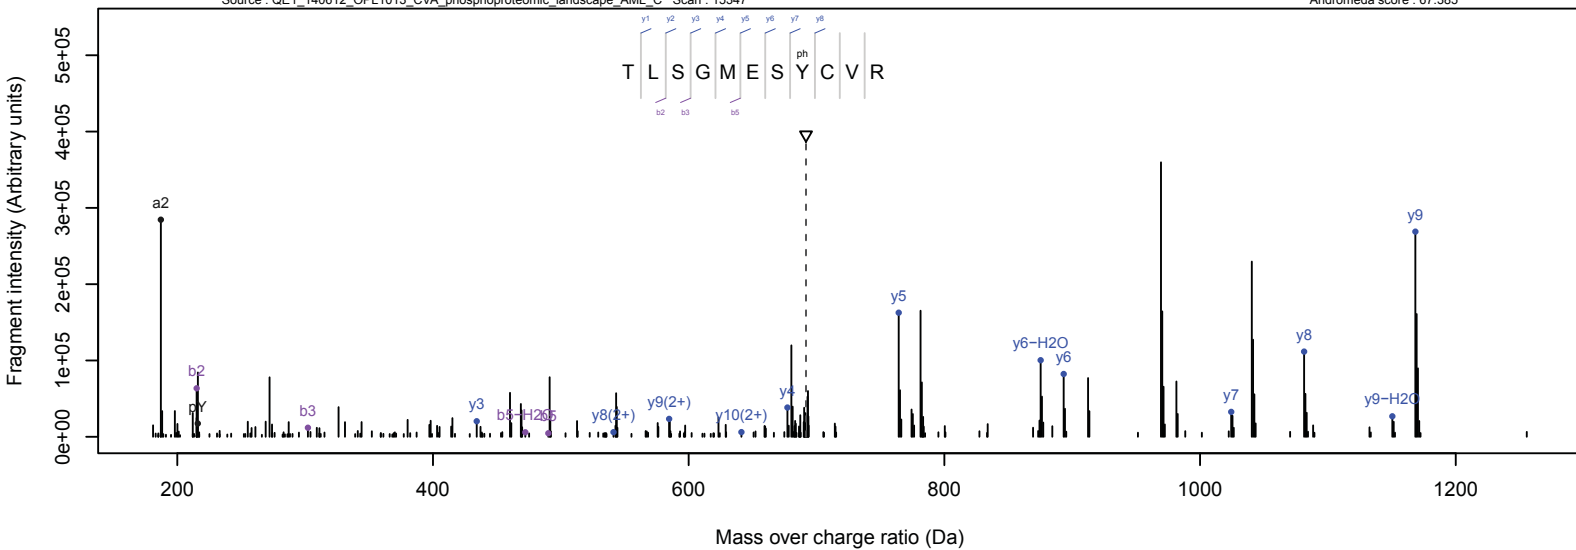

## Y(ph)QQITPVNQRS-2+

Source : QE1\_140612\_OPL1013\_CVA\_phosphoproteomic\_landscape\_AML\_C Scan : 8816

Andromeda score : 67.385

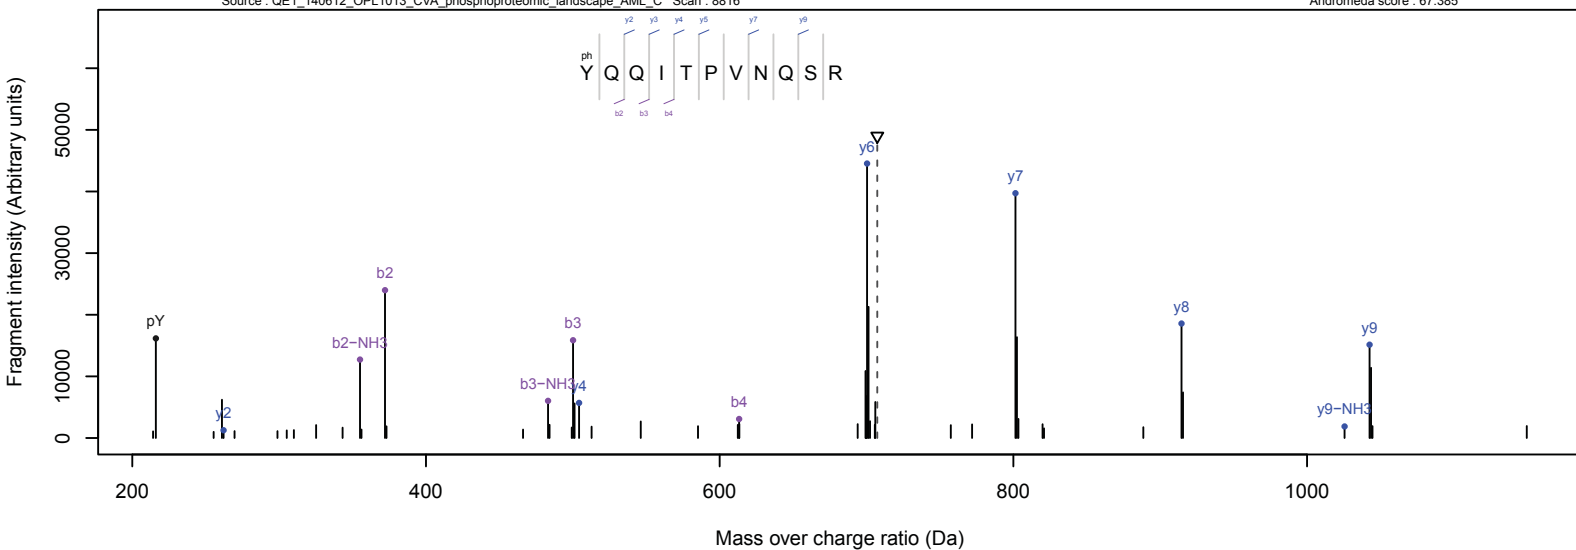

## IKDQLNY(ph)WSAK-2+

Source : QE1\_140612\_OPL1013\_CVA\_phosphoproteomic\_landscape\_AML\_C Scan : 20117

Andromeda score : 67.252

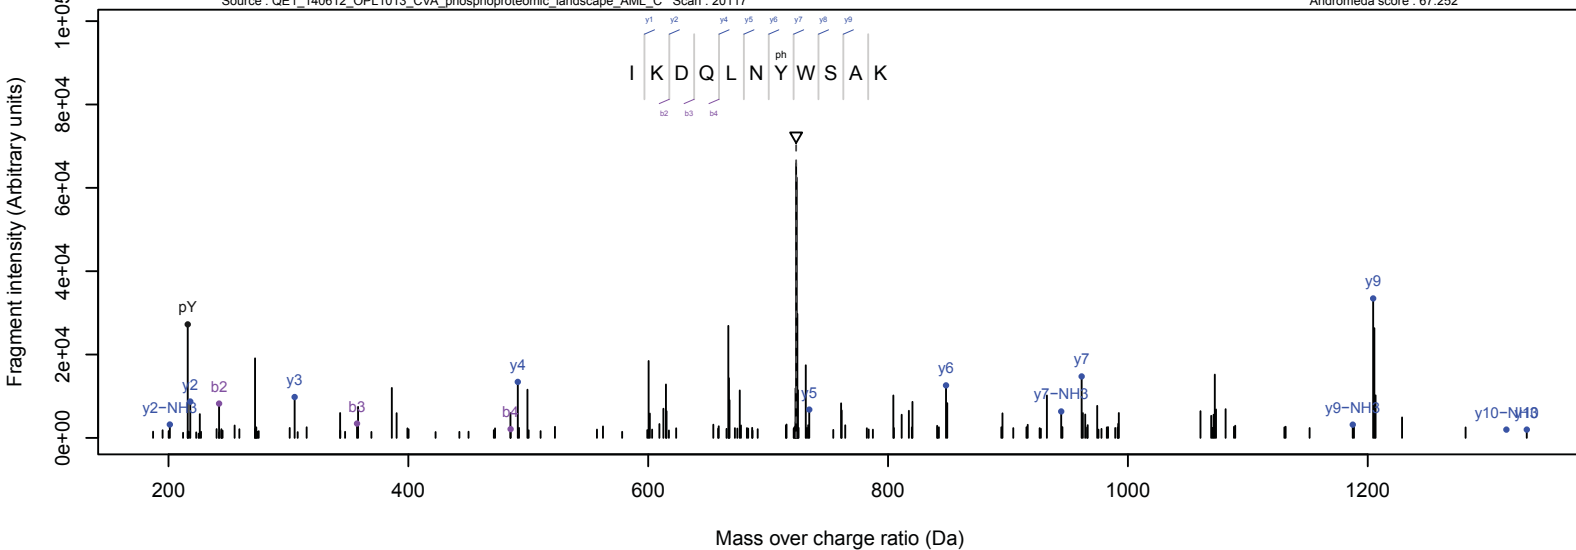

## MLEGGEDPLY(ph)VARR-2+

Source : QE1\_140612\_OPL1013\_CVA\_phosphoproteomic\_landscape\_AML\_C Scan : 26791

Andromeda score : 67.234

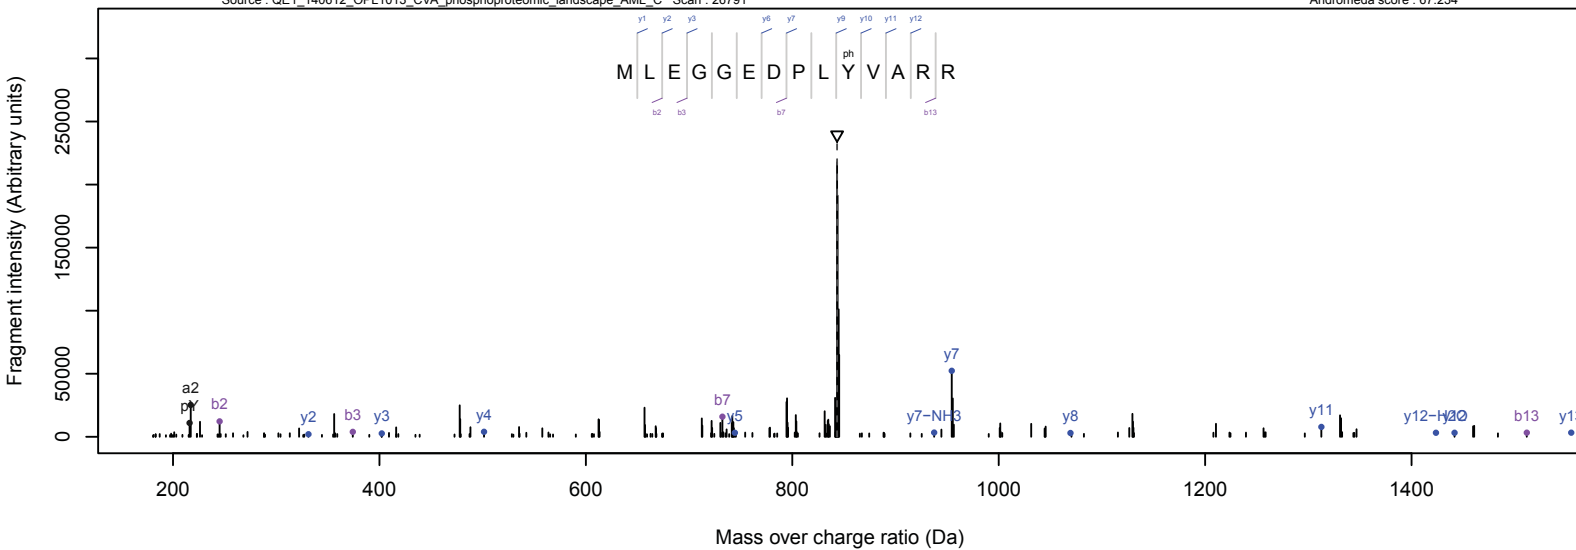

## TVEALY(ph)KFVVPKPR-3+

Source : QE1\_140908\_OPL1013\_CvA\_pTyrIP\_AML\_HEL Scan : 33263

Andromeda score : 67.234

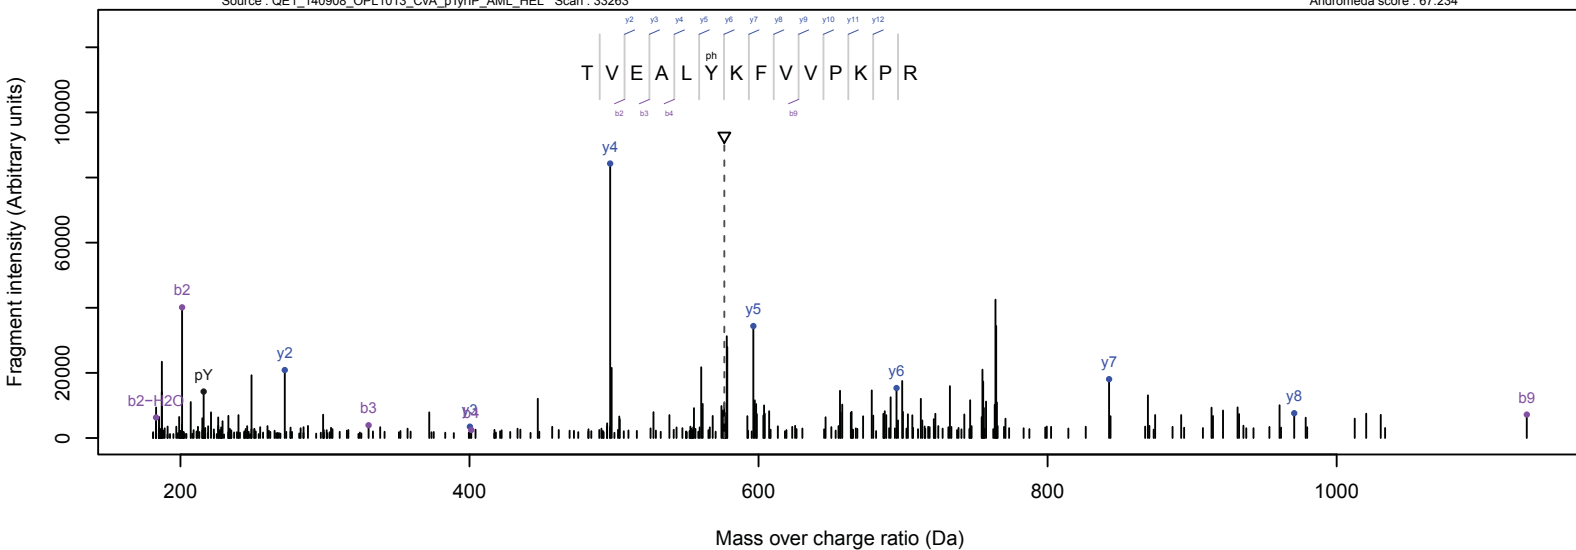

## VAIQKEDLQY(ph)HNR-4+

Source : QE1\_140612\_OPL1013\_CVA\_phosphoproteomic\_landscape\_AML\_C Scan : 7234

Andromeda score : 67.234

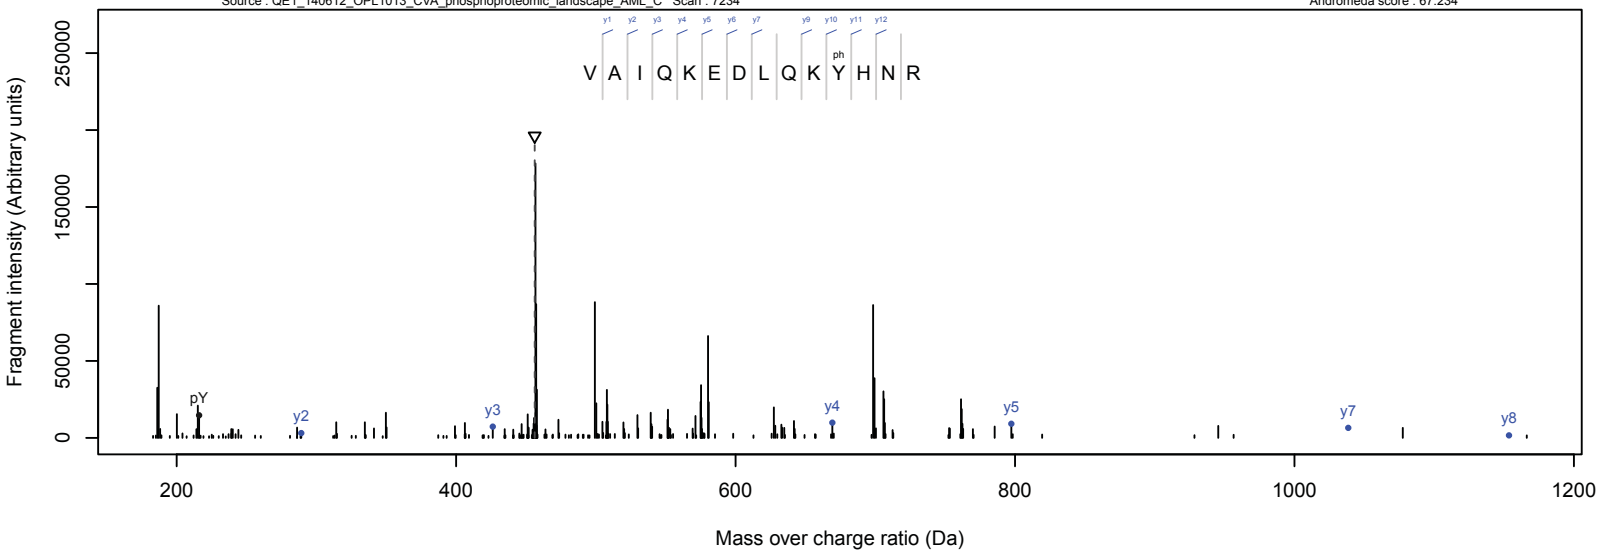

## YLYSSEDY(ph)IKSGALLACGIVNSGVR-3+

Source : QE1\_140612\_OPL1013\_CVA\_phosphoproteomic\_landscape\_AML\_B Scan : 44393

Andromeda score : 67.217

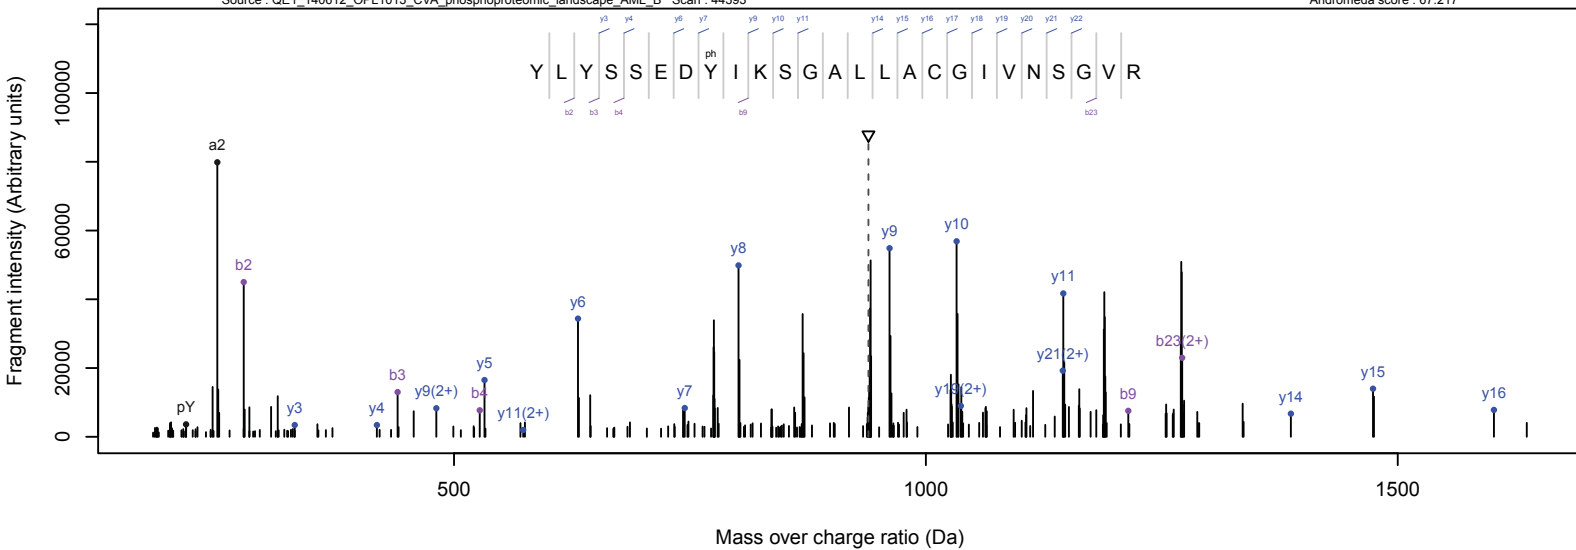

ESTNYPGDY(ph)TLCVSCDGKVEHYR-4+

Source : QE1\_140612\_OPL1013\_CVA\_phosphoproteomic\_landscape\_AML\_B Scan : 21977

Andromeda score : 67.194

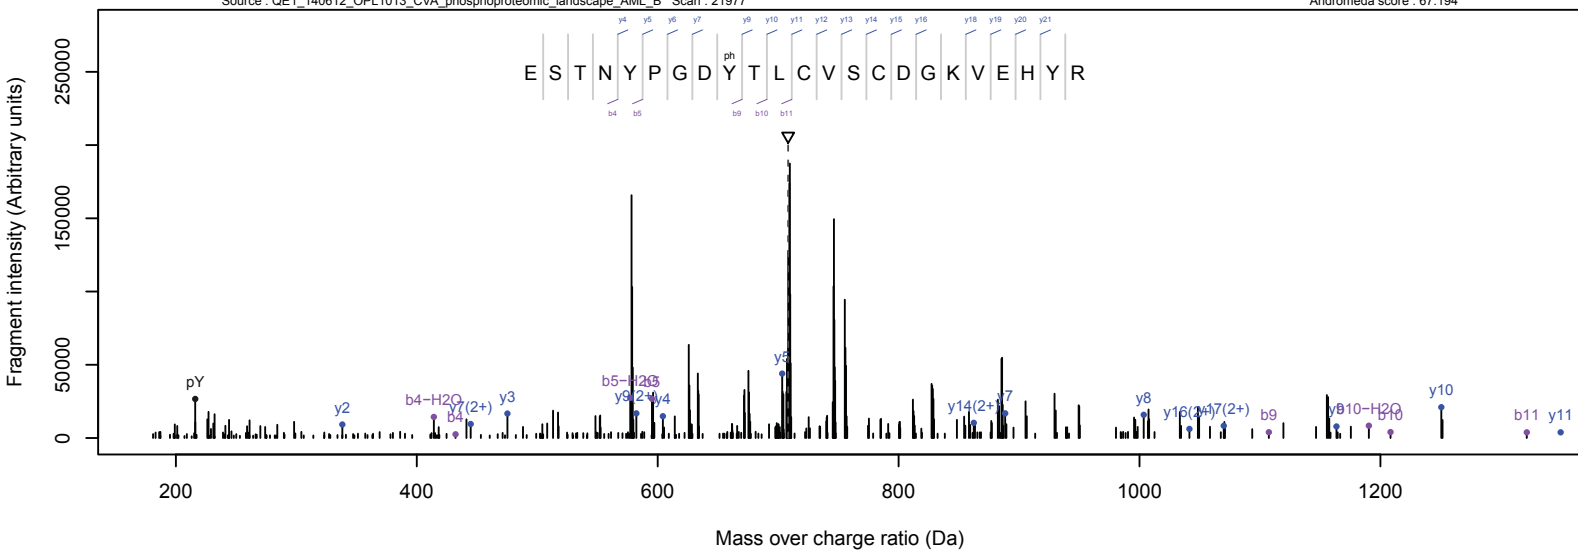

QQQLDAERLDSYVNADHDLY(ph)CNR-3+

Source : QE1\_140908\_OPL1013\_CvA\_pTyrIP\_AML\_HL60 Scan : 32710

Andromeda score : 67.194

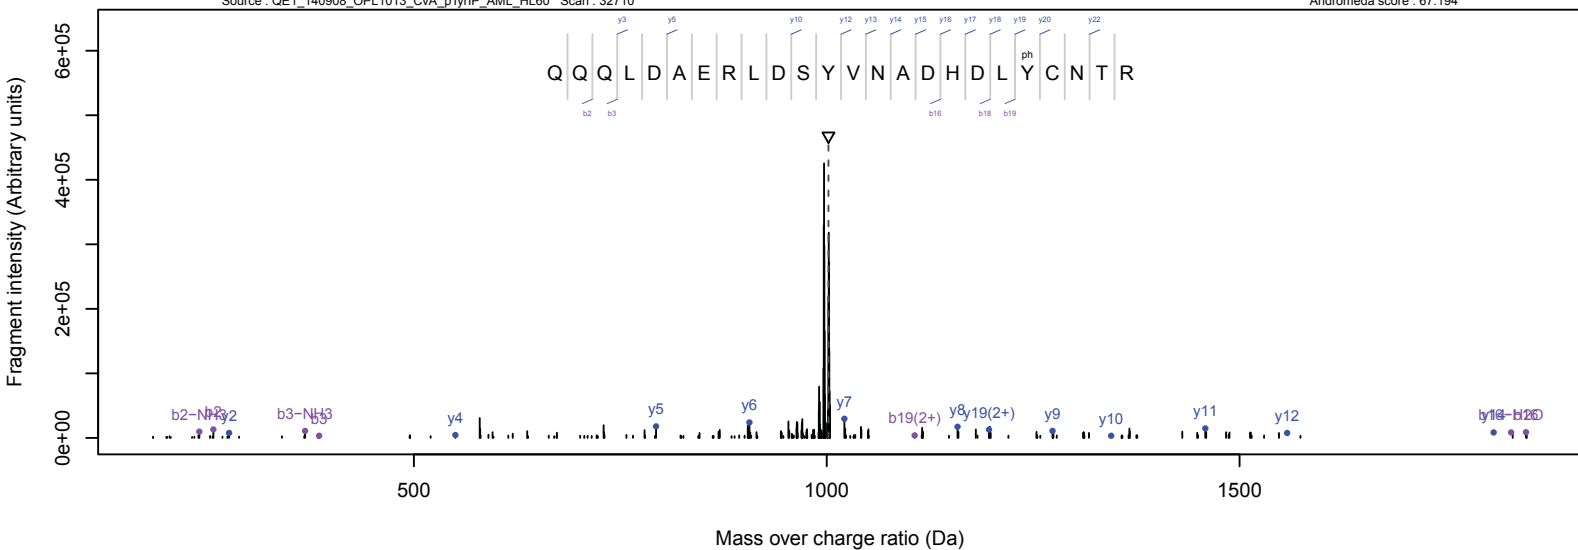

FY(ph)GPQVNNISHTK-3+

Source : QE1\_140612\_OPL1013\_CVA\_phosphoproteomic\_landscape\_AML\_C Scan : 16071

Andromeda score : 67.187

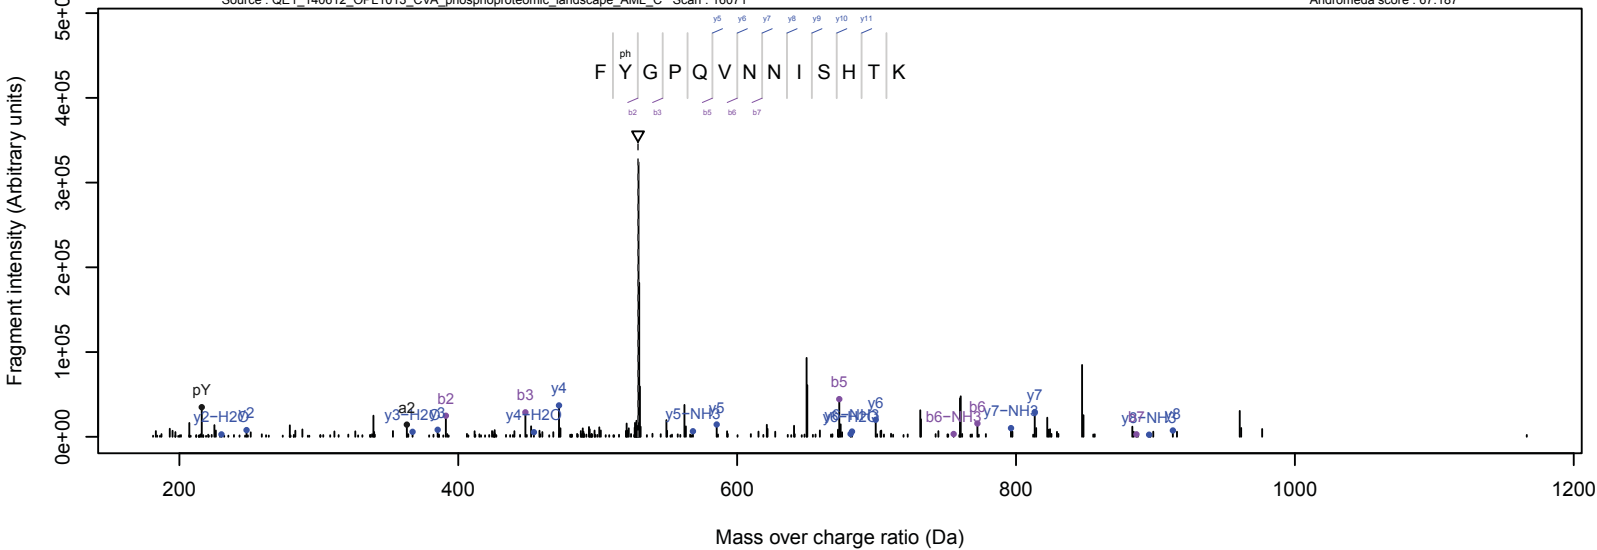

## FICSPDCSANY(ph)SK-2+

Source : QE1\_140612\_OPL1013\_CVA\_phosphoproteomic\_landscape\_AML\_C Scan : 25472

Andromeda score : 67.136

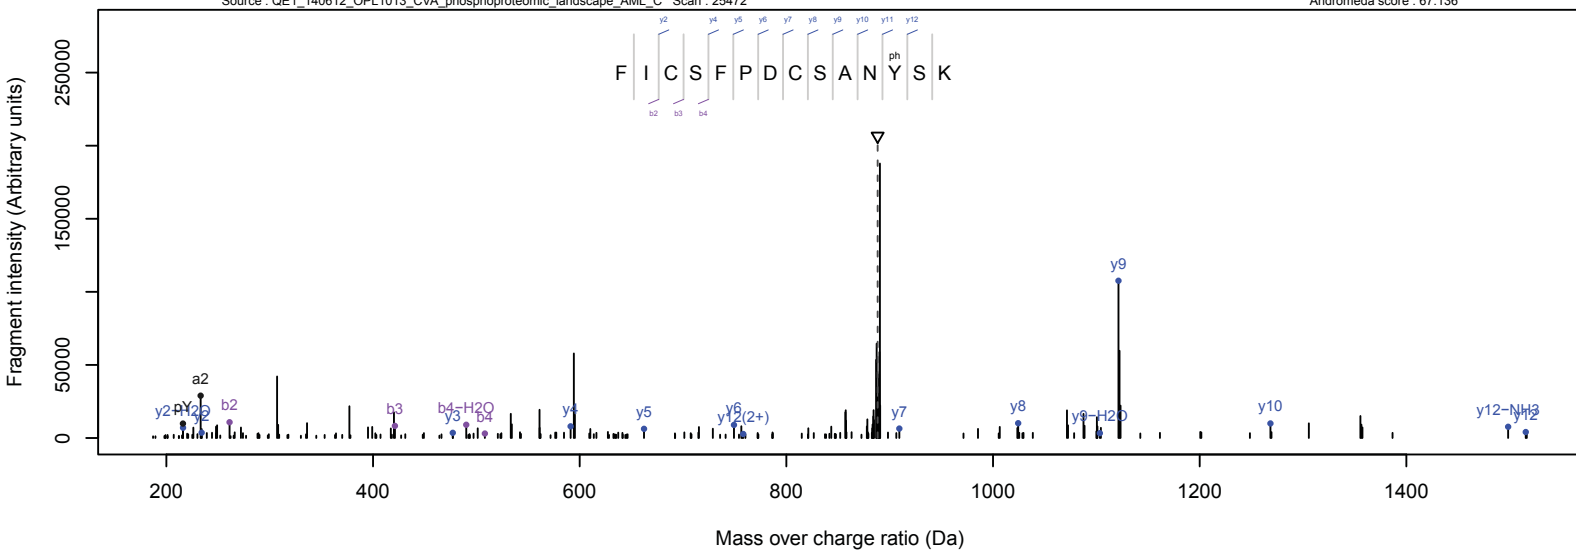

## KTRDQY(ph)LMWLTQK-3+

Source : QE1\_140612\_OPL1013\_CVA\_phosphoproteomic\_landscape\_AML\_A Scan : 28712

Andromeda score : 67.136

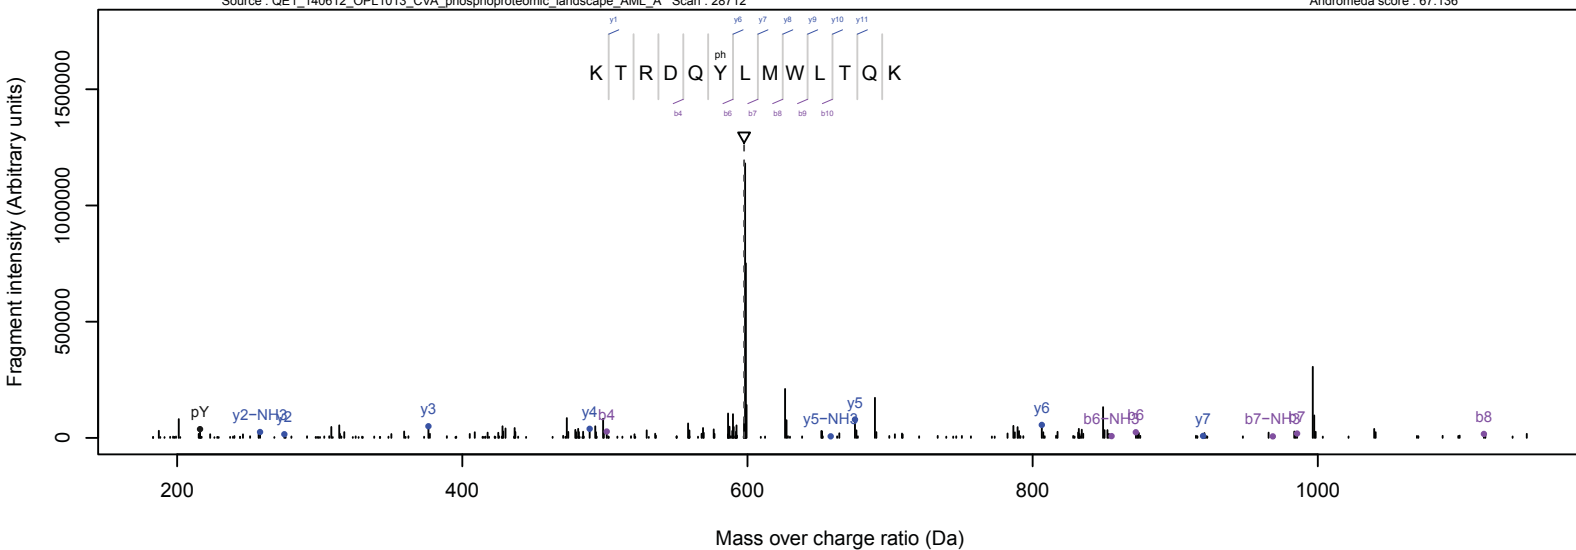

## CPLNPHSHLGT(ph)YGVFTNAAFDPS-3+

Source : QE1\_140908\_OPL1013\_CvA\_pTyrIP\_AML\_HEL Scan : 39430

Andromeda score : 67.11

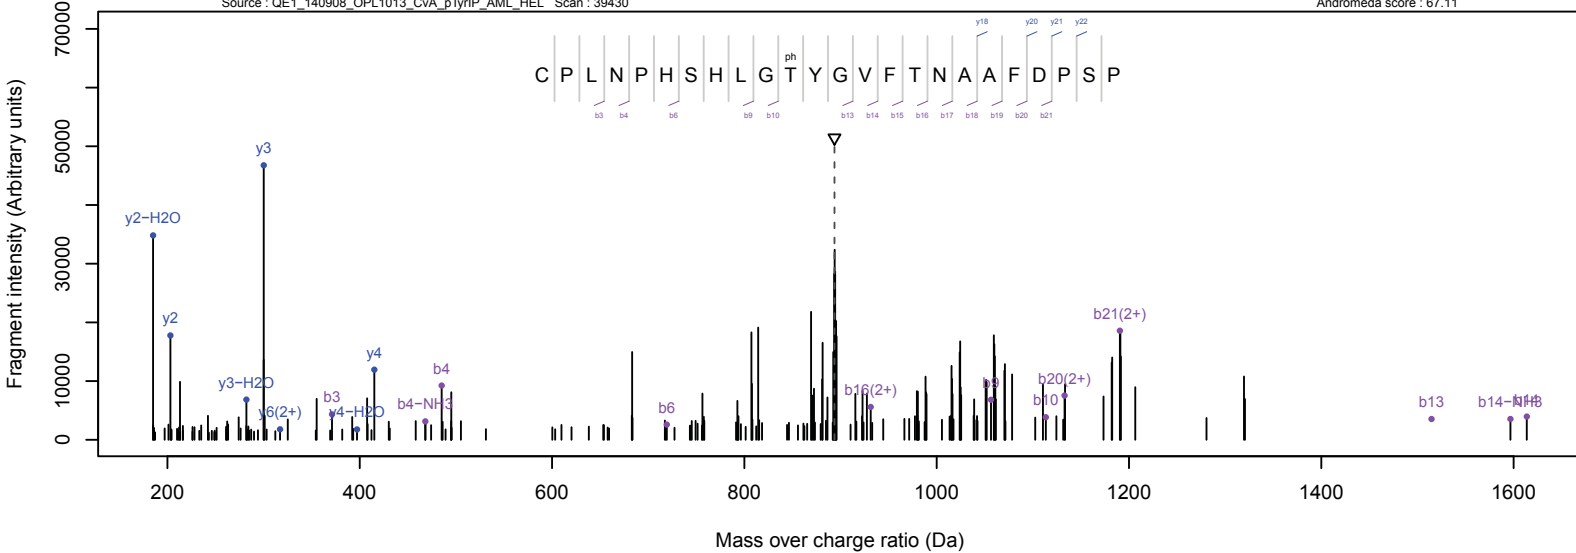

## VLY(ph)LSLK-2+

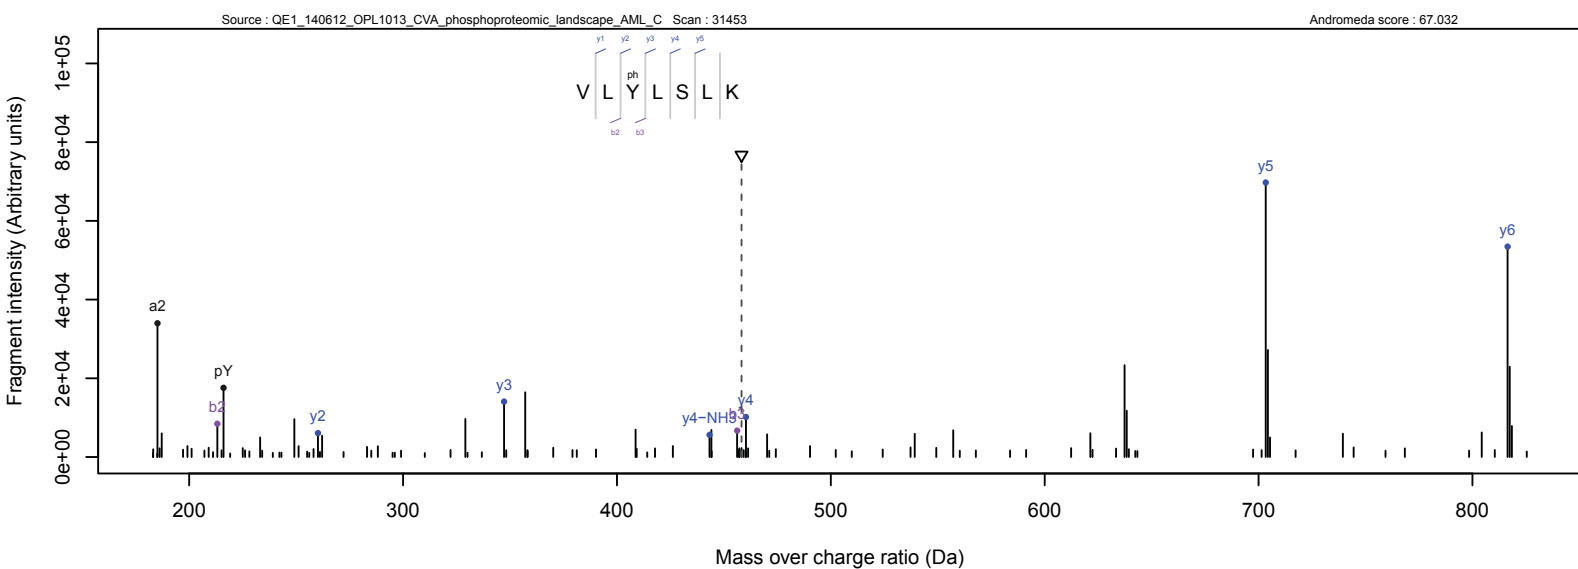

## IRPVPEY(ph)QKYGSVAFPNFEQGVACL R-4+

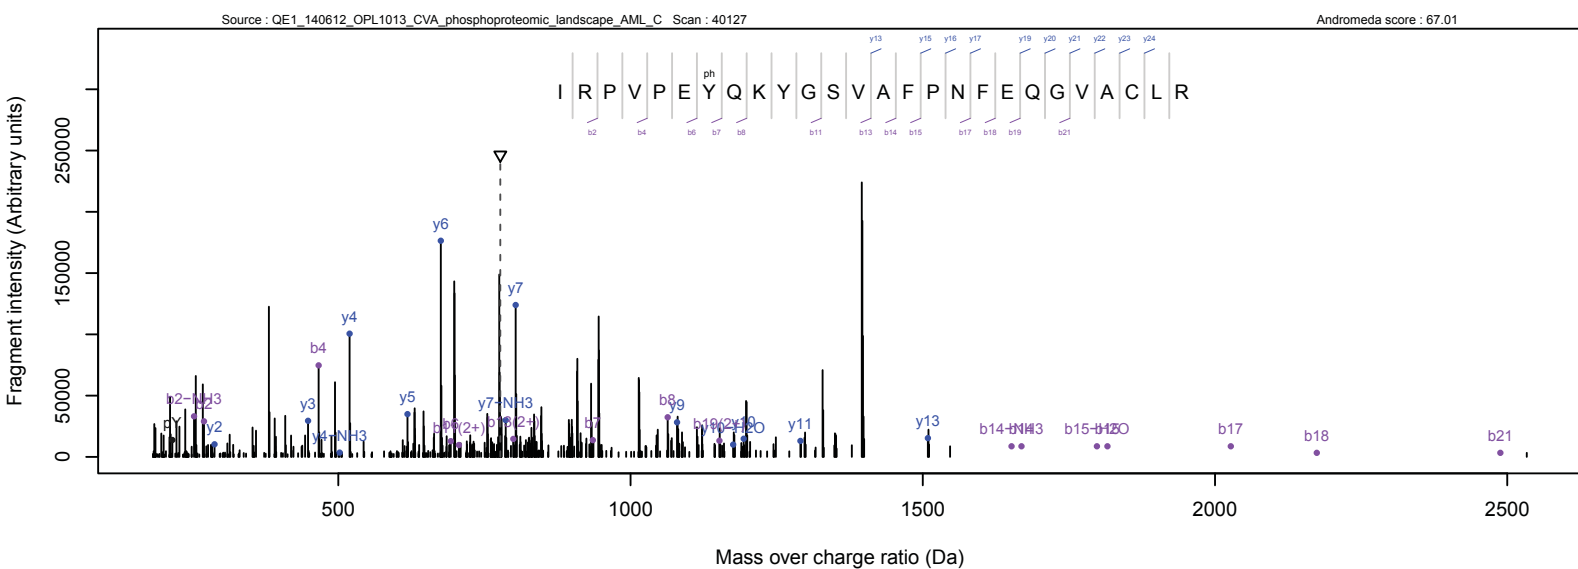

## SVC DY(ph)FFEAQER-2+

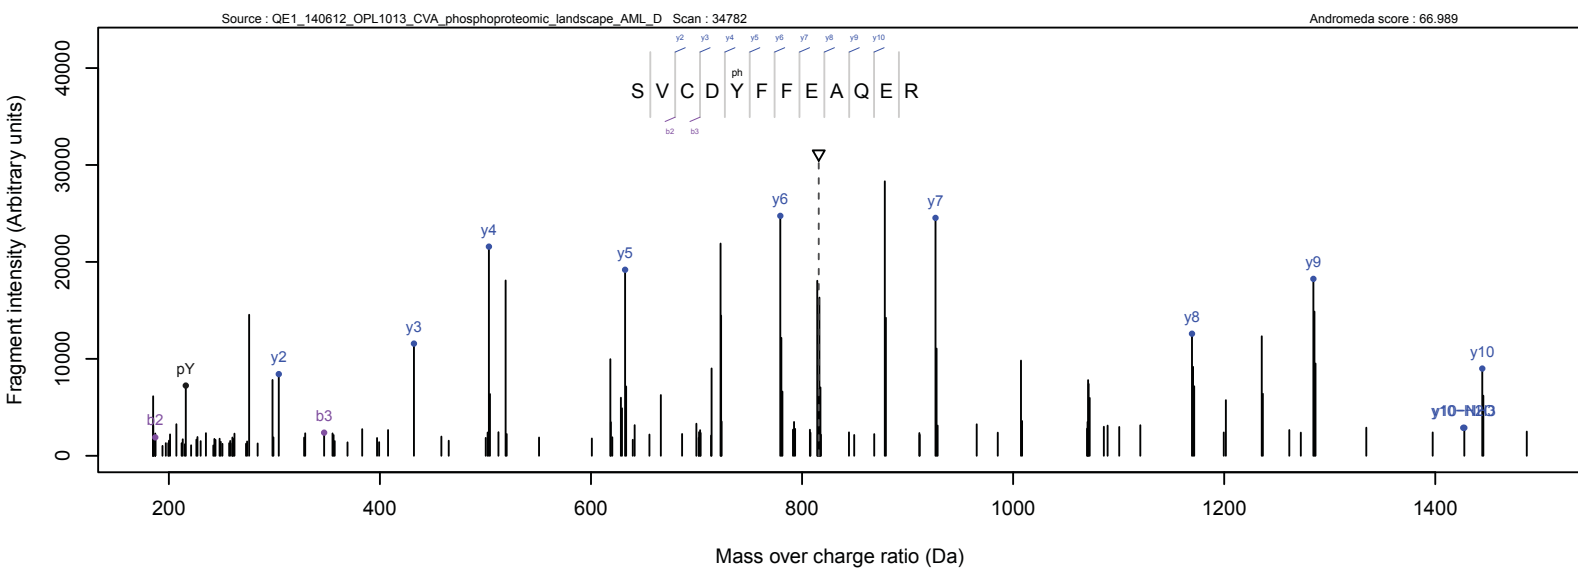

**KRYPT(ph)AEEILVGGYLR-3+**

Source: QE1\_140612\_OPL1013\_CVA\_phosphoproteomic\_landscape\_AML\_C Scan: 42081

Andromeda score: 66.977

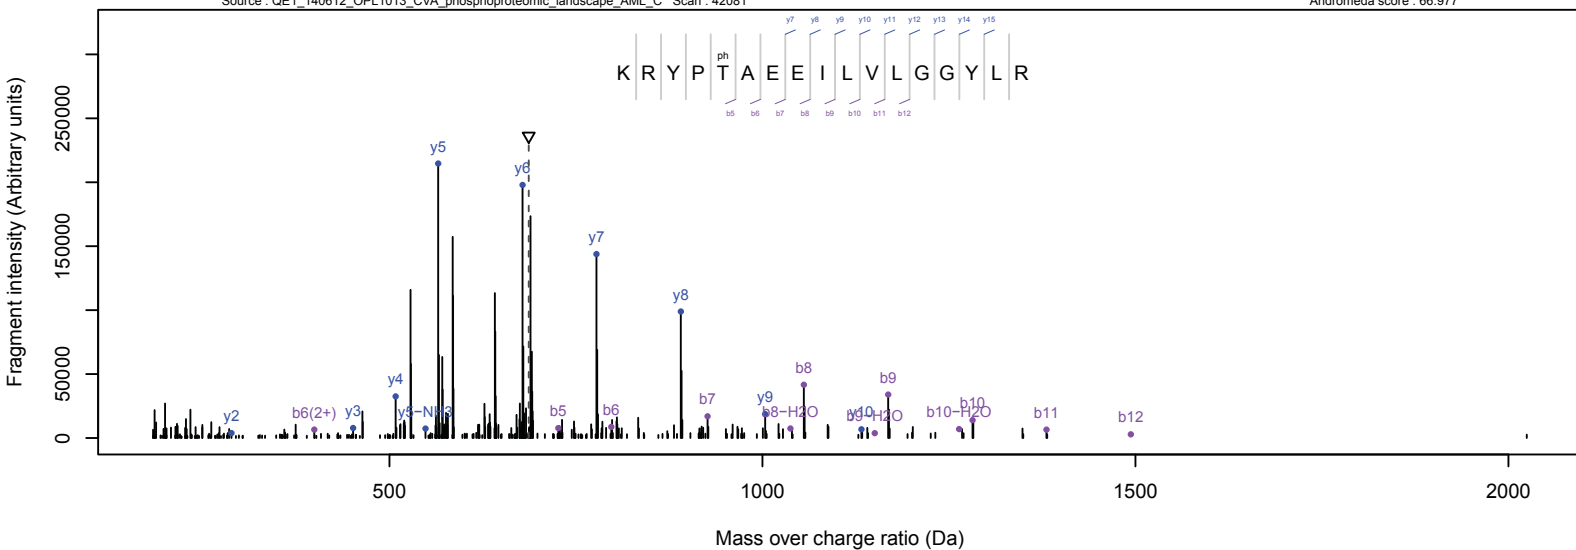

**SEFRDESQ(ph)FR-3+**

Source: QE1\_140612\_OPL1013\_CVA\_phosphoproteomic\_landscape\_AML\_C Scan: 16119

Andromeda score: 66.953

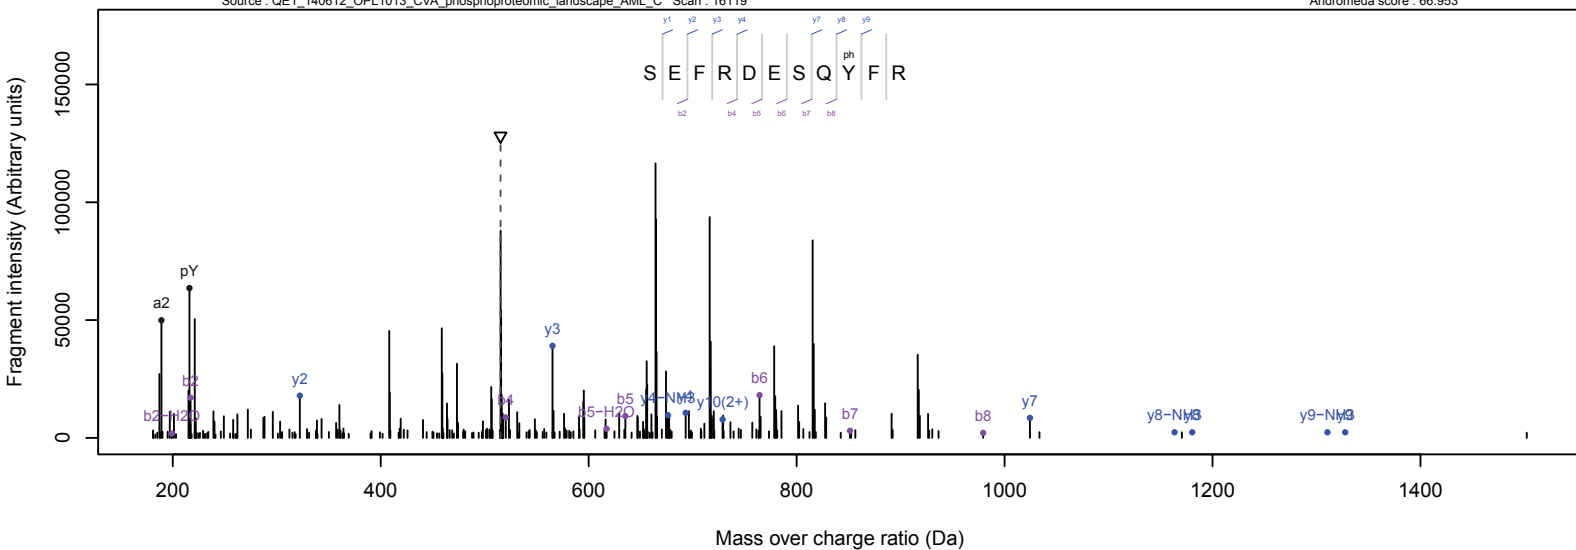

**HHTIQNSDDAY(ph)VQLDNLPGMSLVAGK-3+**

Source: QE1\_140612\_OPL1013\_CVA\_phosphoproteomic\_landscape\_AML\_B Scan: 41078

Andromeda score: 66.925

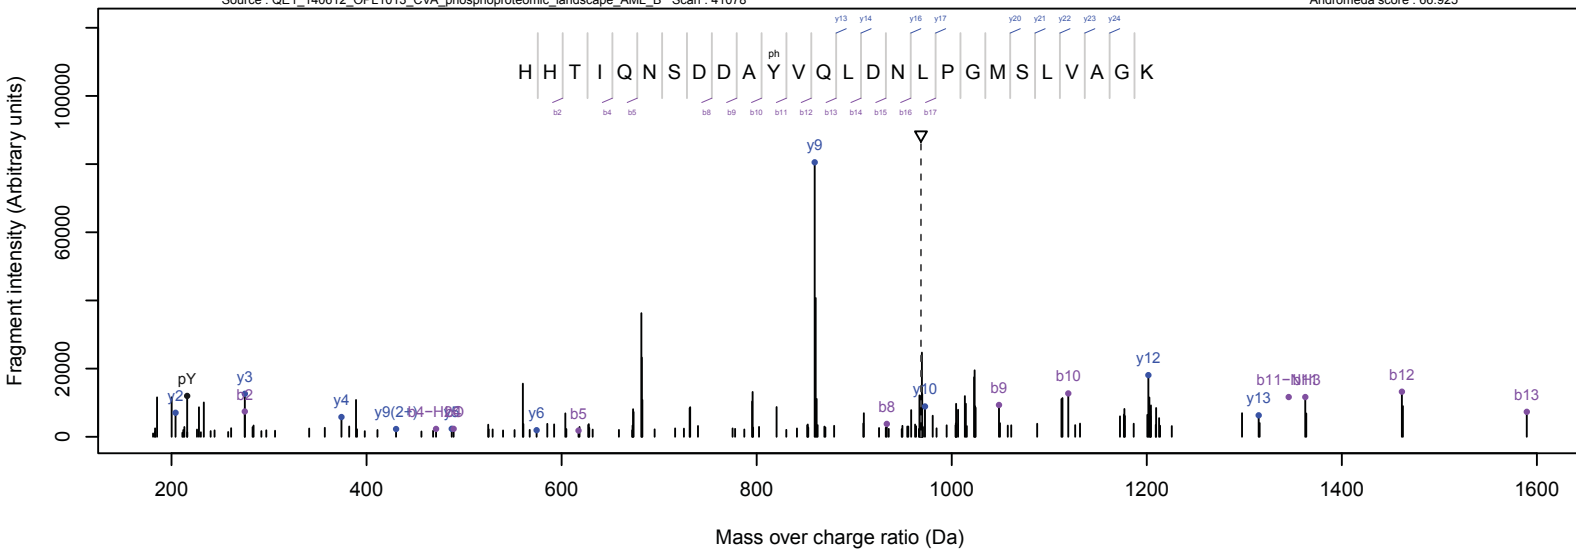

AAAGDAPPAAPAAAPAAASCASLPGALGGSAAGAEDSY(ph)GLVAPATAAYR-4+

Source: QE1\_140612\_OPL1013\_CVA\_phosphoproteomic\_landscape\_AML\_C Scan: 41712

Andromeda score: 66.916

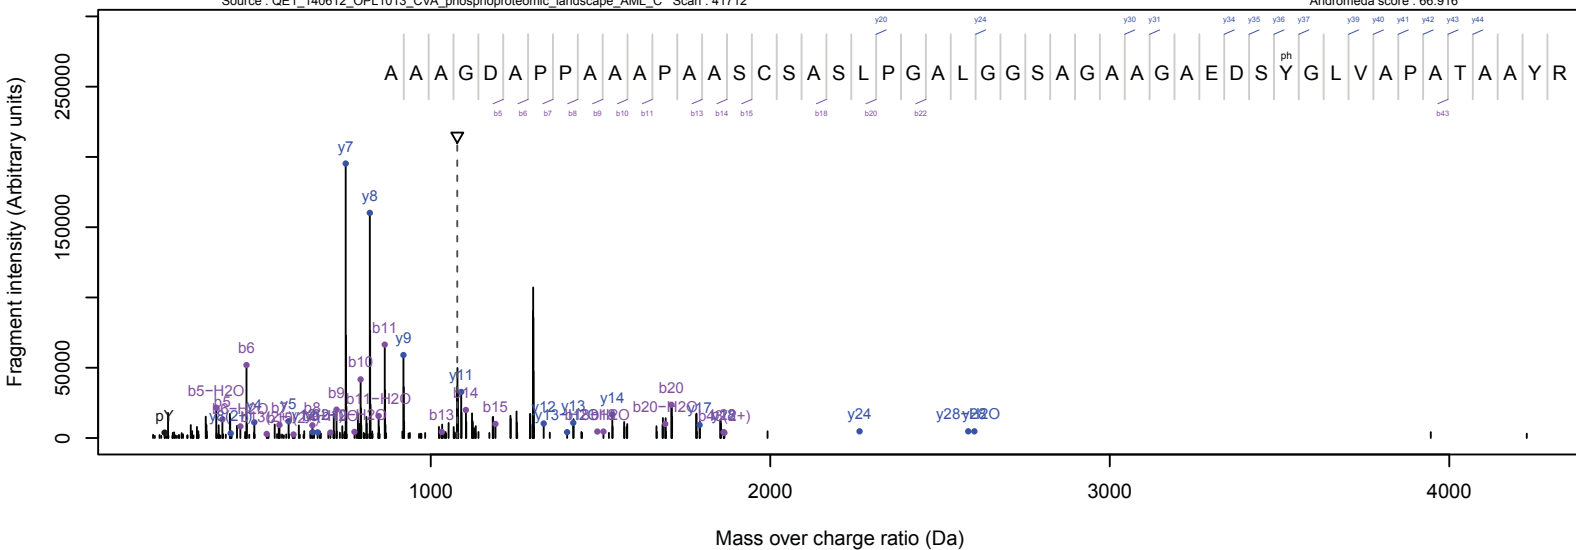

FLEENSSDPTY(ph)TSSLGGK-2+

Source: QE1\_140612\_OPL1013\_CVA\_phosphoproteomic\_landscape\_AML\_C Scan: 22253

Andromeda score: 66.893

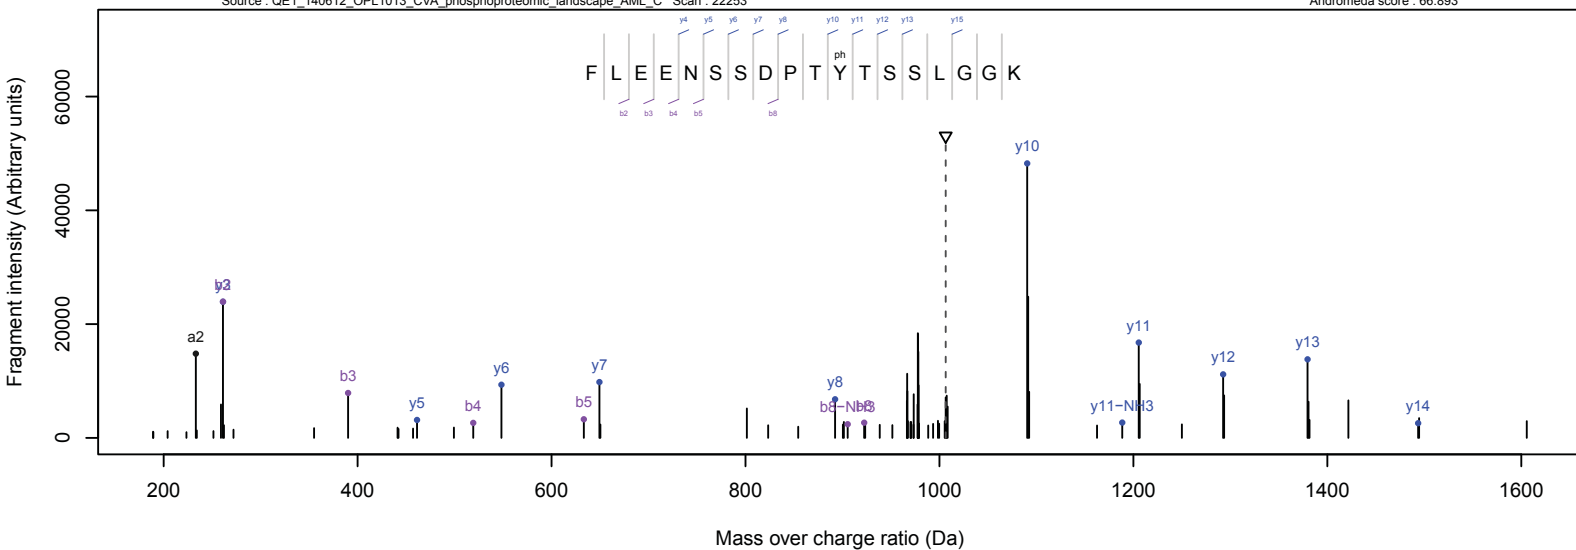

KYPDYIQIAMPTESR-2+

Source: QE1\_140908\_OPL1013\_CvA\_pTyrIP\_AML\_Kasumi6 Scan: 34829

Andromeda score: 66.893

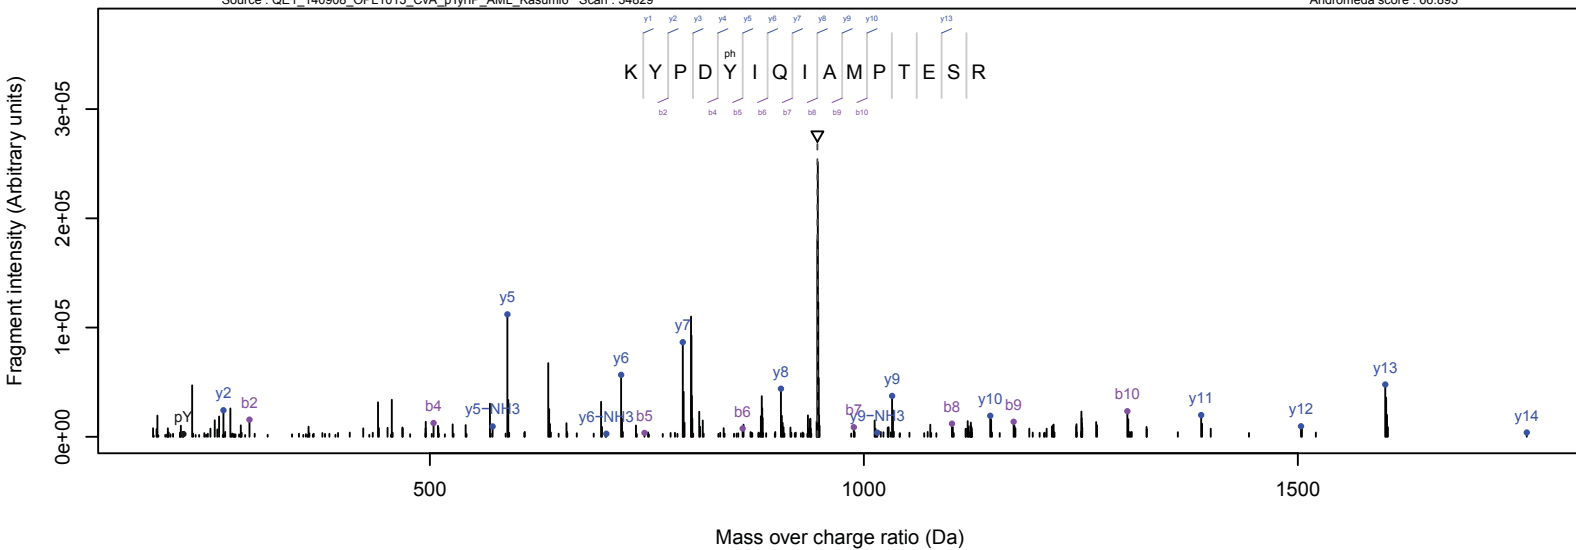



## YGPQFTLQHVPDY(ph)RQNVYIPGSNATLTNAAGKR-4+

Source: QE1\_140612\_OPL1013\_CVA\_phosphoproteomic\_landscape\_AML\_C Scan: 34607

Andromeda score: 66.884

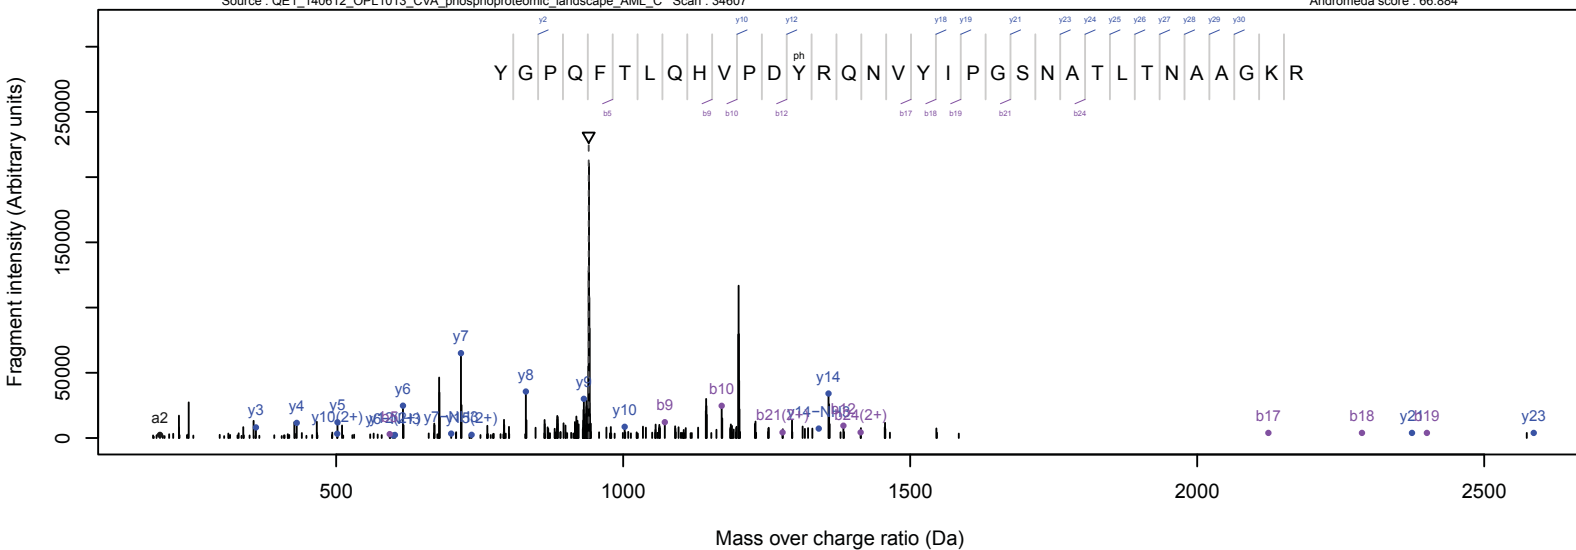

## ARY(ph)PAVDYNLVQDLK-2+

Source: QE1\_140612\_OPL1013\_CVA\_phosphoproteomic\_landscape\_AML\_C Scan: 33604

Andromeda score: 66.826

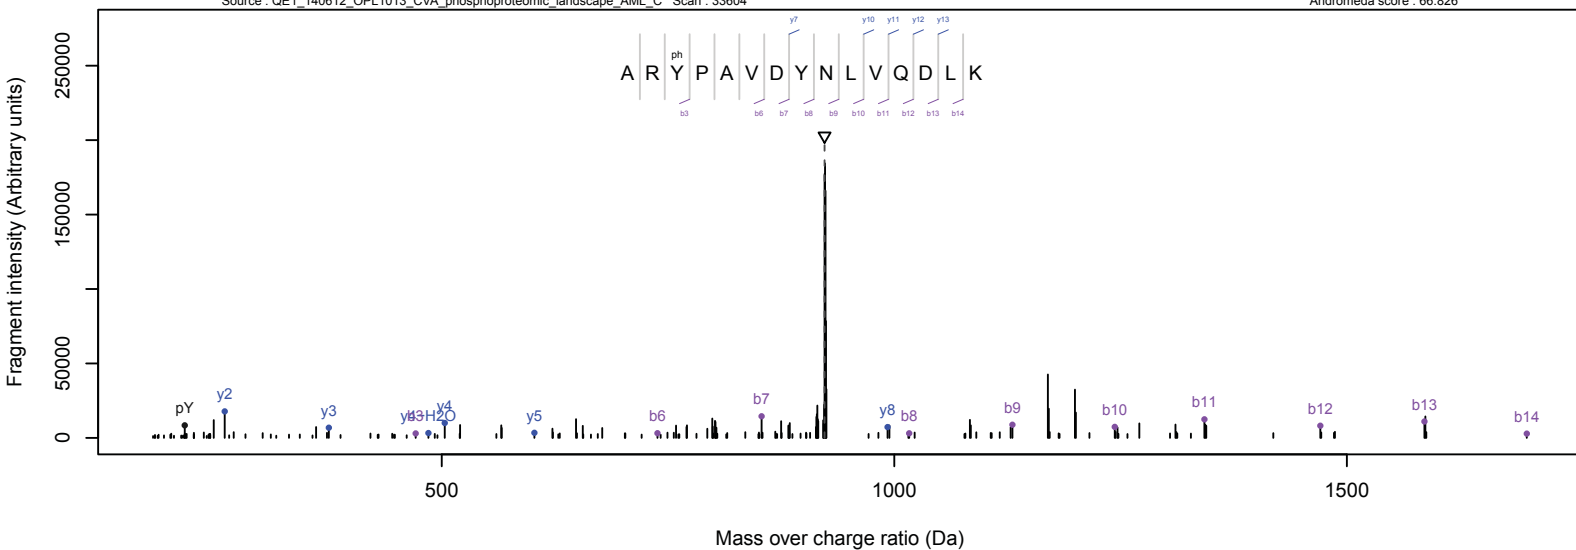

## FKVEY(ph)HAGGSTQNSIK-3+

Source: QE1\_140612\_OPL1013\_CVA\_phosphoproteomic\_landscape\_AML\_B Scan: 10923

Andromeda score: 66.826

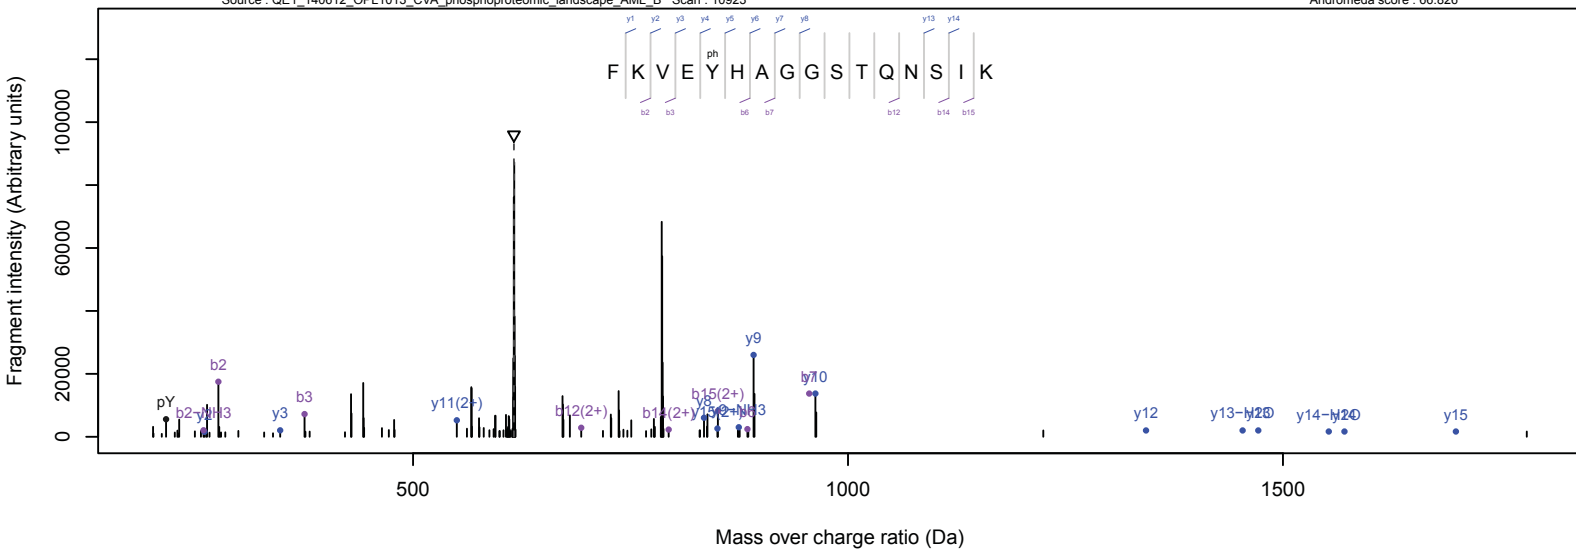

## PVTYQFHPNLDYY(ph)KAR-4+

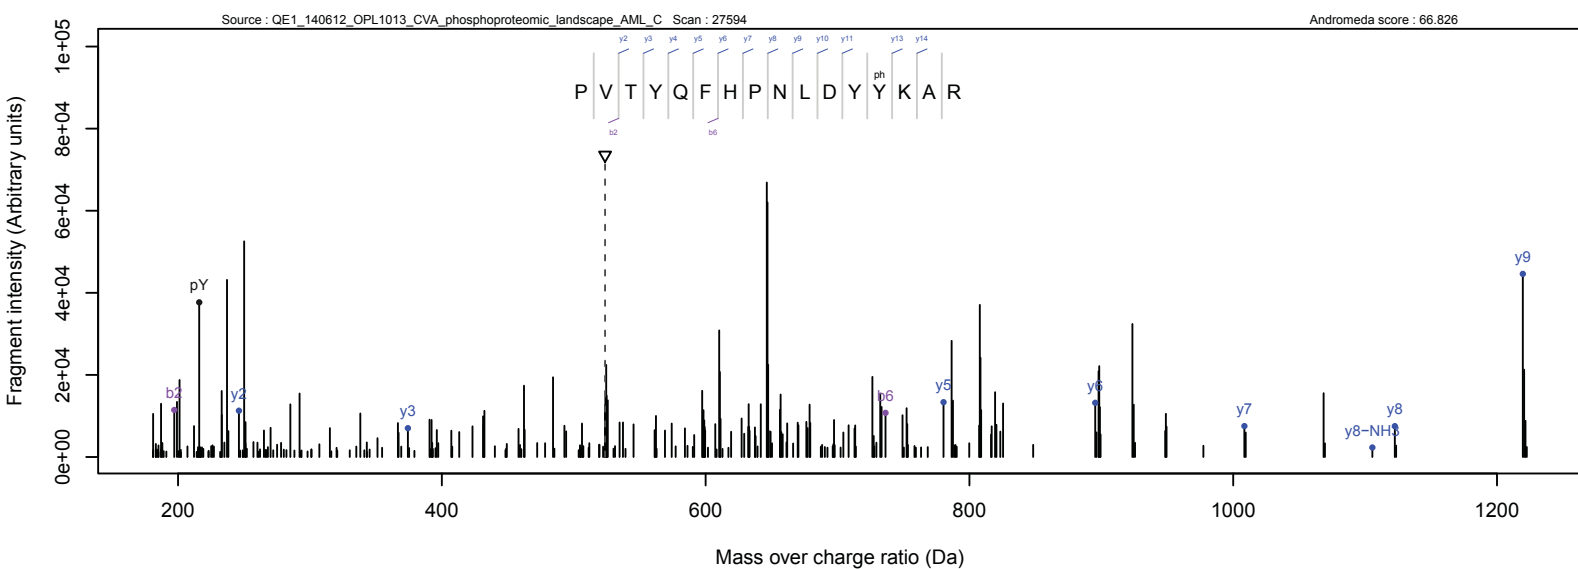

## GY(ph)GFGLIK-2+

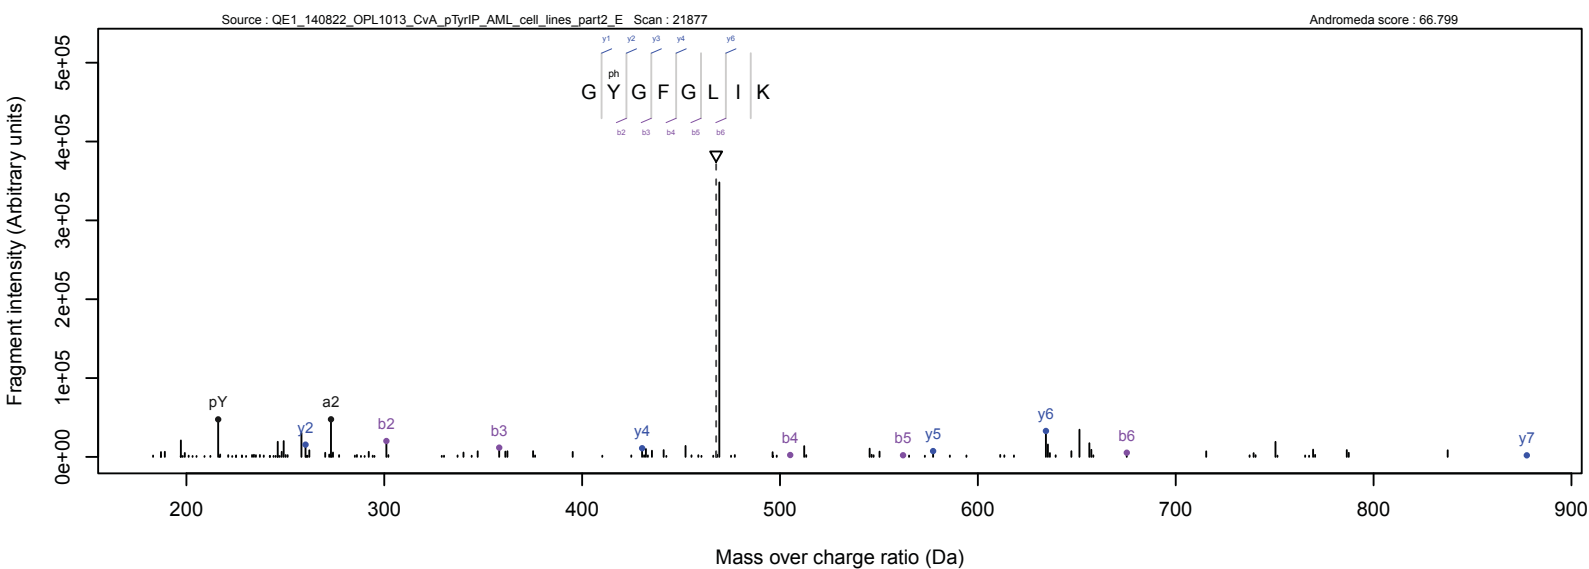

## EEADGVY(ph)AASGLR-2+

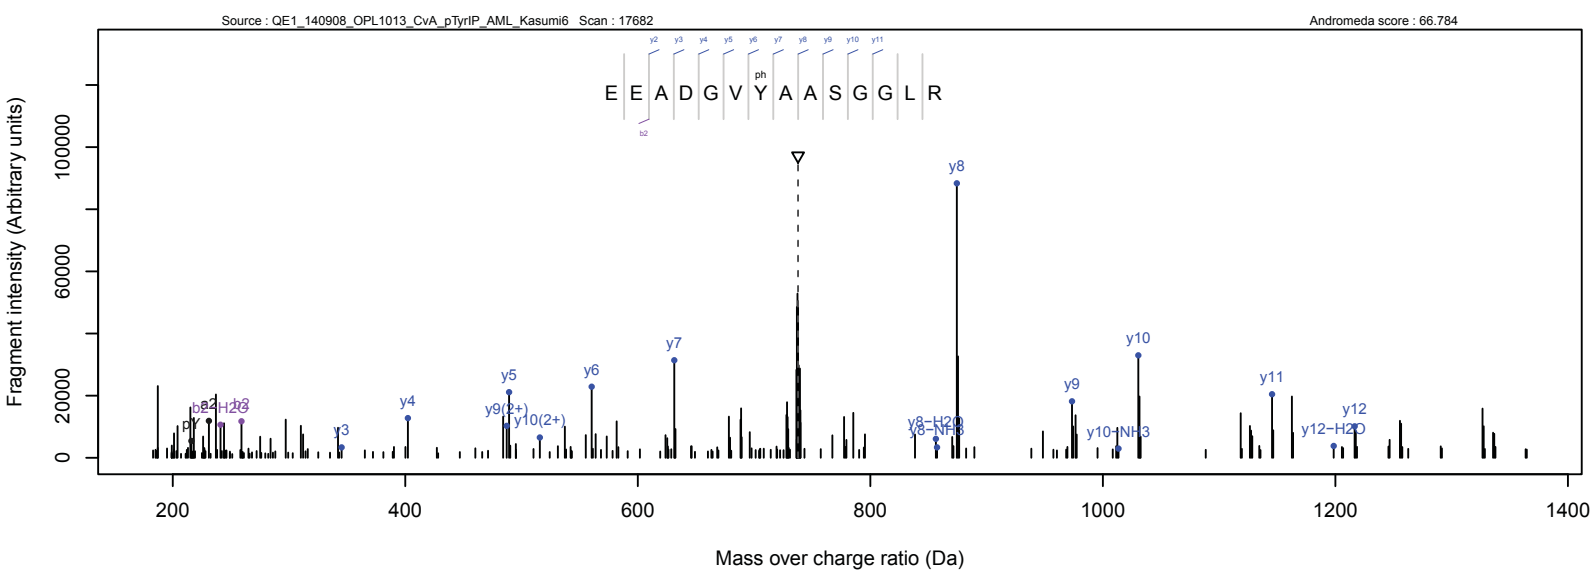

## GTY(ph)GILSK-2+

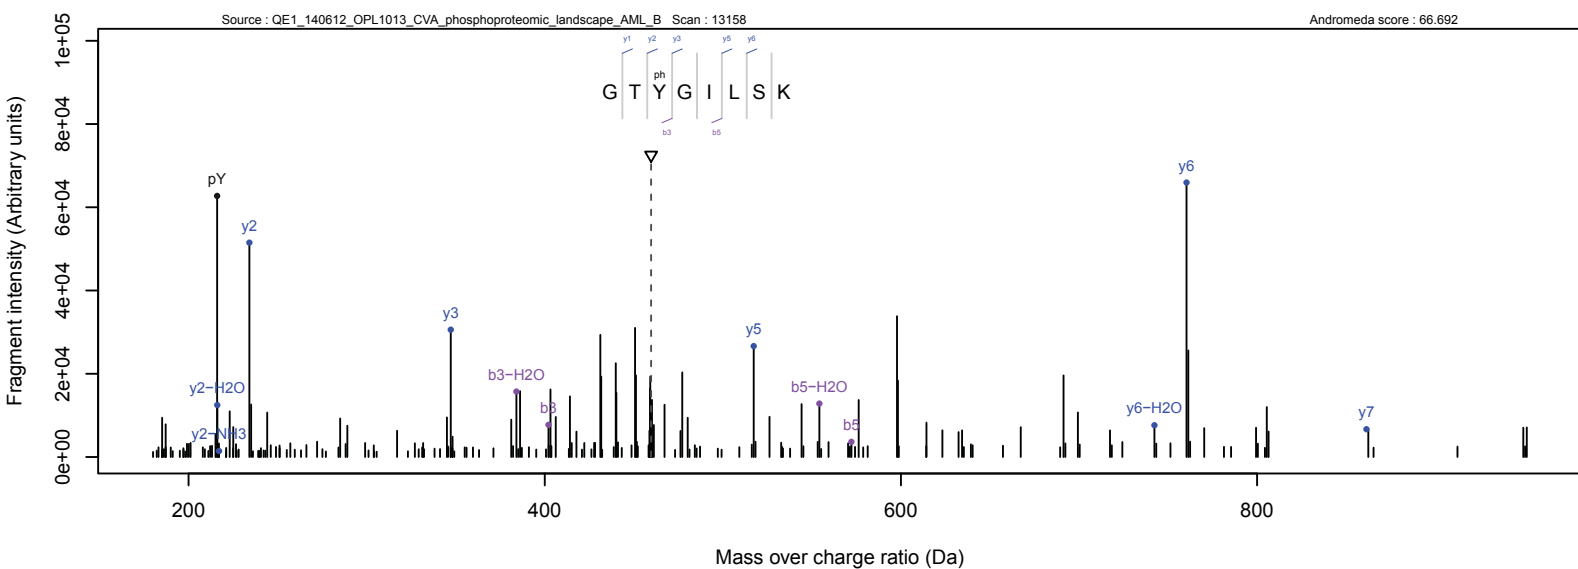

## LIEY(ph)YLTK-2+

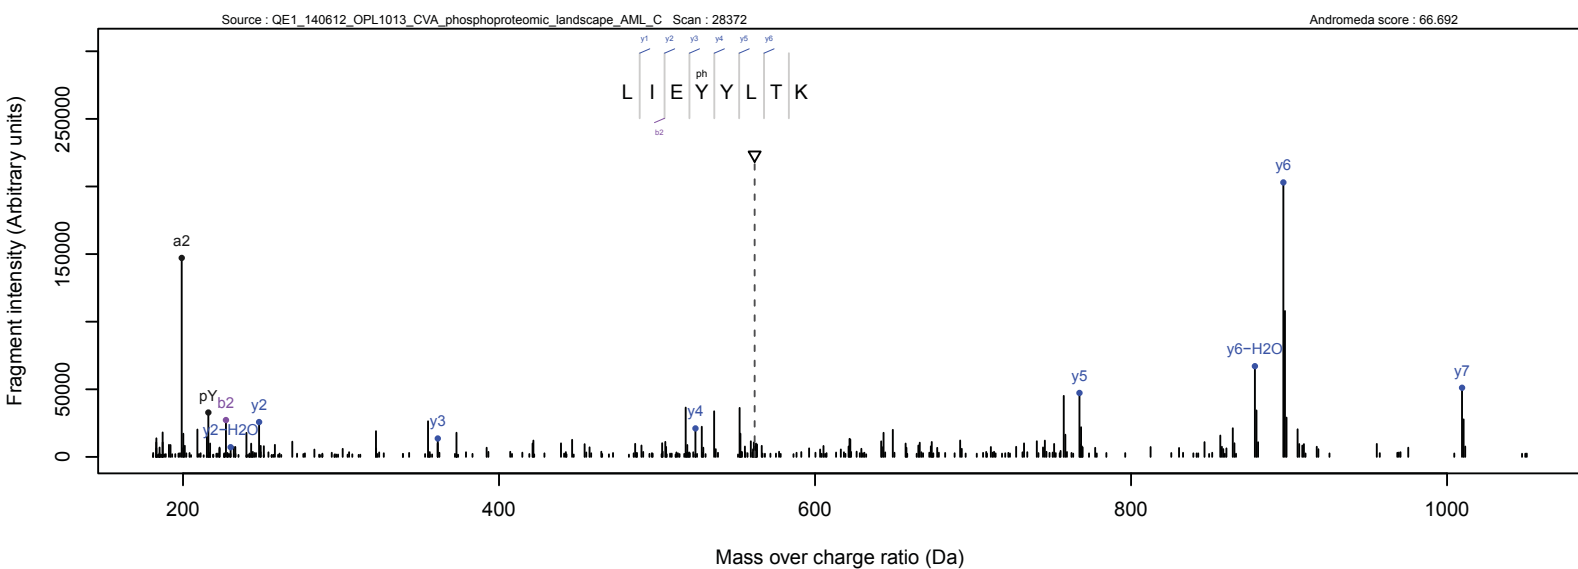

## QFY(ph)INVER-2+

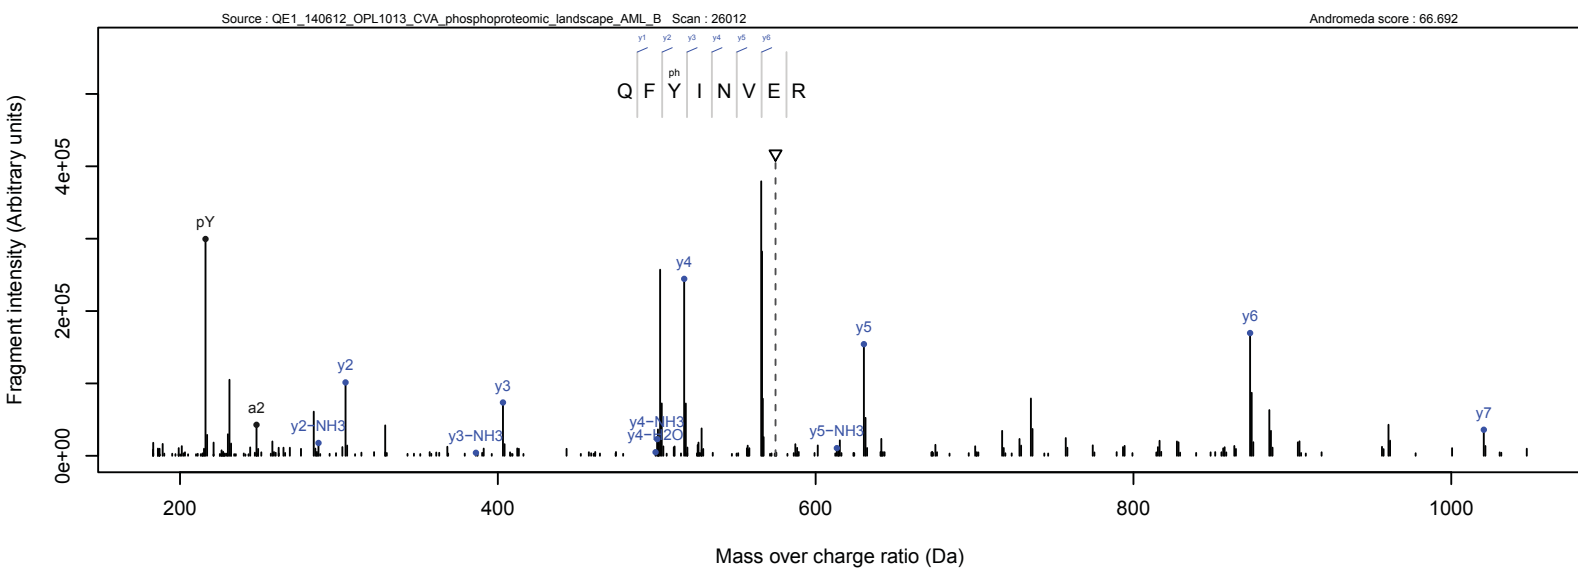



## YKETDLLILFKDDY(ph)FAK-3+

Source : QE1\_140612\_OPL1013\_CVA\_phosphoproteomic\_landscape\_AML\_A Scan : 47150

Andromeda score : 66.606

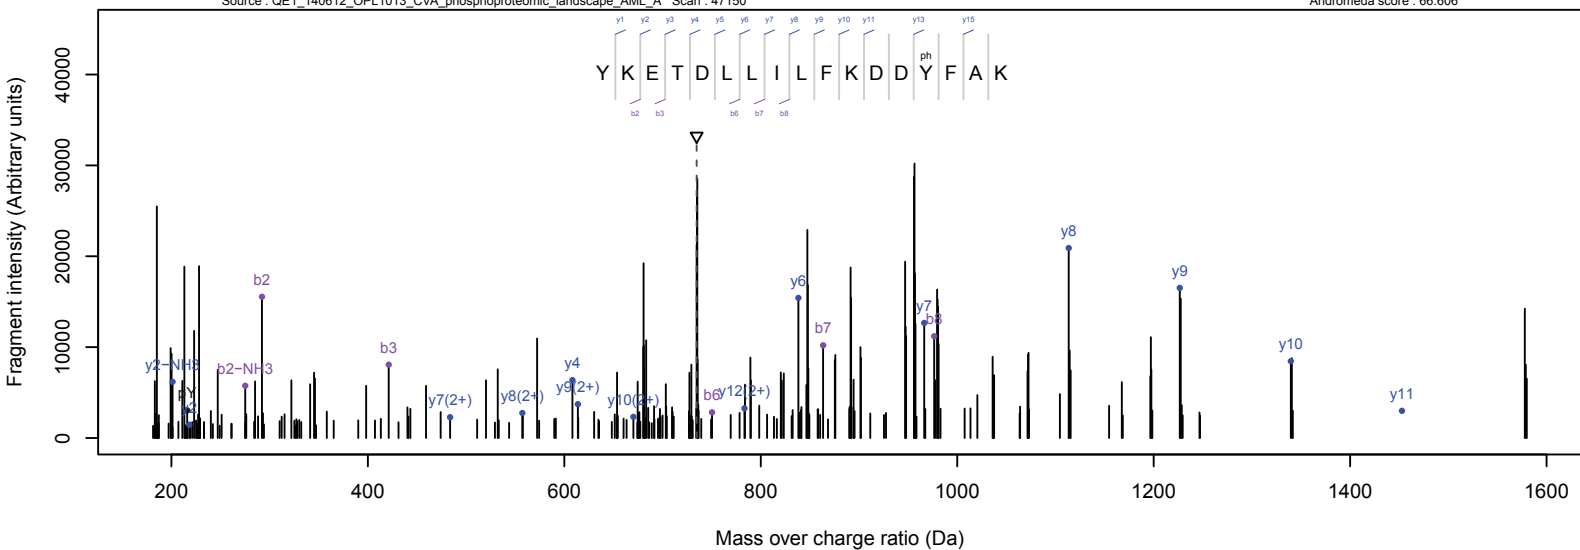

## KVIY(ph)SQPSAR-2+

Source : QE1\_140822\_OPL1013\_CvA\_pTyrIP\_AML\_cell\_lines\_part2\_F Scan : 3538

Andromeda score : 66.56

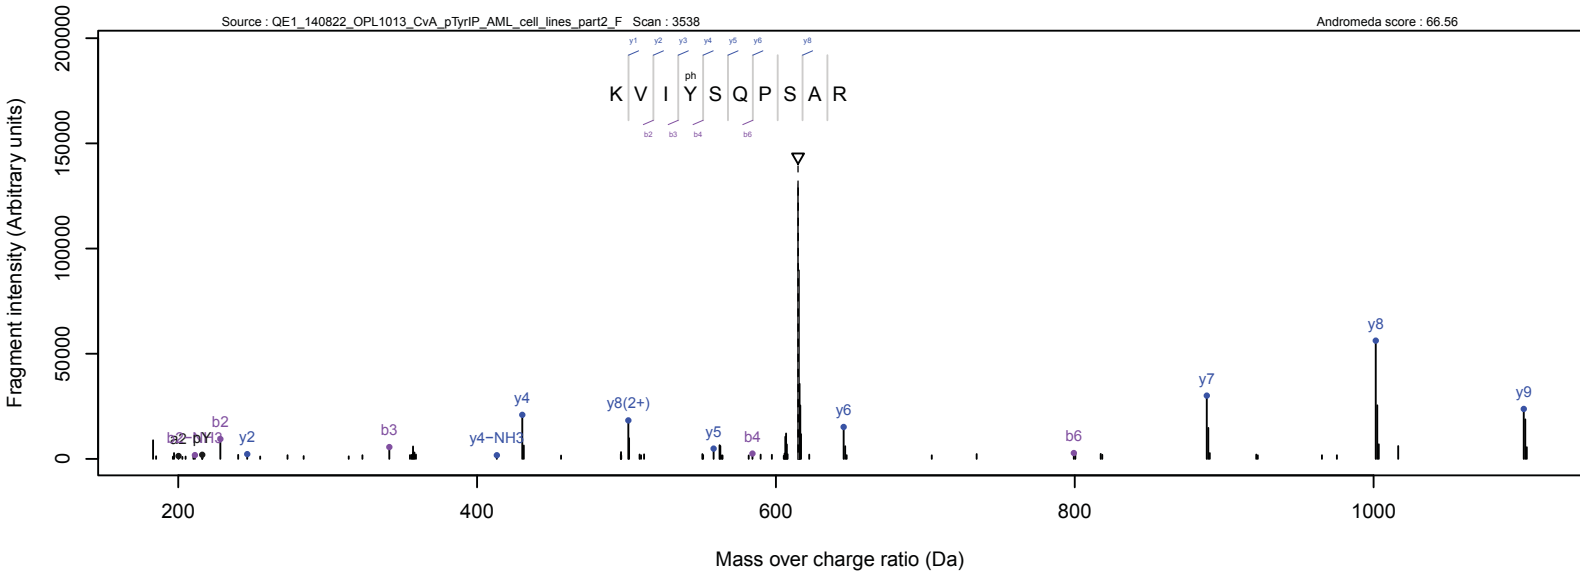

## (ac)MEAIKY(ph)DFK-2+

Source : Qe1\_141024\_OPL1013\_CvA\_AML\_pTyrIP\_MOLM13 Scan : 35485

Andromeda score : 66.56

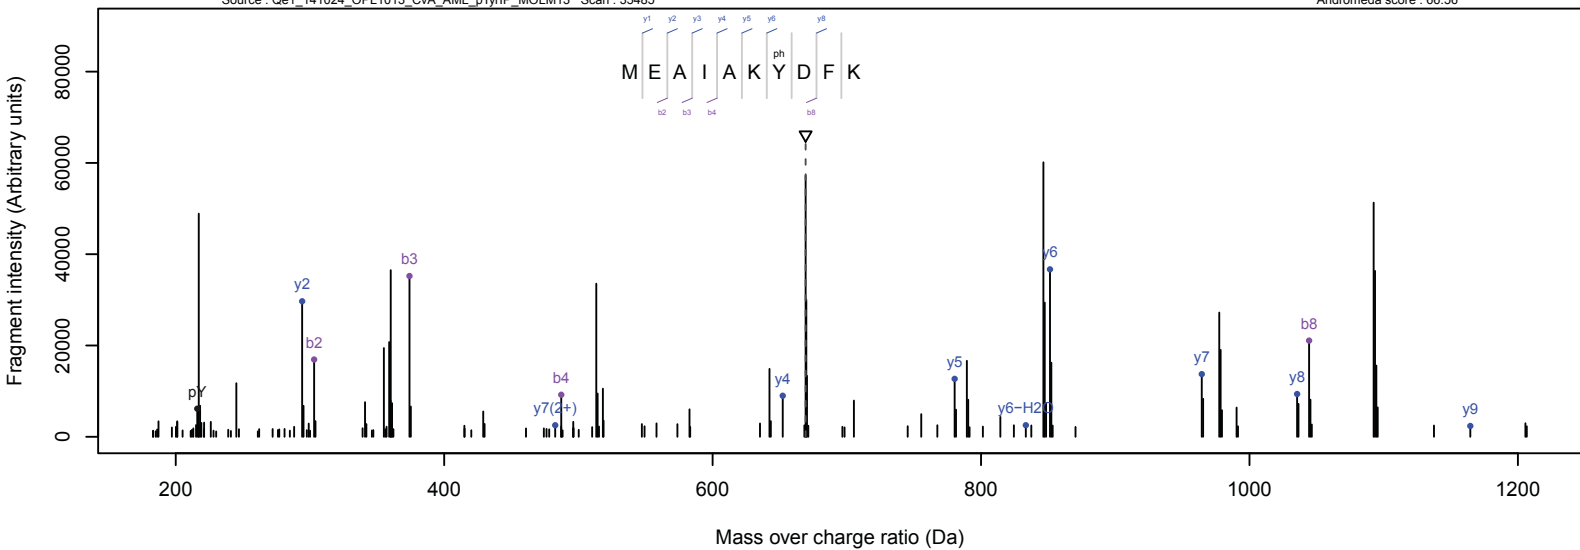

## EEIIPVAAEYDKTGEY(ph)PVPLIR-3+

Source : QE1\_140612\_OPL1013\_CVA\_phosphoproteomic\_landscape\_AML\_C Scan : 44197

Andromeda score : 66.536

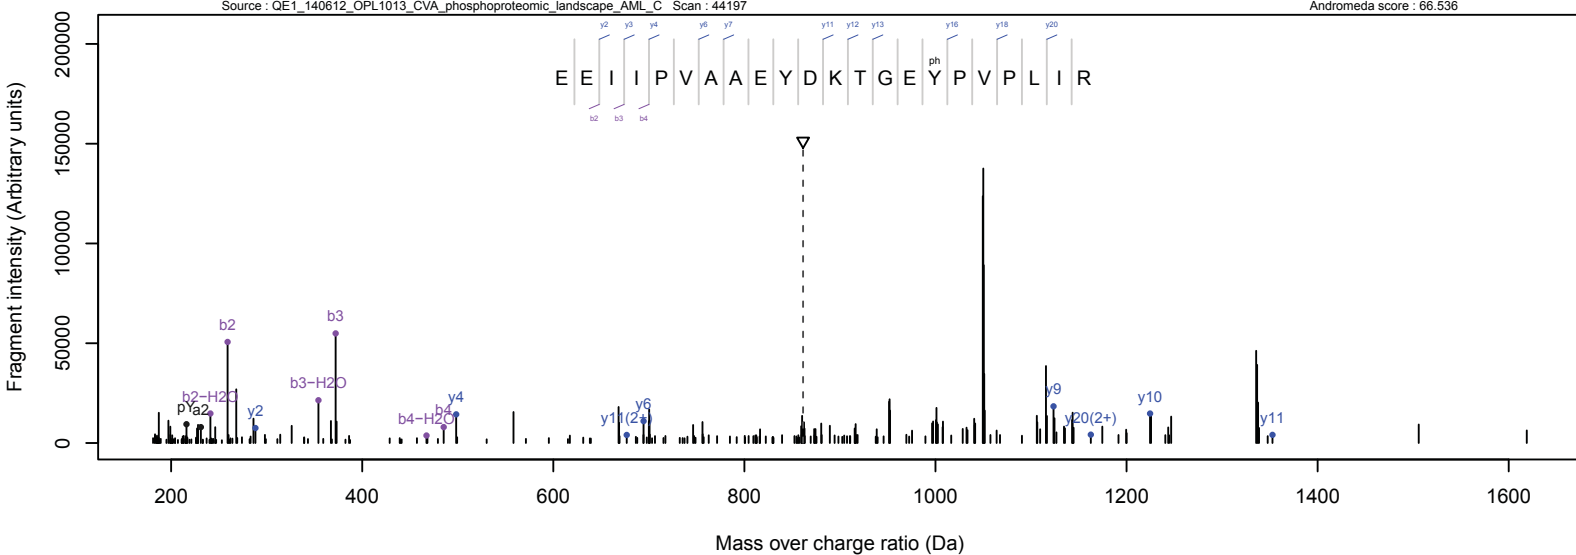

## SNILWDKEHIY(ph)DEQPPNVEEWVK-3+

Source : QE1\_140612\_OPL1013\_CVA\_phosphoproteomic\_landscape\_AML\_C Scan : 39876

Andromeda score : 66.52

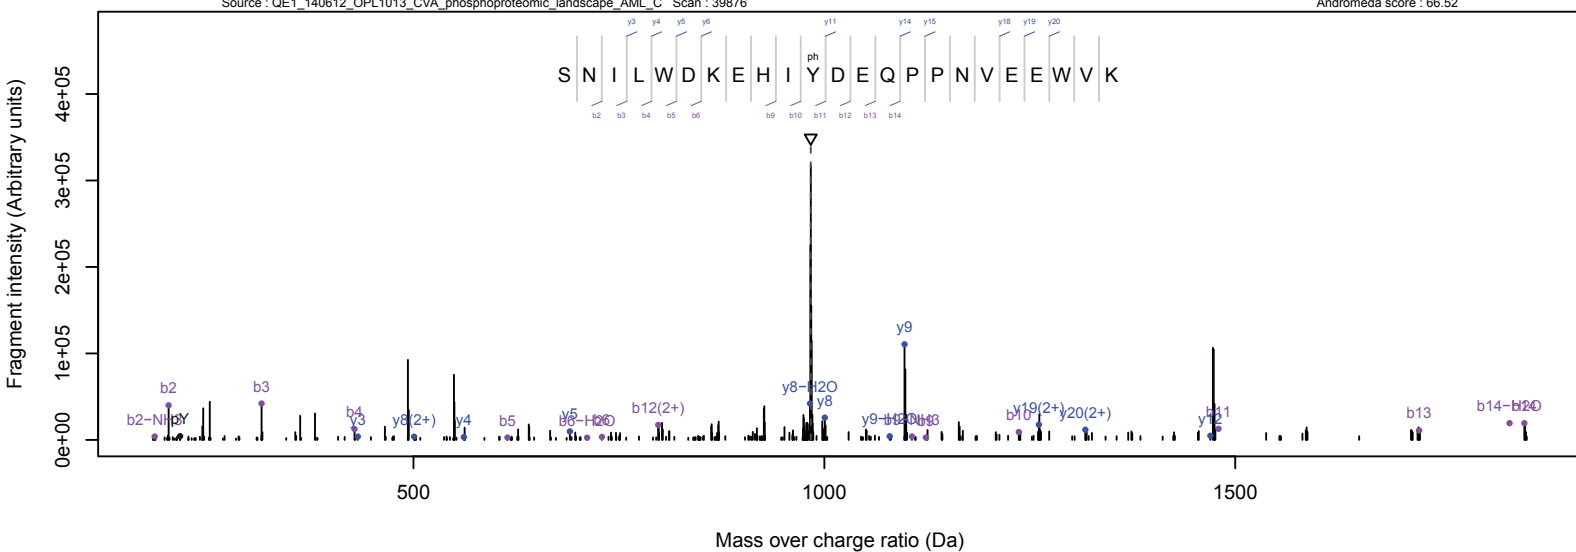

## ATVNTFGY(ph)IAK-2+

Source : QE1\_140612\_OPL1013\_CVA\_phosphoproteomic\_landscape\_AML\_D Scan : 23960

Andromeda score : 66.486

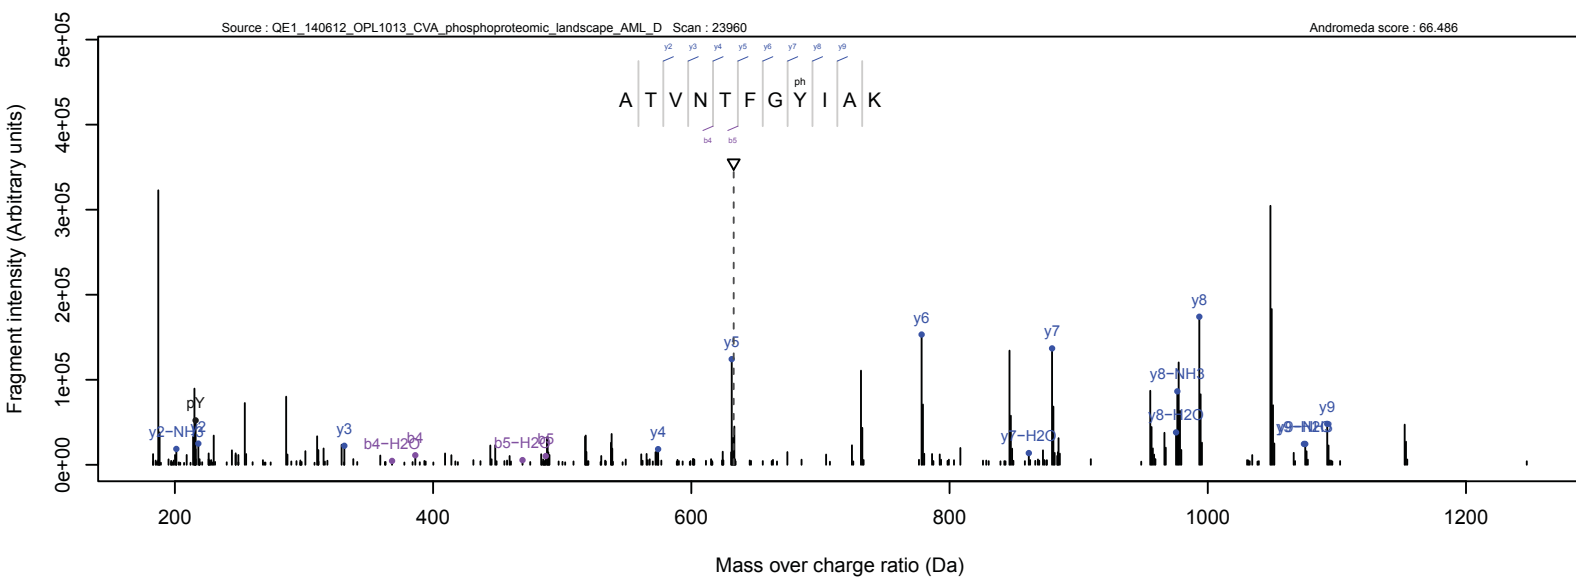

ISGLIY(ph)EETR-2+

Source: QE1\_140822\_OPL1013\_CVA\_pTyrIP\_AML\_cell\_lines\_part2\_E Scan: 15910

Andromeda score: 66.486

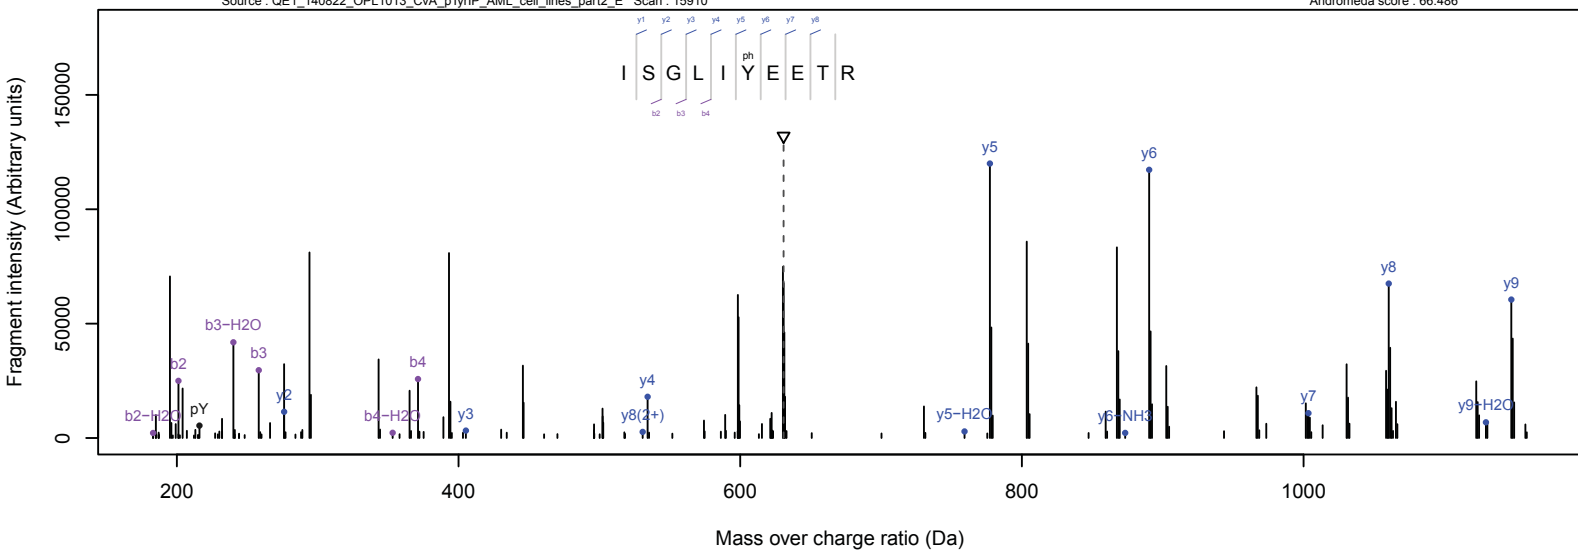

EEEKATLGTNGHHGLVLPKENDY(ph)ESIDLQQGR-5+

Source: QE1\_140612\_OPL1013\_CVA\_phosphoproteomic\_landscape\_AML\_B Scan: 21949

Andromeda score: 66.474

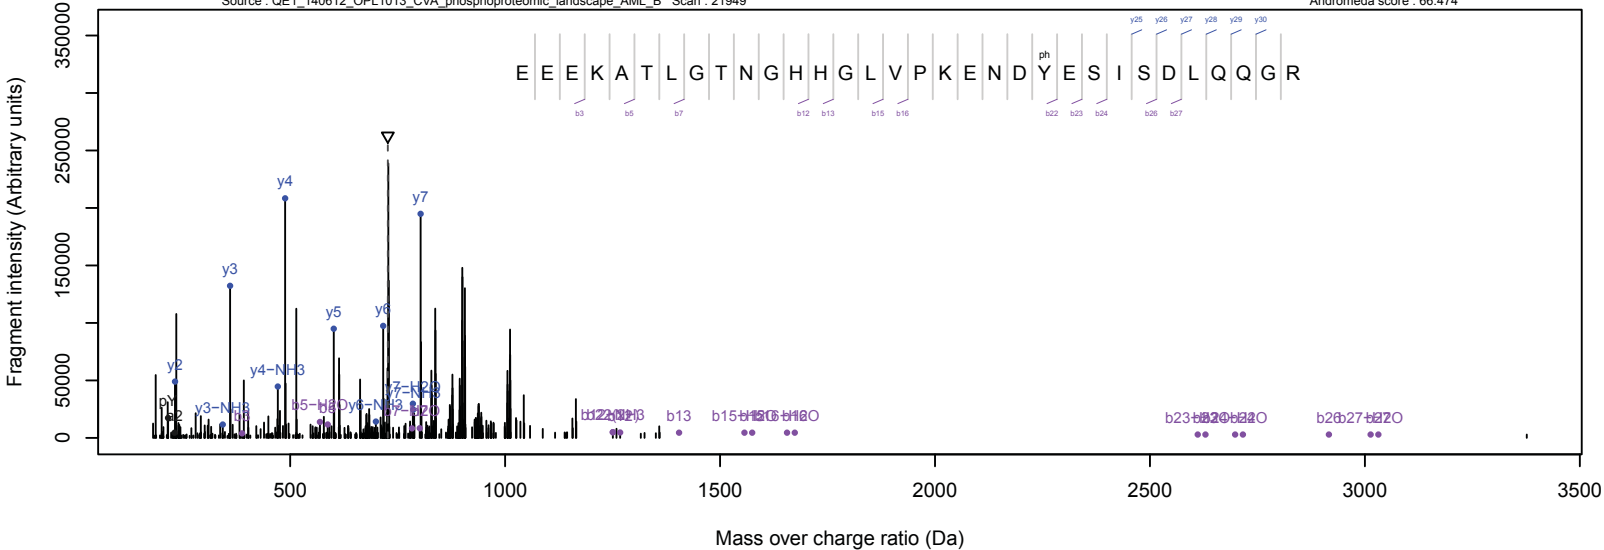

AADVENVPPVISTPHHYLISYIYR-3+

Source: QE1\_140612\_OPL1013\_CVA\_phosphoproteomic\_landscape\_AML\_B Scan: 38352

Andromeda score: 66.467

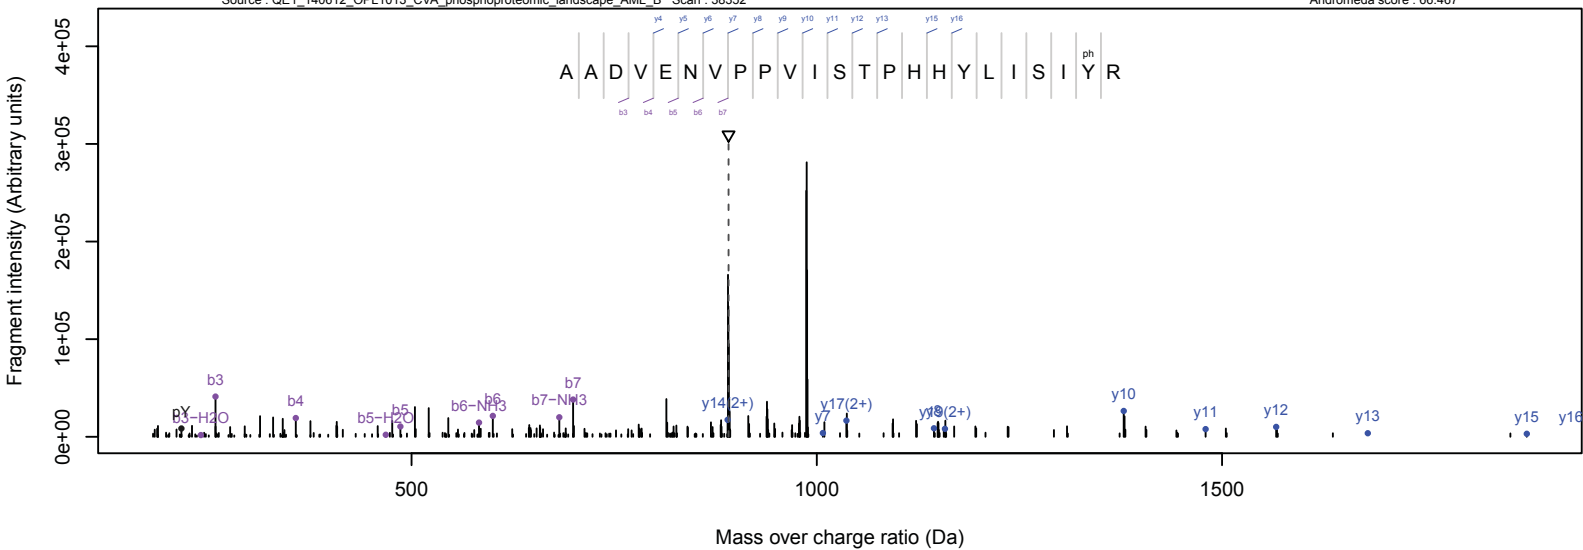

LVSSPCCIVTSTY<sup>ph</sup>GWTANM<sup>ox</sup>ER-2+

Source : QE1\_140612\_OPL1013\_CVA\_phosphoproteomic\_landscape\_AML\_C Scan : 35239

Andromeda score : 66.467

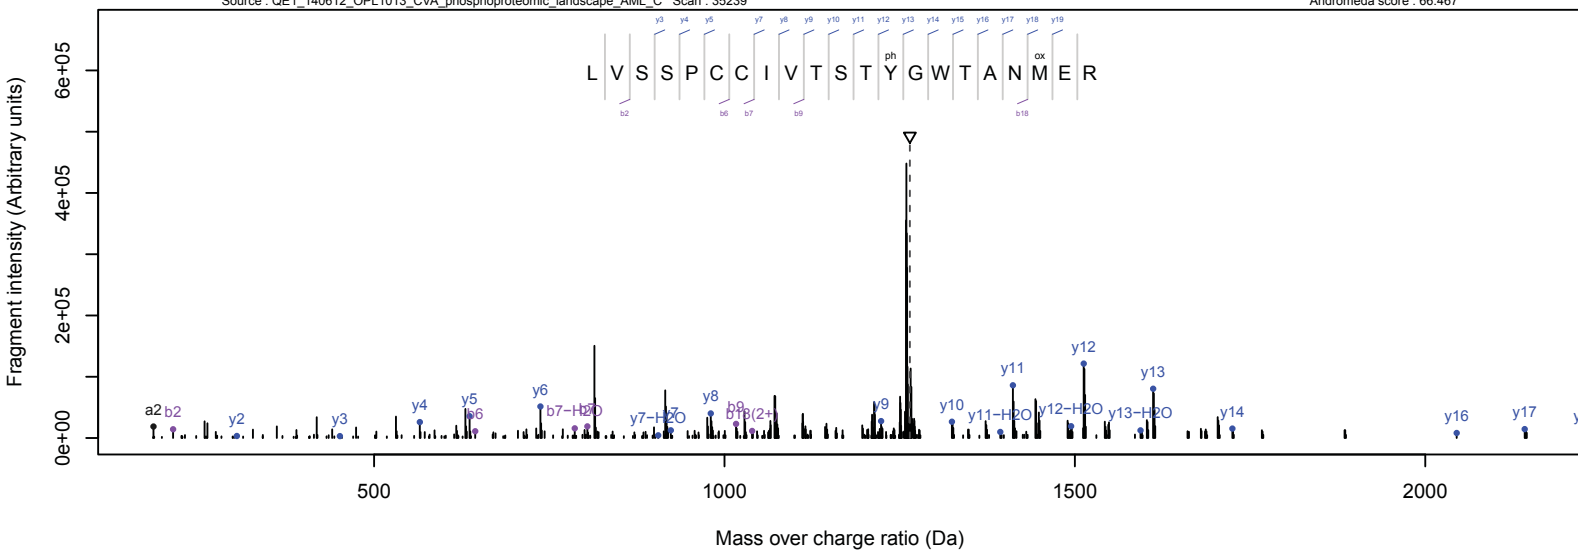GPPQSPVFE<sup>ph</sup>GVYNN<sup>ph</sup>SR

Source : QE1\_140612\_OPL1013\_CVA\_phosphoproteomic\_landscape\_AML\_C Scan : 24450

Andromeda score : 66.436

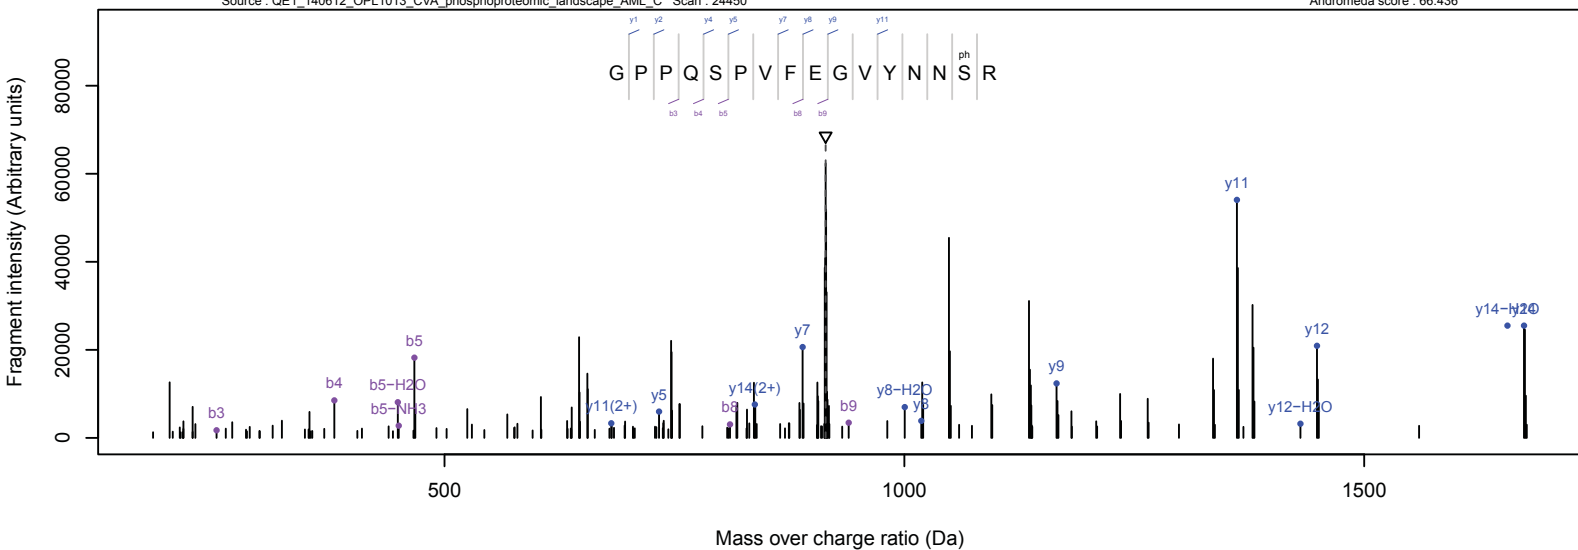LVSY<sup>ph</sup>TNLTQGA<sup>ph</sup>K

Source : QE1\_140612\_OPL1013\_CVA\_phosphoproteomic\_landscape\_AML\_C Scan : 16797

Andromeda score : 66.393

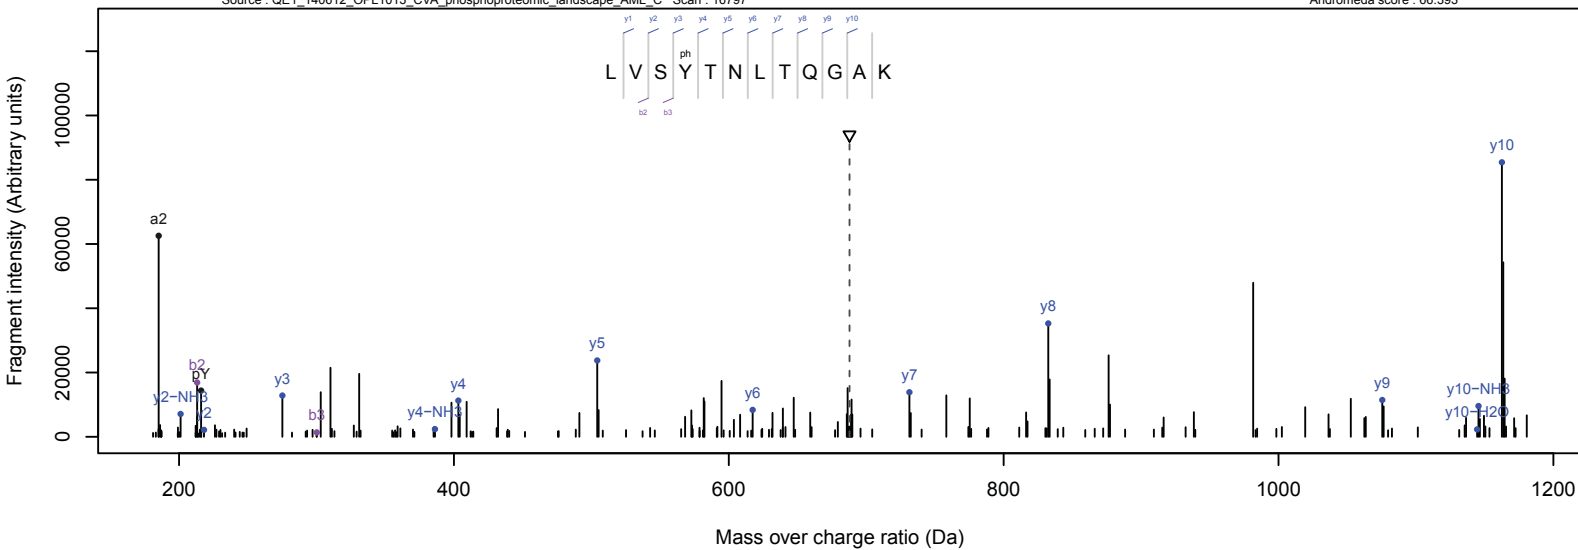



GGHHRPDSSTLHTDDGY(ph)MPMPGVPVPSGR-4+

Source : QE1\_140908\_OPL1013\_CvA\_pTyrIP\_AML\_ML2 Scan : 22886

Andromeda score : 66.378

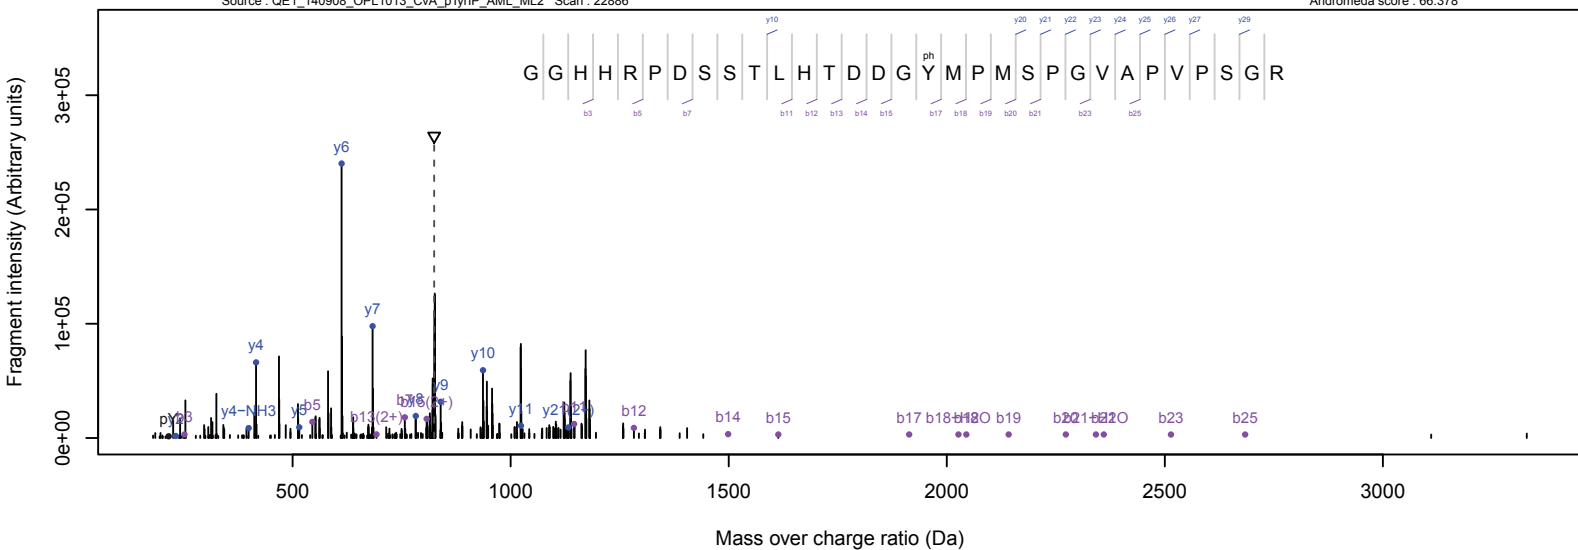

GY(ph)VPATIK-2+

Source : QE1\_140822\_OPL1013\_CvA\_pTyrIP\_AML\_cell\_lines\_part2\_E Scan : 8754

Andromeda score : 66.351

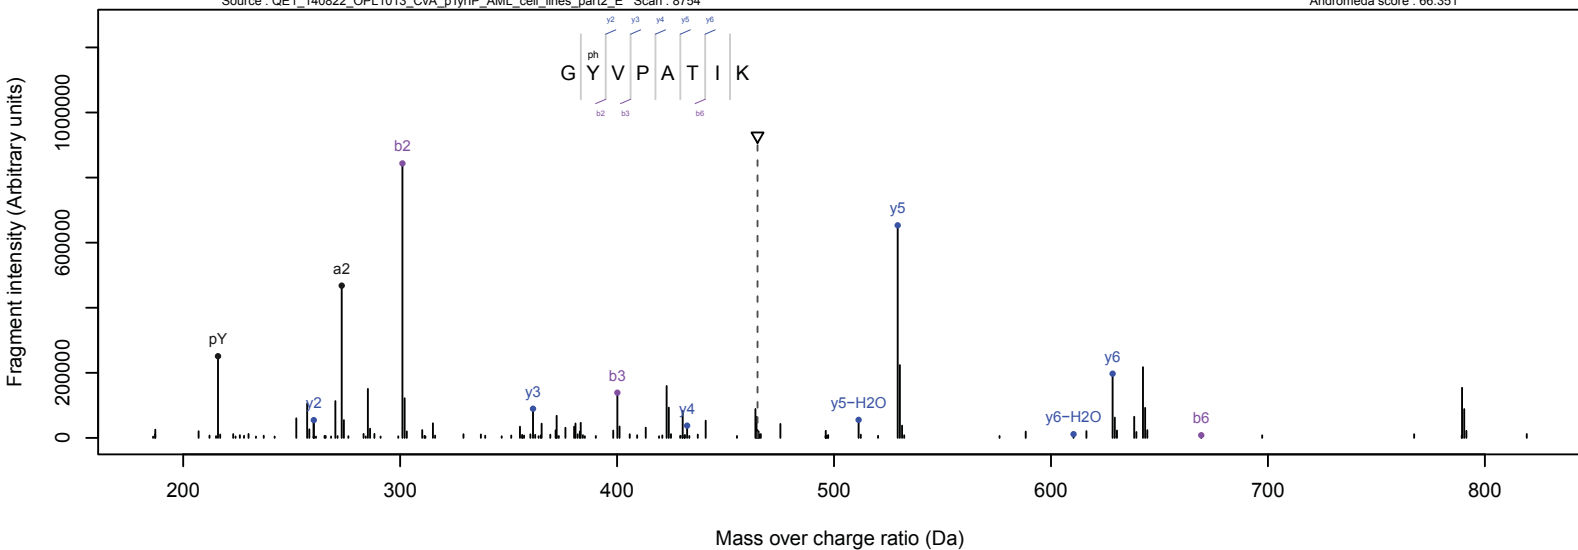

NITY(ph)EELR-2+

Source : QE1\_140822\_OPL1013\_CvA\_pTyrIP\_AML\_cell\_lines\_part2\_E Scan : 10301

Andromeda score : 66.299

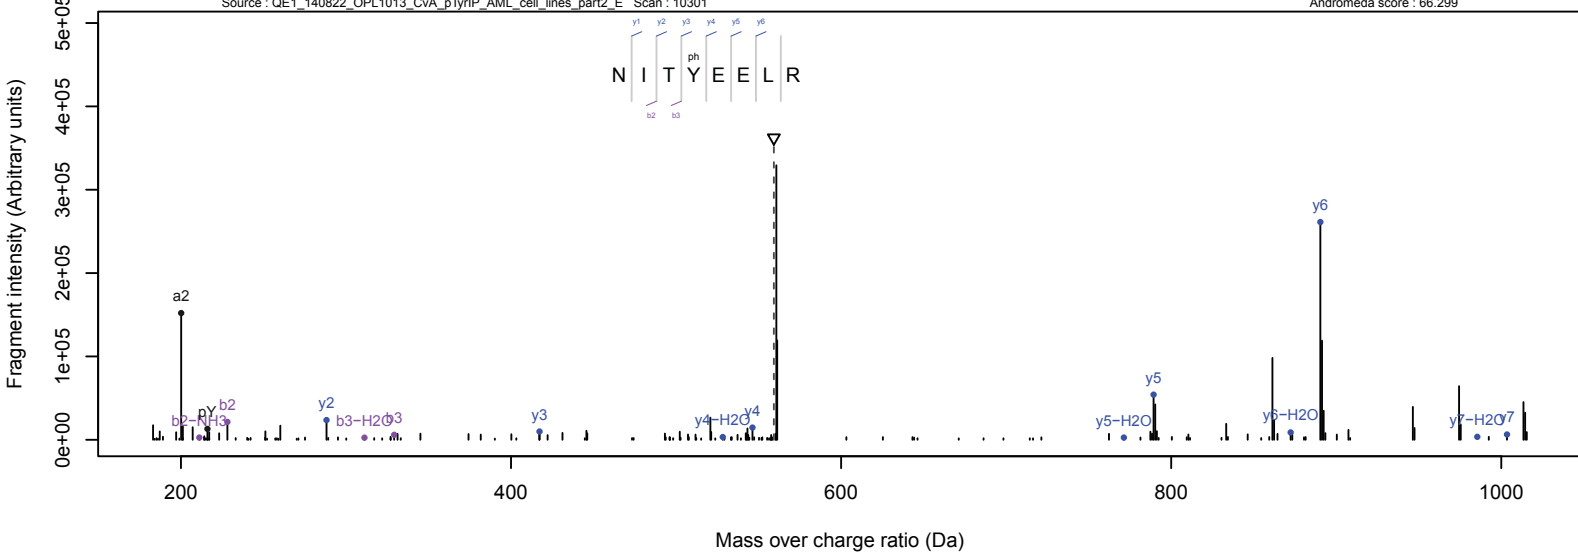

YREPPPTPPG(ph)IGIPITDFEGHSHPAR-4+

Source : QE1\_140908\_OPL1013\_CvA\_pTyrIP\_AML\_HEL Scan : 35901

Andromeda score : 66.294

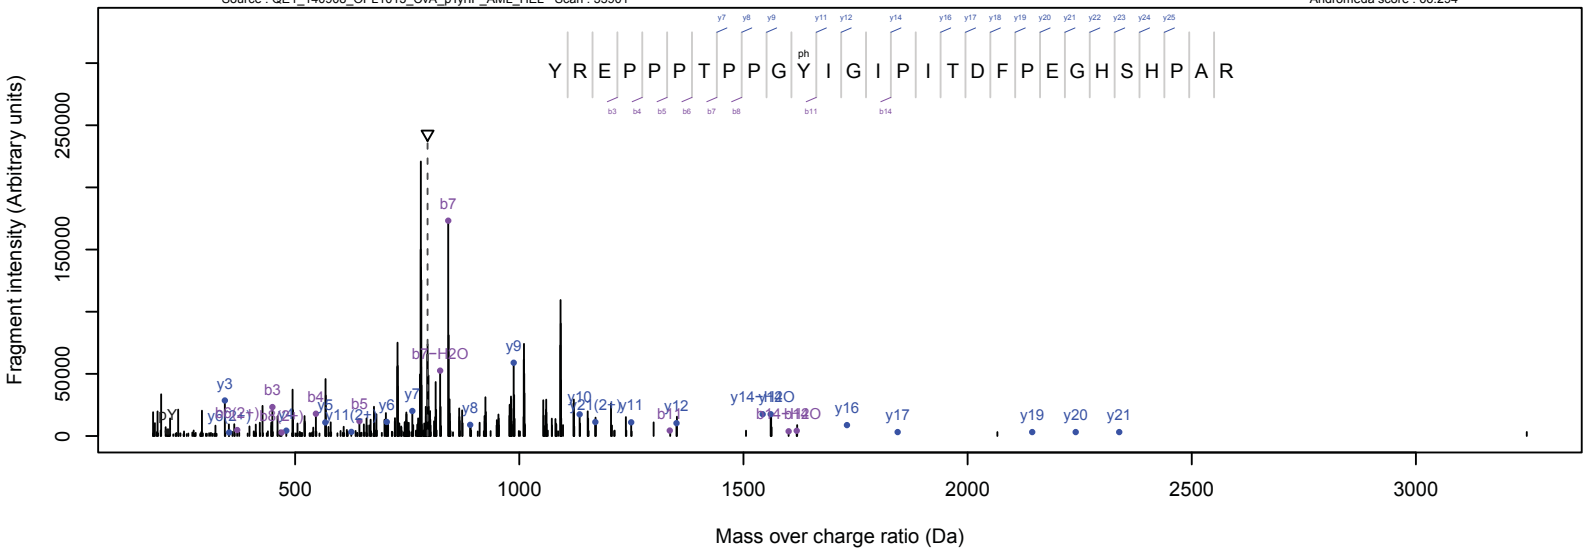

AACLPLPGY(ph)R-2+

Source : QE1\_140612\_OPL1013\_CvA\_phosphoproteomic\_landscape\_AML\_C Scan : 27614

Andromeda score : 66.27

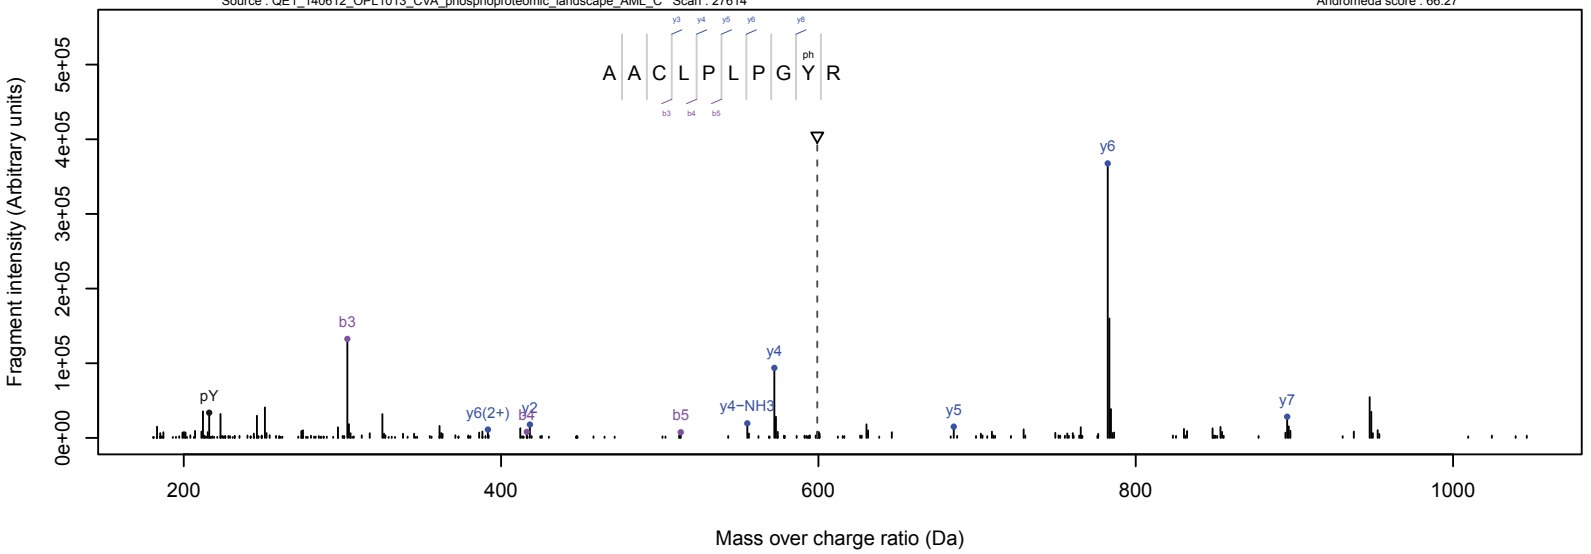

ELDNLQY(ph)RK-2+

Source : QE1\_140612\_OPL1013\_CvA\_phosphoproteomic\_landscape\_AML\_C Scan : 8528

Andromeda score : 66.27

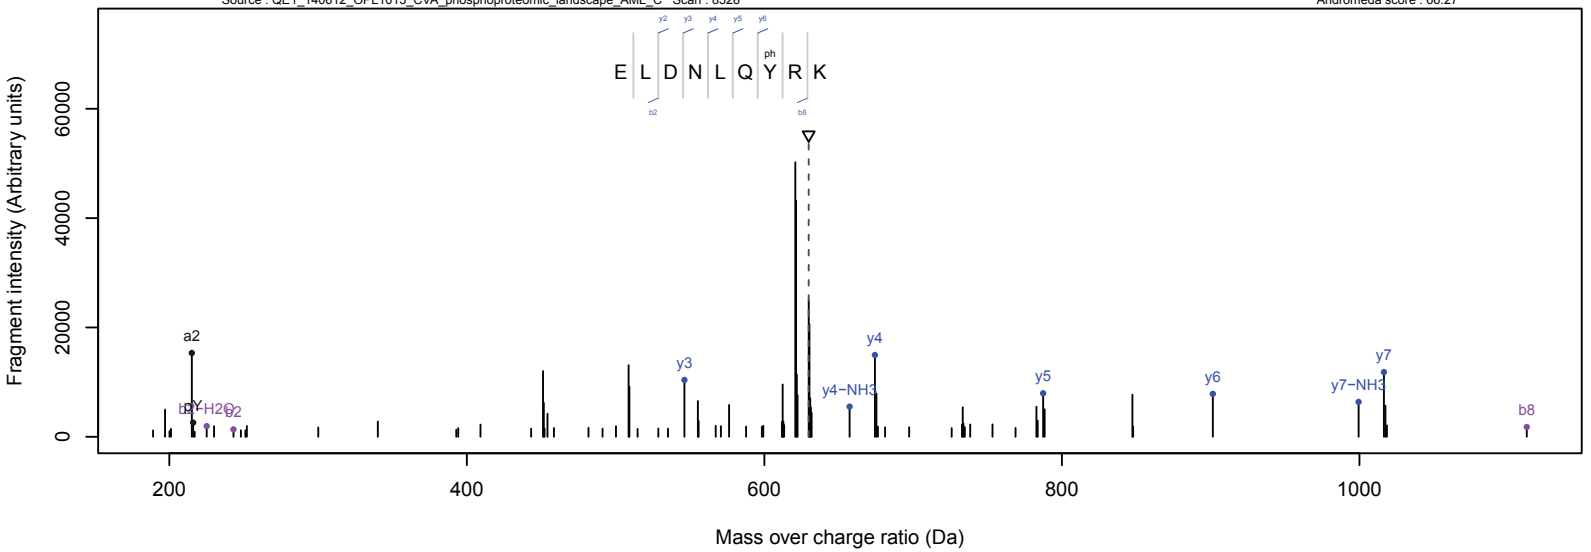

Y(ph)EAQKLER-3+

Source : QE1\_140822\_OPL1013\_CvA\_pTyrIP\_AML\_cell\_lines\_part2\_B Scan : 2909

Andromeda score : 66.27

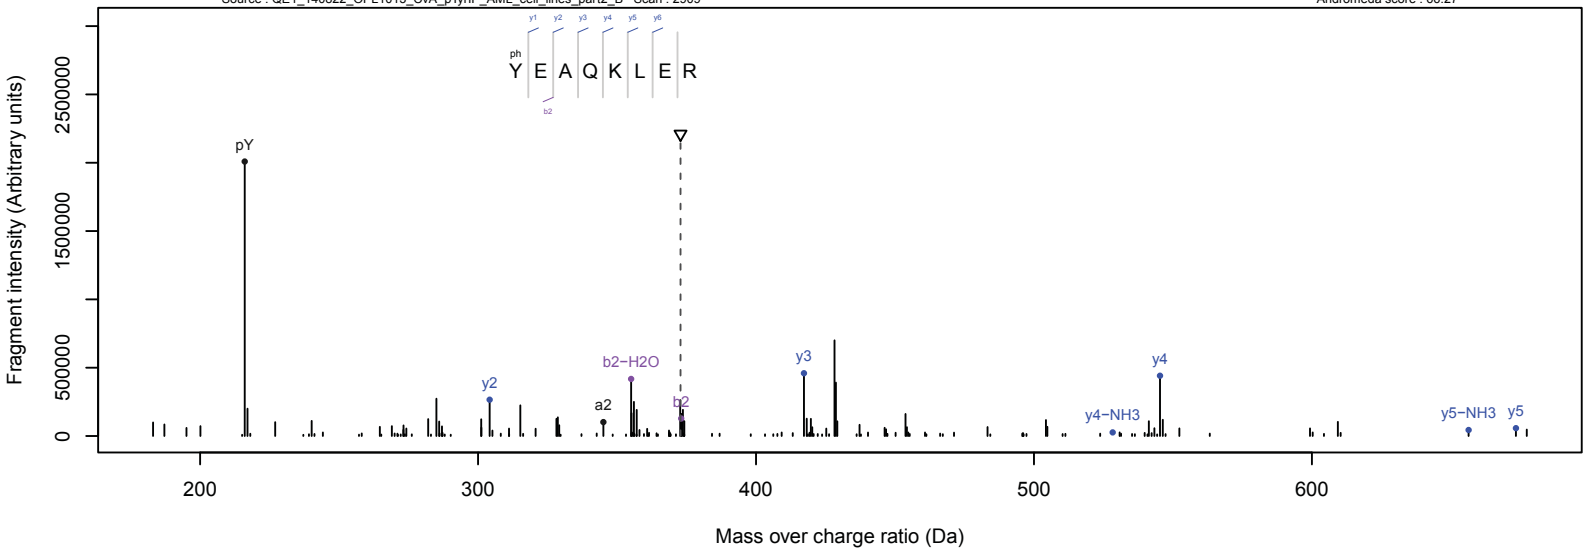

AVENY(ph)LIQMAR-2+

Source : QE1\_140612\_OPL1013\_CvA\_phosphoproteomic\_landscape\_AML\_C Scan : 36201

Andromeda score : 66.267

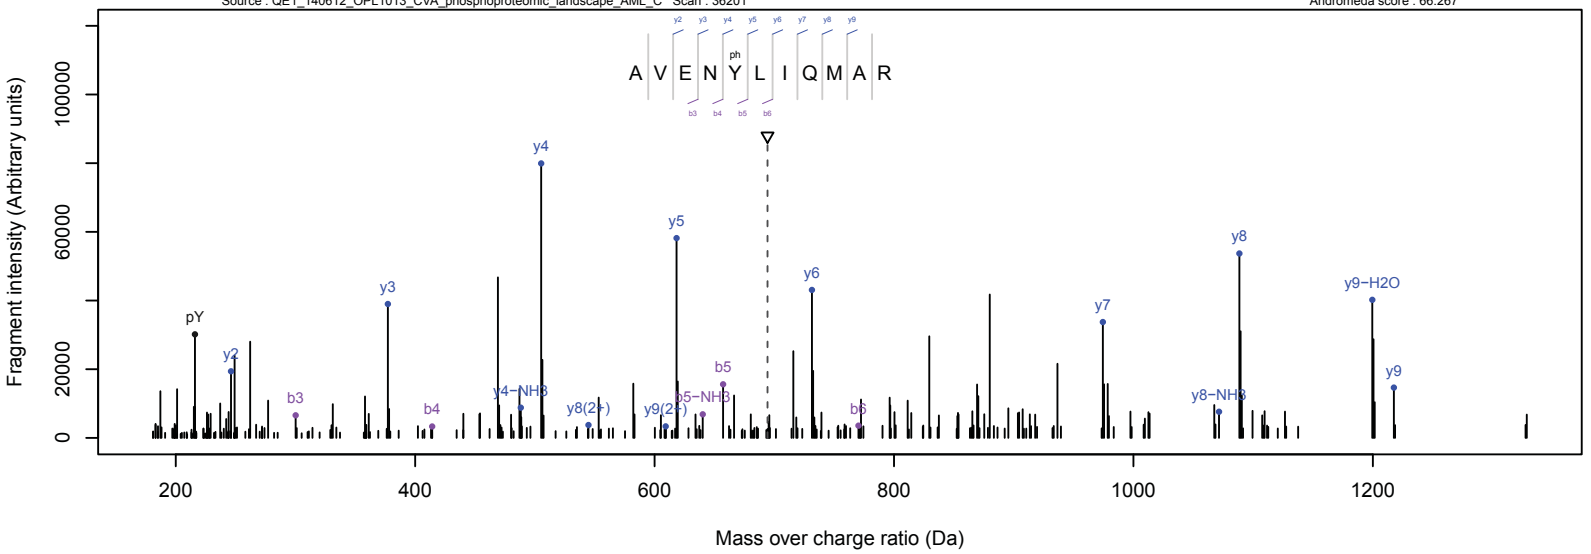

LFGSPAIY(ph)KLK-3+

Source : QE1\_140612\_OPL1013\_CvA\_phosphoproteomic\_landscape\_AML\_B Scan : 30658

Andromeda score : 66.267

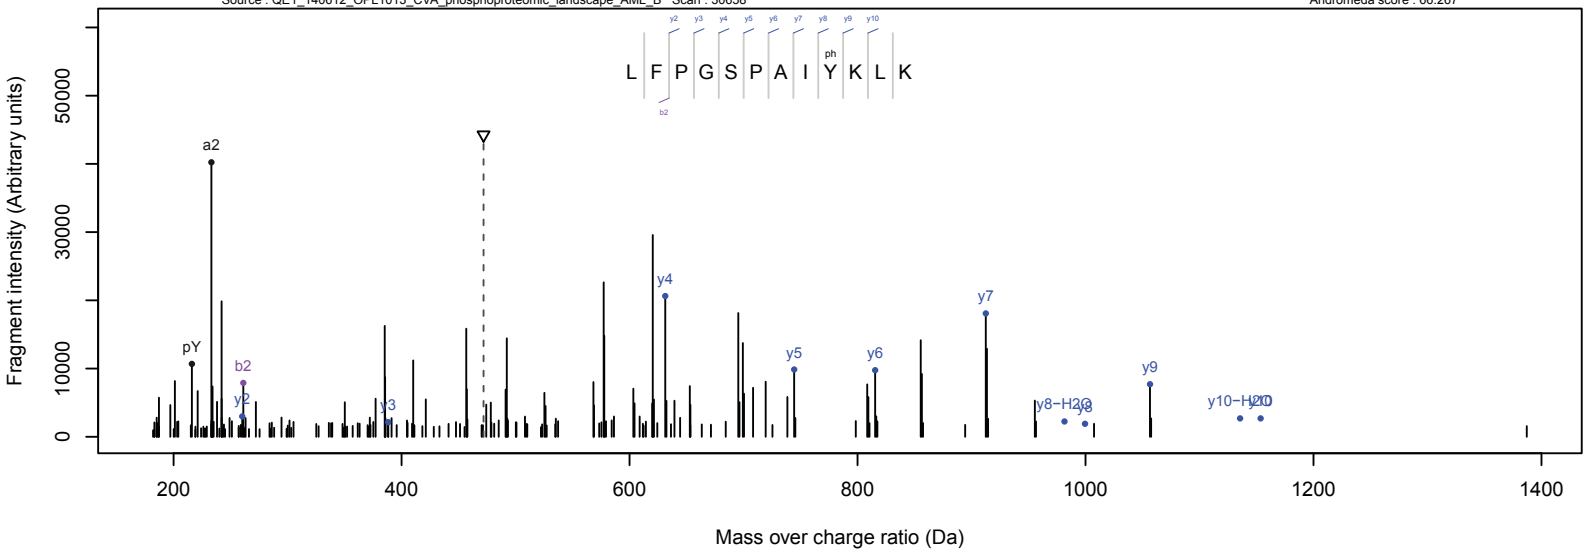

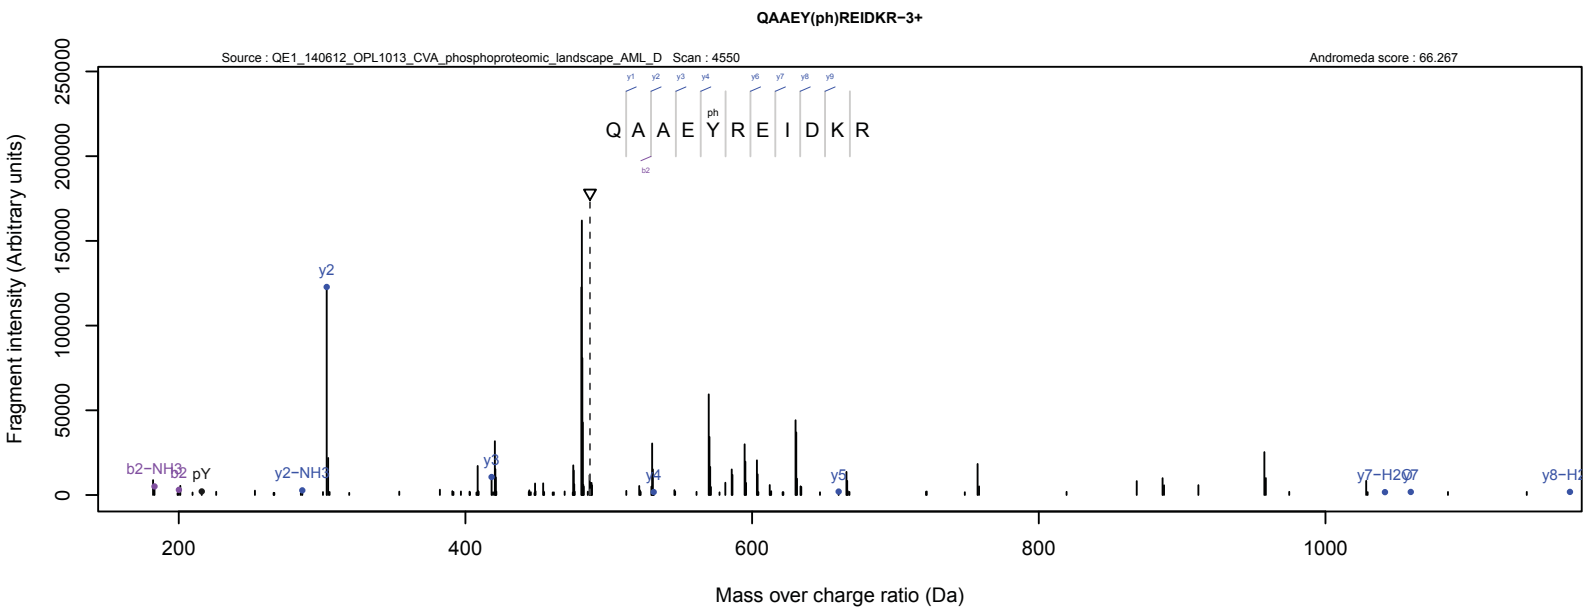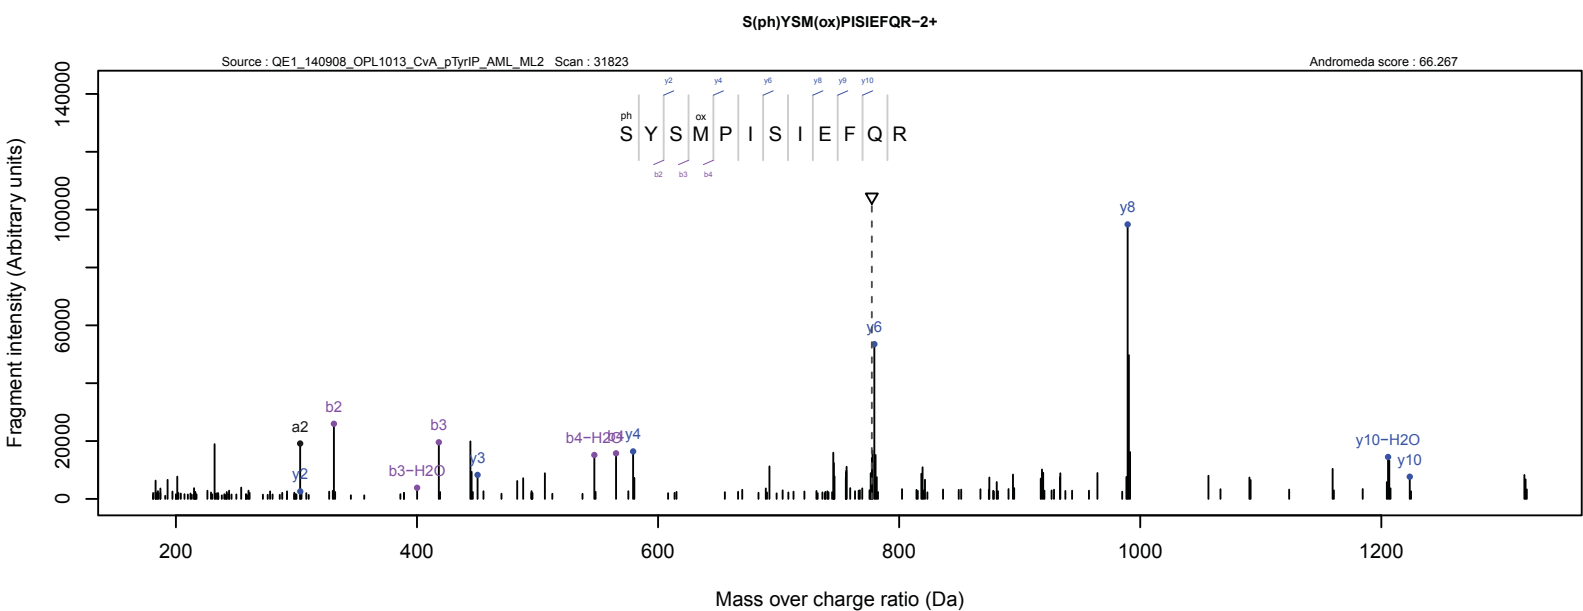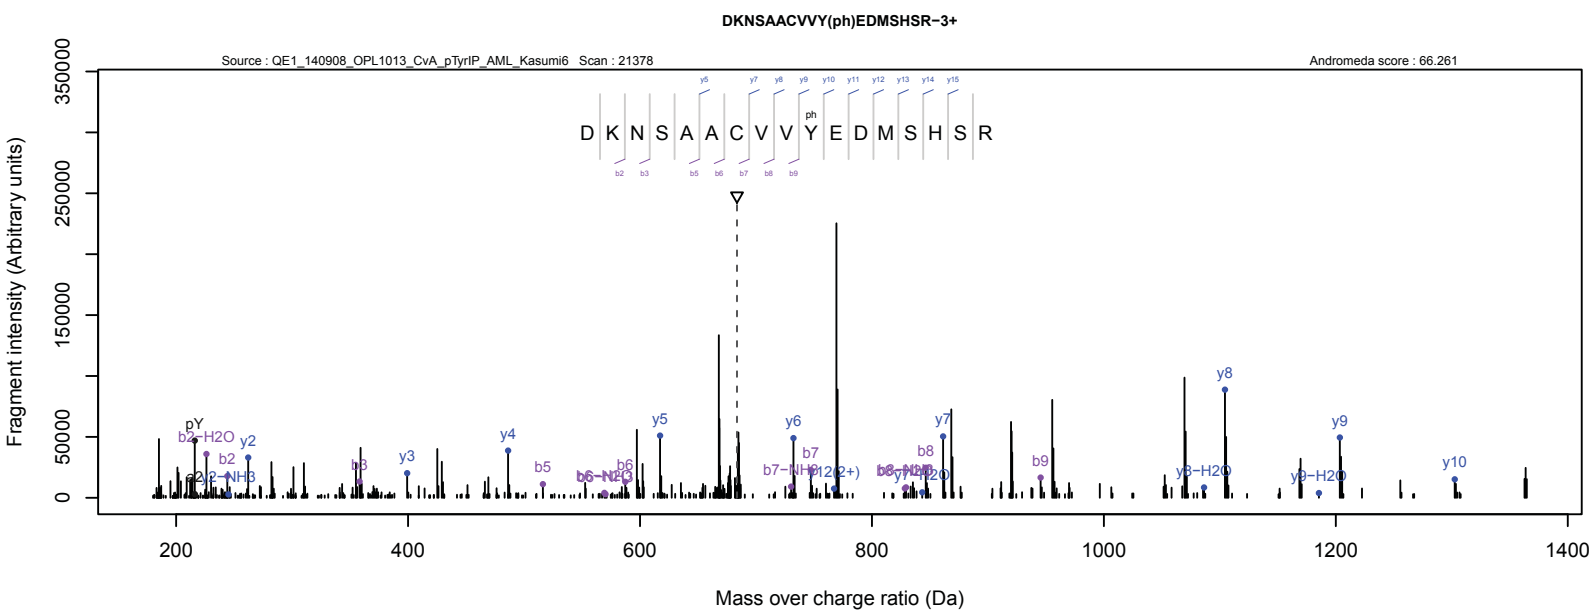

EAETFKEQGNAY(ph)AKK-3+

Source : QE1\_140908\_OPL1013\_CvA\_pTyrIP\_AML\_HEL Scan : 9152

Andromeda score : 66.246

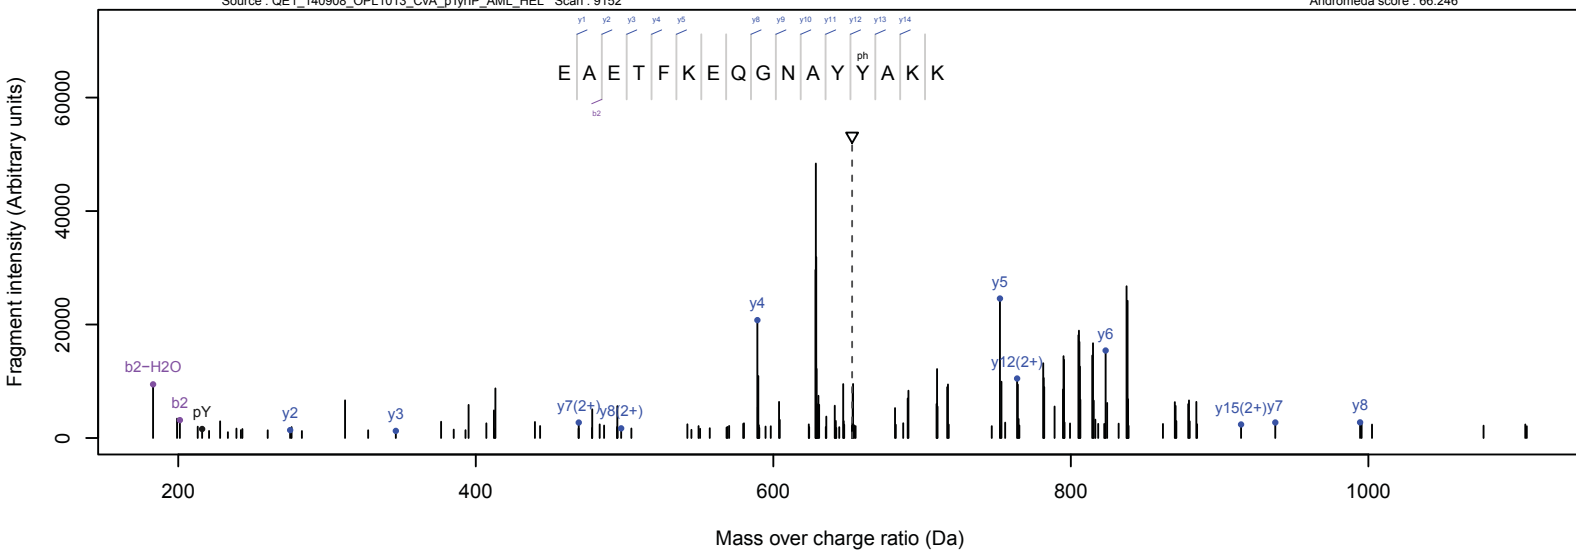

LKEYDEPY(ph)VLLQNK-2+

Source : QE1\_140908\_OPL1013\_CvA\_pTyrIP\_AML\_Kasumi1 Scan : 27703

Andromeda score : 66.246

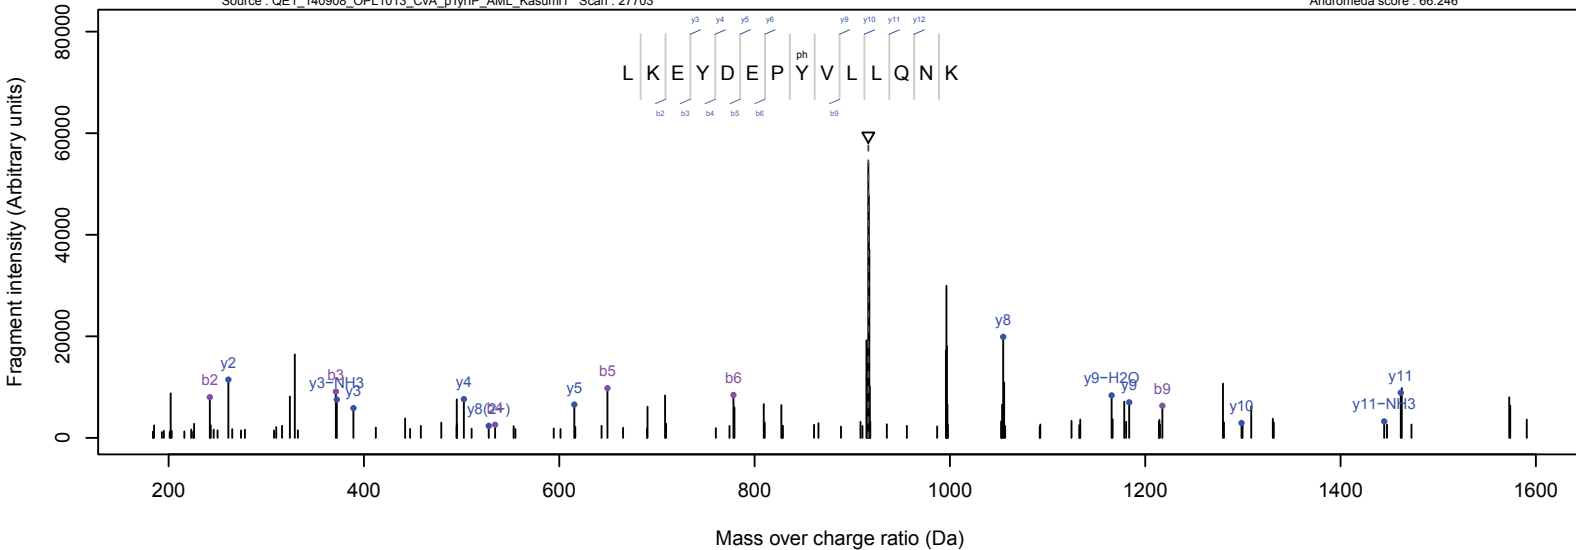

MSY(ph)PVKEQESILK-2+

Source : QE1\_140612\_OPL1013\_CVA\_phosphoproteomic\_landscape\_AML\_C Scan : 19443

Andromeda score : 66.215

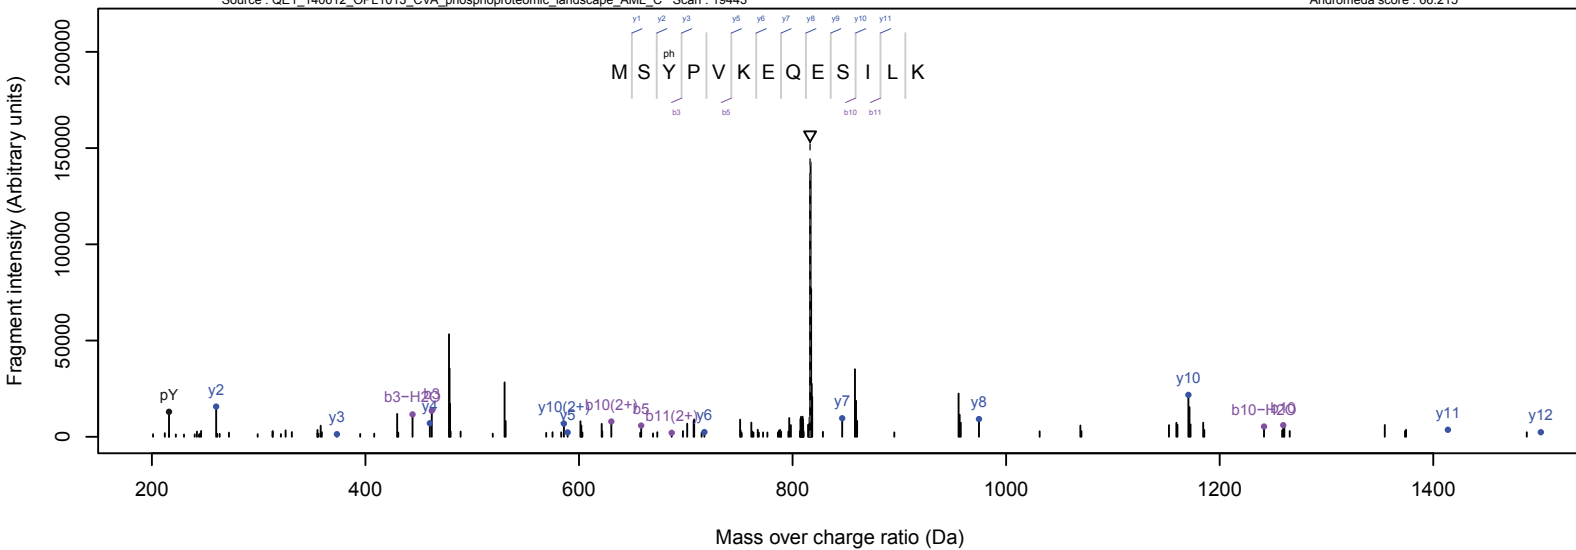

## FSY(ph)VNSFTK-2+

Source : QE1\_140908\_OPL1013\_CvA\_pTyrIP\_AML\_OCI\_AML3 Scan : 22426

Andromeda score : 66.19

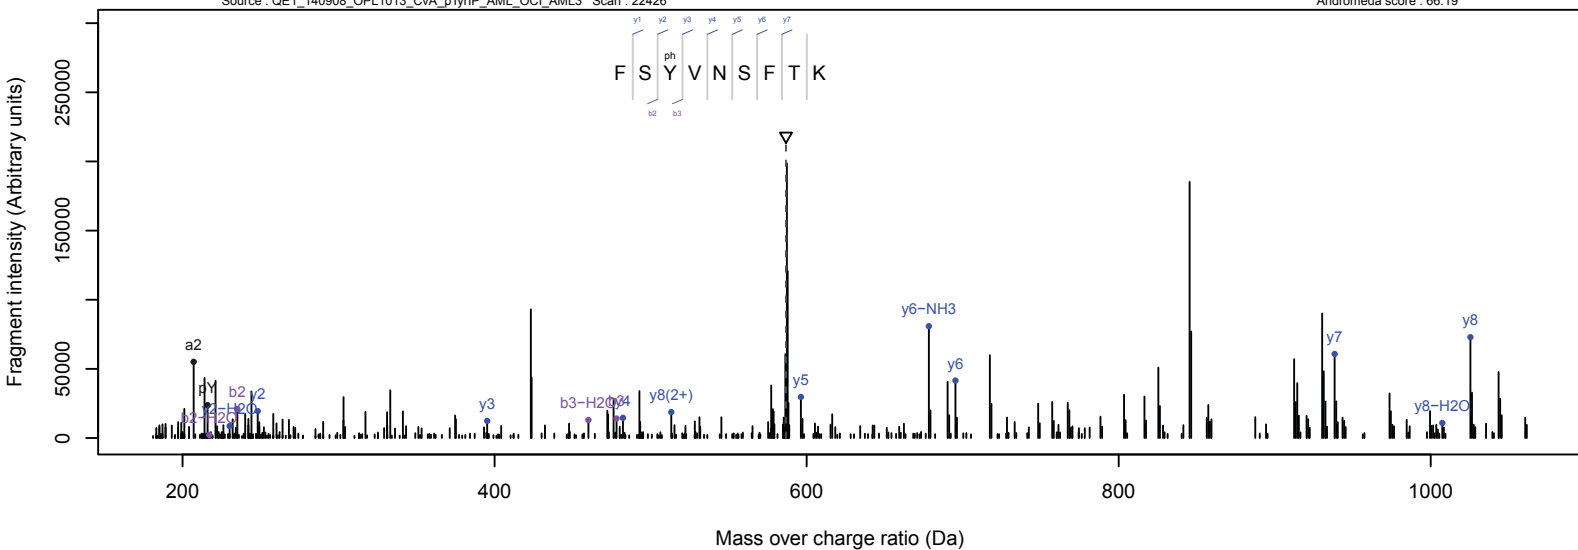

## KDY(ph)PHLVDR-3+

Source : QE1\_140612\_OPL1013\_CvA\_phosphoproteomic\_landscape\_AML\_D Scan : 8621

Andromeda score : 66.19

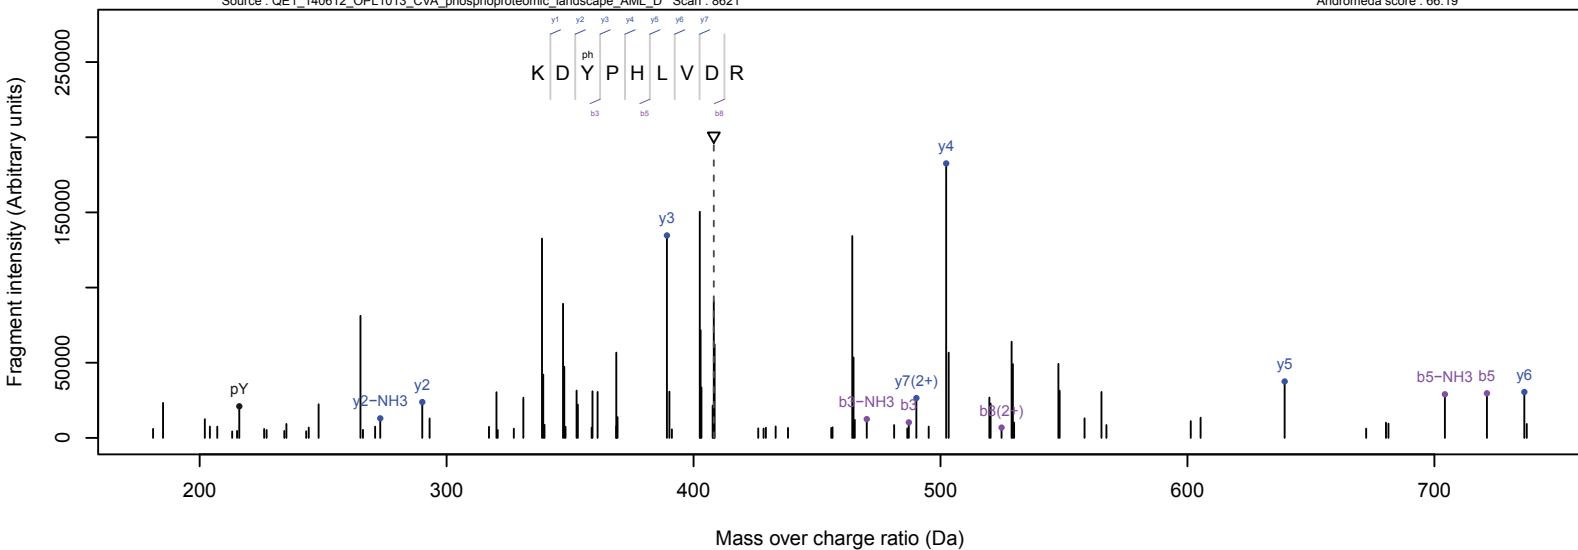

## IPPY(ph)HYIHVLDQNSVSR-3+

Source : QE1\_140612\_OPL1013\_CvA\_phosphoproteomic\_landscape\_AML\_A Scan : 27650

Andromeda score : 66.152

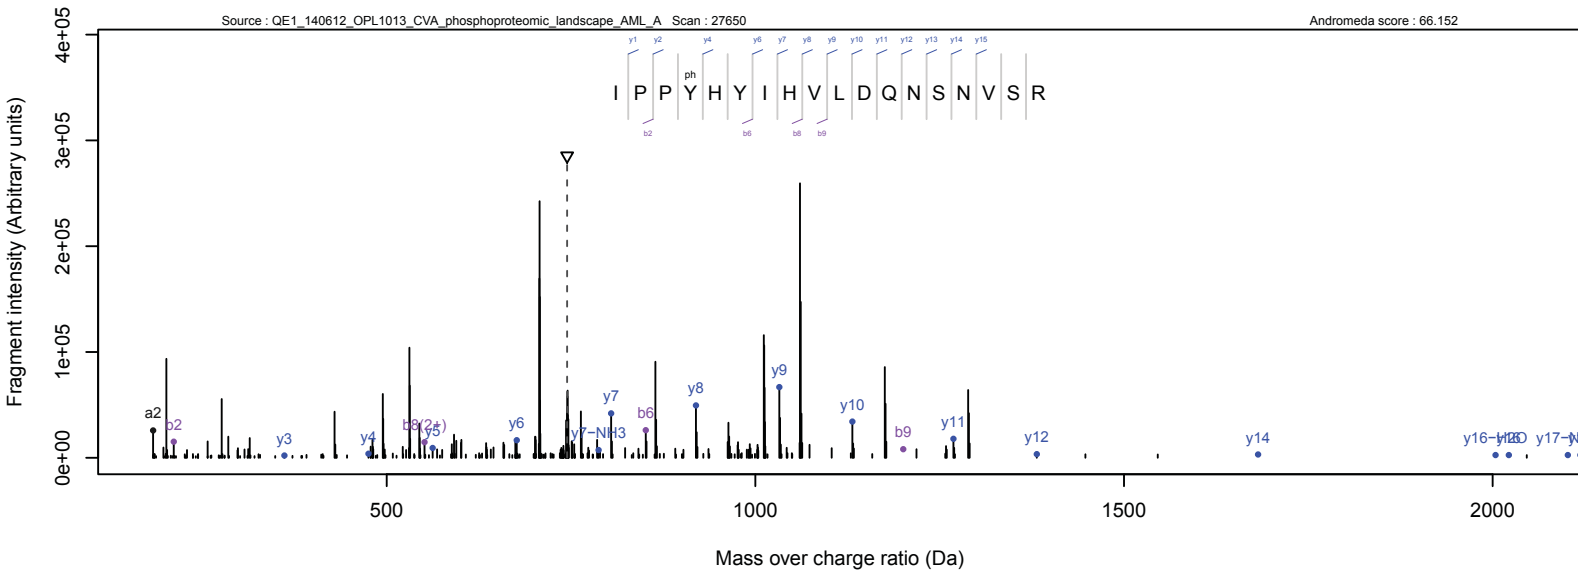

RSPSSQYFSPSNNYQQQY(ph)YSPQAQTPDQQPNR-4+

Source : QE1\_140612\_OPL1013\_CVA\_phosphoproteomic\_landscape\_AML\_C Scan : 23264

Andromeda score : 66.124

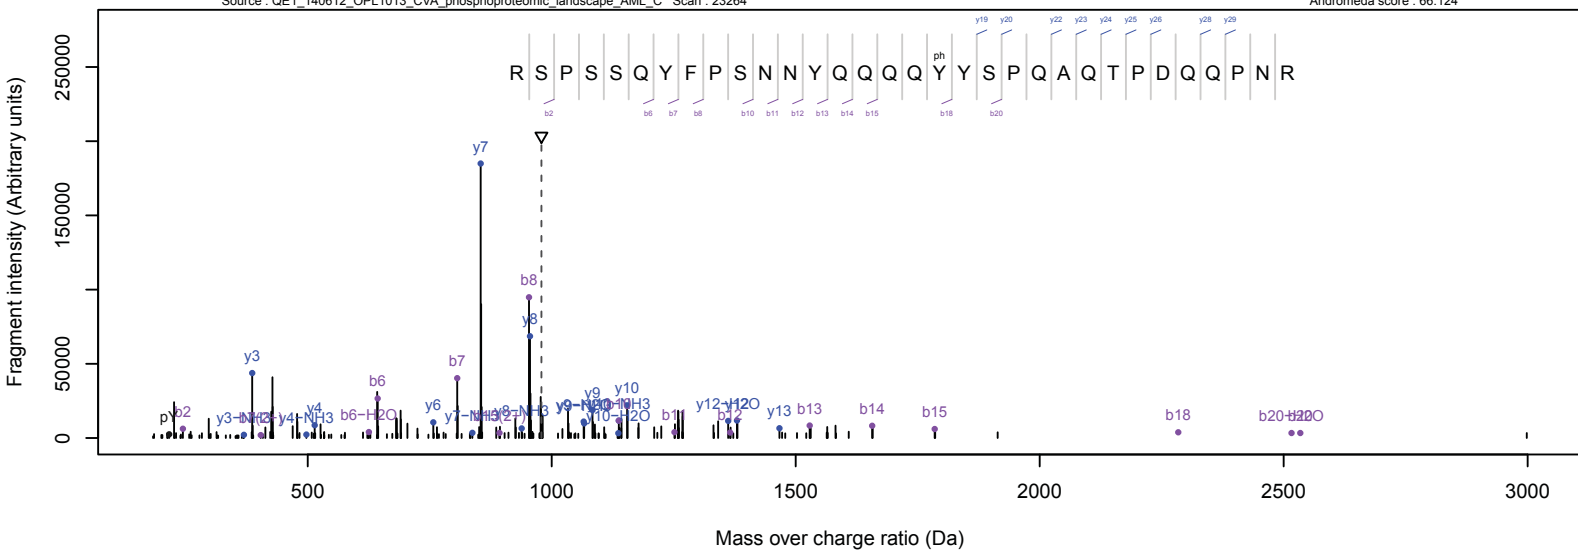

RPDLEIY(ph)KPGLSR-3+

Source : QE1\_140612\_OPL1013\_CVA\_phosphoproteomic\_landscape\_AML\_C Scan : 19210

Andromeda score : 66.059

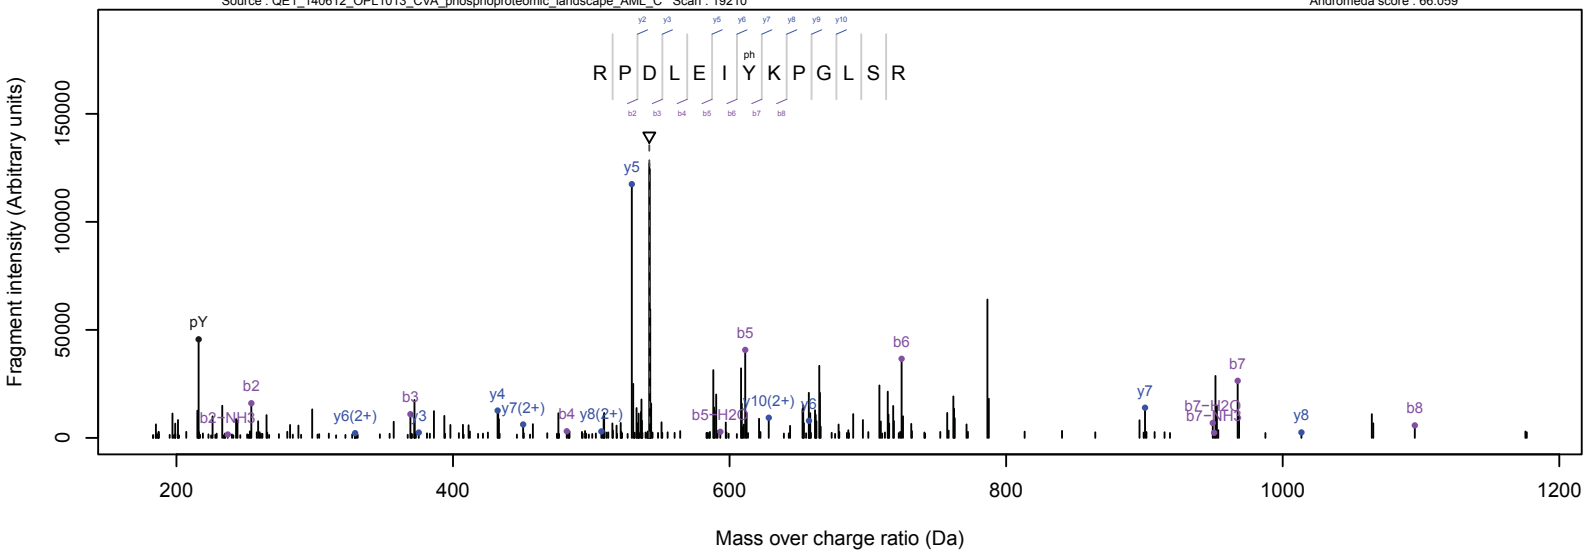

SSY(ph)ASQHSQLGQDLR-3+

Source : QE1\_140612\_OPL1013\_CVA\_phosphoproteomic\_landscape\_AML\_C Scan : 10696

Andromeda score : 66.059

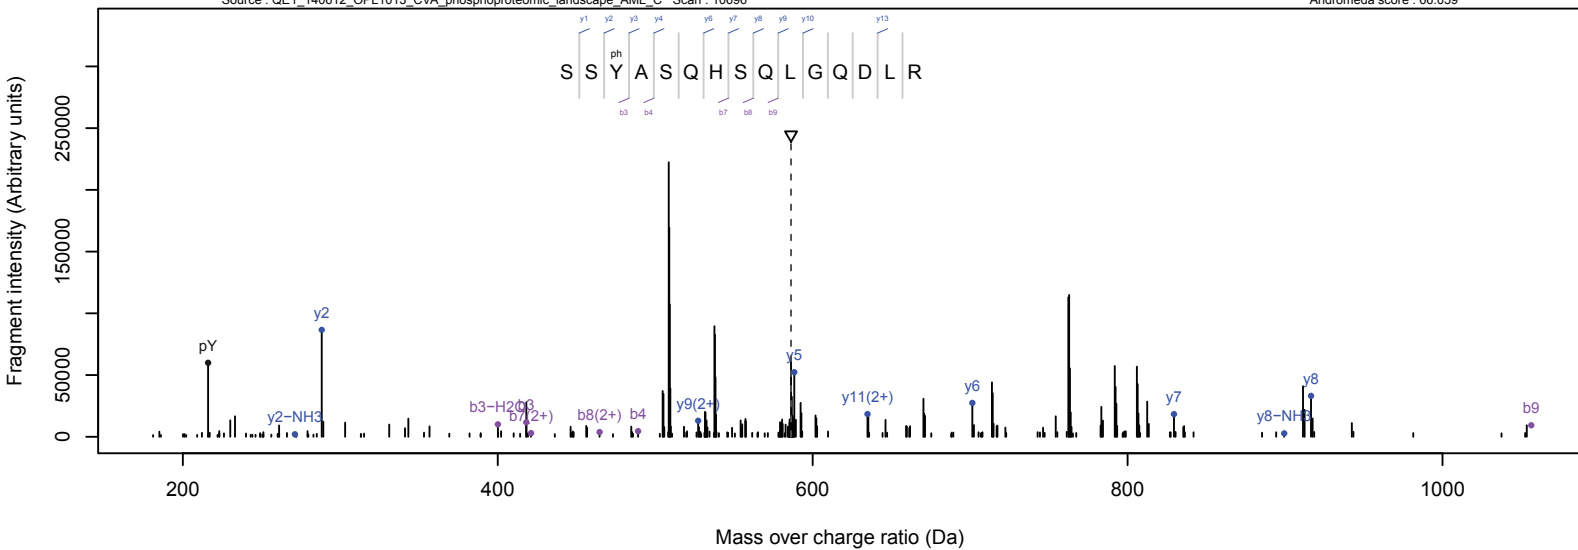

**FKQY(ph)LRNPPK-3+**

Source : QE1\_140612\_OPL1013\_CVA\_phosphoproteomic\_landscape\_AML\_C Scan : 8273

Andromeda score : 66.056

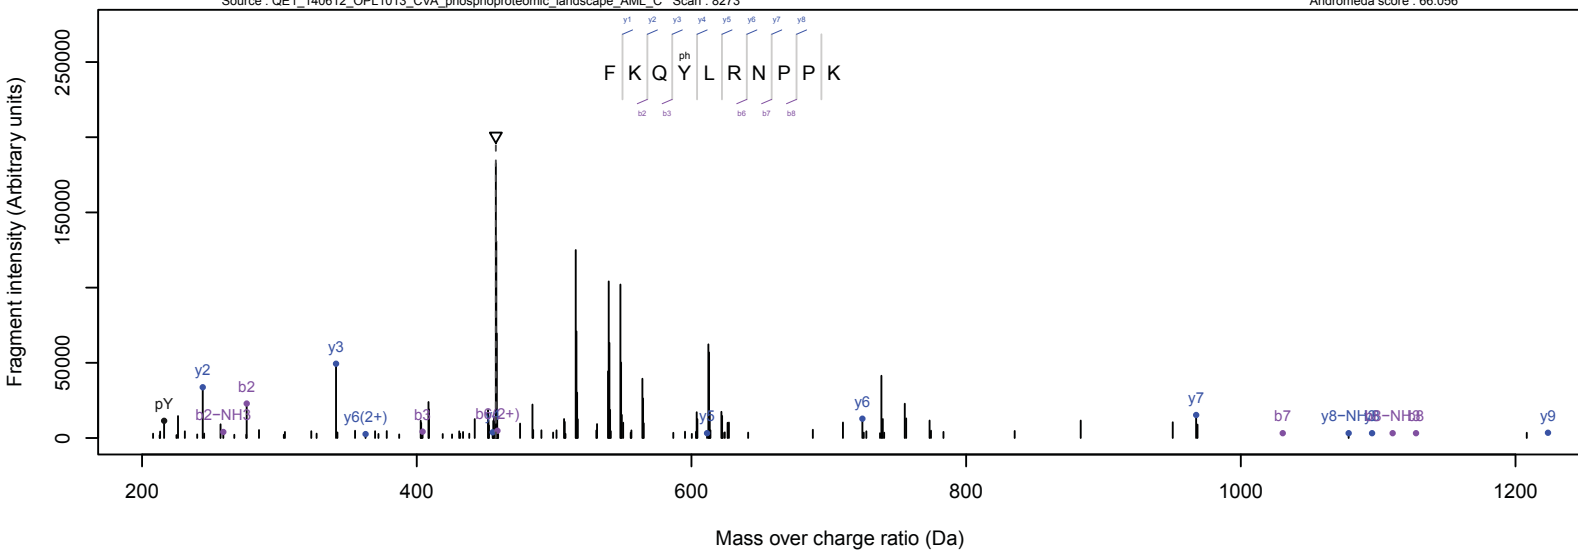

**GGDLMAY(ph)DRR-2+**

Source : QE1\_140612\_OPL1013\_CVA\_phosphoproteomic\_landscape\_AML\_C Scan : 8807

Andromeda score : 66.056

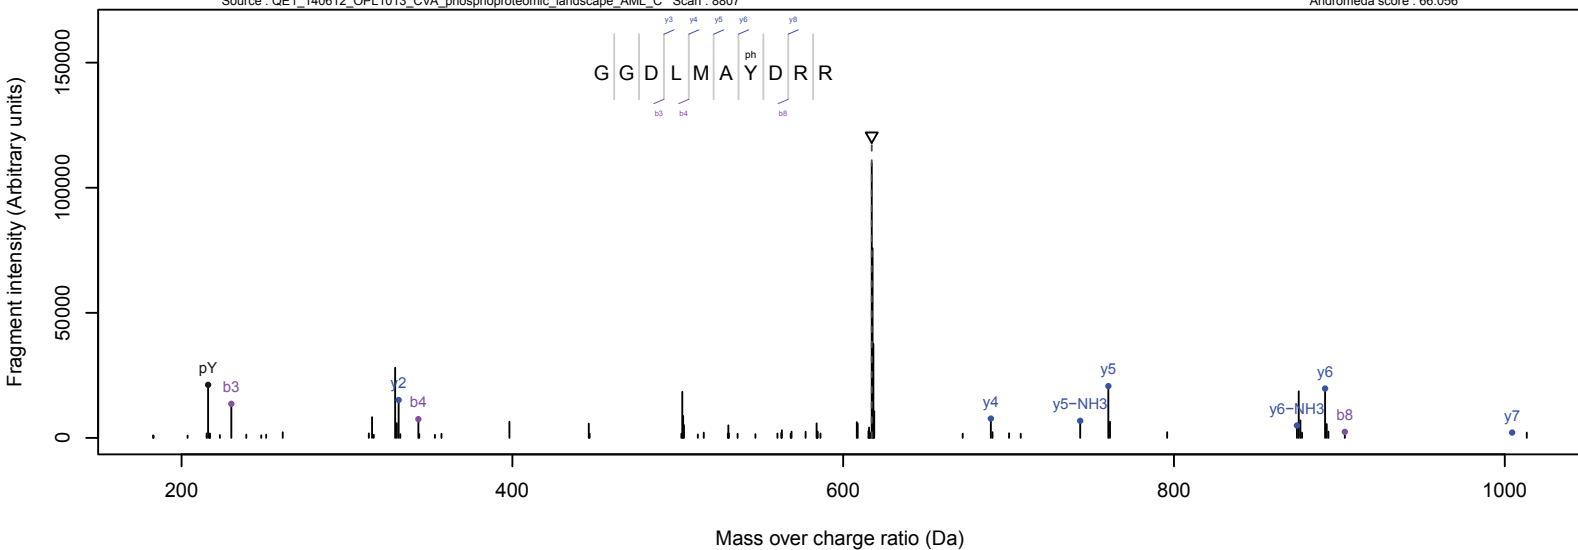

**LEKVV(ph)EELR-2+**

Source : QE1\_140908\_OPL1013\_CvA\_pTyrIP\_AML\_HEL Scan : 15798

Andromeda score : 66.056

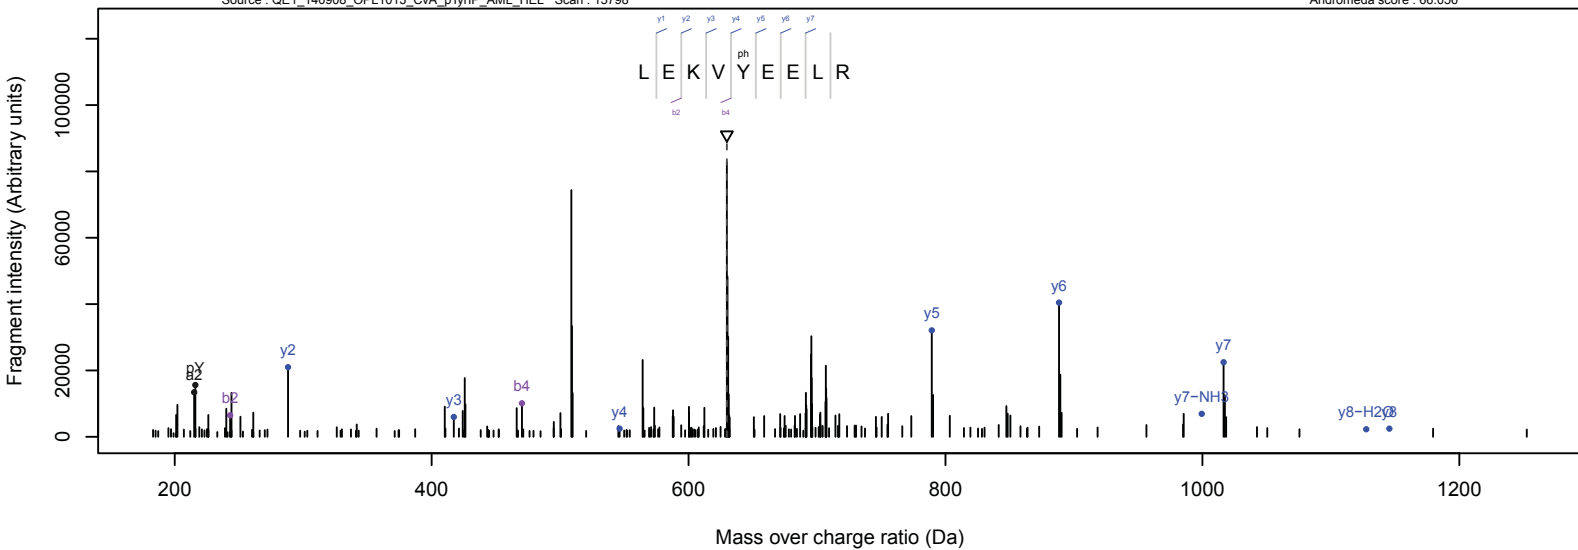



## LYVIY(ph)KVPQR-2+

Source: QE1\_140612\_OPL1013\_CVA\_phosphoproteomic\_landscape\_AML\_C Scan: 29639

Andromeda score: 66.056

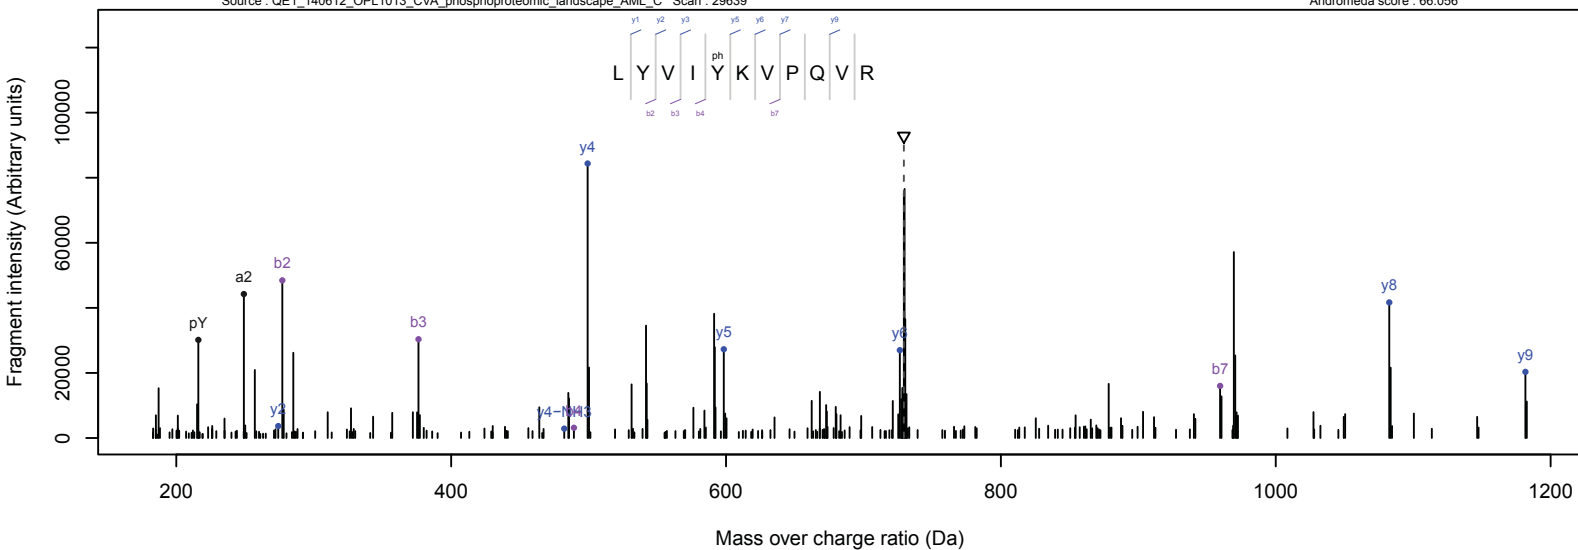

## QYY(ph)VLCSSR-2+

Source: QE1\_140612\_OPL1013\_CVA\_phosphoproteomic\_landscape\_AML\_B Scan: 16667

Andromeda score: 66.056

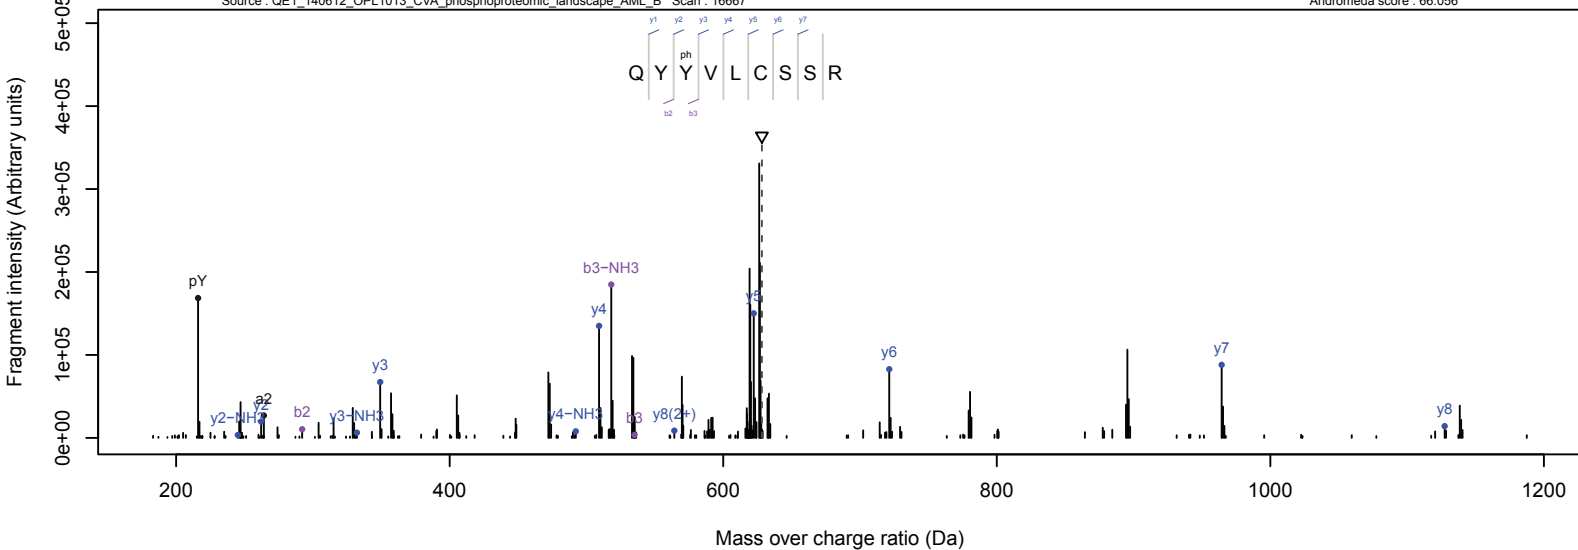

## LHETVDATSETHIY(ph)QVR-3+

Source: QE1\_140612\_OPL1013\_CVA\_phosphoproteomic\_landscape\_AML\_A Scan: 16088

Andromeda score: 66.022

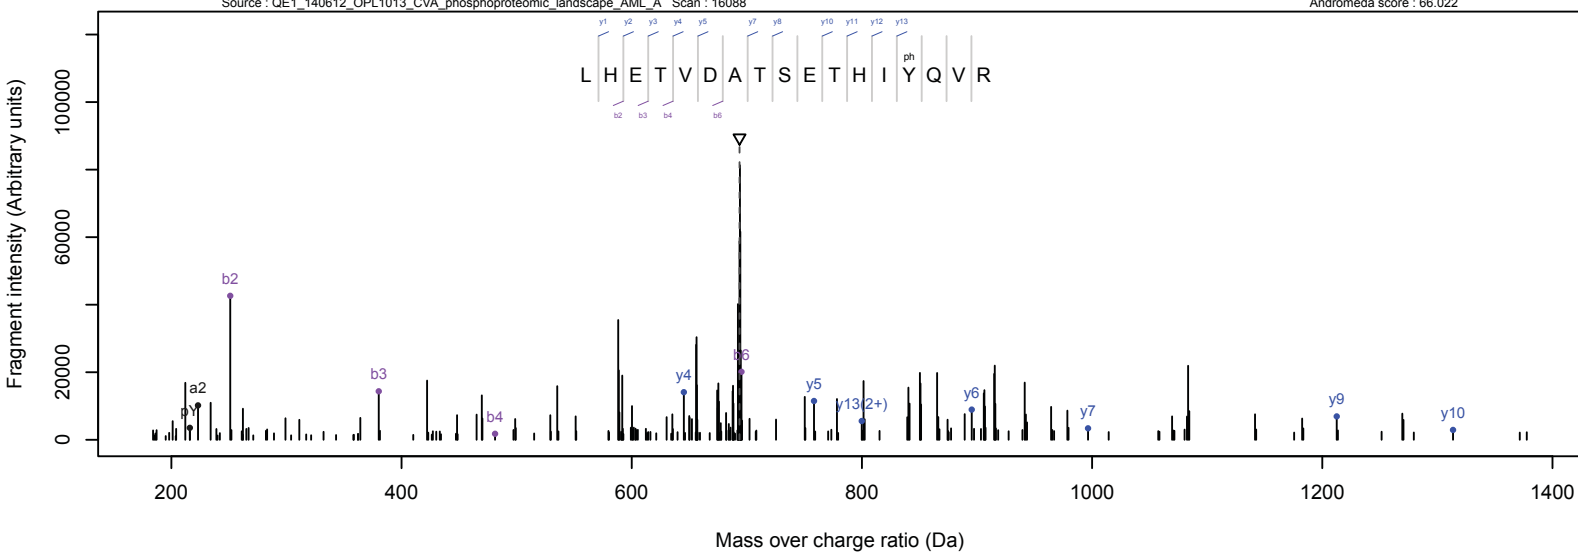

**SLYVAEY(ph)HSEPVDEDEK-2+**

Source: QE1\_140612\_OPL1013\_CVA\_phosphoproteomic\_landscape\_AML\_B Scan: 20597

Andromeda score: 66.022

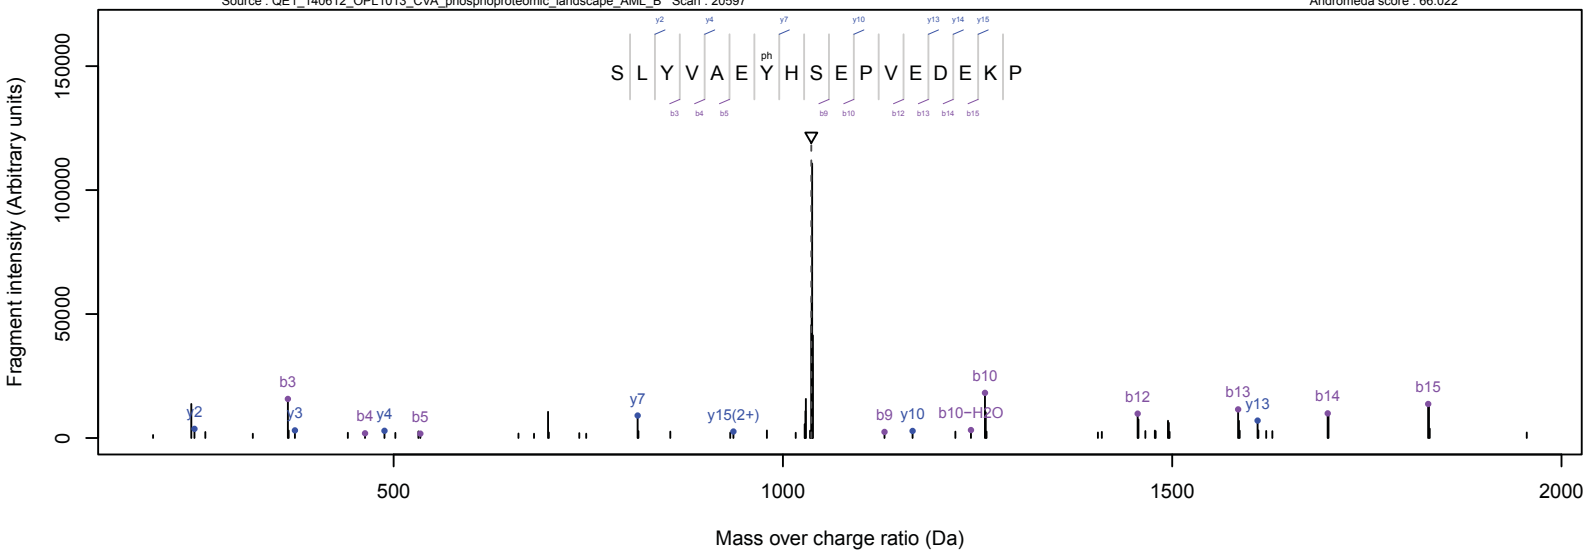

**Y(ph)SVDPSIVNISDEMAK-2+**

Source: QE1\_140612\_OPL1013\_CVA\_phosphoproteomic\_landscape\_AML\_C Scan: 37235

Andromeda score: 66.022

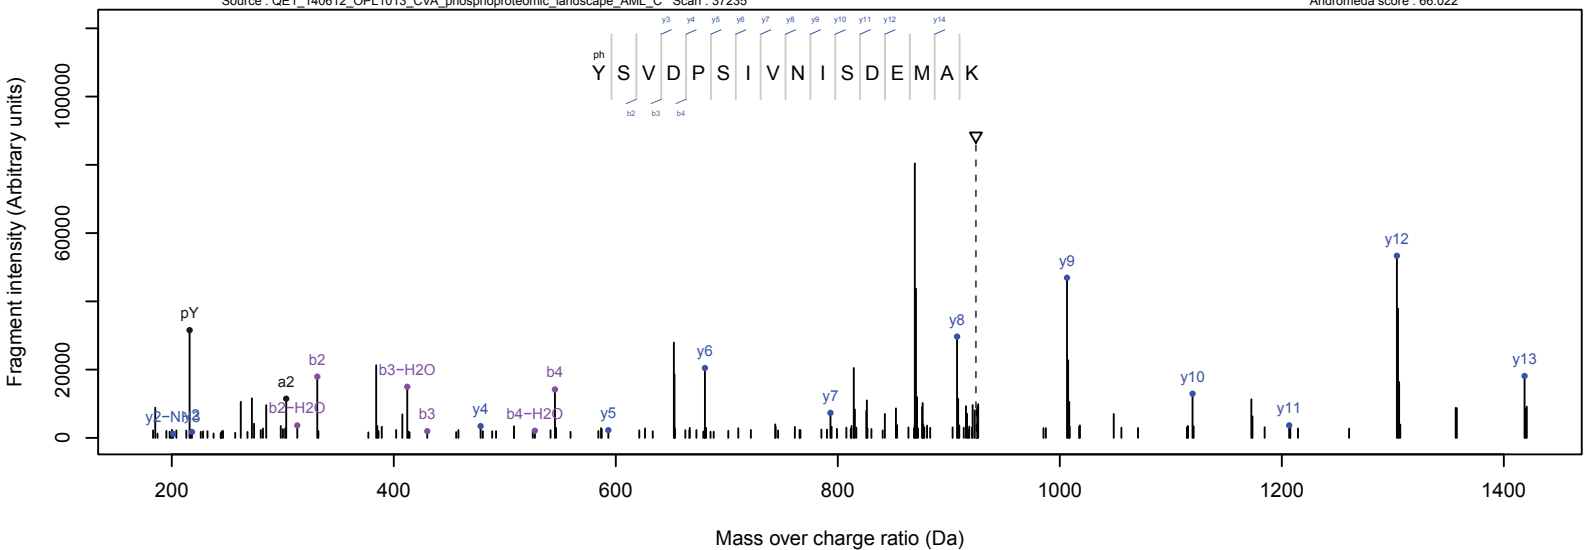

**ICANHYPH)ISPDM(ox)K-3+**

Source: QE1\_140612\_OPL1013\_CVA\_phosphoproteomic\_landscape\_AML\_B Scan: 15729

Andromeda score: 66.004

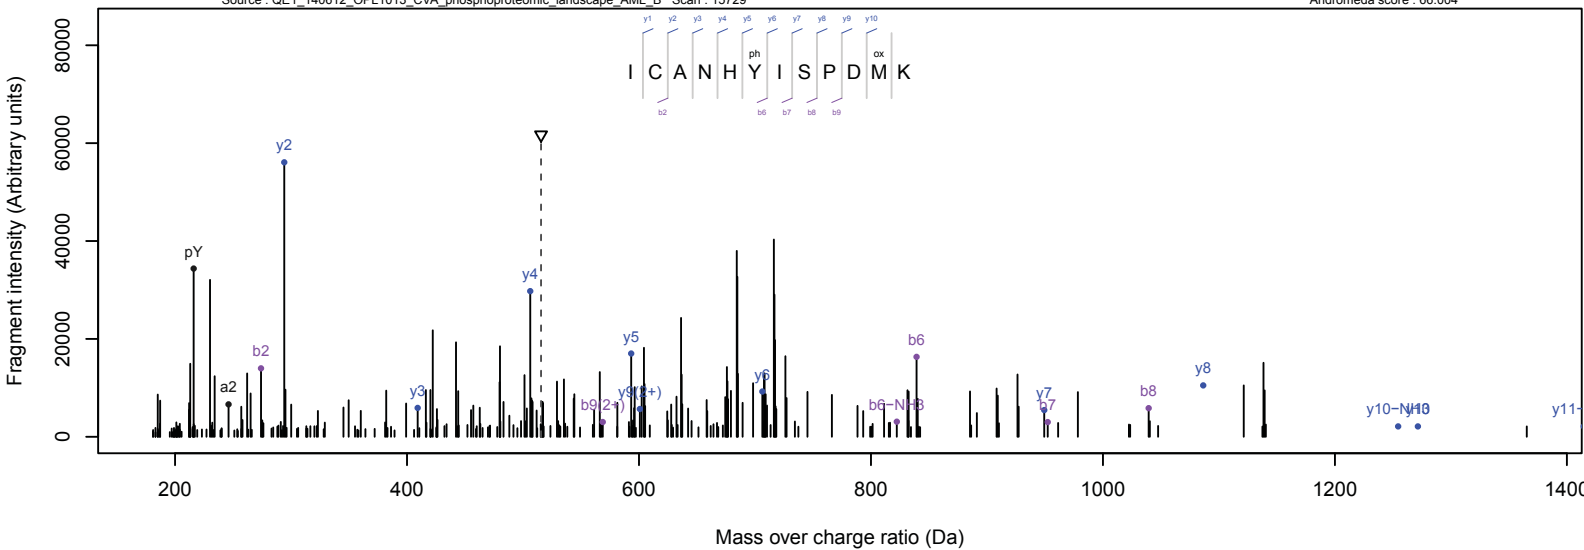

**Y(ph)FLFYDGETVSGK-2+**

Source : QE1\_140612\_OPL1013\_CVA\_phosphoproteomic\_landscape\_AML\_C Scan : 39861

Andromeda score : 66.004

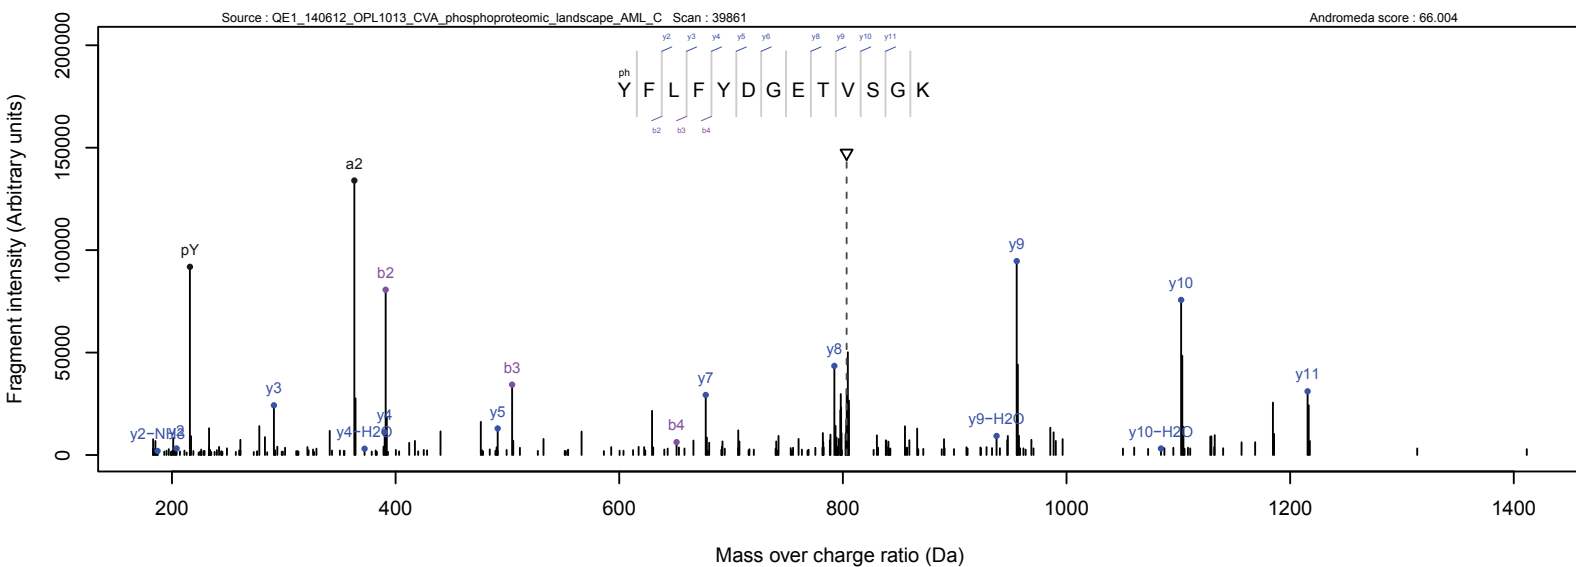

**DHPYIQY(ph)NVLWEEGK-2+**

Source : QE1\_140612\_OPL1013\_CVA\_phosphoproteomic\_landscape\_AML\_A Scan : 34742

Andromeda score : 65.949

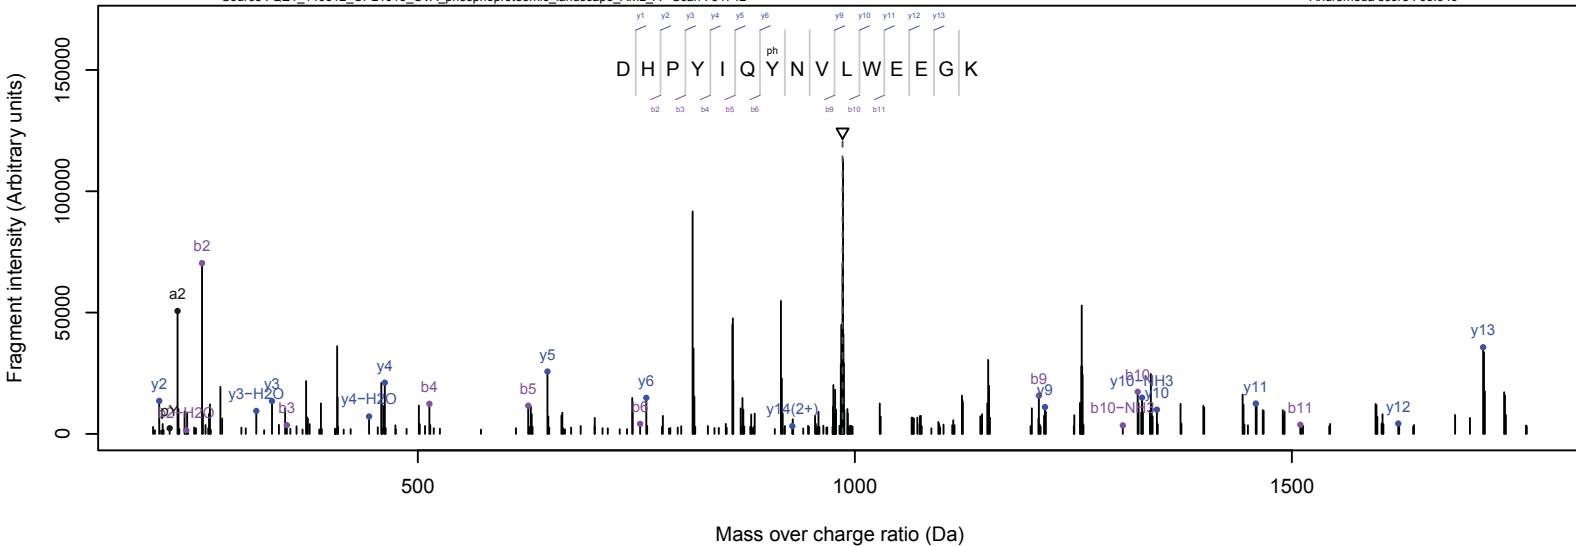

**IVAY(ph)SSMILFSLNHER-3+**

Source : QE1\_140612\_OPL1013\_CVA\_phosphoproteomic\_landscape\_AML\_B Scan : 43073

Andromeda score : 65.949

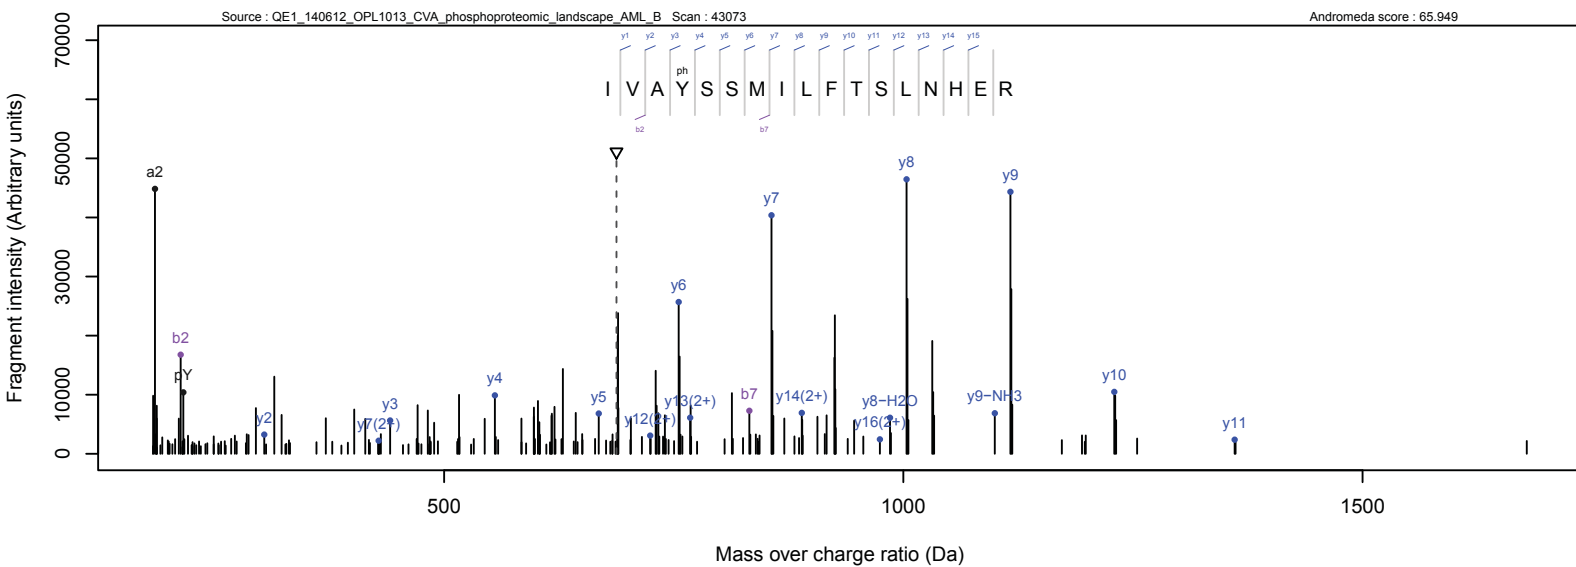

**KVVALY(ph)DYMPM(ox)NANDLQLR-3+**

Source : QE1\_140908\_OPL1013\_CvA\_pTyrIP\_AML\_HEL Scan : 42217

Andromeda score : 65.924

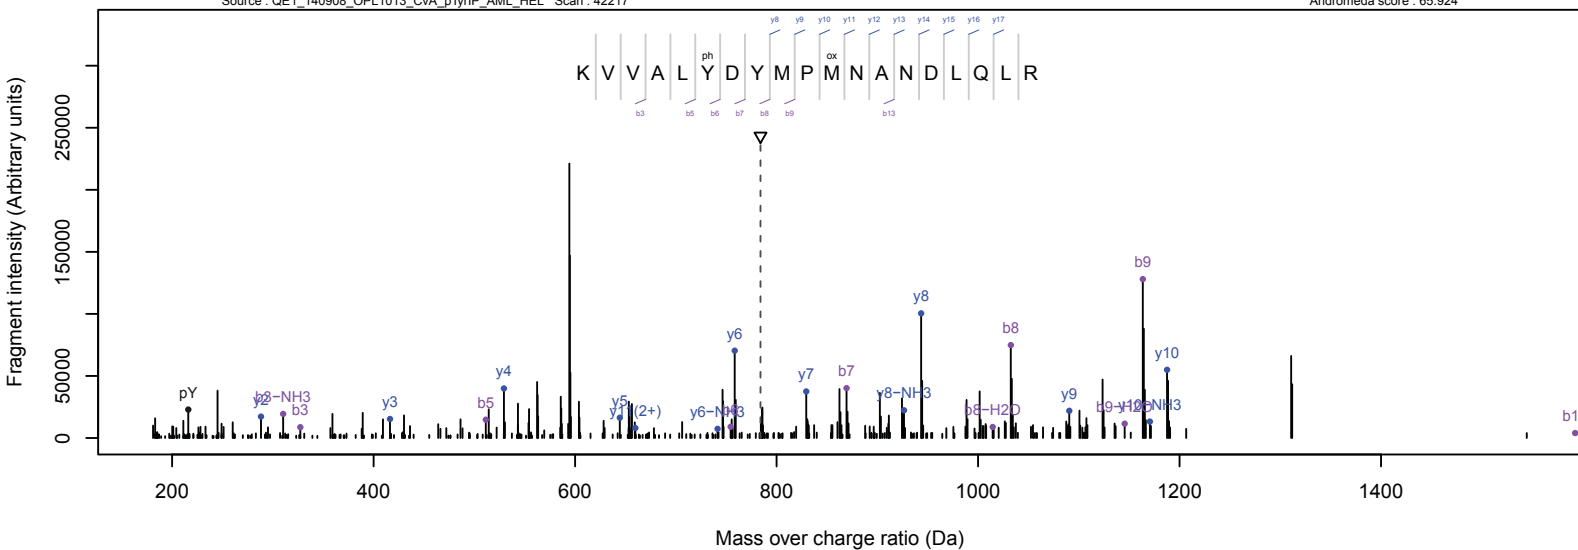

**LSVACFY(ph)GGTPYGGQFER-2+**

Source : QE1\_140908\_OPL1013\_CvA\_pTyrIP\_AML\_HL60 Scan : 40234

Andromeda score : 65.924

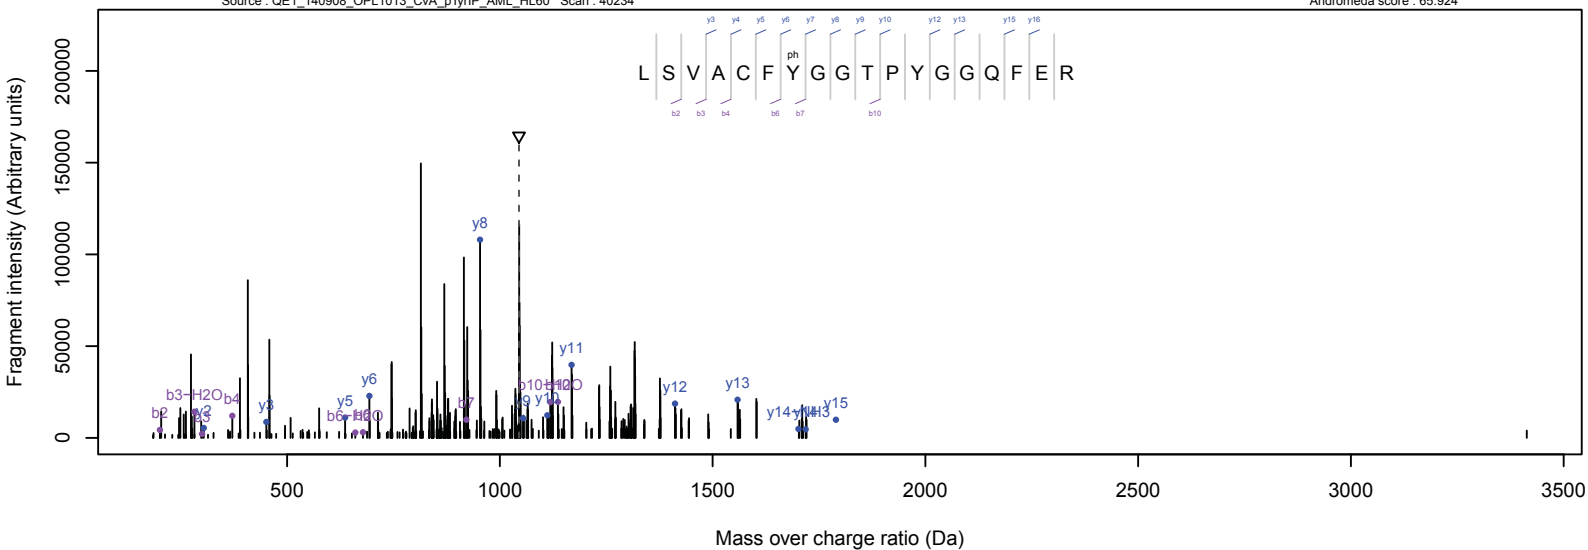

**APTSFGY(ph)DKPHVLVDLLVDDSGK-3+**

Source : QE1\_140908\_OPL1013\_CvA\_pTyrIP\_AML\_HEL Scan : 44287

Andromeda score : 65.854

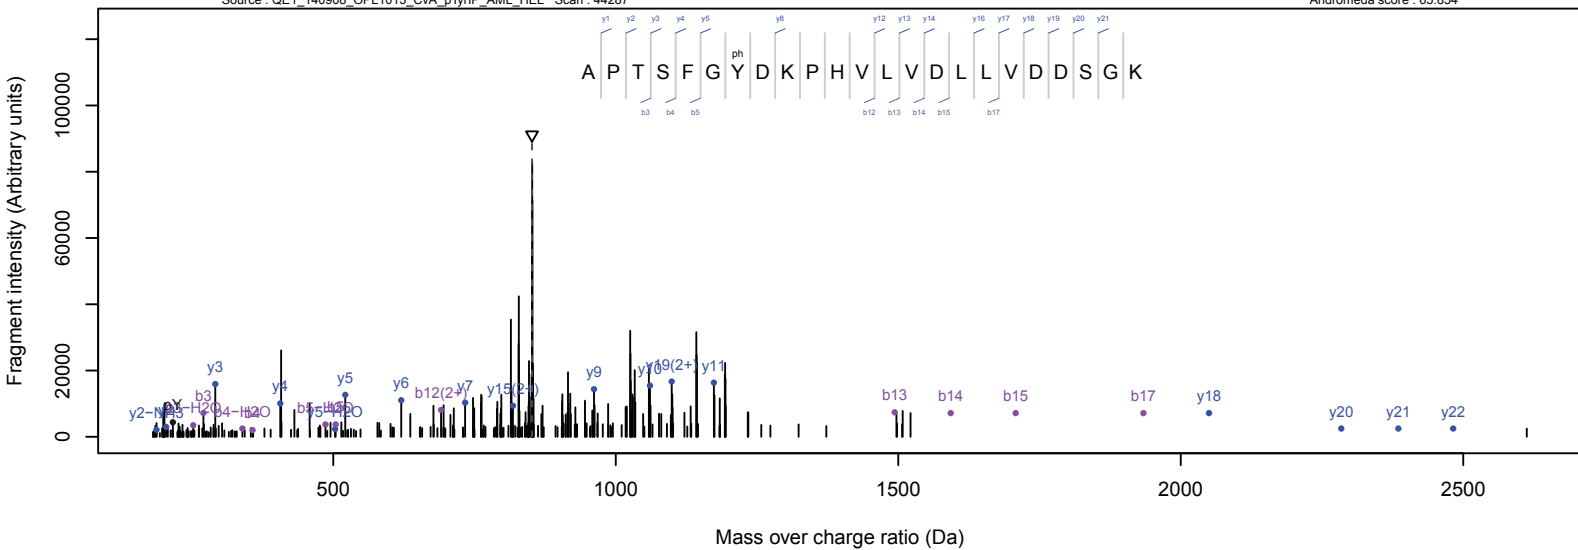

## AFVENY(ph)PQFKK-2+

Source: QE1\_140612\_OPL1013\_CVA\_phosphoproteomic\_landscape\_AML\_C Scan: 17811

Andromeda score: 65.842

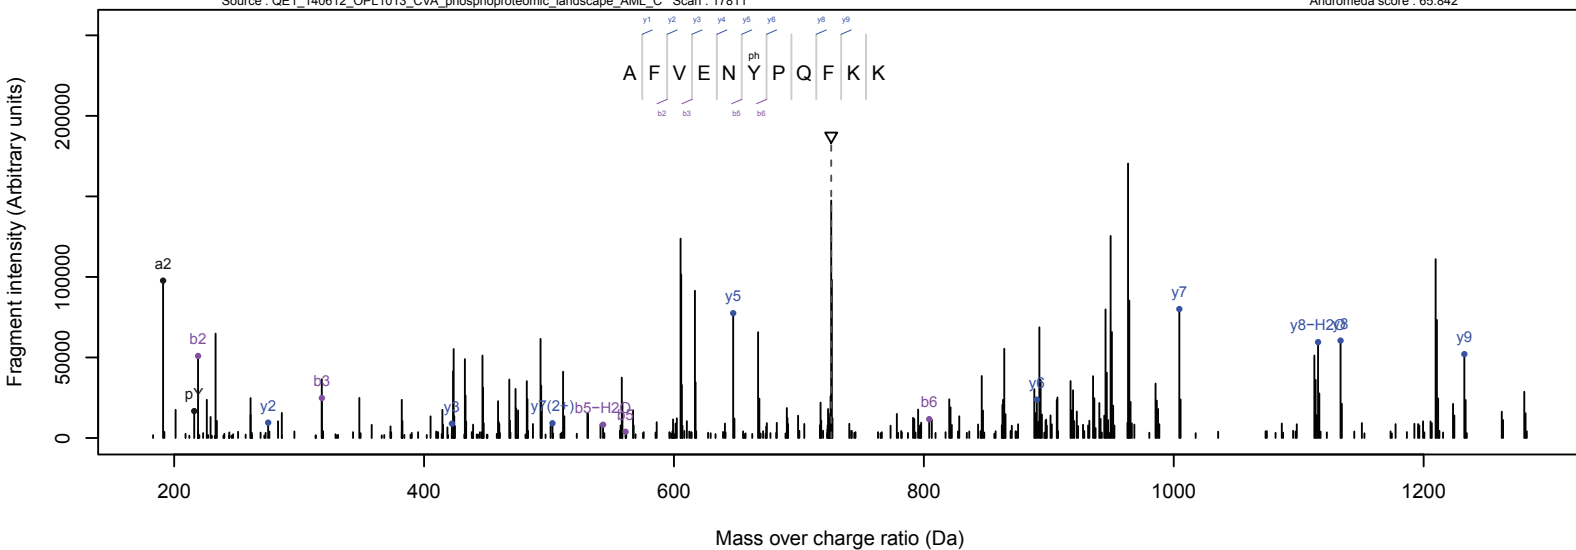

## FLAAGTHLGGTDLDFQMEQYIYKR-3+

Source: QE1\_140612\_OPL1013\_CVA\_phosphoproteomic\_landscape\_AML\_C Scan: 41062

Andromeda score: 65.833

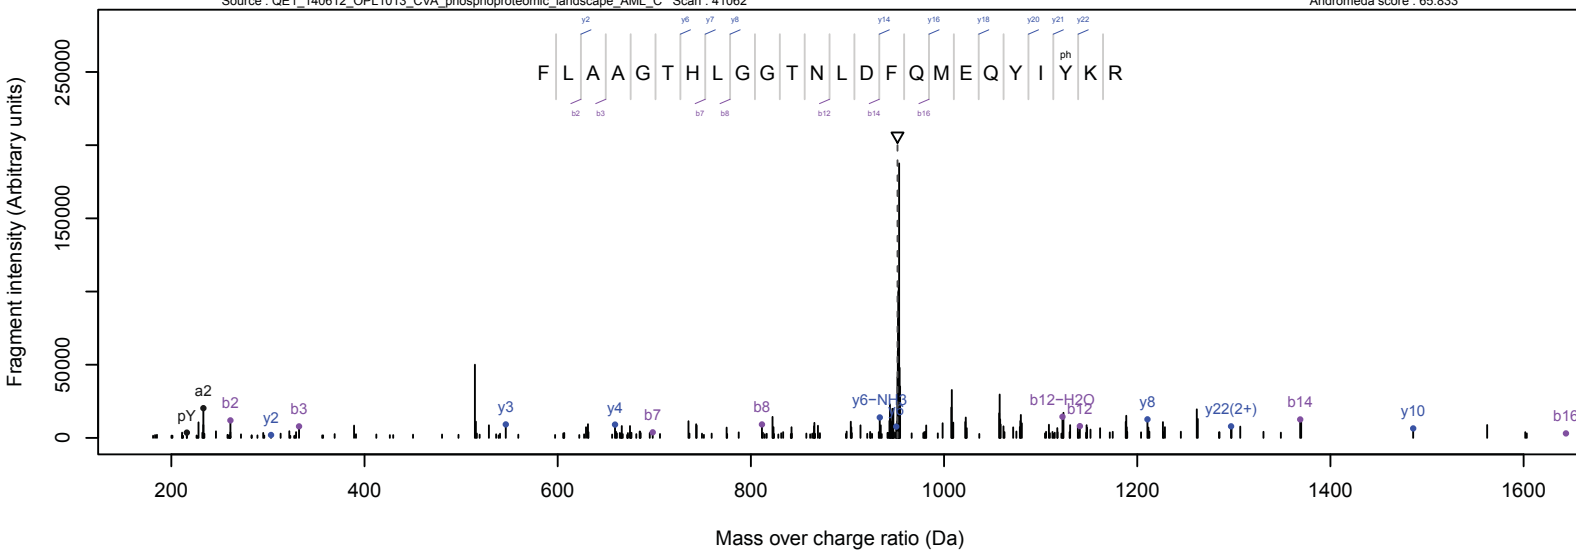

## ASSCETYEY(ph)PQRGGESAGR-3+

Source: QE1\_140908\_OPL1013\_CvA\_pTyrIP\_AML\_Kasumi6 Scan: 8273

Andromeda score: 65.808

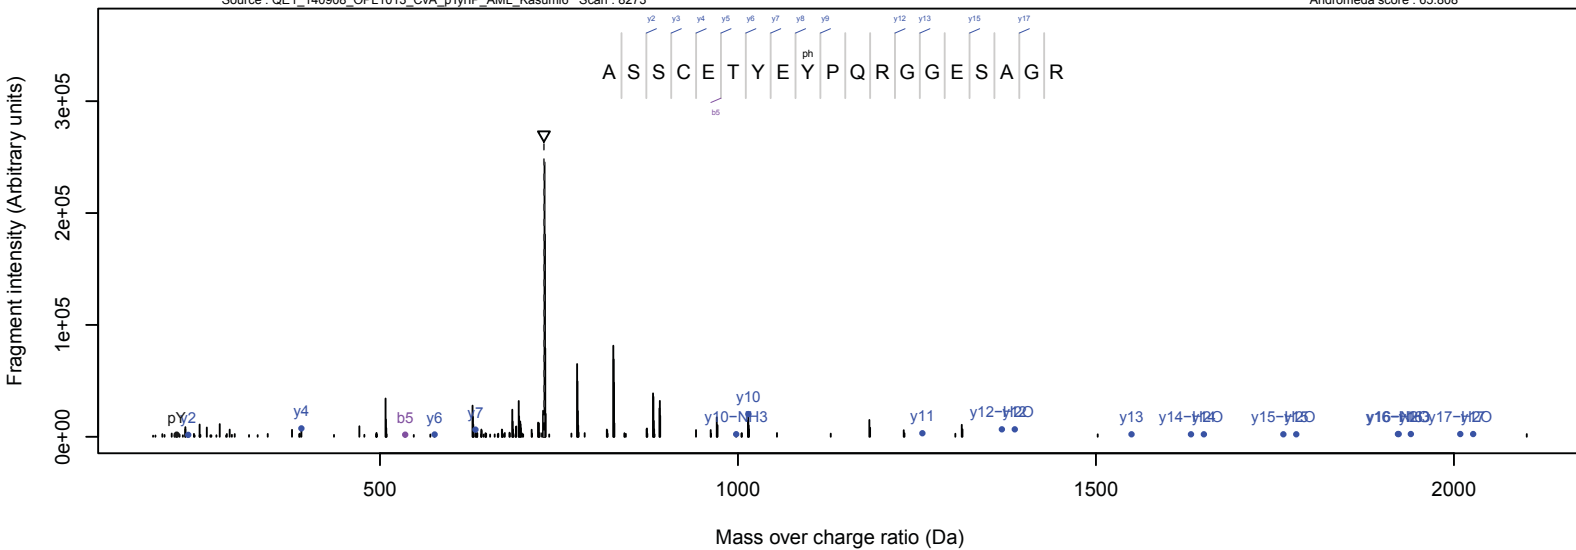

GPPPDGCALGTSVVPVPGYFR-3+

Source : QE1\_140612\_OPL1013\_CVA\_phosphoproteomic\_landscape\_AML\_C Scan : 35671

Andromeda score : 65.808

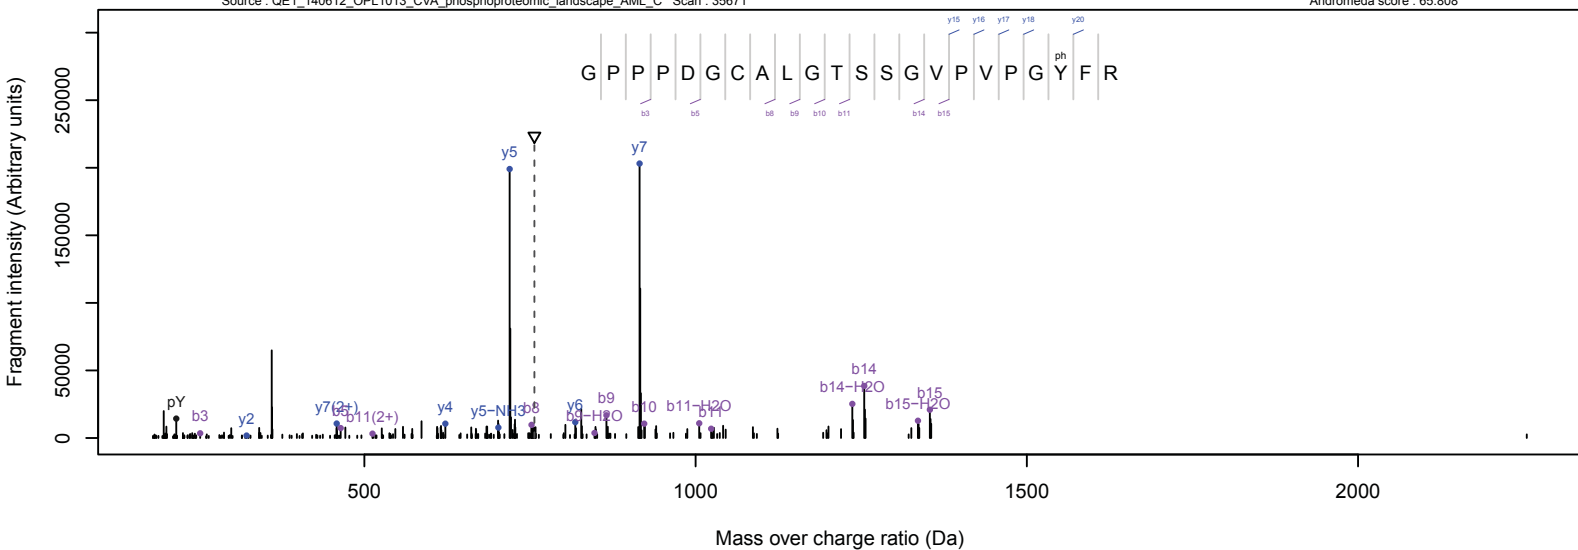

LYSEDELPAEFKLYLPVQNK-3+

Source : QE1\_140612\_OPL1013\_CVA\_phosphoproteomic\_landscape\_AML\_C Scan : 47865

Andromeda score : 65.808

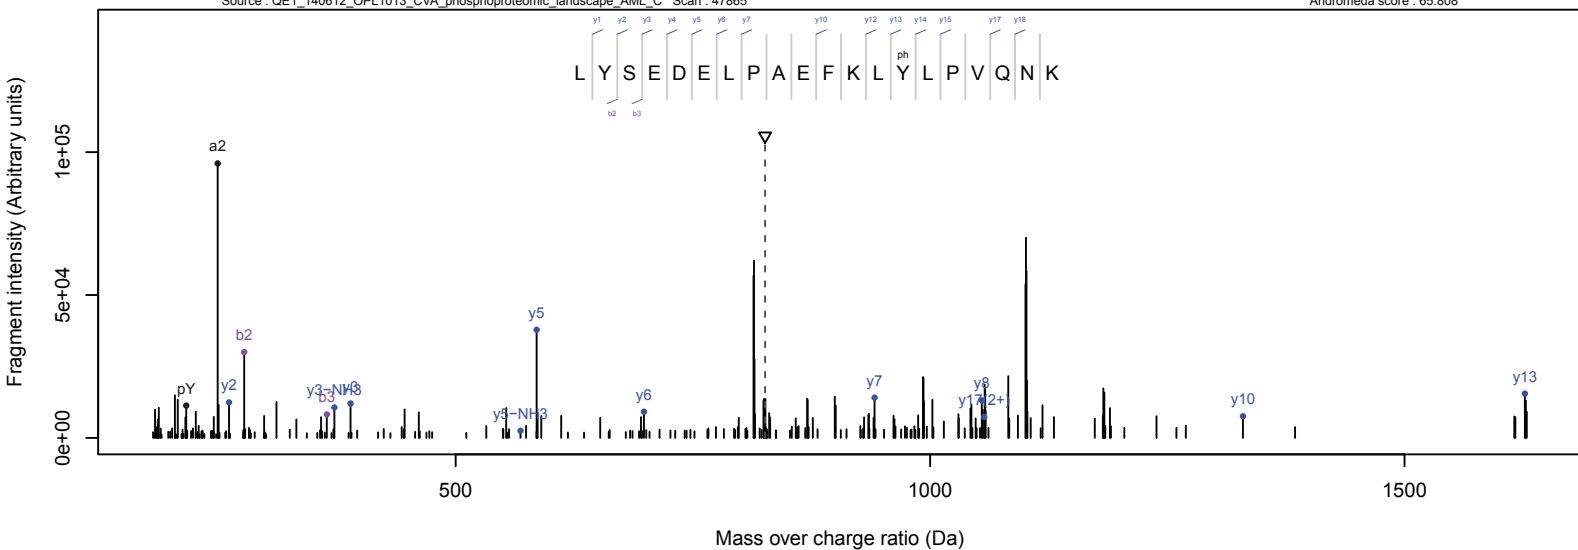

QYVSRPSSLESR-3+

Source : QE1\_140612\_OPL1013\_CVA\_phosphoproteomic\_landscape\_AML\_C Scan : 7910

Andromeda score : 65.773

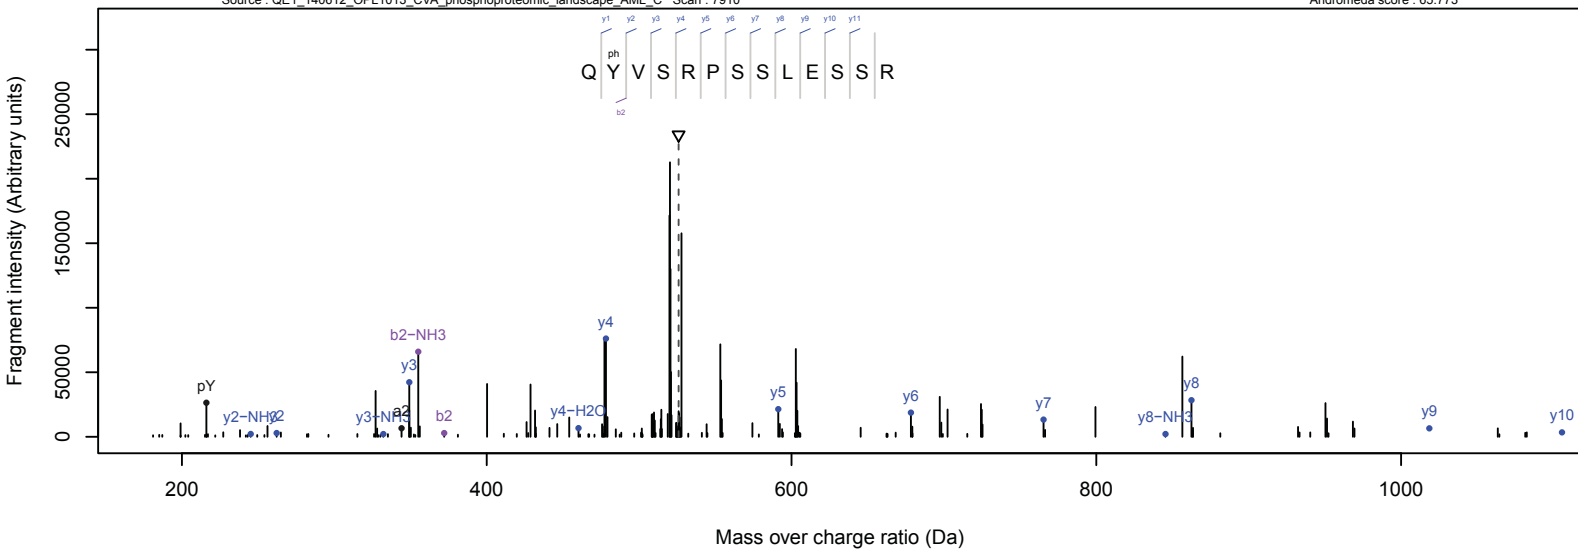

**QSPQTSFPY(ph)KIMPIIQHTLSVQSASSTVK-3+**

Source : QE1\_140612\_OPL1013\_CVA\_phosphoproteomic\_landscape\_AML\_C Scan : 35904

Andromeda score : 65.766

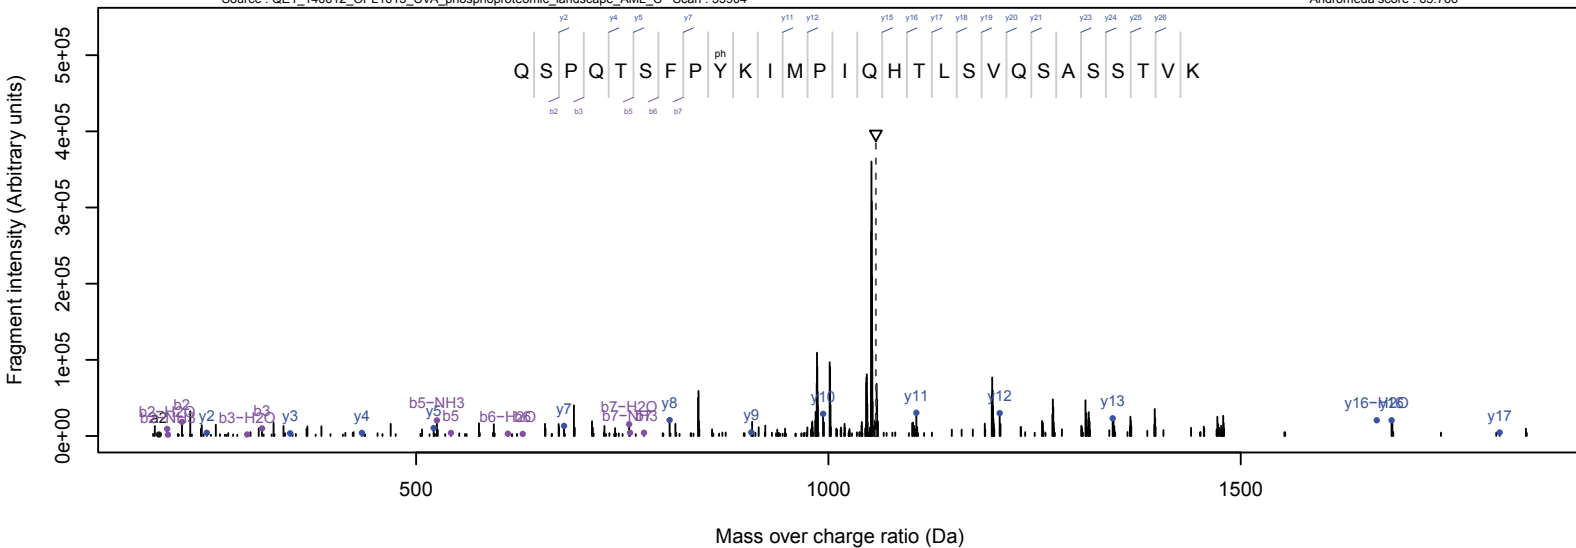

**RHSAS(ph)NLHALAHPAPSPGSCSPK-5+**

Source : QE1\_140908\_OPL1013\_CvA\_pTyrIP\_AML\_HL60 Scan : 10243

Andromeda score : 65.766

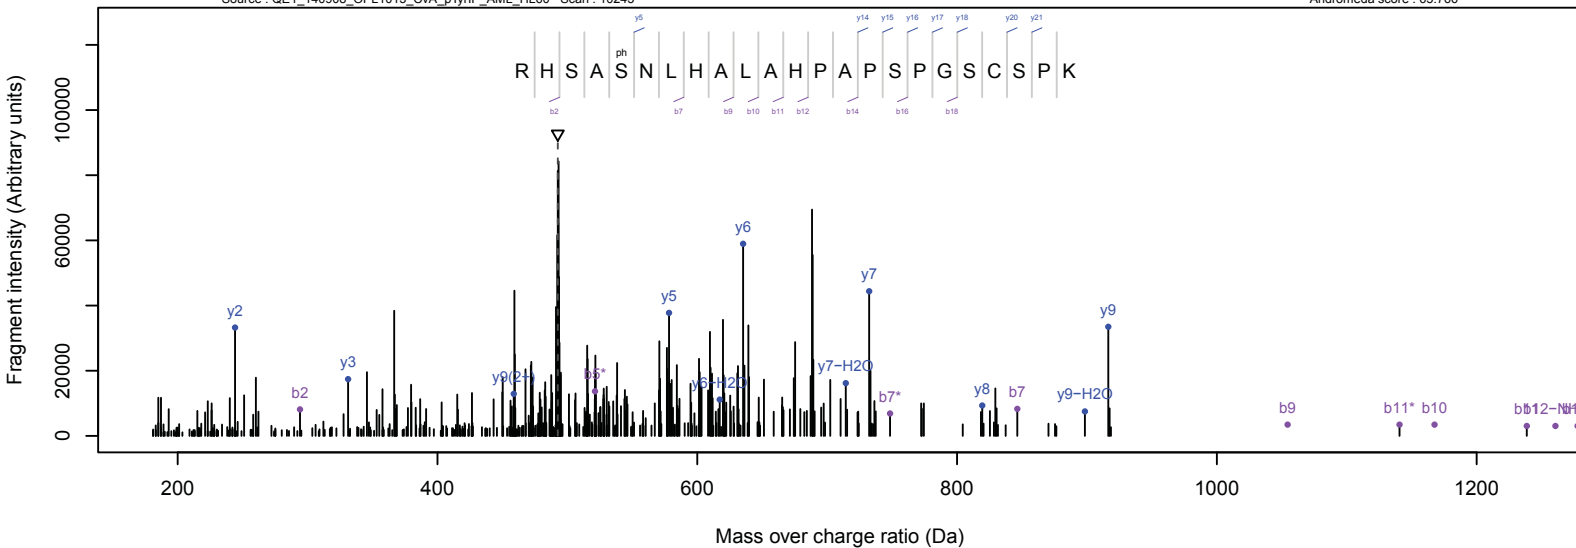

**ALDHY(ph)LTLR-2+**

Source : QE1\_140612\_OPL1013\_CVA\_phosphoproteomic\_landscape\_AML\_C Scan : 26581

Andromeda score : 65.627

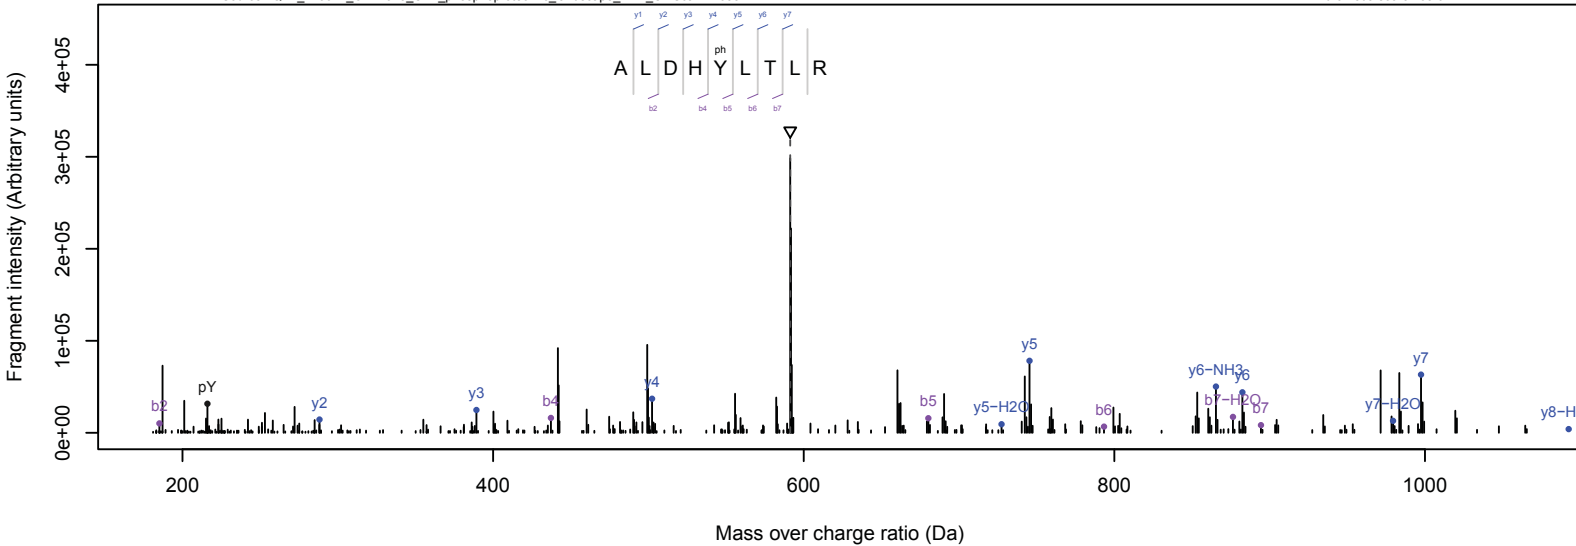

(ac)M(ox)Y(ph)HSLSETR-2+

Source: QE1\_140908\_OPL1013\_CVA\_pTyrIP\_AML\_Kasumi6 Scan: 9420

Andromeda score: 65.627

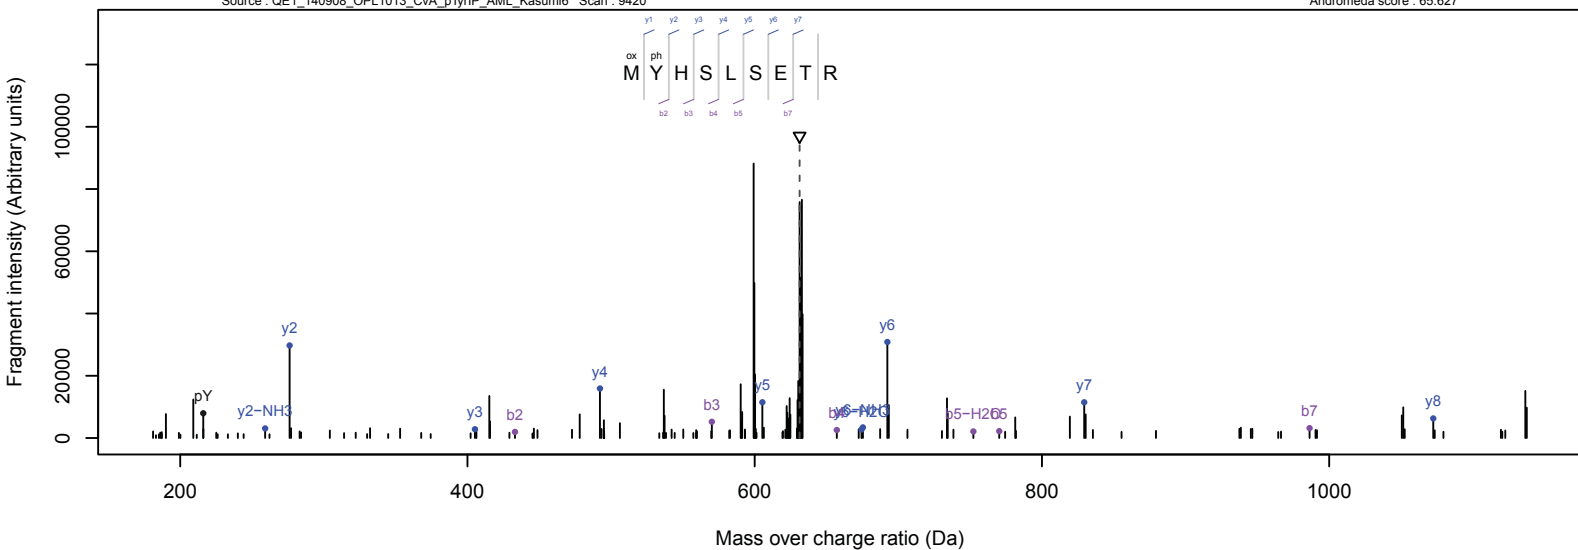

STLGQY(ph)SPLR-2+

Source: QE1\_140612\_OPL1013\_CVA\_phosphoproteomic\_landscape\_AML\_C Scan: 18564

Andromeda score: 65.627

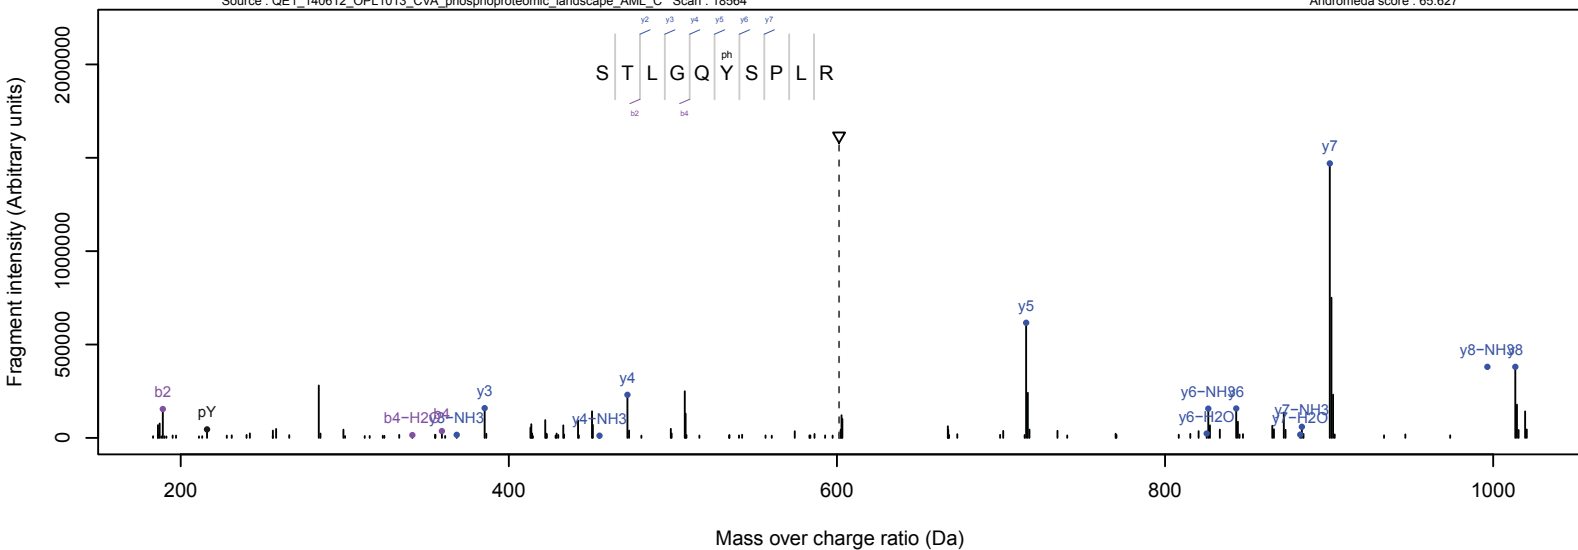

EPGGWVKDY(ph)GTR-2+

Source: QE1\_140612\_OPL1013\_CVA\_phosphoproteomic\_landscape\_AML\_A Scan: 20732

Andromeda score: 65.565

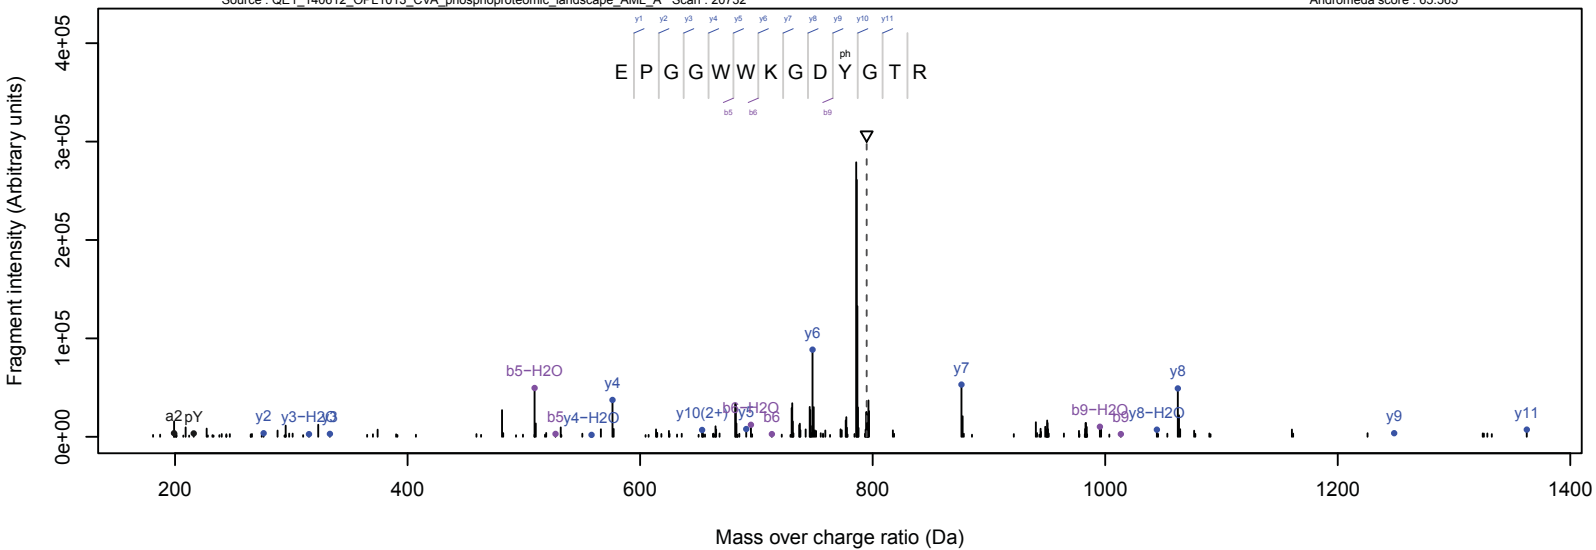



SVDGDQLGMEGPY(ph)EVLKDSSSQENMVEDCLY(ph)ETVKEIK-4+

Source : QE1\_140612\_OPL1013\_CVA\_phosphoproteomic\_landscape\_AML\_B Scan : 47909

Andromeda score : 65.508

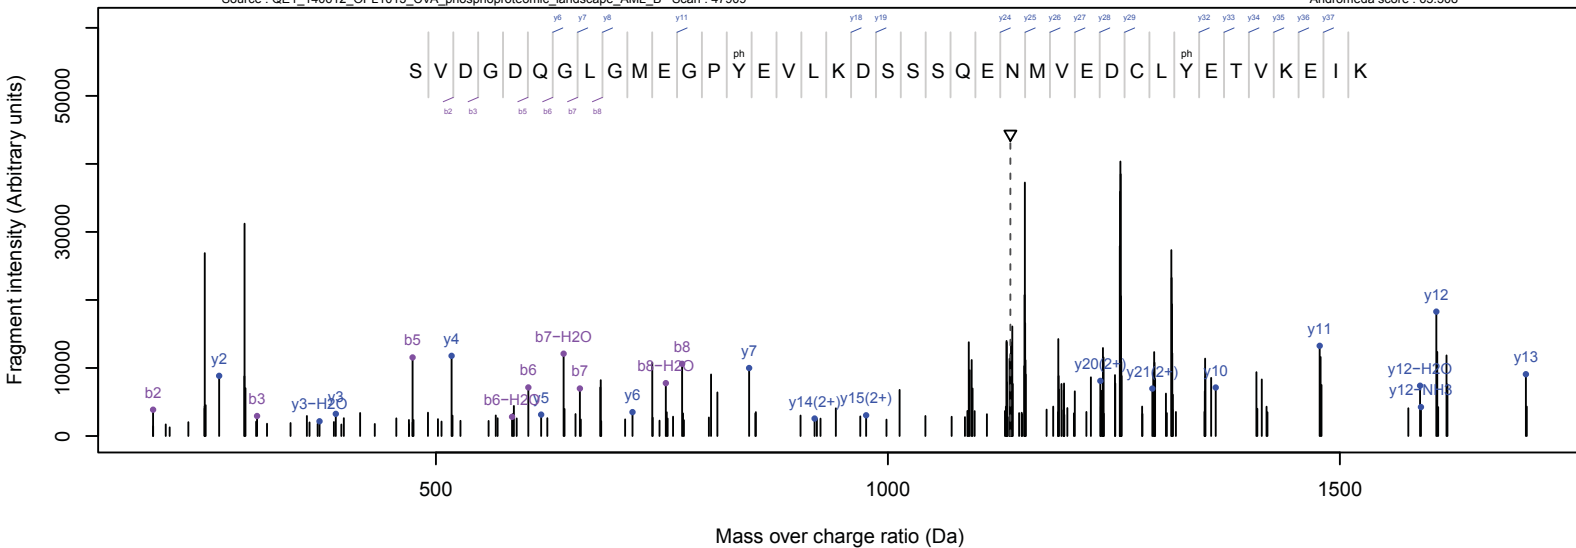

Y(ph)SNVIQSSFSK-2+

Source : QE1\_140612\_OPL1013\_CVA\_phosphoproteomic\_landscape\_AML\_B Scan : 19921

Andromeda score : 65.495

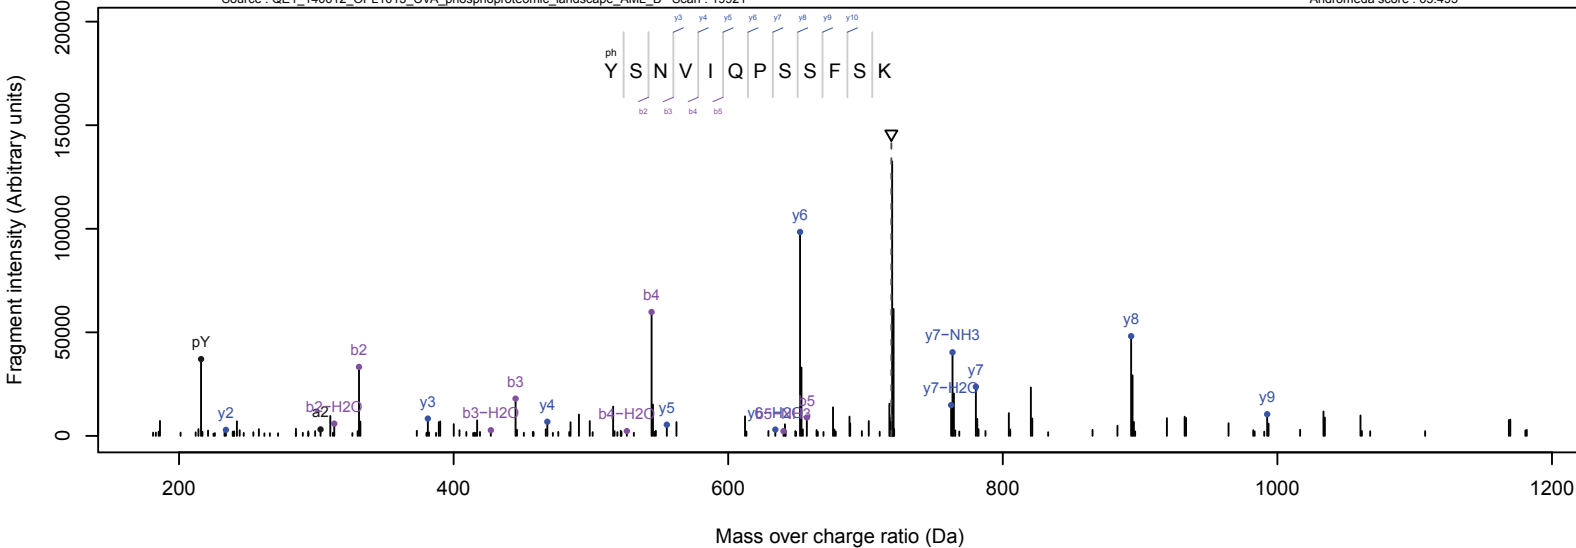

DY(ph)STVSASPTALSTLK-2+

Source : QE1\_140908\_OPL1013\_CvA\_pTyrIP\_AML\_Kasumi6 Scan : 31279

Andromeda score : 65.477

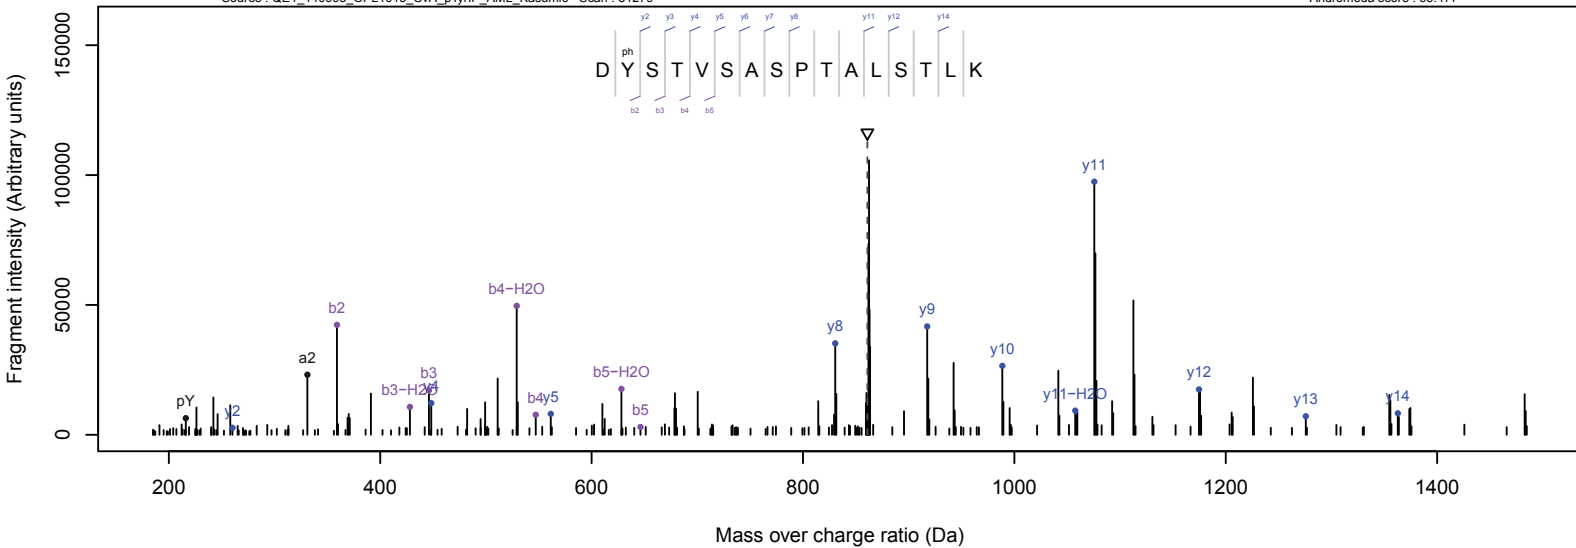

## KKDTAASGY(ph)GTQNIIR-3+

Source : QE1\_140612\_OPL1013\_CVA\_phosphoproteomic\_landscape\_AML\_C Scan : 3742

Andromeda score : 65.467

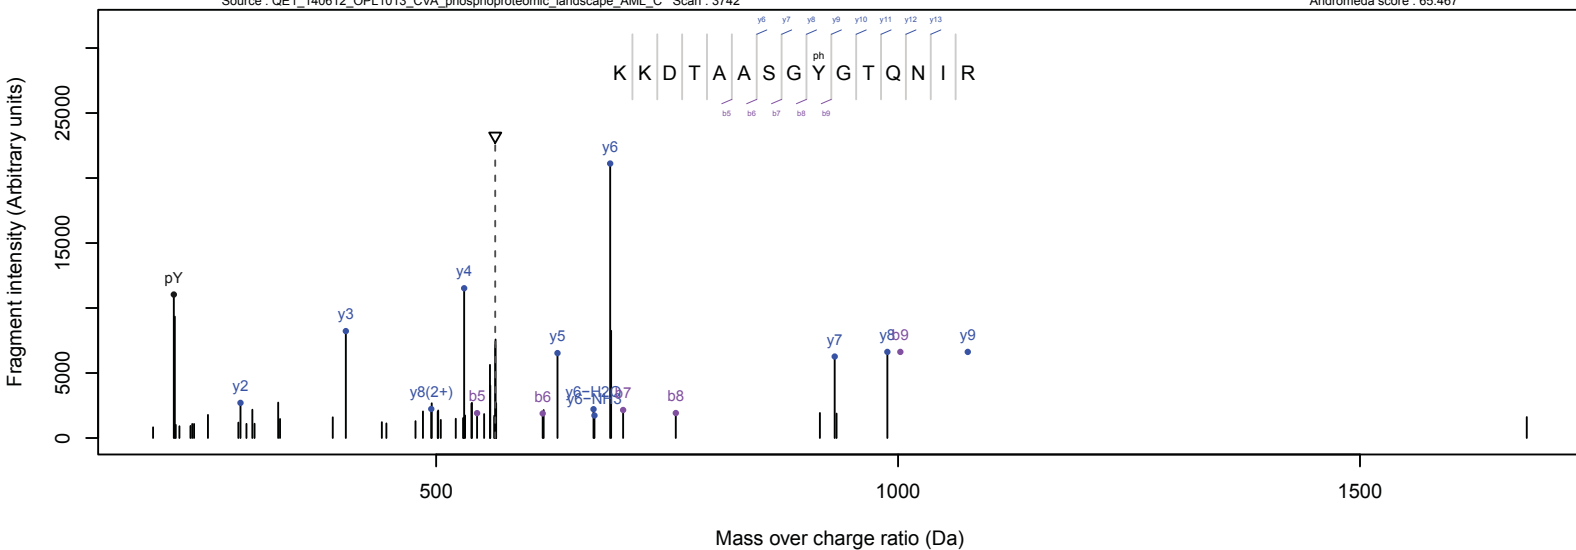

## EATPVVHETEPESGSRPAVLSGY(ph)FK-3+

Source : QE1\_140612\_OPL1013\_CVA\_phosphoproteomic\_landscape\_AML\_C Scan : 27336

Andromeda score : 65.428

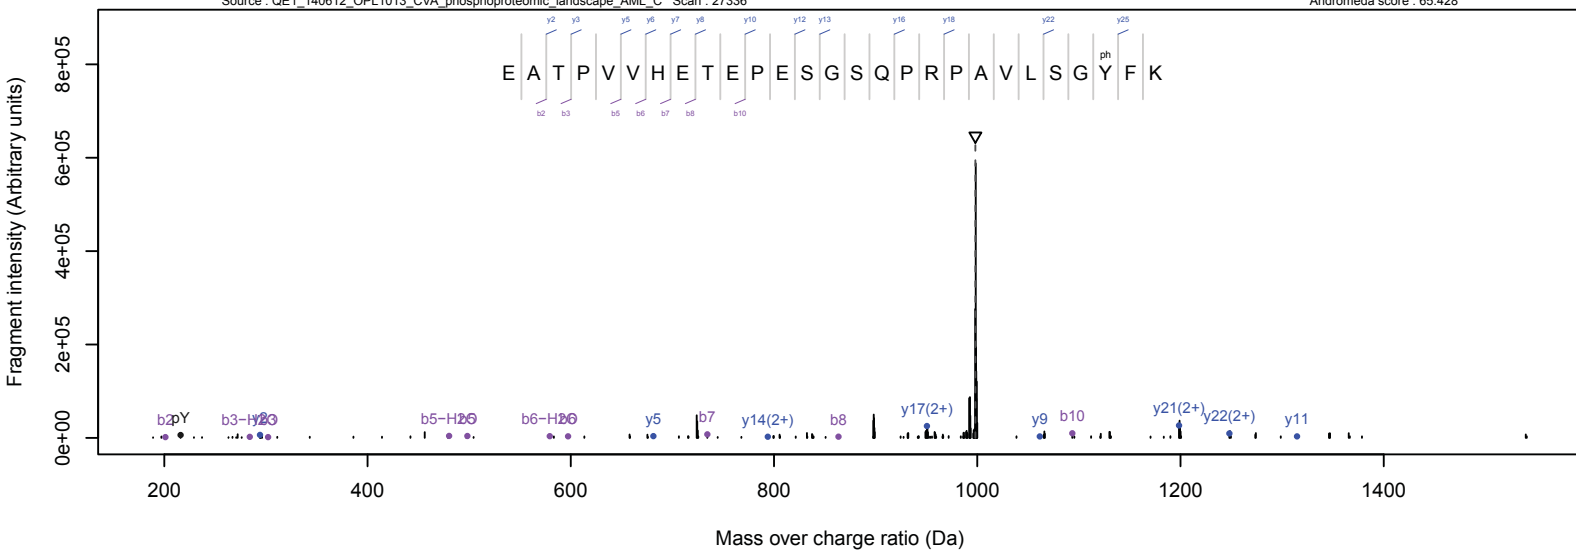

## (ac)MEAAGSPAATET(ph)GKYIASTQRPDGTWR-3+

Source : QE1\_140612\_OPL1013\_CVA\_phosphoproteomic\_landscape\_AML\_C Scan : 30208

Andromeda score : 65.428

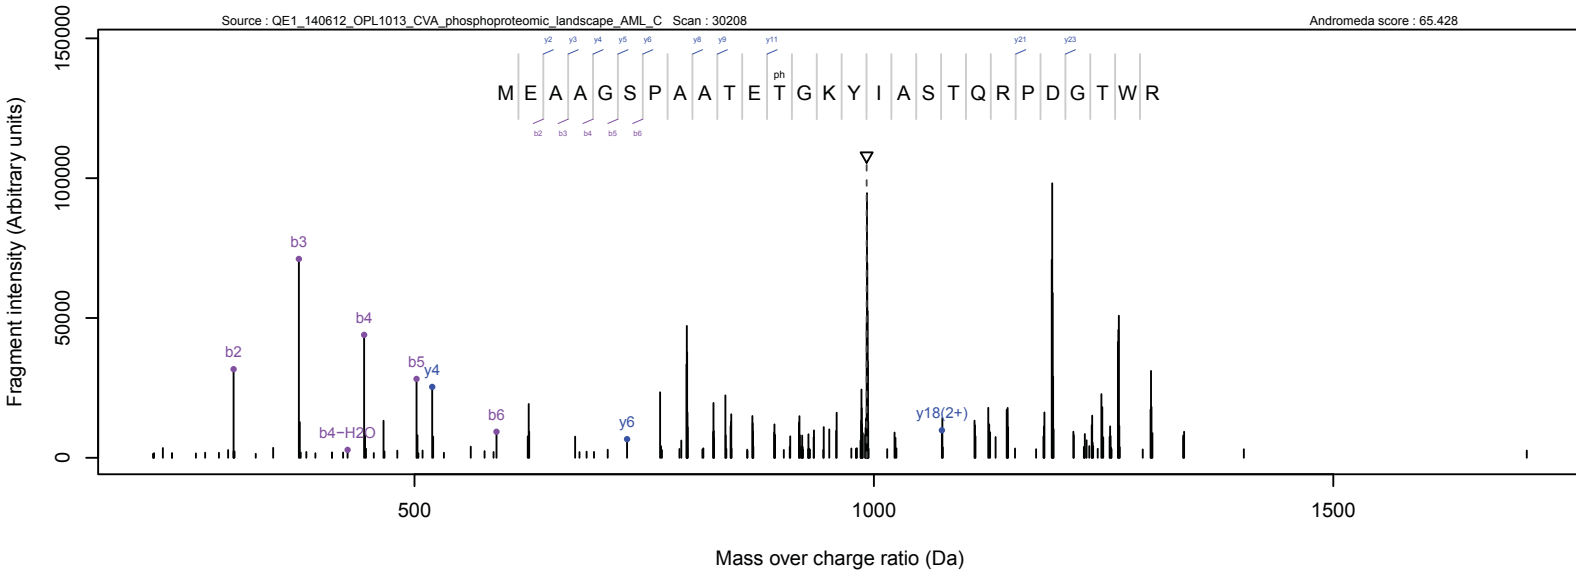

## DKFNECGHVL(ph)ADIK-3+

Source: QE1\_140612\_OPL1013\_CVA\_phosphoproteomic\_landscape\_AML\_B Scan: 22556

Andromeda score: 65.423

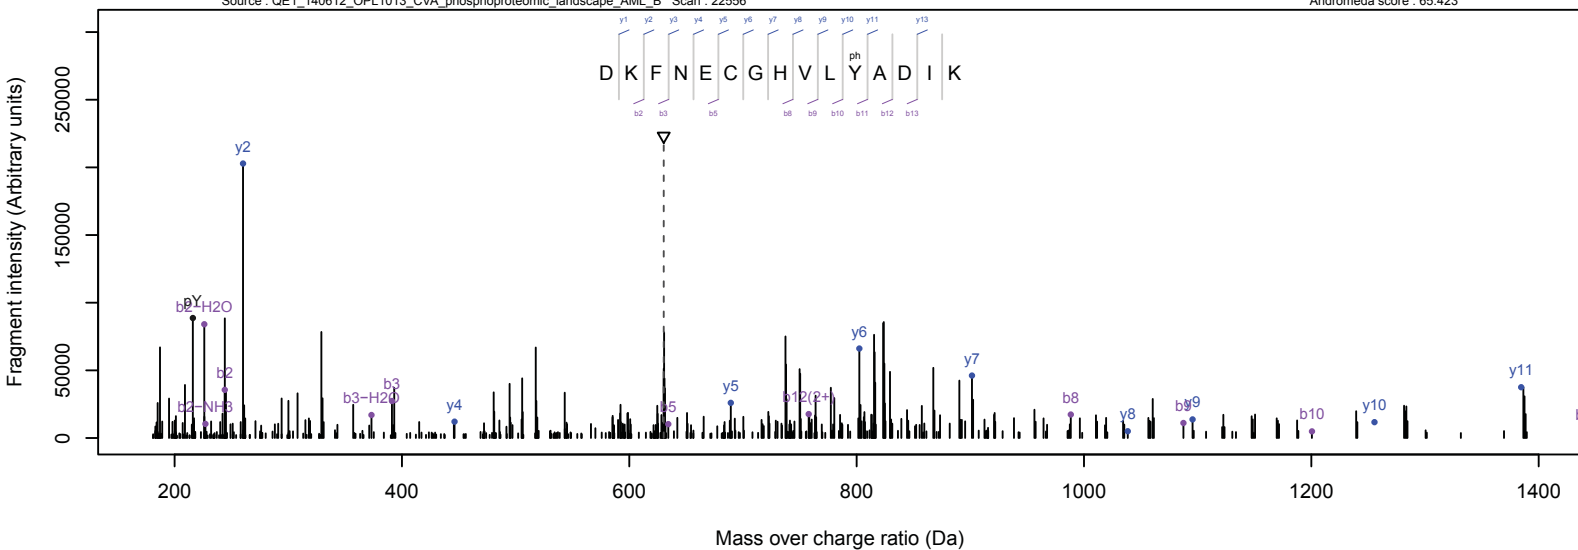

## KGTYPDAIITDPPYGI R-2+

Source: QE1\_140612\_OPL1013\_CVA\_phosphoproteomic\_landscape\_AML\_B Scan: 40957

Andromeda score: 65.423

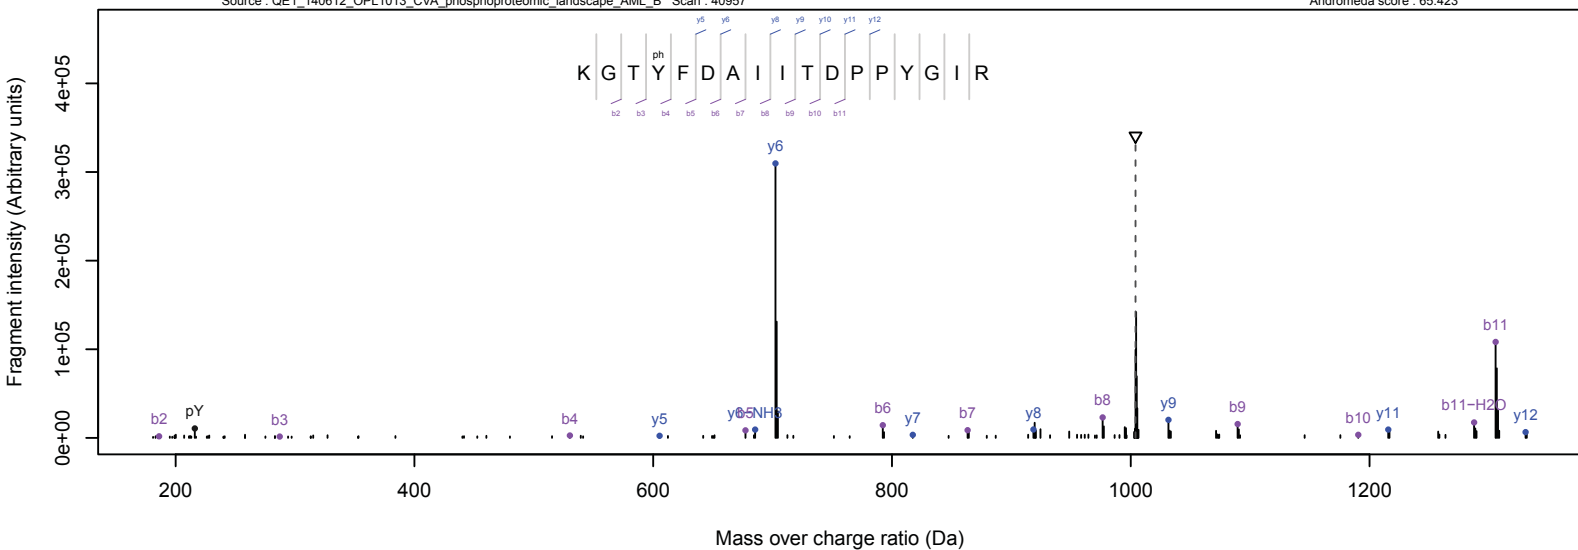

## NTTQNTGYSSGTQ NANY PVR-3+

Source: QE1\_140612\_OPL1013\_CVA\_phosphoproteomic\_landscape\_AML\_C Scan: 7876

Andromeda score: 65.423

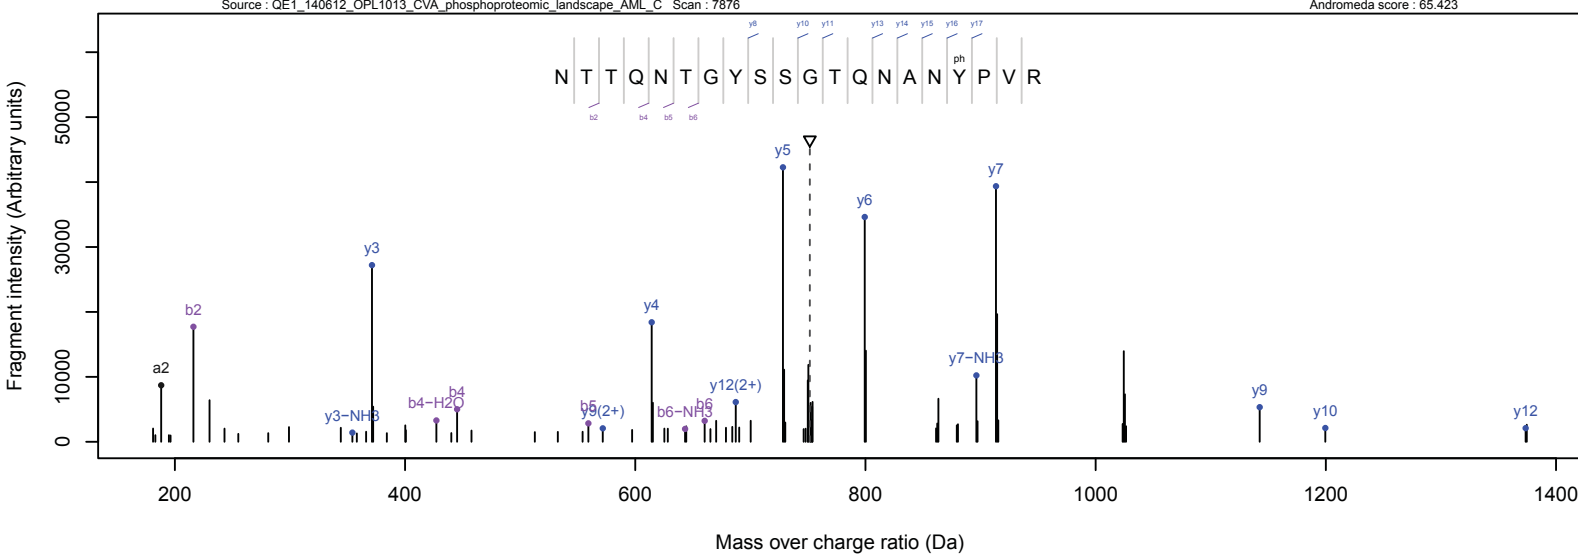



**SGLIY(ph)LTNHIAPHAR-3+**

Source : QE1\_140612\_OPL1013\_CVA\_phosphoproteomic\_landscape\_AML\_B Scan : 29518

Andromeda score : 65.374

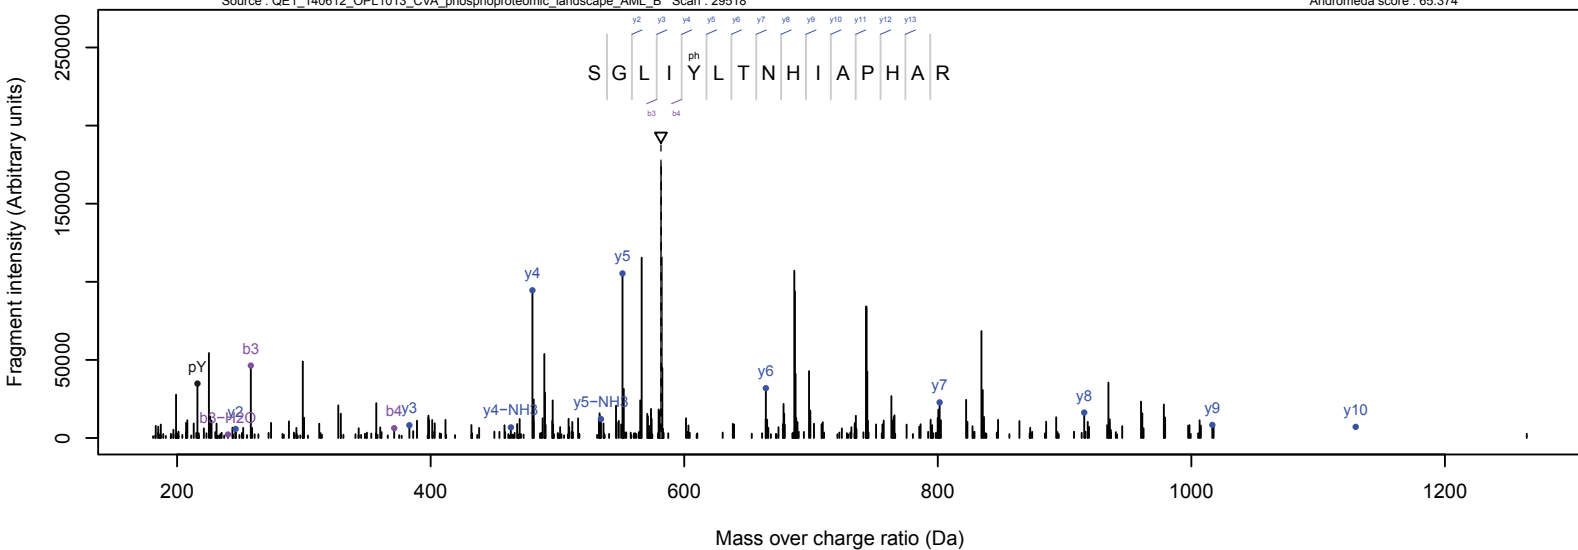

**SRQELIALYGY(ph)DIR-2+**

Source : QE1\_140612\_OPL1013\_CVA\_phosphoproteomic\_landscape\_AML\_C Scan : 33881

Andromeda score : 65.374

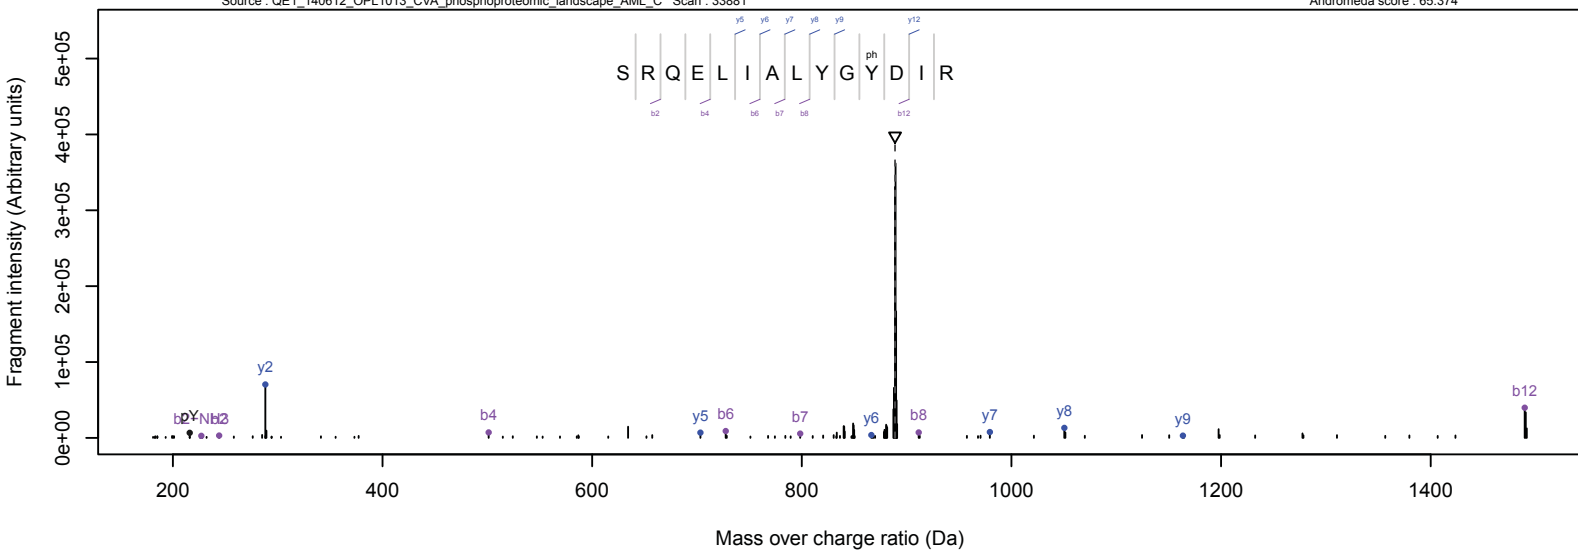

**ENILVSLGAVGEGFHNY(ph)HHSFPYDYSASEYR-4+**

Source : QE1\_140612\_OPL1013\_CVA\_phosphoproteomic\_landscape\_AML\_C Scan : 44371

Andromeda score : 65.33

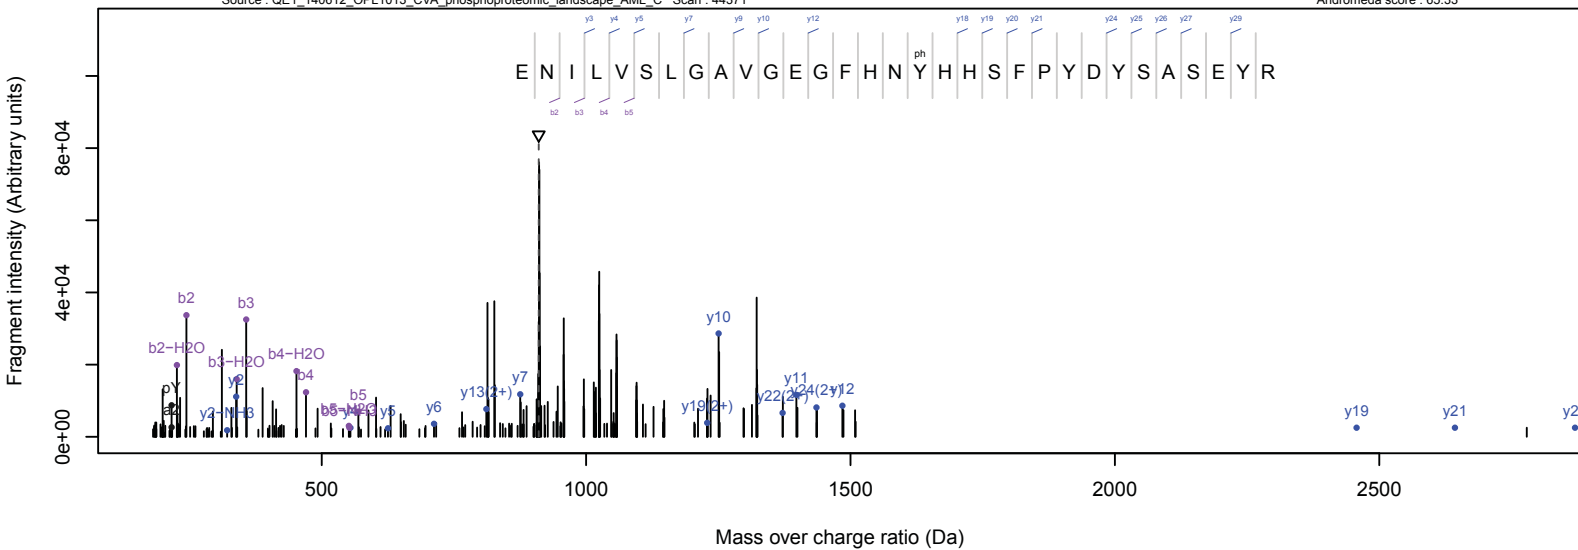

**KLSDLYY(ph)DIHR-3+**

Source : QE1\_140612\_OPL1013\_CVA\_phosphoproteomic\_landscape\_AML\_C Scan : 26436

Andromeda score : 65.295

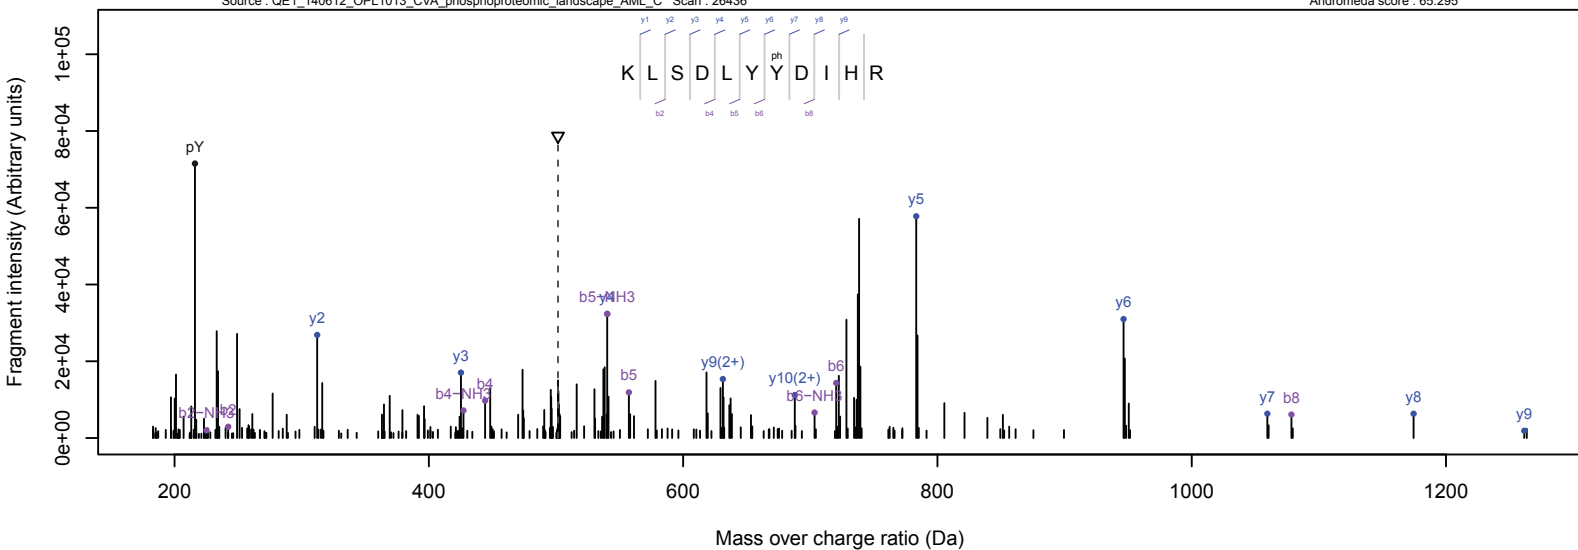

**M(ox)ANY(ph)TNLTQGAK-2+**

Source : QE1\_140908\_OPL1013\_CvA\_pTyrIP\_AML\_Kasumi6 Scan : 10056

Andromeda score : 65.295

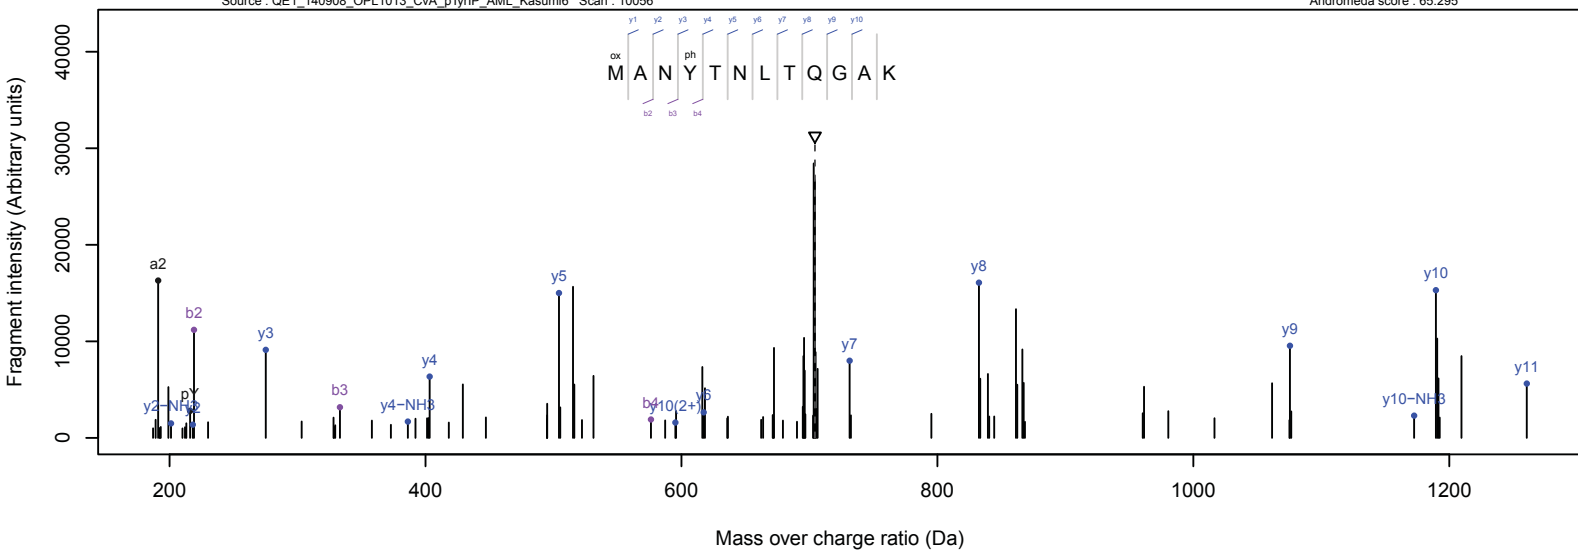

**VGSALKY(ph)EALR-2+**

Source : QE1\_140612\_OPL1013\_CVA\_phosphoproteomic\_landscape\_AML\_B Scan : 15228

Andromeda score : 65.295

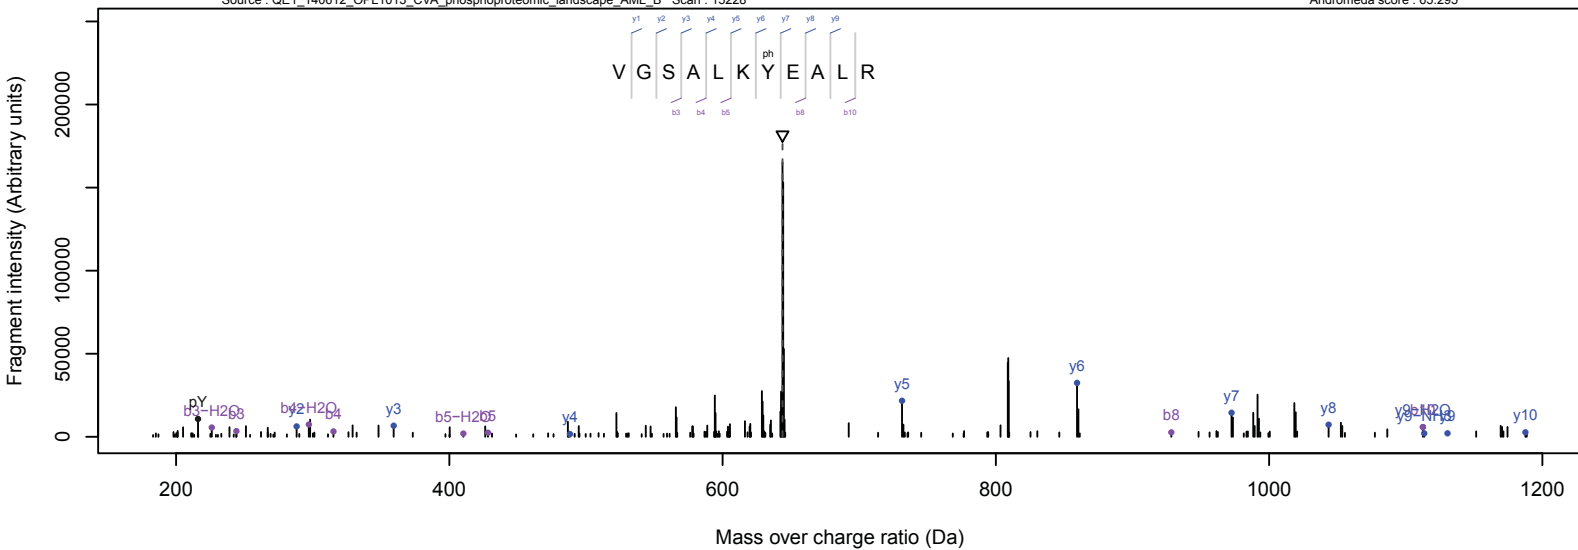

AA<sub>Y</sub>(ph)DILR-2+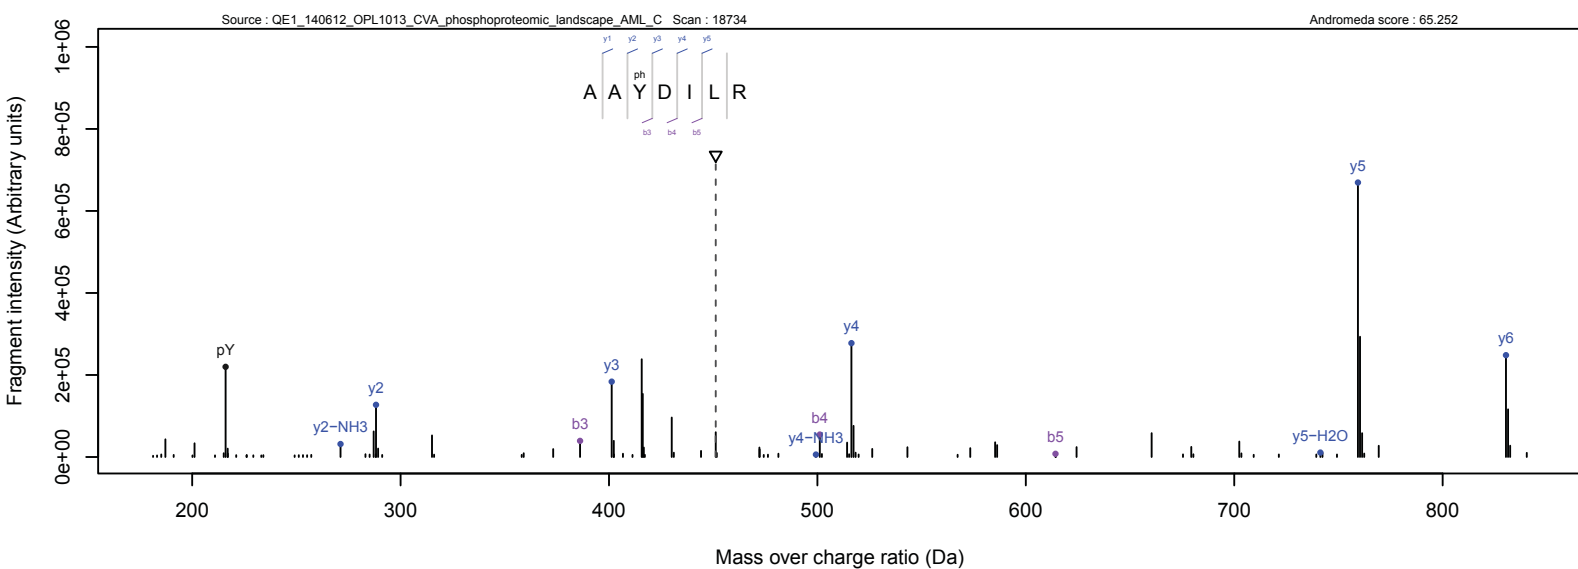

## RCY(ph)LYYFK-2+

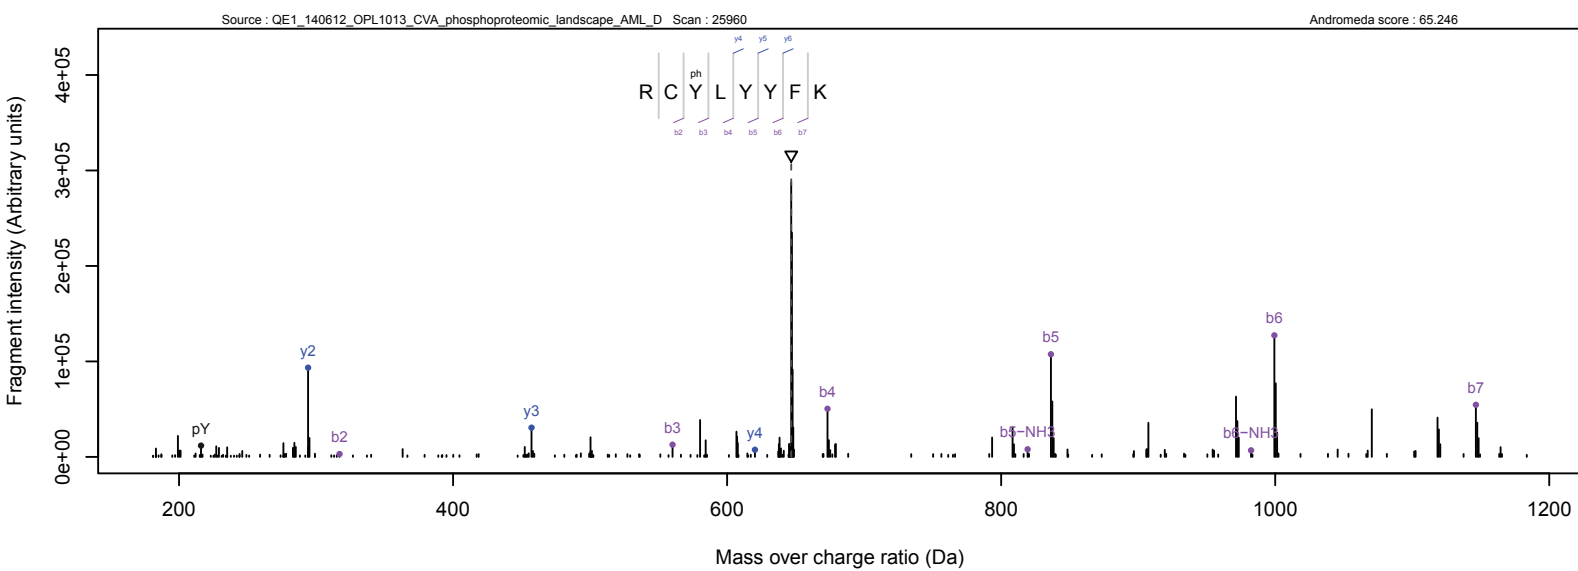VLPALVIPA<sub>HY</sub>(ph)MK-3+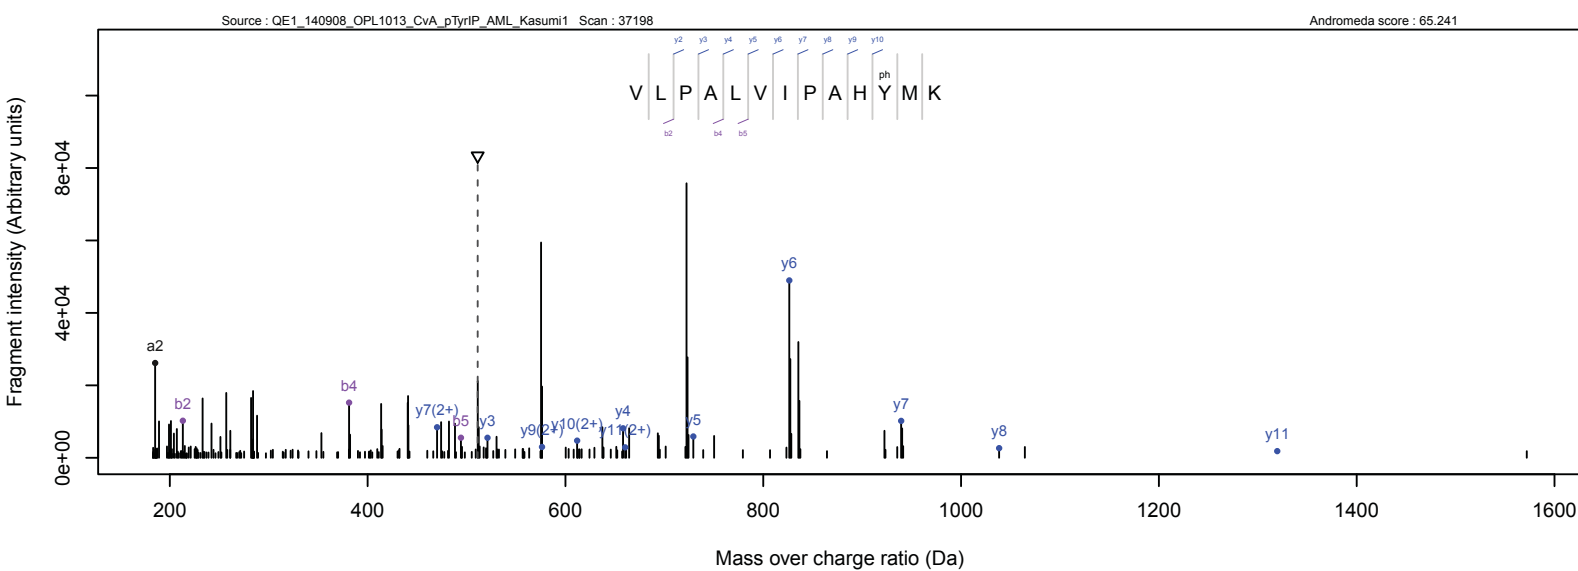

## EVPIY(ph)ANR-2+

Source : QE1\_140612\_OPL1013\_CVA\_phosphoproteomic\_landscape\_AML\_C Scan : 10322

Andromeda score : 65.235

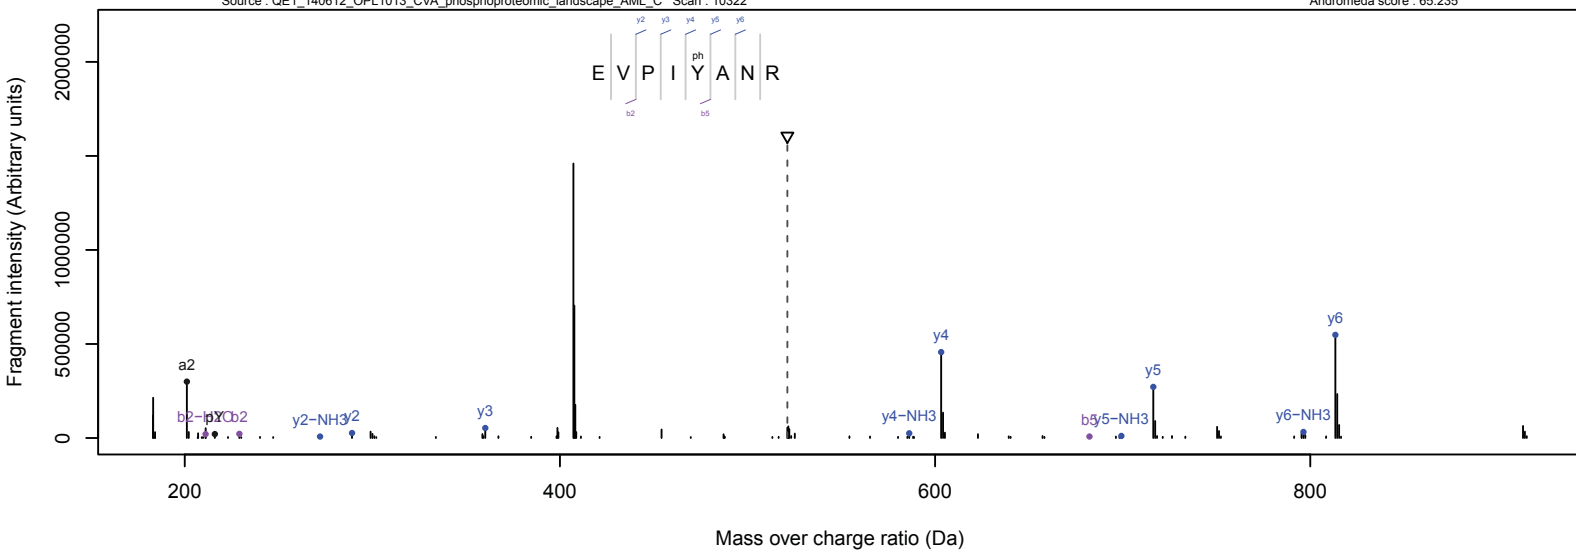

## APGAIGPYS(ph)QAVLVDR-2+

Source : QE1\_140612\_OPL1013\_CVA\_phosphoproteomic\_landscape\_AML\_C Scan : 27704

Andromeda score : 65.231

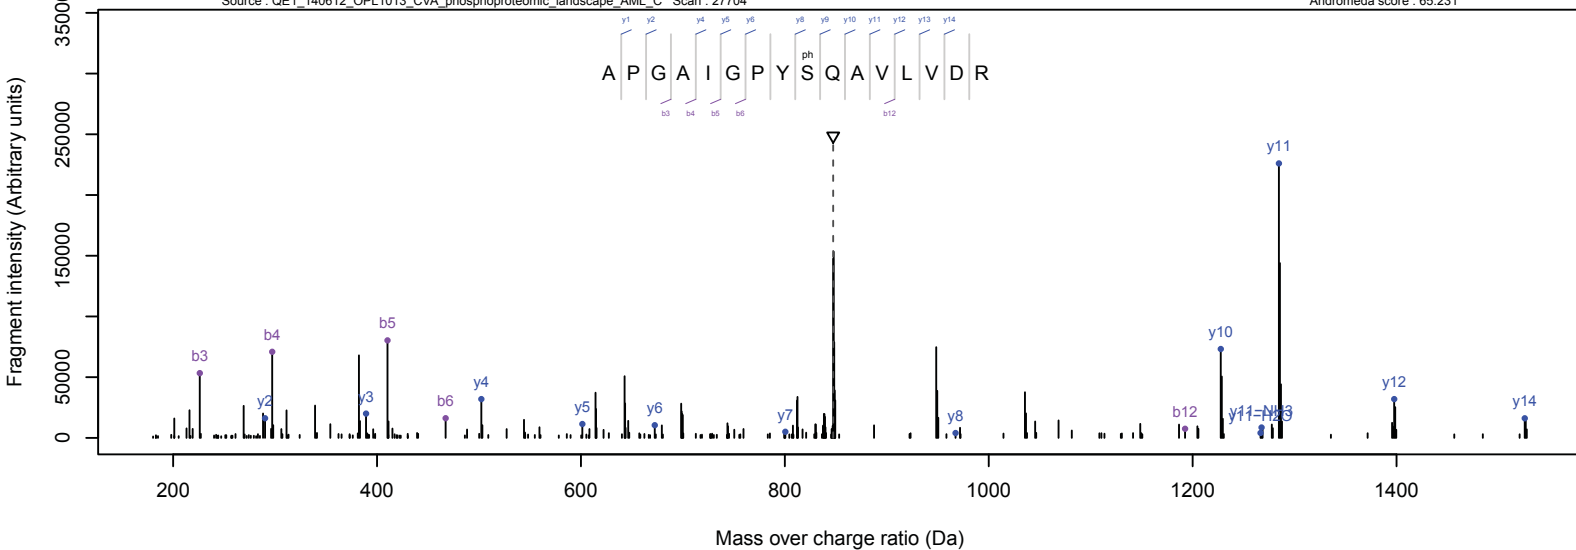

## FIEDLNMY(ph)EASKDGLFR-3+

Source : QE1\_140612\_OPL1013\_CVA\_phosphoproteomic\_landscape\_AML\_C Scan : 41841

Andromeda score : 65.231

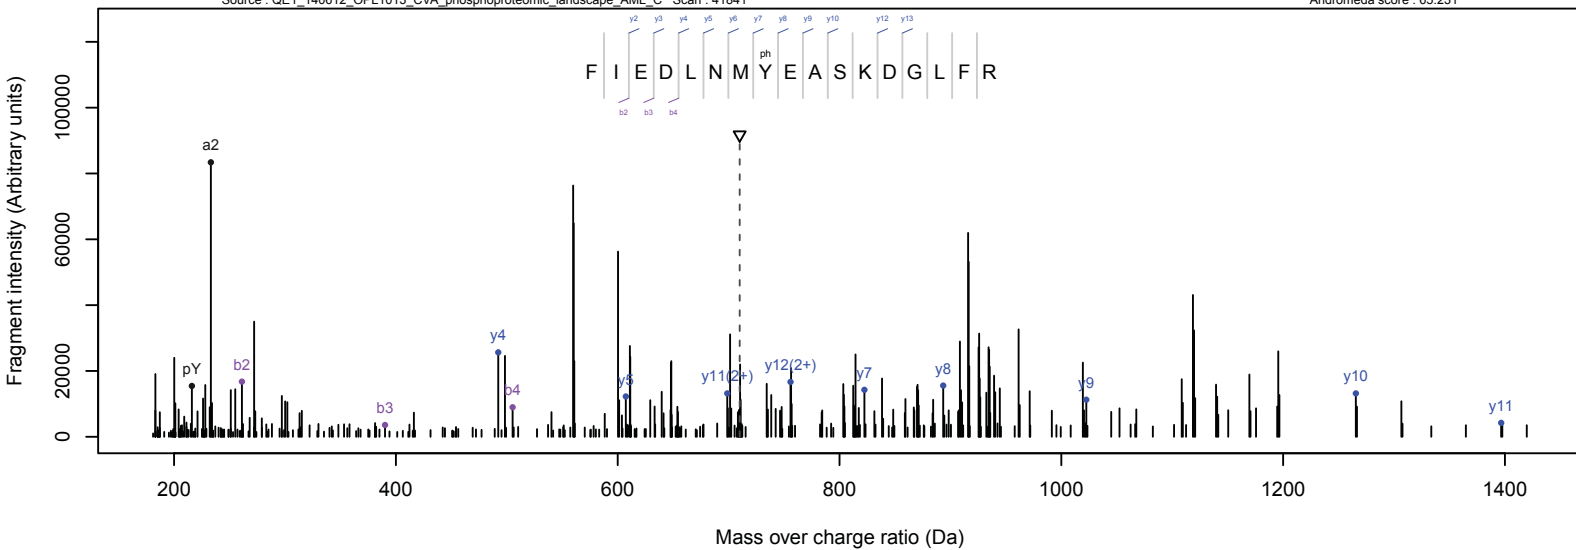



## LNPY(ph)PTSPHPLYPGR-2+

Source: QE1\_140612\_OPL1013\_CVA\_phosphoproteomic\_landscape\_AML\_C Scan: 25383

Andromeda score: 65.231

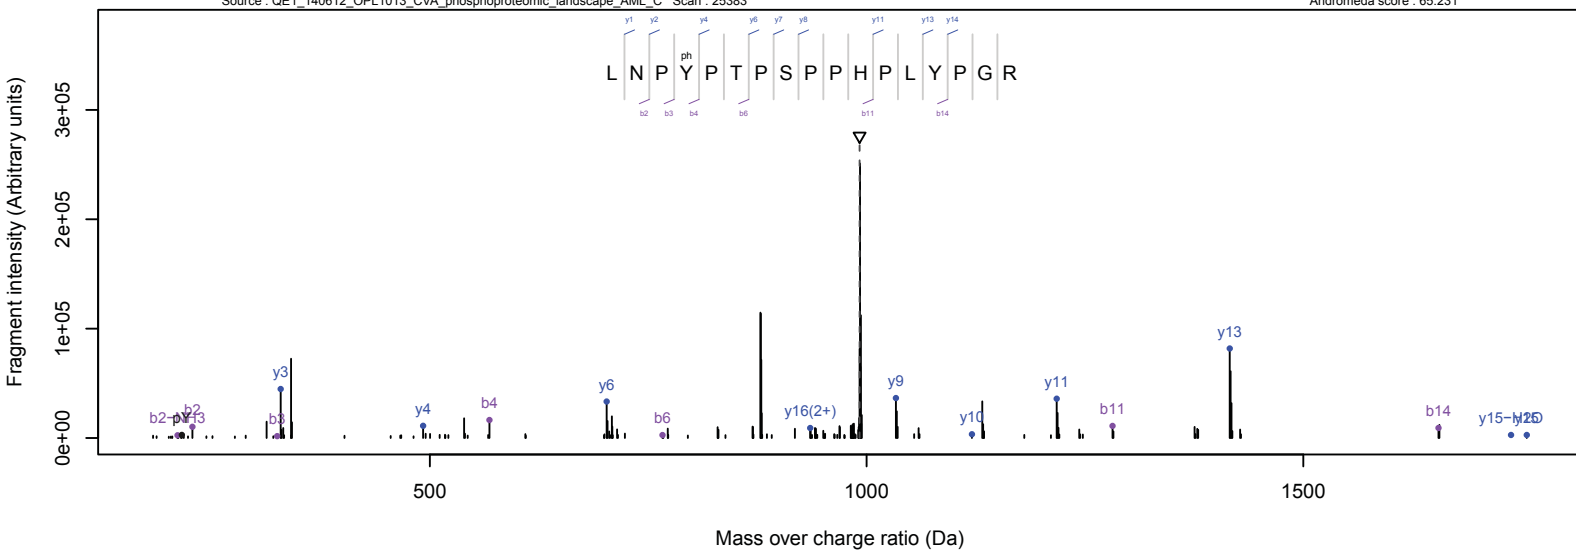

## VFSNGHLGSEE(ph)DVPPR-3+

Source: QE1\_140908\_OPL1013\_CvA\_pTyrIP\_AML\_Kasumi6 Scan: 22187

Andromeda score: 65.231

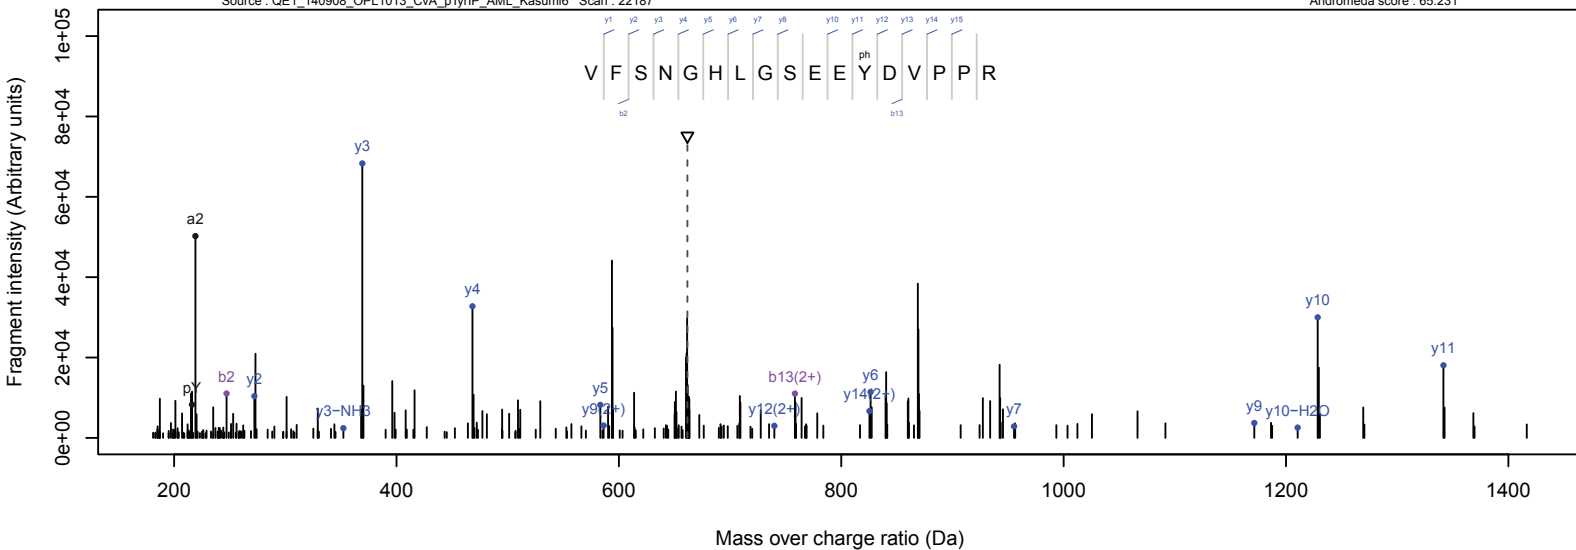

## Y(ph)AINPHLTDQRFPQLR-4+

Source: QE1\_140612\_OPL1013\_CVA\_phosphoproteomic\_landscape\_AML\_C Scan: 28899

Andromeda score: 65.231

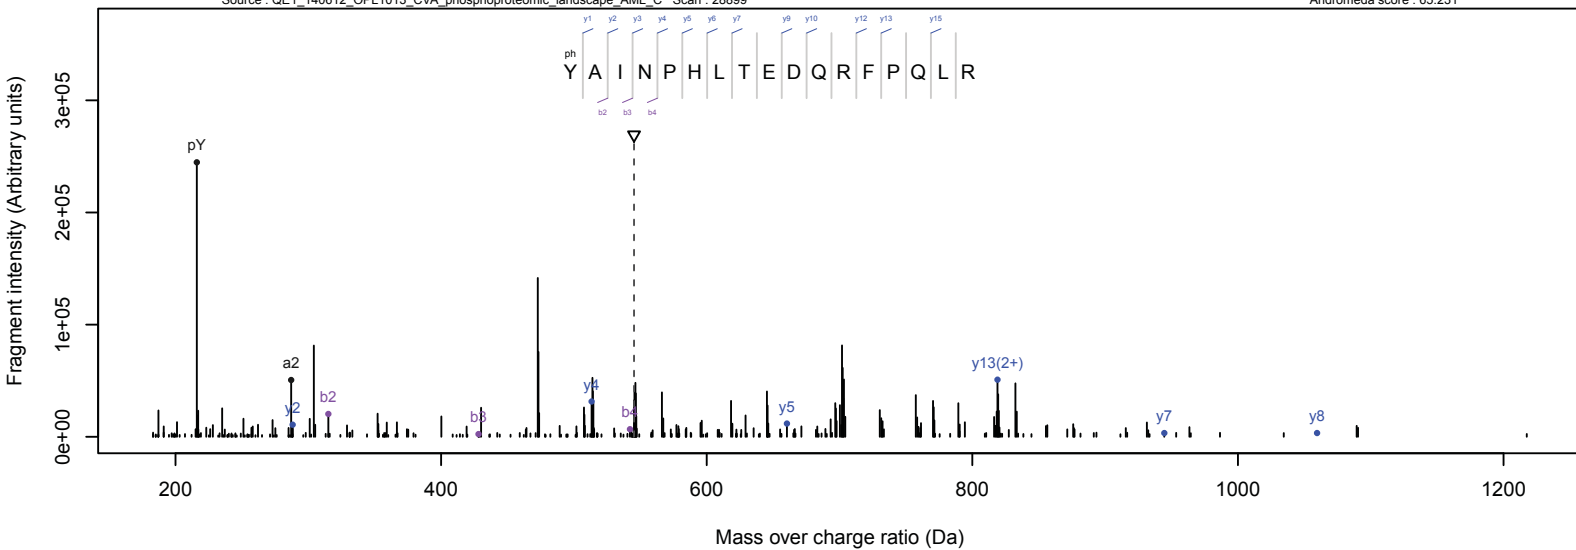

Y(ph)ETSSTSAGDRYDSLGR-3+

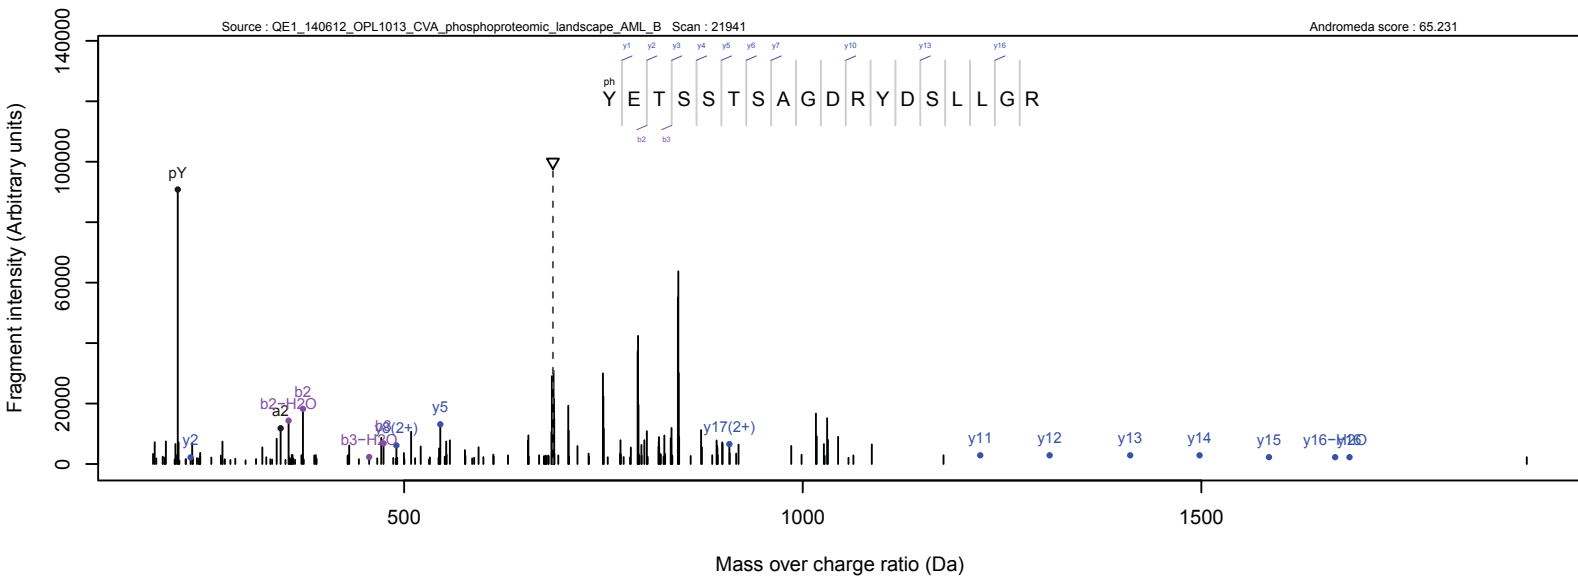

ILSFVY(ph)PIR-2+

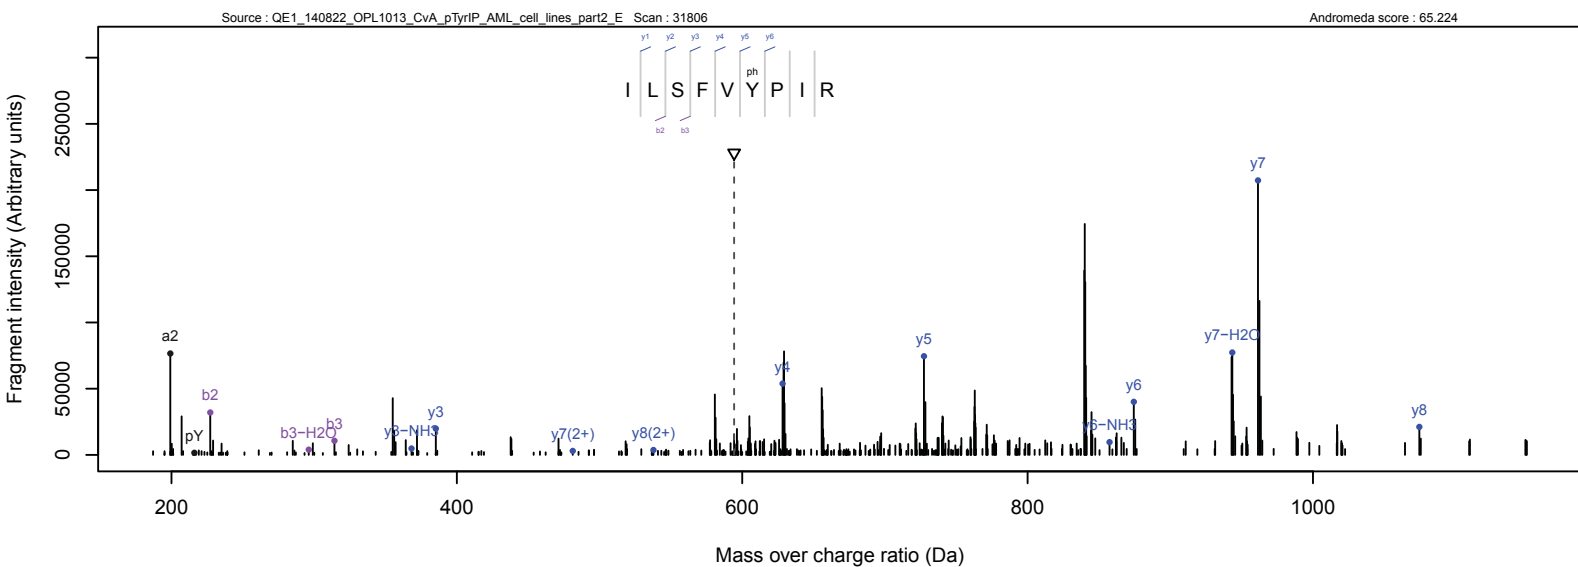

HGAVCHTGAPDATHVHPDVSSSSY(ph)SSR-5+

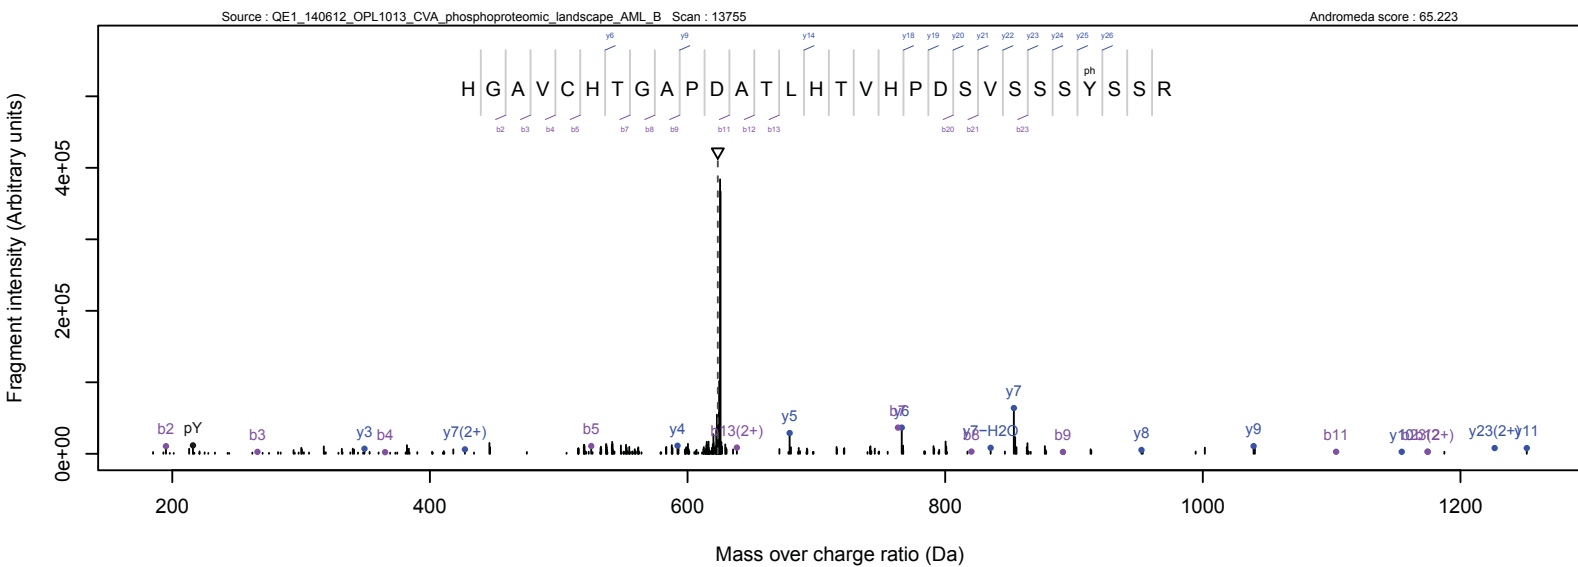

LIHNSHDPSY(ph)FACLIKEDAVHR-4+

Source: QE1\_140612\_OPL1013\_CVA\_phosphoproteomic\_landscape\_AML\_C Scan: 31873

Andromeda score: 65.207

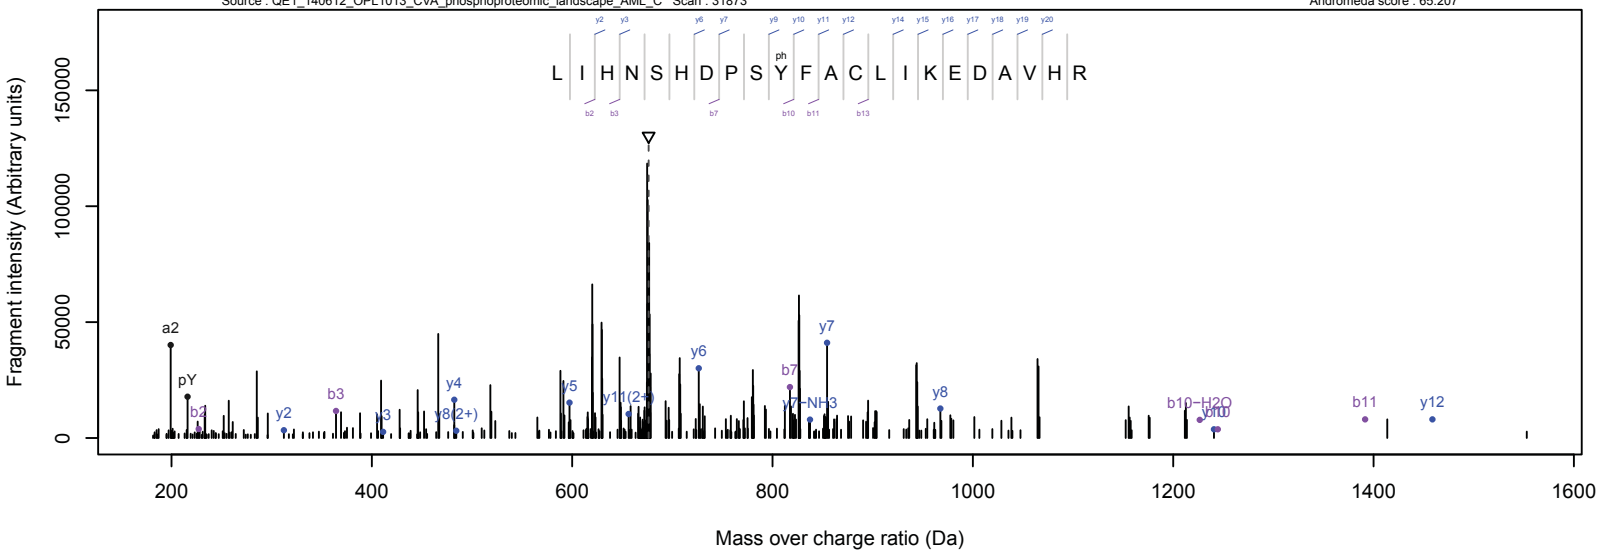

QLTSY(ph)VGSVRPLVTELPDAPIR-3+

Source: QE1\_140612\_OPL1013\_CVA\_phosphoproteomic\_landscape\_AML\_B Scan: 45268

Andromeda score: 65.207

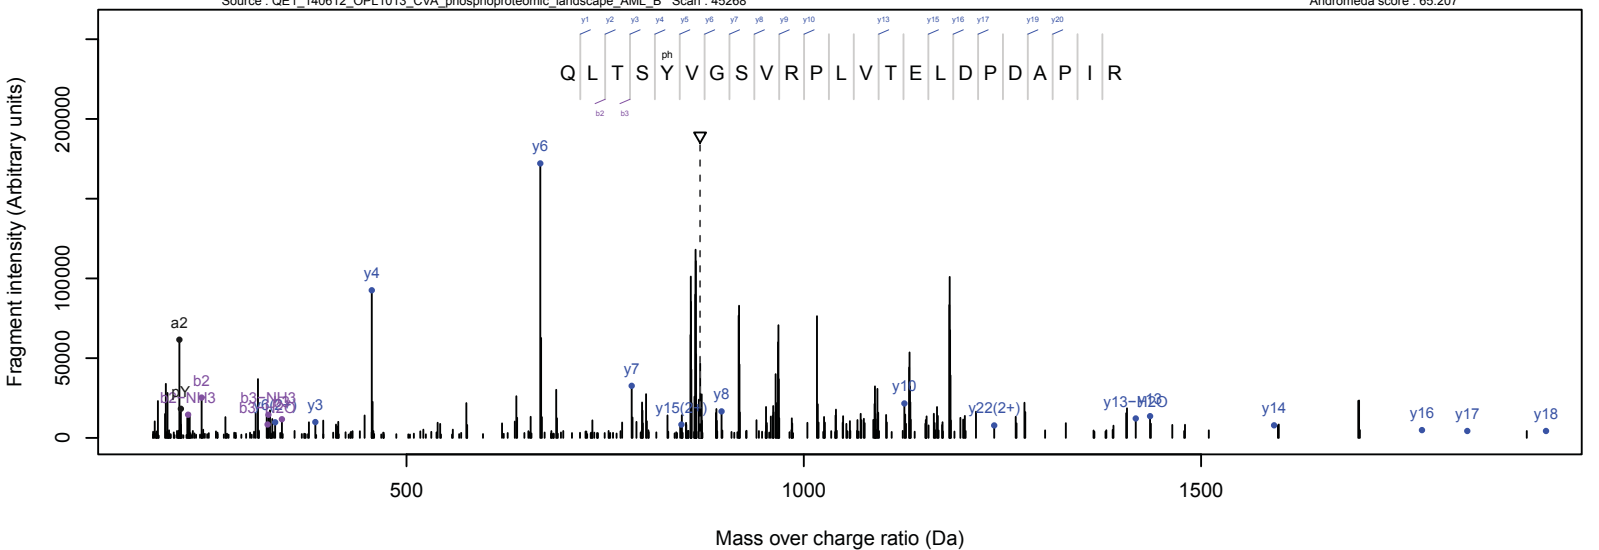

Y(ph)NSTAGIDLNQLSAAIPATR-2+

Source: QE1\_140612\_OPL1013\_CVA\_phosphoproteomic\_landscape\_AML\_C Scan: 41936

Andromeda score: 65.207

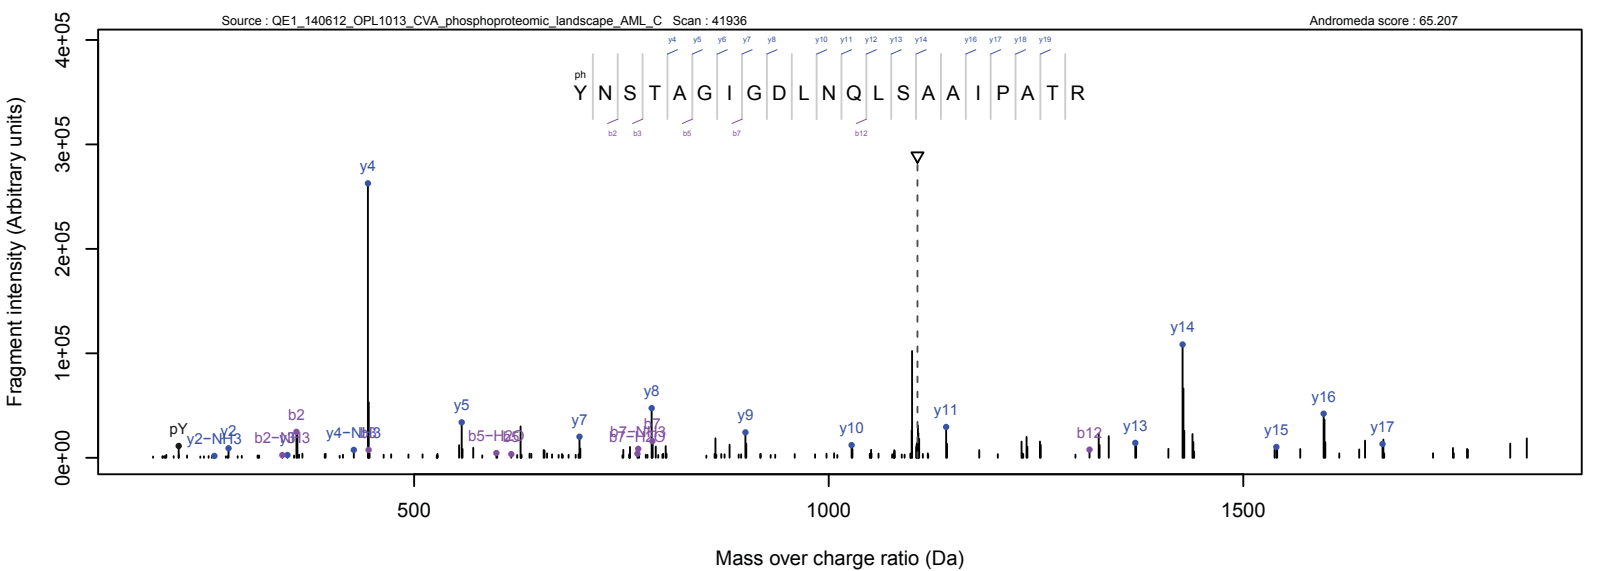

HEIPYYEFQSLQTEIC<sup>ph</sup>QNKYTHFK-4+

Source: QE1\_140612\_OPL1013\_CVA\_phosphoproteomic\_landscape\_AML\_B Scan: 37397

Andromeda score: 65.197

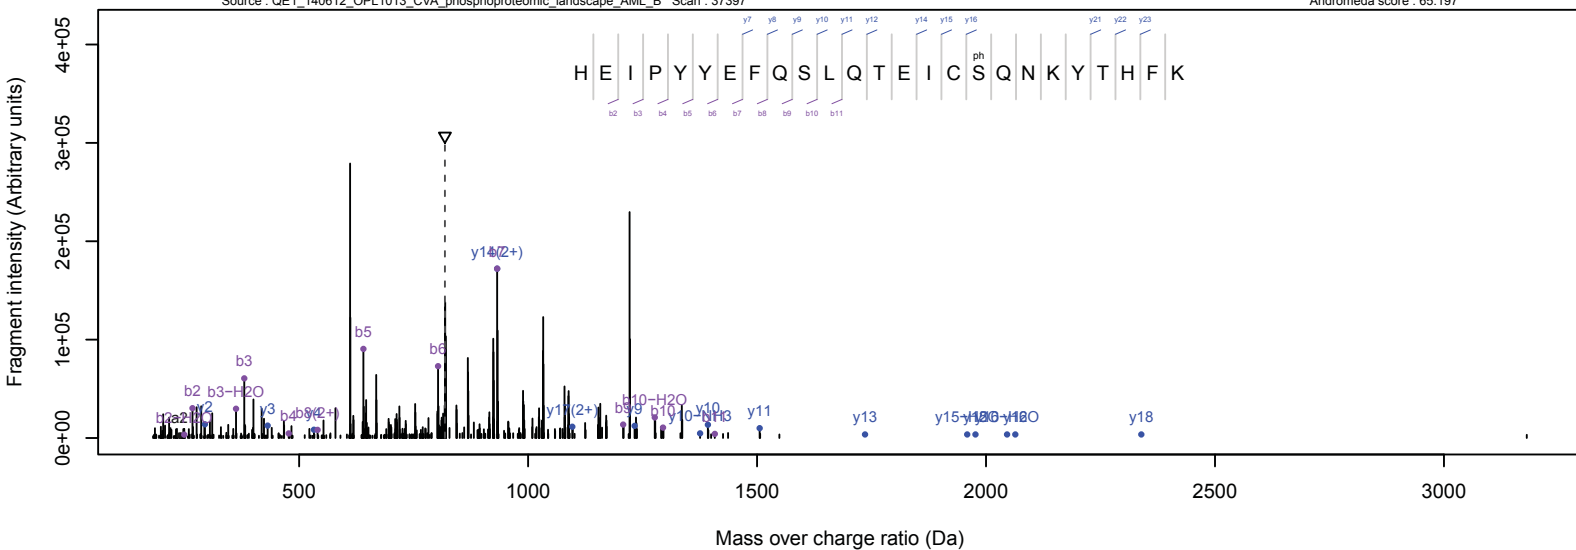KTTGSAQY<sup>ph</sup>SLSDVTSTSSR-3+

Source: QE1\_140612\_OPL1013\_CVA\_phosphoproteomic\_landscape\_AML\_B Scan: 14723

Andromeda score: 65.184

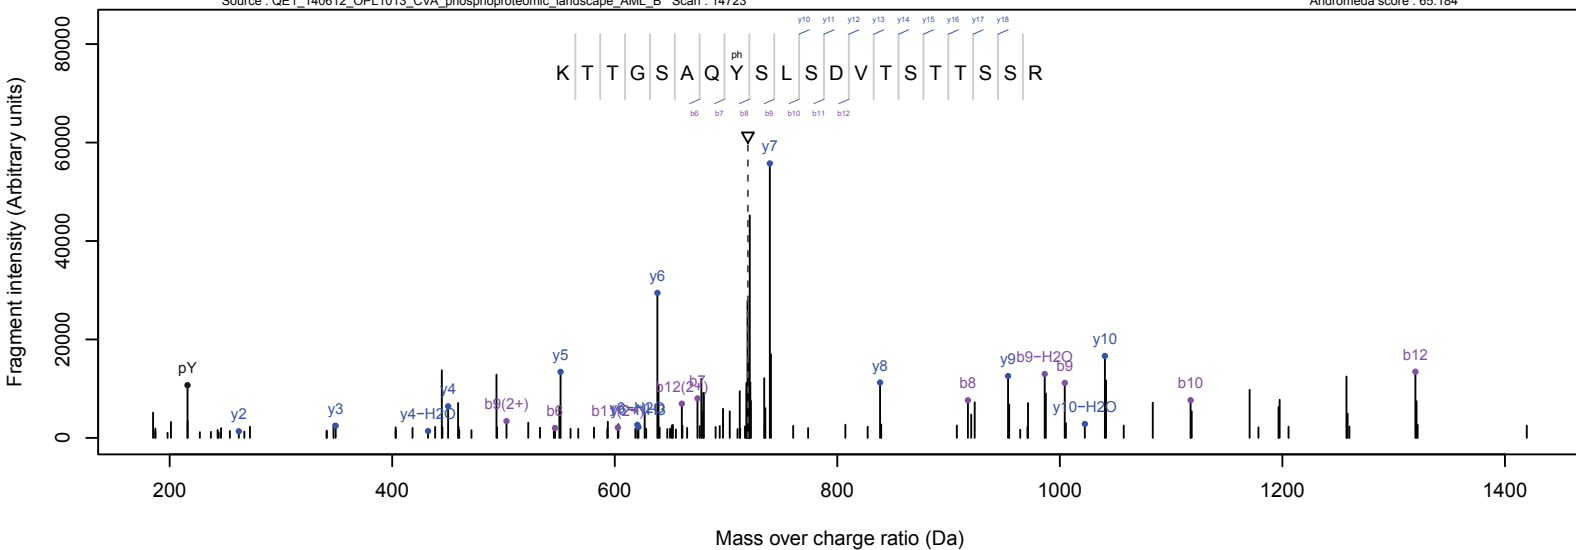SGSHTIGPFSS<sup>ph</sup>QSAAHYISQK-3+

Source: QE1\_140908\_OPL1013\_CvA\_pTyrIP\_AML\_Kasumi1 Scan: 29384

Andromeda score: 65.184

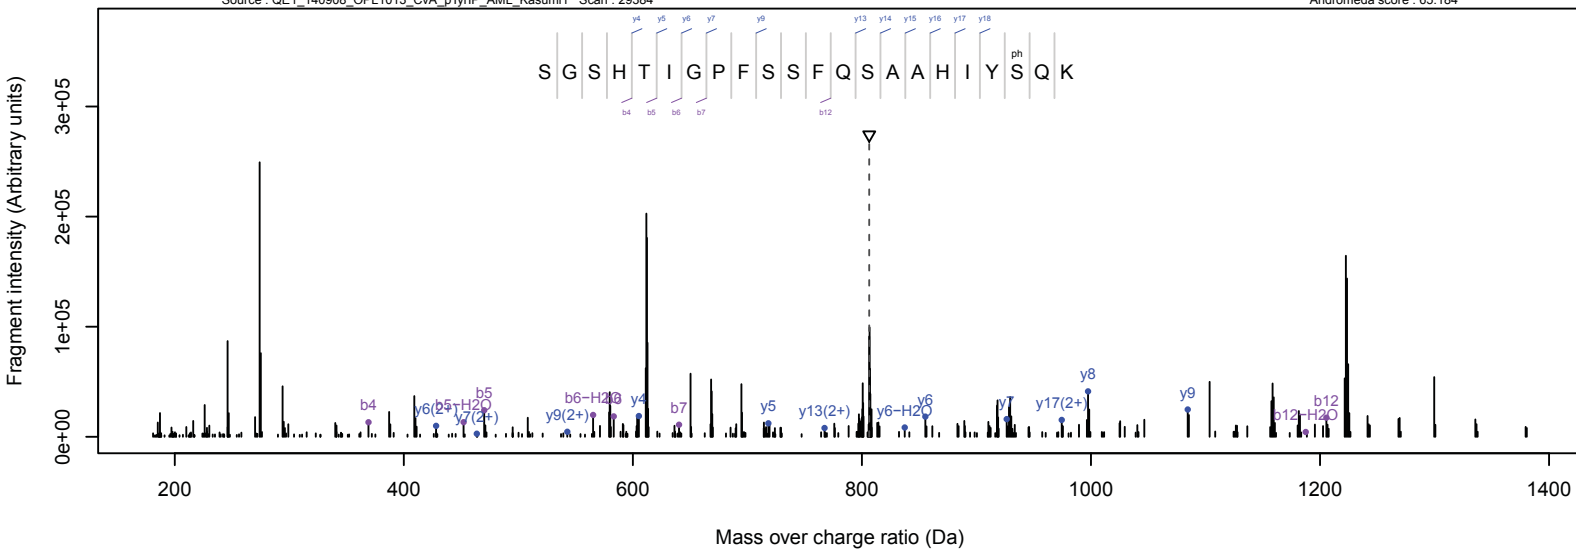

## T(ph)AMRVSPHHPAPTNP-4+

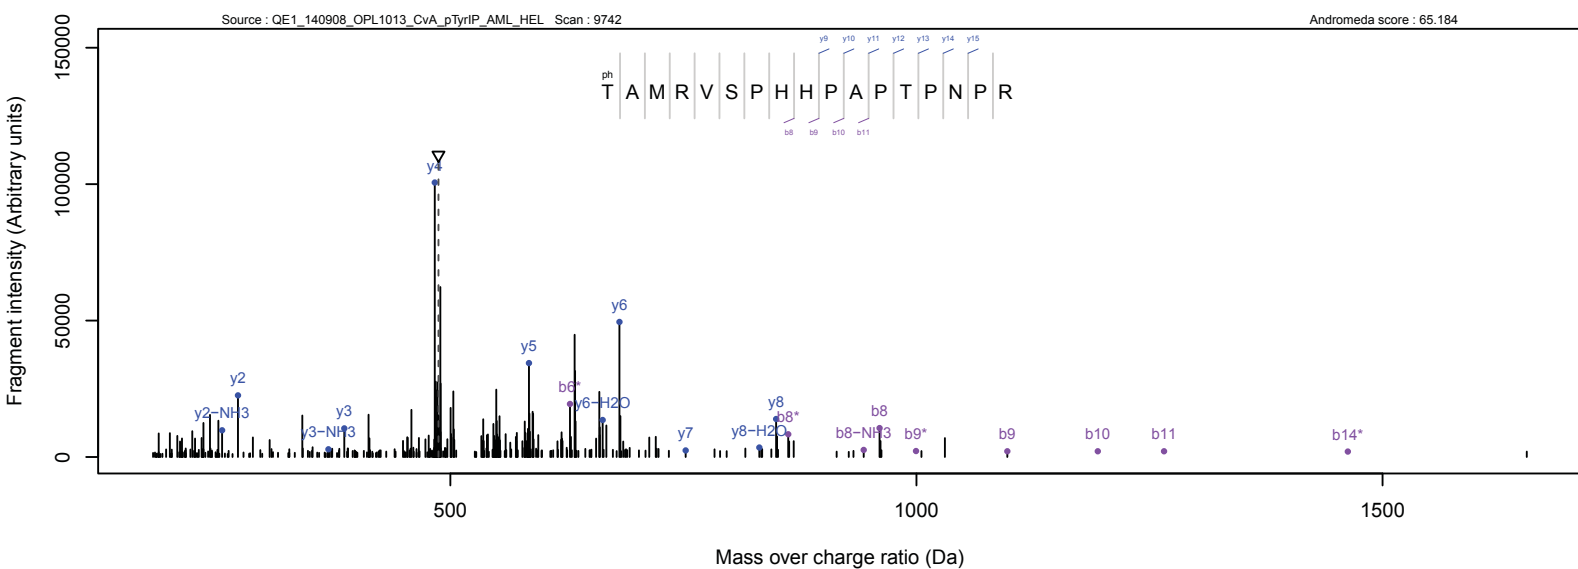

## AVPEGHEY(ph)YRVR-3+

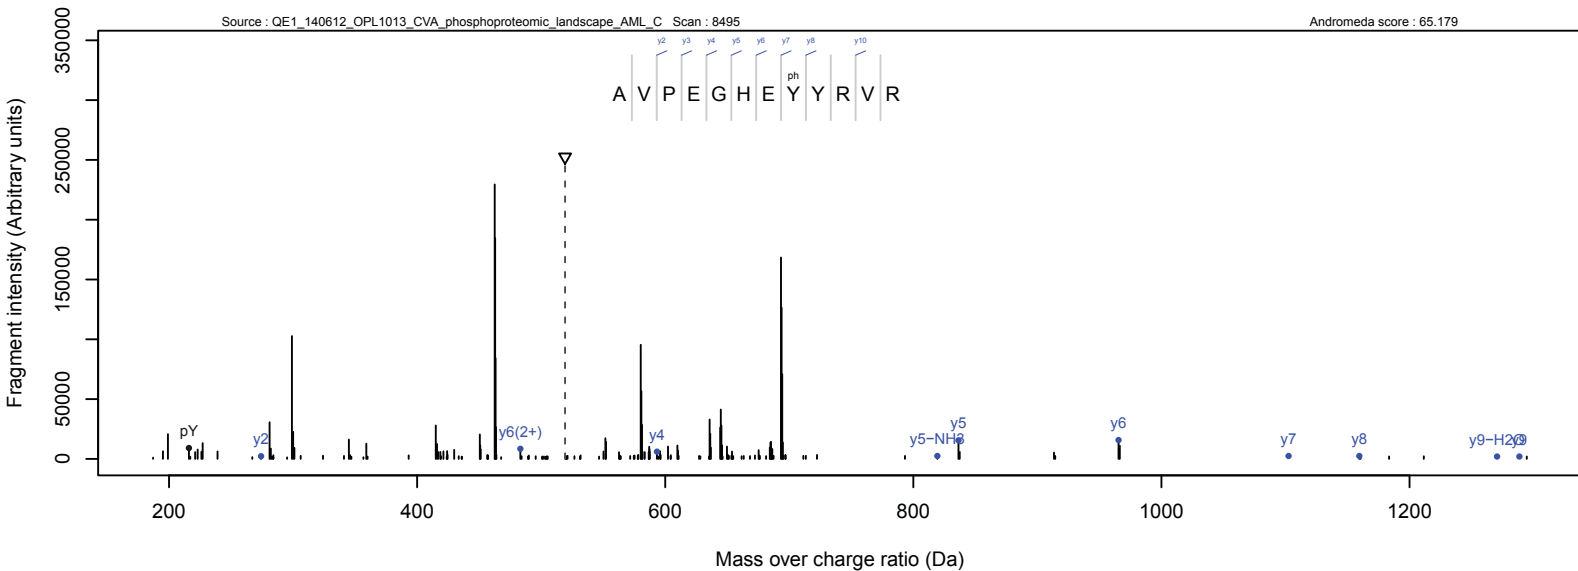

## IGDGMNAY(ph)VAYK-2+

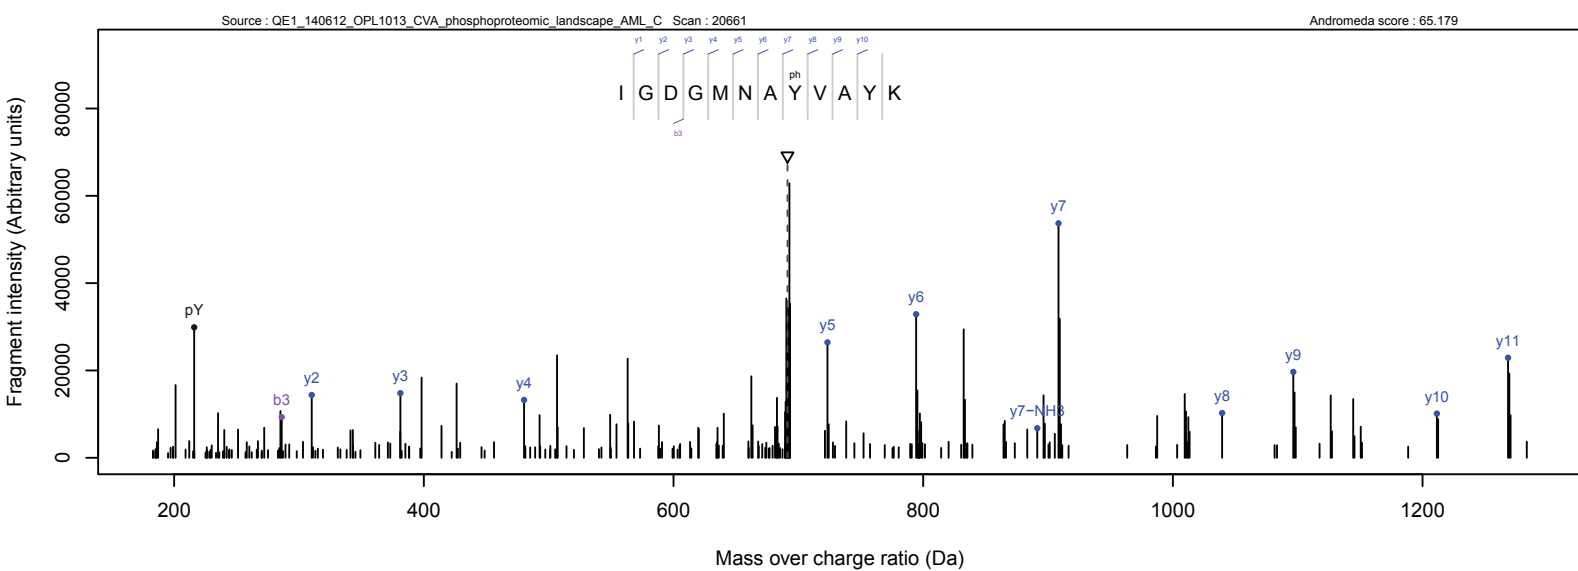

**TLY(ph)IPILTEPR-2+**

Source: QE1\_140612\_OPL1013\_CVA\_phosphoproteomic\_landscape\_AML\_C Scan: 47767

Andromeda score: 65.179

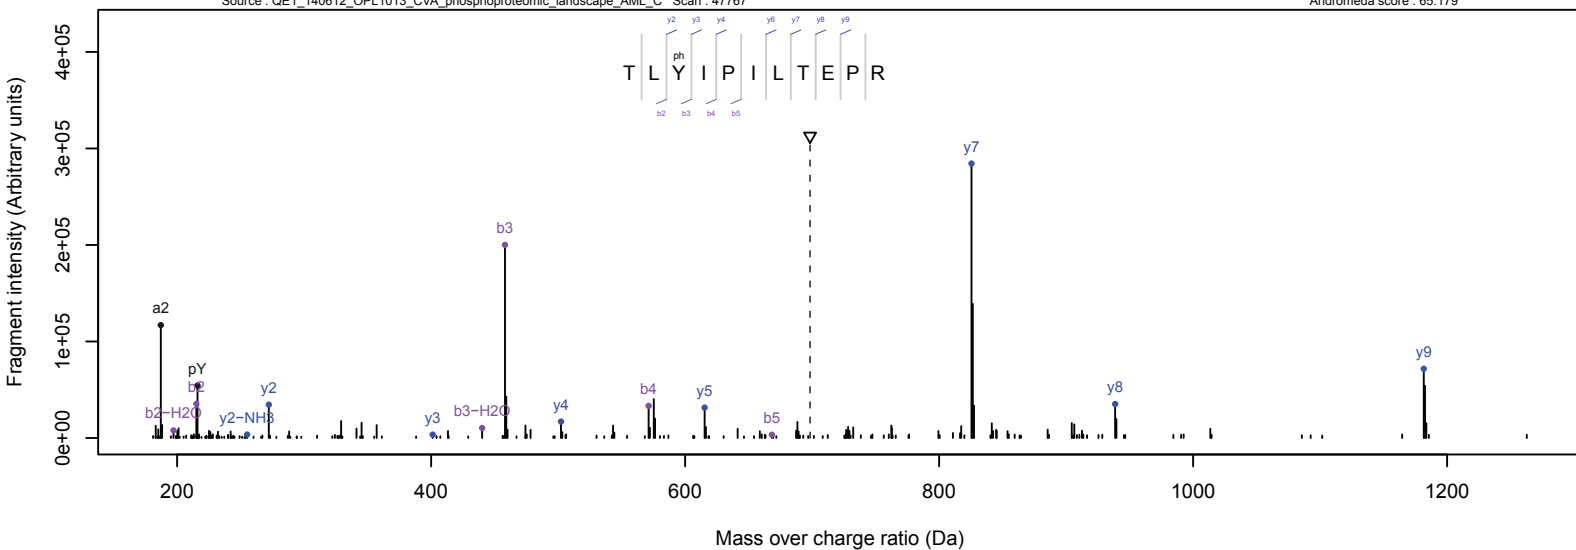

**QGSQSSQPMEVQEGYFGSGDDPY(ph)SSAEPHVSGVK-3+**

Source: QE1\_140612\_OPL1013\_CVA\_phosphoproteomic\_landscape\_AML\_B Scan: 27931

Andromeda score: 65.152

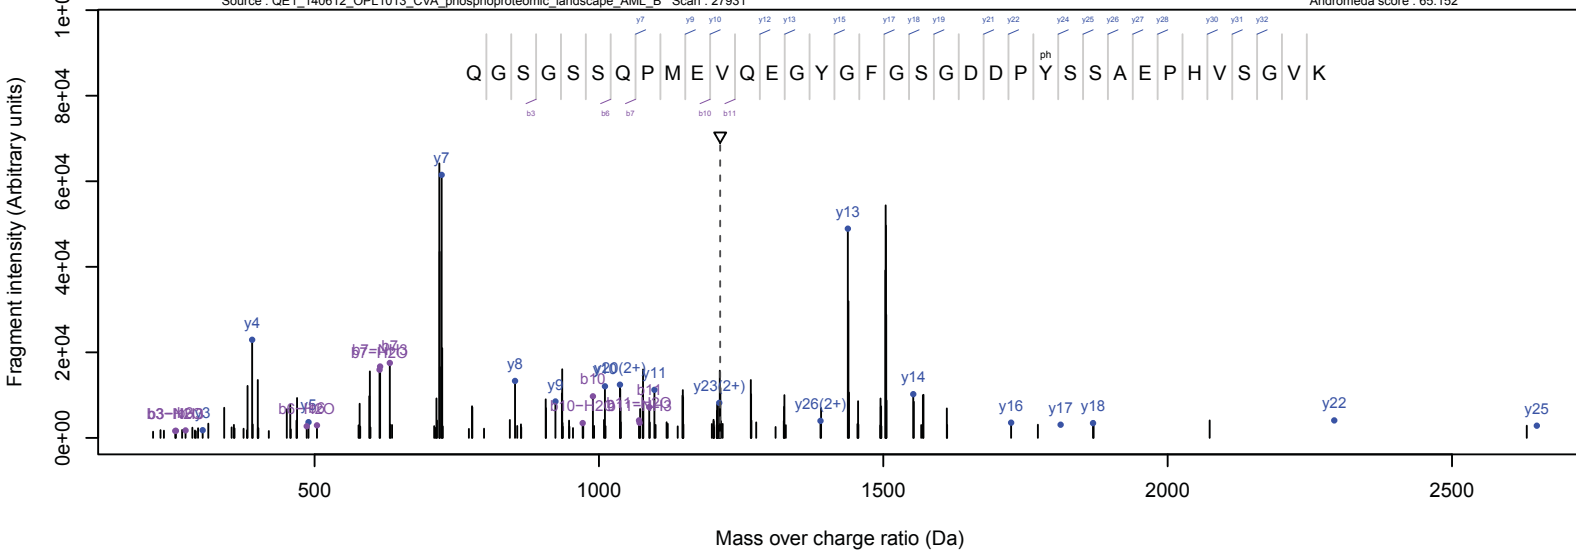

**RLNY(ph)QTPGMRDHPPIIPITDLADNIER-4+**

Source: QE1\_140612\_OPL1013\_CVA\_phosphoproteomic\_landscape\_AML\_C Scan: 35972

Andromeda score: 65.118

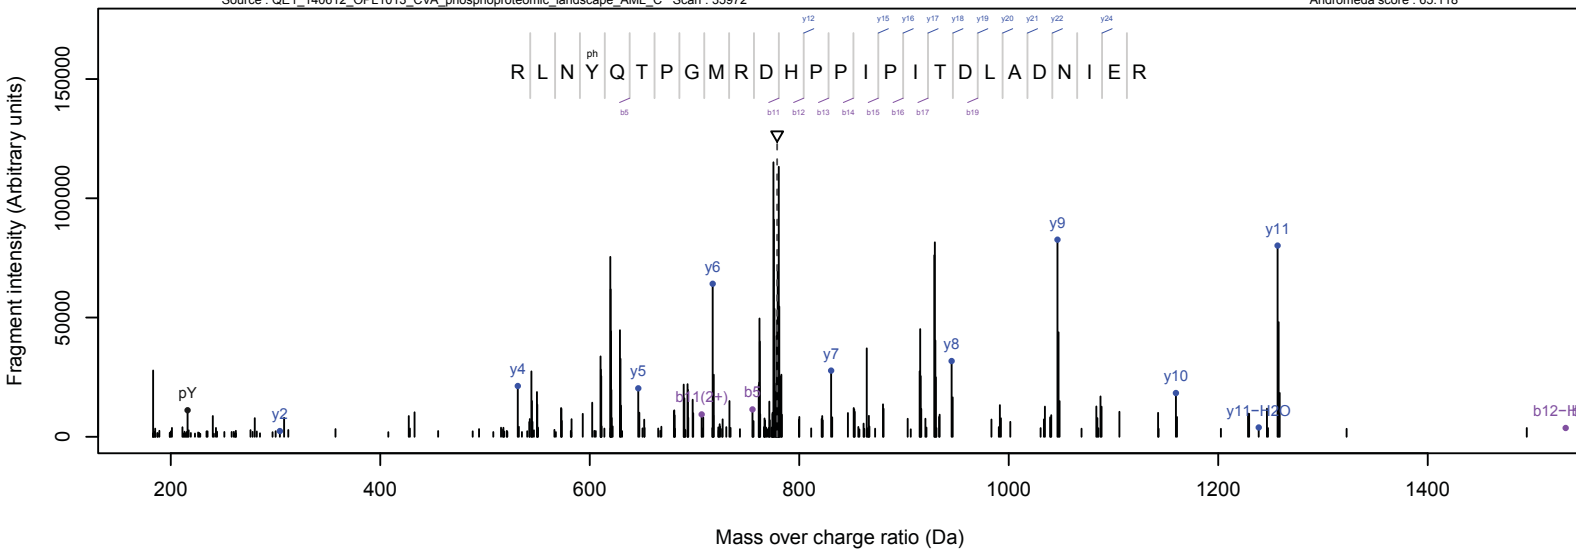



LKDLY(ph)IRPNIAQK-3+

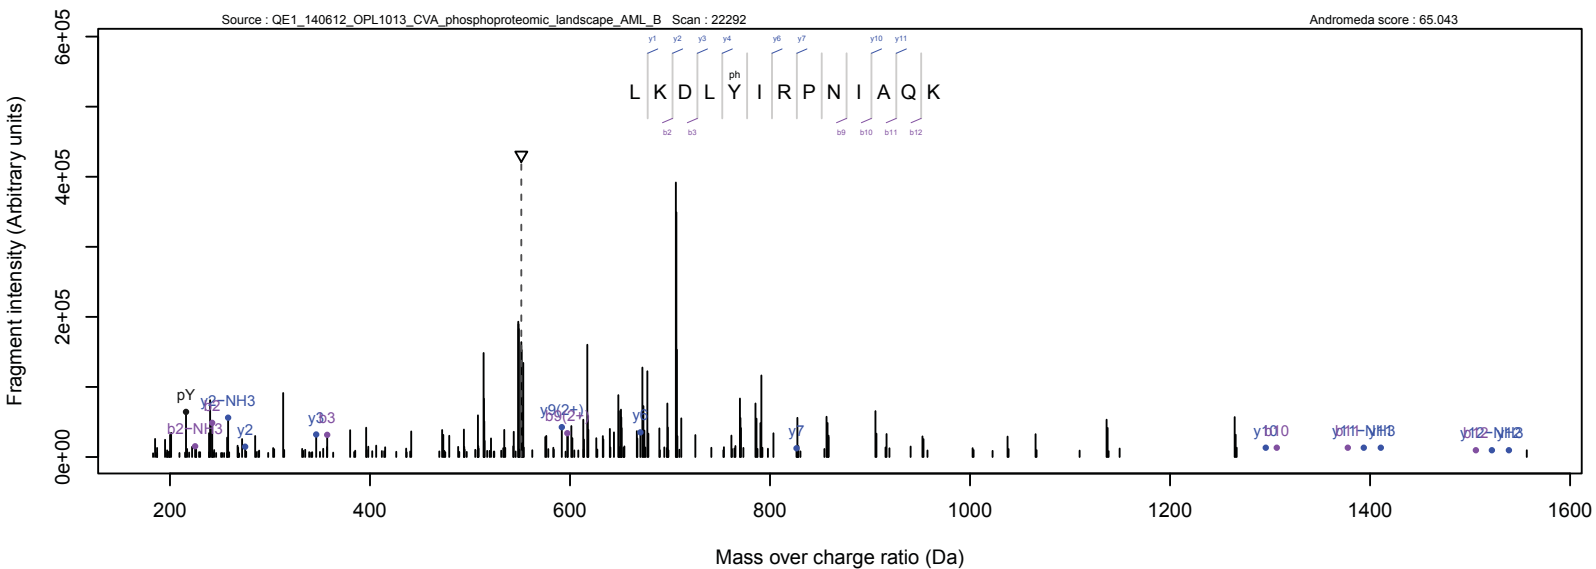

(ac)MQAGKPILYS(ph)YFR-2+

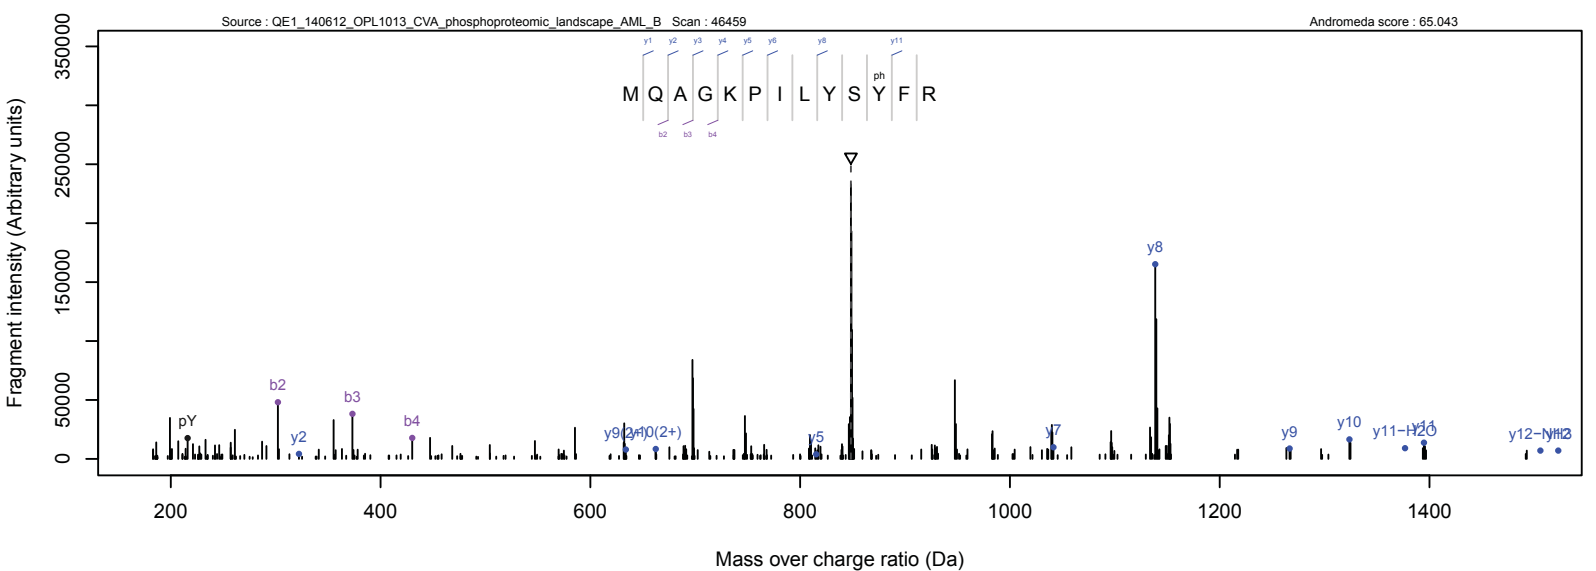

SPY(ph)CCPEGVLCR-2+

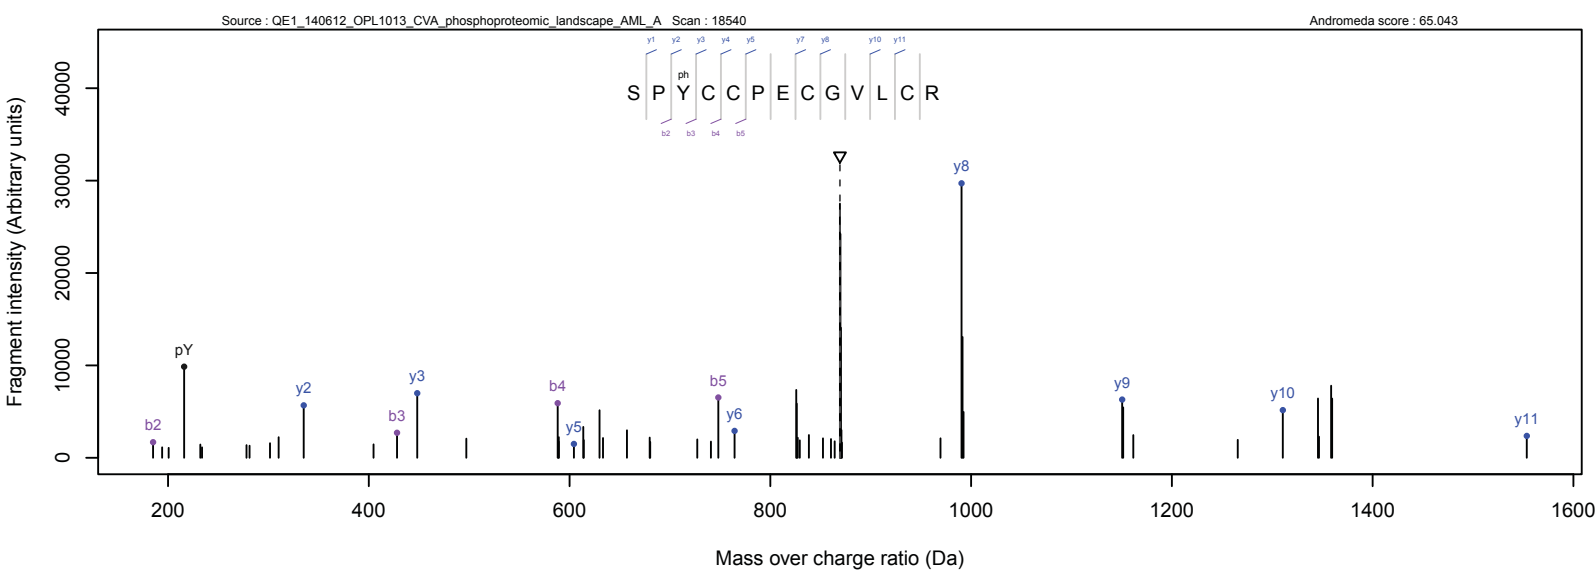





## FIPTY(ph)KYDSK-2+

Source : QE1\_140612\_OPL1013\_CVA\_phosphoproteomic\_landscape\_AML\_C Scan : 13412

Andromeda score : 64.906

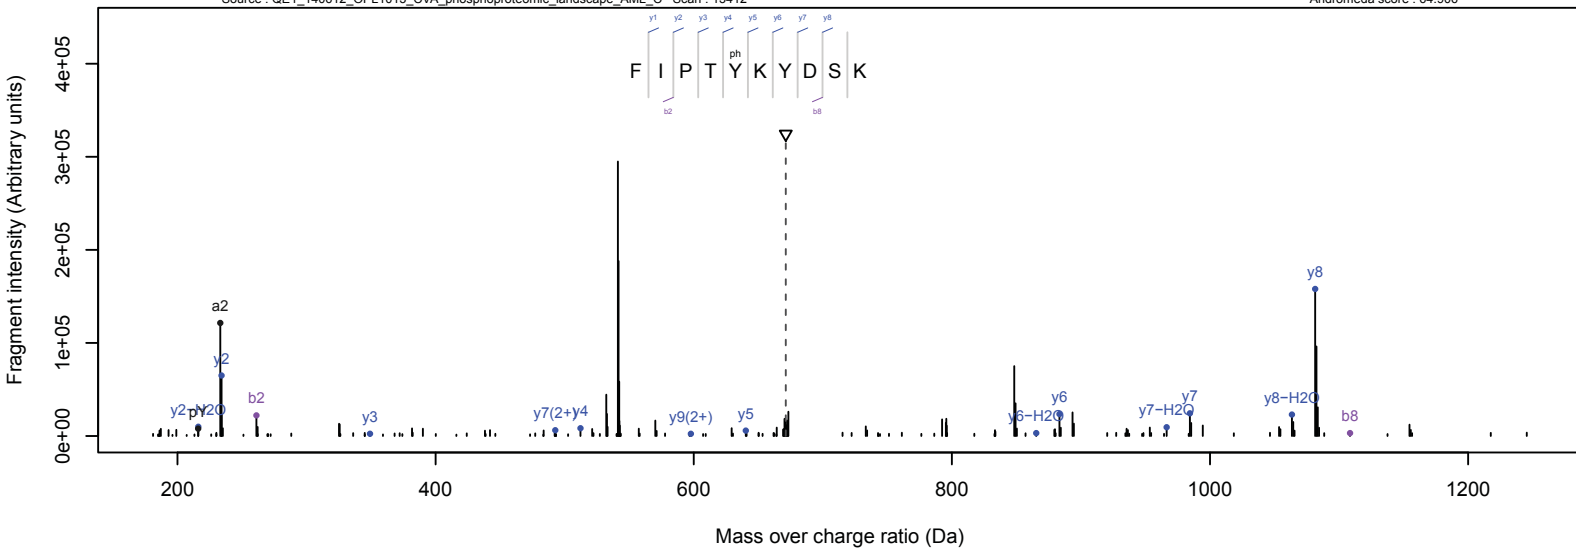

## TQLY(ph)EYLQNR-2+

Source : QE1\_140908\_OPL1013\_CvA\_pTyrIP\_AML\_Kasumi1 Scan : 25984

Andromeda score : 64.906

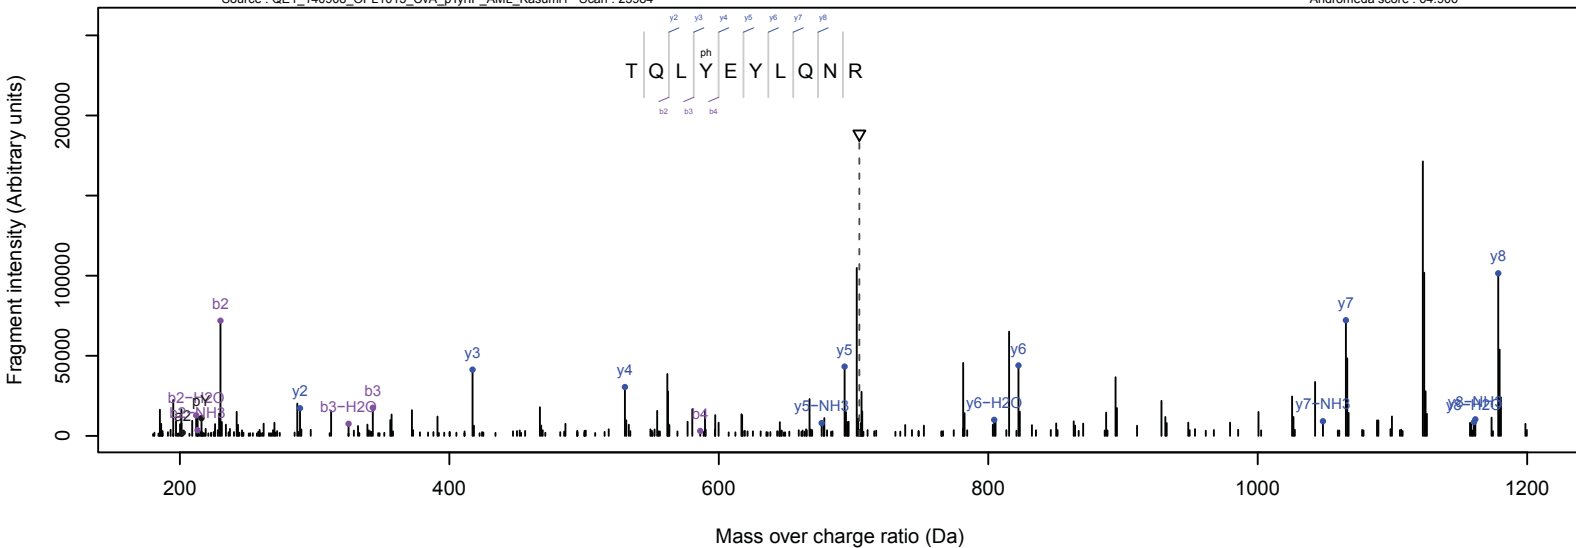

## T(ph)RDYTVLHPSCLSVCNVTIQDTMER-4+

Source : QE1\_140612\_OPL1013\_CVA\_phosphoproteomic\_landscape\_AML\_A Scan : 34422

Andromeda score : 64.845

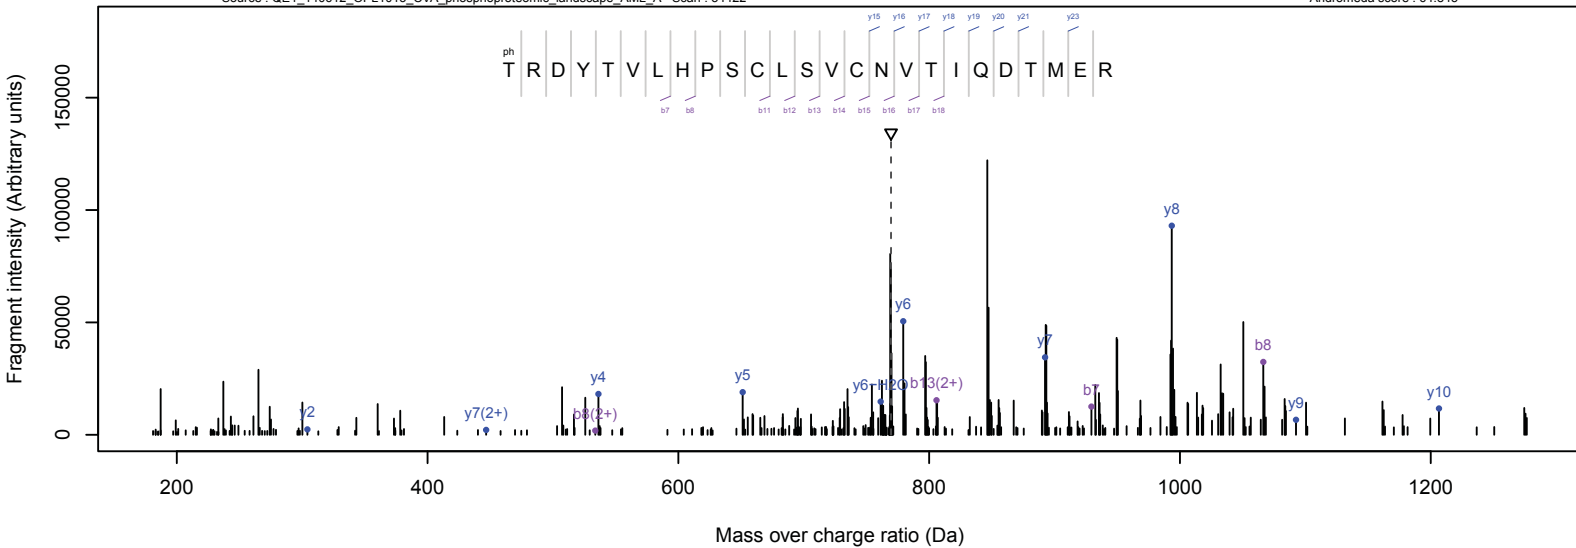

## FINHCCTPNCYAK-3+

Source: QE1\_140612\_OPL1013\_CVA\_phosphoproteomic\_landscape\_AML\_D Scan: 9107

Andromeda score: 64.827

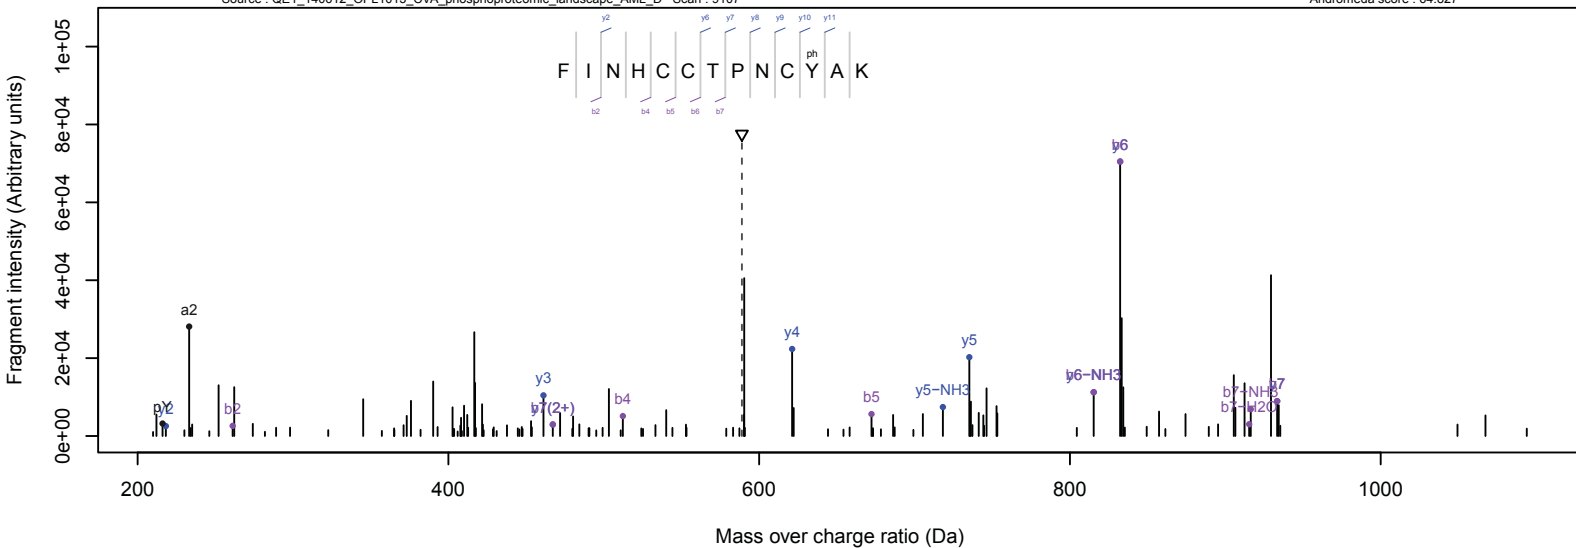

## GTFYQGYLFCFK-2+

Source: QE1\_140612\_OPL1013\_CVA\_phosphoproteomic\_landscape\_AML\_B Scan: 34992

Andromeda score: 64.82

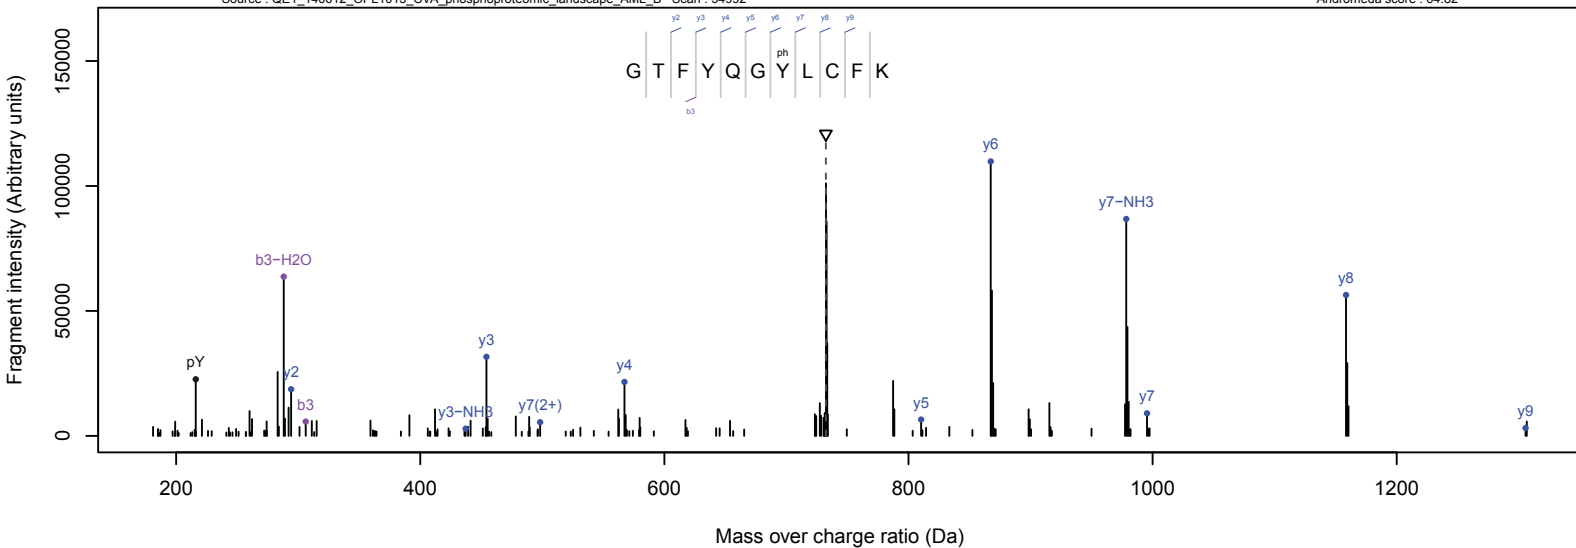

## NGPFKPNYYRY-3+

Source: QE1\_140612\_OPL1013\_CVA\_phosphoproteomic\_landscape\_AML\_D Scan: 19879

Andromeda score: 64.82

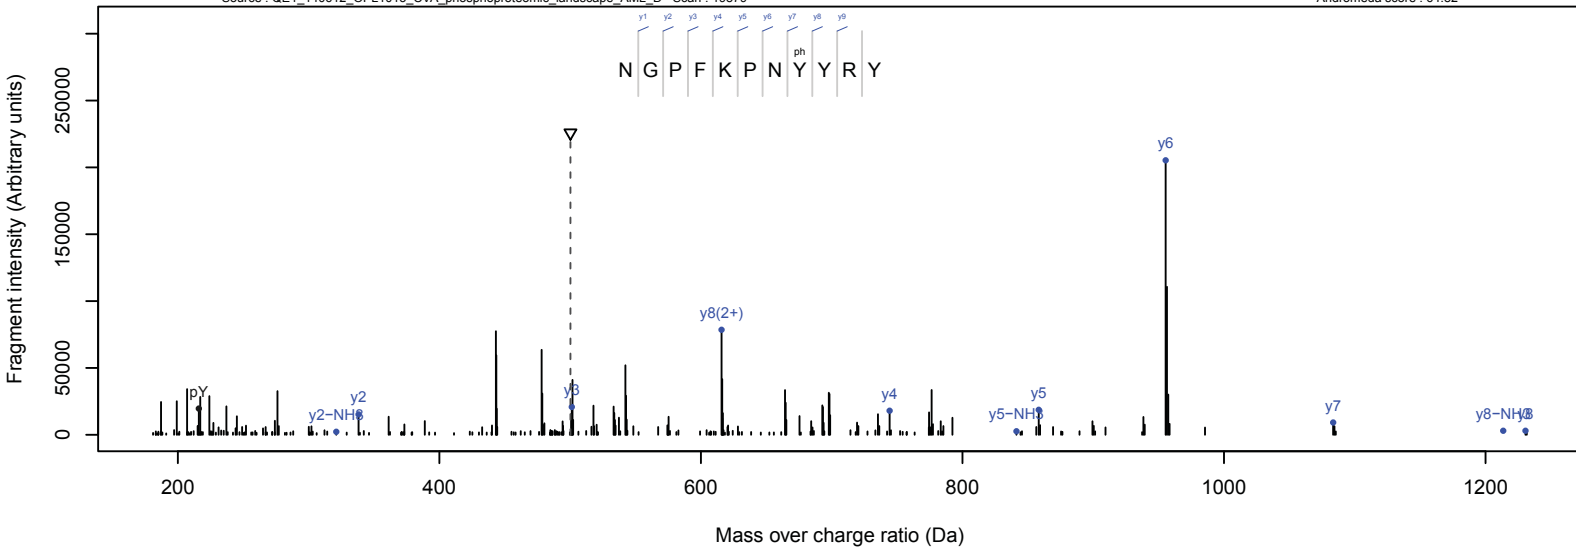

## SLLETQ(ph)QNVR-2+

Source: QE1\_140612\_OPL1013\_CVA\_phosphoproteomic\_landscape\_AML\_B Scan: 17930

Andromeda score: 64.82

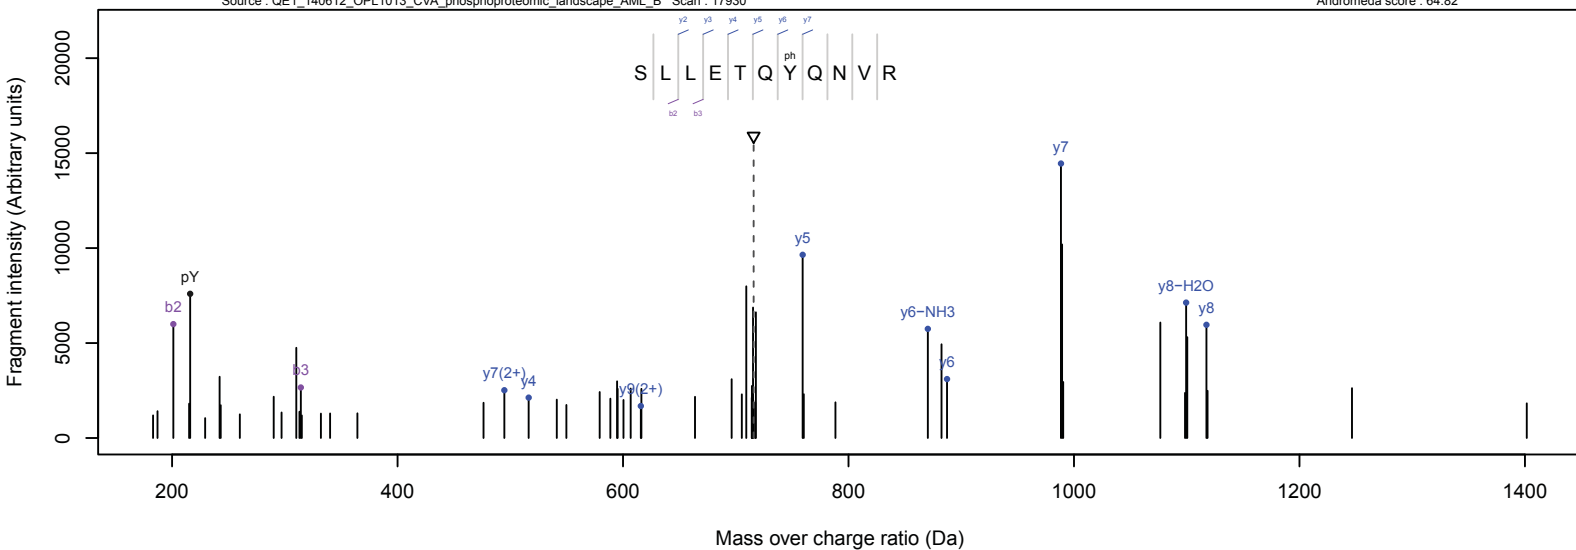

## (ac)STKVPYI(ph)LKR-3+

Source: QE1\_140612\_OPL1013\_CVA\_phosphoproteomic\_landscape\_AML\_C Scan: 22479

Andromeda score: 64.82

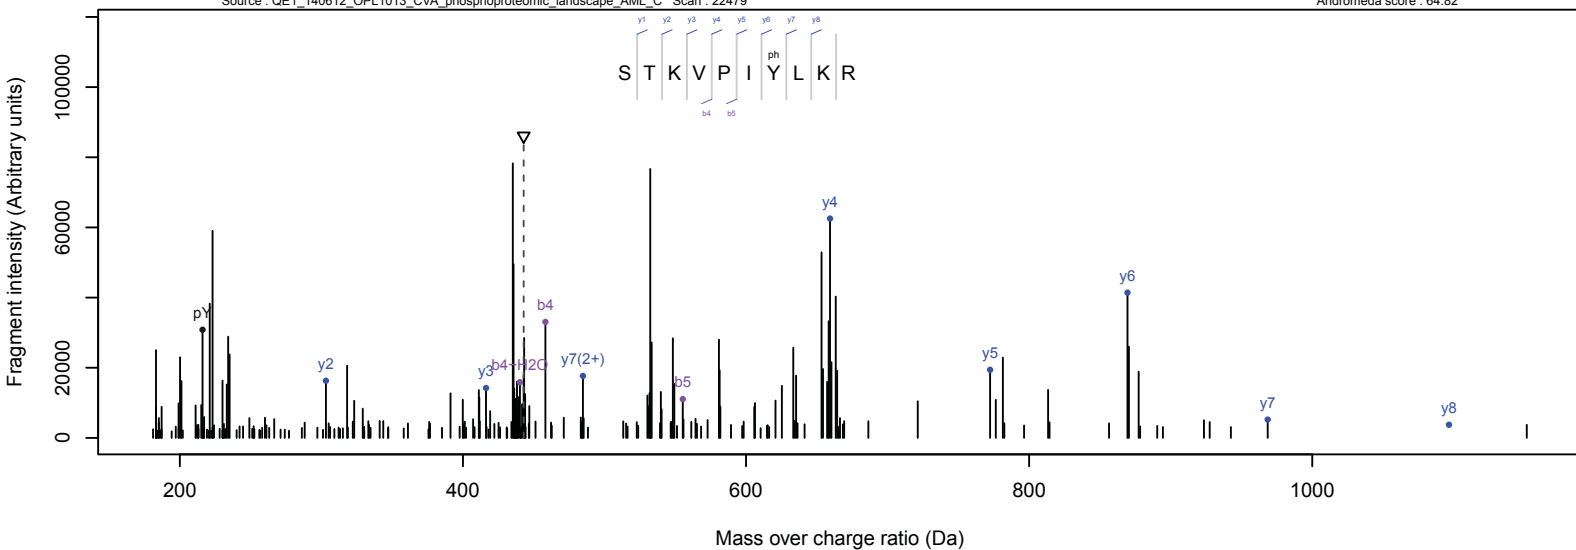

## TY(ph)LLPKSR-2+

Source: QE1\_140822\_OPL1013\_CvA\_pTyrIP\_AML\_cell\_lines\_part2\_B Scan: 9300

Andromeda score: 64.82

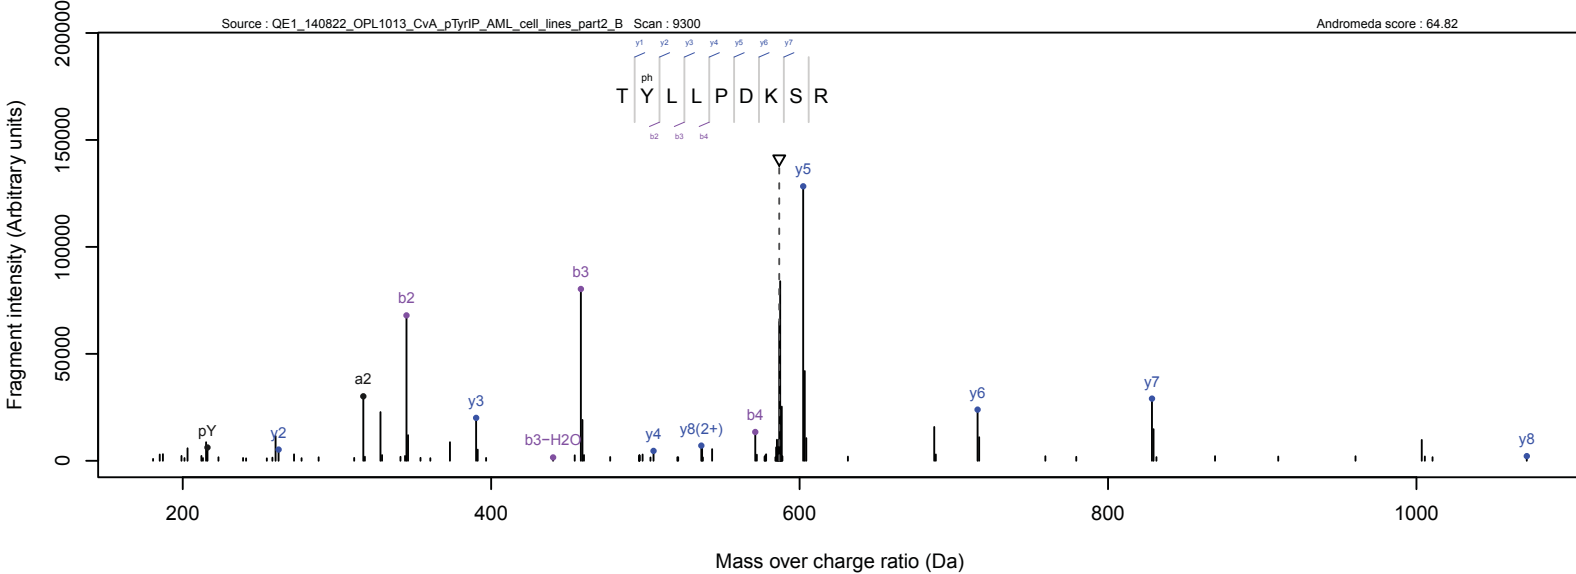

EYLY(ph)VYK-2+

Source : QE1\_140612\_OPL1013\_CVA\_phosphoproteomic\_landscape\_AML\_C Scan : 22093

Andromeda score : 64.803

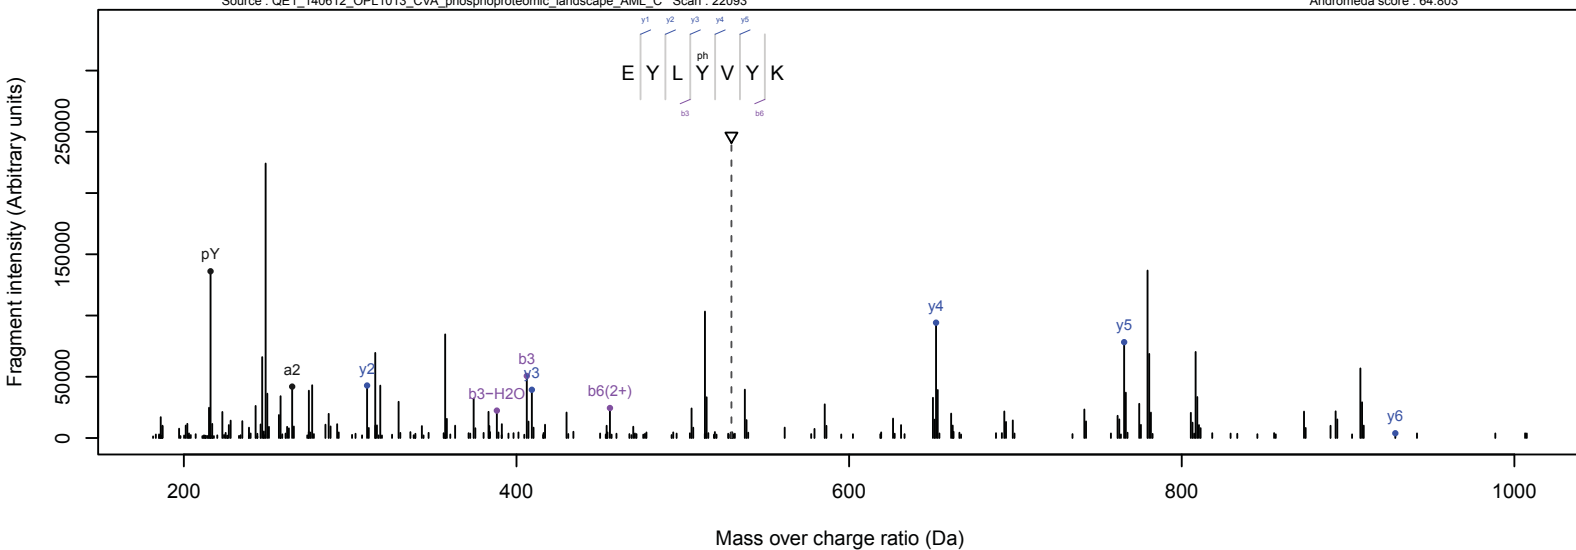

FPYYP(ph)MR-2+

Source : QE1\_140612\_OPL1013\_CVA\_phosphoproteomic\_landscape\_AML\_C Scan : 26161

Andromeda score : 64.776

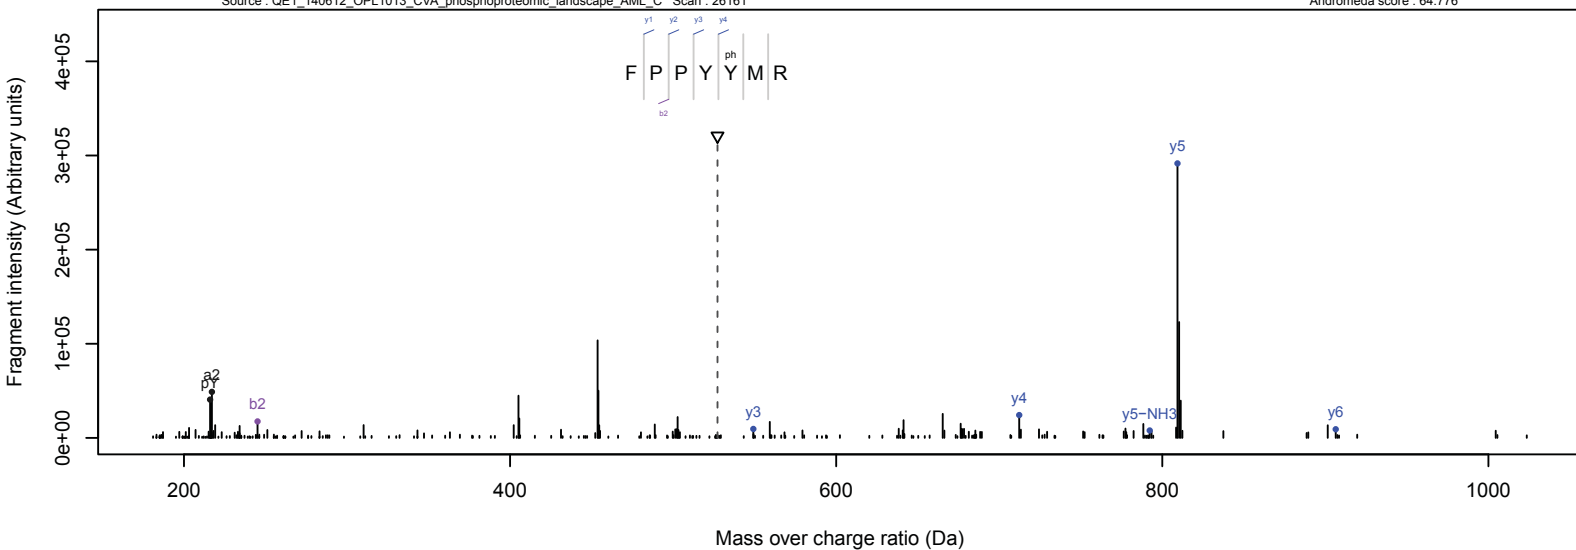

LPPGEQCEGEDTEY(ph)MTPSSRPLRLDTSQSSR-4+

Source : QE1\_140908\_OPL1013\_CvA\_pTyrIP\_AML\_Kasumi6 Scan : 27087

Andromeda score : 64.726

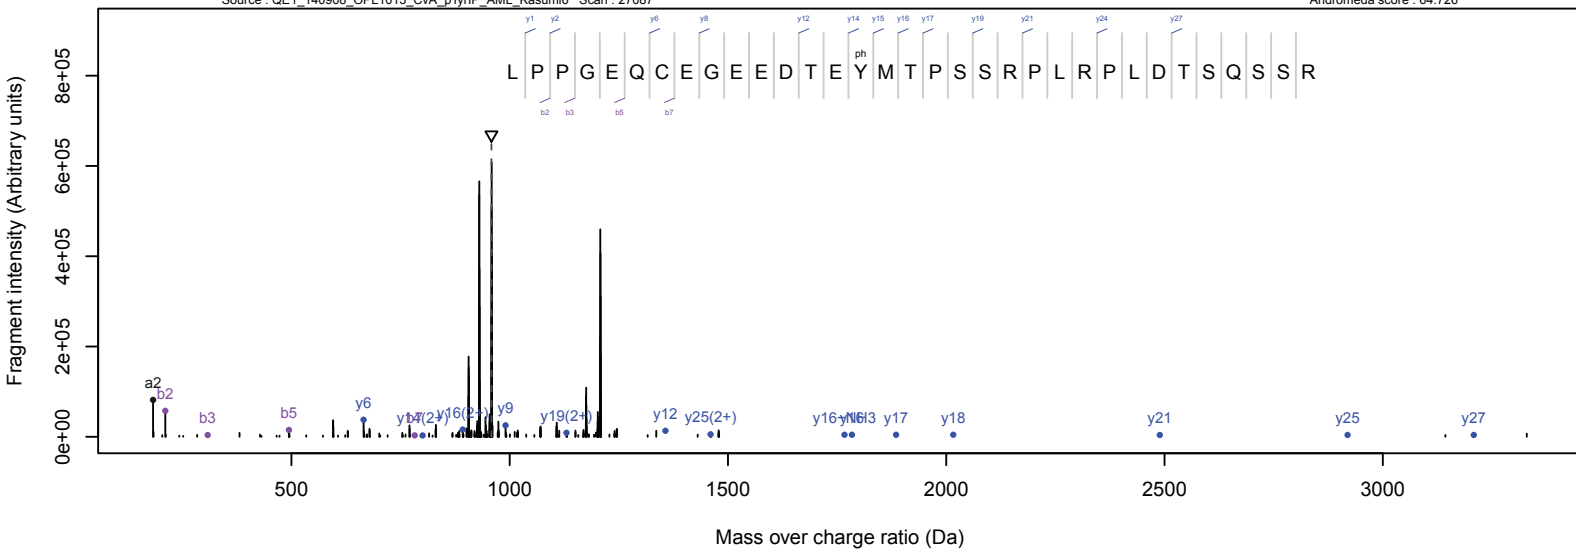

## KKQDLY(ph)MWLSNSPHGPSAK-3+

Source : QE1\_140612\_OPL1013\_CVA\_phosphoproteomic\_landscape\_AML\_B Scan : 24505

Andromeda score : 64.705

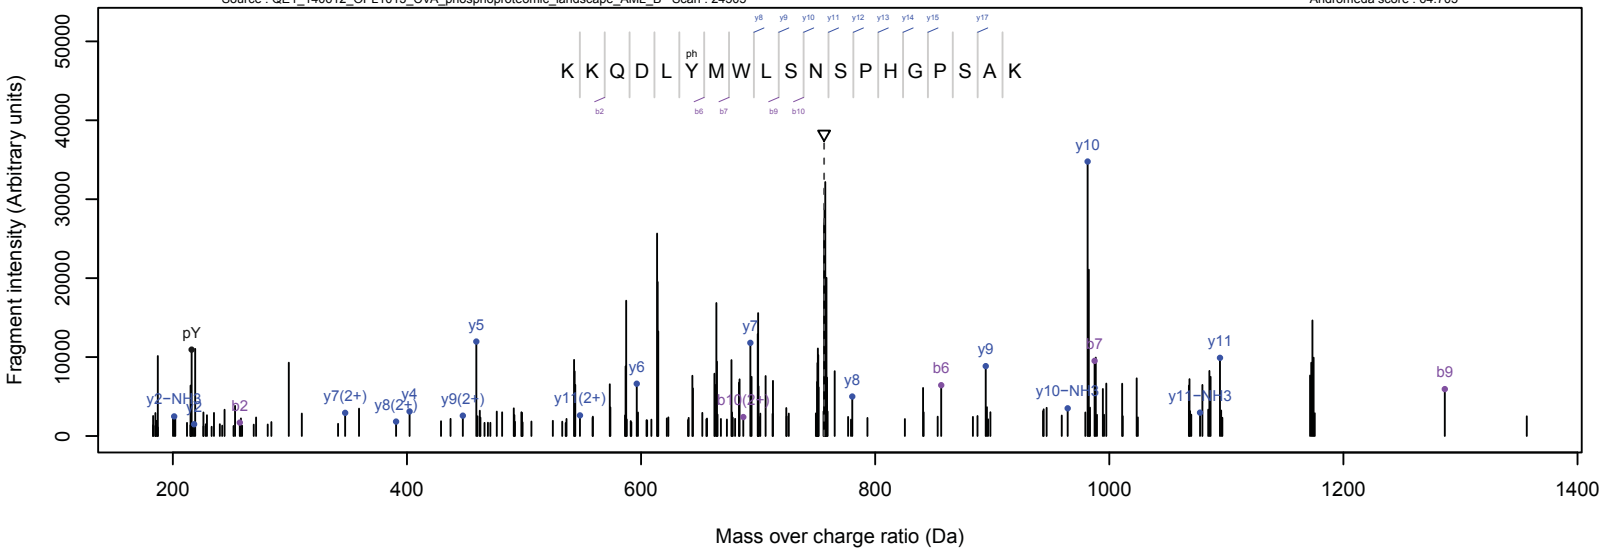

## LQDQLDHRGDHPLTPGSHY(ph)A-4+

Source : QE1\_140612\_OPL1013\_CVA\_phosphoproteomic\_landscape\_AML\_B Scan : 14392

Andromeda score : 64.705

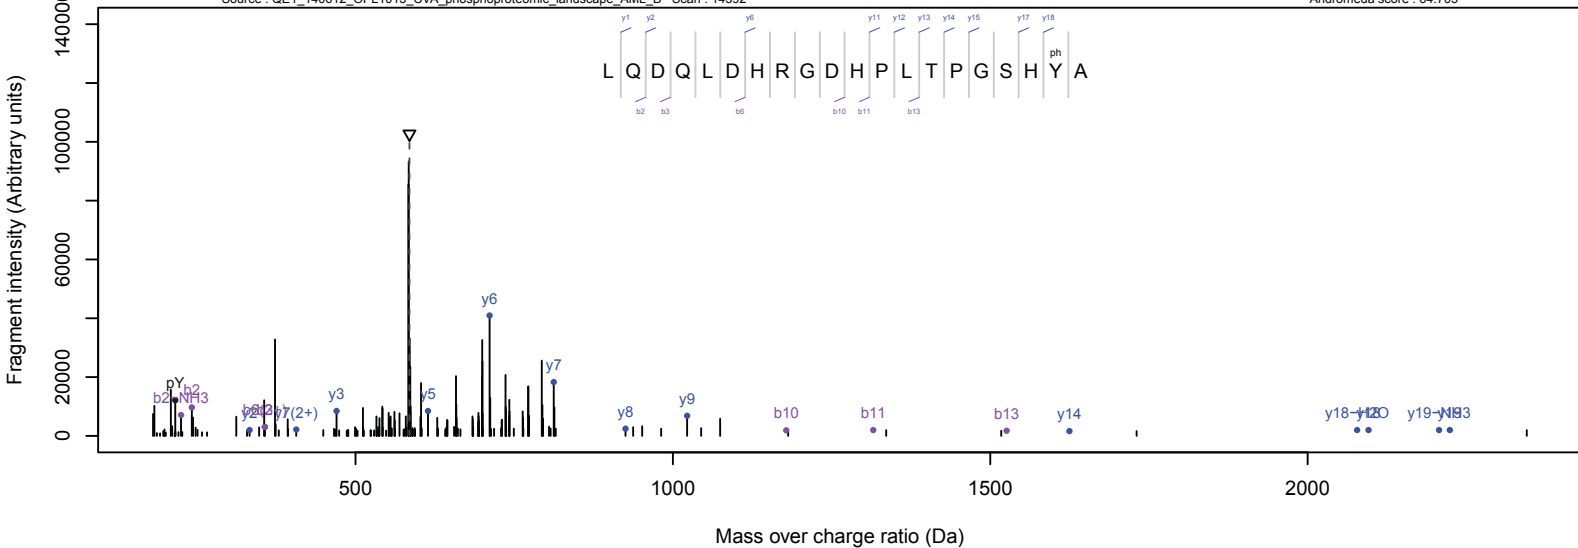

## VTEGLTDVILYHQPD DKKK-4+

Source : QE1\_140612\_OPL1013\_CVA\_phosphoproteomic\_landscape\_AML\_C Scan : 26313

Andromeda score : 64.705

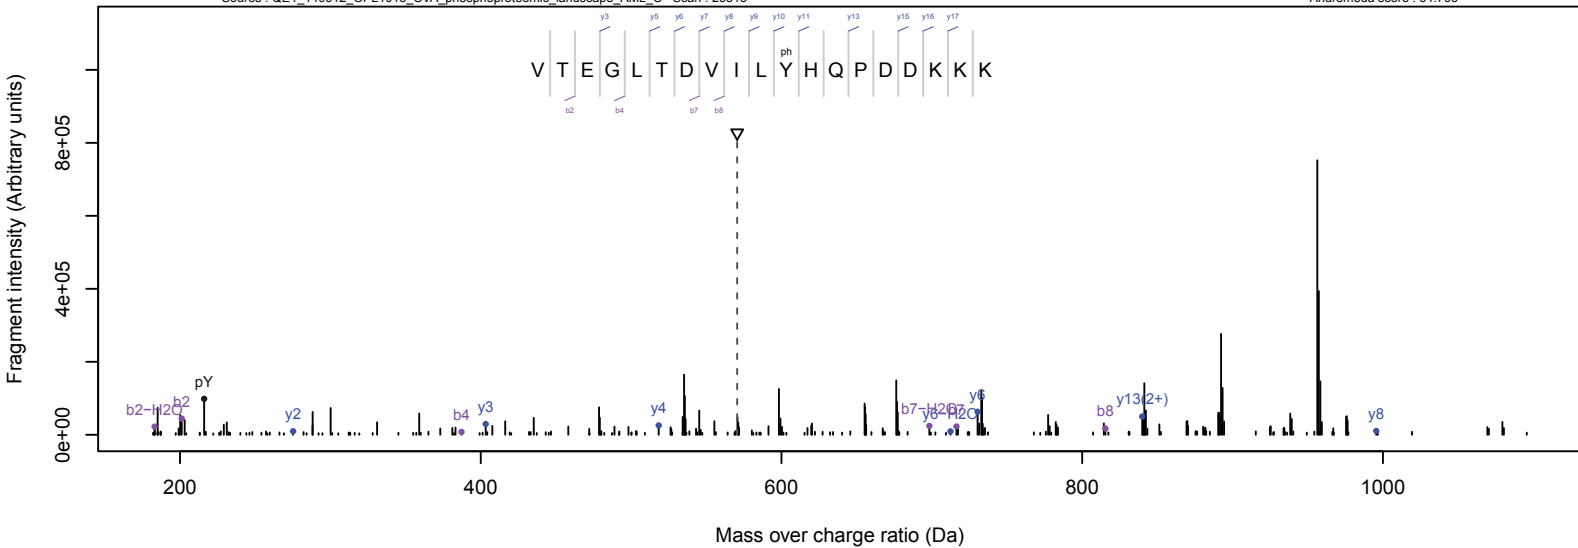



**QTGY(ph)LTIGGQR-2+**

Source : QE1\_140612\_OPL1013\_CVA\_phosphoproteomic\_landscape\_AML\_C Scan : 15653

Andromeda score : 64.64

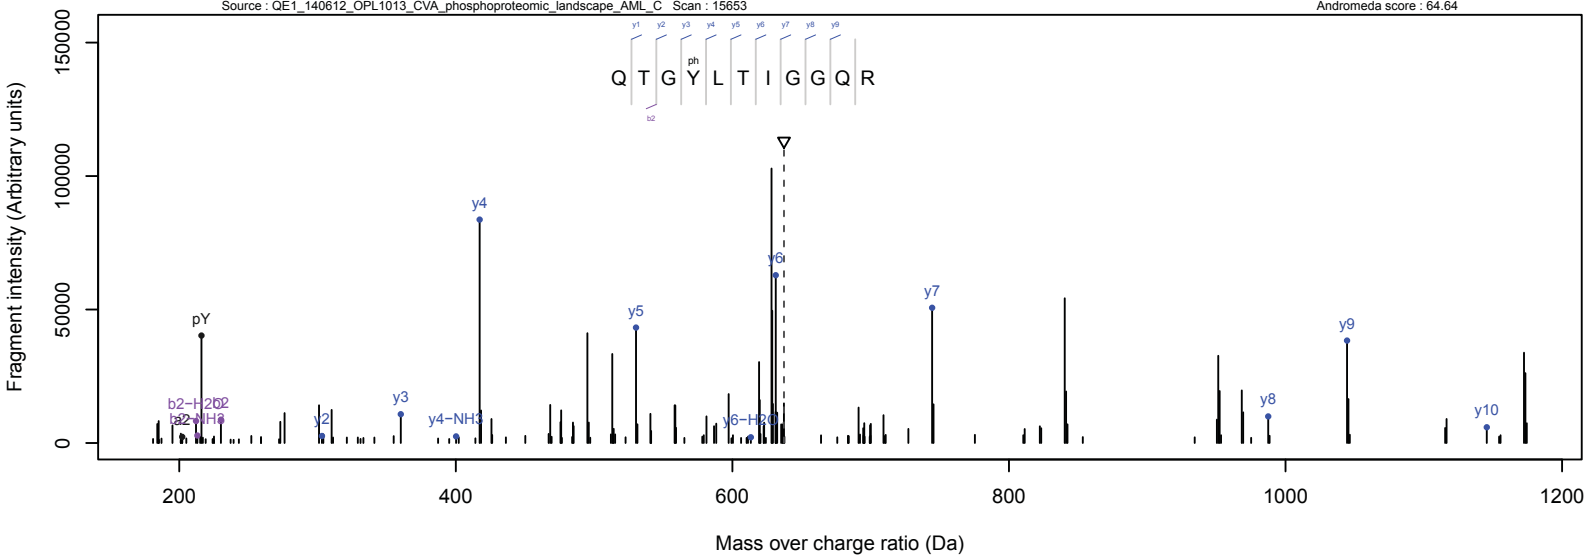

**SMNFDNPVY(ph)LK-2+**

Source : QE1\_140612\_OPL1013\_CVA\_phosphoproteomic\_landscape\_AML\_C Scan : 32804

Andromeda score : 64.64

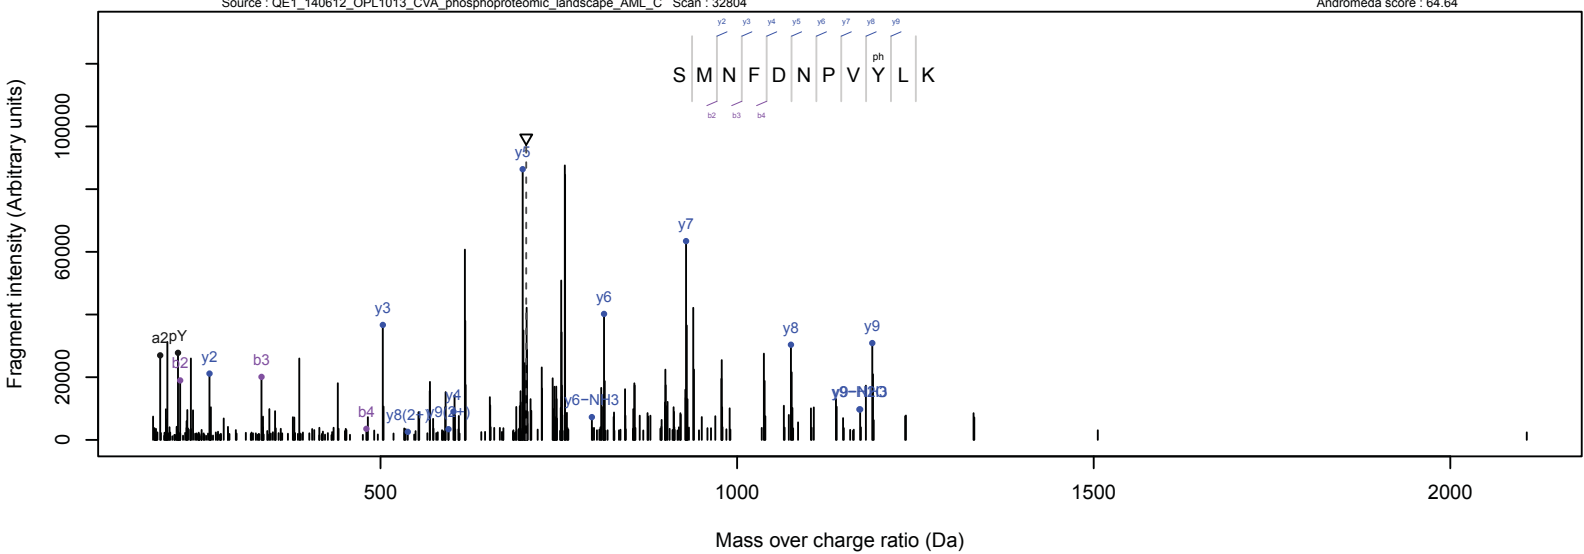

**APPCSGSSITEIINPNYMGVGFPPMPLHVK-4+**

Source : QE1\_140822\_OPL1013\_CvA\_pTyrIP\_AML\_cell\_lines\_part2\_B Scan : 45393

Andromeda score : 64.583

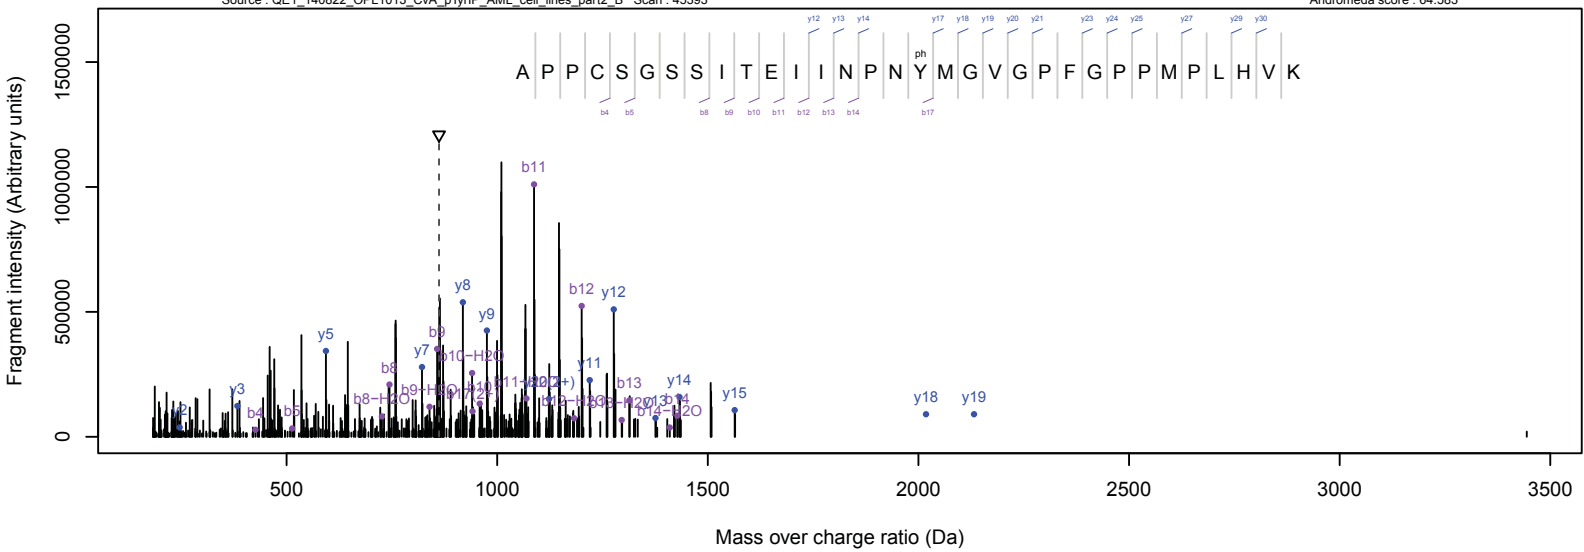



YQQDQIVKEDSVEAVGAQLK<sup>ph</sup>HQQYQDK-4+

Source : QE1\_140908\_OPL1013\_CvA\_pTyrIP\_AML\_Kasumi6 Scan : 30204

Andromeda score : 64.583

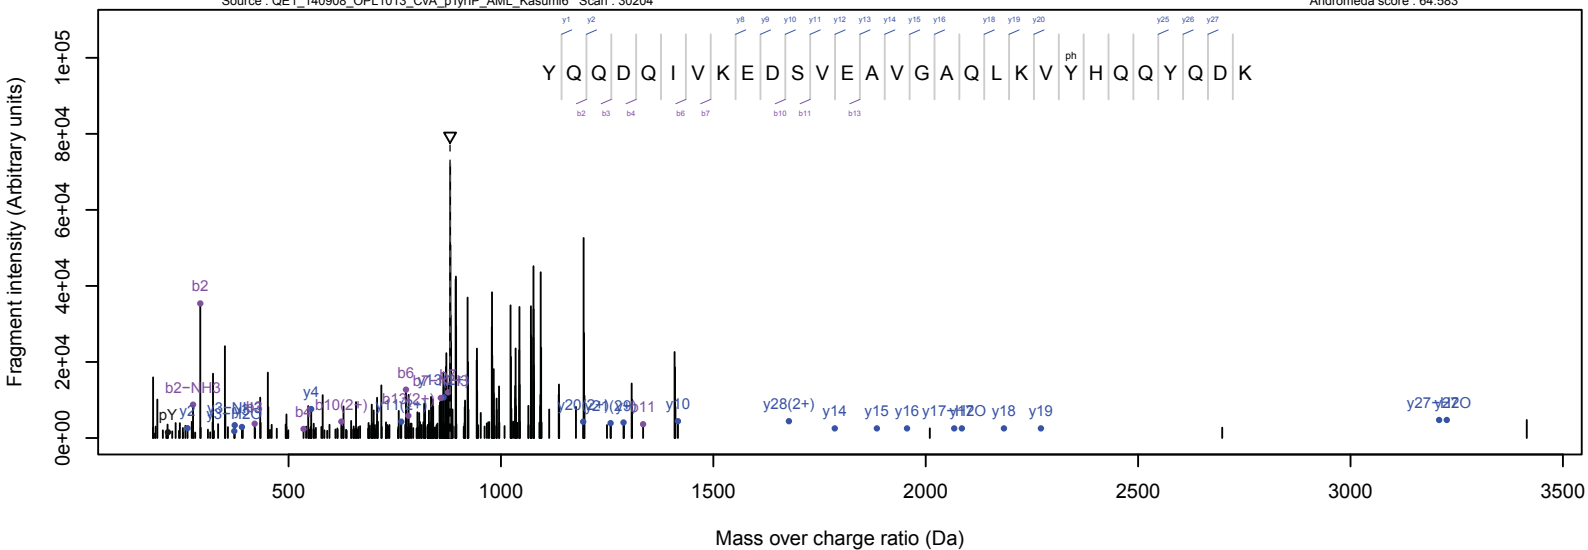

(ac)M(ox)TQEPFREELAY<sup>ph</sup>DRMPTLER-3+

Source : QE1\_140908\_OPL1013\_CvA\_pTyrIP\_AML\_Kasumi1 Scan : 36809

Andromeda score : 64.522

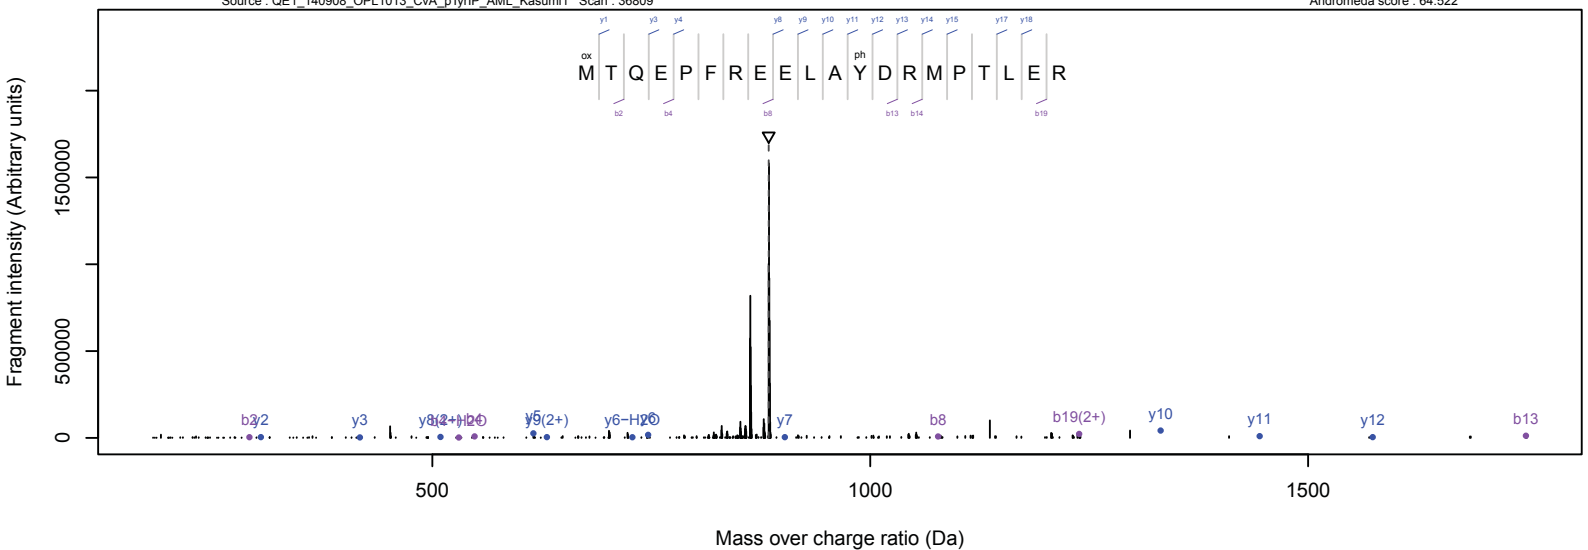

ATEEDKAKNY<sup>ph</sup>EELR-3+

Source : QE1\_140612\_OPL1013\_CvA\_phosphoproteomic\_landscape\_AML\_B Scan : 10439

Andromeda score : 64.52

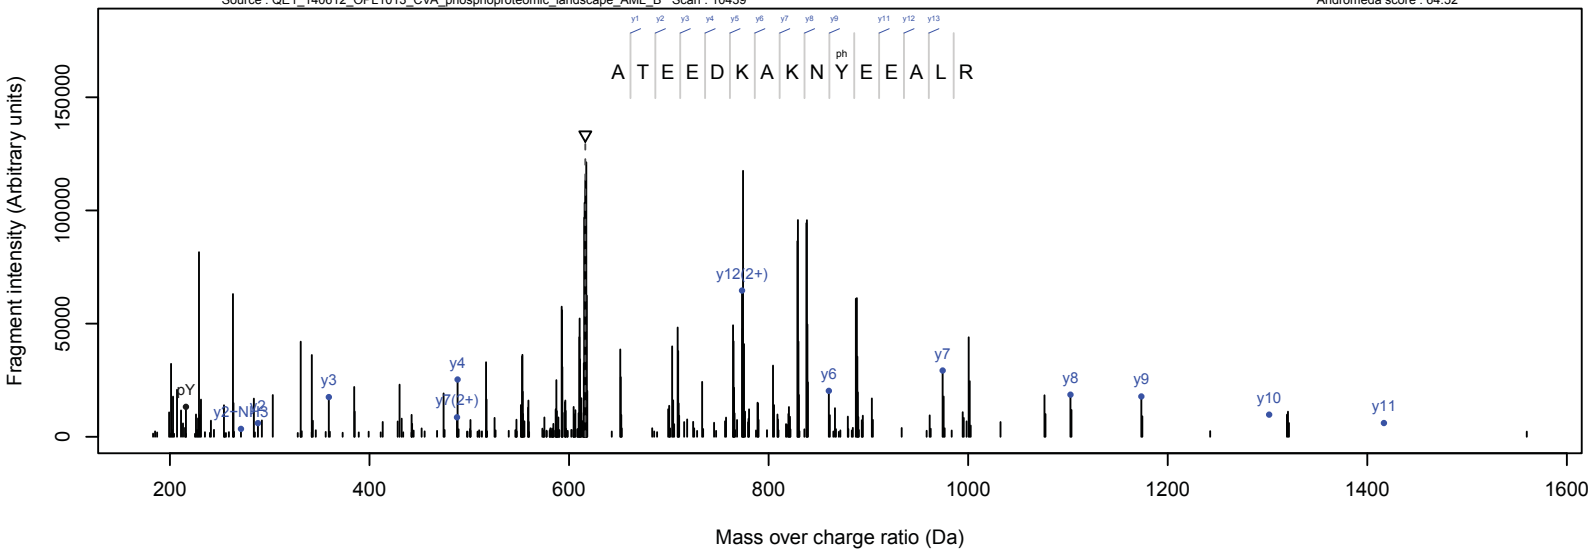

## IKSY(ph)S(ph)FPKPGHR-3+

Source: QE1\_140612\_OPL1013\_CVA\_phosphoproteomic\_landscape\_AML\_C Scan: 9650

Andromeda score: 64.52

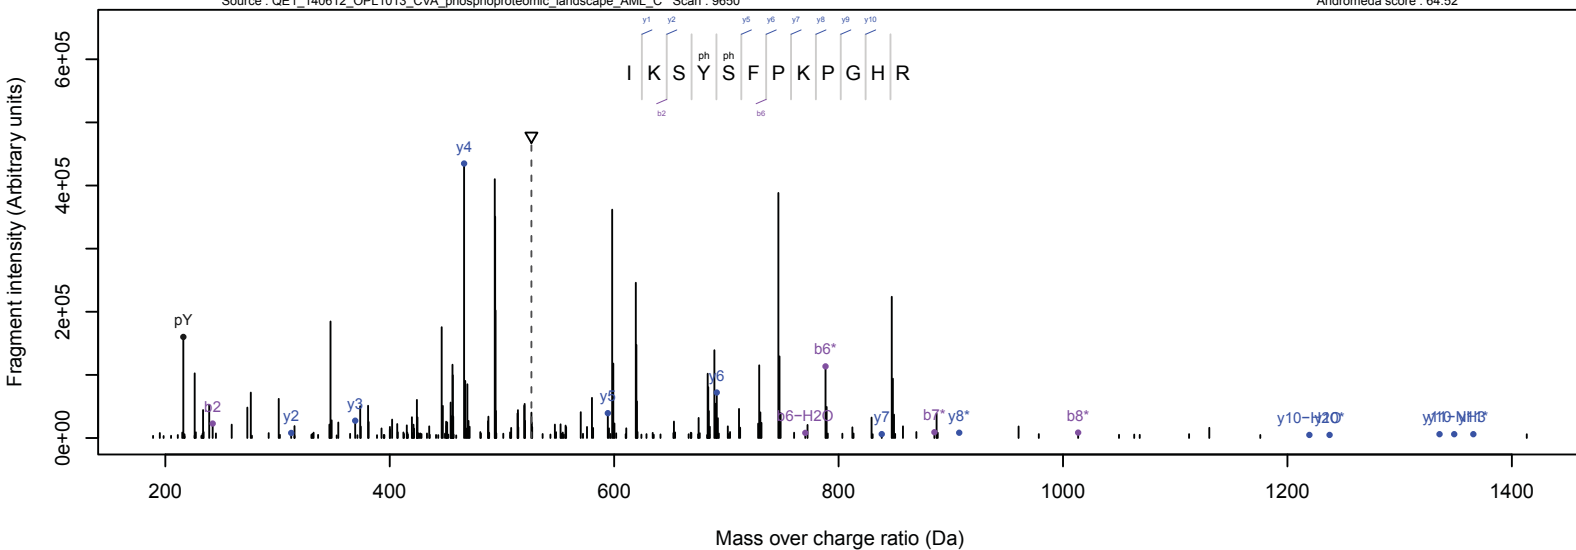

## KAAALEAMKDYT(ph)K-2+

Source: QE1\_140612\_OPL1013\_CVA\_phosphoproteomic\_landscape\_AML\_B Scan: 11040

Andromeda score: 64.52

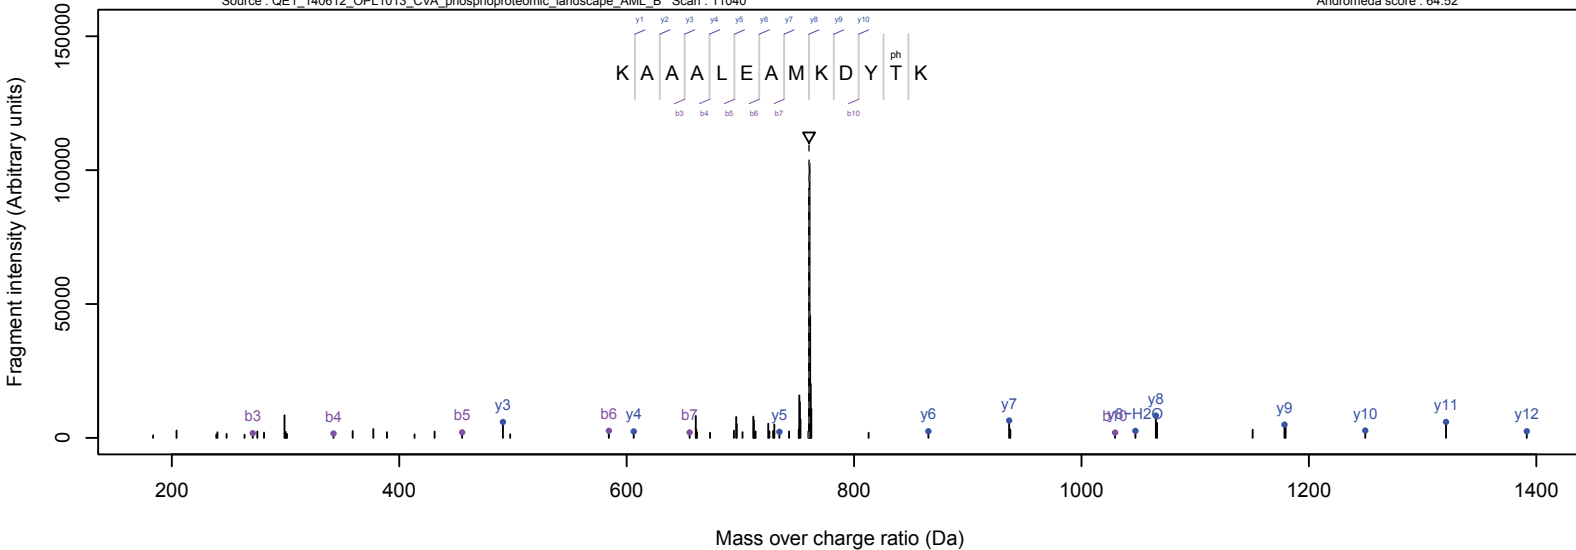

## Y(ph)NKLYTVEYLSNMVGGR-2+

Source: QE1\_140612\_OPL1013\_CVA\_phosphoproteomic\_landscape\_AML\_B Scan: 40906

Andromeda score: 64.454

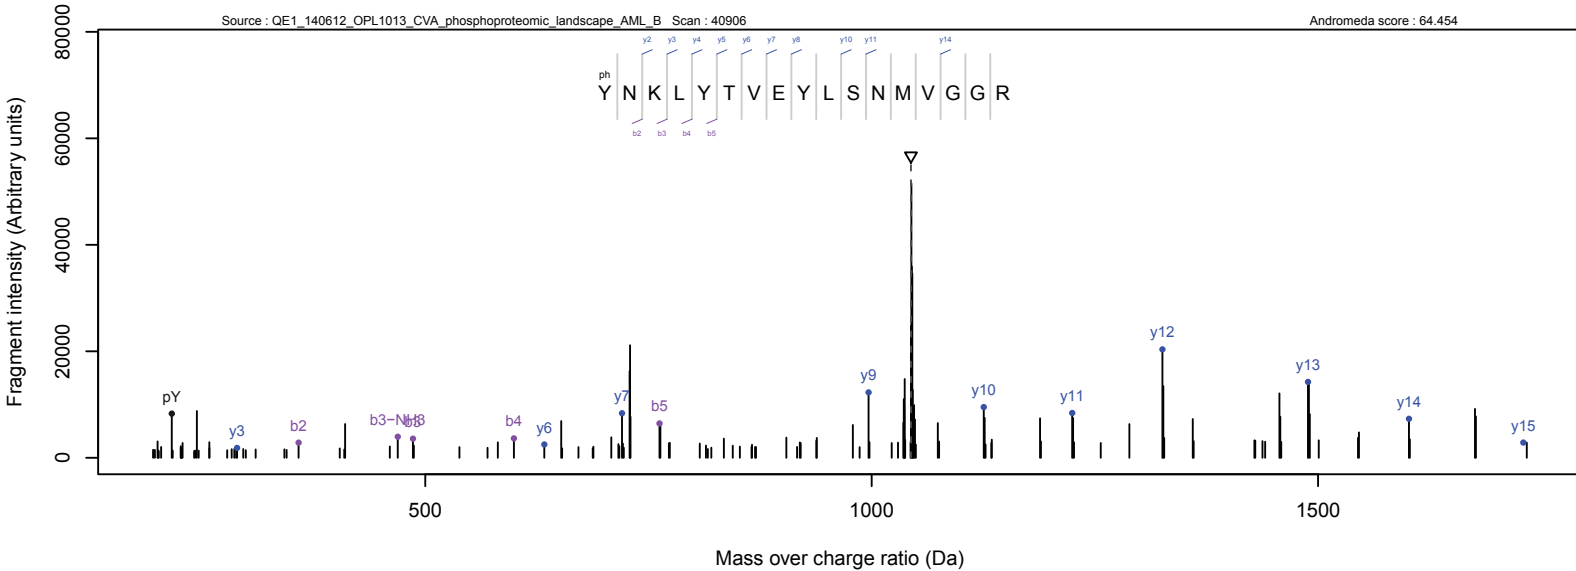

## TPY(ph)IVLSGSGK-2+

Source : QE1\_140612\_OPL1013\_CVA\_phosphoproteomic\_landscape\_AML\_A Scan : 21173

Andromeda score : 64.441

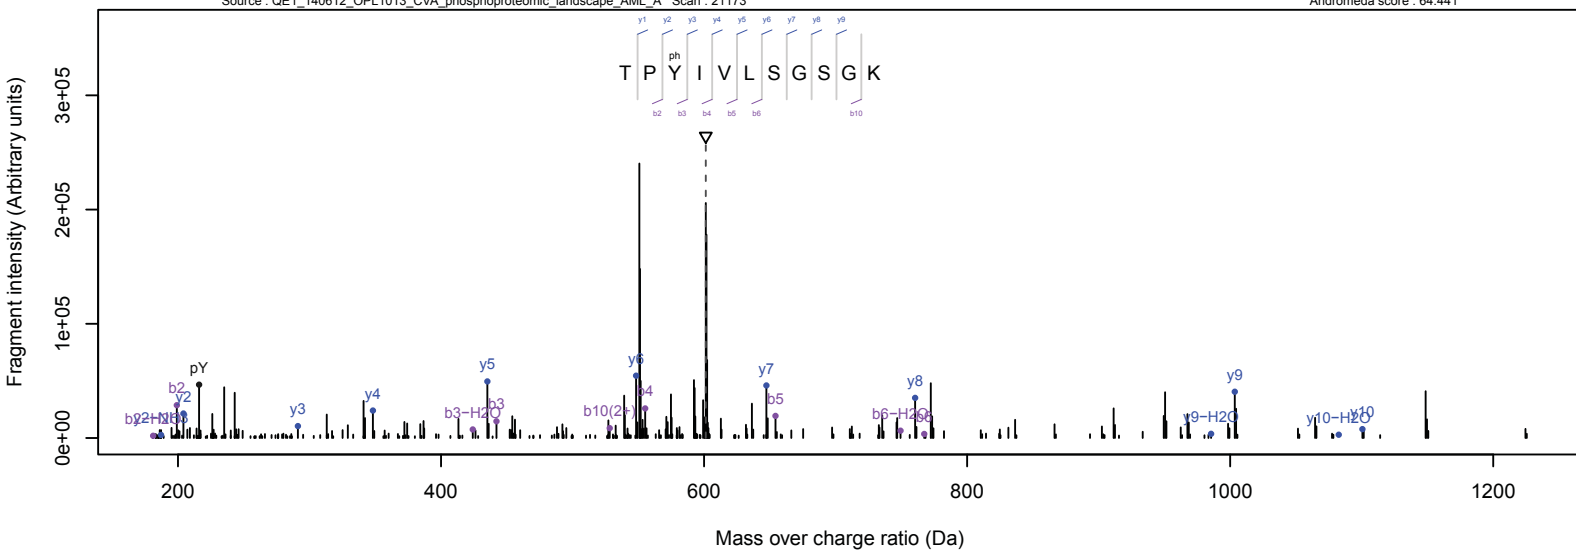

## AIAY(ph)ATHR-2+

Source : QE1\_140822\_OPL1013\_CvA\_pTyrIP\_AML\_cell\_lines\_part2\_E Scan : 3081

Andromeda score : 64.42

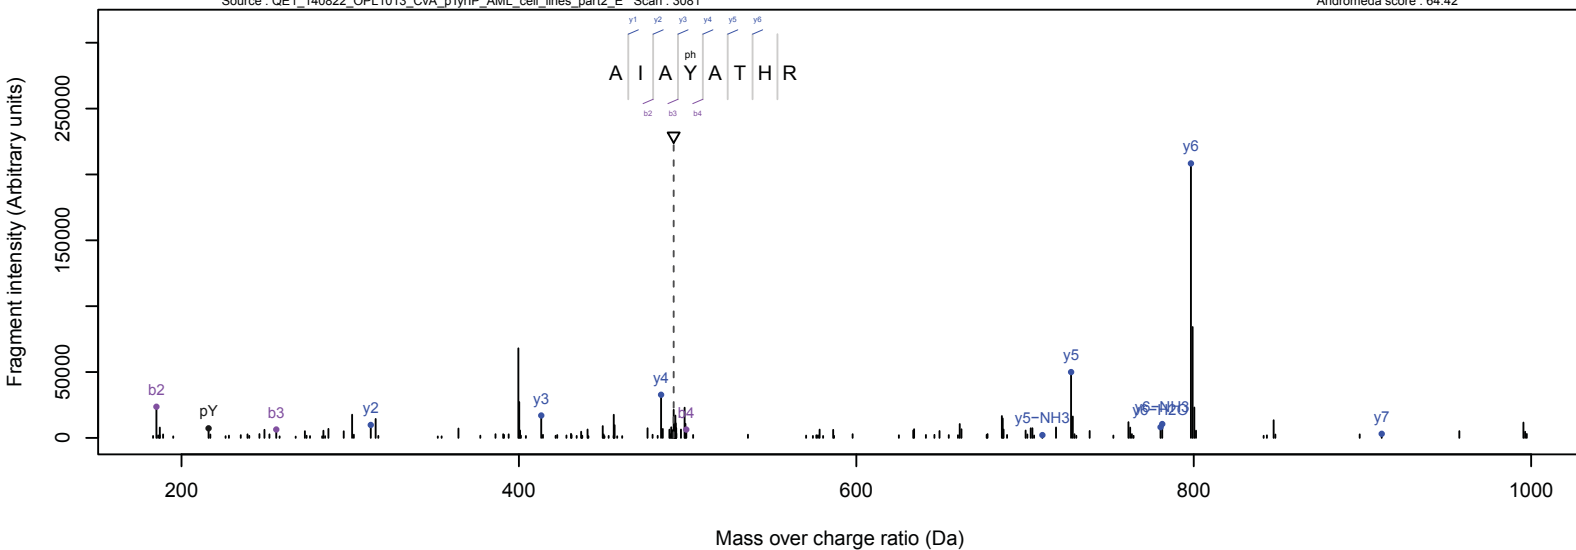

## EPSSYDFVY(ph)HYG-2+

Source : QE1\_140612\_OPL1013\_CVA\_phosphoproteomic\_landscape\_AML\_B Scan : 29457

Andromeda score : 64.374

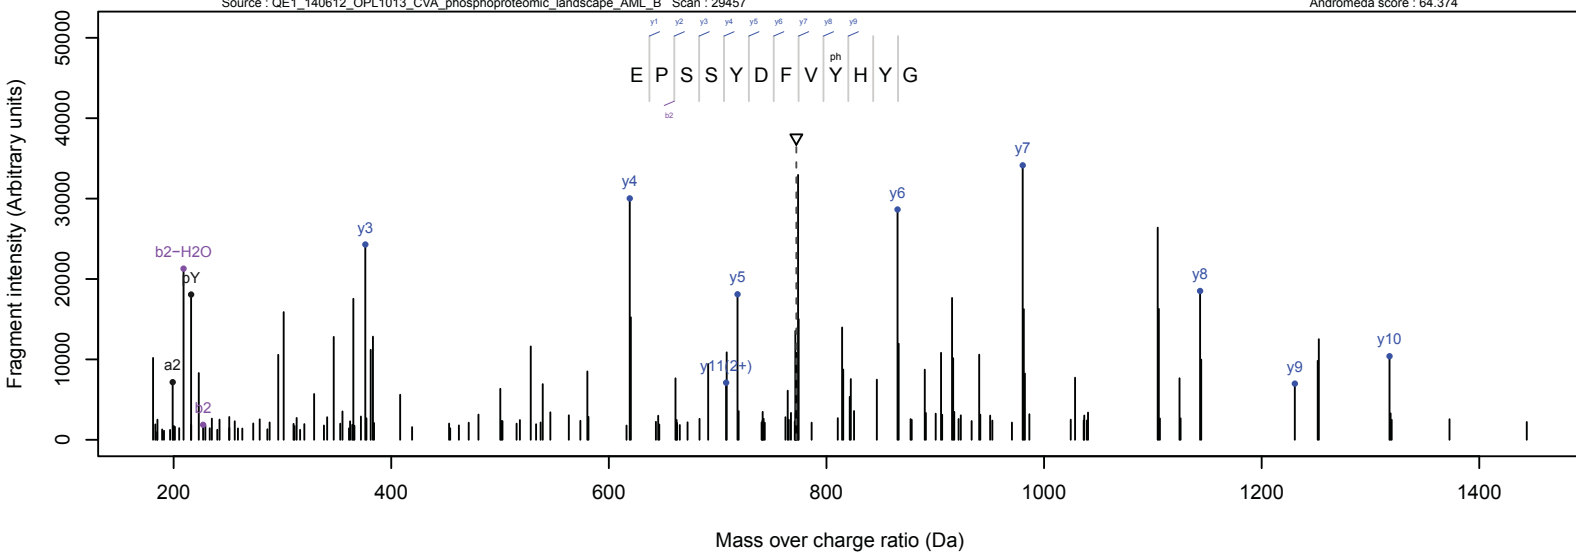

## HHEITY(ph)VALVSDKEGSHVK-4+

Source : QE1\_140612\_OPL1013\_CVA\_phosphoproteomic\_landscape\_AML\_B Scan : 18472

Andromeda score : 64.298

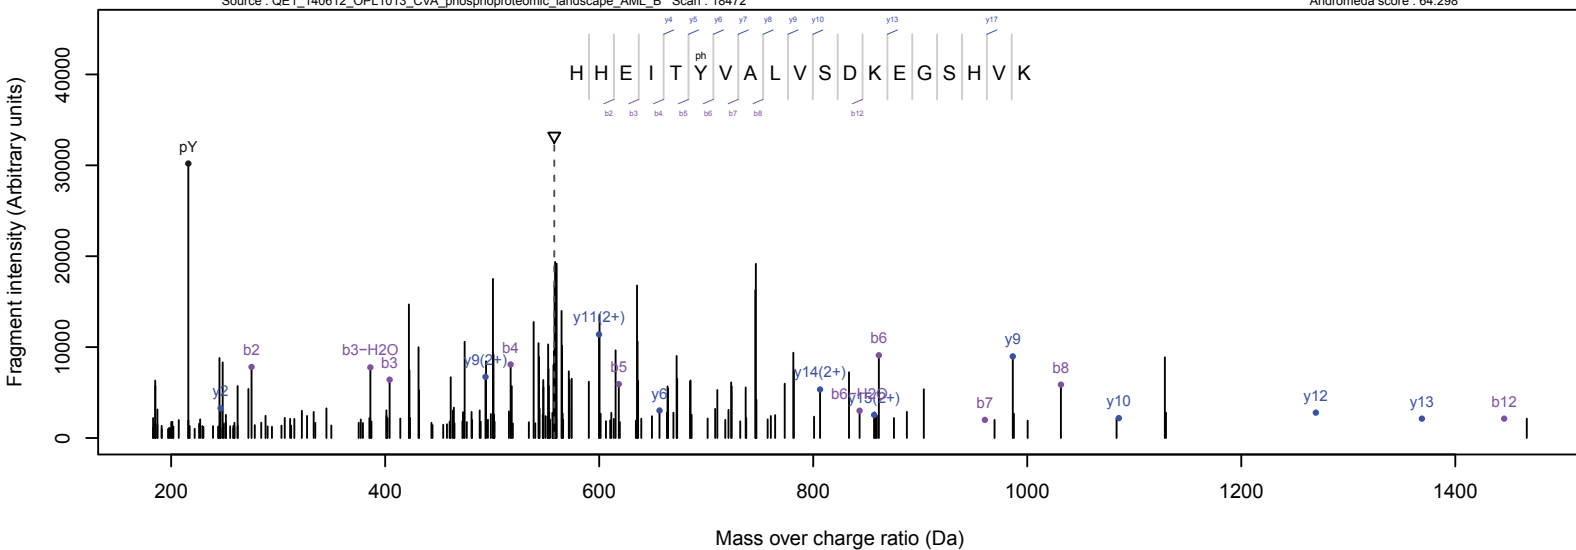

## TFNSELYSLNDY(ph)KPPISK-3+

Source : QE1\_140822\_OPL1013\_CvA\_pTyrIP\_AML\_cell\_lines\_part2\_B Scan : 25546

Andromeda score : 64.275

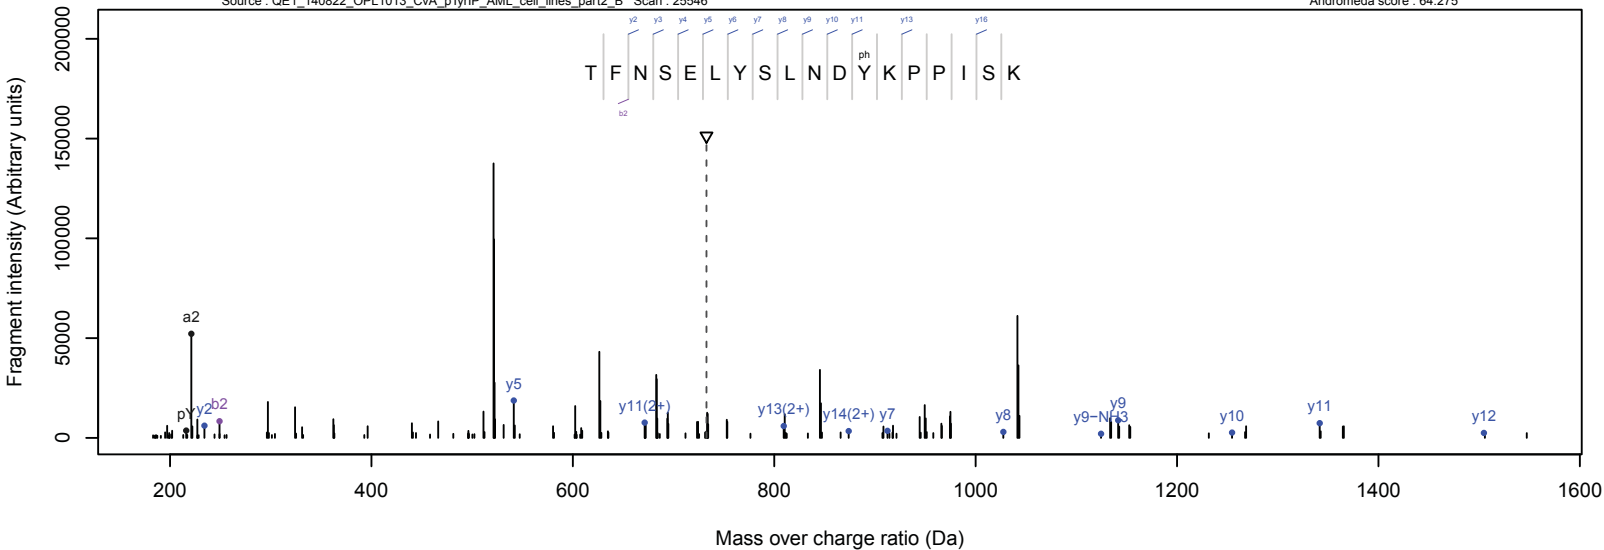

## TAENKLDTKY(ph)PYVCHAE LN A I M N K-4+

Source : QE1\_140612\_OPL1013\_CVA\_phosphoproteomic\_landscape\_AML\_B Scan : 27425

Andromeda score : 64.27

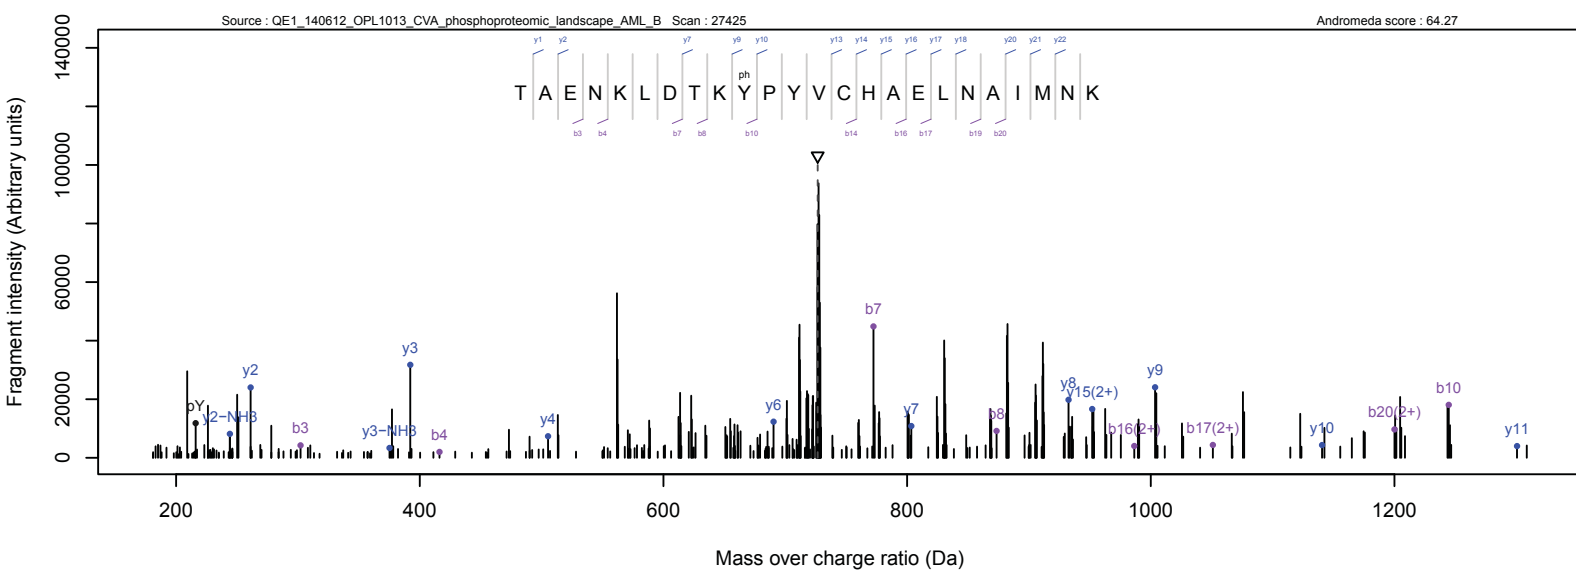

TYYSPVYRS(ph)PNHGTVELQGSQTALYR-3+

Source : QE1\_140612\_OPL1013\_CVA\_phosphoproteomic\_landscape\_AML\_C Scan : 26408

Andromeda score : 64.27

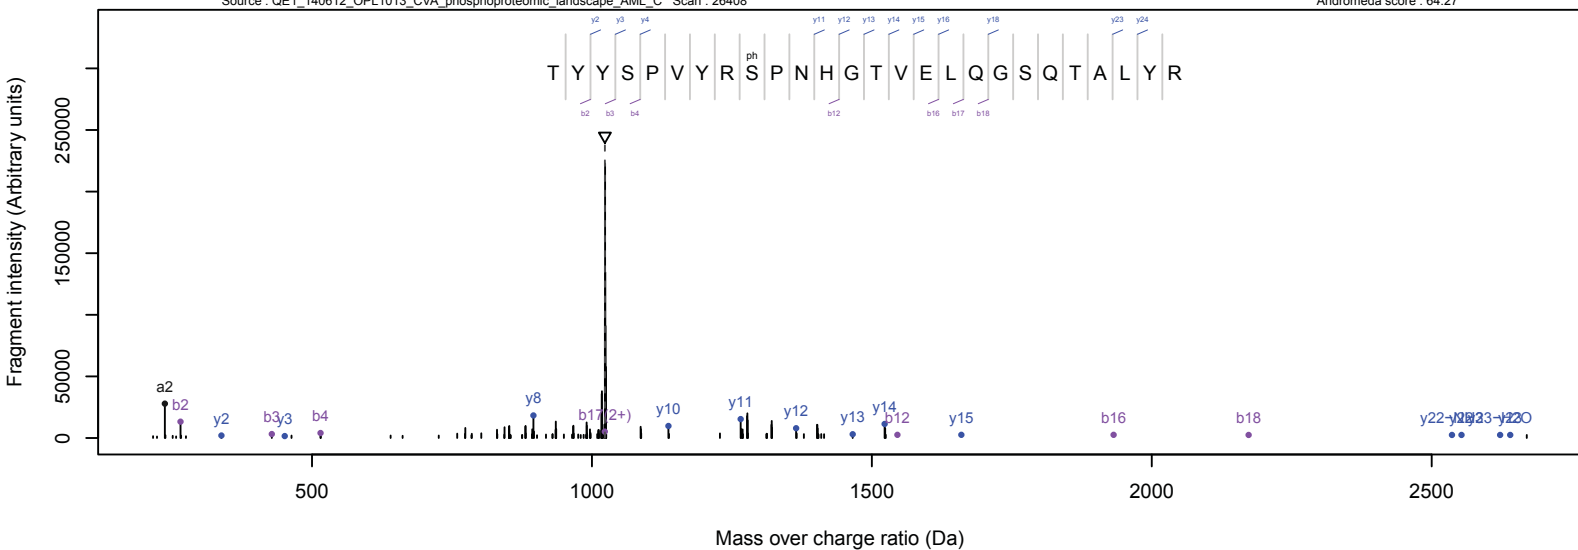

KIDKY(ph)TEVLK-3+

Source : QE1\_140612\_OPL1013\_CVA\_phosphoproteomic\_landscape\_AML\_C Scan : 11099

Andromeda score : 64.266

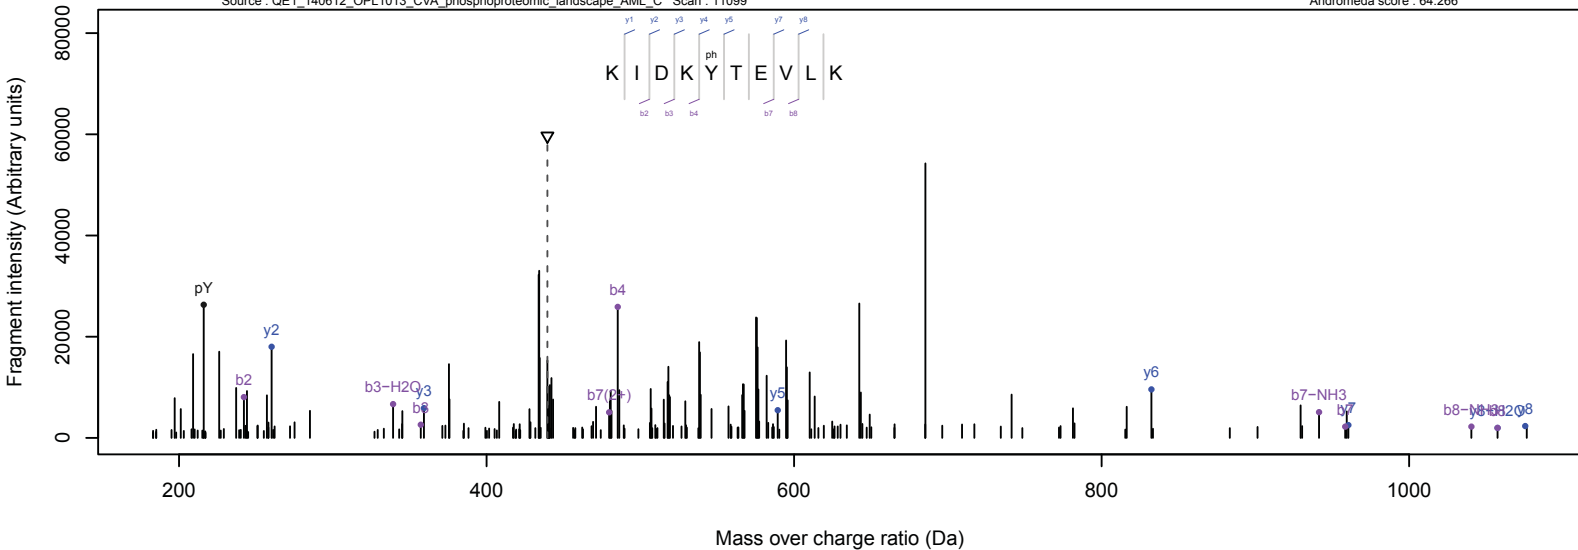

SILY(ph)DER-2+

Source : QE1\_140612\_OPL1013\_CVA\_phosphoproteomic\_landscape\_AML\_D Scan : 12017

Andromeda score : 64.265

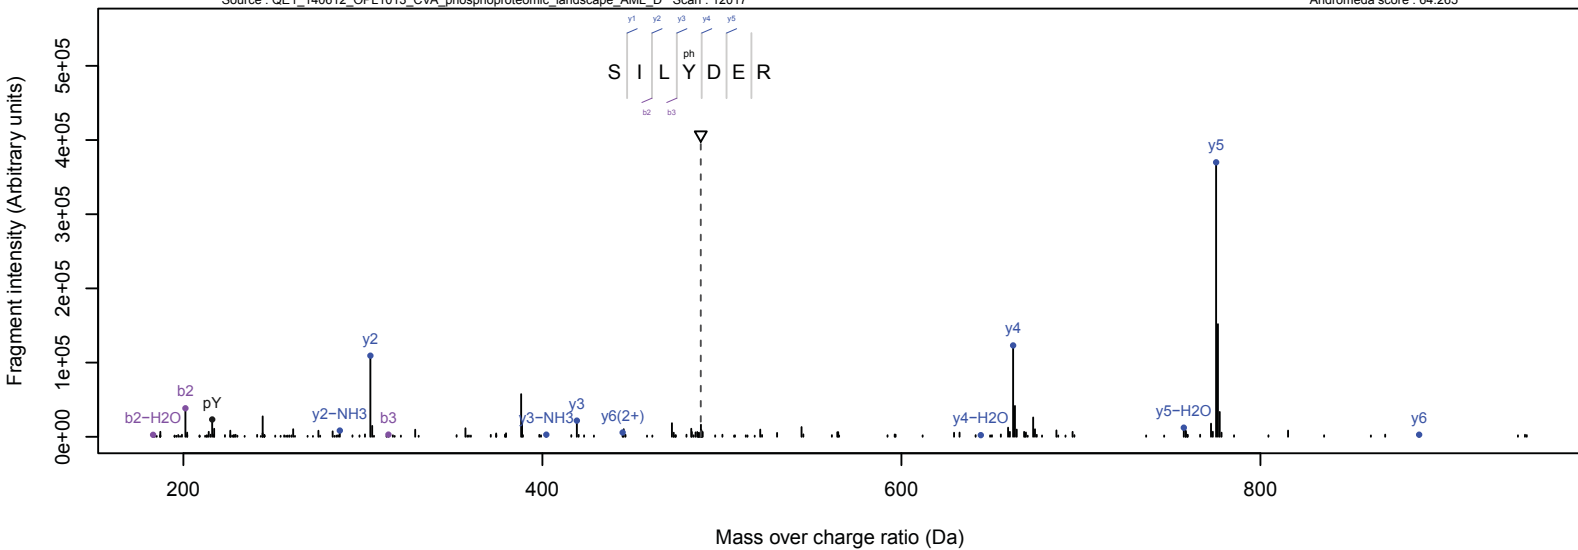

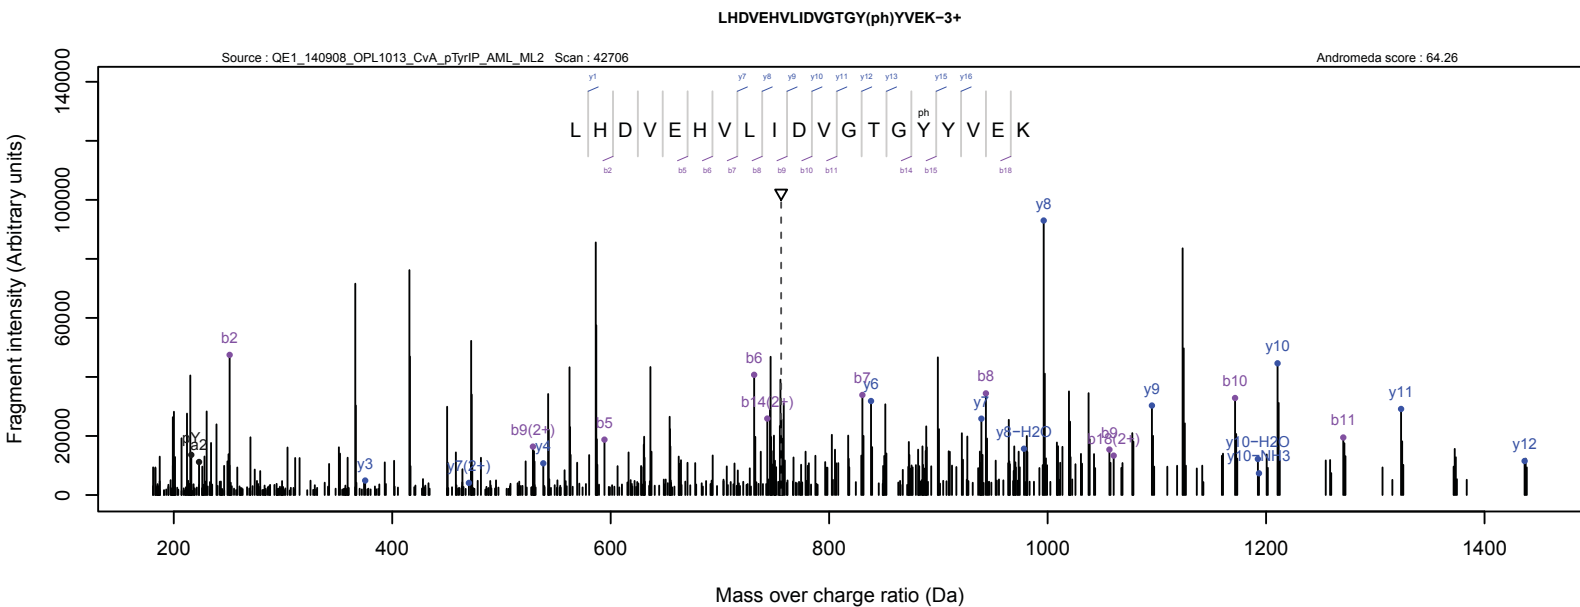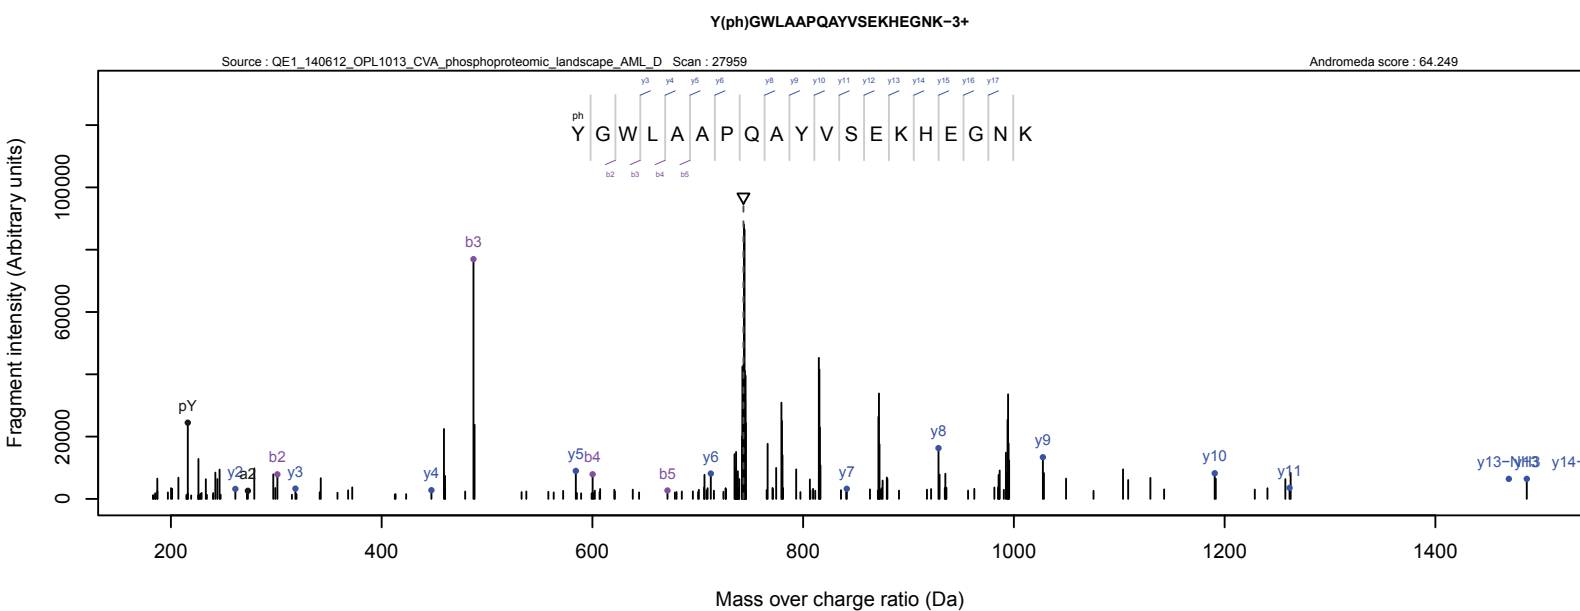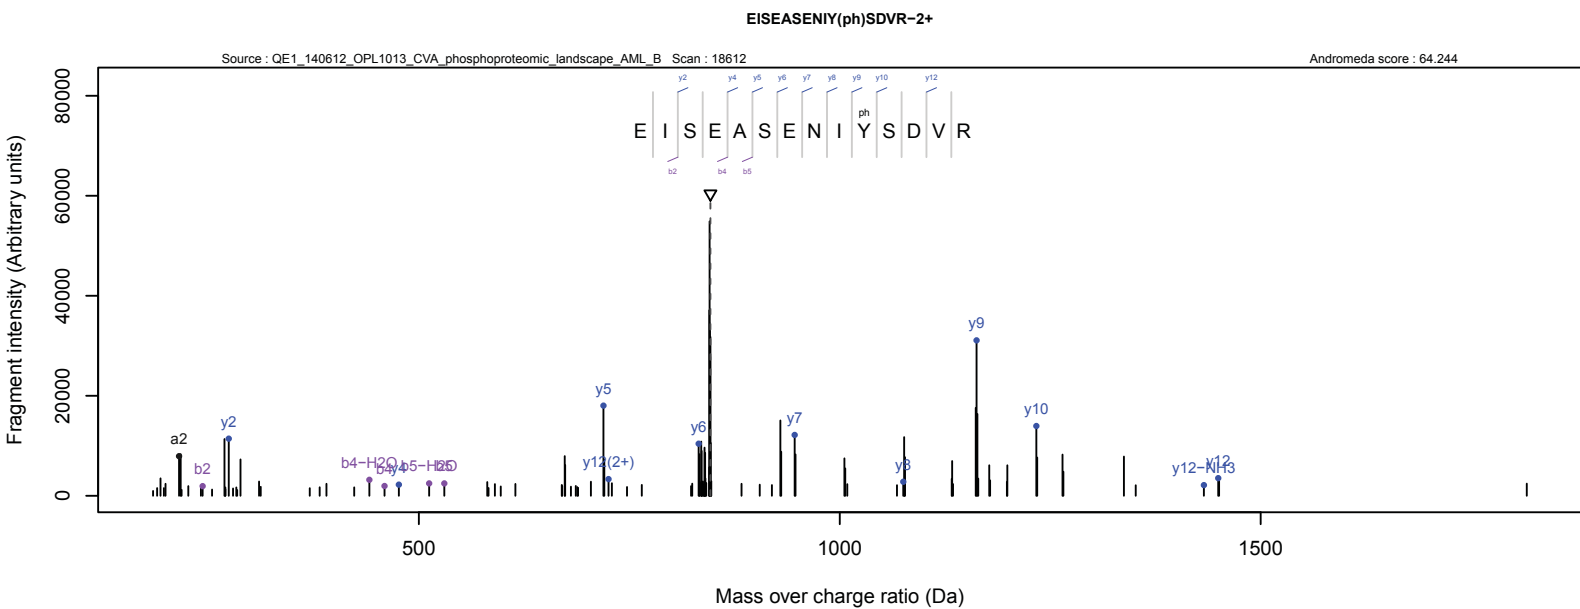

SAVTTVVNPK(ph)EGK-2+

Source : QE1\_140612\_OPL1013\_CVA\_phosphoproteomic\_landscape\_AML\_B Scan : 12188

Andromeda score : 64.244

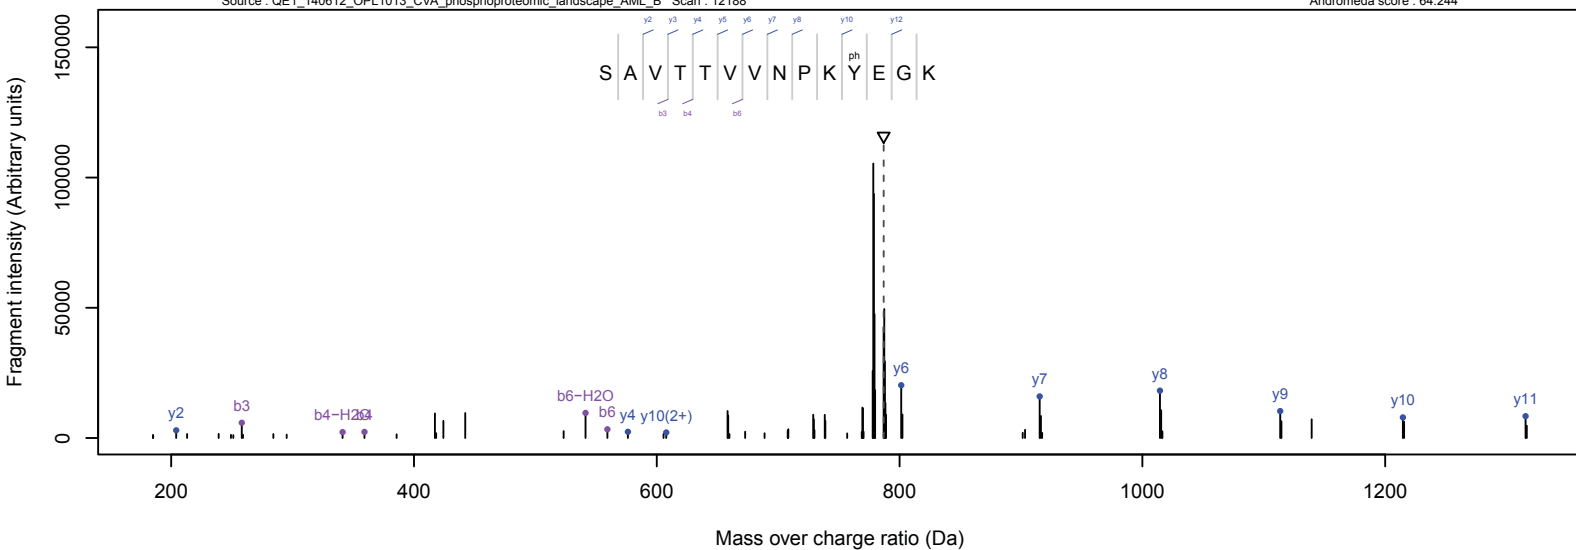

TYNLY(ph)YEGNQLQR-2+

Source : QE1\_140612\_OPL1013\_CVA\_phosphoproteomic\_landscape\_AML\_D Scan : 33802

Andromeda score : 64.244

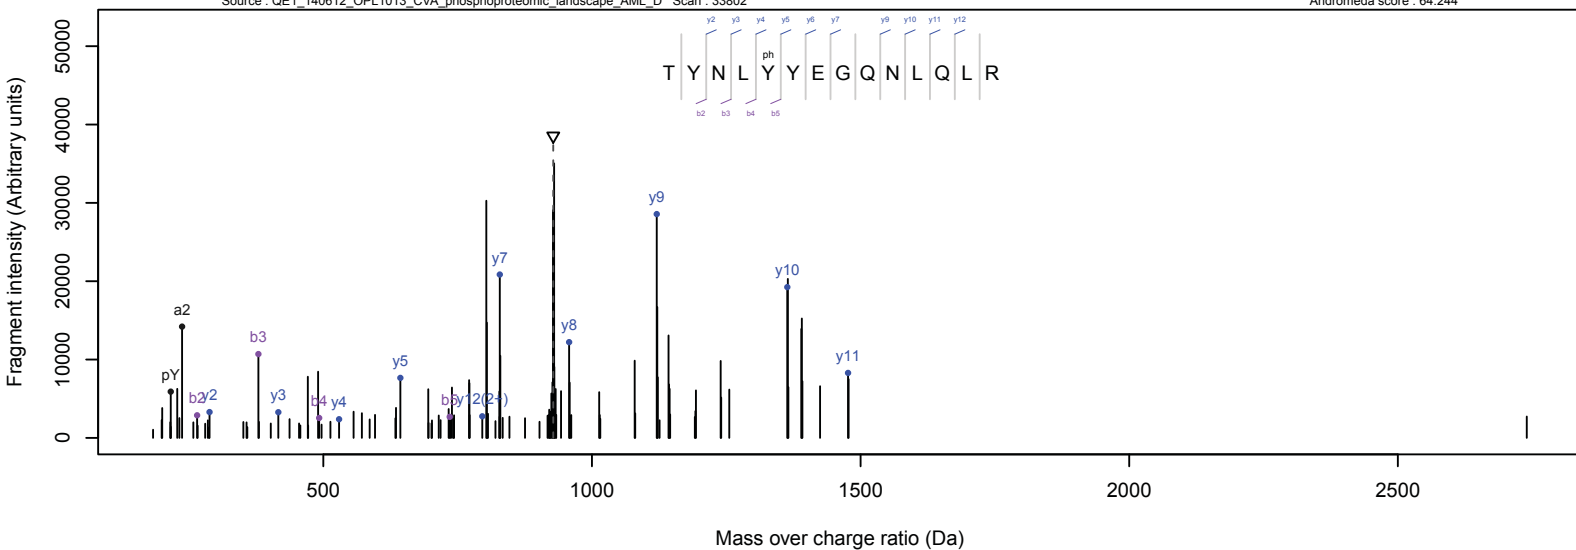

ASDY(ph)QLDQK-2+

Source : QE1\_140822\_OPL1013\_CvA\_pTyrIP\_AML\_cell\_lines\_part2\_B Scan : 3004

Andromeda score : 64.121

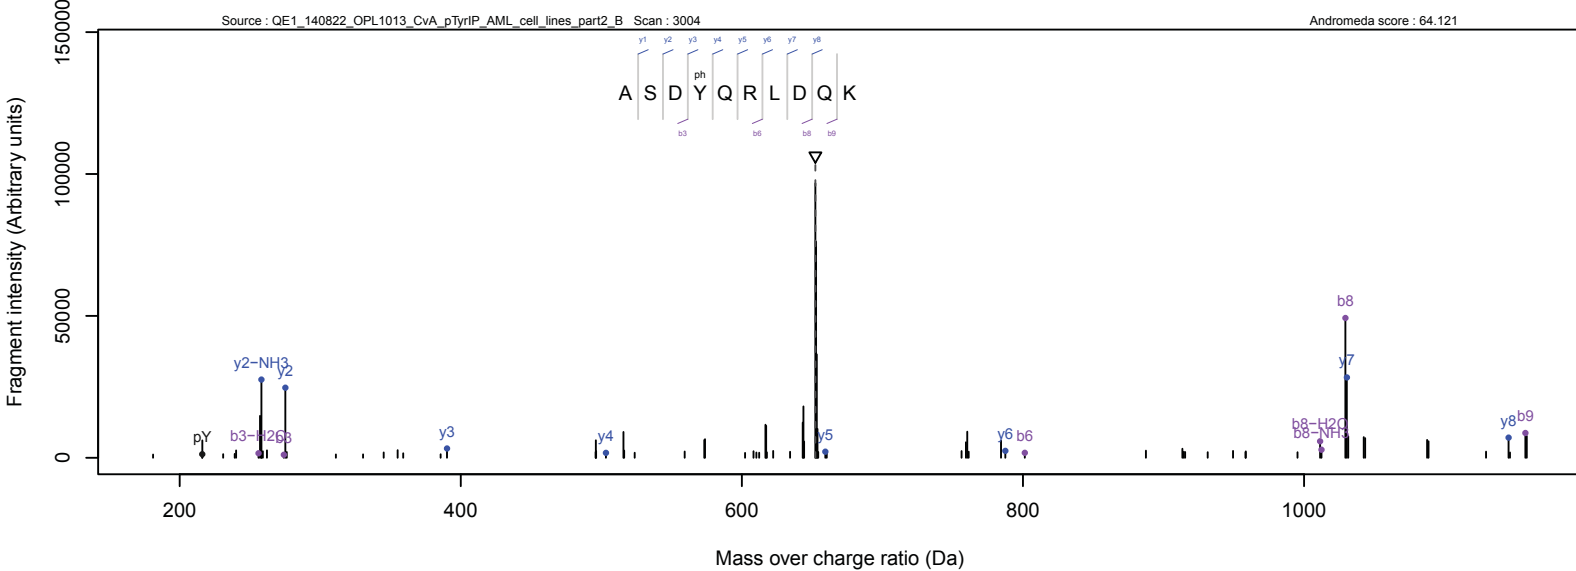

## SY(ph)QEVSFDPAR-2+

Source : QE1\_140612\_OPL1013\_CVA\_phosphoproteomic\_landscape\_AML\_B Scan : 19524

Andromeda score : 64.121

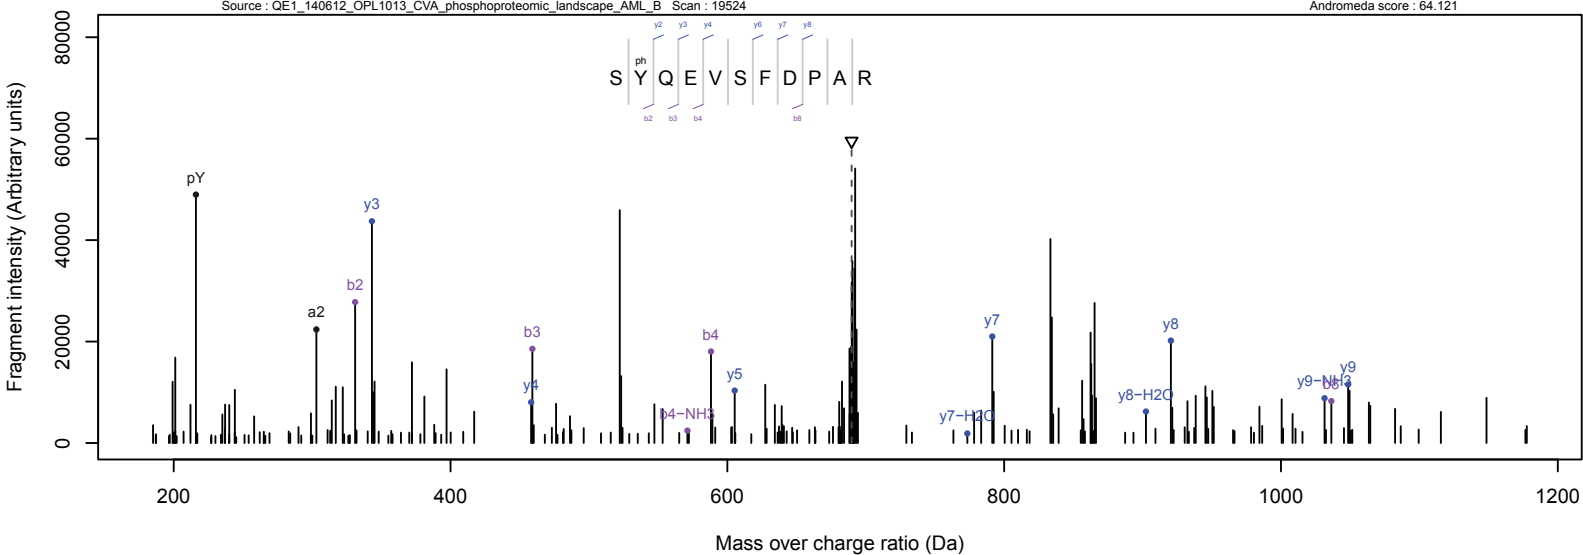

## VEASKVPEY(ph)IKK-3+

Source : QE1\_140612\_OPL1013\_CVA\_phosphoproteomic\_landscape\_AML\_C Scan : 10253

Andromeda score : 64.121

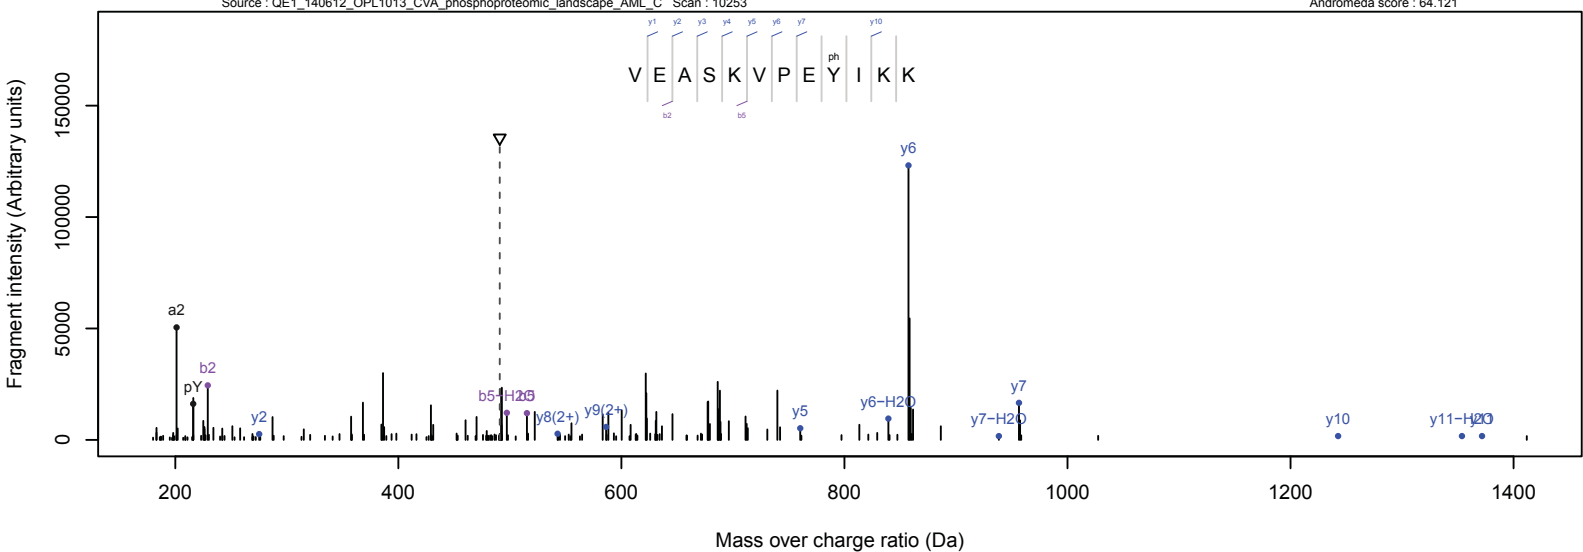

## PSVY(ph)LSTPSSASK-2+

Source : QE1\_140612\_OPL1013\_CVA\_phosphoproteomic\_landscape\_AML\_B Scan : 16300

Andromeda score : 64.104

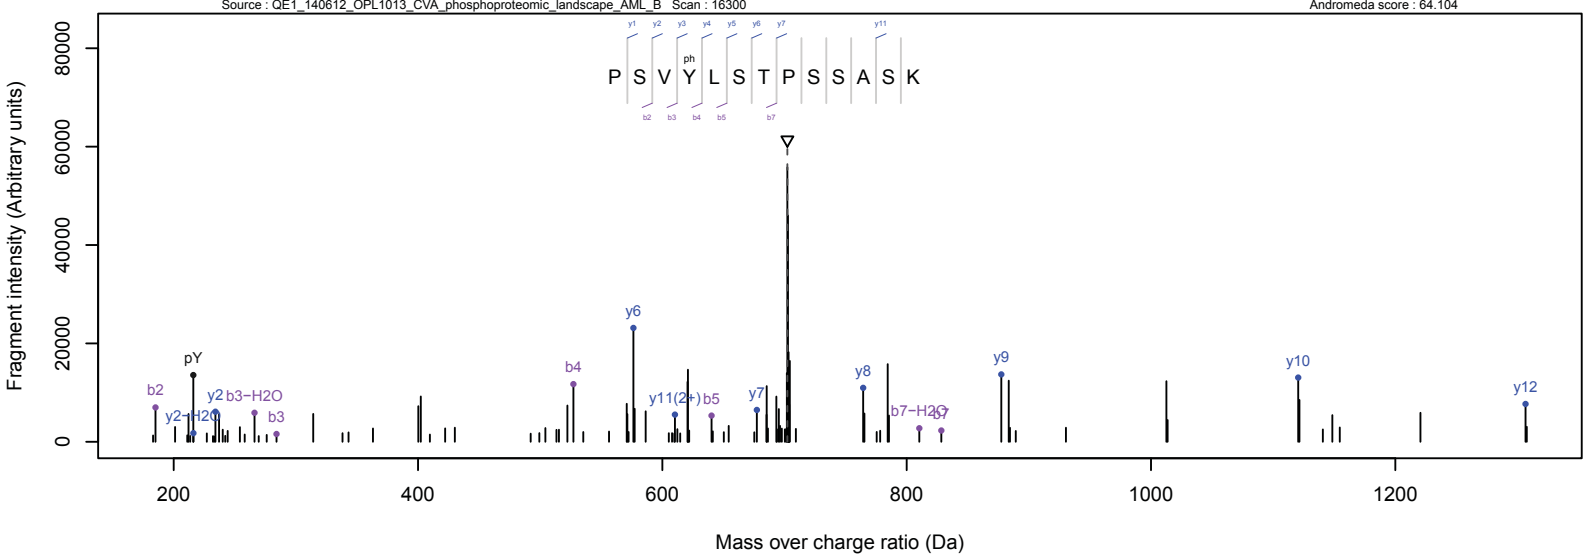



## WFSIQNNQLVY(ph)QKK-3+

Source : QE1\_140908\_OPL1013\_CVA\_pTyrIP\_AML\_ML2 Scan : 36275

Andromeda score : 64.104

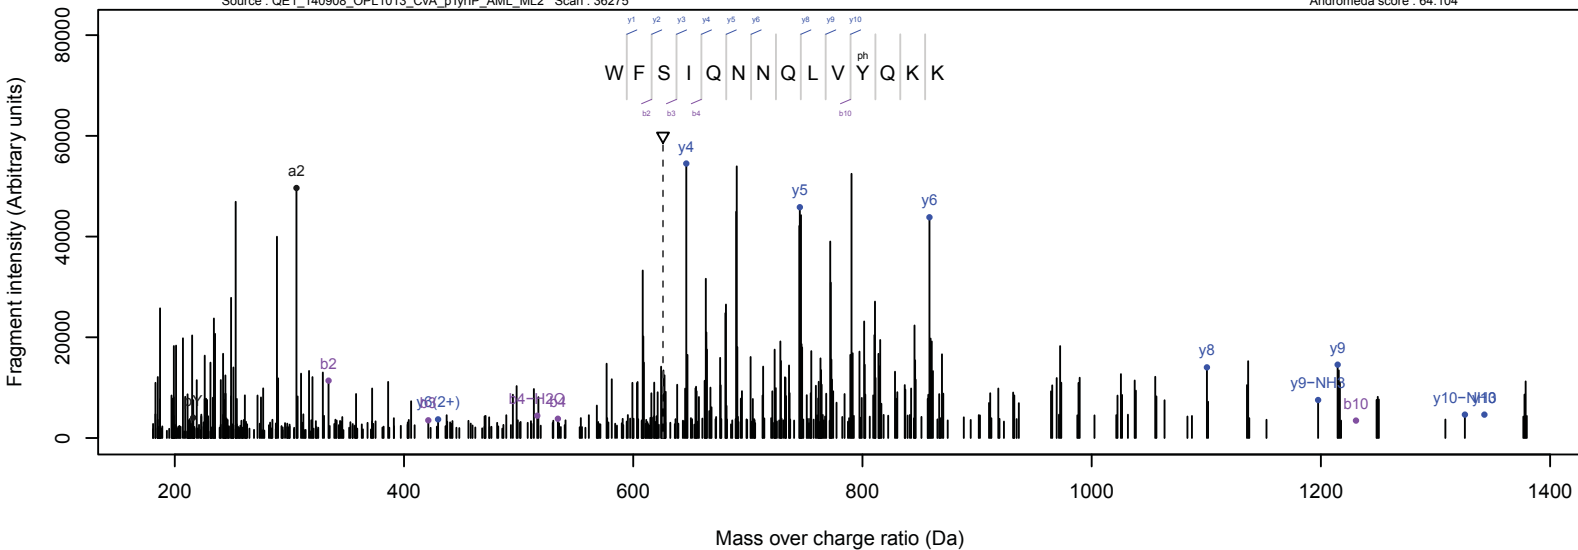

## Y(ph)NAPTSHVTPSVK-3+

Source : QE1\_140612\_OPL1013\_CVA\_phosphoproteomic\_landscape\_AML\_C Scan : 8483

Andromeda score : 64.104

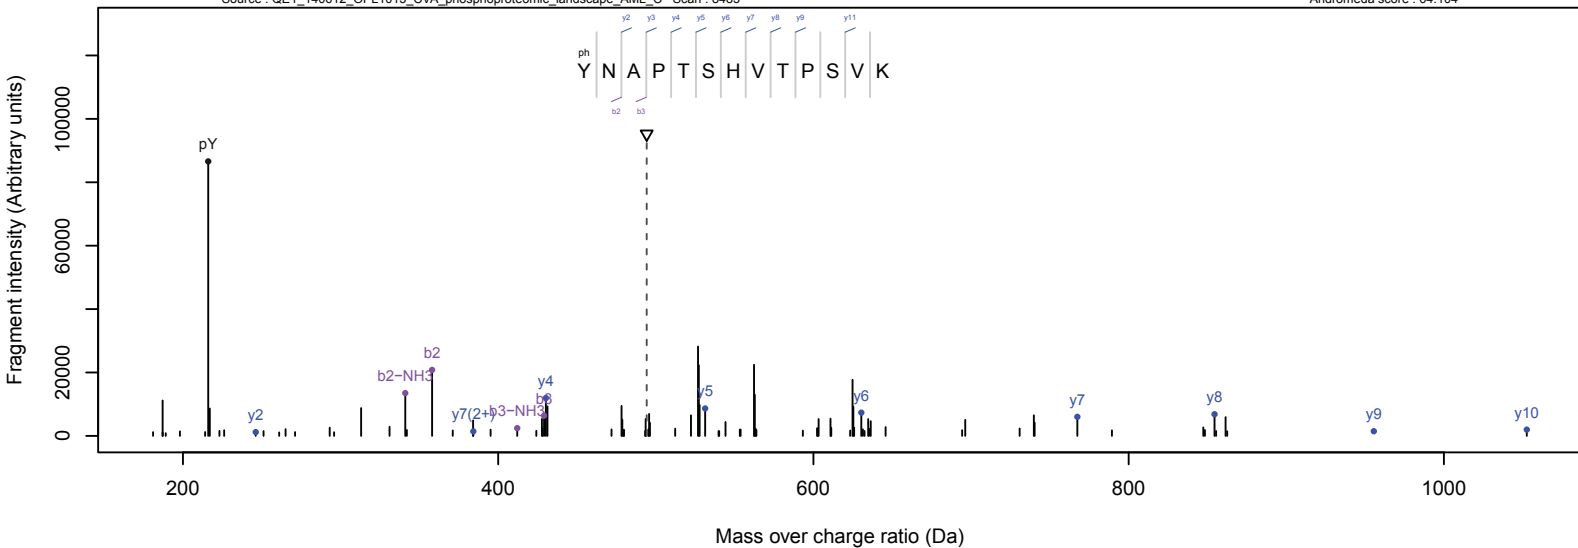

## NDVGFKY(ph)SVK-2+

Source : QE1\_140612\_OPL1013\_CVA\_phosphoproteomic\_landscape\_AML\_E Scan : 12079

Andromeda score : 64.103

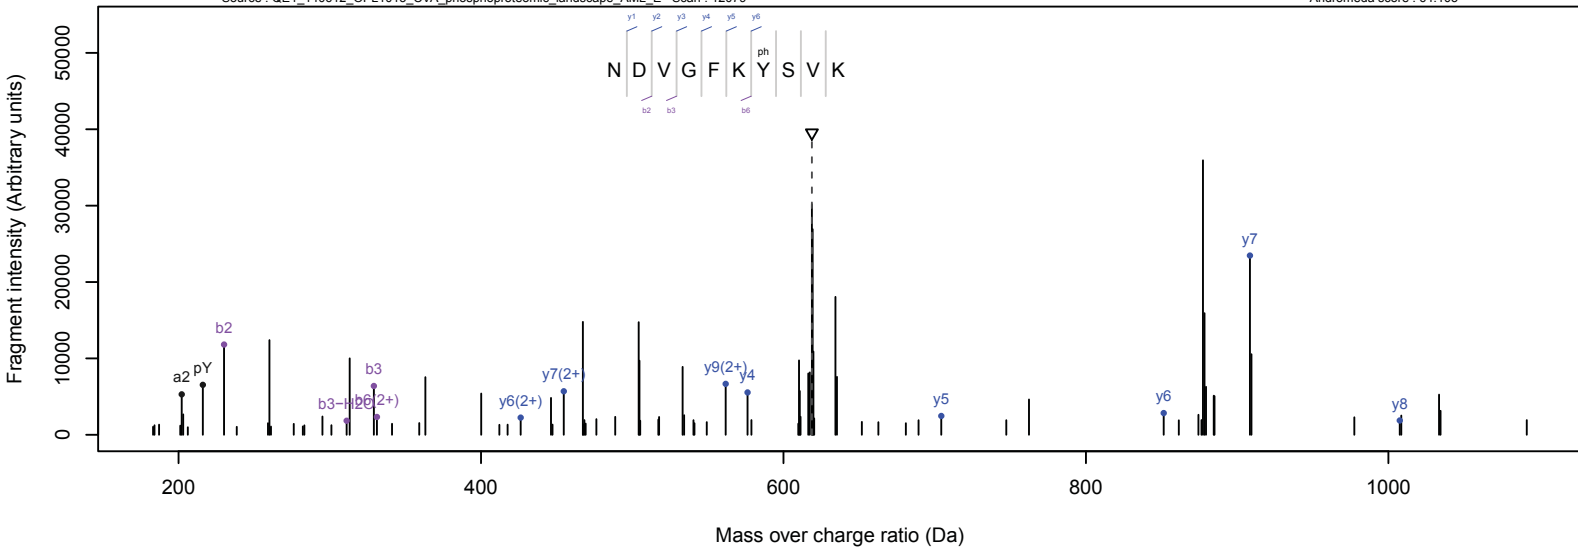

## RVFNPY(ph)TEFKEFSR-3+

Source : QE1\_140612\_OPL1013\_CVA\_phosphoproteomic\_landscape\_AML\_C Scan : 31894

Andromeda score : 64.04

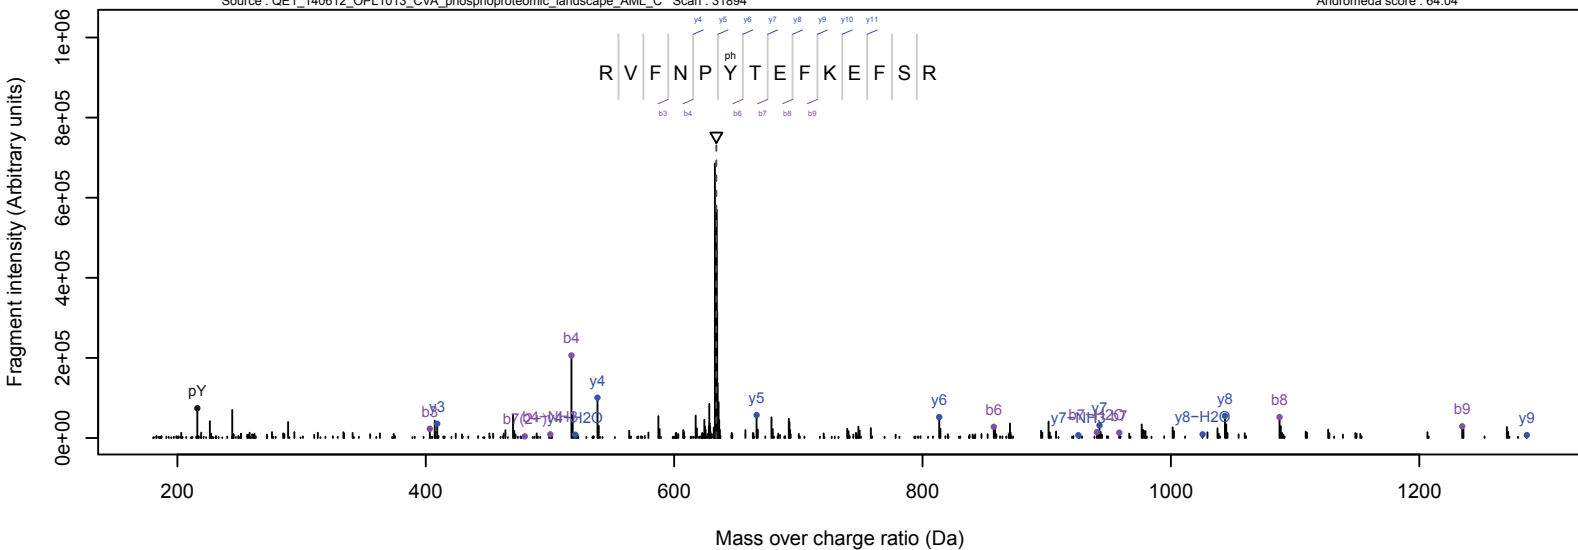

## YLQLTQSELSSY(ph)HRK-3+

Source : QE1\_140612\_OPL1013\_CVA\_phosphoproteomic\_landscape\_AML\_C Scan : 18987

Andromeda score : 64.04

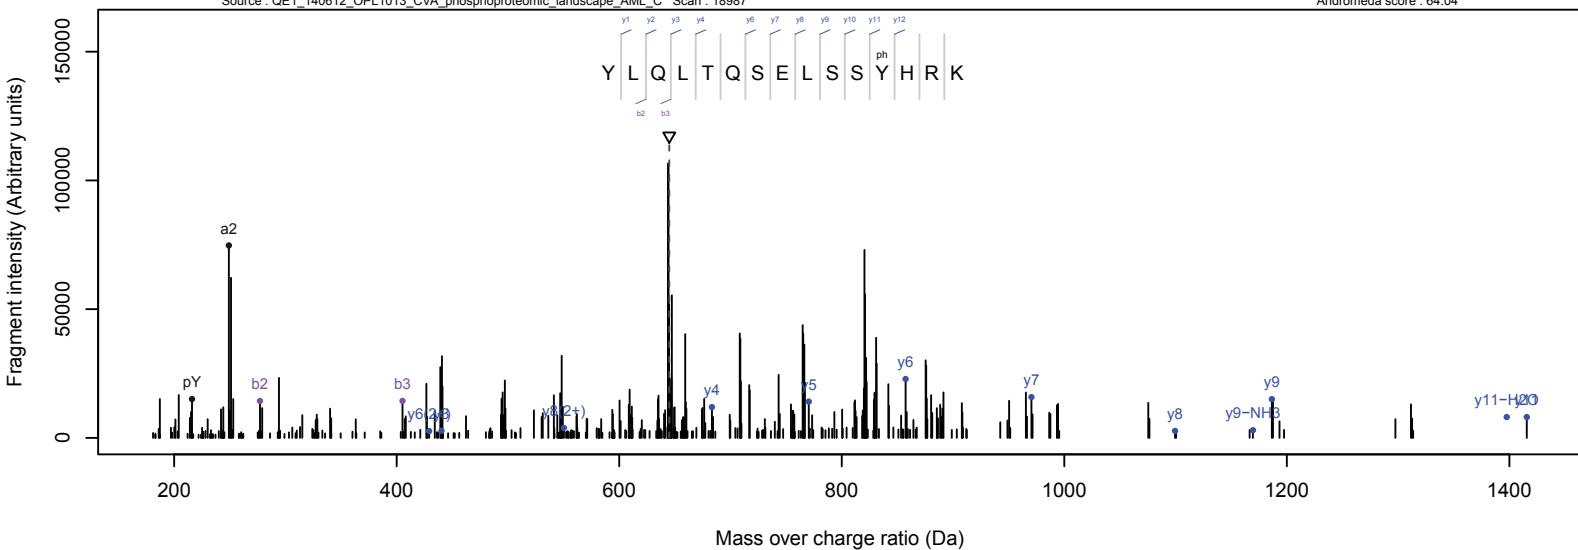

## EVFNTDECSIQHCLY(ph)QFTR-3+

Source : QE1\_140908\_OPL1013\_CvA\_pTyrIP\_AML\_HEL Scan : 44541

Andromeda score : 63.998

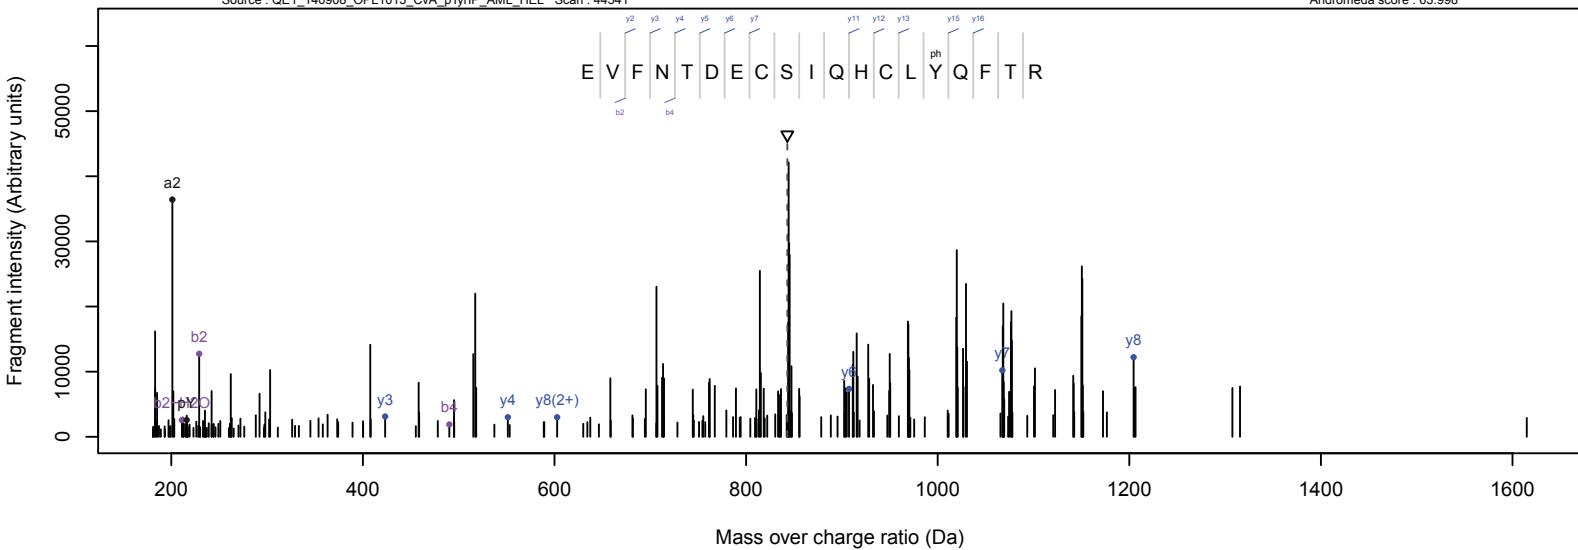

TVTRY(ph)PANSIVVGGCPVCR-3+

Source : QE1\_140612\_OPL1013\_CVA\_phosphoproteomic\_landscape\_AML\_C Scan : 26032

Andromeda score : 63.998

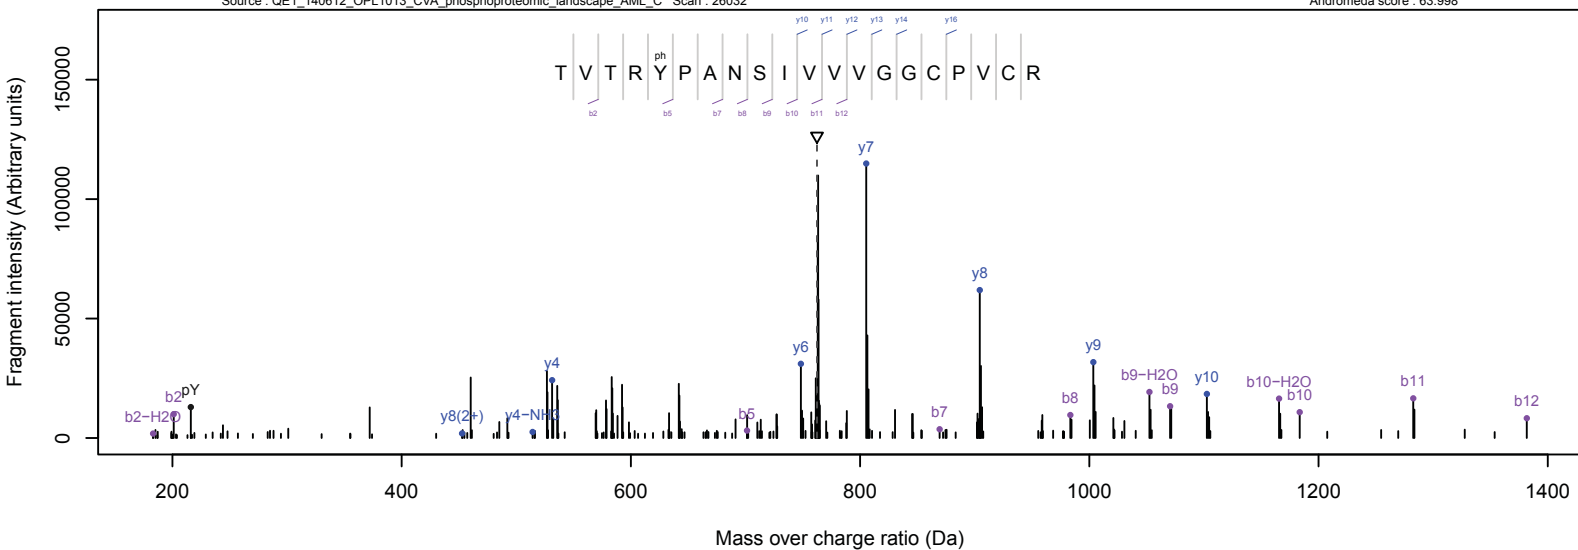

TIATALEY(ph)VYK-2+

Source : QE1\_140612\_OPL1013\_CVA\_phosphoproteomic\_landscape\_AML\_A Scan : 37801

Andromeda score : 63.944

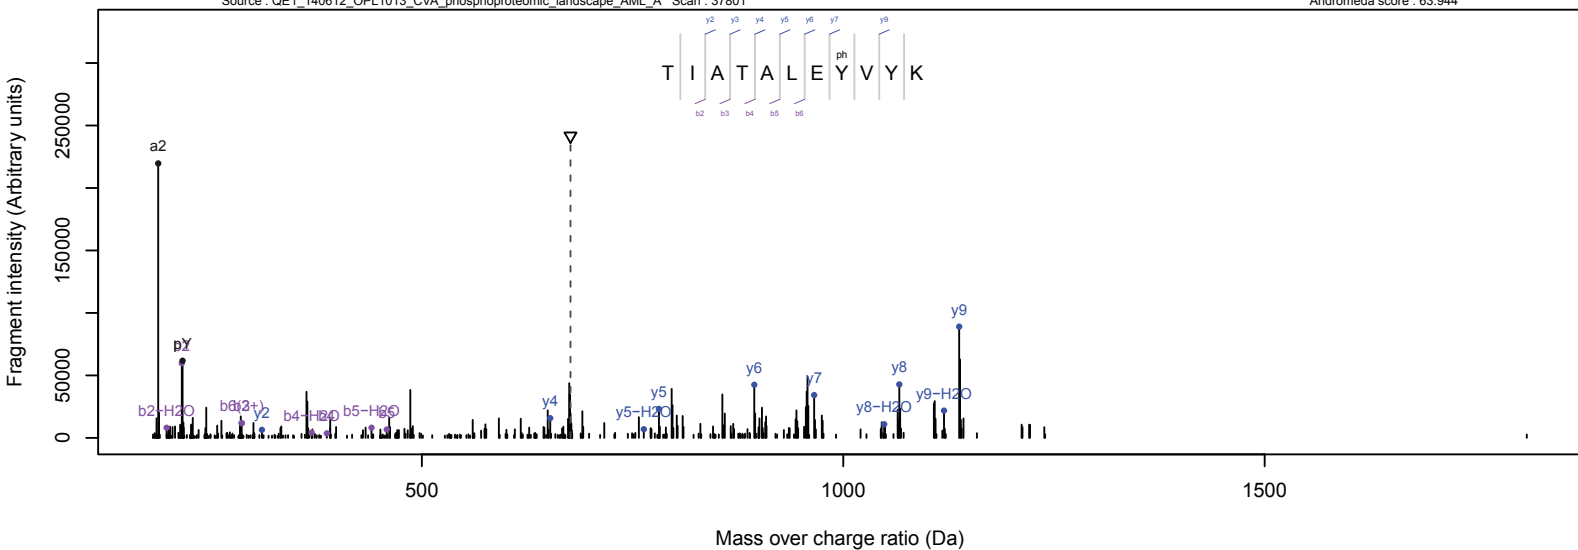

NLLNHPWIMQDYNYPVEWQSK-3+

Source : QE1\_140612\_OPL1013\_CVA\_phosphoproteomic\_landscape\_AML\_B Scan : 45827

Andromeda score : 63.869

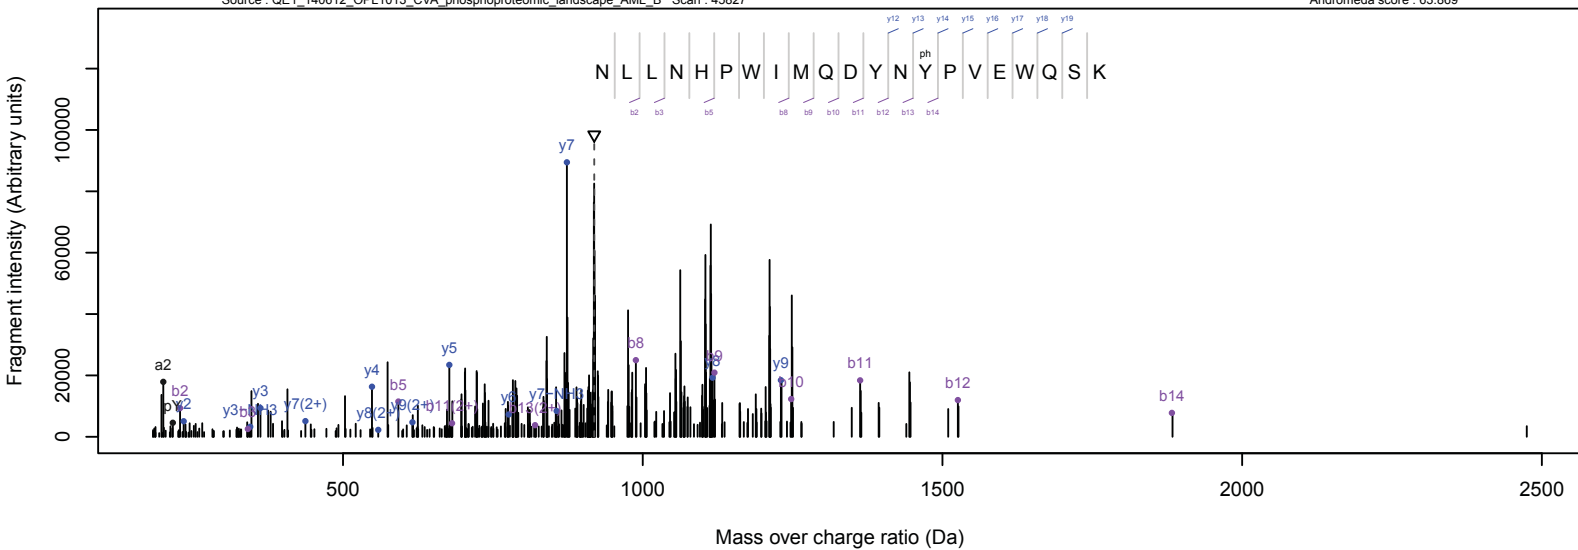

## TY(ph)VISASR-2+

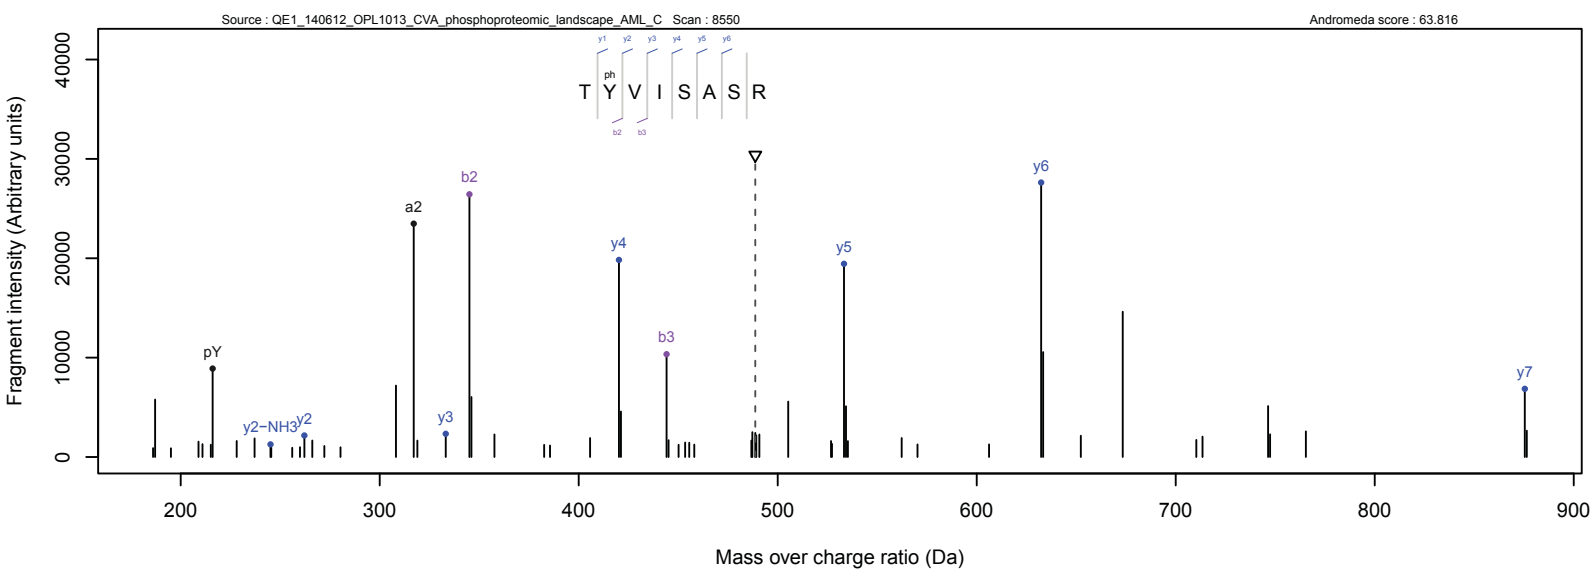

## Y(ph)KAPFHQLR-3+

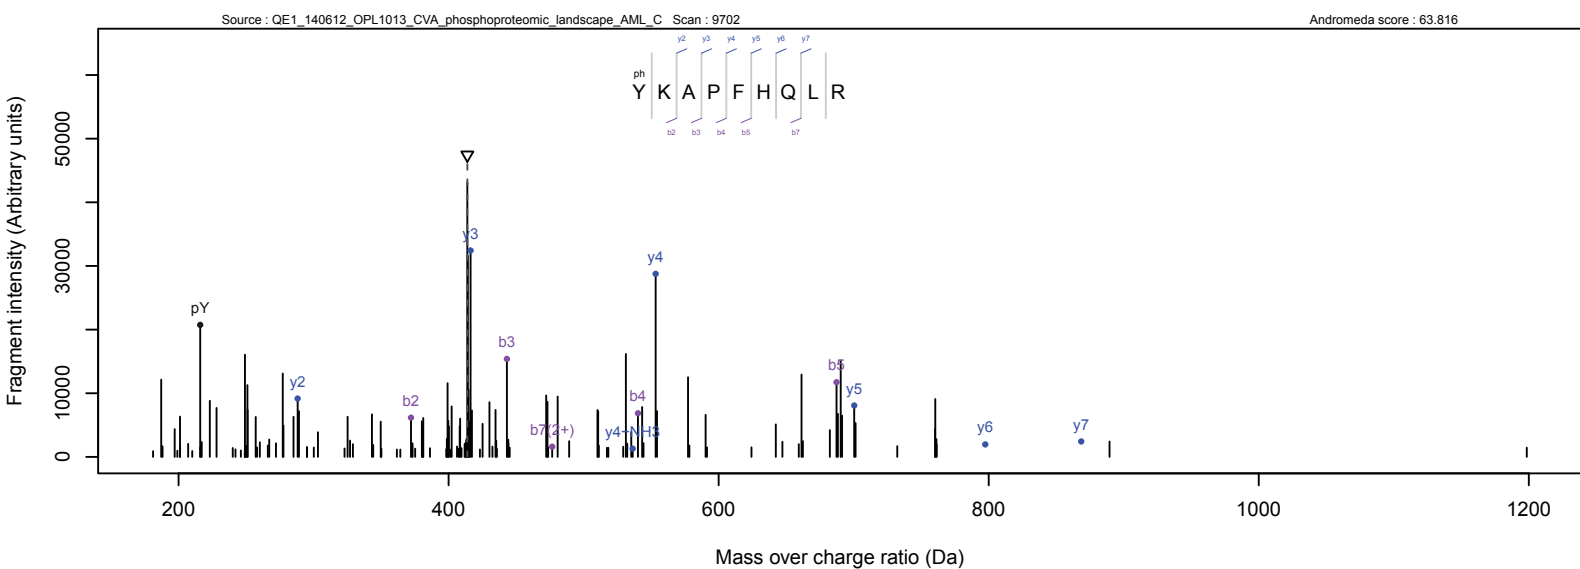

## Y(ph)LTVATVFR-2+

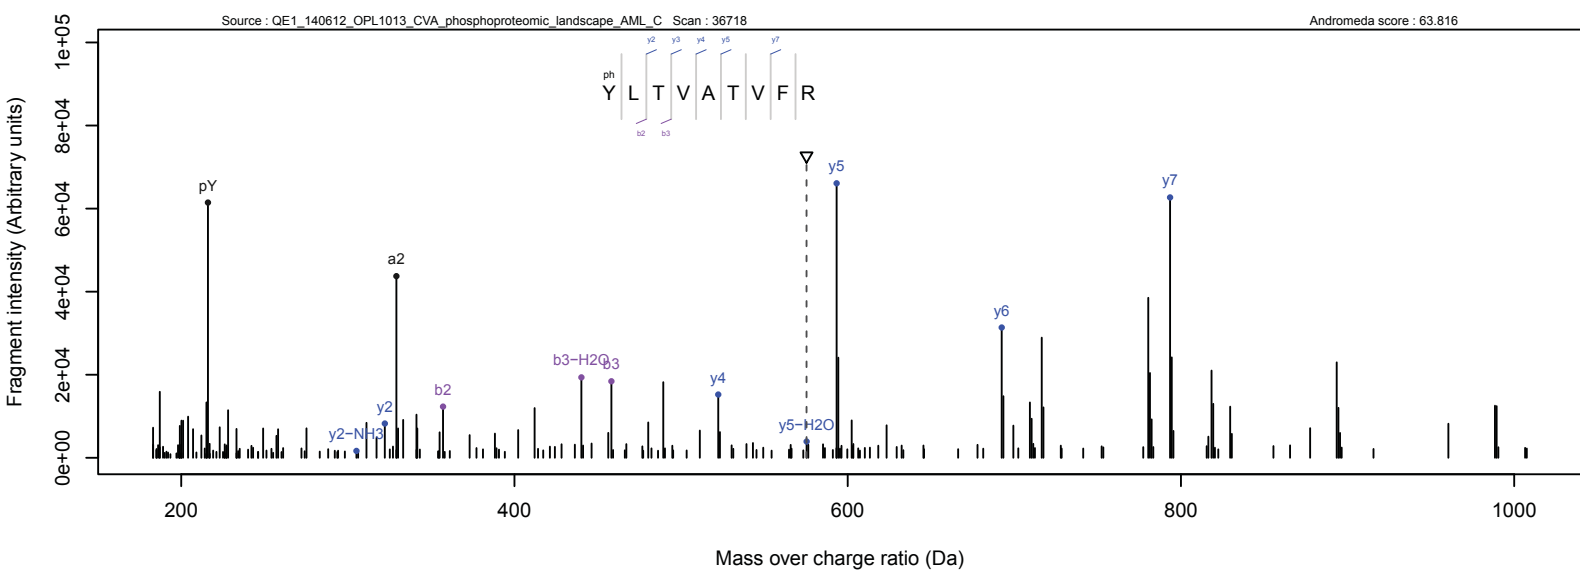

DVVICPDASLEDAKKEGY(ph)DVVVLPGGNLGAQNLSESAVK-4+

Source : QE1\_140612\_OPL1013\_CVA\_phosphoproteomic\_landscape\_AML\_B Scan : 43663

Andromeda score : 63.73

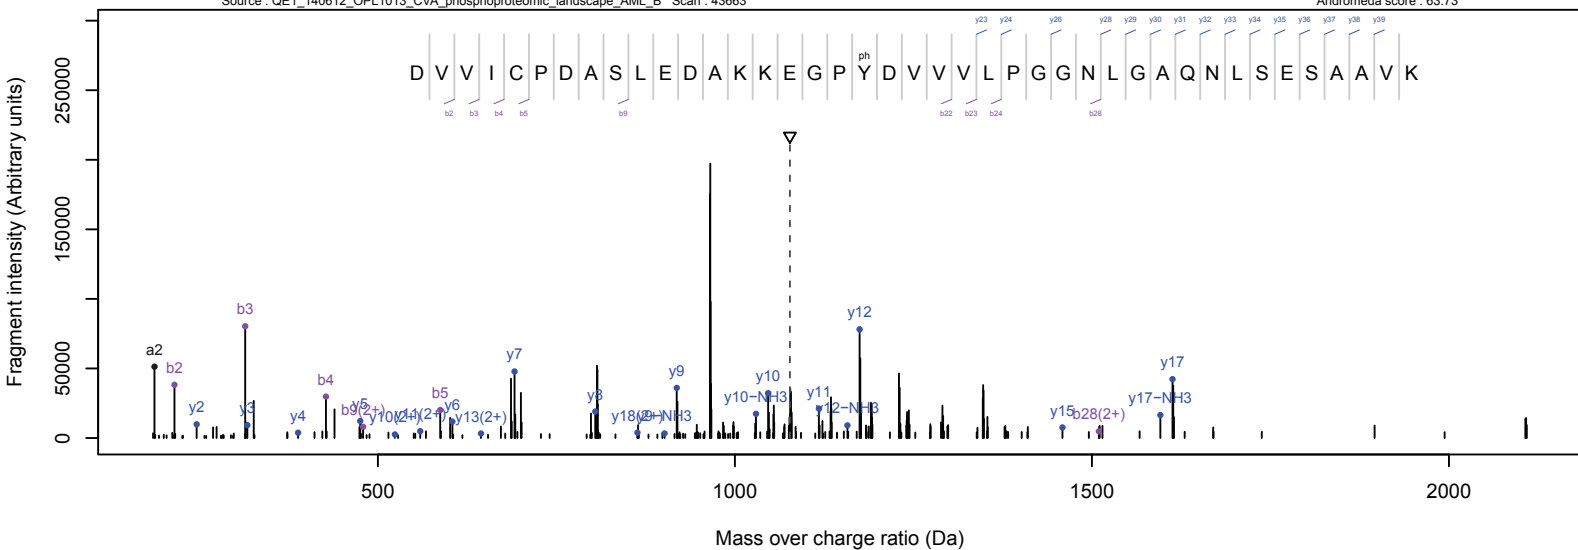

TKAVENY(ph)LIQMAR-2+

Source : QE1\_140612\_OPL1013\_CVA\_phosphoproteomic\_landscape\_AML\_C Scan : 31230

Andromeda score : 63.727

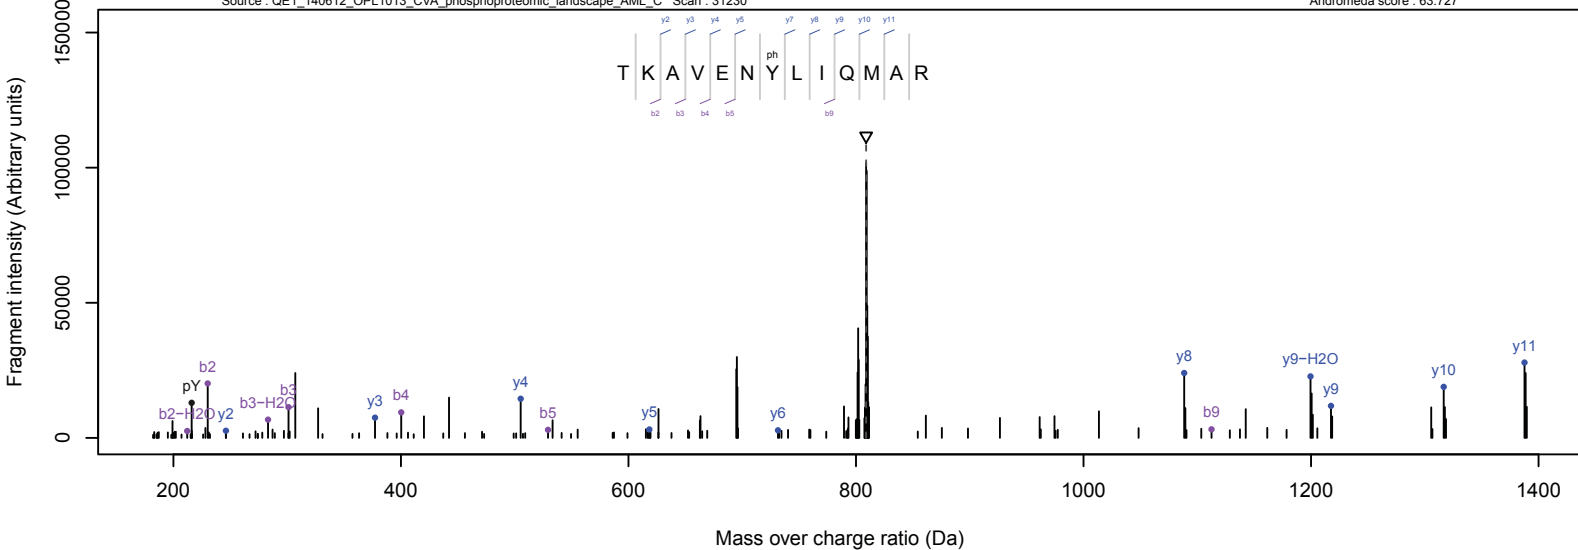

SQELNFVMDVNS(ph)SKYPSLLLSQEEK-3+

Source : QE1\_140612\_OPL1013\_CVA\_phosphoproteomic\_landscape\_AML\_C Scan : 40837

Andromeda score : 63.701

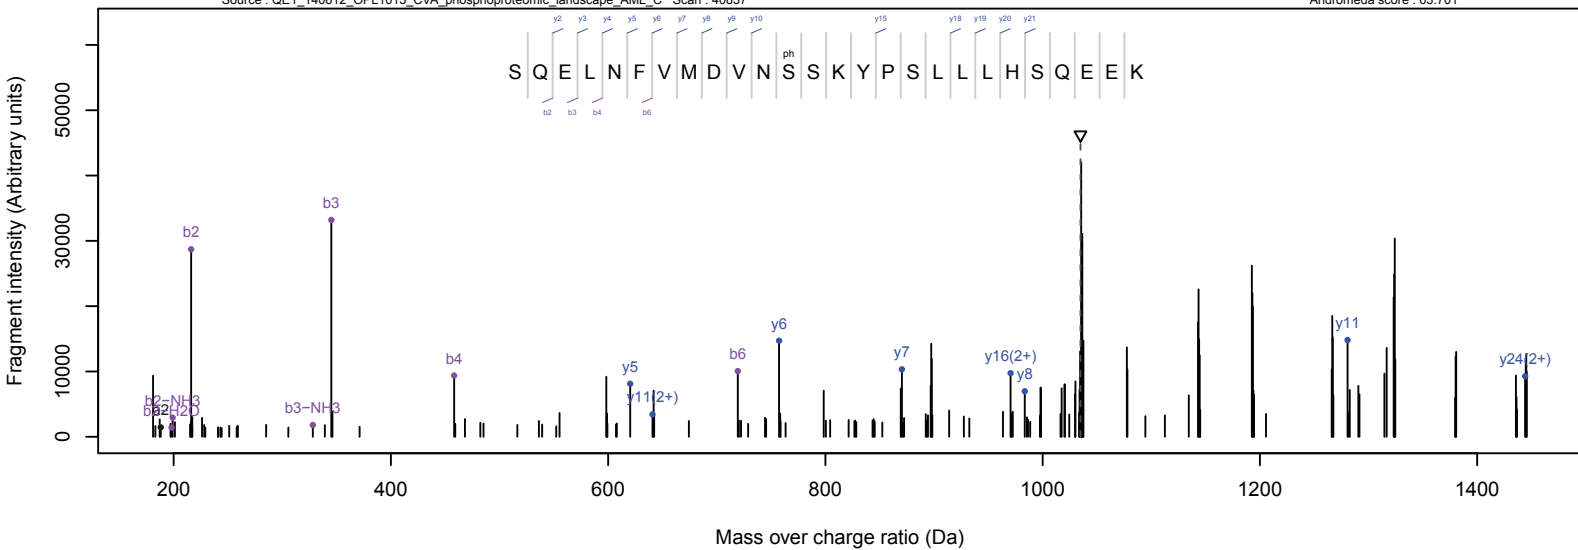

## KYPDY(ph)IQIAMPTESR-2+

Source : QE1\_140908\_OPL1013\_CvA\_pTyrIP\_AML\_Kasumi6 Scan : 26884

Andromeda score : 63.691

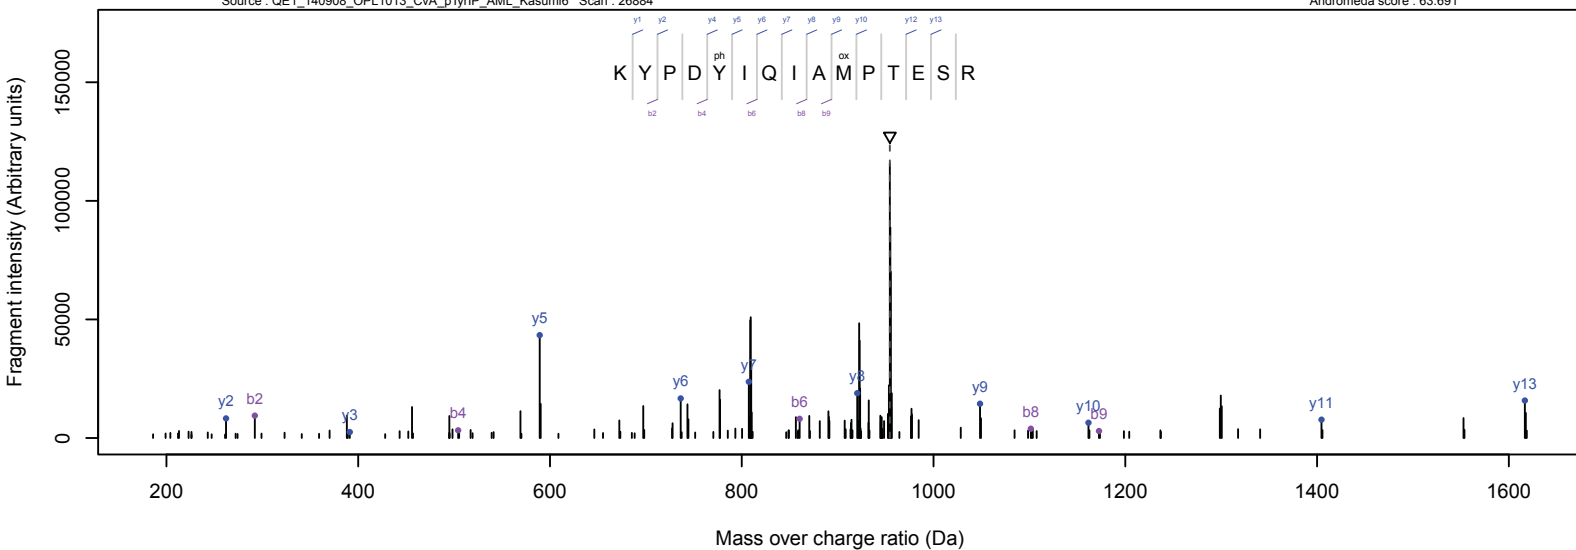

## LCEQLSTVIPNSHVY(ph)YRR-3+

Source : QE1\_140612\_OPL1013\_CVA\_phosphoproteomic\_landscape\_AML\_C Scan : 27744

Andromeda score : 63.691

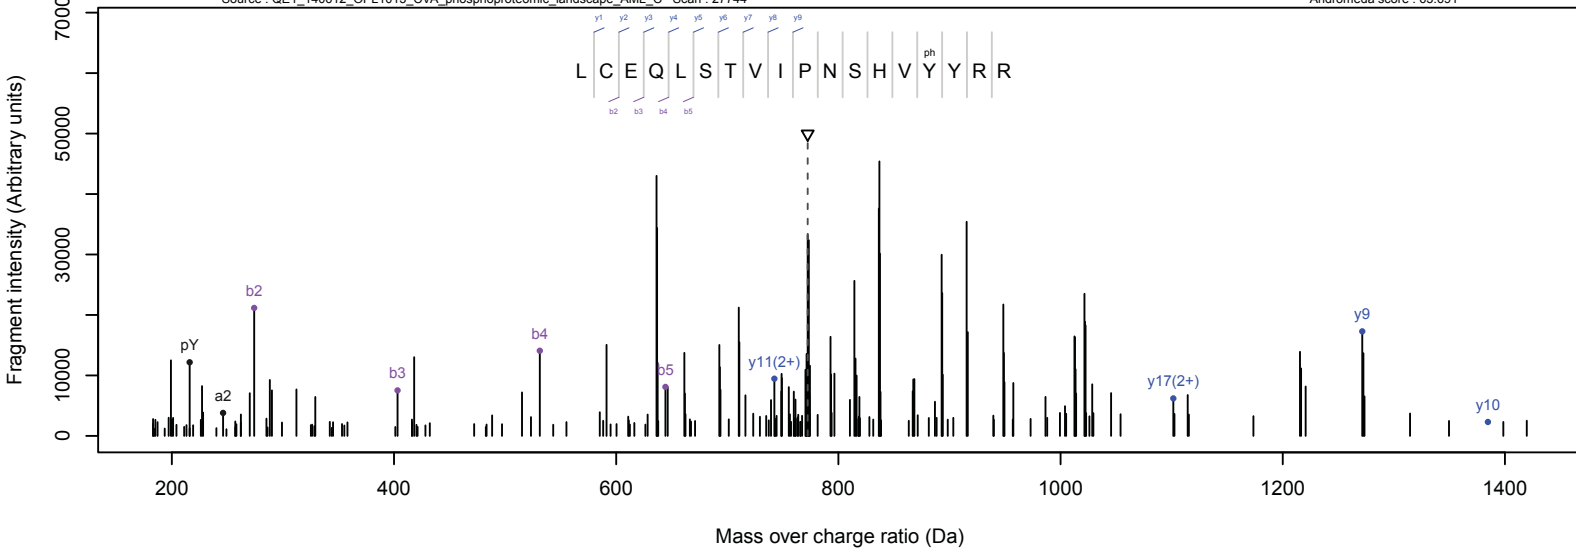

## SSSY(ph)FKDSESADAGGAQR-3+

Source : QE1\_140612\_OPL1013\_CVA\_phosphoproteomic\_landscape\_AML\_C Scan : 6915

Andromeda score : 63.691

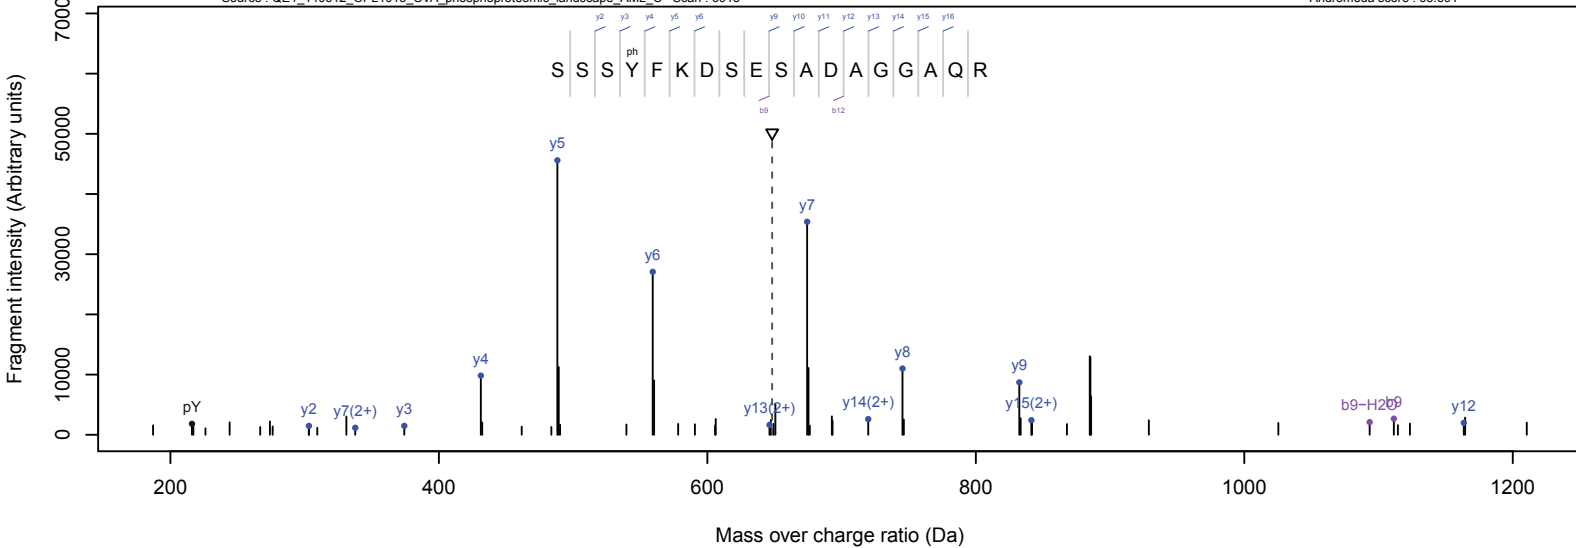

## VADMALHY(ph)ANKYNILVR-3+

Source: QE1\_140612\_OPL1013\_CVA\_phosphoproteomic\_landscape\_AML\_C Scan: 37061

Andromeda score: 63.691

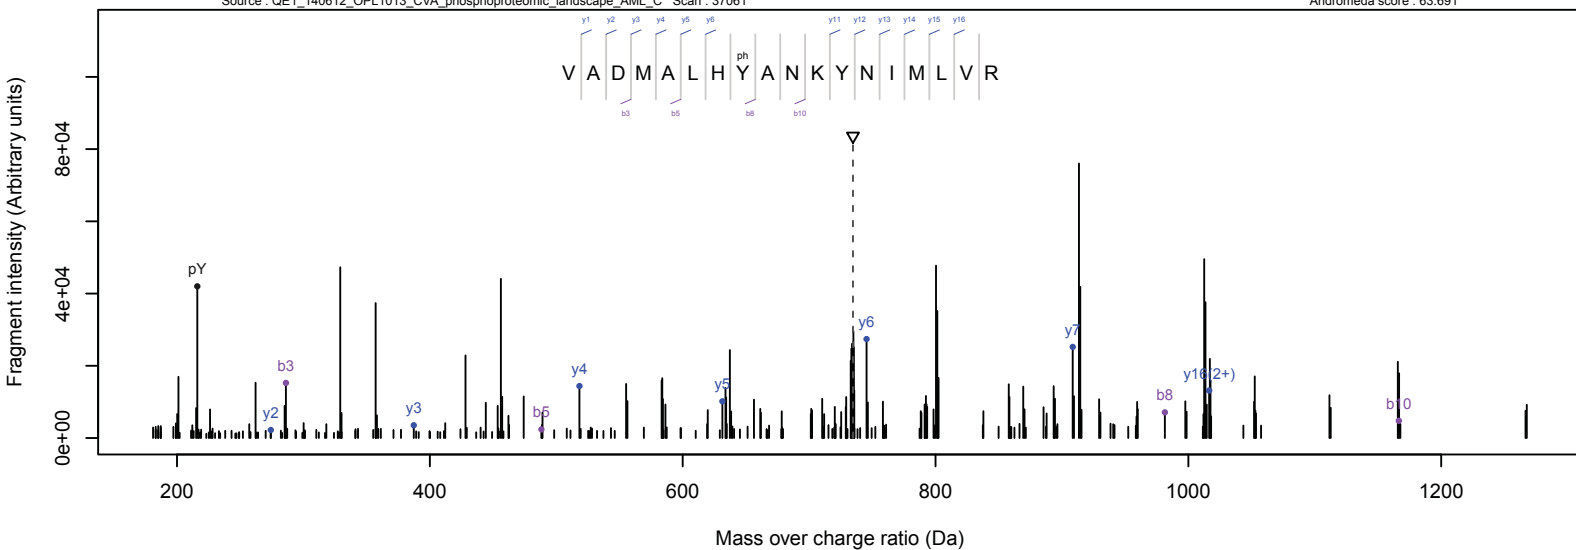

## VDKLY(ph)AGLKDLAER-3+

Source: QE1\_140612\_OPL1013\_CVA\_phosphoproteomic\_landscape\_AML\_B Scan: 28826

Andromeda score: 63.691

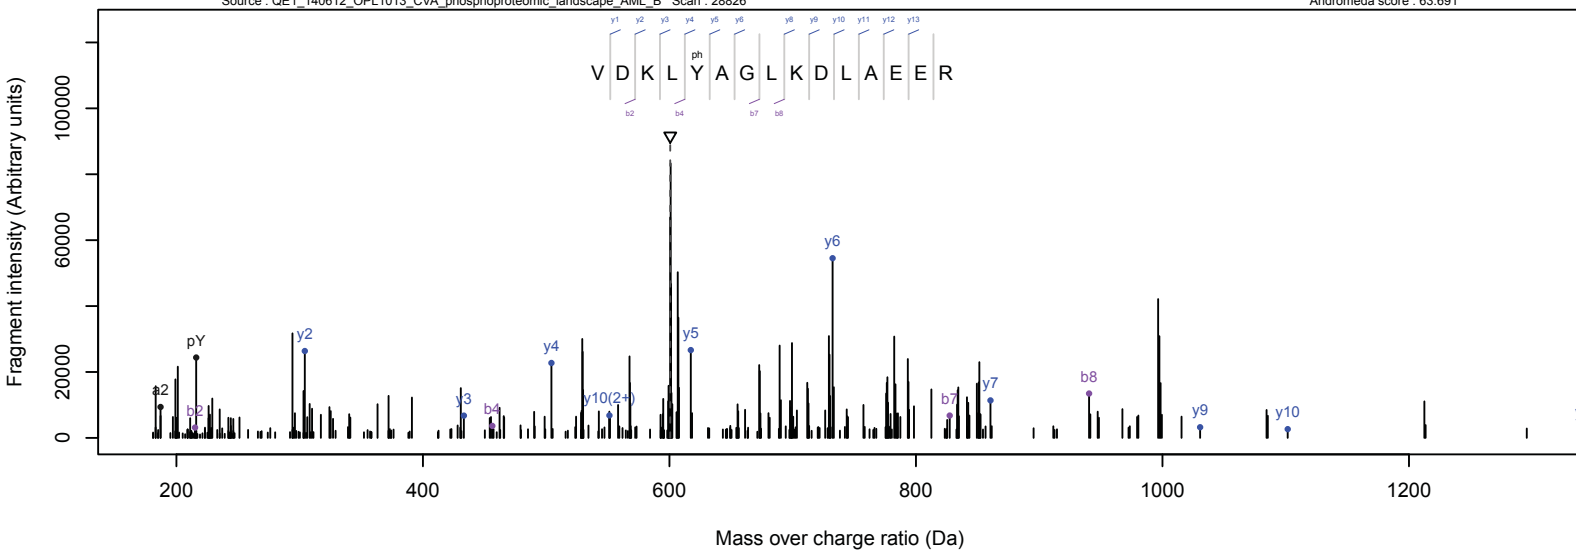

## VKEGYVPQEEV(ph)ENK-2+

Source: QE1\_140612\_OPL1013\_CVA\_phosphoproteomic\_landscape\_AML\_C Scan: 20077

Andromeda score: 63.691

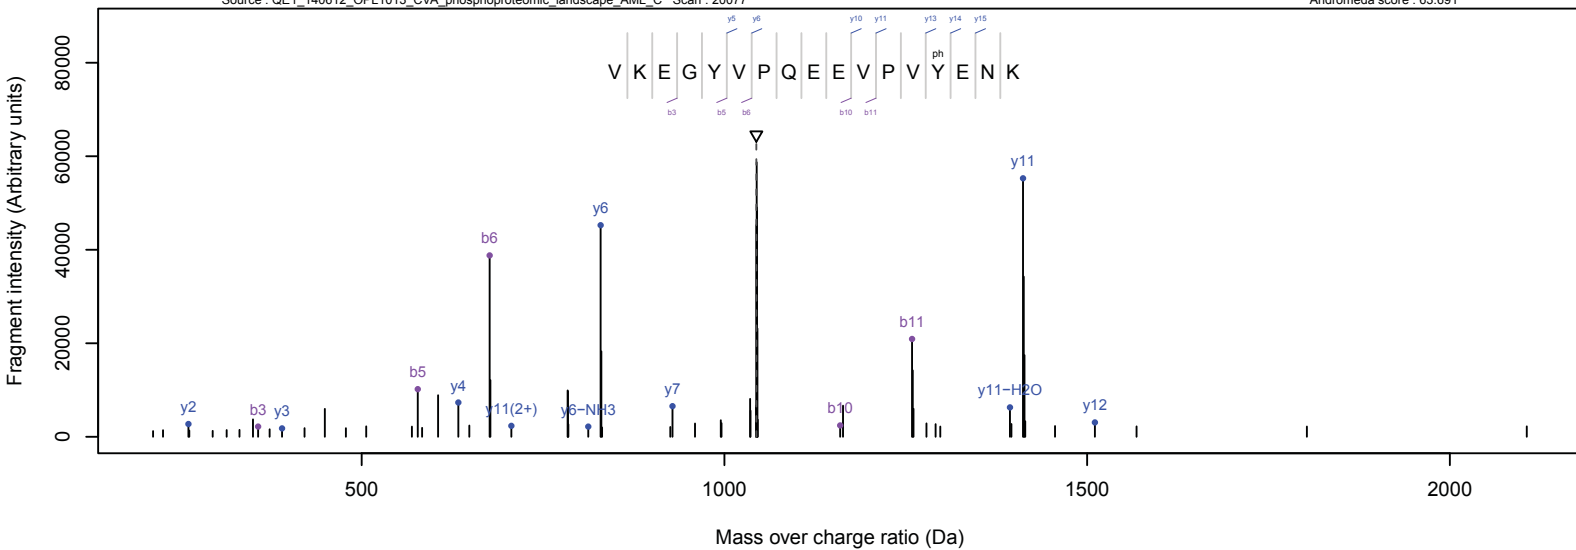

## VSKDGQY(ph)ILATGTYKPR-3+

Source : QE1\_140612\_OPL1013\_CVA\_phosphoproteomic\_landscape\_AML\_B Scan : 17610

Andromeda score : 63.691

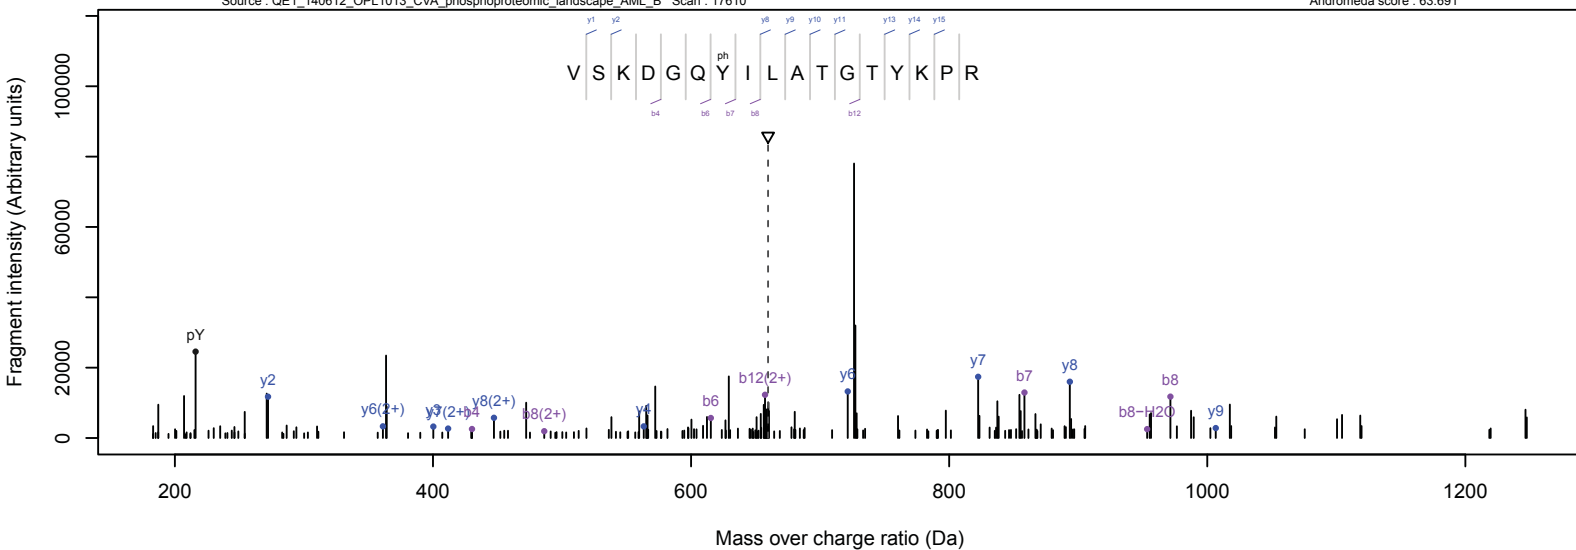

## GQEATDTEYS(ph)EIKIHR-3+

Source : QE1\_140908\_OPL1013\_CvA\_pTyrIP\_AML\_ML2 Scan : 13604

Andromeda score : 63.682

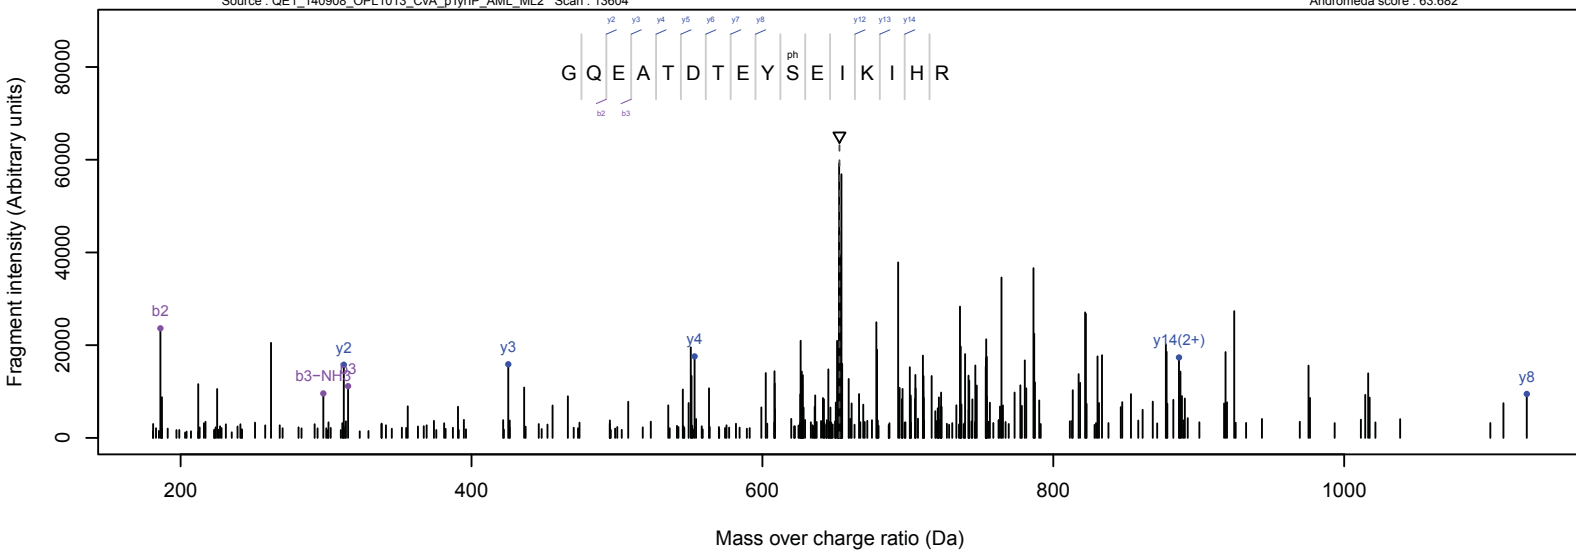

## GTQALY(ph)SWPYHFLR-2+

Source : QE1\_140612\_OPL1013\_CVA\_phosphoproteomic\_landscape\_AML\_C Scan : 42460

Andromeda score : 63.682

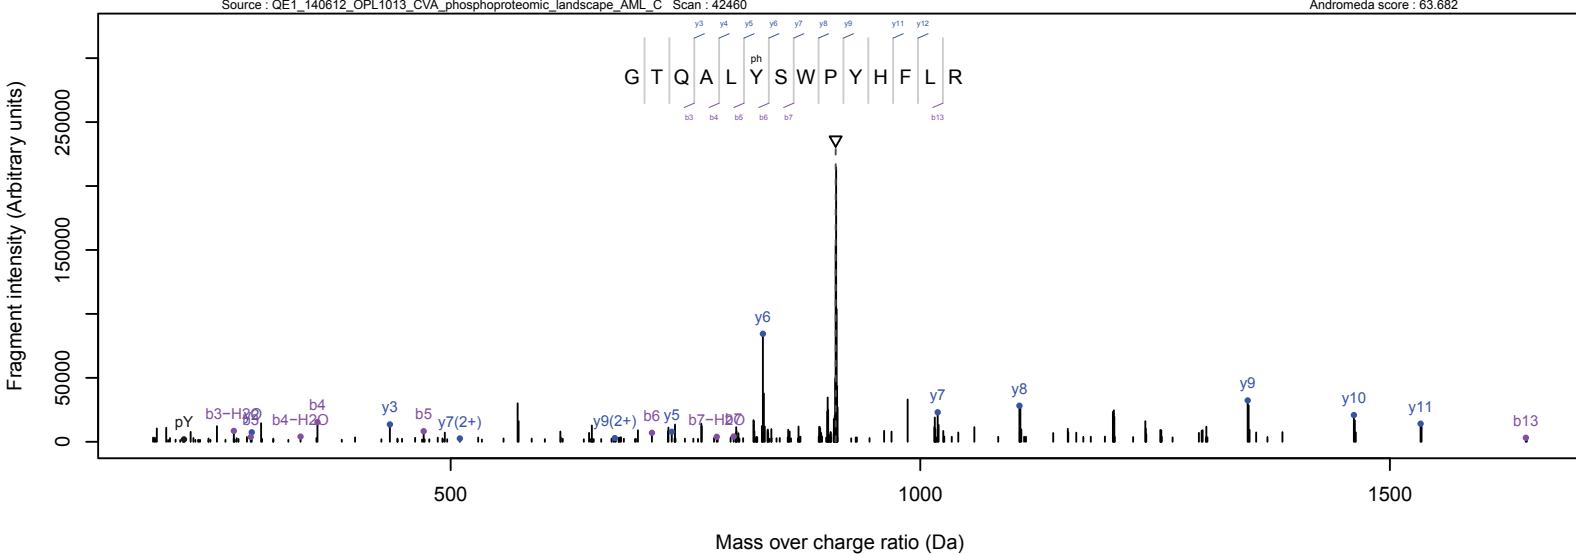



**KDIES(ph)YKSGSGVNNR-3+**

Source : QE1\_140612\_OPL1013\_CVA\_phosphoproteomic\_landscape\_AML\_C Scan : 3712

Andromeda score : 63.682

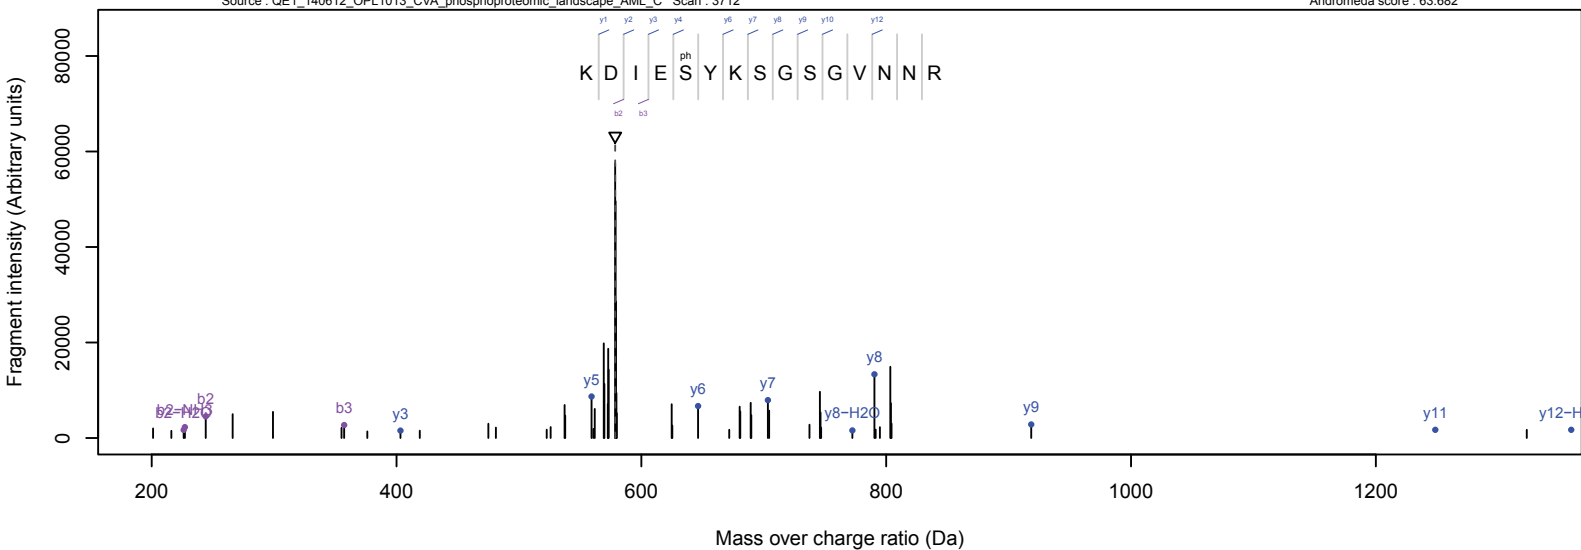

**YKLY(ph)PWIHQFSNNRR-4+**

Source : QE1\_140612\_OPL1013\_CVA\_phosphoproteomic\_landscape\_AML\_B Scan : 28571

Andromeda score : 63.682

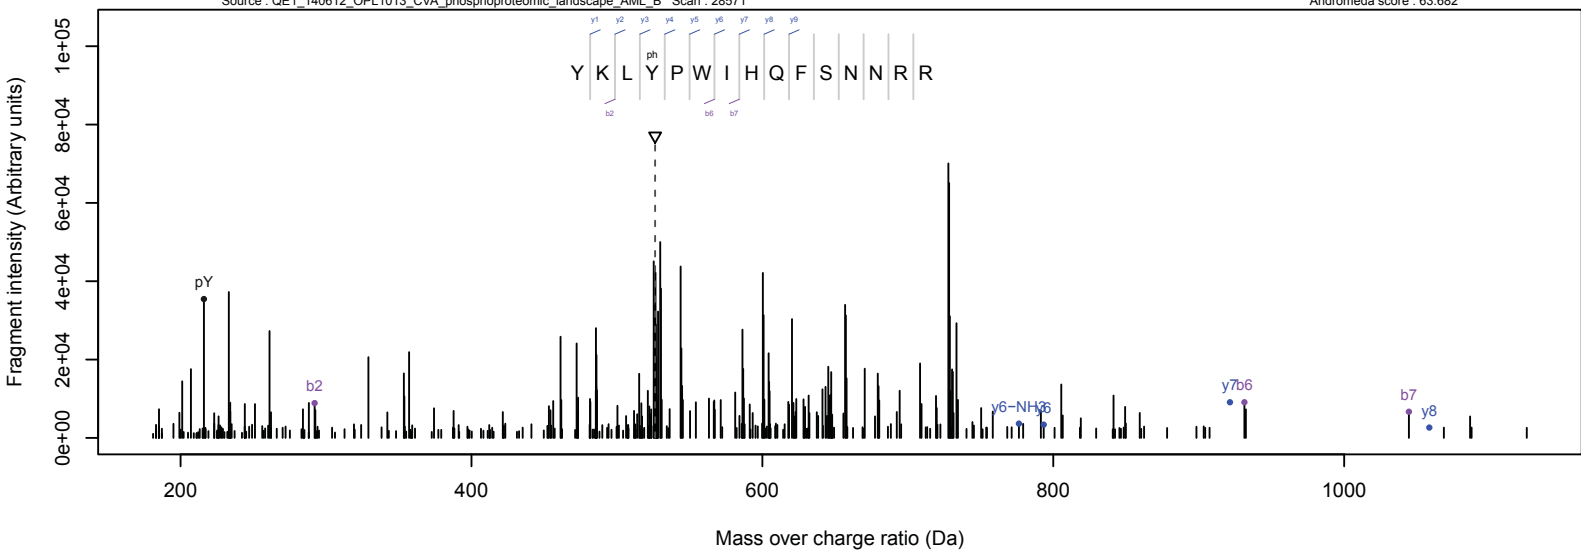

**KQPSLHY(ph)TAAQLLEK-3+**

Source : QE1\_140612\_OPL1013\_CVA\_phosphoproteomic\_landscape\_AML\_C Scan : 24871

Andromeda score : 63.681

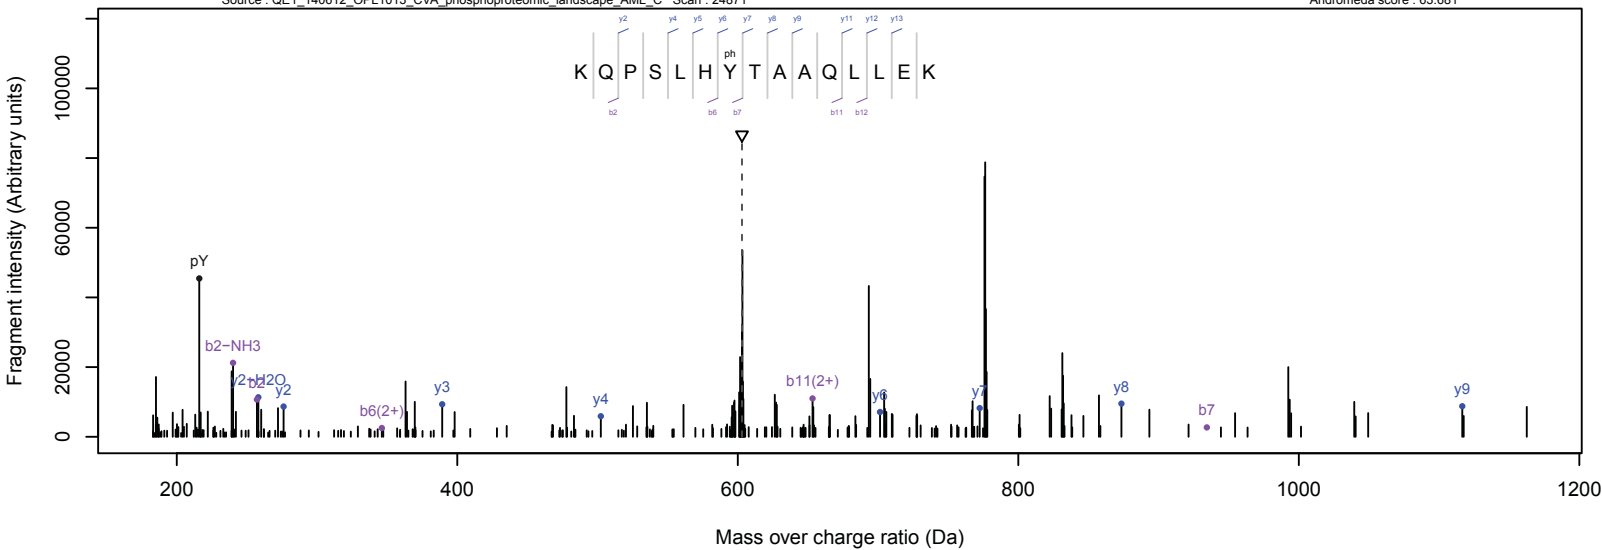

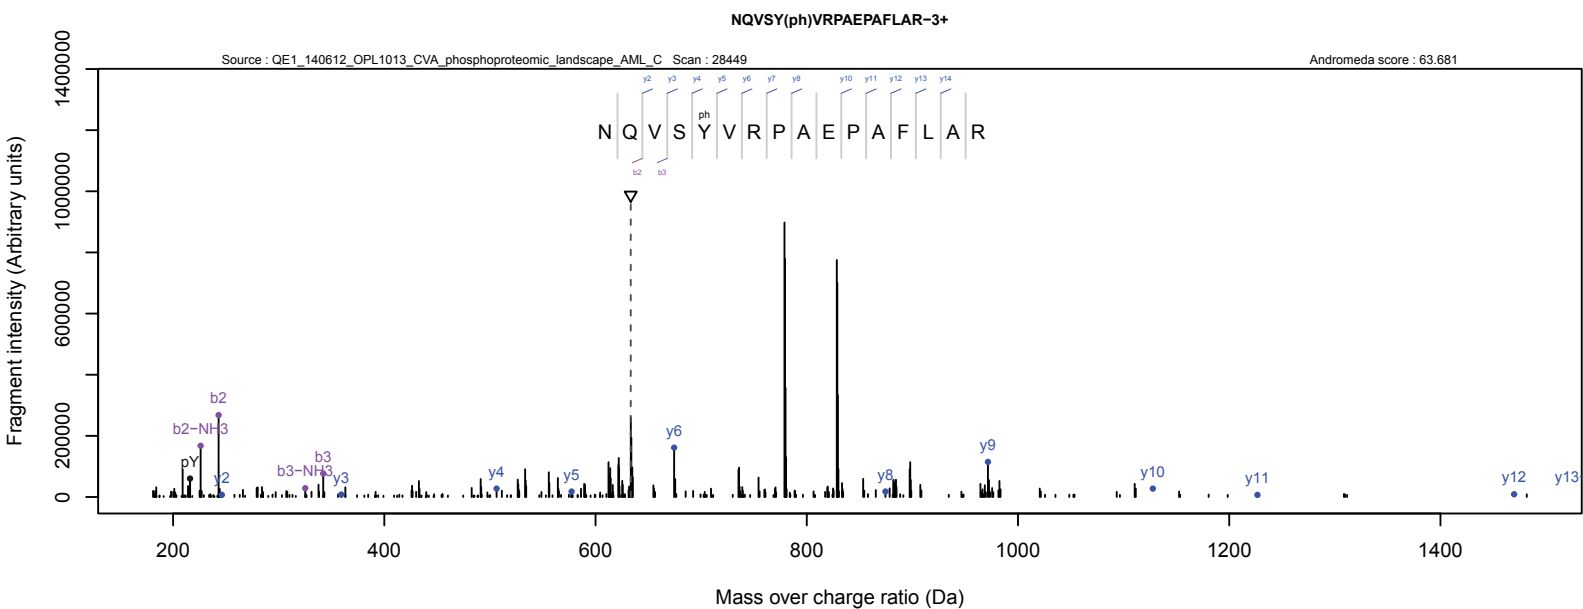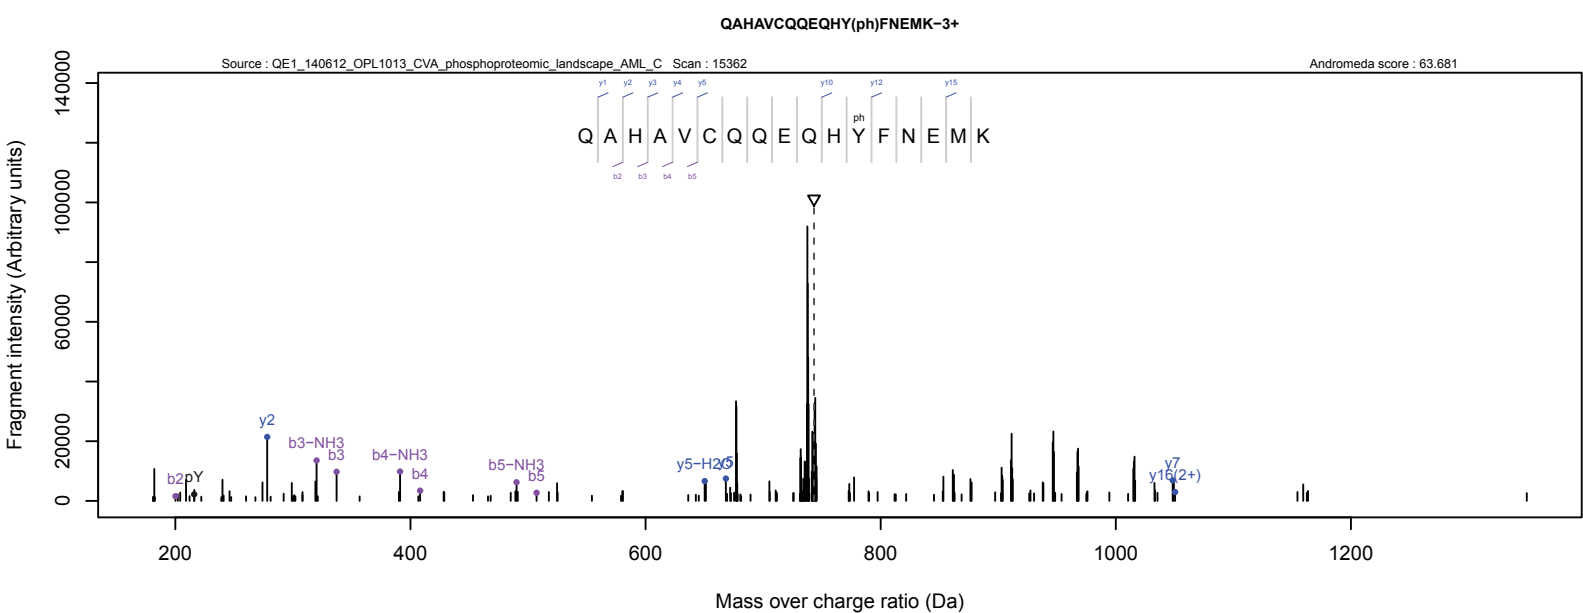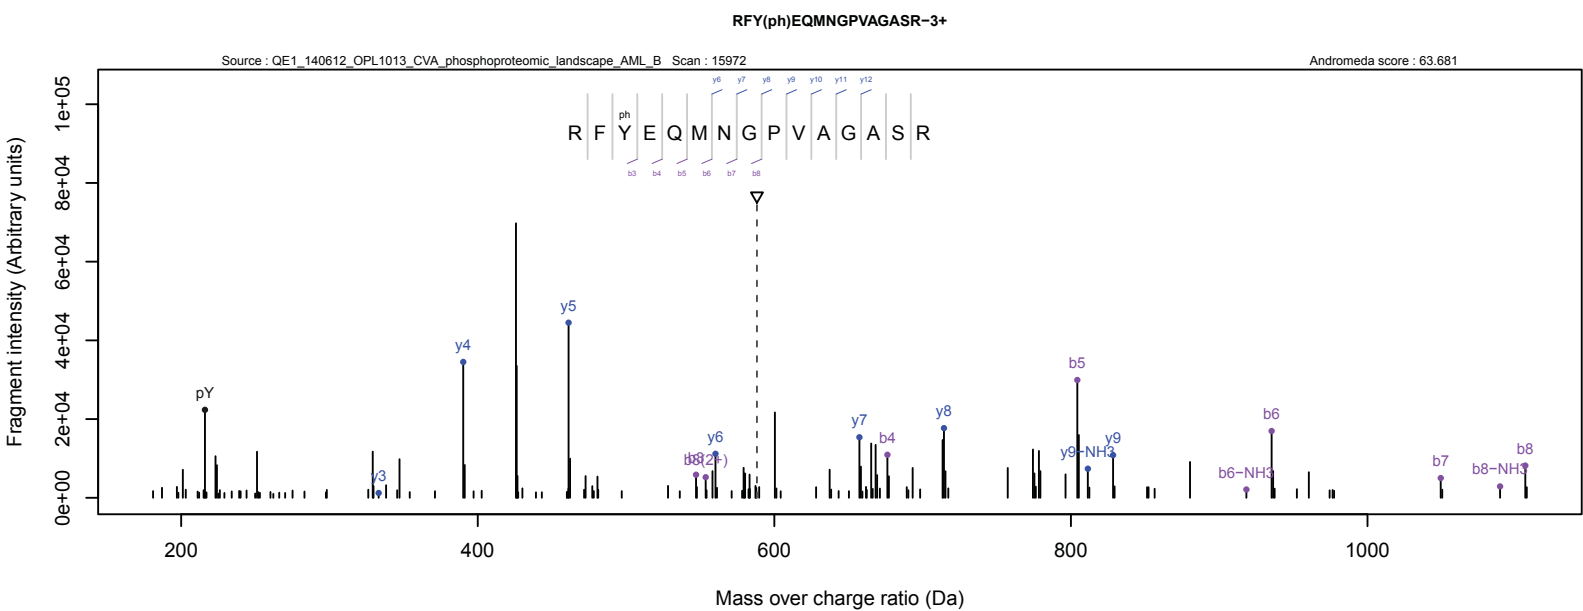

## ILY(ph)EGTHLDPERK-2+

Source : QE1\_140908\_OPL1013\_CvA\_pTyrIP\_AML\_ML2 Scan : 15185

Andromeda score : 63.662

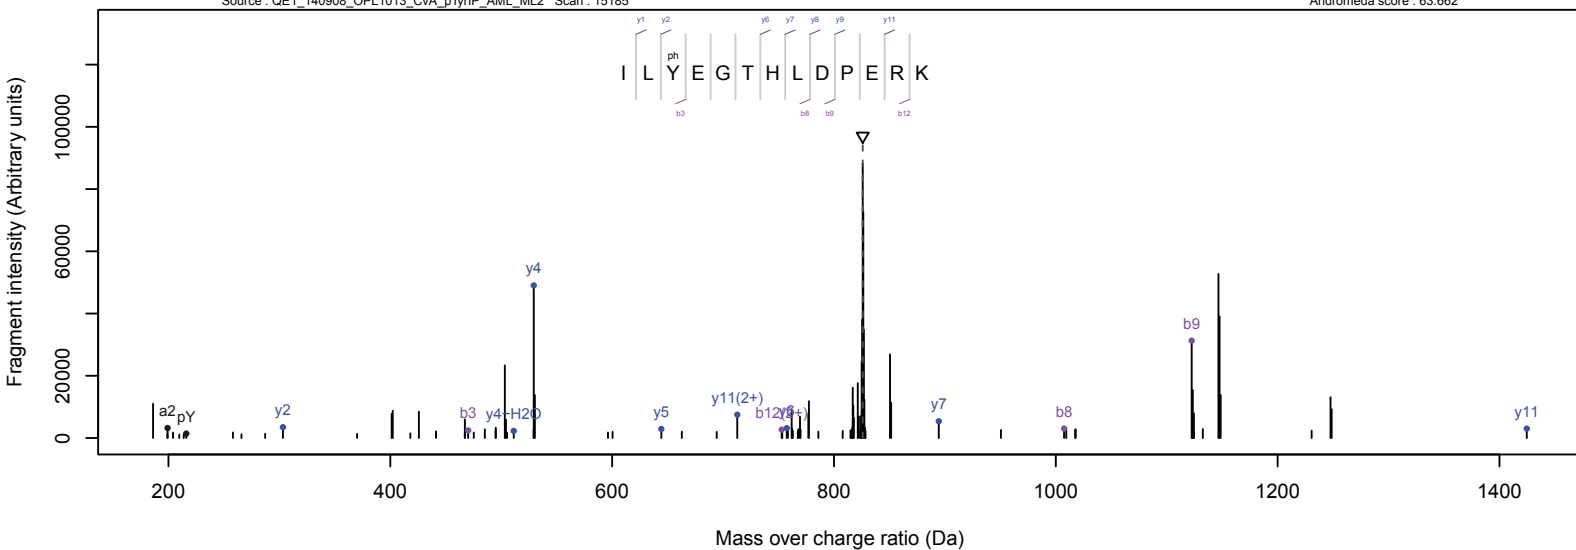

## LDEDLAAY(ph)CR-2+

Source : QE1\_140612\_OPL1013\_CVA\_phosphoproteomic\_landscape\_AML\_C Scan : 16270

Andromeda score : 63.624

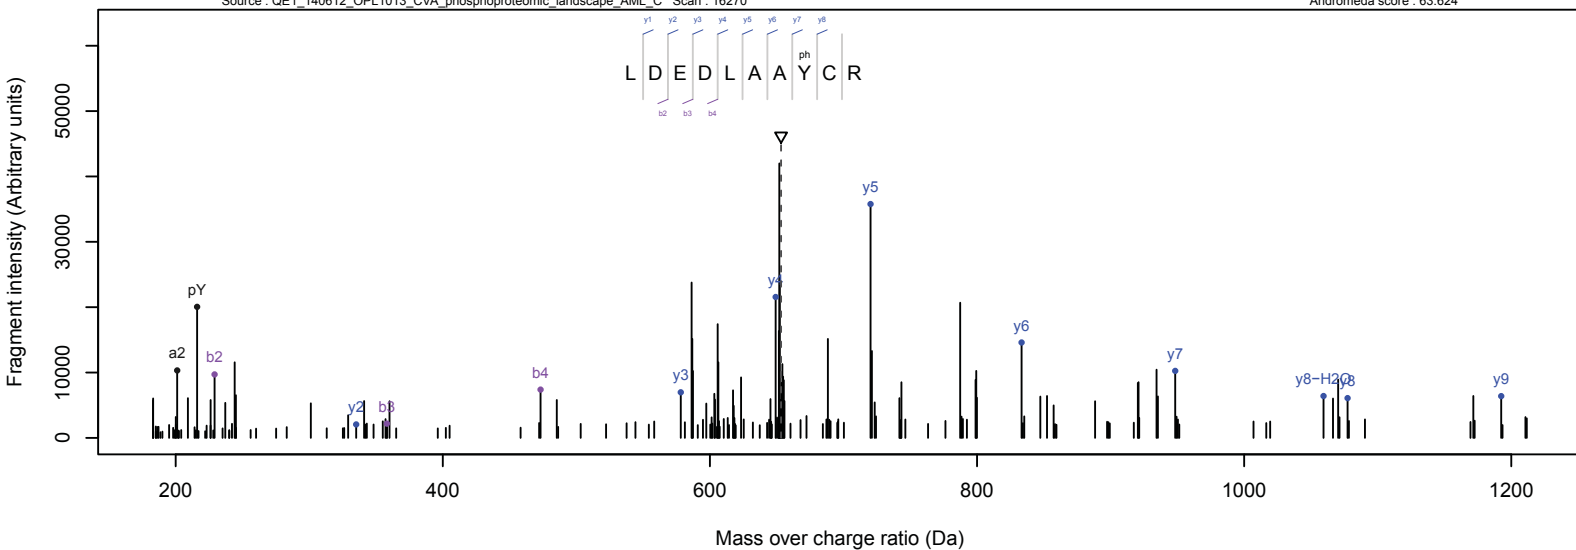

## LVGDTVSY(ph)SK-2+

Source : QE1\_140612\_OPL1013\_CVA\_phosphoproteomic\_landscape\_AML\_C Scan : 8926

Andromeda score : 63.624

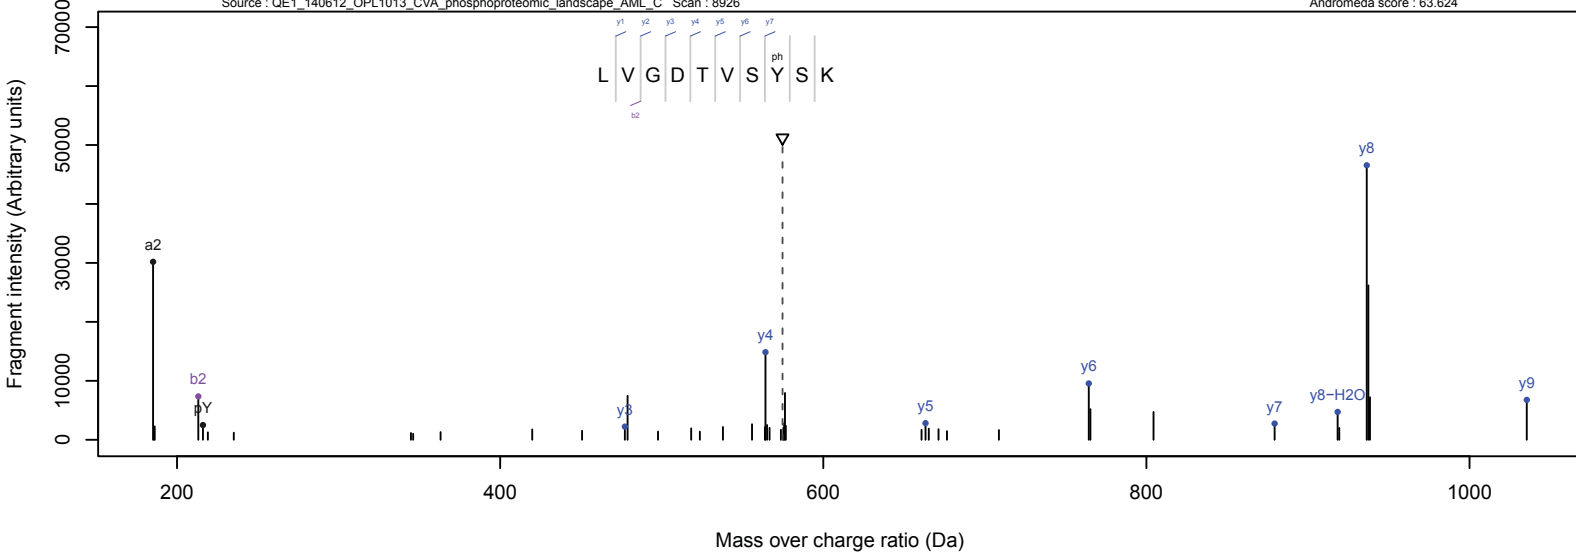

## NY(ph)GFQIHTK-2+

Source : QE1\_140612\_OPL1013\_CVA\_phosphoproteomic\_landscape\_AML\_B Scan : 12676

Andromeda score : 63.624

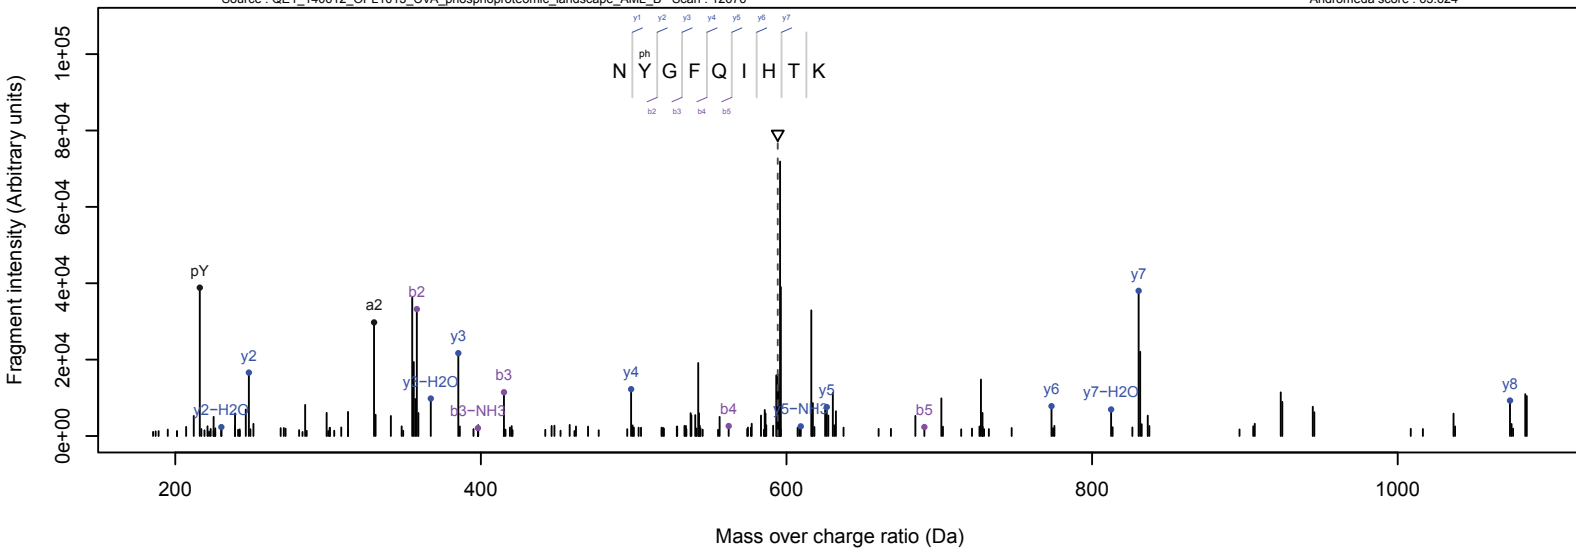

## VQVEY(ph)KGETK-2+

Source : QE1\_140822\_OPL1013\_CvA\_pTyrIP\_AML\_cell\_lines\_part2\_E Scan : 3096

Andromeda score : 63.624

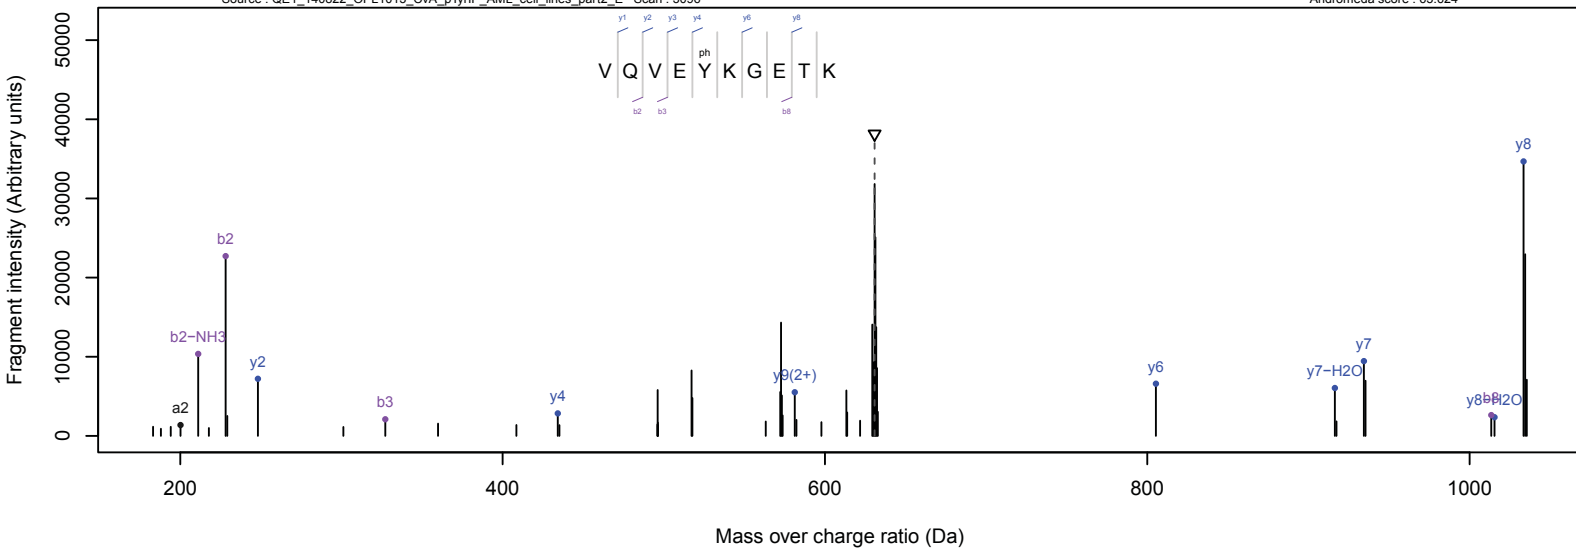

## VTIEY(ph)YSQLK-2+

Source : Qe1\_141024\_OPL1013\_CvA\_AML\_pTyrIP\_MOLM13 Scan : 27021

Andromeda score : 63.624

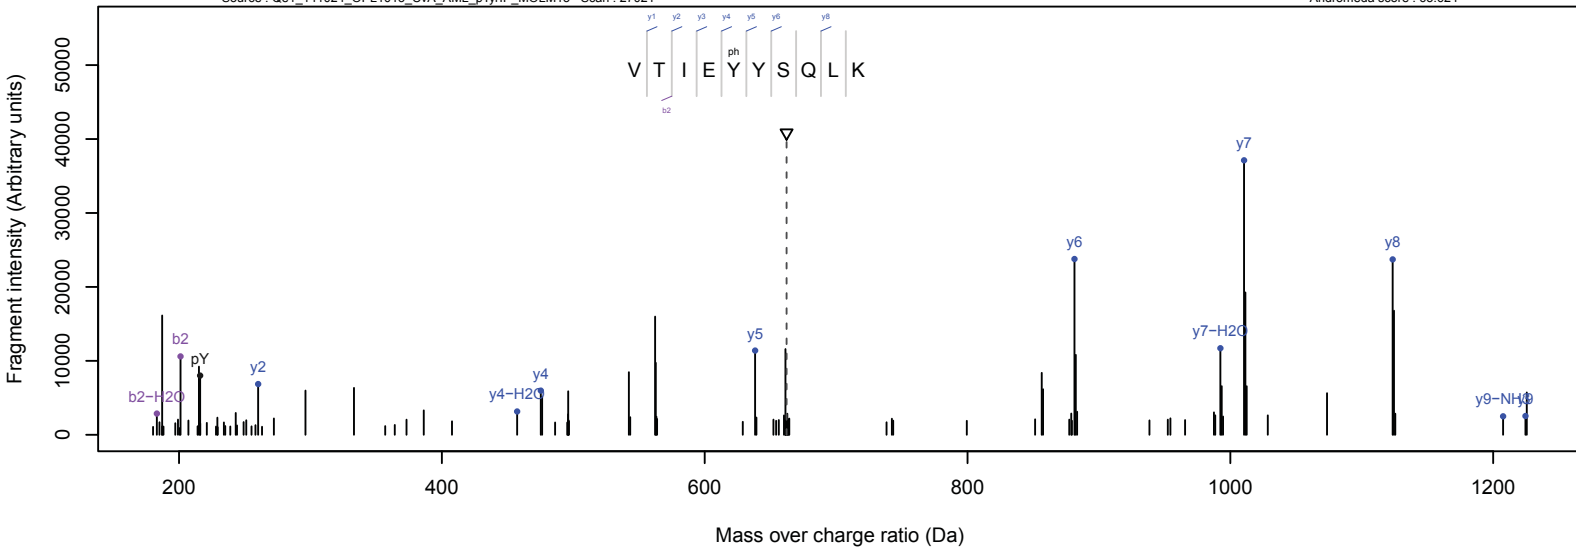

TNQAILSQLY(ph)QSPNR-2+

Source : QE1\_140612\_OPL1013\_CVA\_phosphoproteomic\_landscape\_AML\_B Scan : 26338

Andromeda score : 63.614

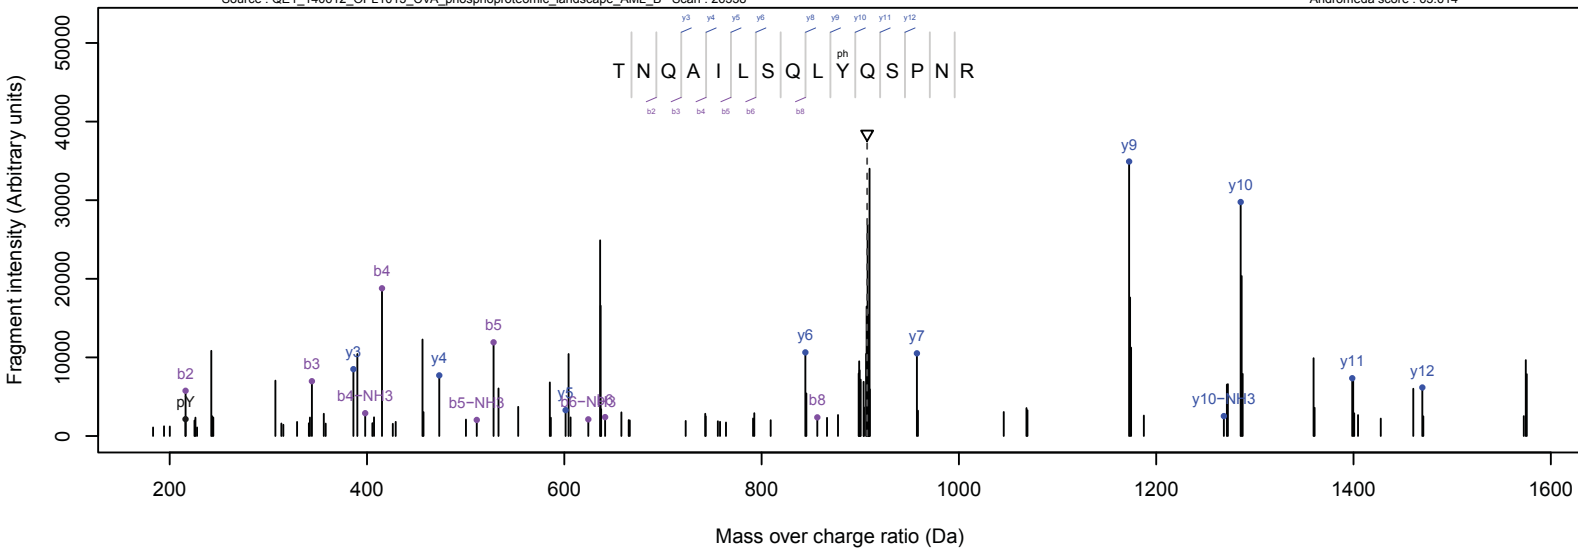

AASPY(ph)SQRPAS(ph)PTAIRR-3+

Source : QE1\_140612\_OPL1013\_CVA\_phosphoproteomic\_landscape\_AML\_C Scan : 9174

Andromeda score : 63.606

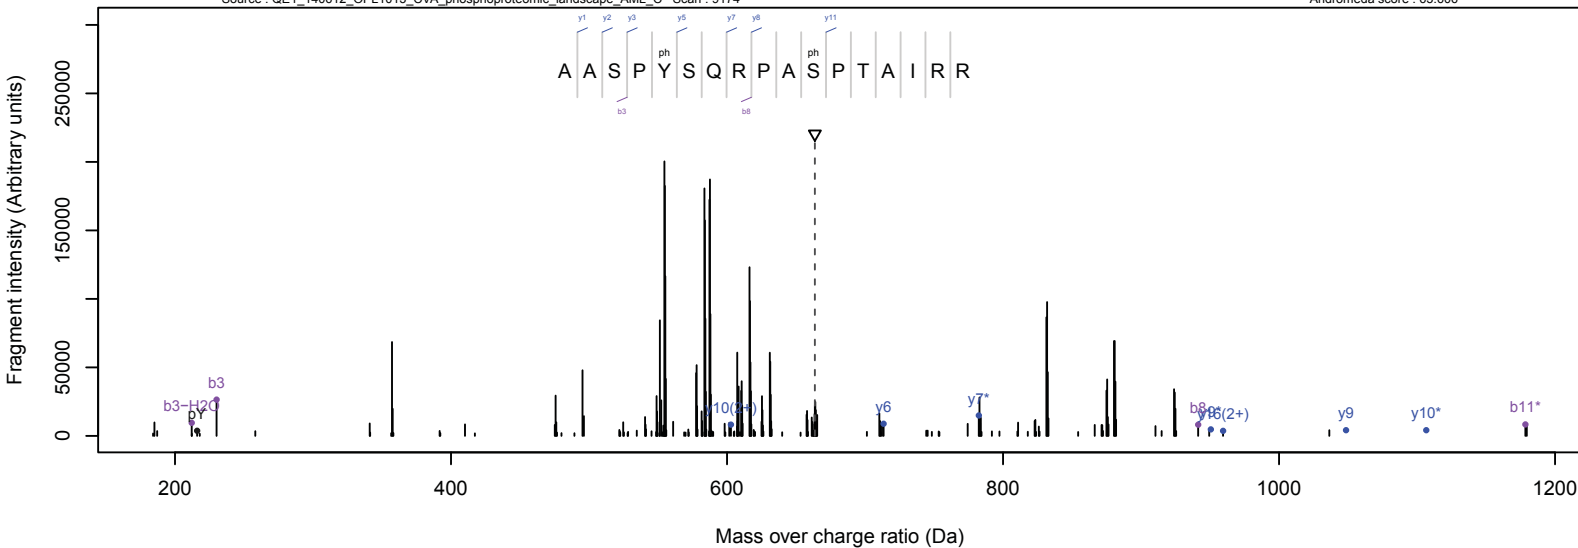

TGFVPSNY(ph)VERK-3+

Source : QE1\_140612\_OPL1013\_CVA\_phosphoproteomic\_landscape\_AML\_C Scan : 17124

Andromeda score : 63.602

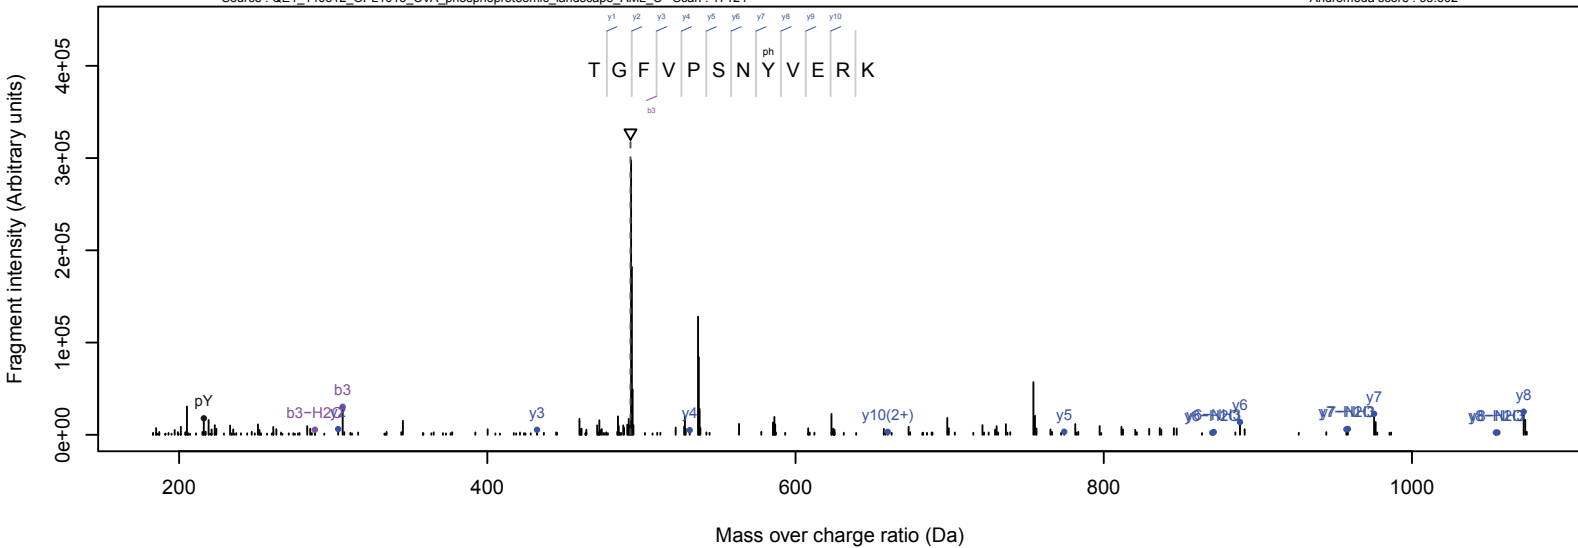

## TY(ph)EVSLR-2+

Source : QE1\_140822\_OPL1013\_CvA\_pTyrIP\_AML\_cell\_lines\_part2\_B Scan : 8304

Andromeda score : 63.565

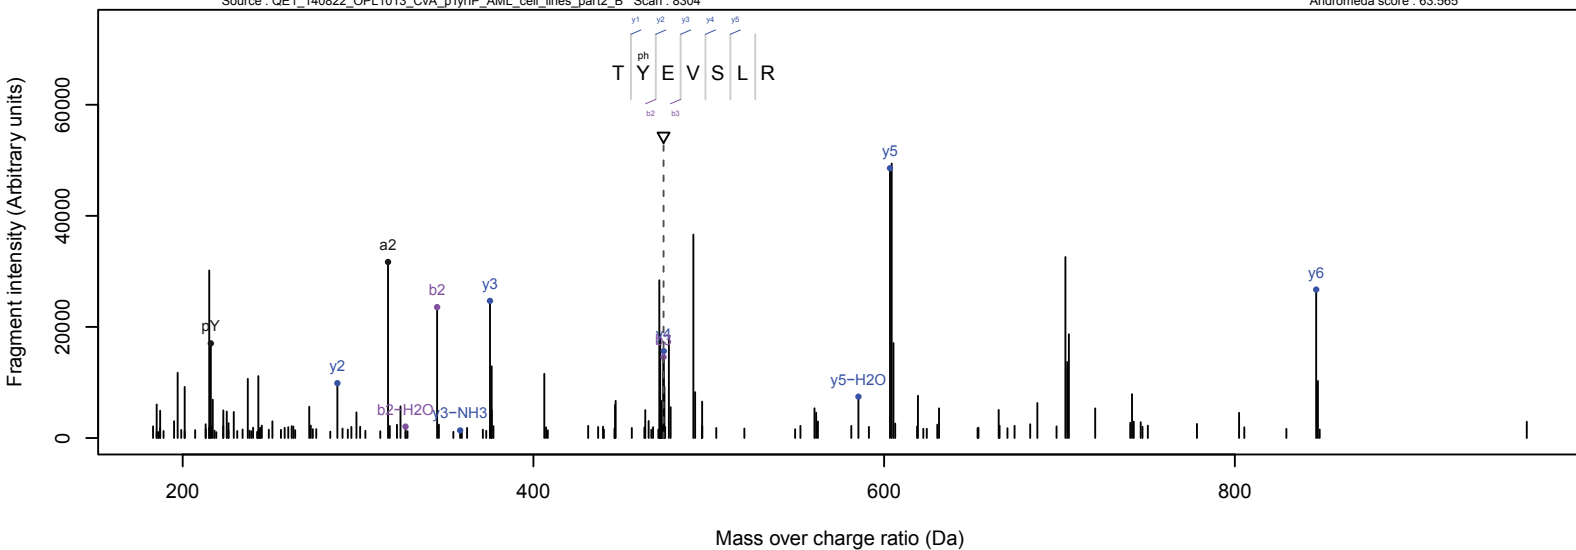

## YY(ph)TPVLAK-2+

Source : QE1\_140822\_OPL1013\_CvA\_pTyrIP\_AML\_cell\_lines\_part2\_B Scan : 13751

Andromeda score : 63.565

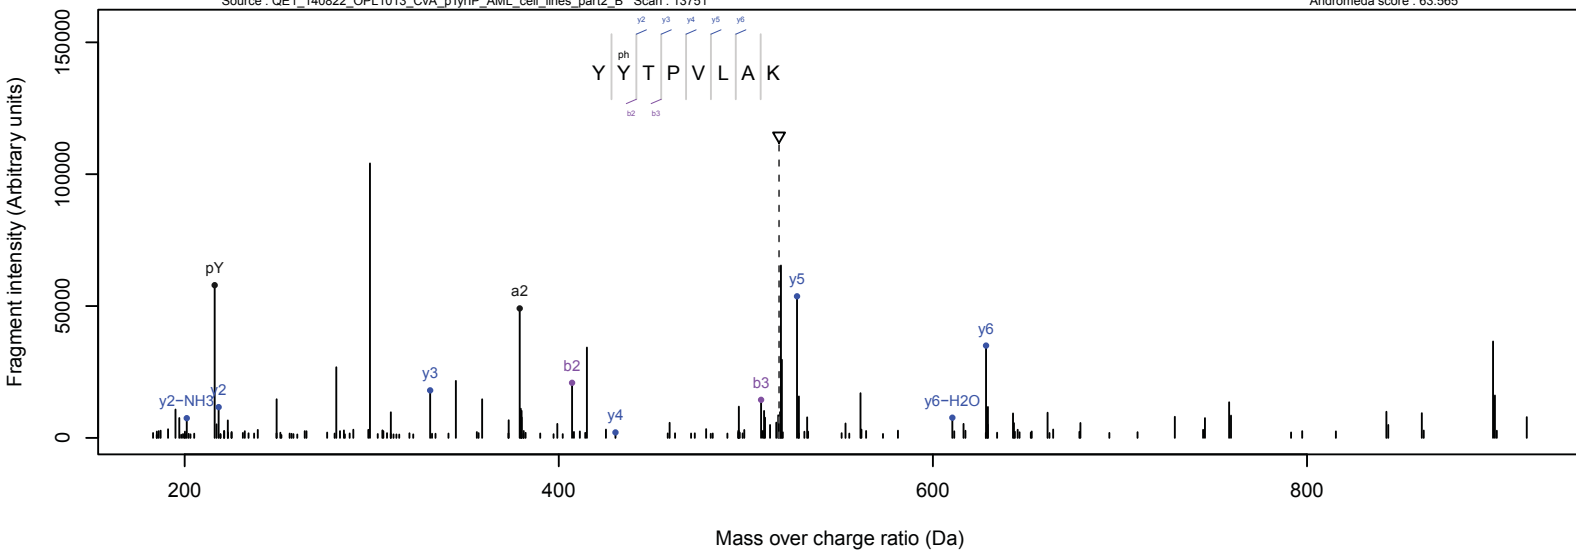

## Y(ph)AINPHLTEDQR-3+

Source : QE1\_140612\_OPL1013\_CvA\_phosphoproteomic\_landscape\_AML\_C Scan : 14256

Andromeda score : 63.473

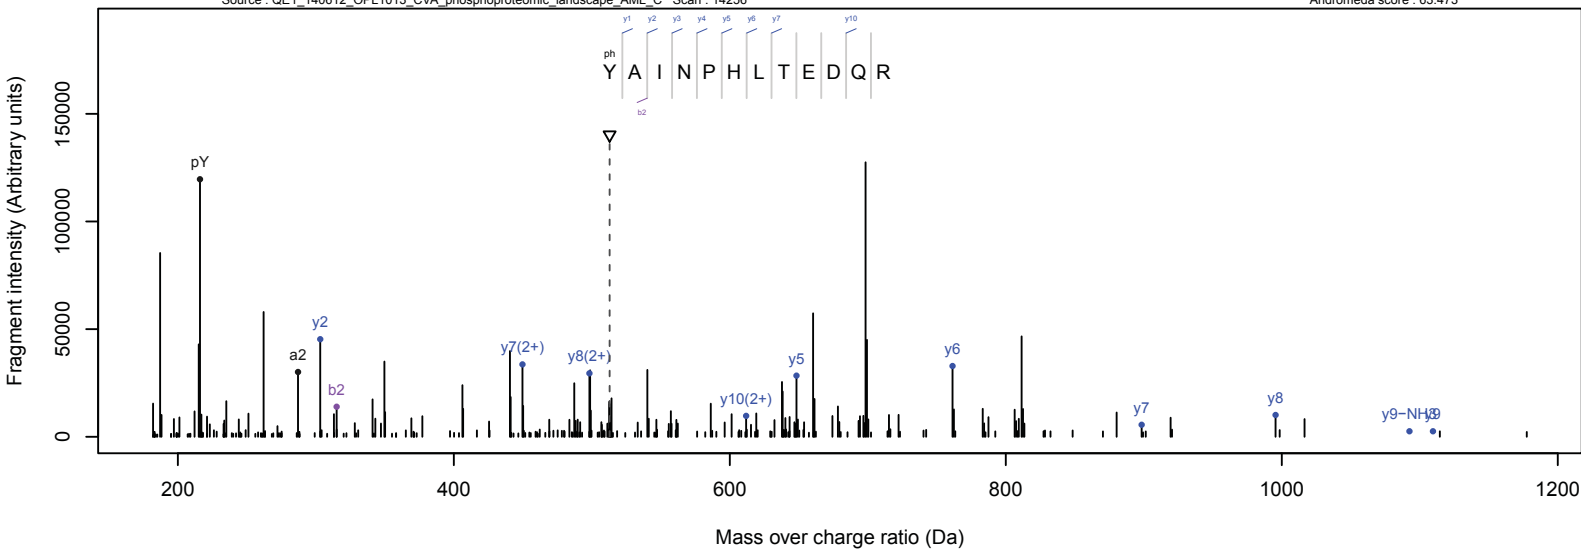

## SVY(ph)FKPSLTSPSGEFRK-3+

Source : QE1\_140612\_OPL1013\_CVA\_phosphoproteomic\_landscape\_AML\_C Scan : 26656

Andromeda score : 63.462

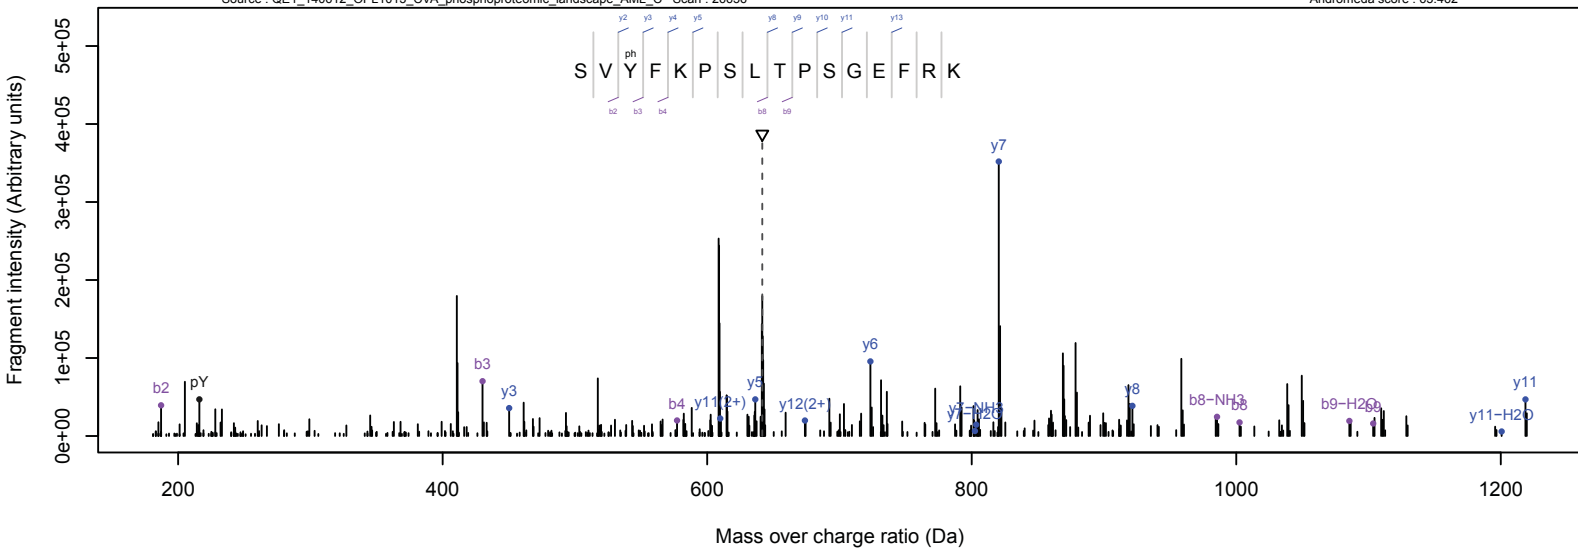

## LY(ph)SVSYLLK-2+

Source : QE1\_140908\_OPL1013\_CvA\_pTyrIP\_AML\_HEL Scan : 36616

Andromeda score : 63.426

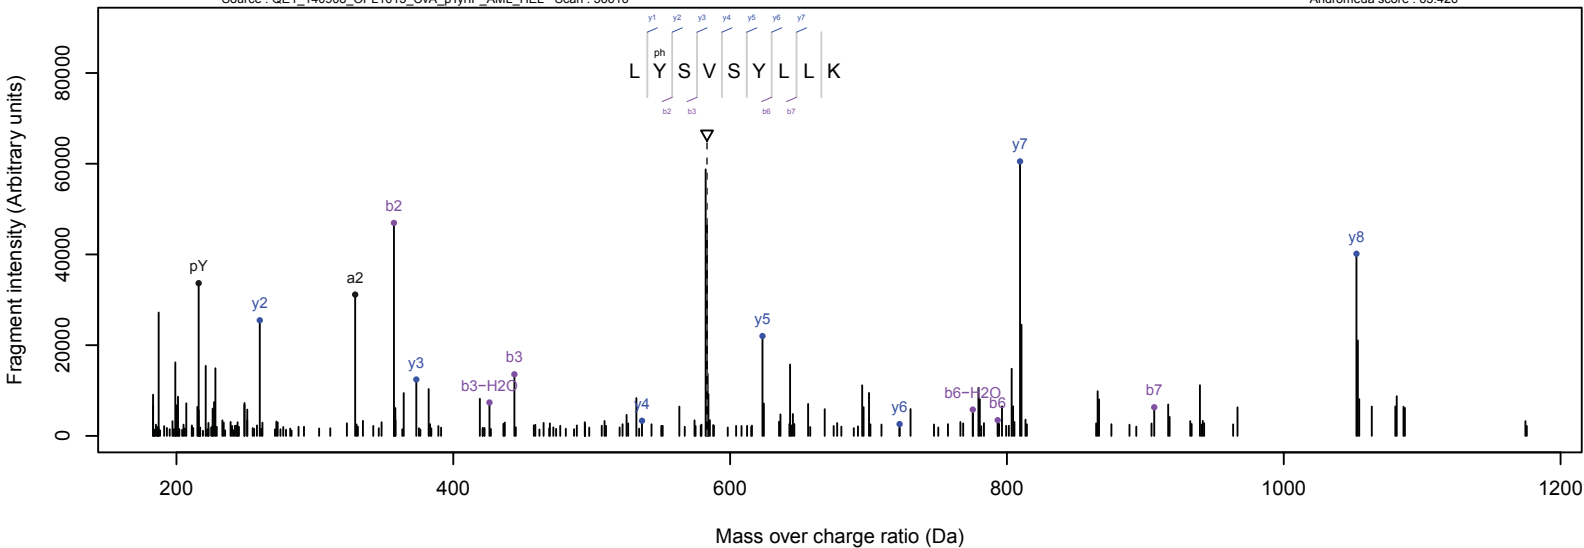

## GY(ph)FAVTEK-2+

Source : QE1\_140612\_OPL1013\_CVA\_phosphoproteomic\_landscape\_AML\_D Scan : 14310

Andromeda score : 63.419

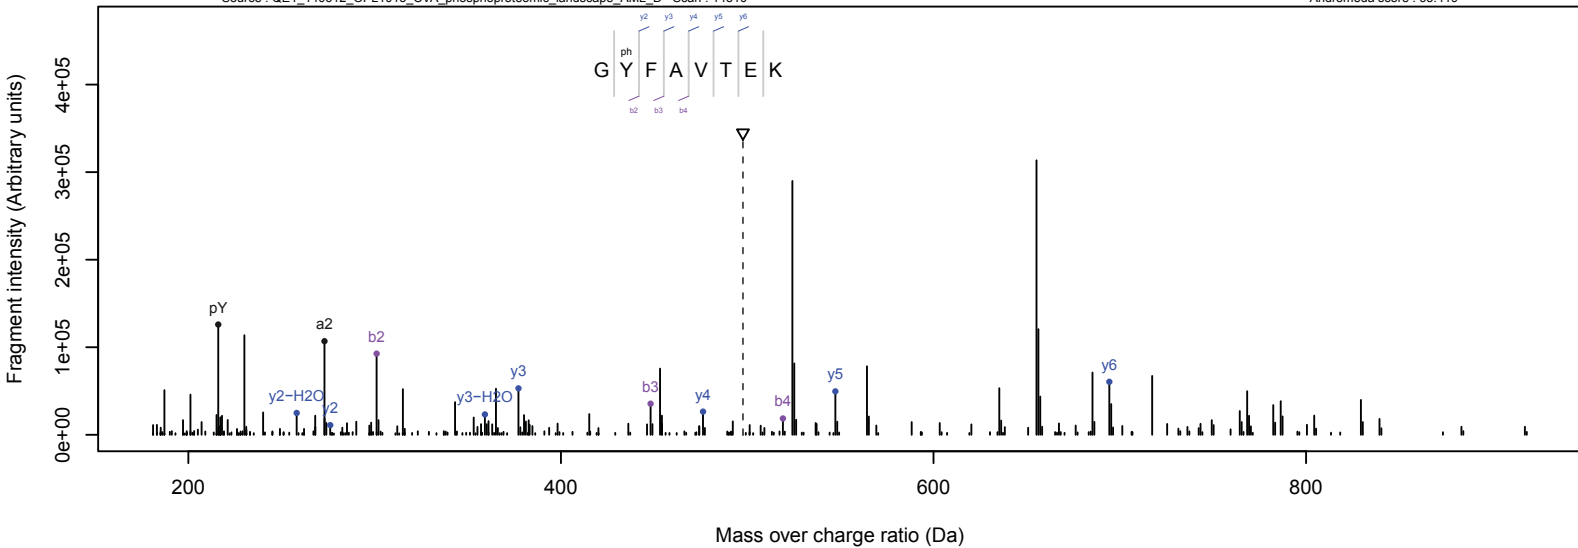

**GSMEAGPY(ph)LPR-2+**

Source: QE1\_140612\_OPL1013\_CVA\_phosphoproteomic\_landscape\_AML\_C Scan: 19476

Andromeda score: 63.415

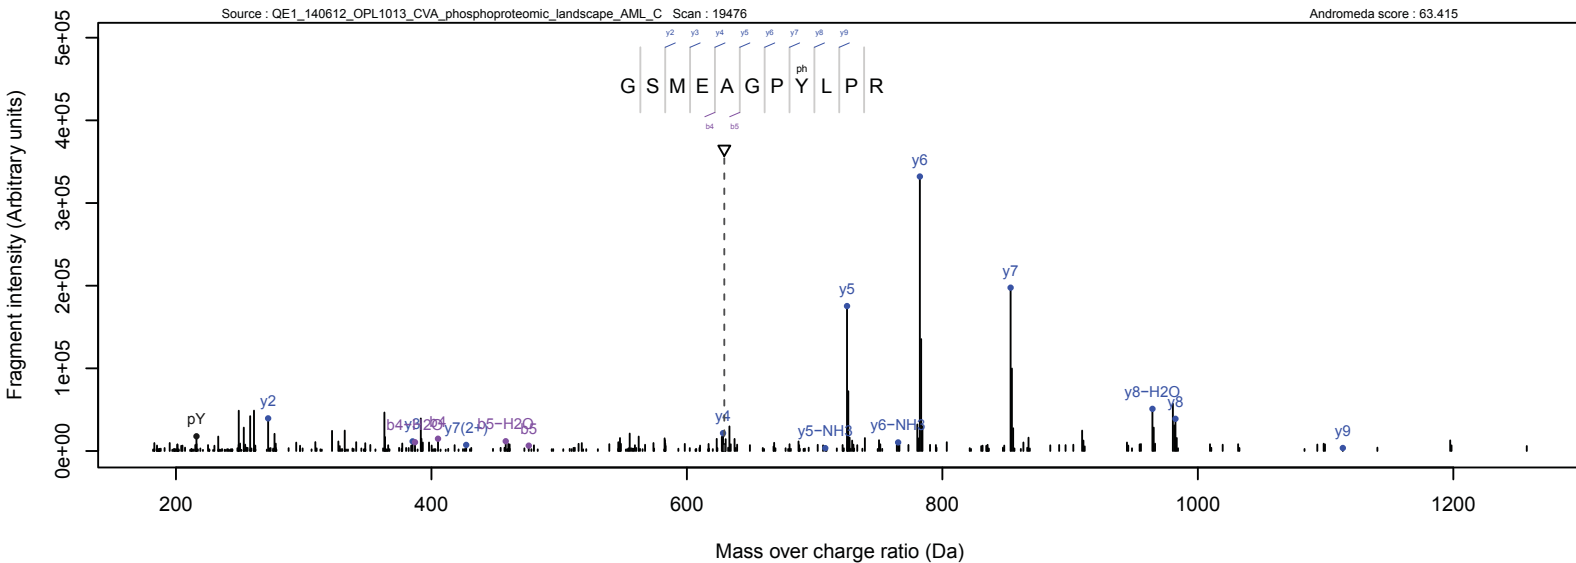

**IKLGHY(ph)ATQLQNTYDR-3+**

Source: QE1\_140612\_OPL1013\_CVA\_phosphoproteomic\_landscape\_AML\_D Scan: 23093

Andromeda score: 63.385

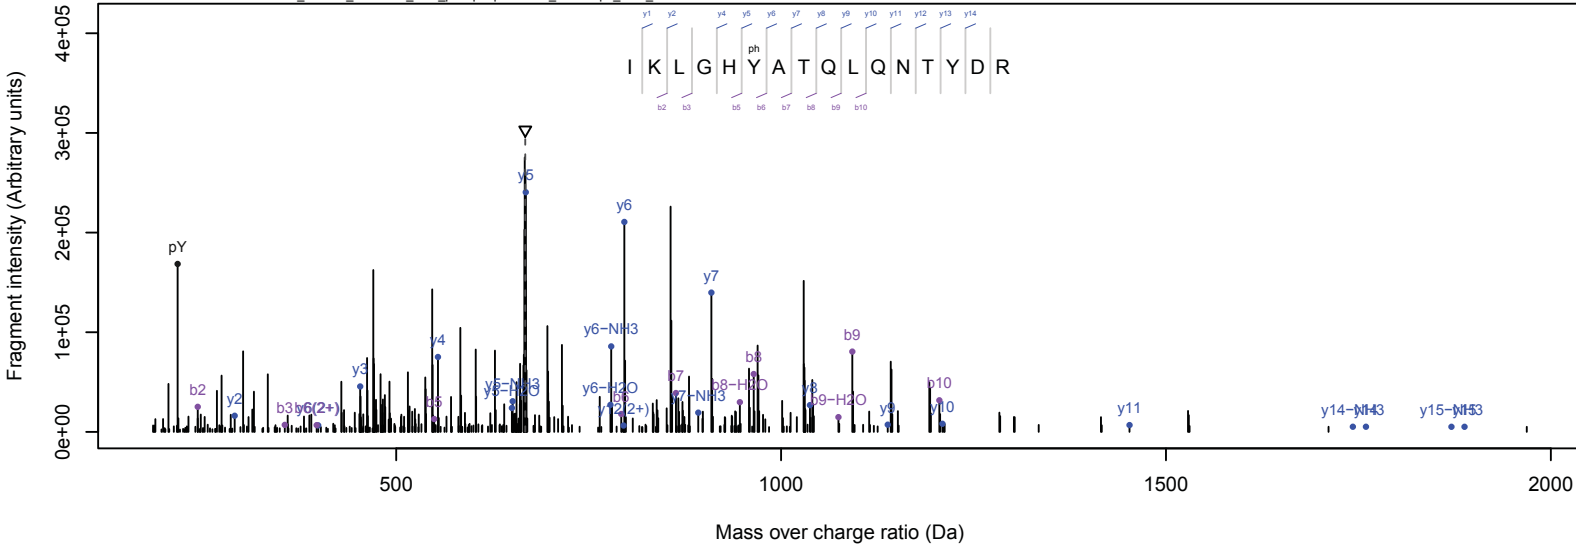

**S(ph)GTNHYSTSSCTPPANGTDSIMANR-3+**

Source: QE1\_140612\_OPL1013\_CVA\_phosphoproteomic\_landscape\_AML\_B Scan: 15033

Andromeda score: 63.376

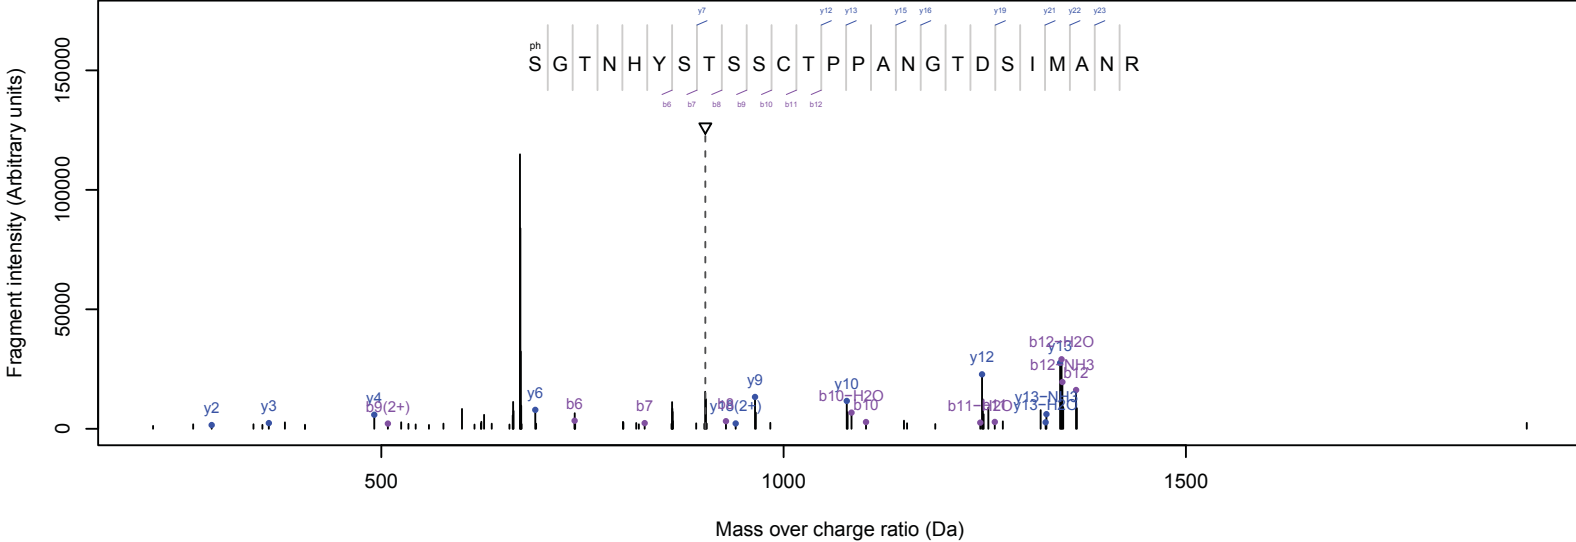



## GFGFVY(ph)FQNHDAADK-2+

Source : QE1\_140612\_OPL1013\_CVA\_phosphoproteomic\_landscape\_AML\_A Scan : 33384

Andromeda score : 63.31

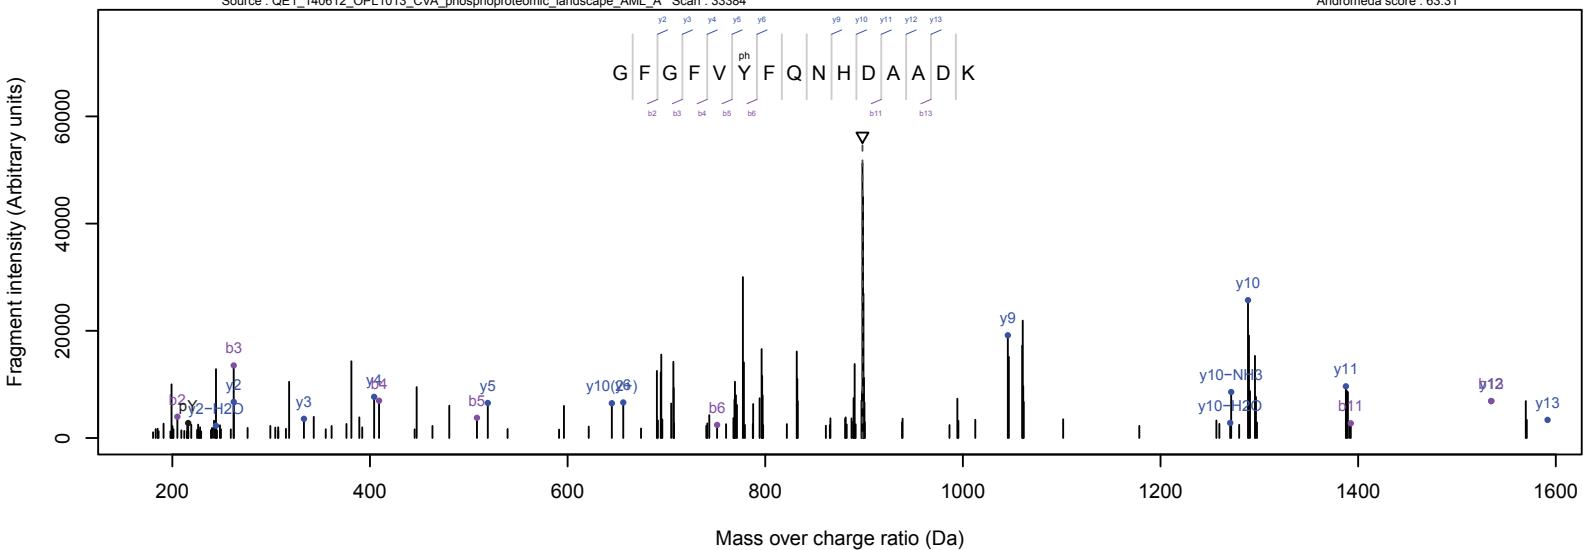

## DGVNKDY(ph)EETELISTANYR-3+

Source : QE1\_140612\_OPL1013\_CVA\_phosphoproteomic\_landscape\_AML\_B Scan : 28149

Andromeda score : 63.302

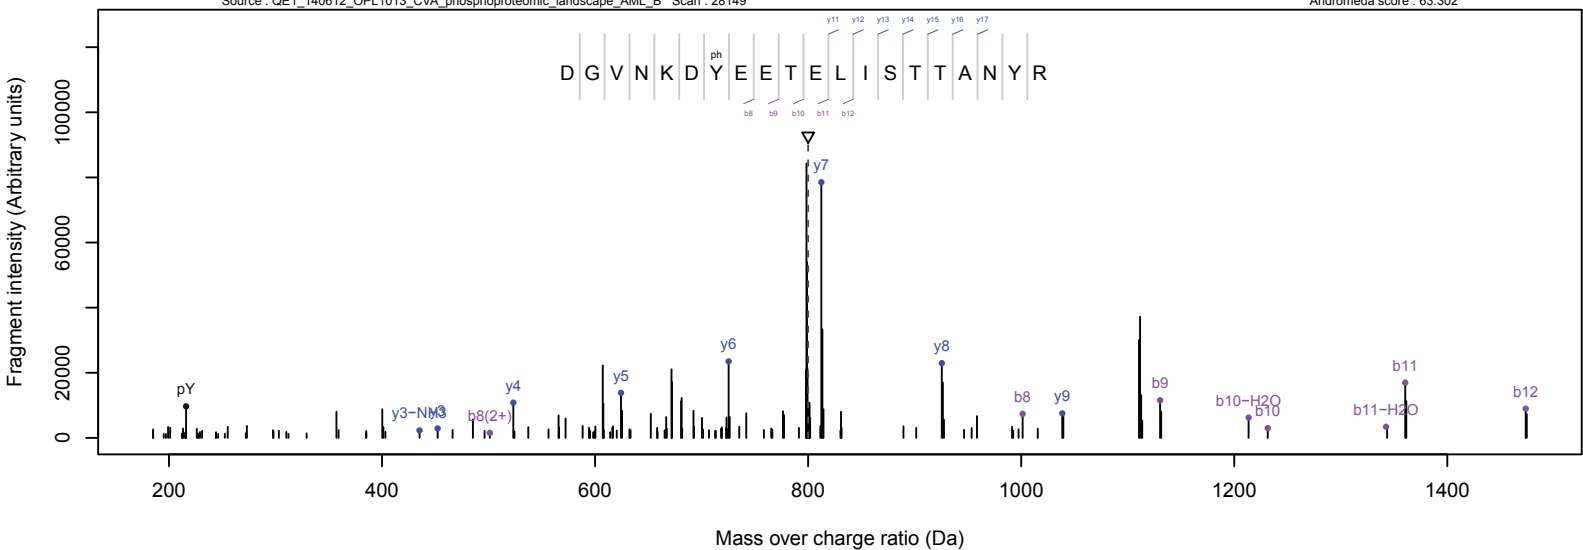

## NEETIEPDKTY(ph)ENVLSSR-3+

Source : QE1\_140908\_OPL1013\_CvA\_pTyrIP\_AML\_Kasumi1 Scan : 21471

Andromeda score : 63.302

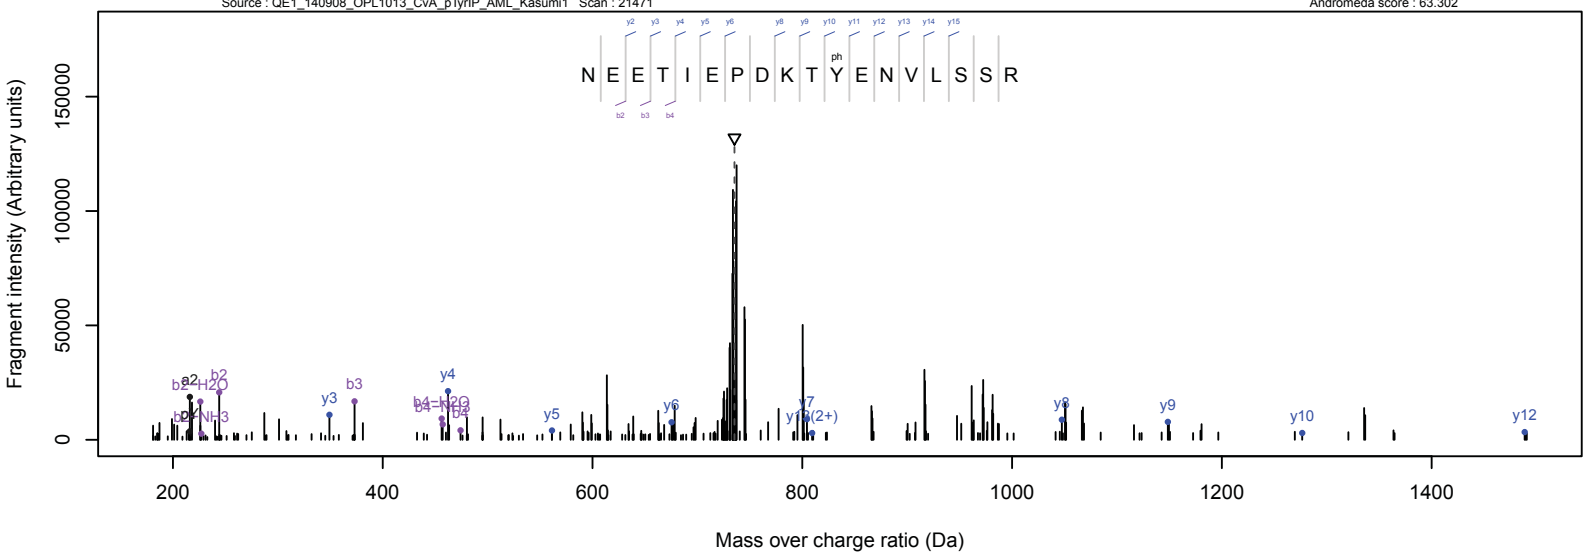

NQDLALSLESIPGGY<sup>ph</sup>NALRR-3+

Source : QE1\_140612\_OPL1013\_CVA\_phosphoproteomic\_landscape\_AML\_C Scan : 37544

Andromeda score : 63.302

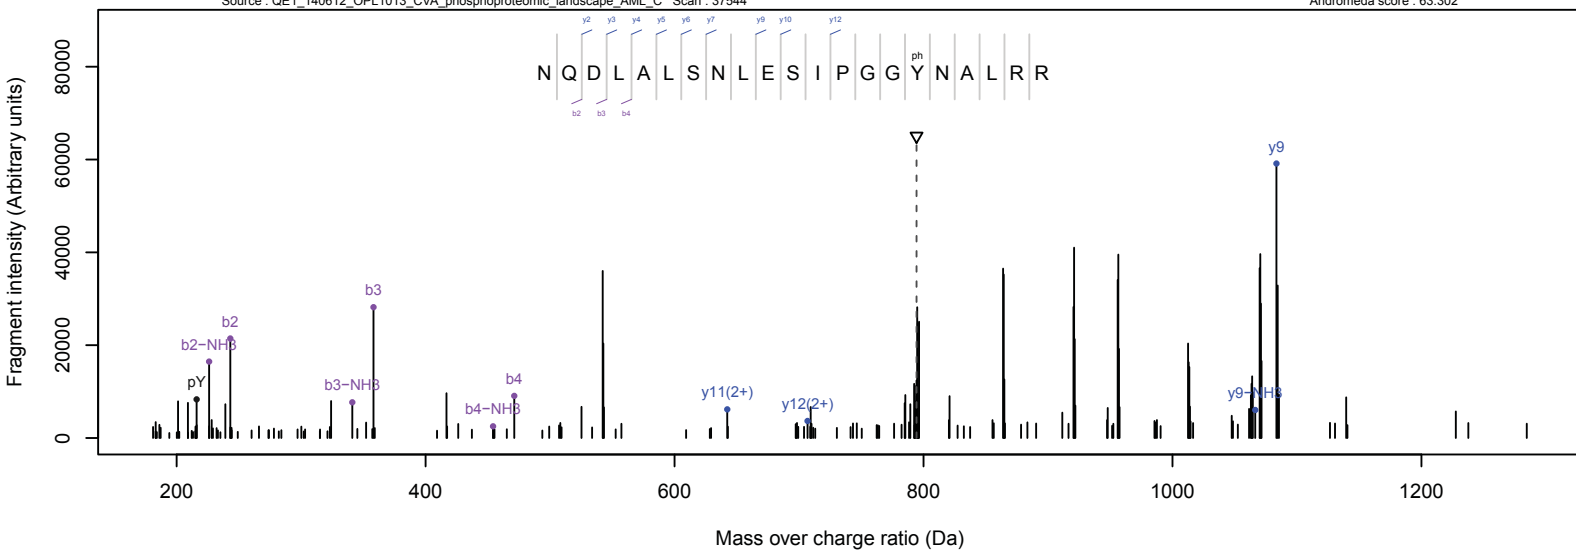Y<sup>ph</sup>YTMHLTTLCLNTSLDNPTR-3+

Source : QE1\_140612\_OPL1013\_CVA\_phosphoproteomic\_landscape\_AML\_C Scan : 33035

Andromeda score : 63.302

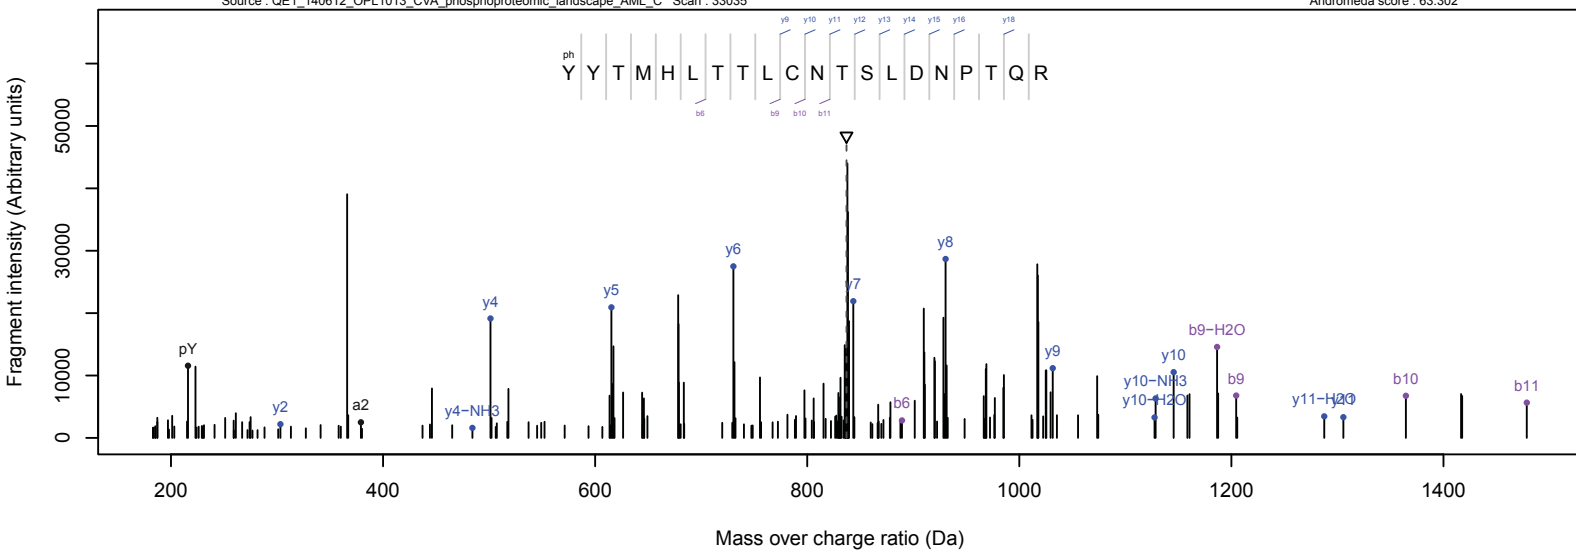(ac)ANEAY<sup>ph</sup>PCPCDIGHR-2+

Source : QE1\_140612\_OPL1013\_CVA\_phosphoproteomic\_landscape\_AML\_B Scan : 16325

Andromeda score : 63.29

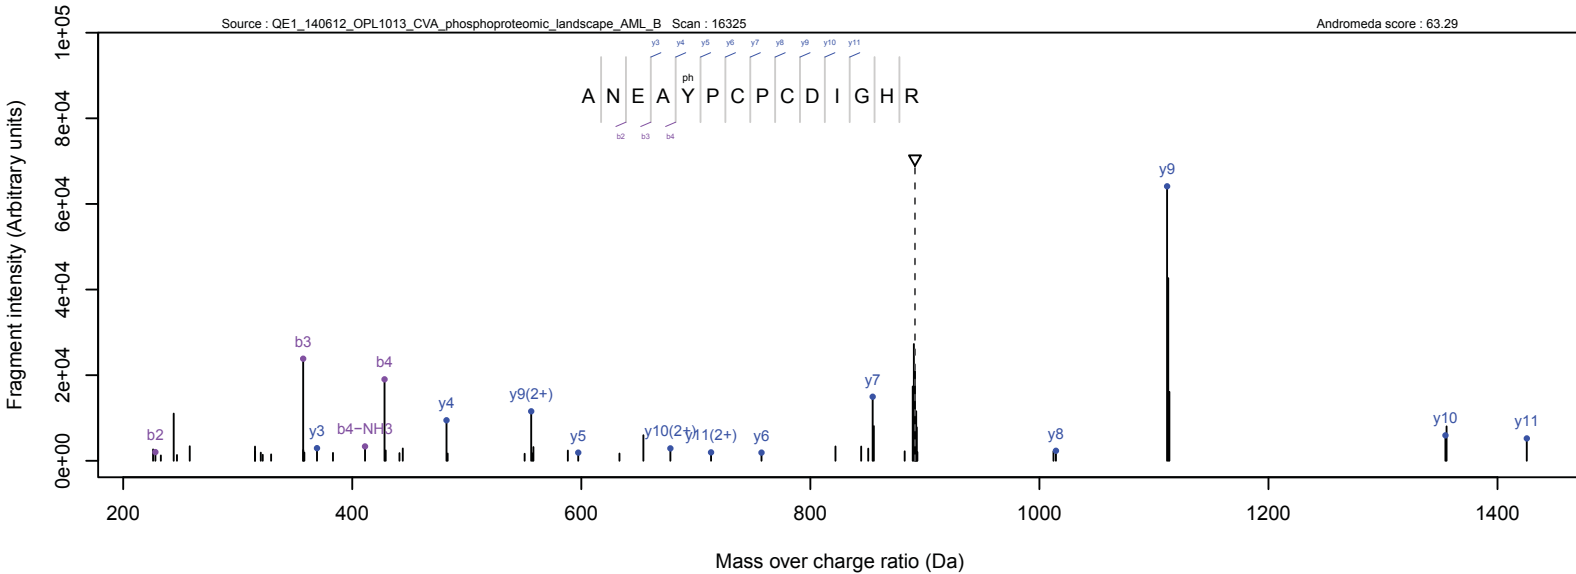

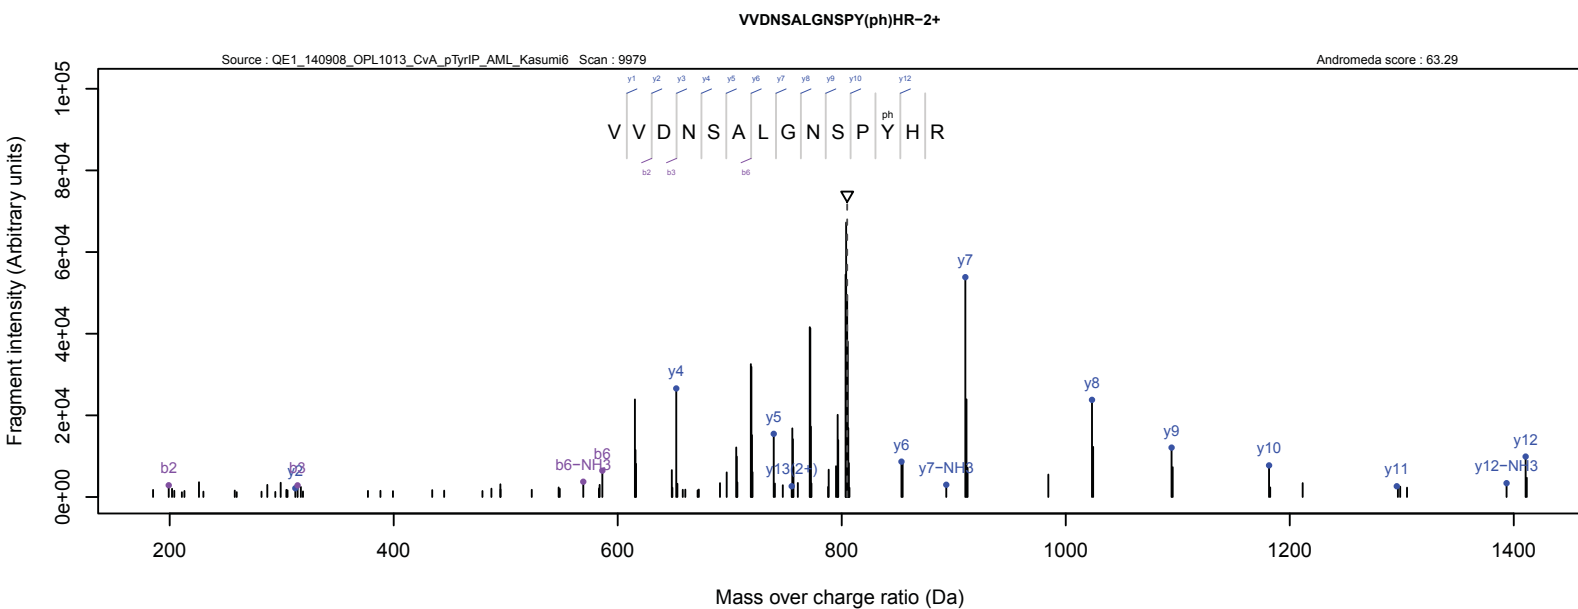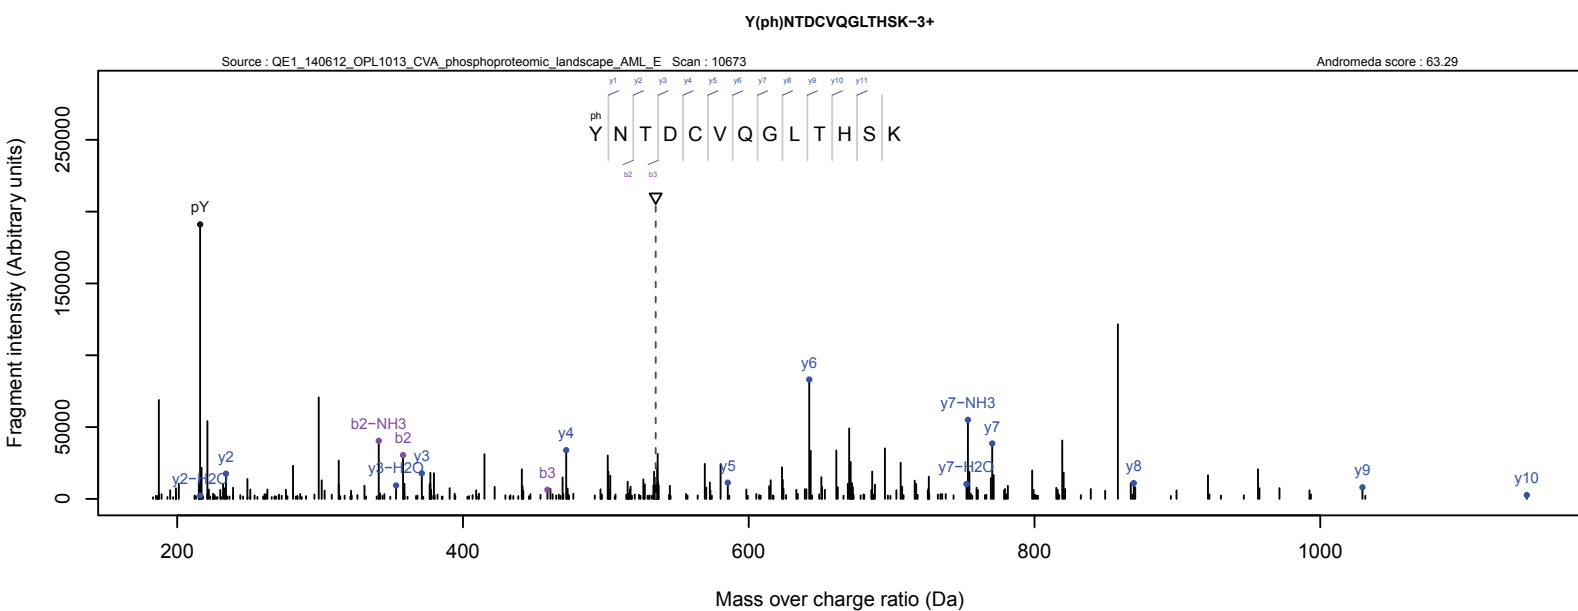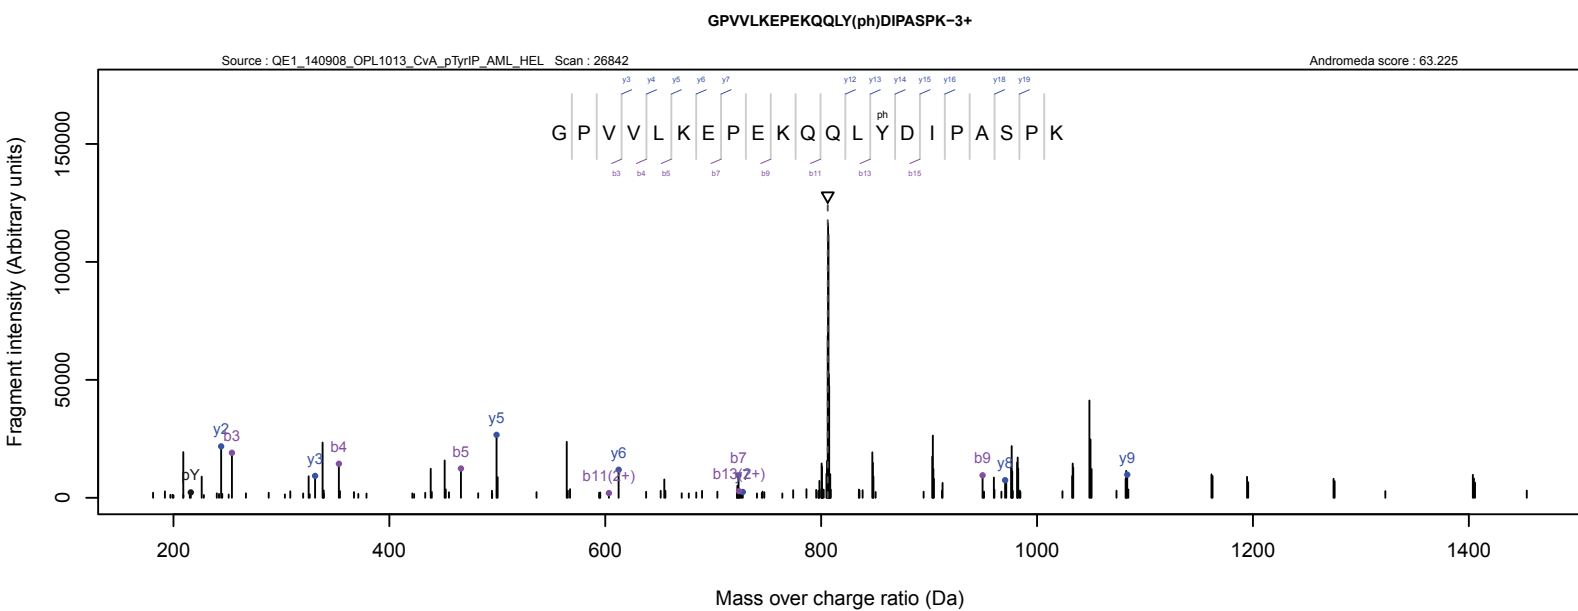

VGVGTCGIADKPM<sup>ph</sup>TQYQDTSK-3+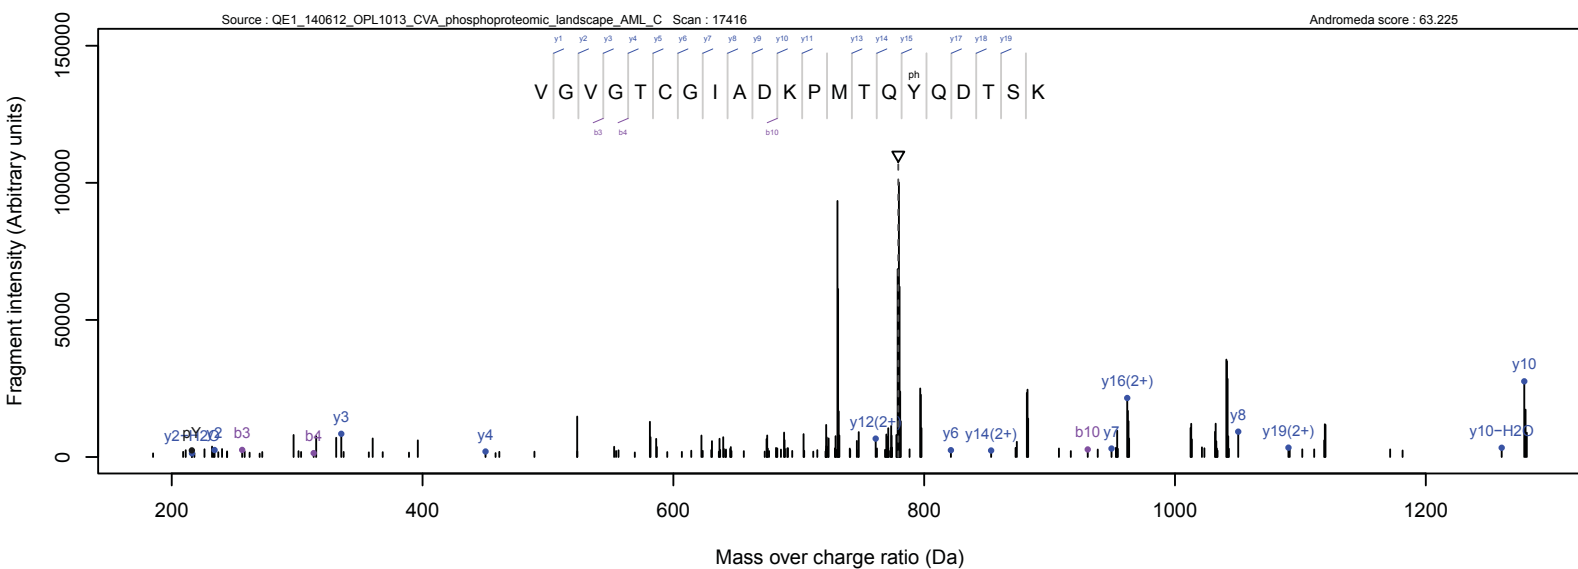EFEV<sup>ph</sup>GPIK-2+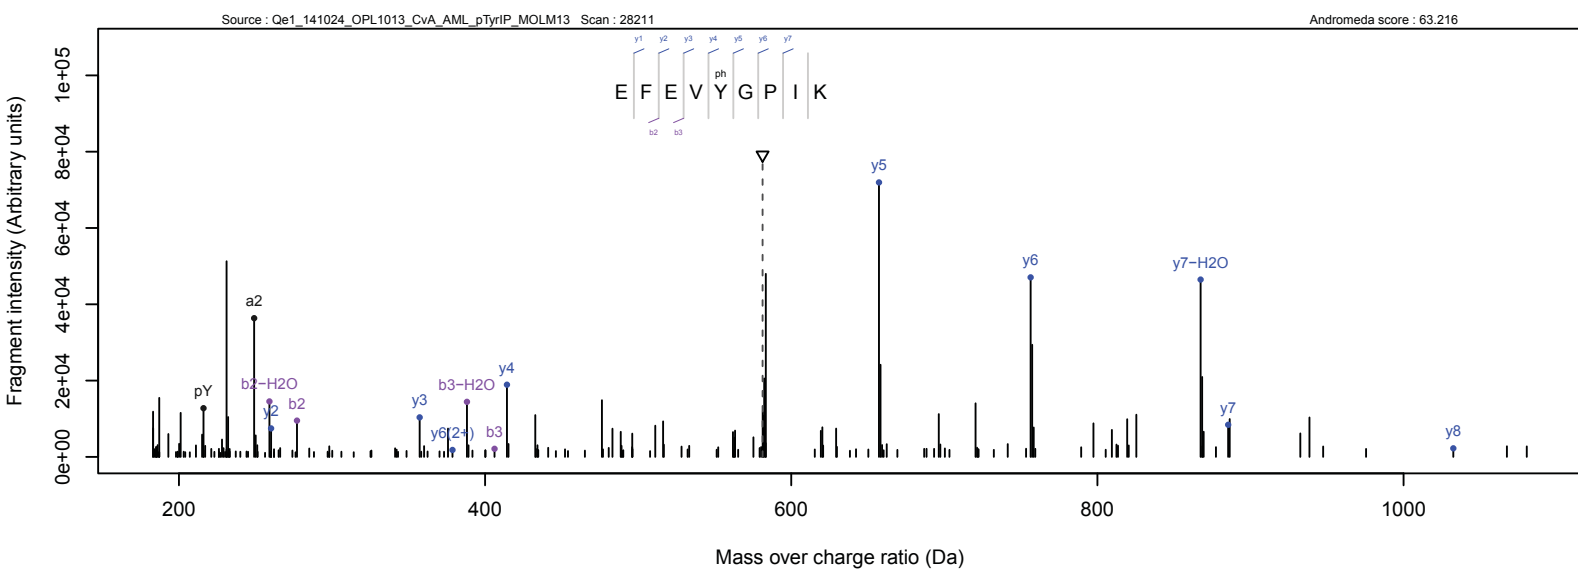Y<sup>ph</sup>LILLQEMK-2+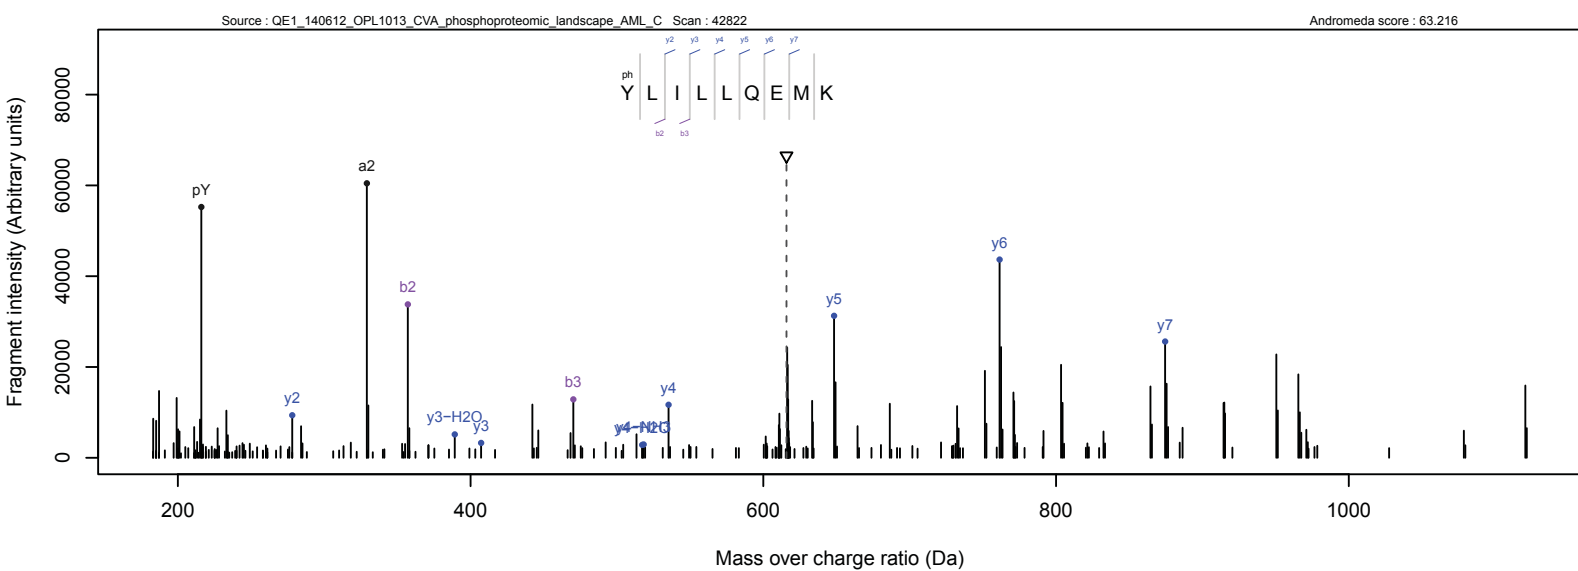



## (ac)SSSY(ph)YVNALFSK-2+

Source : QE1\_140612\_OPL1013\_CVA\_phosphoproteomic\_landscape\_AML\_C Scan : 45259

Andromeda score : 63.181

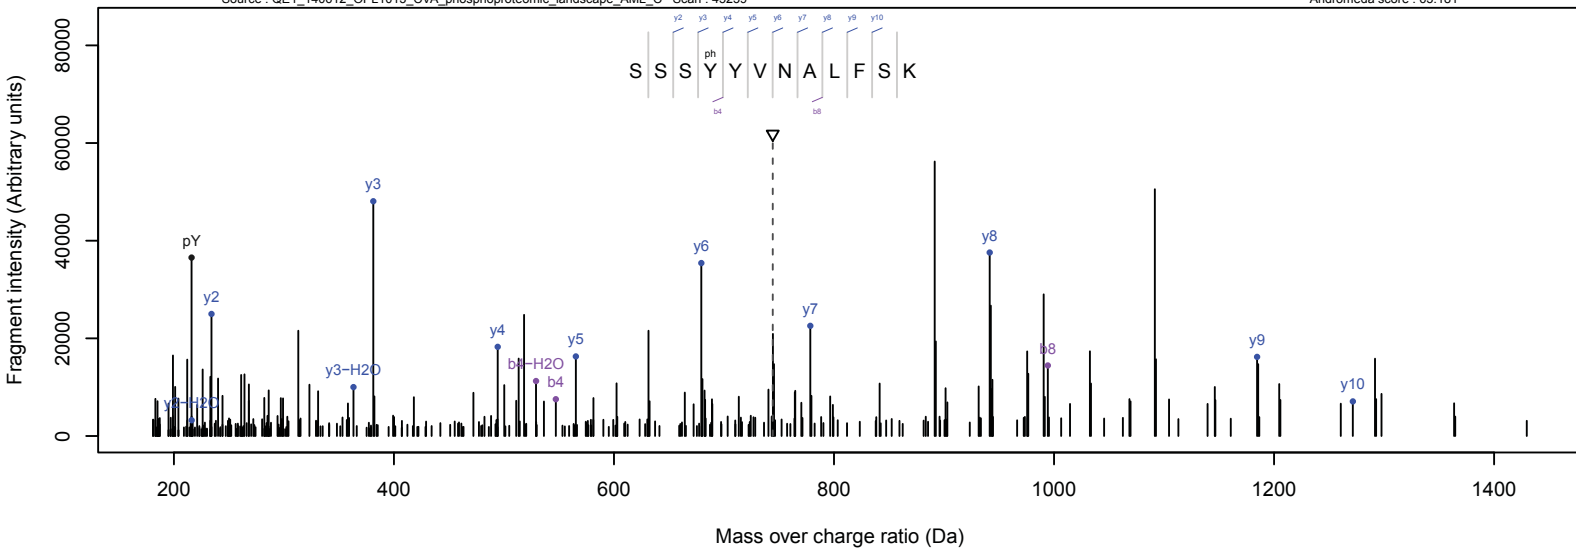

## NLTALLTCPGALQAYSVANKHGHY(ph)PNTIAEK-4+

Source : QE1\_140612\_OPL1013\_CVA\_phosphoproteomic\_landscape\_AML\_D Scan : 41923

Andromeda score : 63.111

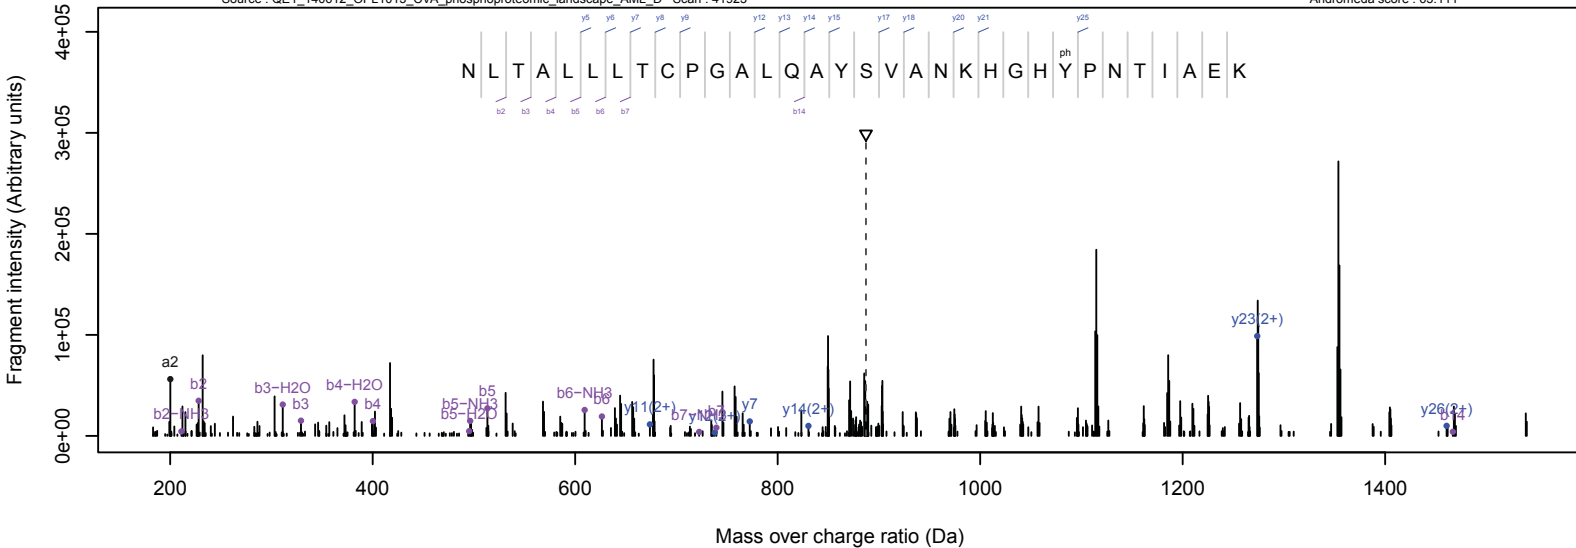

## CLY(ph)ASVLTAQPR-2+

Source : QE1\_140612\_OPL1013\_CVA\_phosphoproteomic\_landscape\_AML\_B Scan : 26343

Andromeda score : 63.091

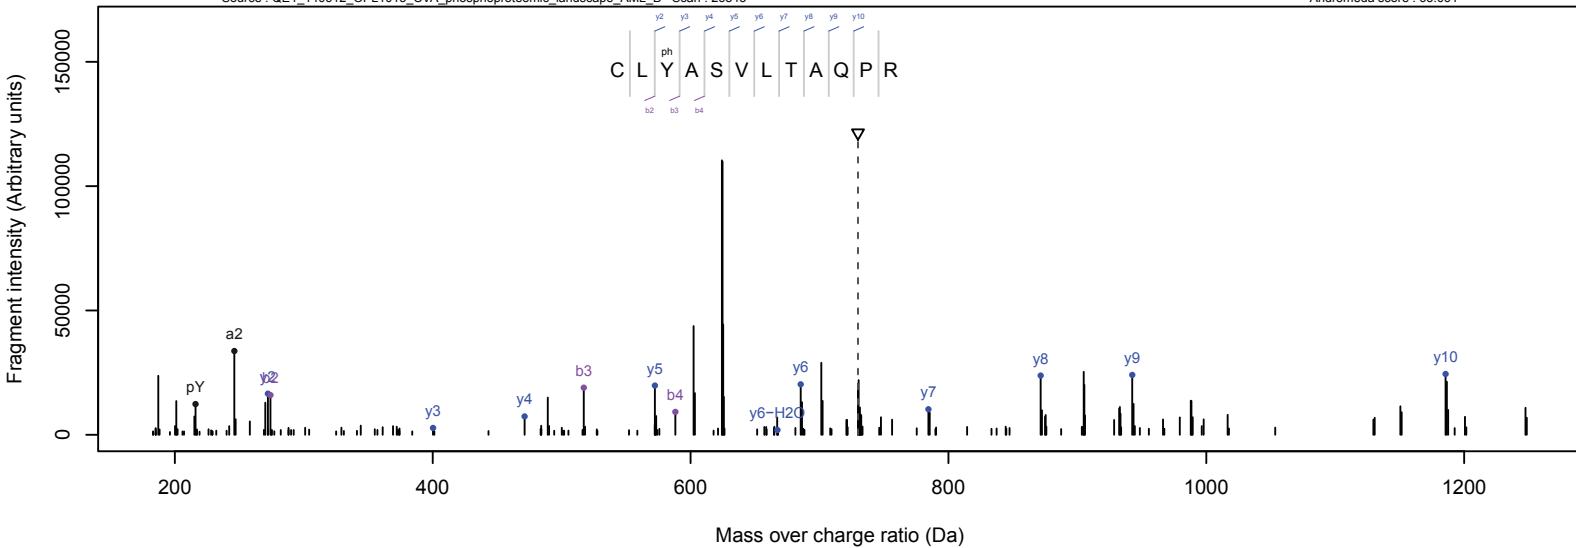

HQY(ph)PDGEVWKK-3+

Source: QE1\_140612\_OPL1013\_CVA\_phosphoproteomic\_landscape\_AML\_B Scan: 9715

Andromeda score: 63.091

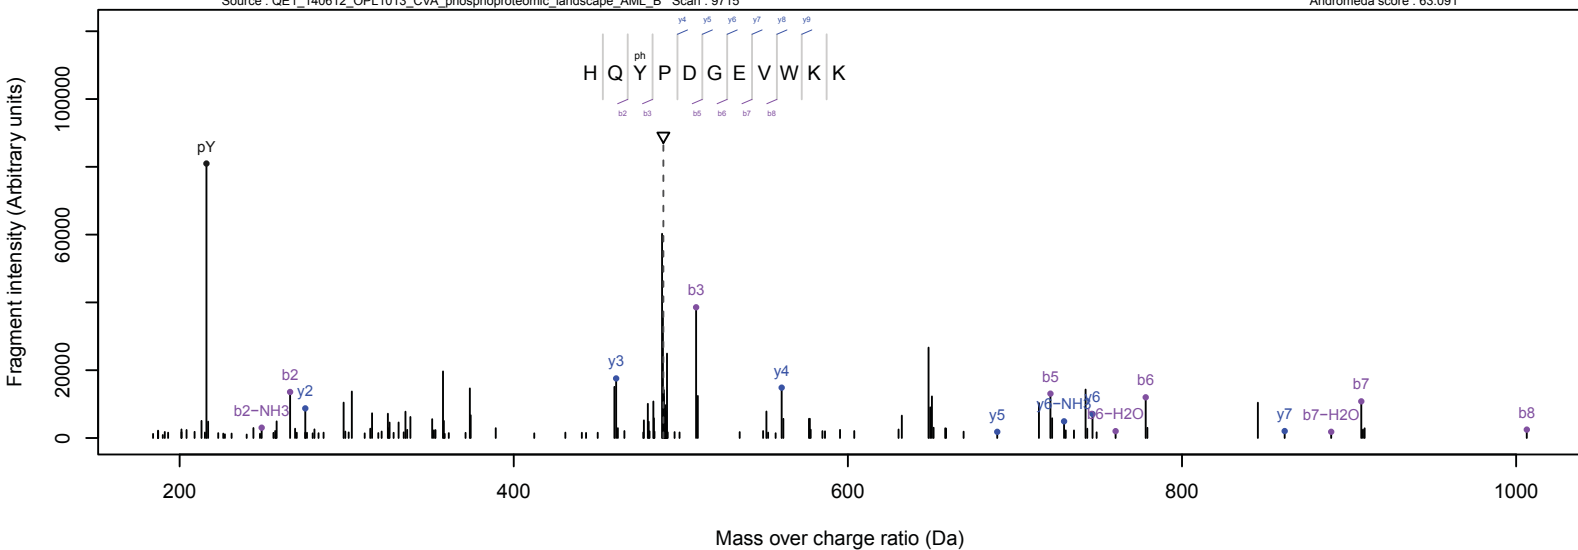

(ac)MNKPITPS(ph)TYVR-2+

Source: QE1\_140612\_OPL1013\_CVA\_phosphoproteomic\_landscape\_AML\_C Scan: 21942

Andromeda score: 63.091

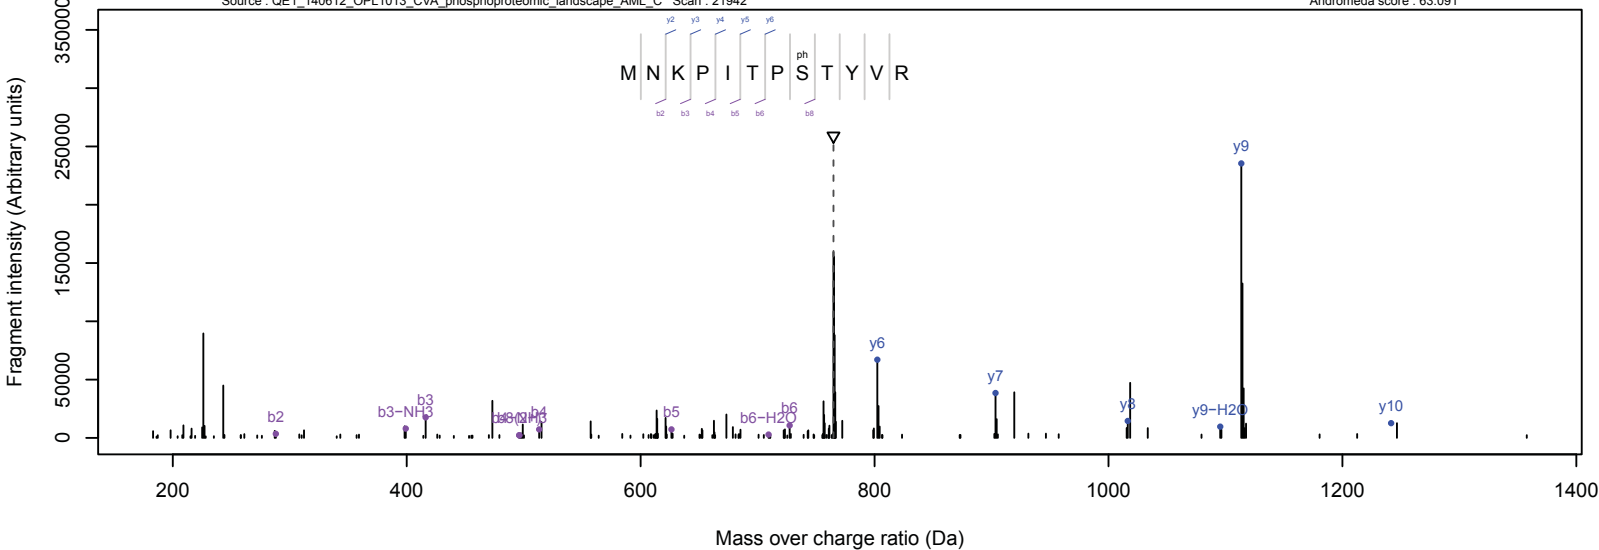

(ac)TDSKY(ph)FTTTK-2+

Source: QE1\_140612\_OPL1013\_CVA\_phosphoproteomic\_landscape\_AML\_C Scan: 12110

Andromeda score: 63.091

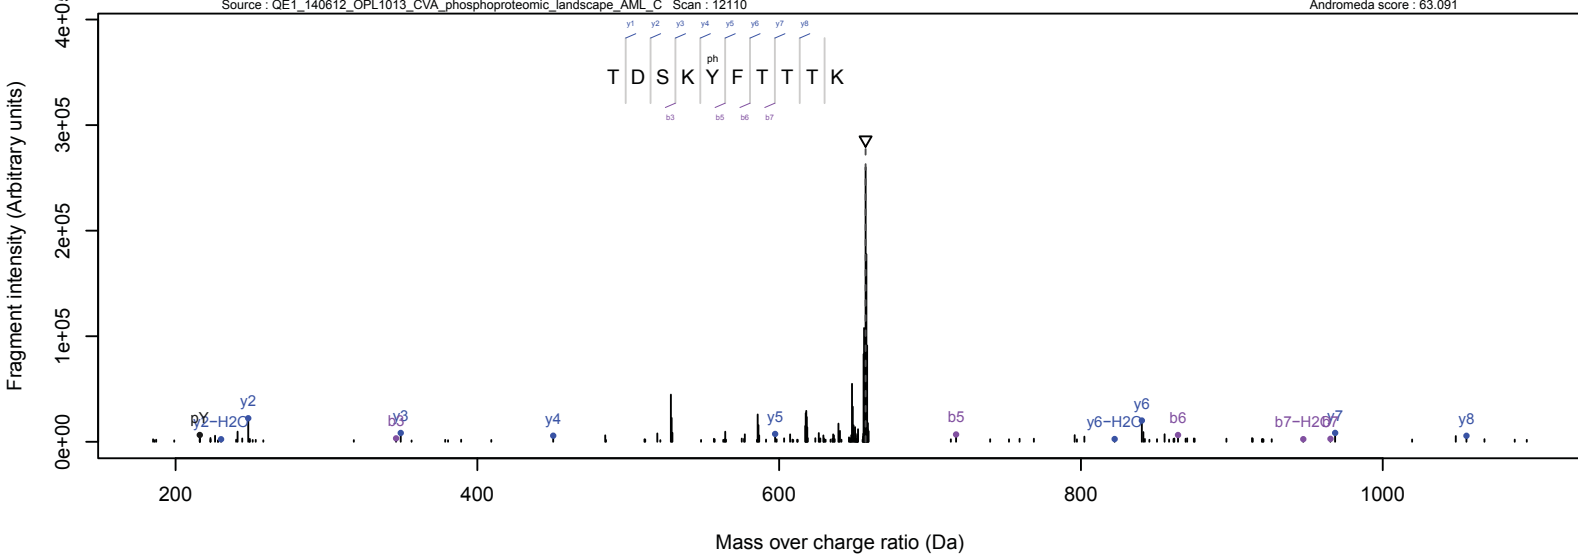

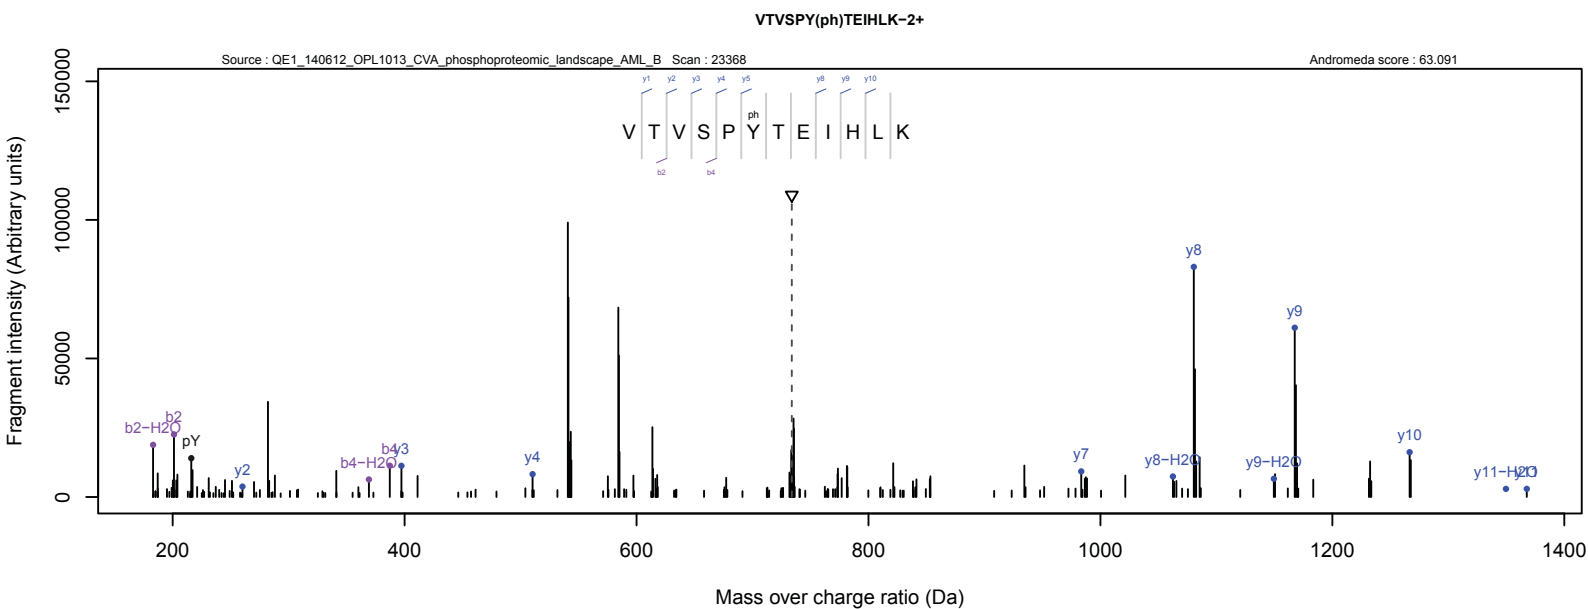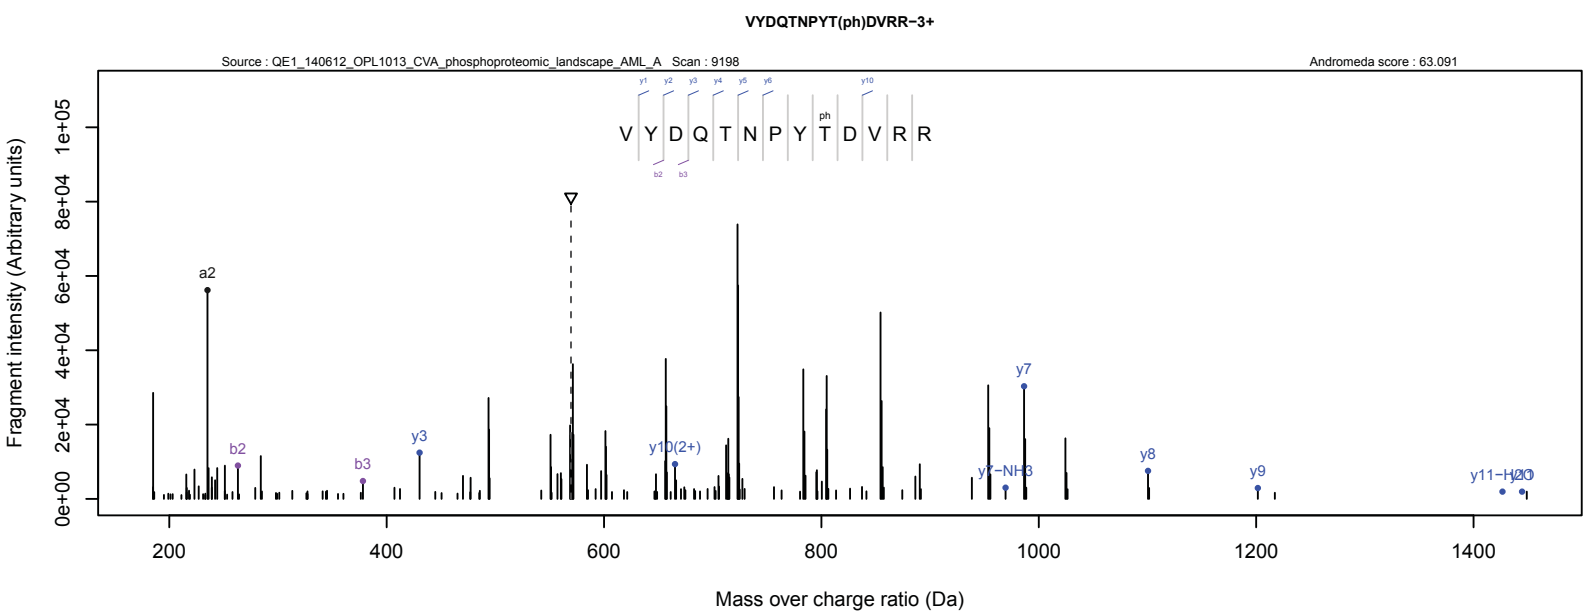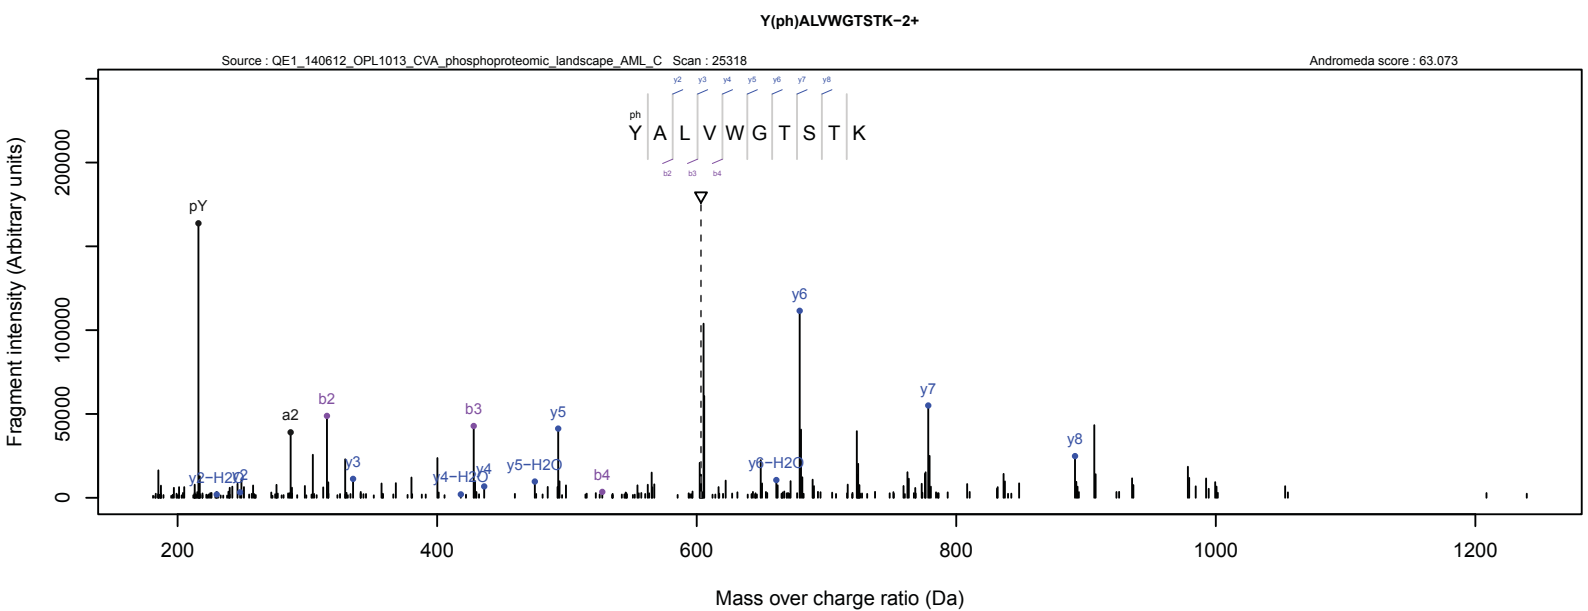



## EFIESLQKPGQVVY(ph)K-2+

Source : QE1\_140908\_OPL1013\_CvA\_pTyrIP\_AML\_Kasumi1 Scan : 34671

Andromeda score : 63.062

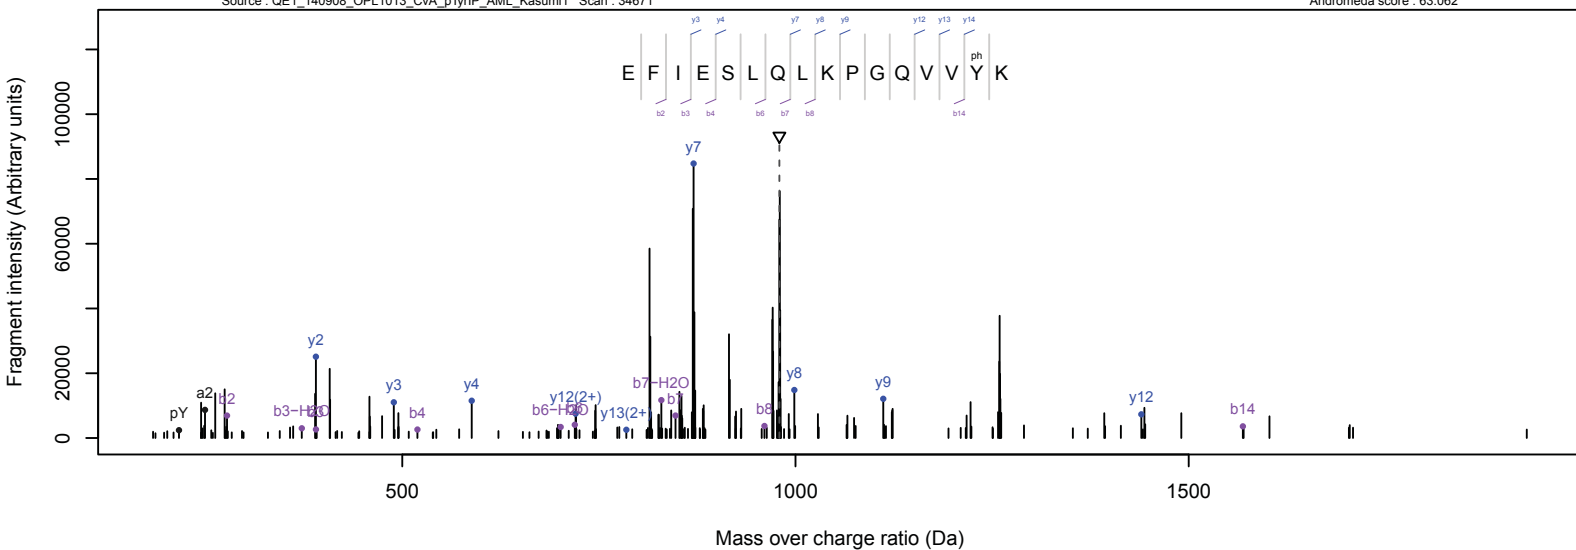

## AVPKEDIYSGGGGGSR-3+

Source : QE1\_140612\_OPL1013\_CVA\_phosphoproteomic\_landscape\_AML\_B Scan : 6596

Andromeda score : 62.94

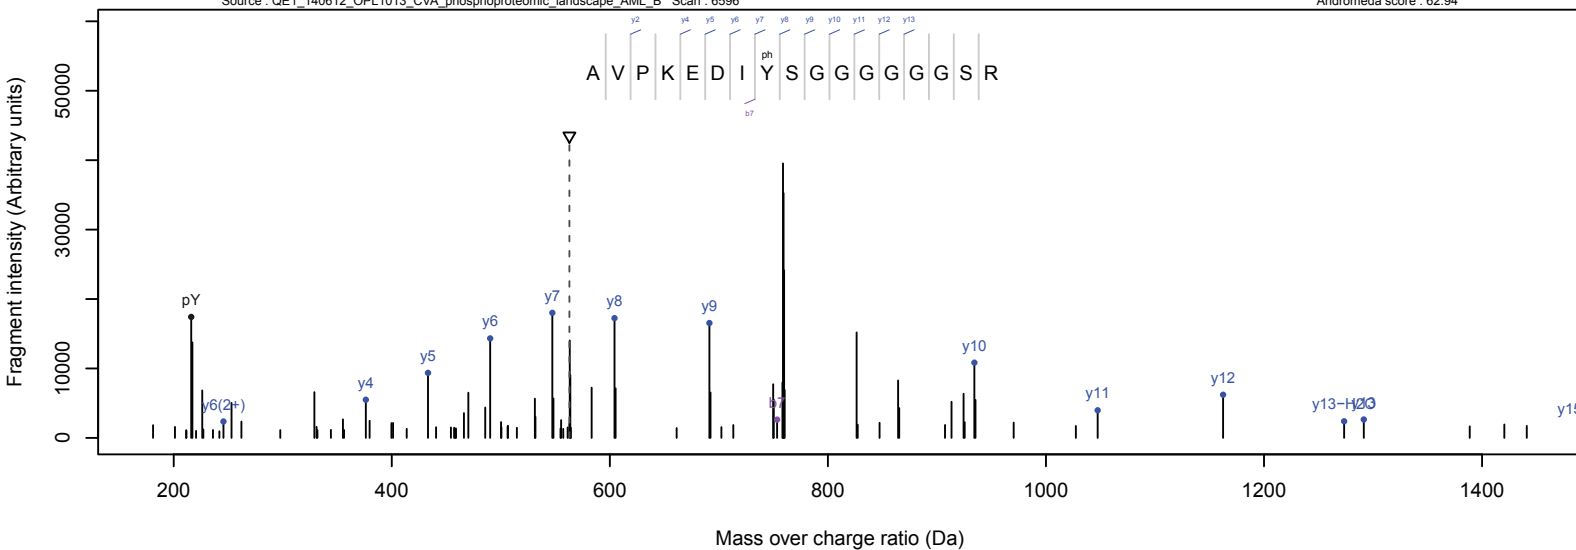

## IKLGDSS(ph)NYIYISPFGR-2+

Source : QE1\_140612\_OPL1013\_CVA\_phosphoproteomic\_landscape\_AML\_B Scan : 37434

Andromeda score : 62.94

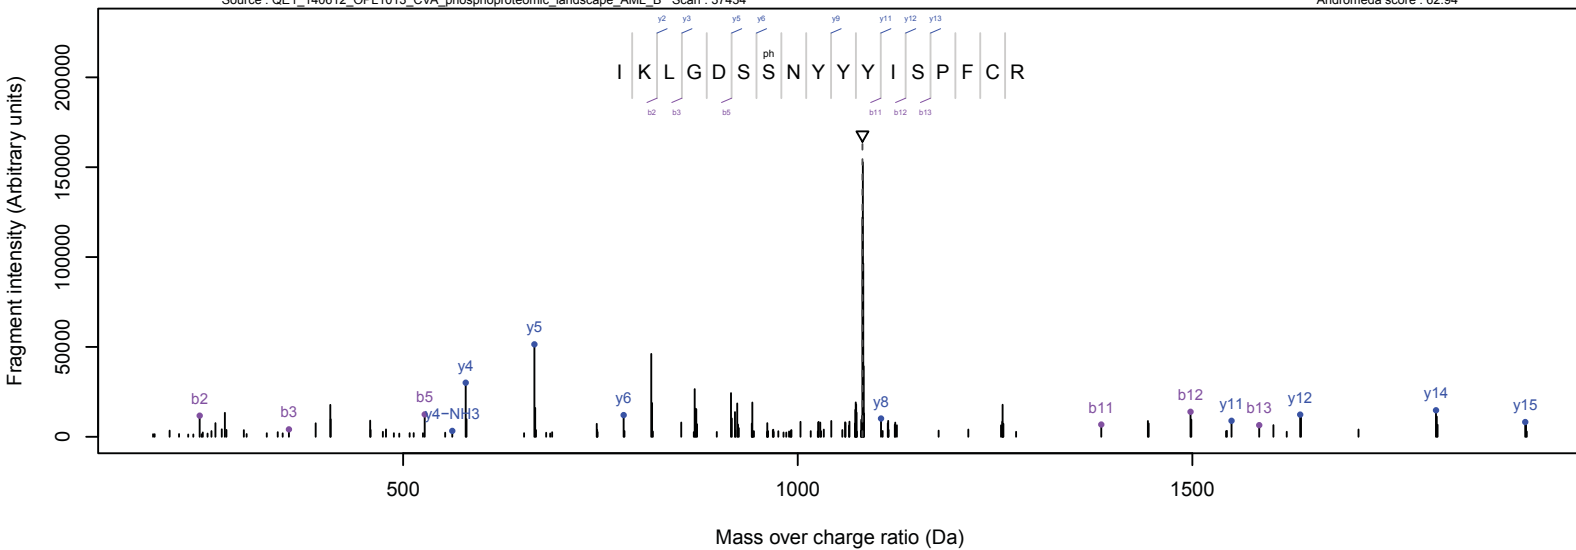

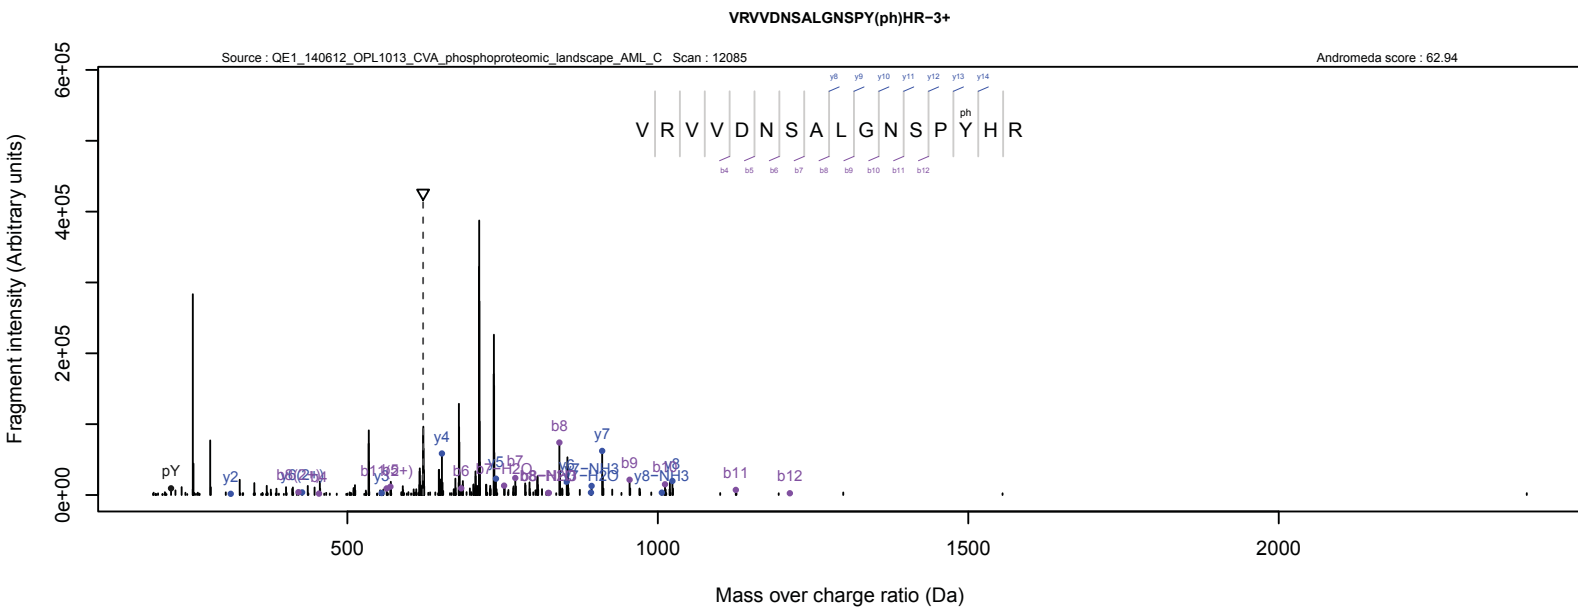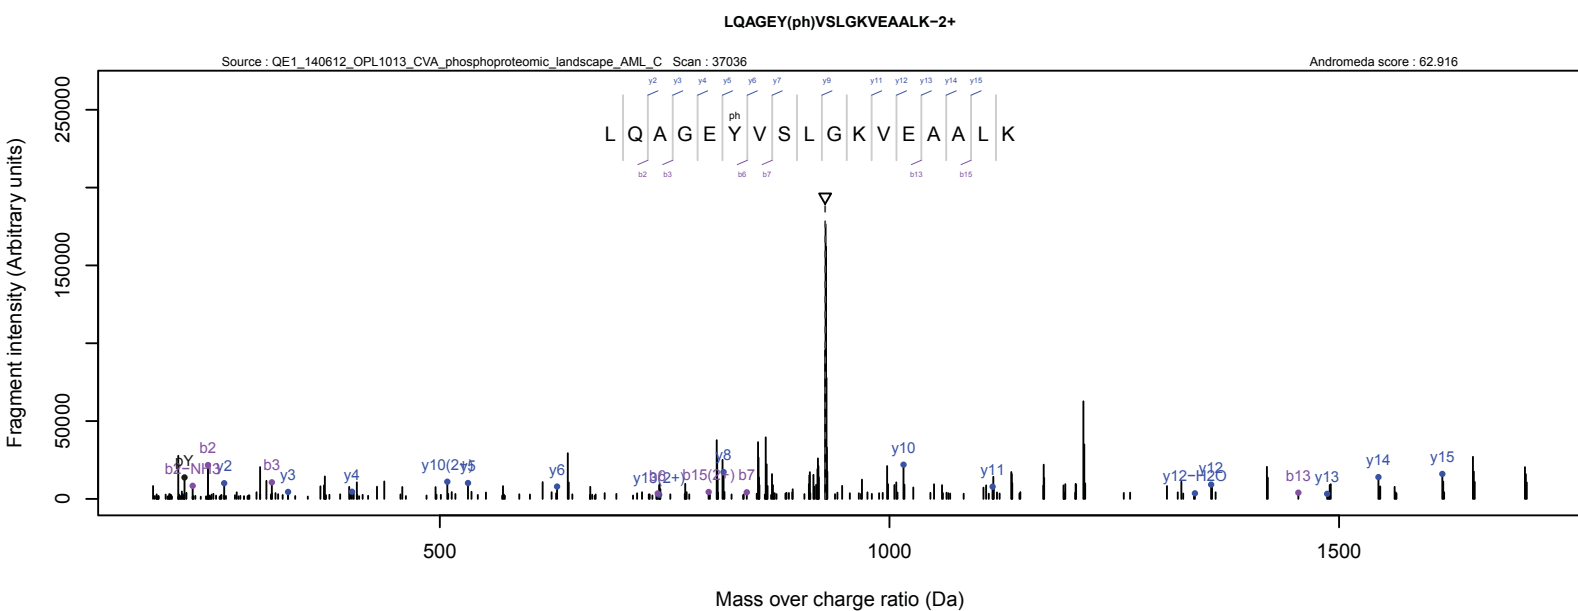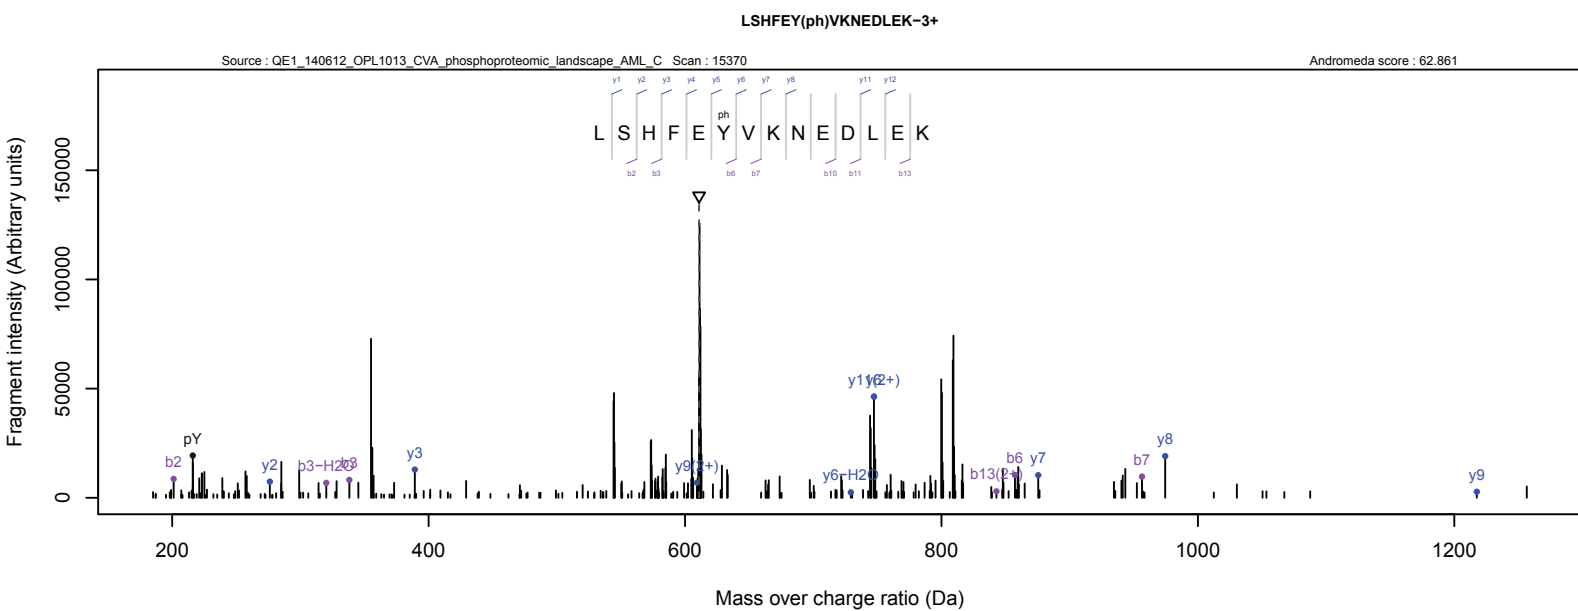

PSPIY(ph)ISSYSSPAR-2+

Source : QE1\_140612\_OPL1013\_CVA\_phosphoproteomic\_landscape\_AML\_C Scan : 27017

Andromeda score : 62.861

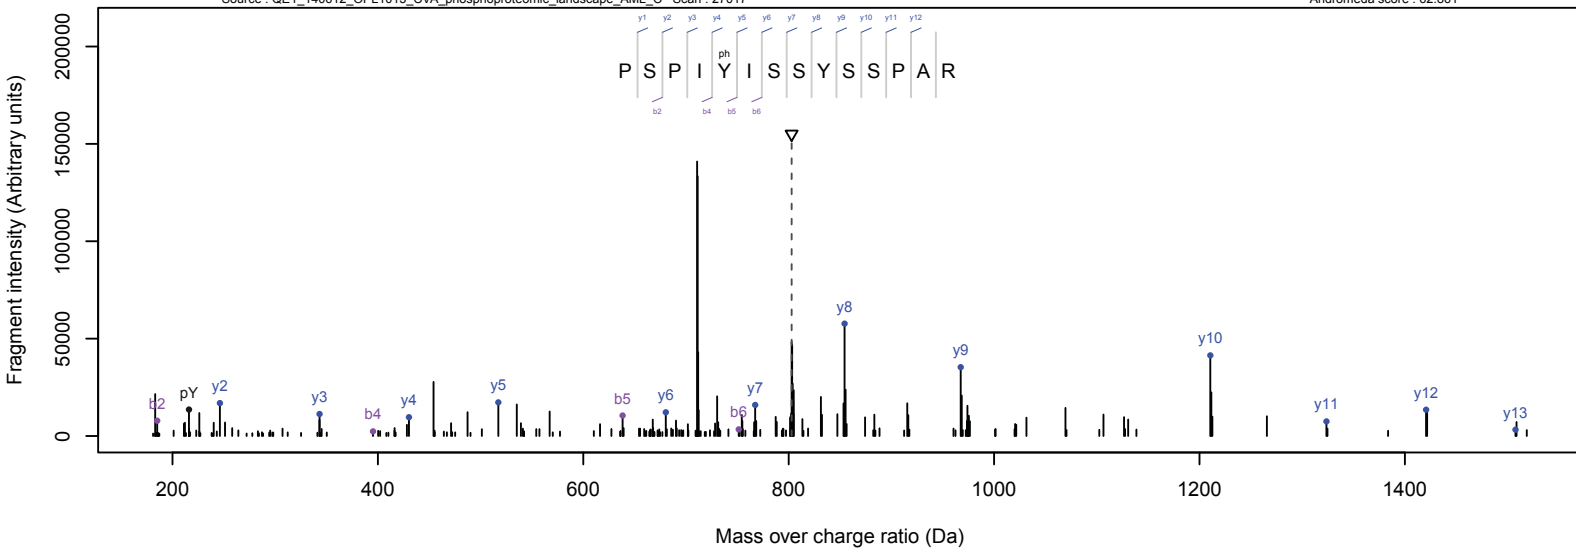

Y(ph)SIKYNPGYVLASR-2+

Source : QE1\_140612\_OPL1013\_CVA\_phosphoproteomic\_landscape\_AML\_C Scan : 26785

Andromeda score : 62.861

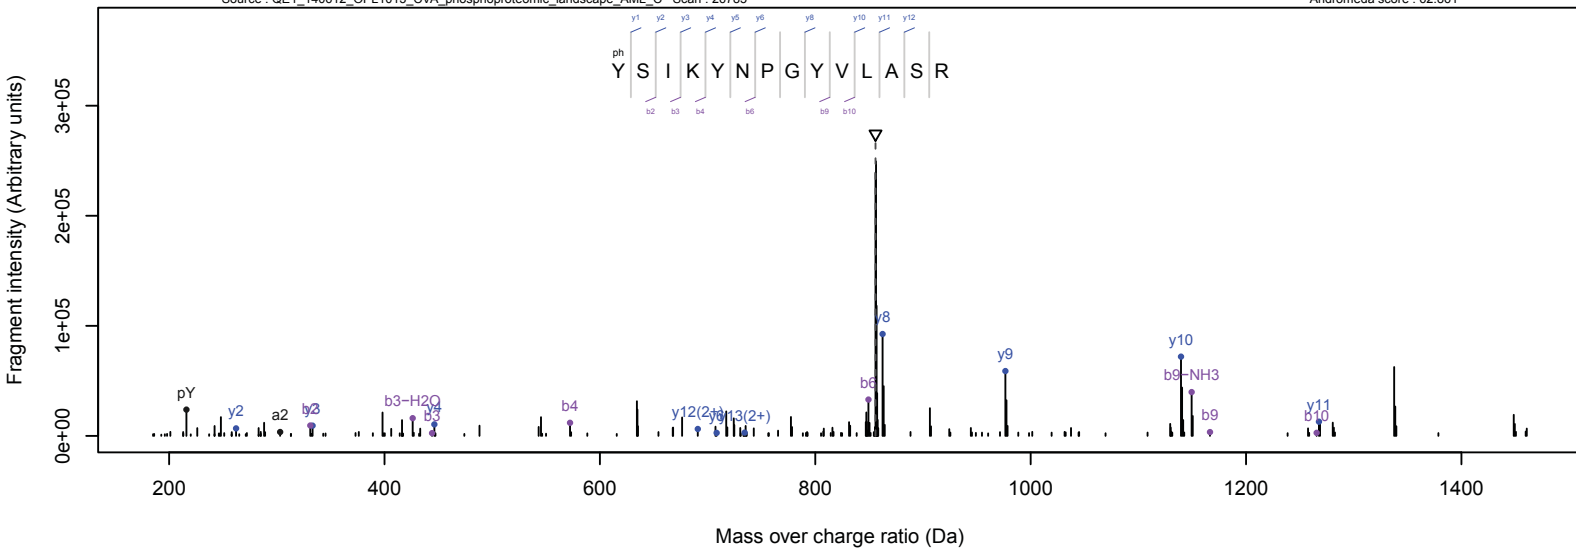

ELYENTGQSNFEEHIYGNETS(ph)YNFQKPR-4+

Source : QE1\_140908\_OPL1013\_CvA\_pTyrIP\_AML\_Kasumi6 Scan : 33738

Andromeda score : 62.858

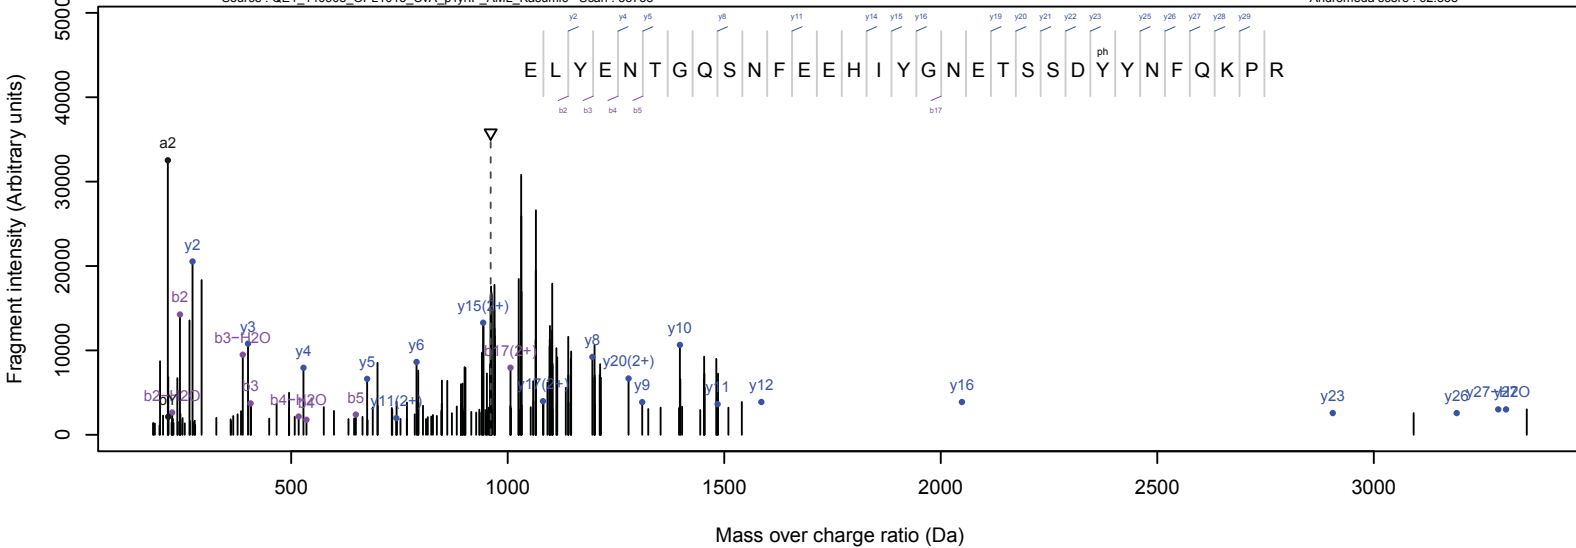

GATIPYRPKPASTPVI FAGGQAYTIQQQY(ph)AIPHPDLTK-4+

Source : QE1\_140612\_OPL1013\_CVA\_phosphoproteomic\_landscape\_AML\_C Scan : 39373

Andromeda score : 62.853

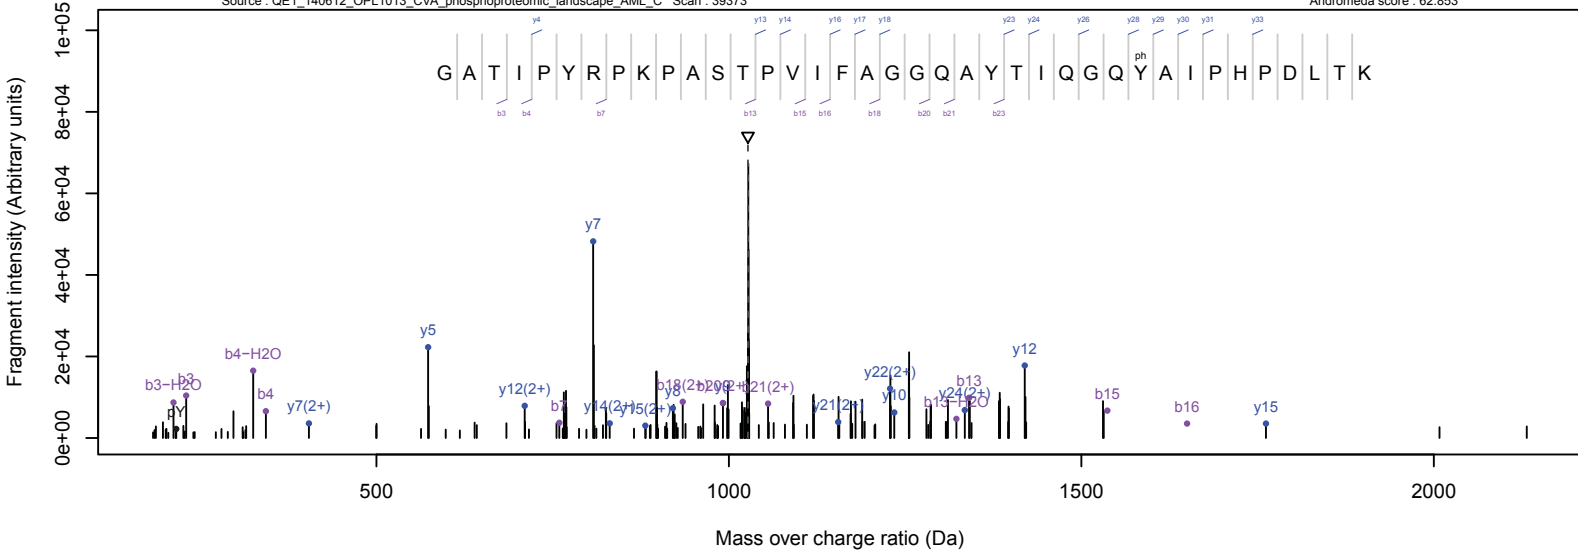

LDSYVNADHDLYCNT(ph)RR-3+

Source : QE1\_140908\_OPL1013\_CvA\_pTyrIP\_AML\_HL60 Scan : 19225

Andromeda score : 62.813

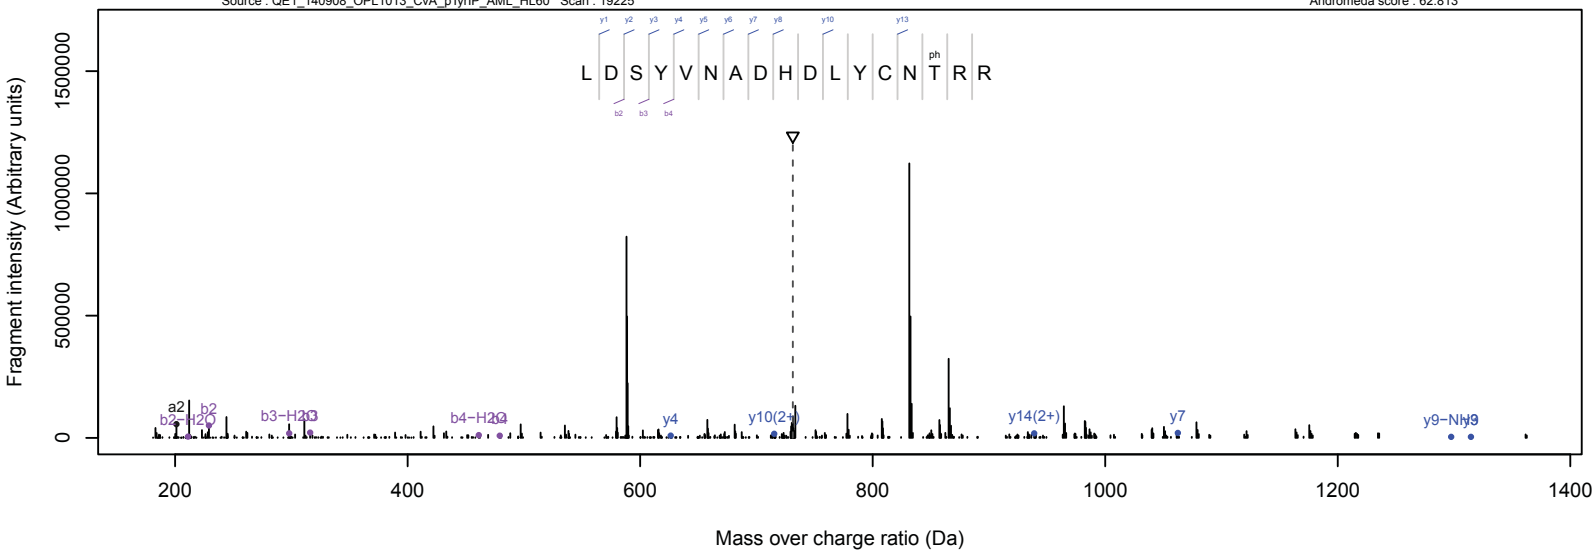

TPVLFDIY(ph)EIKEAIK-3+

Source : QE1\_140822\_OPL1013\_CvA\_pTyrIP\_AML\_cell\_lines\_part2\_B Scan : 44138

Andromeda score : 62.813

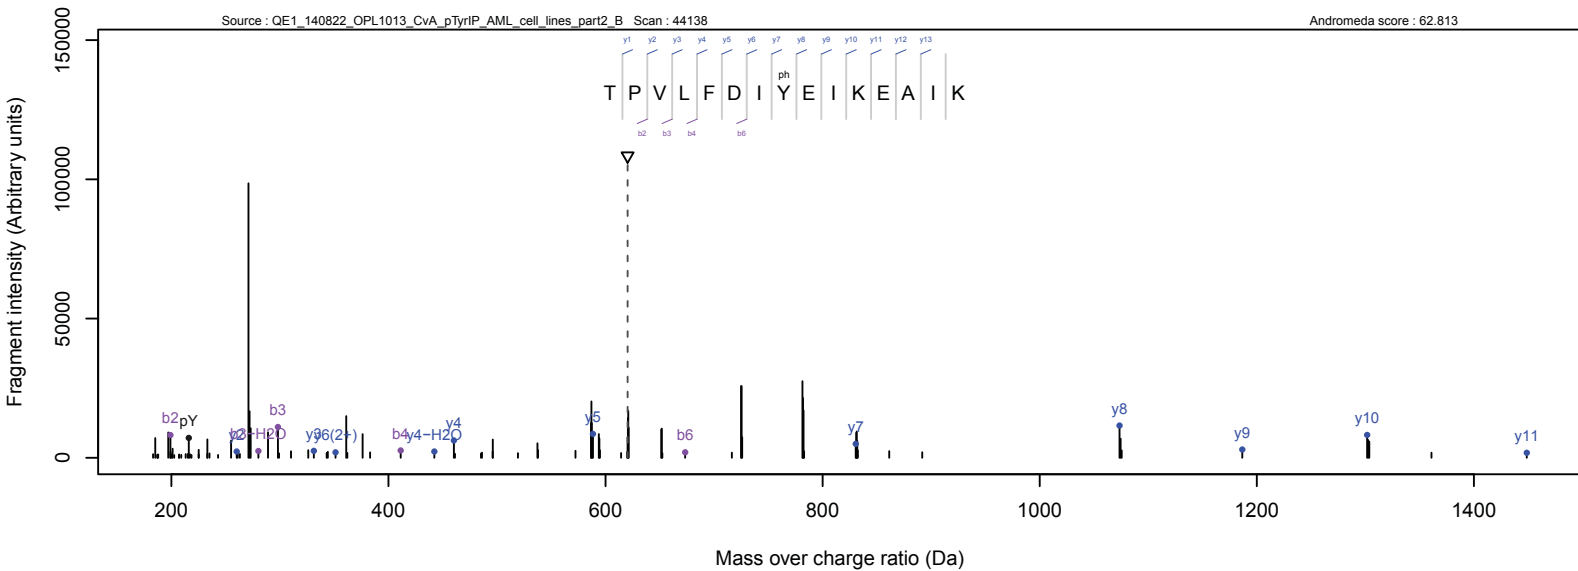

VCNY(ph)GLTFTQK-2+

Source : QE1\_140612\_OPL1013\_CVA\_phosphoproteomic\_landscape\_AML\_A Scan : 20479

Andromeda score : 62.799

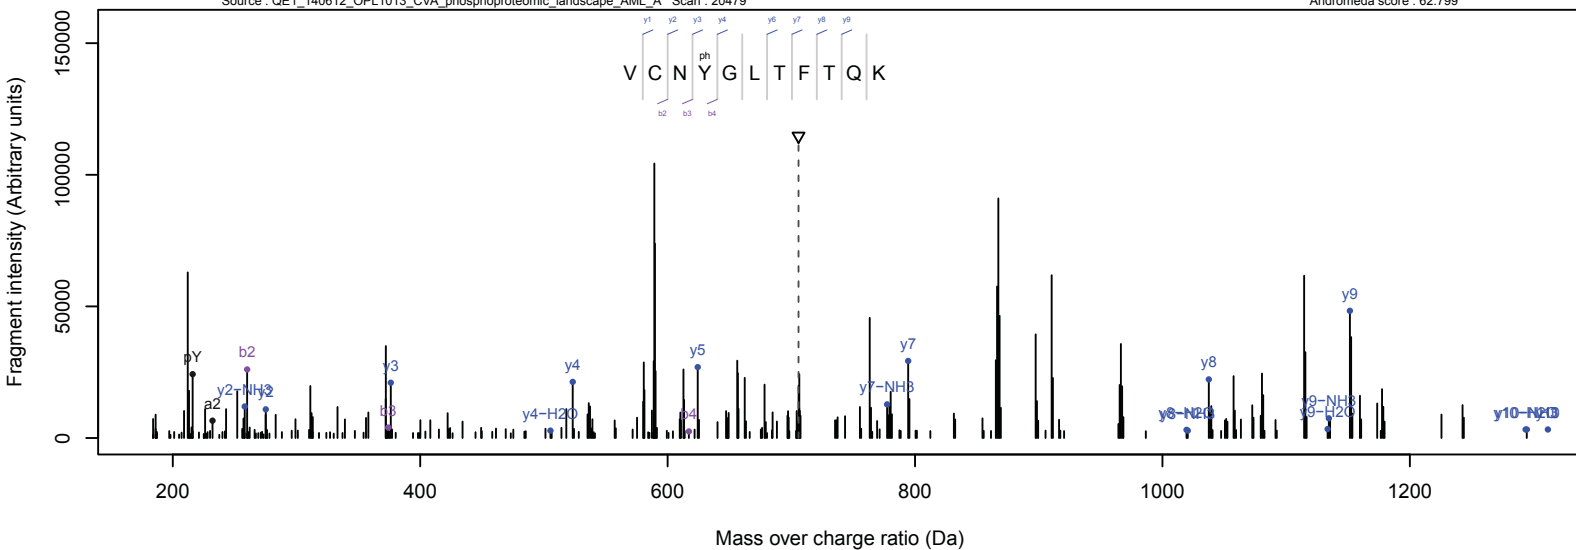

EVCPTVTHRPAlyRDPVTDIPY(ph)ATAR-4+

Source : QE1\_140612\_OPL1013\_CVA\_phosphoproteomic\_landscape\_AML\_C Scan : 28189

Andromeda score : 62.781

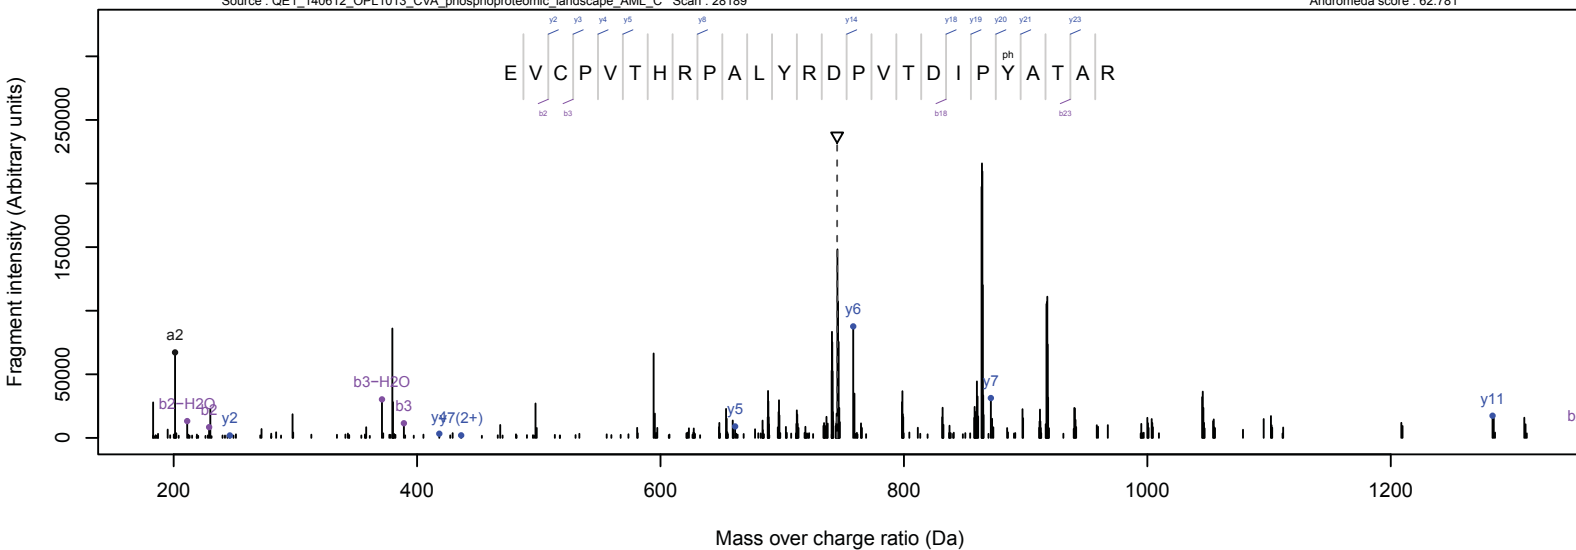

SAY(ph)EAGIQALKPPDAPGDEAPK-3+

Source : QE1\_140908\_OPL1013\_CvA\_pTyrIP\_AML\_HEL Scan : 30512

Andromeda score : 62.781

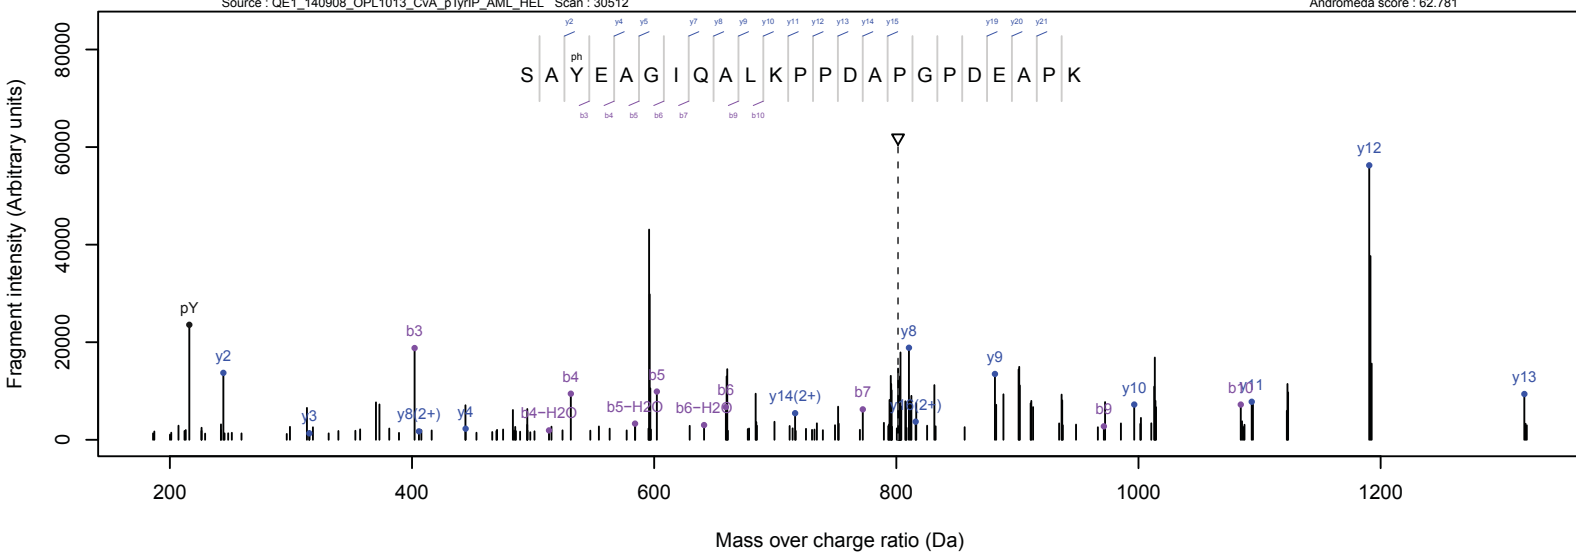

RILY(ph)QLNEPTTWSLTSR-3+

Source : QE1\_140908\_OPL1013\_CvA\_pTyrIP\_AML\_Kasumi1 Scan : 34578

Andromeda score : 62.739

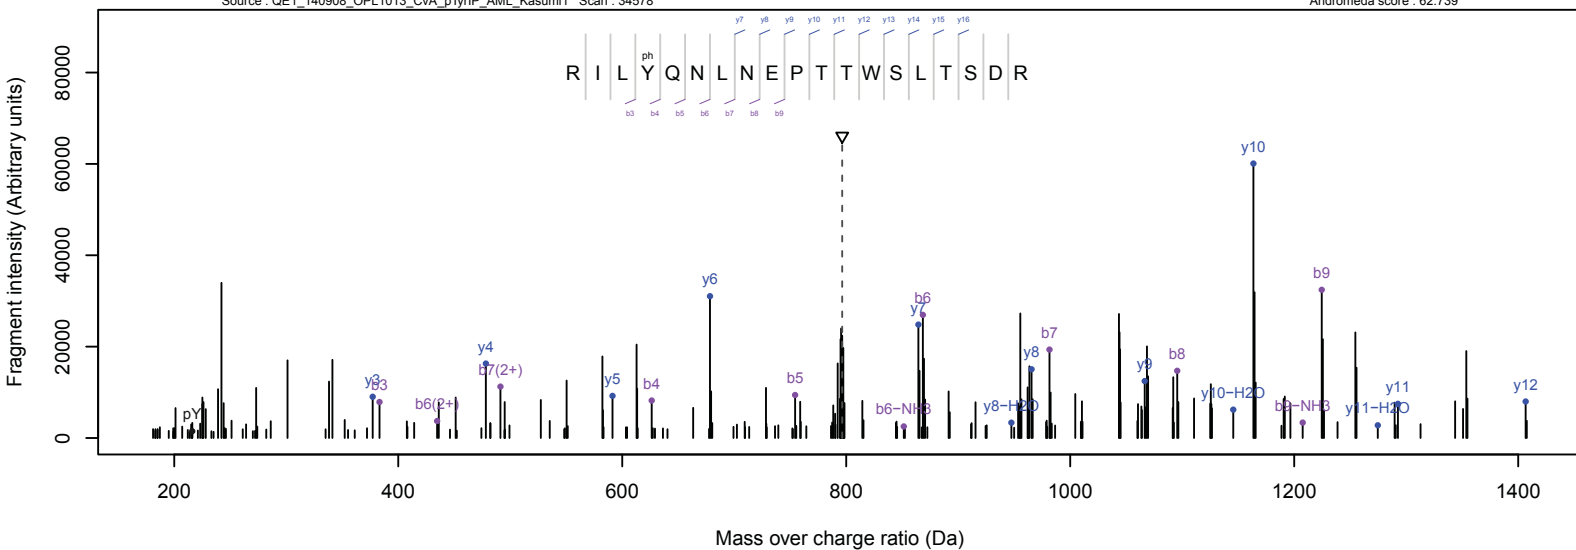

SGFEPPGDFPFEDYSQH(Y)R-3+

Source : QE1\_140908\_OPL1013\_CvA\_pTyrIP\_AML\_HEL Scan : 43865

Andromeda score : 62.739

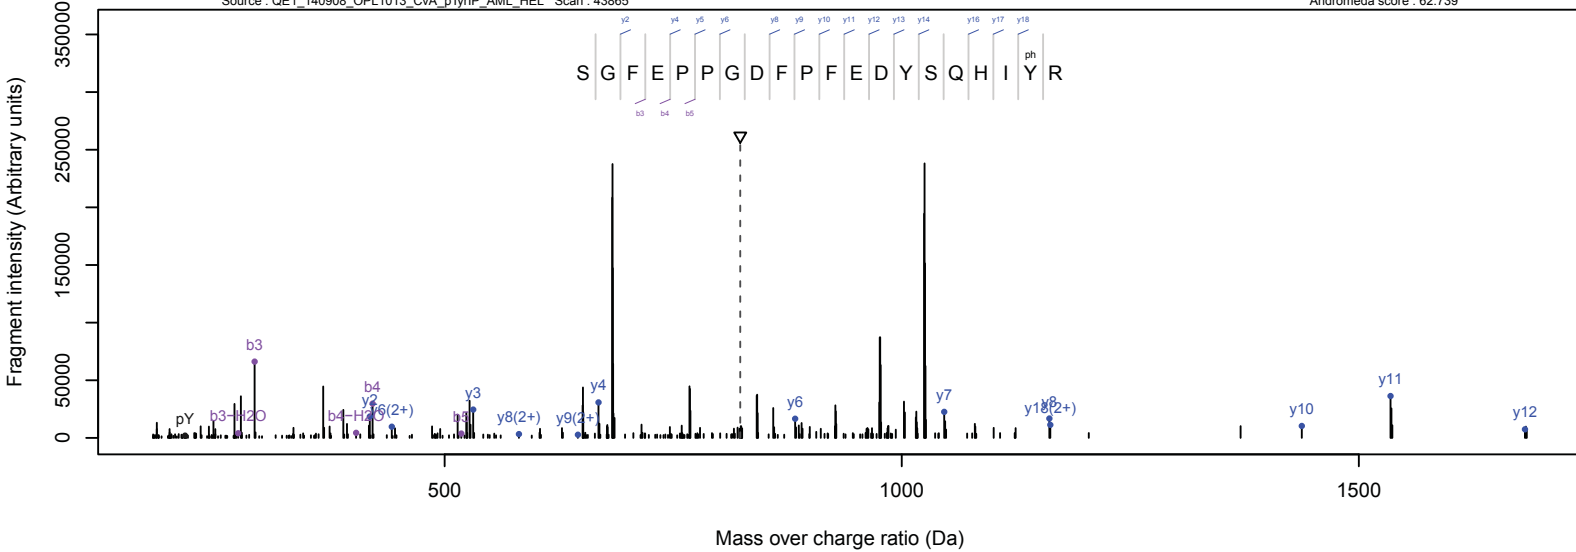

VY(ph)ENVGLMQQKS(ph)FR-3+

Source : QE1\_140612\_OPL1013\_CVA\_phosphoproteomic\_landscape\_AML\_C Scan : 23646

Andromeda score : 62.739

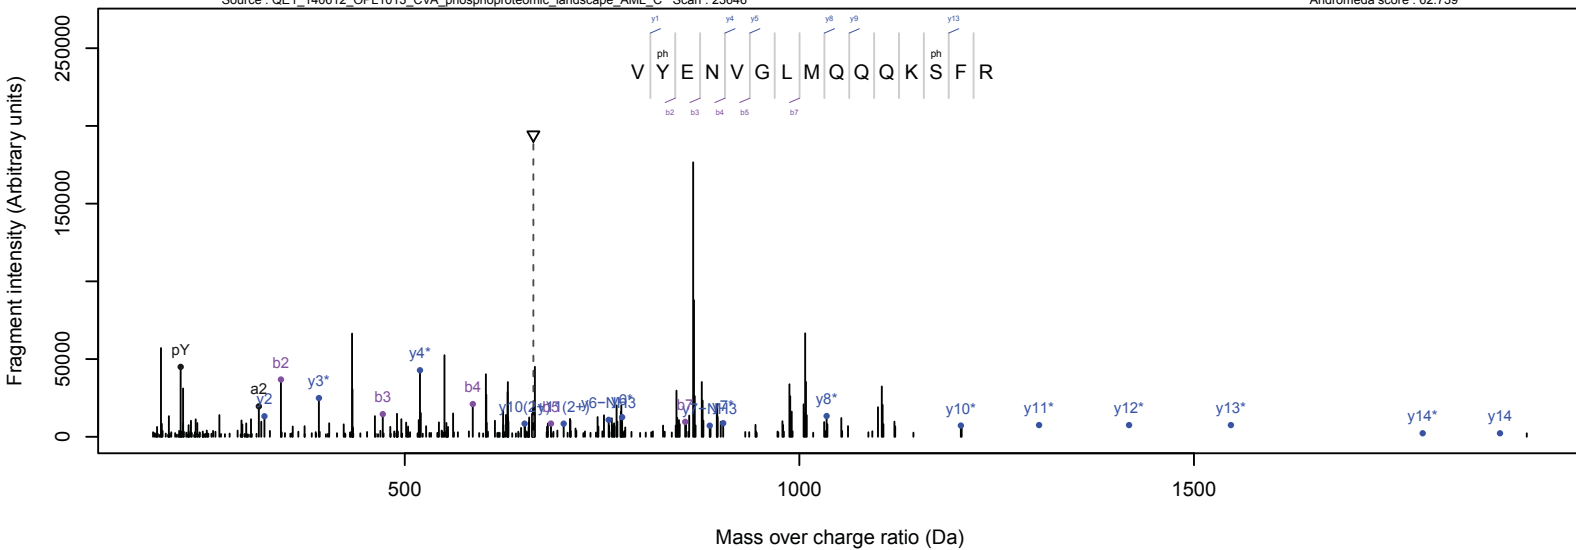

## TY(ph)YVFGR-2+

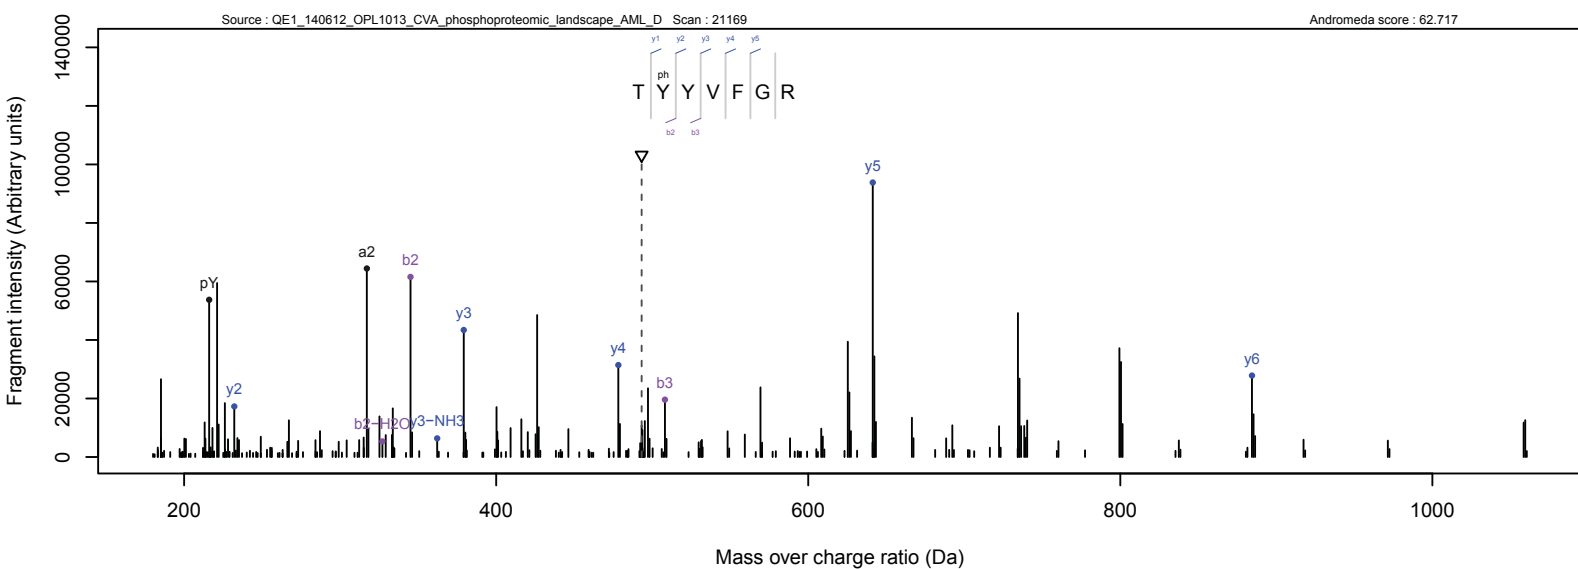

## LAY(ph)HPLK-2+

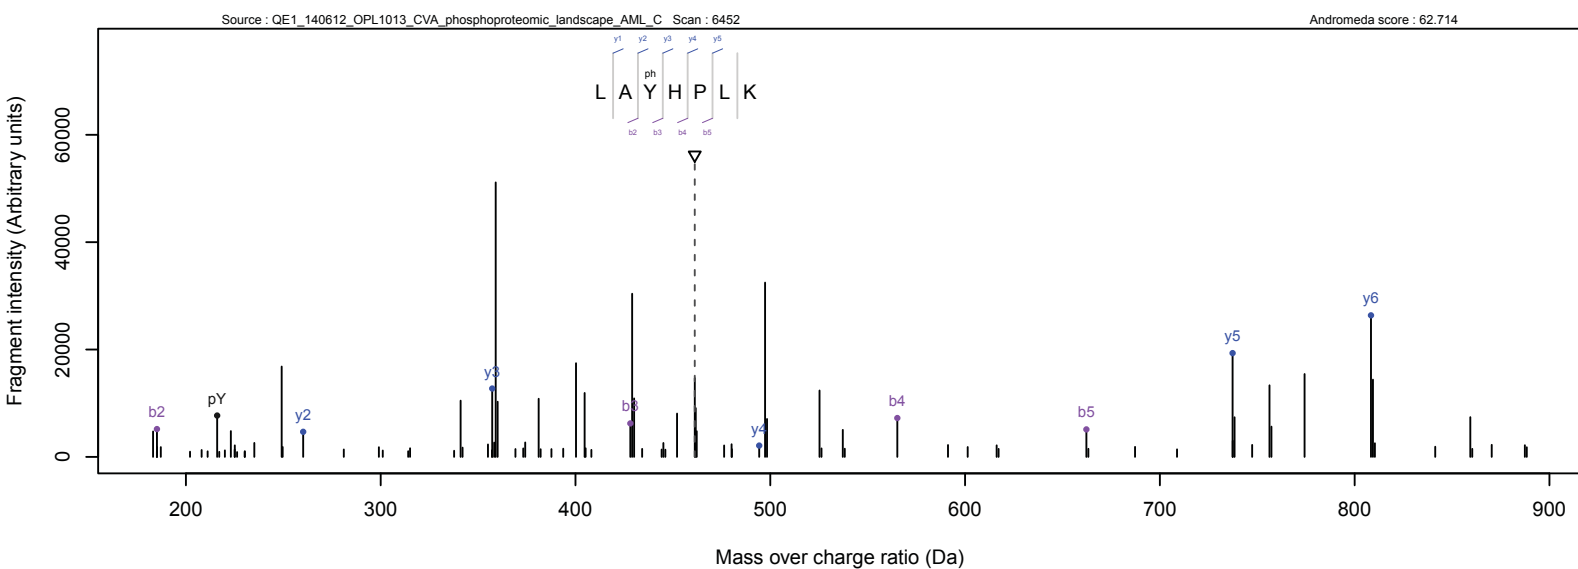

## QGY(ph)VIYR-2+

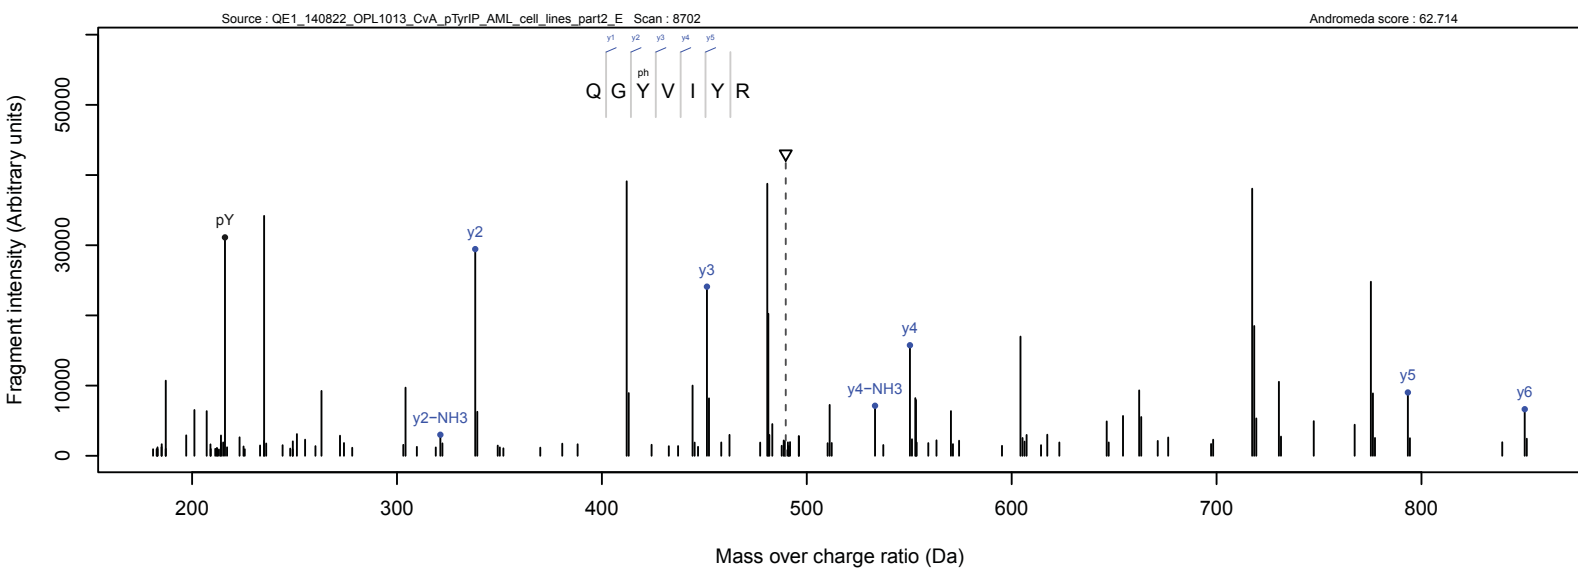

## SY(ph)SYVCGISSK-2+

Source : QE1\_140612\_OPL1013\_CVA\_phosphoproteomic\_landscape\_AML\_D Scan : 15773

Andromeda score : 62.694

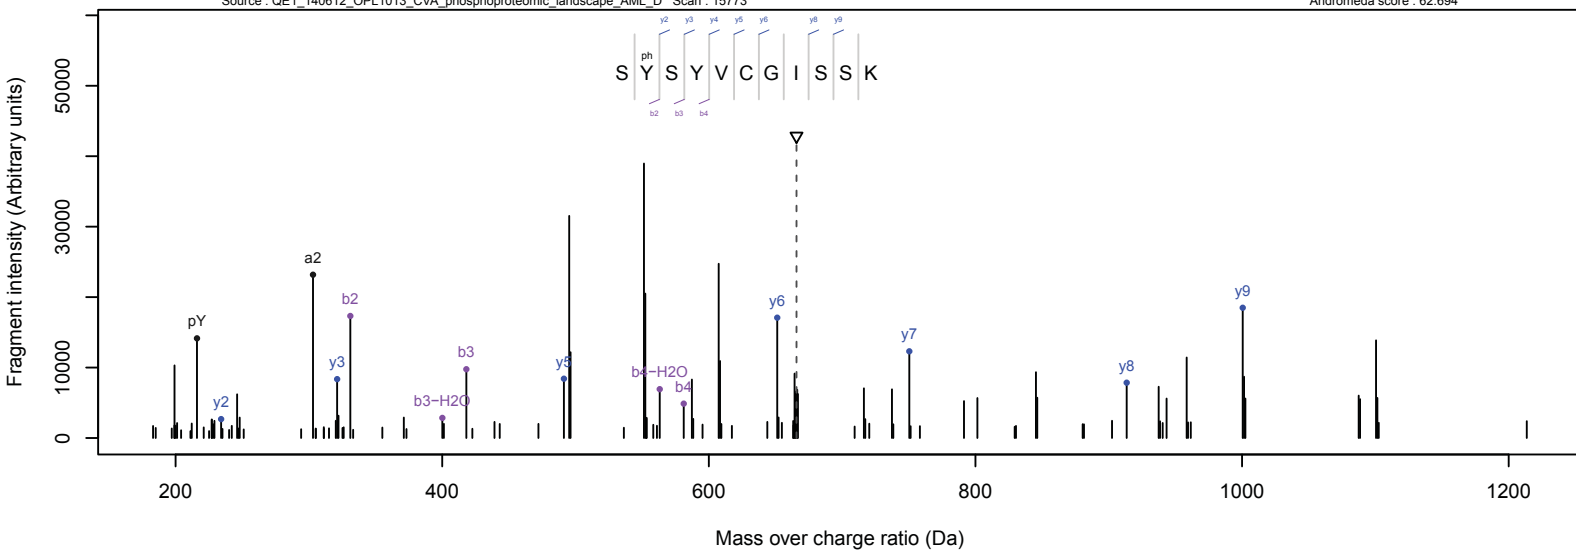

## AKEIY(ph)M(ox)TFLSSK-2+

Source : QE1\_140908\_OPL1013\_CvA\_pTyrIP\_AML\_HEL Scan : 22023

Andromeda score : 62.68

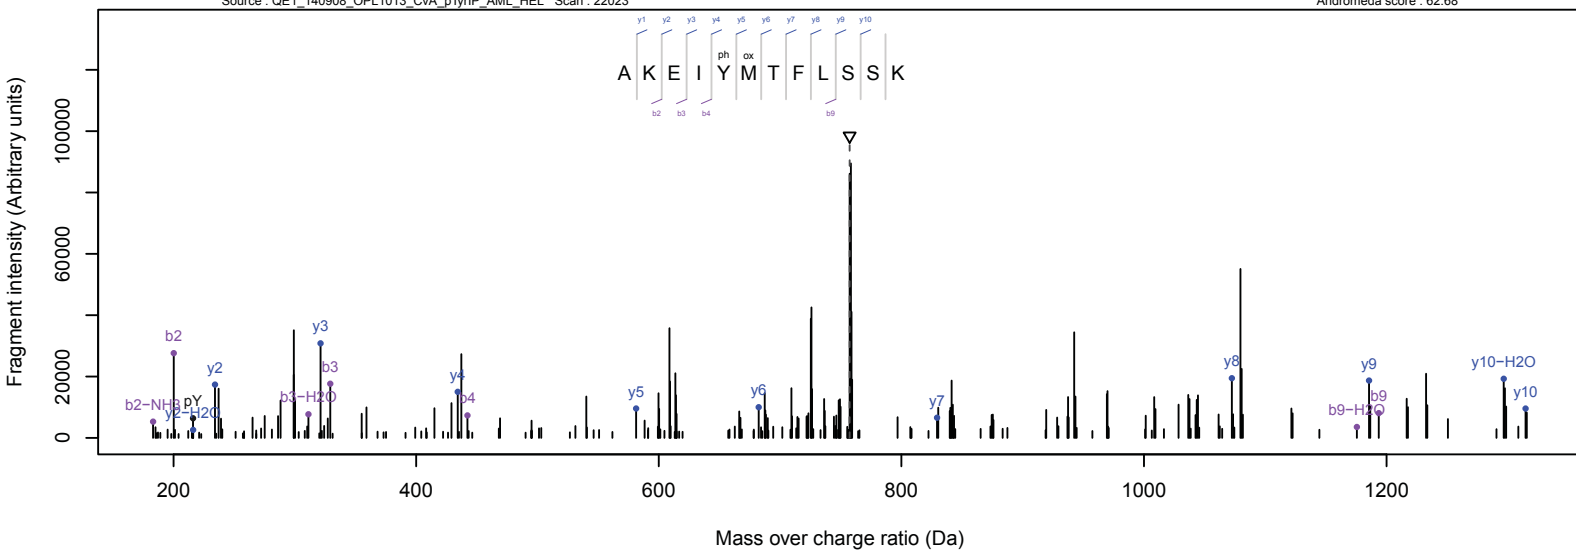

## VNSMVAY(ph)KIPVND-2+

Source : QE1\_140612\_OPL1013\_CVA\_phosphoproteomic\_landscape\_AML\_B Scan : 25674

Andromeda score : 62.68

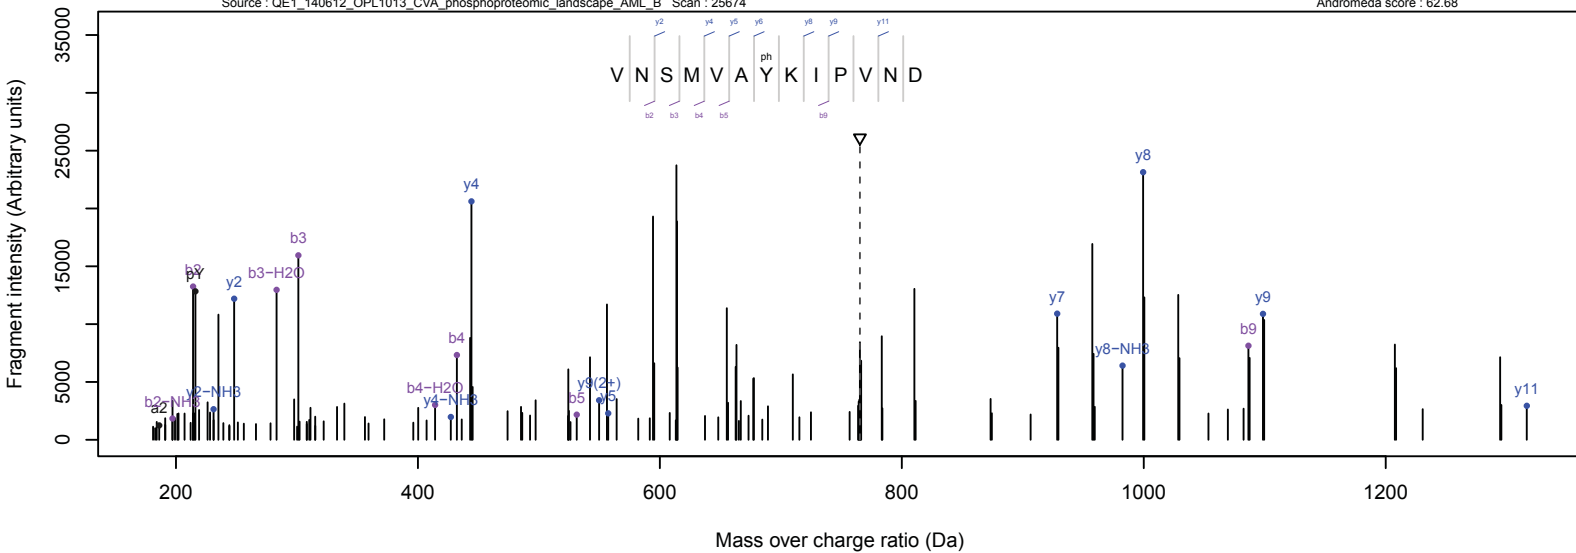



VTLKY(ph)PHYFLLK-3+

Source : QE1\_140612\_OPL1013\_CVA\_phosphoproteomic\_landscape\_AML\_D Scan : 36533

Andromeda score : 62.68

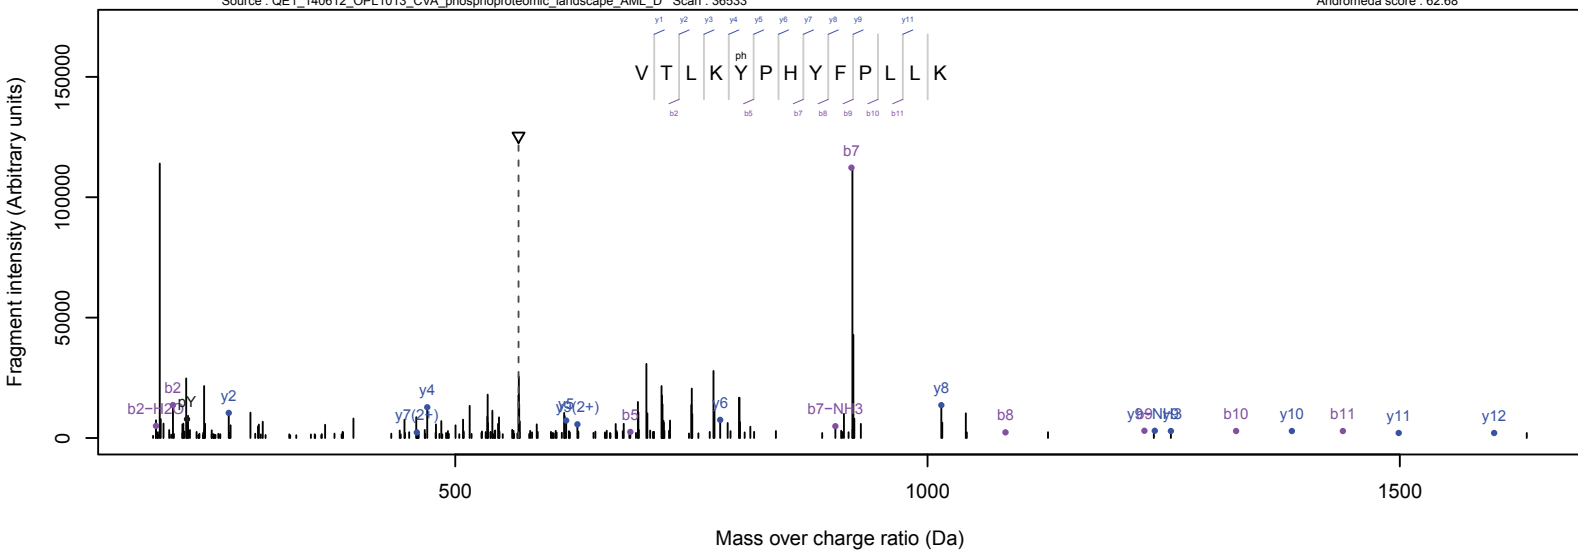

VIAGLY(ph)QR-2+

Source : QE1\_140612\_OPL1013\_CVA\_phosphoproteomic\_landscape\_AML\_D Scan : 14668

Andromeda score : 62.659

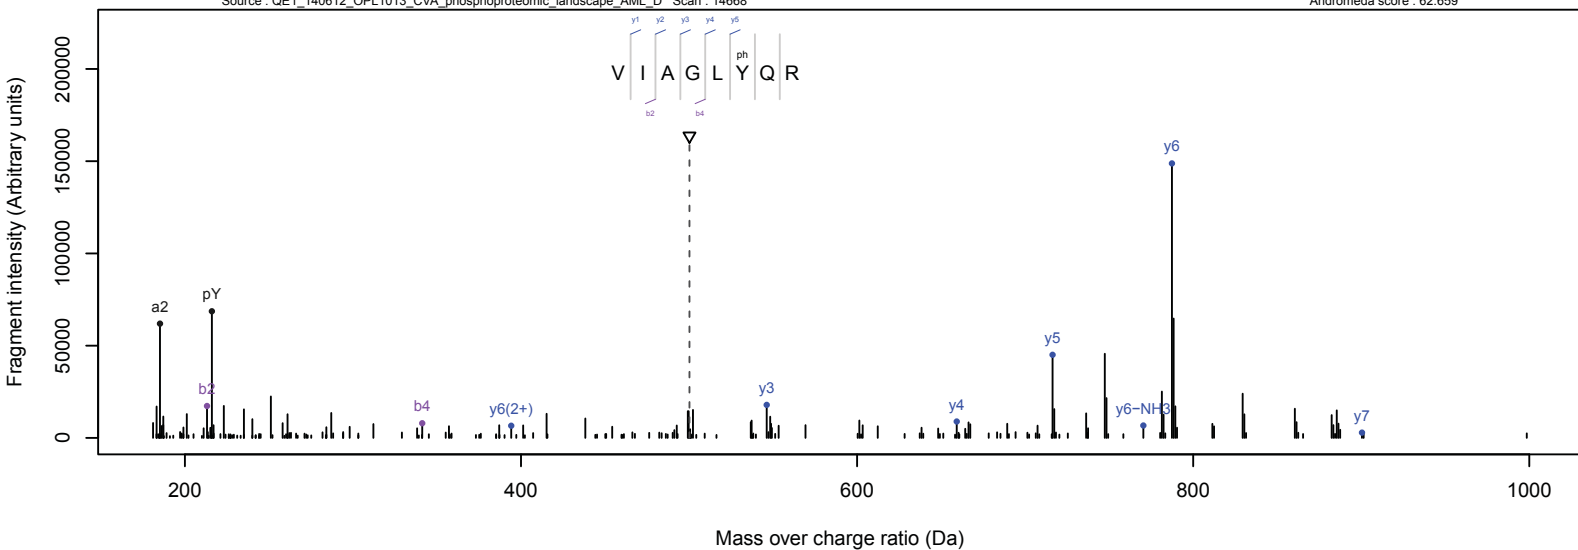

ALVNCQY(ph)SSATFSTGER-2+

Source : QE1\_140908\_OPL1013\_CvA\_pTyrIP\_AML\_HL60 Scan : 24344

Andromeda score : 62.658

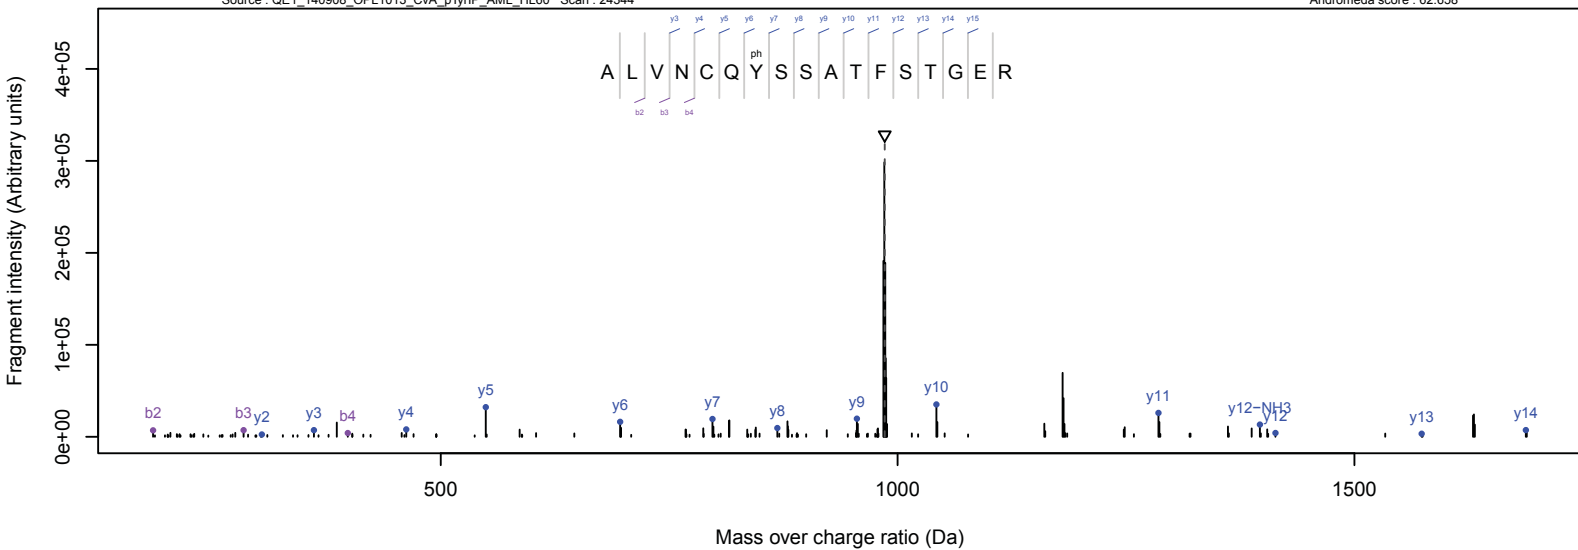

## SIPVNEKDTLT(ph)YFIYSVK-3+

Source: QE1\_140612\_OPL1013\_CVA\_phosphoproteomic\_landscape\_AML\_C Scan: 47107

Andromeda score: 62.658

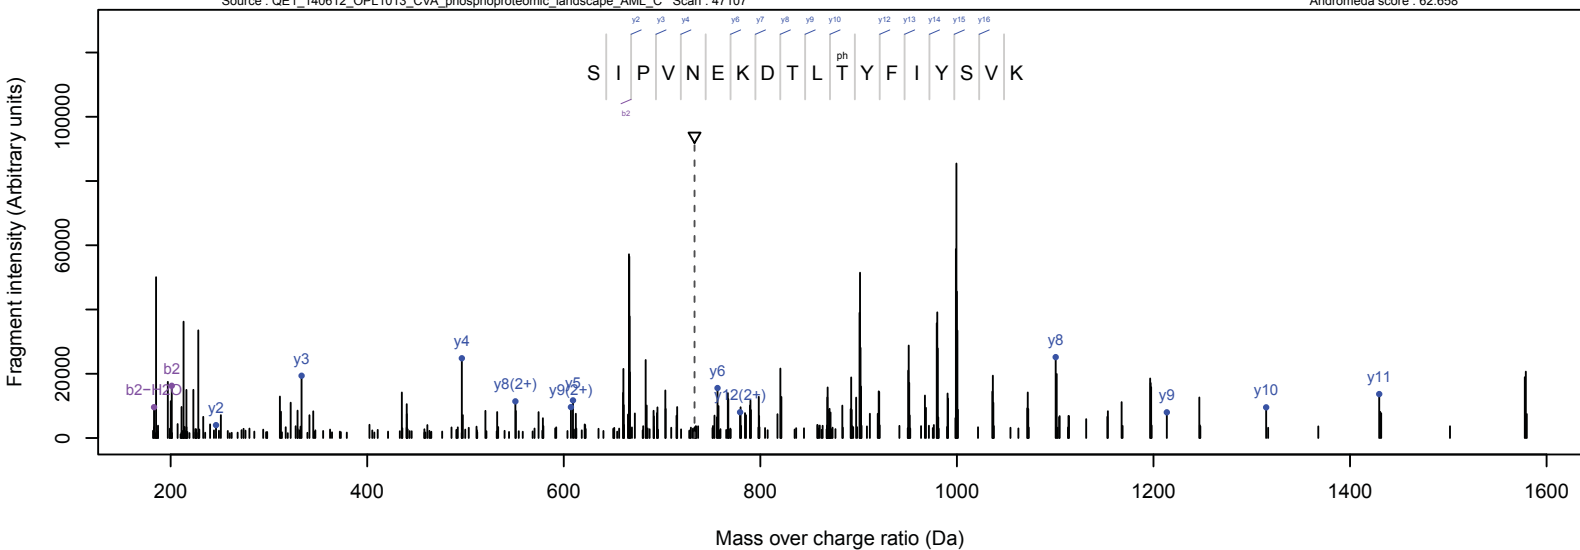

## SY(ph)SFPKPGHRK-3+

Source: QE1\_140612\_OPL1013\_CVA\_phosphoproteomic\_landscape\_AML\_B Scan: 5390

Andromeda score: 62.633

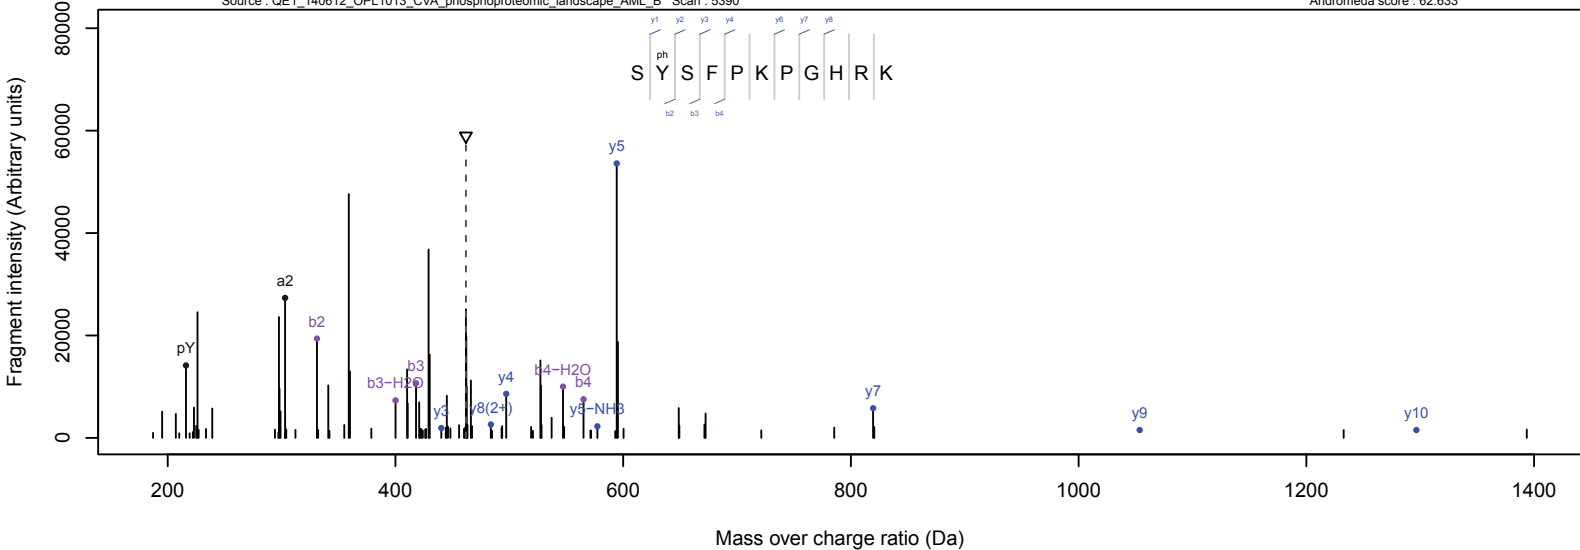

## TTGFGMIYDSL DY(ph)AKKNEPK-3+

Source: QE1\_140612\_OPL1013\_CVA\_phosphoproteomic\_landscape\_AML\_A Scan: 35708

Andromeda score: 62.617

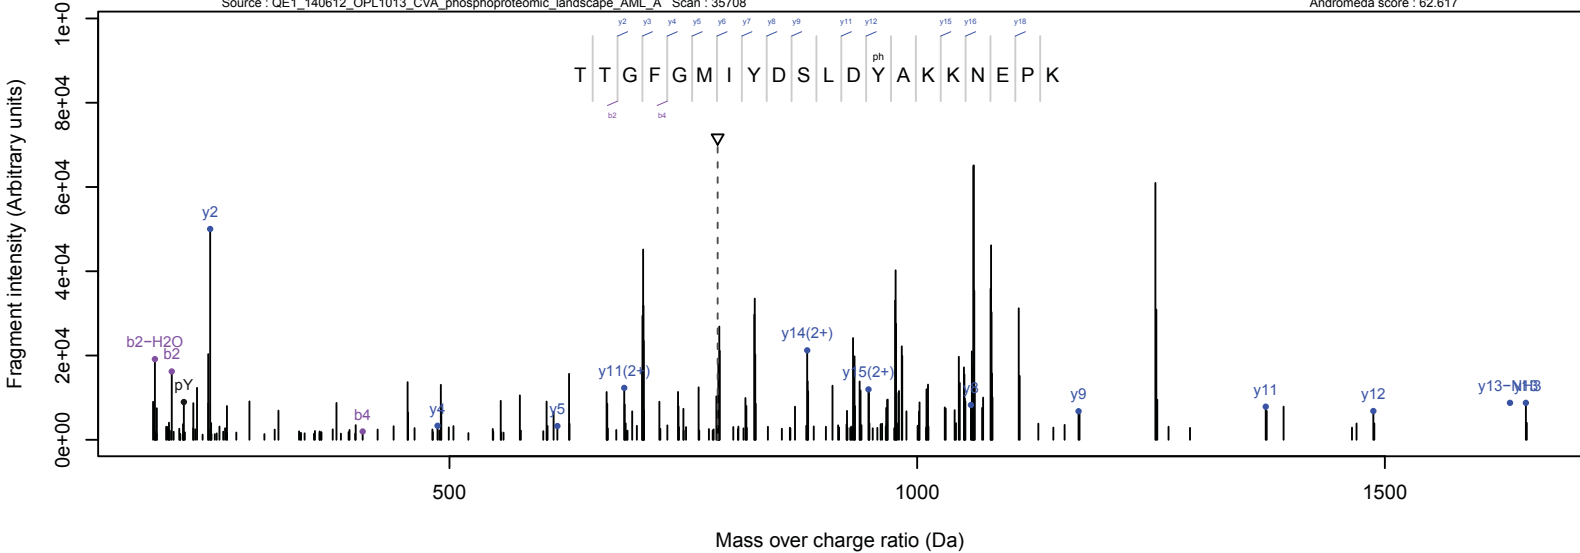

## RPPGLEYP(h)CYNPESHNP EEQLSSK-3+

Source: QE1\_140612\_OPL1013\_CVA\_phosphoproteomic\_landscape\_AML\_B Scan: 19001

Andromeda score: 62.589

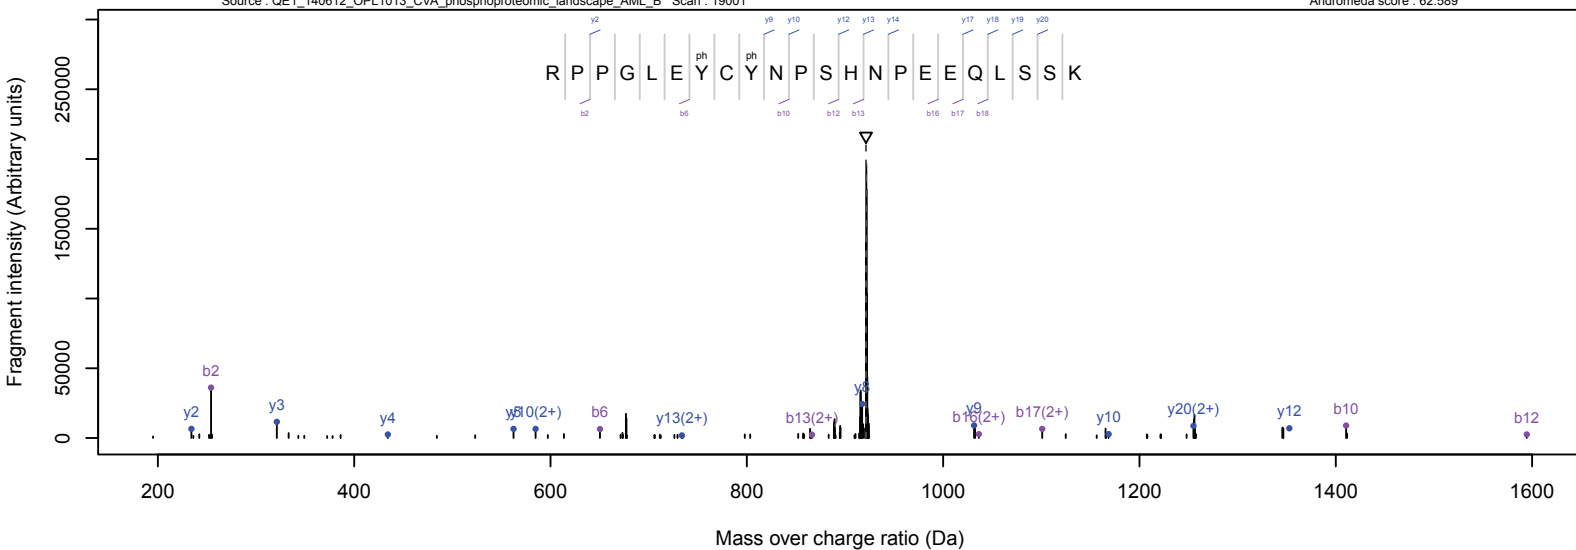

## TVM(ox)YTAGVSEWRPFY(h)PRR-3+

Source: QE1\_140908\_OPL1013\_Cva\_pTyrIP\_AML\_HL60 Scan: 34305

Andromeda score: 62.589

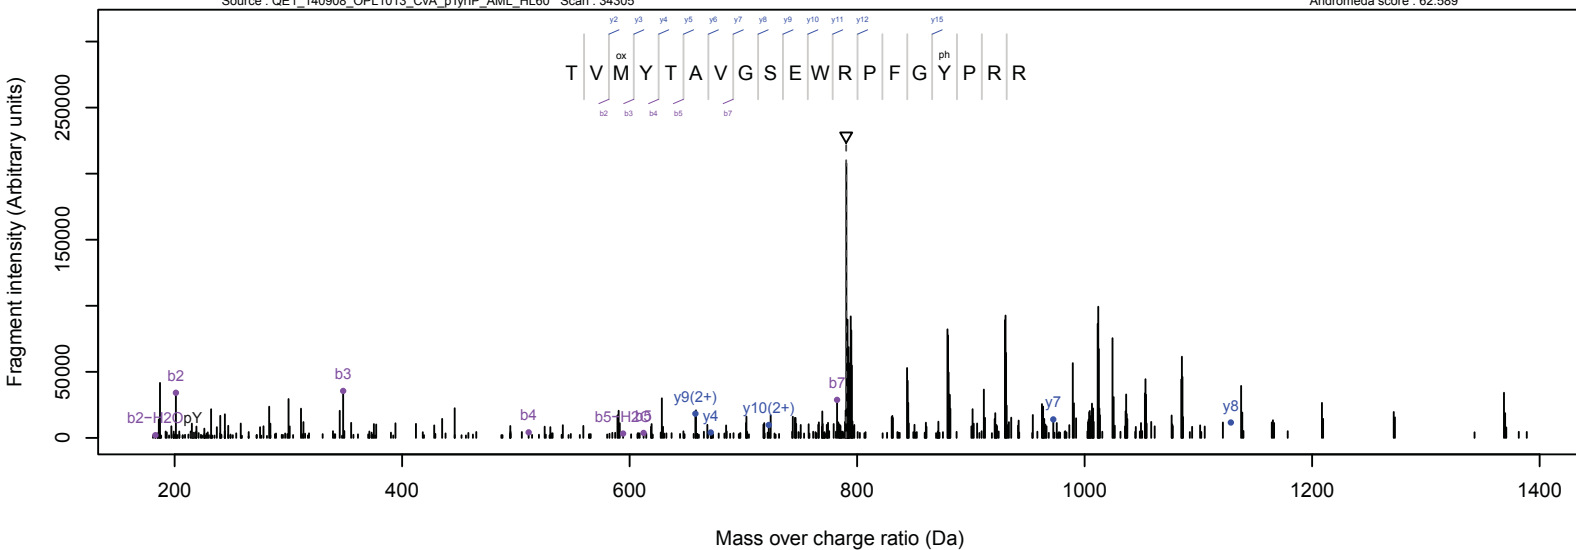

## YHGHSMDPGVS(h)YRTREEIQEVR-5+

Source: QE1\_140612\_OPL1013\_CVA\_phosphoproteomic\_landscape\_AML\_F Scan: 17013

Andromeda score: 62.589

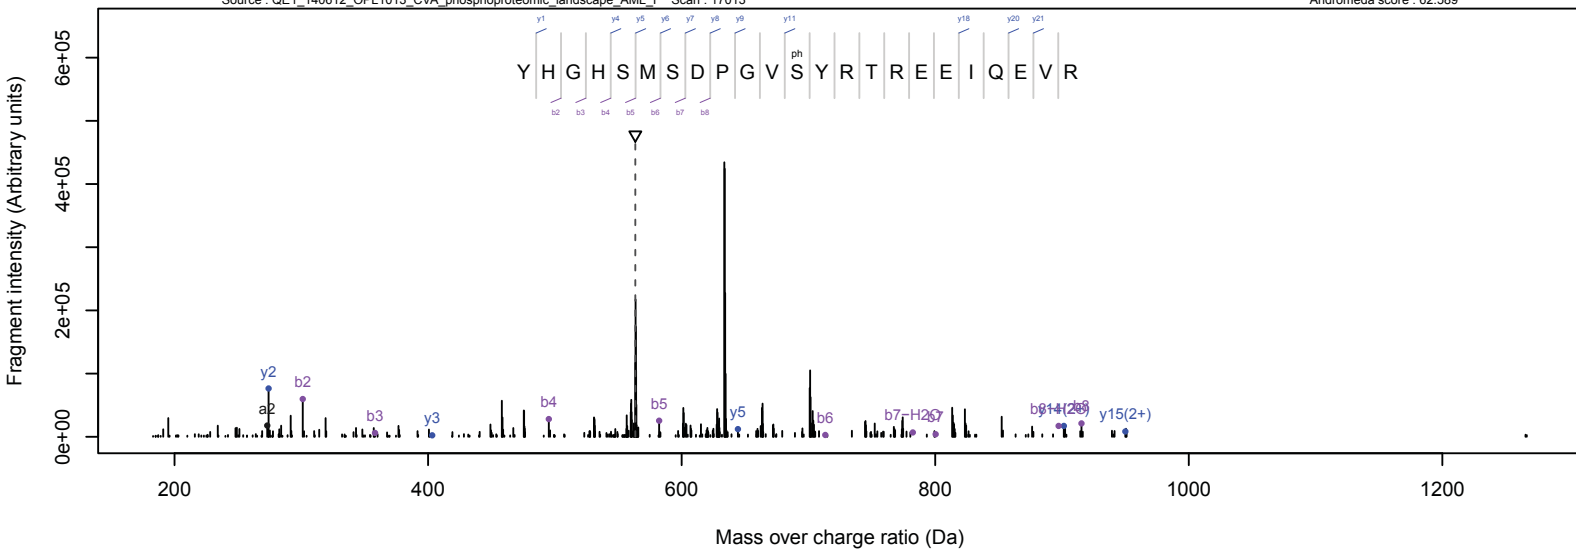

## EY(ph)GM(ox)IYLGK-2+

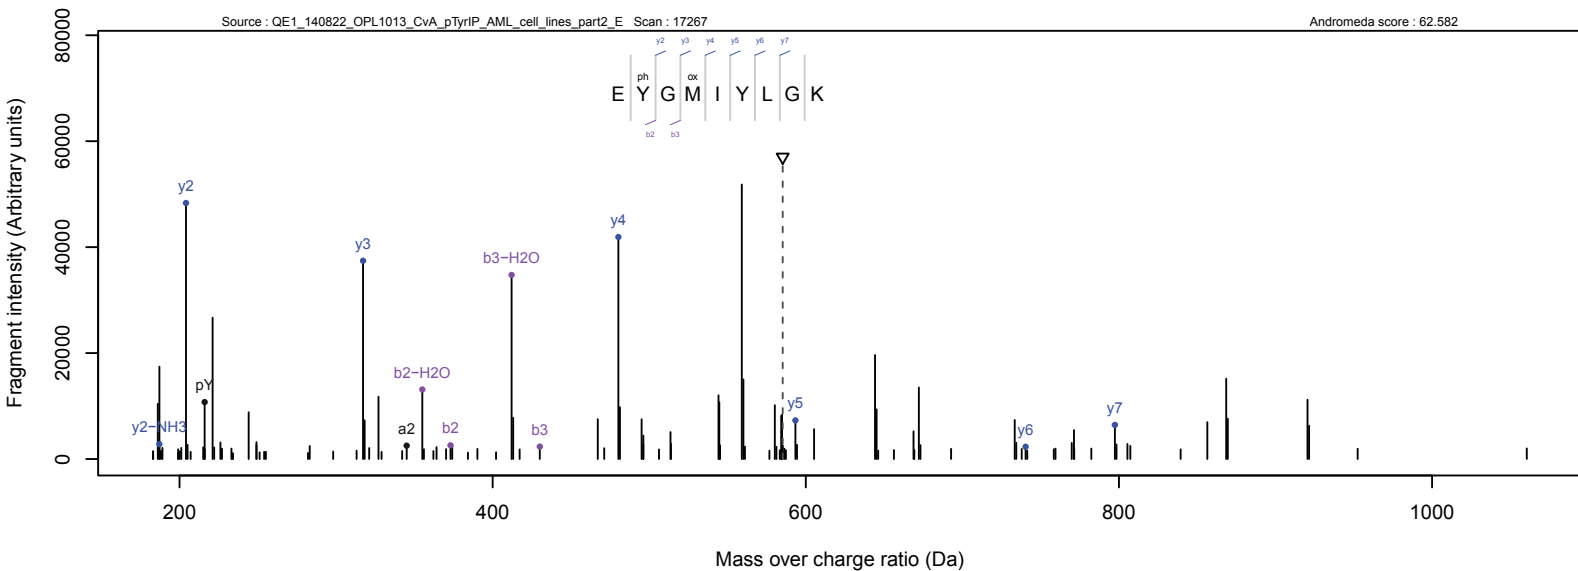

## LTPTHAASPVY(ph)RR-3+

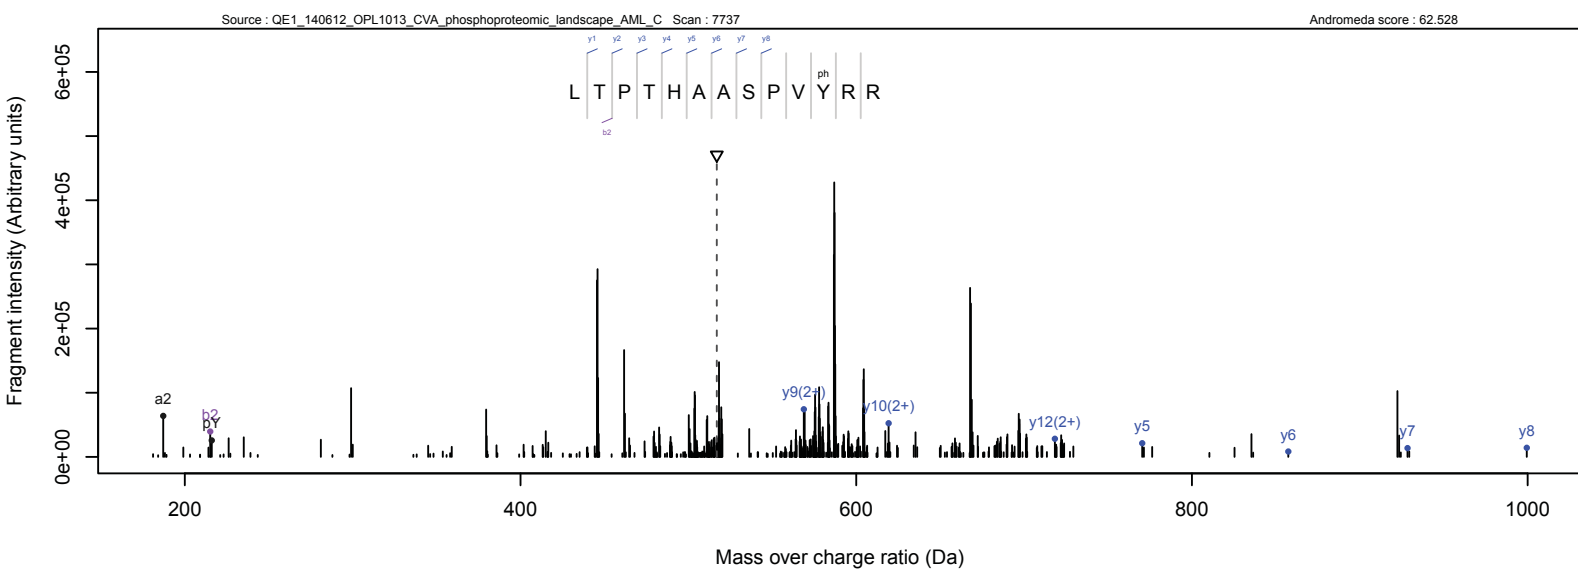

## (ac)GDTAKPY(ph)FVK-2+

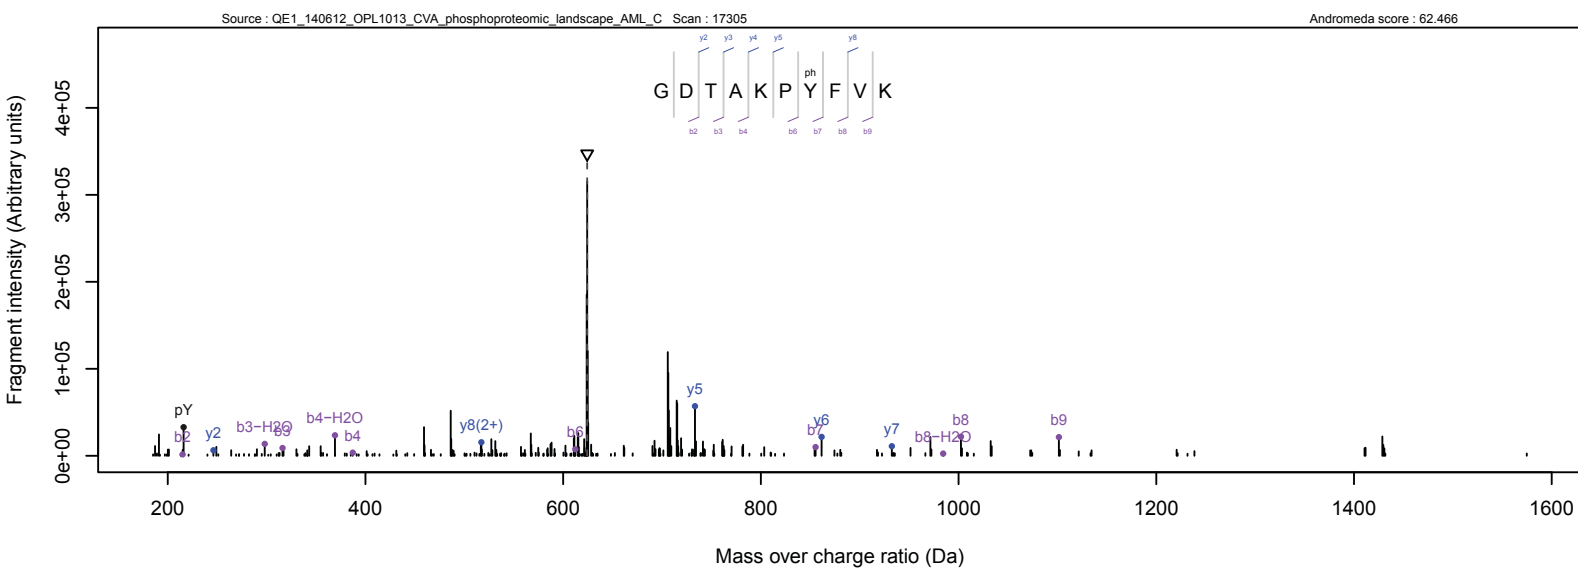

## GKY(ph)YAVNYPLR-2+

Source : QE1\_140612\_OPL1013\_CVA\_phosphoproteomic\_landscape\_AML\_B Scan : 20520

Andromeda score : 62.466

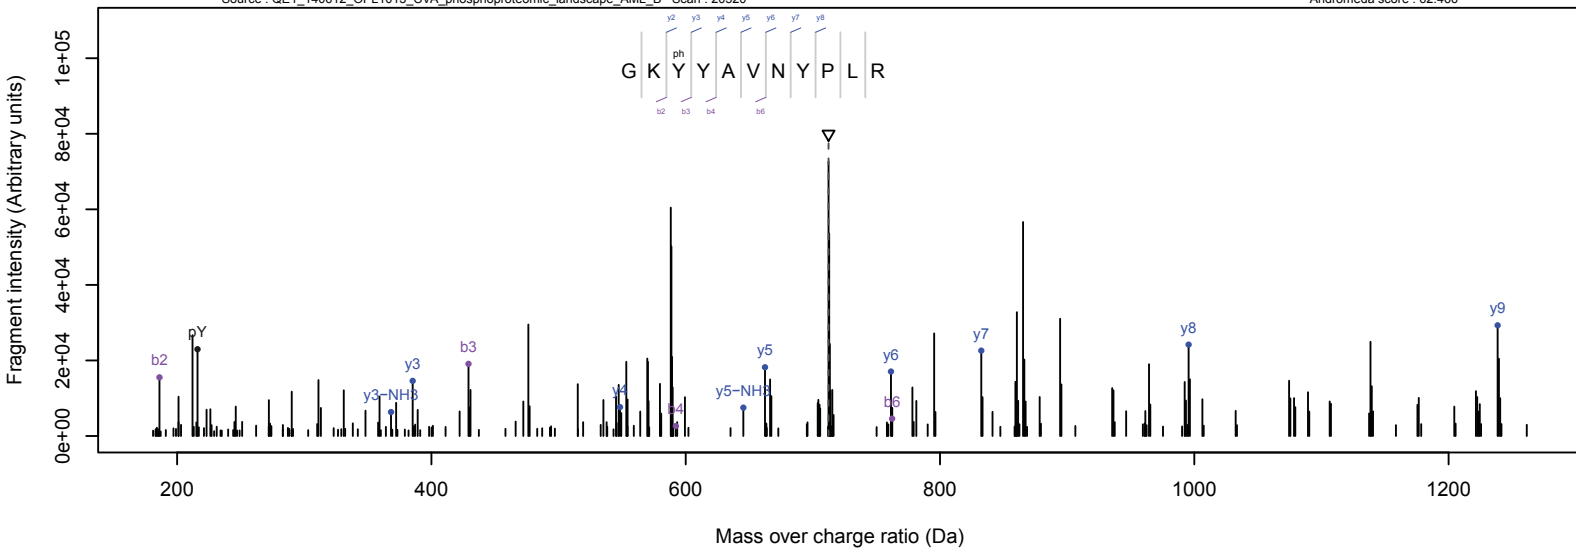

## IY(ph)VISLAEPR-2+

Source : QE1\_140908\_OPL1013\_CvA\_pTyrIP\_AML\_HEL Scan : 36660

Andromeda score : 62.466

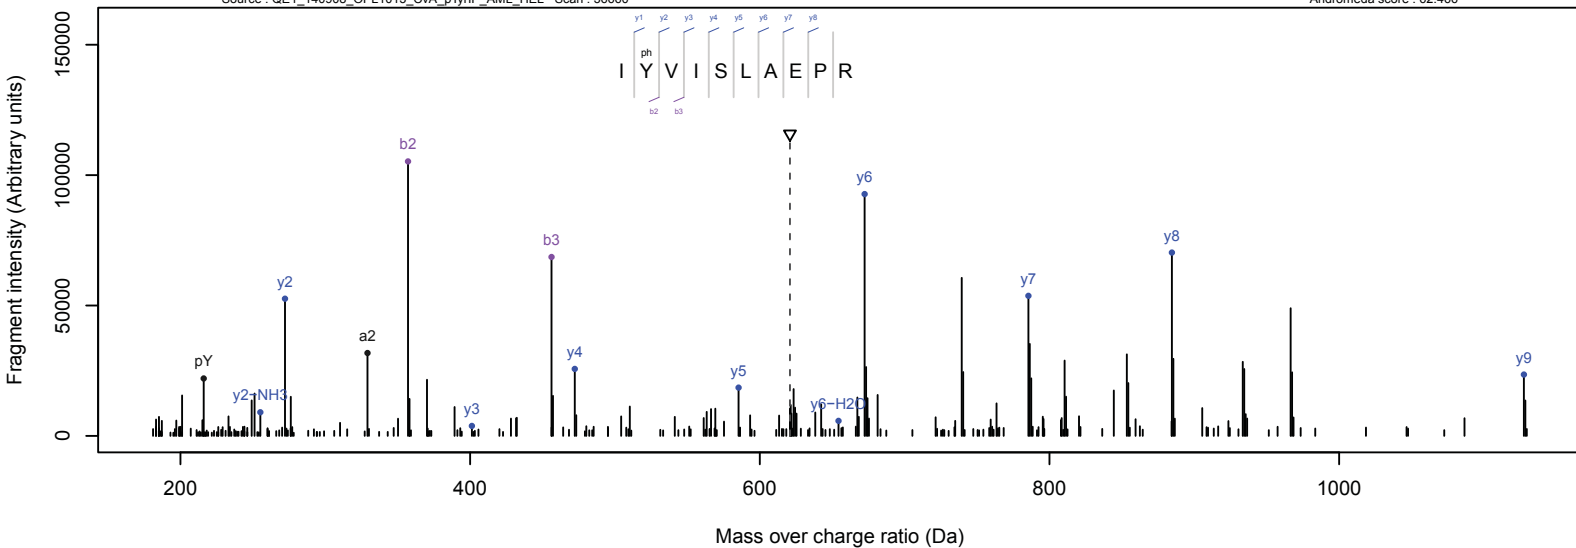

## LREY(ph)EAALNSK-2+

Source : QE1\_140908\_OPL1013\_CvA\_pTyrIP\_AML\_OCI\_AML3 Scan : 9951

Andromeda score : 62.454

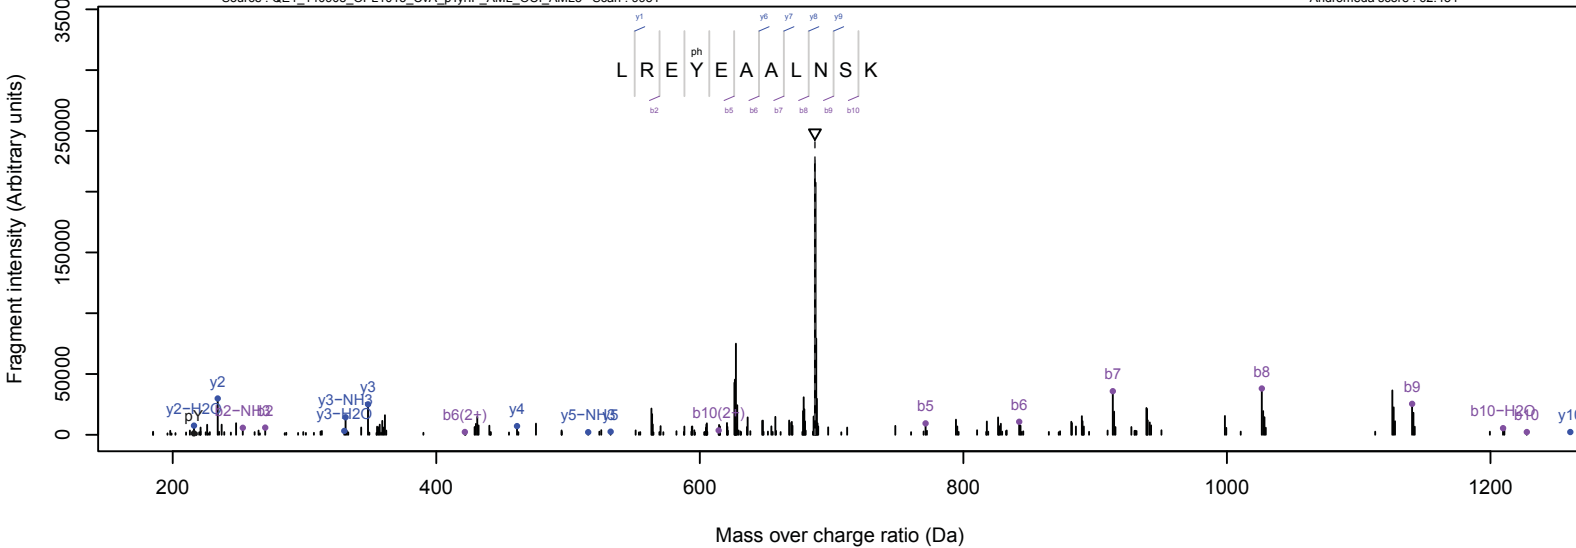

## CKAEHDQLLLNYAK-3+

Source : QE1\_140612\_OPL1013\_CVA\_phosphoproteomic\_landscape\_AML\_A Scan : 16499

Andromeda score : 62.357

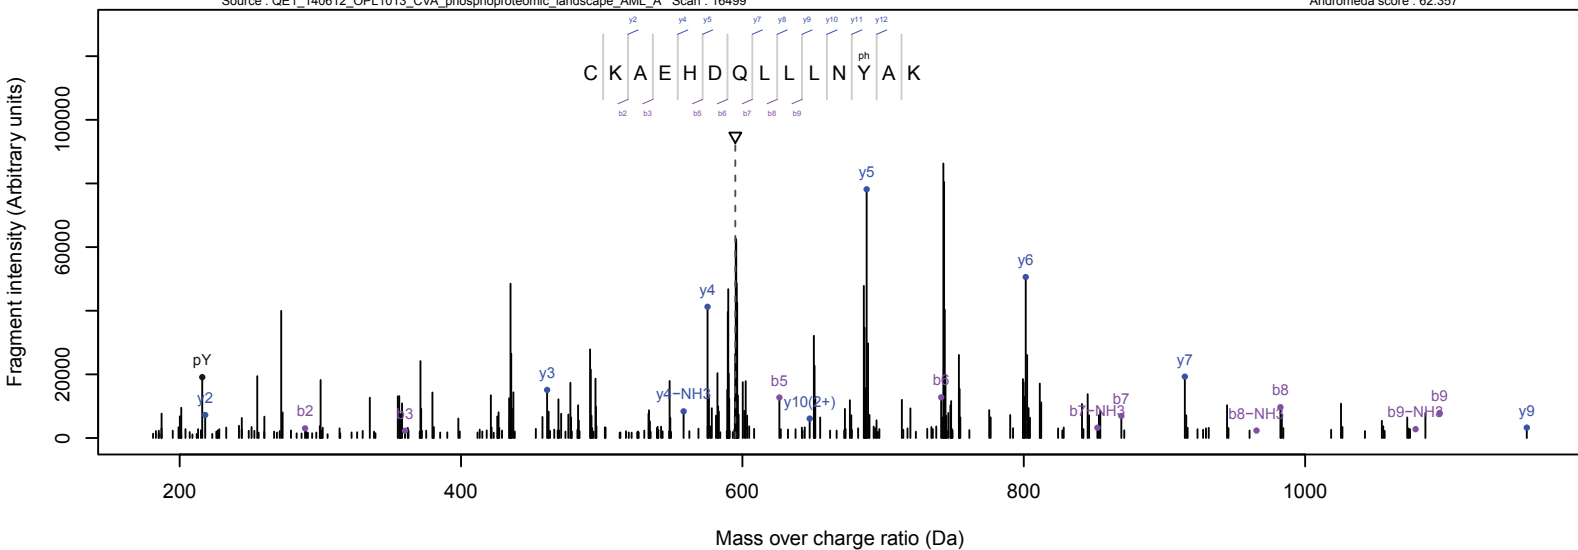

## RSDSY(ph)VLEHSVK-3+

Source : QE1\_140612\_OPL1013\_CVA\_phosphoproteomic\_landscape\_AML\_B Scan : 16674

Andromeda score : 62.357

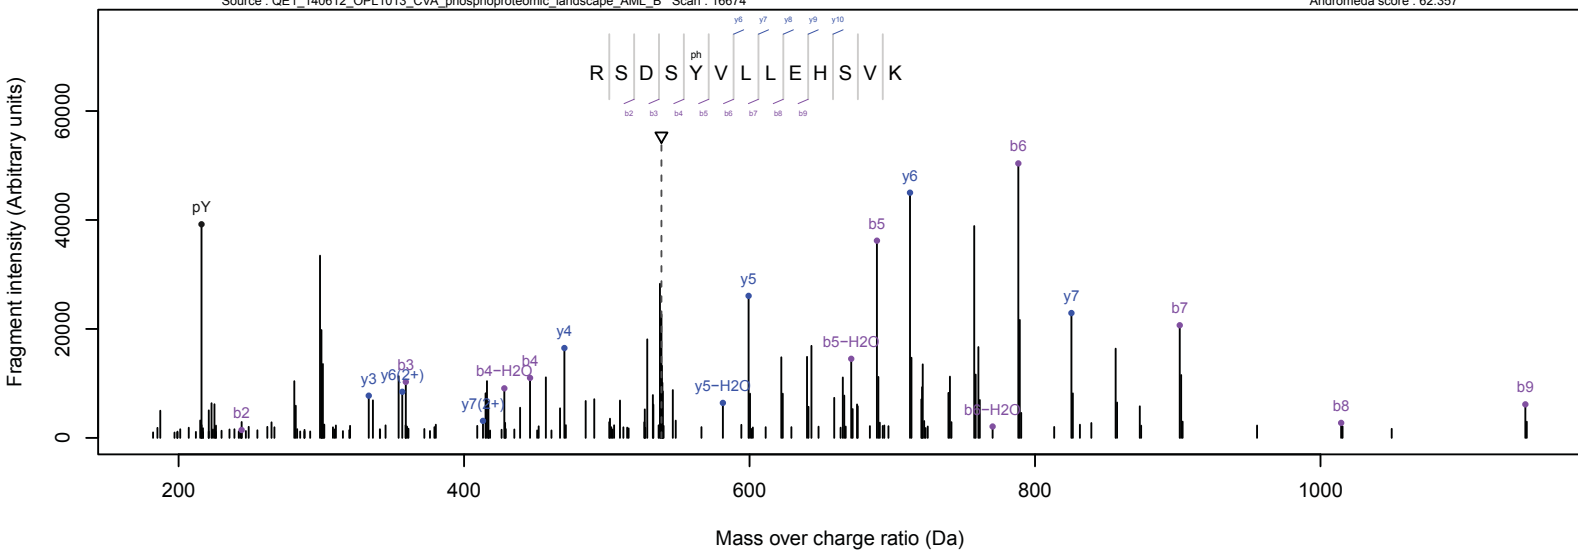

## TSVFTPAY(ph)GSVTNVR-2+

Source : QE1\_140612\_OPL1013\_CVA\_phosphoproteomic\_landscape\_AML\_C Scan : 27987

Andromeda score : 62.357

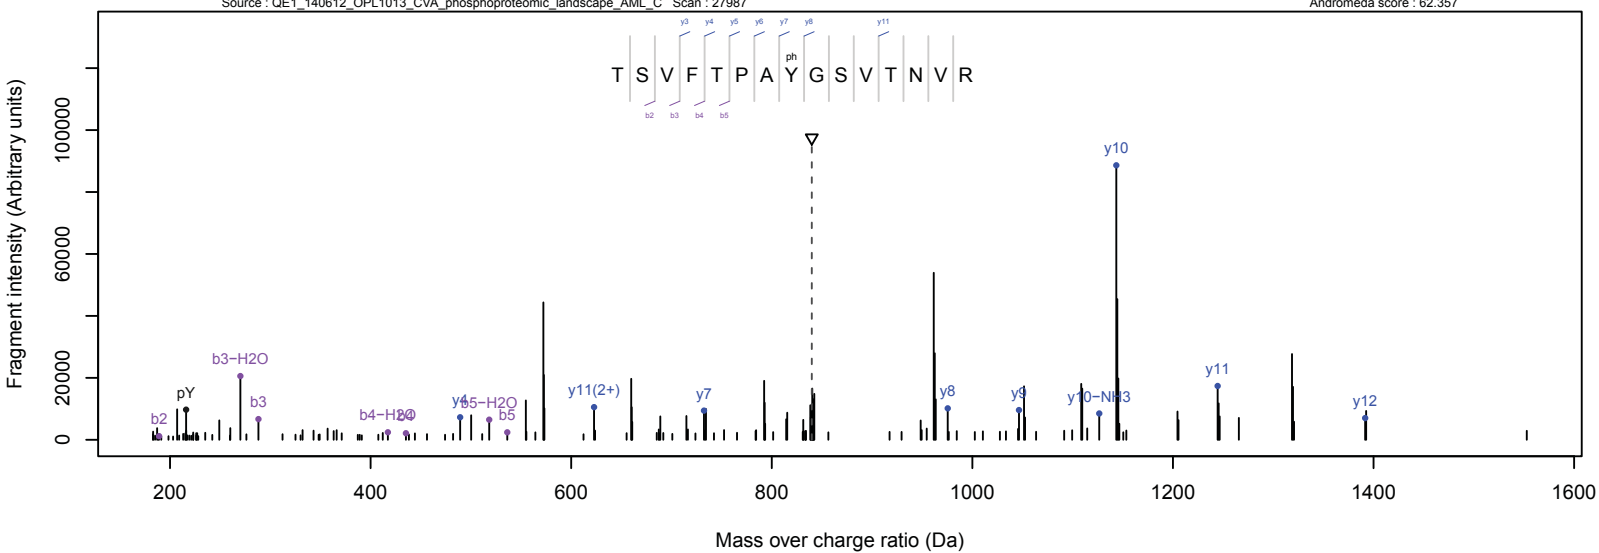

**KHY(ph)DFHILER-3+**

Source : QE1\_140612\_OPL1013\_CVA\_phosphoproteomic\_landscape\_AML\_C Scan : 17262

Andromeda score : 62.338

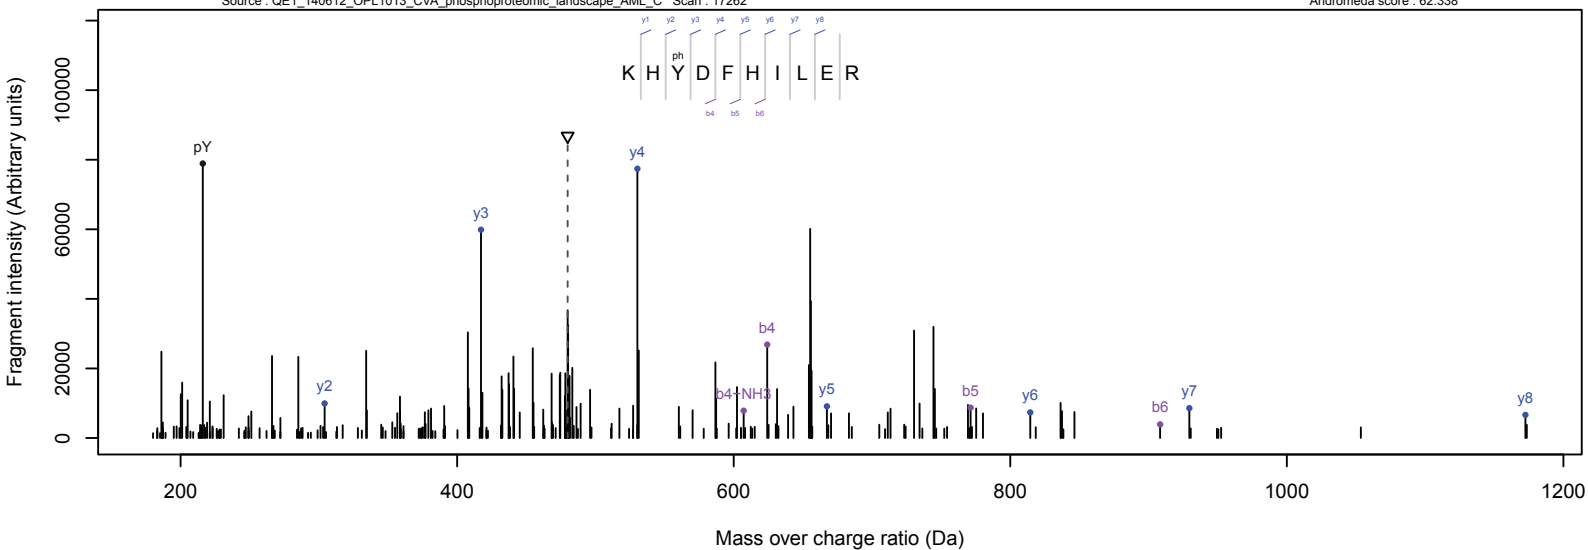

**Y(ph)RIKDDLTTIR-3+**

Source : QE1\_140612\_OPL1013\_CVA\_phosphoproteomic\_landscape\_AML\_C Scan : 15816

Andromeda score : 62.338

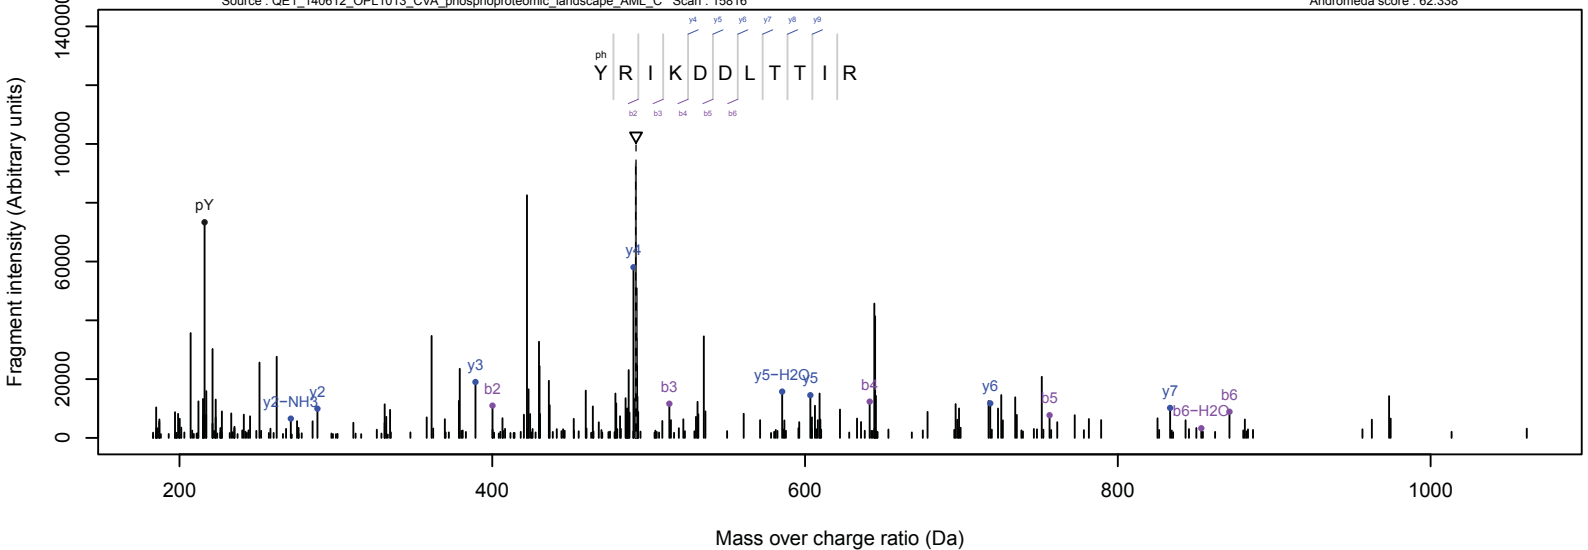

**EAY(ph)PGDVFYLHSR-2+**

Source : QE1\_140908\_OPL1013\_CvA\_pTyrIP\_AML\_Kasumi1 Scan : 28455

Andromeda score : 62.287

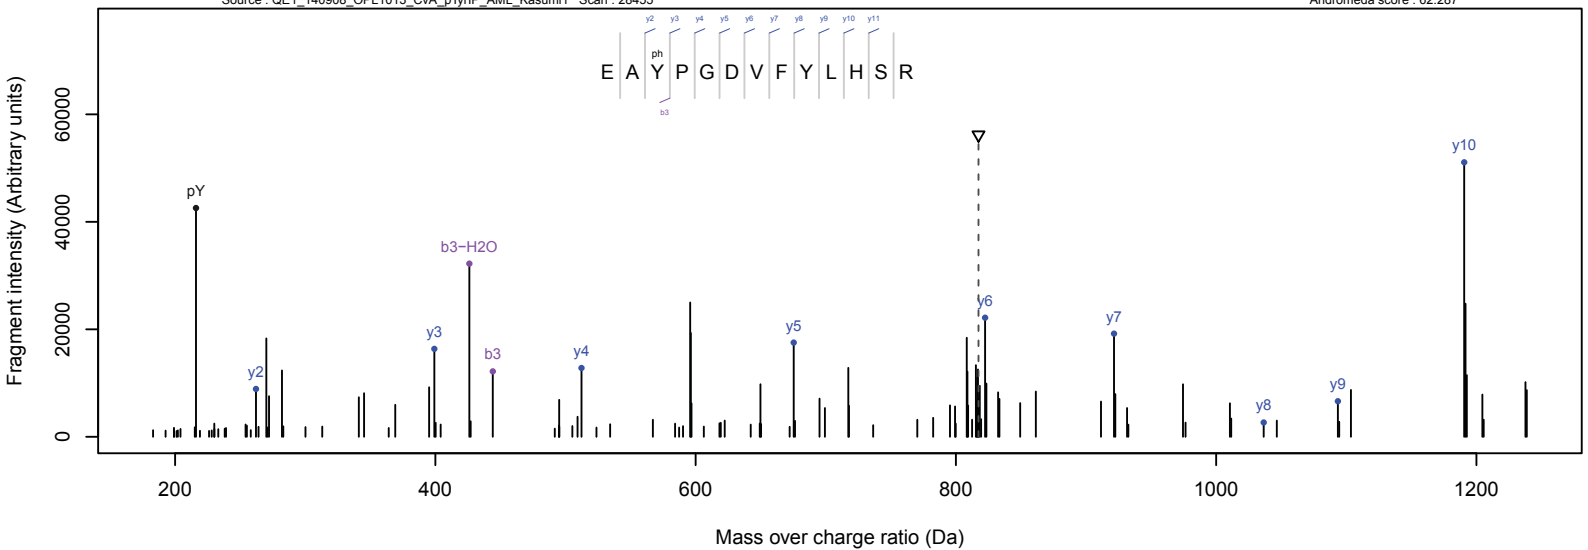

**(ac)MNGPADGEVDY(ph)KKK-3+**

Source : QE1\_140612\_OPL1013\_CVA\_phosphoproteomic\_landscape\_AML\_E Scan : 9825

Andromeda score : 62.287

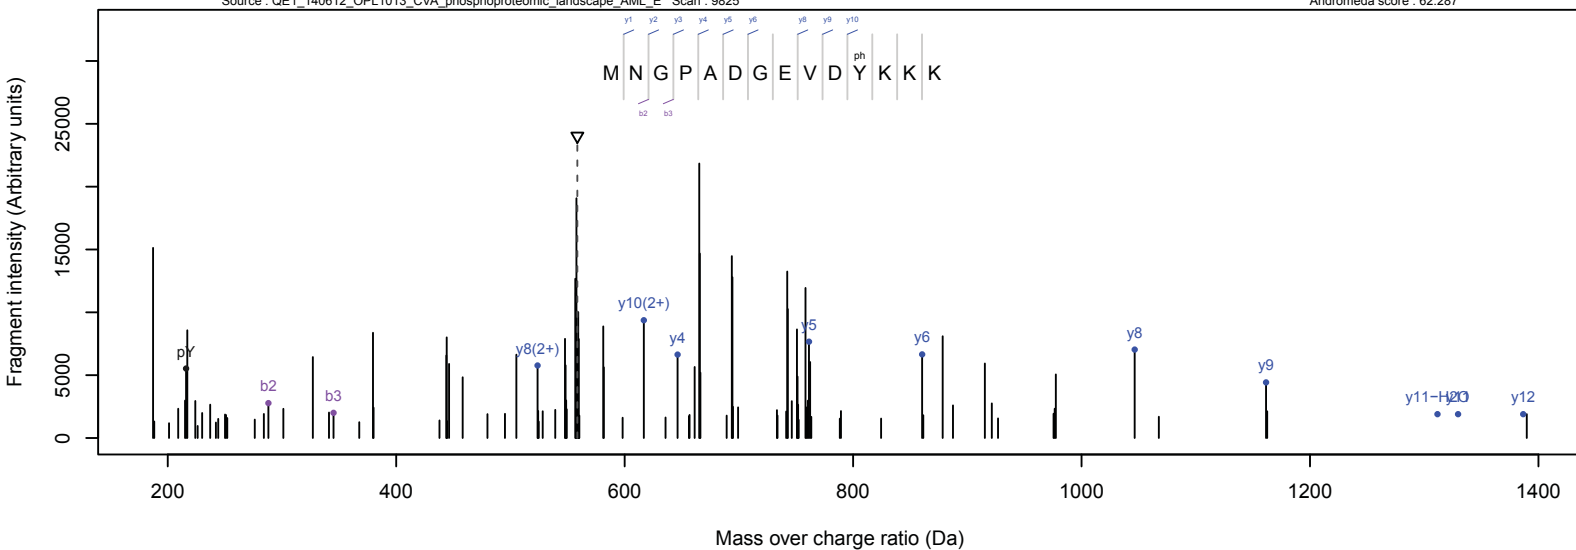**SLAFHRPPY(ph)HLLQQR-4+**

Source : QE1\_140612\_OPL1013\_CVA\_phosphoproteomic\_landscape\_AML\_C Scan : 23748

Andromeda score : 62.287

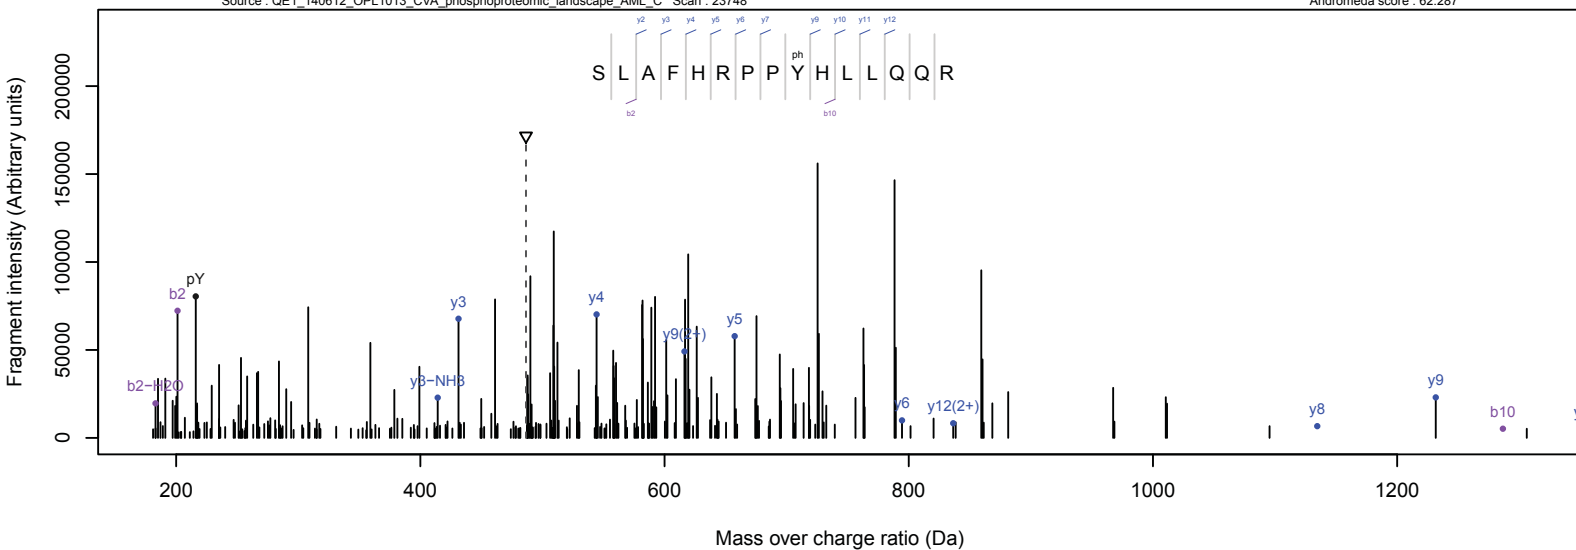**AQSPSY(ph)VISTGVSPSR-2+**

Source : QE1\_140612\_OPL1013\_CVA\_phosphoproteomic\_landscape\_AML\_C Scan : 21012

Andromeda score : 62.203

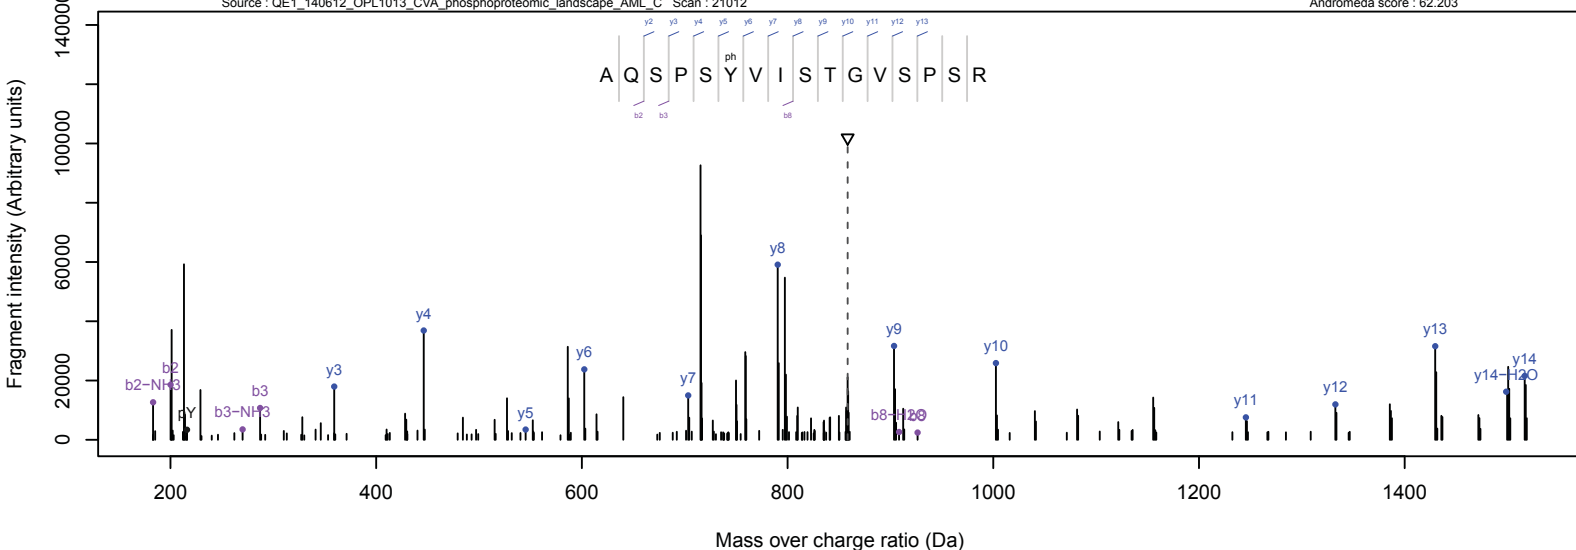



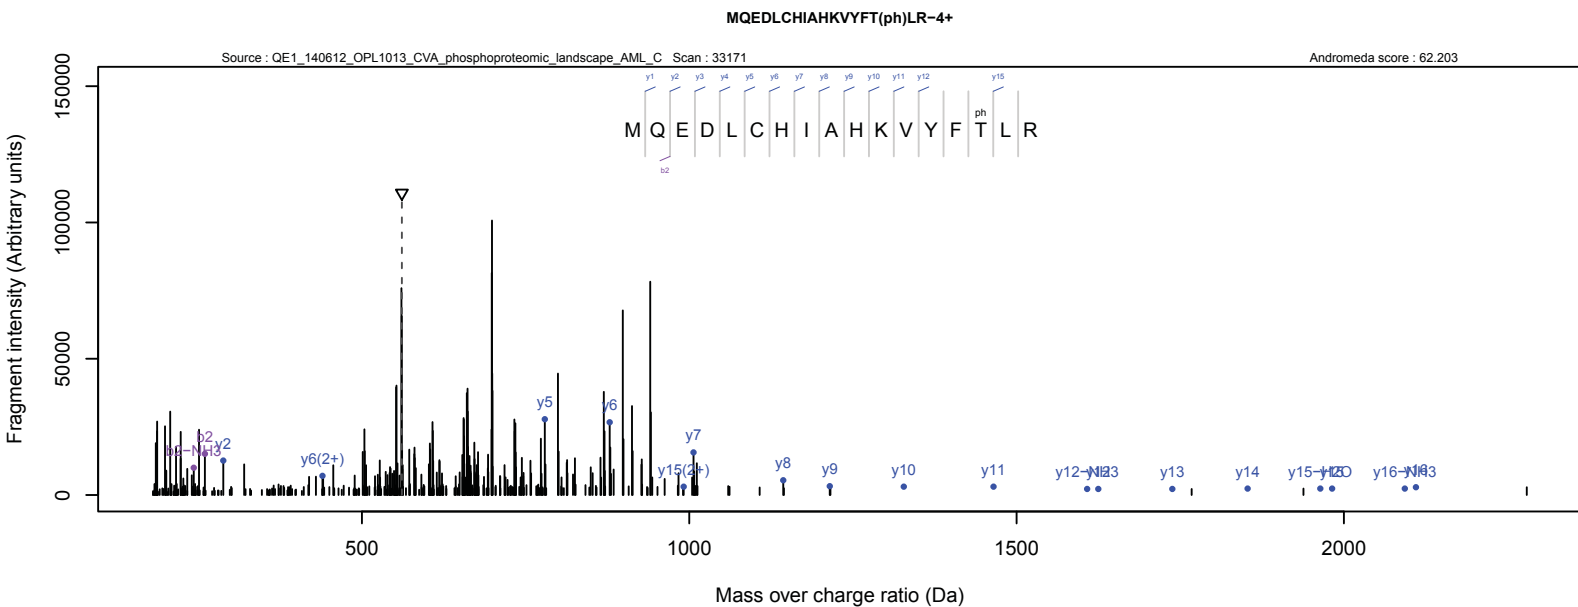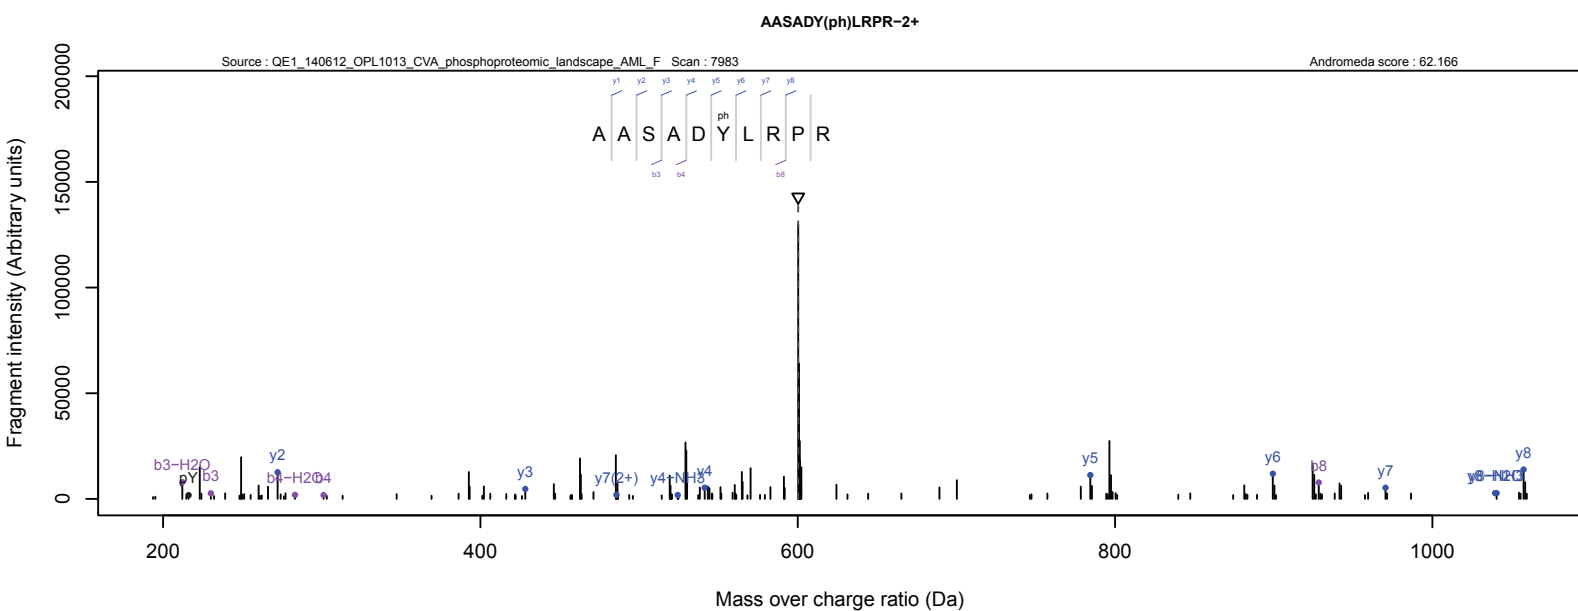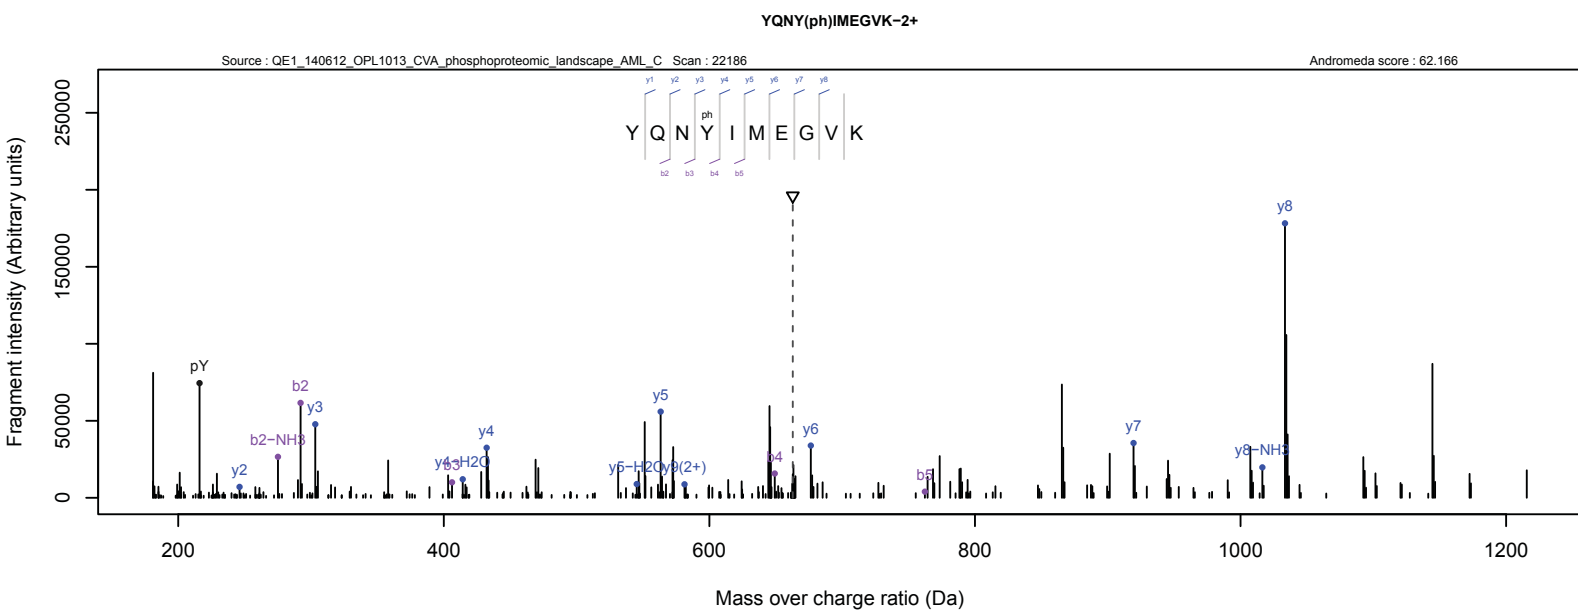

SLASHLSGY(ph)IPPK-2+

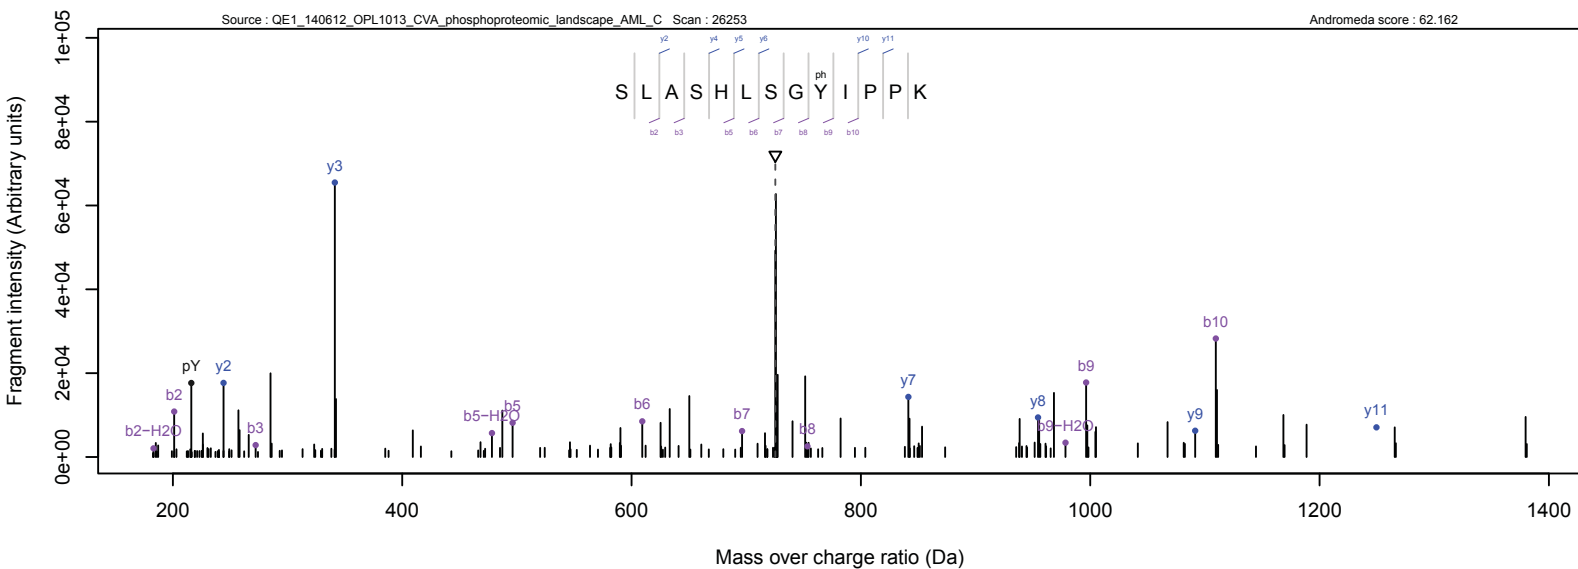

KPGY(ph)HAPVALLNDIPQSTEQYDPPFAEHRPPK-5+

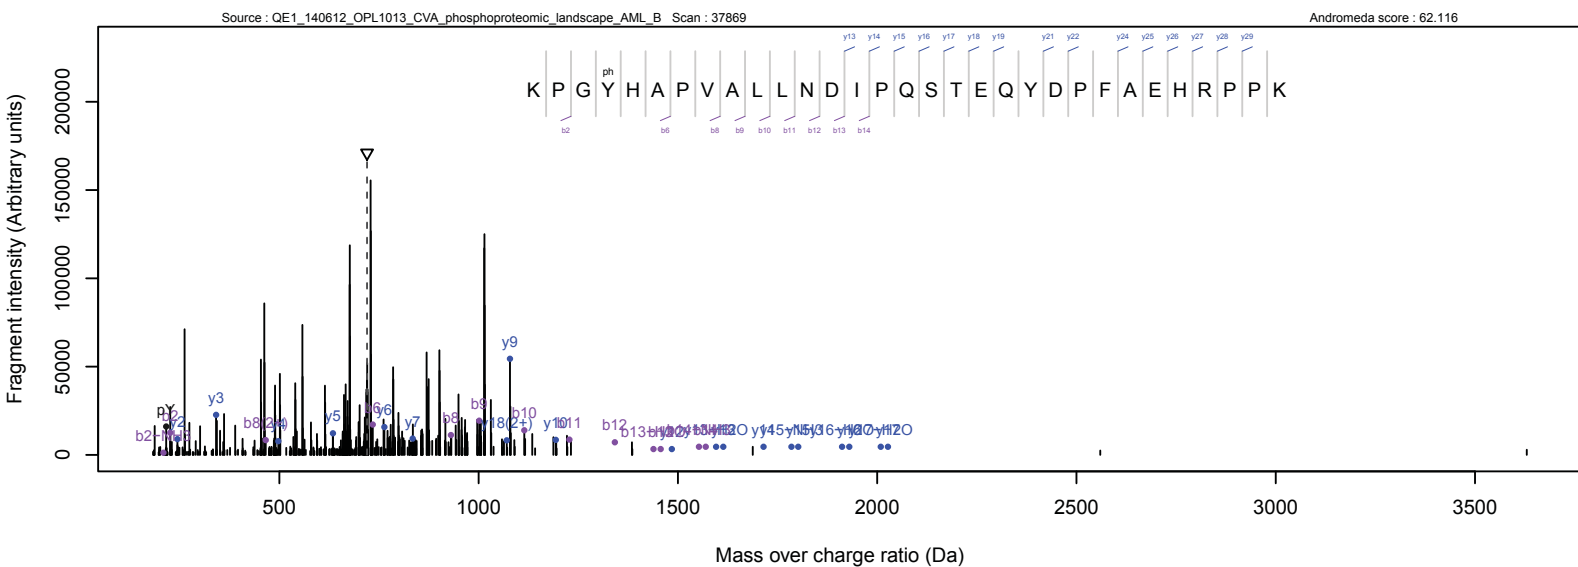

NY(ph)PHIGHTDHMTNTSNGQPSTLTIFETAL-3+

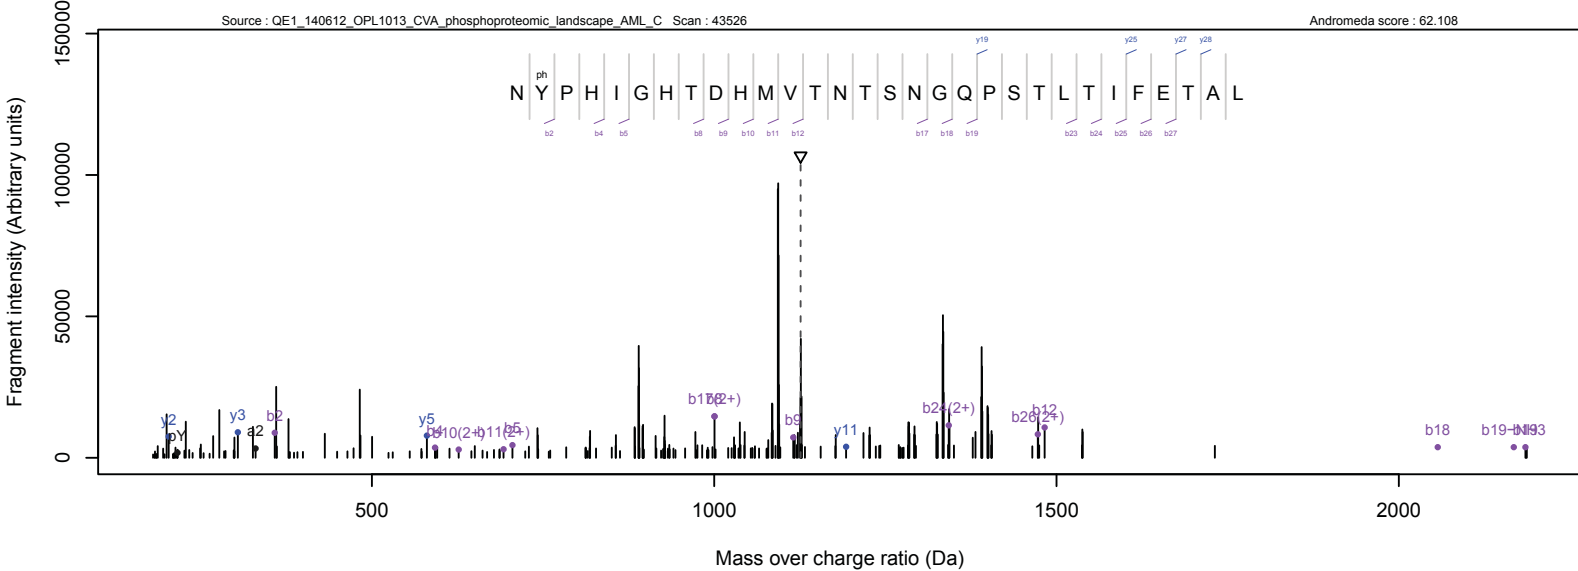

(ac)MDDEEETY(ph)RLWK-2+

Source : QE1\_140612\_OPL1013\_CVA\_phosphoproteomic\_landscape\_AML\_C Scan : 34510

Andromeda score : 62.088

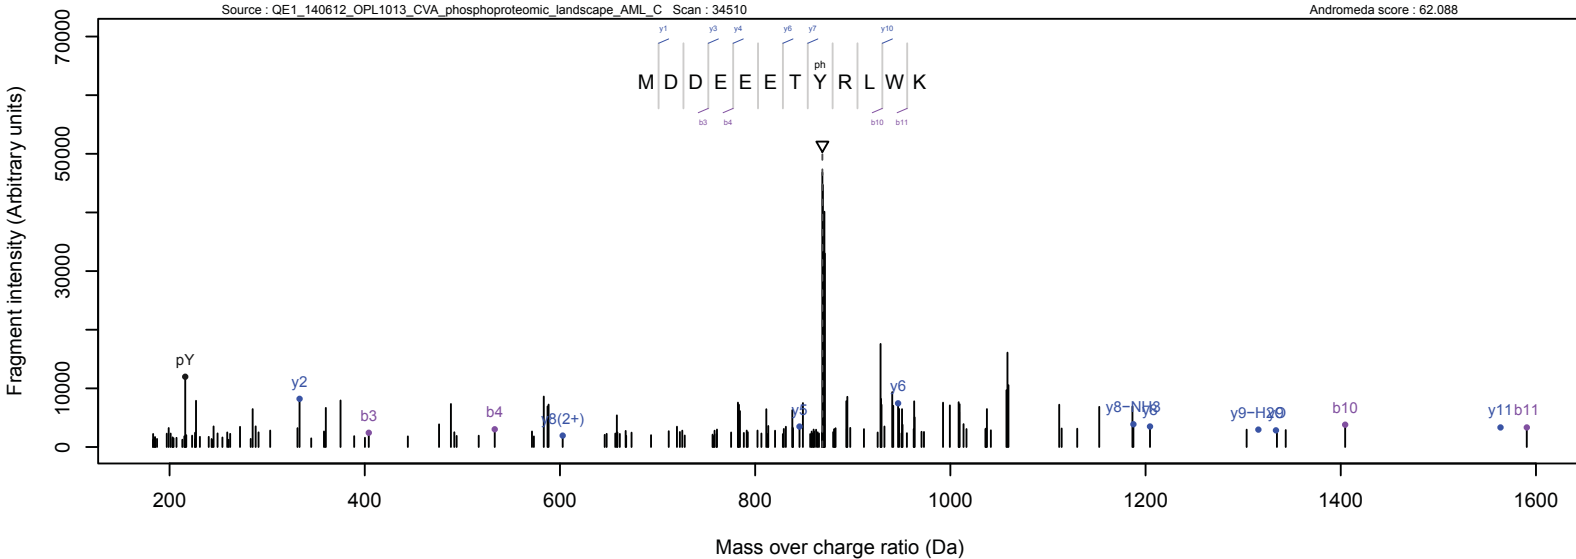

GQQQQQQQGVGHGY(ph)YM(ox)AGGTSQK-3+

Source : QE1\_140908\_OPL1013\_CvA\_pTyrIP\_AML\_HEL Scan : 6967

Andromeda score : 62.082

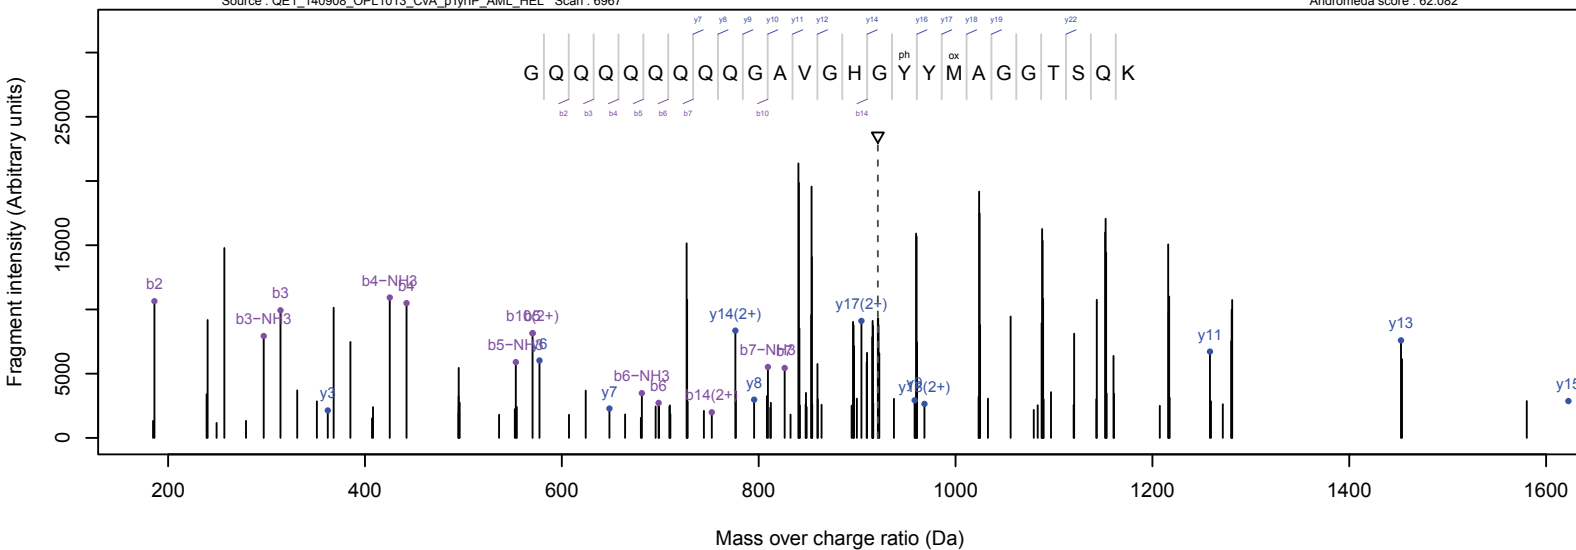

DSM(ox)SAAEVGTGQYAT(ph)TK-2+

Source : QE1\_140612\_OPL1013\_CVA\_phosphoproteomic\_landscape\_AML\_C Scan : 11759

Andromeda score : 62.055

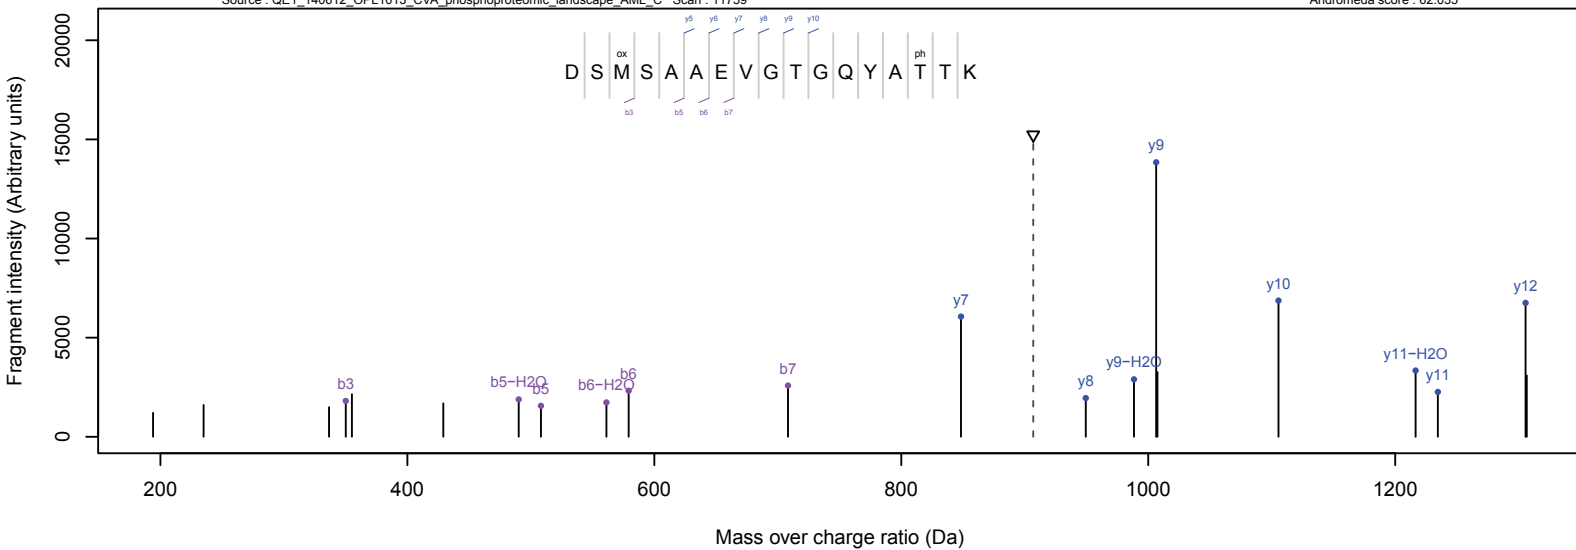

## INVYNESSQKY(ph)VPR-3+

Source: QE1\_140612\_OPL1013\_CVA\_phosphoproteomic\_landscape\_AML\_C Scan: 19187

Andromeda score: 62.055

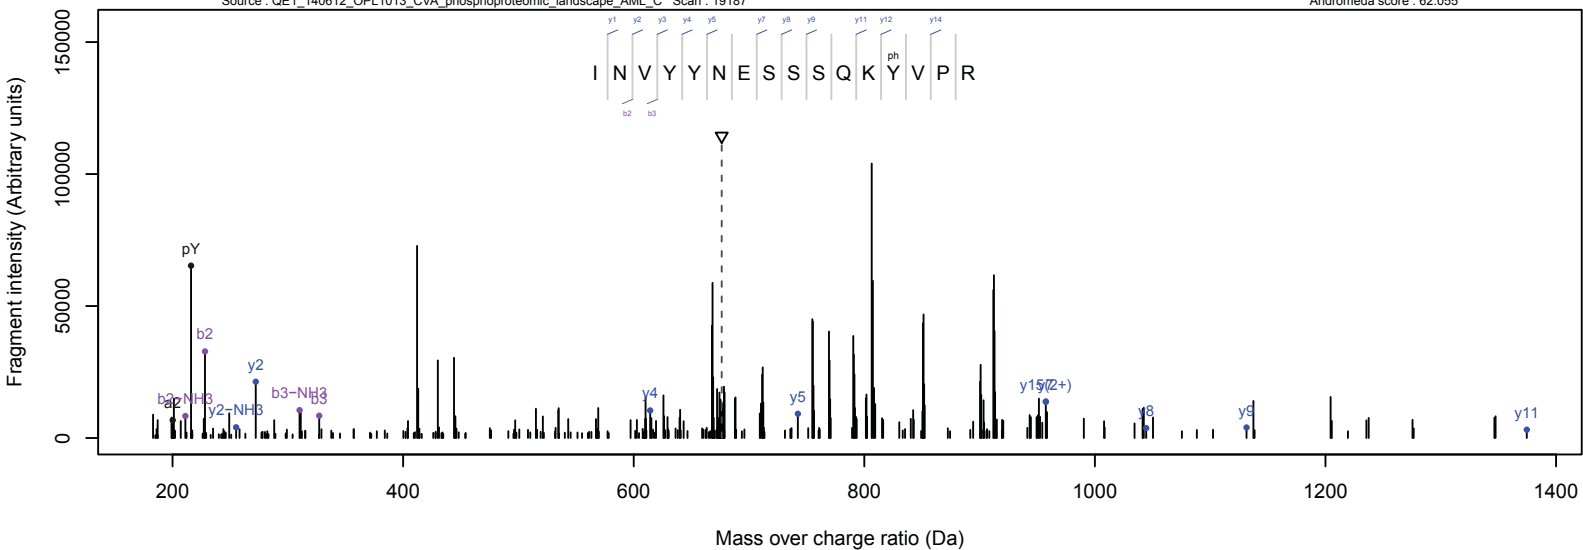

## HRSPLEKPHNGLLPQHGDY(ph)QYGR-5+

Source: QE1\_140612\_OPL1013\_CVA\_phosphoproteomic\_landscape\_AML\_C Scan: 23066

Andromeda score: 62.028

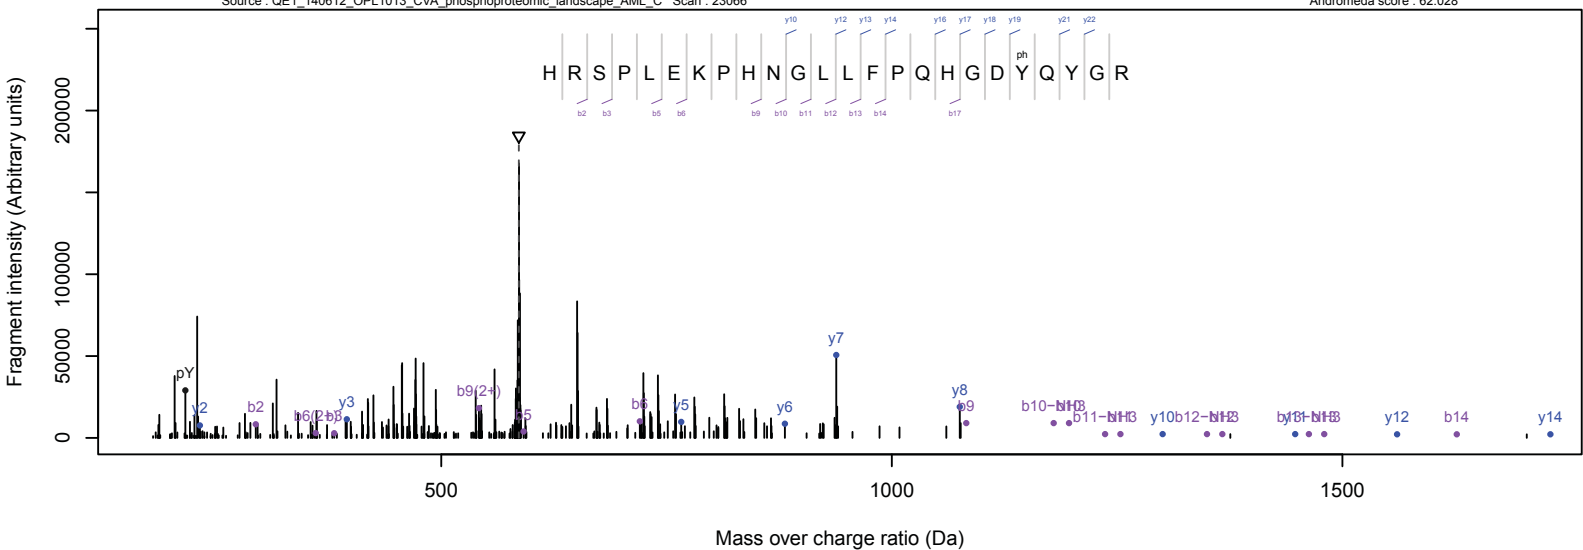

## YLLETSGNLDGLEYPK(LHDFGYR-3+

Source: QE1\_140612\_OPL1013\_CVA\_phosphoproteomic\_landscape\_AML\_C Scan: 46359

Andromeda score: 61.963

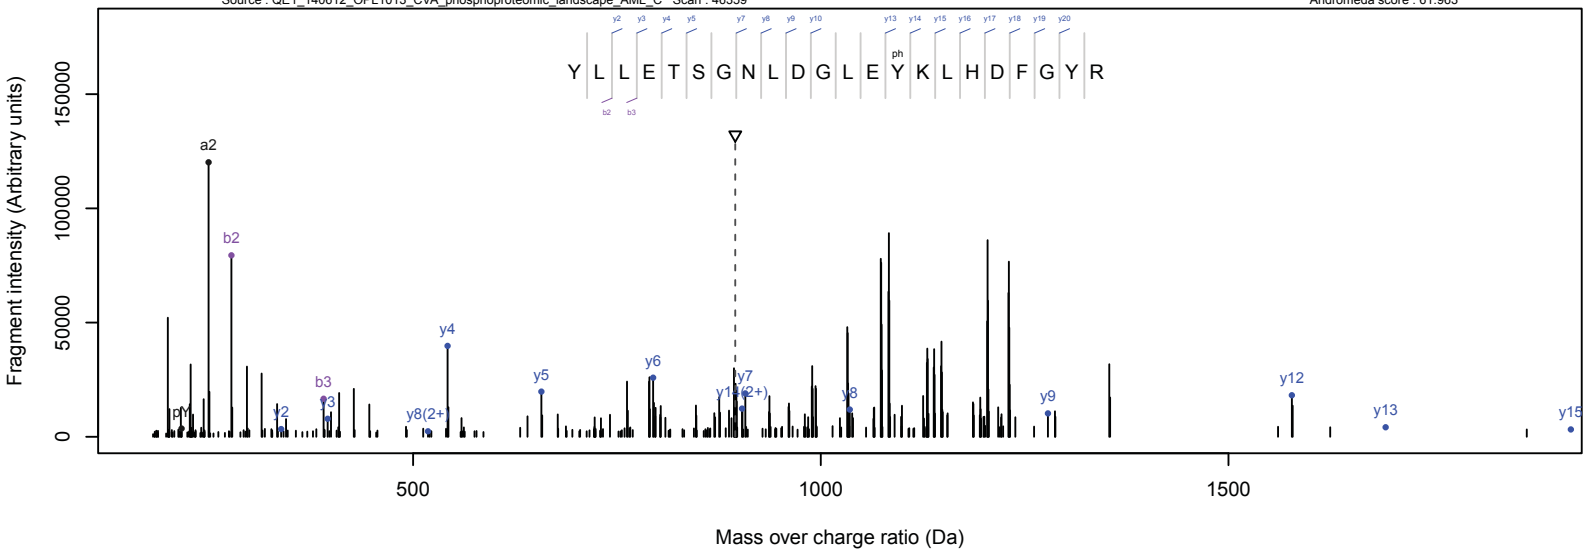

## GDKEEQVSWTQY(ph)TQR-3+

Source : QE1\_140612\_OPL1013\_CVA\_phosphoproteomic\_landscape\_AML\_C Scan : 16354

Andromeda score : 61.962

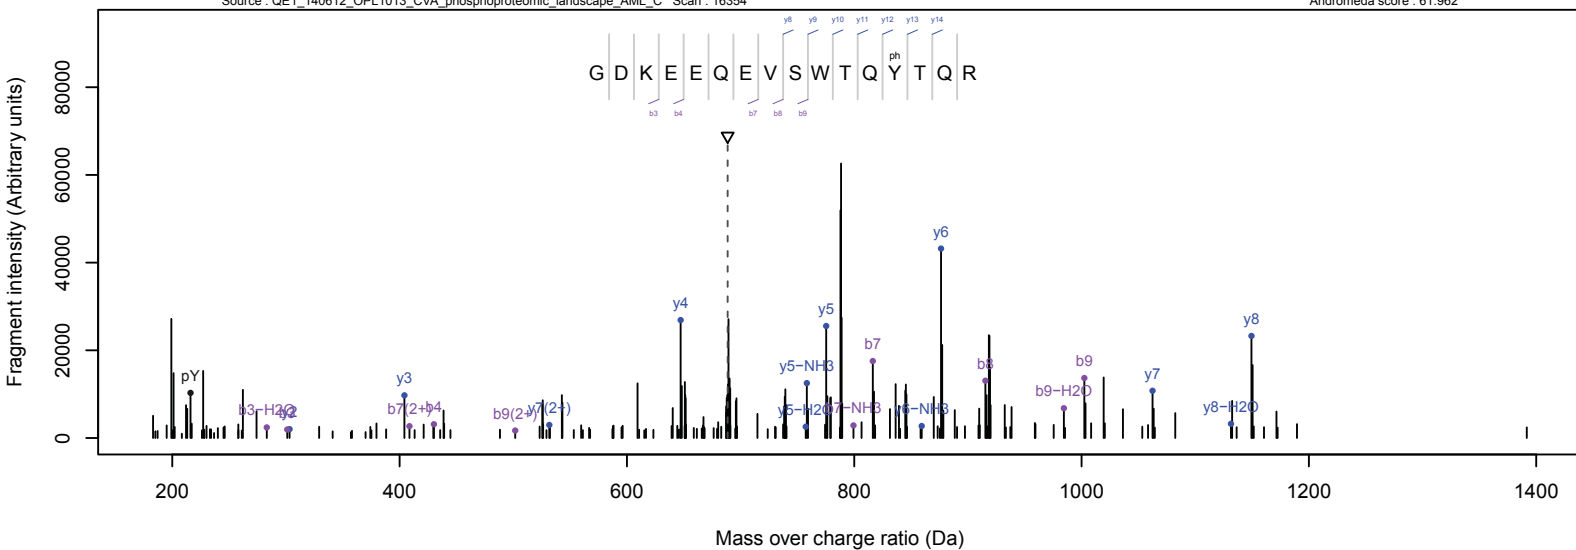

## NY(ph)IQIER-2+

Source : QE1\_140612\_OPL1013\_CVA\_phosphoproteomic\_landscape\_AML\_A Scan : 12784

Andromeda score : 61.962

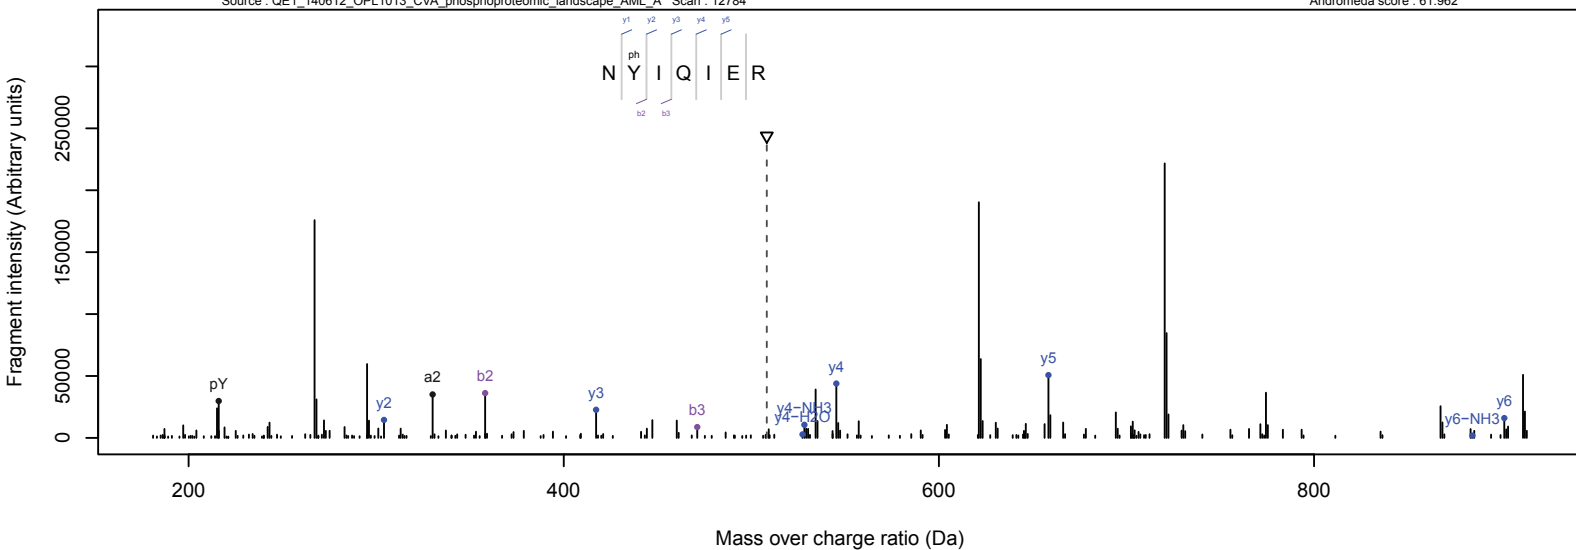

## SAVSPDLHITPIY(ph)EGR-2+

Source : QE1\_140612\_OPL1013\_CVA\_phosphoproteomic\_landscape\_AML\_B Scan : 30423

Andromeda score : 61.962

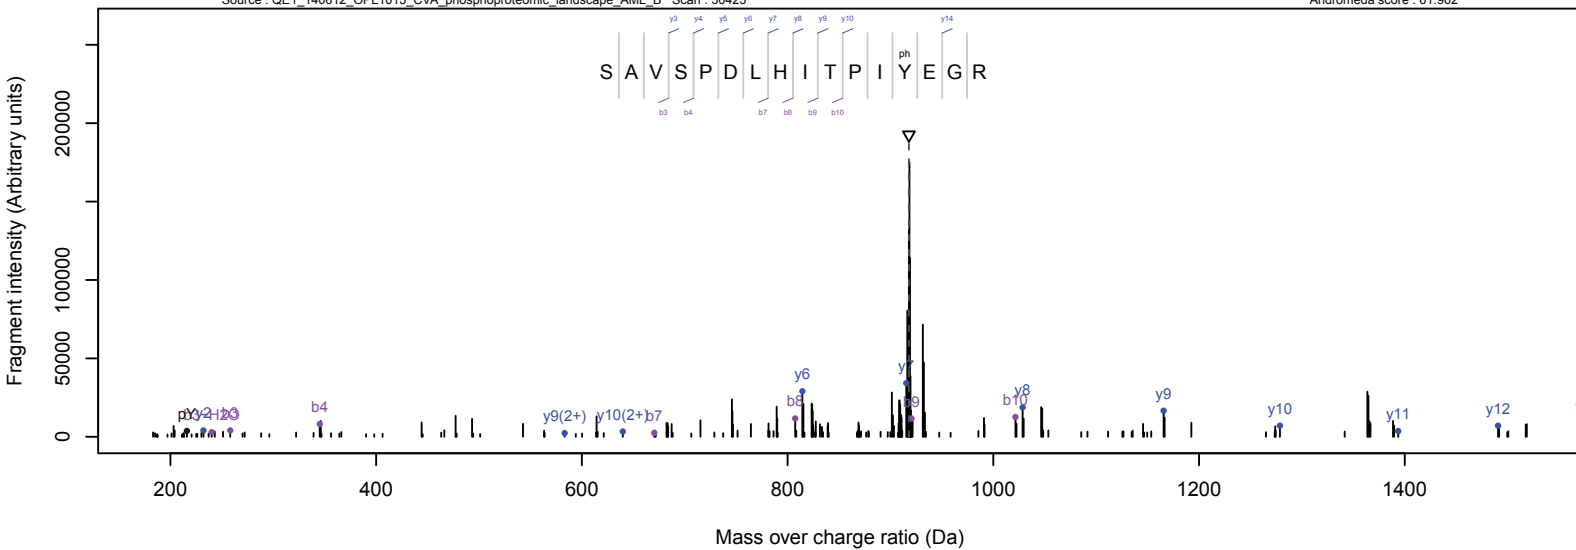

## IY(ph)NKIPGTSNNGLEEFKK-3+

Source : QE1\_140612\_OPL1013\_CVA\_phosphoproteomic\_landscape\_AML\_B Scan : 23048

Andromeda score : 61.942

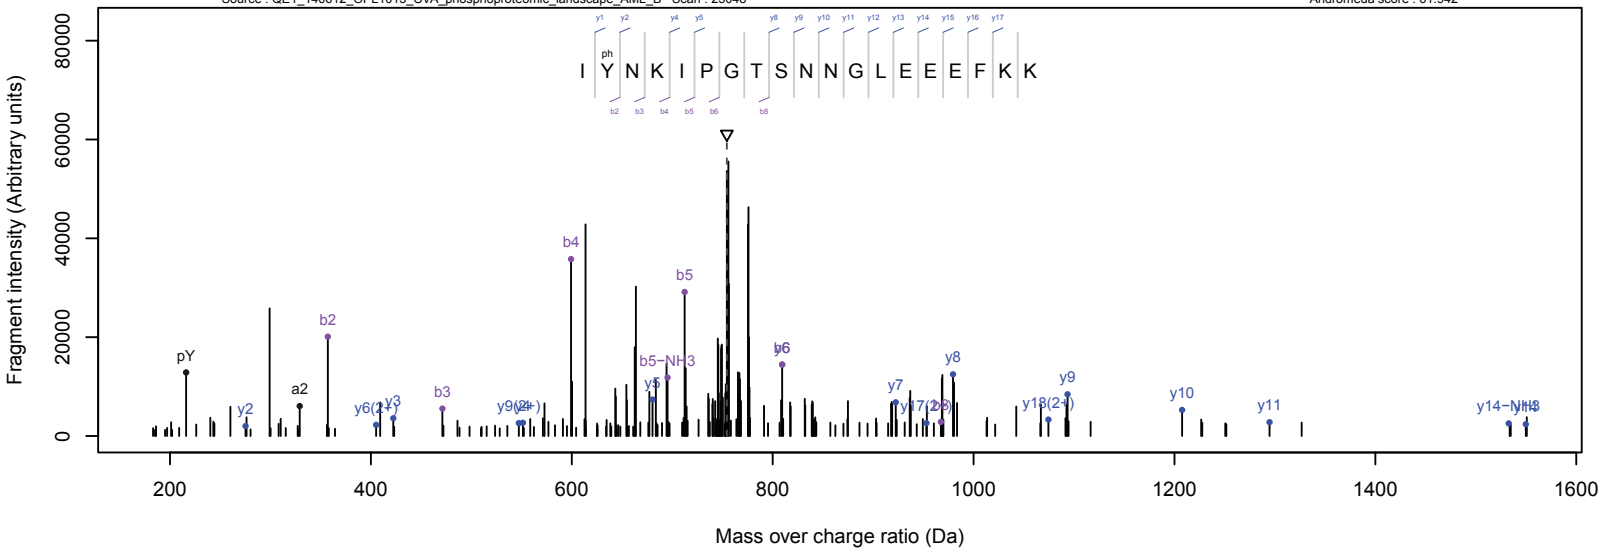

## RAAY(ph)LNMSSEDPSPHPSMALNTR-3+

Source : QE1\_140612\_OPL1013\_CVA\_phosphoproteomic\_landscape\_AML\_B Scan : 23742

Andromeda score : 61.942

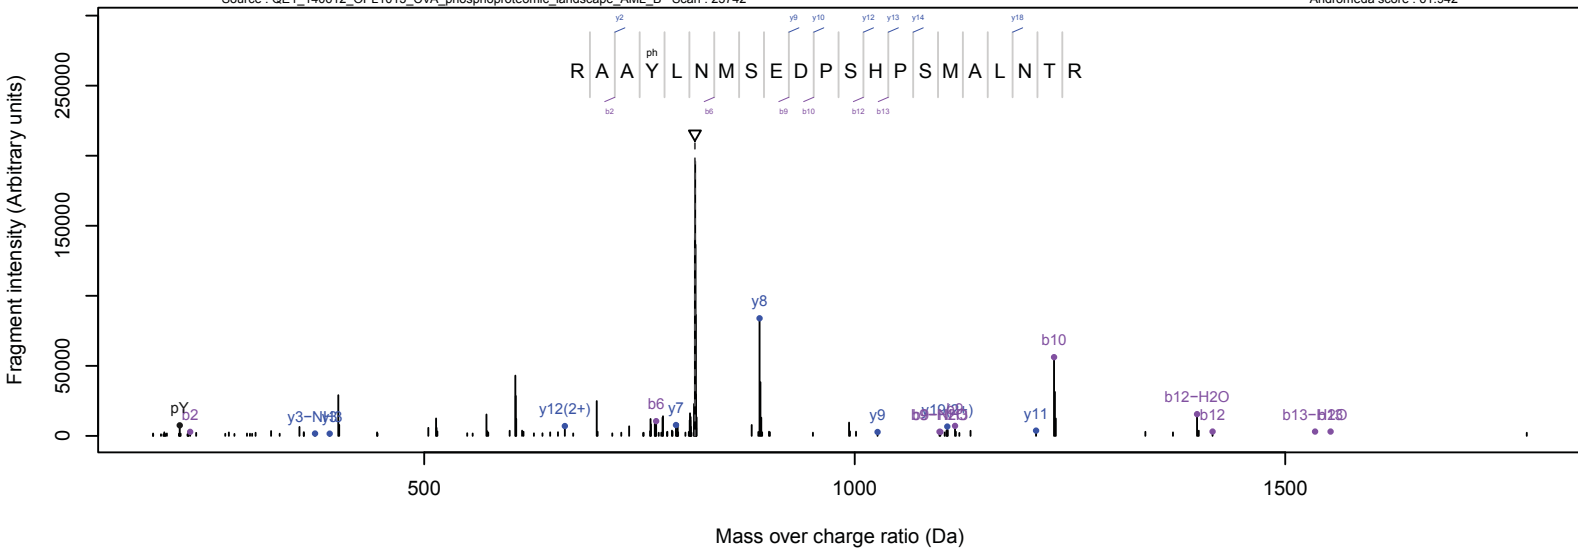

## SSGRVY(ph)YFNHITNASQWER-4+

Source : QE1\_140612\_OPL1013\_CVA\_phosphoproteomic\_landscape\_AML\_C Scan : 27990

Andromeda score : 61.942

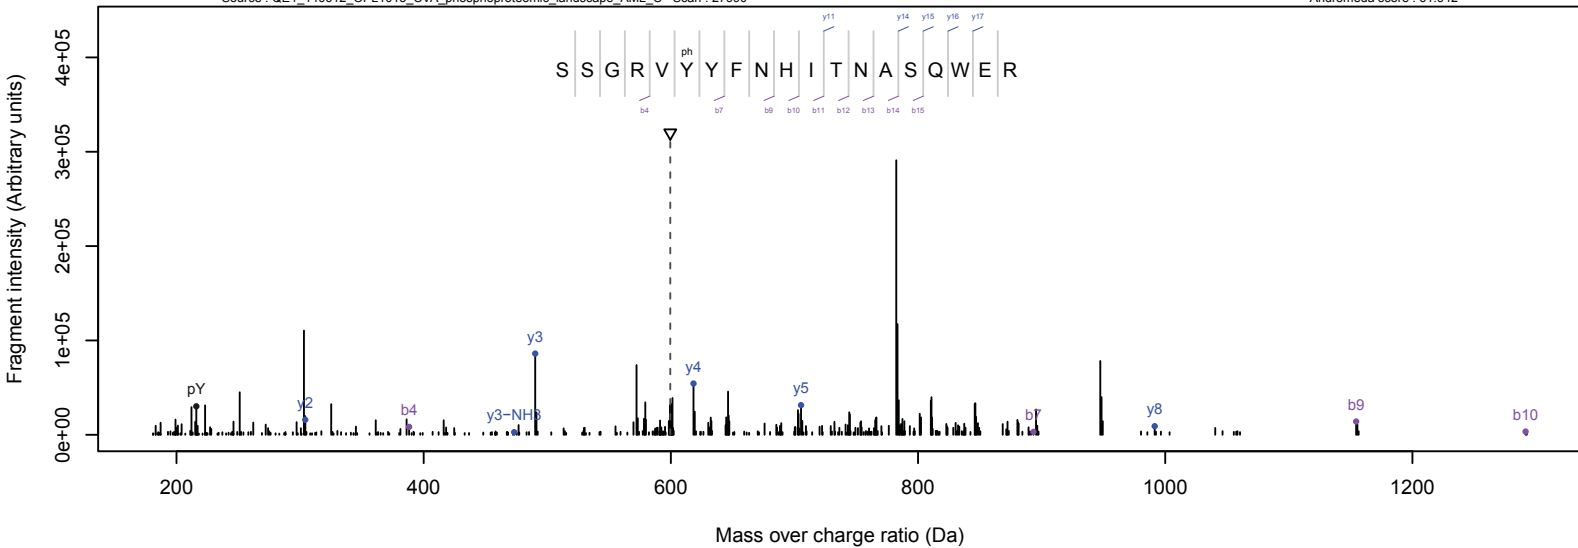

## AIM(ox)TYVSSFY(ph)HAFSGAQK-3+

Source : QE1\_140908\_OPL1013\_CvA\_pTyrIP\_AML\_HEL Scan : 41093

Andromeda score : 61.87

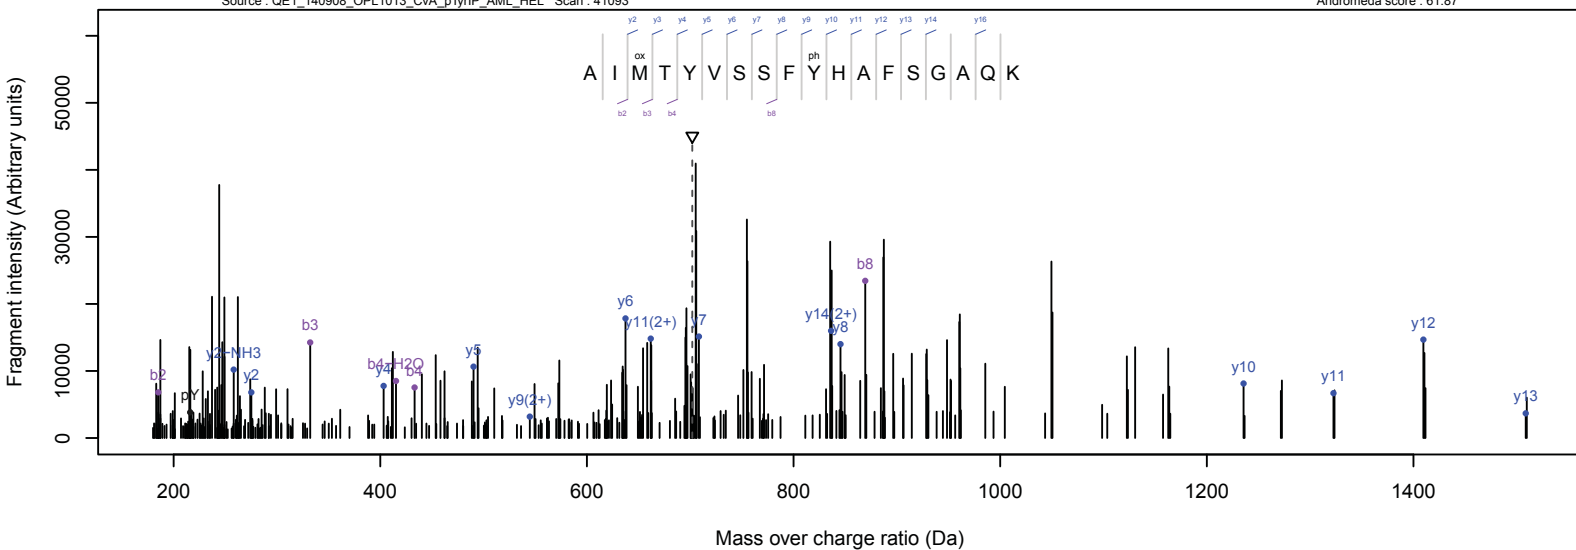

## TQIAICPNNHEVHIYEK-3+

Source : QE1\_140908\_OPL1013\_CvA\_pTyrIP\_AML\_HEL Scan : 23330

Andromeda score : 61.87

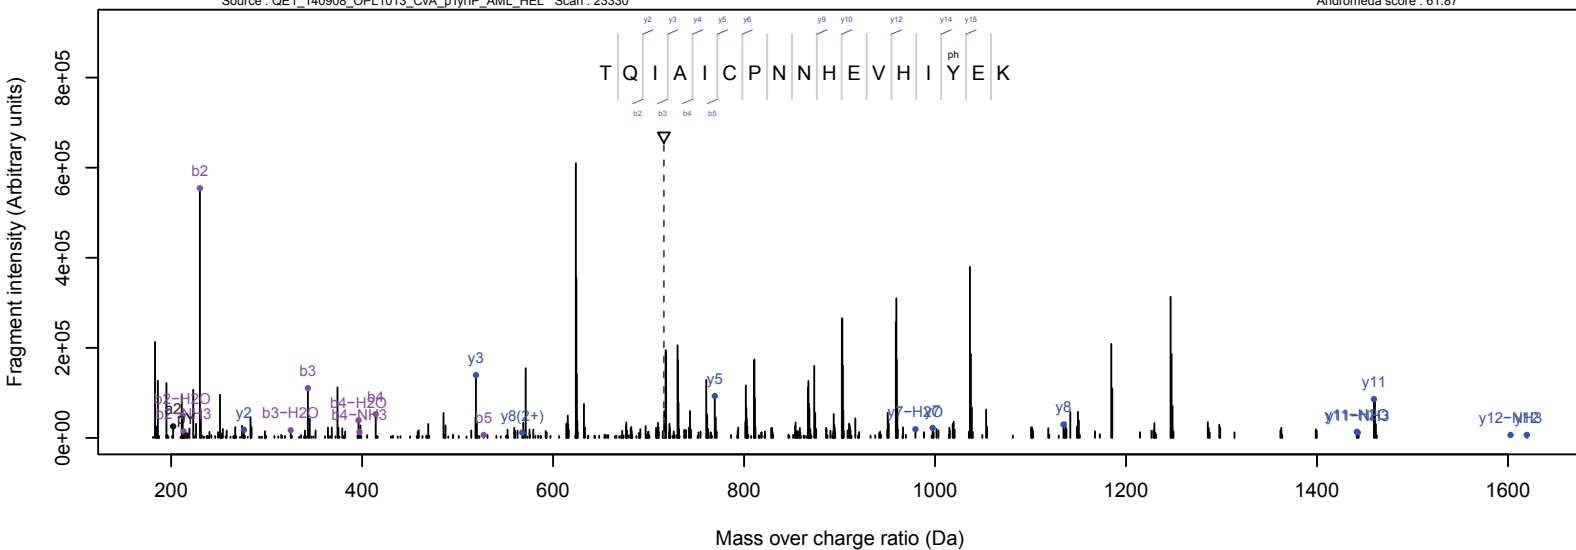

## Y(ph)FQIGTIVDNPADFYHSR-3+

Source : QE1\_140612\_OPL1013\_CVA\_phosphoproteomic\_landscape\_AML\_C Scan : 44166

Andromeda score : 61.87

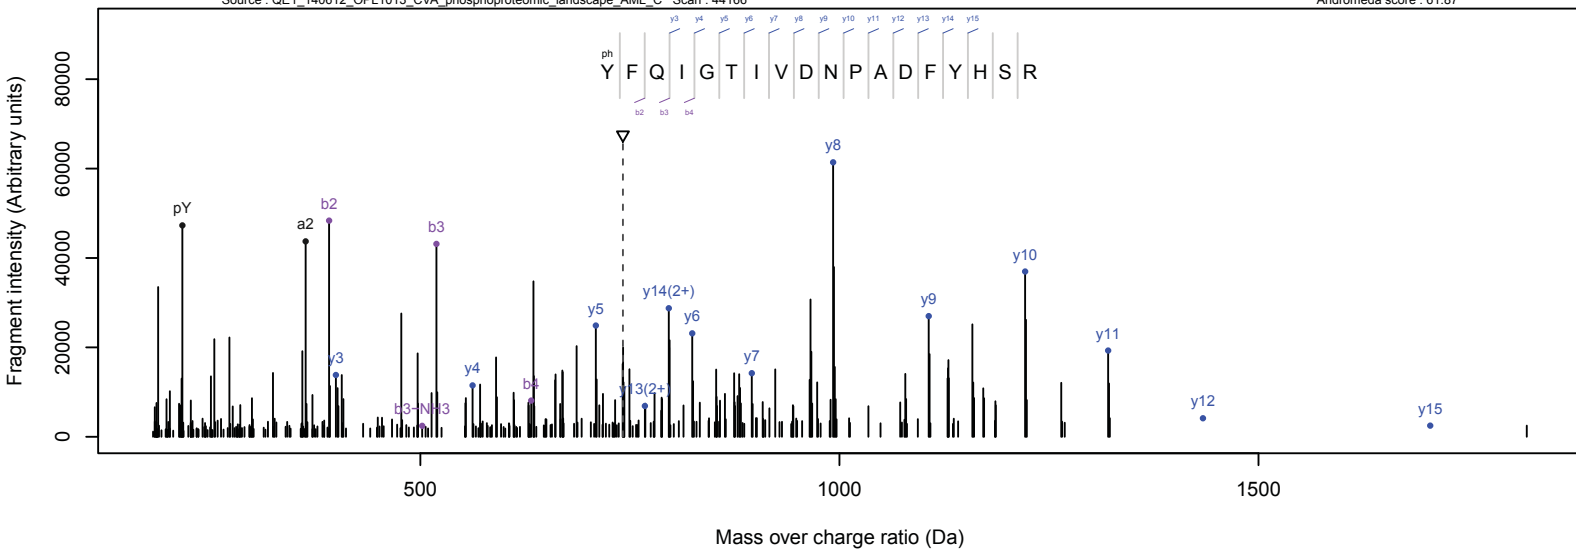

## SKEY(ph)FSK-2+

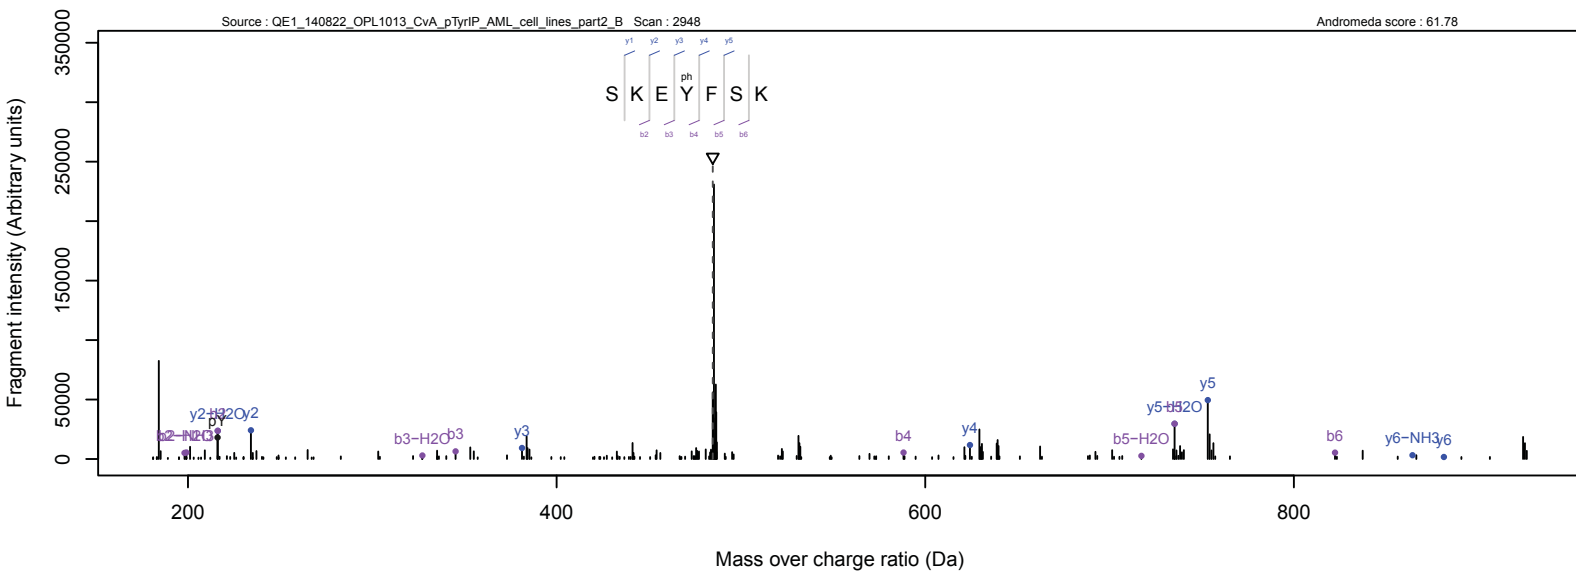

## AQY(ph)MLVVHMR-3+

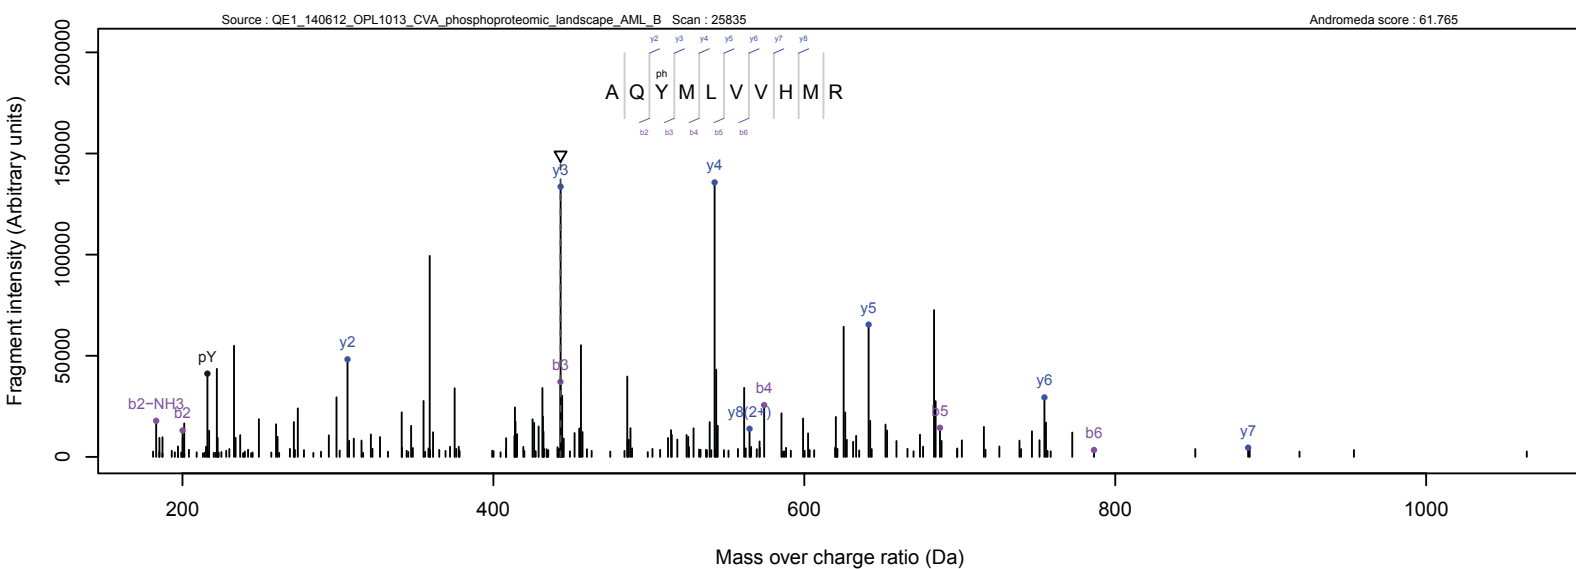

## EDLY(ph)LKPIQR-2+

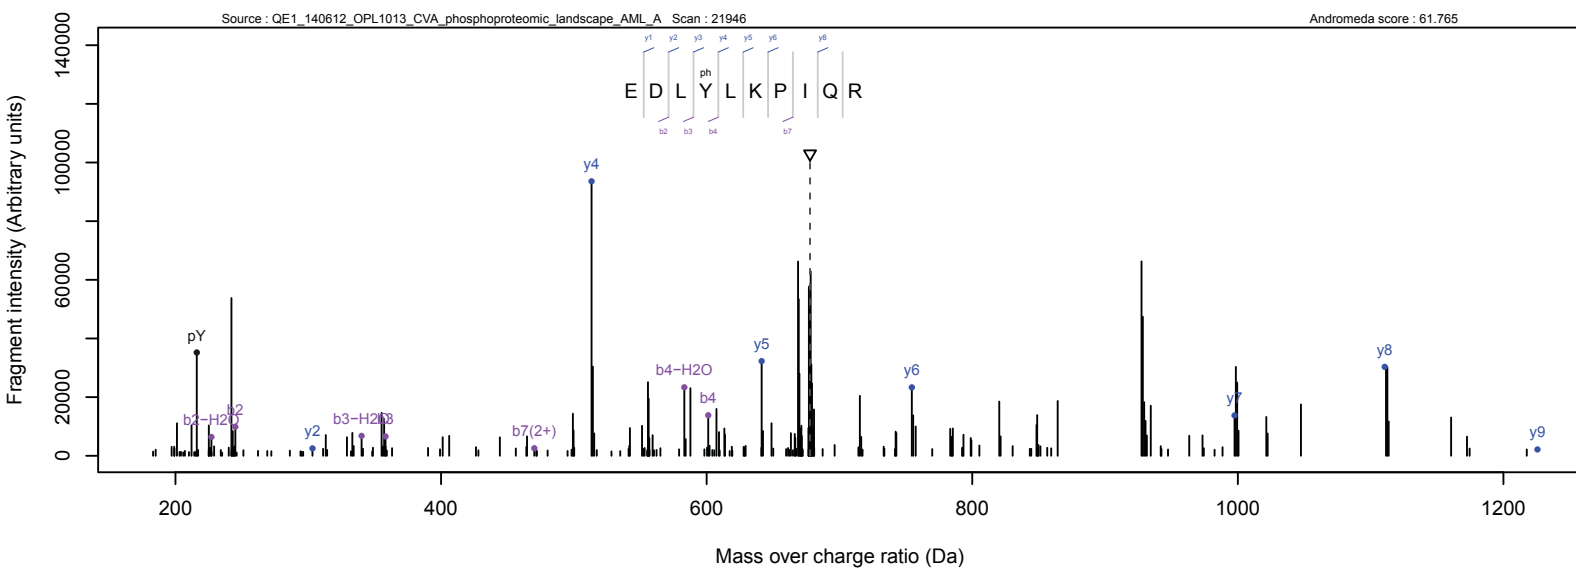



Y(ph)RCITQQFFR-3+

Source : QE1\_140612\_OPL1013\_CVA\_phosphoproteomic\_landscape\_AML\_C Scan : 25603

Andromeda score : 61.765

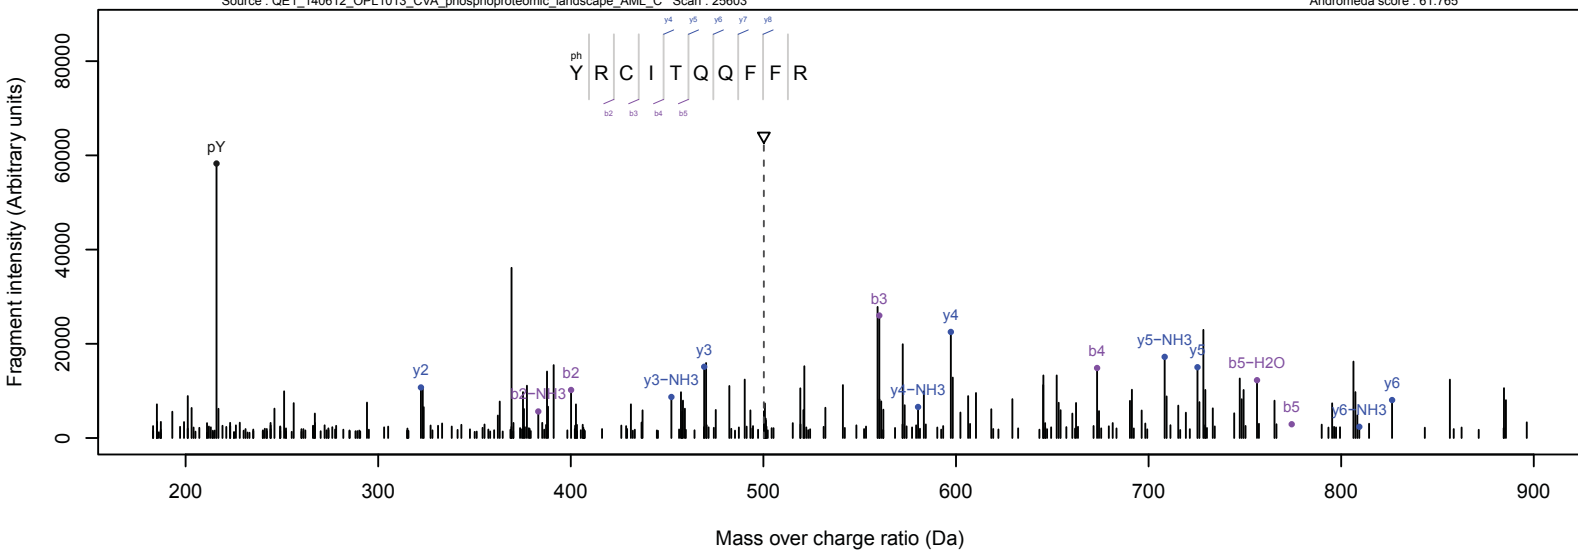

T(ph)STYDNPVSLPGSPGEEASALSSQACDSKGDTLASPNSSETGPGKK-4+

Source : QE1\_140908\_OPL1013\_CvA\_pTyrIP\_AML\_HEL Scan : 32785

Andromeda score : 61.739

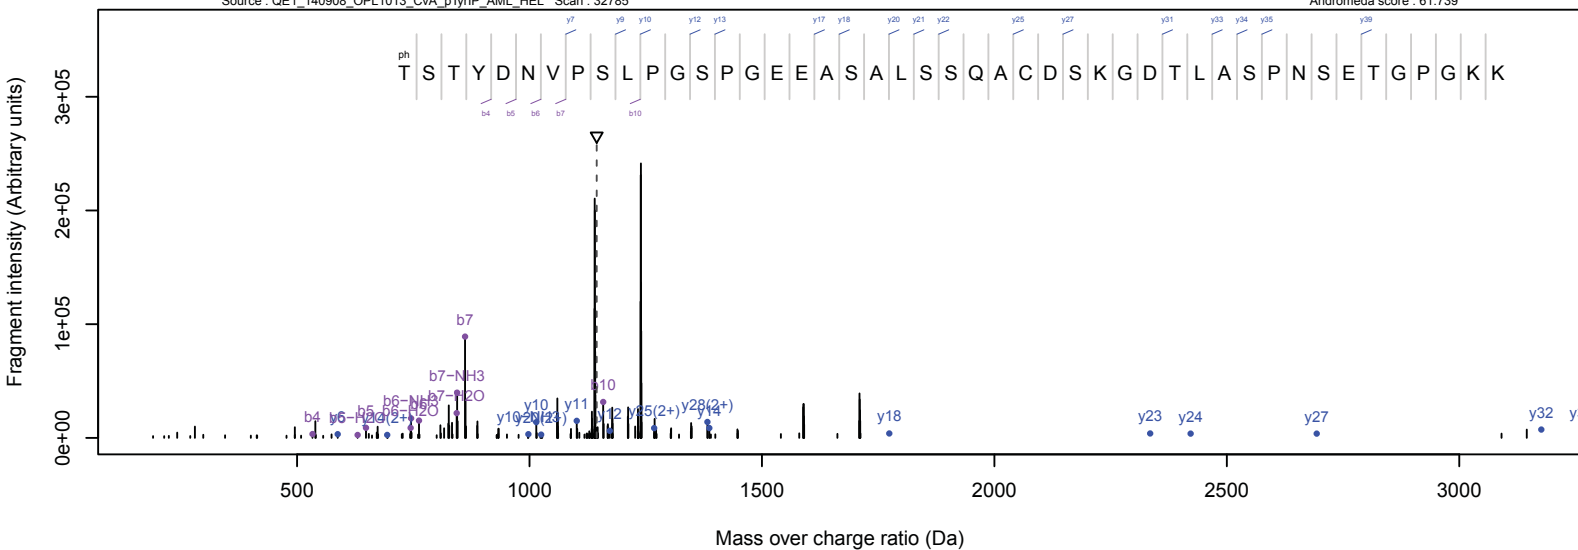

DGTLGALHTSSKPTALPSASSAY(ph)FPGQLPNS-3+

Source : QE1\_140612\_OPL1013\_CVA\_phosphoproteomic\_landscape\_AML\_C Scan : 38004

Andromeda score : 61.738

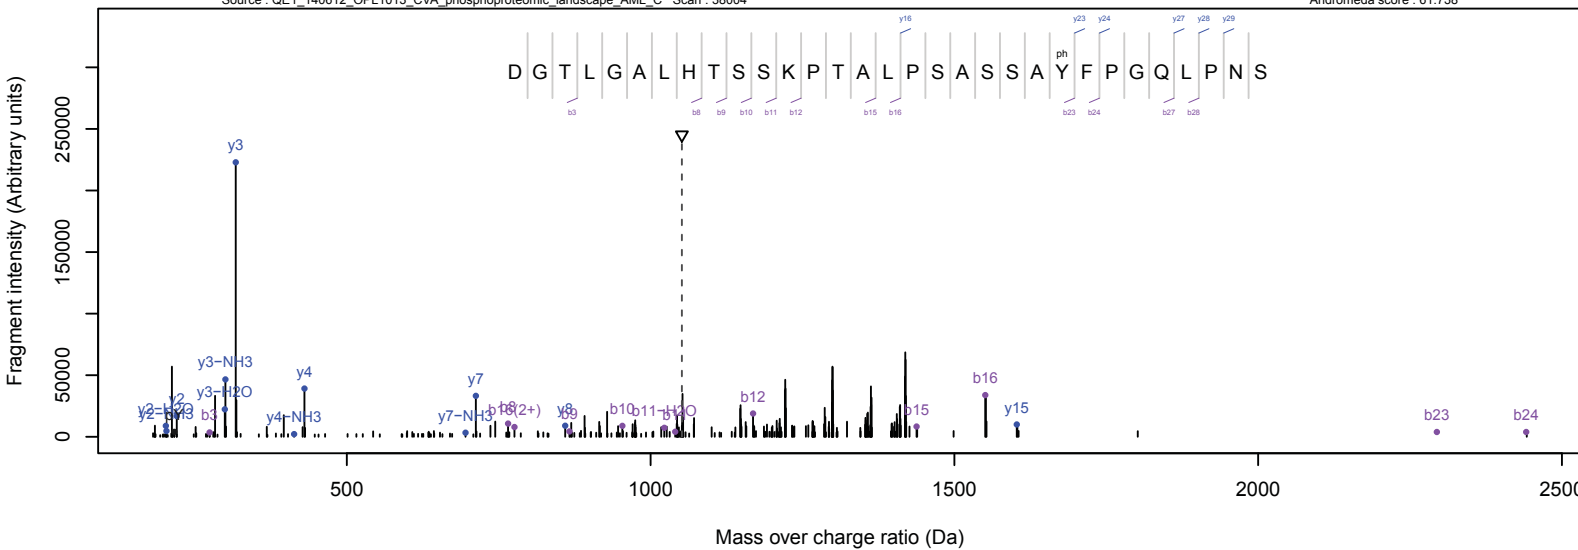

## IY(ph)FQVFLPK-2+

Source : QE1\_140612\_OPL1013\_CVA\_phosphoproteomic\_landscape\_AML\_C Scan : 48032

Andromeda score : 61.691

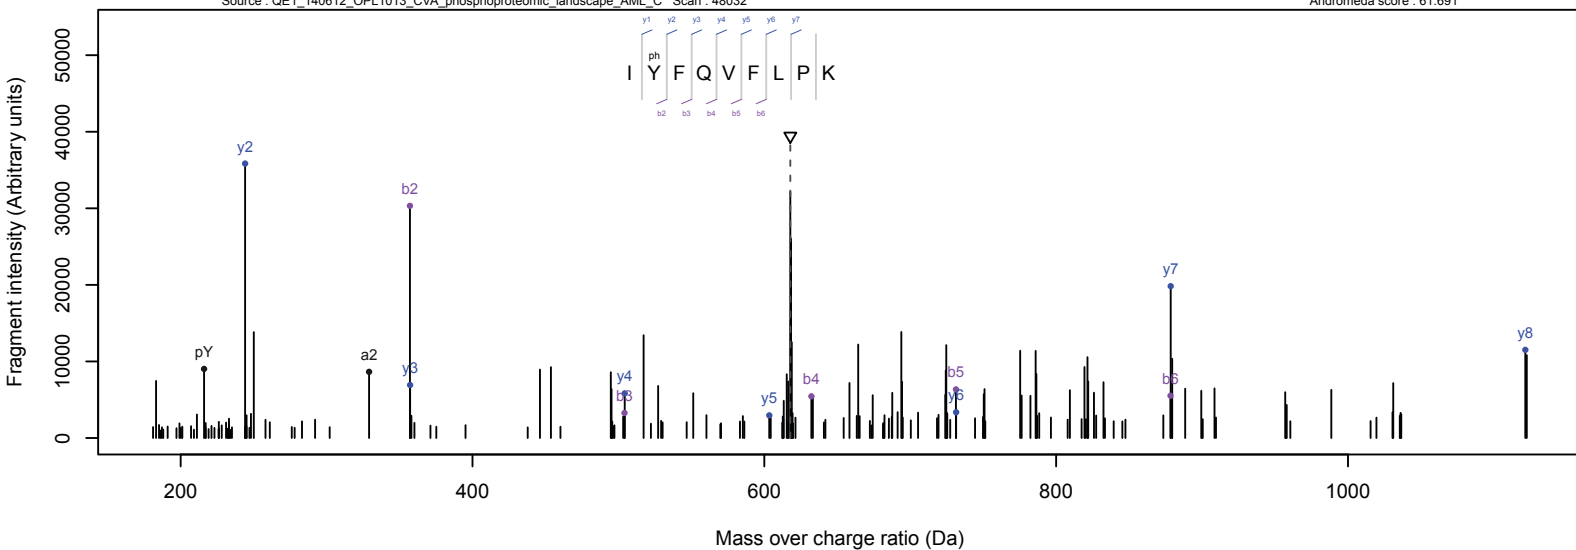

## AKLY(ph)RWDR-3+

Source : QE1\_140612\_OPL1013\_CVA\_phosphoproteomic\_landscape\_AML\_D Scan : 9878

Andromeda score : 61.679

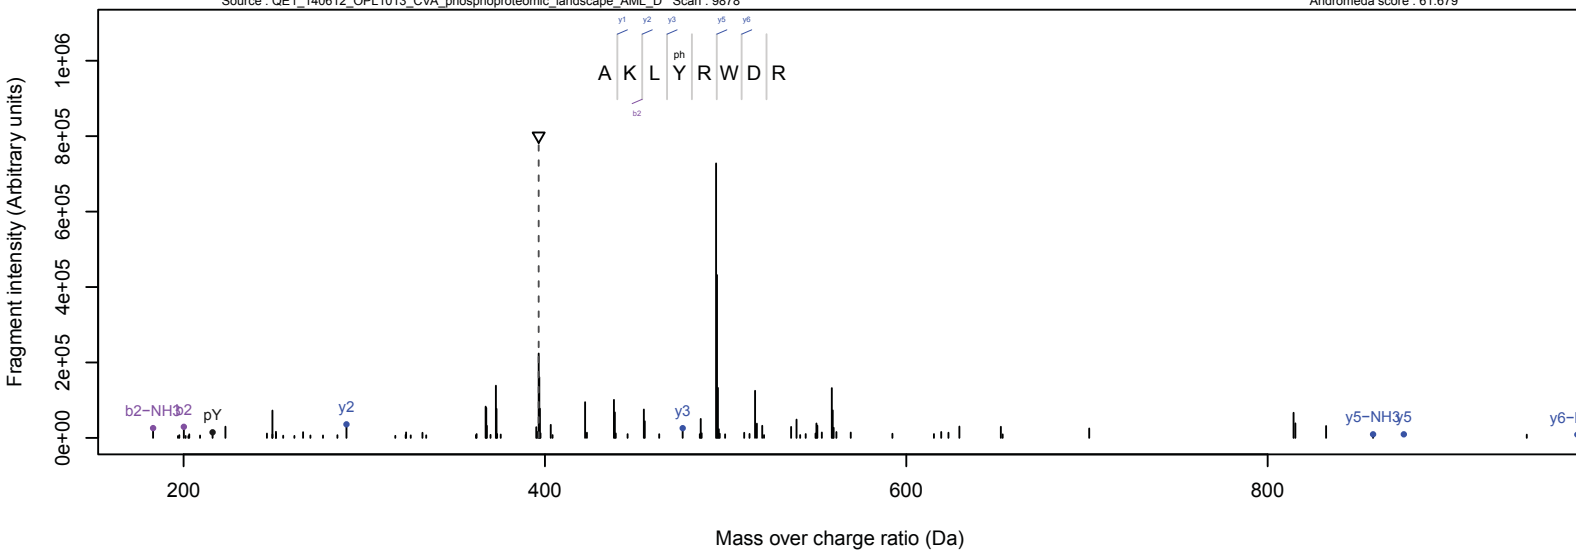

## YSQAPTLPSGAHLDPY(ph)VAGSGR-3+

Source : QE1\_140612\_OPL1013\_CVA\_phosphoproteomic\_landscape\_AML\_C Scan : 28025

Andromeda score : 61.616

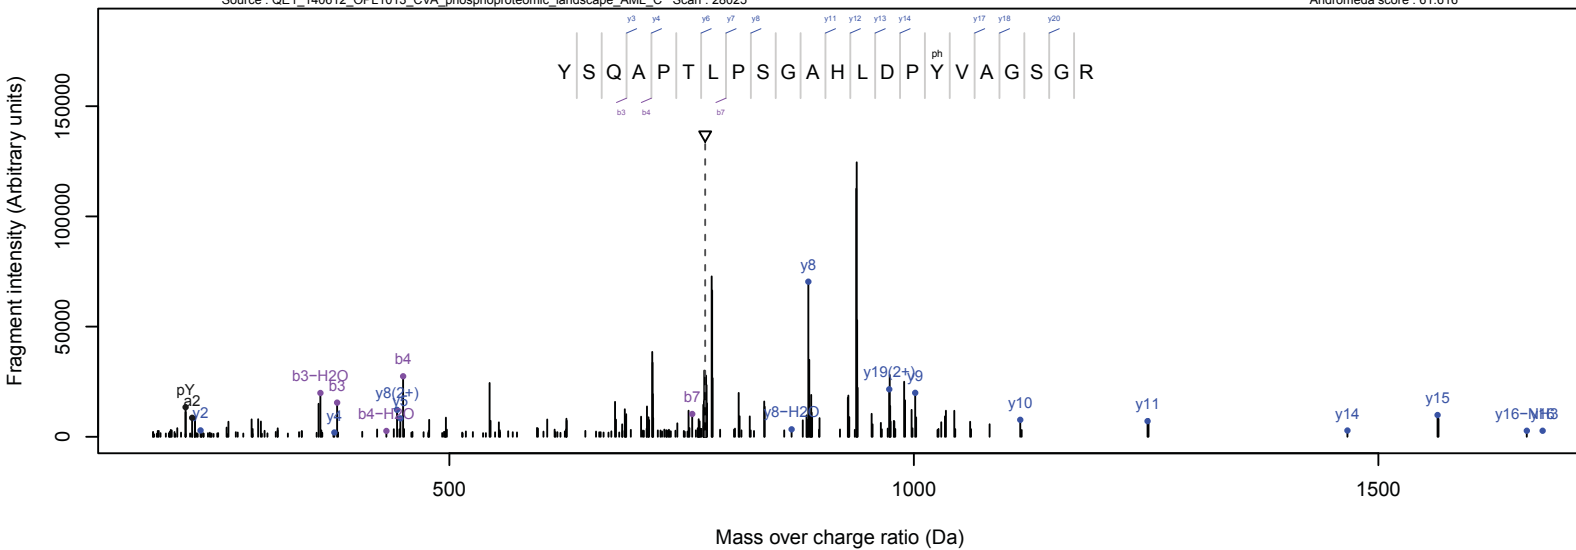

## GNSDGY(ph)IIPINKEGCIPEGDVR-3+

Source: QE1\_140612\_OPL1013\_CVA\_phosphoproteomic\_landscape\_AML\_C Scan: 31661

Andromeda score: 61.612

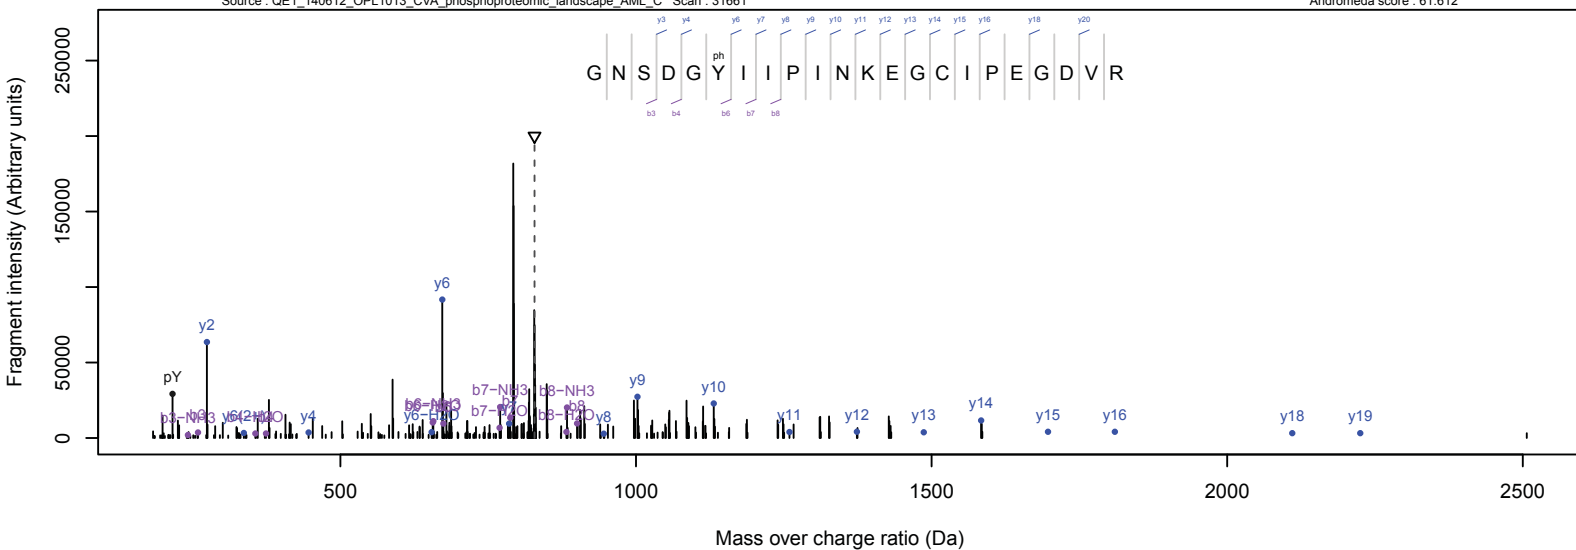

## PLY(ph)SVTVK-2+

Source: QE1\_140612\_OPL1013\_CVA\_phosphoproteomic\_landscape\_AML\_C Scan: 14497

Andromeda score: 61.602

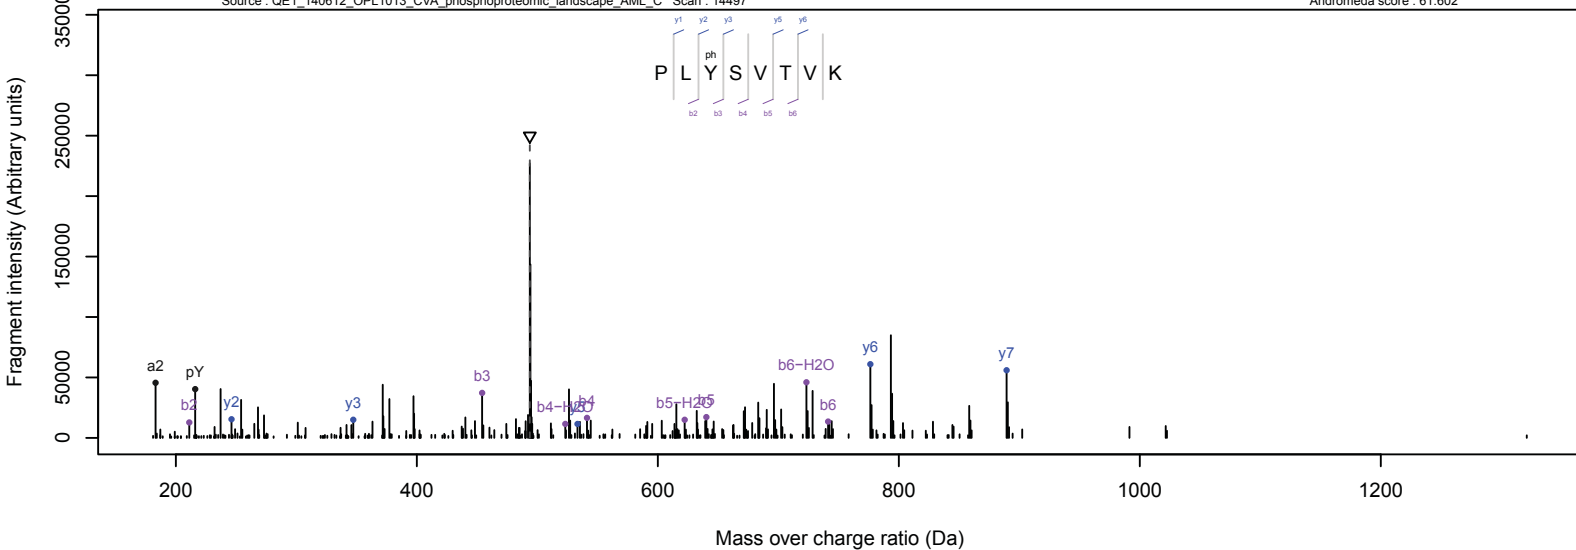

## NY(ph)FGAQPHYR-3+

Source: QE1\_140612\_OPL1013\_CVA\_phosphoproteomic\_landscape\_AML\_C Scan: 11732

Andromeda score: 61.593

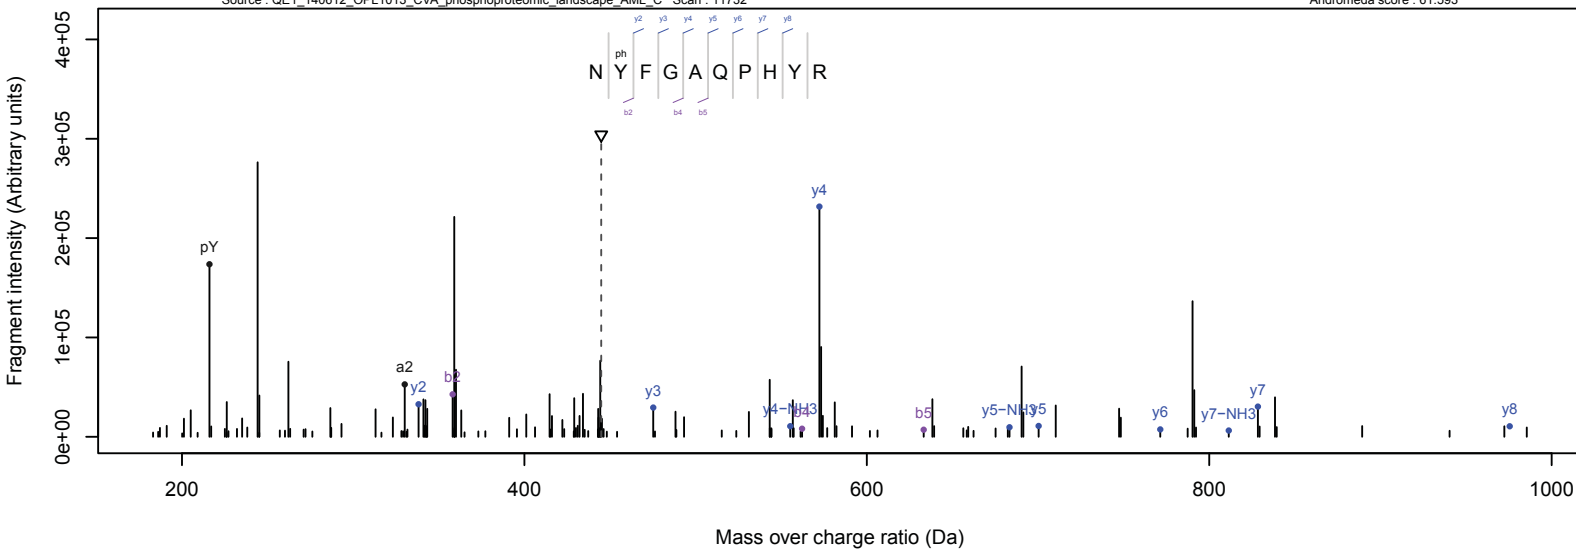

## LKY(ph)PVSQQNK-3+

Source : QE1\_140612\_OPL1013\_CVA\_phosphoproteomic\_landscape\_AML\_C Scan : 4494

Andromeda score : 61.56

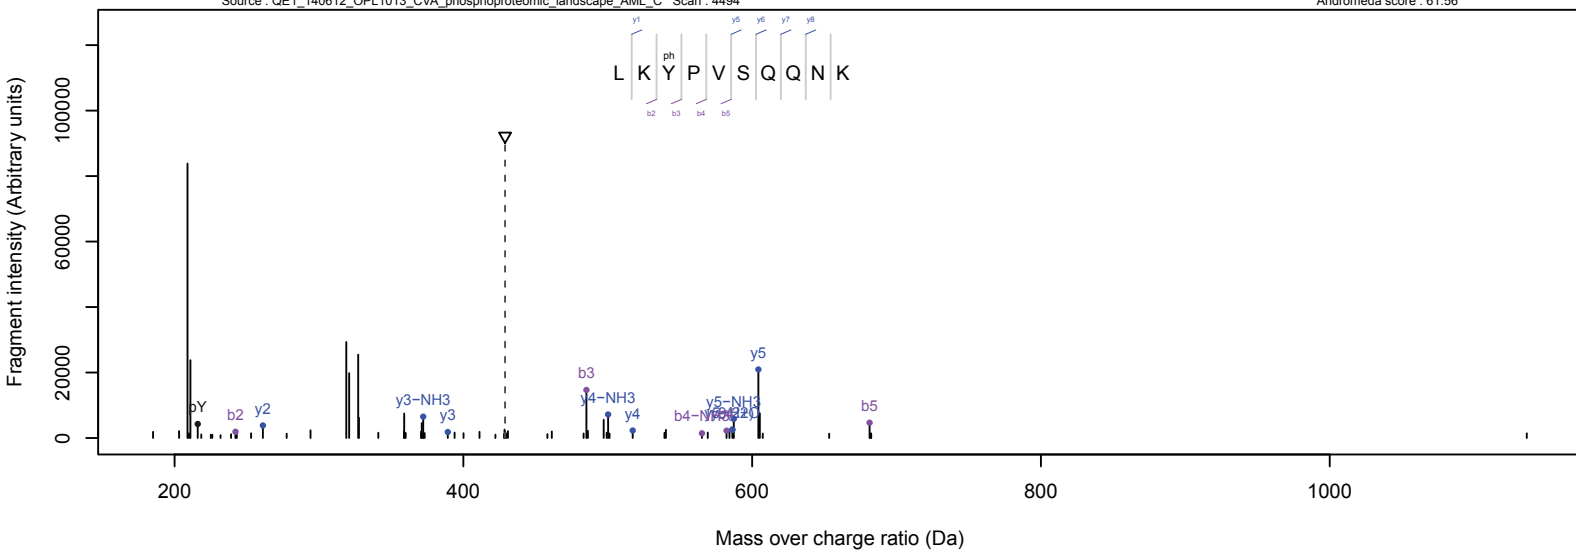

## DAY(ph)REAQLVQR-3+

Source : QE1\_140612\_OPL1013\_CVA\_phosphoproteomic\_landscape\_AML\_B Scan : 16892

Andromeda score : 61.523

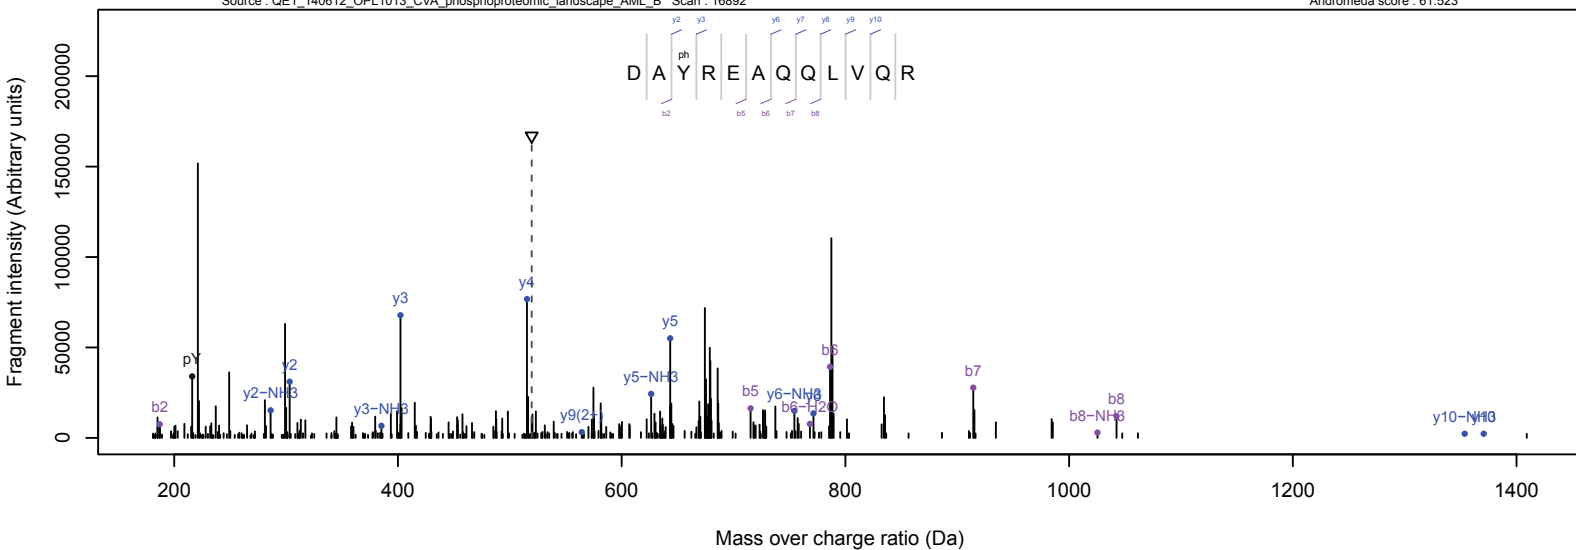

## LSSSIHEIDSLGKPY(ph)SK-3+

Source : QE1\_140612\_OPL1013\_CVA\_phosphoproteomic\_landscape\_AML\_C Scan : 48161

Andromeda score : 61.508

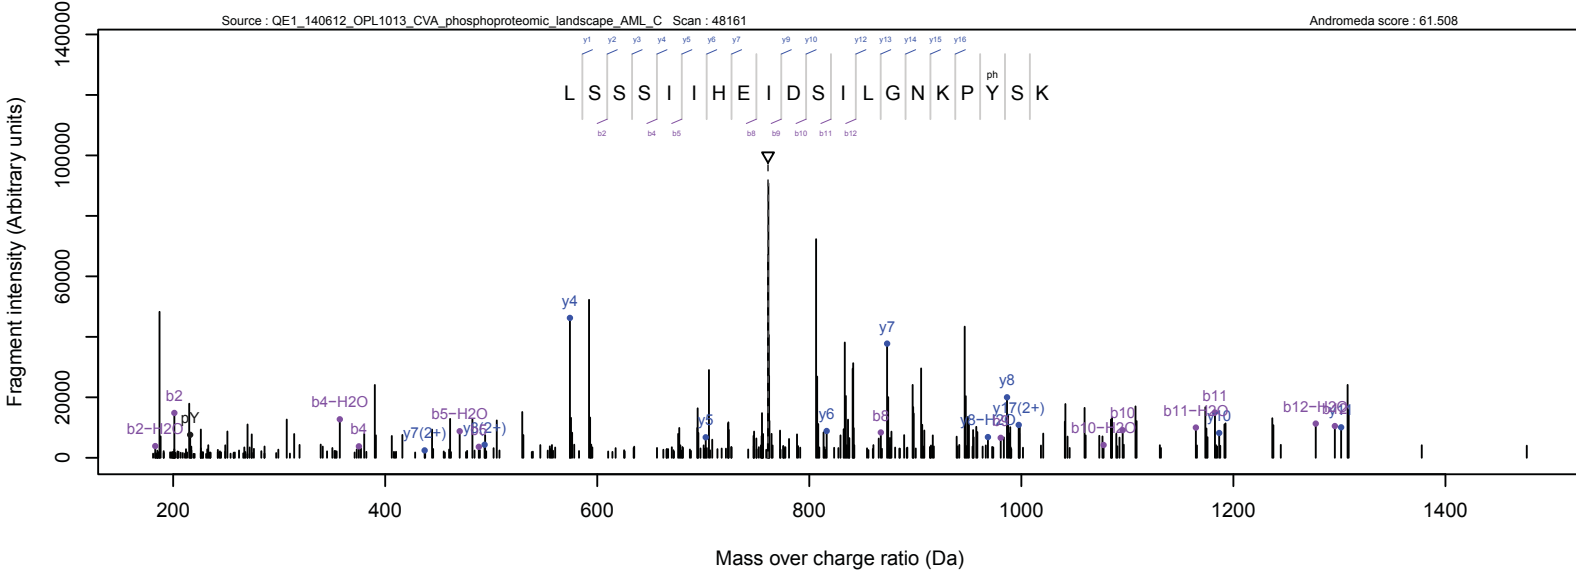

**SLY(ph)HDISGDTSGDYR-3+**

Source : QE1\_140612\_OPL1013\_CVA\_phosphoproteomic\_landscape\_AML\_B Scan : 16850

Andromeda score : 61.503

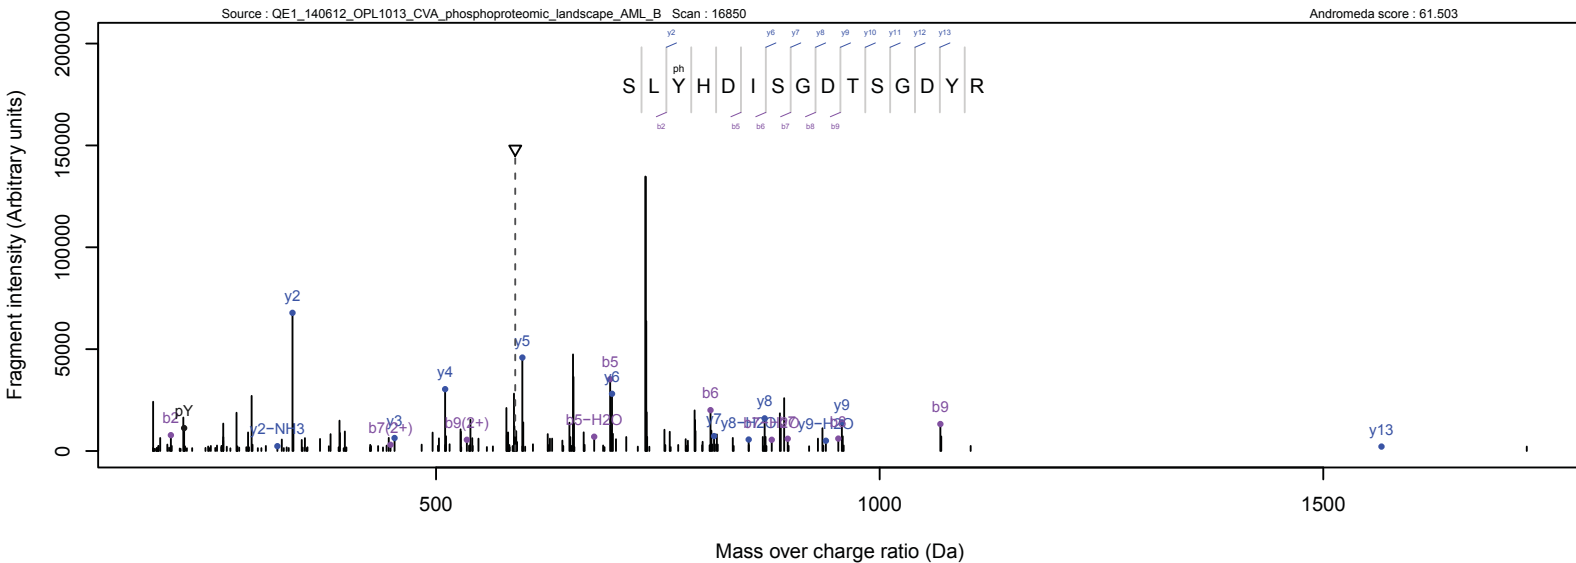

**QSY(ph)PNSYSLNR-2+**

Source : QE1\_140612\_OPL1013\_CVA\_phosphoproteomic\_landscape\_AML\_C Scan : 11367

Andromeda score : 61.48

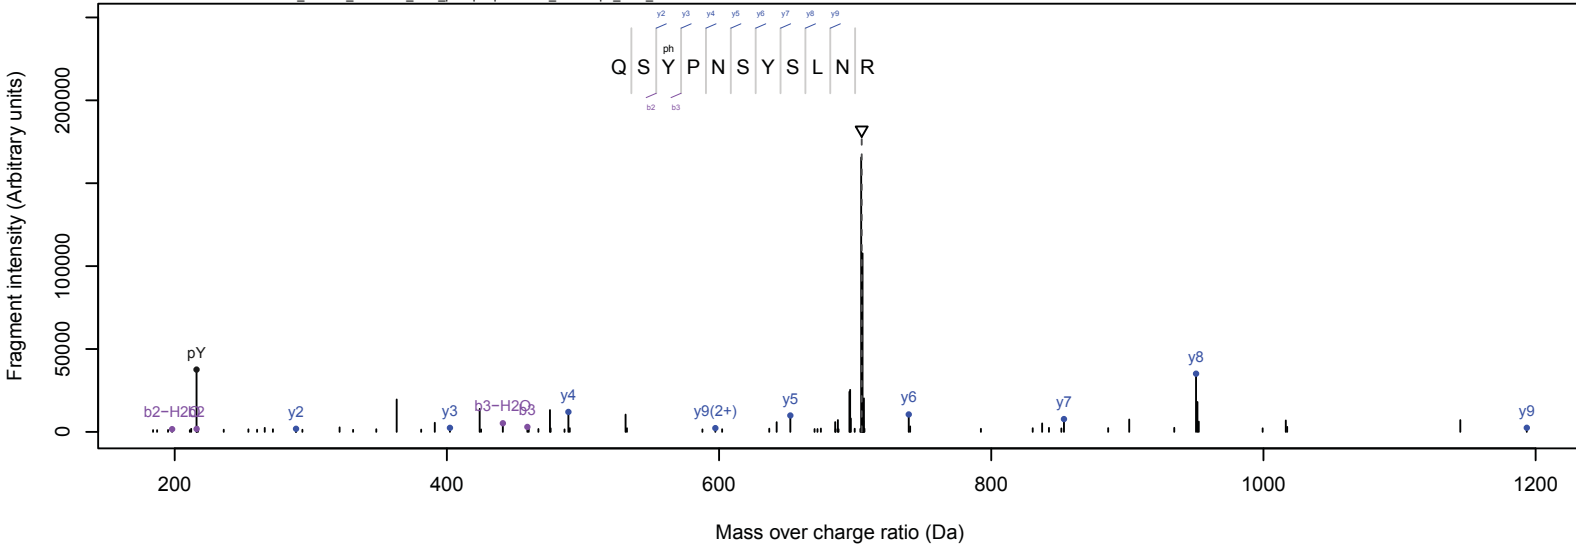

**LGQSDPAPLQHQM(ox)DIY(ph)QK-3+**

Source : QE1\_140908\_OPL1013\_CvA\_pTyrIP\_AML\_Kasumi1 Scan : 15256

Andromeda score : 61.477

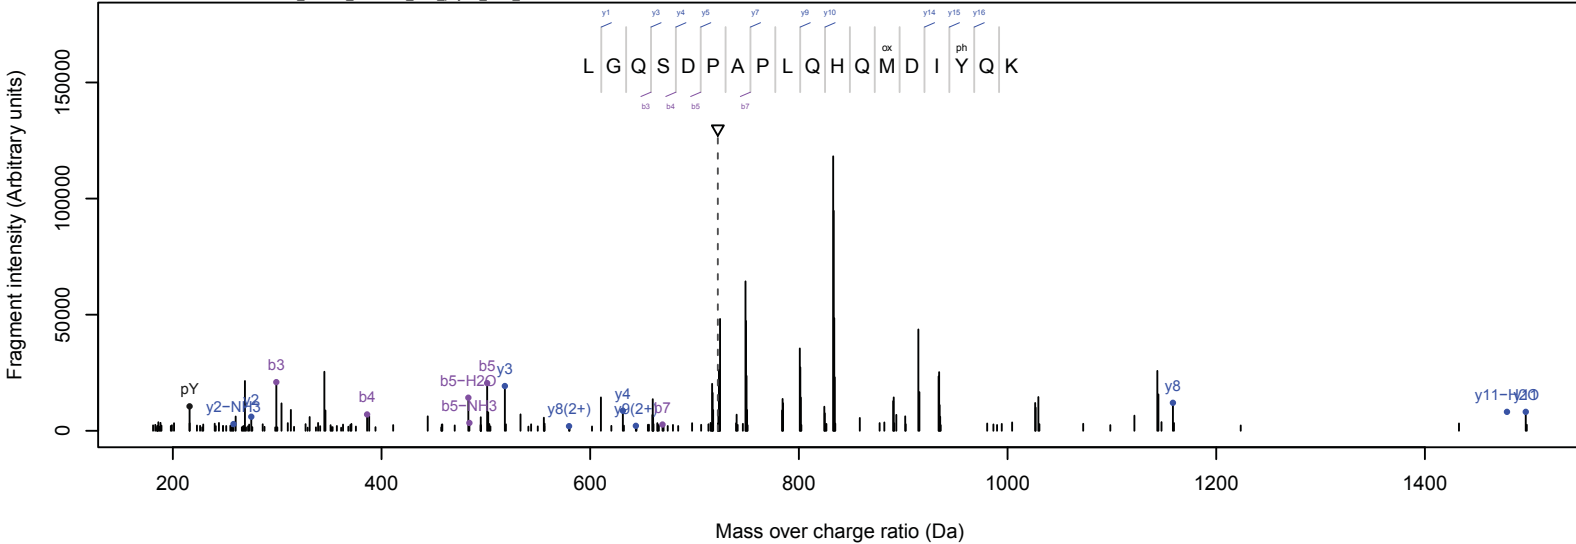

RHEMPPHIY(ph)AITDTAYR-4+

Source : QE1\_140908\_OPL1013\_CvA\_pTyrIP\_AML\_HEL Scan : 24560

Andromeda score : 61.477

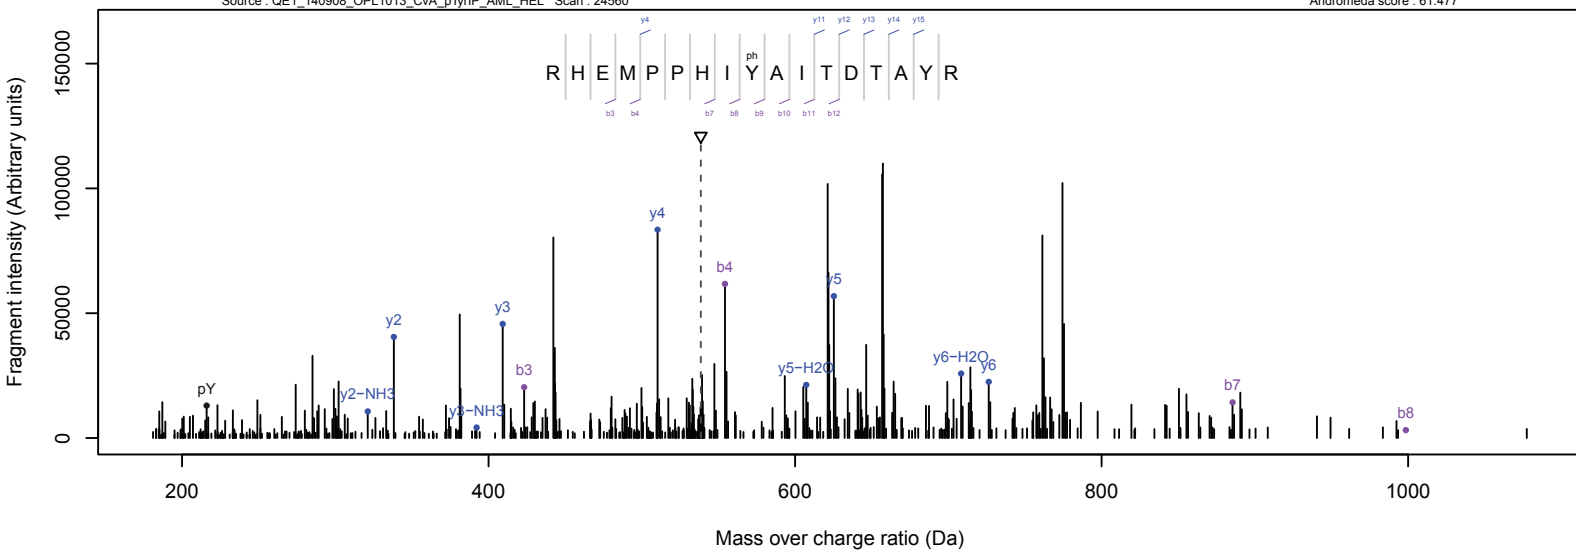

SEDSTIY(ph)DLLKDPVSLR-3+

Source : QE1\_140612\_OPL1013\_CVA\_phosphoproteomic\_landscape\_AML\_B Scan : 47464

Andromeda score : 61.477

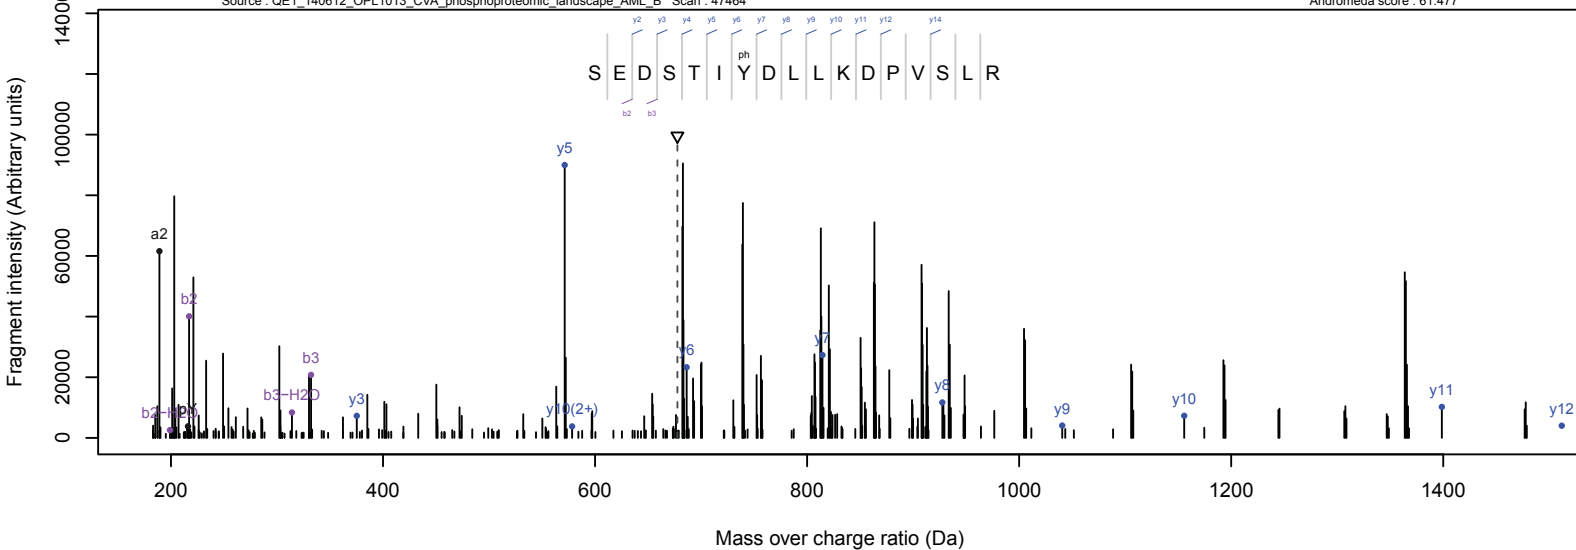

ISY(ph)VQDENRDPIRR-3+

Source : QE1\_140908\_OPL1013\_CvA\_pTyrIP\_AML\_HEL Scan : 11641

Andromeda score : 61.423

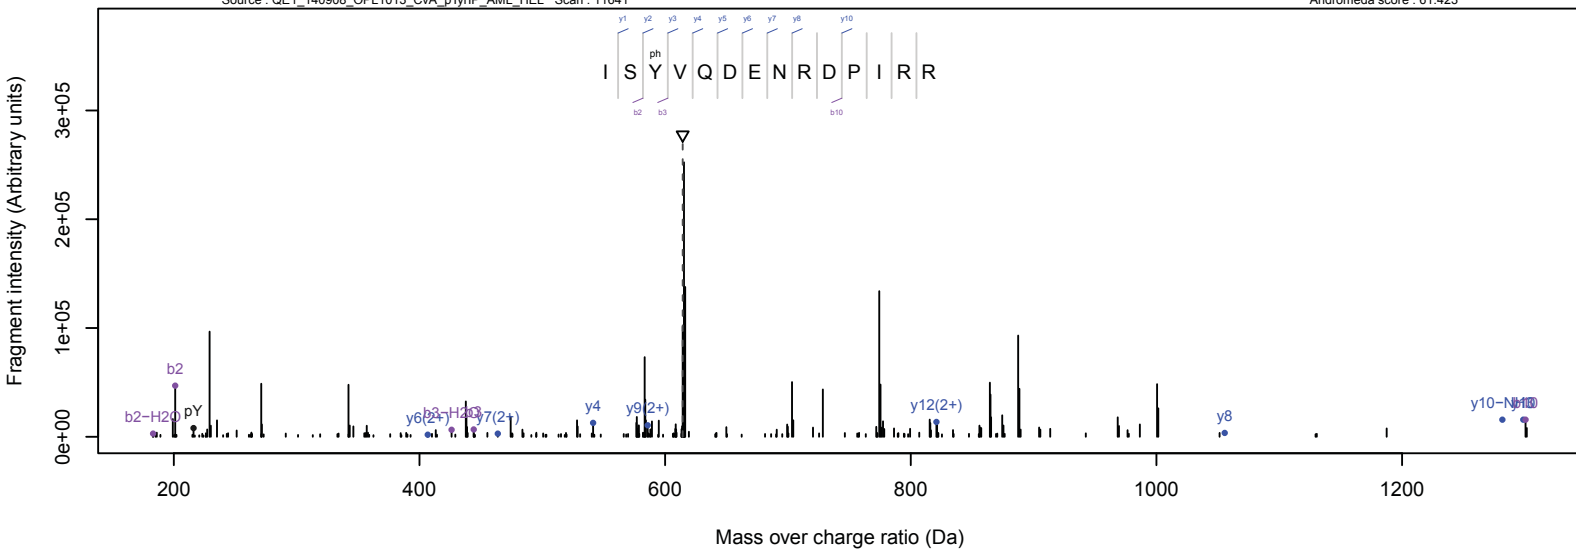

## Y(ph)NLHQIQGHSAPR-3+

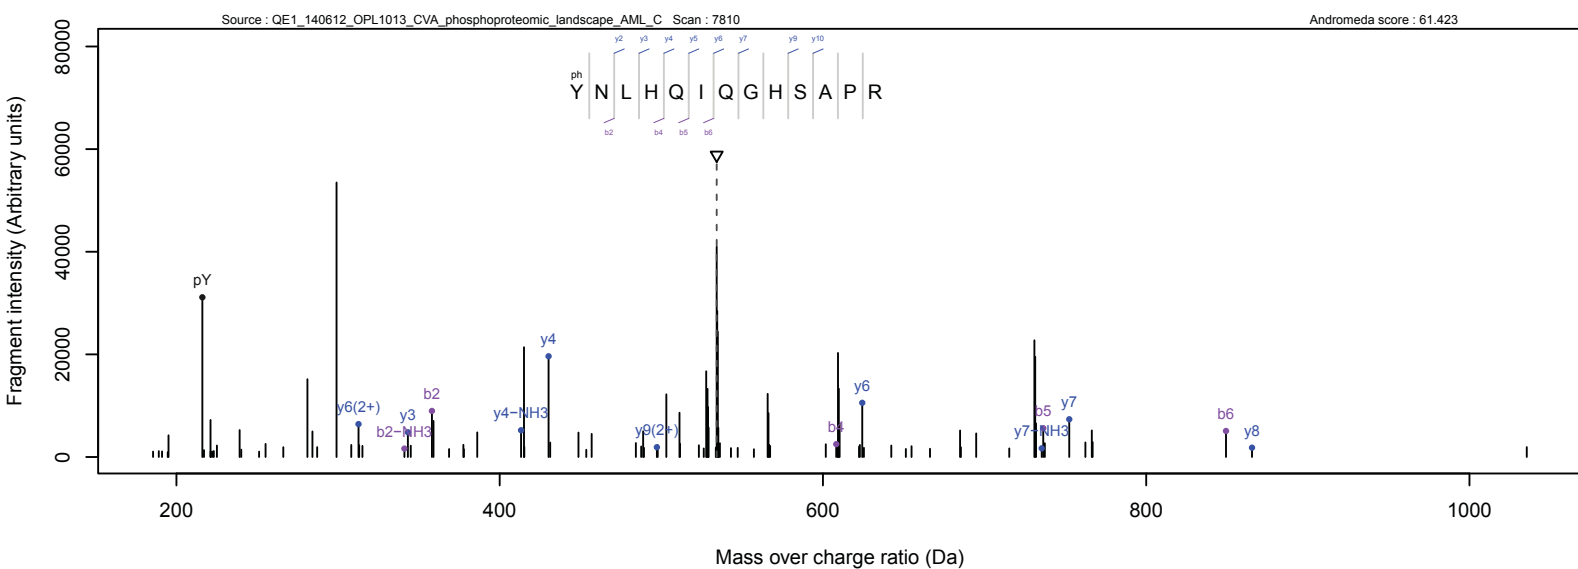

## VFGAGY(ph)PSLPTMTVSDWYEQHR-3+

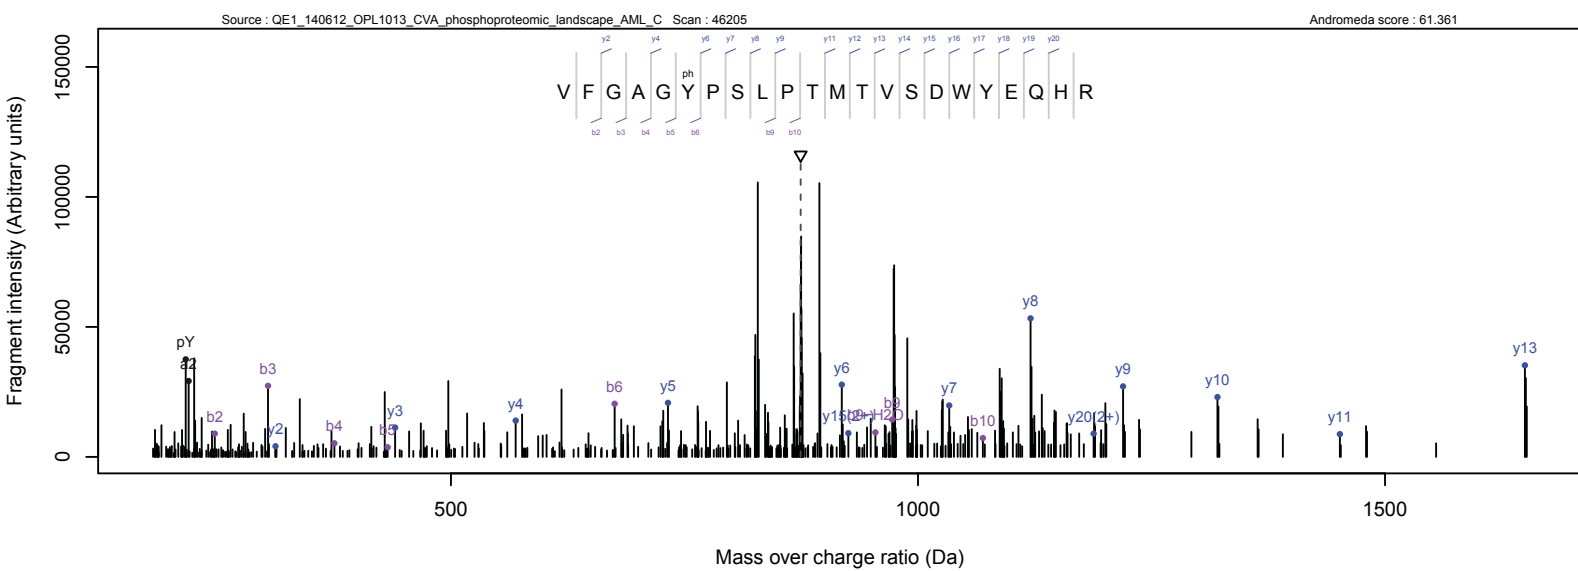

## GFGFVY(ph)ATVEEVDAAAMNARPHK-3+

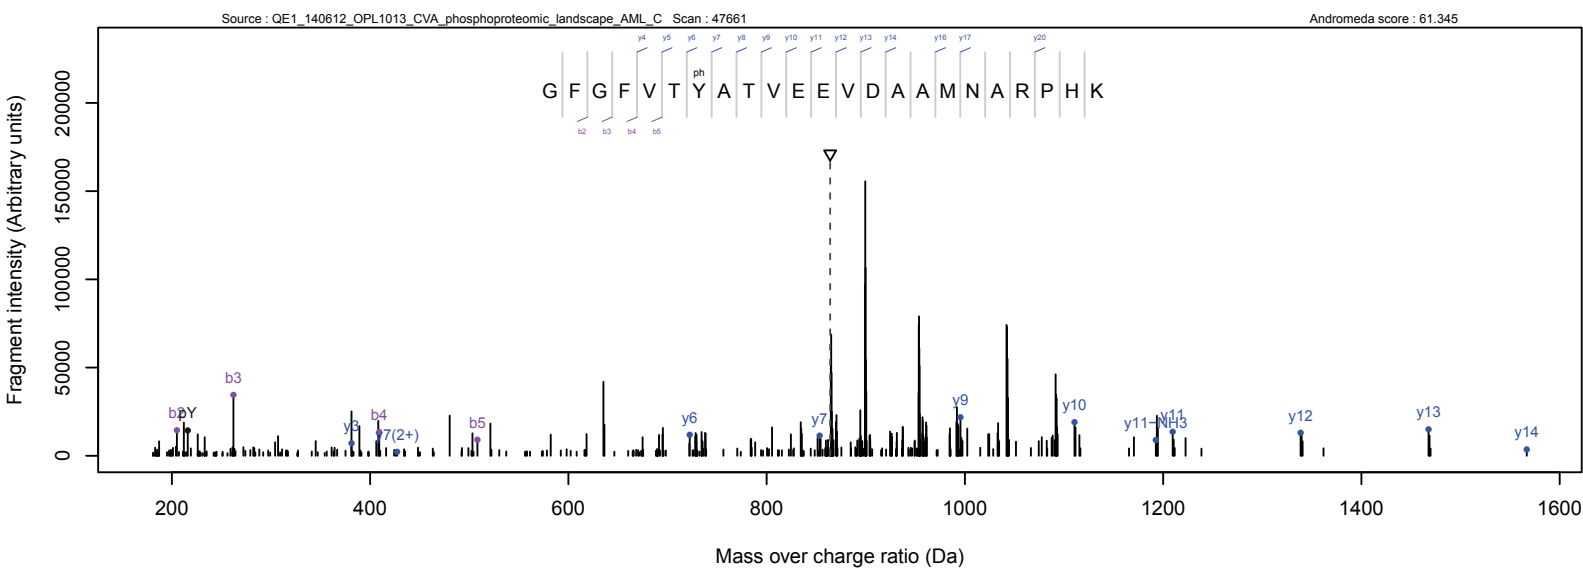

## EGIIPANY(ph)VQK-2+

Source : QE1\_140612\_OPL1013\_CVA\_phosphoproteomic\_landscape\_AML\_A Scan : 21862

Andromeda score : 61.344

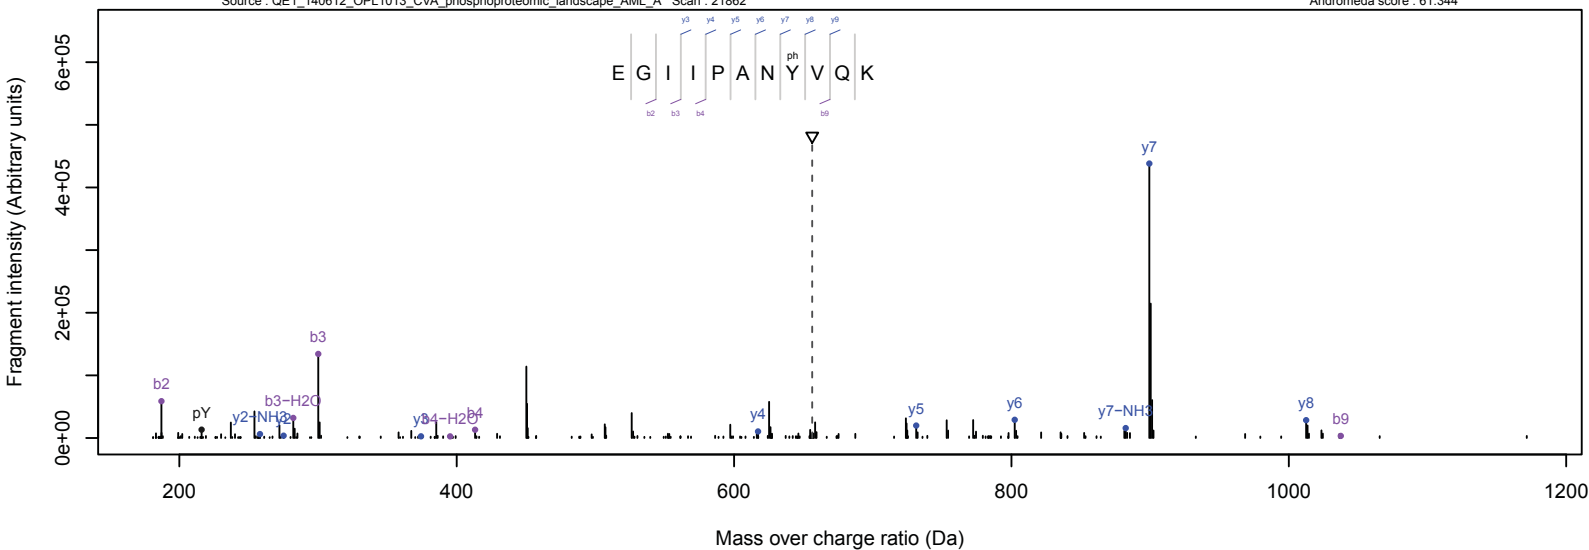

## IY(ph)PTFLHLHGK-3+

Source : QE1\_140612\_OPL1013\_CVA\_phosphoproteomic\_landscape\_AML\_B Scan : 27277

Andromeda score : 61.344

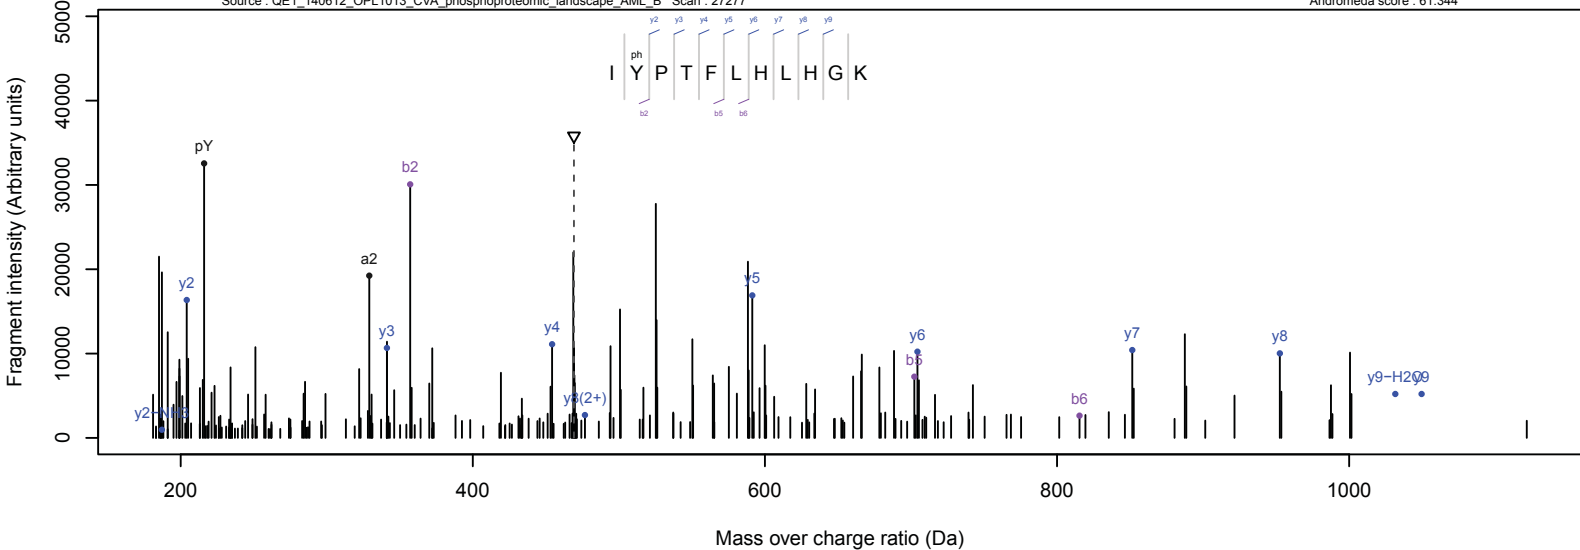

## SSSPQY(ph)GLTK-2+

Source : QE1\_140612\_OPL1013\_CVA\_phosphoproteomic\_landscape\_AML\_C Scan : 7263

Andromeda score : 61.344

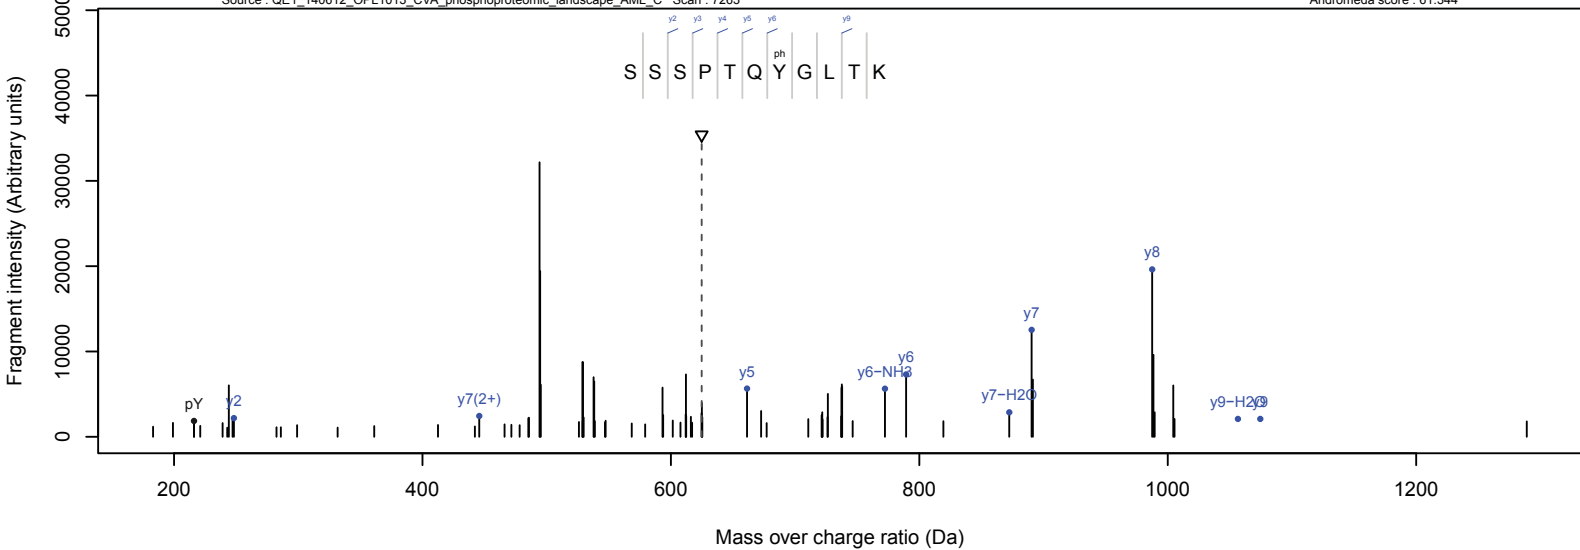



## (ac)AFAETY(ph)PAASSLPNGDCGRPR-3+

Source : QE1\_140612\_OPL1013\_CVA\_phosphoproteomic\_landscape\_AML\_C Scan : 28792

Andromeda score : 61.276

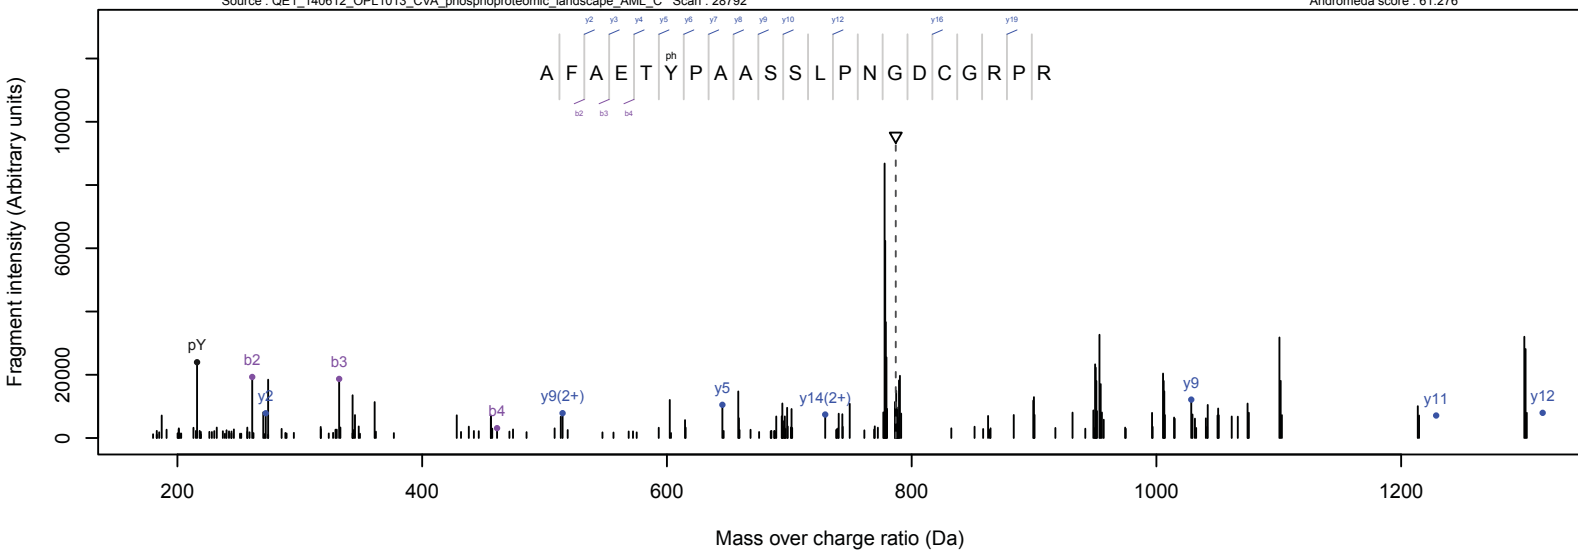

## AVY(ph)EDRPPGSVVPTSAAEASR-3+

Source : QE1\_140612\_OPL1013\_CVA\_phosphoproteomic\_landscape\_AML\_C Scan : 19696

Andromeda score : 61.276

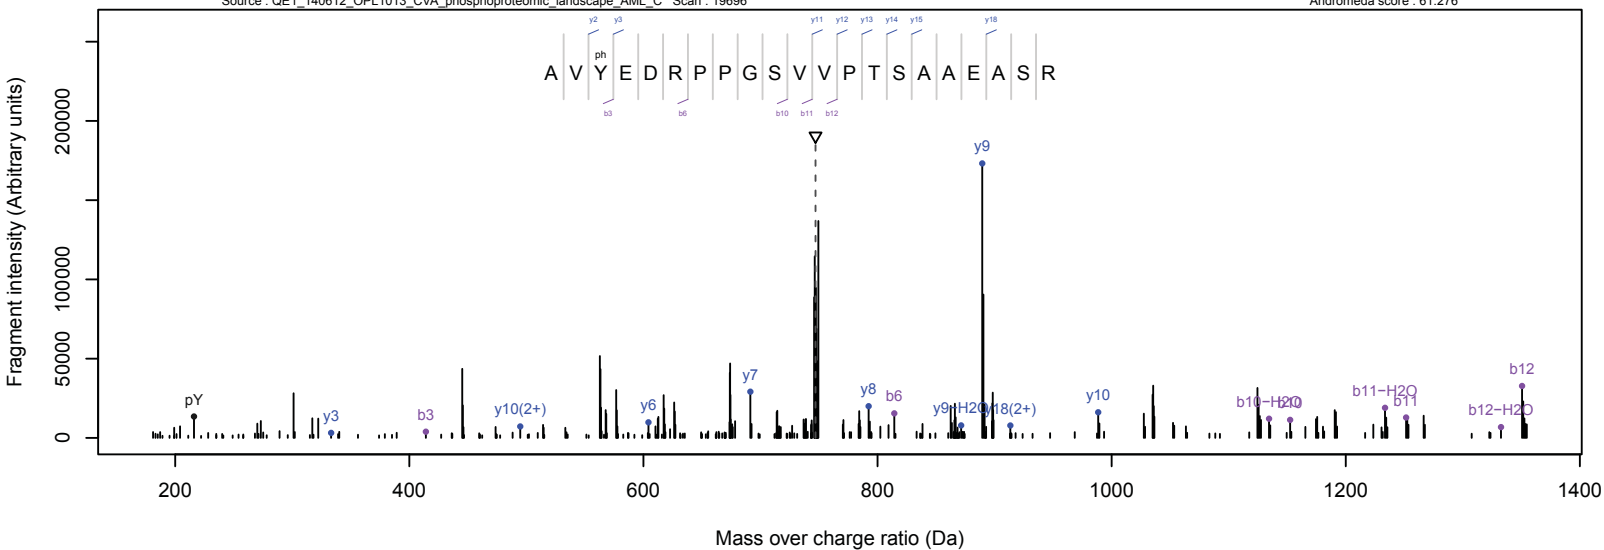

## MQFESSYEGY(ph)FLACEKER-3+

Source : QE1\_140612\_OPL1013\_CVA\_phosphoproteomic\_landscape\_AML\_B Scan : 33257

Andromeda score : 61.276

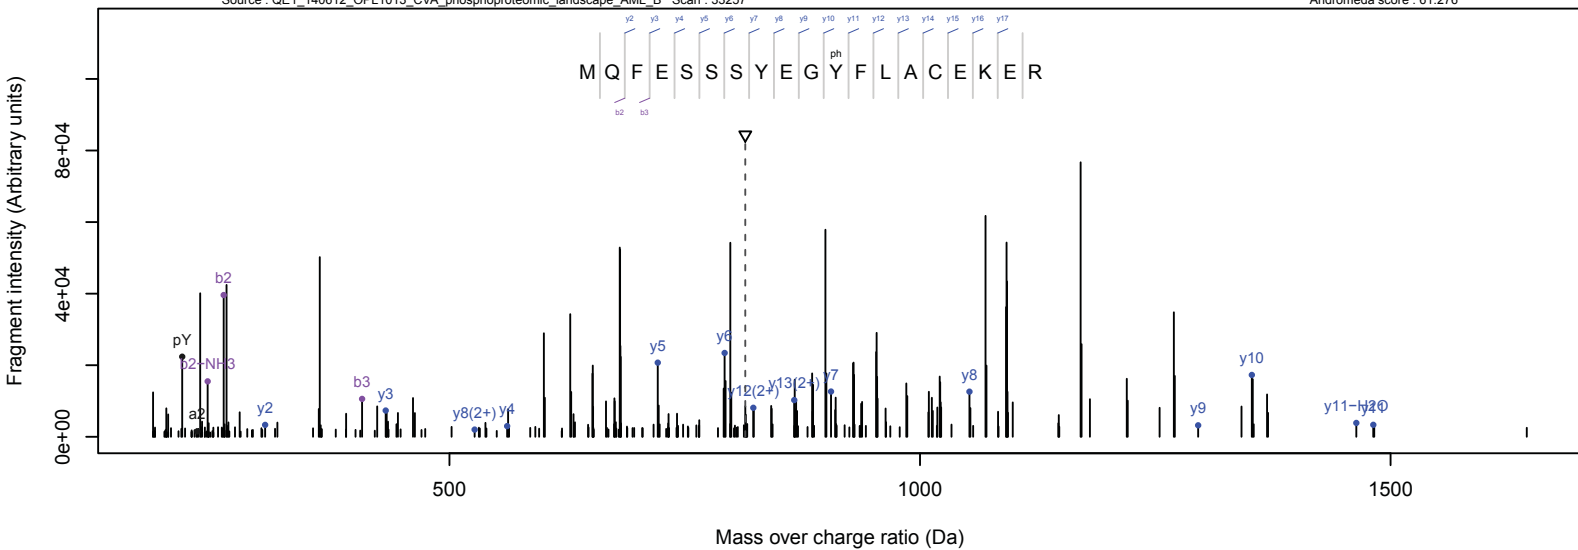

## AGIDPNAITYG(ph)YNK-2+

Source : QE1\_140612\_OPL1013\_CVA\_phosphoproteomic\_landscape\_AML\_C Scan : 29071

Andromeda score : 61.265

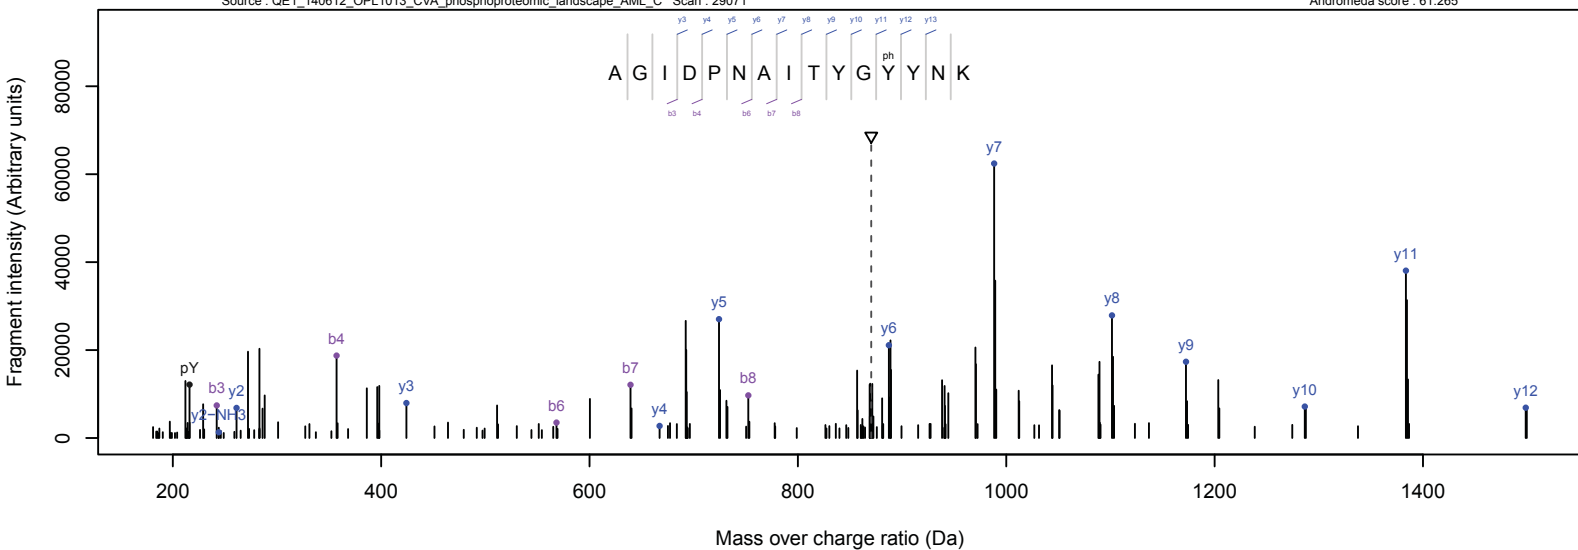

## KRPSY(ph)VVPTSLSHGIK-4+

Source : QE1\_140612\_OPL1013\_CVA\_phosphoproteomic\_landscape\_AML\_C Scan : 17498

Andromeda score : 61.265

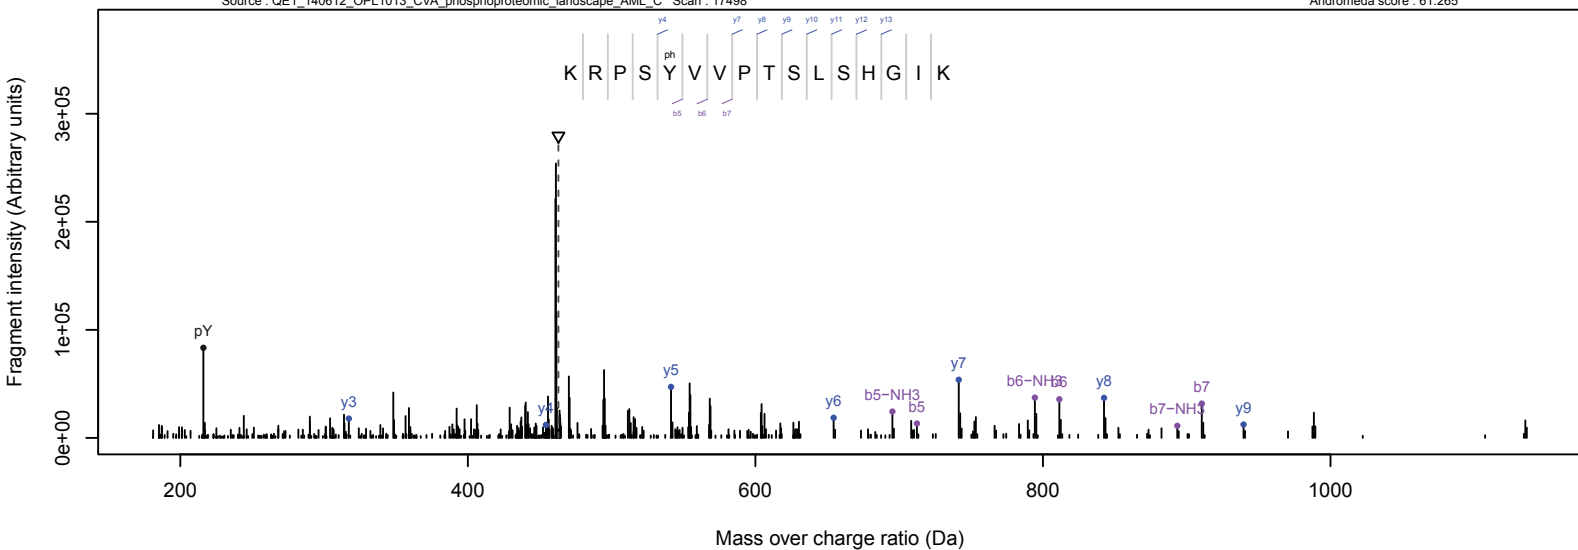

## TKPSDEEMLFY(ph)GHYK-3+

Source : QE1\_140908\_OPL1013\_CvA\_pTyrIP\_AML\_HEL Scan : 31176

Andromeda score : 61.265

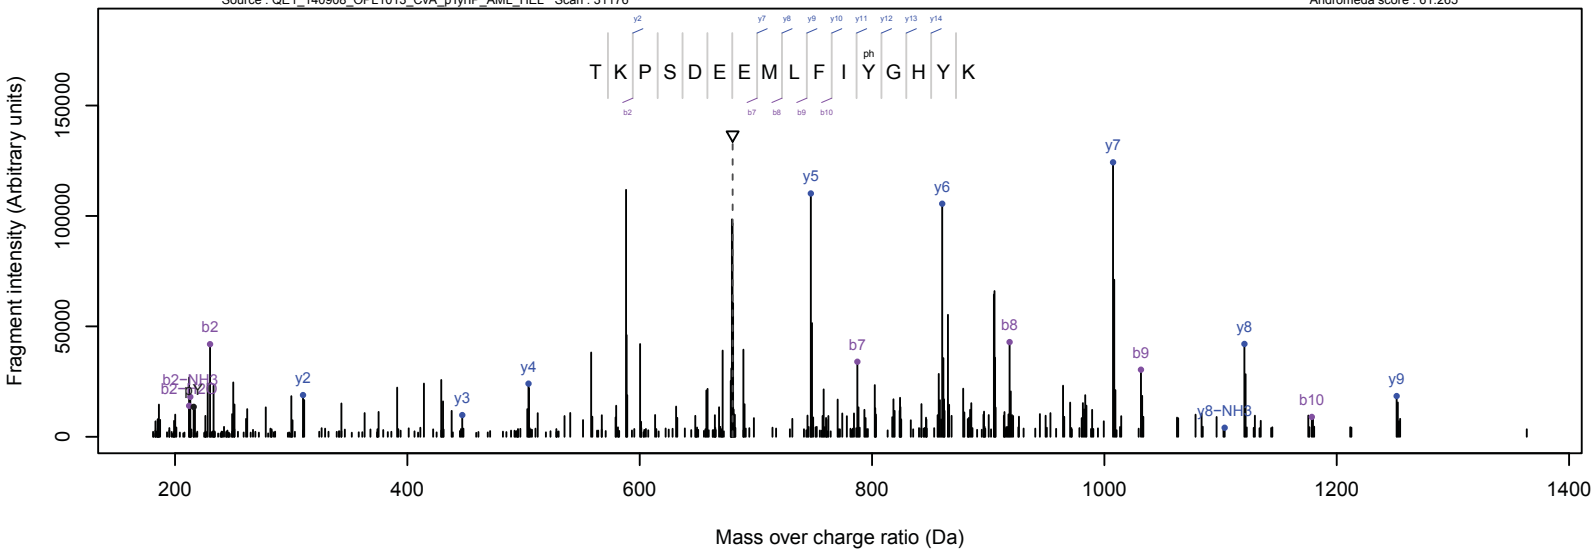

YGNEGY(ph)IPSNYVTGK-2+

Source : QE1\_140612\_OPL1013\_CVA\_phosphoproteomic\_landscape\_AML\_C Scan : 23246

Andromeda score : 61.265

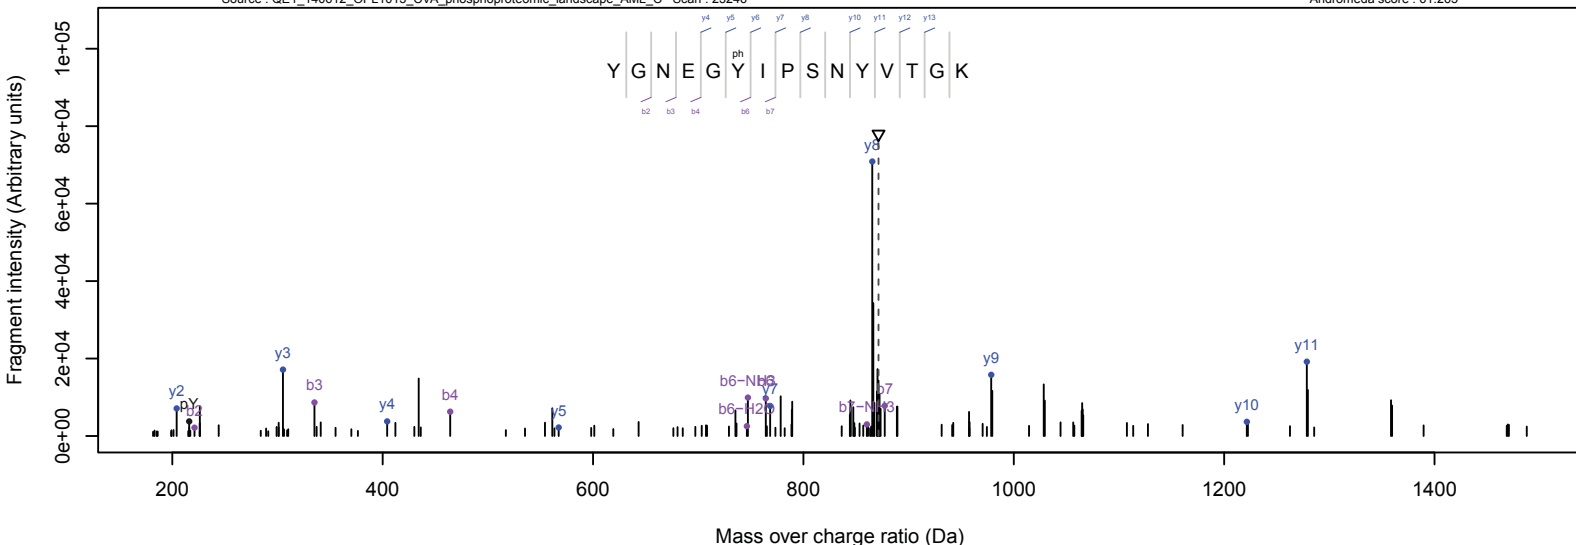

HATGNY(ph)IIMDADLSHHPK-3+

Source : QE1\_140612\_OPL1013\_CVA\_phosphoproteomic\_landscape\_AML\_C Scan : 27554

Andromeda score : 61.253

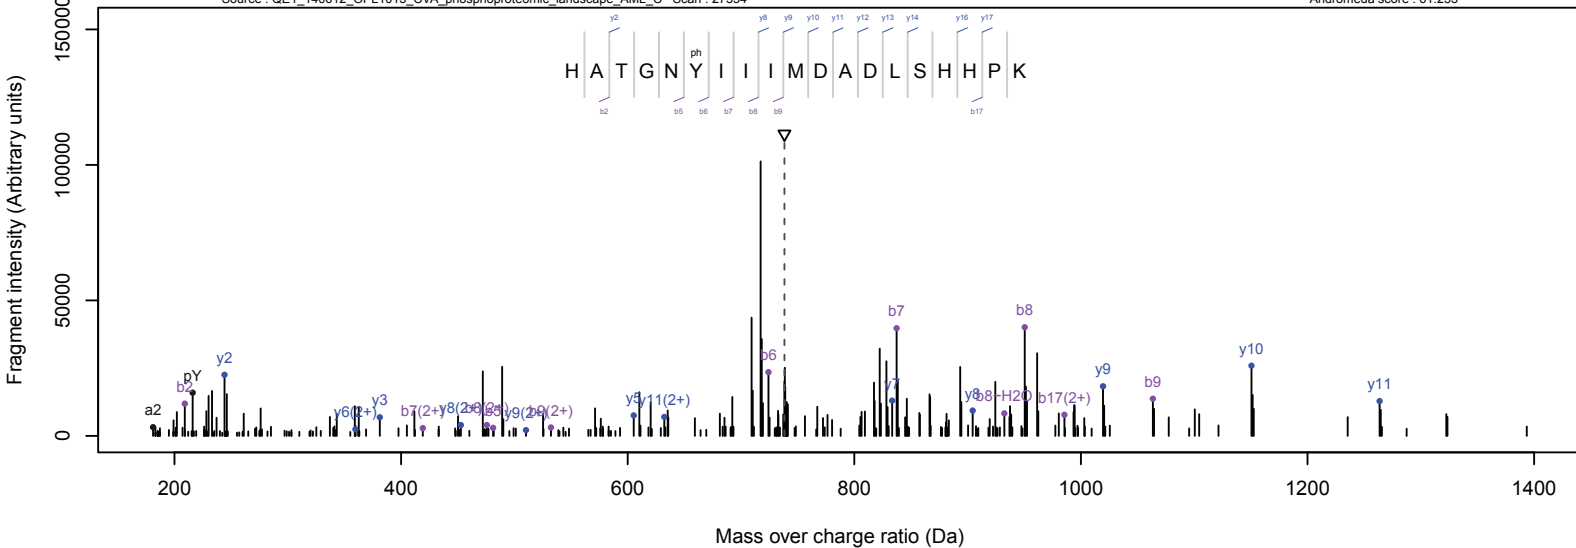

NVDFNY(ph)ATKDK-2+

Source : QE1\_140612\_OPL1013\_CVA\_phosphoproteomic\_landscape\_AML\_A Scan : 10816

Andromeda score : 61.235

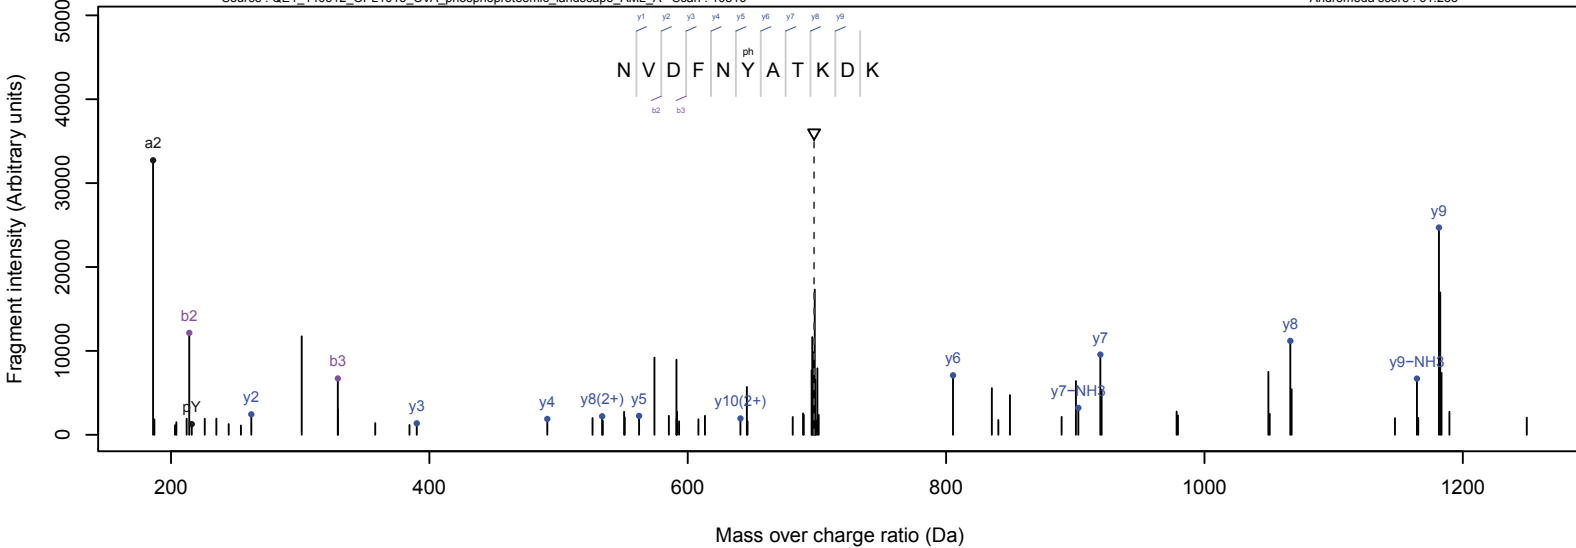

SDSY(ph)VELSQYR-2+

Source : QE1\_140612\_OPL1013\_CVA\_phosphoproteomic\_landscape\_AML\_D Scan : 20371

Andromeda score : 61.235

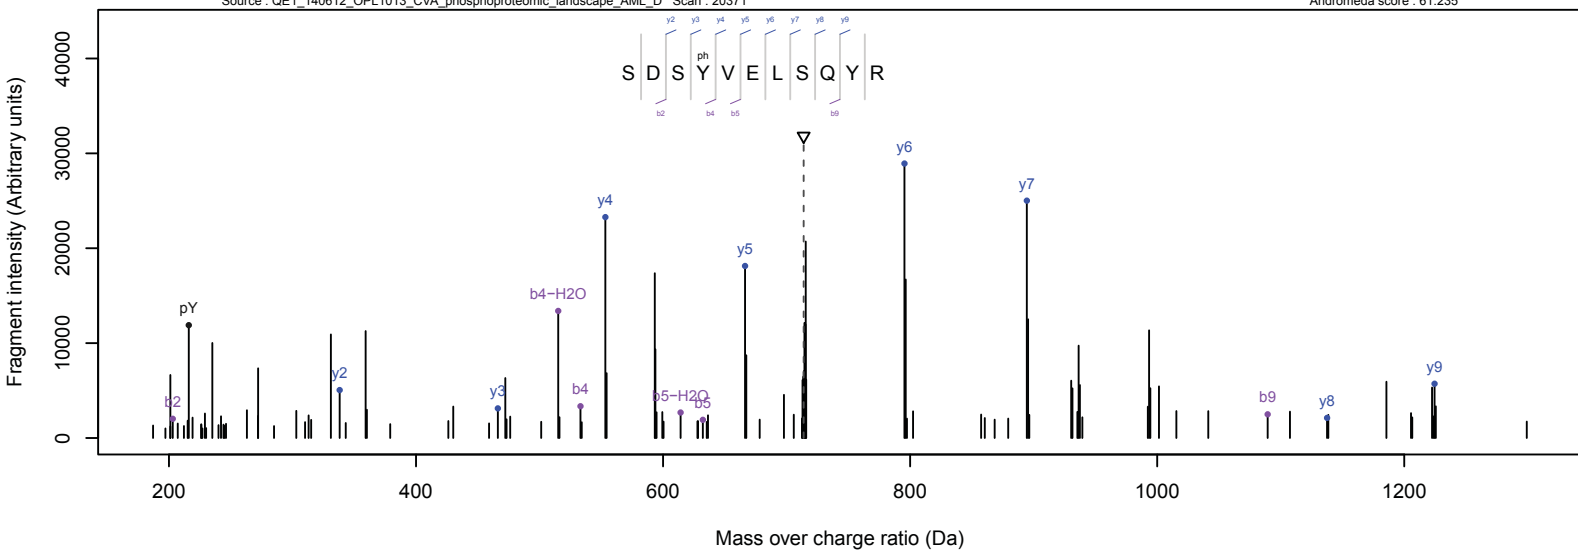

EKKLY(ph)ANMFER-3+

Source : QE1\_140612\_OPL1013\_CVA\_phosphoproteomic\_landscape\_AML\_B Scan : 16749

Andromeda score : 61.233

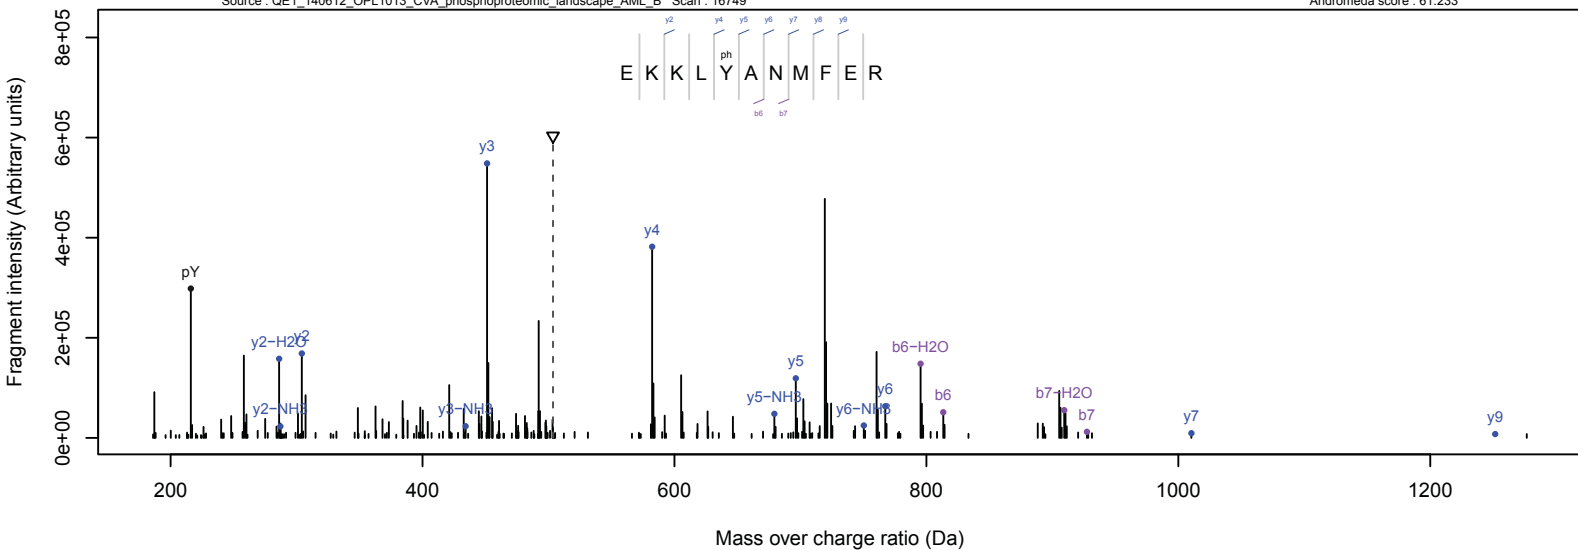

PLPQDSY(ph)TVVR-2+

Source : QE1\_140612\_OPL1013\_CVA\_phosphoproteomic\_landscape\_AML\_B Scan : 17499

Andromeda score : 61.233

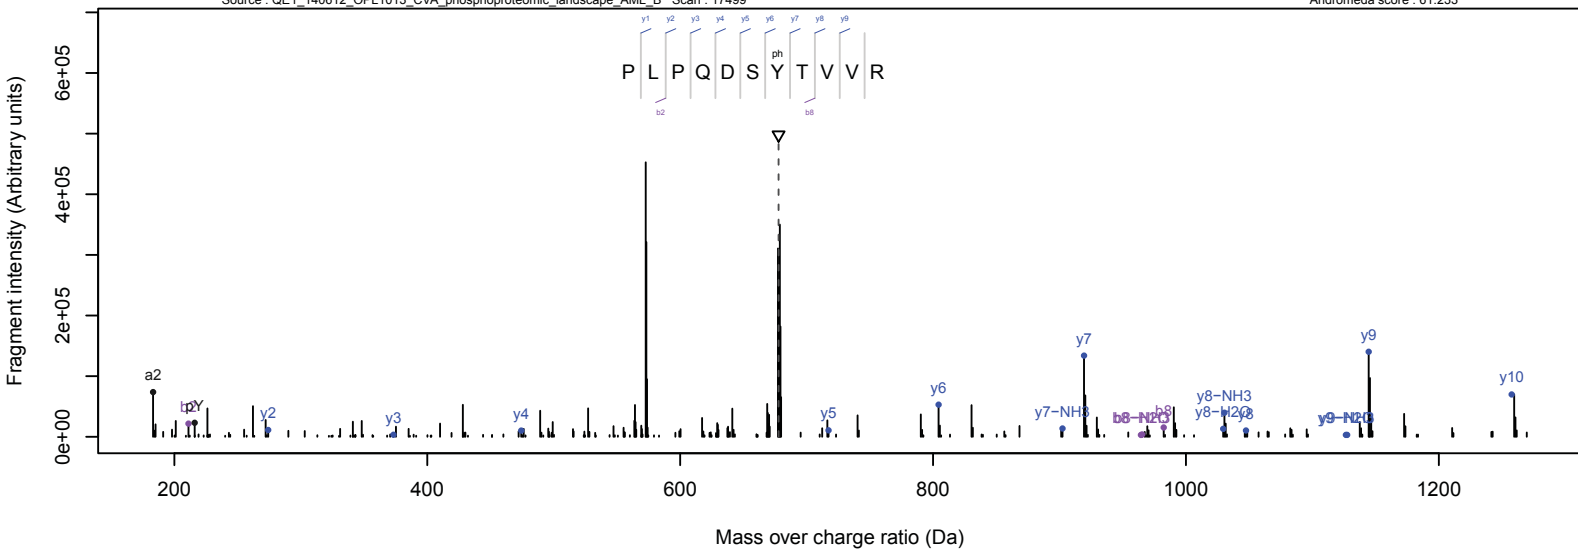

## SDGIY(ph)IINLKR-2+

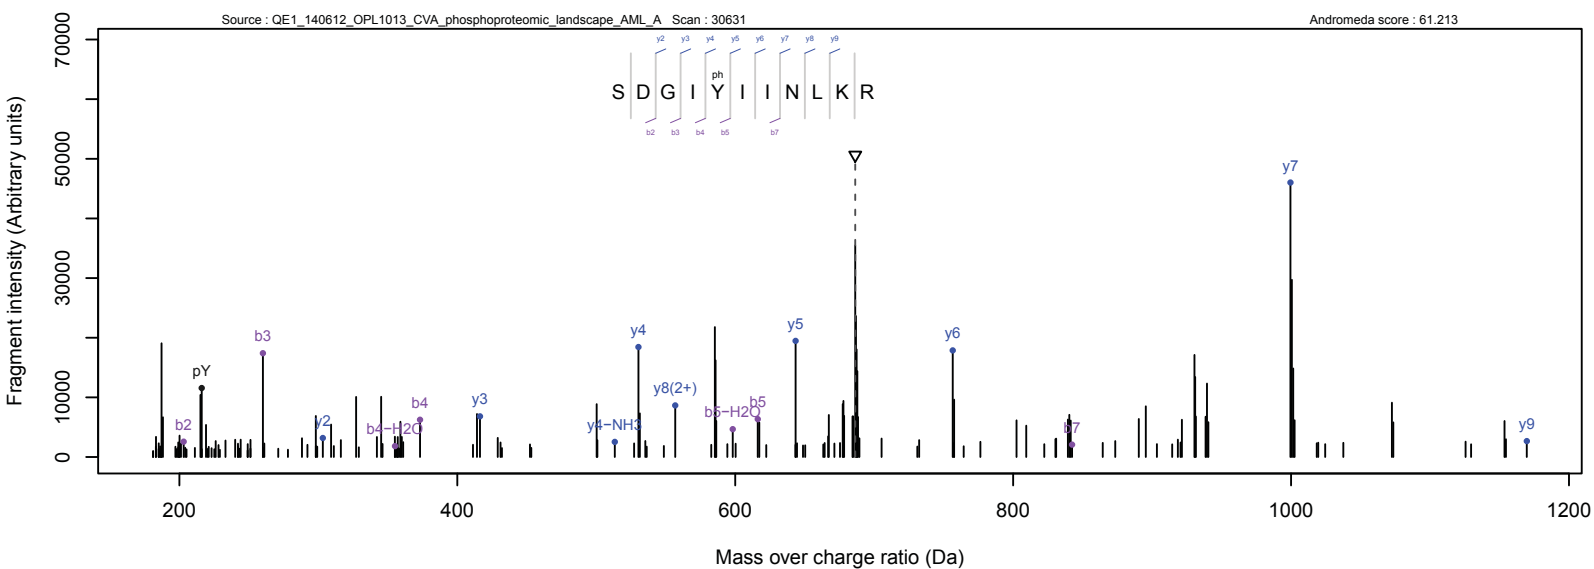

## LLDTSTY(ph)KEAFRK-3+

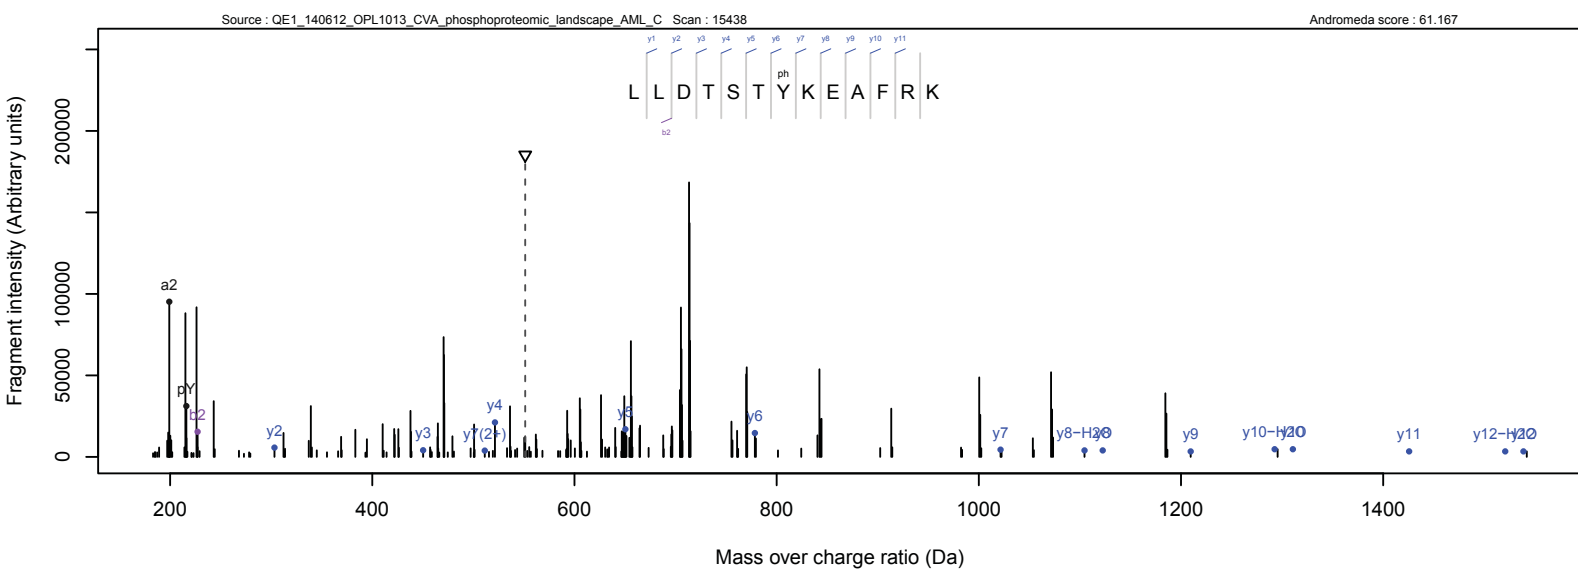

## VLGLLALDYPY(ph)KHK-3+

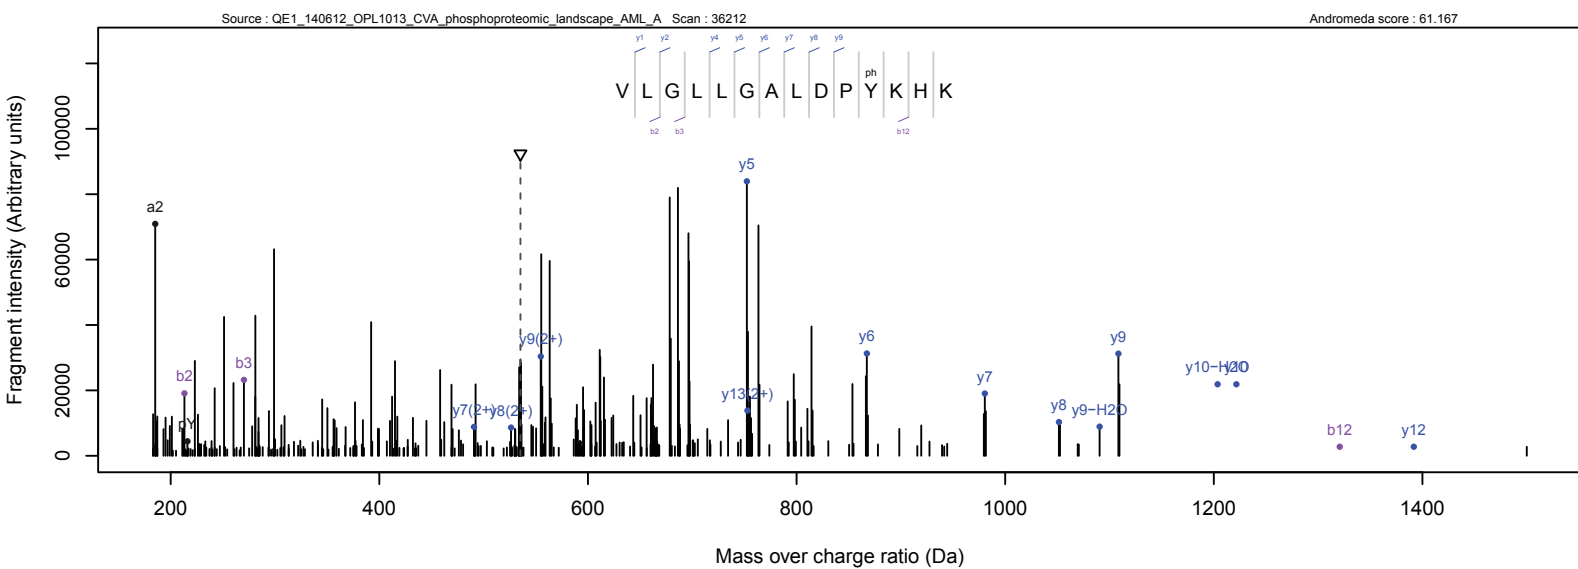

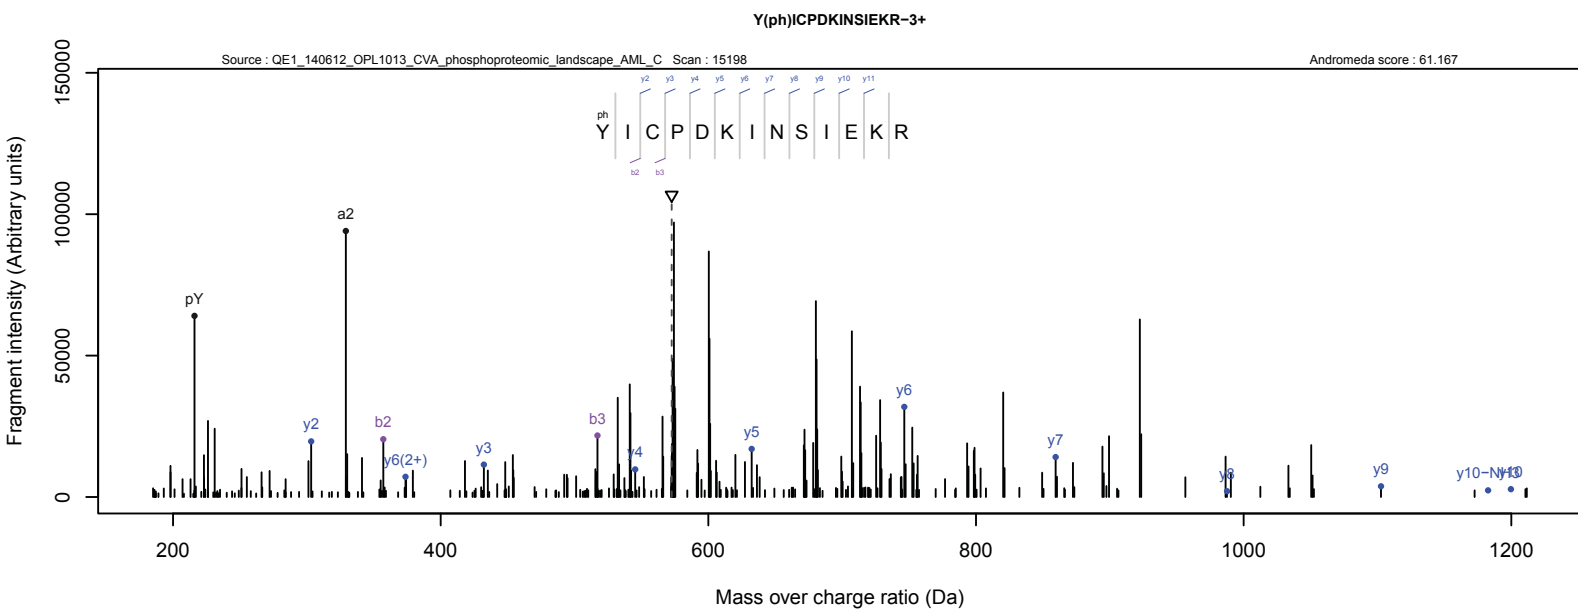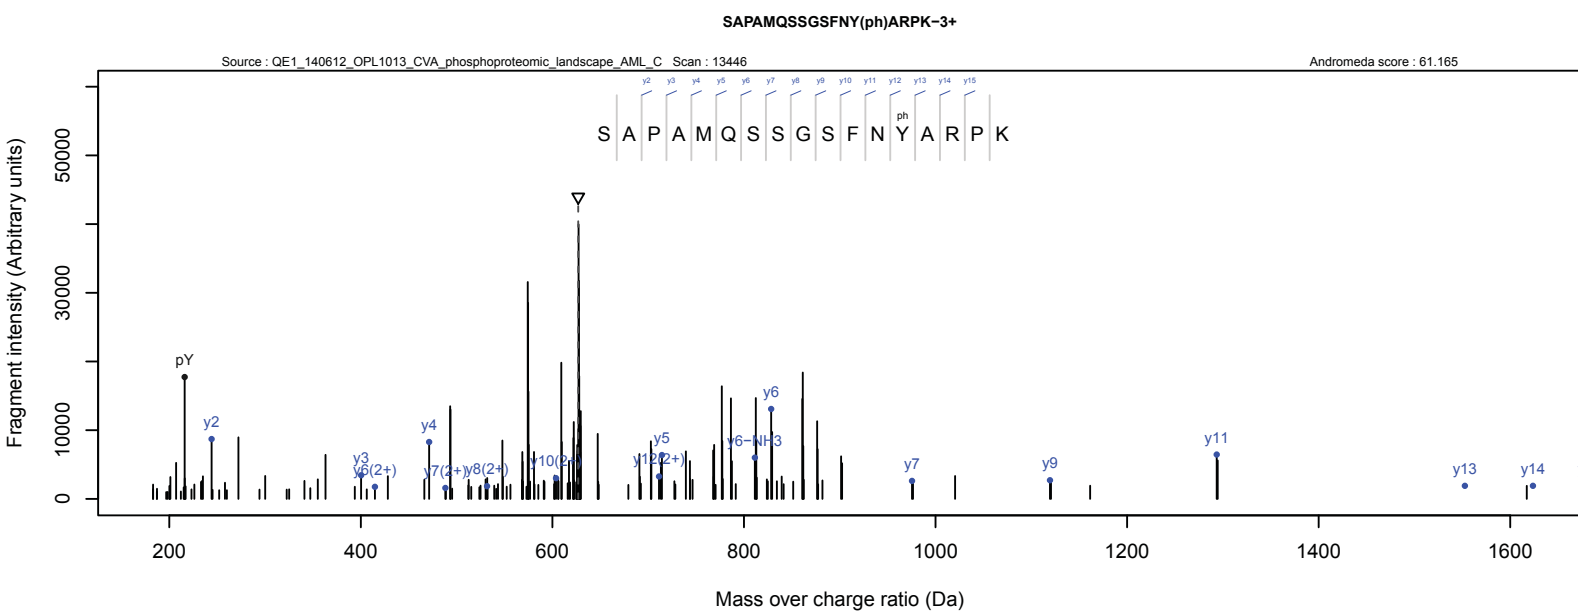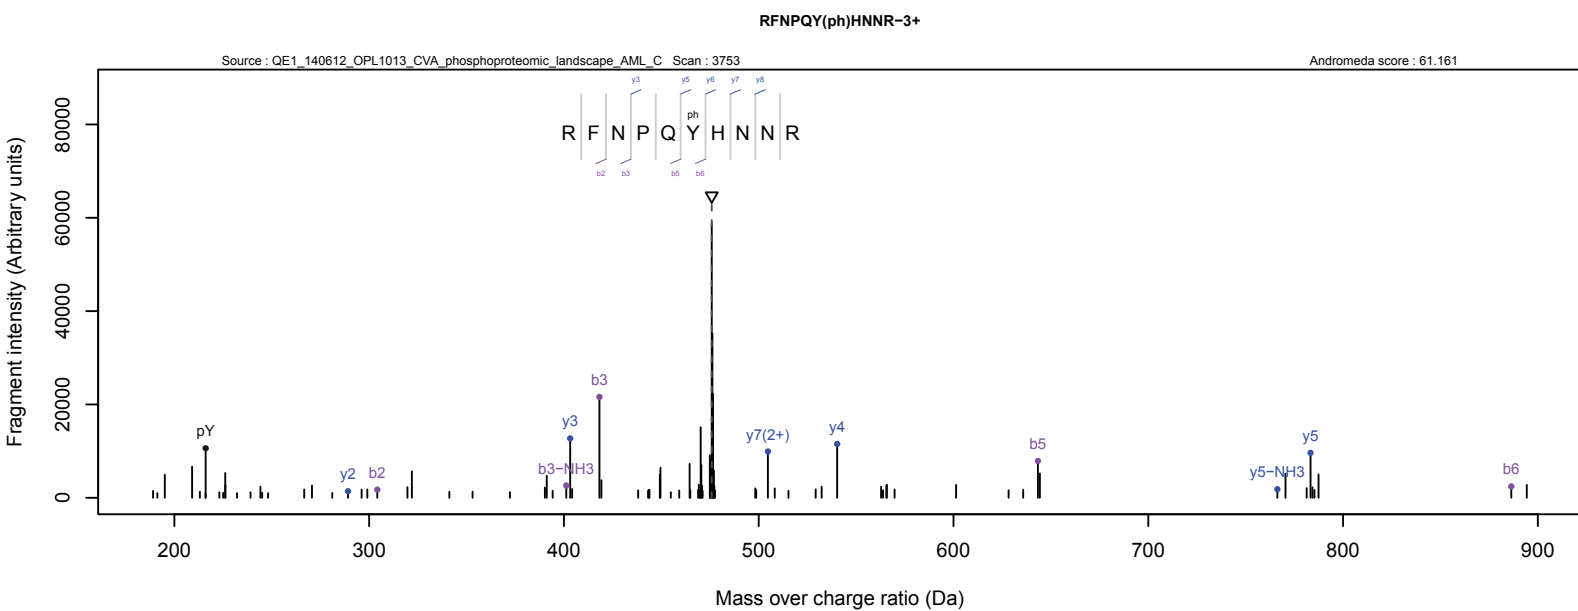



HGMNGFFQQMIY(ph)DSPPSR-3+

Source : QE1\_140908\_OPL1013\_CVA\_pTyrIP\_AML\_Kasumi6 Scan : 35779

Andromeda score : 61.096

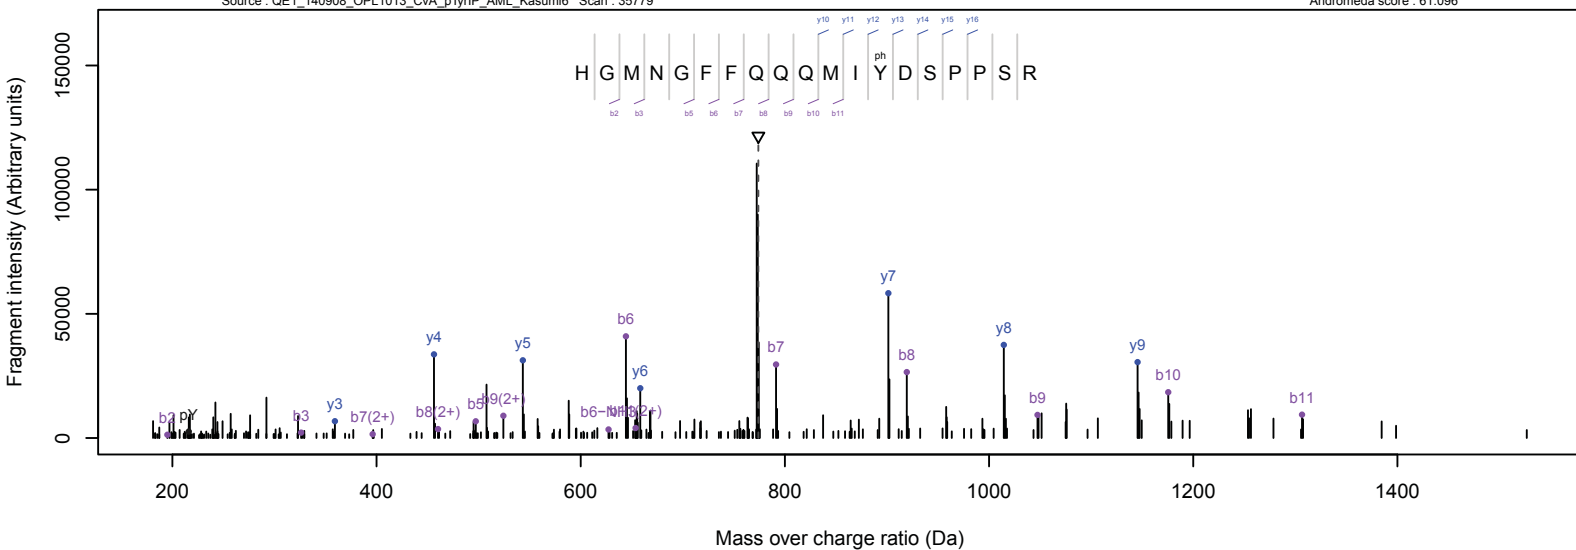

QQQY(ph)ADLLSHDQLLTER-3+

Source : QE1\_140612\_OPL1013\_CVA\_phosphoproteomic\_landscape\_AML\_B Scan : 31375

Andromeda score : 61.096

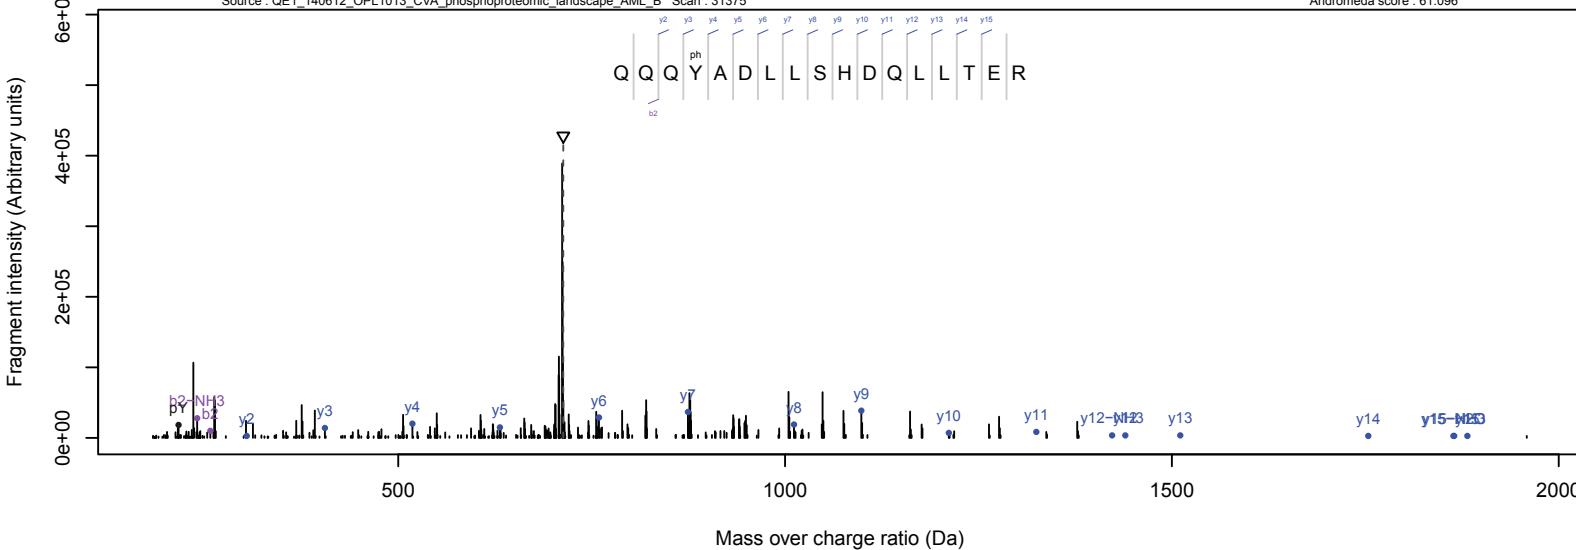

SVVAPEHVKG(ph)YVEAYK-3+

Source : QE1\_140612\_OPL1013\_CVA\_phosphoproteomic\_landscape\_AML\_B Scan : 26669

Andromeda score : 61.096

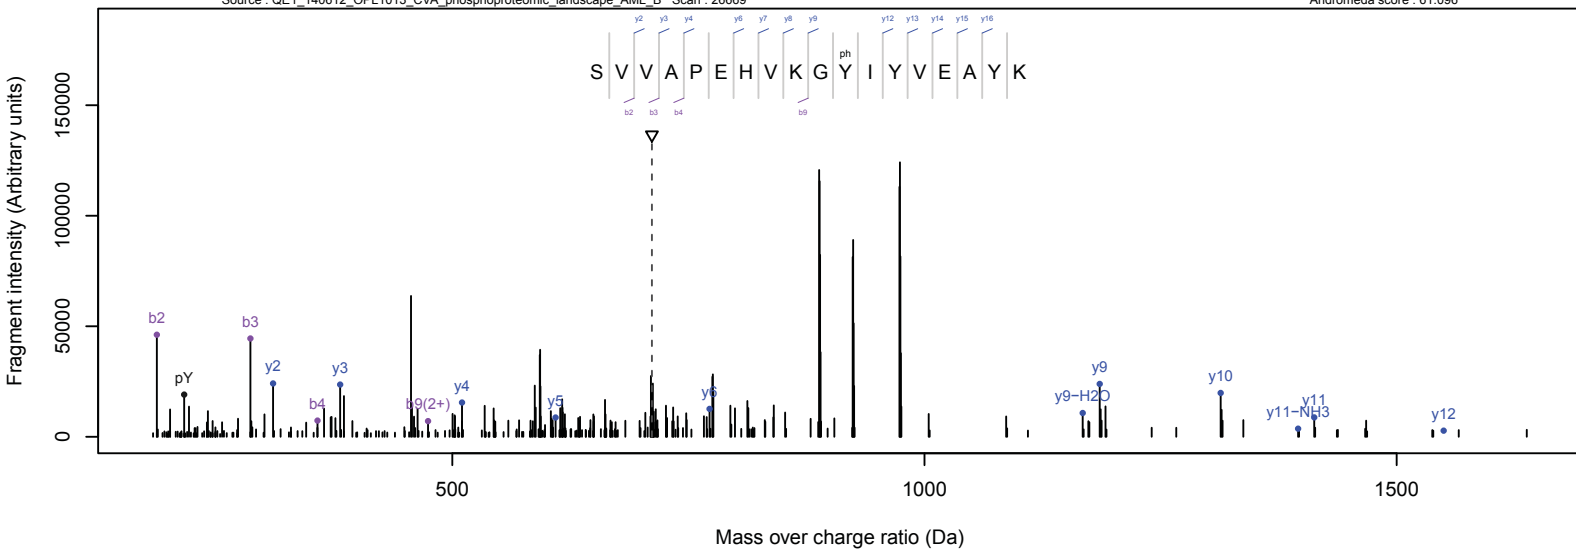



## SVVSQSVCDY(ph)FFEAQEK-2+

Source : QE1\_140612\_OPL1013\_CVA\_phosphoproteomic\_landscape\_AML\_D Scan : 38068

Andromeda score : 61.096

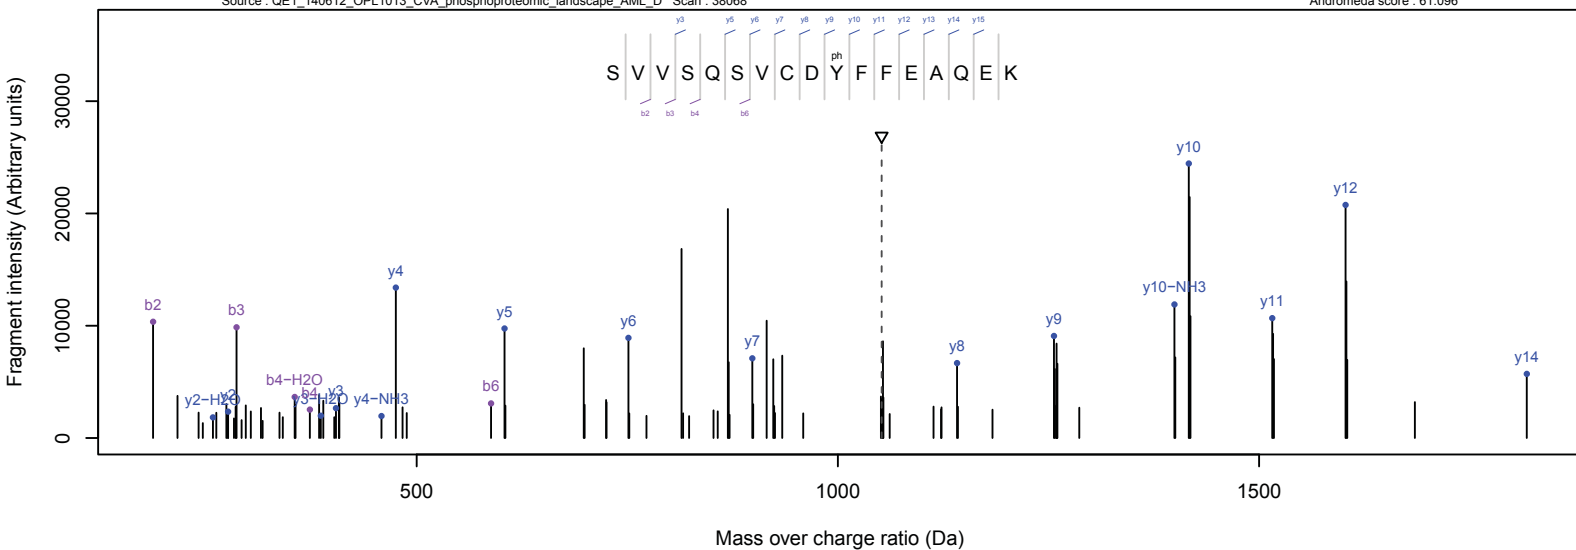

## FVTKNDGY(ph)VHIHPSSVNYQVR-4+

Source : QE1\_140612\_OPL1013\_CVA\_phosphoproteomic\_landscape\_AML\_B Scan : 20452

Andromeda score : 61.087

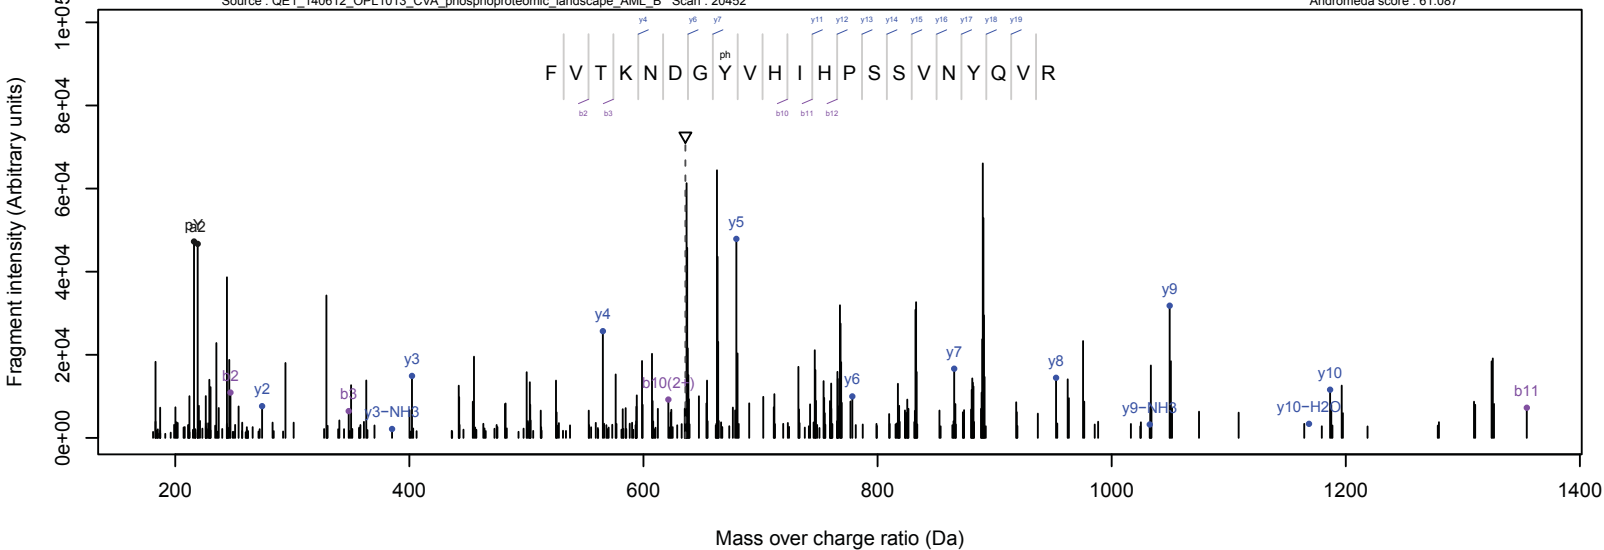

## (ac)SDY(ph)STGGPPPGPPPAGGGGGAGGAGGPPPPPPGAGDR-3+

Source : QE1\_140822\_OPL1013\_CvA\_pTyrIP\_AML\_cell\_lines\_part2\_F Scan : 20964

Andromeda score : 61.082

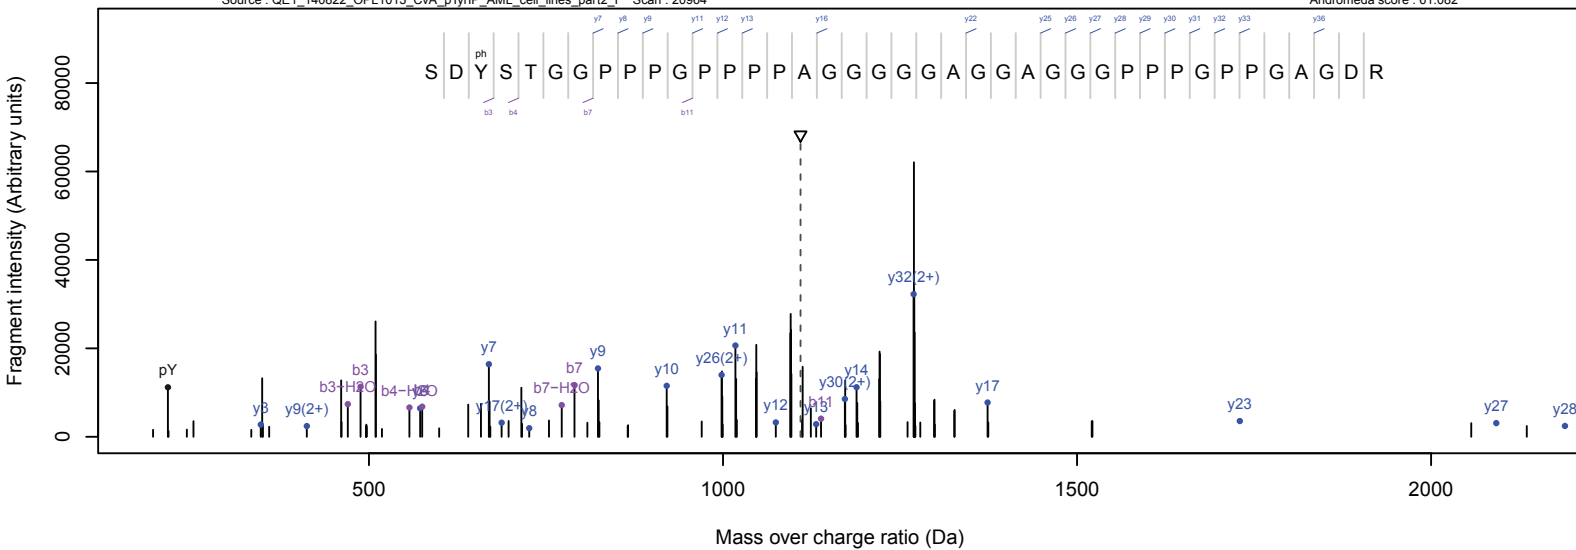

**EESTY(ph)LPLTSMQPTEAMGEEPSRAE-3+**

Source : QE1\_140612\_OPL1013\_CVA\_phosphoproteomic\_landscape\_AML\_B Scan : 39684

Andromeda score : 61.039

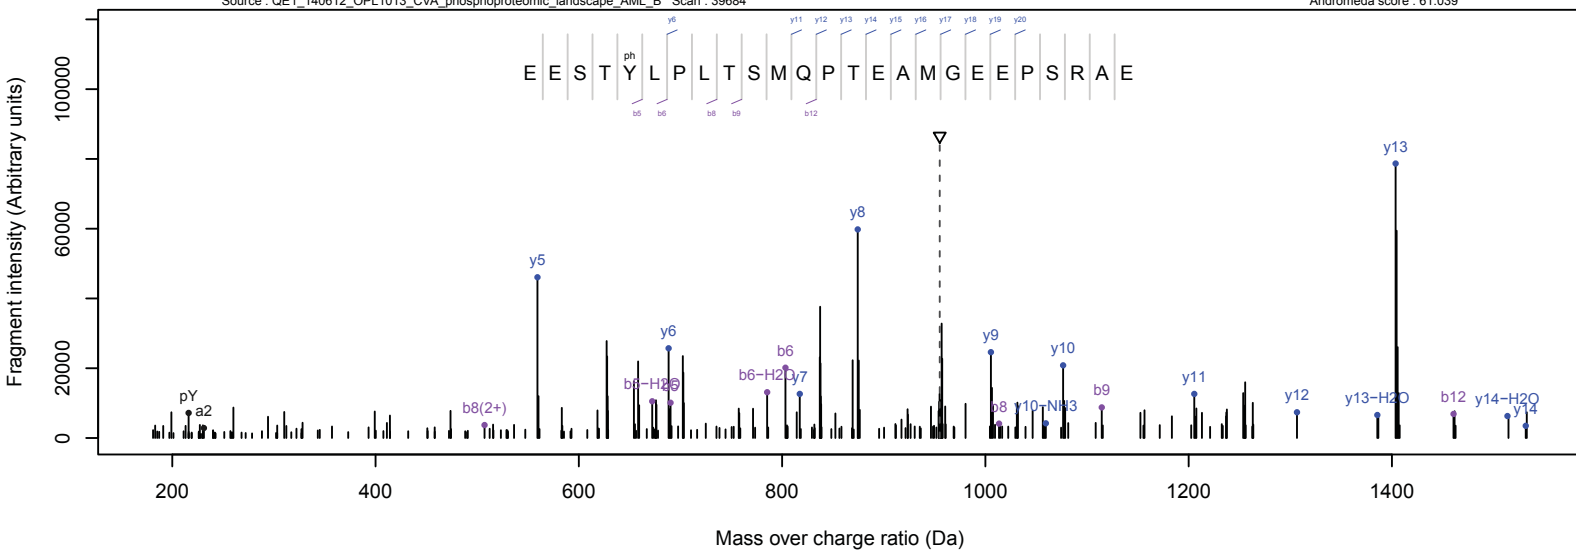

**ELISNASDALDKIRY(ph)ESLTDPK-3+**

Source : QE1\_140908\_OPL1013\_CvA\_pTyrIP\_AML\_HL60 Scan : 43743

Andromeda score : 61.039

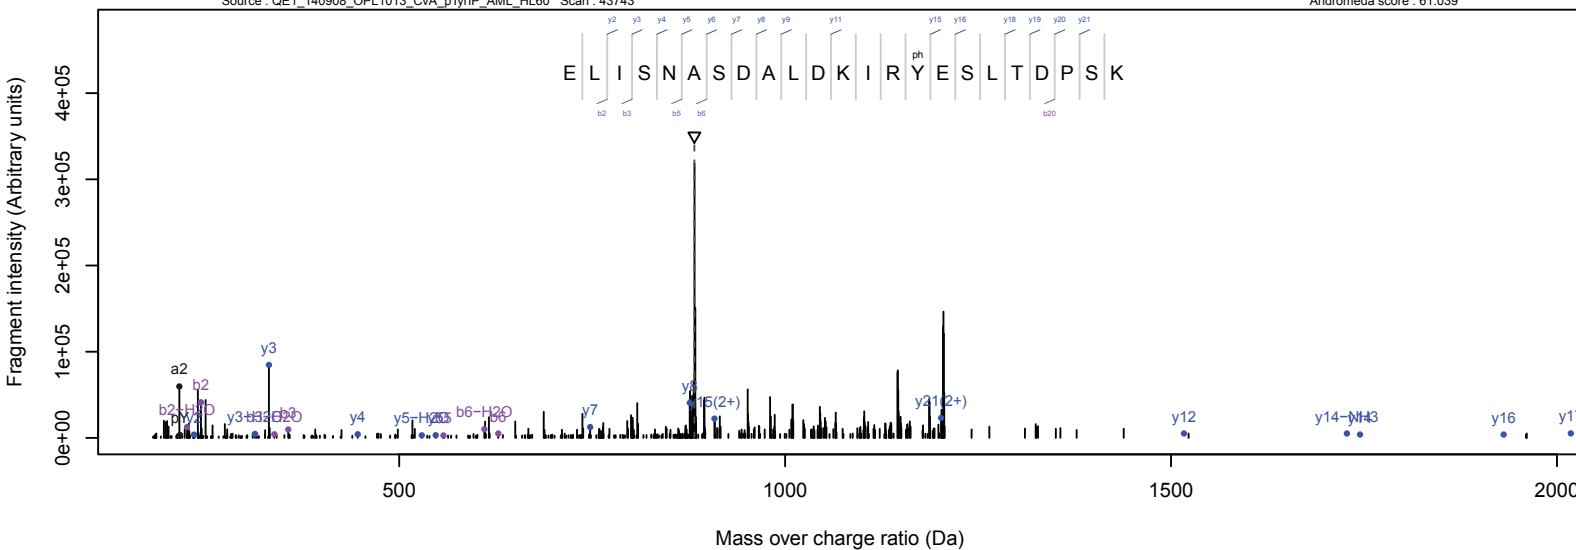

**IYSGDY(ph)YR-2+**

Source : QE1\_140908\_OPL1013\_CvA\_pTyrIP\_AML\_Kasumi6 Scan : 12831

Andromeda score : 60.91

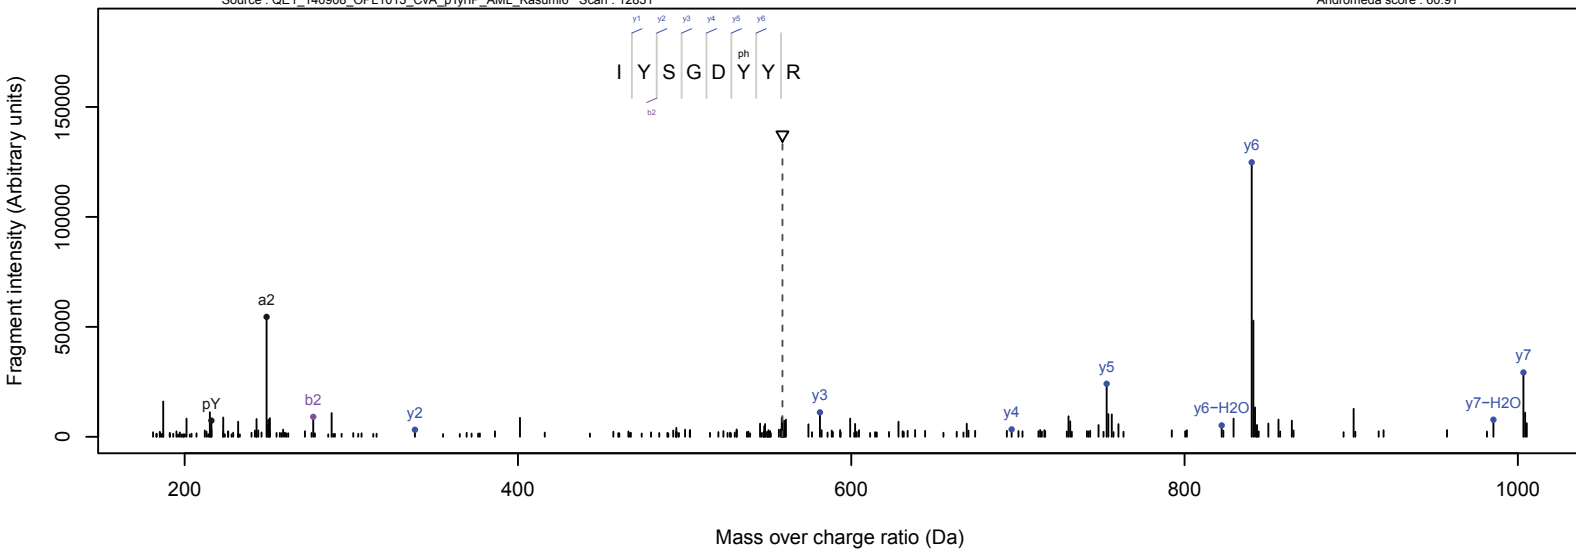

## Y(ph)RFQSNHM(ox)DM(ox)VR-3+

Source: QE1\_140908\_OPL1013\_CVA\_pTyrIP\_AML\_Kasumi6 Scan: 5301

Andromeda score: 60.893

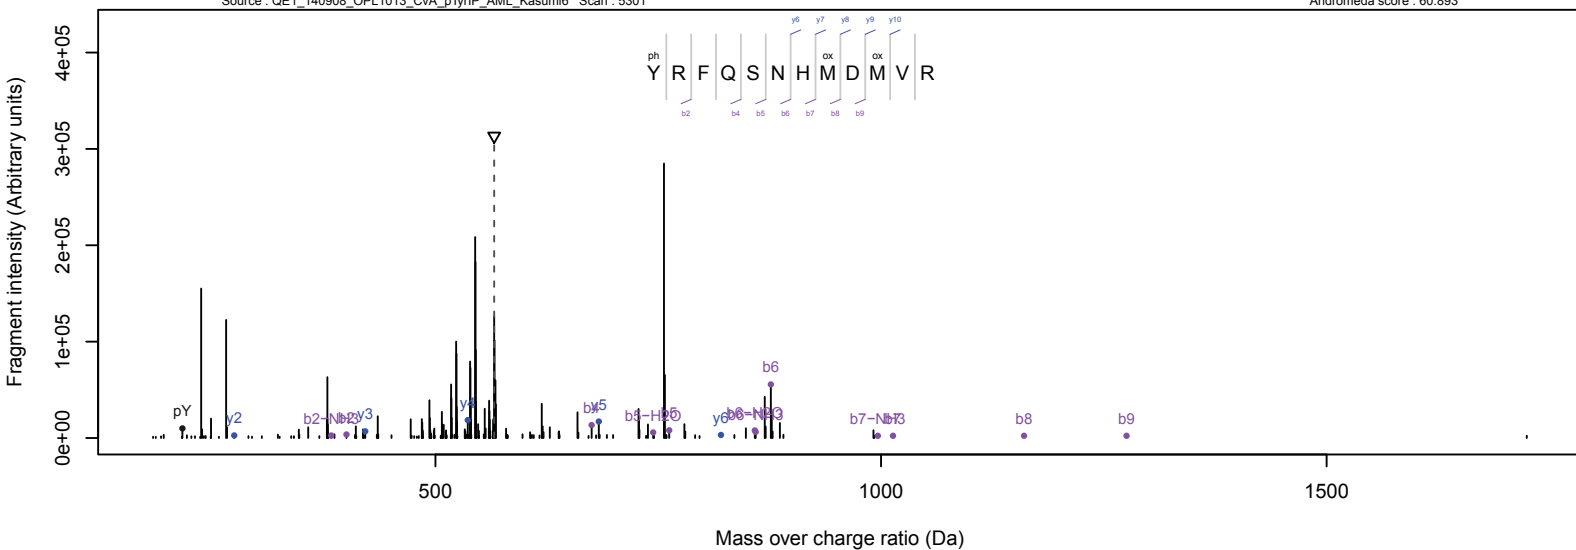

## TY(ph)PNCFVAK-2+

Source: QE1\_140612\_OPL1013\_CVA\_phosphoproteomic\_landscape\_AML\_D Scan: 14097

Andromeda score: 60.828

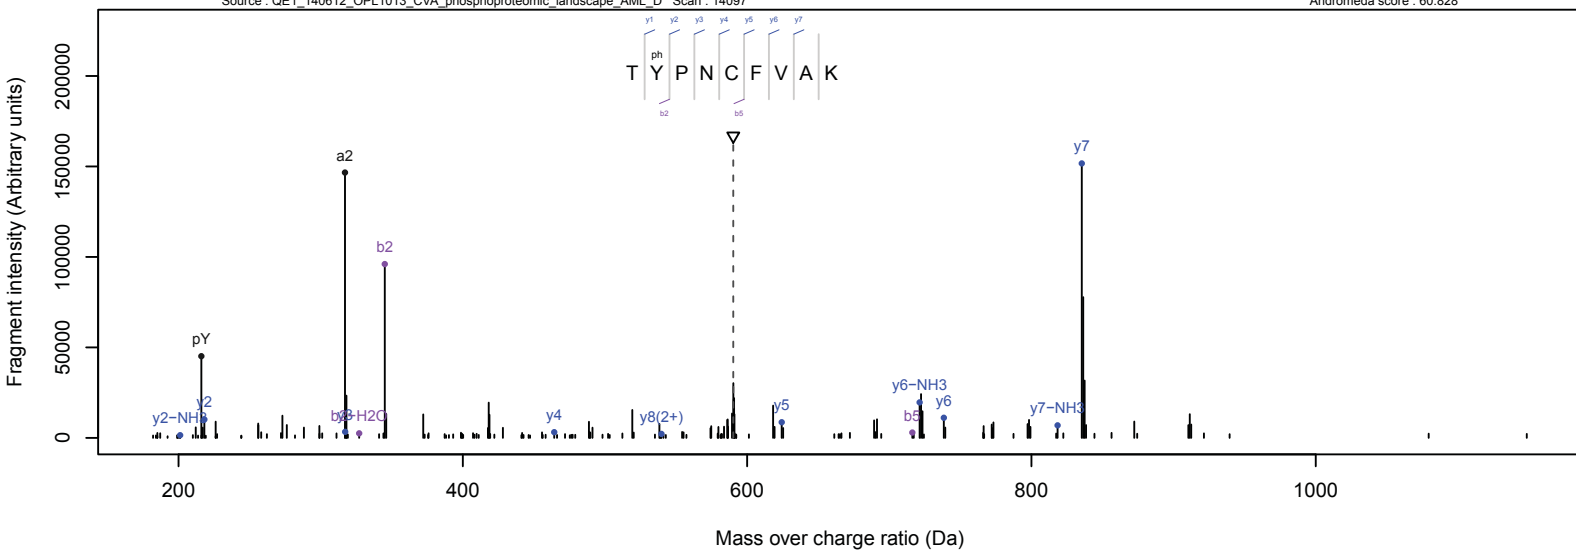

## FSDLKLNPGQDHSLLY(ph)STIPR-4+

Source: QE1\_140612\_OPL1013\_CVA\_phosphoproteomic\_landscape\_AML\_B Scan: 31519

Andromeda score: 60.8

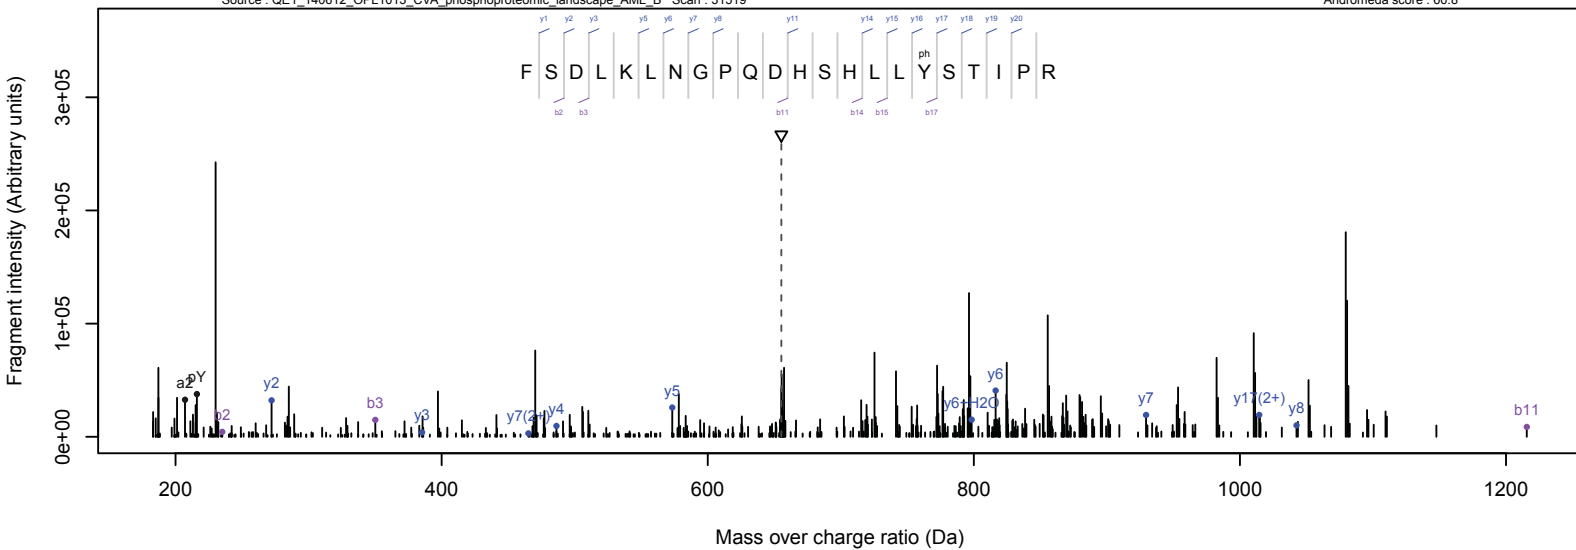

ITNDY(ph)F-2+

Source : QE1\_140612\_OPL1013\_CVA\_phosphoproteomic\_landscape\_AML\_C Scan : 33409

Andromeda score : 60.799

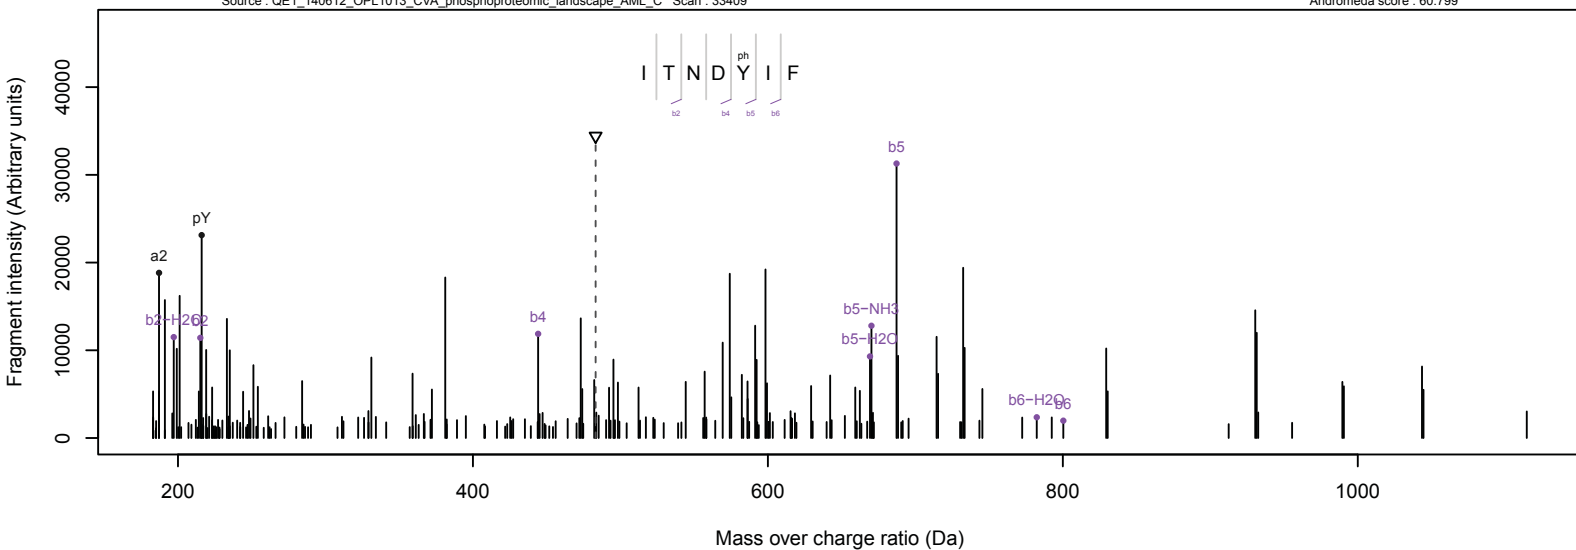

FTAQGLPDLNHSQV(ph)AVK-2+

Source : QE1\_140908\_OPL1013\_CvA\_pTyrIP\_AML\_HL60 Scan : 33181

Andromeda score : 60.764

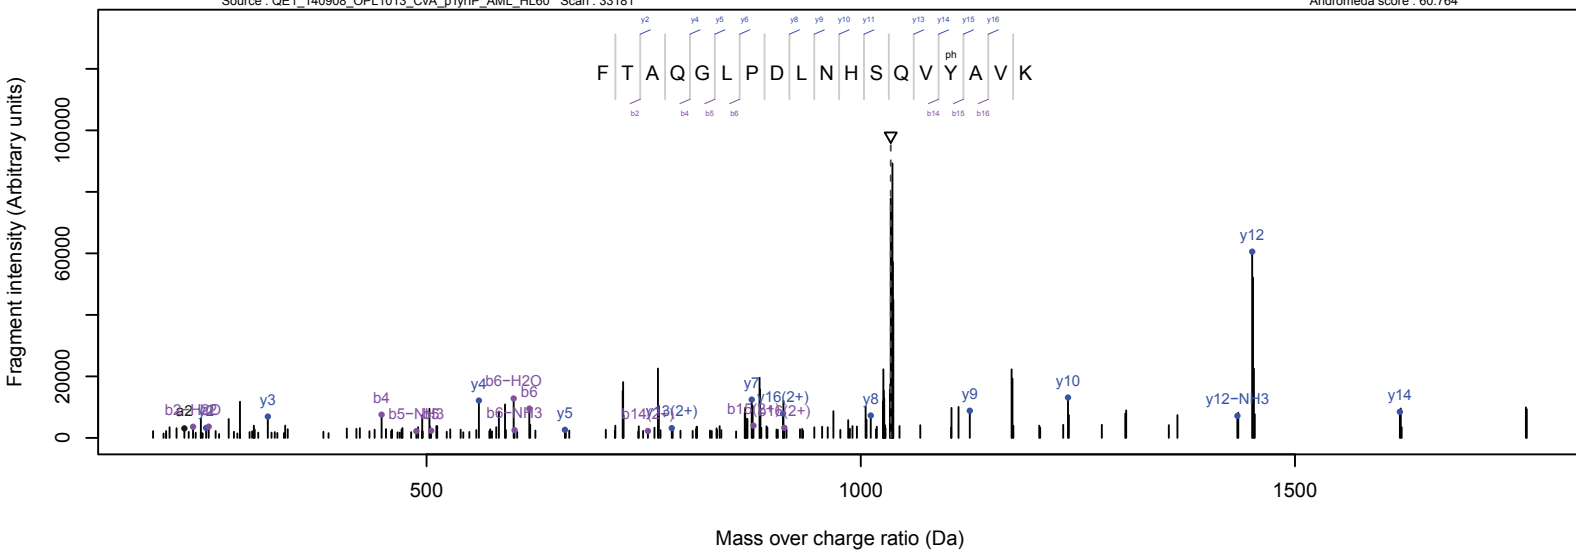

NAYLNNSEEGDEY(ph)FDKNLALFEEEMDTRPK-4+

Source : QE1\_140612\_OPL1013\_CVA\_phosphoproteomic\_landscape\_AML\_C Scan : 46737

Andromeda score : 60.762

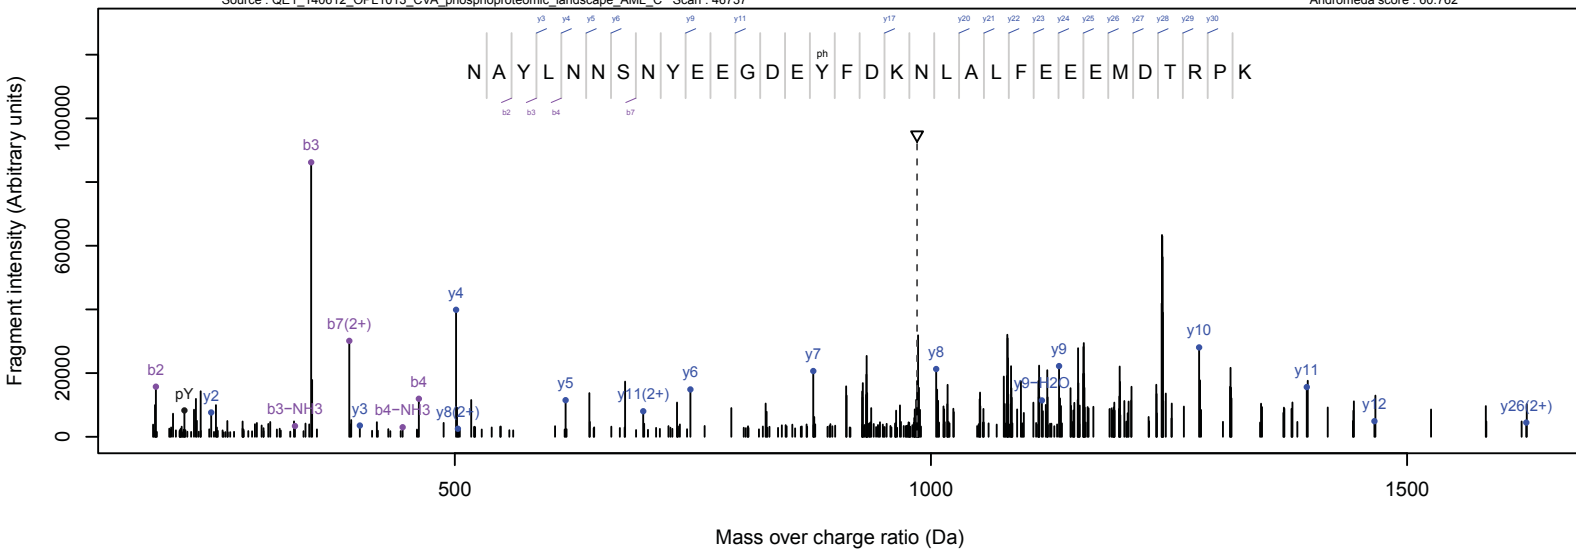

KTY(ph)FAHDALQQCTVGDIVLLR-3+

Source : QE1\_140612\_OPL1013\_CVA\_phosphoproteomic\_landscape\_AML\_C Scan : 38974

Andromeda score : 60.761

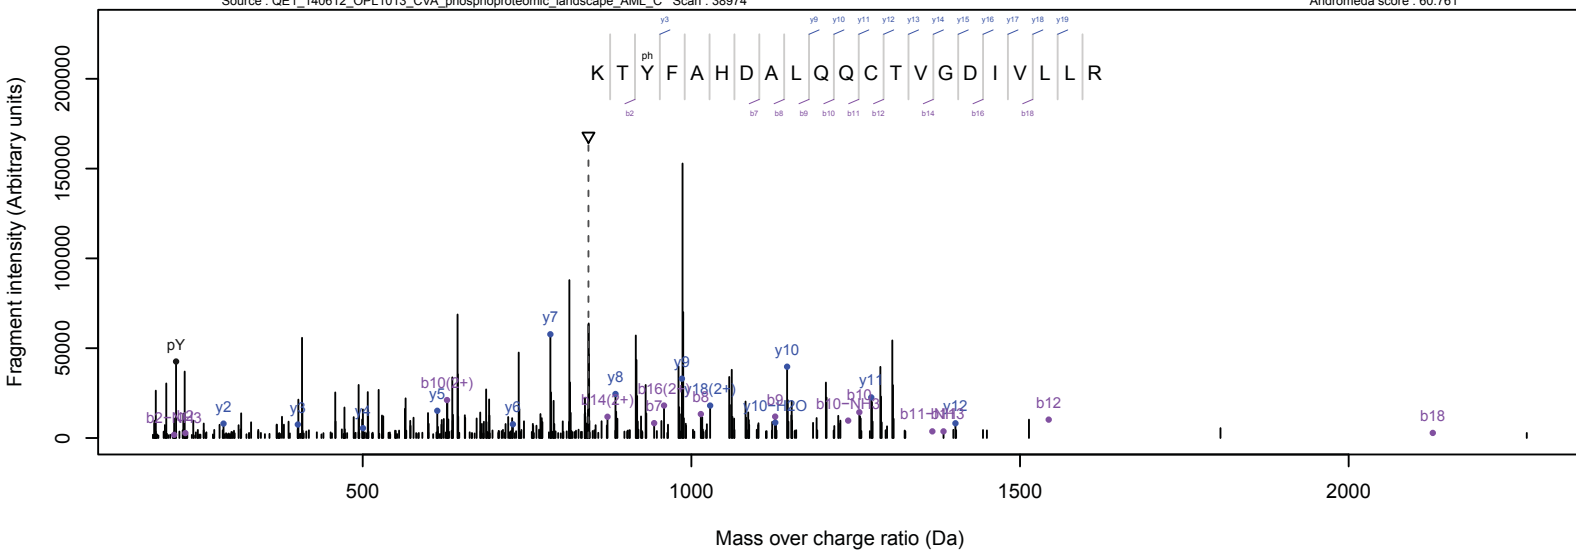

GLWHPY(ph)NR-2+

Source : QE1\_140612\_OPL1013\_CVA\_phosphoproteomic\_landscape\_AML\_C Scan : 13368

Andromeda score : 60.76

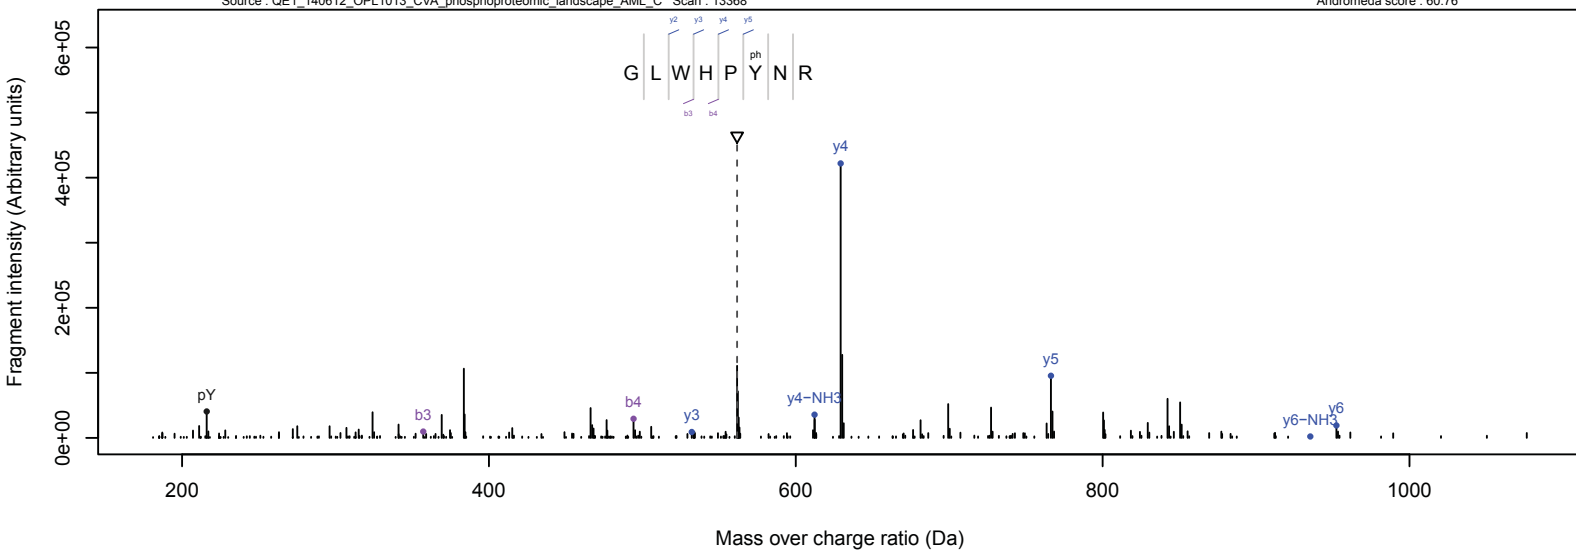

LYLASHPQ(ph)AGPGAEEAFSR-3+

Source : QE1\_140612\_OPL1013\_CVA\_phosphoproteomic\_landscape\_AML\_A Scan : 27178

Andromeda score : 60.735

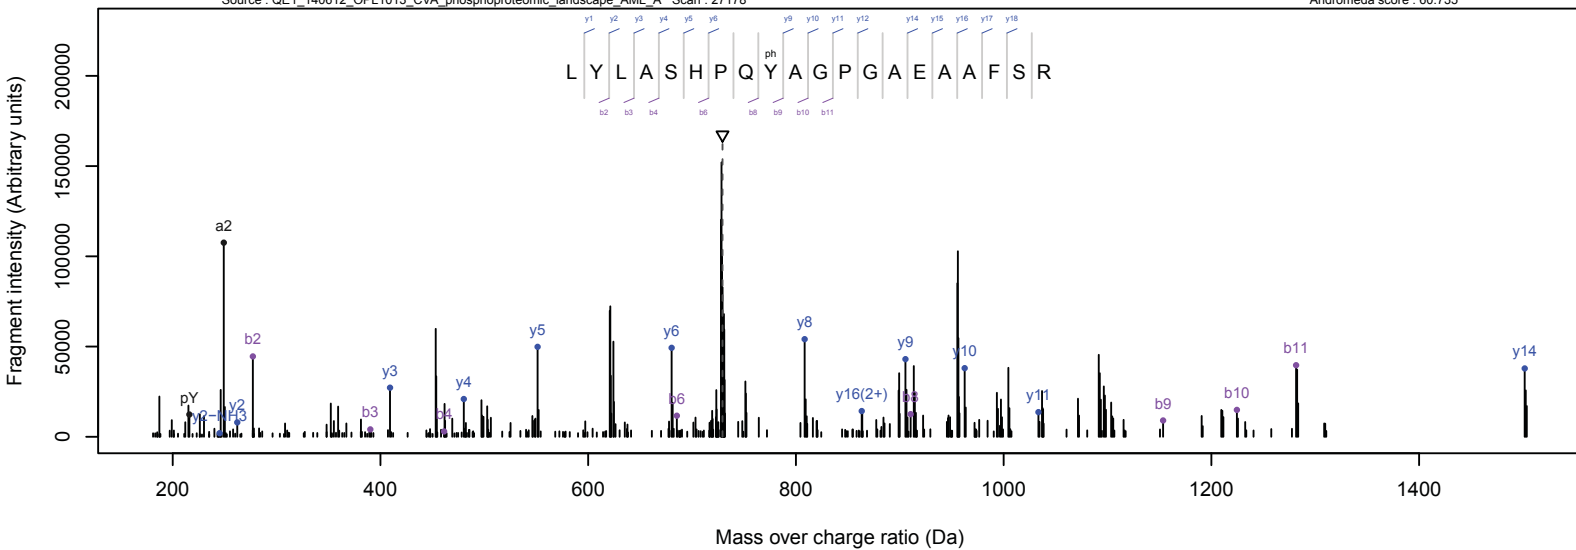

## SWREPKPEY(ph)GDFQPVSSDPK-3+

Source : QE1\_140612\_OPL1013\_CVA\_phosphoproteomic\_landscape\_AML\_C Scan : 22339

Andromeda score : 60.735

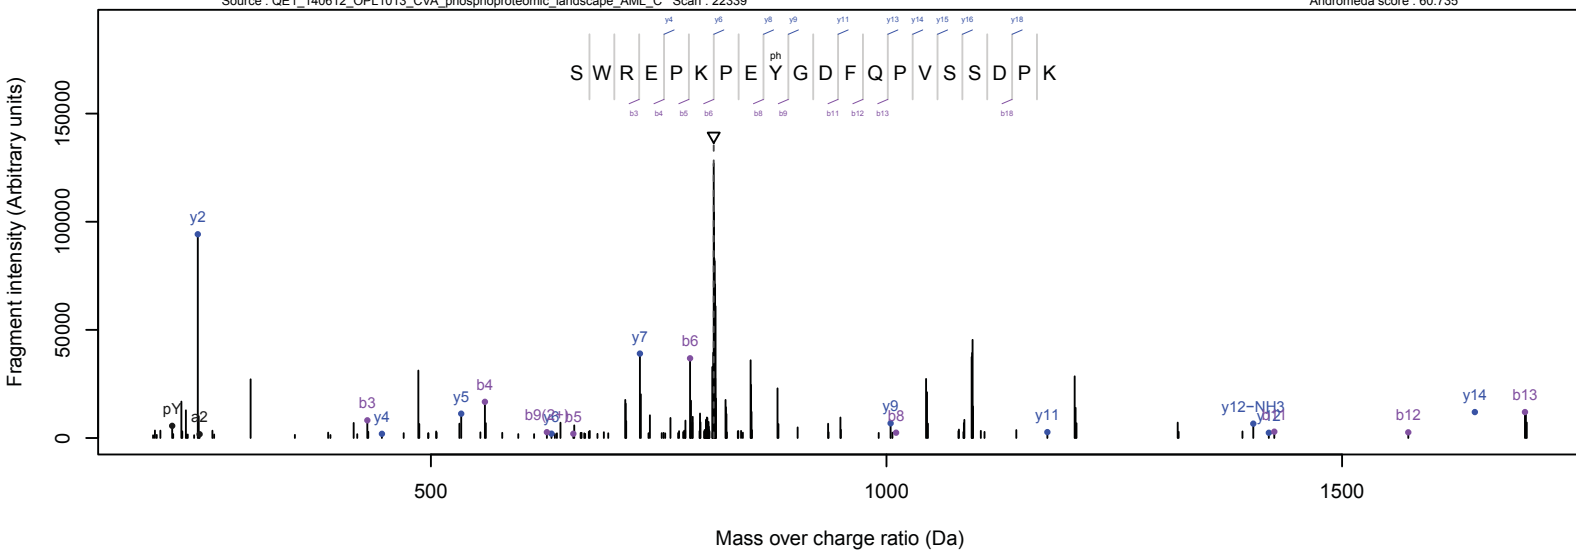

## AVNY(ph)FSK-2+

Source : QE1\_140822\_OPL1013\_CvA\_pTyrIP\_AML\_cell\_lines\_part2\_E Scan : 5498

Andromeda score : 60.682

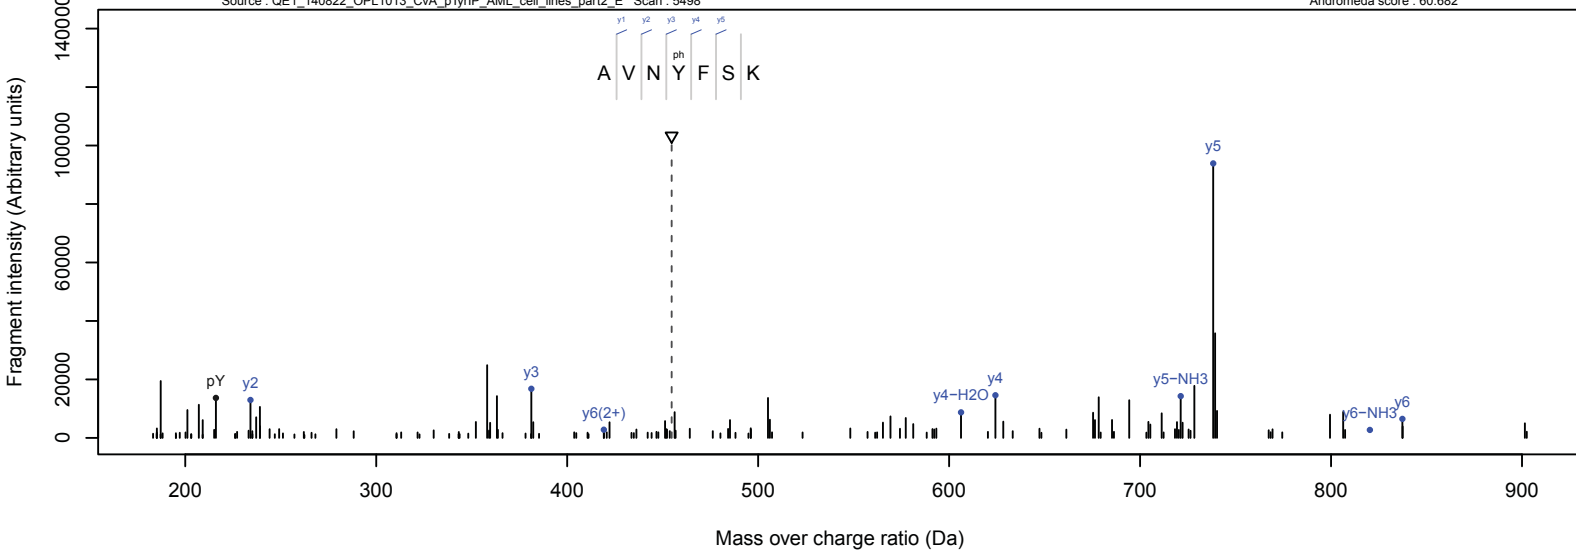

## Y(ph)GVAWEK-2+

Source : QE1\_140822\_OPL1013\_CvA\_pTyrIP\_AML\_cell\_lines\_part2\_E Scan : 9110

Andromeda score : 60.682

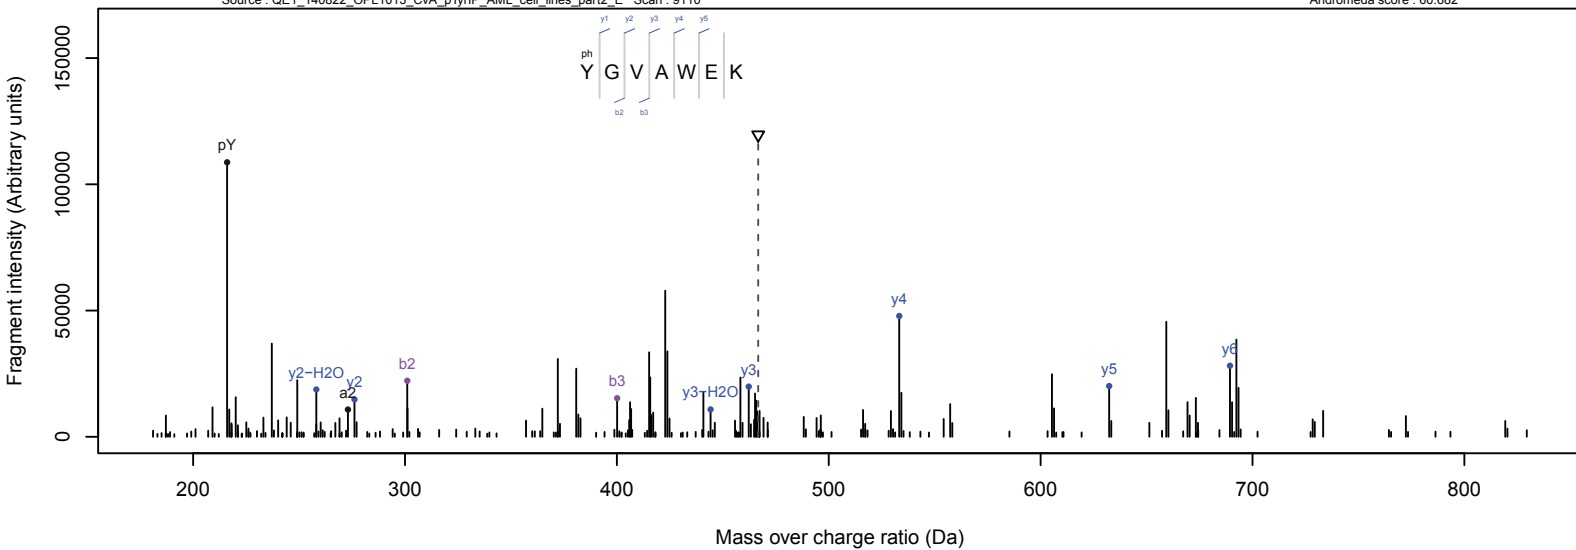

**KQPHGGQKPSYSGYQSHQGQQSYNQSPYSNY(ph)GPPQGK-5+**

Source : QE1\_140612\_OPL1013\_CVA\_phosphoproteomic\_landscape\_AML\_B Scan : 11439

Andromeda score : 60.649

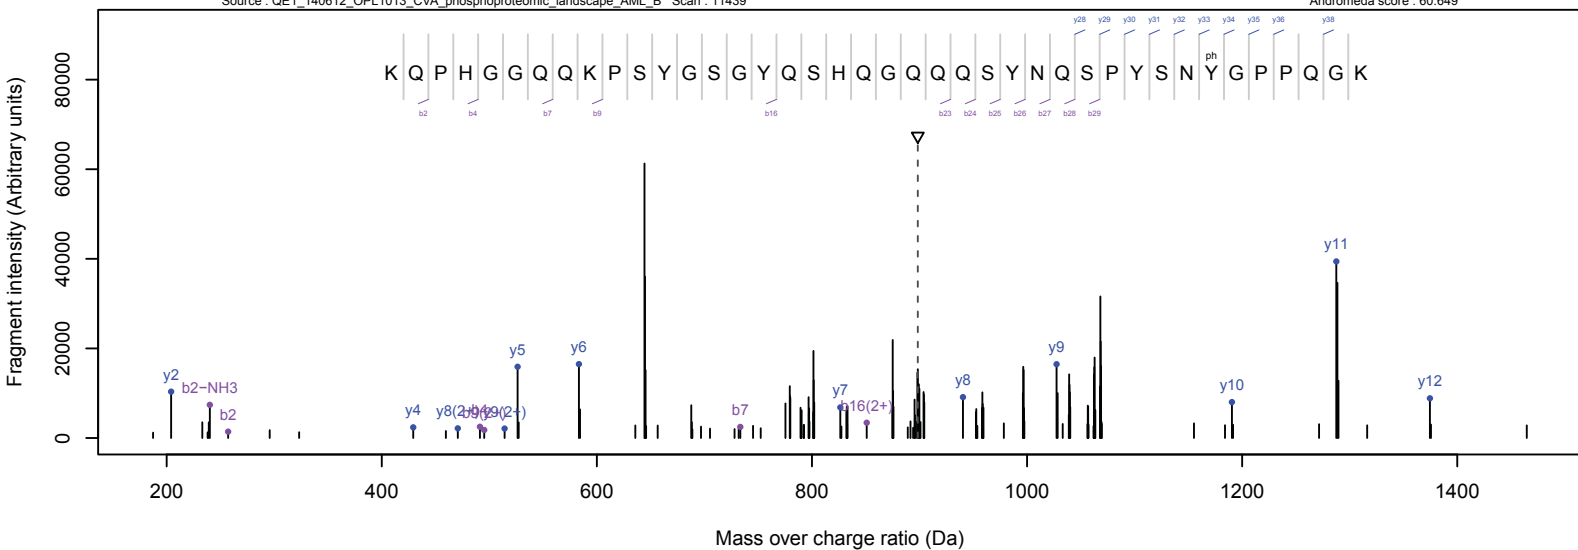

**SFAHLLPSEPSPEGSYVGQHSQGLGGHYADS(ph)YLKR-5+**

Source : QE1\_140612\_OPL1013\_CVA\_phosphoproteomic\_landscape\_AML\_C Scan : 32210

Andromeda score : 60.645

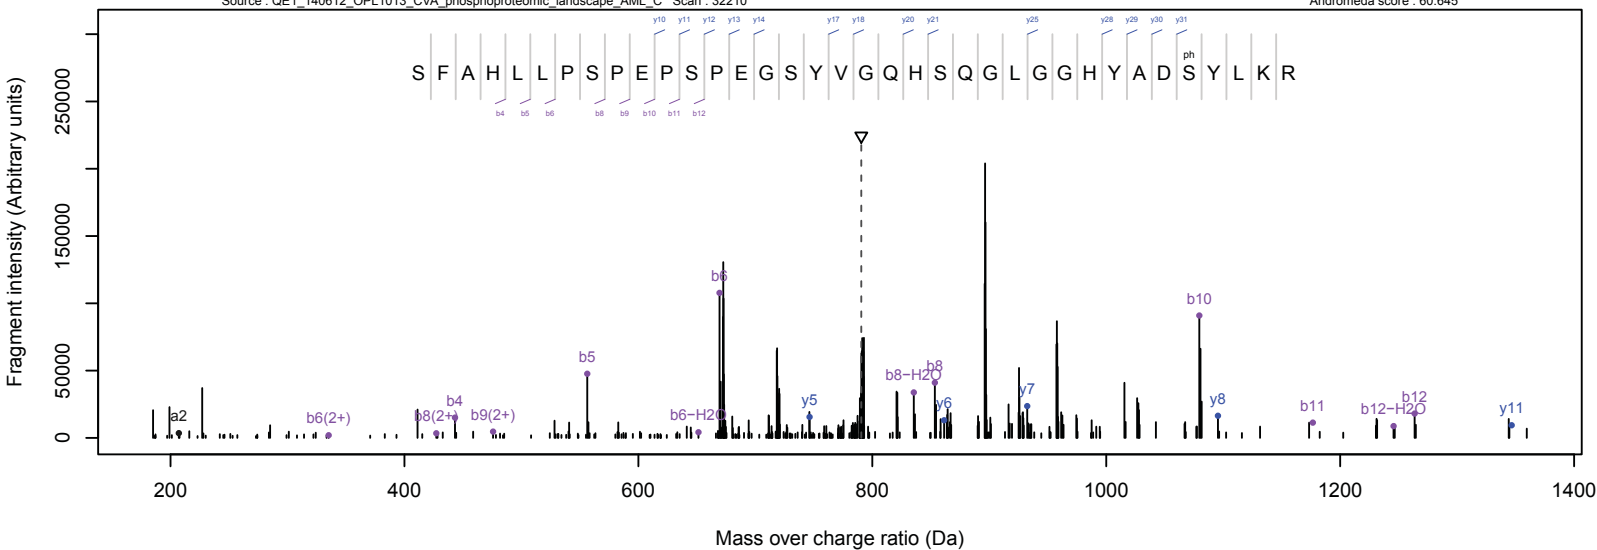

**AQVY(ph)NKQDYDLMVFPESDSQK-3+**

Source : QE1\_140612\_OPL1013\_CVA\_phosphoproteomic\_landscape\_AML\_C Scan : 31602

Andromeda score : 60.621

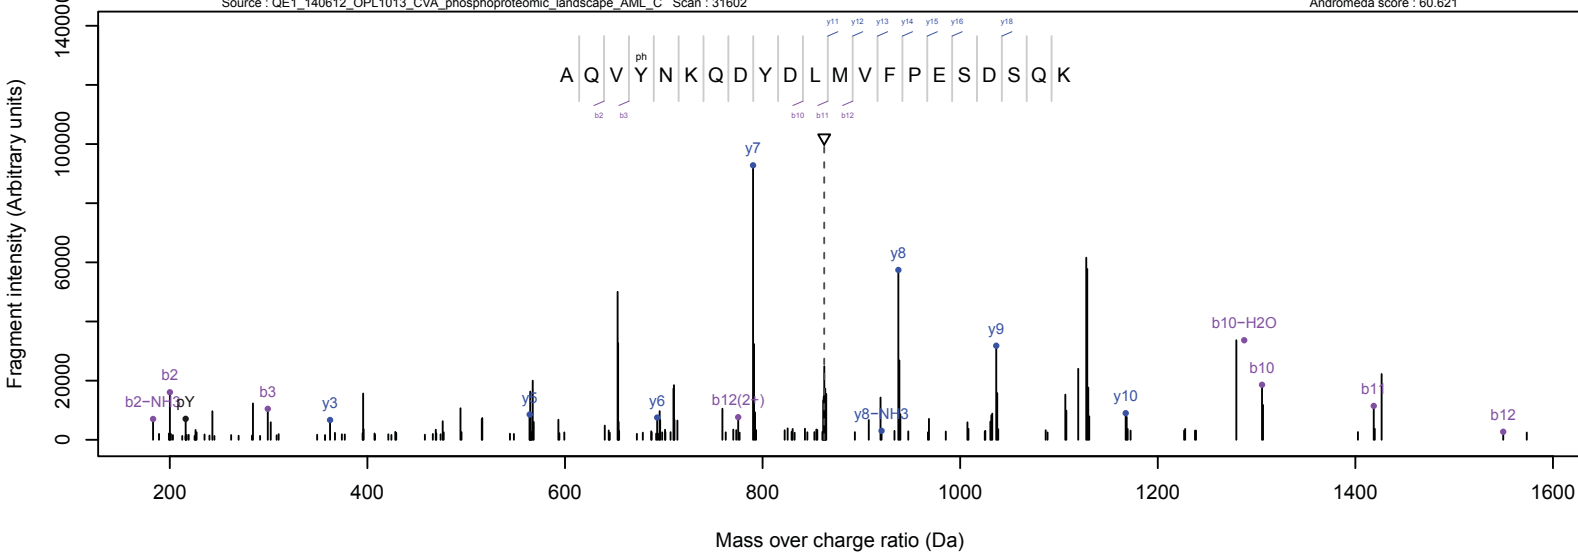

QE<sup>ph</sup>YPQYGHYGNQRPPYGY-3+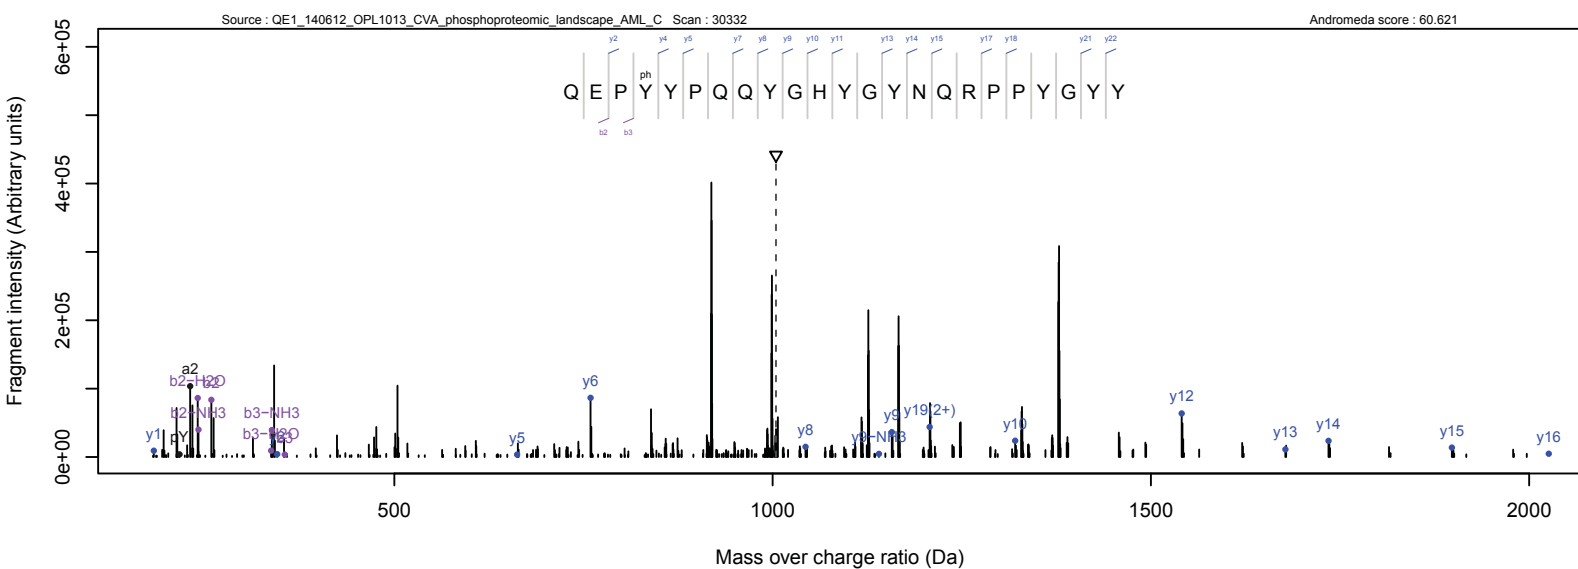EGY<sup>ph</sup>VPQEEVPVYENK-2+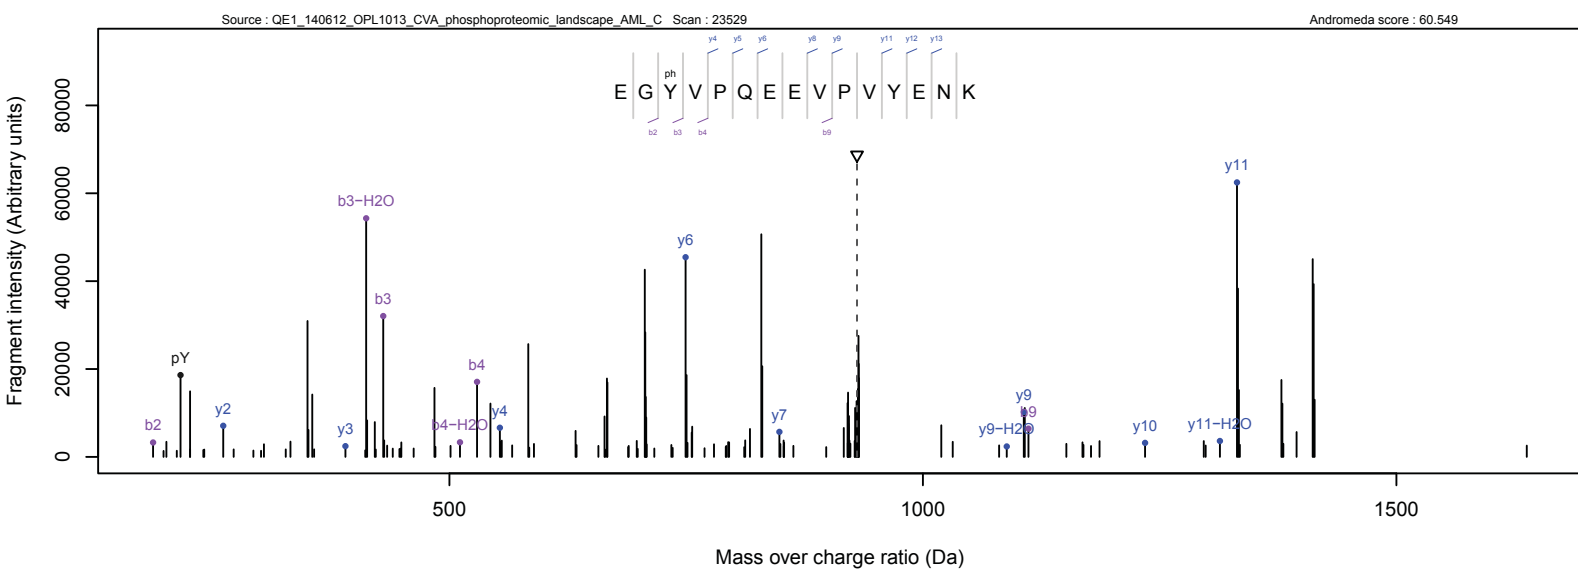NNCPFSADENY<sup>ph</sup>RPLAK-3+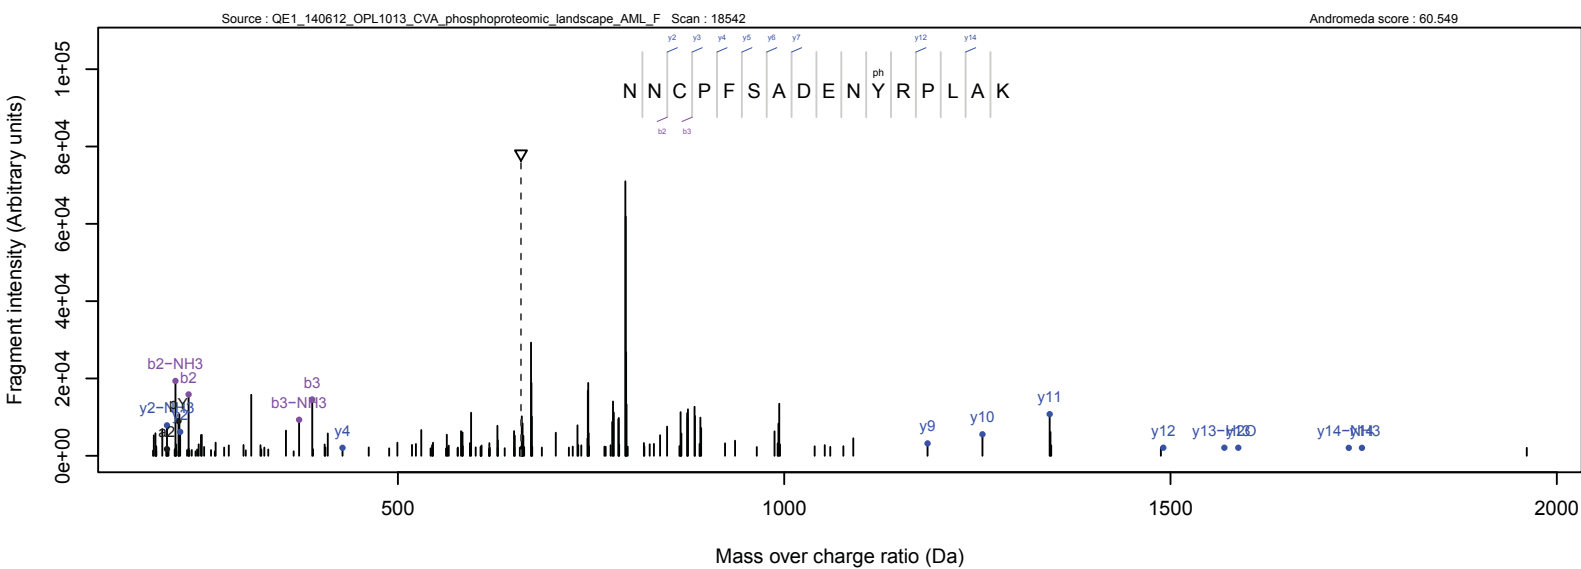



RLVQSPNS(ph)FMDVK-3+

Source : QE1\_140612\_OPL1013\_CVA\_phosphoproteomic\_landscape\_AML\_C Scan : 26855

Andromeda score : 60.549

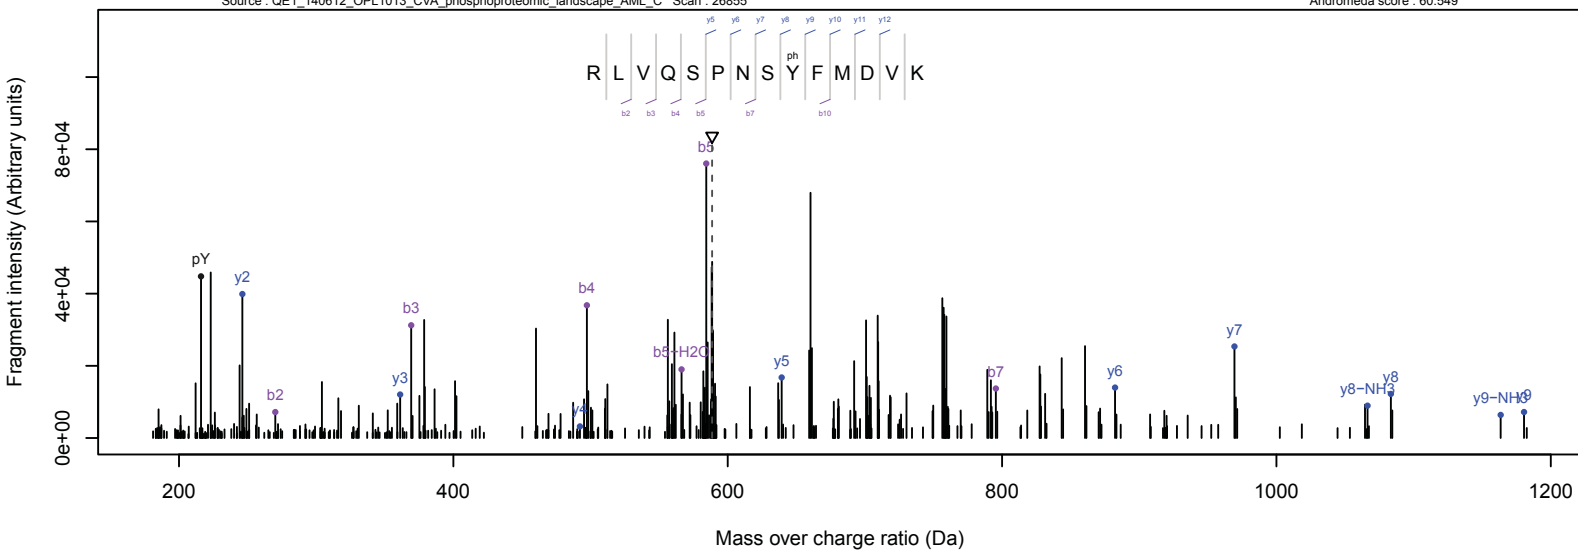

RNY(ph)QVTNSMFGASR-3+

Source : QE1\_140612\_OPL1013\_CVA\_phosphoproteomic\_landscape\_AML\_C Scan : 16860

Andromeda score : 60.549

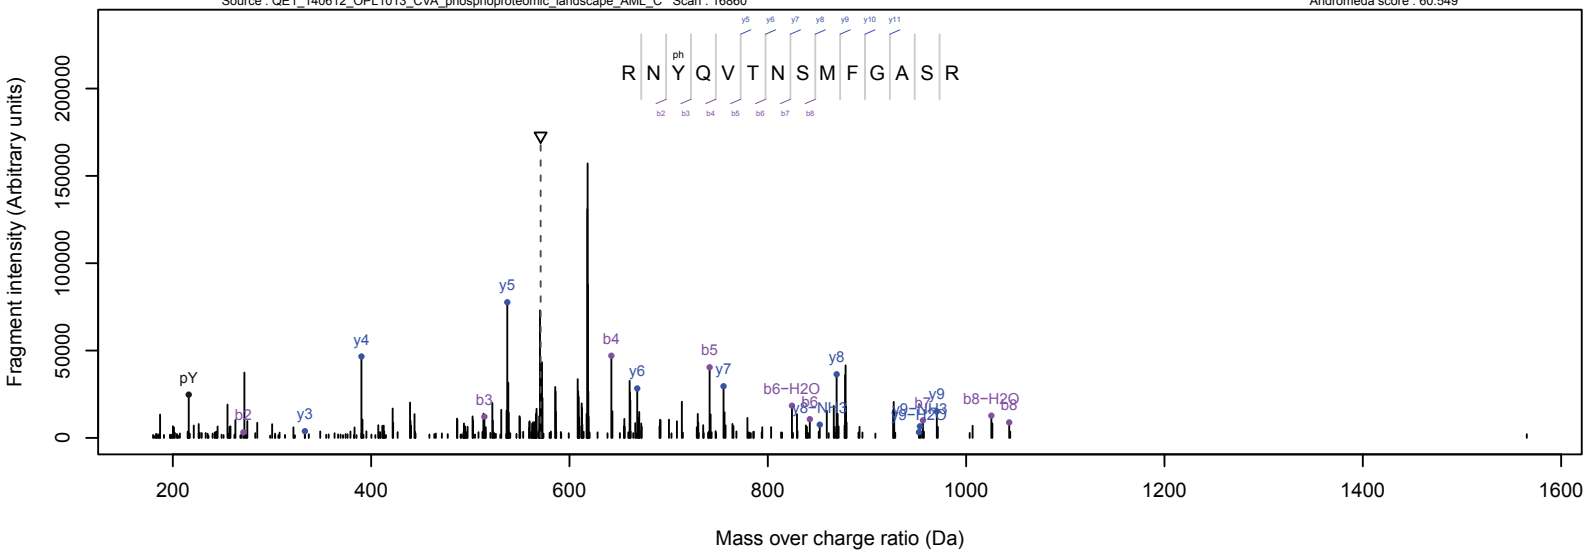

IEINQTTLY(ph)YQPLLGGVSEHDCSVLR-3+

Source : QE1\_140612\_OPL1013\_CVA\_phosphoproteomic\_landscape\_AML\_C Scan : 43300

Andromeda score : 60.527

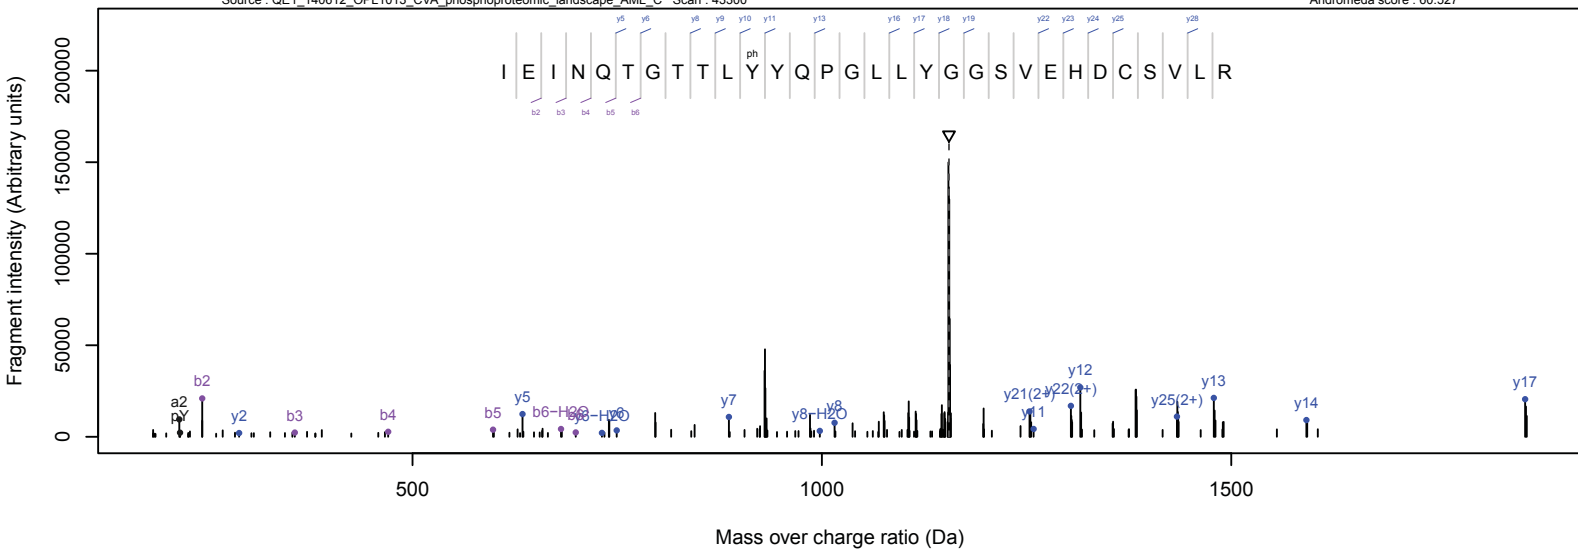

## IIY(ph)KNTPENLHEMAK-3+

Source : QE1\_140612\_OPL1013\_CVA\_phosphoproteomic\_landscape\_AML\_B Scan : 14172

Andromeda score : 60.489

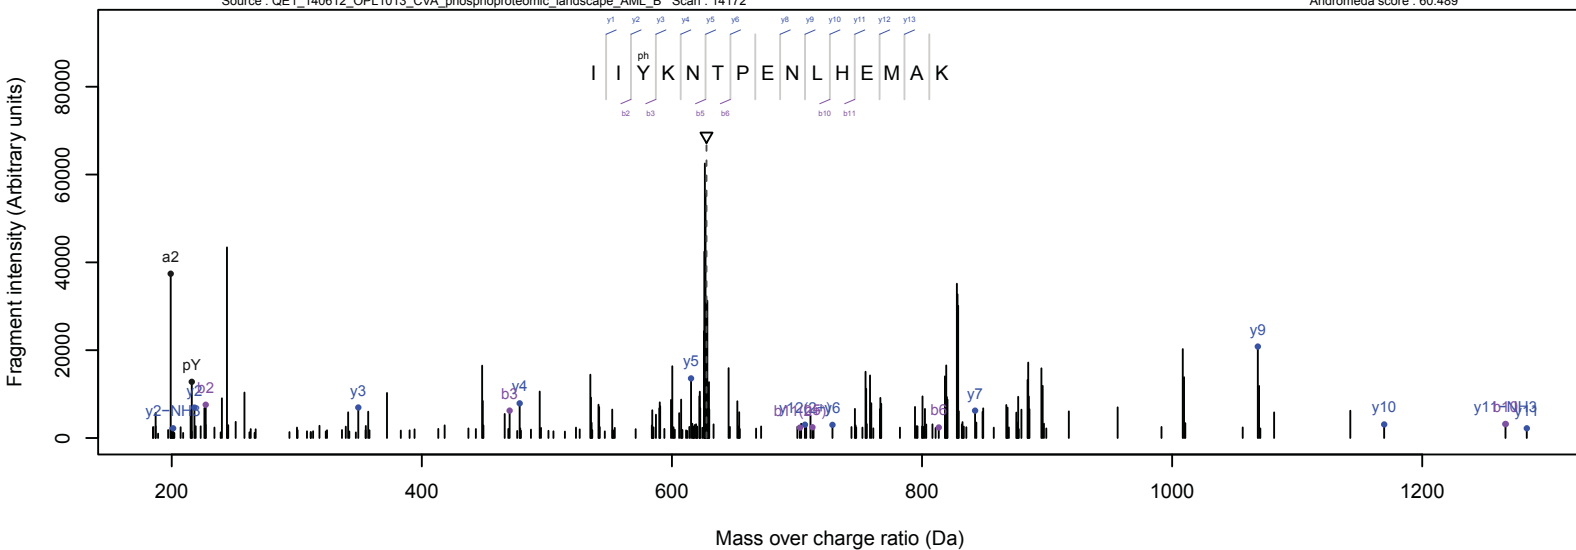

## TFGPVY(ph)EGKDLIAQAR-3+

Source : QE1\_140822\_OPL1013\_CvA\_pTyrIP\_AML\_cell\_lines\_part2\_B Scan : 26540

Andromeda score : 60.489

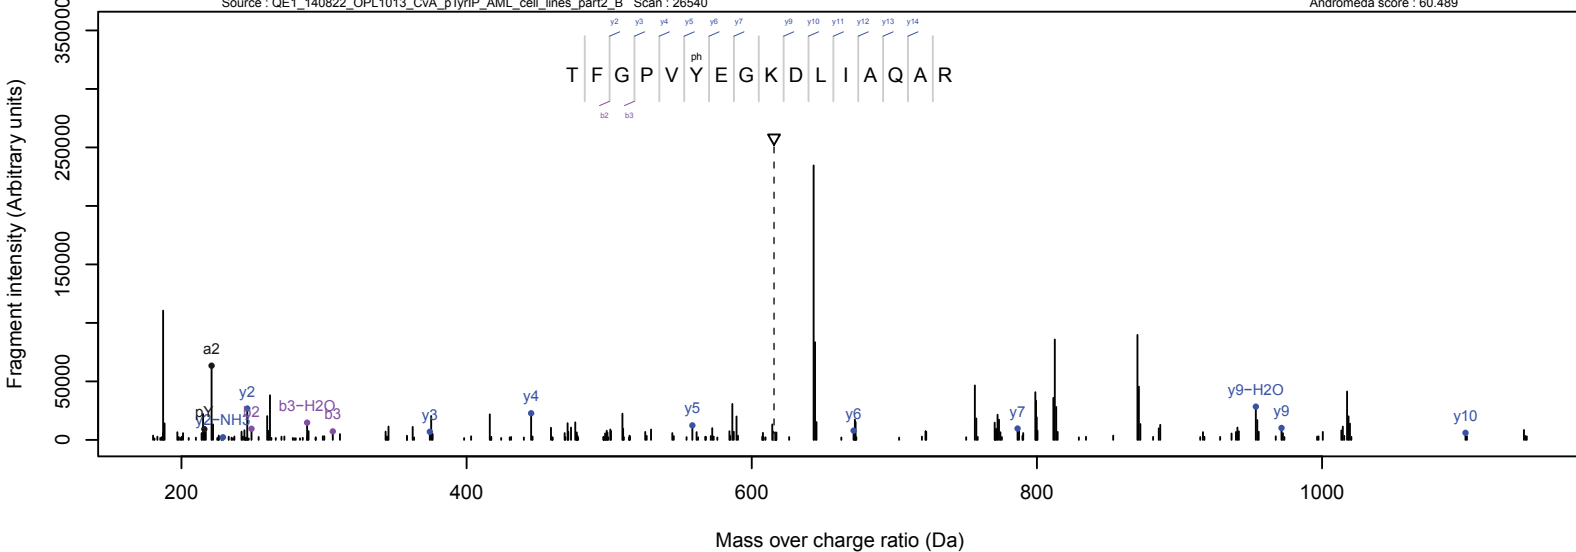

## YKVEY(ph)PIMYSTDPENGHIFNCIQR-3+

Source : QE1\_140612\_OPL1013\_CVA\_phosphoproteomic\_landscape\_AML\_B Scan : 35677

Andromeda score : 60.472

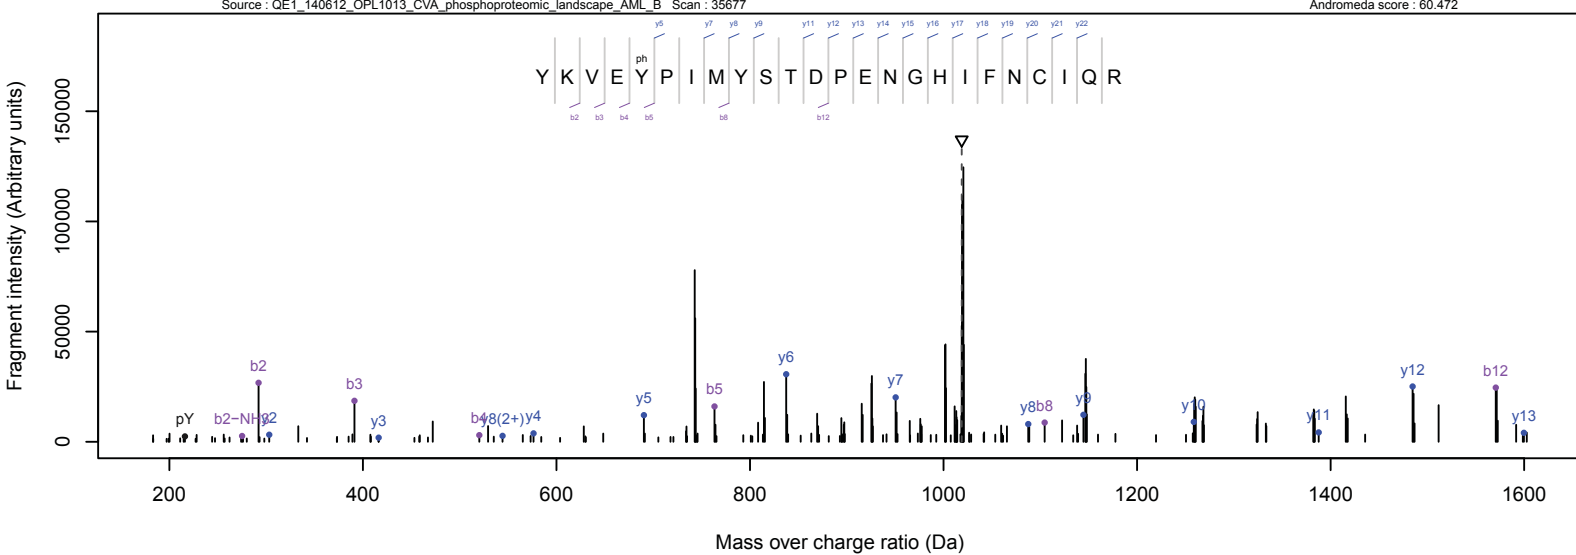

## GY(ph)SSLLK-2+

Source : QE1\_140612\_OPL1013\_CVA\_phosphoproteomic\_landscape\_AML\_B Scan : 9763

Andromeda score : 60.436

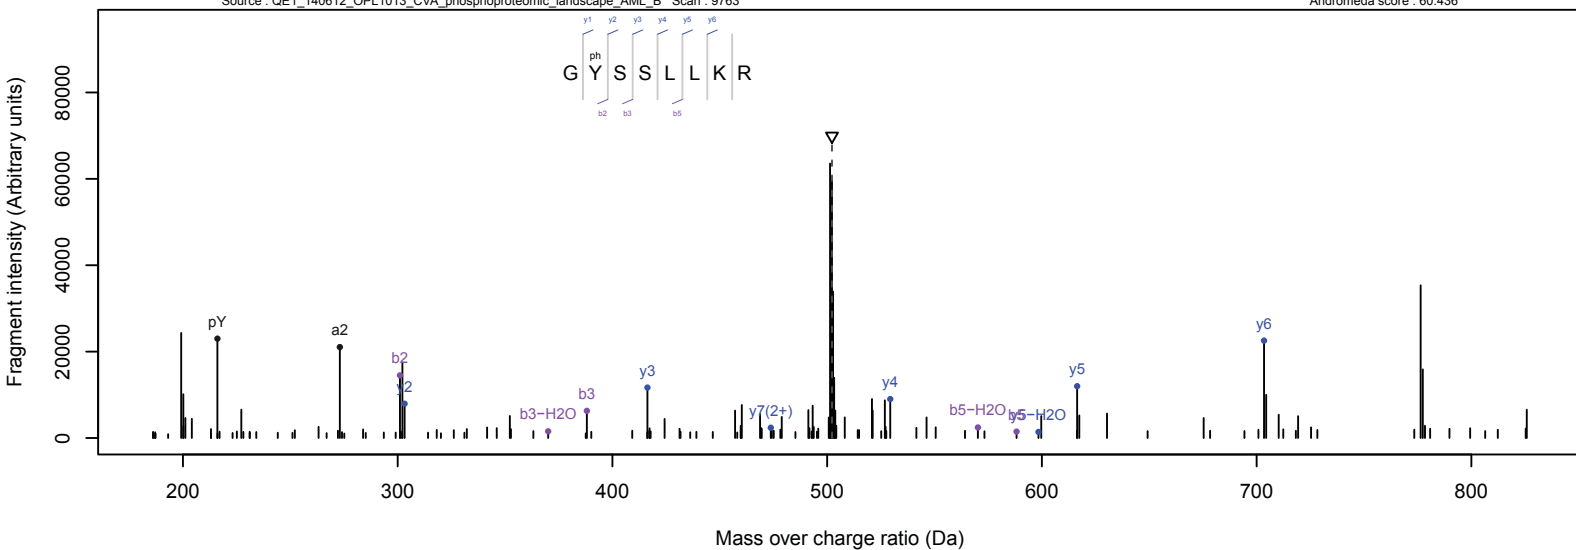

## SY(ph)VAWDR-2+

Source : QE1\_140612\_OPL1013\_CVA\_phosphoproteomic\_landscape\_AML\_D Scan : 14625

Andromeda score : 60.436

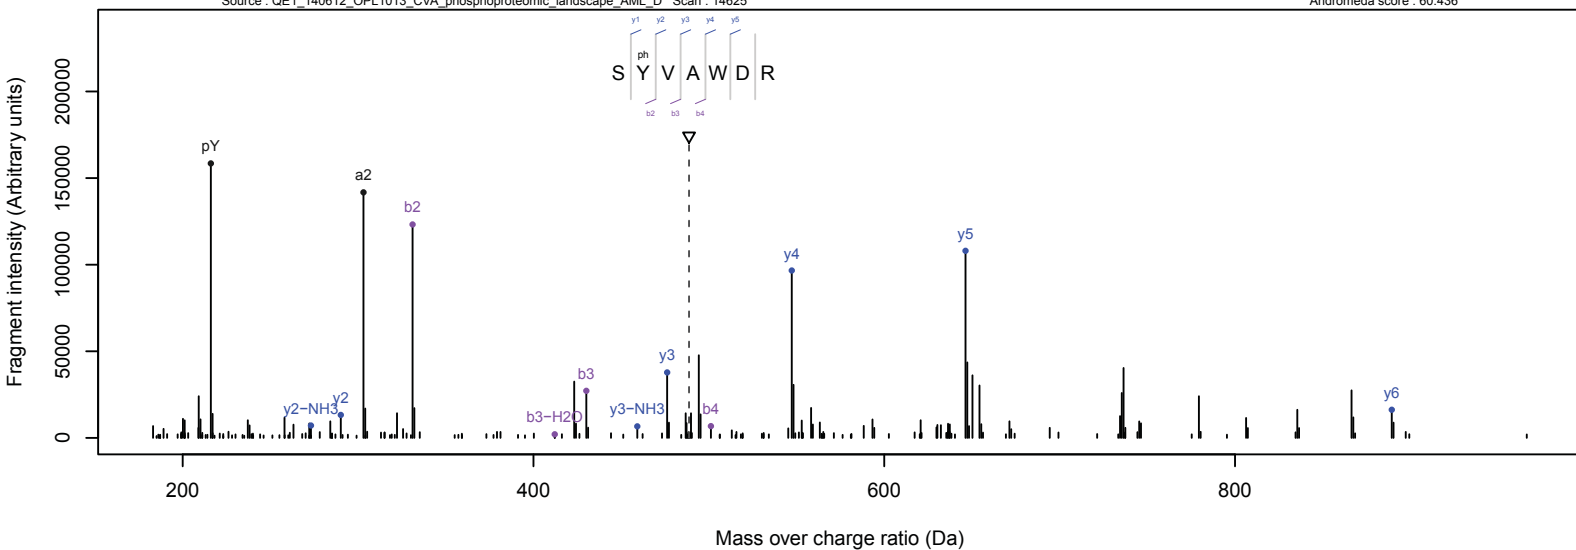

## Y(ph)NSDLVQK-2+

Source : QE1\_140822\_OPL1013\_CvA\_pTyrIP\_AML\_cell\_lines\_part2\_B Scan : 4269

Andromeda score : 60.436

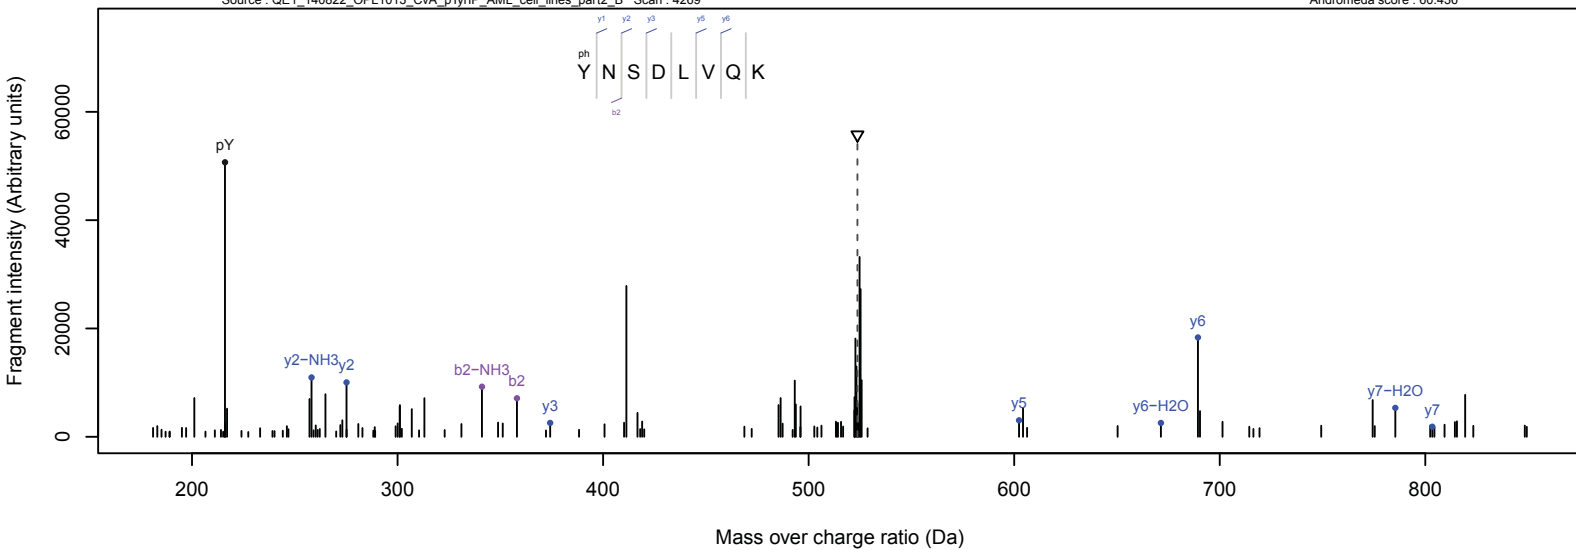

Y(ph)SPWGMKK-2+

Source : QE1\_140612\_OPL1013\_CVA\_phosphoproteomic\_landscape\_AML\_D Scan : 11681

Andromeda score : 60.436

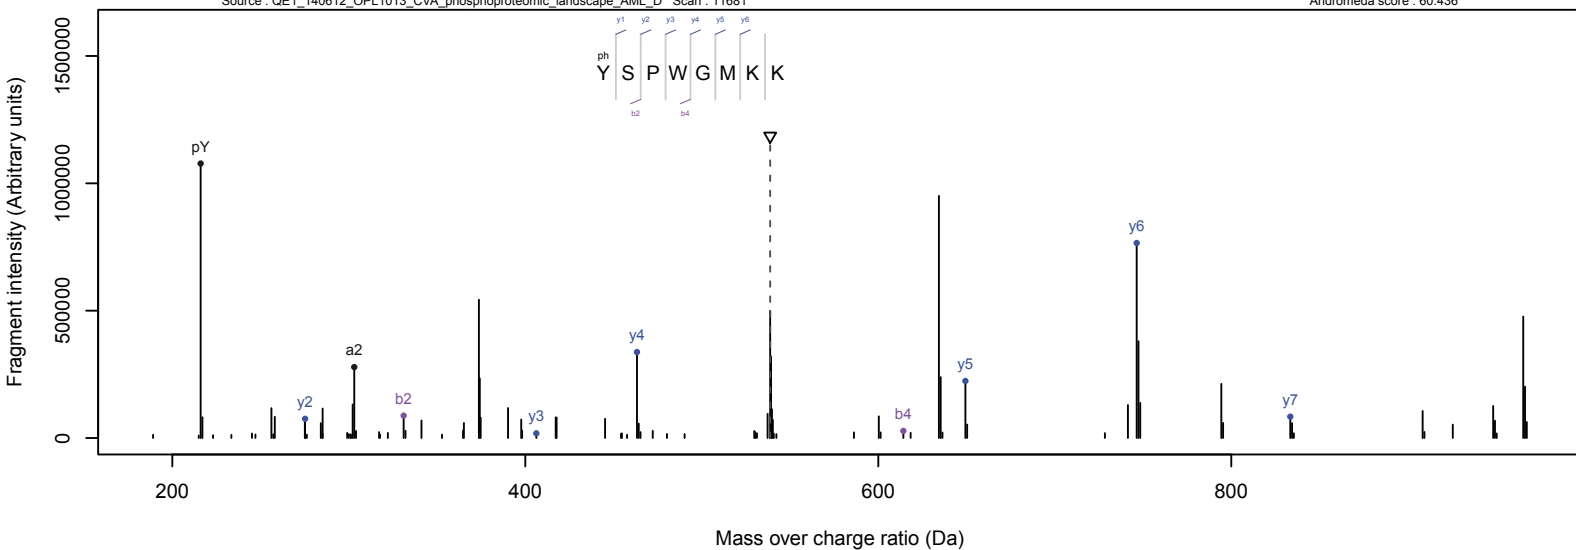

GSTLDNSLHKDLLGAISGIASPY(ph)TTSTPNINSVR-4+

Source : QE1\_140612\_OPL1013\_CVA\_phosphoproteomic\_landscape\_AML\_C Scan : 45590

Andromeda score : 60.381

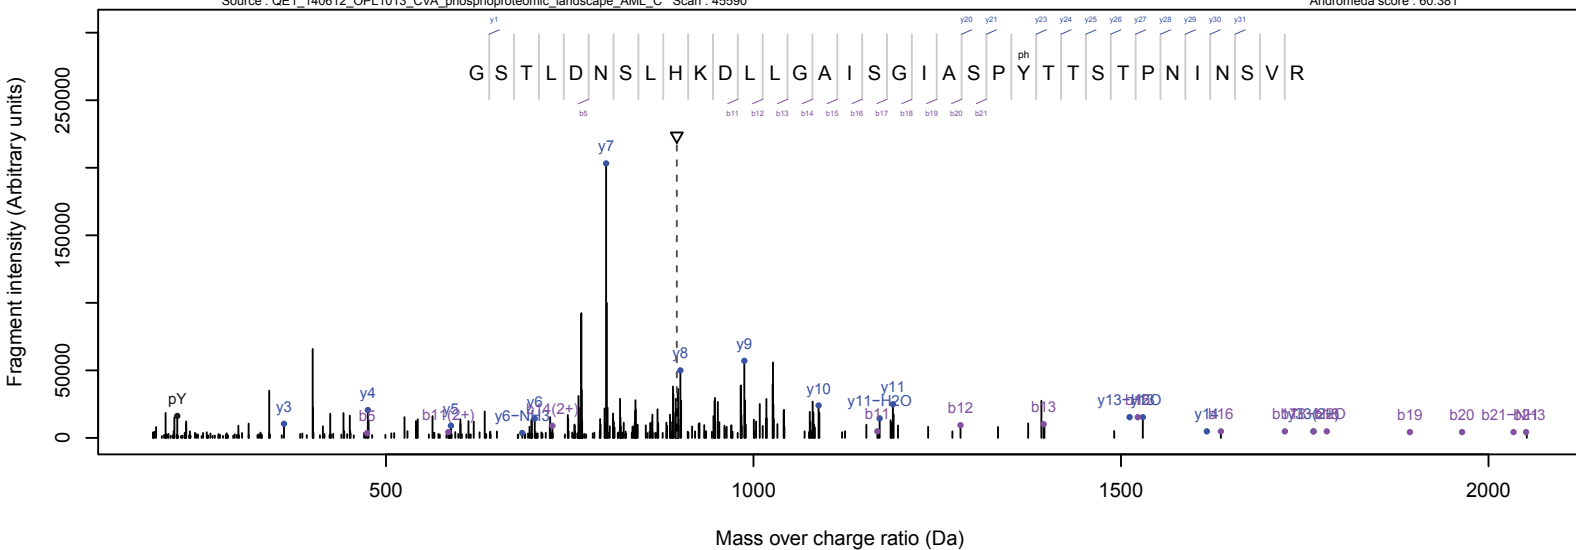

LPQASRPYS(ph)SVPAGSEKPPK-3+

Source : QE1\_140908\_OPL1013\_CvA\_pTyrIP\_AML\_HEL Scan : 13849

Andromeda score : 60.325

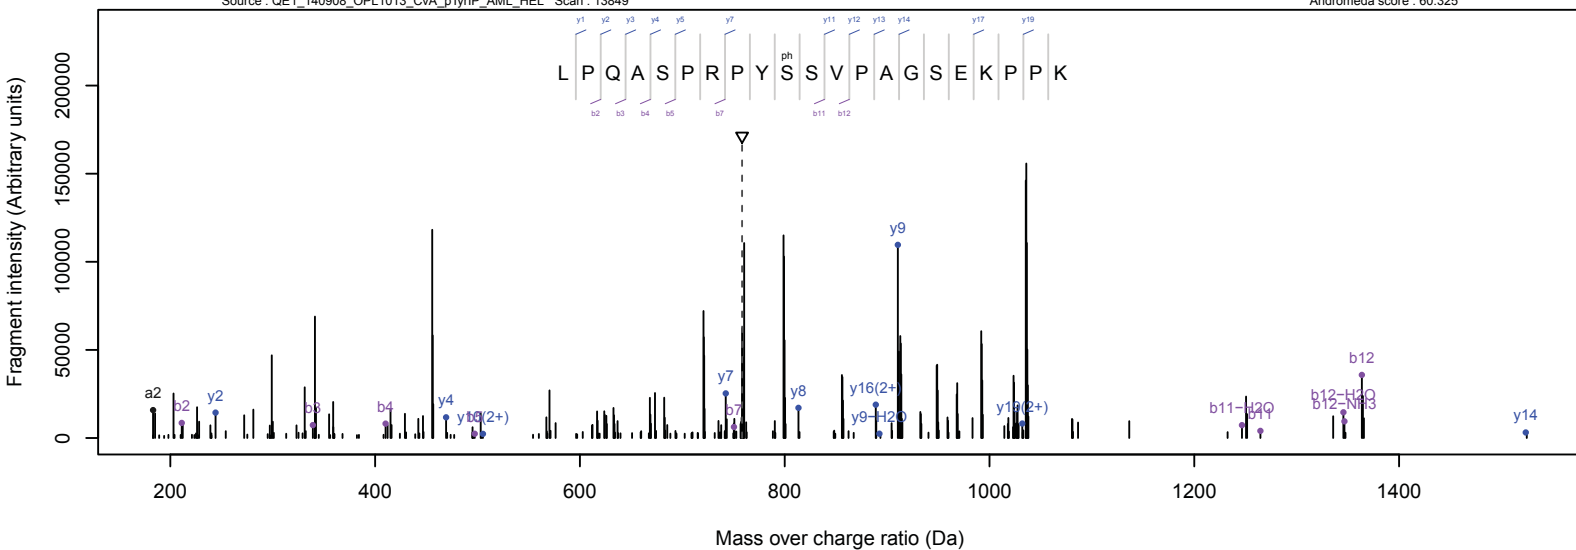

QEELNNQLFLY(ph)DTHQNLRL-3+

Source : QE1\_140612\_OPL1013\_CVA\_phosphoproteomic\_landscape\_AML\_A Scan : 31938

Andromeda score : 60.307

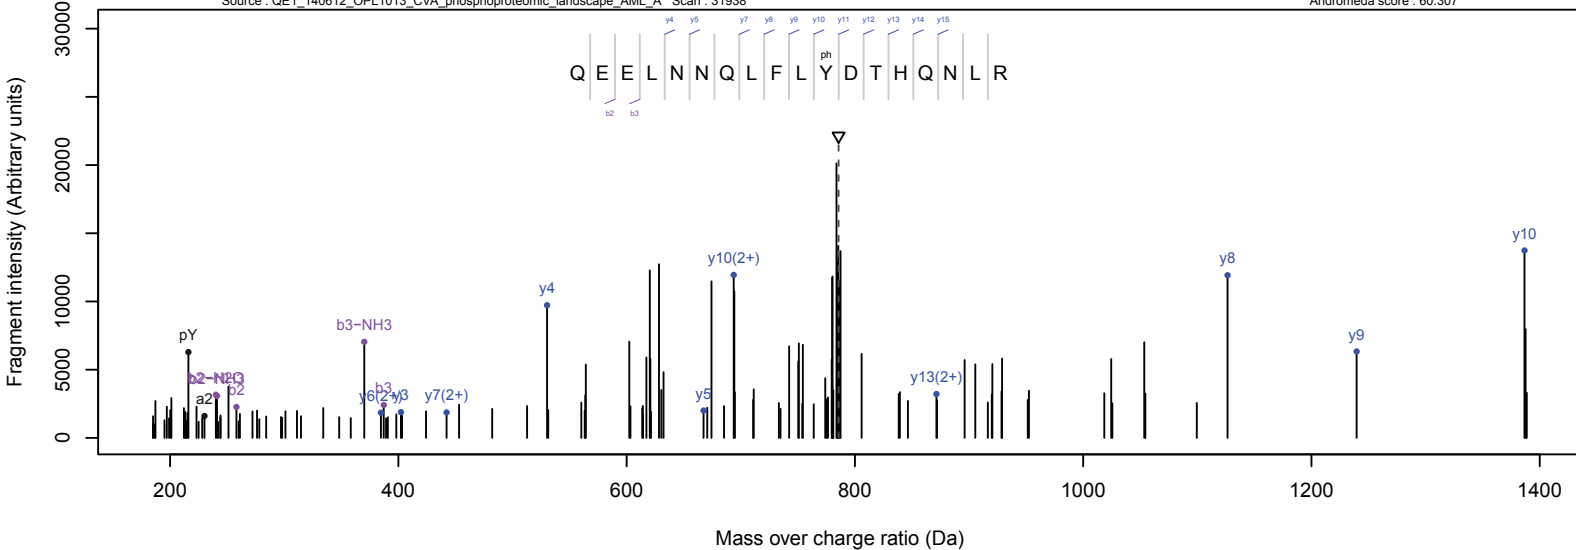

RLDPNKY(ph)PVPENWLHK-4+

Source : QE1\_140612\_OPL1013\_CVA\_phosphoproteomic\_landscape\_AML\_D Scan : 25847

Andromeda score : 60.307

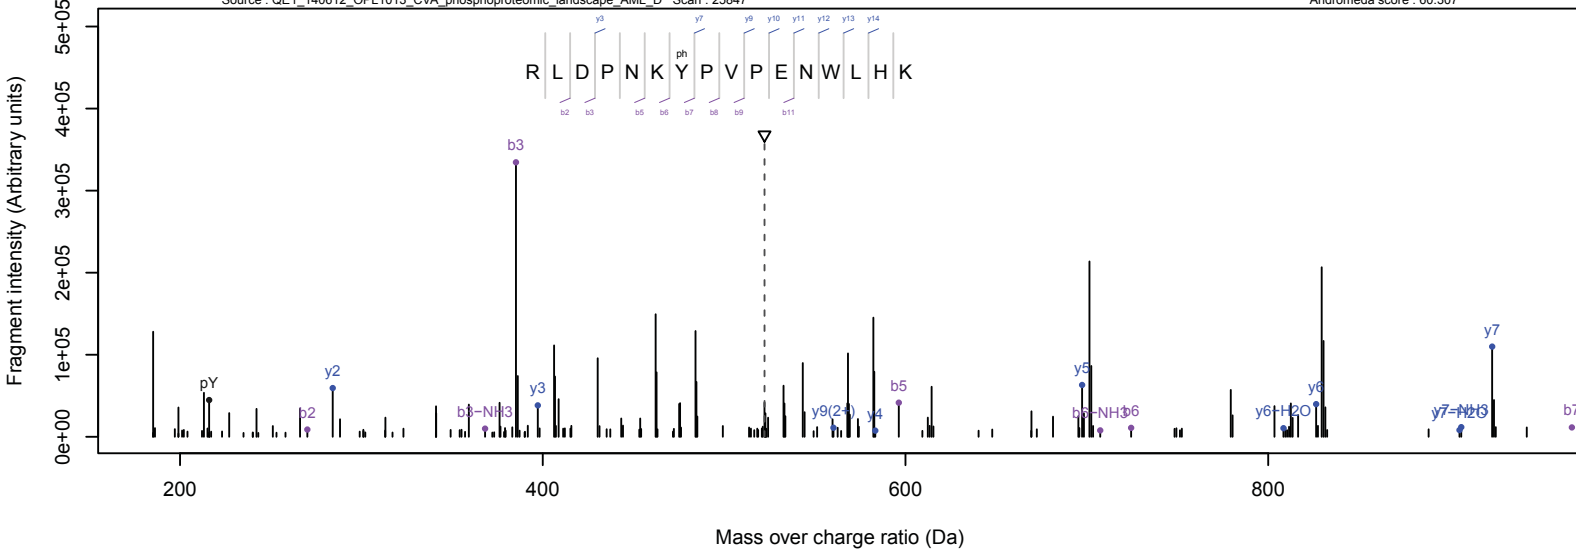

VKGNNVY(ph)CLDR-2+

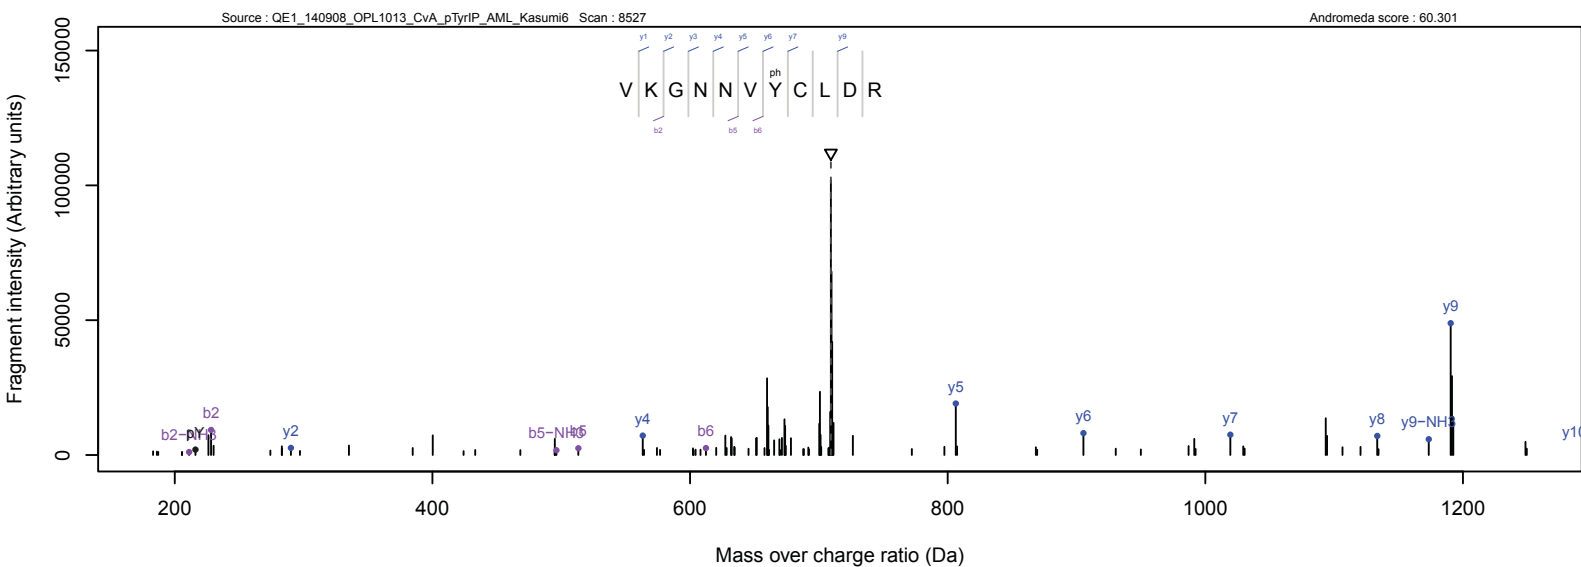

Y(ph)PLHAIR-2+

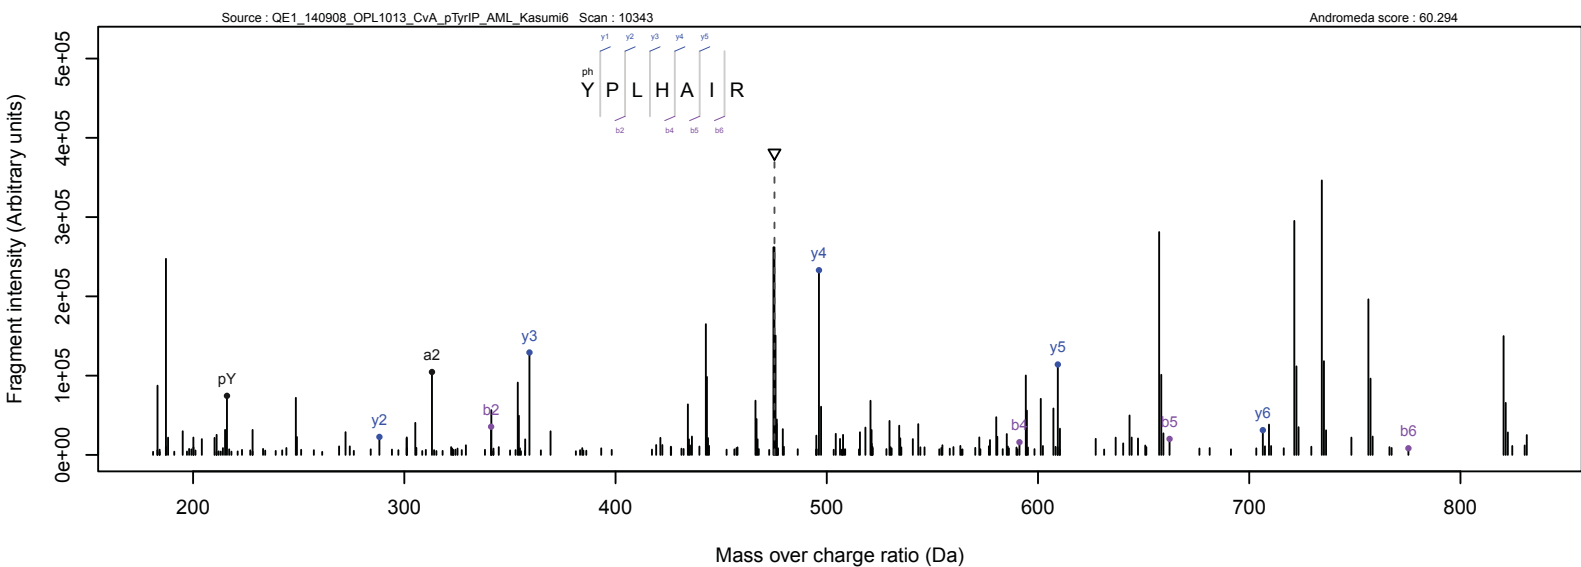

KAQLDY(ph)VDLYLIHSPMSLKPGEEELSPDENGK-4+

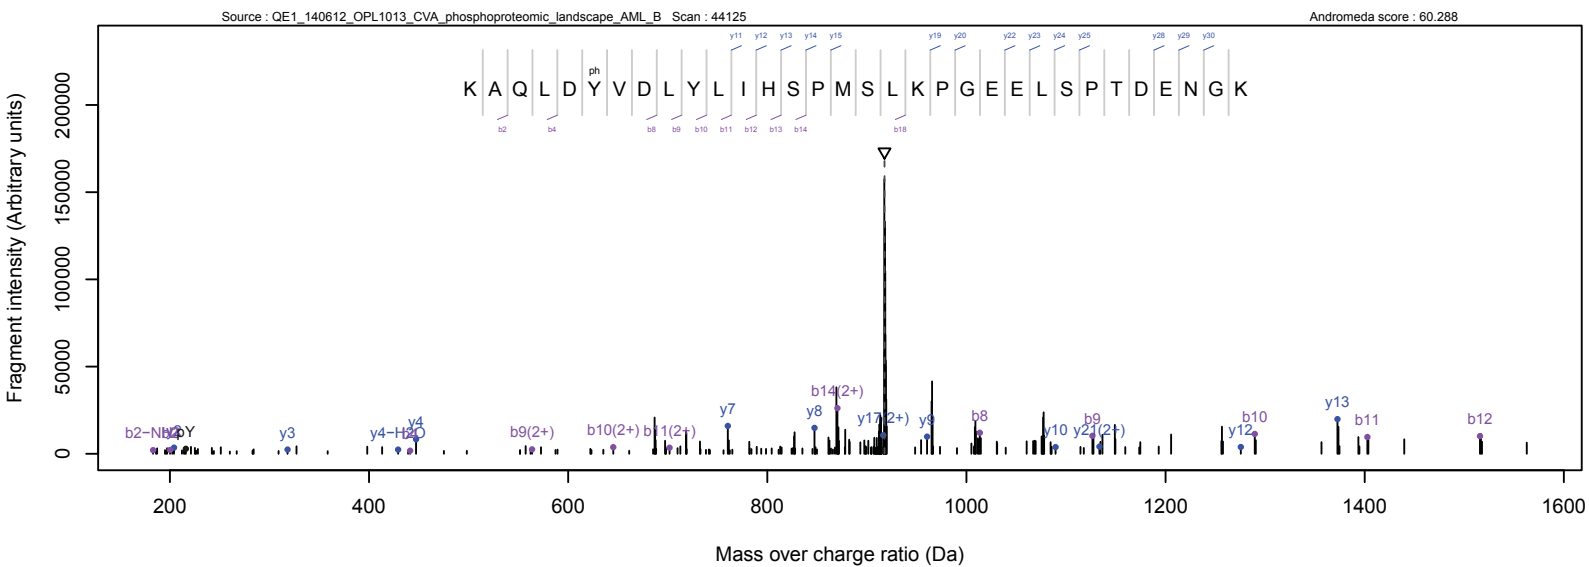

## GDHPLTPGSHY(ph)A-2+

Source: QE1\_140908\_OPL1013\_CvA\_pTyrIP\_AML\_Kasumi6 Scan: 8814

Andromeda score: 60.255

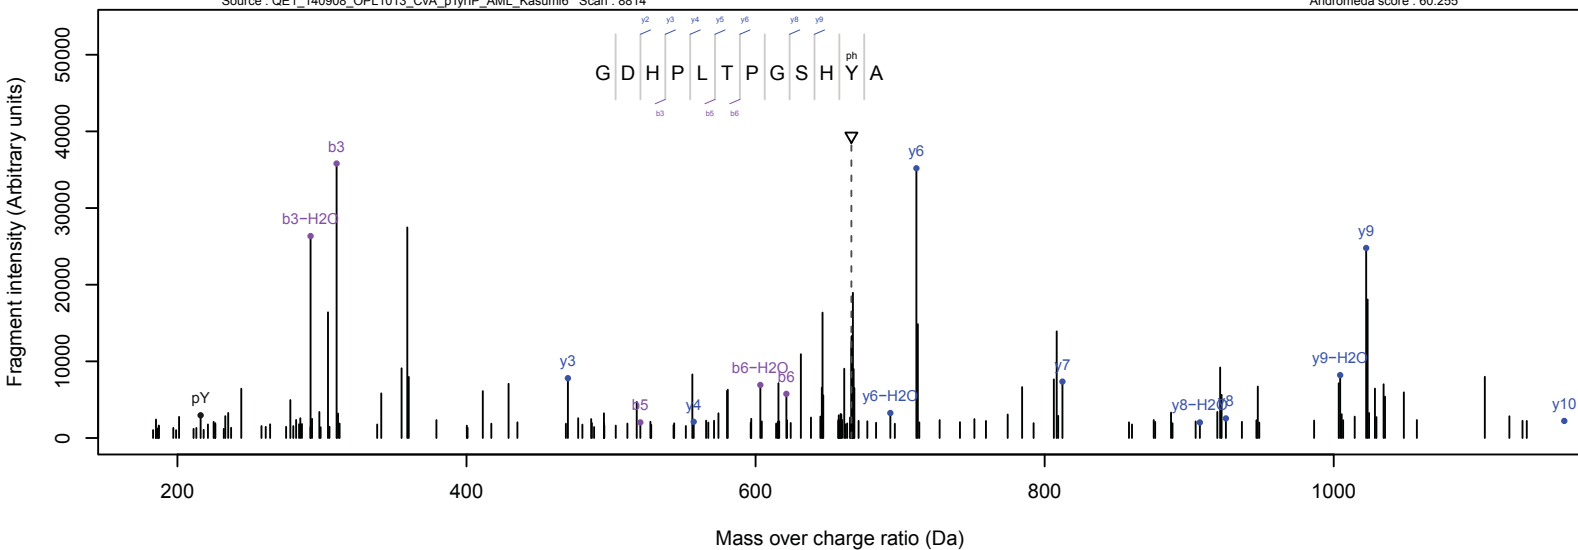

## M(ox)T(ph)HDCGYEELLTS-2+

Source: QE1\_140822\_OPL1013\_CvA\_pTyrIP\_AML\_cell\_lines\_part2\_E Scan: 15294

Andromeda score: 60.255

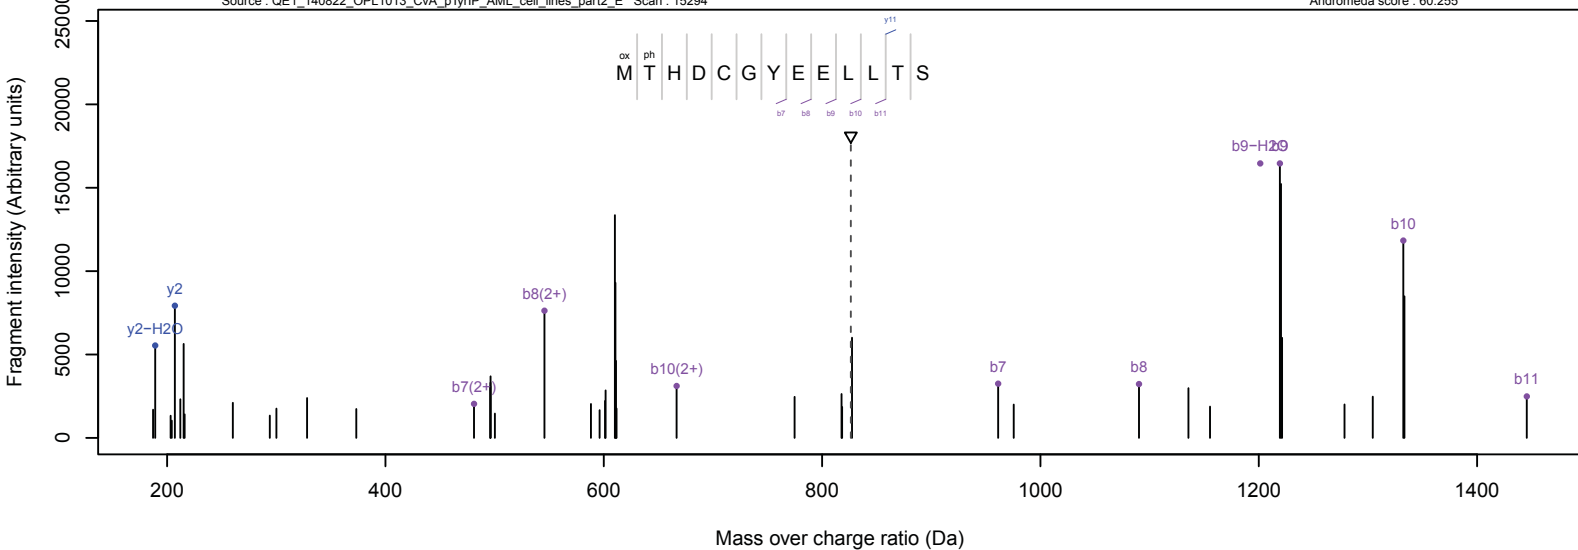

## SFTPDHVY(ph)AR-2+

Source: QE1\_140908\_OPL1013\_CvA\_pTyrIP\_AML\_HEL Scan: 18764

Andromeda score: 60.255

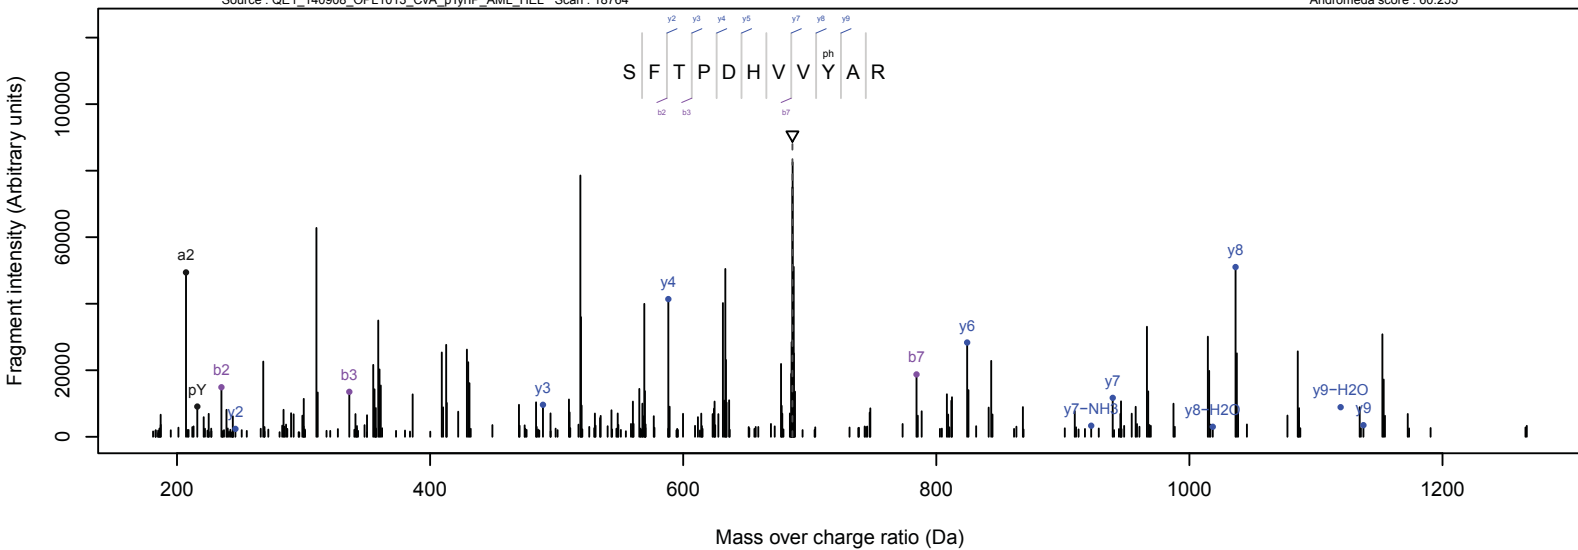

## AAGY(ph)AHGLVFSK-2+

Source : QE1\_140612\_OPL1013\_CVA\_phosphoproteomic\_landscape\_AML\_B Scan : 18692

Andromeda score : 60.196

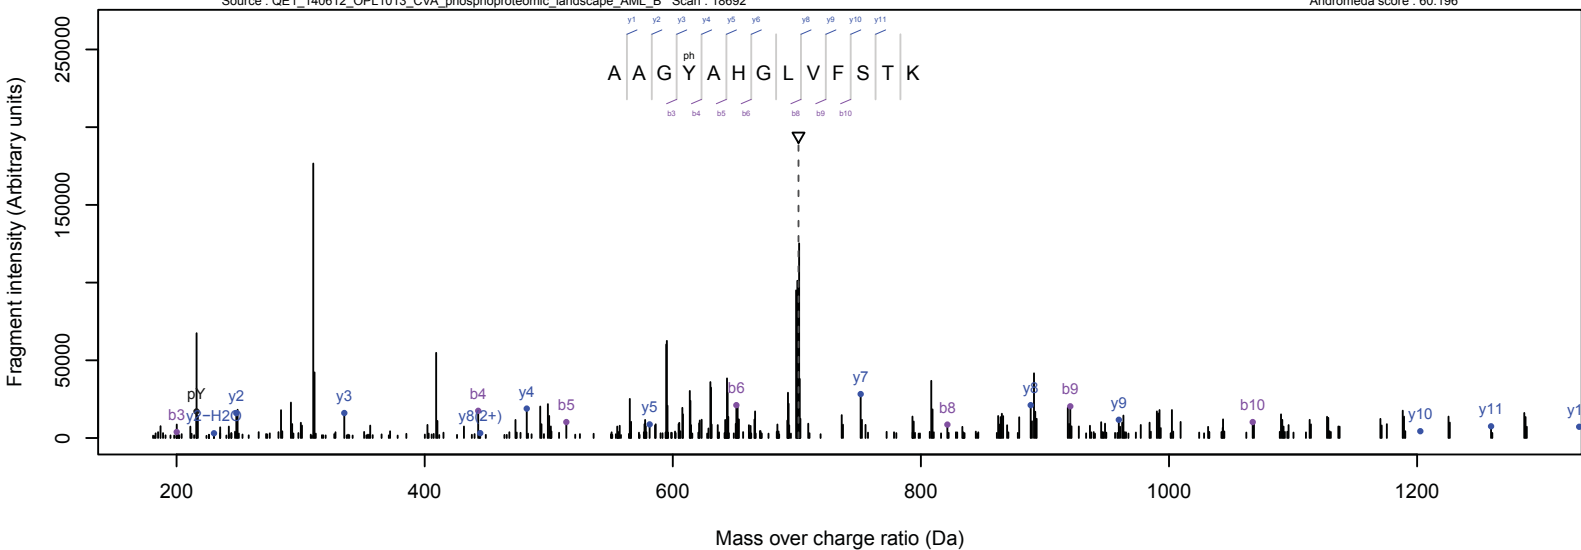

## CMPDNNFHSLY(ph)VKR-3+

Source : QE1\_140612\_OPL1013\_CVA\_phosphoproteomic\_landscape\_AML\_C Scan : 19871

Andromeda score : 60.196

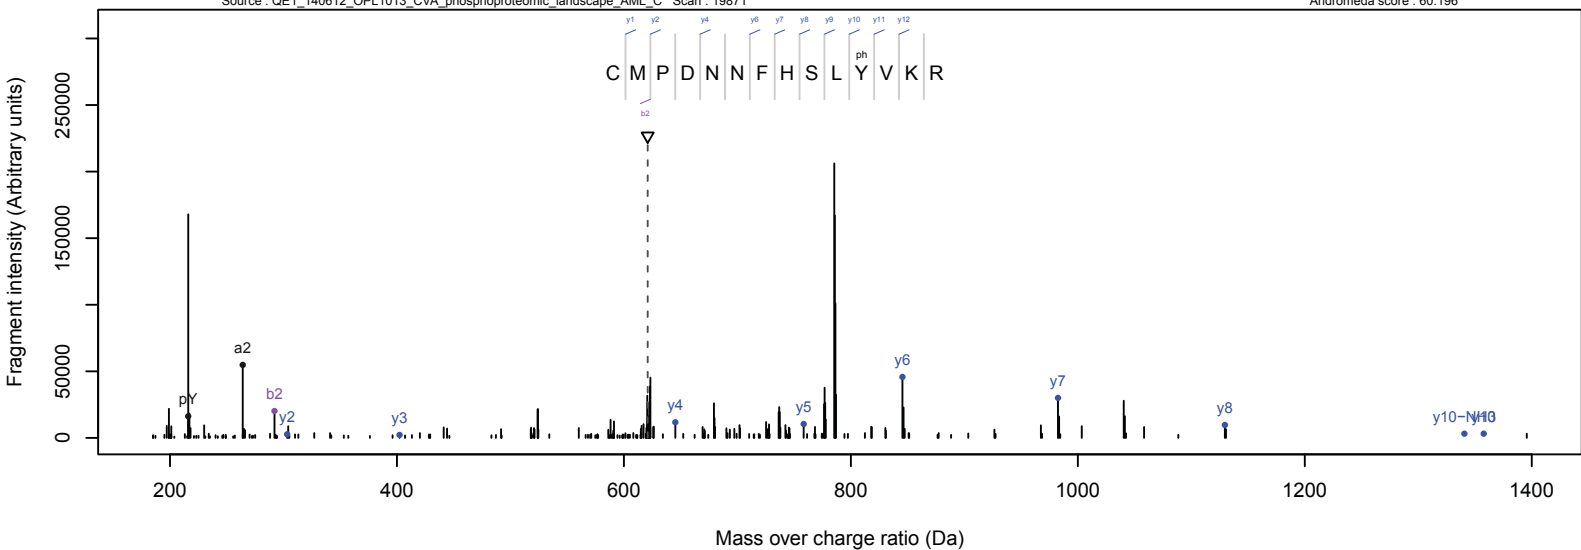

## NTDQGVY(ph)LGLSK-2+

Source : QE1\_140612\_OPL1013\_CVA\_phosphoproteomic\_landscape\_AML\_C Scan : 21530

Andromeda score : 60.178

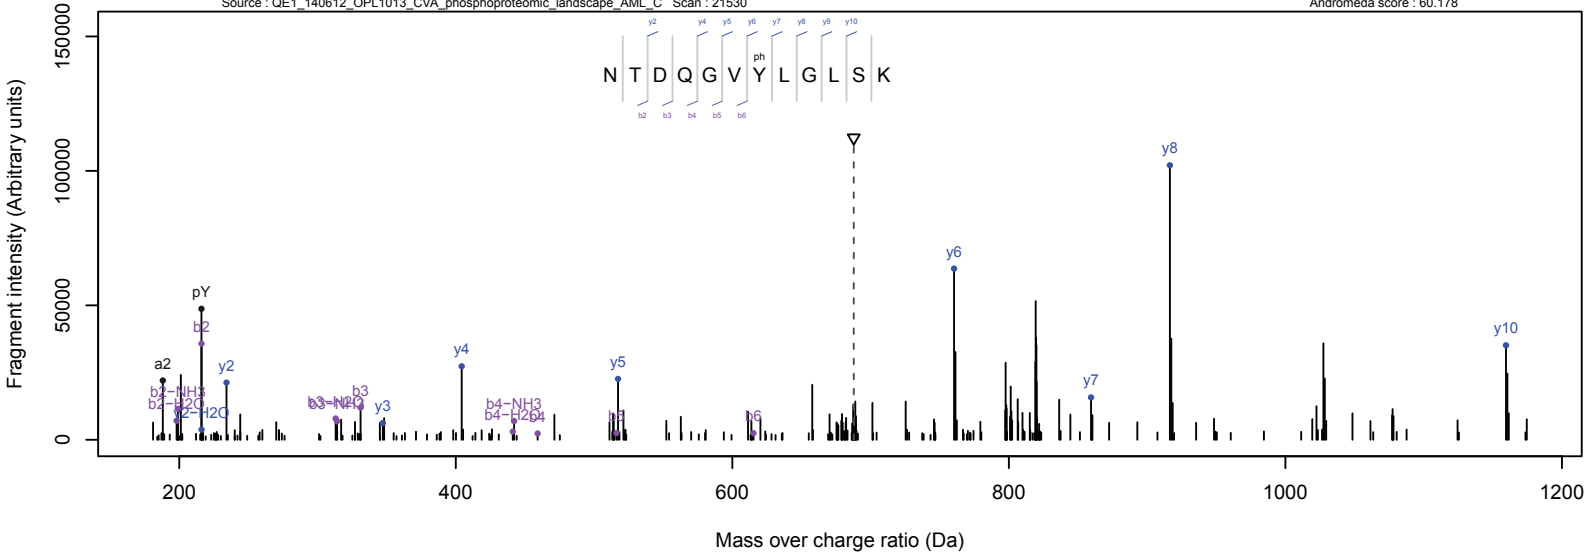



AHGGFTNESS(ph)YHRR-4+

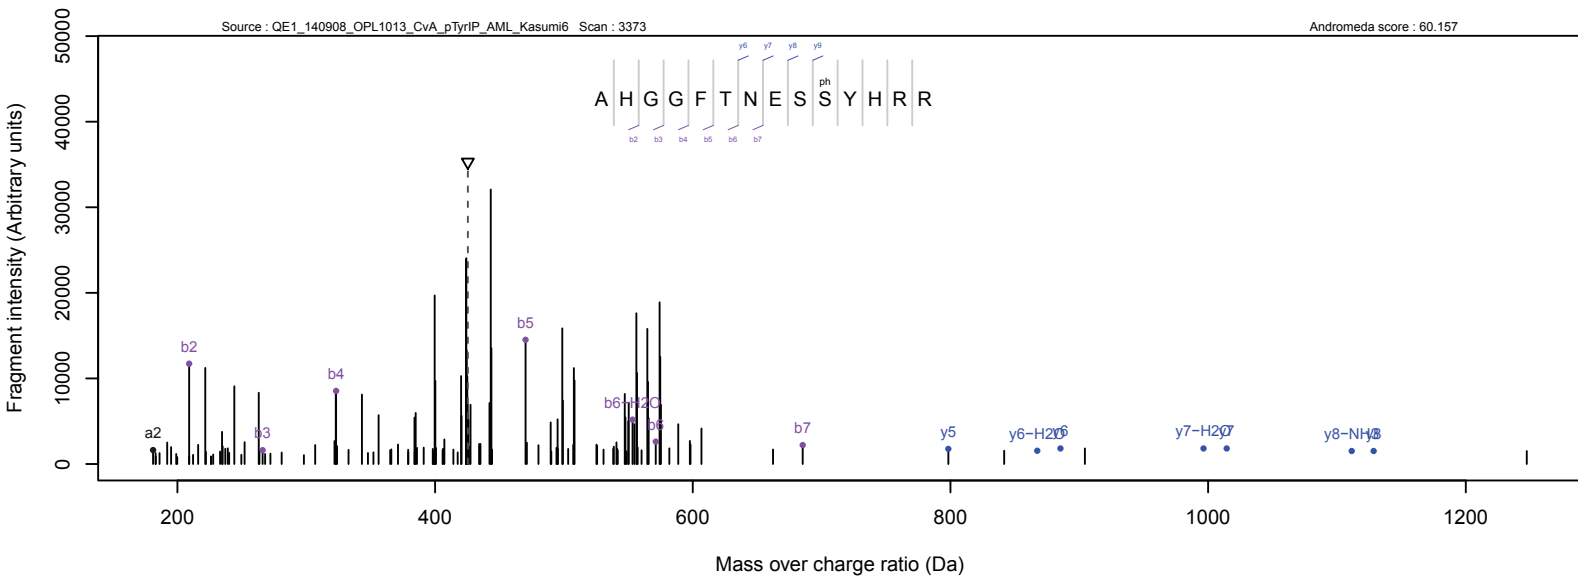

GGSY(ph)PHLLWDVR-2+

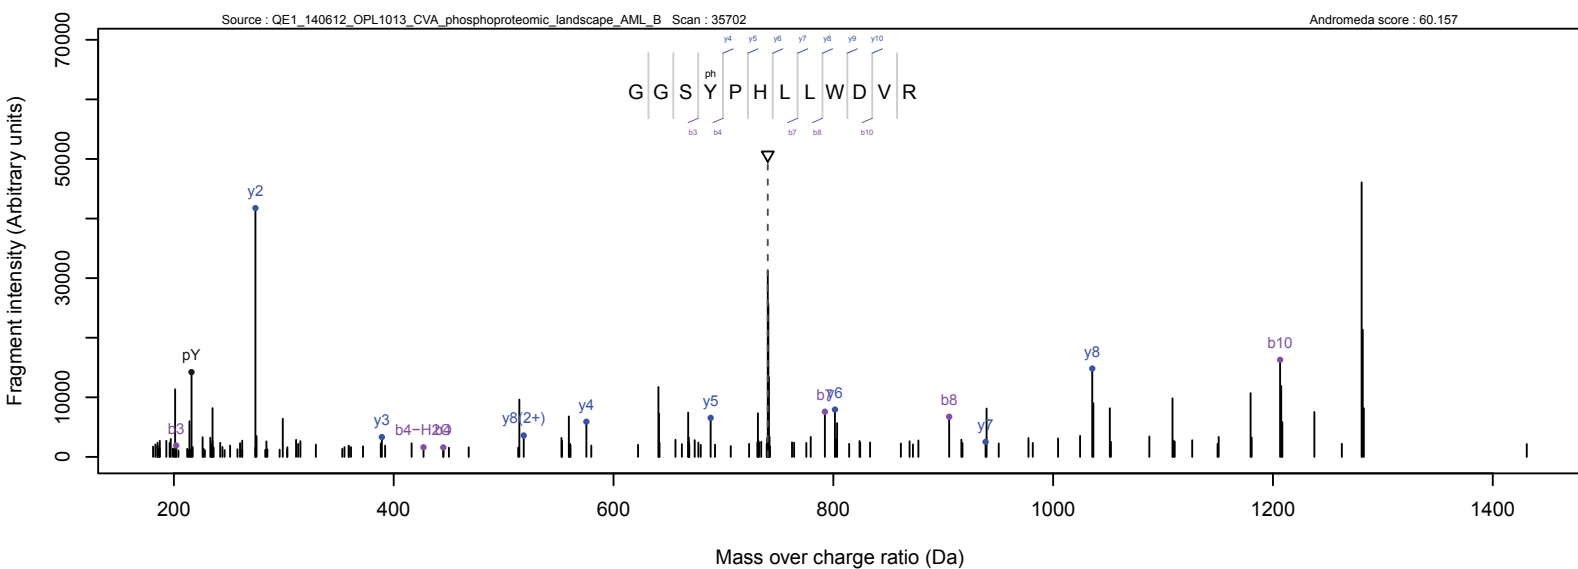

(ac)M(ox)DDREDLVY(ph)QAK-2+

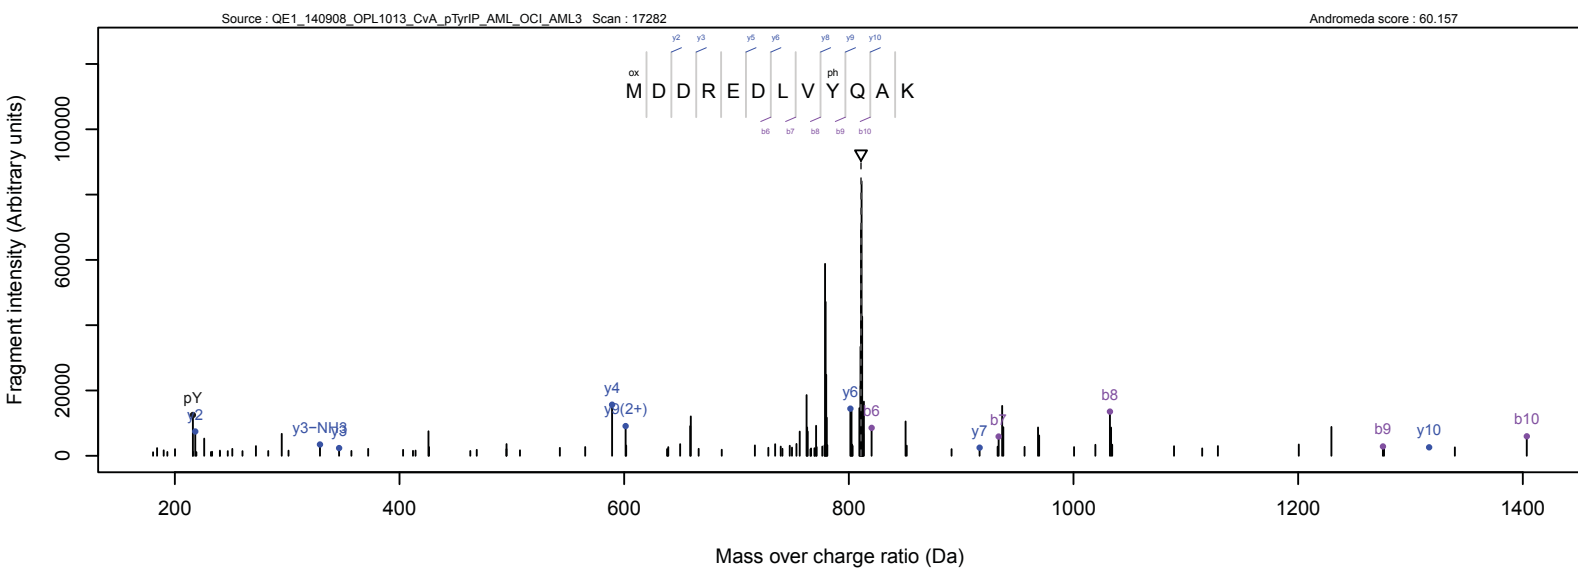

## VY(ph)VGNLTGAGK-2+

Source: QE1\_140612\_OPL1013\_CVA\_phosphoproteomic\_landscape\_AML\_A Scan: 14941

Andromeda score: 60.157

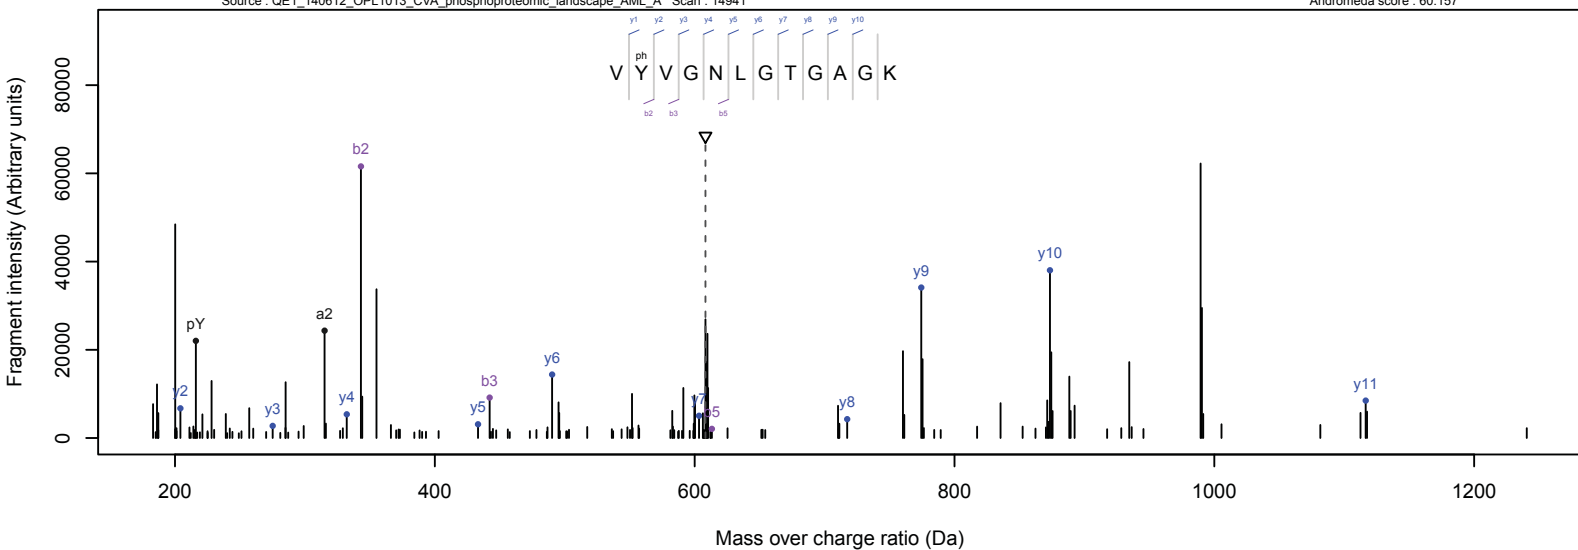

## Y(ph)RDVSPFDHSR-3+

Source: QE1\_140612\_OPL1013\_CVA\_phosphoproteomic\_landscape\_AML\_C Scan: 10239

Andromeda score: 60.157

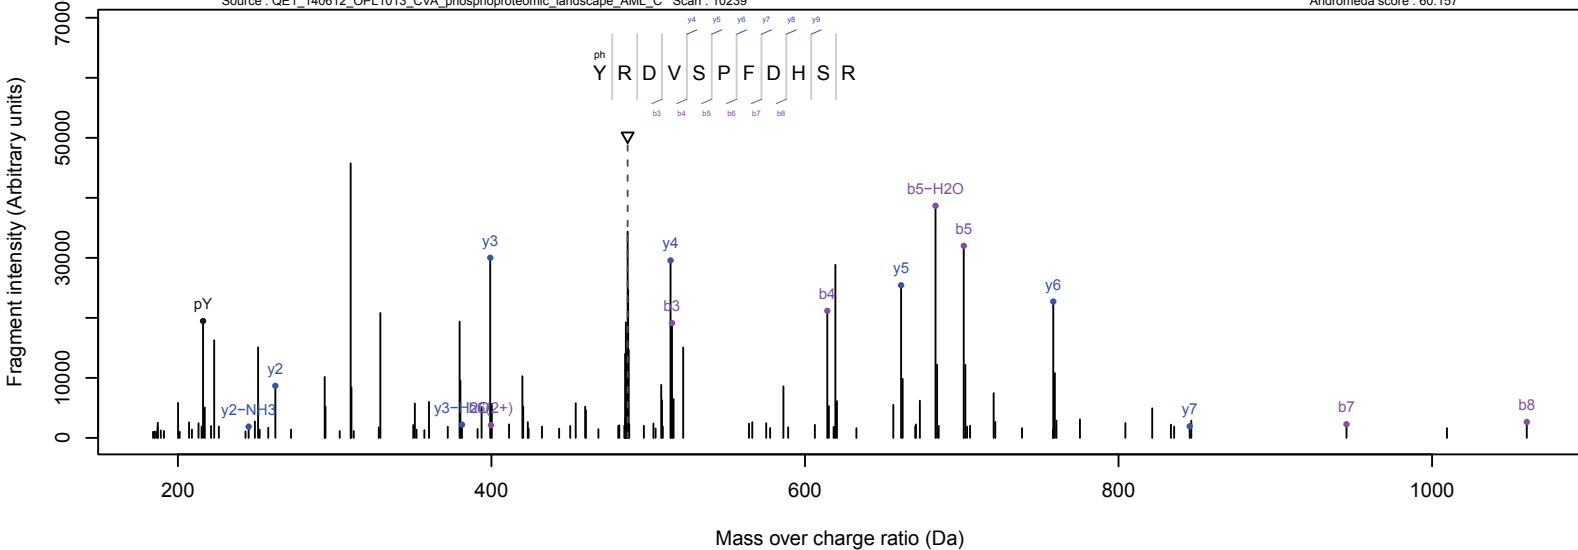

## RVY(ph)LTQLK-2+

Source: QE1\_140612\_OPL1013\_CVA\_phosphoproteomic\_landscape\_AML\_B Scan: 17081

Andromeda score: 60.102

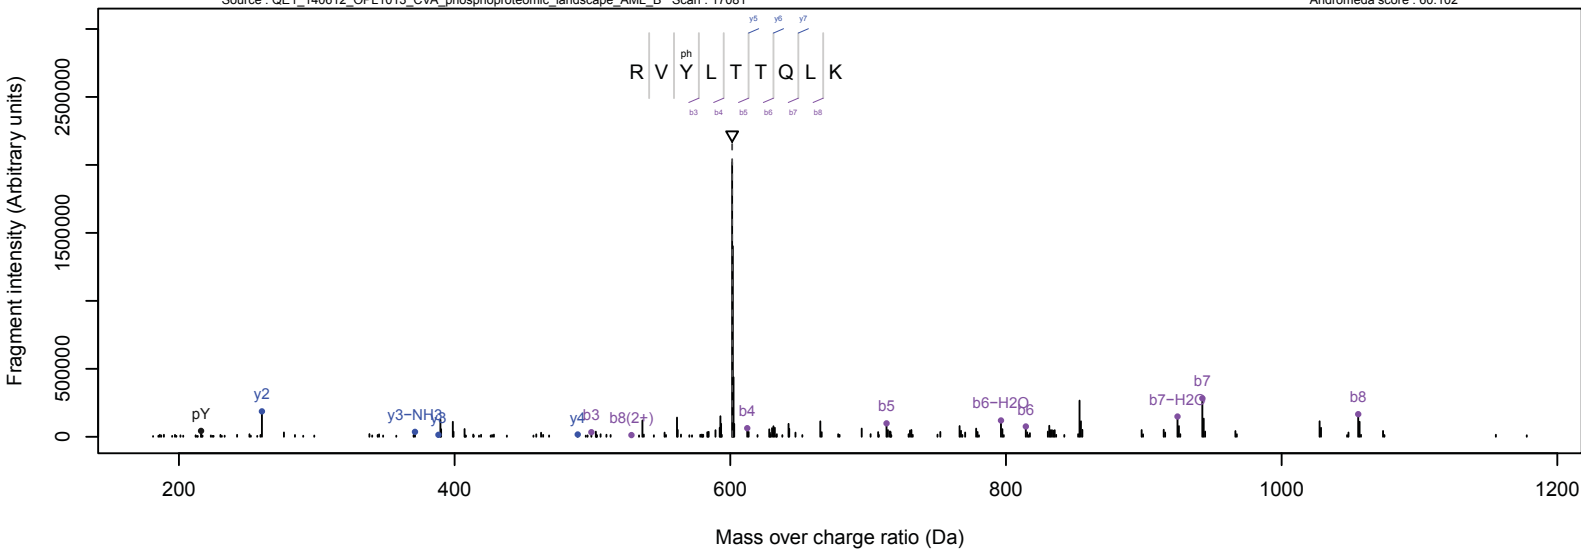

Y(ph)HTEIVFAR-2+

Source : Qe1\_141024\_OPL1013\_CvA\_AML\_pTyrIP\_MOLM13 Scan : 20051

Andromeda score : 60.102

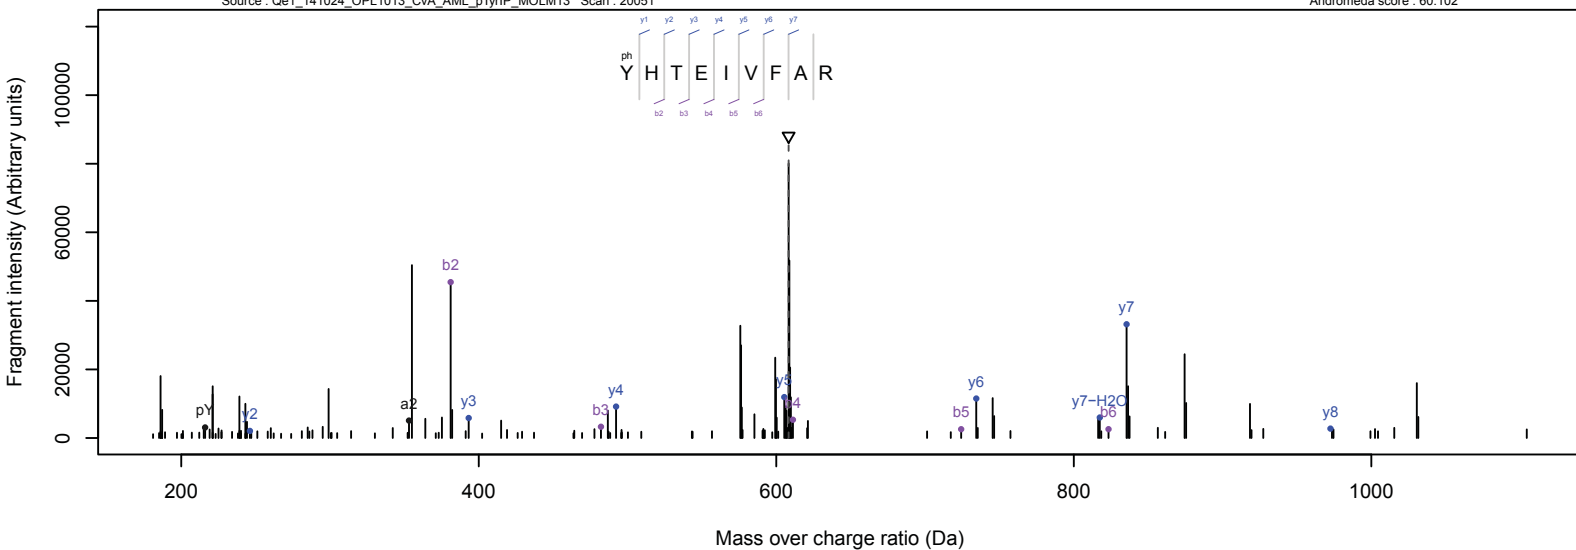

FSGWY(ph)DADLSPAGHEEAK-3+

Source : QE1\_140908\_OPL1013\_CvA\_pTyrIP\_AML\_Kasumi1 Scan : 29252

Andromeda score : 60.062

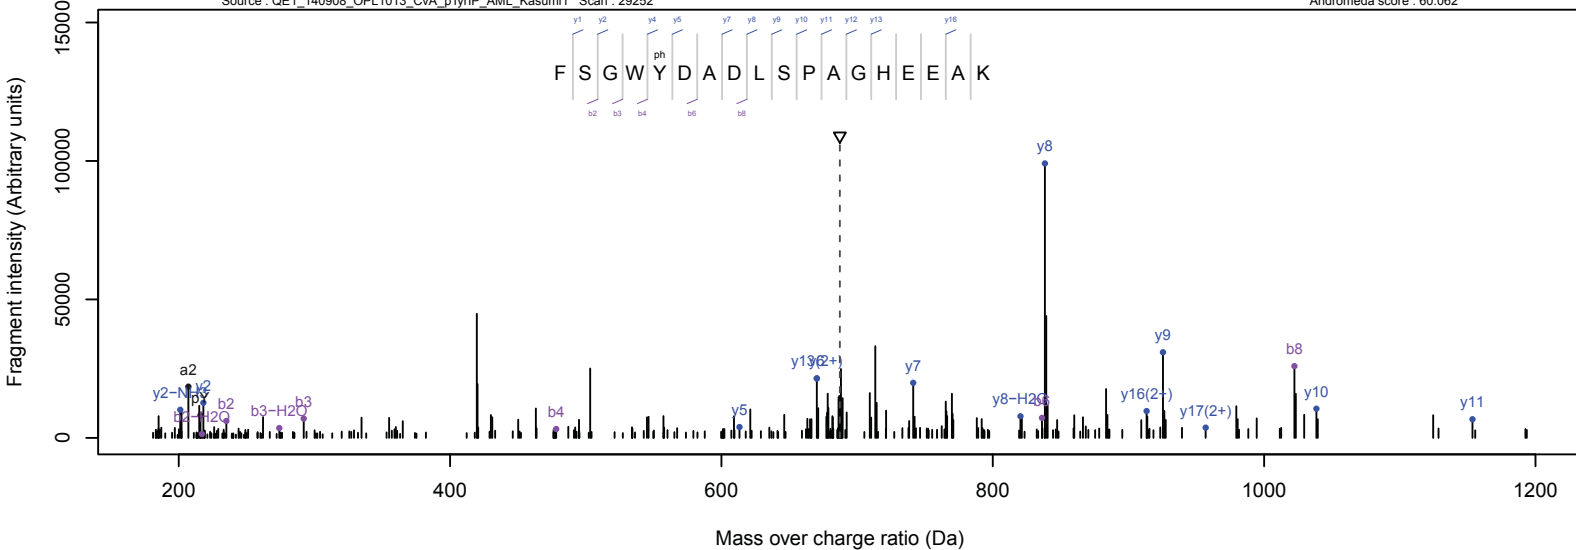

LYKEELEQTY(ph)HAKLENAR-4+

Source : QE1\_140612\_OPL1013\_CVA\_phosphoproteomic\_landscape\_AML\_C Scan : 16504

Andromeda score : 60.062

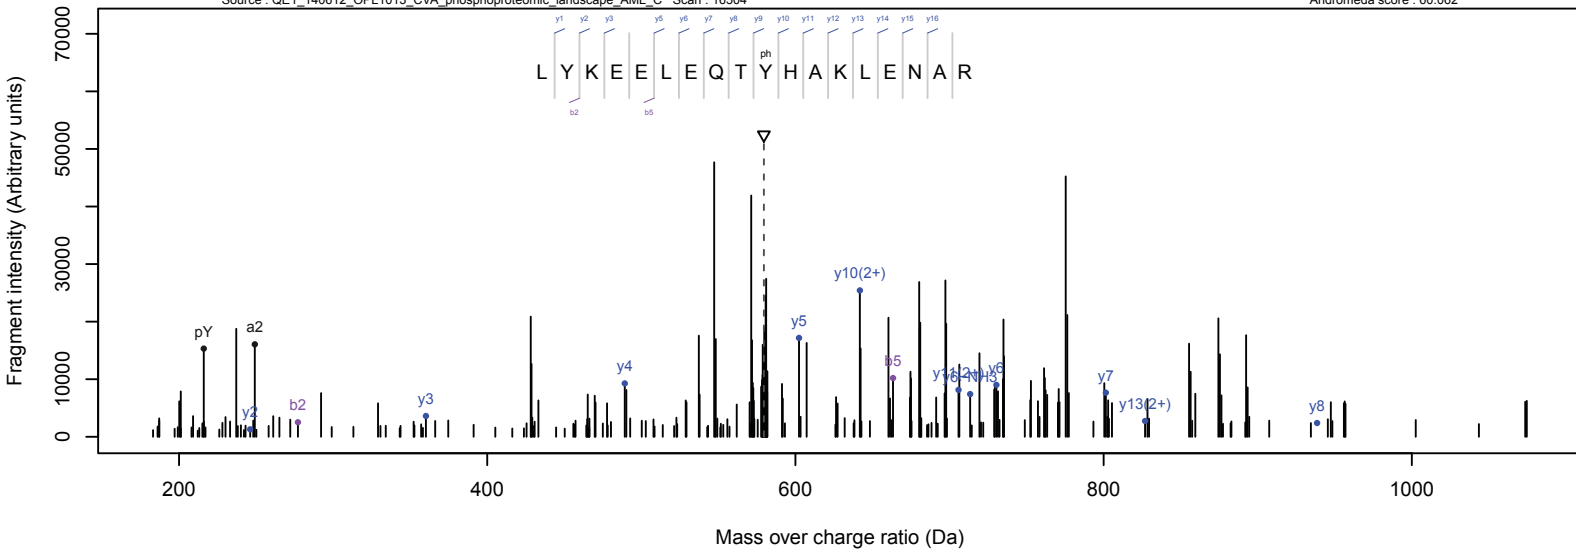

## SSGGSYRDS(ph)YDSYATHNE-3+

Source: QE1\_140612\_OPL1013\_CVA\_phosphoproteomic\_landscape\_AML\_B Scan: 9438

Andromeda score: 60.062

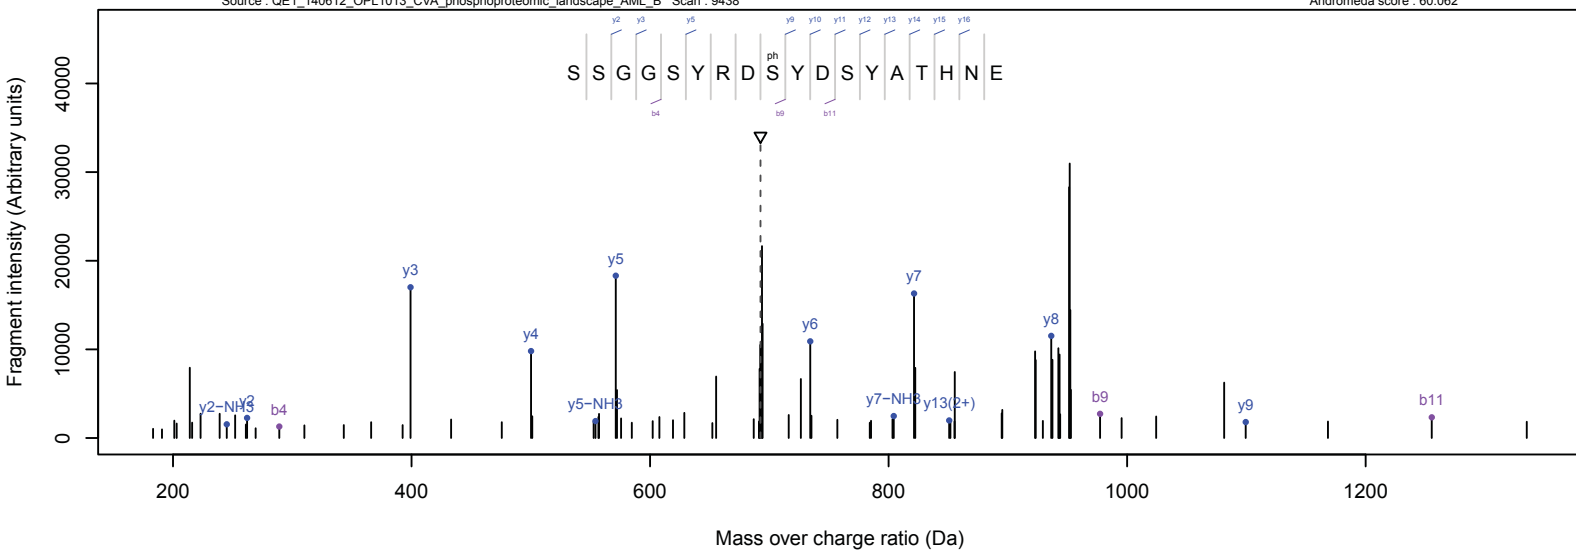

## AKQGY(ph)VIYR-2+

Source: QE1\_140612\_OPL1013\_CVA\_phosphoproteomic\_landscape\_AML\_A Scan: 8502

Andromeda score: 60.019

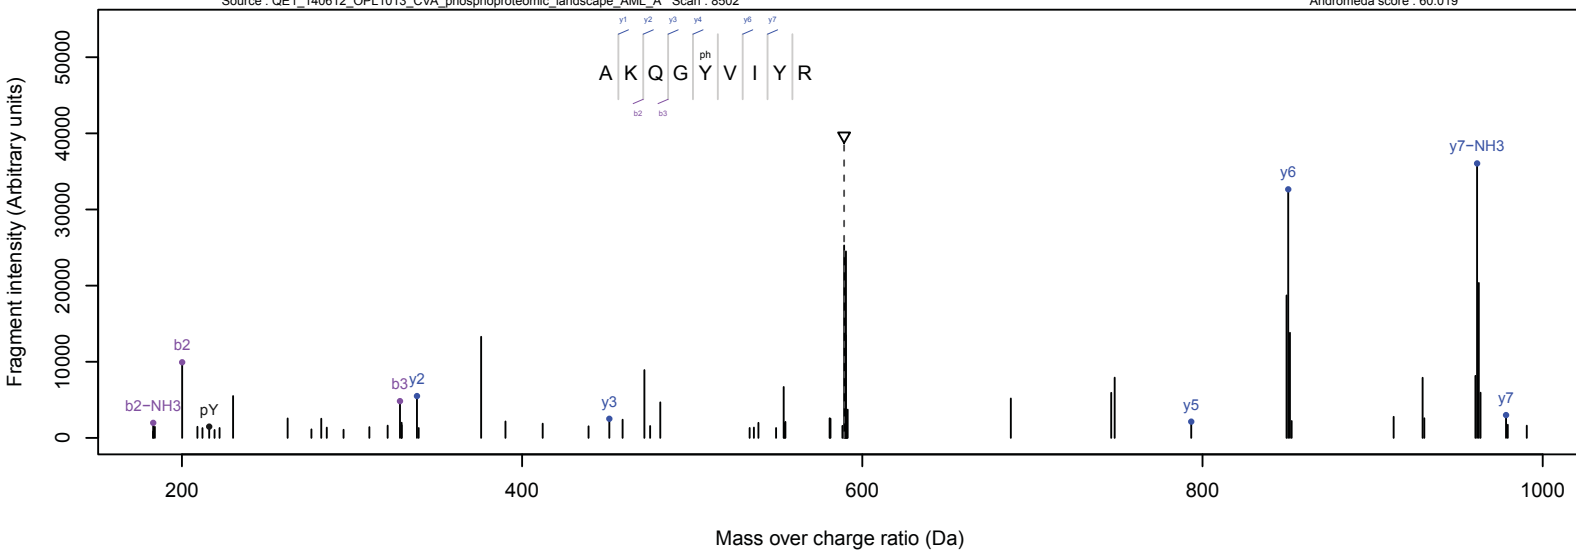

## NFLY(ph)AWCGK-2+

Source: QE1\_140612\_OPL1013\_CVA\_phosphoproteomic\_landscape\_AML\_B Scan: 34993

Andromeda score: 60.019

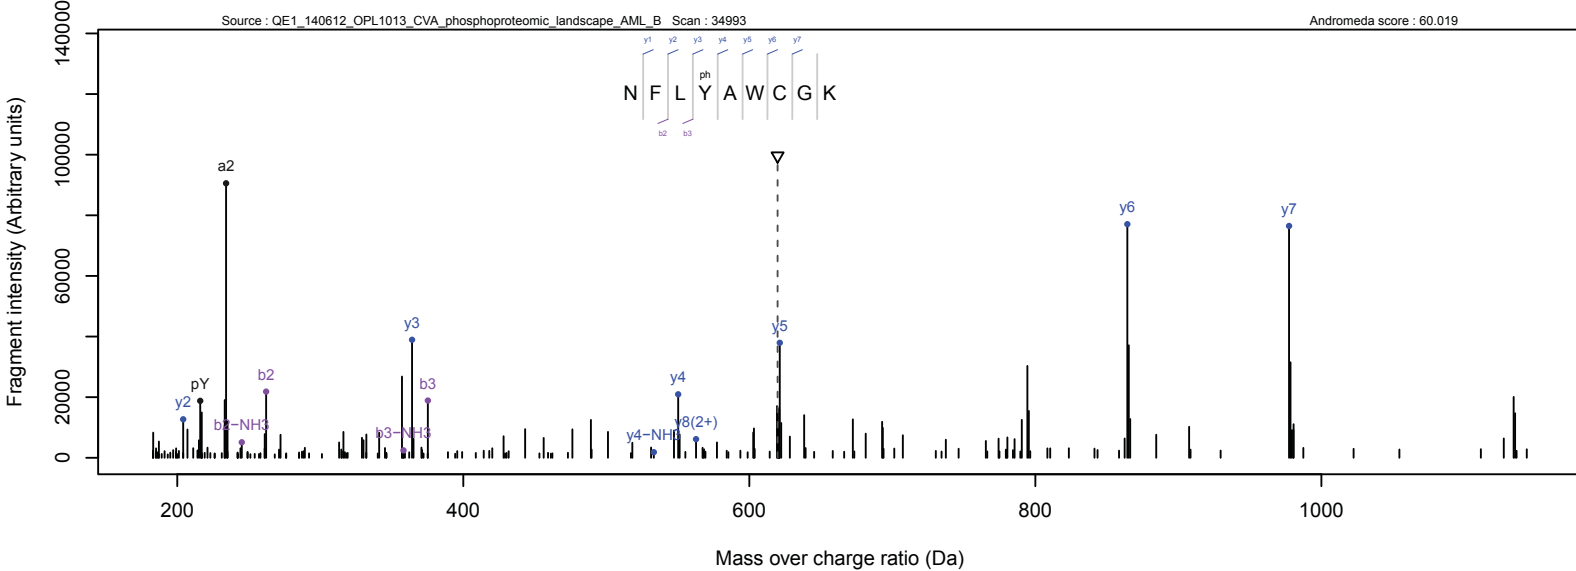

ISY(ph)TQFPNSFYEPHQDFTSPDIFKK-4+

Source : QE1\_140612\_OPL1013\_CVA\_phosphoproteomic\_landscape\_AML\_C Scan : 41093

Andromeda score : 59.912

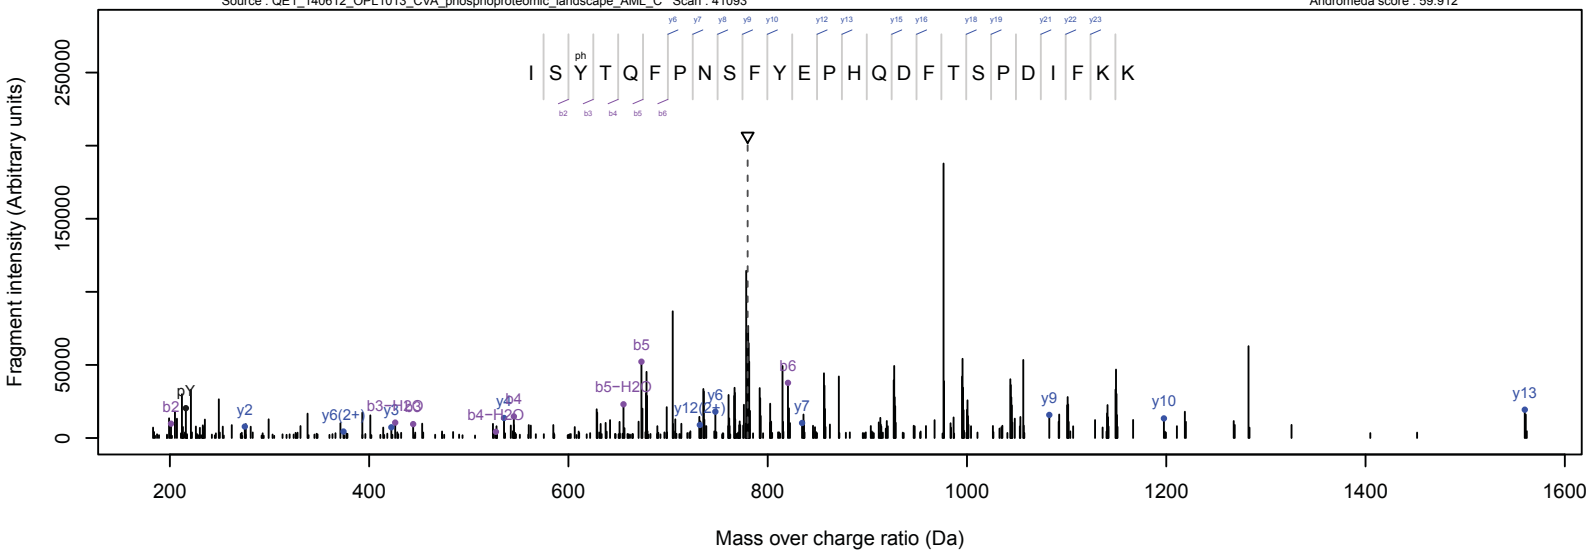

TM(ox)PTTQSFASDPK(ph)ATPQVIQAPGPR-3+

Source : QE1\_140908\_OPL1013\_CvA\_pTyrIP\_AML\_Kasumi6 Scan : 30318

Andromeda score : 59.912

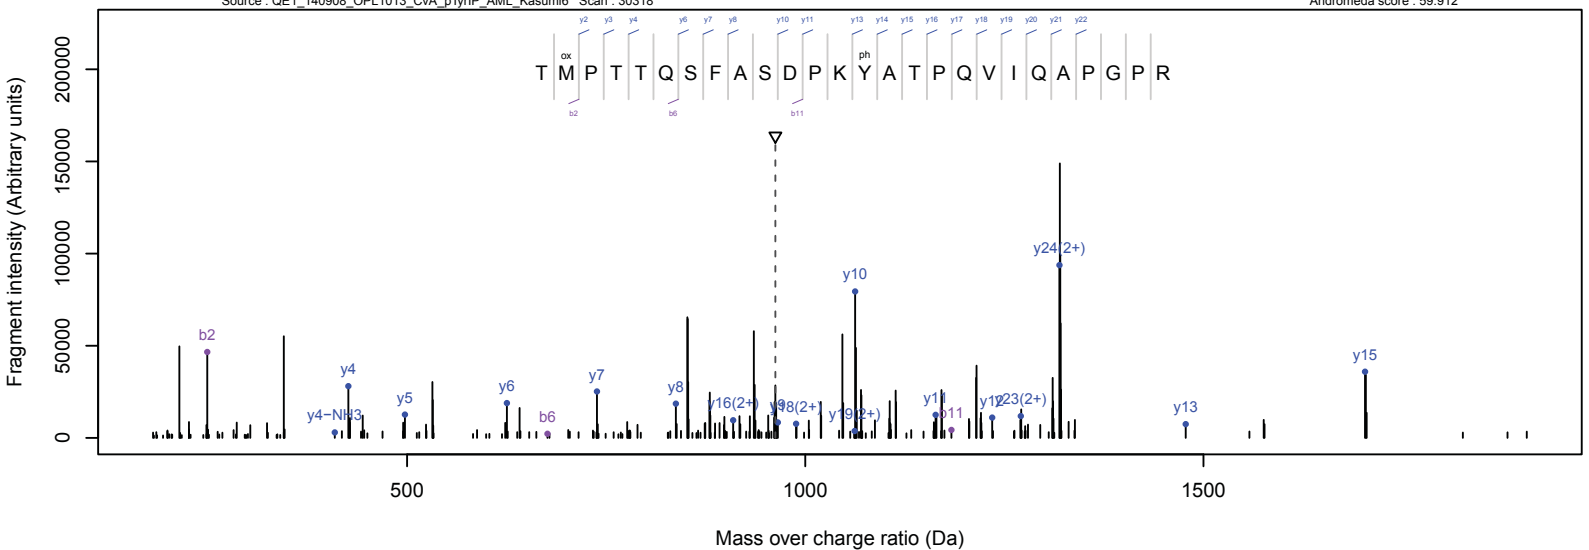

LQDLLLHYTAHPLSPYGETLTEPLAR-3+

Source : QE1\_140908\_OPL1013\_CvA\_pTyrIP\_AML\_HEL Scan : 45324

Andromeda score : 59.893

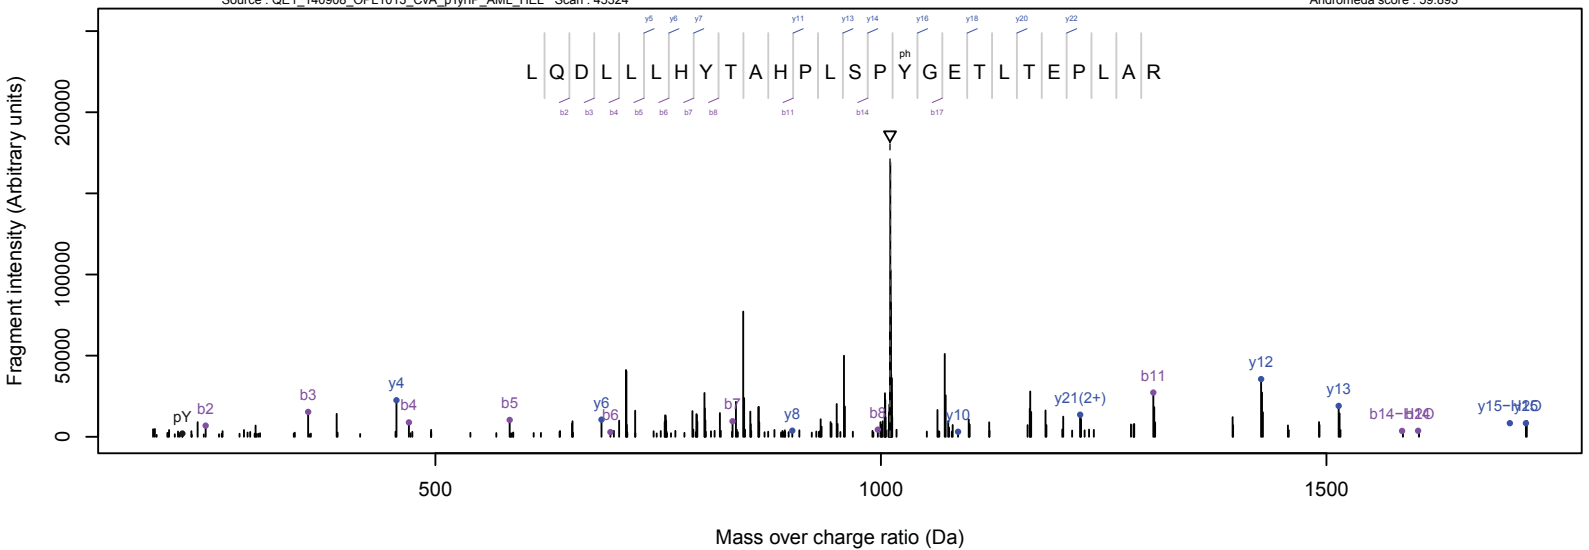

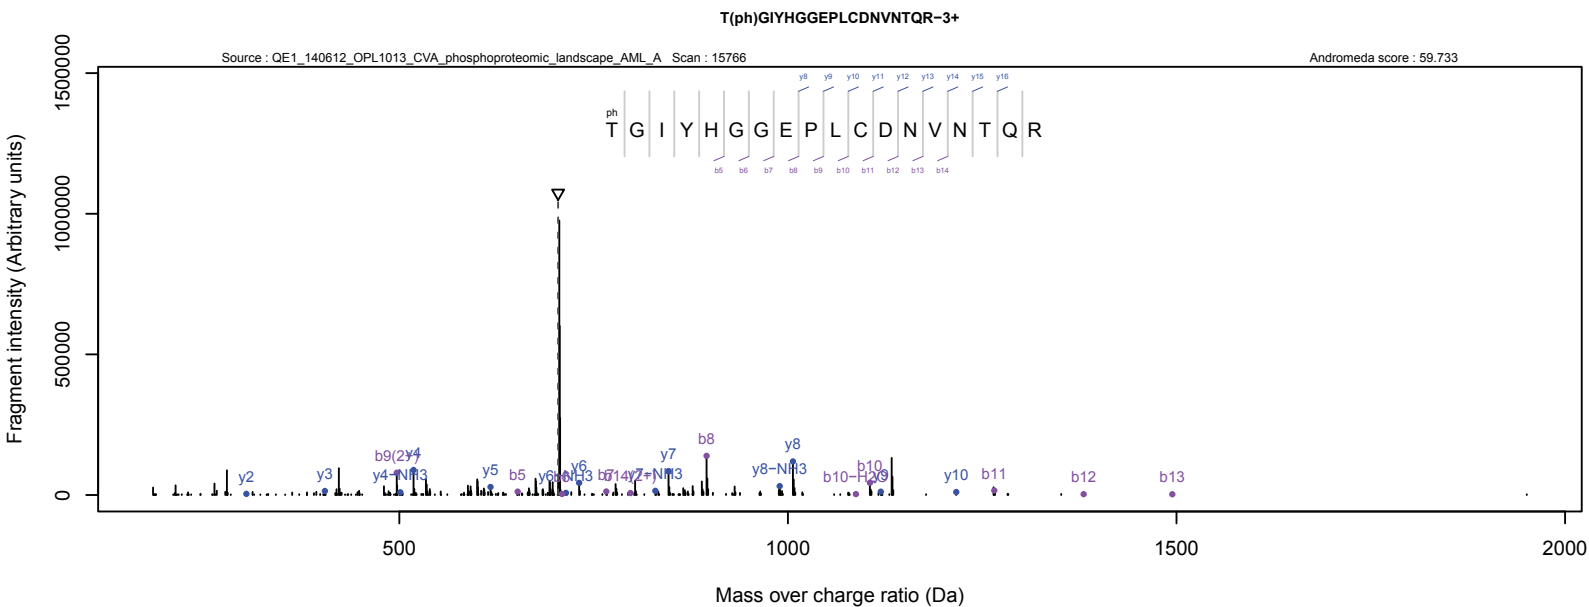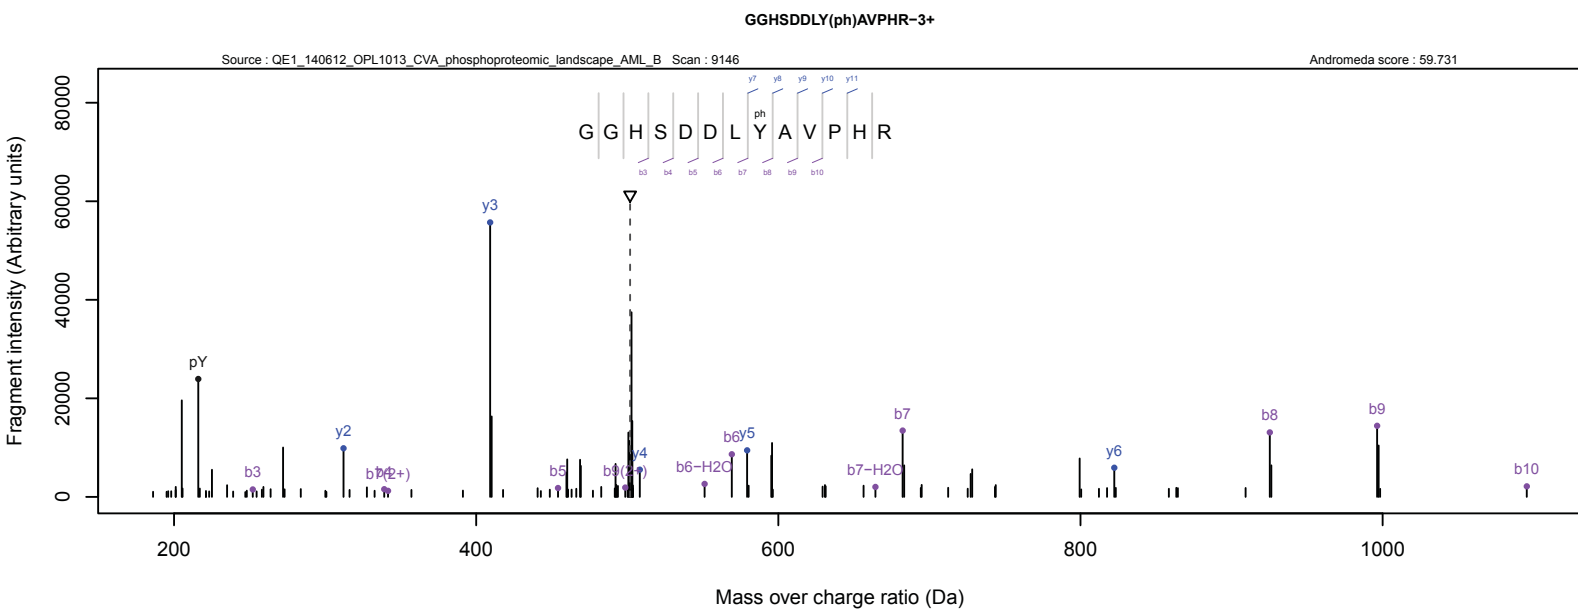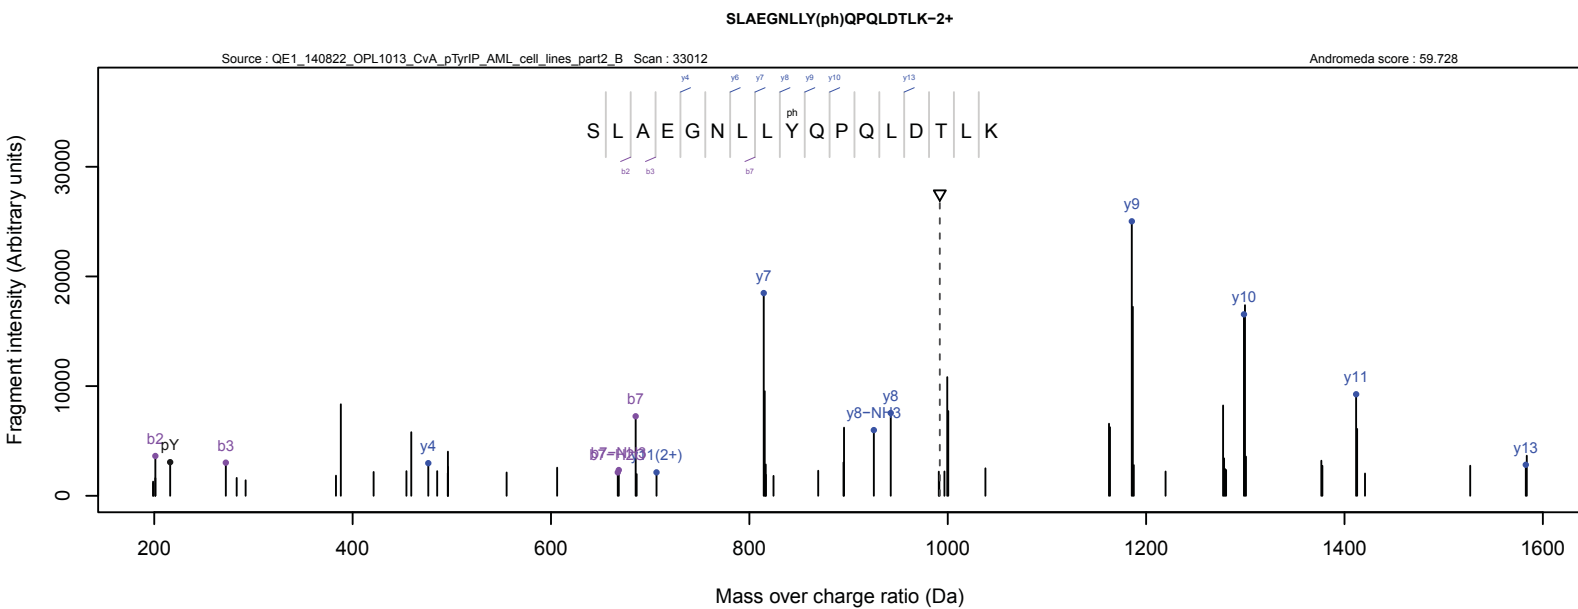

## Y(ph)PSLGQKPGGSDFLM(ox)K-3+

Source : QE1\_140612\_OPL1013\_CVA\_phosphoproteomic\_landscape\_AML\_C Scan : 27066

Andromeda score : 59.728

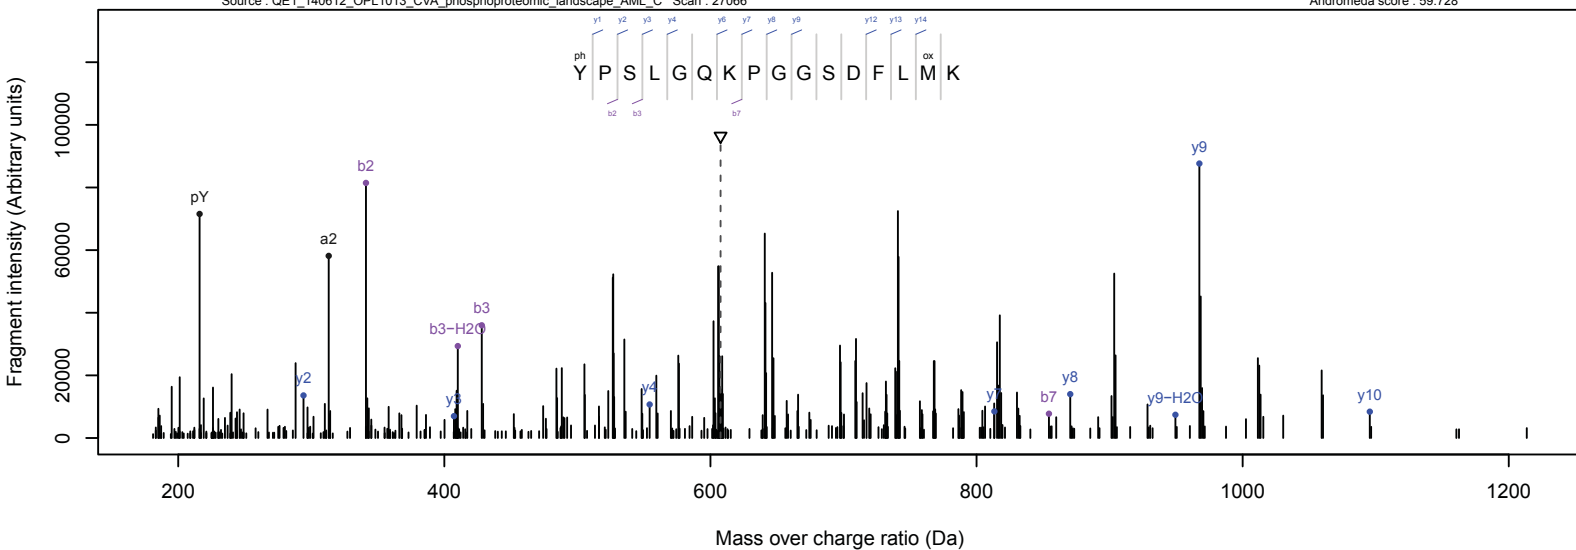

## EAWASKDATY(ph)TSAR-3+

Source : QE1\_140612\_OPL1013\_CVA\_phosphoproteomic\_landscape\_AML\_F Scan : 9148

Andromeda score : 59.709

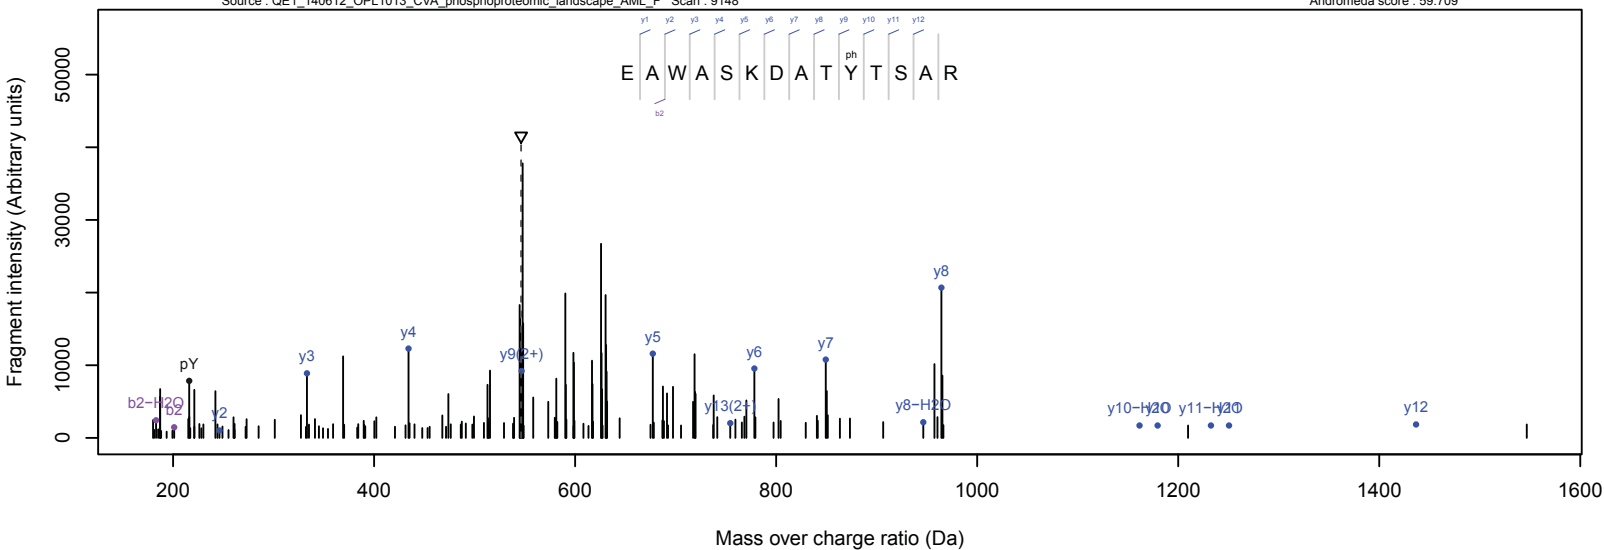

## VSSQLVAIPVY(ph)VK-2+

Source : QE1\_140612\_OPL1013\_CVA\_phosphoproteomic\_landscape\_AML\_C Scan : 37939

Andromeda score : 59.709

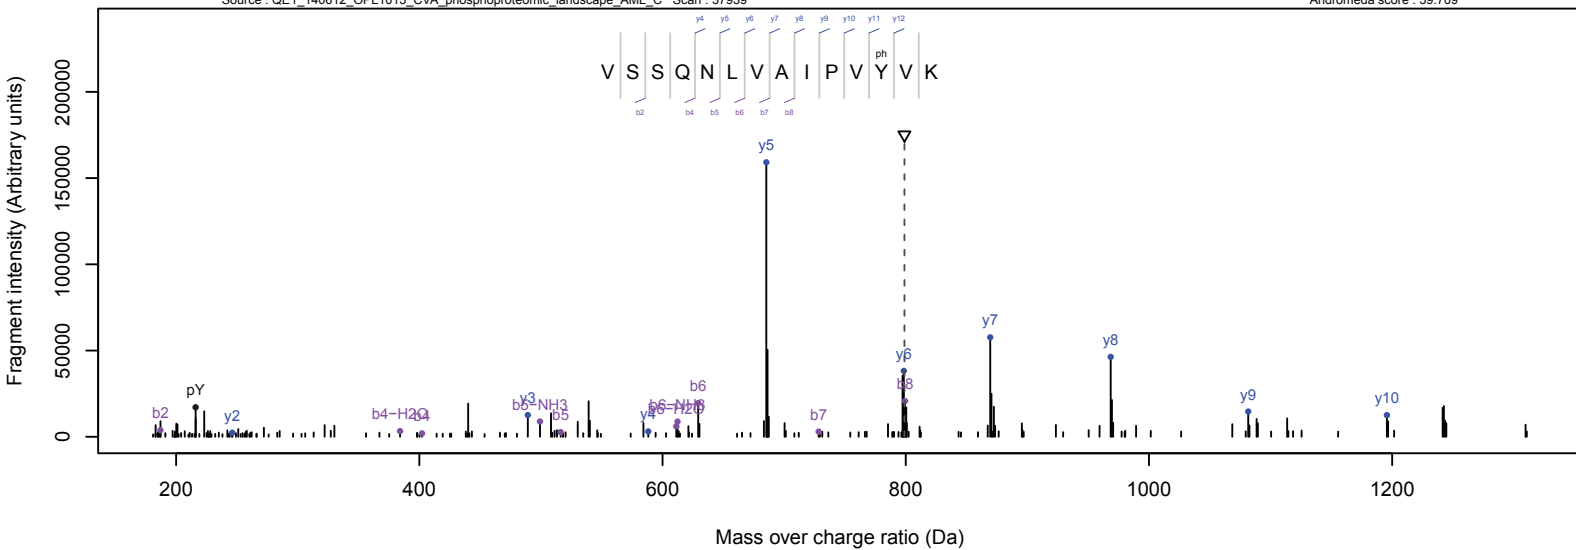





TPPLITDY(ph)REYHTDTTVK-3+

Source: QE1\_140612\_OPL1013\_CVA\_phosphoproteomic\_landscape\_AML\_D Scan: 22596

Andromeda score: 59.585

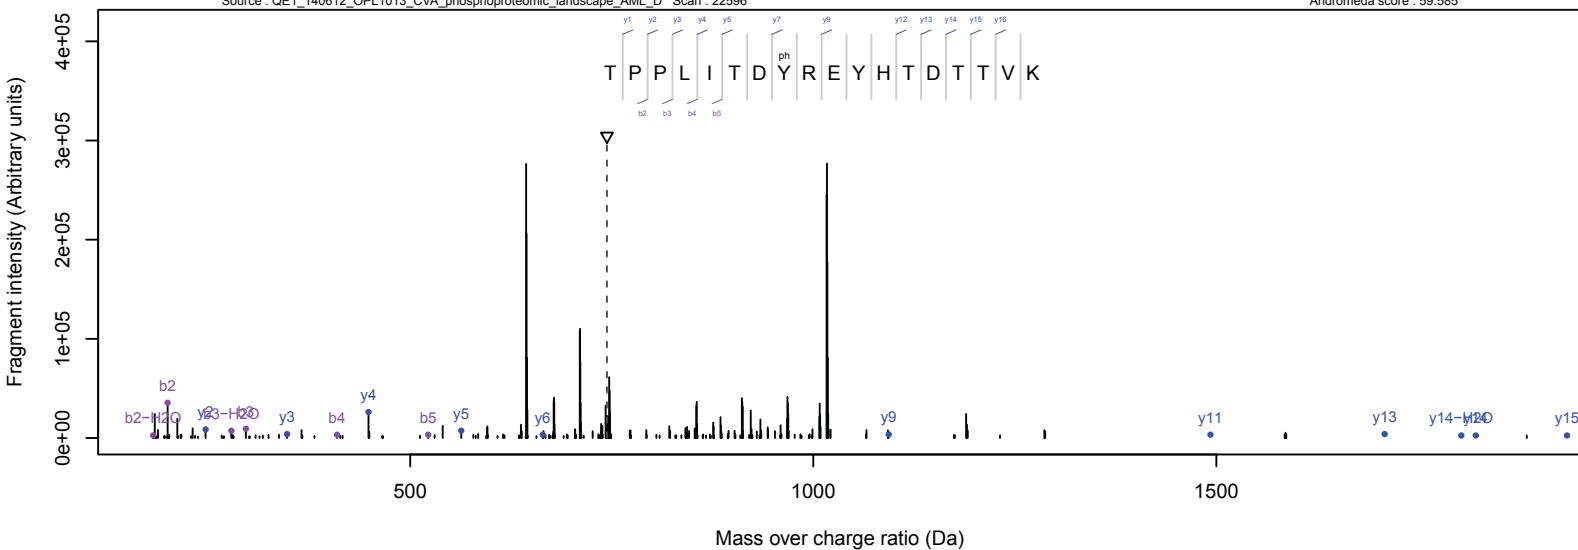

KTVTY(ph)EDPQAVGGLASALDNR-3+

Source: QE1\_140612\_OPL1013\_CVA\_phosphoproteomic\_landscape\_AML\_C Scan: 31283

Andromeda score: 59.539

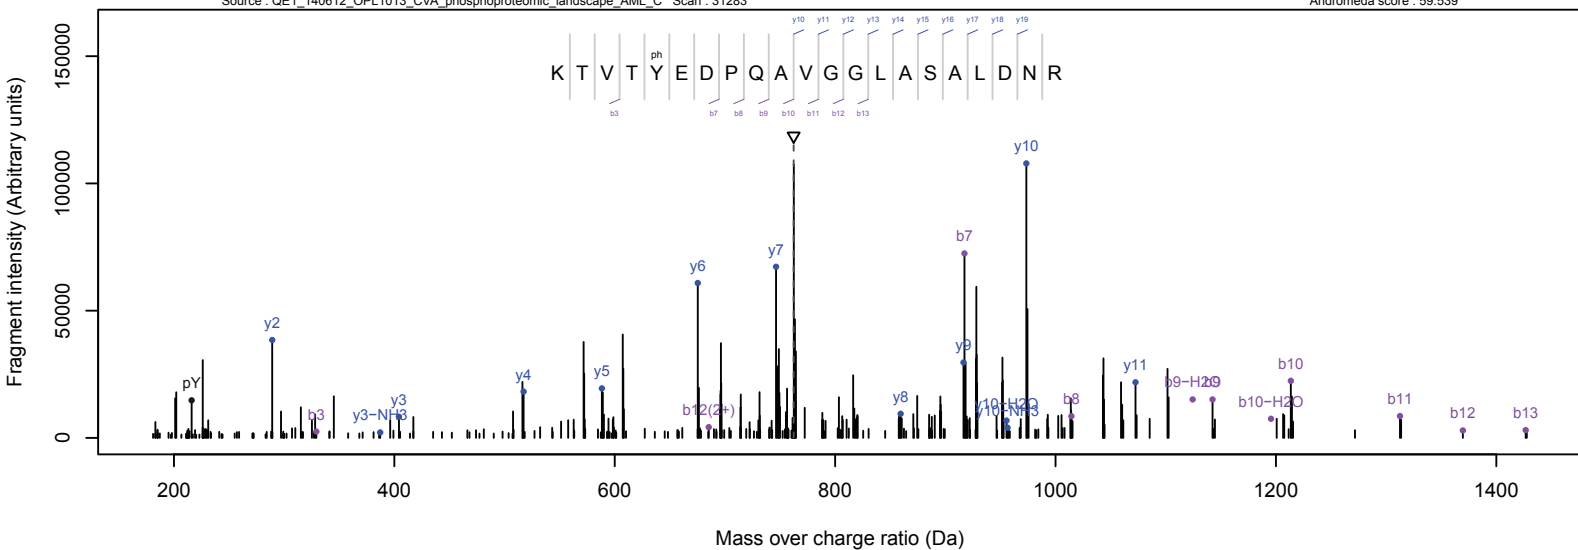

NSVSPGLPQRPASAGAMLGGLNSANGACPSVGNNGY(ph)VSAR-3+

Source: QE1\_140612\_OPL1013\_CVA\_phosphoproteomic\_landscape\_AML\_C Scan: 34410

Andromeda score: 59.525

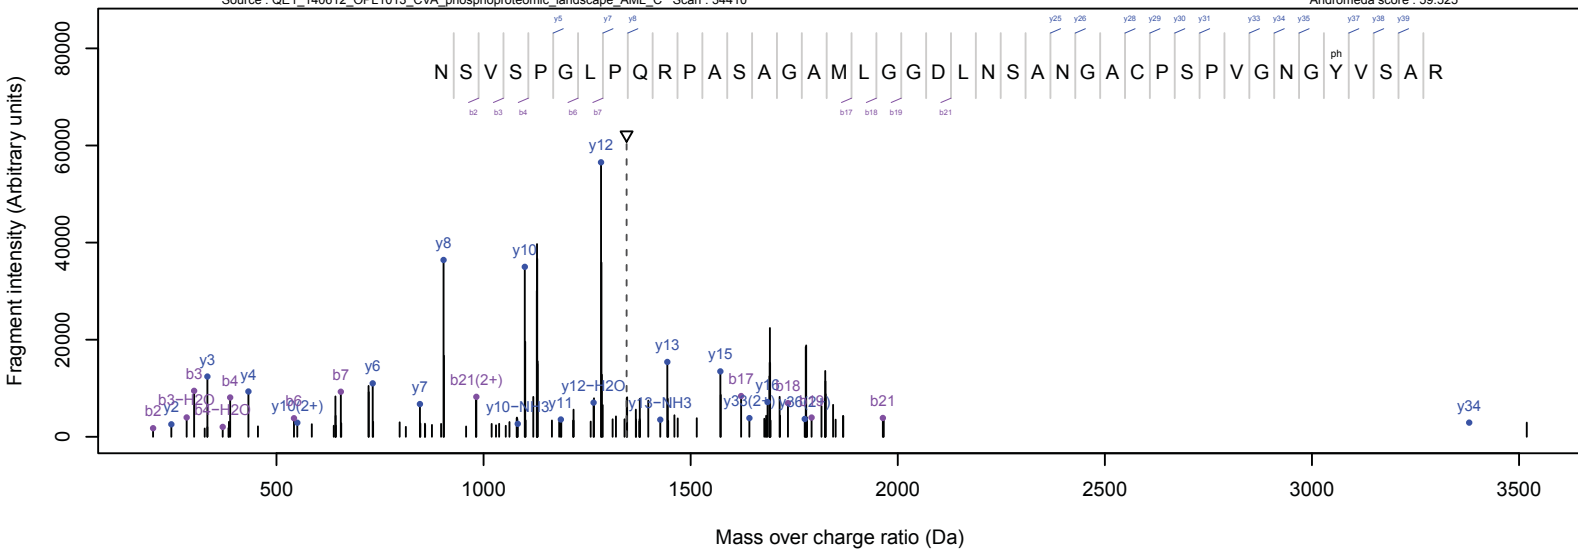

AYKTEMQDNTY(ph)PEILR-3+

Source : QE1\_140612\_OPL1013\_CVA\_phosphoproteomic\_landscape\_AML\_B Scan : 23488

Andromeda score : 59.502

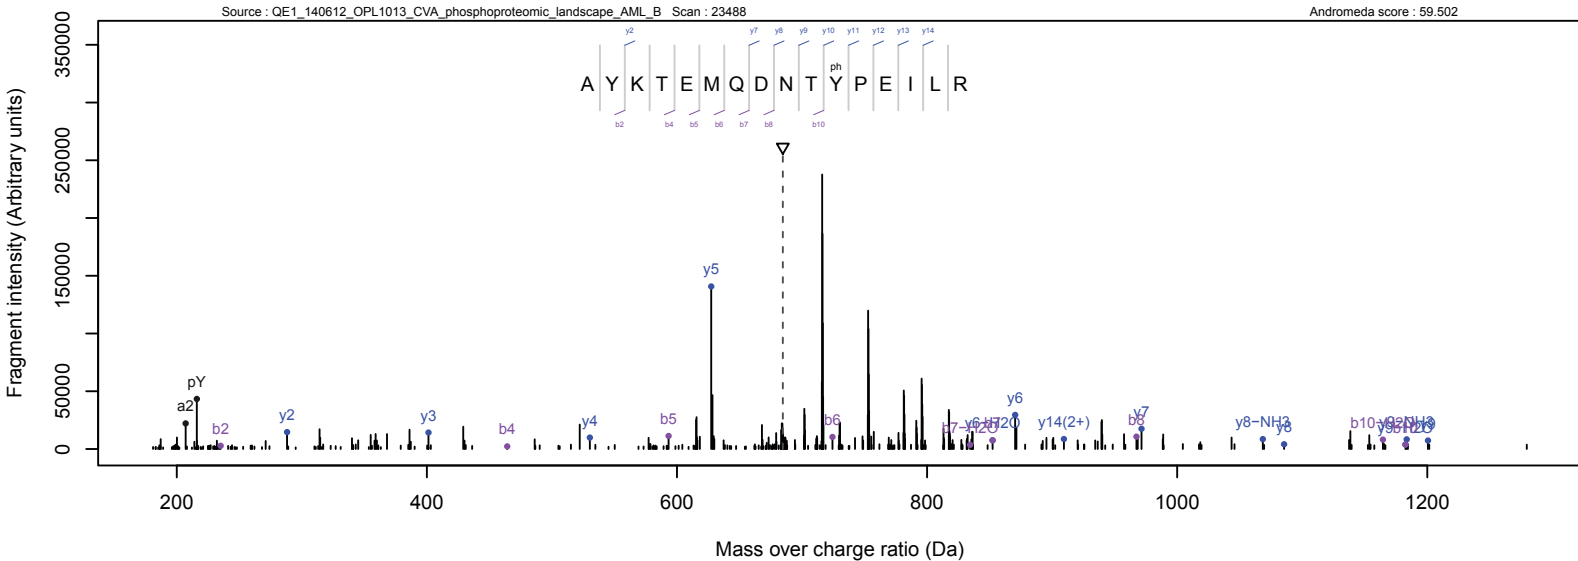

LSSVSSHDSGFVSDATY(ph)SKPPSPMPDITSQK-4+

Source : QE1\_140612\_OPL1013\_CVA\_phosphoproteomic\_landscape\_AML\_C Scan : 26513

Andromeda score : 59.434

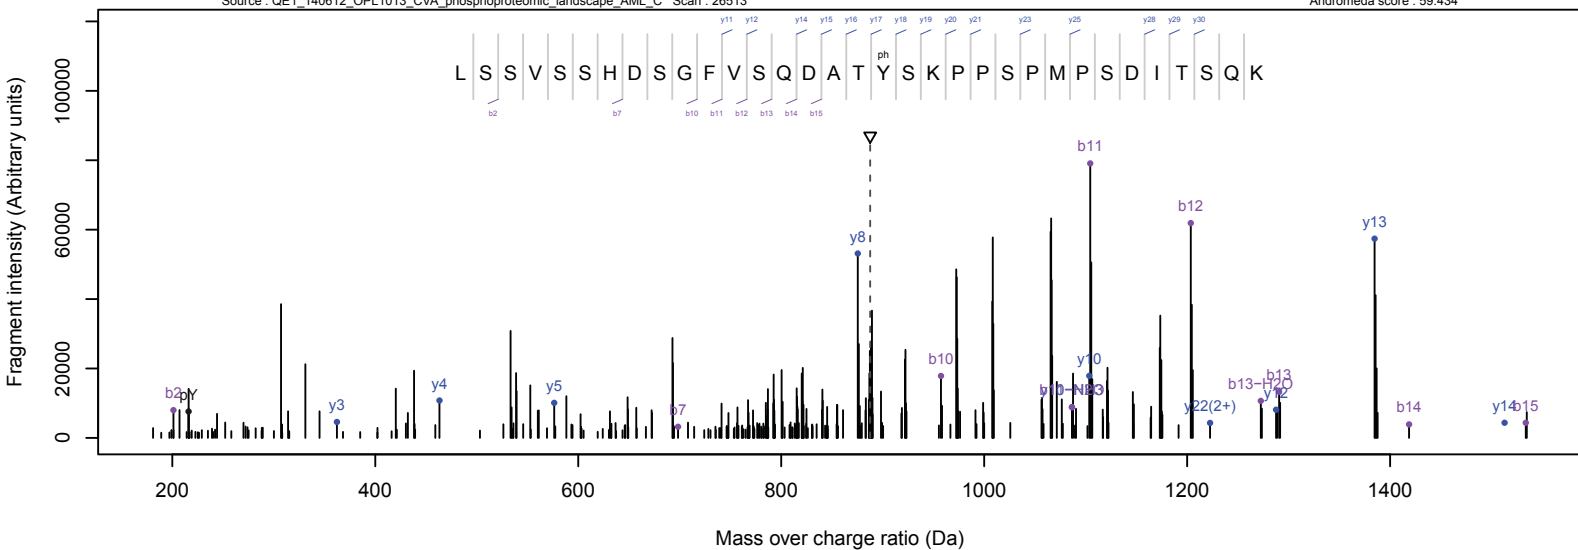

Y(ph)ISAAPGAEAK-2+

Source : QE1\_140822\_OPL1013\_CvA\_pTyrIP\_AML\_cell\_lines\_part2\_B Scan : 5592

Andromeda score : 59.418

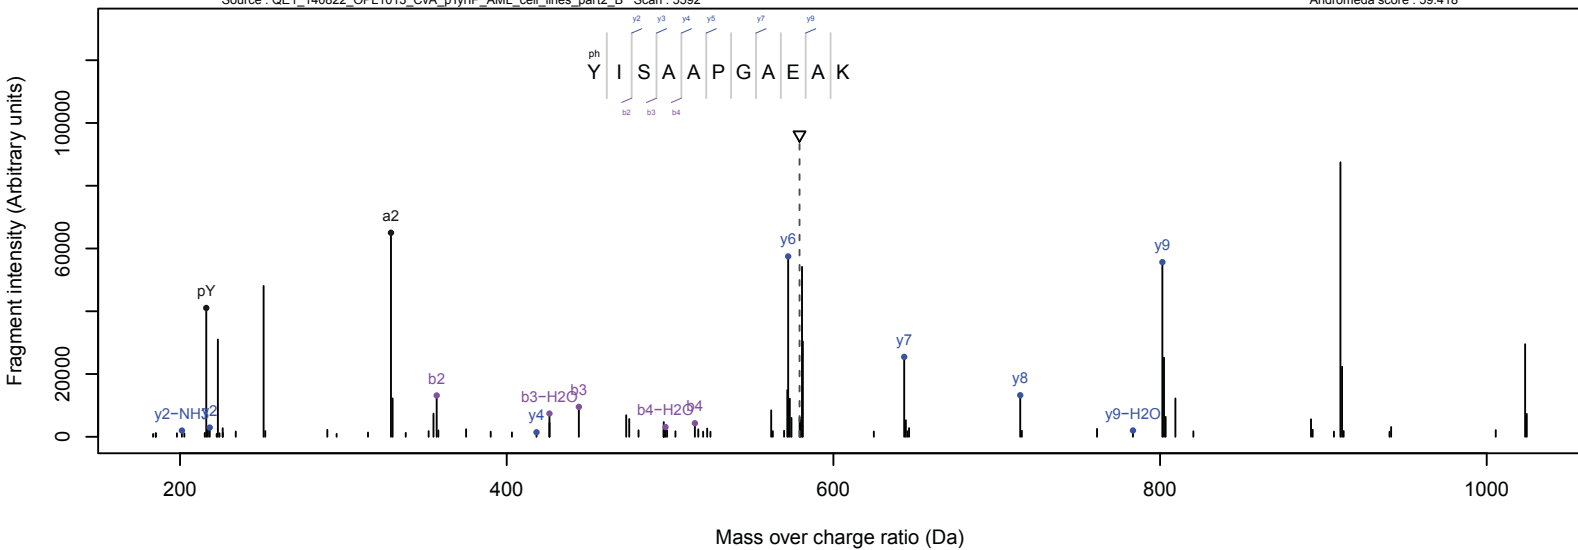

LVELLM(ox)HNDY(ph)KVVPALR-3+

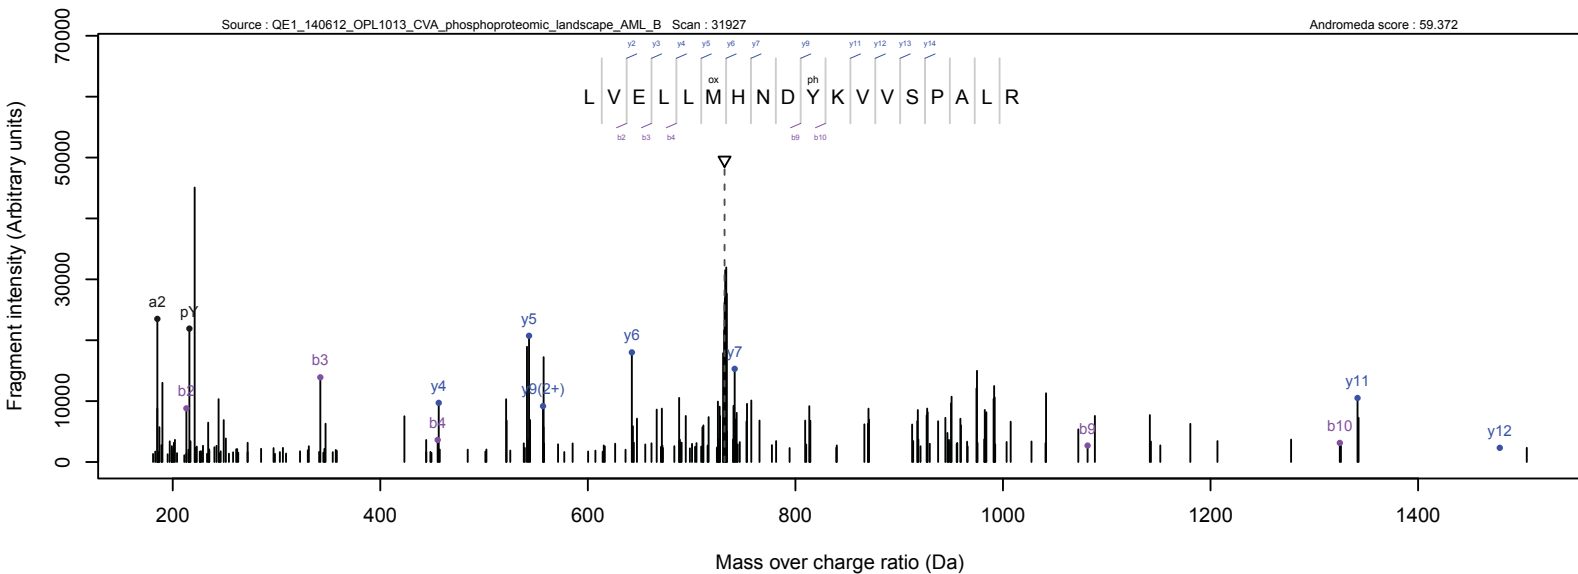

LY(ph)KVPDQKPEQFAFNGEFK-3+

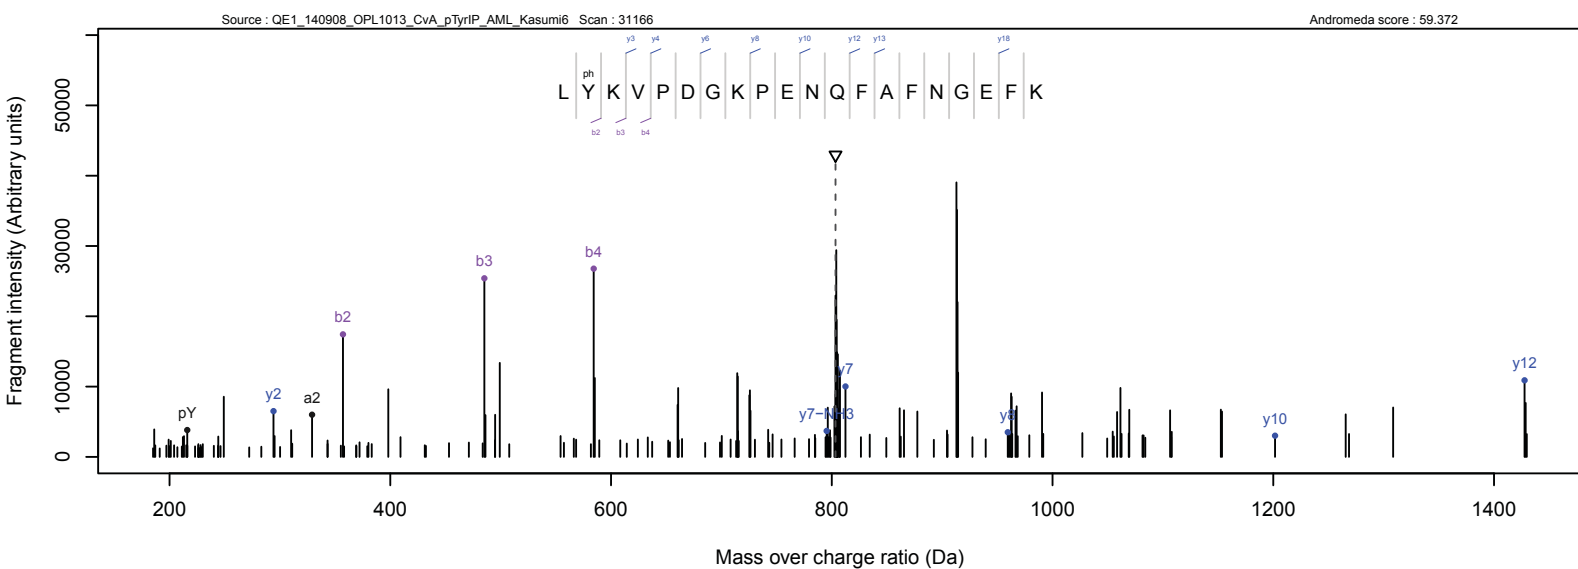

TTYQALPCLPSMYG(ph)PNR-2+

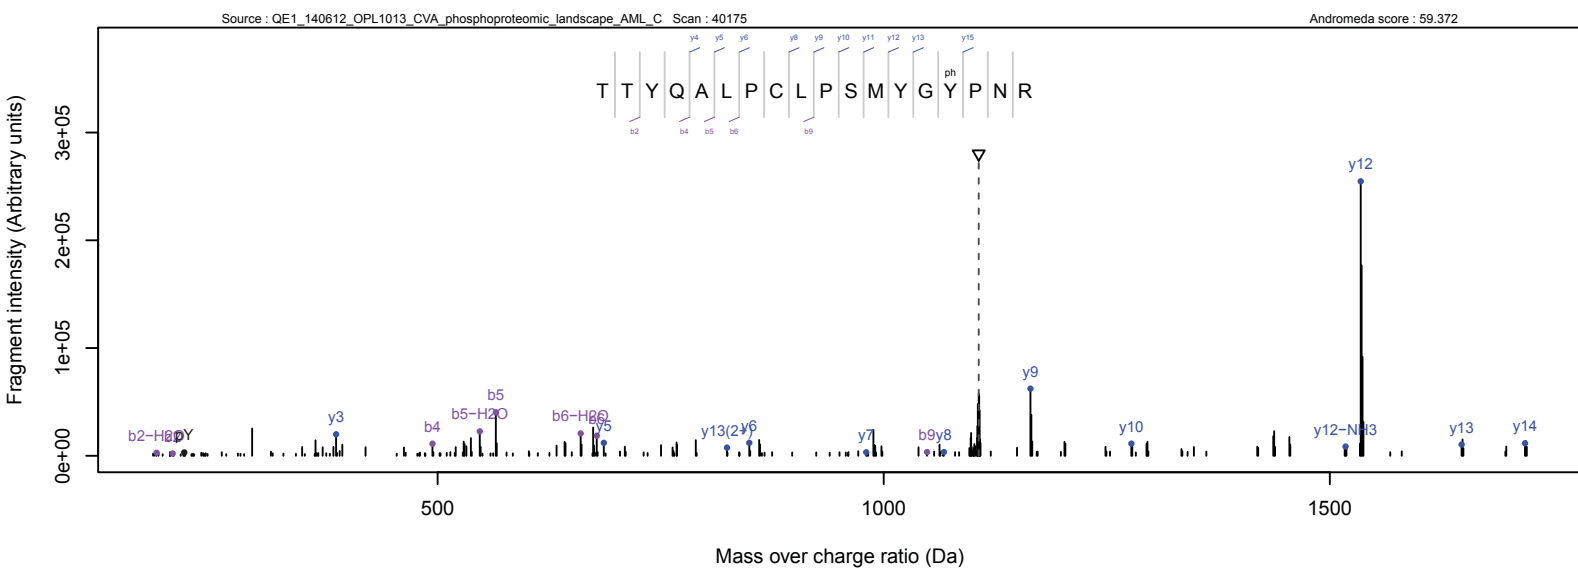

## TIY(ph)TYIM(ox)ASR-2+

Source : QE1\_140908\_OPL1013\_CvA\_pTyrIP\_AML\_HEL Scan : 23568

Andromeda score : 59.367

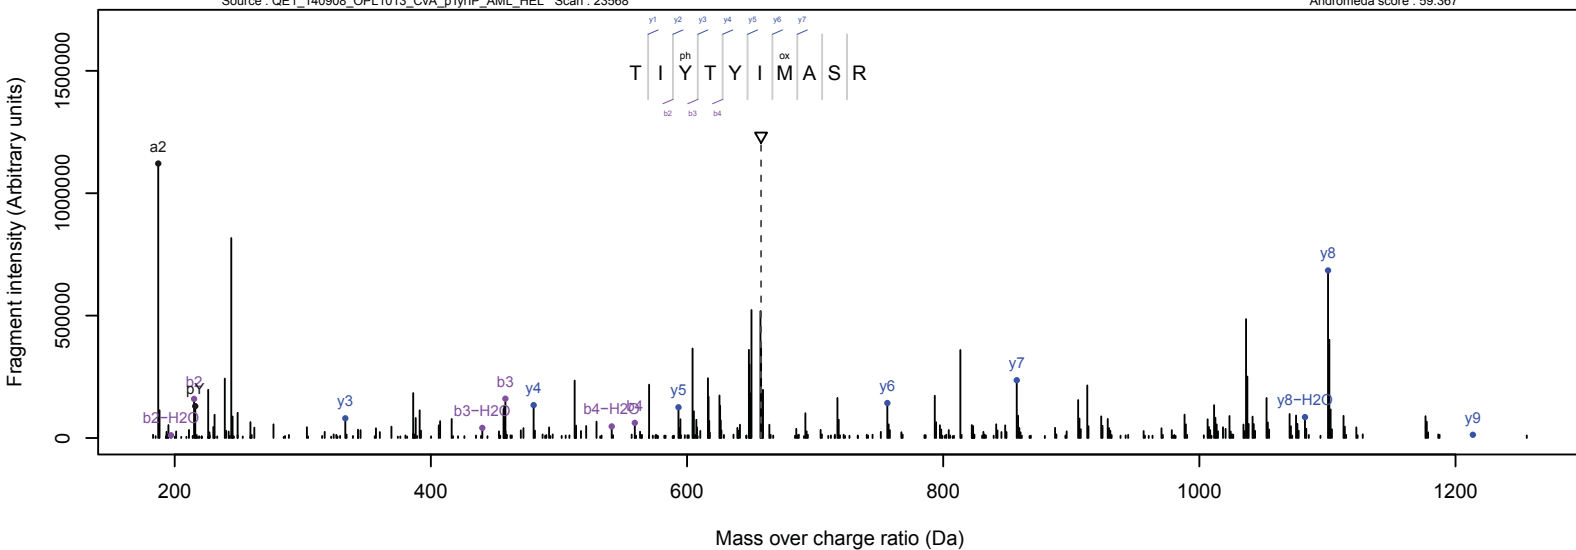

## VVHVNGY(ph)GK-2+

Source : QE1\_140822\_OPL1013\_CvA\_pTyrIP\_AML\_cell\_lines\_part2\_B Scan : 3069

Andromeda score : 59.35

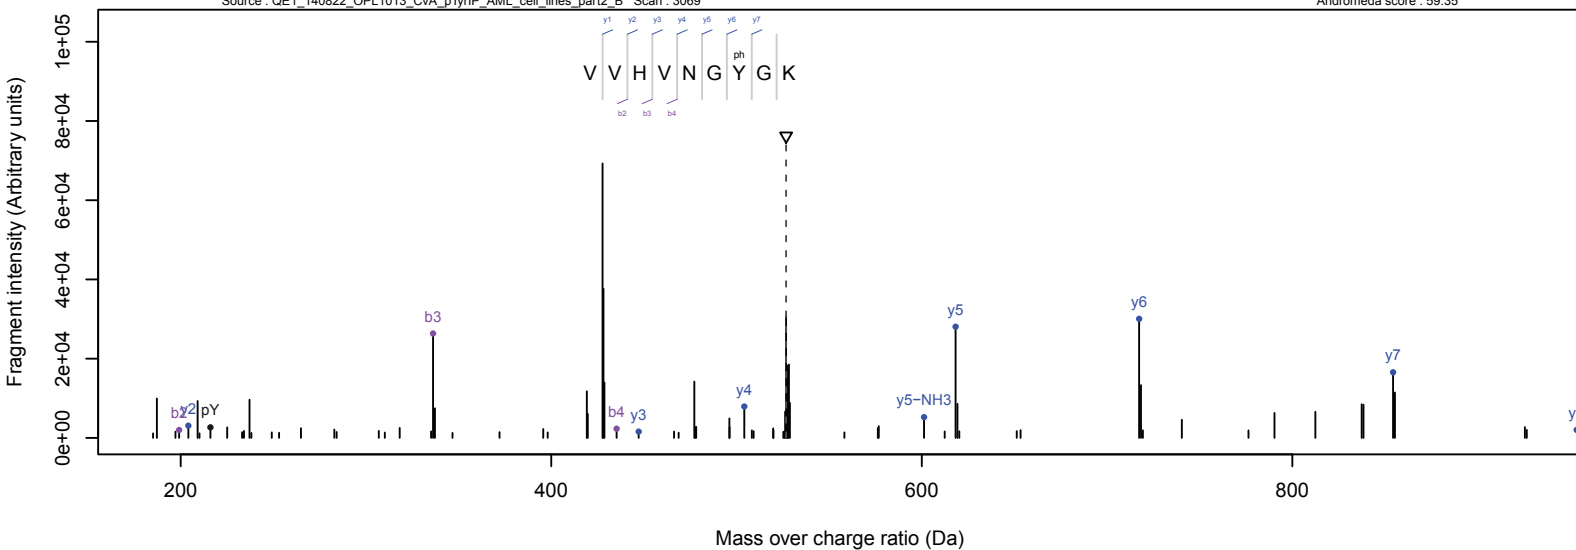

## Y(ph)FSPPPAR-2+

Source : QE1\_140612\_OPL1013\_CVA\_phosphoproteomic\_landscape\_AML\_C Scan : 14286

Andromeda score : 59.35

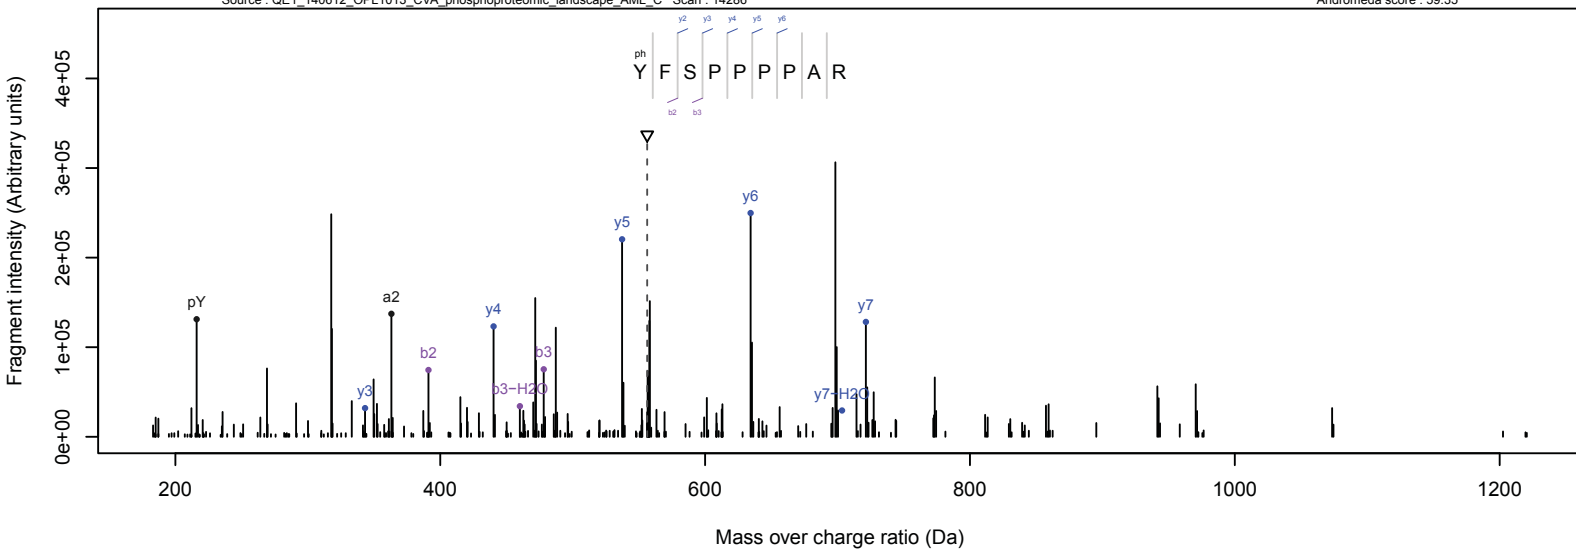

**LGFSSPY(ph)EGLNKSPK-3+**

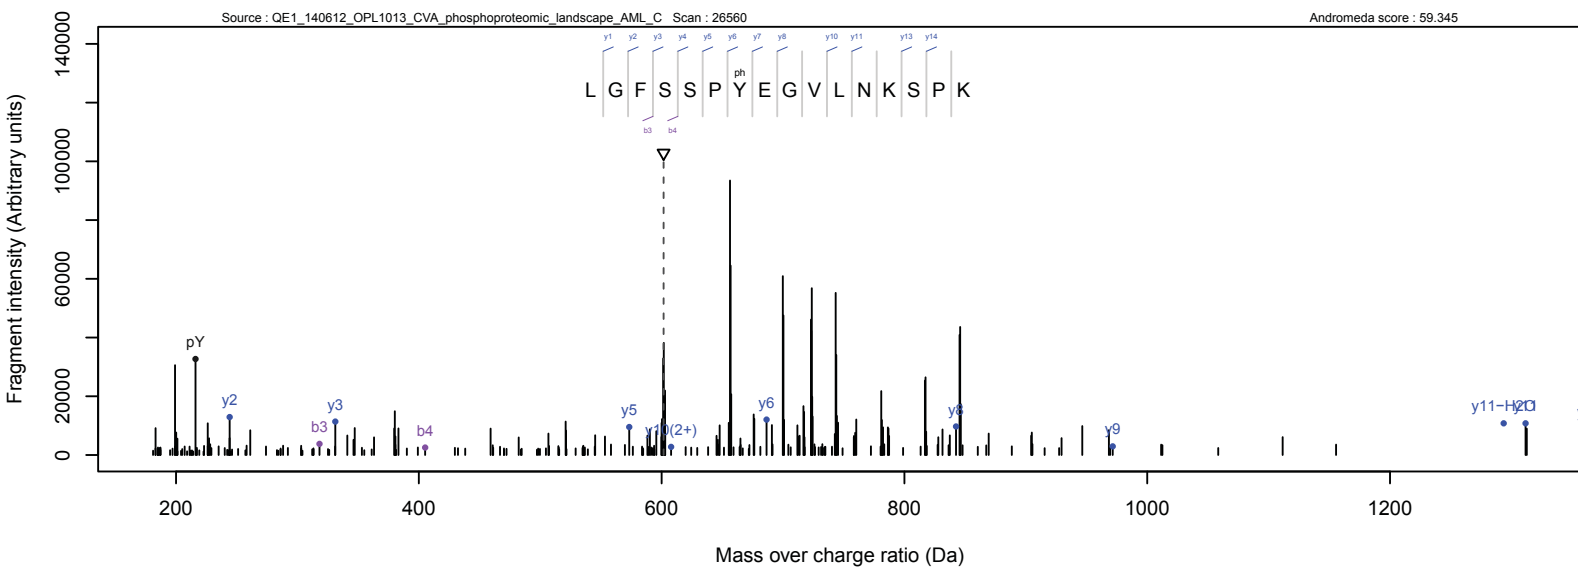

**RVEAM(ox)KQY(ph)QEEIQELNEVAR-3+**

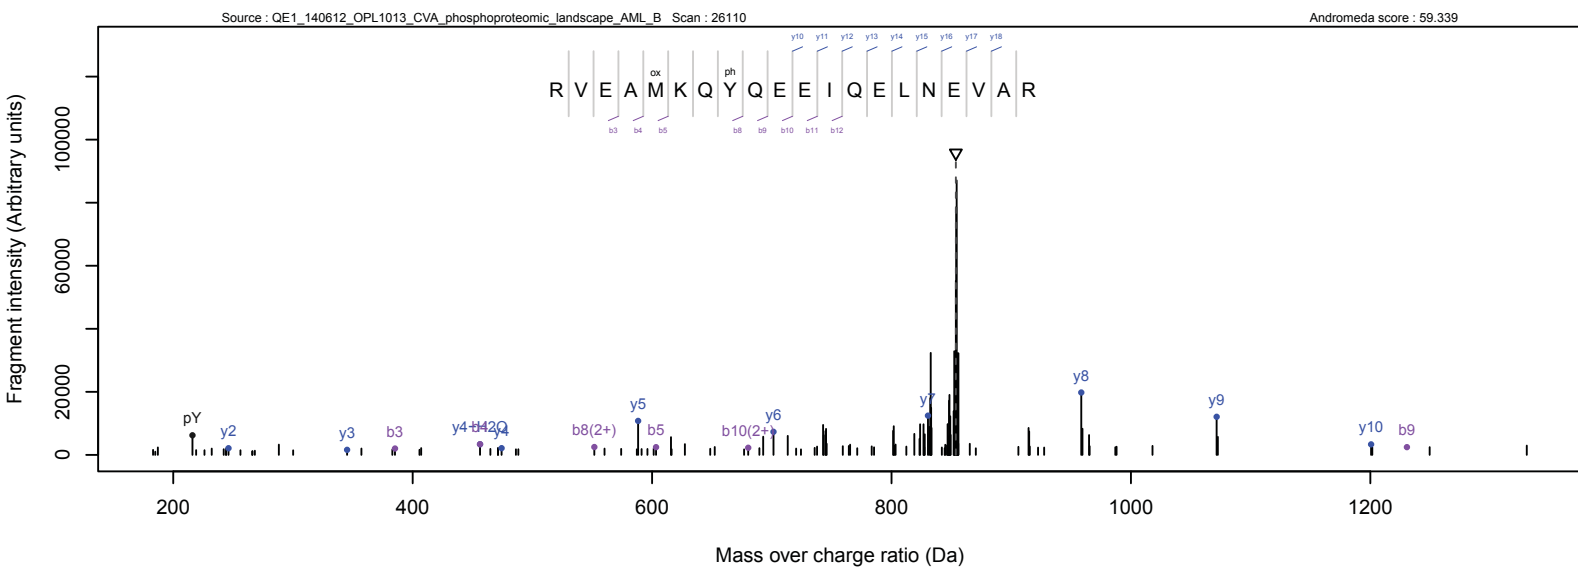

**TPQGGLY(ph)NRPCLHR-3+**

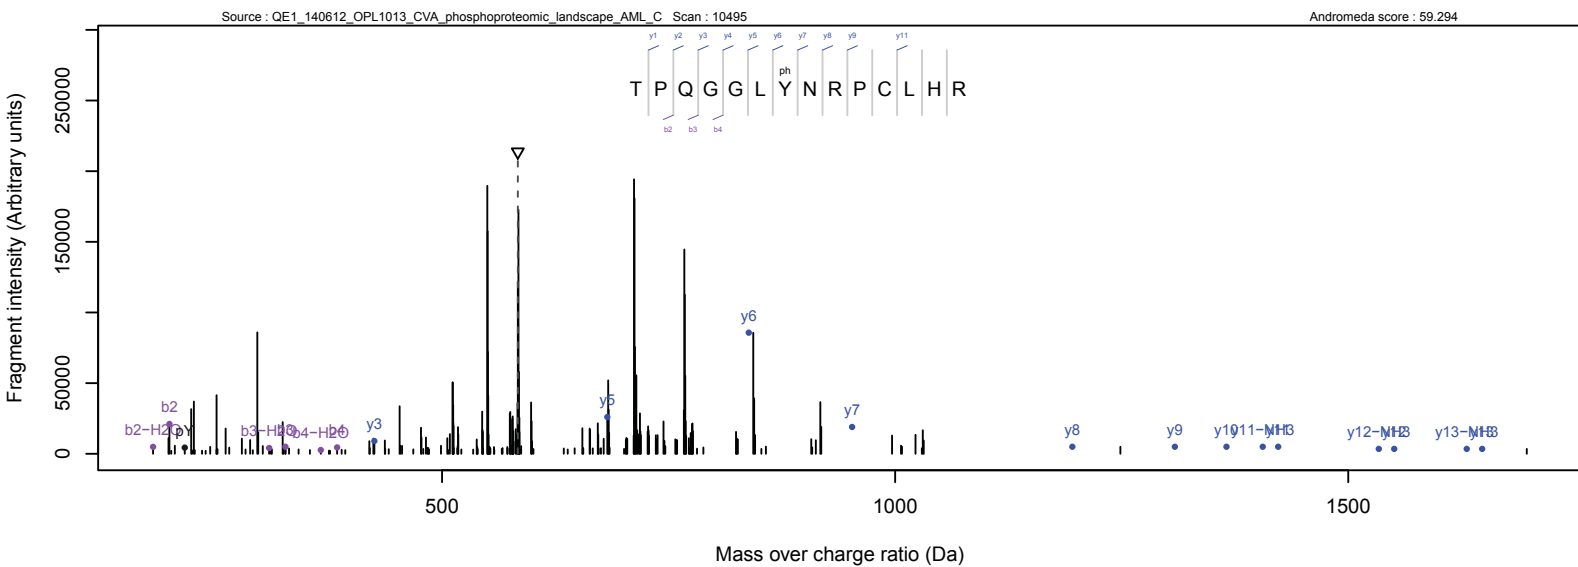

QAHLCVLASNCDEPMY(ph)VKLVEALCAEHQINLIK-4+

Source : QE1\_140612\_OPL1013\_CVA\_phosphoproteomic\_landscape\_AML\_C Scan : 47847

Andromeda score : 59.263

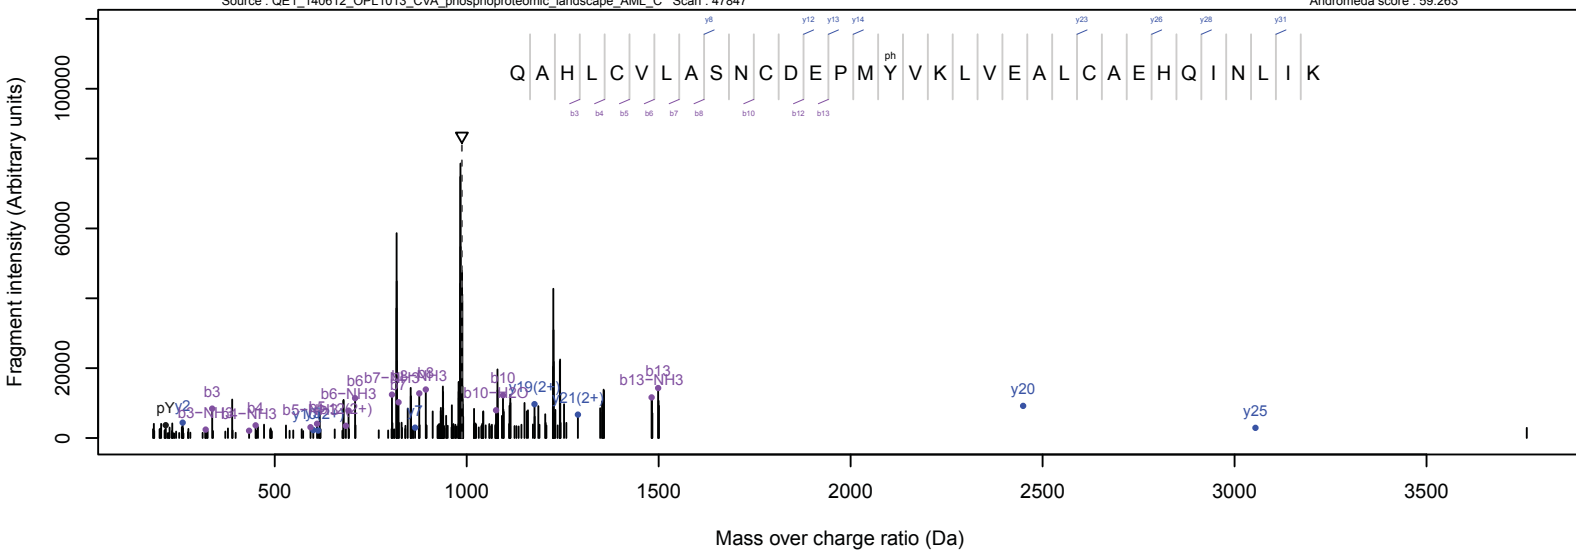

CPNLTY(ph)LNLSGNK-2+

Source : QE1\_140612\_OPL1013\_CVA\_phosphoproteomic\_landscape\_AML\_A Scan : 30551

Andromeda score : 59.248

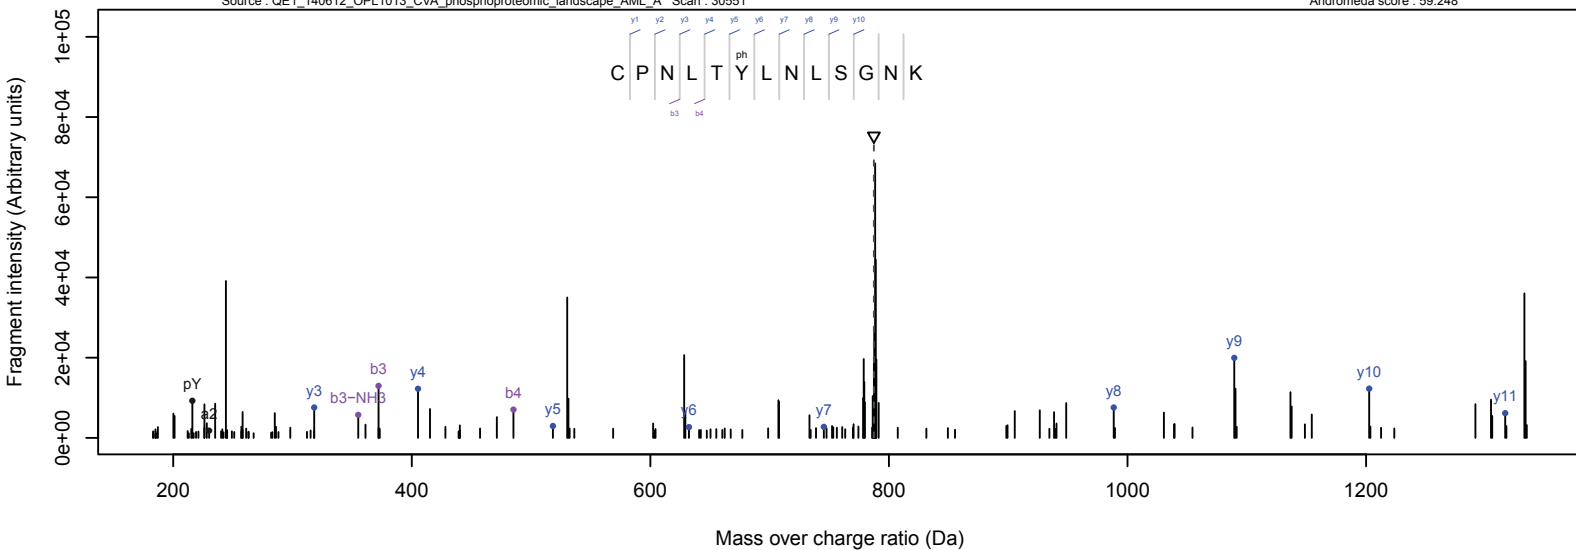

QVHPFHVY(ph)PQPGMQR-3+

Source : QE1\_140612\_OPL1013\_CVA\_phosphoproteomic\_landscape\_AML\_C Scan : 19475

Andromeda score : 59.248

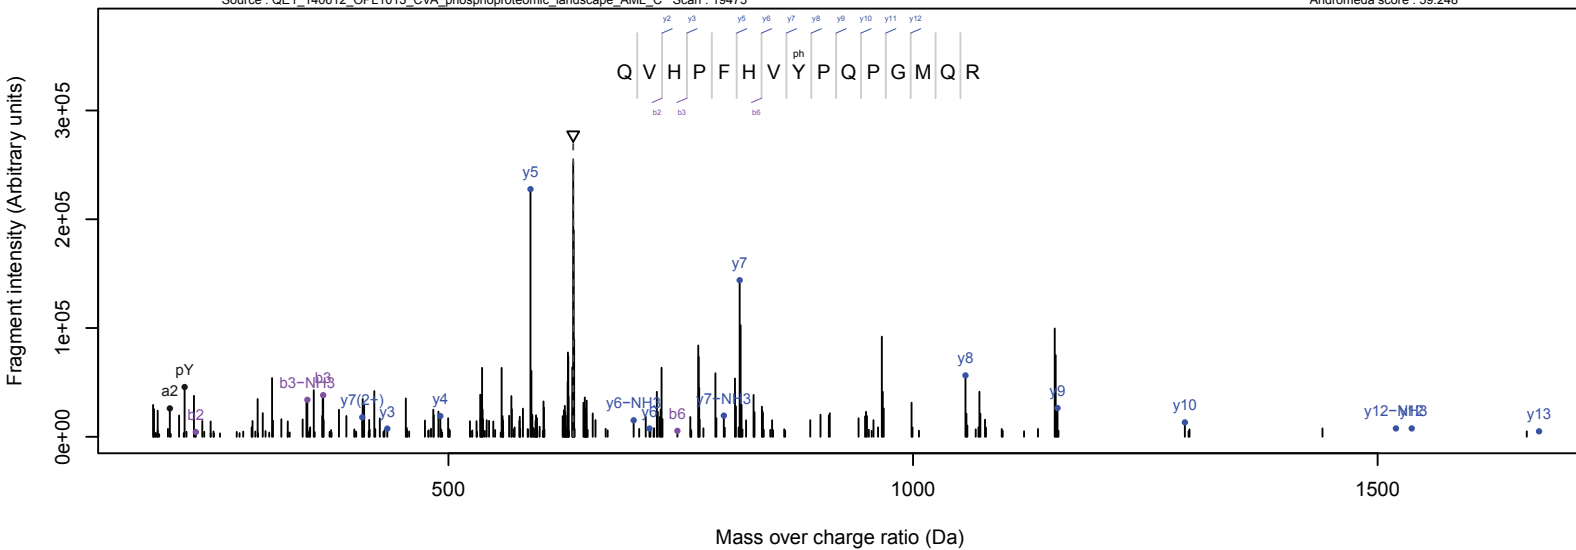

## TLSKDDVNY(ph)KMHFR-4+

Source : Qe1\_141024\_OPL1013\_CvA\_AML\_pTyrIP\_MOLM13 Scan : 17233

Andromeda score : 59.248

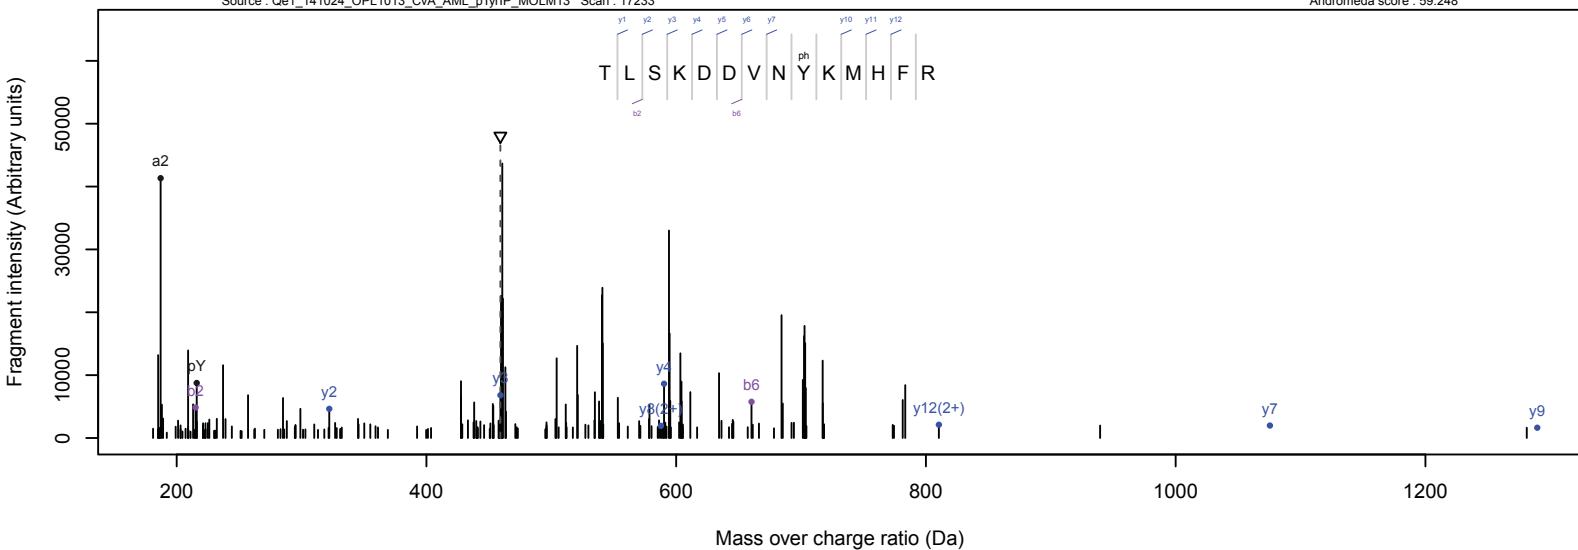

## VYSTENHQPHHYT R-4+

Source : QE1\_140908\_OPL1013\_CvA\_pTyrIP\_AML\_Kasumi6 Scan : 3341

Andromeda score : 59.248

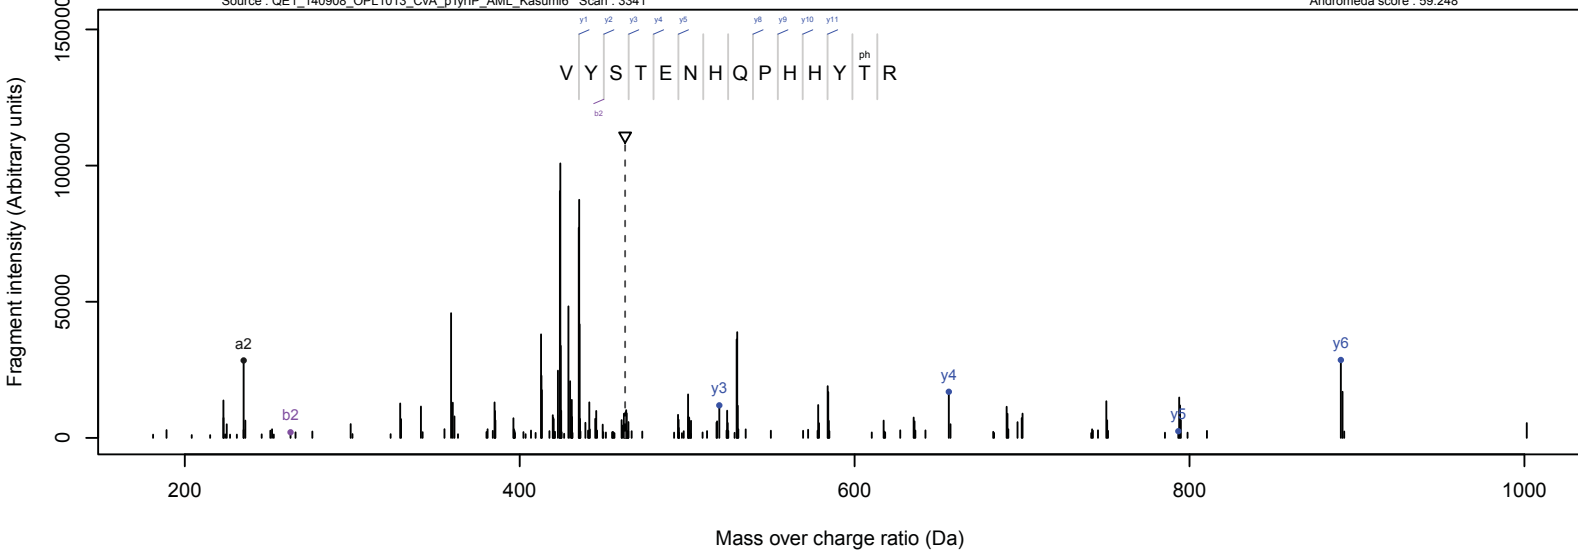

## GDINPNIPY P T R-2+

Source : Qe1\_141024\_OPL1013\_CvA\_AML\_pTyrIP\_MOLM13 Scan : 21113

Andromeda score : 59.227

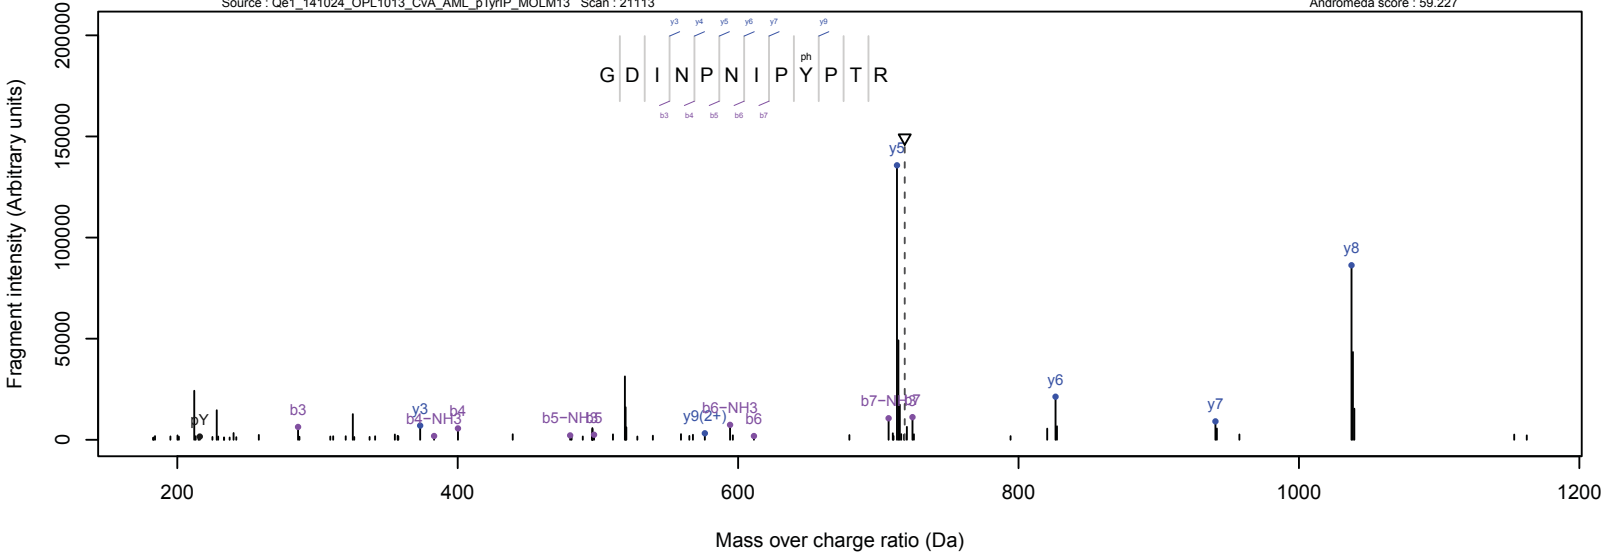

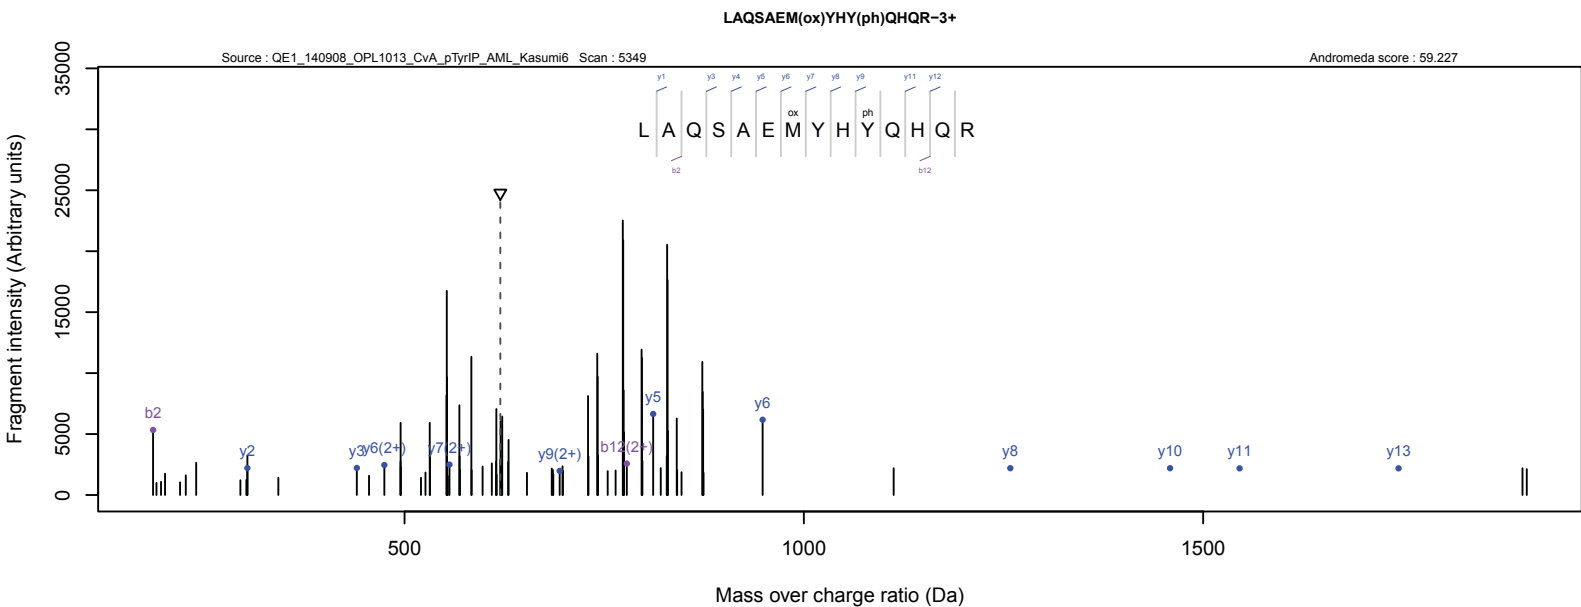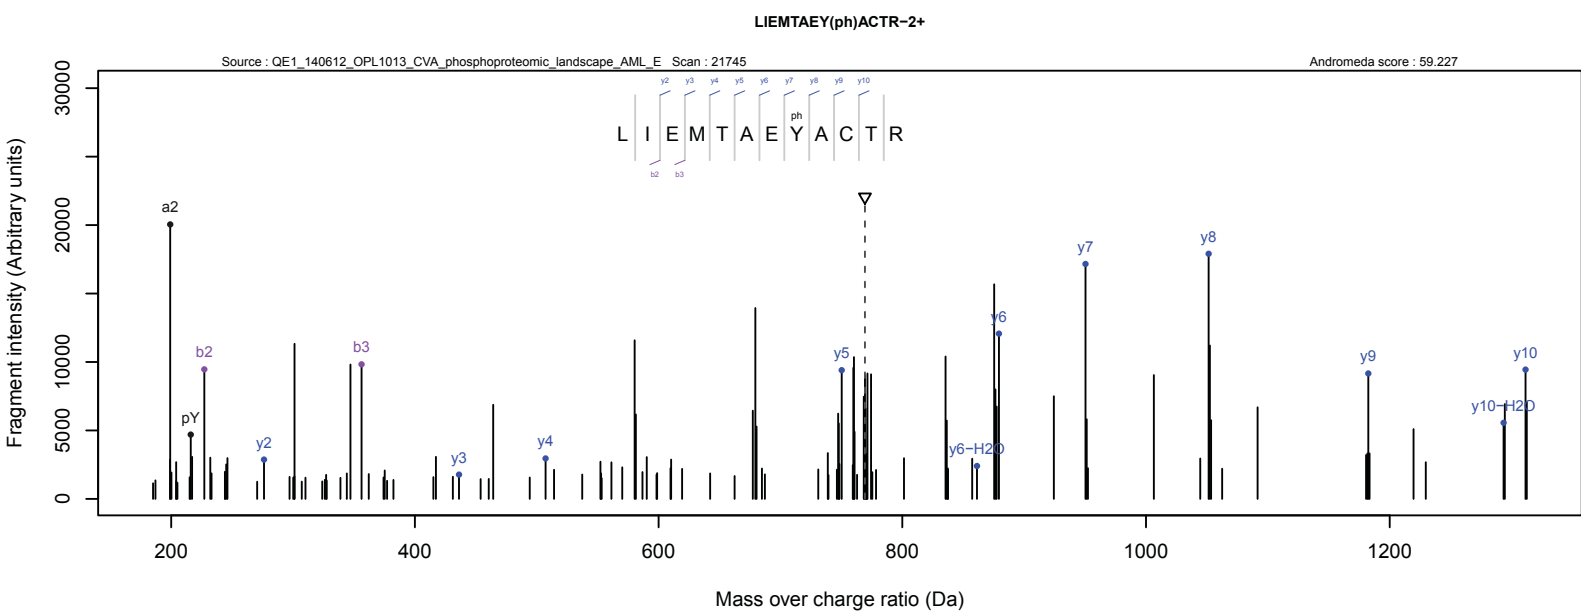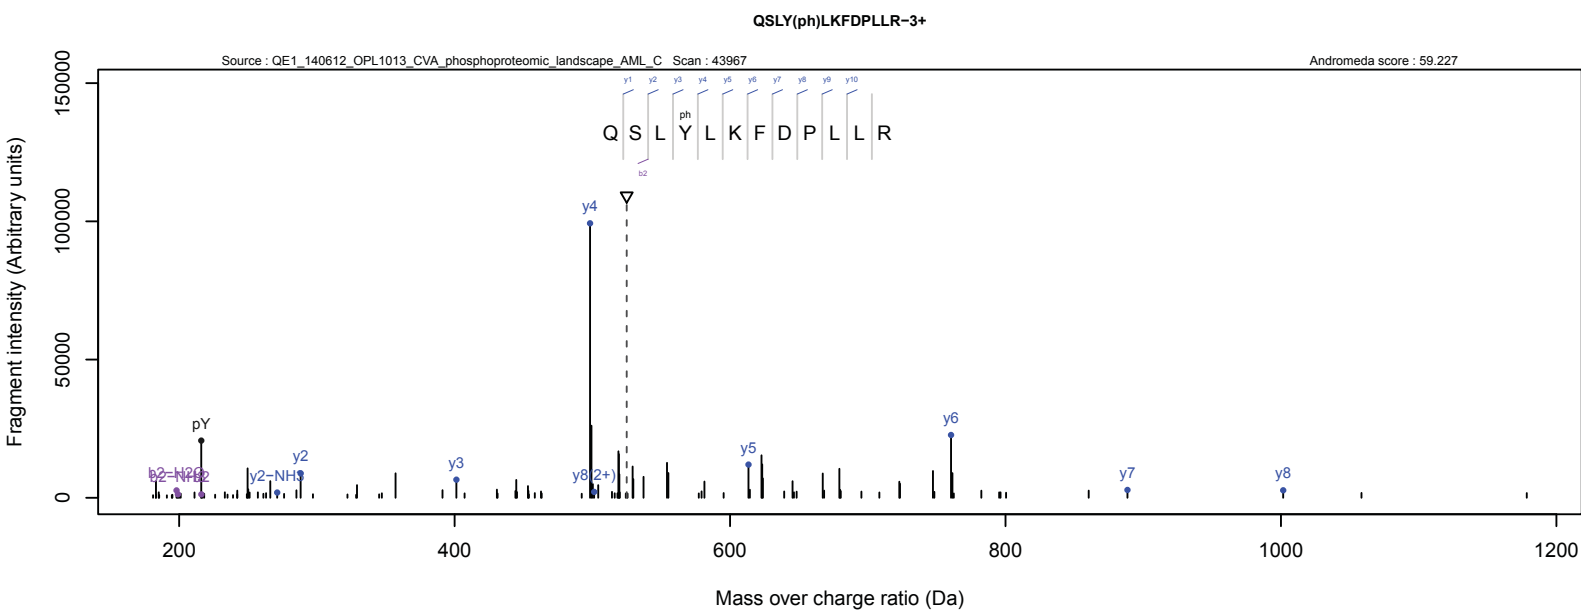



## ERDY(ph)AEIQDFHR-3+

Source: QE1\_140612\_OPL1013\_CVA\_phosphoproteomic\_landscape\_AML\_C Scan: 14013

Andromeda score: 59.225

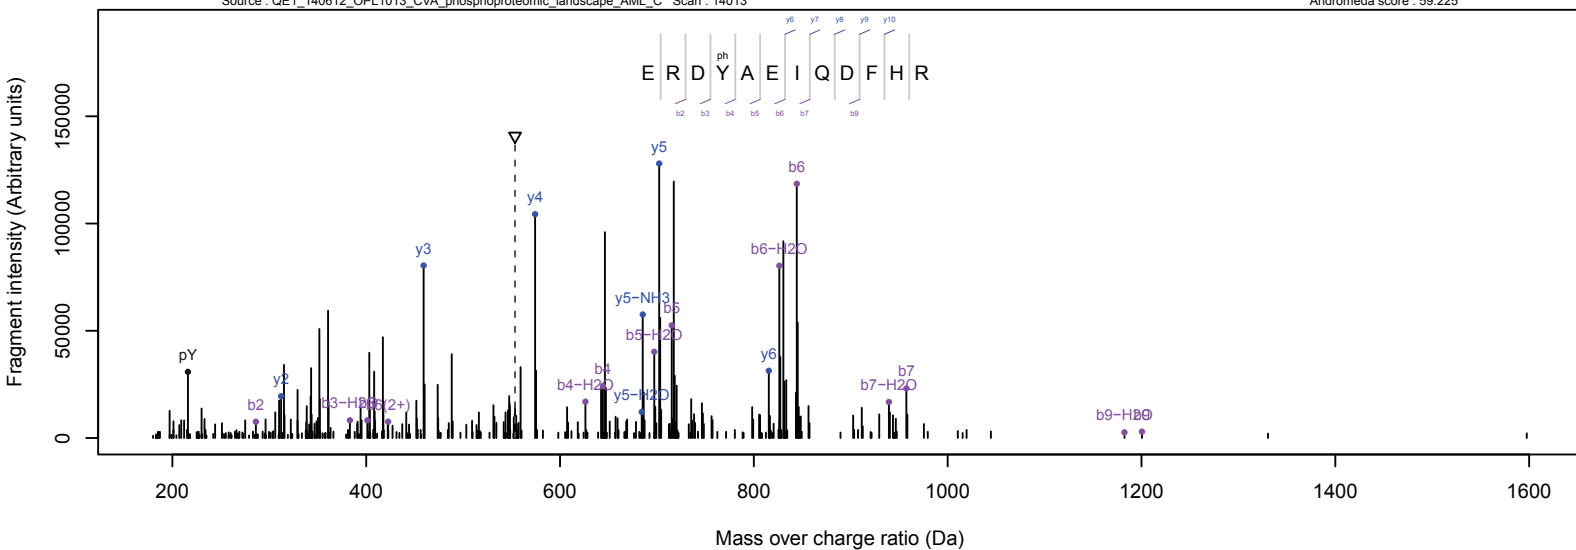

## CLY(ph)M(ox)WPSVPDEKGE LLNPTGTVR-3+

Source: QE1\_140612\_OPL1013\_CVA\_phosphoproteomic\_landscape\_AML\_A Scan: 39424

Andromeda score: 59.212

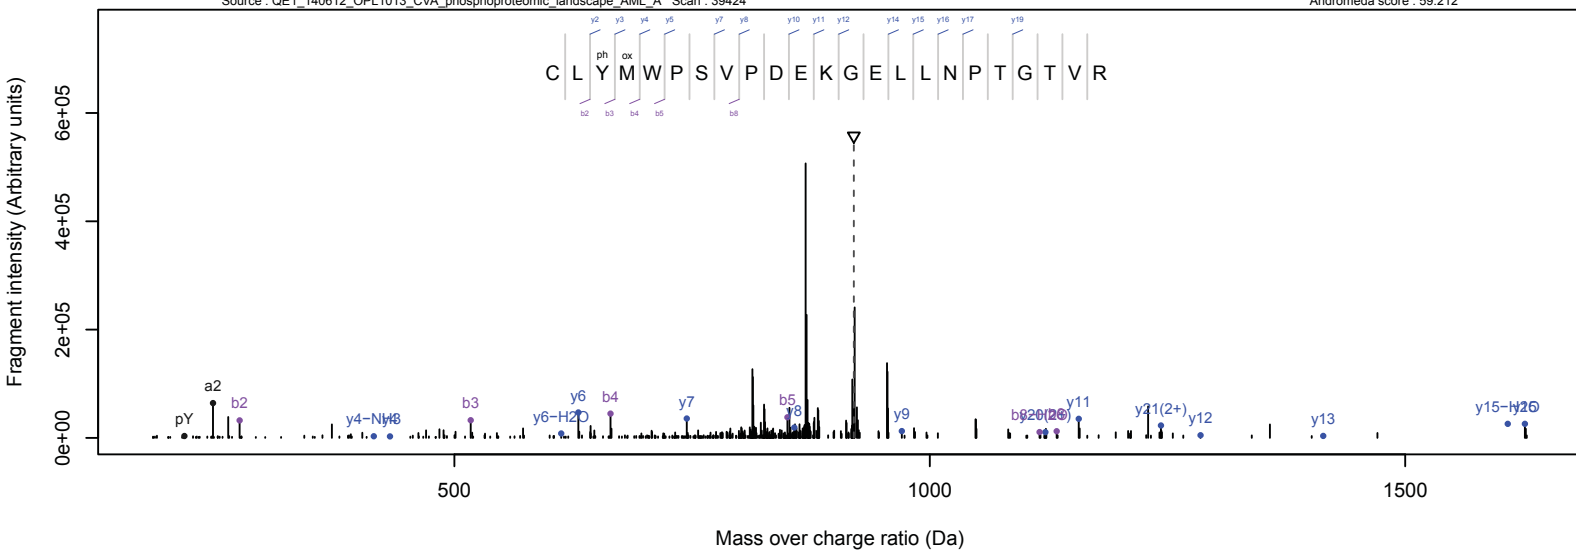

## EIQY(ph)APLSFHK-2+

Source: QE1\_140908\_OPL1013\_CvA\_pTyrIP\_AML\_OCI\_AML3 Scan: 25401

Andromeda score: 59.198

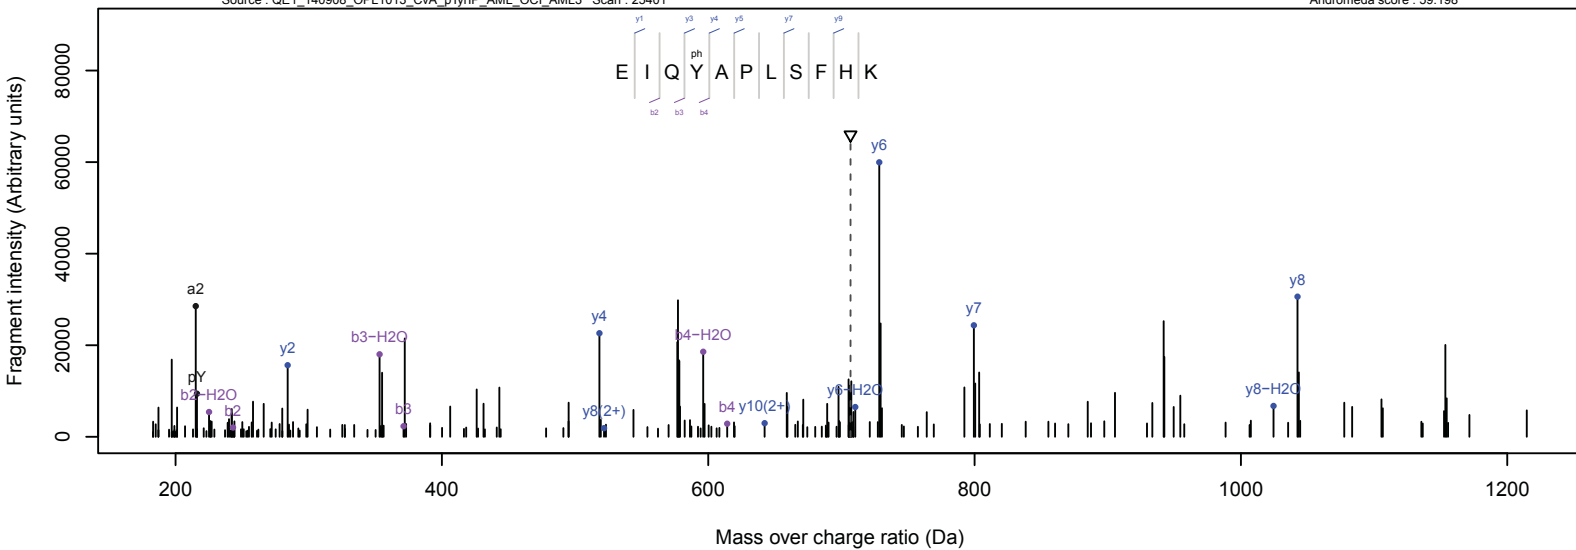

## FSPDSQ(ph)IDNR-2+

Source : QE1\_140612\_OPL1013\_CVA\_phosphoproteomic\_landscape\_AML\_C Scan : 14411

Andromeda score : 59.198

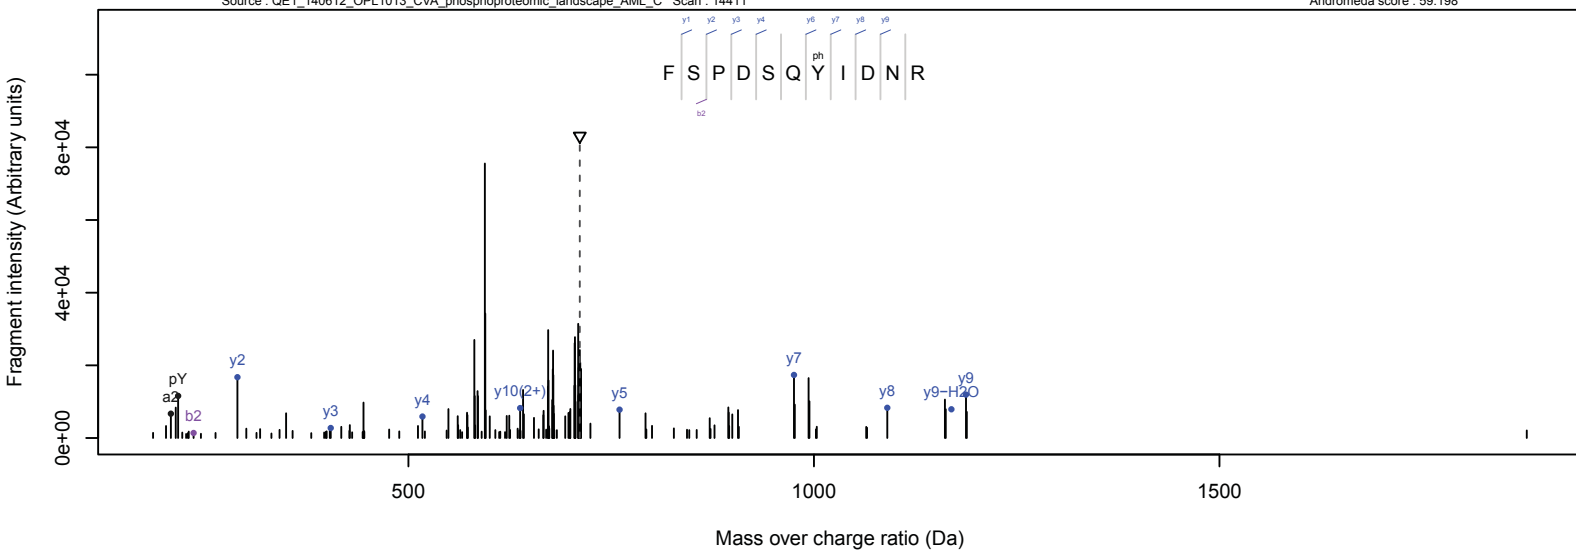

## HGVVPLATY(ph)MR-2+

Source : QE1\_140612\_OPL1013\_CVA\_phosphoproteomic\_landscape\_AML\_A Scan : 25201

Andromeda score : 59.198

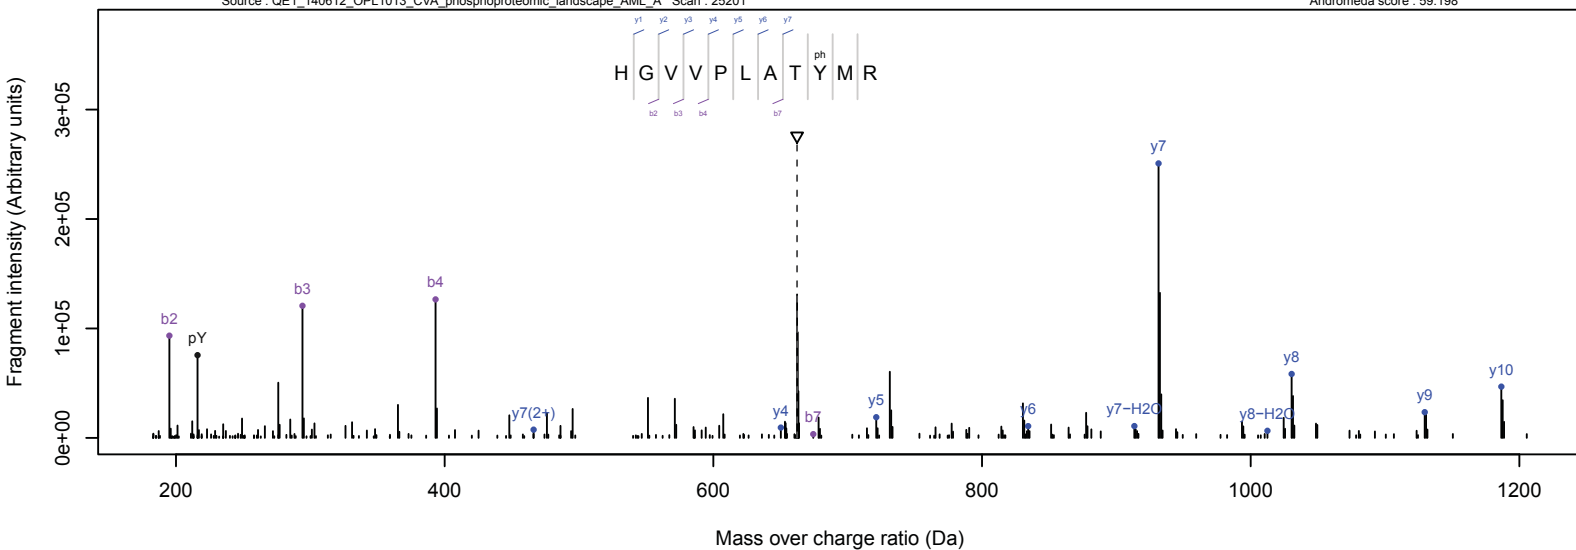

## ICY(ph)IFHETFGR-3+

Source : QE1\_140612\_OPL1013\_CVA\_phosphoproteomic\_landscape\_AML\_B Scan : 30399

Andromeda score : 59.198

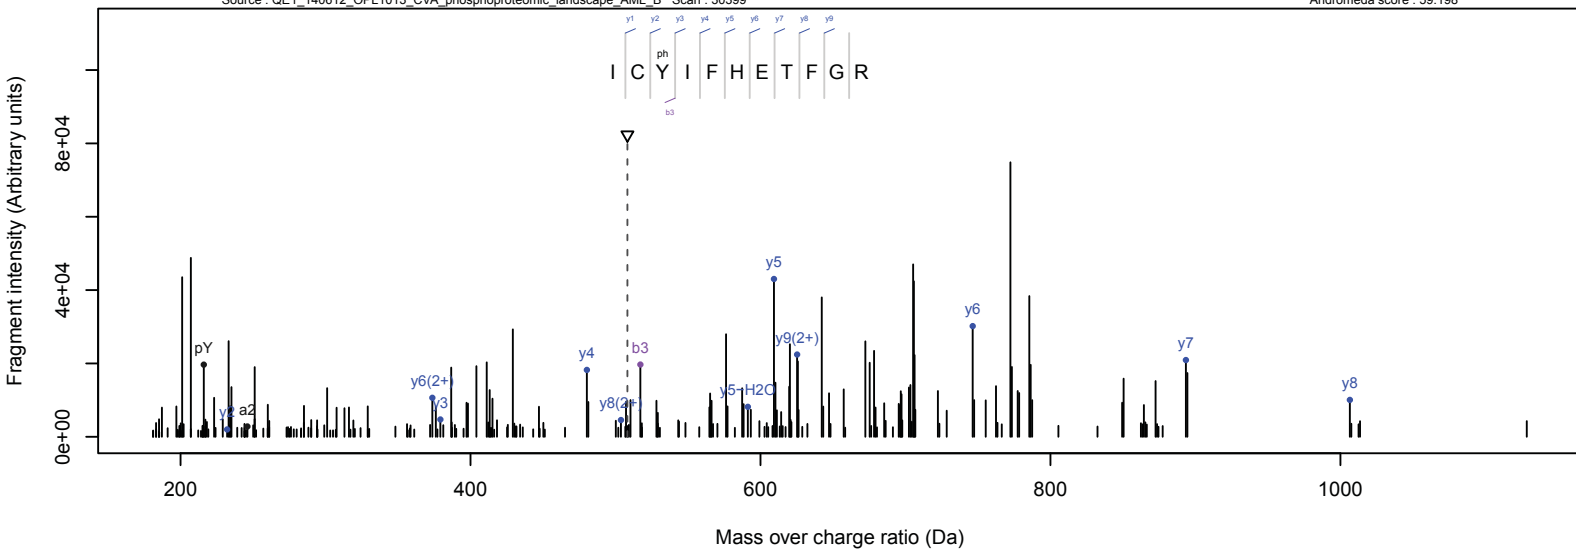

## KKY(ph)EPPVPTR-3+

Source : QE1\_140908\_OPL1013\_CvA\_pTyrIP\_AML\_HEL Scan : 6348

Andromeda score : 59.198

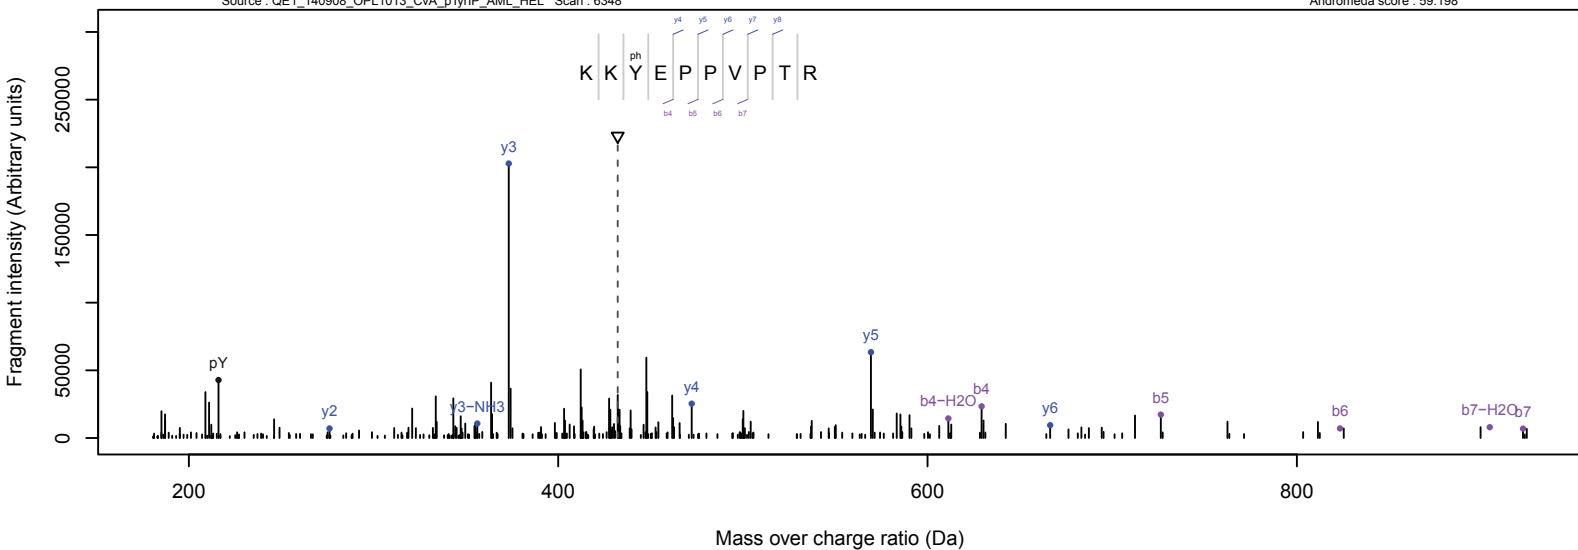

## QGYPEGY(ph)YSSK-2+

Source : QE1\_140822\_OPL1013\_CvA\_pTyrIP\_AML\_cell\_lines\_part2\_B Scan : 6037

Andromeda score : 59.198

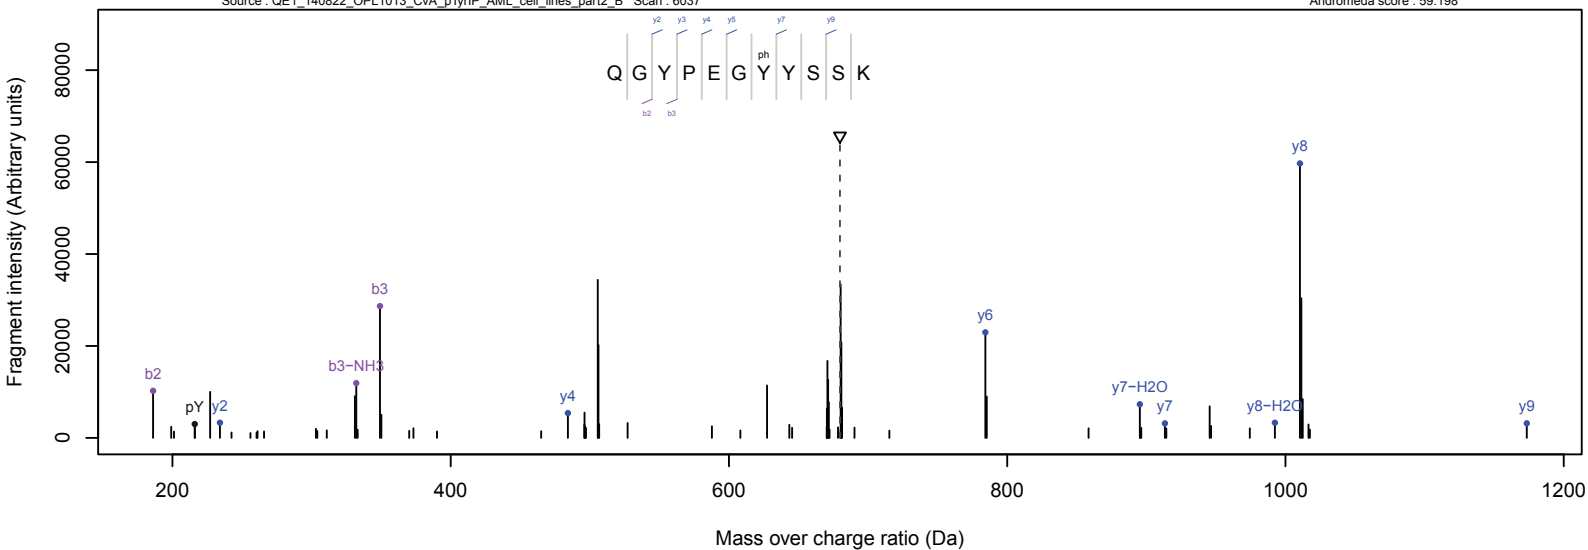

## Y(ph)GGITDPGTVPR-2+

Source : QE1\_140612\_OPL1013\_CVA\_phosphoproteomic\_landscape\_AML\_B Scan : 16039

Andromeda score : 59.198

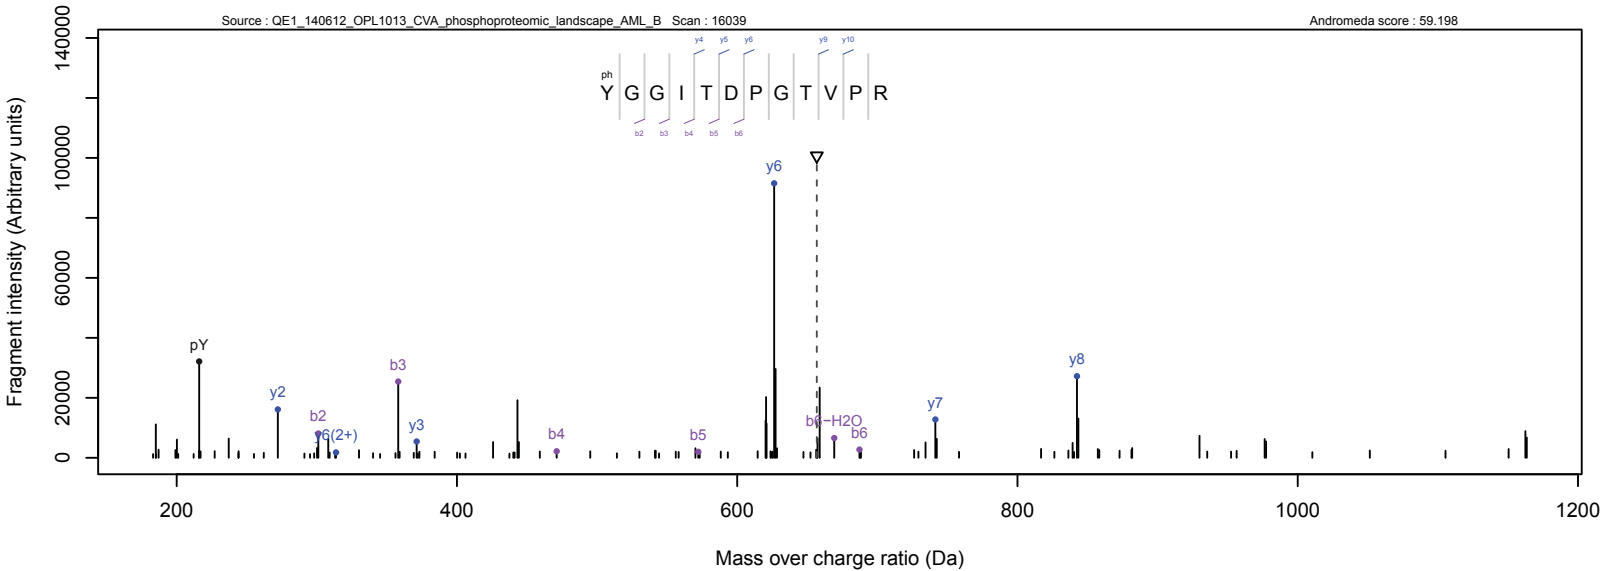

## YVHQLFSQHY(ph)R-3+

Source : QE1\_140612\_OPL1013\_CVA\_phosphoproteomic\_landscape\_AML\_C Scan : 14892

Andromeda score : 59.198

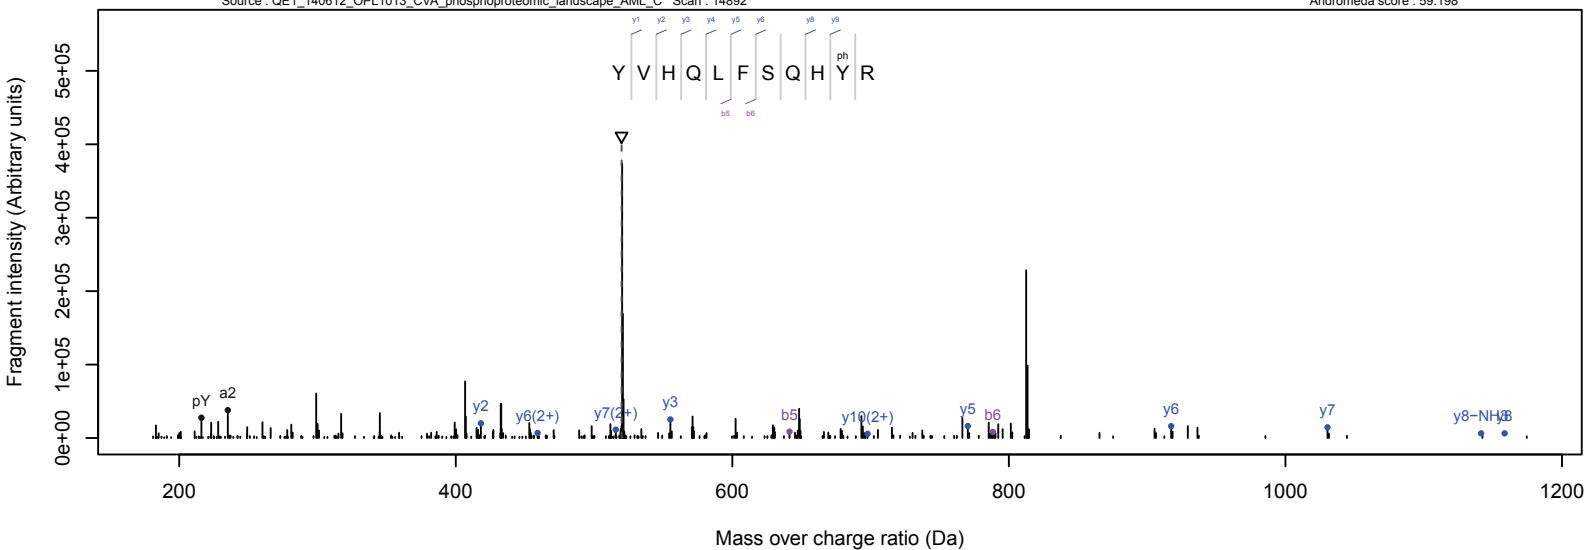

## DRTDIQLIPCAIDQDPY(ph)FR-3+

Source : QE1\_140612\_OPL1013\_CVA\_phosphoproteomic\_landscape\_AML\_C Scan : 46679

Andromeda score : 59.163

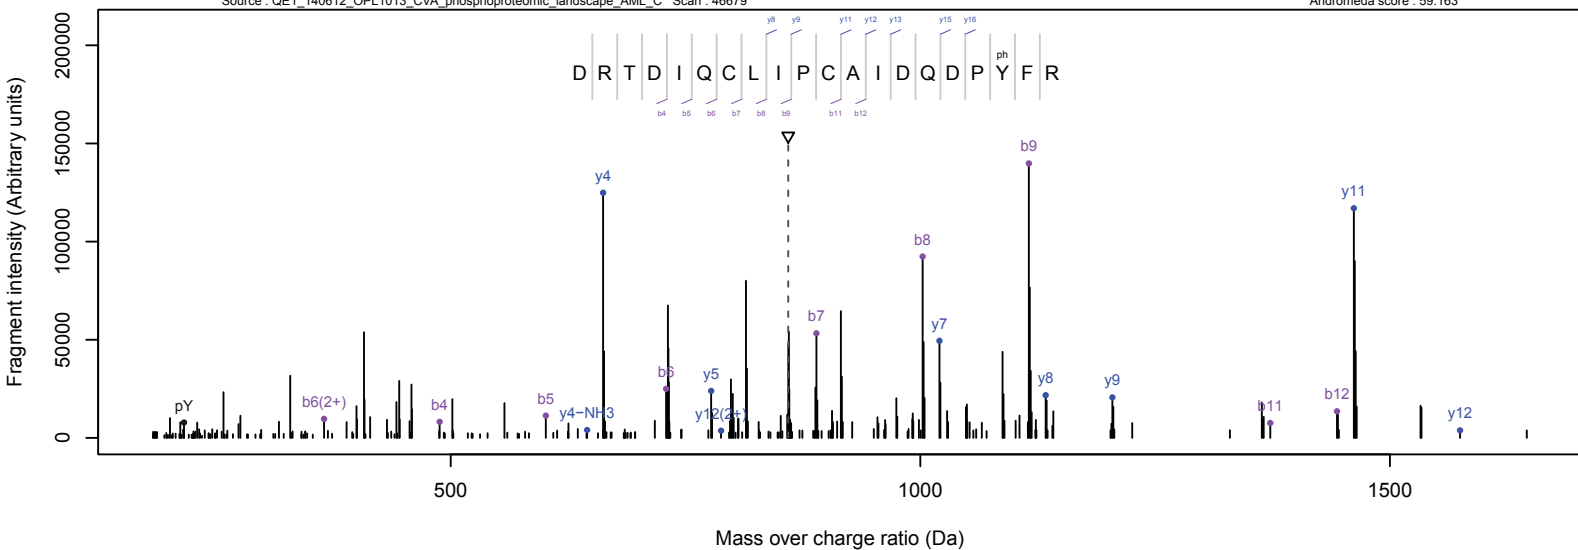

## GHLSRPEAQSLSPYTTSANR-3+

Source : QE1\_140908\_OPL1013\_CvA\_pTyrIP\_AML\_HL60 Scan : 13506

Andromeda score : 59.163

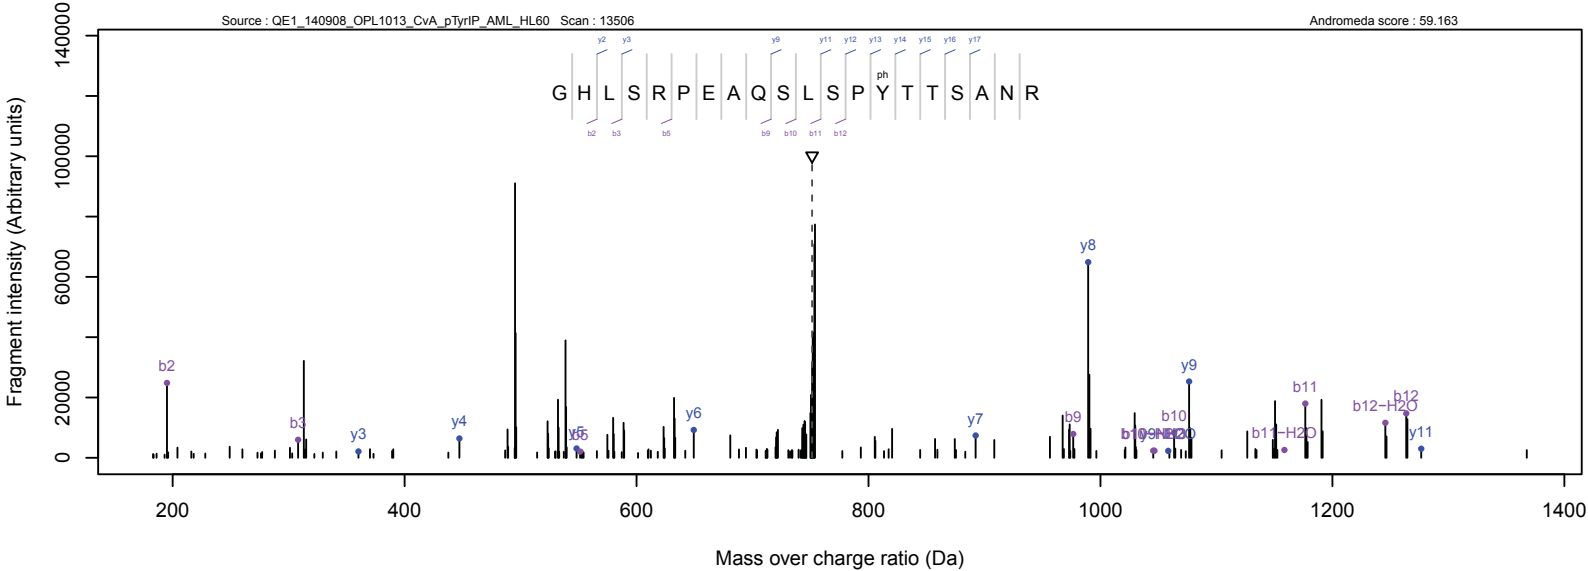

LLY(ph)NLEMEQMAK-2+

Source : QE1\_140612\_OPL1013\_CVA\_phosphoproteomic\_landscape\_AML\_C Scan : 33728

Andromeda score : 59.155

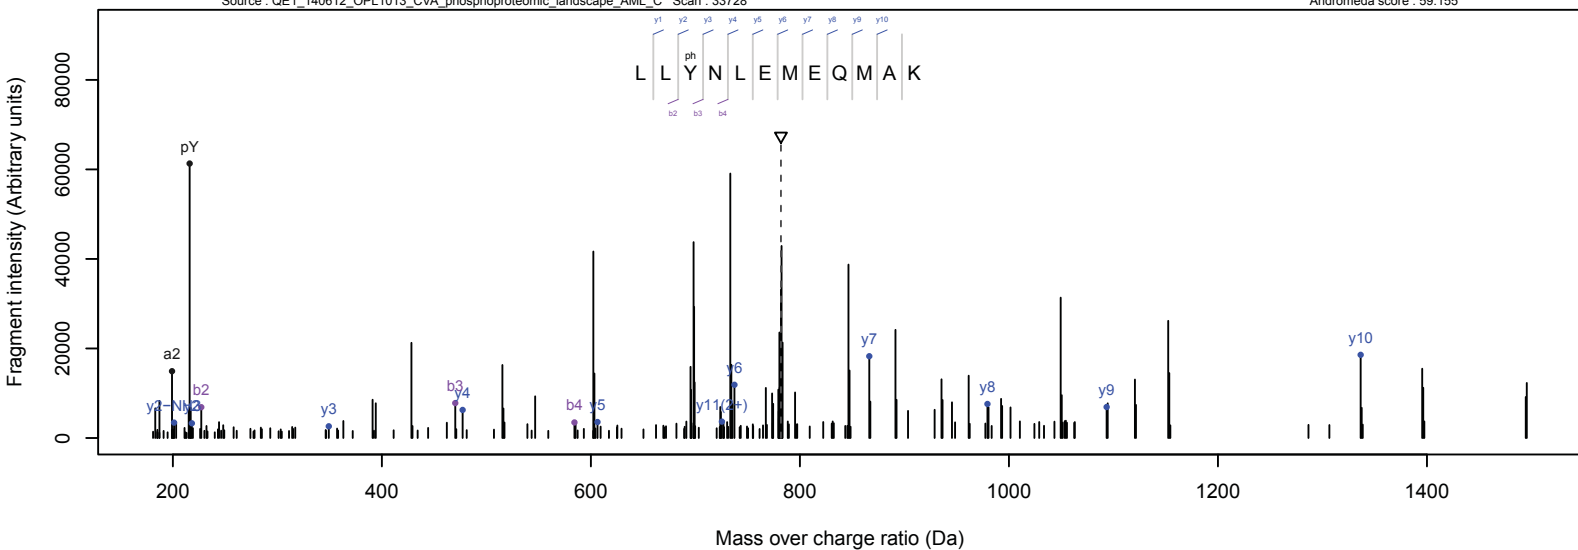

QGGY(ph)SMHQLQGNKEYGSEK-3+

Source : QE1\_140612\_OPL1013\_CVA\_phosphoproteomic\_landscape\_AML\_C Scan : 8668

Andromeda score : 59.154

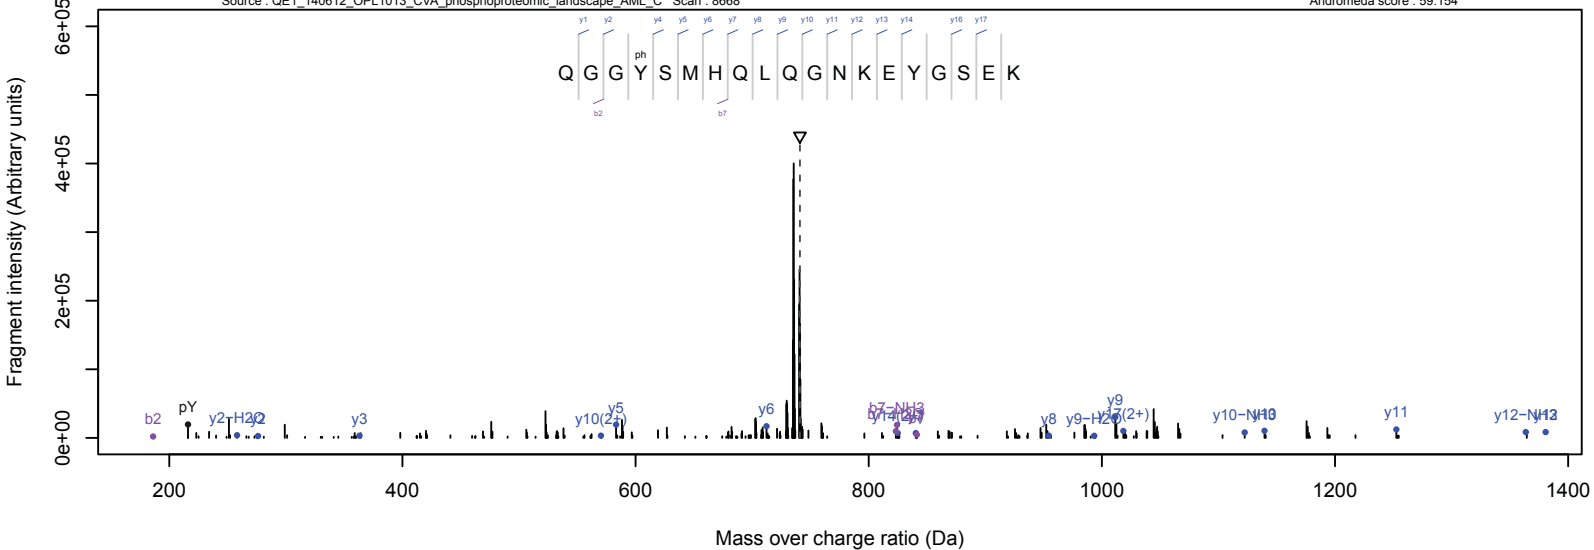

NLY(ph)IISVK-2+

Source : QE1\_140612\_OPL1013\_CVA\_phosphoproteomic\_landscape\_AML\_C Scan : 31541

Andromeda score : 59.153

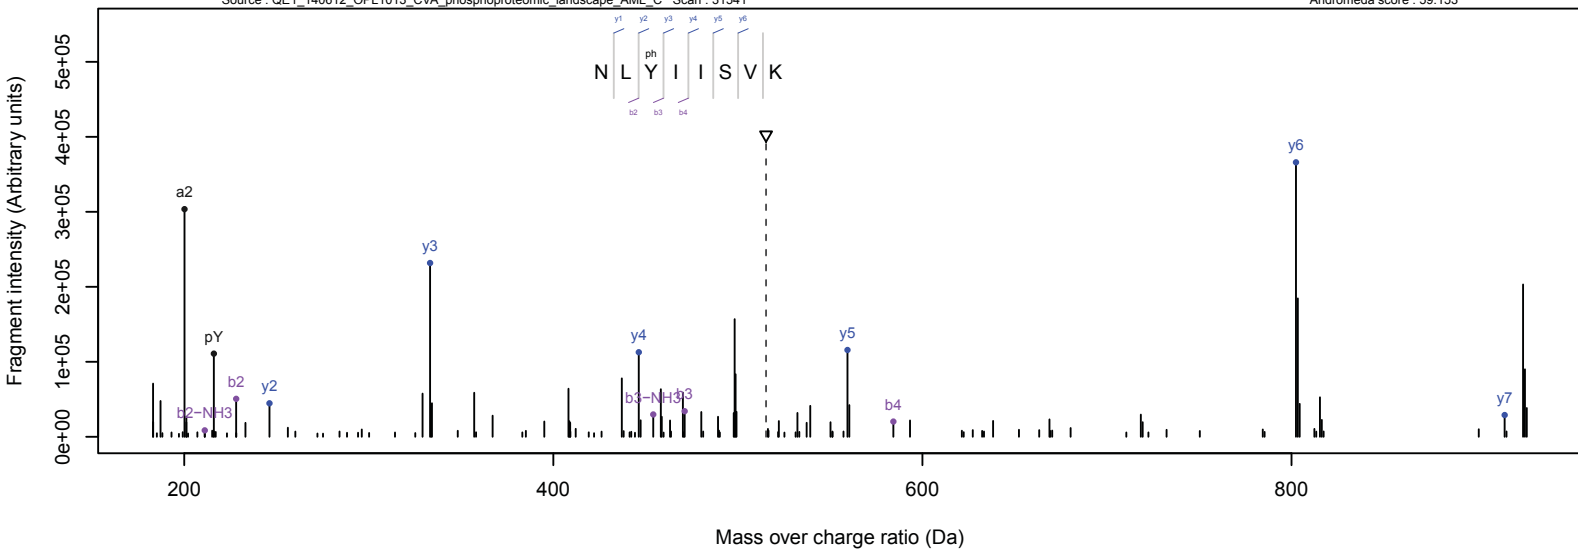

## GVPGCCY(ph)SSLPR-2+

Source: QE1\_140612\_OPL1013\_CVA\_phosphoproteomic\_landscape\_AML\_C Scan: 15745

Andromeda score: 59.116

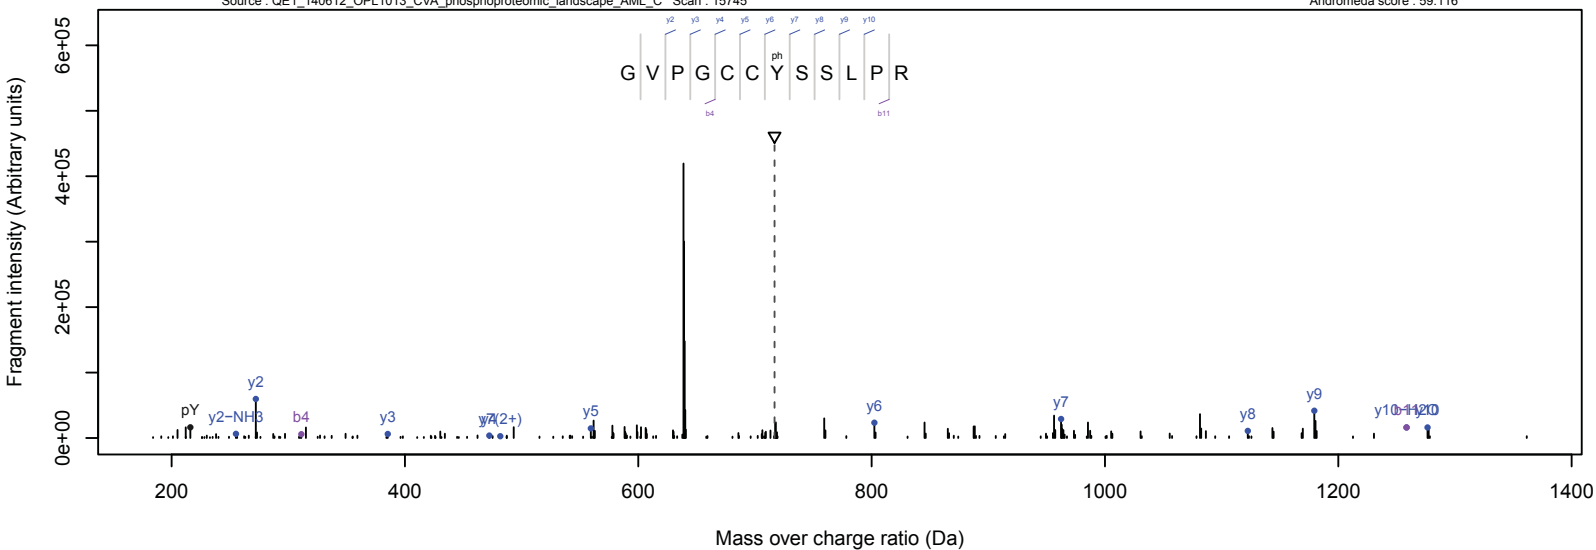

## LTEGQY(ph)VLCR-2+

Source: QE1\_140612\_OPL1013\_CVA\_phosphoproteomic\_landscape\_AML\_B Scan: 17261

Andromeda score: 59.067

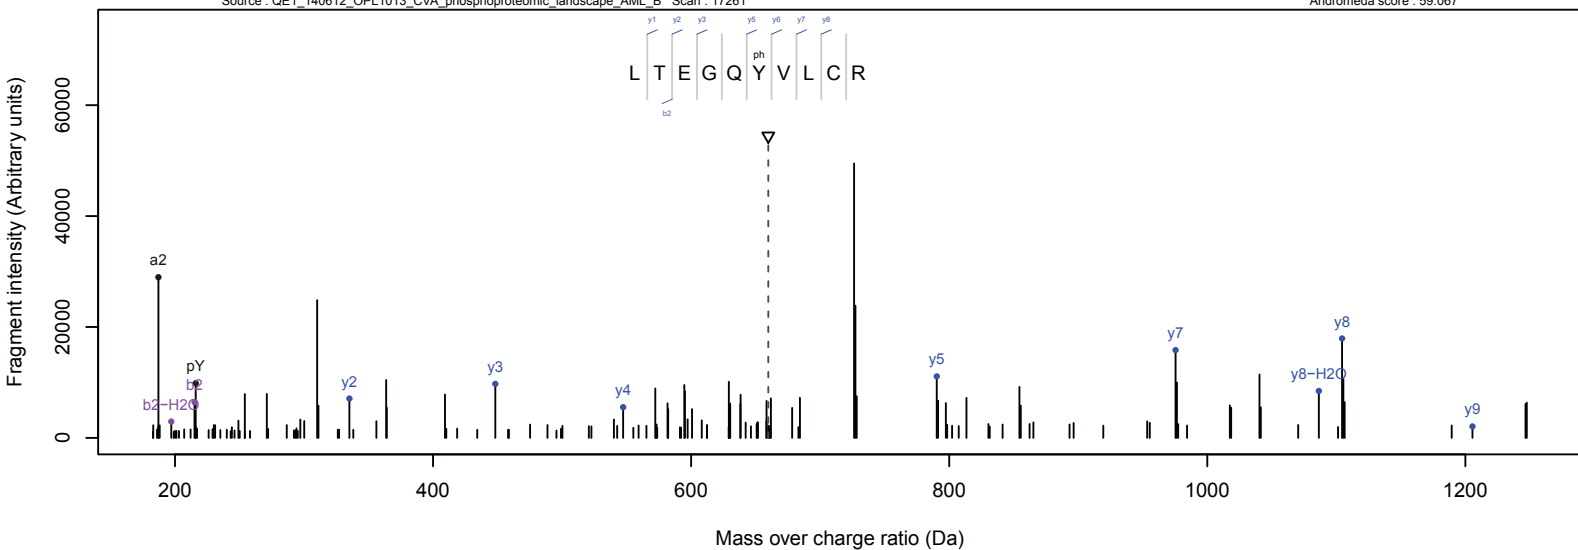

## (ac)SY(ph)GPLDMYR-2+

Source: QE1\_140612\_OPL1013\_CVA\_phosphoproteomic\_landscape\_AML\_C Scan: 36952

Andromeda score: 59.067

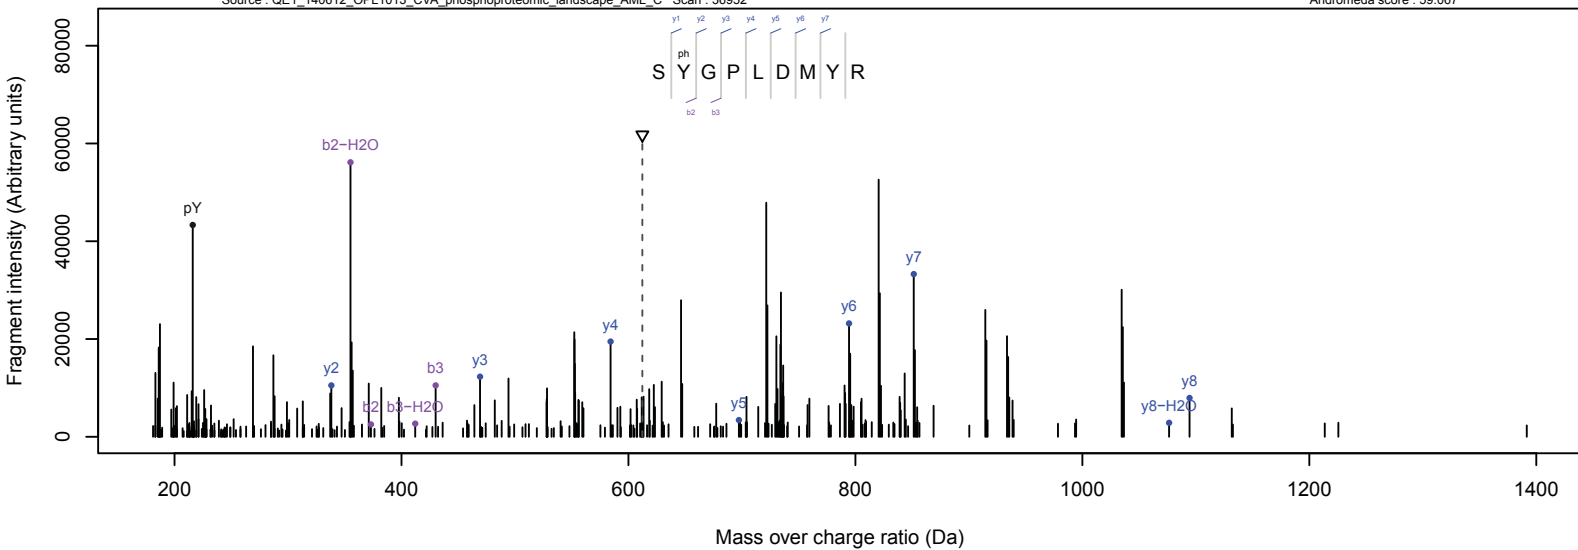

**KY(ph)FSLKPEEK-3+**

Source : QE1\_140612\_OPL1013\_CVA\_phosphoproteomic\_landscape\_AML\_C Scan : 11992

Andromeda score : 59.04

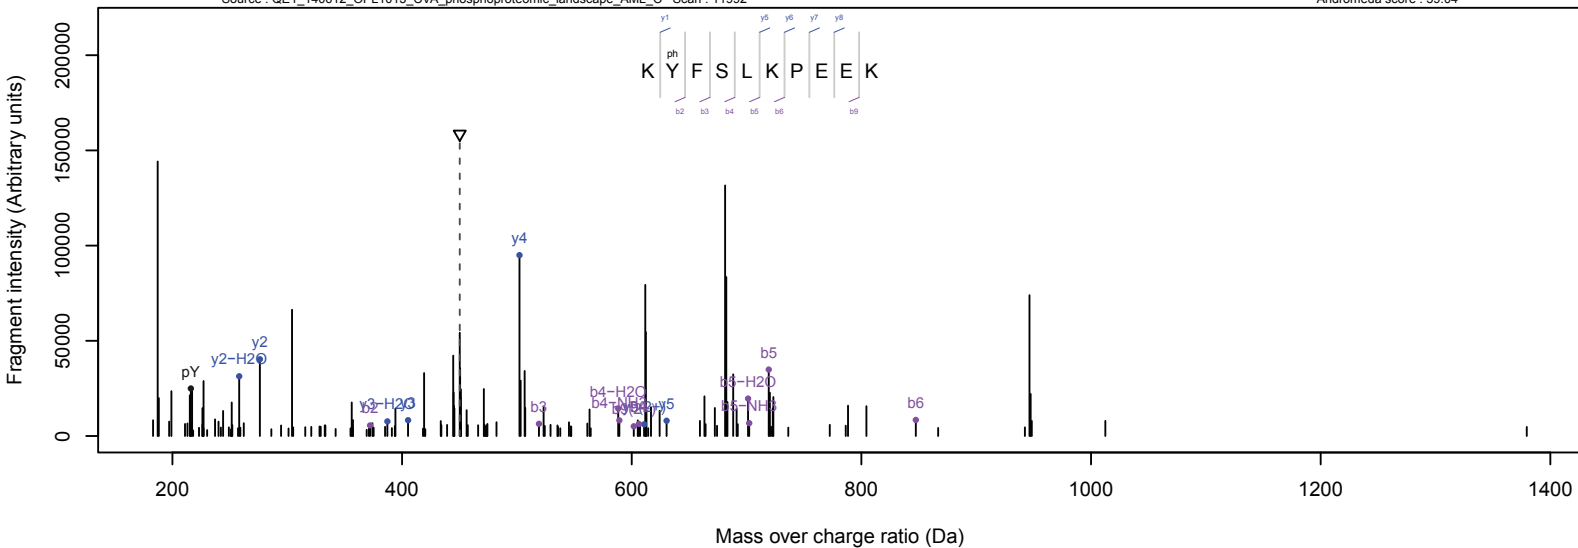

**(ac)SFDPNLLHNNHNGY(ph)PNGTSAALR-3+**

Source : QE1\_140612\_OPL1013\_CVA\_phosphoproteomic\_landscape\_AML\_C Scan : 31591

Andromeda score : 58.998

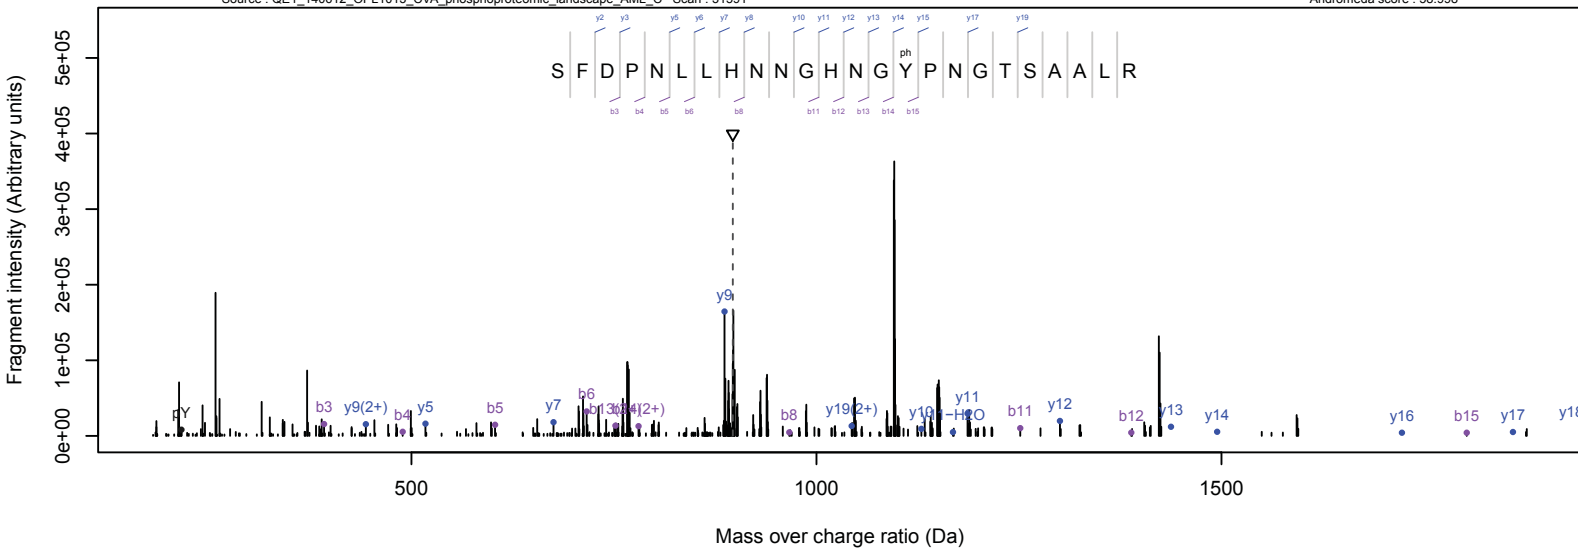

**AA Y(ph)VLFYQR-2+**

Source : QE1\_140612\_OPL1013\_CVA\_phosphoproteomic\_landscape\_AML\_C Scan : 30139

Andromeda score : 58.981

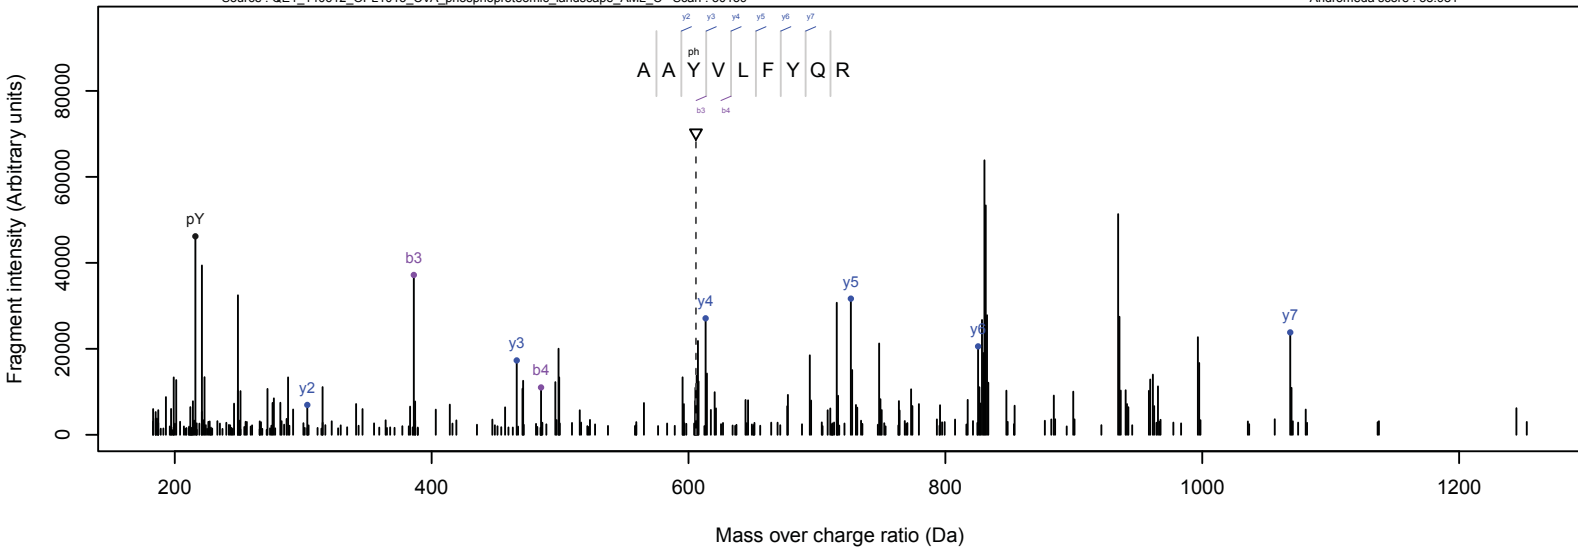

## LLY(ph)EIQNR-2+

Source : QE1\_140612\_OPL1013\_CVA\_phosphoproteomic\_landscape\_AML\_B Scan : 16884

Andromeda score : 58.981

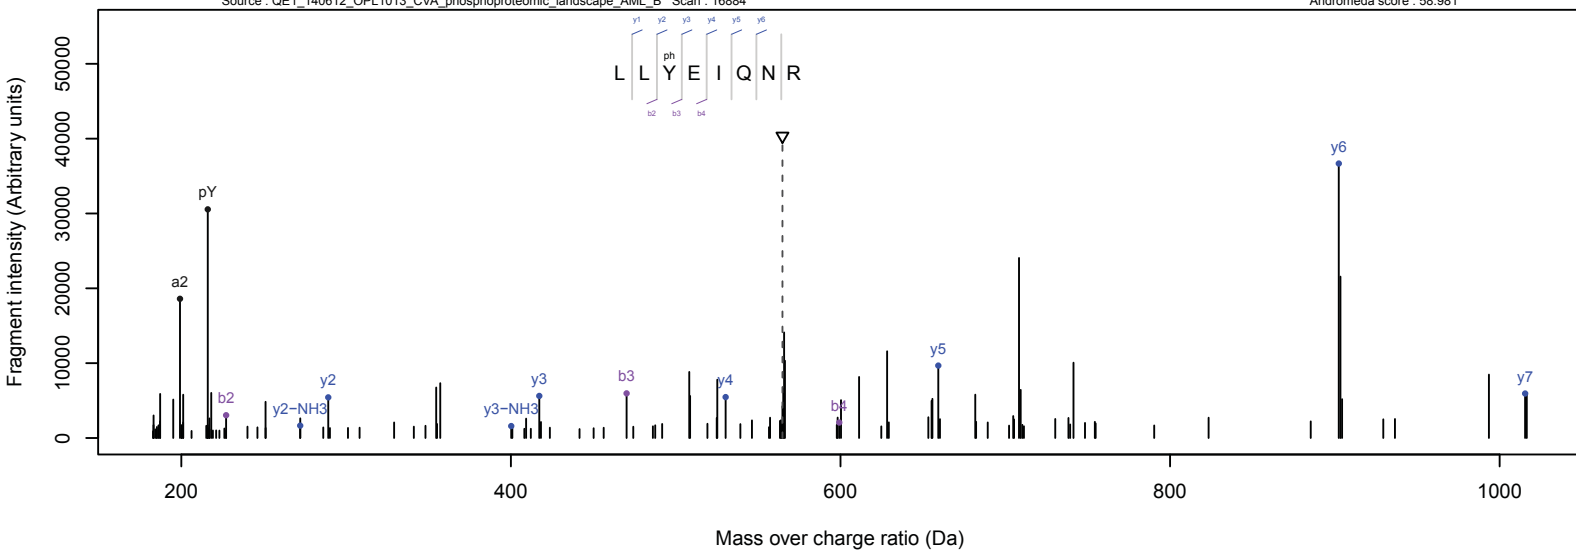

## VY(ph)INM(ox)PGRG-2+

Source : QE1\_140908\_OPL1013\_CvA\_pTyrIP\_AML\_Kasumi6 Scan : 11314

Andromeda score : 58.981

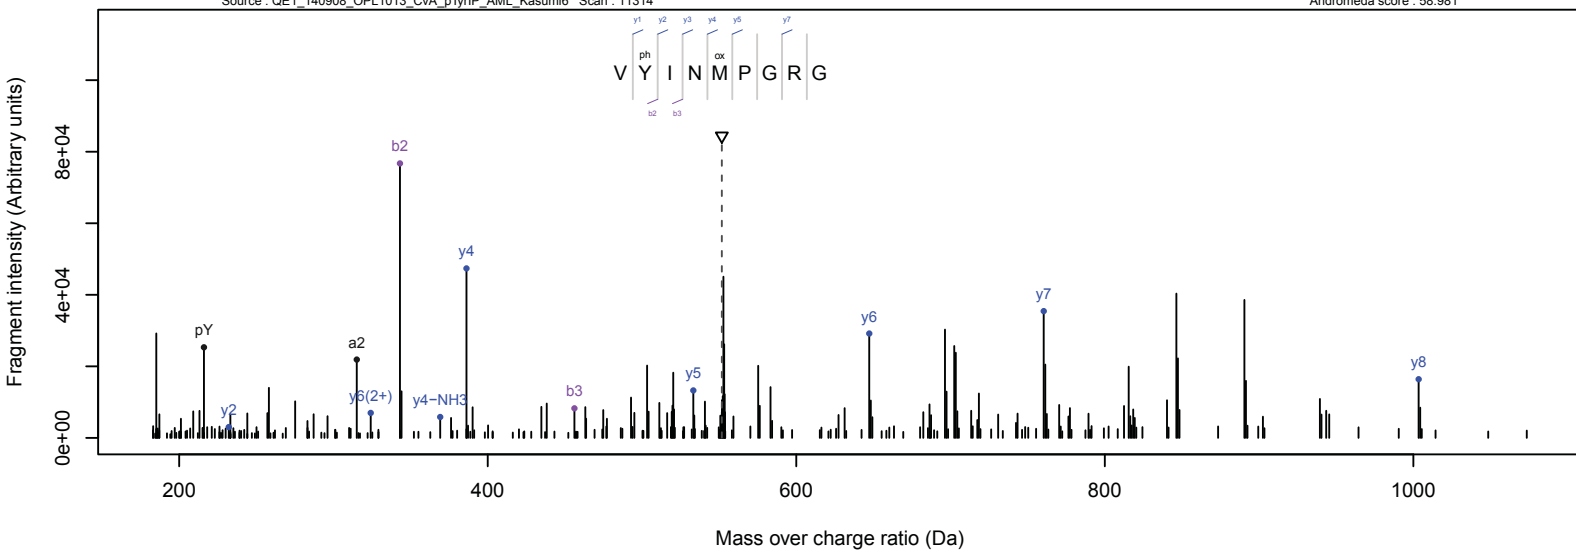

## YAY(ph)YDTER-2+

Source : QE1\_140612\_OPL1013\_CVA\_phosphoproteomic\_landscape\_AML\_D Scan : 7861

Andromeda score : 58.981

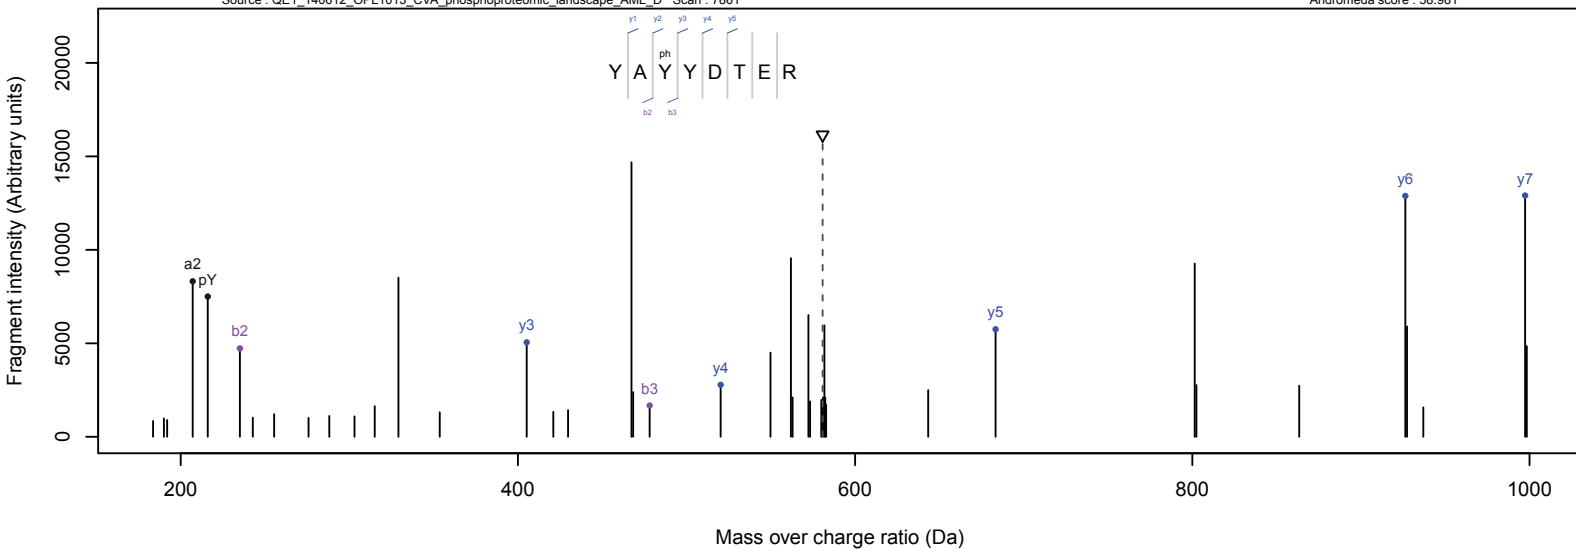



## Y(ph)LFTGLK-2+

Source : QE1\_140612\_OPL1013\_CVA\_phosphoproteomic\_landscape\_AML\_C Scan : 29047

Andromeda score : 58.981

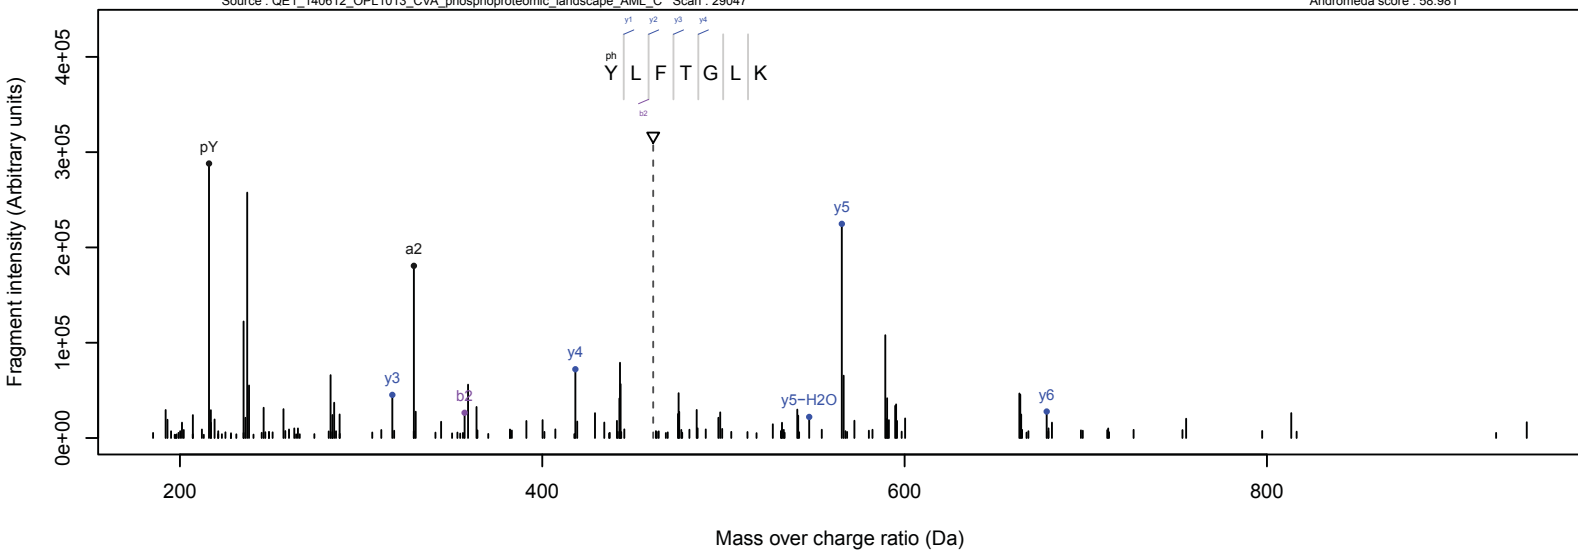

## IGY(ph)SFKKDEIENSIVHR-4+

Source : QE1\_140612\_OPL1013\_CVA\_phosphoproteomic\_landscape\_AML\_C Scan : 22727

Andromeda score : 58.98

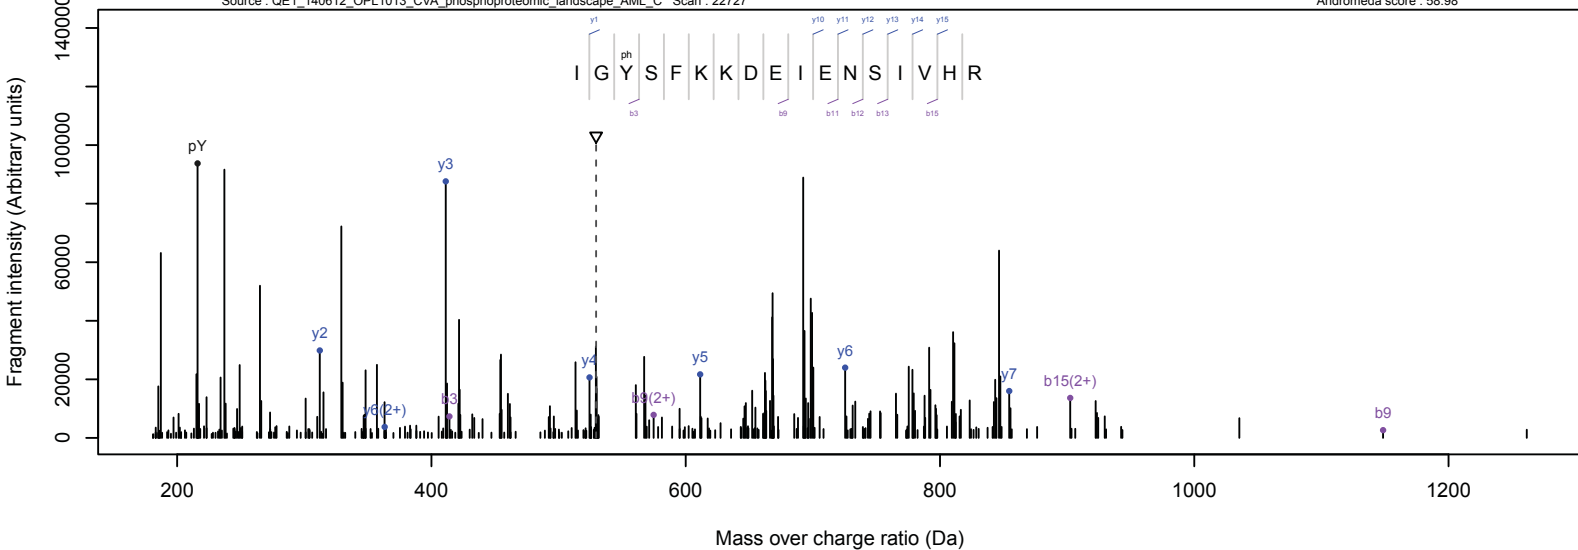

## LAEMPADSGY(ph)PAYLGAR-2+

Source : QE1\_140612\_OPL1013\_CVA\_phosphoproteomic\_landscape\_AML\_C Scan : 29567

Andromeda score : 58.98

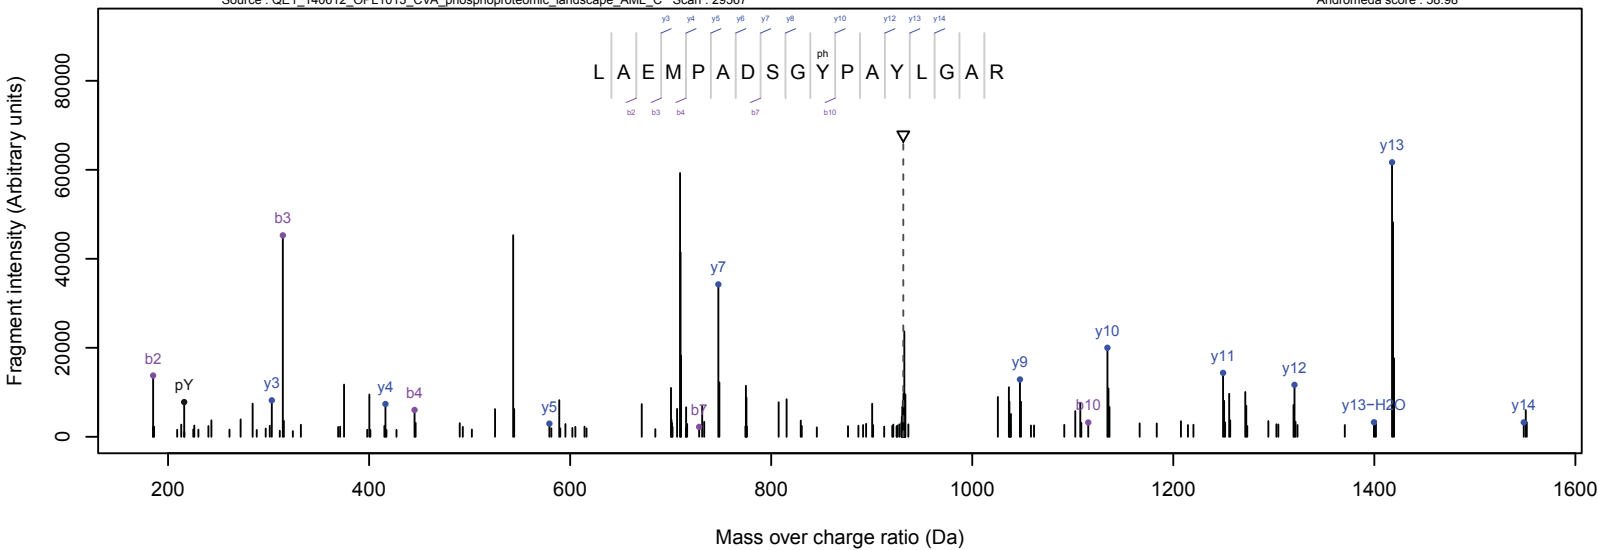

(ac)MQPQSVLHSGY(ph)FHPLLR-3+

Source: QE1\_140612\_OPL1013\_CVA\_phosphoproteomic\_landscape\_AML\_C Scan: 41733

Andromeda score: 58.98

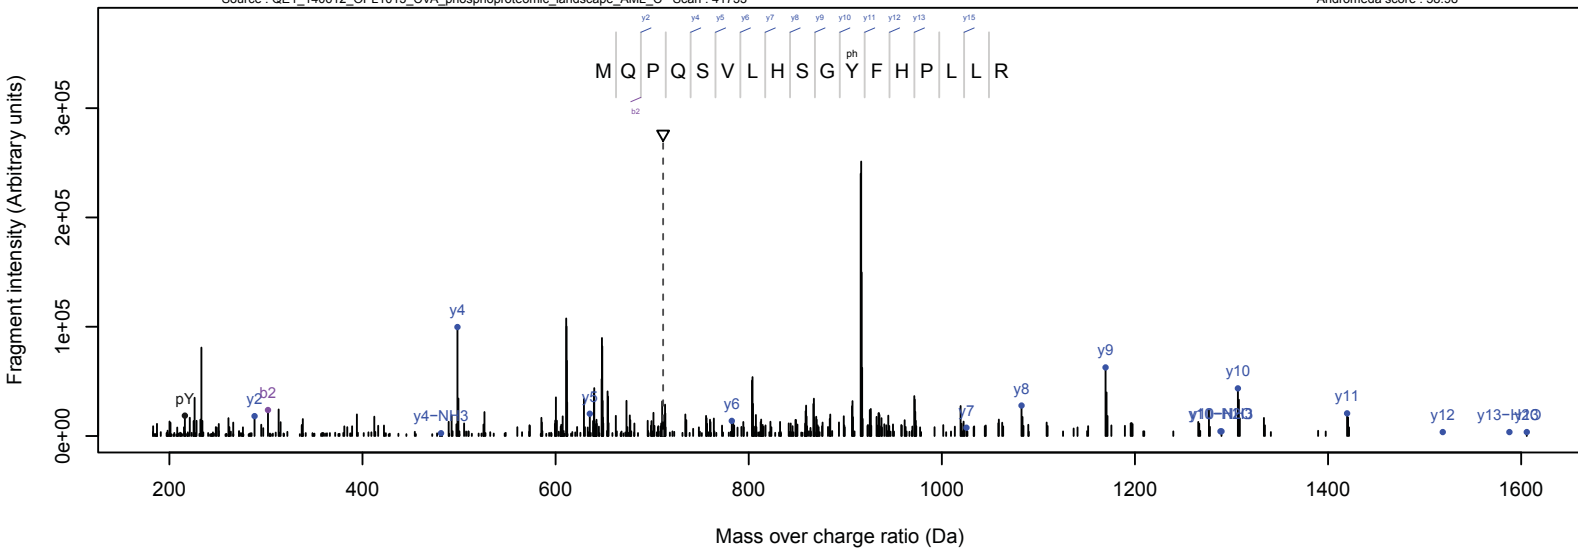

VERADGY(ph)EPPVQESV-2+

Source: QE1\_140612\_OPL1013\_CVA\_phosphoproteomic\_landscape\_AML\_B Scan: 16802

Andromeda score: 58.98

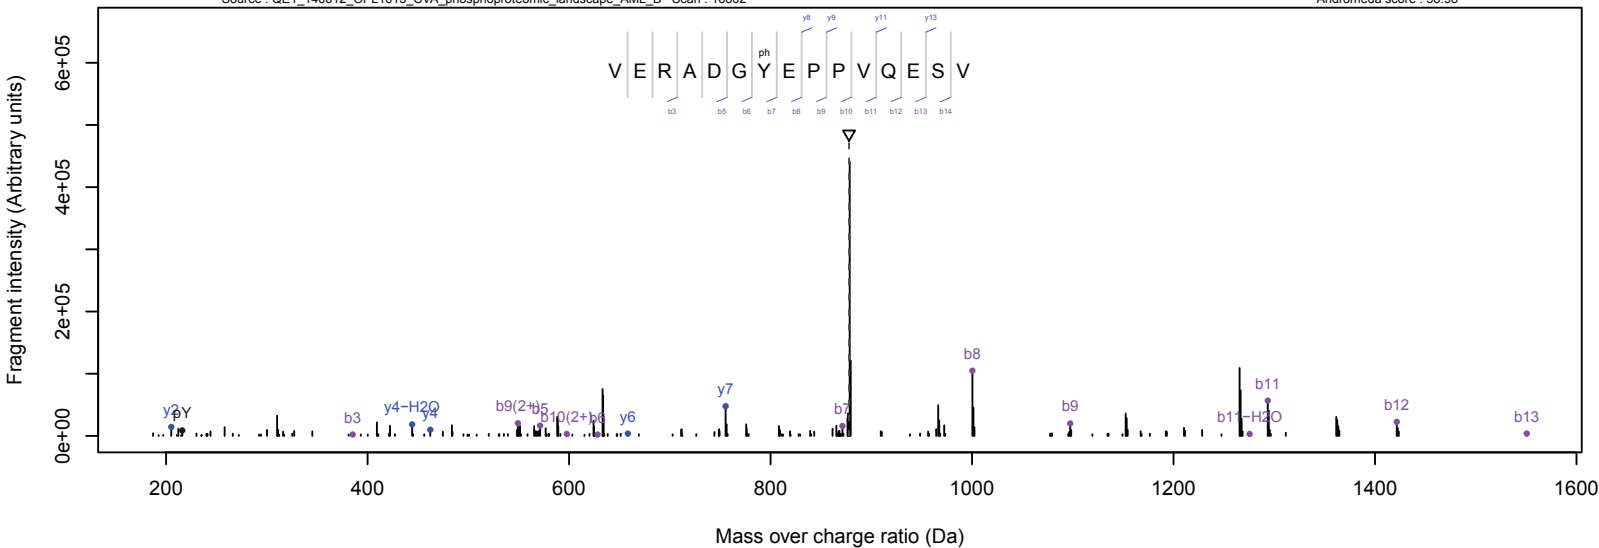

THCPY(ph)AVALPEVAPAQLTEALR-3+

Source: QE1\_140612\_OPL1013\_CVA\_phosphoproteomic\_landscape\_AML\_B Scan: 42395

Andromeda score: 58.964

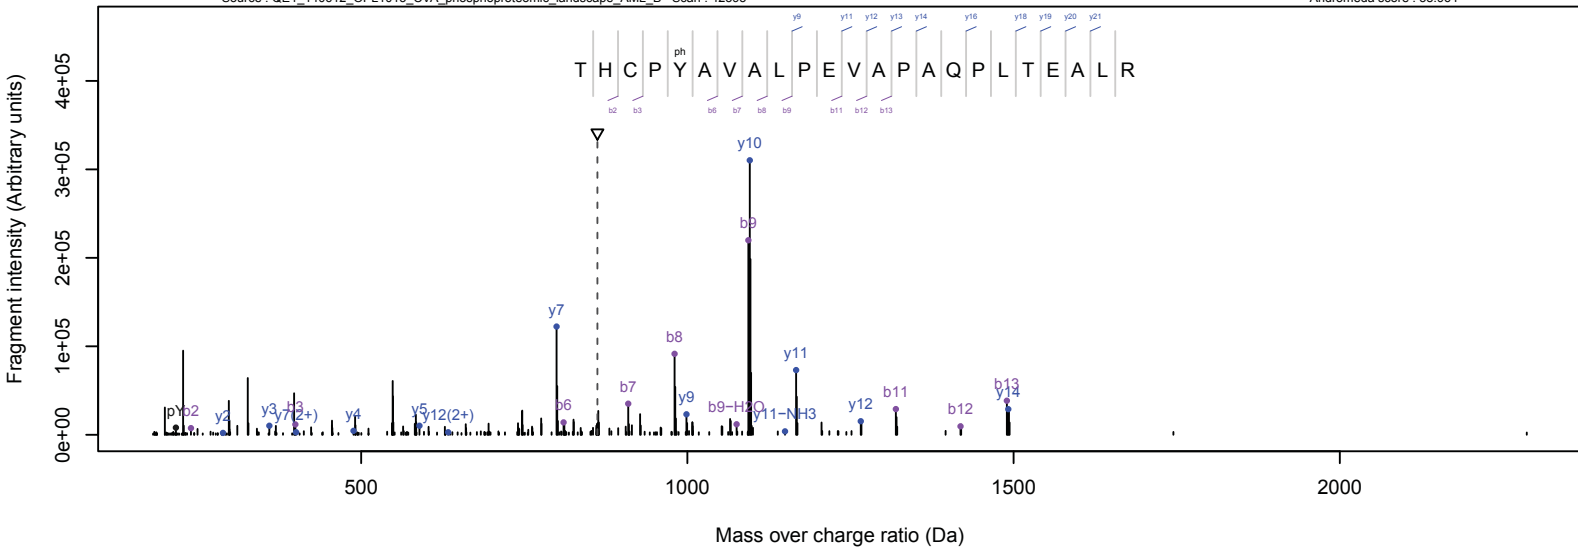

LLPIPDSLPISPDGQHADIYKLR-3+

Source : QE1\_140612\_OPL1013\_CVA\_phosphoproteomic\_landscape\_AML\_C Scan : 44797

Andromeda score : 58.952

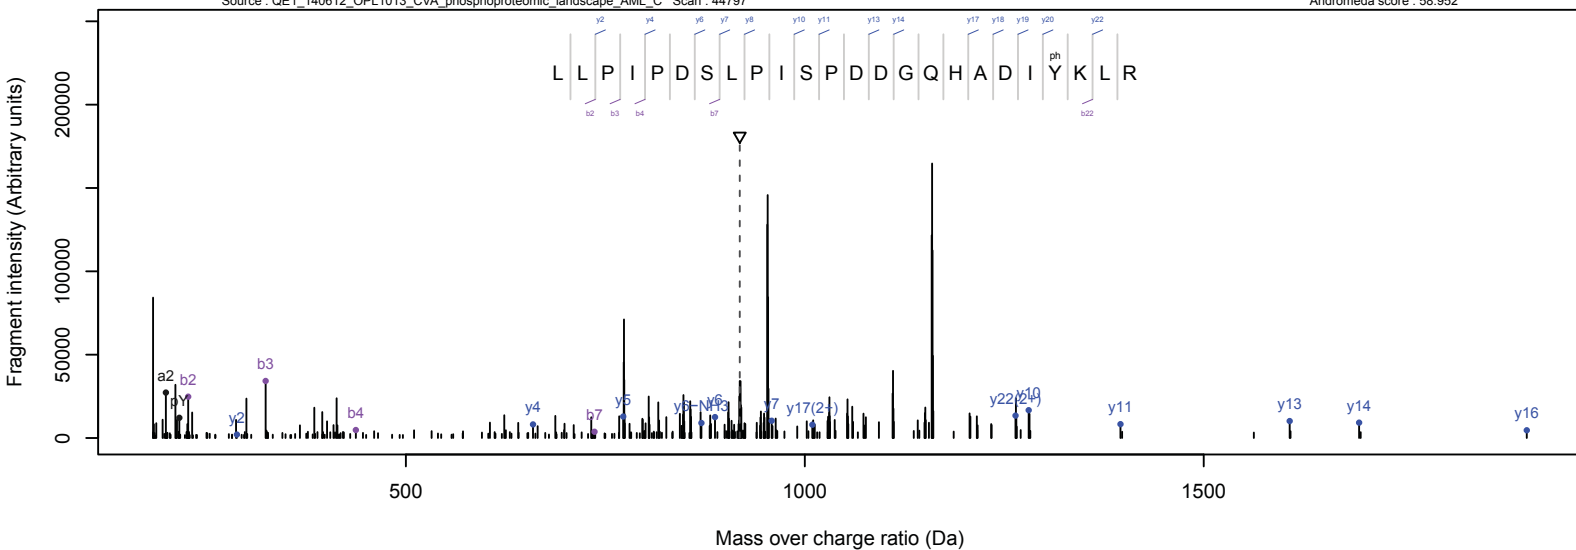

KGGSYS(ph)QAASSDQAQSDMSLTACK-3+

Source : QE1\_140908\_OPL1013\_CvA\_pTyrIP\_AML\_Kasumi6 Scan : 14838

Andromeda score : 58.938

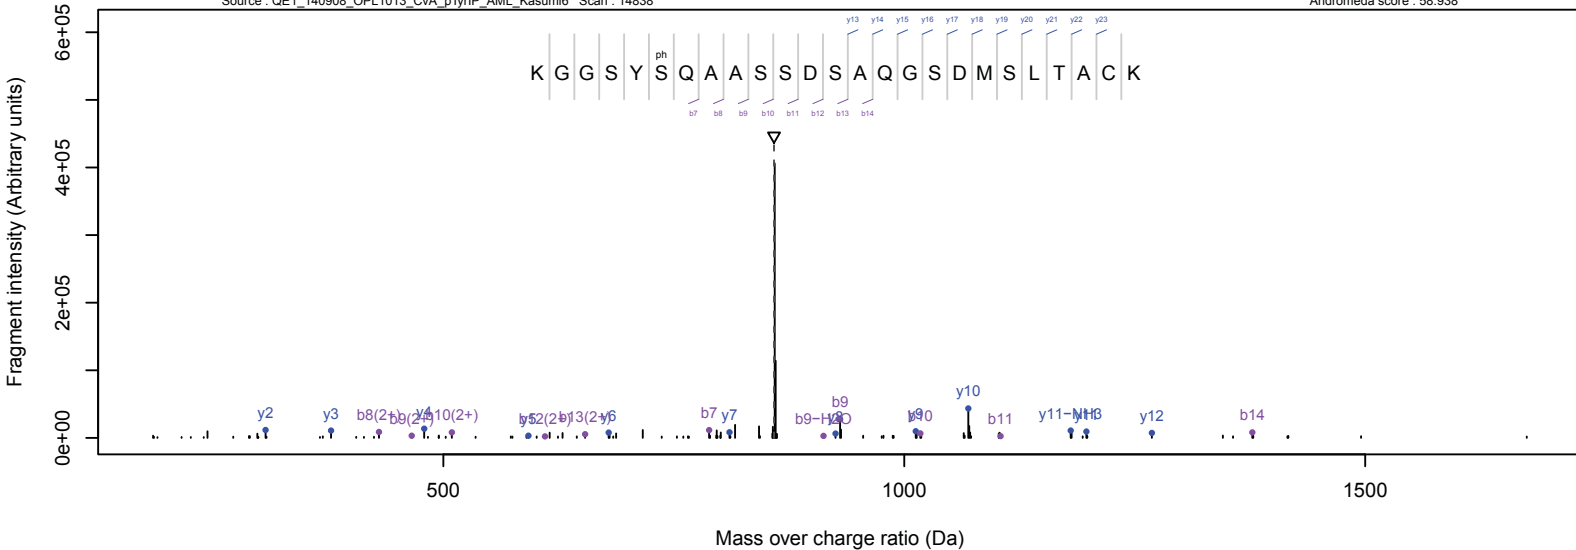

CEFQDAYVLLSEKK-3+

Source : Qe1\_141024\_OPL1013\_CvA\_AML\_pTyrIP\_MOLM13 Scan : 33311

Andromeda score : 58.885

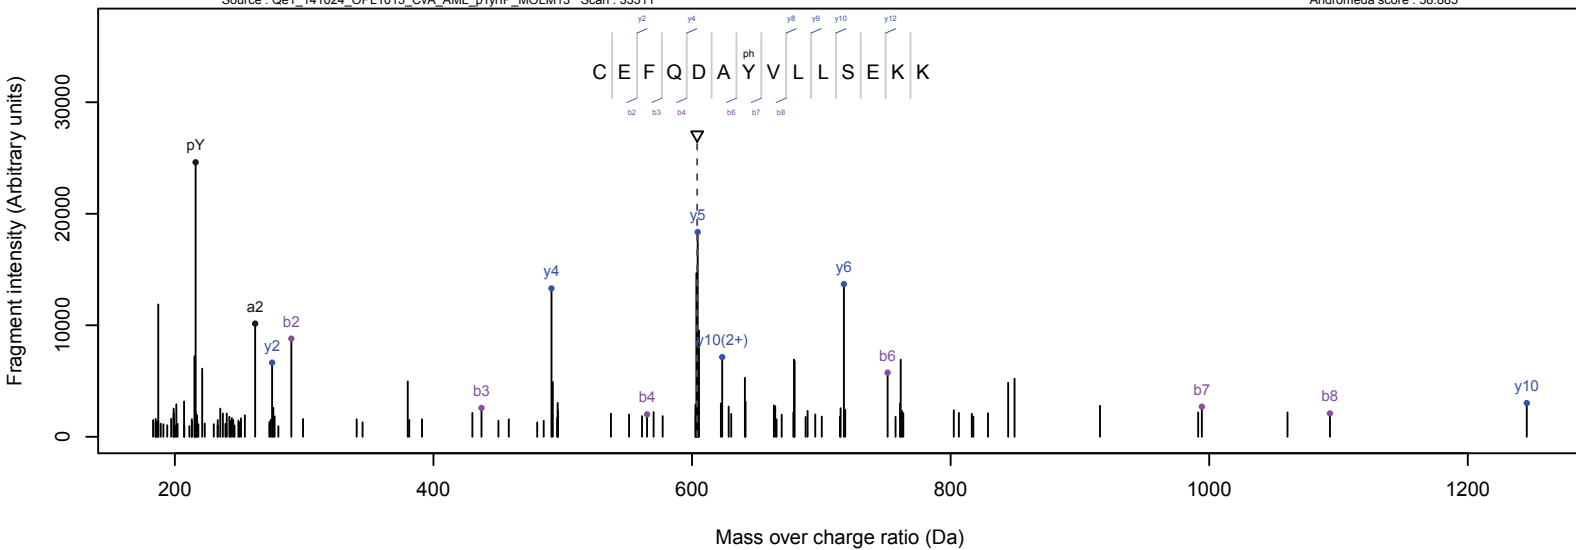

EDEKDGQAY(ph)KFVSR-3+

Source : QE1\_140612\_OPL1013\_CVA\_phosphoproteomic\_landscape\_AML\_C Scan : 8929

Andromeda score : 58.885

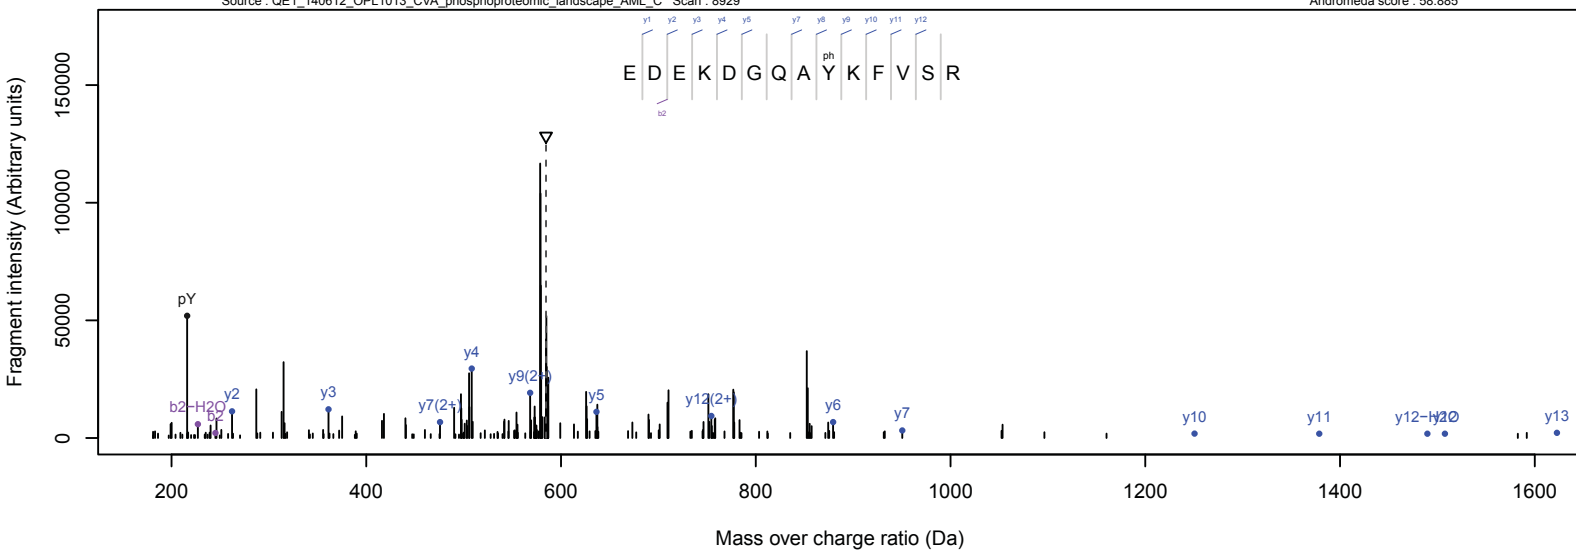

FIY(ph)M(ox)AVQHYIETLQR-3+

Source : QE1\_140612\_OPL1013\_CVA\_phosphoproteomic\_landscape\_AML\_A Scan : 41520

Andromeda score : 58.885

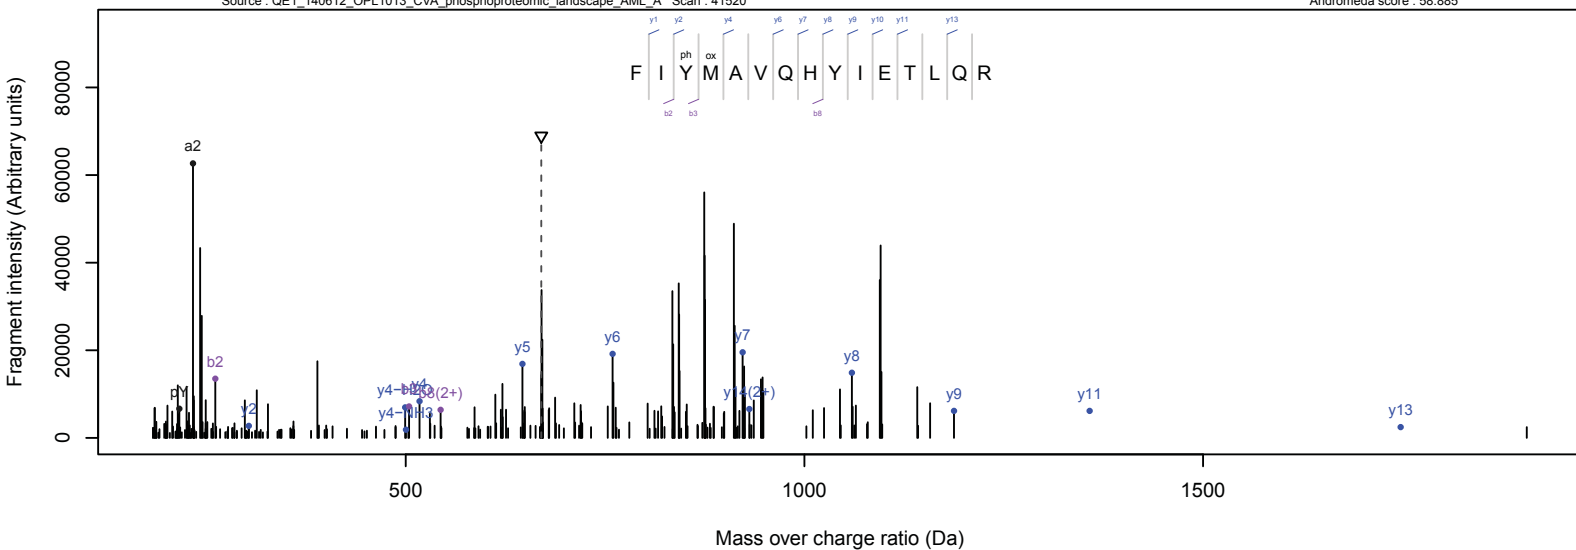

GAPIET(ph)LGYHSASNRR-3+

Source : QE1\_140612\_OPL1013\_CVA\_phosphoproteomic\_landscape\_AML\_A Scan : 12381

Andromeda score : 58.885

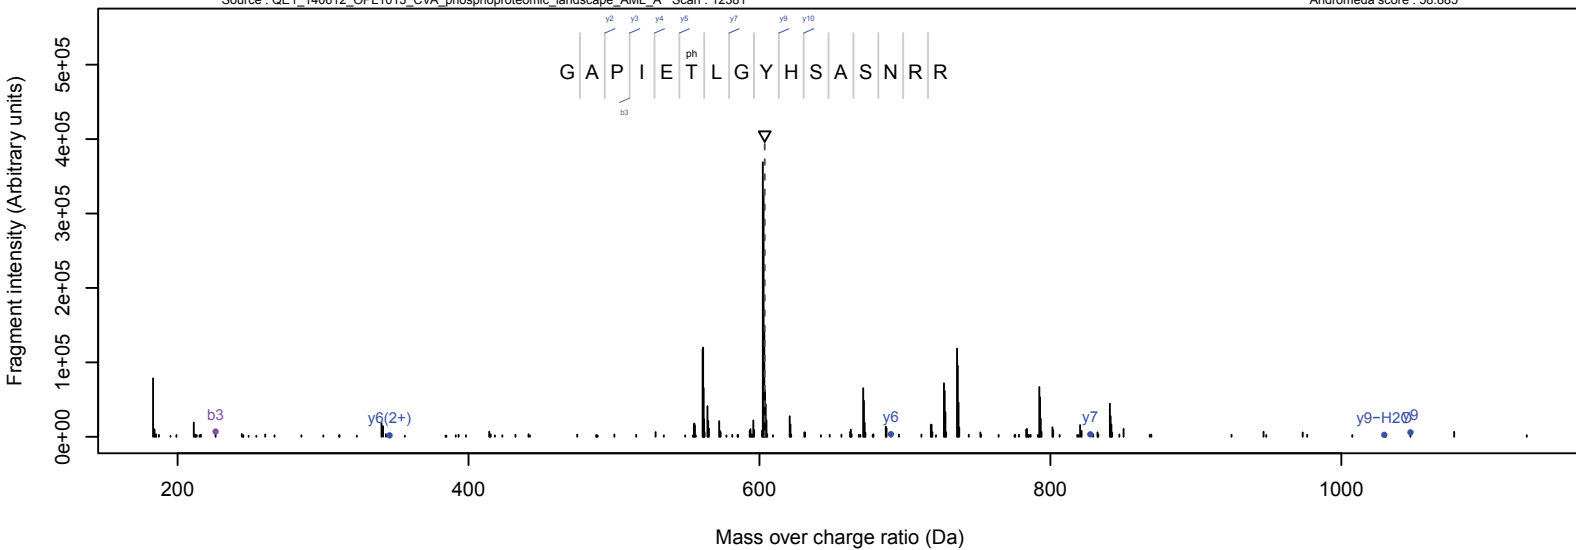

HGLTY(ph)ATIDGSVNPk-2+

Source: QE1\_140612\_OPL1013\_CVA\_phosphoproteomic\_landscape\_AML\_D Scan: 19503

Andromeda score: 58.885

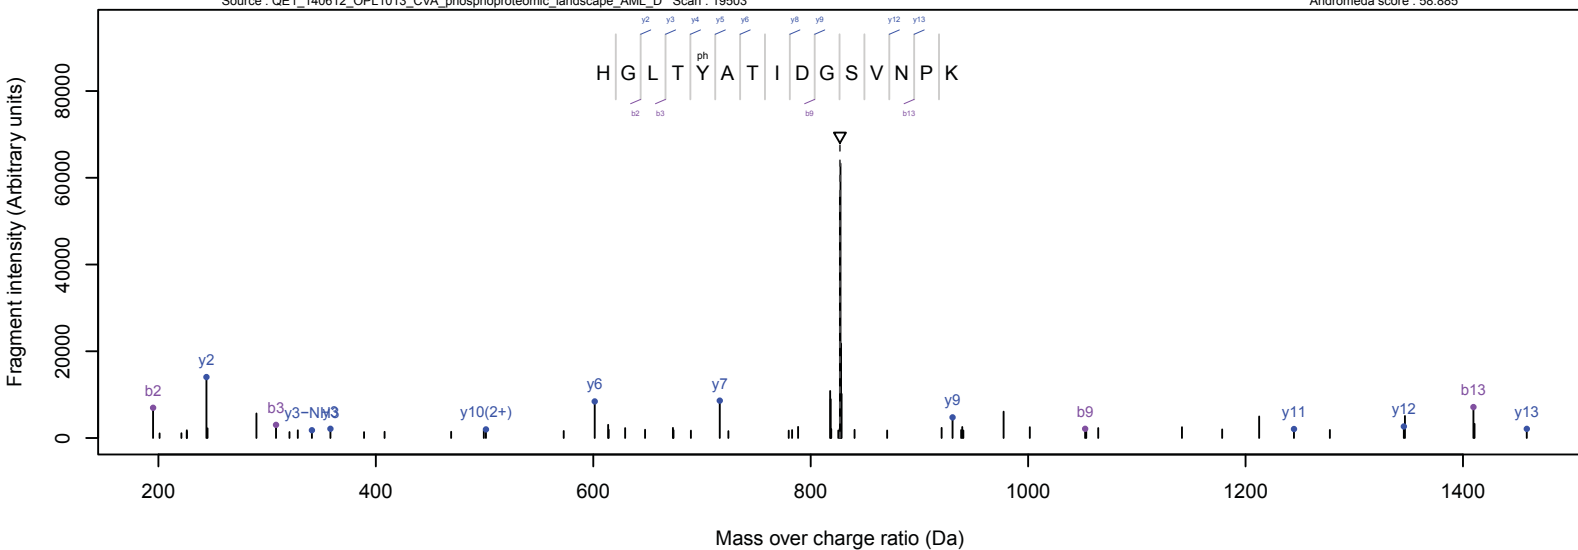

LQDAY(ph)YIFQEMADK-2+

Source: QE1\_140612\_OPL1013\_CVA\_phosphoproteomic\_landscape\_AML\_D Scan: 44139

Andromeda score: 58.885

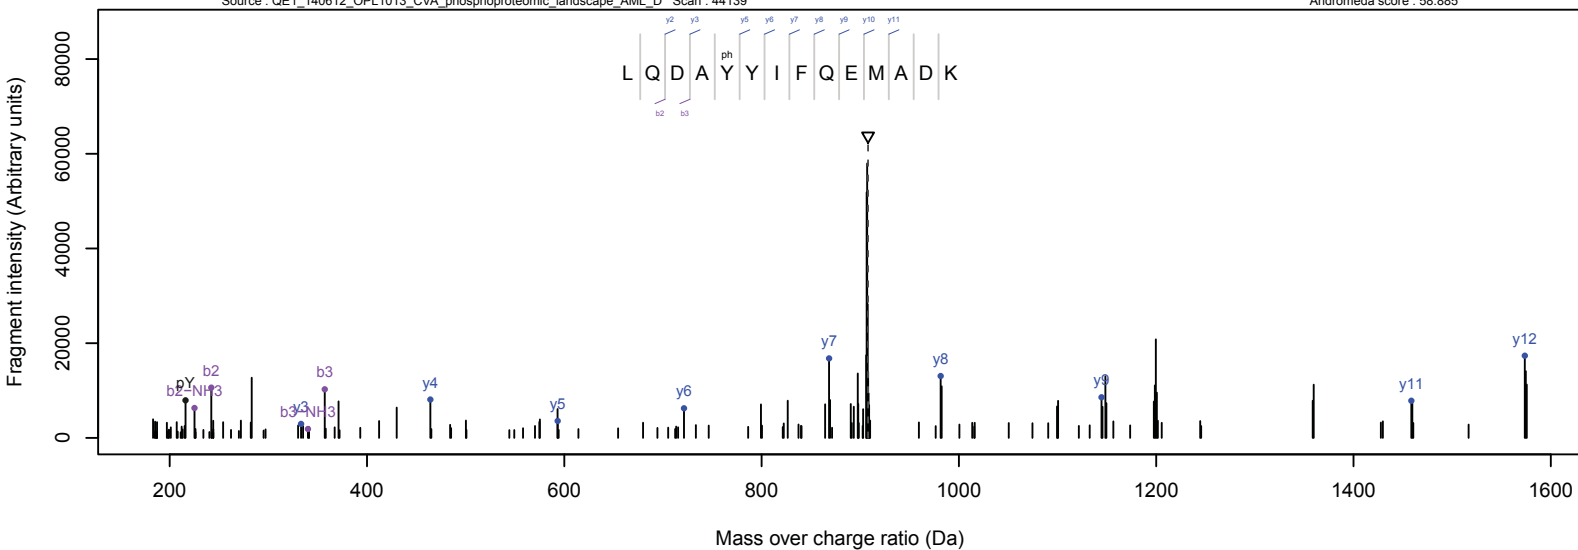

NLTNIAMRPGLEG(ph)YALPR-3+

Source: QE1\_140612\_OPL1013\_CVA\_phosphoproteomic\_landscape\_AML\_C Scan: 36076

Andromeda score: 58.864

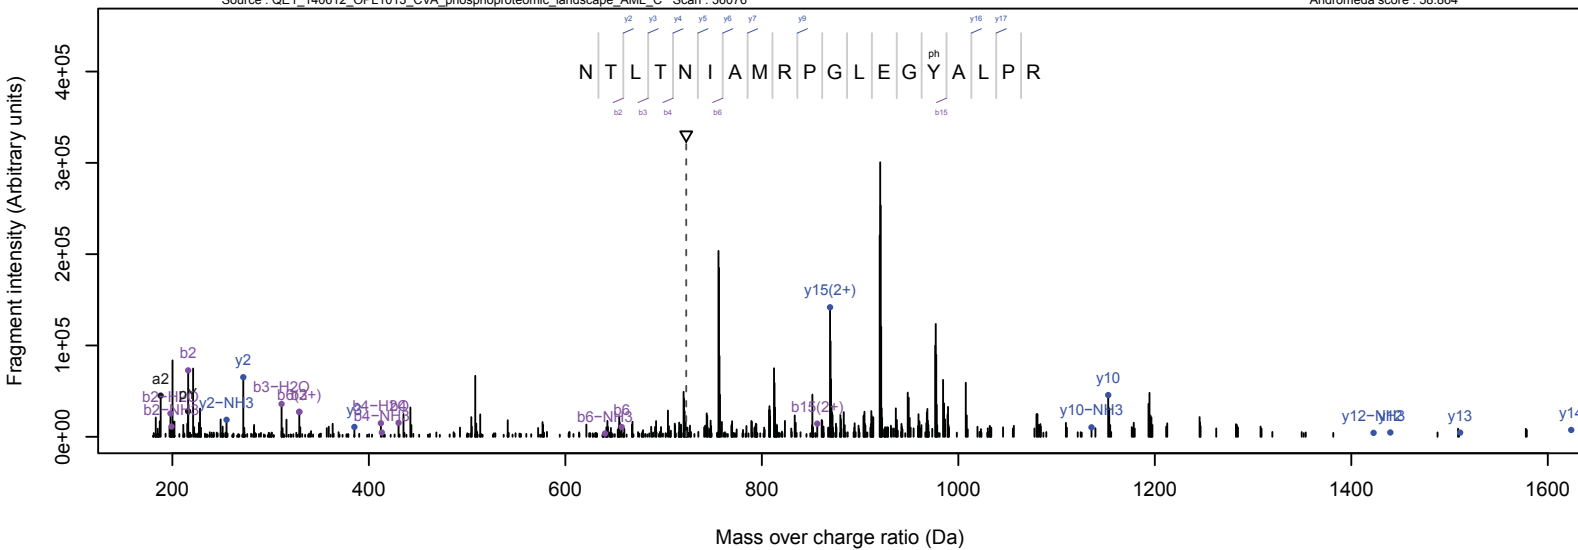

## VTWYCCGPTVY(ph)DASHMGHAR-3+

Source : QE1\_140908\_OPL1013\_CvA\_pTyrIP\_AML\_Kasumi1 Scan : 27342

Andromeda score : 58.848

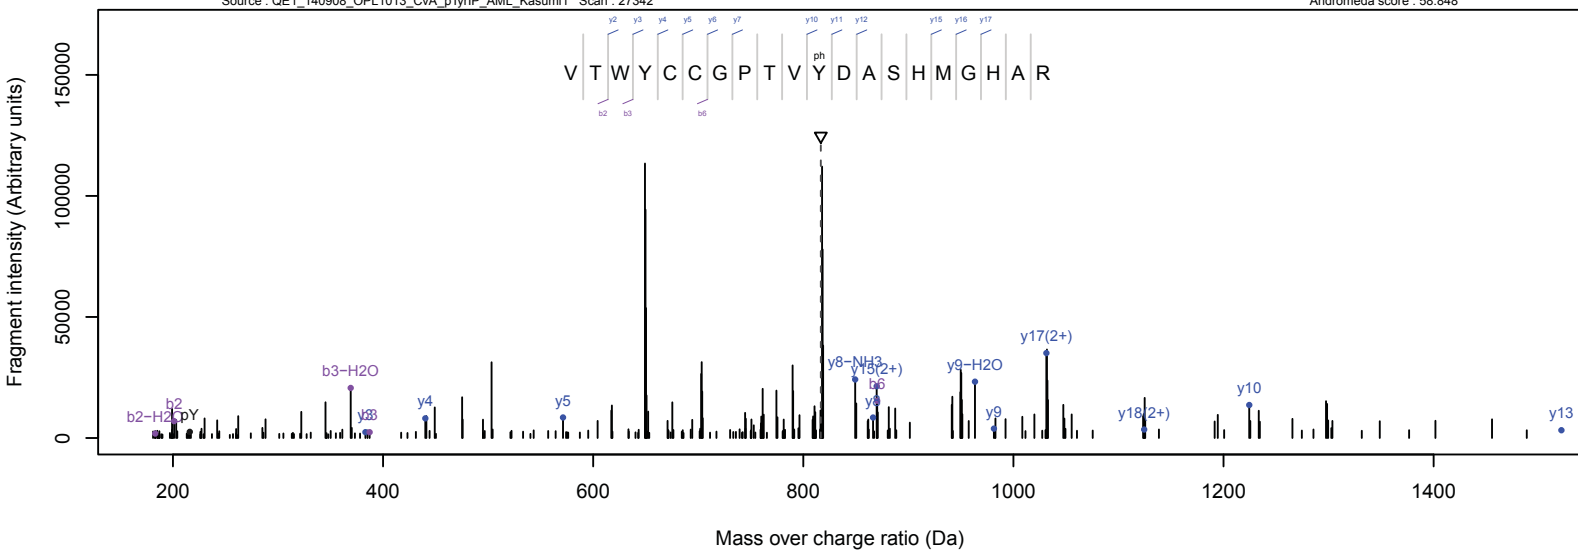

## (ac)M(ox)EESGY(ph)ESVLCVKPDVHVYR-3+

Source : QE1\_140908\_OPL1013\_CvA\_pTyrIP\_AML\_Kasumi6 Scan : 34800

Andromeda score : 58.835

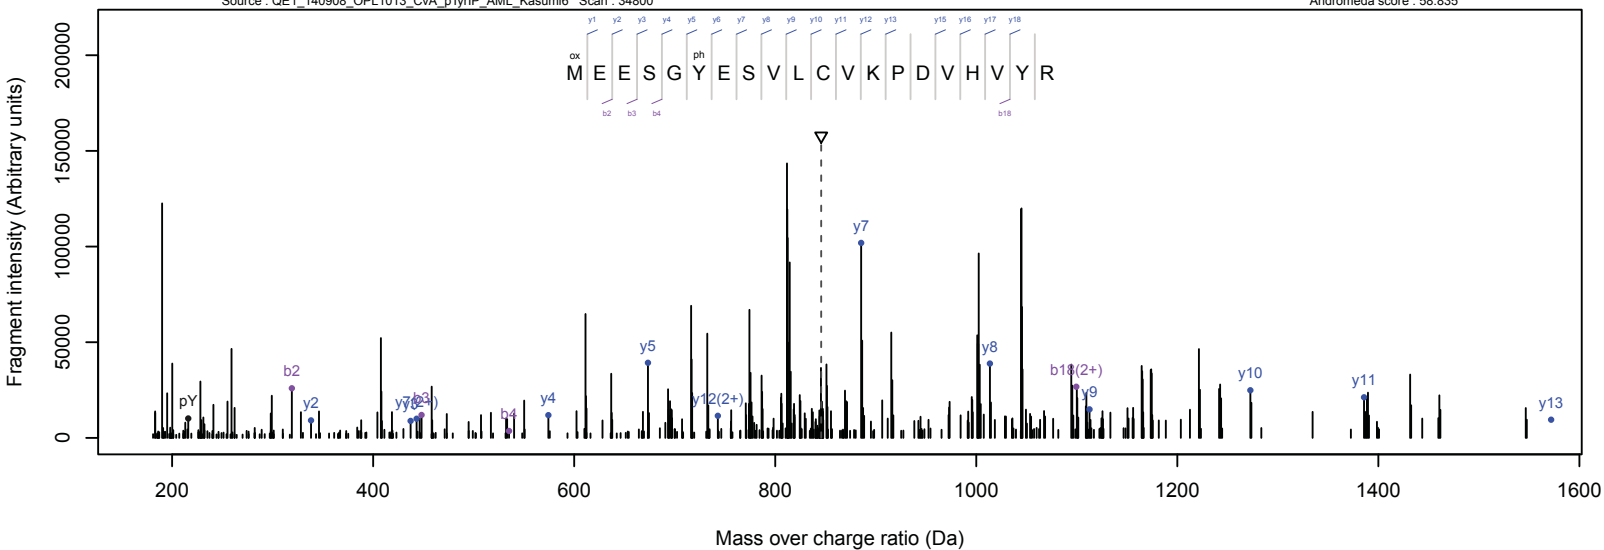

## QY(ph)YVNQFK-2+

Source : QE1\_140612\_OPL1013\_CVA\_phosphoproteomic\_landscape\_AML\_D Scan : 16441

Andromeda score : 58.815

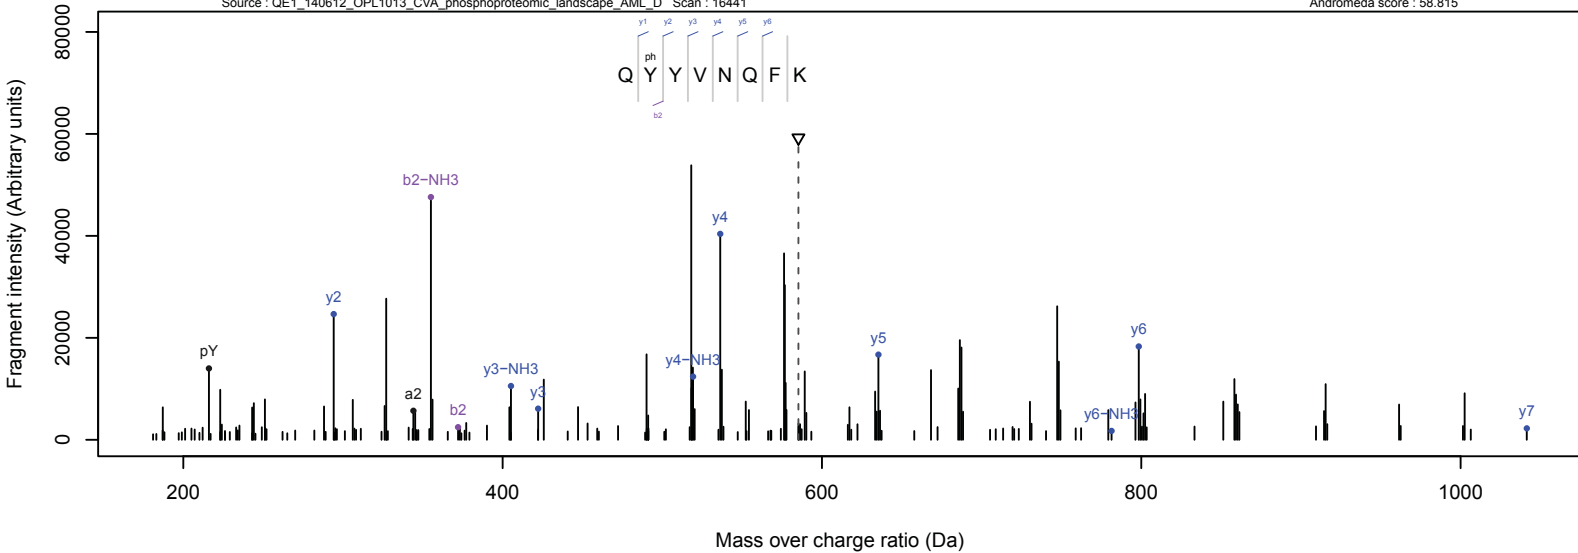

## Y(ph)ADVIIPR-2+

Source : QE1\_140612\_OPL1013\_CVA\_phosphoproteomic\_landscape\_AML\_B Scan : 22494

Andromeda score : 58.815

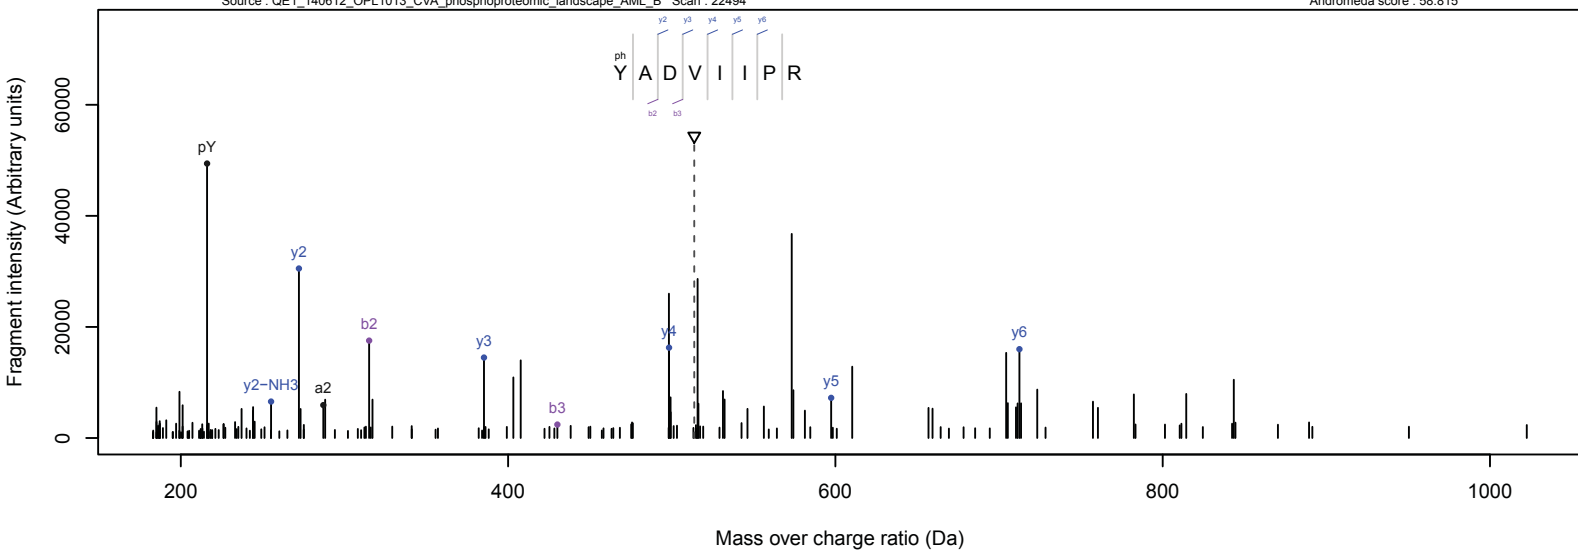

## YSYKY(ph)FPR-3+

Source : QE1\_140612\_OPL1013\_CVA\_phosphoproteomic\_landscape\_AML\_C Scan : 17608

Andromeda score : 58.815

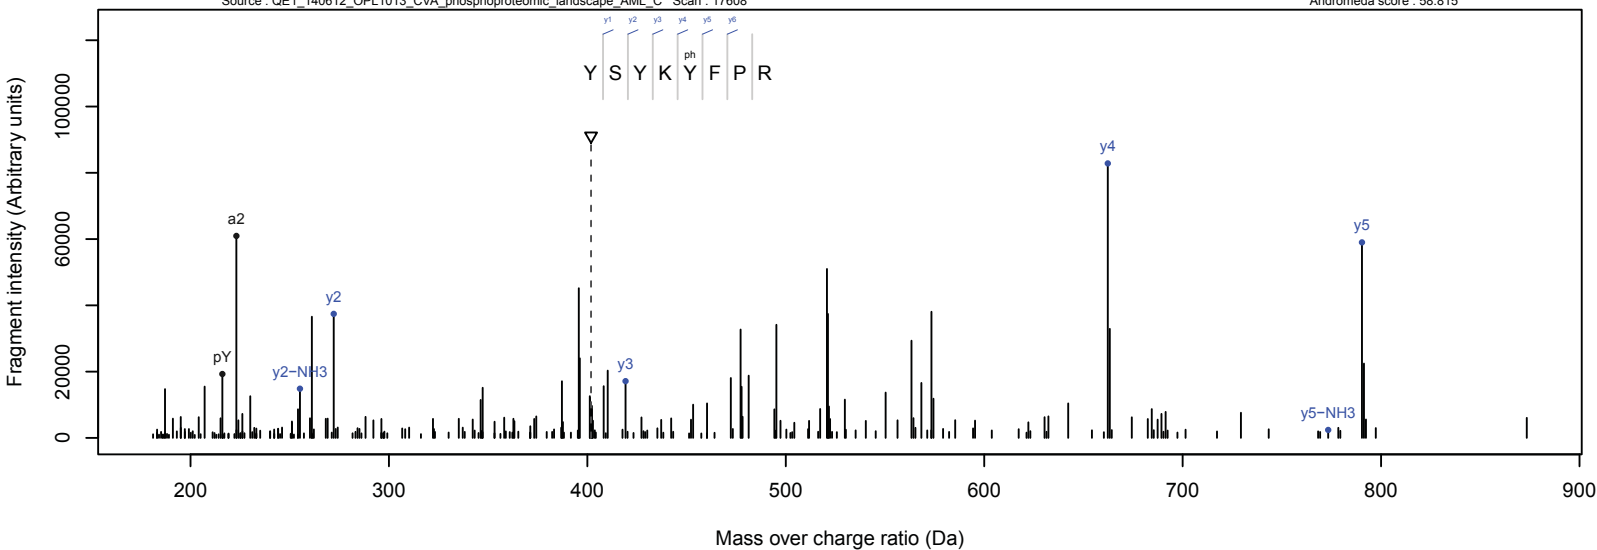

## NSAACVVY(ph)EDMSHSR-3+

Source : QE1\_140822\_OPL1013\_CvA\_pTyrIP\_AML\_cell\_lines\_part2\_B Scan : 13311

Andromeda score : 58.814

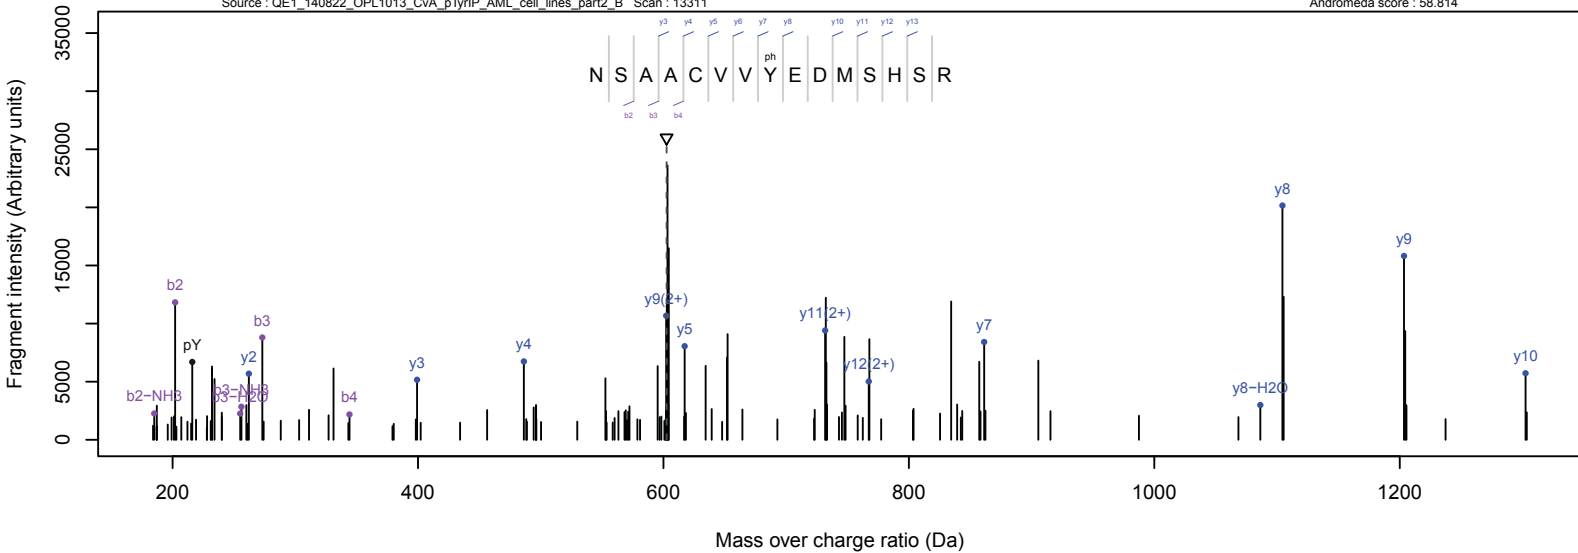

## RASALIDRPAPY(ph)FER-3+

Source : QE1\_140612\_OPL1013\_CVA\_phosphoproteomic\_landscape\_AML\_C Scan : 22121

Andromeda score : 58.814

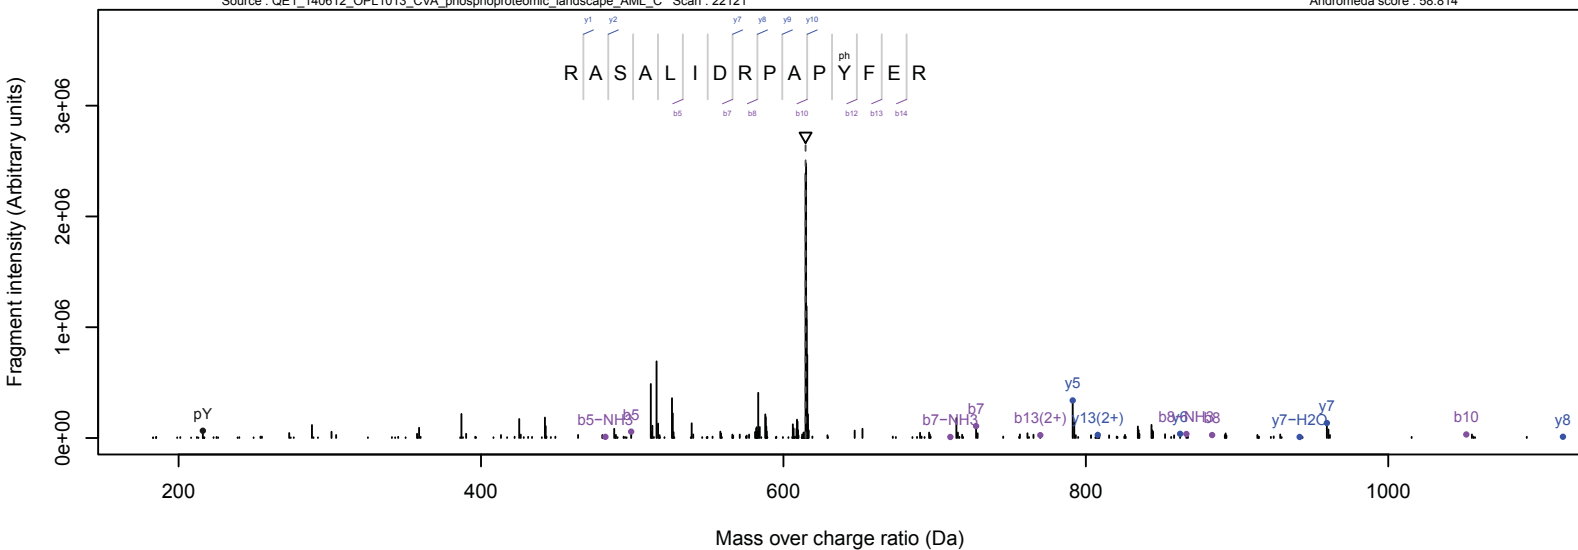

## TPTYREPVS DY(ph)QVLR-3+

Source : QE1\_140612\_OPL1013\_CVA\_phosphoproteomic\_landscape\_AML\_A Scan : 21616

Andromeda score : 58.814

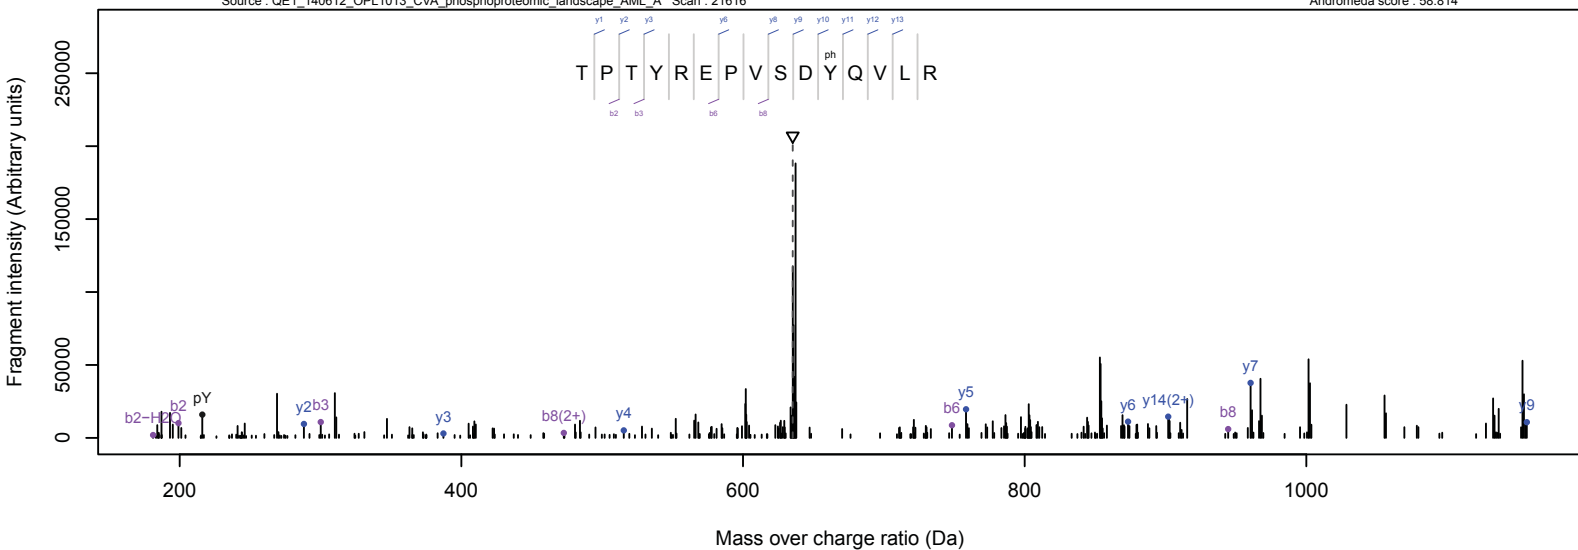

## QLWVAFQCCR DY(ph)ENVPAAADPSGSQQQAEK-3+

Source : QE1\_140908\_OPL1013\_CvA\_pTyrIP\_AML\_Kasumi1 Scan : 33993

Andromeda score : 58.812

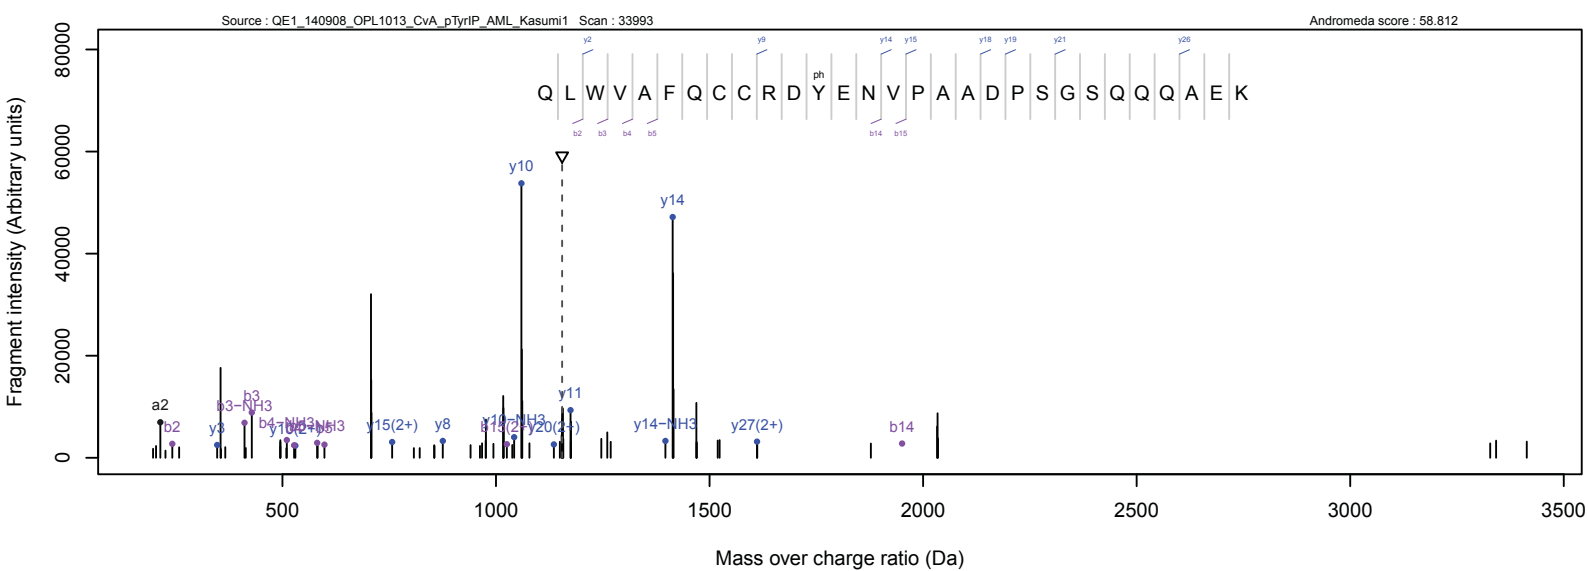



**RGPNYTSGY(ph)GTNSELSNPSETESER-3+**

Source : QE1\_140612\_OPL1013\_CVA\_phosphoproteomic\_landscape\_AML\_C Scan : 14403

Andromeda score : 58.812

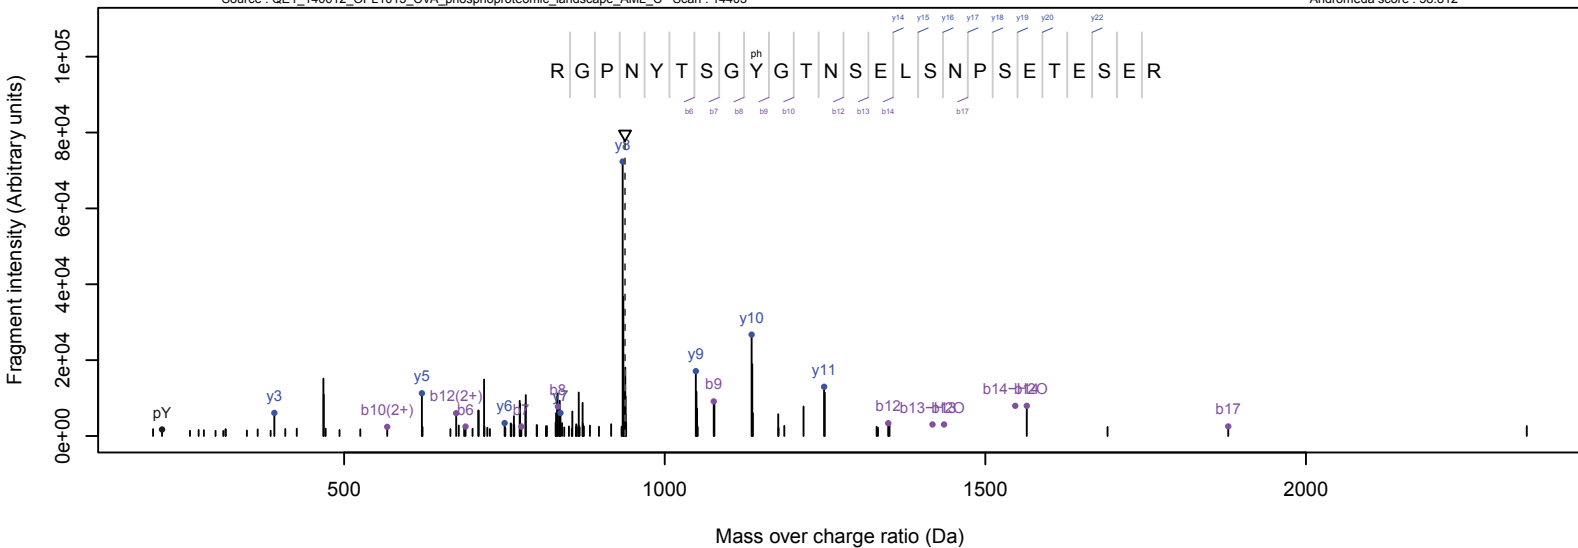

**VCFY(ph)SNSFNGPK-2+**

Source : QE1\_140612\_OPL1013\_CVA\_phosphoproteomic\_landscape\_AML\_A Scan : 23439

Andromeda score : 58.781

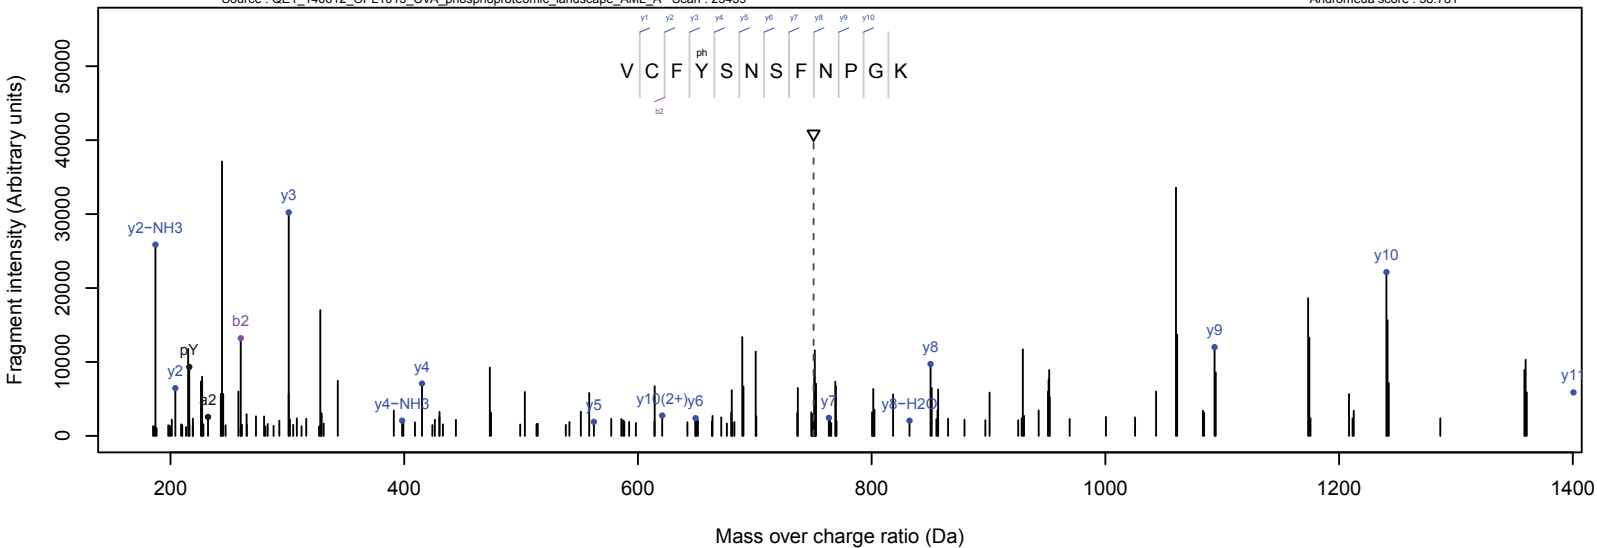

**ASESSKPWPDATY(ph)GTGSASR-3+**

Source : QE1\_140612\_OPL1013\_CVA\_phosphoproteomic\_landscape\_AML\_B Scan : 13982

Andromeda score : 58.712

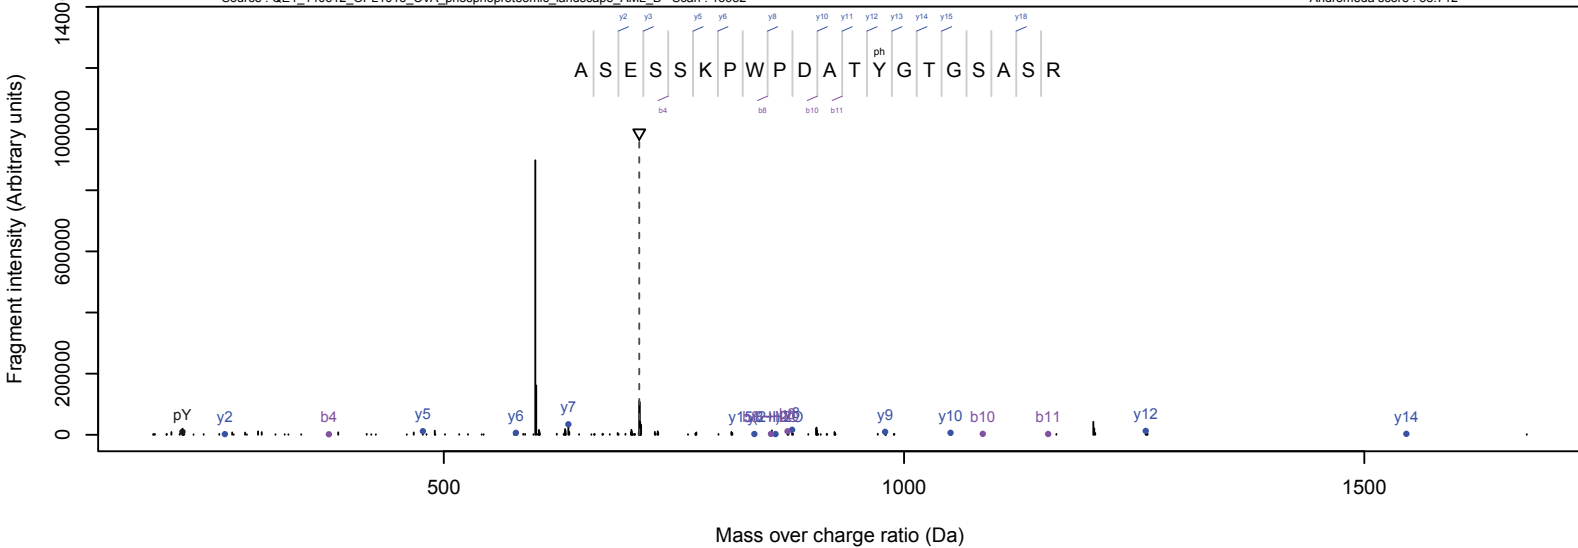

LAQQYY(ph)LVYQEPIPTAQLVQR-3+

Source : QE1\_140612\_OPL1013\_CVA\_phosphoproteomic\_landscape\_AML\_D Scan : 45242

Andromeda score : 58.712

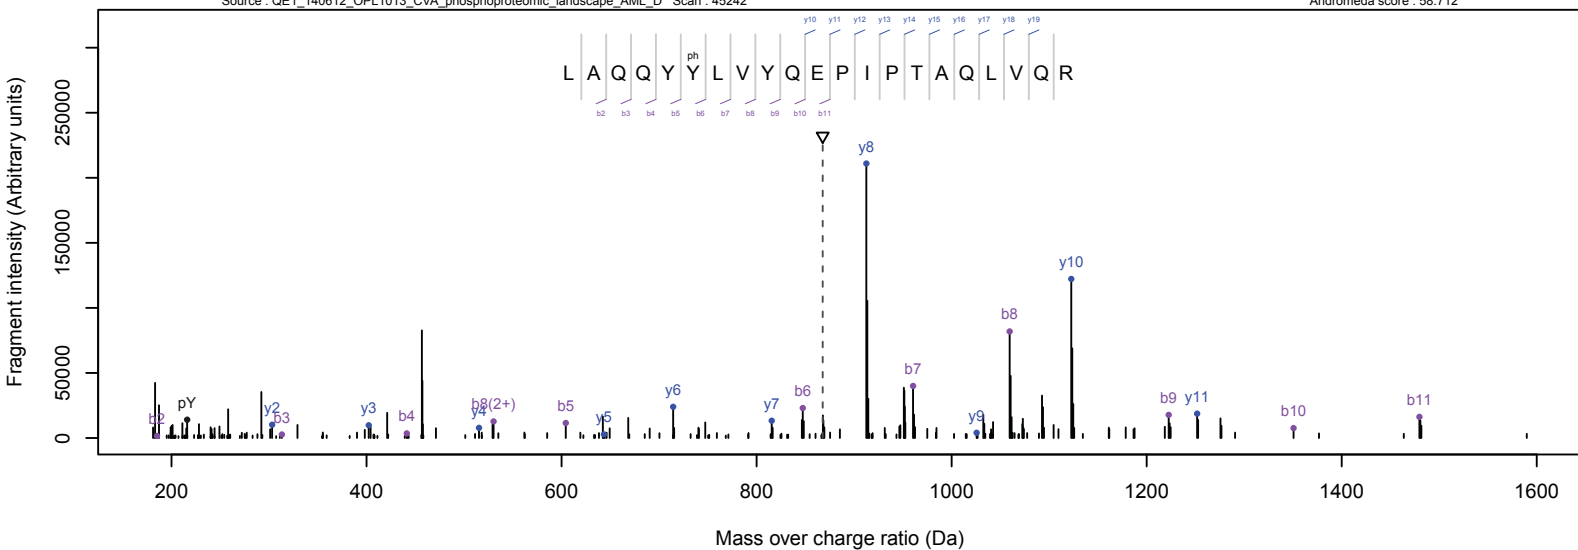

PGFTSLPGSTMTPPSPGNPY(ph)AR-3+

Source : QE1\_140612\_OPL1013\_CVA\_phosphoproteomic\_landscape\_AML\_C Scan : 34428

Andromeda score : 58.712

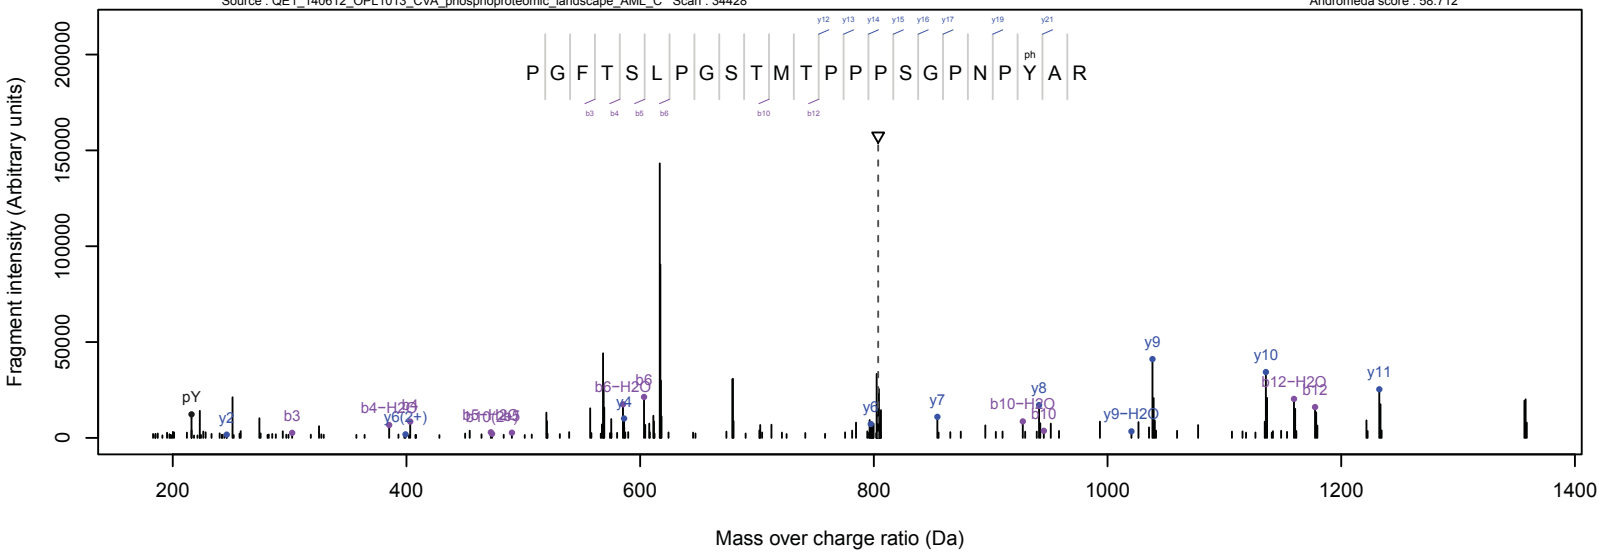

VTGDLFY(ph)THVTM(ox)GQR-3+

Source : QE1\_140908\_OPL1013\_CvA\_pTyrIP\_AML\_Kasumi6 Scan : 26366

Andromeda score : 58.712

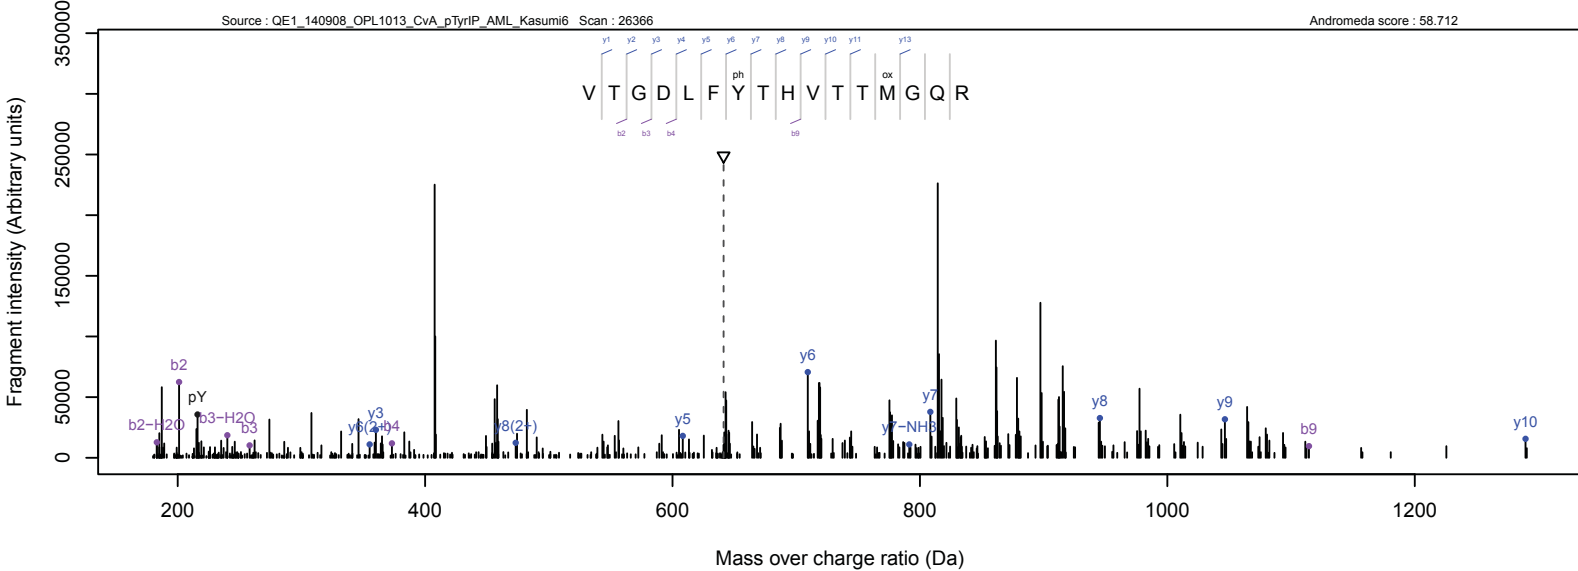

## ATQY(ph)GIFER-2+

Source : QE1\_140612\_OPL1013\_CVA\_phosphoproteomic\_landscape\_AML\_C Scan : 18196

Andromeda score : 58.699

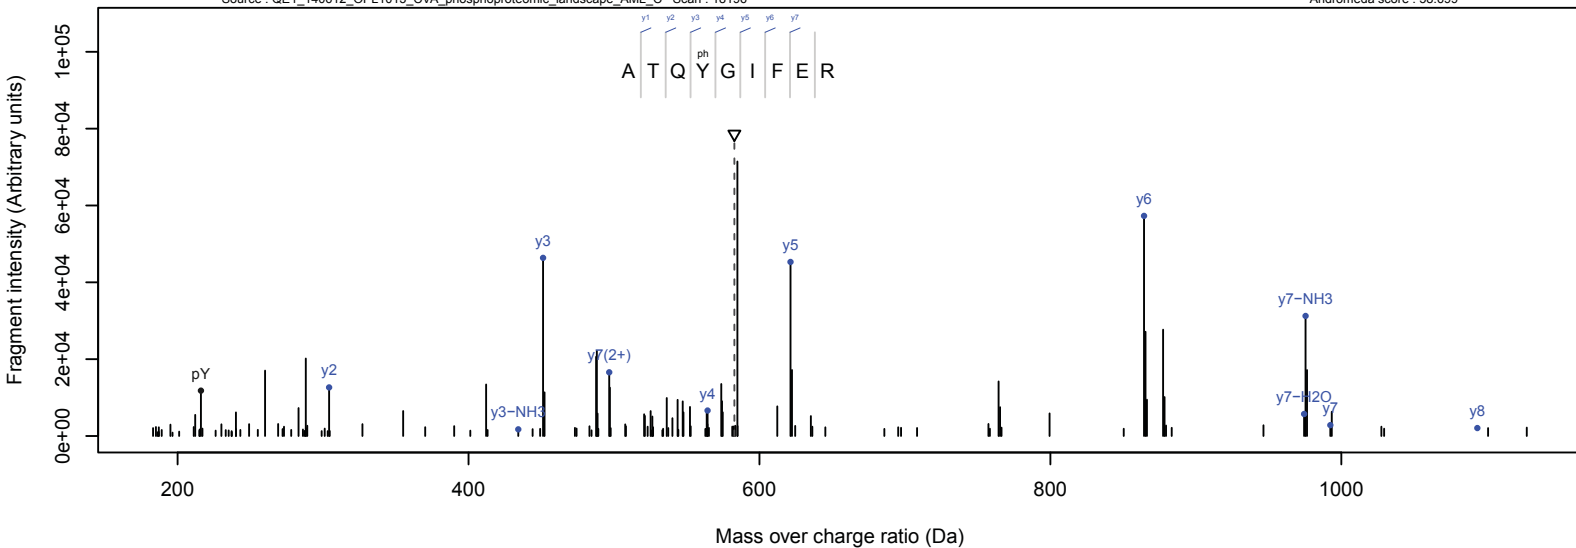

## KIY(ph)SGDYR-2+

Source : QE1\_140612\_OPL1013\_CVA\_phosphoproteomic\_landscape\_AML\_D Scan : 9263

Andromeda score : 58.699

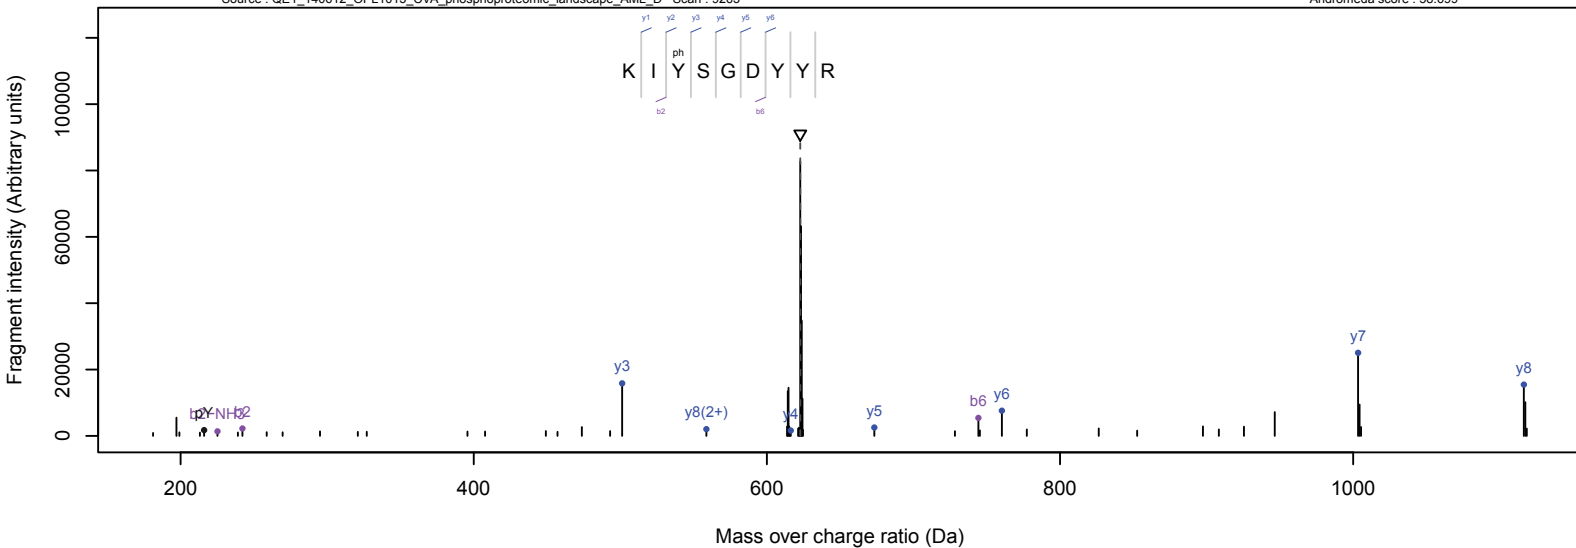

## LSGSNPY(ph)TVTPQIINSK-2+

Source : QE1\_140612\_OPL1013\_CVA\_phosphoproteomic\_landscape\_AML\_C Scan : 26473

Andromeda score : 58.693

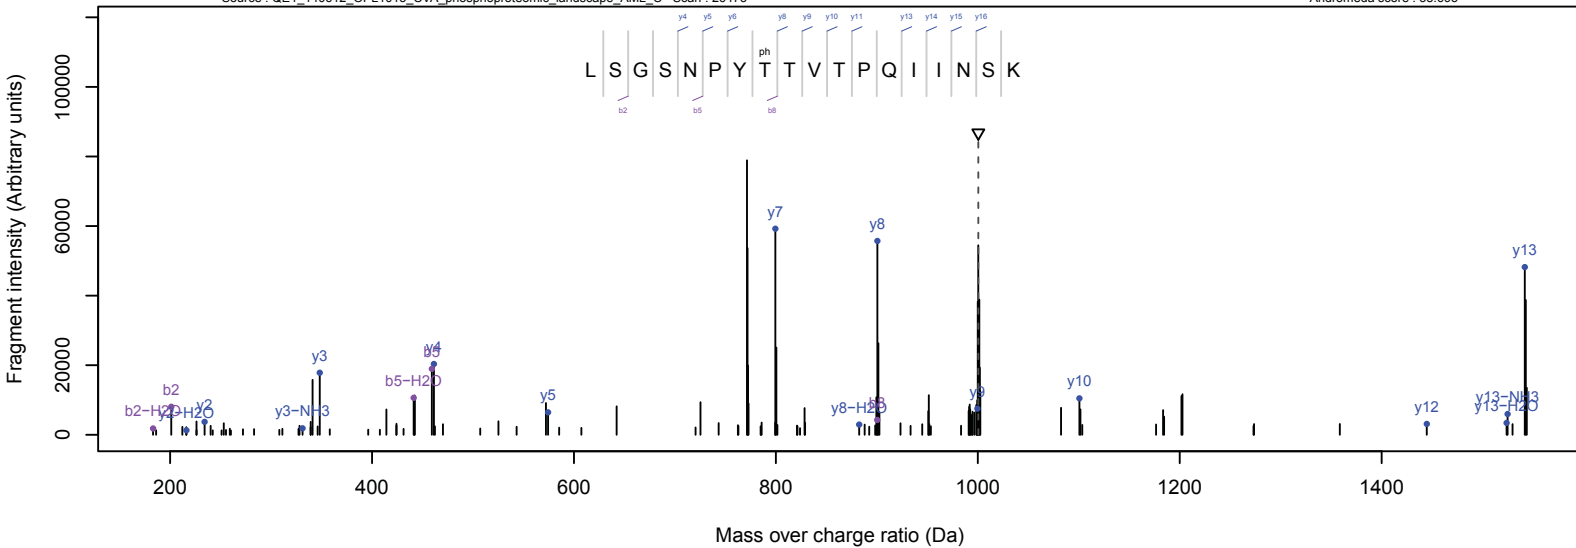

## TSPY(ph)PIILSFENHVDSPR-3+

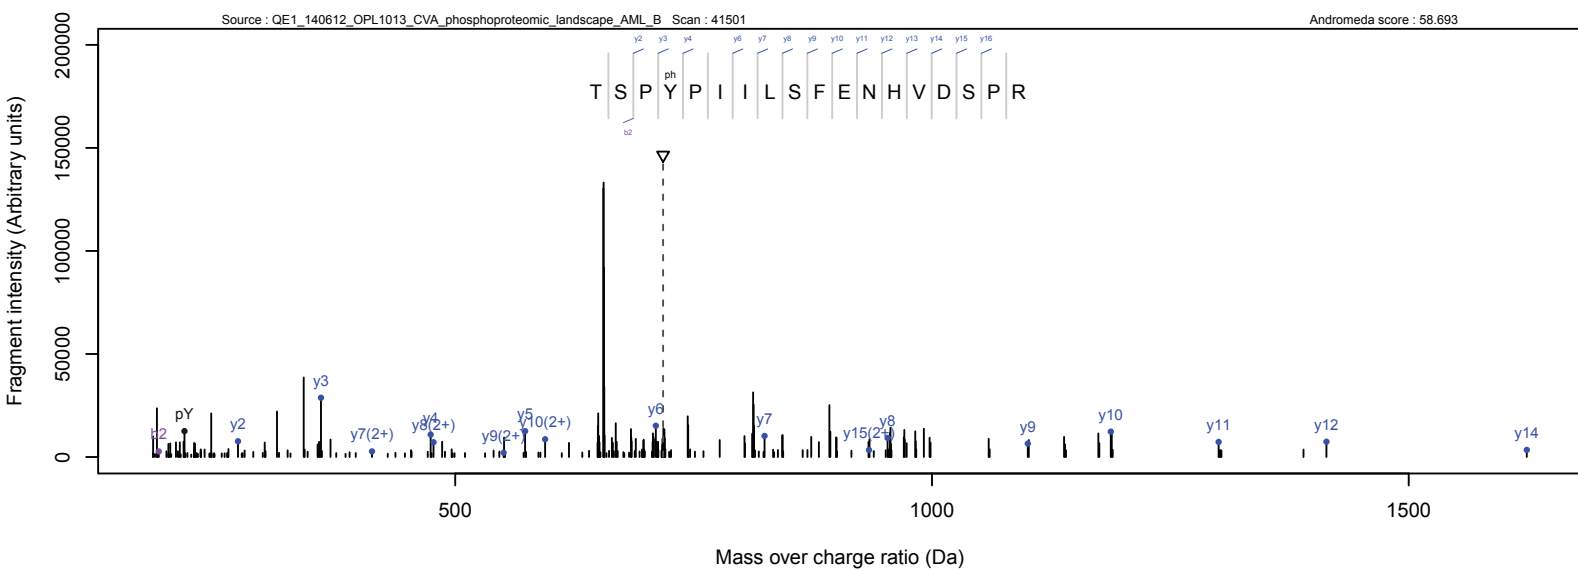

## Y(ph)PSLSLHGIEGAFSGSGAK-3+

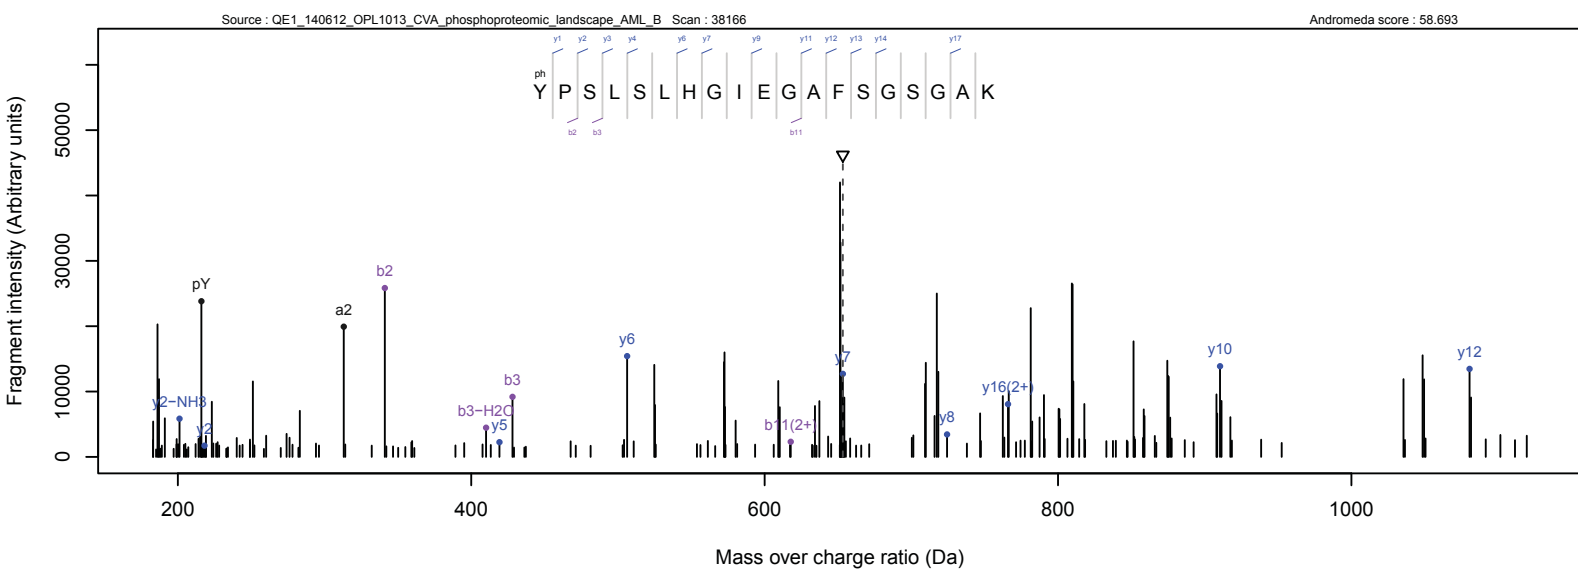

## RFY(ph)PESSYK-2+

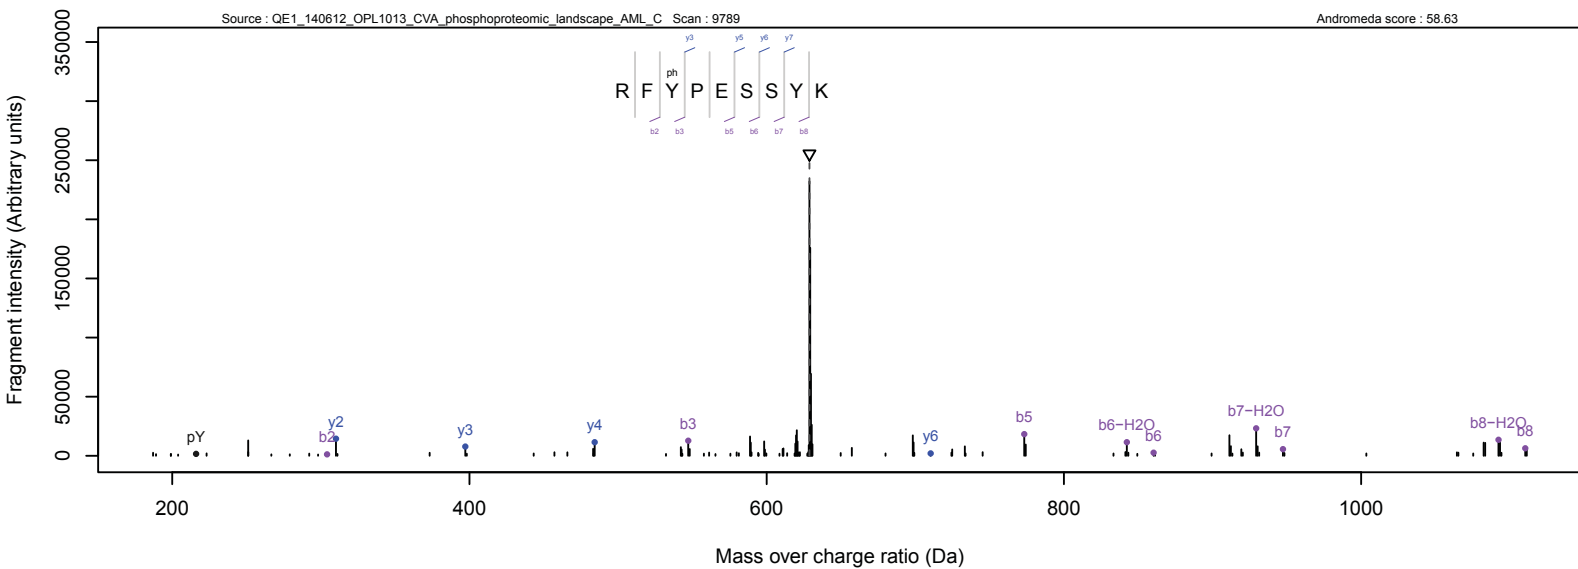

## GHY(ph)YVPLLR-2+

Source : QE1\_140612\_OPL1013\_CVA\_phosphoproteomic\_landscape\_AML\_B Scan : 28135

Andromeda score : 58.596

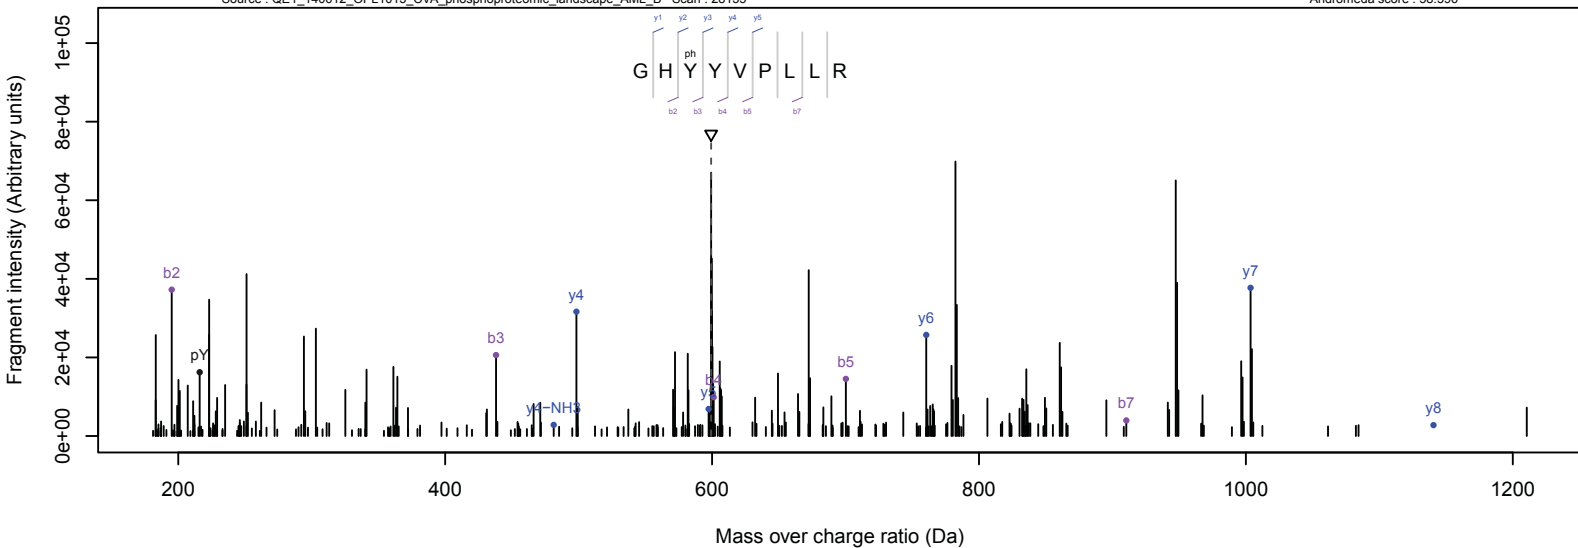

## AFSY(ph)YLPVLPQAPQDGHHLQPPPPYPYGHKR-5+

Source : QE1\_140612\_OPL1013\_CVA\_phosphoproteomic\_landscape\_AML\_C Scan : 37120

Andromeda score : 58.565

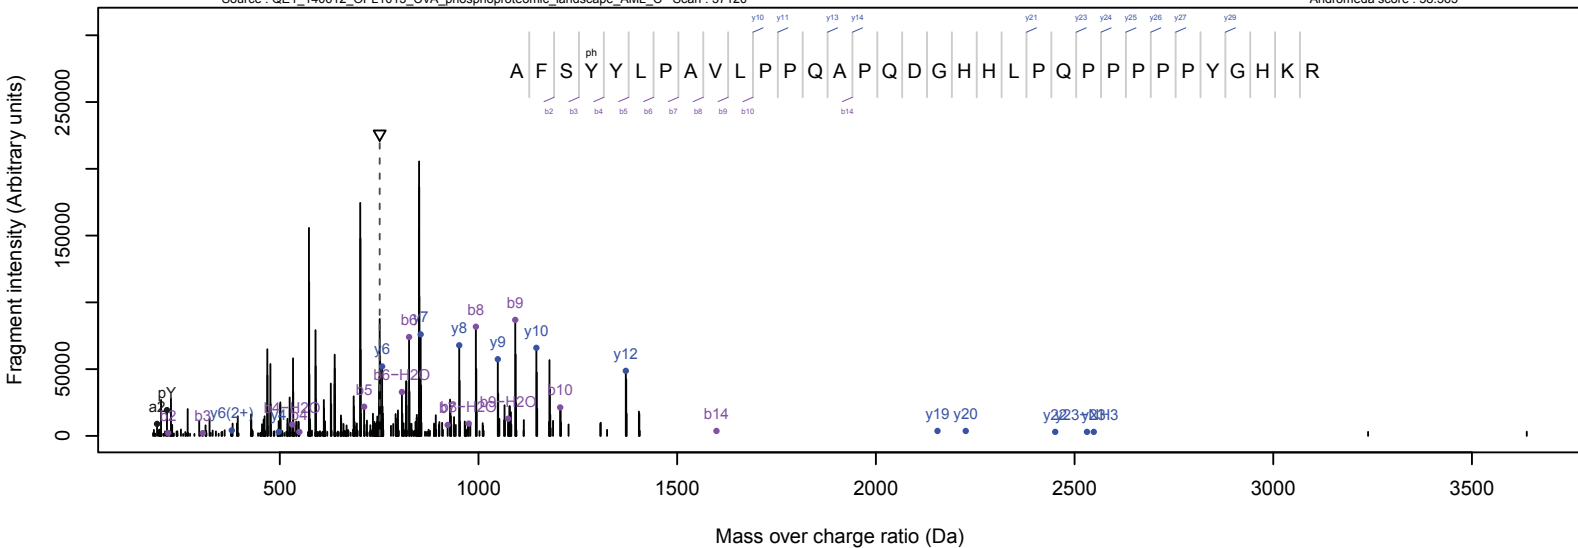

## GALIHNSKEPGGWWKGDY(ph)GTR-4+

Source : QE1\_140612\_OPL1013\_CVA\_phosphoproteomic\_landscape\_AML\_A Scan : 26330

Andromeda score : 58.516

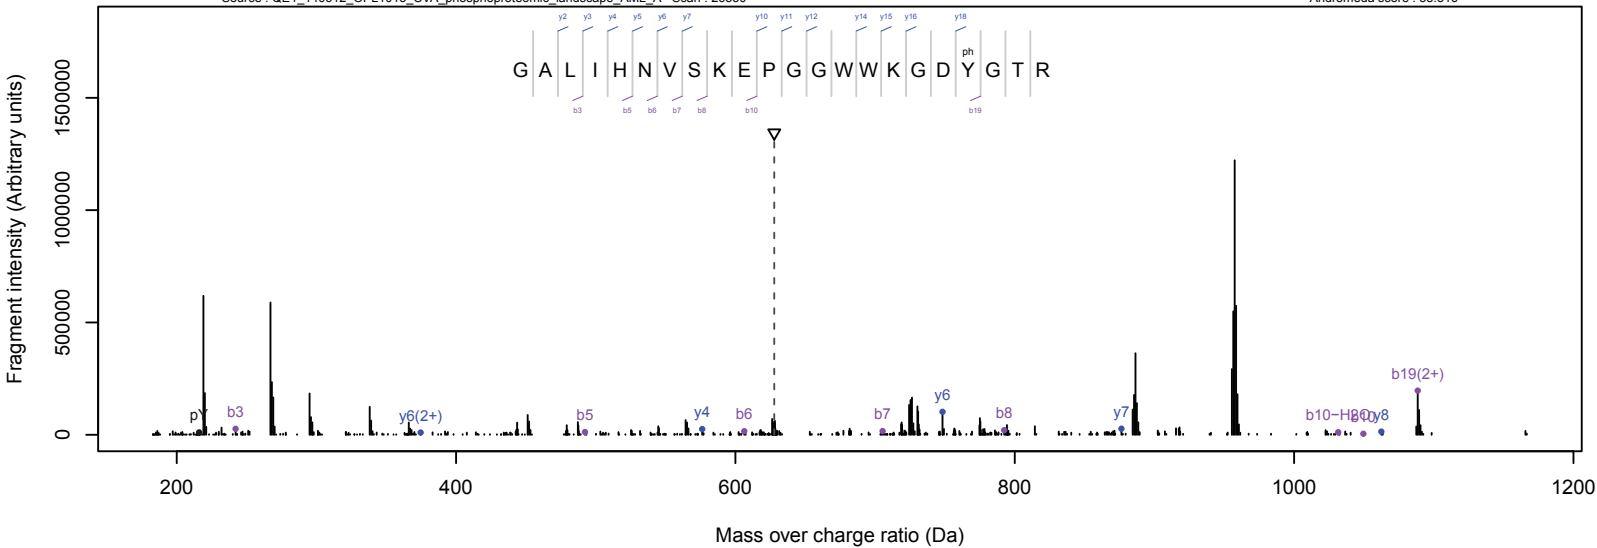

## EINVNINEY(ph)KR-3+

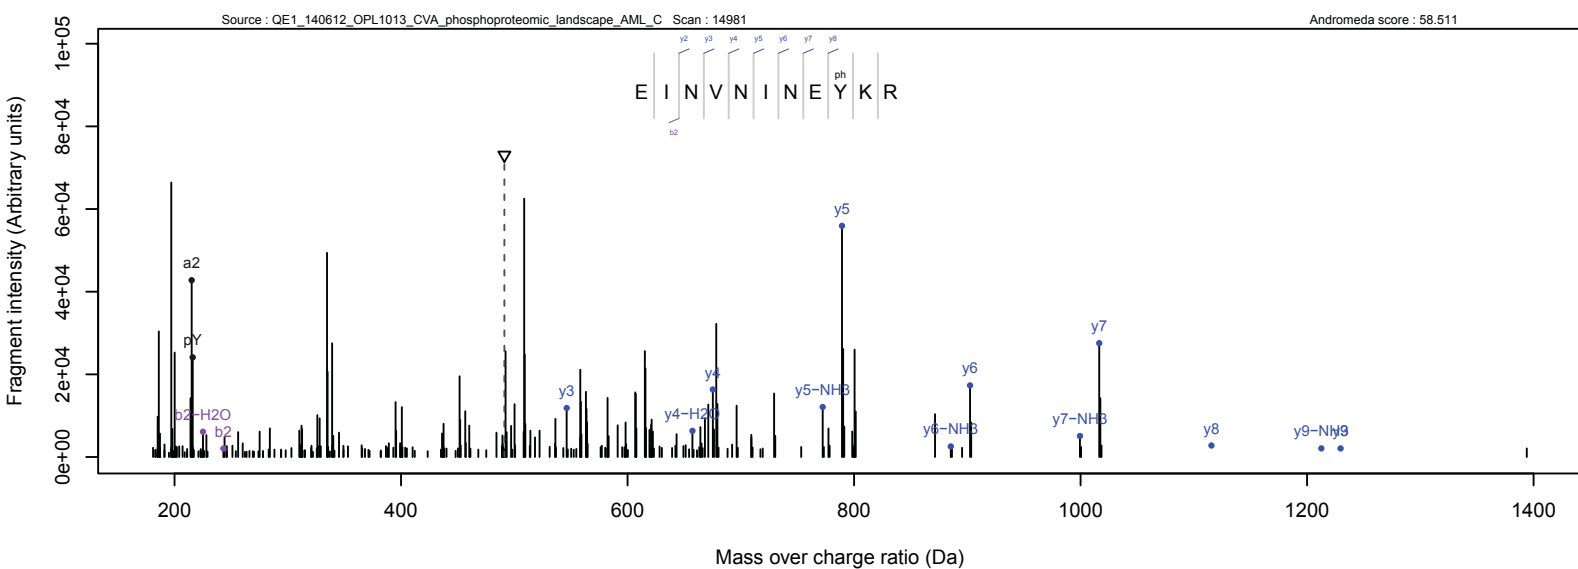

## SKQPLY(ph)SSIVTVEASKPNGQR-3+

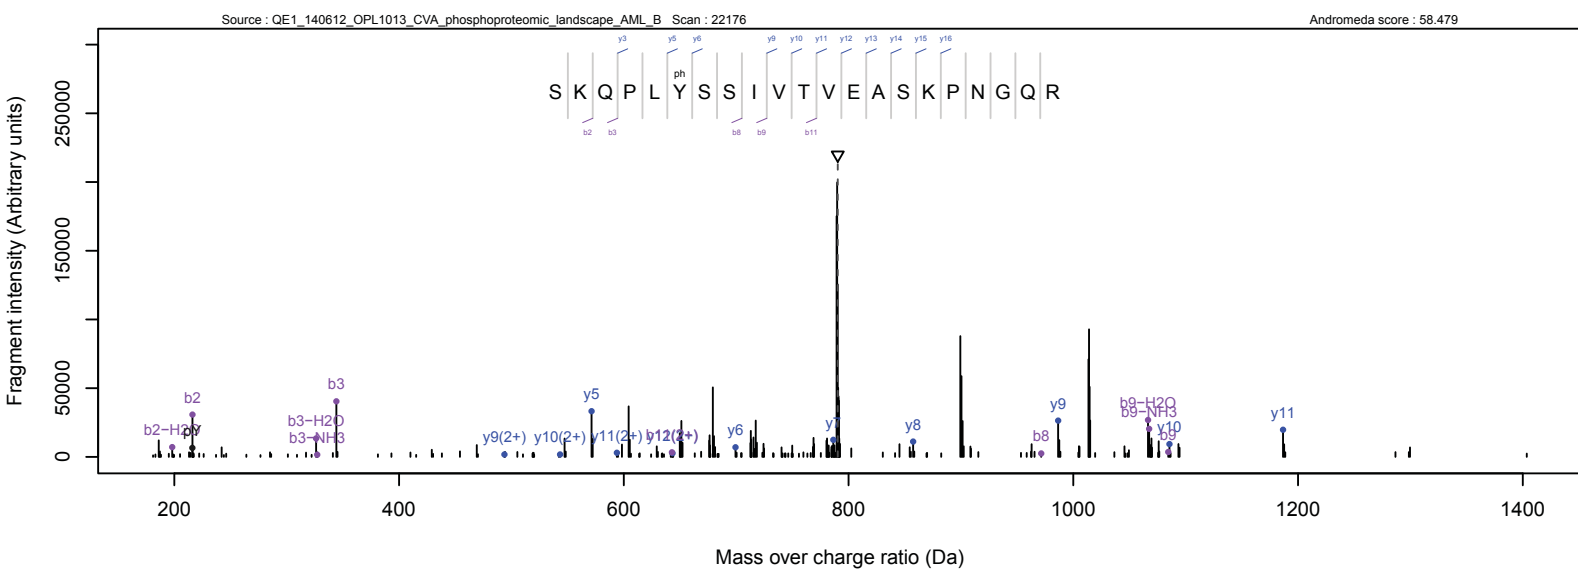

## (ac)M(ox)QY(ph)LNIKEDCNAM(ox)AFCAK-3+

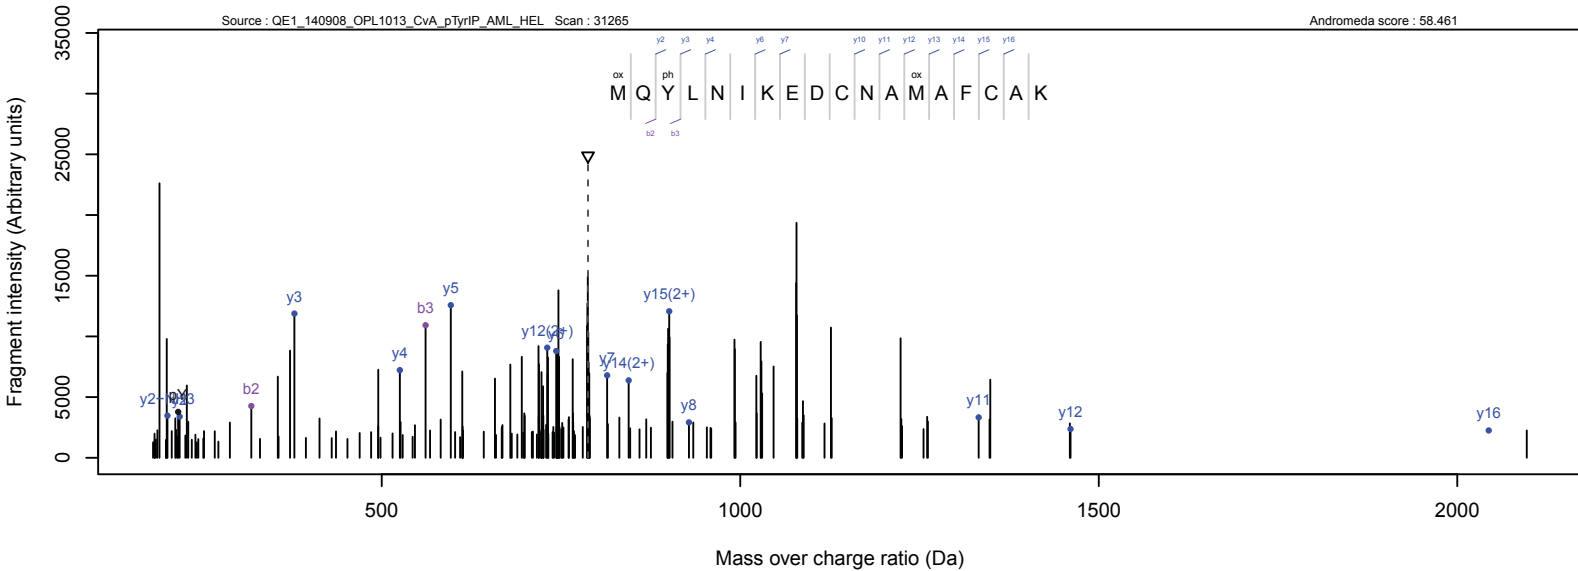

ATEYIQ(ph)MR-2+

Source : QE1\_140612\_OPL1013\_CVA\_phosphoproteomic\_landscape\_AML\_A Scan : 19016

Andromeda score : 58.433

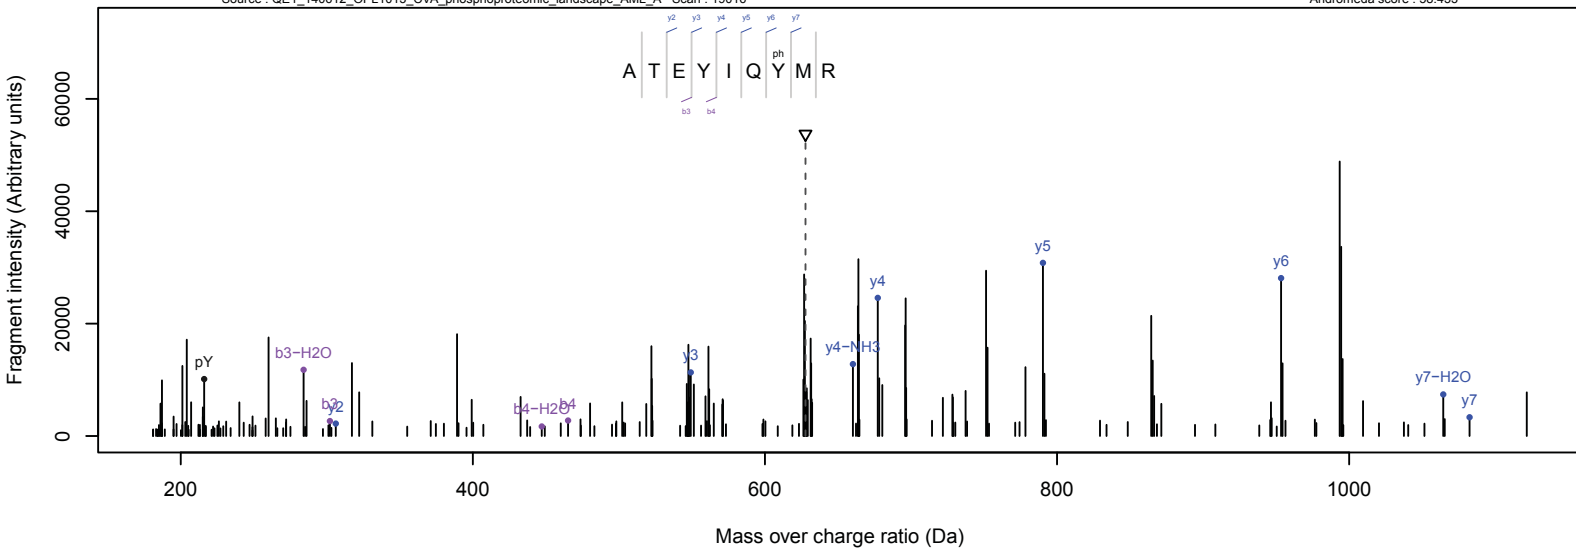

LWQPDACY(ph)KPIGKP-2+

Source : QE1\_140612\_OPL1013\_CVA\_phosphoproteomic\_landscape\_AML\_C Scan : 23493

Andromeda score : 58.338

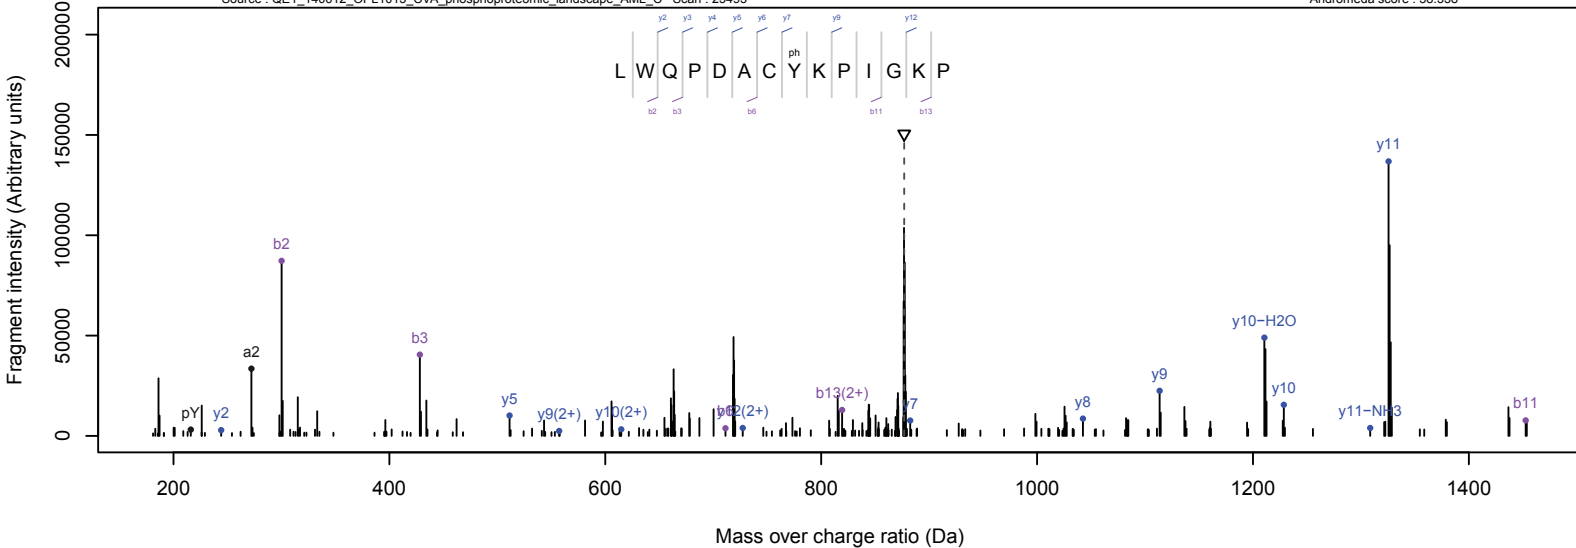

Y(ph)TNGHLFTTISVSGM(ox)TMCYACNK-3+

Source : QE1\_140612\_OPL1013\_CVA\_phosphoproteomic\_landscape\_AML\_C Scan : 34264

Andromeda score : 58.324

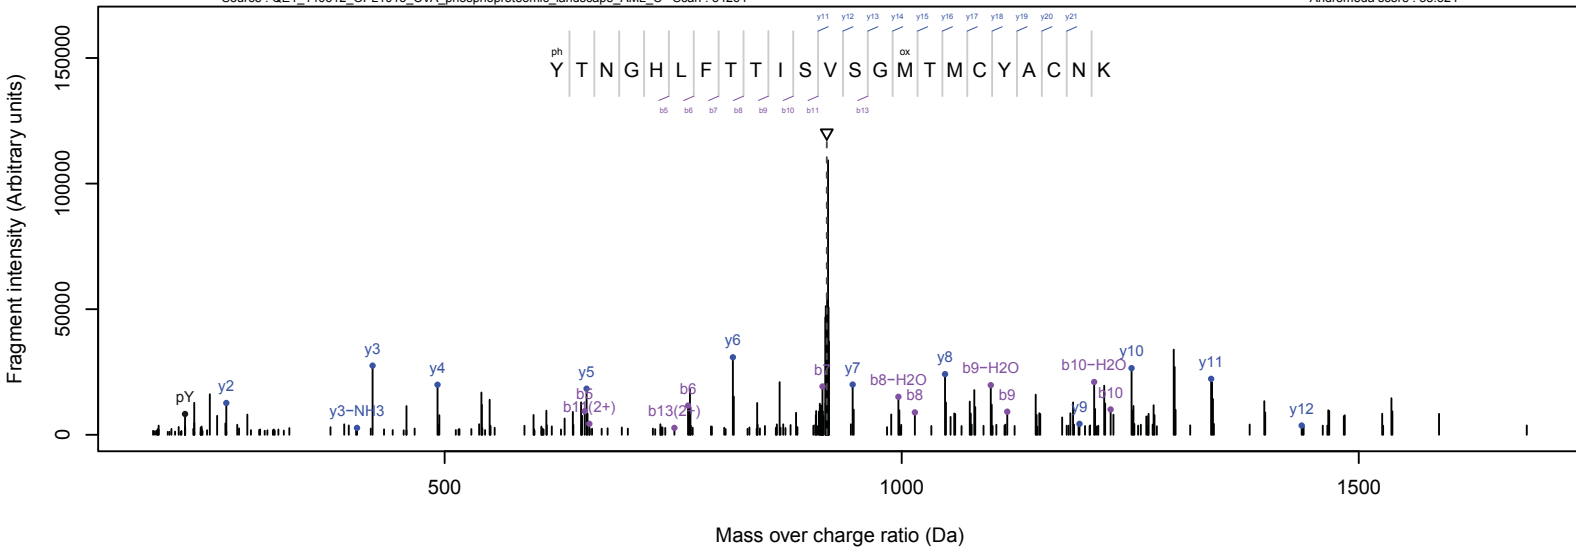

## AQHY(ph)INMPVQFKPK-3+

Source : QE1\_140612\_OPL1013\_CVA\_phosphoproteomic\_landscape\_AML\_B Scan : 24183

Andromeda score : 58.32

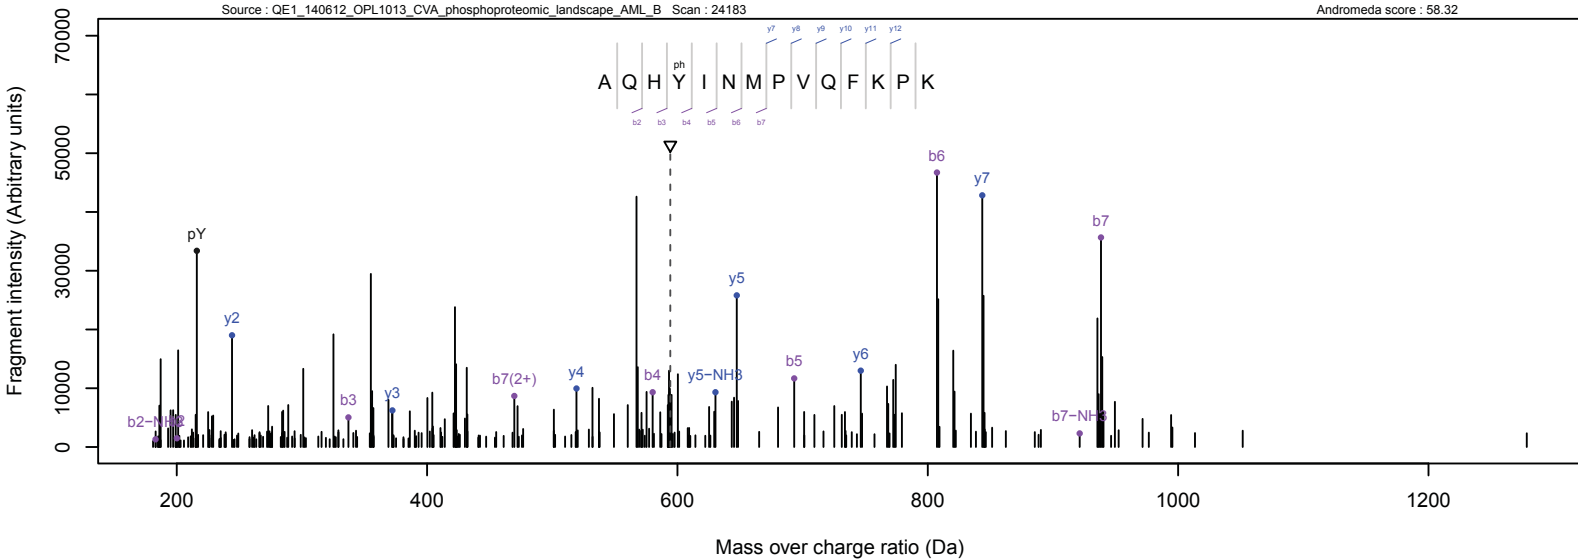

## ASTSDY(ph)QVISDR-2+

Source : QE1\_140612\_OPL1013\_CVA\_phosphoproteomic\_landscape\_AML\_C Scan : 10902

Andromeda score : 58.32

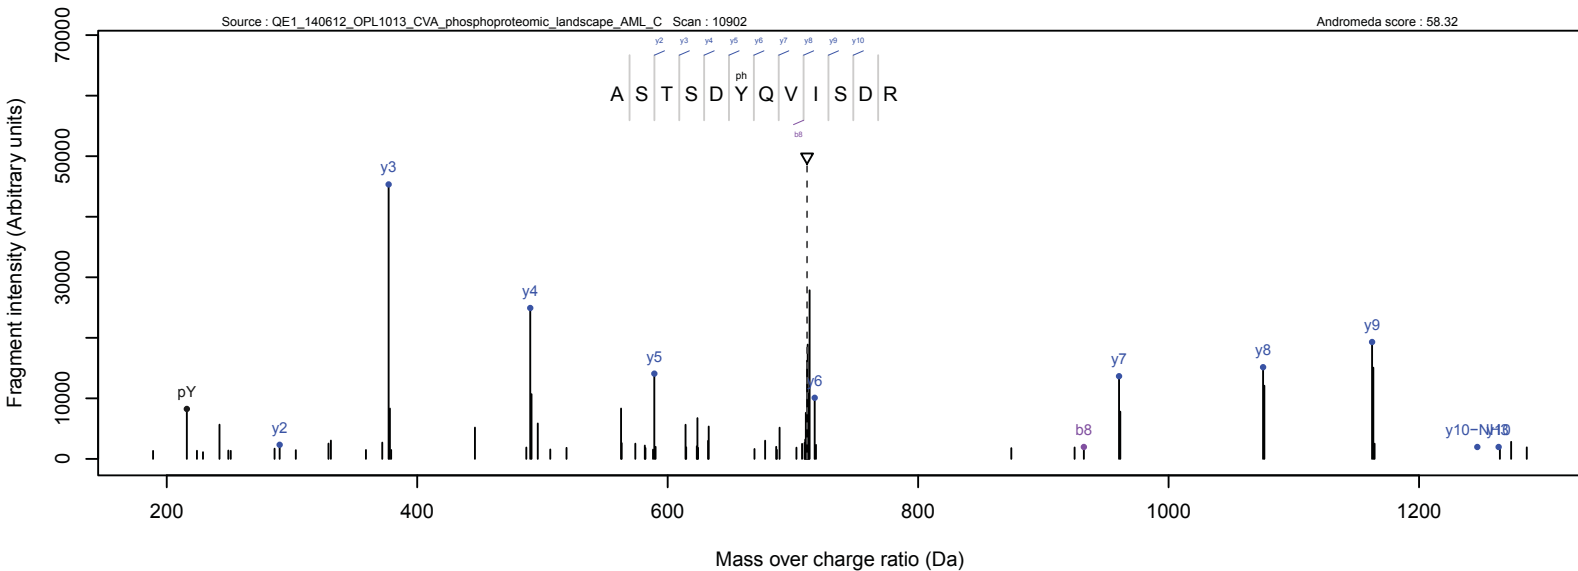

## DSY(ph)SGGVNMYHMK-2+

Source : QE1\_140612\_OPL1013\_CVA\_phosphoproteomic\_landscape\_AML\_D Scan : 22871

Andromeda score : 58.32

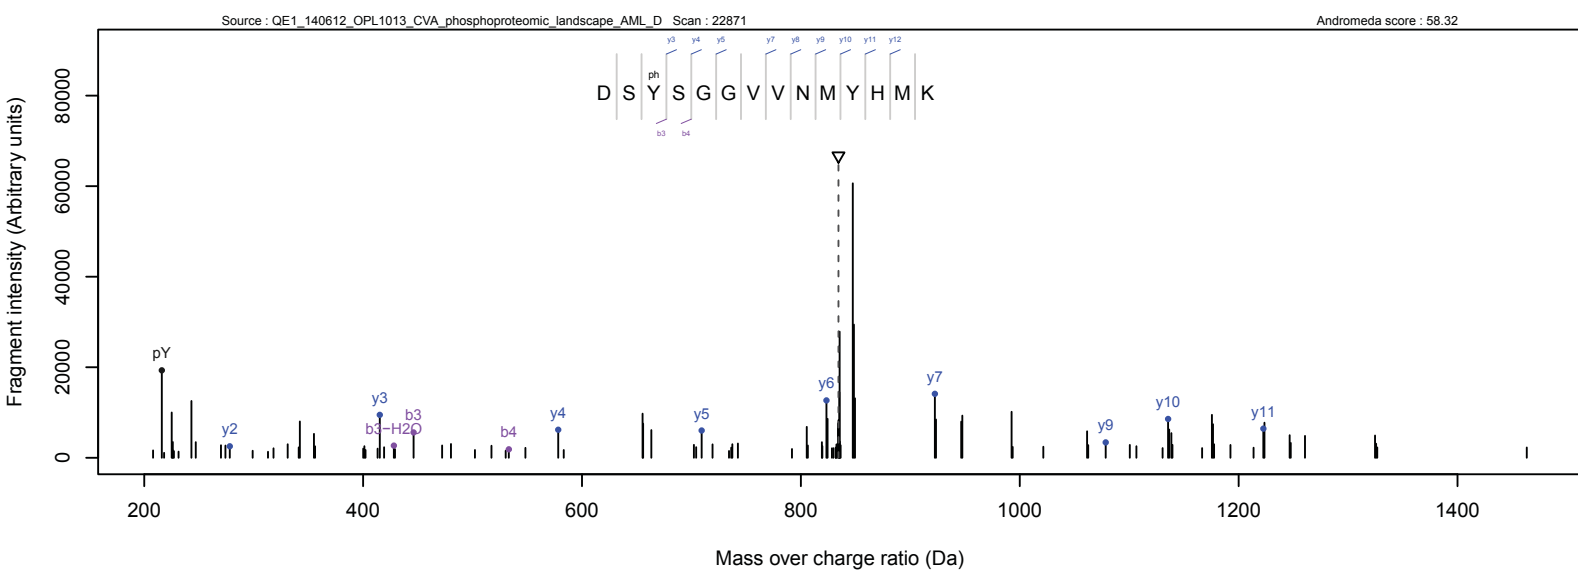



## EGWPSSAY(ph)GVTK-2+

Source : QE1\_140612\_OPL1013\_CVA\_phosphoproteomic\_landscape\_AML\_C Scan : 19157

Andromeda score : 58.32

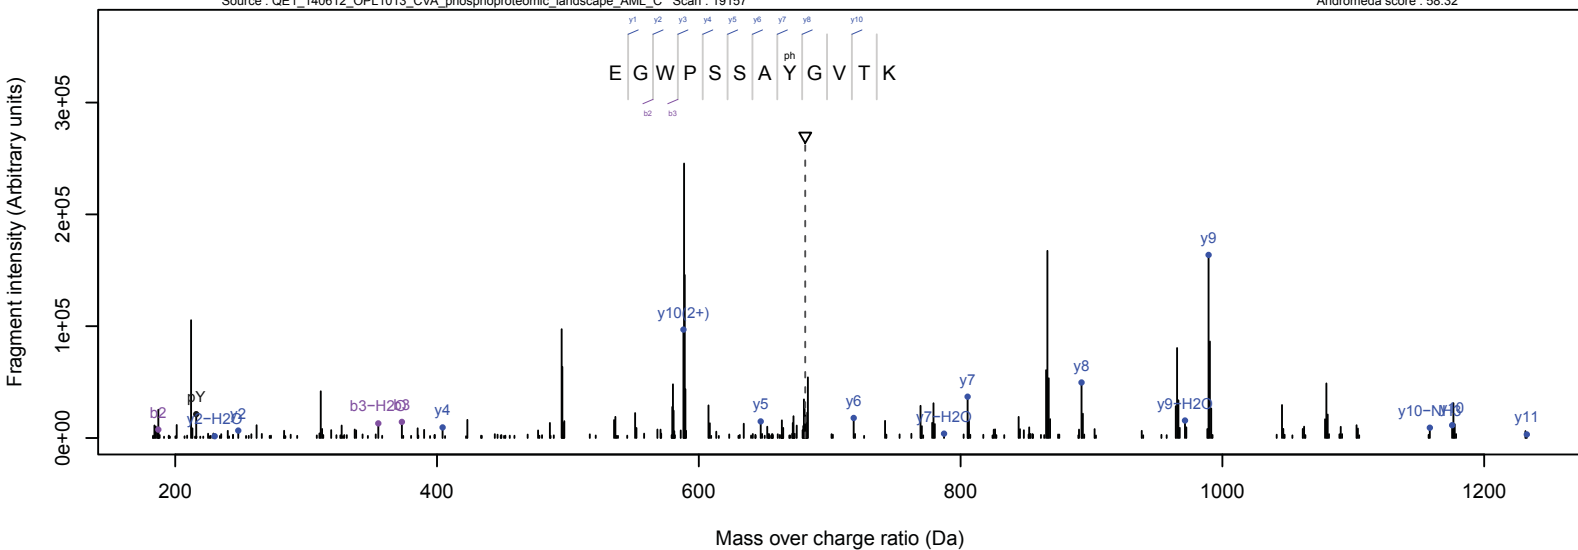

## ESNY(ph)FGLSPEER-2+

Source : QE1\_140612\_OPL1013\_CVA\_phosphoproteomic\_landscape\_AML\_C Scan : 25780

Andromeda score : 58.32

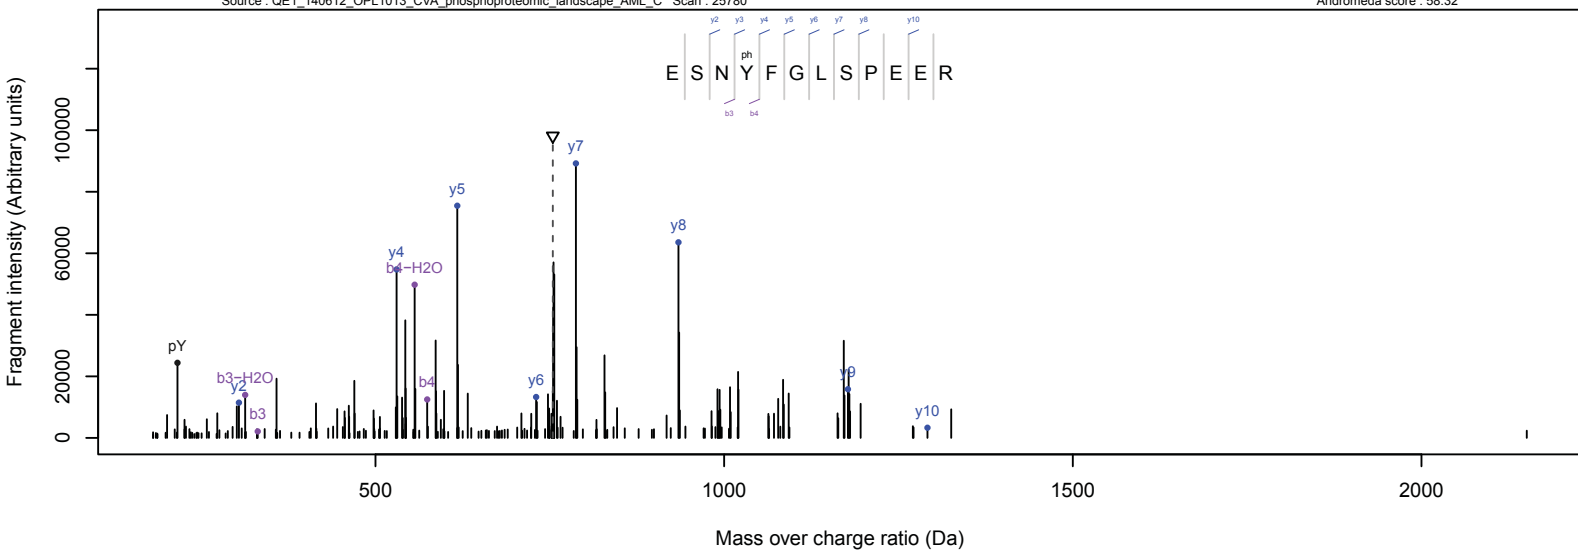

## LHDAAY(ph)VGDLQTLR-3+

Source : QE1\_140612\_OPL1013\_CVA\_phosphoproteomic\_landscape\_AML\_C Scan : 25966

Andromeda score : 58.32

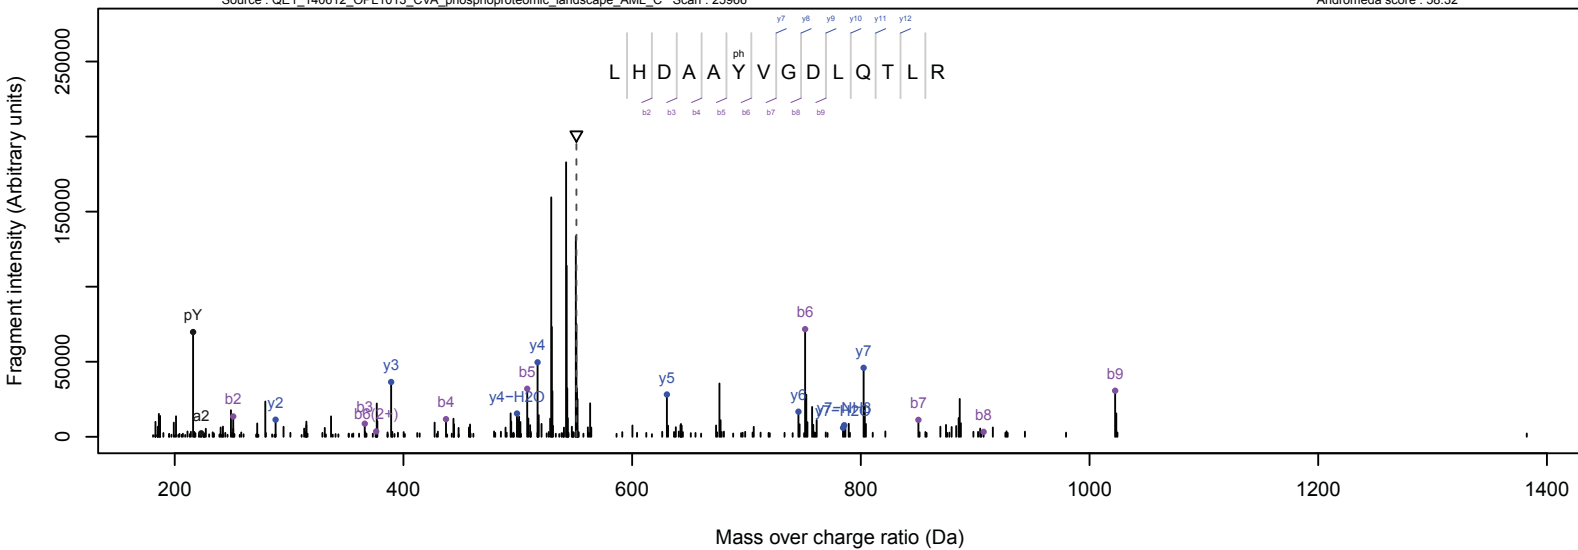

## TPEGGPAPPYSEV-2+

Source: QE1\_140908\_OPL1013\_CvA\_pTyrIP\_AML\_Kasumi6 Scan: 22381

Andromeda score: 58.32

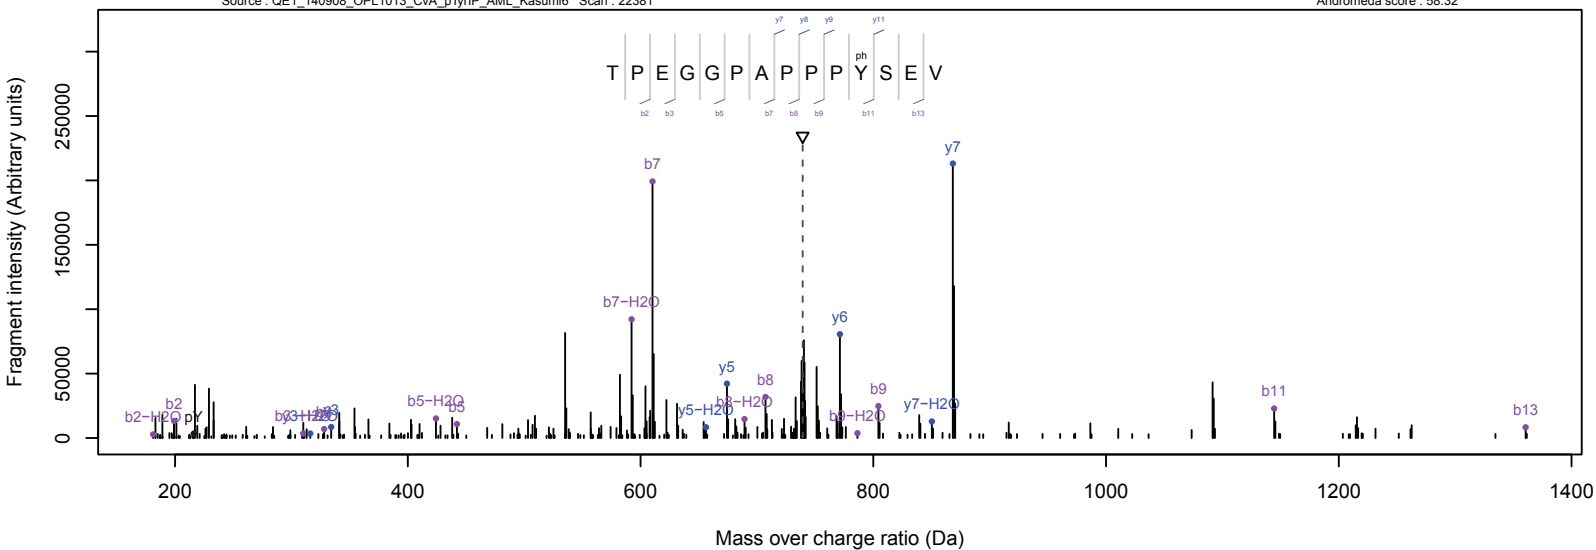

## VSEGGWTKVEYR-2+

Source: QE1\_140612\_OPL1013\_CVA\_phosphoproteomic\_landscape\_AML\_C Scan: 15287

Andromeda score: 58.32

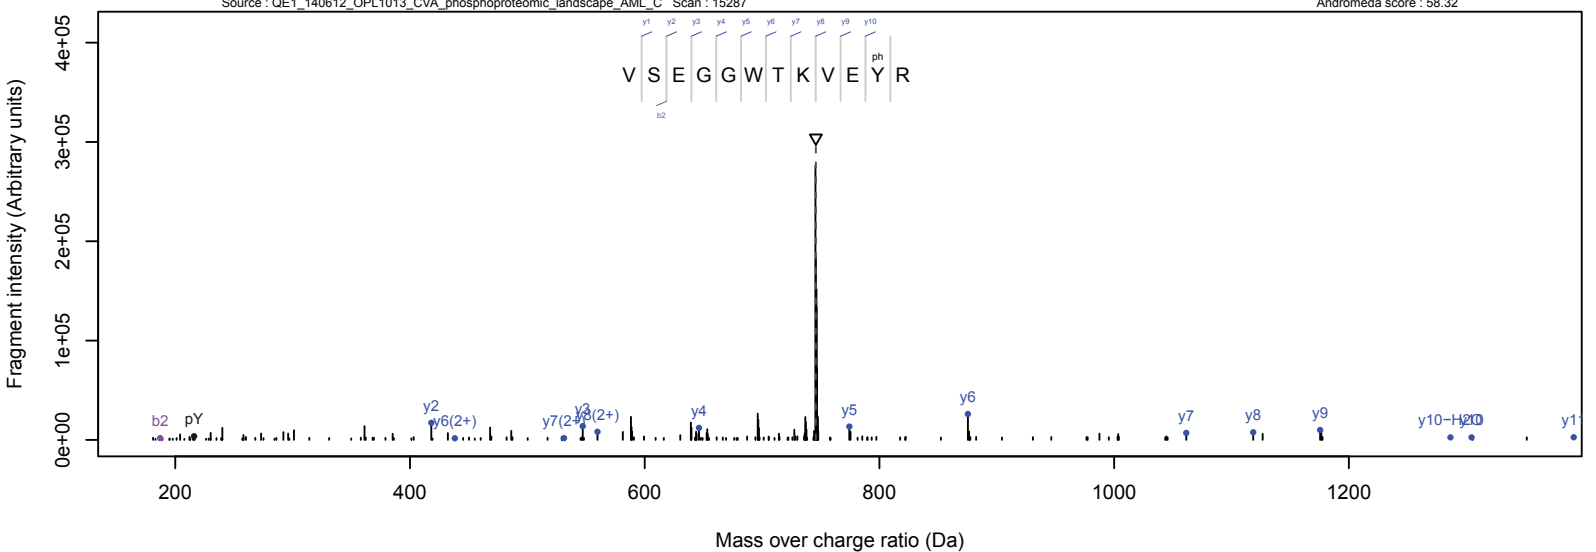

## Y(ph)AAELHLVHWNTK-3+

Source: QE1\_140908\_OPL1013\_CvA\_pTyrIP\_AML\_OCI\_AML3 Scan: 29482

Andromeda score: 58.32

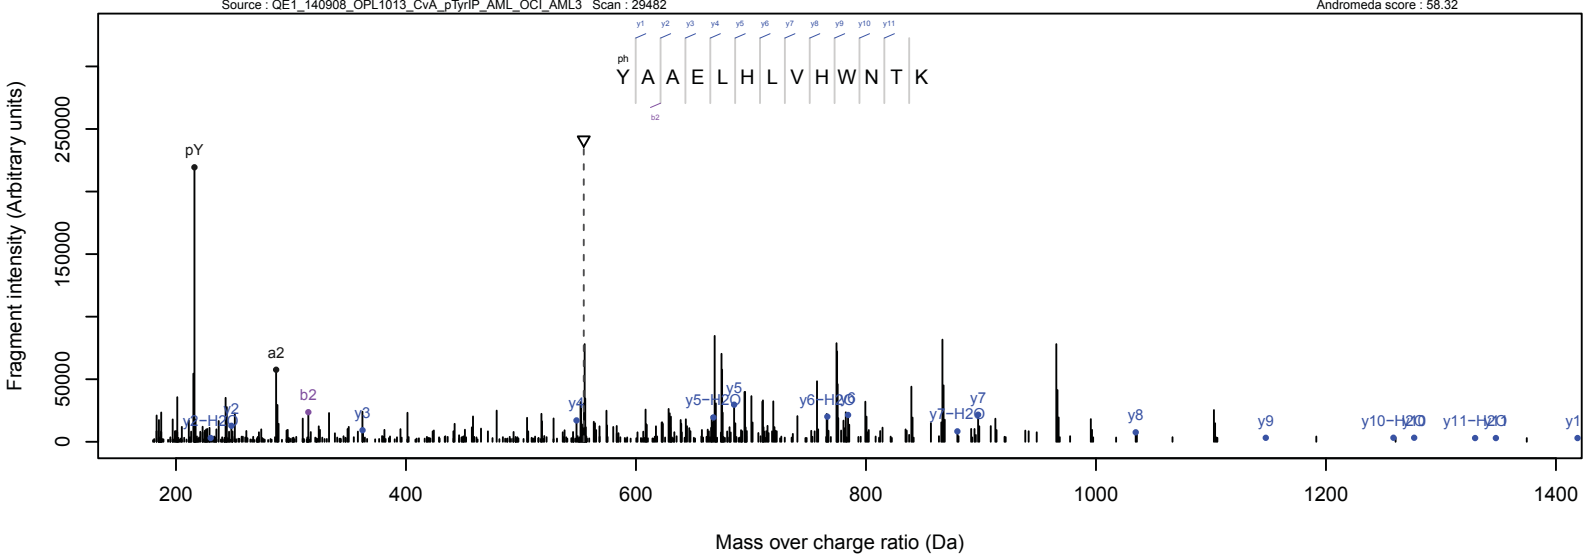

ILY(ph)SQCGDVMR-2+

Source: QE1\_140612\_OPL1013\_CVA\_phosphoproteomic\_landscape\_AML\_C Scan: 17096

Andromeda score: 58.274

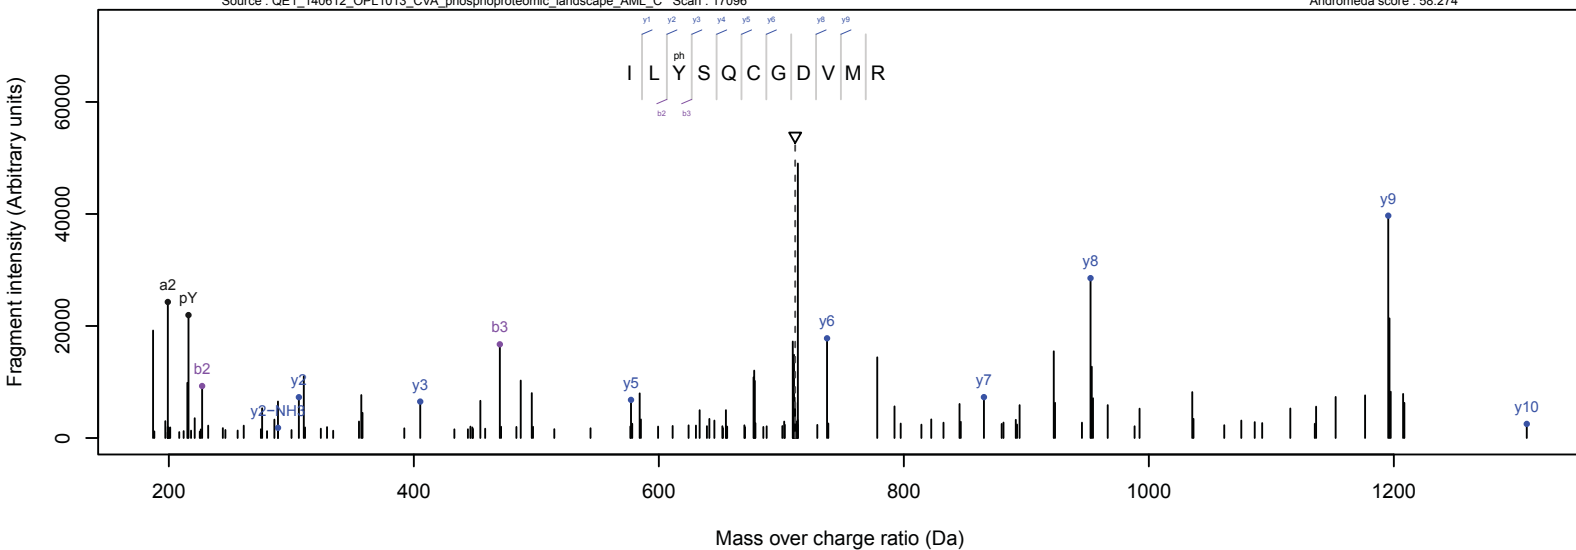

VKNLFASFTEESSINY(ph)TFKTPEK-3+

Source: QE1\_140612\_OPL1013\_CVA\_phosphoproteomic\_landscape\_AML\_B Scan: 39331

Andromeda score: 58.272

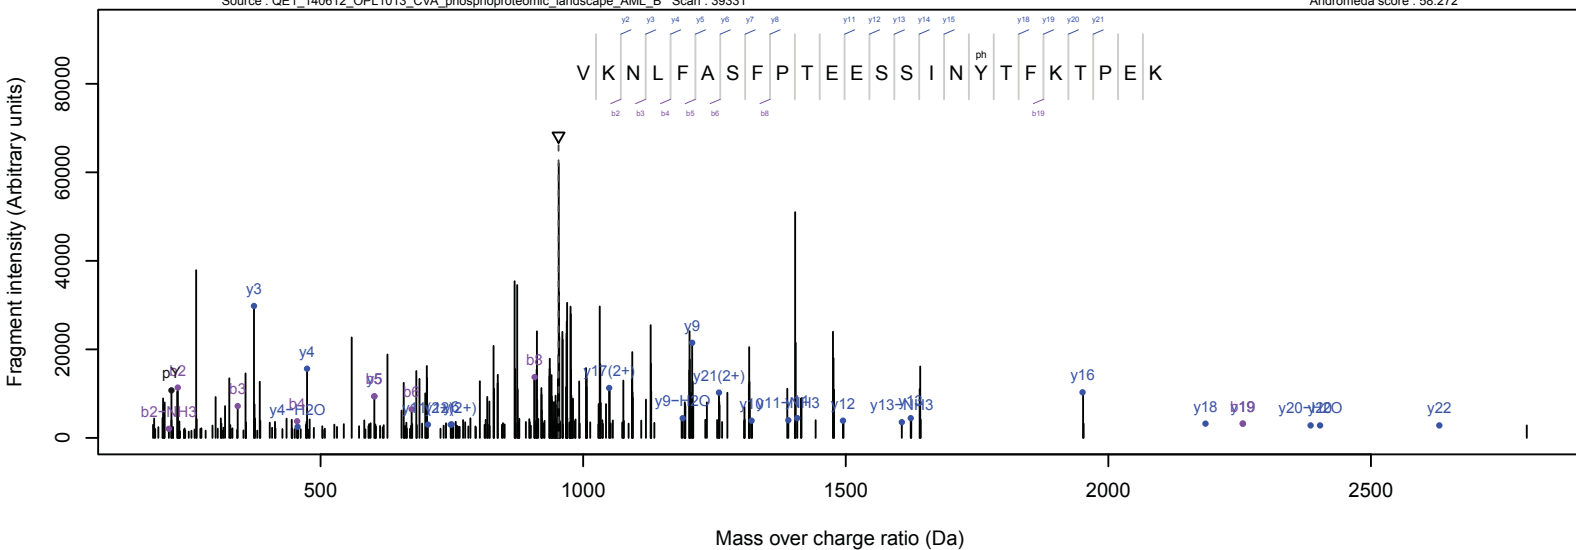

FVDEGSLYGLSIATSR-2+

Source: QE1\_140908\_OPL1013\_CvA\_pTyrIP\_AML\_HEL Scan: 38974

Andromeda score: 58.246

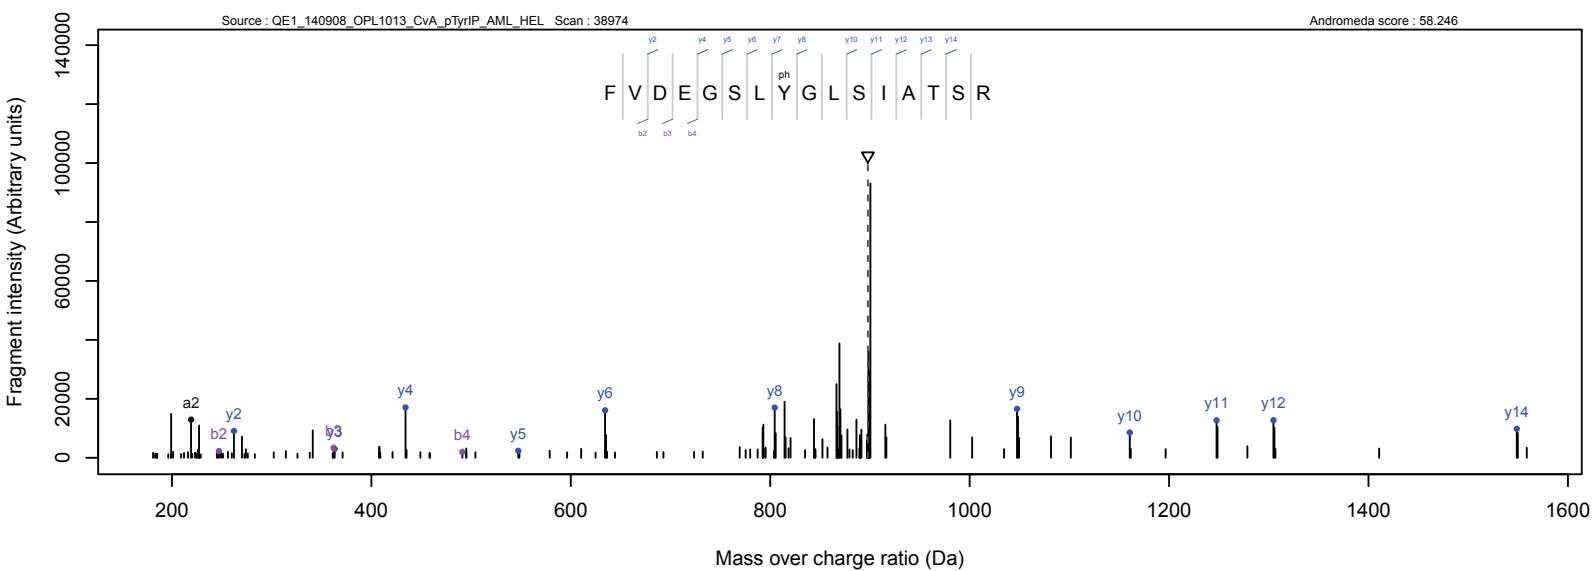

GFGHIGIAPDVY(ph)SACKR-3+

Source : QE1\_140908\_OPL1013\_CvA\_pTyrIP\_AML\_OCI\_AML3 Scan : 34156

Andromeda score : 58.246

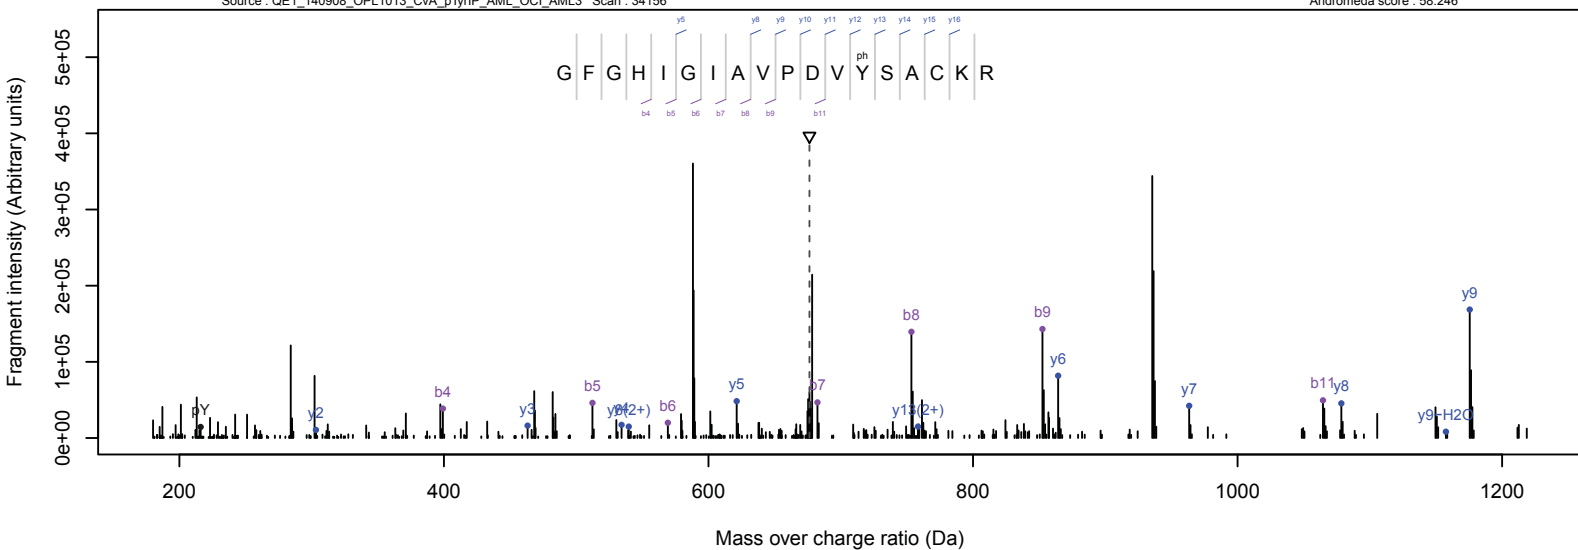

SVY(ph)FKPSLTSPGSEFR-3+

Source : QE1\_140612\_OPL1013\_CVA\_phosphoproteomic\_landscape\_AML\_C Scan : 32303

Andromeda score : 58.246

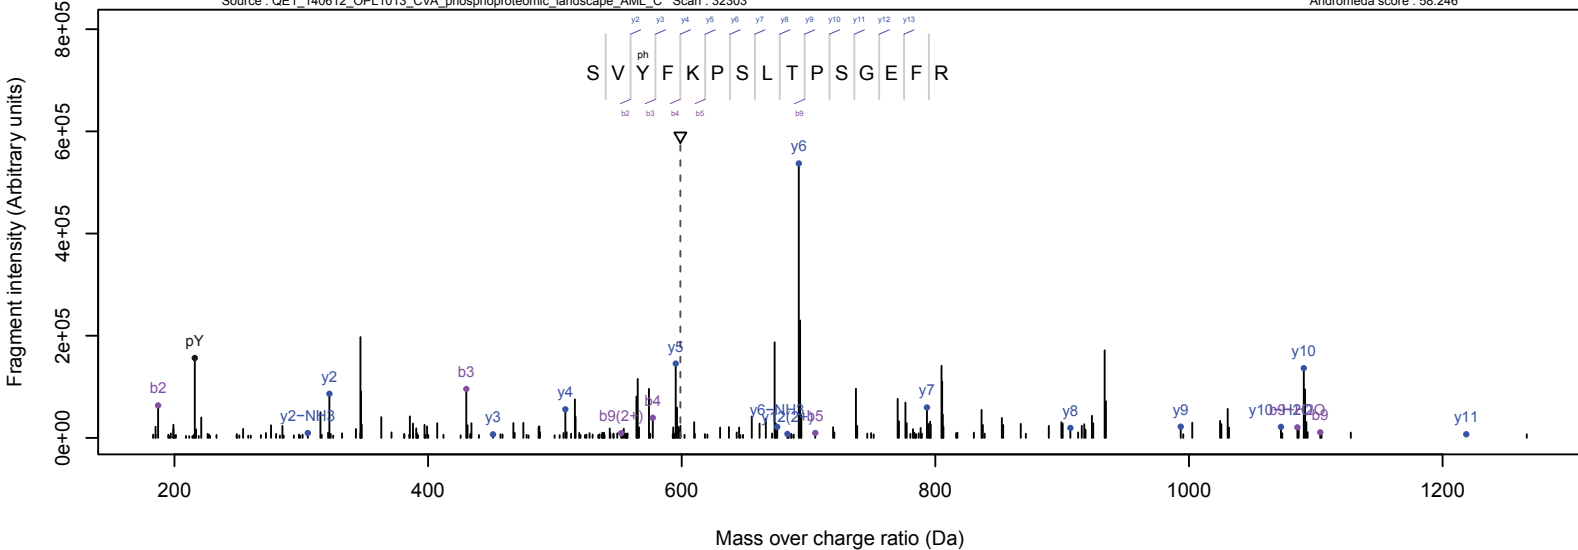

APTKEFY(ph)A-2+

Source : QE1\_140822\_OPL1013\_CvA\_pTyrIP\_AML\_cell\_lines\_part2\_E Scan : 7242

Andromeda score : 58.23

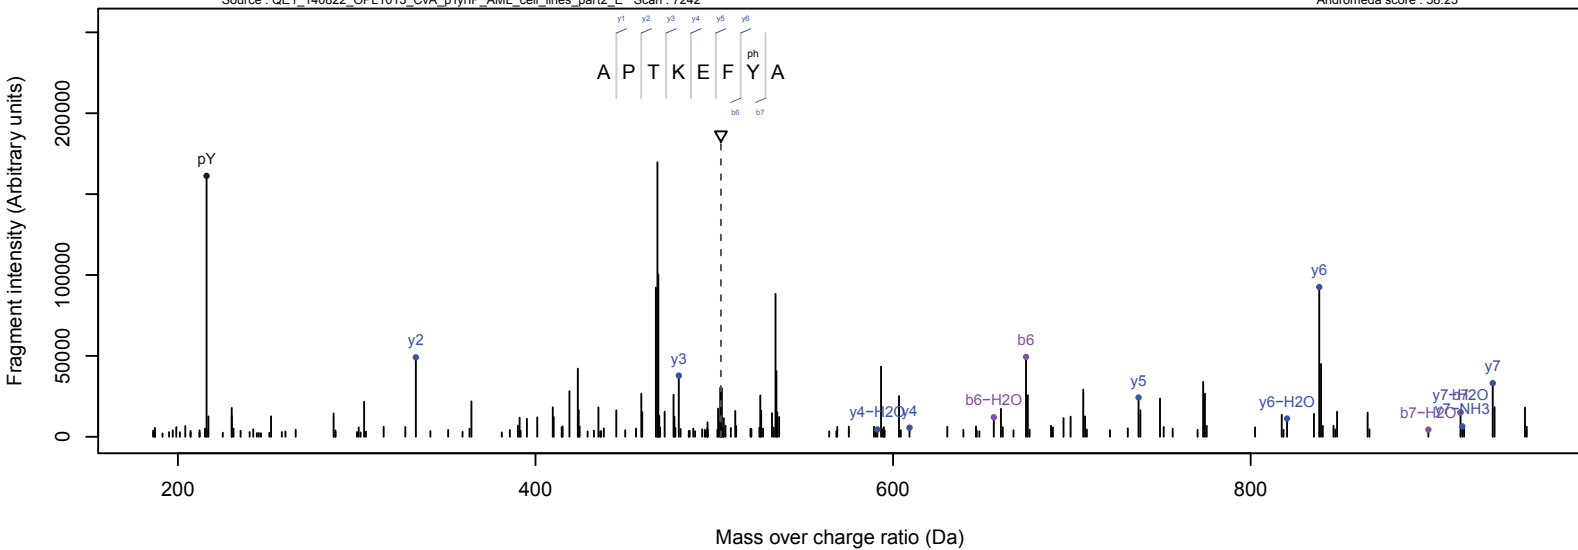

## AY(ph)VSTLMGVPGR-2+

Source: QE1\_140612\_OPL1013\_CVA\_phosphoproteomic\_landscape\_AML\_A Scan: 28421

Andromeda score: 58.172

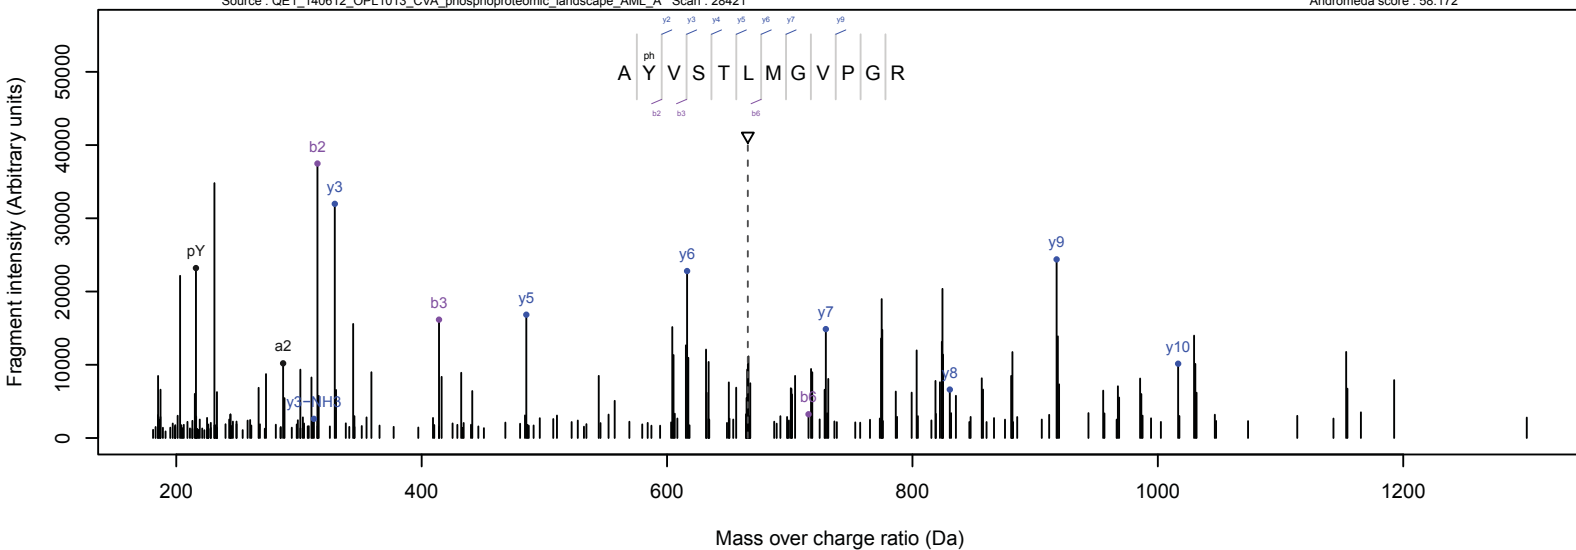

## DINSLY(ph)DVSR-2+

Source: QE1\_140822\_OPL1013\_CvA\_pTyrIP\_AML\_cell\_lines\_part2\_B Scan: 15893

Andromeda score: 58.172

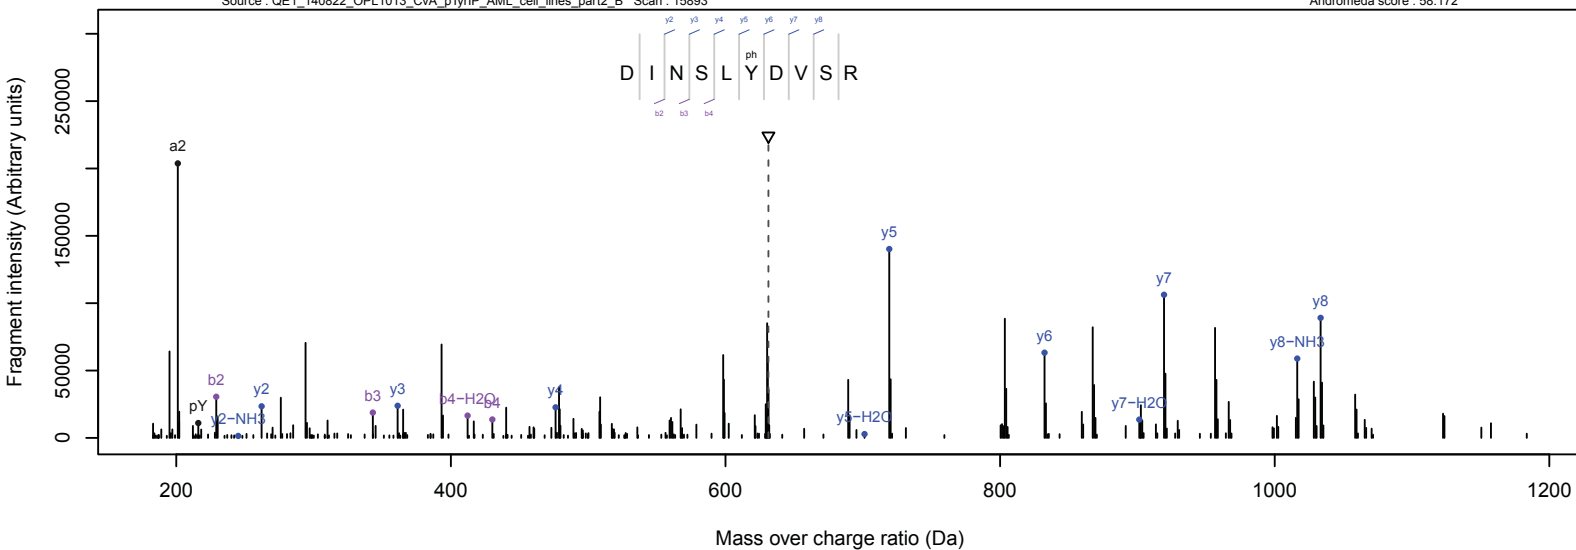

## TQQHY(ph)DKCPK-3+

Source: QE1\_140822\_OPL1013\_CvA\_pTyrIP\_AML\_cell\_lines\_part2\_E Scan: 2685

Andromeda score: 58.172

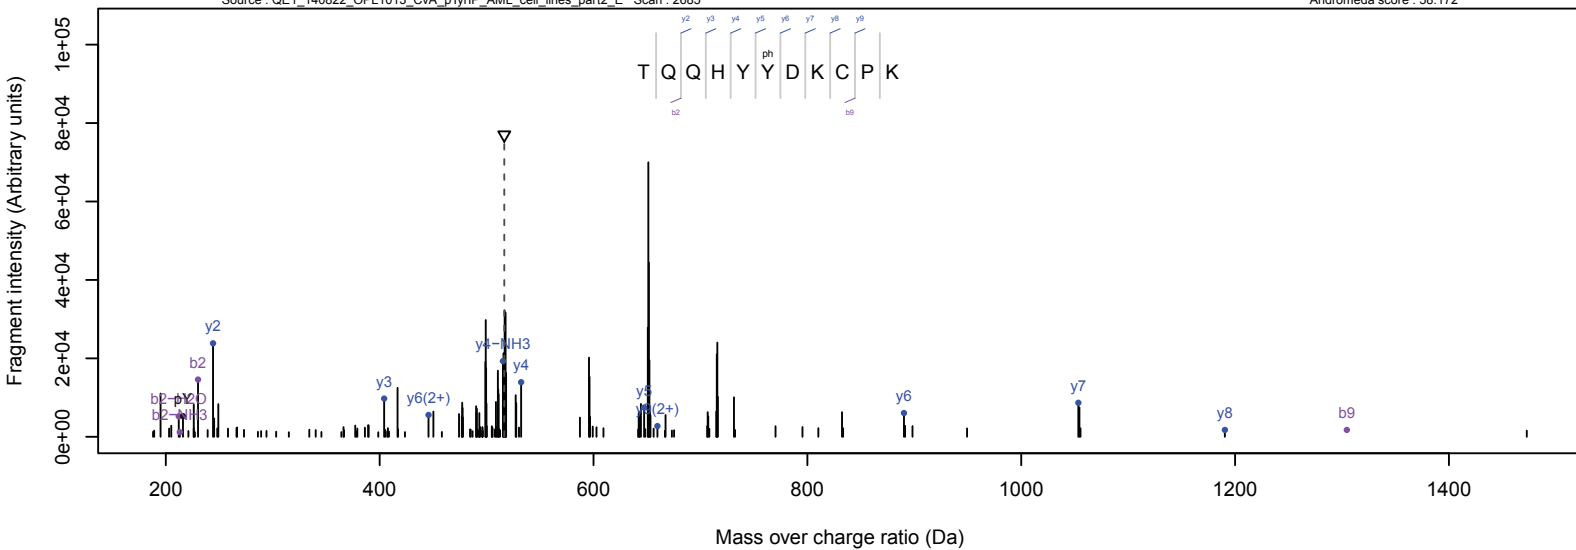



NHAM(ox)KPINDNKEPLNSDVQY(ph)TEVQVSSAESHK-5+

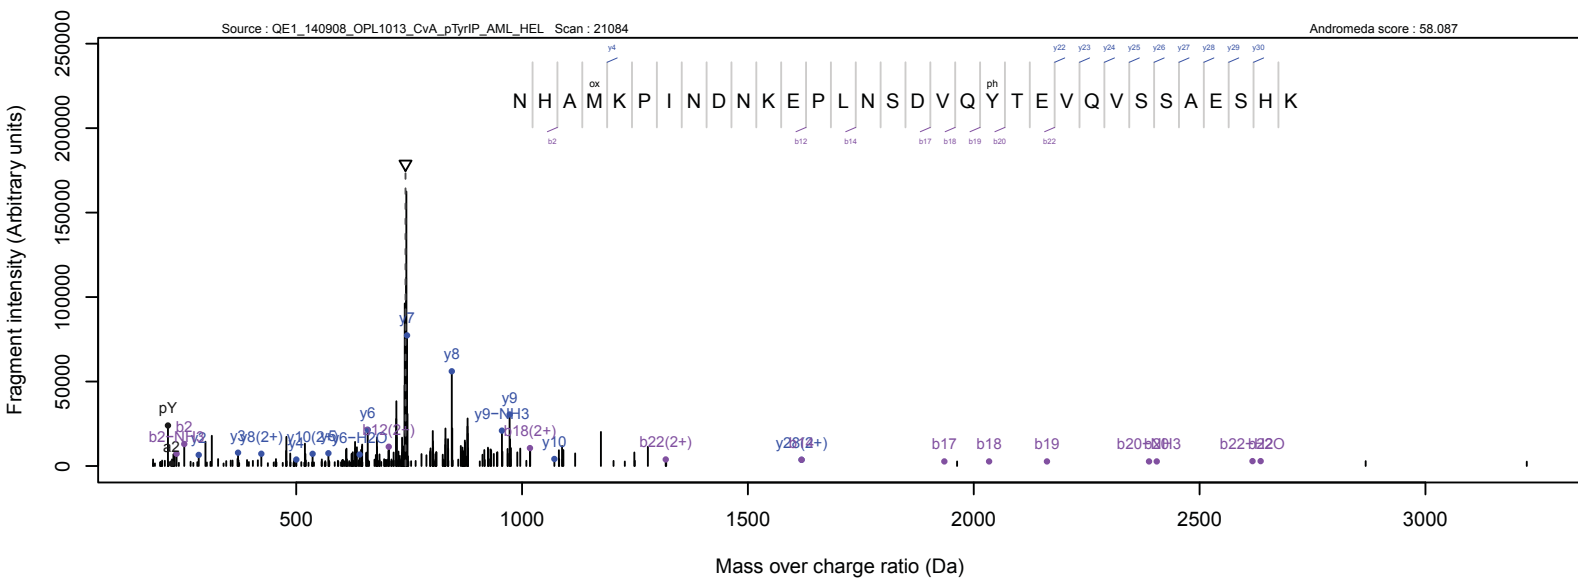

FYAY(ph)NPLAGLLTGK-2+

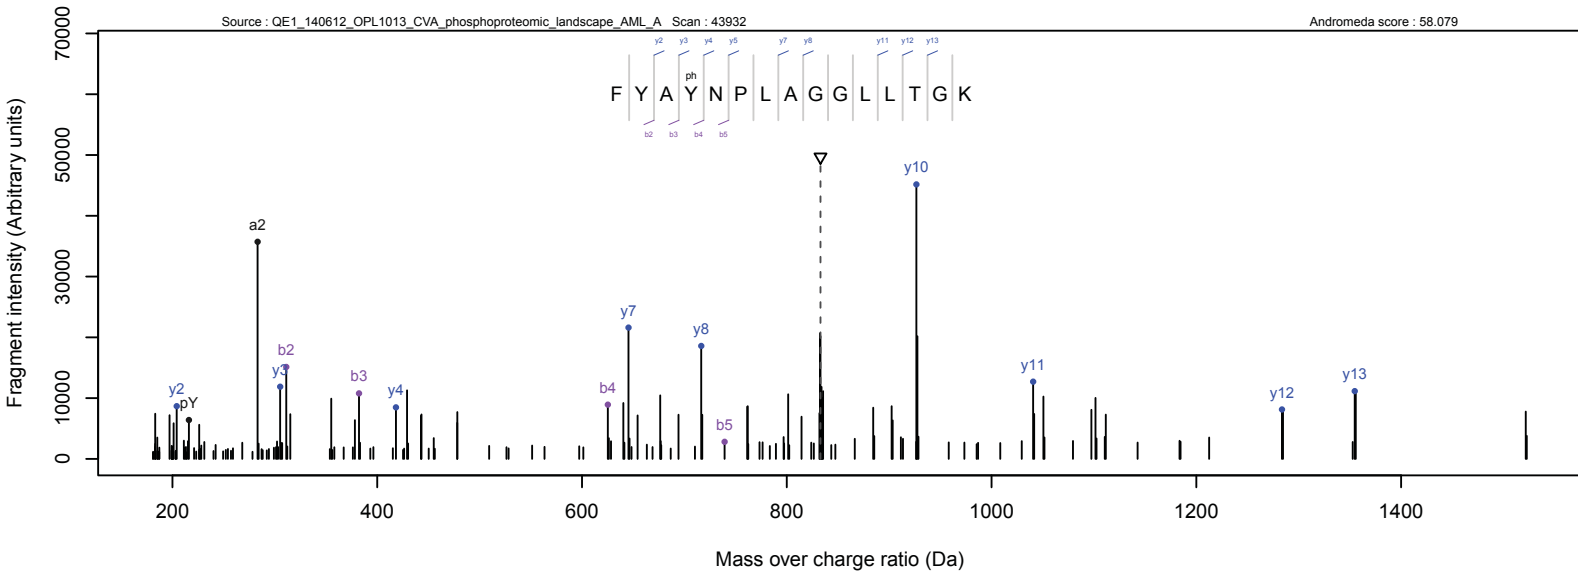

PGSSIPGSPGHTIY(ph)AK-3+

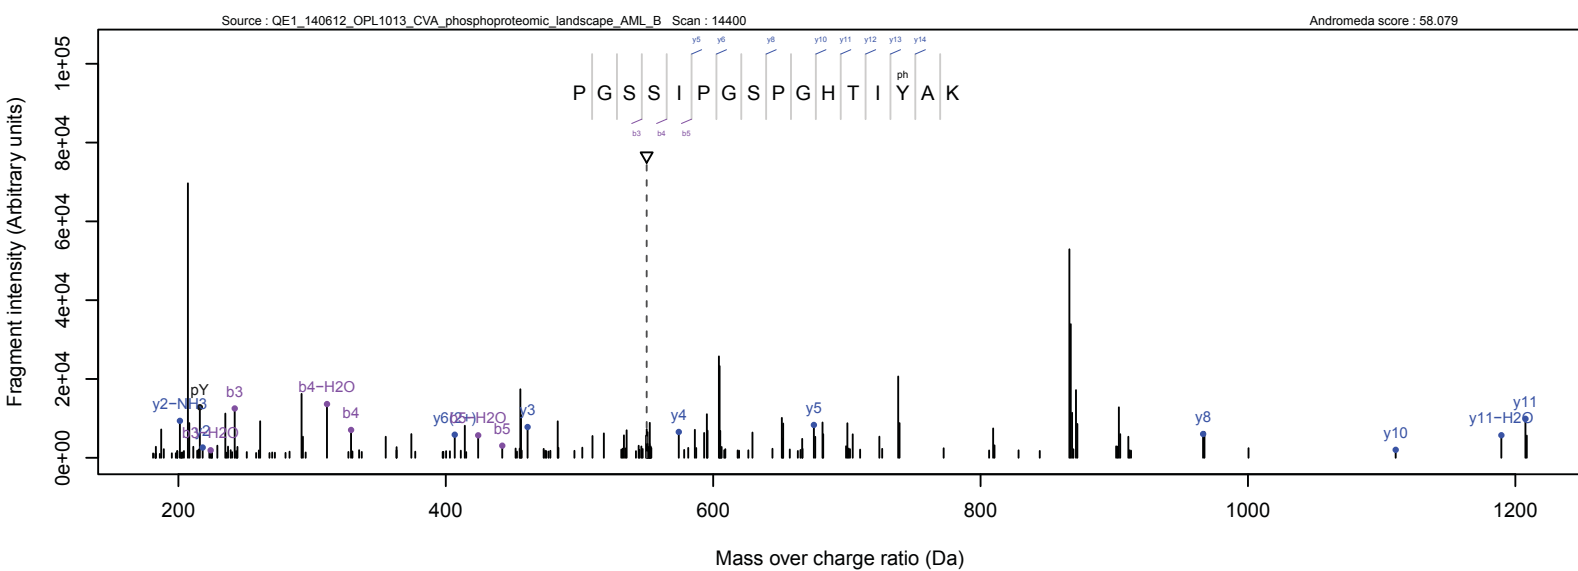

## SM(ox)LEVNY(ph)PMENGIVR-2+

Source : QE1\_140612\_OPL1013\_CVA\_phosphoproteomic\_landscape\_AML\_B Scan : 29697

Andromeda score : 58.079

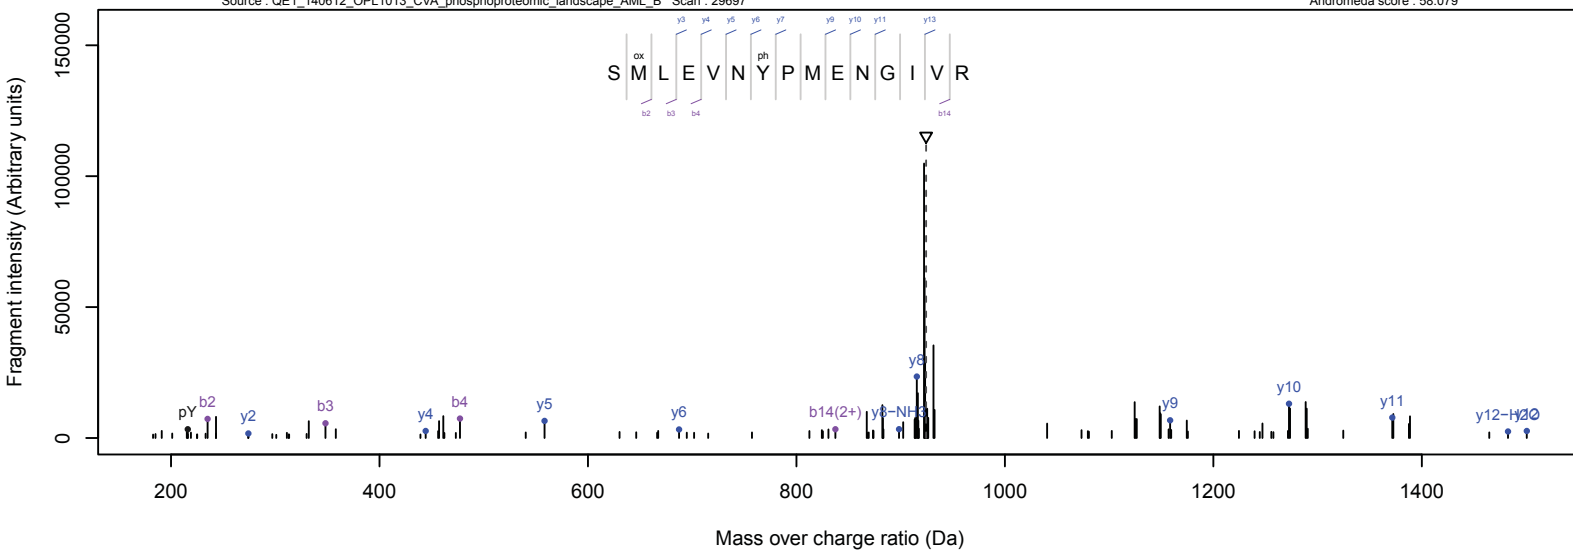

## HAIY(ph)DKLDDGLIAPGVR-3+

Source : QE1\_140908\_OPL1013\_CvA\_pTyrIP\_AML\_Kasumi1 Scan : 27761

Andromeda score : 58.024

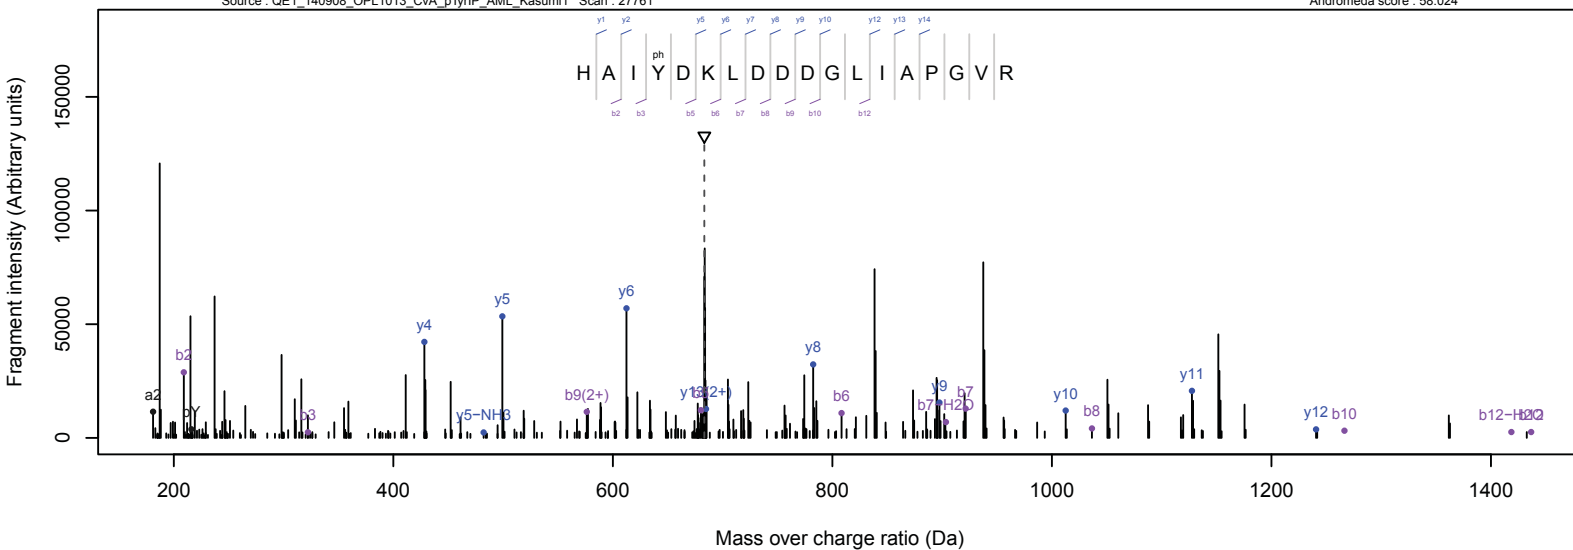

## QIQSPFPHTNSEQKMY(ph)PAVTV-3+

Source : QE1\_140612\_OPL1013\_CVA\_phosphoproteomic\_landscape\_AML\_C Scan : 32820

Andromeda score : 58.024

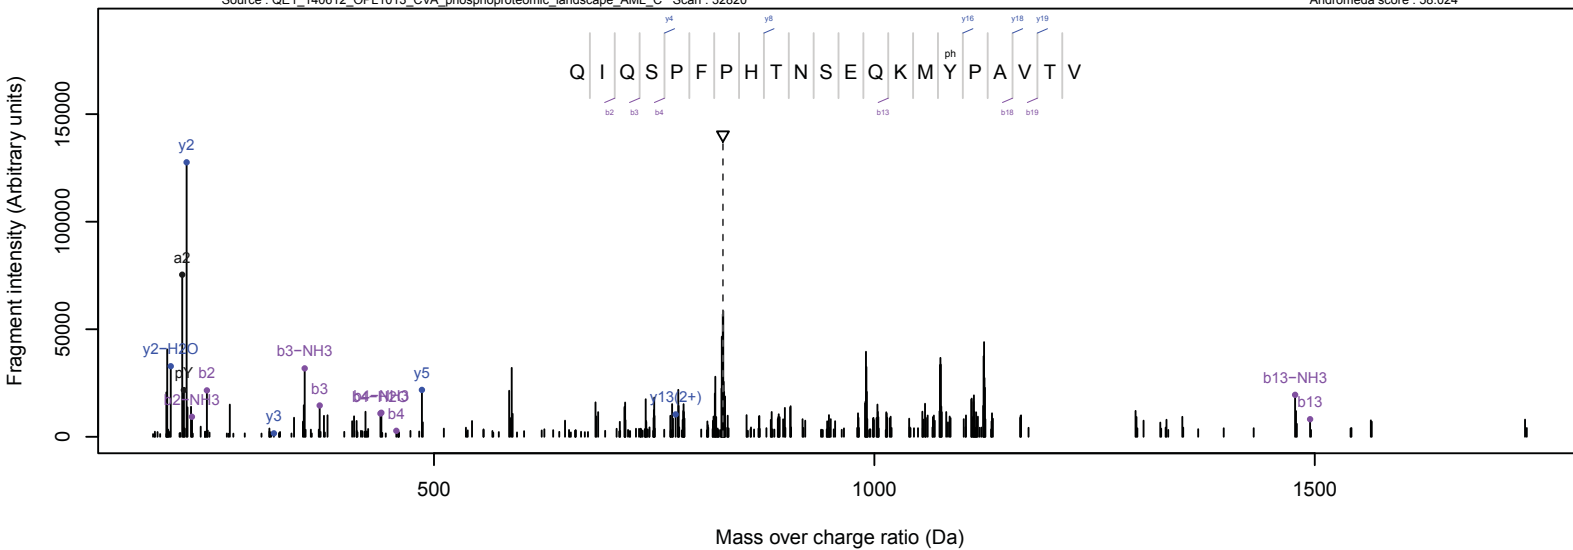



AVTDTHE<sup>ph</sup>NGDLGTASE<sup>ph</sup>TPLDDGASKLDDLHTLY<sup>ph</sup>HKK-4+

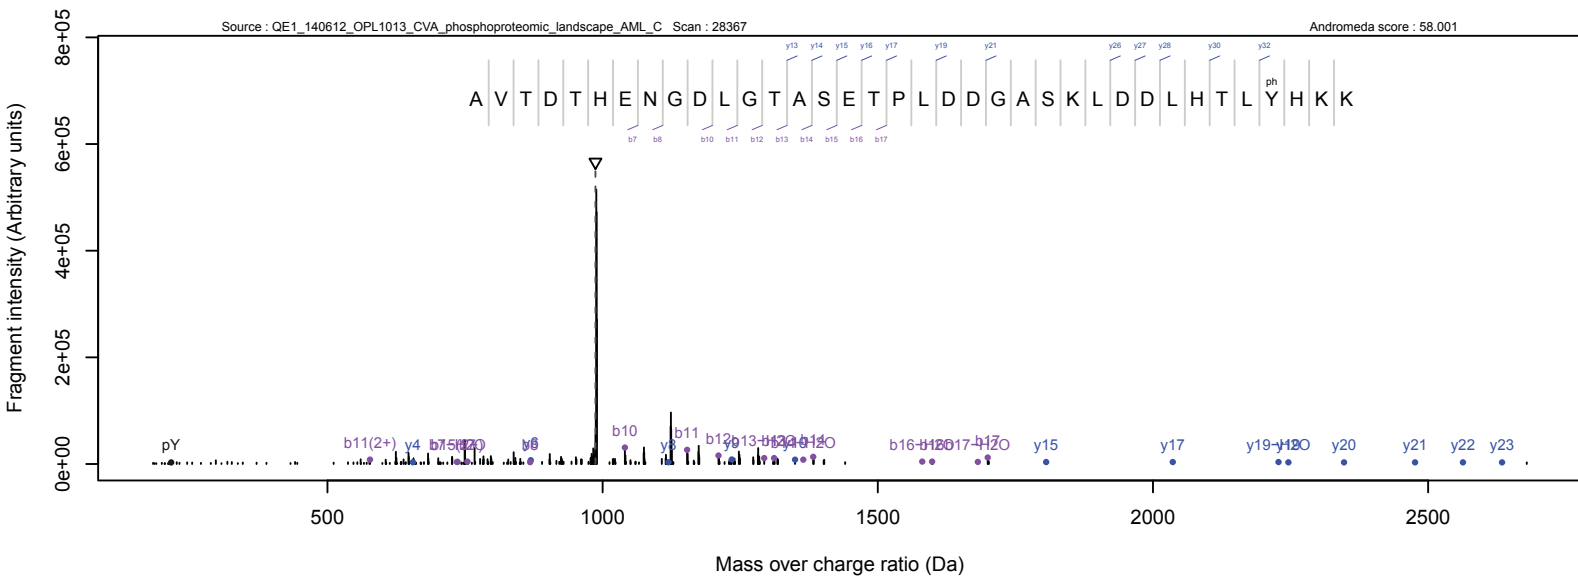

AHQVVEDGY<sup>ph</sup>EFFAKR-3+

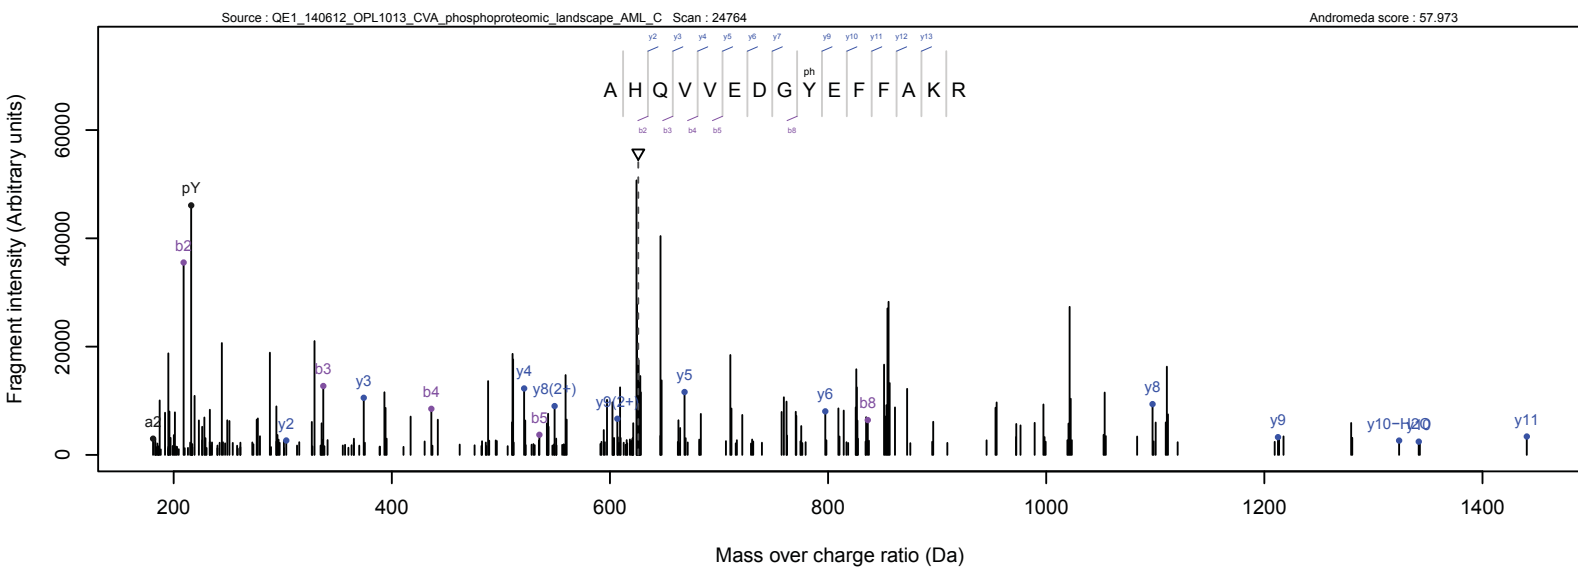

IAVY<sup>ph</sup>HLQELASAE<sup>ph</sup>LAK-3+

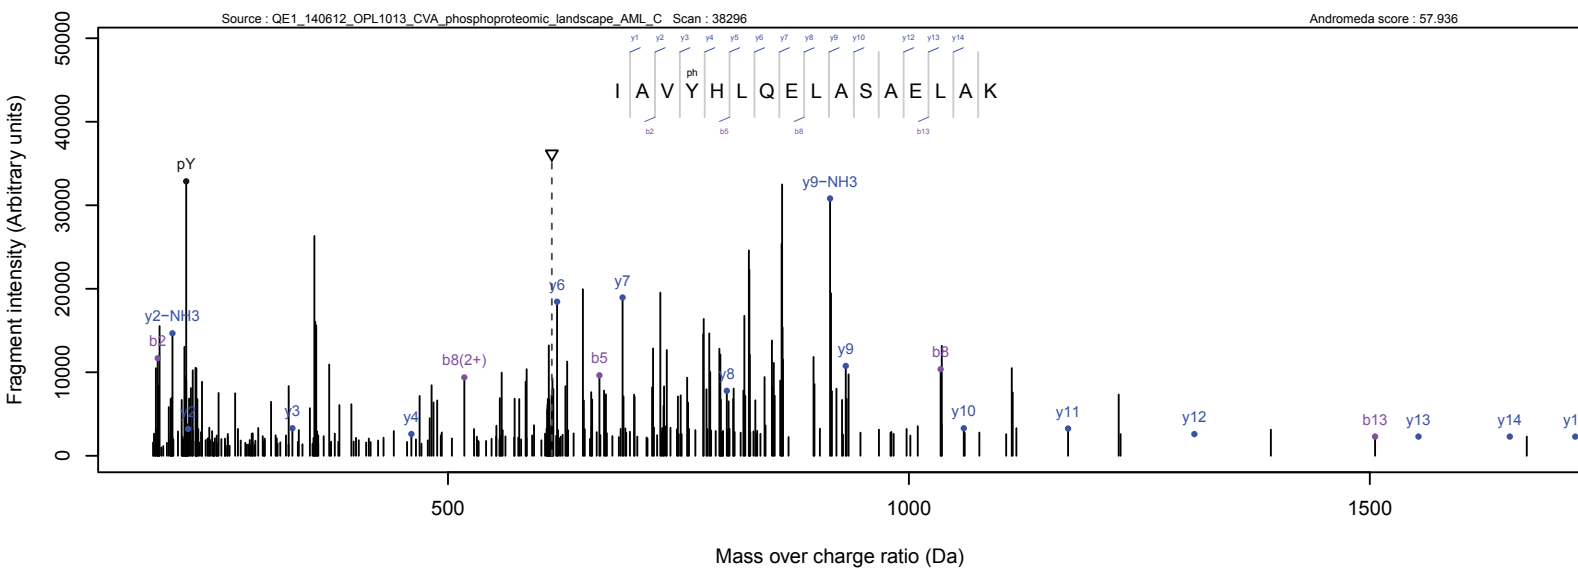

## RRFPYY(ph)M(ox)R-3+

Source : QE1\_140612\_OPL1013\_CVA\_phosphoproteomic\_landscape\_AML\_C Scan : 13589

Andromeda score : 57.931

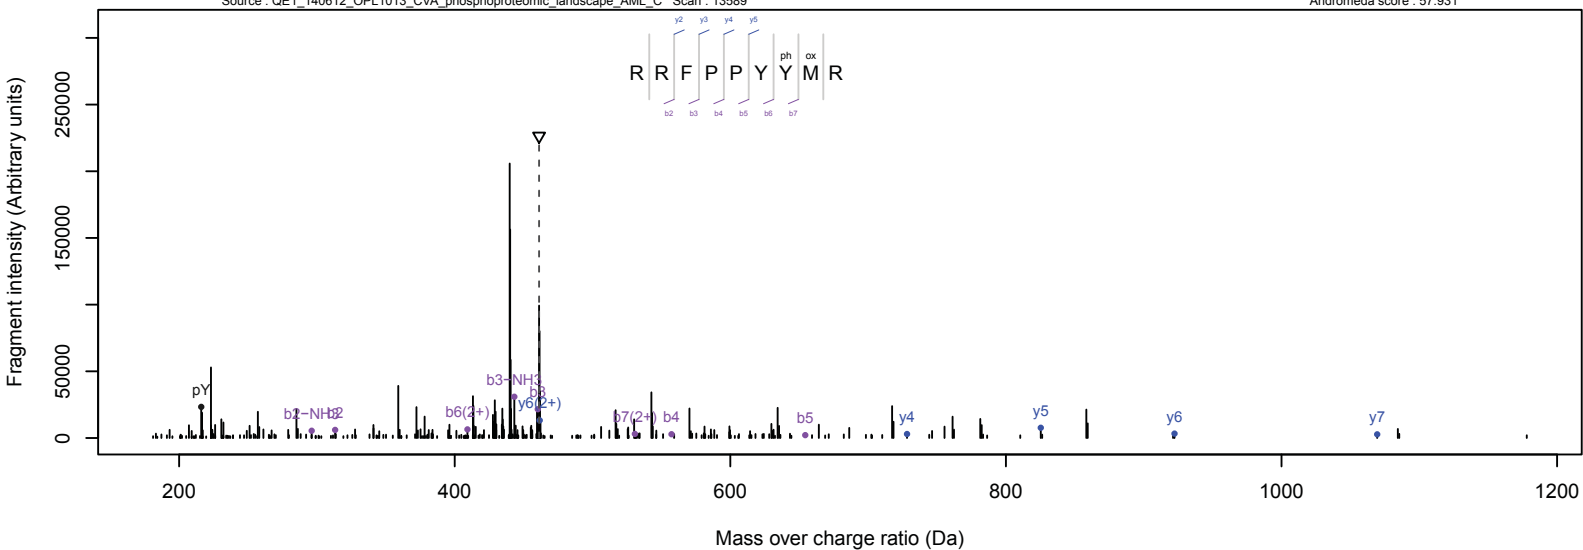

## KCPFY(ph)AAEQDKGALGSSCPFR-3+

Source : QE1\_140612\_OPL1013\_CVA\_phosphoproteomic\_landscape\_AML\_C Scan : 26795

Andromeda score : 57.802

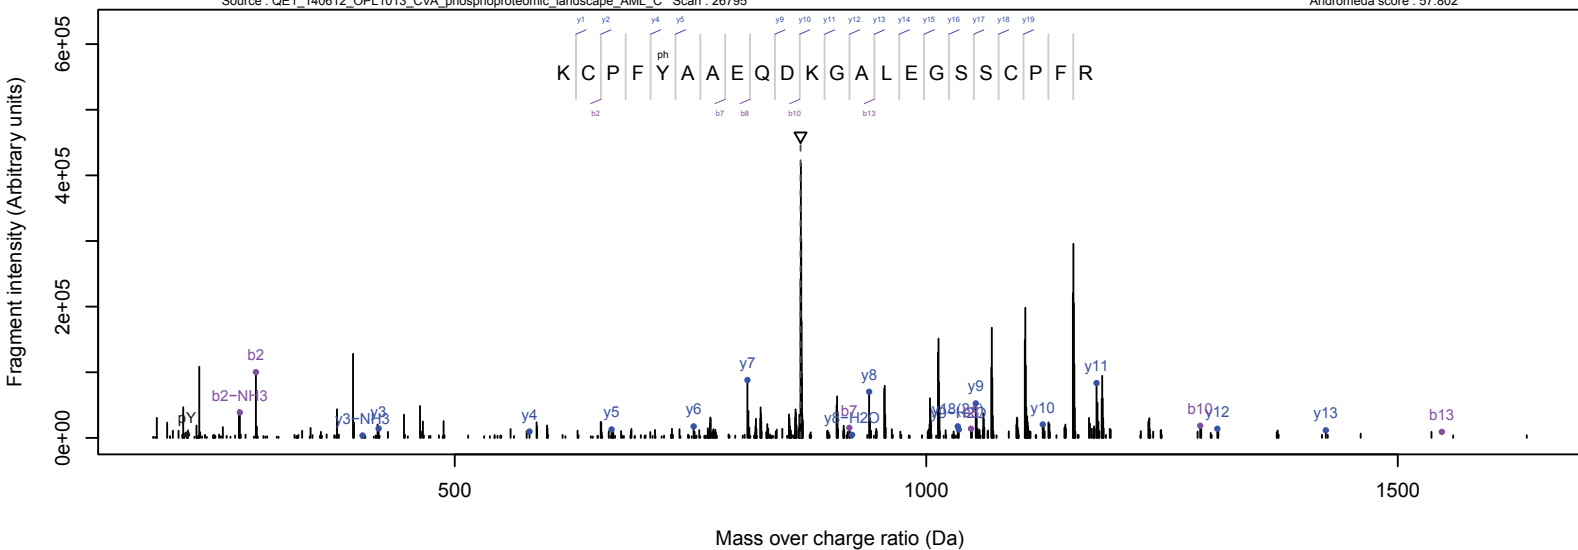

## MTLDTLSIY(ph)ETPSM(ox)GLLDKK-3+

Source : QE1\_140908\_OPL1013\_CvA\_pTyrIP\_AML\_HL60 Scan : 42949

Andromeda score : 57.798

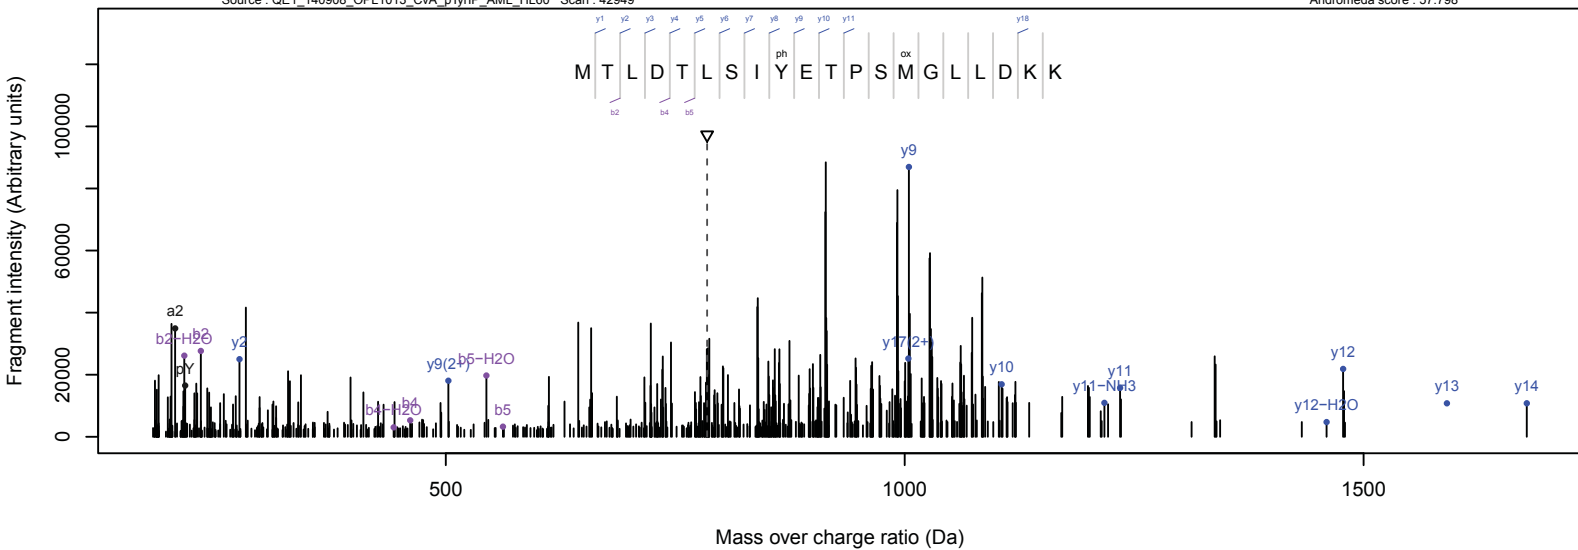

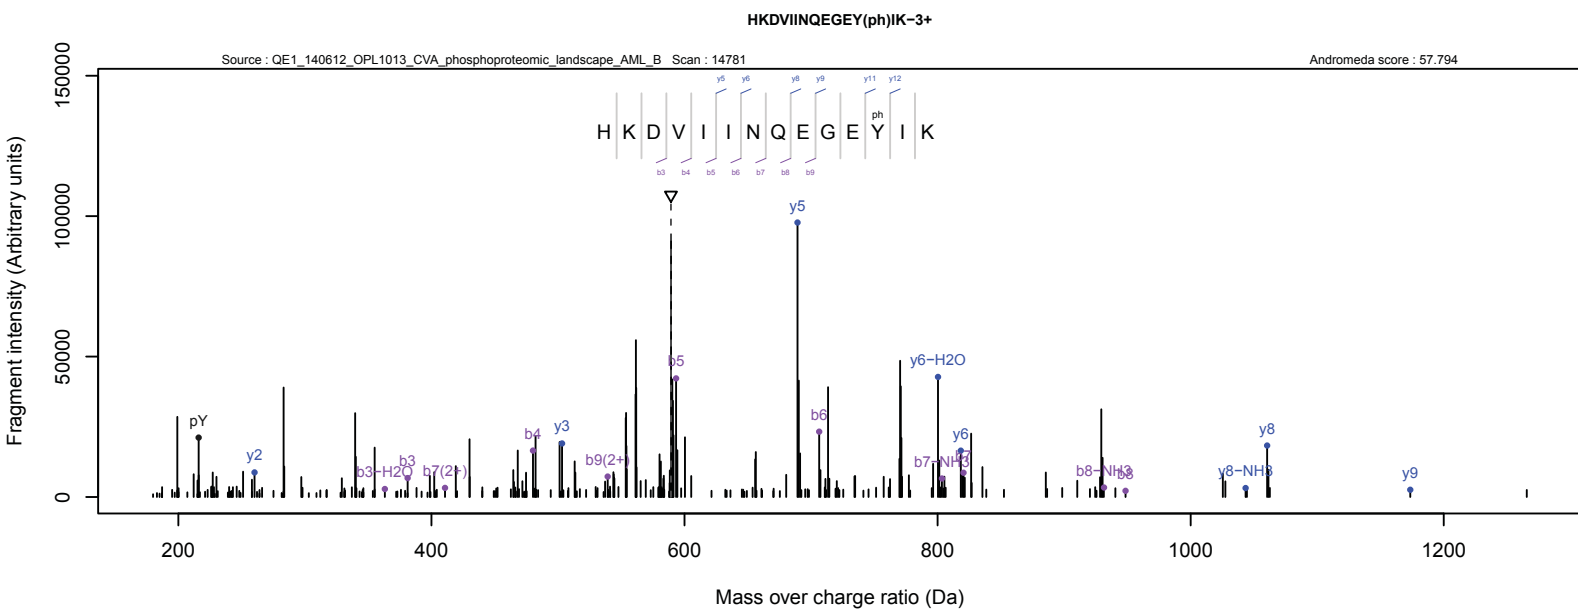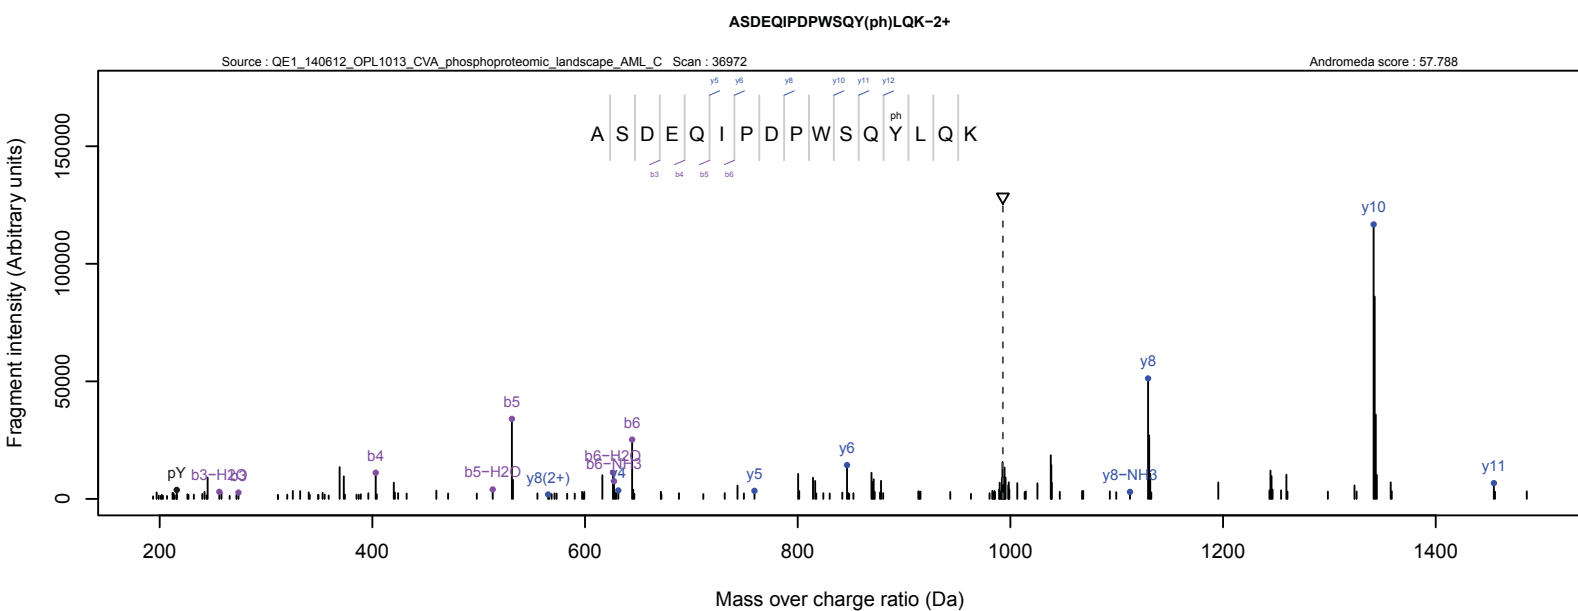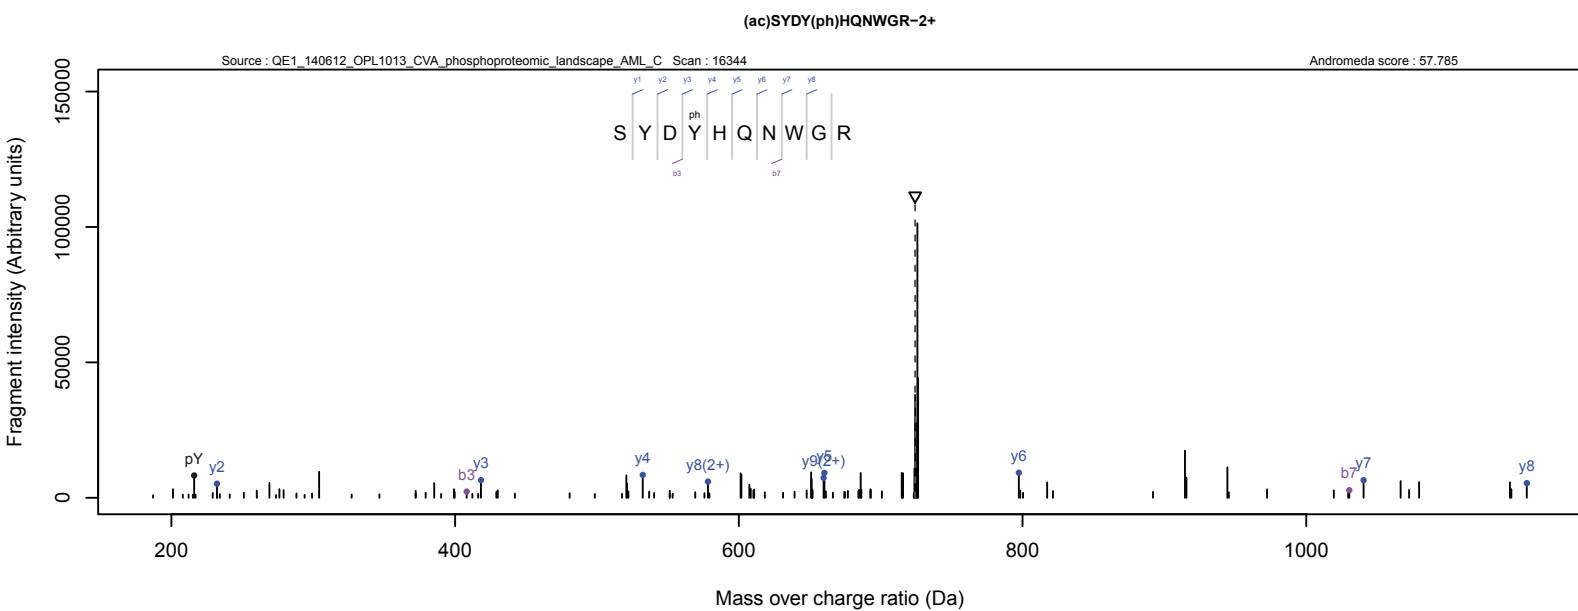

## M(ox)DSYTSY(ph)CNAVSDLHSASEIDMSVK-3+

Source: QE1\_140908\_OPL1013\_CVA\_pTyrIP\_AML\_Kasumi1 Scan: 30213

Andromeda score: 57.738

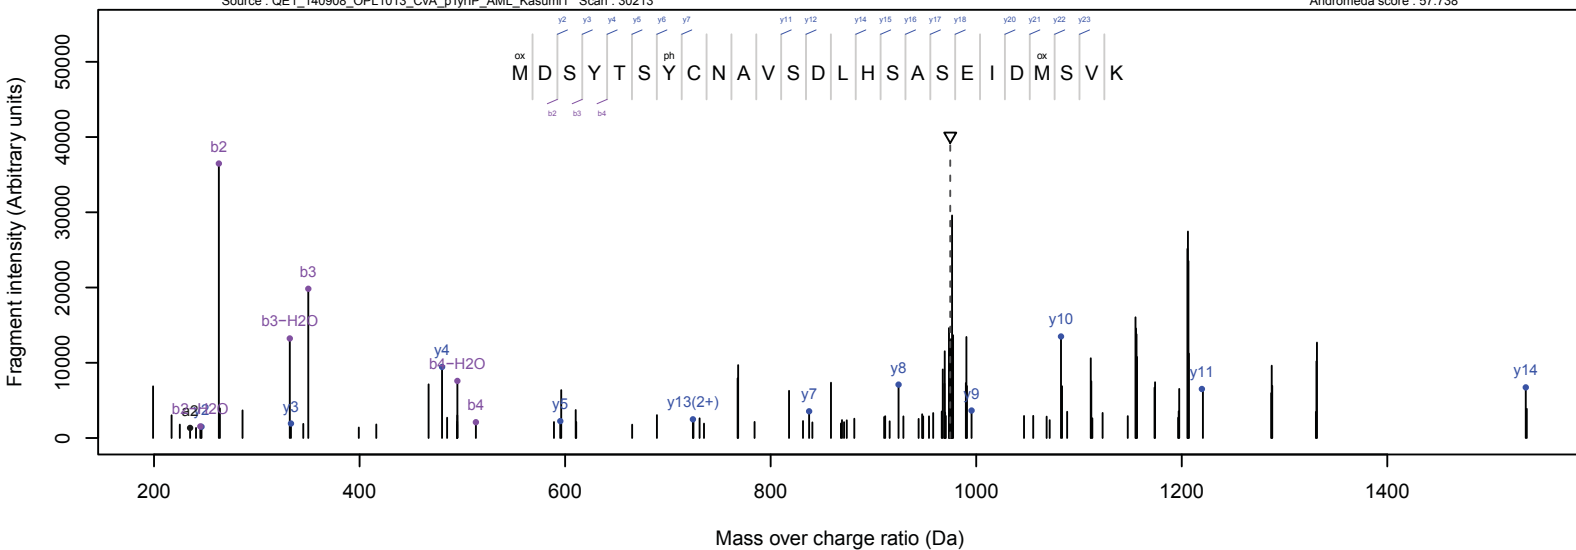

## Y(ph)YAVNYPLRDGIDDES YEAI FKP VMSK-4+

Source: QE1\_140612\_OPL1013\_CVA\_phosphoproteomic\_landscape\_AML\_B Scan: 46558

Andromeda score: 57.738

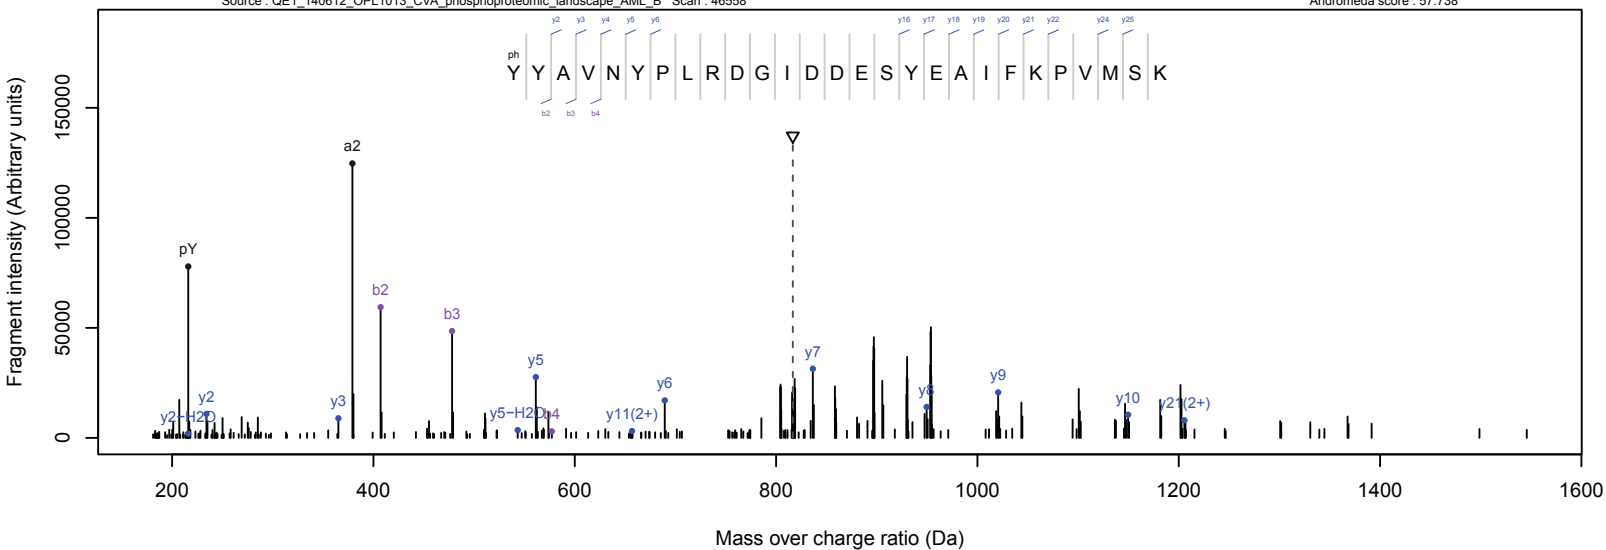

## EGEY(ph)IKLK-2+

Source: QE1\_140612\_OPL1013\_CVA\_phosphoproteomic\_landscape\_AML\_D Scan: 12246

Andromeda score: 57.59

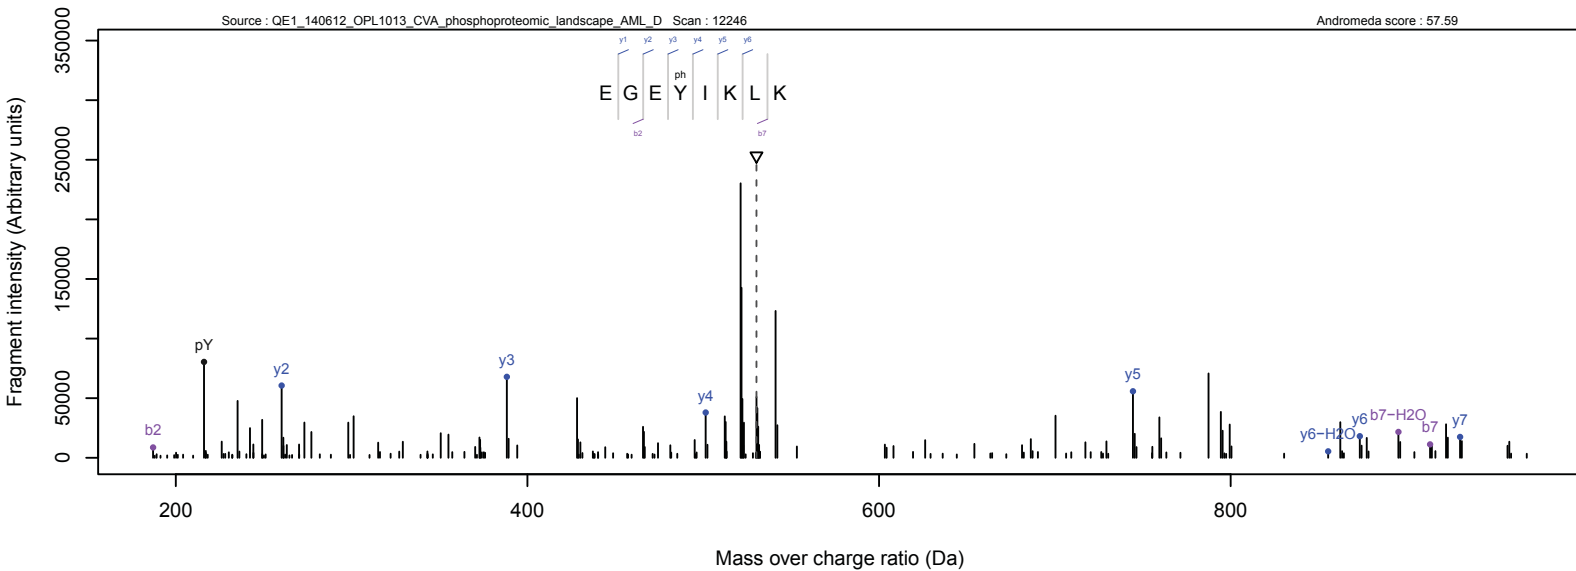

## LYKELY(ph)AR-2+

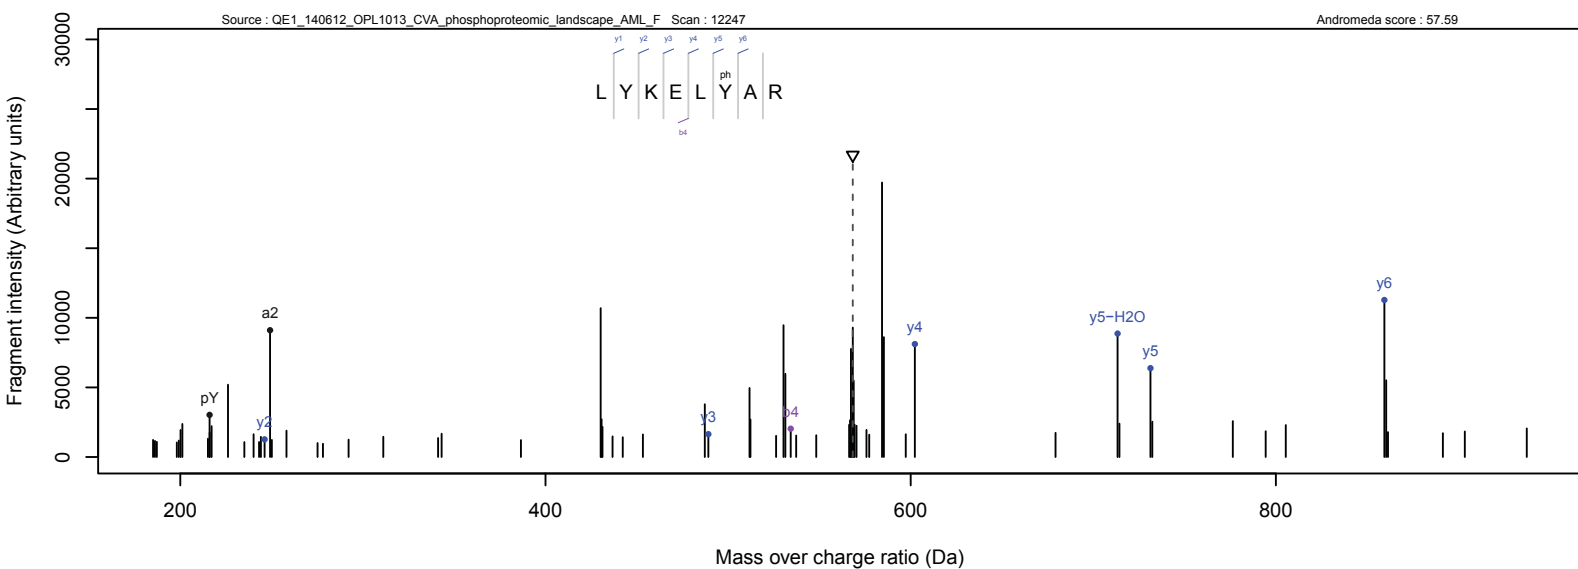

## Y(ph)TAISVIK-2+

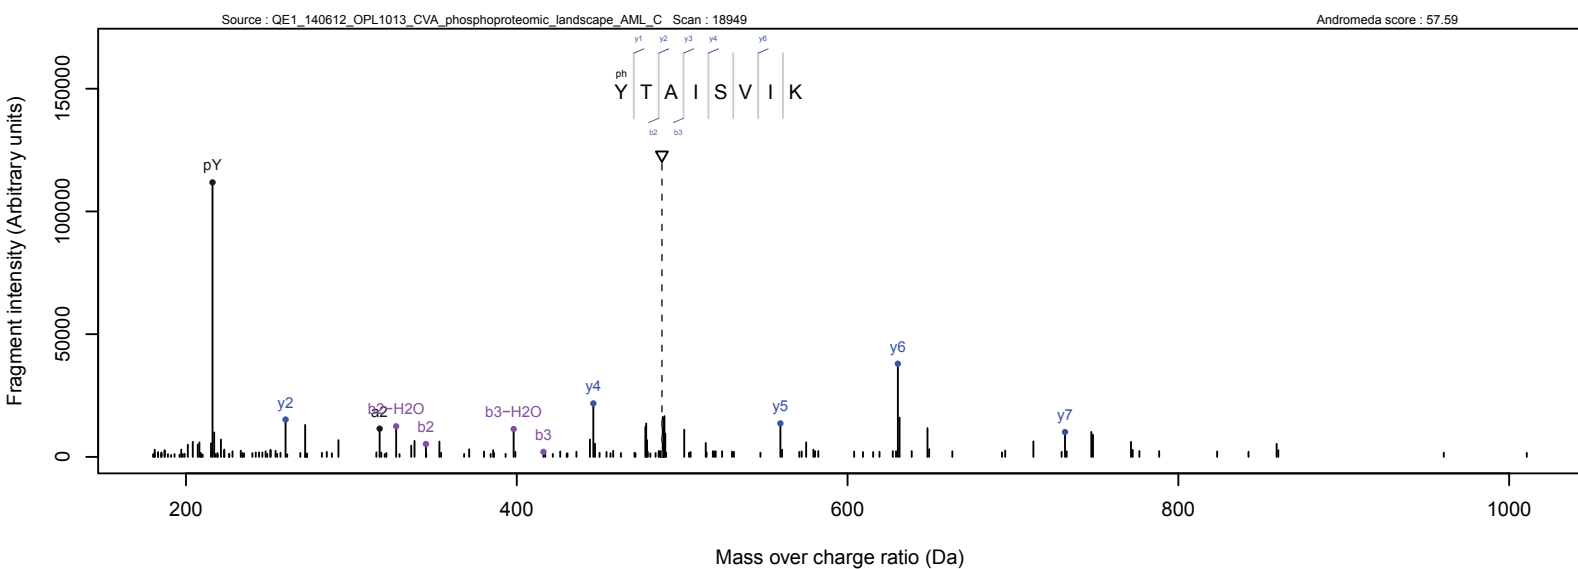

## Y(ph)PYVGILHVR-3+

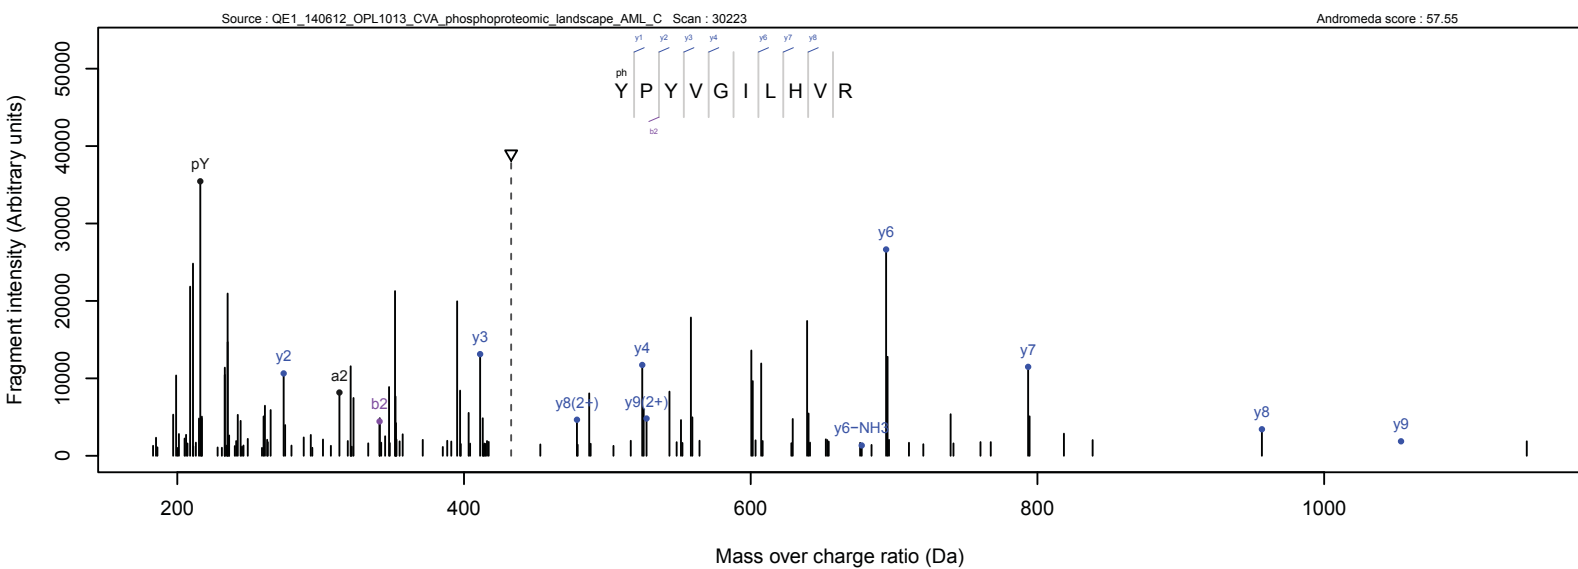

## LKQFDAY(ph)PK-2+

Source : QE1\_140612\_OPL1013\_CVA\_phosphoproteomic\_landscape\_AML\_C Scan : 10483

Andromeda score : 57.532

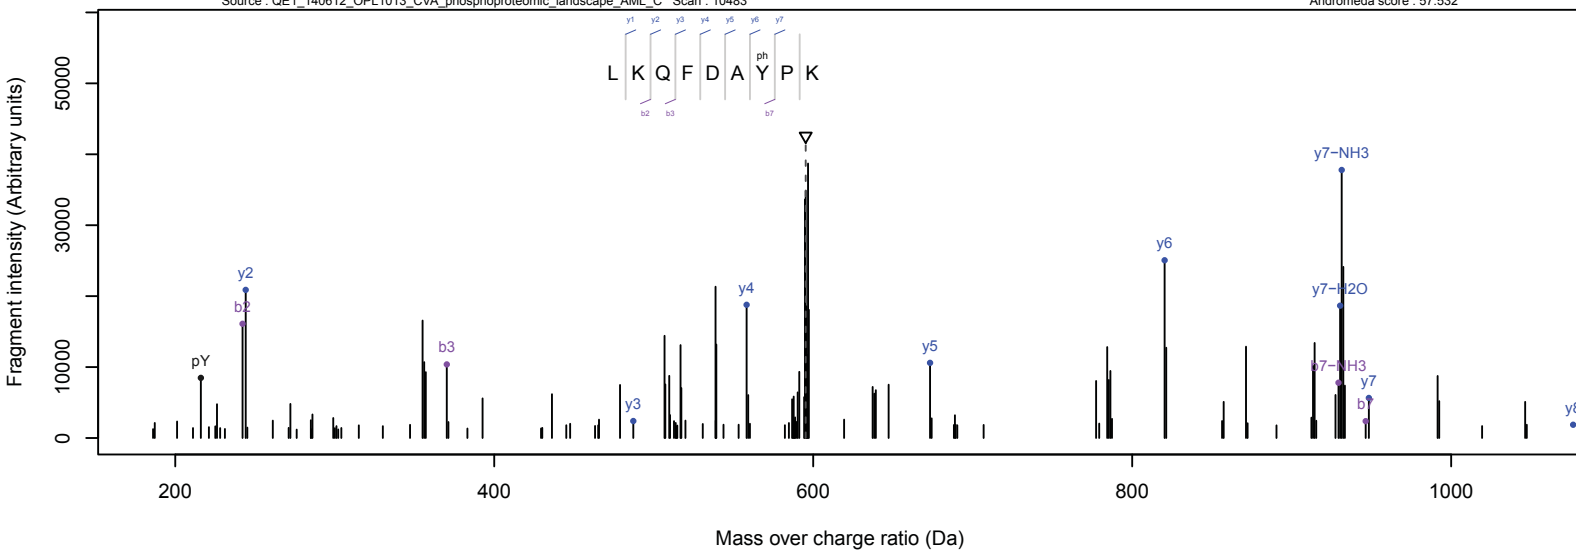

## Y(ph)GYLSLPKM(ox)K-2+

Source : QE1\_140612\_OPL1013\_CVA\_phosphoproteomic\_landscape\_AML\_C Scan : 27049

Andromeda score : 57.532

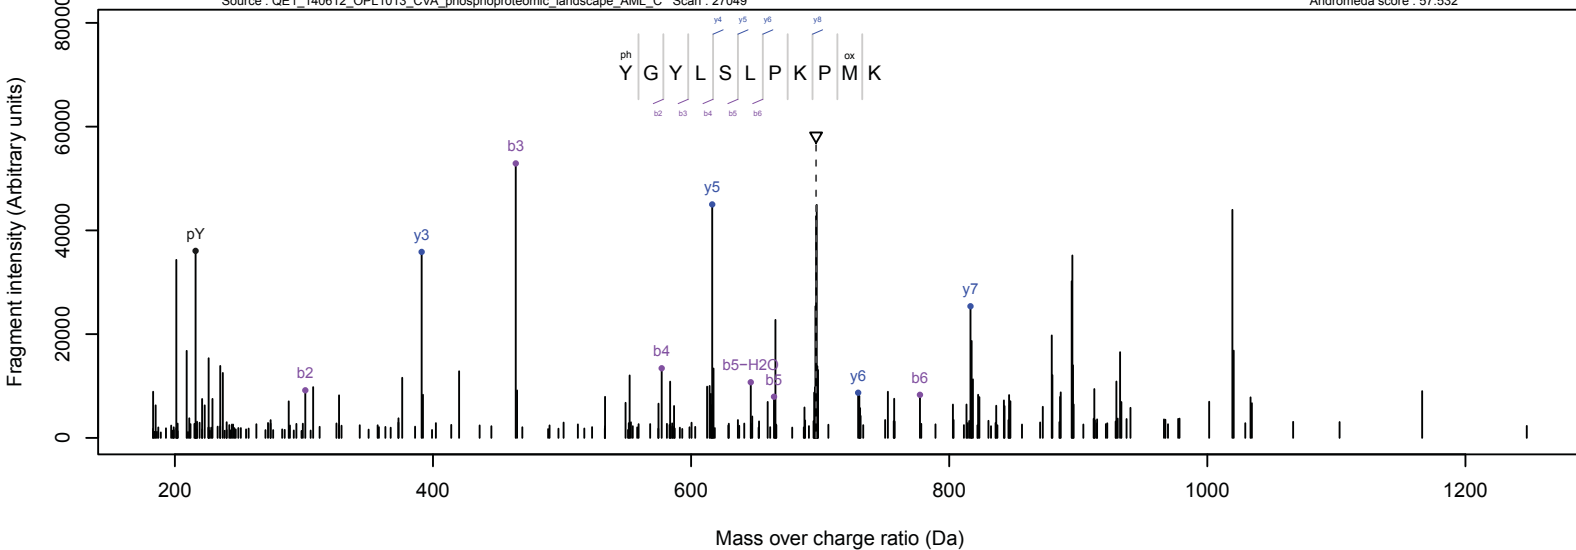

## LRVDY(ph)SGGFEPFSLR-3+

Source : QE1\_140612\_OPL1013\_CVA\_phosphoproteomic\_landscape\_AML\_D Scan : 43779

Andromeda score : 57.525

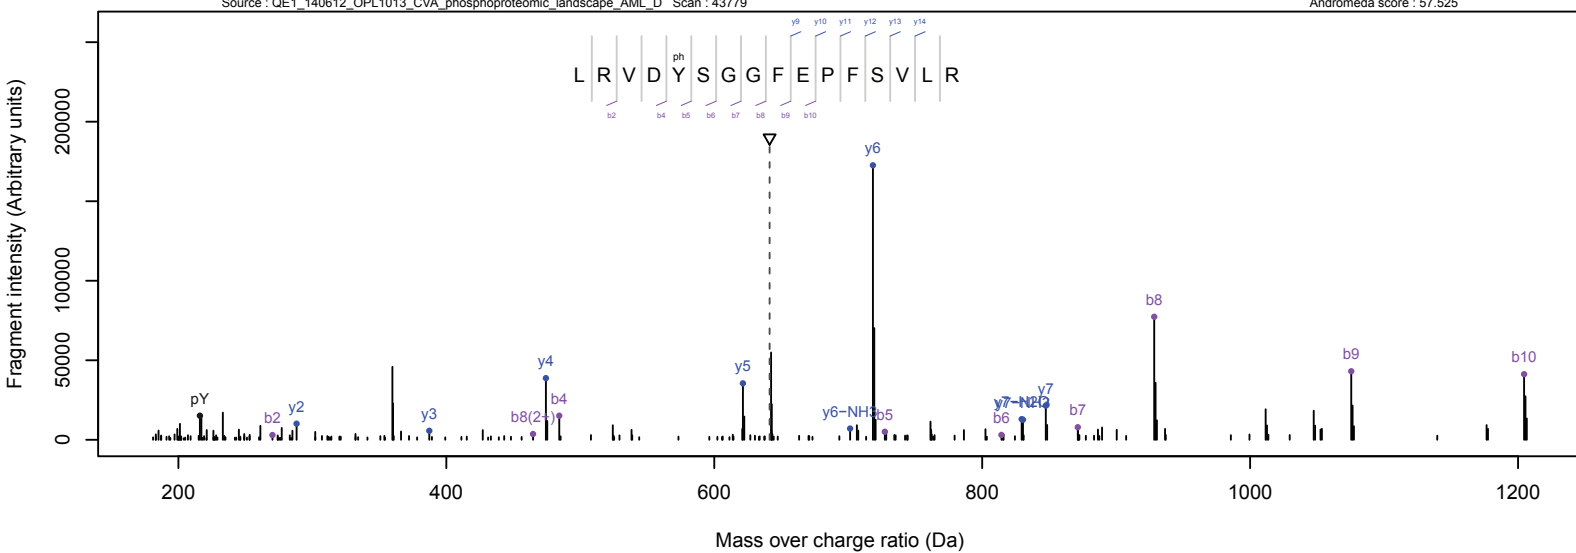

## FQDSSSY(ph)PTVDSNLLGQSR-2+

Source : QE1\_140612\_OPL1013\_CVA\_phosphoproteomic\_landscape\_AML\_B Scan : 27172

Andromeda score : 57.484

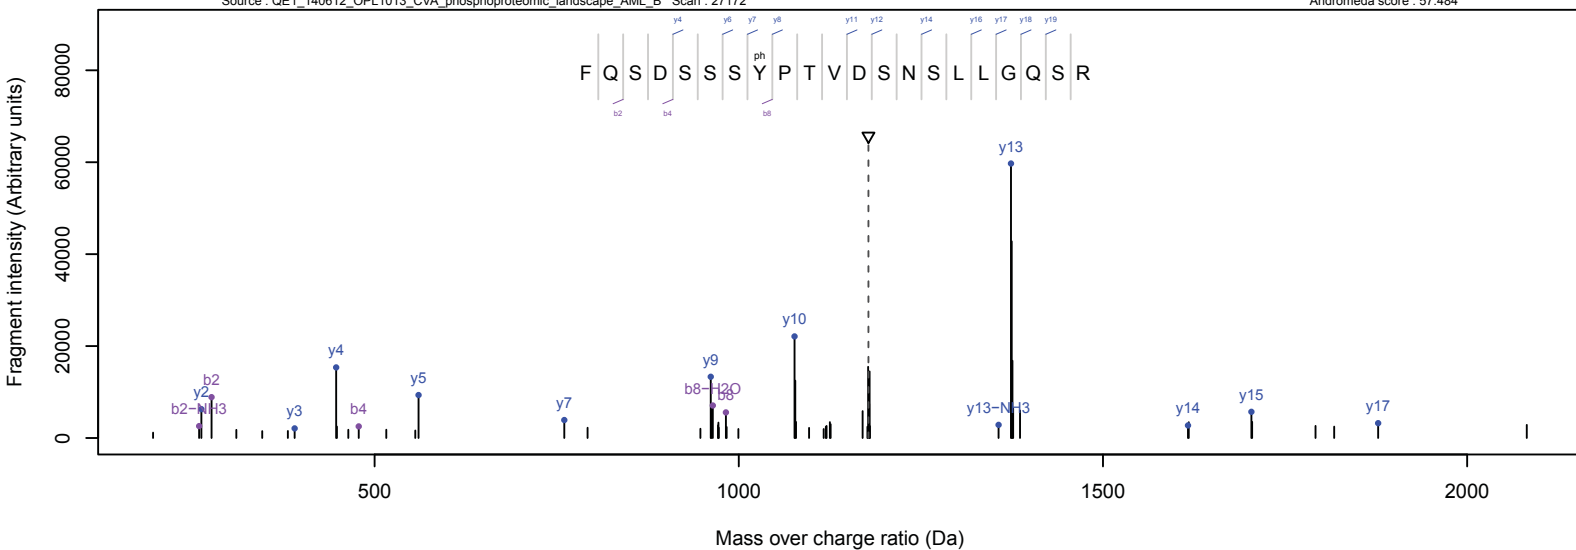

## DM(ox)GTTDSGPY(ph)FEK-2+

Source : QE1\_140612\_OPL1013\_CVA\_phosphoproteomic\_landscape\_AML\_C Scan : 16301

Andromeda score : 57.434

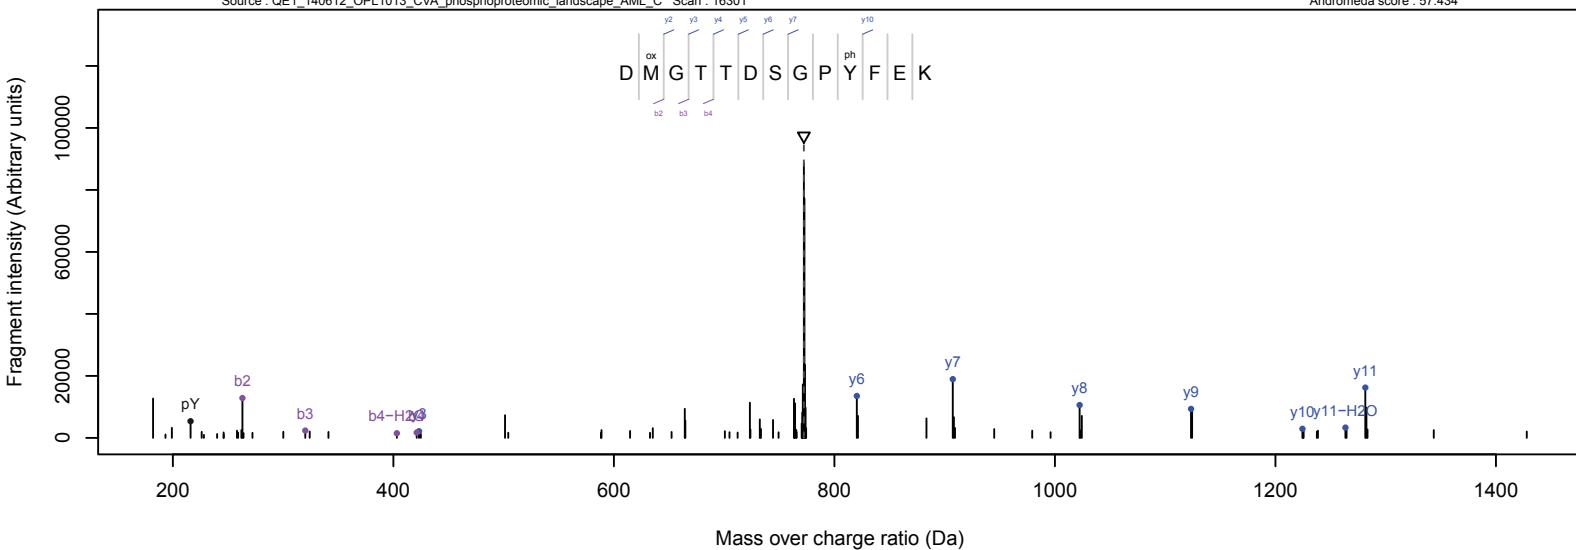

## IGITNHDEYS(ph)LVR-3+

Source : QE1\_140612\_OPL1013\_CVA\_phosphoproteomic\_landscape\_AML\_D Scan : 22372

Andromeda score : 57.434

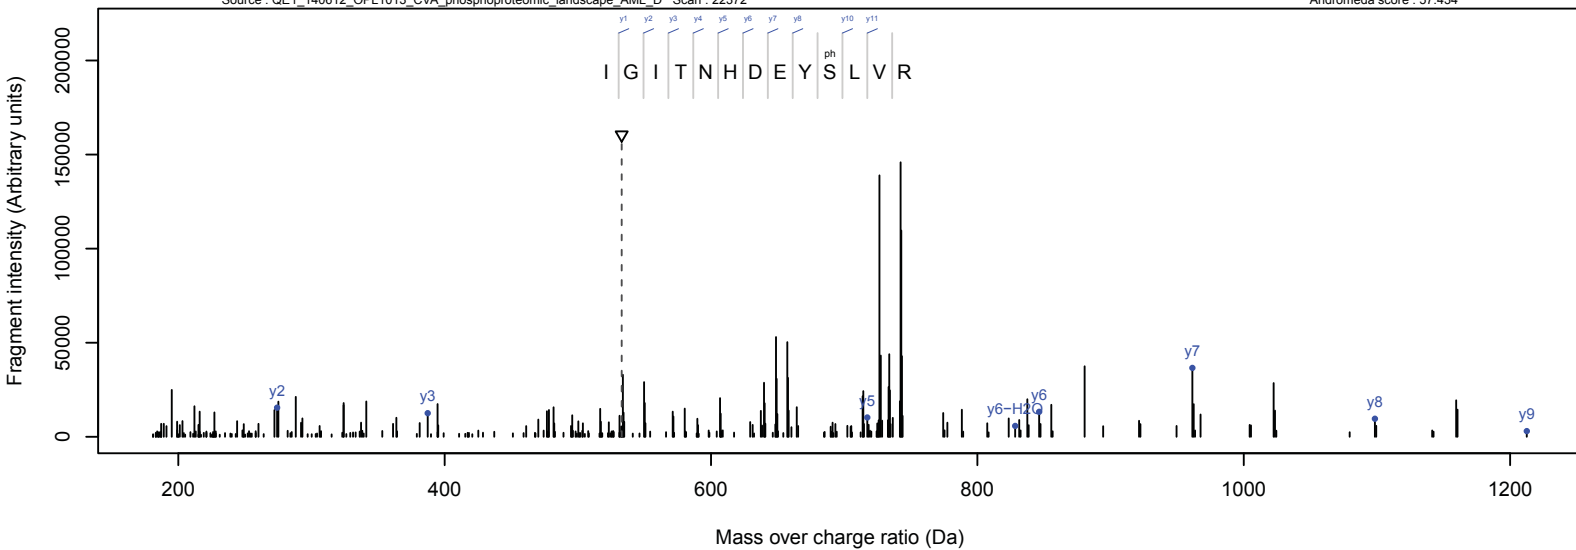

## IIY(ph)GGSVTGATCK-2+

Source : QE1\_140612\_OPL1013\_CVA\_phosphoproteomic\_landscape\_AML\_E Scan : 13042

Andromeda score : 57.434

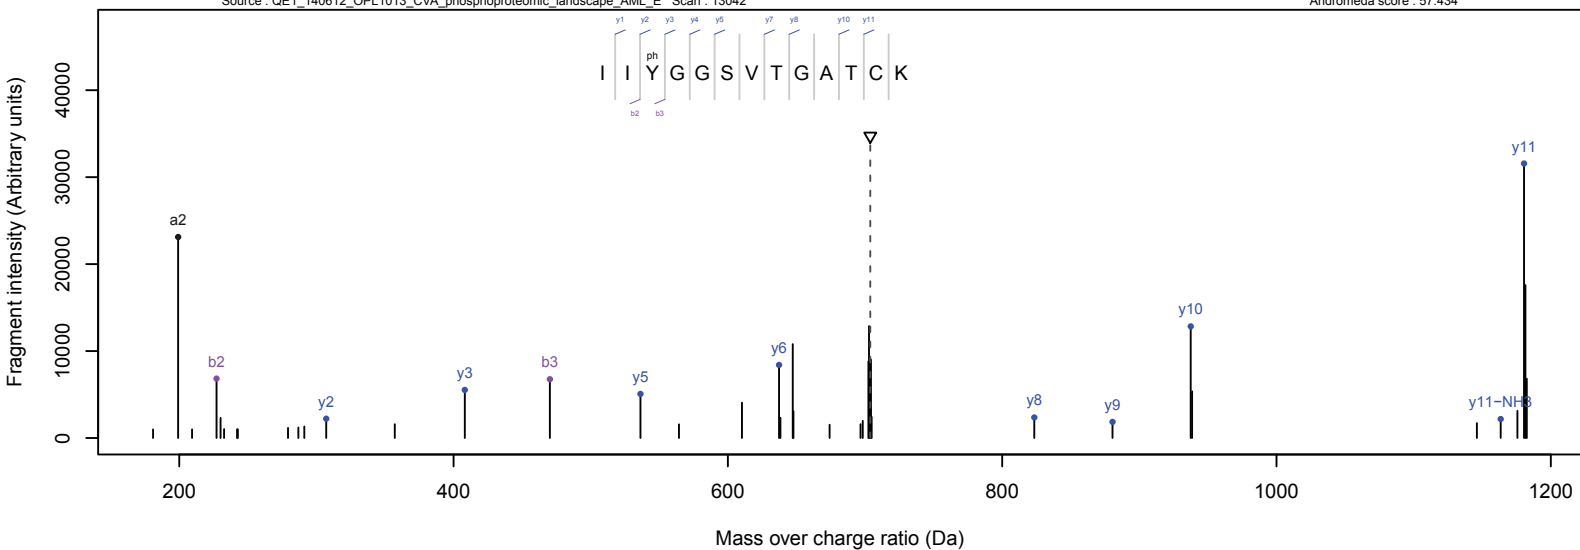

## LM(ox)TGDTY(ph)TAHAGAK-3+

Source : QE1\_140908\_OPL1013\_CvA\_pTyrIP\_AML\_OCI\_AML3 Scan : 4968

Andromeda score : 57.434

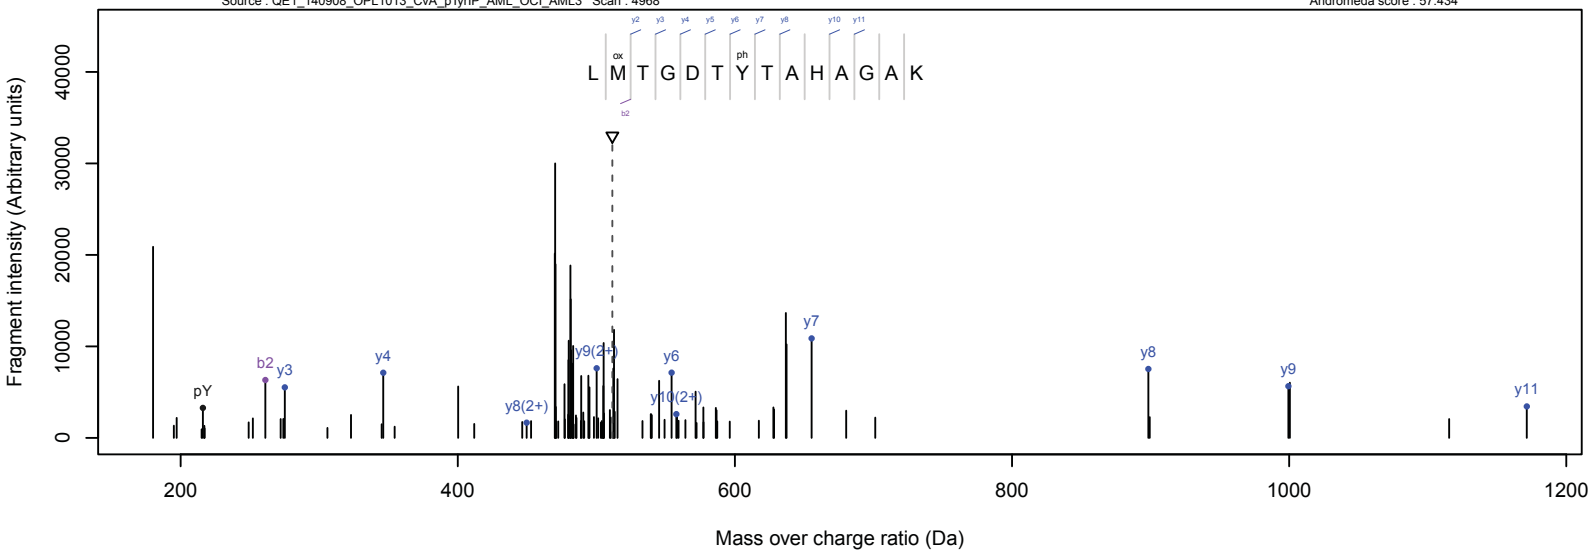

## LYTPDNY(ph)EKFIQNK-2+

Source : QE1\_140612\_OPL1013\_CVA\_phosphoproteomic\_landscape\_AML\_C Scan : 24773

Andromeda score : 57.434

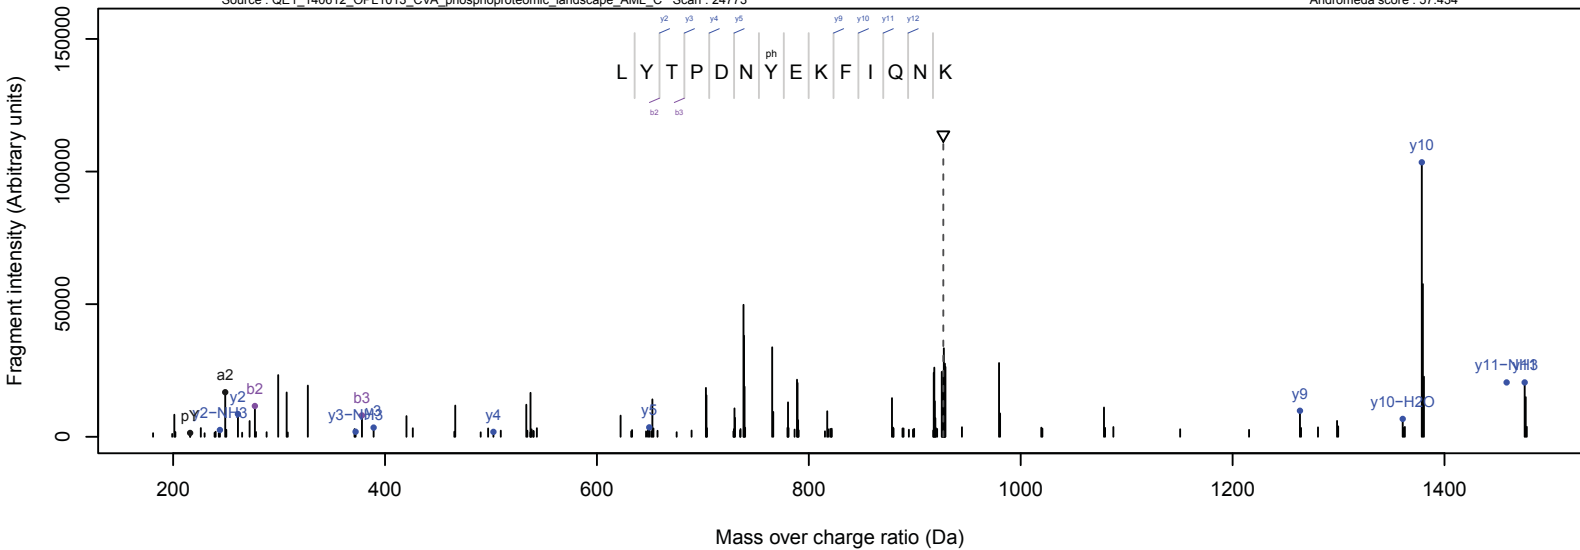



## QIDNTGSS(ph)TYRPPR-3+

Source : QE1\_140612\_OPL1013\_CVA\_phosphoproteomic\_landscape\_AML\_C Scan : 5534

Andromeda score : 57.434

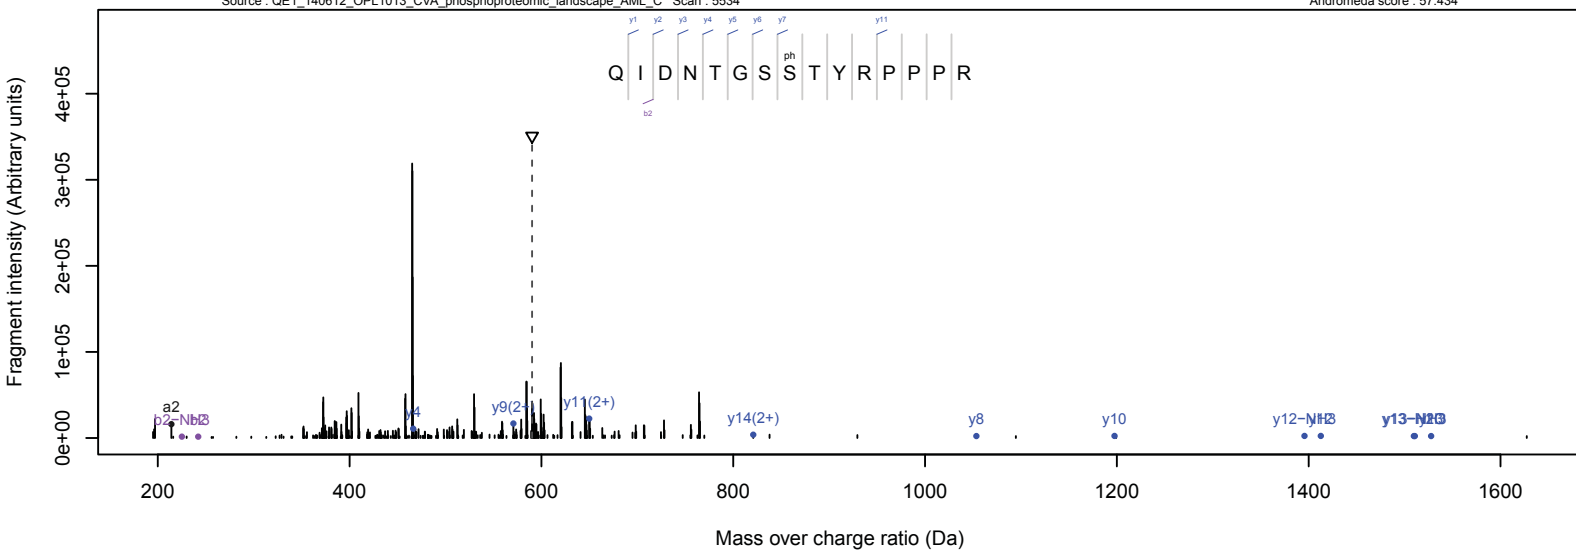

## VLKETVY(ph)CIGQR-3+

Source : QE1\_140908\_OPL1013\_CvA\_pTyrIP\_AML\_HEL Scan : 21762

Andromeda score : 57.434

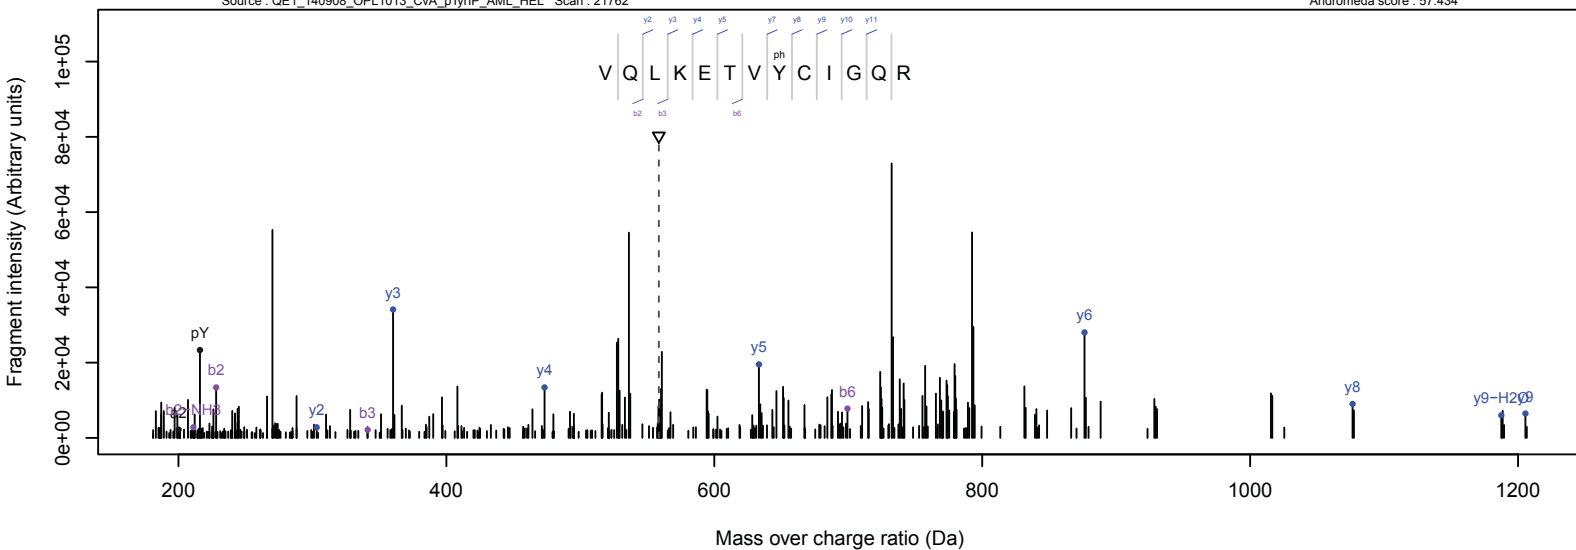

## VSLEEIY(ph)HGSTKR-3+

Source : QE1\_140612\_OPL1013\_CVA\_phosphoproteomic\_landscape\_AML\_C Scan : 16467

Andromeda score : 57.434

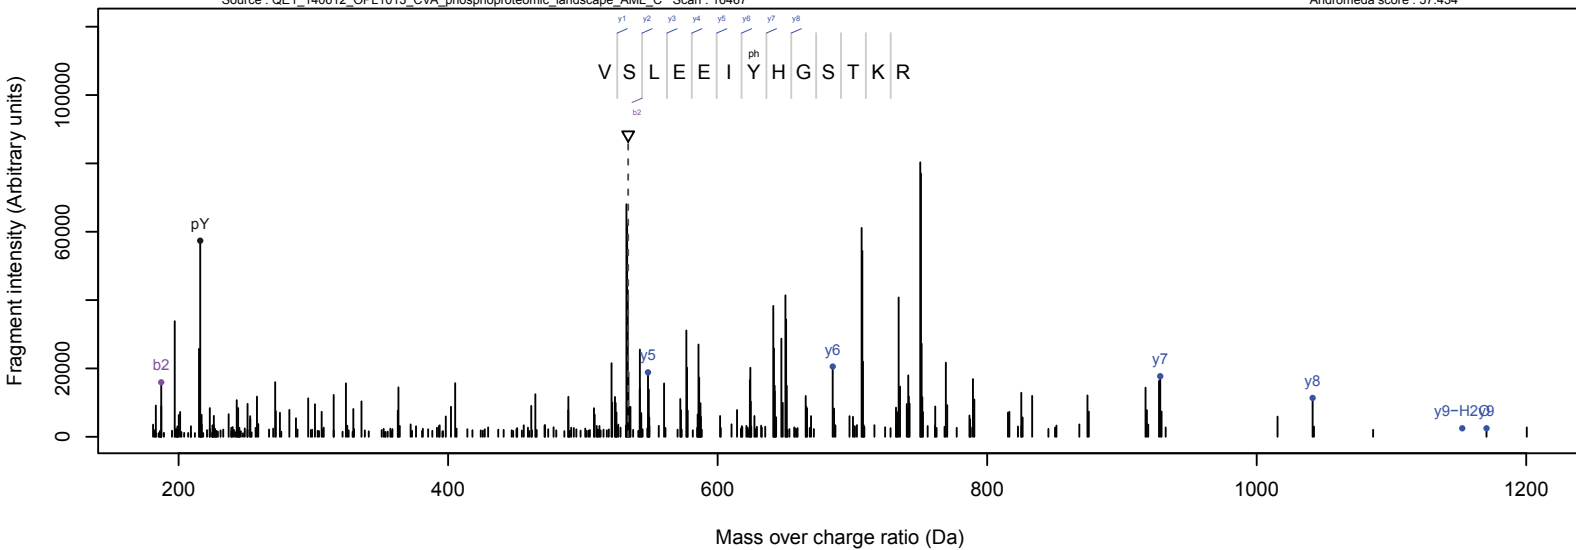



## ARDYNPY(ph)PYSDAINTYDK-3+

Source : QE1\_140612\_OPL1013\_CVA\_phosphoproteomic\_landscape\_AML\_B Scan : 23241

Andromeda score : 57.366

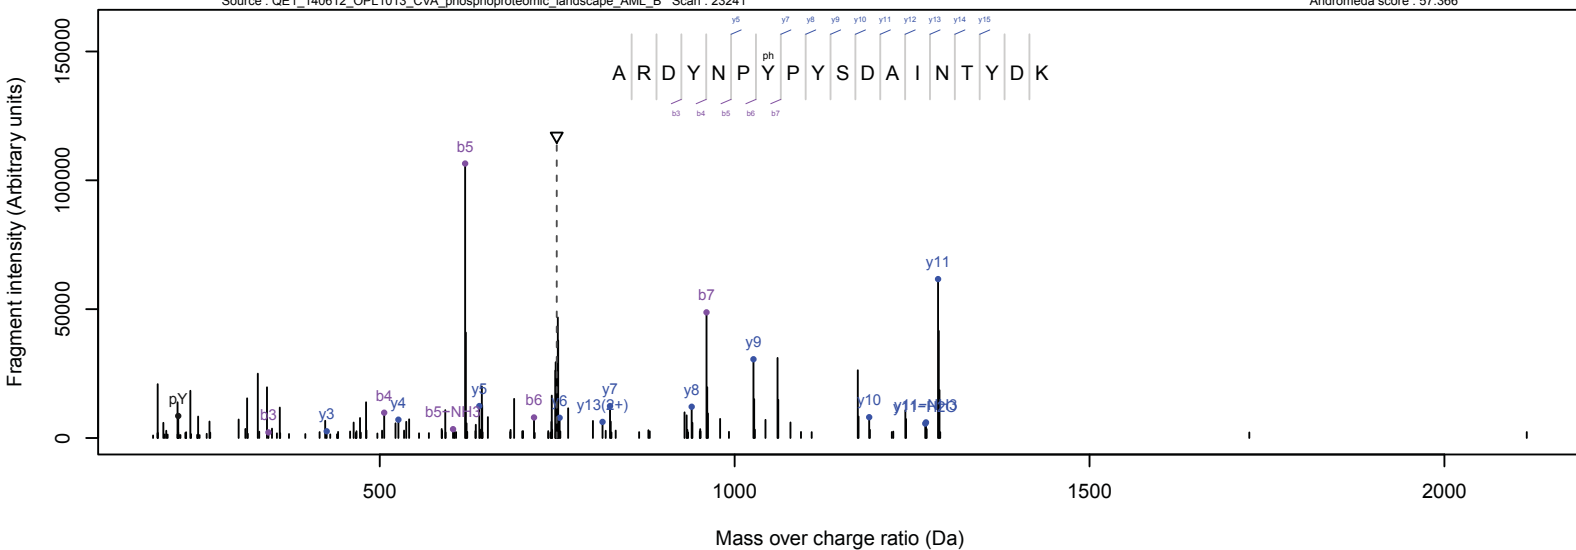

## DQNKY(ph)KDAANLLNDALAIR-3+

Source : QE1\_140612\_OPL1013\_CVA\_phosphoproteomic\_landscape\_AML\_C Scan : 39979

Andromeda score : 57.366

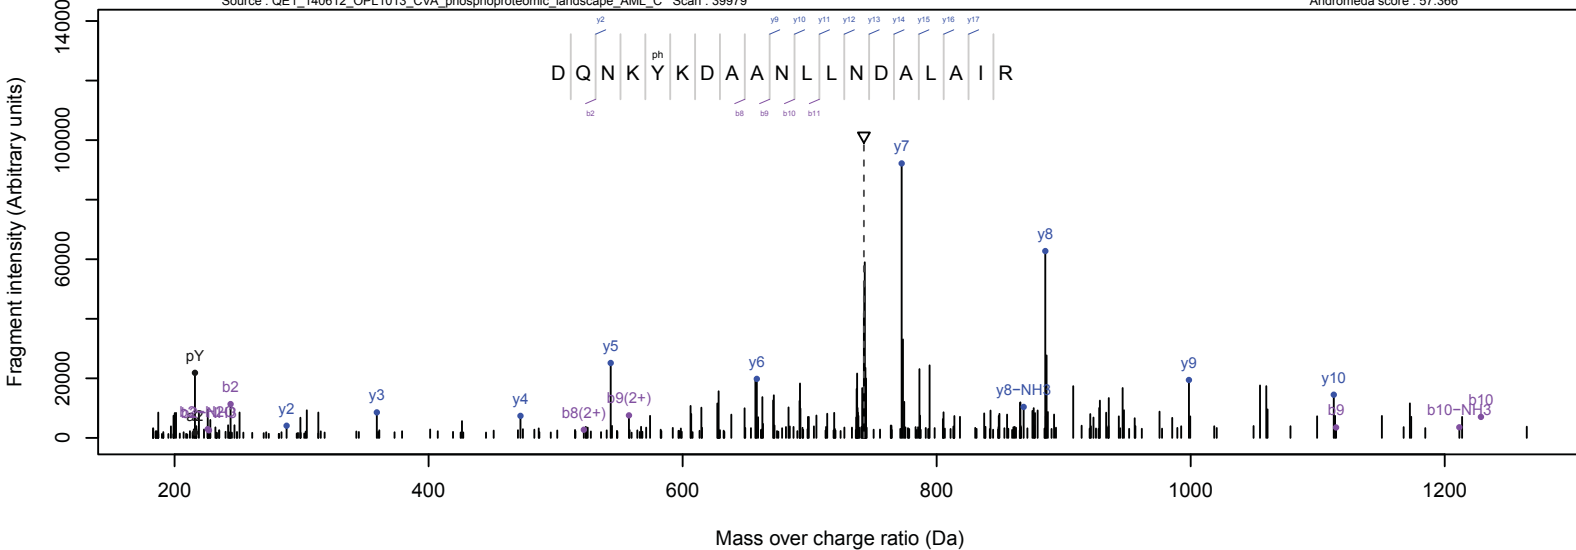

## RHEVTICNY(ph)EASNPADHR-4+

Source : QE1\_140612\_OPL1013\_CVA\_phosphoproteomic\_landscape\_AML\_C Scan : 11789

Andromeda score : 57.366

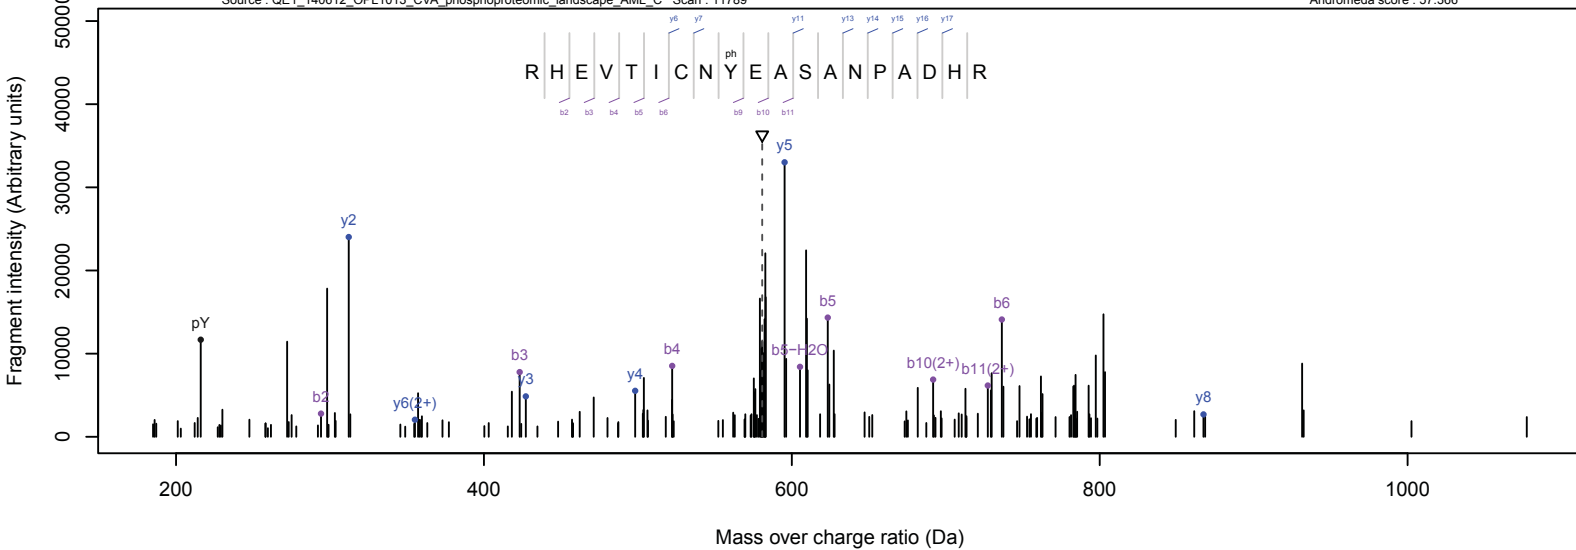

VTWYCCGPTVYDAS(ph)HM(ox)GHAR-3+

Source : QE1\_140908\_OPL1013\_CvA\_pTyrIP\_AML\_OCI\_AML3 Scan : 25185

Andromeda score : 57.366

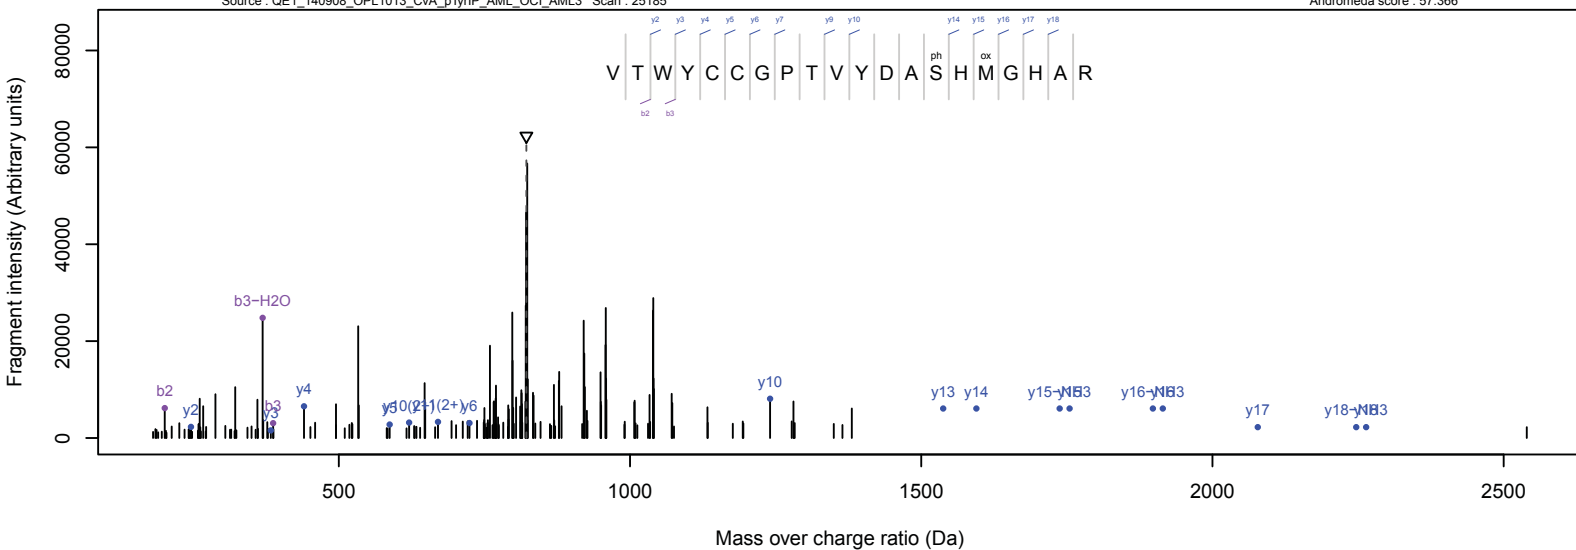

TFHNPT(ph)YFSR-2+

Source : QE1\_140612\_OPL1013\_CVA\_phosphoproteomic\_landscape\_AML\_F Scan : 15972

Andromeda score : 57.347

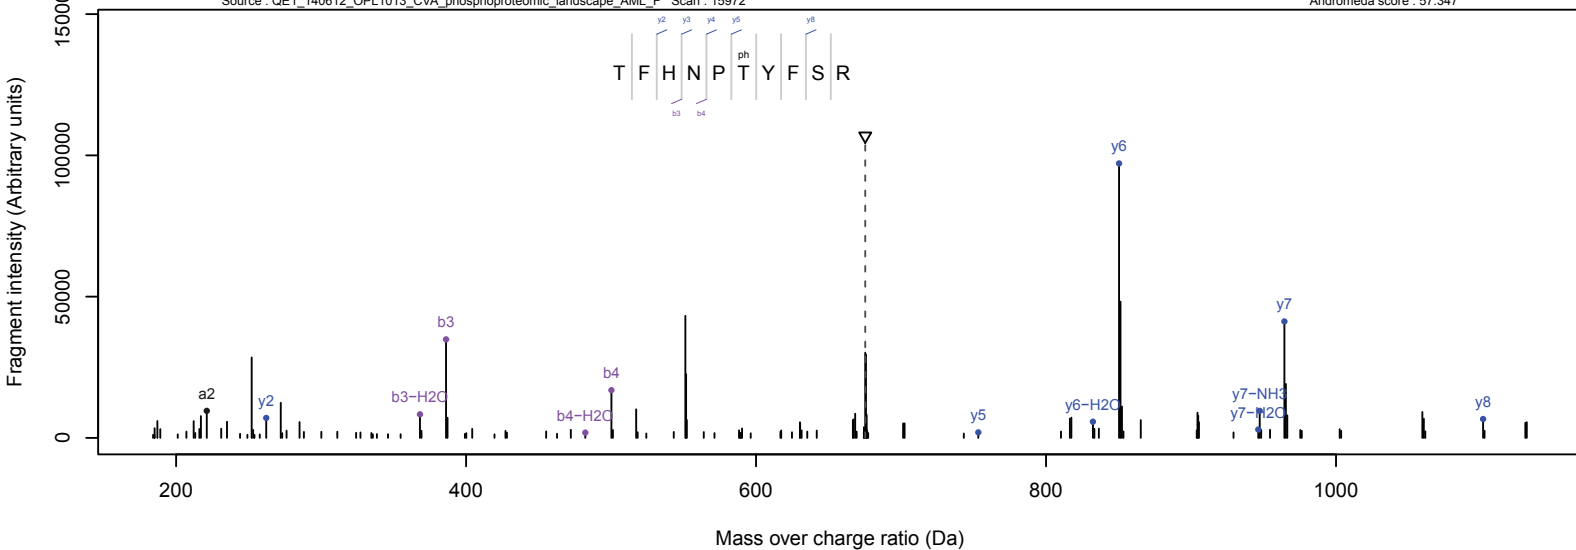

QALSSHMY(ph)SASLLR-3+

Source : QE1\_140908\_OPL1013\_CvA\_pTyrIP\_AML\_HEL Scan : 25790

Andromeda score : 57.288

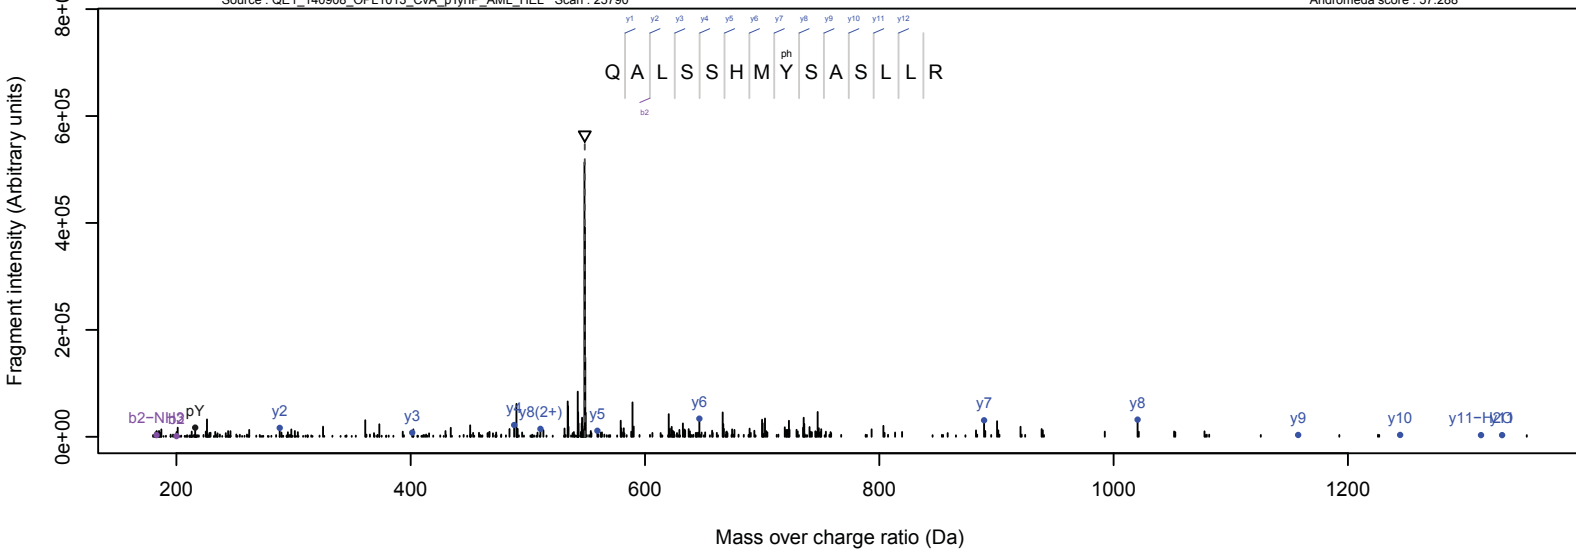

SRPEFM(ox)LPVHFY(ph)GK-3+

Source : QE1\_140908\_OPL1013\_CVA\_pTyrIP\_AML\_Kasumi1 Scan : 32097

Andromeda score : 57.288

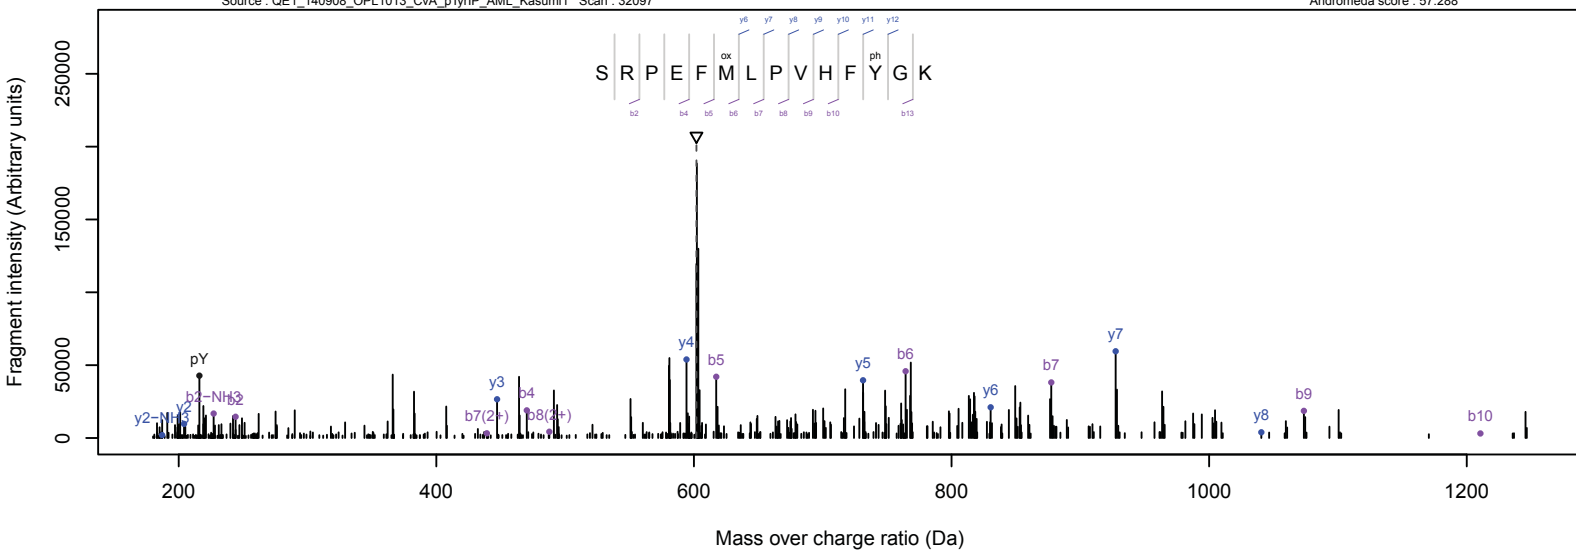

NGDY(ph)LCVK-2+

Source : QE1\_140612\_OPL1013\_CVA\_phosphoproteomic\_landscape\_AML\_D Scan : 12369

Andromeda score : 57.249

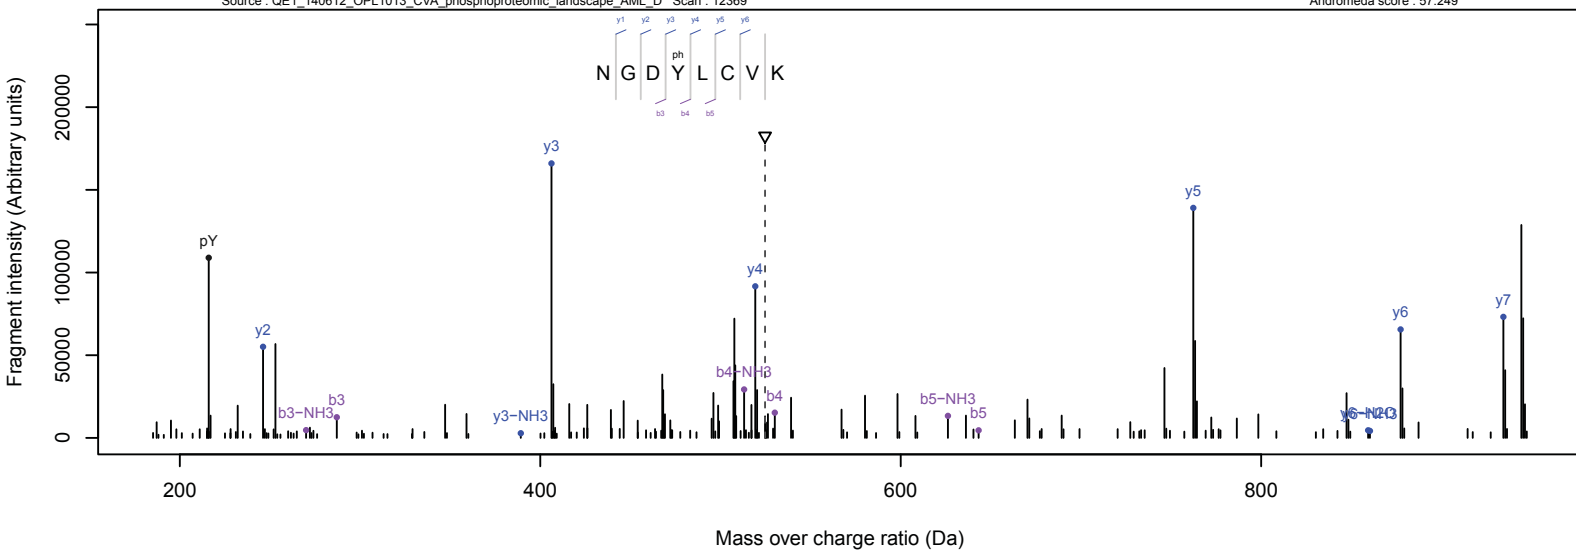

LY(ph)AHVYGNQSEKPDENEKAFQCLSK-4+

Source : QE1\_140612\_OPL1013\_CVA\_phosphoproteomic\_landscape\_AML\_B Scan : 20334

Andromeda score : 57.238

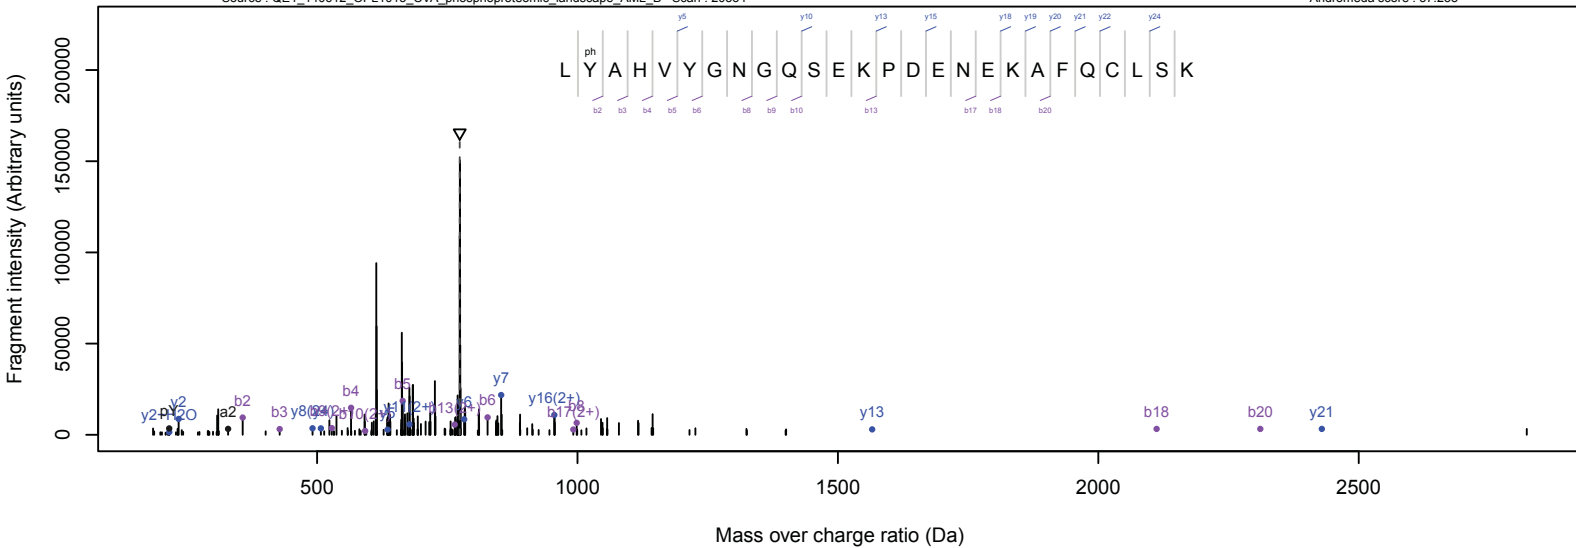

RGLVPM(ox)EENSIY(ph)SSWQEVGEFVVVQR-3+

Source : QE1\_140612\_OPL1013\_CVA\_phosphoproteomic\_landscape\_AML\_C Scan : 47409

Andromeda score : 57.21

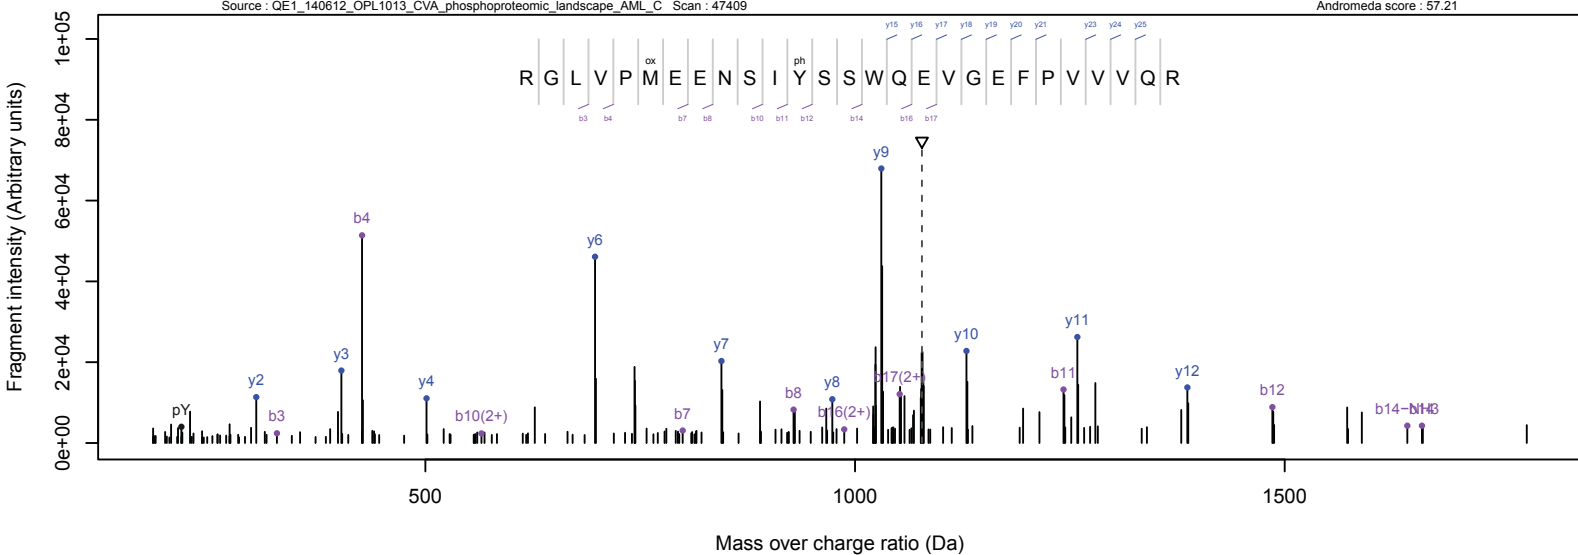

RSCQNLGYT(ph)AASPQAPEAASNTGNAER-3+

Source : QE1\_140612\_OPL1013\_CVA\_phosphoproteomic\_landscape\_AML\_D Scan : 13907

Andromeda score : 57.21

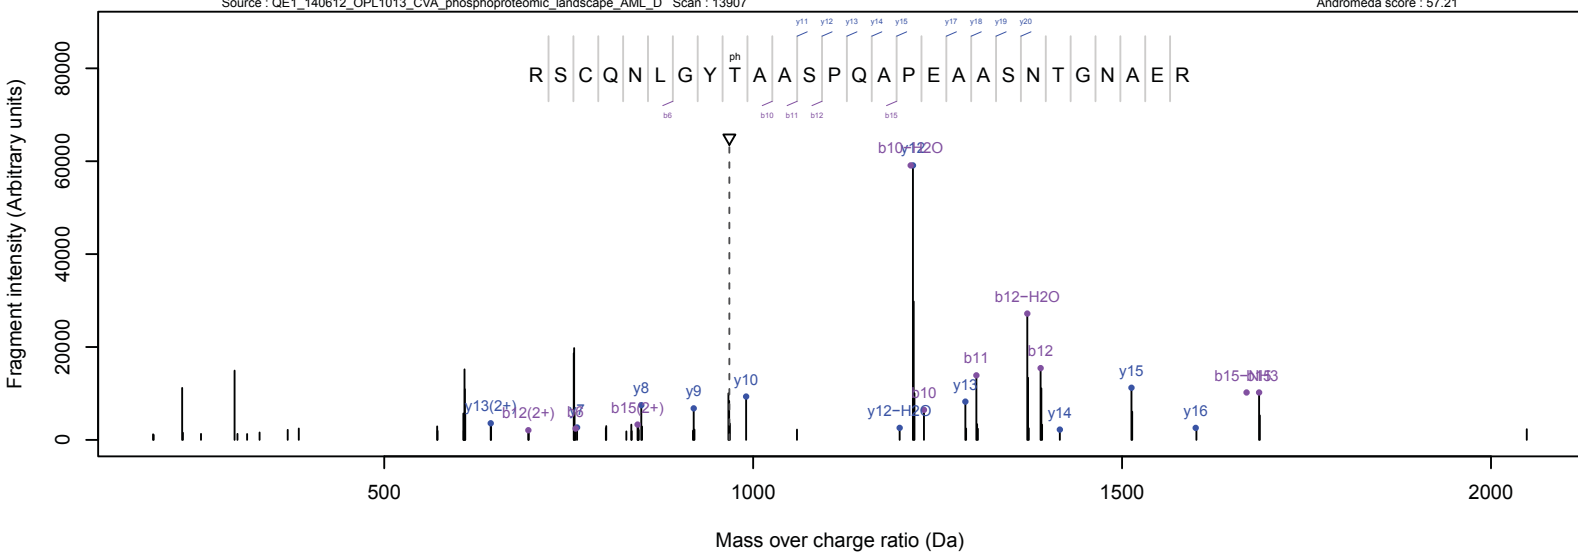

SRPSEAEVPSFDQPPEGSHLPCY(ph)NK-4+

Source : QE1\_140612\_OPL1013\_CVA\_phosphoproteomic\_landscape\_AML\_C Scan : 27449

Andromeda score : 57.21

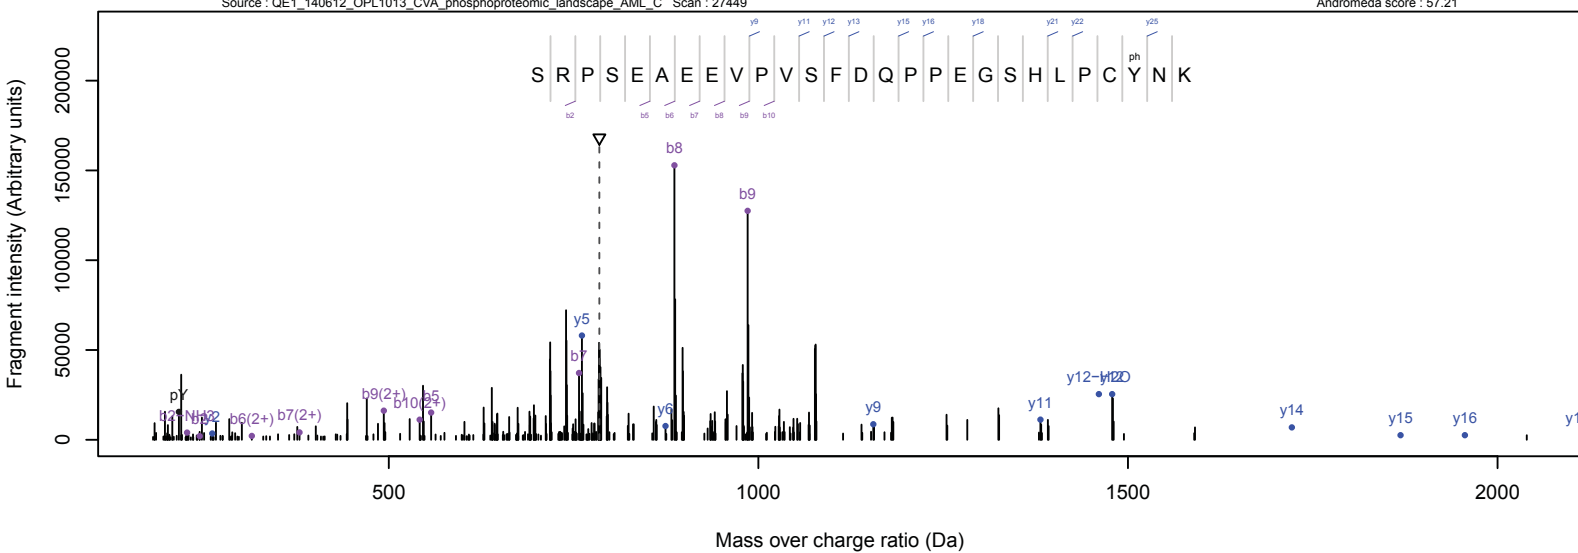

EMVSQYLY(ph)TSK-2+

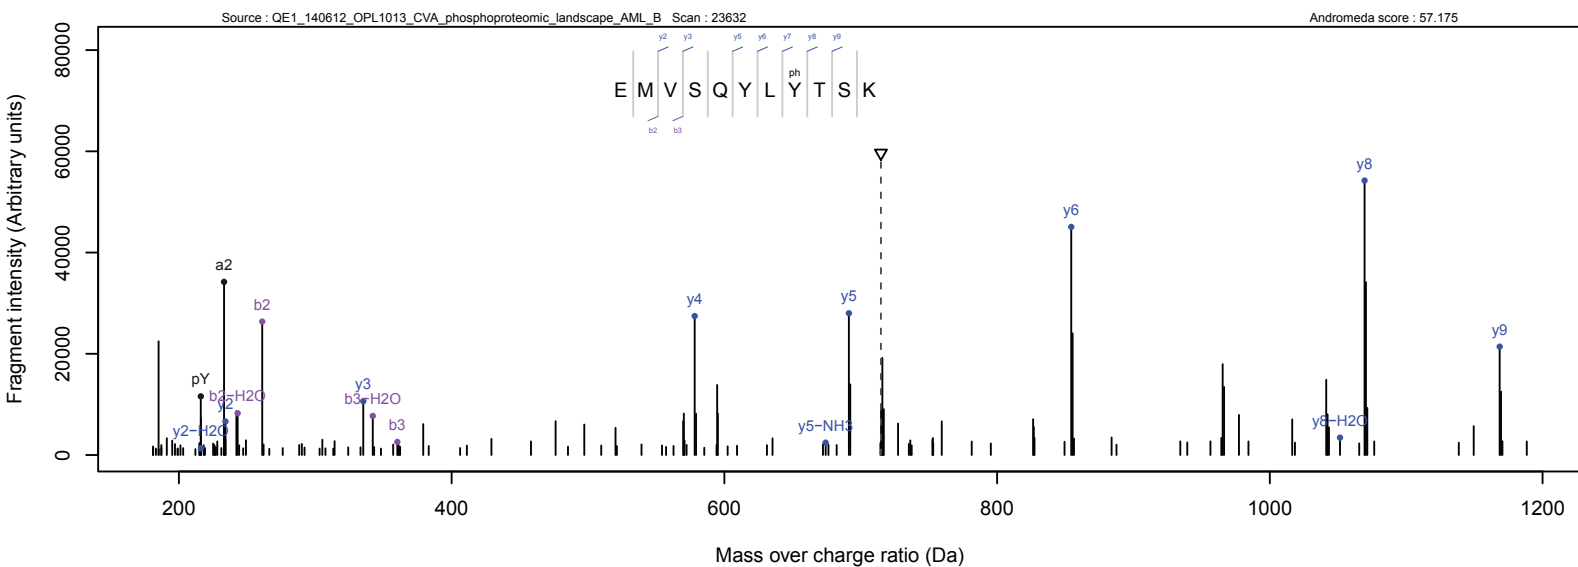

SQY(ph)LQLGPSR-2+

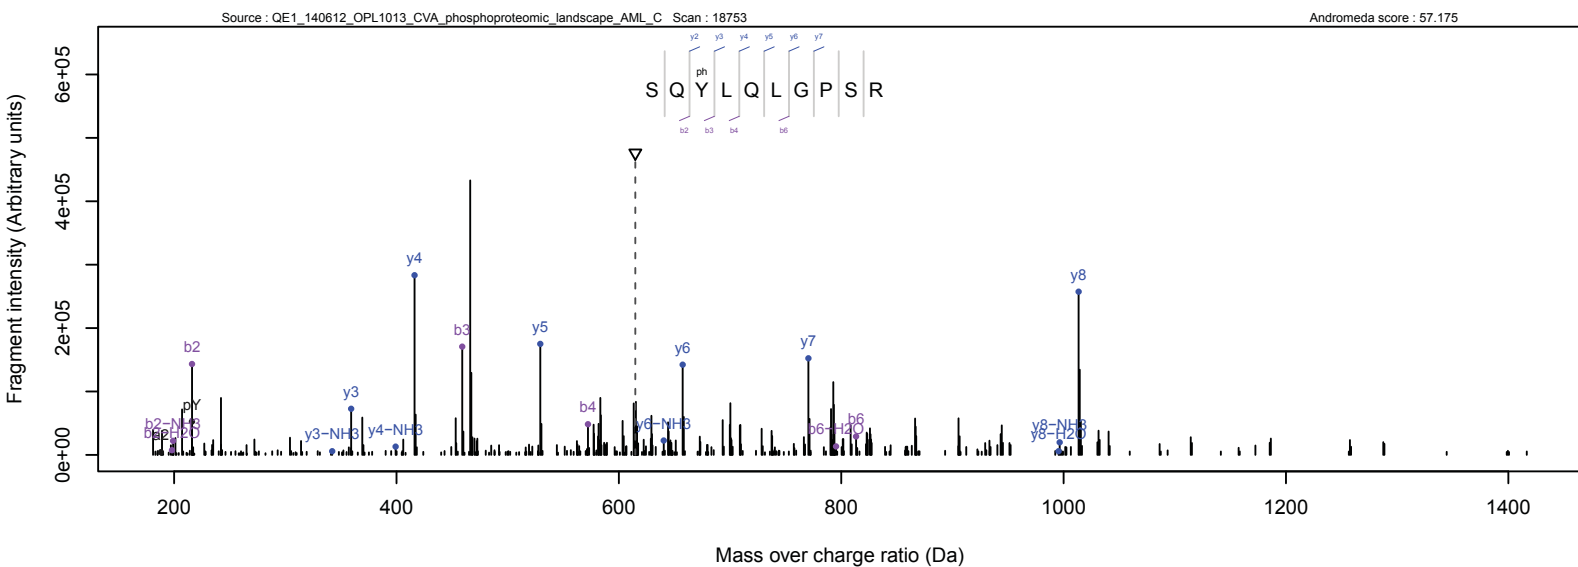

Y(ph)LAEFATGNDRK-2+

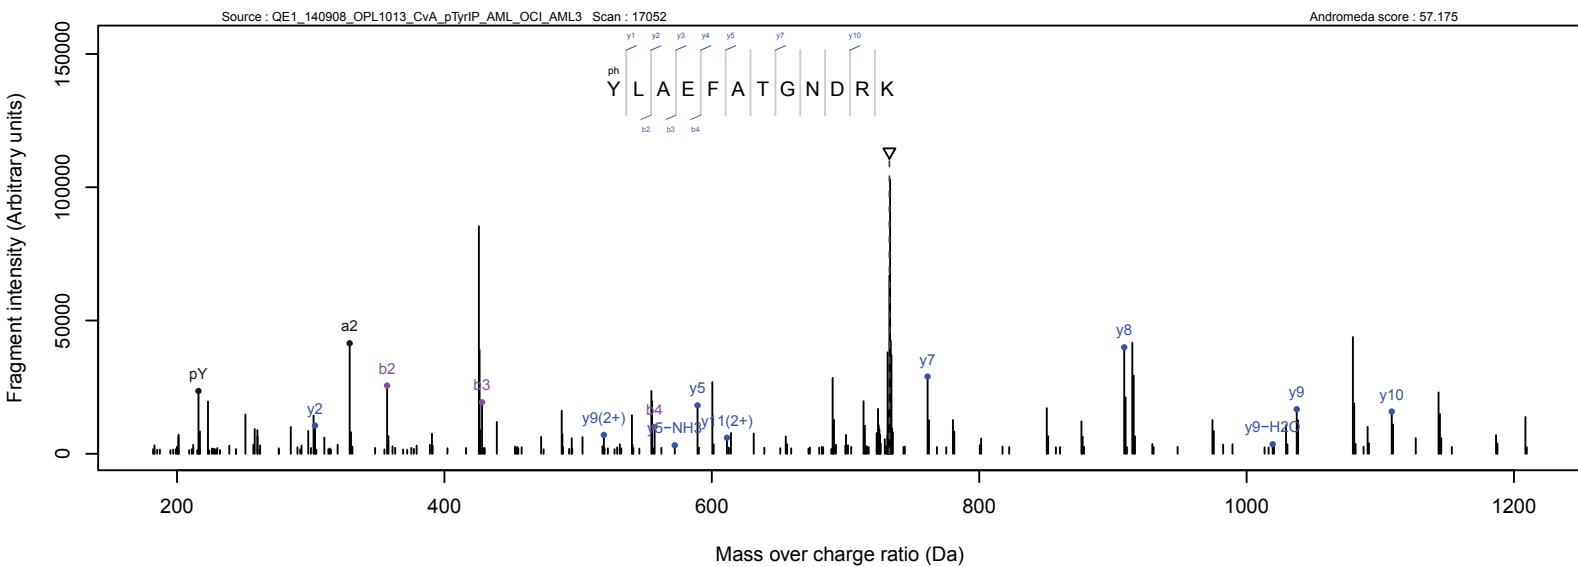

## NLVY(ph)DQSPNR-2+

Source : QE1\_140612\_OPL1013\_CVA\_phosphoproteomic\_landscape\_AML\_D Scan : 9030

Andromeda score : 57.174

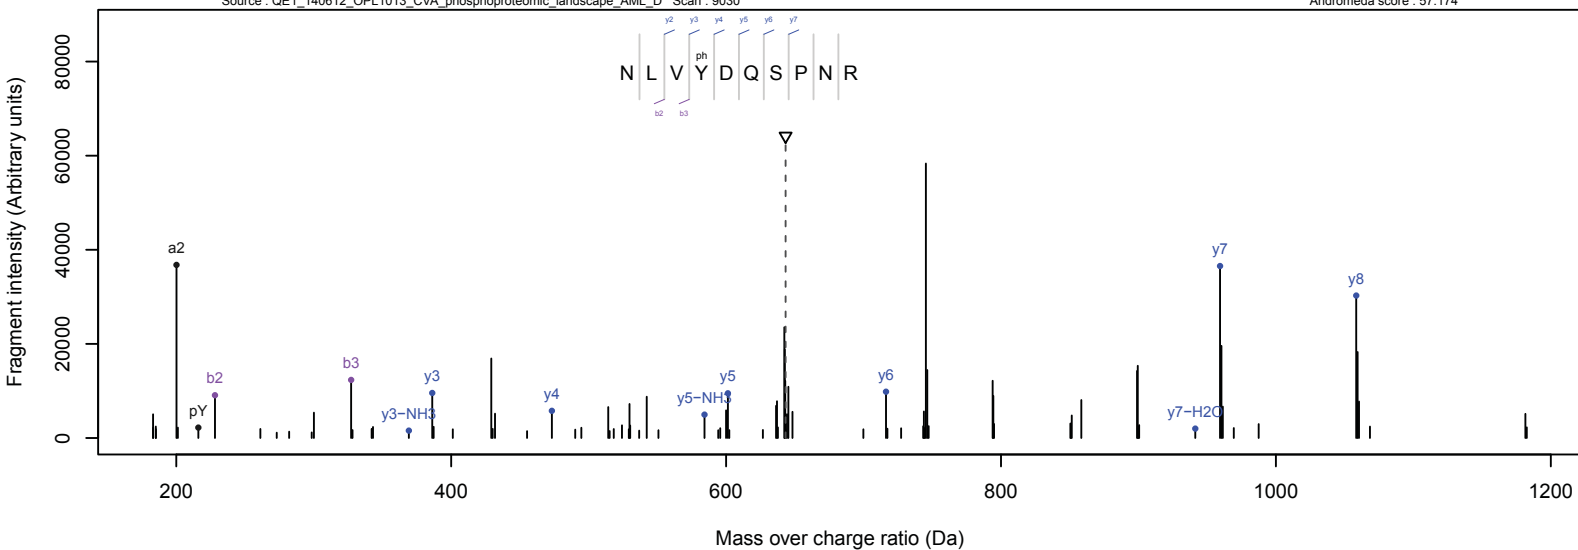

## HEVTICNY(ph)EASANPADHR-3+

Source : QE1\_140612\_OPL1013\_CVA\_phosphoproteomic\_landscape\_AML\_B Scan : 13459

Andromeda score : 57.173

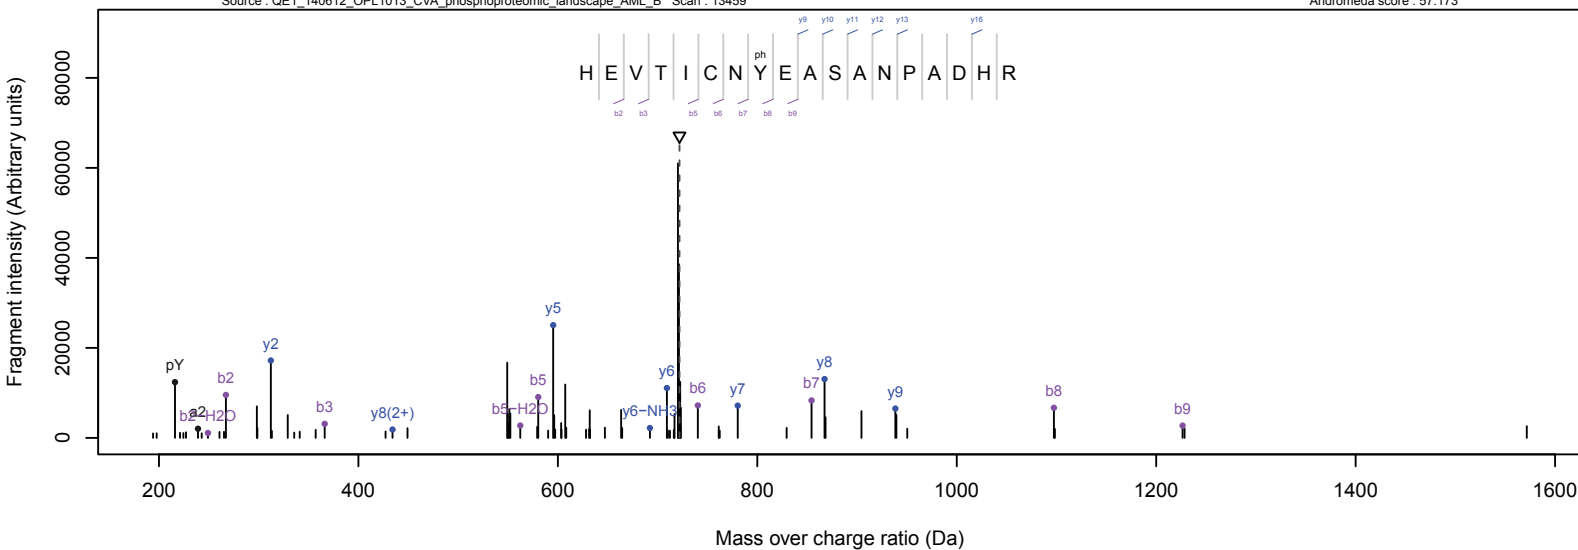

## LHY(ph)PM(ox)VEYCIPTTSGEDVR-3+

Source : QE1\_140612\_OPL1013\_CVA\_phosphoproteomic\_landscape\_AML\_C Scan : 29883

Andromeda score : 57.173

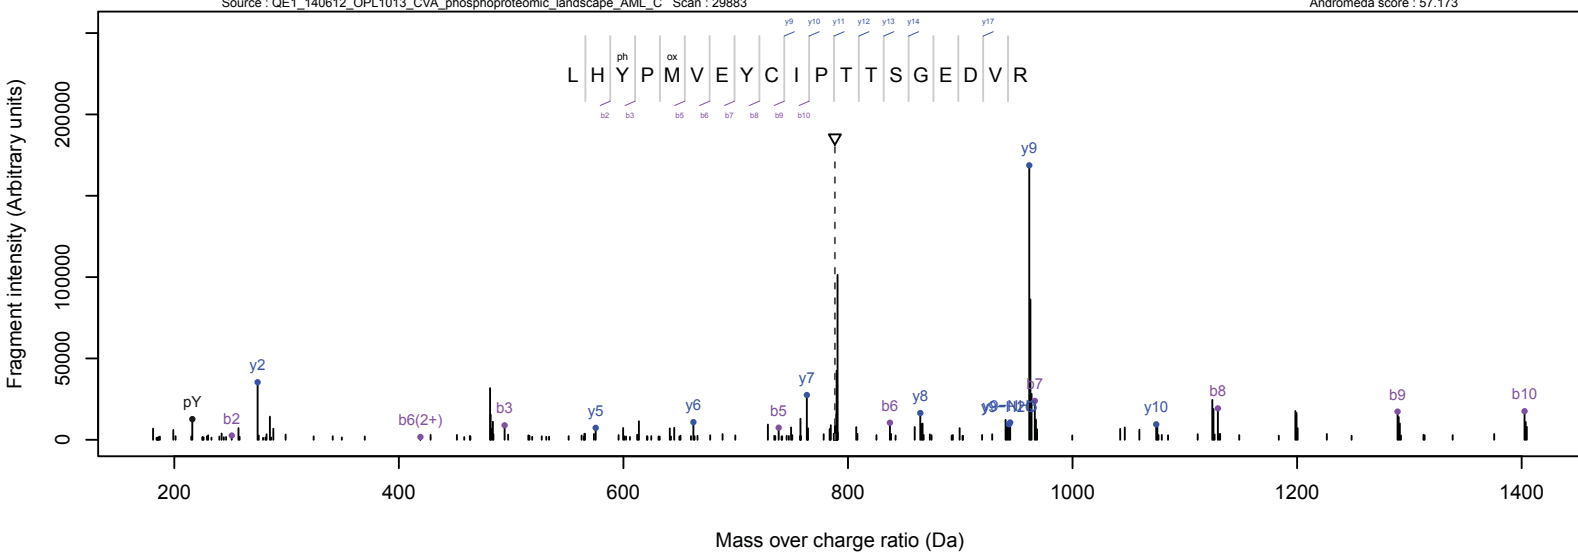



DFTIY(ph)NPLLTASK-2+

Source: QE1\_140908\_OPL1013\_CvA\_pTyrIP\_AML\_Kasumi6 Scan: 41520

Andromeda score: 57.148

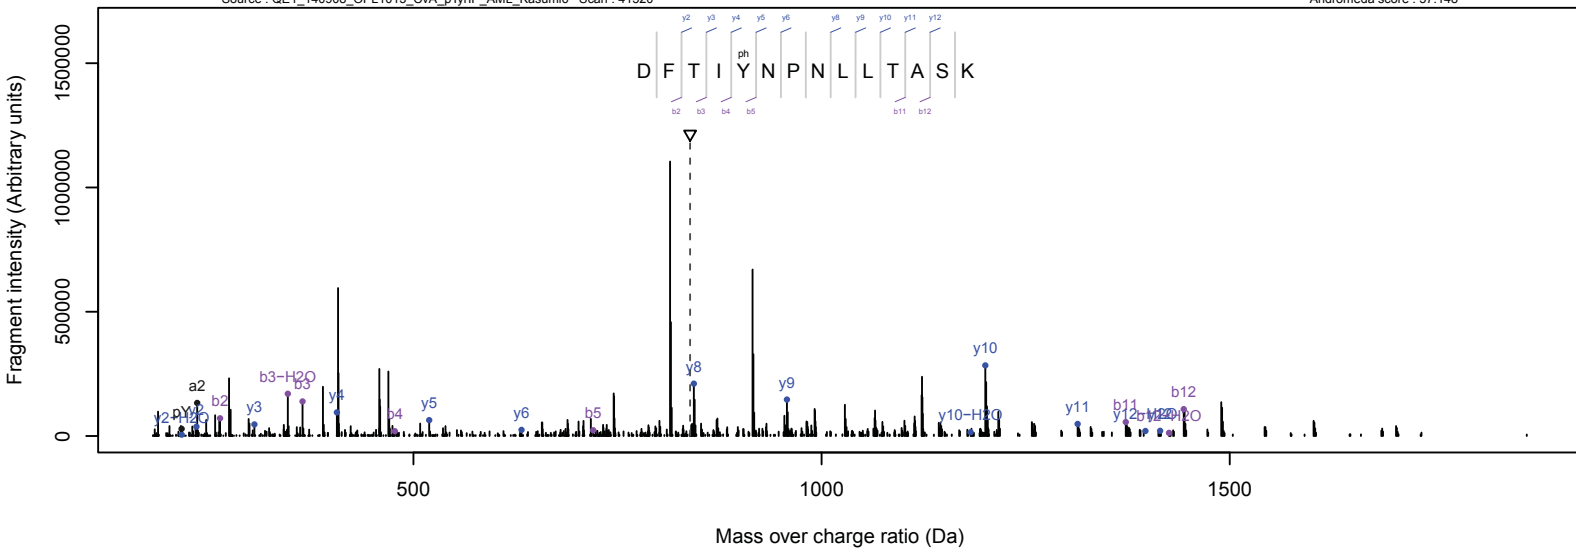

KVVDATDASYPVNTCVHY(ph)LKLPESSEEIMR-4+

Source: QE1\_140612\_OPL1013\_CVA\_phosphoproteomic\_landscape\_AML\_B Scan: 37411

Andromeda score: 57.144

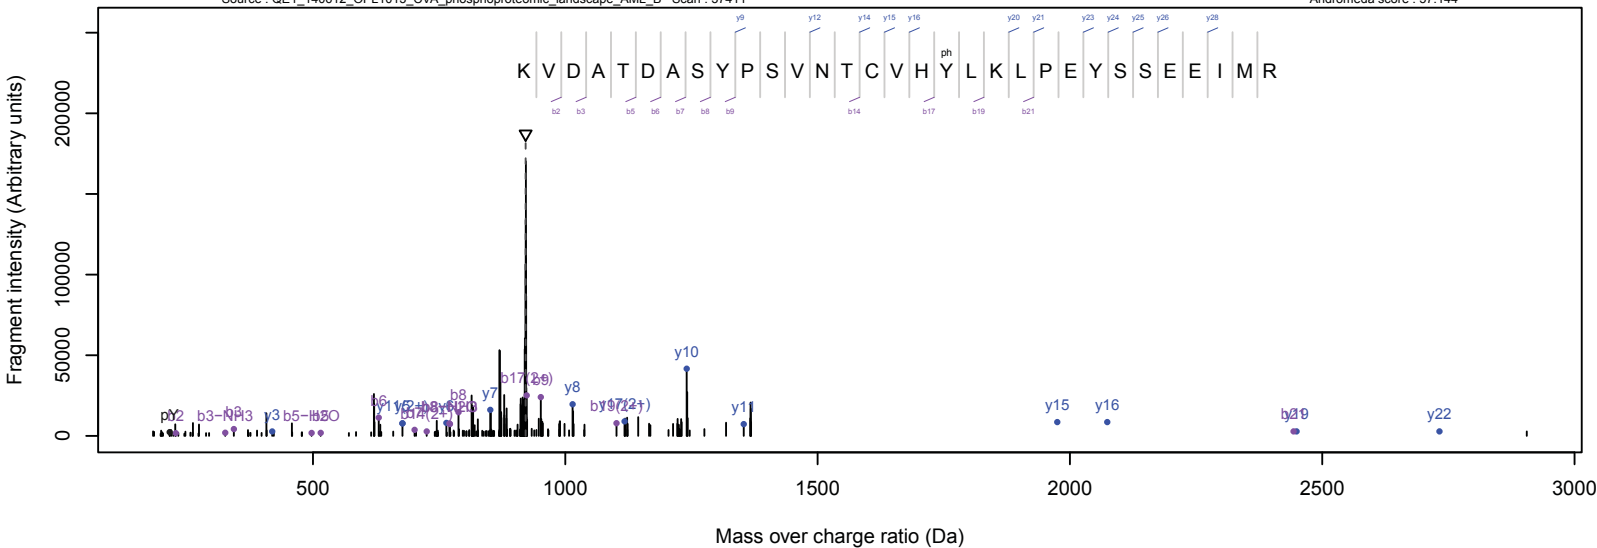

AHT(ph)PTPGIYMGRPTHSGGGGGGGGGGGGGGR-4+

Source: QE1\_140908\_OPL1013\_CvA\_pTyrIP\_AML\_HL60 Scan: 7984

Andromeda score: 57.097

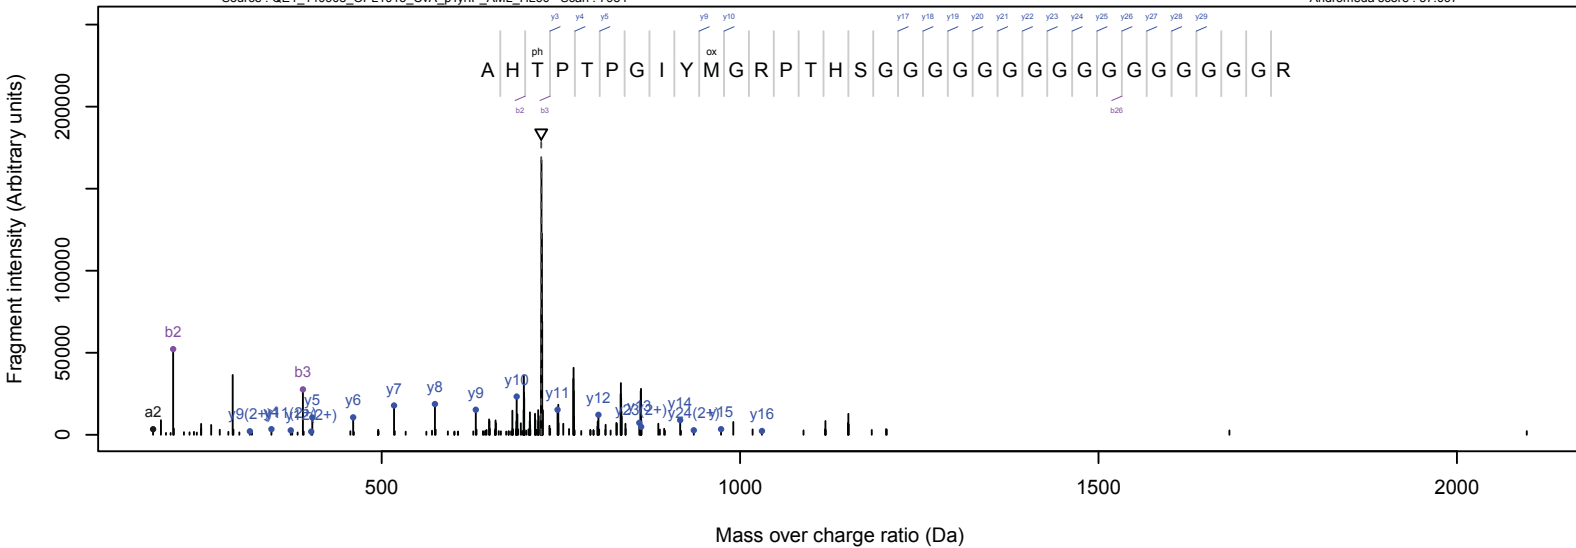

## SGISTNHADYSSSPAGSPGAQVSLY(ph)NSPSVASPAR-3+

Source : QE1\_140612\_OPL1013\_CVA\_phosphoproteomic\_landscape\_AML\_F Scan : 25958

Andromeda score : 57.088

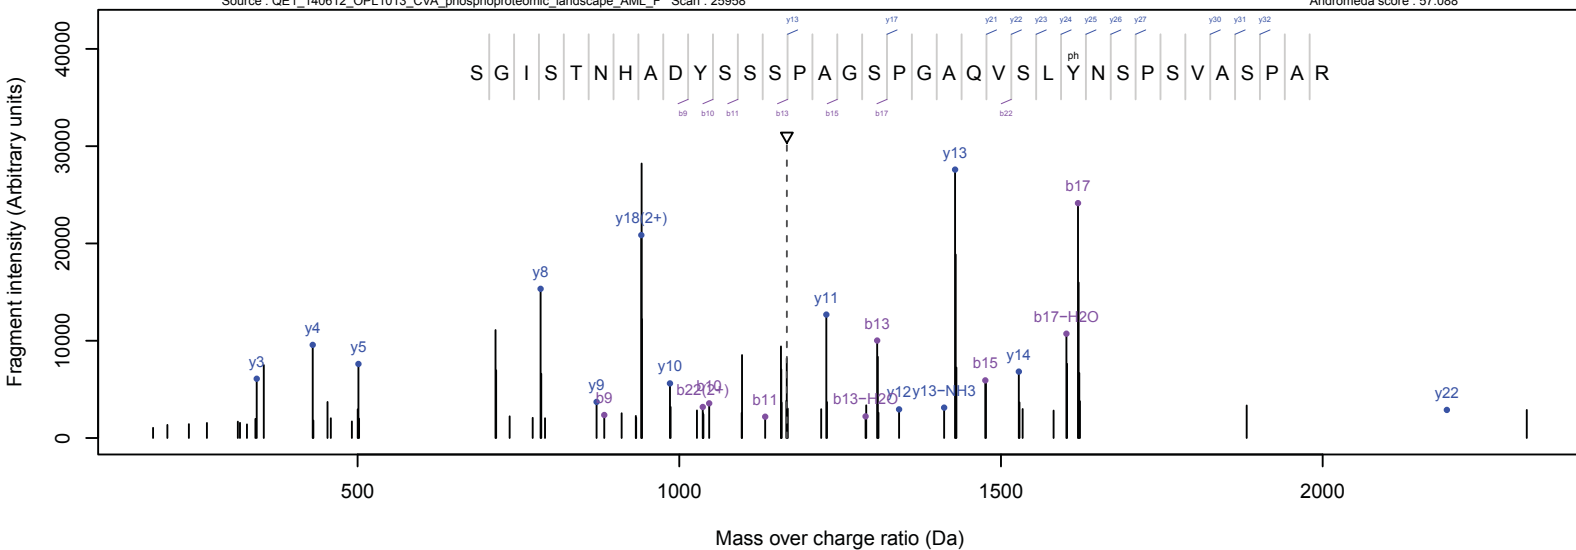

## MMSKPQTSGAYVLNKVPVK-3+

Source : QE1\_140612\_OPL1013\_CVA\_phosphoproteomic\_landscape\_AML\_C Scan : 24097

Andromeda score : 57.045

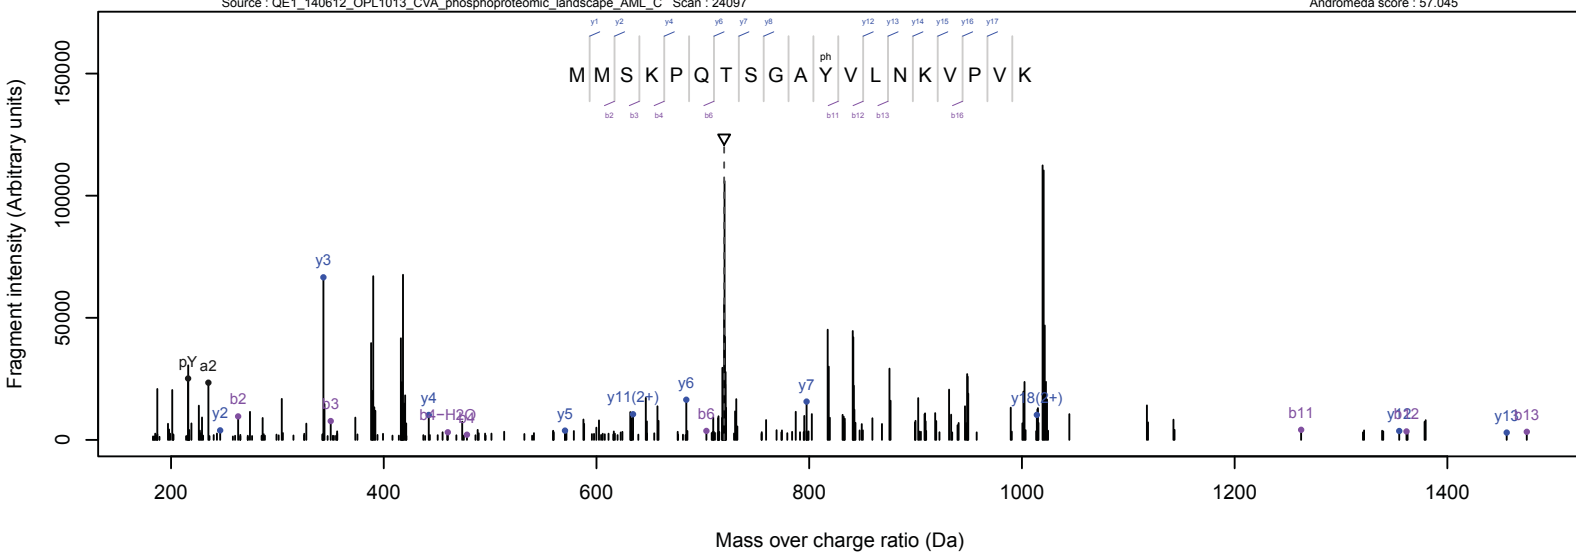

## VSRDTLYEAVR-3+

Source : QE1\_140908\_OPL1013\_CvA\_pTyrIP\_AML\_HEL Scan : 16676

Andromeda score : 57.042

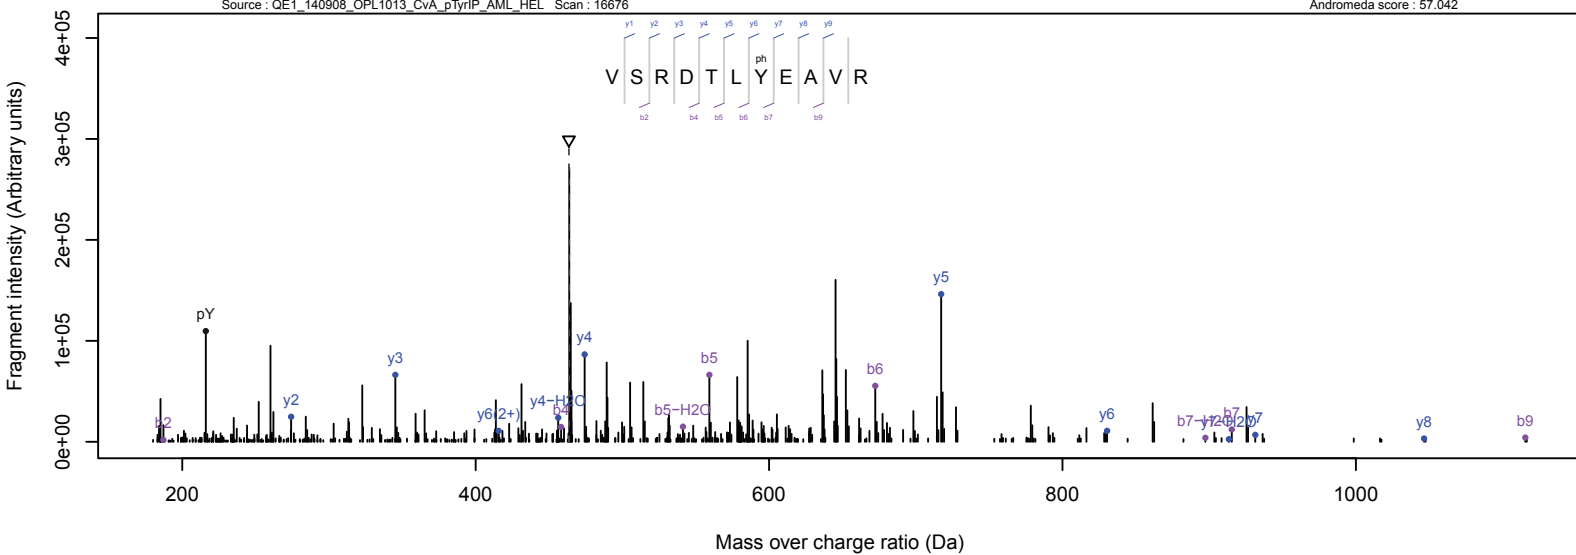

FIY(ph)EAWQGV<sup>ER</sup>-2+

Source: QE1\_140908\_OPL1013\_CvA\_pTyrIP\_AML\_HEL Scan: 33870

Andromeda score: 57.003

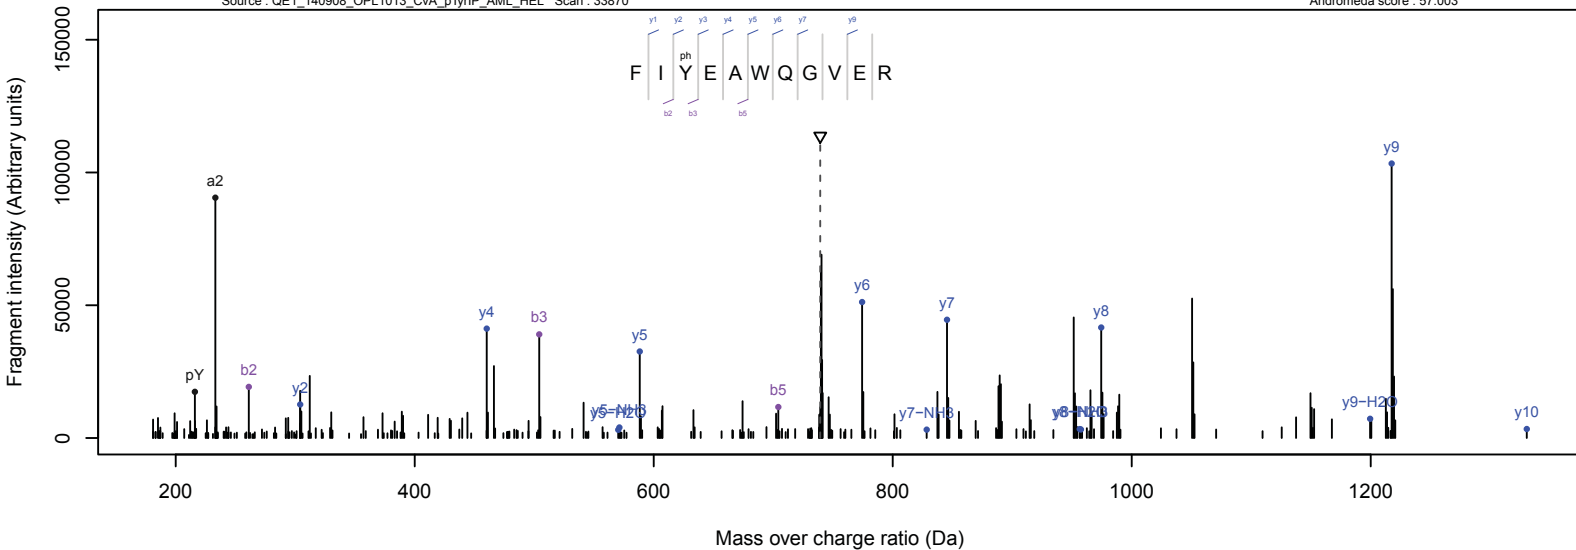

## TSAY(ph)TLIAPNIR-2+

Source: QE1\_140612\_OPL1013\_CVA\_phosphoproteomic\_landscape\_AML\_C Scan: 29030

Andromeda score: 56.956

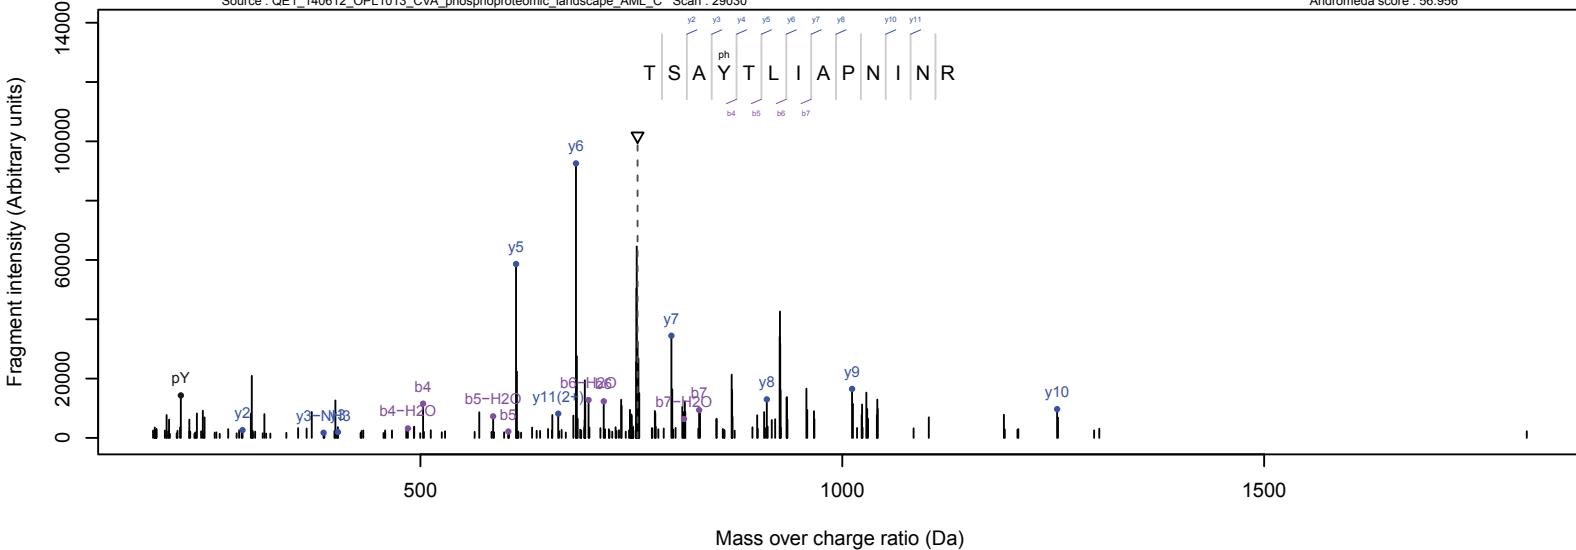

## QGTY(ph)GGYFR-2+

Source: QE1\_140822\_OPL1013\_CvA\_pTyrIP\_AML\_cell\_lines\_part2\_E Scan: 9062

Andromeda score: 56.916

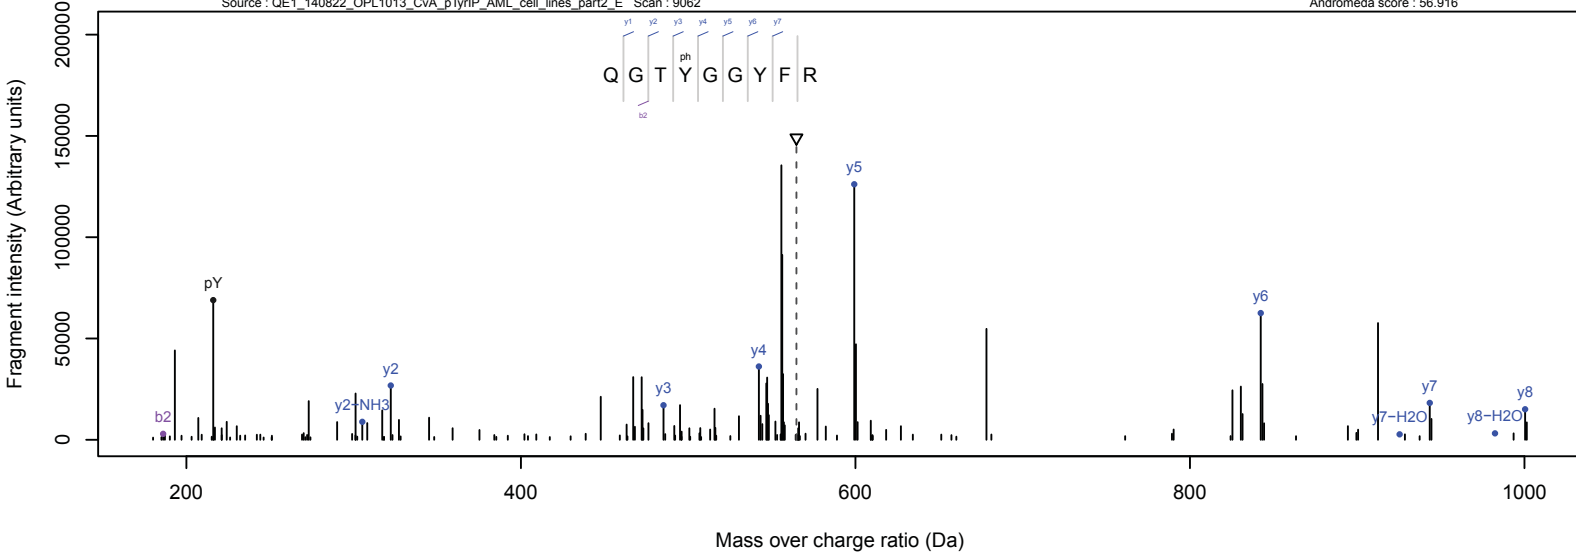

**FNKIPFY(ph)LQPHASSGAK-3+**

Source : QE1\_140612\_OPL1013\_CVA\_phosphoproteomic\_landscape\_AML\_C Scan : 28825

Andromeda score : 56.906

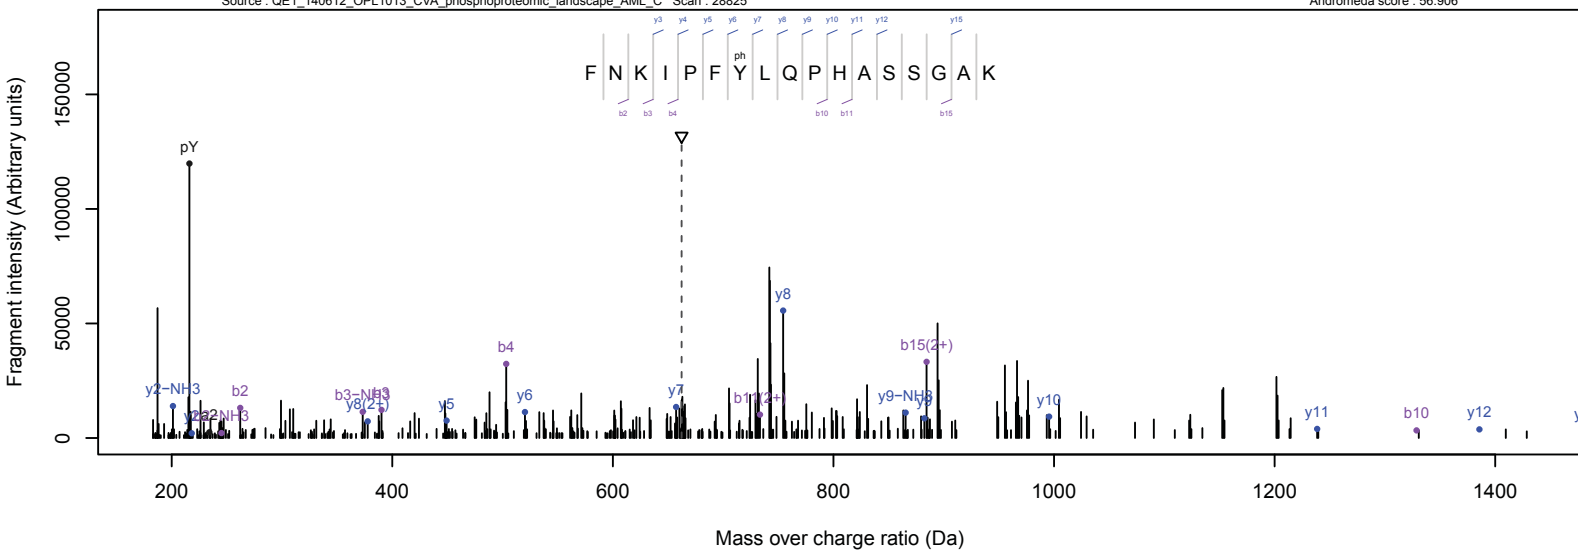

**TNHIGHT(ph)GYLNTVTVSPDGLSCASGGKDGQAMLWDLNEGK-4+**

Source : QE1\_140612\_OPL1013\_CVA\_phosphoproteomic\_landscape\_AML\_B Scan : 37250

Andromeda score : 56.903

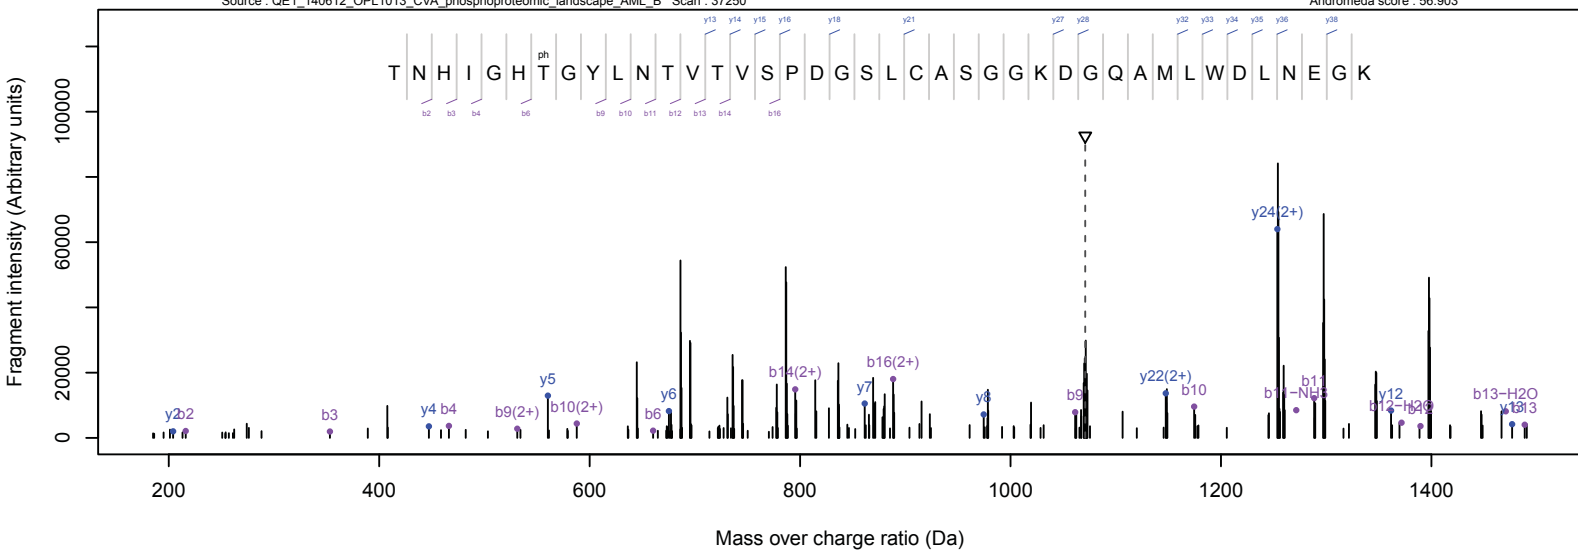

**VCYYDGDVGNYPYGGQHPMKPHR-4+**

Source : QE1\_140612\_OPL1013\_CVA\_phosphoproteomic\_landscape\_AML\_C Scan : 22999

Andromeda score : 56.882

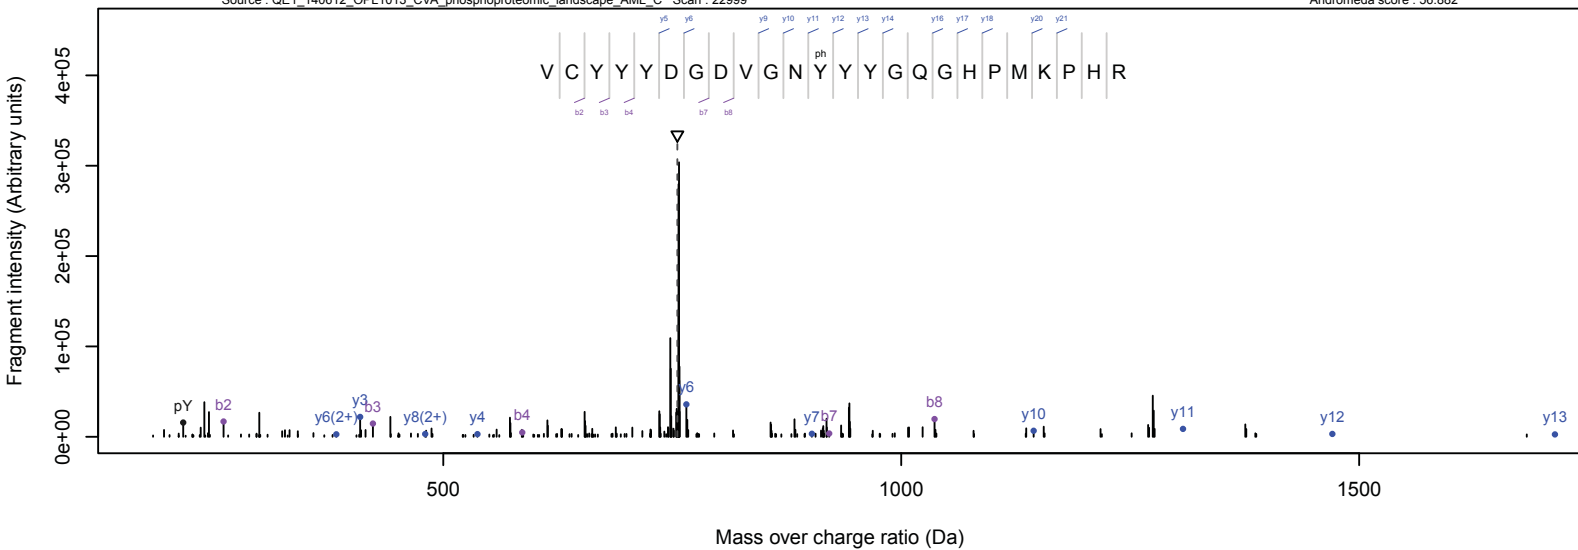

YQQIESY(ph)YPVAPHPTQIRPSYL<sup>R</sup>-3+

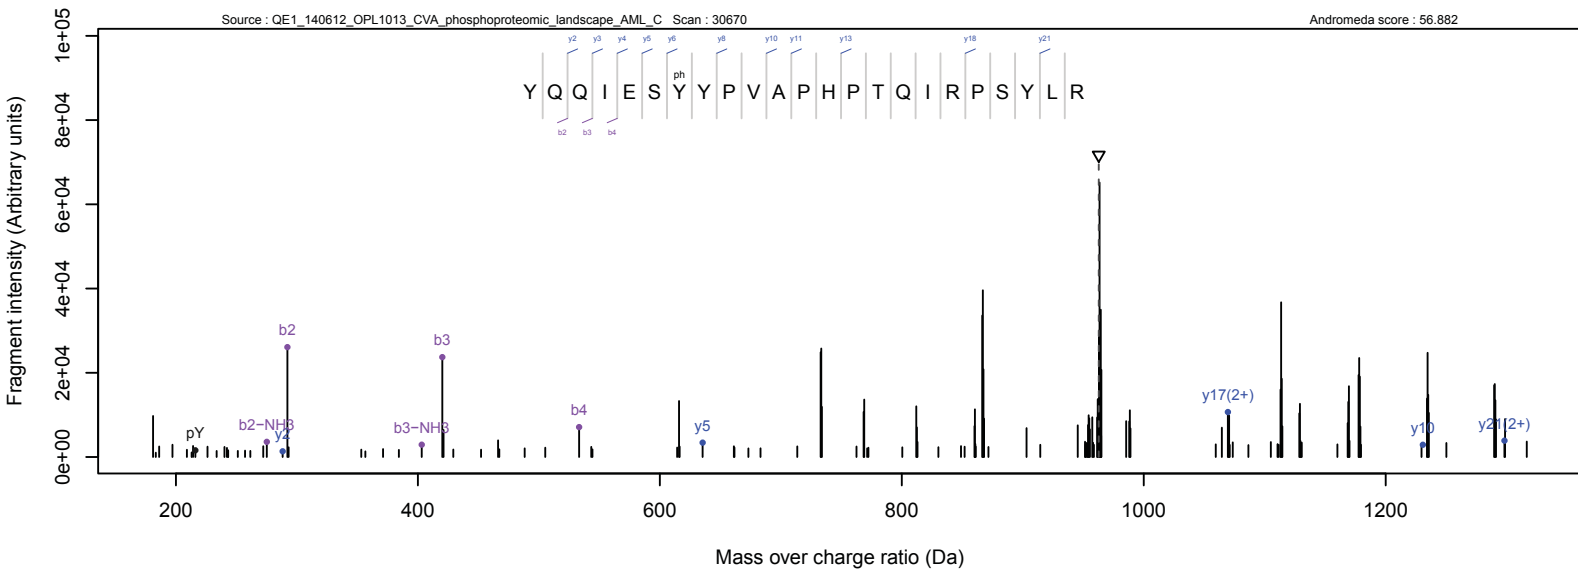

SESAPTLHPY(ph)SPLSPK<sup>-3+</sup>

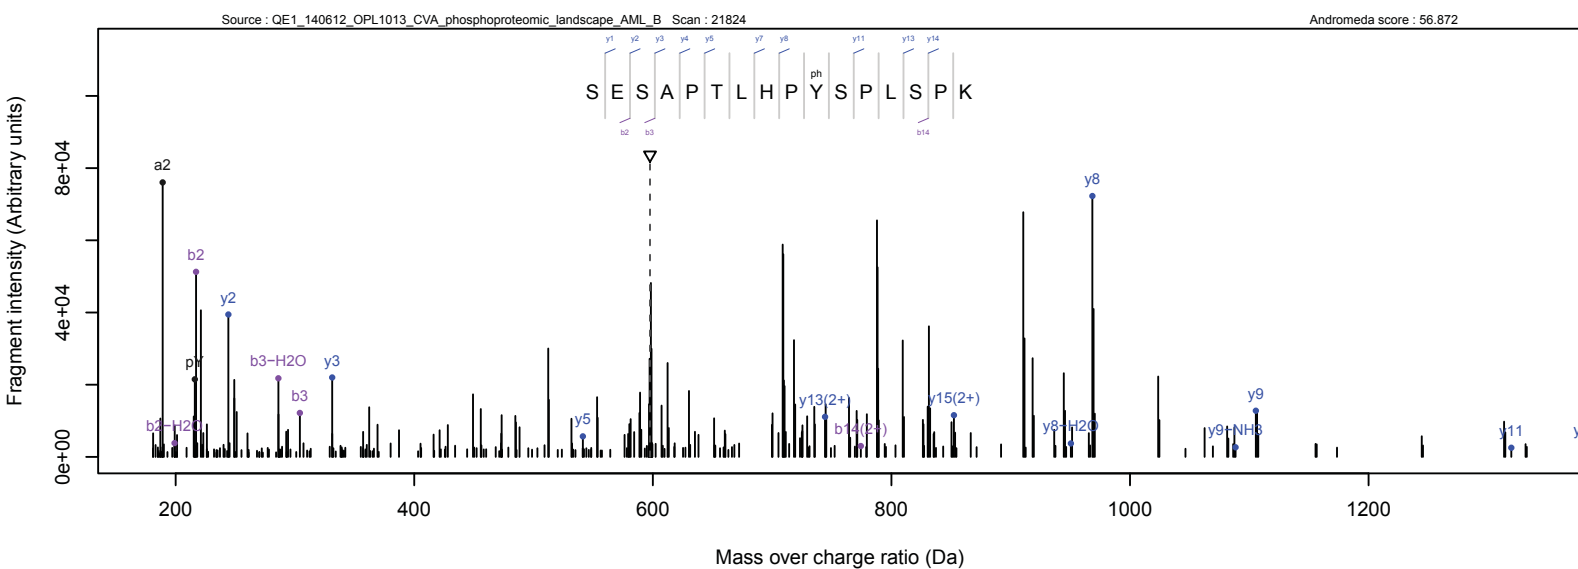

TPLPLCSSQAQMDY(ph)RR<sup>-3+</sup>

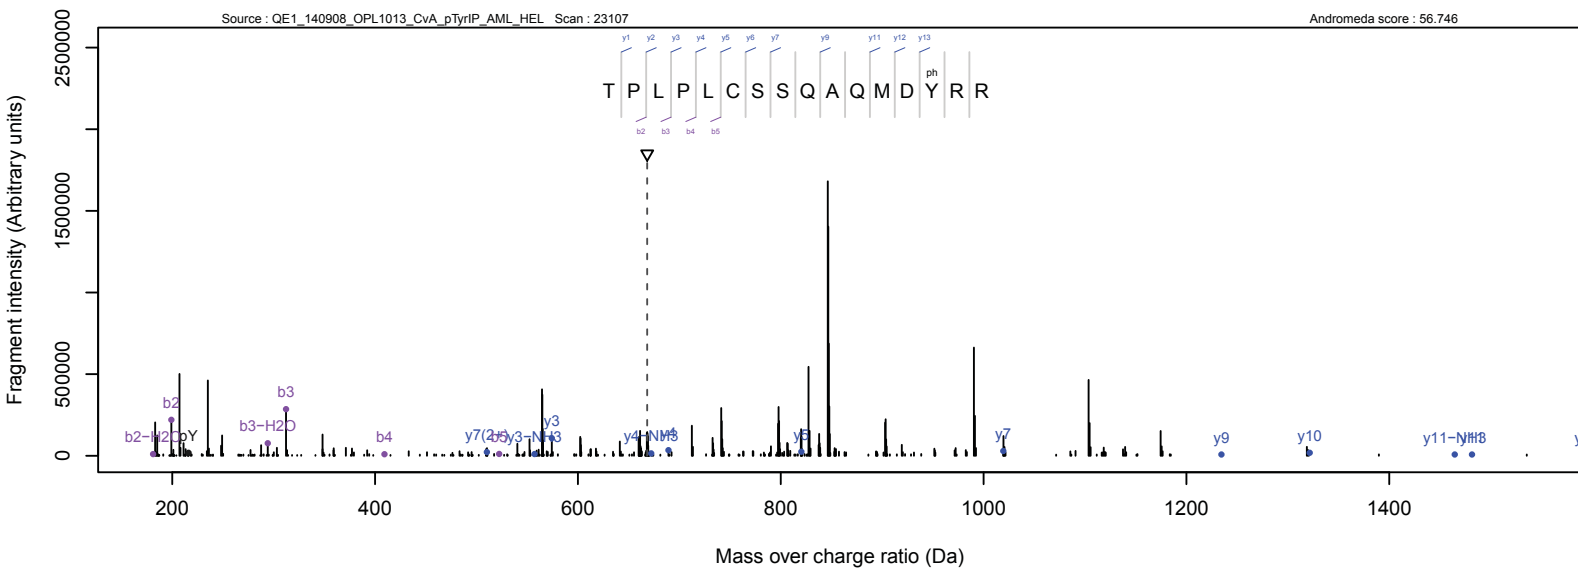

## NVDFNY(ph)ATK-2+

Source : QE1\_140612\_OPL1013\_CVA\_phosphoproteomic\_landscape\_AML\_A Scan : 12608

Andromeda score : 56.725

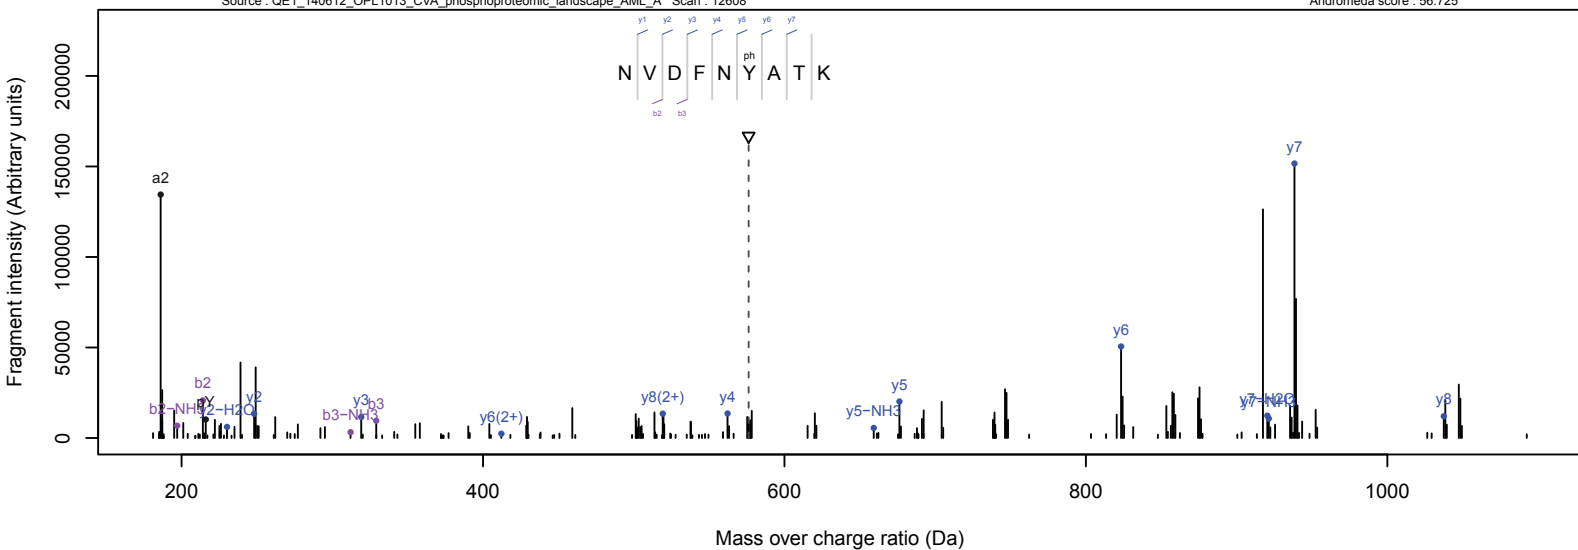

## IHPMAYQLQLQAASNFKS(ph)PVK-3+

Source : QE1\_140612\_OPL1013\_CVA\_phosphoproteomic\_landscape\_AML\_B Scan : 32752

Andromeda score : 56.719

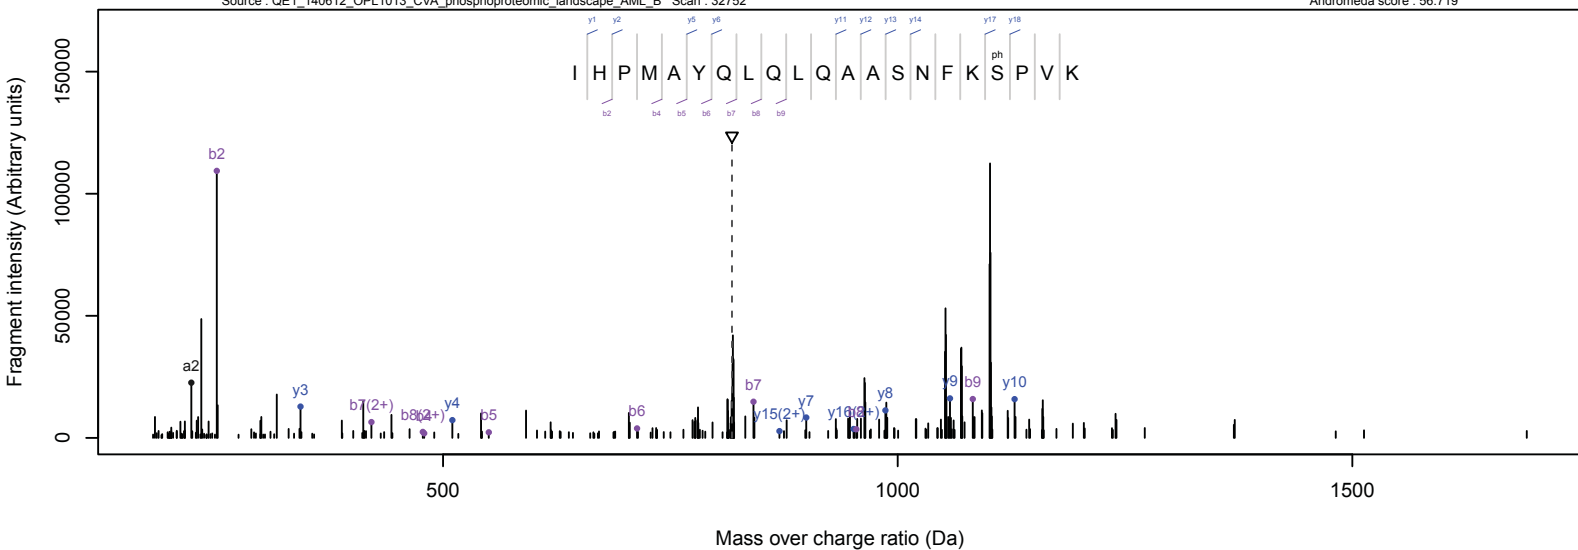

## FY(ph)PVYPAPNVVANTSGSGPK-2+

Source : QE1\_140612\_OPL1013\_CVA\_phosphoproteomic\_landscape\_AML\_B Scan : 33720

Andromeda score : 56.708

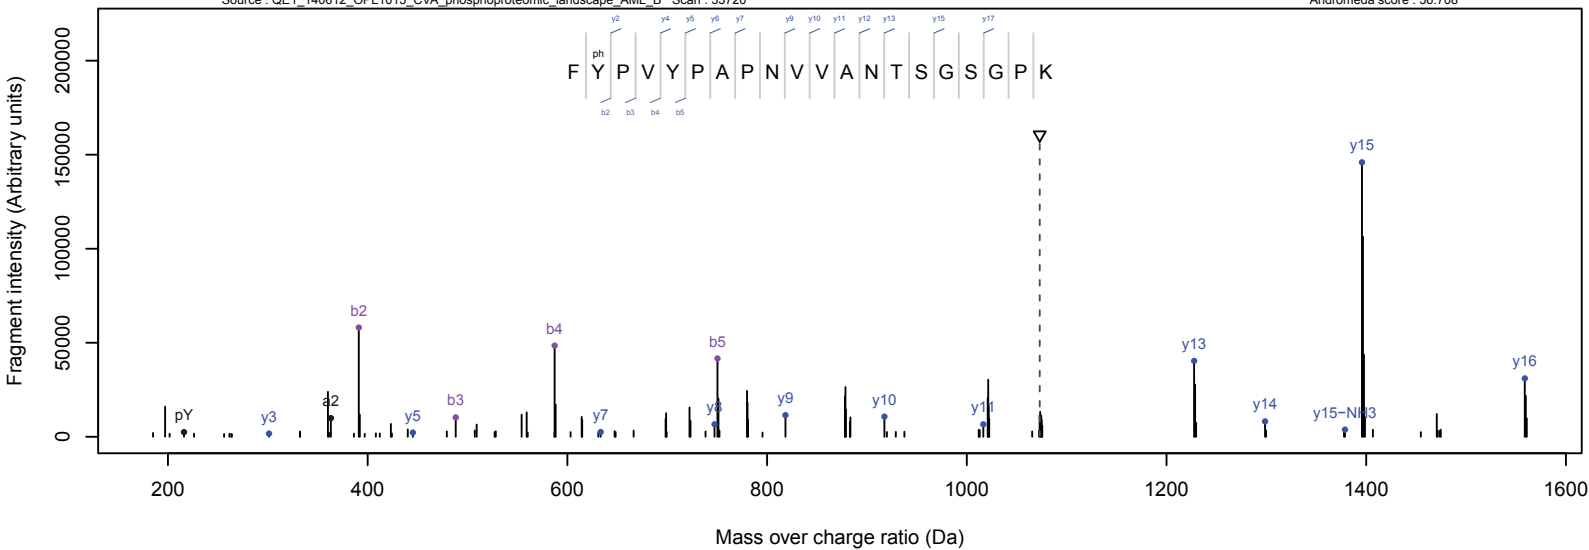

HHLHDADSISSIDSTSS<sup>ph</sup>YFNHYR-3+

Source : QE1\_140612\_OPL1013\_CVA\_phosphoproteomic\_landscape\_AML\_C Scan : 23926

Andromeda score : 56.684

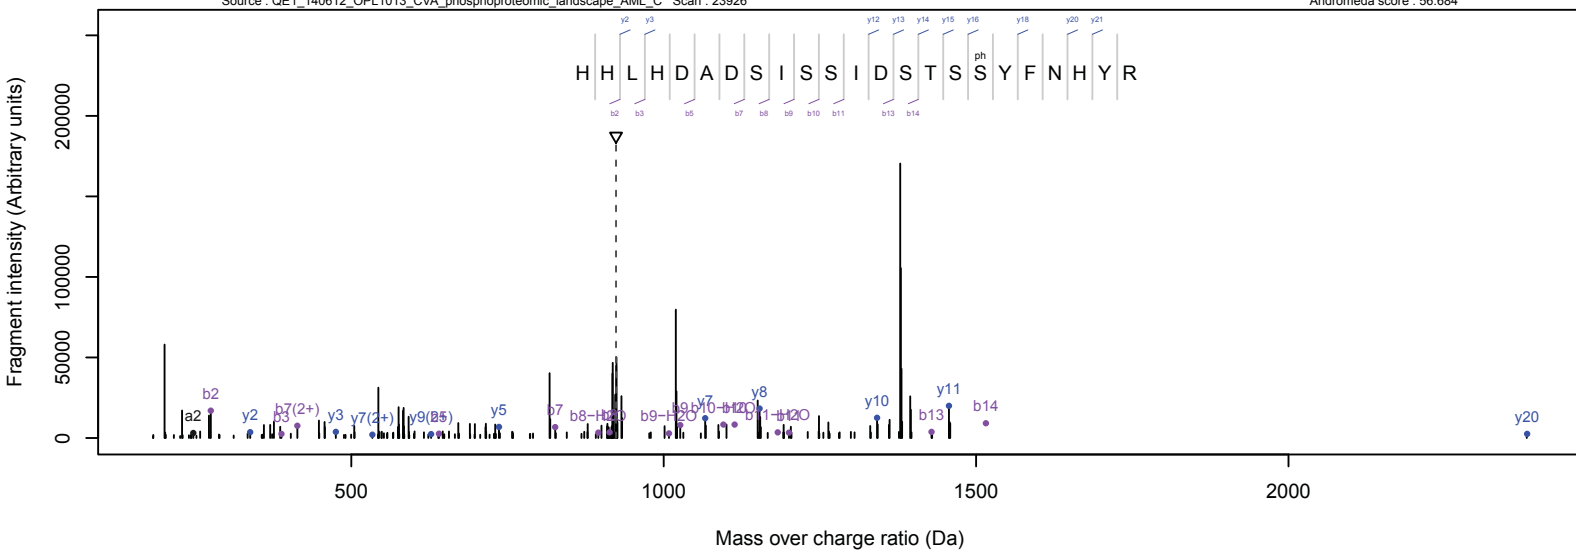RVY<sup>ph</sup>MQSQANQITFGQPLDIQSR-3+

Source : QE1\_140612\_OPL1013\_CVA\_phosphoproteomic\_landscape\_AML\_C Scan : 34079

Andromeda score : 56.681

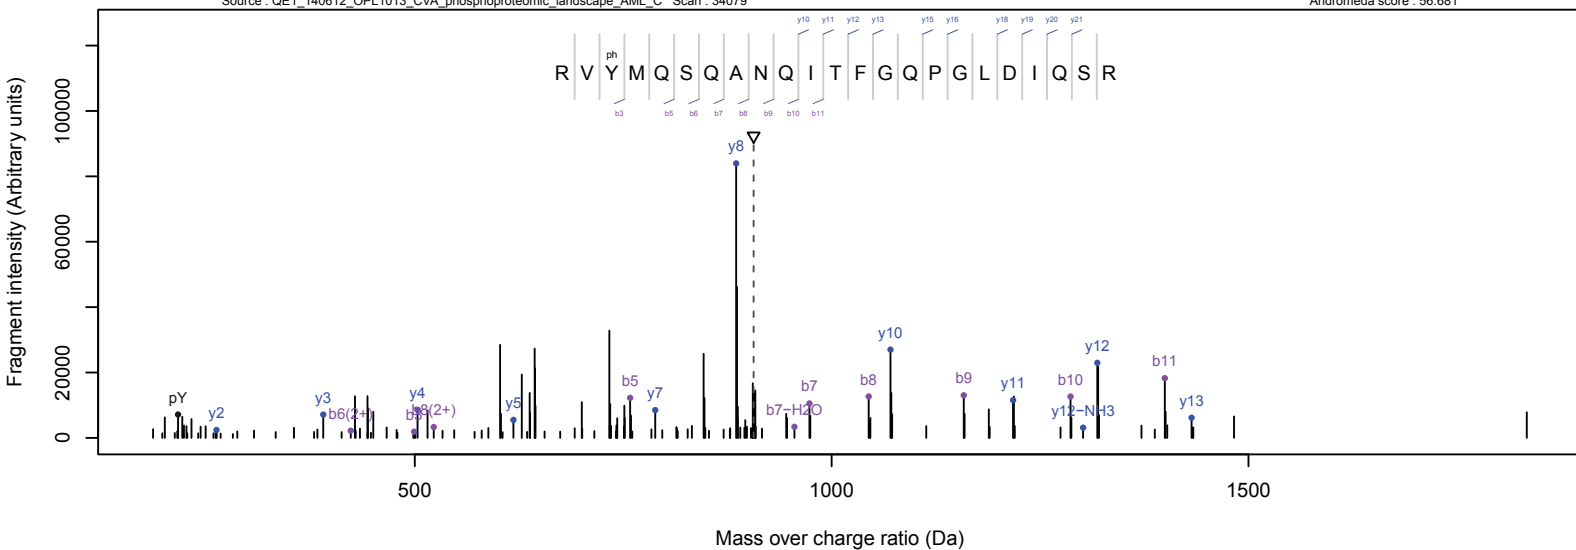TPQTVAGY<sup>ph</sup>TIPPGHQVCVSP TVNQR-3+

Source : QE1\_140612\_OPL1013\_CVA\_phosphoproteomic\_landscape\_AML\_C Scan : 25630

Andromeda score : 56.681

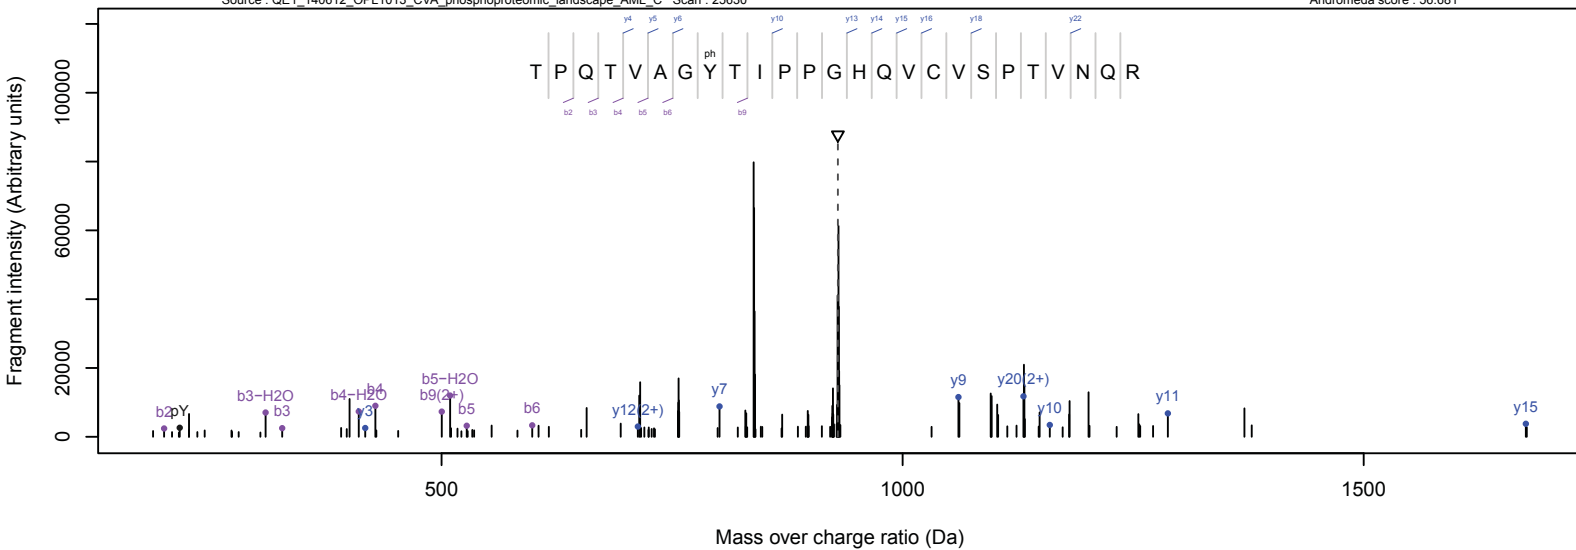

## VY(ph)ALPEDLVEVNPK-2+

Source: QE1\_140612\_OPL1013\_CVA\_phosphoproteomic\_landscape\_AML\_D Scan: 38666

Andromeda score: 56.65

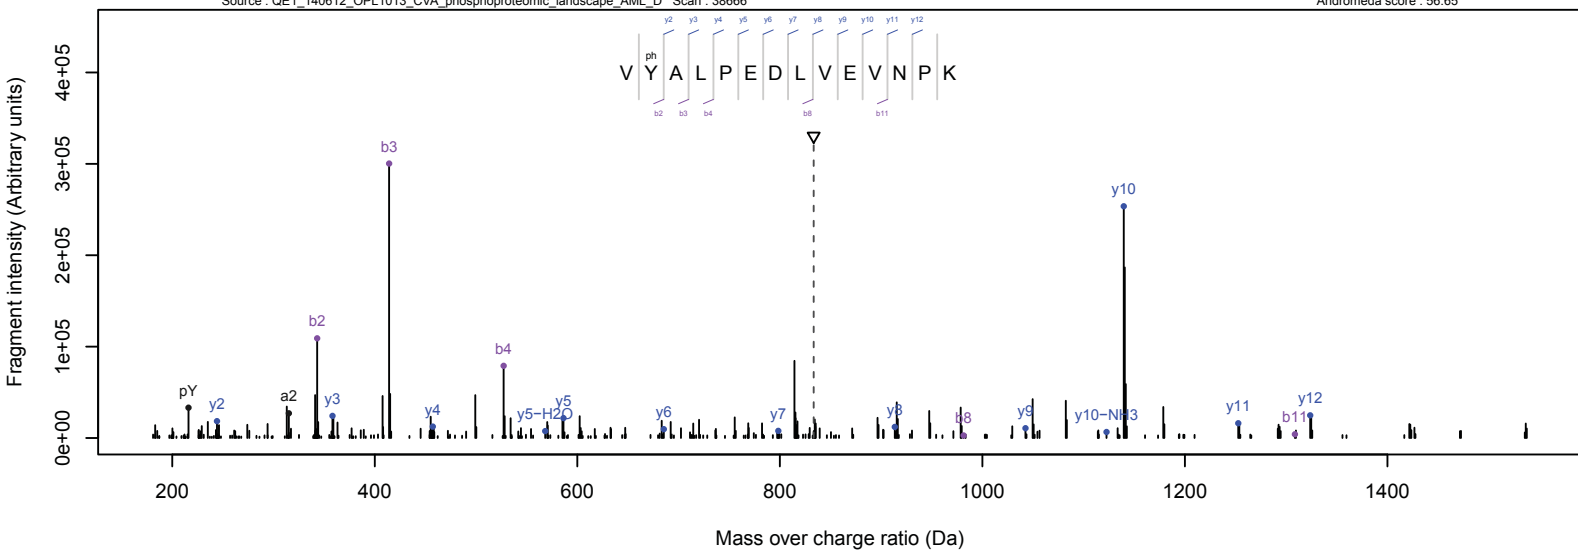

## AADIAEALY(ph)SVPR-2+

Source: QE1\_140612\_OPL1013\_CVA\_phosphoproteomic\_landscape\_AML\_C Scan: 36301

Andromeda score: 56.569

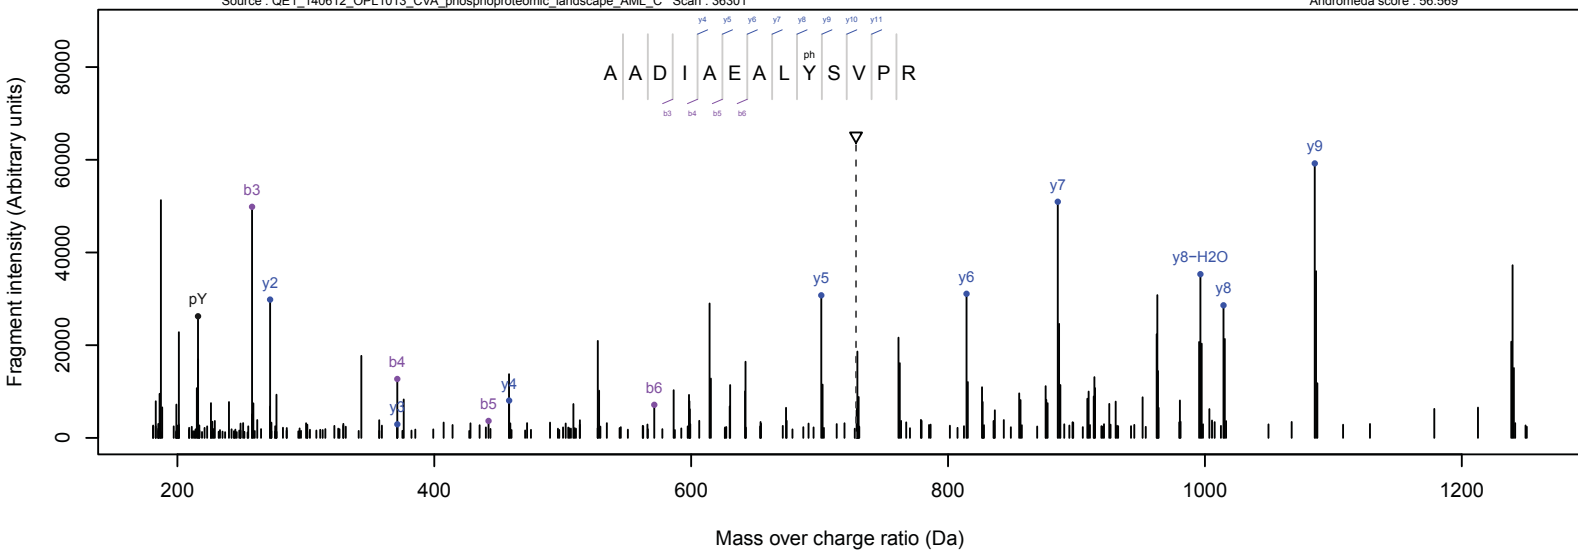

## Y(ph)LAASYISQSLAR-2+

Source: QE1\_140612\_OPL1013\_CVA\_phosphoproteomic\_landscape\_AML\_C Scan: 33483

Andromeda score: 56.569

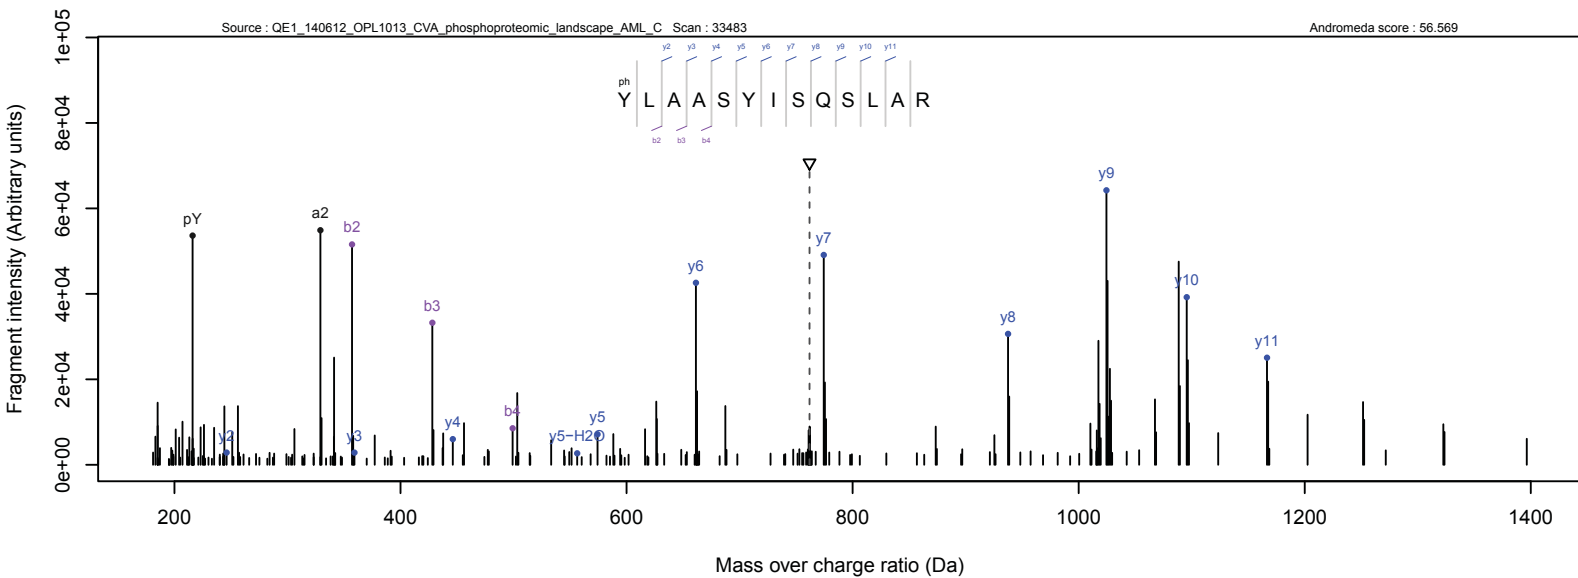



AVPEGHEY<sup>(ph)</sup>YR-3+

Source : QE1\_140612\_OPL1013\_CVA\_phosphoproteomic\_landscape\_AML\_C Scan : 6047

Andromeda score : 56.548

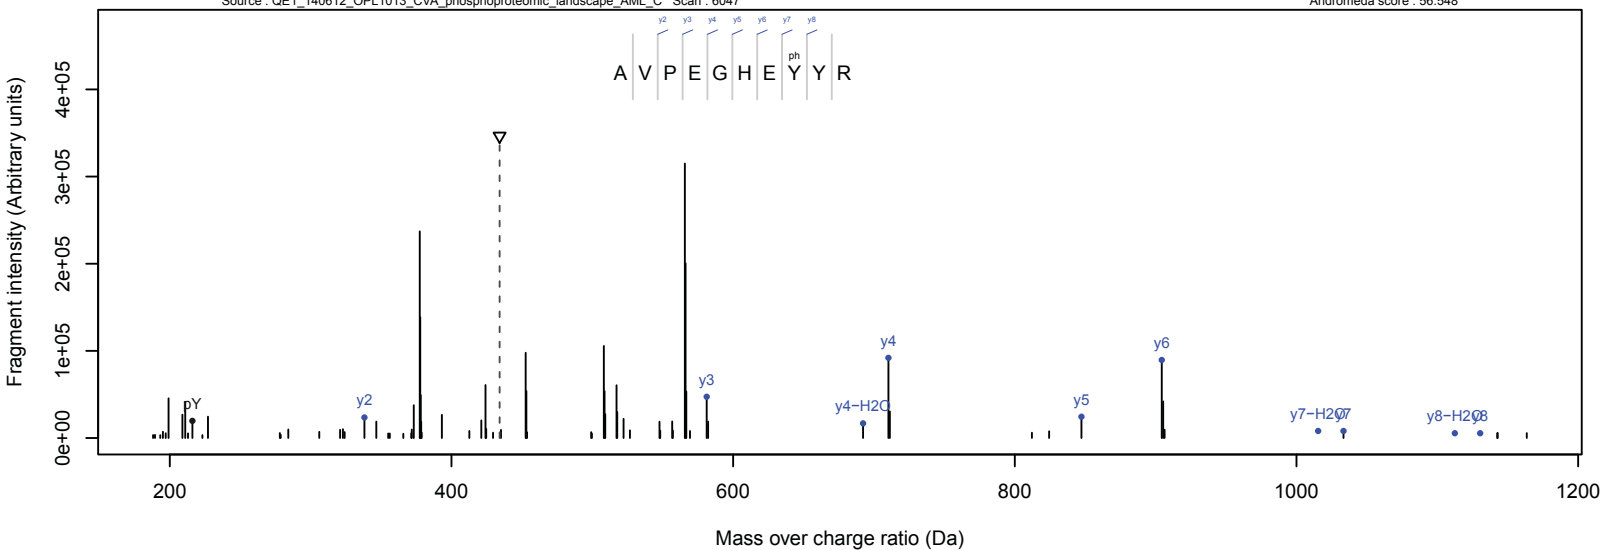ASY<sup>(ph)</sup>VAPLTAQPATYR-2+

Source : QE1\_140612\_OPL1013\_CVA\_phosphoproteomic\_landscape\_AML\_C Scan : 24270

Andromeda score : 56.514

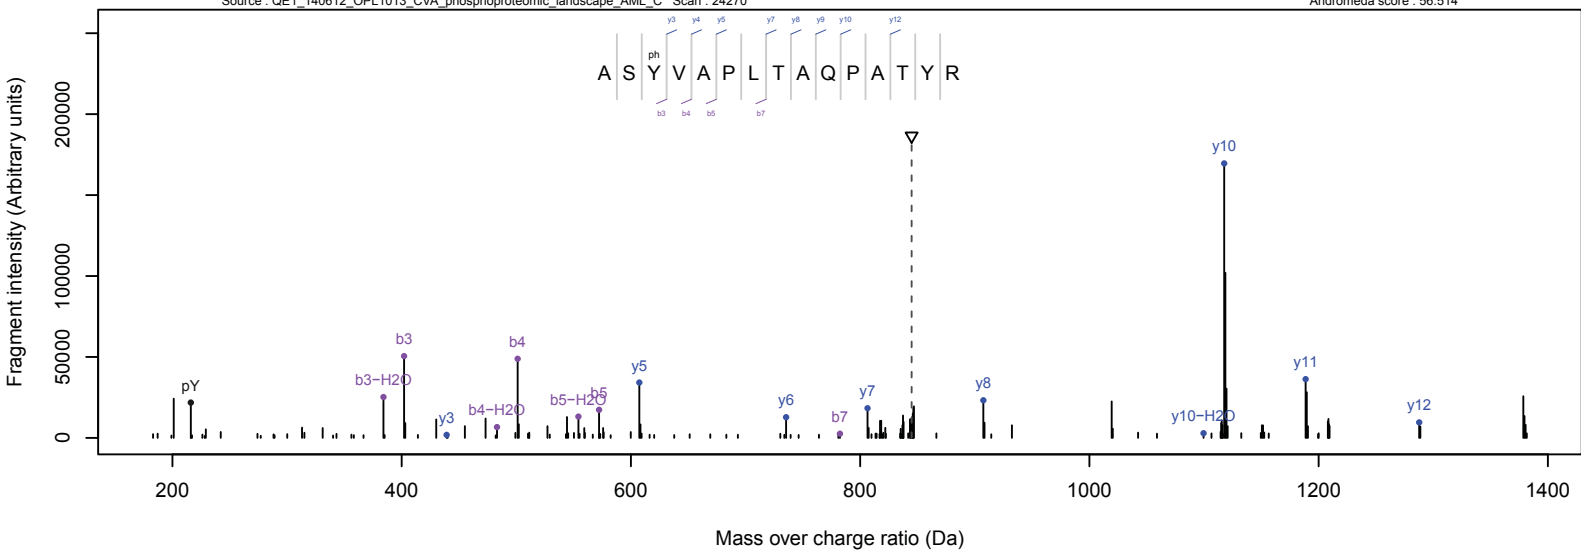LLDLVQQSCNY<sup>(ph)</sup>KQLR-3+

Source : QE1\_140612\_OPL1013\_CVA\_phosphoproteomic\_landscape\_AML\_A Scan : 27244

Andromeda score : 56.514

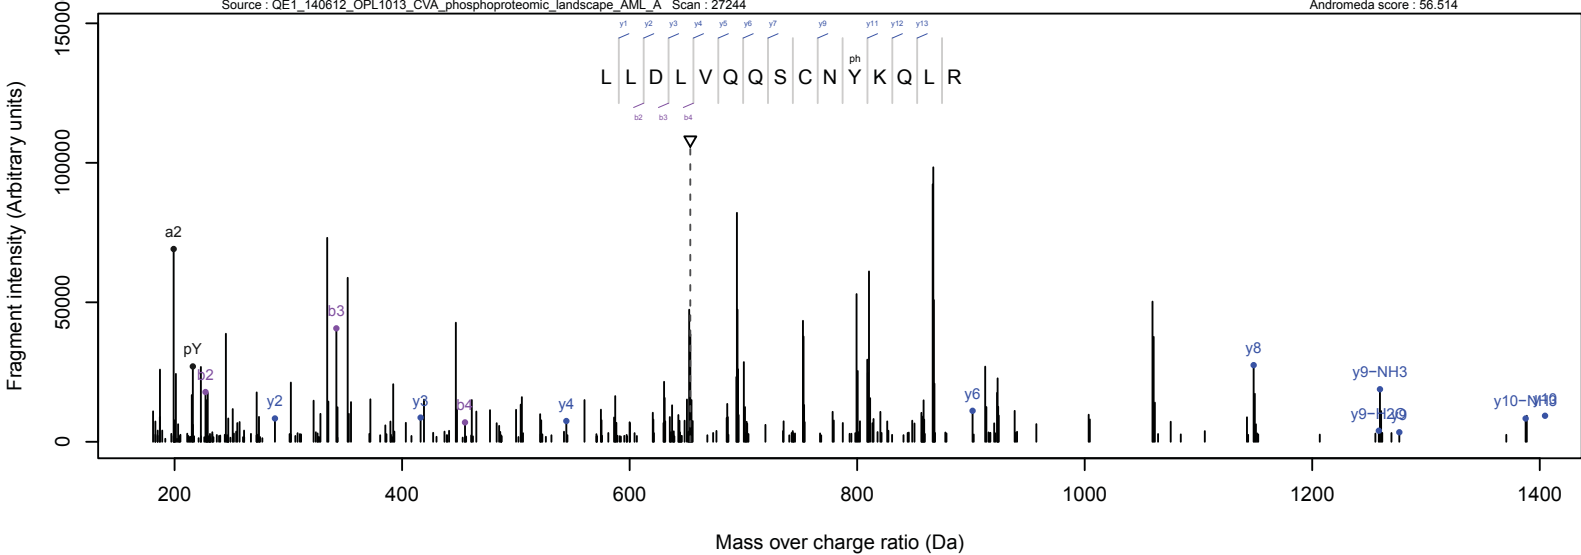

VY(ph)APASTLVLDQPYANEGTVVVTTER-3+

Source : QE1\_140612\_OPL1013\_CVA\_phosphoproteomic\_landscape\_AML\_B Scan : 36253

Andromeda score : 56.485

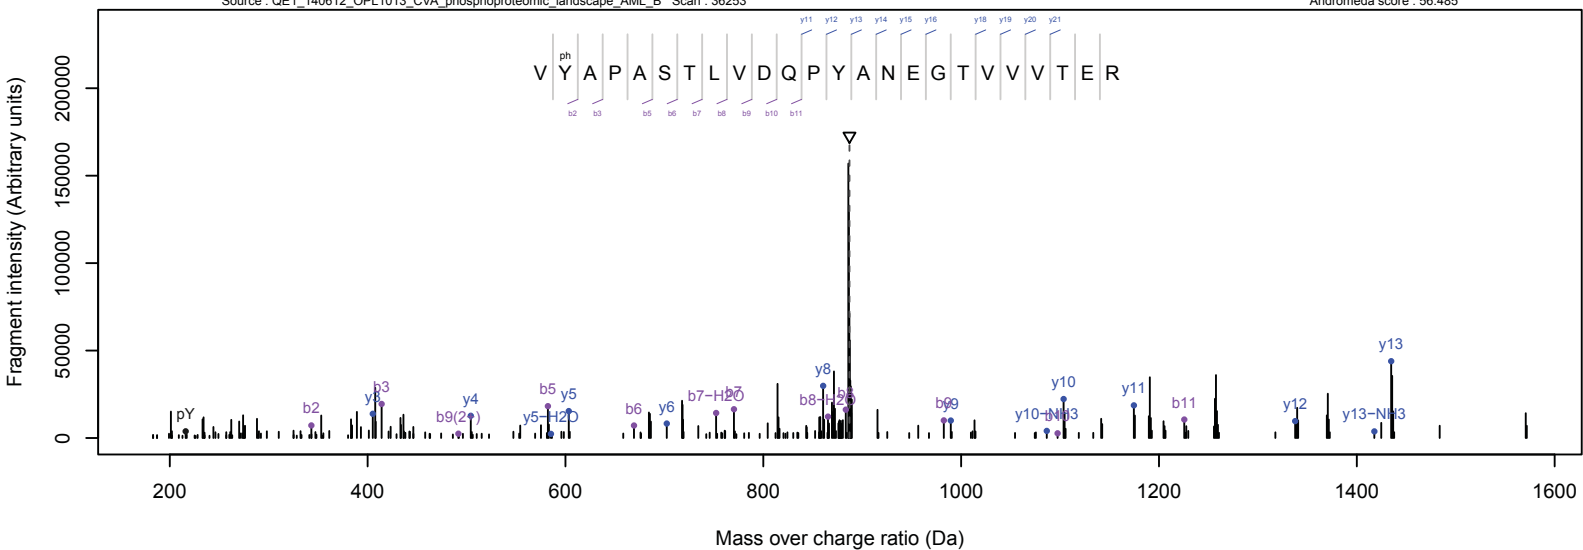

AAQY(ph)LKVEQLFGLGLRPR-3+

Source : QE1\_140612\_OPL1013\_CVA\_phosphoproteomic\_landscape\_AML\_C Scan : 43790

Andromeda score : 56.424

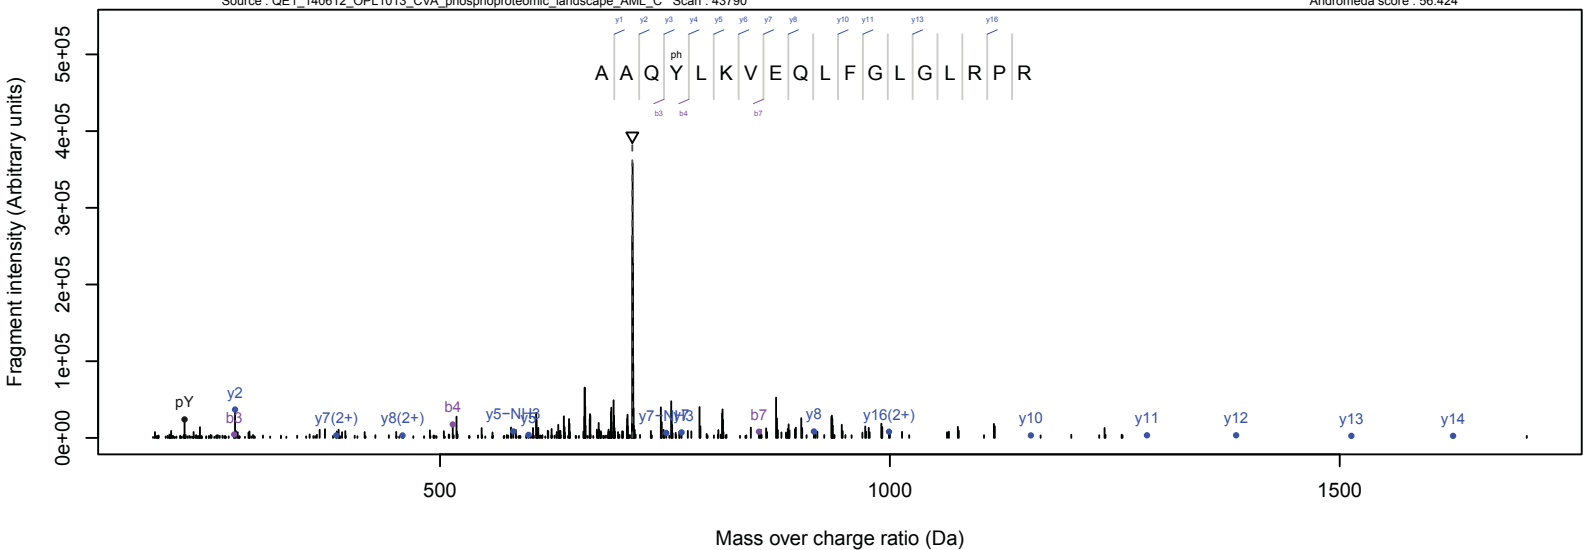

Y(ph)AAPELEIAR-2+

Source : Qe1\_141024\_OPL1013\_CvA\_AML\_pTyrIP\_MOLM13 Scan : 24324

Andromeda score : 56.404

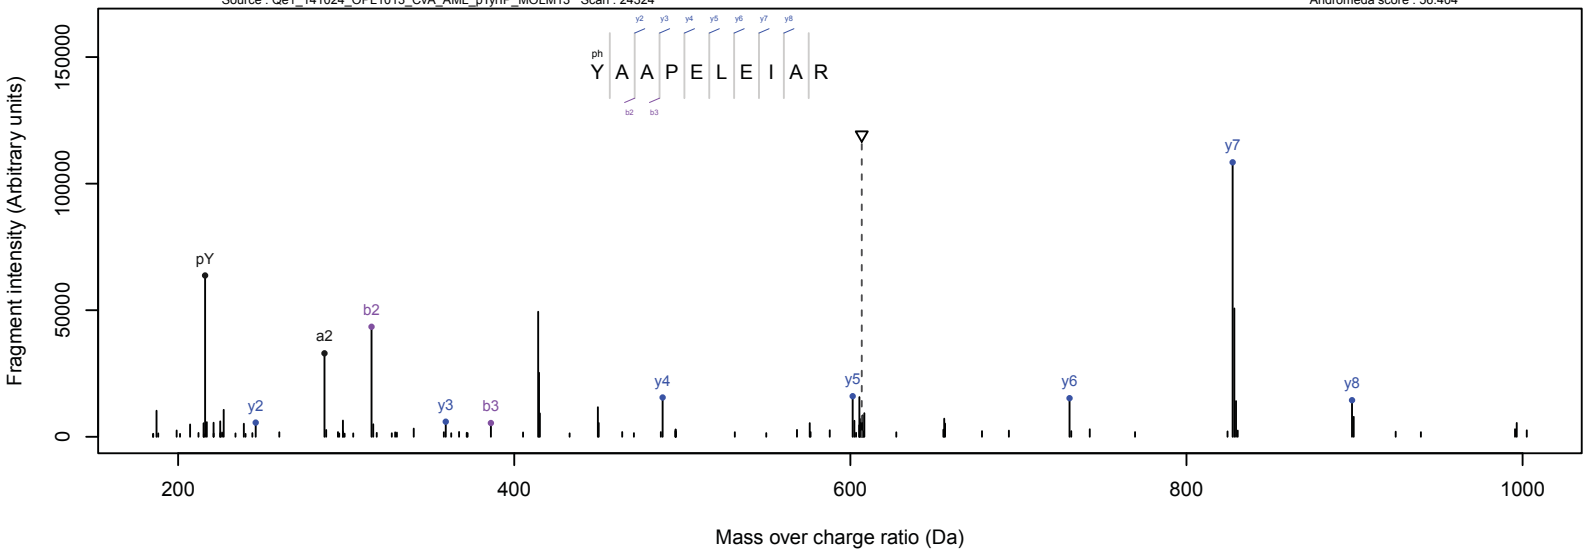

RIDTLNSDGY(ph)TPEPAR-3+

Source : QE1\_140612\_OPL1013\_CVA\_phosphoproteomic\_landscape\_AML\_B Scan : 14655

Andromeda score : 56.313

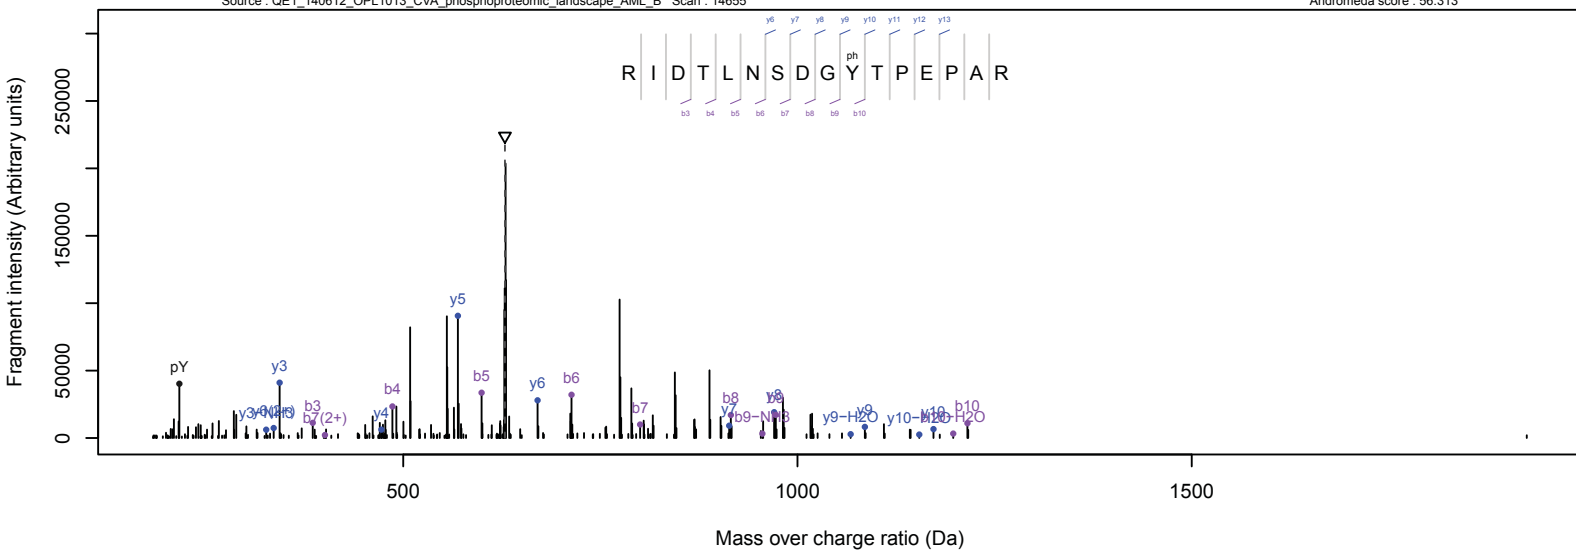

LRQLALETIDINKDYPYFMK-3+

Source : QE1\_140612\_OPL1013\_CVA\_phosphoproteomic\_landscape\_AML\_C Scan : 38412

Andromeda score : 56.304

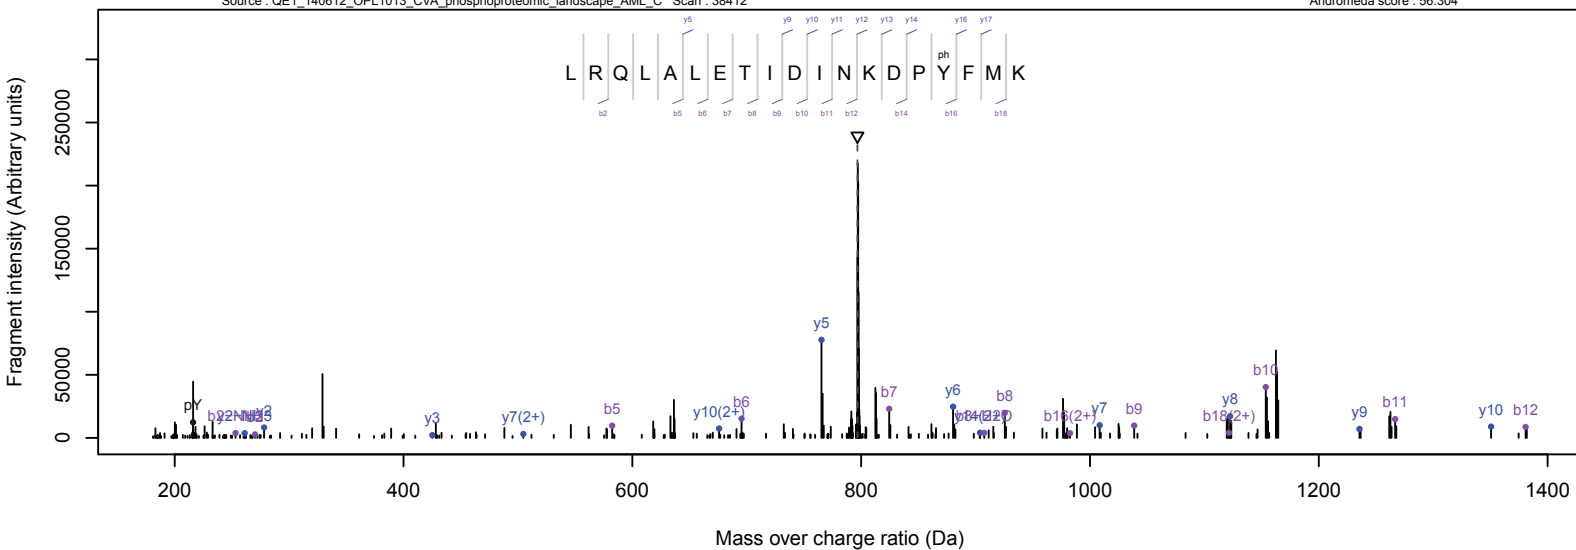

AFSY(ph)YGPLR-2+

Source : QE1\_140908\_OPL1013\_CvA\_pTyrIP\_AML\_ML2 Scan : 28248

Andromeda score : 56.258

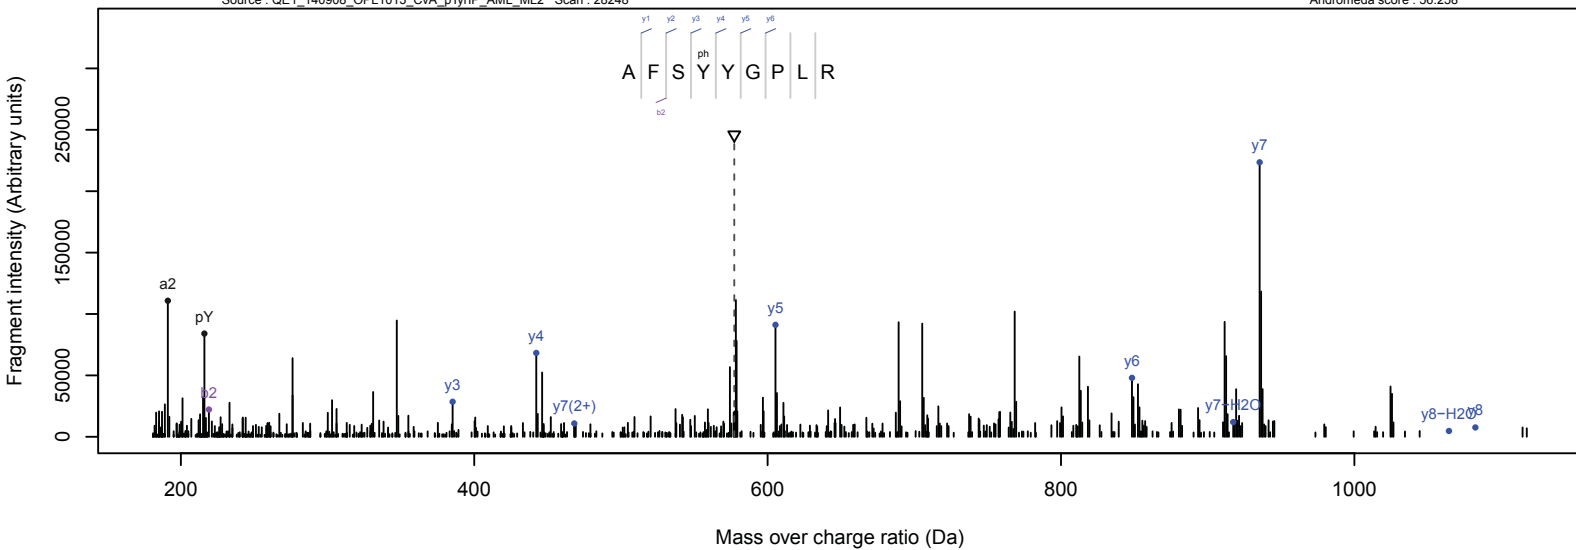

## Y(ph)VAVACQDR-2+

Source : QE1\_140612\_OPL1013\_CVA\_phosphoproteomic\_landscape\_AML\_B Scan : 5672

Andromeda score : 56.258

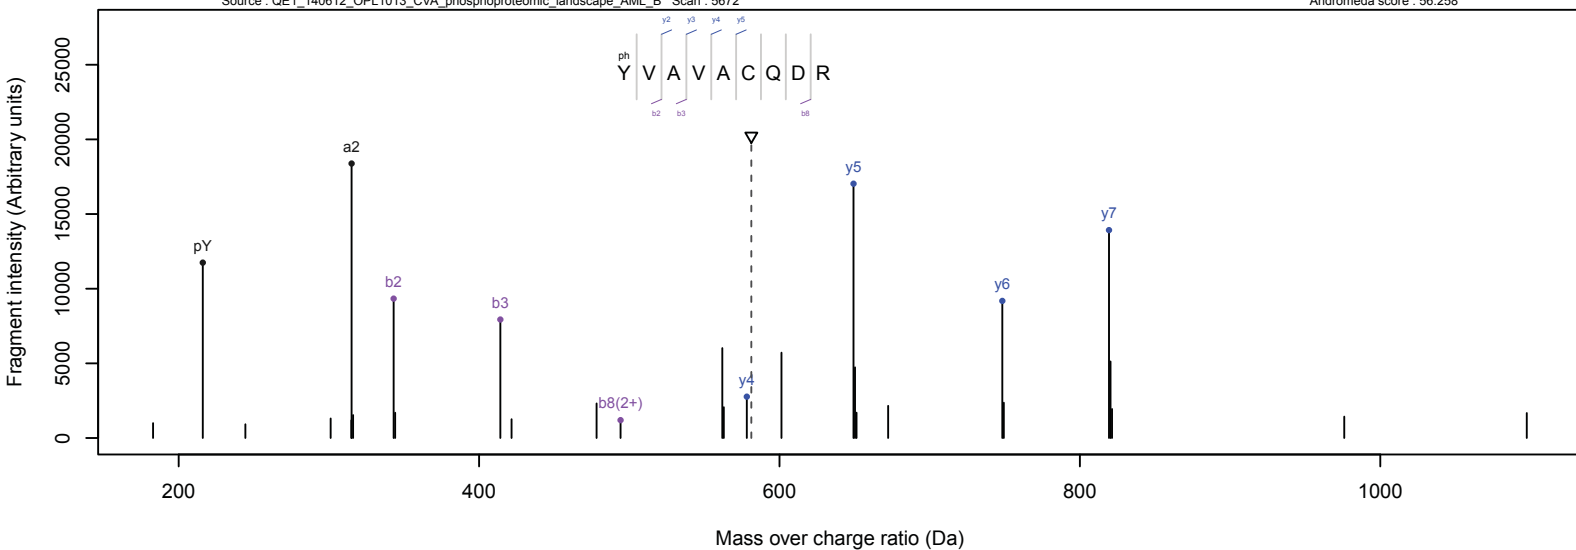

## EDISYASLTTLGAEDQEPTY(ph)CNMGLSSHLPLGR-4+

Source : QE1\_140908\_OPL1013\_CvA\_pTyrIP\_AML\_Kasumi1 Scan : 37494

Andromeda score : 56.22

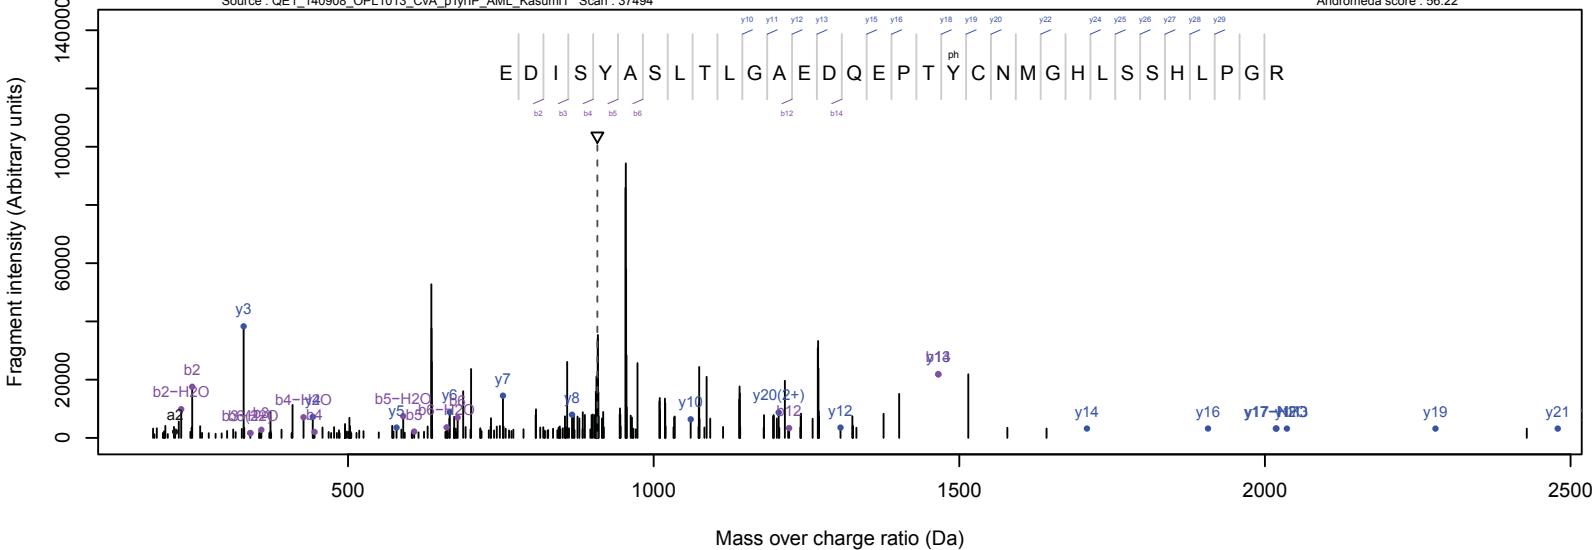

## LPPQQHIYAY(ph)PQQMHTPPVQSSSACM(ox)FSQEMYGPPALR-4+

Source : QE1\_140612\_OPL1013\_CVA\_phosphoproteomic\_landscape\_AML\_B Scan : 39575

Andromeda score : 56.211

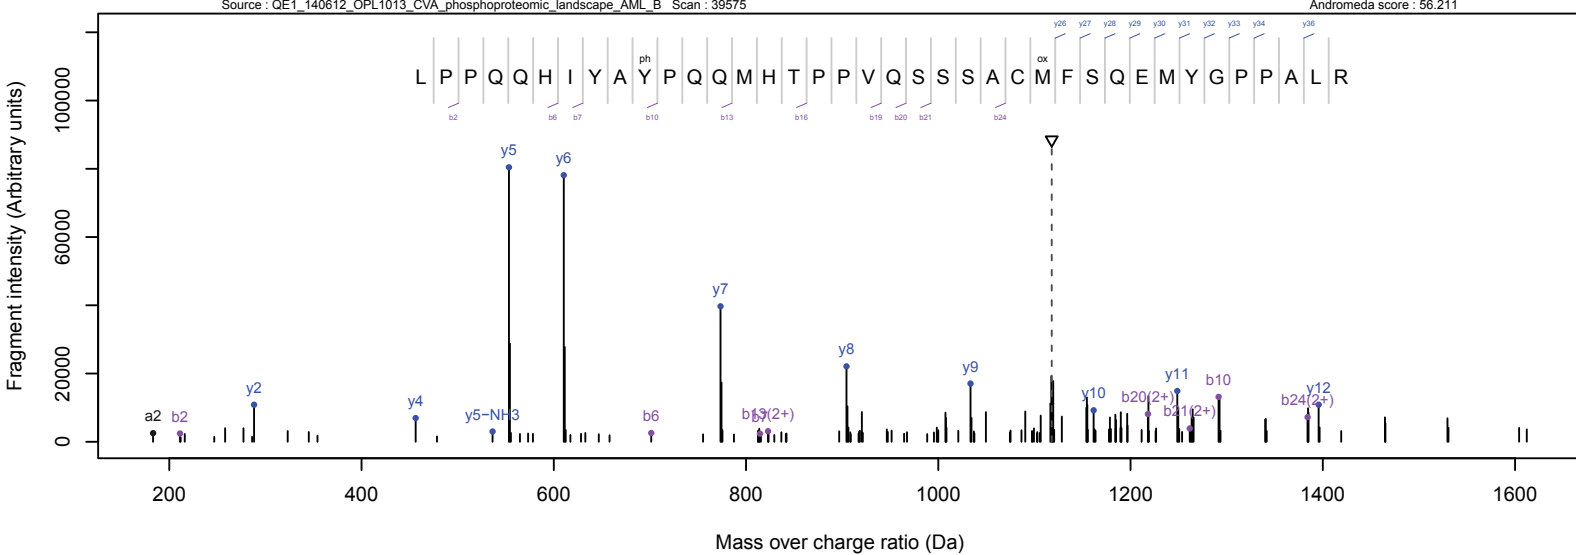

## IKY(ph)SGGPQIVK-2+

Source : QE1\_140612\_OPL1013\_CVA\_phosphoproteomic\_landscape\_AML\_B Scan : 10158

Andromeda score : 56.205

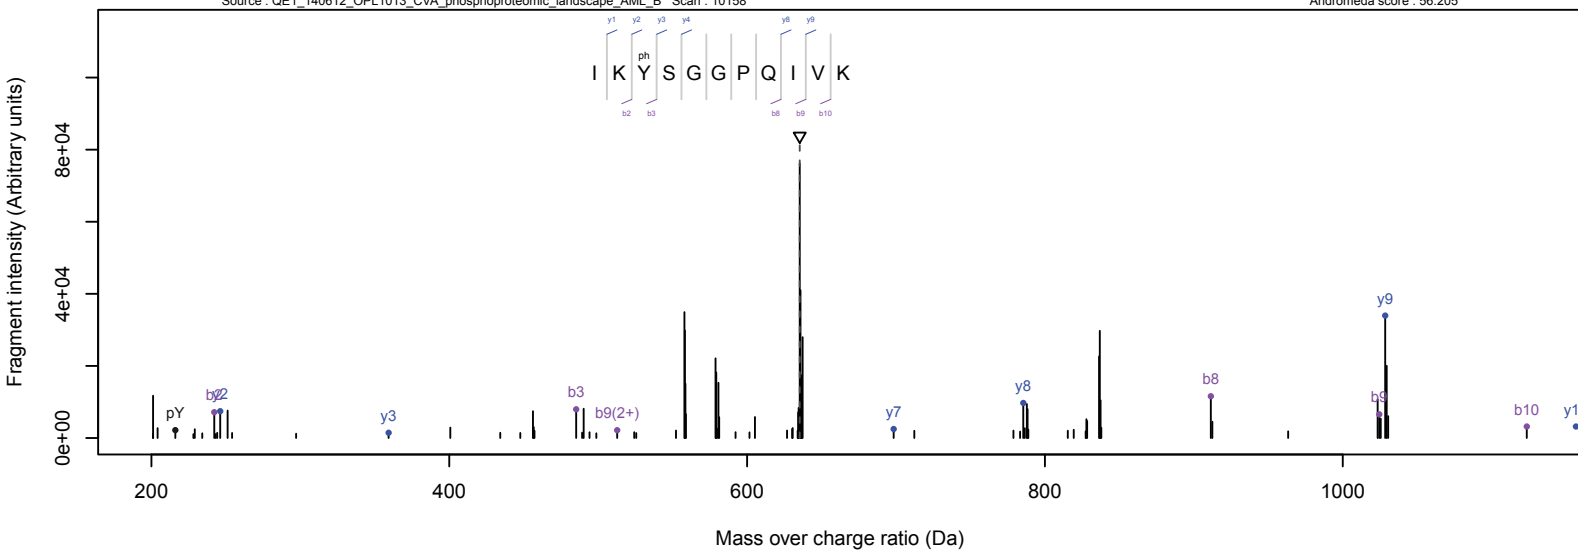

## MVLNTY(ph)MFPQQPR-2+

Source : QE1\_140612\_OPL1013\_CVA\_phosphoproteomic\_landscape\_AML\_C Scan : 39890

Andromeda score : 56.205

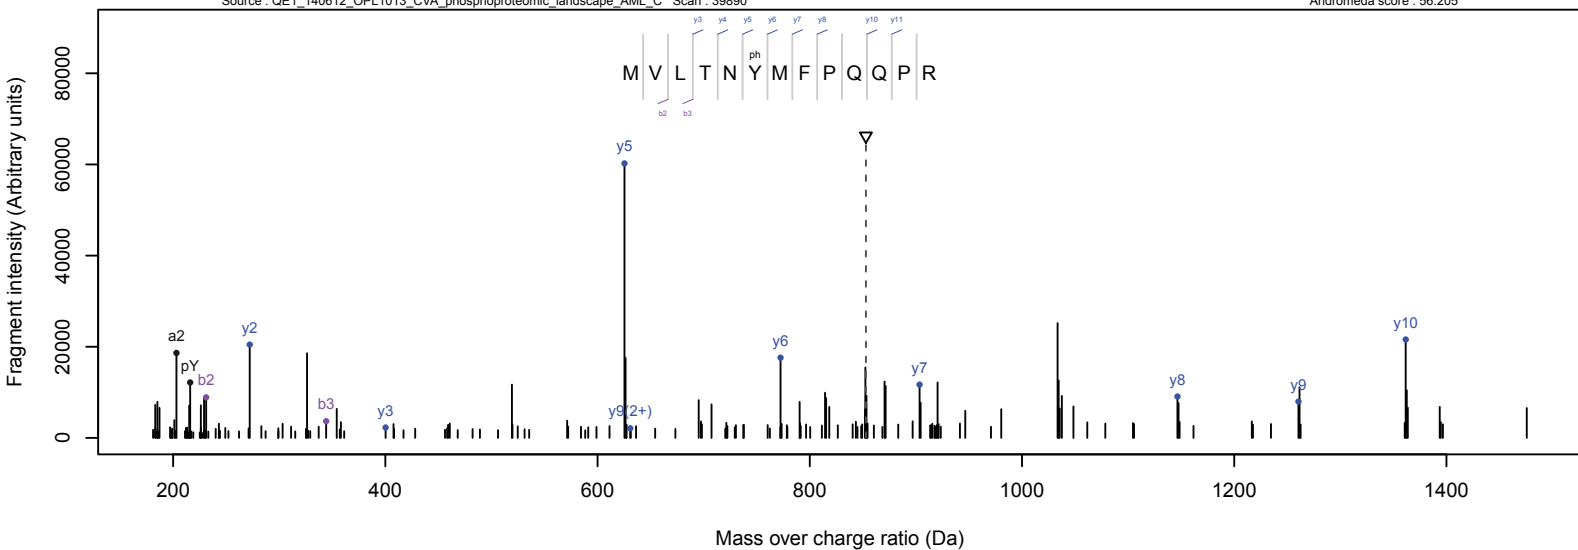

## NGHVY(ph)KYDGF-3+

Source : QE1\_140612\_OPL1013\_CVA\_phosphoproteomic\_landscape\_AML\_B Scan : 9102

Andromeda score : 56.205

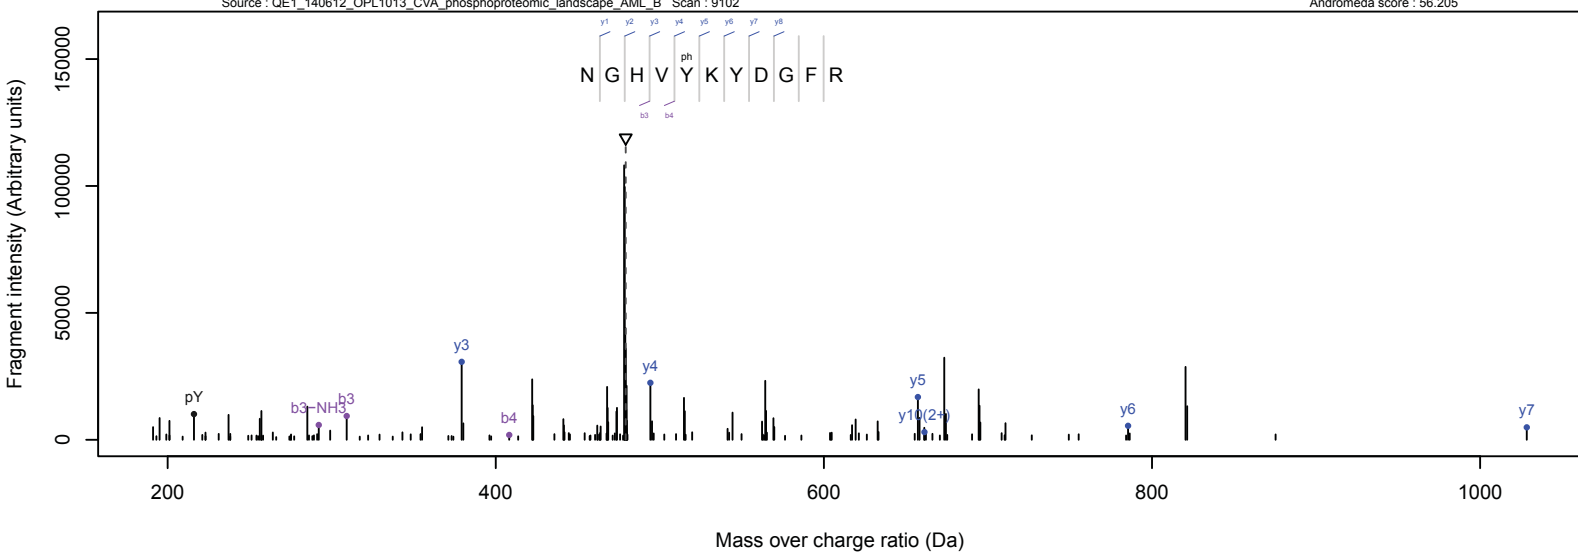

**SYSSGGEDGY(ph)VR-2+**

Source : QE1\_140612\_OPL1013\_CVA\_phosphoproteomic\_landscape\_AML\_D Scan : 5914

Andromeda score : 56.205

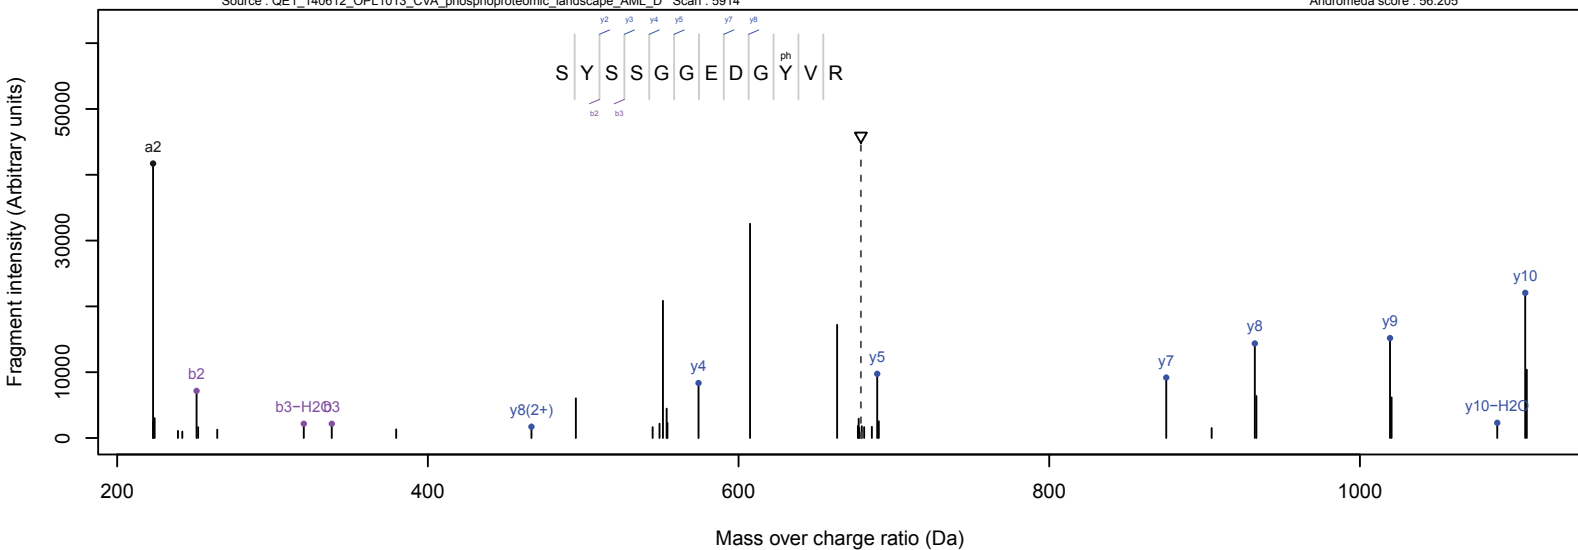

**YTPYTISPY(ph)NRK-3+**

Source : QE1\_140612\_OPL1013\_CVA\_phosphoproteomic\_landscape\_AML\_A Scan : 15162

Andromeda score : 56.205

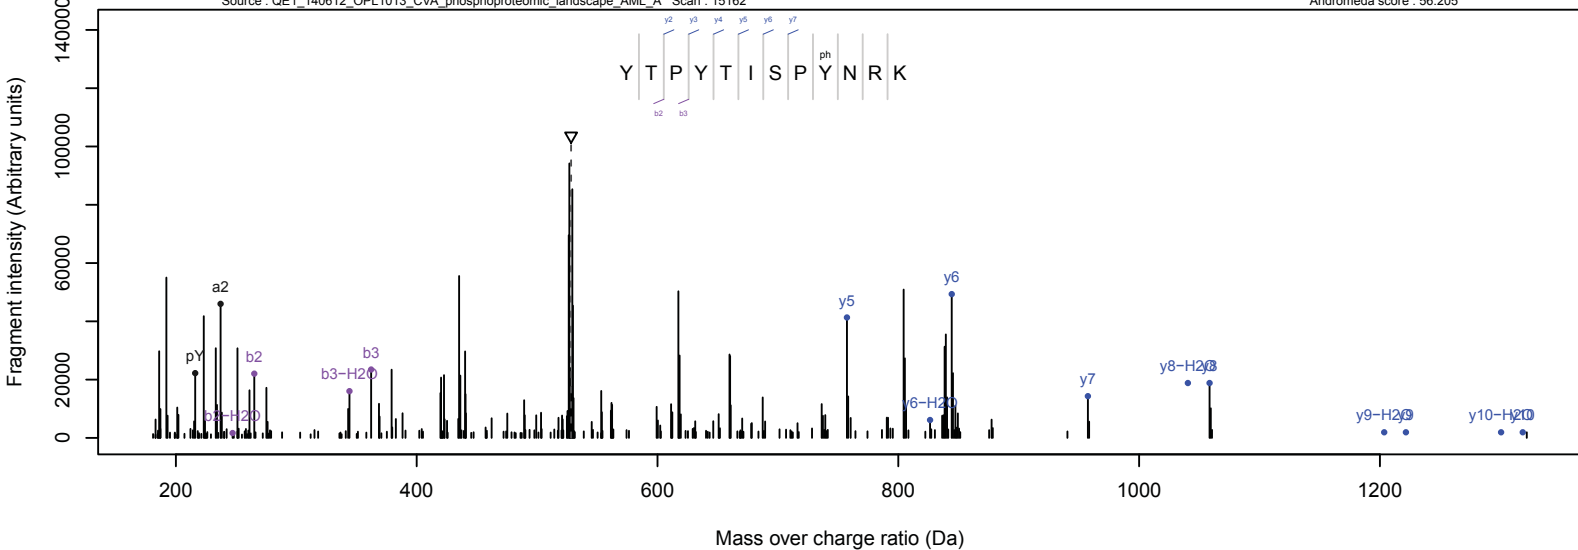

**KAISEDGCVTDTEPEDEKVVSY(ph)SK-4+**

Source : QE1\_140612\_OPL1013\_CVA\_phosphoproteomic\_landscape\_AML\_A Scan : 16372

Andromeda score : 56.172

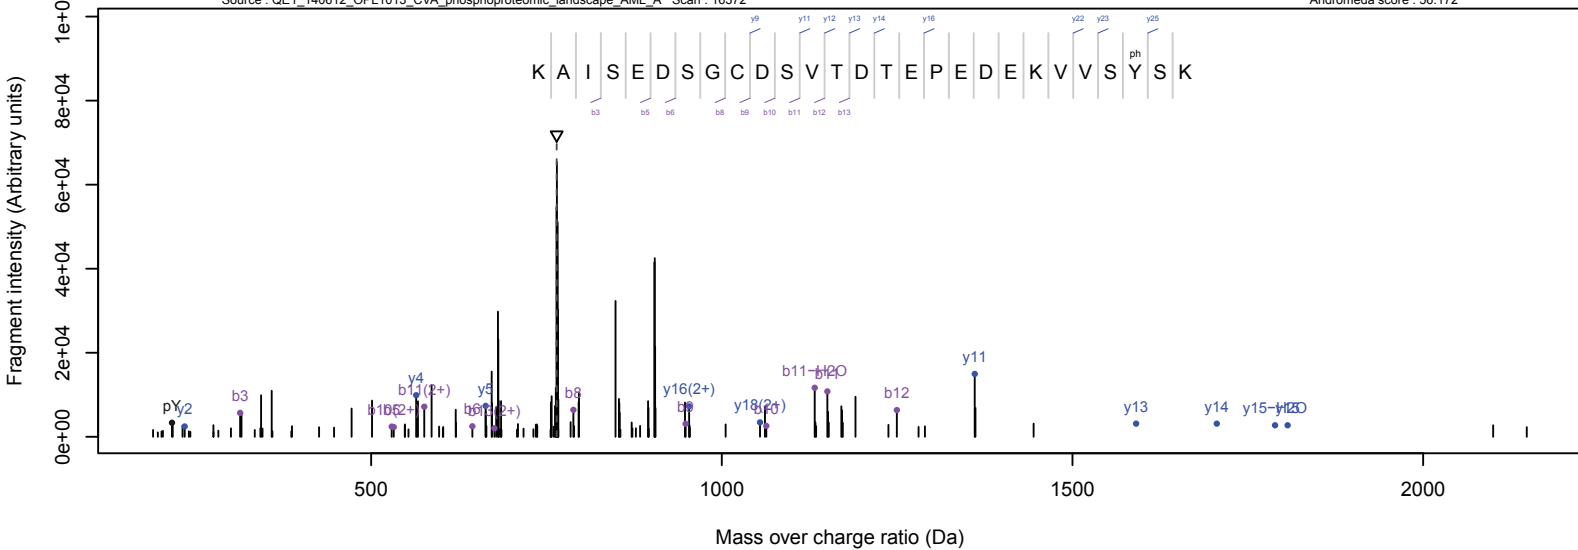

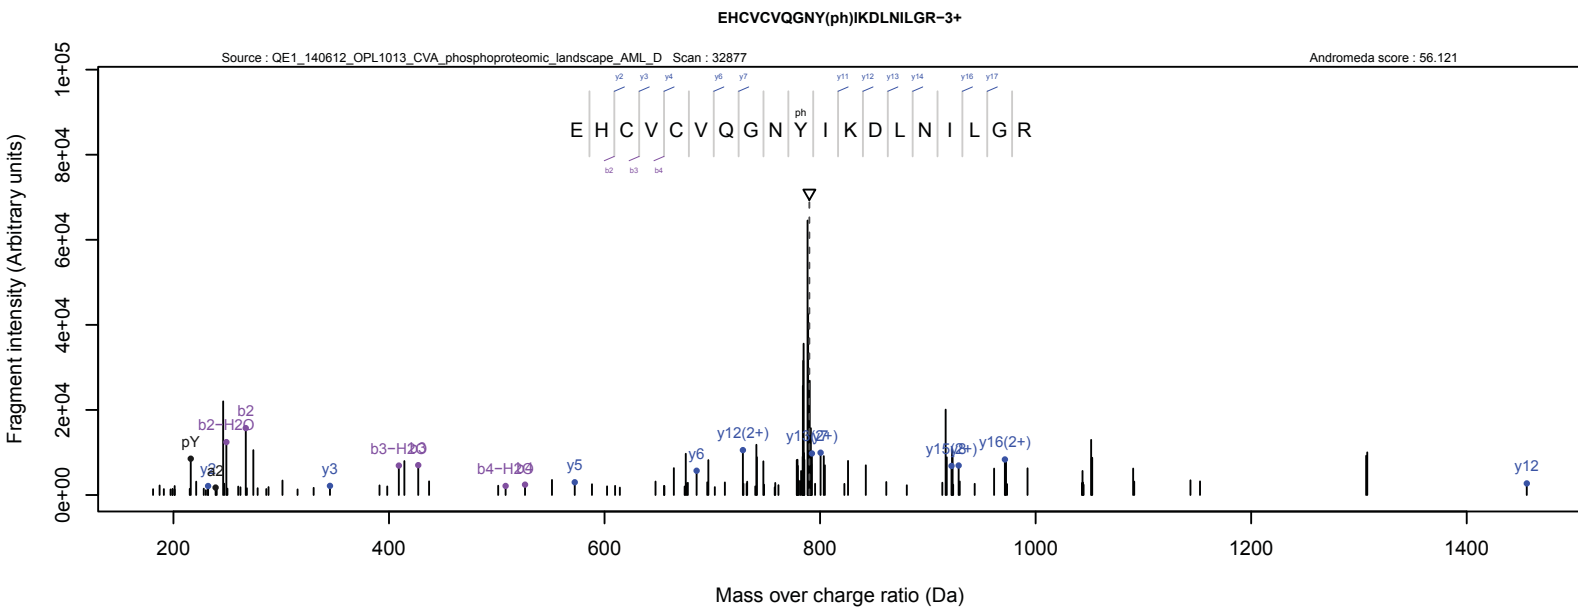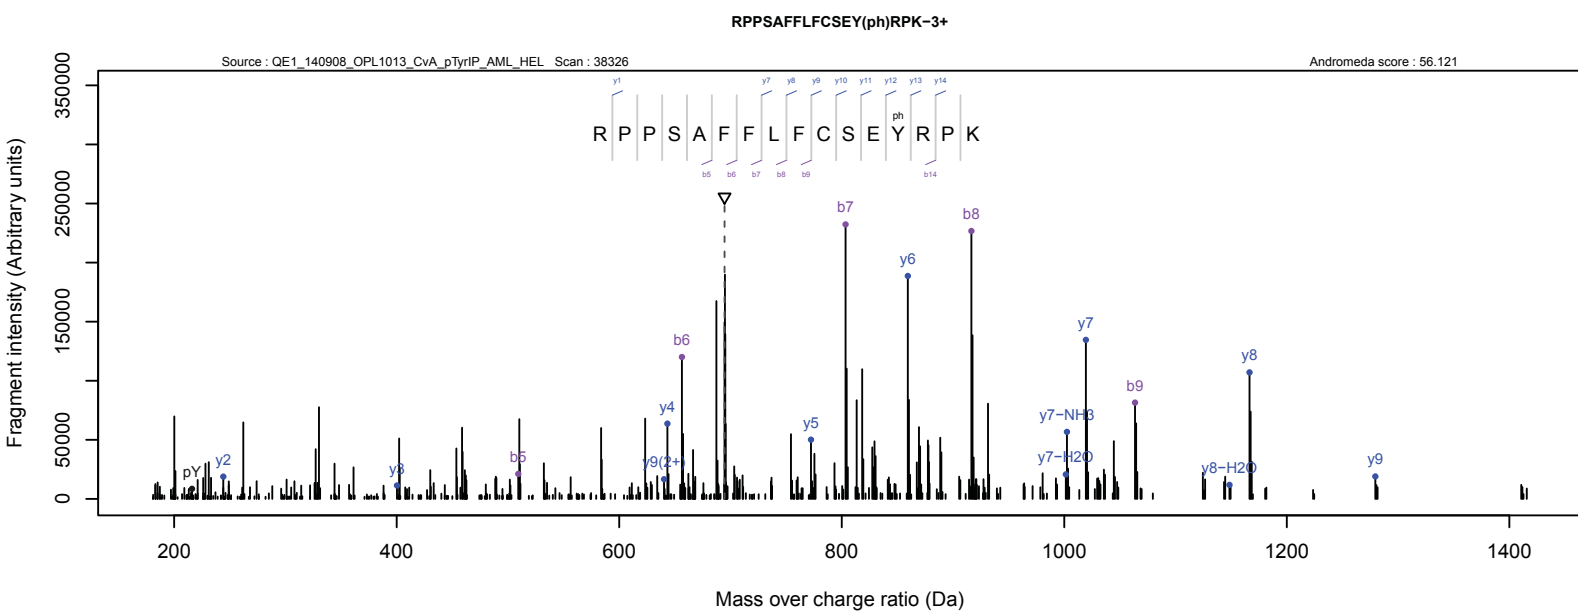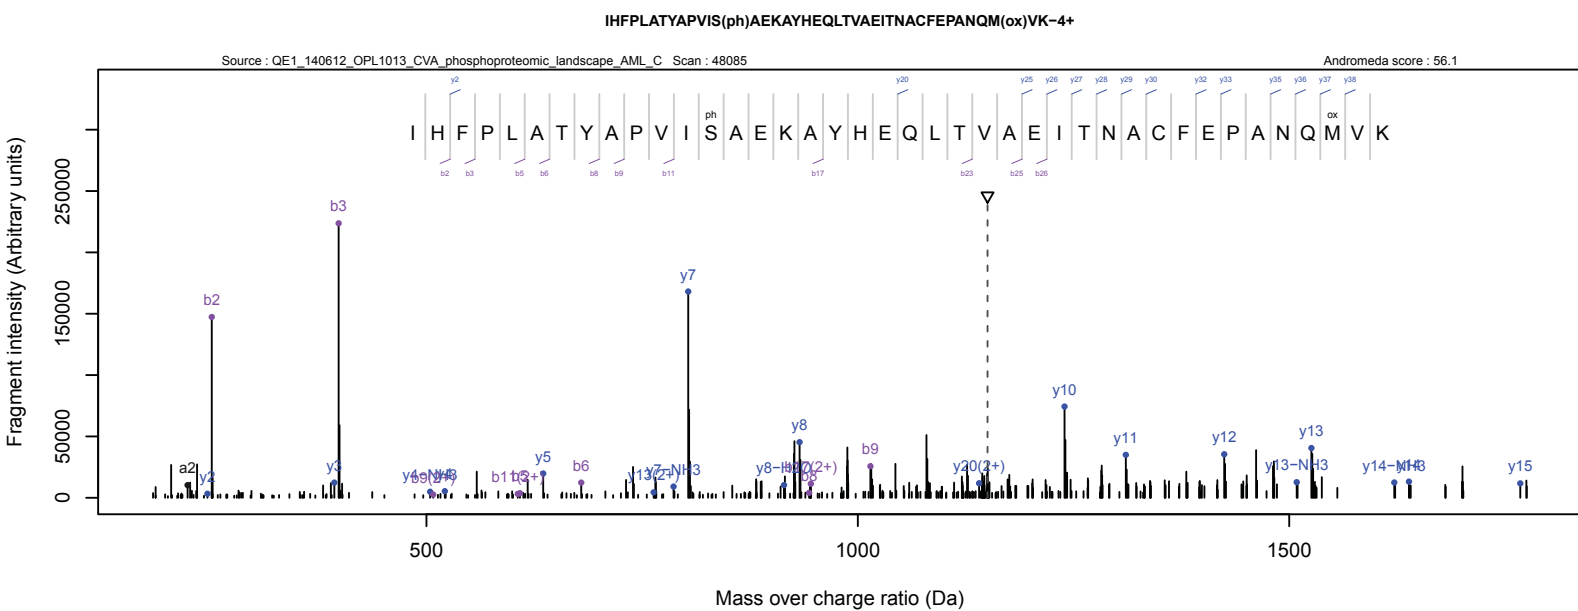

LVPEGPTDSSEGNLS(ph)LSSLNLSLHLLTSSSFR-4+

Source : QE1\_140612\_OPL1013\_CVA\_phosphoproteomic\_landscape\_AML\_C Scan : 46448

Andromeda score : 56.1

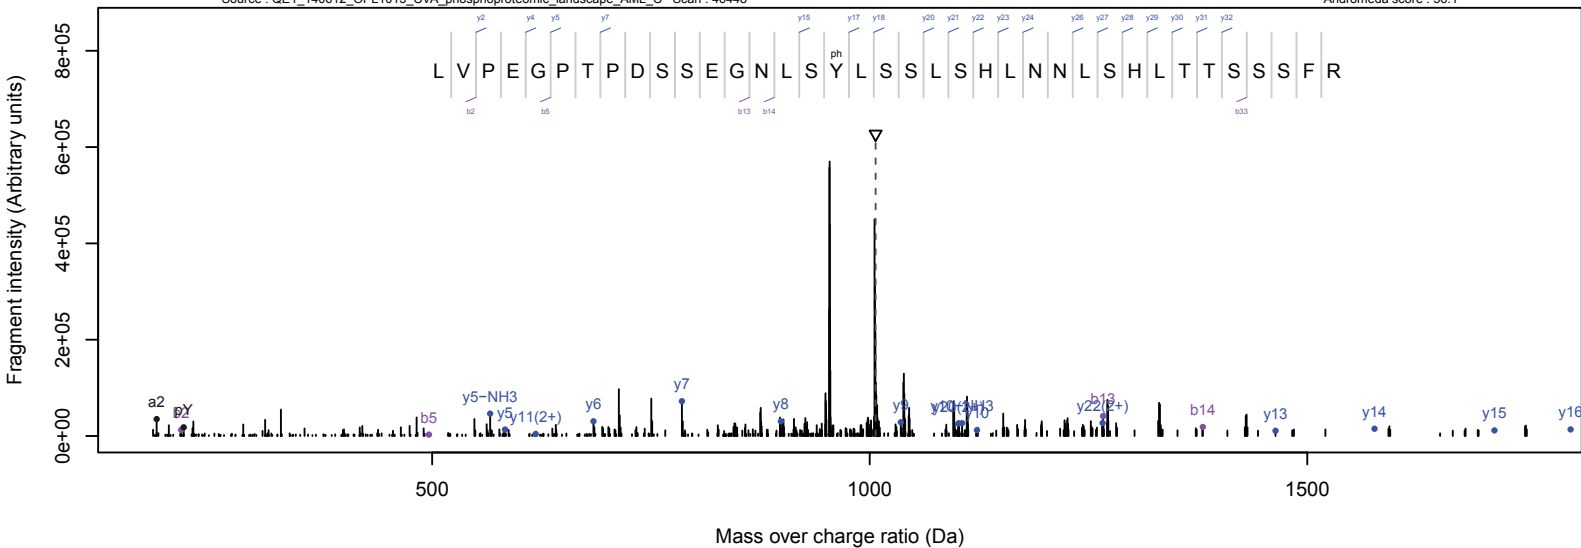

EM(ox)VSQYLY(ph)TSK-2+

Source : QE1\_140908\_OPL1013\_CvA\_pTyrIP\_AML\_HEL Scan : 20696

Andromeda score : 56.087

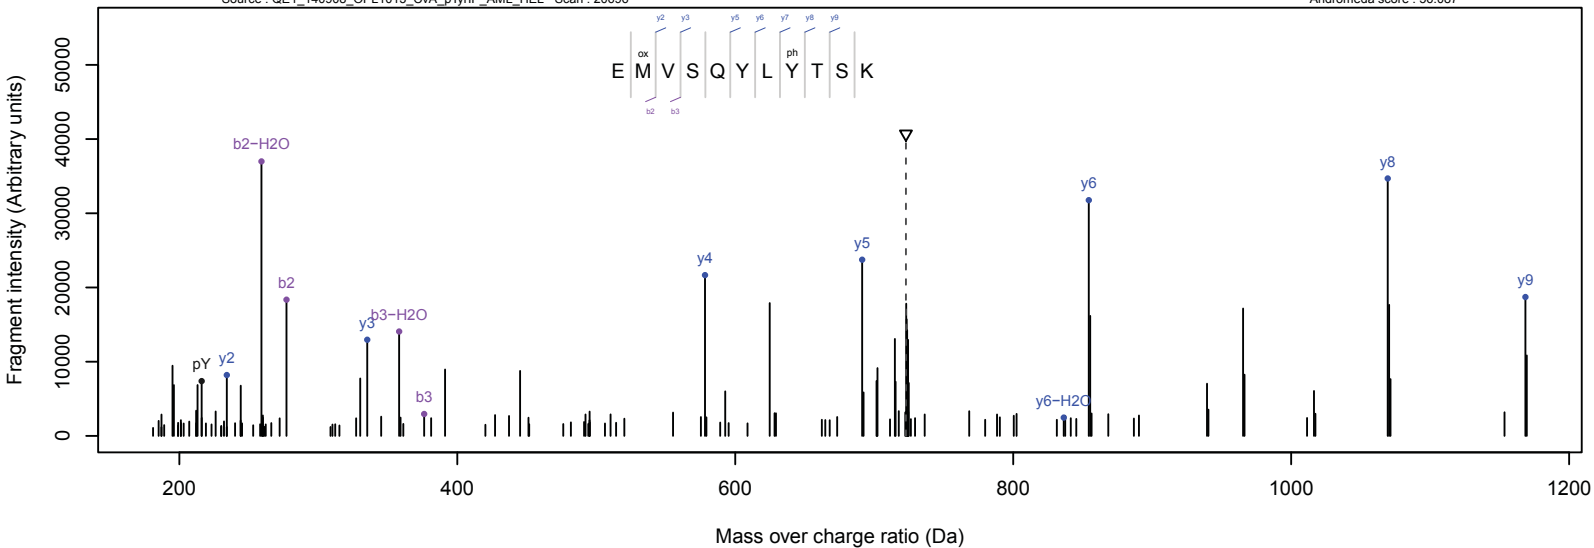

VHHFY(ph)PSLPTLLRPSGRPSR-5+

Source : QE1\_140612\_OPL1013\_CVA\_phosphoproteomic\_landscape\_AML\_C Scan : 30248

Andromeda score : 56.081

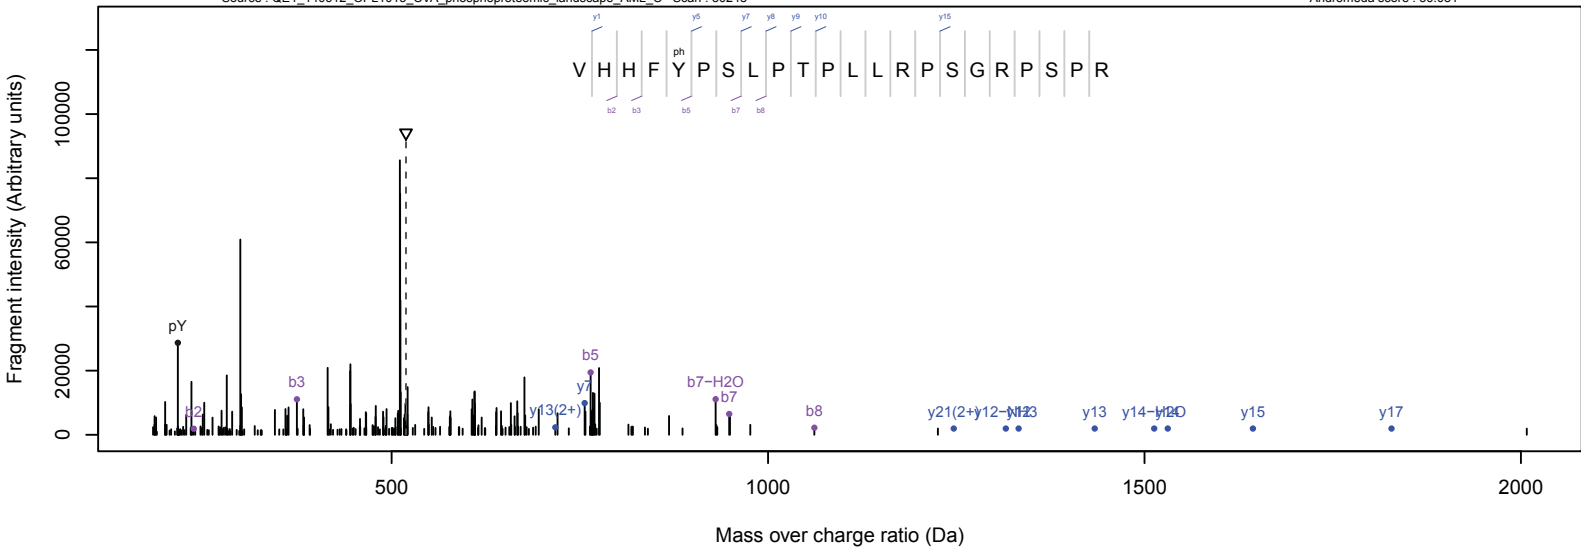



## LLELALQY(ph)PR-2+

Source : Qe1\_141024\_OPL1013\_CvA\_AML\_pTyrIP\_MOLM13 Scan : 34456

Andromeda score : 56.043

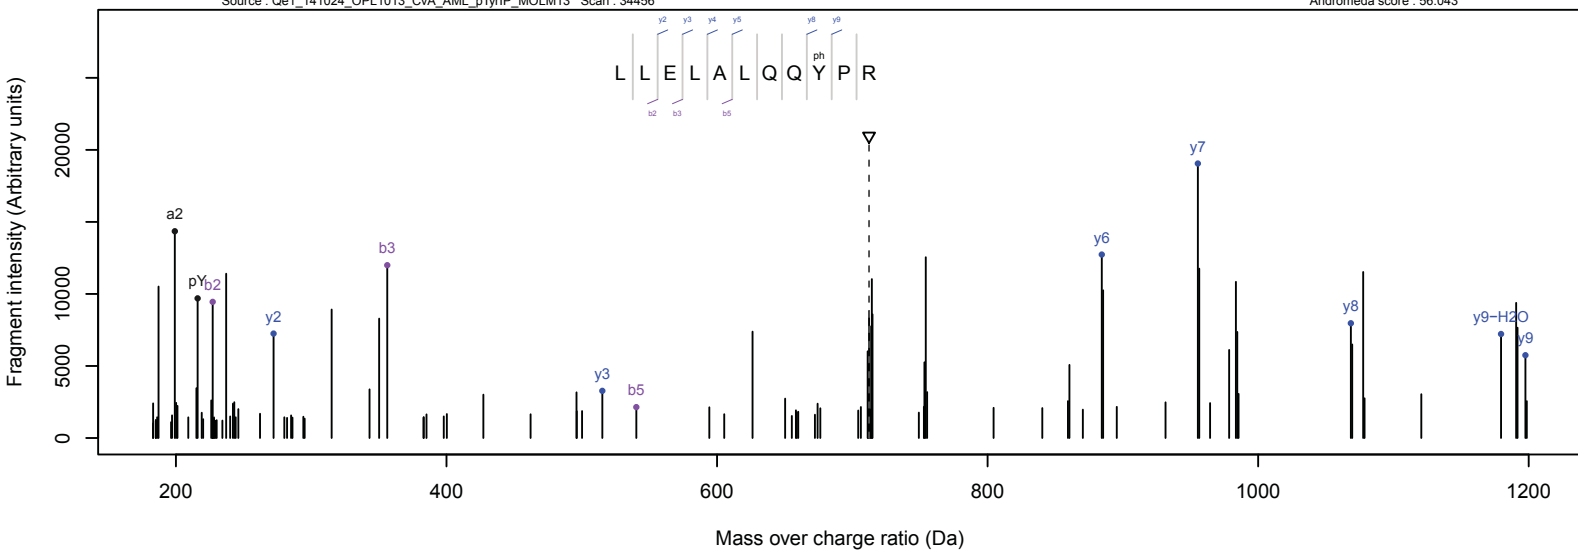

## TYNQHY(ph)NNLLR-3+

Source : QE1\_140612\_OPL1013\_CVA\_phosphoproteomic\_landscape\_AML\_C Scan : 13247

Andromeda score : 56.043

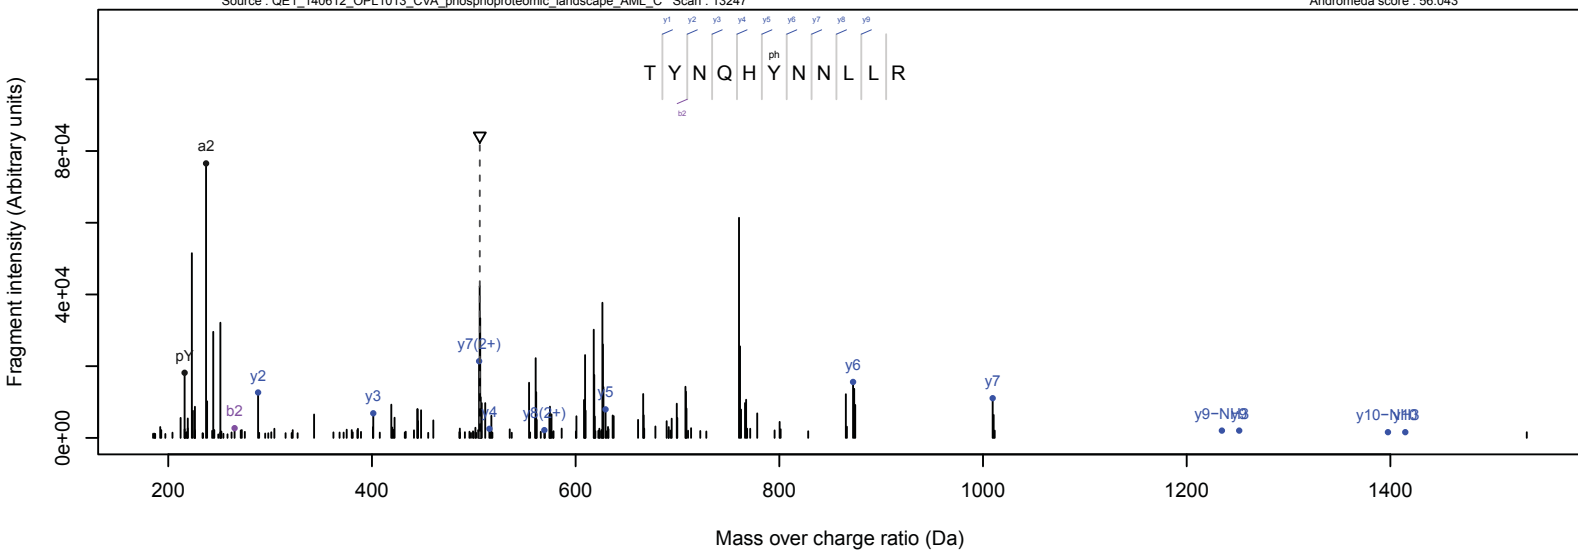

## VSSGY(ph)SSPTTSEMSIK-2+

Source : QE1\_140612\_OPL1013\_CVA\_phosphoproteomic\_landscape\_AML\_C Scan : 15660

Andromeda score : 56.039

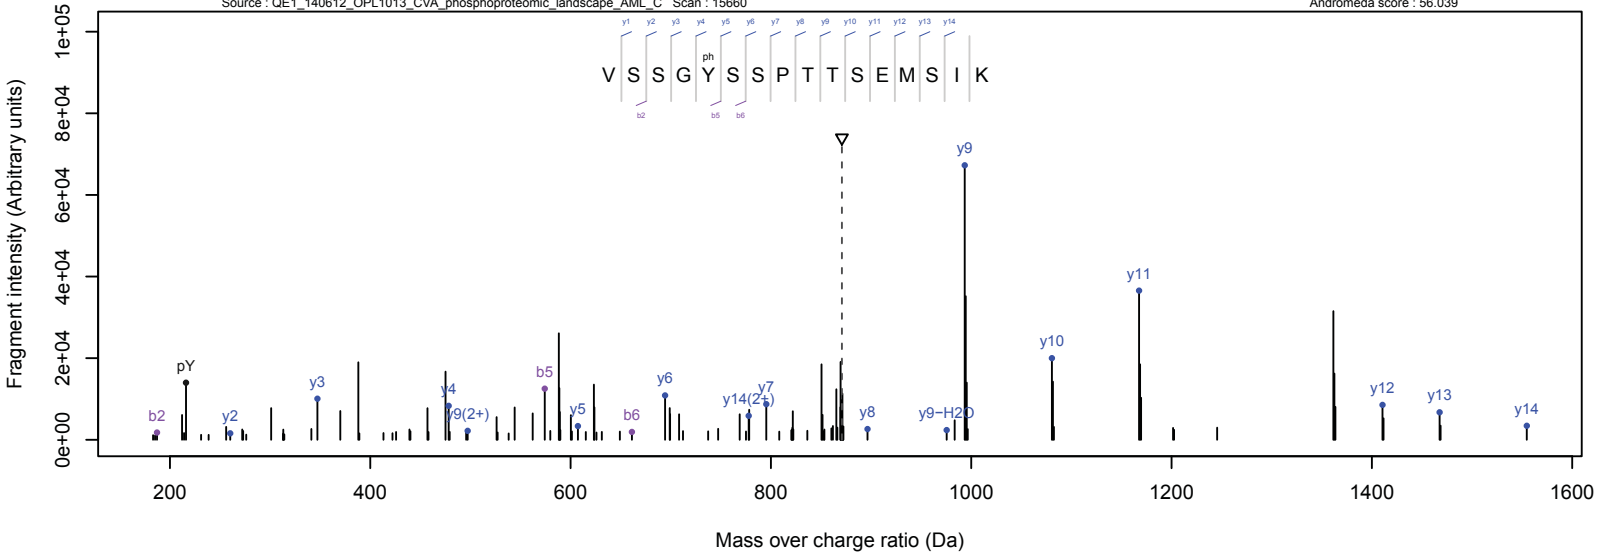

## GSHPY(ph)IDFR-2+

Source: QE1\_140612\_OPL1013\_CVA\_phosphoproteomic\_landscape\_AML\_B Scan: 17974

Andromeda score: 56.013

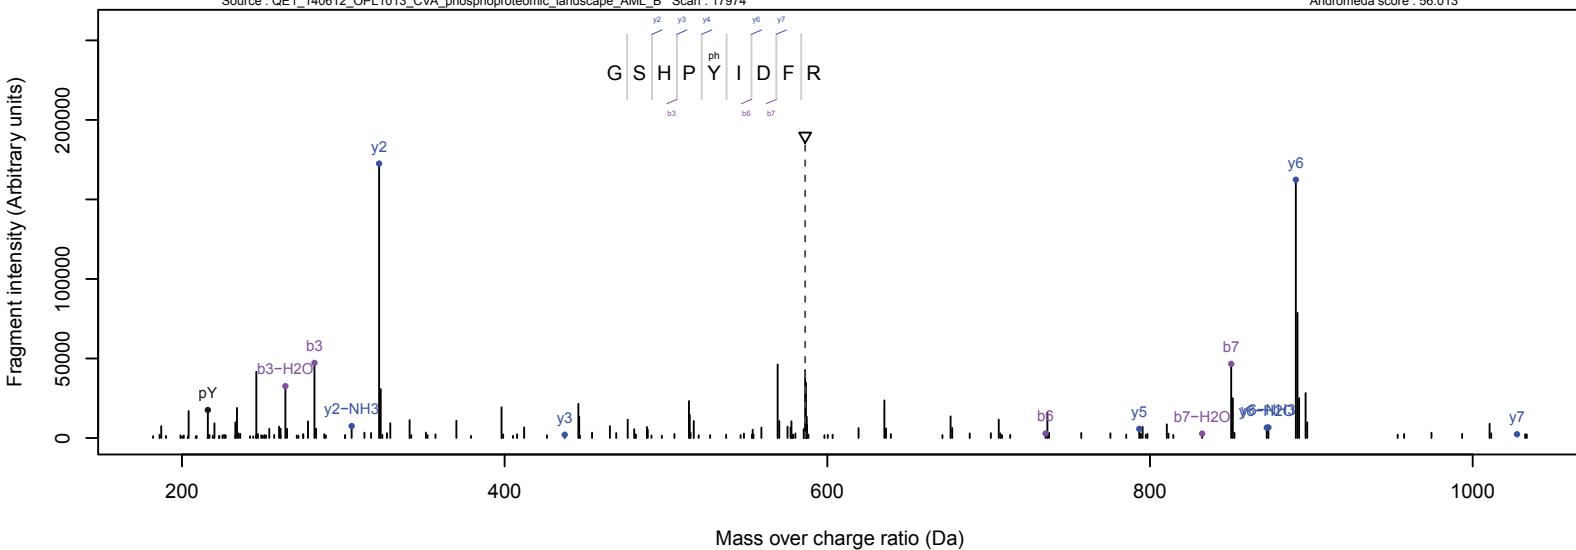

## LY(ph)PIANGNNQSPVDIK-2+

Source: QE1\_140908\_OPL1013\_CvA\_pTyrIP\_AML\_HEL Scan: 27304

Andromeda score: 55.975

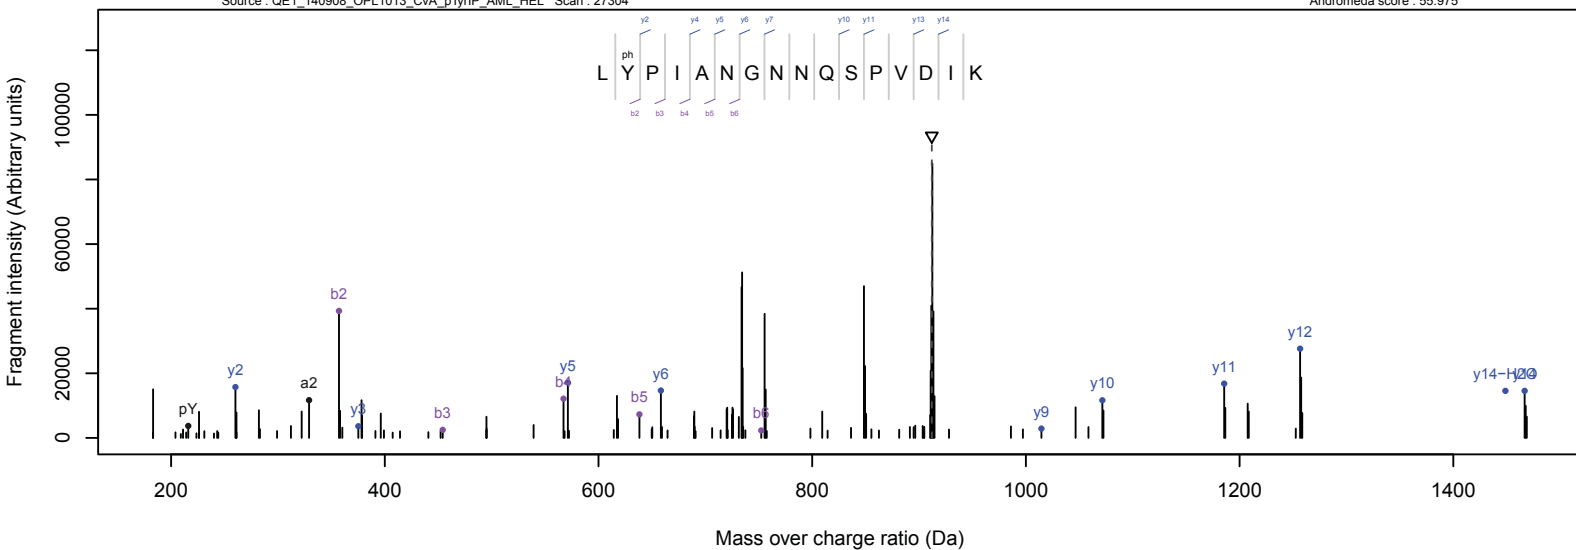

## SNDKVY(ph)ENVTLVK-2+

Source: QE1\_140908\_OPL1013\_CvA\_pTyrIP\_AML\_HEL Scan: 23025

Andromeda score: 55.975

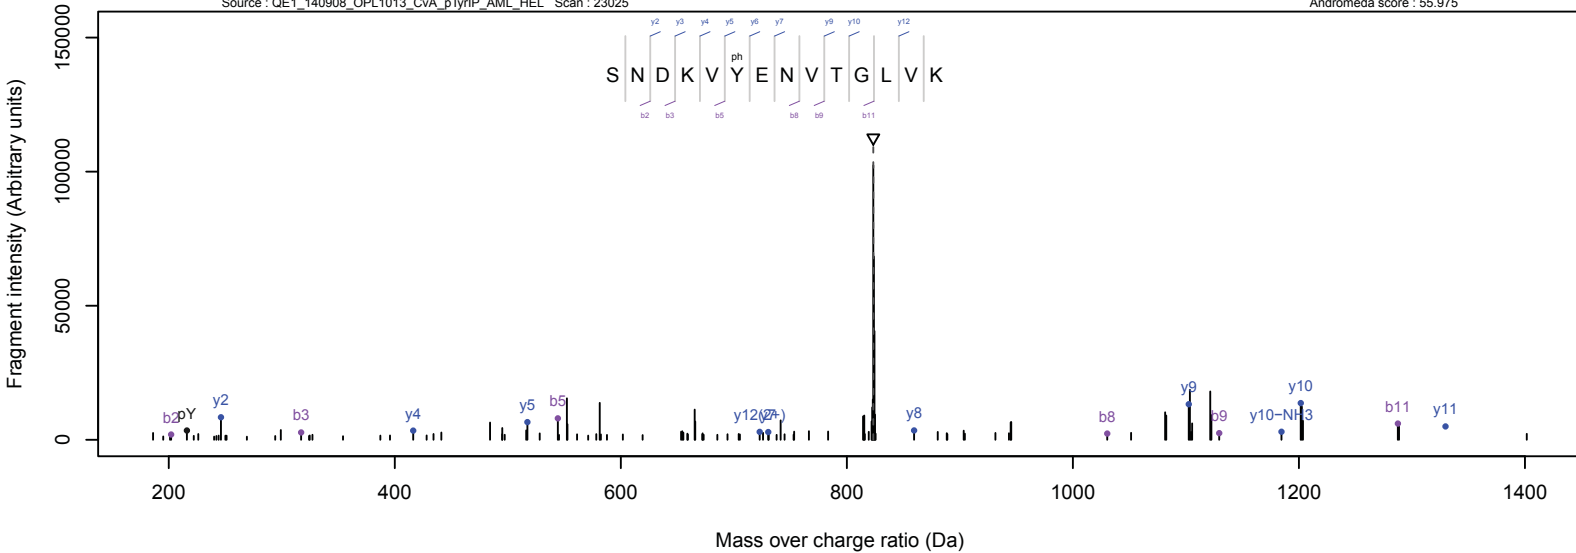



LVY(ph)HIGLTPAK-2+

Source : QE1\_140612\_OPL1013\_CVA\_phosphoproteomic\_landscape\_AML\_B Scan : 21361

Andromeda score : 55.801

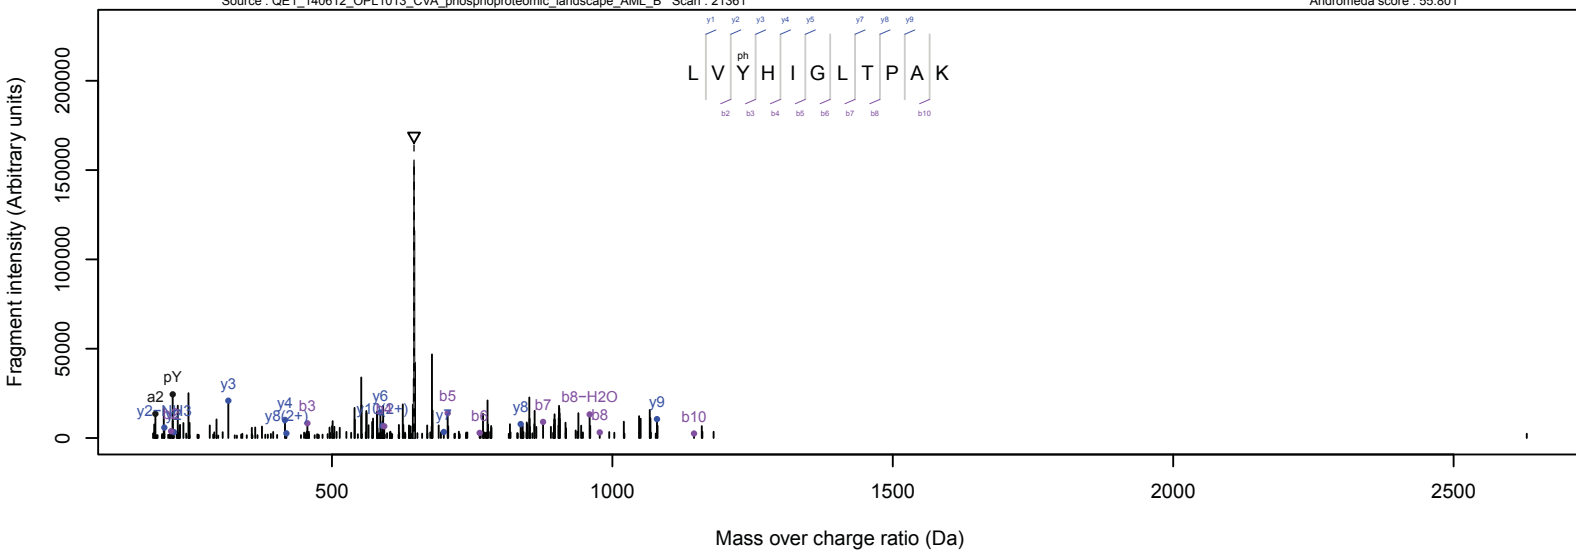

KDY(ph)SNFMASLNLRL-2+

Source : QE1\_140612\_OPL1013\_CVA\_phosphoproteomic\_landscape\_AML\_C Scan : 35012

Andromeda score : 55.782

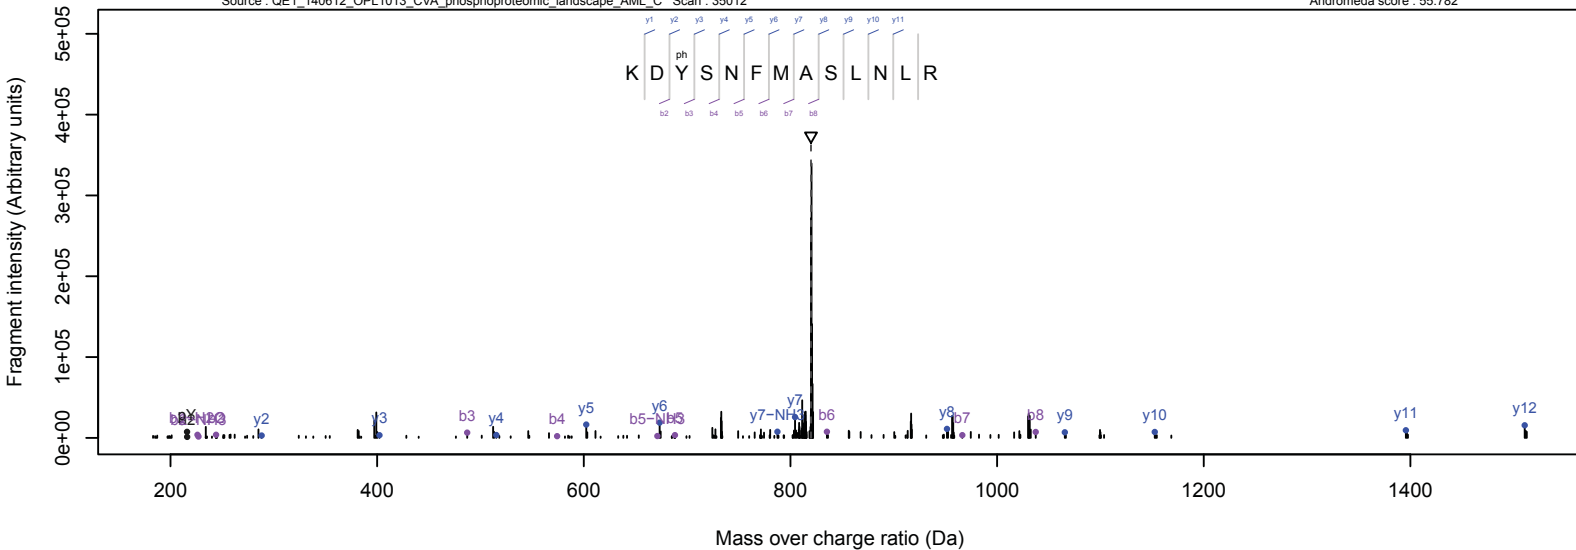

NVYATTVGTPY(ph)KGGNLYHTDVSLEFGEPTFEYLRK-4+

Source : QE1\_140612\_OPL1013\_CVA\_phosphoproteomic\_landscape\_AML\_C Scan : 41955

Andromeda score : 55.779

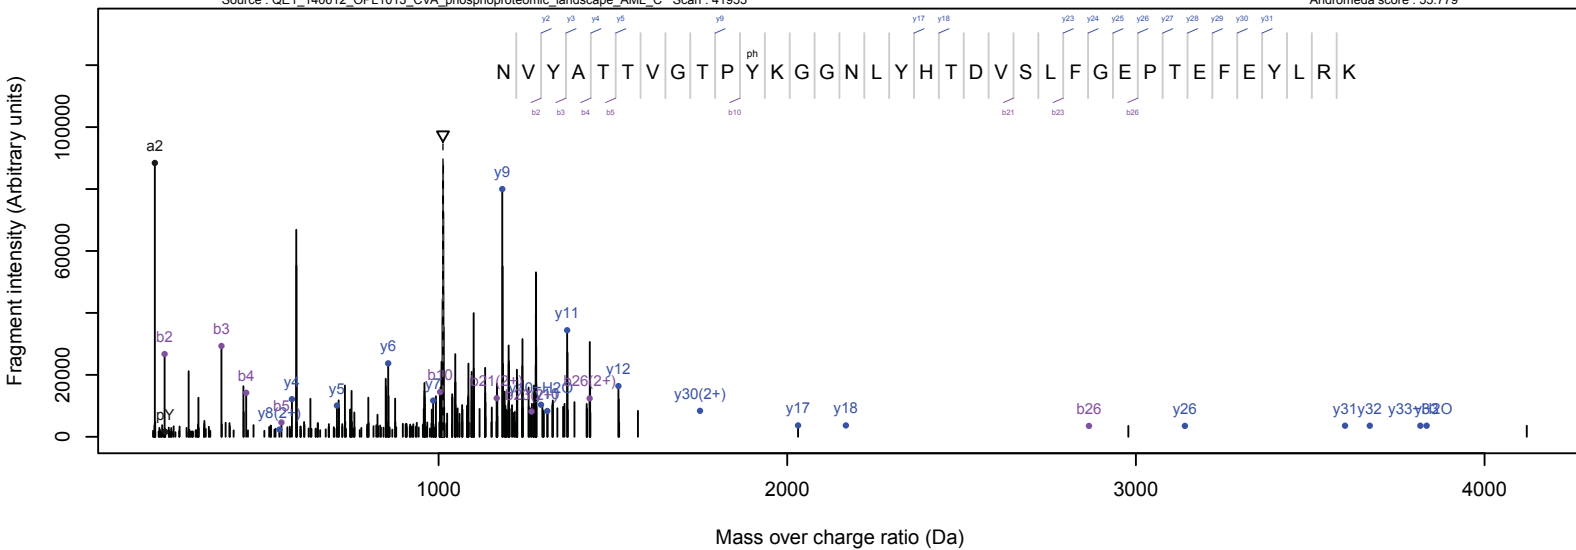

## GY(ph)AEVVVASENSVHK-3+

Source : QE1\_140612\_OPL1013\_CVA\_phosphoproteomic\_landscape\_AML\_B Scan : 16863

Andromeda score : 55.757

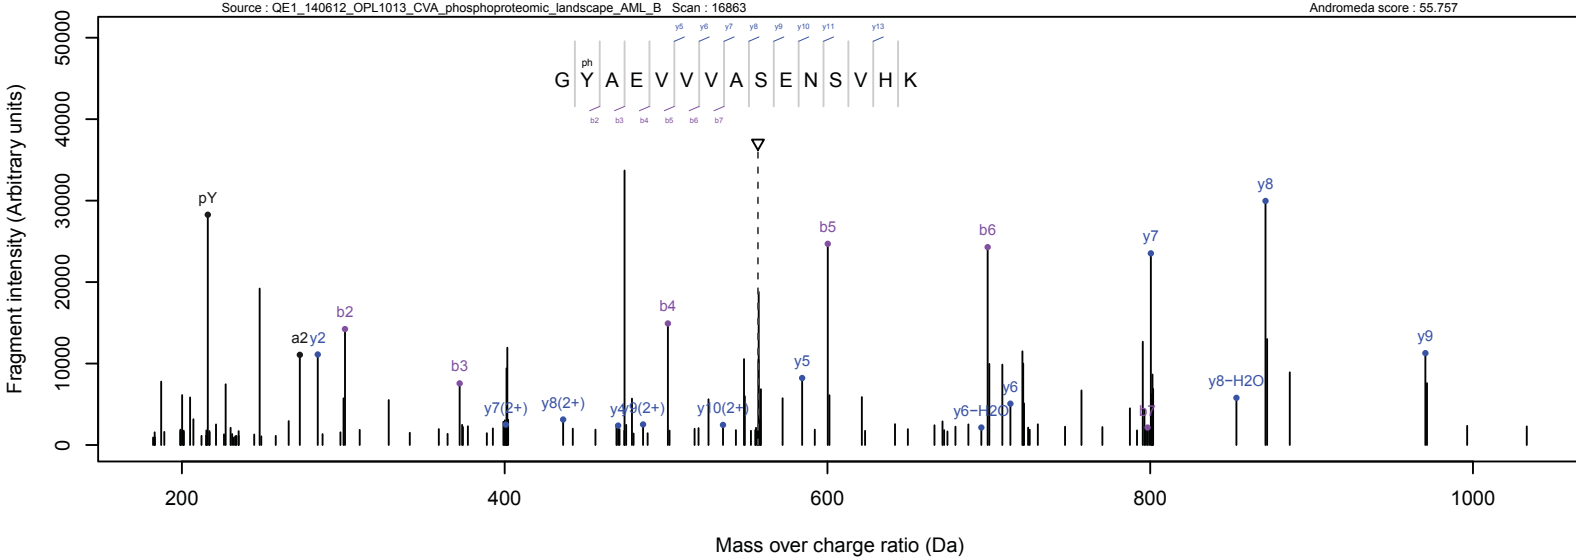

## AGGGAAEQEELHY(ph)IPIR-3+

Source : QE1\_140612\_OPL1013\_CVA\_phosphoproteomic\_landscape\_AML\_A Scan : 28187

Andromeda score : 55.755

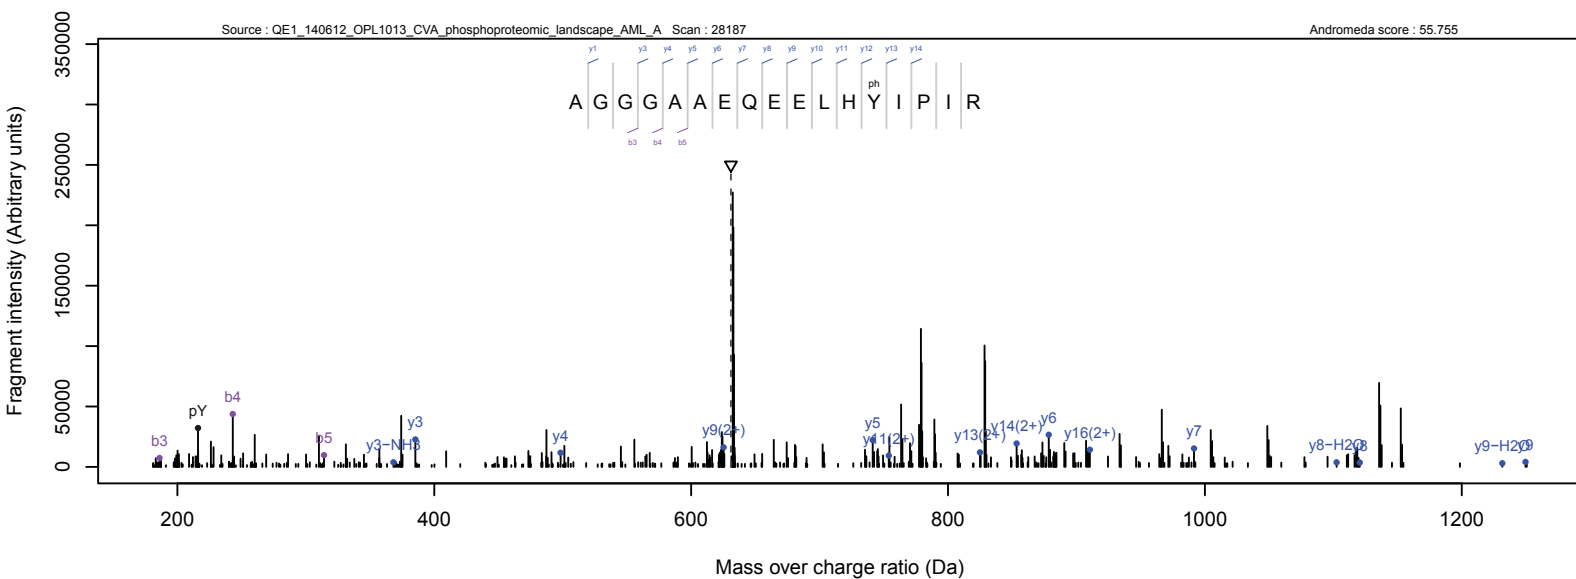

## ATPEQY(ph)ILKENYGQK-3+

Source : QE1\_140612\_OPL1013\_CVA\_phosphoproteomic\_landscape\_AML\_D Scan : 19780

Andromeda score : 55.755

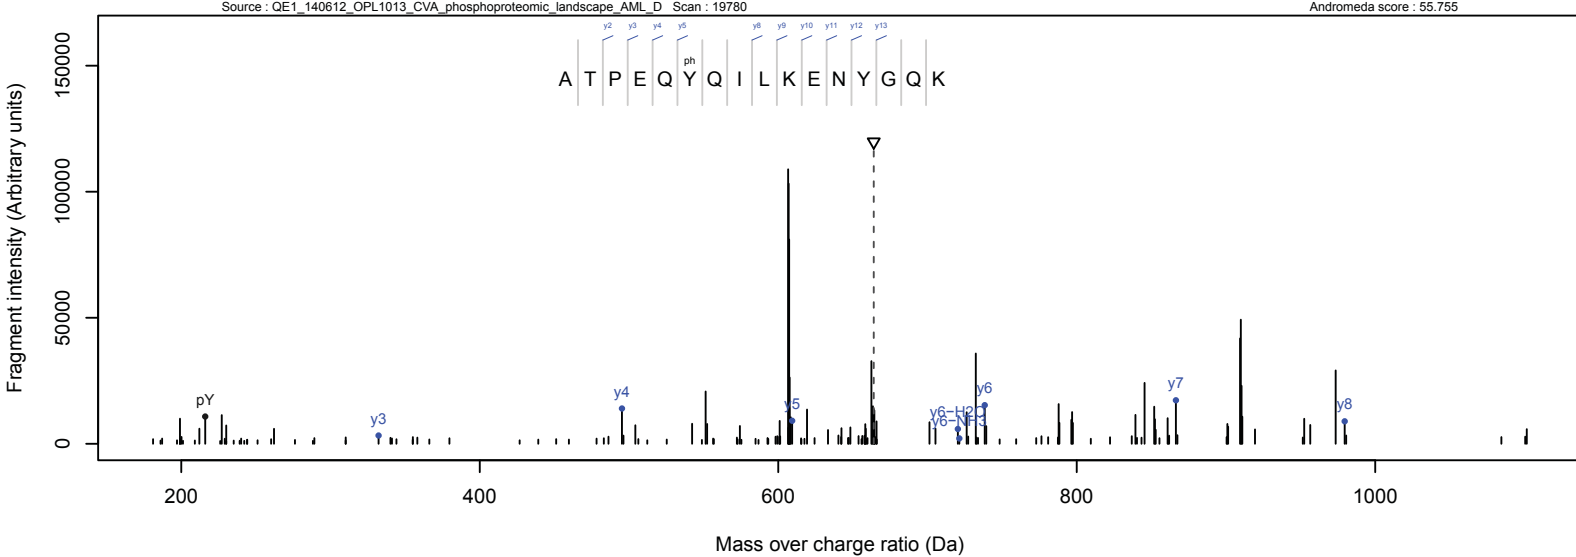

## IIDVVY(ph)NASNNELVR-2+

Source : QE1\_140612\_OPL1013\_CVA\_phosphoproteomic\_landscape\_AML\_A Scan : 32512

Andromeda score : 55.755

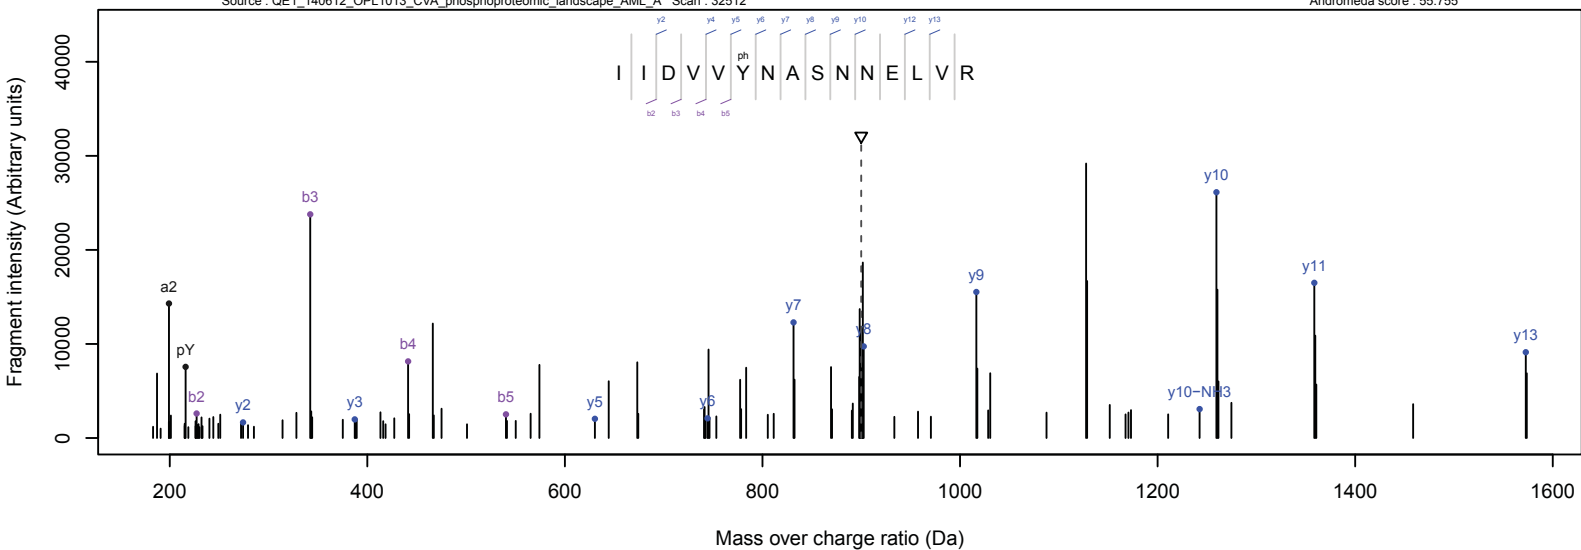

## KRVEDAY(ph)ILTCNVSLEYEK-3+

Source : QE1\_140908\_OPL1013\_CvA\_pTyrIP\_AML\_HEL Scan : 31075

Andromeda score : 55.745

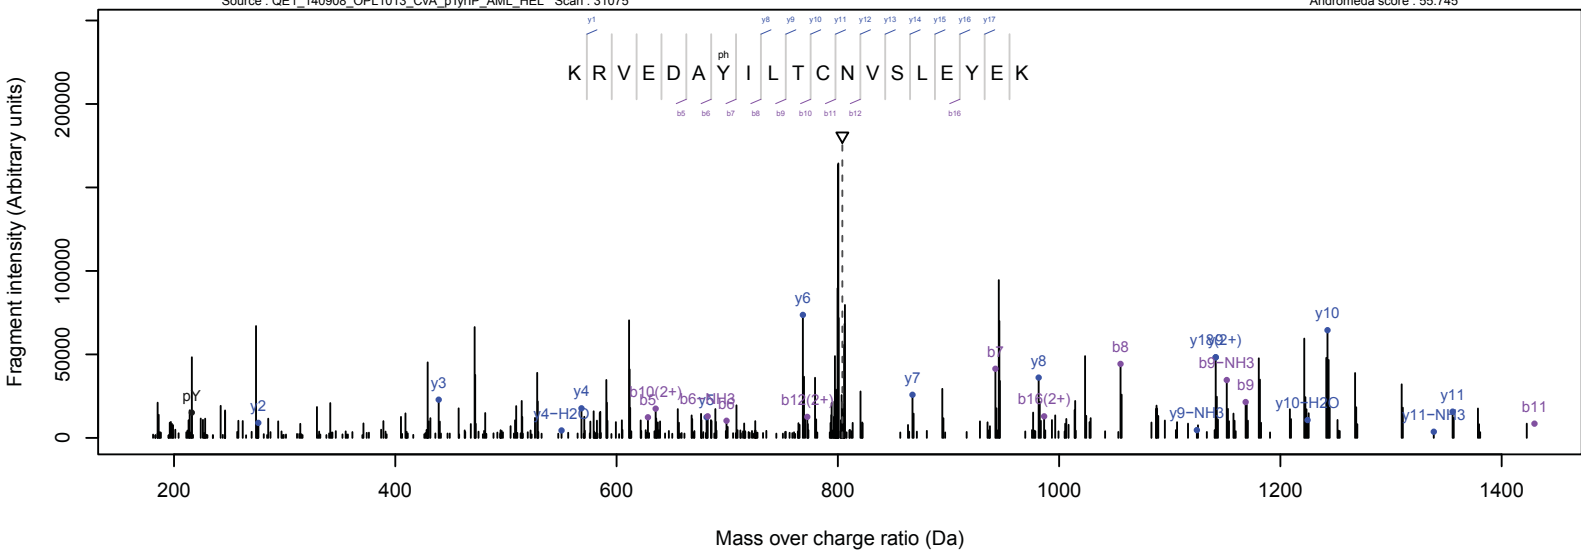

## TNTAY(ph)QCFSLPQSSTHIR-3+

Source : QE1\_140612\_OPL1013\_CVA\_phosphoproteomic\_landscape\_AML\_B Scan : 31356

Andromeda score : 55.707

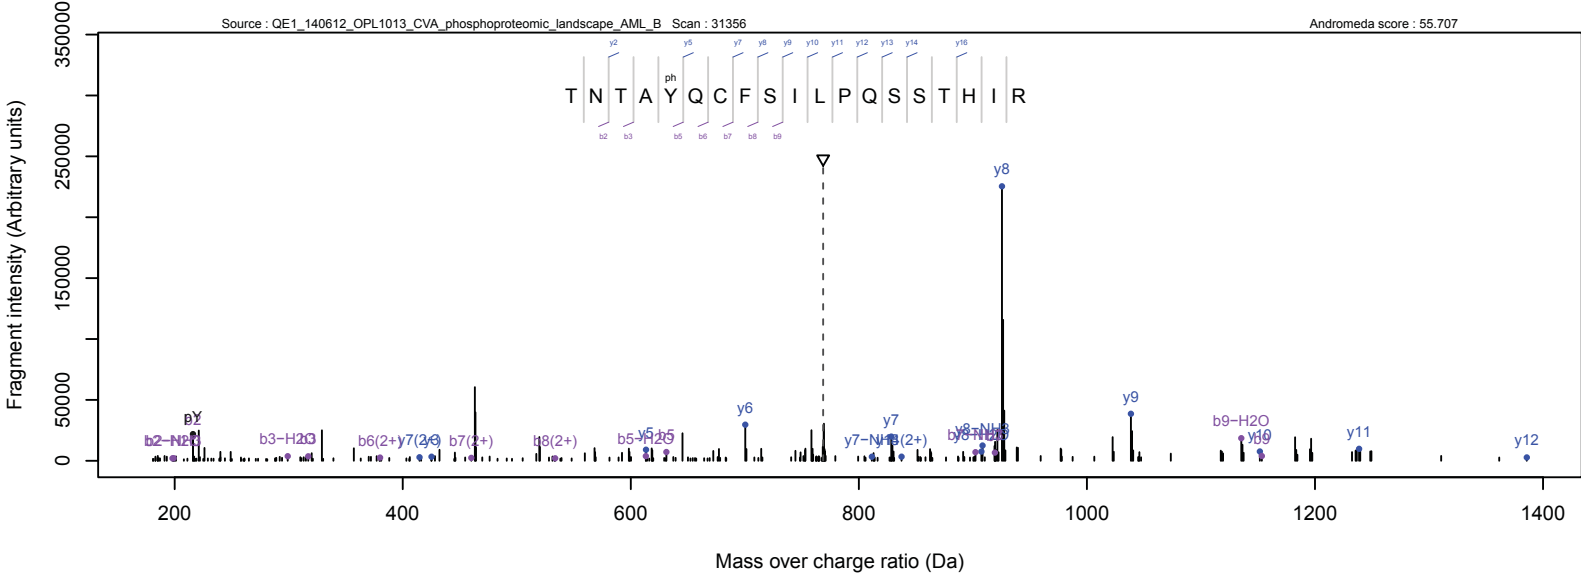

TPQGPPEIY(ph)SDTQFSLQSTAK-3+

Source : QE1\_140908\_OPL1013\_CvA\_pTyrIP\_AML\_HEL Scan : 35799

Andromeda score : 55.705

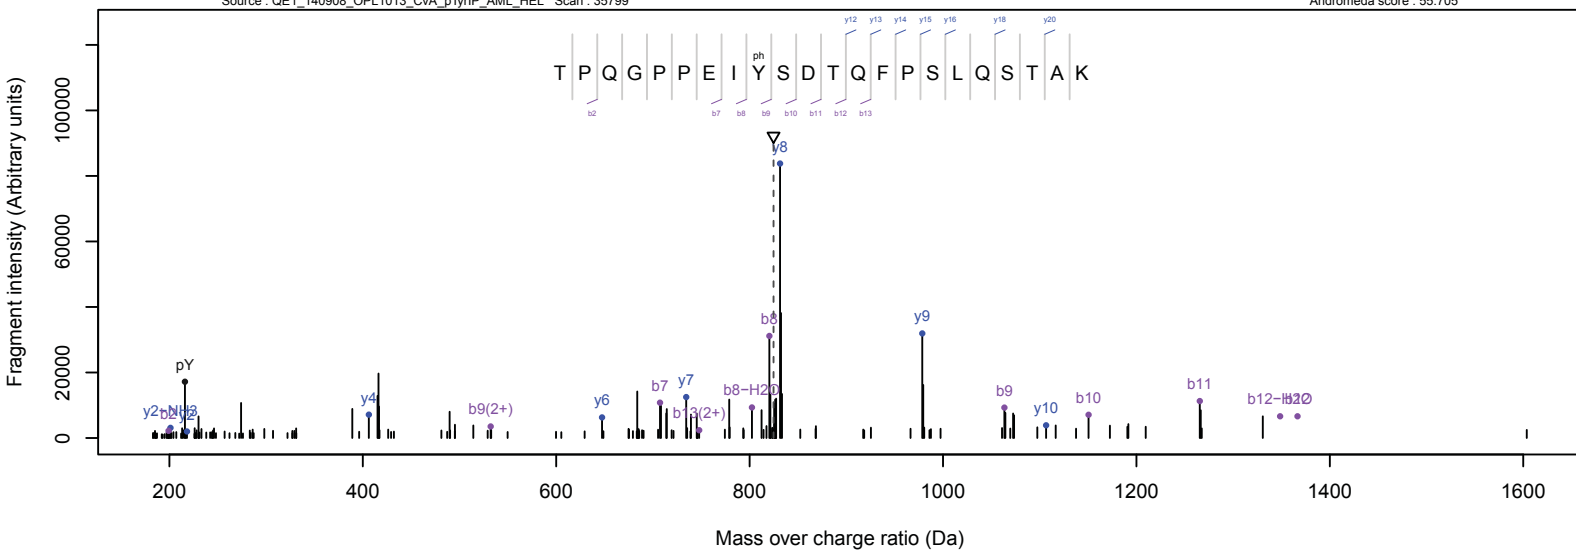

SLVDGY(ph)KQWSSAPNLVK-3+

Source : QE1\_140612\_OPL1013\_CVA\_phosphoproteomic\_landscape\_AML\_C Scan : 31347

Andromeda score : 55.688

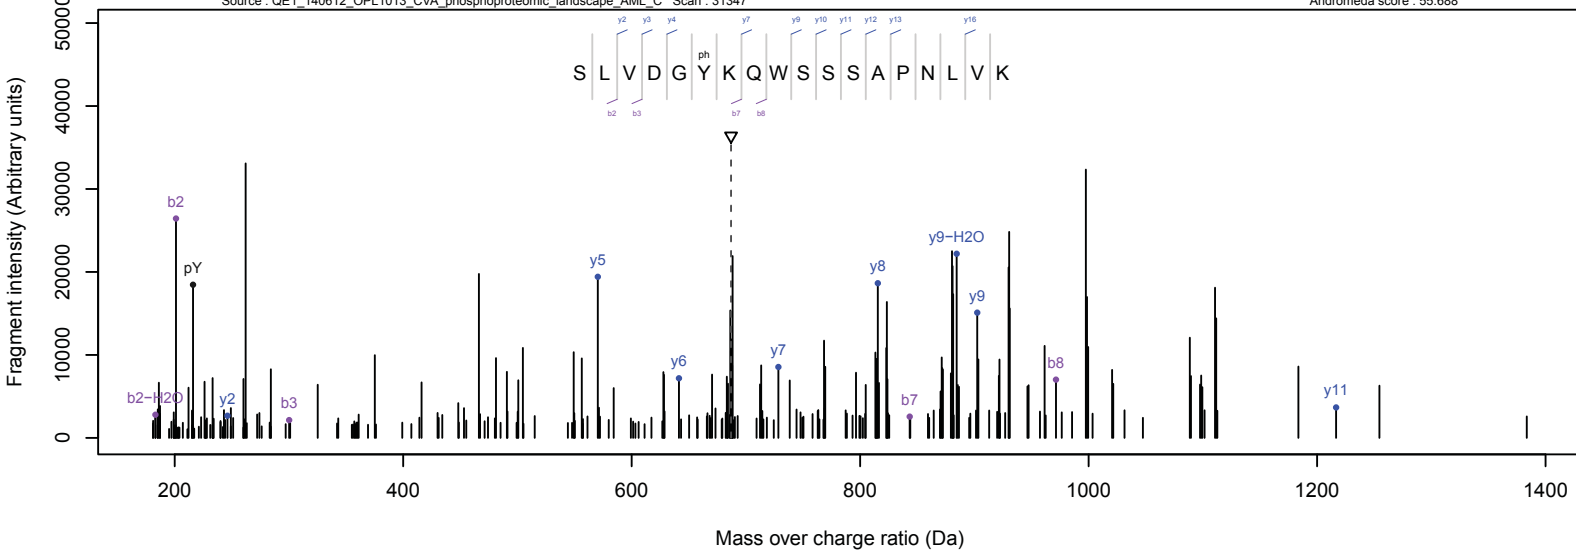

CSDVSELSSSPGYPYHQEPYVCKPEER-4+

Source : QE1\_140612\_OPL1013\_CVA\_phosphoproteomic\_landscape\_AML\_B Scan : 20639

Andromeda score : 55.662

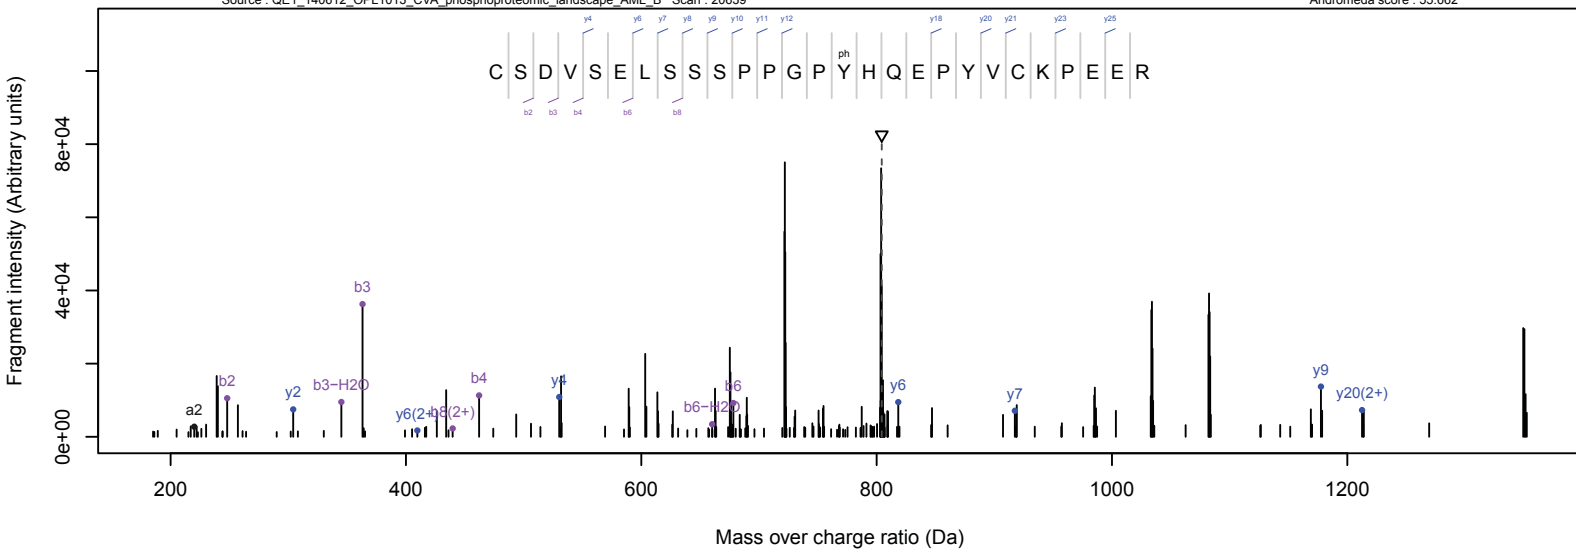





EALSVVSD DQSLFDS(ph)AYGAAHLPK-3+

Source : QE1\_140612\_OPL1013\_CVA\_phosphoproteomic\_landscape\_AML\_B Scan : 43733

Andromeda score : 55.634

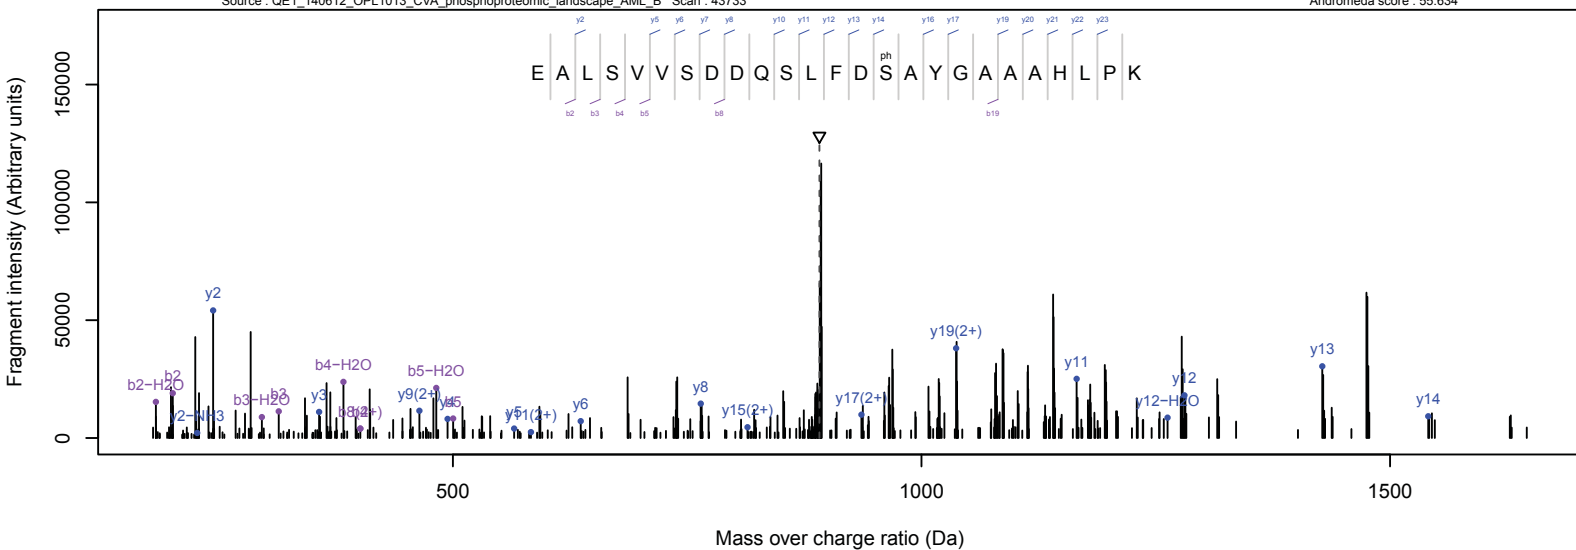

ATENDIY(ph)NFFSPLNPVR-3+

Source : QE1\_140822\_OPL1013\_CvA\_pTyrIP\_AML\_cell\_lines\_part2\_E Scan : 41234

Andromeda score : 55.546

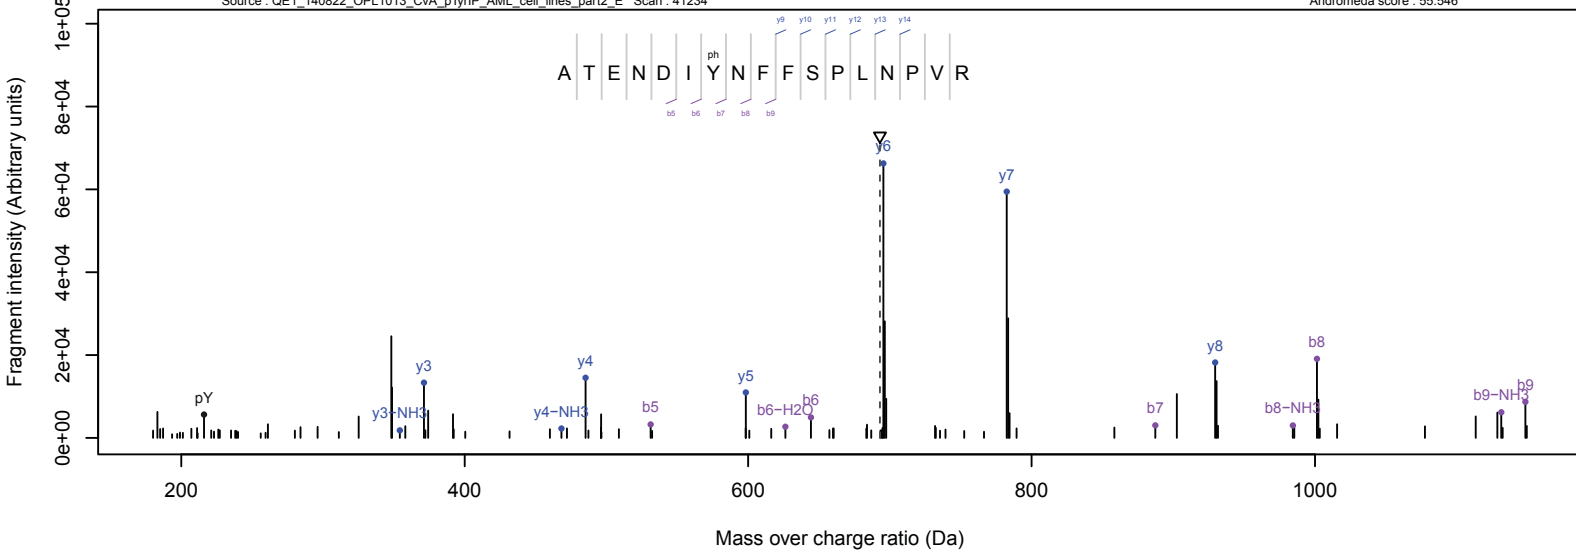

AY(ph)ILNLVK-2+

Source : QE1\_140612\_OPL1013\_CVA\_phosphoproteomic\_landscape\_AML\_C Scan : 34495

Andromeda score : 55.531

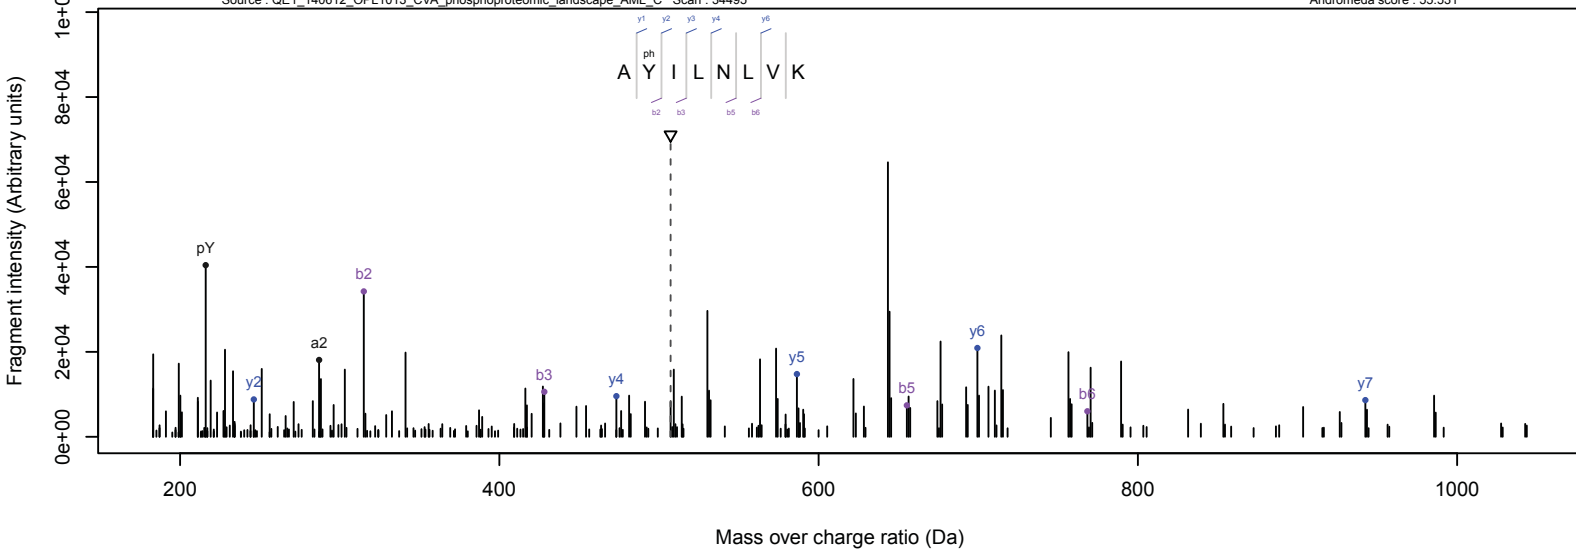

(ac)SAEGY(ph)QYR-2+

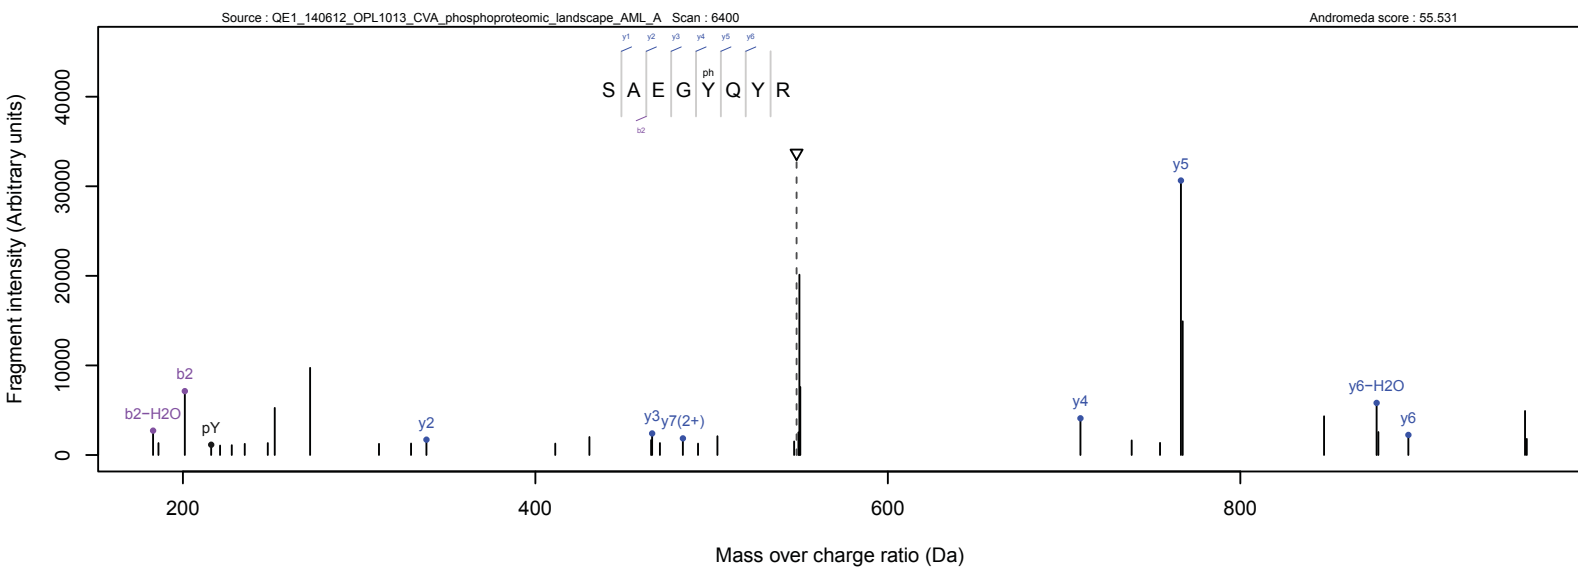

LTY(ph)FNMR-2+

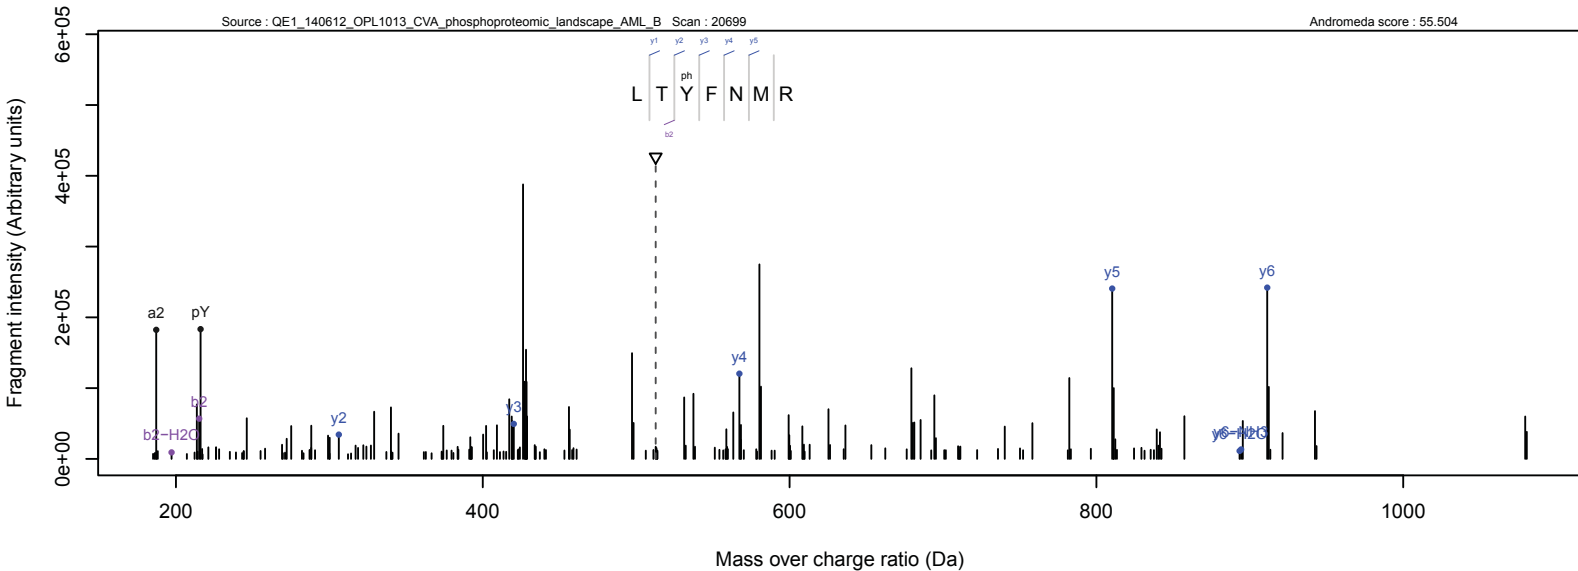

FD FHGIAQLQPHPTESMYKYPSPDISYMP SYH AHQK-6+

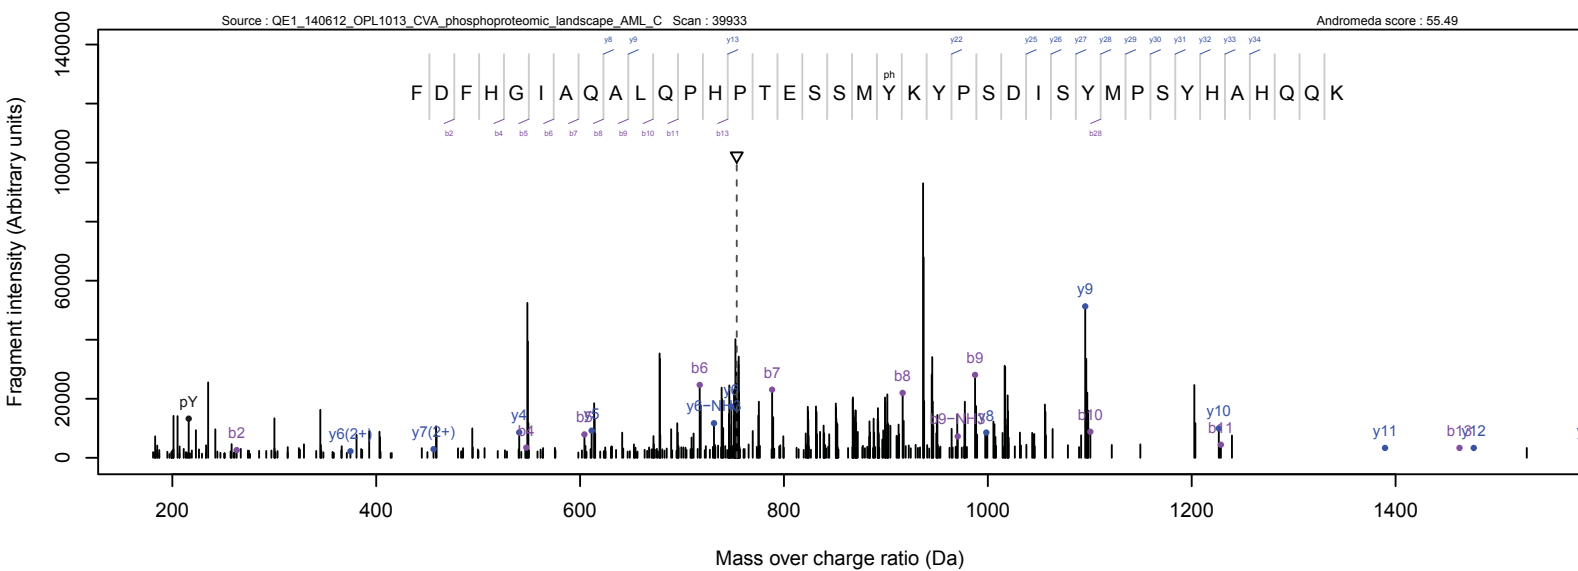

**LTDPKEDPIYDEPEGLAPVPPQGLYDLPREP-4+**

Source : QE1\_140908\_OPL1013\_CvA\_pTyrIP\_AML\_HEL Scan : 42367

Andromeda score : 55.484

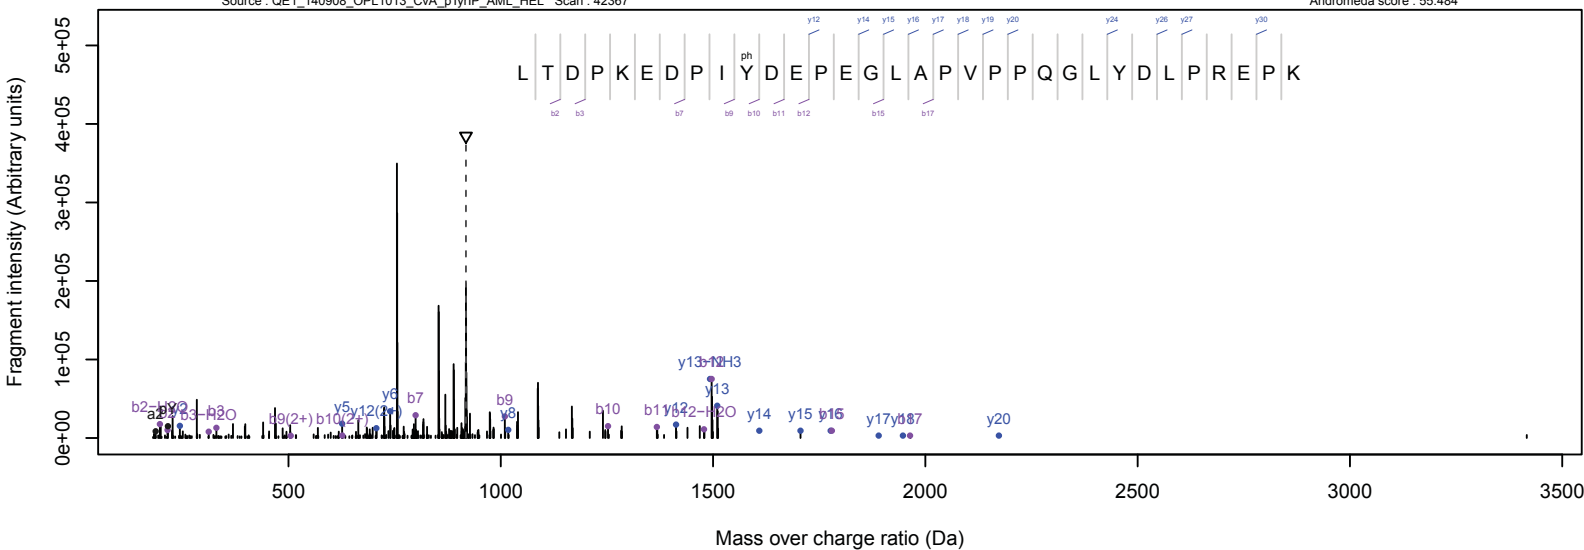

**HGHY(ph)PNTIAEK-3+**

Source : QE1\_140612\_OPL1013\_CVA\_phosphoproteomic\_landscape\_AML\_D Scan : 5114

Andromeda score : 55.467

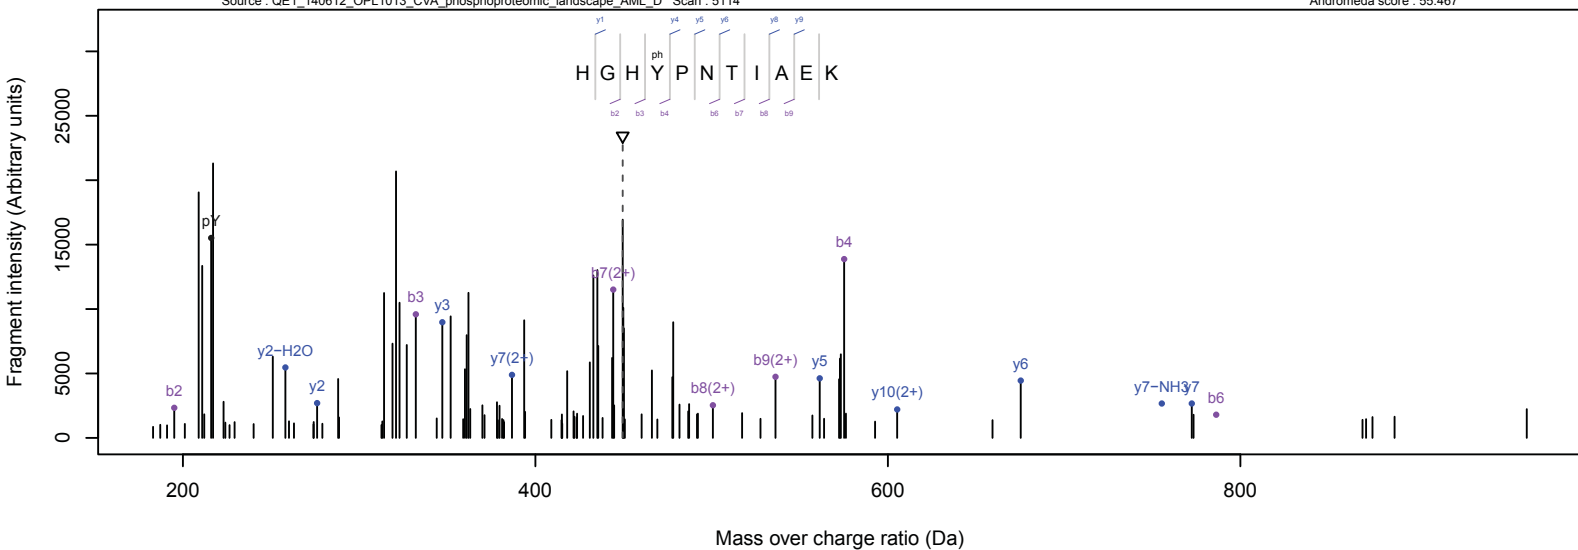

**SGY(ph)FLWTK-2+**

Source : QE1\_140612\_OPL1013\_CVA\_phosphoproteomic\_landscape\_AML\_C Scan : 33473

Andromeda score : 55.461

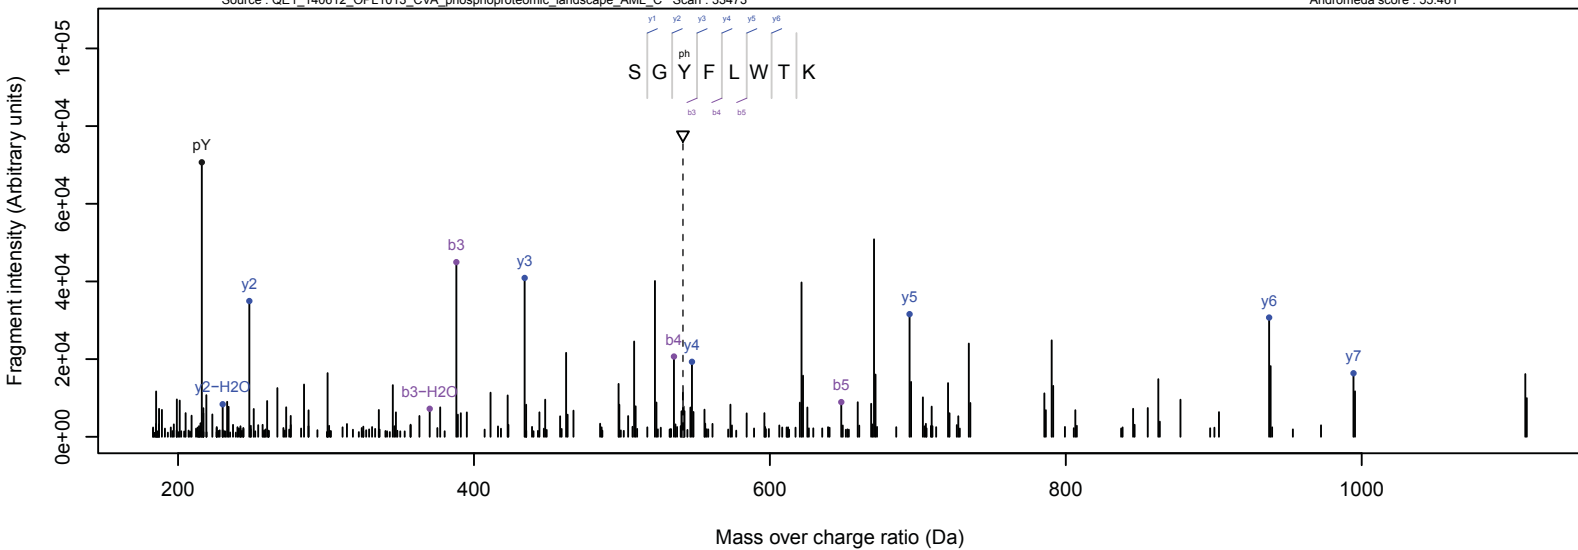

## GTAAFY(ph)HHLPAASGCK-3+

Source: QE1\_140612\_OPL1013\_CVA\_phosphoproteomic\_landscape\_AML\_A Scan: 14771

Andromeda score: 55.437

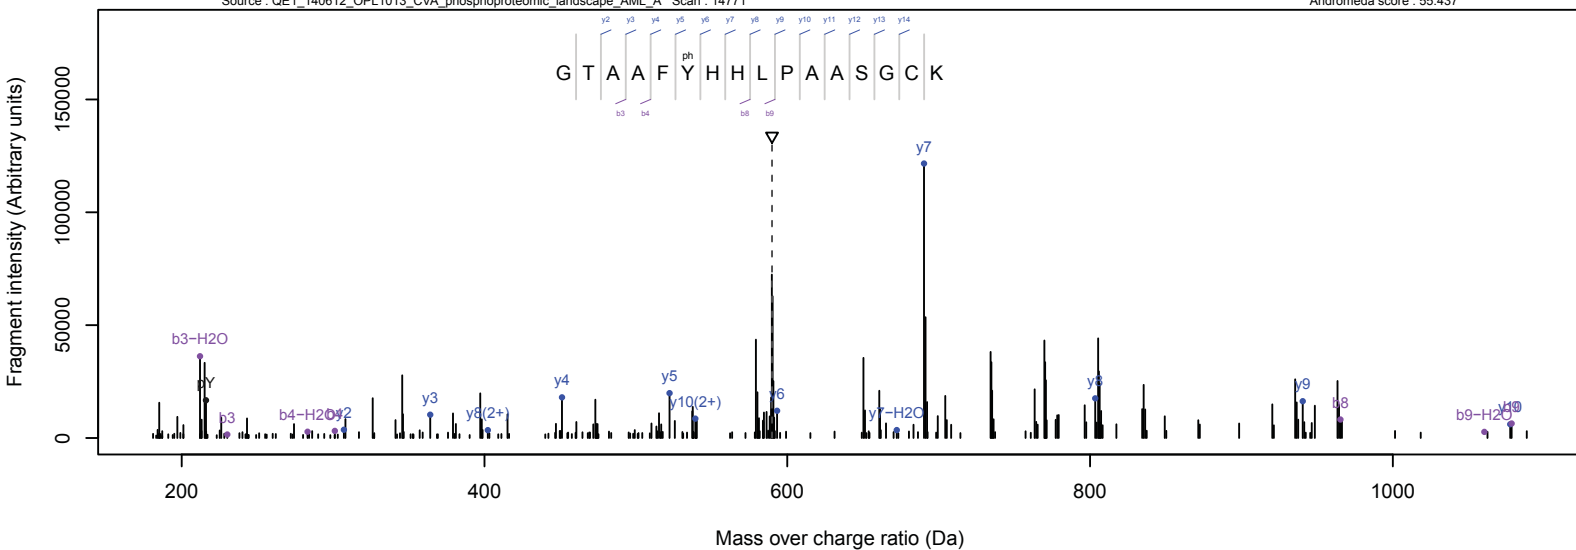

## VAQGIRREEVSY(ph)QLAFNK-2+

Source: QE1\_140612\_OPL1013\_CVA\_phosphoproteomic\_landscape\_AML\_C Scan: 27643

Andromeda score: 55.437

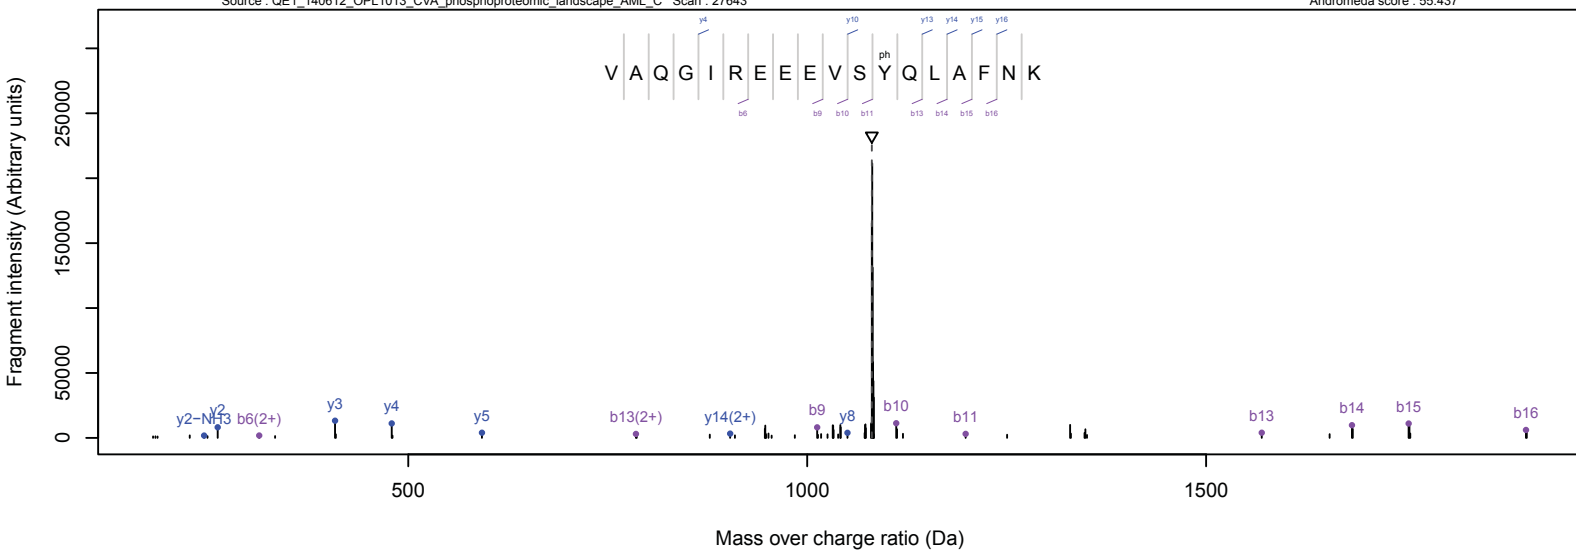

## LKEYT(ph)IK-2+

Source: QE1\_140822\_OPL1013\_CvA\_pTyrIP\_AML\_cell\_lines\_part2\_B Scan: 4084

Andromeda score: 55.37

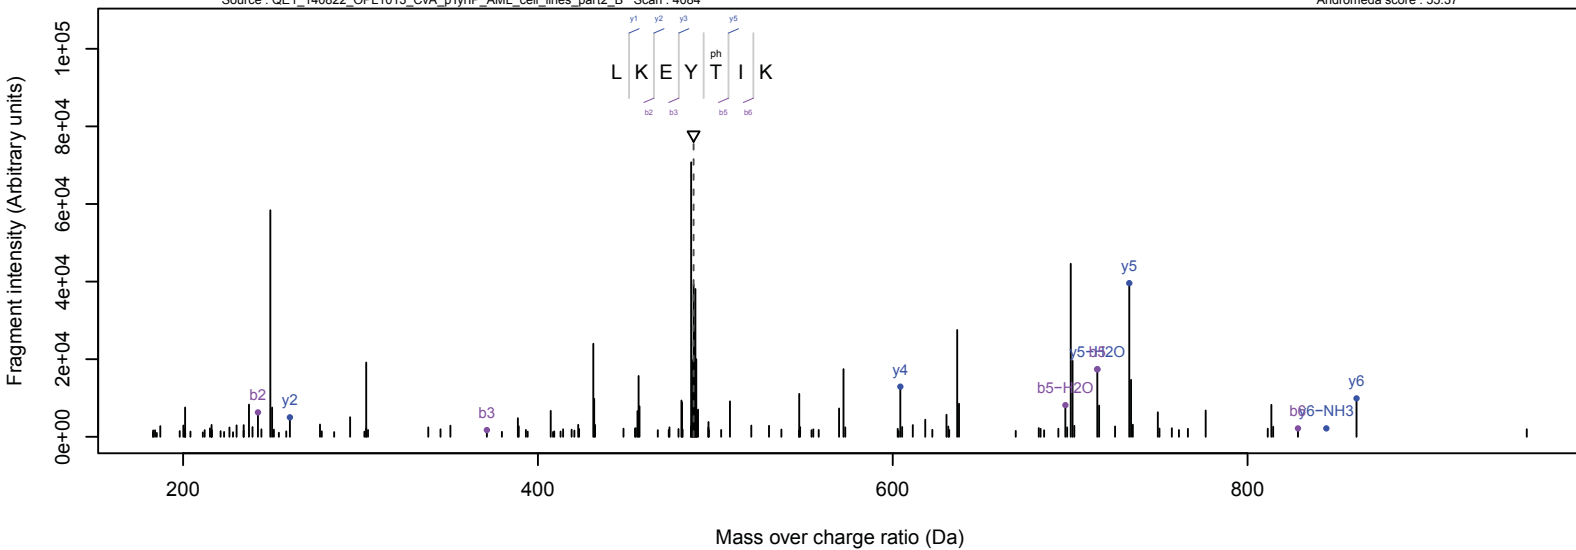

VPNKHY(ph)VYIIR-3+

Source : QE1\_140612\_OPL1013\_CVA\_phosphoproteomic\_landscape\_AML\_D Scan : 17172

Andromeda score : 55.353

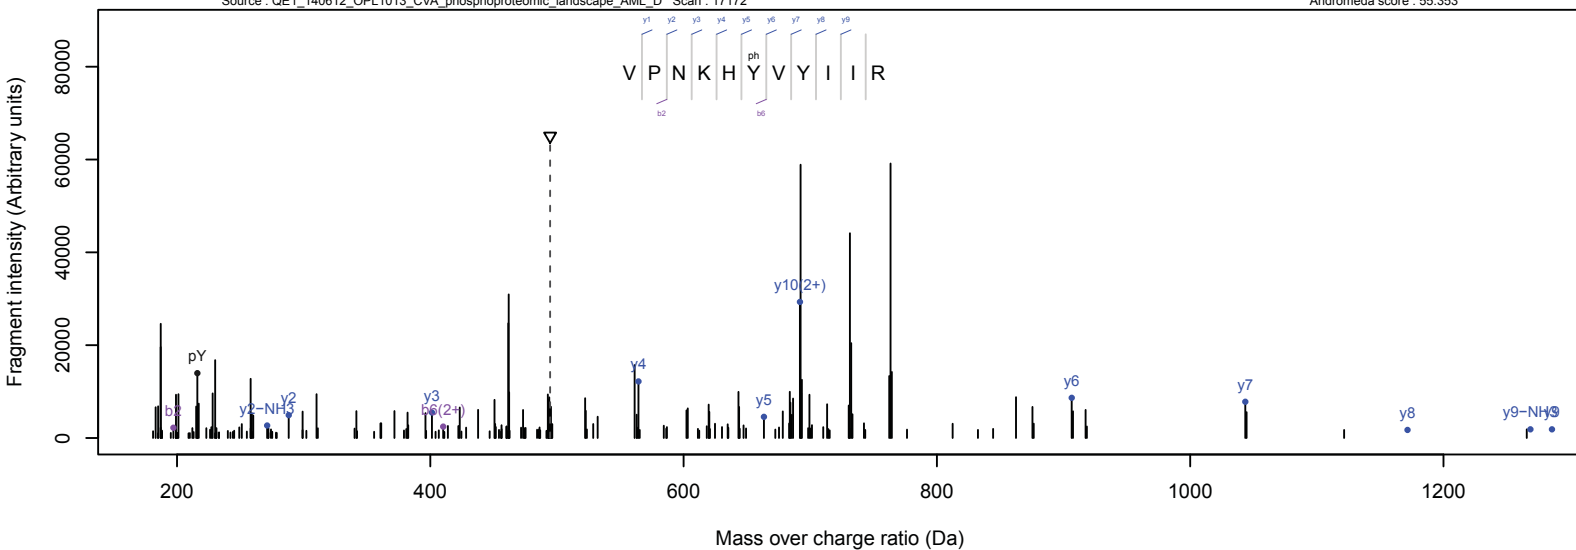

KGRDPY(ph)AYIPLNR-3+

Source : QE1\_140612\_OPL1013\_CVA\_phosphoproteomic\_landscape\_AML\_C Scan : 21759

Andromeda score : 55.335

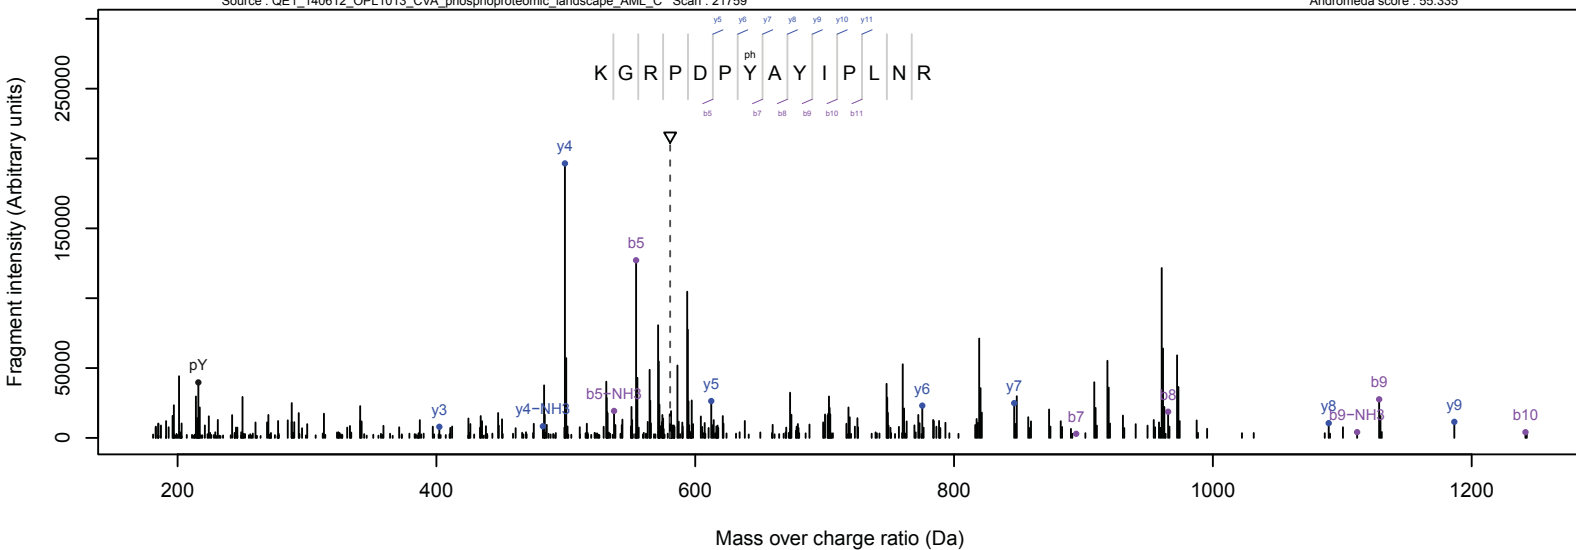

DQDELNPY(ph)AAWR-2+

Source : QE1\_140612\_OPL1013\_CVA\_phosphoproteomic\_landscape\_AML\_C Scan : 28288

Andromeda score : 55.291

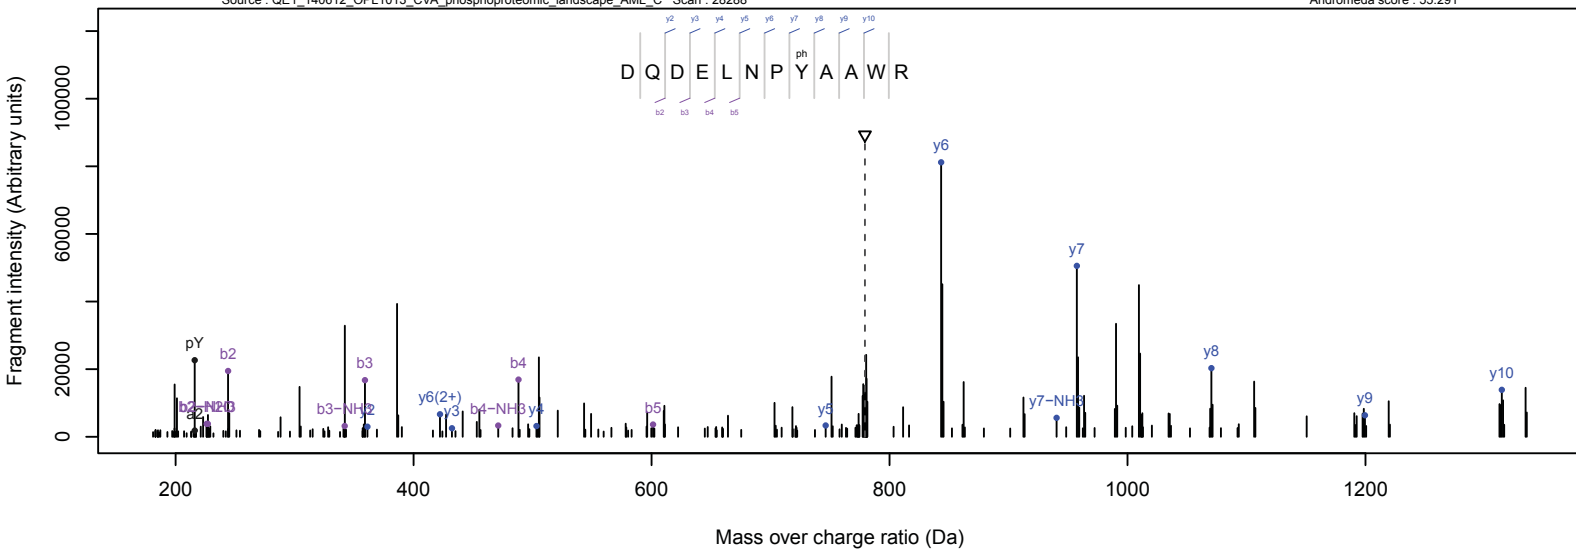

**KHNSY(ph)PQPYPYPAQRPPGPR-4+**

Source: QE1\_140612\_OPL1013\_CVA\_phosphoproteomic\_landscape\_AML\_C Scan: 13322

Andromeda score: 55.267

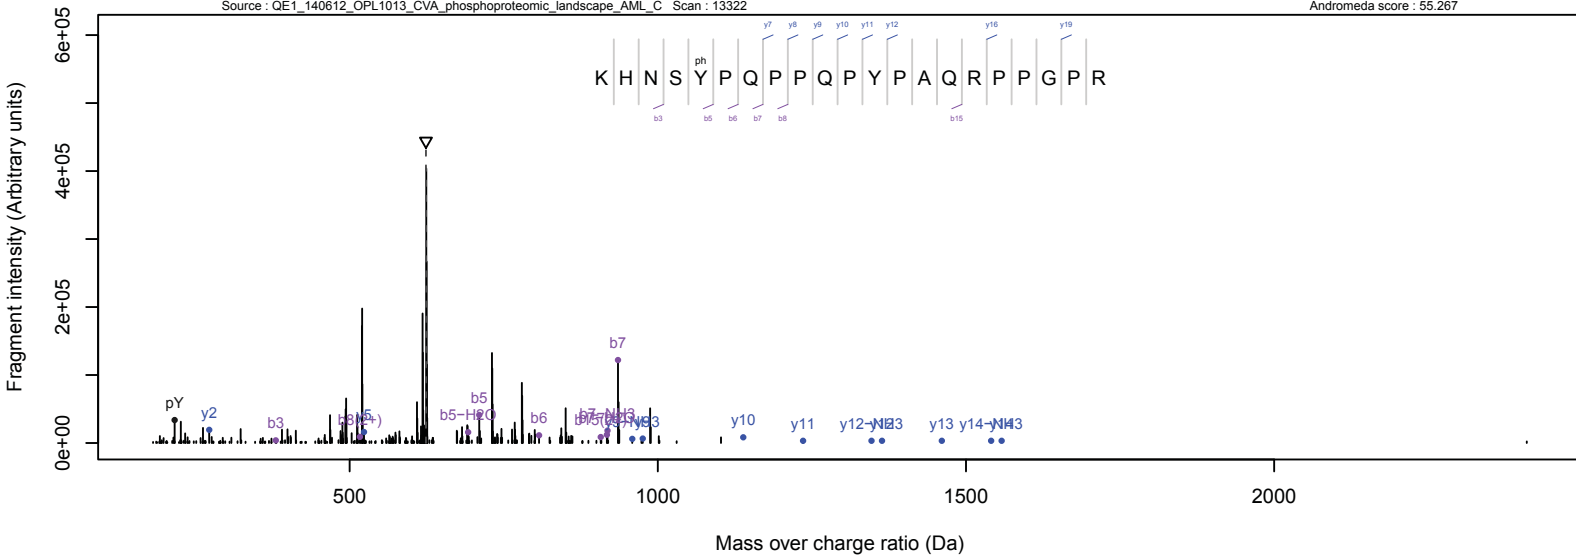

**ITLTSDPRLPY(ph)K-3+**

Source: QE1\_140612\_OPL1013\_CVA\_phosphoproteomic\_landscape\_AML\_C Scan: 23457

Andromeda score: 55.261

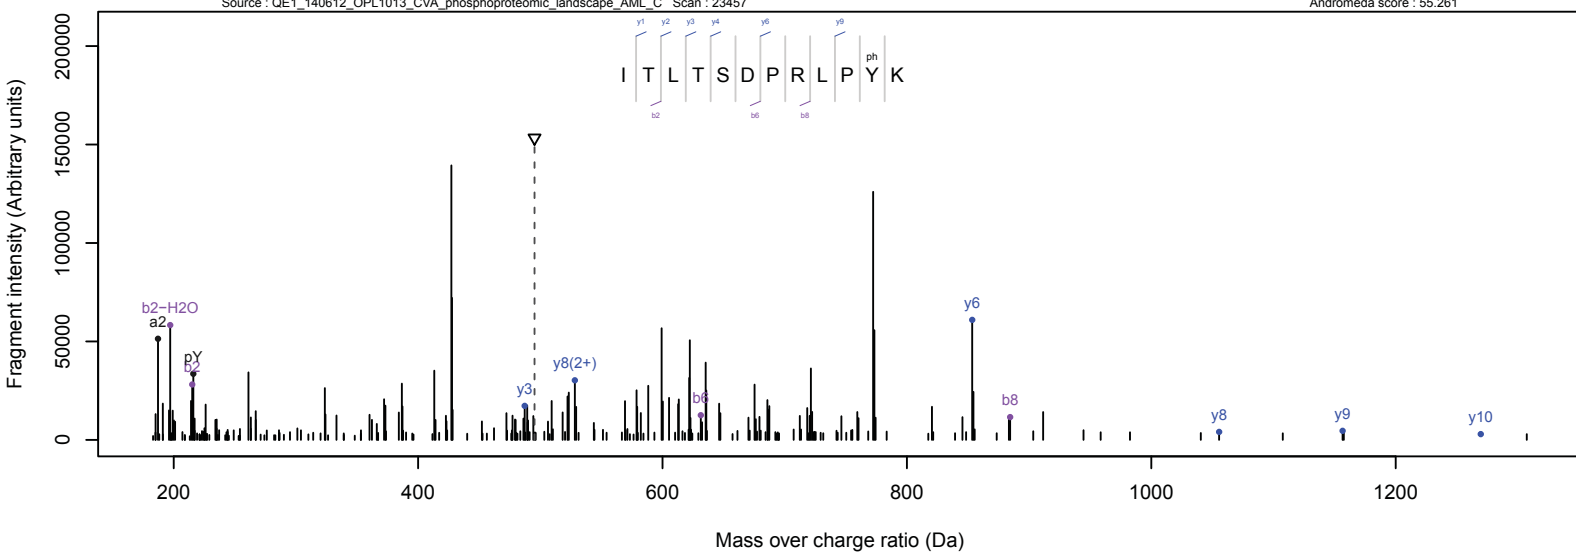

**LKATDY(ph)PLIAR-2+**

Source: QE1\_140612\_OPL1013\_CVA\_phosphoproteomic\_landscape\_AML\_D Scan: 20929

Andromeda score: 55.261

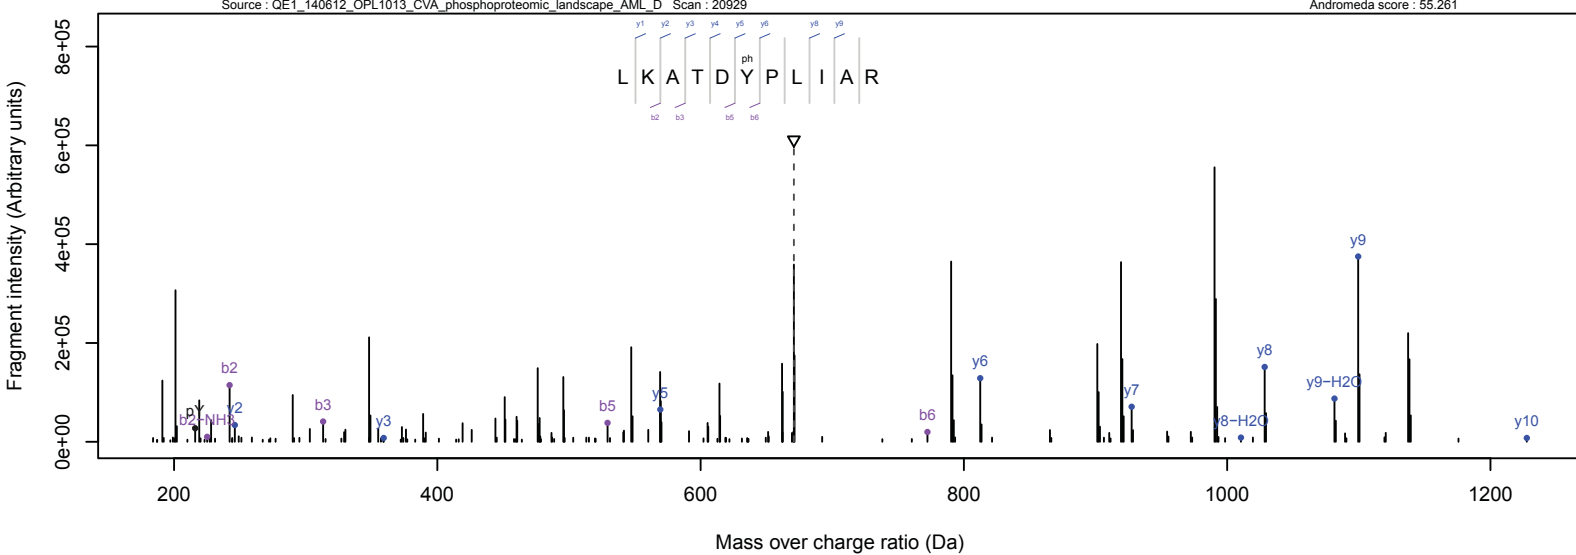

## LLLGAVAY(ph)GVR-2+

Source : QE1\_140612\_OPL1013\_CVA\_phosphoproteomic\_landscape\_AML\_C Scan : 34294

Andromeda score : 55.261

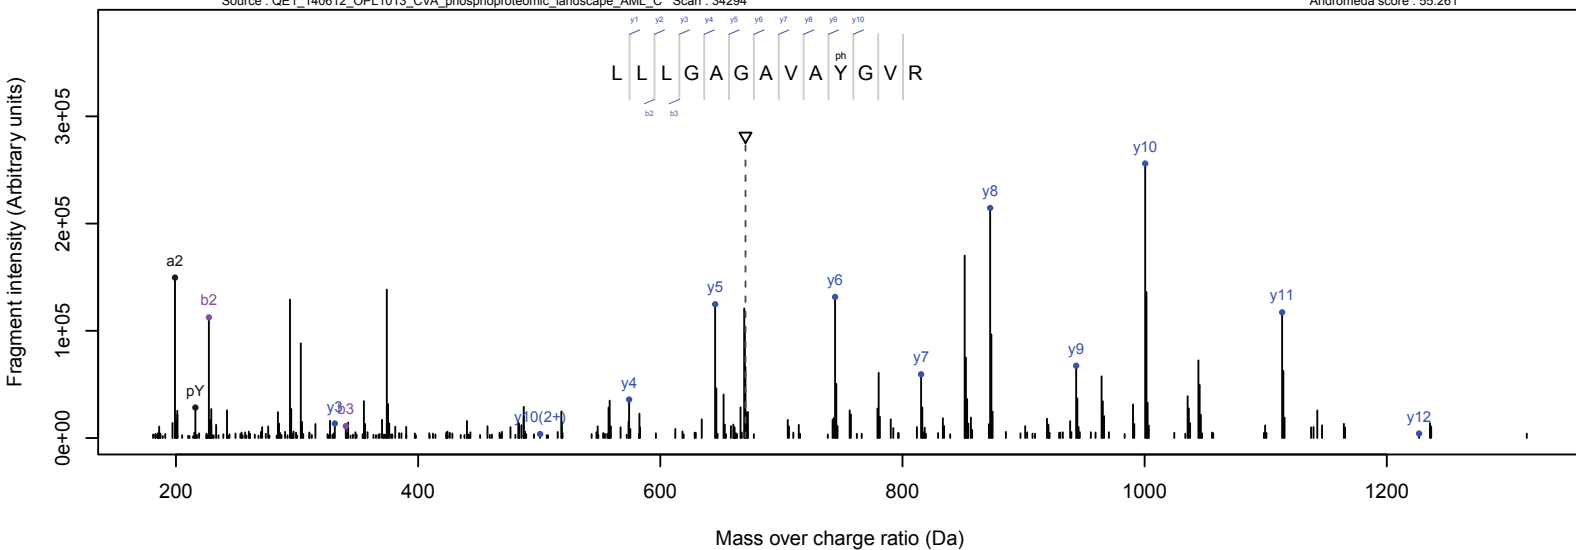

## LY(ph)SVVFQEICNR-2+

Source : QE1\_140612\_OPL1013\_CVA\_phosphoproteomic\_landscape\_AML\_B Scan : 35965

Andromeda score : 55.261

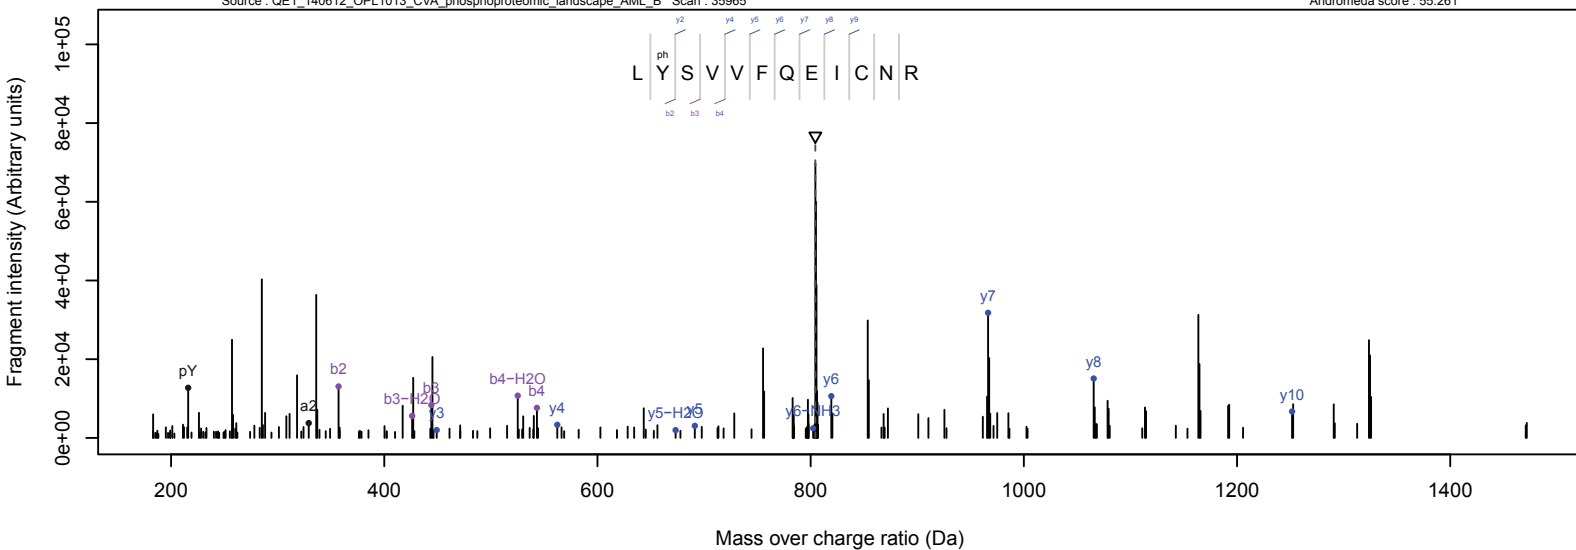

## SRQPSY(ph)VPAPLR-3+

Source : QE1\_140612\_OPL1013\_CVA\_phosphoproteomic\_landscape\_AML\_C Scan : 16143

Andromeda score : 55.261

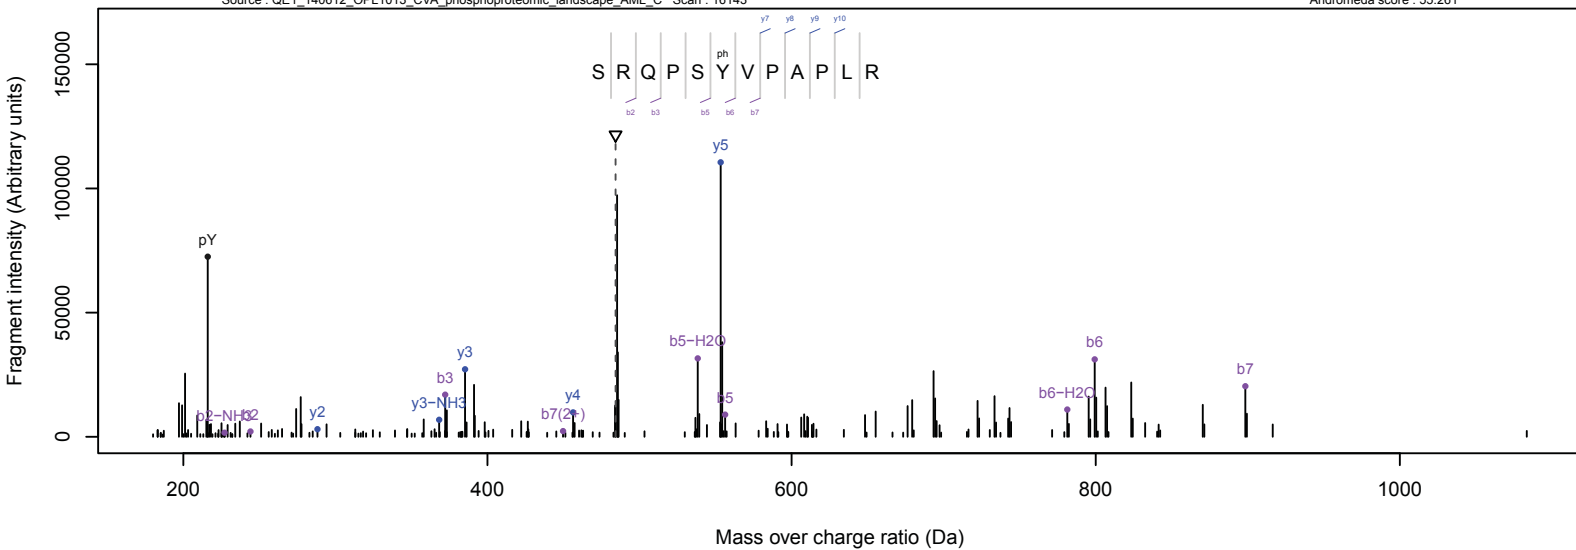

Y(ph)APLHLVPLIER-2+

Source: QE1\_140612\_OPL1013\_CVA\_phosphoproteomic\_landscape\_AML\_C Scan: 39646

Andromeda score: 55.261

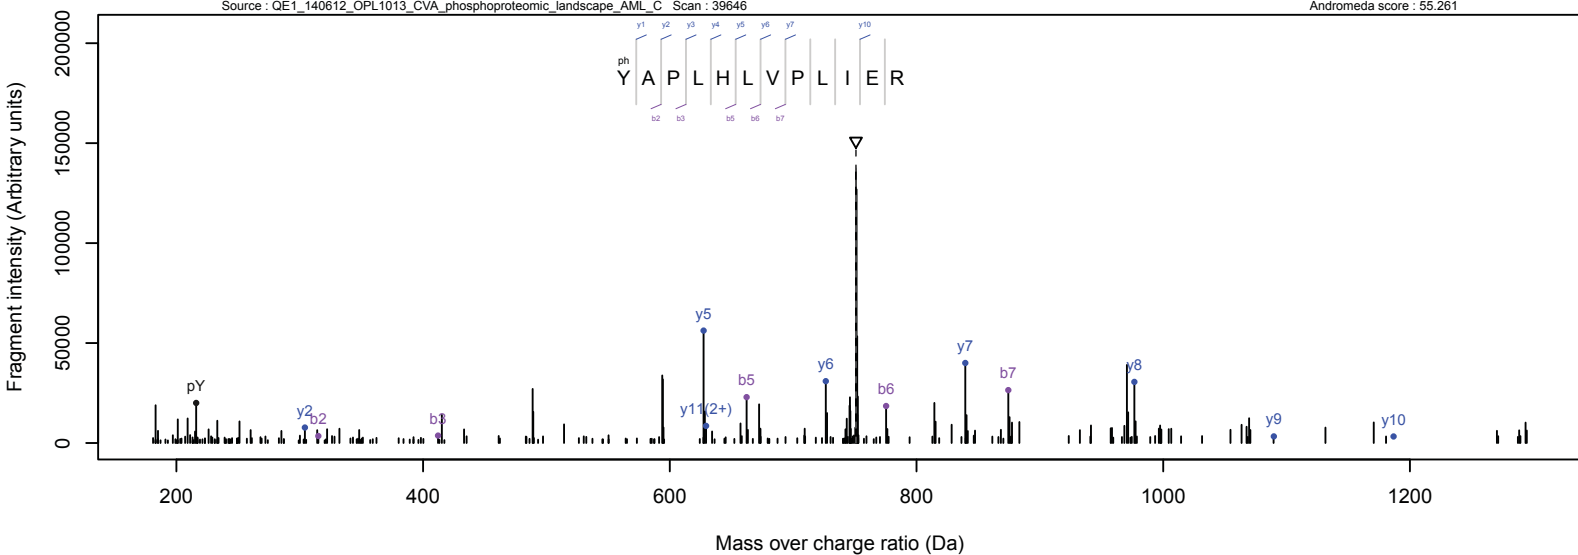

AIY(ph)QVYNALQEK-2+

Source: QE1\_140612\_OPL1013\_CVA\_phosphoproteomic\_landscape\_AML\_B Scan: 28518

Andromeda score: 55.196

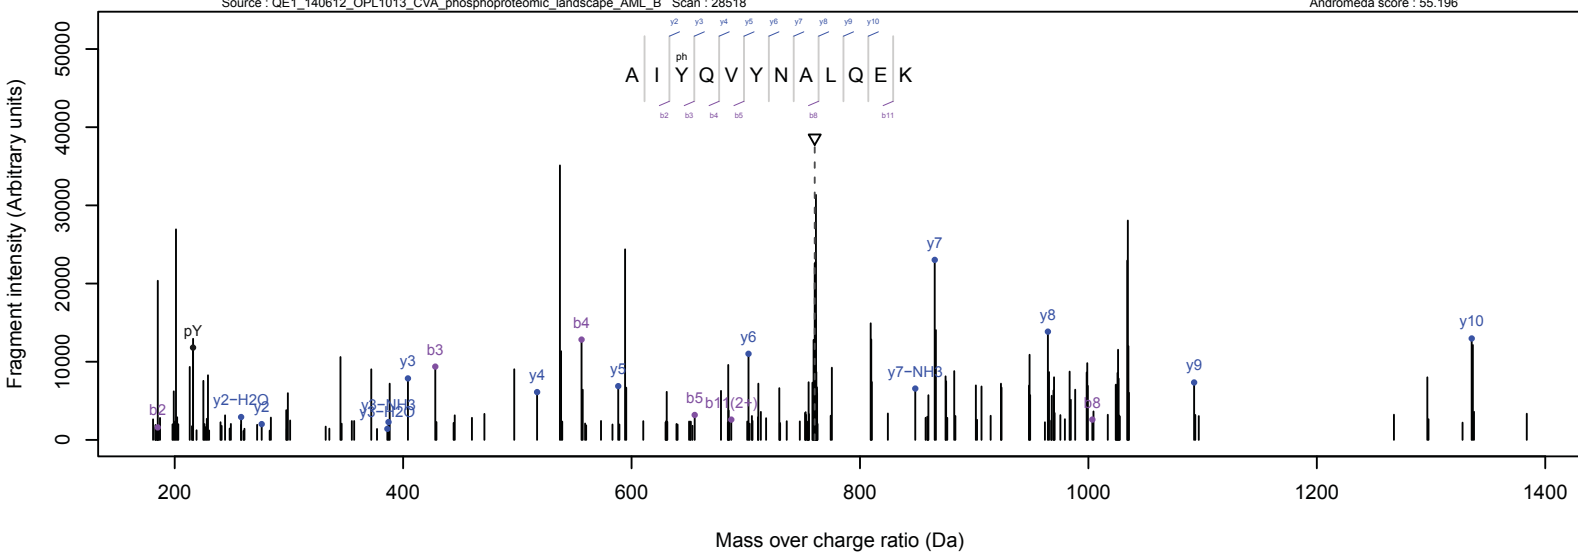

EEPIIITEY(ph)M(ox)AK-2+

Source: QE1\_140822\_OPL1013\_CvA\_pTyrIP\_AML\_cell\_lines\_part2\_B Scan: 38243

Andromeda score: 55.196

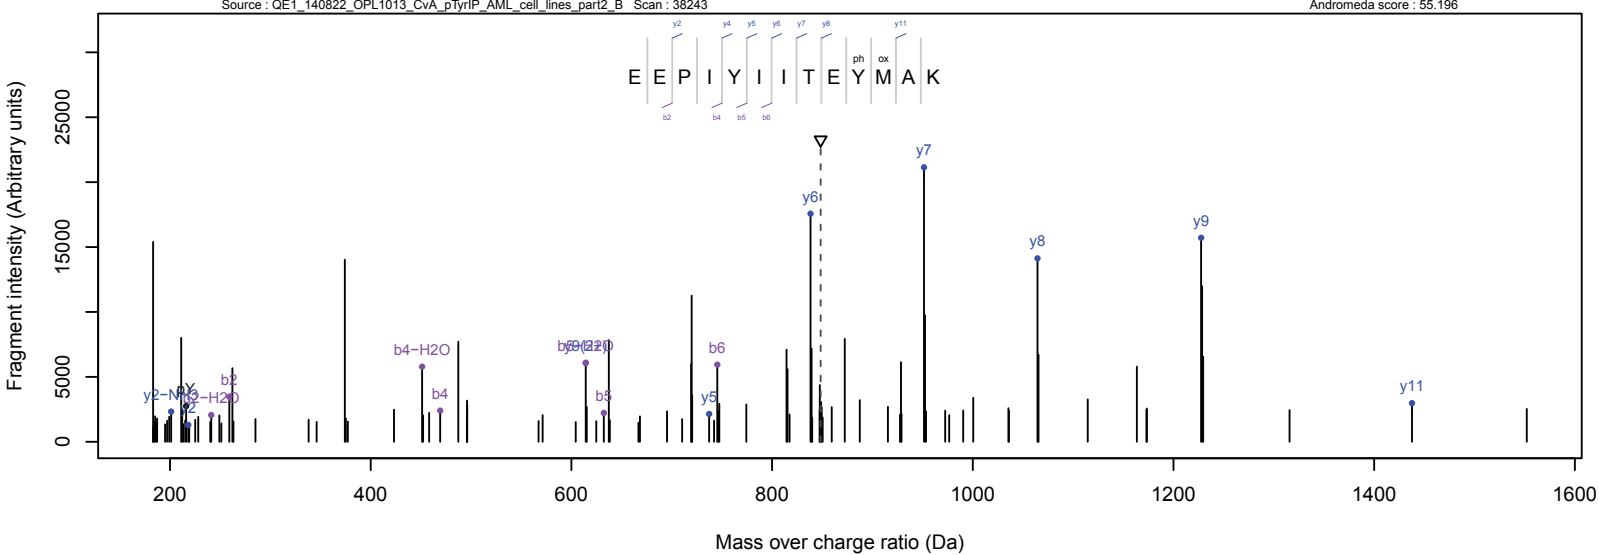



S(ph)NSAWQIY(ph)LQR-2+

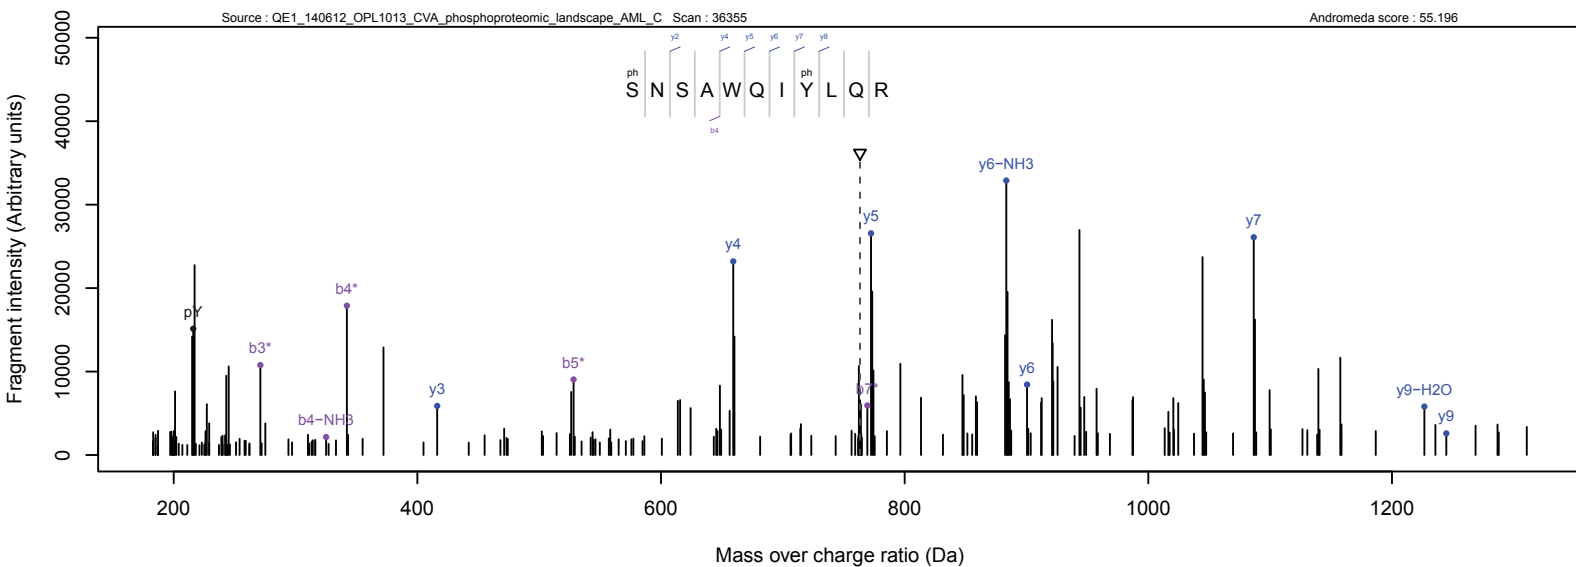

NLT(ph)YFGVVHGPSAQLLSAAPEGVPLAQR-3+

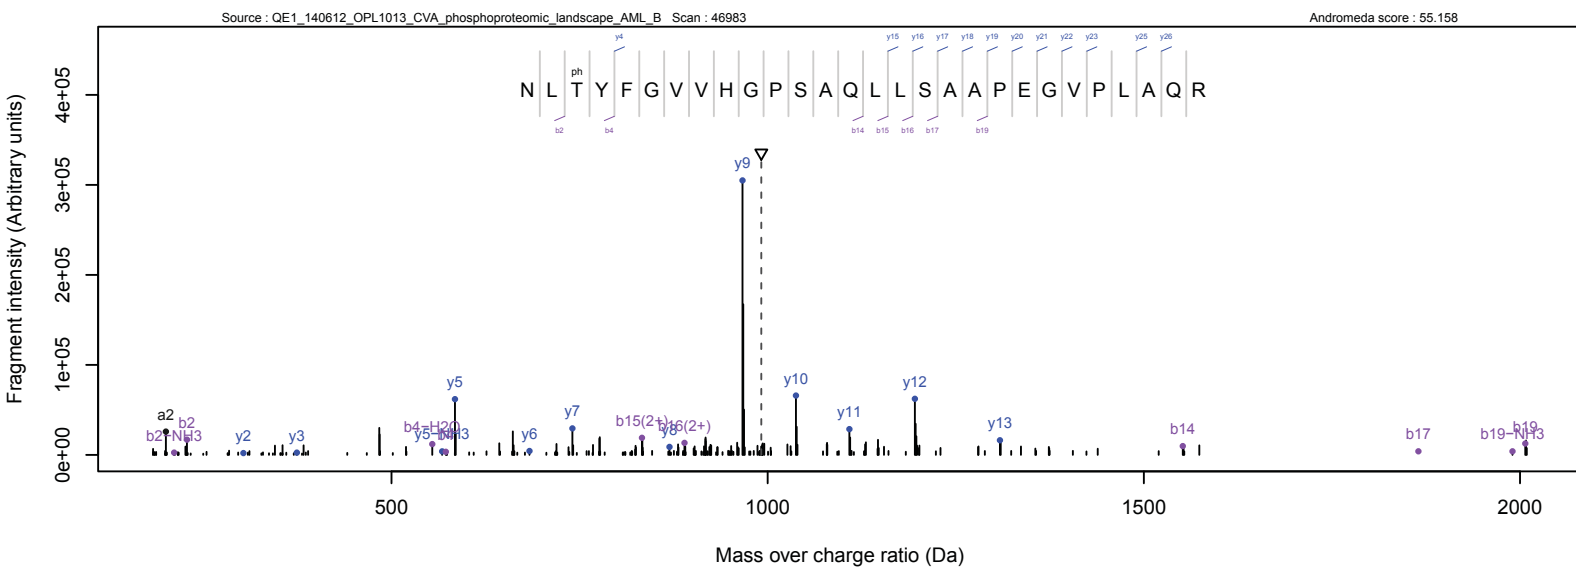

SDSTNSEDN(ph)VPMNPGSSTLLAMER-3+

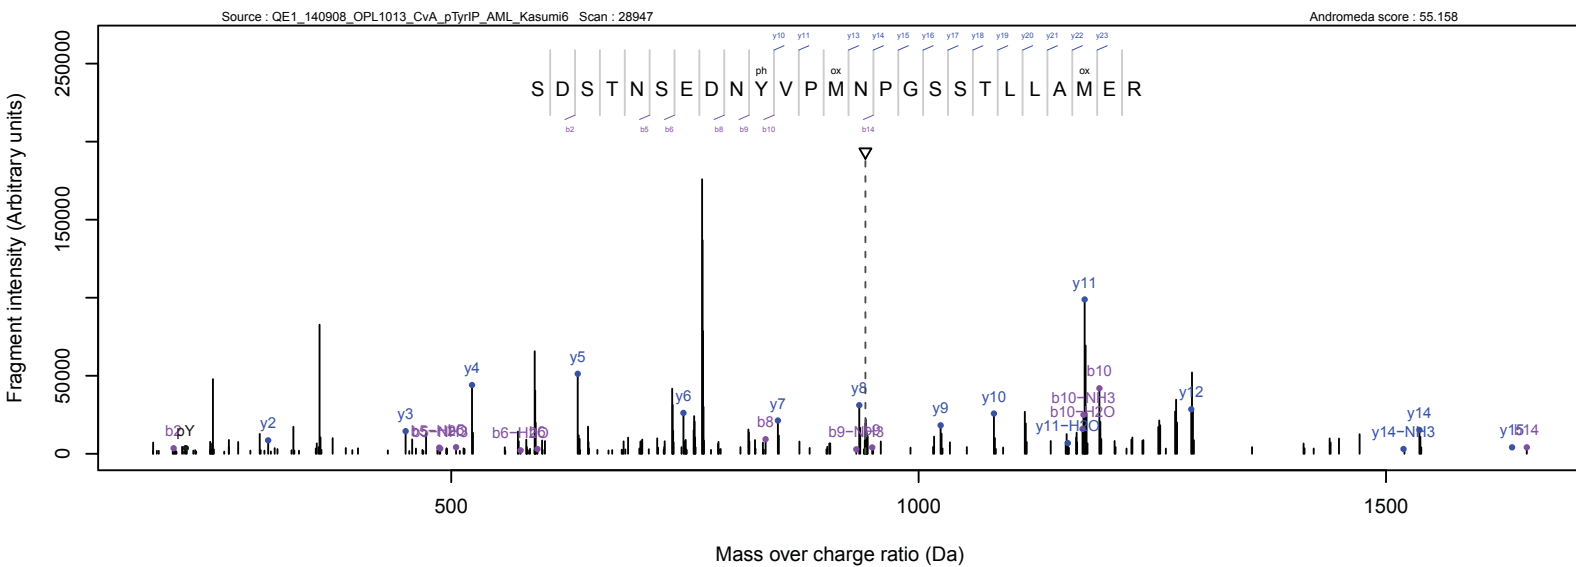

## SSANVY(ph)HHPTPAVSSNFYSTVGR-3+

Source : QE1\_140612\_OPL1013\_CVA\_phosphoproteomic\_landscape\_AML\_C Scan : 21747

Andromeda score : 55.158

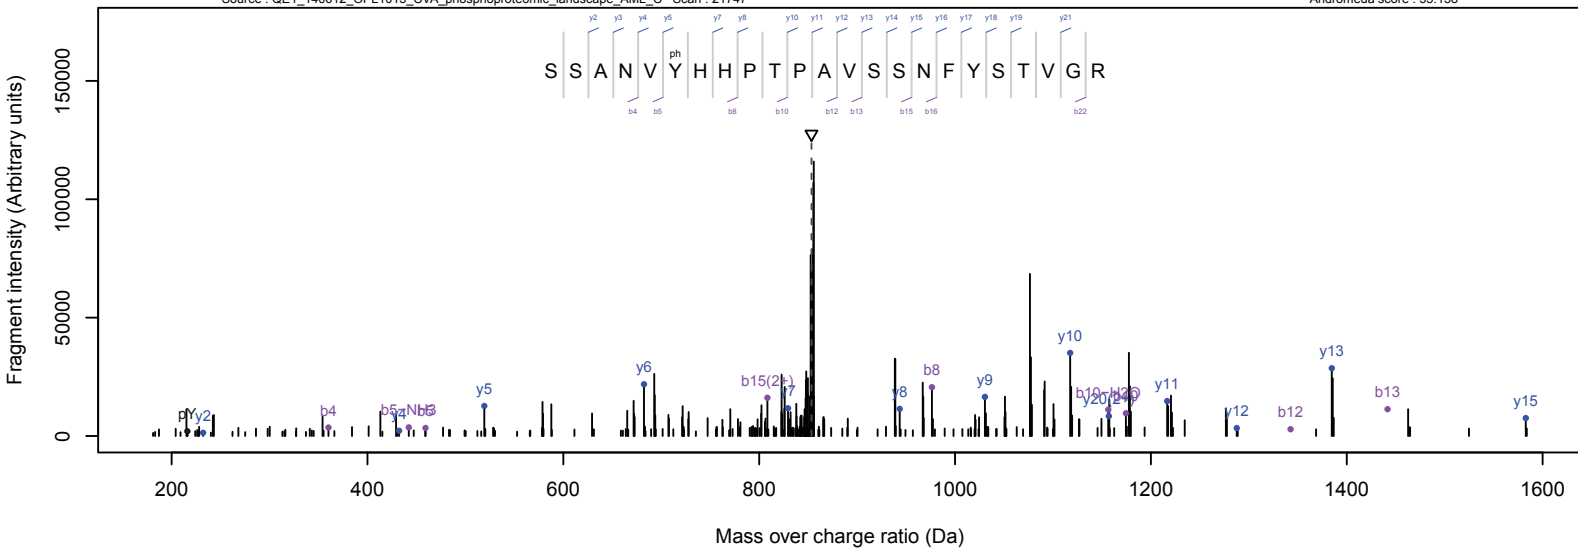

## HM(ox)AGLKVY(ph)NVDGSPNNATGQSR-3+

Source : QE1\_140908\_OPL1013\_CvA\_pTyrIP\_AML\_HEL Scan : 12923

Andromeda score : 55.128

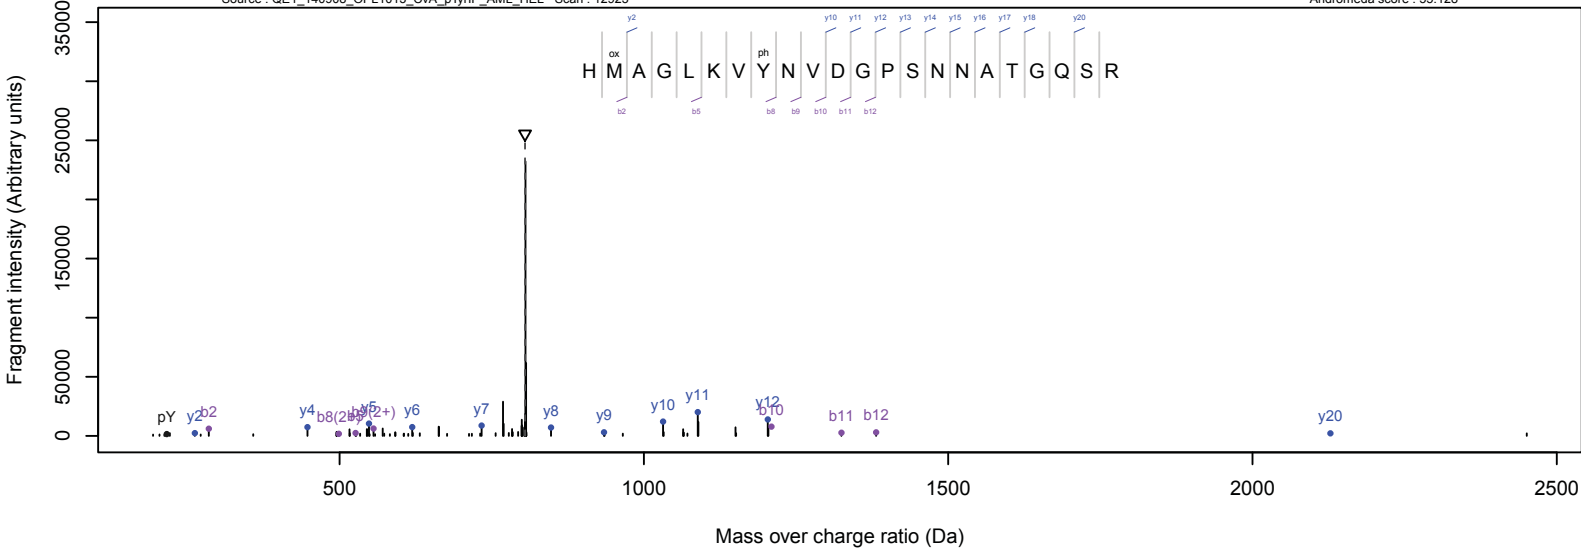

## TCVGLPFSAEHSAHQDHYT(ph)LLER-3+

Source : QE1\_140612\_OPL1013\_CVA\_phosphoproteomic\_landscape\_AML\_C Scan : 37909

Andromeda score : 55.128

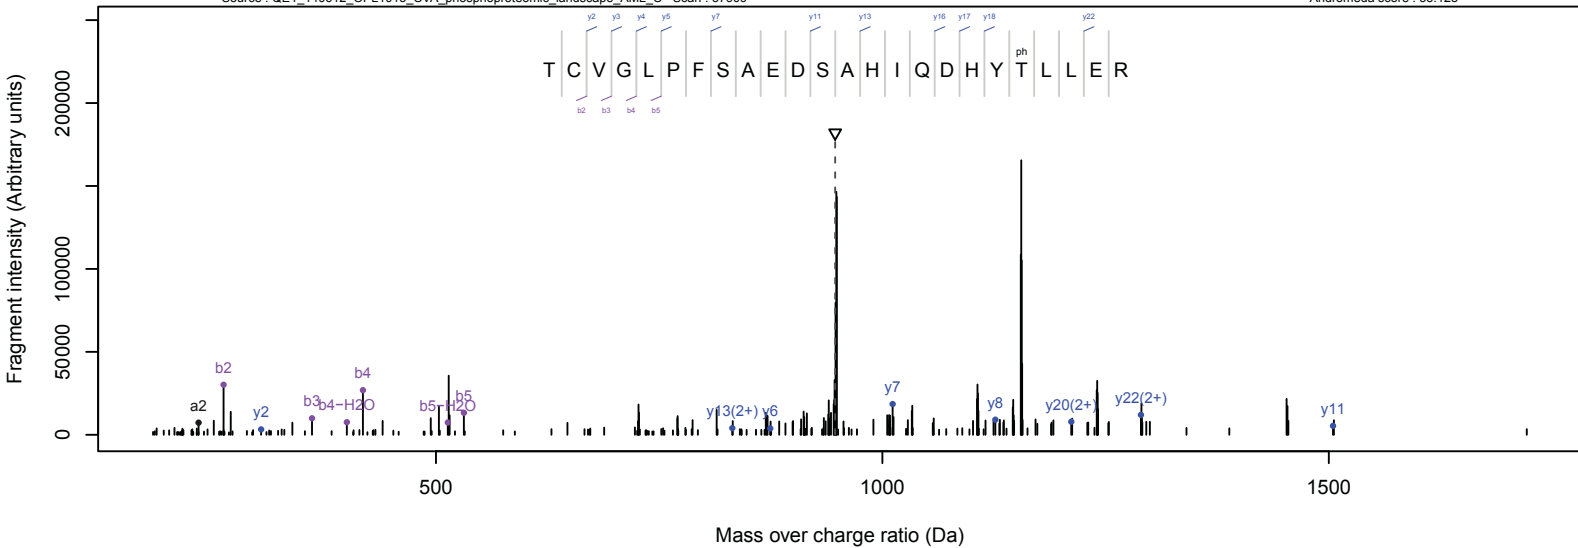

**KTY(ph)PTVK-2+**

Source : QE1\_140822\_OPL1013\_CvA\_pTyrIP\_AML\_cell\_lines\_part2\_E Scan : 2844

Andromeda score : 55.112

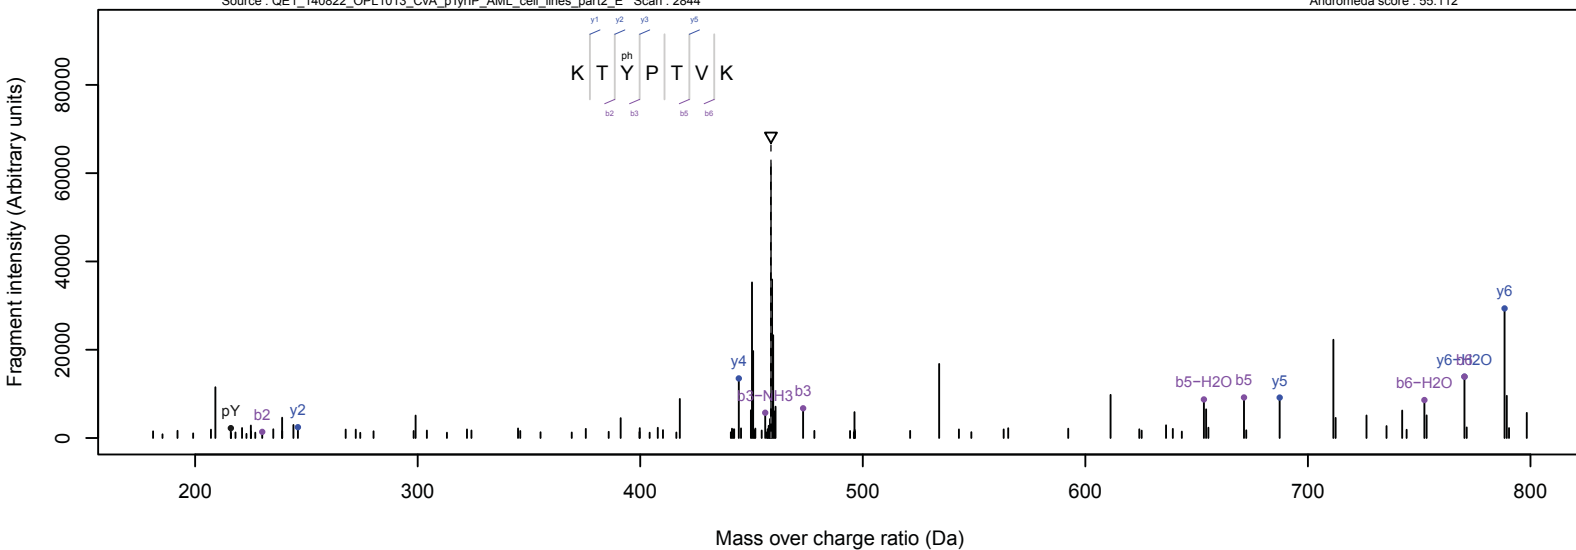

**RVPCAY(ph)DK-2+**

Source : QE1\_140822\_OPL1013\_CvA\_pTyrIP\_AML\_cell\_lines\_part2\_B Scan : 2918

Andromeda score : 55.064

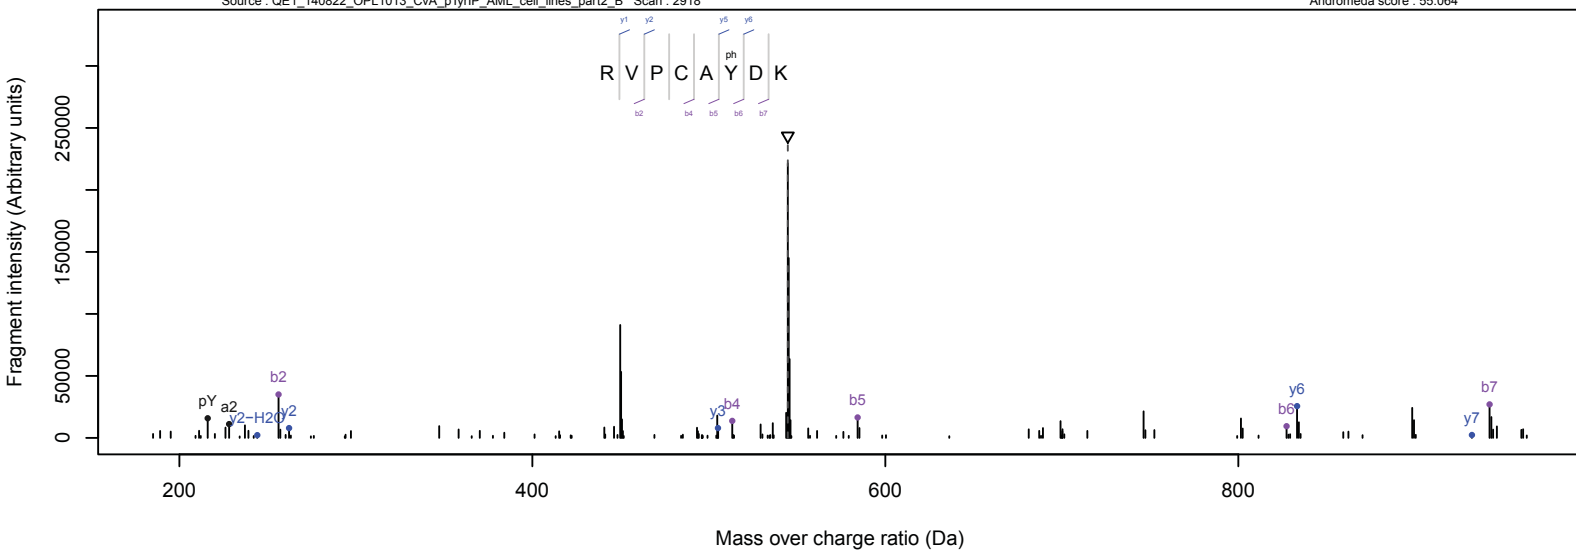

**LSADS(ph)GYIILPDIDPVPEEEDLGKR-3+**

Source : QE1\_140822\_OPL1013\_CvA\_pTyrIP\_AML\_cell\_lines\_part2\_B Scan : 45254

Andromeda score : 55.051

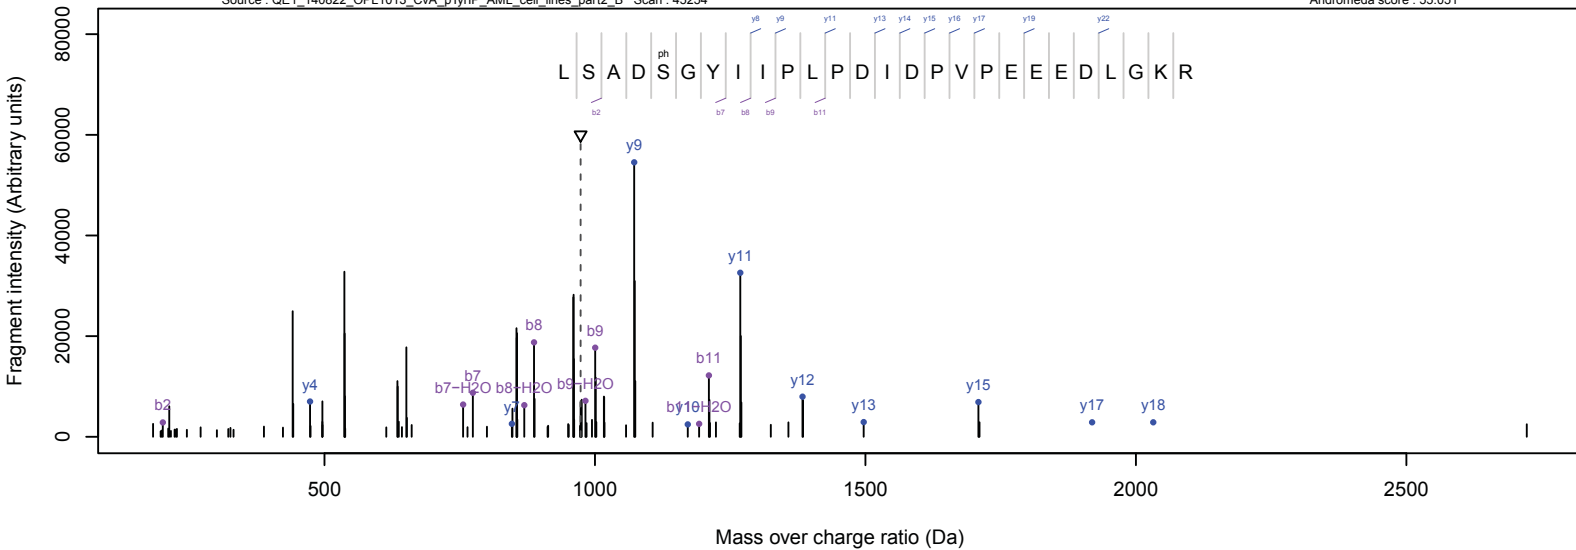

(ac)MY(ph)APGGAGLPGRR-2+

Source : QE1\_140612\_OPL1013\_CVA\_phosphoproteomic\_landscape\_AML\_C Scan : 22786

Andromeda score : 55.04

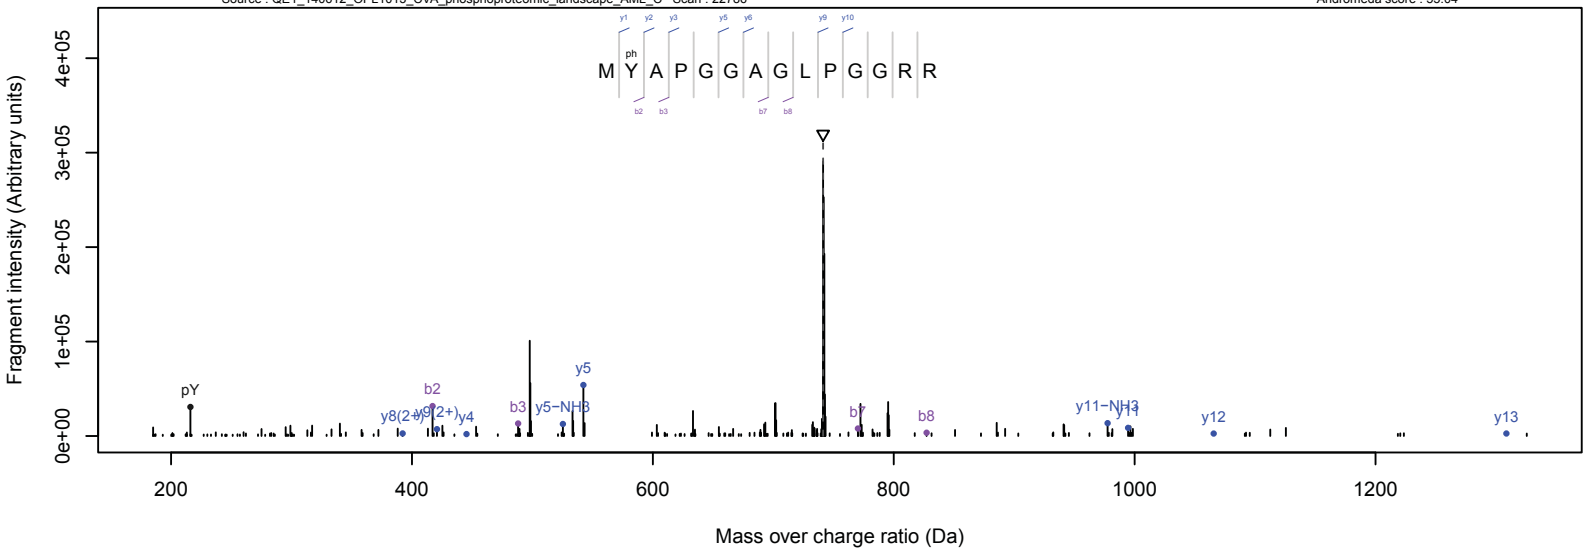

TAWKNY(ph)IQIER-2+

Source : QE1\_140612\_OPL1013\_CVA\_phosphoproteomic\_landscape\_AML\_A Scan : 24995

Andromeda score : 55.04

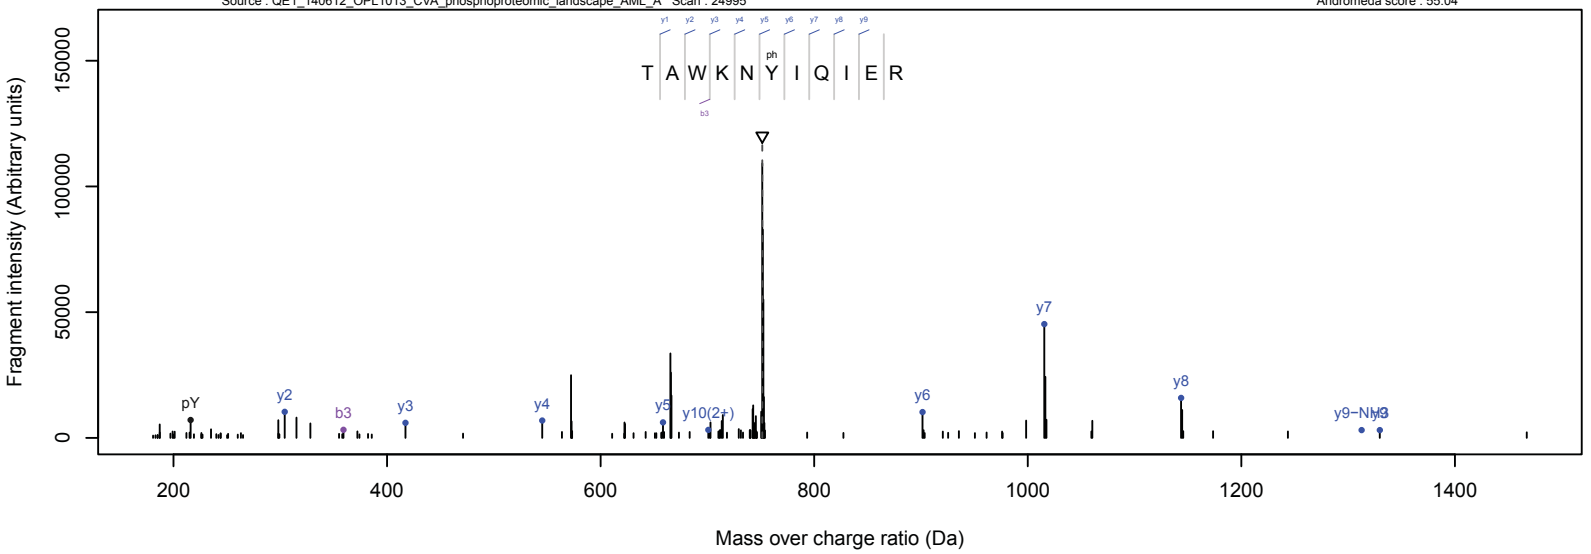

GYNDY(ph)YEESYFTTR-2+

Source : QE1\_140612\_OPL1013\_CVA\_phosphoproteomic\_landscape\_AML\_C Scan : 29779

Andromeda score : 55.011

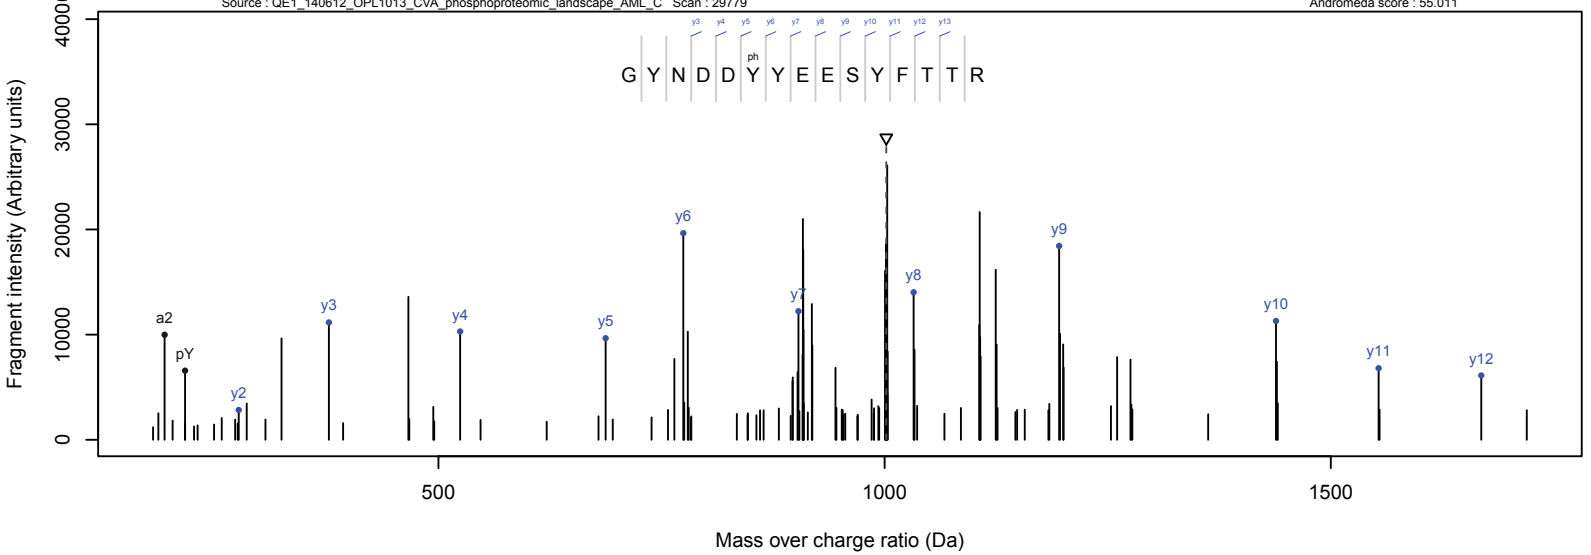

## Y(ph)FDGSGGNHVEHYR-3+

Source : QE1\_140908\_OPL1013\_CvA\_pTyrIP\_AML\_OCI\_AML3 Scan : 10036

Andromeda score : 55.011

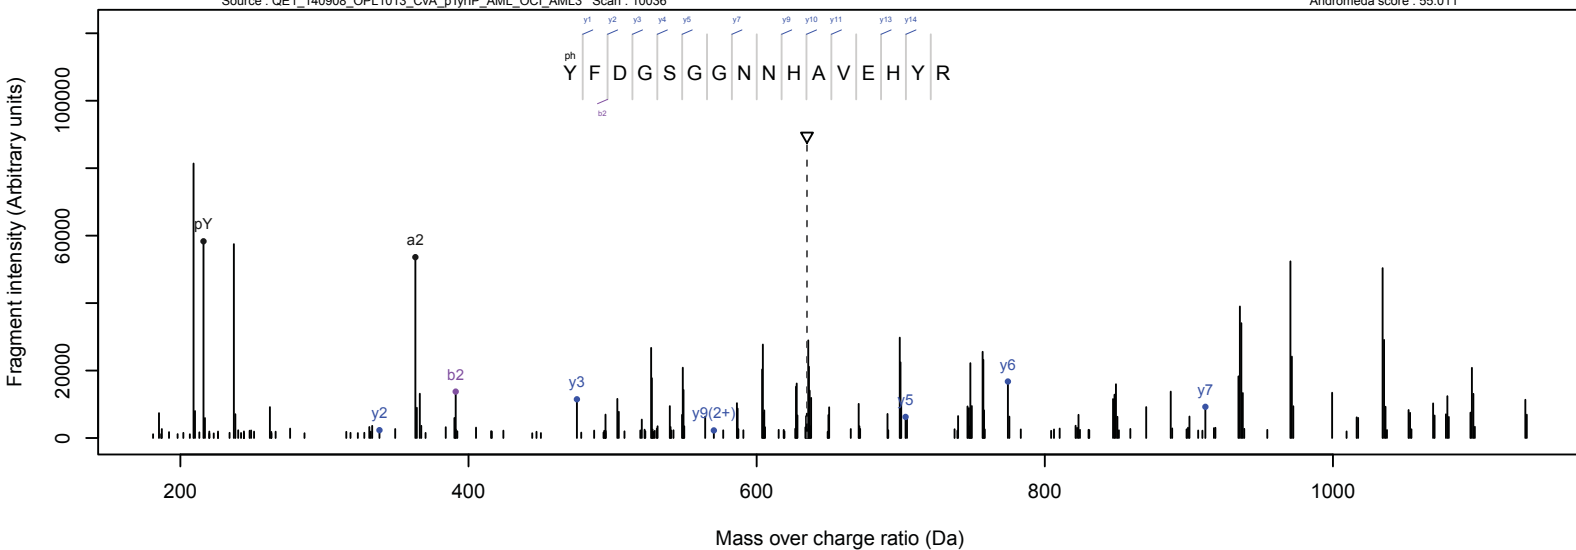

## YLEGY(ph)VANLRDDEKR-3+

Source : QE1\_140908\_OPL1013\_CvA\_pTyrIP\_AML\_HEL Scan : 20901

Andromeda score : 55.011

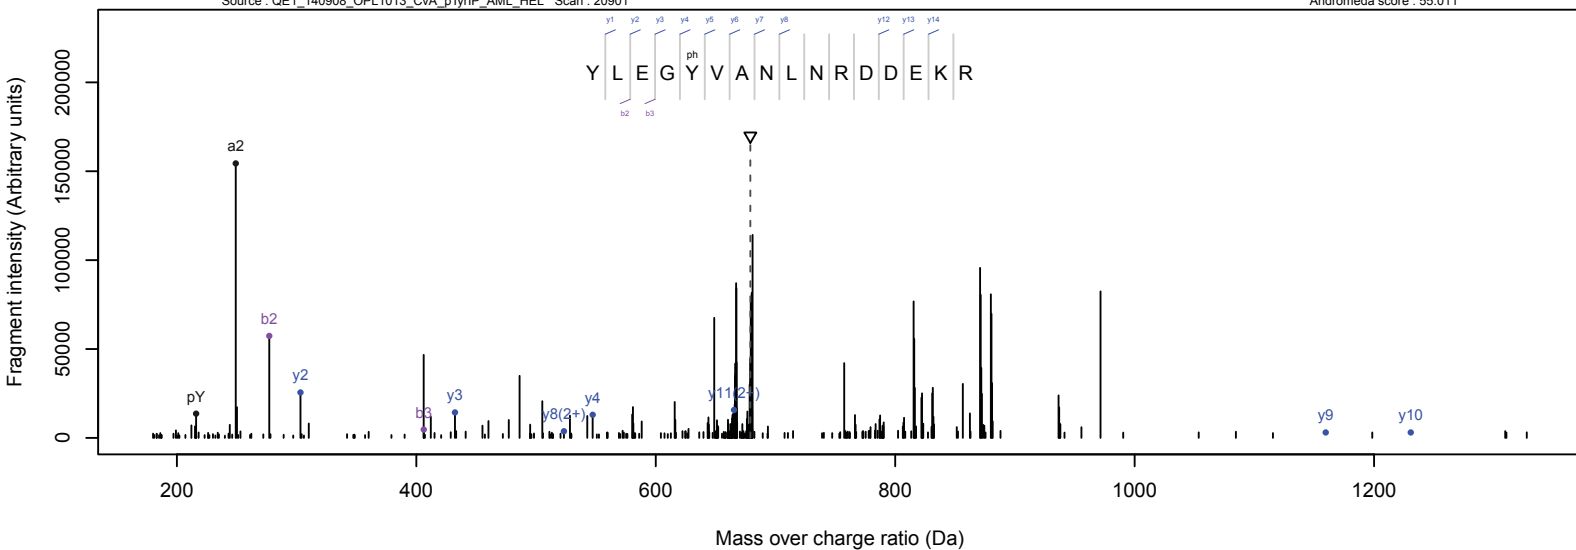

## ASGIY(ph)YVPK-2+

Source : QE1\_140612\_OPL1013\_CVA\_phosphoproteomic\_landscape\_AML\_D Scan : 19095

Andromeda score : 54.982

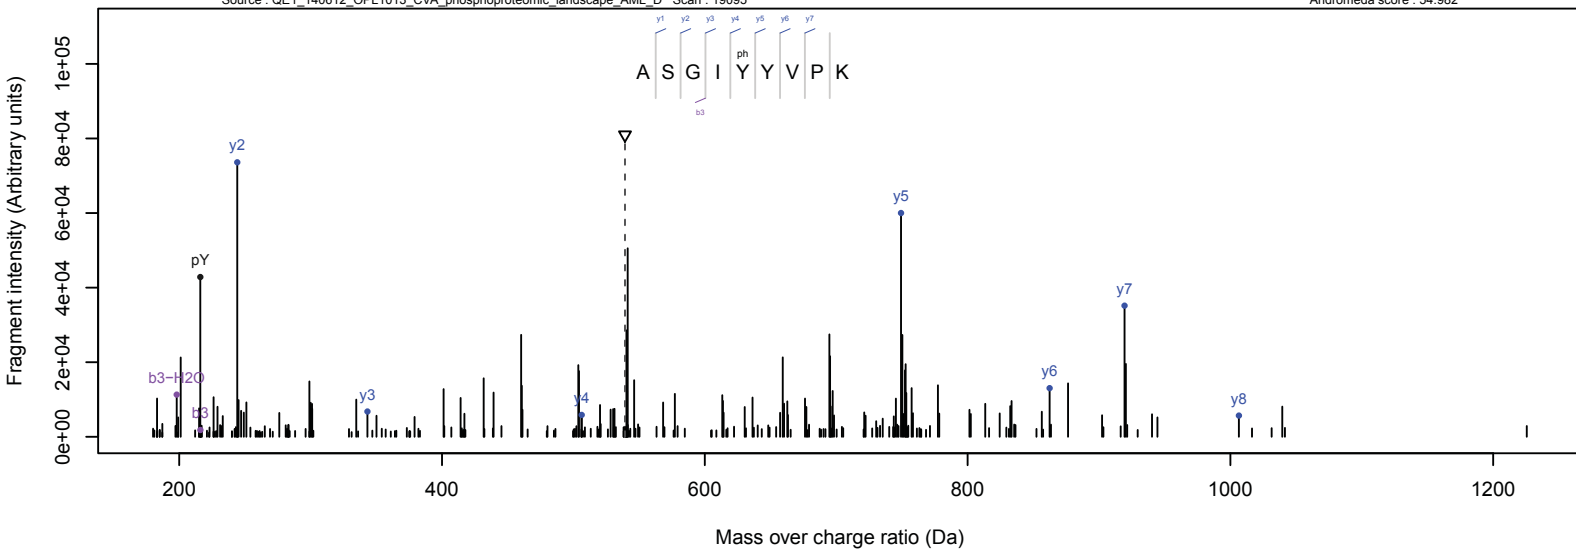

## ATSVY(ph)LVQK-2+

Source : QE1\_140612\_OPL1013\_CVA\_phosphoproteomic\_landscape\_AML\_D Scan : 14370

Andromeda score : 54.982

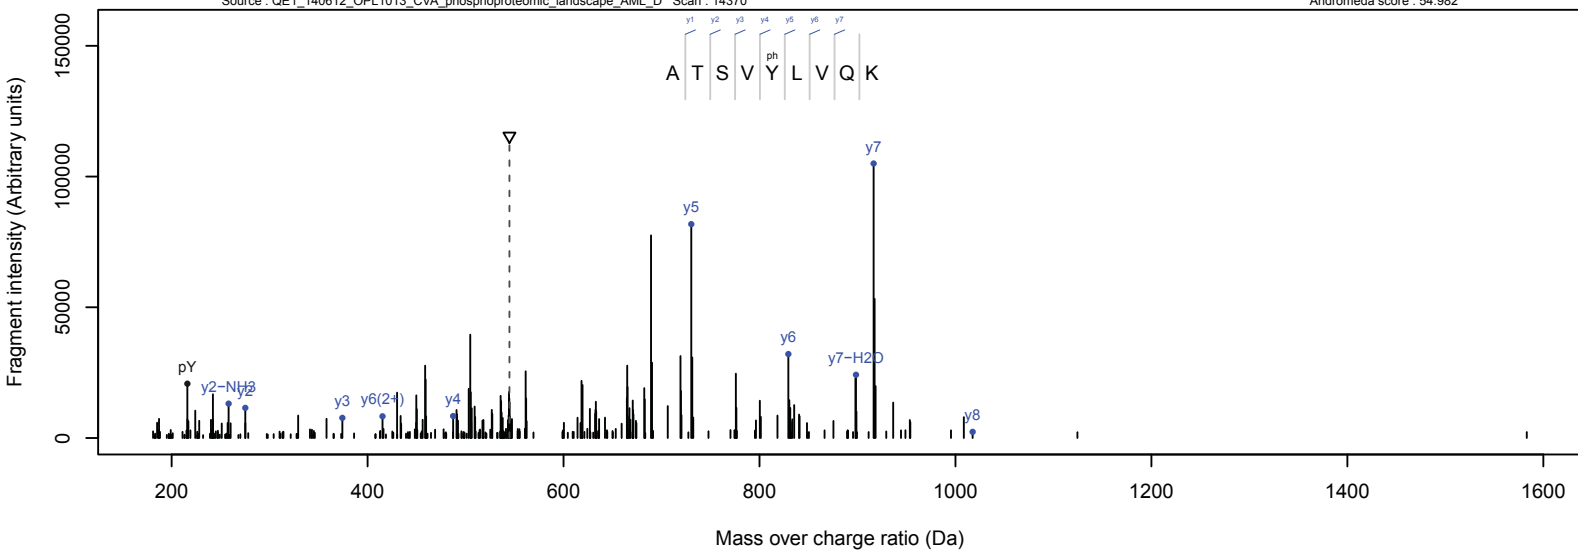

## AYY(ph)LACGFCR-2+

Source : QE1\_140612\_OPL1013\_CVA\_phosphoproteomic\_landscape\_AML\_C Scan : 27468

Andromeda score : 54.982

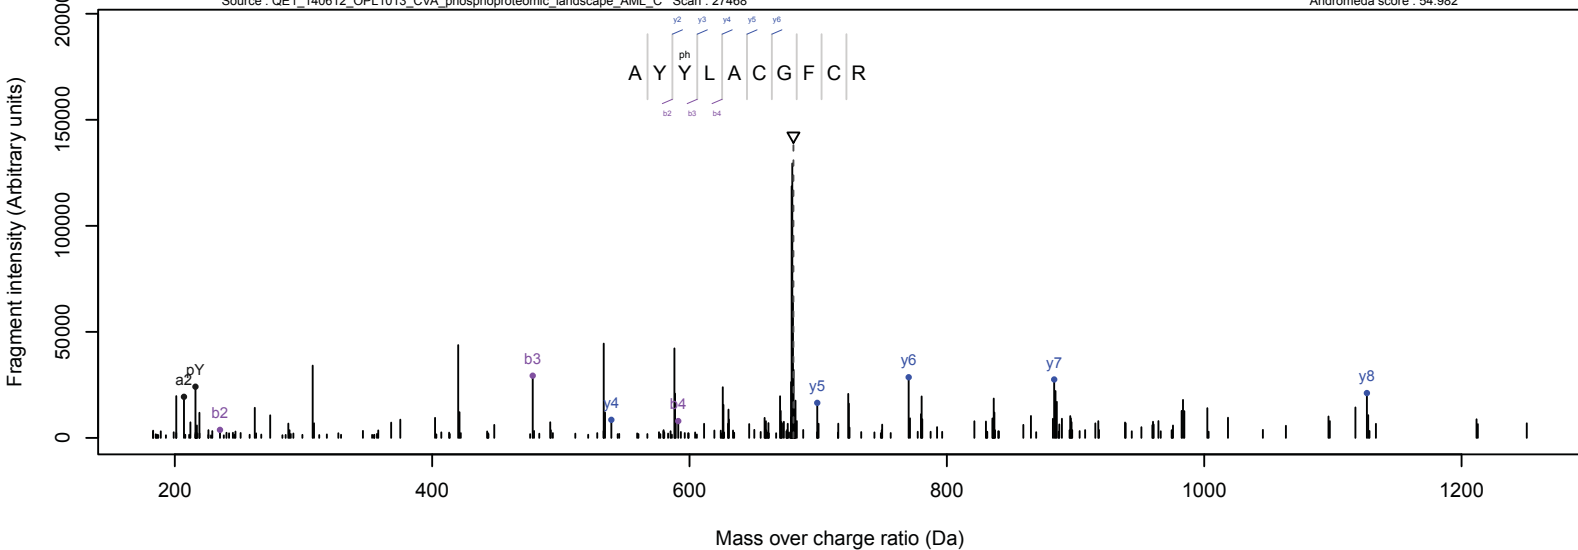

## QIY(ph)IYNEK-2+

Source : QE1\_140612\_OPL1013\_CVA\_phosphoproteomic\_landscape\_AML\_B Scan : 16438

Andromeda score : 54.982

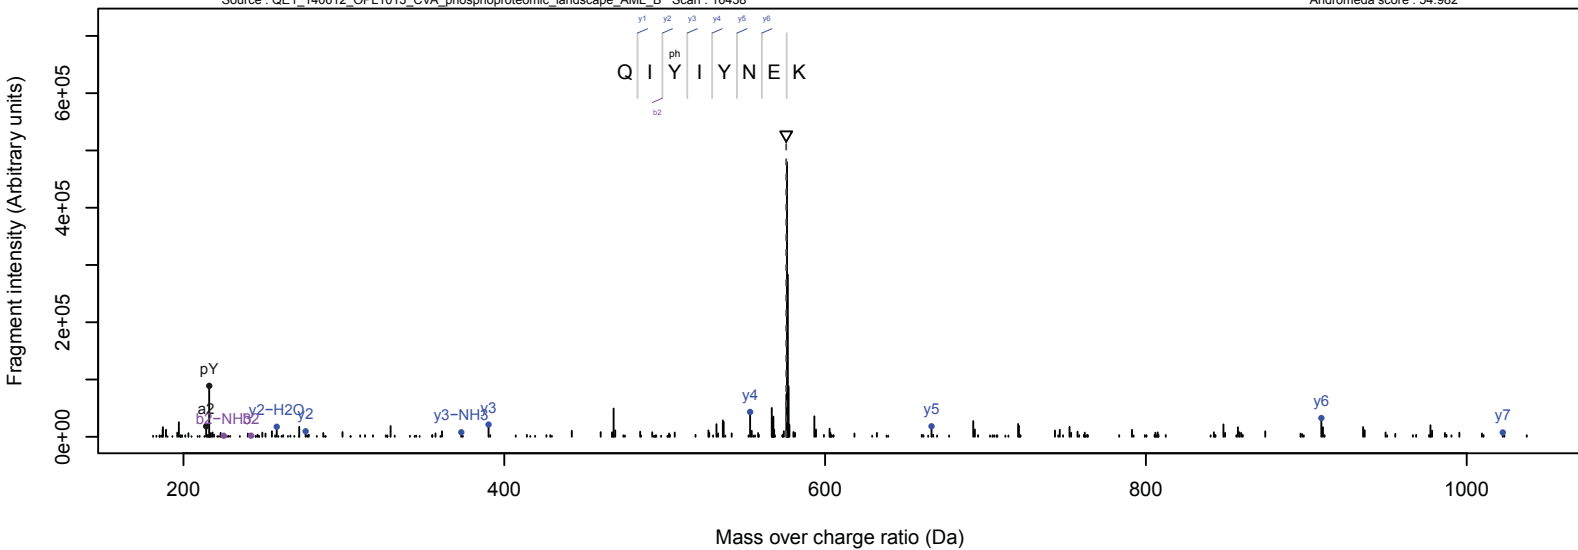

GVTGSGFFDFGRNPYKKGK-3+

Source : QE1\_140612\_OPL1013\_CVA\_phosphoproteomic\_landscape\_AML\_C Scan : 32281

Andromeda score : 54.964

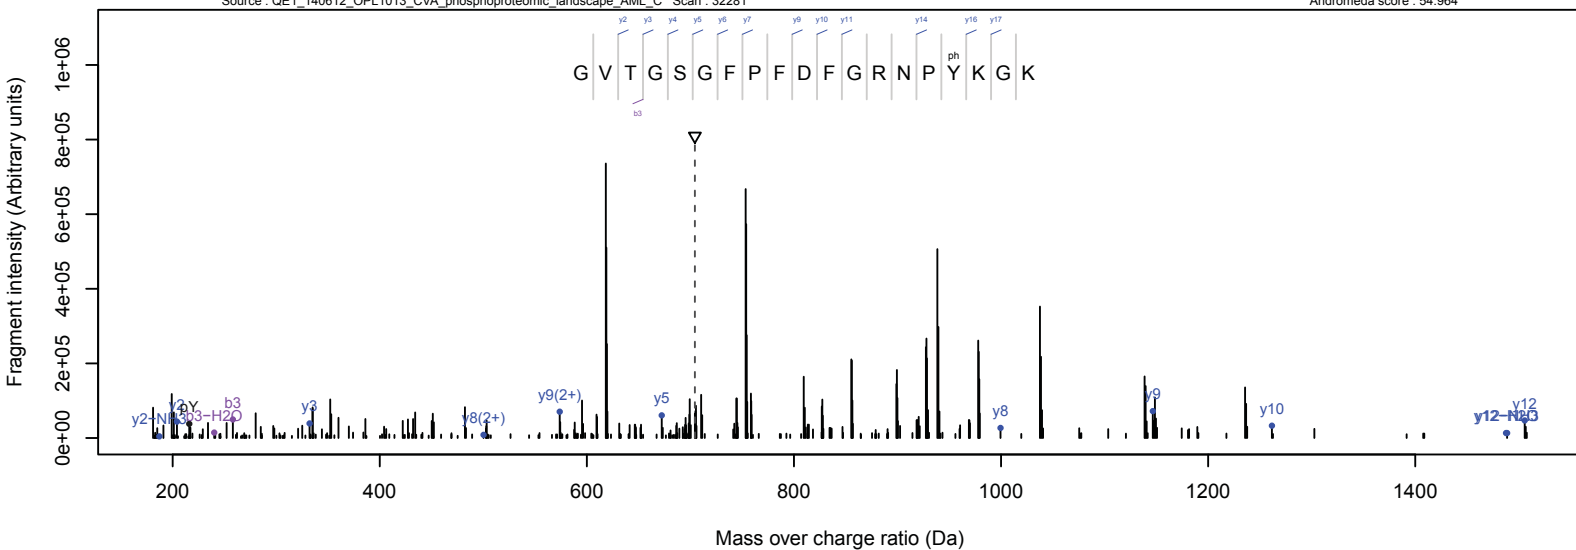

Y(ph)ASPEM(ox)CFVFSDR-2+

Source : QE1\_140908\_OPL1013\_CvA\_pTyrIP\_AML\_HEL Scan : 32359

Andromeda score : 54.951

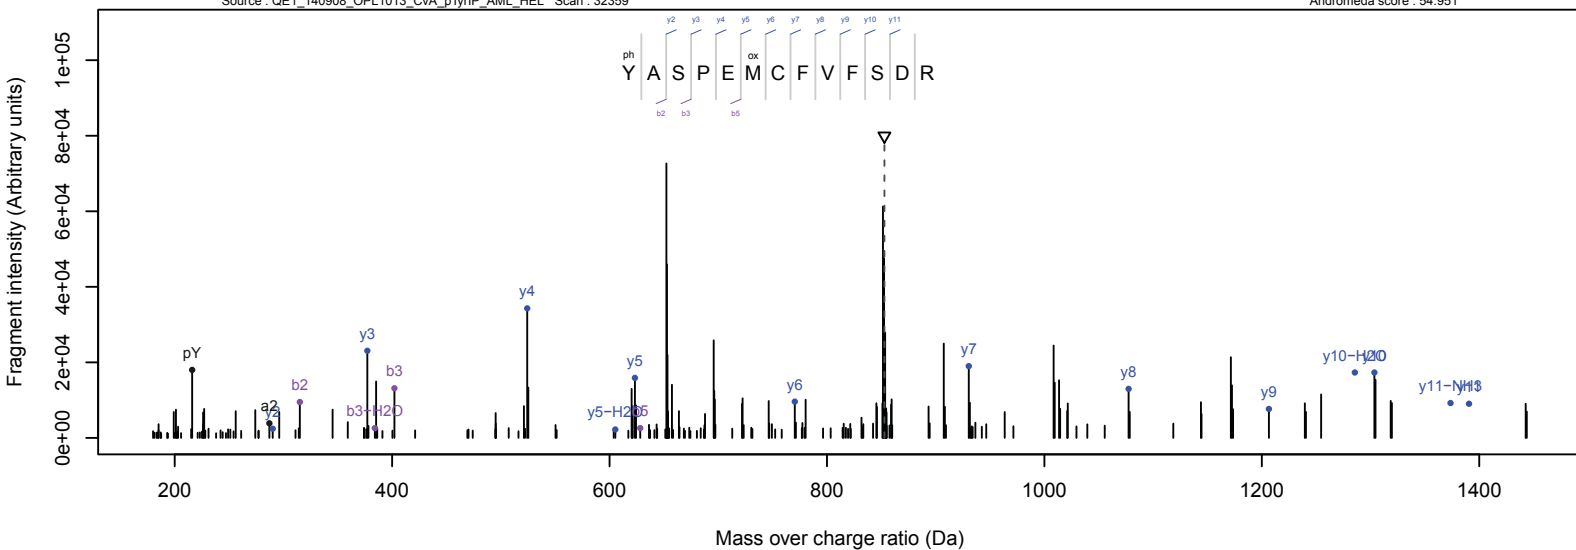

ARWY(ph)EWLDPSIKK-3+

Source : QE1\_140612\_OPL1013\_CVA\_phosphoproteomic\_landscape\_AML\_A Scan : 34598

Andromeda score : 54.898

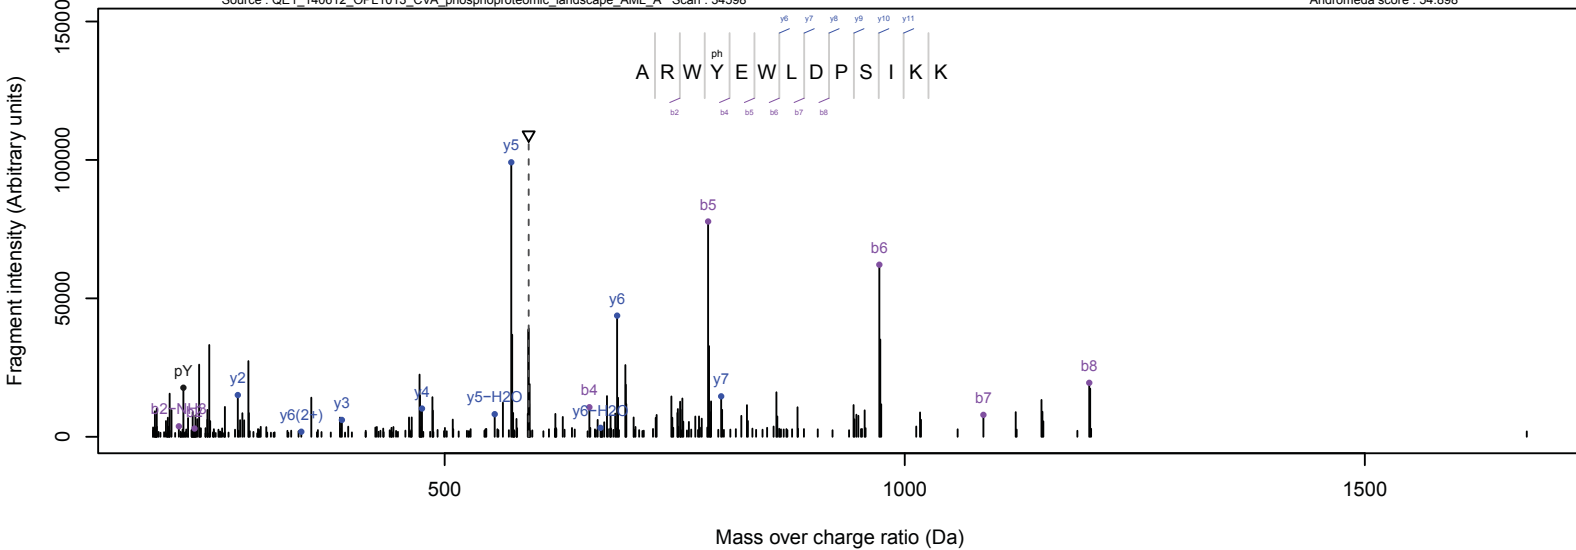

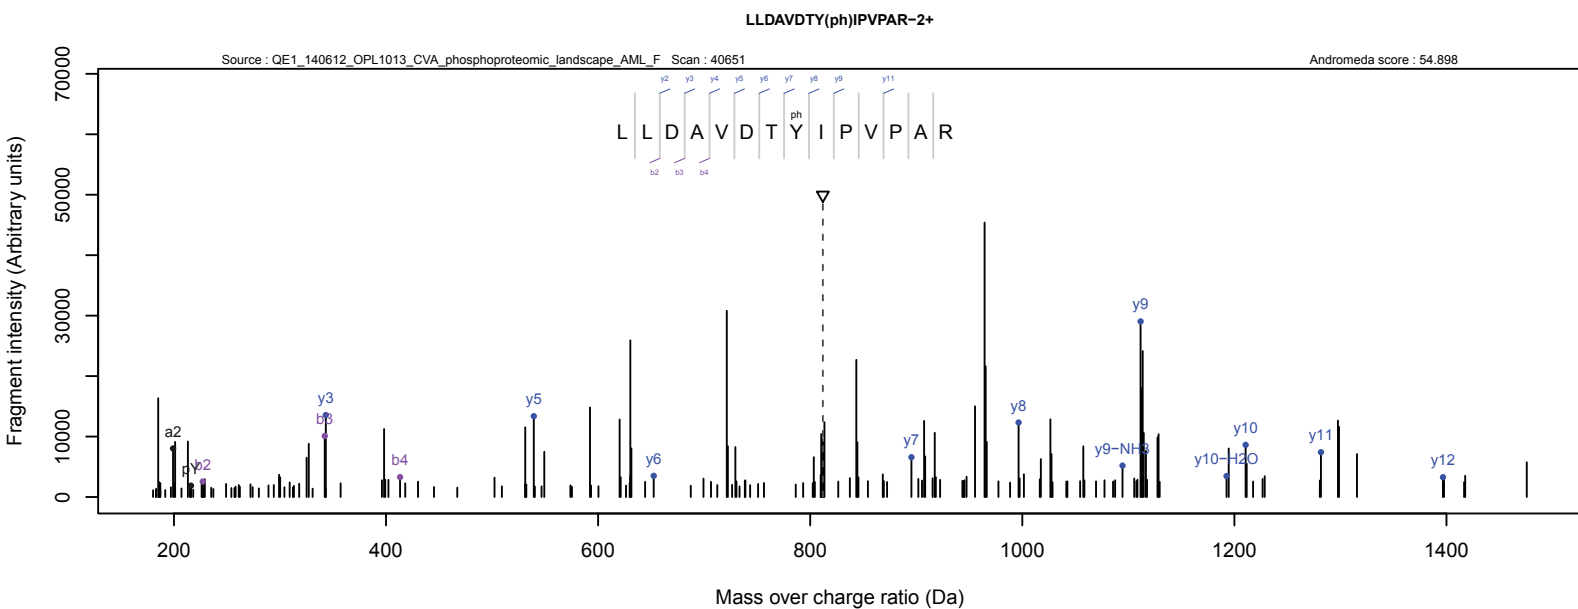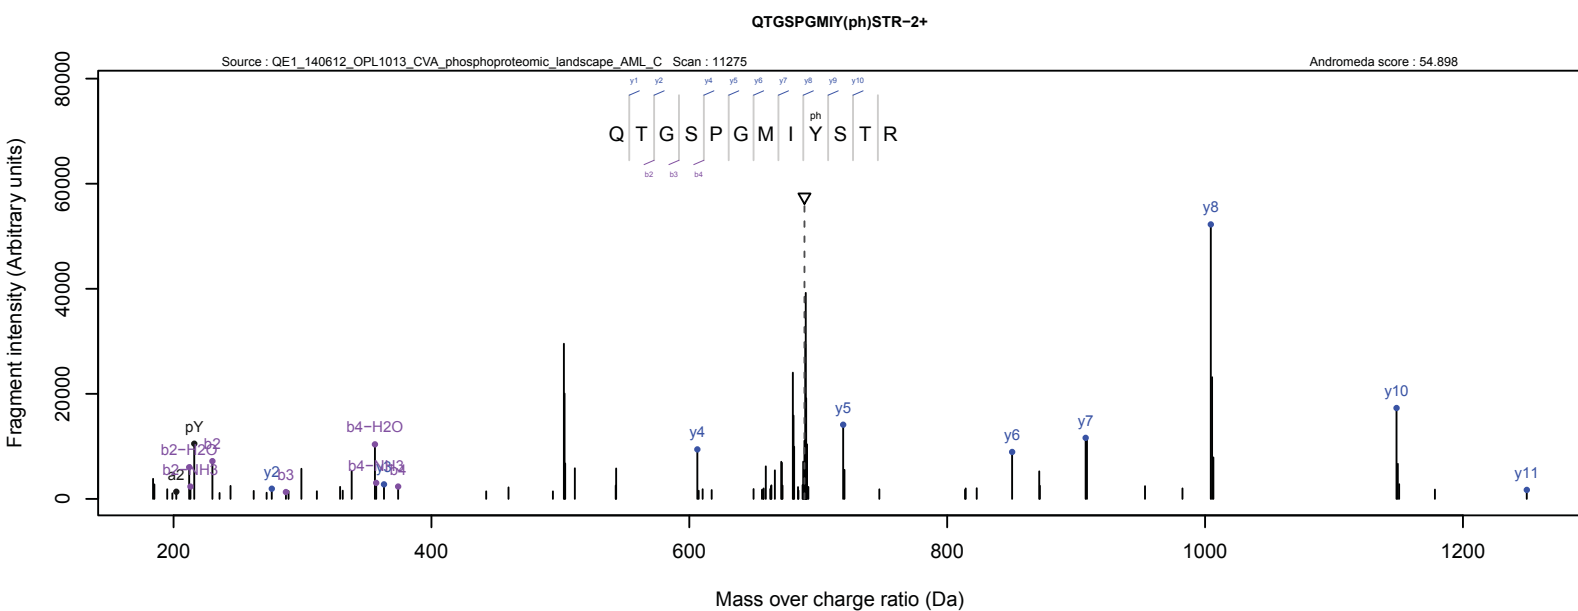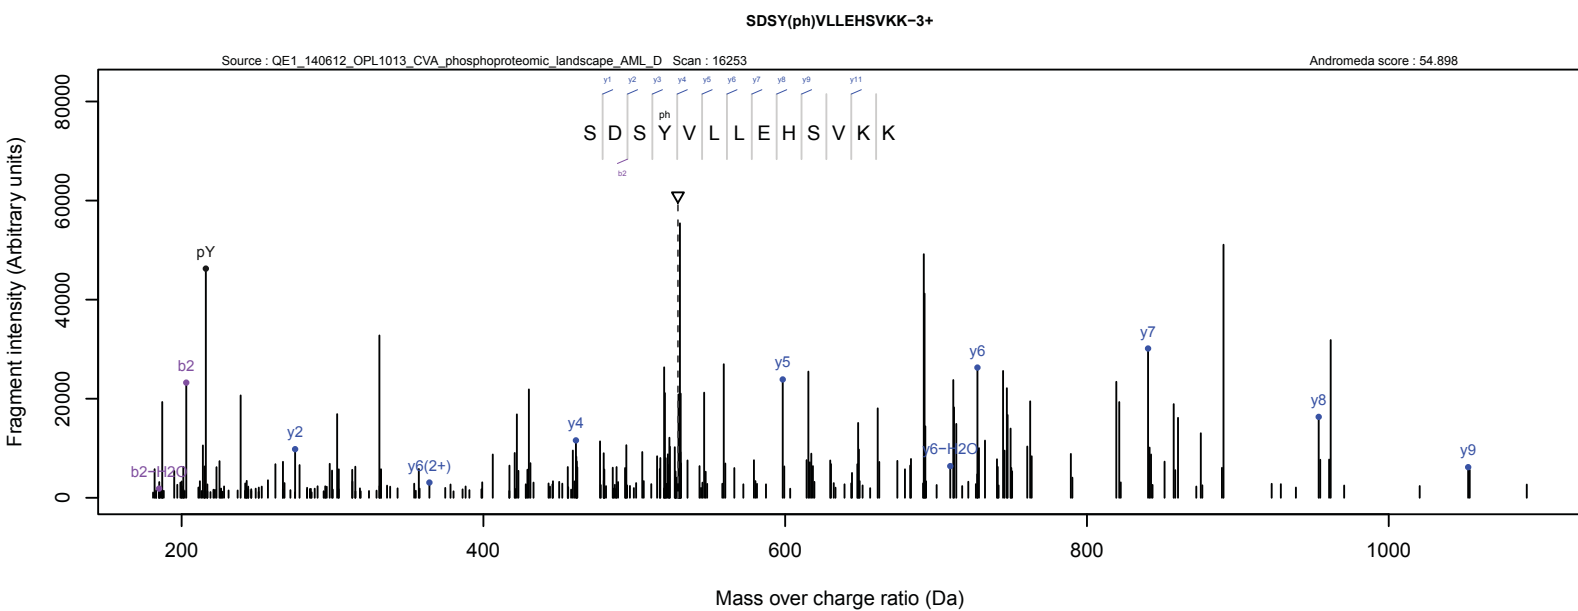



## SETAPDS(ph)YKVQDKK-3+

Source : QE1\_140612\_OPL1013\_CVA\_phosphoproteomic\_landscape\_AML\_C Scan : 3609

Andromeda score : 54.898

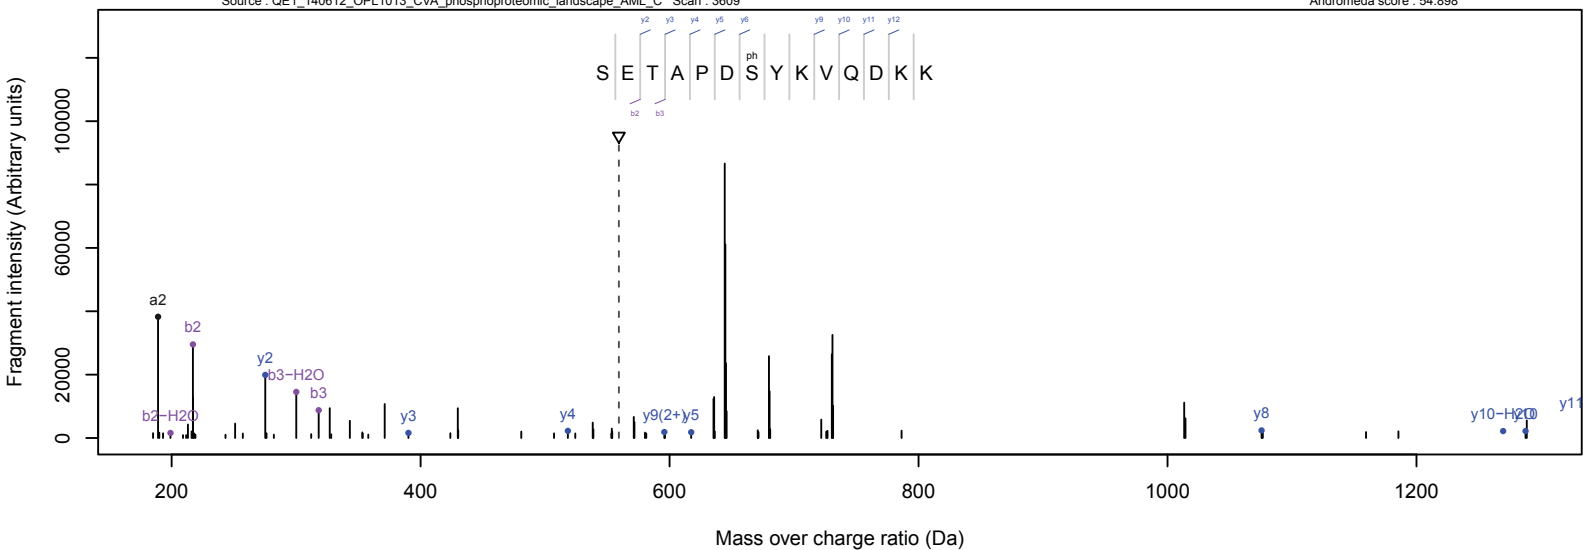

## (ac)SQWY(ph)ELQLDSK-2+

Source : QE1\_140612\_OPL1013\_CVA\_phosphoproteomic\_landscape\_AML\_B Scan : 40671

Andromeda score : 54.898

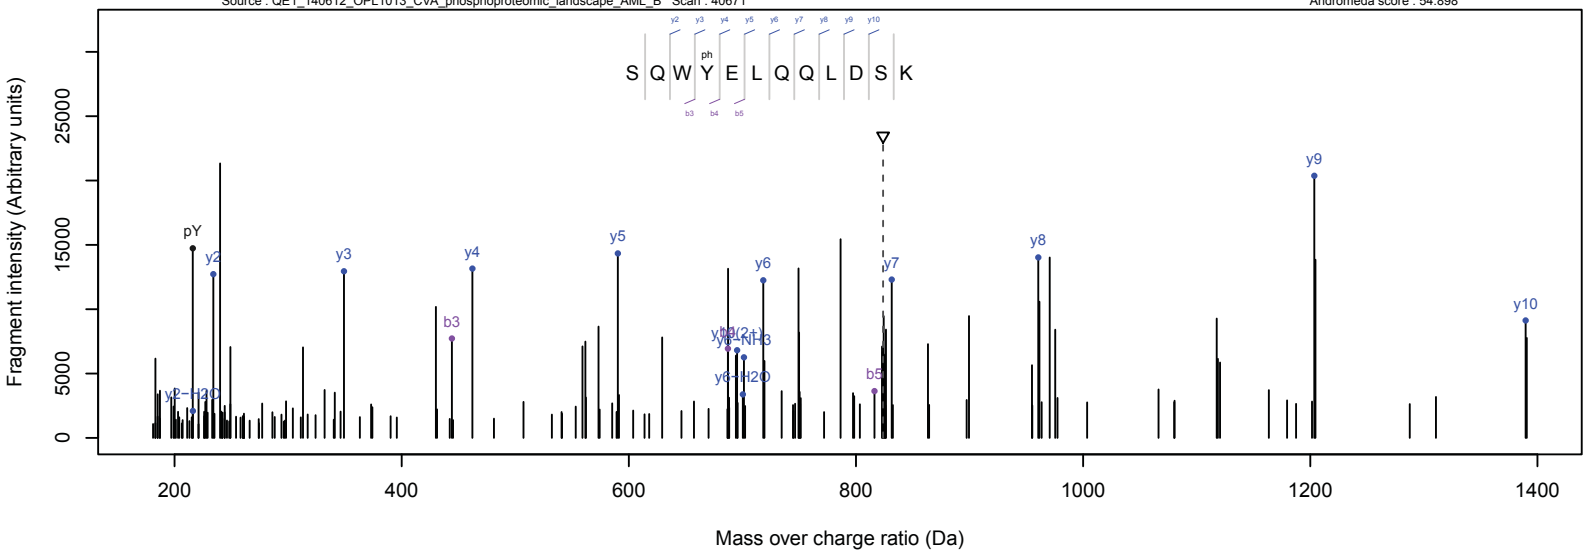

## GKGIY(ph)LWDVEGR-2+

Source : QE1\_140612\_OPL1013\_CVA\_phosphoproteomic\_landscape\_AML\_B Scan : 32414

Andromeda score : 54.871

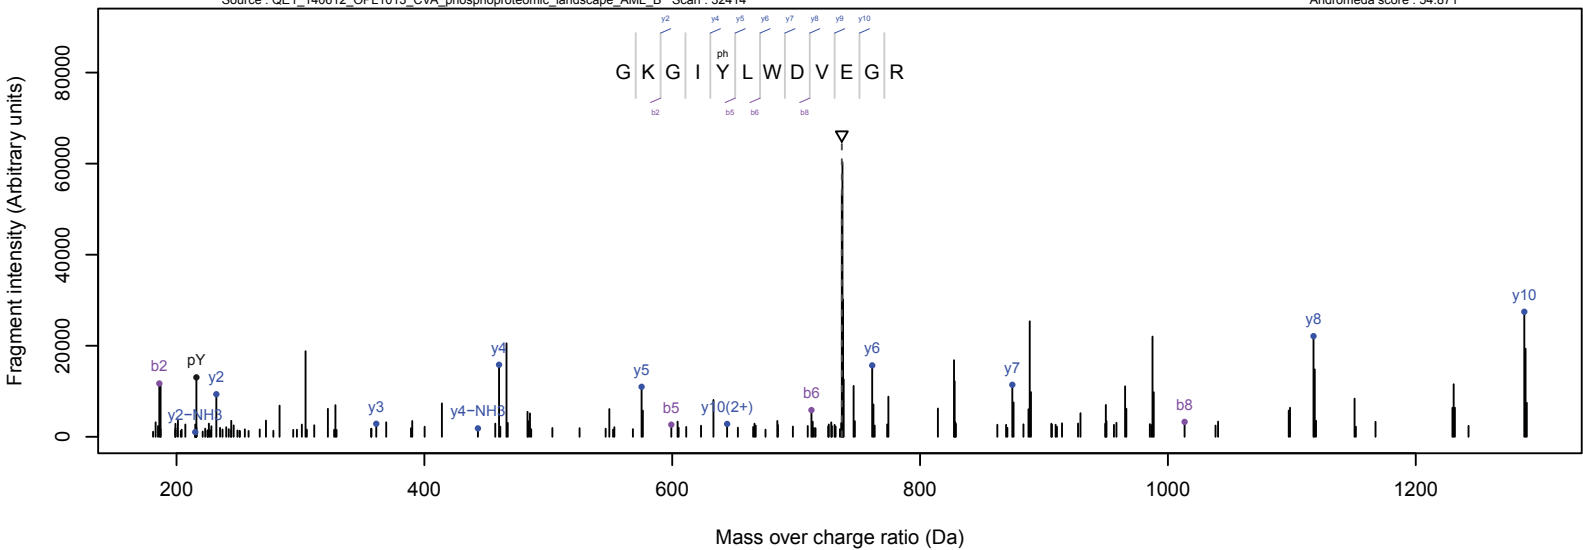

## KAGNFY(ph)VPAEPK

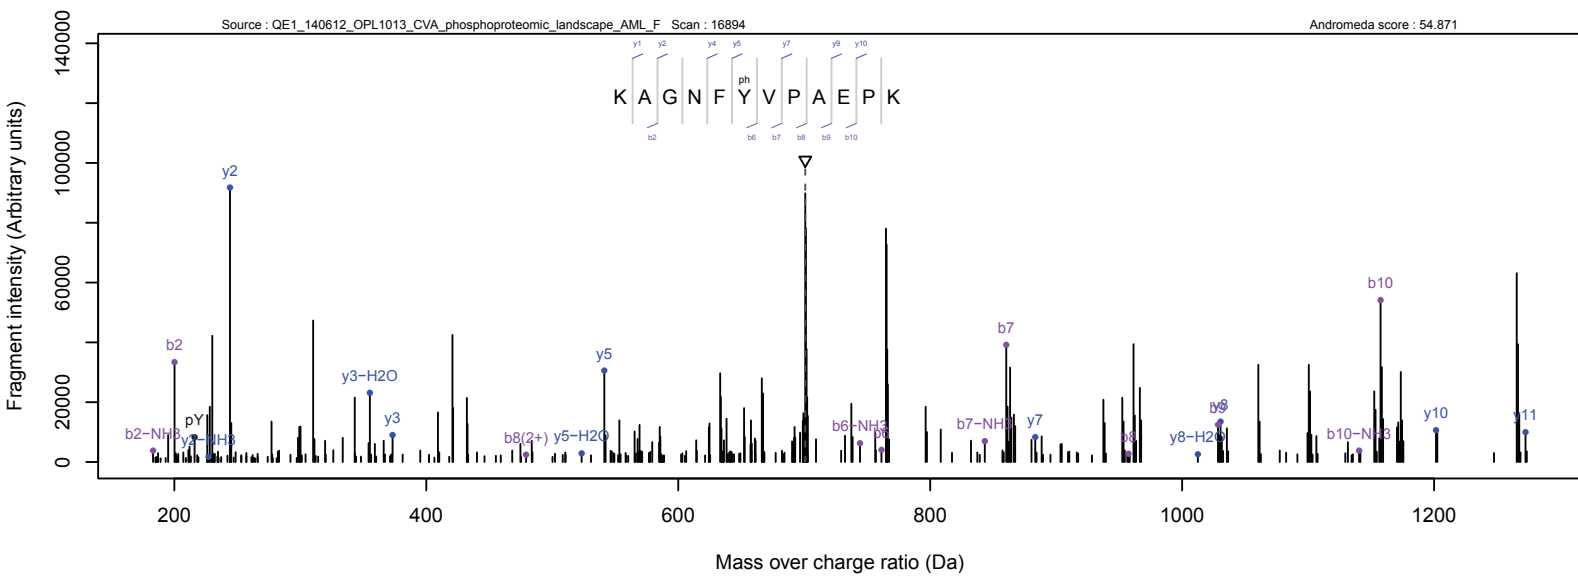

## GTVRDY(ph)PDFSPSVDAAEIQK

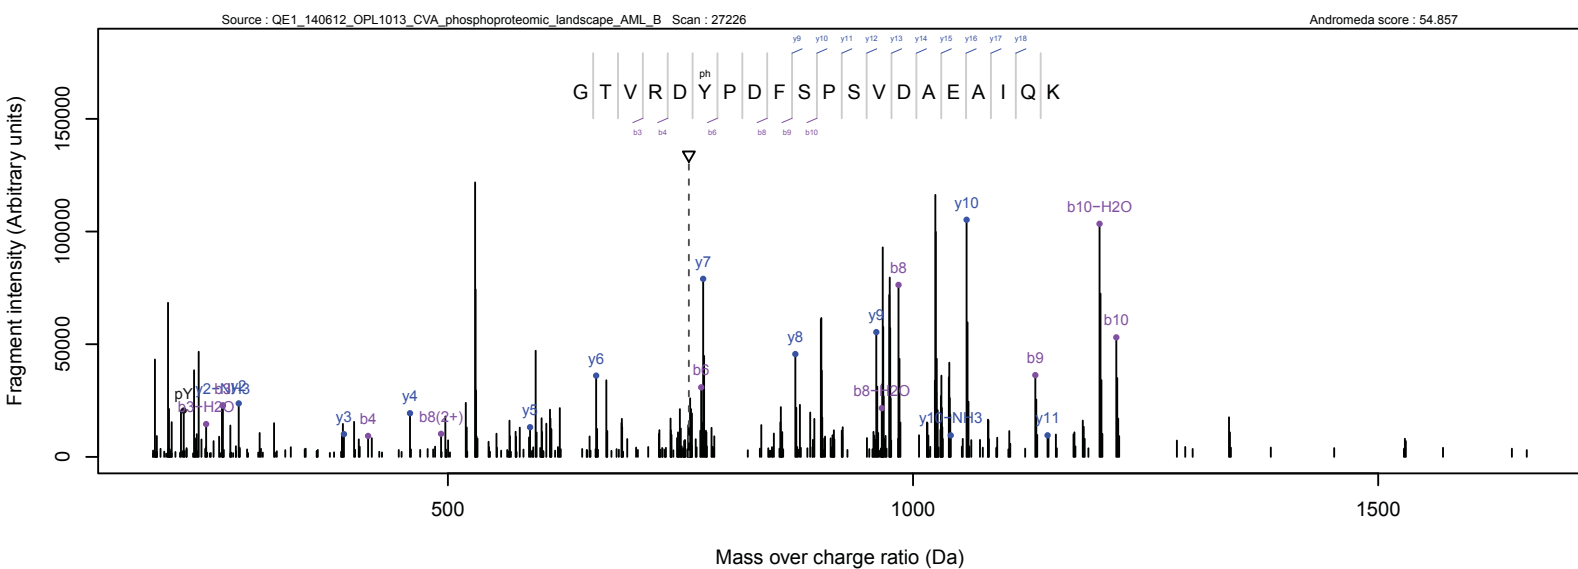

## RAQIEGDY(ph)LSYR

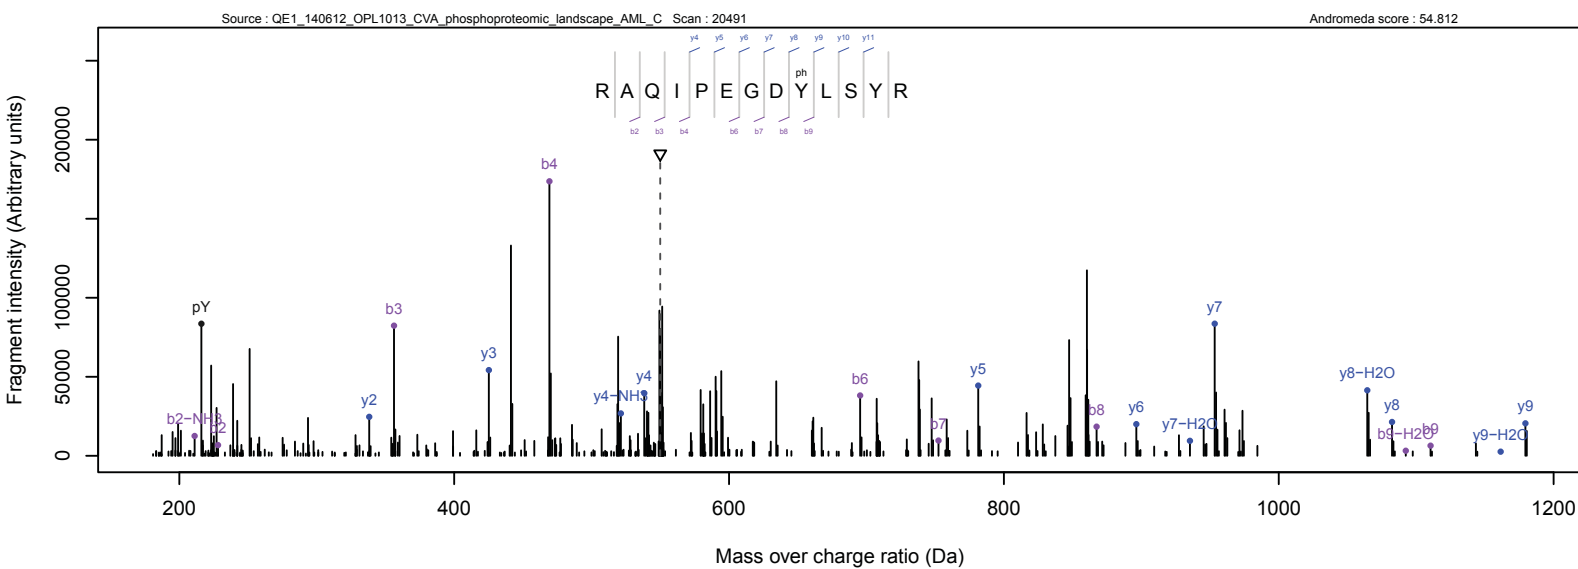

## RDPPQY(ph)PVVPHLDR-3+

Source : Qe1\_141024\_OPL1013\_CvA\_AML\_pTyrIP\_MOLM13 Scan : 23083

Andromeda score : 54.812

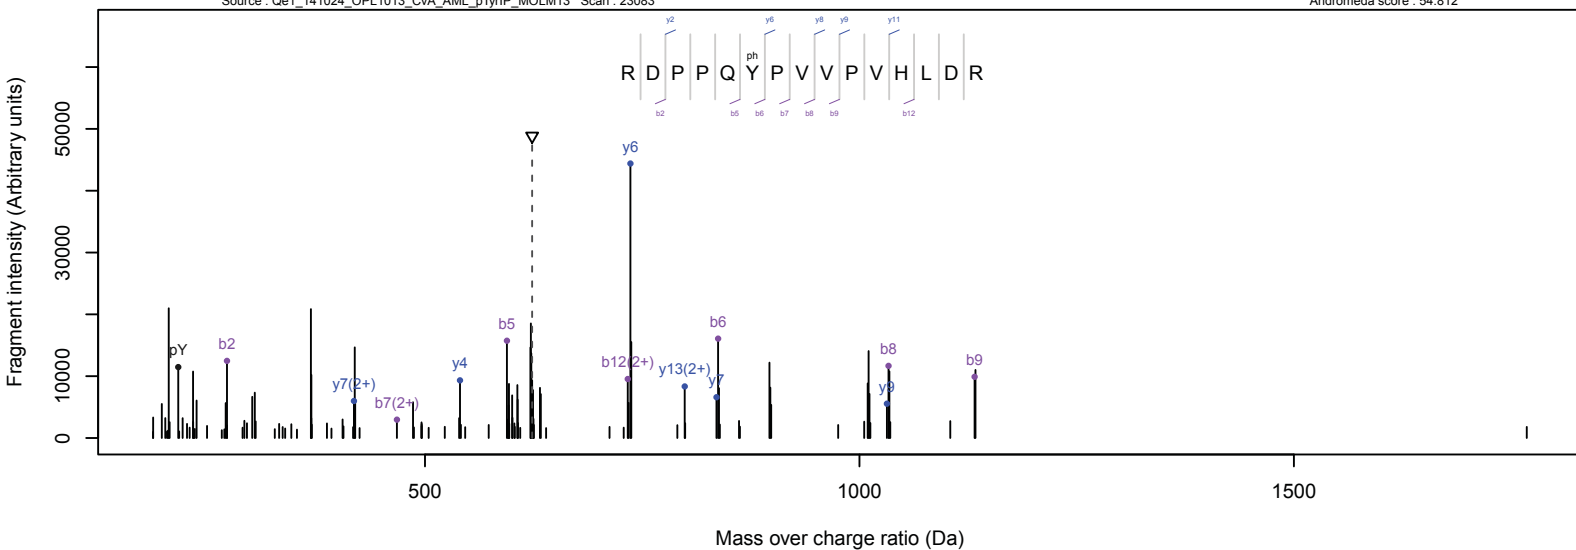

## VY(ph)PVSVPYSSAQSTSK-2+

Source : QE1\_140612\_OPL1013\_CVA\_phosphoproteomic\_landscape\_AML\_B Scan : 21443

Andromeda score : 54.812

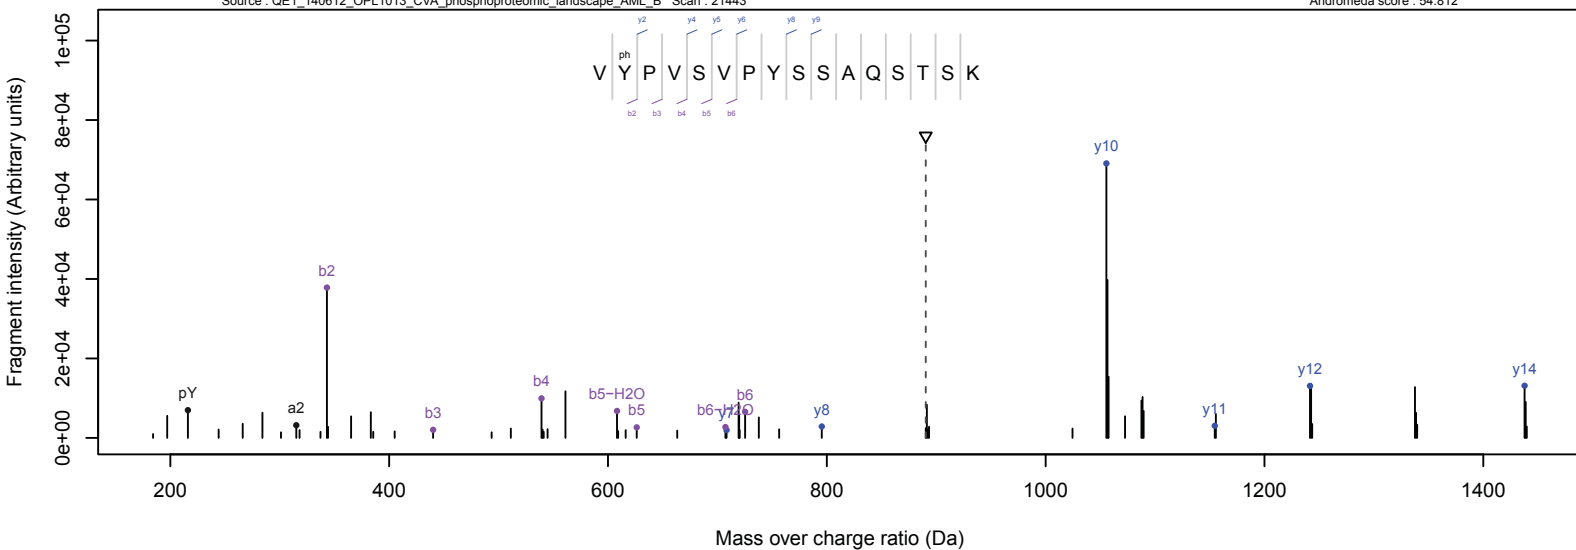

## TY(ph)TYISR-2+

Source : QE1\_140612\_OPL1013\_CVA\_phosphoproteomic\_landscape\_AML\_A Scan : 8157

Andromeda score : 54.776

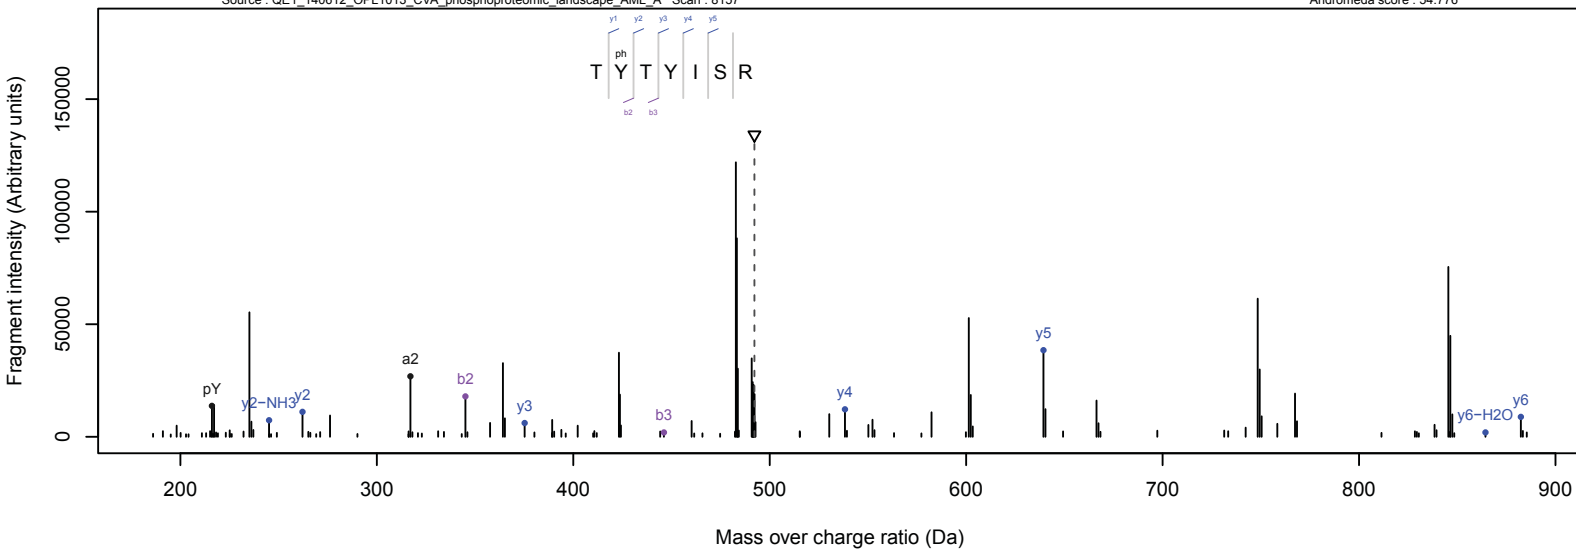

## LLEIDPY(ph)LKPYAVDFQR-3+

Source : QE1\_140612\_OPL1013\_CVA\_phosphoproteomic\_landscape\_AML\_C Scan : 45053

Andromeda score : 54.768

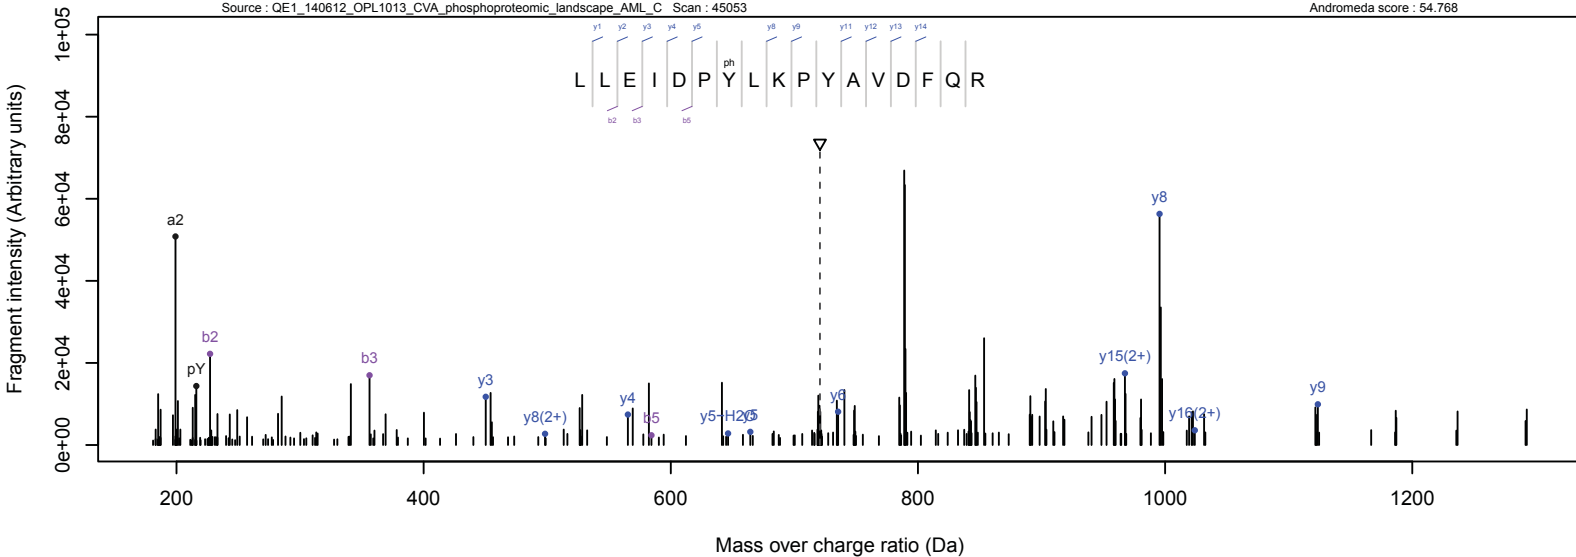

## SKEPQLIAFY(ph)HKMEMK-4+

Source : QE1\_140612\_OPL1013\_CVA\_phosphoproteomic\_landscape\_AML\_C Scan : 27965

Andromeda score : 54.764

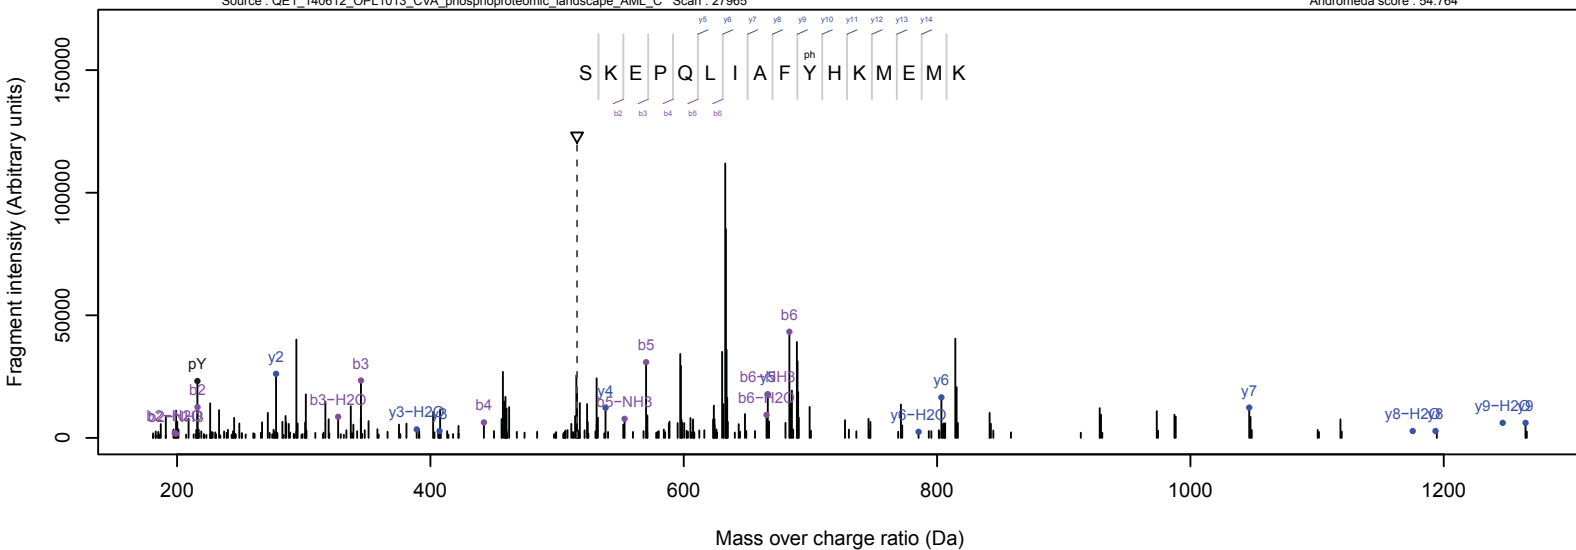

## TVSDLIQKVV(ph)ELQASR-3+

Source : QE1\_140908\_OPL1013\_CvA\_pTyrIP\_AML\_HEL Scan : 38813

Andromeda score : 54.764

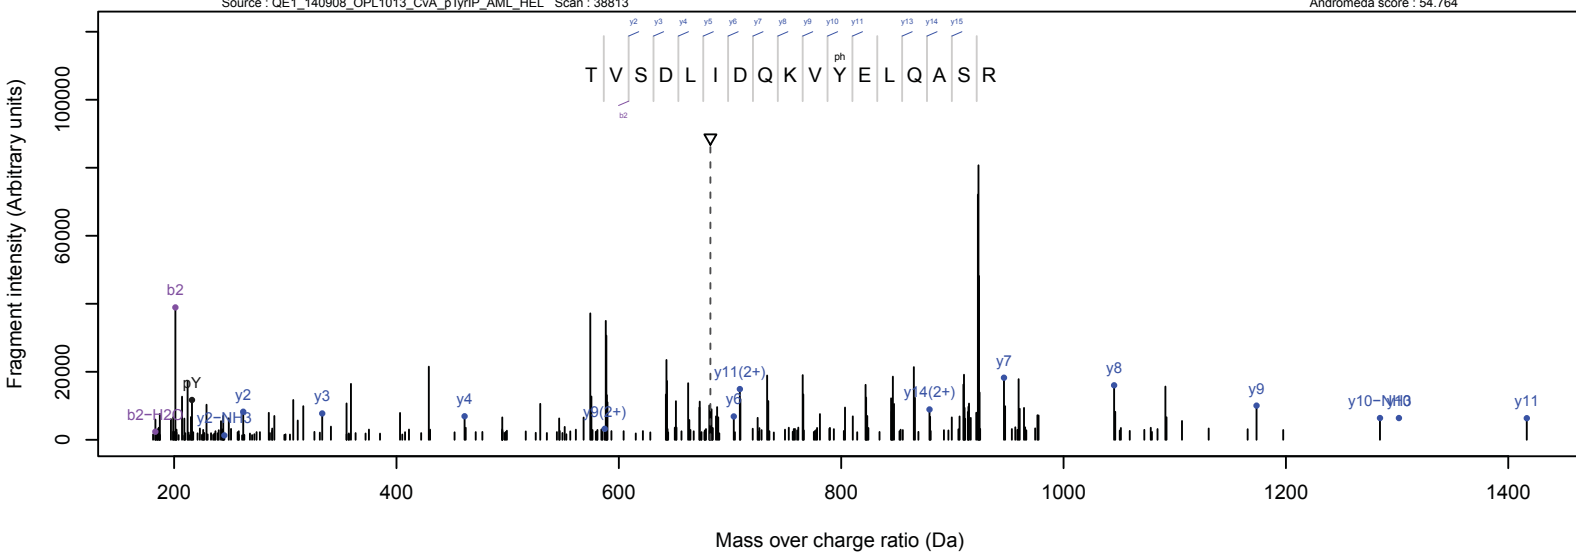

**YIEDEDY(ph)YKASVTRLPIK-3+**

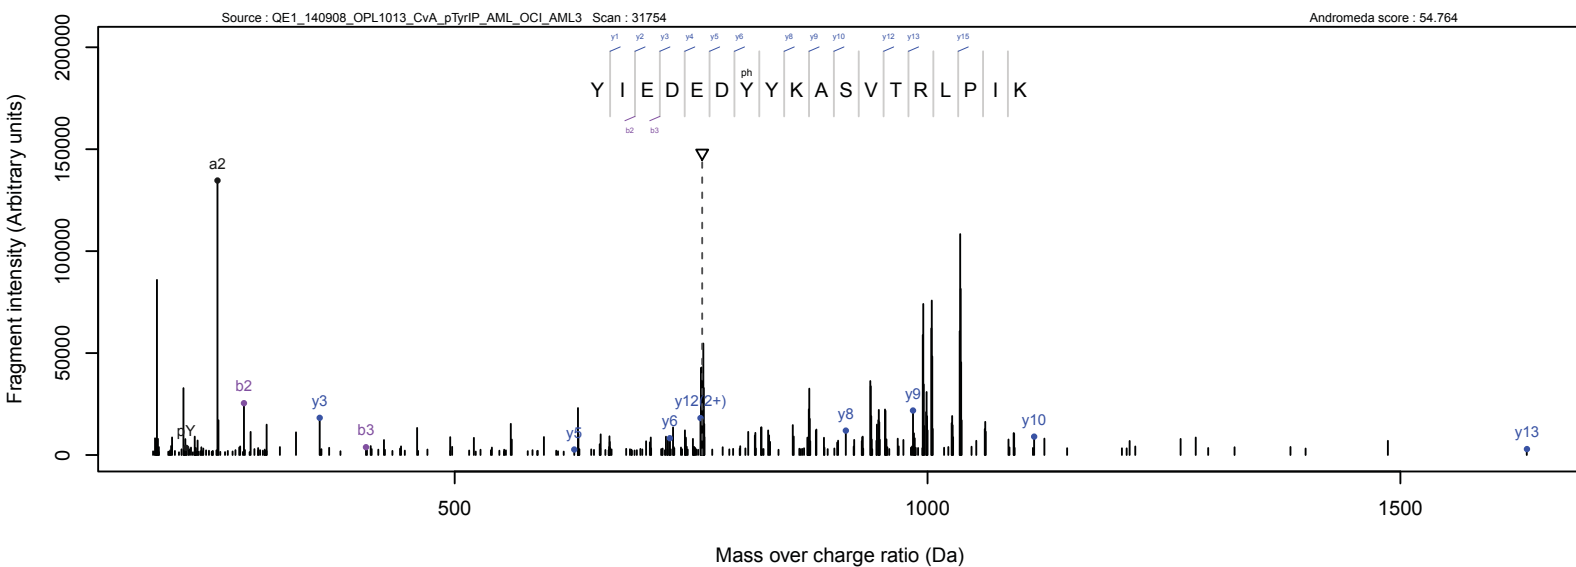

**NNVPSKPGASAIHTVSTPELANMQLQGS(ph)HNYSTAHMLK-5+**

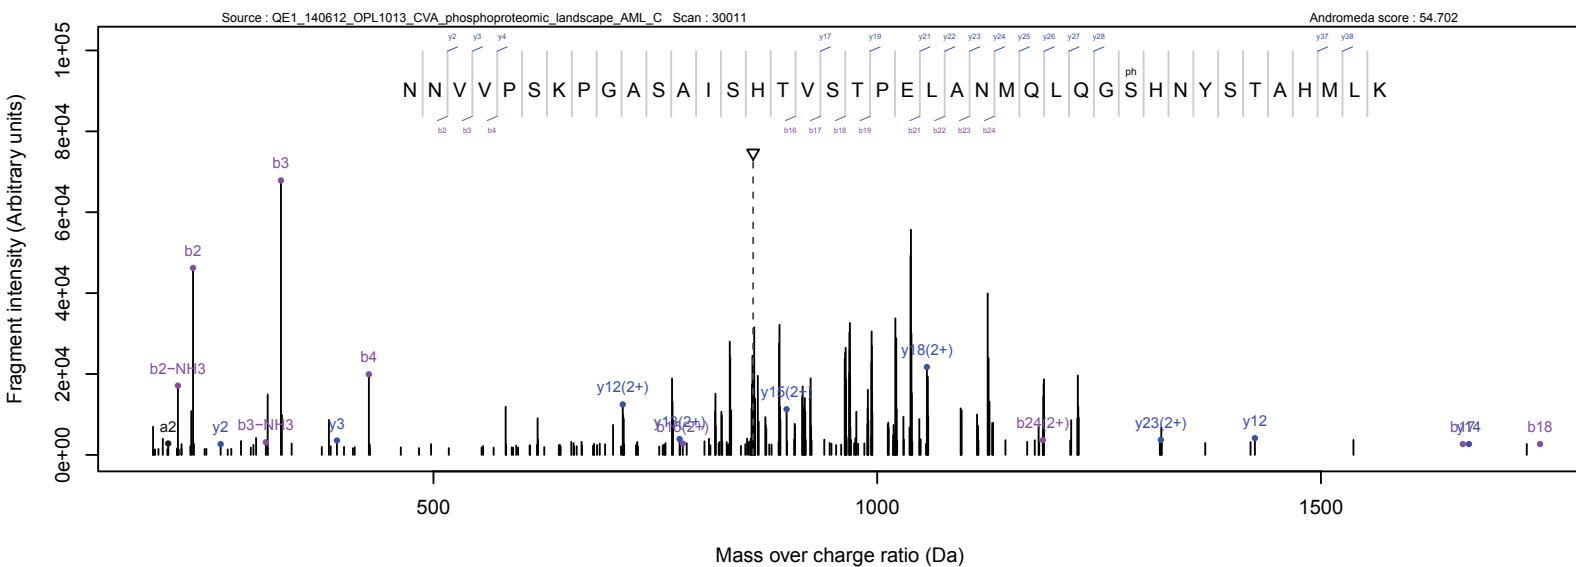

**AVAP TMSLHGSHLY(ph)TSLPSLGLQPLALTK-4+**

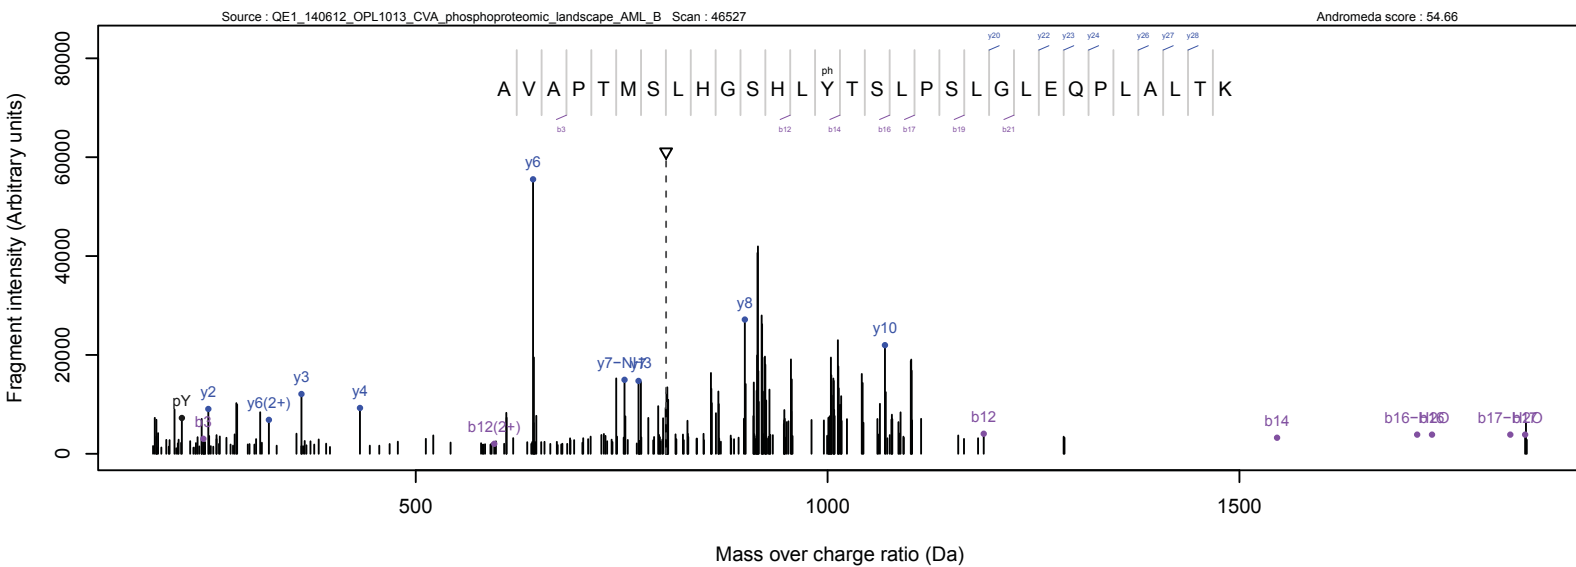

## Y(ph)FMHGVCR-2+

Source: QE1\_140612\_OPL1013\_CVA\_phosphoproteomic\_landscape\_AML\_C Scan: 11981

Andromeda score: 54.611

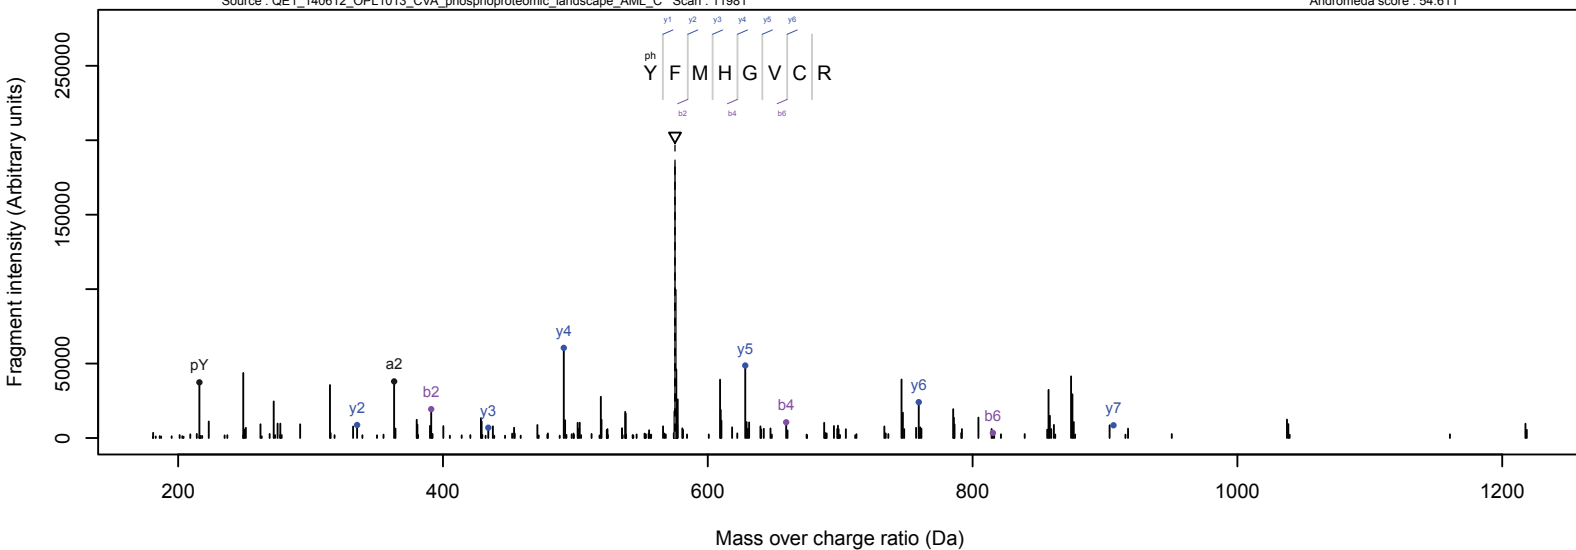

## KDTFFKDVDY(ph)VCISDNYWLGK-3+

Source: QE1\_140612\_OPL1013\_CVA\_phosphoproteomic\_landscape\_AML\_C Scan: 45327

Andromeda score: 54.582

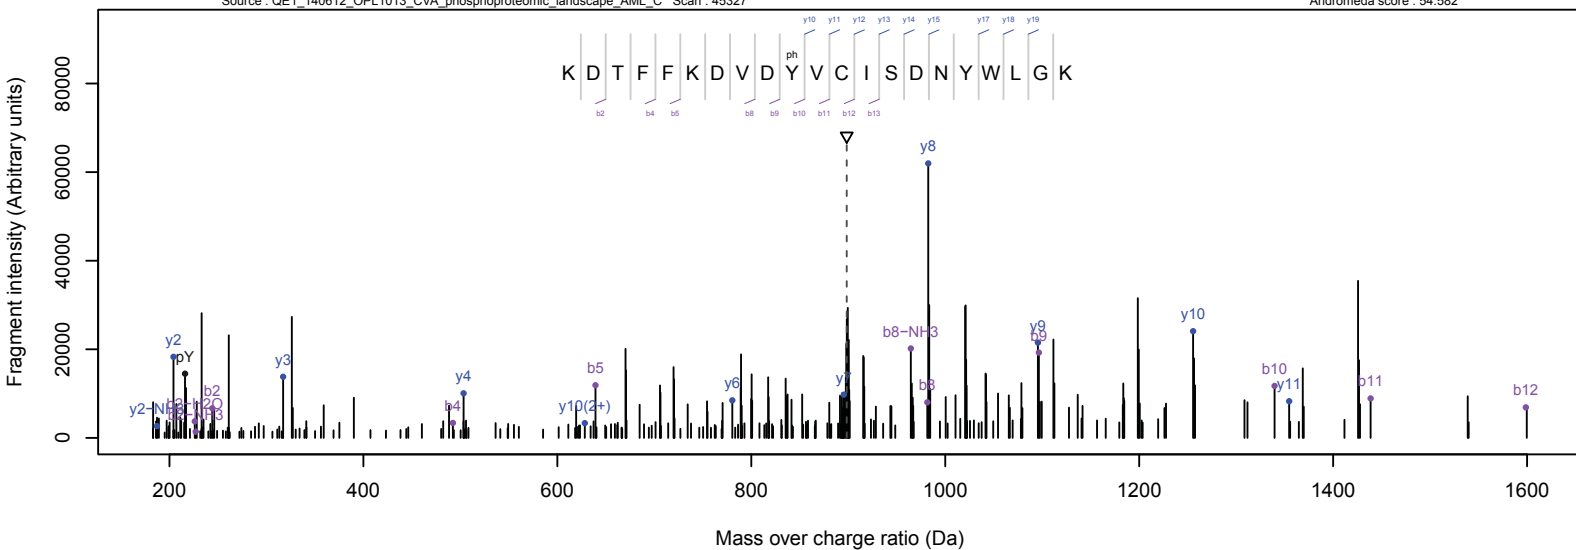

## IRQY(ph)LPR-2+

Source: QE1\_140612\_OPL1013\_CVA\_phosphoproteomic\_landscape\_AML\_B Scan: 9055

Andromeda score: 54.571

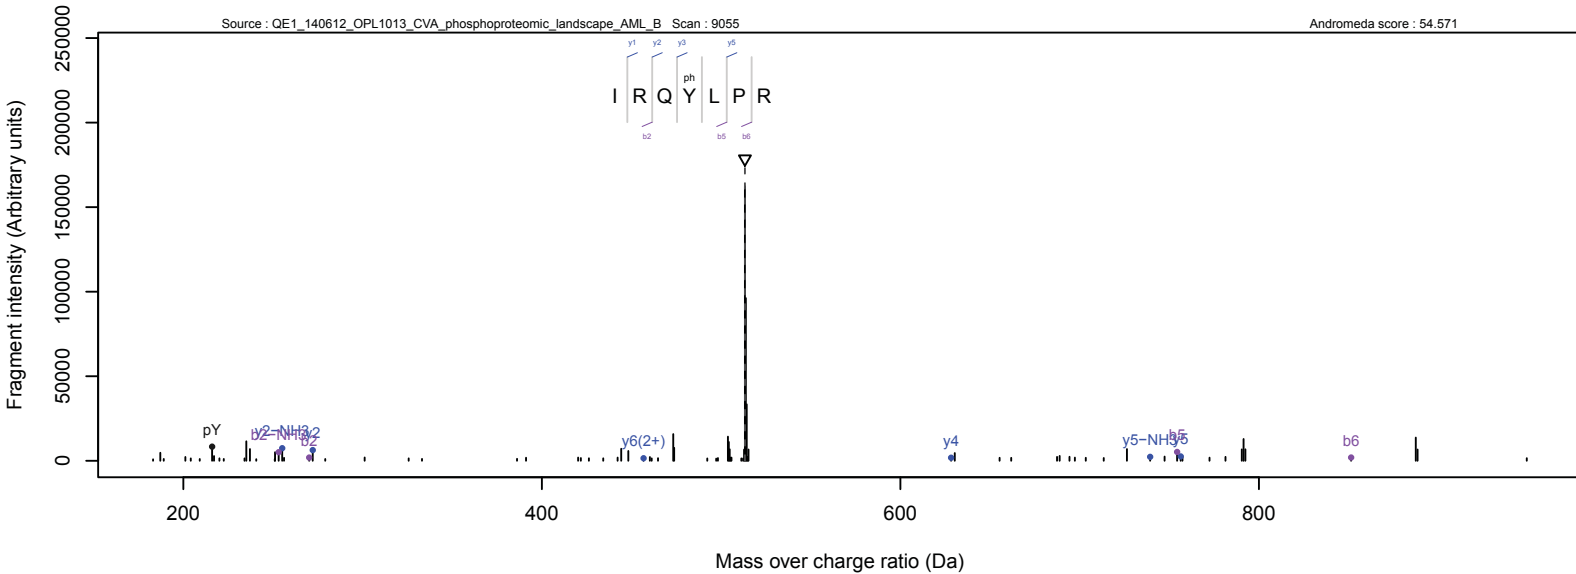

**CIELDCWDGPKVIY(ph)HGWTR-4+**

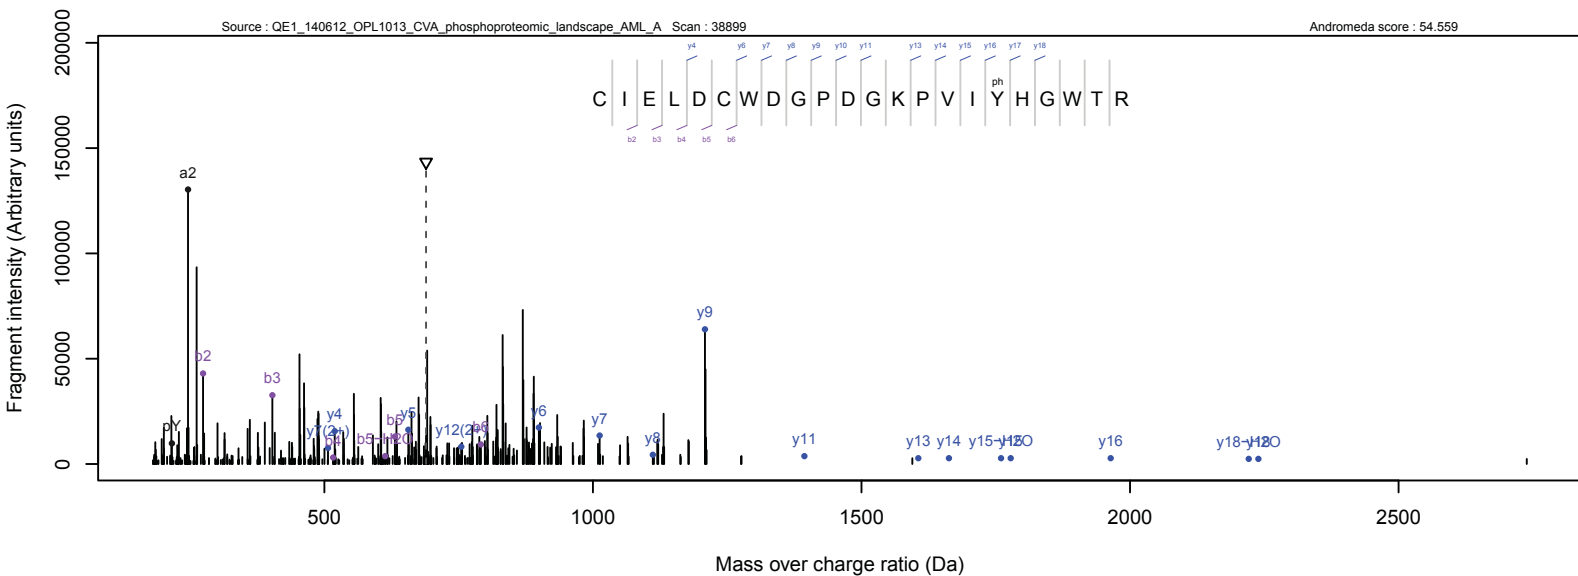

**LANY(ph)TNLSQGVVEHEEESR-3+**

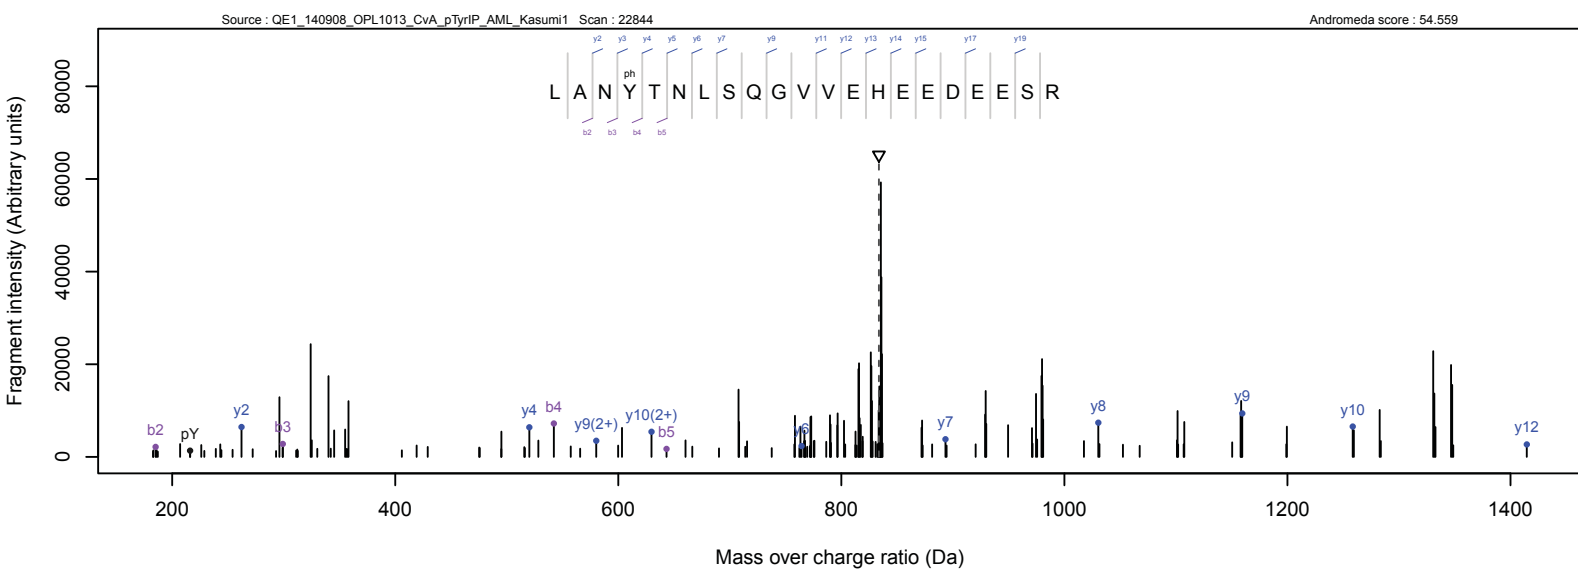

**(ac)M(ox)LPVY(ph)QEVKPNPLQDANLCSR-3+**

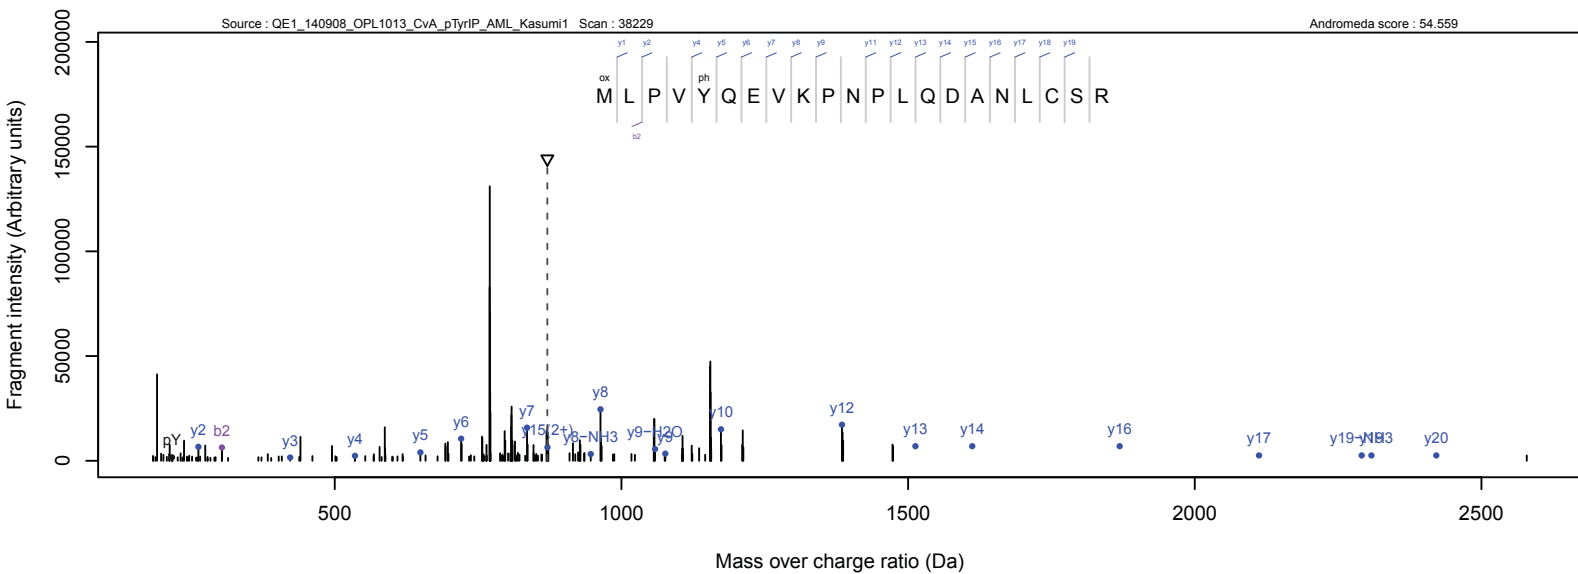

## (ac)ASTSY(ph)DYCR-2+

Source: QE1\_140822\_OPL1013\_CvA\_pTyrIP\_AML\_cell\_lines\_part2\_E Scan: 5722

Andromeda score: 54.539

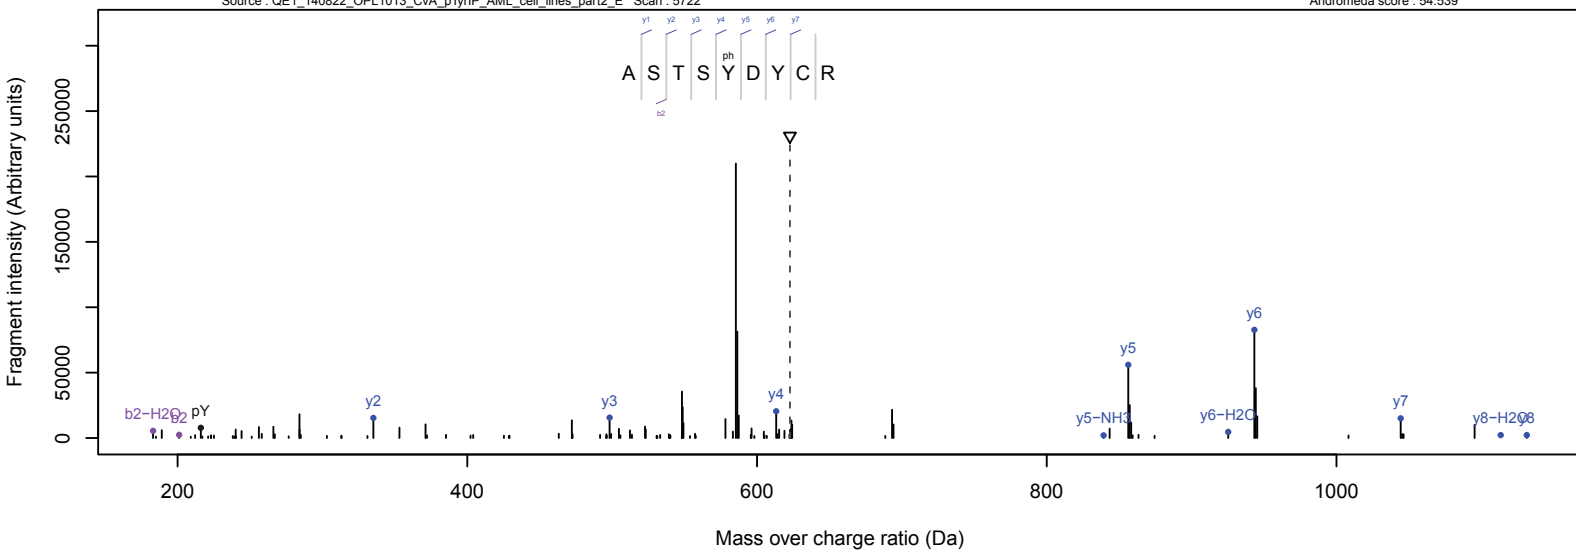

## DY(ph)LIKIIDSDSNLSVVK-3+

Source: QE1\_140612\_OPL1013\_CVA\_phosphoproteomic\_landscape\_AML\_D Scan: 46286

Andromeda score: 54.511

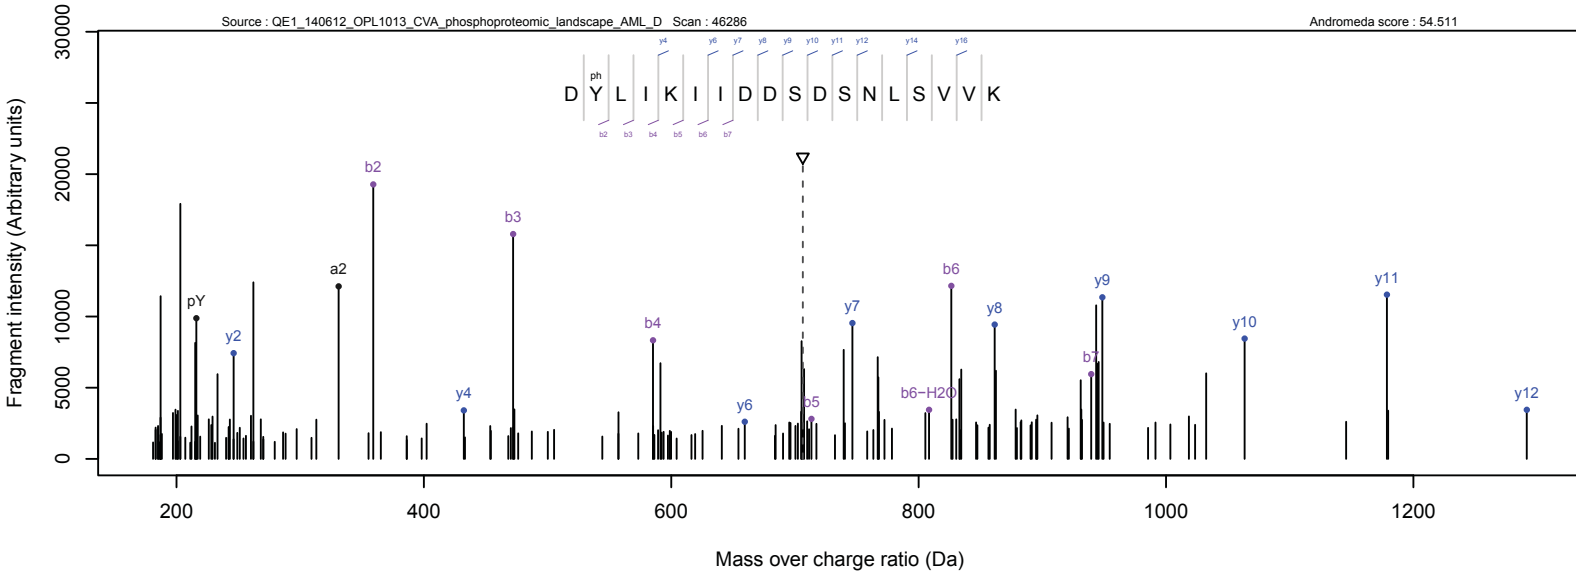

## VPTVSRPY(ph)SFIEFDTFIQK-3+

Source: QE1\_140612\_OPL1013\_CVA\_phosphoproteomic\_landscape\_AML\_C Scan: 47234

Andromeda score: 54.511

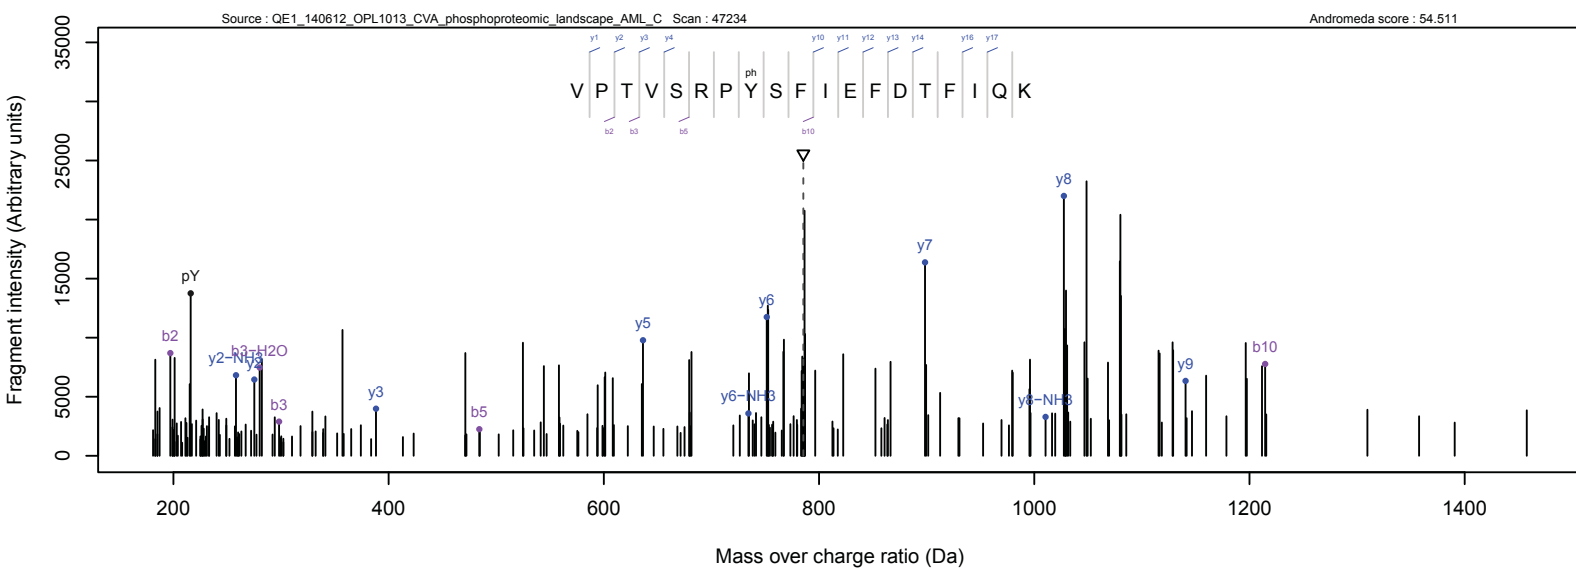



TVQPVAM(ox)GPDGLPVDASSVSNY(ph)IQLTGR-3+

Source: QE1\_140908\_OPL1013\_CvA\_pTyrIP\_AML\_Kasumi6 Scan: 40965

Andromeda score: 54.466

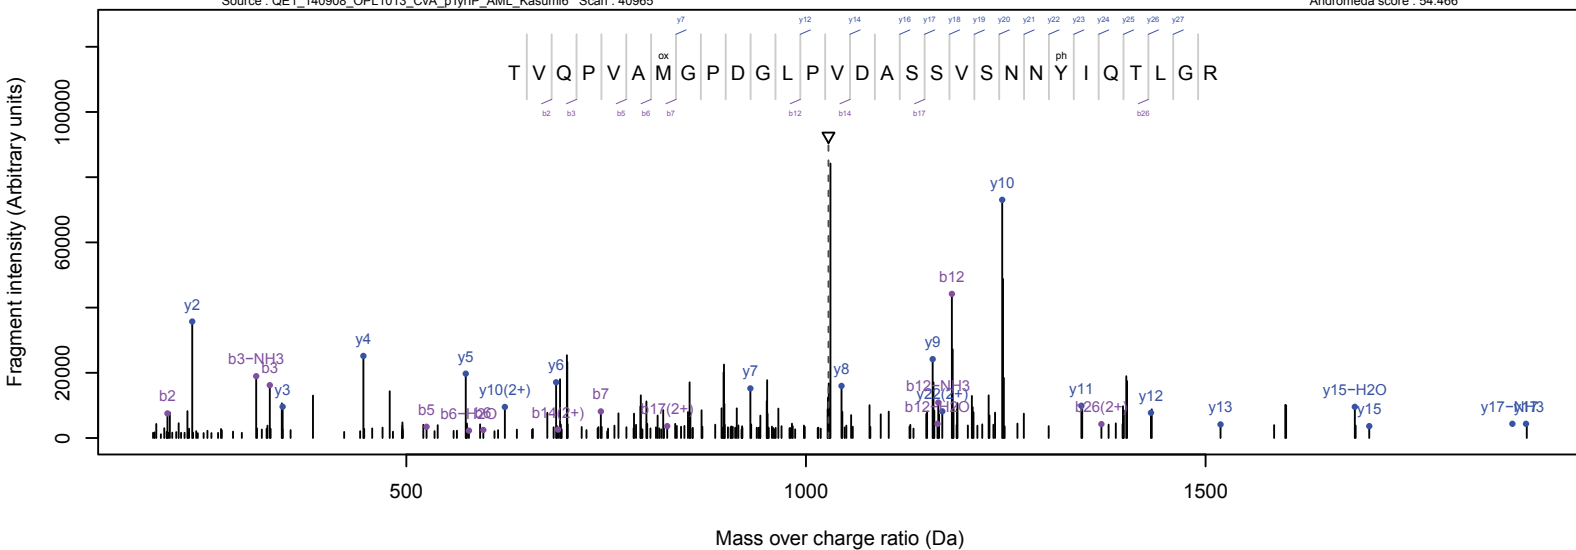

AAFY(ph)HQPWAQEA VGR-3+

Source: QE1\_140612\_OPL1013\_CVA\_phosphoproteomic\_landscape\_AML\_C Scan: 25902

Andromeda score: 54.402

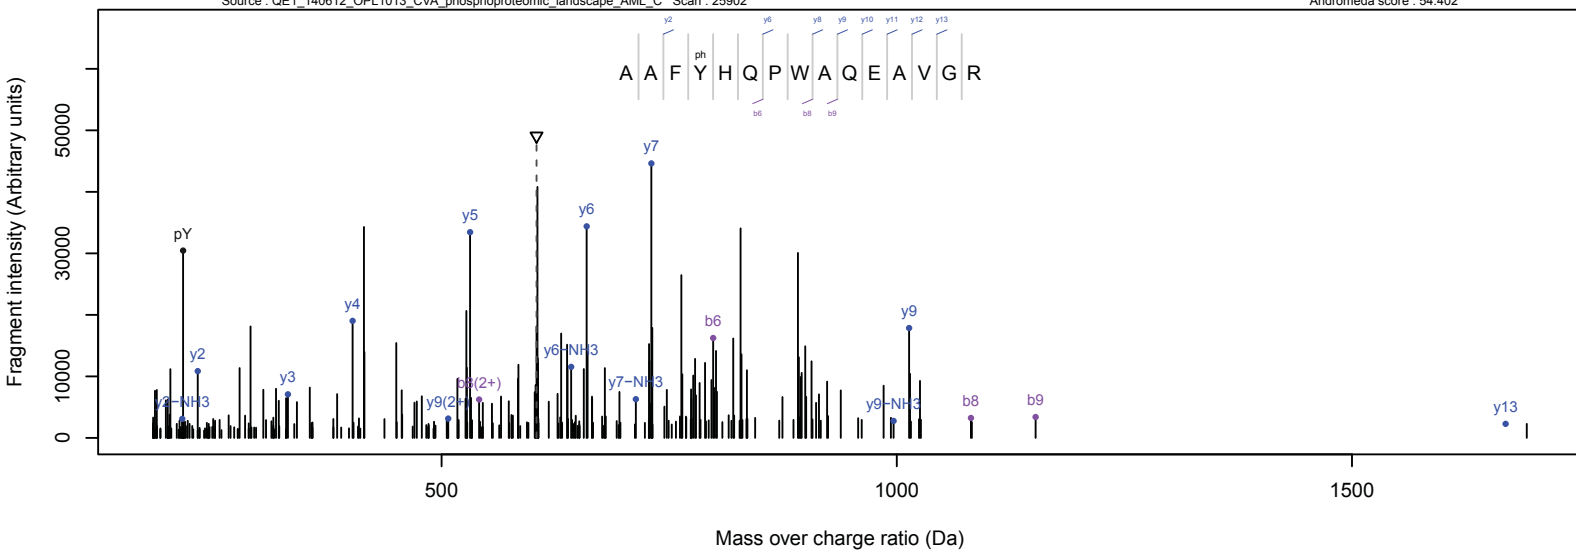

HLSFY(ph)IFDRD VFR-3+

Source: QE1\_140612\_OPL1013\_CVA\_phosphoproteomic\_landscape\_AML\_C Scan: 46255

Andromeda score: 54.343

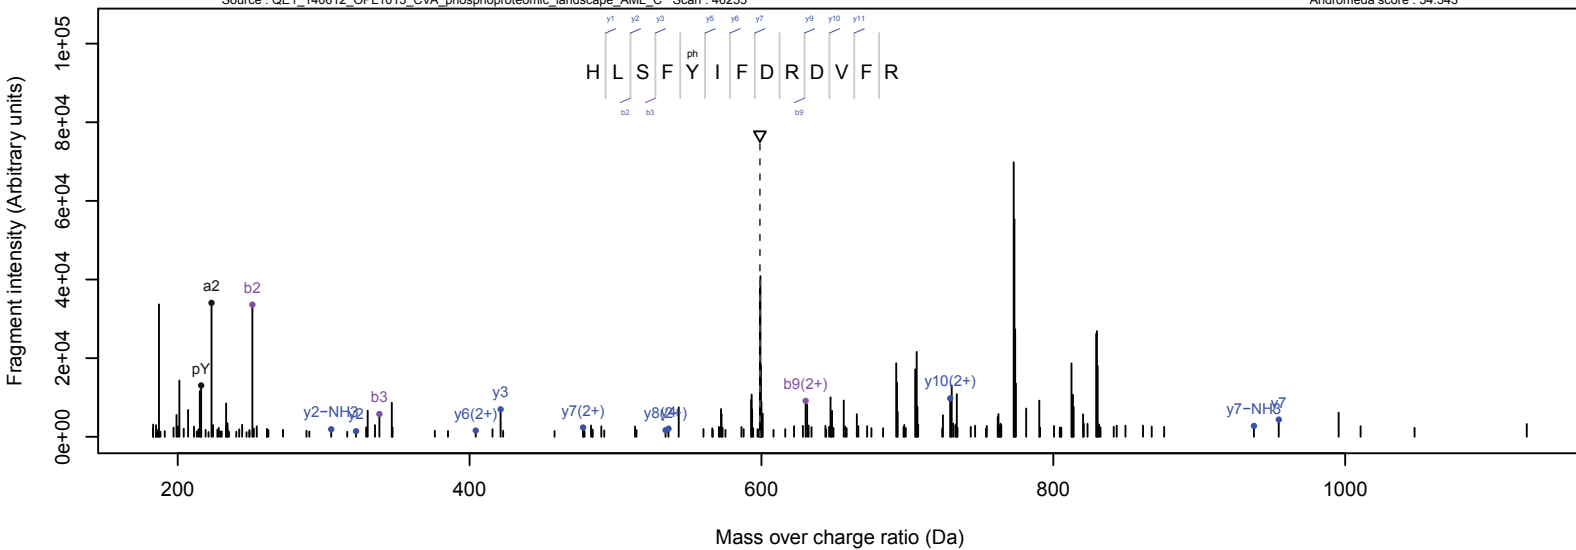

M(ox)HG DY(ph)TLTLR-2+

Source: QE1\_140612\_OPL1013\_CVA\_phosphoproteomic\_landscape\_AML\_A Scan: 15212

Andromeda score: 54.343

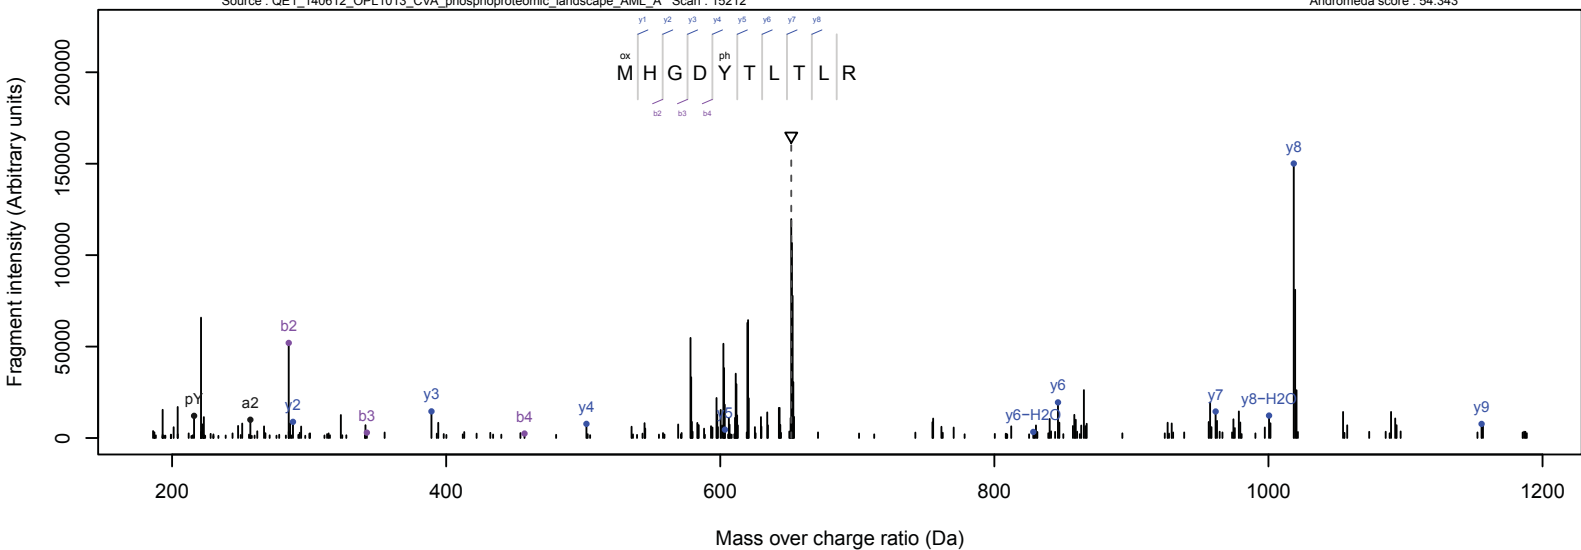

RWY(ph)PEEYEFAPK-2+

Source: QE1\_140612\_OPL1013\_CVA\_phosphoproteomic\_landscape\_AML\_D Scan: 29820

Andromeda score: 54.343

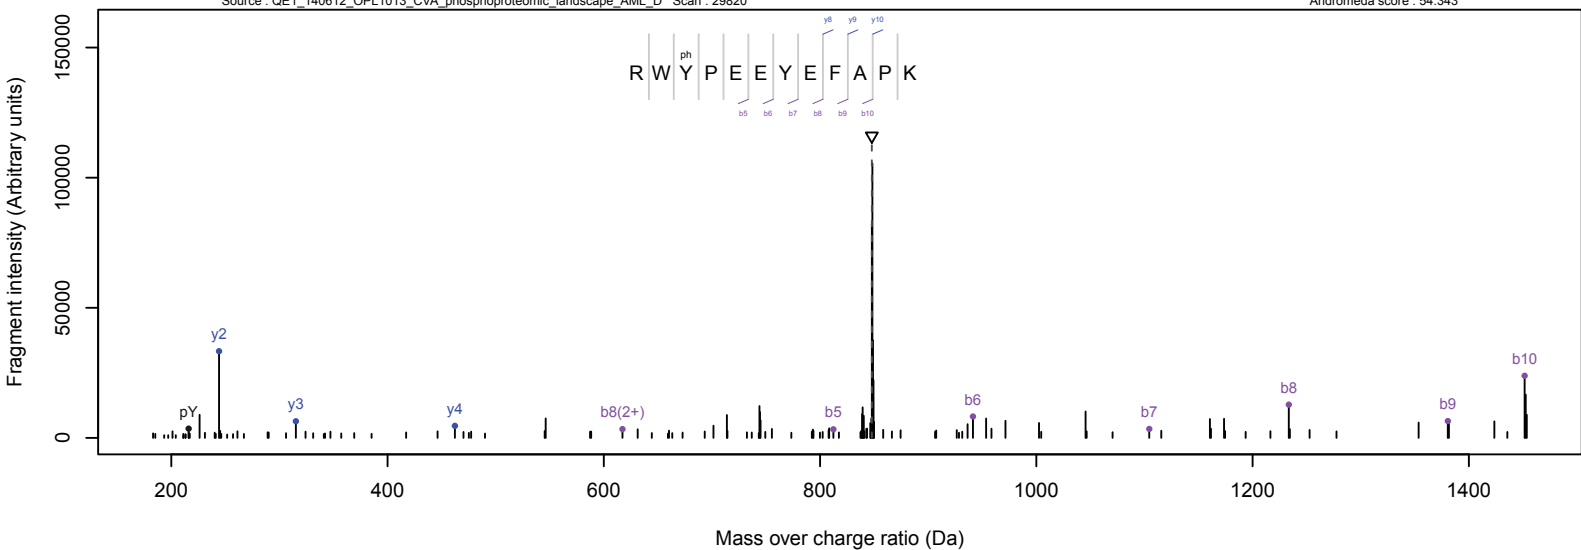

VIDRELY(ph)QLQR-3+

Source: QE1\_140612\_OPL1013\_CVA\_phosphoproteomic\_landscape\_AML\_A Scan: 20813

Andromeda score: 54.343

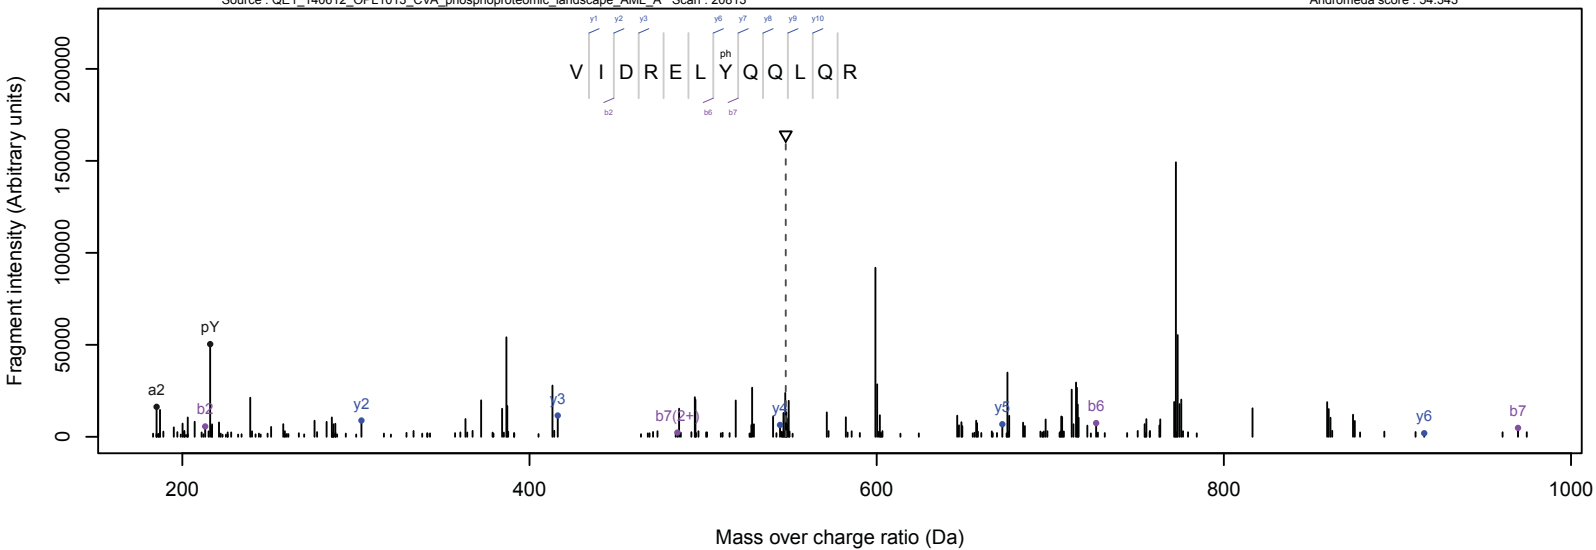

WTEY(ph)GLTFTEK-2+

Source : QE1\_140612\_OPL1013\_CVA\_phosphoproteomic\_landscape\_AML\_B Scan : 31462

Andromeda score : 54.343

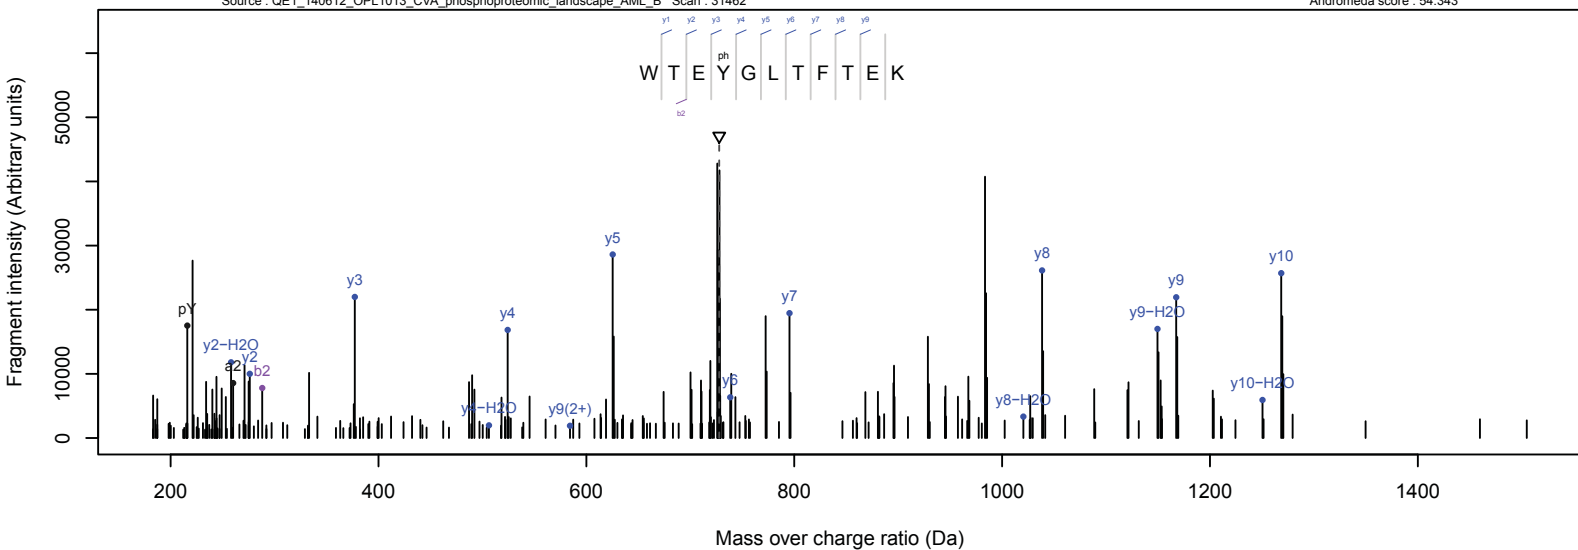

YQQNPAAVLY(ph)QR-2+

Source : QE1\_140612\_OPL1013\_CVA\_phosphoproteomic\_landscape\_AML\_B Scan : 21806

Andromeda score : 54.343

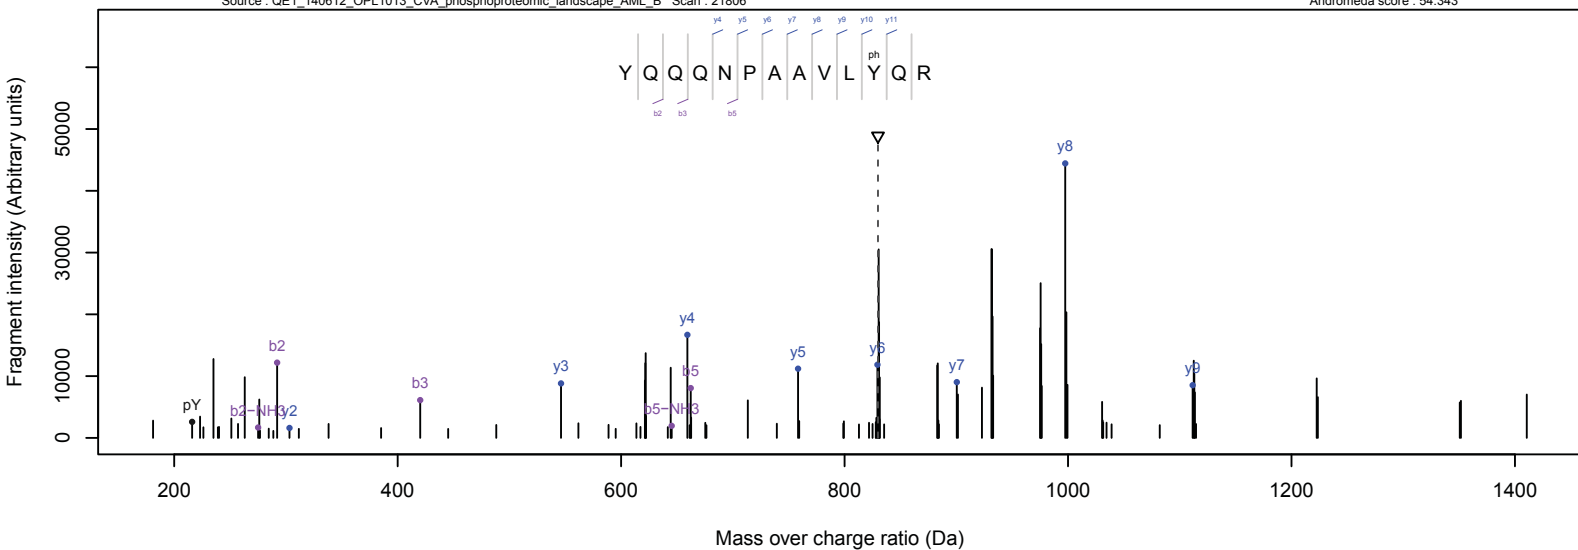

ALSNLEISIPGGY(ph)NALRR-3+

Source : QE1\_140612\_OPL1013\_CVA\_phosphoproteomic\_landscape\_AML\_C Scan : 29017

Andromeda score : 54.281

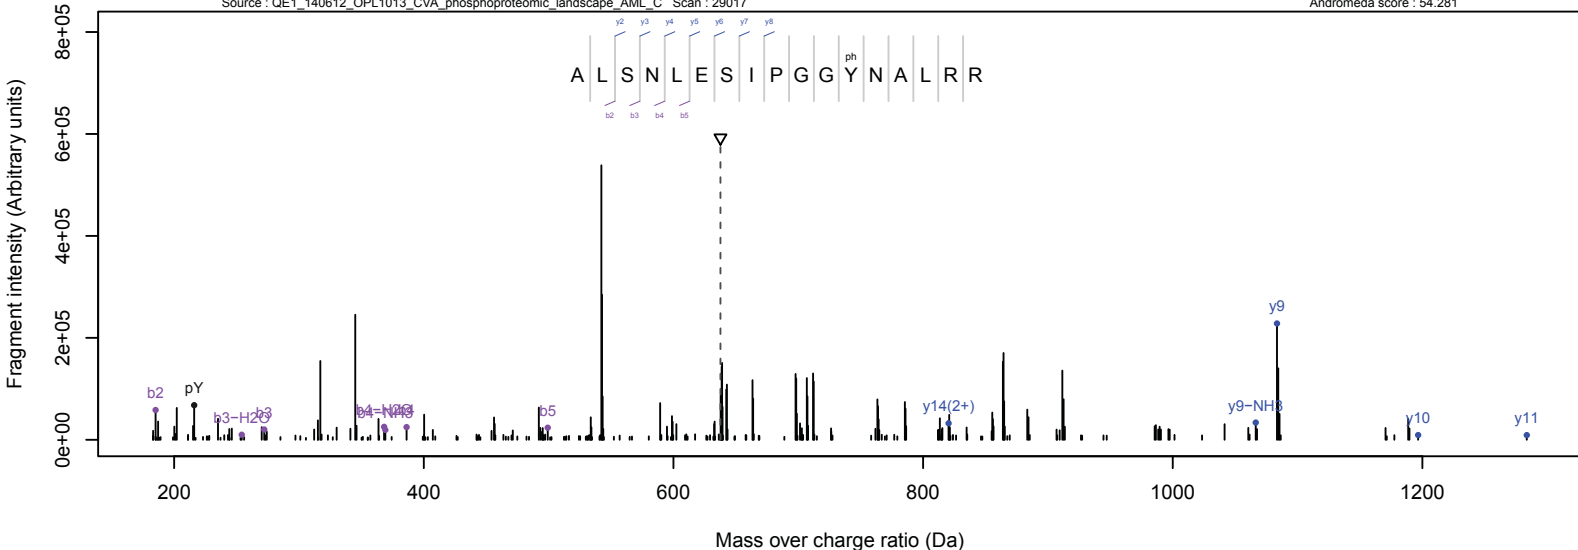

DRPQSSY(ph)DPFAGM(ox)K-3+

Source : QE1\_140908\_OPL1013\_CvA\_pTyrIP\_AML\_HL60 Scan : 27208

Andromeda score : 54.281

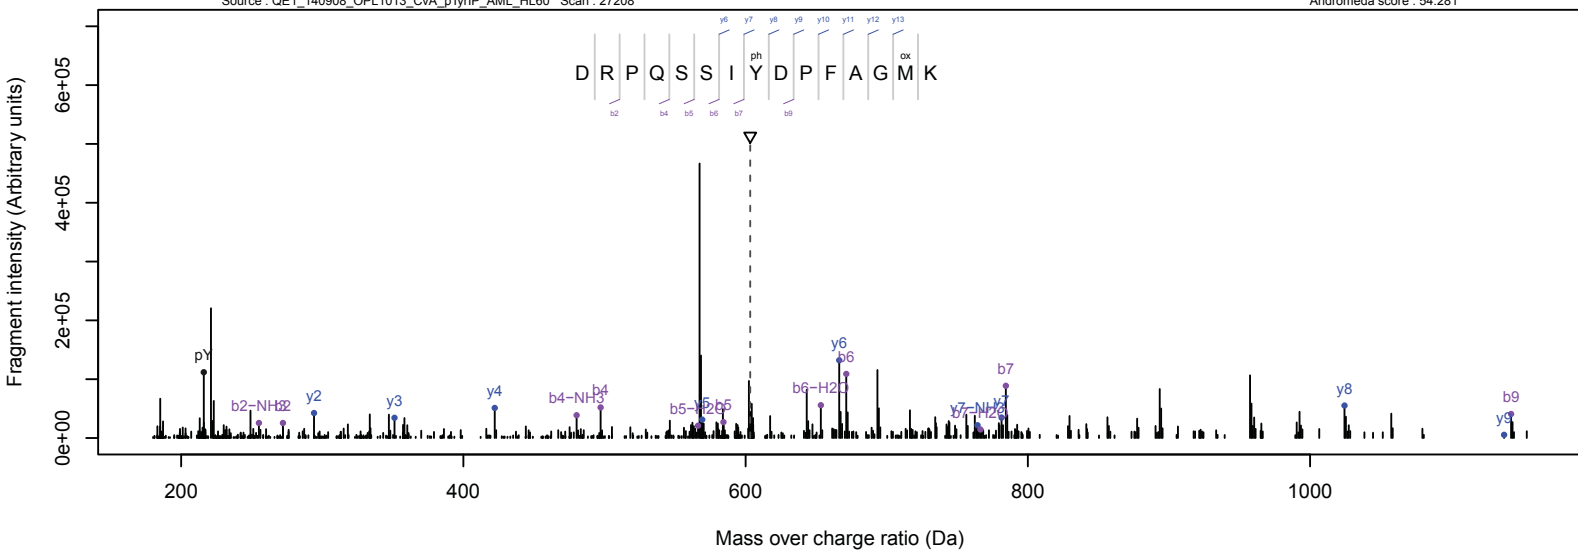

LLFNPSGPY(ph)QKPVHEK-3+

Source : QE1\_140612\_OPL1013\_CvA\_phosphoproteomic\_landscape\_AML\_C Scan : 16300

Andromeda score : 54.281

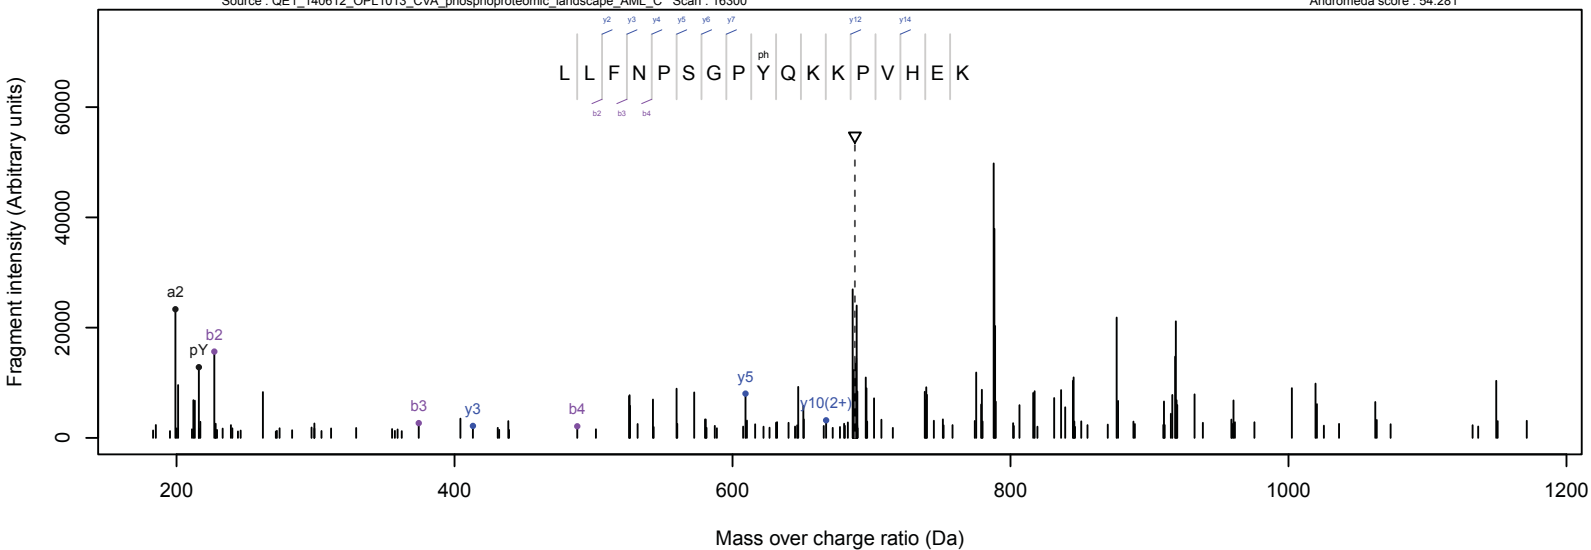

SES(ph)PKEPEQLRK-3+

Source : QE1\_140908\_OPL1013\_CvA\_pTyrIP\_AML\_HL60 Scan : 6170

Andromeda score : 54.281

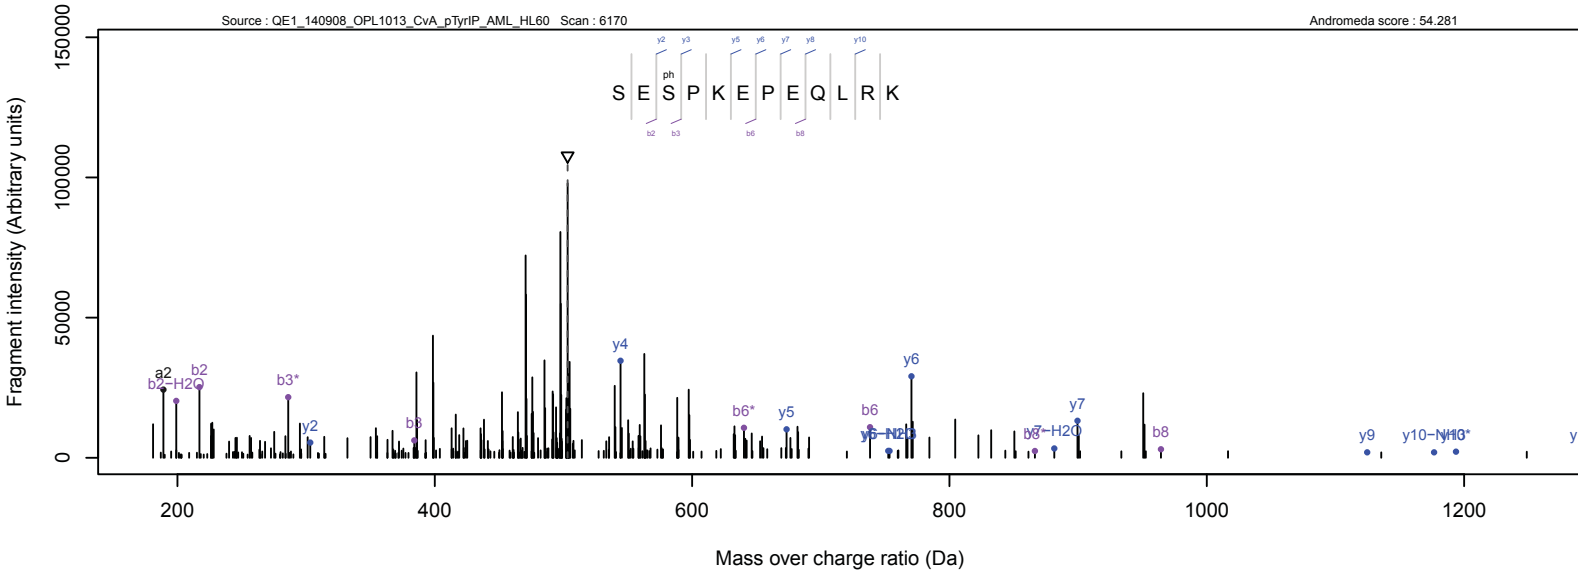

## SGLAAY(ph)FFMGR-2+

Source : QE1\_140612\_OPL1013\_CVA\_phosphoproteomic\_landscape\_AML\_C Scan : 45572

Andromeda score : 54.259

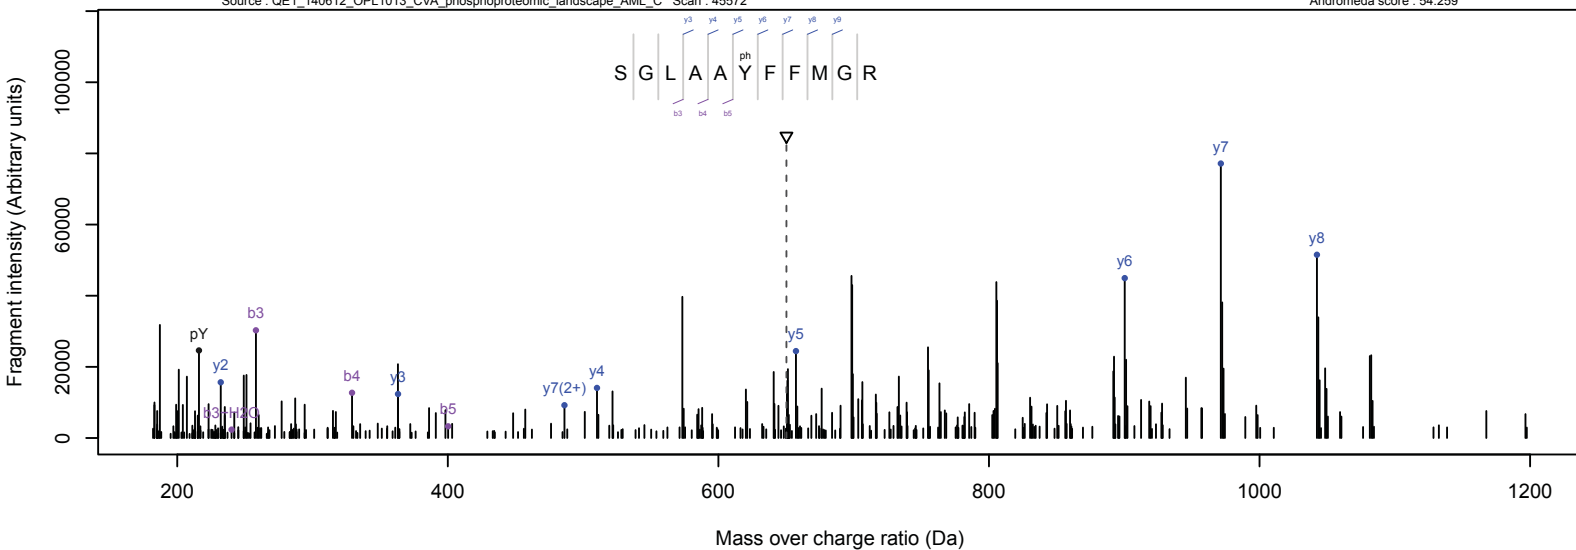

## SY(ph)ETVLSFGK-2+

Source : QE1\_140612\_OPL1013\_CVA\_phosphoproteomic\_landscape\_AML\_C Scan : 28791

Andromeda score : 54.259

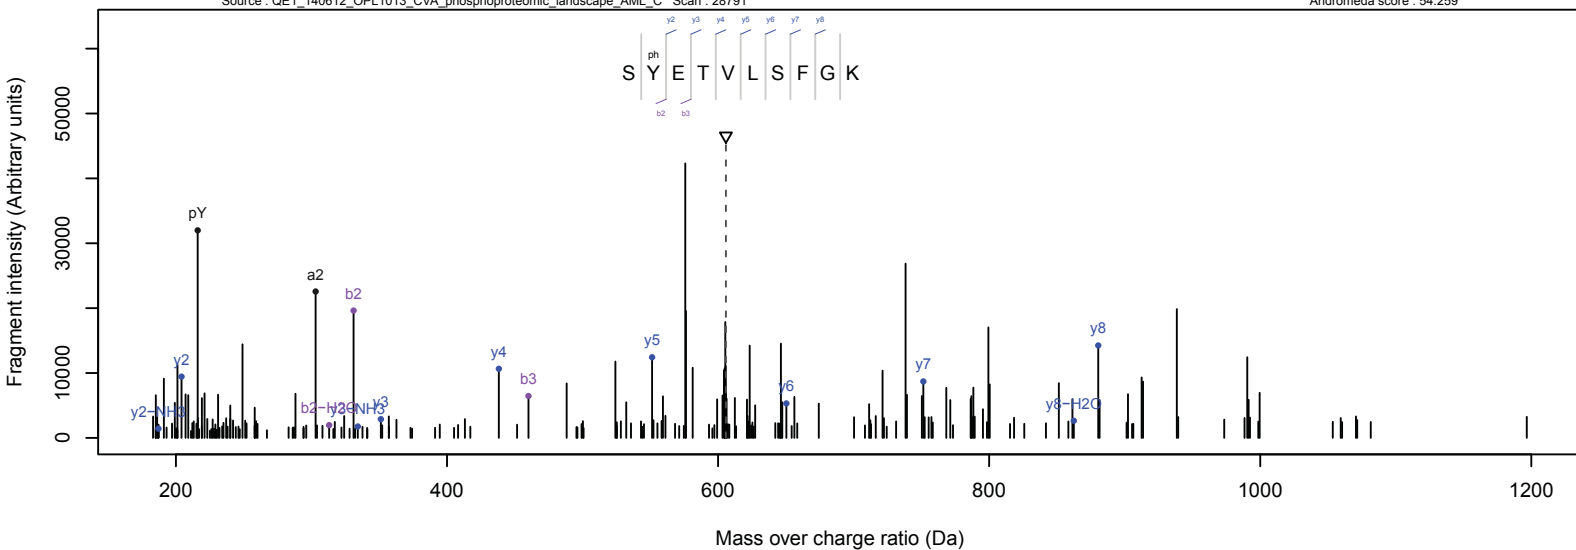

## QGTQY(ph)TFSSIEREEYGK-3+

Source : QE1\_140908\_OPL1013\_CvA\_pTyrIP\_AML\_HL60 Scan : 26465

Andromeda score : 54.253

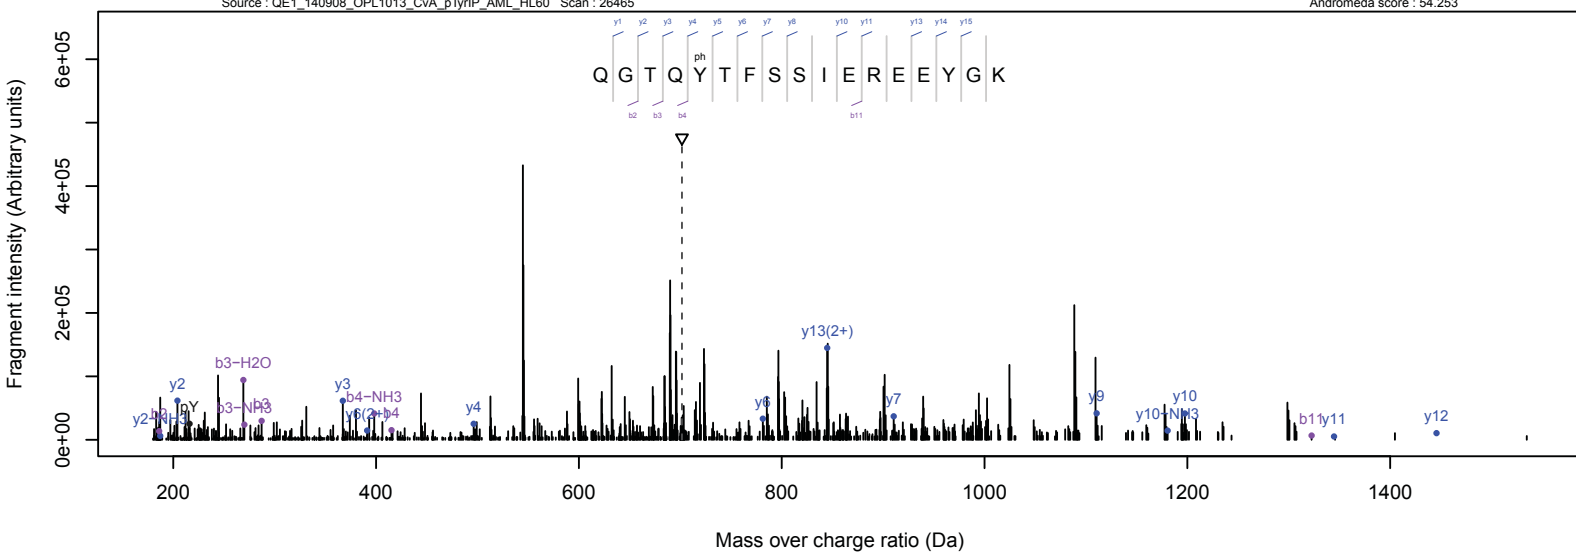

SLQY<sup>EY</sup>(ph)KANSNLVLQADR-3+

Source : QE1\_140612\_OPL1013\_CVA\_phosphoproteomic\_landscape\_AML\_A Scan : 26636

Andromeda score : 54.253

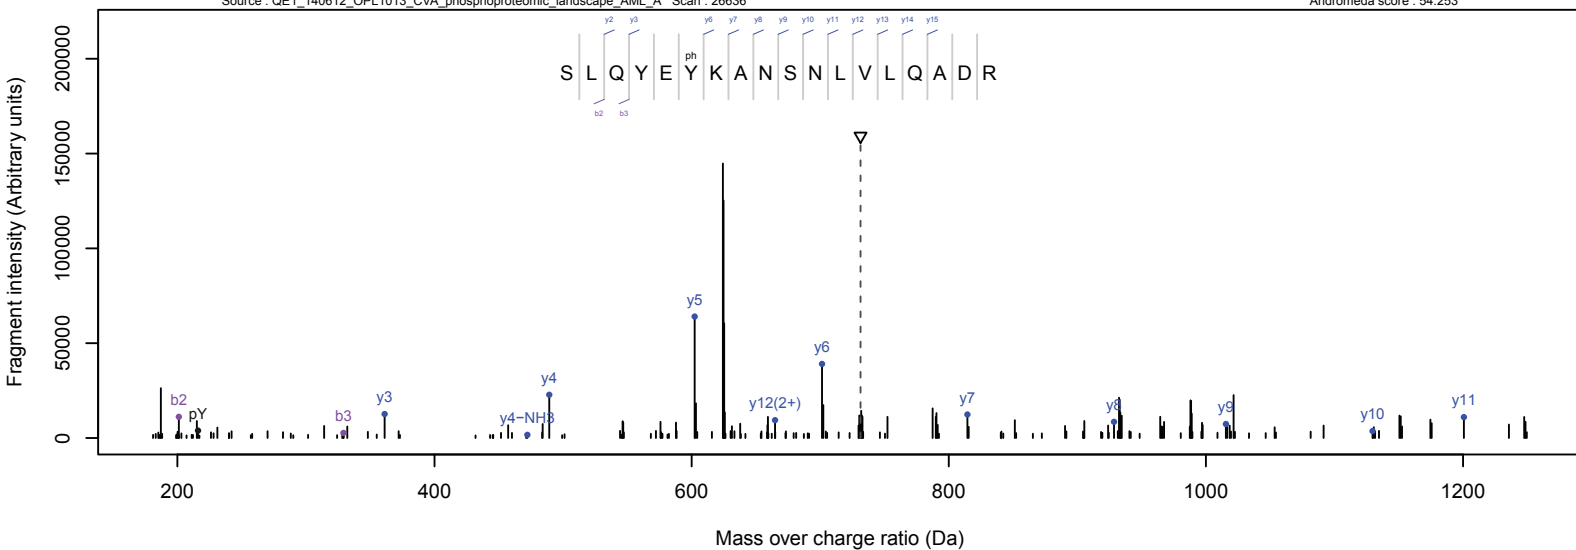

GVTQFGNK<sup>Y</sup>(ph)IQQT<sup>K</sup>PLTLER-3+

Source : QE1\_140612\_OPL1013\_CVA\_phosphoproteomic\_landscape\_AML\_A Scan : 26393

Andromeda score : 54.225

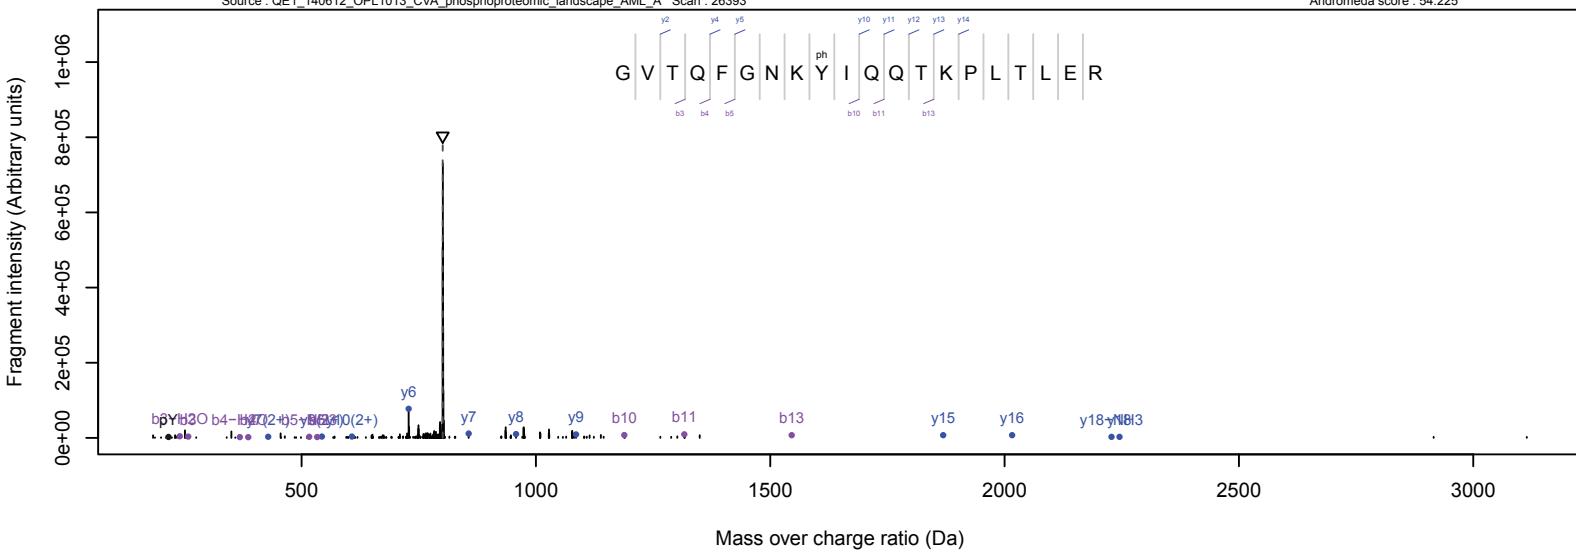

ERLY<sup>Y</sup>(ph)PLR-2+

Source : QE1\_140612\_OPL1013\_CVA\_phosphoproteomic\_landscape\_AML\_C Scan : 11641

Andromeda score : 54.205

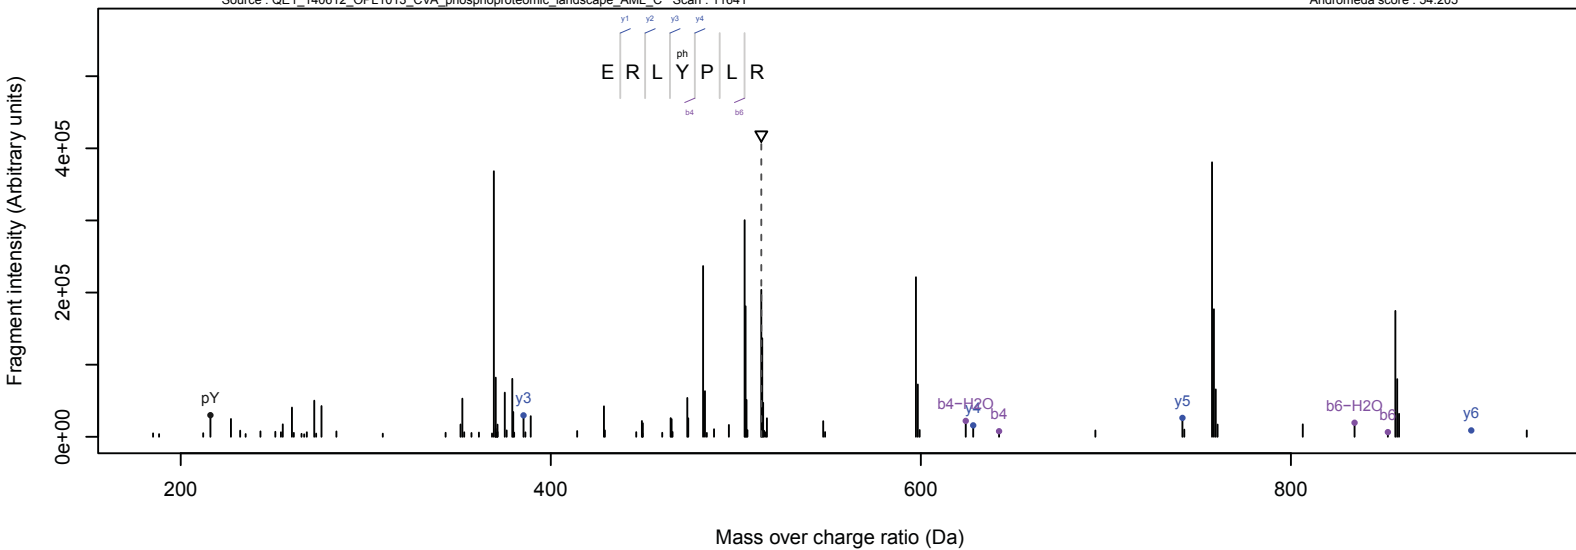

**EQNSPIY(ph)ISR-2+**

Source : QE1\_140612\_OPL1013\_CVA\_phosphoproteomic\_landscape\_AML\_C Scan : 17367

Andromeda score : 54.198

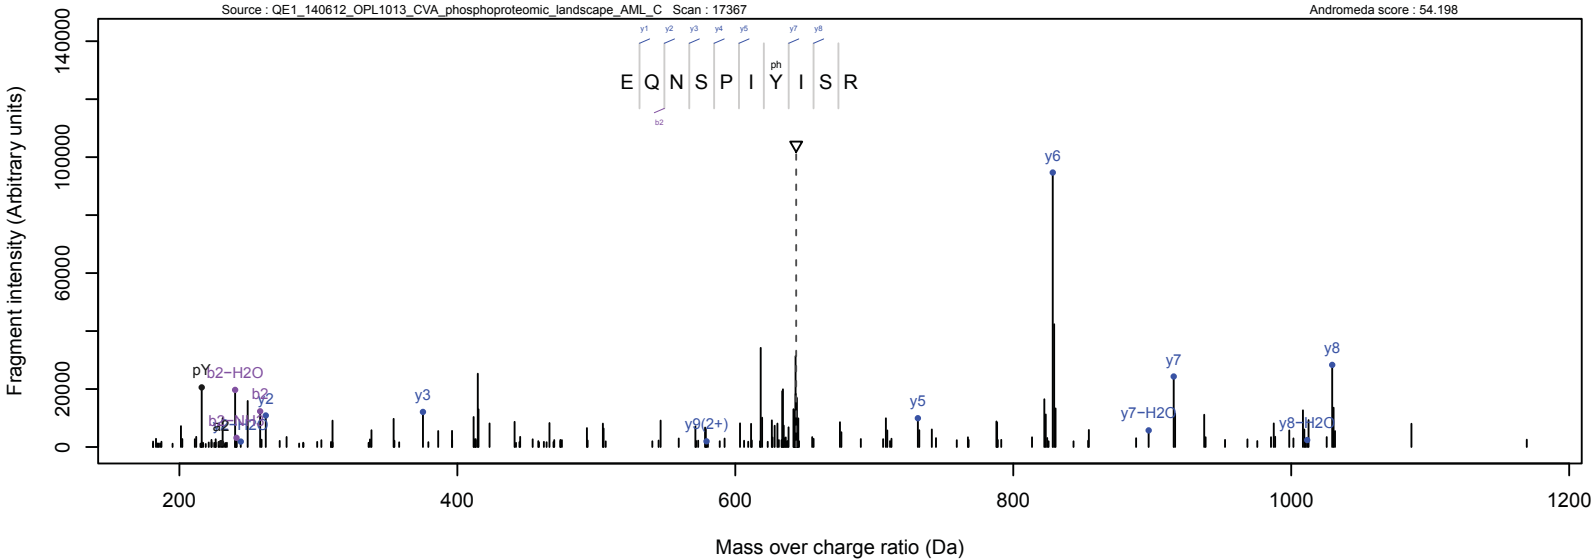

**GQYTHKIY(ph)HLK-3+**

Source : QE1\_140612\_OPL1013\_CVA\_phosphoproteomic\_landscape\_AML\_C Scan : 7147

Andromeda score : 54.198

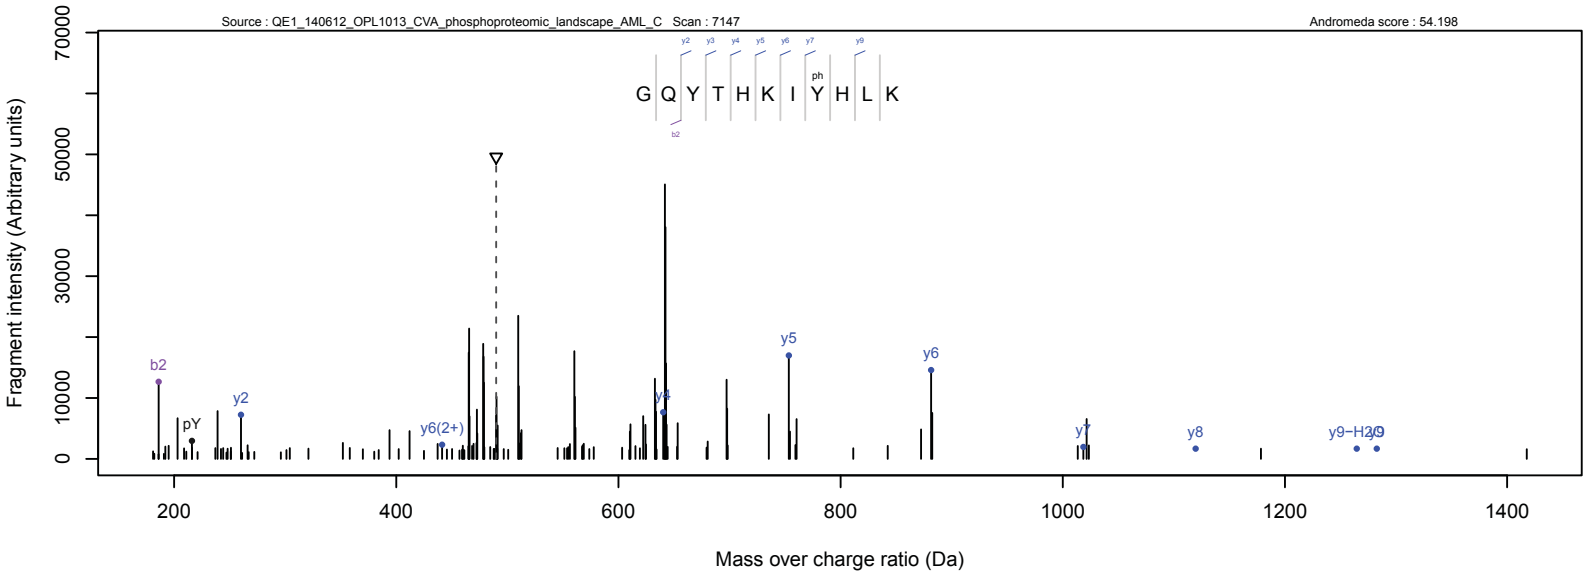

**KMGVPY(ph)CIK-2+**

Source : QE1\_140612\_OPL1013\_CVA\_phosphoproteomic\_landscape\_AML\_C Scan : 24835

Andromeda score : 54.198

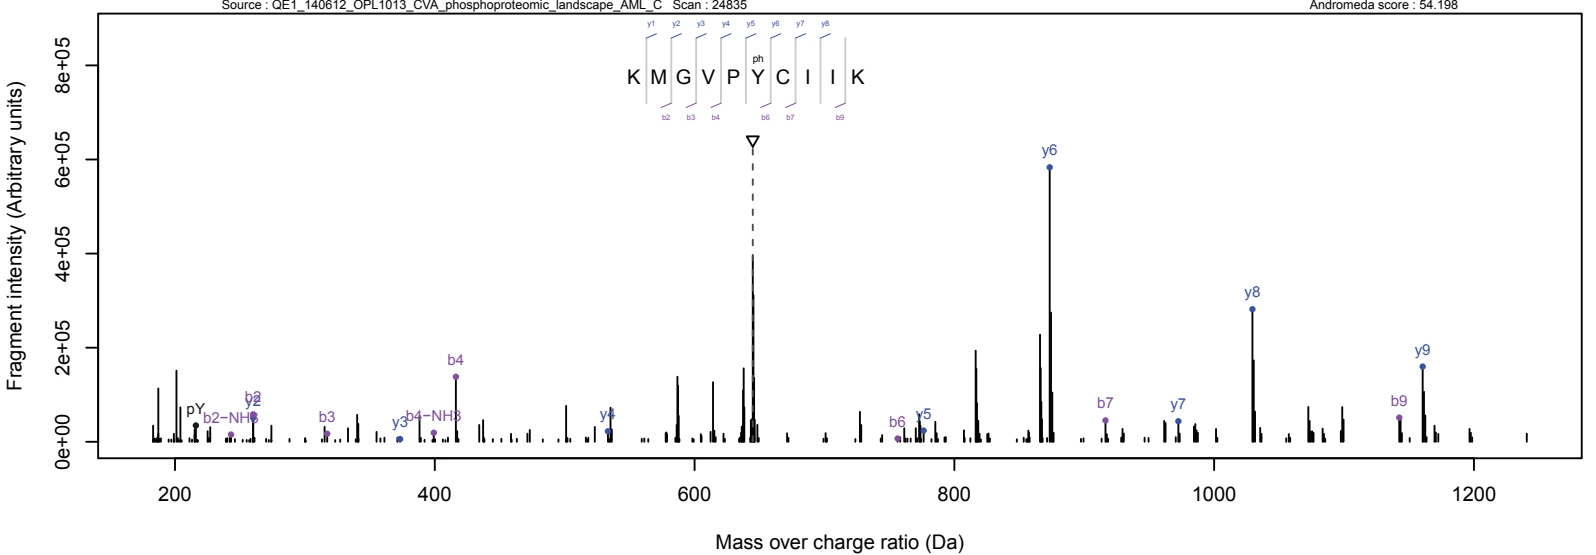

## HGQVY(ph)LRK-3+

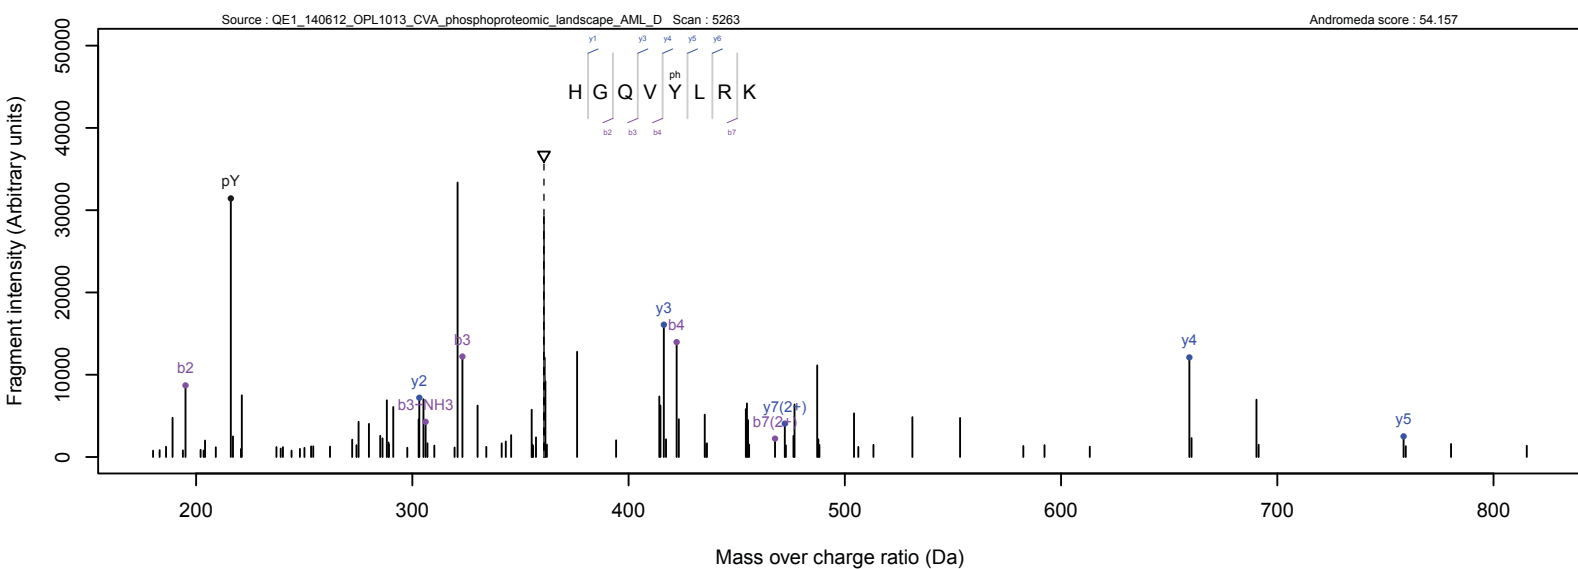

## TVWQY(ph)HFR-2+

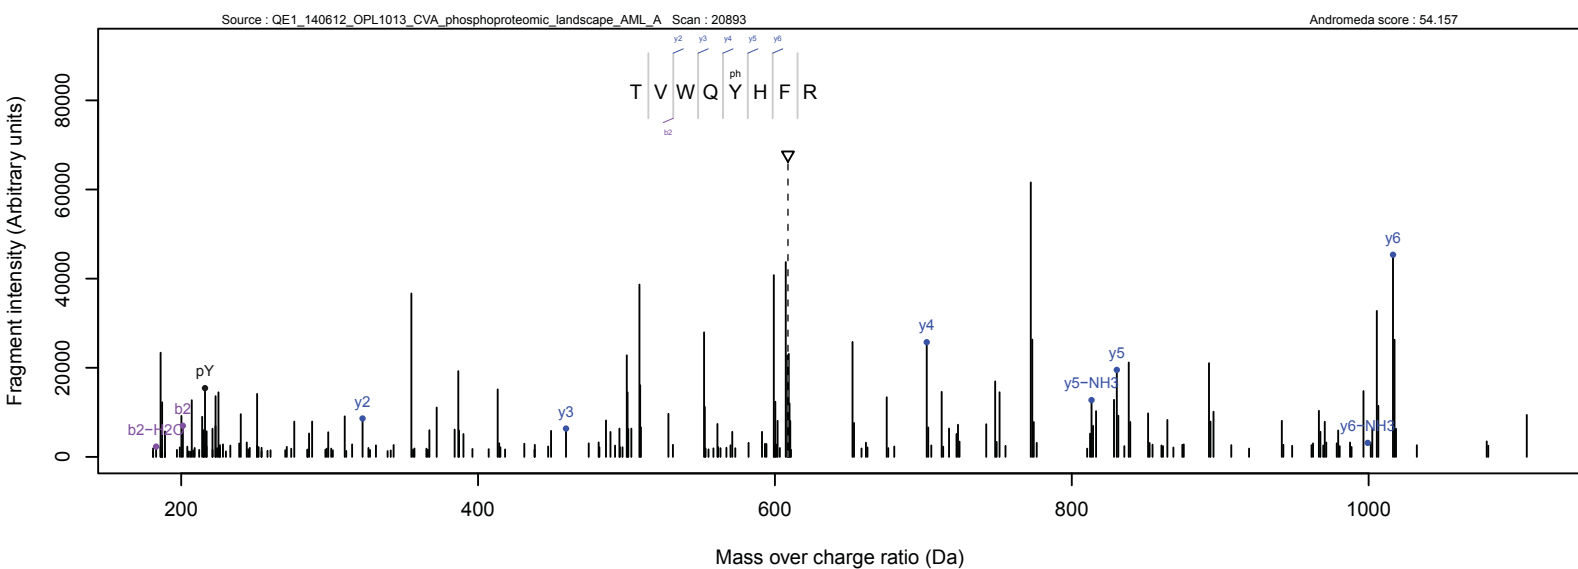

## Y(ph)FWQNF RK-3+

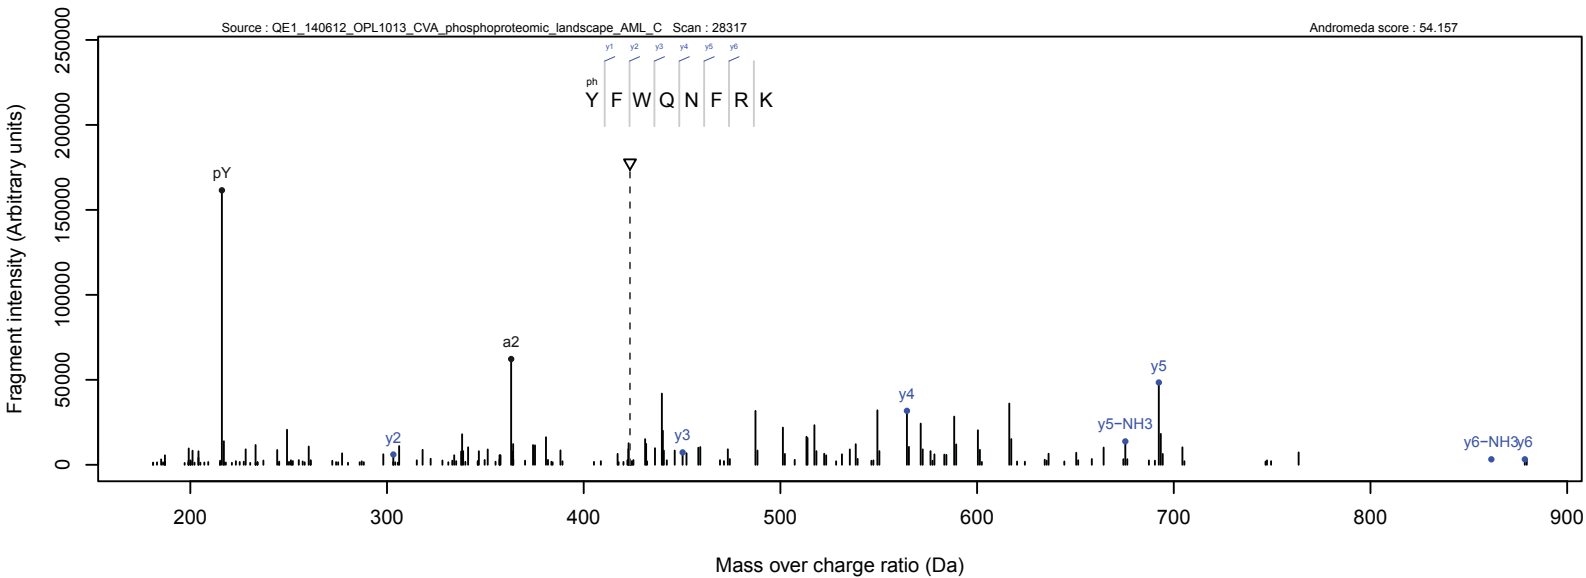



## Y(ph)GIPLAYK-2+

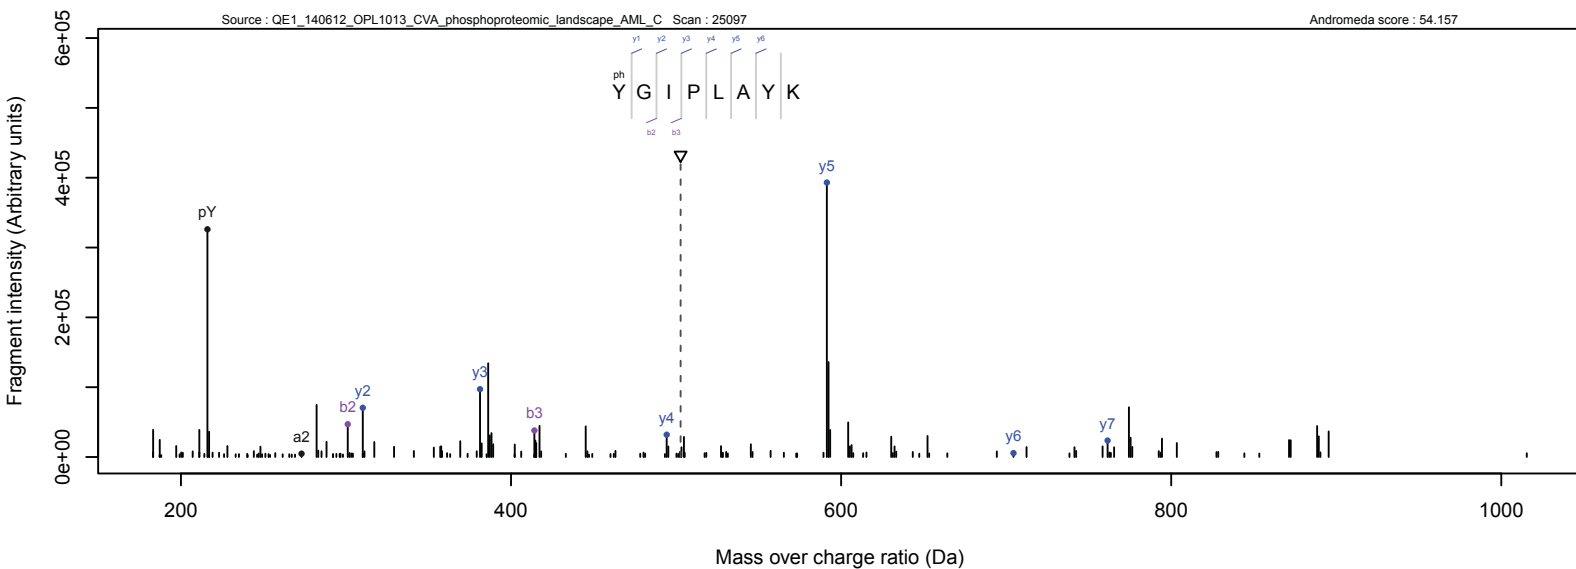

## GIGIENHY(ph)LNDGLWHMK-3+

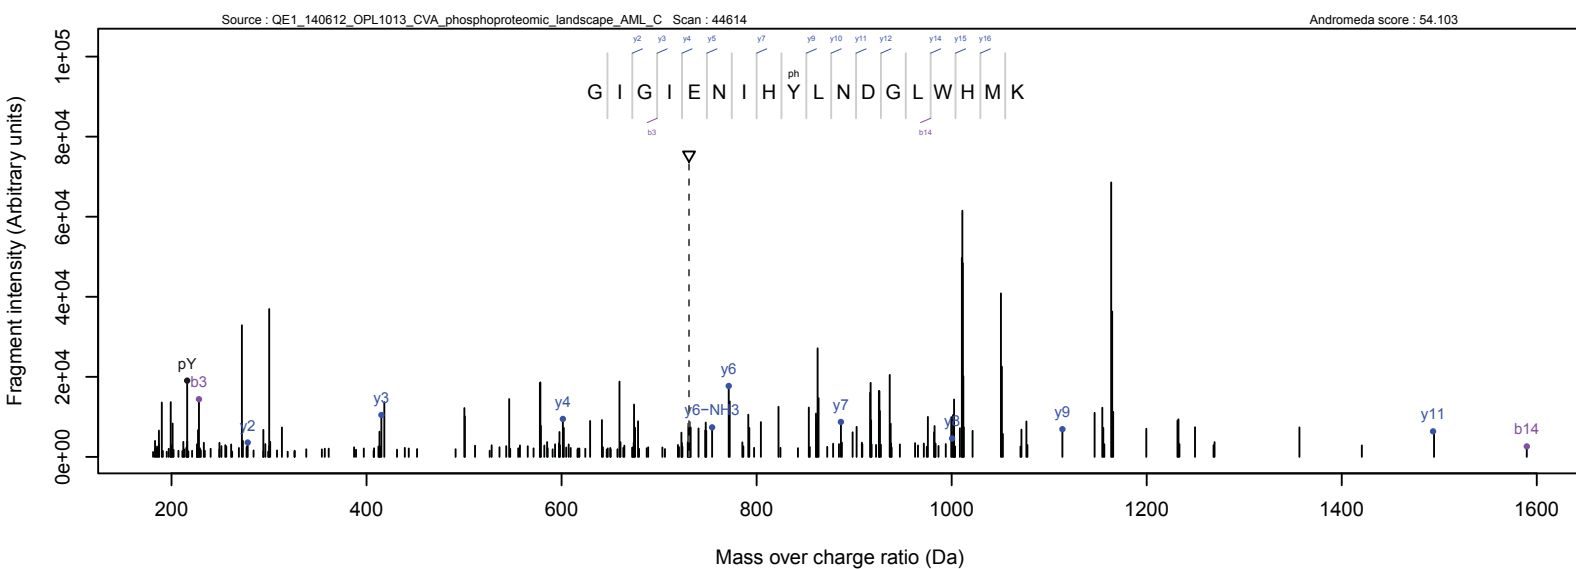

## GQLLSIPAAYGDLEMVR-2+

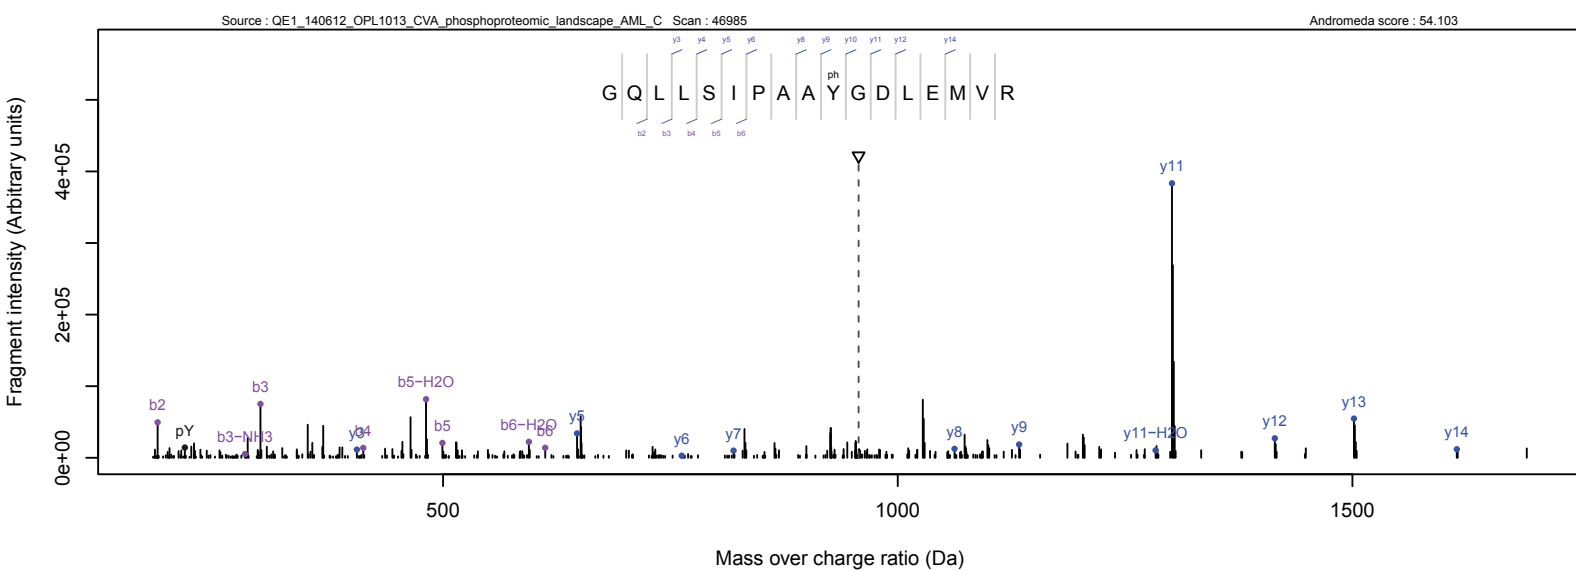

## NISNY(ph)FFSKDPTMGSHK-3+

Source : QE1\_140612\_OPL1013\_CVA\_phosphoproteomic\_landscape\_AML\_C Scan : 29313

Andromeda score : 54.103

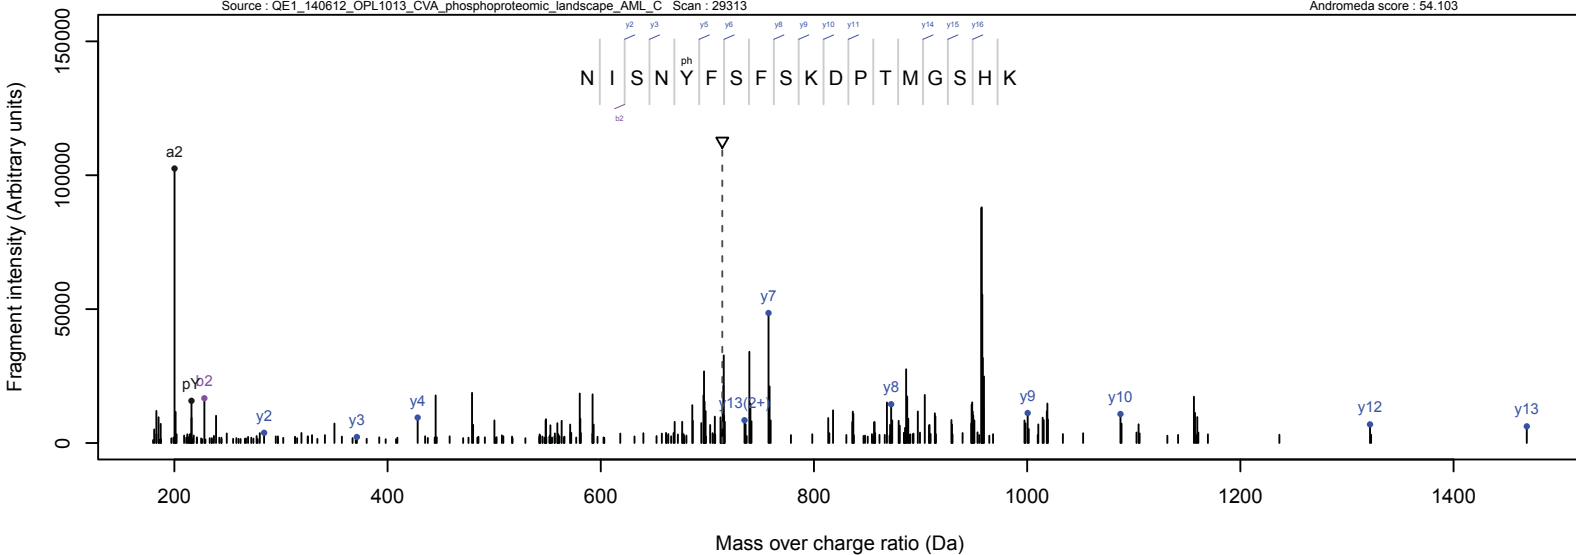

## VFADFATARPPGY(ph)EFELK-3+

Source : QE1\_140612\_OPL1013\_CVA\_phosphoproteomic\_landscape\_AML\_A Scan : 41365

Andromeda score : 54.103

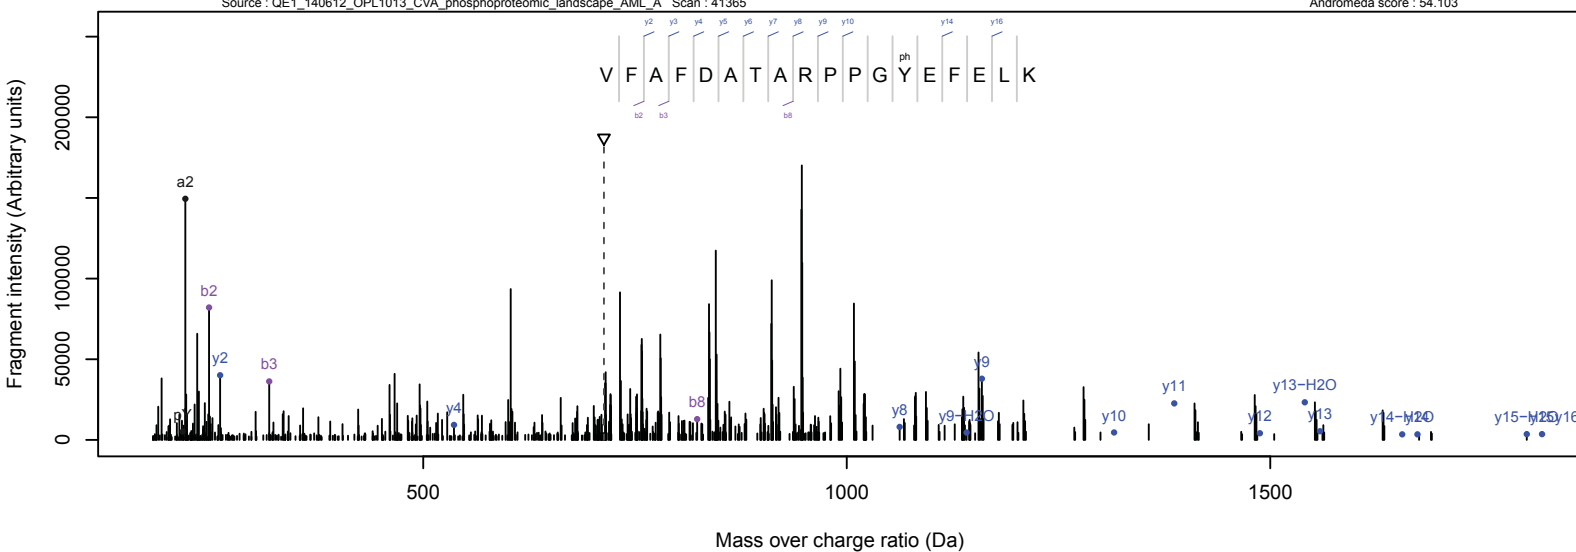

## SSLPPTVNGY(ph)HASGTPAHPPEAHMSVR-4+

Source : QE1\_140612\_OPL1013\_CVA\_phosphoproteomic\_landscape\_AML\_C Scan : 18855

Andromeda score : 54.096

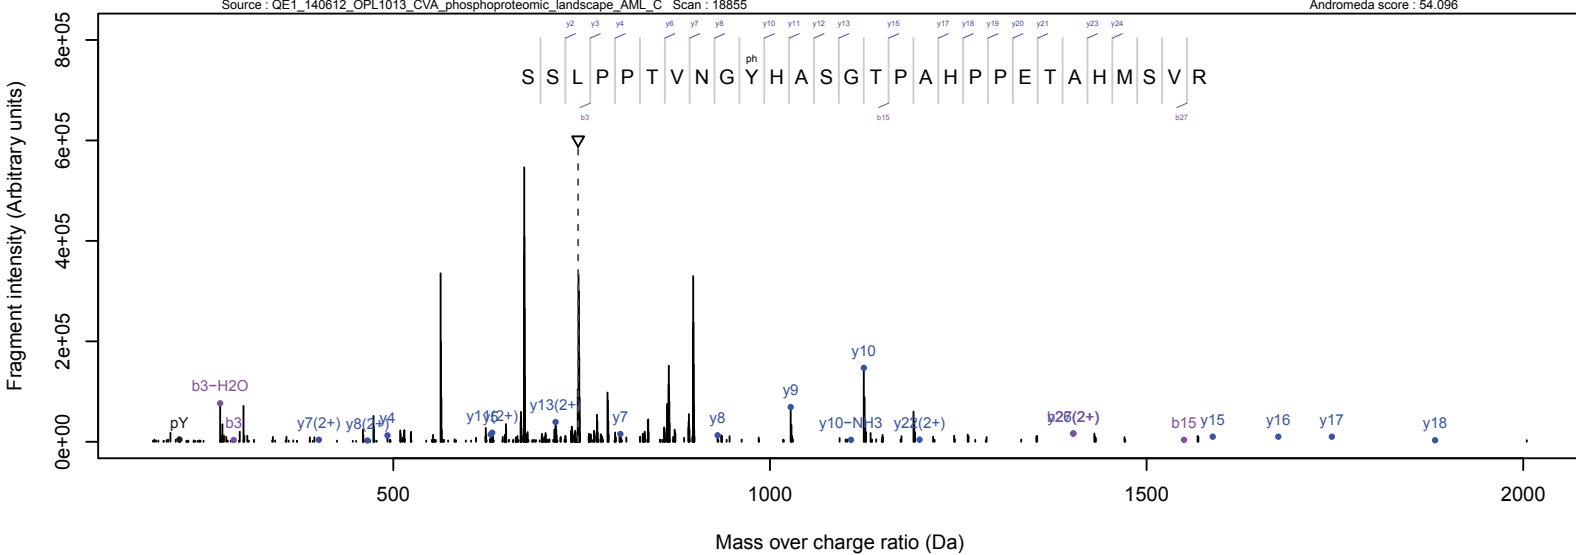

## IDYGEY(ph)MDKNNVRR-3+

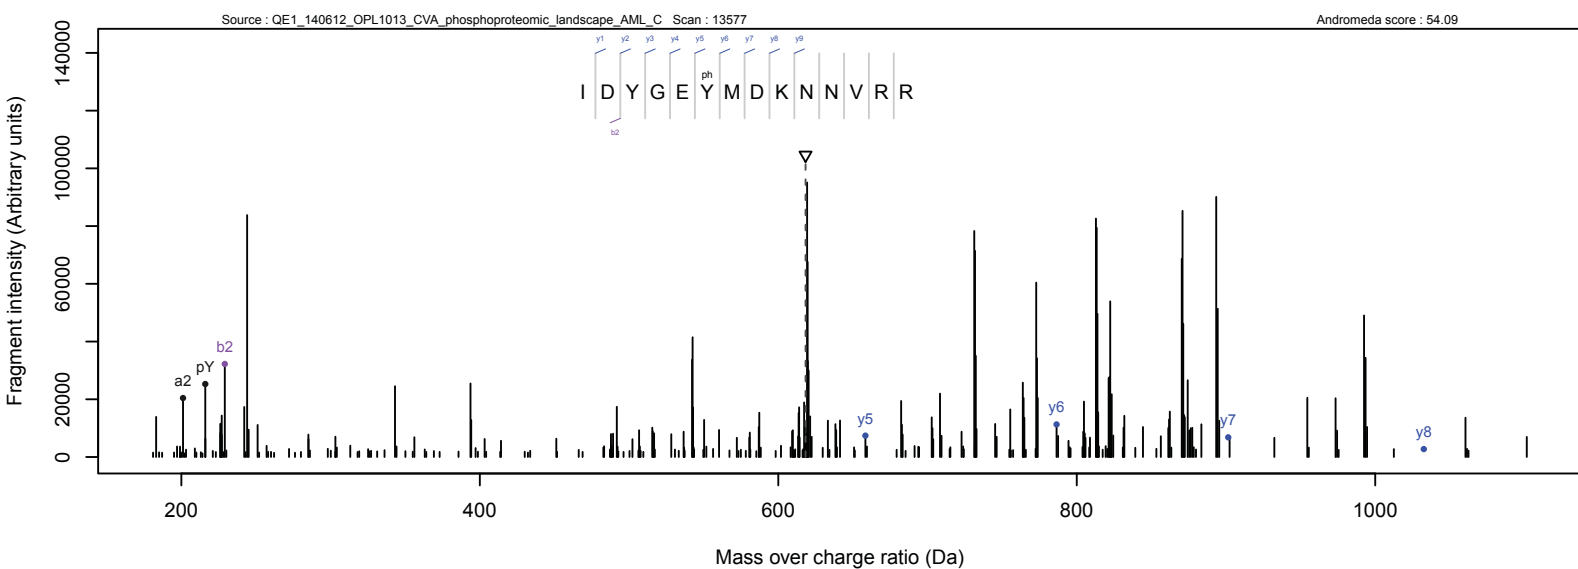

## IY(ph)AGVGEFSFEEIR-2+

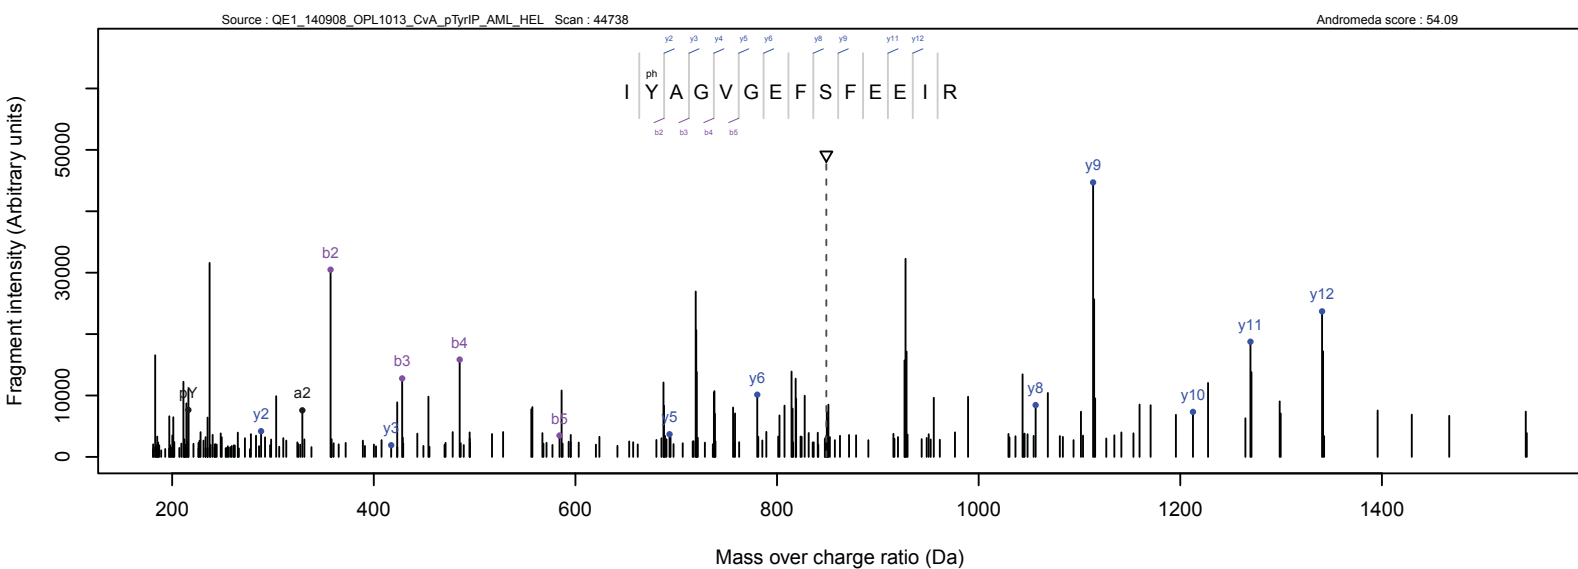

## VY(ph)ESIGQYGGETVK-2+

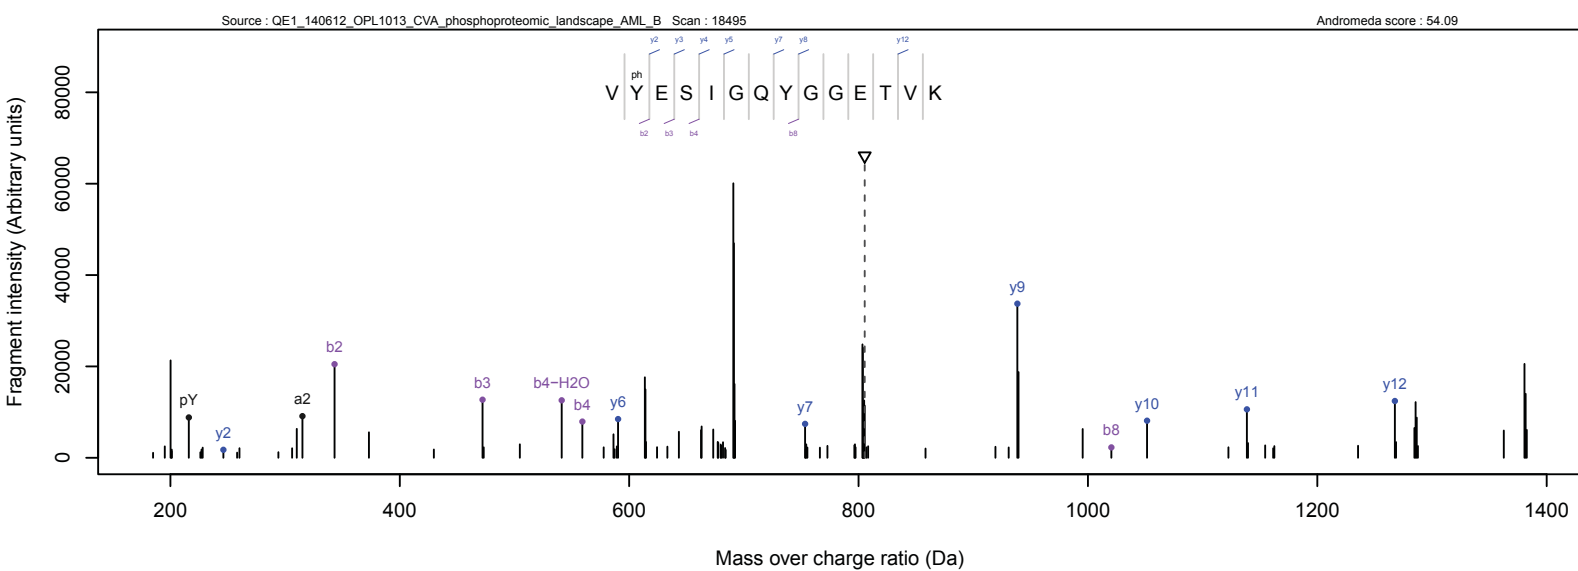

## FTY(ph)LGSQDR-2+

Source: QE1\_140612\_OPL1013\_CVA\_phosphoproteomic\_landscape\_AML\_C Scan: 11695

Andromeda score: 54.066

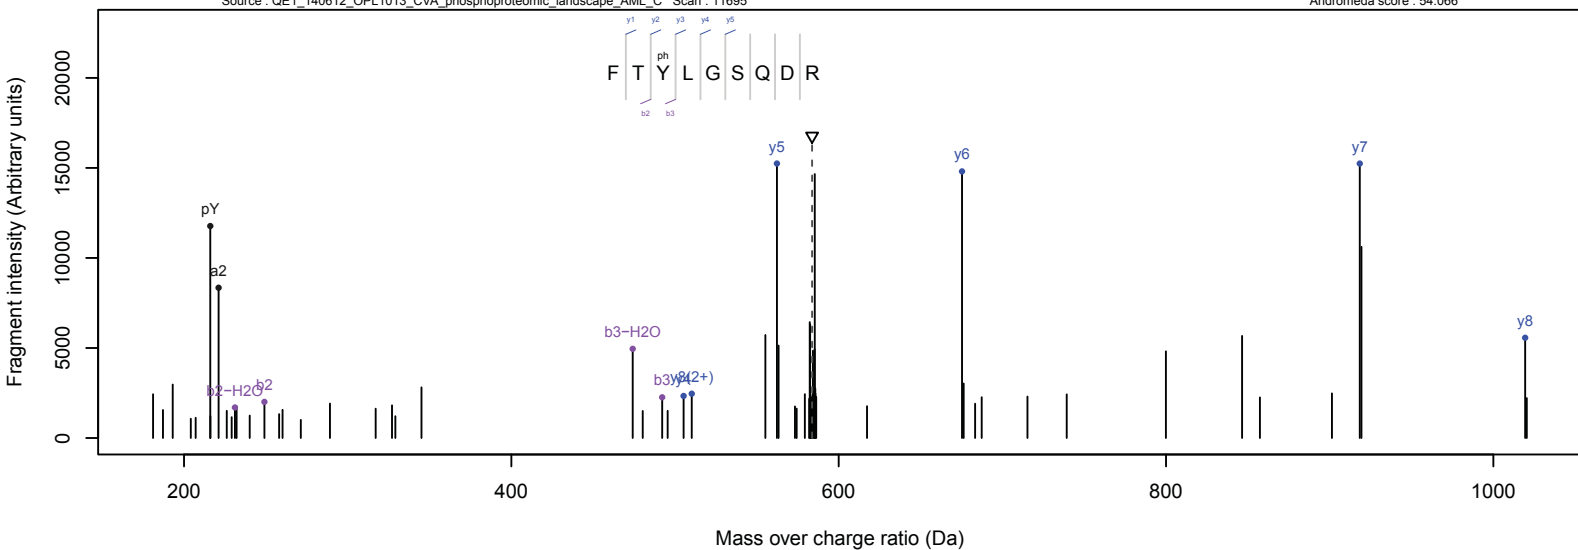

## YGNFQLYQM(ox)K-2+

Source: QE1\_140822\_OPL1013\_CvA\_pTyrIP\_AML\_cell\_lines\_part2\_E Scan: 16996

Andromeda score: 54.066

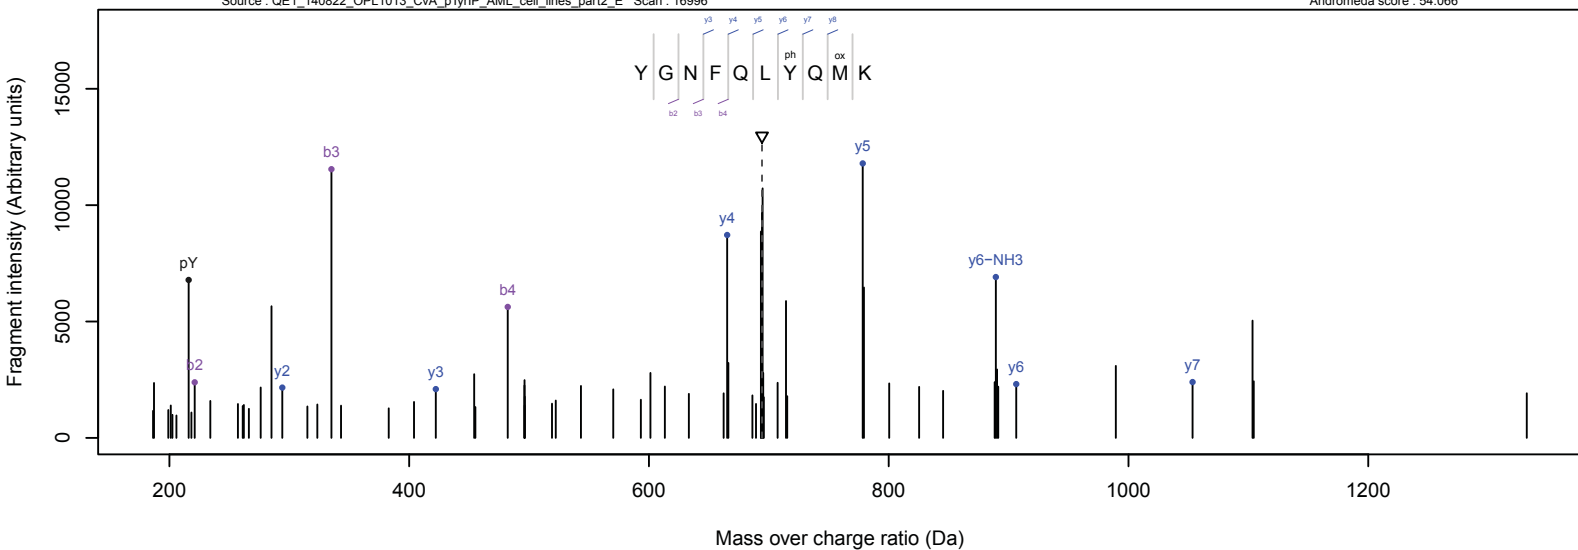

## ALMGLY(pH)HGQVLCK-2+

Source: QE1\_140612\_OPL1013\_CVA\_phosphoproteomic\_landscape\_AML\_E Scan: 26254

Andromeda score: 54.023

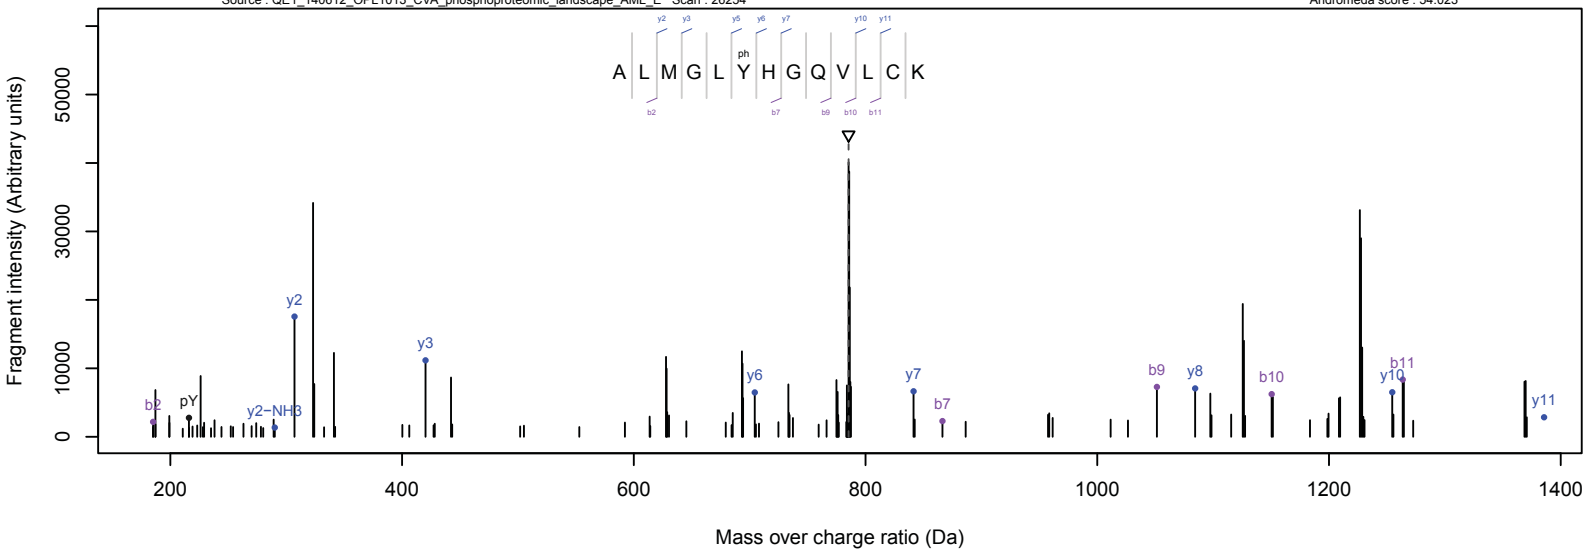

## GSSGAPVY(ph)VDLAYIPNHCSGK-3+

Source : QE1\_140612\_OPL1013\_CVA\_phosphoproteomic\_landscape\_AML\_D Scan : 33696

Andromeda score : 54.008

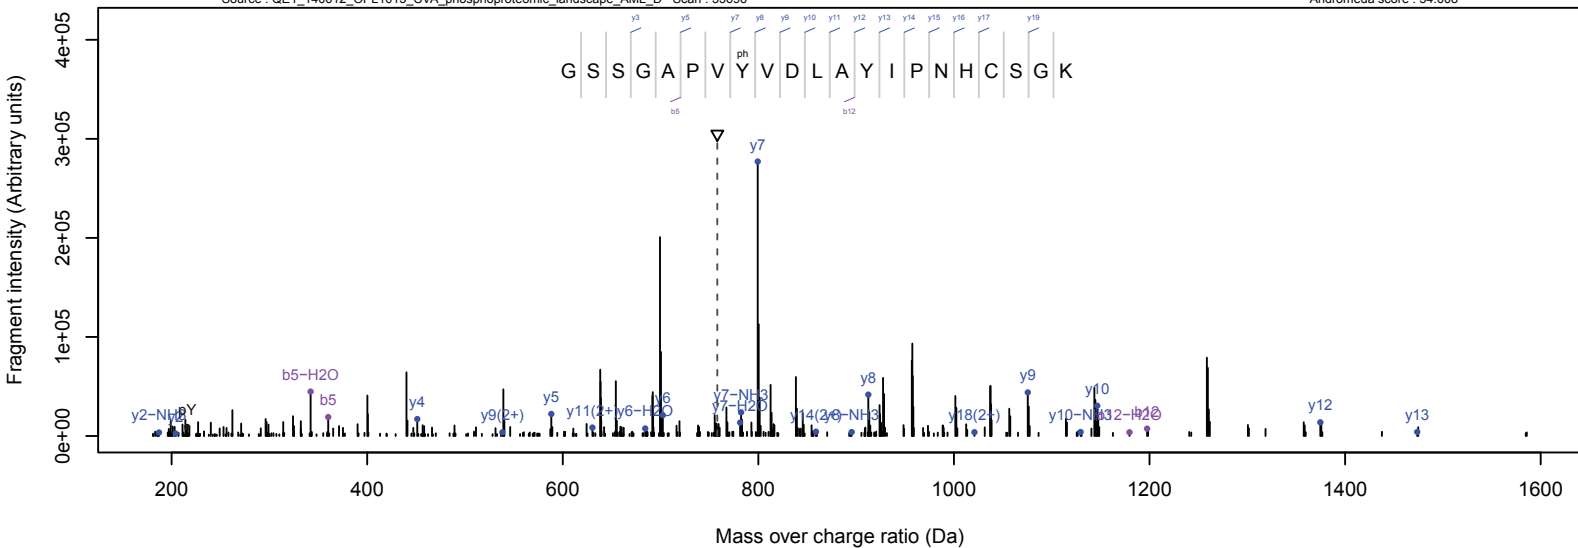

## KTDY(ph)FFLEVQK-2+

Source : QE1\_140612\_OPL1013\_CVA\_phosphoproteomic\_landscape\_AML\_A Scan : 32150

Andromeda score : 54.007

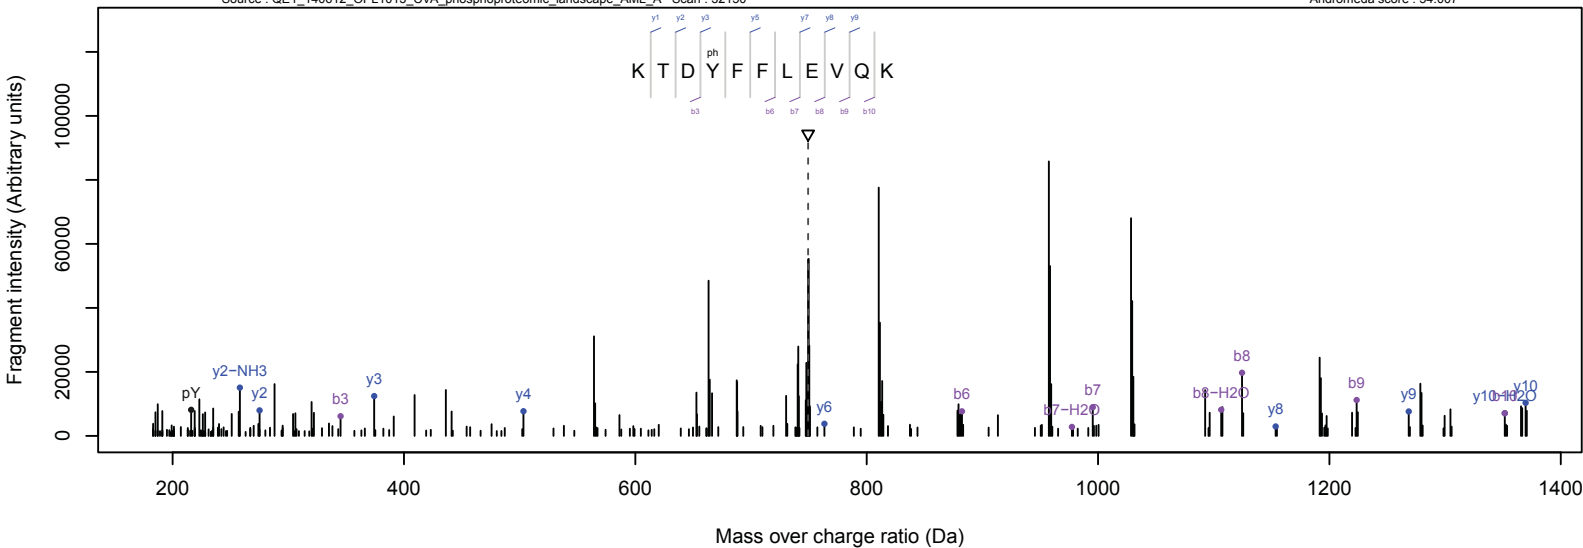

## TQNKEESYDFS(ph)YEEK-3+

Source : QE1\_140612\_OPL1013\_CVA\_phosphoproteomic\_landscape\_AML\_B Scan : 12604

Andromeda score : 54.004

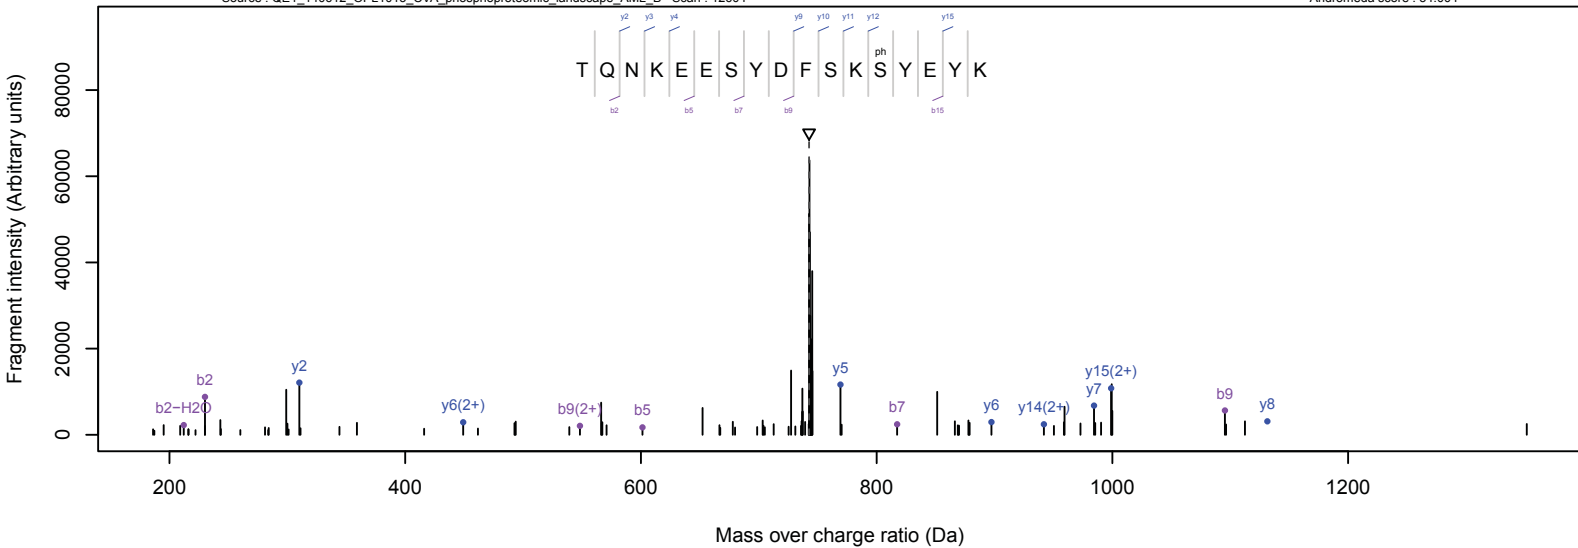

## KPSVSAQMAYGQSS(ph)STQWVR-3+

Source : QE1\_140612\_OPL1013\_CVA\_phosphoproteomic\_landscape\_AML\_C Scan : 25756

Andromeda score : 53.998

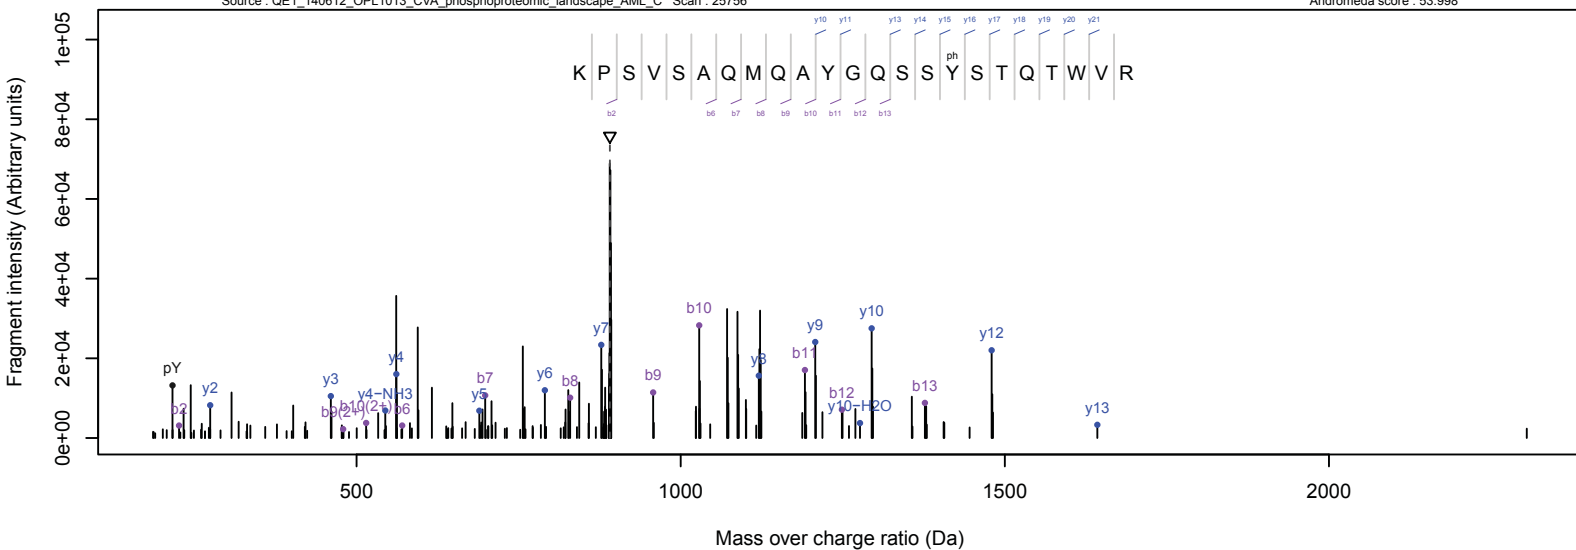

## RAY(ph)SNLGNHVFVFLGR-3+

Source : QE1\_140612\_OPL1013\_CVA\_phosphoproteomic\_landscape\_AML\_D Scan : 22285

Andromeda score : 53.981

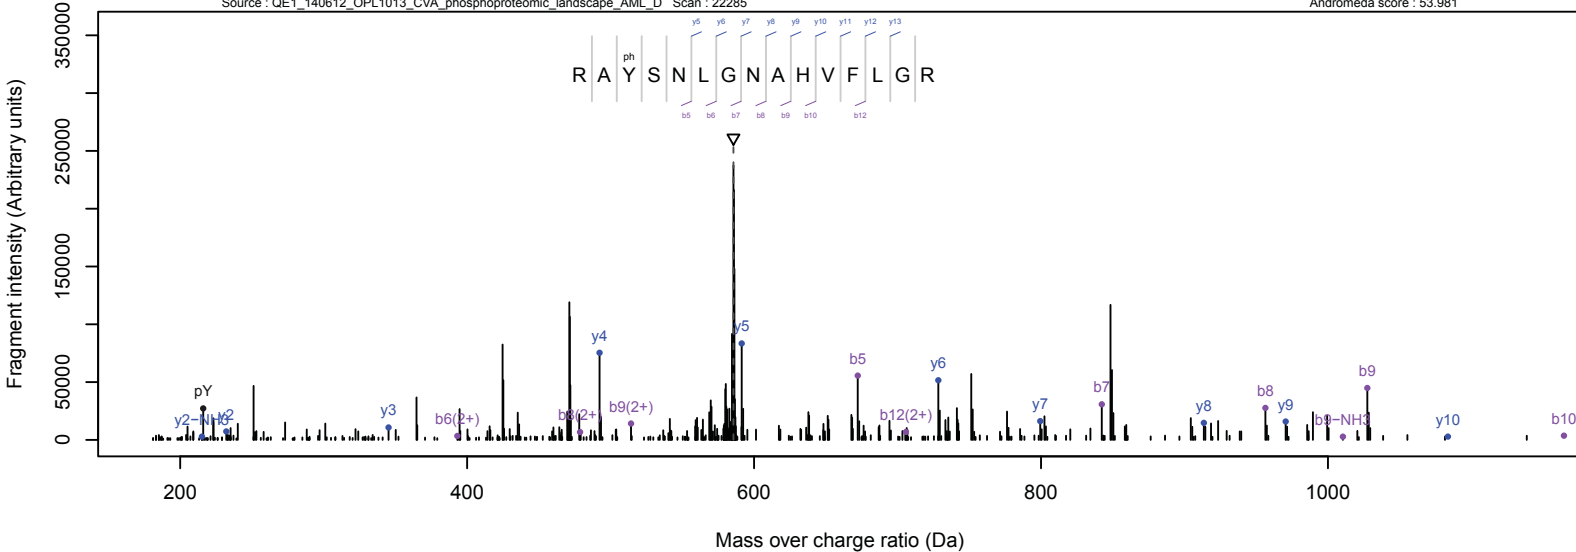

## SLY(ph)VSCK-2+

Source : QE1\_140822\_OPL1013\_CvA\_pTyrIP\_AML\_cell\_lines\_part2\_E Scan : 5745

Andromeda score : 53.968

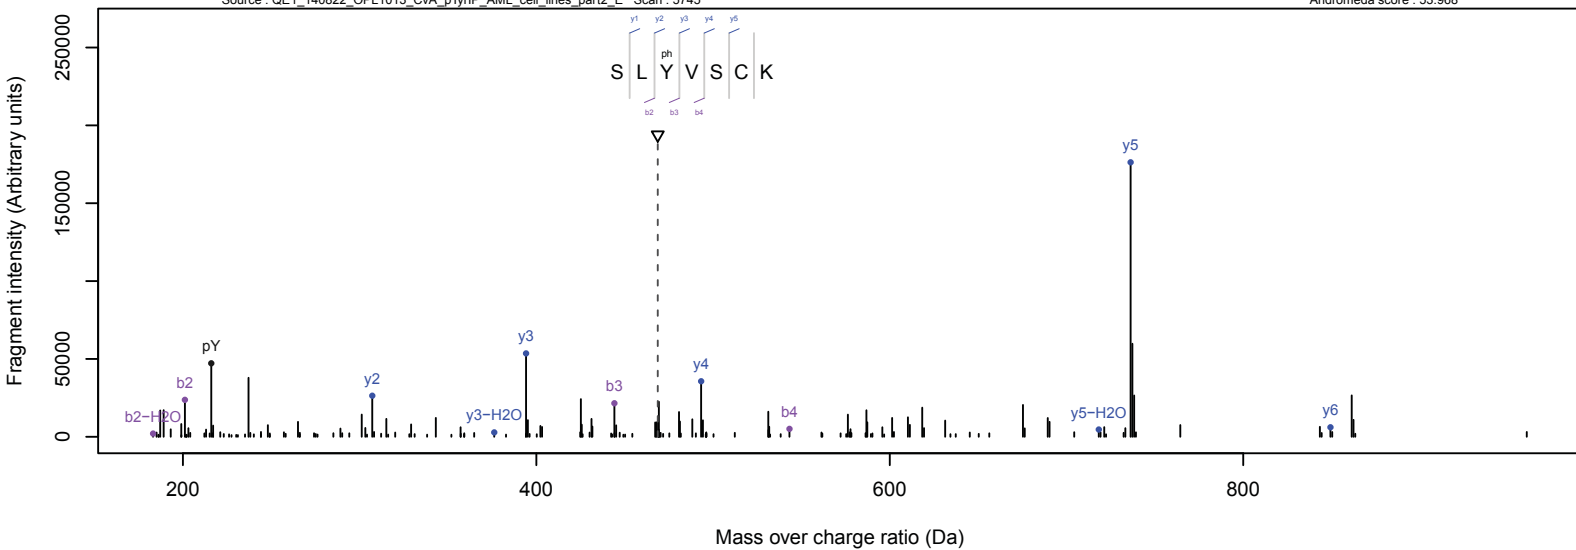

## VSLY(ph)GYLR-2+

Source : QE1\_140612\_OPL1013\_CVA\_phosphoproteomic\_landscape\_AML\_B Scan : 29773

Andromeda score : 53.968

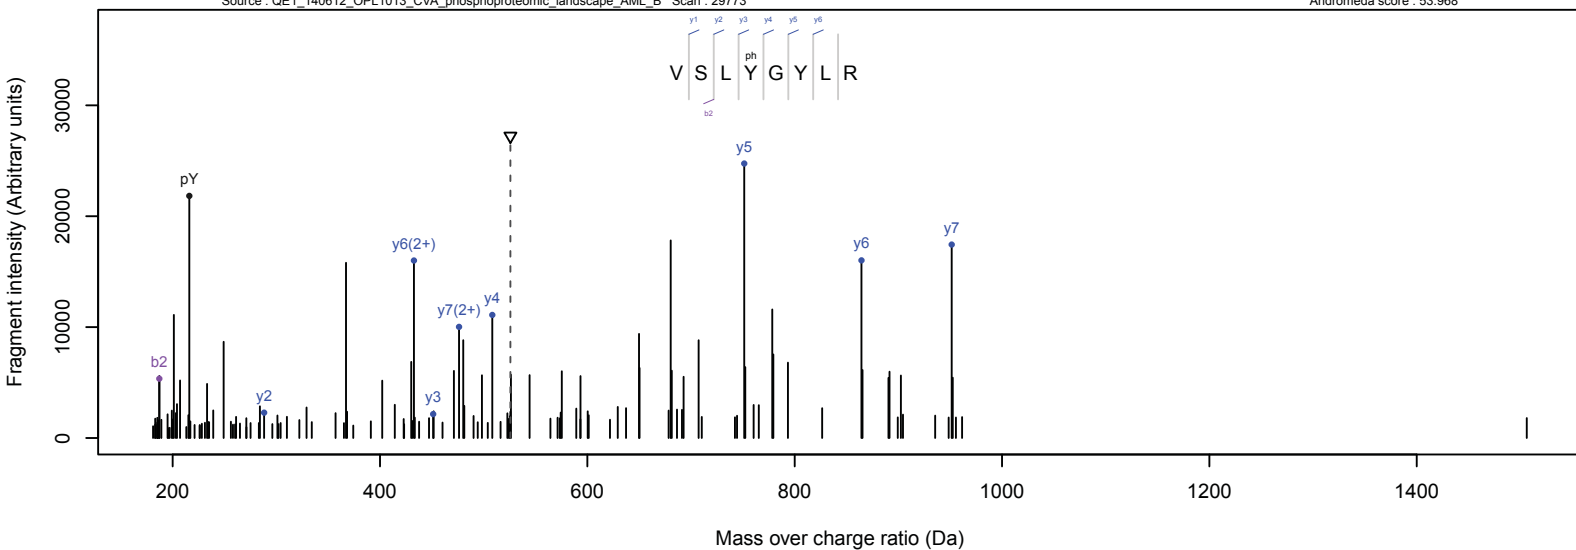

## Y(ph)IPFTHGK-2+

Source : QE1\_140612\_OPL1013\_CVA\_phosphoproteomic\_landscape\_AML\_C Scan : 15333

Andromeda score : 53.968

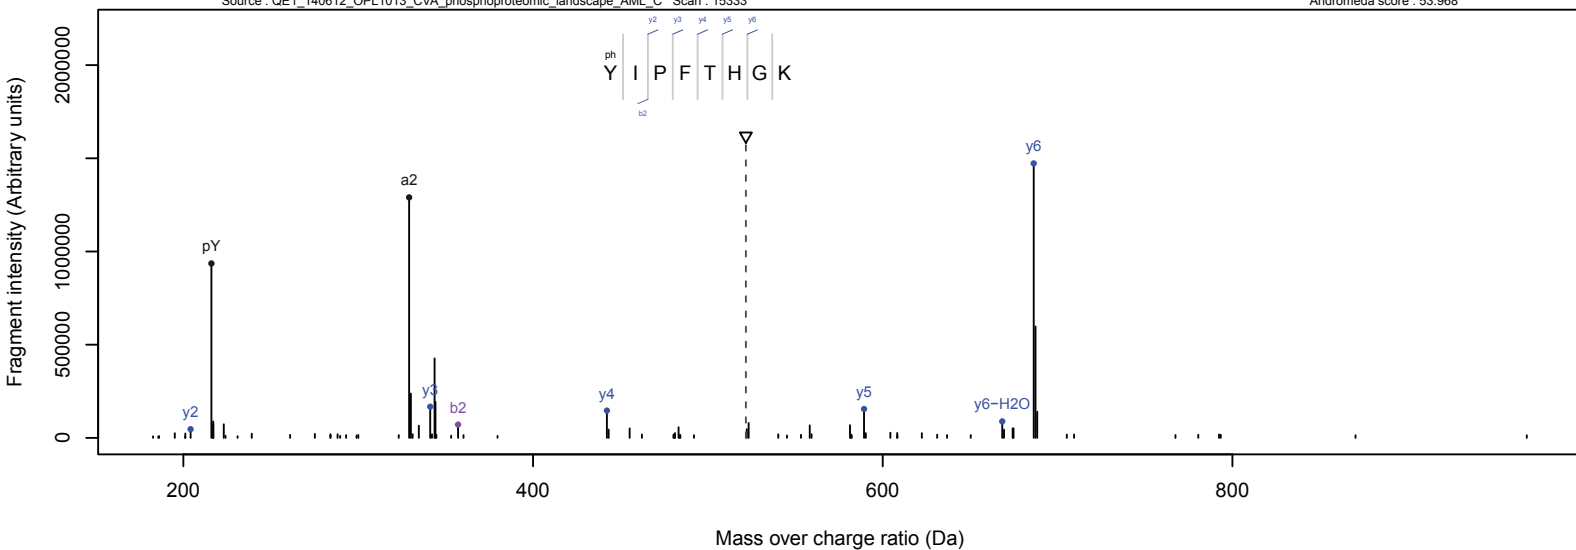

## EAETFKEQGNAY(ph)YAK-3+

Source : QE1\_140612\_OPL1013\_CVA\_phosphoproteomic\_landscape\_AML\_C Scan : 9854

Andromeda score : 53.946

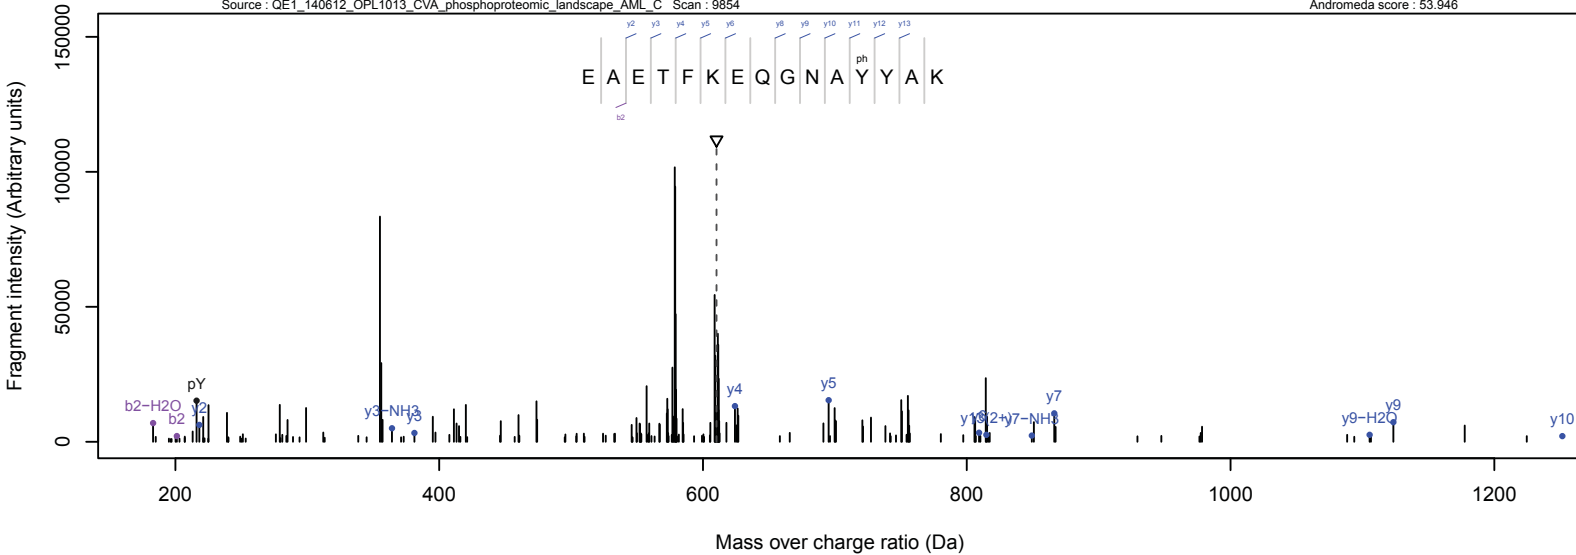

## LY(ph)LPVQNK-2+

Source: QE1\_140612\_OPL1013\_CVA\_phosphoproteomic\_landscape\_AML\_C Scan: 21739

Andromeda score: 53.891

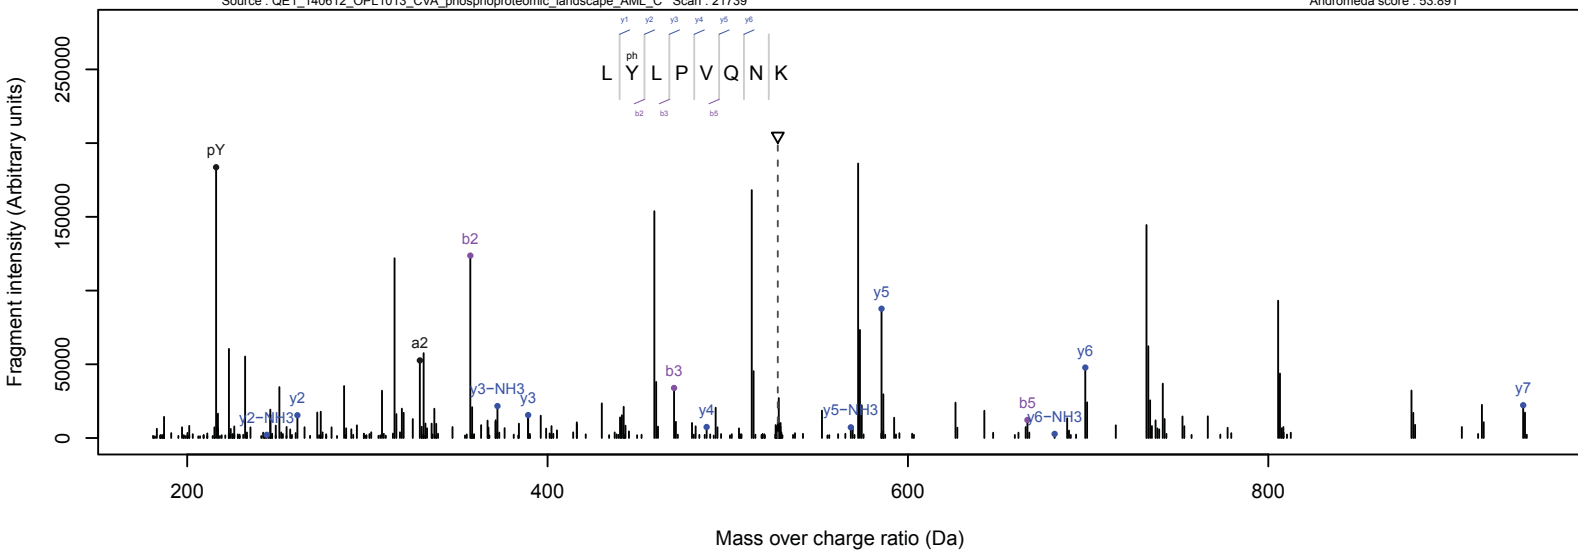

## LDADY(ph)PLR-2+

Source: QE1\_140612\_OPL1013\_CVA\_phosphoproteomic\_landscape\_AML\_D Scan: 15303

Andromeda score: 53.775

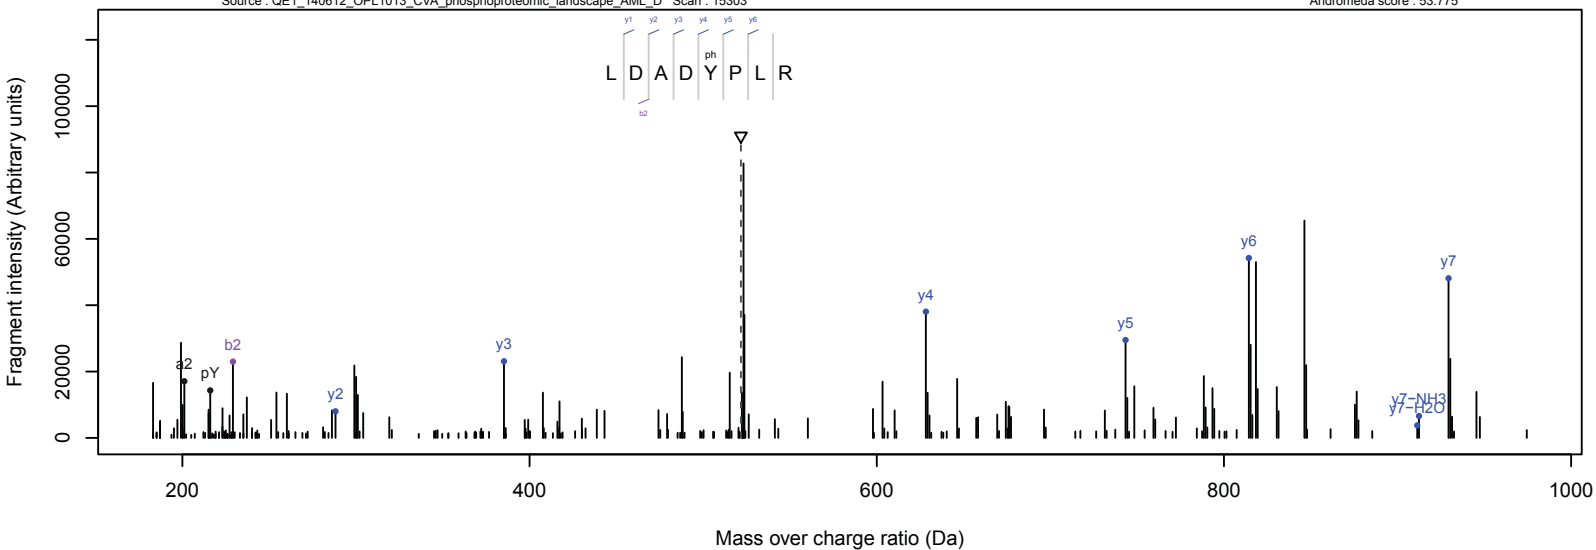

## GMSEALKVPSSTVEY(ph)LKK-3+

Source: QE1\_140612\_OPL1013\_CVA\_phosphoproteomic\_landscape\_AML\_C Scan: 27530

Andromeda score: 53.768

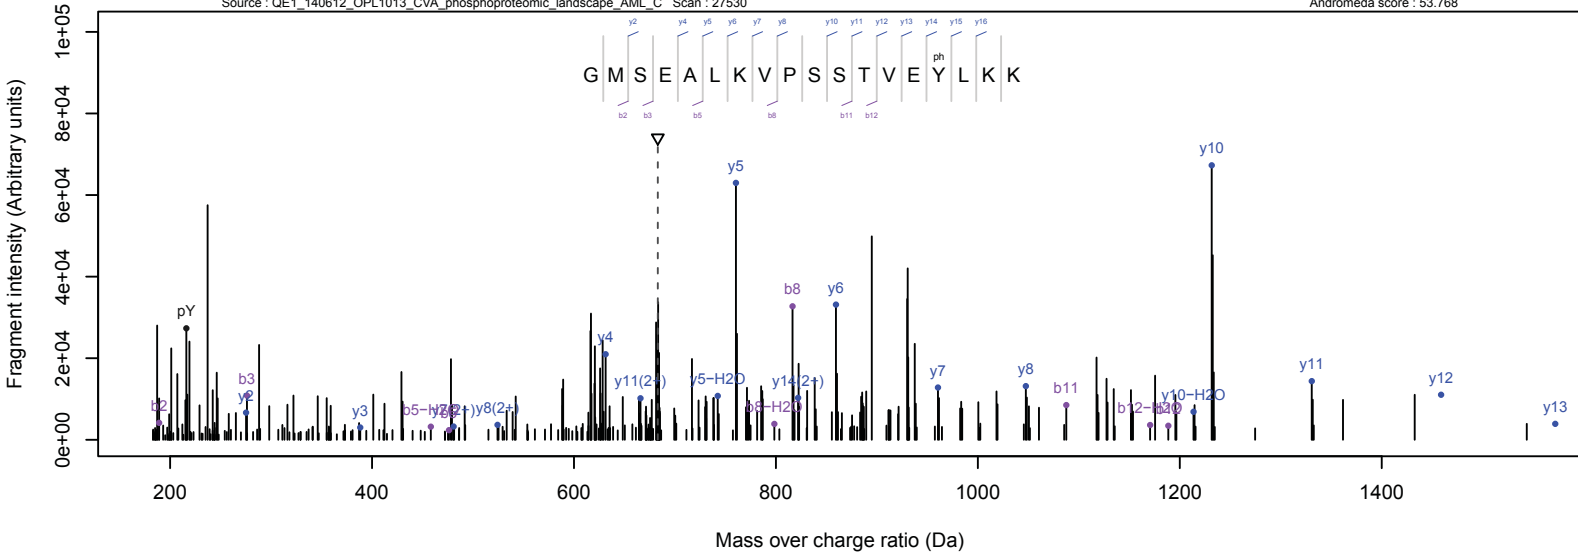



## GFTTAY(ph)LR-2+

Source : QE1\_140612\_OPL1013\_CVA\_phosphoproteomic\_landscape\_AML\_C Scan : 20413

Andromeda score : 53.756

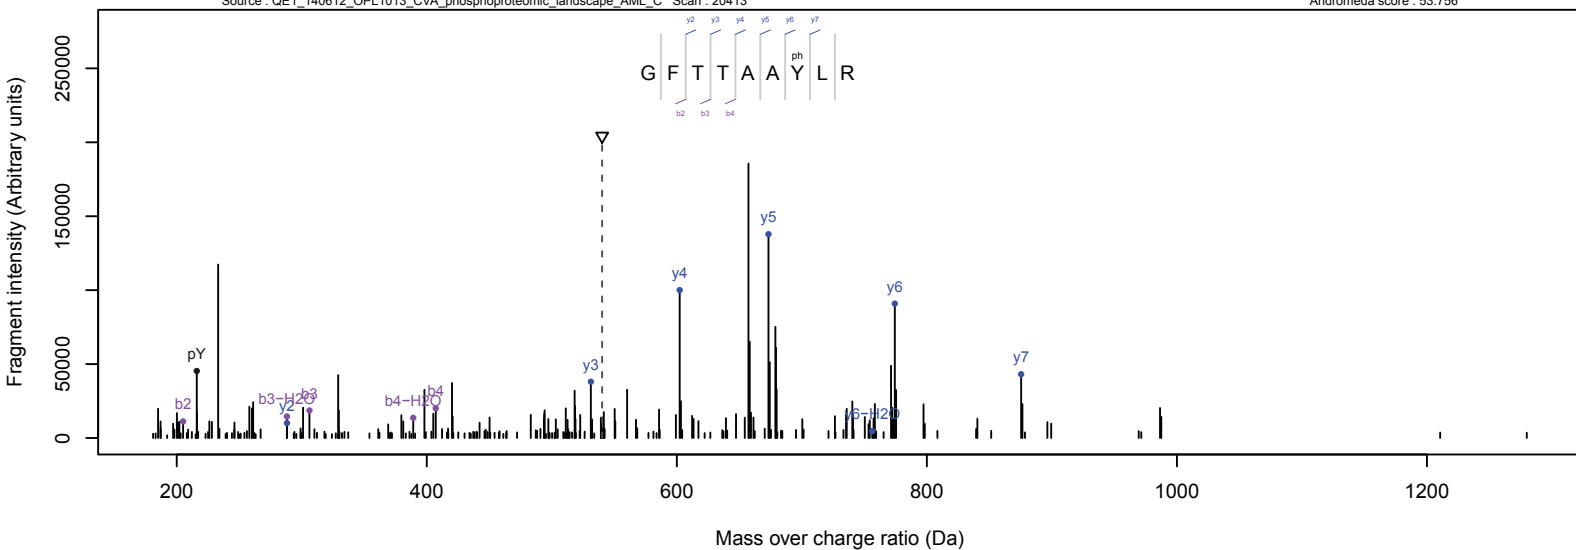

## LAELSDY(ph)RR-2+

Source : QE1\_140612\_OPL1013\_CVA\_phosphoproteomic\_landscape\_AML\_C Scan : 9423

Andromeda score : 53.756

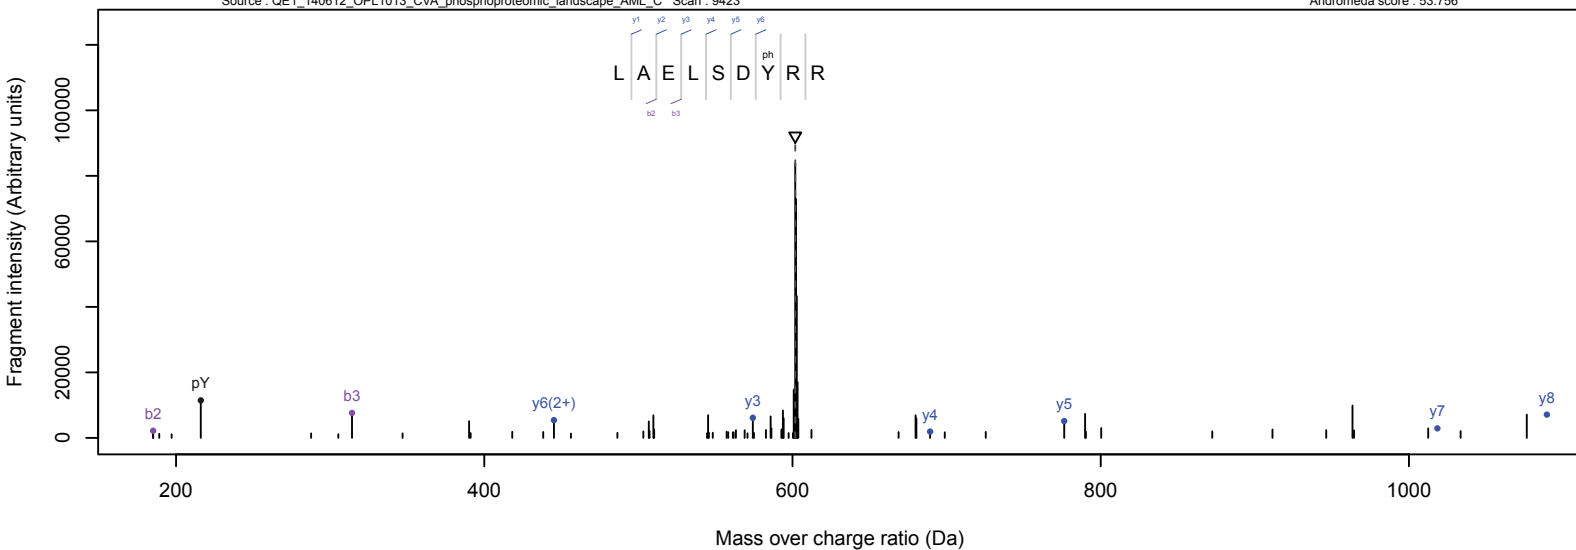

## Y(ph)VALTSLLR-2+

Source : QE1\_140612\_OPL1013\_CVA\_phosphoproteomic\_landscape\_AML\_D Scan : 40571

Andromeda score : 53.756

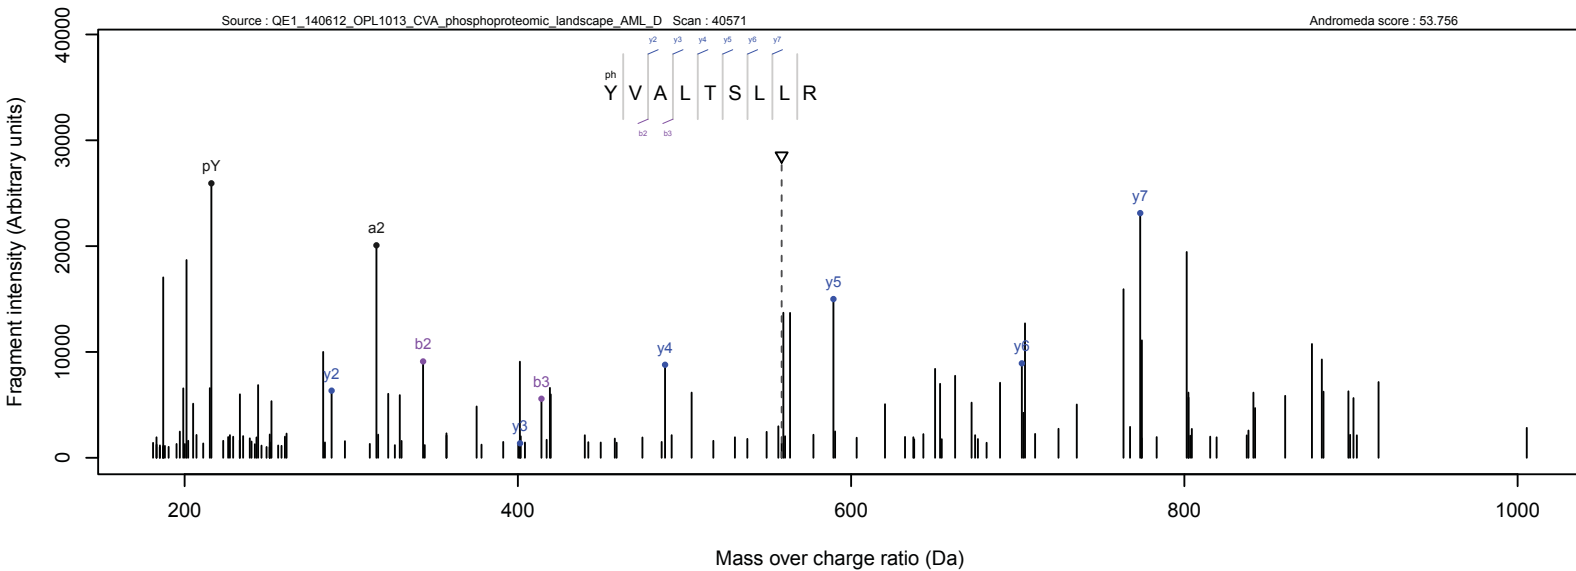

## Y(ph)CLPFLQPGR-2+

Source : QE1\_140612\_OPL1013\_CVA\_phosphoproteomic\_landscape\_AML\_A Scan : 37329

Andromeda score : 53.751

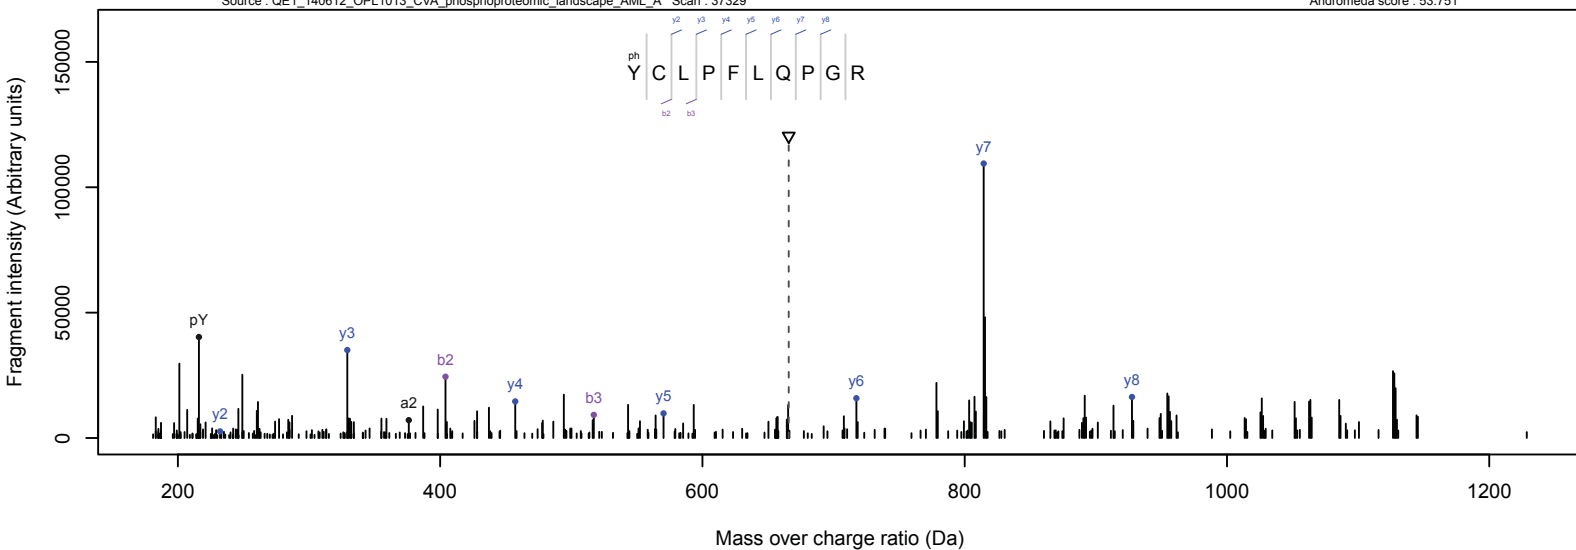

## ATAVMPDGGFKDISLSDY(ph)KGGK-3+

Source : QE1\_140612\_OPL1013\_CVA\_phosphoproteomic\_landscape\_AML\_B Scan : 27974

Andromeda score : 53.625

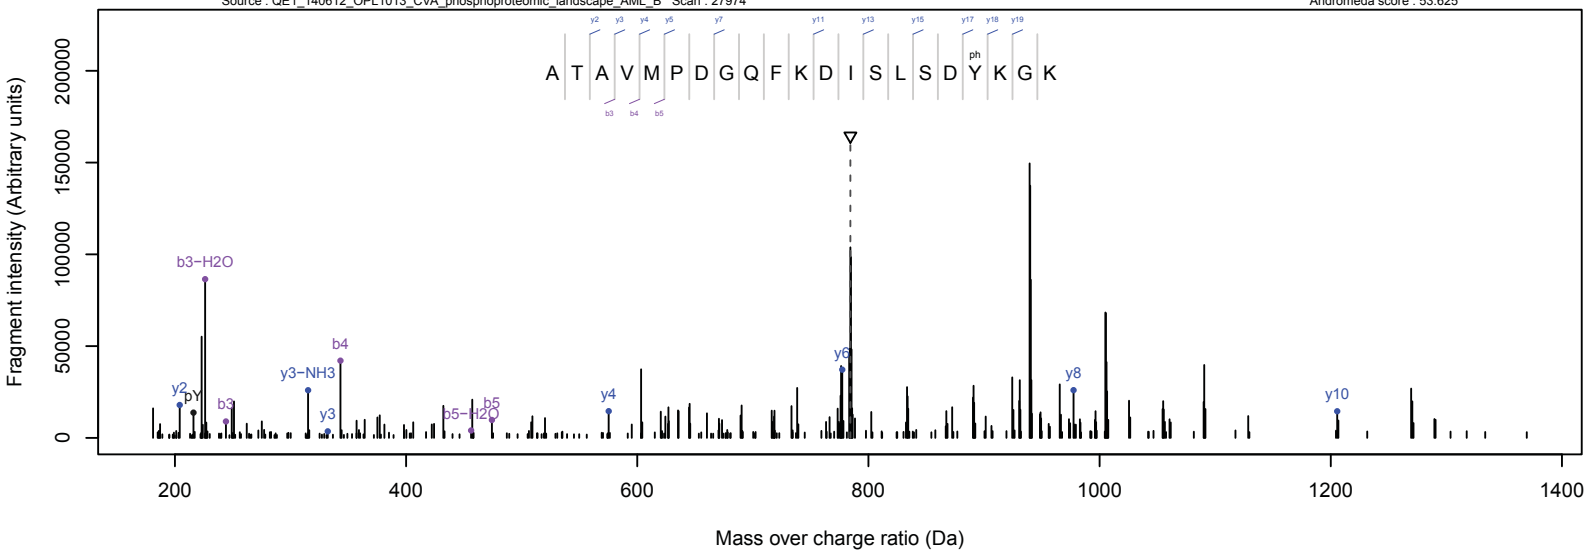

## KGLAYCETHY(ph)NQLFGDVCFHCNR-3+

Source : QE1\_140612\_OPL1013\_CVA\_phosphoproteomic\_landscape\_AML\_C Scan : 30932

Andromeda score : 53.603

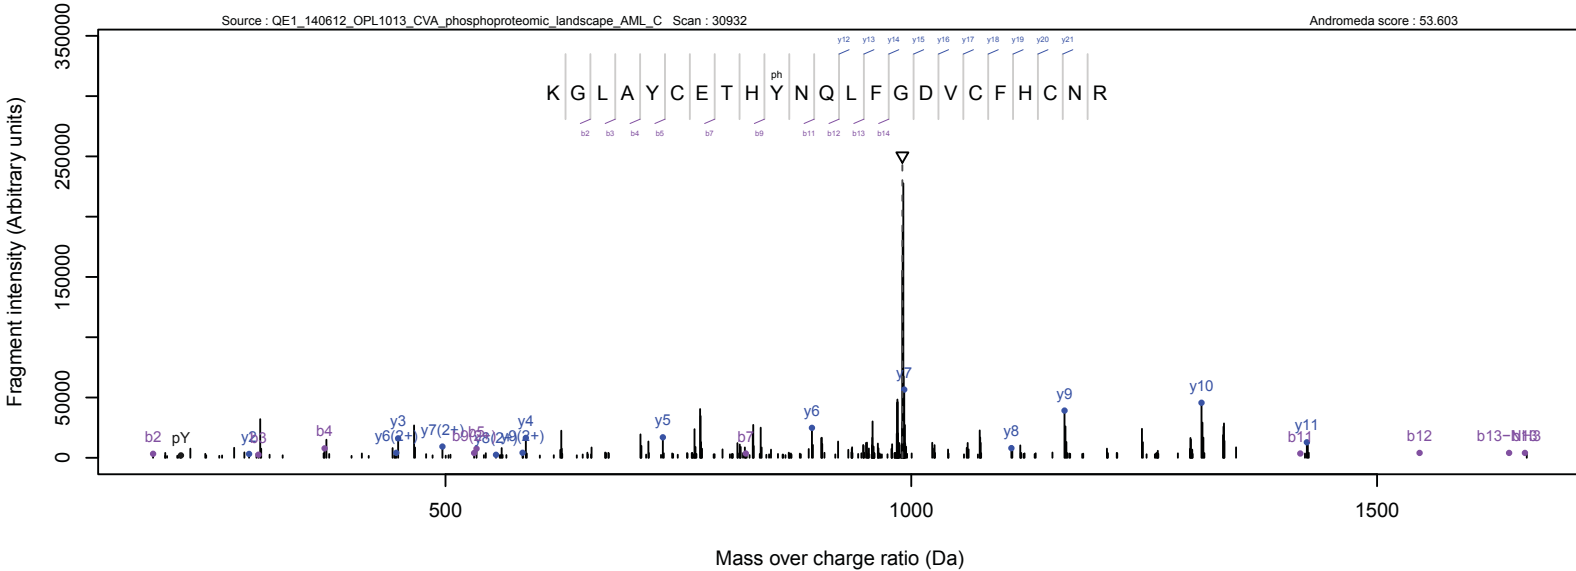

## Y(ph)VLHVVAPEWR-2+

Source : QE1\_140612\_OPL1013\_CVA\_phosphoproteomic\_landscape\_AML\_B Scan : 31961

Andromeda score : 53.567

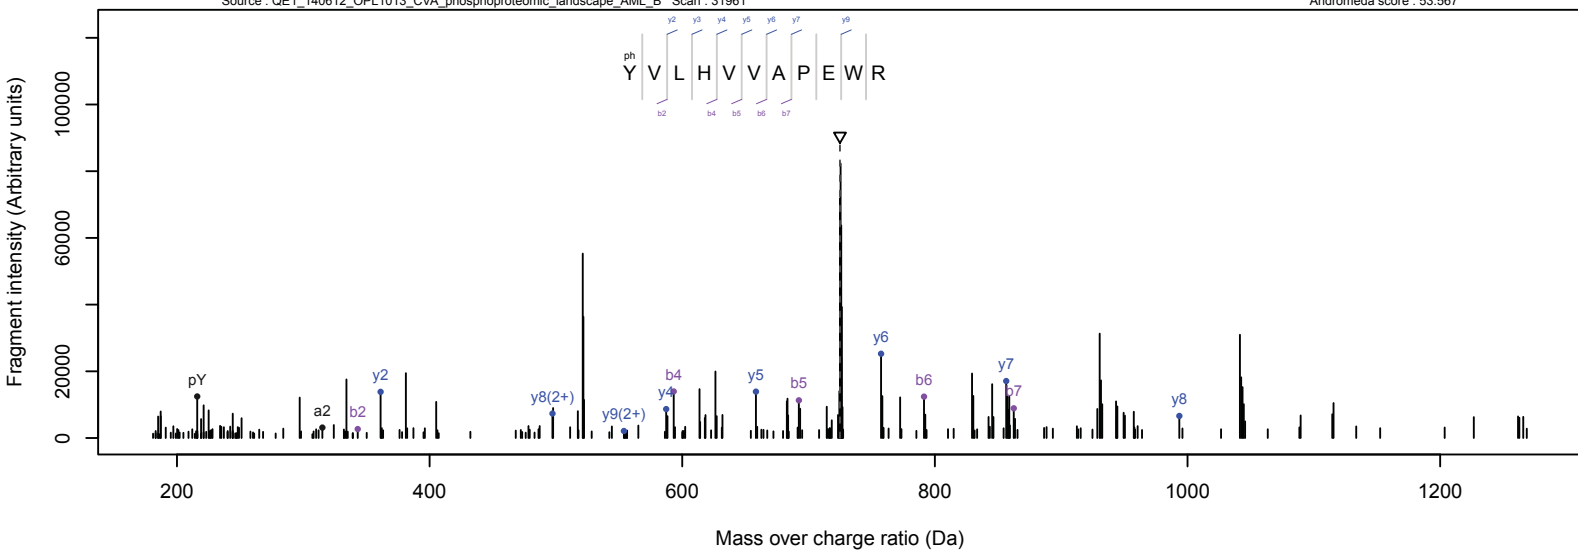

## GQPIY(ph)IQFSNHKELK-3+

Source : QE1\_140612\_OPL1013\_CVA\_phosphoproteomic\_landscape\_AML\_A Scan : 23379

Andromeda score : 53.565

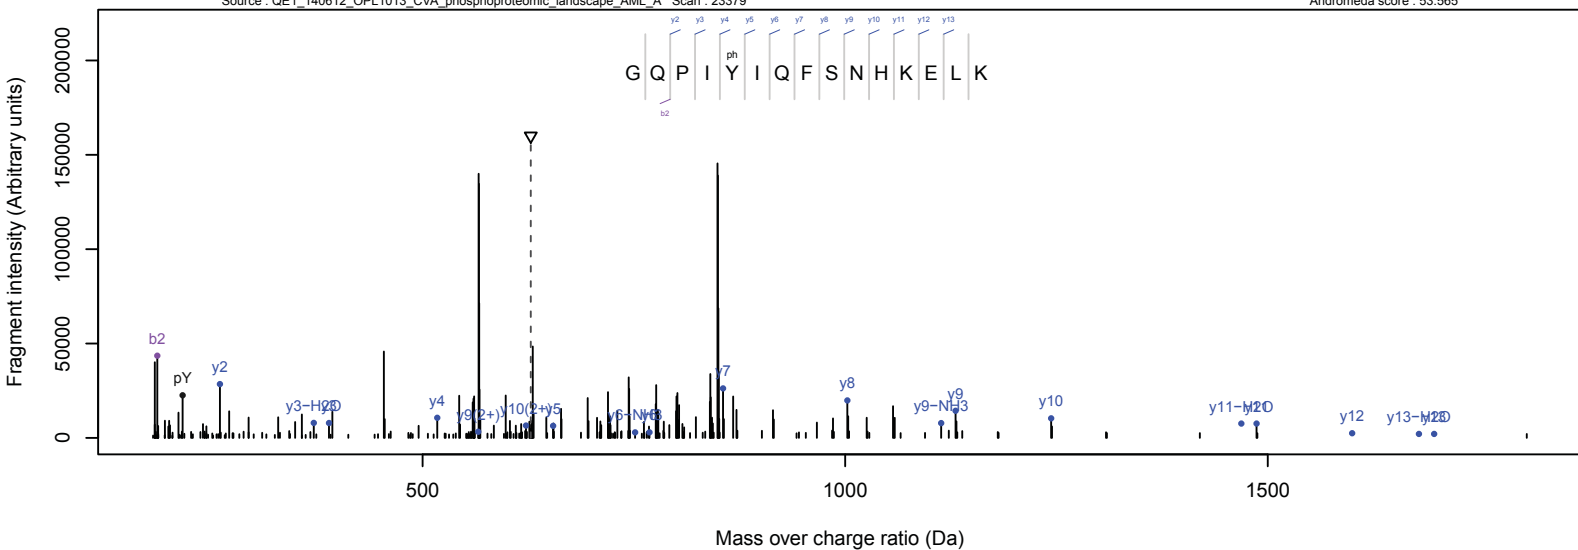

## KLY(ph)TGPLAIHCMQVHK-4+

Source : QE1\_140908\_OPL1013\_CvA\_pTyrIP\_AML\_HL60 Scan : 23594

Andromeda score : 53.565

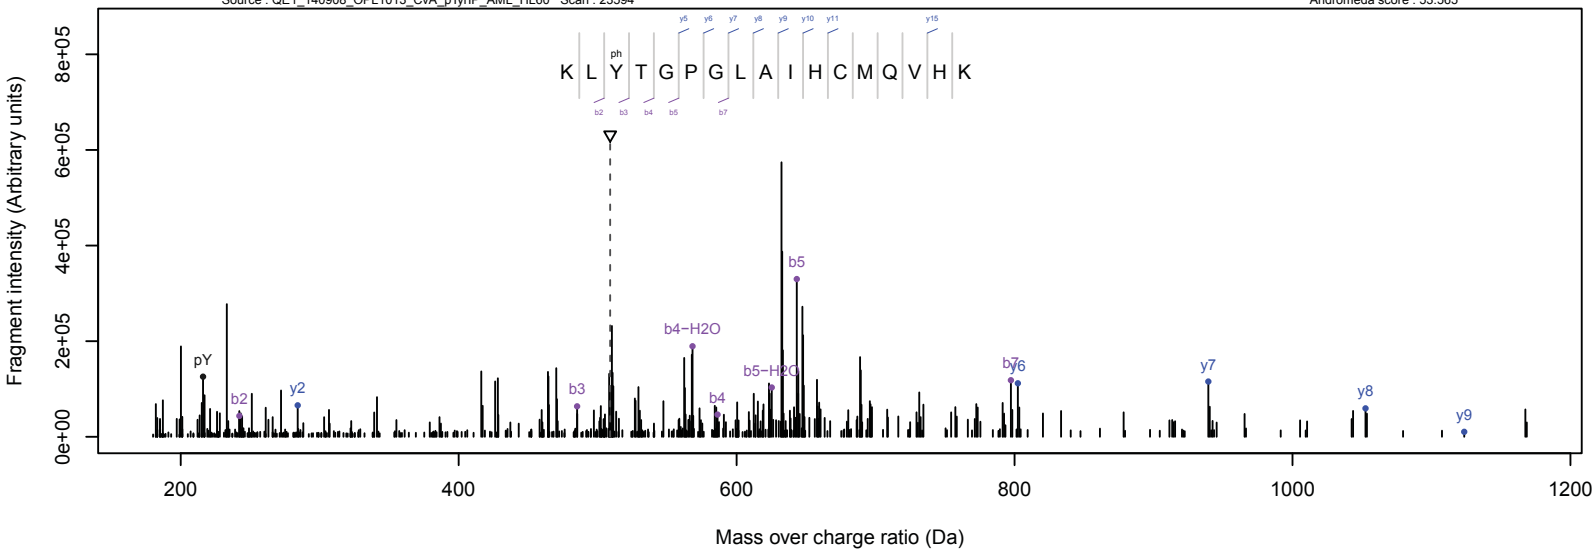

**KREESY(ph)LSNSQTPER-3+**

Source : QE1\_140908\_OPL1013\_CVA\_pTyrIP\_AML\_Kasumi6 Scan : 6126

Andromeda score : 53.565

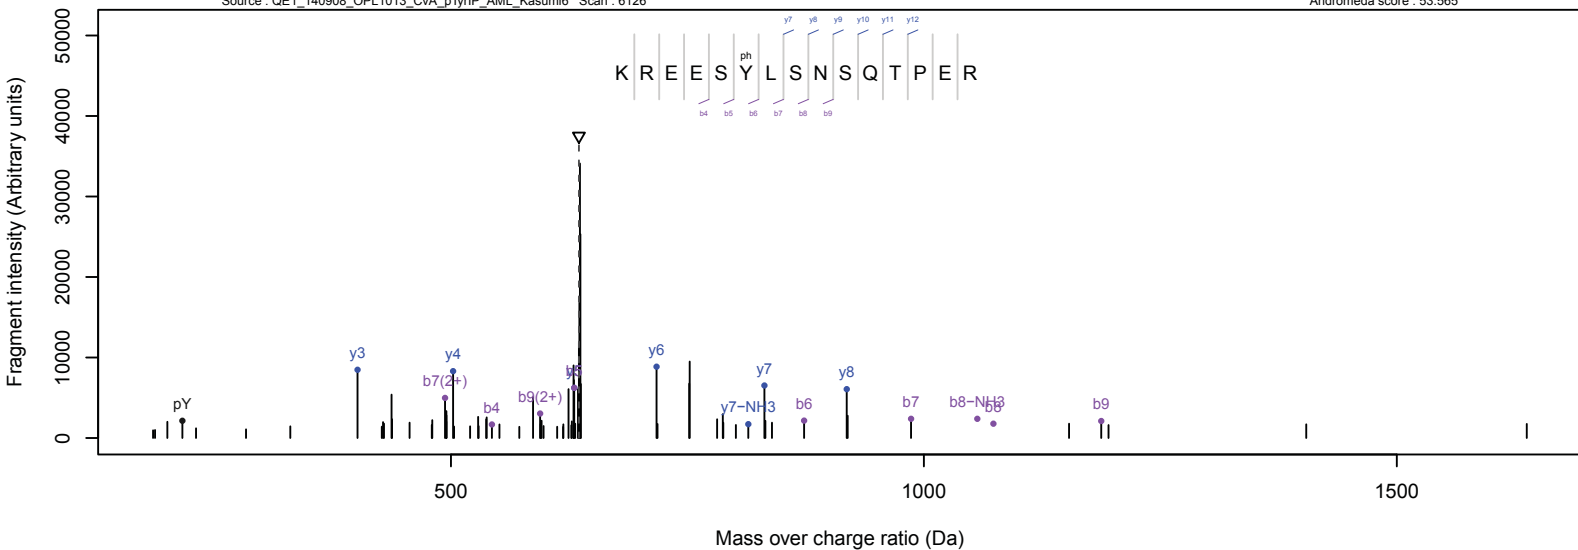

**RLQHQLY(ph)YSQDDSNRK-4+**

Source : QE1\_140612\_OPL1013\_CVA\_phosphoproteomic\_landscape\_AML\_C Scan : 7373

Andromeda score : 53.565

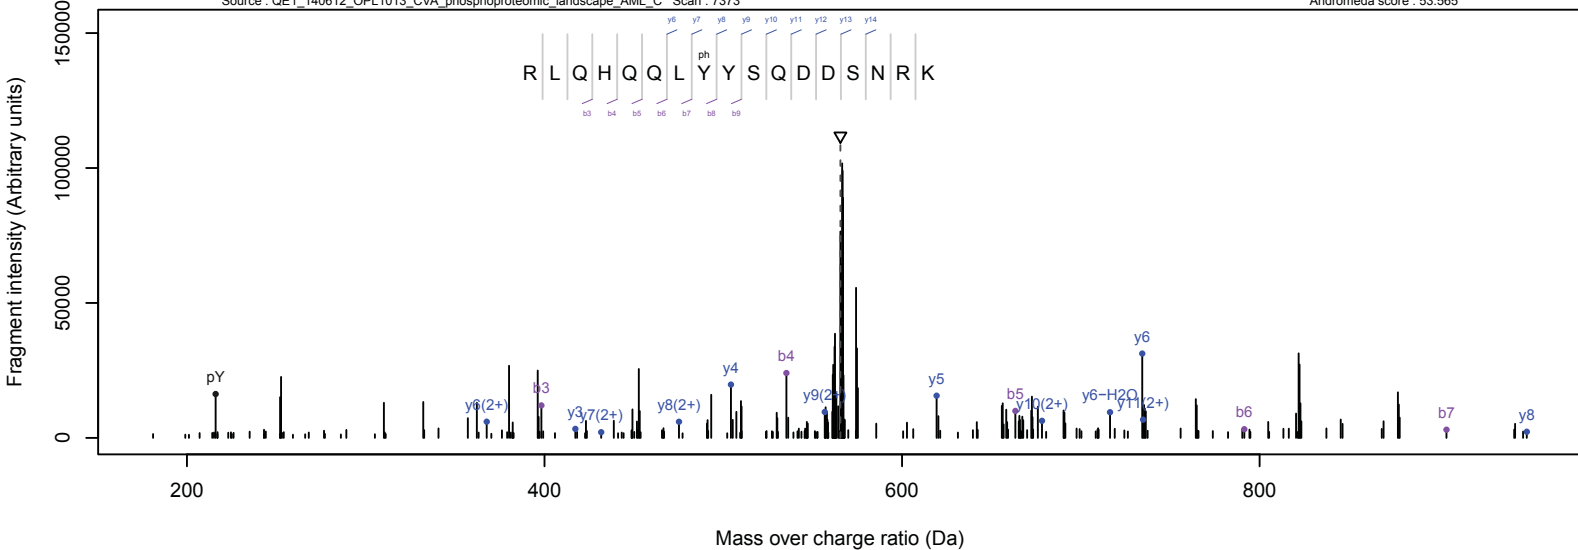

**Y(ph)VFASVDSKPPVISLQK-3+**

Source : QE1\_140612\_OPL1013\_CVA\_phosphoproteomic\_landscape\_AML\_B Scan : 33980

Andromeda score : 53.565

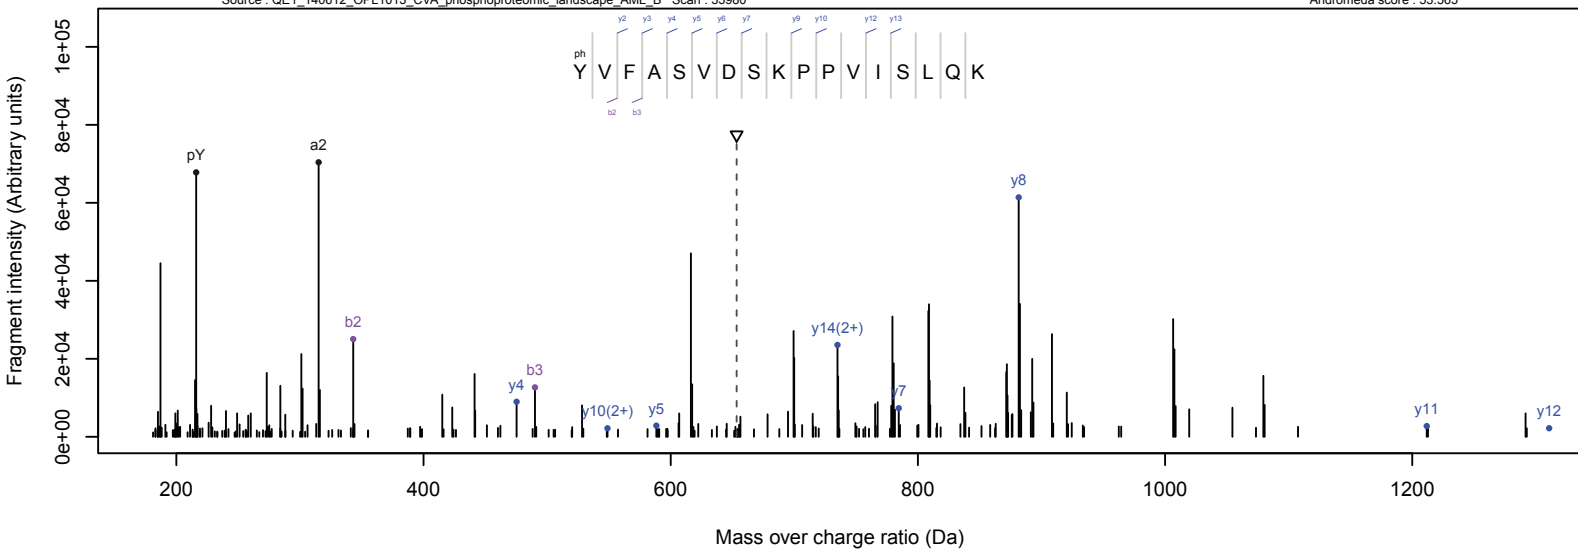

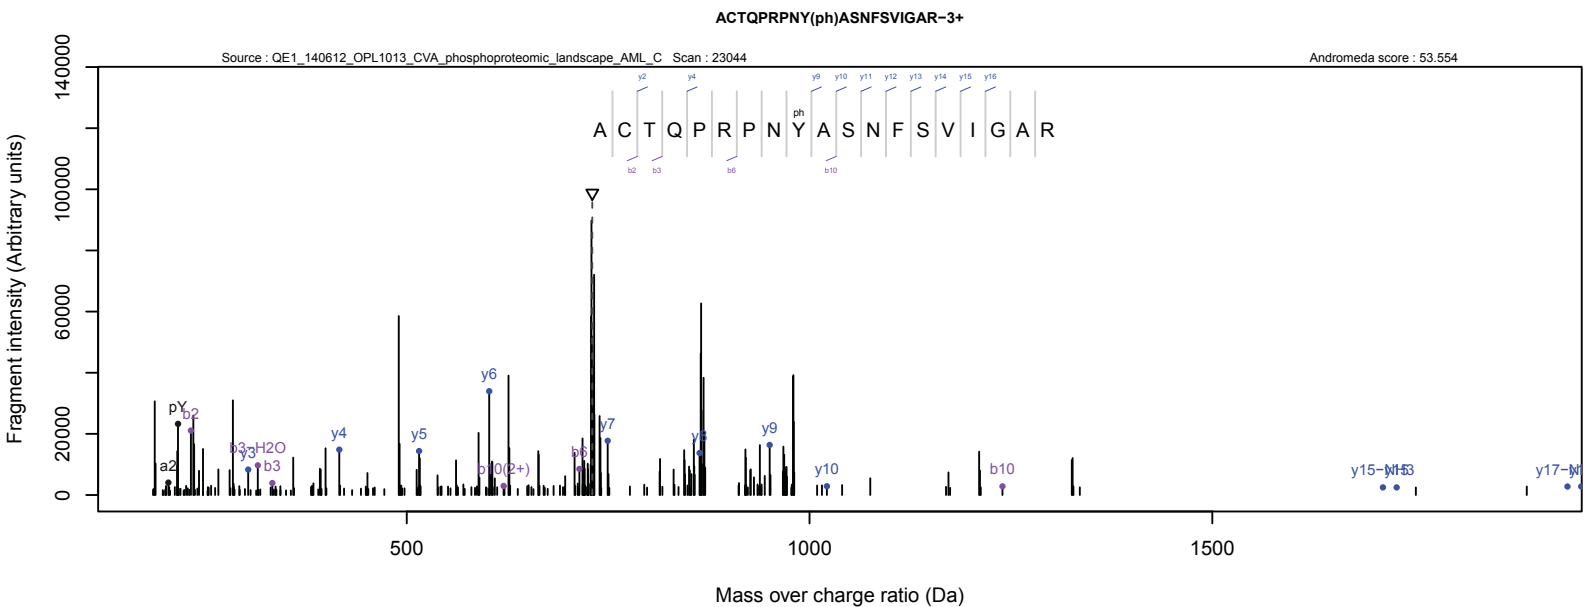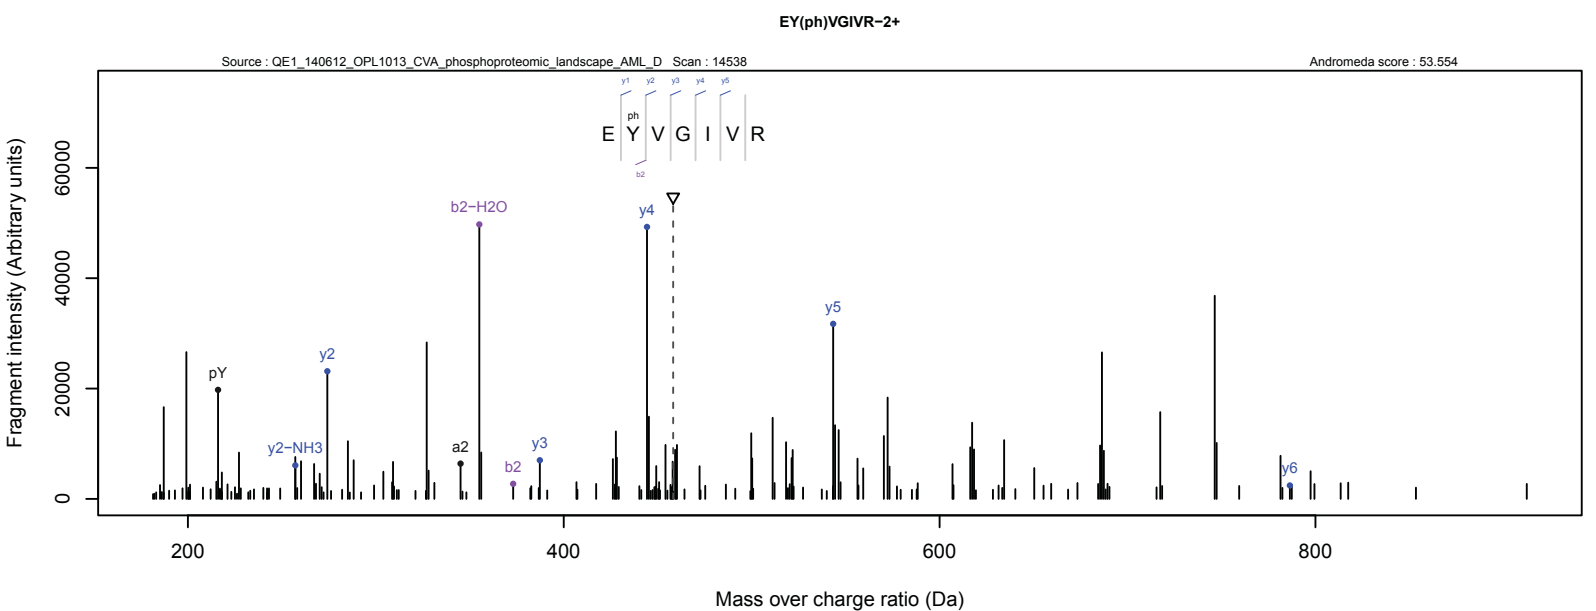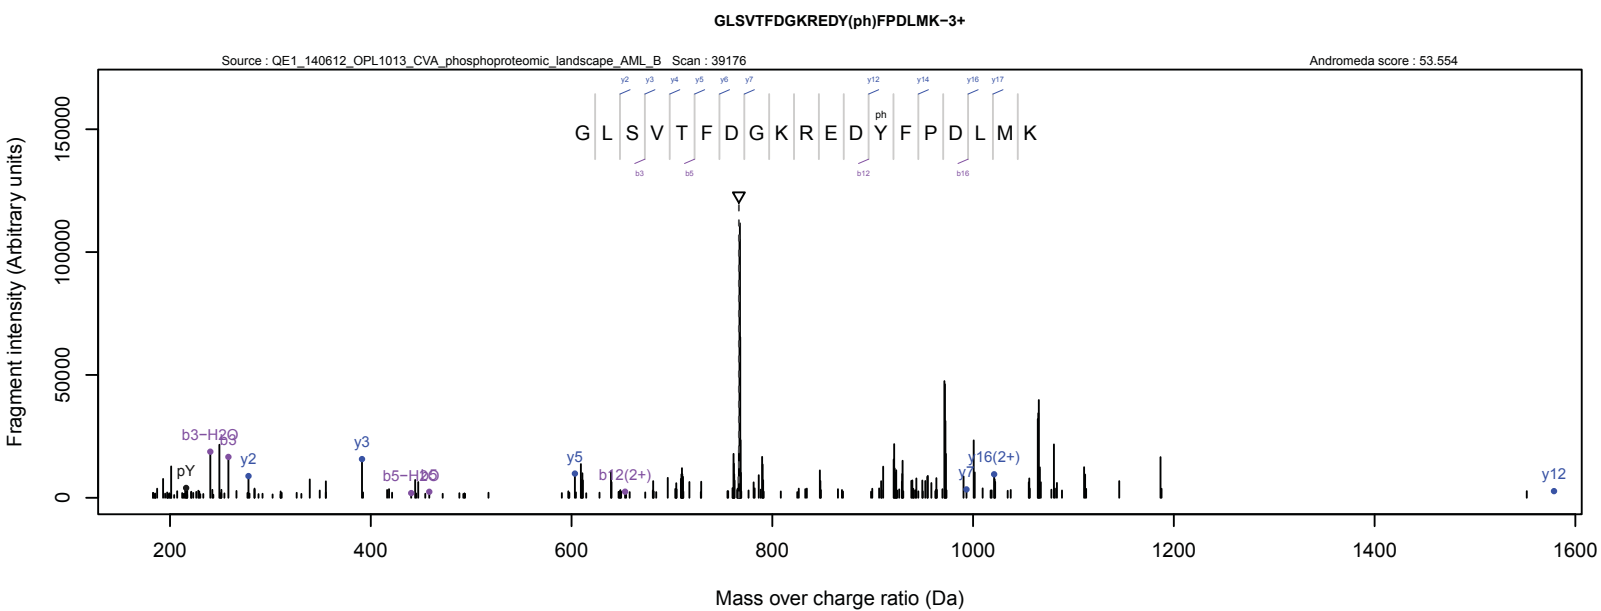

TTHLFVVTENQSYIVSGKDY(ph)PRVELDTHGCGLR-5+

Source : QE1\_140612\_OPL1013\_CVA\_phosphoproteomic\_landscape\_AML\_B Scan : 40696

Andromeda score : 53.553

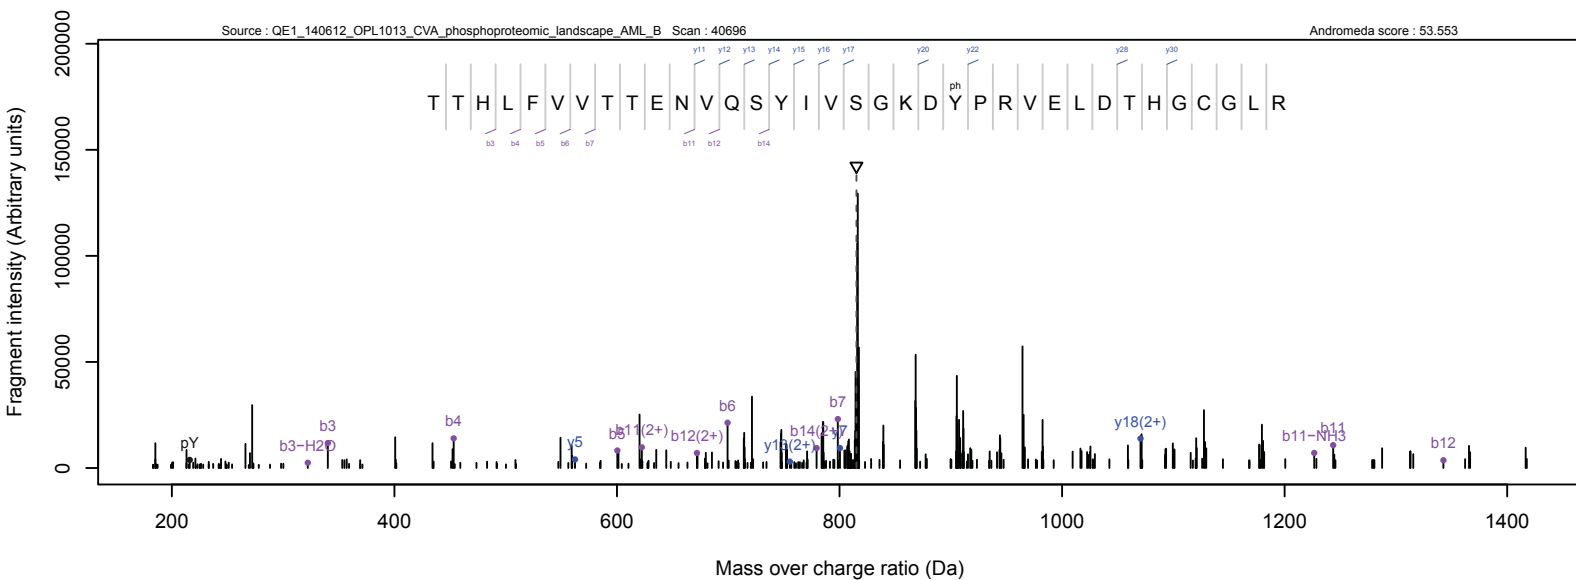

NRY(ph)FISLQQPPAPEESAVDVS K-3+

Source : QE1\_140612\_OPL1013\_CVA\_phosphoproteomic\_landscape\_AML\_C Scan : 35057

Andromeda score : 53.496

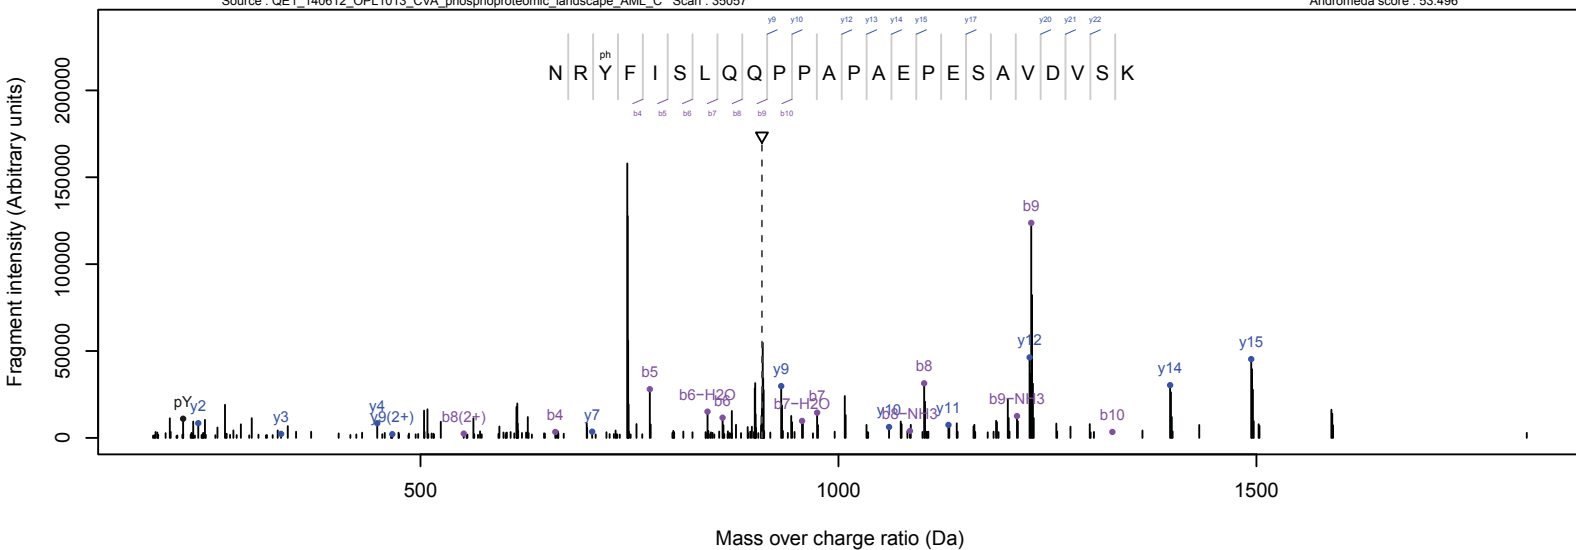

FLY(ph)LYCSK-2+

Source : QE1\_140612\_OPL1013\_CVA\_phosphoproteomic\_landscape\_AML\_D Scan : 30974

Andromeda score : 53.493

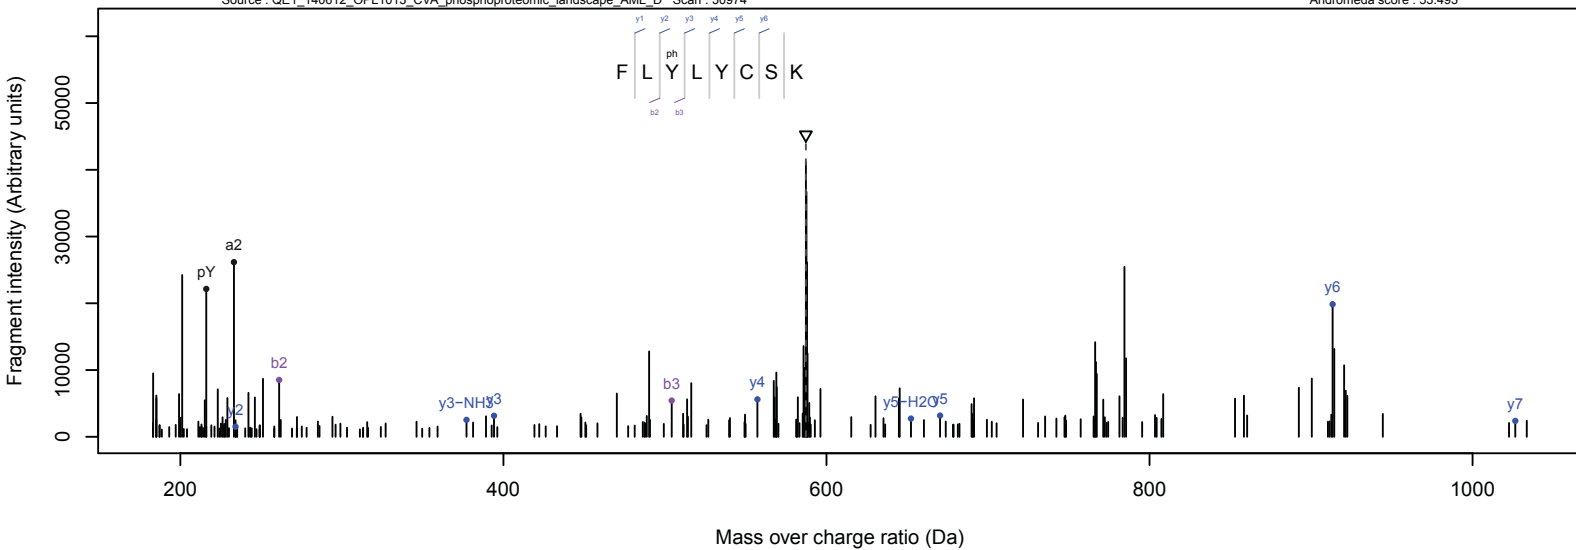

LNY(ph)KPPPQK-2+

Source : QE1\_140822\_OPL1013\_CVA\_pTyrIP\_AML\_cell\_lines\_part2\_E Scan : 3481

Andromeda score : 53.493

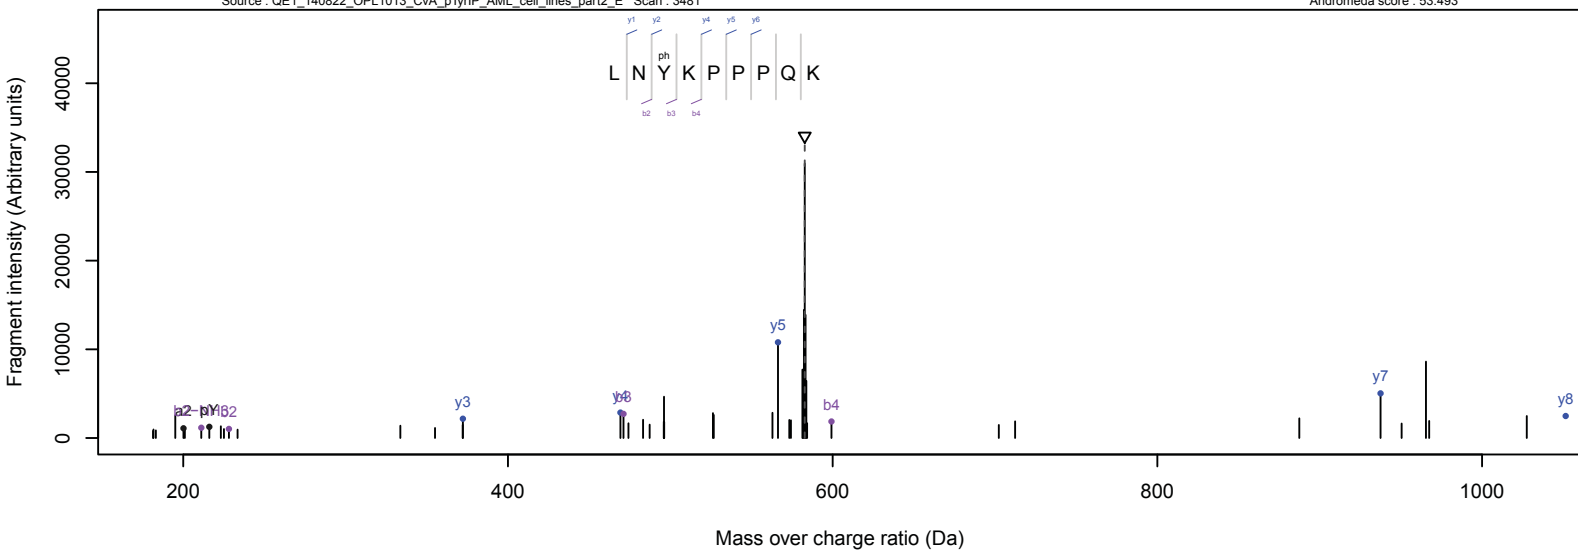

VHFPDPNKLHCFQLTVPDEGY(ph)YQGK-4+

Source : QE1\_140612\_OPL1013\_CVA\_phosphoproteomic\_landscape\_AML\_B Scan : 37354

Andromeda score : 53.481

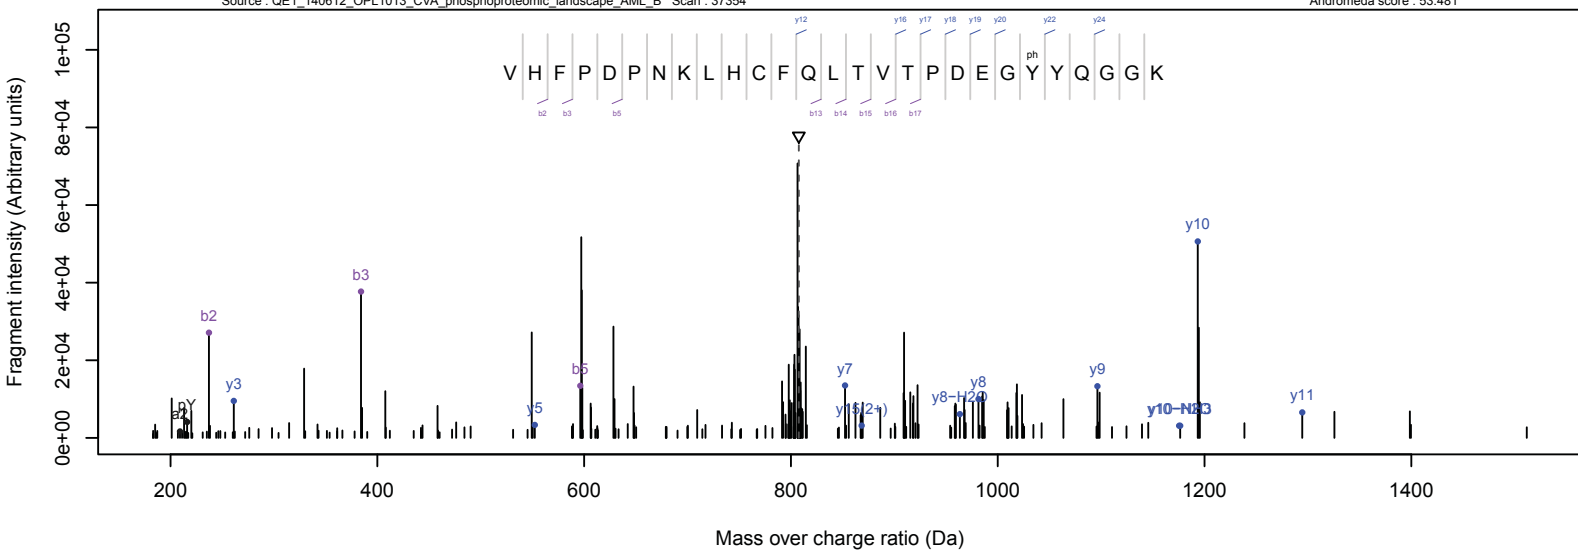

ACY(ph)LSINPQKDETLETEK-3+

Source : QE1\_140612\_OPL1013\_CVA\_phosphoproteomic\_landscape\_AML\_B Scan : 24512

Andromeda score : 53.453

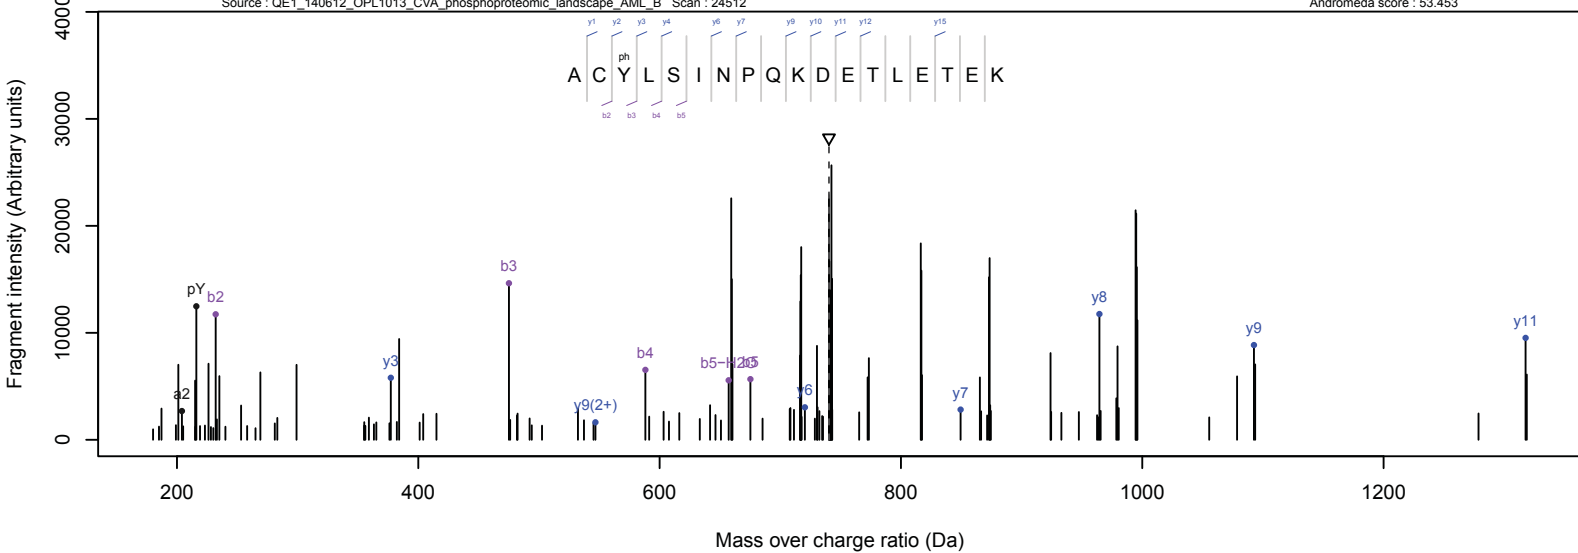

## Y(ph)LEQLHQLYSDSFPMELR-3+

Source : QE1\_140612\_OPL1013\_CVA\_phosphoproteomic\_landscape\_AML\_D Scan : 46571

Andromeda score : 53.453

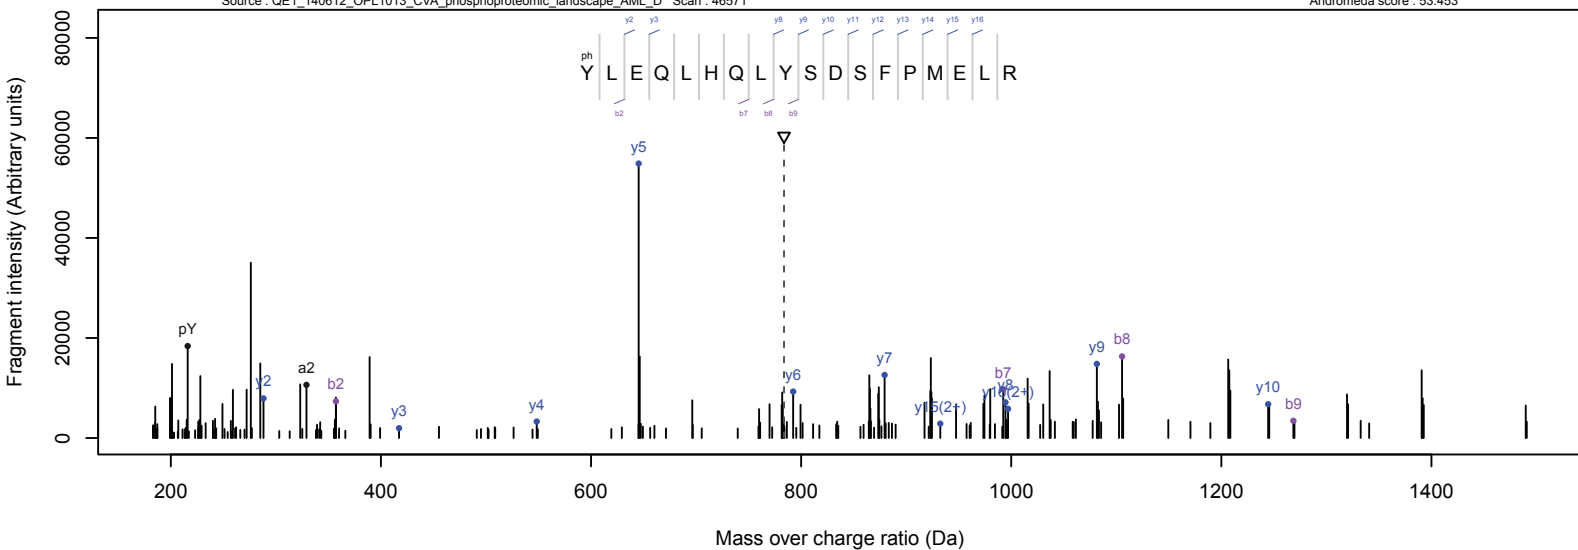

## ATY(ph)LSVADEHLR-2+

Source : Qe1\_141024\_OPL1013\_CvA\_AML\_pTyrIP\_MOLM13 Scan : 21458

Andromeda score : 53.448

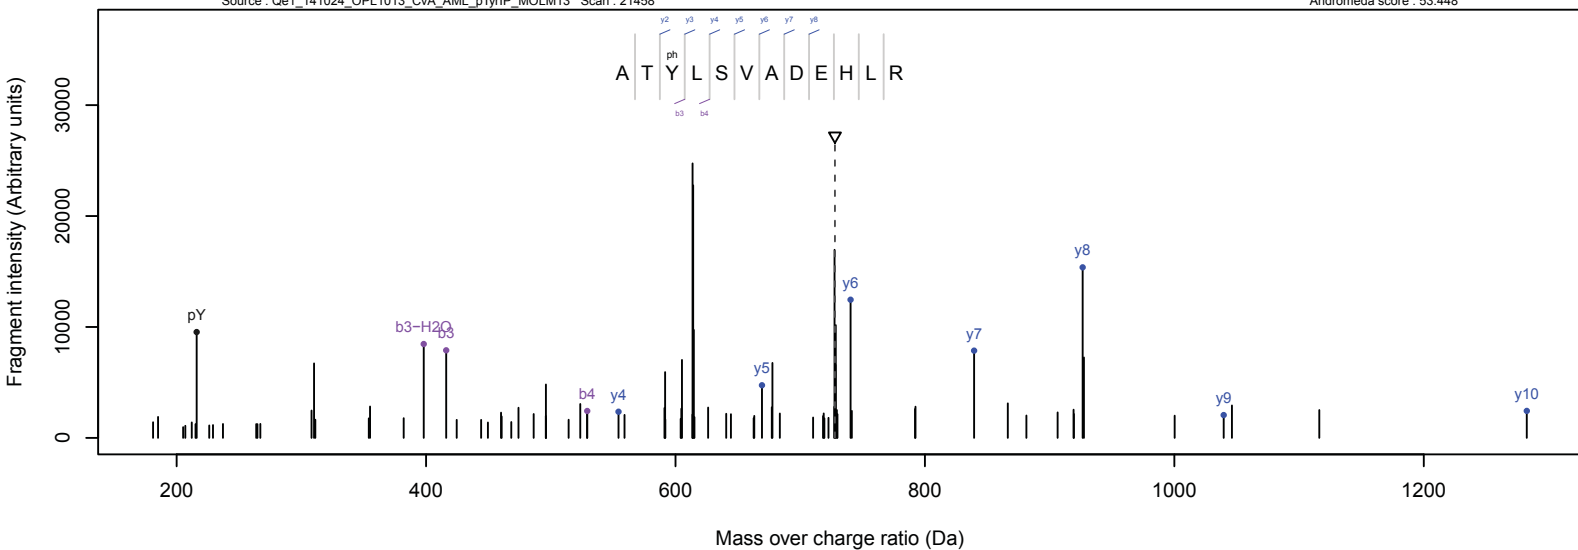

## DTDIVDEAIYFK-2+

Source : QE1\_140612\_OPL1013\_CVA\_phosphoproteomic\_landscape\_AML\_C Scan : 48748

Andromeda score : 53.448

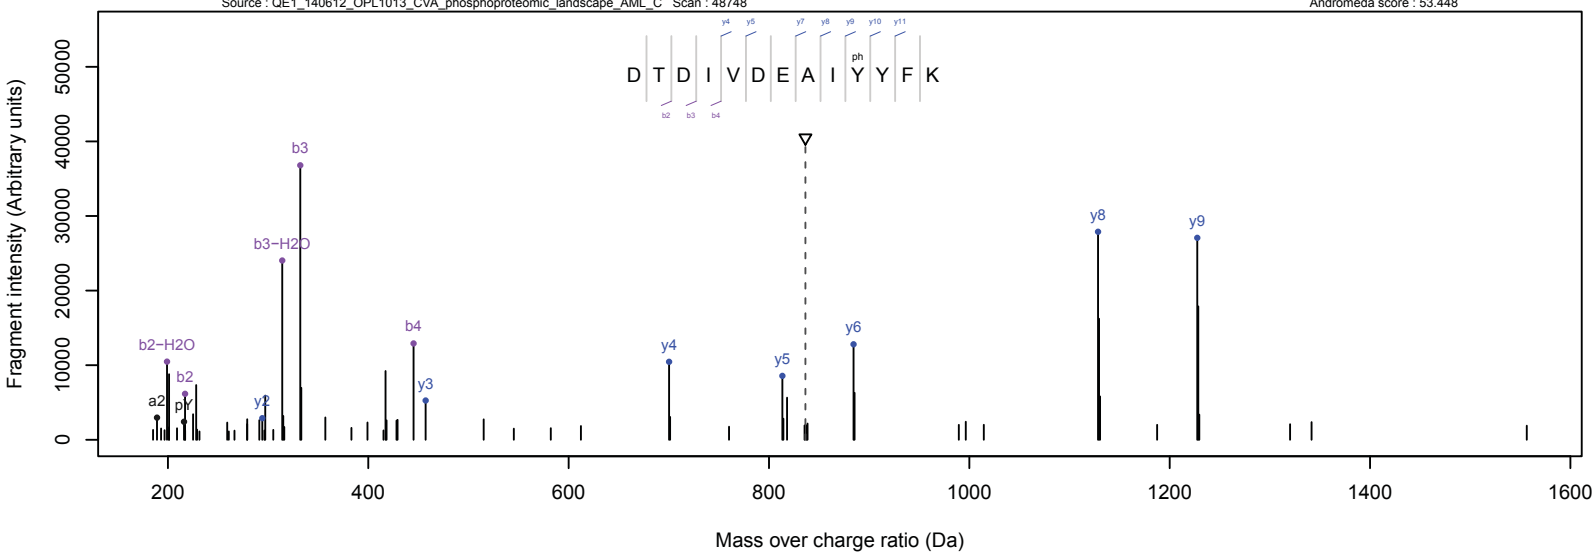



**KSEVLY(ph)YTVEK-2+**

Source : QE1\_140612\_OPL1013\_CVA\_phosphoproteomic\_landscape\_AML\_C Scan : 19266

Andromeda score : 53.448

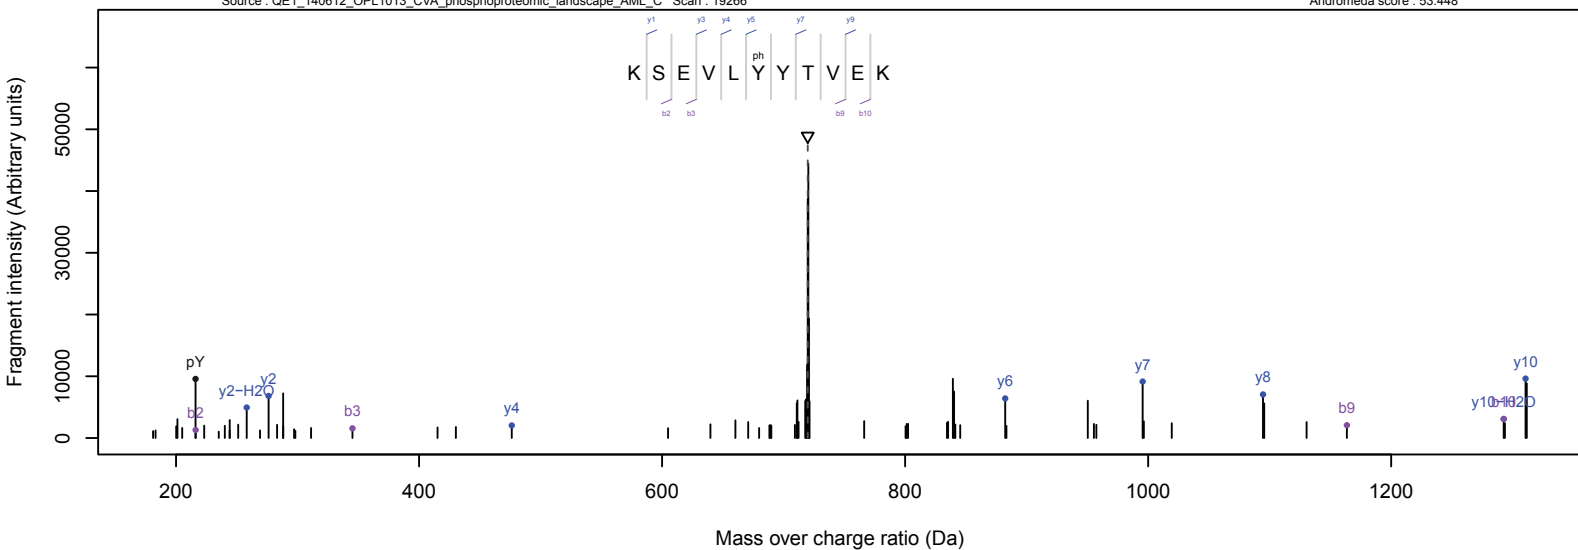

**LDSGGFY(ph)ITSR-2+**

Source : QE1\_140822\_OPL1013\_CvA\_pTyrIP\_AML\_cell\_lines\_part2\_E Scan : 18406

Andromeda score : 53.448

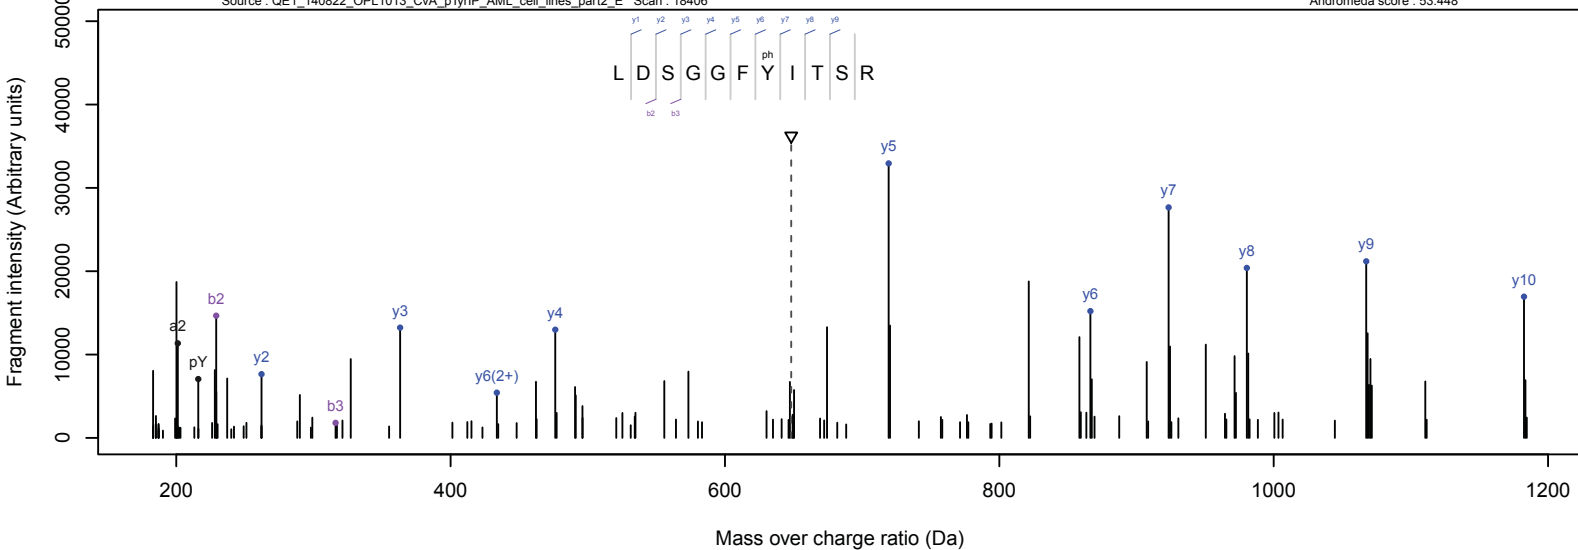

**QSVQSDQGY(ph)ISR-2+**

Source : QE1\_140612\_OPL1013\_CVA\_phosphoproteomic\_landscape\_AML\_C Scan : 6551

Andromeda score : 53.448

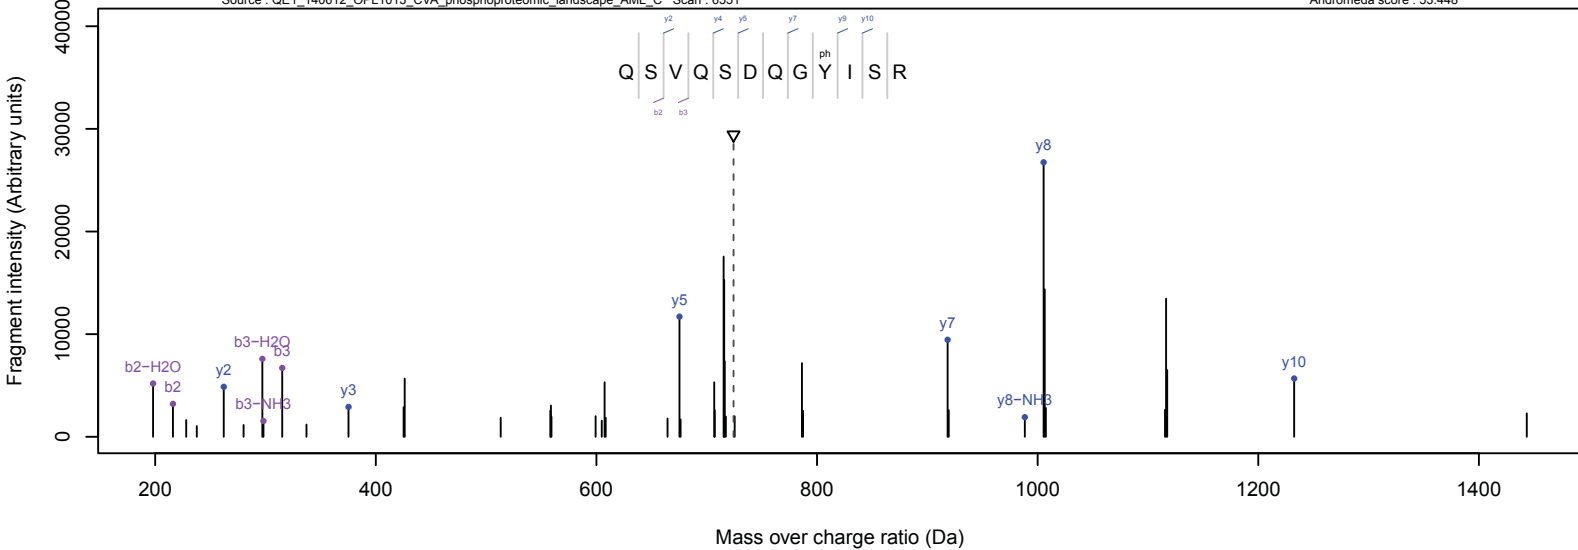

**Y(ph)VGFGNTPPPQKK-3+**

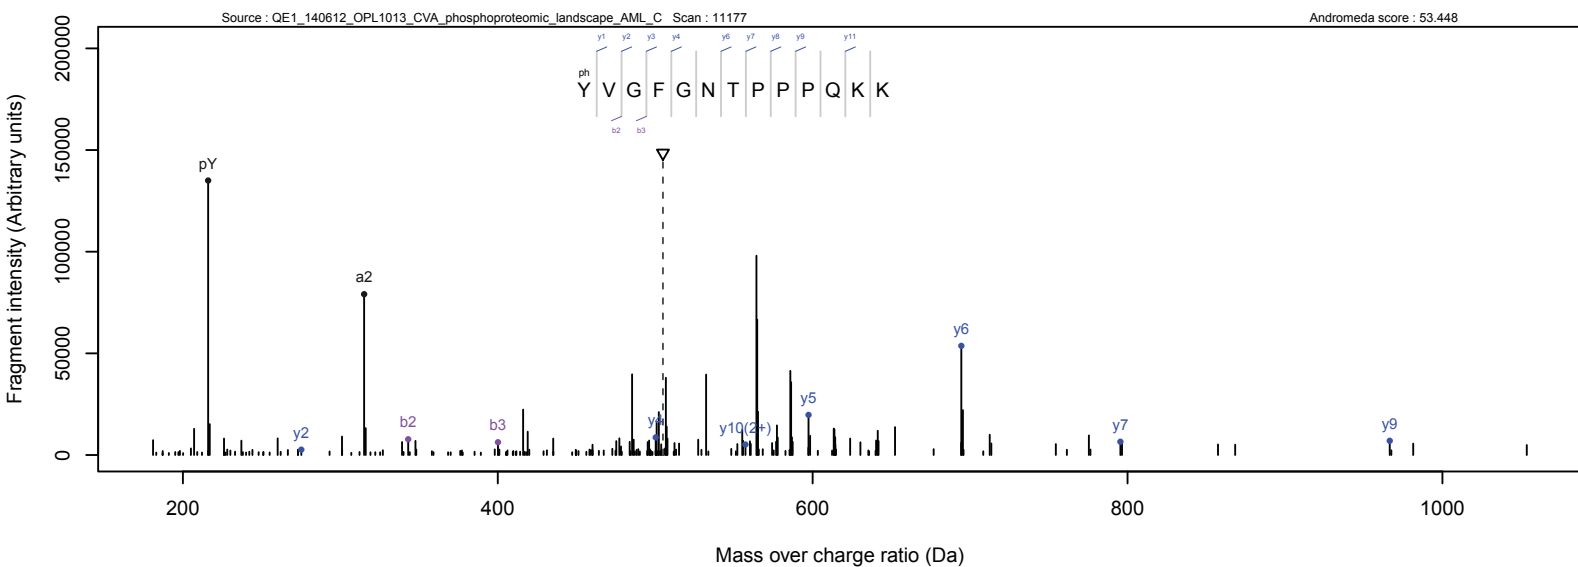

**Y(ph)VVTSVSWWSHK-3+**

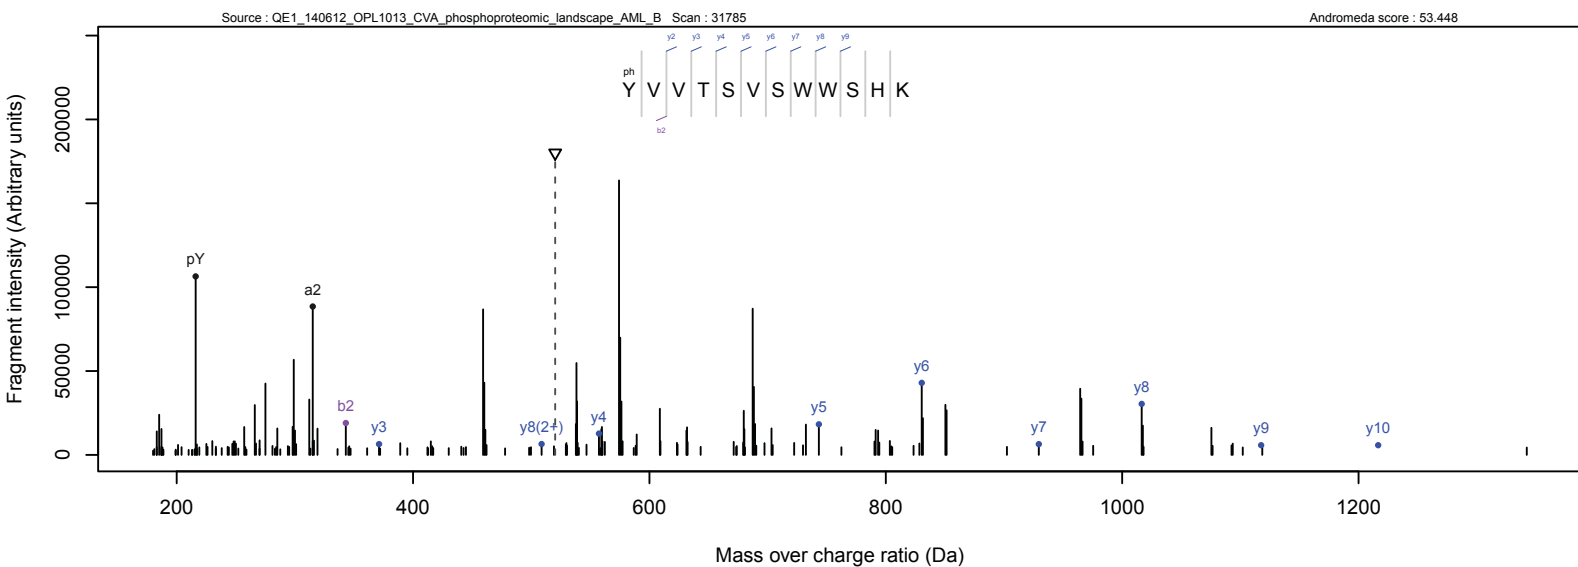

**ISDFGM(ox)SREEADGVY(ph)AASGGLR-3+**

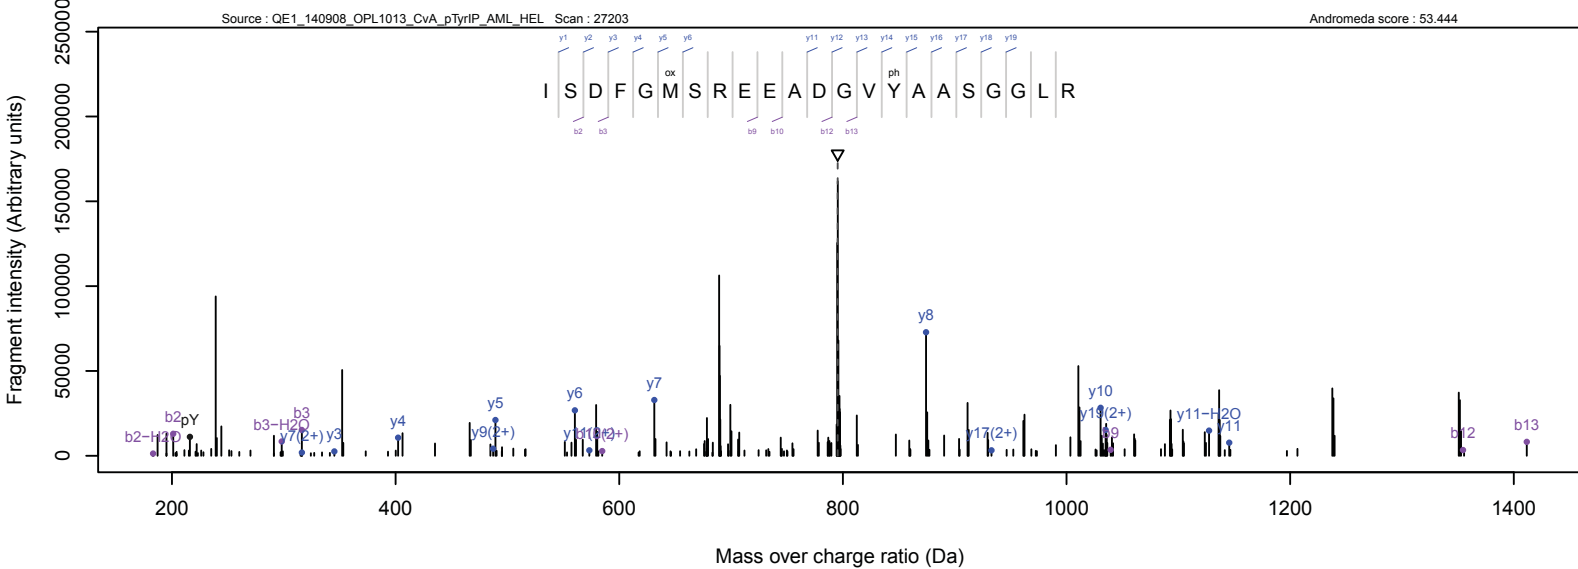

SRPSEAEVPV<sup>S</sup>FDQPPEGSHLPC<sup>Y</sup>(ph)NKVR-4+

Source : QE1\_140612\_OPL1013\_CVA\_phosphoproteomic\_landscape\_AML\_C Scan : 26174

Andromeda score : 53.401

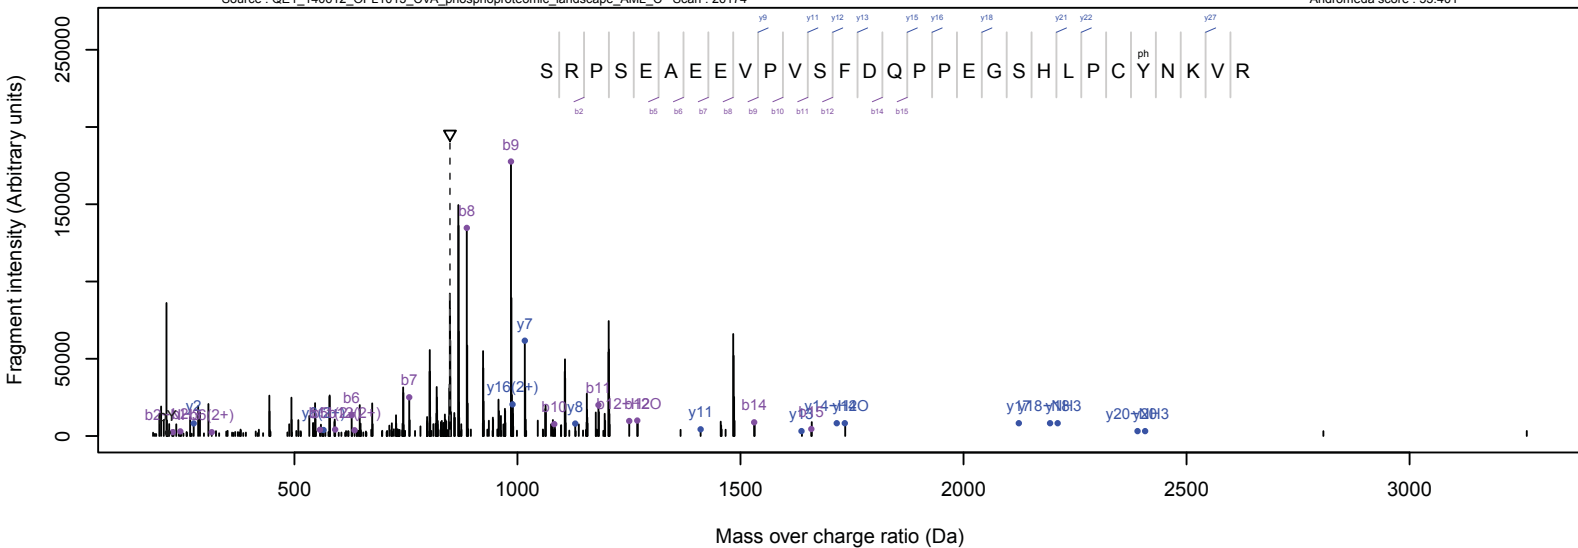

NFRHPEIVG<sup>Y</sup>SV<sup>P</sup>GR-3+

Source : QE1\_140612\_OPL1013\_CVA\_phosphoproteomic\_landscape\_AML\_C Scan : 21283

Andromeda score : 53.395

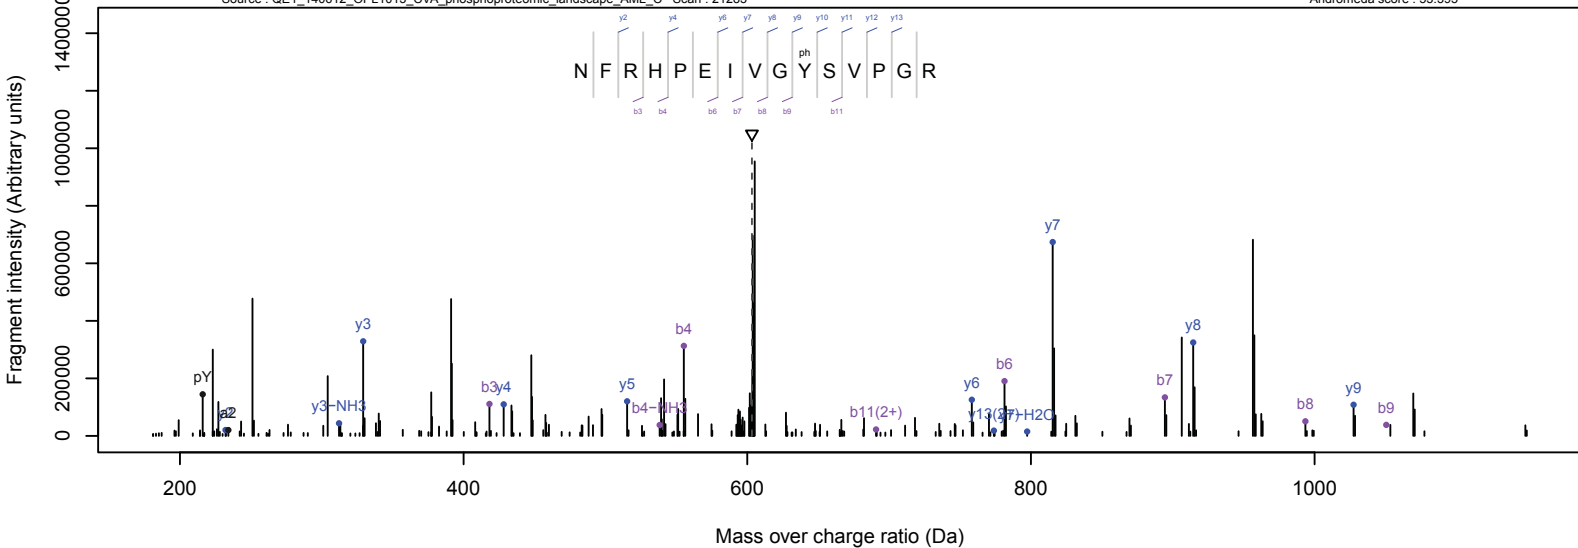

TACTNFM<sup>ox</sup>MTPY<sup>ph</sup>VVTR-2+

Source : QE1\_140908\_OPL1013\_CvA\_pTyrIP\_AML\_Kasumi1 Scan : 29569

Andromeda score : 53.395

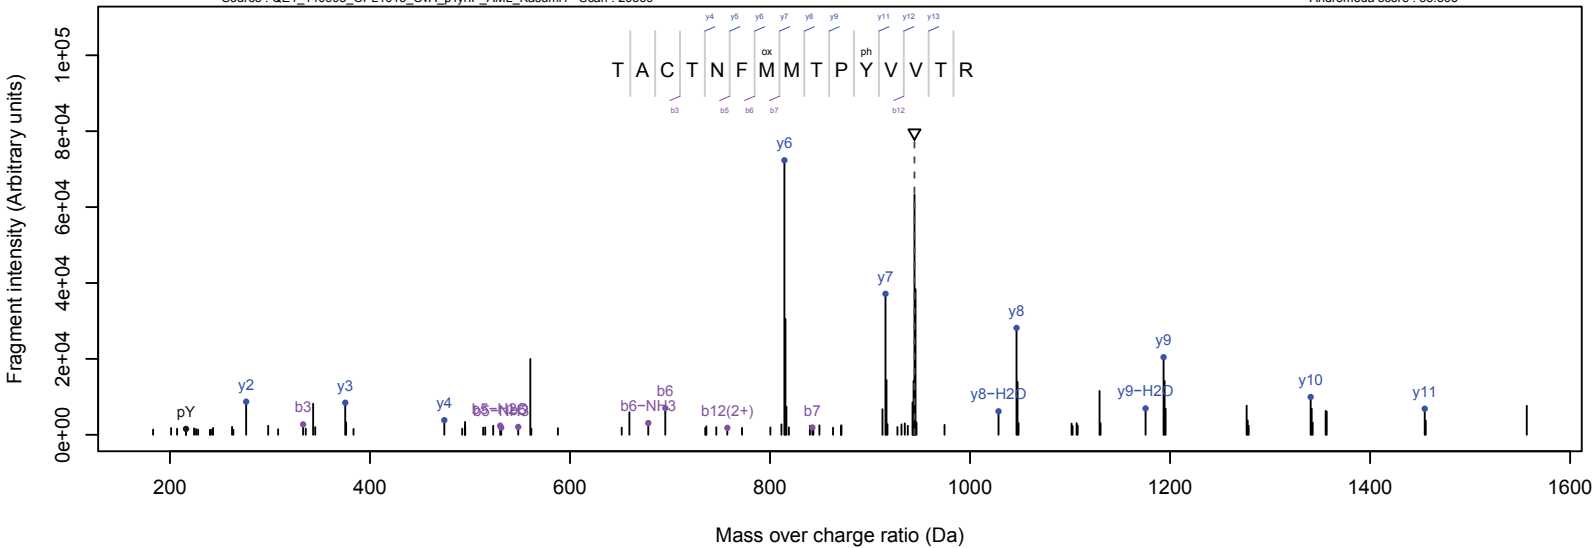



CVICDSY(ph)VRPCTLVR-3+

Source : QE1\_140612\_OPL1013\_CVA\_phosphoproteomic\_landscape\_AML\_C Scan : 26885

Andromeda score : 53.3

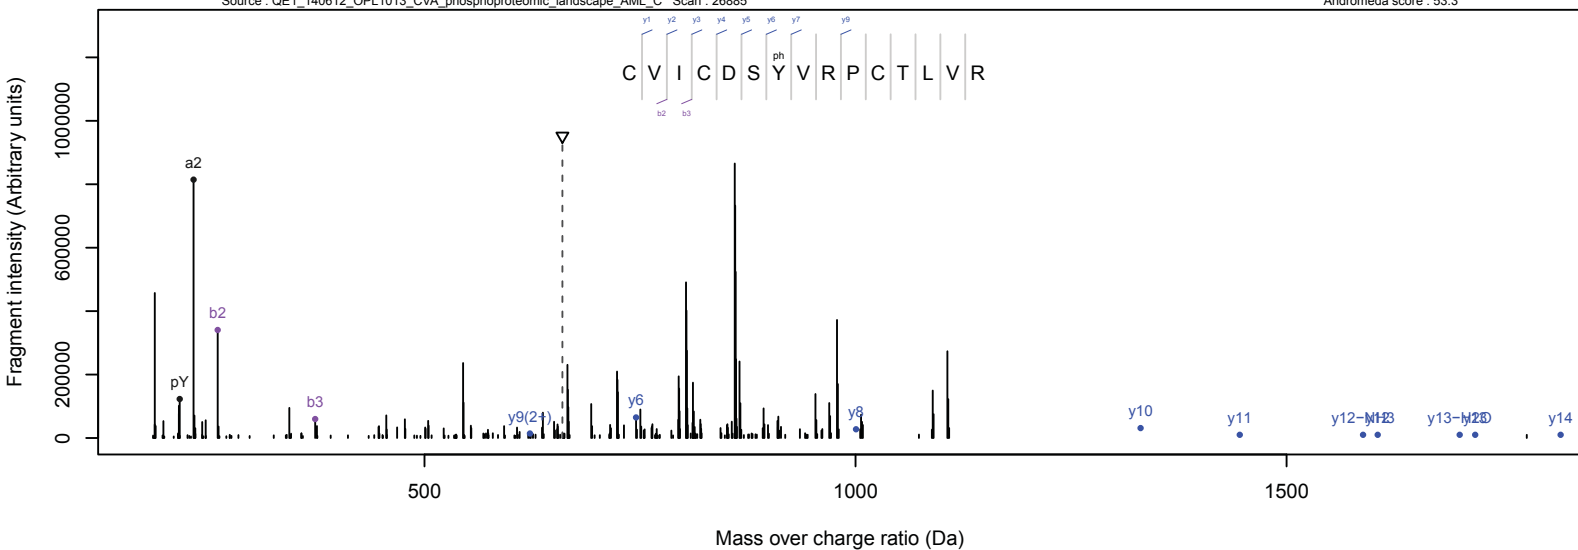

GALADY(ph)EGKDVATR-2+

Source : Qe1\_141024\_OPL1013\_CvA\_AML\_pTyrIP\_MOLM13 Scan : 13752

Andromeda score : 53.3

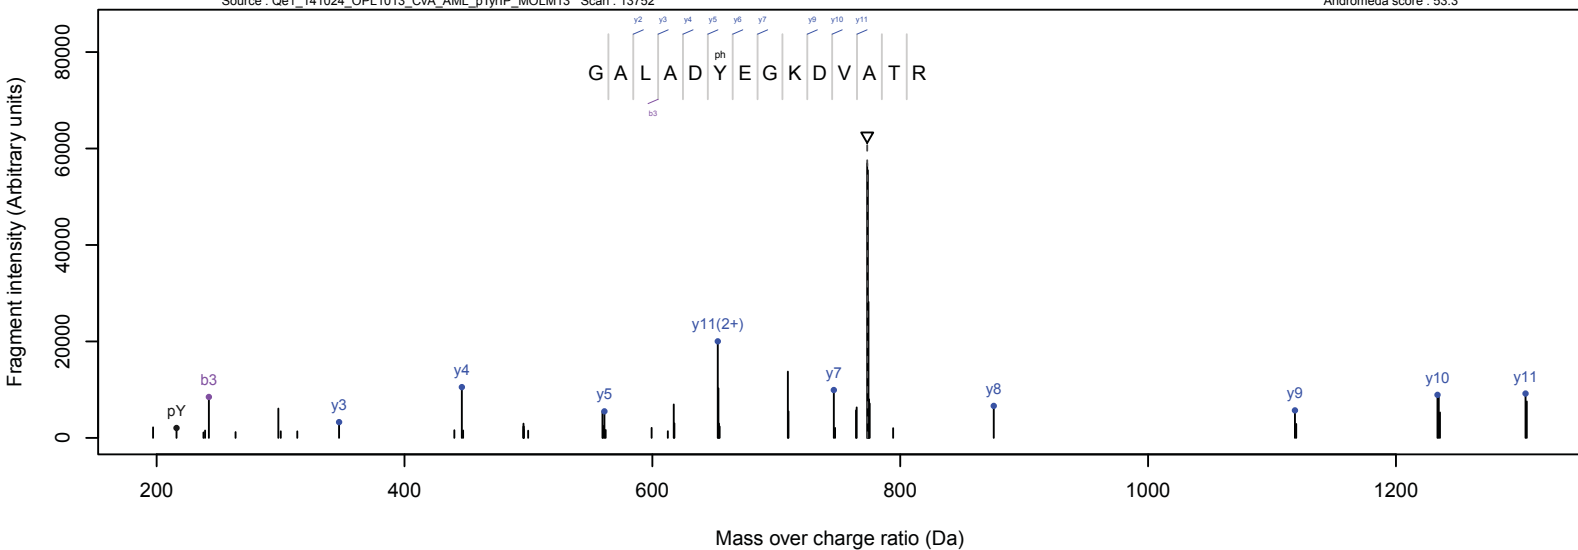

LSSTDDG(ph)IDLQFK-2+

Source : QE1\_140822\_OPL1013\_CvA\_pTyrIP\_AML\_cell\_lines\_part2\_E Scan : 26545

Andromeda score : 53.3

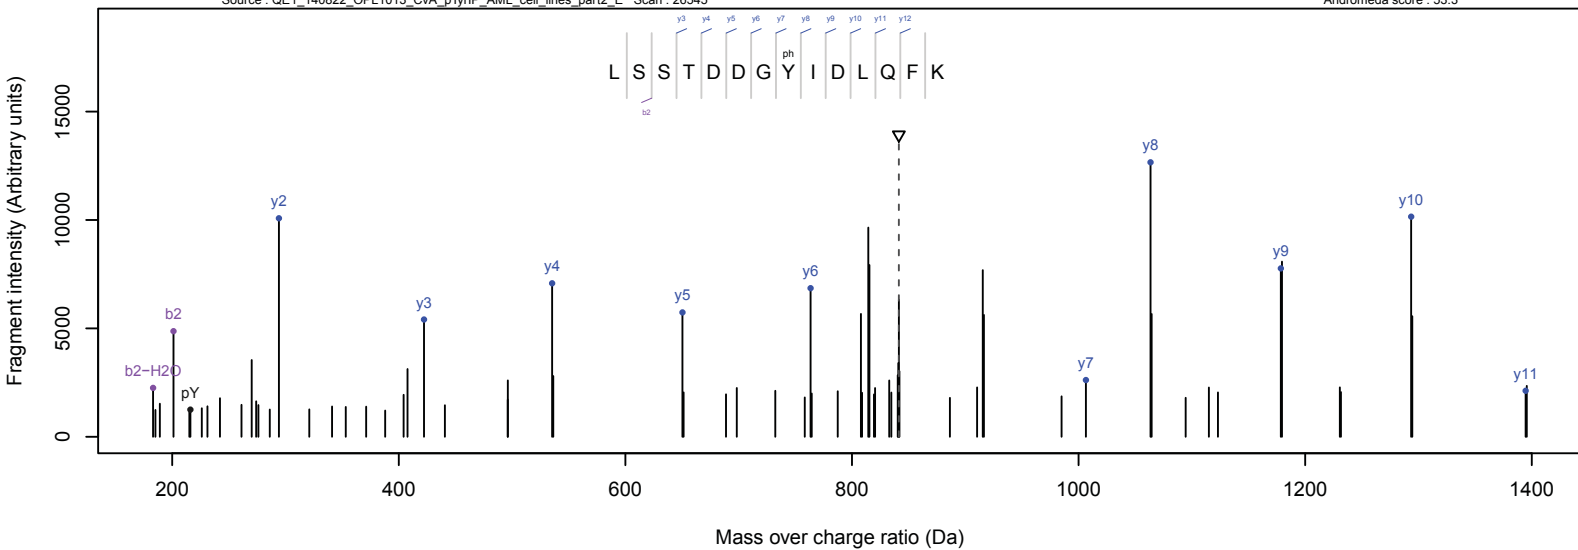

VADSDY(ph)EAICKVPR-3+

Source : QE1\_140612\_OPL1013\_CVA\_phosphoproteomic\_landscape\_AML\_B Scan : 16320

Andromeda score : 53.3

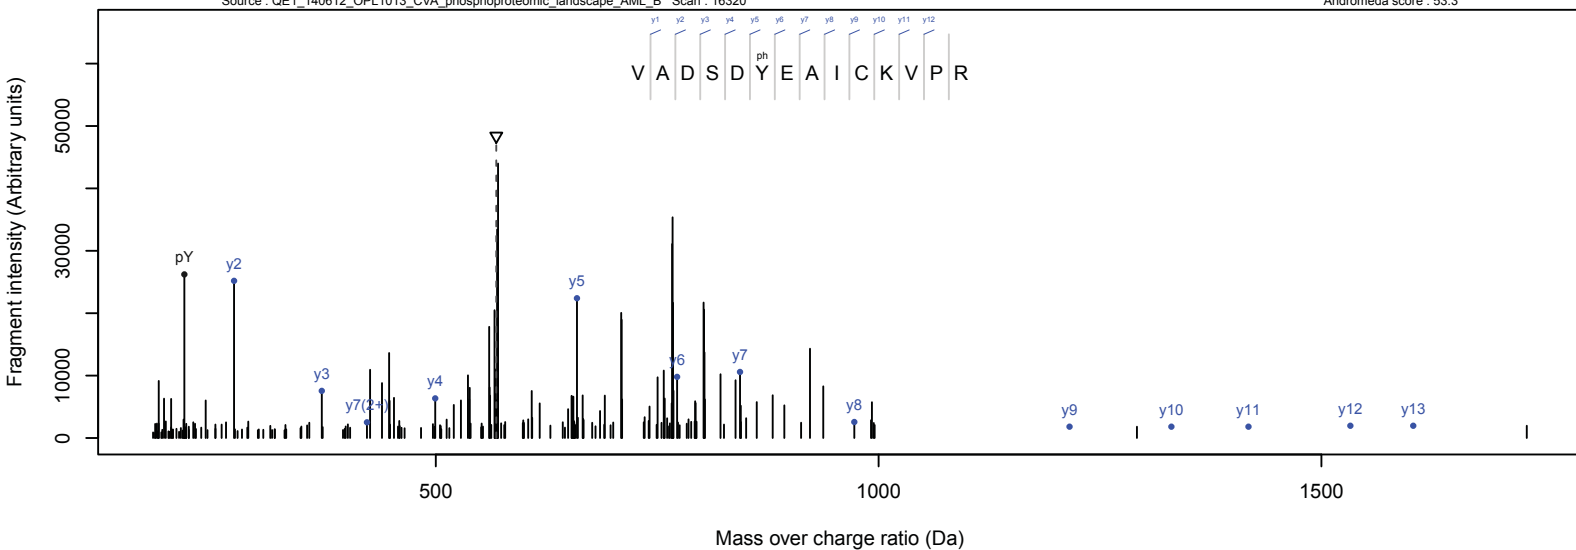

Y(ph)GQYTMNQESTTIK-2+

Source : QE1\_140612\_OPL1013\_CVA\_phosphoproteomic\_landscape\_AML\_B Scan : 15172

Andromeda score : 53.3

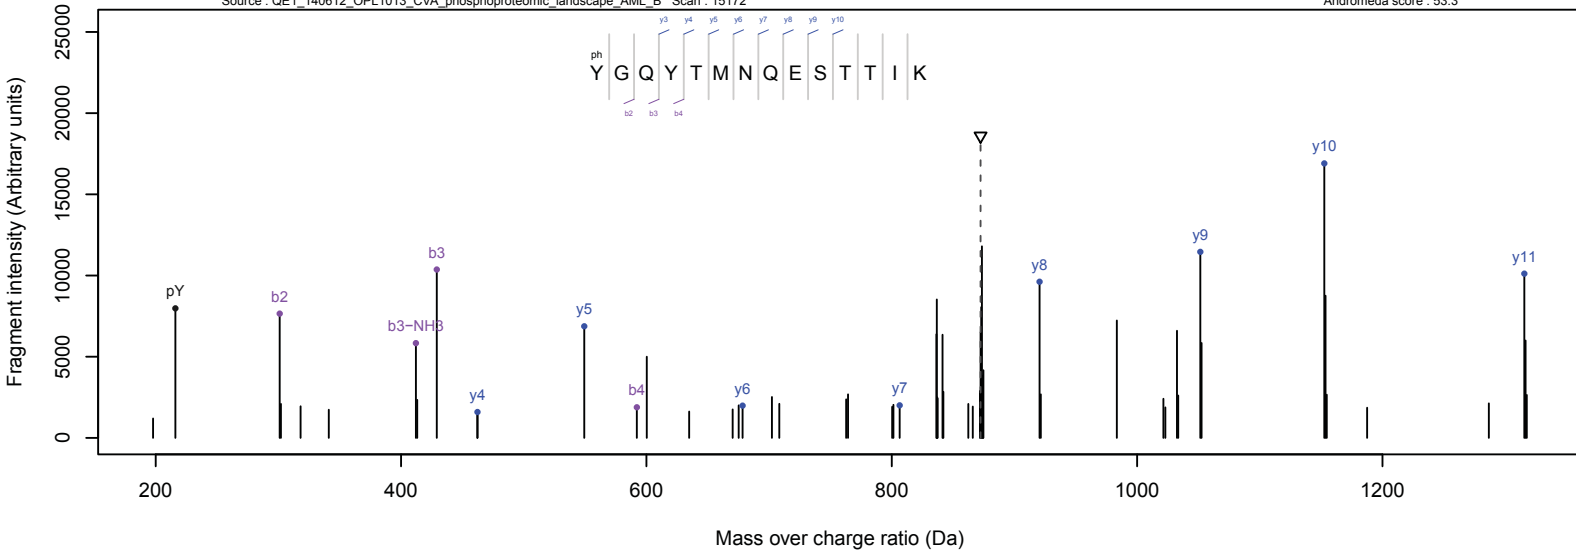

FMQTFVLAPEGSVPNKFYVHNDMFR-3+

Source : QE1\_140612\_OPL1013\_CVA\_phosphoproteomic\_landscape\_AML\_B Scan : 46195

Andromeda score : 53.281

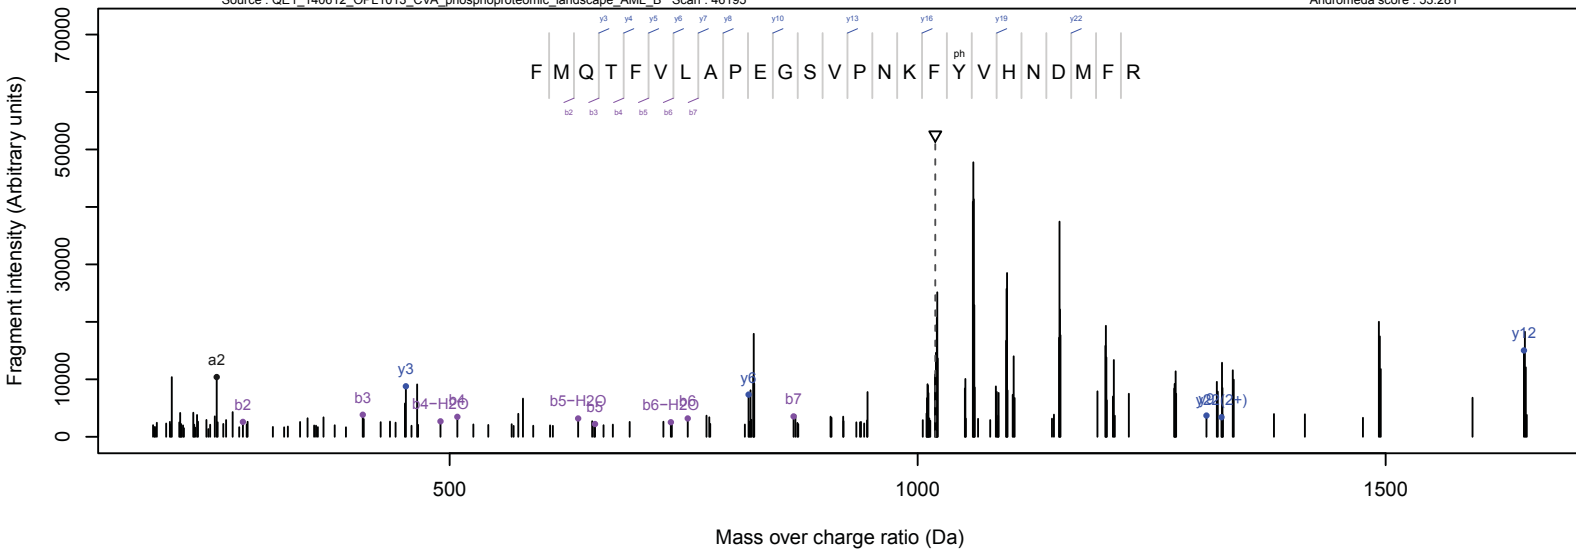

AHAY(ph)GDPNAGLNSQLHYK-3+

Source : QE1\_140612\_OPL1013\_CVA\_phosphoproteomic\_landscape\_AML\_C Scan : 15114

Andromeda score : 53.255

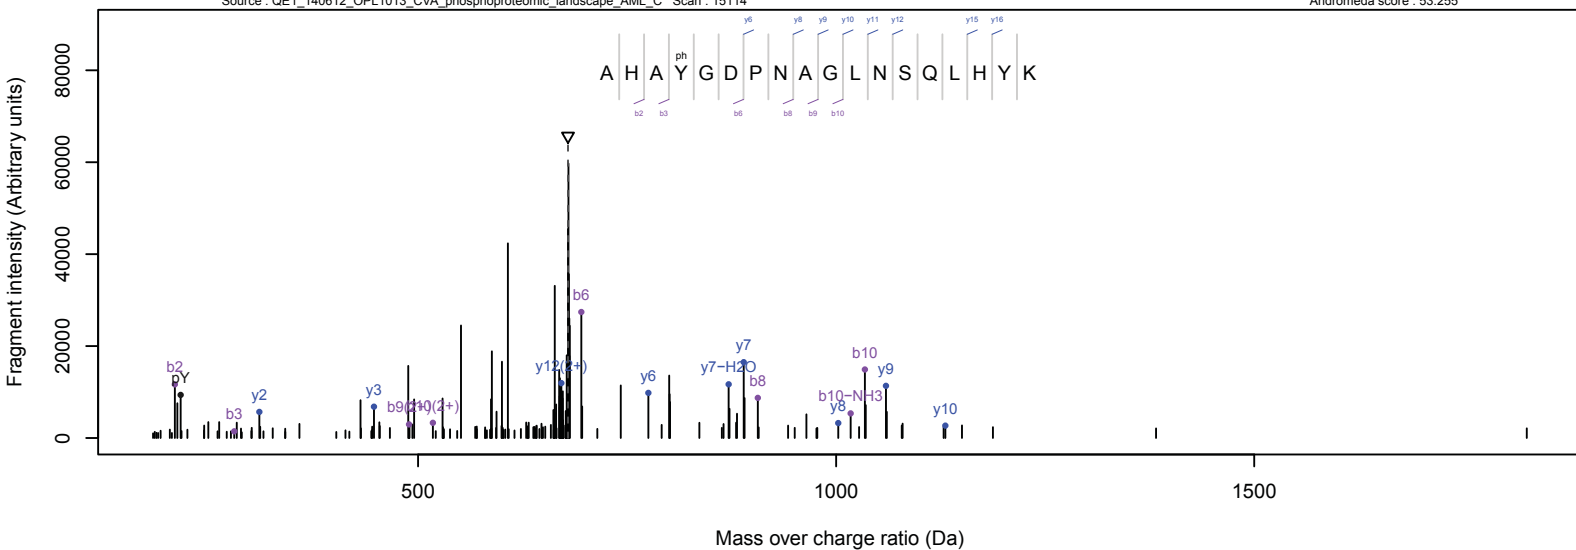

GLAY(ph)PARPAQLR-2+

Source : QE1\_140612\_OPL1013\_CVA\_phosphoproteomic\_landscape\_AML\_B Scan : 16047

Andromeda score : 53.237

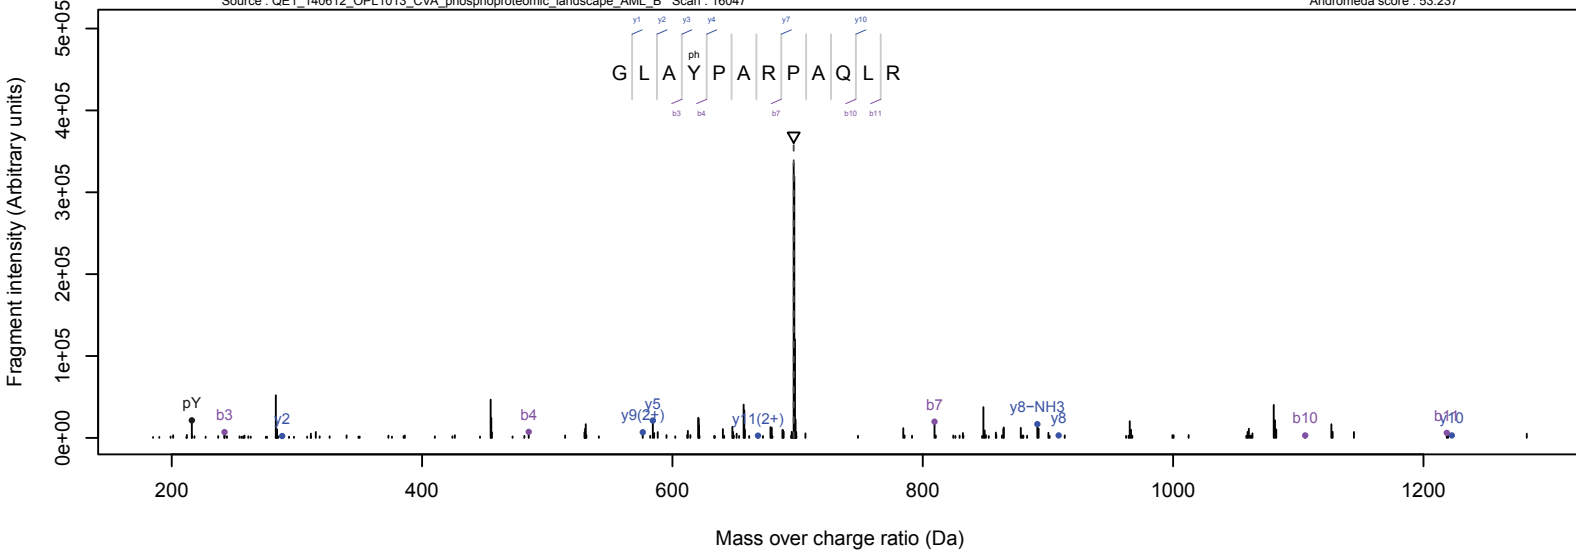

KTPY(ph)EEQLHR-3+

Source : QE1\_140612\_OPL1013\_CVA\_phosphoproteomic\_landscape\_AML\_D Scan : 5237

Andromeda score : 53.237

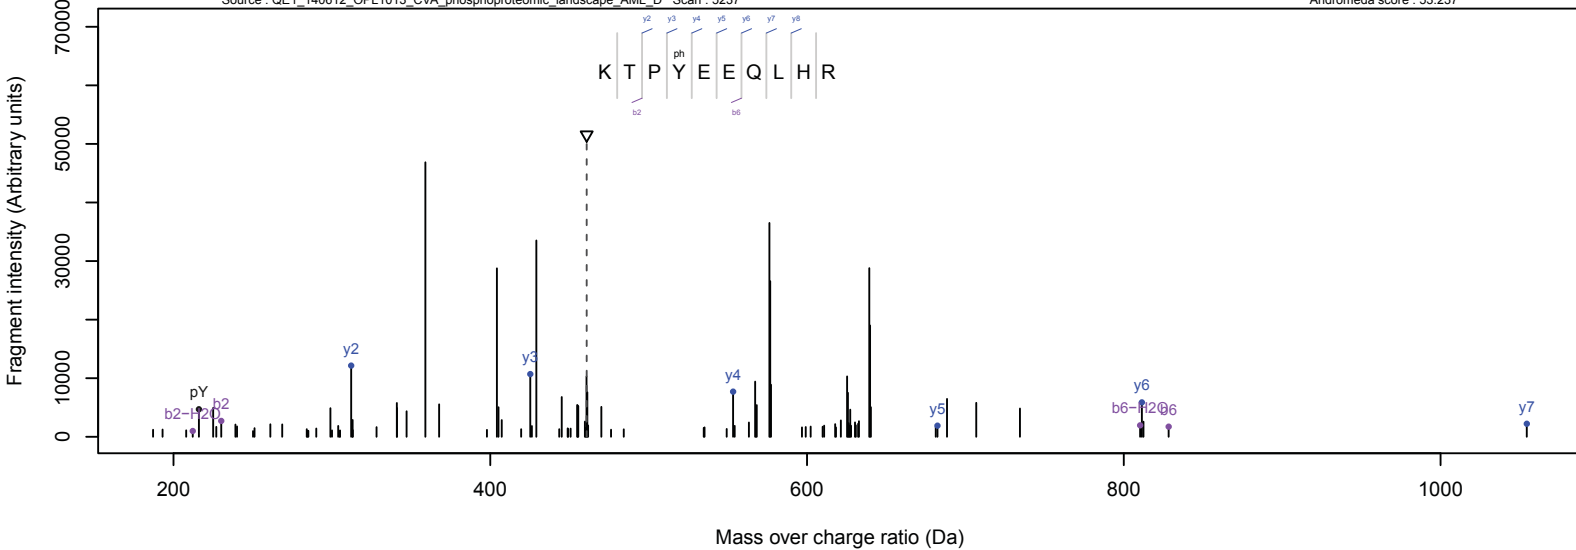

MIY(ph)YLLDRK-3+

Source : QE1\_140612\_OPL1013\_CVA\_phosphoproteomic\_landscape\_AML\_C Scan : 36851

Andromeda score : 53.237

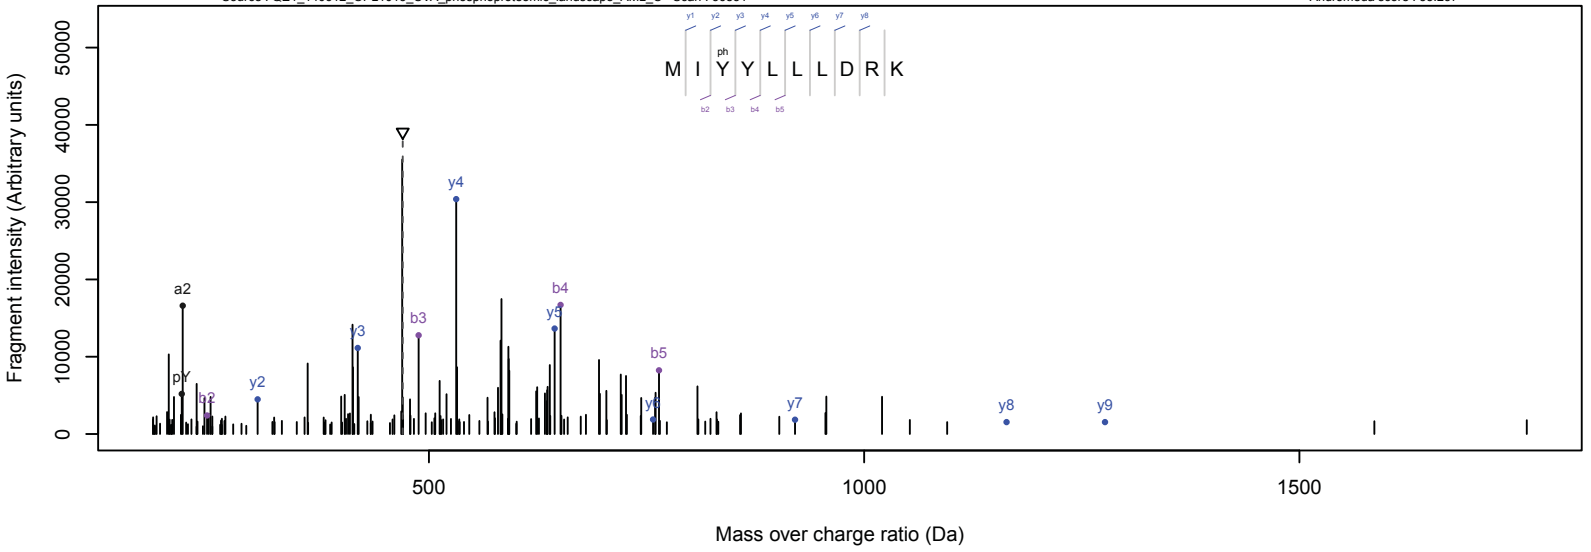

SINGSLY(ph)IFR-2+

Source : QE1\_140612\_OPL1013\_CVA\_phosphoproteomic\_landscape\_AML\_A Scan : 36468

Andromeda score : 53.237

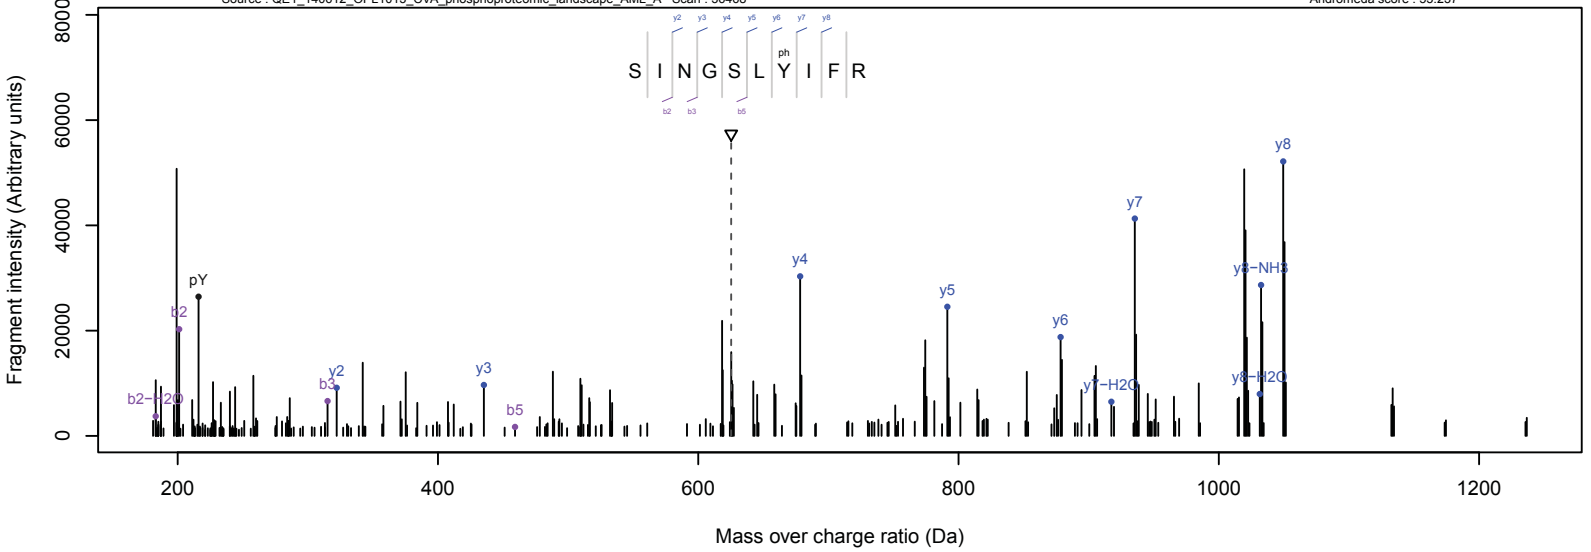

LIAGTSAY(ph)AR-2+

Source : QE1\_140908\_OPL1013\_CvA\_pTyrIP\_AML\_Kasumi6 Scan : 22574

Andromeda score : 53.211

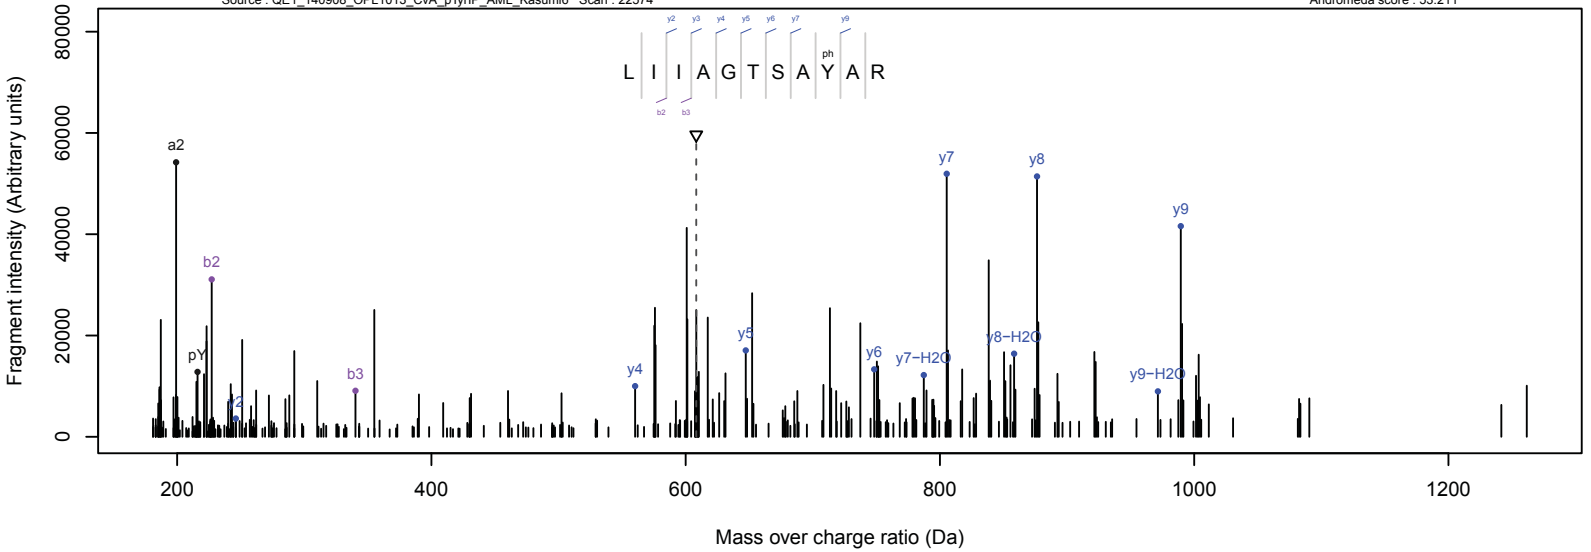



## HFSGLEEAVY(ph)RNIQACK-3+

Source: QE1\_140612\_OPL1013\_CVA\_phosphoproteomic\_landscape\_AML\_D Scan: 31748

Andromeda score: 53.21

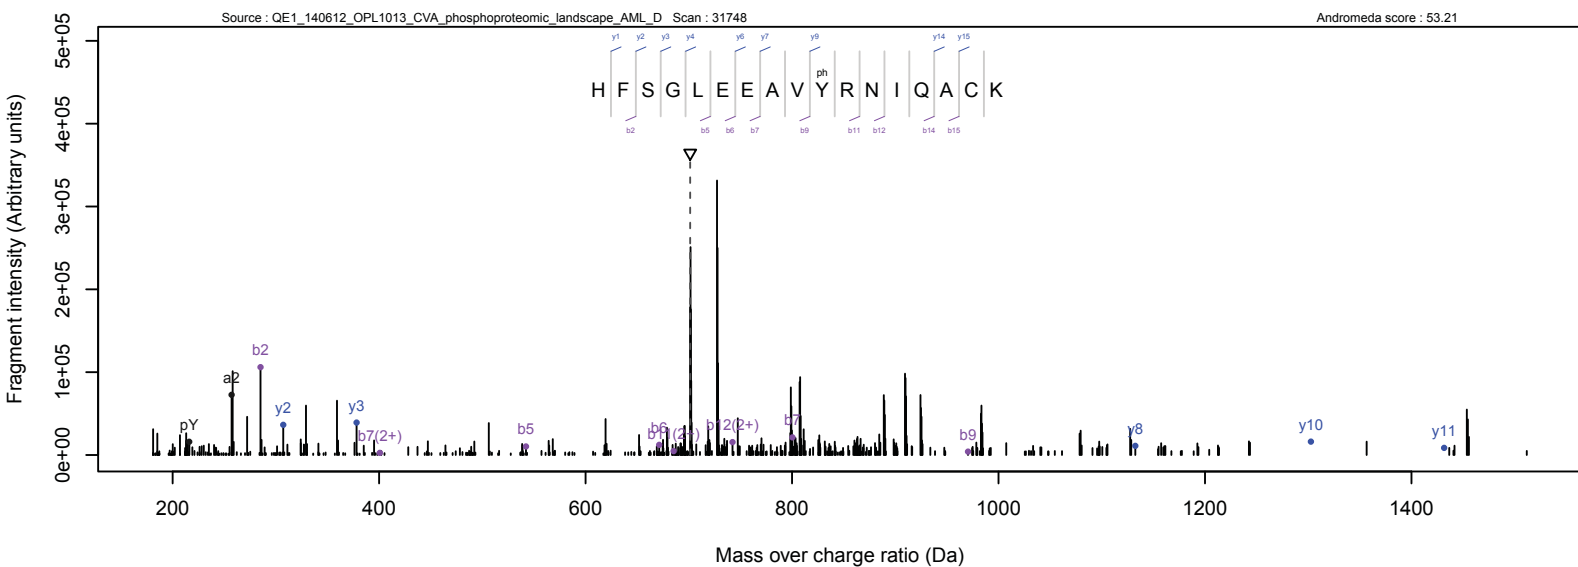

## SHNVAAGSY(ph)EAPLPPGSFHGDFAYGTYR-3+

Source: QE1\_140612\_OPL1013\_CVA\_phosphoproteomic\_landscape\_AML\_B Scan: 32049

Andromeda score: 53.197

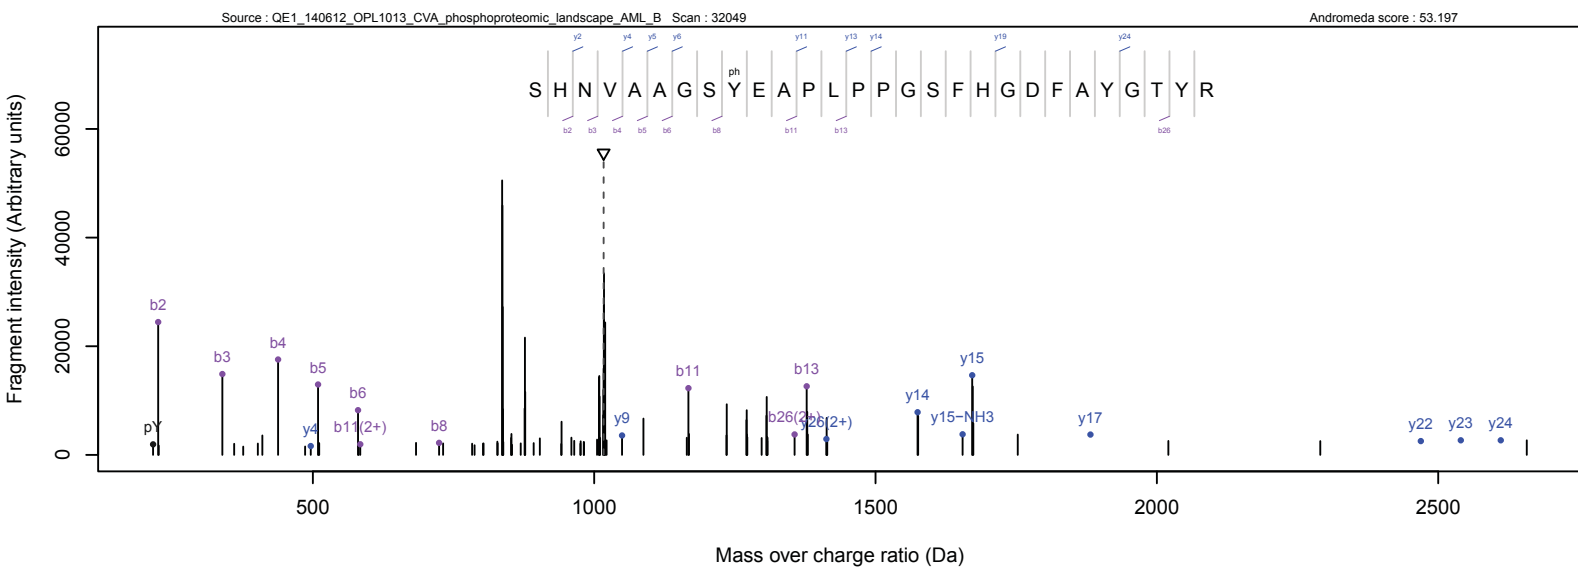

## TLETLLPTANISDVPAAHAQH YQDVLY(ph)HAK-4+

Source: QE1\_140612\_OPL1013\_CVA\_phosphoproteomic\_landscape\_AML\_A Scan: 44539

Andromeda score: 53.197

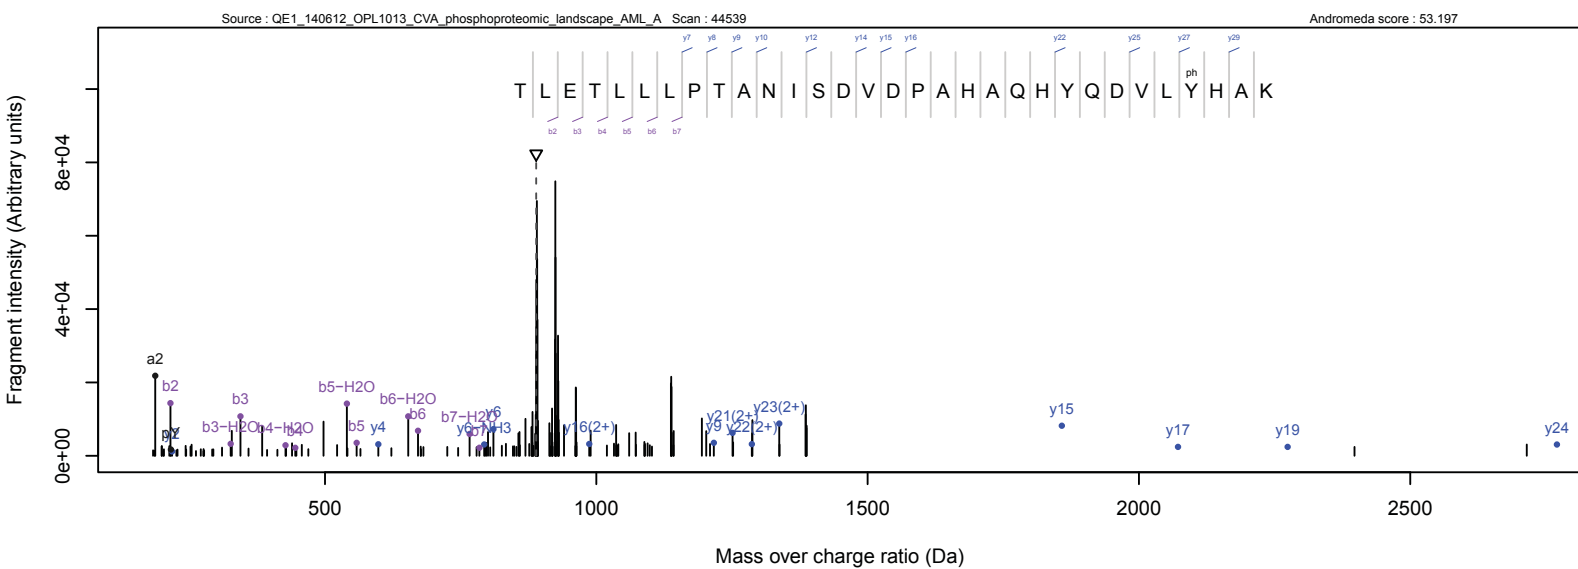

## ASYDDPY(ph)KKAVAMSK-3+

Source: QE1\_140612\_OPL1013\_CVA\_phosphoproteomic\_landscape\_AML\_C Scan: 10767

Andromeda score: 53.168

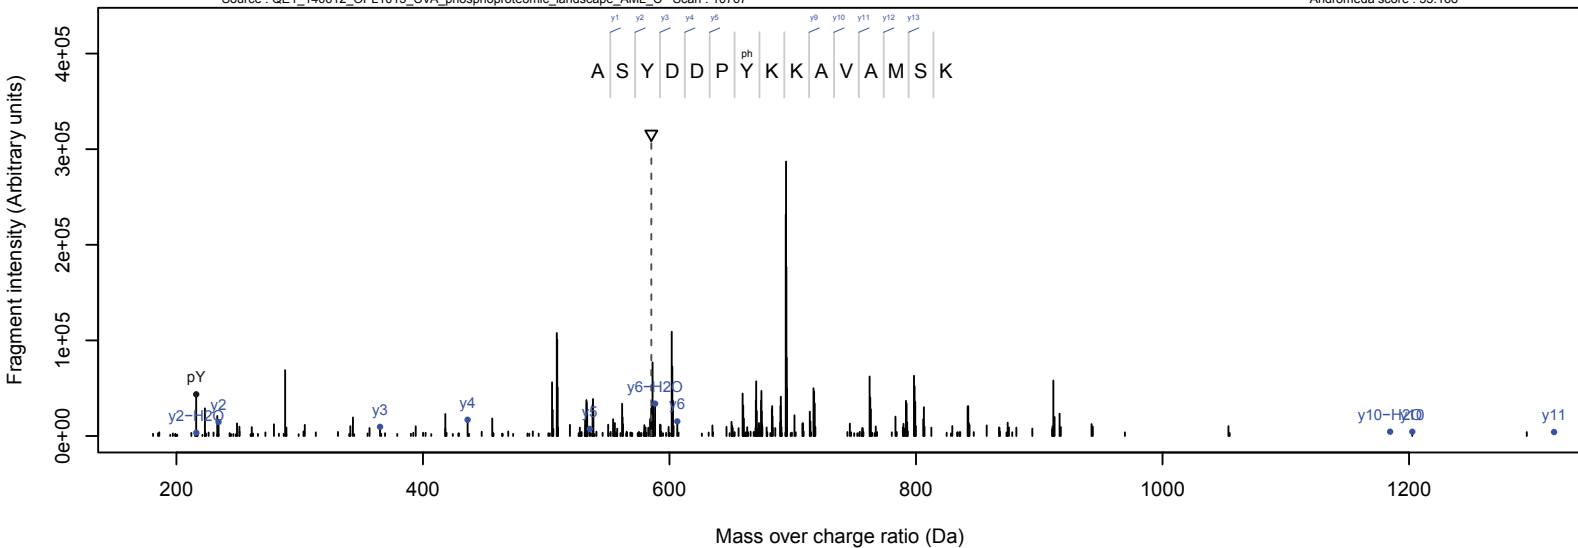

## LGQDPY(ph)RLGHDPYR-3+

Source: QE1\_140908\_OPL1013\_CvA\_pTyrIP\_AML\_OCI\_AML3 Scan: 15397

Andromeda score: 53.168

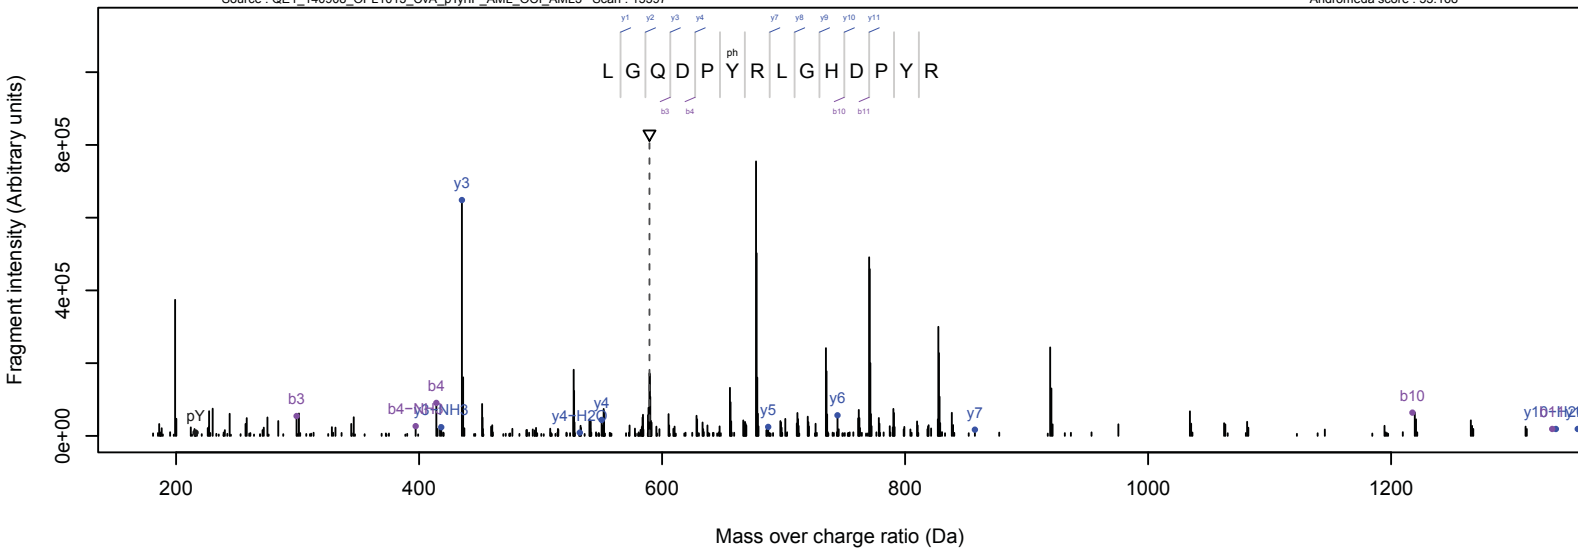

## VLEMEDQKNS(ph)YEQK-3+

Source: QE1\_140612\_OPL1013\_CVA\_phosphoproteomic\_landscape\_AML\_B Scan: 17755

Andromeda score: 53.168

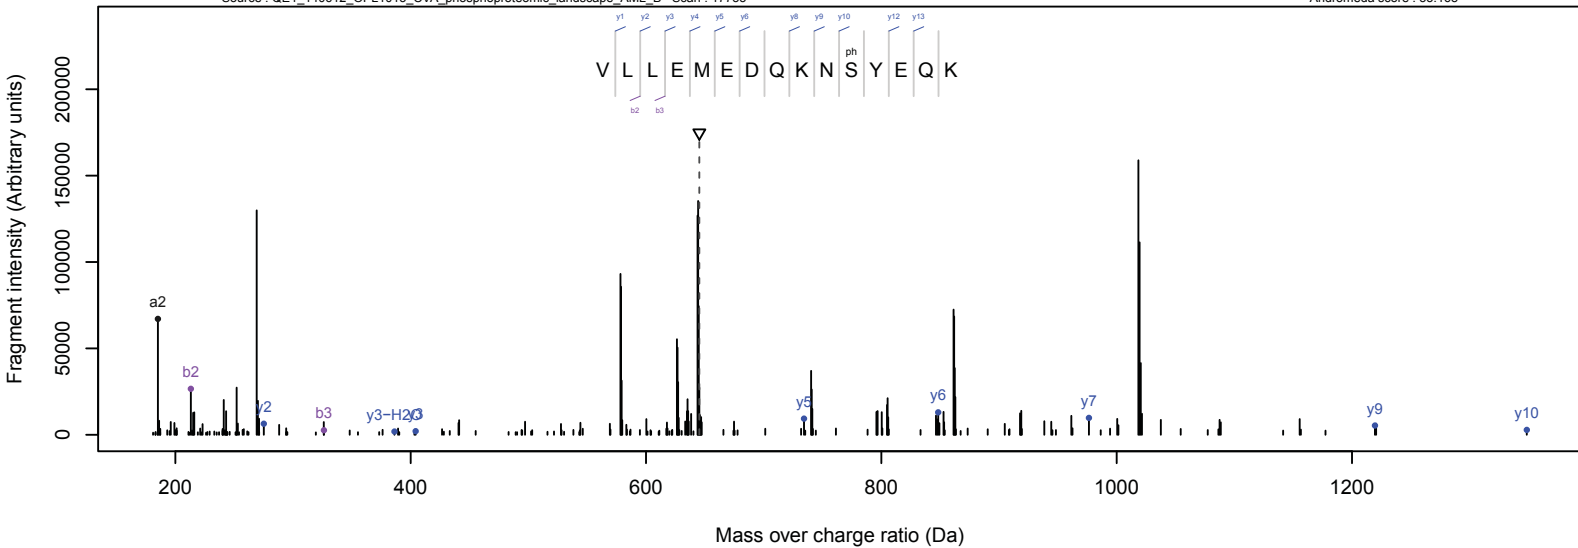

RPPGYYSYLK-2+

Source : QE1\_140612\_OPL1013\_CVA\_phosphoproteomic\_landscape\_AML\_C Scan : 15325

Andromeda score : 53.124

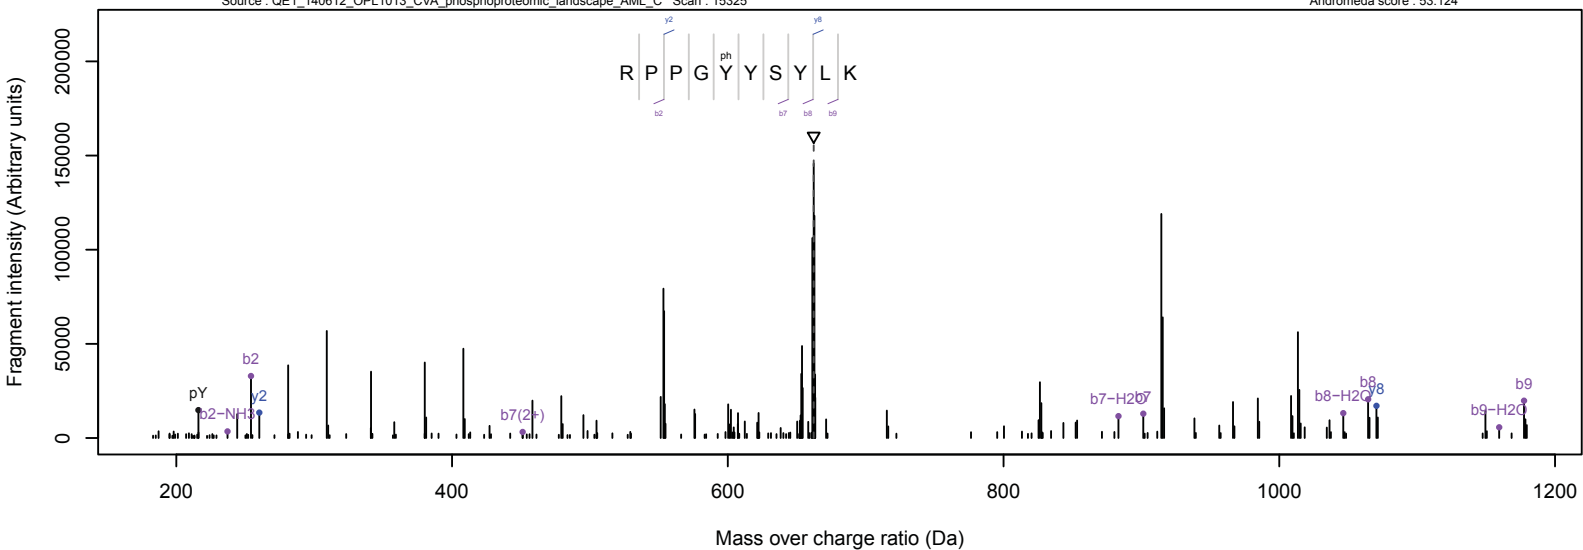

YGNFQLYQMK-2+

Source : QE1\_140612\_OPL1013\_CVA\_phosphoproteomic\_landscape\_AML\_C Scan : 26954

Andromeda score : 53.124

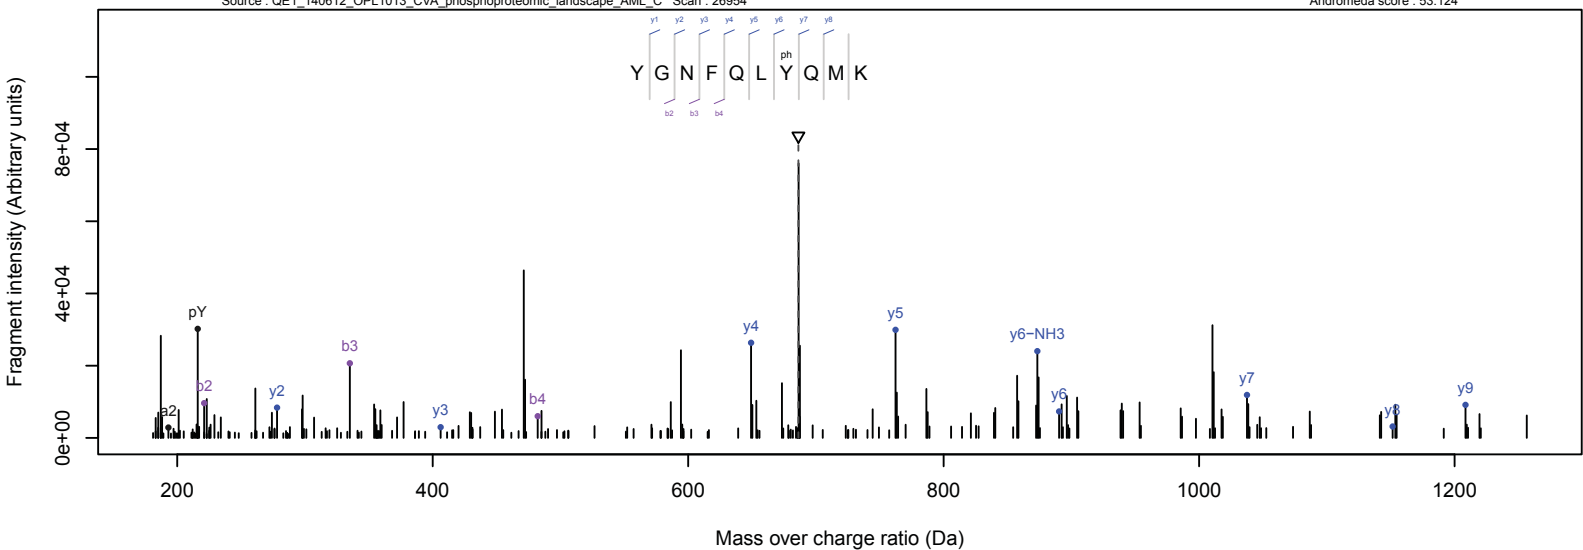

Y(ph)RPGTVLR-2+

Source : QE1\_140612\_OPL1013\_CVA\_phosphoproteomic\_landscape\_AML\_A Scan : 8298

Andromeda score : 53.124

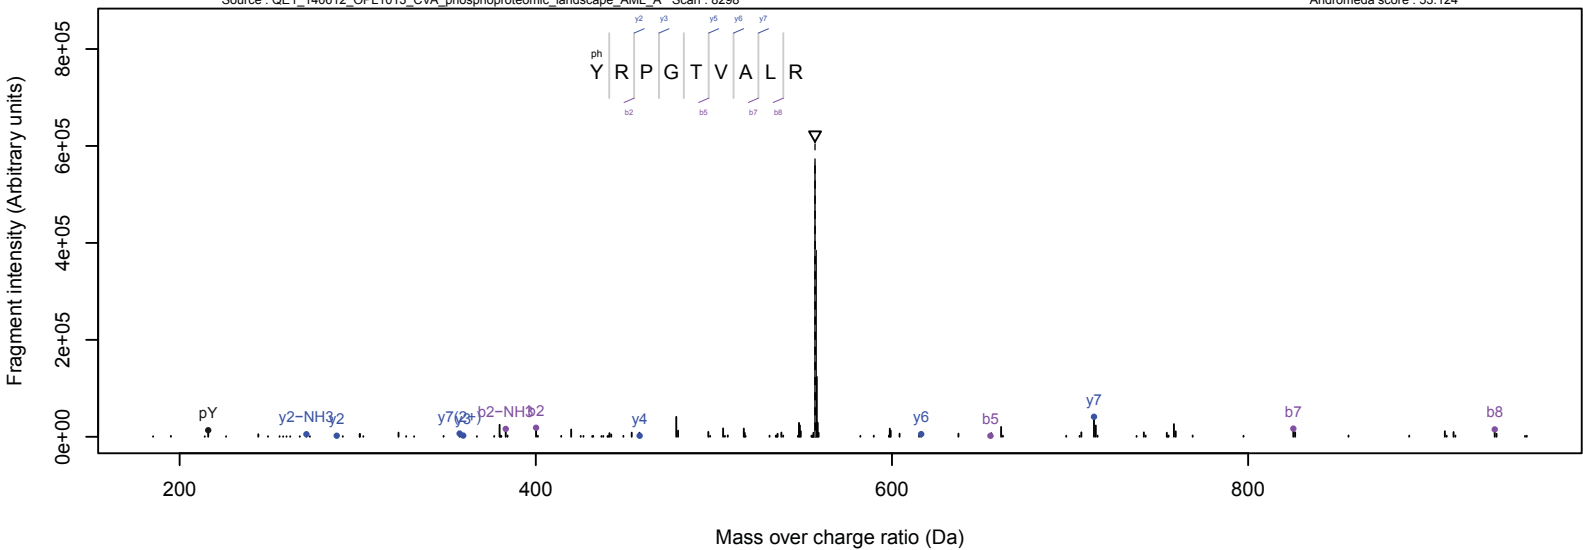

YYEGY(ph)YAAGPGYGGRRNDSPTYGQQGHPNTWK-4+

Source : QE1\_140612\_OPL1013\_CVA\_phosphoproteomic\_landscape\_AML\_C Scan : 22910

Andromeda score : 53.091

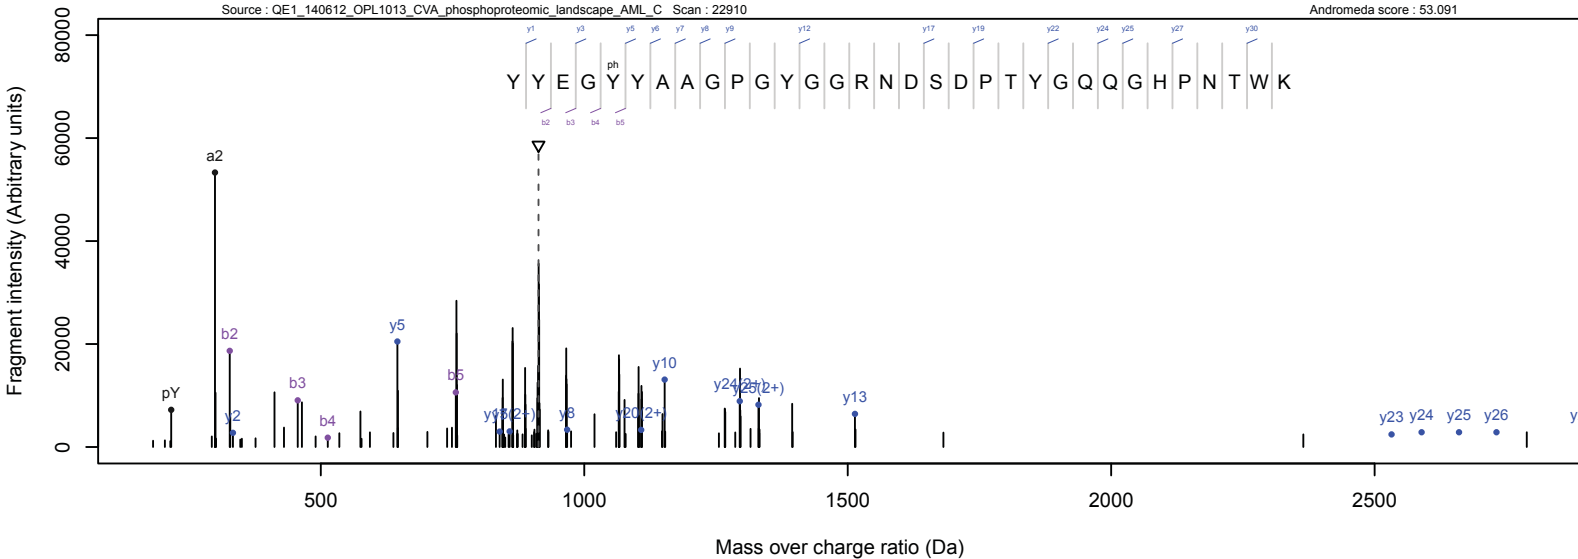

LTDIFY(ph)PVRR-2+

Source : QE1\_140612\_OPL1013\_CVA\_phosphoproteomic\_landscape\_AML\_C Scan : 17305

Andromeda score : 53.089

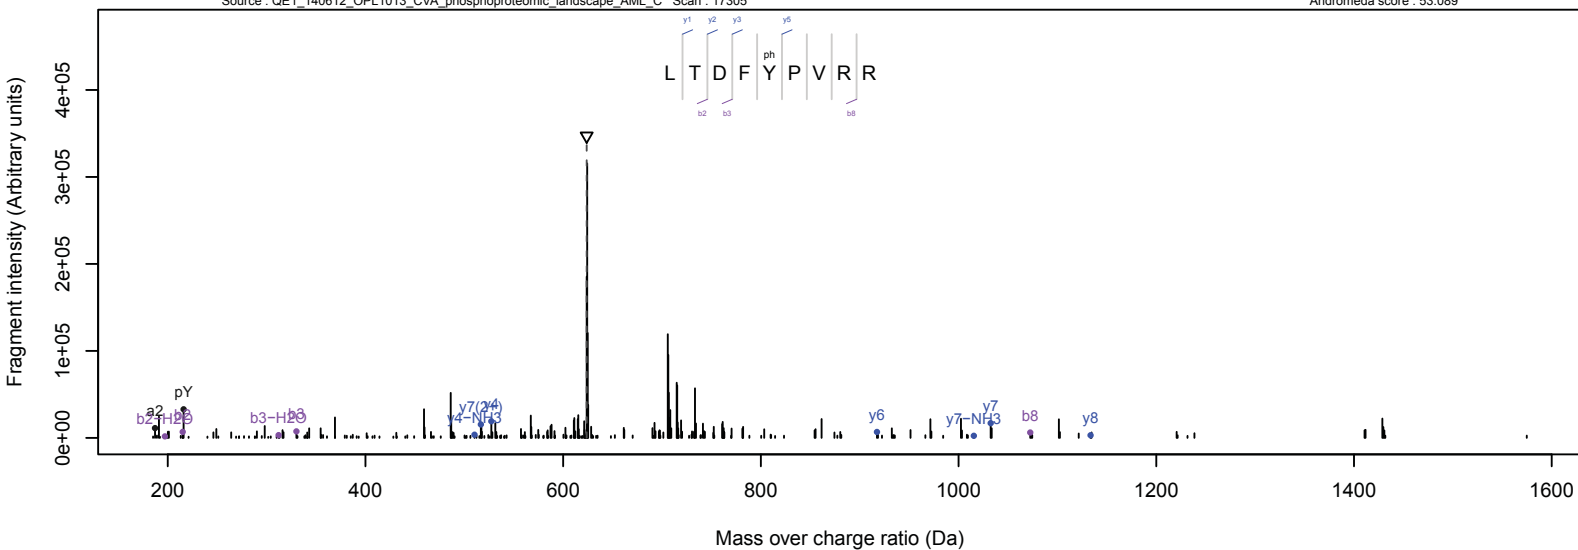

ELTY(ph)QNTDLSEIKEEEQVK-3+

Source : QE1\_140908\_OPL1013\_CvA\_pTyrIP\_AML\_ML2 Scan : 26502

Andromeda score : 53.037

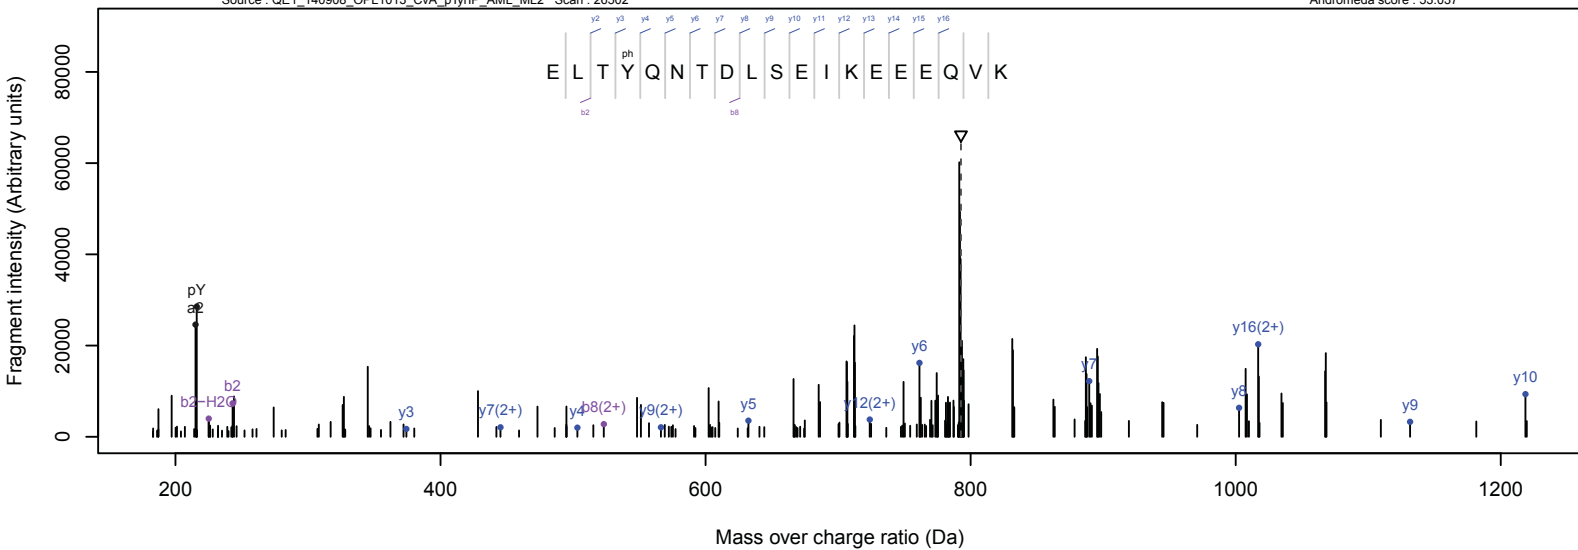

CHGHFGLFPANY(ph)VK-2+

Source : QE1\_140612\_OPL1013\_CVA\_phosphoproteomic\_landscape\_AML\_A Scan : 27887

Andromeda score : 53.034

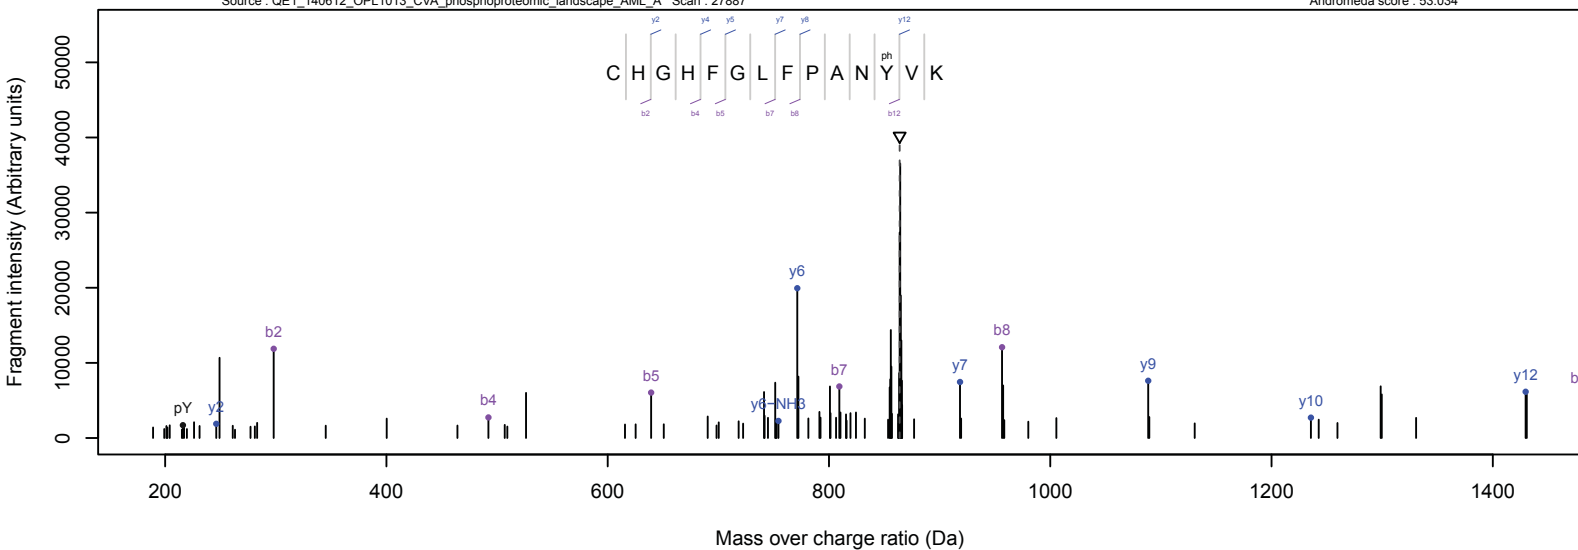

VSDAVQPNNY(ph)LIR-2+

Source : QE1\_140908\_OPL1013\_CvA\_pTyrIP\_AML\_Kasumi6 Scan : 26082

Andromeda score : 53.034

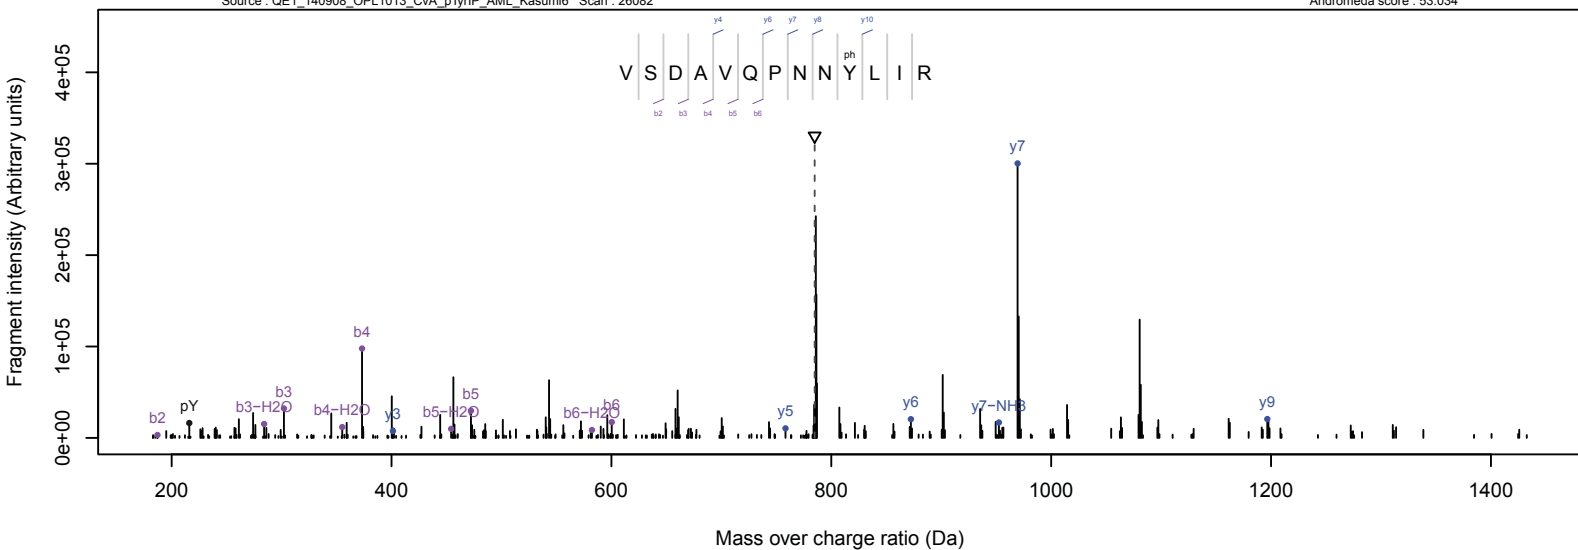

HREEMSNESSDY(ph)ENVLTAK-3+

Source : QE1\_140612\_OPL1013\_CVA\_phosphoproteomic\_landscape\_AML\_B Scan : 14986

Andromeda score : 53.033

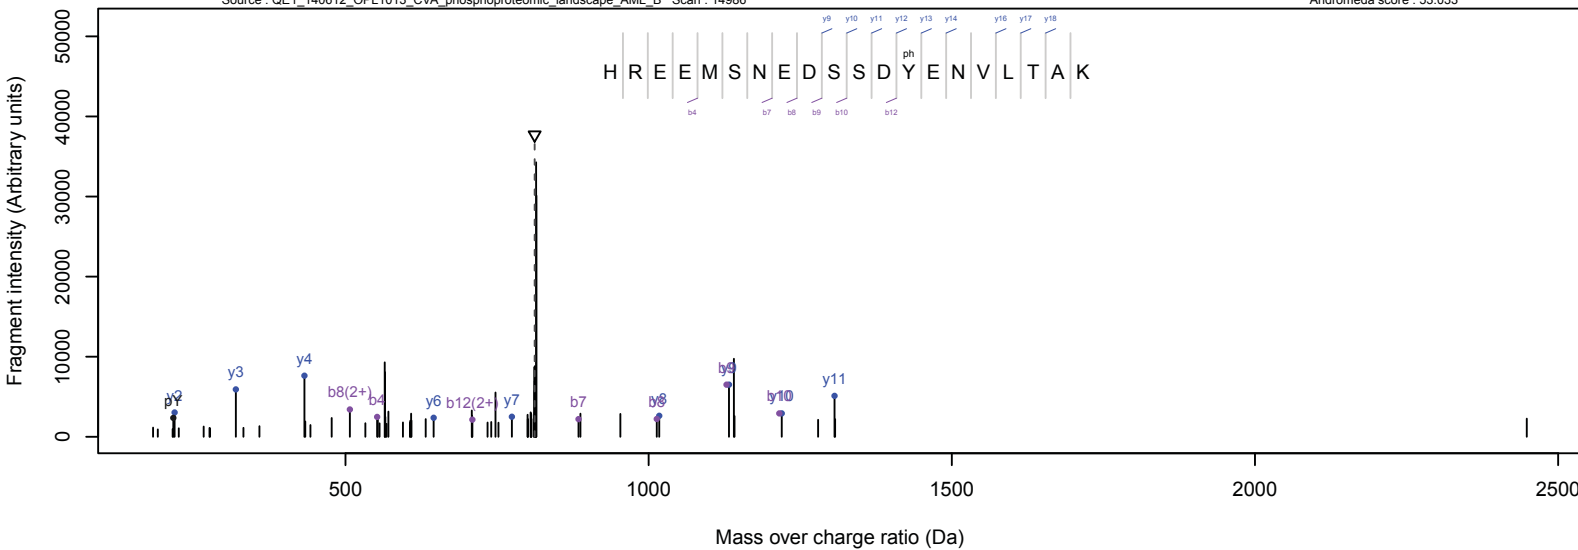

## HSSSPY(ph)VVYPSDKPFLNSDLRR-4+

Source : QE1\_140612\_OPL1013\_CVA\_phosphoproteomic\_landscape\_AML\_C Scan : 27274

Andromeda score : 53.033

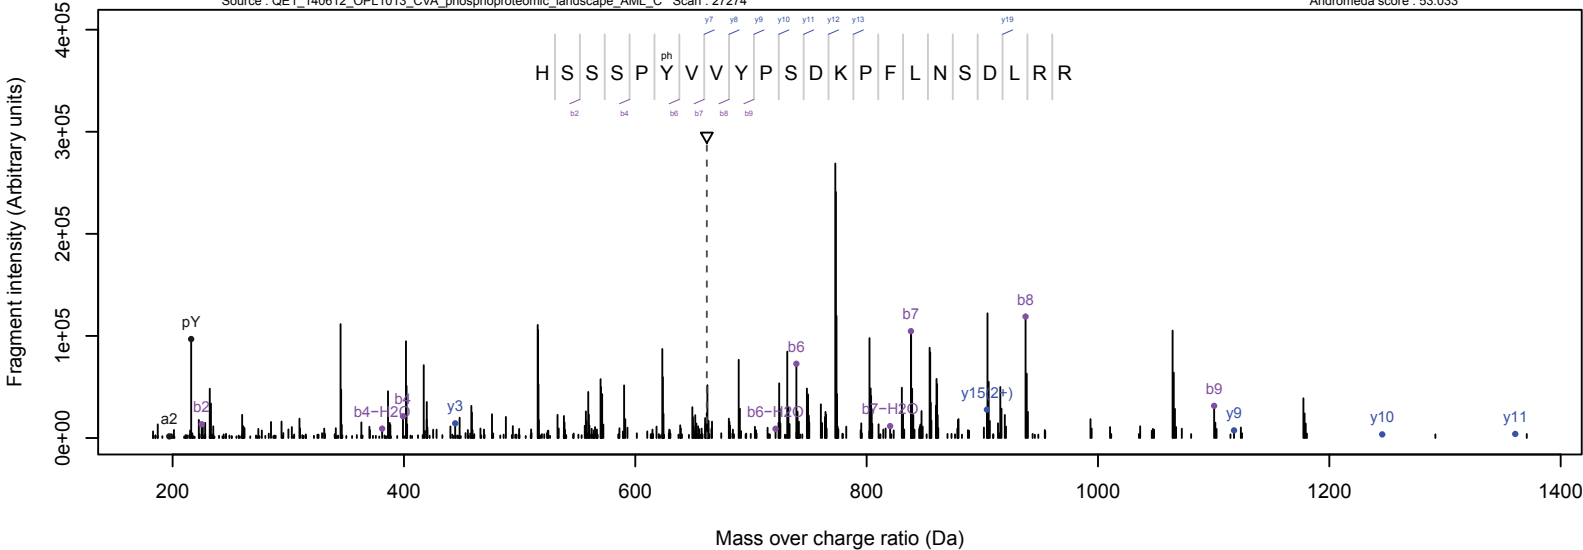

## WDEMNIATYHPADKDYGLMK-3+

Source : QE1\_140612\_OPL1013\_CVA\_phosphoproteomic\_landscape\_AML\_B Scan : 39874

Andromeda score : 53.033

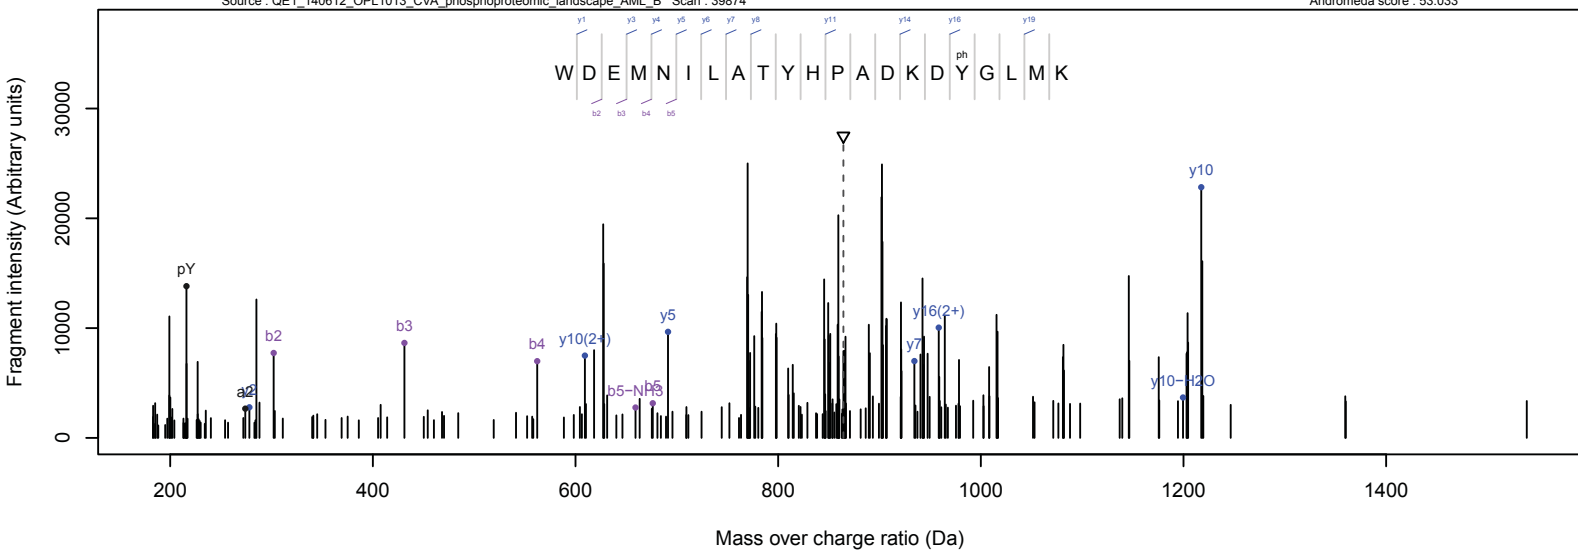

## TLTSELALYKR-2+

Source : QE1\_140612\_OPL1013\_CVA\_phosphoproteomic\_landscape\_AML\_F Scan : 22478

Andromeda score : 53.013

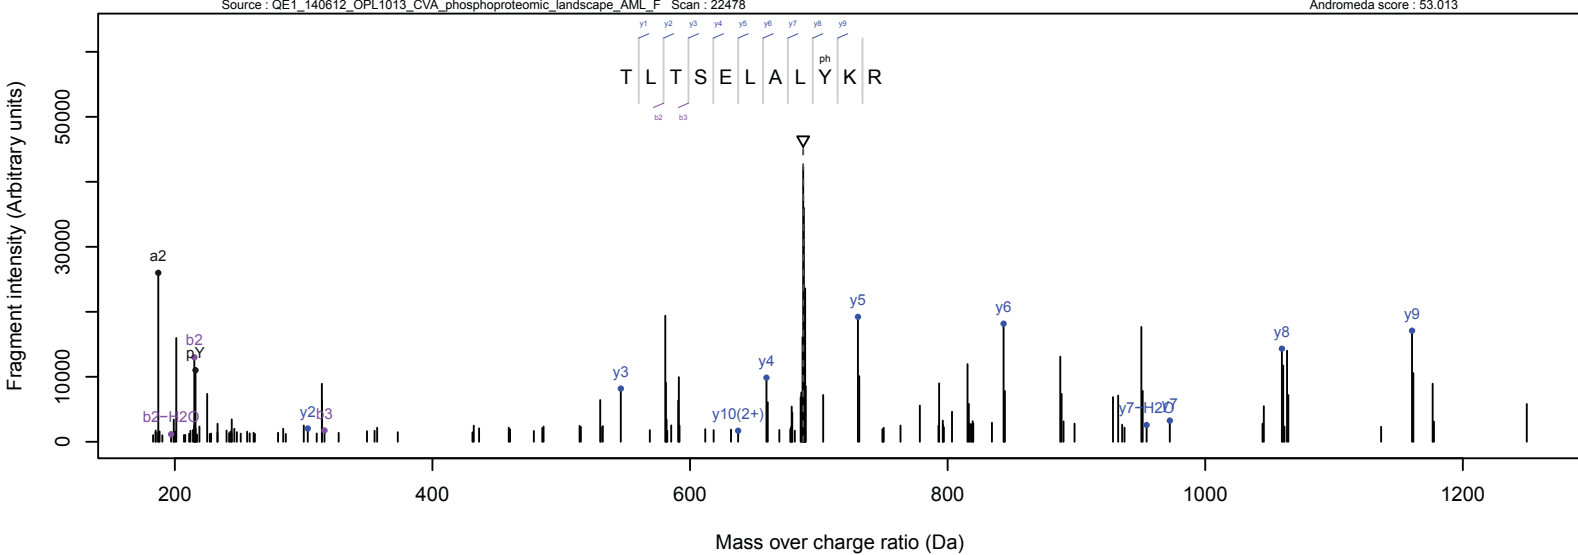

## YTLHY(ph)KTDAPLNIR-3+

Source: QE1\_140612\_OPL1013\_CVA\_phosphoproteomic\_landscape\_AML\_C Scan: 21241

Andromeda score: 53.008

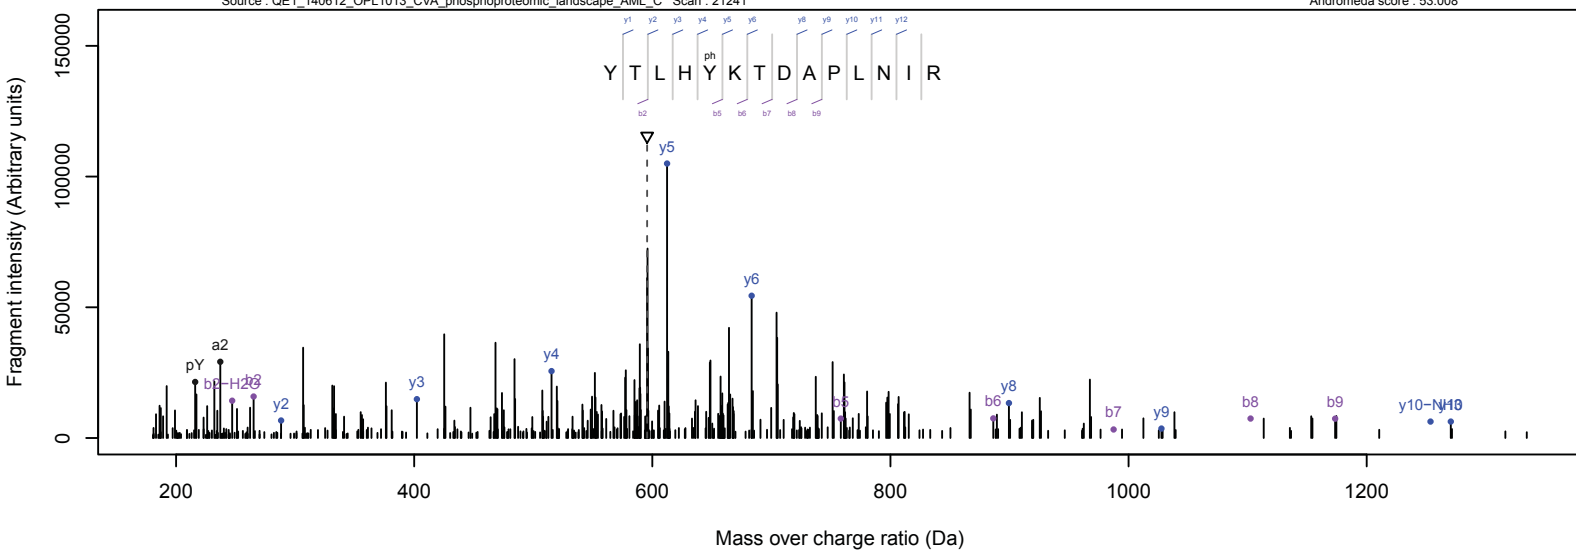

## GPVY(ph)ALHDVSDKIPMTNSPILDPLPNLK-3+

Source: QE1\_140612\_OPL1013\_CVA\_phosphoproteomic\_landscape\_AML\_C Scan: 45976

Andromeda score: 52.97

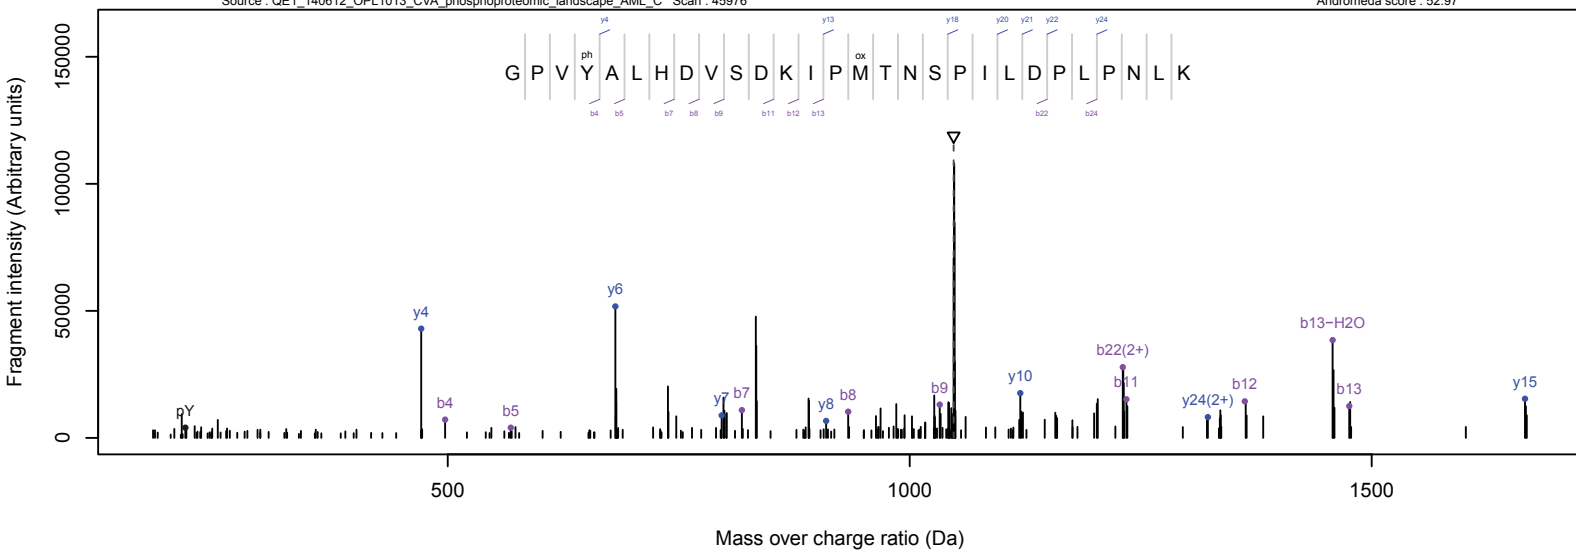

## LSKNPY(ph)LNLASVLPVCLSSPASK-3+

Source: QE1\_140612\_OPL1013\_CVA\_phosphoproteomic\_landscape\_AML\_C Scan: 47499

Andromeda score: 52.97

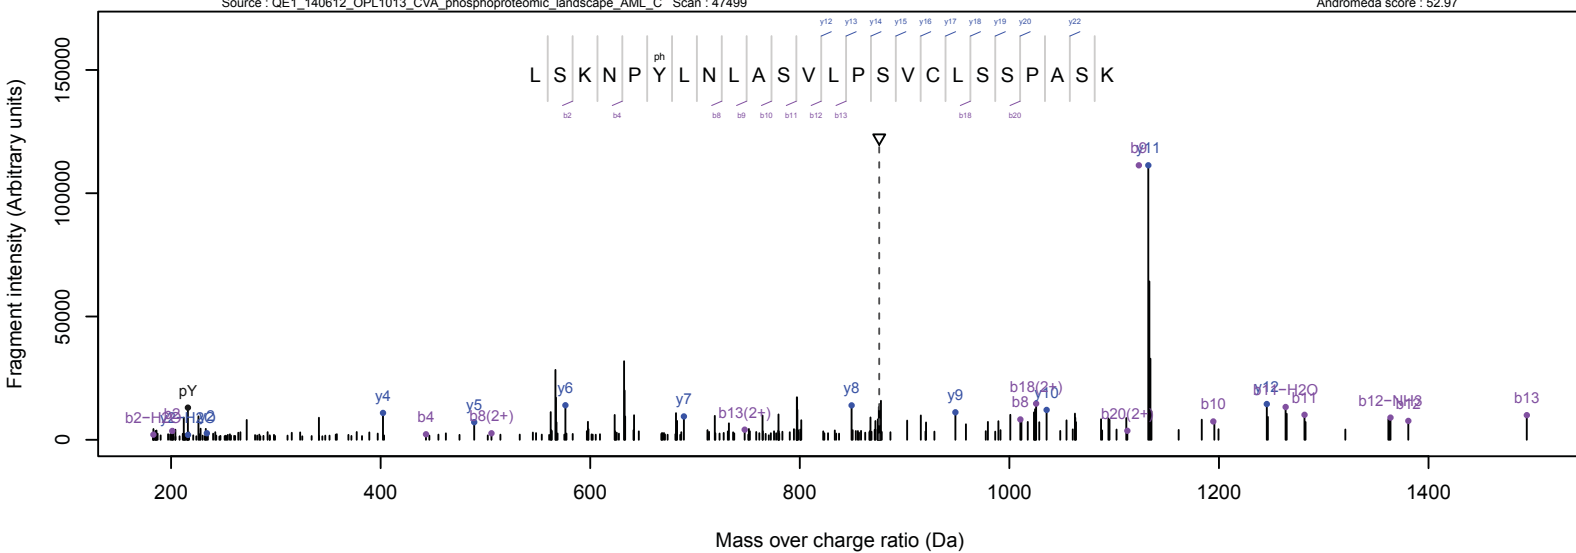

VEDLVKQY(ph)FQTAEK-3+

Source : QE1\_140612\_OPL1013\_CVA\_phosphoproteomic\_landscape\_AML\_B Scan : 22987

Andromeda score : 52.966

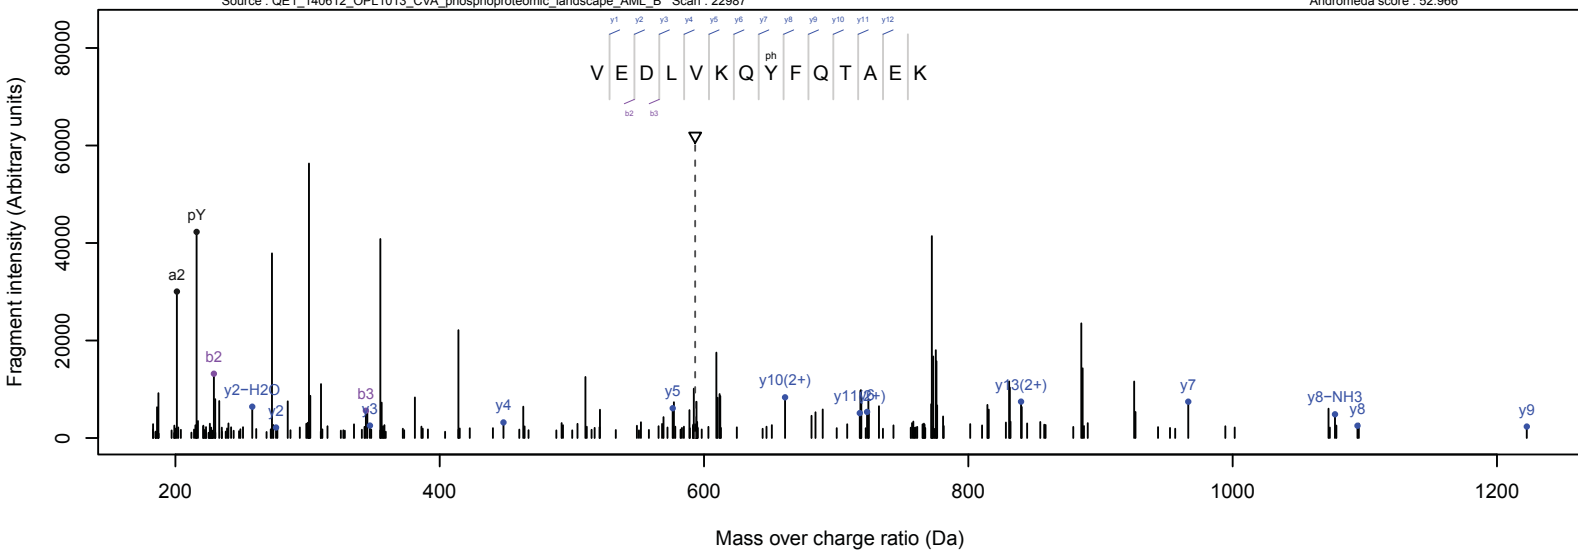

TQY(ph)FHVK-2+

Source : QE1\_140612\_OPL1013\_CVA\_phosphoproteomic\_landscape\_AML\_C Scan : 7983

Andromeda score : 52.937

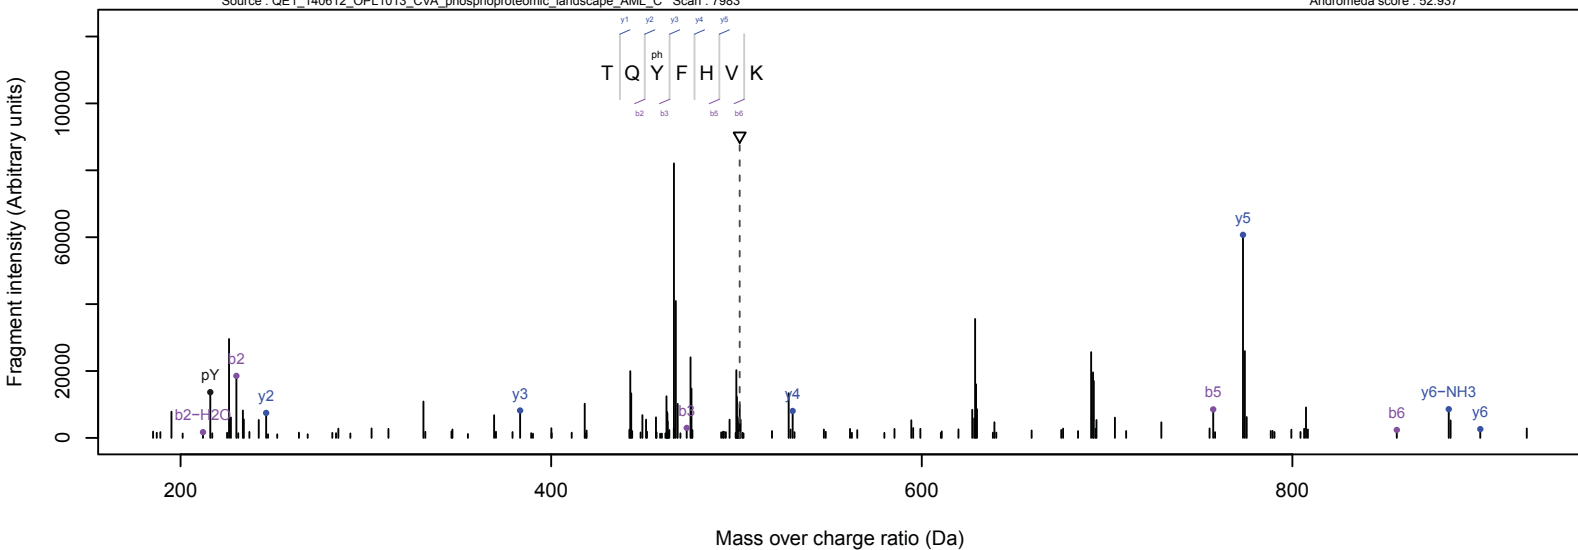

ICEEAAY(ph)SNPSLPLVHPPSHSK-3+

Source : QE1\_140612\_OPL1013\_CVA\_phosphoproteomic\_landscape\_AML\_C Scan : 25671

Andromeda score : 52.898

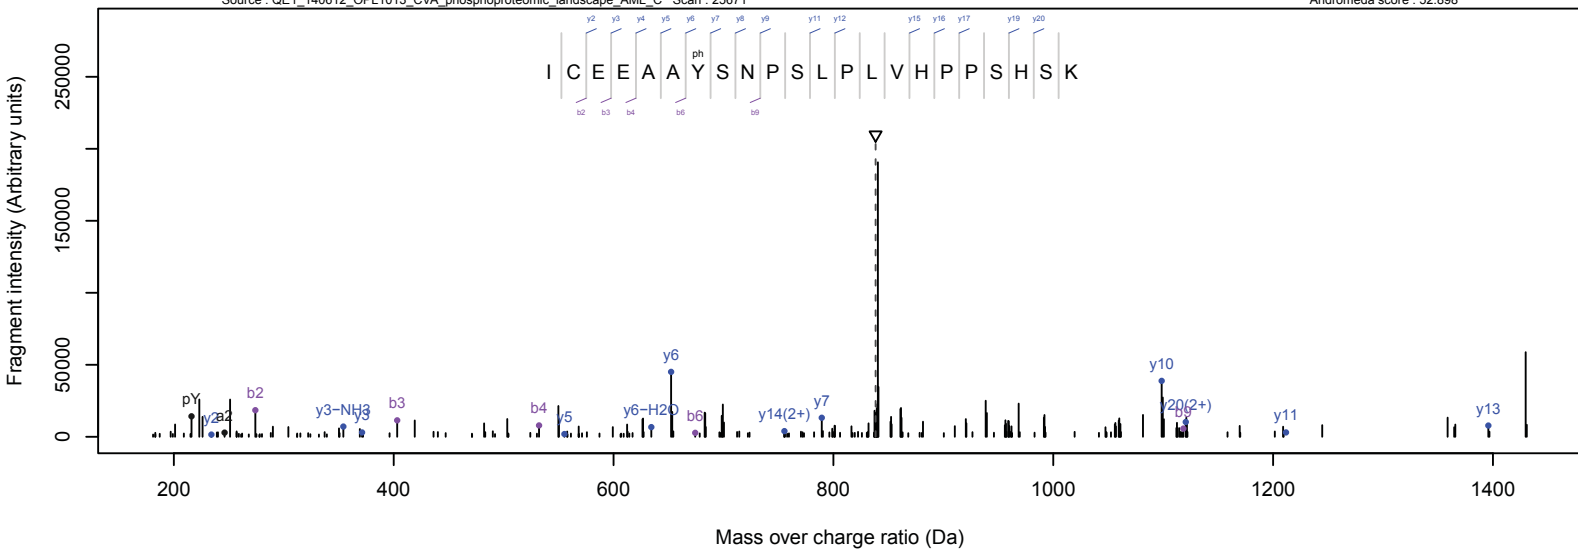



**GRDPY(ph)AYIPLNR-3+**

Source : QE1\_140612\_OPL1013\_CVA\_phosphoproteomic\_landscape\_AML\_C Scan : 26029

Andromeda score : 52.891

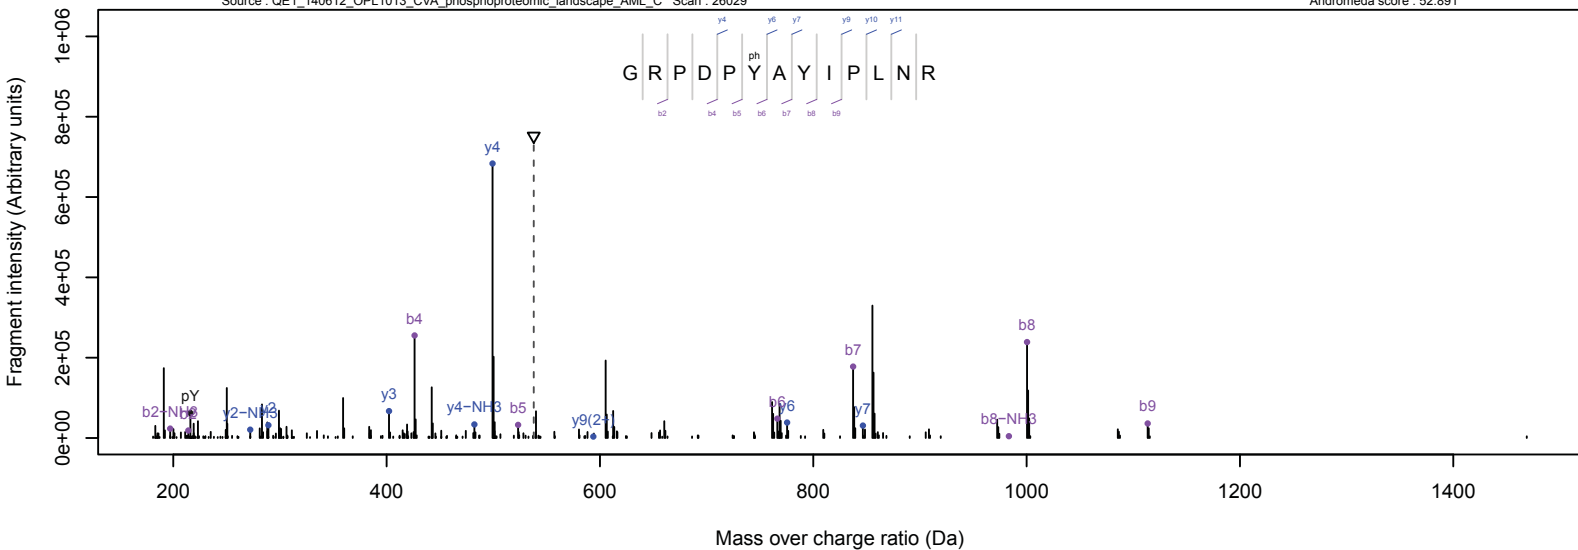

**MTPY(ph)GCLPTGDR-2+**

Source : QE1\_140612\_OPL1013\_CVA\_phosphoproteomic\_landscape\_AML\_A Scan : 17019

Andromeda score : 52.891

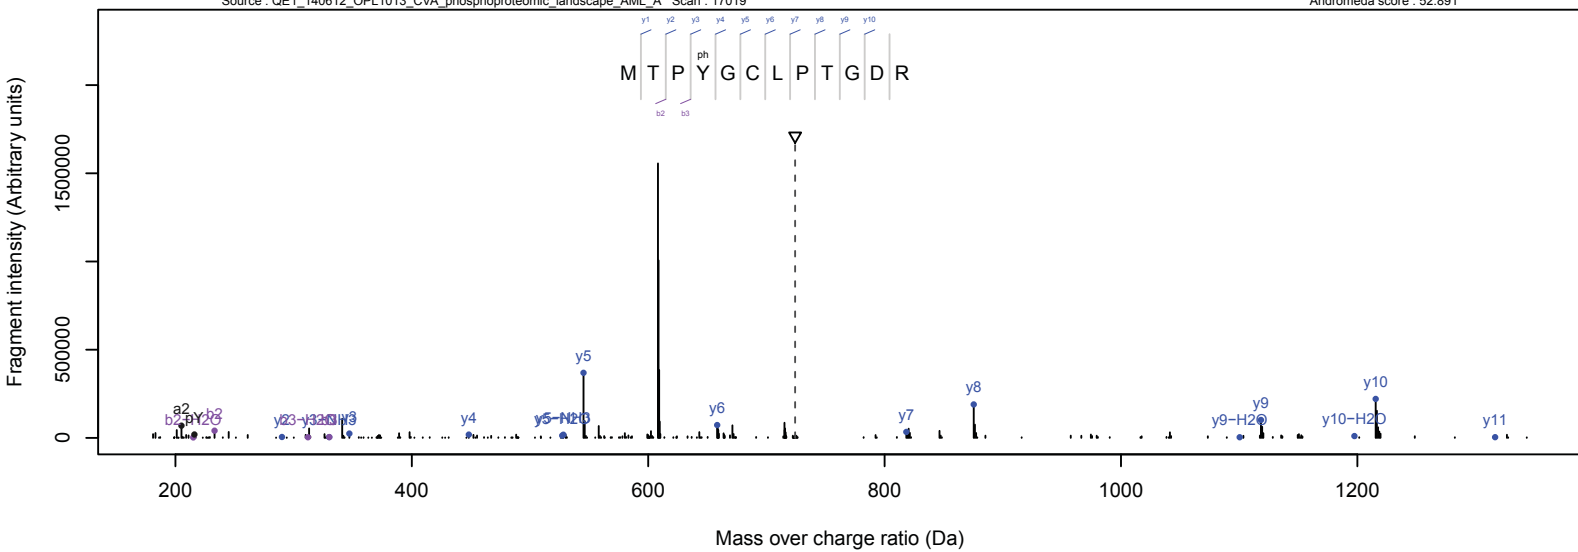

**VPY(ph)GKGPSFNQER-3+**

Source : QE1\_140612\_OPL1013\_CVA\_phosphoproteomic\_landscape\_AML\_B Scan : 10212

Andromeda score : 52.891

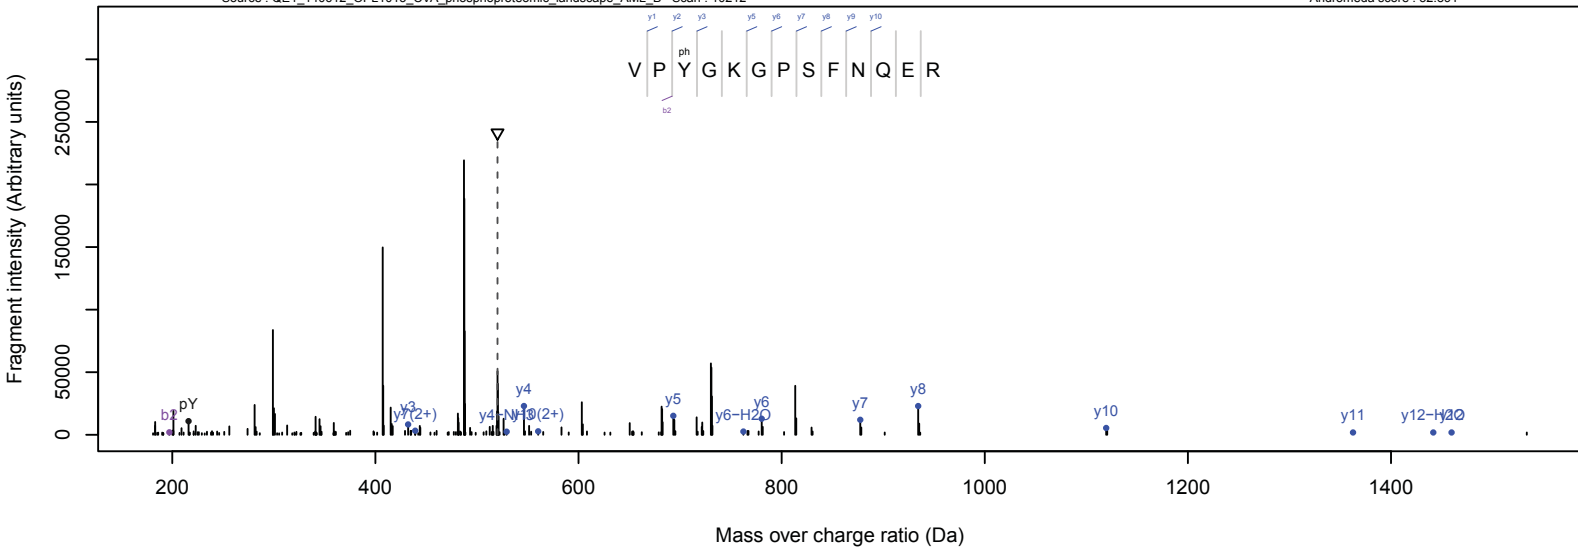

## LEQIKKGY(ph)DAPLCNLLLFK-3+

Source : QE1\_140612\_OPL1013\_CVA\_phosphoproteomic\_landscape\_AML\_C Scan : 42996

Andromeda score : 52.866

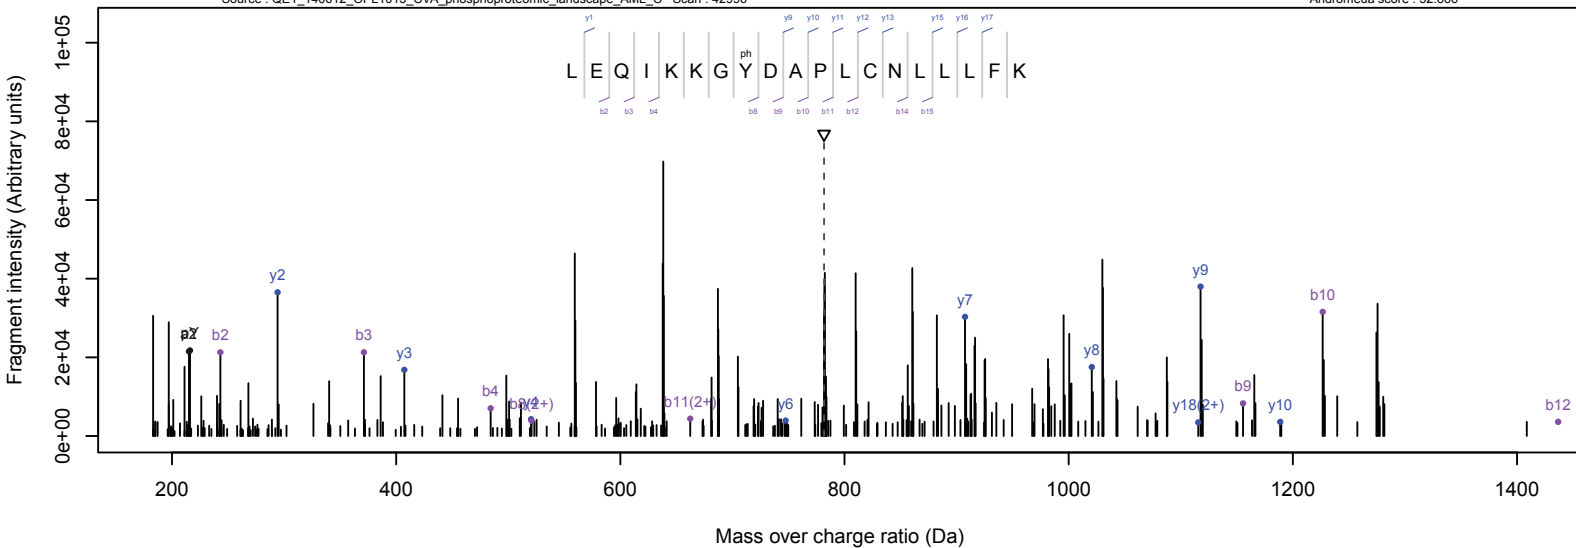

## VY(ph)ELHGSSPAVSSSEECTPSR-3+

Source : QE1\_140612\_OPL1013\_CVA\_phosphoproteomic\_landscape\_AML\_B Scan : 13603

Andromeda score : 52.866

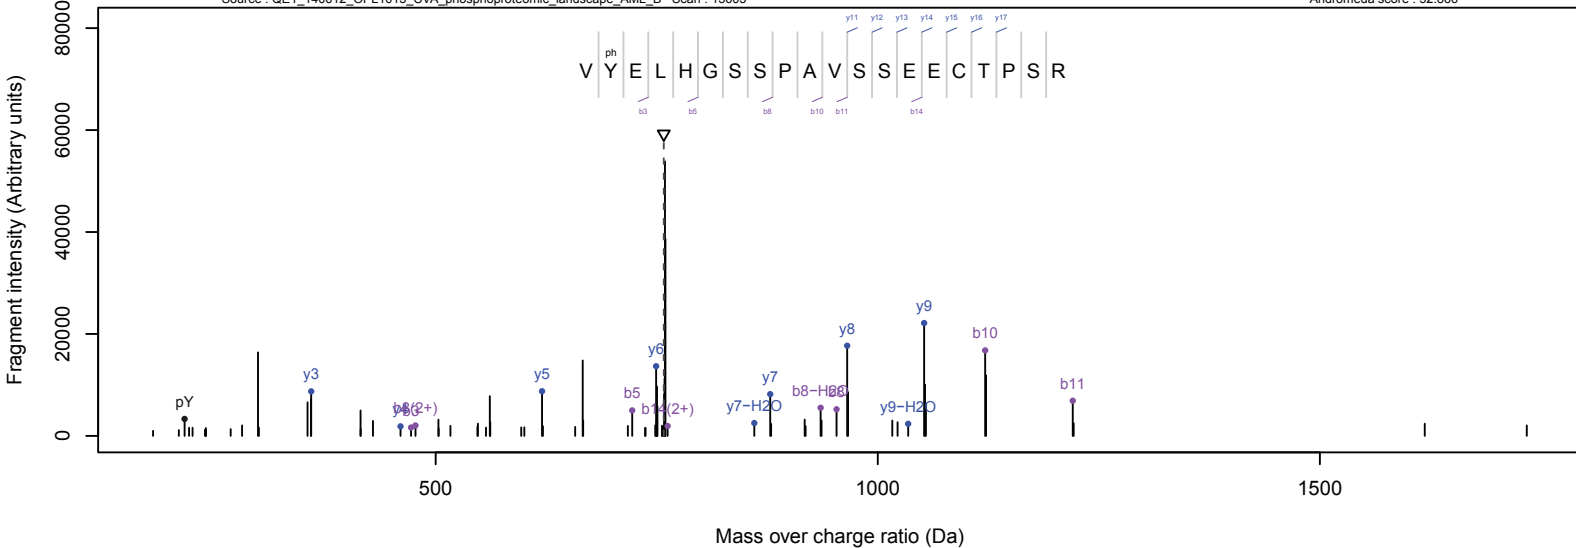

## (ac)AY(ph)HSFLVEPISCHAWNK-3+

Source : QE1\_140612\_OPL1013\_CVA\_phosphoproteomic\_landscape\_AML\_C Scan : 39236

Andromeda score : 52.862

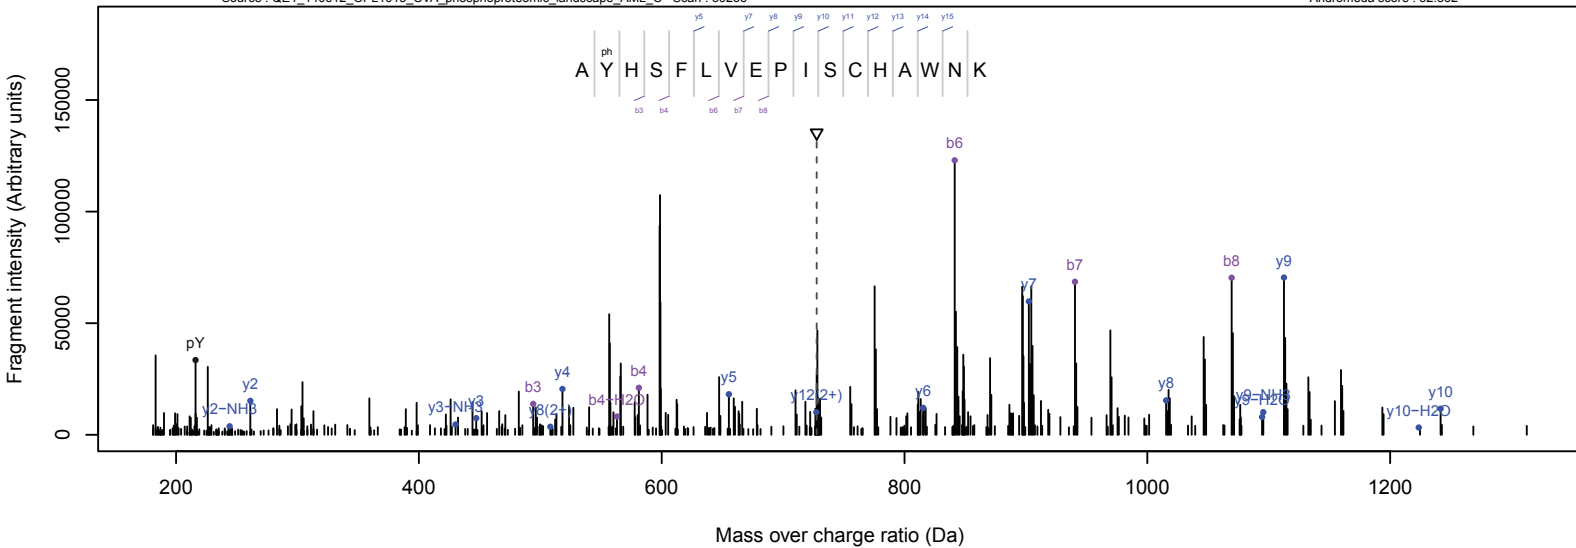

## KEY(ph)NSIGVSGFEIR-2+

Source : QE1\_140612\_OPL1013\_CVA\_phosphoproteomic\_landscape\_AML\_C Scan : 29104

Andromeda score : 52.862

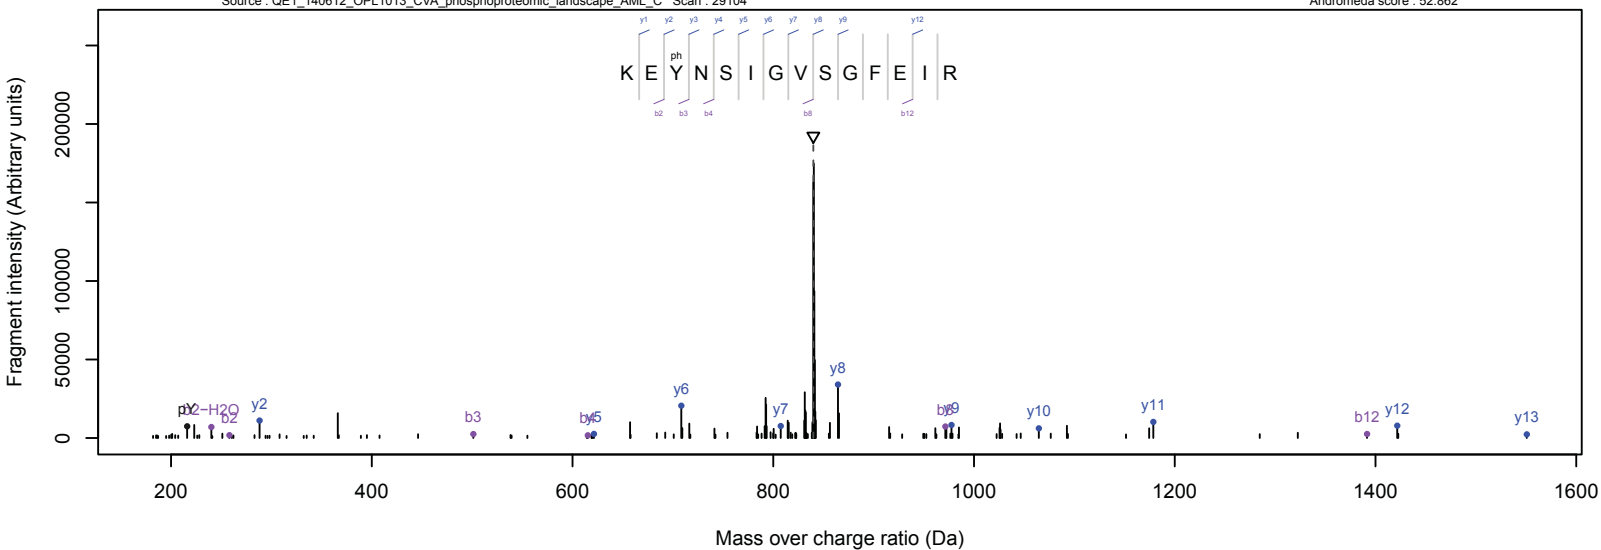

## RRPGDPVCPF(ph)SHQLR-4+

Source : QE1\_140612\_OPL1013\_CVA\_phosphoproteomic\_landscape\_AML\_C Scan : 17320

Andromeda score : 52.862

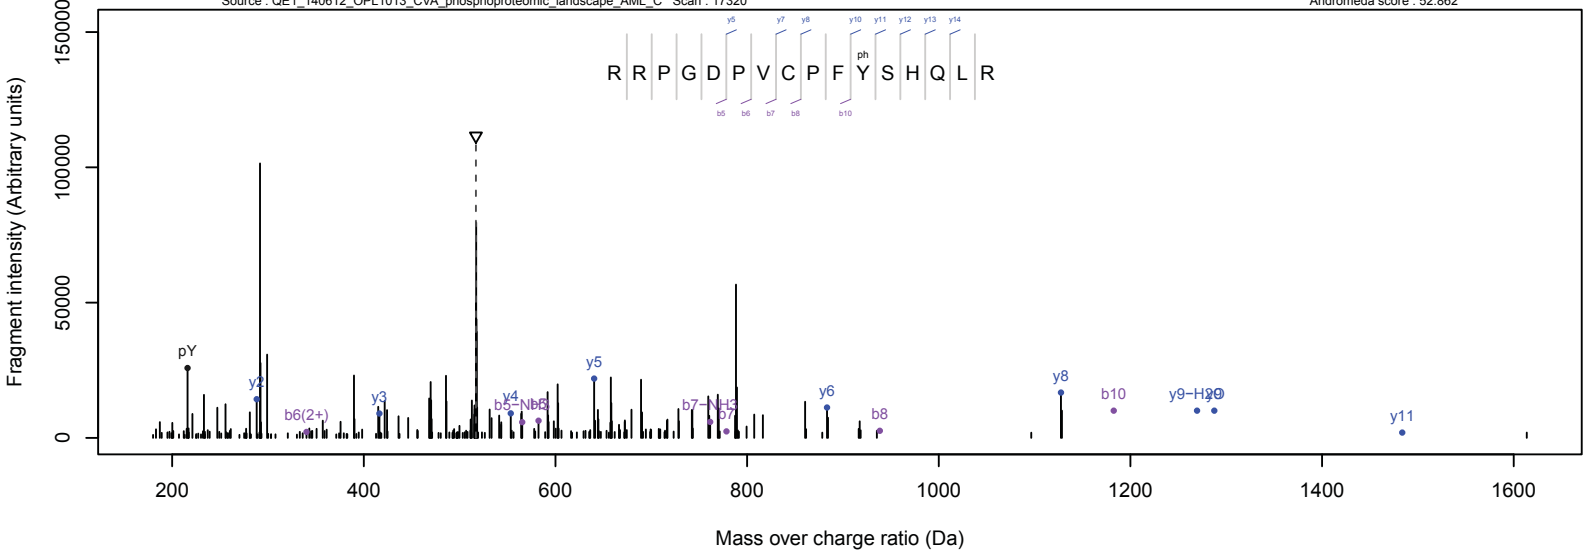

## LVHGLVVKDPSIYDTLESVR-3+

Source : QE1\_140612\_OPL1013\_CVA\_phosphoproteomic\_landscape\_AML\_F Scan : 36529

Andromeda score : 52.814

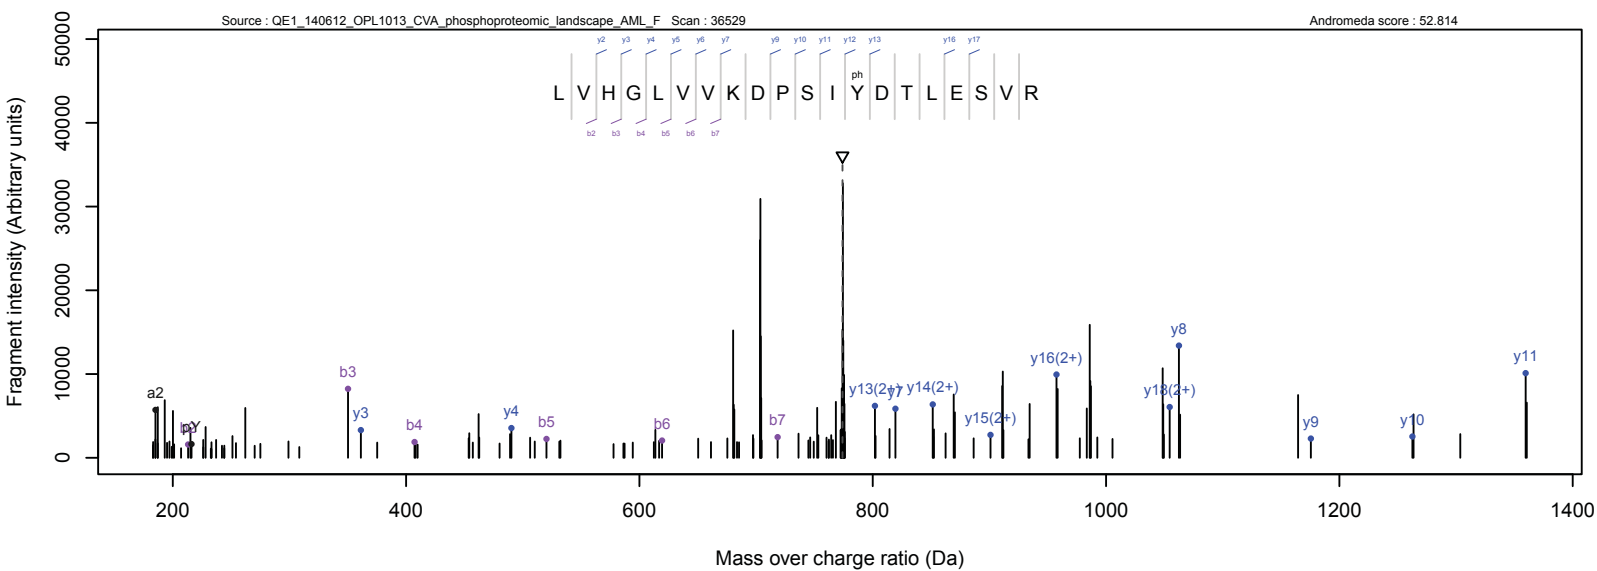

## VNIFGVESGKKEY(ph)SLDTR-3+

Source : QE1\_140612\_OPL1013\_CVA\_phosphoproteomic\_landscape\_AML\_B Scan : 25949

Andromeda score : 52.814

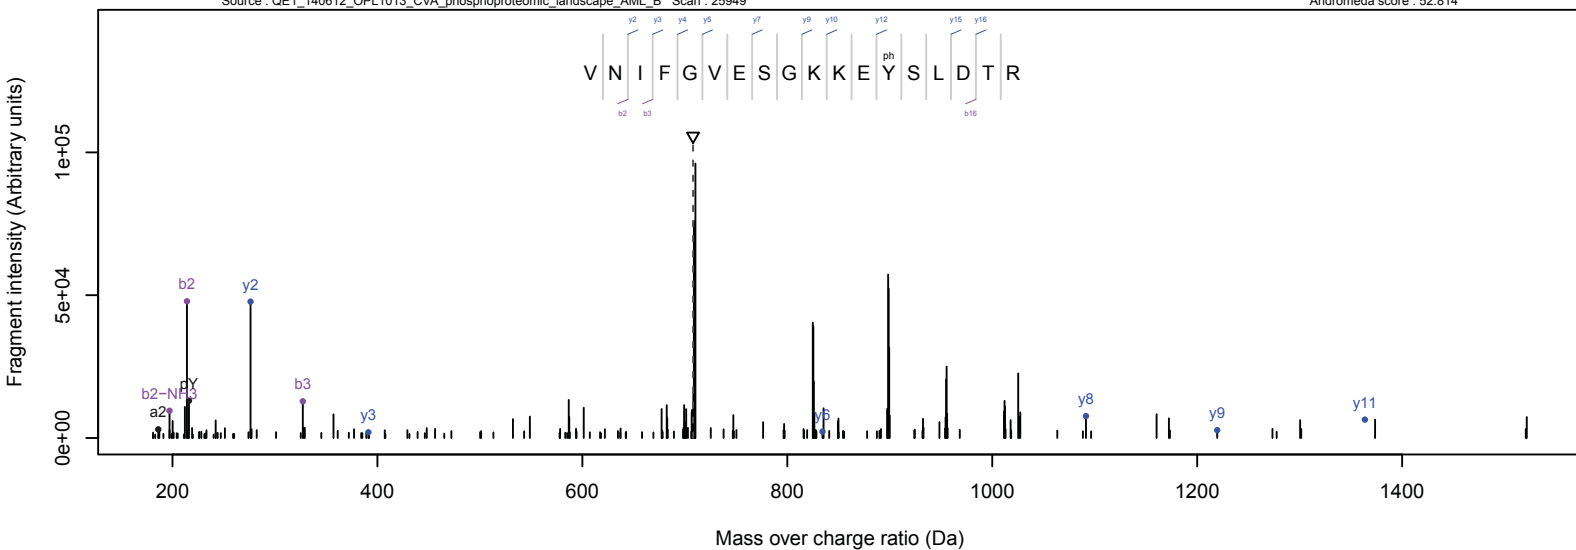

## VVETDPSY(ph)CIVAPDTVIHCEGEPIKR-4+

Source : QE1\_140908\_OPL1013\_CvA\_pTyrIP\_AML\_Kasumi1 Scan : 31071

Andromeda score : 52.773

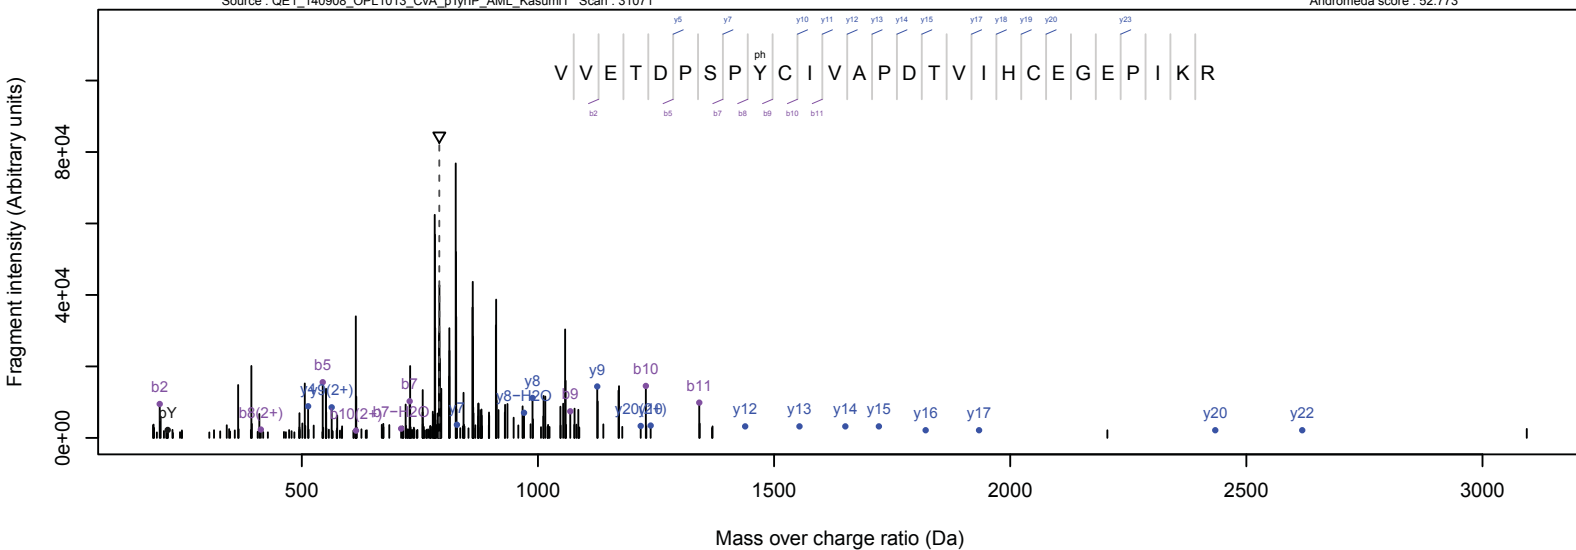

## VKNLSASFPTTEESSINY(ph)TFK-3+

Source : QE1\_140612\_OPL1013\_CVA\_phosphoproteomic\_landscape\_AML\_B Scan : 32226

Andromeda score : 52.769

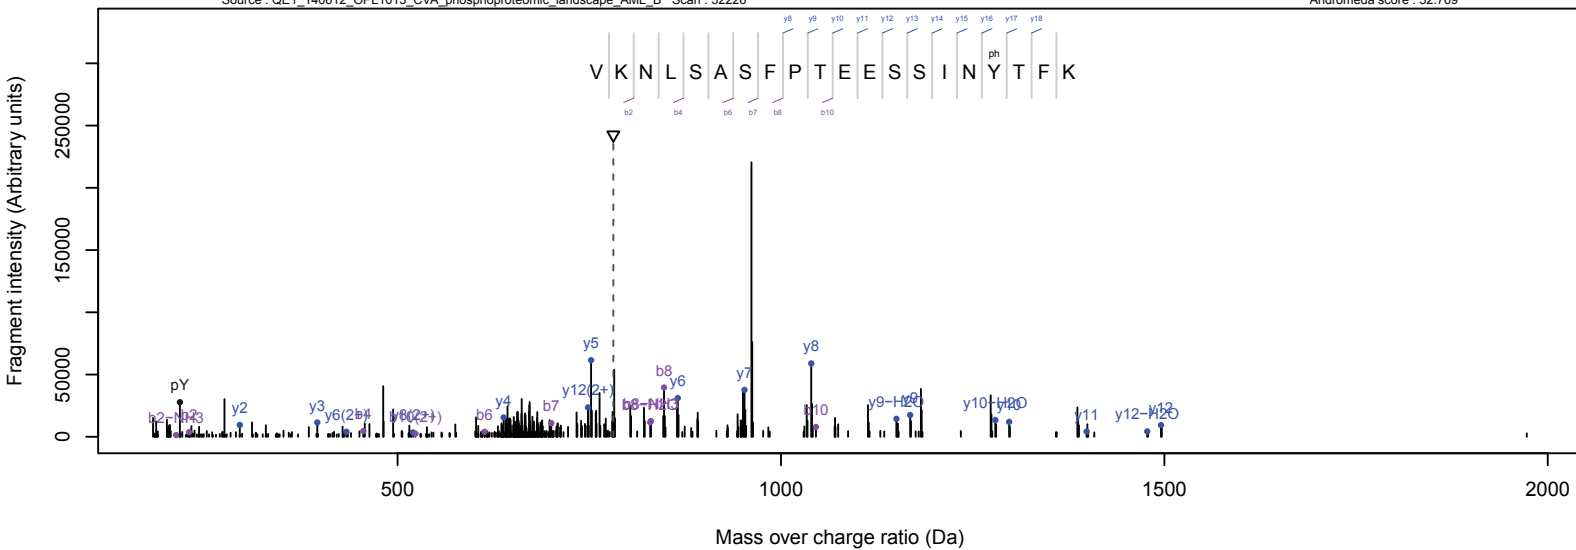

## KVSLY(ph)GYLR-2+

Source: QE1\_140908\_OPL1013\_CvA\_pTyrIP\_AML\_HEL Scan: 25955

Andromeda score: 52.725

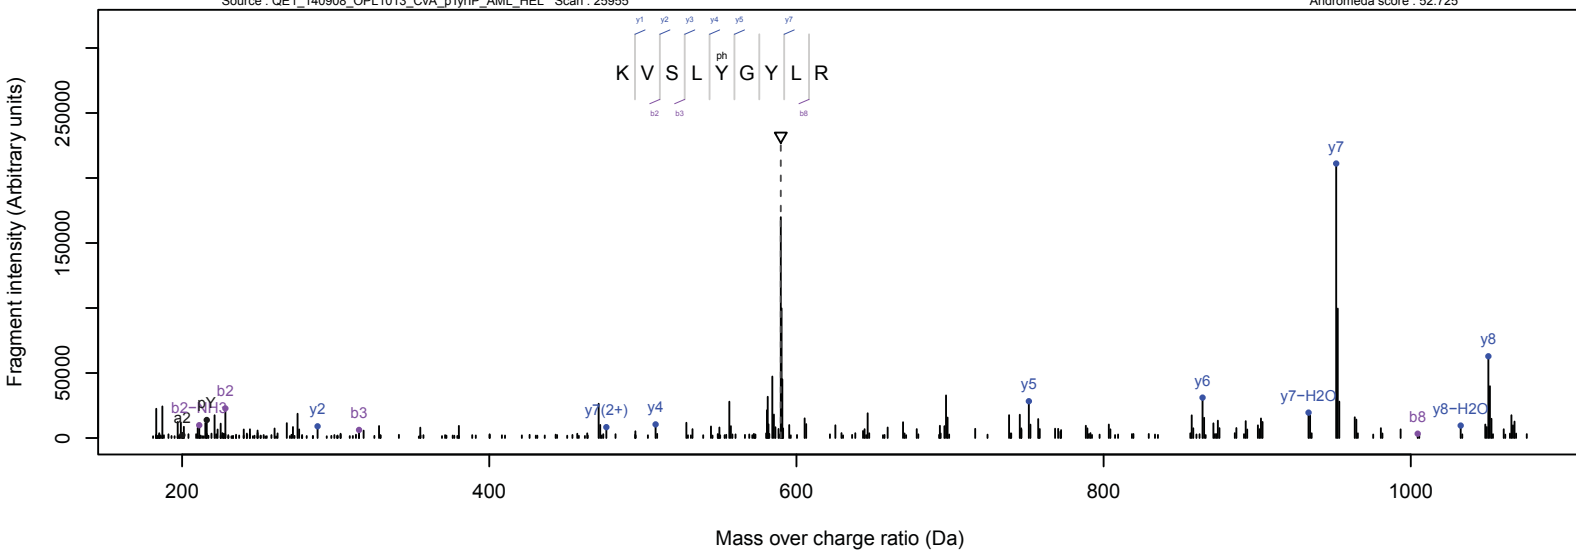

## FGNVY(ph)LAR-2+

Source: QE1\_140612\_OPL1013\_CvA\_phosphoproteomic\_landscape\_AML\_C Scan: 22022

Andromeda score: 52.716

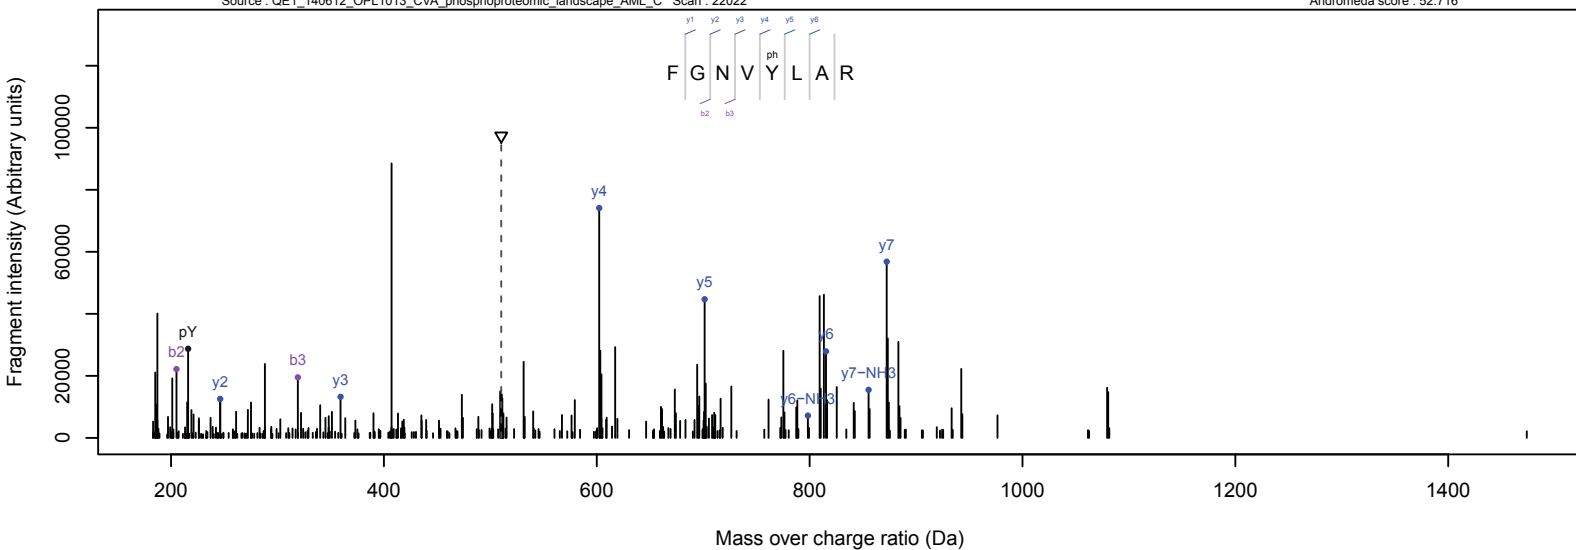

## LTVY(ph)LGKR-2+

Source: QE1\_140612\_OPL1013\_CvA\_phosphoproteomic\_landscape\_AML\_C Scan: 15905

Andromeda score: 52.716

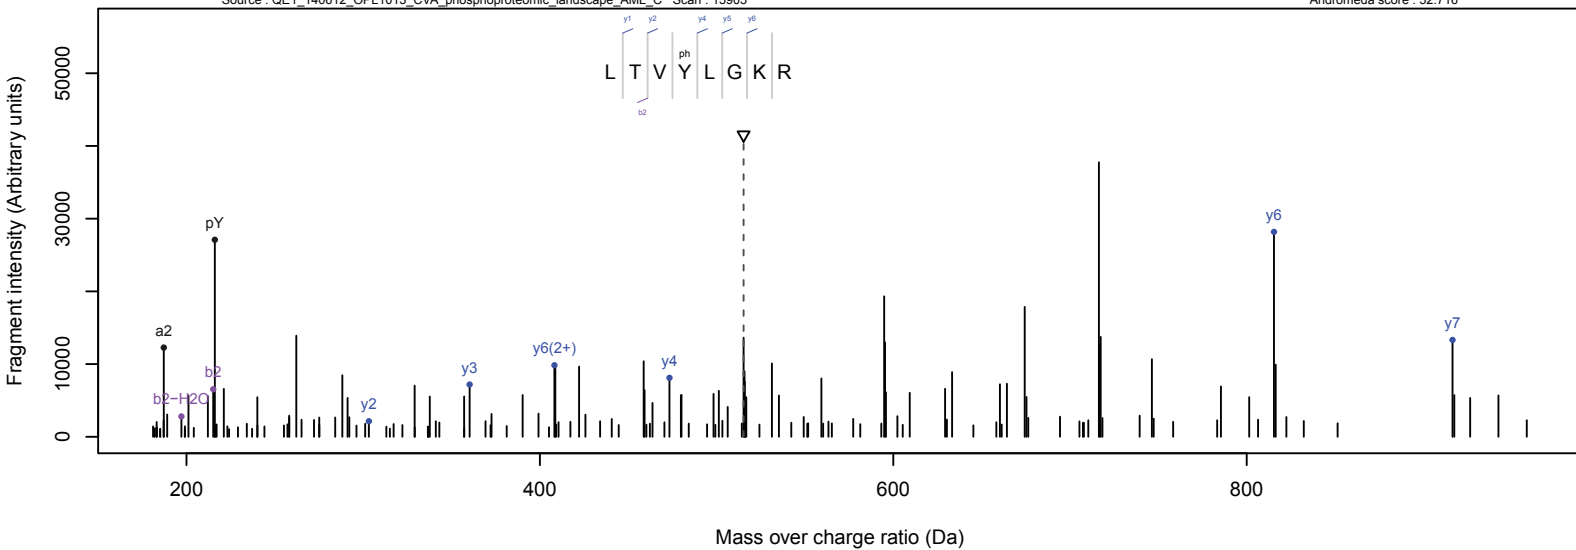

## RFPPY(ph)YM(ox)R-3+

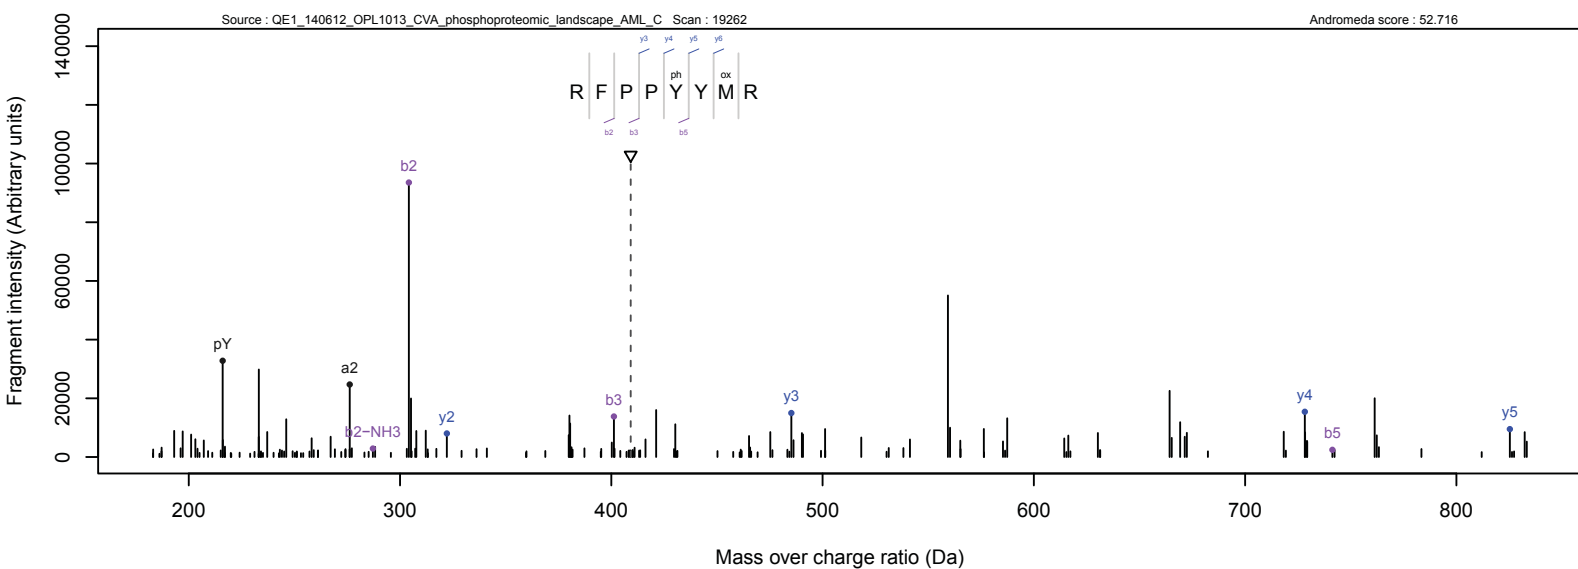

## FKVAS(ph)FR-2+

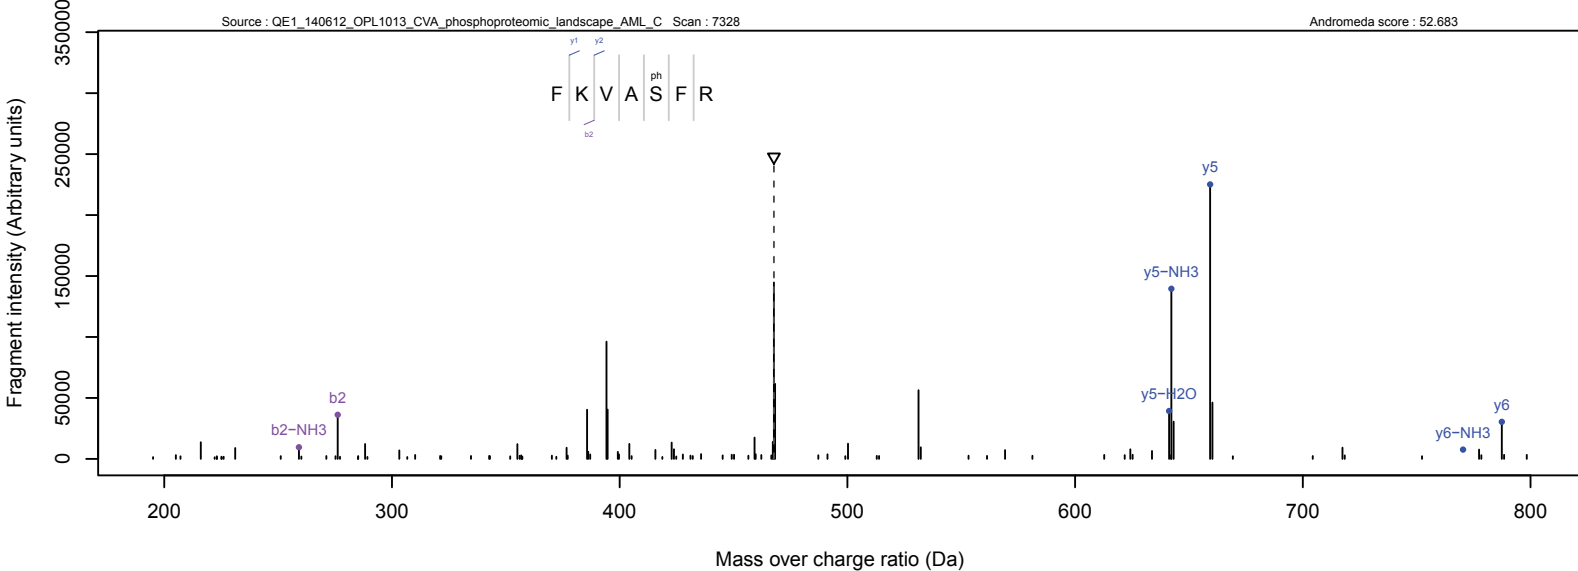

## Y(ph)AFVM(ox)FK-2+

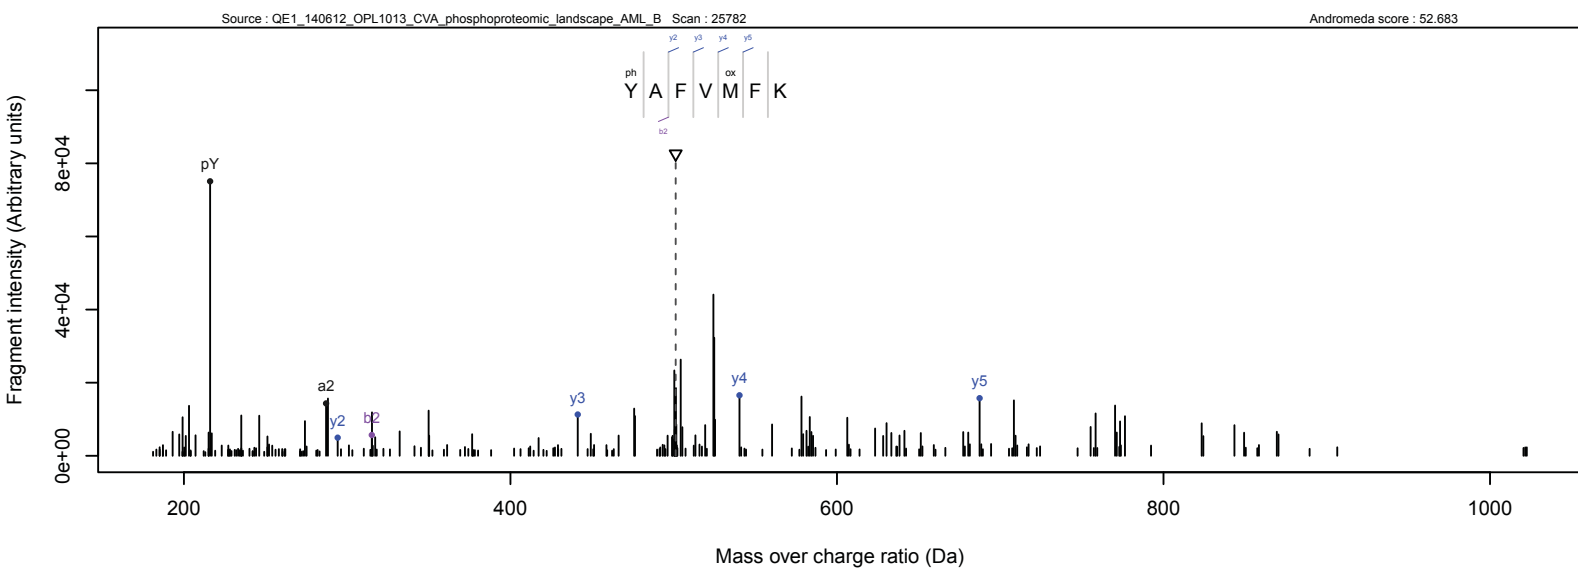

## GTGLY(ph)ELWK-2+

Source : QE1\_140612\_OPL1013\_CVA\_phosphoproteomic\_landscape\_AML\_B Scan : 35892

Andromeda score : 52.579

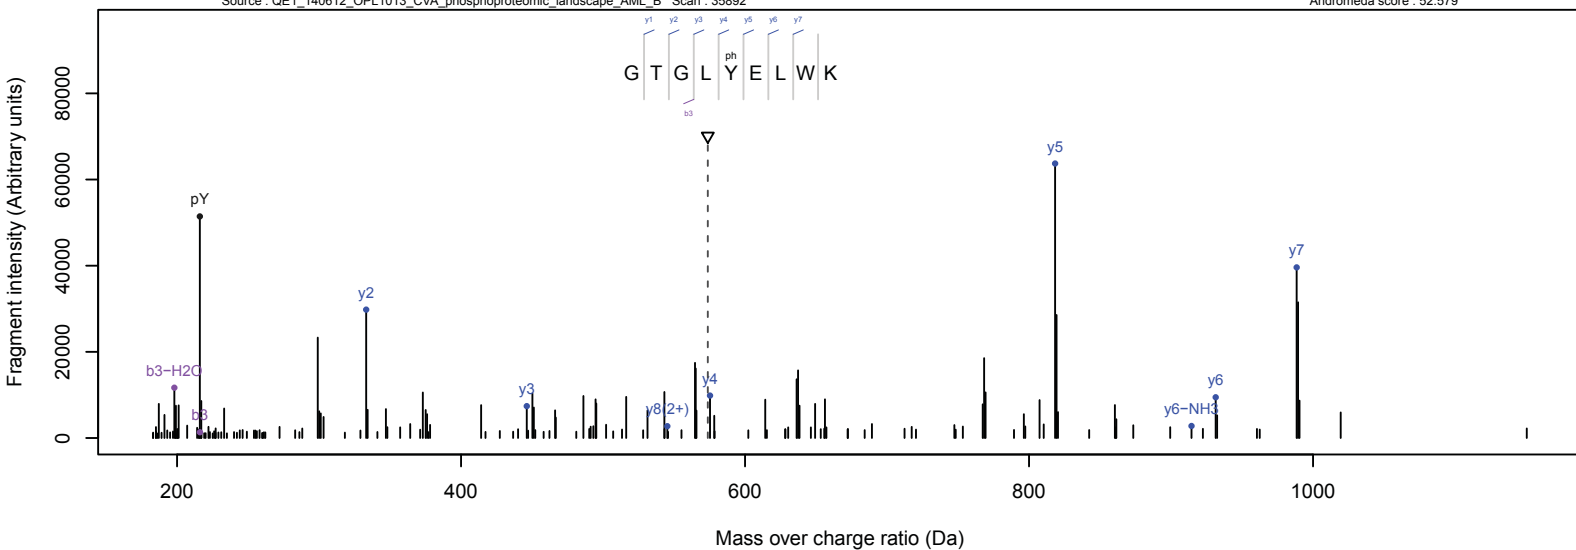

## VDY(ph)FIASK-2+

Source : Qe1\_141024\_OPL1013\_CvA\_AML\_pTyrIP\_MOLM13 Scan : 19485

Andromeda score : 52.579

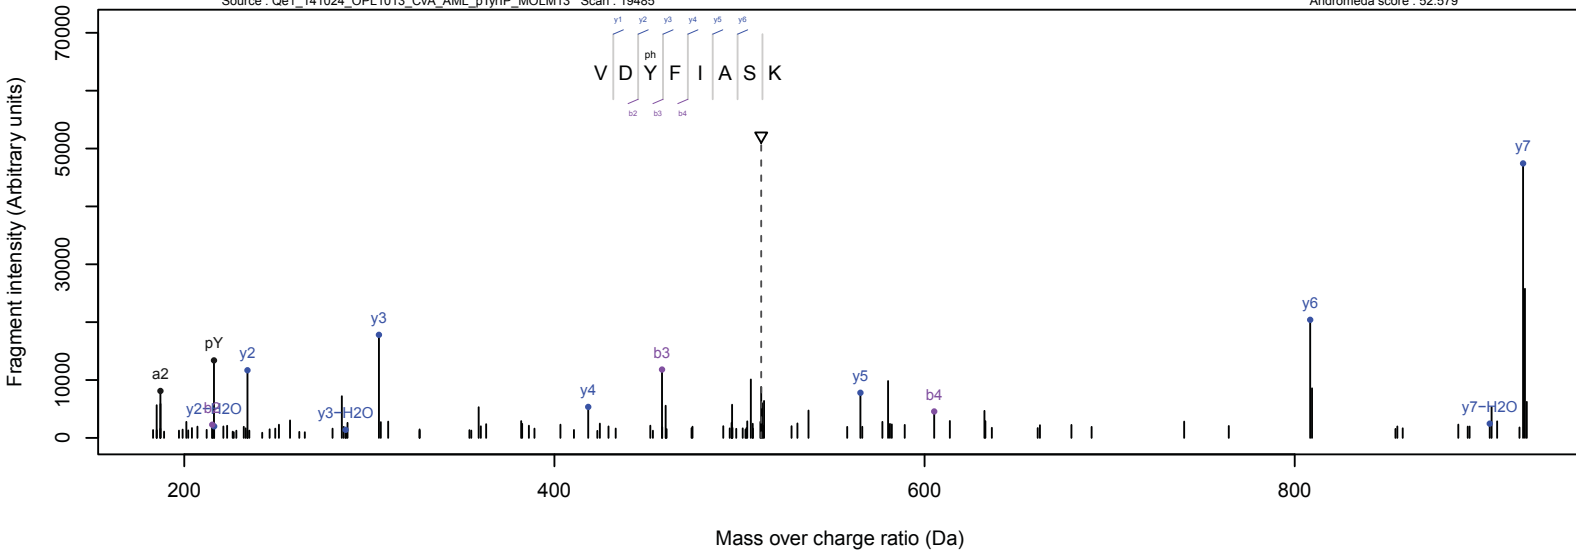

## Y(ph)MLSVDNLK-2+

Source : QE1\_140612\_OPL1013\_CVA\_phosphoproteomic\_landscape\_AML\_C Scan : 27903

Andromeda score : 52.579

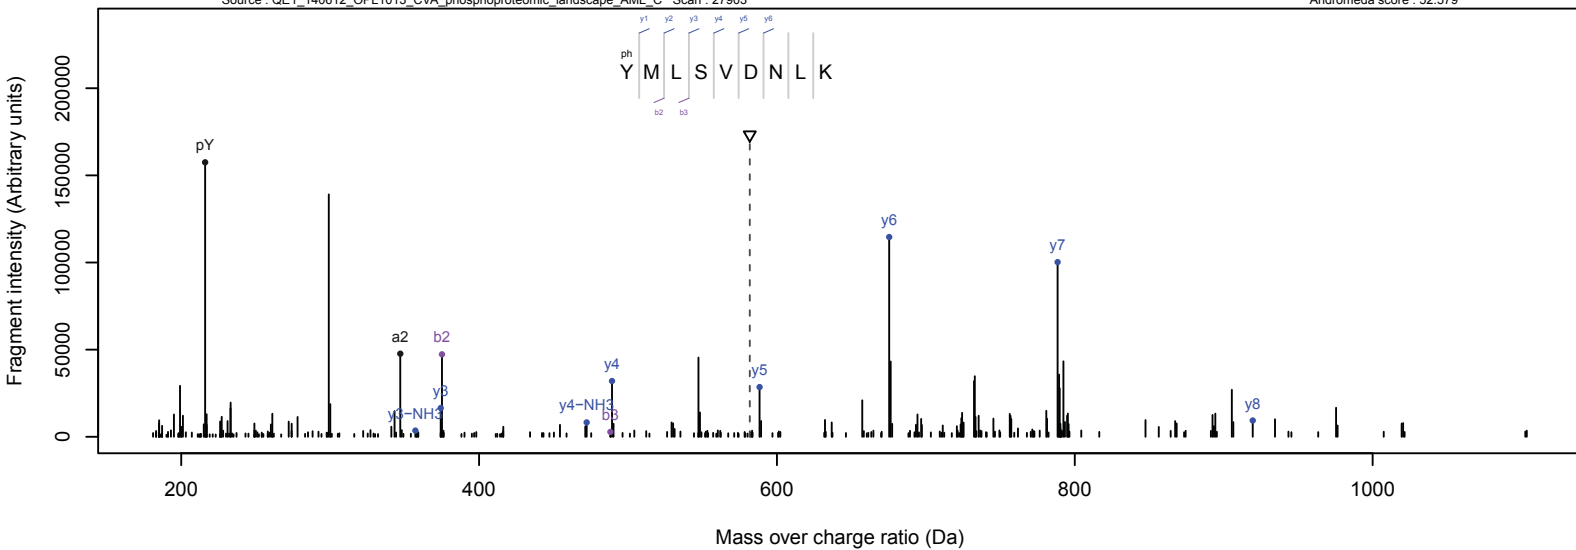

## APAFRDY(ph)VAVAR-3+

Source: QE1\_140908\_OPL1013\_CvA\_pTyrIP\_AML\_HEL Scan: 22613

Andromeda score: 52.576

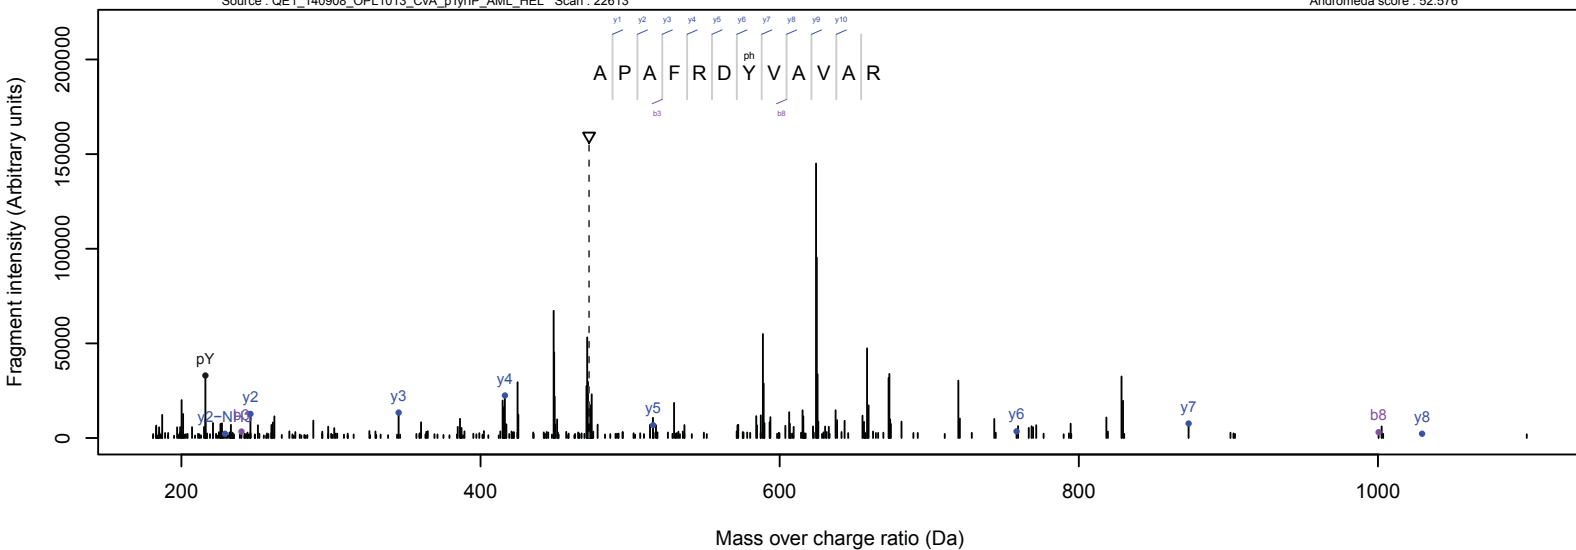

## ARAEGHMVY(ph)LAR-3+

Source: QE1\_140612\_OPL1013\_CVA\_phosphoproteomic\_landscape\_AML\_C Scan: 12003

Andromeda score: 52.576

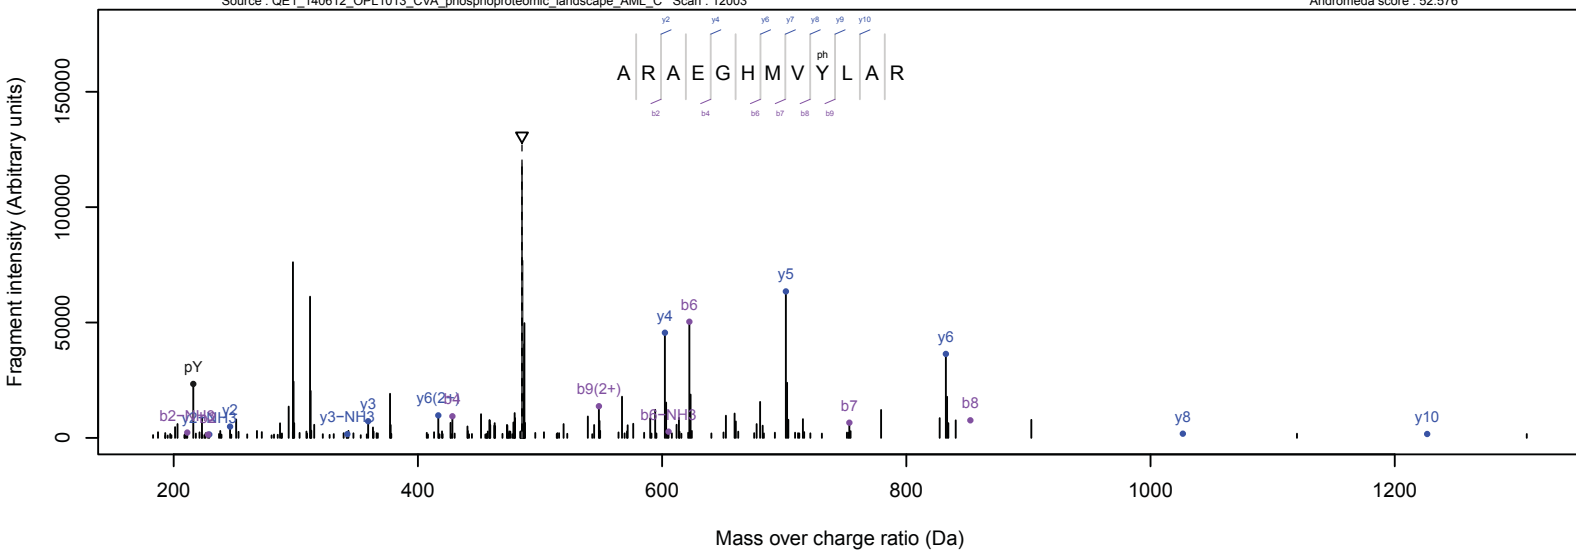

## ELPGHTGY(ph)LSCCR-3+

Source: QE1\_140612\_OPL1013\_CVA\_phosphoproteomic\_landscape\_AML\_F Scan: 13456

Andromeda score: 52.576

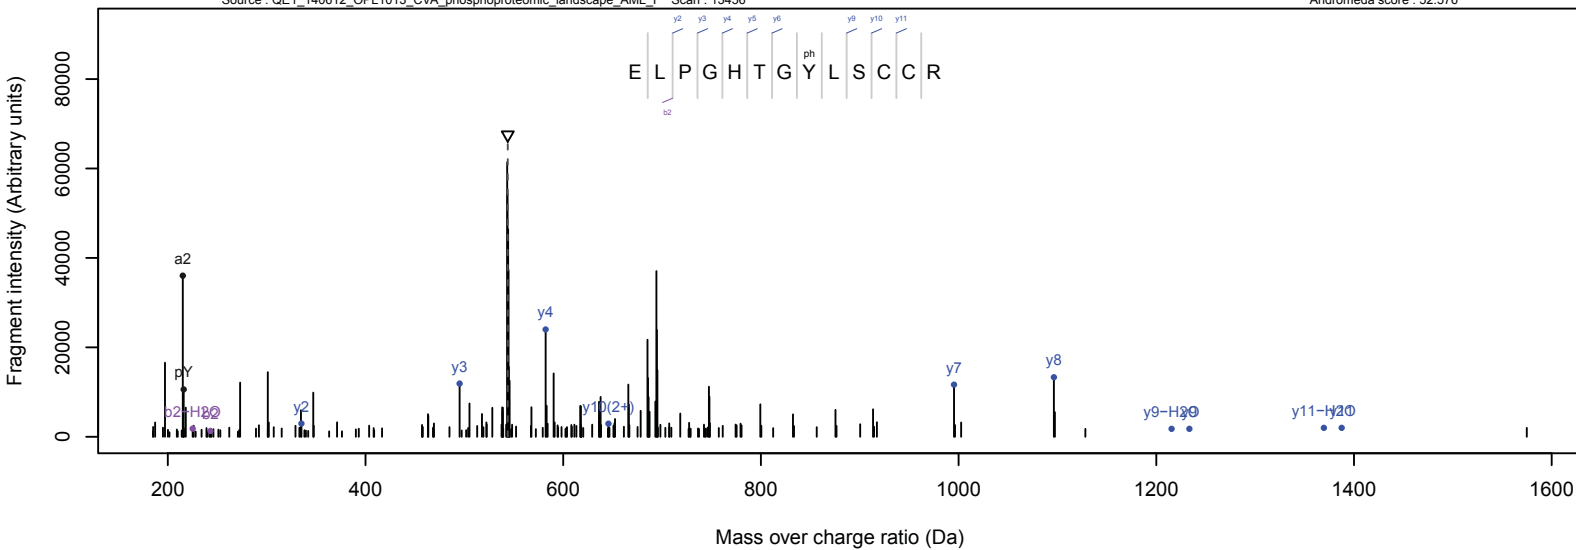



## LAAVY(ph)NGVDNKK-2+

Source : QE1\_140612\_OPL1013\_CVA\_phosphoproteomic\_landscape\_AML\_D Scan : 11971

Andromeda score : 52.576

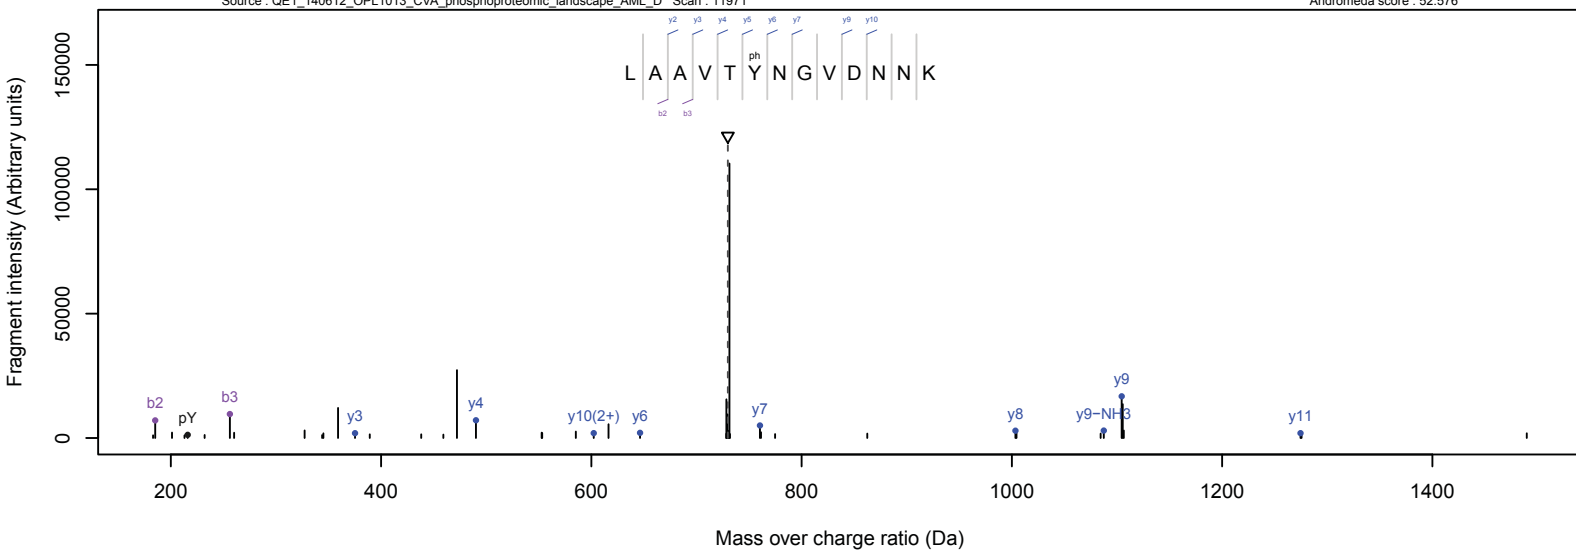

## NTIDTKDY(ph)STHR-3+

Source : QE1\_140612\_OPL1013\_CVA\_phosphoproteomic\_landscape\_AML\_D Scan : 3844

Andromeda score : 52.576

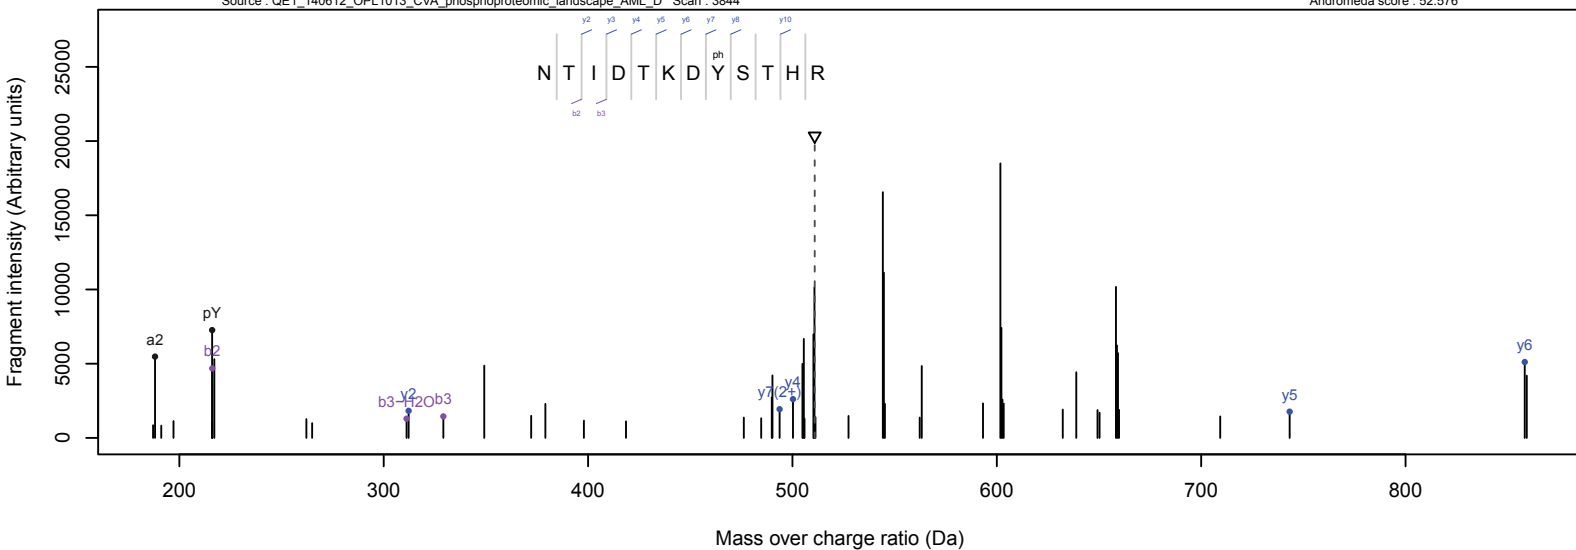

## TFPASNY(ph)TVSSR-2+

Source : QE1\_140612\_OPL1013\_CVA\_phosphoproteomic\_landscape\_AML\_C Scan : 14928

Andromeda score : 52.576

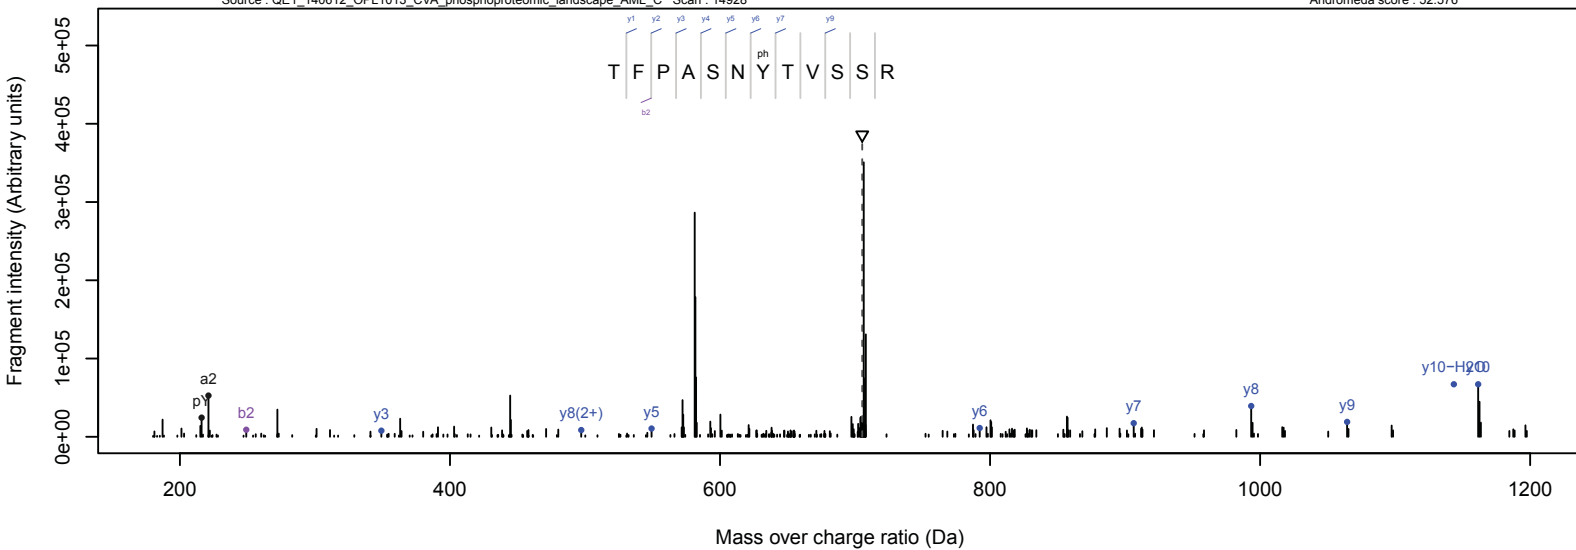

## VQLVDNVY(ph)CIGQR-2+

Source : QE1\_140612\_OPL1013\_CVA\_phosphoproteomic\_landscape\_AML\_C Scan : 27717

Andromeda score : 52.576

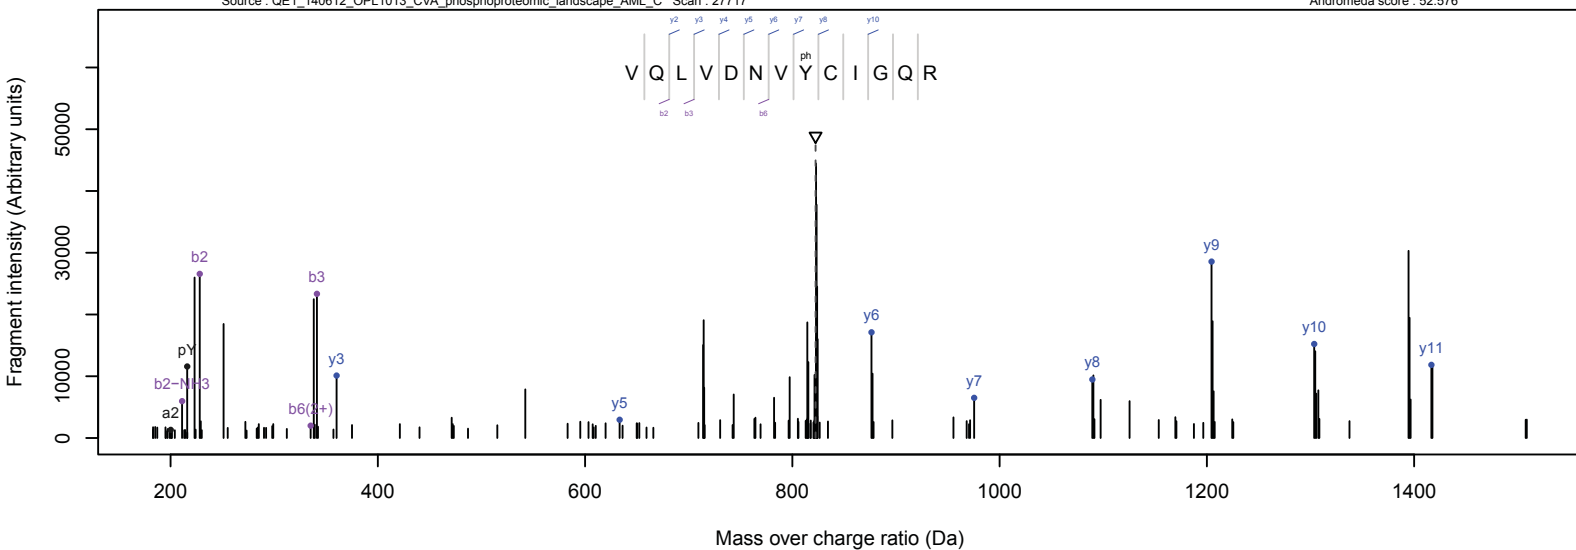

## Y(ph)FTWDPSPRFQPR-3+

Source : QE1\_140612\_OPL1013\_CVA\_phosphoproteomic\_landscape\_AML\_C Scan : 36817

Andromeda score : 52.576

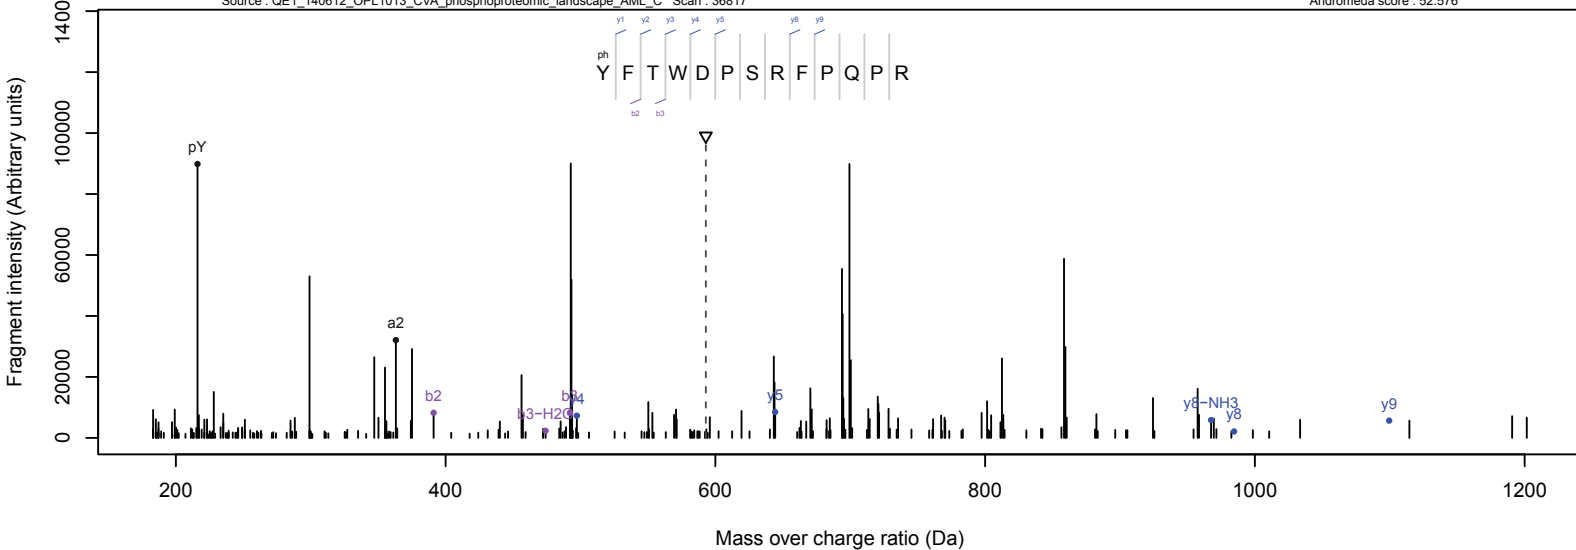

## LHSLYTPVIKDRDYHLK-4+

Source : QE1\_140612\_OPL1013\_CVA\_phosphoproteomic\_landscape\_AML\_C Scan : 20410

Andromeda score : 52.569

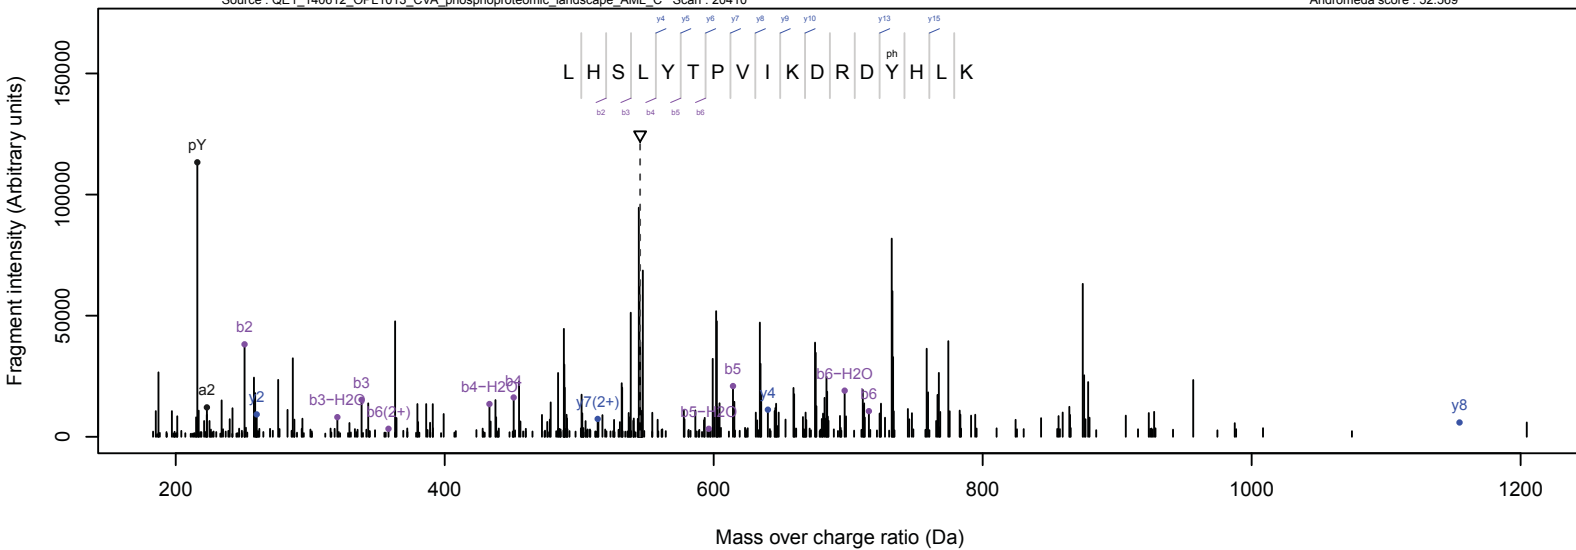

**GAIISQ(ph)YNR-2+**

Source: QE1\_140612\_OPL1013\_CVA\_phosphoproteomic\_landscape\_AML\_C Scan: 16195

Andromeda score: 52.549

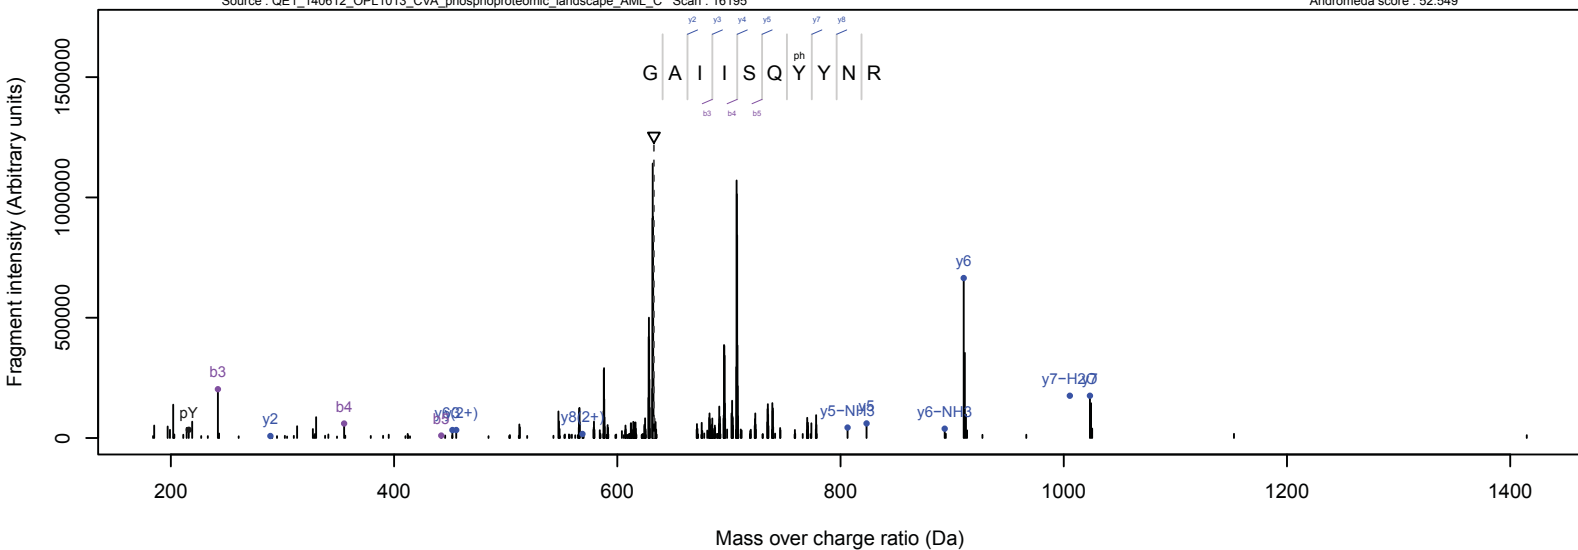

**FYTFICSVCSGPEY(L)KR-3+**

Source: QE1\_140612\_OPL1013\_CVA\_phosphoproteomic\_landscape\_AML\_C Scan: 37192

Andromeda score: 52.52

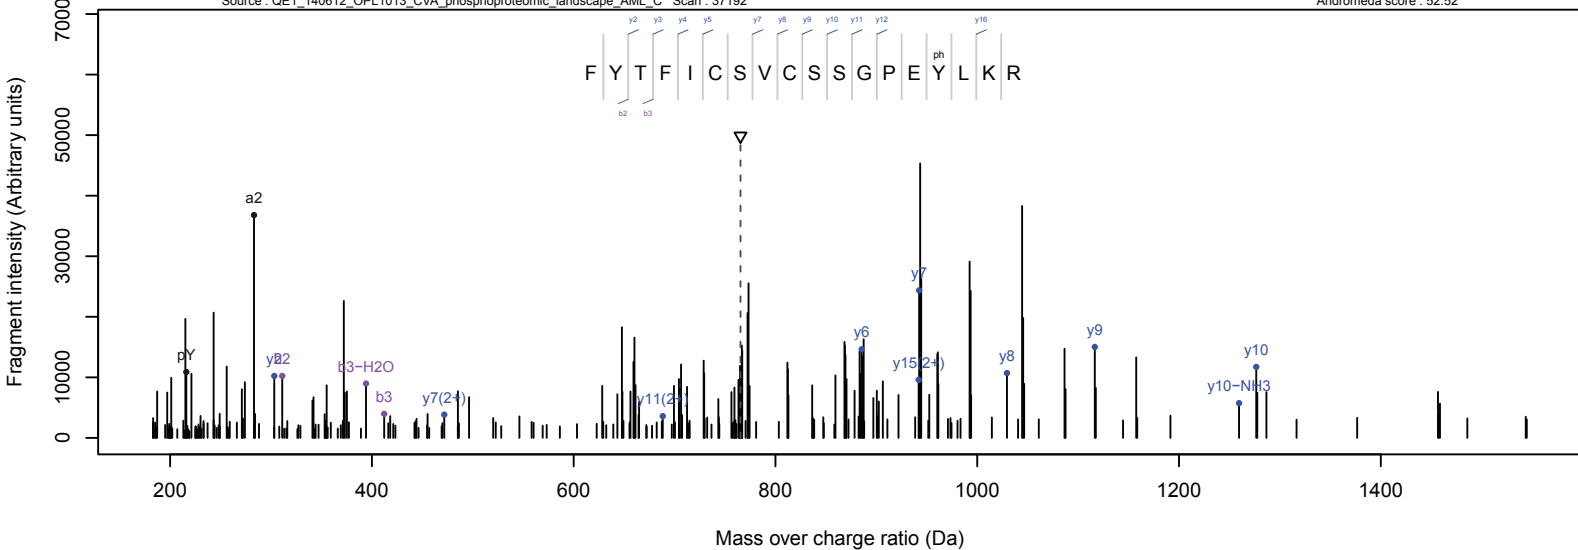

**VGY(ph)LTGLPTTNSR-2+**

Source: QE1\_140612\_OPL1013\_CVA\_phosphoproteomic\_landscape\_AML\_C Scan: 24607

Andromeda score: 52.5

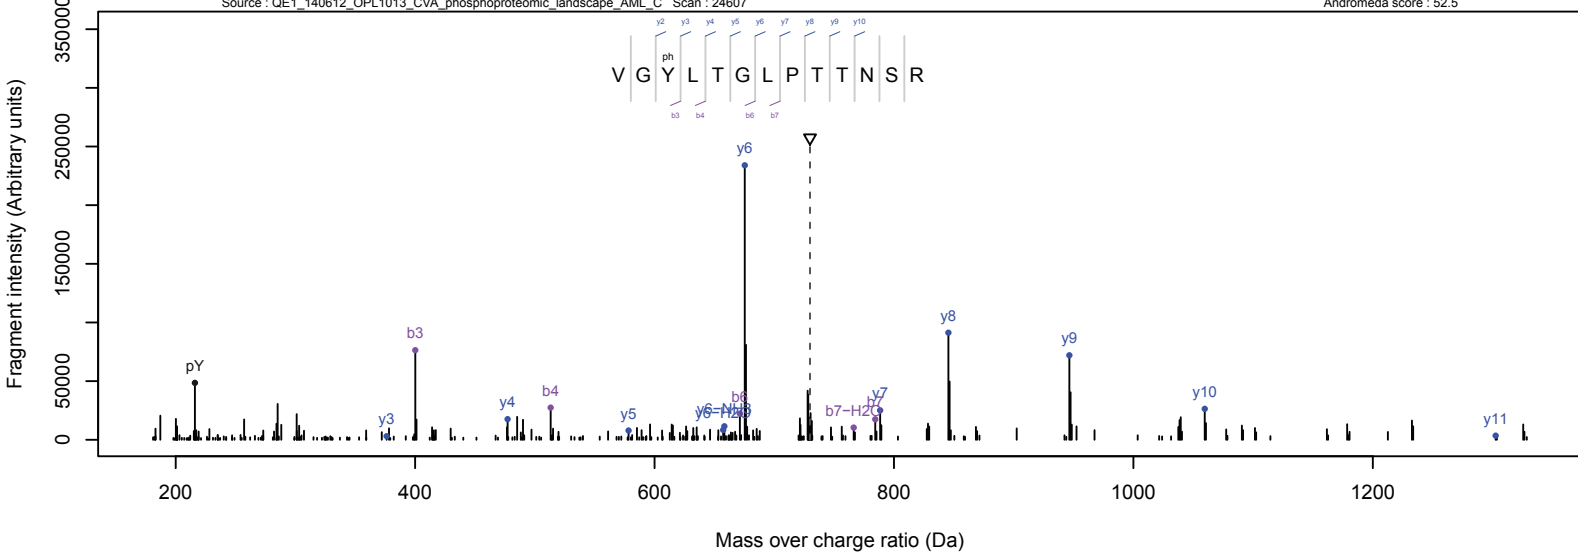

HL<sup>Y</sup>(ph)LFP<sup>G</sup>HPPT-2+

Source : QE1\_140612\_OPL1013\_CVA\_phosphoproteomic\_landscape\_AML\_C Scan : 32090

Andromeda score : 52.49

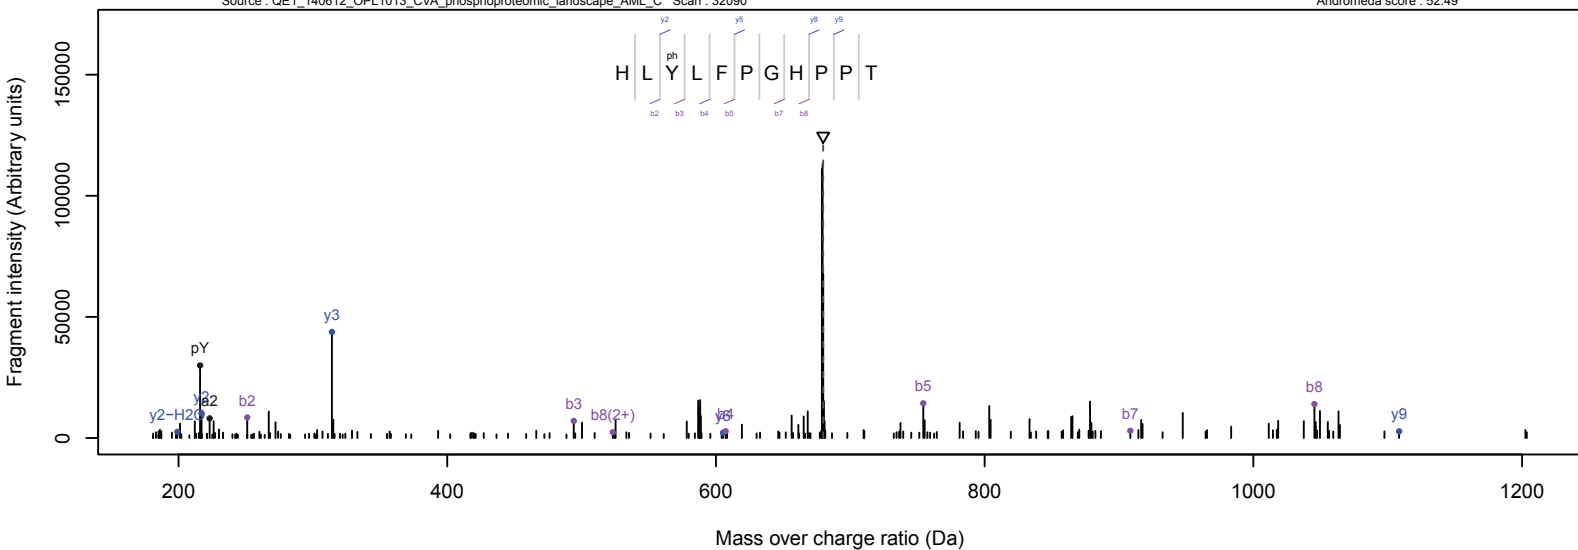

QLQE<sup>Y</sup>(ph)LAQ<sup>G</sup>KK-2+

Source : QE1\_140612\_OPL1013\_CVA\_phosphoproteomic\_landscape\_AML\_C Scan : 14915

Andromeda score : 52.49

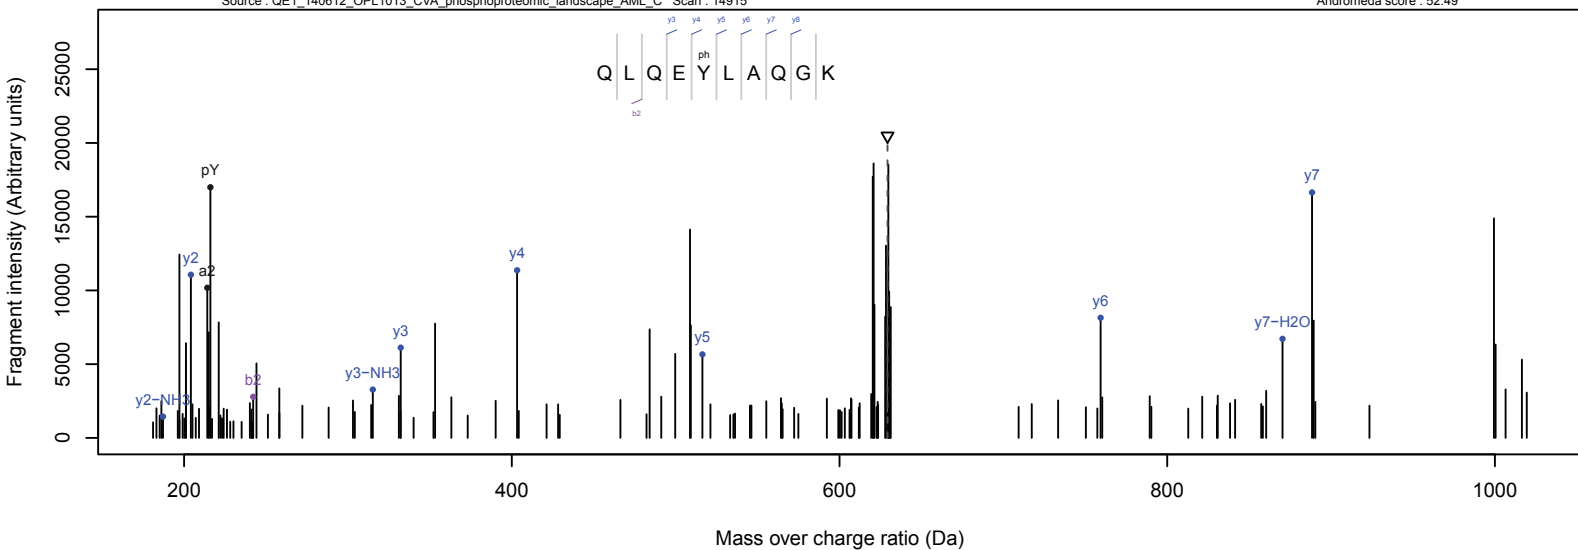

SFDLTTP<sup>Y</sup>(ph)R-2+

Source : QE1\_140612\_OPL1013\_CVA\_phosphoproteomic\_landscape\_AML\_C Scan : 23923

Andromeda score : 52.49

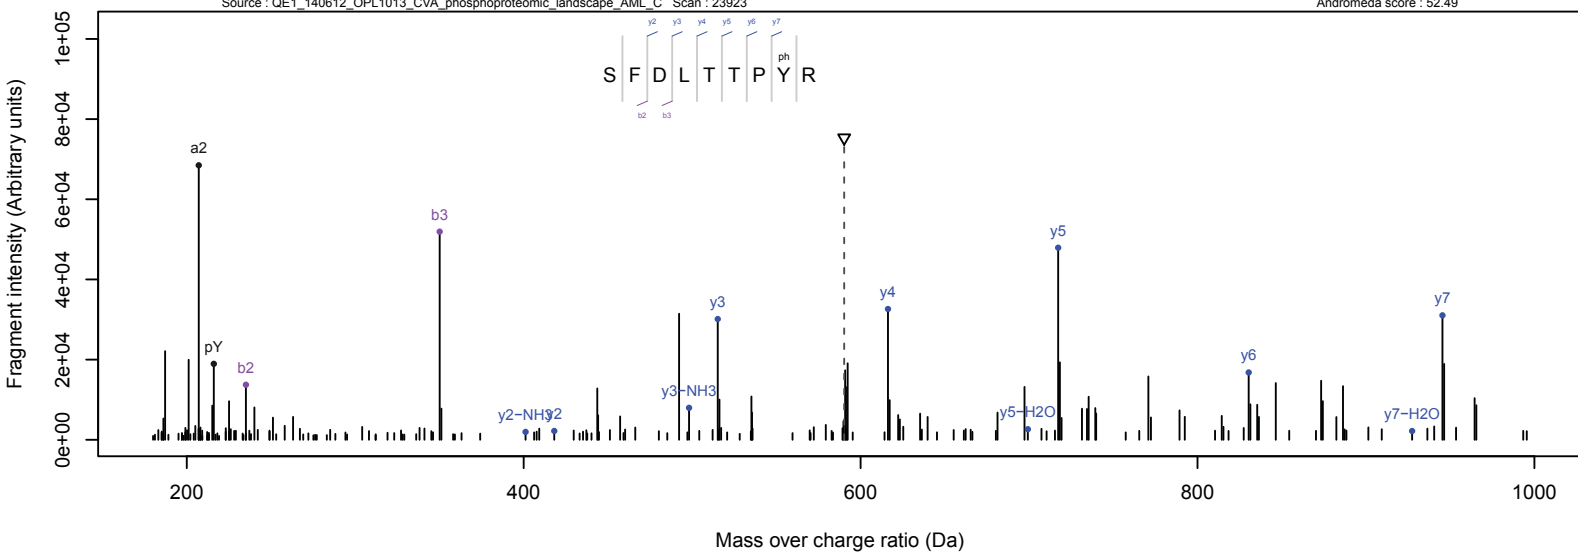

## LY(ph)GLSTFK-2+

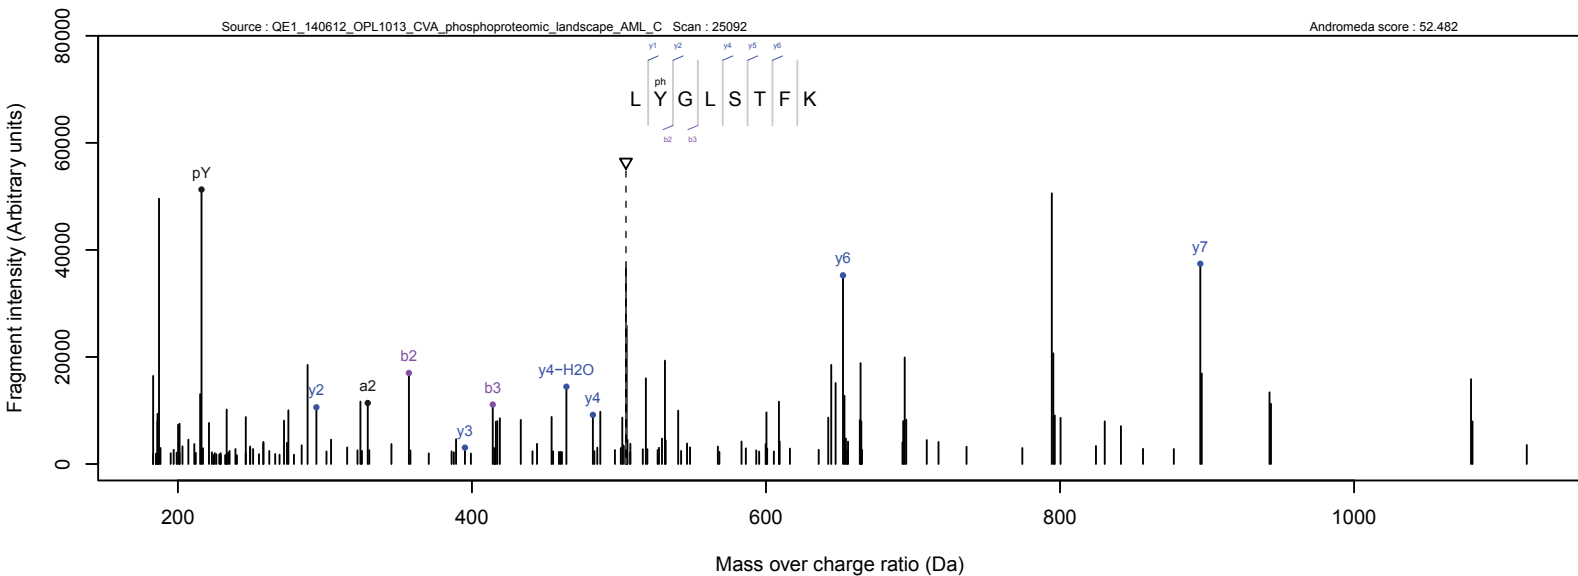

## MGVPY(ph)CIK-2+

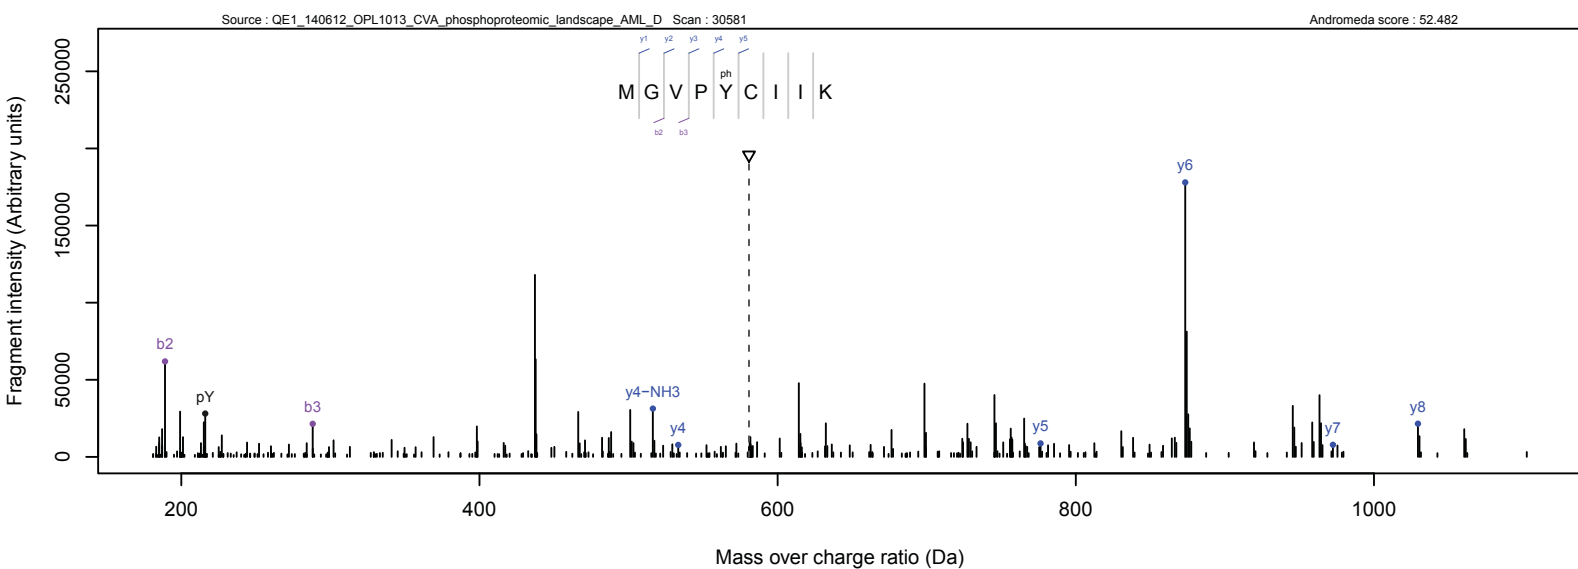

## Y(ph)VPLADVK-2+

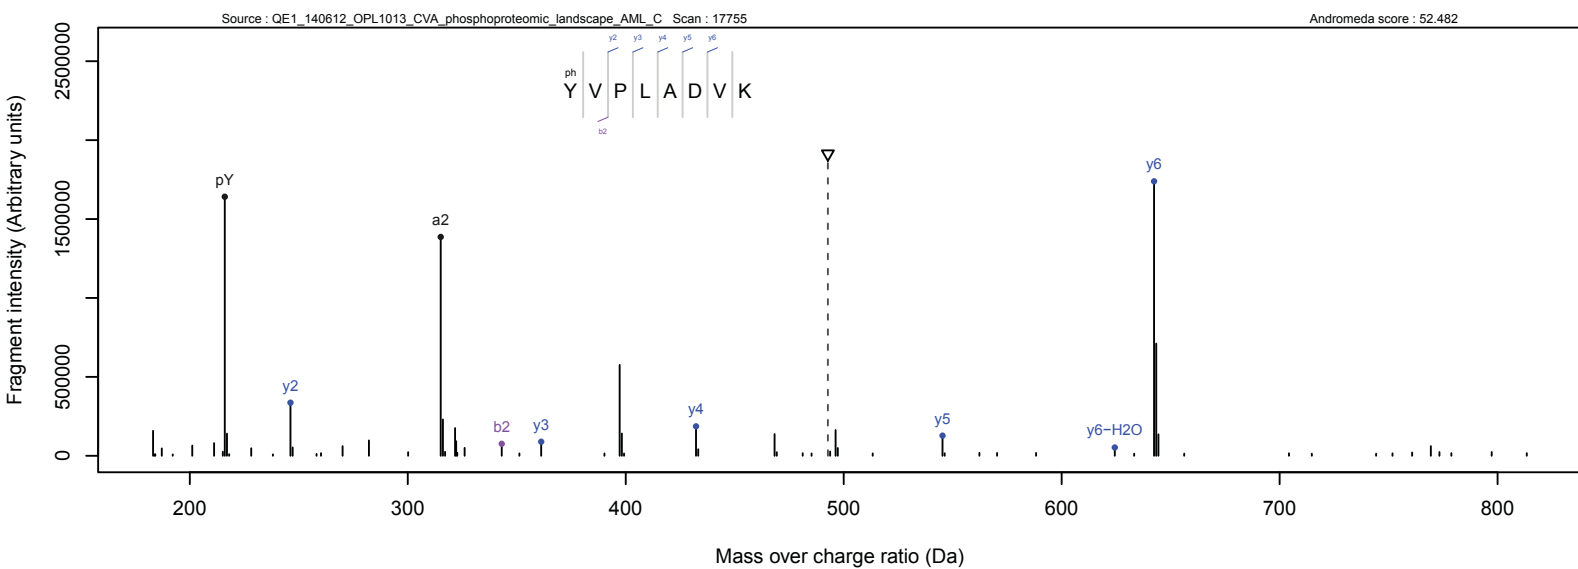

## GPHFNPSAIHNFY(ph)DNIGFVGPVPPKPK-4+

Source: QE1\_140612\_OPL1013\_CVA\_phosphoproteomic\_landscape\_AML\_B Scan: 37890

Andromeda score: 52.465

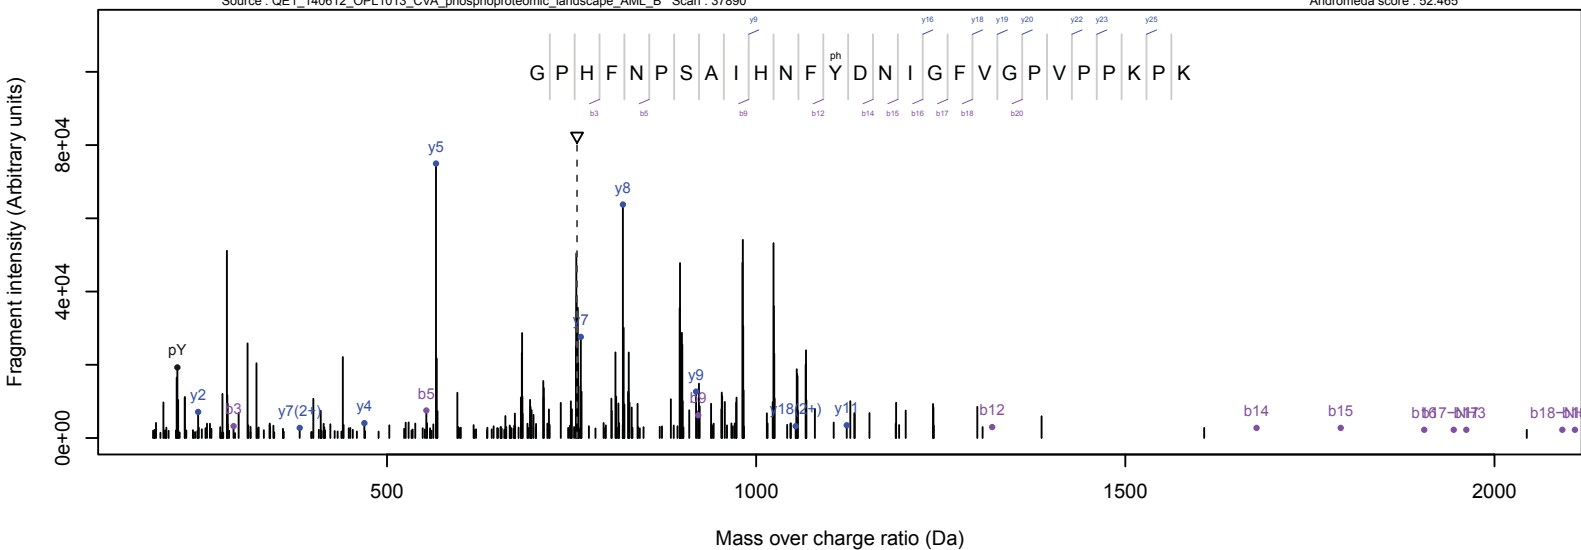

## SY(ph)EYKSNPSAVAGNETPGASTK-3+

Source: QE1\_140612\_OPL1013\_CVA\_phosphoproteomic\_landscape\_AML\_B Scan: 11189

Andromeda score: 52.451

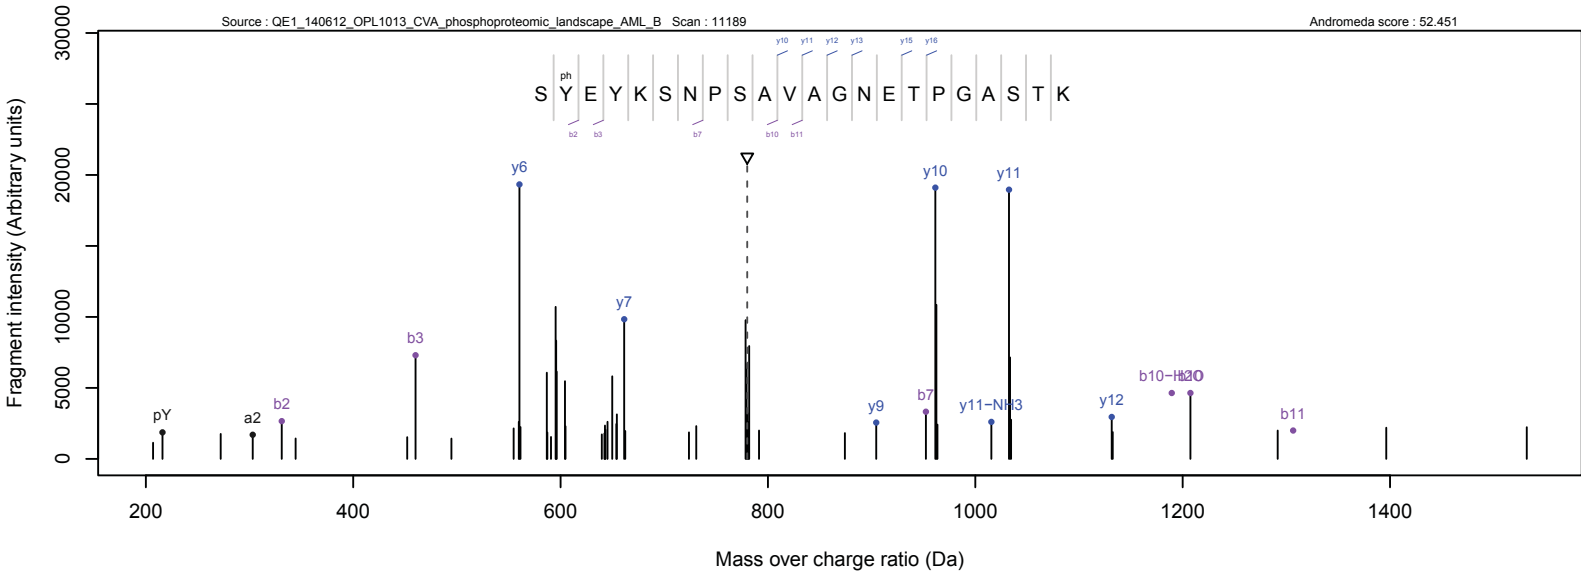

## TEDGKVEKHY(ph)LFYDGESVSGK-4+

Source: QE1\_140612\_OPL1013\_CVA\_phosphoproteomic\_landscape\_AML\_C Scan: 19454

Andromeda score: 52.451

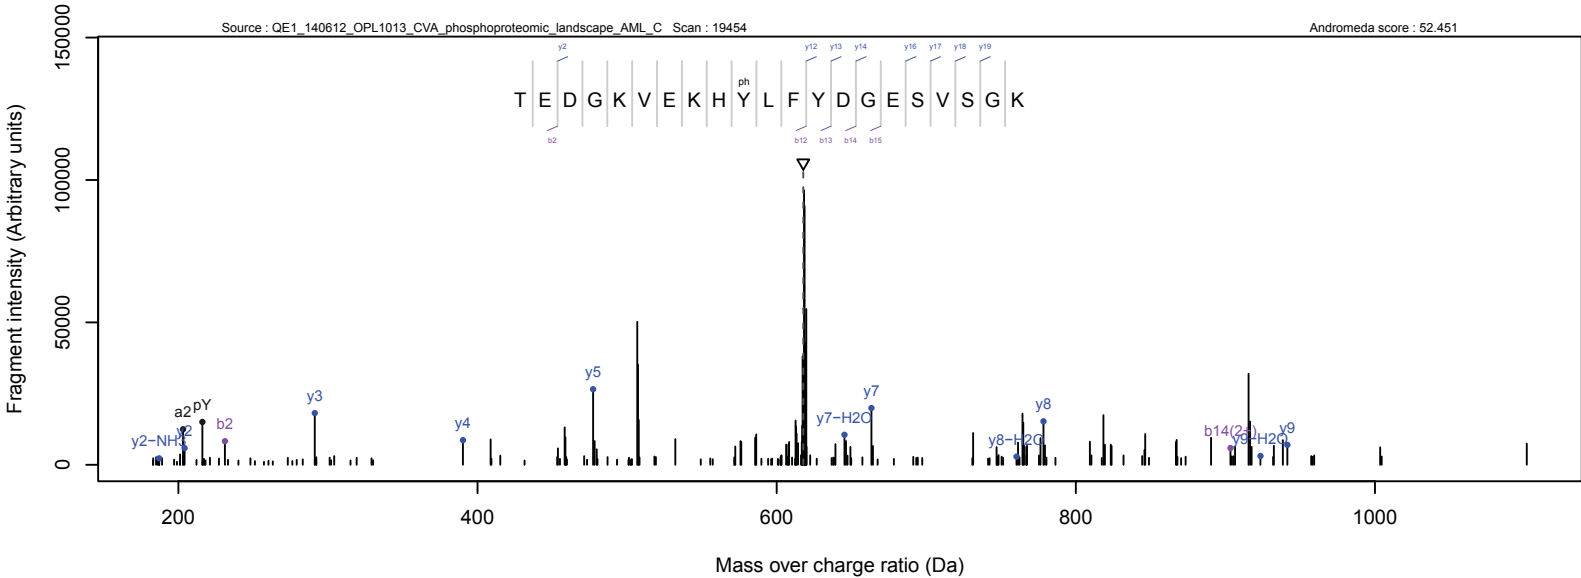

## TAGTSFM(ox)MTPY(ph)VVTR-2+

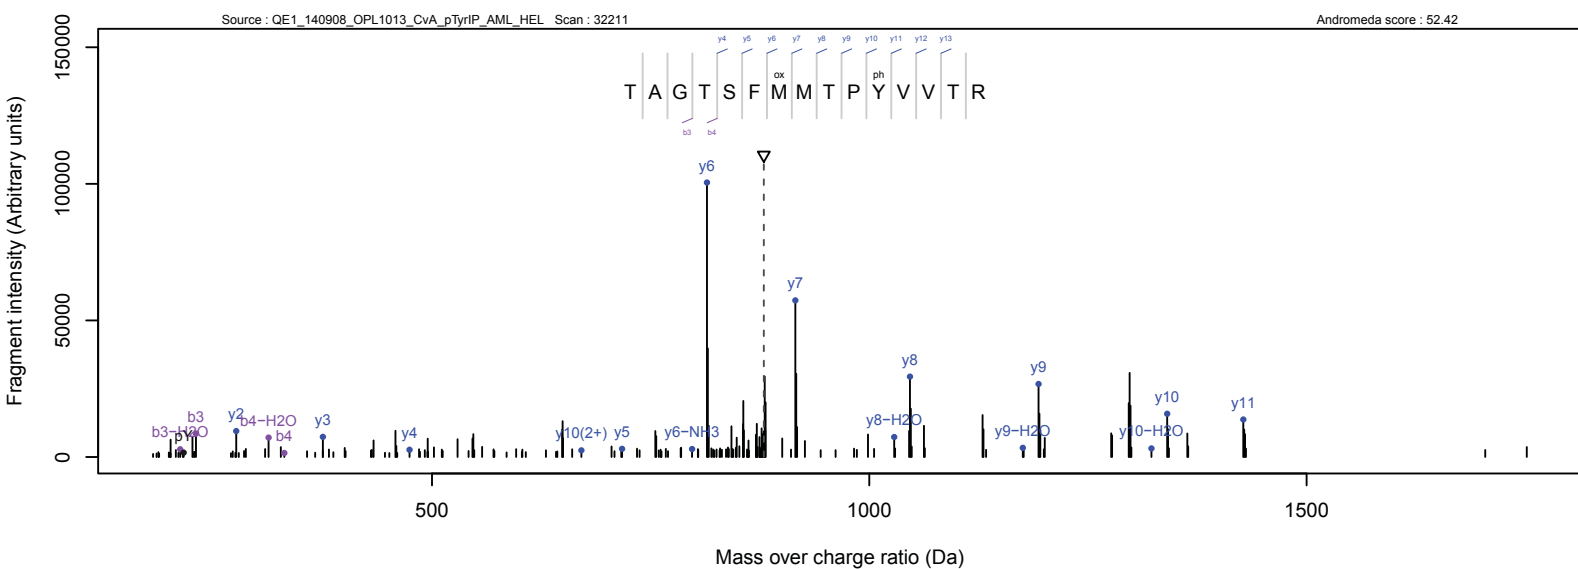

## IMEY(ph)YEK-2+

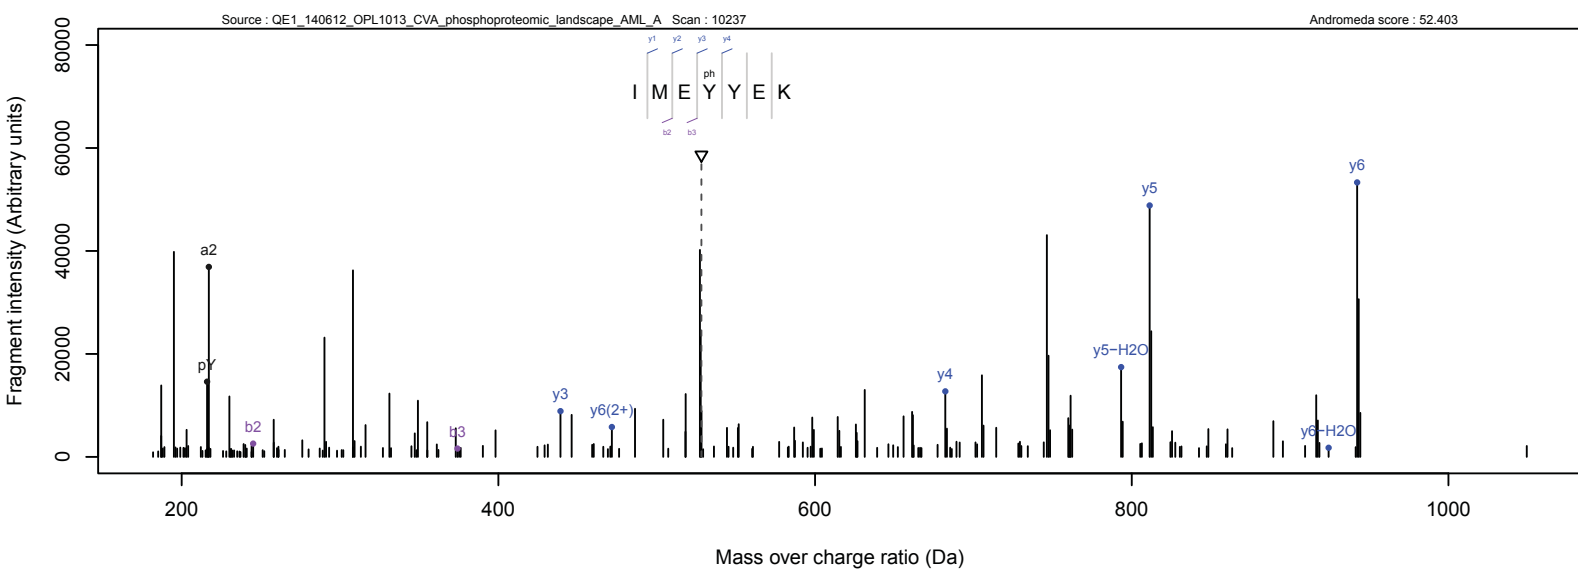

## VY(ph)AMCQIK-2+

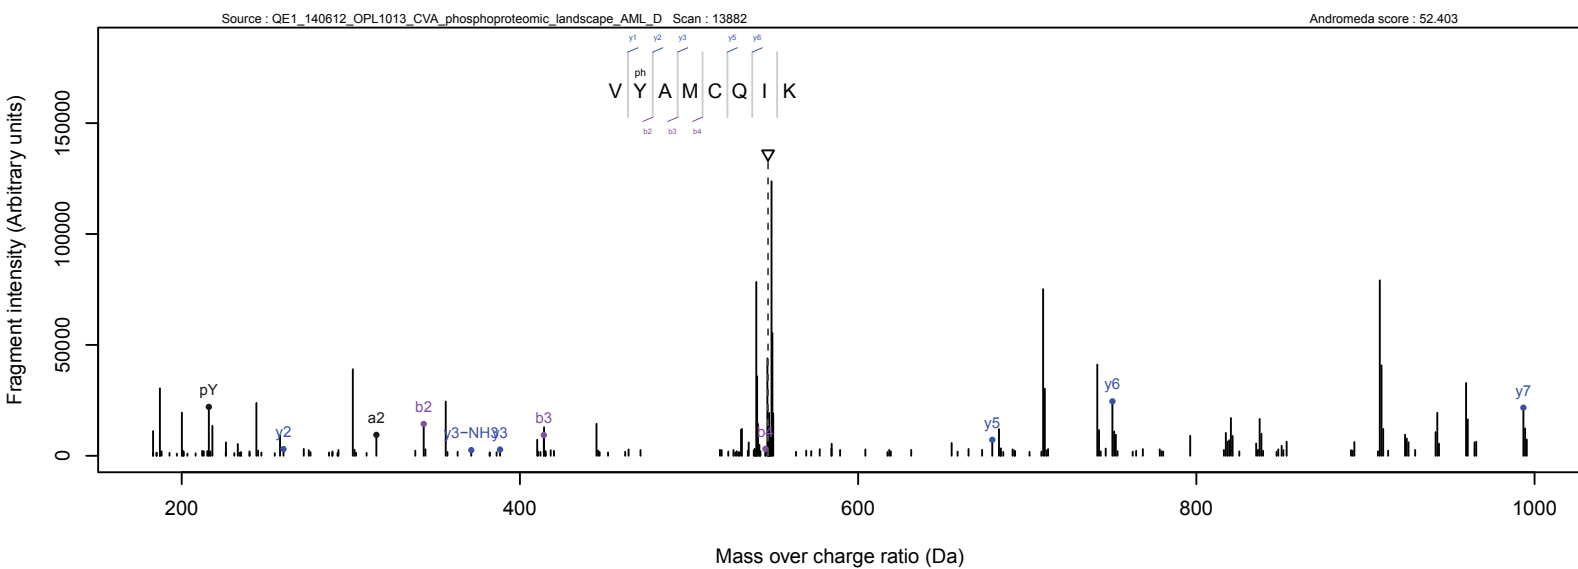

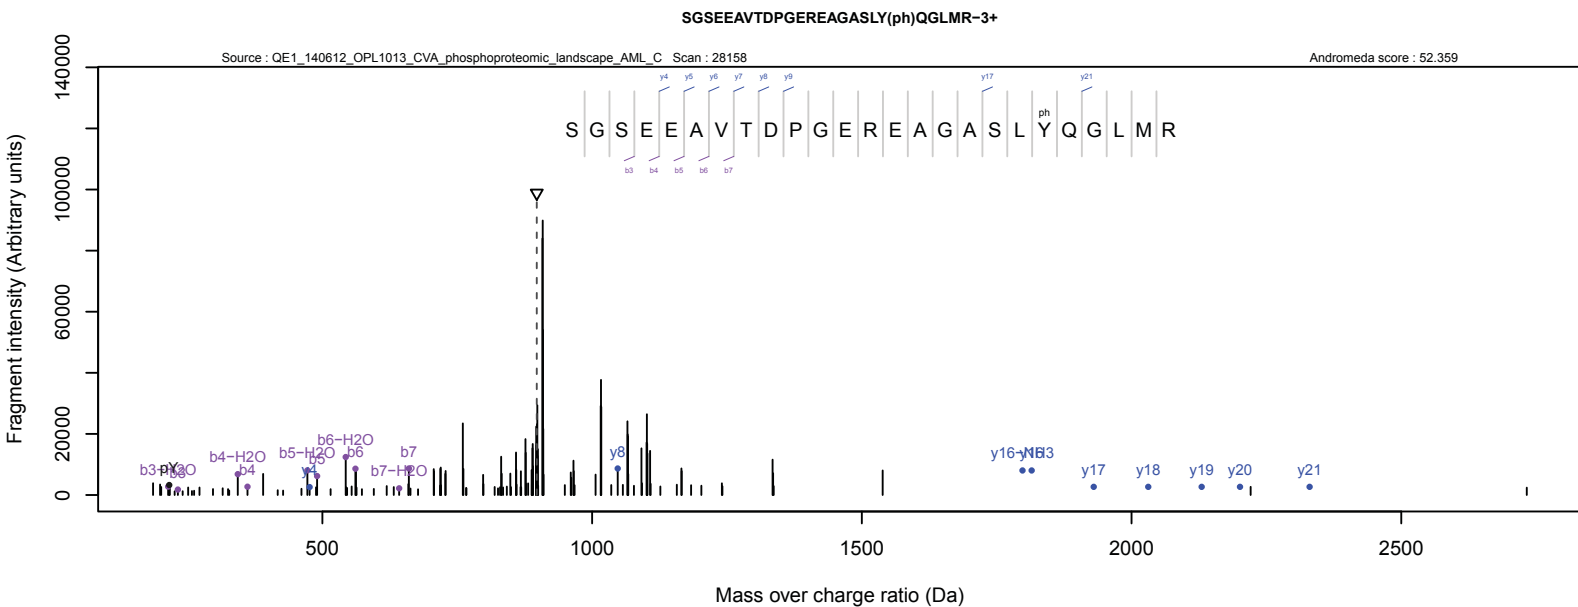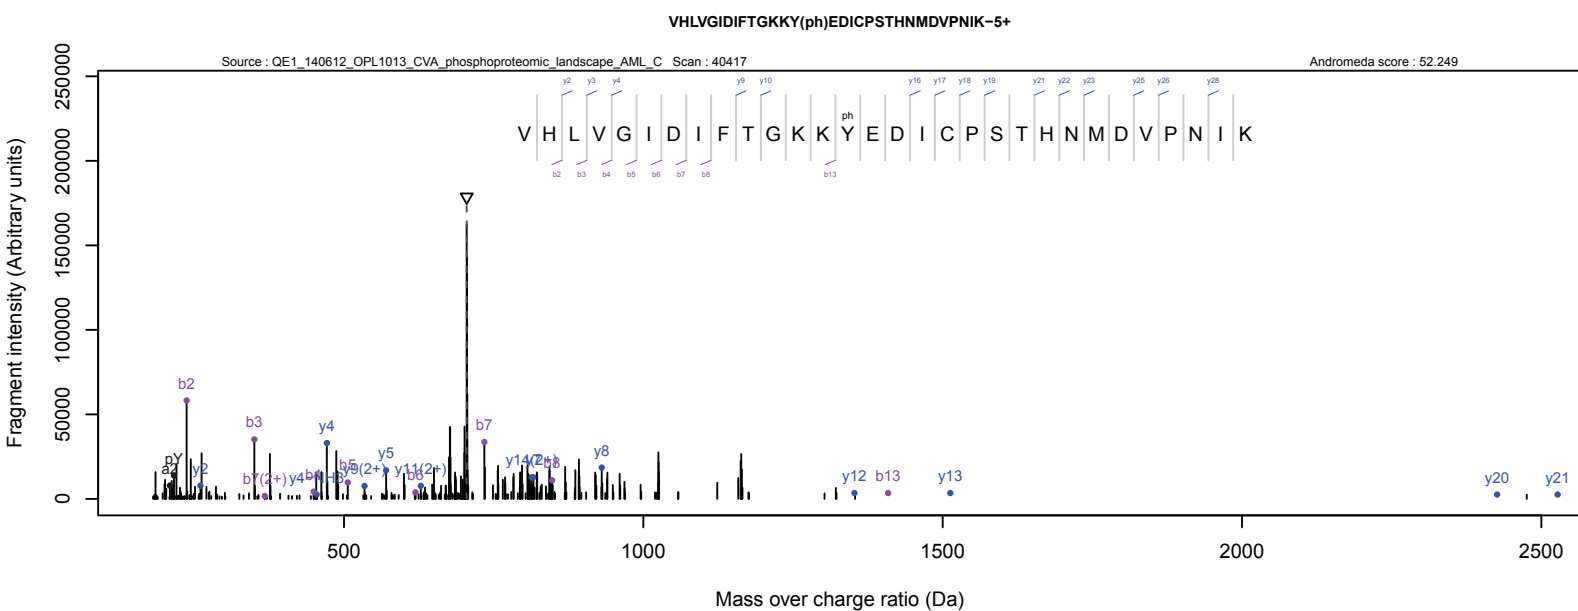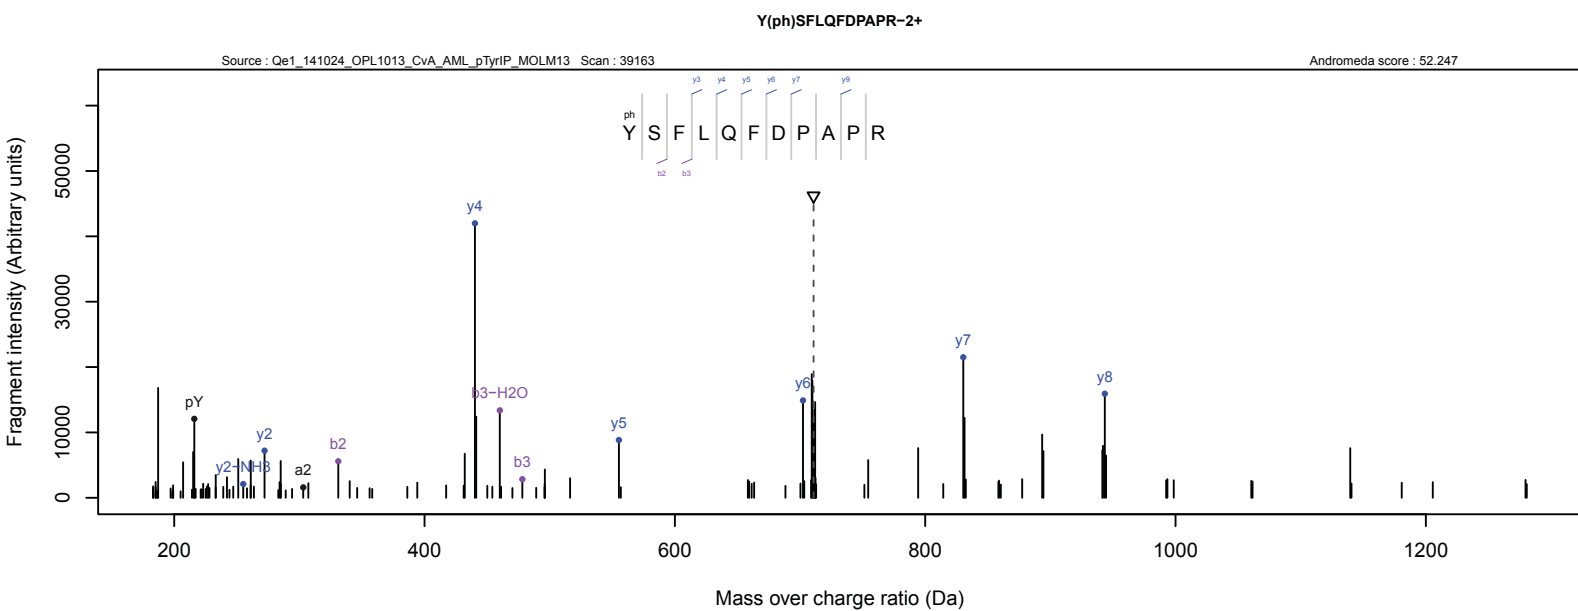



**Y(ph)YRPPEGTYGK-3+**

Source : QE1\_140612\_OPL1013\_CVA\_phosphoproteomic\_landscape\_AML\_B Scan : 9179

Andromeda score : 52.247

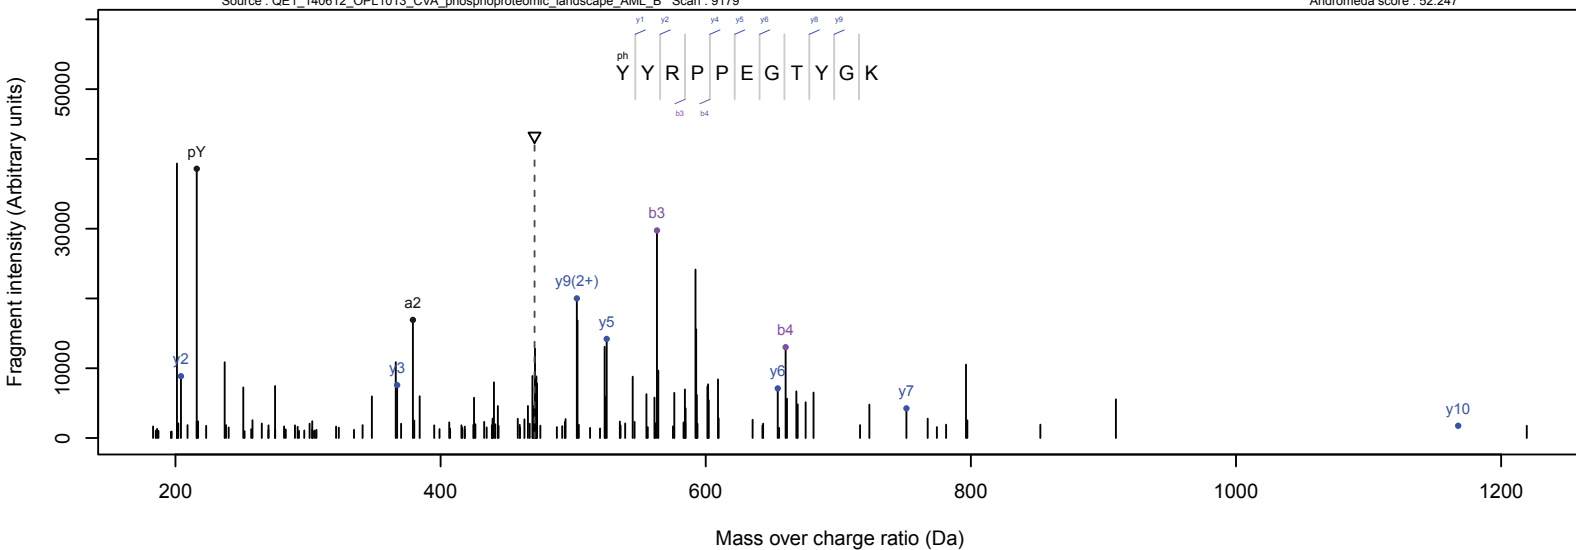

**GGSY(ph)TQAASSDAQGSDVSLTACKV-3+**

Source : QE1\_140612\_OPL1013\_CVA\_phosphoproteomic\_landscape\_AML\_C Scan : 21884

Andromeda score : 52.226

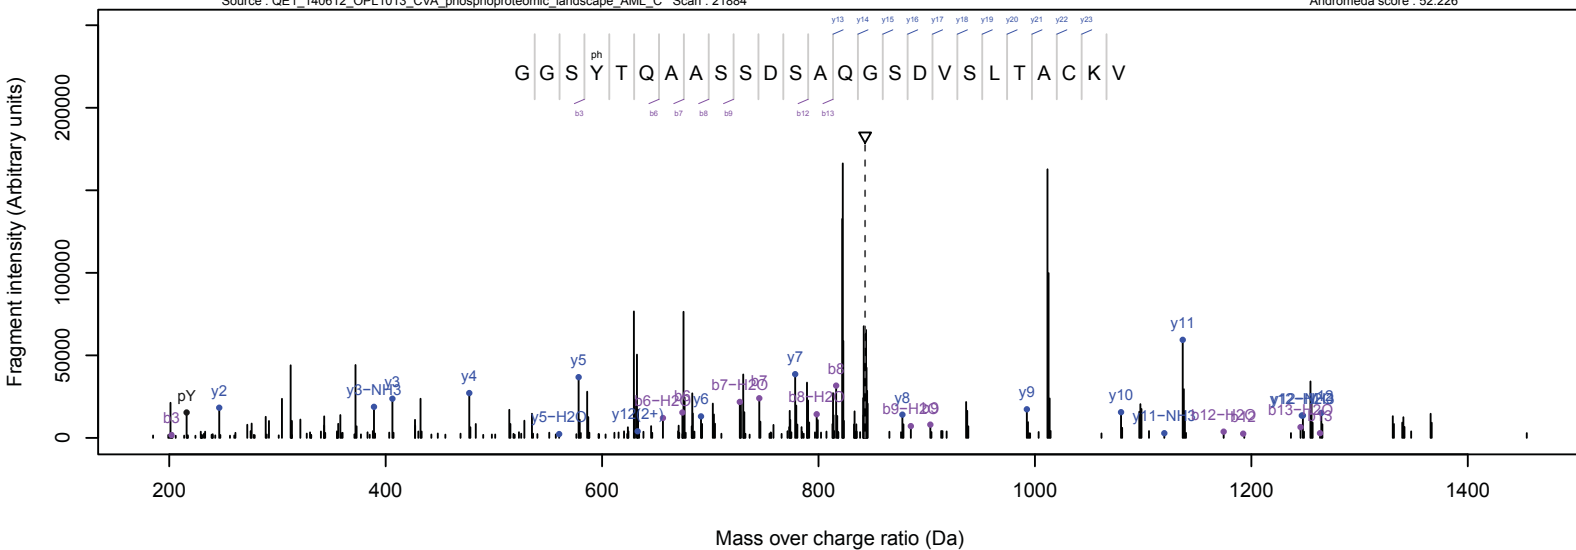

**AKY(ph)FYITPGICPSLSTMK-3+**

Source : QE1\_140612\_OPL1013\_CVA\_phosphoproteomic\_landscape\_AML\_C Scan : 39392

Andromeda score : 52.185

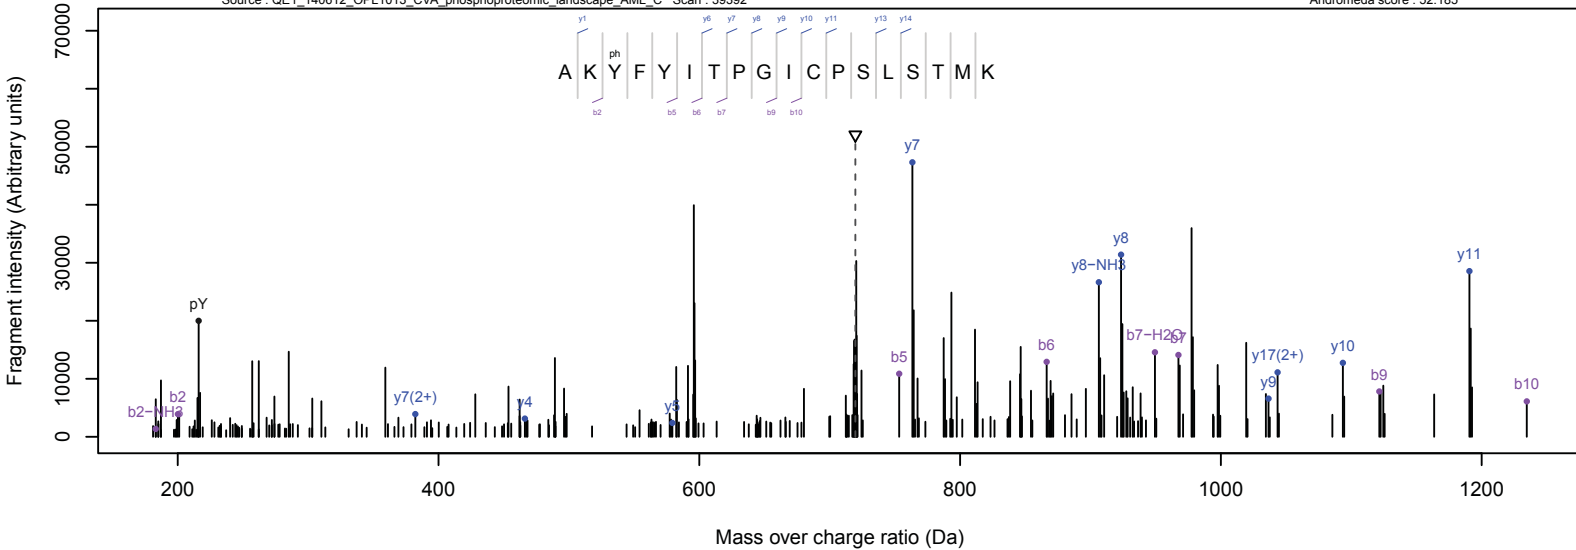

## GYVSCALGCPY(ph)EGKISPAK-3+

Source : QE1\_140612\_OPL1013\_CVA\_phosphoproteomic\_landscape\_AML\_C Scan : 23268

Andromeda score : 52.185

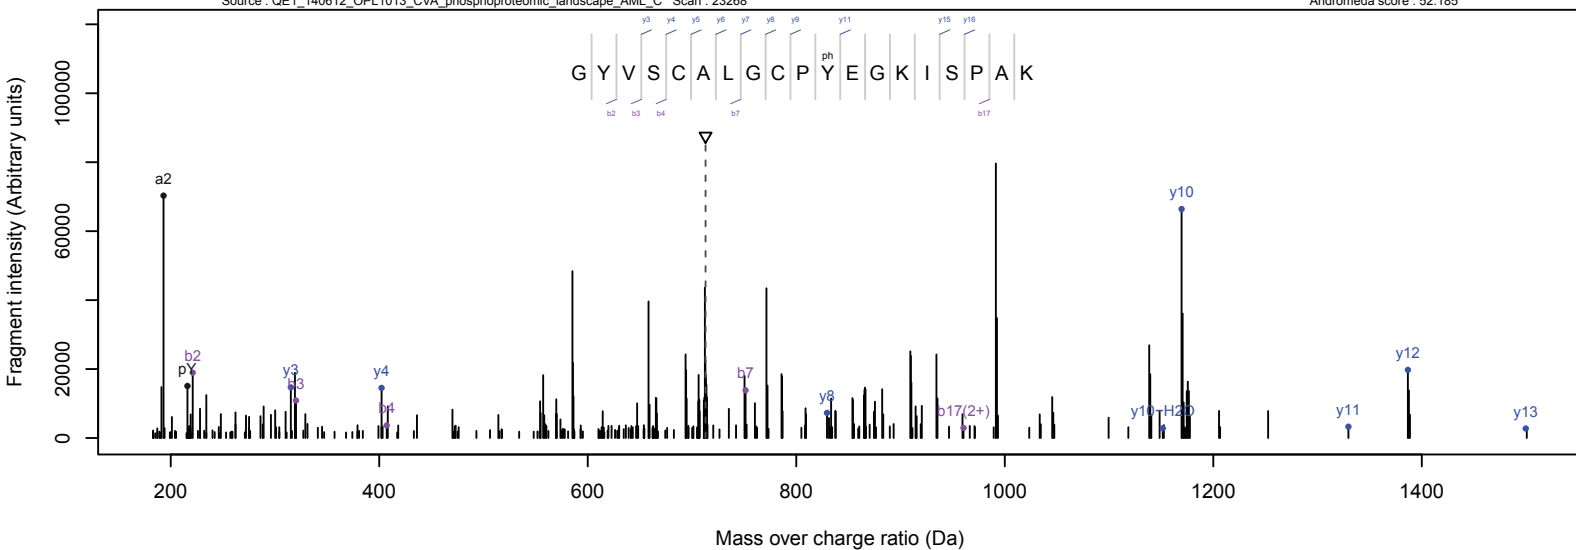

## INPY(ph)MSSPCHIEMLTEK-3+

Source : QE1\_140612\_OPL1013\_CVA\_phosphoproteomic\_landscape\_AML\_A Scan : 39303

Andromeda score : 52.185

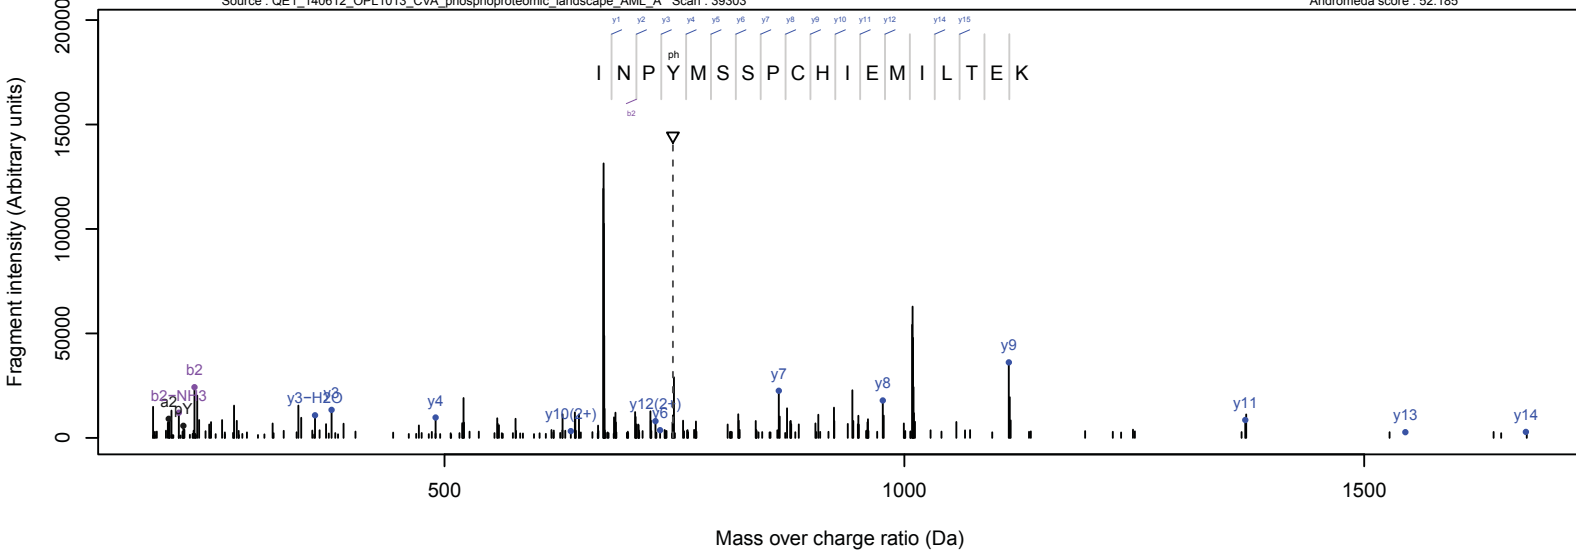

## KLSIFQSHCHY(ph)YLQER-4+

Source : QE1\_140612\_OPL1013\_CVA\_phosphoproteomic\_landscape\_AML\_C Scan : 23920

Andromeda score : 52.185

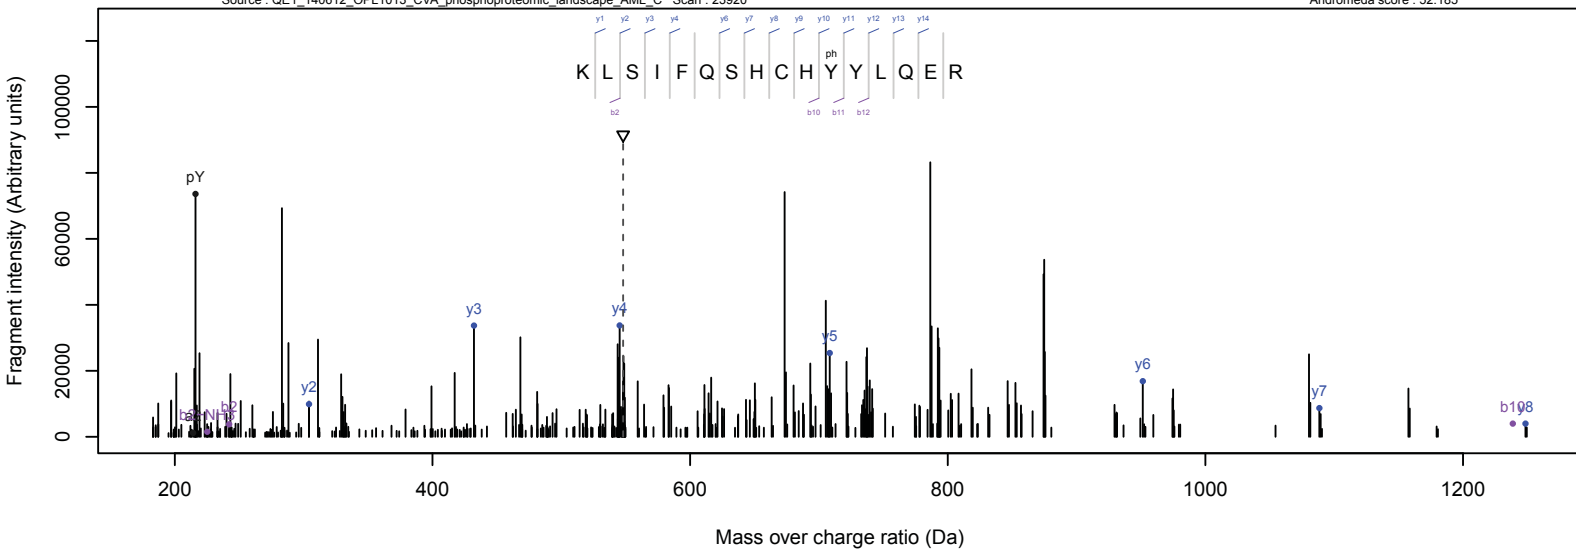

AYPYMEGEPEDDVY(ph)LKR-3+

Source : QE1\_140612\_OPL1013\_CVA\_phosphoproteomic\_landscape\_AML\_E Scan : 27187

Andromeda score : 52.172

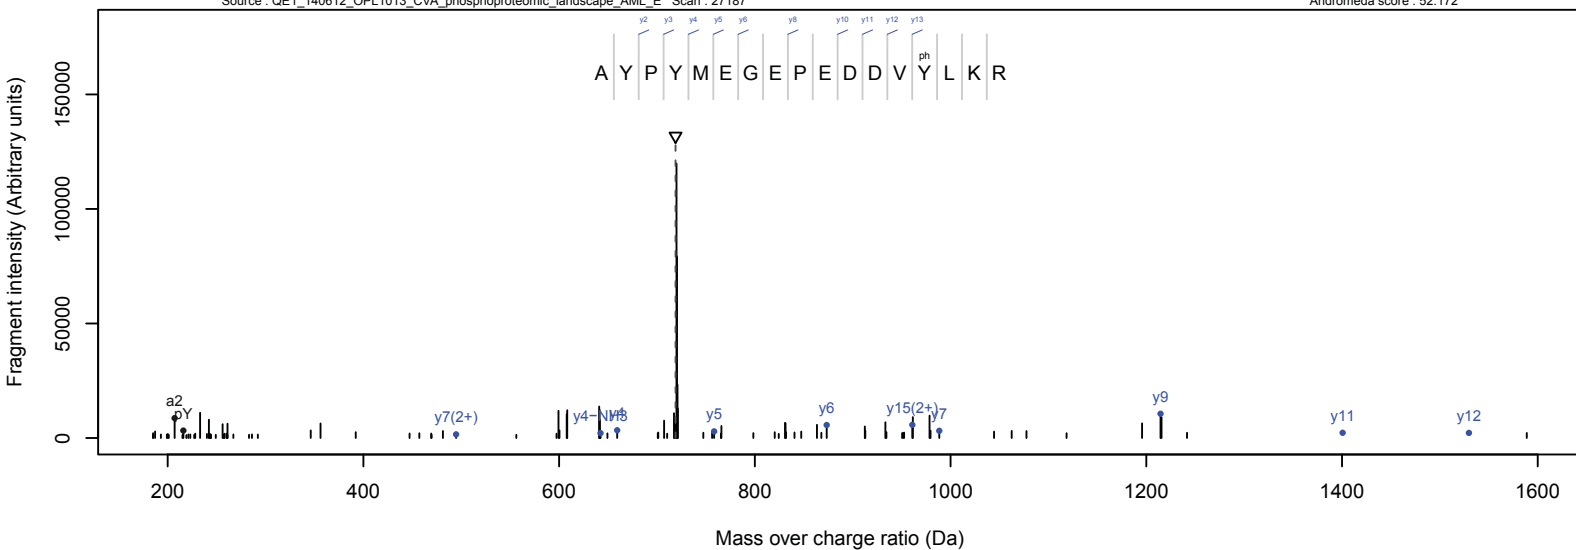

DHY(ph)PCVSSLEQLTELGR-3+

Source : QE1\_140612\_OPL1013\_CVA\_phosphoproteomic\_landscape\_AML\_C Scan : 42130

Andromeda score : 52.172

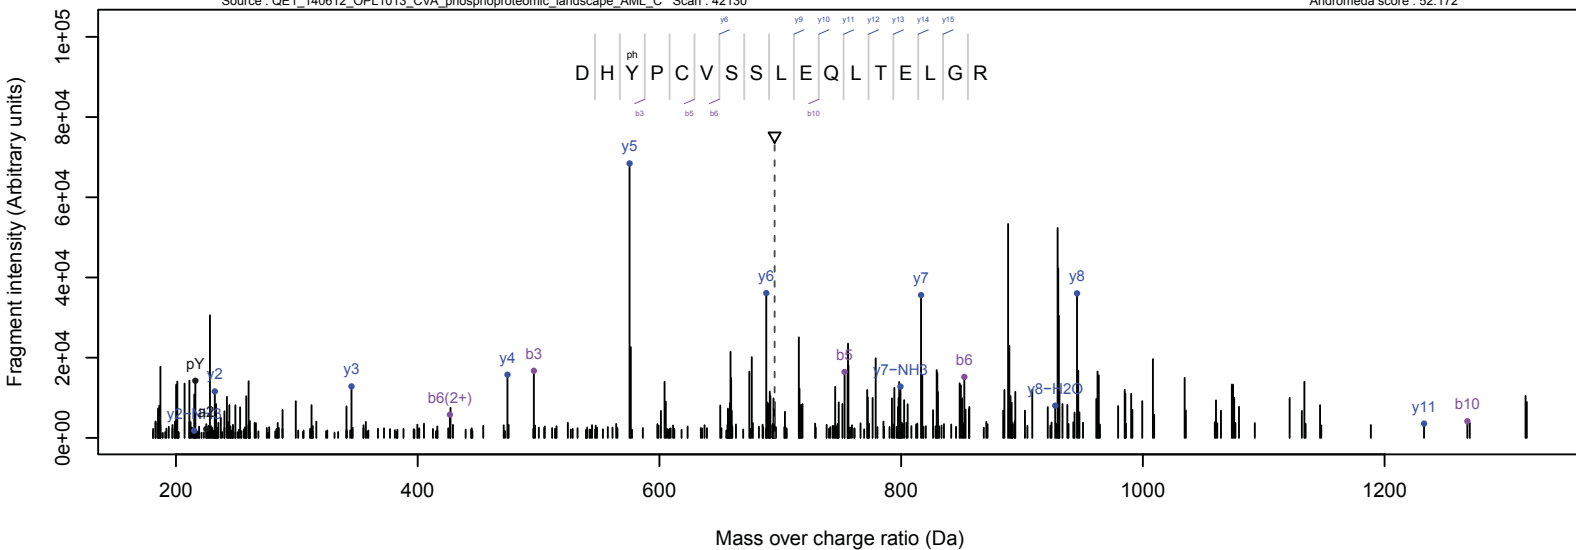

RISTATPY(ph)MNGETSTK-3+

Source : QE1\_140612\_OPL1013\_CVA\_phosphoproteomic\_landscape\_AML\_A Scan : 10793

Andromeda score : 52.172

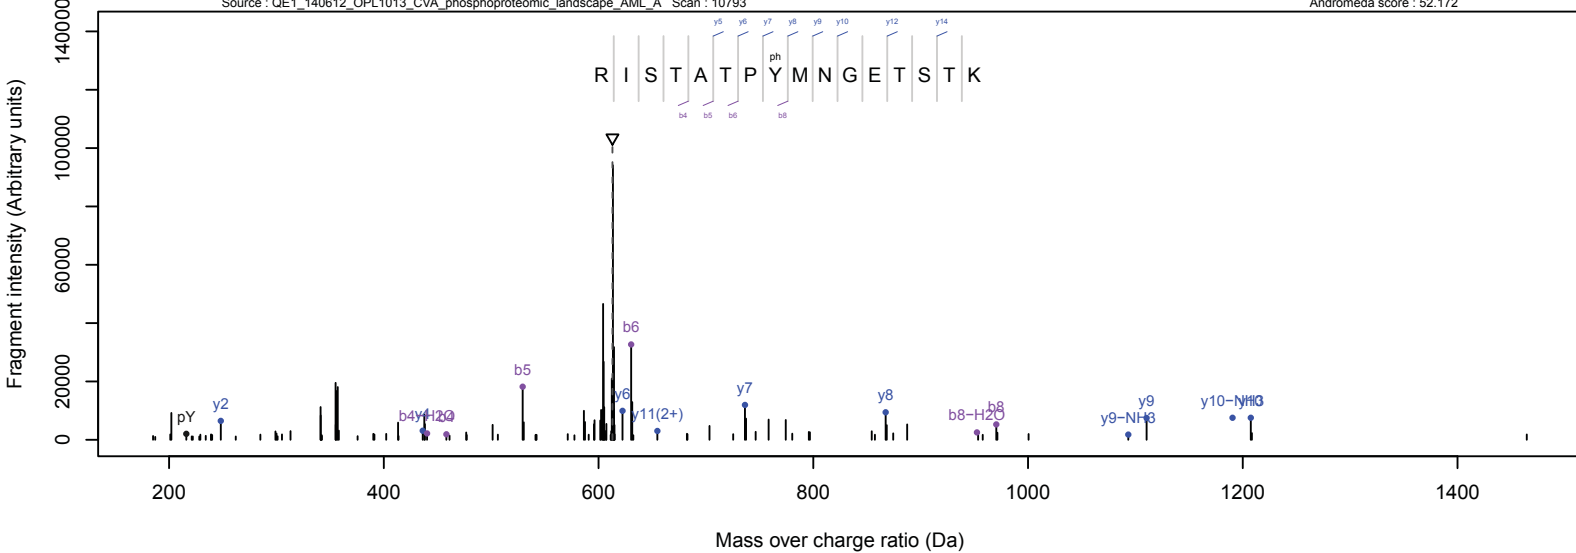

## TAPY(ph)VVTGSVDQTVK-2+

Source : QE1\_140612\_OPL1013\_CVA\_phosphoproteomic\_landscape\_AML\_C Scan : 21409

Andromeda score : 52.172

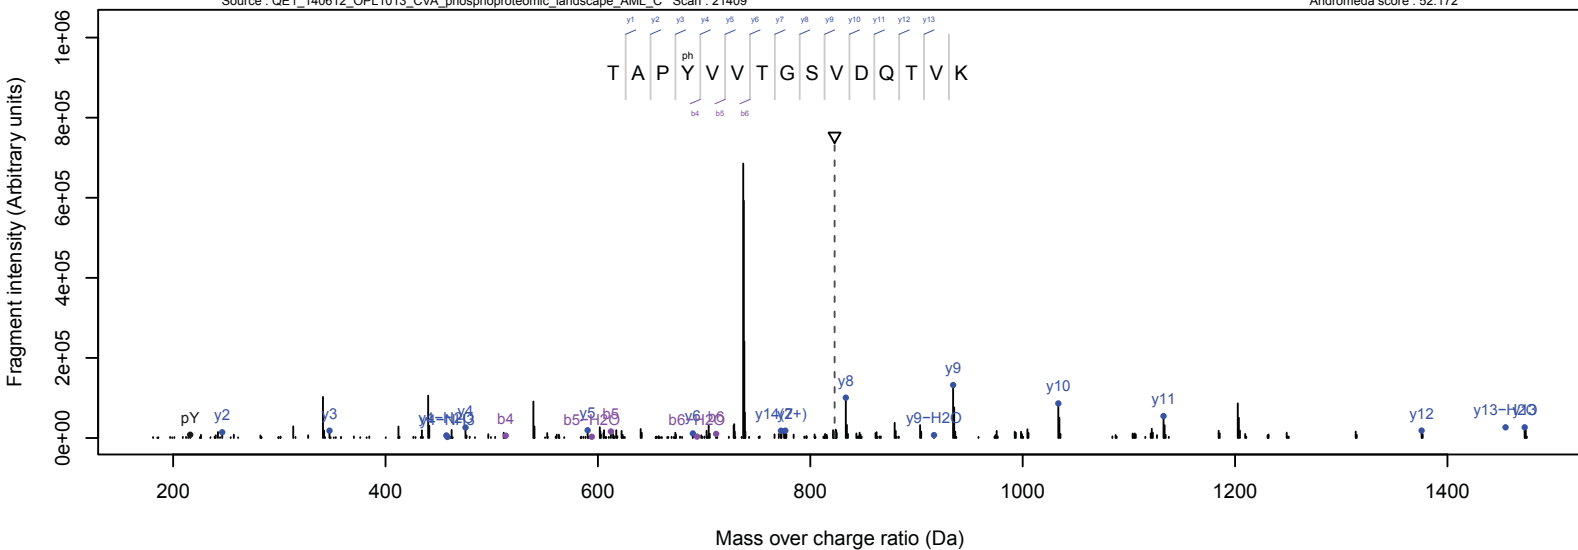

## NIY(ph)AFM(ox)GTPVQK-2+

Source : QE1\_140908\_OPL1013\_CvA\_pTyrIP\_AML\_HEL Scan : 23990

Andromeda score : 52.132

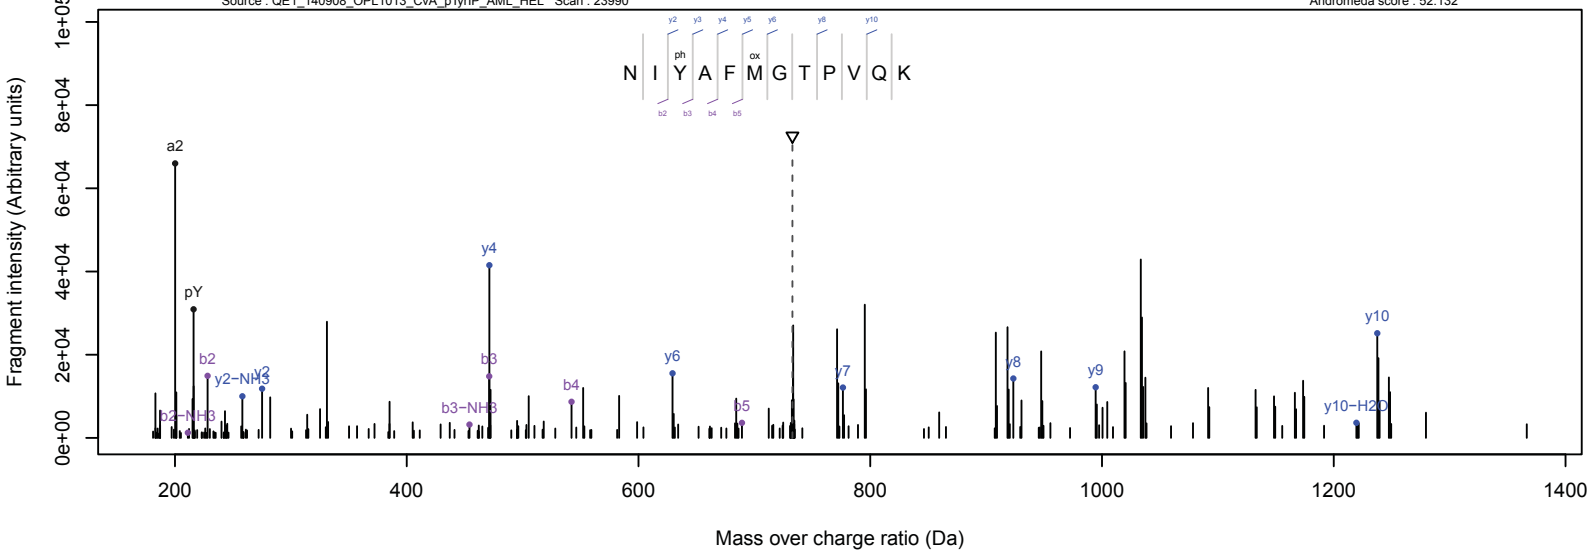

## VQIVY(ph)KPVDSLK-2+

Source : QE1\_140612\_OPL1013\_CVA\_phosphoproteomic\_landscape\_AML\_C Scan : 22574

Andromeda score : 52.101

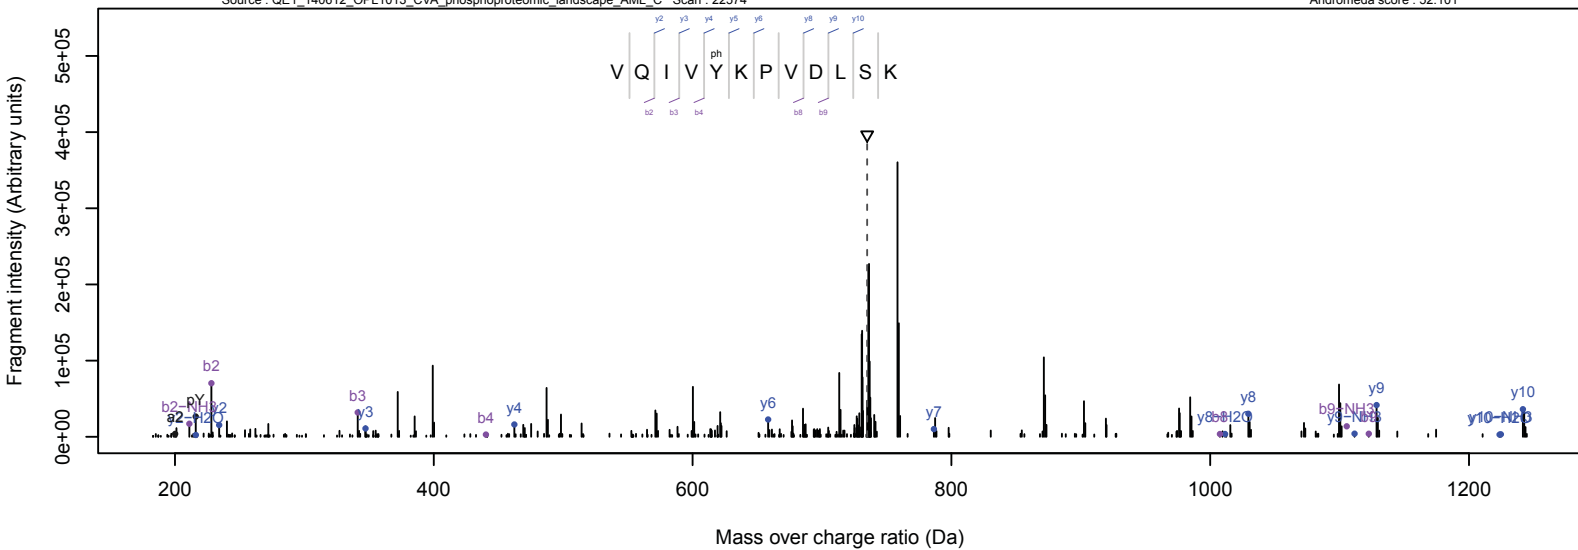

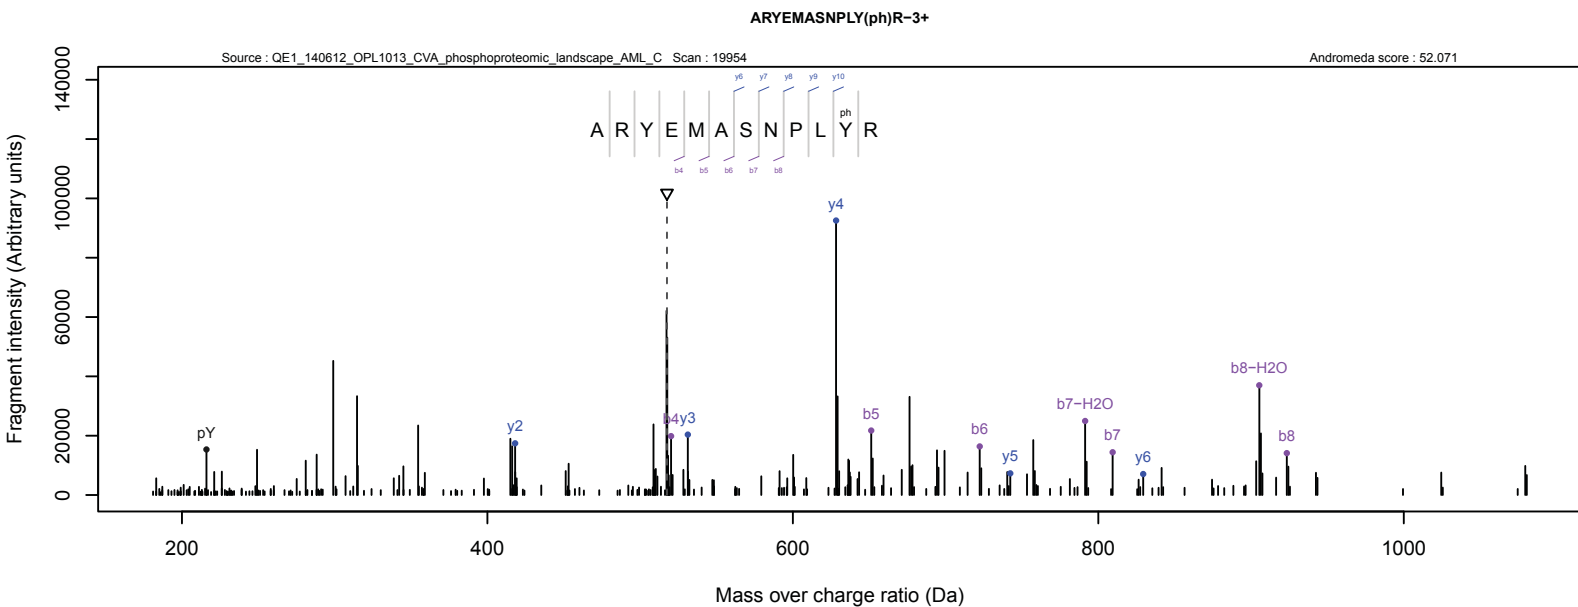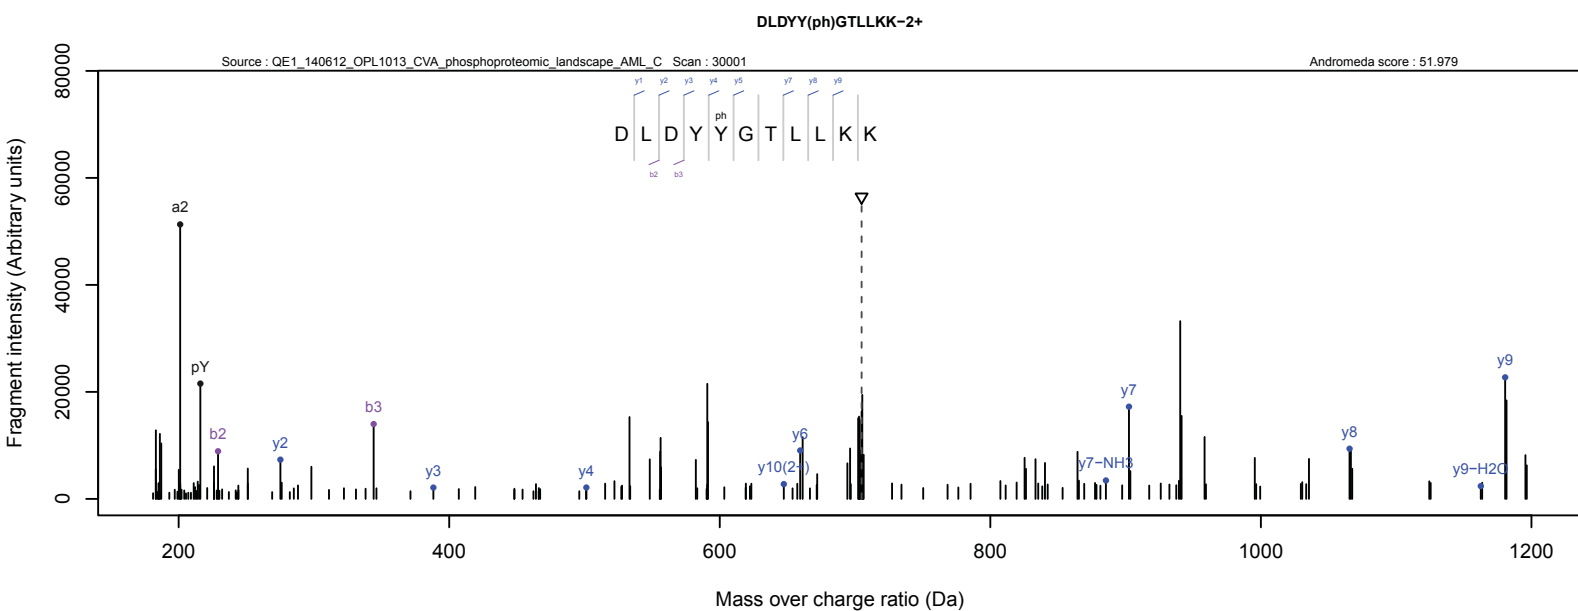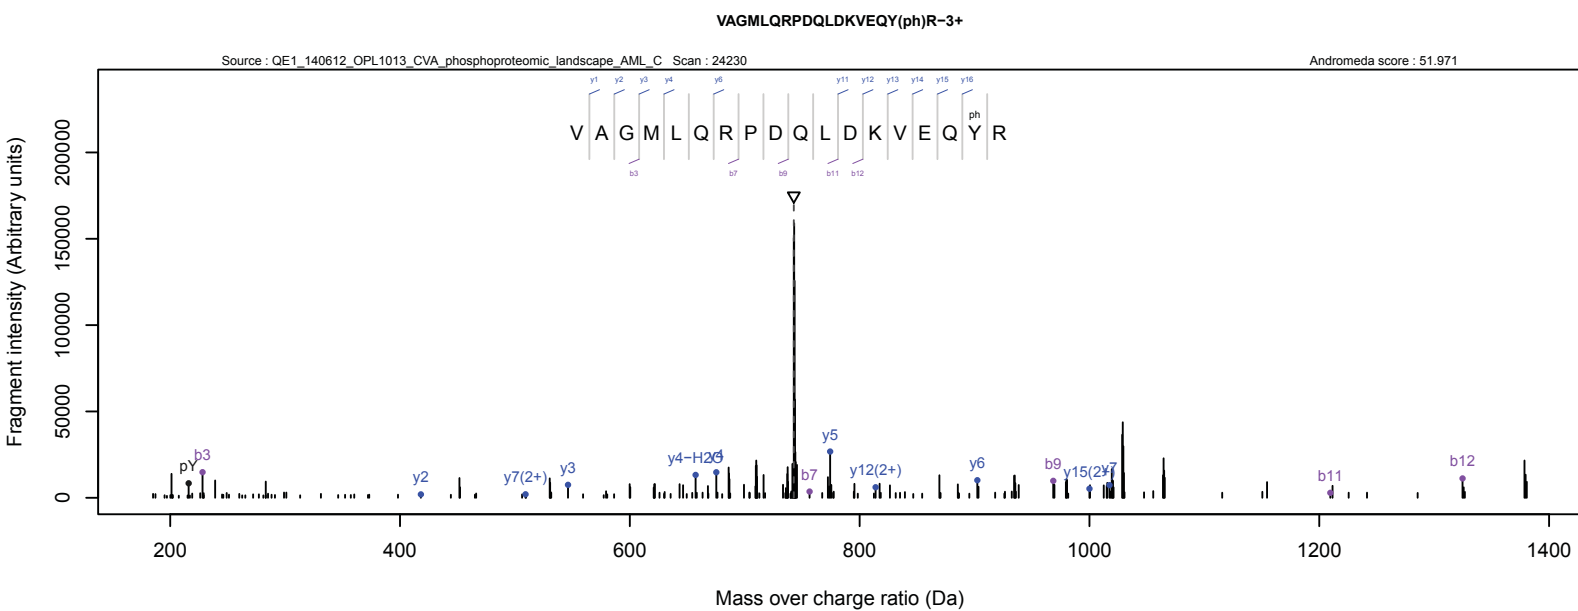

**IQSIY(ph)LER-2+**

Source : QE1\_140908\_OPL1013\_CvA\_pTyrIP\_AML\_OCI\_AML3 Scan : 23107

Andromeda score : 51.949

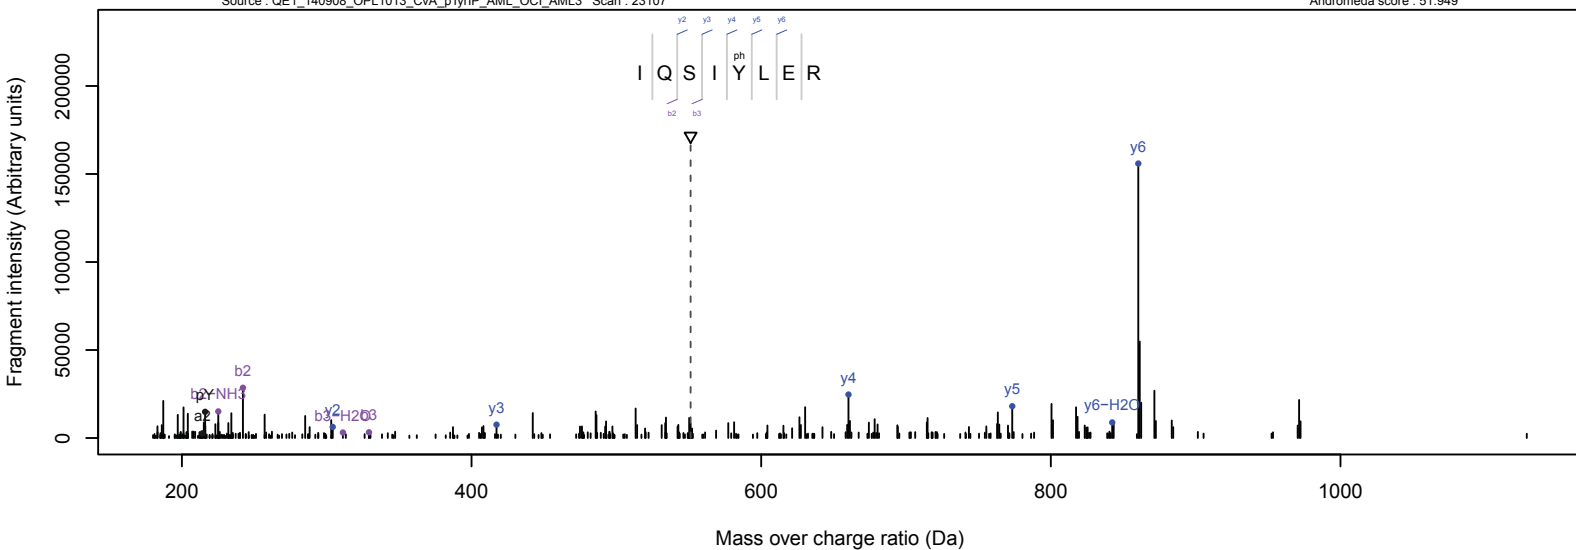

**ENSY(ph)PKEADIVIK-3+**

Source : QE1\_140612\_OPL1013\_CVA\_phosphoproteomic\_landscape\_AML\_D Scan : 19561

Andromeda score : 51.939

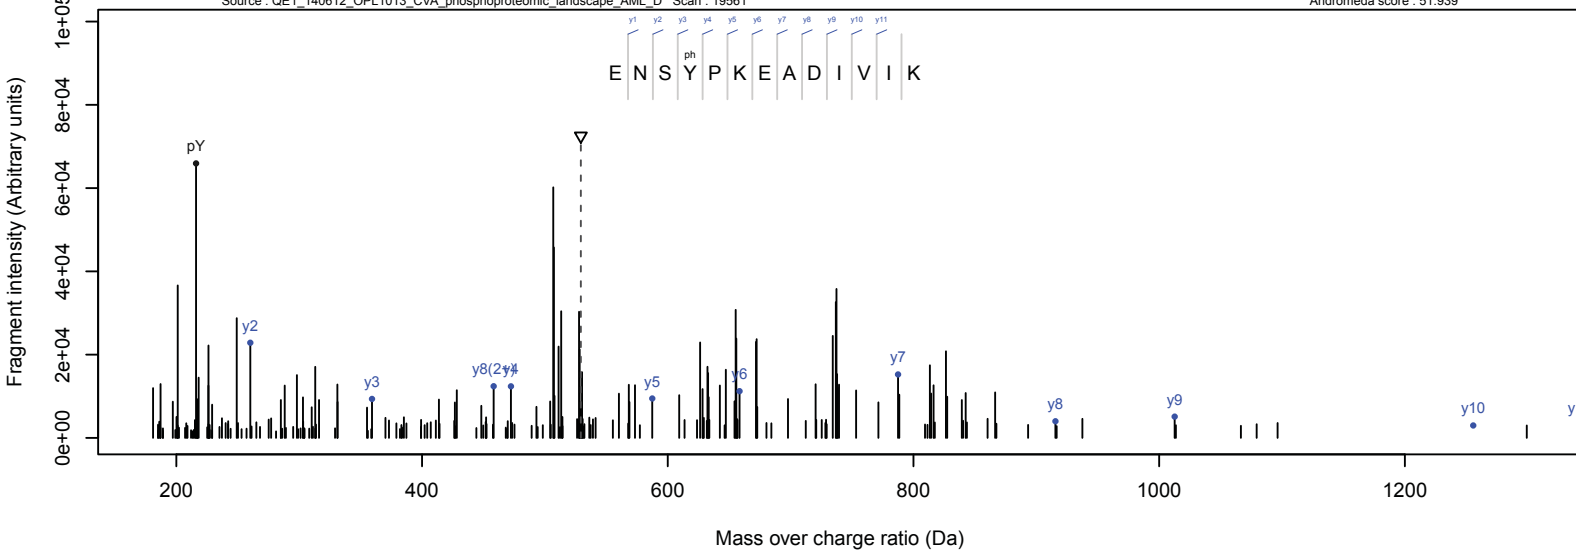

**KWY(ph)TIFK-2+**

Source : QE1\_140908\_OPL1013\_CvA\_pTyrIP\_AML\_HEL Scan : 30382

Andromeda score : 51.864

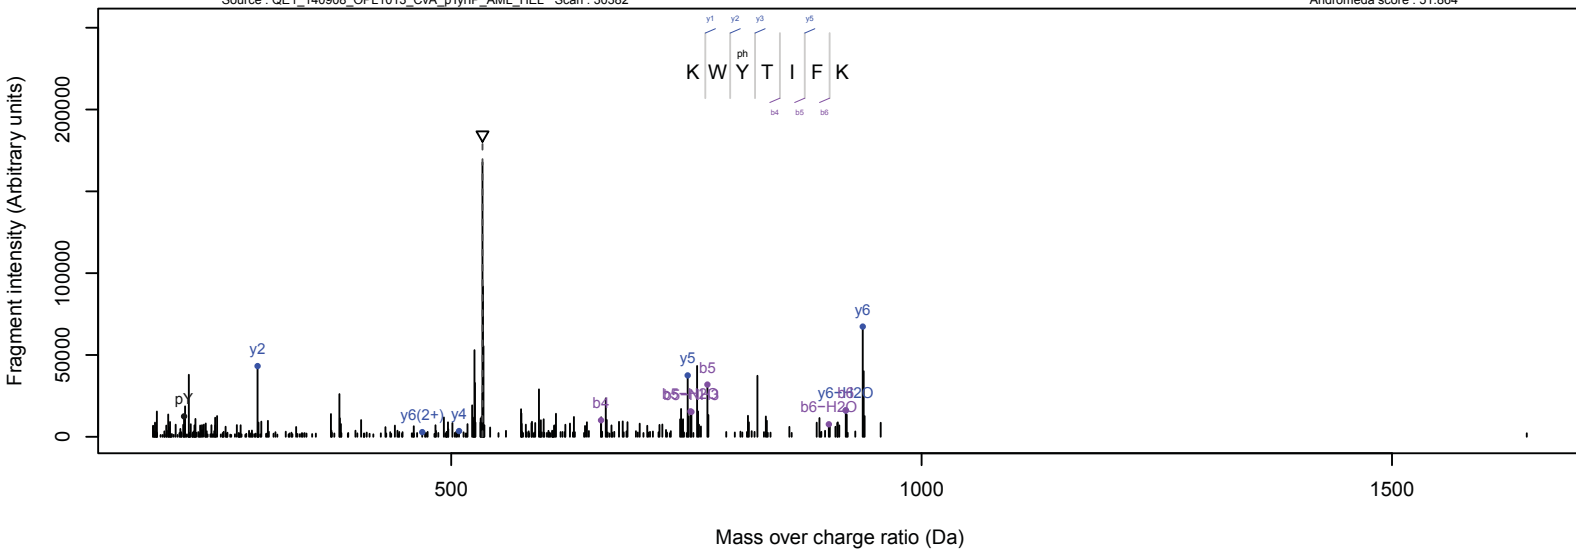

SENLGGDKPDYFSSVATVVYLRK-4+

Source : QE1\_140612\_OPL1013\_CVA\_phosphoproteomic\_landscape\_AML\_A Scan : 37543

Andromeda score : 51.827

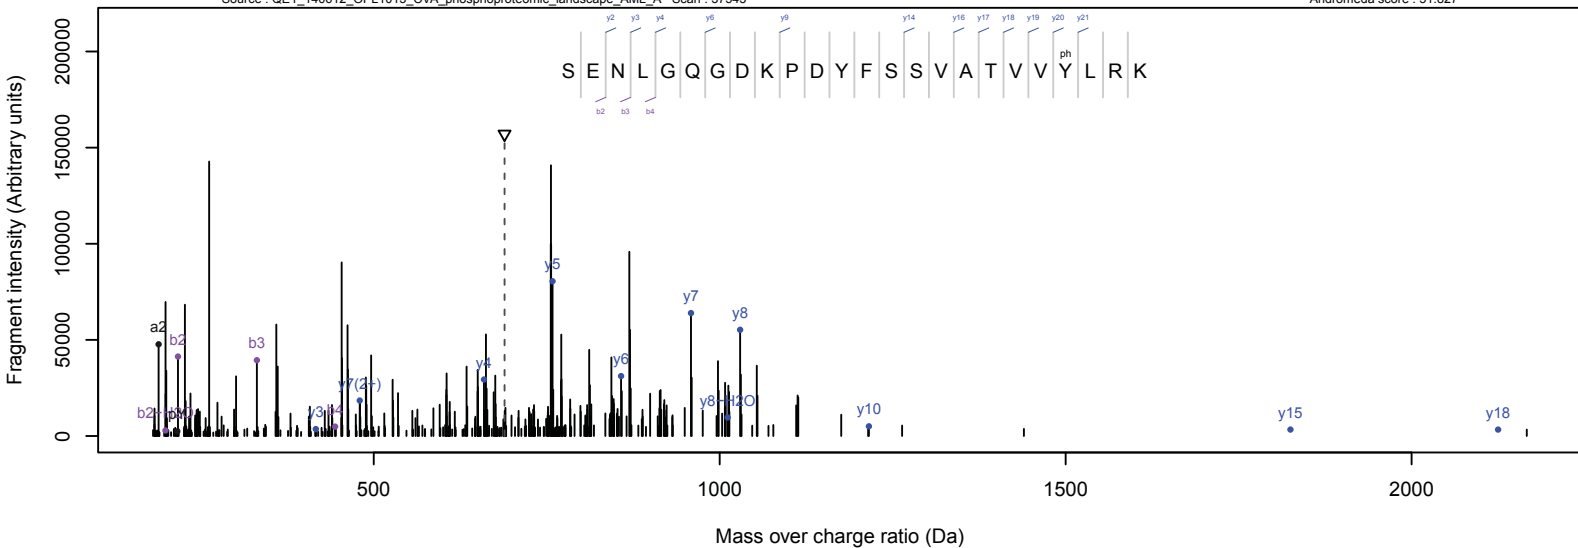

SDSTNSEDNYPMPNPGSSTLLAMER-3+

Source : QE1\_140908\_OPL1013\_CvA\_pTyrIP\_AML\_Kasumi6 Scan : 33942

Andromeda score : 51.811

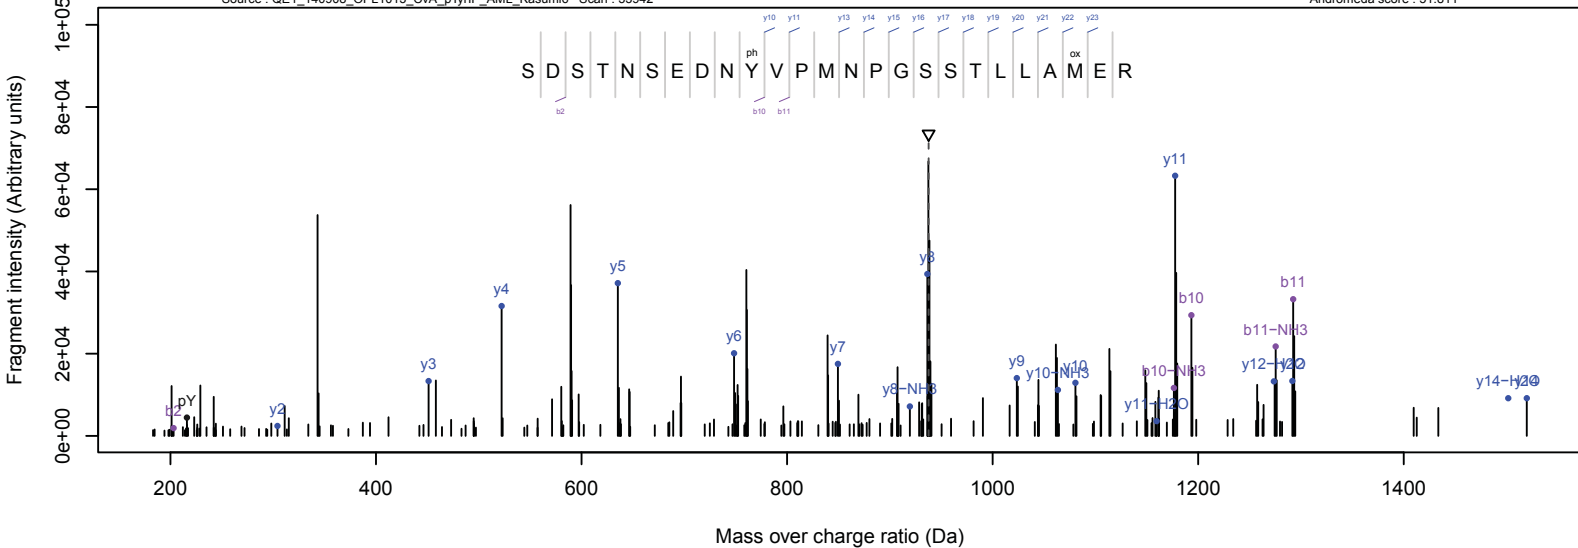

M(ox)SDPNMEANSHYGHNDVVR-3+

Source : QE1\_140908\_OPL1013\_CvA\_pTyrIP\_AML\_Kasumi6 Scan : 6989

Andromeda score : 51.798

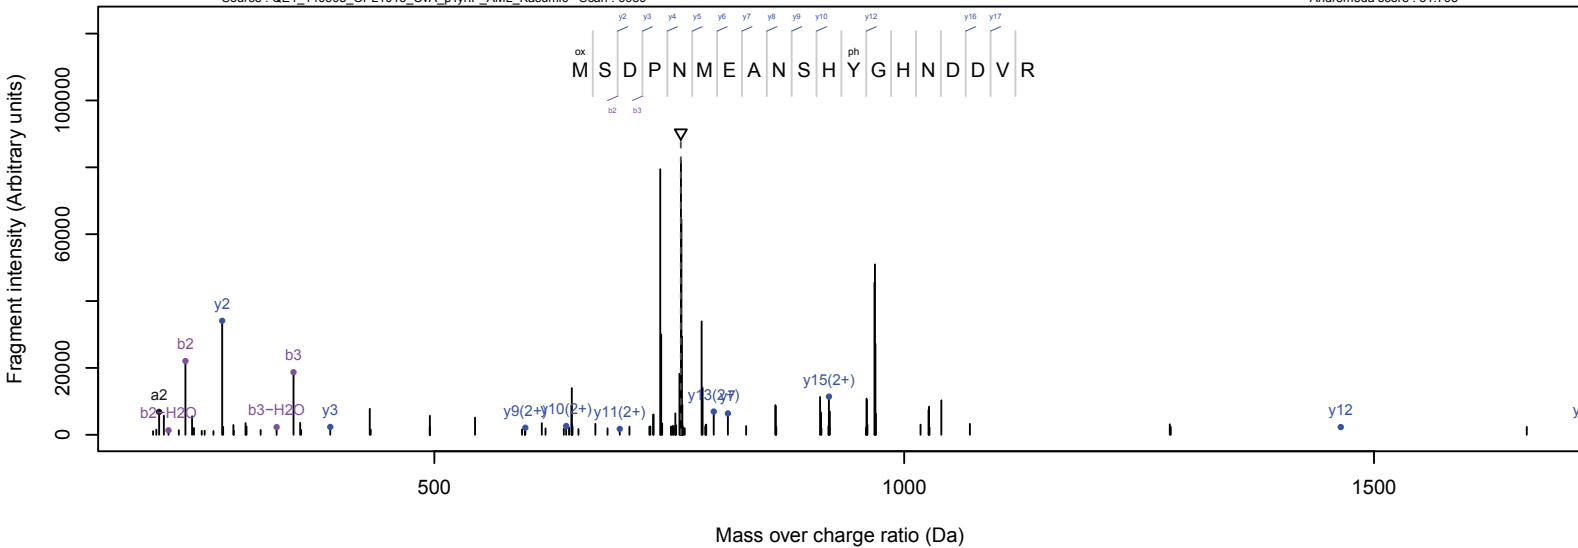

## HY(ph)GNQFPA-2+

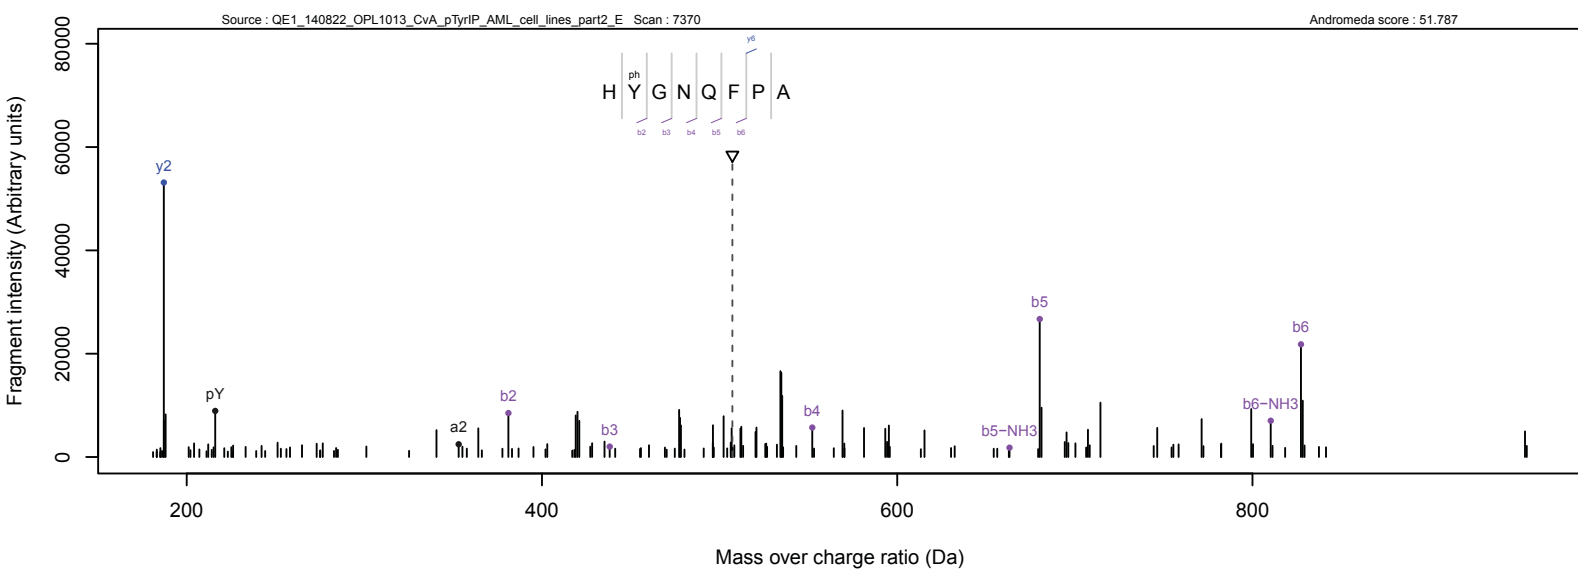

## MY(ph)SYPAR-2+

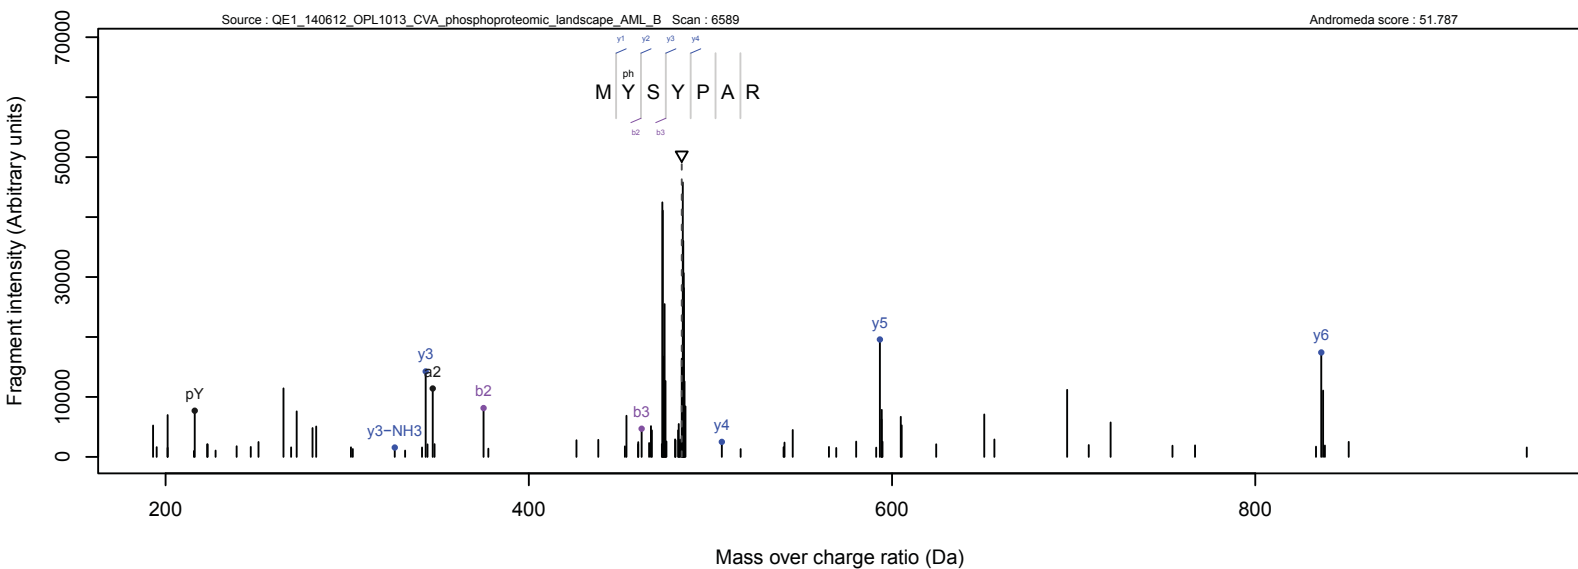

## APSRQDVY(ph)GPQQR-3+

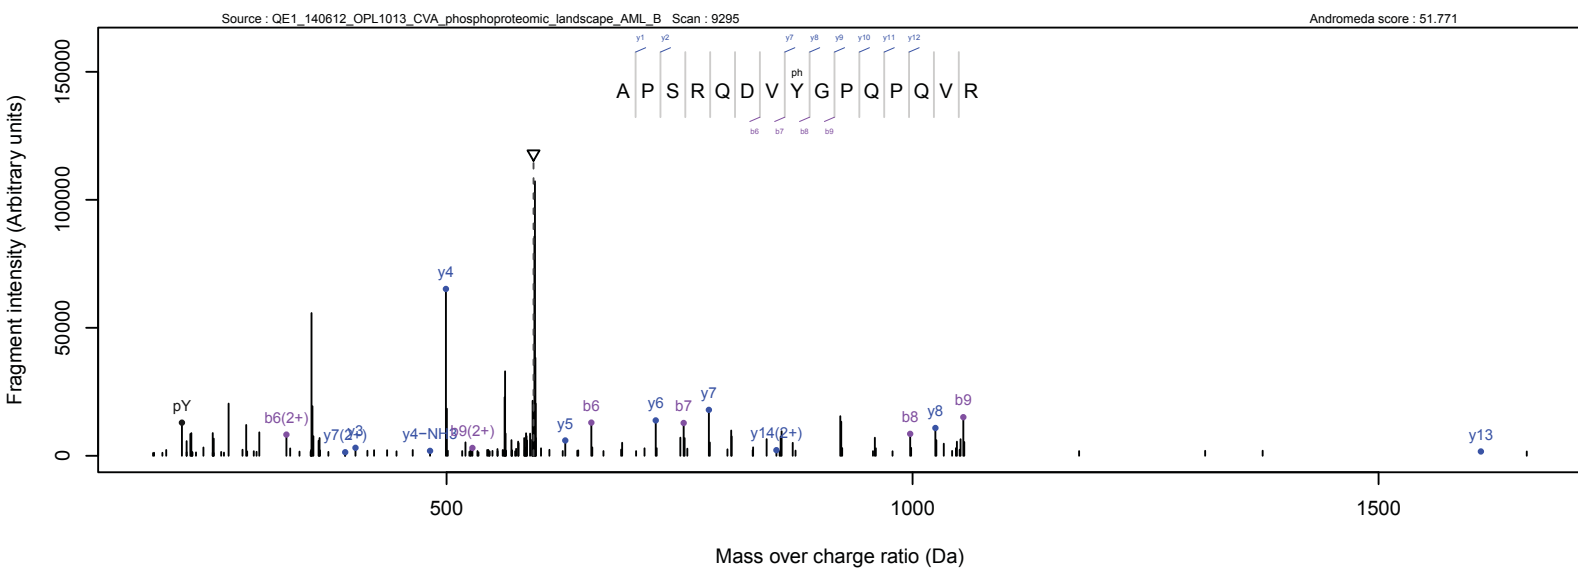



**DSEREGQGY(ph)SFVSR-3+**

Source : QE1\_140612\_OPL1013\_CVA\_phosphoproteomic\_landscape\_AML\_C Scan : 10395

Andromeda score : 51.771

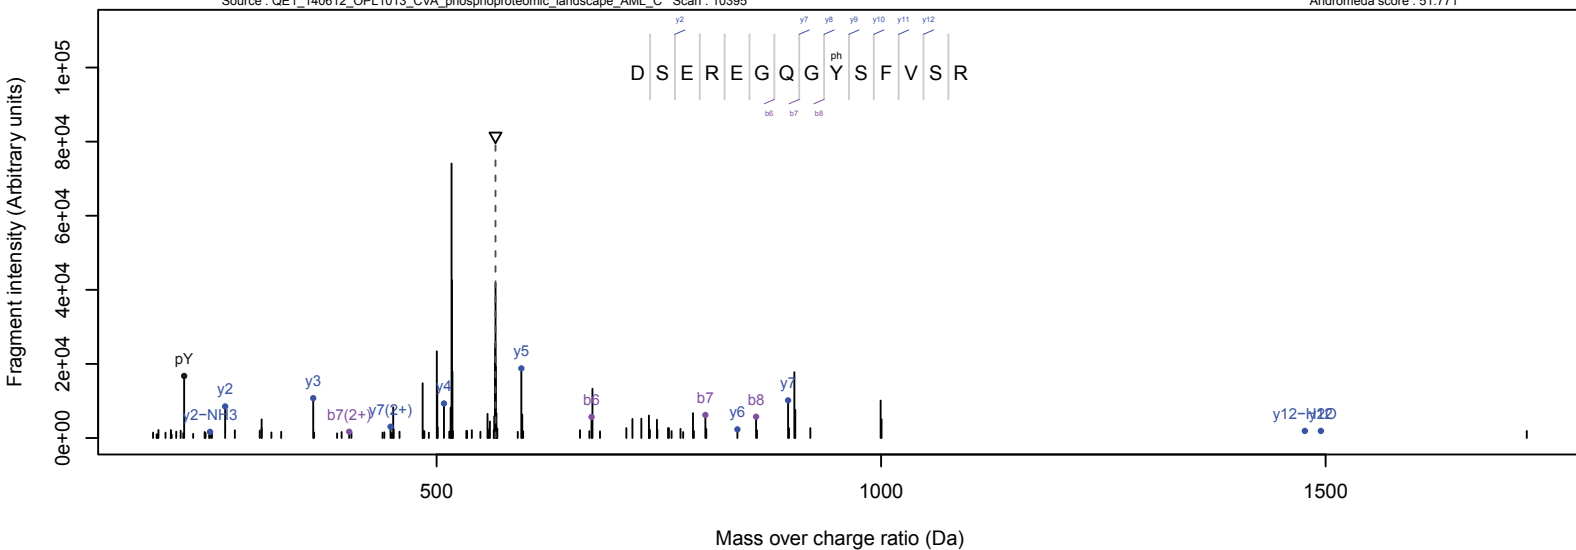

**ELSDPAGAIYT(ph)SR-2+**

Source : QE1\_140908\_OPL1013\_CvA\_pTyrIP\_AML\_HEL Scan : 32554

Andromeda score : 51.771

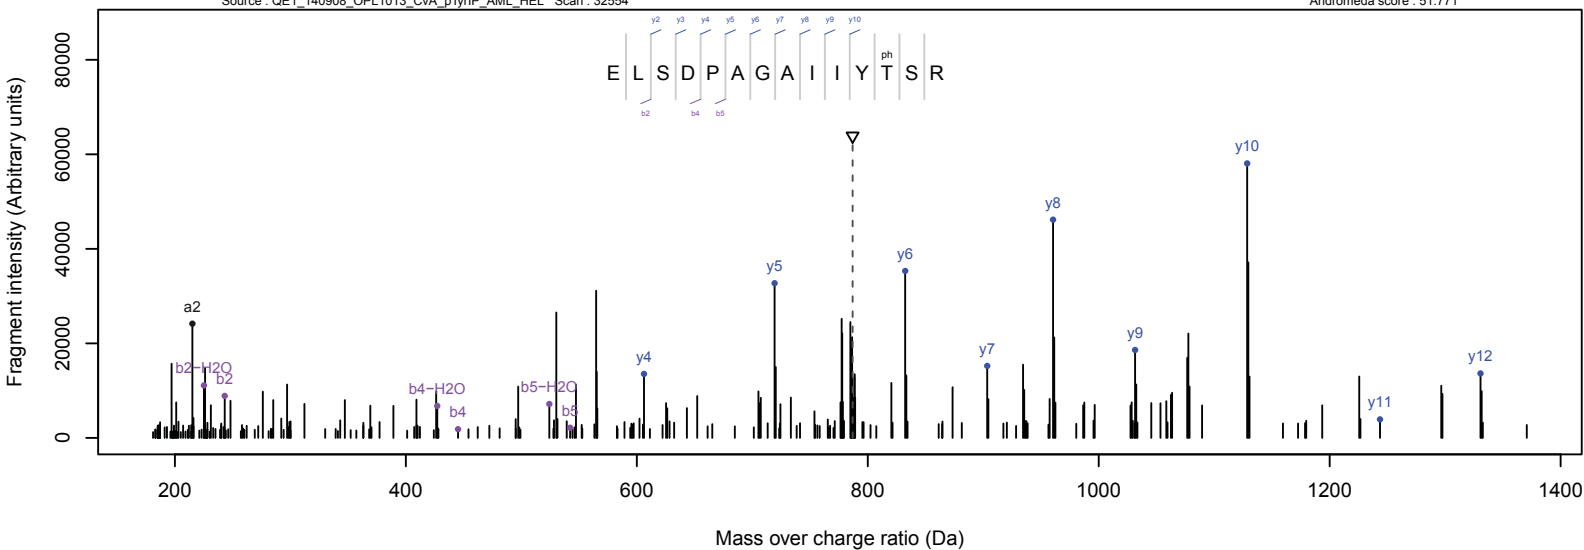

**IHTGERPY(ph)VCPLGK-3+**

Source : QE1\_140612\_OPL1013\_CVA\_phosphoproteomic\_landscape\_AML\_A Scan : 15170

Andromeda score : 51.771

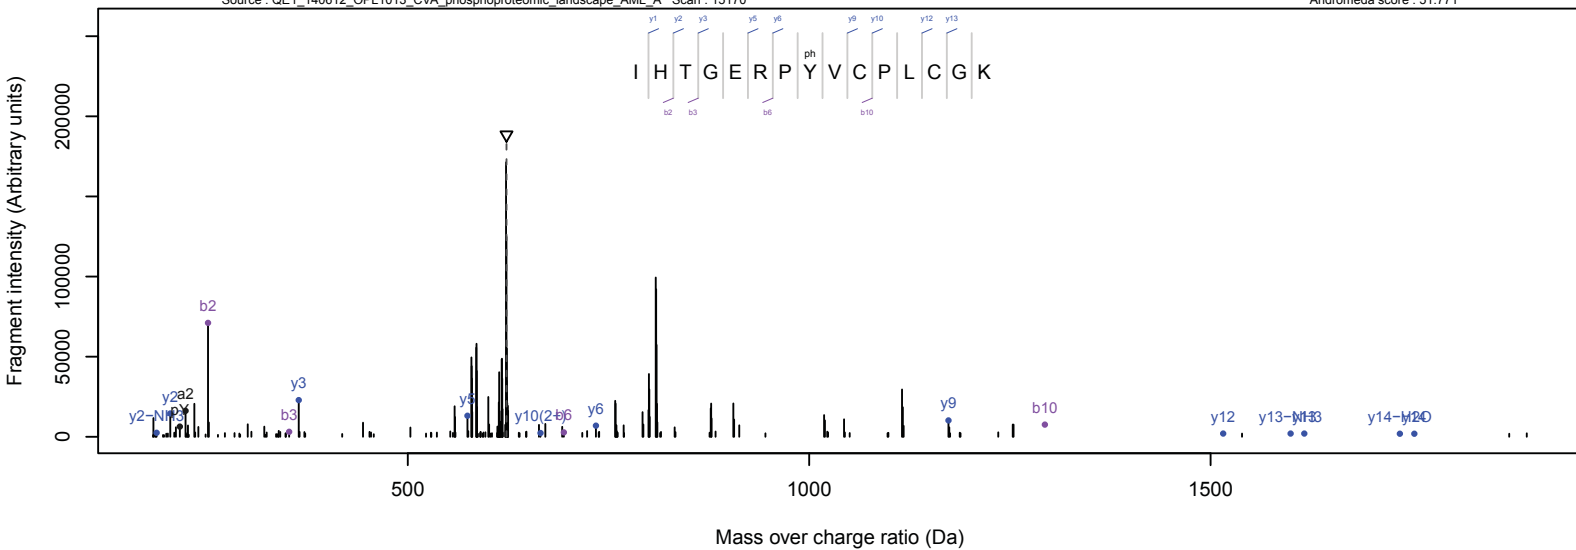

## QNLLSQSHAY(ph)QQFLR-3+

Source: QE1\_140612\_OPL1013\_CVA\_phosphoproteomic\_landscape\_AML\_C Scan: 29741

Andromeda score: 51.771

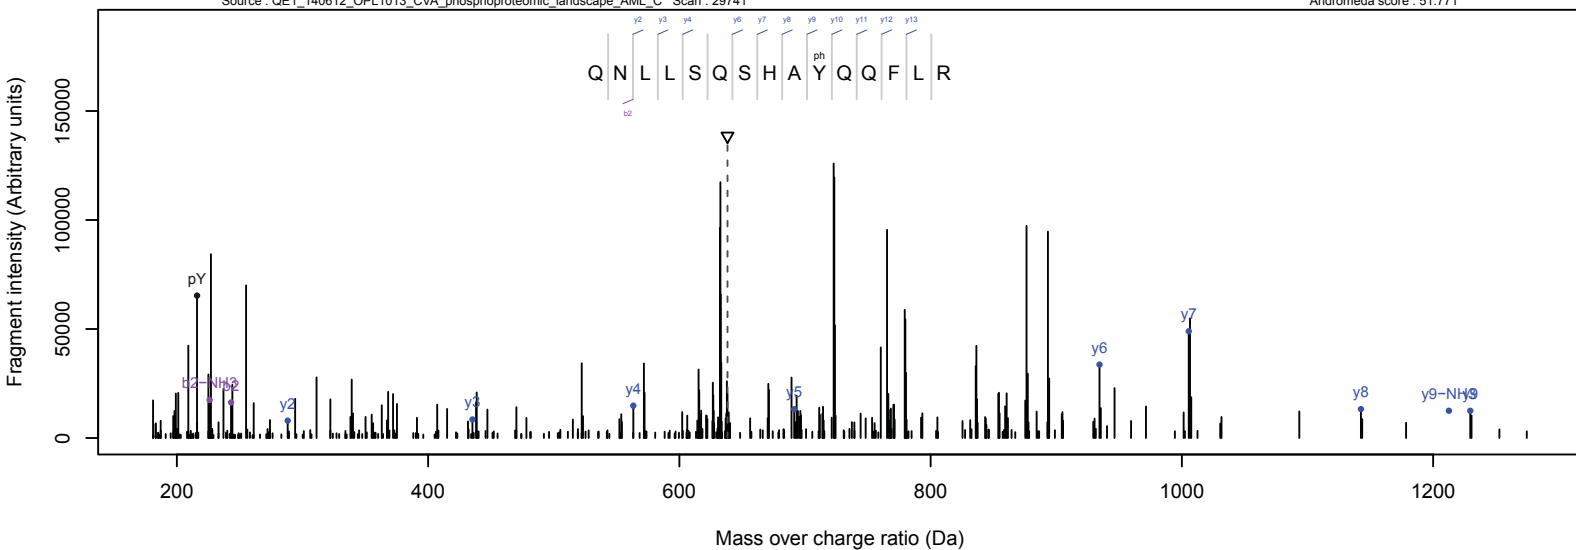

## SQSASY(ph)PVCHSK-3+

Source: QE1\_140612\_OPL1013\_CVA\_phosphoproteomic\_landscape\_AML\_C Scan: 6500

Andromeda score: 51.771

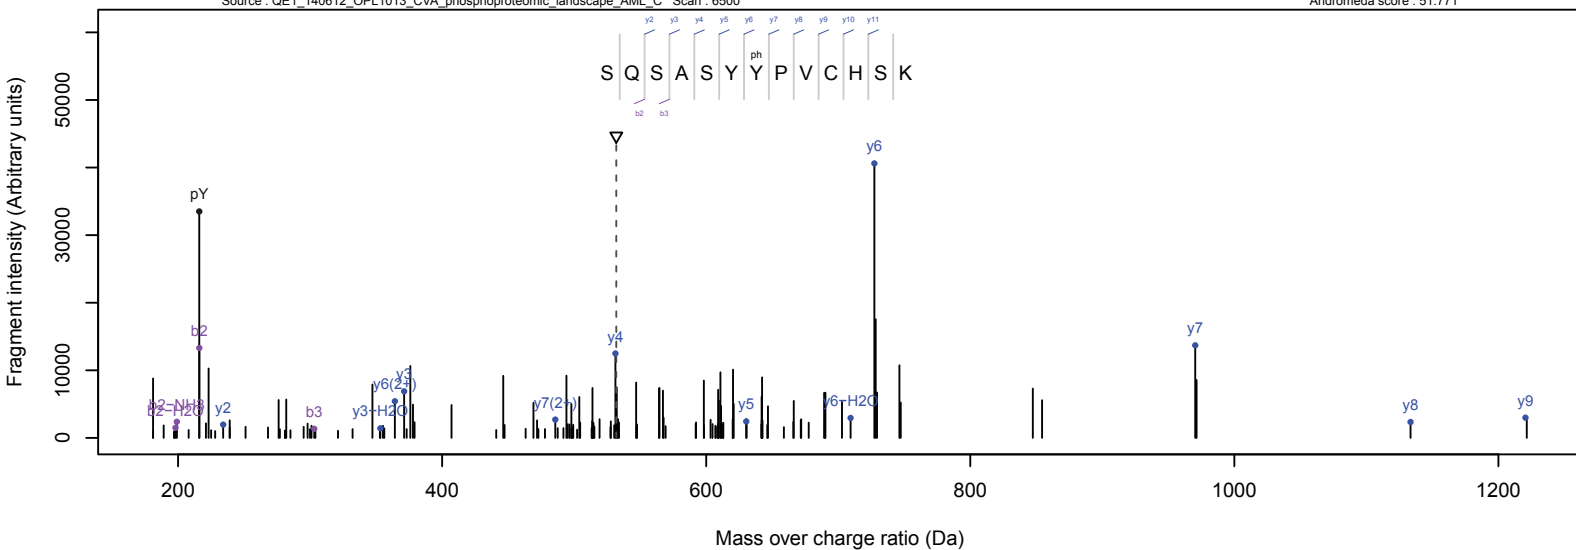

## NQEDNTGKY(ph)PDIISR-3+

Source: QE1\_140612\_OPL1013\_CVA\_phosphoproteomic\_landscape\_AML\_B Scan: 13802

Andromeda score: 51.76

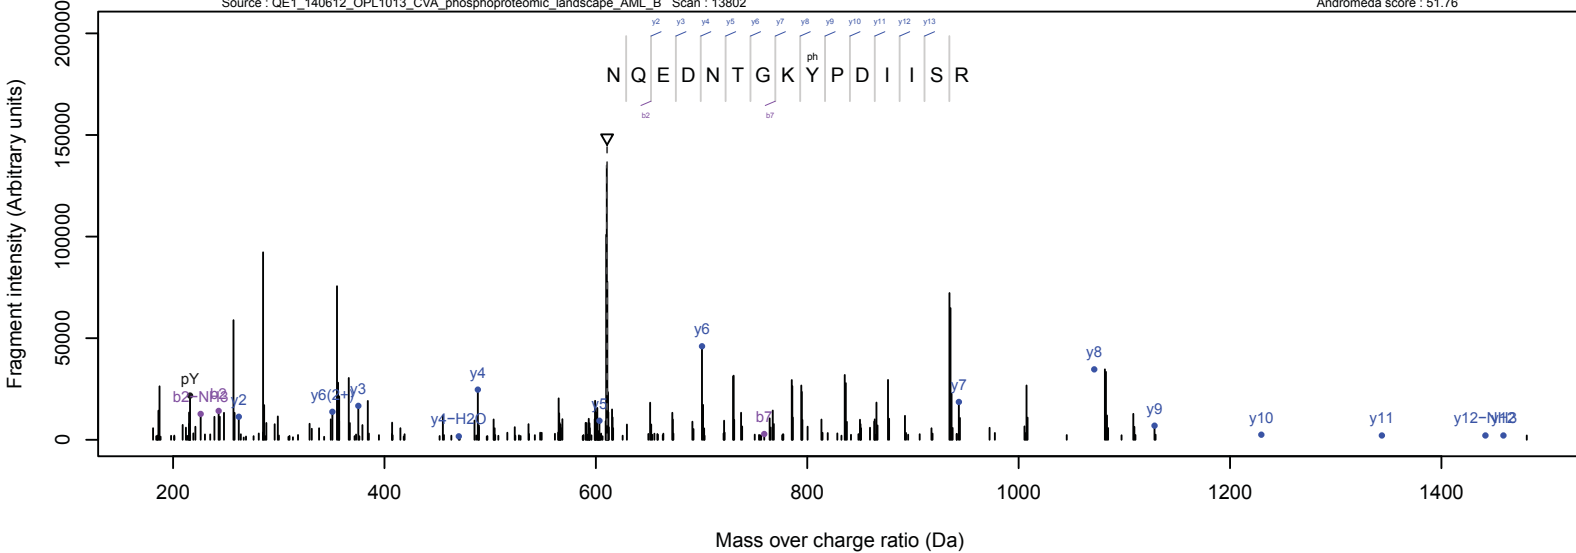

## FRY(ph)LMAEK-3+

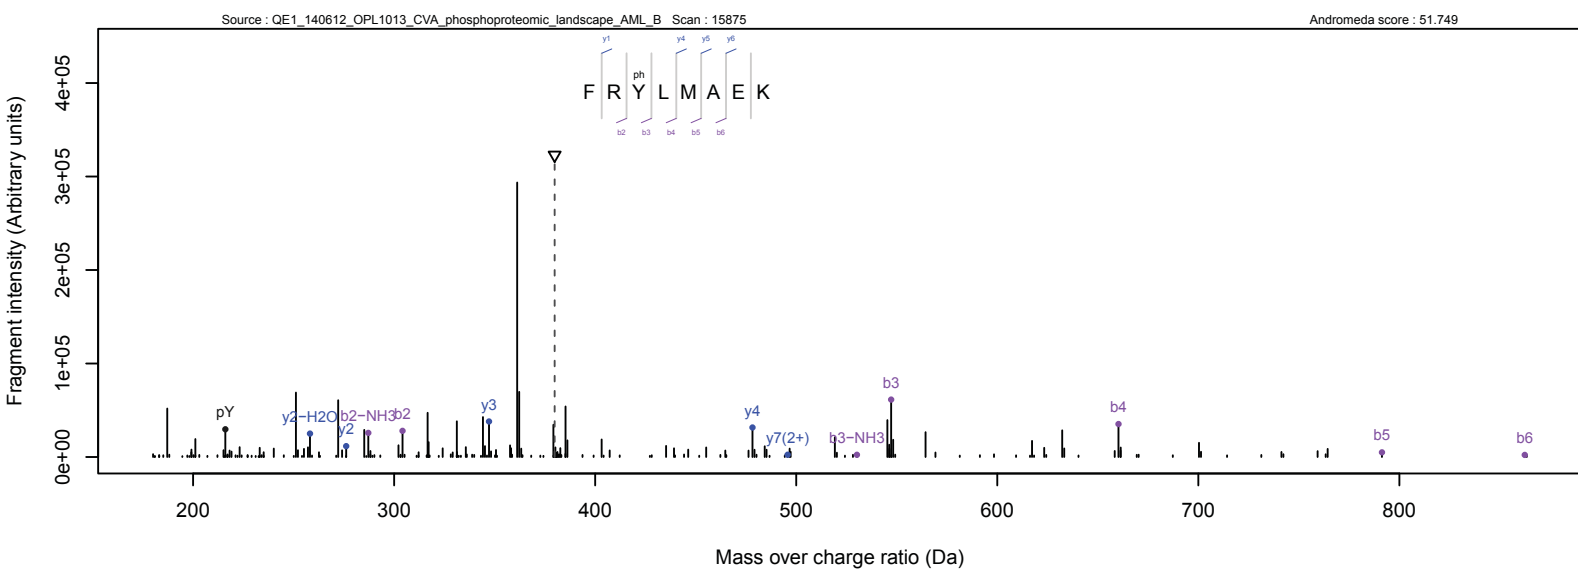

## KTY(ph)EIWHR-3+

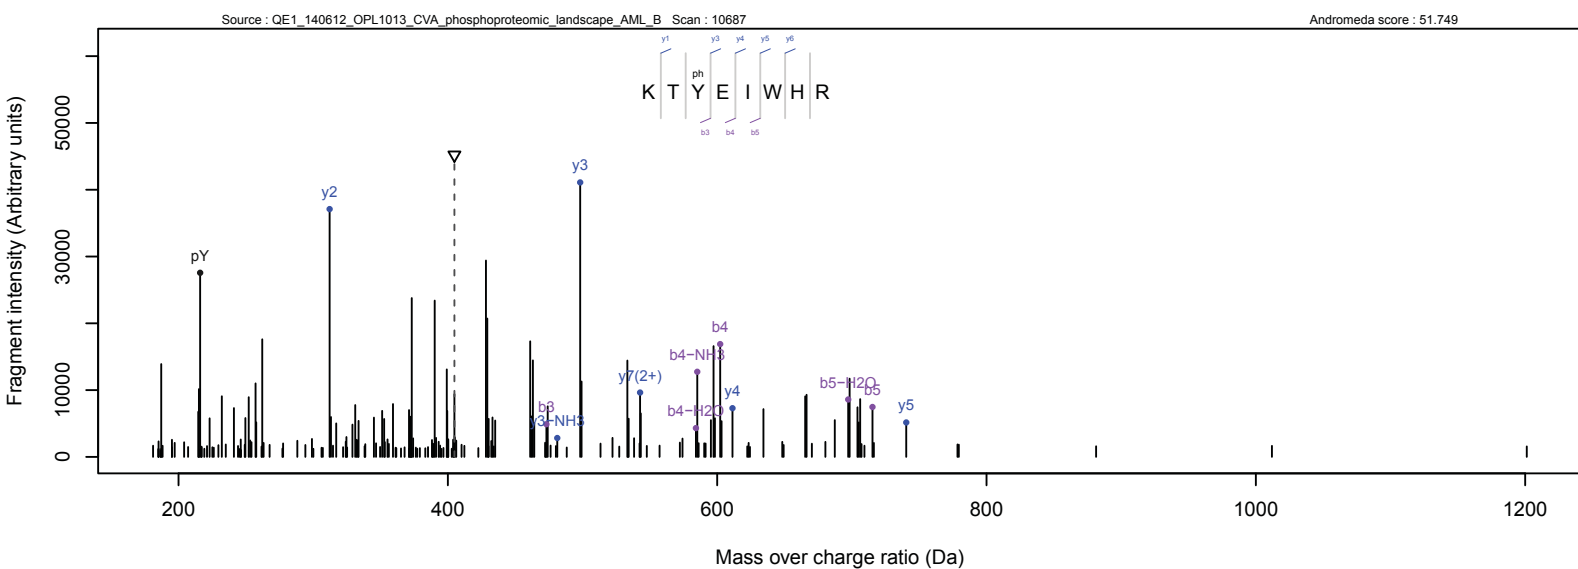

## DIM(ox)NDSNY(ph)IVK-2+

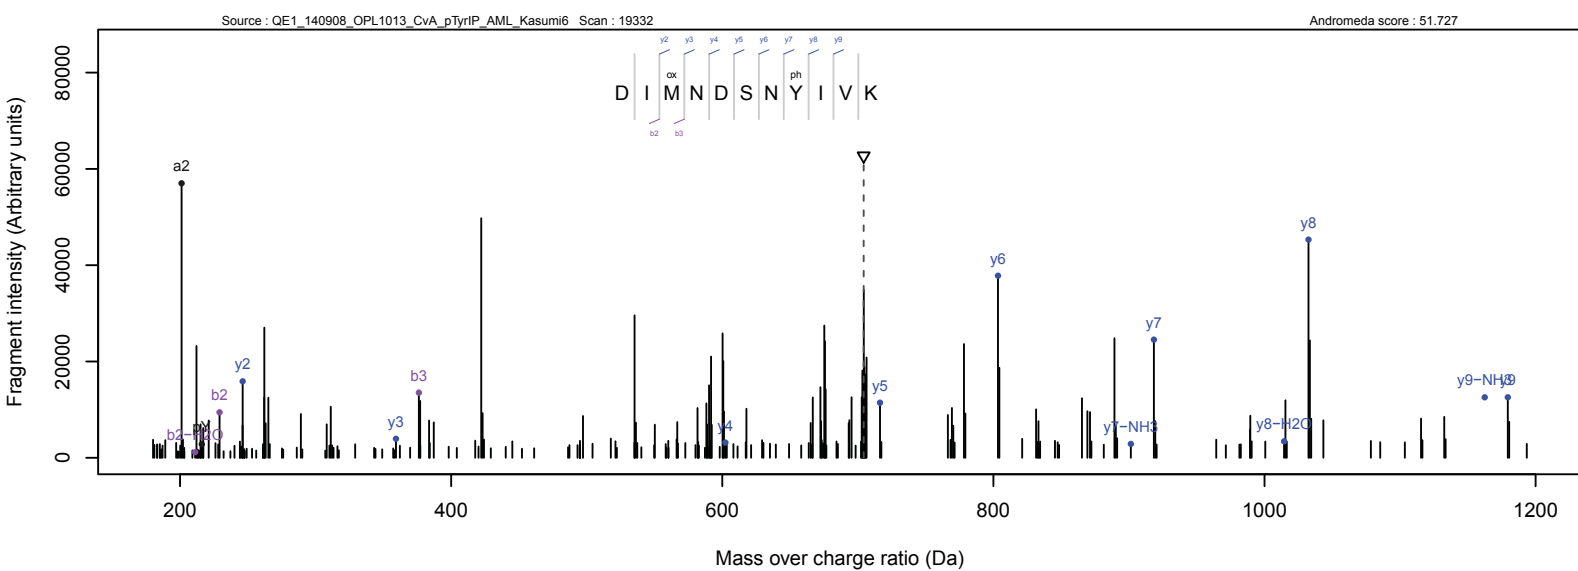

## QY(ph)CSFEDCKK-3+

Source : QE1\_140612\_OPL1013\_CVA\_phosphoproteomic\_landscape\_AML\_C Scan : 12164

Andromeda score : 51.727

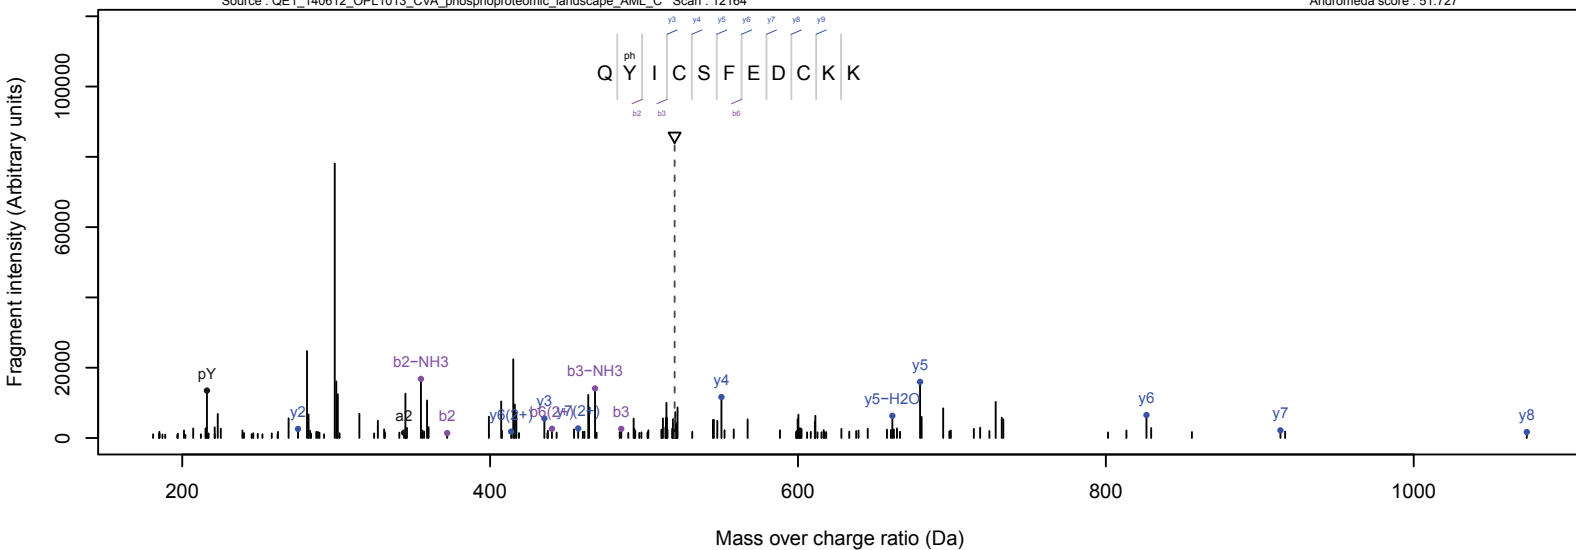

## AKTY(ph)QTELPFK-2+

Source : QE1\_140612\_OPL1013\_CVA\_phosphoproteomic\_landscape\_AML\_C Scan : 28355

Andromeda score : 51.726

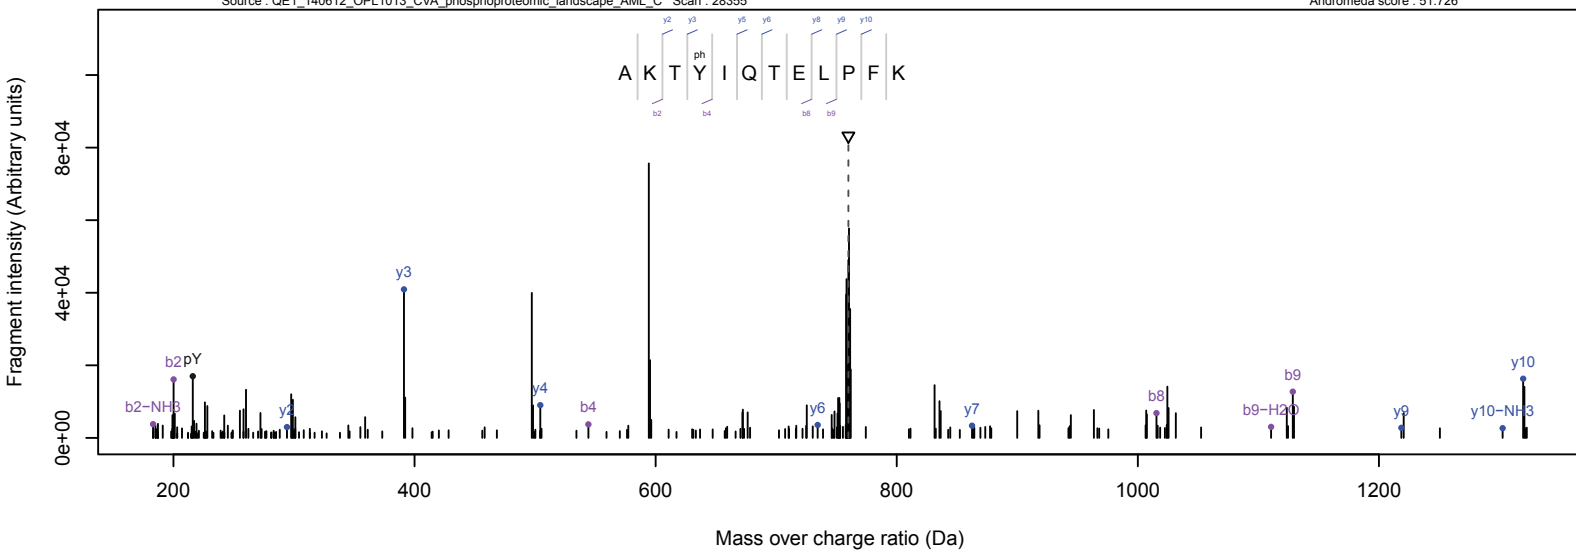

## ALPSMDKY(ph)AVFK-2+

Source : QE1\_140612\_OPL1013\_CVA\_phosphoproteomic\_landscape\_AML\_B Scan : 27764

Andromeda score : 51.726

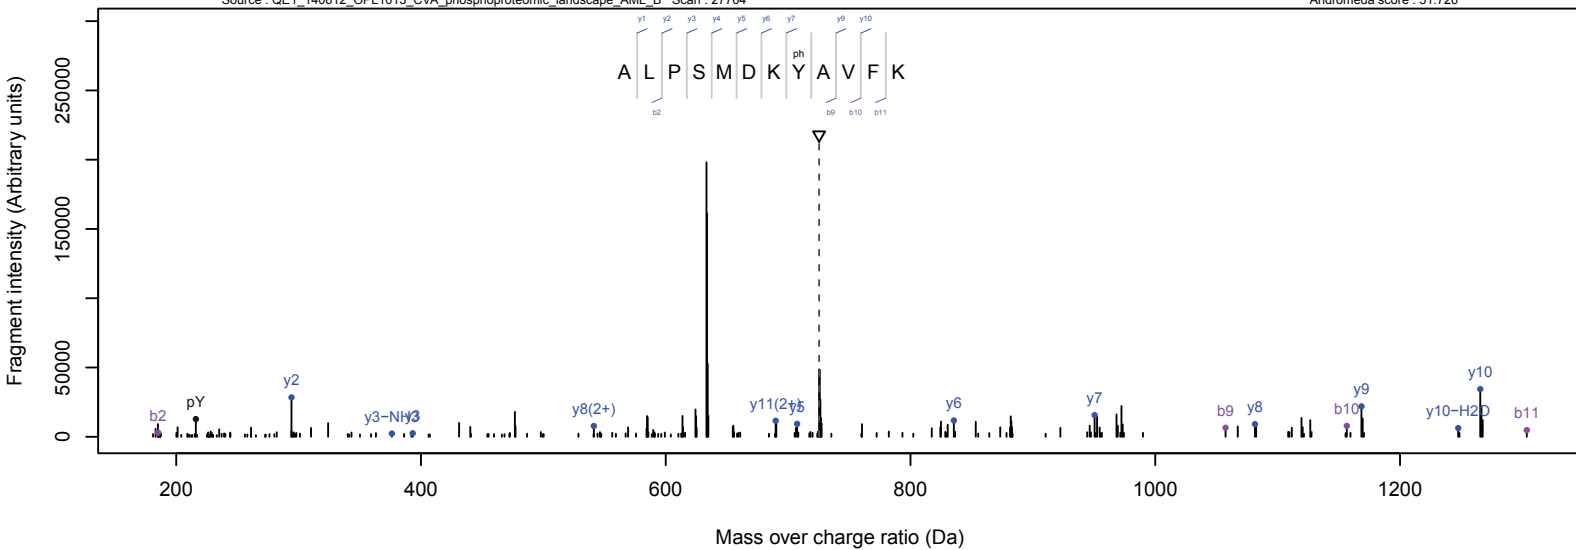

## GITTAACVY(ph)PAR-2+

Source : QE1\_140612\_OPL1013\_CVA\_phosphoproteomic\_landscape\_AML\_C Scan : 22635

Andromeda score : 51.726

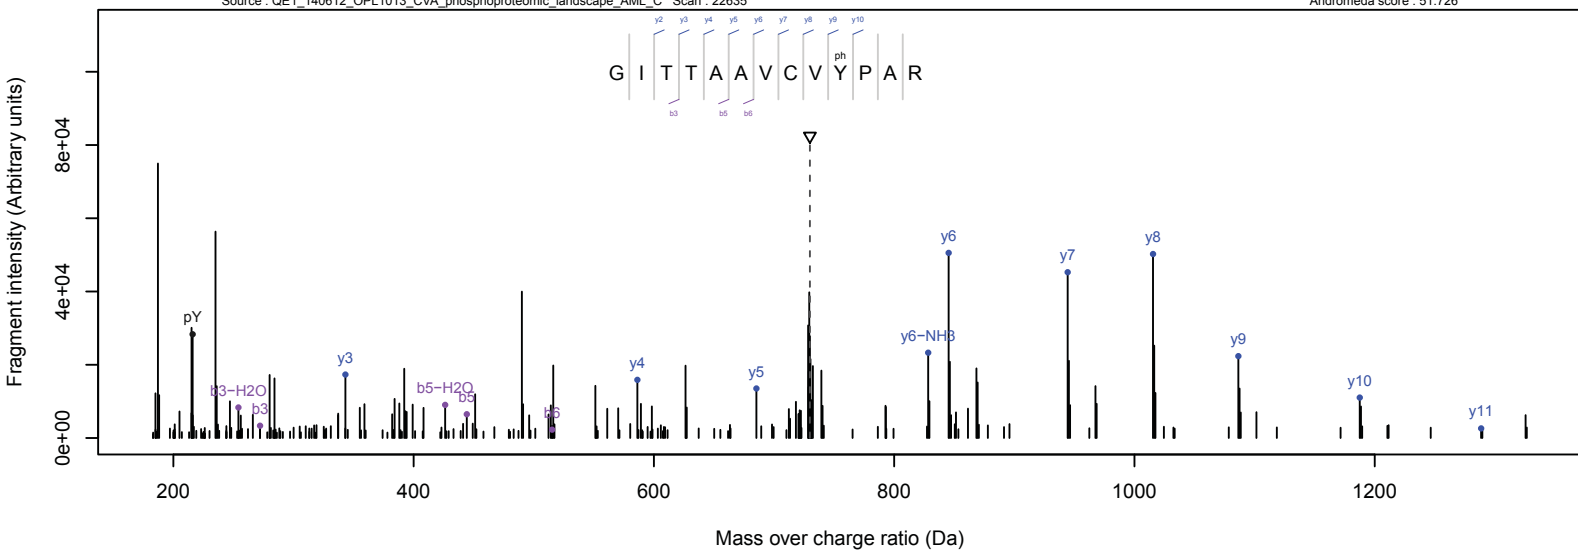

## LTPTHAASPVY(ph)R-2+

Source : QE1\_140612\_OPL1013\_CVA\_phosphoproteomic\_landscape\_AML\_C Scan : 9967

Andromeda score : 51.726

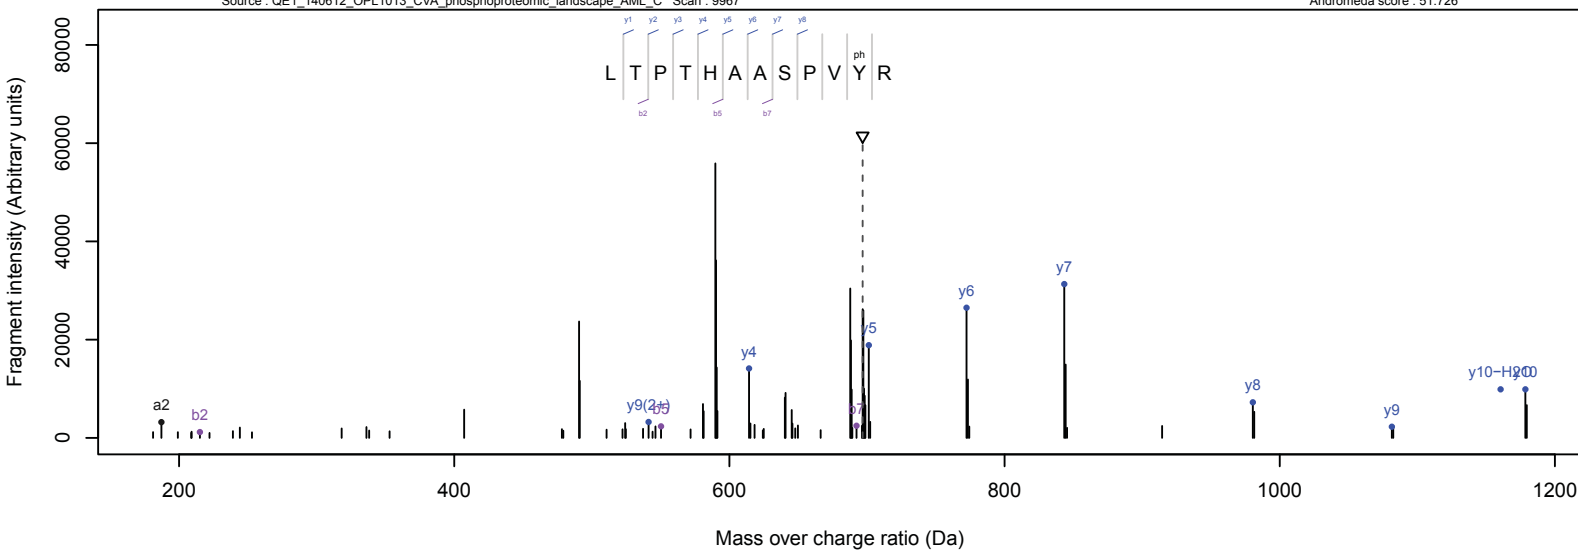

## MANY(ph)TNLTQGAK-2+

Source : QE1\_140612\_OPL1013\_CVA\_phosphoproteomic\_landscape\_AML\_C Scan : 11574

Andromeda score : 51.726

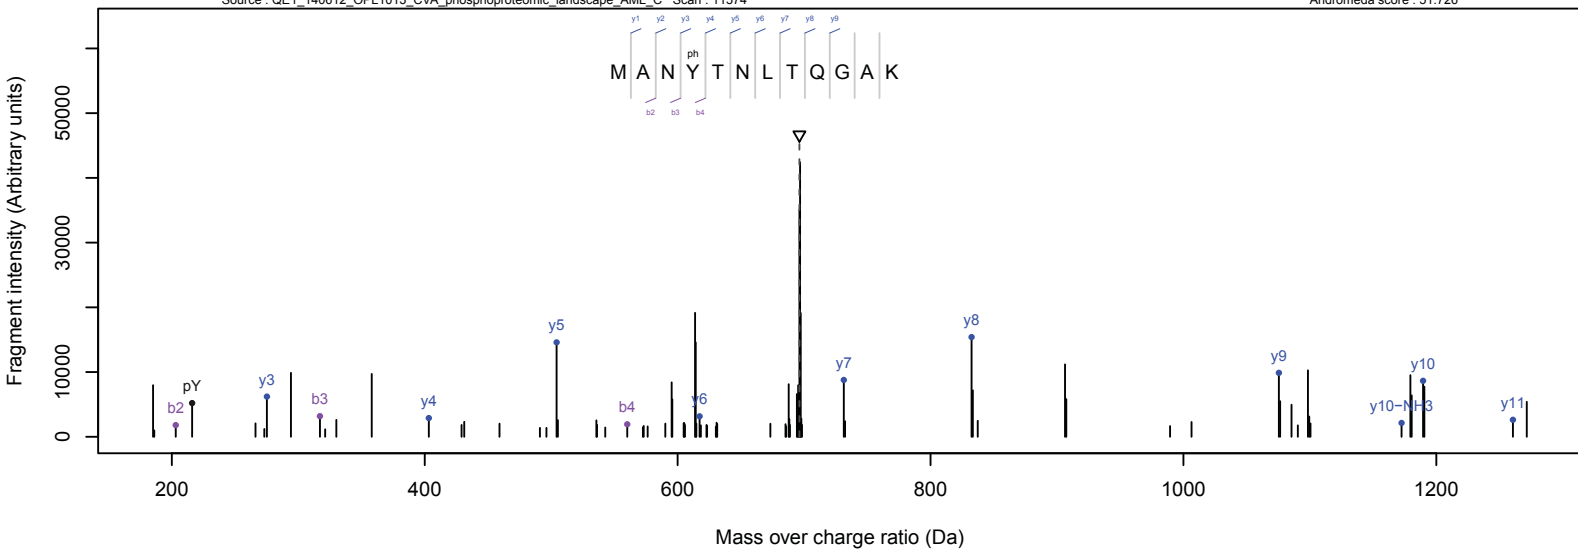

## SSIQHARLPQDSY(ph)TVVR-3+

Source : QE1\_140612\_OPL1013\_CVA\_phosphoproteomic\_landscape\_AML\_B Scan : 15853

Andromeda score : 51.684

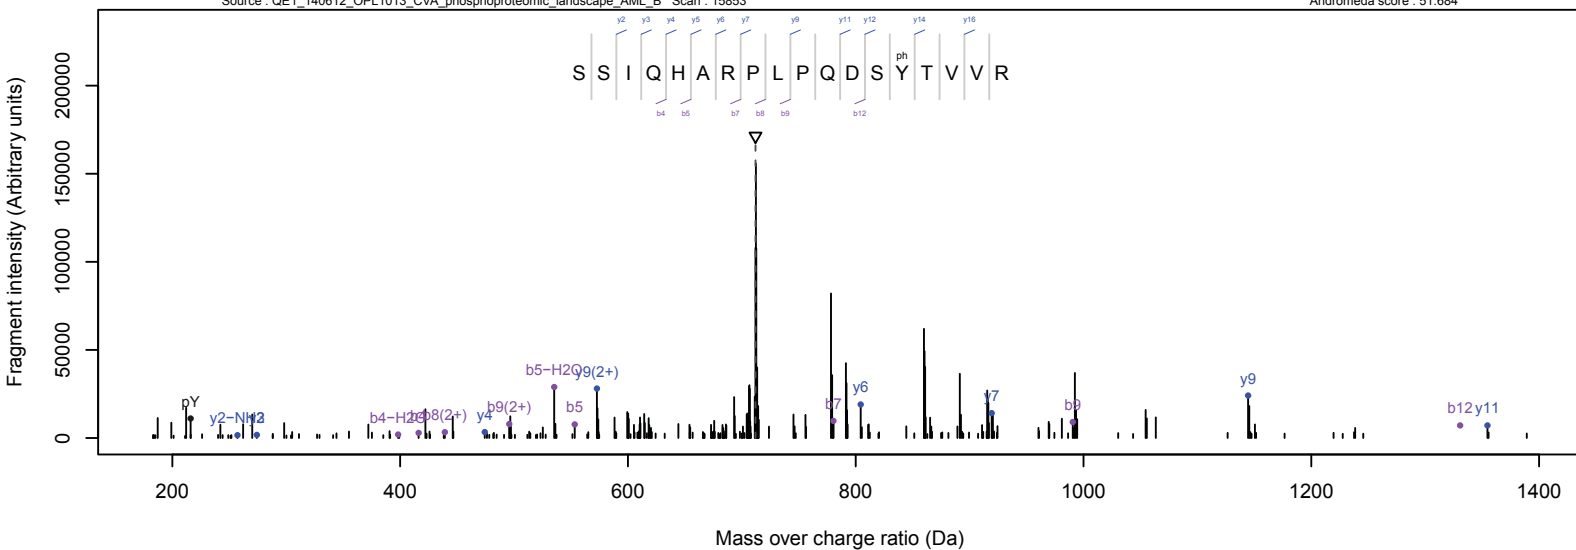

## QDNCVHDLQAHNKEIY(ph)TIK-4+

Source : QE1\_140908\_OPL1013\_CvA\_pTyrIP\_AML\_HEL Scan : 16816

Andromeda score : 51.611

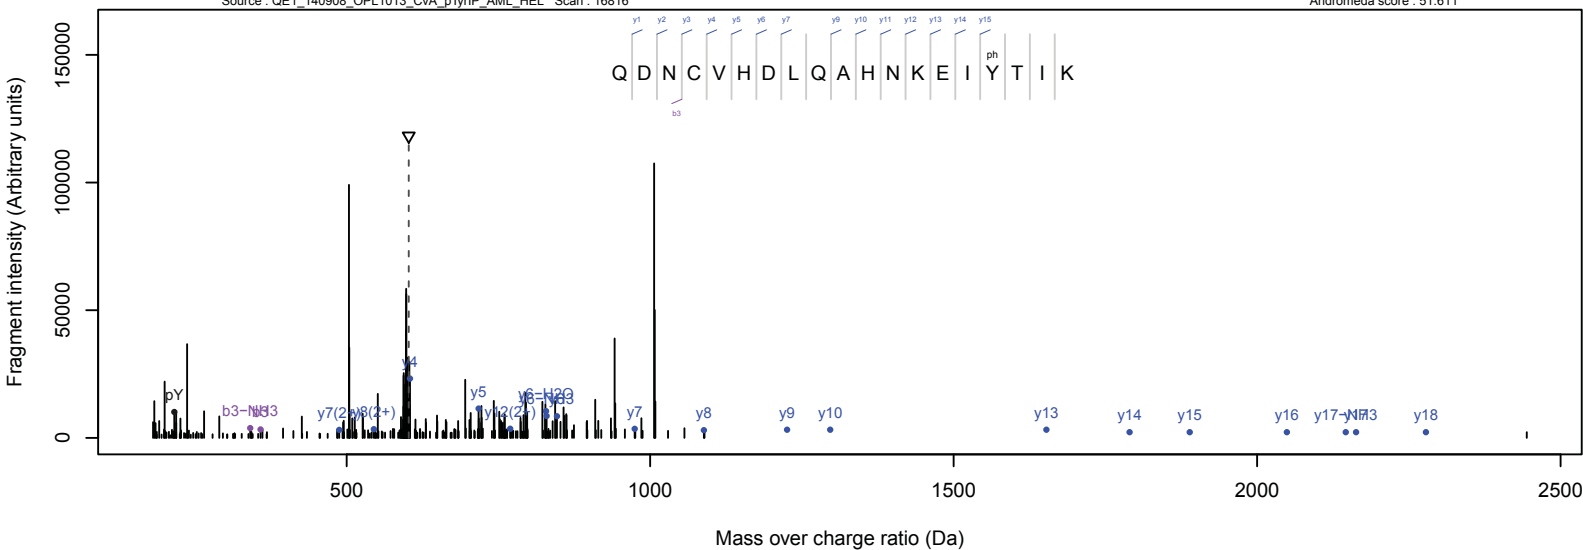

## FAGSGNEENNAY(ph)PHK-3+

Source : QE1\_140908\_OPL1013\_CvA\_pTyrIP\_AML\_HL60 Scan : 4859

Andromeda score : 51.591

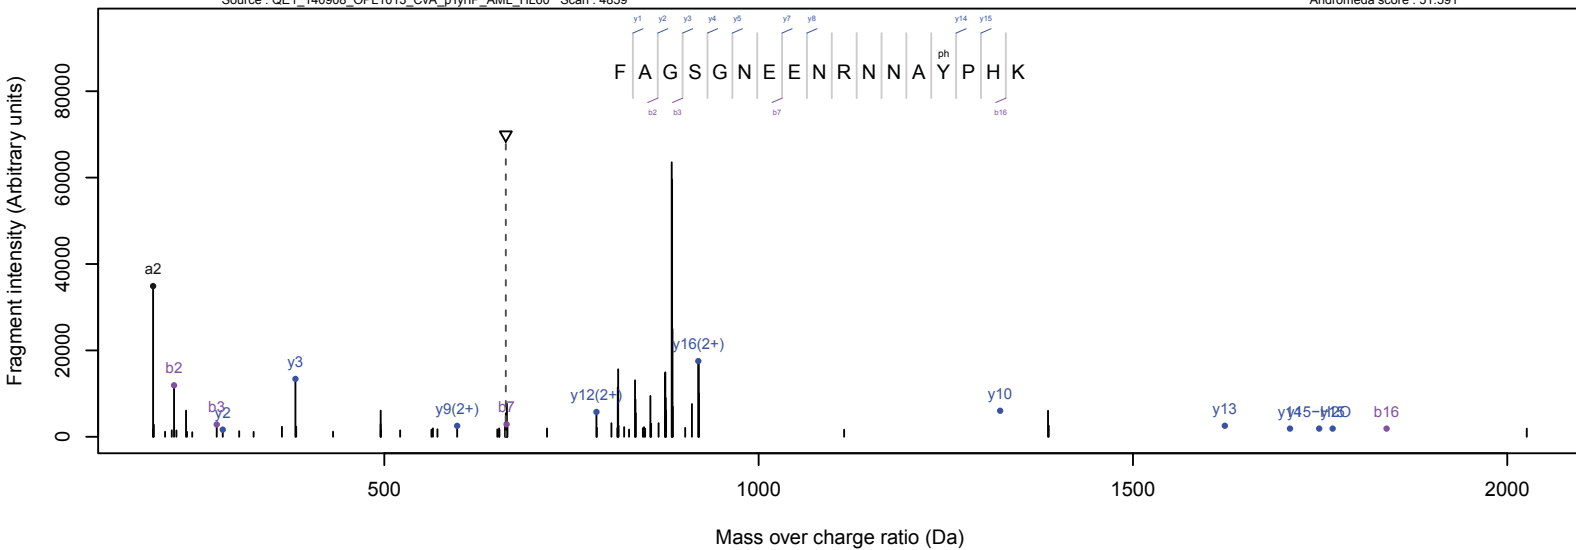

## FIY(ph)GNQLFATSQSK-2+

Source : QE1\_140612\_OPL1013\_CVA\_phosphoproteomic\_landscape\_AML\_B Scan : 30360

Andromeda score : 51.591

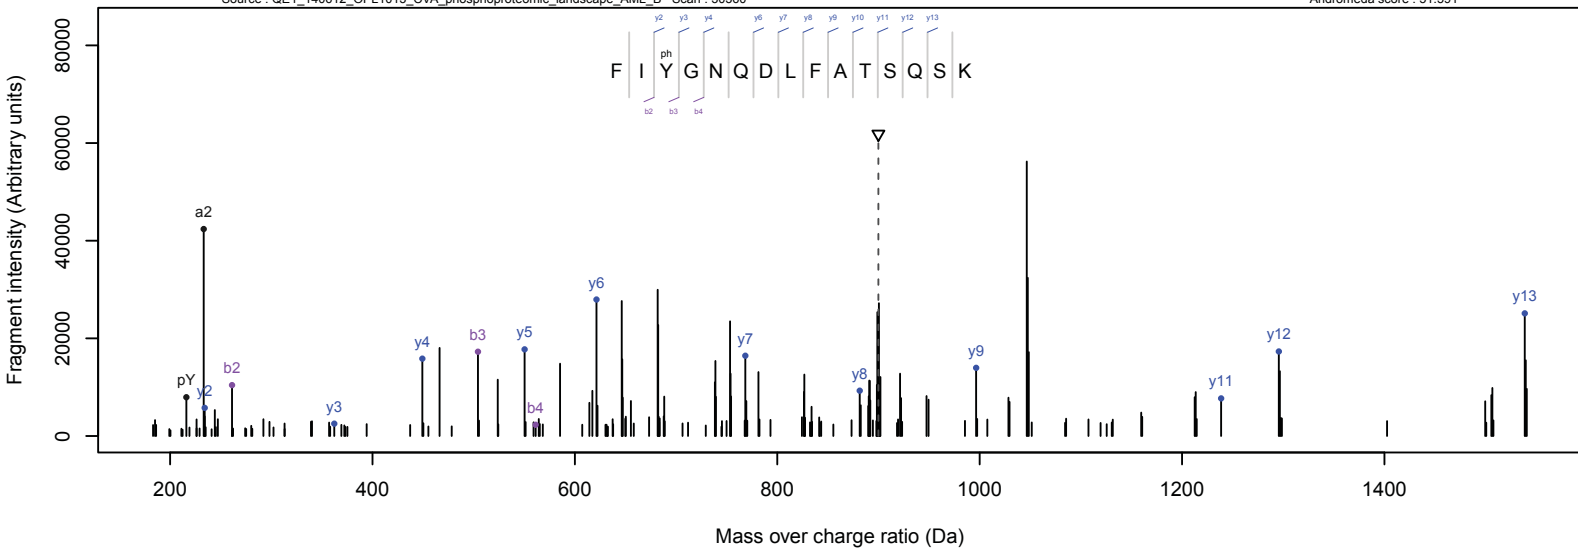

## YQS(ph)FKER-2+

Source : QE1\_140822\_OPL1013\_CvA\_pTyrIP\_AML\_cell\_lines\_part2\_F Scan : 4070

Andromeda score : 51.572

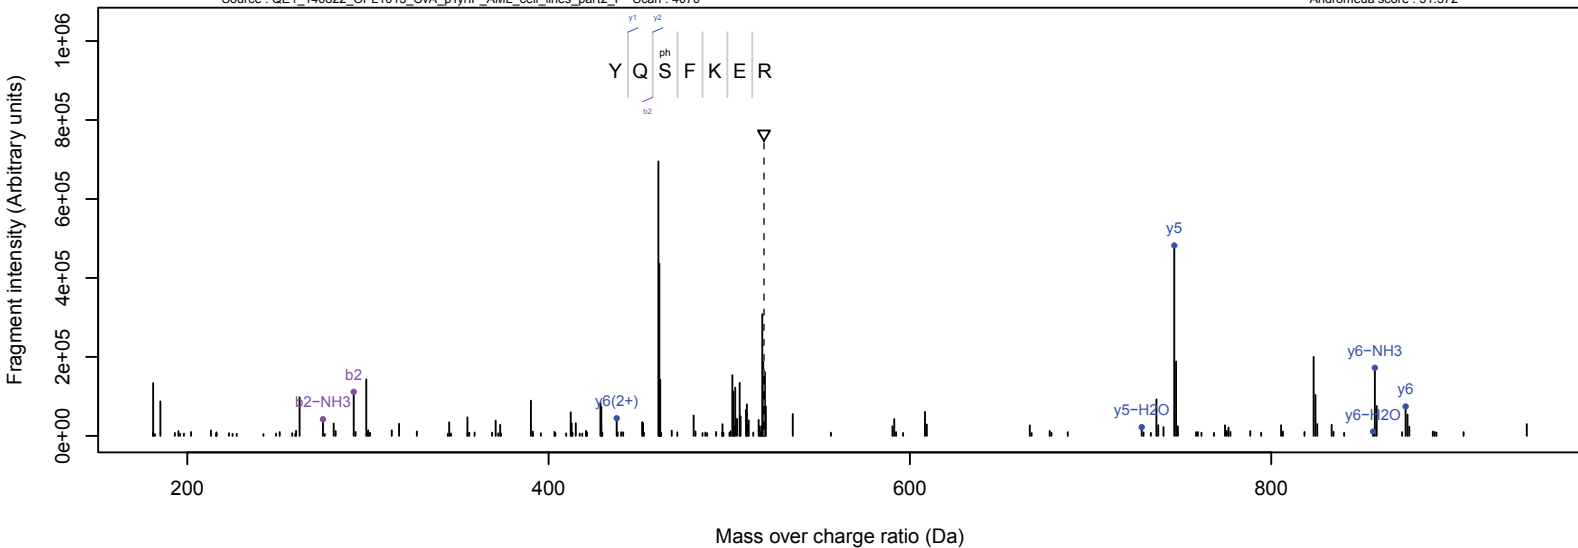

## YIGENLQLLVDRPDGT(ph)YCFR-3+

Source : QE1\_140612\_OPL1013\_CVA\_phosphoproteomic\_landscape\_AML\_C Scan : 42922

Andromeda score : 51.566

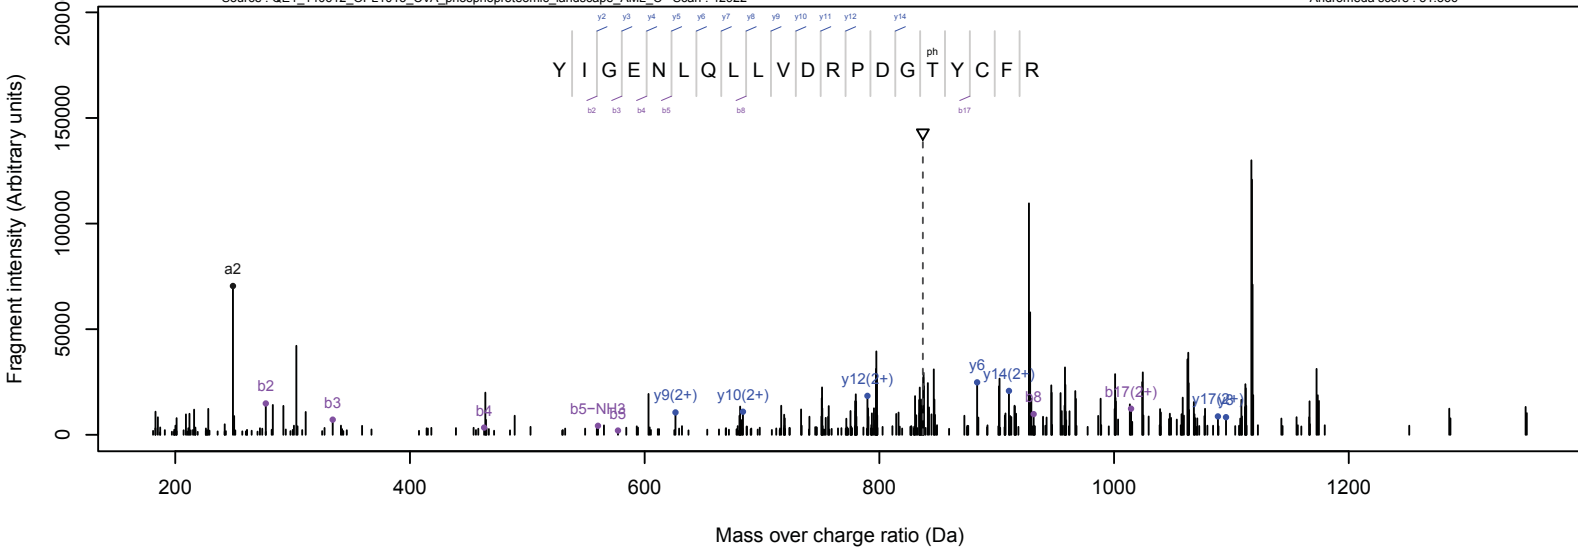

## YSGSYNDY(ph)LR-2+

Source : QE1\_140612\_OPL1013\_CVA\_phosphoproteomic\_landscape\_AML\_A Scan : 16375

Andromeda score : 51.531

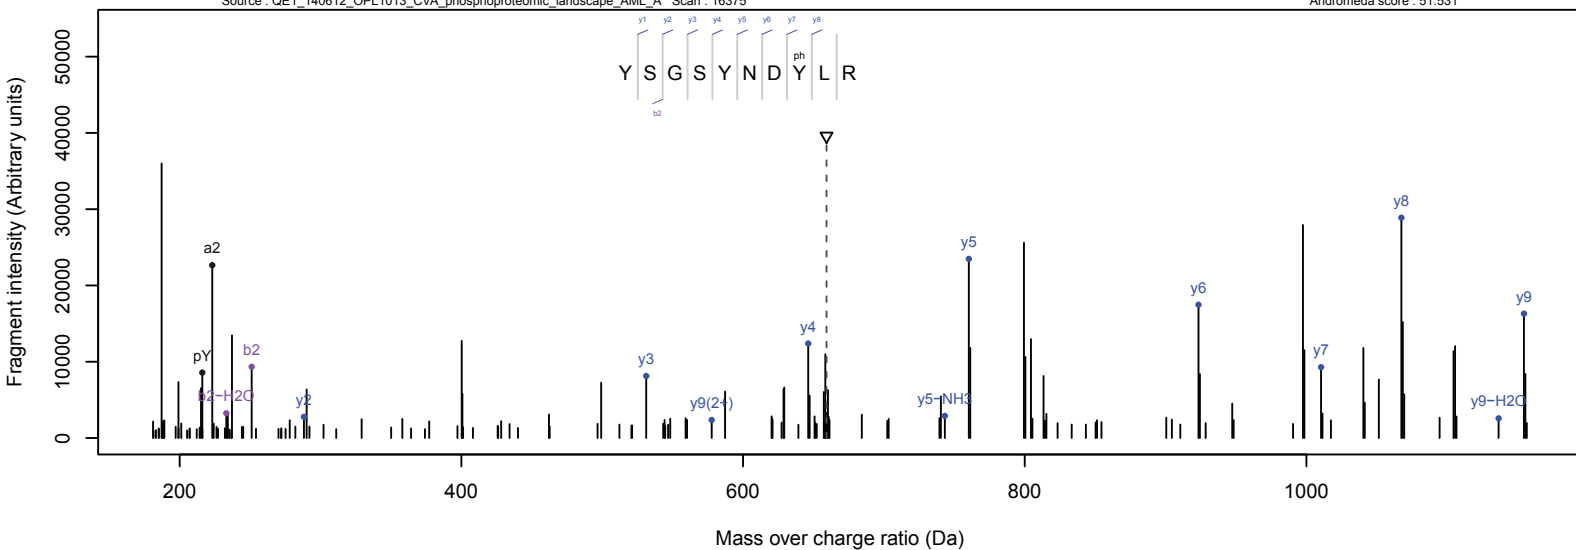

## VDKSAVGFNEMEAPTAYK-3+

Source : QE1\_140612\_OPL1013\_CVA\_phosphoproteomic\_landscape\_AML\_C Scan : 23543

Andromeda score : 51.524

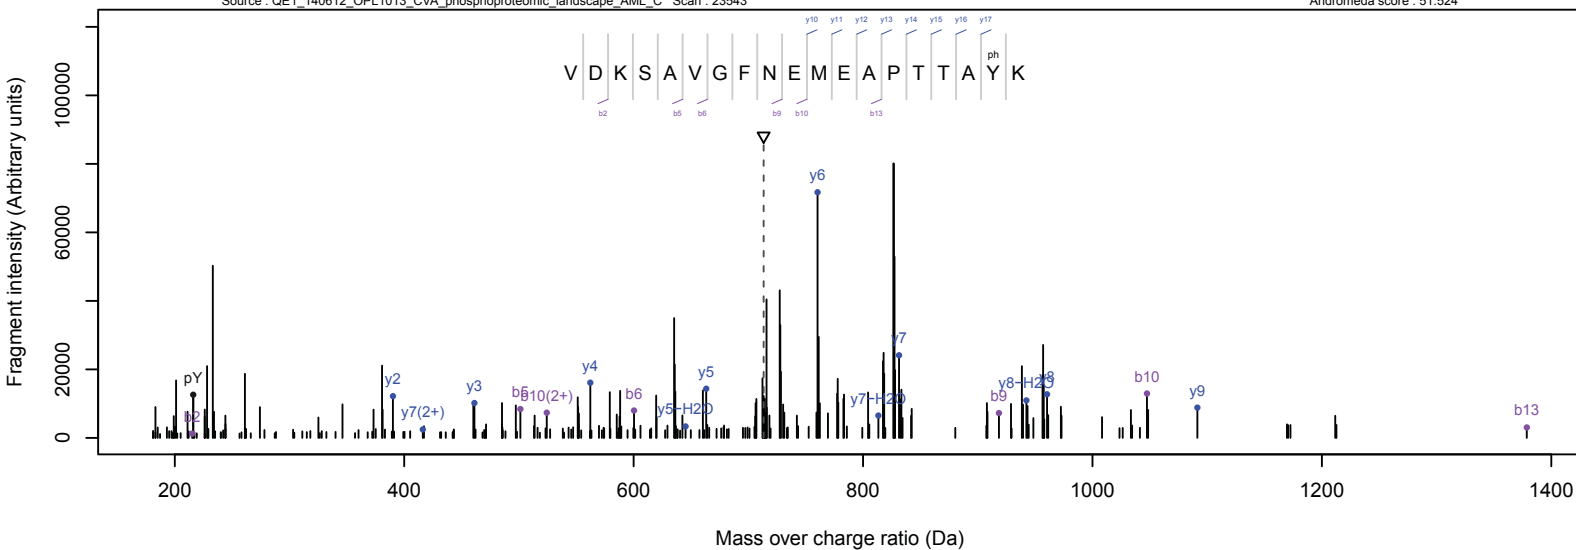

## ASTQSKPPGTSSY(ph)EIVI-2+

Source : QE1\_140908\_OPL1013\_CvA\_pTyrIP\_AML\_HEL Scan : 29324

Andromeda score : 51.495

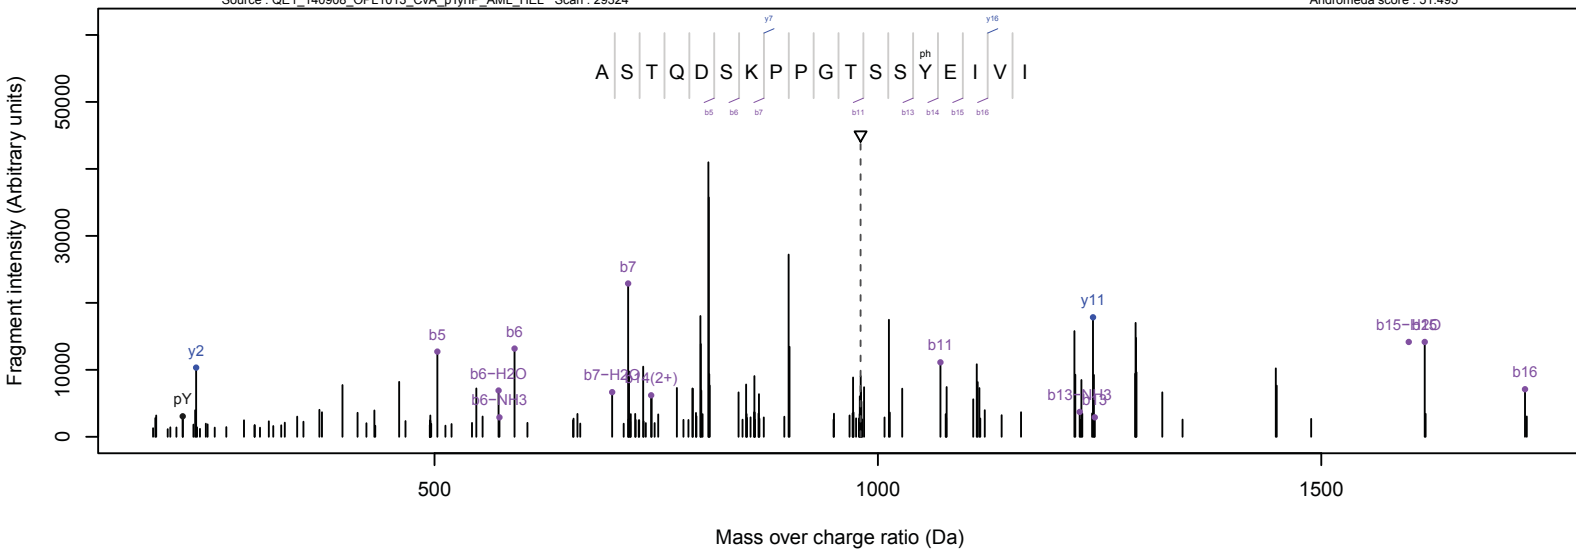





## AFVENVY(ph)PQFK-2+

Source : QE1\_140612\_OPL1013\_CVA\_phosphoproteomic\_landscape\_AML\_C Scan : 23980

Andromeda score : 51.445

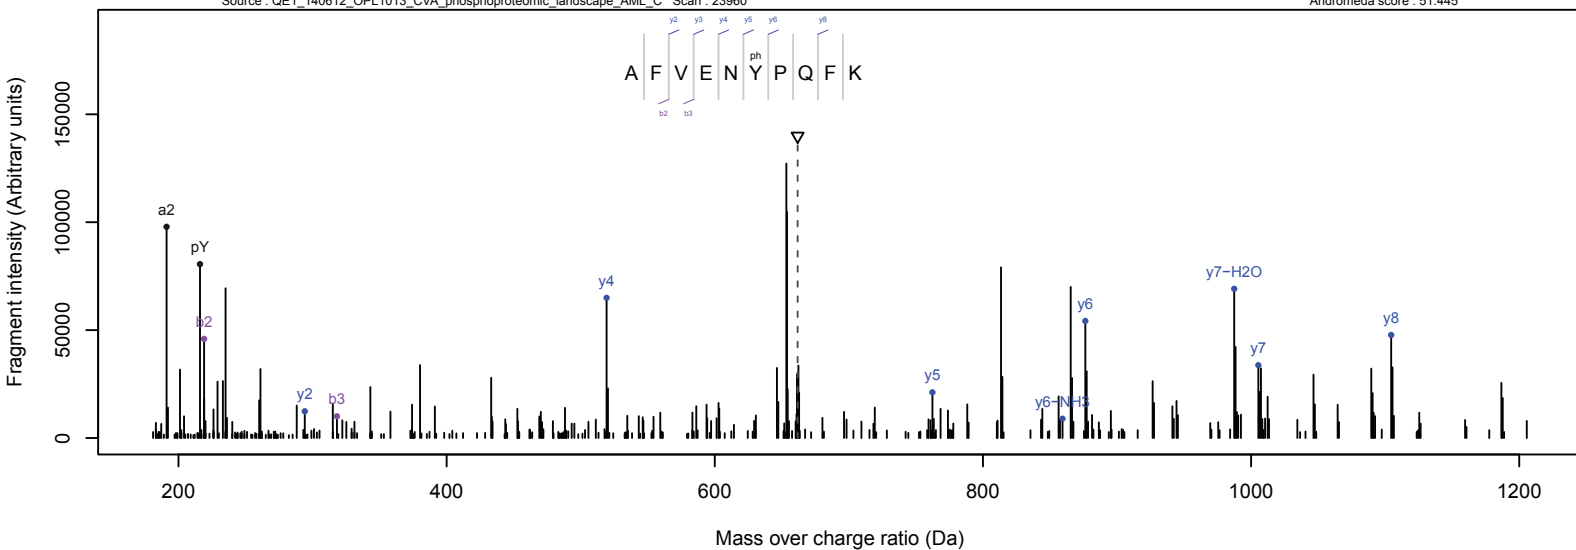

## VCMVY(ph)DLYK-2+

Source : QE1\_140612\_OPL1013\_CVA\_phosphoproteomic\_landscape\_AML\_A Scan : 29589

Andromeda score : 51.445

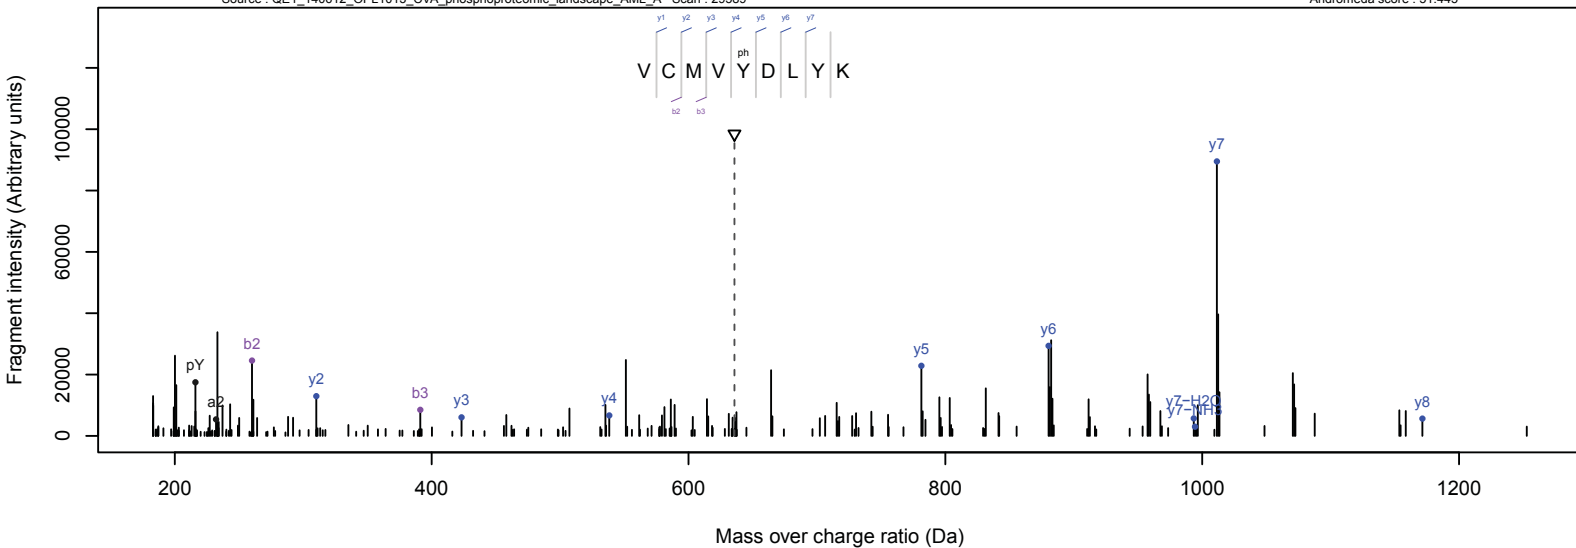

## Y(ph)LGLENLR-2+

Source : QE1\_140612\_OPL1013\_CVA\_phosphoproteomic\_landscape\_AML\_C Scan : 40337

Andromeda score : 51.445

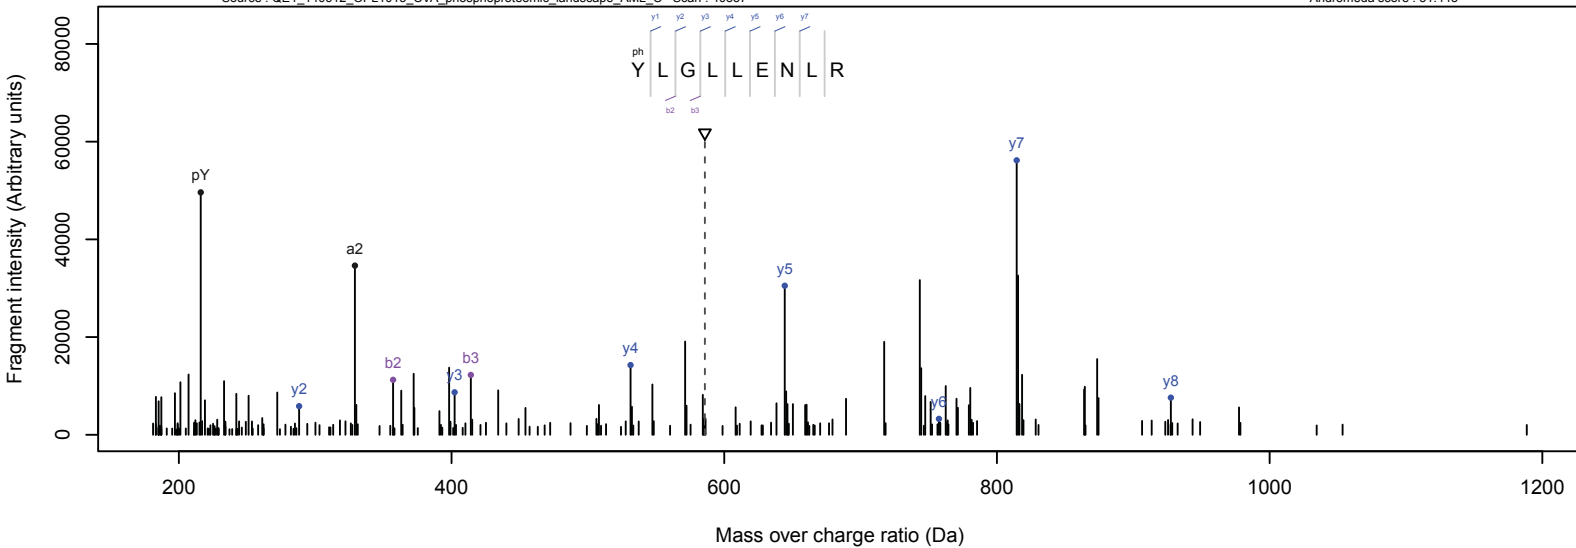

## LY(ph)VPLYSSK-2+

Source : QE1\_140612\_OPL1013\_CVA\_phosphoproteomic\_landscape\_AML\_D Scan : 29884

Andromeda score : 51.436

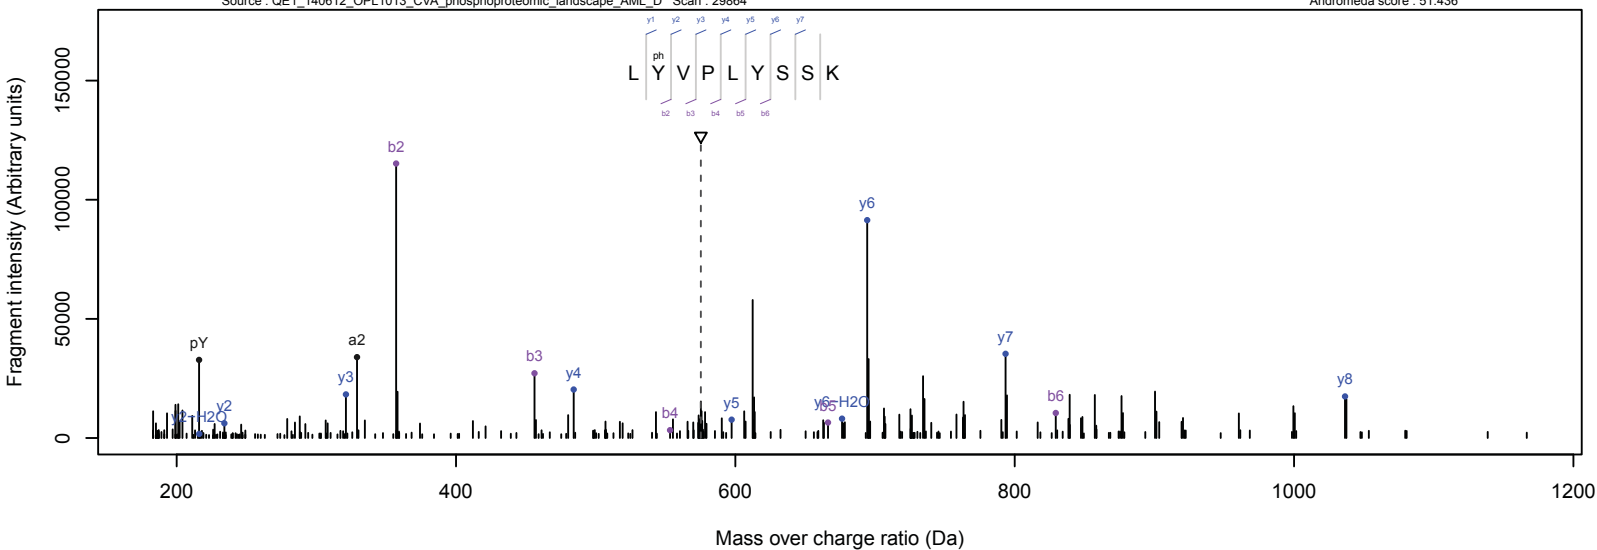

## RPSYAPPPTAPATQMPSTPGFVGYNPYS(ph)HLAYNNYR-4+

Source : QE1\_140612\_OPL1013\_CVA\_phosphoproteomic\_landscape\_AML\_C Scan : 36233

Andromeda score : 51.401

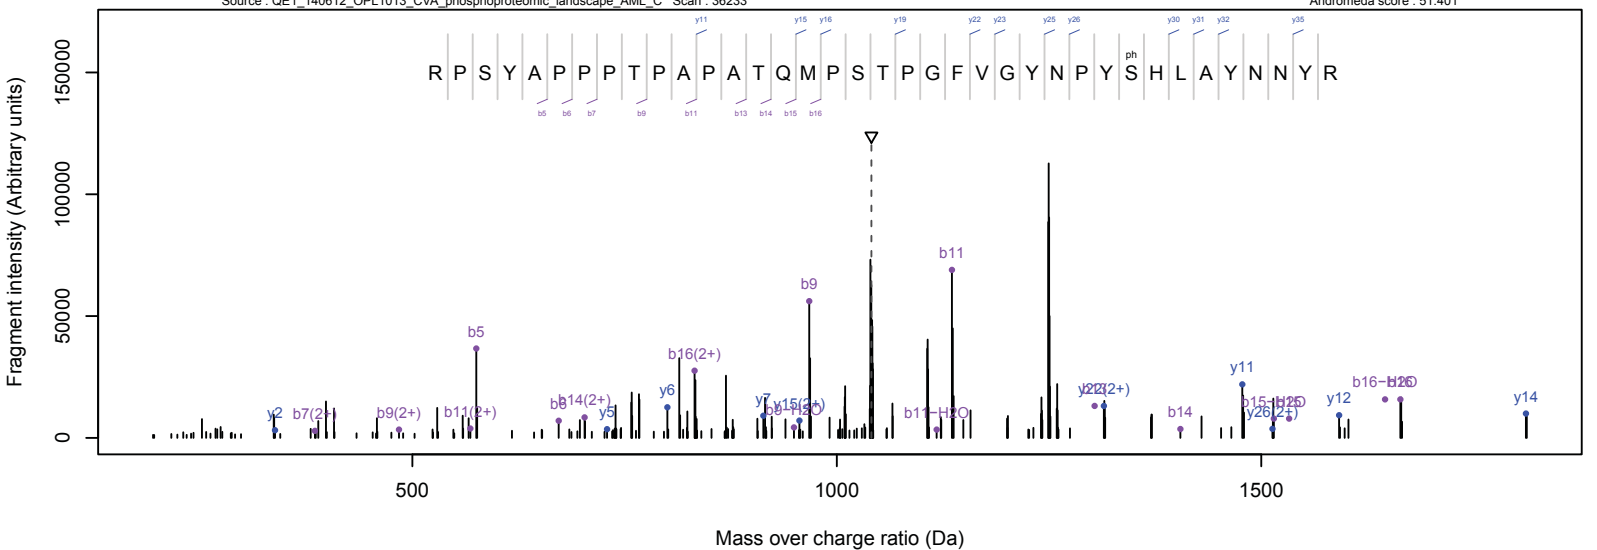

## SWASLFHDSKPSSSSPVAY(ph)VETK-3+

Source : QE1\_140612\_OPL1013\_CVA\_phosphoproteomic\_landscape\_AML\_B Scan : 34532

Andromeda score : 51.39

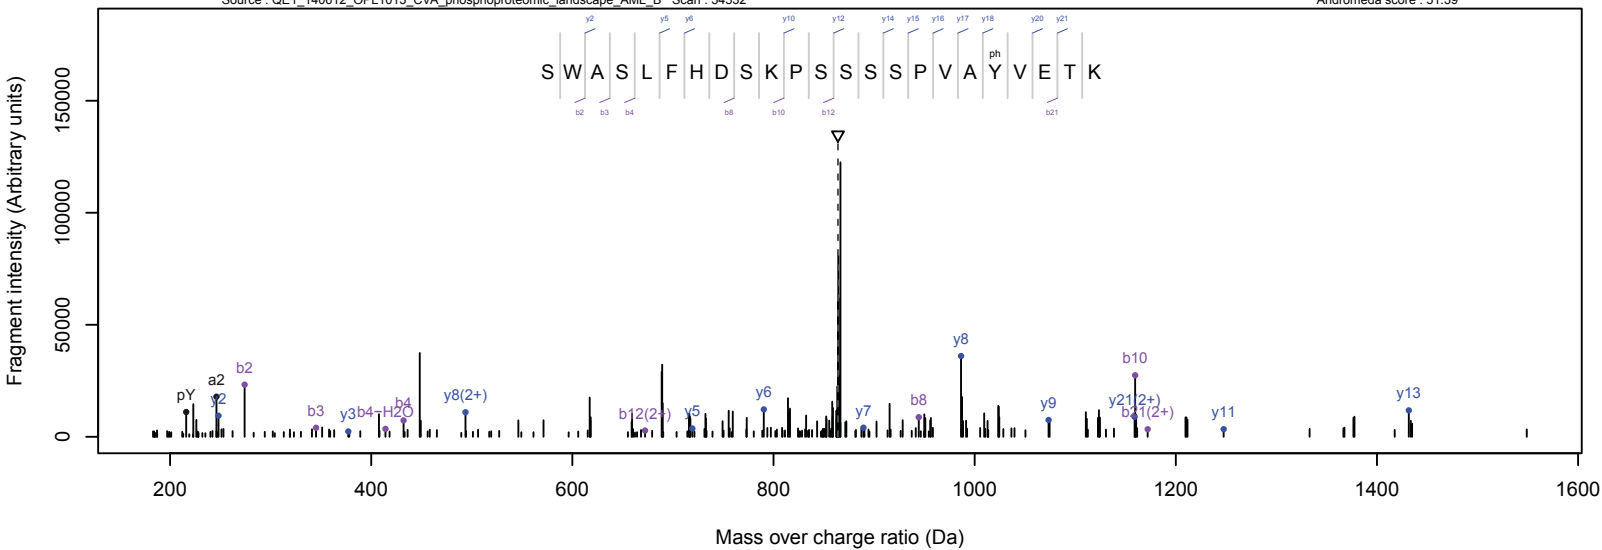

TSHVENDY(ph)IDNPSLALTTGPK-3+

Source : QE1\_140908\_OPL1013\_CVA\_pTyrIP\_AML\_OCI\_AML3 Scan : 31252

Andromeda score : 51.39

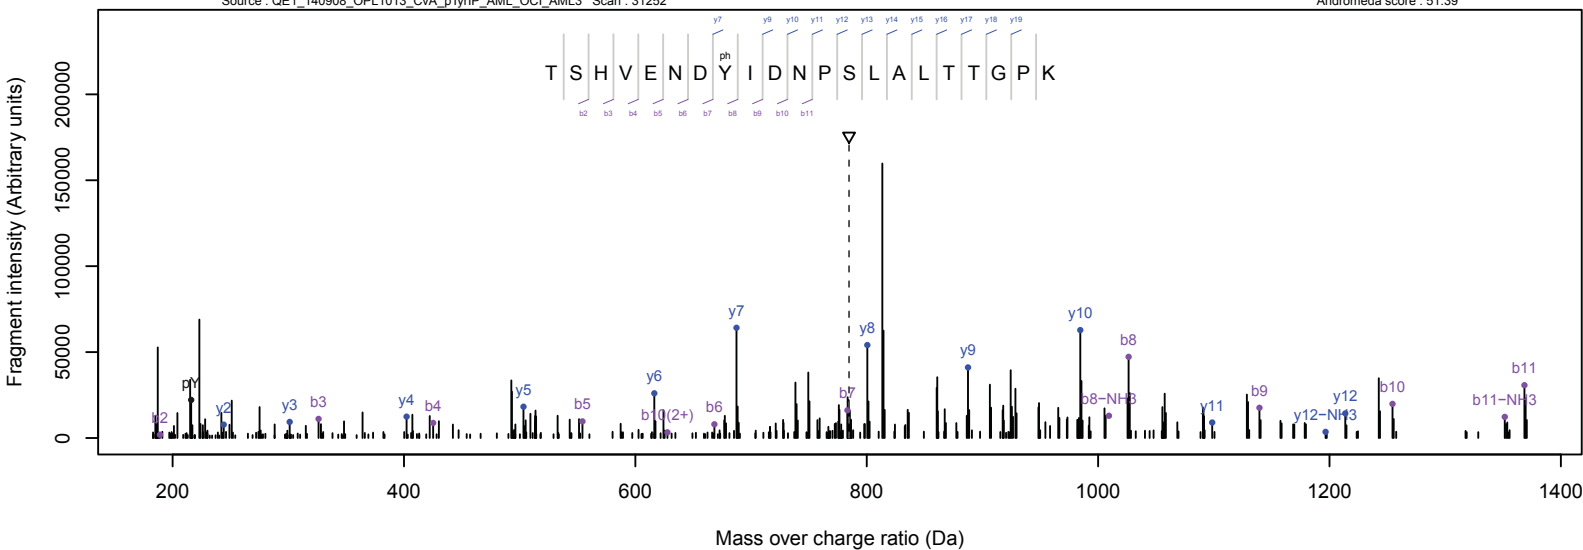

KNLEATY(ph)GTVR-3+

Source : QE1\_140612\_OPL1013\_CVA\_phosphoproteomic\_landscape\_AML\_B Scan : 7018

Andromeda score : 51.359

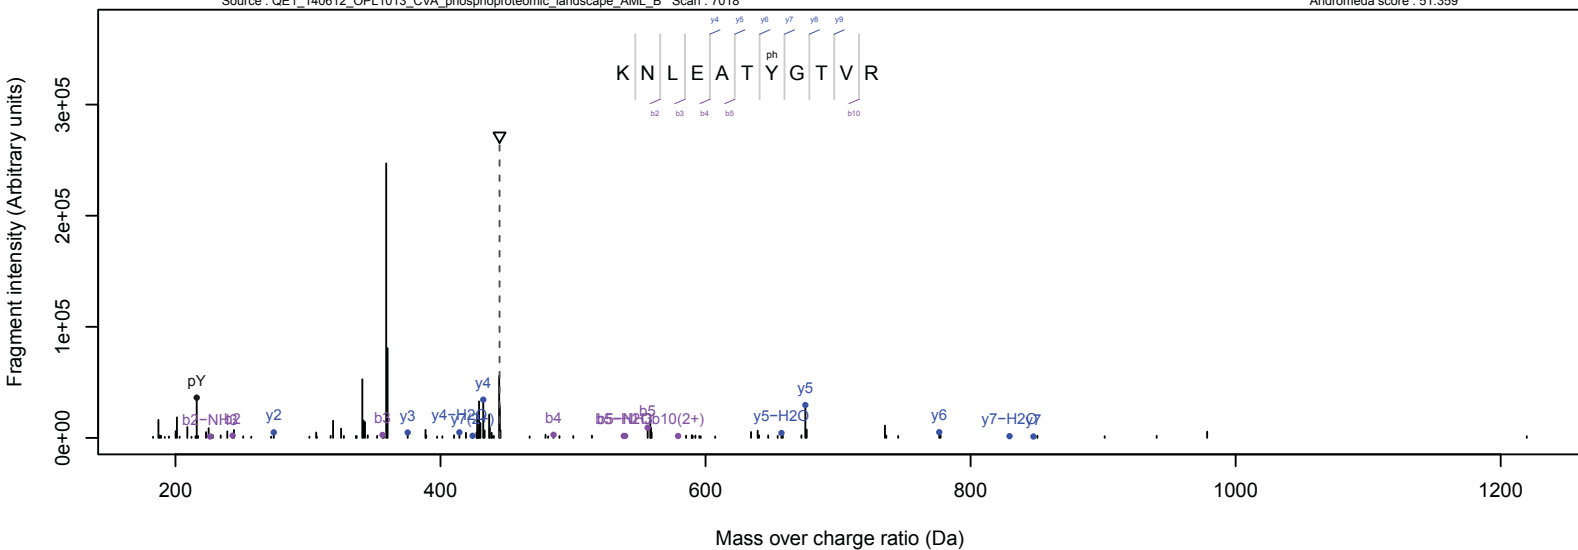

KLIGNIS(ph)CR-2+

Source : QE1\_140612\_OPL1013\_CVA\_phosphoproteomic\_landscape\_AML\_C Scan : 8992

Andromeda score : 51.346

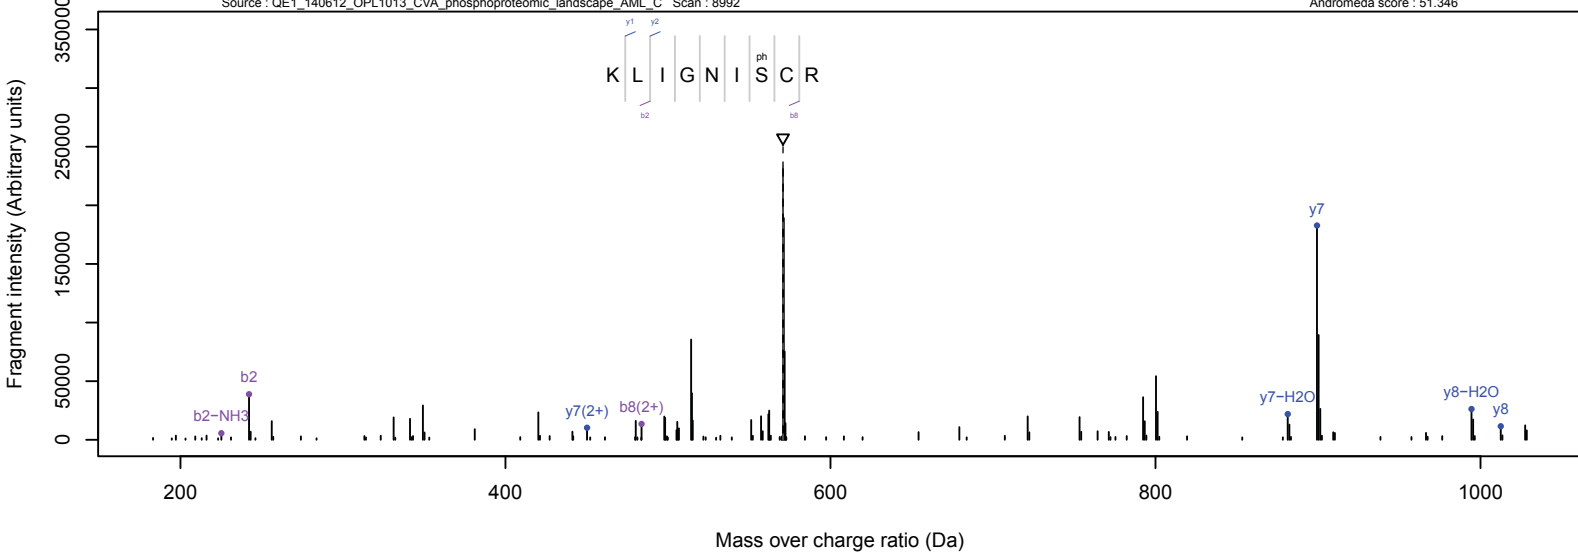

NLLGLY(ph)PR-2+

Source : QE1\_140612\_OPL1013\_CVA\_phosphoproteomic\_landscape\_AML\_B Scan : 31509

Andromeda score : 51.346

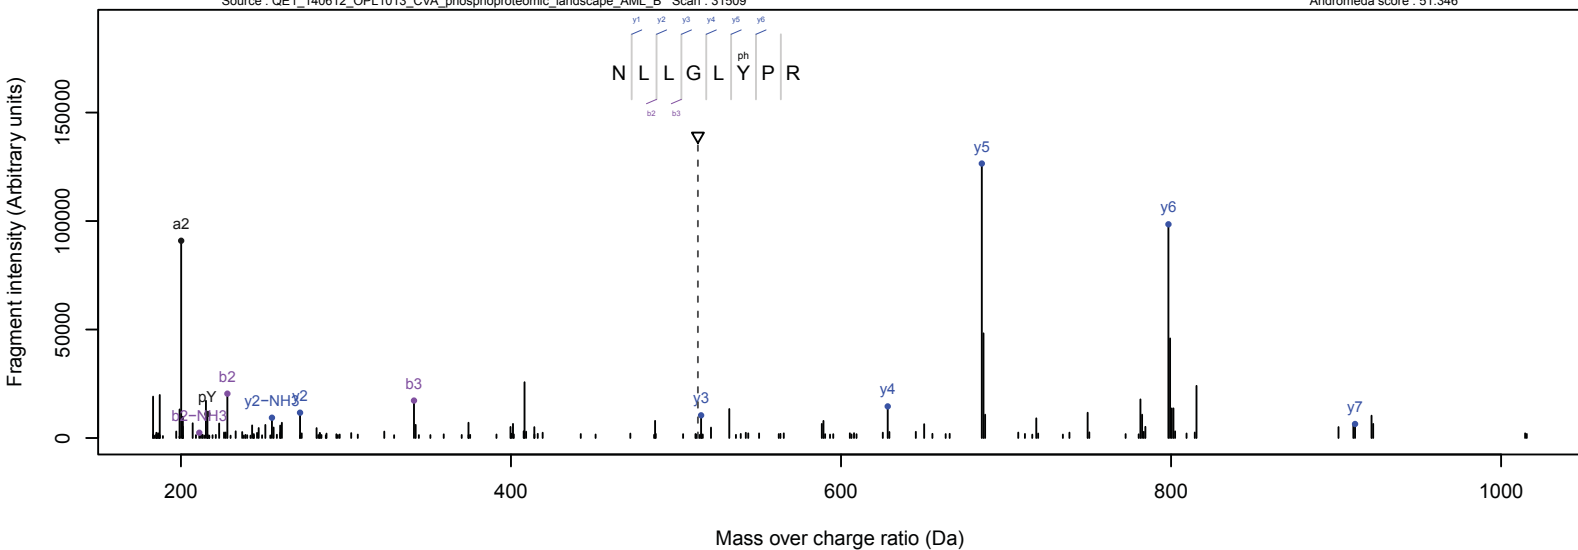

Y(ph)LIPELCK-2+

Source : QE1\_140612\_OPL1013\_CVA\_phosphoproteomic\_landscape\_AML\_C Scan : 32699

Andromeda score : 51.346

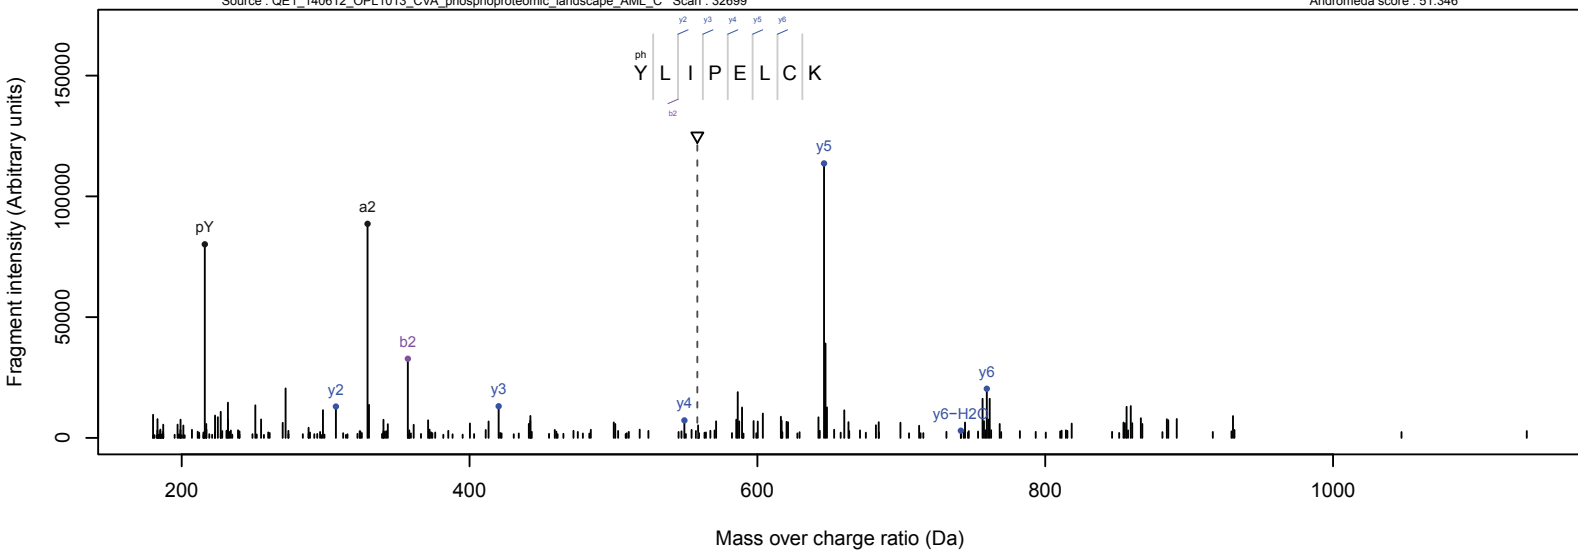

Y(ph)LNFFTK-2+

Source : QE1\_140612\_OPL1013\_CVA\_phosphoproteomic\_landscape\_AML\_C Scan : 32980

Andromeda score : 51.346

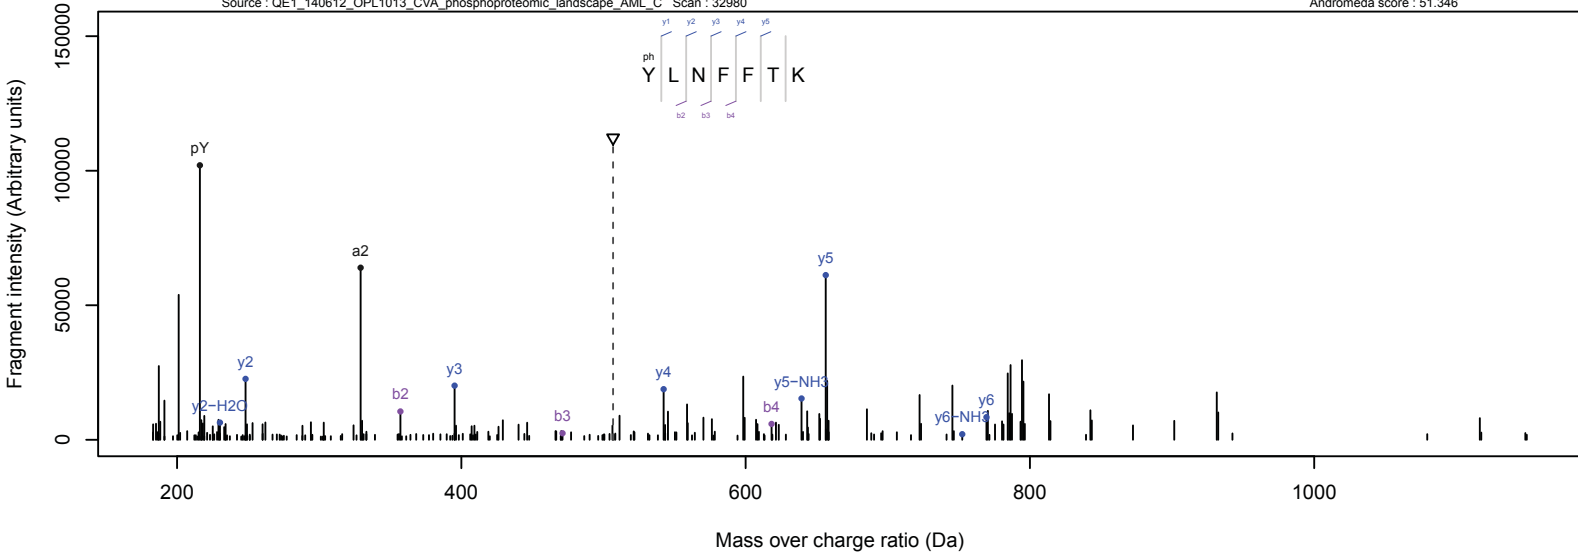

## KSY(ph)ISGNVNCGLVNLNGTK-3+

Source: QE1\_140612\_OPL1013\_CVA\_phosphoproteomic\_landscape\_AML\_C Scan: 17136

Andromeda score: 51.31

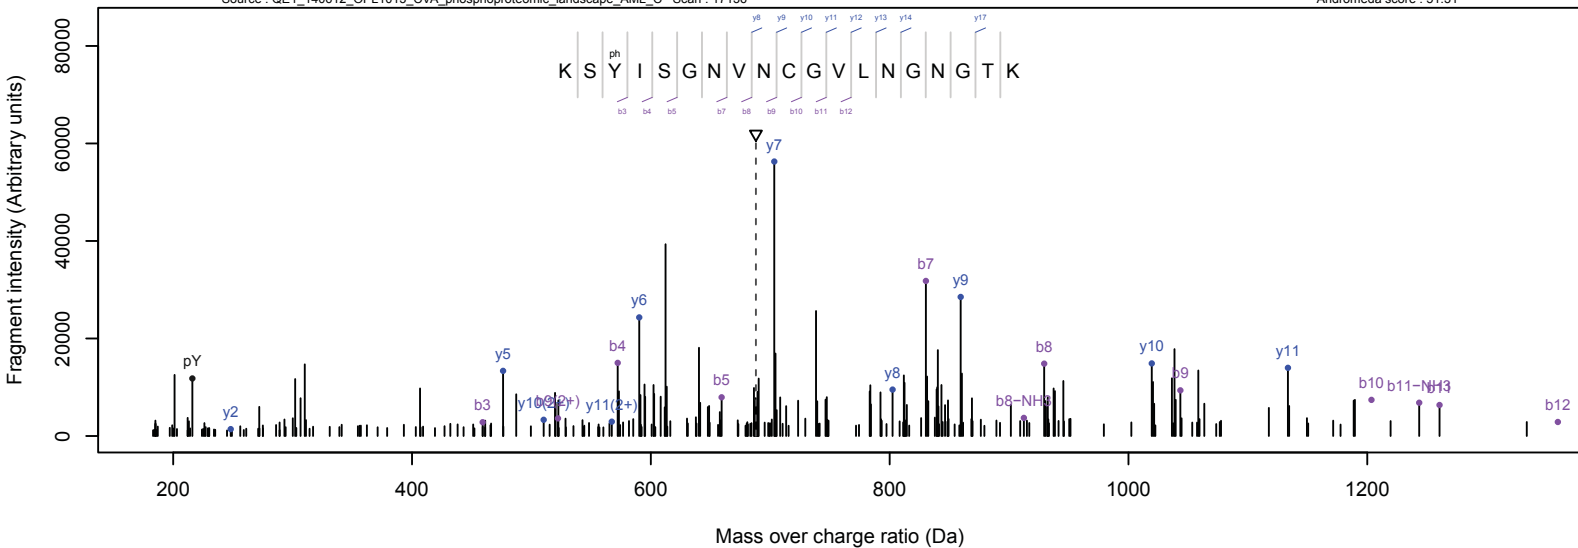

## GNYPVTGLAFR-2+

Source: QE1\_140612\_OPL1013\_CVA\_phosphoproteomic\_landscape\_AML\_B Scan: 29210

Andromeda score: 51.286

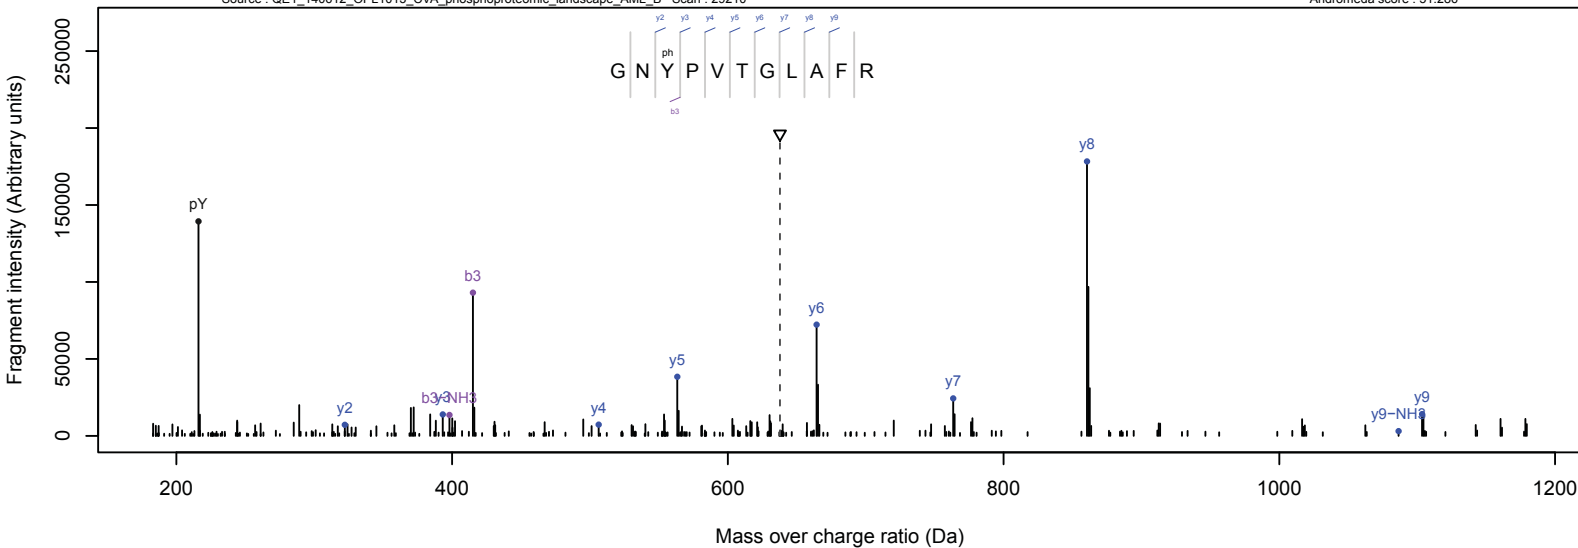

## LALIAADYAVR-2+

Source: QE1\_140612\_OPL1013\_CVA\_phosphoproteomic\_landscape\_AML\_B Scan: 32258

Andromeda score: 51.286

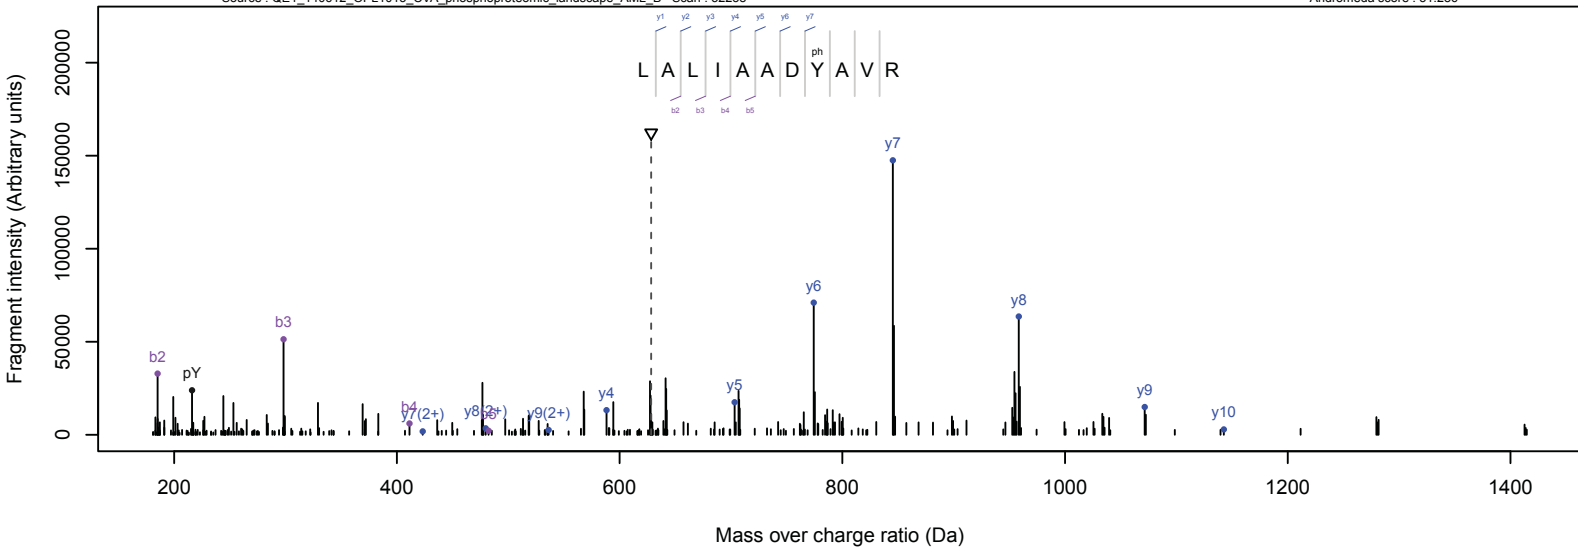

## QY(ph)PLVTPNEER-2+

Source : QE1\_140612\_OPL1013\_CVA\_phosphoproteomic\_landscape\_AML\_B Scan : 15566

Andromeda score : 51.286

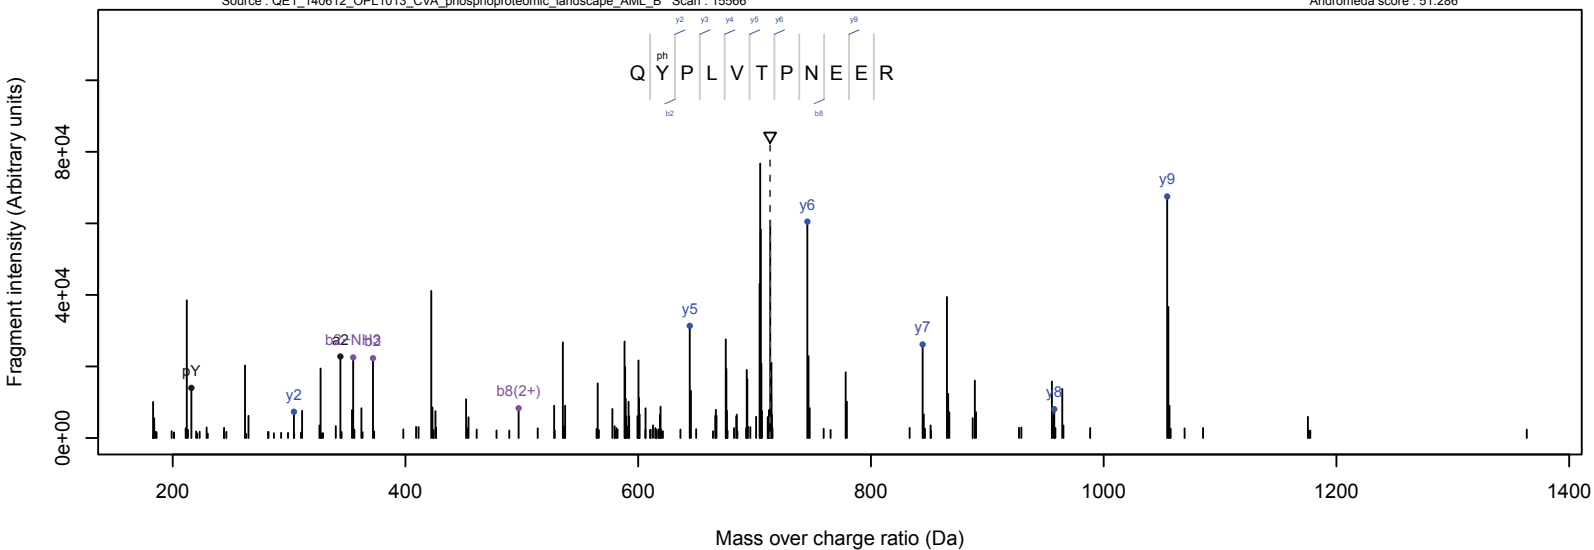

## Y(ph)QVVQTLDCLR-2+

Source : QE1\_140612\_OPL1013\_CVA\_phosphoproteomic\_landscape\_AML\_C Scan : 29076

Andromeda score : 51.286

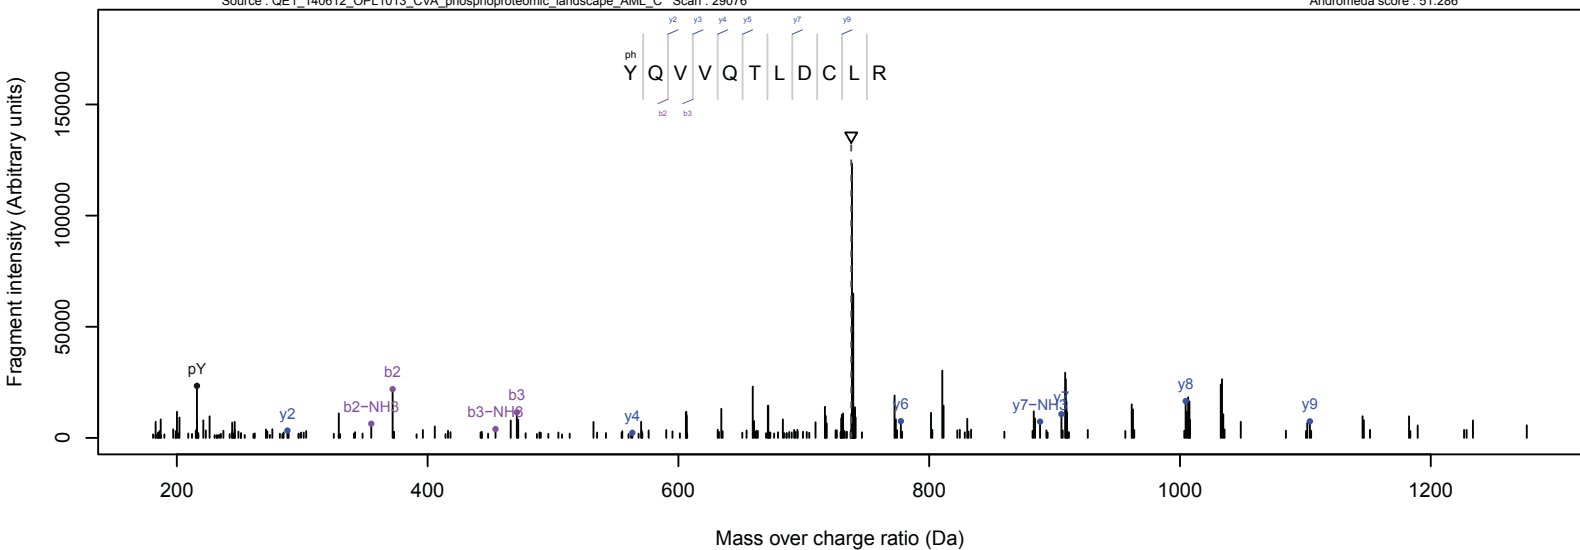

## Y(ph)DKDVGQWK-2+

Source : QE1\_140612\_OPL1013\_CVA\_phosphoproteomic\_landscape\_AML\_D Scan : 8570

Andromeda score : 51.276

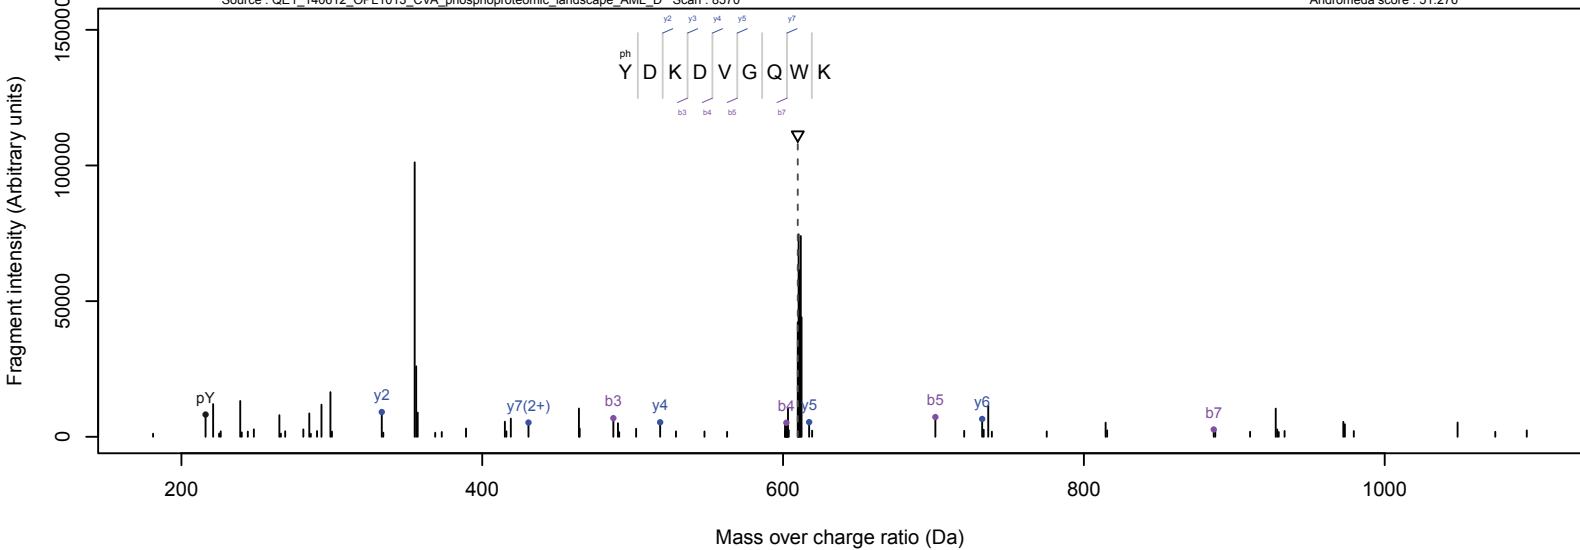

## LQDQQVINY(ph)SIVK-2+

Source : QE1\_140612\_OPL1013\_CVA\_phosphoproteomic\_landscape\_AML\_B Scan : 30277

Andromeda score : 51.259

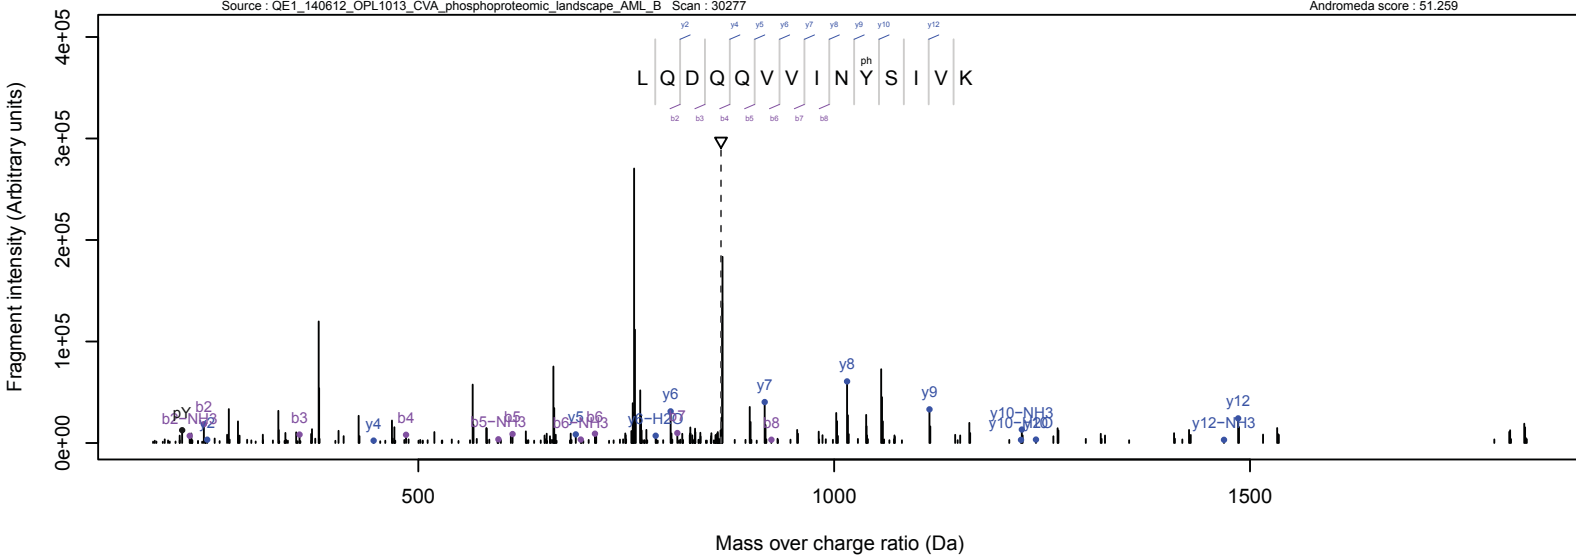

## AQVVY(ph)YSEMHK-3+

Source : QE1\_140612\_OPL1013\_CVA\_phosphoproteomic\_landscape\_AML\_C Scan : 12999

Andromeda score : 51.252

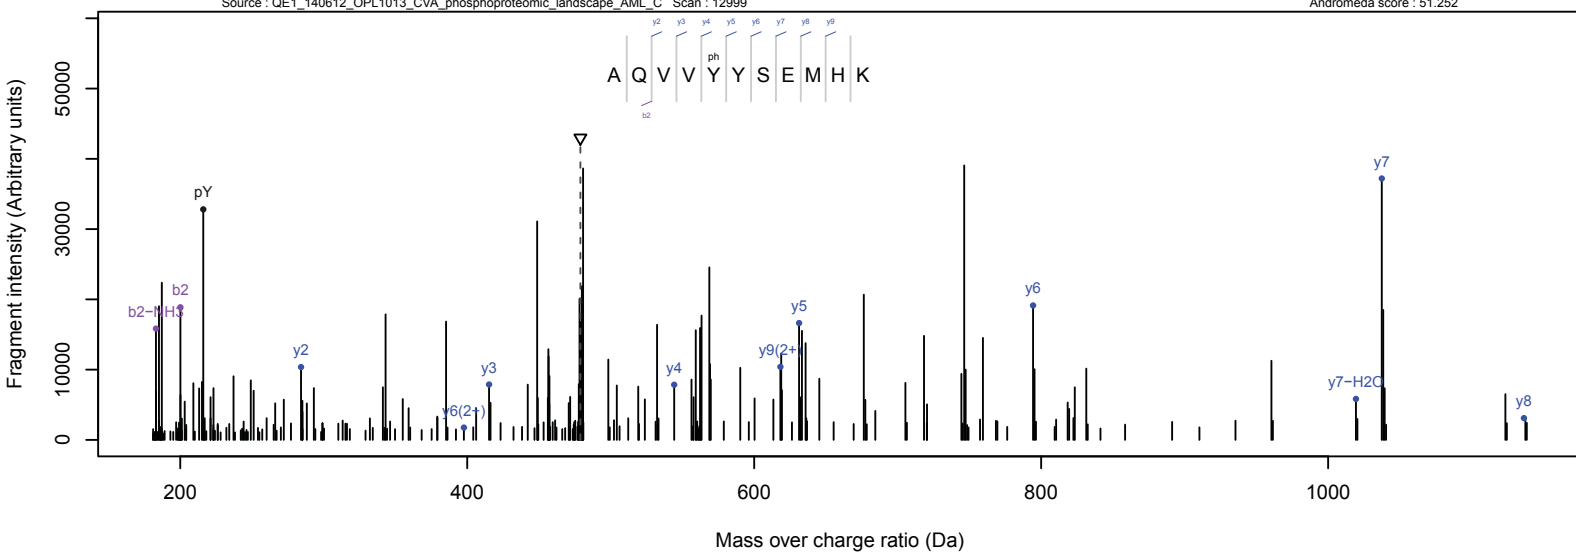

## KSTVLQQQY(ph)NR-3+

Source : QE1\_140822\_OPL1013\_CvA\_pTyrIP\_AML\_cell\_lines\_part2\_B Scan : 3603

Andromeda score : 51.252

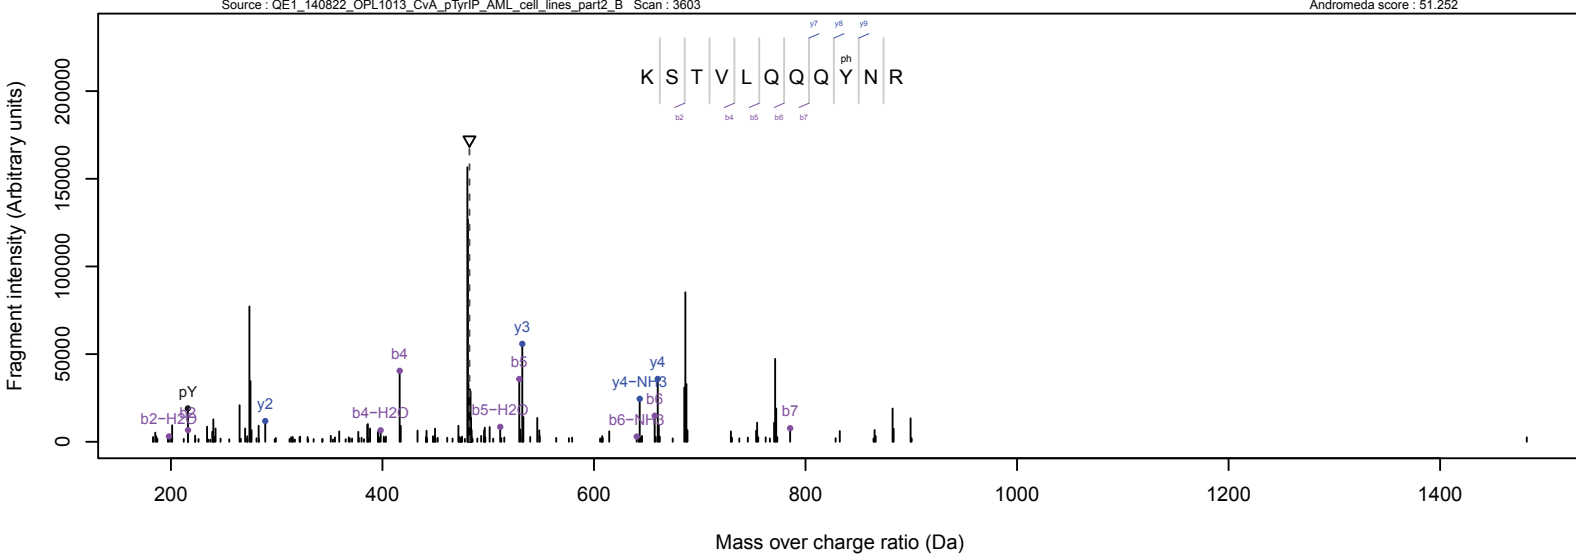



## Y(ph)GLIFHSTFIGR-3+

Source: QE1\_140612\_OPL1013\_CVA\_phosphoproteomic\_landscape\_AML\_C Scan: 37205

Andromeda score: 51.135

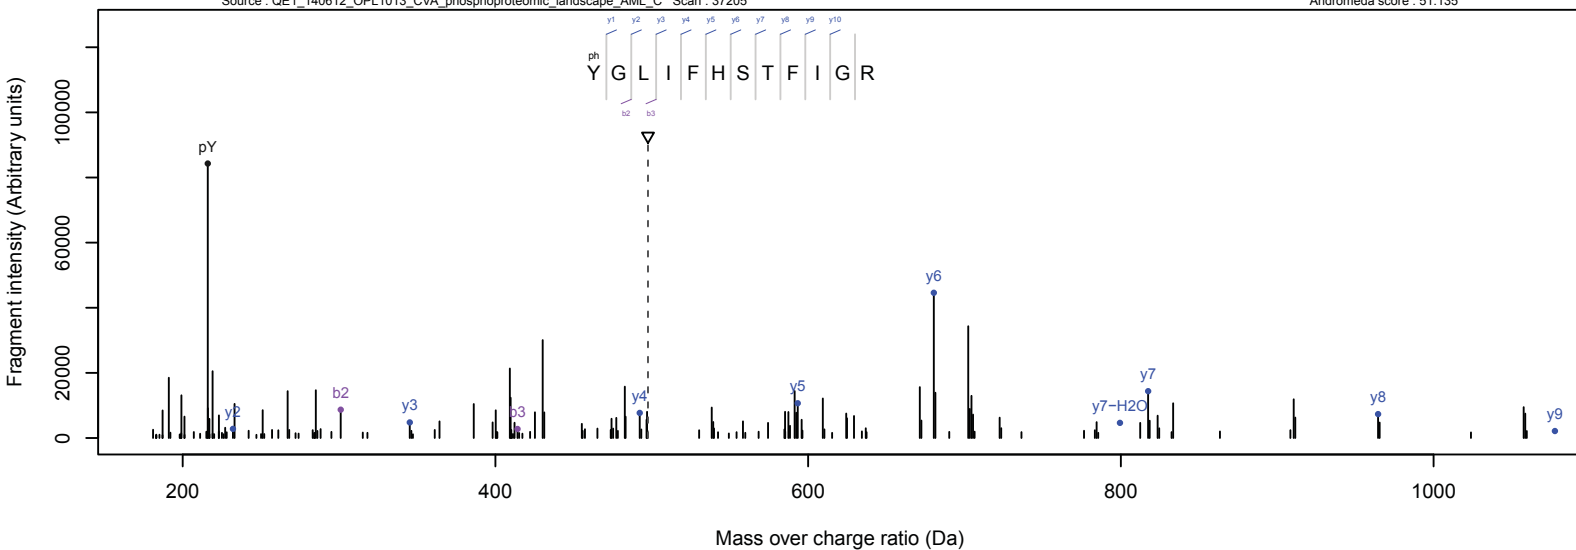

## GRY(ph)IPPHLR-3+

Source: QE1\_140612\_OPL1013\_CVA\_phosphoproteomic\_landscape\_AML\_C Scan: 11274

Andromeda score: 51.113

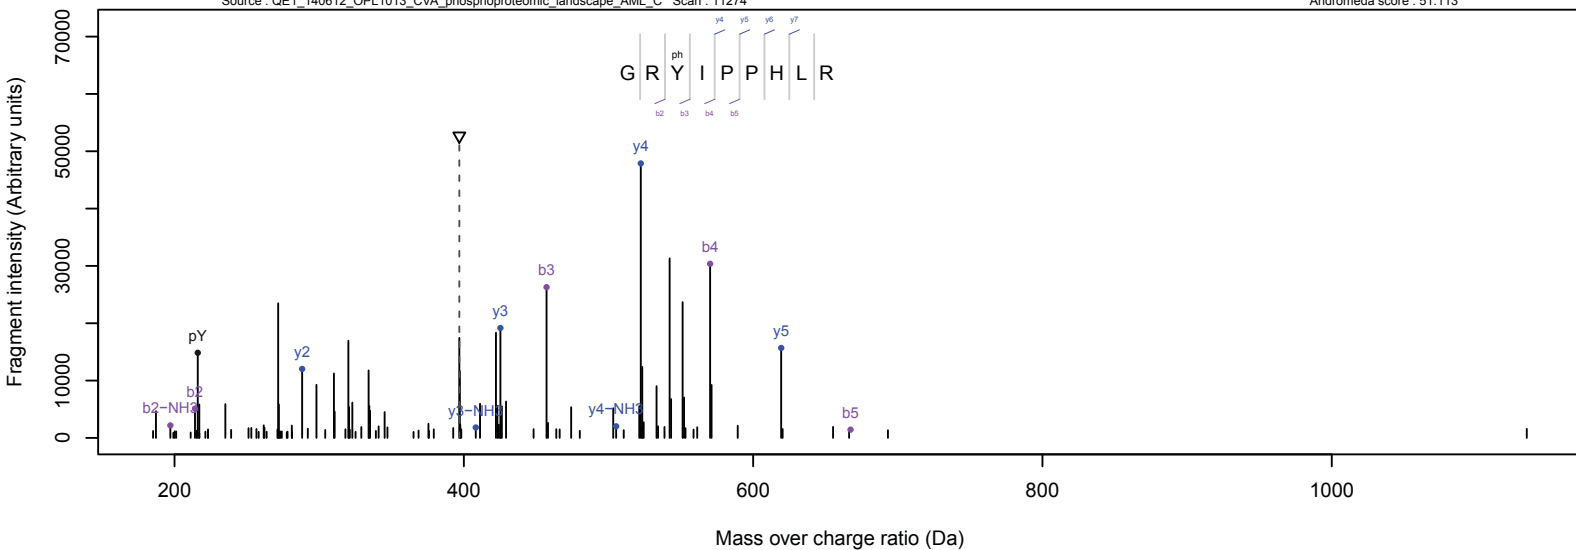

## HY(ph)ECSSDHPNLQPYLSR-3+

Source: QE1\_140908\_OPL1013\_CvA\_pTyrIP\_AML\_HEL Scan: 20704

Andromeda score: 51.089

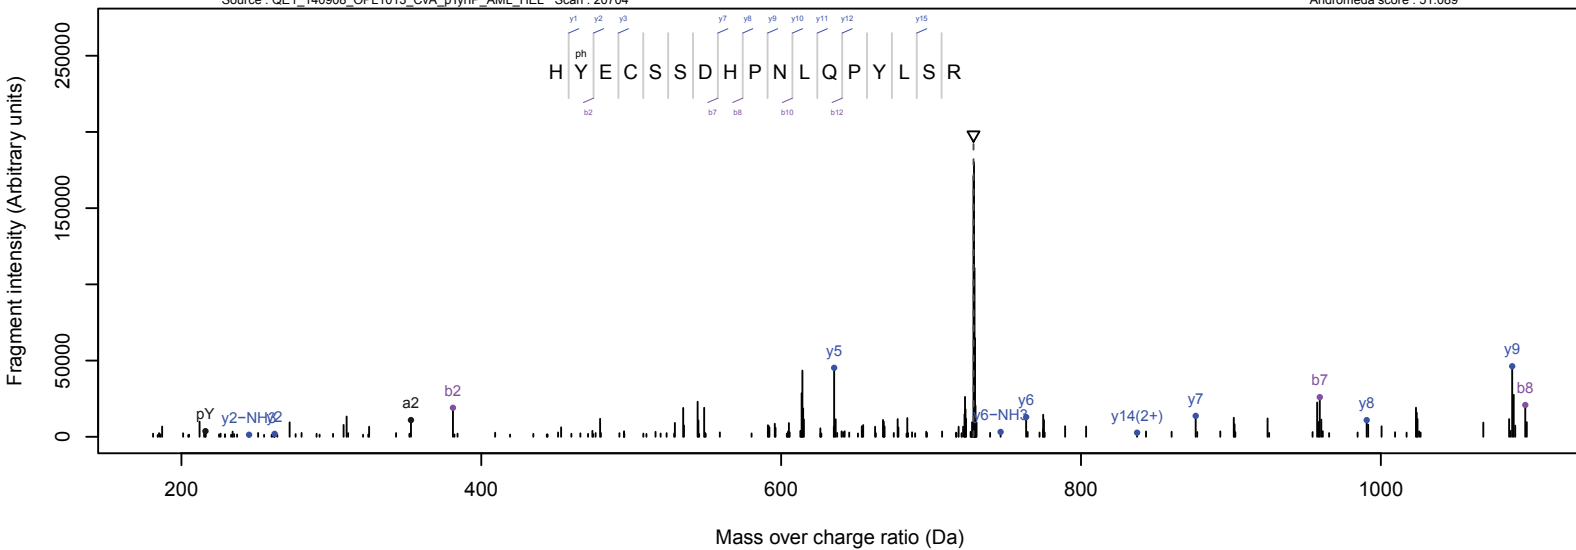

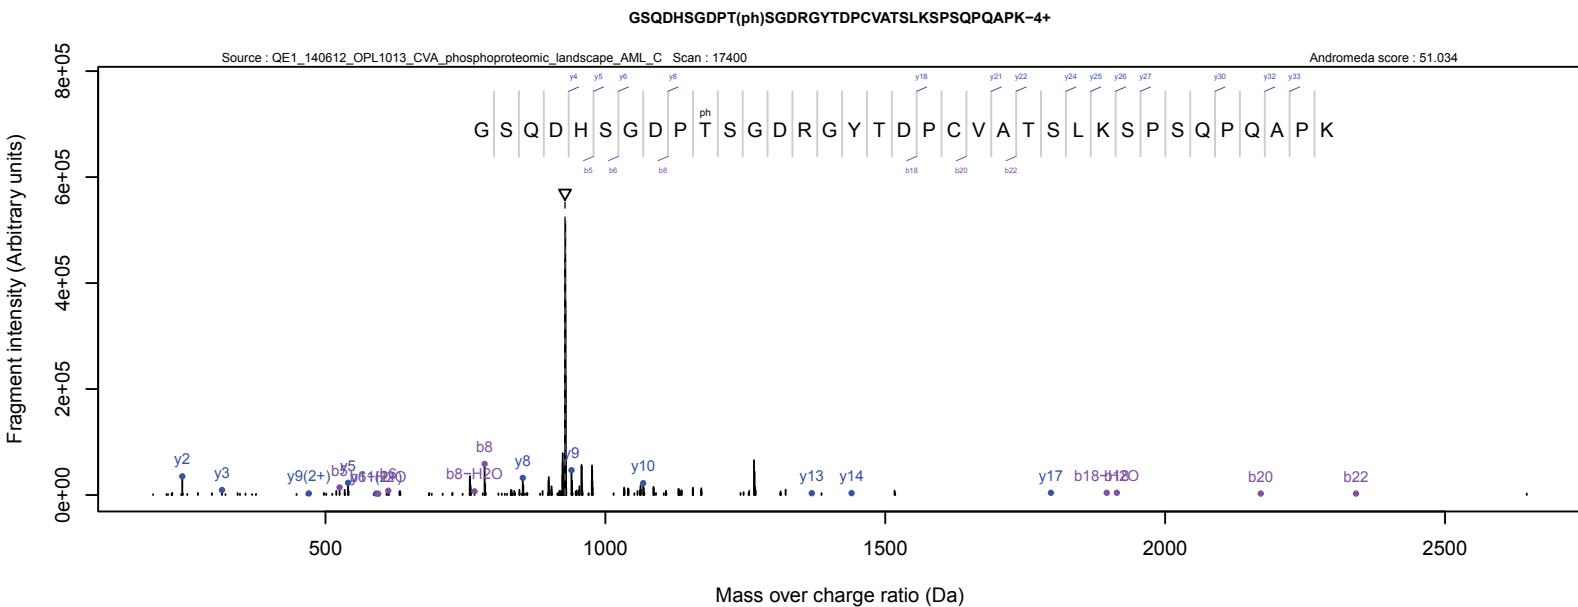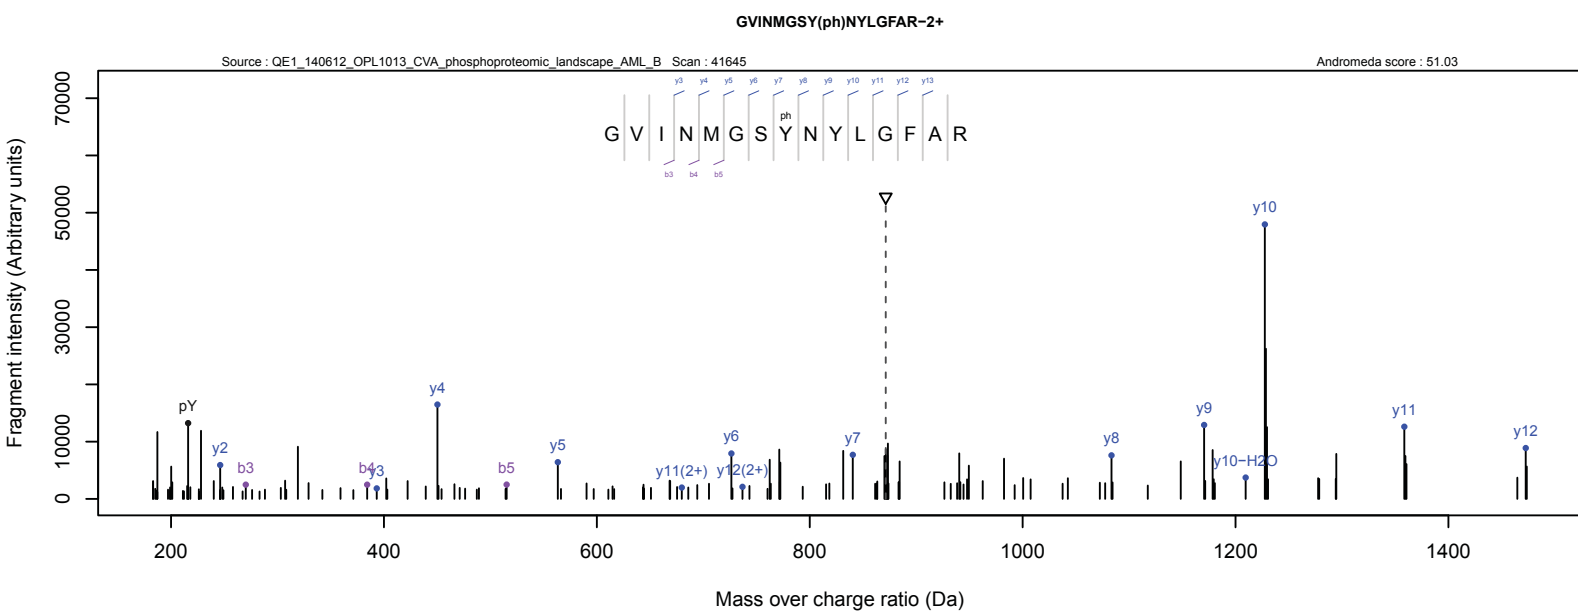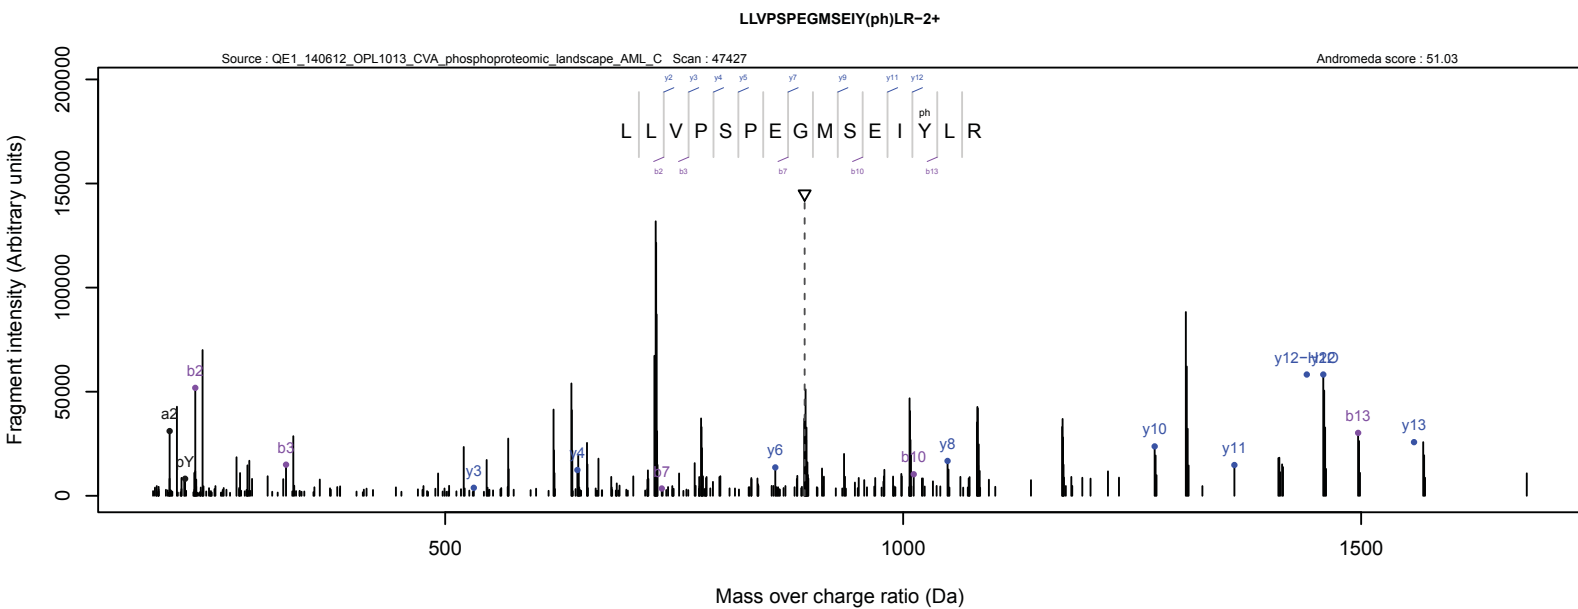

**QLEY(ph)QLEDDKLSQK-3+**

Source : QE1\_140612\_OPL1013\_CVA\_phosphoproteomic\_landscape\_AML\_C Scan : 18413

Andromeda score : 51.03

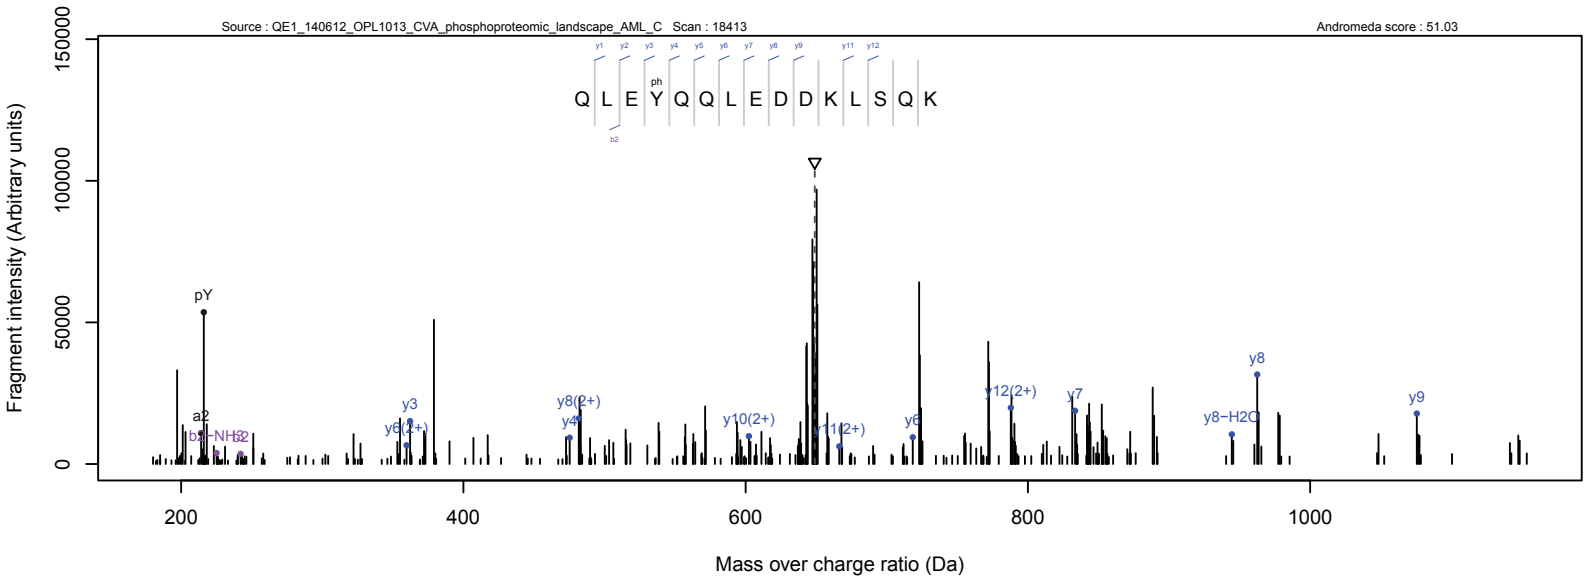

**STNVVY(ph)QAHHVSR-3+**

Source : QE1\_140612\_OPL1013\_CVA\_phosphoproteomic\_landscape\_AML\_B Scan : 7032

Andromeda score : 51.03

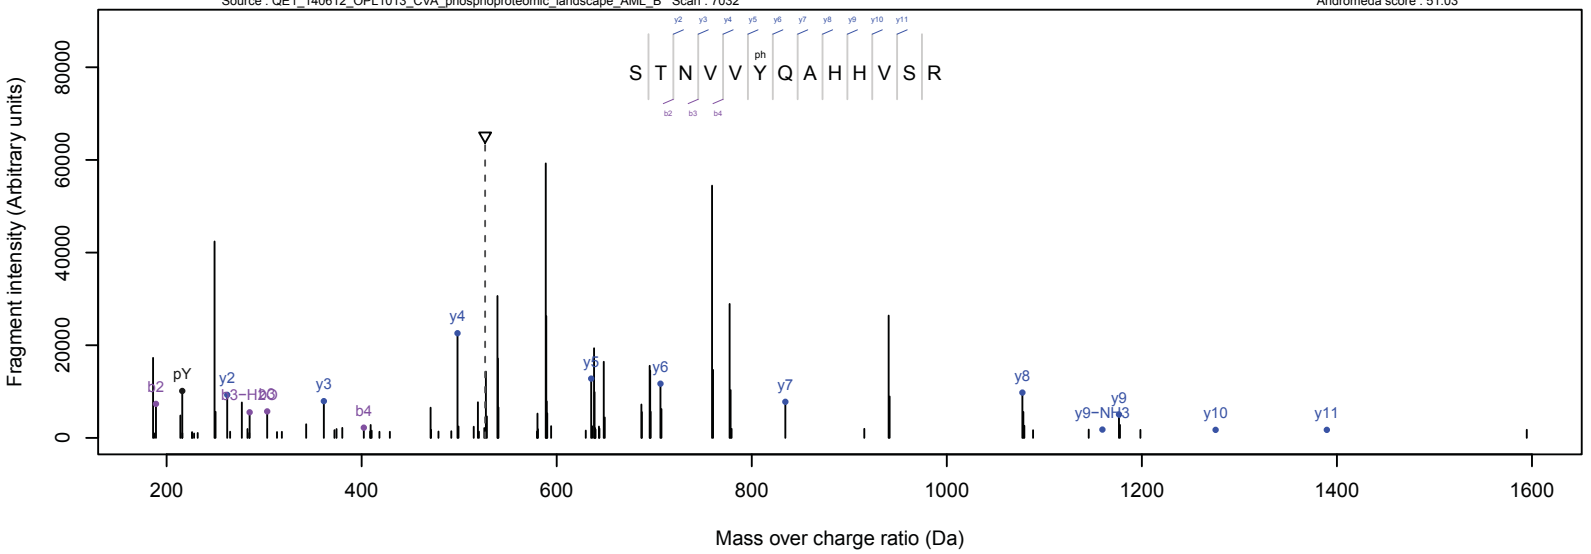

**EGLY(ph)QYK-2+**

Source : QE1\_140822\_OPL1013\_CvA\_pTyrIP\_AML\_cell\_lines\_part2\_E Scan : 6228

Andromeda score : 50.966

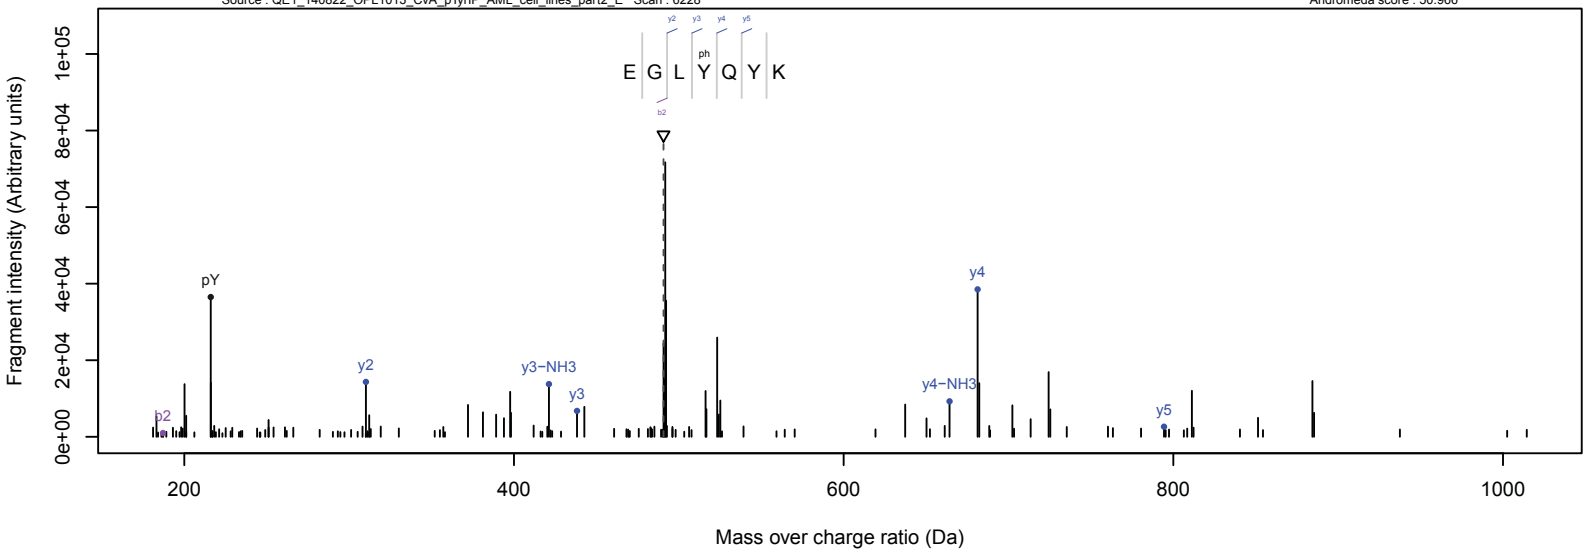

LFLHY(ph)GR-2+

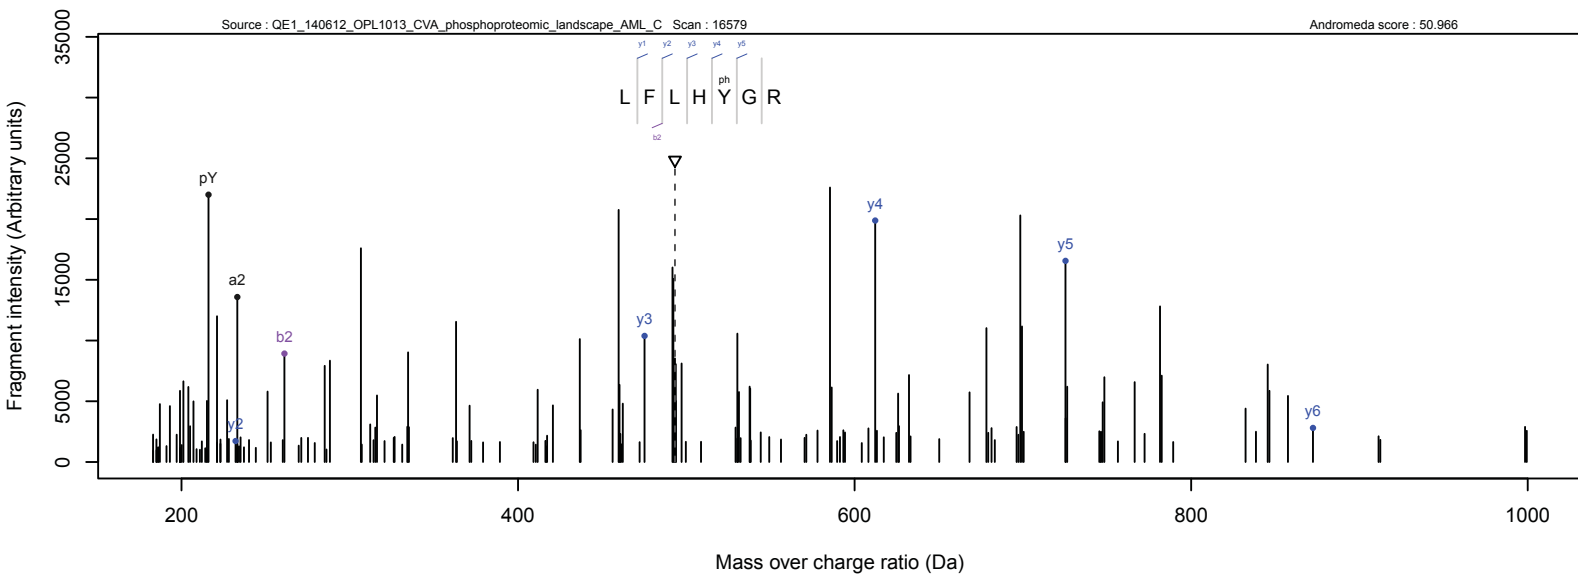

Y(ph)FMAPLK-2+

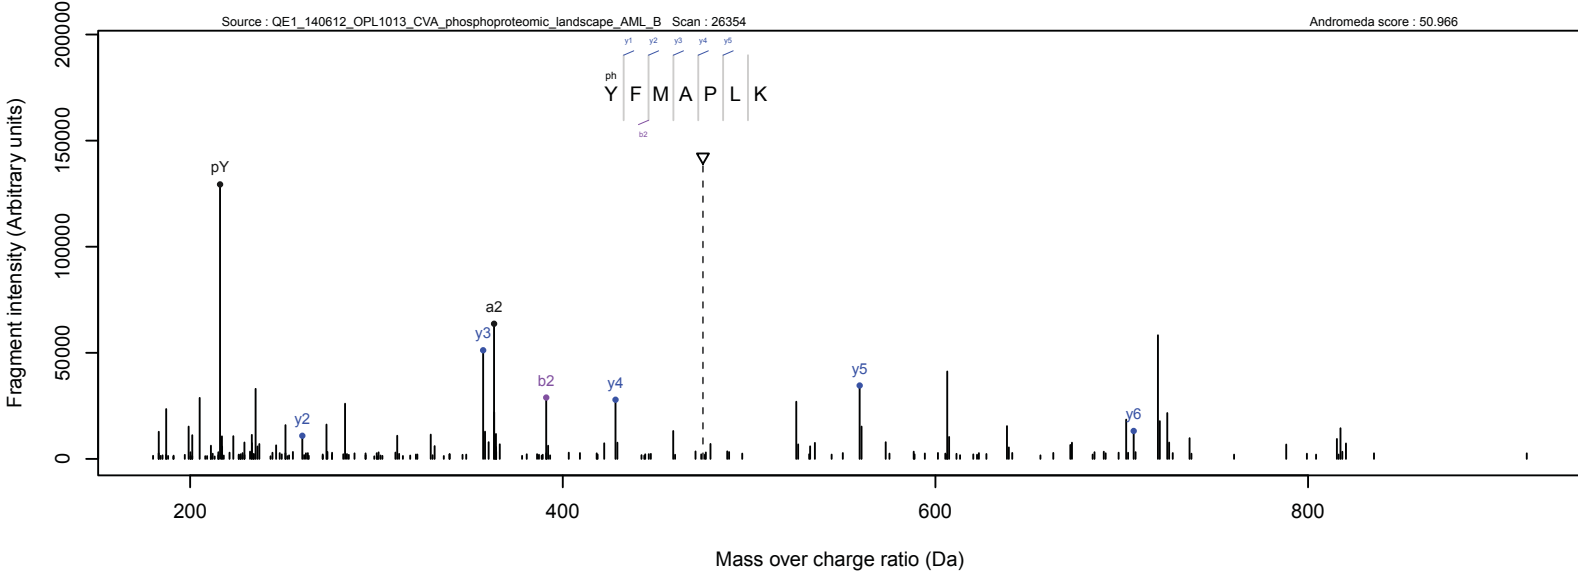

CY(ph)VLSSQNLAHPAPPVPPR-3+

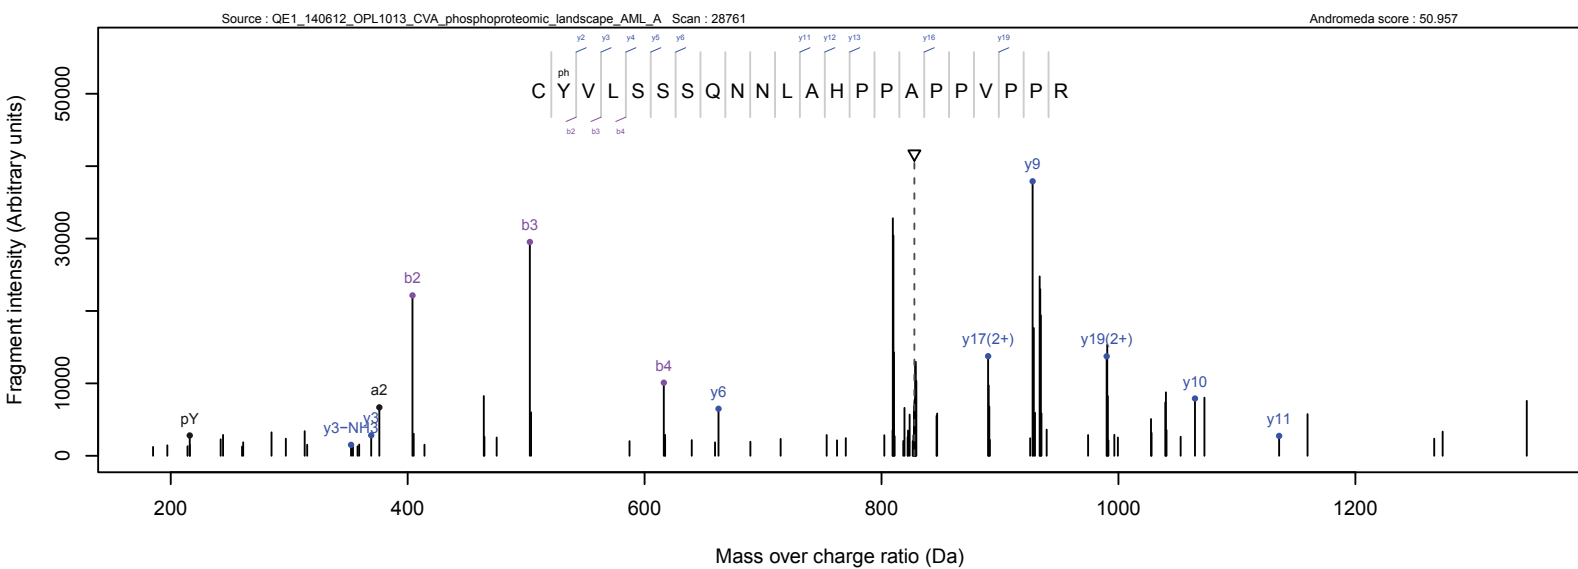

## QFDNLKPSGGY(ph)ITGDQAR-3+

Source: QE1\_140612\_OPL1013\_CVA\_phosphoproteomic\_landscape\_AML\_C Scan: 20748

Andromeda score: 50.957

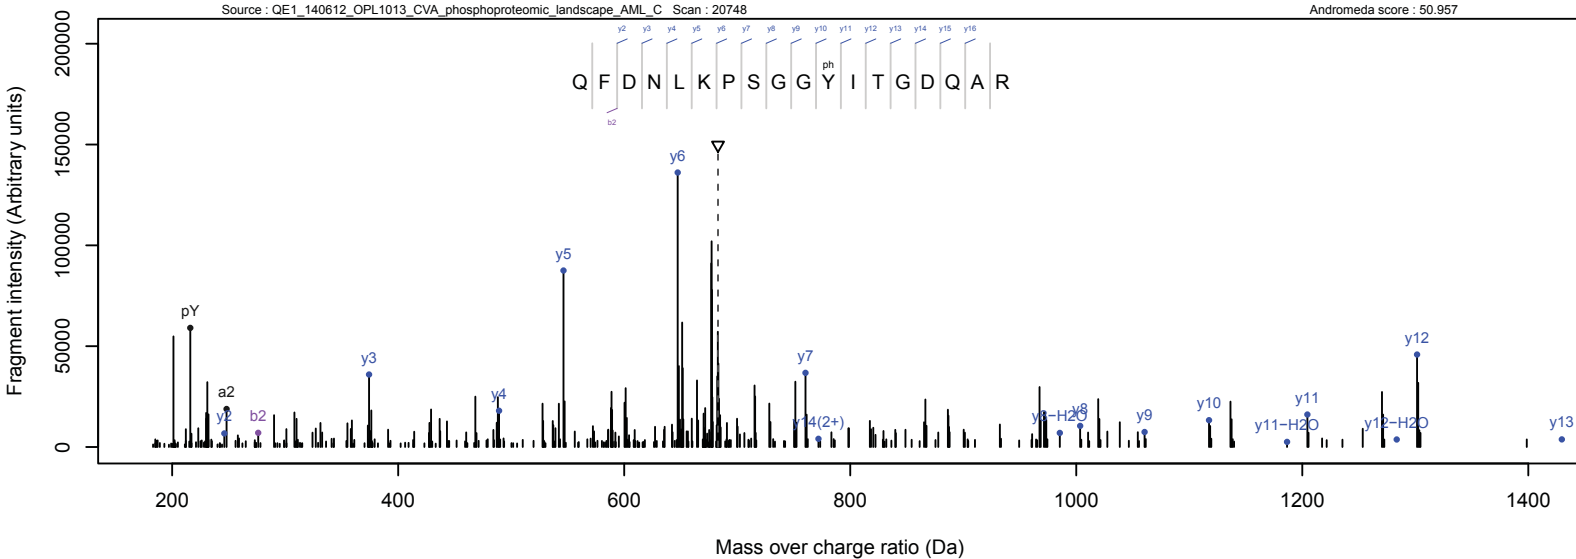

## ILGENAKPNY(ph)GCQVTIQSEQEK-3+

Source: QE1\_140908\_OPL1013\_CvA\_pTyrIP\_AML\_OCI\_AML3 Scan: 21276

Andromeda score: 50.956

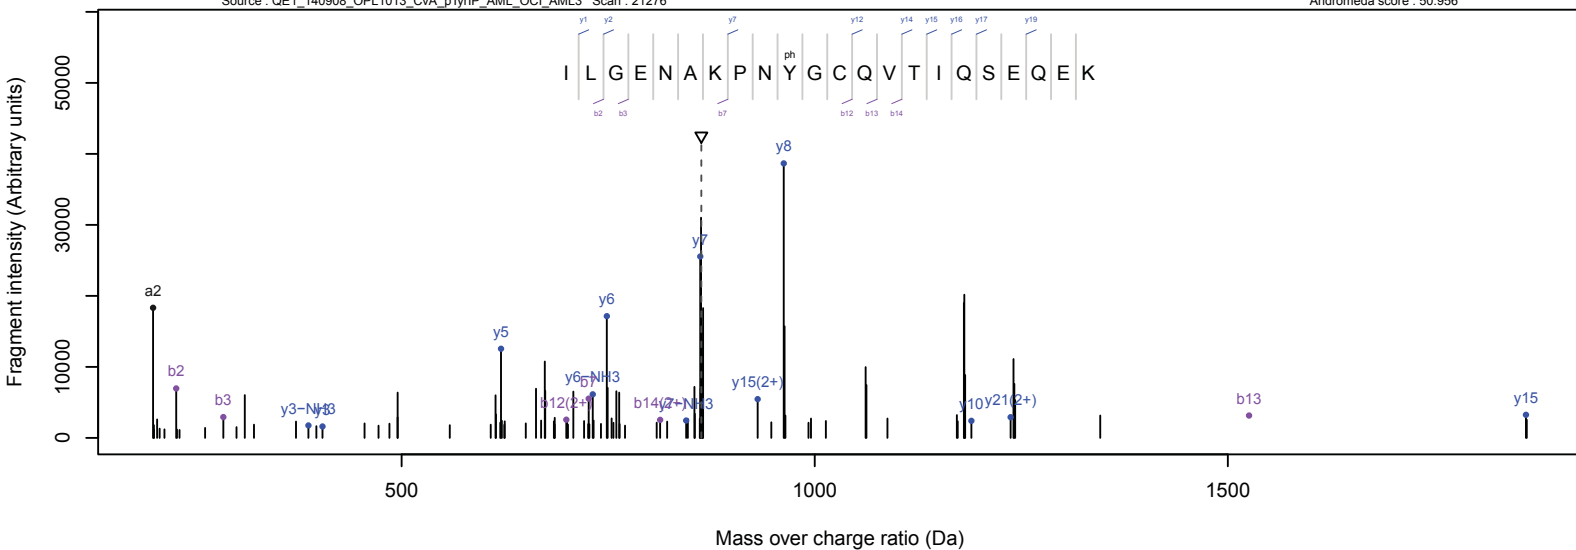

## EVGM(ox)PADY(ph)VNK-2+

Source: QE1\_140822\_OPL1013\_CvA\_pTyrIP\_AML\_cell\_lines\_part2\_B Scan: 9327

Andromeda score: 50.95

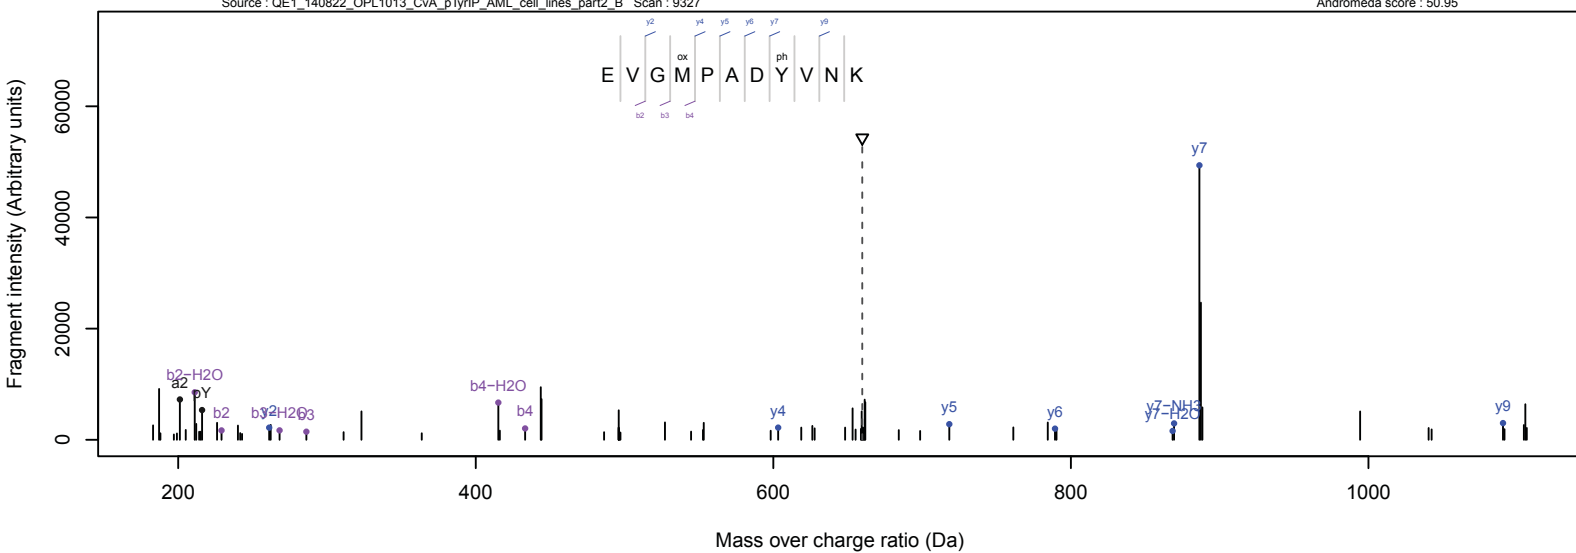

## SENLIY(ph)TYDK-2+

Source : QE1\_140612\_OPL1013\_CVA\_phosphoproteomic\_landscape\_AML\_D Scan : 22137

Andromeda score : 50.95

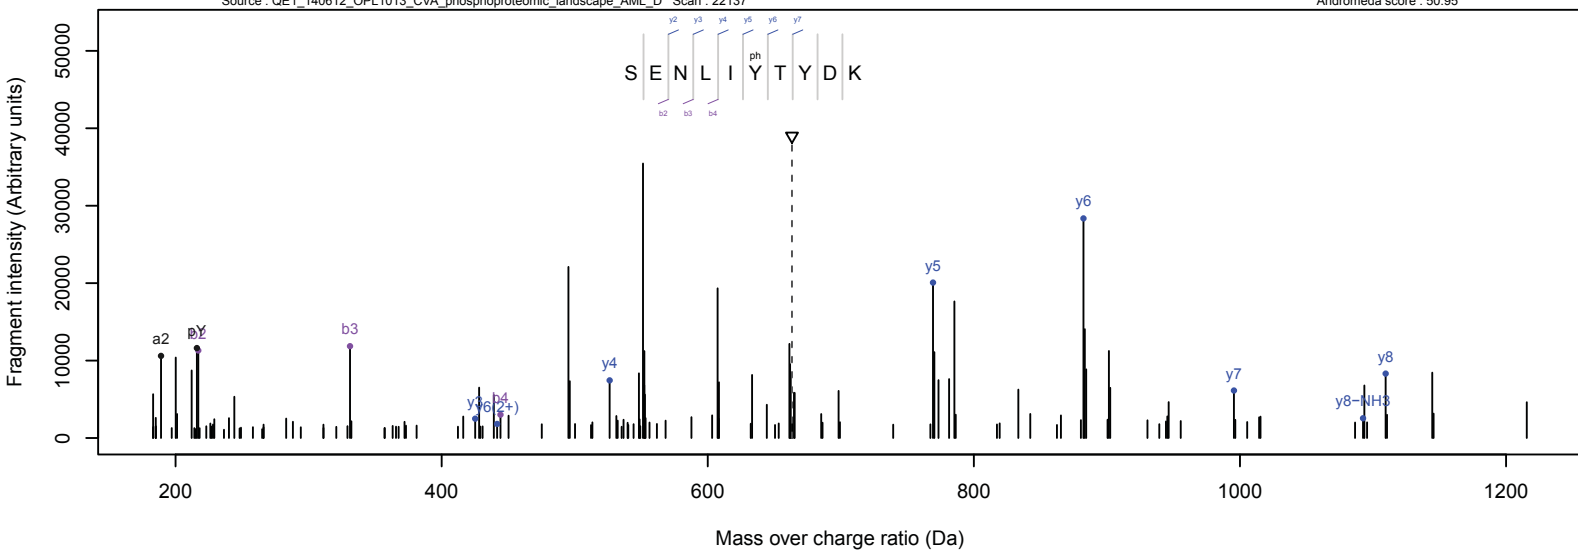

## AHGGFTNESSY(ph)HR-3+

Source : QE1\_140908\_OPL1013\_CvA\_pTyrIP\_AML\_Kasumi6 Scan : 4077

Andromeda score : 50.897

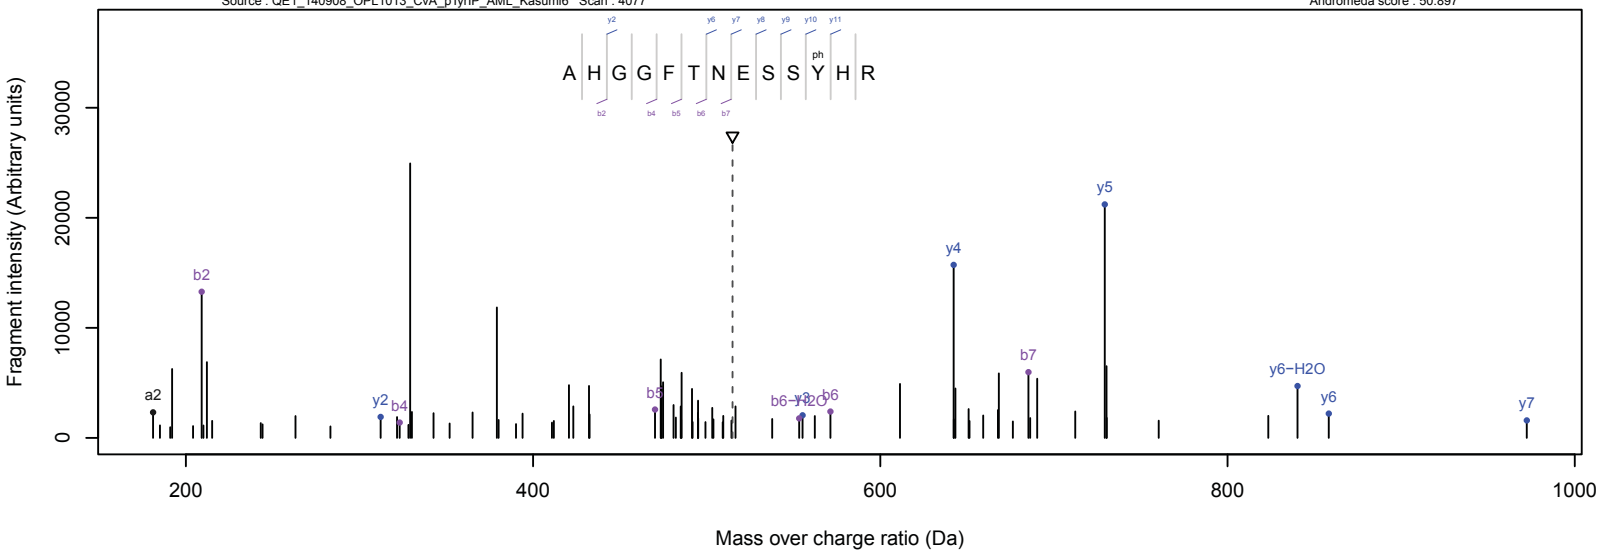

## DIY(ph)STVIDIHLR-3+

Source : QE1\_140822\_OPL1013\_CvA\_pTyrIP\_AML\_cell\_lines\_part2\_B Scan : 30049

Andromeda score : 50.897

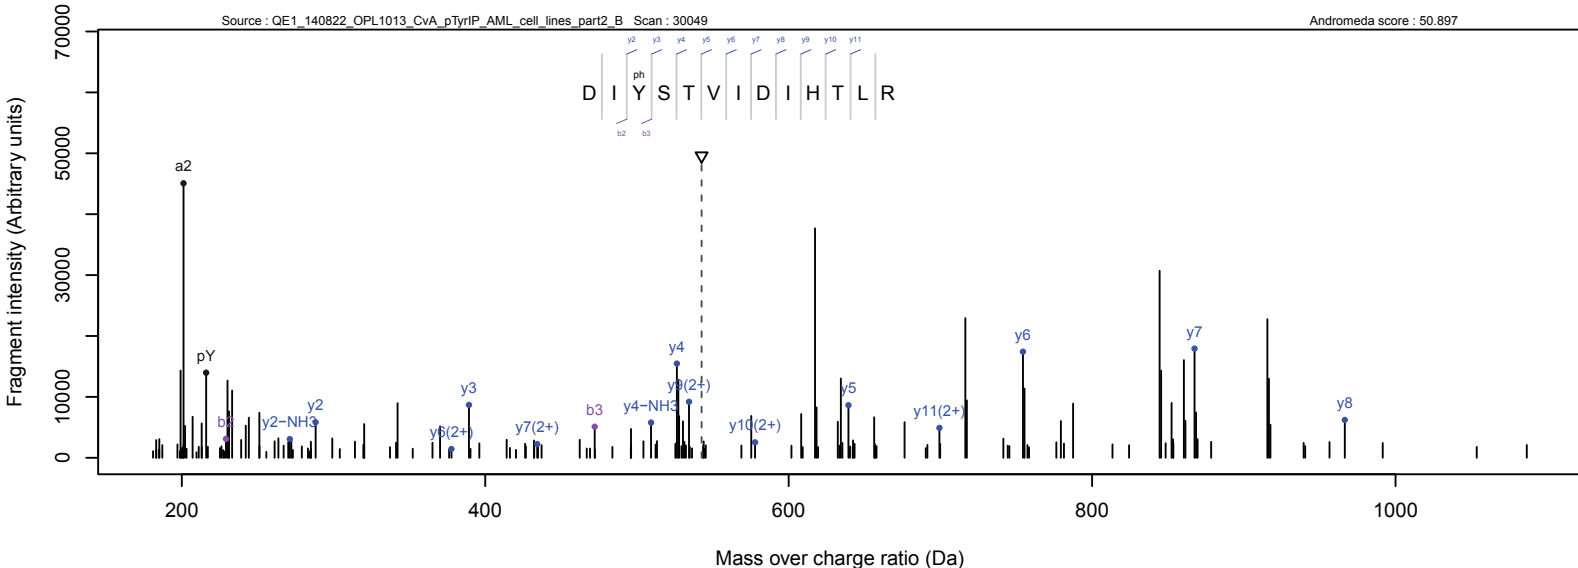

## HSY(ph)IDLQAGGAR-2+

Source : QE1\_140612\_OPL1013\_CVA\_phosphoproteomic\_landscape\_AML\_C Scan : 14150

Andromeda score : 50.897

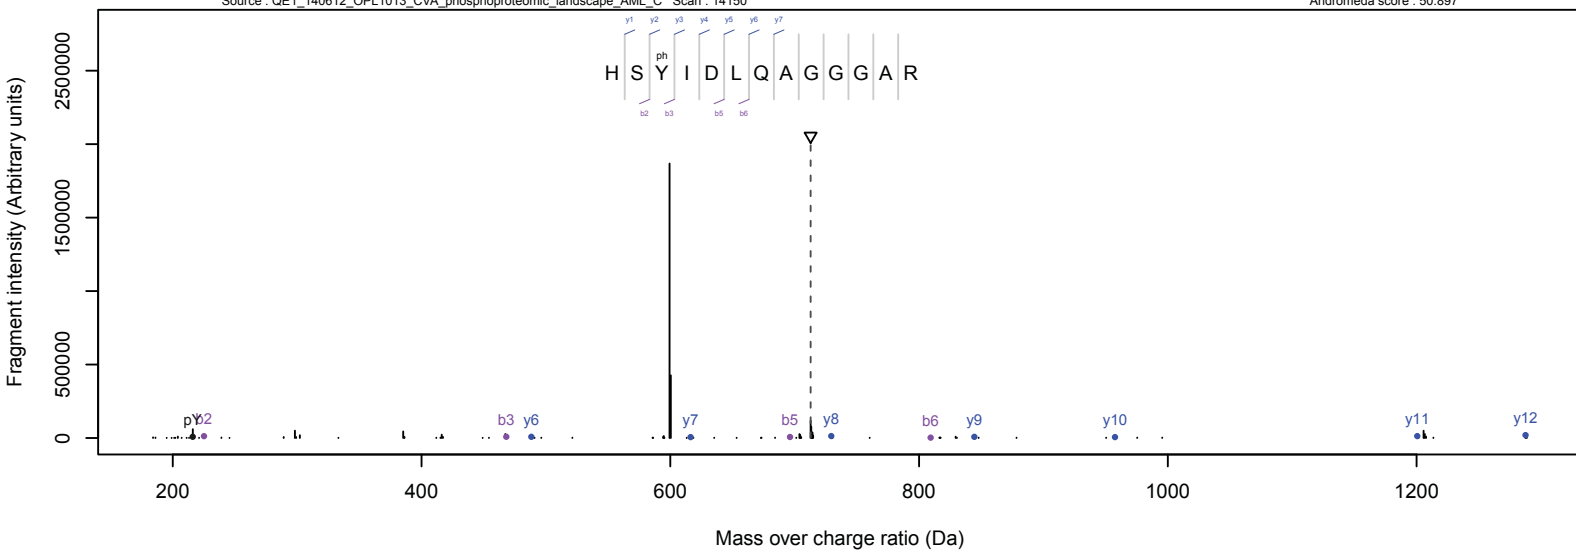

## STFDAHIY(ph)EGR-2+

Source : QE1\_140612\_OPL1013\_CVA\_phosphoproteomic\_landscape\_AML\_A Scan : 14916

Andromeda score : 50.897

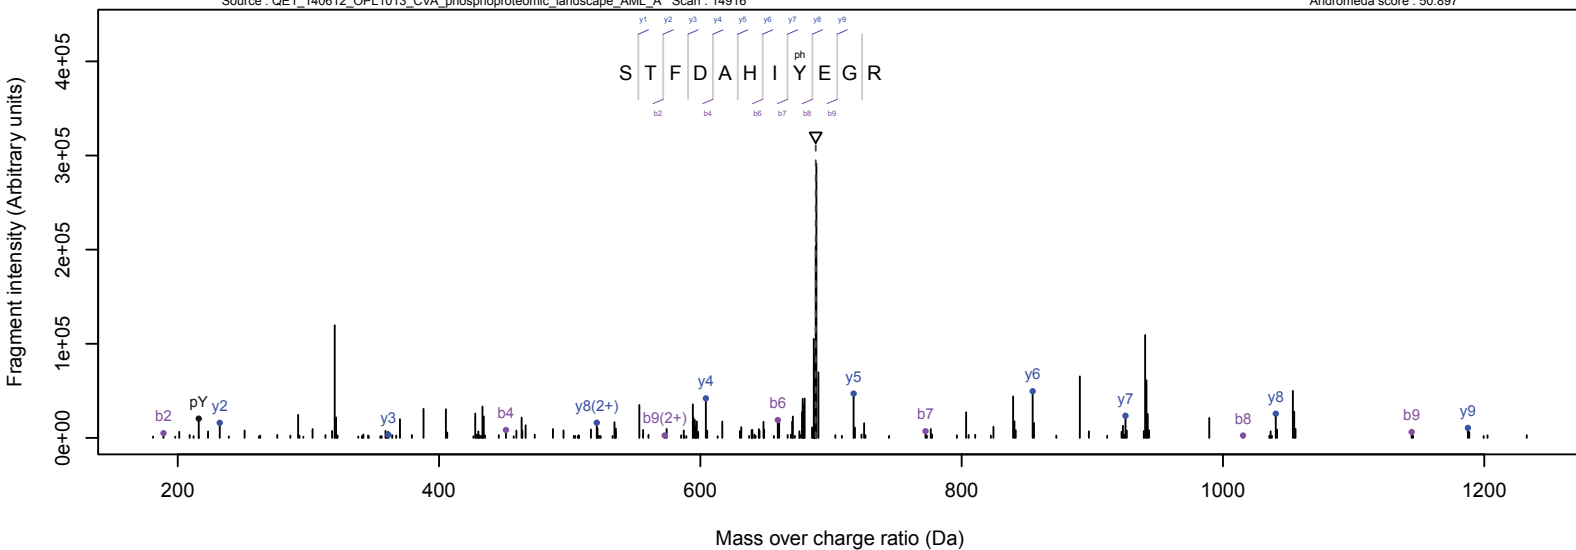

## TVTAM(ox)DVVY(ph)ALKR-3+

Source : QE1\_140612\_OPL1013\_CVA\_phosphoproteomic\_landscape\_AML\_A Scan : 32487

Andromeda score : 50.897

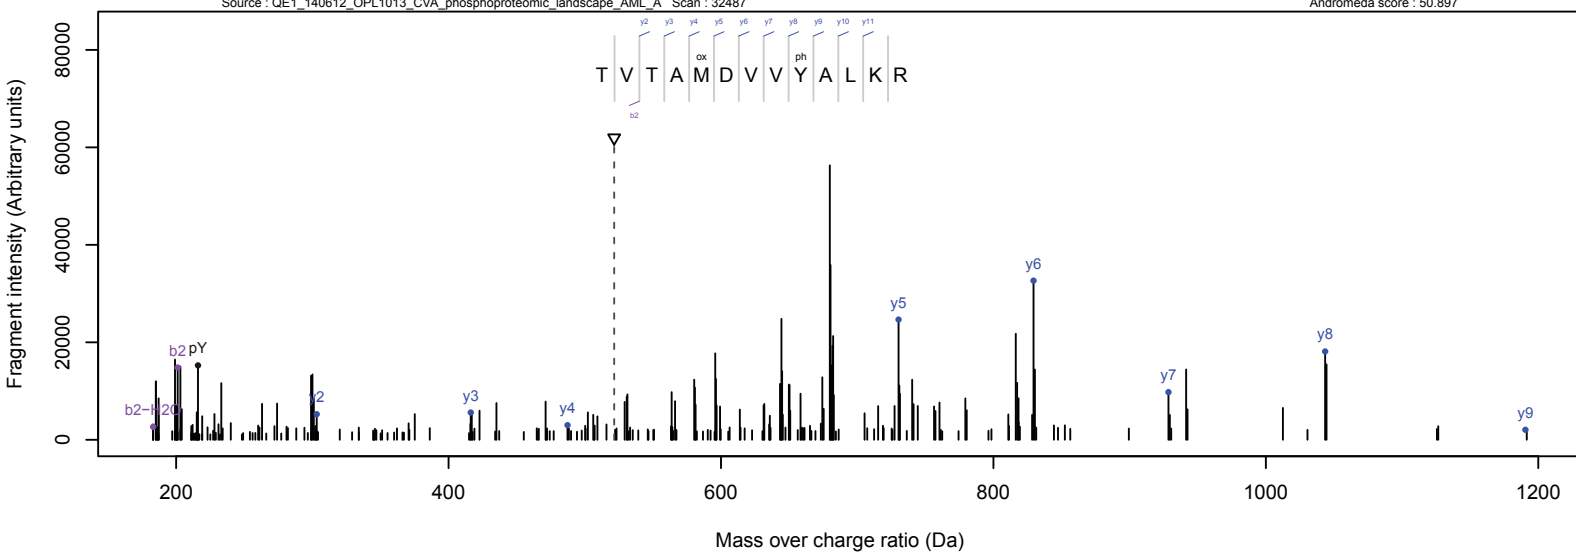

## WANY(ph)HLENAGCNK-3+

Source : QE1\_140612\_OPL1013\_CVA\_phosphoproteomic\_landscape\_AML\_B Scan : 12394

Andromeda score : 50.897

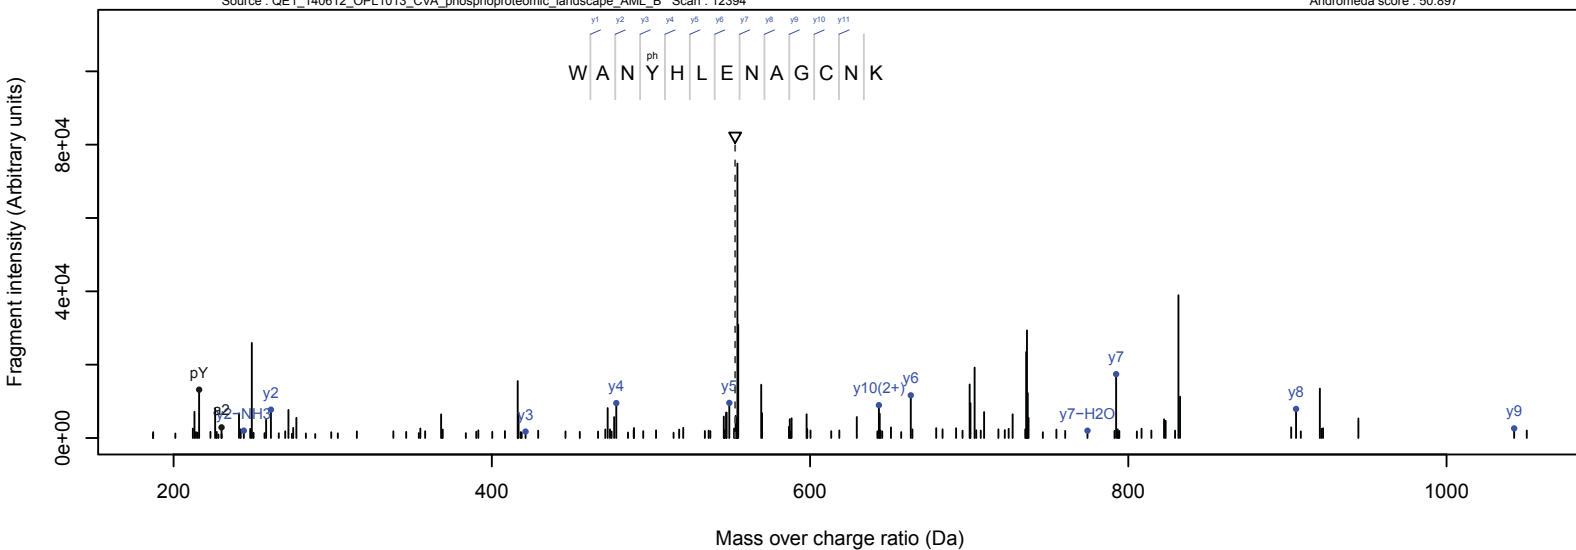

## GSIDREDGSLQGPIGNQH(ph)QPVGKPDPAAPPK-4+

Source : QE1\_140612\_OPL1013\_CVA\_phosphoproteomic\_landscape\_AML\_B Scan : 23751

Andromeda score : 50.891

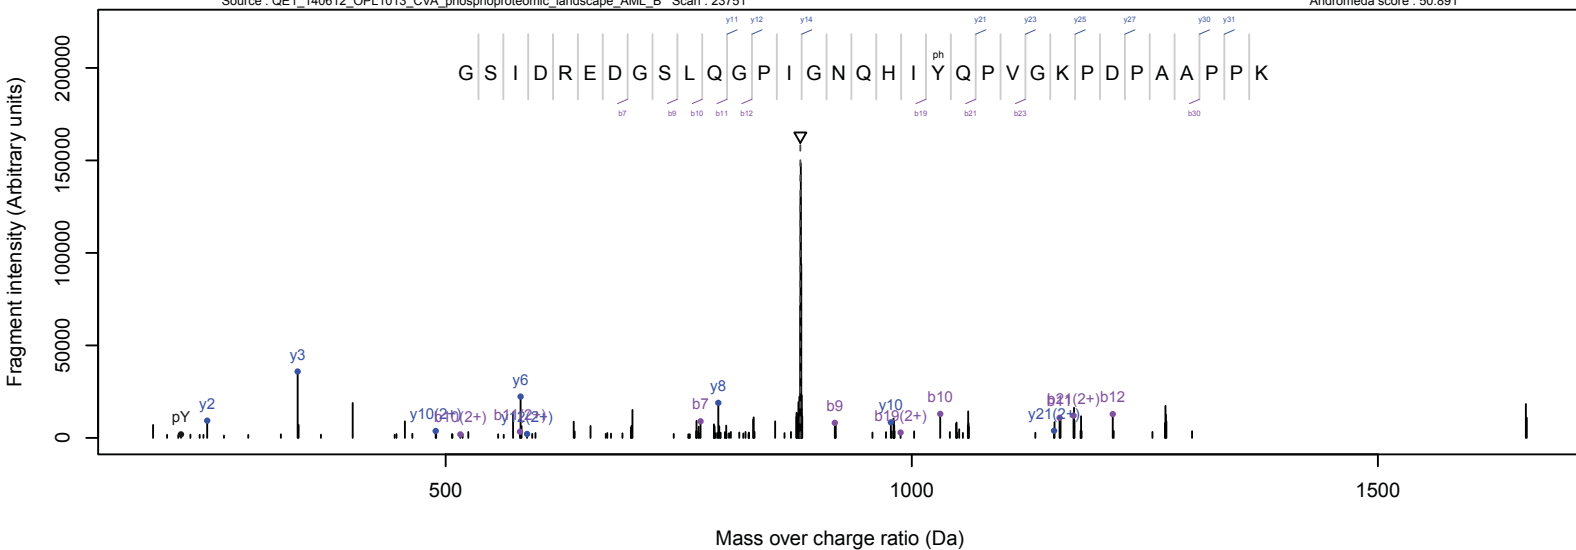

## LKTNHIGHT(ph)GYLNTVTVSPDGLCASGGK-4+

Source : QE1\_140612\_OPL1013\_CVA\_phosphoproteomic\_landscape\_AML\_B Scan : 23132

Andromeda score : 50.865

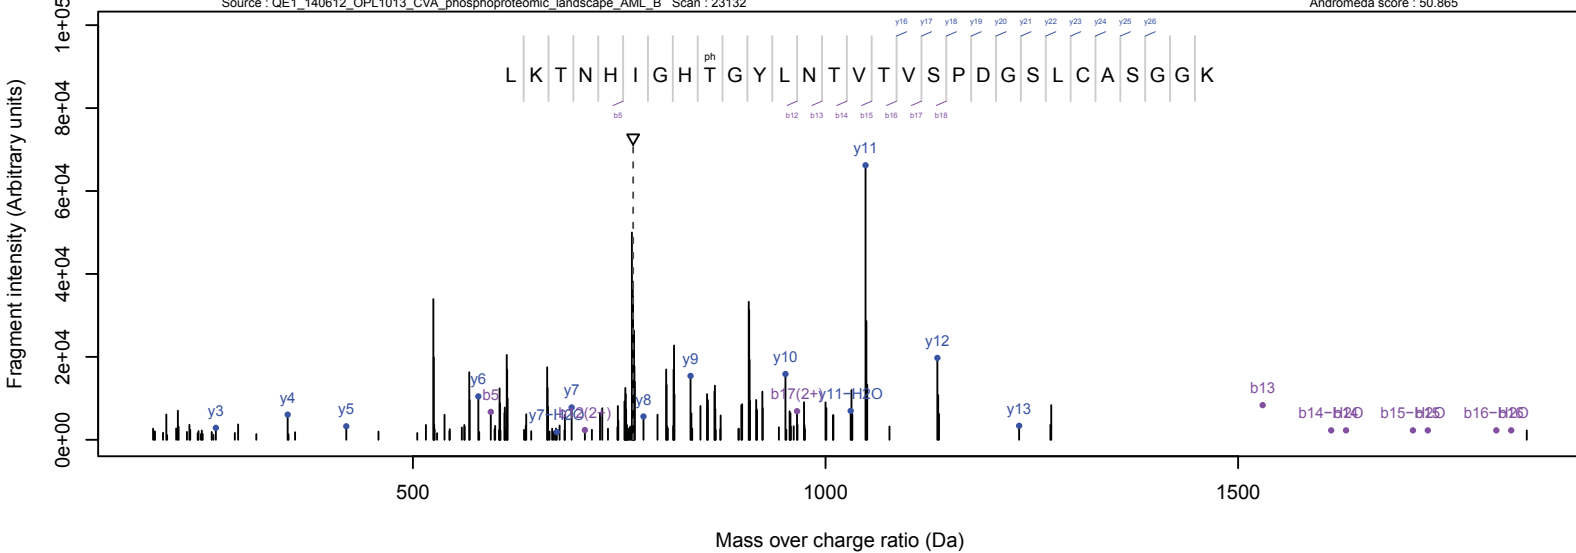



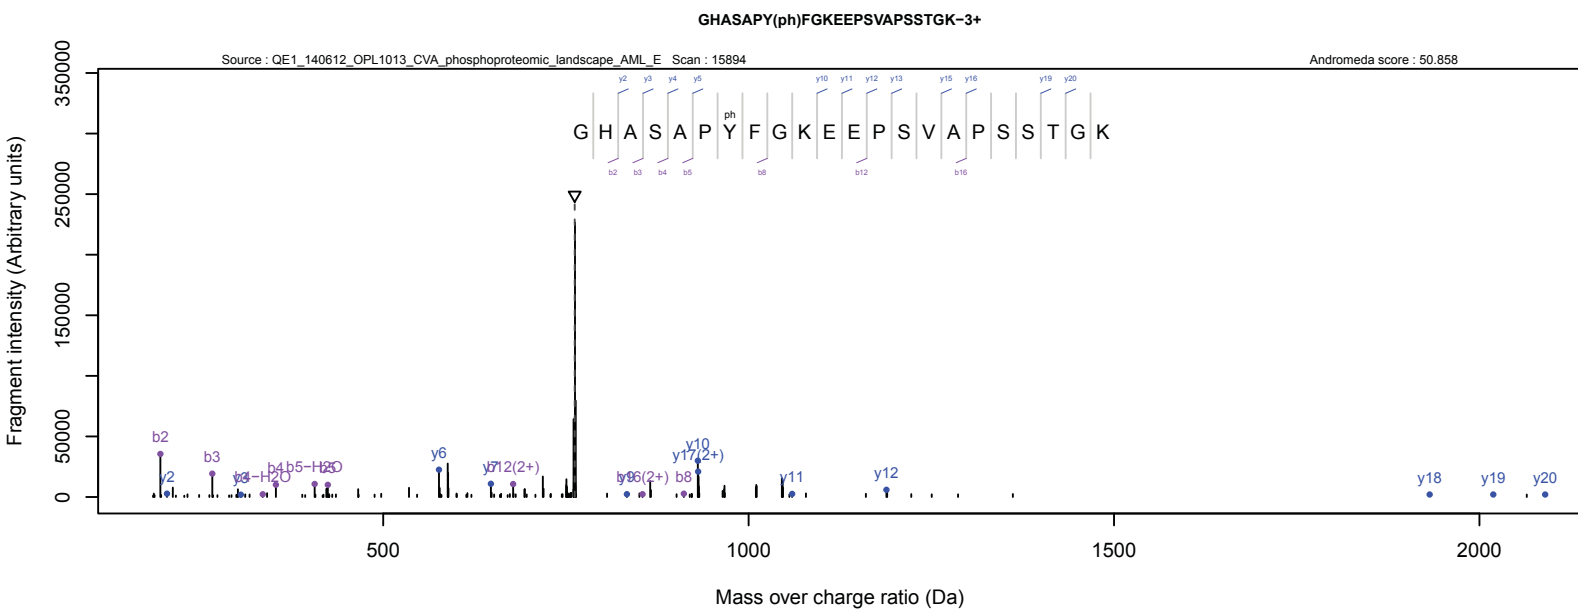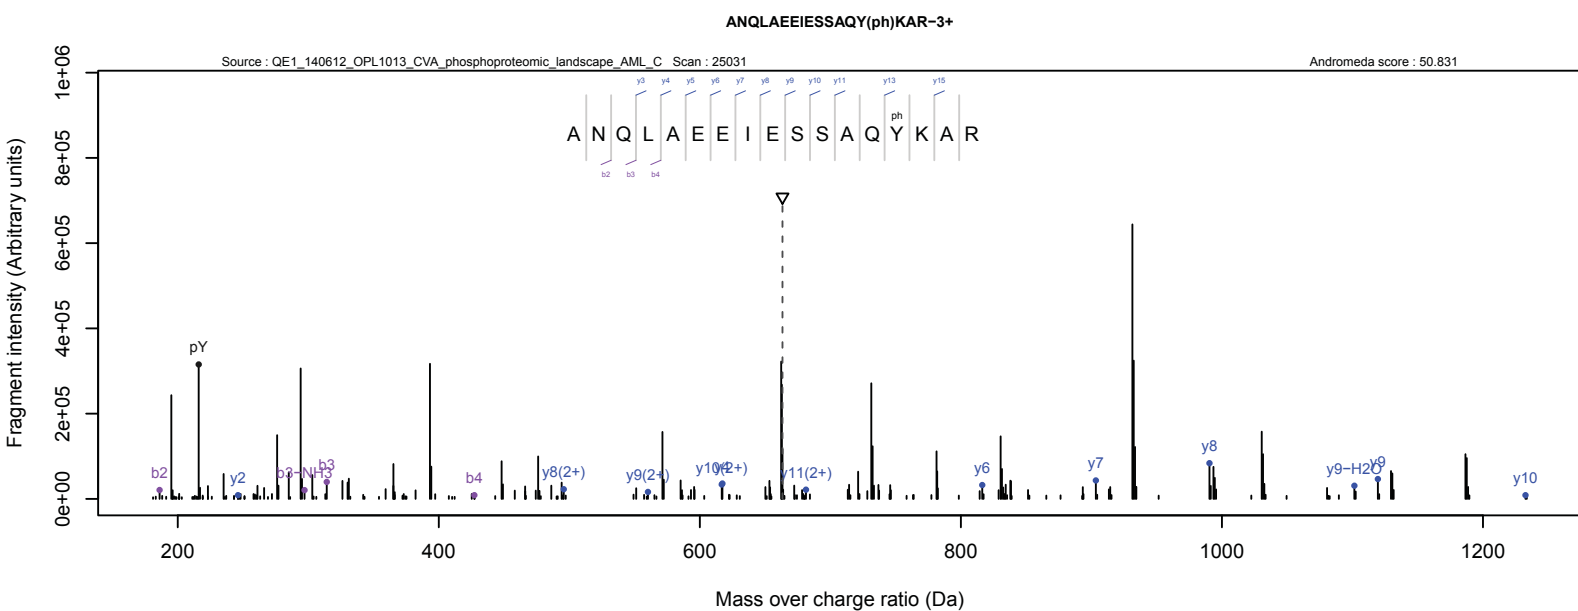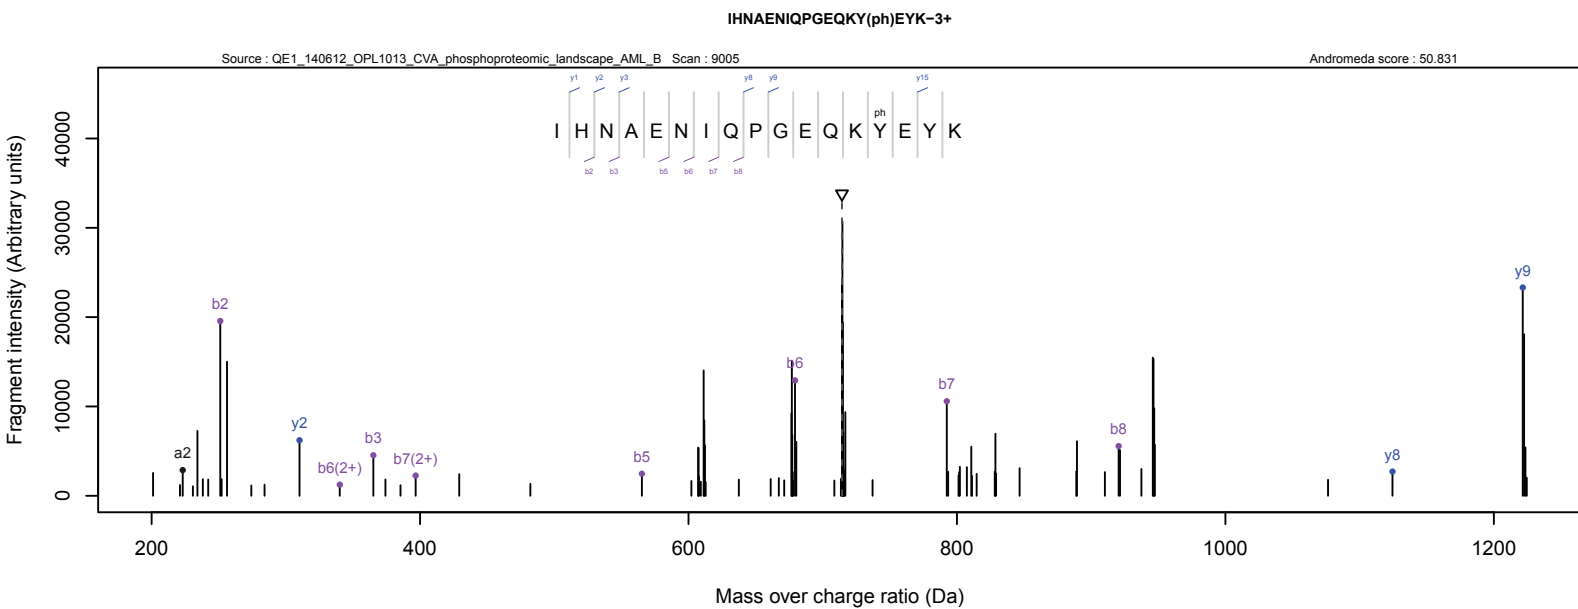

## YSDKELQY(ph)IDAI SNK-3+

Source: QE1\_140612\_OPL1013\_CVA\_phosphoproteomic\_landscape\_AML\_C Scan: 28264

Andromeda score: 50.831

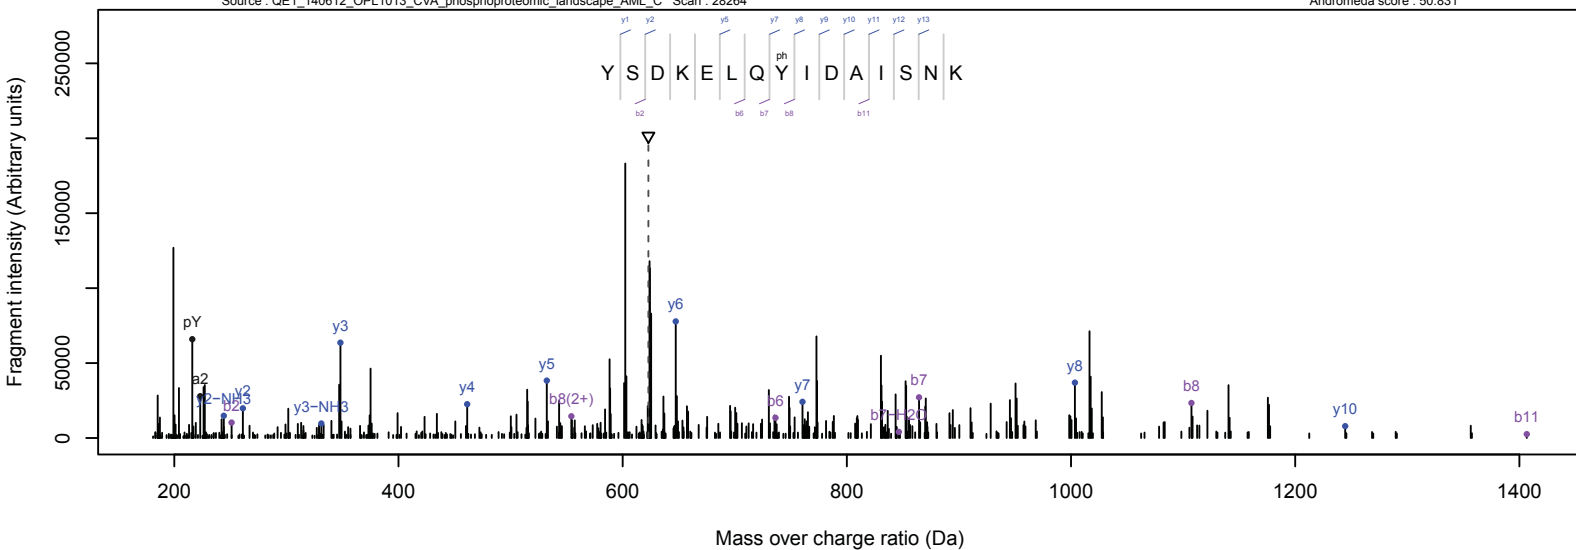

## EVPIPEHIDYHLTR-3+

Source: QE1\_140908\_OPL1013\_CvA\_pTyrIP\_AML\_HL60 Scan: 39227

Andromeda score: 50.827

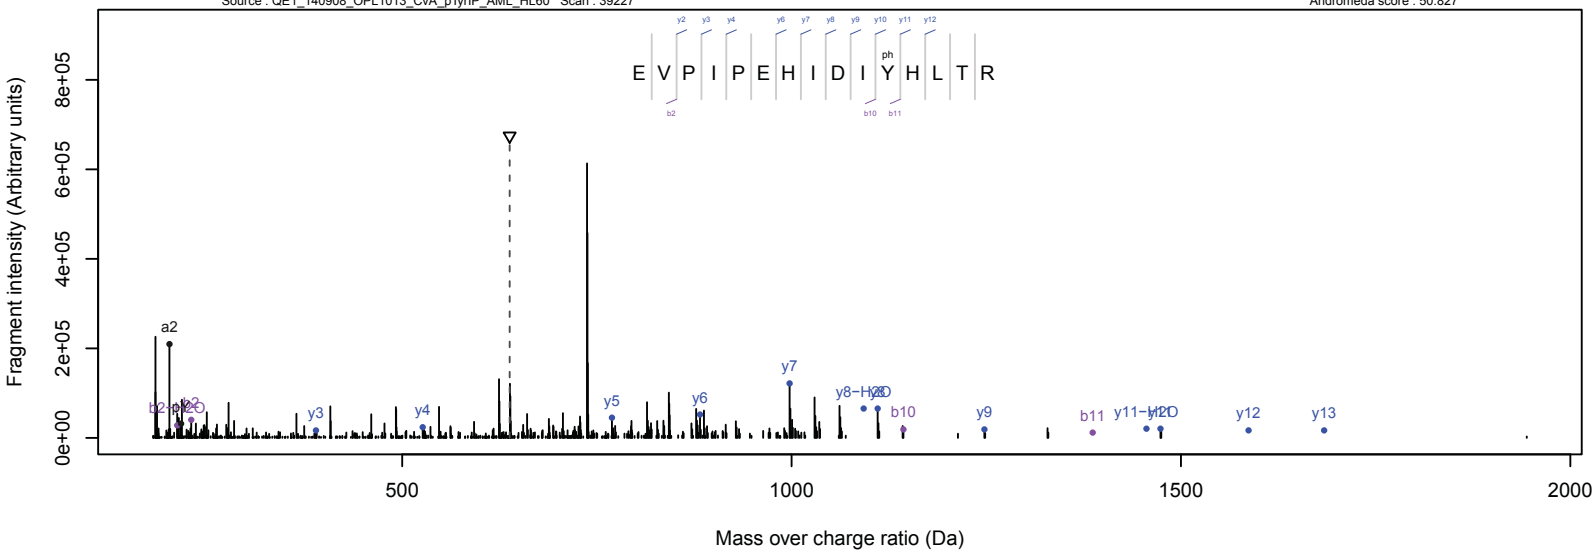

## SPGLSPLLHYPSCHR-3+

Source: QE1\_140612\_OPL1013\_CVA\_phosphoproteomic\_landscape\_AML\_C Scan: 23033

Andromeda score: 50.827

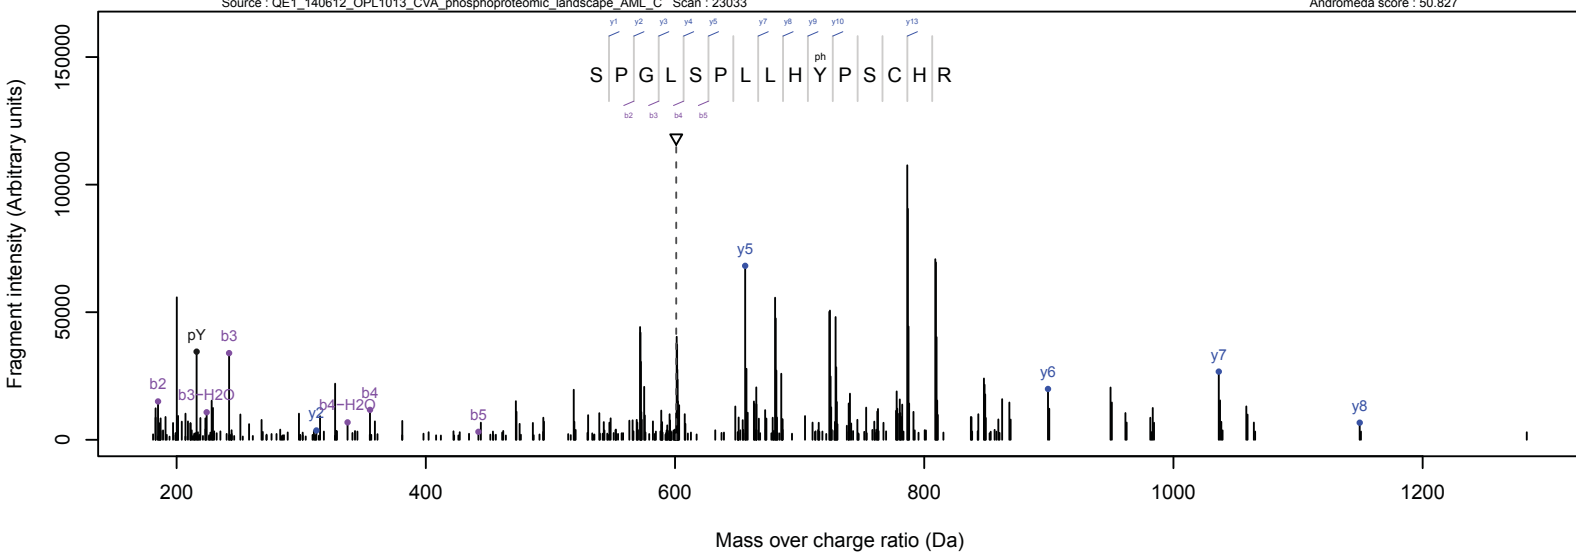

**SY(ph)SRPSPLVLPSSR-3+**

Source : QE1\_140612\_OPL1013\_CVA\_phosphoproteomic\_landscape\_AML\_C Scan : 21998

Andromeda score : 50.827

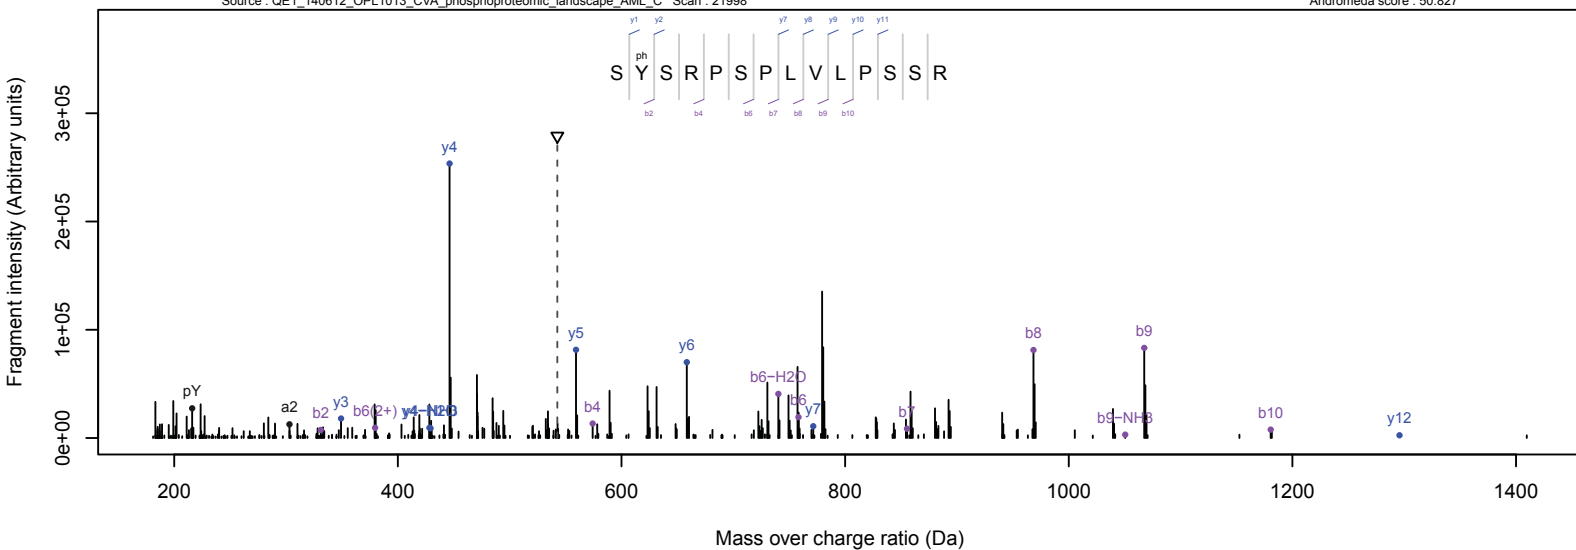

**DIEY(ph)FVNQR-2+**

Source : QE1\_140612\_OPL1013\_CVA\_phosphoproteomic\_landscape\_AML\_C Scan : 26811

Andromeda score : 50.805

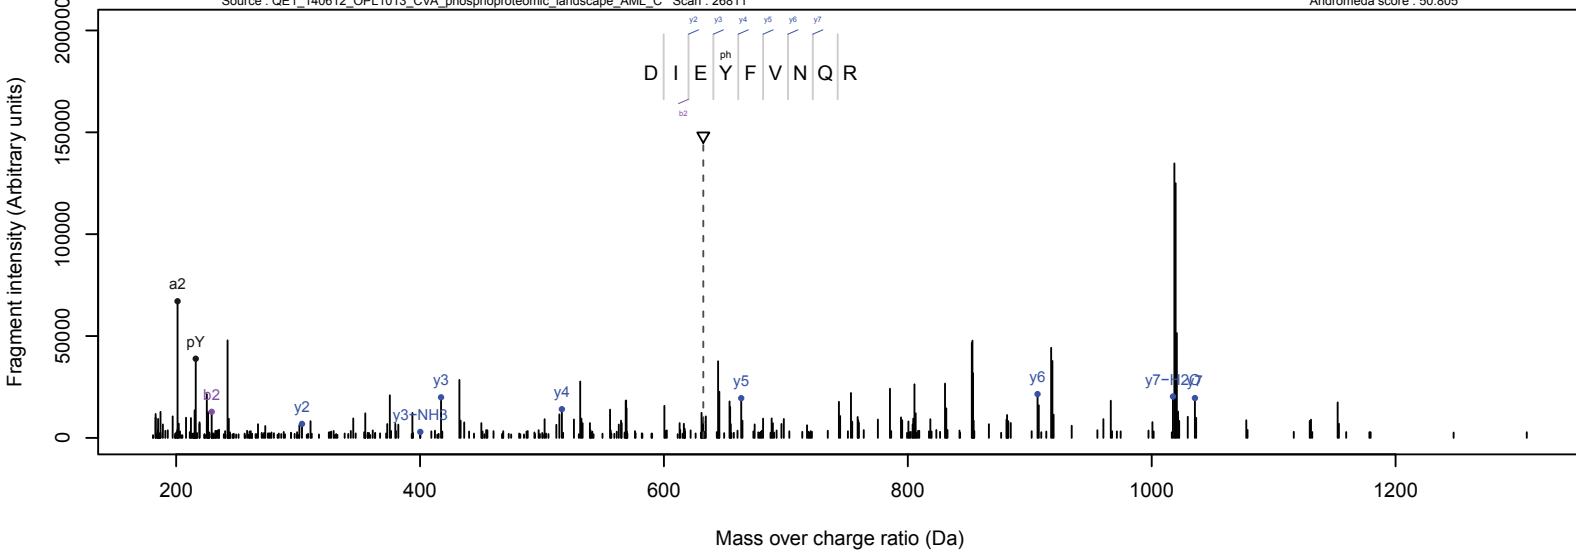

**VSNSKFY(ph)S-2+**

Source : QE1\_140822\_OPL1013\_CvA\_pTyrIP\_AML\_cell\_lines\_part2\_B Scan : 4125

Andromeda score : 50.805

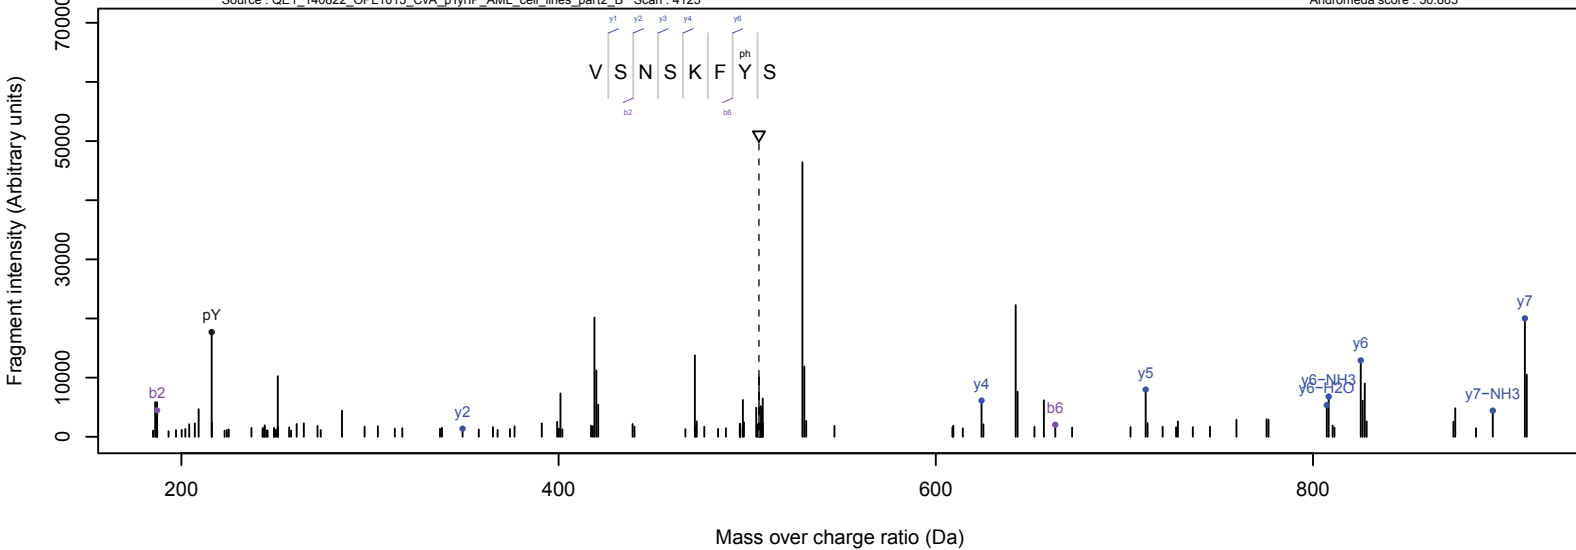

## WLNSPNTY(ph)M(ox)K-2+

Source: QE1\_140908\_OPL1013\_CvA\_pTyrIP\_AML\_Kasumi6 Scan: 17788

Andromeda score: 50.791

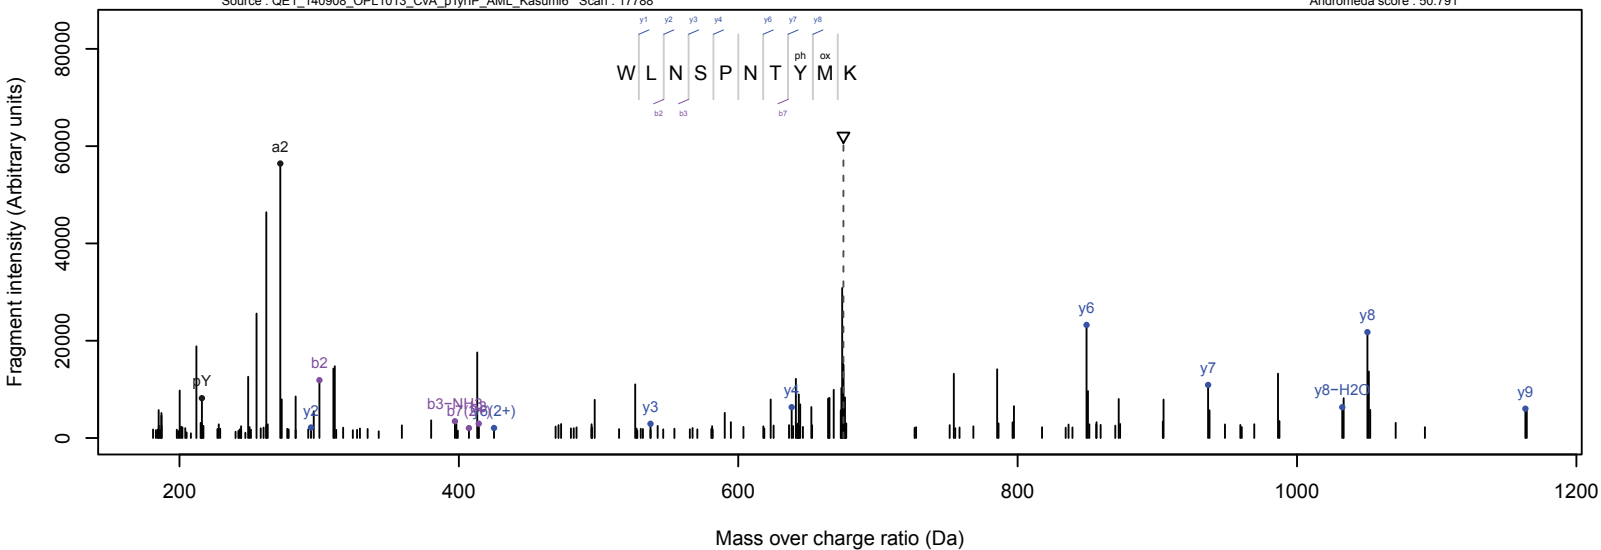

## DVYEEDSY(ph)VKR-2+

Source: QE1\_140822\_OPL1013\_CvA\_pTyrIP\_AML\_cell\_lines\_part2\_F Scan: 6077

Andromeda score: 50.786

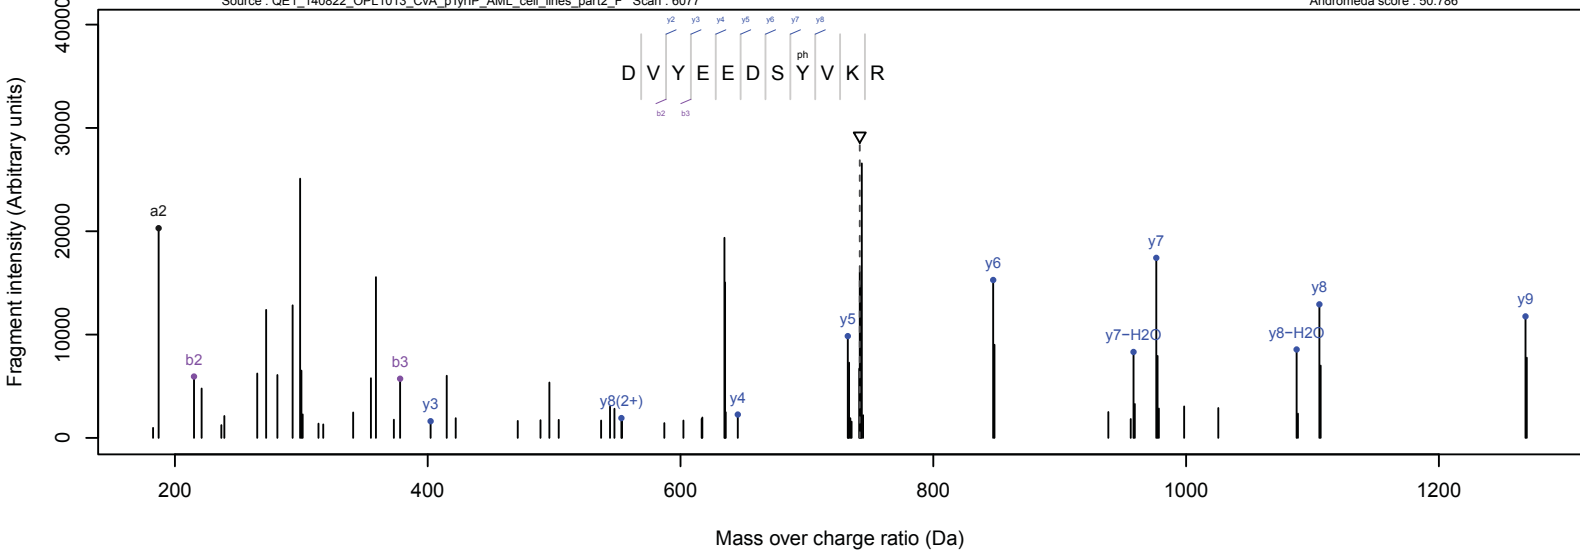

## VLQWSDY(ph)EIVR-2+

Source: QE1\_140612\_OPL1013\_CvA\_phosphoproteomic\_landscape\_AML\_C Scan: 36633

Andromeda score: 50.786

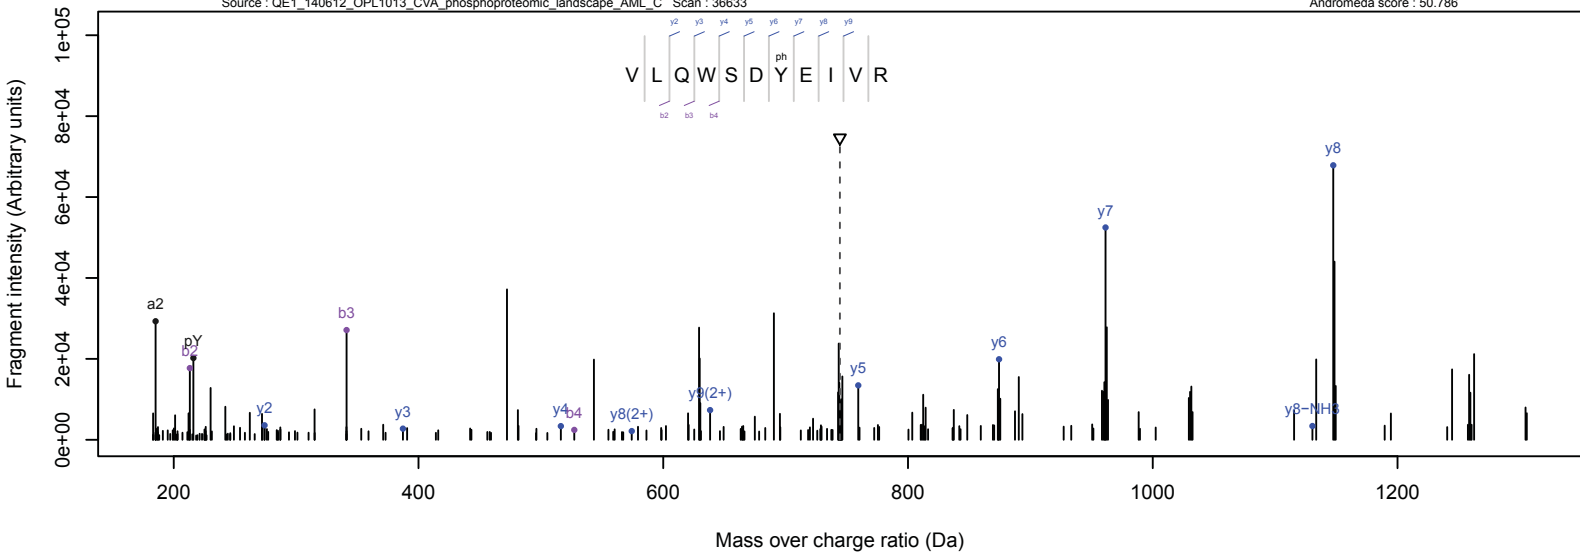

**Y(ph)ETLVGTIGKK-2+**

Source : QE1\_140612\_OPL1013\_CVA\_phosphoproteomic\_landscape\_AML\_B Scan : 17129

Andromeda score : 50.786

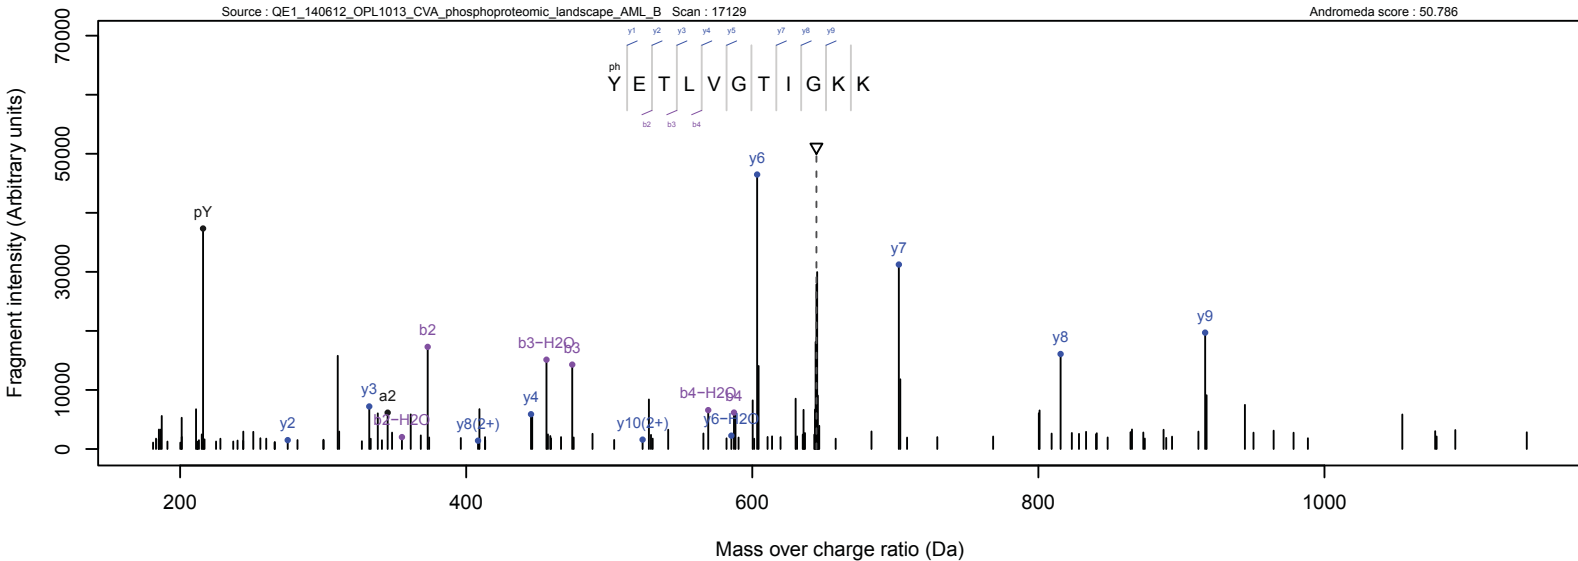

**SENEIDIYKSMPLNGAGHQLQMCYQISR-4+**

Source : QE1\_140612\_OPL1013\_CVA\_phosphoproteomic\_landscape\_AML\_C Scan : 34461

Andromeda score : 50.767

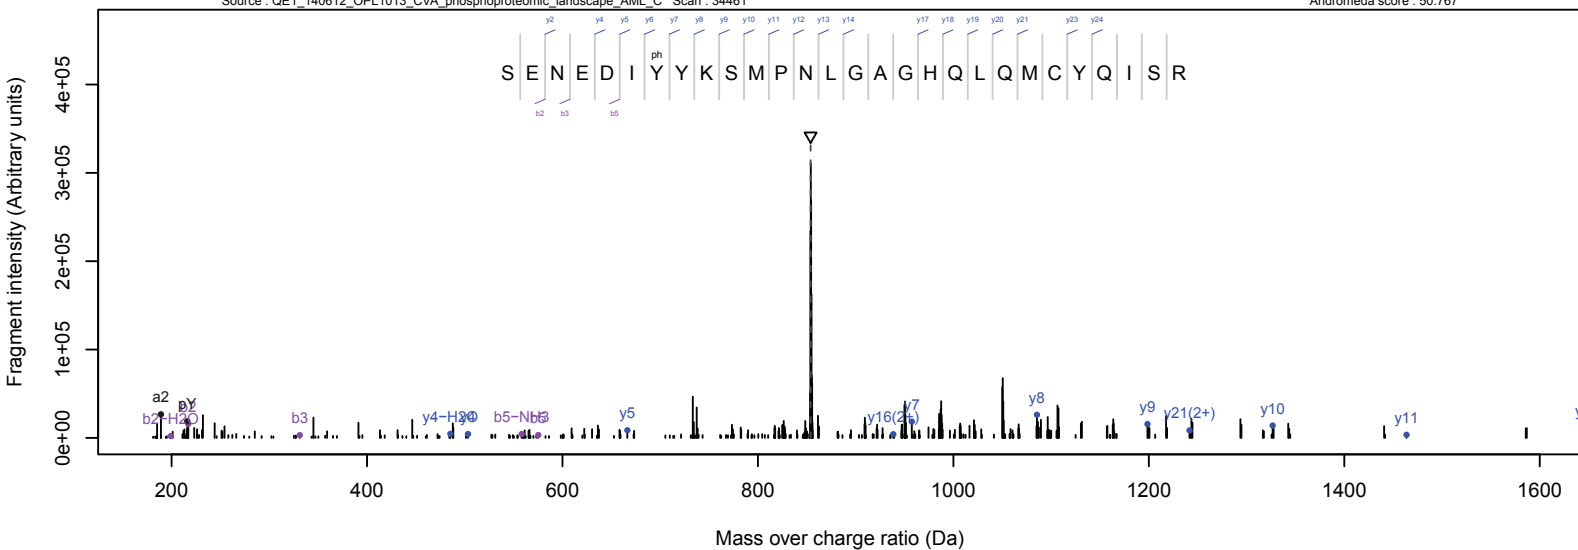

**GLAYCETHY(N)QLFGDVCFHCNR-4+**

Source : QE1\_140612\_OPL1013\_CVA\_phosphoproteomic\_landscape\_AML\_C Scan : 34576

Andromeda score : 50.752

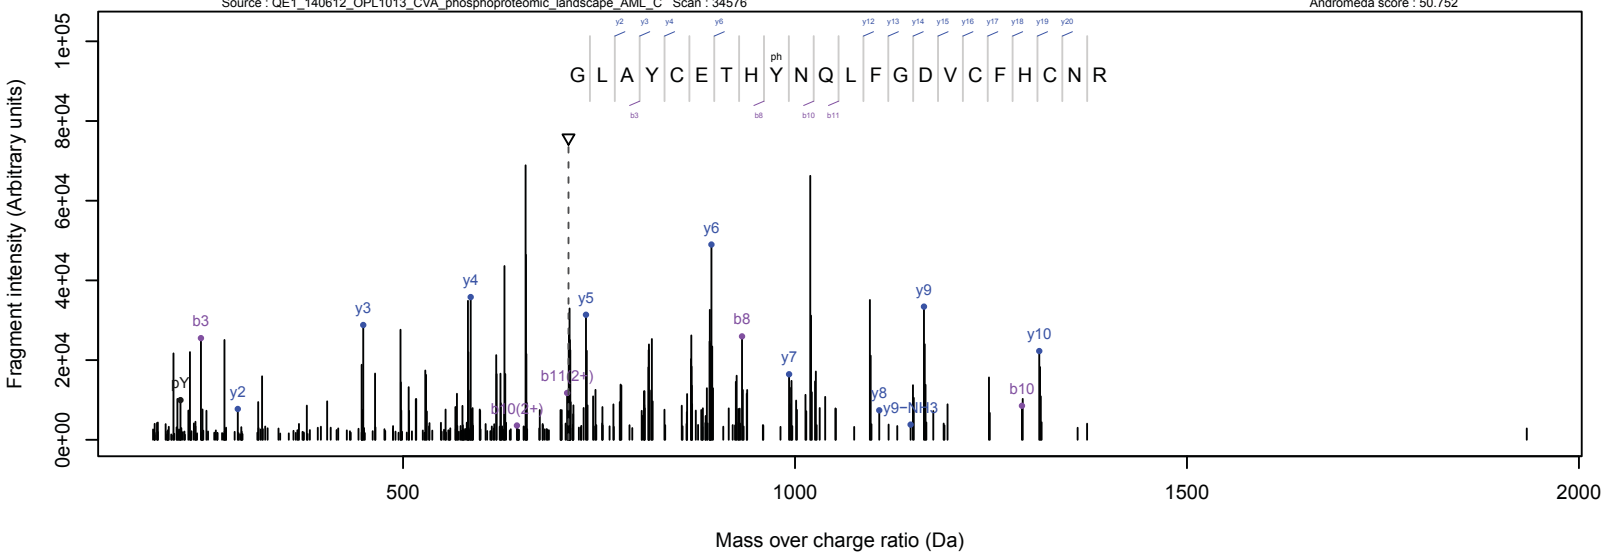

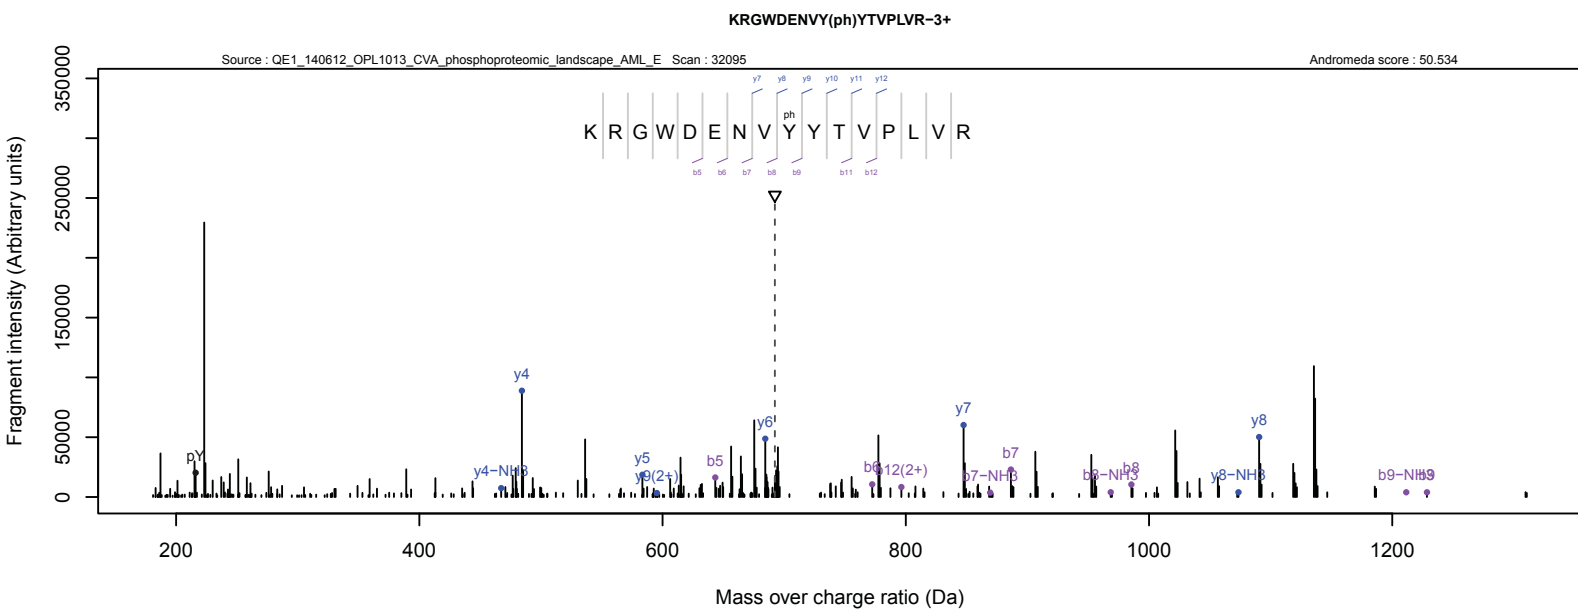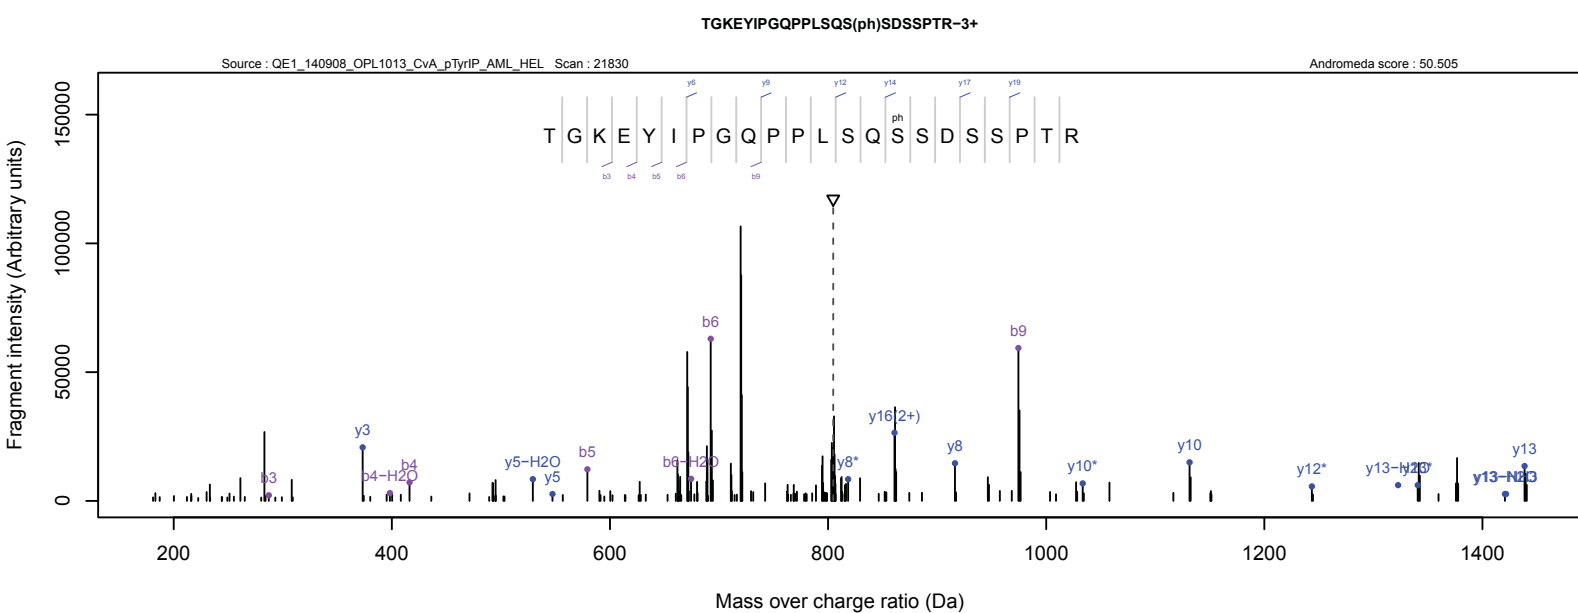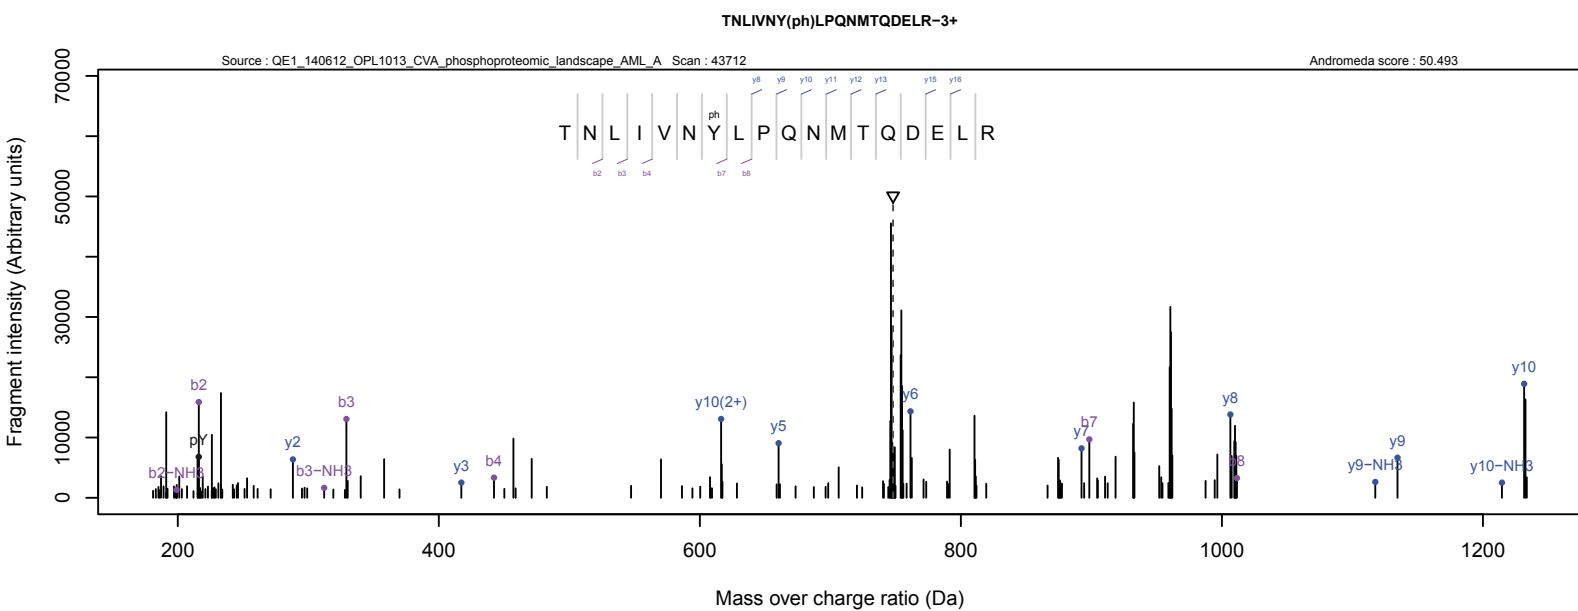

## LRY(ph)PVSVK-2+

Source : QE1\_140612\_OPL1013\_CVA\_phosphoproteomic\_landscape\_AML\_C Scan : 10524

Andromeda score : 50.473

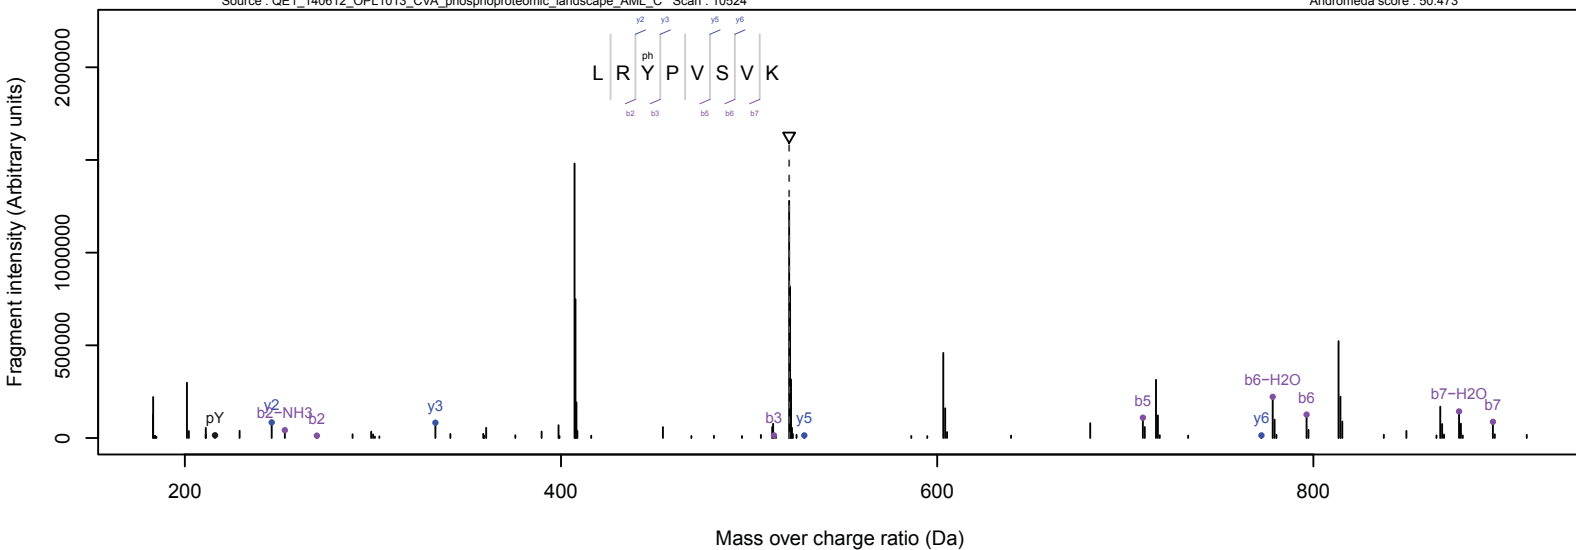

## VTEY(ph)LYANK-2+

Source : QE1\_140612\_OPL1013\_CVA\_phosphoproteomic\_landscape\_AML\_E Scan : 12819

Andromeda score : 50.473

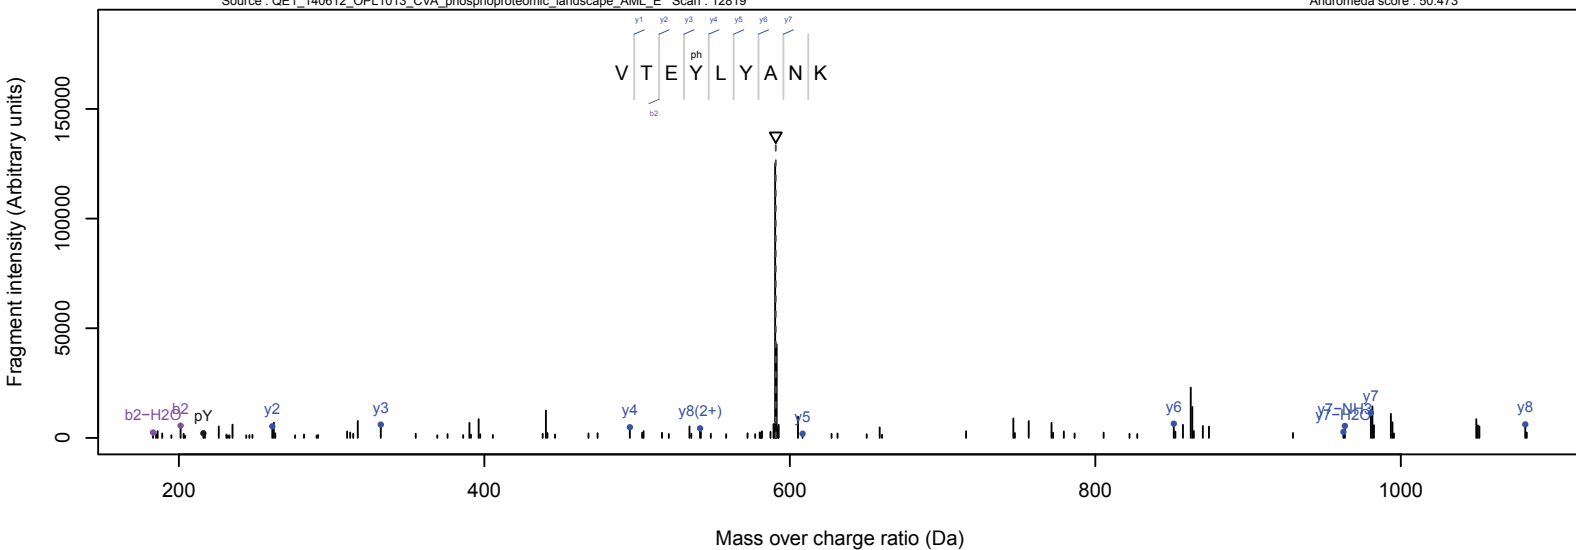

## GFKEQIY(ph)DVYR-2+

Source : QE1\_140908\_OPL1013\_CvA\_pTyrIP\_AML\_HL60 Scan : 28850

Andromeda score : 50.467

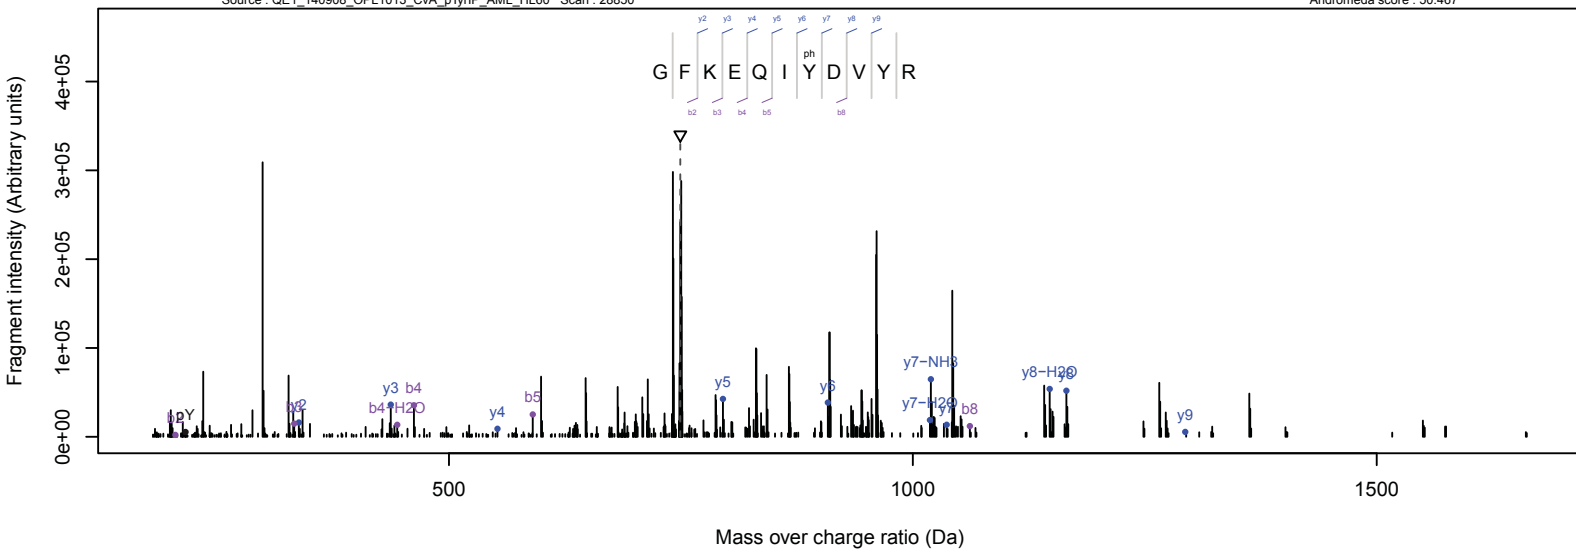

## YKYGNAGEAT(ph)HHAVDSDAVNVGVTA YNINNIGIK-4+

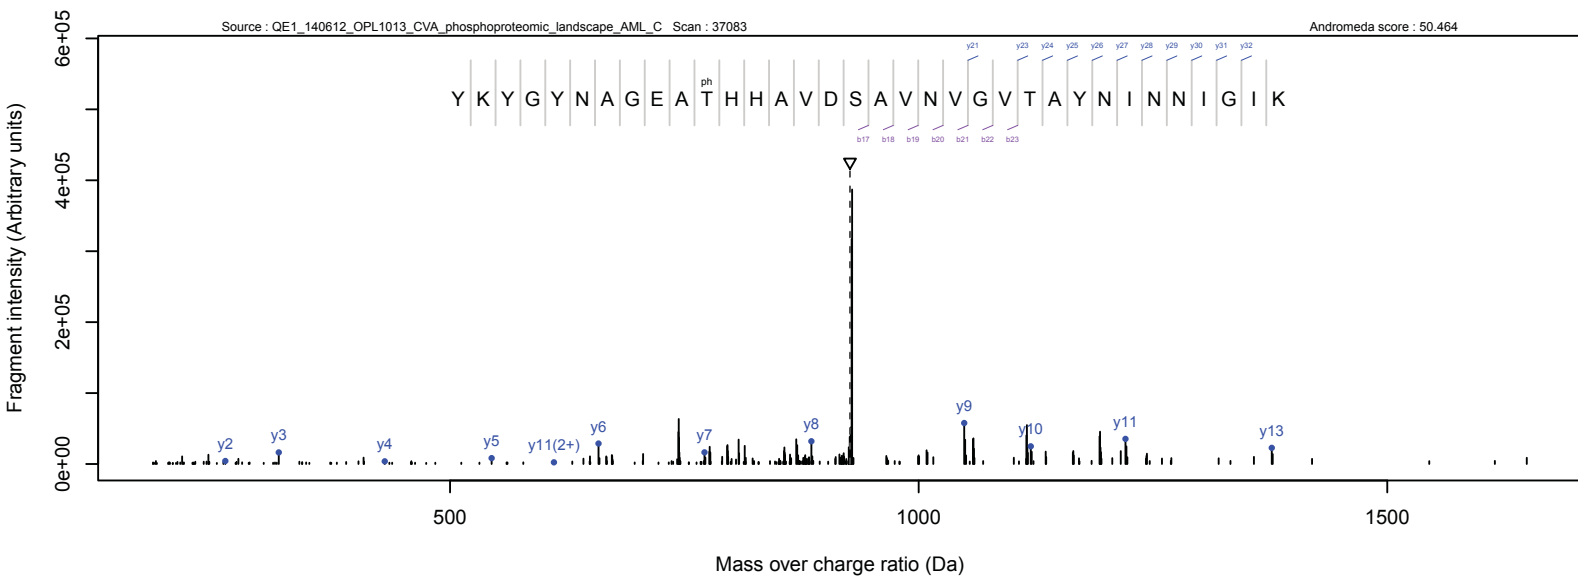

## DQY(ph)LVWLTQK-2+

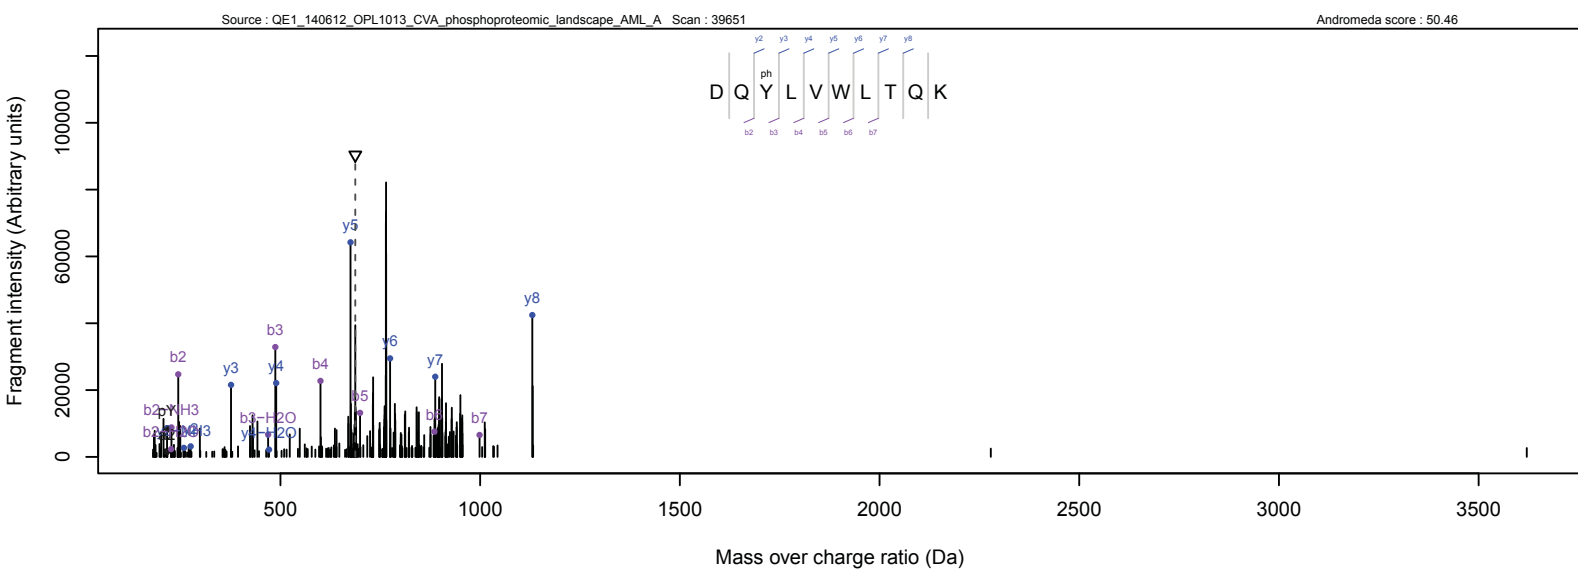

## HPAGVY(ph)QVSGLHNK-3+

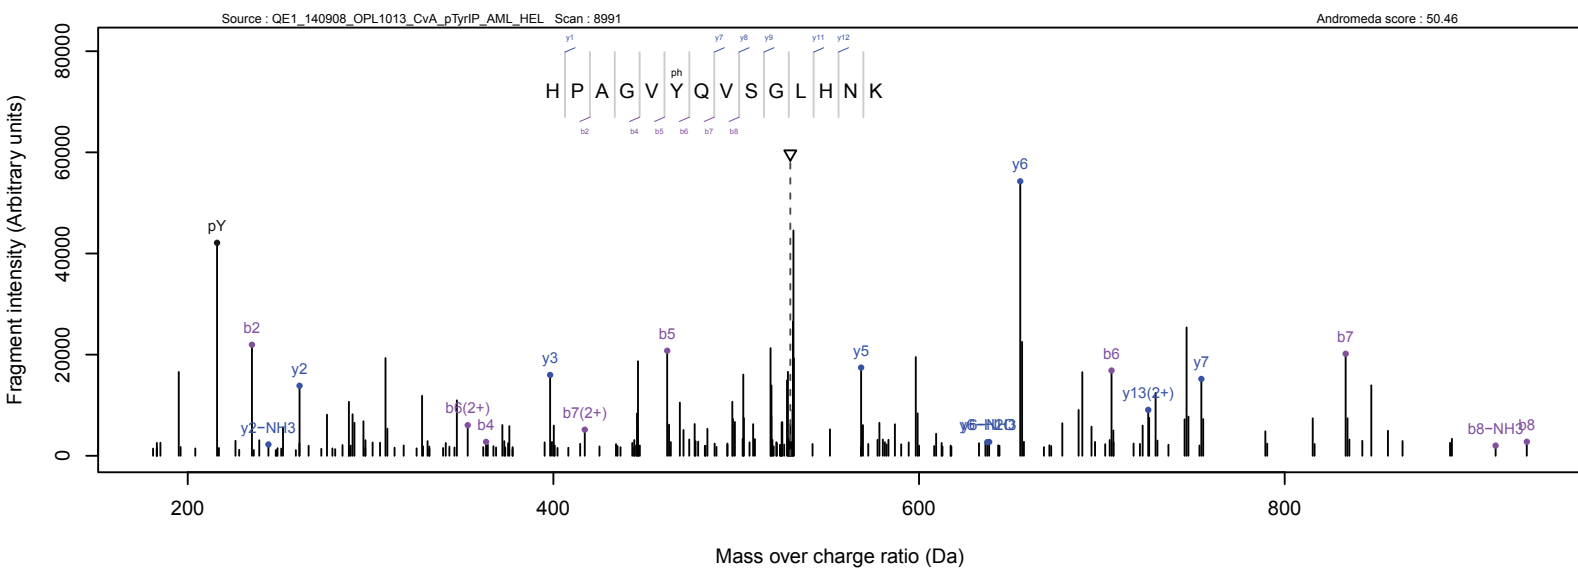



**Y(ph)RSSNLAQQAPVR-3+**

Source : QE1\_140612\_OPL1013\_CVA\_phosphoproteomic\_landscape\_AML\_B Scan : 8850

Andromeda score : 50.46

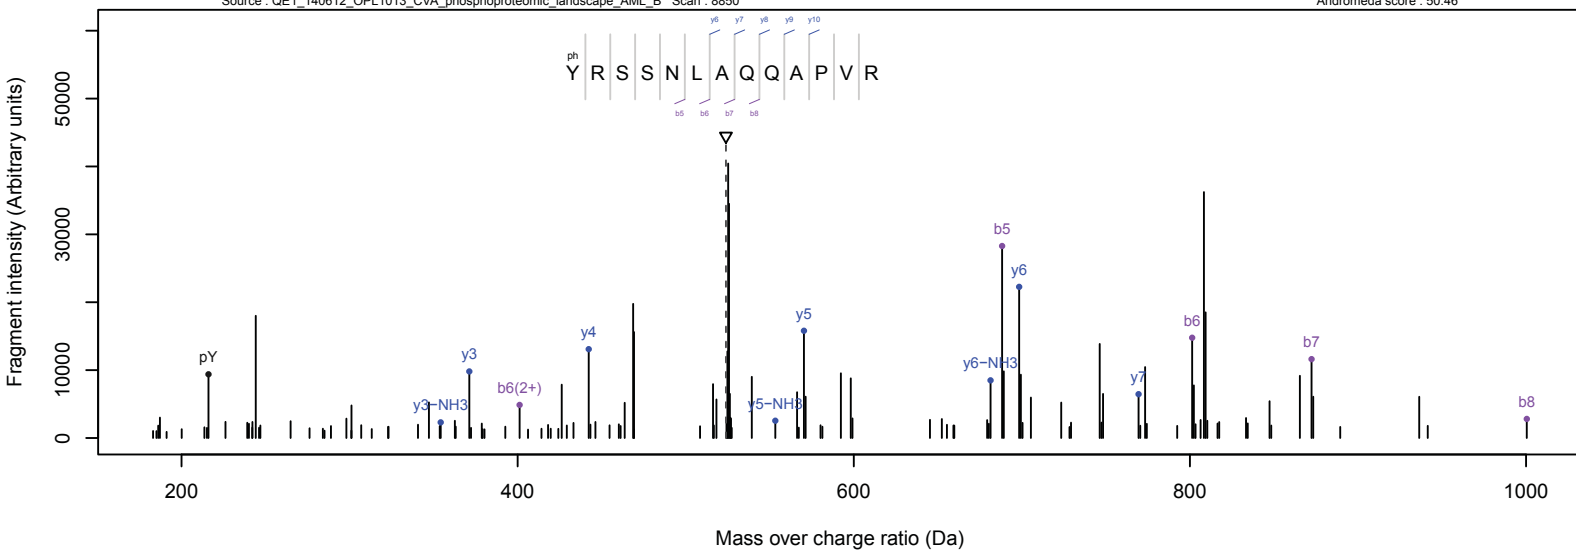

**Y(ph)SSNRPIIASLSQTEVVR-3+**

Source : QE1\_140612\_OPL1013\_CVA\_phosphoproteomic\_landscape\_AML\_C Scan : 25855

Andromeda score : 50.404

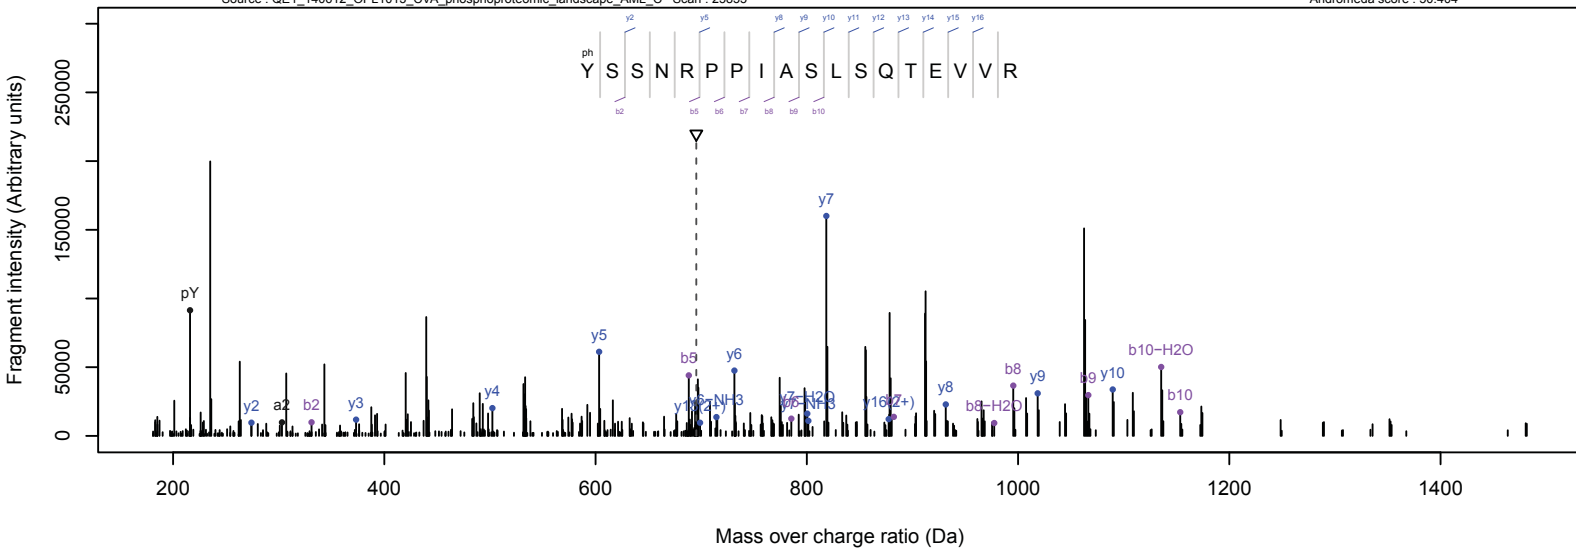

**SVLQY(ph)NSAMKNDTVTPAELSELR-3+**

Source : QE1\_140612\_OPL1013\_CVA\_phosphoproteomic\_landscape\_AML\_C Scan : 36031

Andromeda score : 50.364

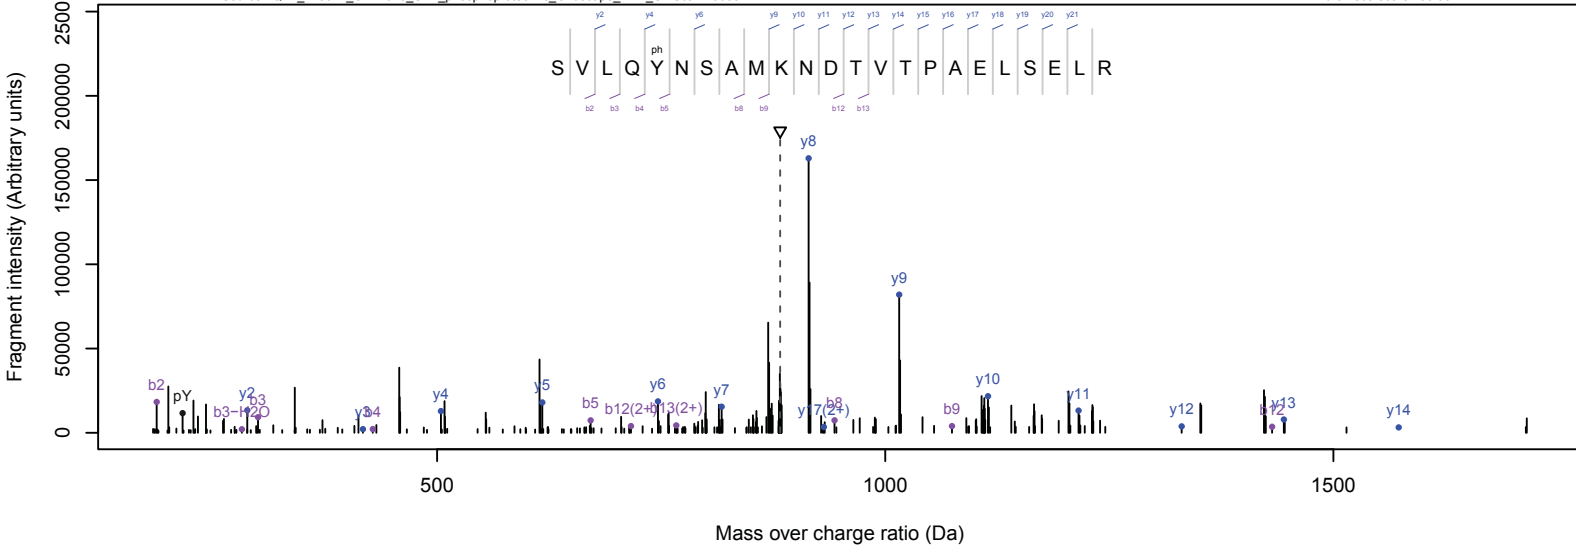

**SMPSMGY(ph)MHTVVSAPSLHGK-4+**

Source : QE1\_140612\_OPL1013\_CVA\_phosphoproteomic\_landscape\_AML\_C Scan : 26663

Andromeda score : 50.358

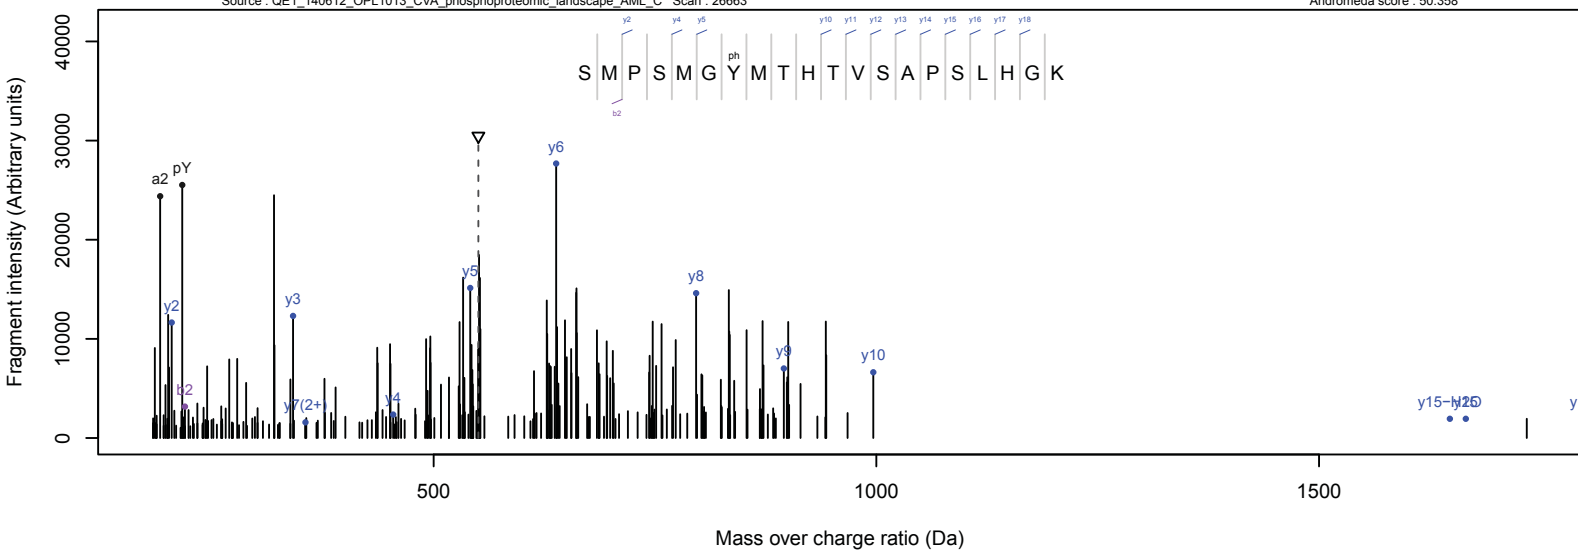

**VVTNNY(ph)KPVANHQYNI EYER-3+**

Source : QE1\_140612\_OPL1013\_CVA\_phosphoproteomic\_landscape\_AML\_C Scan : 17364

Andromeda score : 50.358

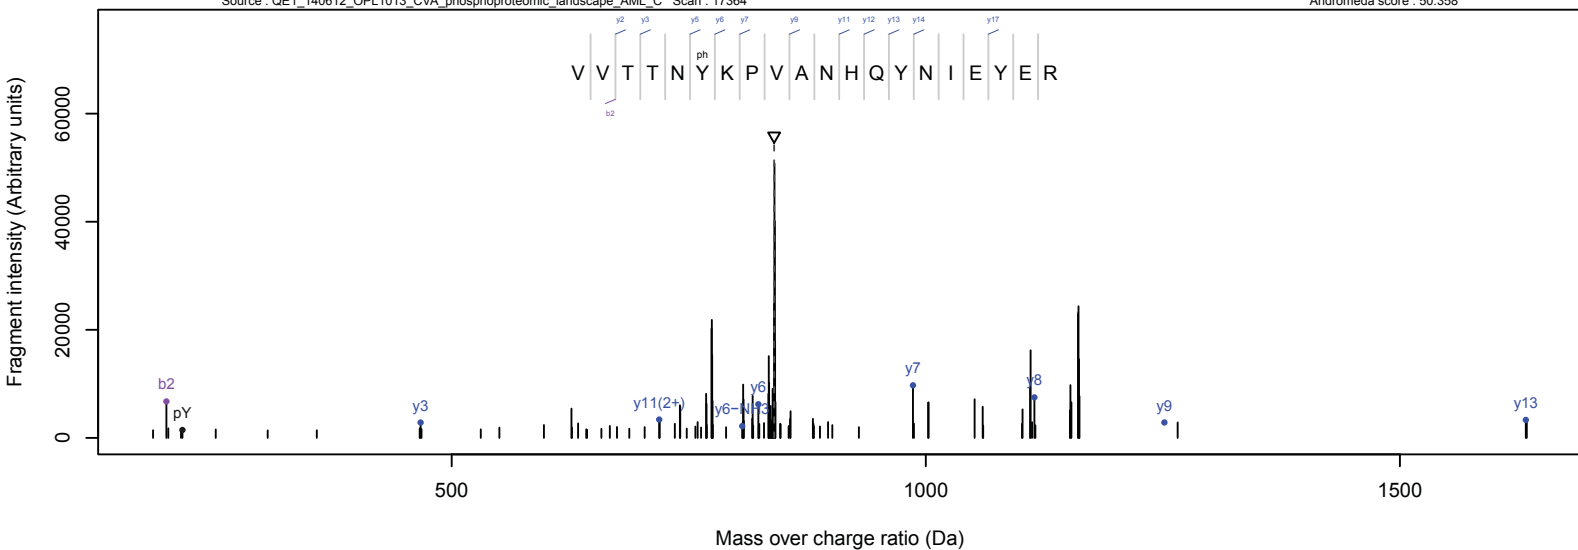

**DAFGY(ph)ATLKR-2+**

Source : QE1\_140612\_OPL1013\_CVA\_phosphoproteomic\_landscape\_AML\_C Scan : 17683

Andromeda score : 50.354

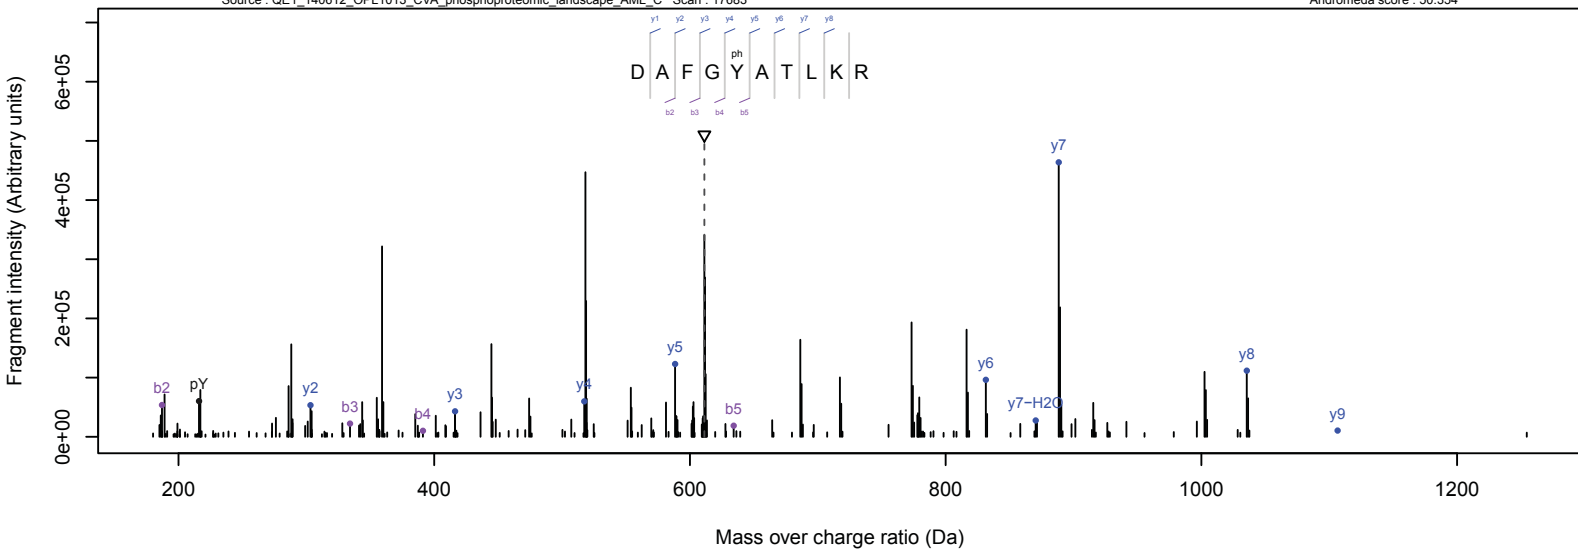

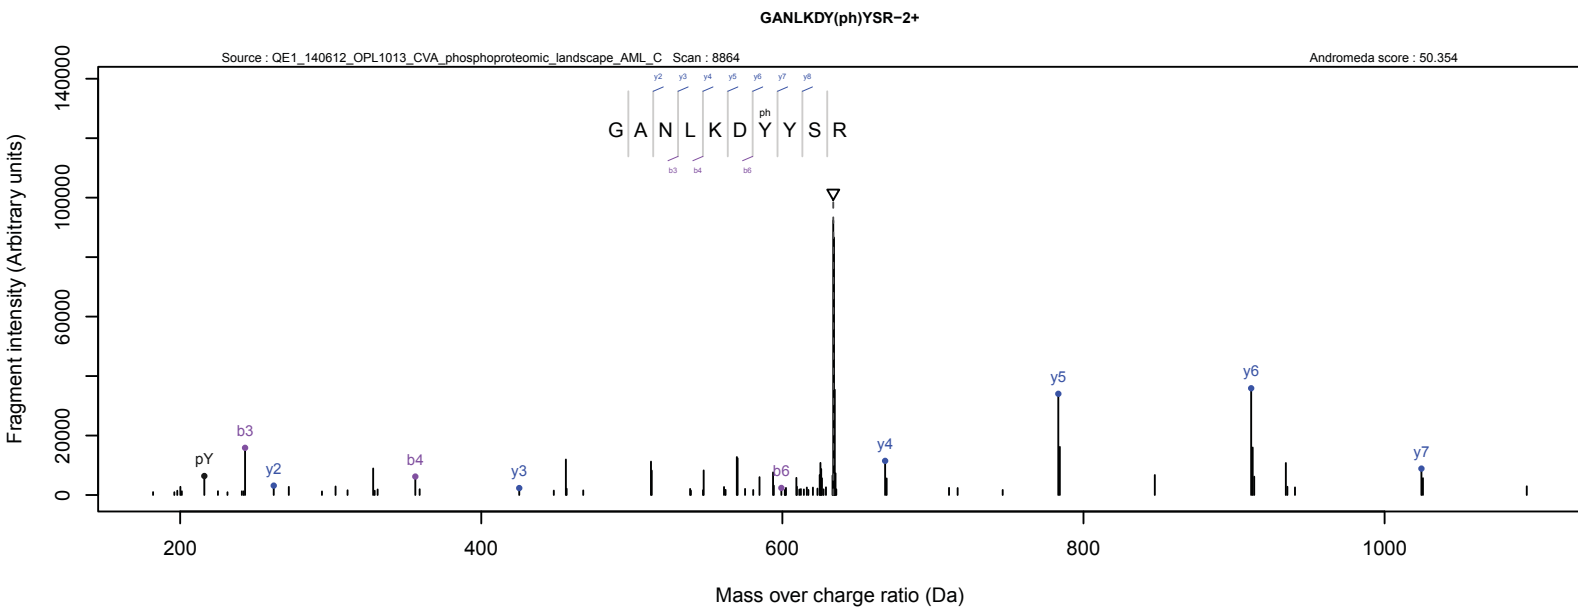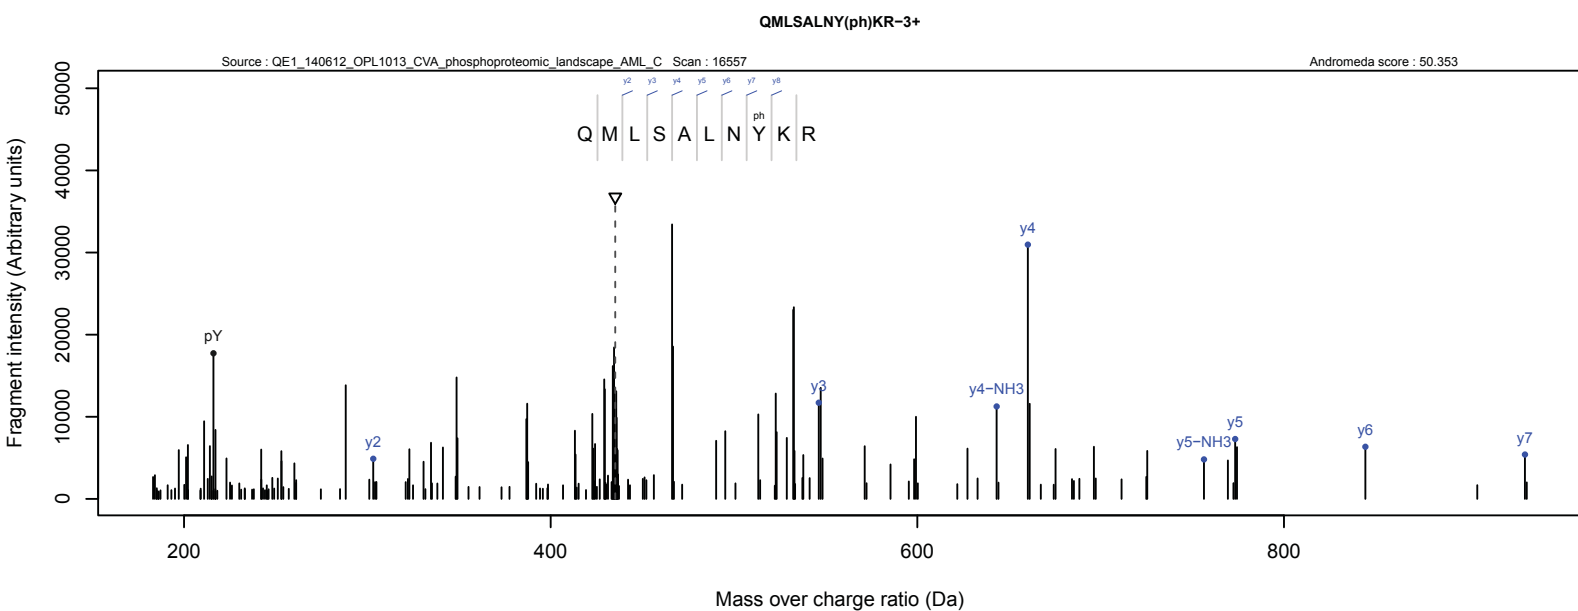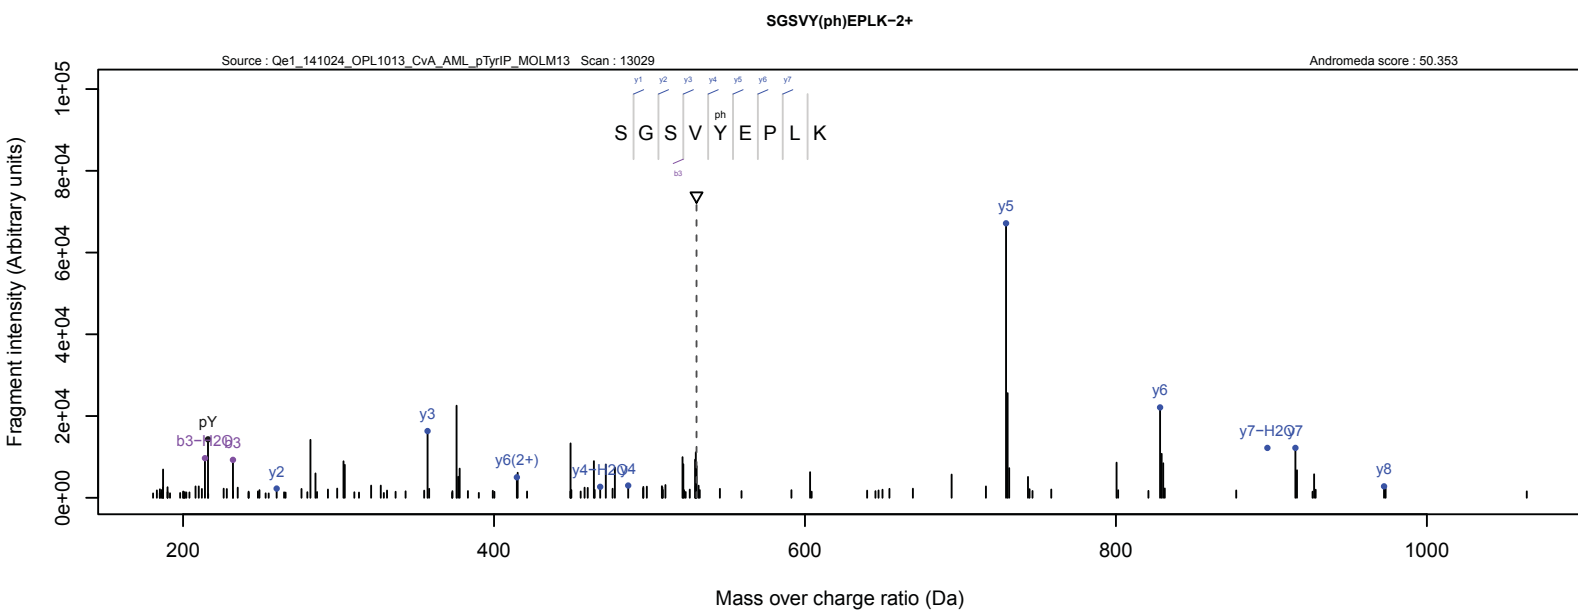

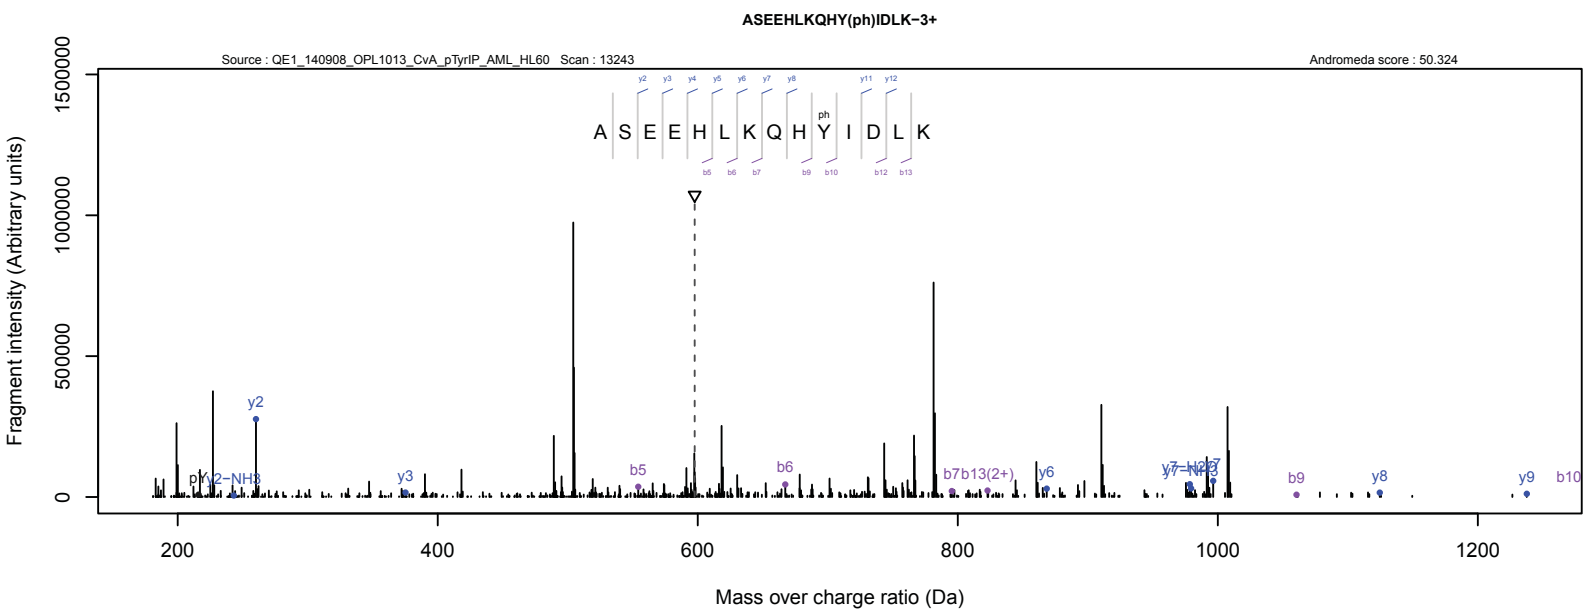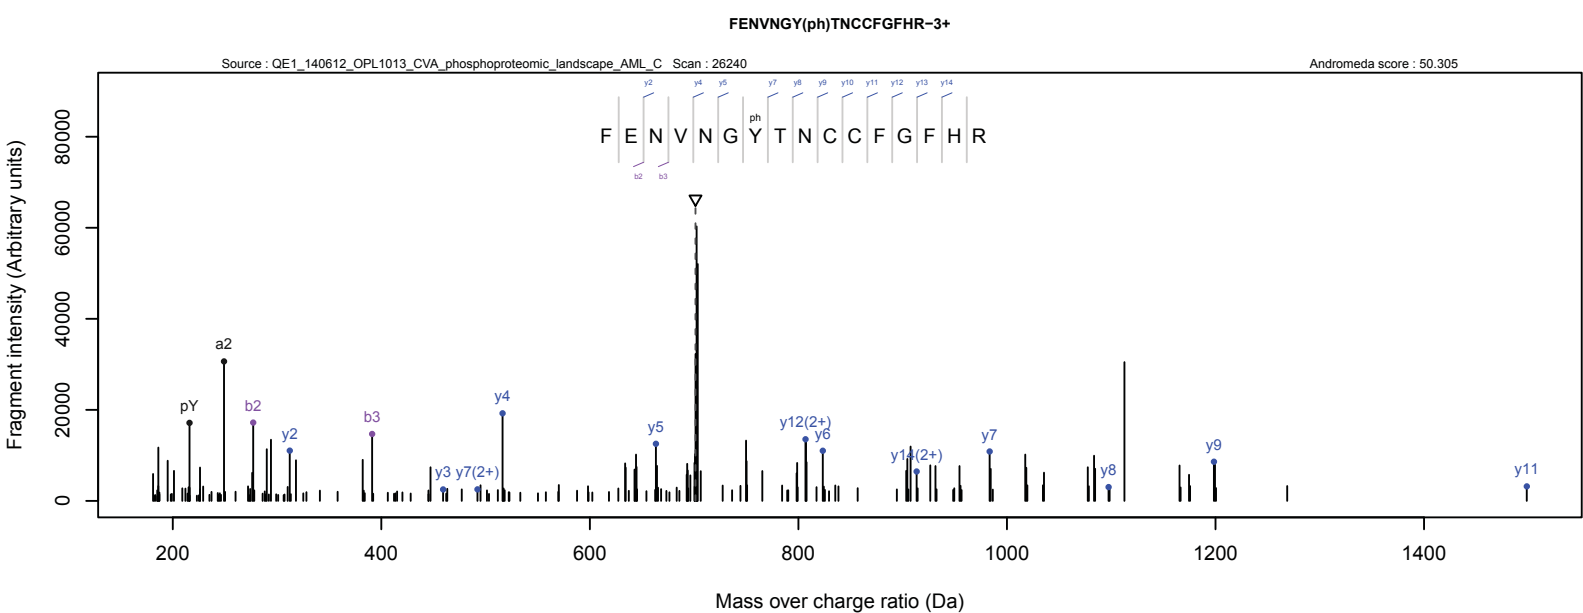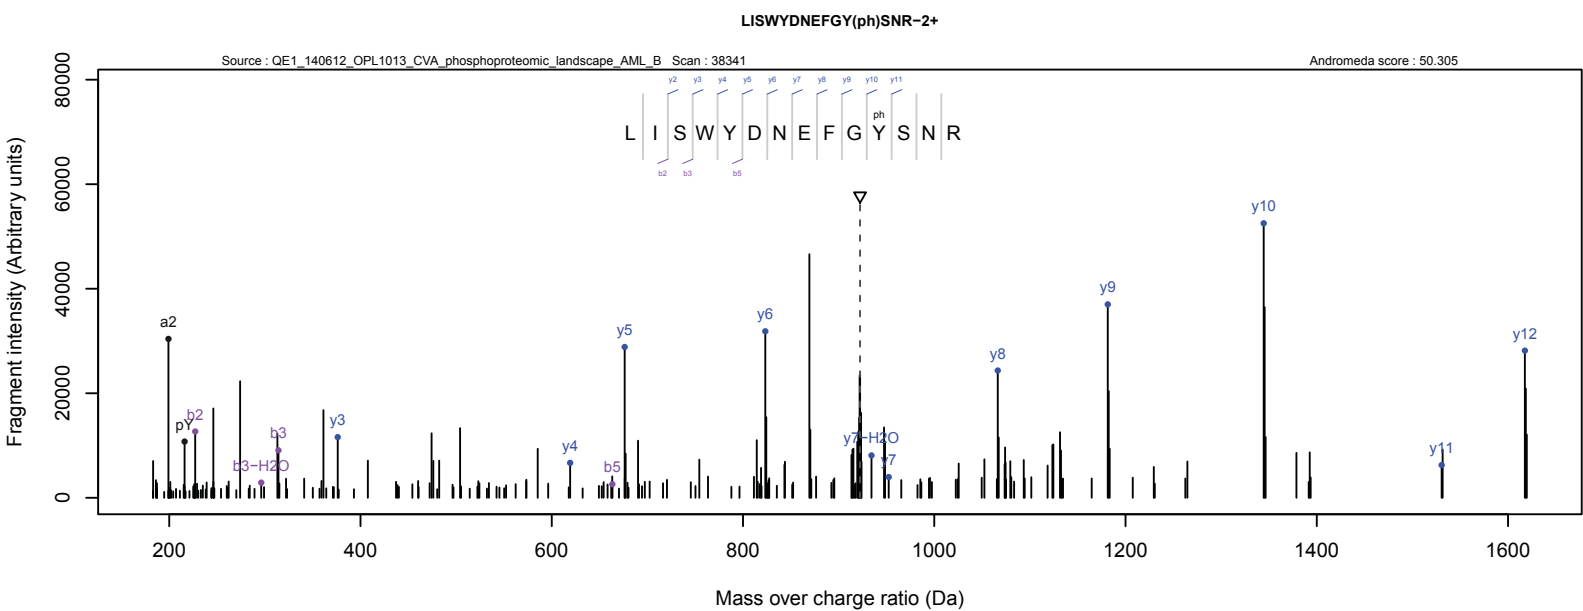

GAAAGQRDY(ph)DLLVVGGSGLCAK-3+

Source : QE1\_140612\_OPL1013\_CVA\_phosphoproteomic\_landscape\_AML\_B Scan : 30005

Andromeda score : 50.271

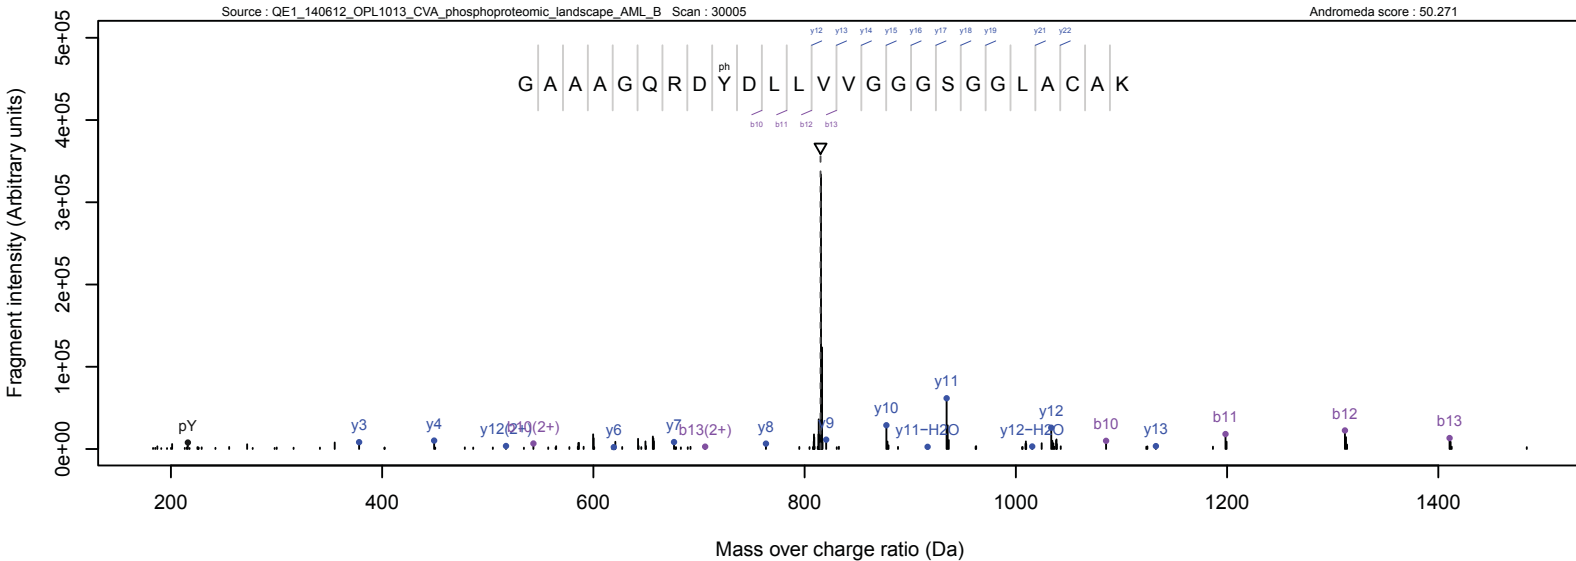

GGNLY(ph)HTDVSFLGEPTEFEYLK-3+

Source : QE1\_140612\_OPL1013\_CVA\_phosphoproteomic\_landscape\_AML\_C Scan : 40822

Andromeda score : 50.271

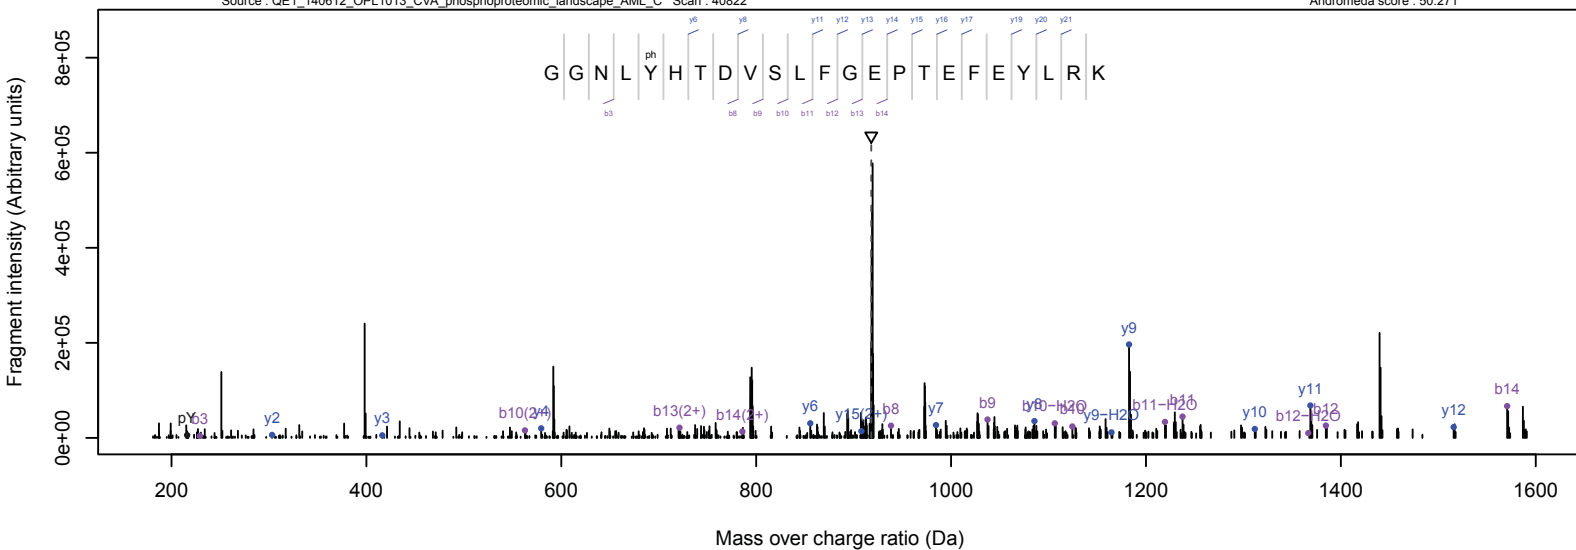

SASY(ph)PCAAPRPGAPETLHGGFQR-3+

Source : QE1\_140612\_OPL1013\_CVA\_phosphoproteomic\_landscape\_AML\_C Scan : 20627

Andromeda score : 50.271

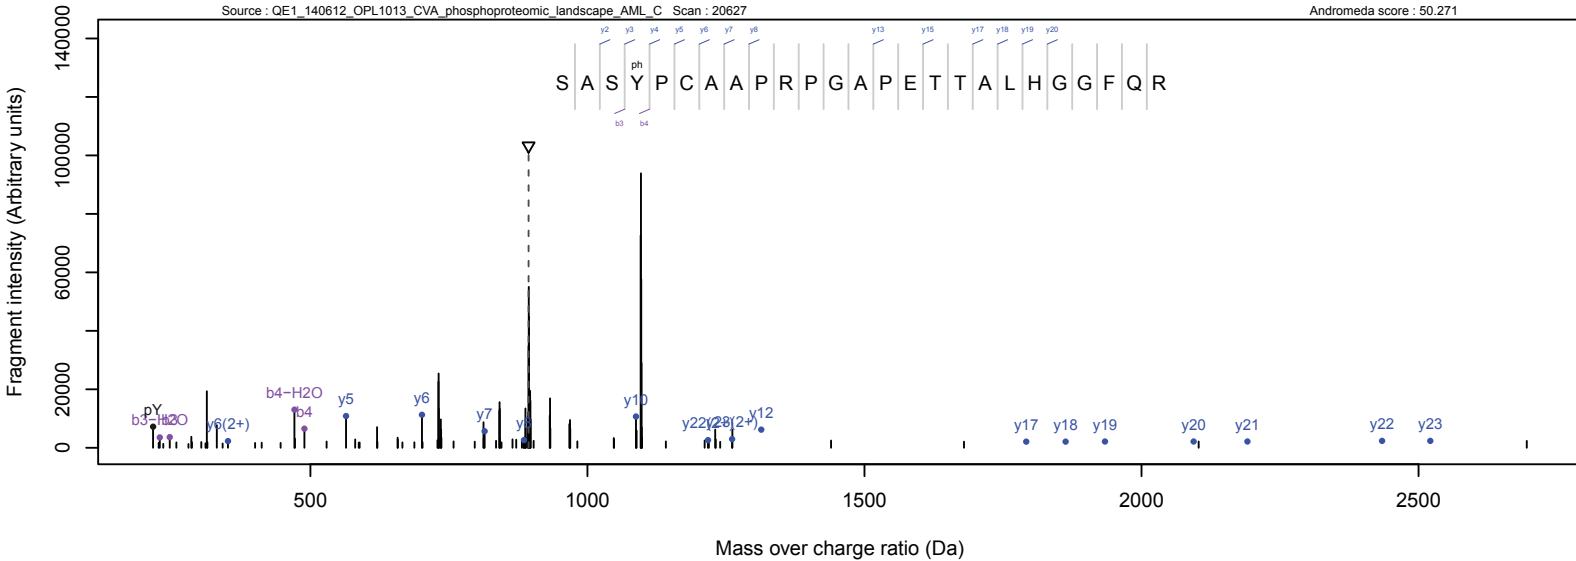

IIEHDGY(ph)SEEECR-3+

Source : QE1\_140908\_OPL1013\_CVA\_pTyrIP\_AML\_Kasumi6 Scan : 7473

Andromeda score : 50.222

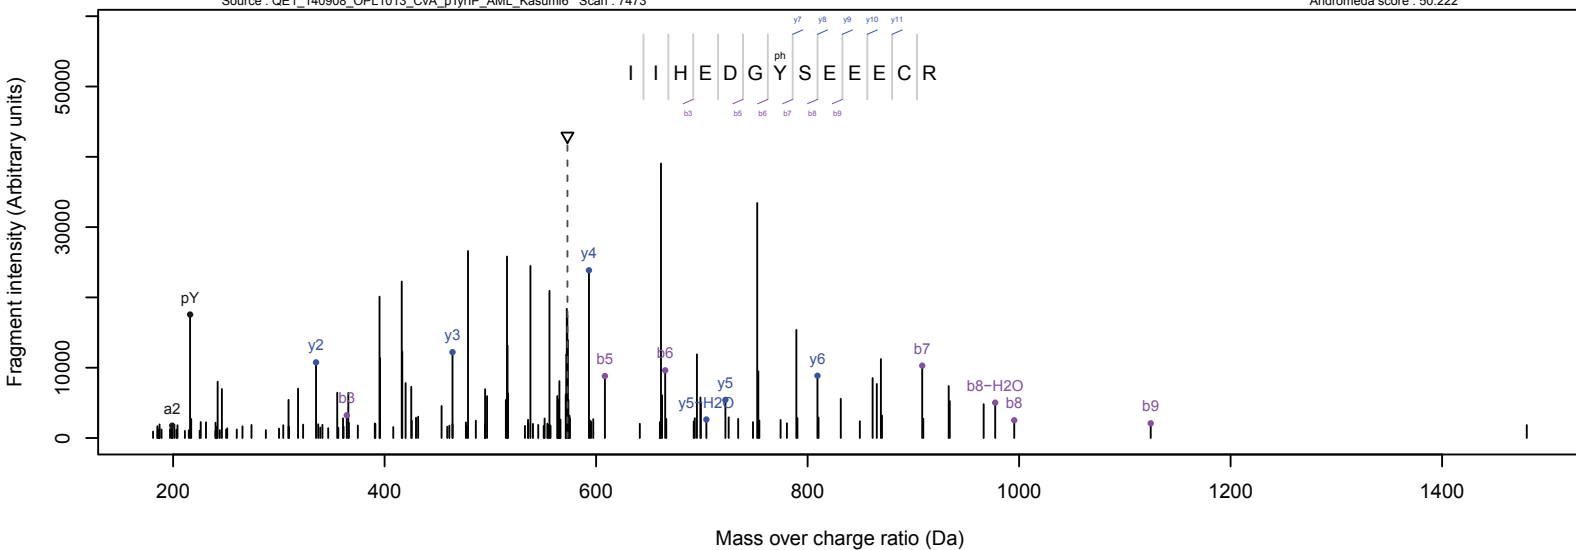

RDPSLPY(ph)LEQYR-3+

Source : QE1\_140612\_OPL1013\_CVA\_phosphoproteomic\_landscape\_AML\_C Scan : 26285

Andromeda score : 50.222

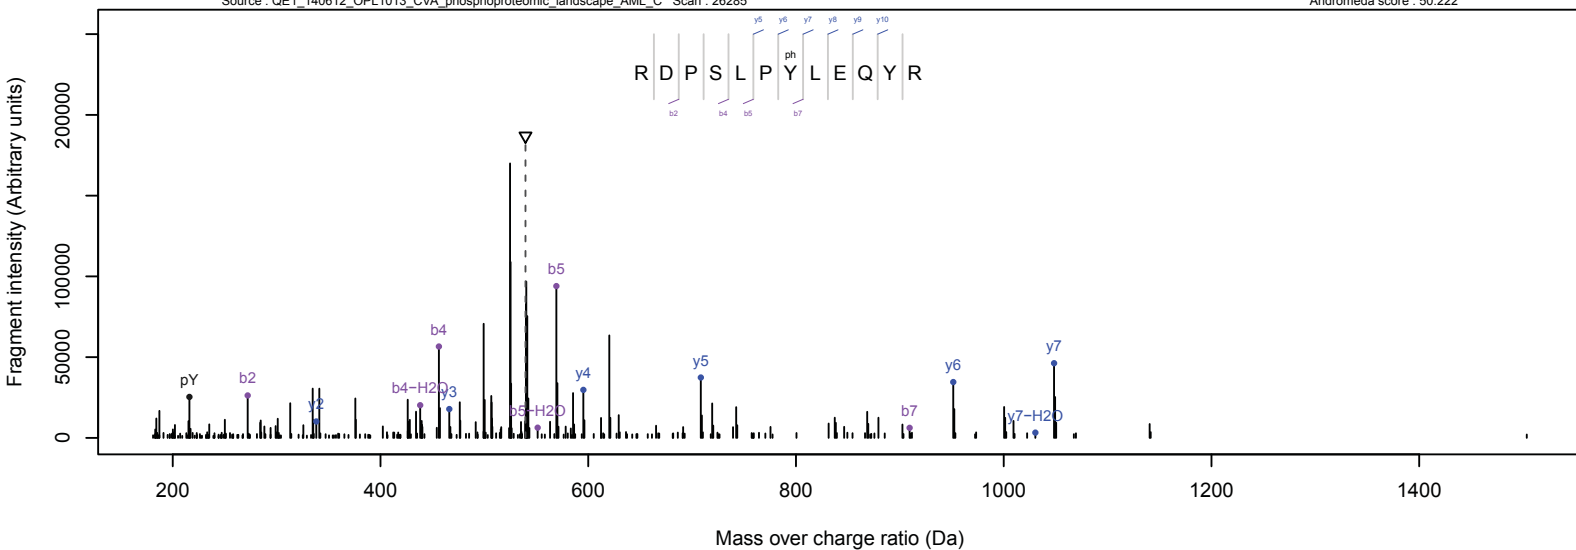

FSDQAGPAIP(ph)SNSYSKK-2+

Source : QE1\_140612\_OPL1013\_CVA\_phosphoproteomic\_landscape\_AML\_C Scan : 14909

Andromeda score : 50.178

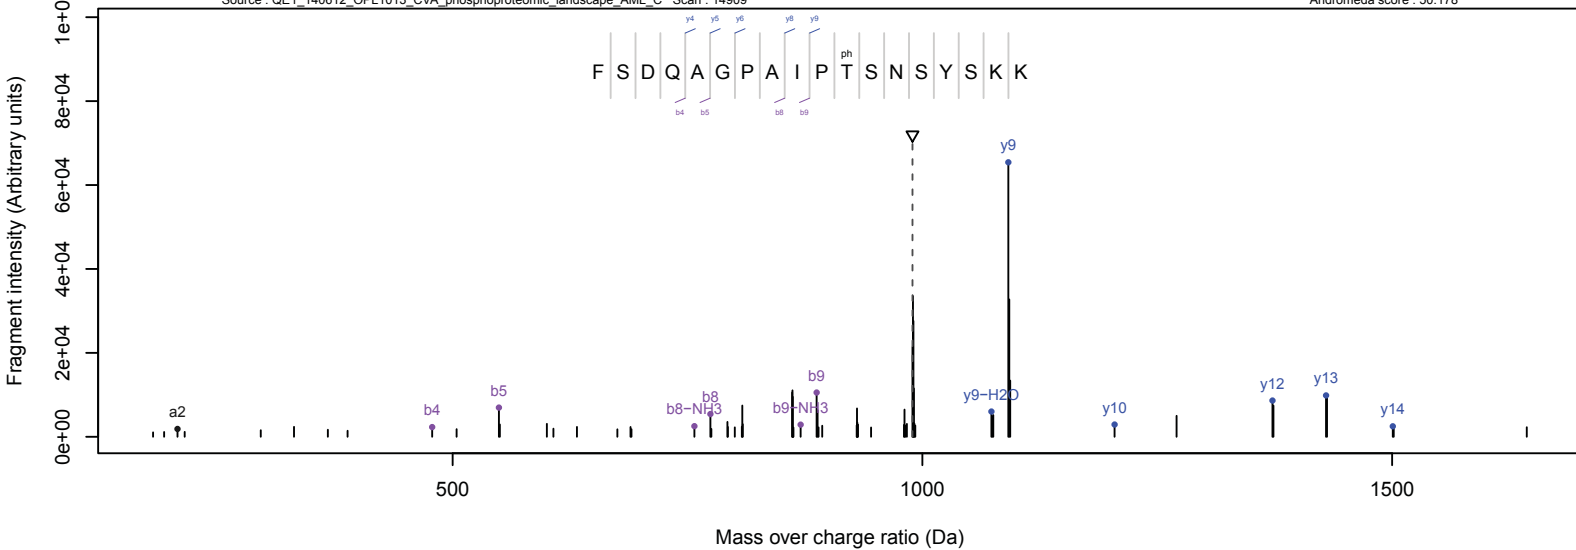

## HYCY(ph)PHFTCAVDTENIRR-4+

Source : QE1\_140612\_OPL1013\_CVA\_phosphoproteomic\_landscape\_AML\_B Scan : 22425

Andromeda score : 50.178

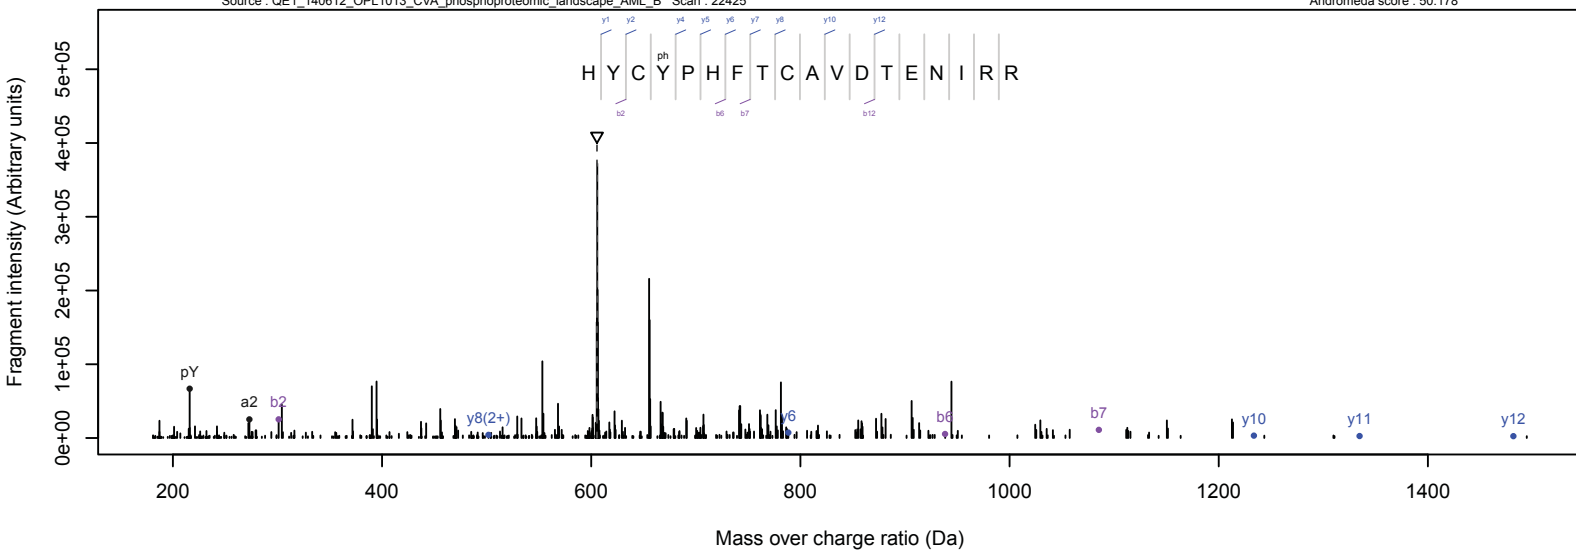

## NLIPM(ox)DPNGLSDPY(ph)VKLK-3+

Source : QE1\_140612\_OPL1013\_CVA\_phosphoproteomic\_landscape\_AML\_C Scan : 34311

Andromeda score : 50.178

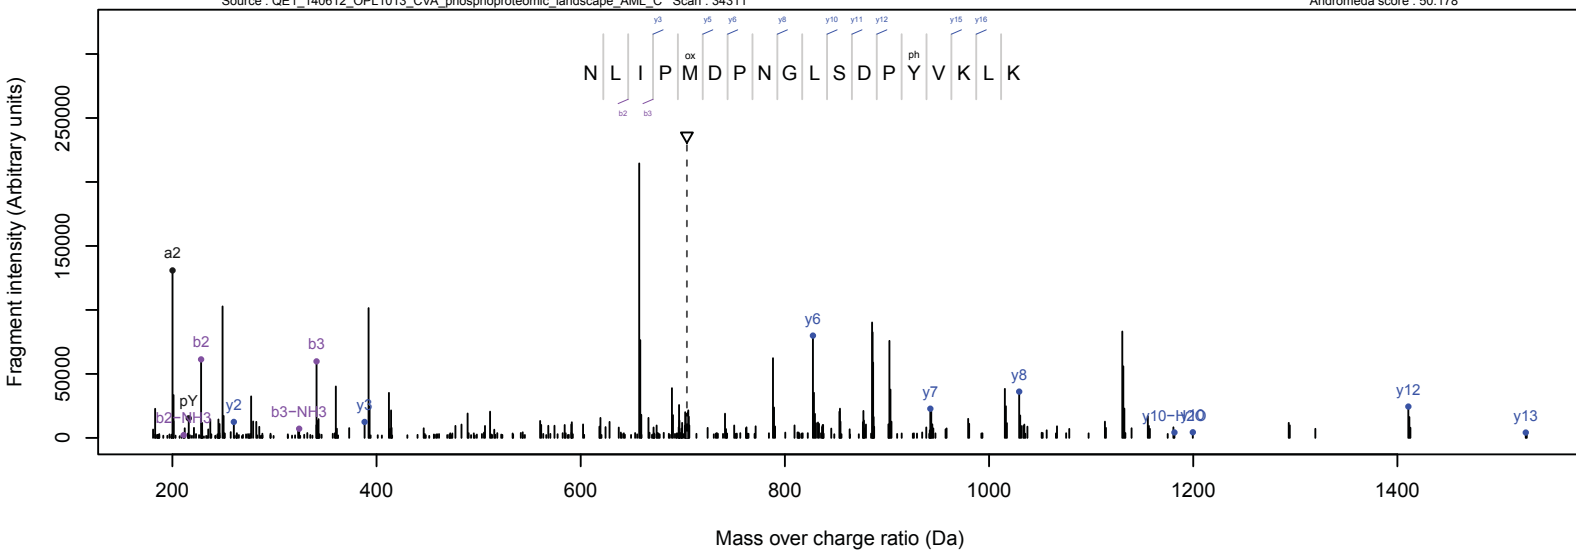

## TAPY(ph)KNVNVQNFHISWK-3+

Source : QE1\_140612\_OPL1013\_CVA\_phosphoproteomic\_landscape\_AML\_C Scan : 29841

Andromeda score : 50.178

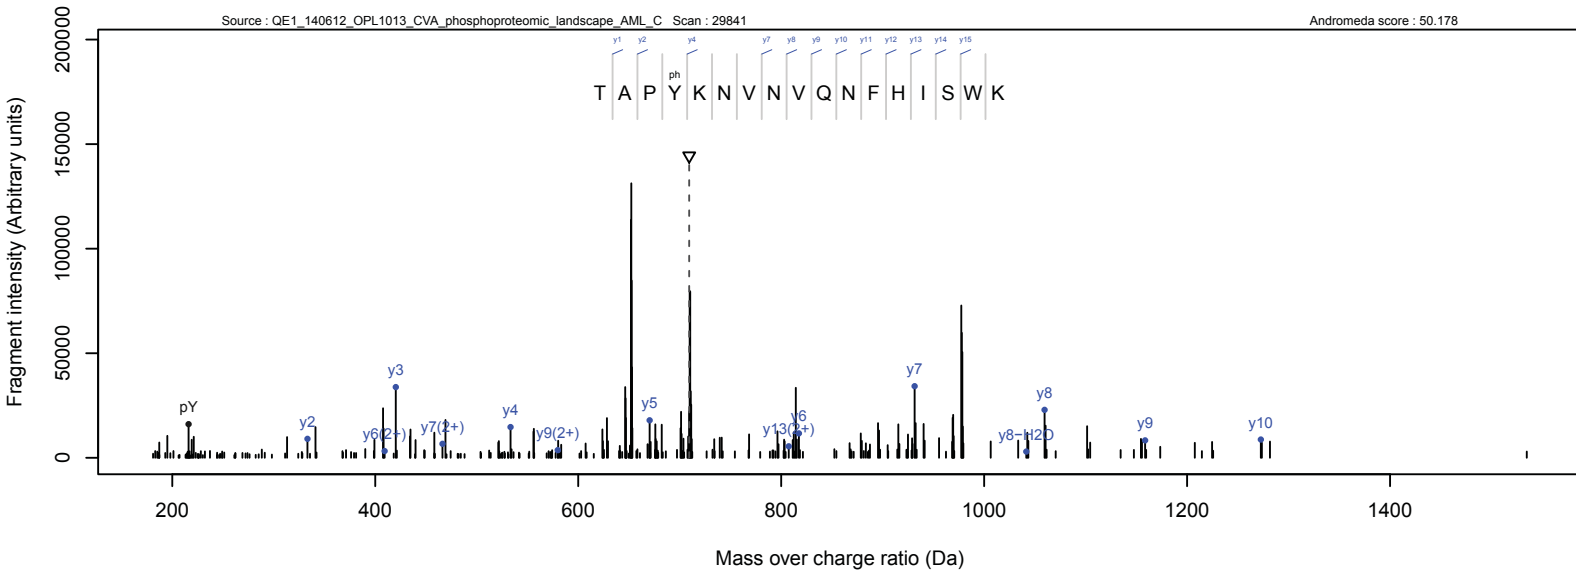

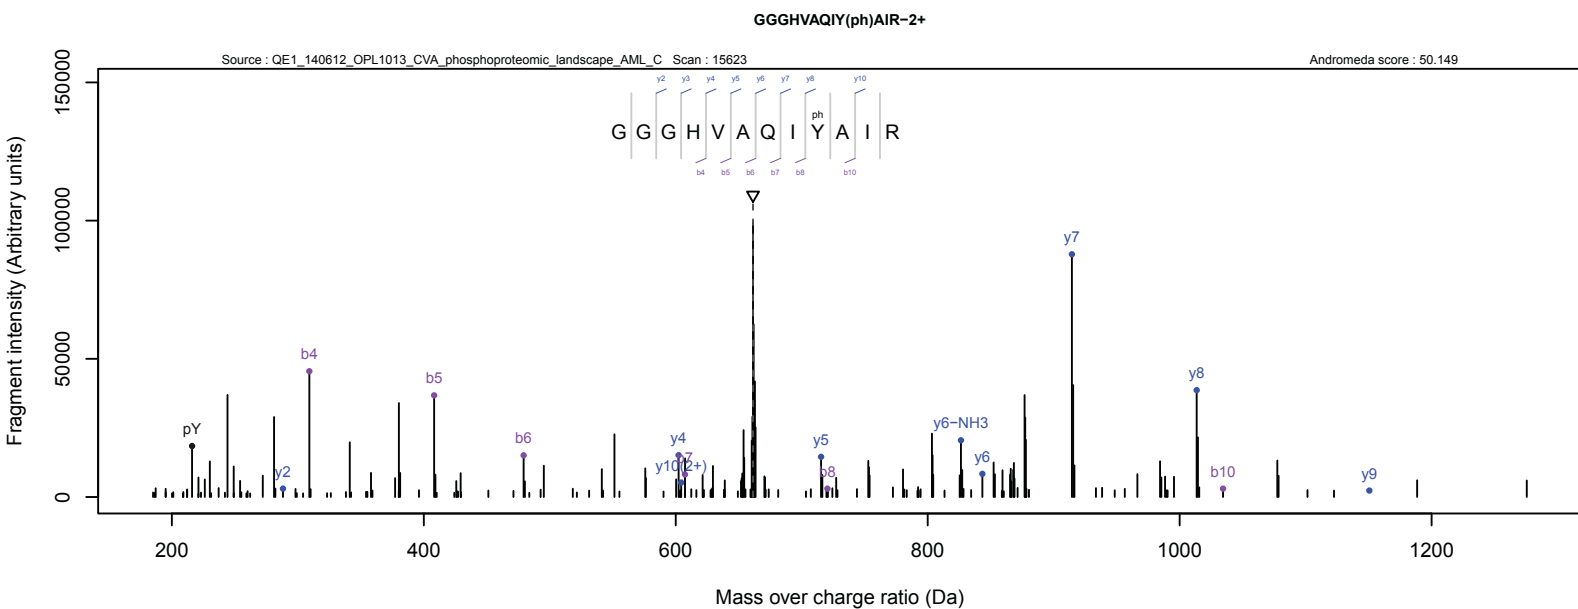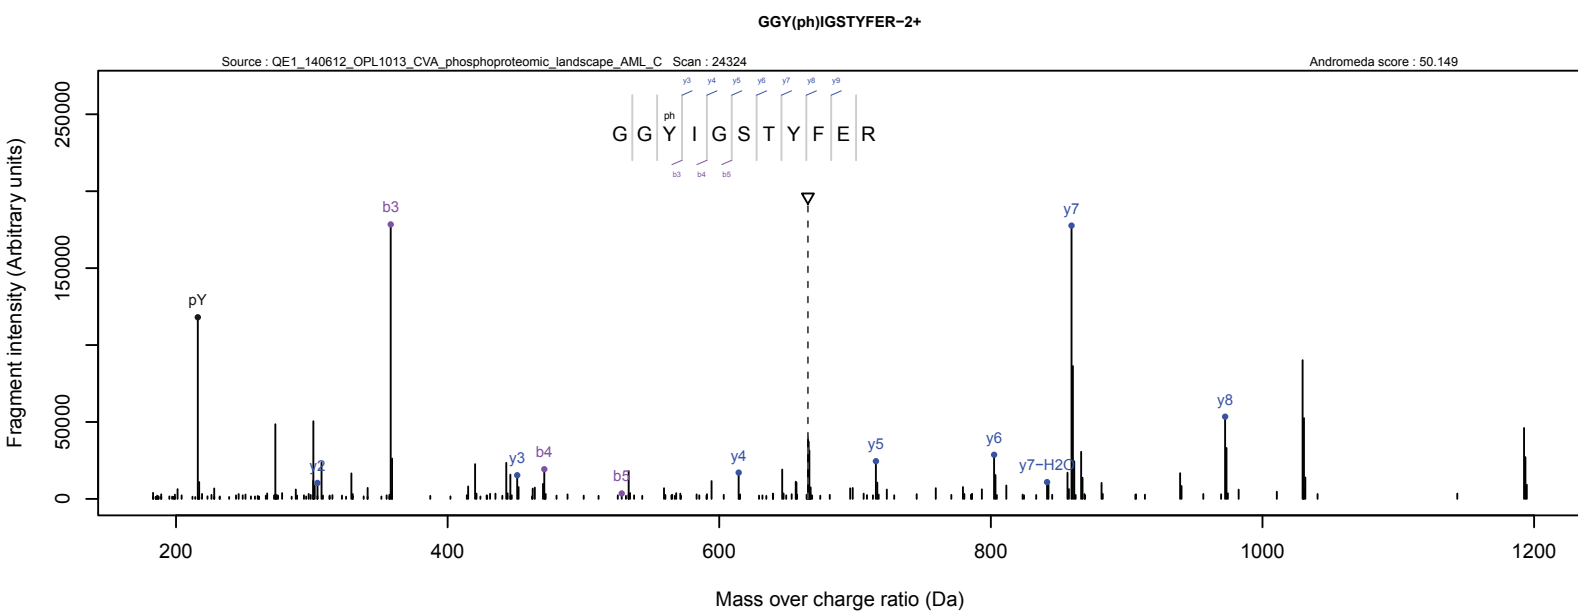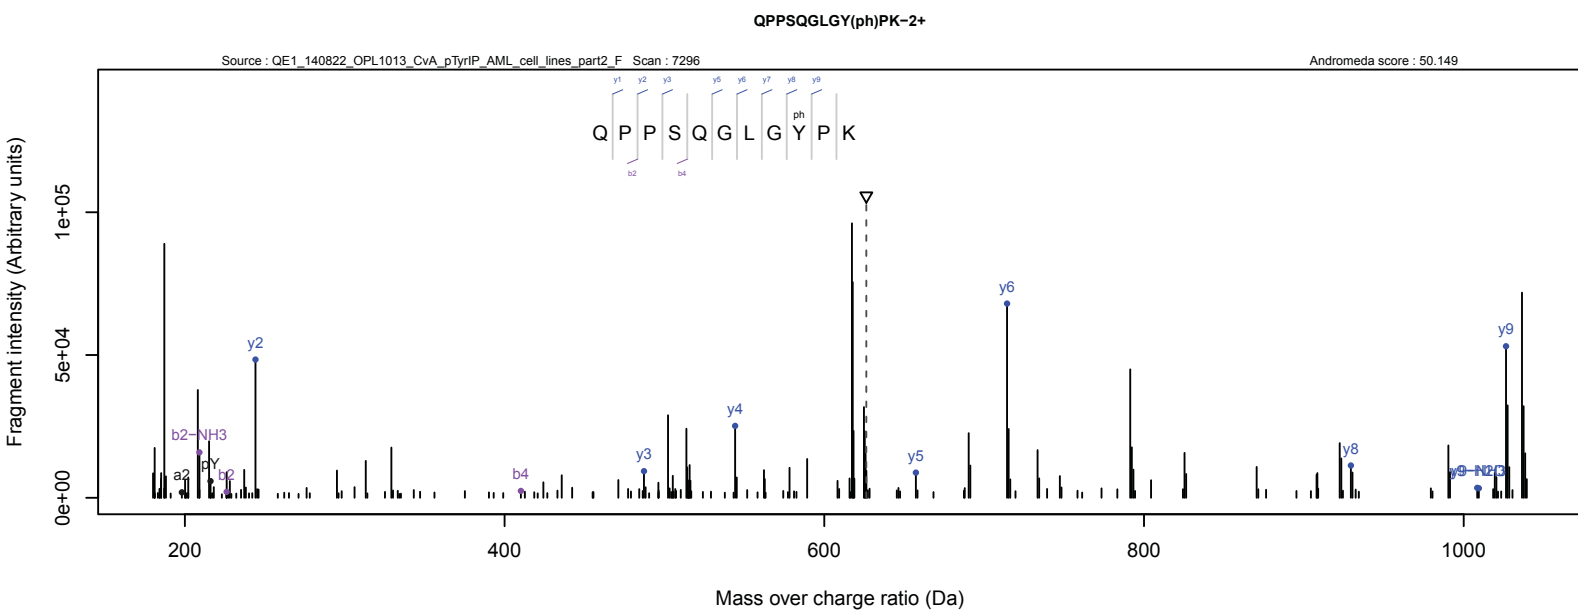



## AIRDEAIY(ph)HFR-3+

Source : QE1\_140612\_OPL1013\_CVA\_phosphoproteomic\_landscape\_AML\_E Scan : 18207

Andromeda score : 50.116

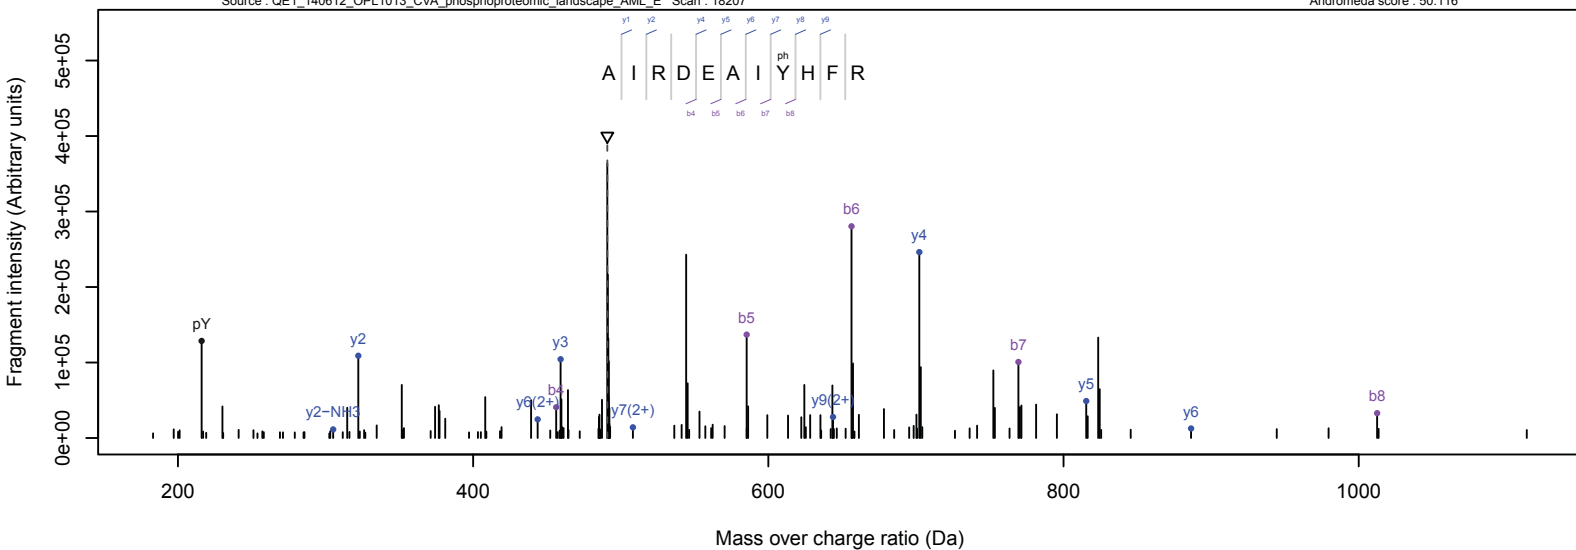

## RAPEPLY(ph)PR-2+

Source : QE1\_140612\_OPL1013\_CVA\_phosphoproteomic\_landscape\_AML\_C Scan : 10836

Andromeda score : 50.108

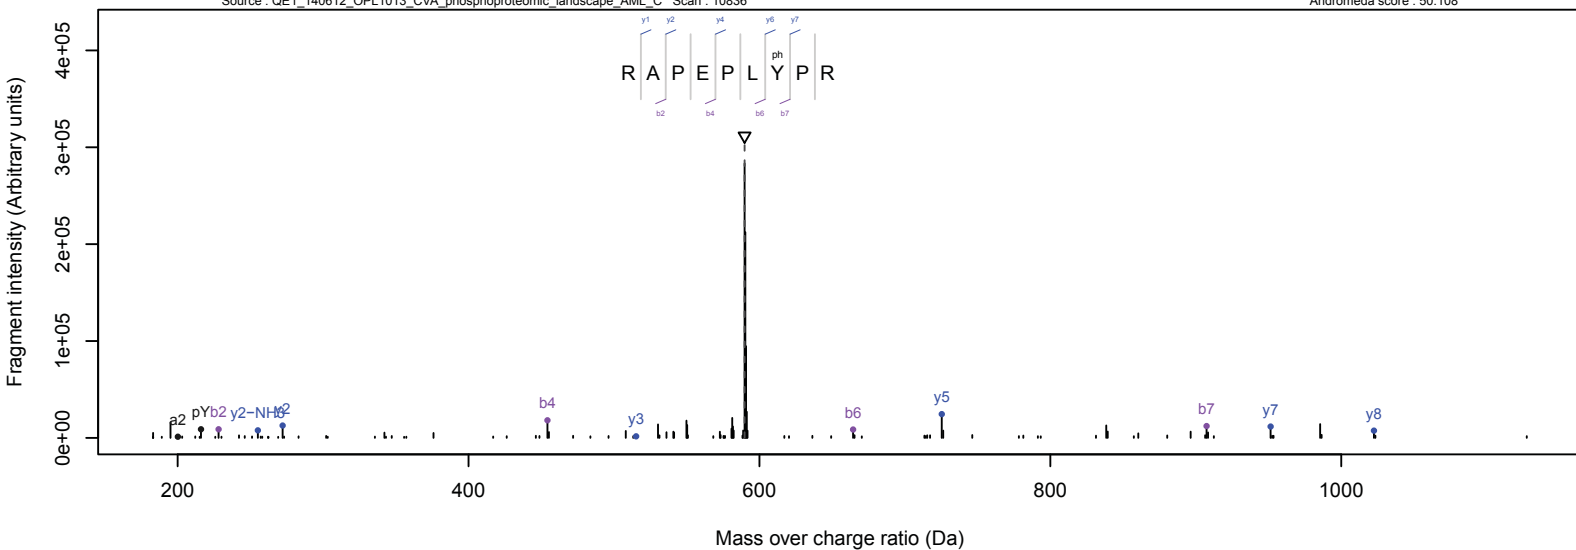

## YNPY(ph)TTRPNR-3+

Source : QE1\_140612\_OPL1013\_CVA\_phosphoproteomic\_landscape\_AML\_C Scan : 4417

Andromeda score : 50.108

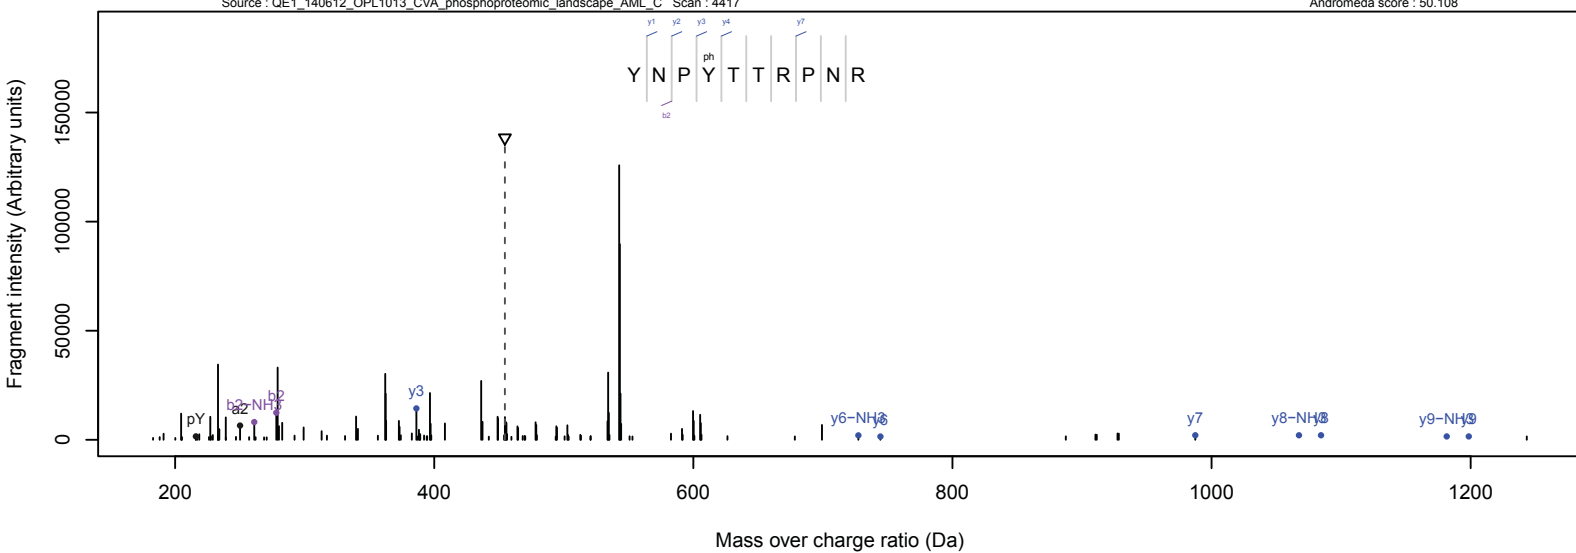

AVGASFLY(ph)EPAK-2+

Source : QE1\_140612\_OPL1013\_CVA\_phosphoproteomic\_landscape\_AML\_B Scan : 29235

Andromeda score : 50.088

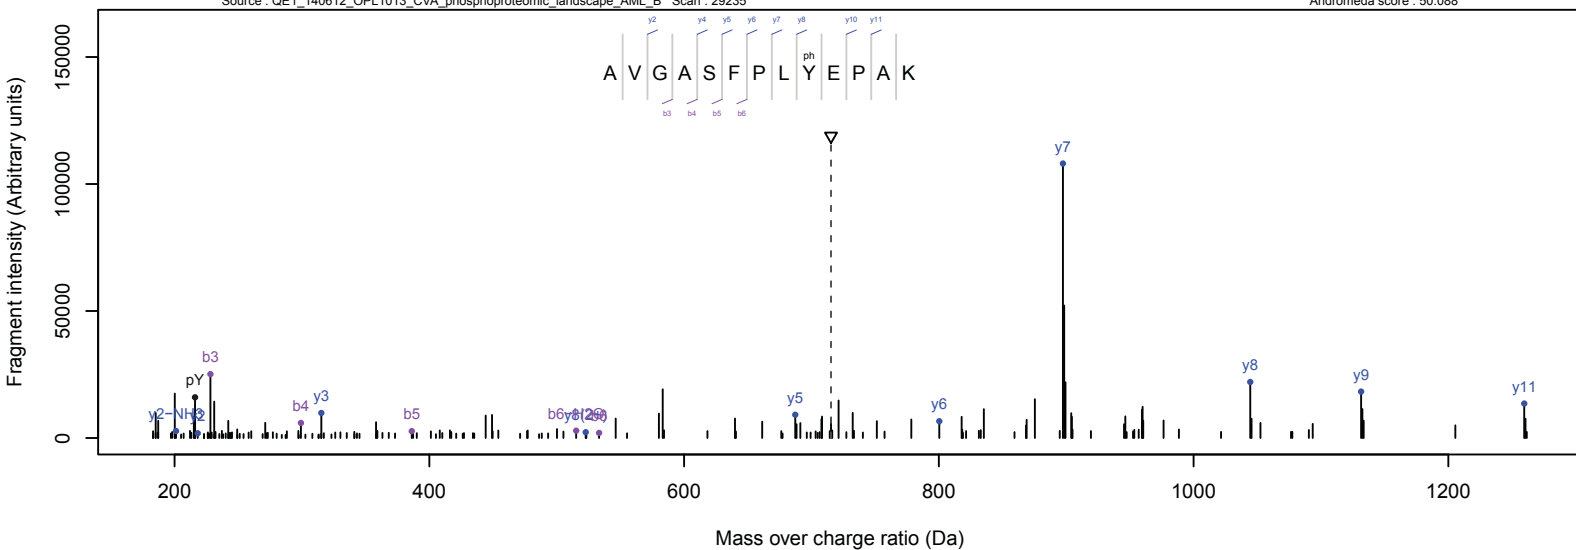

HEQNIDCGGY(ph)VK-2+

Source : QE1\_140908\_OPL1013\_CvA\_pTyrIP\_AML\_Kasumi6 Scan : 6477

Andromeda score : 50.088

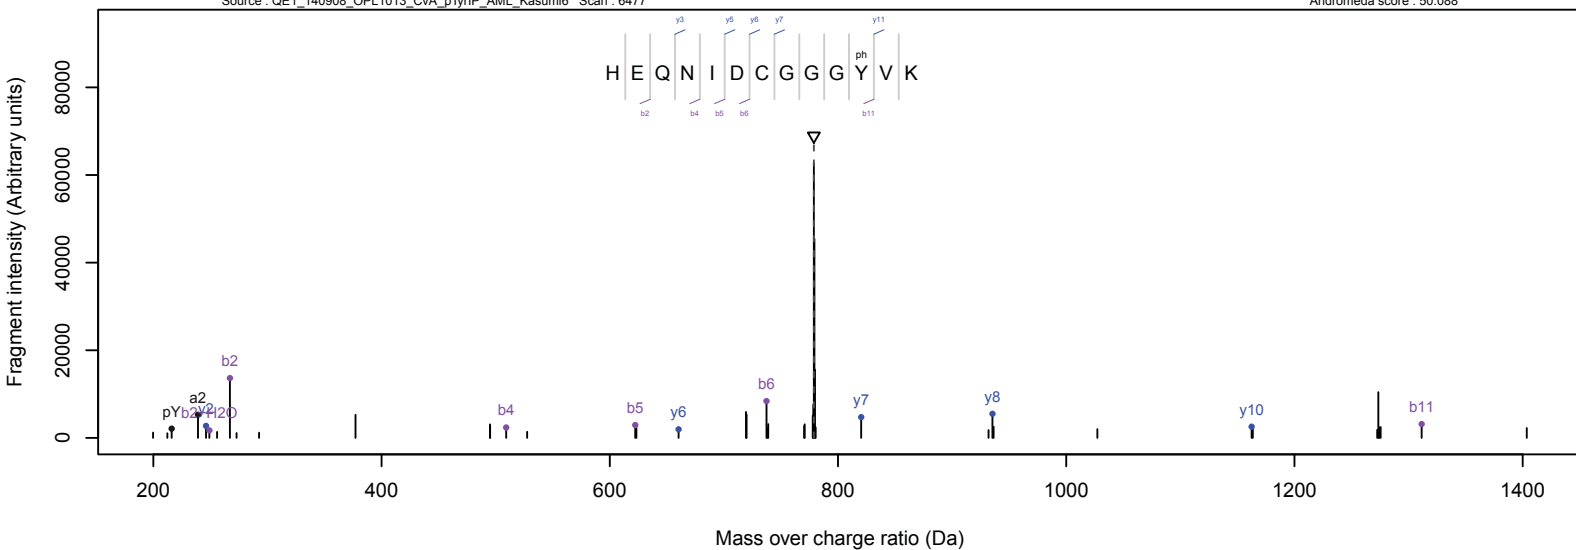

LAGEEEEALRQY(ph)QQR-3+

Source : QE1\_140612\_OPL1013\_CVA\_phosphoproteomic\_landscape\_AML\_C Scan : 11741

Andromeda score : 50.088

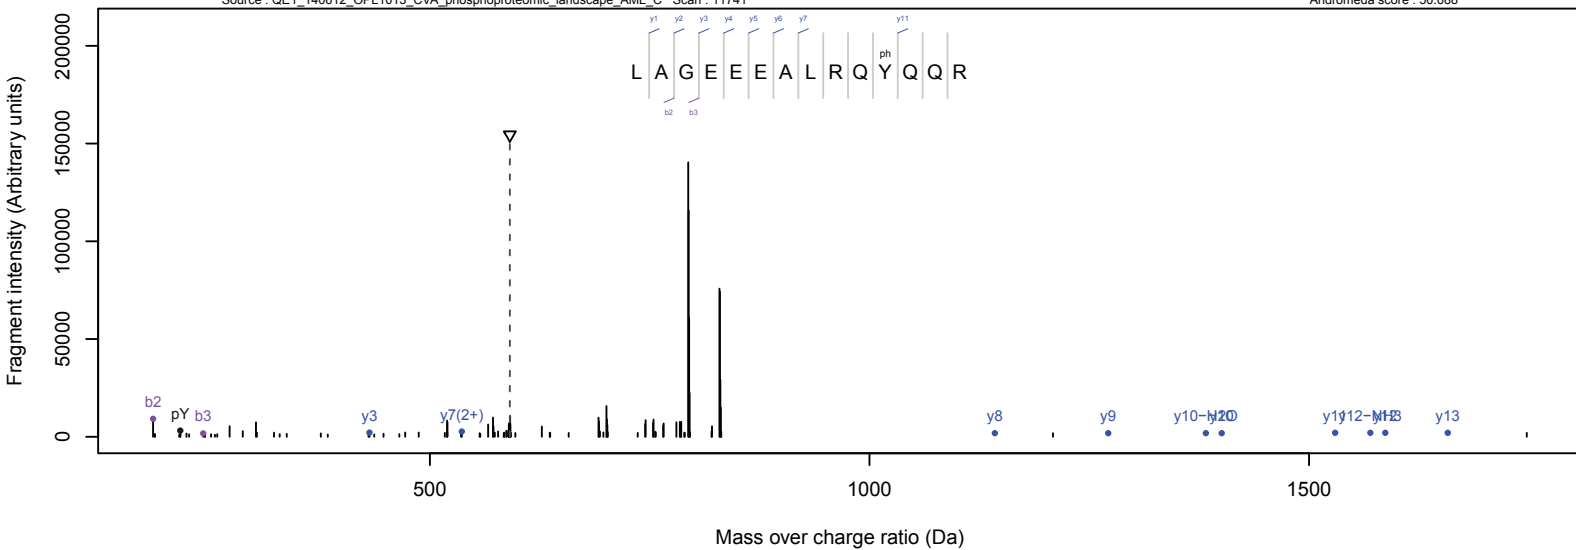

RCLY(ph)ASVLTQPR-3+

Source : QE1\_140612\_OPL1013\_CVA\_phosphoproteomic\_landscape\_AML\_B Scan : 21320

Andromeda score : 50.088

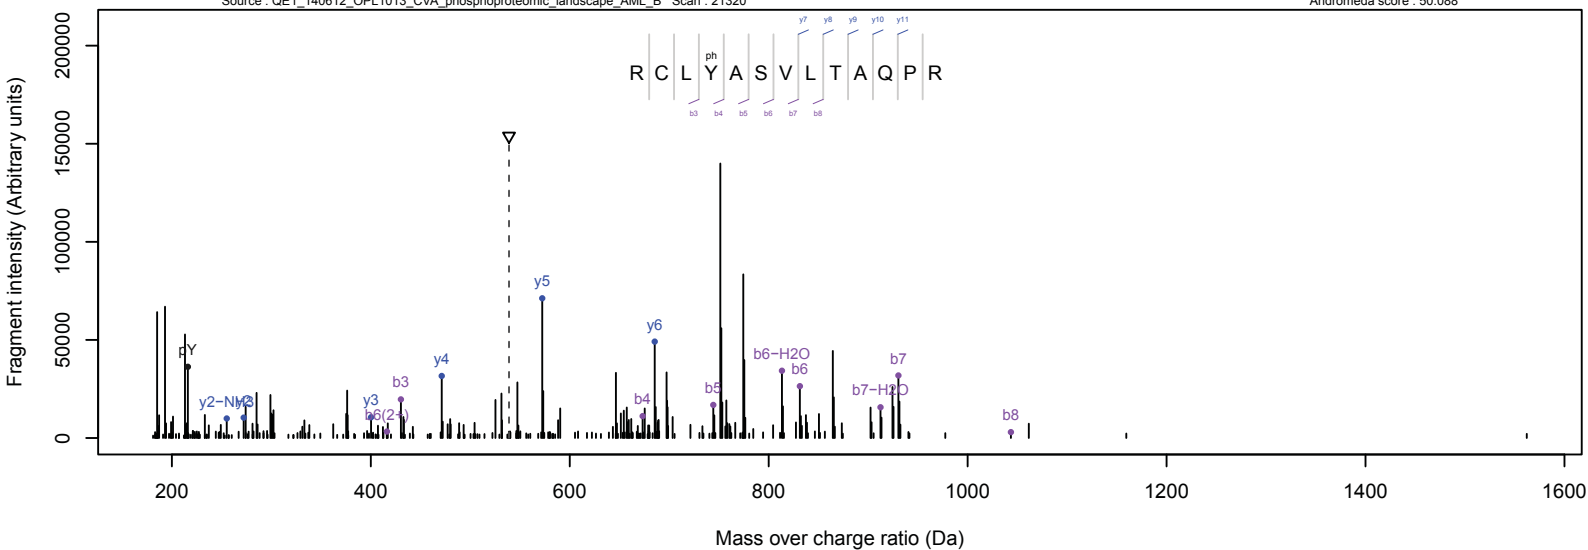

SKPPYTDY(ph)VSTR-3+

Source : QE1\_140908\_OPL1013\_CvA\_pTyrIP\_AML\_OCI\_AML3 Scan : 14170

Andromeda score : 50.088

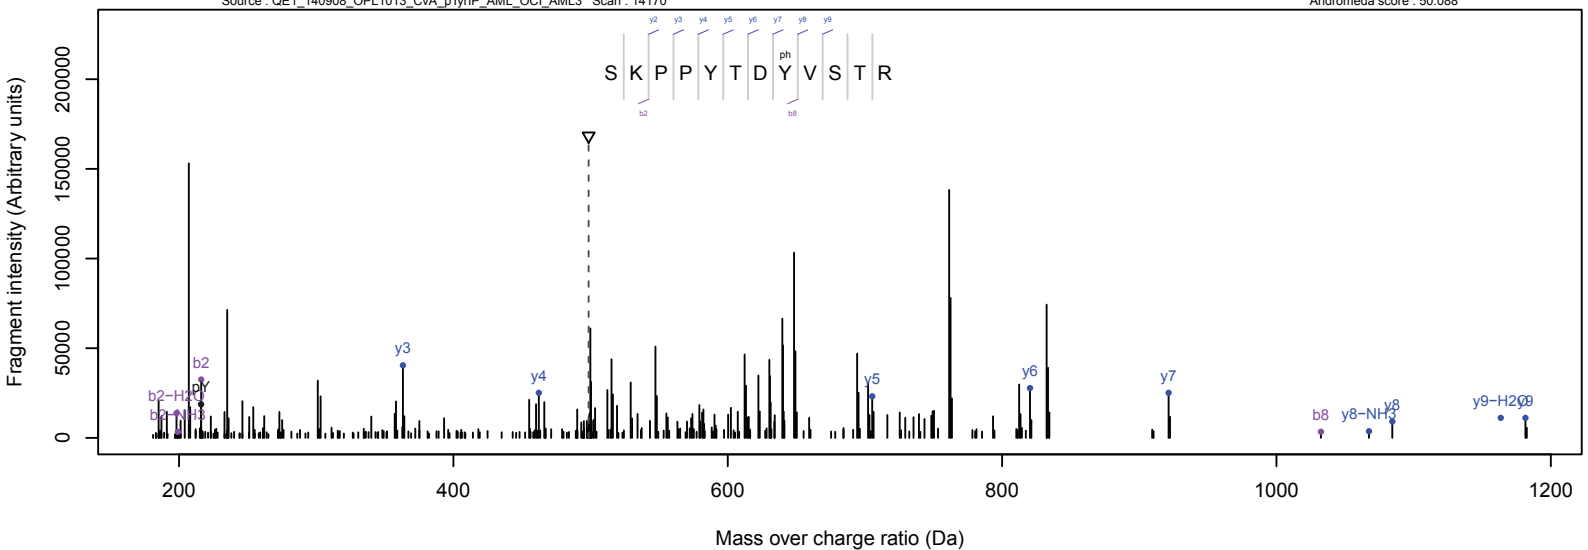

SLLAY(ph)DLGLTTK-2+

Source : QE1\_140908\_OPL1013\_CvA\_pTyrIP\_AML\_OCI\_AML3 Scan : 44065

Andromeda score : 50.088

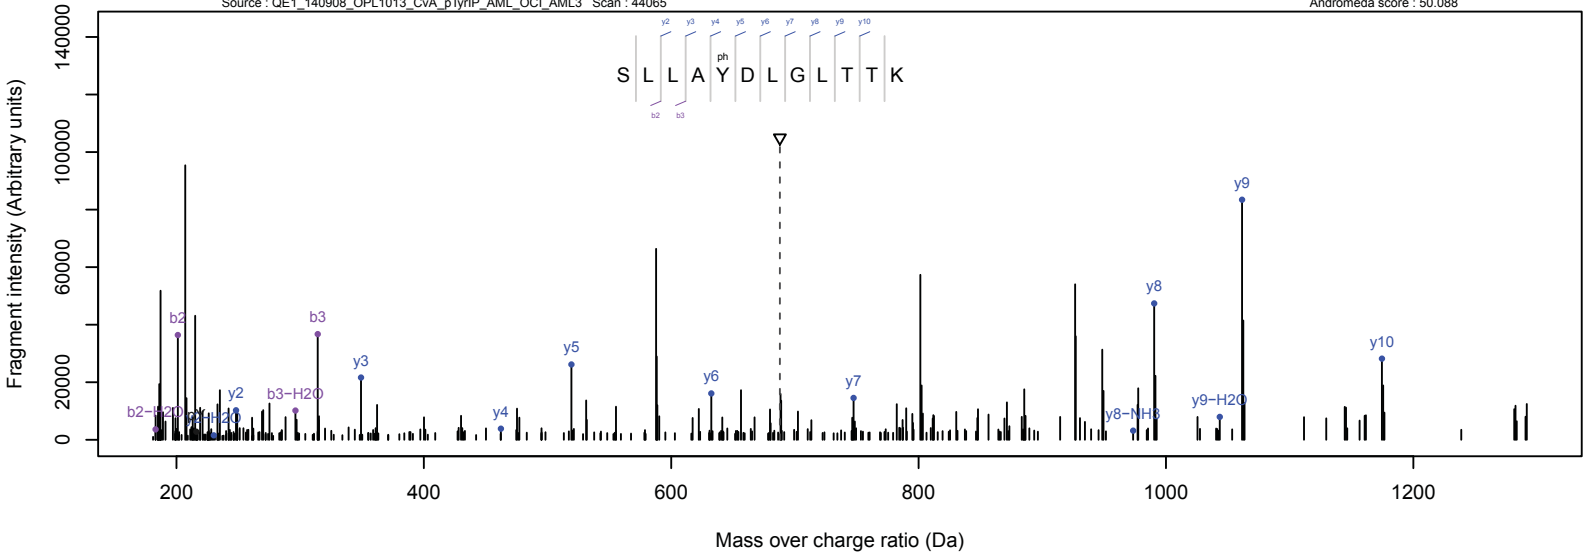

VIGNSGVVY(ph)QAK-2+

Source : QE1\_140612\_OPL1013\_CVA\_phosphoproteomic\_landscape\_AML\_A Scan : 25825

Andromeda score : 50.088

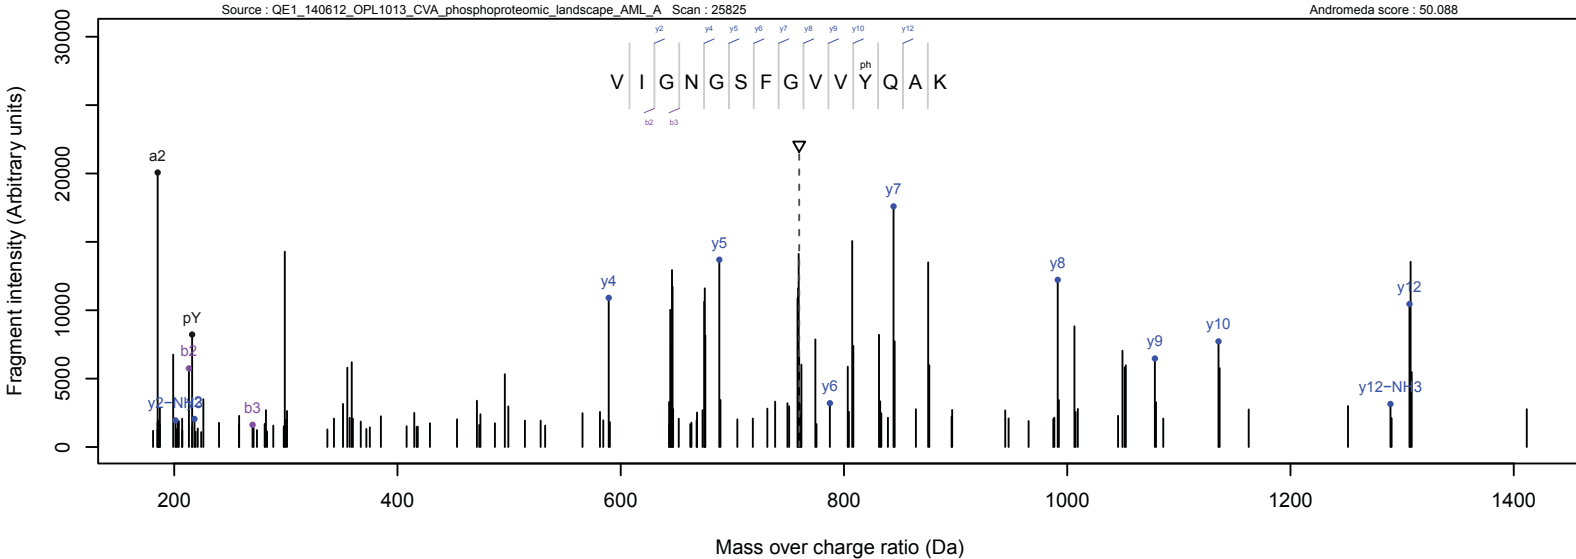

WIDATSGIY(ph)NSEK-2+

Source : QE1\_140612\_OPL1013\_CVA\_phosphoproteomic\_landscape\_AML\_B Scan : 23188

Andromeda score : 50.088

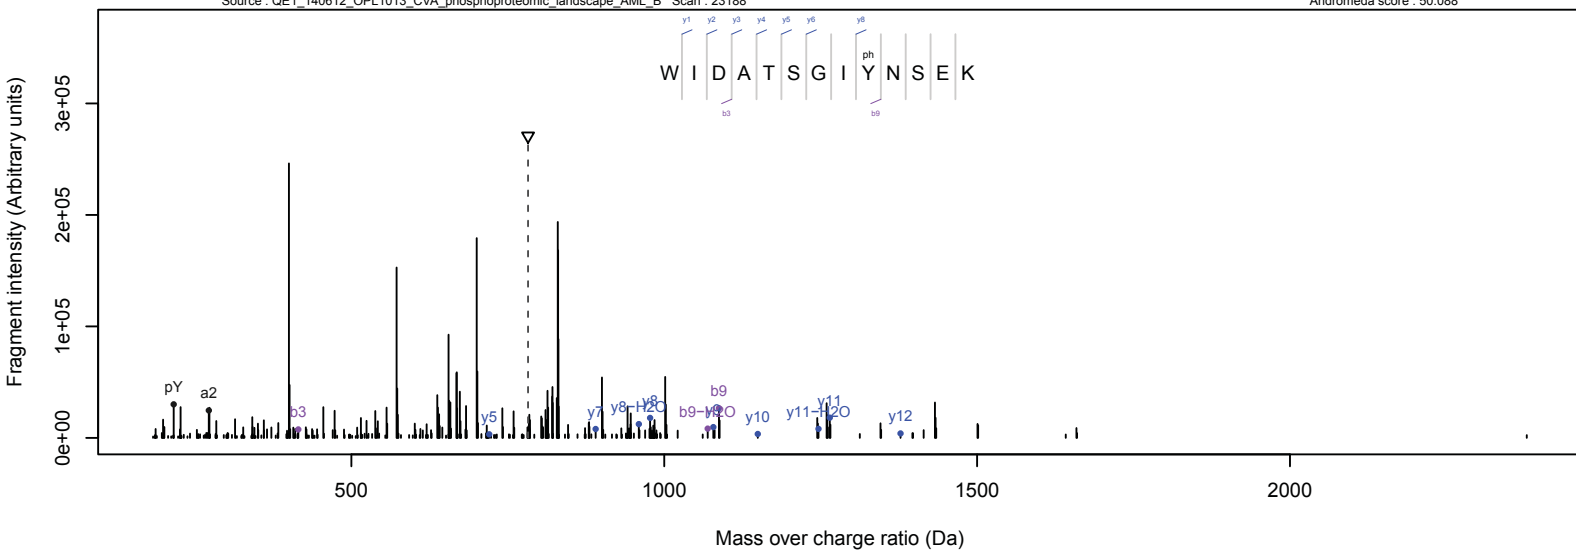

GSLSGDY(ph)LYIFDGS DGGVSSSPGPGDIEGSKK-3+

Source : QE1\_140822\_OPL1013\_CvA\_pTyrIP\_AML\_cell\_lines\_part2\_B Scan : 33343

Andromeda score : 50.042

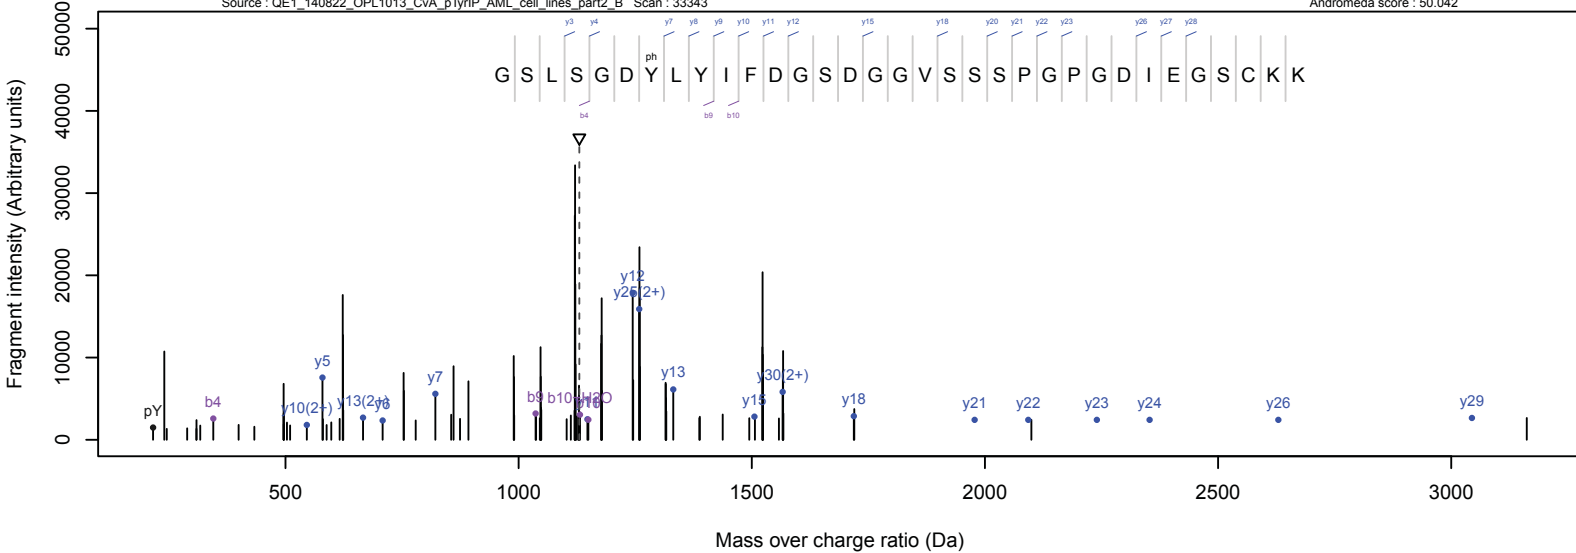



## NLDHVY(ph)NR-2+

Source : QE1\_140822\_OPL1013\_CvA\_pTyrIP\_AML\_cell\_lines\_part2\_B Scan : 3391

Andromeda score : 50.04

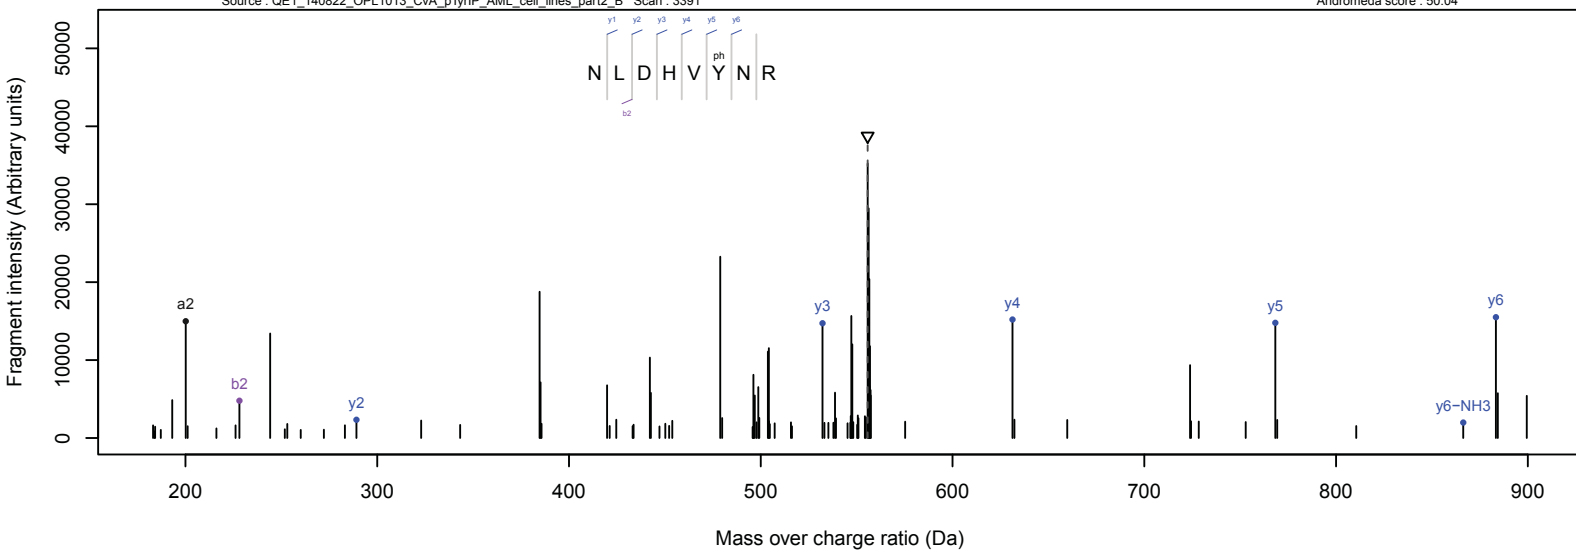

## SDALETGLFNHY(ph)QMK-3+

Source : QE1\_140612\_OPL1013\_CVA\_phosphoproteomic\_landscape\_AML\_A Scan : 40214

Andromeda score : 50.04

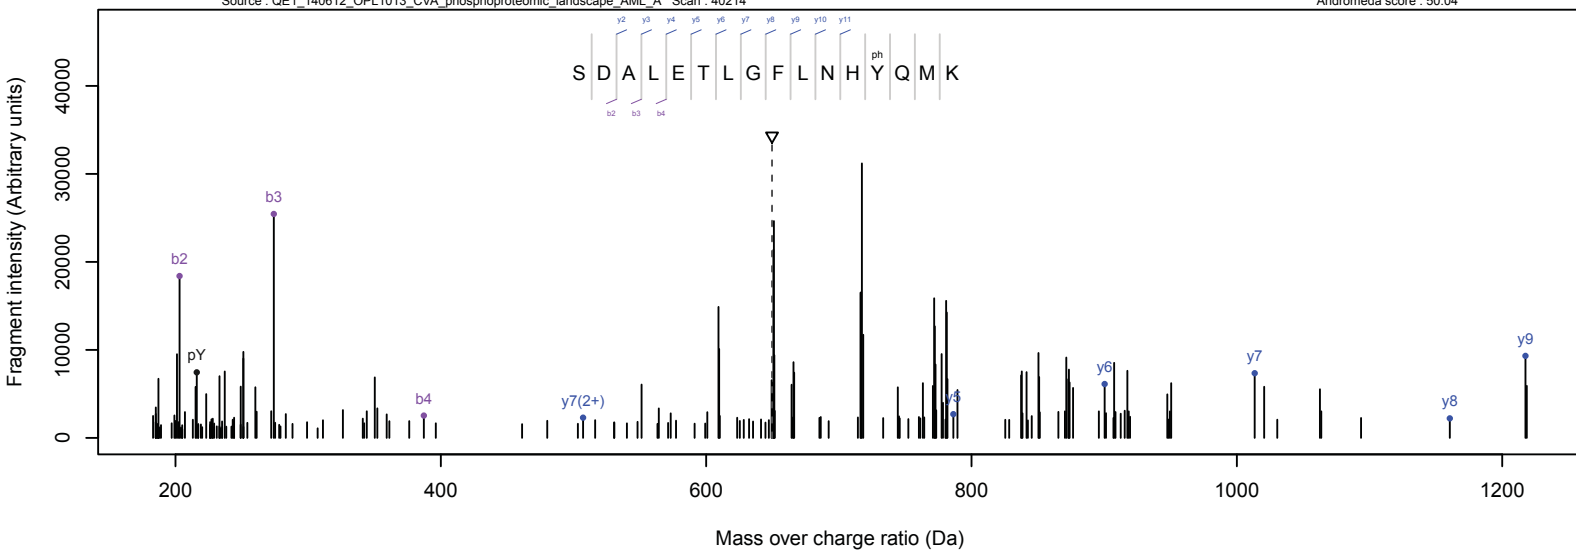

## Y(ph)FEPLVKK-2+

Source : QE1\_140612\_OPL1013\_CVA\_phosphoproteomic\_landscape\_AML\_C Scan : 17505

Andromeda score : 50.04

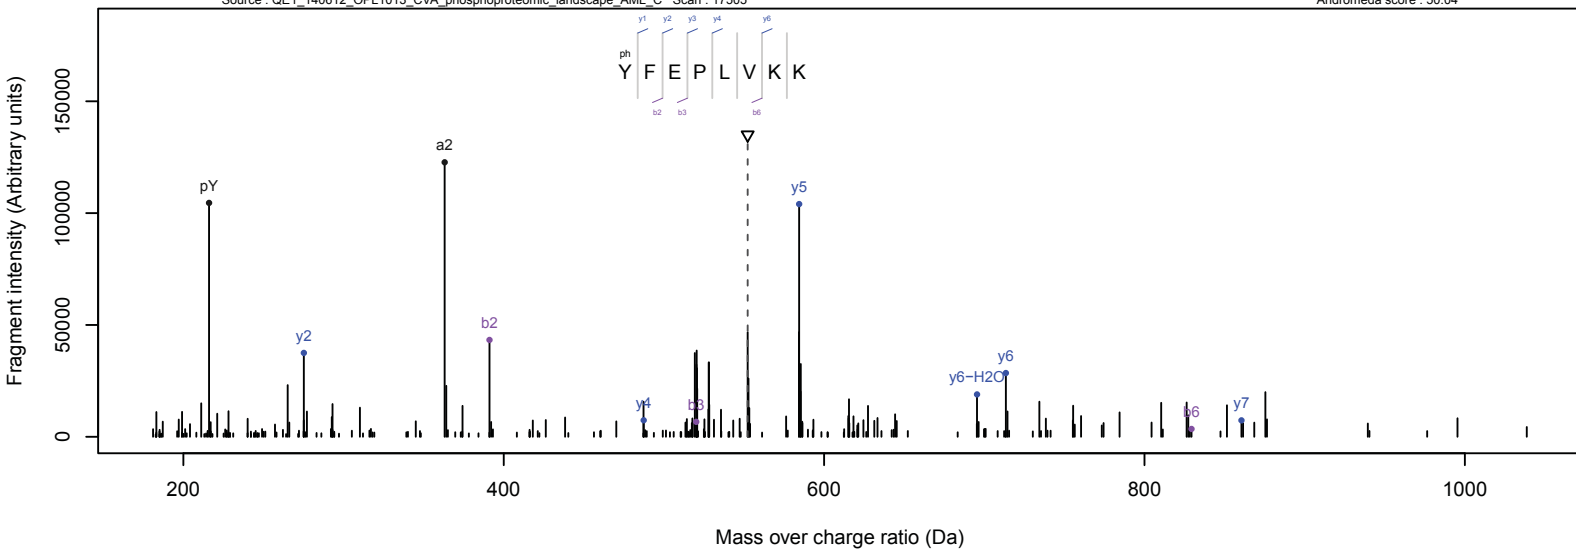

Y(ph)VLPLAFGK-2+

Source : Qe1\_141024\_OPL1013\_CvA\_AML\_pTyrIP\_MOLM13 Scan : 38651

Andromeda score : 50.04

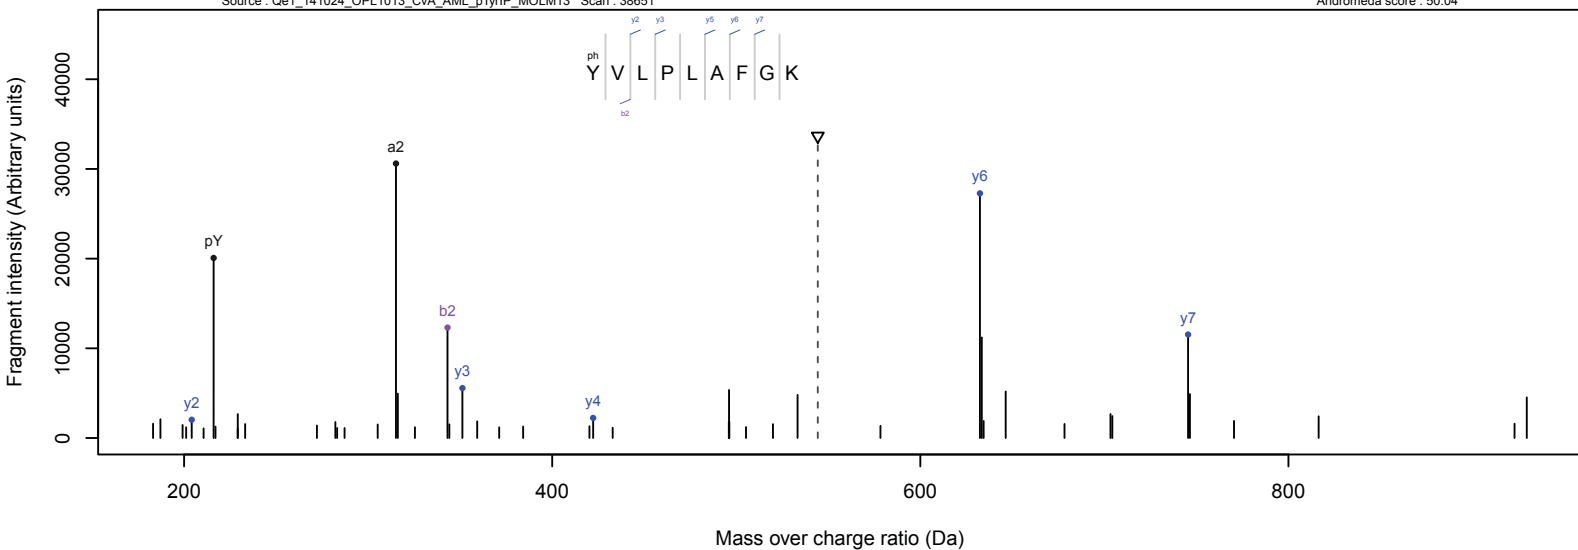

GIVVY(ph)TGDR-2+

Source : QE1\_140822\_OPL1013\_CvA\_pTyrIP\_AML\_cell\_lines\_part2\_F Scan : 9922

Andromeda score : 50.034

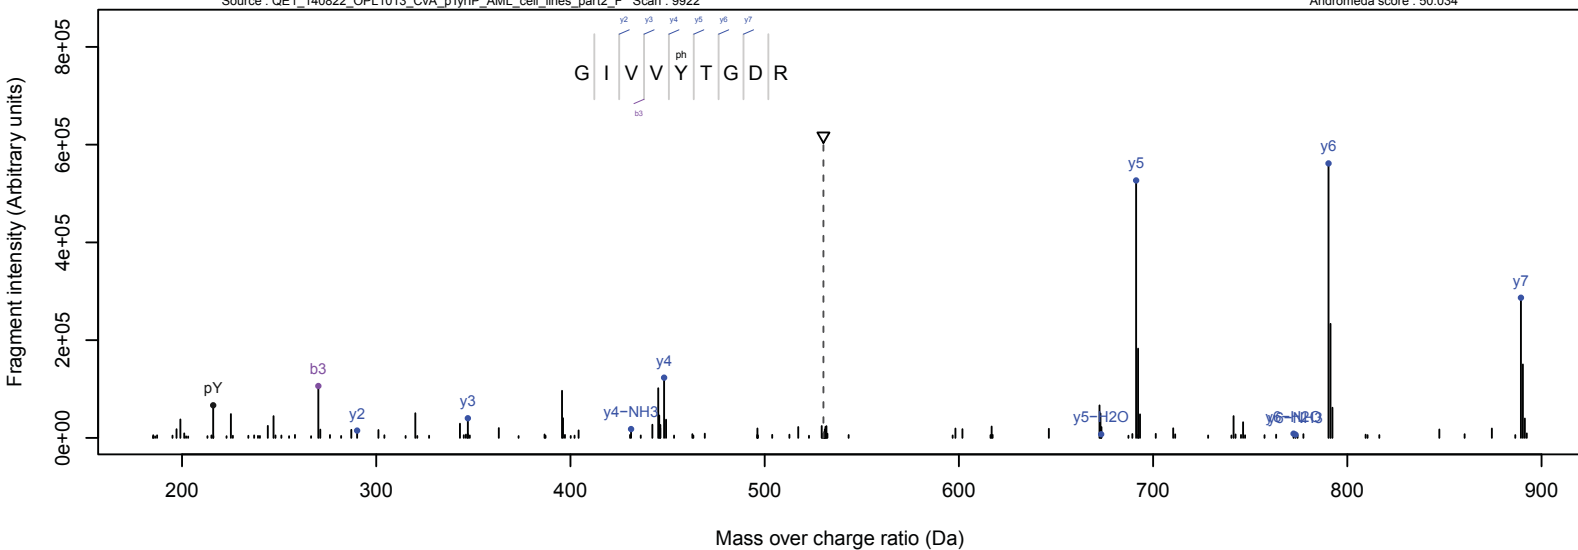

IDHY(ph)RHTAAQLGEK-3+

Source : QE1\_140612\_OPL1013\_CVA\_phosphoproteomic\_landscape\_AML\_C Scan : 4992

Andromeda score : 49.988

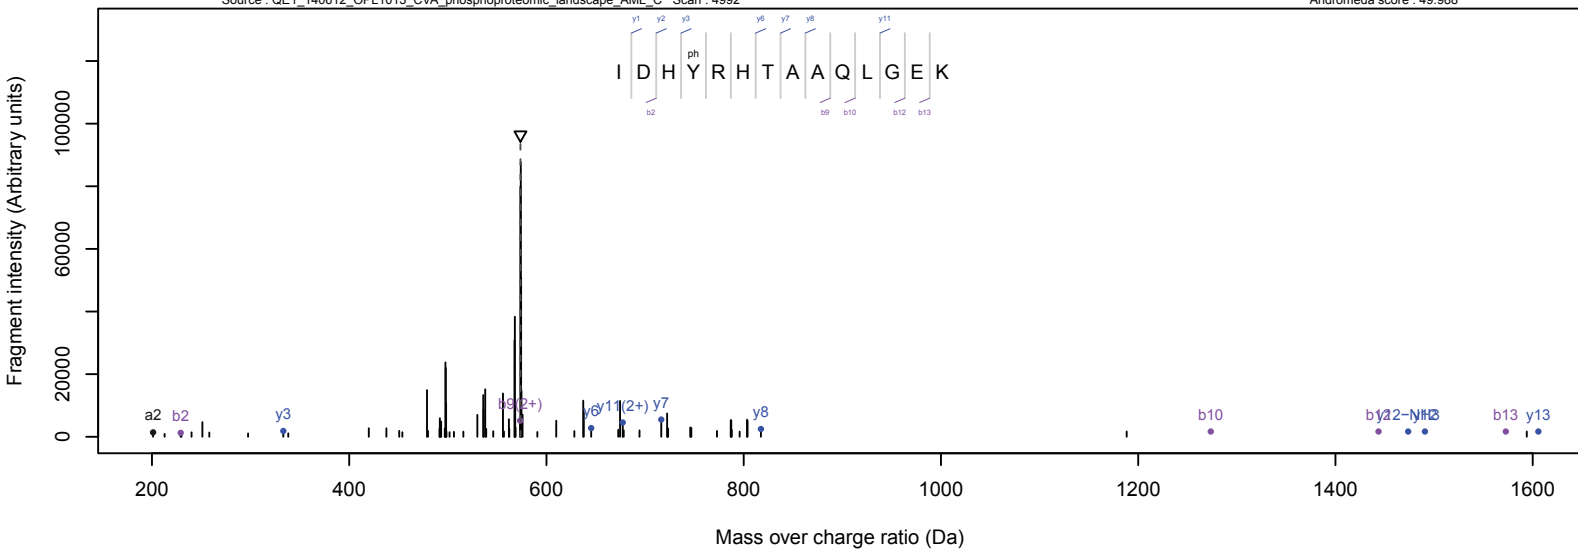

## ILQNY(ph)DNKQVR-3+

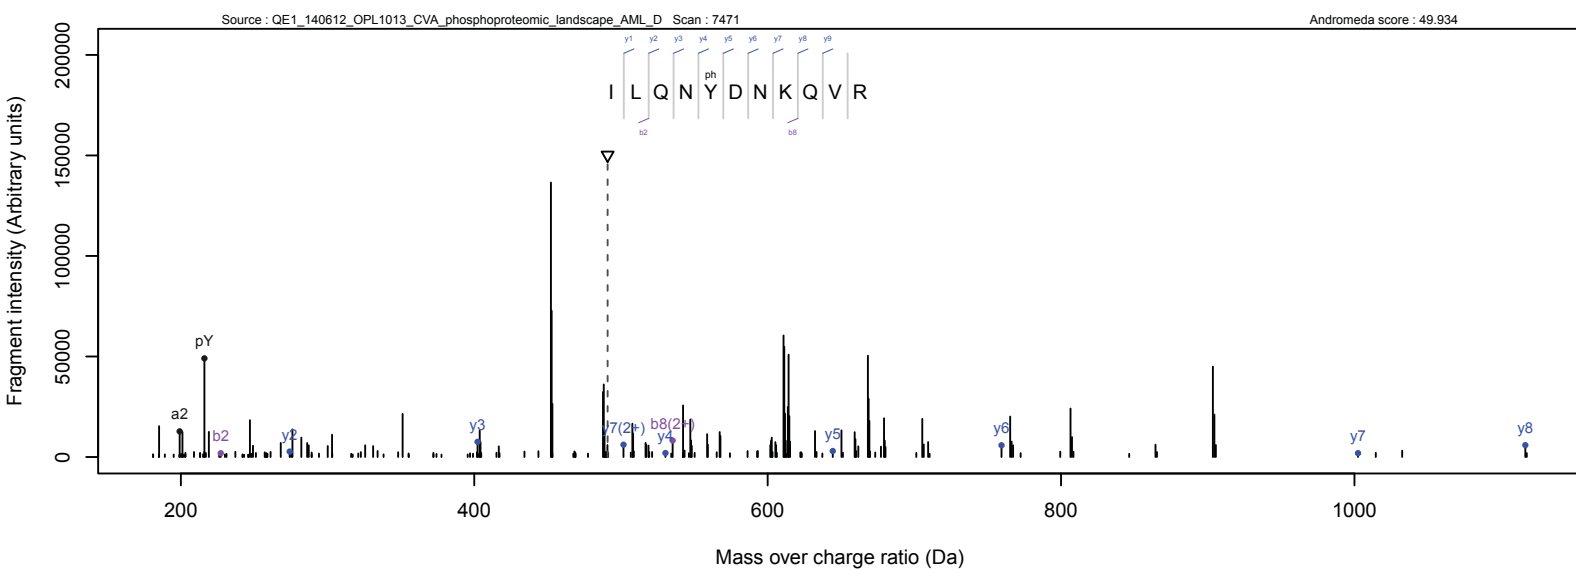

## GPAY(ph)GLSR-2+

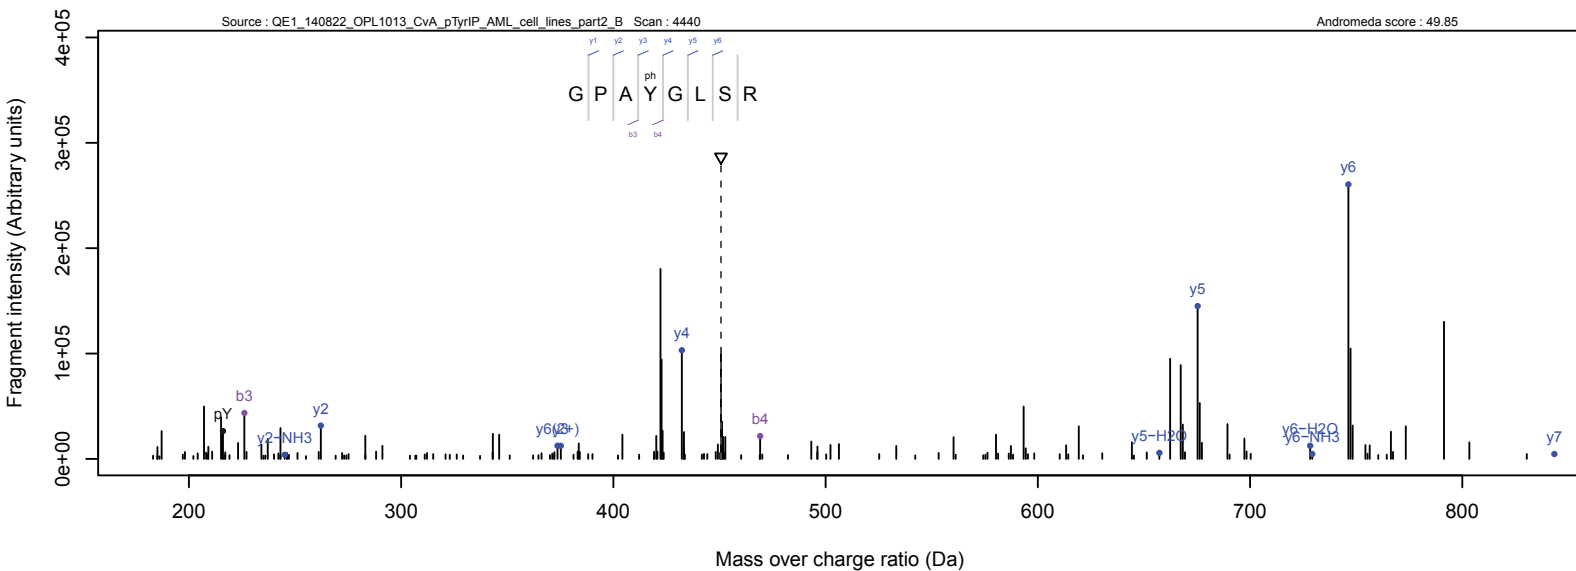

## ITLDNAY(ph)MEK-2+

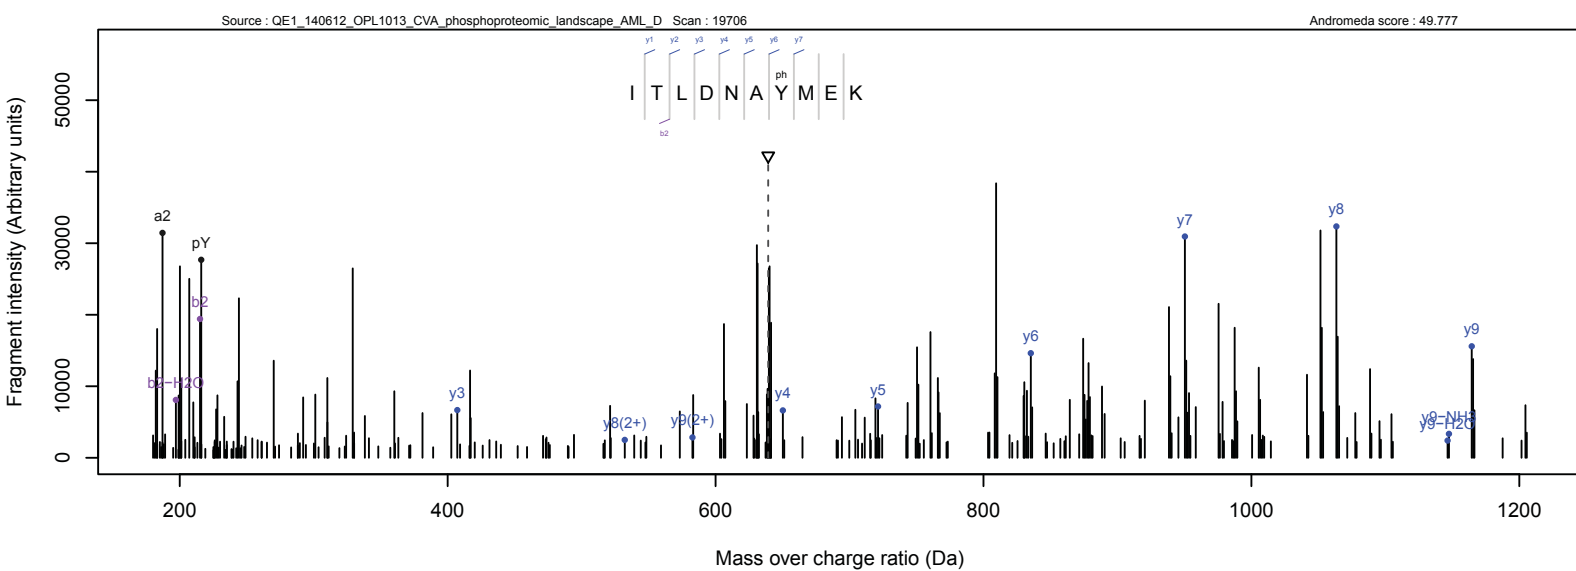



## EPGYTPPGAGNQNPpGMYpVVTGPK-2+

Source: QE1\_140612\_OPL1013\_CVA\_phosphoproteomic\_landscape\_AML\_C Scan: 26429

Andromeda score: 49.765

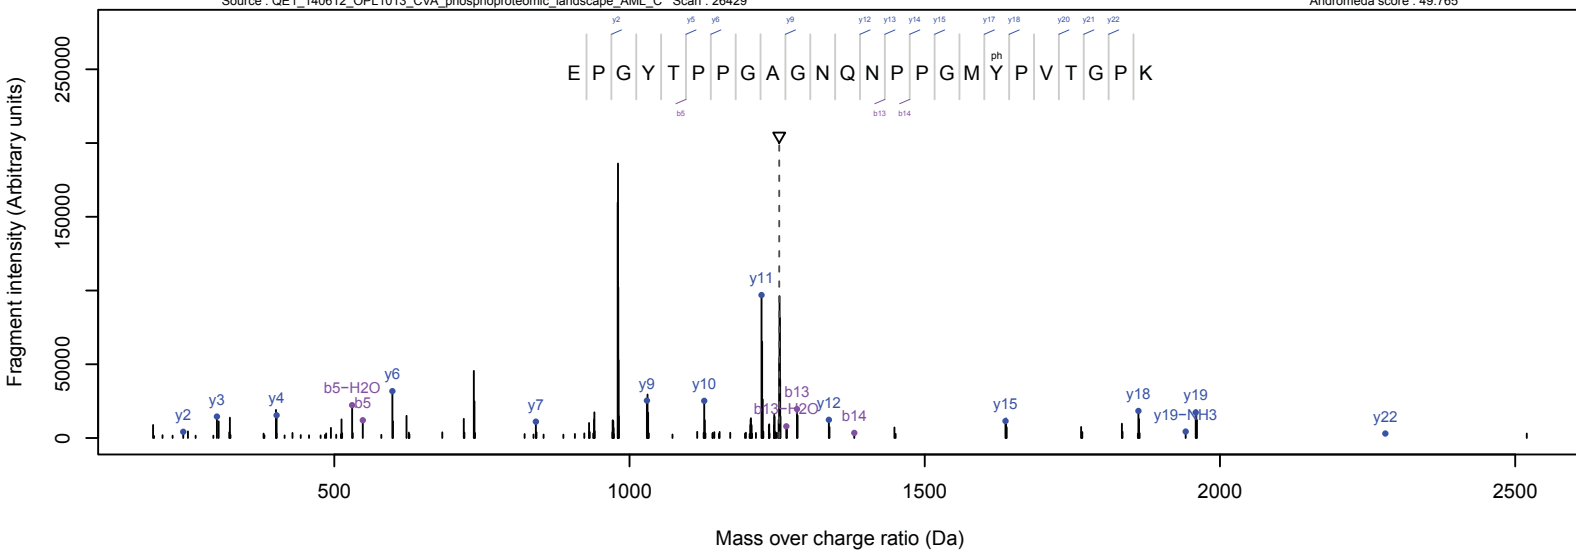

## SSLTEPTAEVYNQpYPSNALVFESSPFNTGSAHVK-3+

Source: QE1\_140612\_OPL1013\_CVA\_phosphoproteomic\_landscape\_AML\_C Scan: 42176

Andromeda score: 49.744

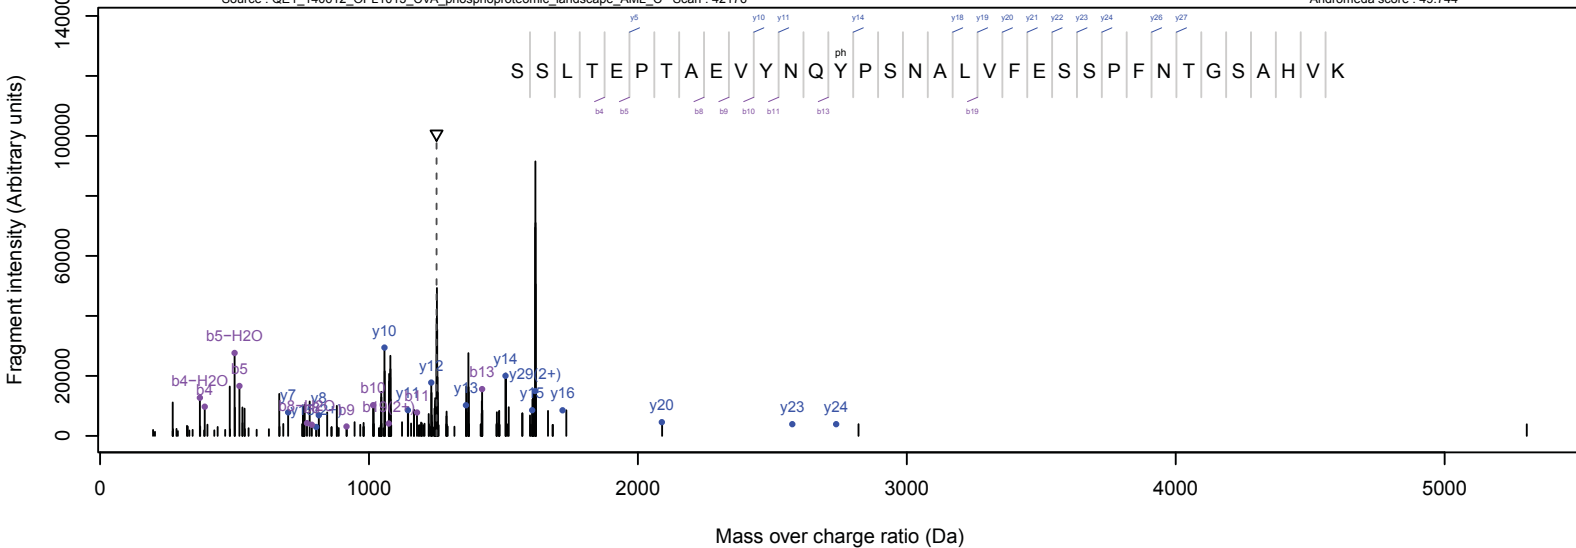

## NVYpATTVGTpYK-2+

Source: QE1\_140612\_OPL1013\_CVA\_phosphoproteomic\_landscape\_AML\_C Scan: 15761

Andromeda score: 49.732

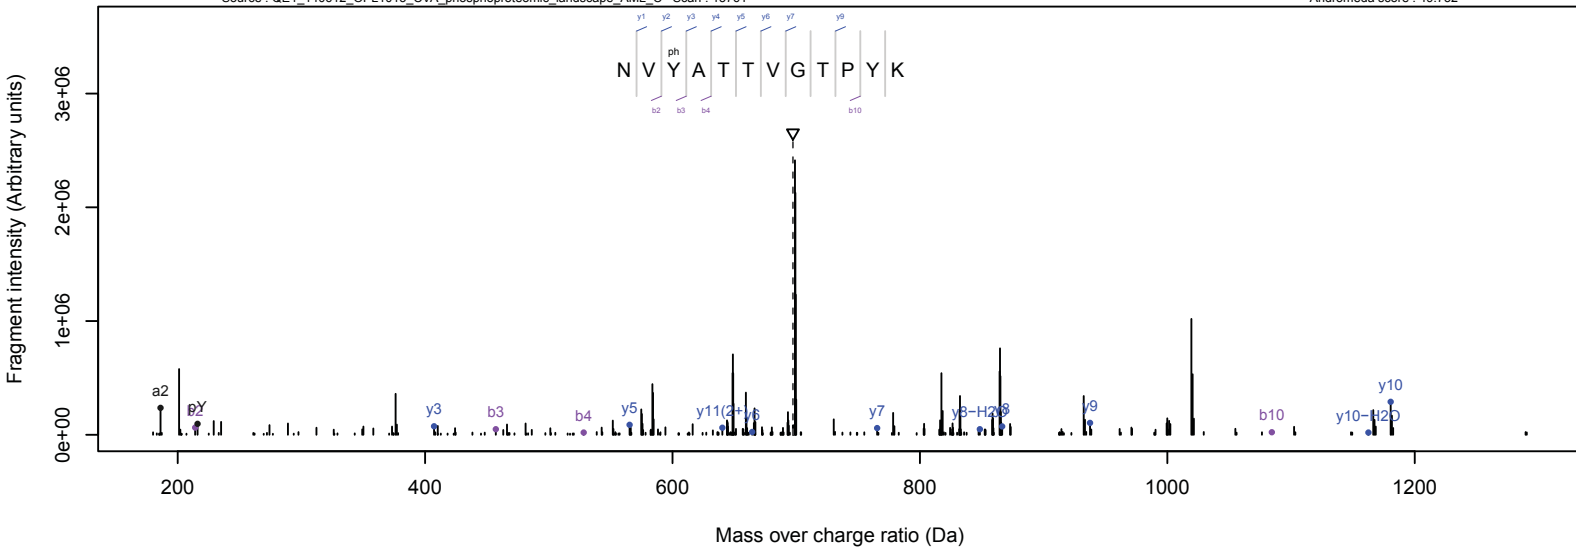

## AY(ph)QLLSAR-2+

Source : QE1\_140612\_OPL1013\_CVA\_phosphoproteomic\_landscape\_AML\_C Scan : 15070

Andromeda score : 49.715

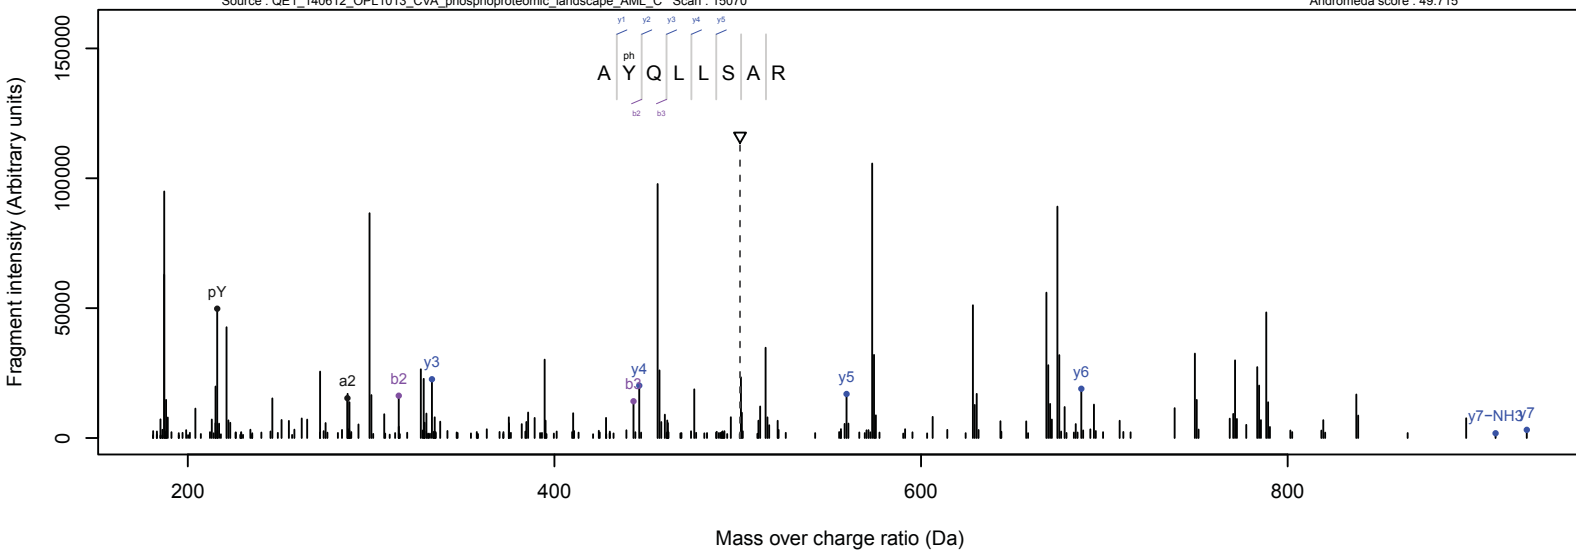

## FQHY(ph)PHIKR-3+

Source : QE1\_140612\_OPL1013\_CVA\_phosphoproteomic\_landscape\_AML\_C Scan : 7233

Andromeda score : 49.715

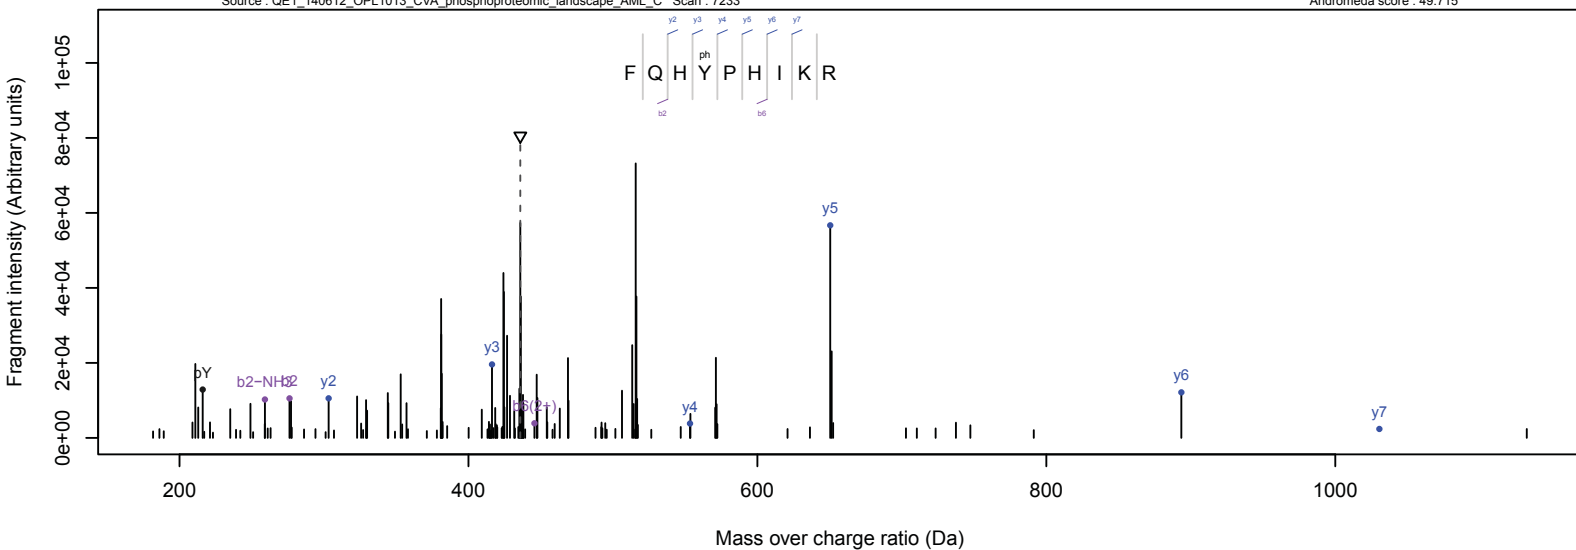

## FY(ph)PESSYK-2+

Source : QE1\_140612\_OPL1013\_CVA\_phosphoproteomic\_landscape\_AML\_C Scan : 10464

Andromeda score : 49.715

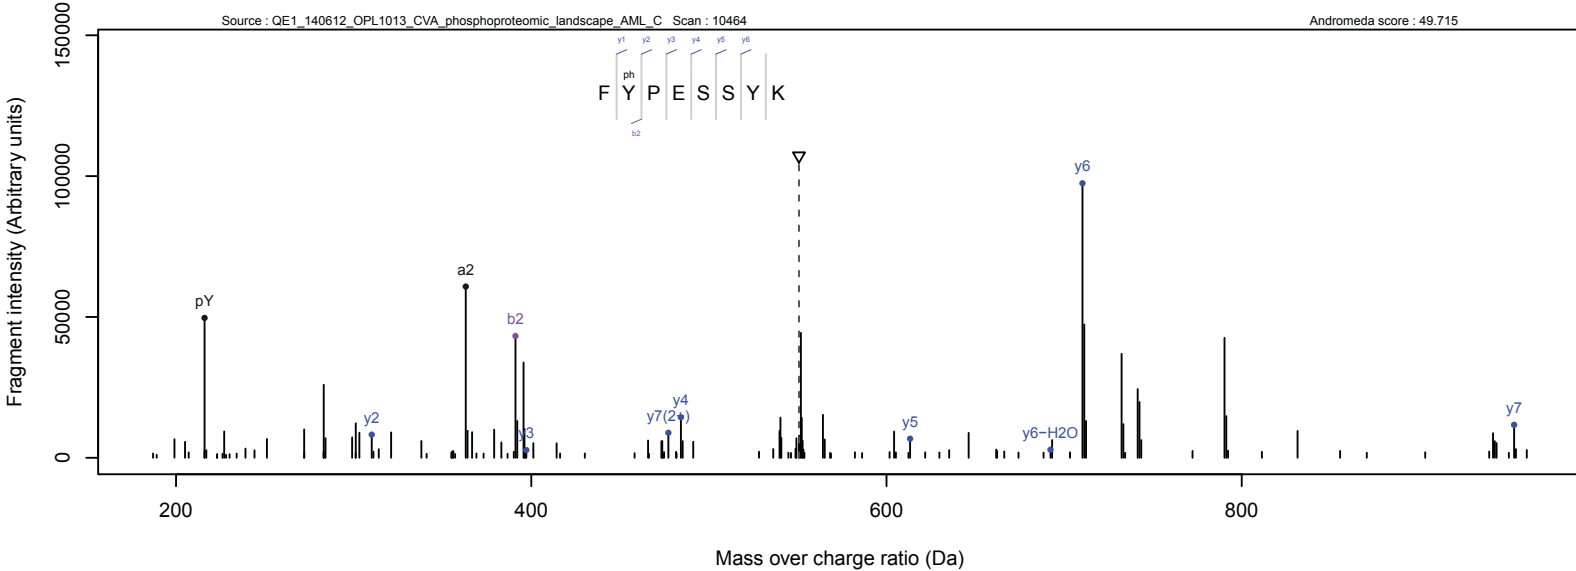

## HRDY(ph)VCFR-3+

Source : QE1\_140612\_OPL1013\_CVA\_phosphoproteomic\_landscape\_AML\_B Scan : 10043

Andromeda score : 49.715

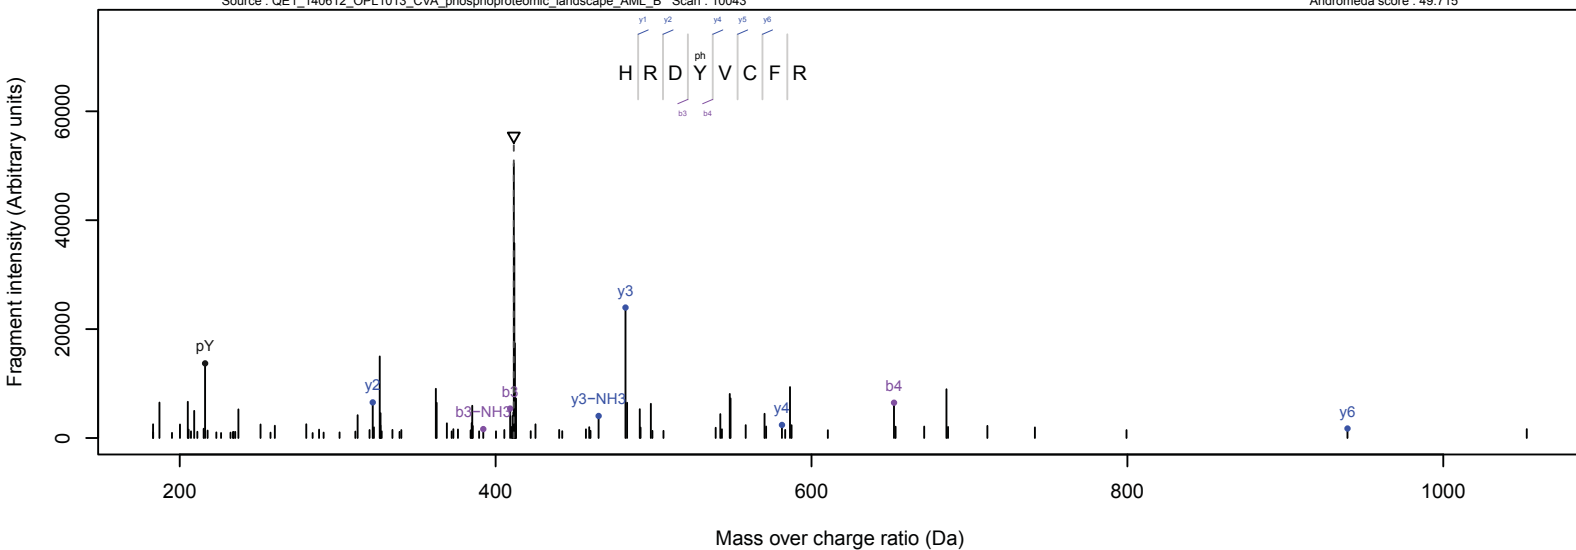

## FYCDYCDTYLT(ph)HDSPSVRK-3+

Source : QE1\_140612\_OPL1013\_CVA\_phosphoproteomic\_landscape\_AML\_C Scan : 22231

Andromeda score : 49.708

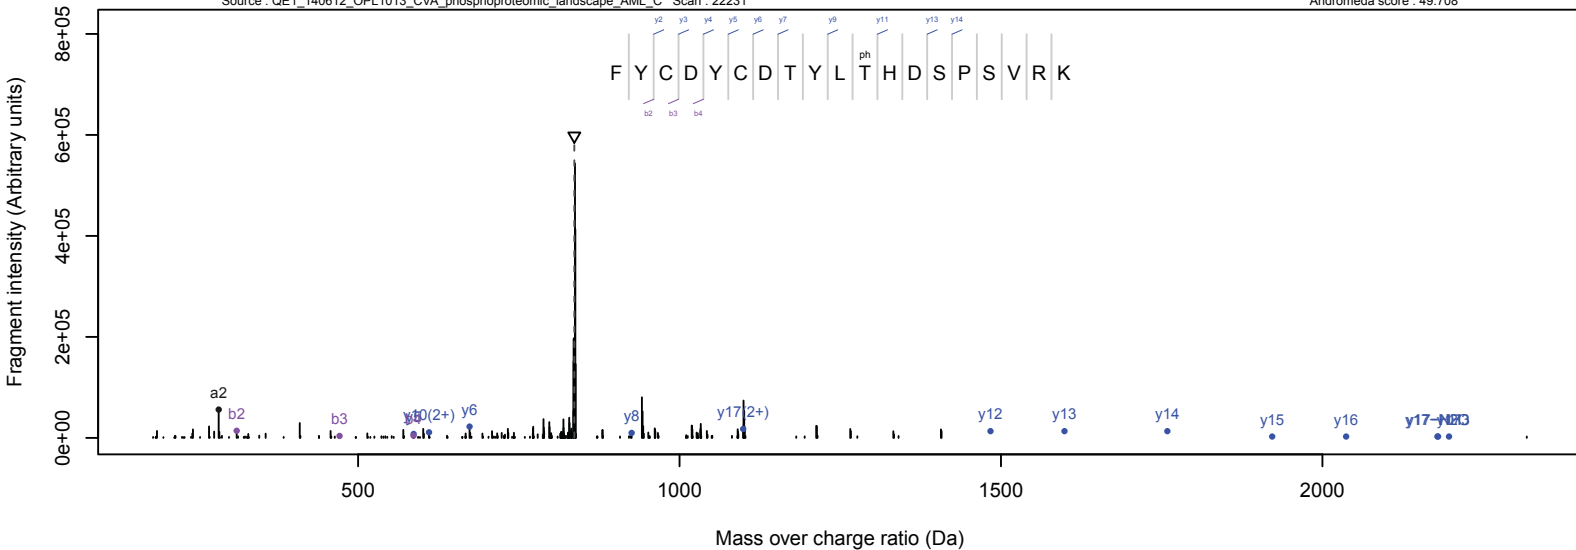

## MRNGY(ph)ELSPTAAANFTR-3+

Source : QE1\_140612\_OPL1013\_CVA\_phosphoproteomic\_landscape\_AML\_C Scan : 24651

Andromeda score : 49.708

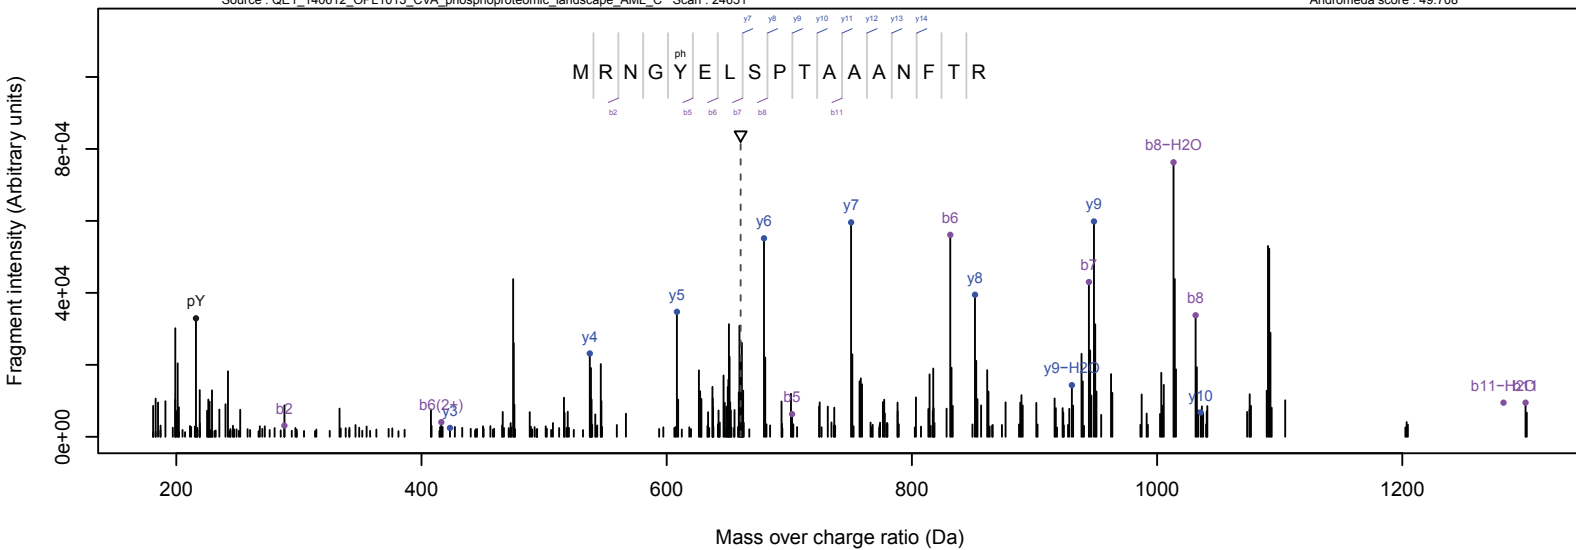

## KFLDTSHY(ph)STAGSSSVR-3+

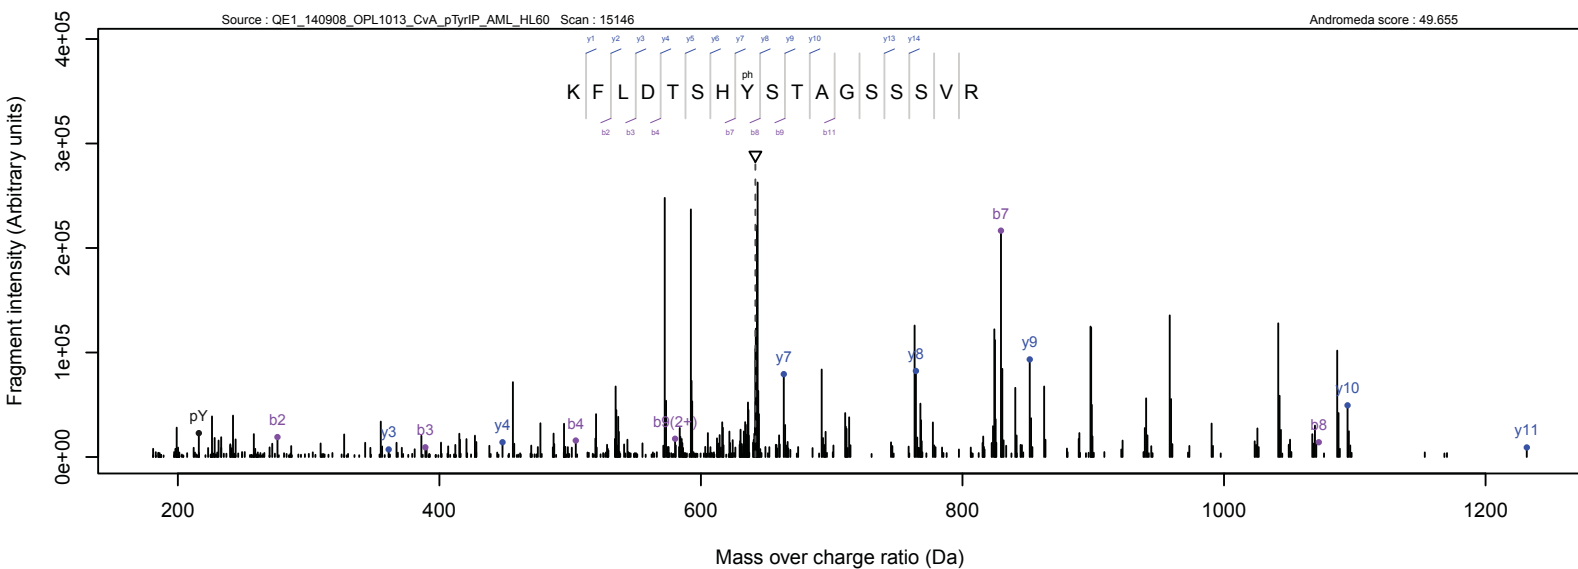

## KLDVEEPDSANSS(ph)STR-3+

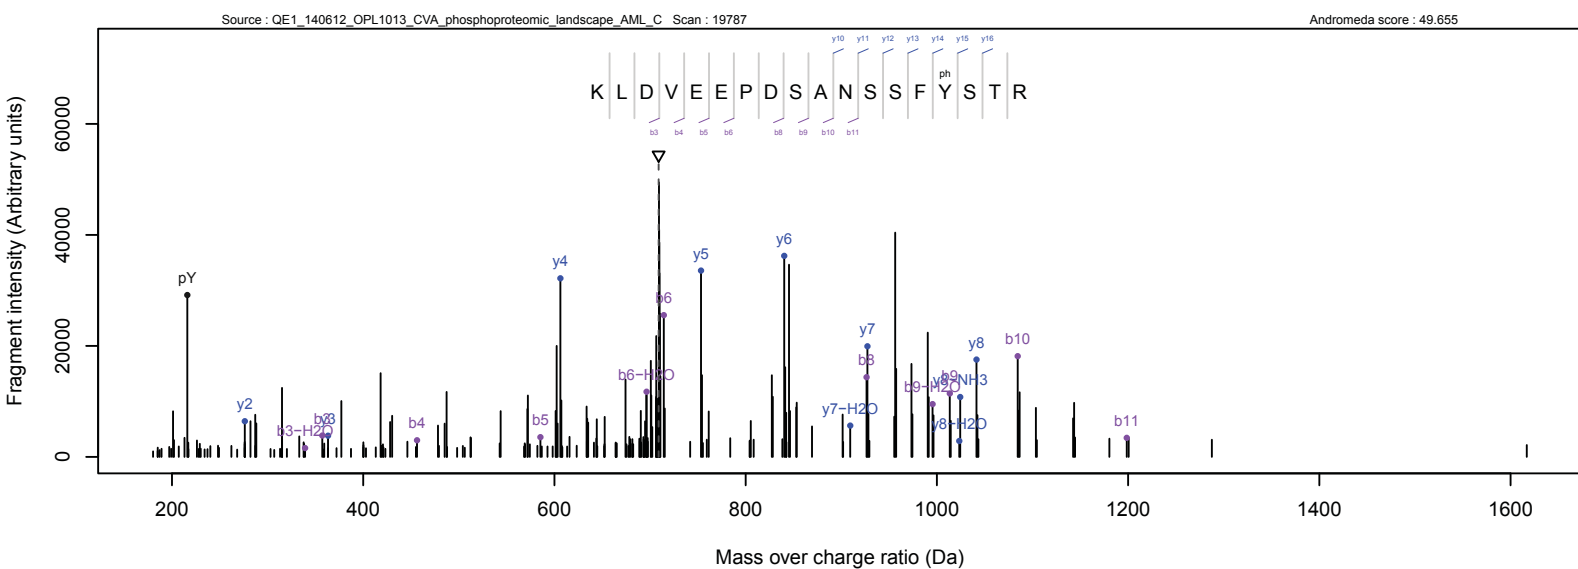

## AIY(ph)TMR-2+

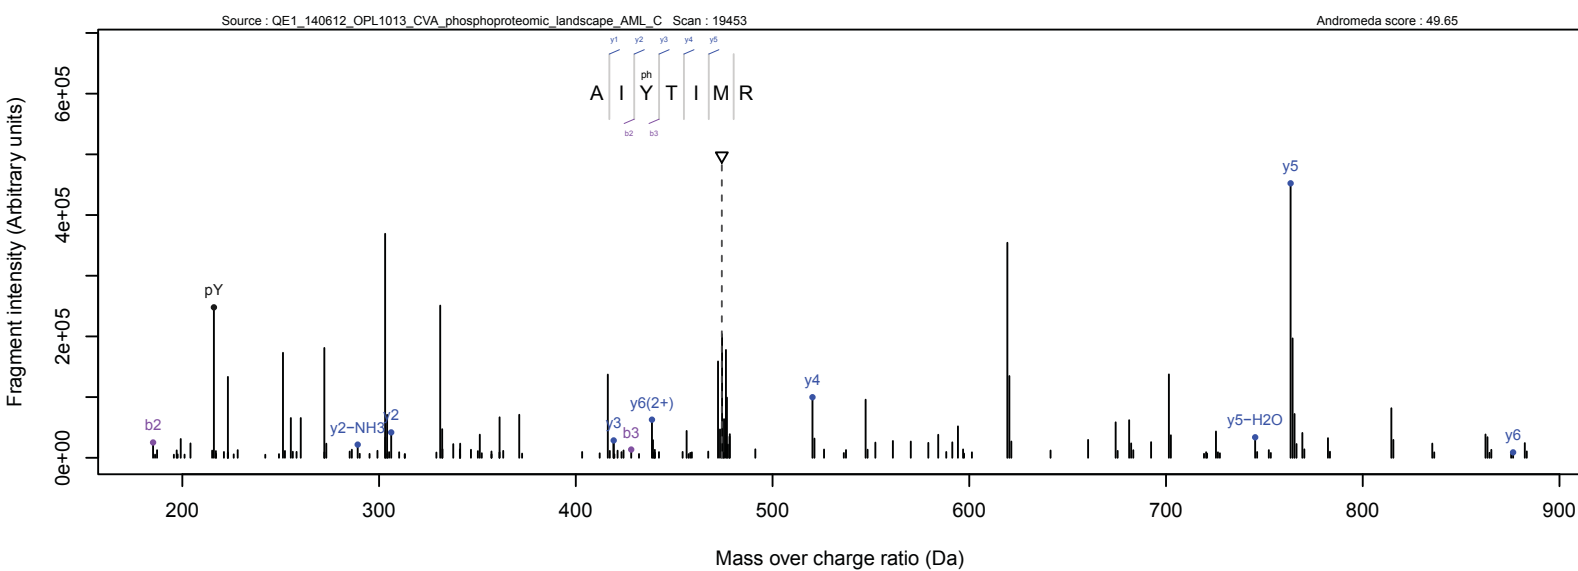

## ALEYTIY(ph)NQLNETR-2+

Source : QE1\_140908\_OPL1013\_CvA\_pTyrIP\_AML\_HEL Scan : 29532

Andromeda score : 49.595

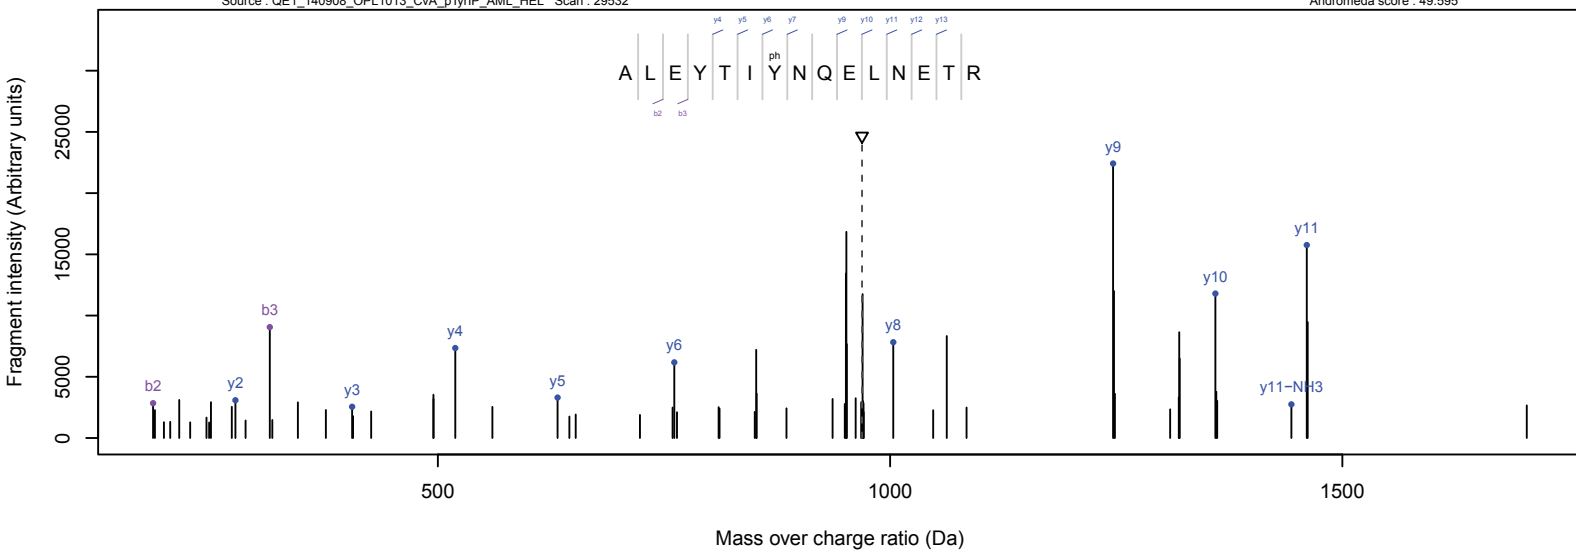

## DLY(ph)HRVDVIFCDK-3+

Source : QE1\_140908\_OPL1013\_CvA\_pTyrIP\_AML\_HEL Scan : 31974

Andromeda score : 49.595

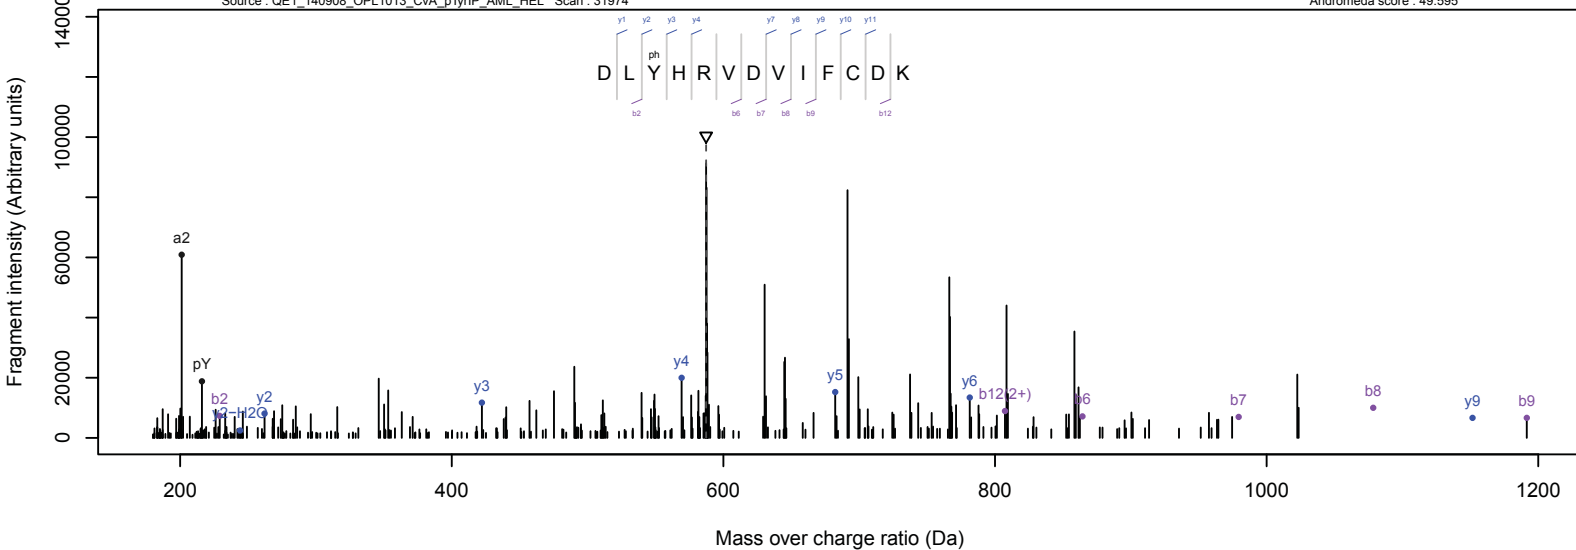

## GTGYQAGGLSPY(ph)LR-2+

Source : QE1\_140908\_OPL1013\_CvA\_pTyrIP\_AML\_HEL Scan : 24409

Andromeda score : 49.595

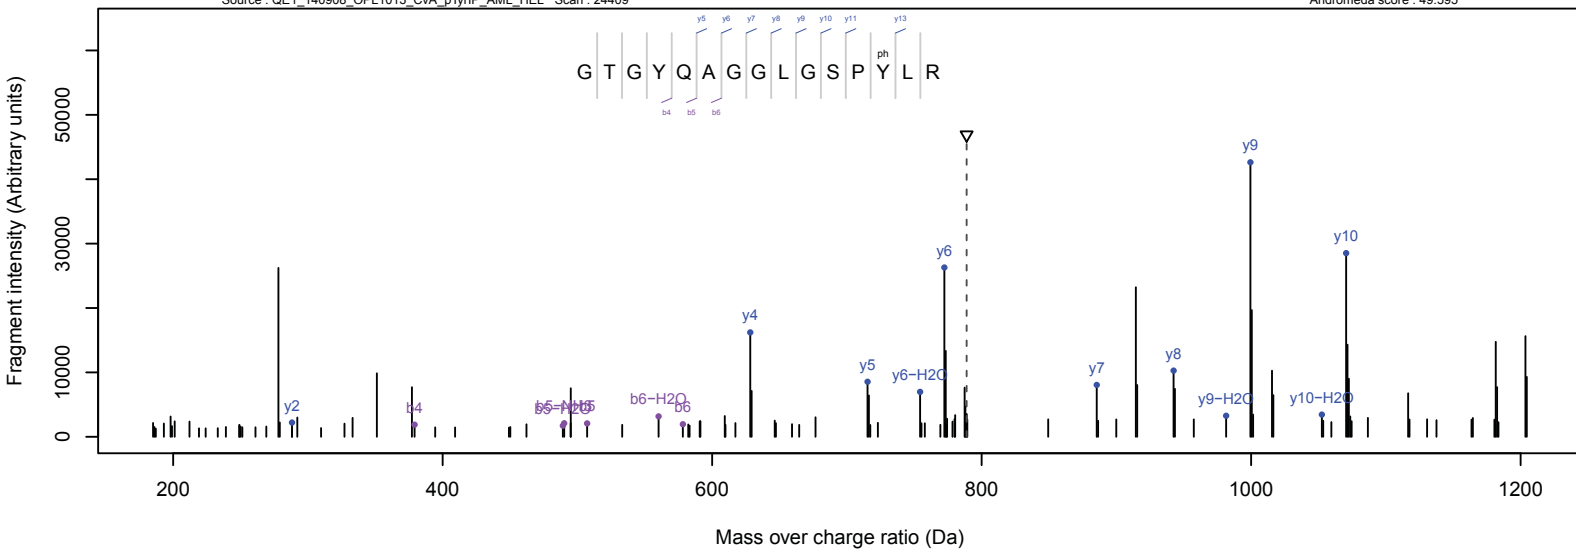



## CQNEQLTAVTQQVSIQQHKDQY(ph)NLLK-4+

Source: QE1\_140612\_OPL1013\_CVA\_phosphoproteomic\_landscape\_AML\_C Scan: 34157

Andromeda score: 49.559

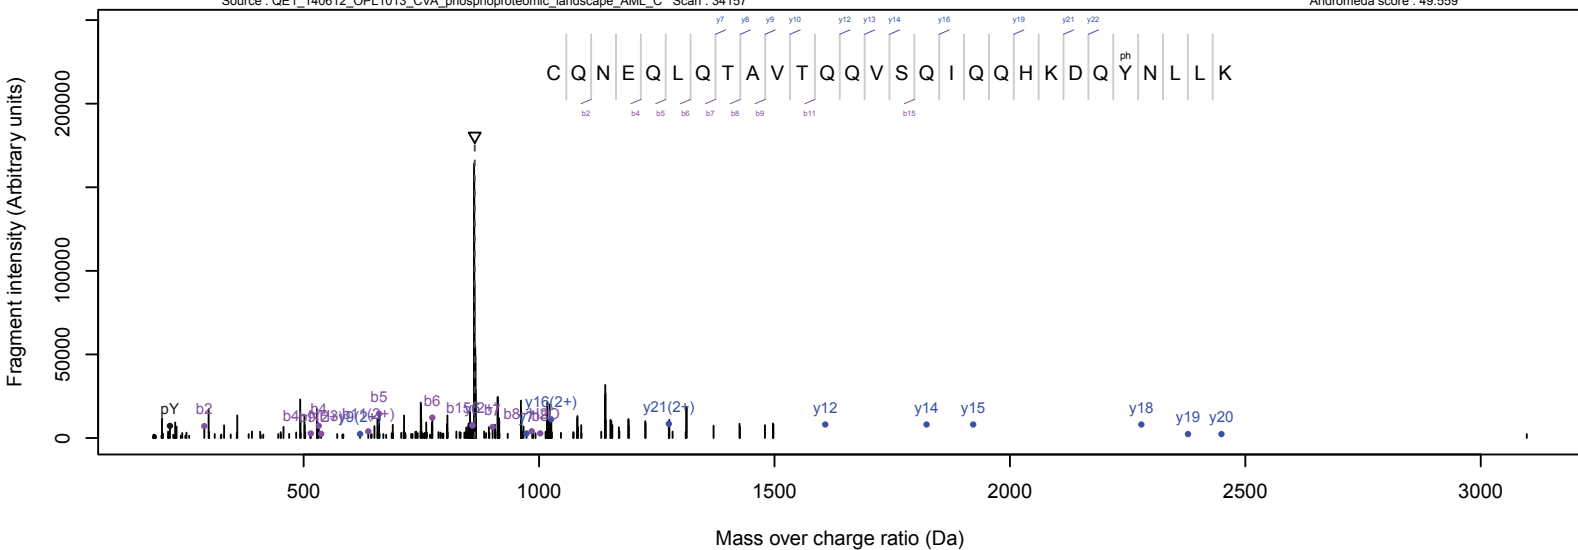

## SADVTTSPYADT(ph)QNSYGCATSTPYSTR-3+

Source: QE1\_140612\_OPL1013\_CVA\_phosphoproteomic\_landscape\_AML\_C Scan: 20723

Andromeda score: 49.559

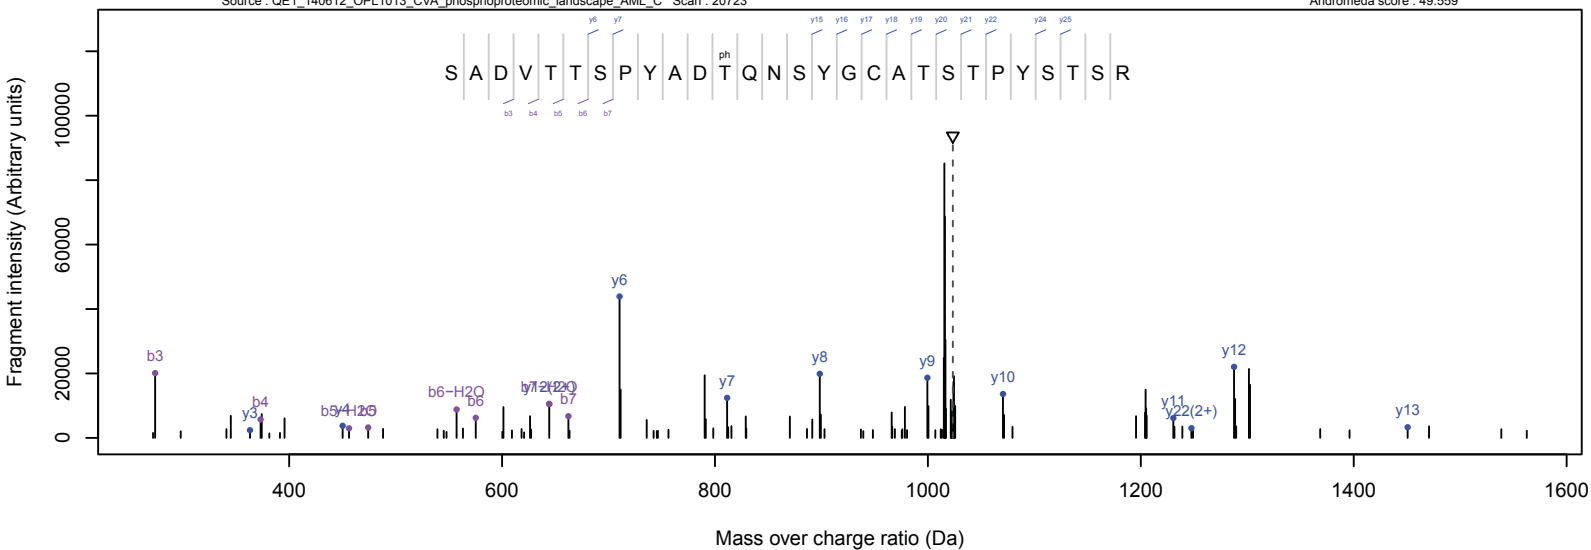

## ASSVVYSATKDY(ph)KDHYR-4+

Source: QE1\_140612\_OPL1013\_CVA\_phosphoproteomic\_landscape\_AML\_C Scan: 9439

Andromeda score: 49.537

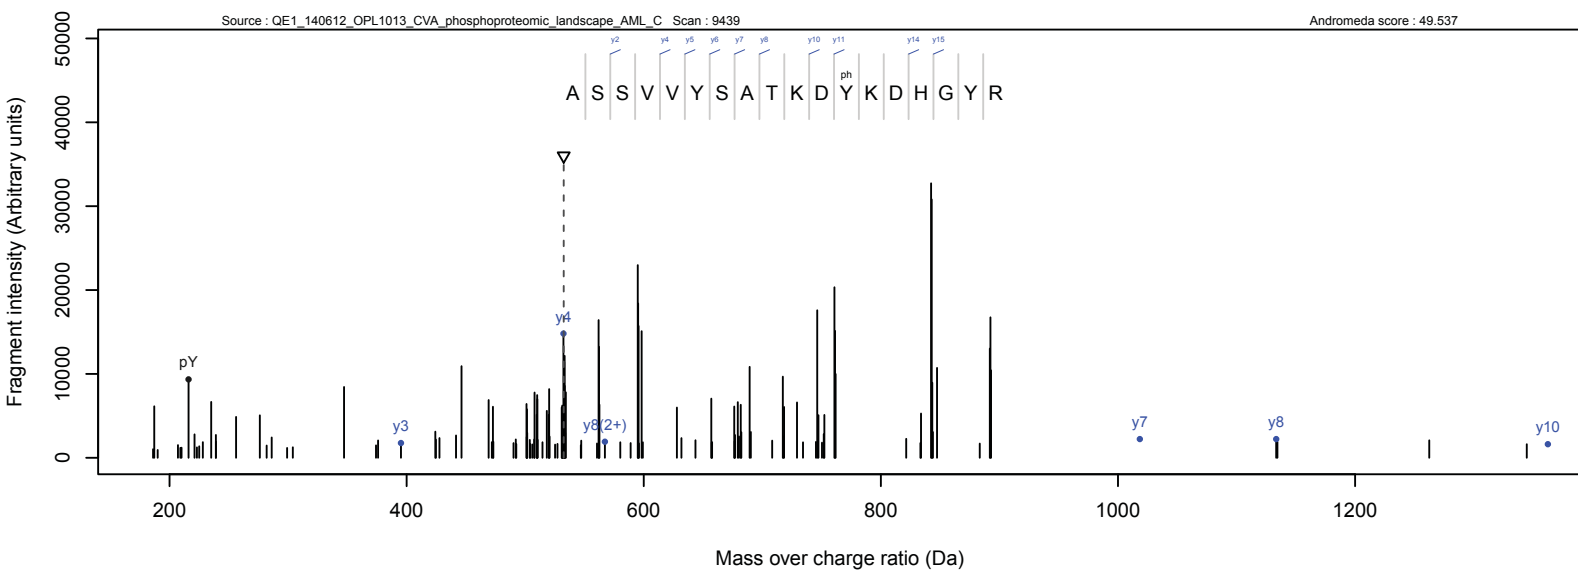

TLEQHDNIVTHYK<sup>ph</sup>NMIR-4+

Source : QE1\_140612\_OPL1013\_CVA\_phosphoproteomic\_landscape\_AML\_C Scan : 20007

Andromeda score : 49.537

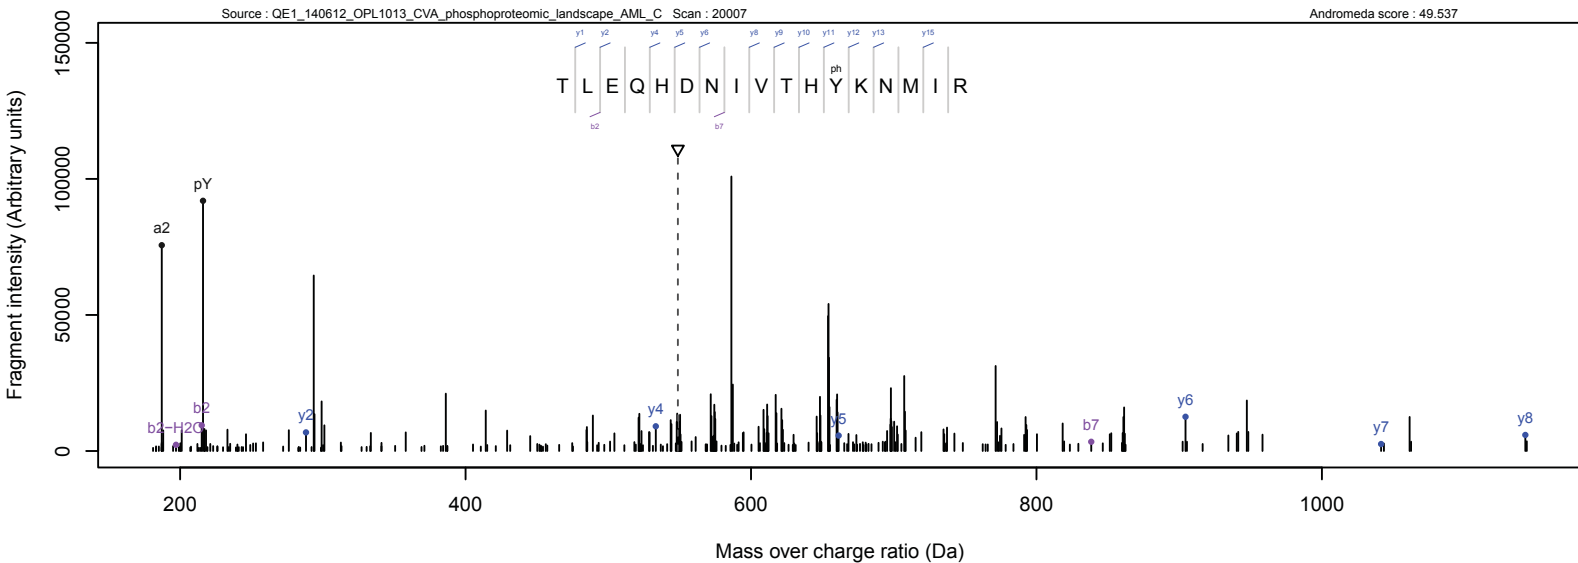

TTGIVETHFTKDL<sup>ph</sup>YFK-3+

Source : QE1\_140612\_OPL1013\_CVA\_phosphoproteomic\_landscape\_AML\_C Scan : 39921

Andromeda score : 49.537

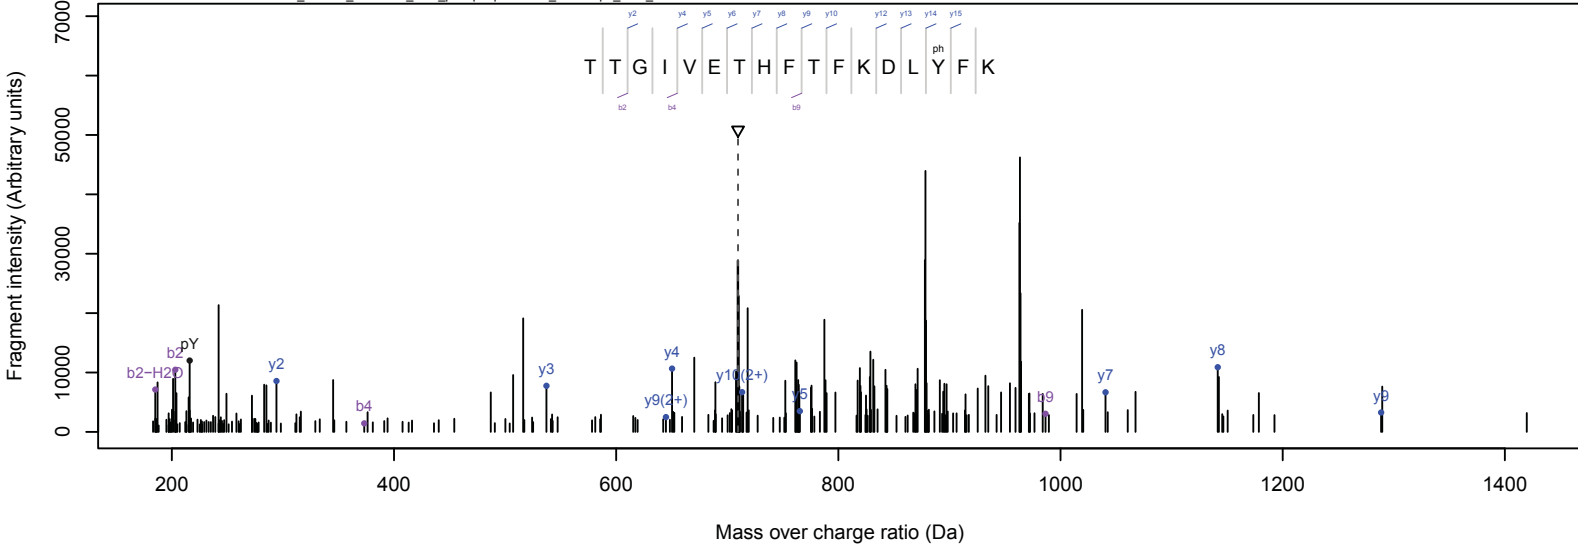

TKVVY<sup>ph</sup>LASETFNYSIDR-3+

Source : QE1\_140612\_OPL1013\_CVA\_phosphoproteomic\_landscape\_AML\_C Scan : 37772

Andromeda score : 49.528

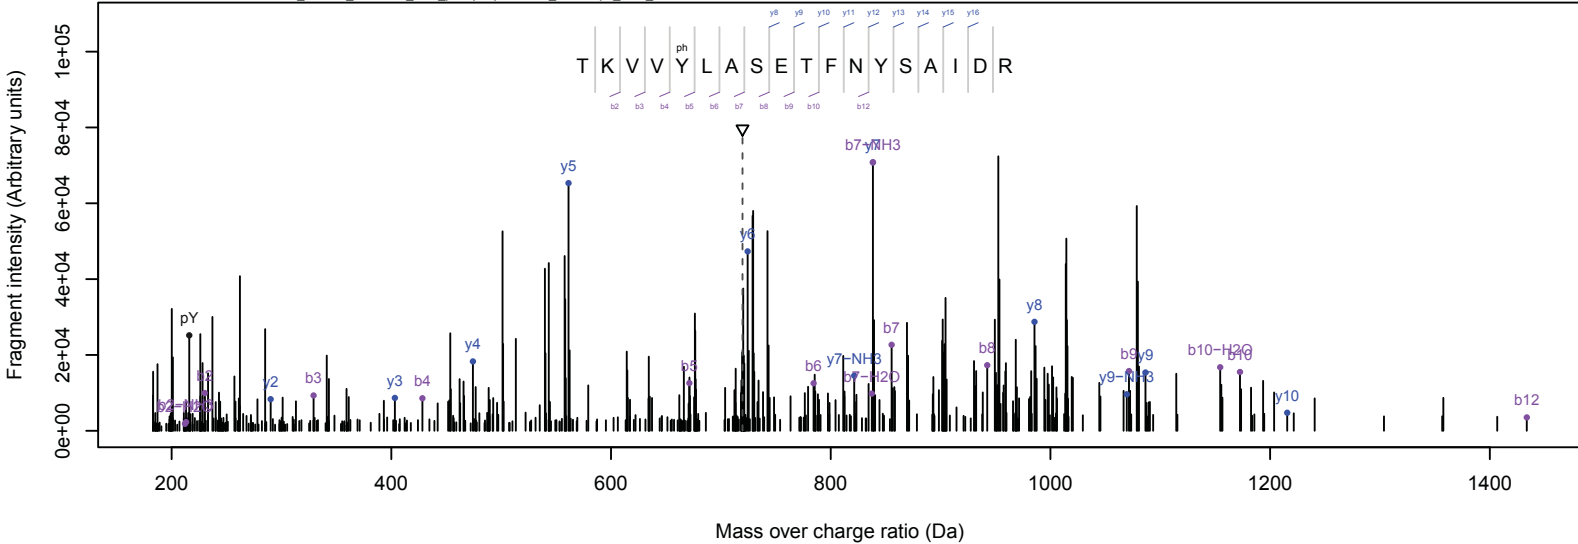



**Y(ph)GGVSGSQPPPVAPEPGVPSSPSQEPPTKR-3+**

Source : QE1\_140612\_OPL1013\_CVA\_phosphoproteomic\_landscape\_AML\_C Scan : 23395

Andromeda score : 49.525

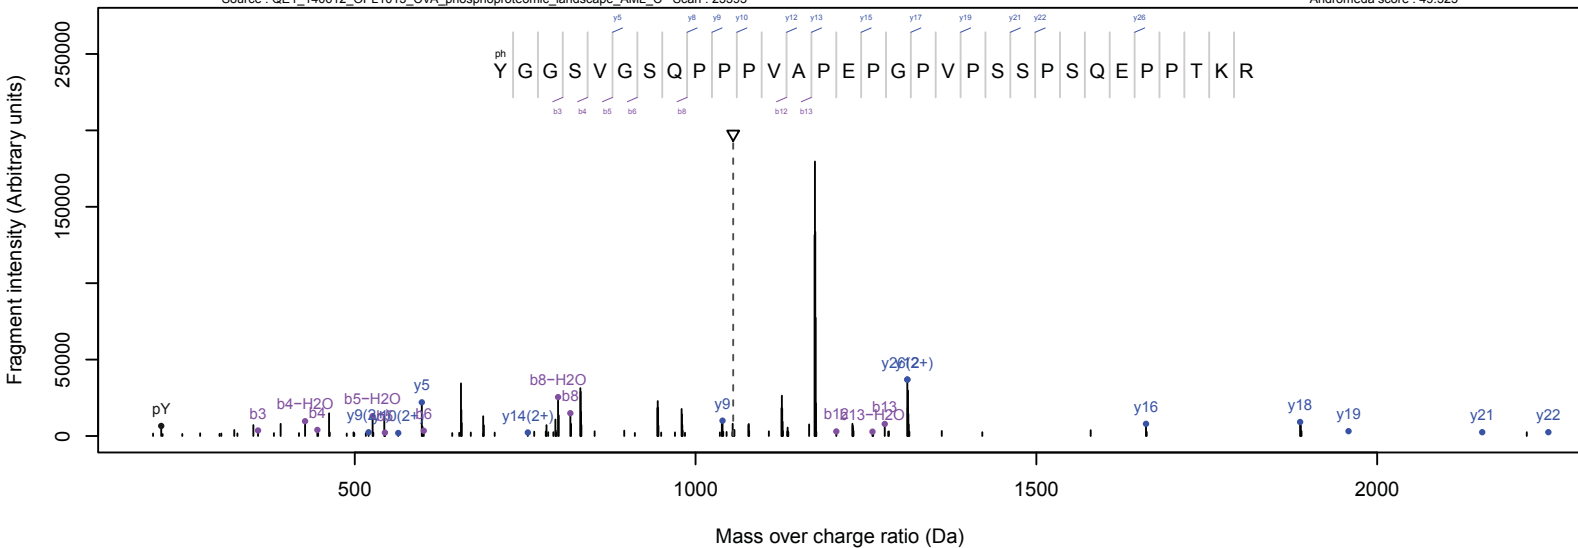

**GPT(ph)YVNM(ox)TVGSFVCTSCSGSLR-3+**

Source : QE1\_140908\_OPL1013\_CvA\_pTyrIP\_AML\_HEL Scan : 34442

Andromeda score : 49.497

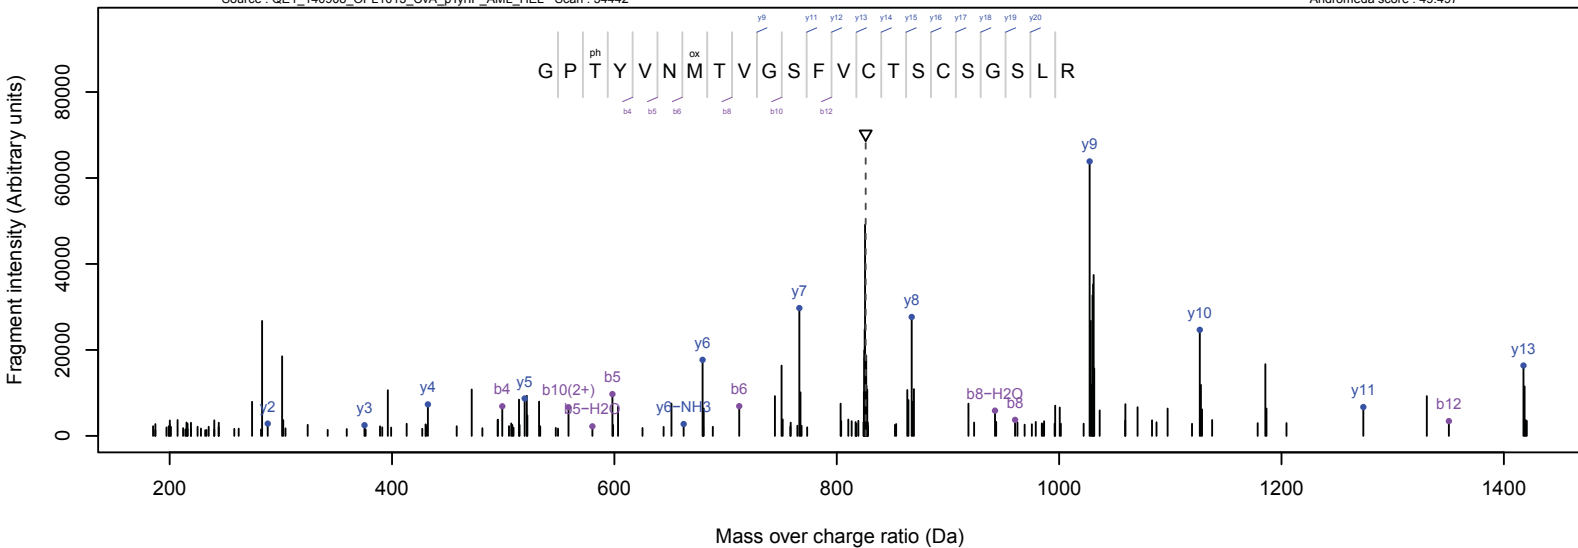

**STQLSHLVY(ph)R-2+**

Source : QE1\_140612\_OPL1013\_CVA\_phosphoproteomic\_landscape\_AML\_C Scan : 17017

Andromeda score : 49.466

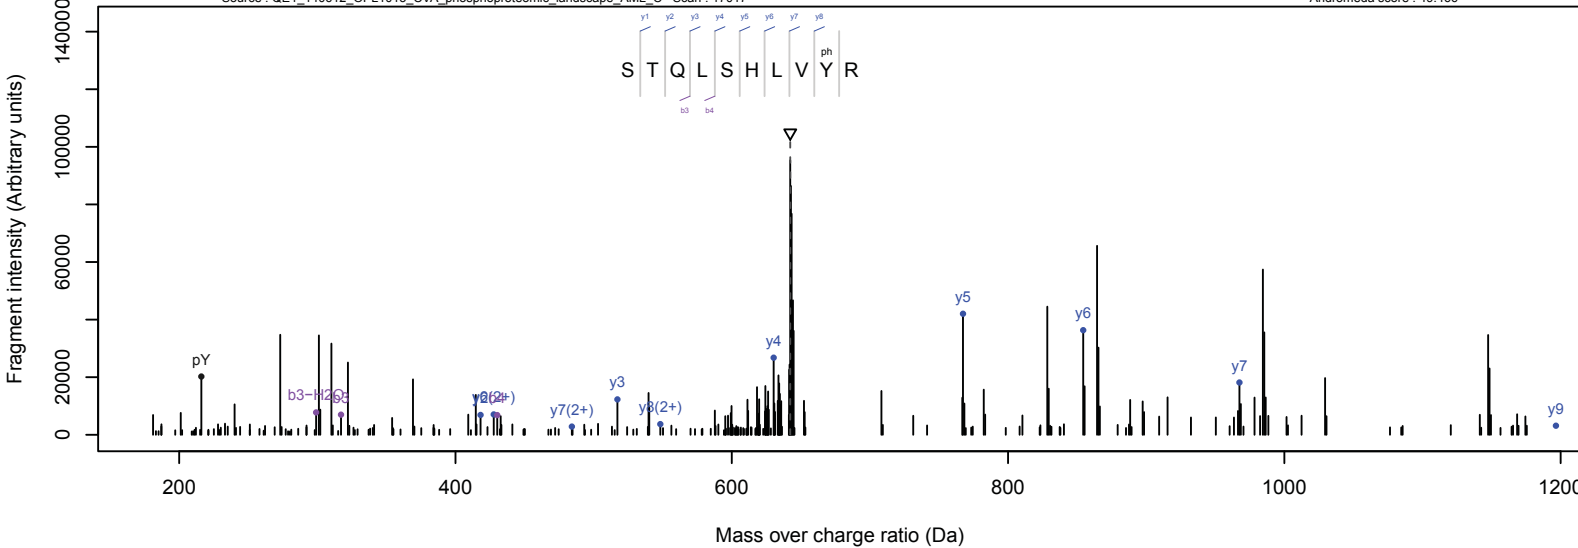

## FNSITSAY(ph)R-2+

Source: QE1\_140612\_OPL1013\_CVA\_phosphoproteomic\_landscape\_AML\_C Scan: 18797

Andromeda score: 49.448

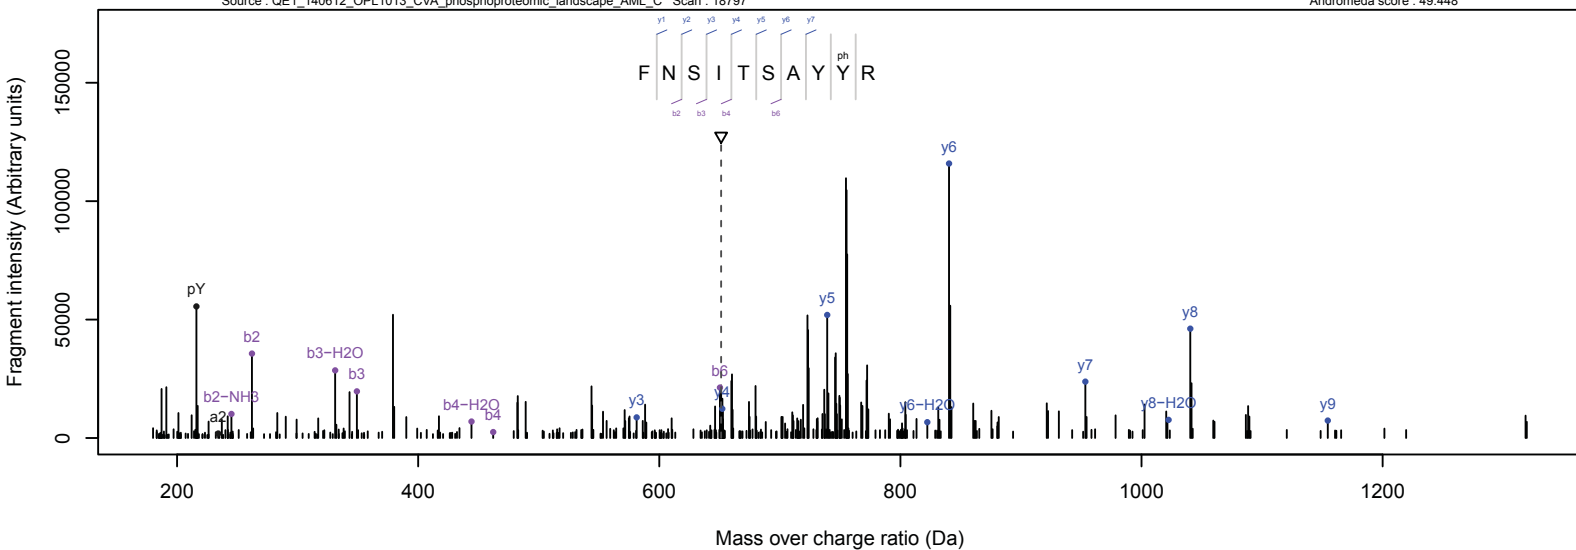

## TEGGY(ph)YQITGR-2+

Source: QE1\_140612\_OPL1013\_CVA\_phosphoproteomic\_landscape\_AML\_E Scan: 13044

Andromeda score: 49.448

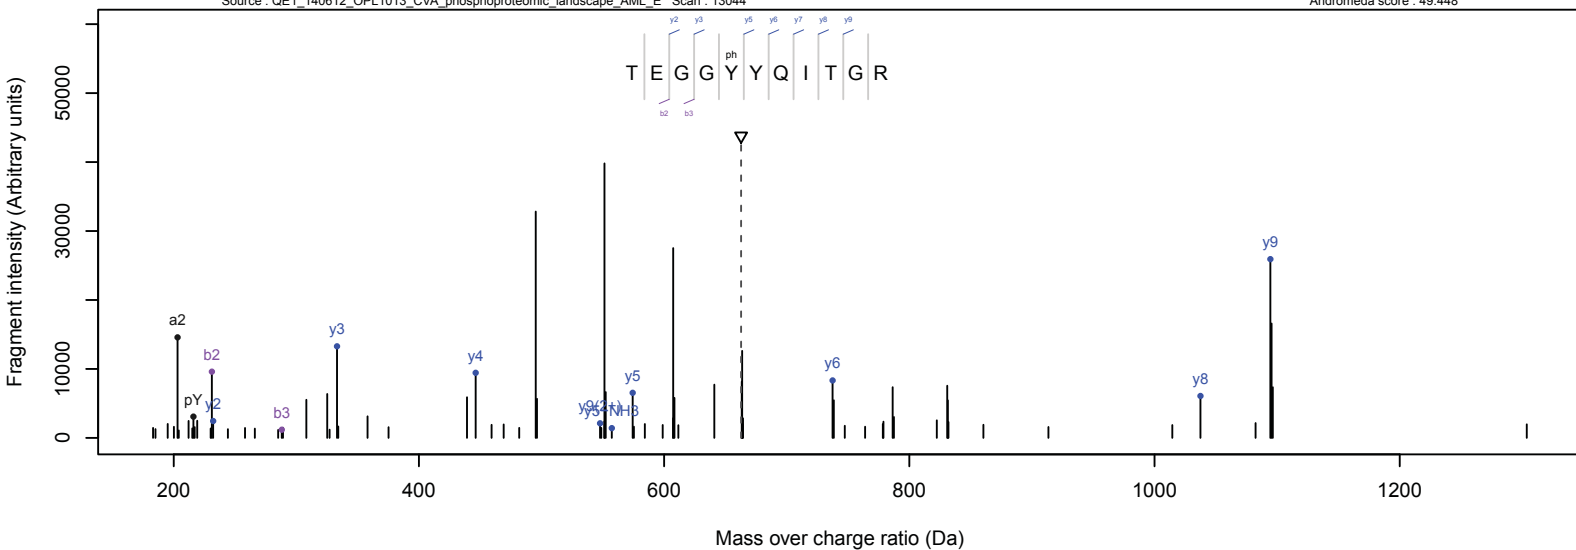

## TSY(ph)LTELIDR-2+

Source: QE1\_140908\_OPL1013\_CvA\_pTyrIP\_AML\_HEL Scan: 37390

Andromeda score: 49.448

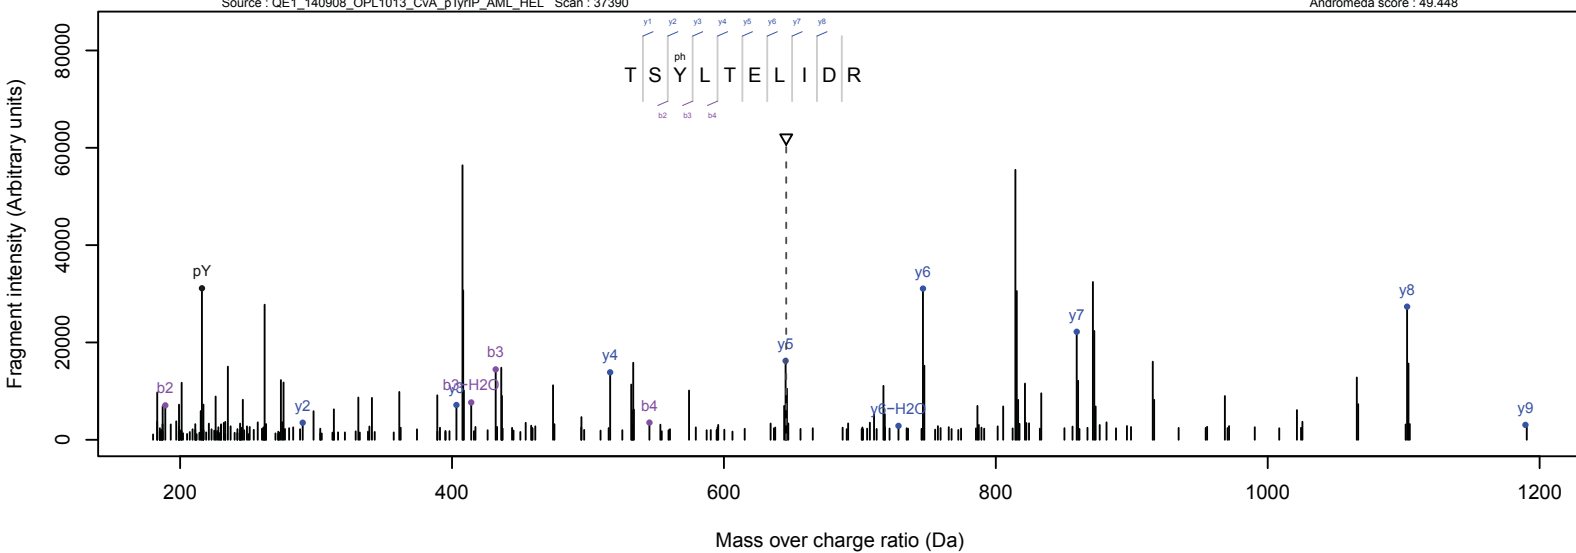

## VPSSTVEY(ph)LKK-3+

Source: QE1\_140612\_OPL1013\_CVA\_phosphoproteomic\_landscape\_AML\_C Scan: 10827

Andromeda score: 49.448

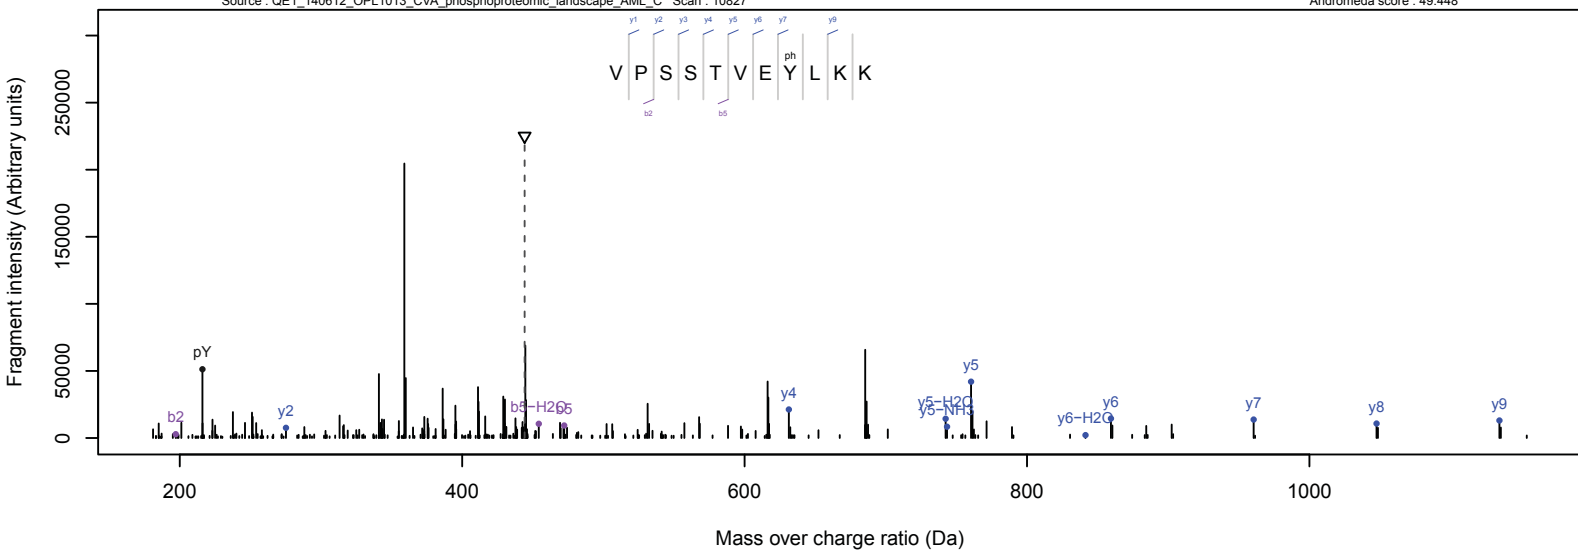

## VVNGKVEY(ph)FLK-3+

Source: QE1\_140612\_OPL1013\_CVA\_phosphoproteomic\_landscape\_AML\_C Scan: 25305

Andromeda score: 49.448

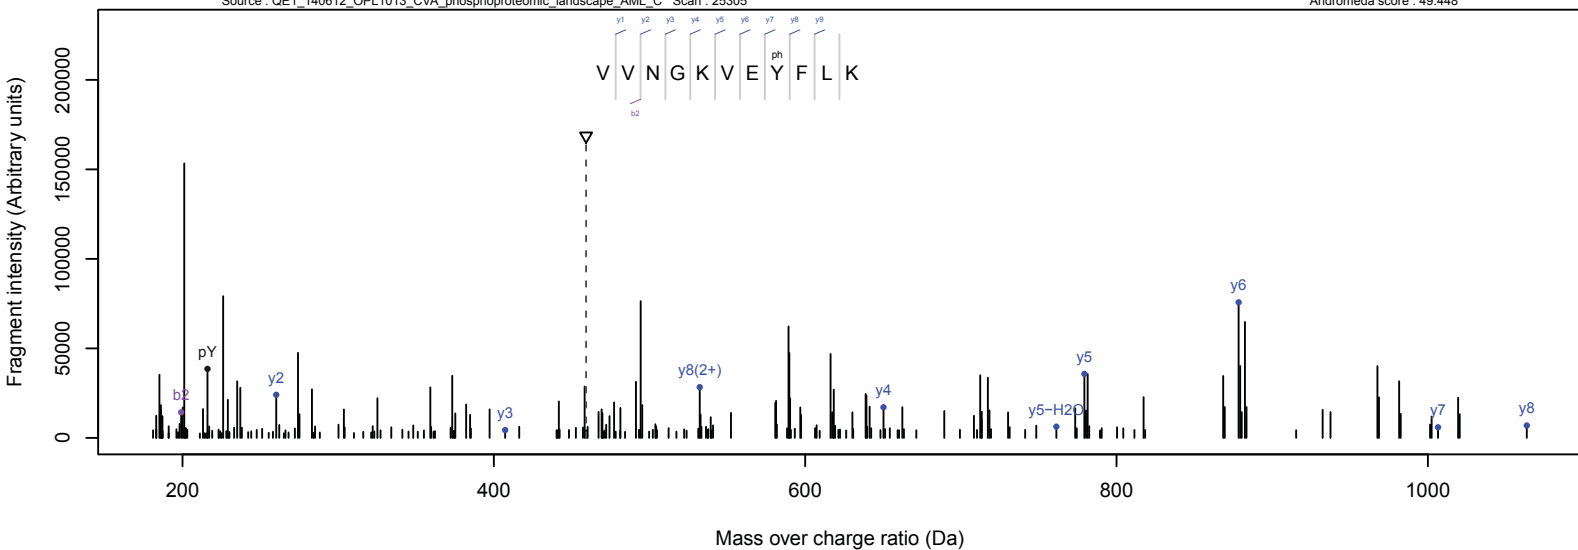

## IY(ph)VGLSK-2+

Source: QE1\_140822\_OPL1013\_CvA\_pTyrIP\_AML\_cell\_lines\_part2\_E Scan: 12362

Andromeda score: 49.442

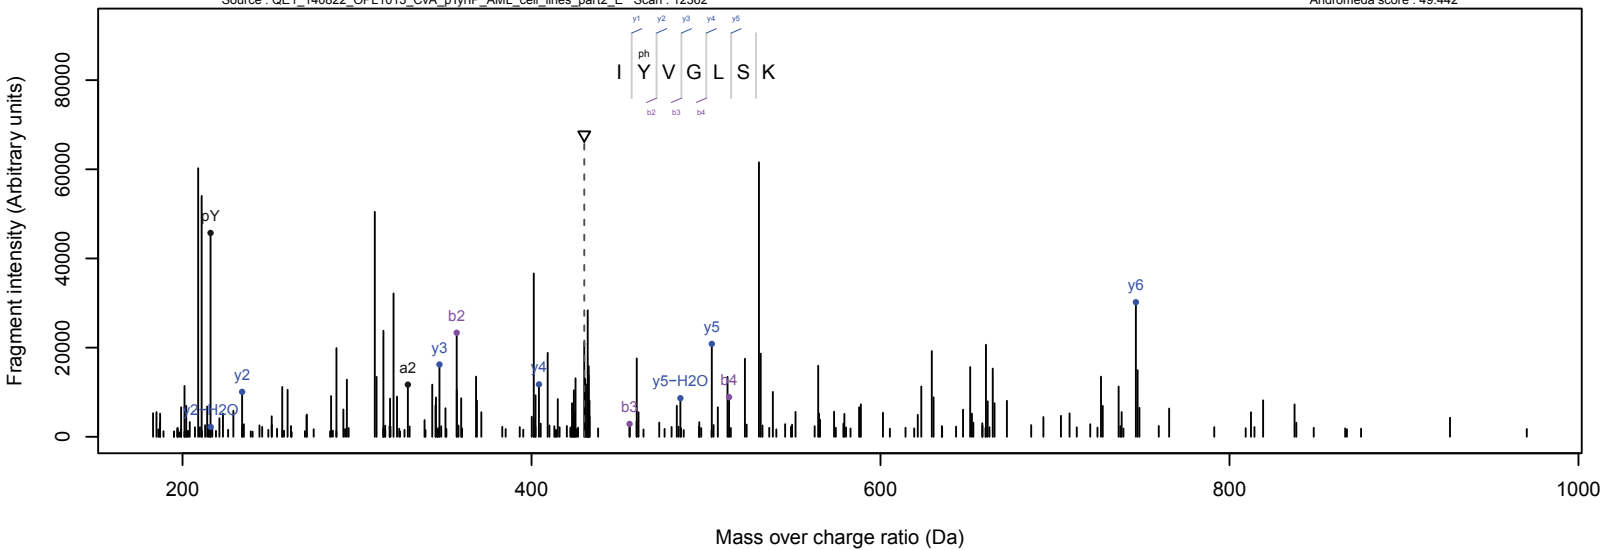

## YGM(ox)LLY(ph)QNYR-2+

Source : QE1\_140908\_OPL1013\_CvA\_pTyrIP\_AML\_HEL Scan : 24506

Andromeda score : 49.418

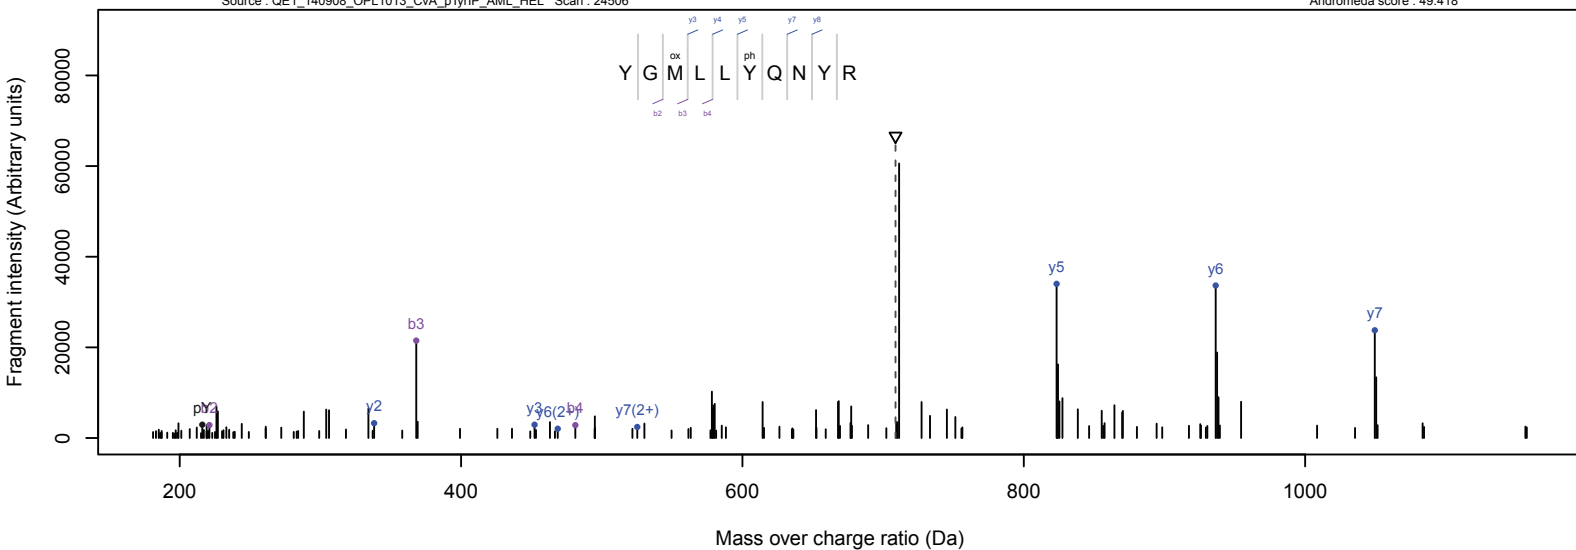

## TY(ph)EIWHR-2+

Source : QE1\_140612\_OPL1013\_CVA\_phosphoproteomic\_landscape\_AML\_B Scan : 14148

Andromeda score : 49.358

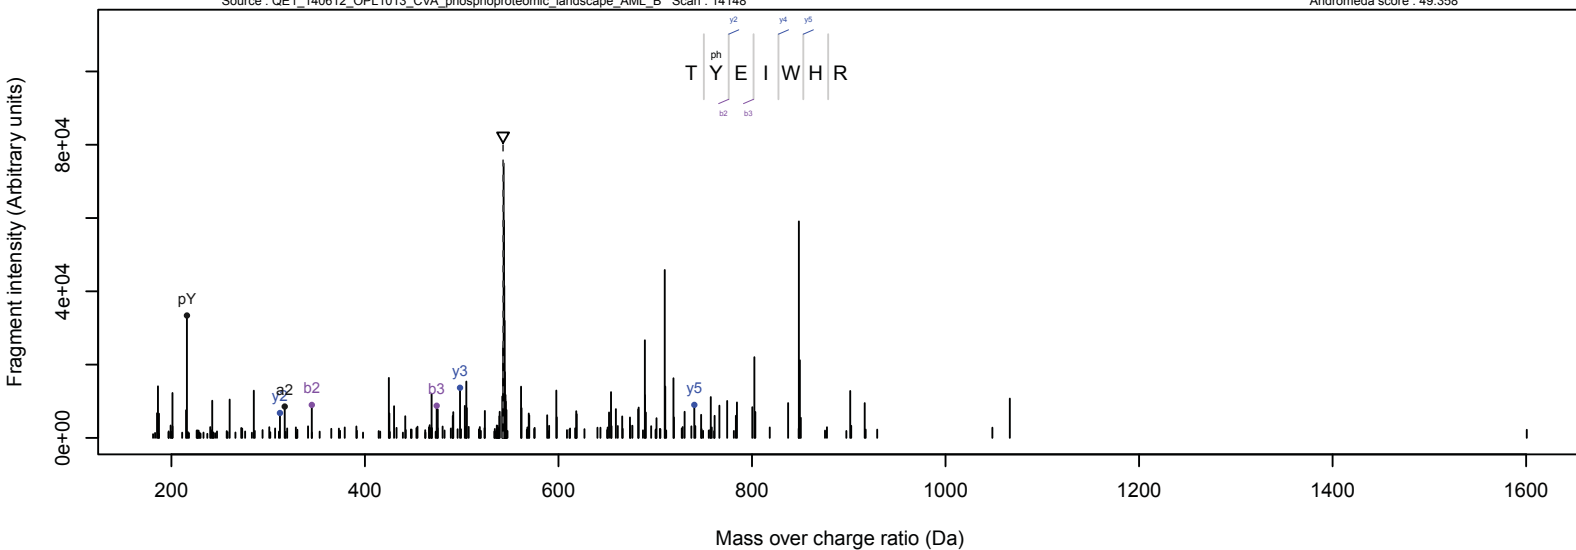

## Y(ph)FQLPPR-2+

Source : QE1\_140612\_OPL1013\_CVA\_phosphoproteomic\_landscape\_AML\_C Scan : 24619

Andromeda score : 49.358

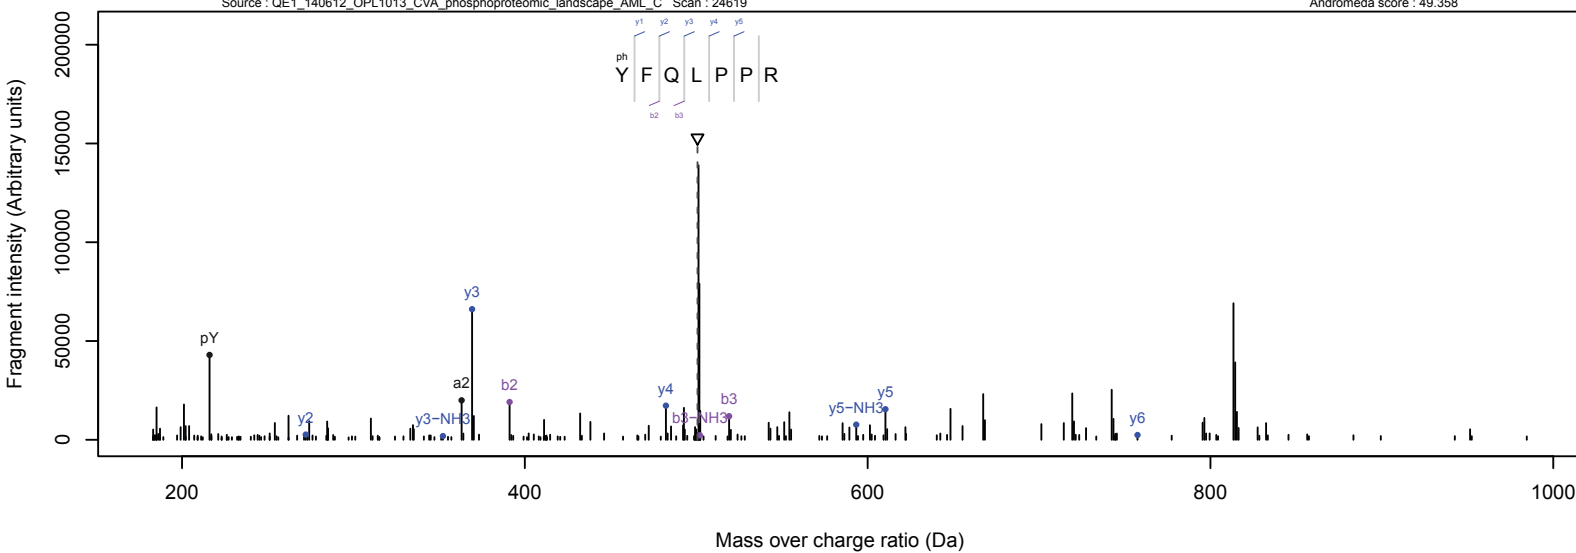

## VELCSFGY(ph)KIYPGHR-3+

Source : QE1\_140612\_OPL1013\_CVA\_phosphoproteomic\_landscape\_AML\_C Scan : 25999

Andromeda score : 49.343

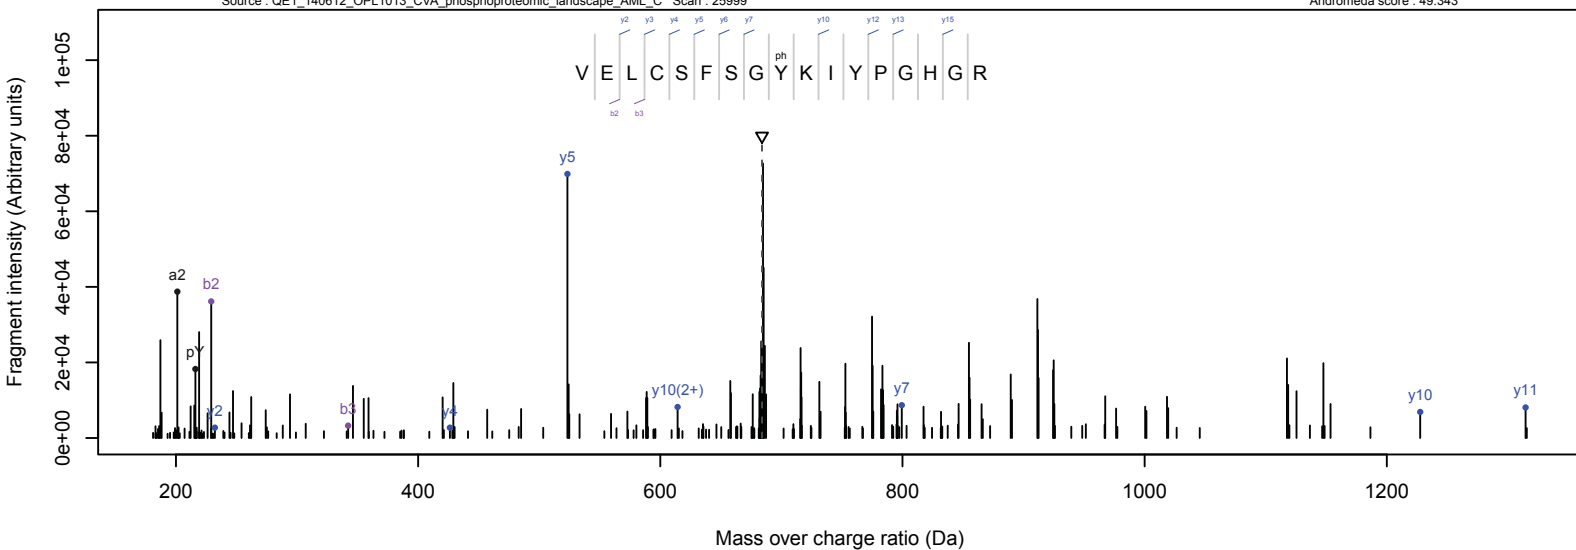

## NCTAGAVY(ph)TYHEK-3+

Source : QE1\_140612\_OPL1013\_CVA\_phosphoproteomic\_landscape\_AML\_B Scan : 6950

Andromeda score : 49.333

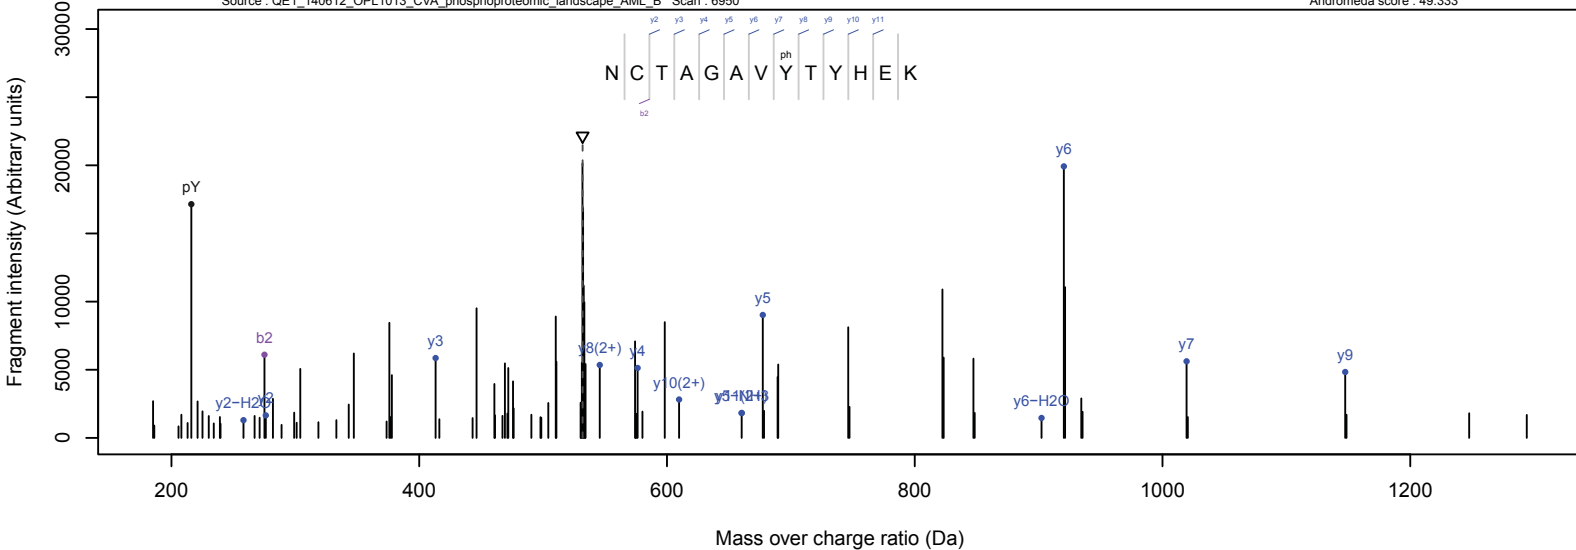

## NQLGNY(ph)PTLPLM(ox)K-2+

Source : QE1\_140612\_OPL1013\_CVA\_phosphoproteomic\_landscape\_AML\_C Scan : 28468

Andromeda score : 49.333

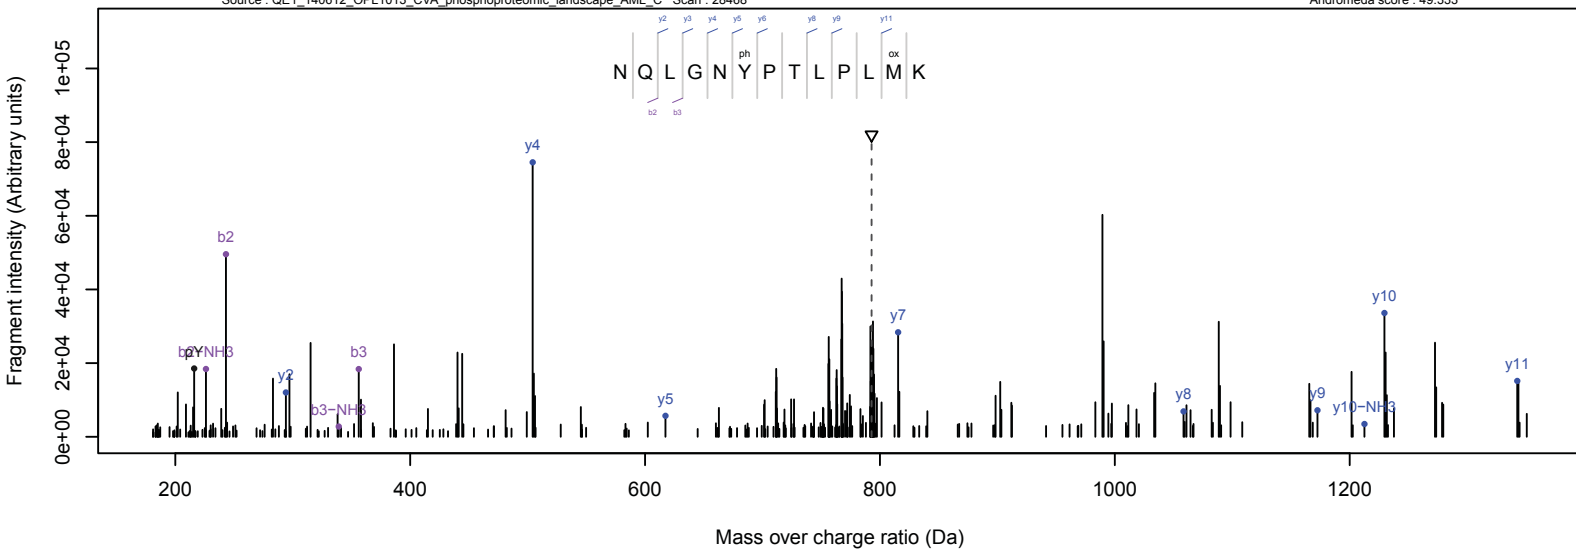

## YEPVLFEEKHYK-3+

Source: QE1\_140612\_OPL1013\_CVA\_phosphoproteomic\_landscape\_AML\_C Scan: 23643

Andromeda score: 49.333

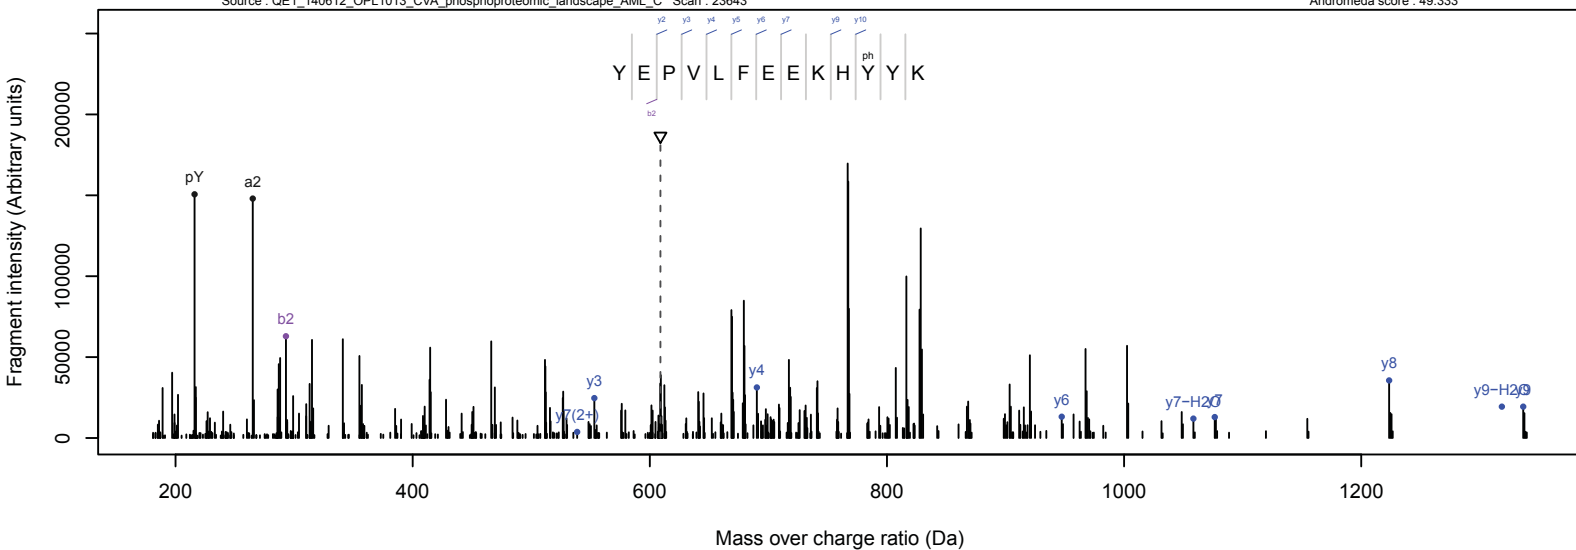

## LTPEYLELKK-3+

Source: QE1\_140612\_OPL1013\_CVA\_phosphoproteomic\_landscape\_AML\_C Scan: 20985

Andromeda score: 49.3

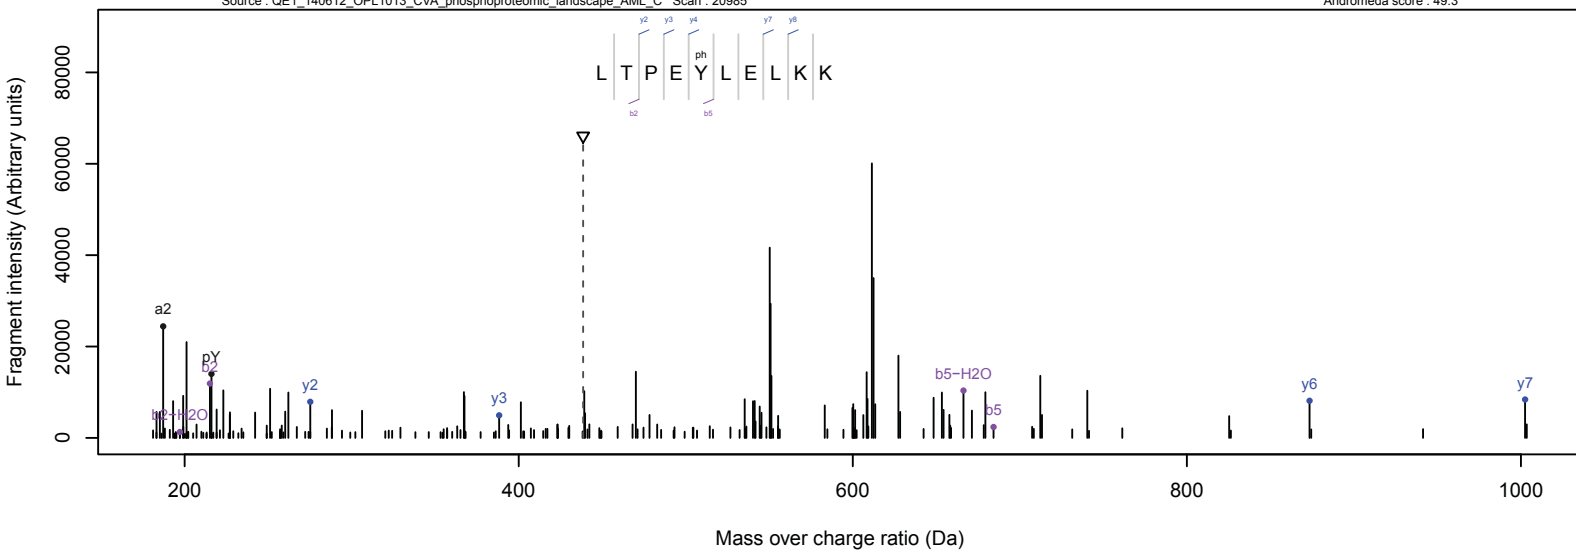

## MIY(ph)ASSKDAIK-2+

Source: QE1\_140612\_OPL1013\_CVA\_phosphoproteomic\_landscape\_AML\_C Scan: 10622

Andromeda score: 49.3

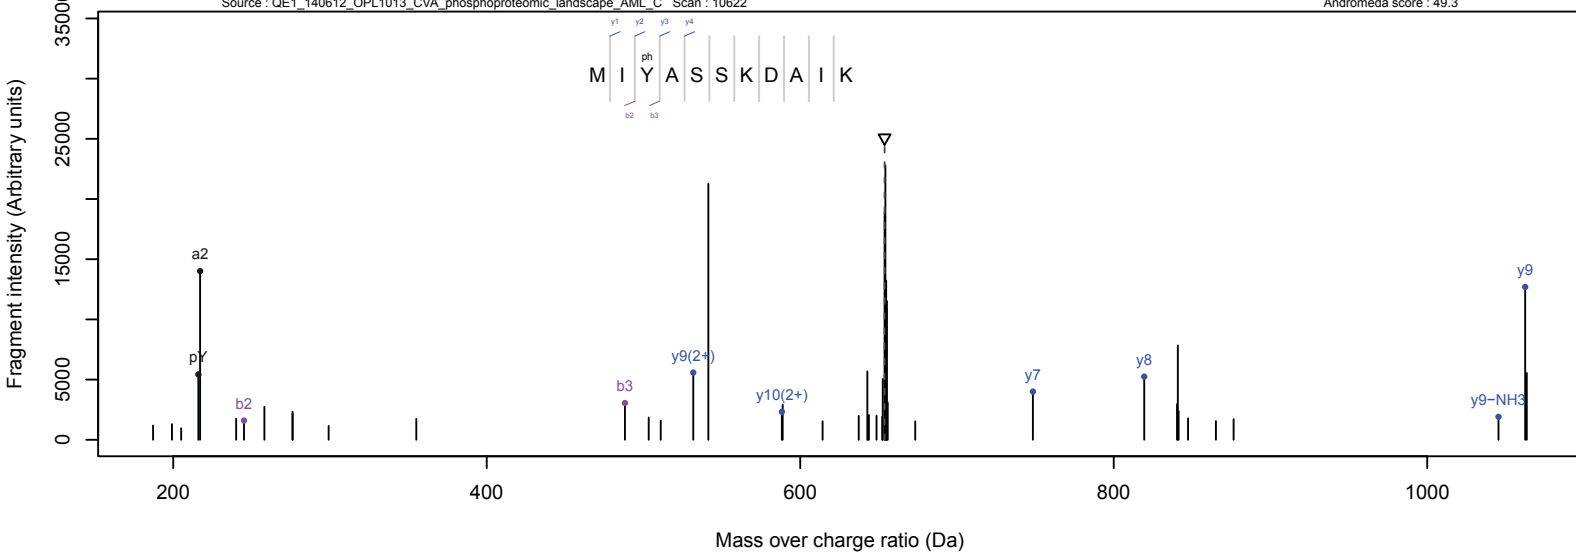

TLY(ph)VGNLSR-2+

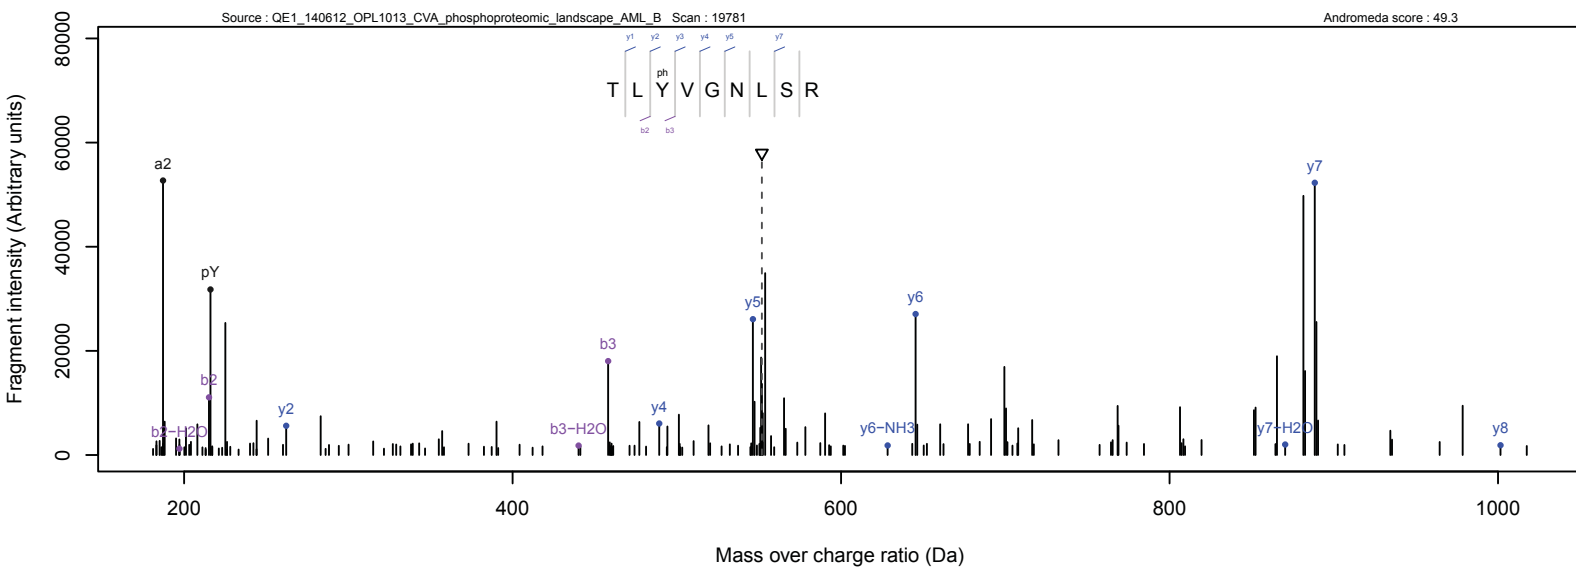

CNSPAKYDCY(ph)LQR-3+

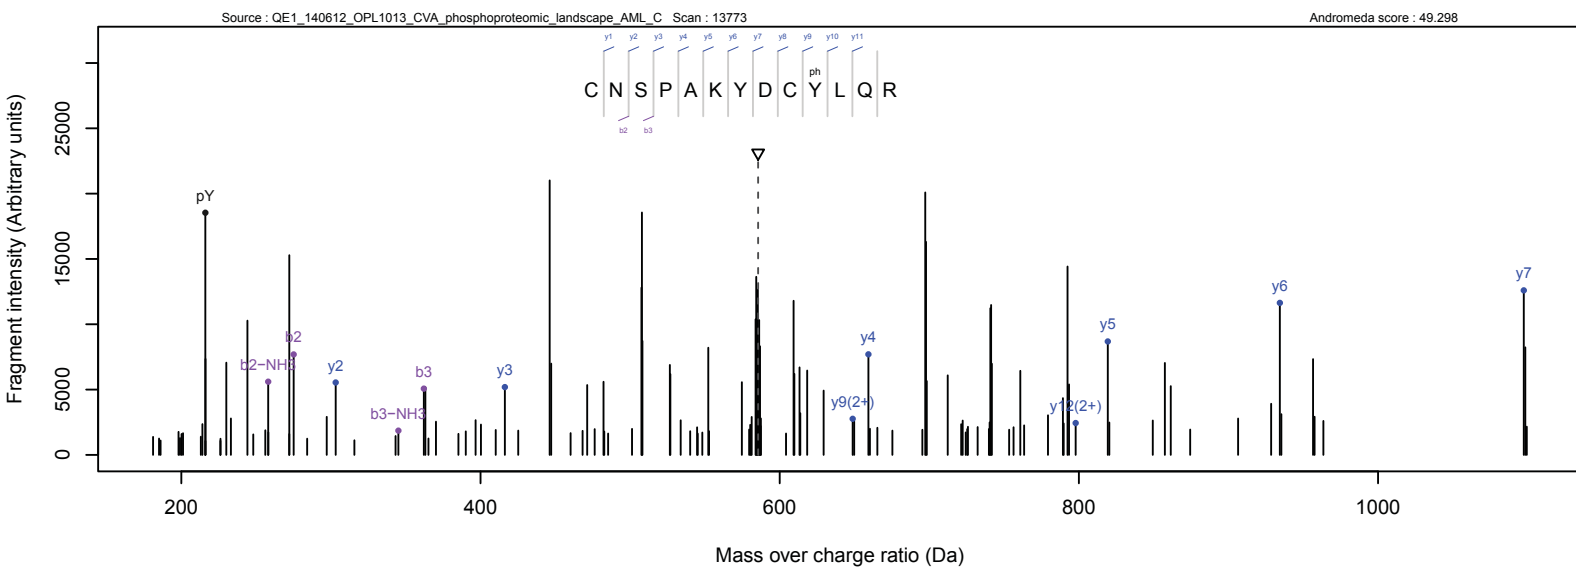

LRLEEEALY(ph)AAQR-3+

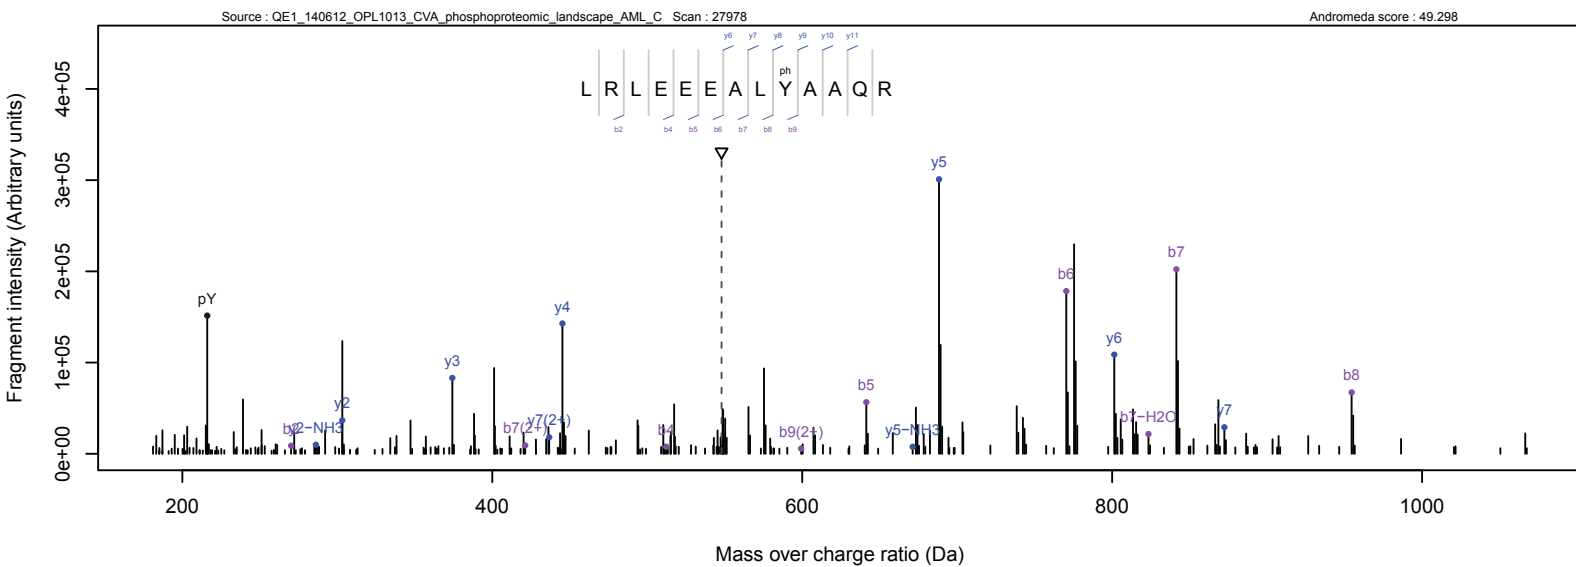

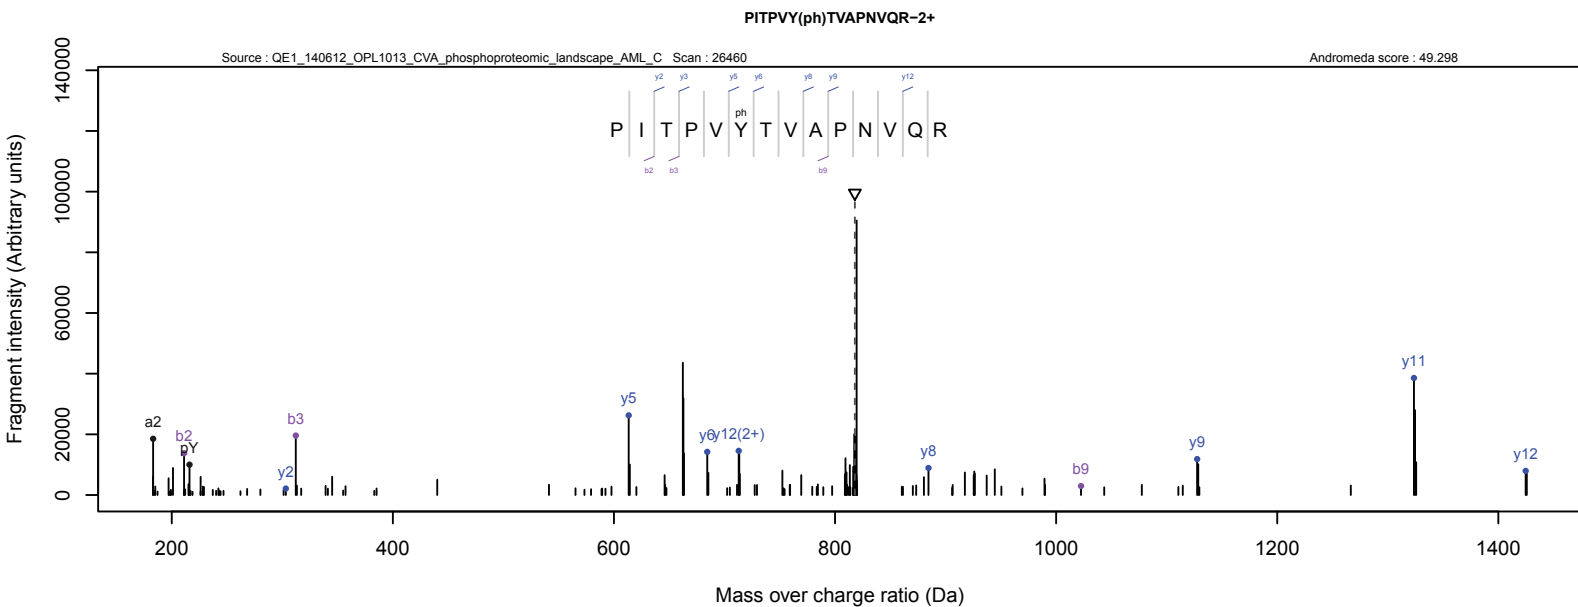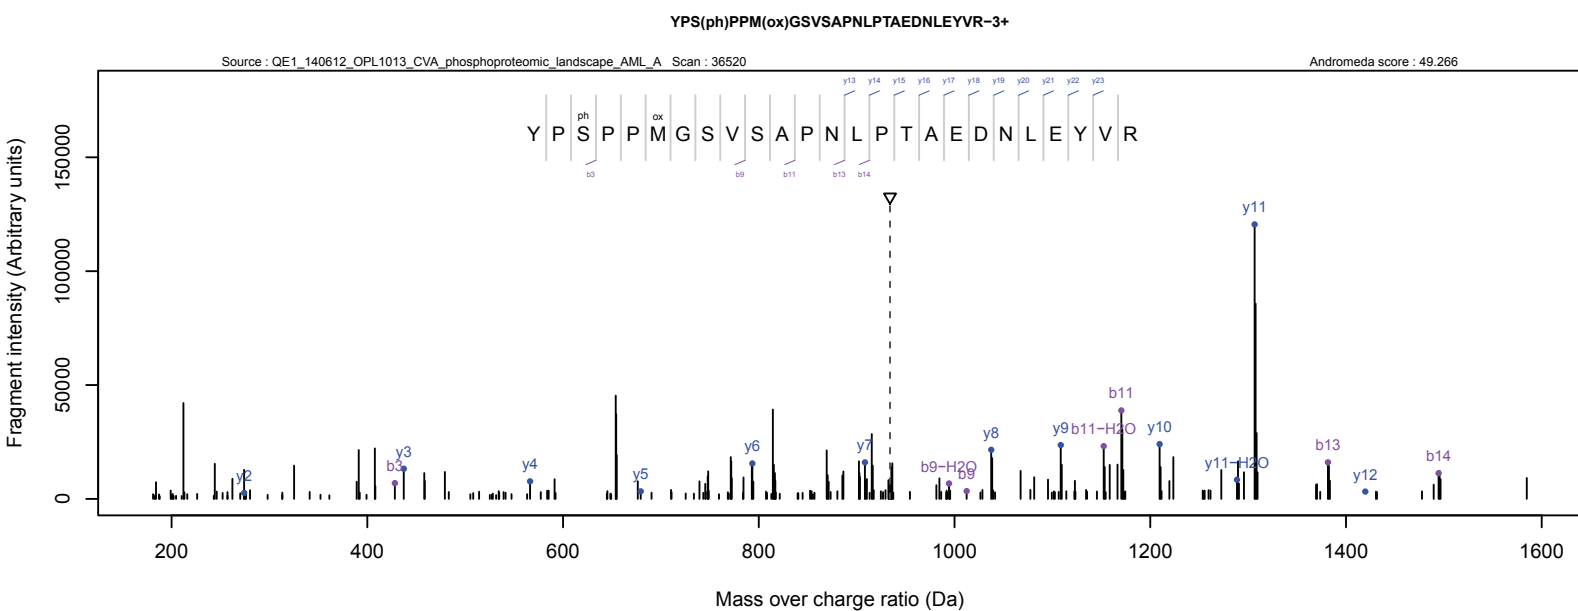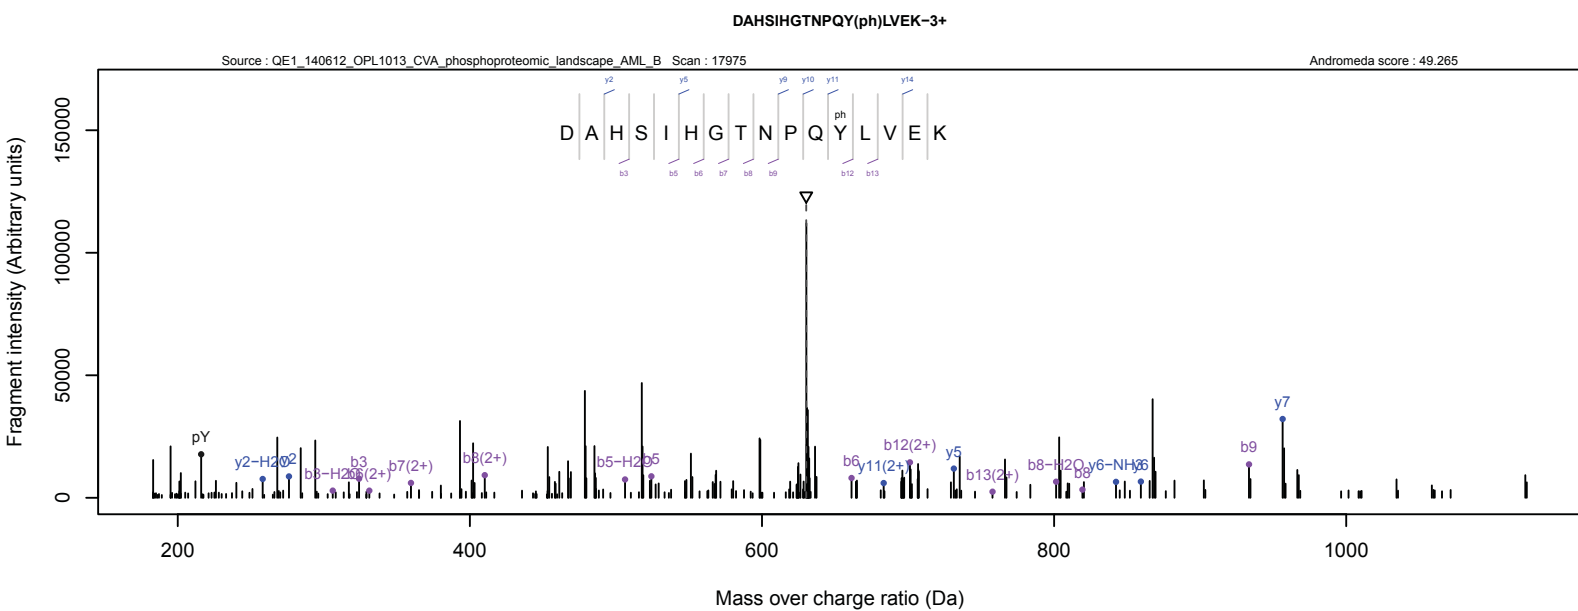



**EHVLCQFSAWY(ph)PFFR-3+**

Source : QE1\_140612\_OPL1013\_CVA\_phosphoproteomic\_landscape\_AML\_D Scan : 43889

Andromeda score : 49.265

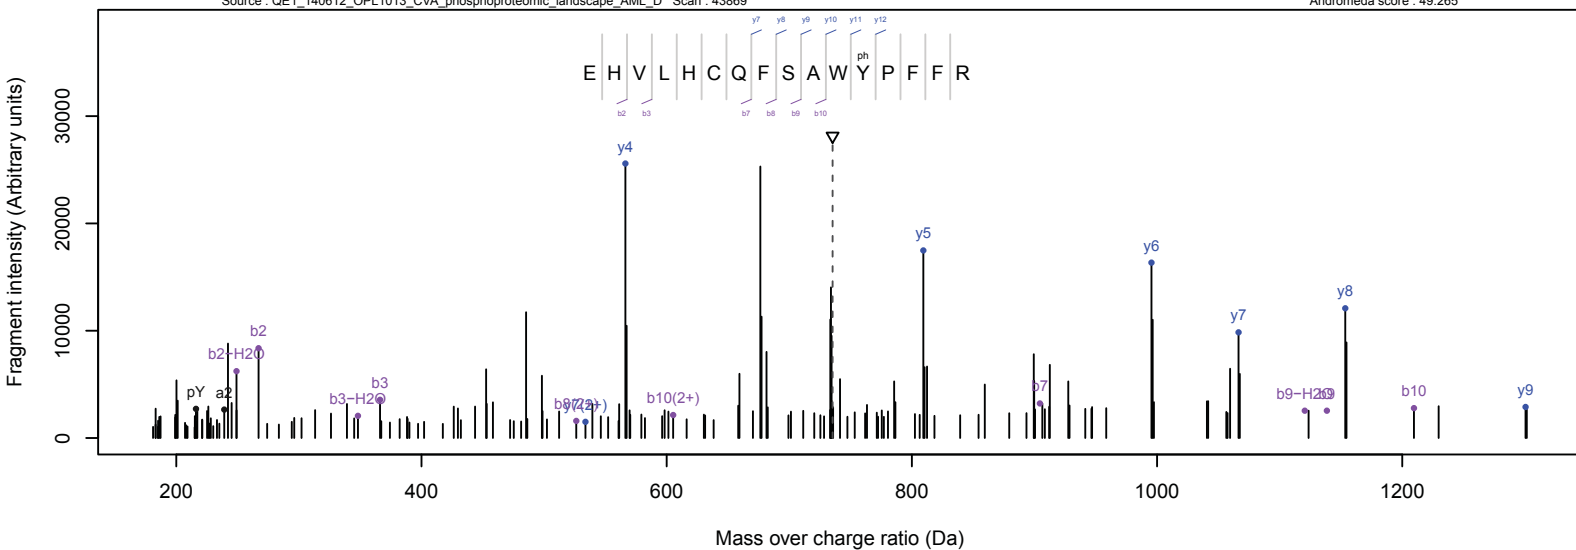

**Y(ph)SLSEDKLIR-3+**

Source : QE1\_140612\_OPL1013\_CVA\_phosphoproteomic\_landscape\_AML\_C Scan : 17936

Andromeda score : 49.189

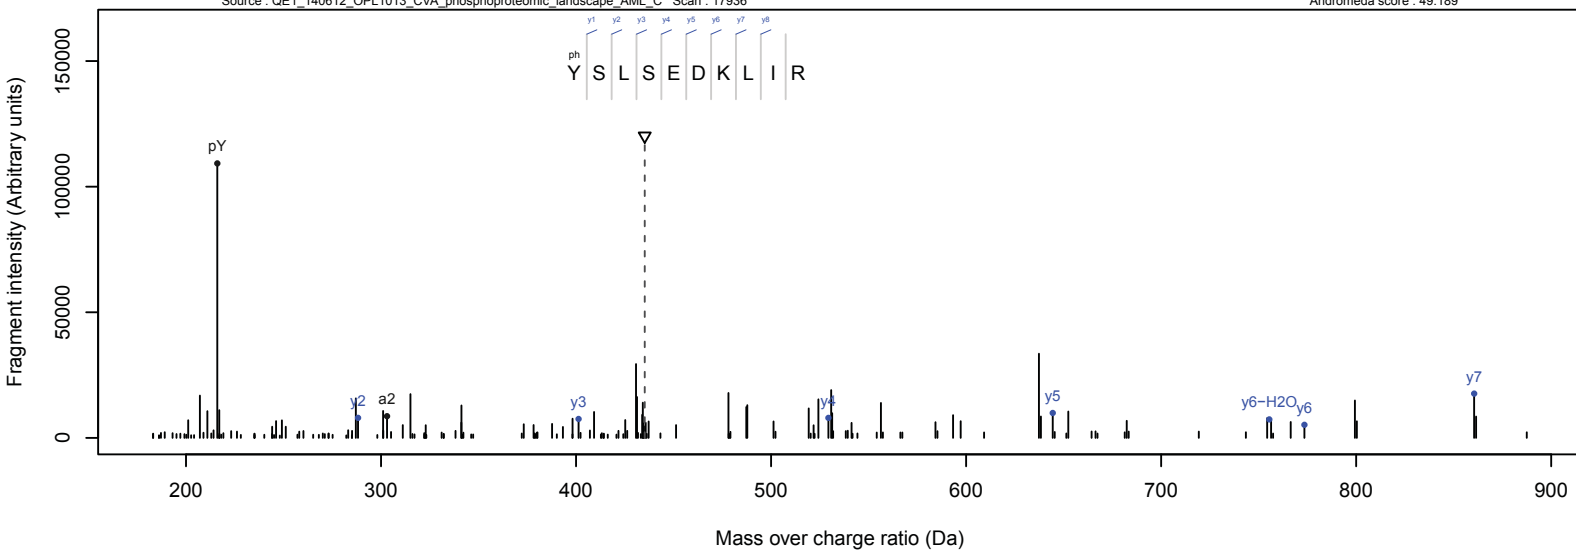

**RAQDEHPQEDGY(ph)YLLQER-3+**

Source : QE1\_140612\_OPL1013\_CVA\_phosphoproteomic\_landscape\_AML\_B Scan : 28539

Andromeda score : 49.188

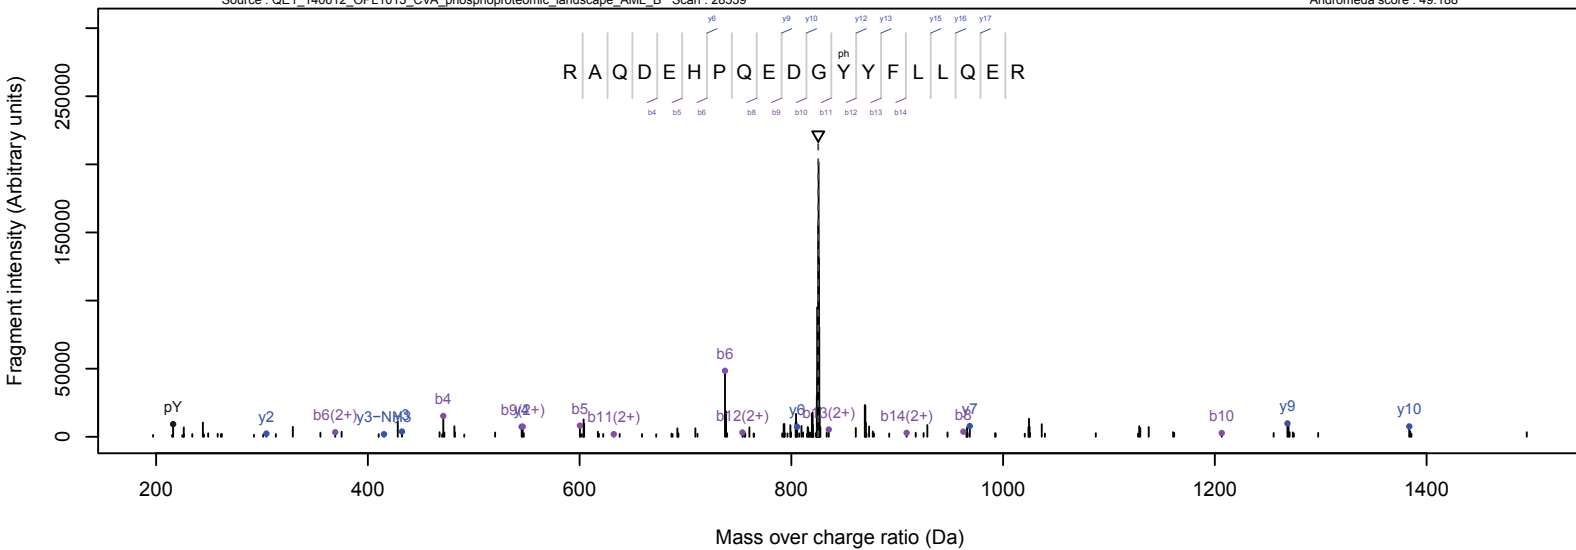

## SSTSNANDIPECADKY(ph)YDALVK-3+

Source : QE1\_140612\_OPL1013\_CVA\_phosphoproteomic\_landscape\_AML\_D Scan : 35838

Andromeda score : 49.125

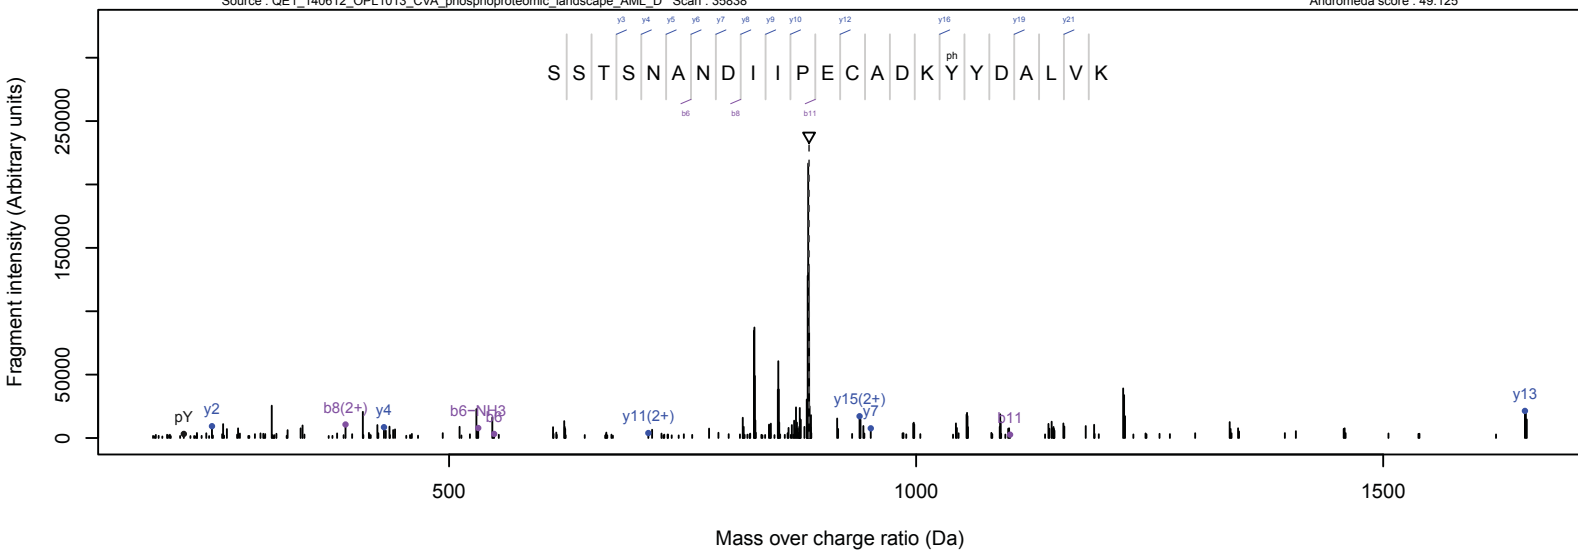

## (ac)AY(ph)HSGYGAHGSK-3+

Source : QE1\_140822\_OPL1013\_CvA\_pTyrIP\_AML\_cell\_lines\_part2\_E Scan : 2902

Andromeda score : 49.097

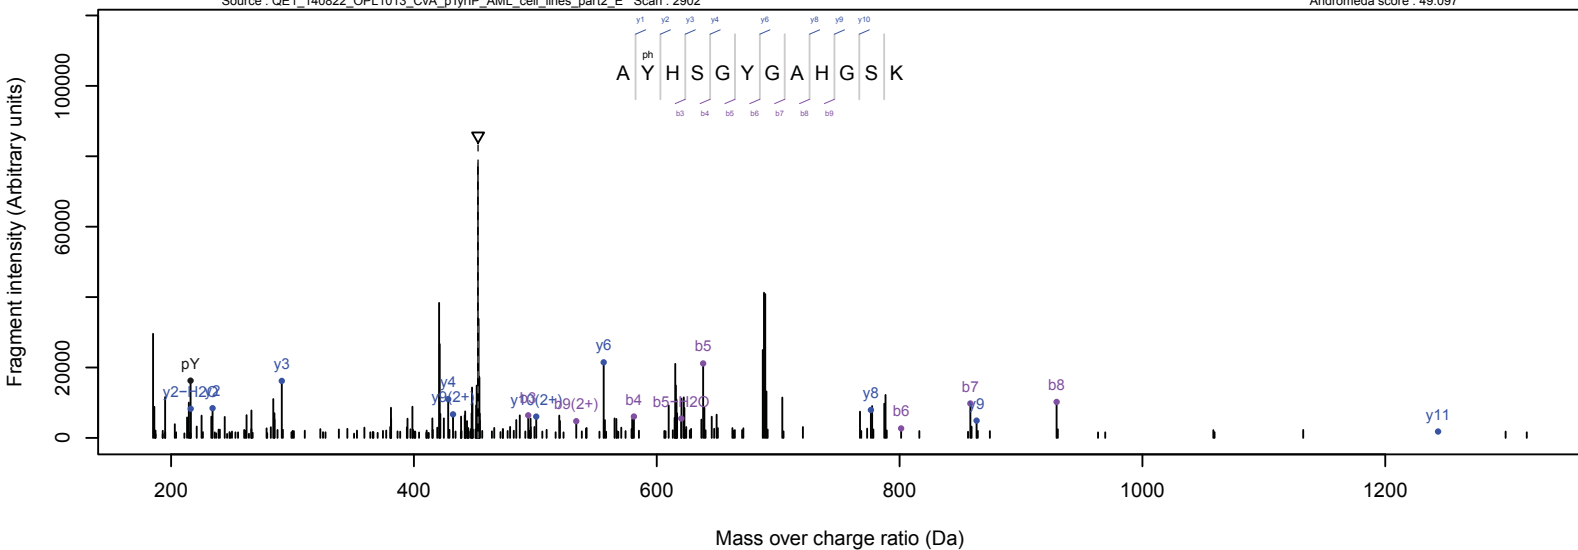

## GGS(ph)PYNQFDIIPGDTLGGHTGPAGDSWLPK-3+

Source : QE1\_140612\_OPL1013\_CVA\_phosphoproteomic\_landscape\_AML\_C Scan : 46277

Andromeda score : 49.087

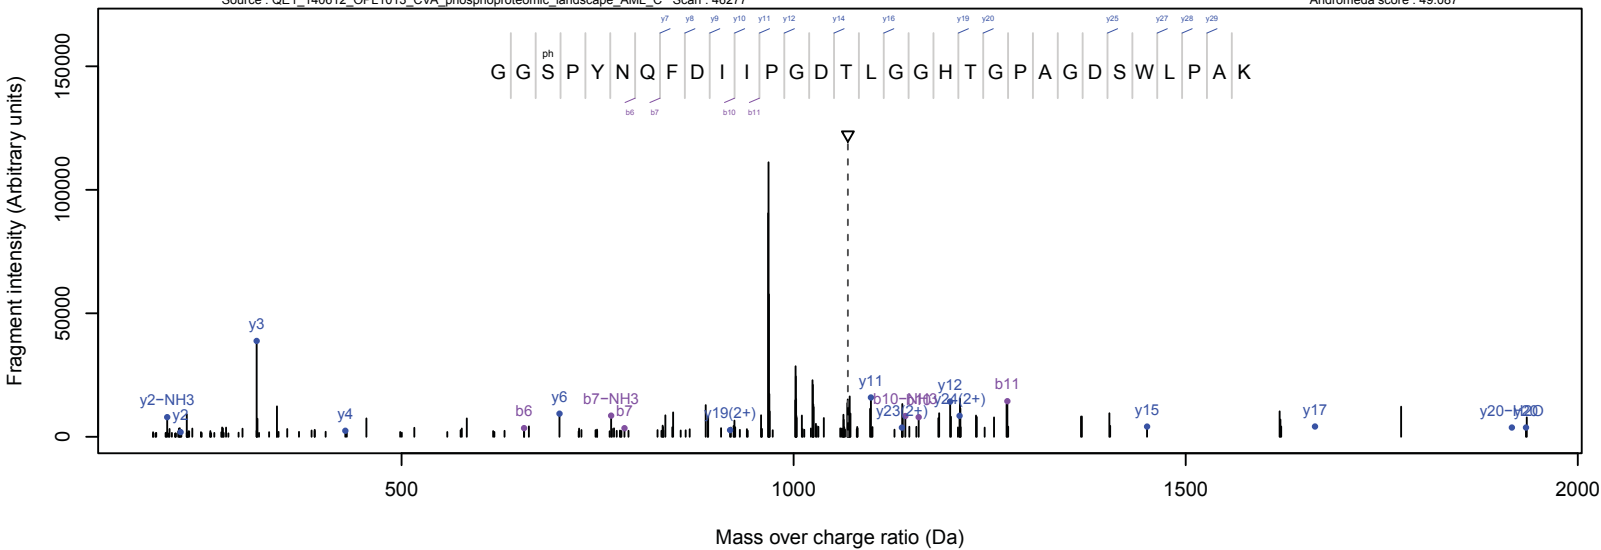

**AEPMPASSAPPASS(ph)LYSSPVNSSAPLAEDIDPELAR-3+**

Source : QE1\_140908\_OPL1013\_CVA\_pTyrIPL\_AML\_Kasumi6 Scan : 46588

Andromeda score : 49.073

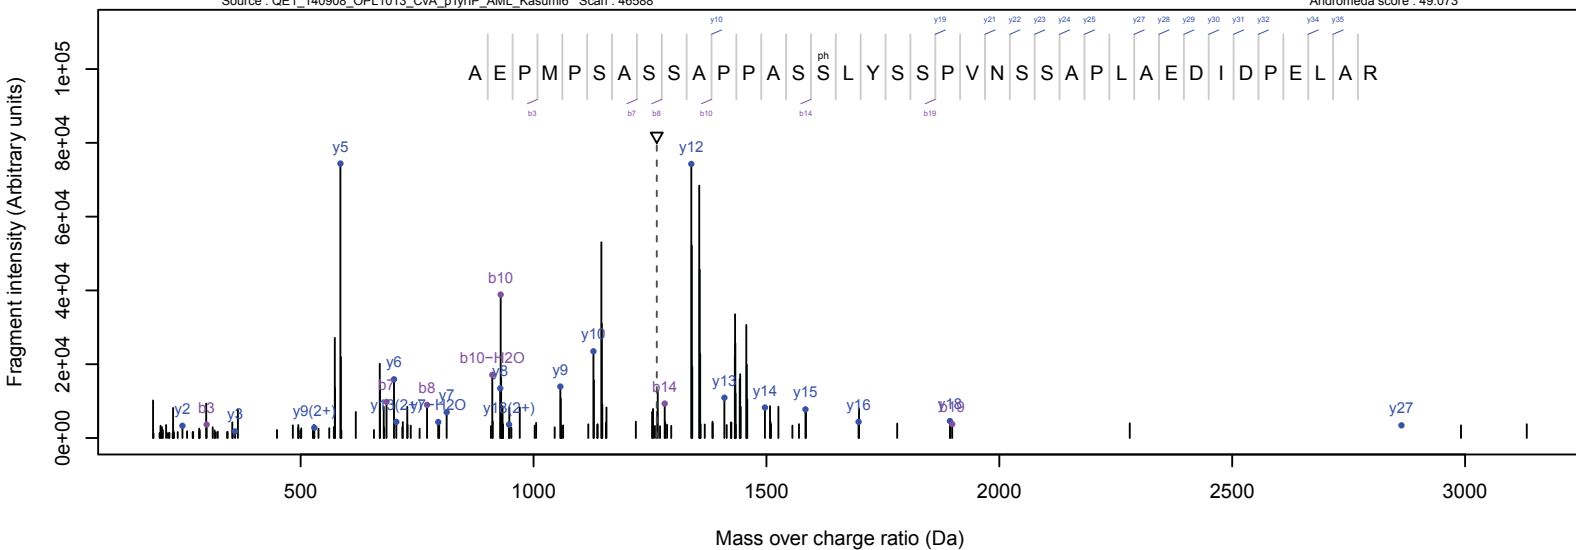

**GGHMDDGGY(ph)SM(ox)NFMSSSR-3+**

Source : QE1\_140612\_OPL1013\_CVA\_phosphoproteomic\_landscape\_AML\_C Scan : 14557

Andromeda score : 49.036

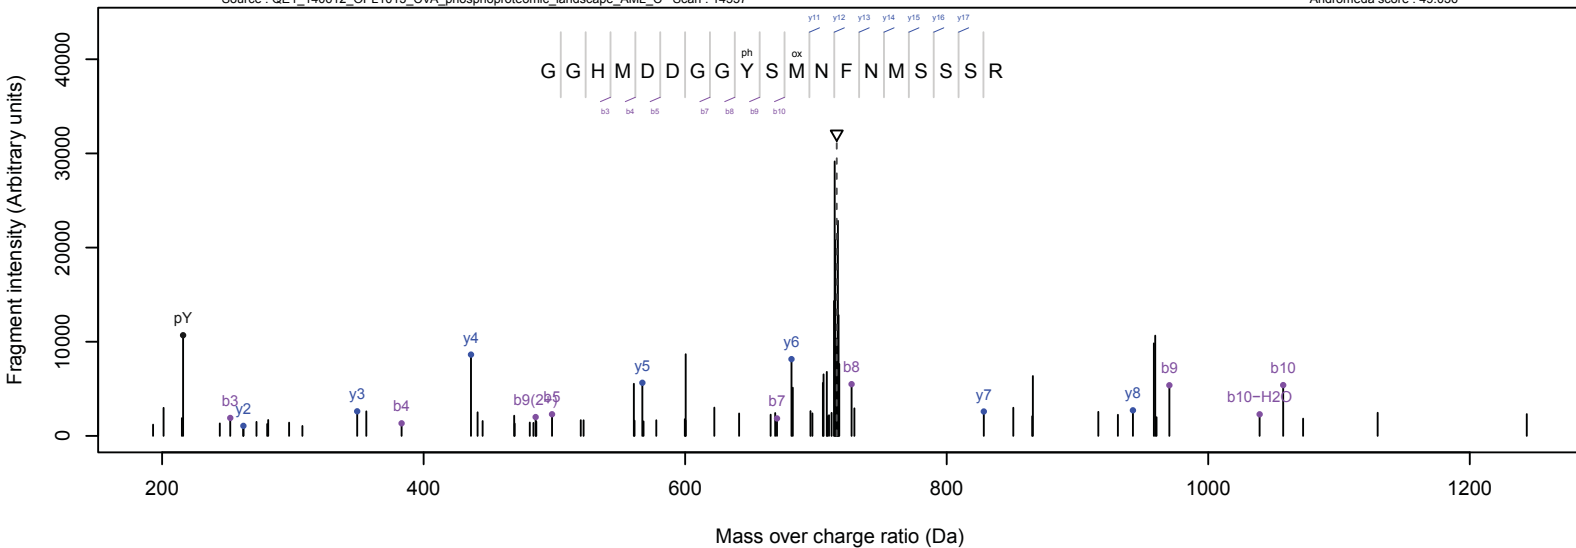

**FLAPY(ph)TTFSR-2+**

Source : QE1\_140612\_OPL1013\_CVA\_phosphoproteomic\_landscape\_AML\_D Scan : 30129

Andromeda score : 48.998

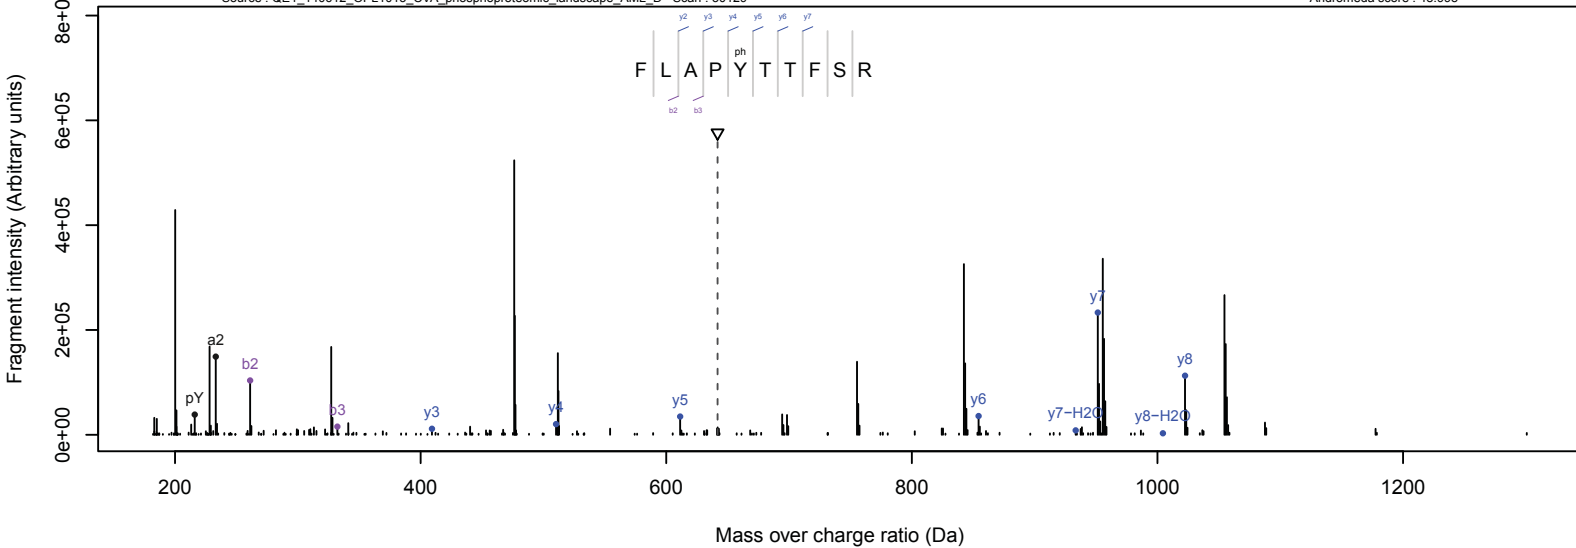

## NVTGHY(ph)ISPFHDIPLK-3+

Source : QE1\_140612\_OPL1013\_CVA\_phosphoproteomic\_landscape\_AML\_C Scan : 32230

Andromeda score : 48.907

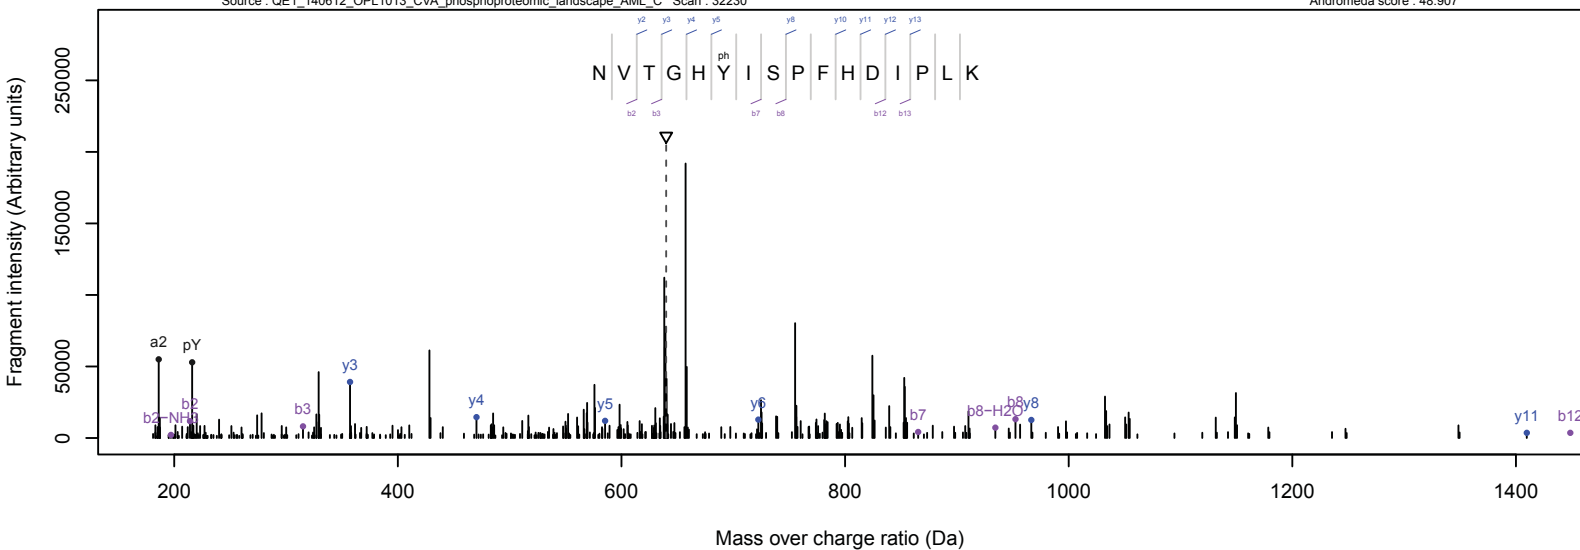

## SILTAIPNDPYPFHITK-2+

Source : QE1\_140612\_OPL1013\_CVA\_phosphoproteomic\_landscape\_AML\_D Scan : 39222

Andromeda score : 48.899

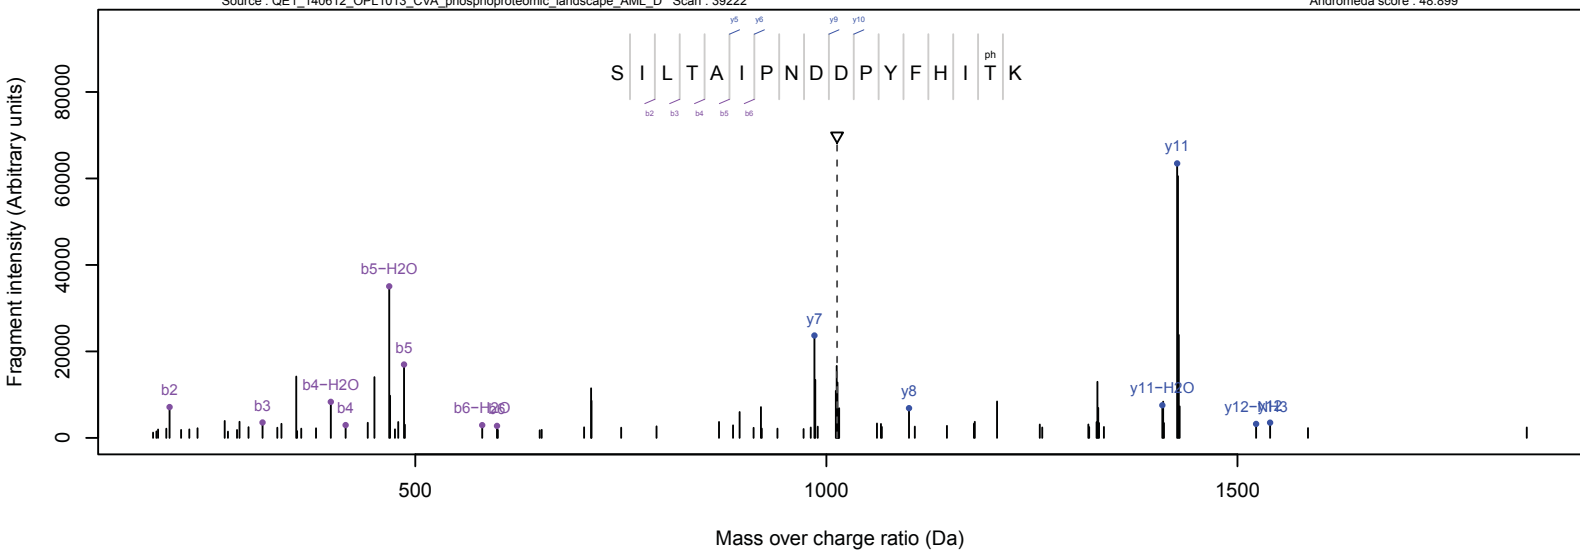

## WYAPECINYKFSK-3+

Source : QE1\_140908\_OPL1013\_CvA\_pTyrIP\_AML\_OCI\_AML3 Scan : 35419

Andromeda score : 48.899

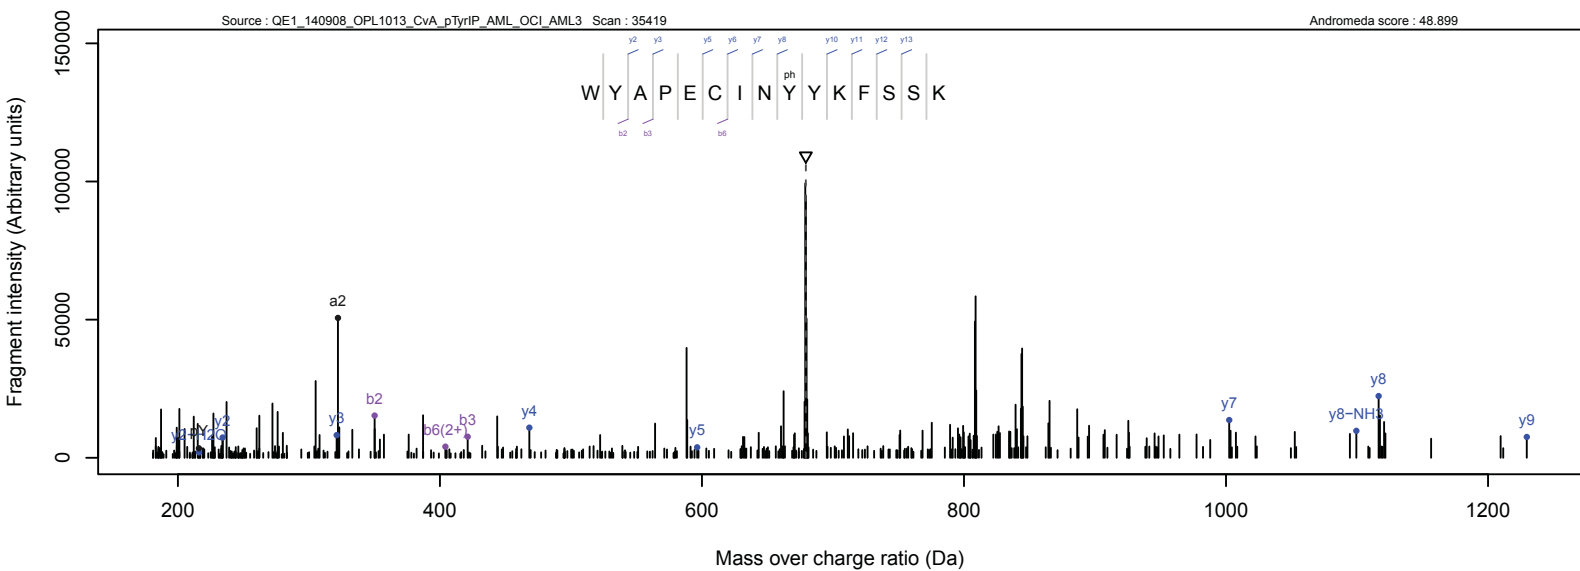

## GY(ph)ESFGVHR-2+

Source : QE1\_140612\_OPL1013\_CVA\_phosphoproteomic\_landscape\_AML\_C Scan : 9643

Andromeda score : 48.794

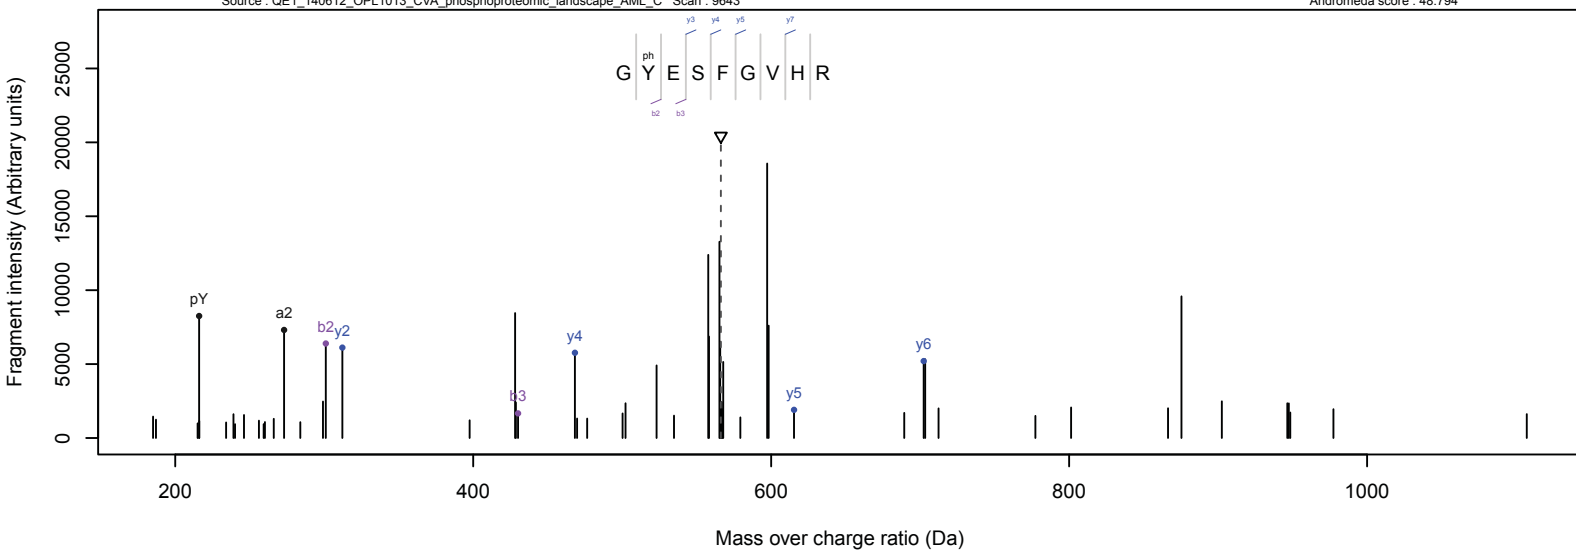

## KICTY(ph)FHR-3+

Source : QE1\_140612\_OPL1013\_CVA\_phosphoproteomic\_landscape\_AML\_C Scan : 9353

Andromeda score : 48.794

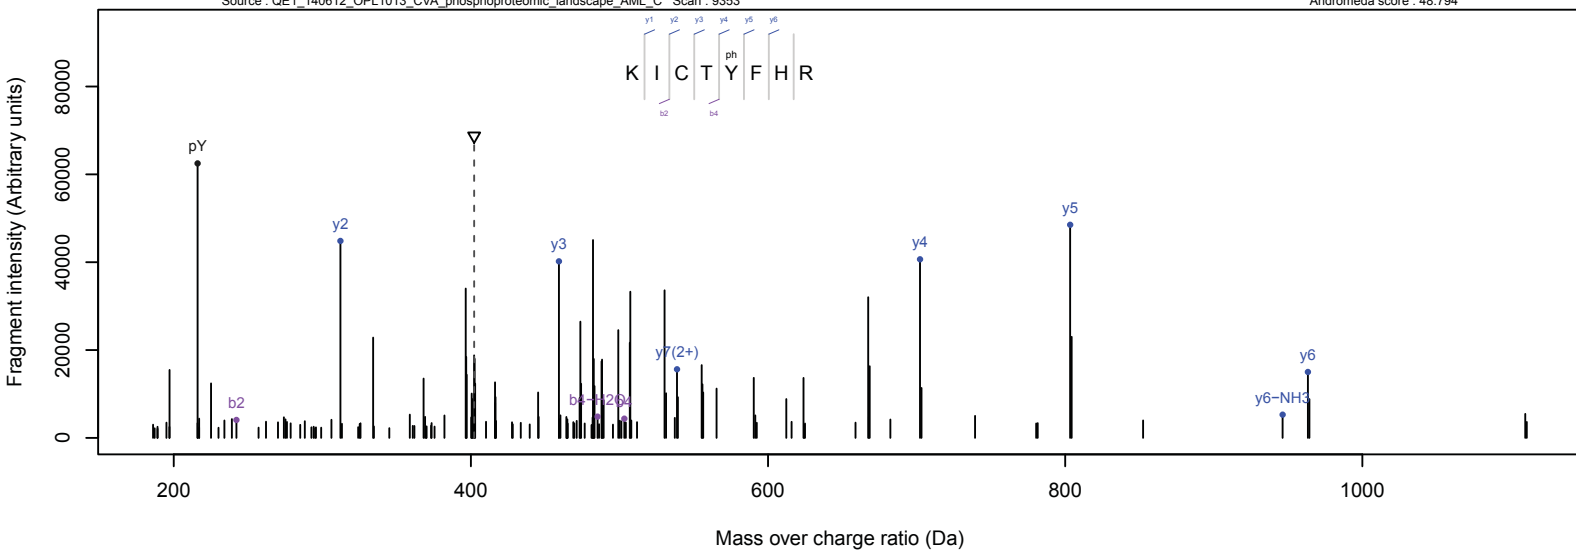

## VMVY(ph)SALR-2+

Source : QE1\_140612\_OPL1013\_CVA\_phosphoproteomic\_landscape\_AML\_C Scan : 18377

Andromeda score : 48.794

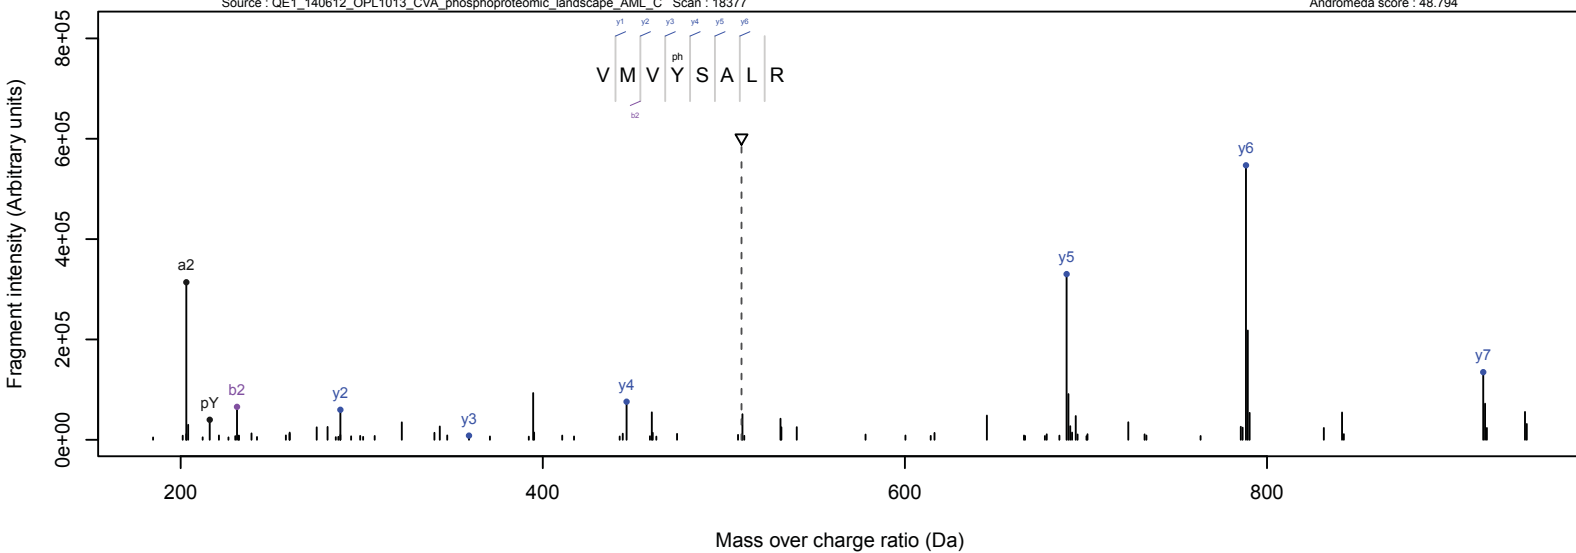

MQEATPSAQATNETQMCY<sup>ph</sup>ASLDH<sup>ph</sup>SVK-3+

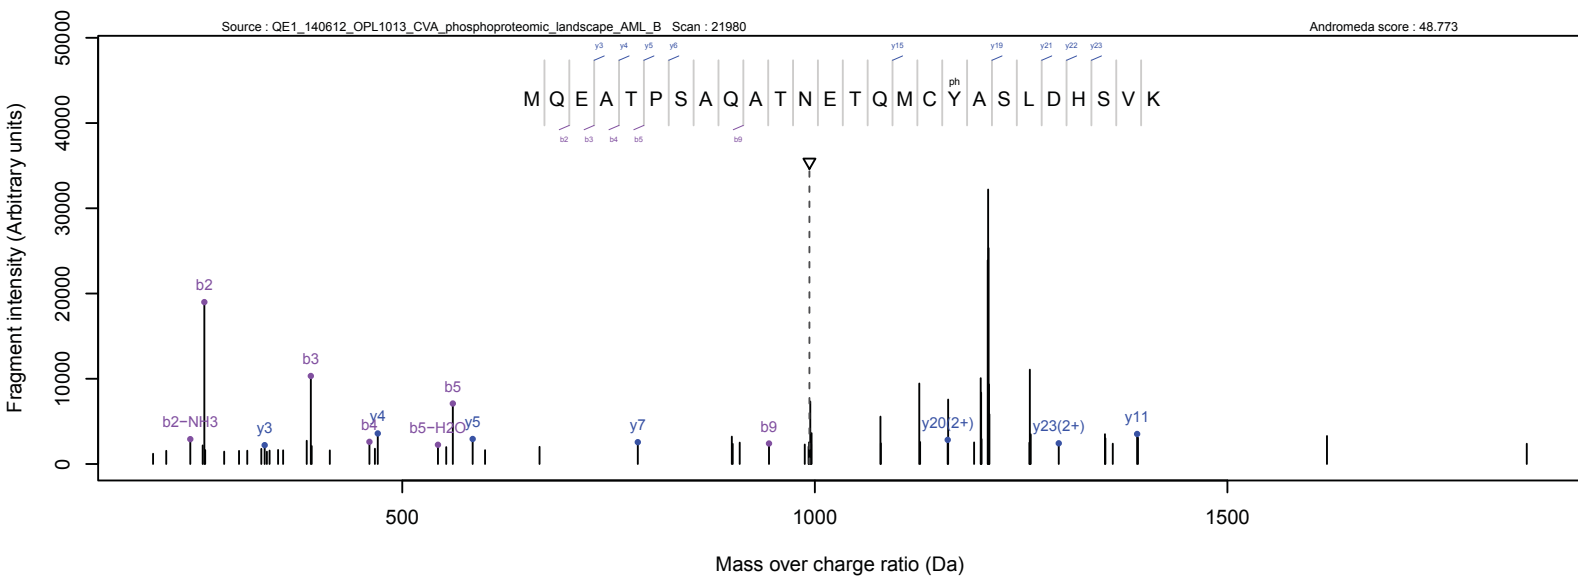

QLMLY<sup>ph</sup>YHR-3+

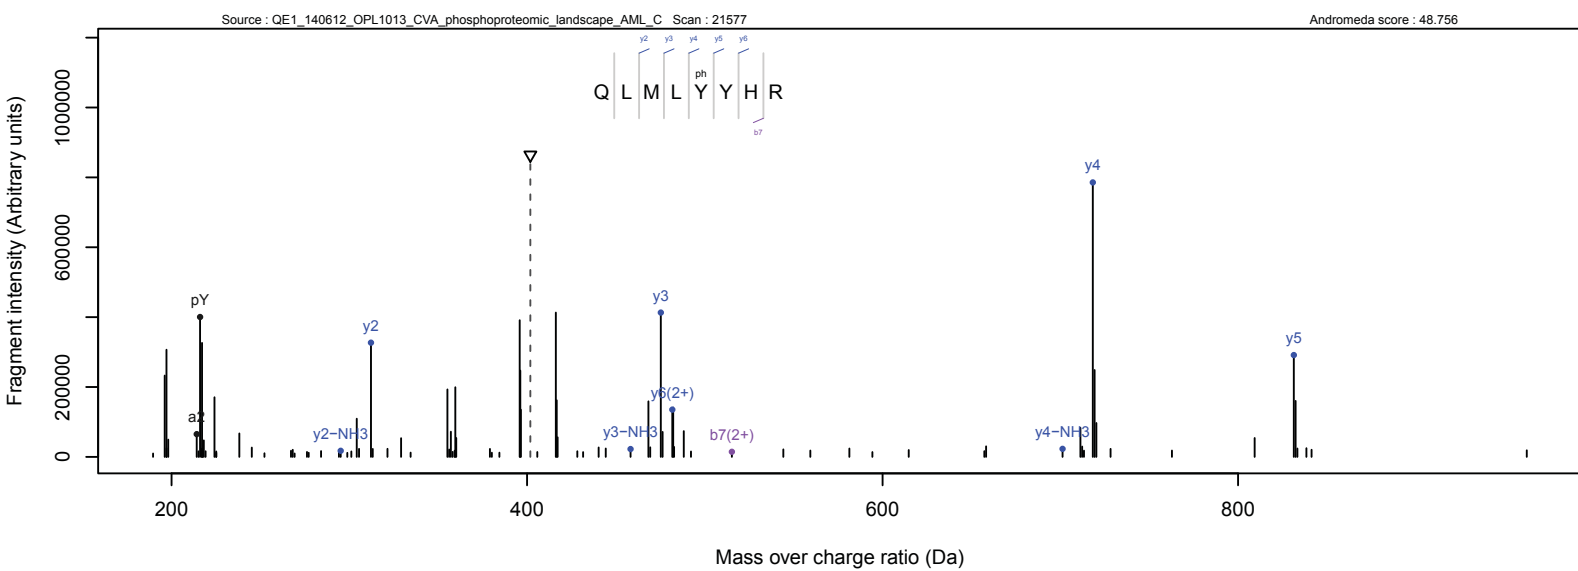

Y<sup>ph</sup>FYLF<sup>ph</sup>PNR-2+

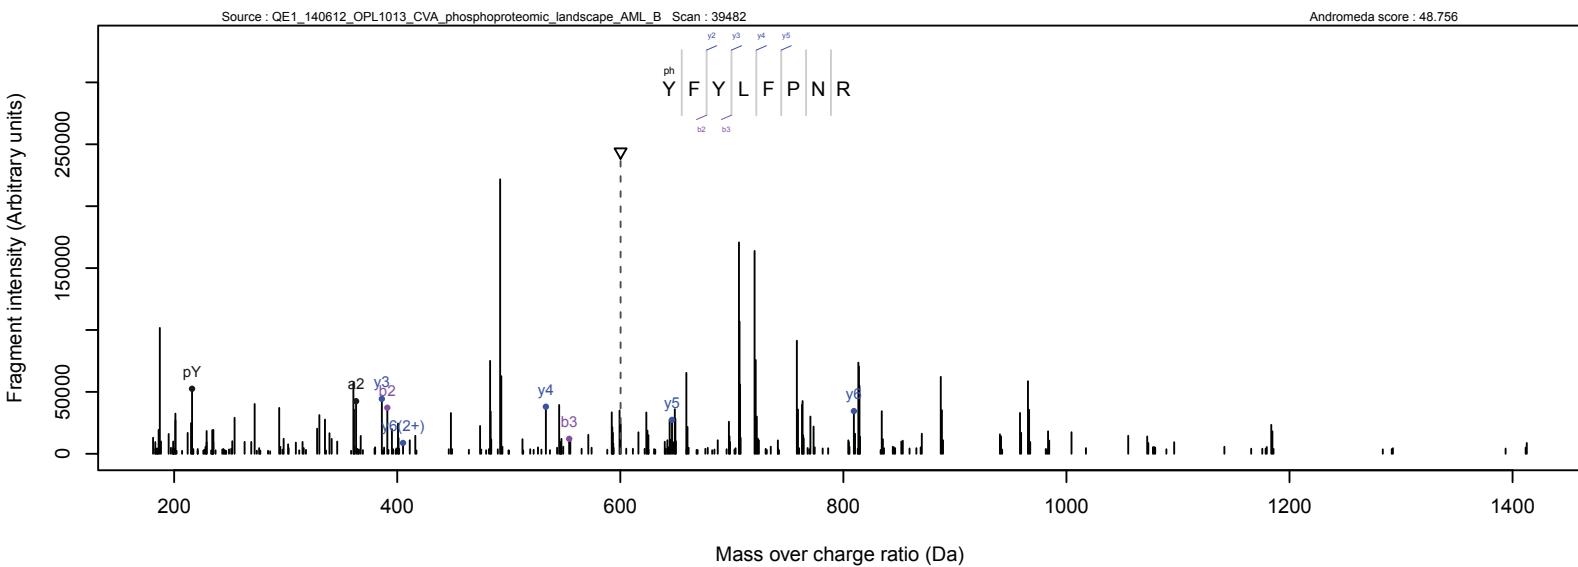

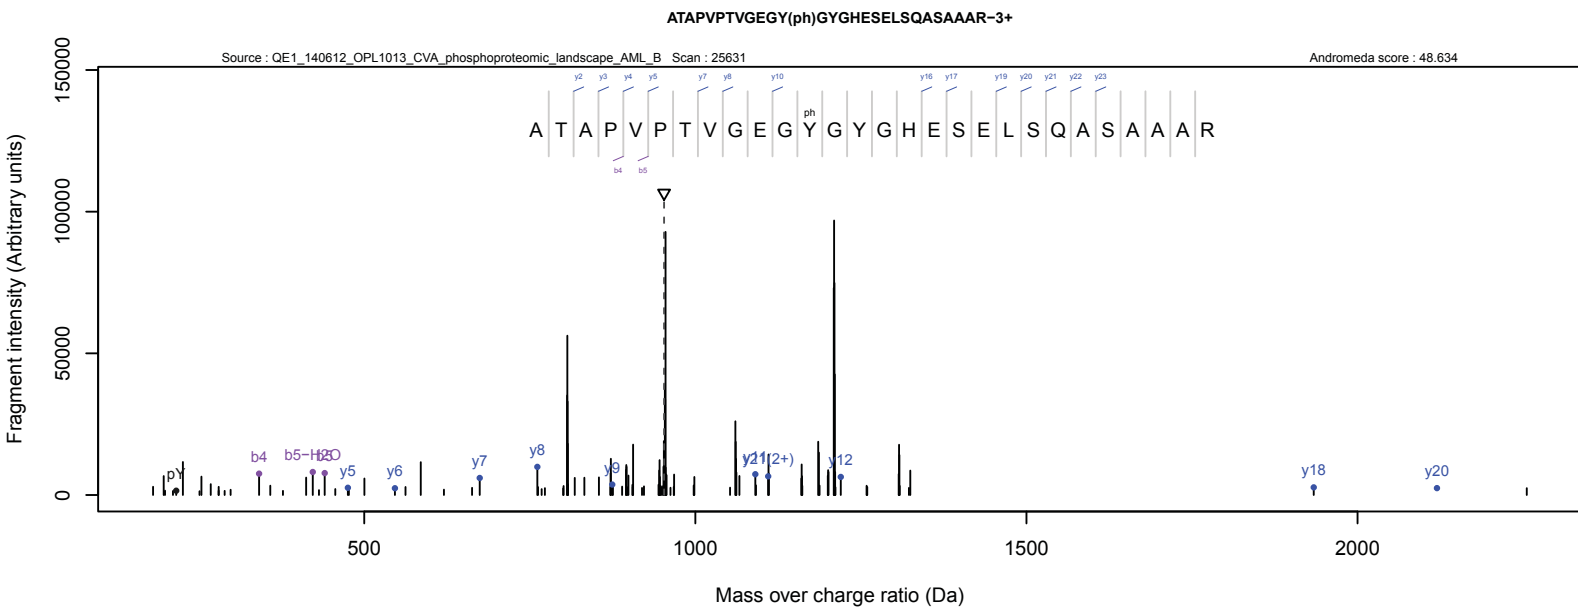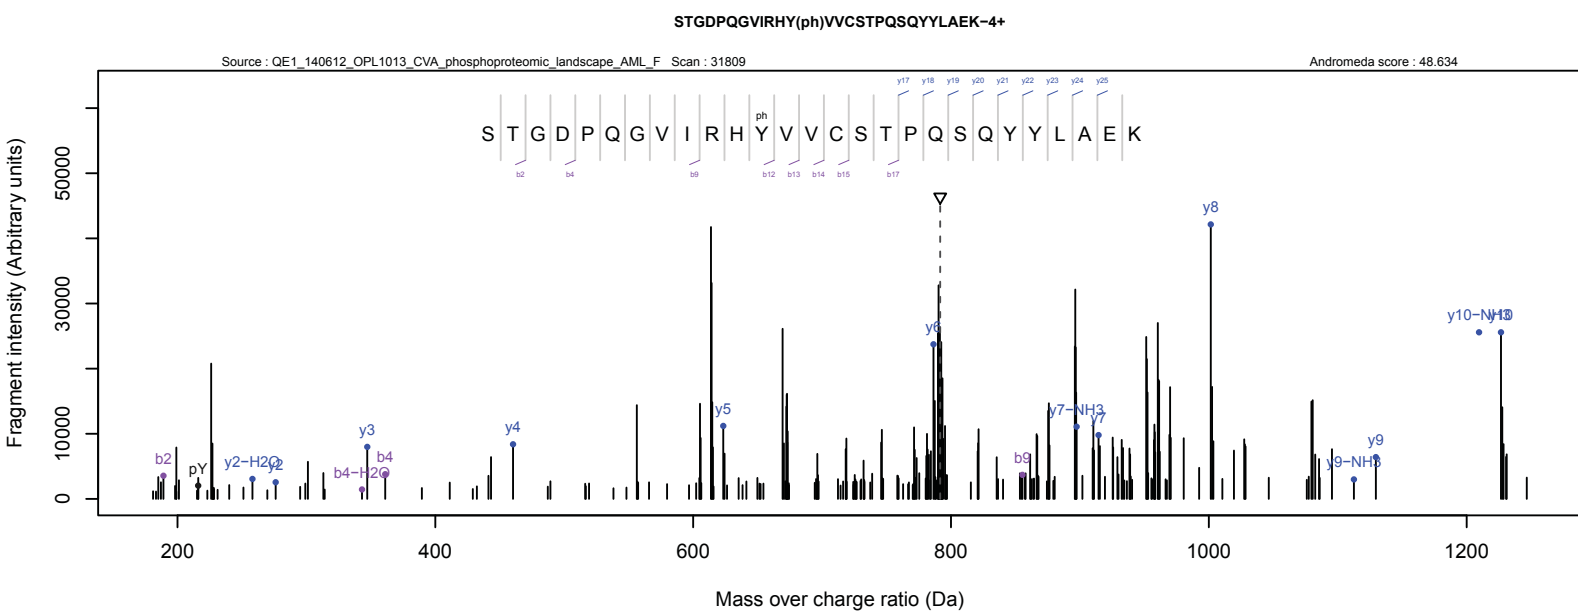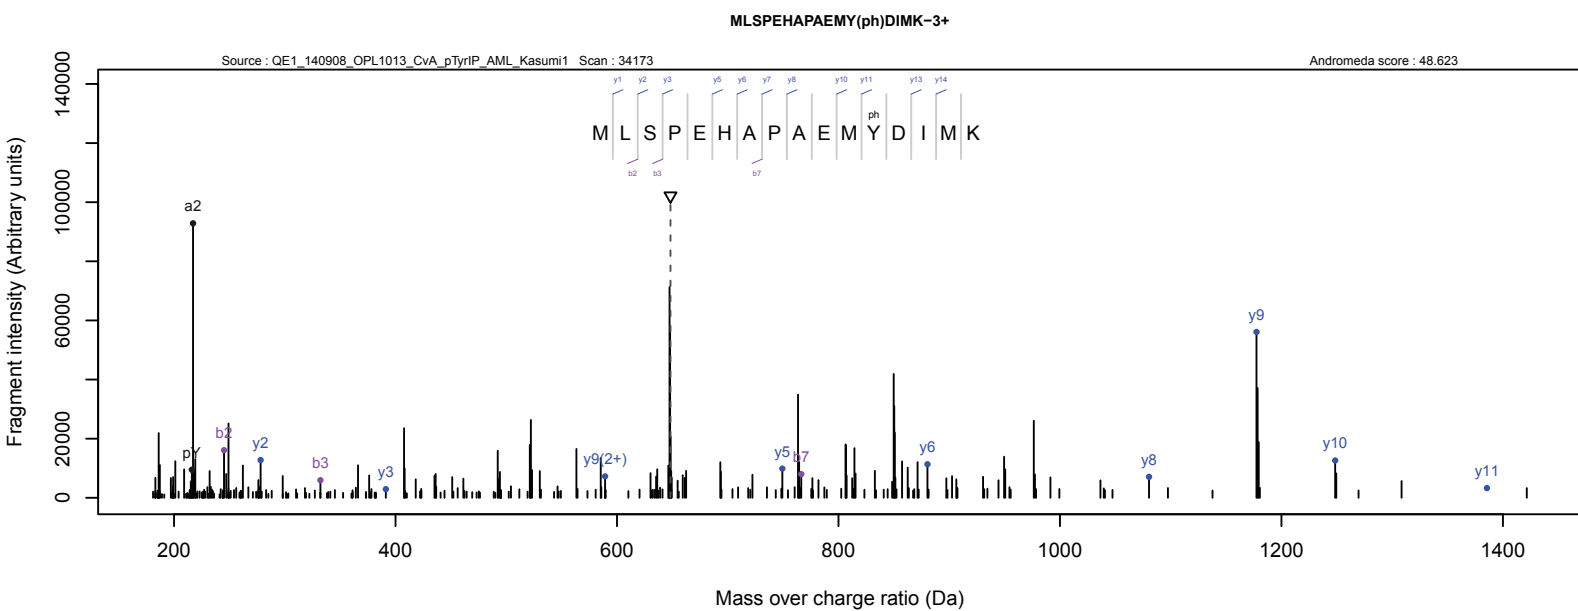

SGY(ph)AFVDCPDEHWAM(ox)K-3+

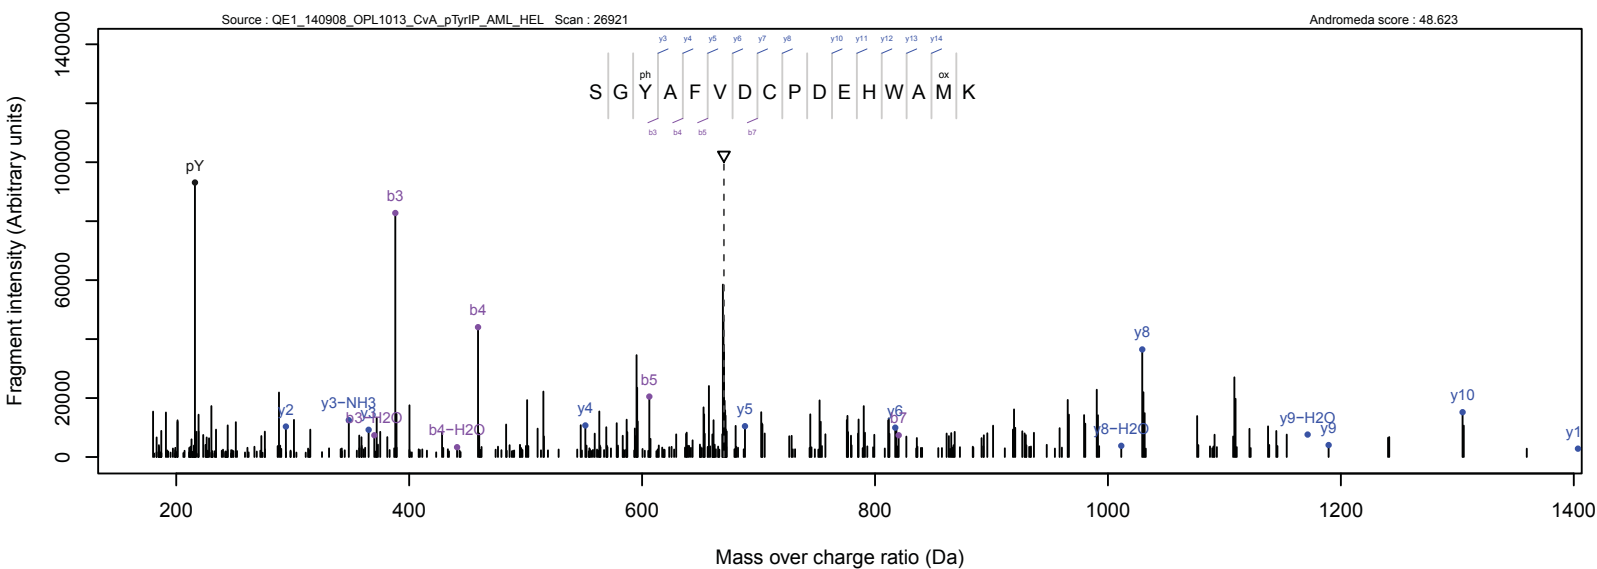

ASPHATPSTLHFTSPPIIQPGPY(ph)FSPHAIR-4+

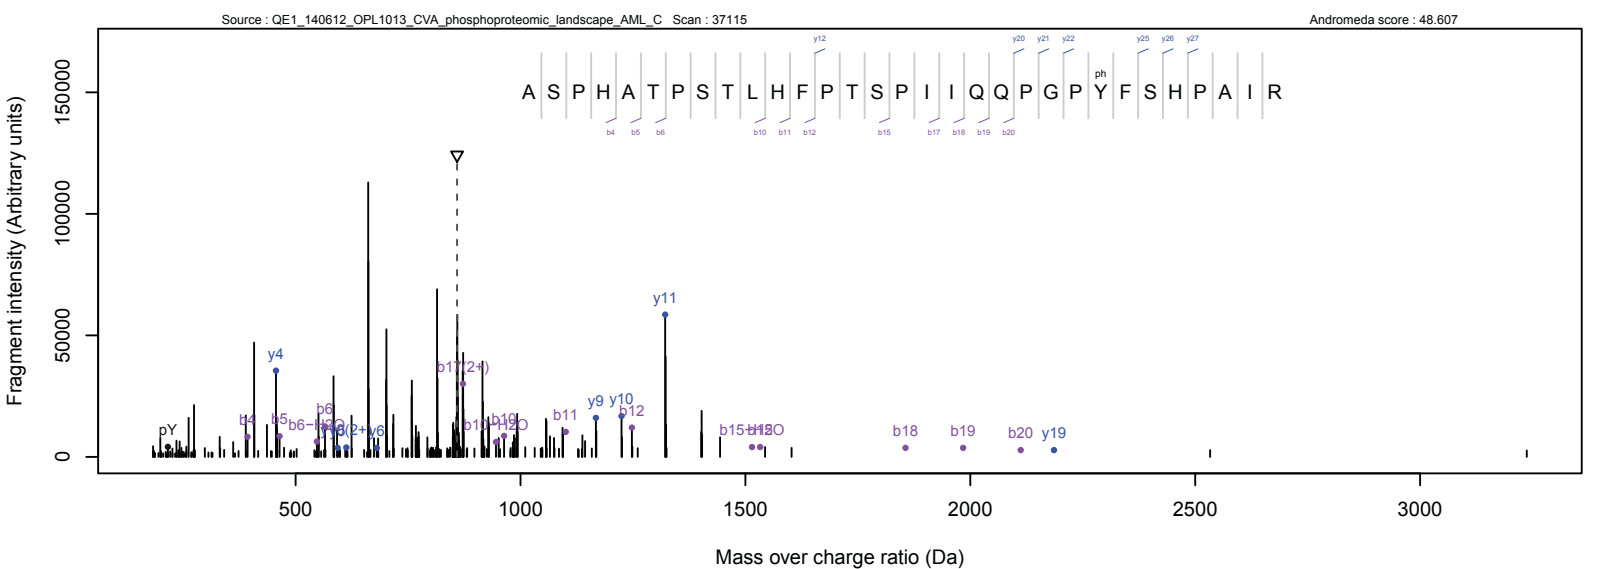

Y(ph)SDMSSVYR-2+

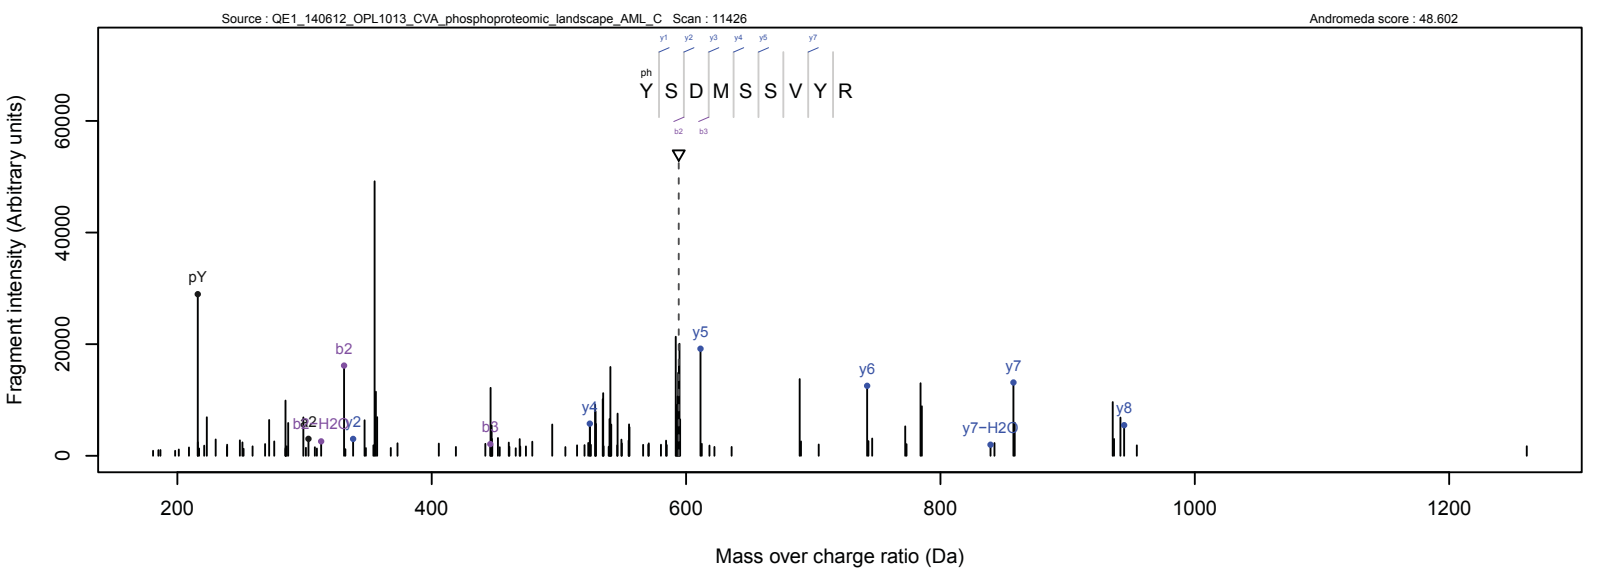



RAHT(ph)PTPGIYMGRRPTHTSGGGGGGGGGGGGR-5+

Source : QE1\_140908\_OPL1013\_CvA\_pTyrIP\_AML\_ML2 Scan : 8582

Andromeda score : 48.576

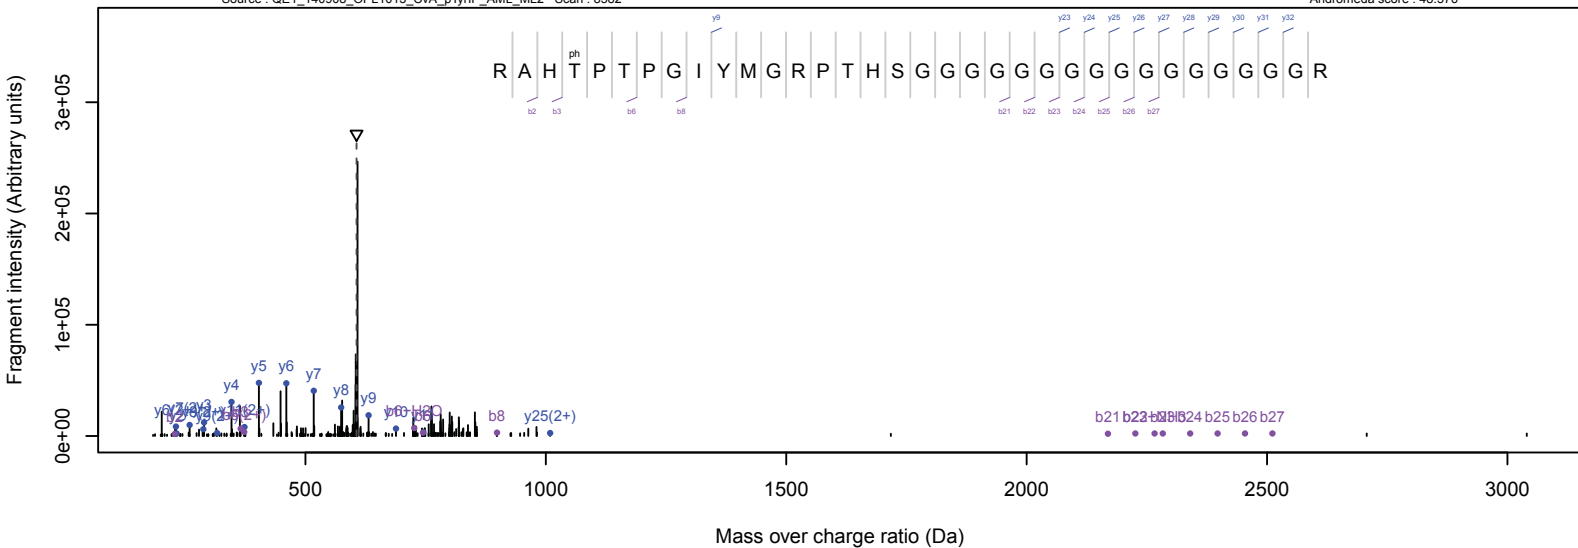

DAVVY(ph)TAESK-2+

Source : QE1\_140612\_OPL1013\_CVA\_phosphoproteomic\_landscape\_AML\_C Scan : 7606

Andromeda score : 48.568

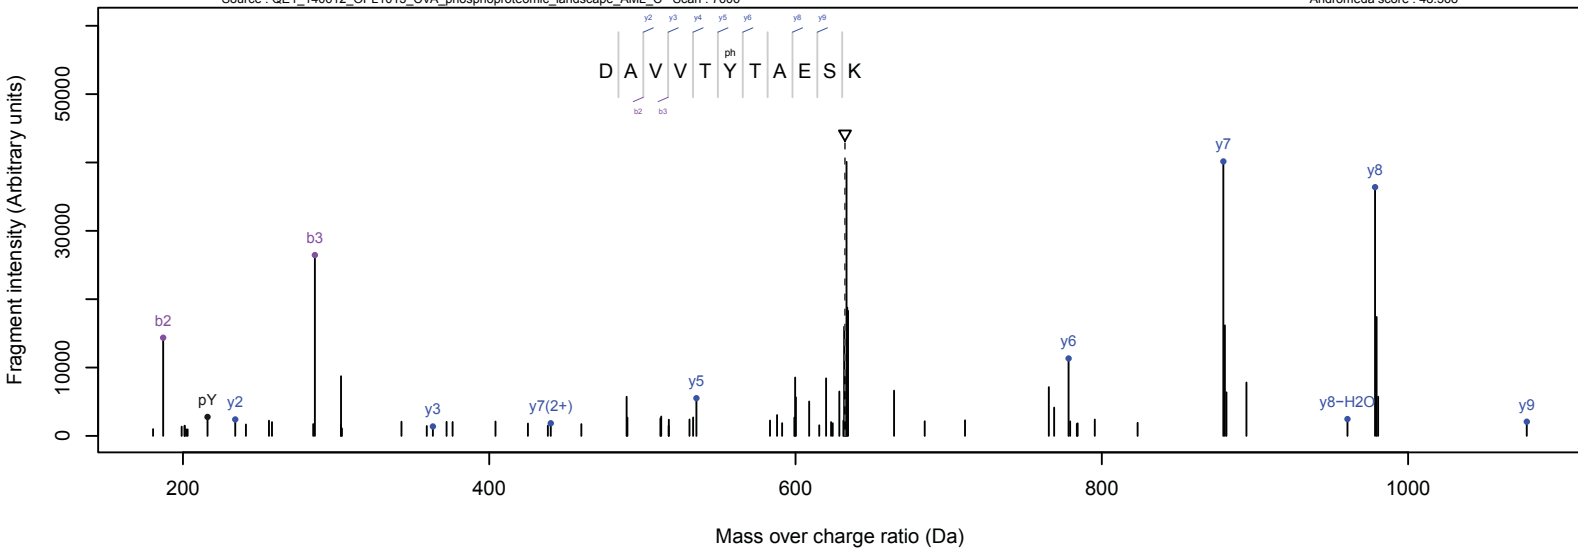

KTIY(ph)TYIM(ox)ASR-3+

Source : QE1\_140908\_OPL1013\_CvA\_pTyrIP\_AML\_HEL Scan : 17836

Andromeda score : 48.568

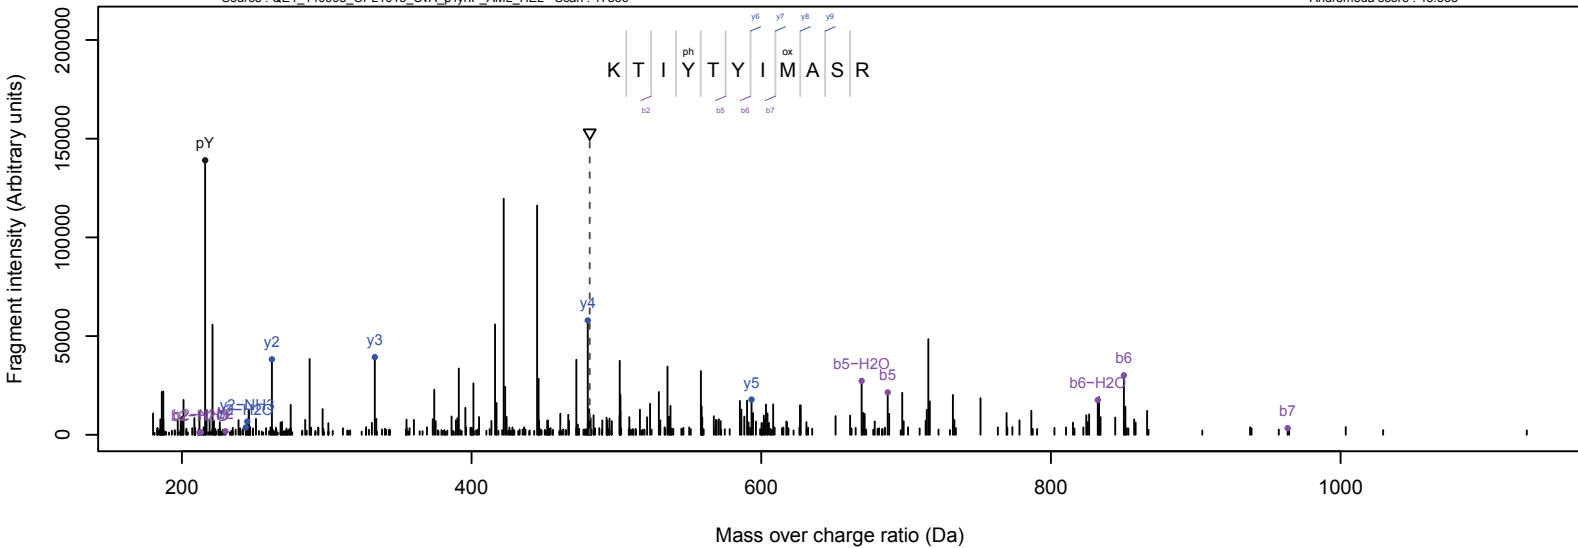

## NFATSLY(ph)SMIK-2+

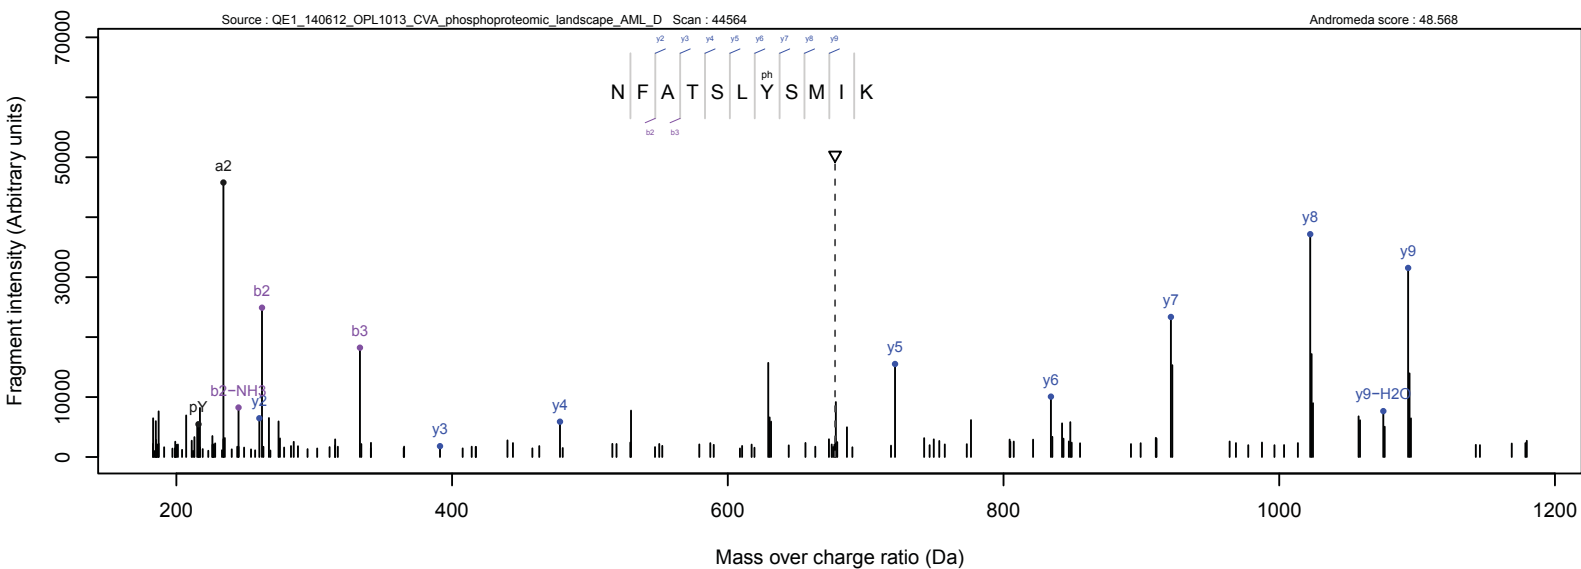

## NVY(ph)DLTSIPVR-2+

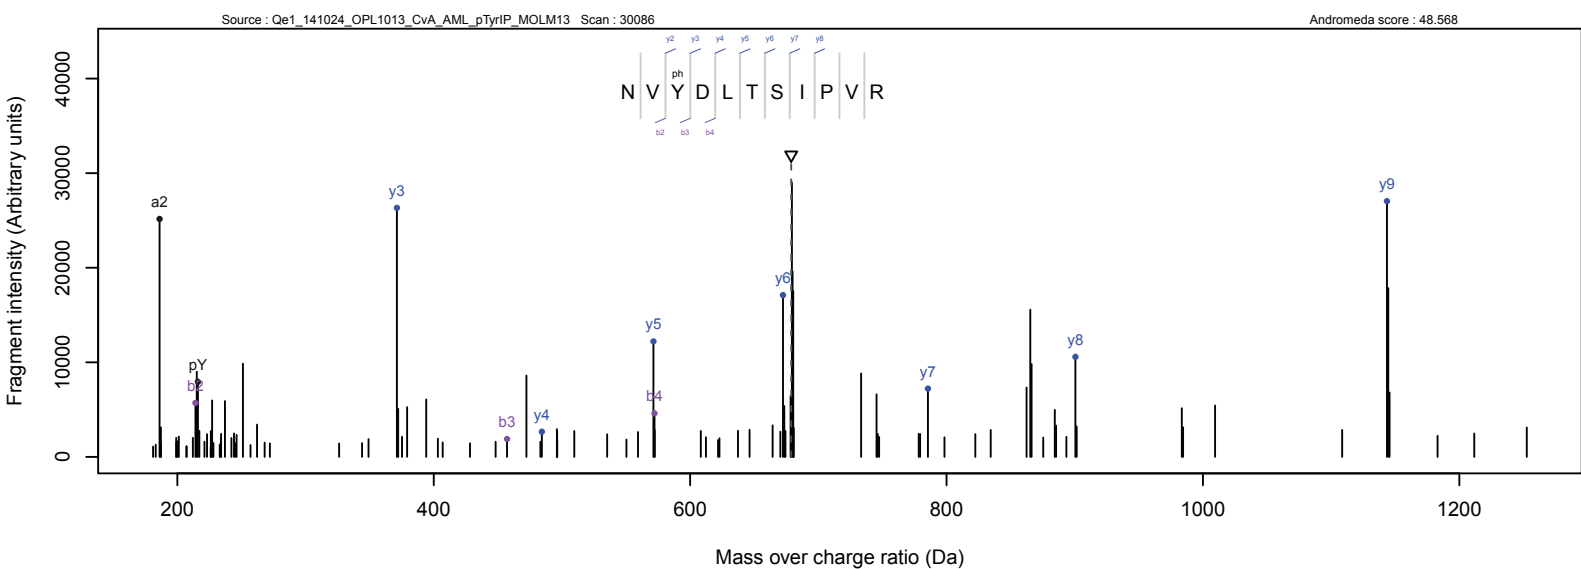

## RDEY(ph)GLPSQPK-2+

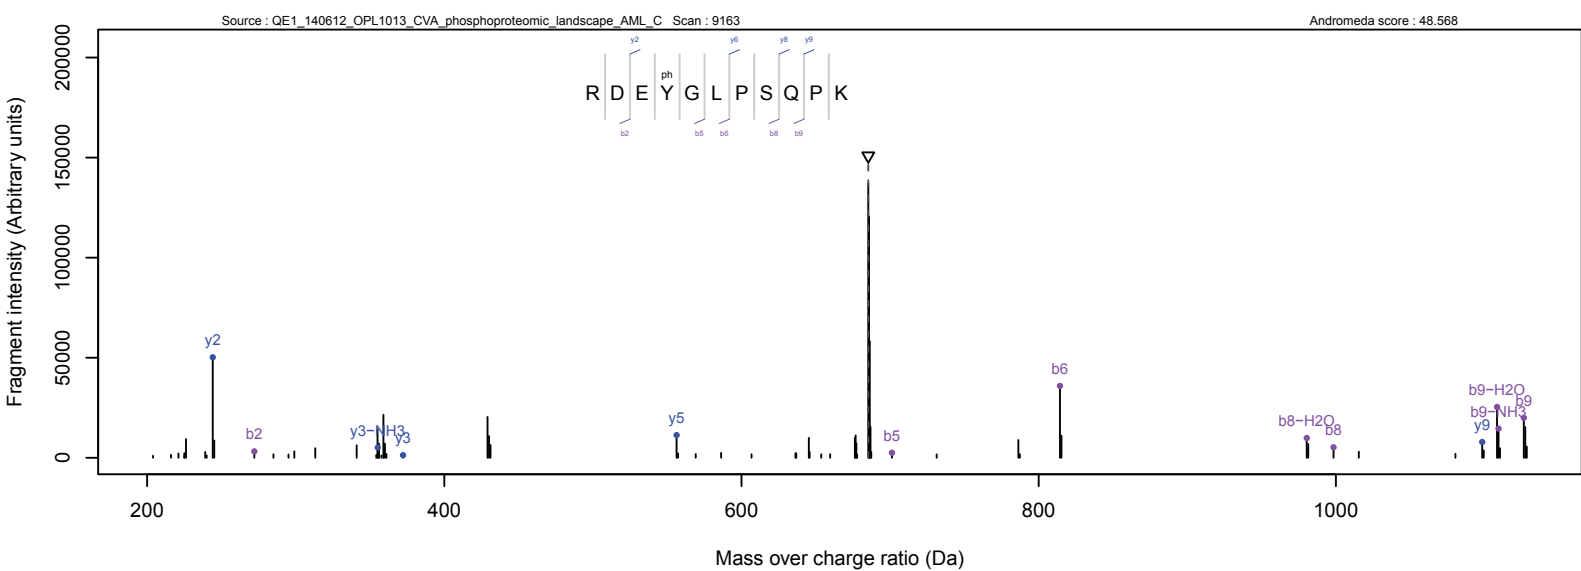

## AGLY(ph)GLPR-2+

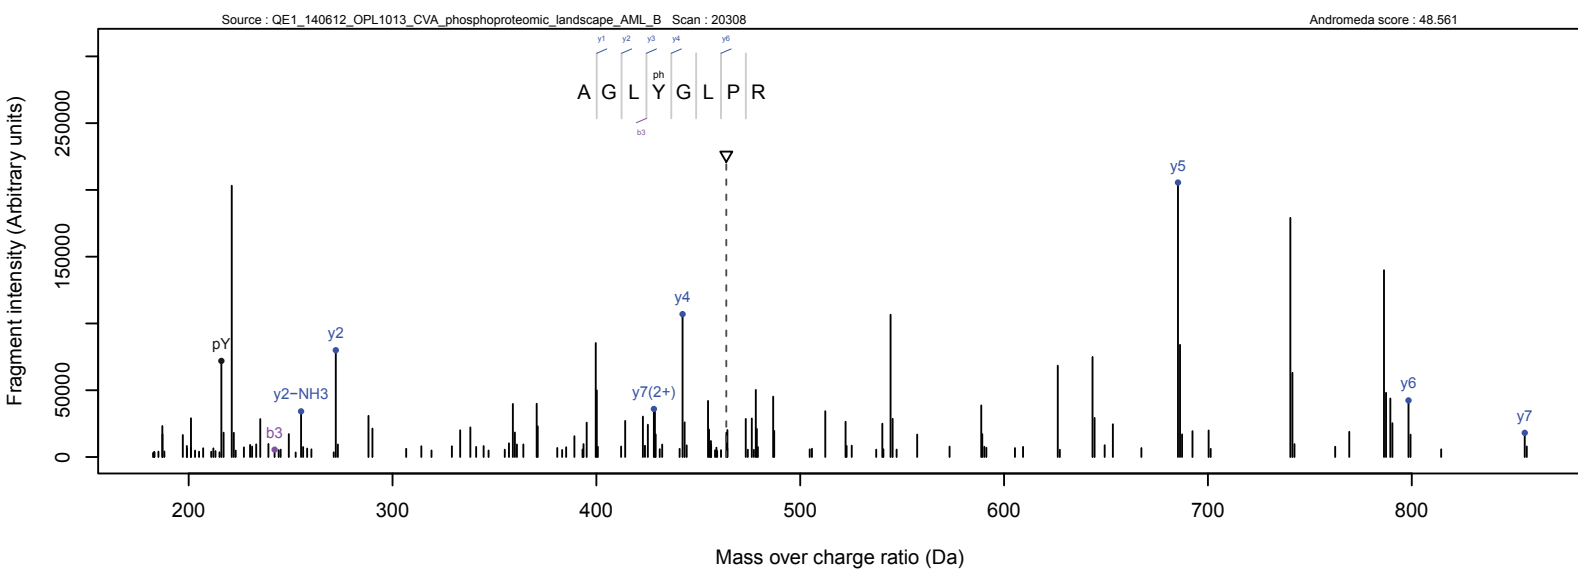

## CASQSGM(ox)TAYG(ph)RR-3+

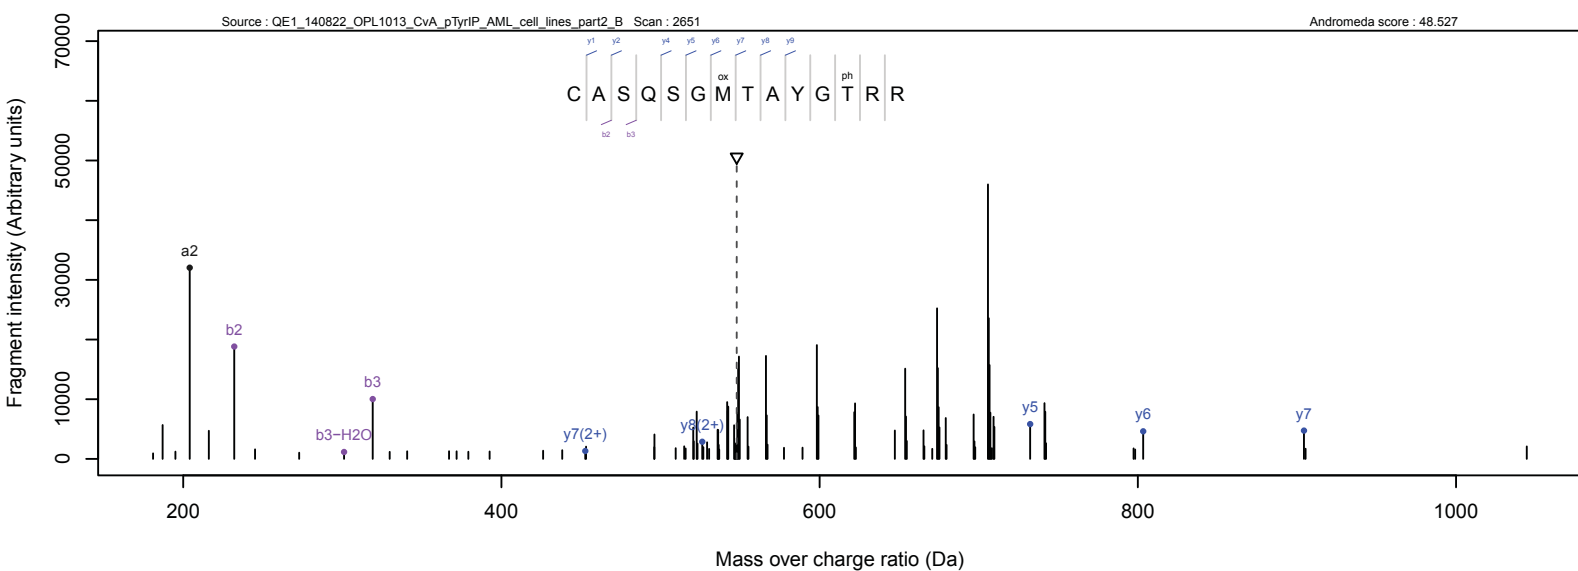

## KGIVSQGY(ph)HR-3+

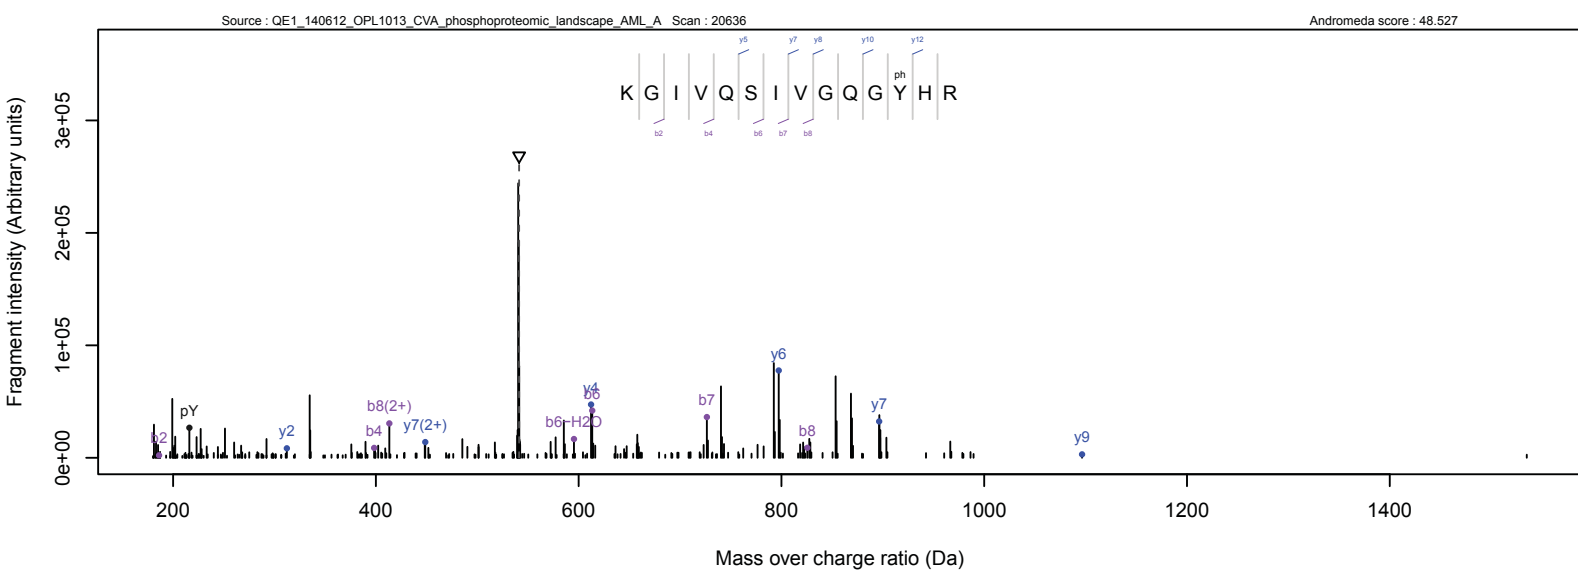

**KGSGDY(ph)MPMSPK-2+**

Source : QE1\_140908\_OPL1013\_CVA\_pTyrIP\_AML\_ML2 Scan : 12186

Andromeda score : 48.527

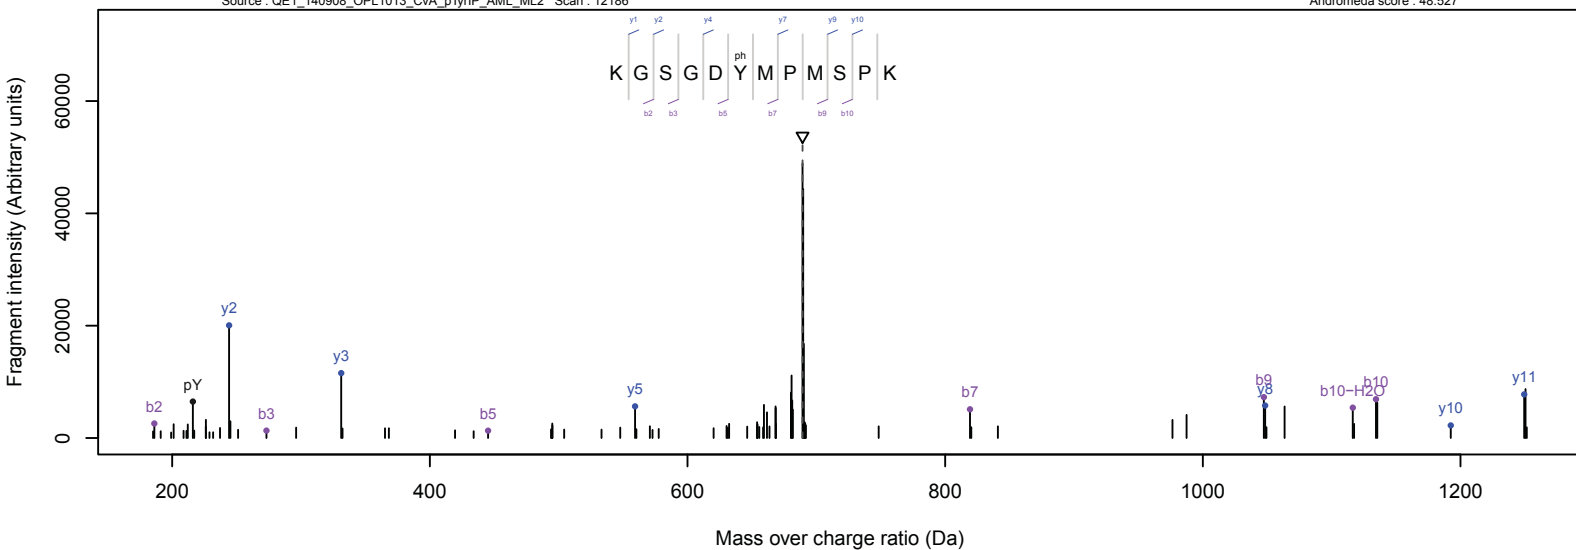

**LAQSAEMYH(ph)QHQR-3+**

Source : QE1\_140612\_OPL1013\_CVA\_phosphoproteomic\_landscape\_AML\_B Scan : 7795

Andromeda score : 48.527

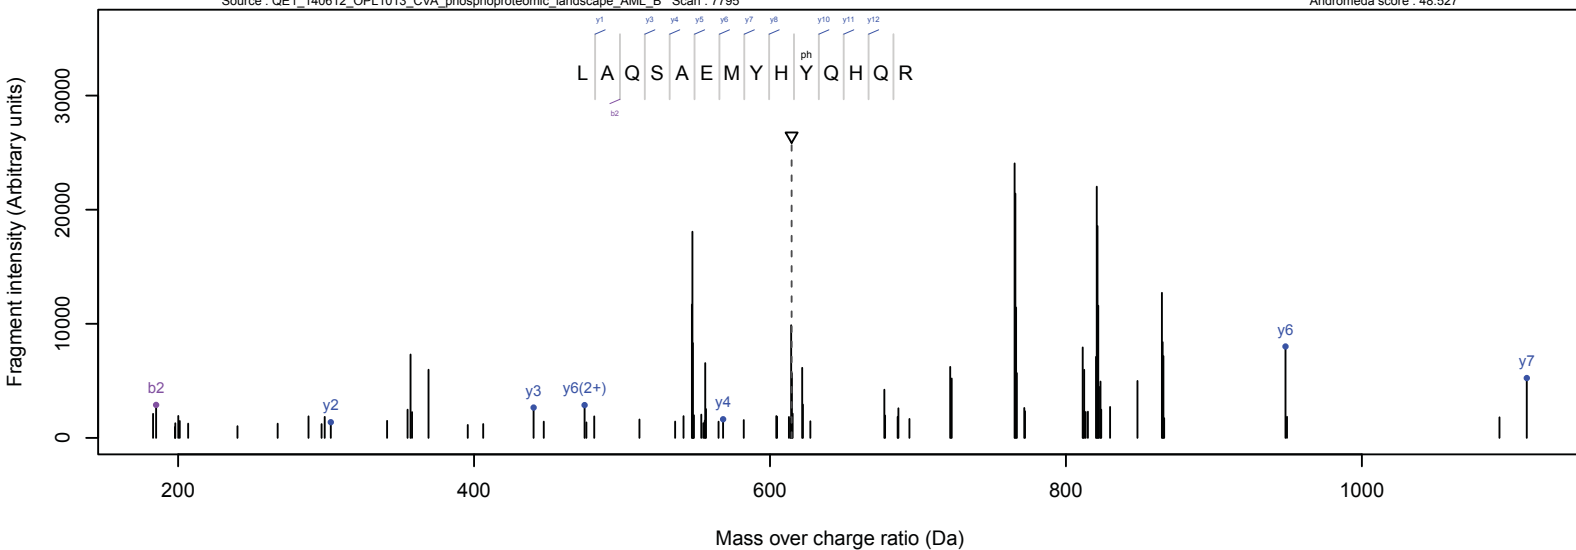

**NCLLASVHY(ph)VFR-3+**

Source : QE1\_140612\_OPL1013\_CVA\_phosphoproteomic\_landscape\_AML\_C Scan : 47704

Andromeda score : 48.527

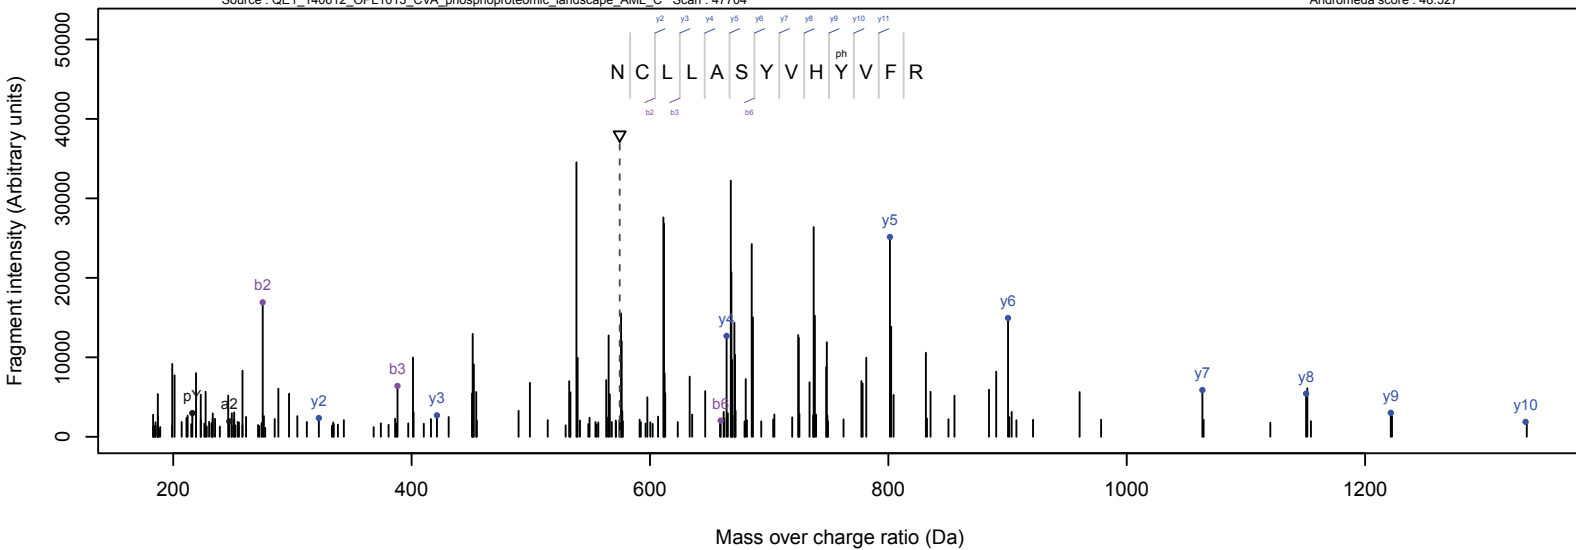

Y(ph)LLGTSLARPCIA R-3+

Source : QE1\_140612\_OPL1013\_CVA\_phosphoproteomic\_landscape\_AML\_C Scan : 31447

Andromeda score : 48.527

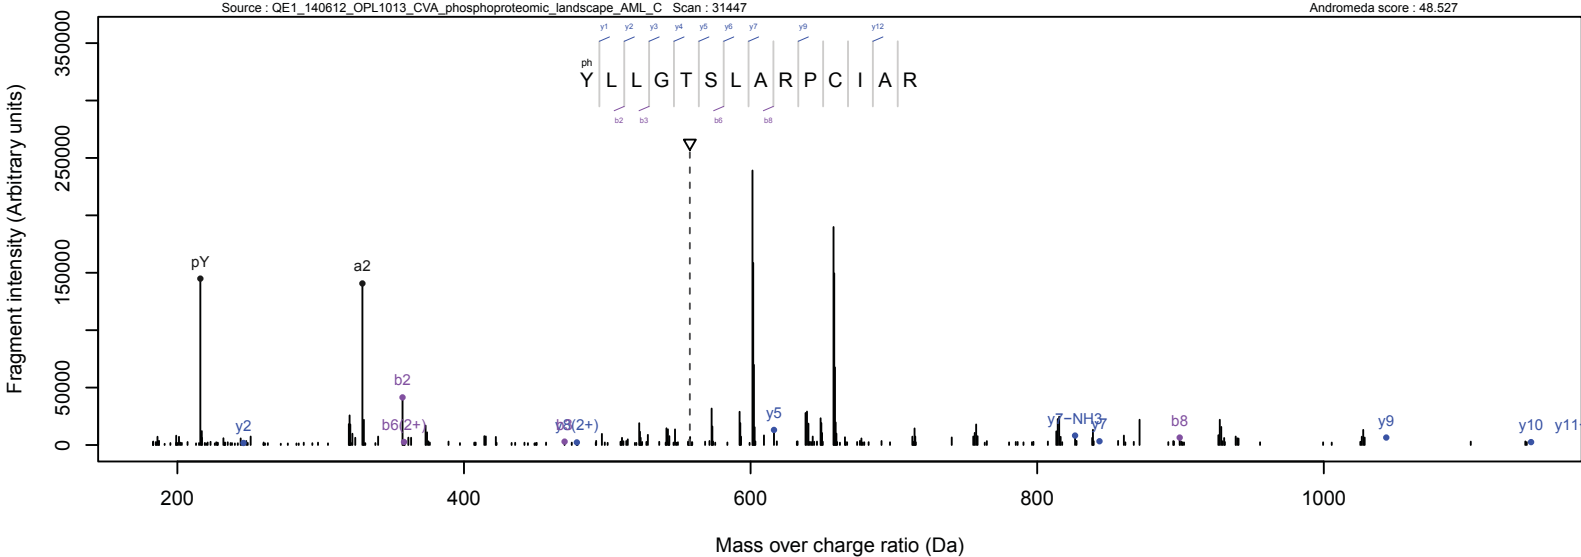

FRSHEGETAY(ph)IR-3+

Source : QE1\_140612\_OPL1013\_CVA\_phosphoproteomic\_landscape\_AML\_A Scan : 7977

Andromeda score : 48.467

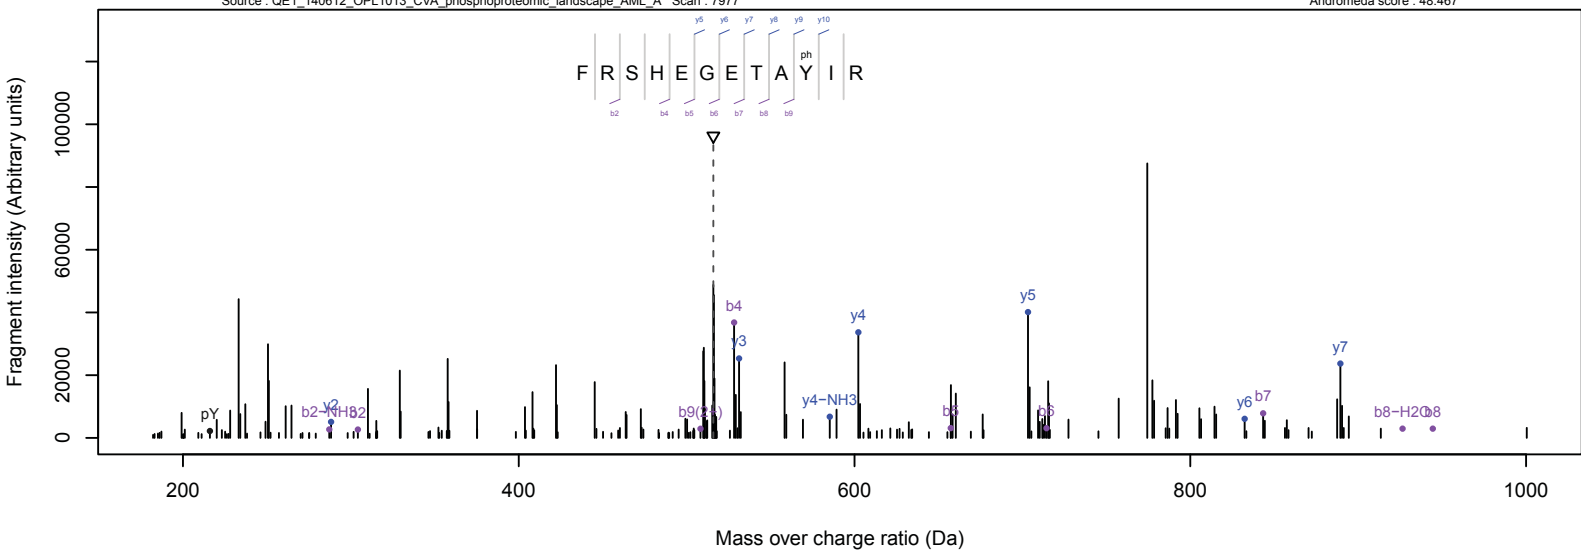

LM(ox)NEDPM(ox)YS(ph)M(ox)YAK-2+

Source : QE1\_140908\_OPL1013\_CvA\_pTyrIP\_AML\_HEL Scan : 11440

Andromeda score : 48.467

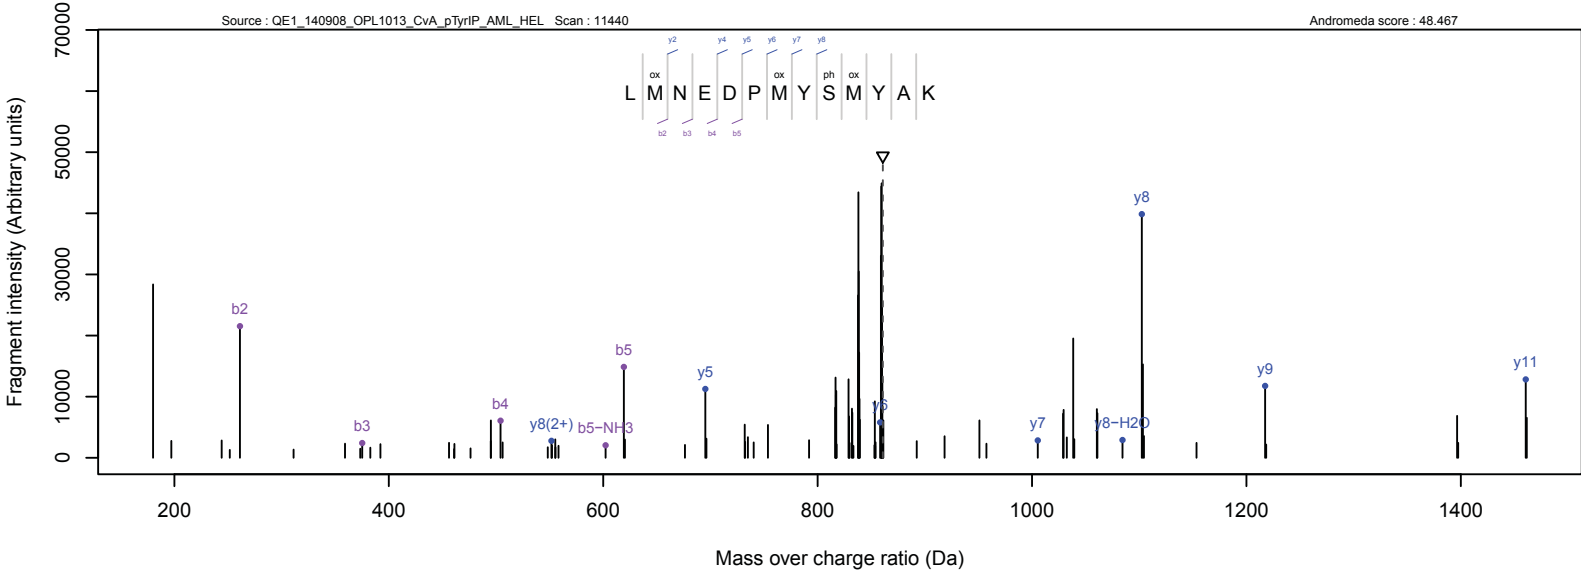

## SSQYDKY(ph)FTSSR-3+

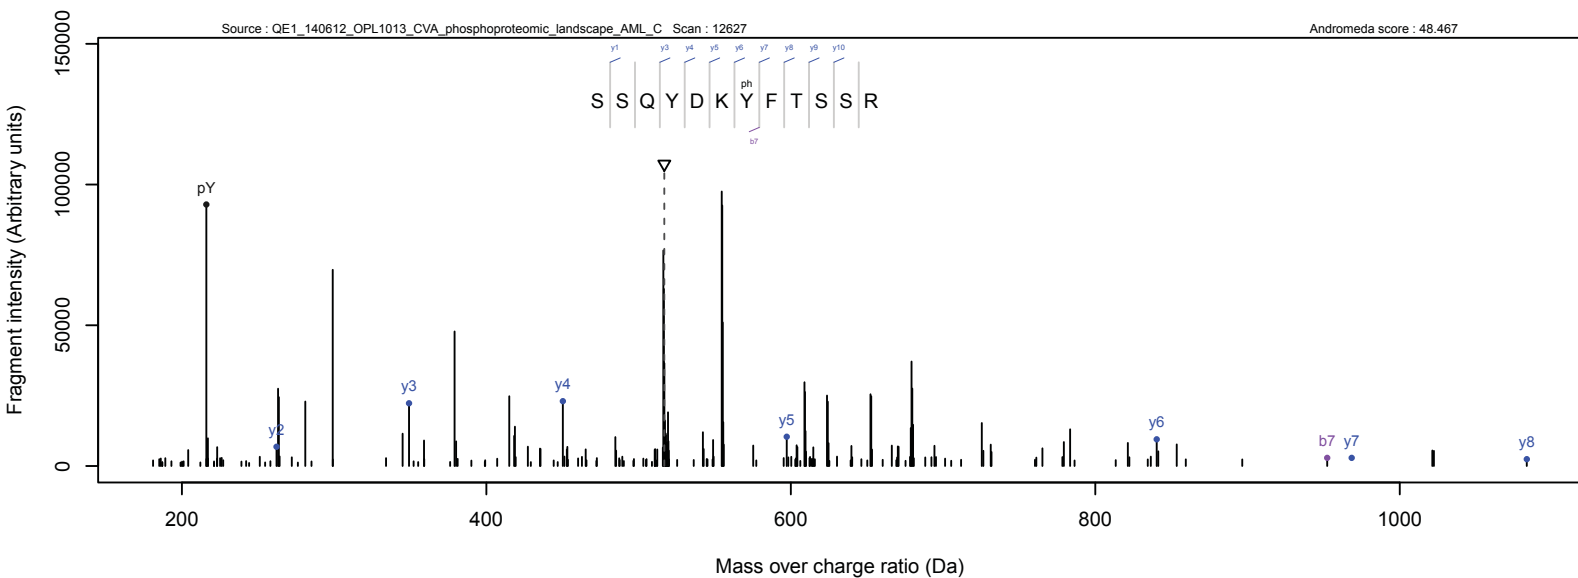

## EGY(ph)KFYPPK-2+

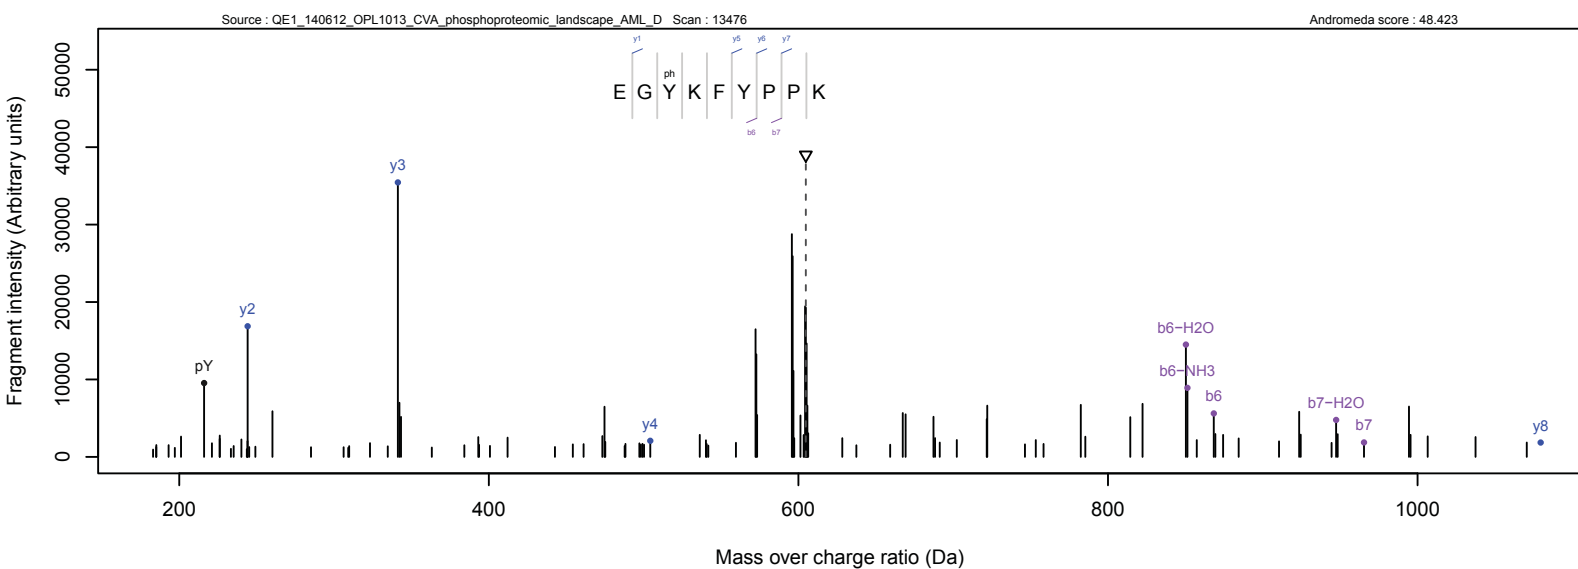

## LELQGRGS(ph)PNAR-3+

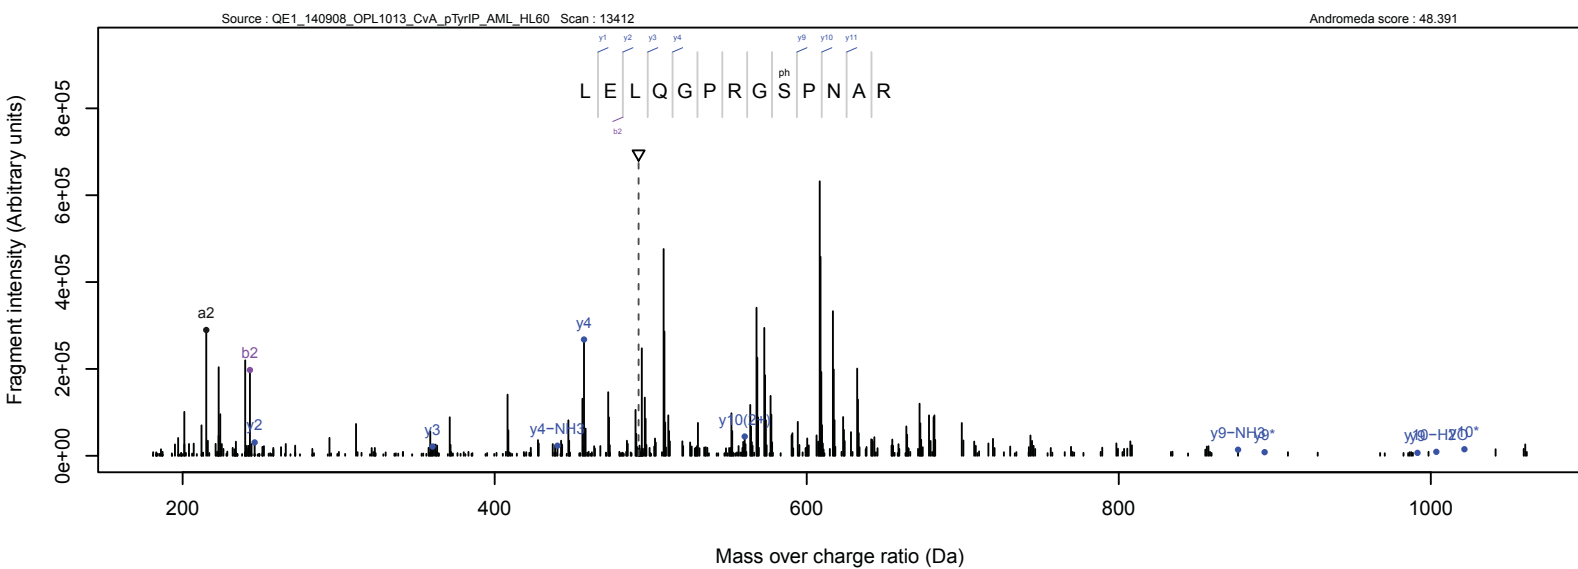



## GQKY(ph)FDSDYNM(ox)AK-3+

Source : QE1\_140612\_OPL1013\_CVA\_phosphoproteomic\_landscape\_AML\_C Scan : 13676

Andromeda score : 48.351

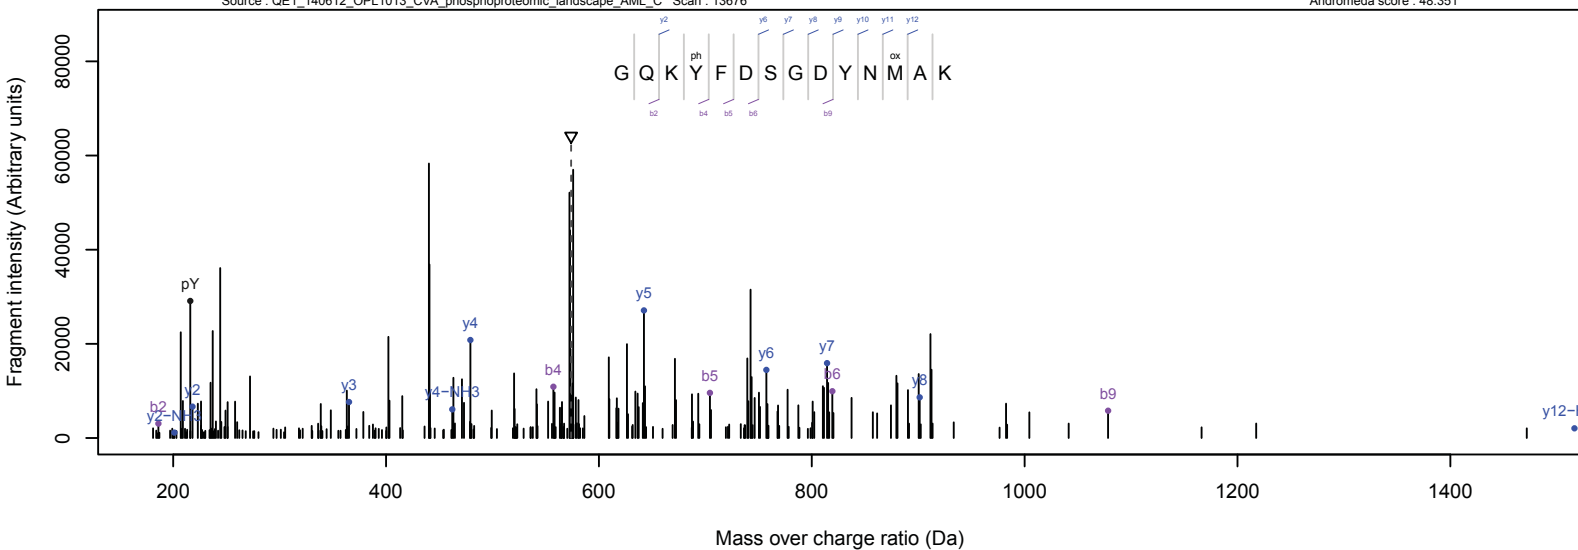

## MLSLNNY(ph)SVPQSTR-2+

Source : QE1\_140612\_OPL1013\_CVA\_phosphoproteomic\_landscape\_AML\_B Scan : 25215

Andromeda score : 48.351

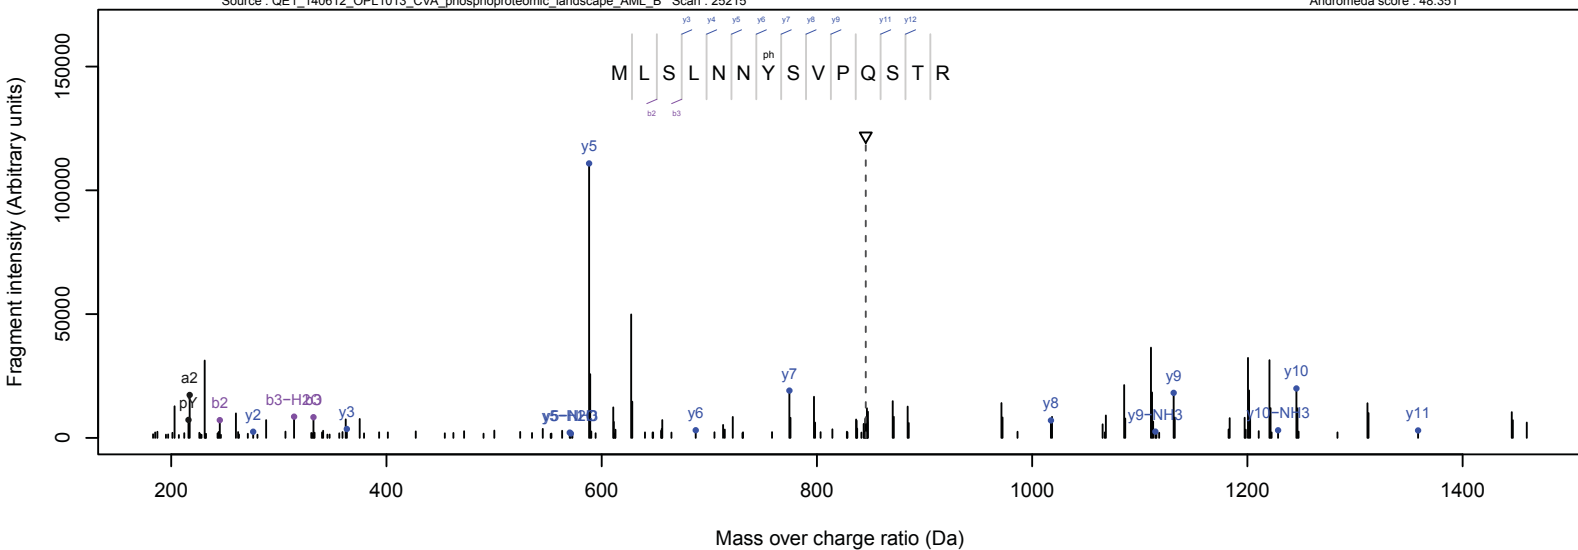

## VFY(ph)HLPTGCQEIAEEVVR-3+

Source : QE1\_140612\_OPL1013\_CVA\_phosphoproteomic\_landscape\_AML\_C Scan : 34299

Andromeda score : 48.288

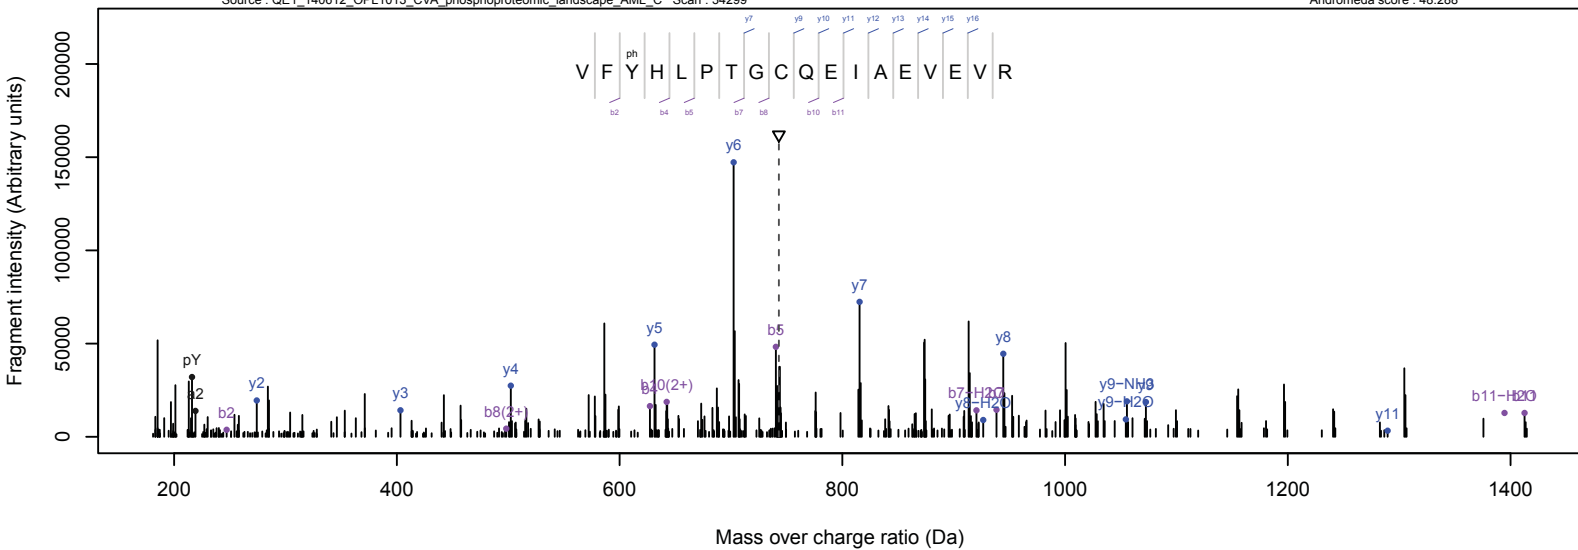



## VHTFVDCS(ph)NREDIYSSAK-3+

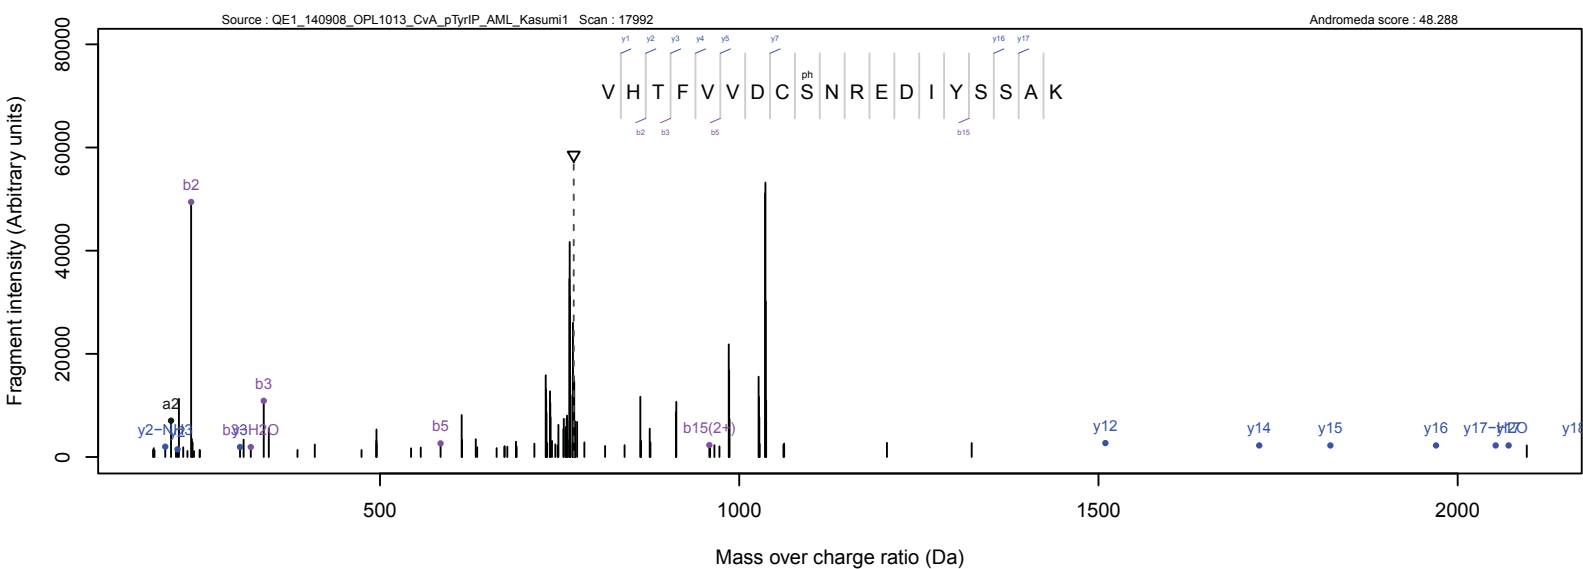

## THNGASPY(ph)QCTICTEYCPSSLSSMQK-3+

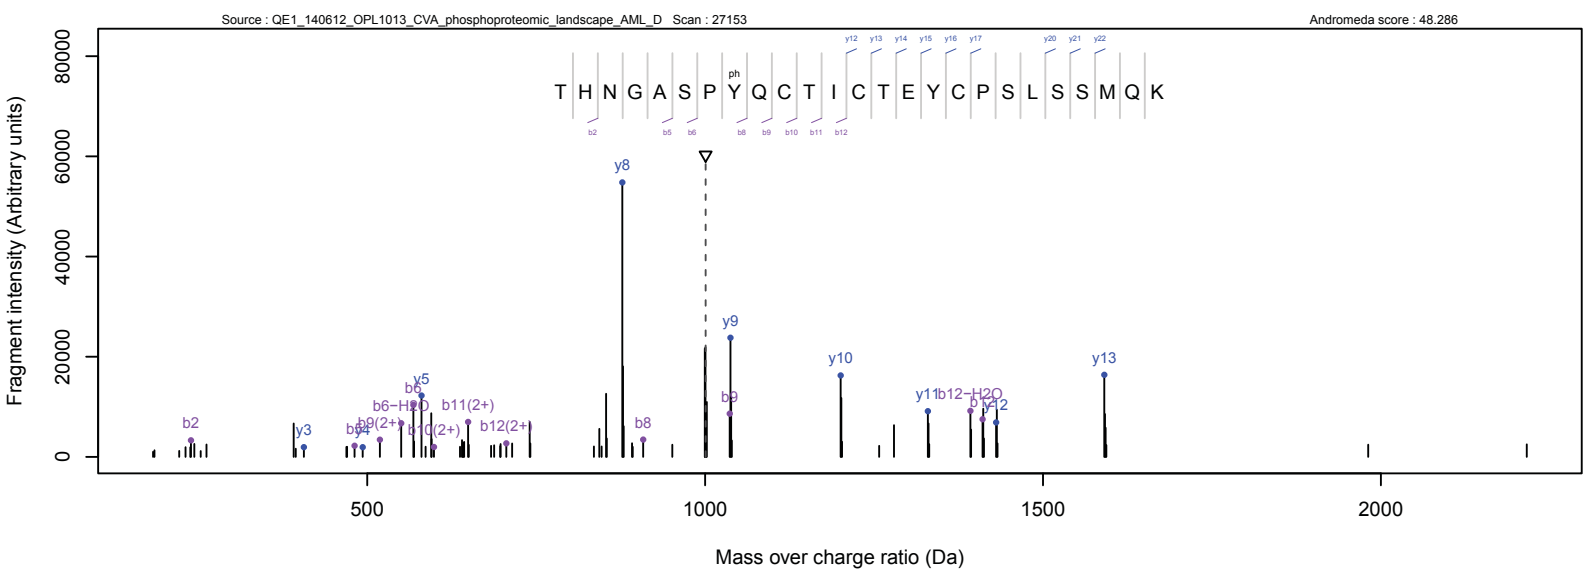

## AGHPVLY(ph)CSAR-3+

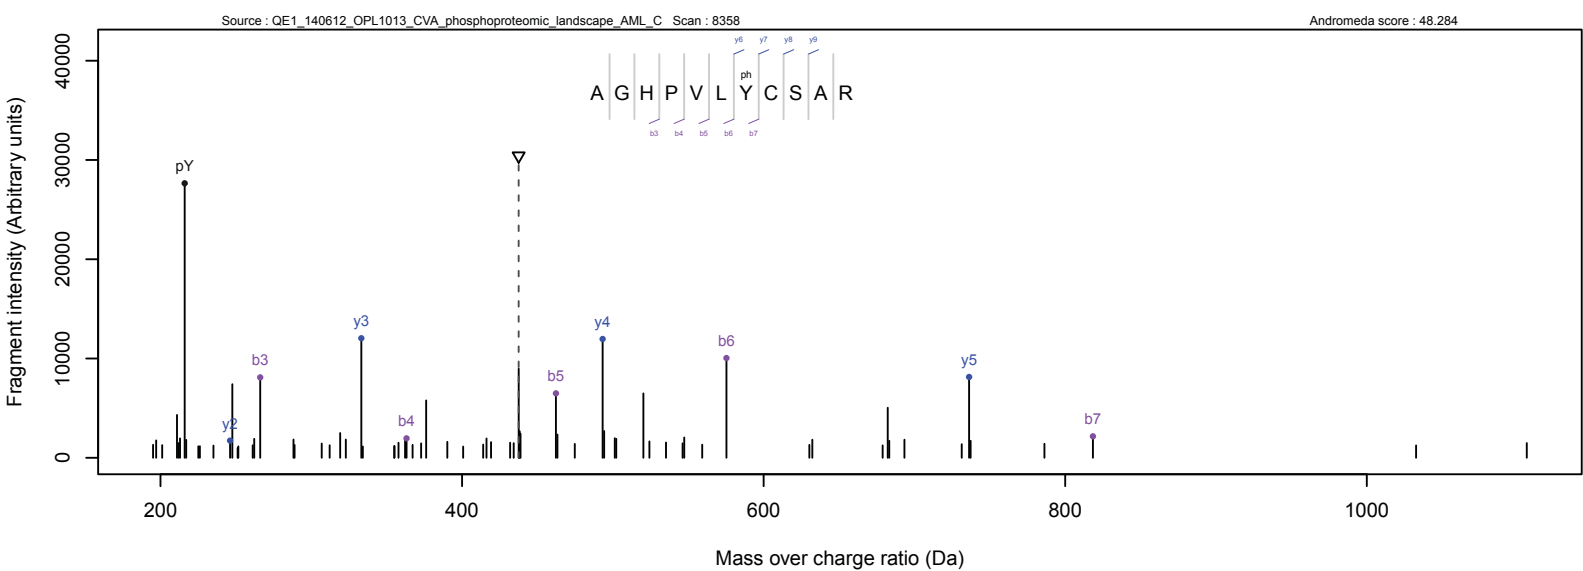

## IQNPSAY(ph)AKR-3+

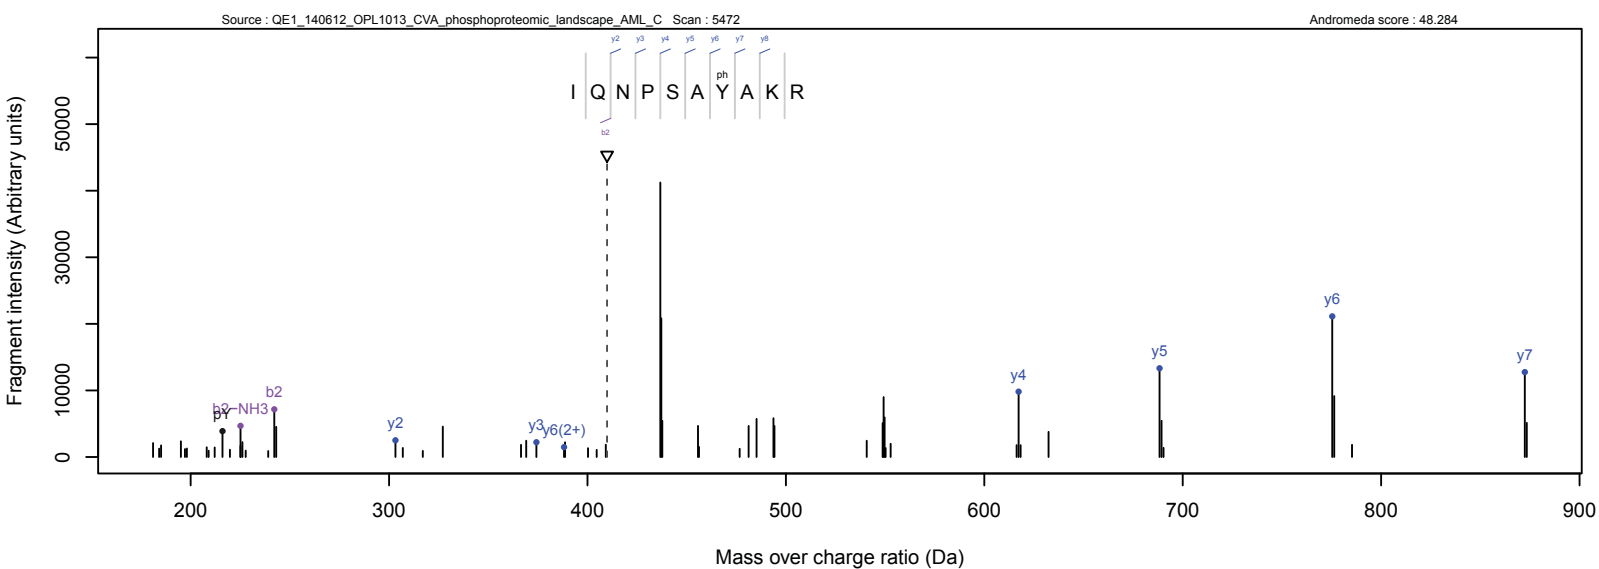

## KHVLY(ph)VEHR-3+

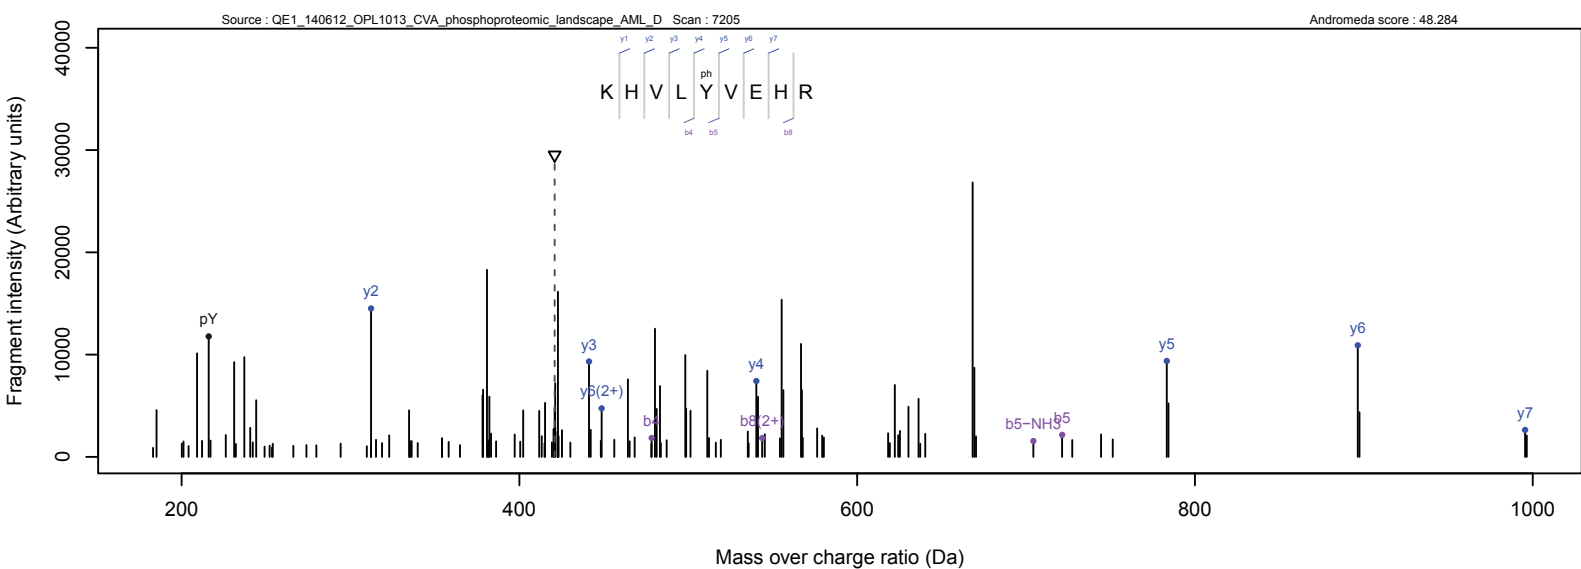

## RFVDY(ph)CLQK-2+

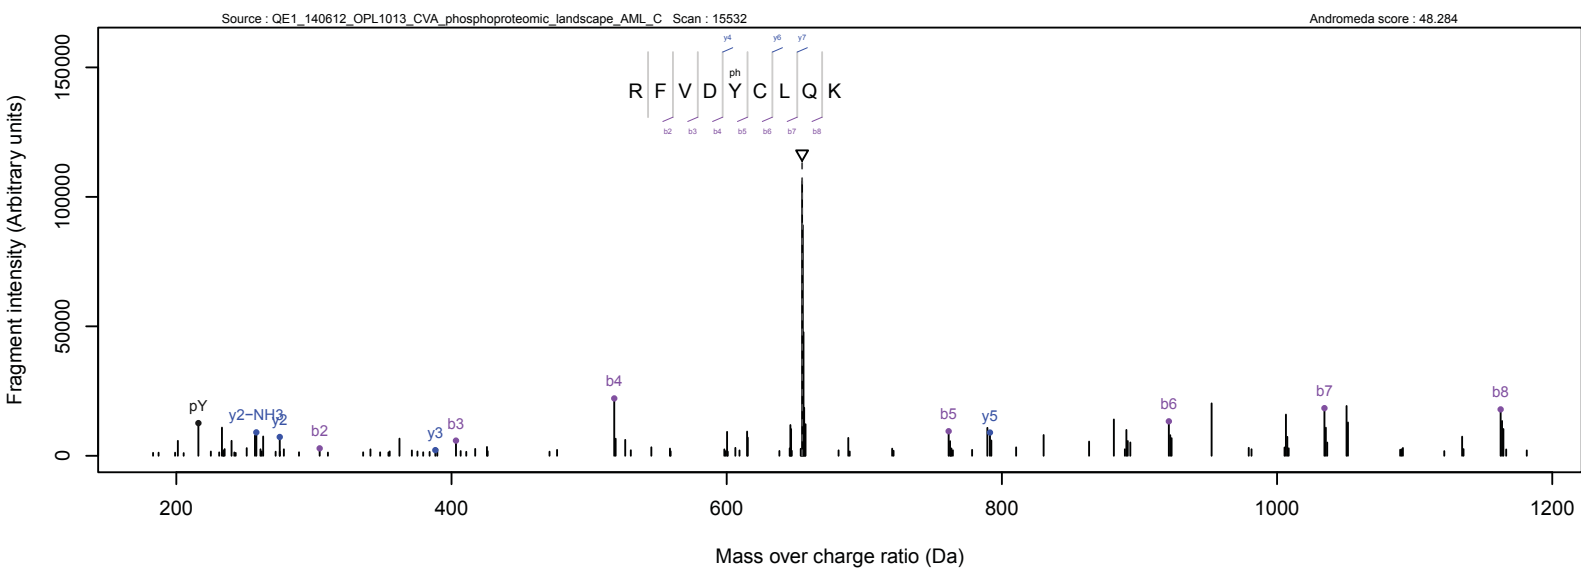

## TY(ph)LGMSTLR-2+

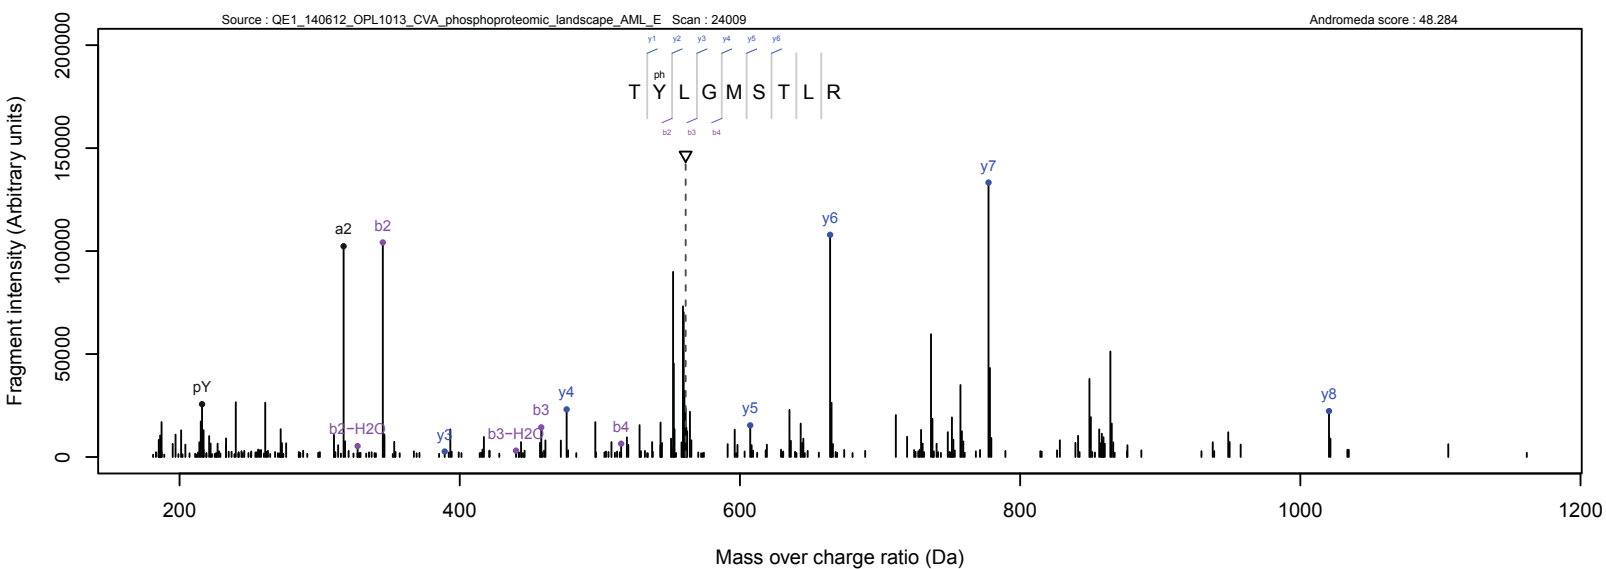

## Y(ph)CFPNYVGRPK-3+

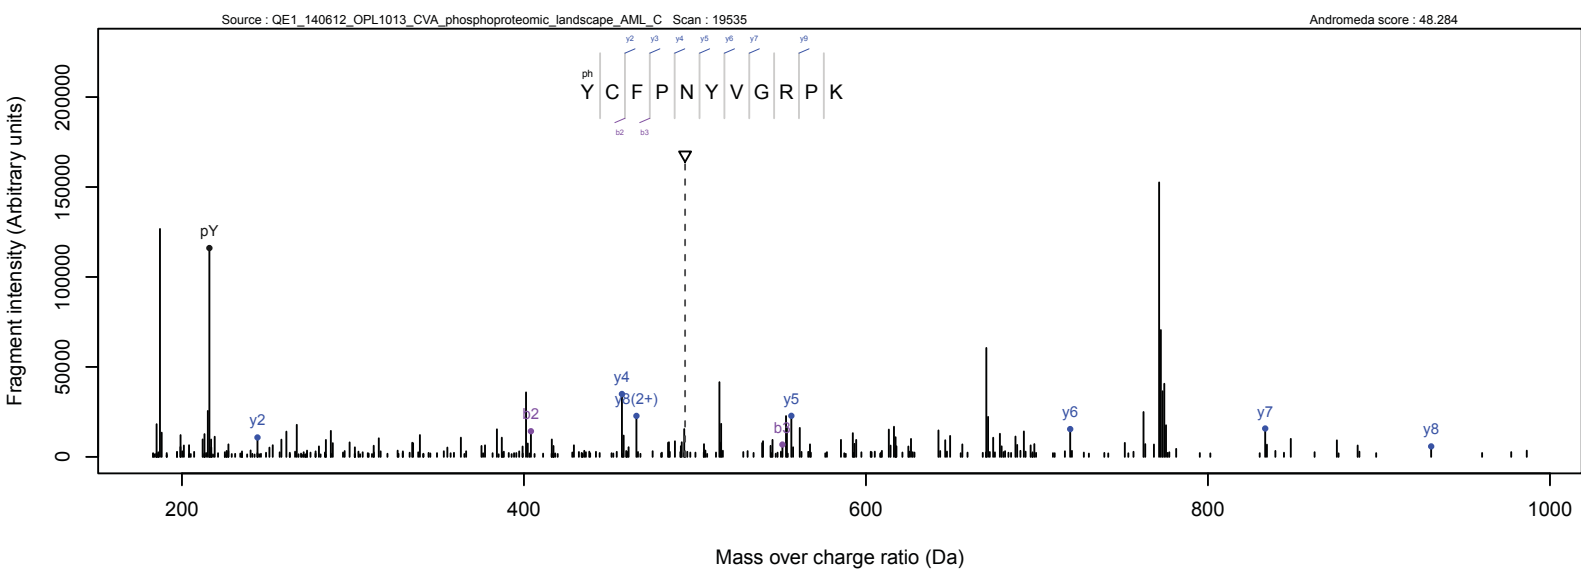

## Y(ph)LQTYGEWNR-2+

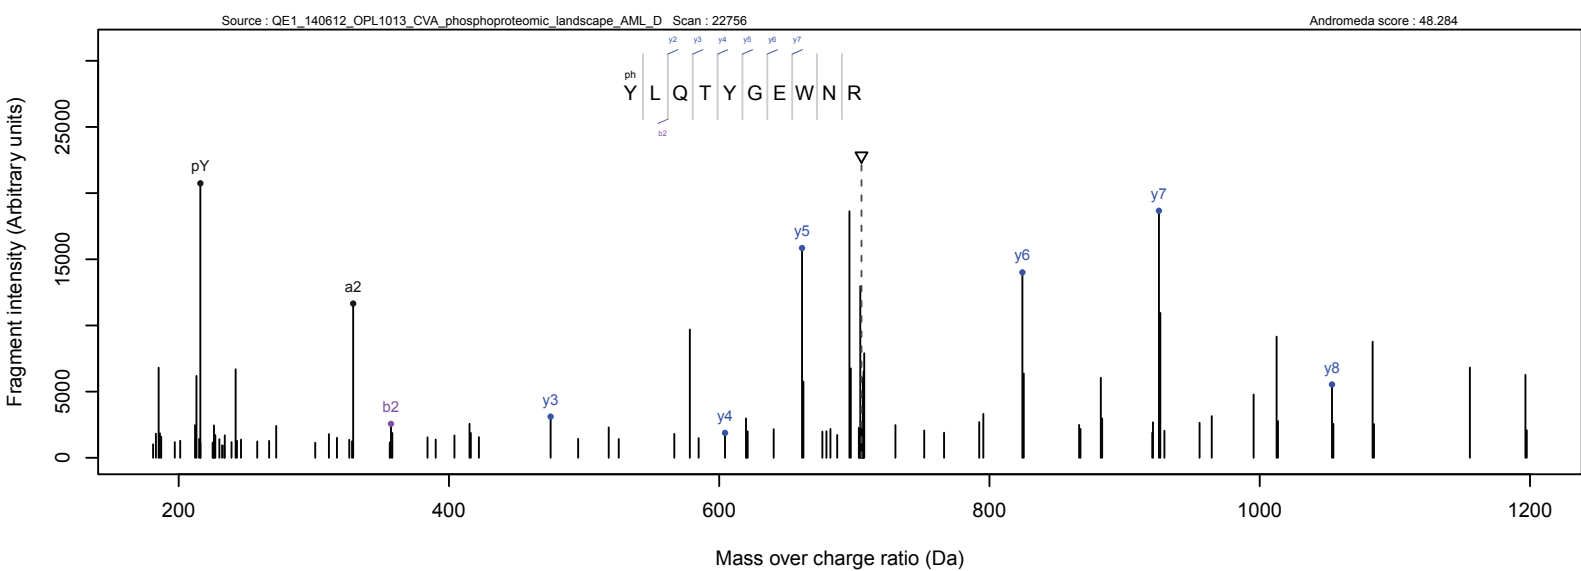

## TPVDFY(ph)PSALHPSGLMKPMPQESLNGTGCR-4+

Source : QE1\_140612\_OPL1013\_CVA\_phosphoproteomic\_landscape\_AML\_C Scan : 42065

Andromeda score : 48.226

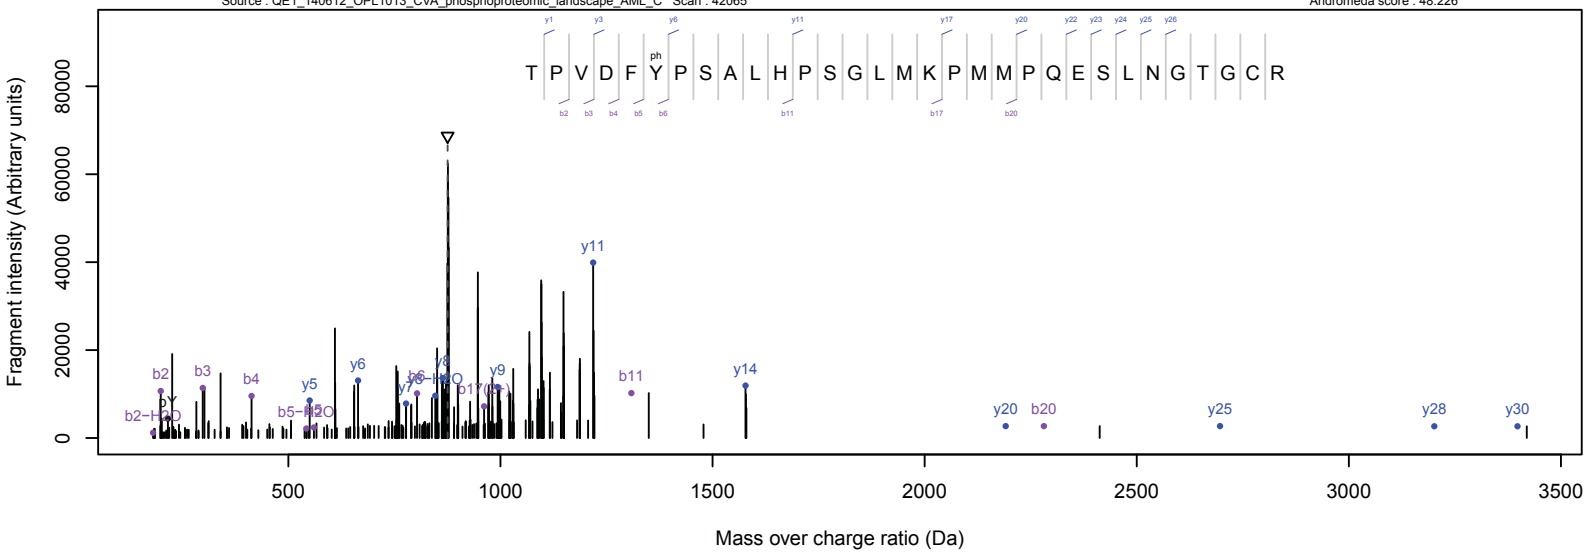

## (ac)AS(ph)GVAVSDGVIK-2+

Source : QE1\_140612\_OPL1013\_CVA\_phosphoproteomic\_landscape\_AML\_D Scan : 28297

Andromeda score : 48.216

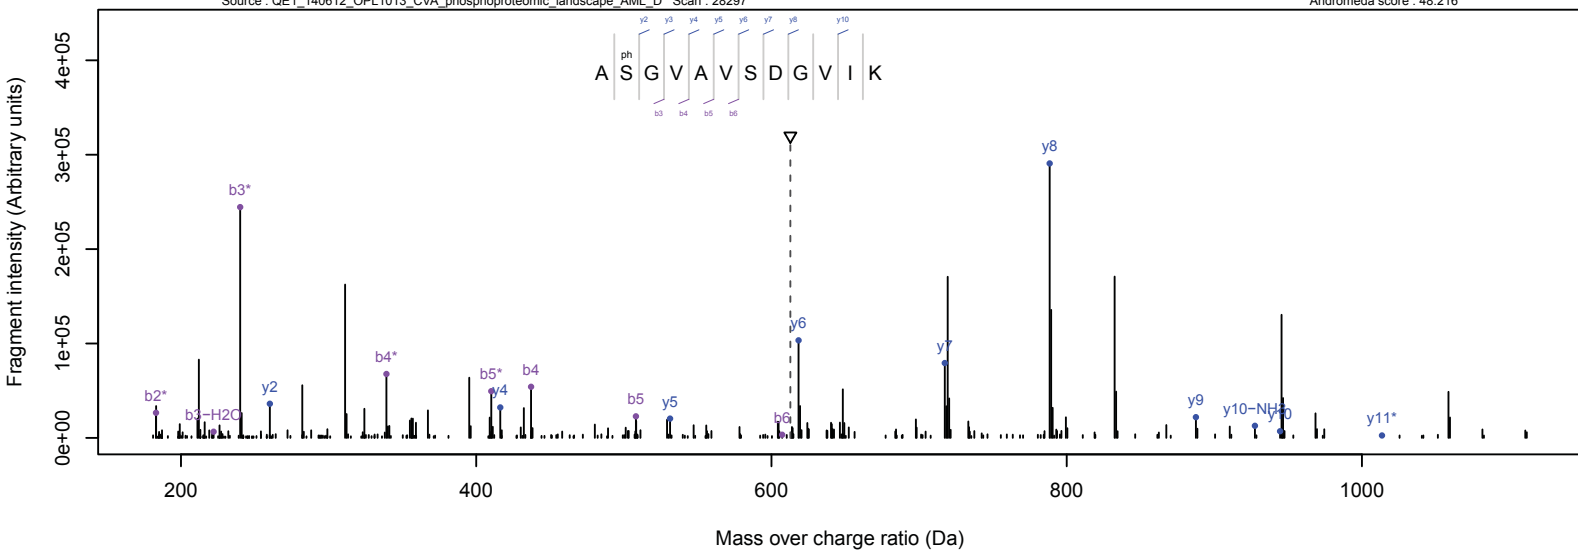

## YGNEY(ph)IPSNYVTGKK-2+

Source : QE1\_140612\_OPL1013\_CVA\_phosphoproteomic\_landscape\_AML\_C Scan : 19325

Andromeda score : 48.216

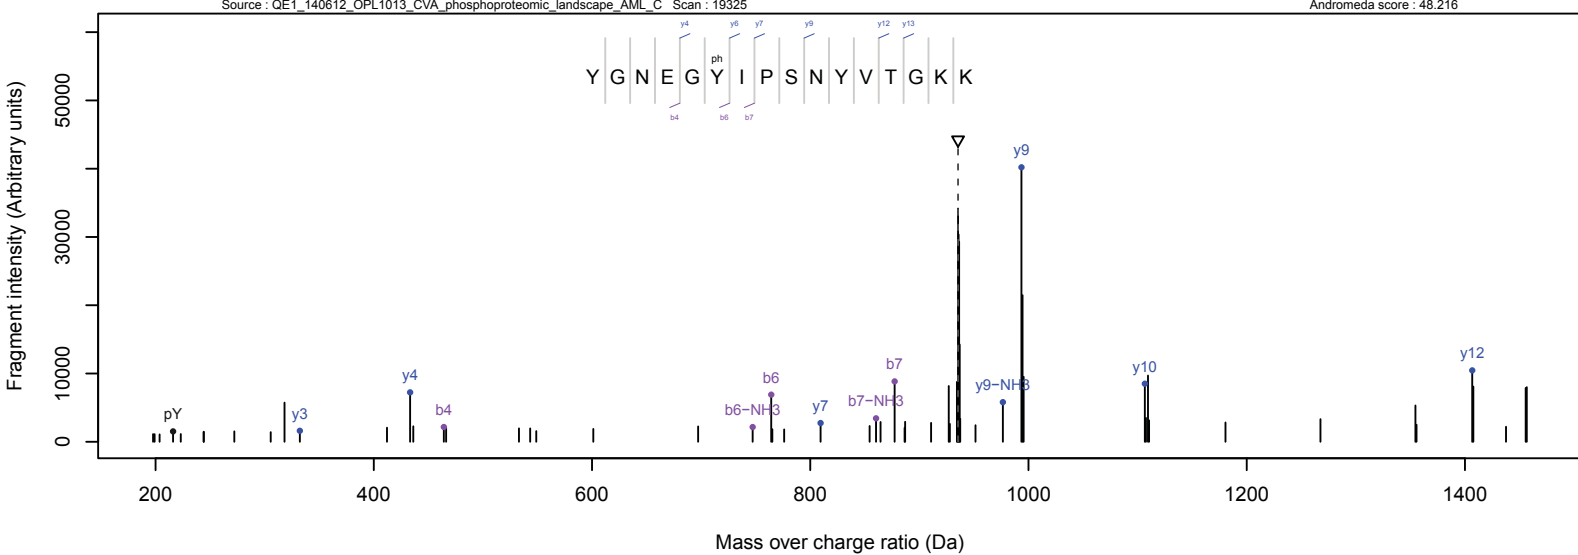

GY(ph)LLPM(ox)R-2+

Source: QE1\_140822\_OPL1013\_CvA\_pTyrIP\_AML\_cell\_lines\_part2\_B Scan: 15561

Andromeda score: 48.174

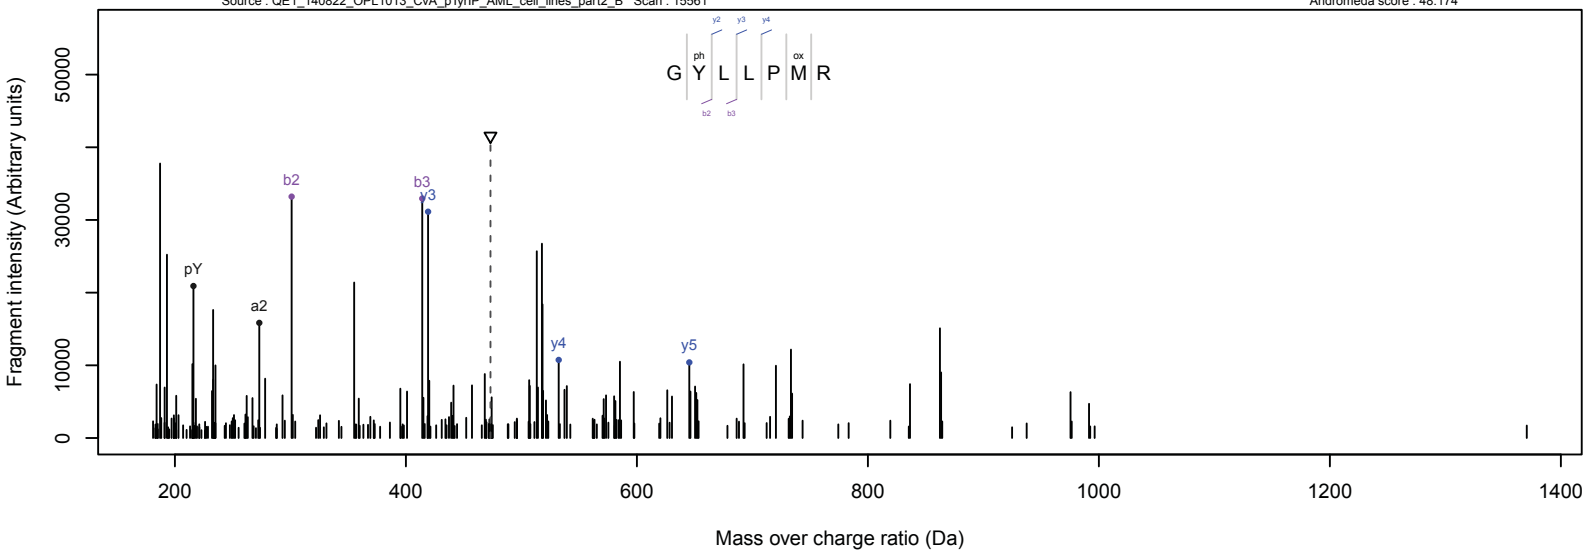

IDTLGIY(ph)GK-2+

Source: QE1\_140612\_OPL1013\_CVA\_phosphoproteomic\_landscape\_AML\_B Scan: 19583

Andromeda score: 48.091

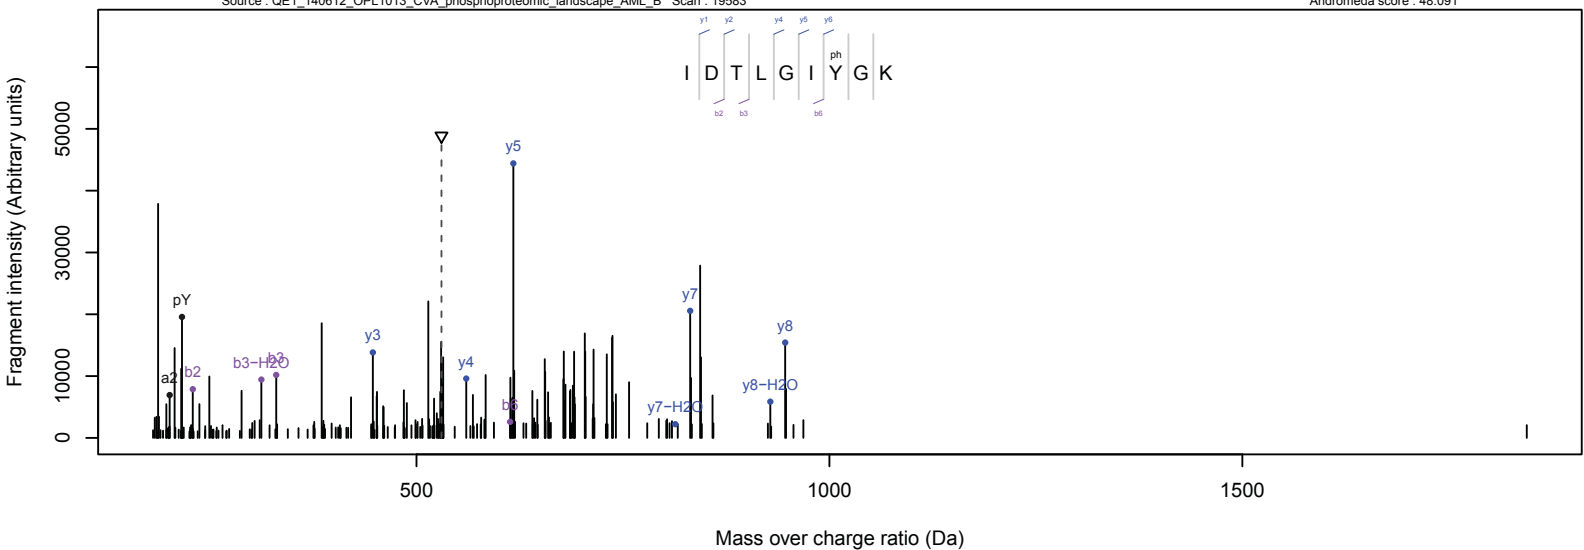

QQYIEQSQA E I Y H N R F D A V Q S A H R-4+

Source: QE1\_140908\_OPL1013\_CvA\_pTyrIP\_AML\_HEL Scan: 23775

Andromeda score: 48.077

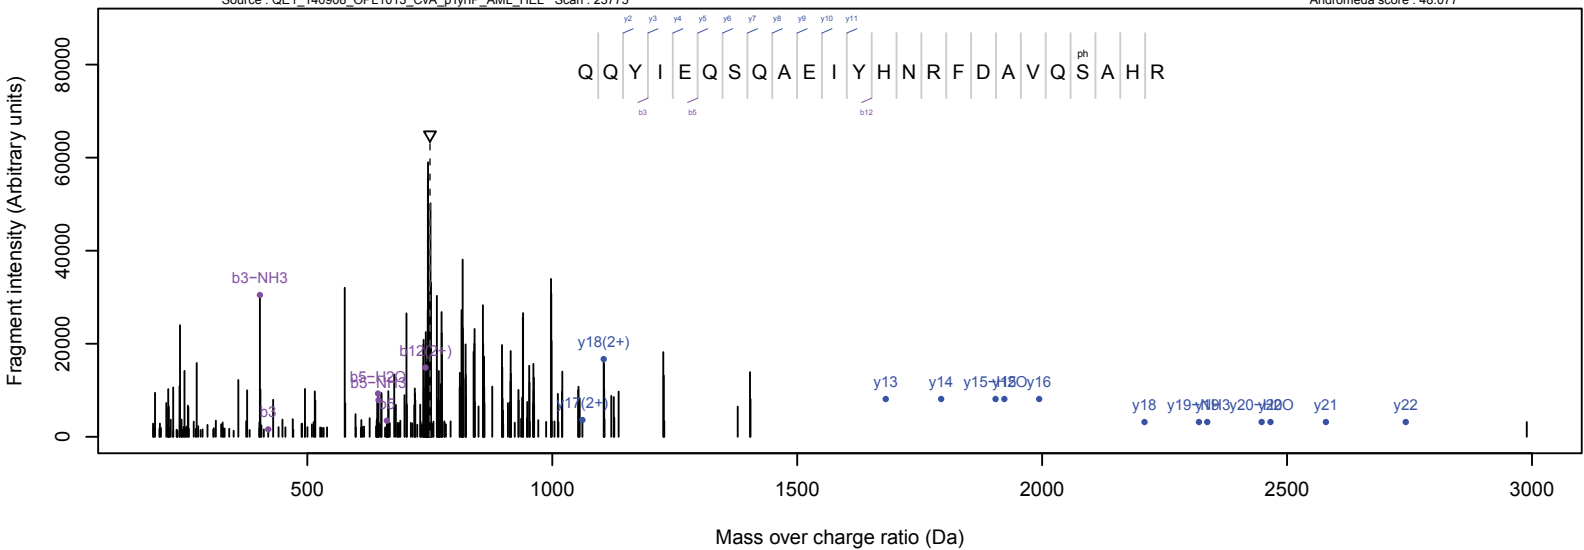

## IVSSSDVGHDEYSTQ(ph)LVKK-3+

Source : QE1\_140908\_OPL1013\_CVA\_pTyrIP\_AML\_HEL Scan : 17332

Andromeda score : 48.053

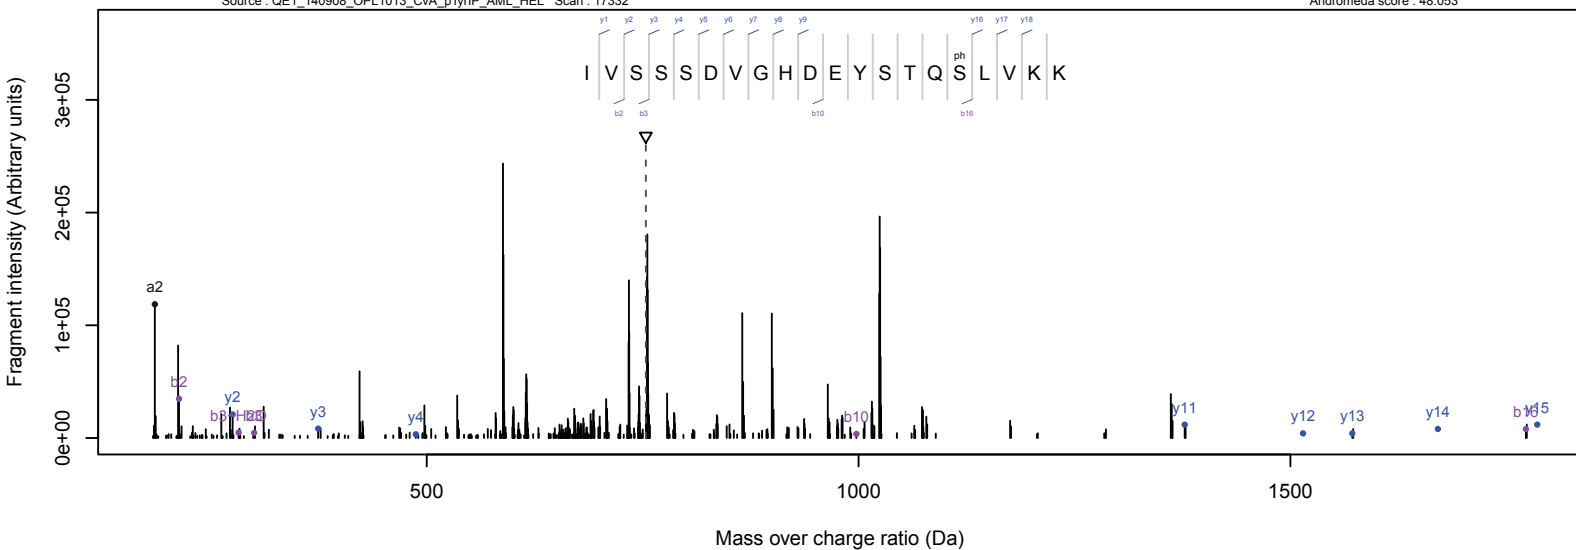

## SSLSSNDG(ph)ENIDSLTRK-3+

Source : QE1\_140612\_OPL1013\_CVA\_phosphoproteomic\_landscape\_AML\_B Scan : 20827

Andromeda score : 48.053

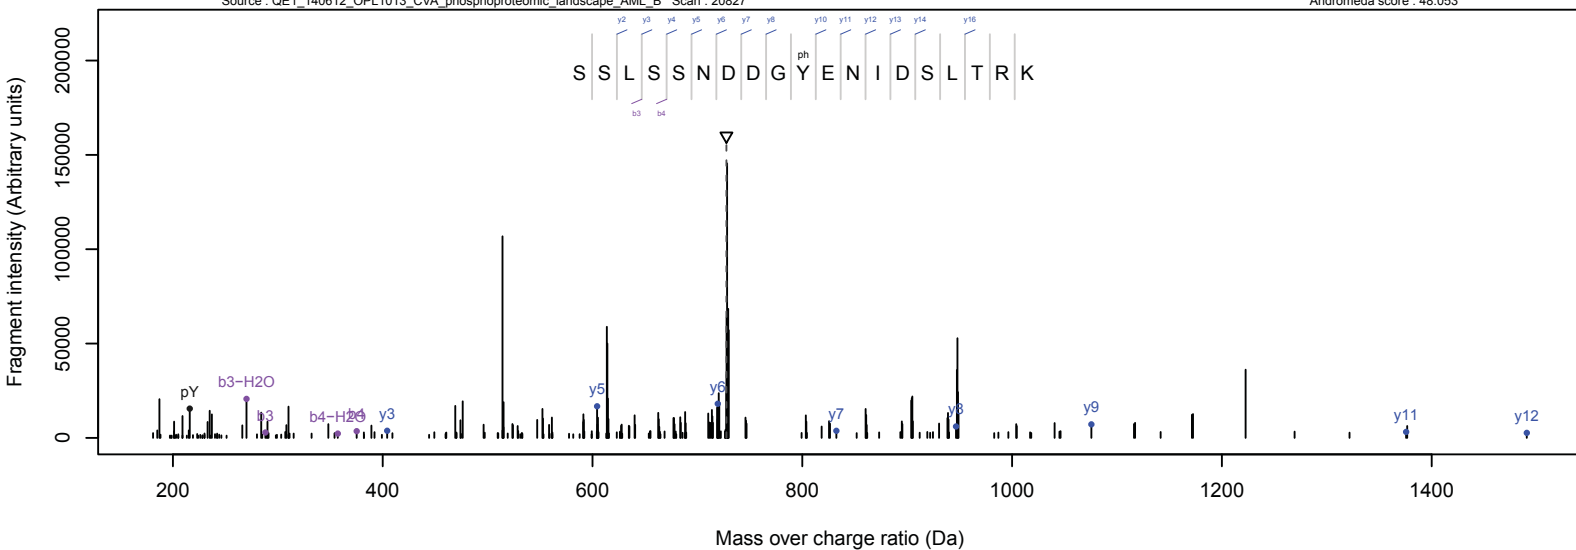

## Y(ph)PALHKPENQDIDWGALEGETR-3+

Source : QE1\_140612\_OPL1013\_CVA\_phosphoproteomic\_landscape\_AML\_B Scan : 30611

Andromeda score : 48.053

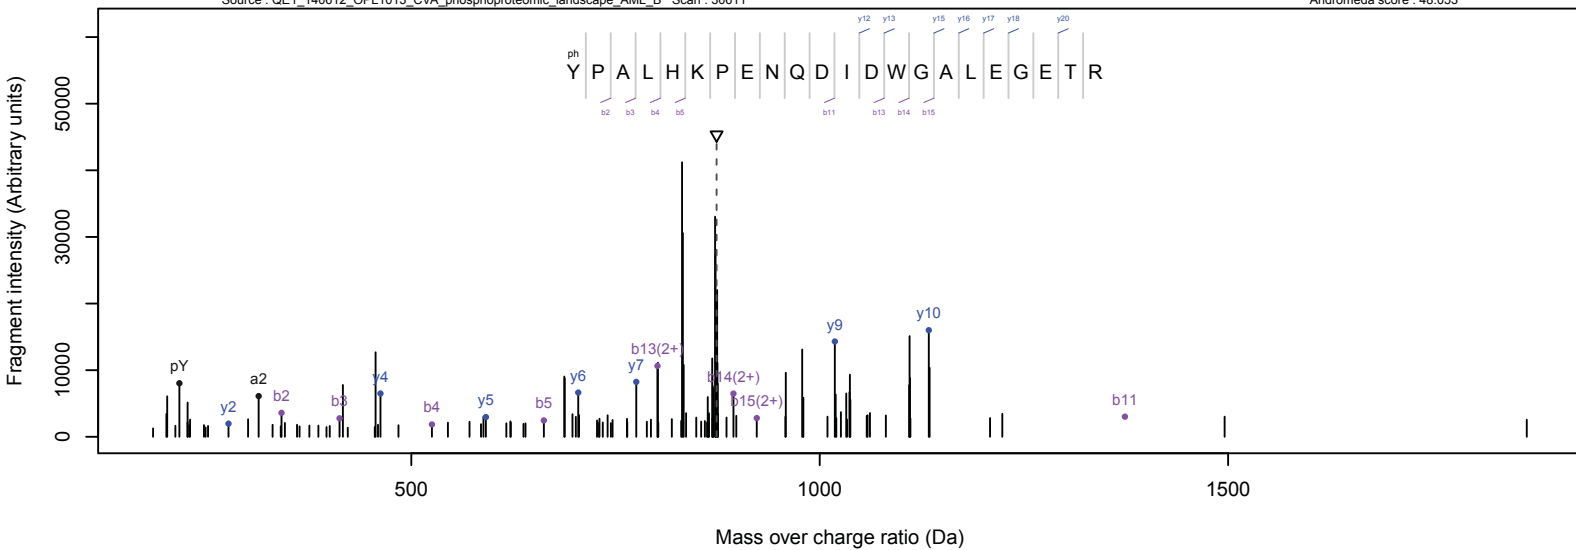

LHY(ph)CVSCAIHSK-3+

Source : QE1\_140612\_OPL1013\_CVA\_phosphoproteomic\_landscape\_AML\_C Scan : 10061

Andromeda score : 48.044

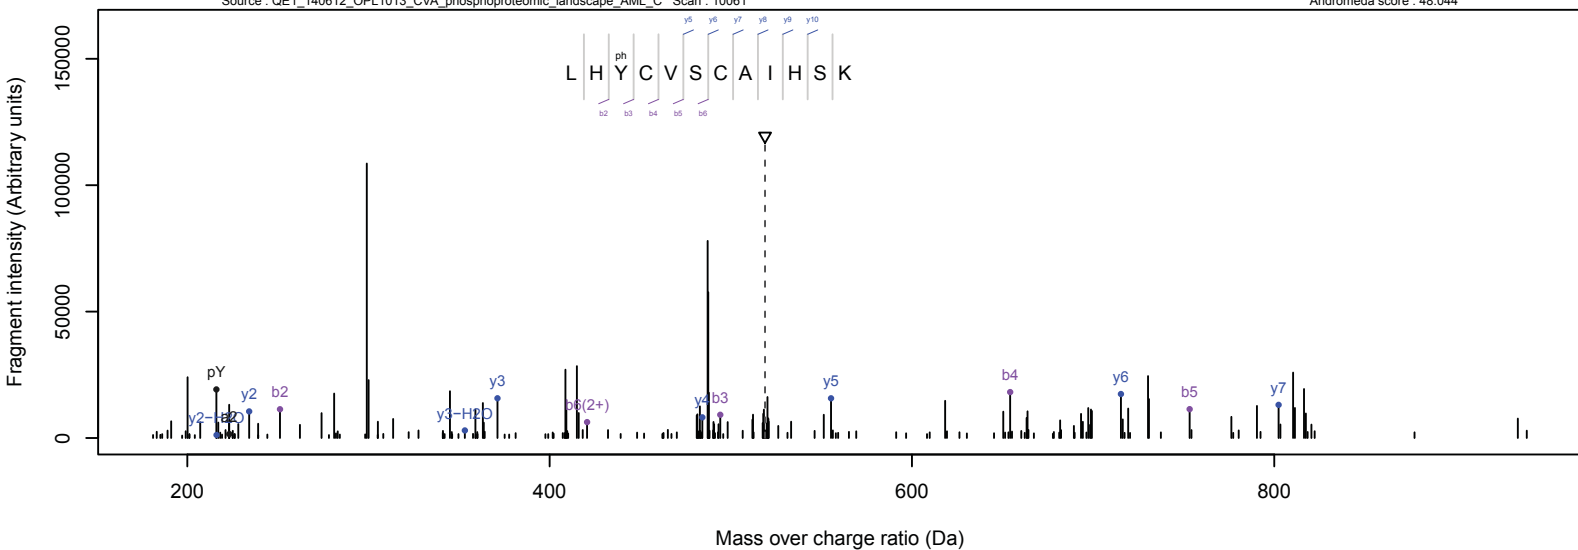

SYKY(ph)SPETPPR-3+

Source : QE1\_140612\_OPL1013\_CVA\_phosphoproteomic\_landscape\_AML\_B Scan : 7621

Andromeda score : 48.044

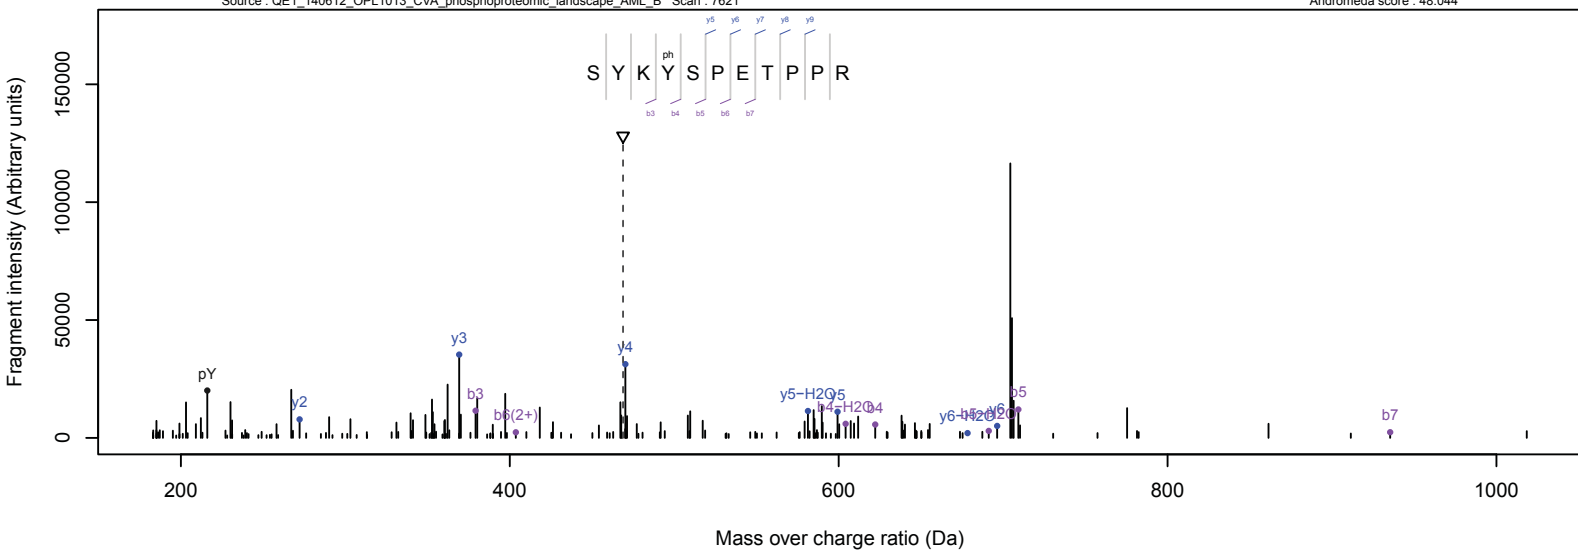

EPMNPIKQYVVK-2+

Source : QE1\_140612\_OPL1013\_CVA\_phosphoproteomic\_landscape\_AML\_C Scan : 15667

Andromeda score : 47.971

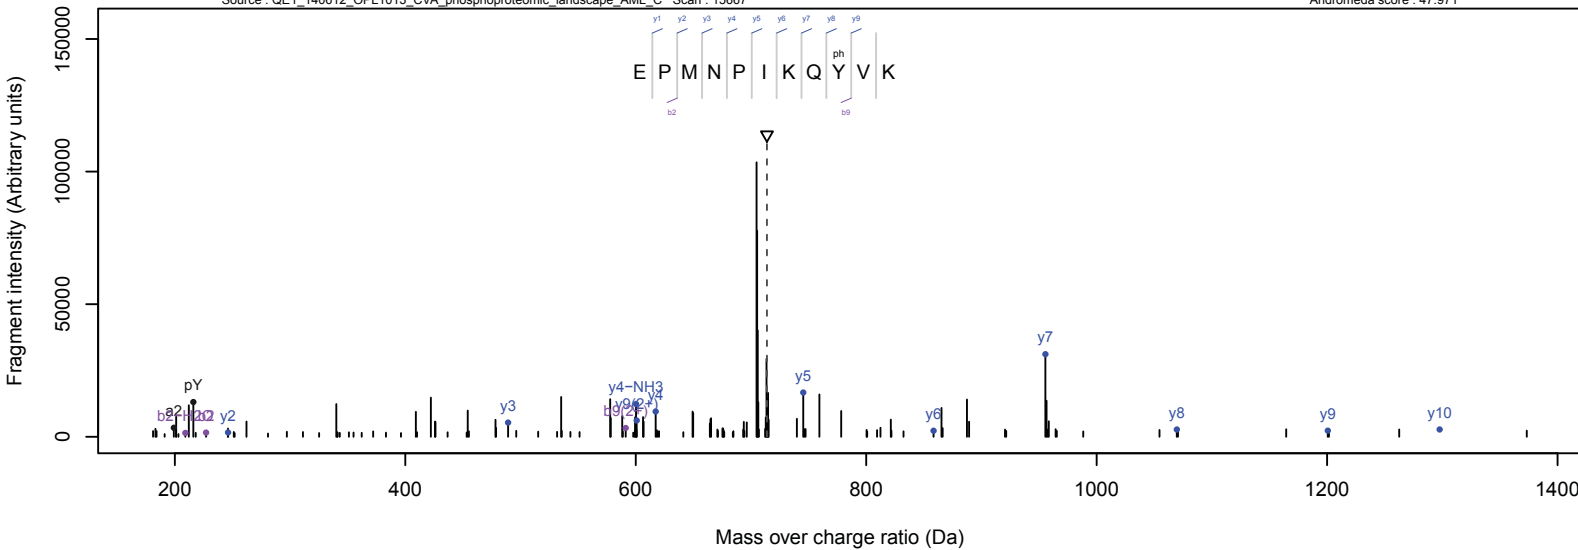

**VLNELY(ph)SVMK-2+**

Source : QE1\_140612\_OPL1013\_CVA\_phosphoproteomic\_landscape\_AML\_C Scan : 34110

Andromeda score : 47.971

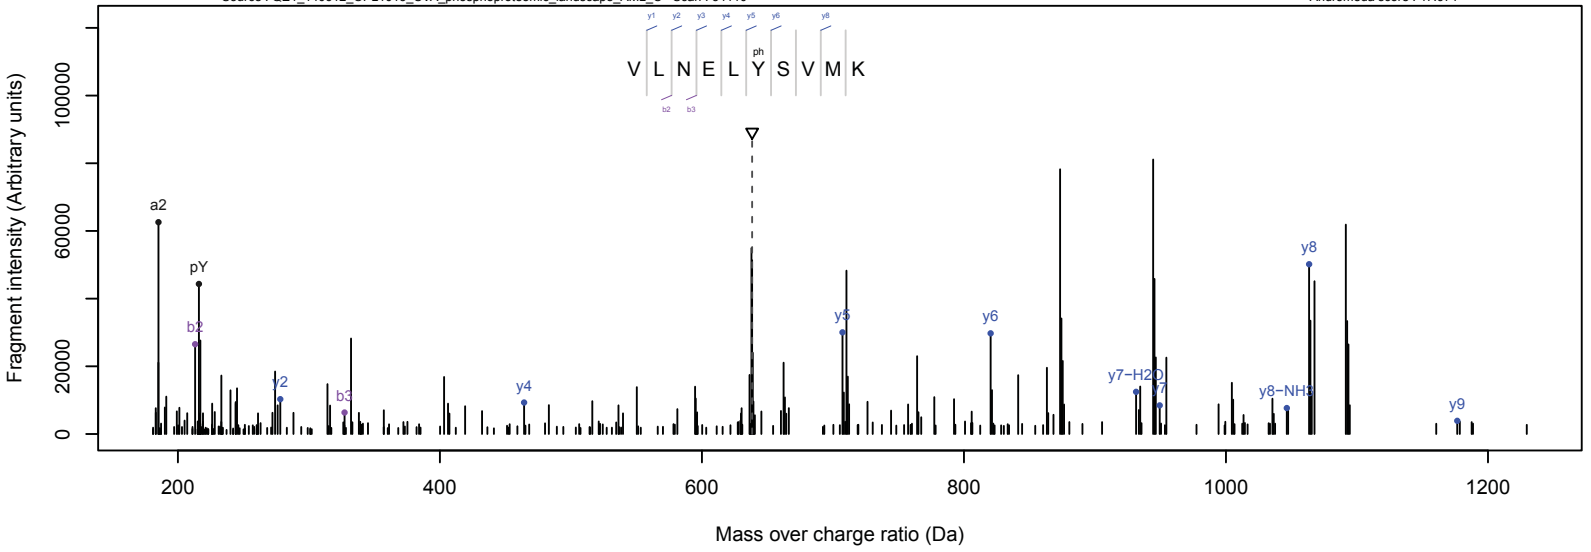

**Y(ph)PTNNGNCTGSATFSVLKK-3+**

Source : QE1\_140612\_OPL1013\_CVA\_phosphoproteomic\_landscape\_AML\_C Scan : 28188

Andromeda score : 47.931

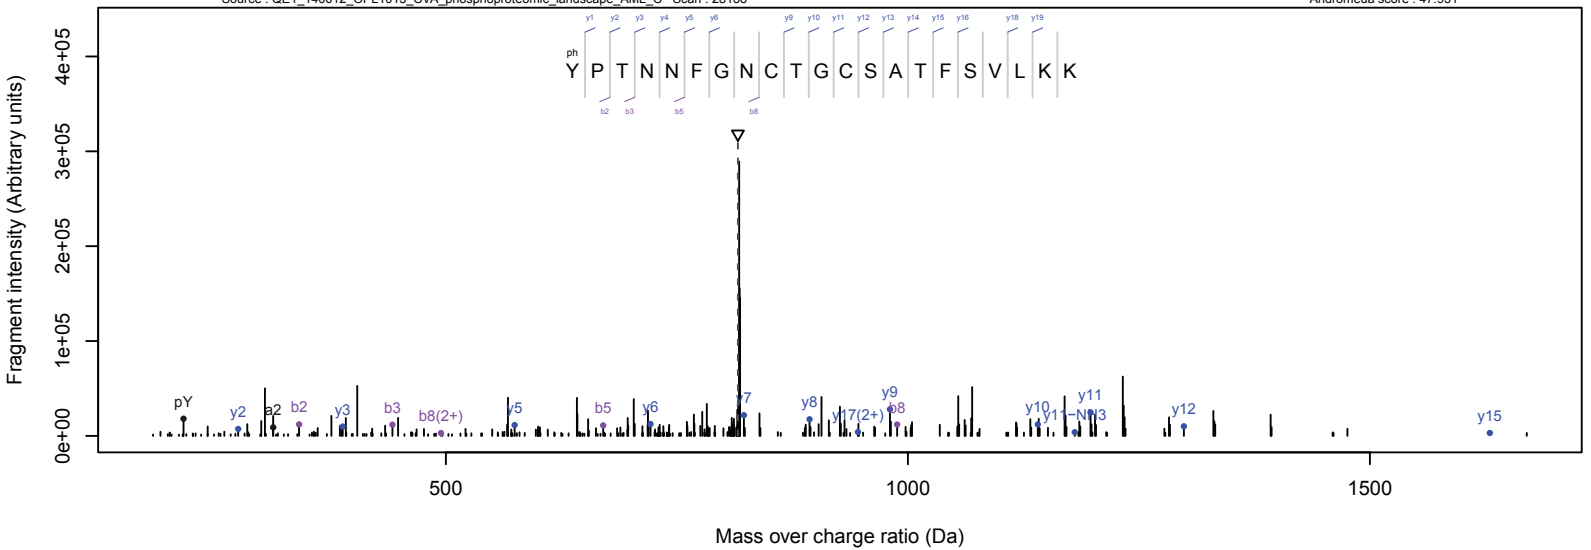

**FLDTSHY(ph)STAGSSSVR-3+**

Source : QE1\_140612\_OPL1013\_CVA\_phosphoproteomic\_landscape\_AML\_C Scan : 14619

Andromeda score : 47.916

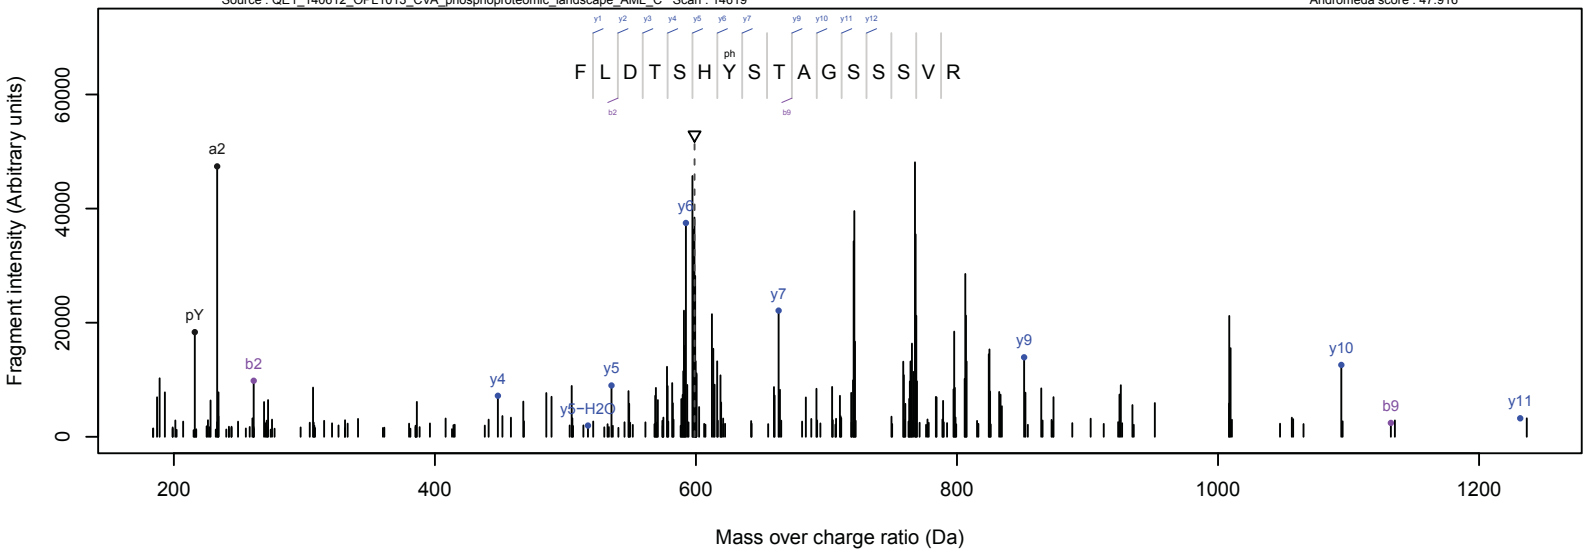



## HEY(ph)PLPR-2+

Source: QE1\_140612\_OPL1013\_CVA\_phosphoproteomic\_landscape\_AML\_D Scan: 8414

Andromeda score: 47.916

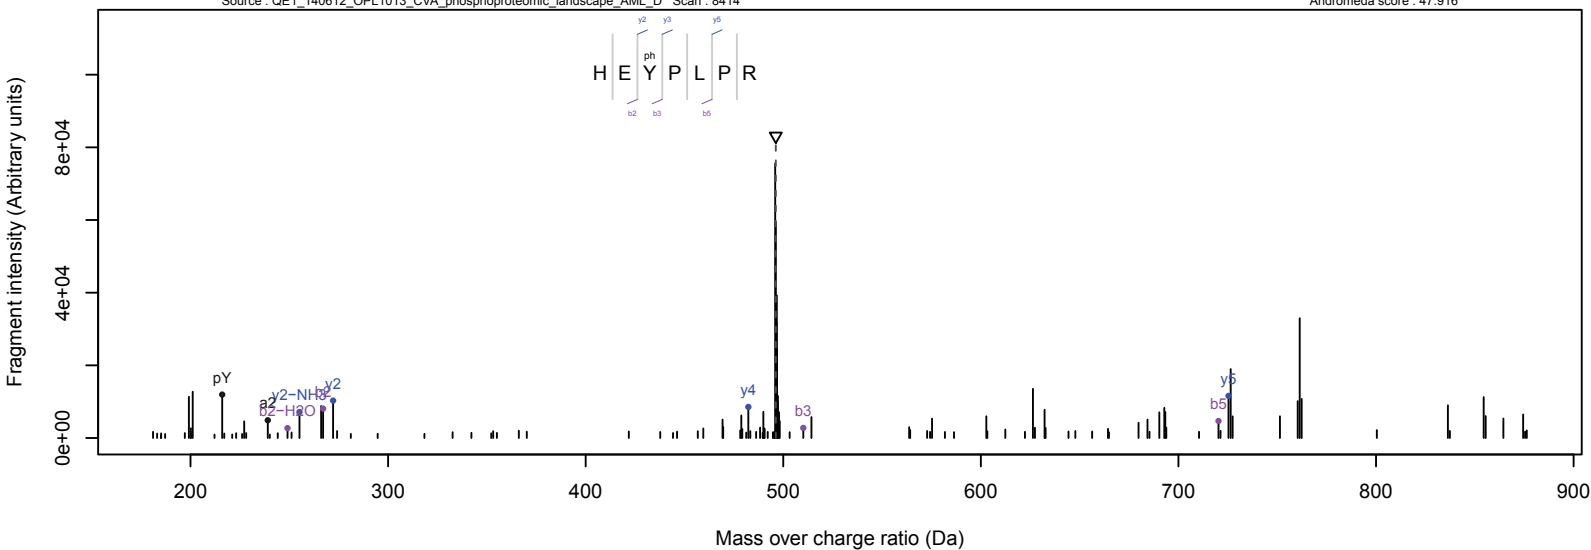

## HPVSLQY(ph)LMEGSYNK-3+

Source: QE1\_140612\_OPL1013\_CVA\_phosphoproteomic\_landscape\_AML\_D Scan: 33490

Andromeda score: 47.916

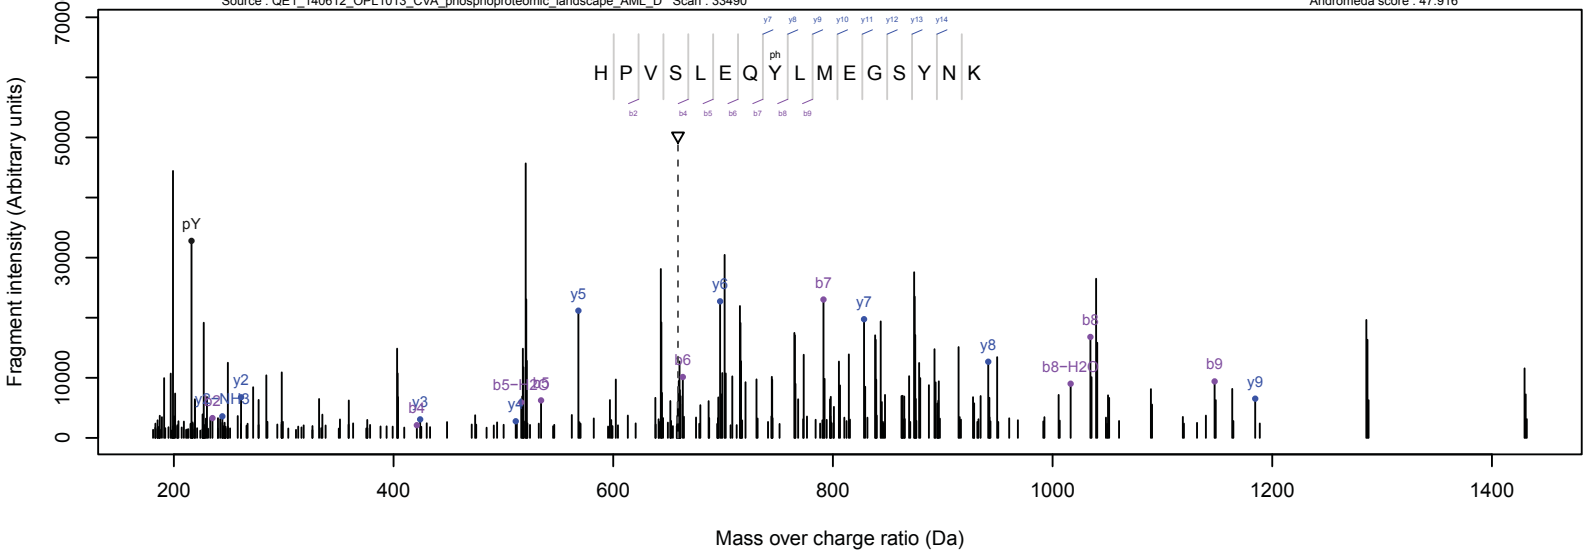

## AISSDMY(ph)FGR-2+

Source: QE1\_140612\_OPL1013\_CVA\_phosphoproteomic\_landscape\_AML\_C Scan: 22691

Andromeda score: 47.894

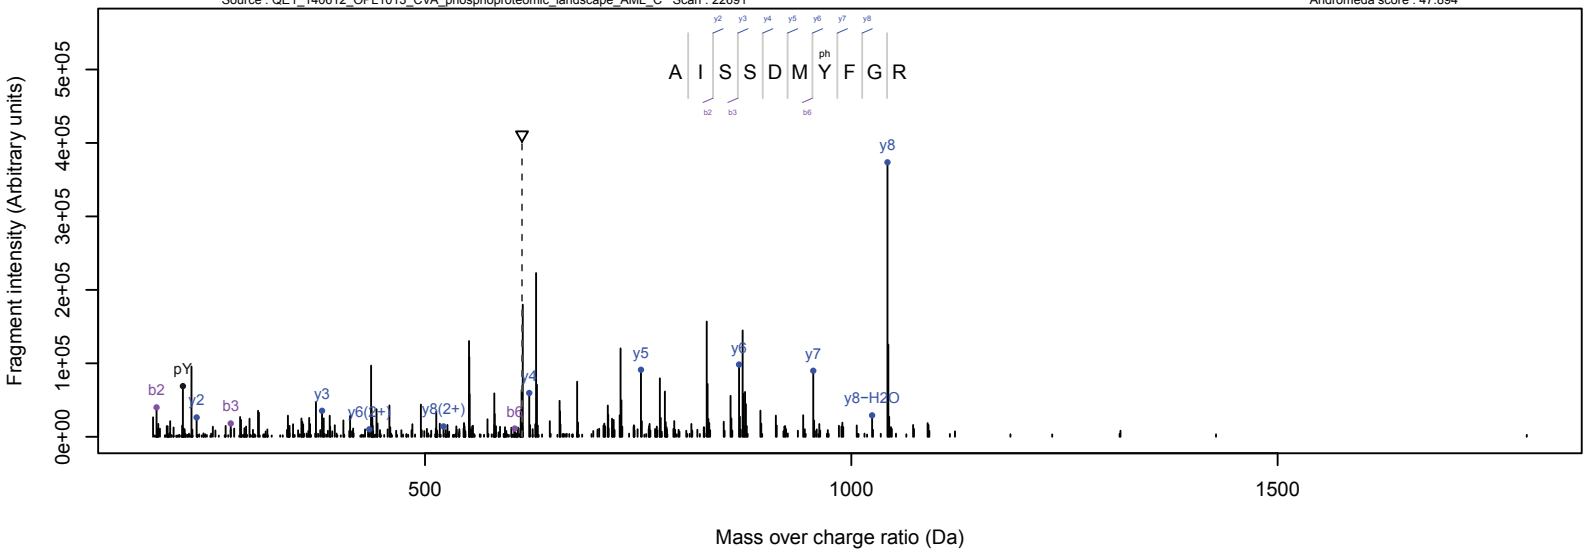

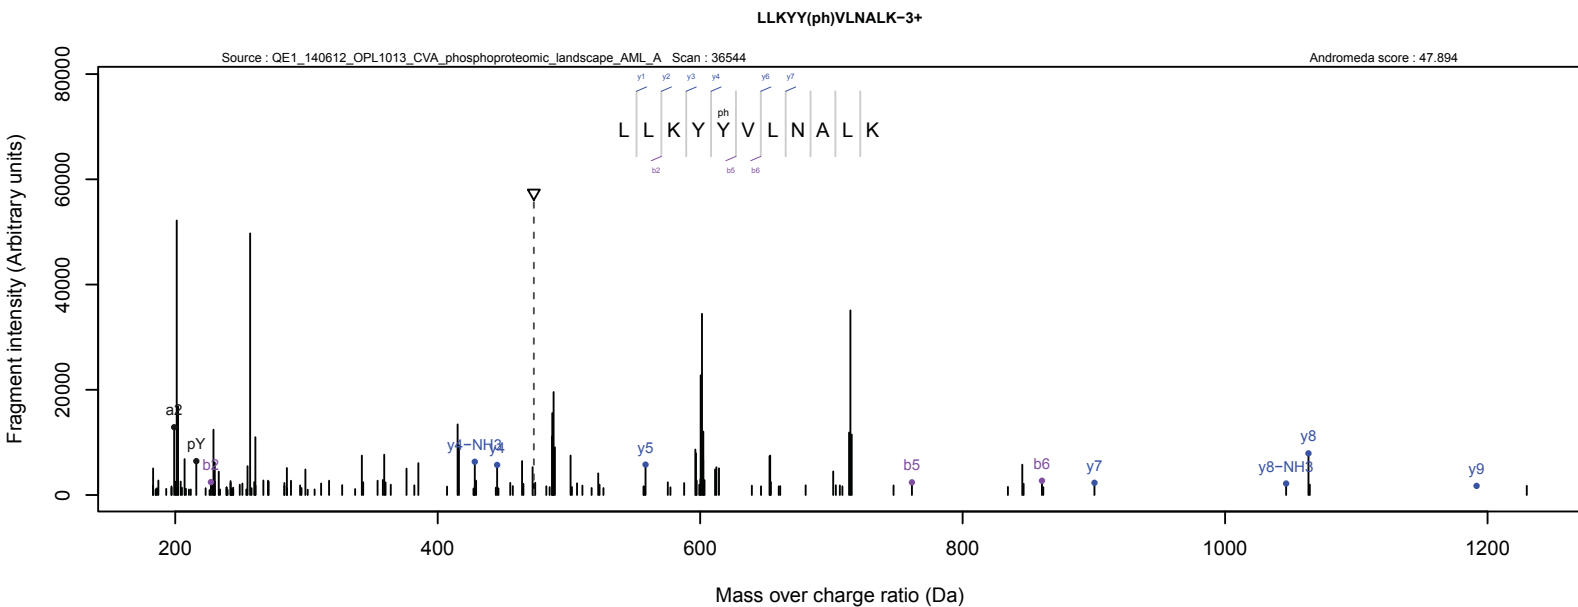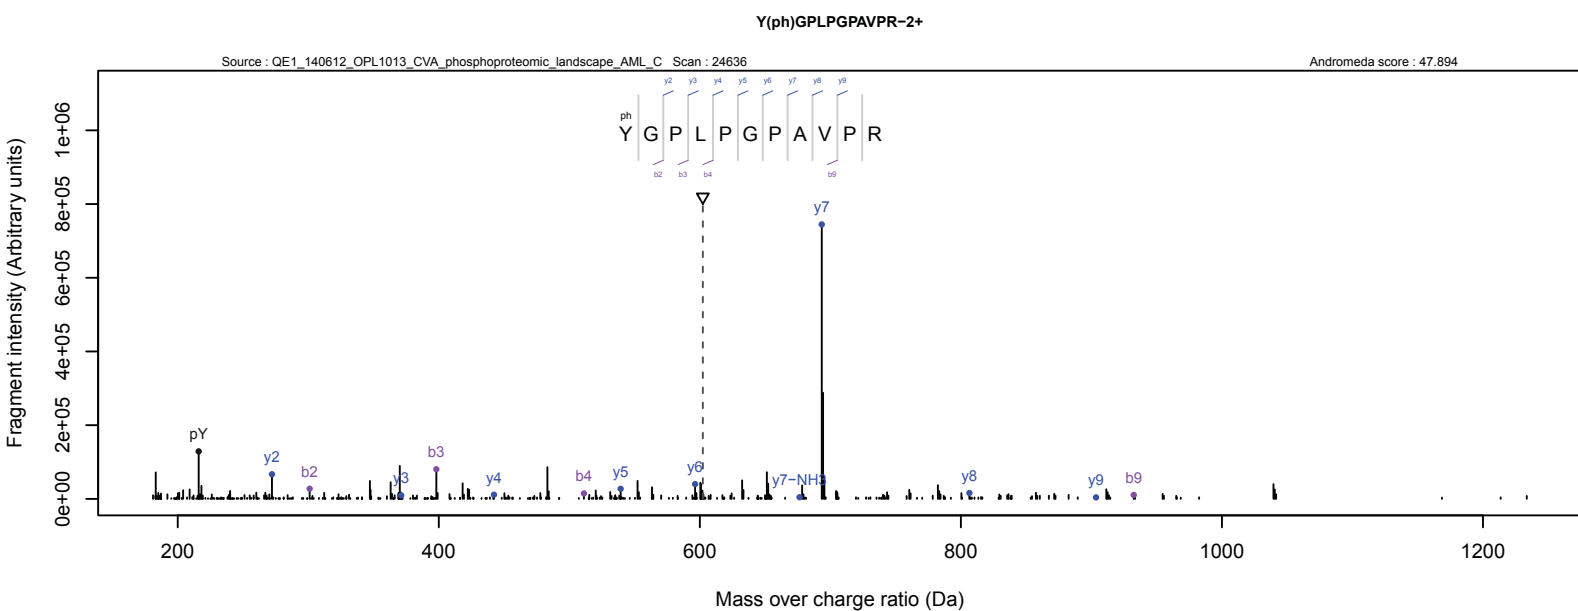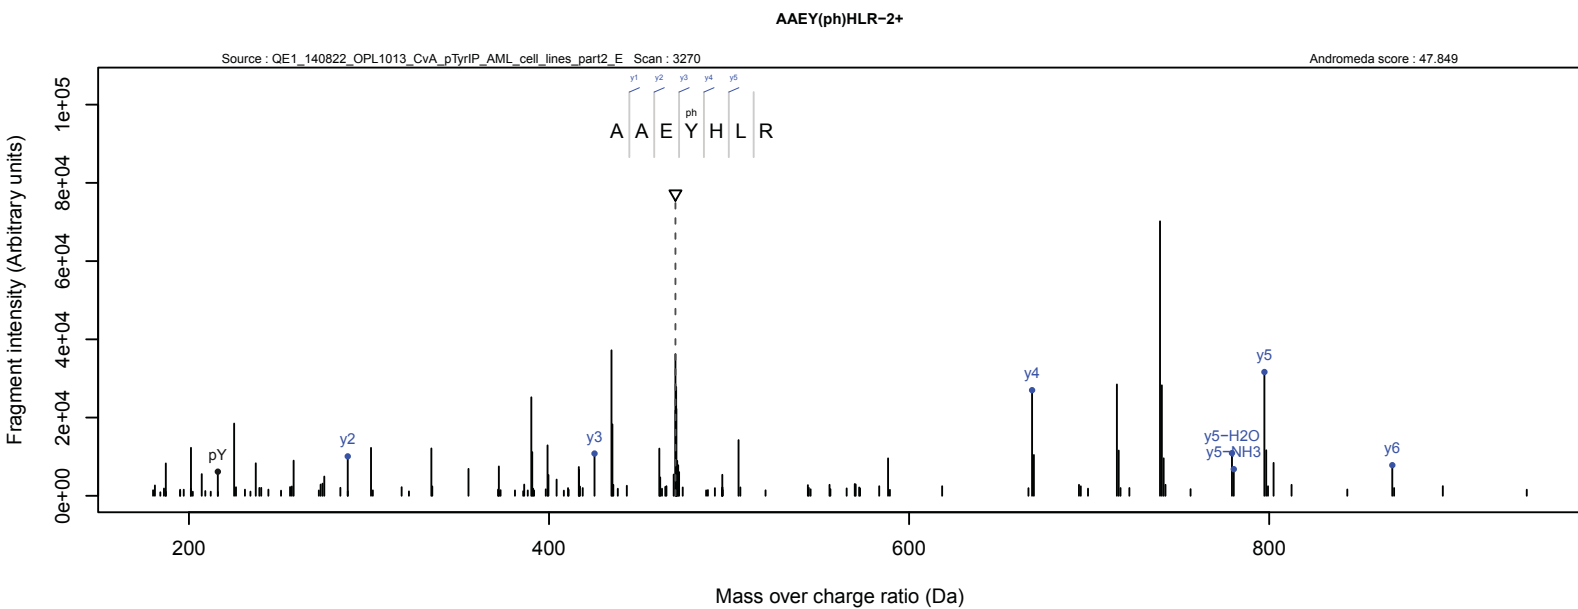

## QVAY(ph)IYK-2+

Source : QE1\_140612\_OPL1013\_CVA\_phosphoproteomic\_landscape\_AML\_A Scan : 12325

Andromeda score : 47.849

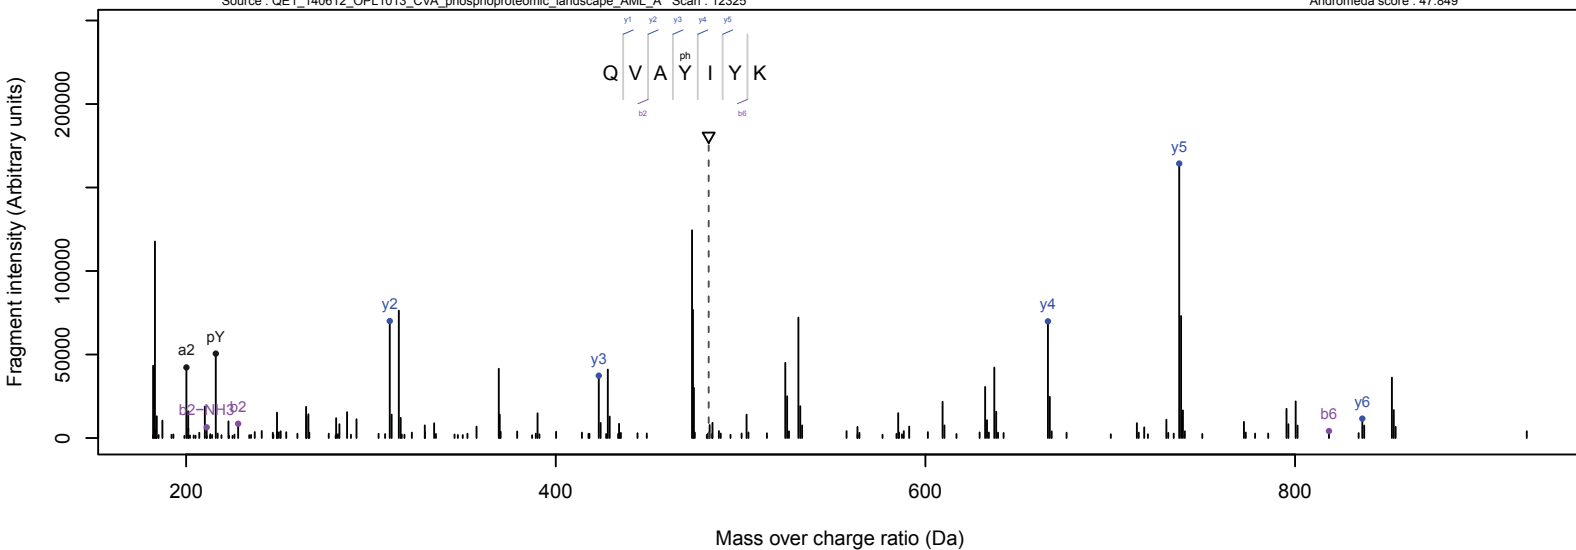

## IY(ph)GISFPDNK-2+

Source : QE1\_140908\_OPL1013\_CvA\_pTyrIP\_AML\_HEL Scan : 30229

Andromeda score : 47.844

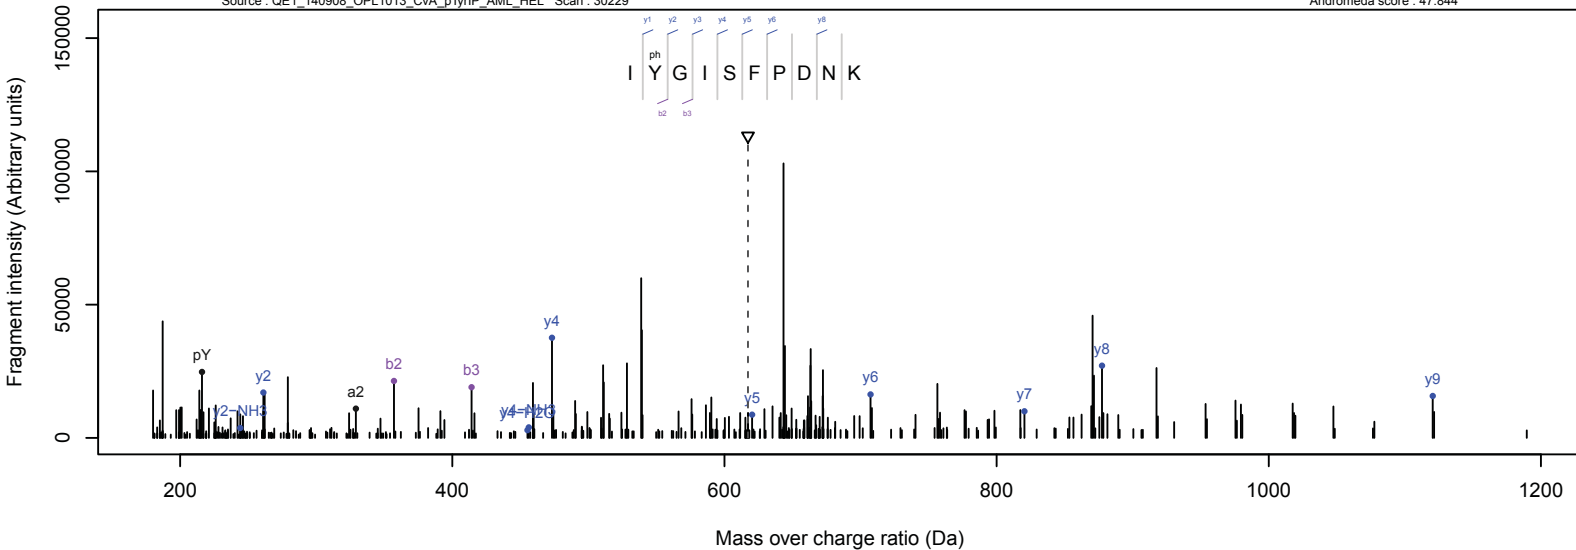

## SNFGY(ph)NIPLK-2+

Source : QE1\_140612\_OPL1013\_CVA\_phosphoproteomic\_landscape\_AML\_A Scan : 26709

Andromeda score : 47.844

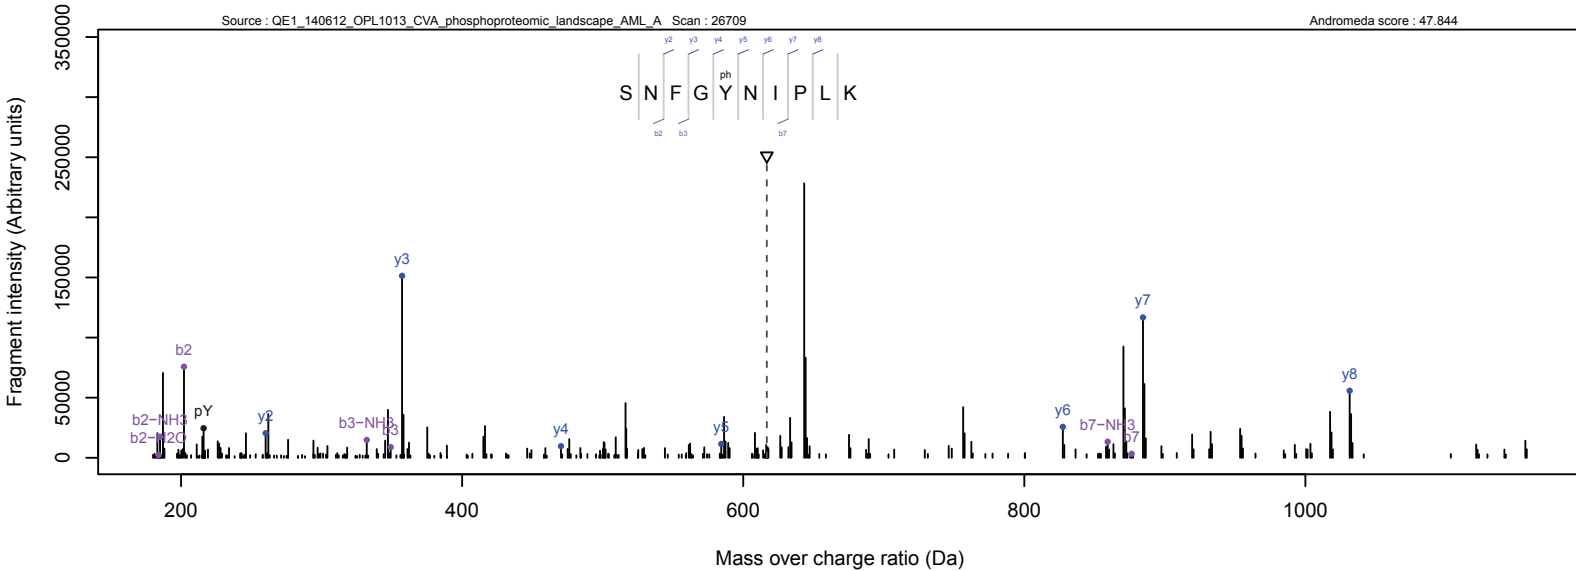

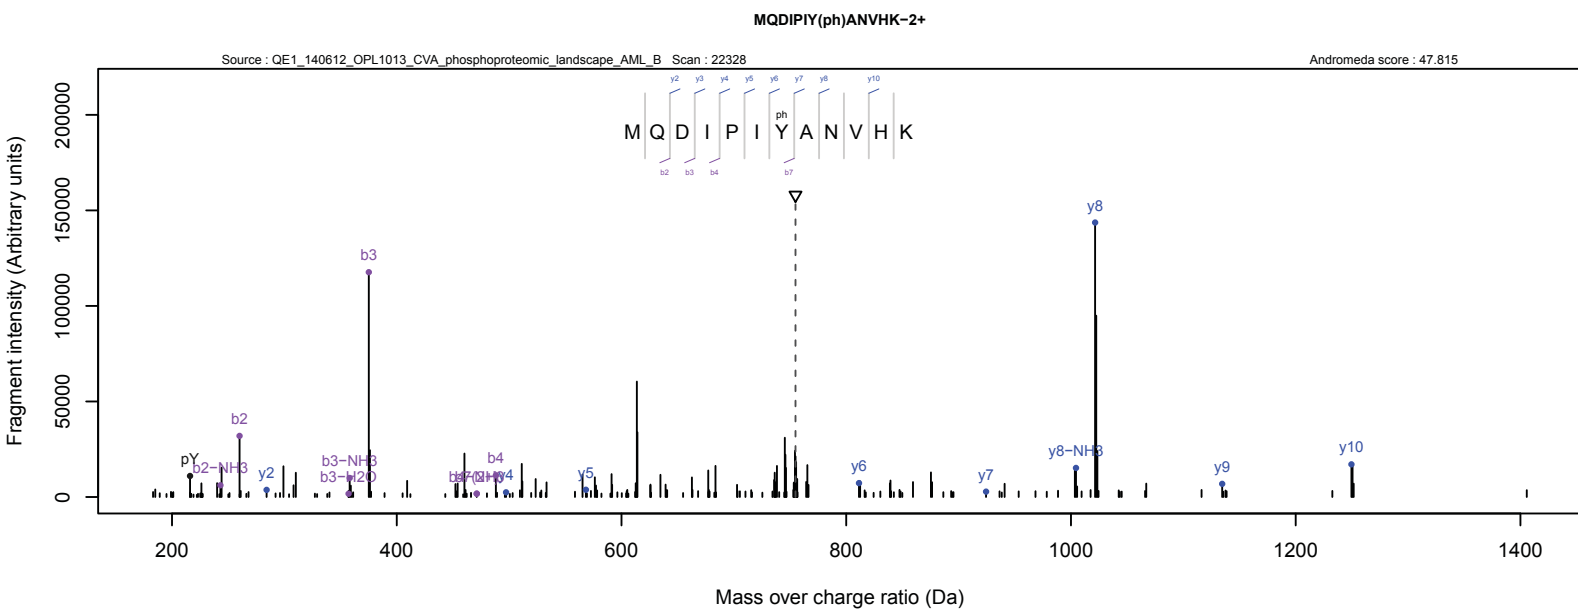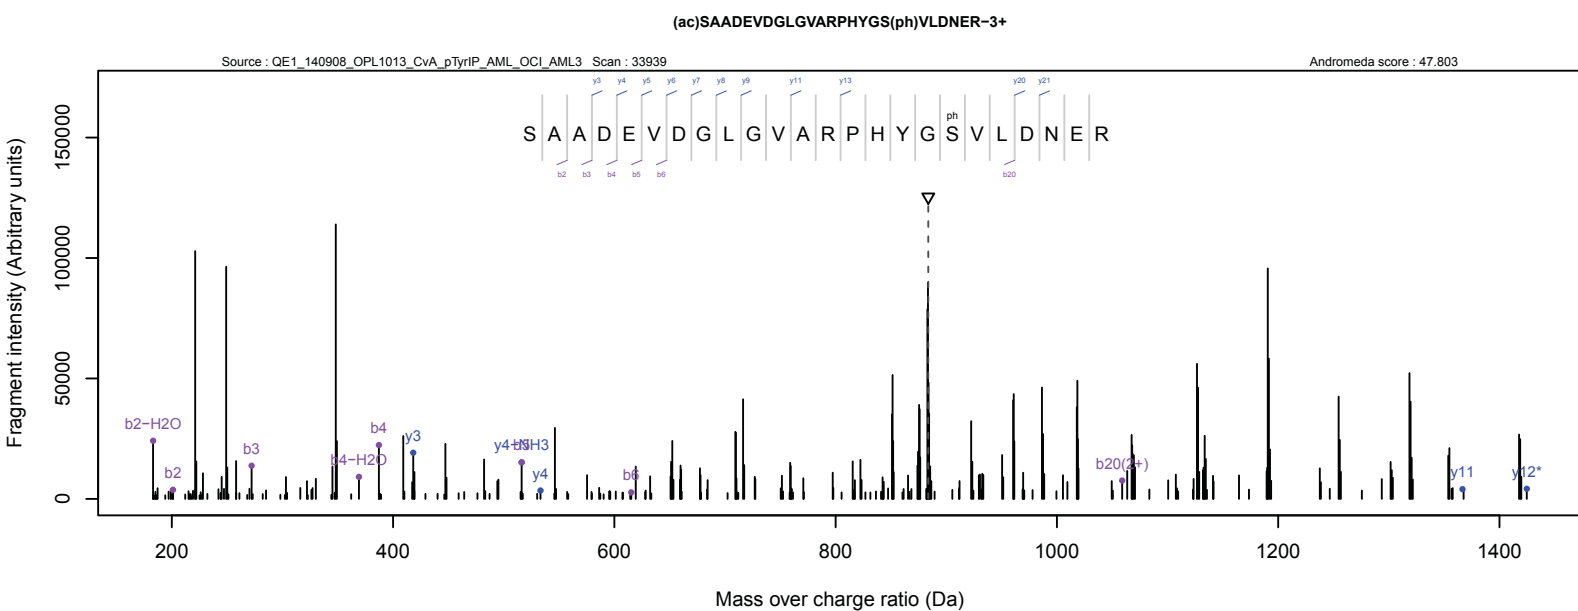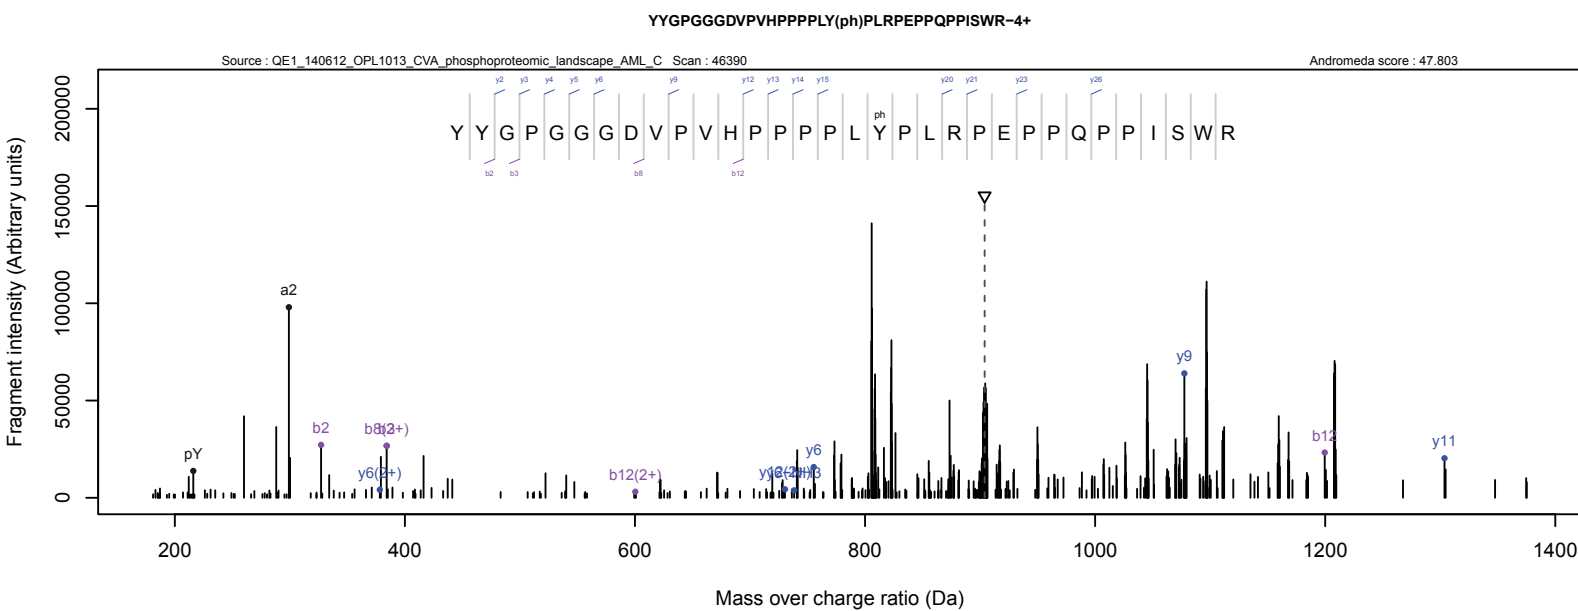

## AIAY(ph)LFPSGLFEKR-3+

Source : QE1\_140612\_OPL1013\_CVA\_phosphoproteomic\_landscape\_AML\_C Scan : 47452

Andromeda score : 47.774

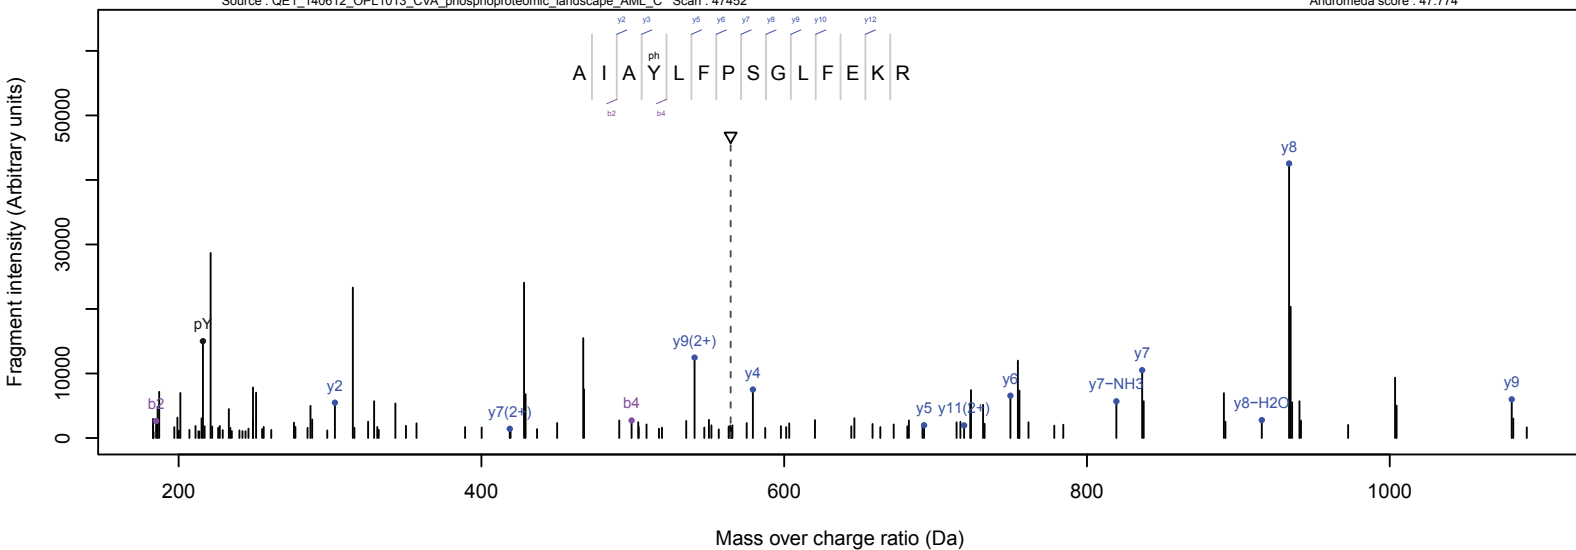

## GAAPNVVY(ph)TYTGKR-2+

Source : QE1\_140612\_OPL1013\_CVA\_phosphoproteomic\_landscape\_AML\_B Scan : 18693

Andromeda score : 47.774

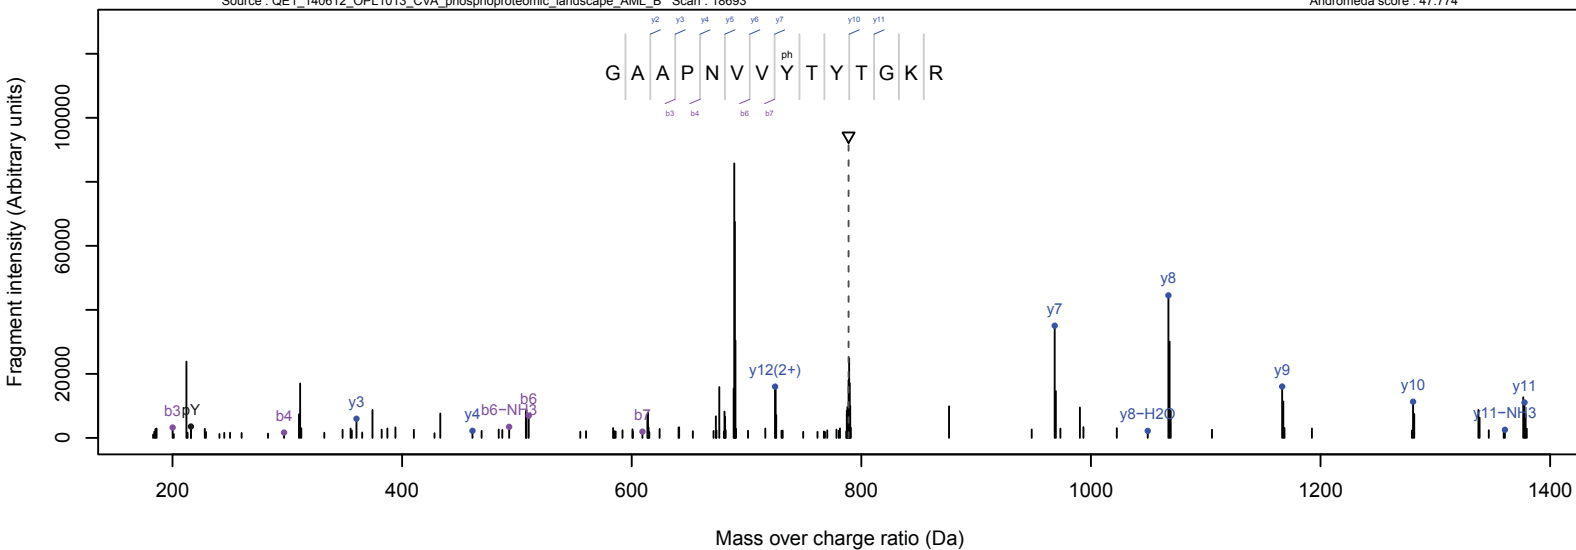

## HFNDPNA D A Y F T K R-3+

Source : QE1\_140612\_OPL1013\_CVA\_phosphoproteomic\_landscape\_AML\_C Scan : 15068

Andromeda score : 47.774

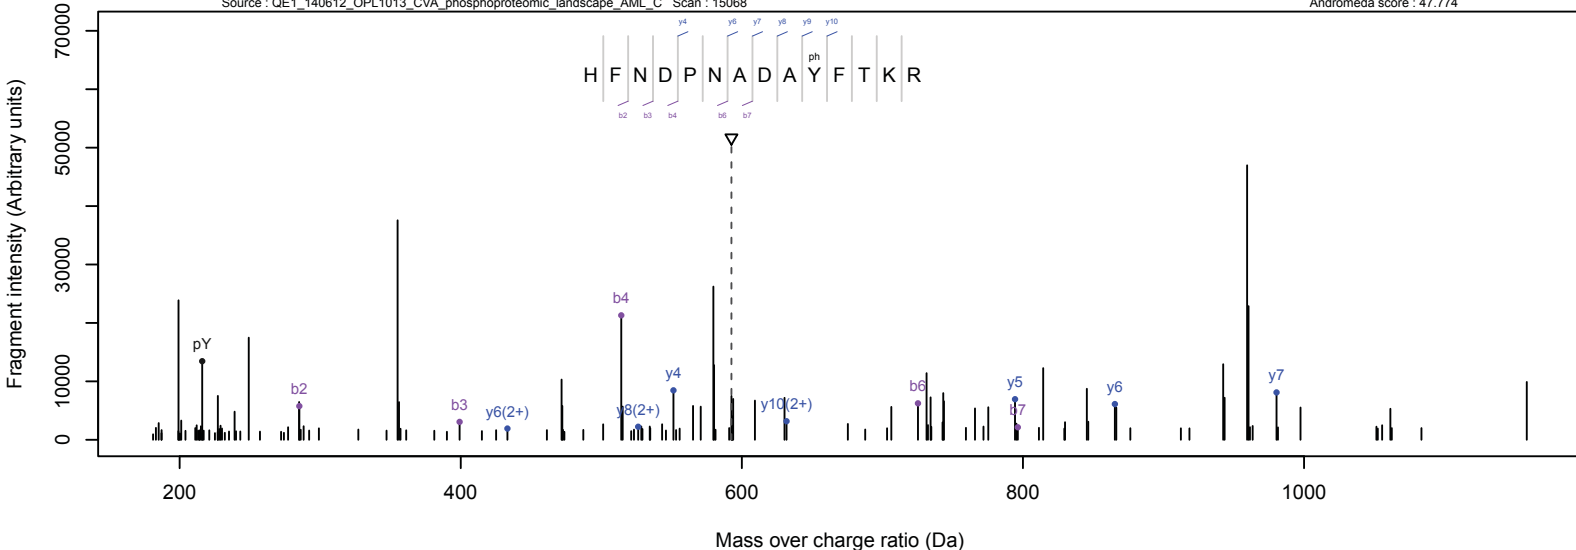

## LYLAENY(ph)CFDSIPK-2+

Source : QE1\_140908\_OPL1013\_CvA\_pTyrIP\_AML\_Kasumi1 Scan : 36734

Andromeda score : 47.774

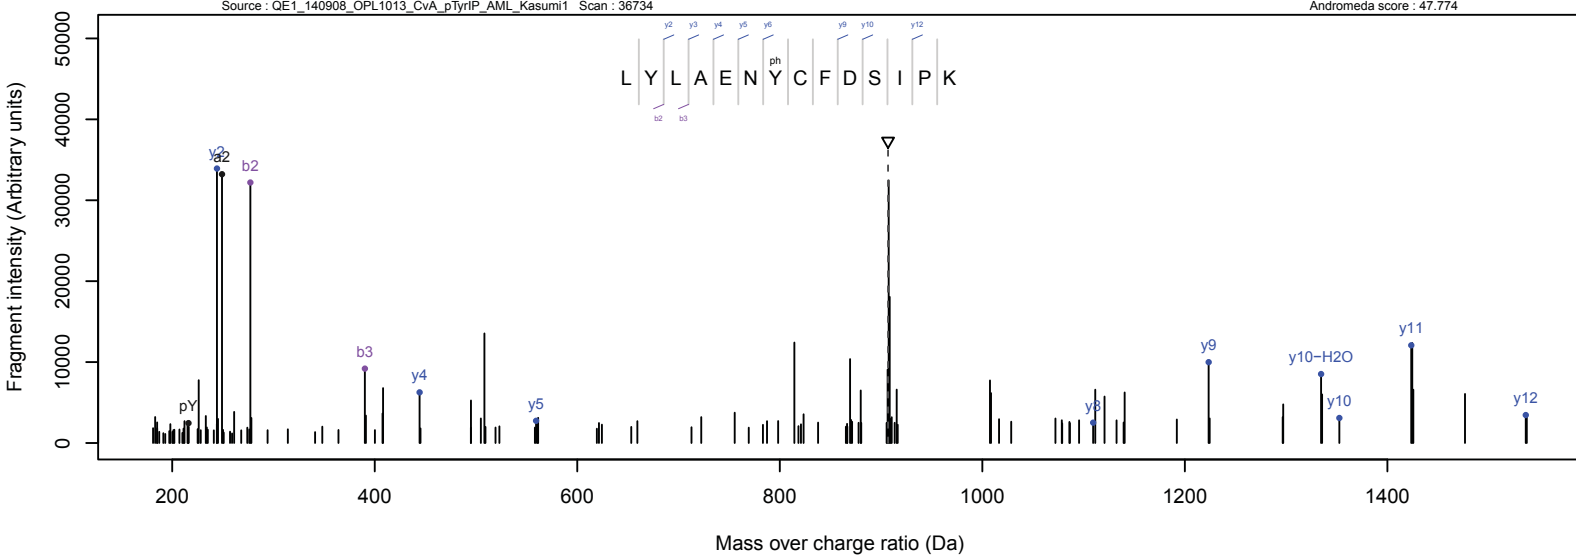

## VPNGSNPYT(ph)LK-2+

Source : QE1\_140612\_OPL1013\_CVA\_phosphoproteomic\_landscape\_AML\_A Scan : 8954

Andromeda score : 47.774

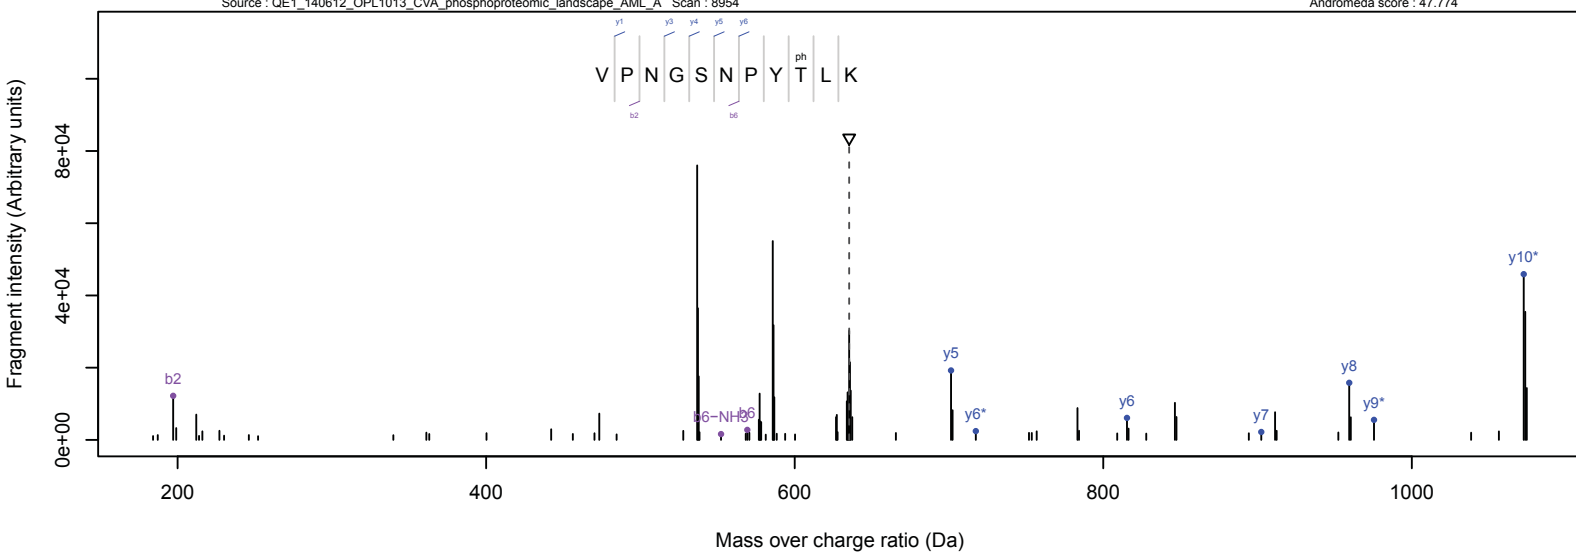

## VQDPSY(ph)APKGPFR-3+

Source : QE1\_140612\_OPL1013\_CVA\_phosphoproteomic\_landscape\_AML\_C Scan : 16139

Andromeda score : 47.774

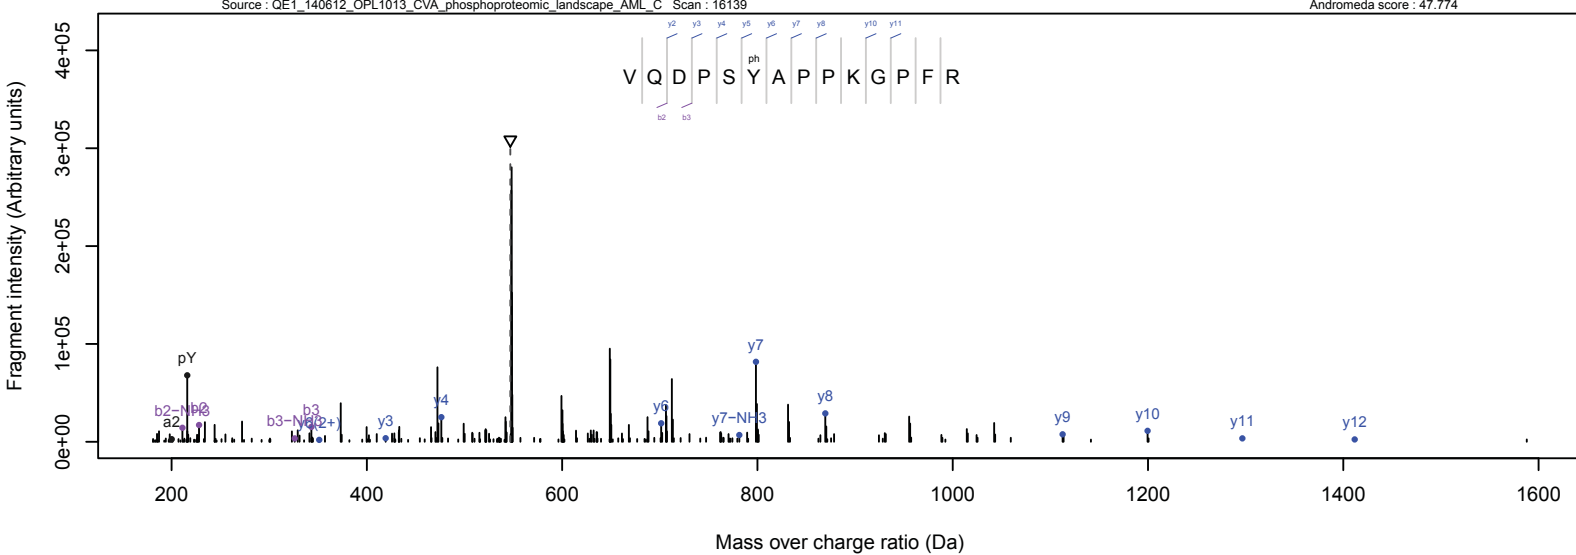

## VSLEEIY(ph)SGCTKR-3+

Source : QE1\_140612\_OPL1013\_CVA\_phosphoproteomic\_landscape\_AML\_C Scan : 19210

Andromeda score : 47.774

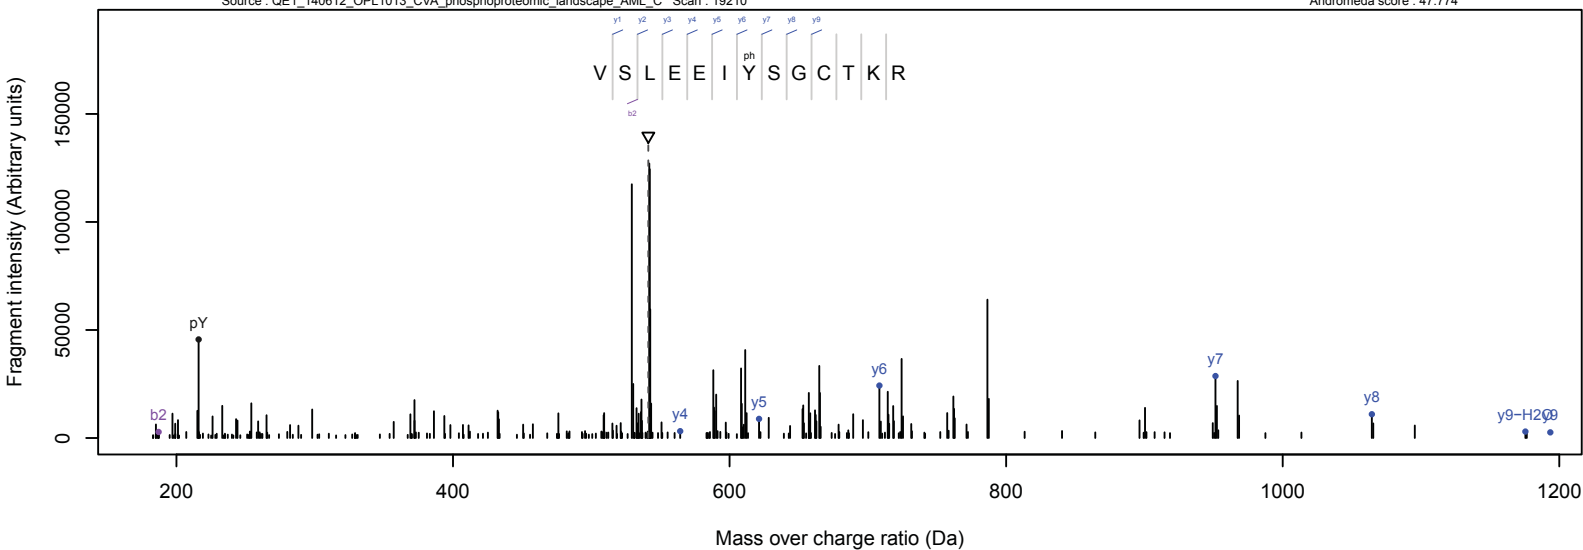

## WDVTVLELSY(ph)HKR-3+

Source : QE1\_140612\_OPL1013\_CVA\_phosphoproteomic\_landscape\_AML\_C Scan : 34470

Andromeda score : 47.774

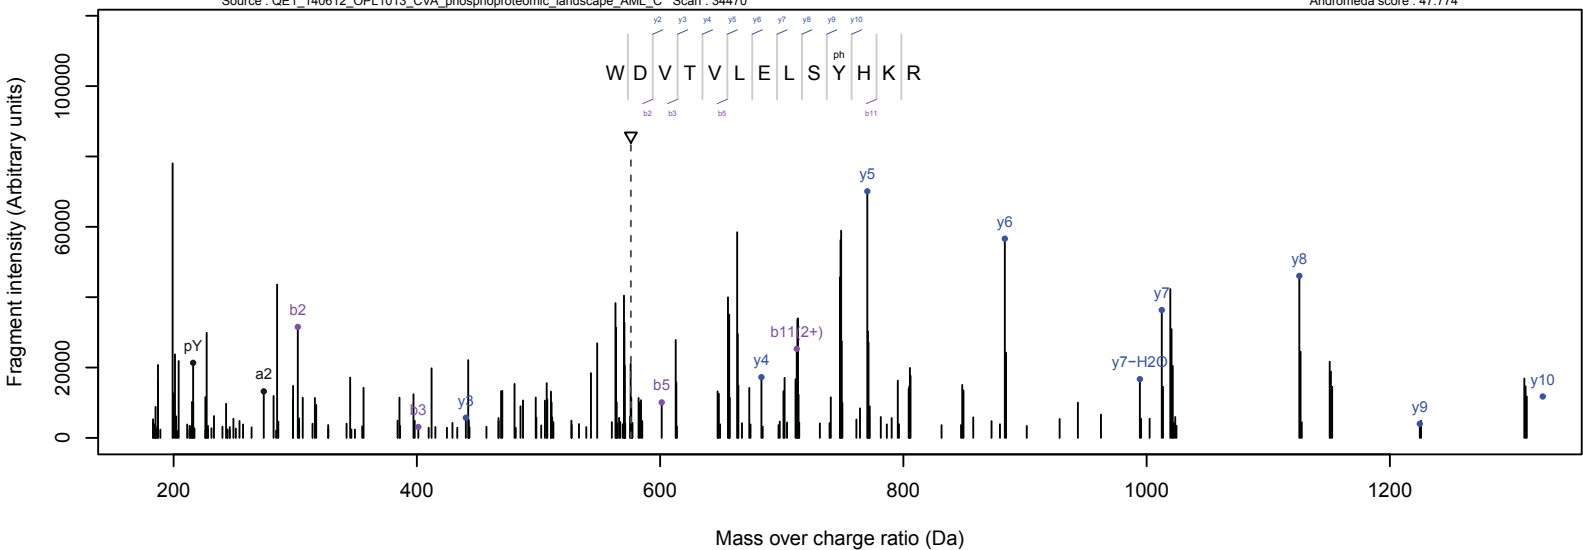

## VLCTRPSGNSAEEY(ph)ENVPCK-3+

Source : QE1\_140822\_OPL1013\_CvA\_pTyrIP\_AML\_cell\_lines\_part2\_B Scan : 13115

Andromeda score : 47.75

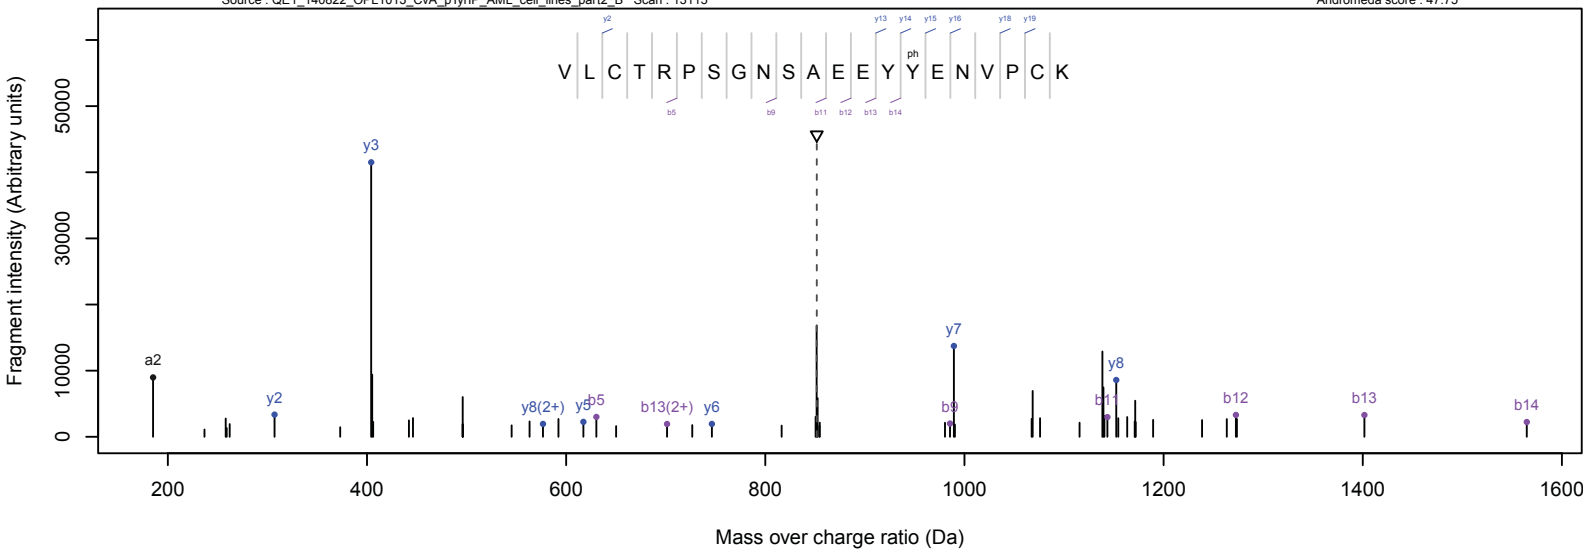

## DFVNY(ph)LVR-2+

Source: QE1\_140612\_OPL1013\_CVA\_phosphoproteomic\_landscape\_AML\_C Scan: 39930

Andromeda score: 47.749

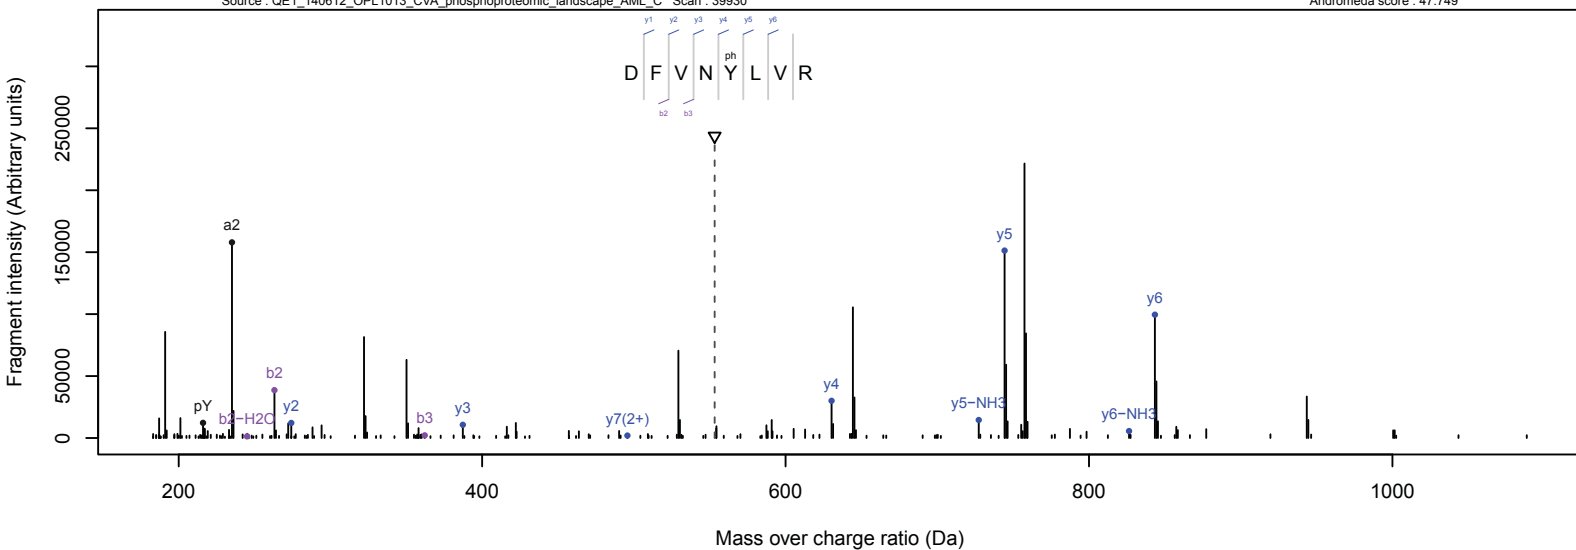

## LLEAAQ(S)TKGYYSYPVSGSGSTAGSR-3+

Source: QE1\_140612\_OPL1013\_CVA\_phosphoproteomic\_landscape\_AML\_C Scan: 24357

Andromeda score: 47.73

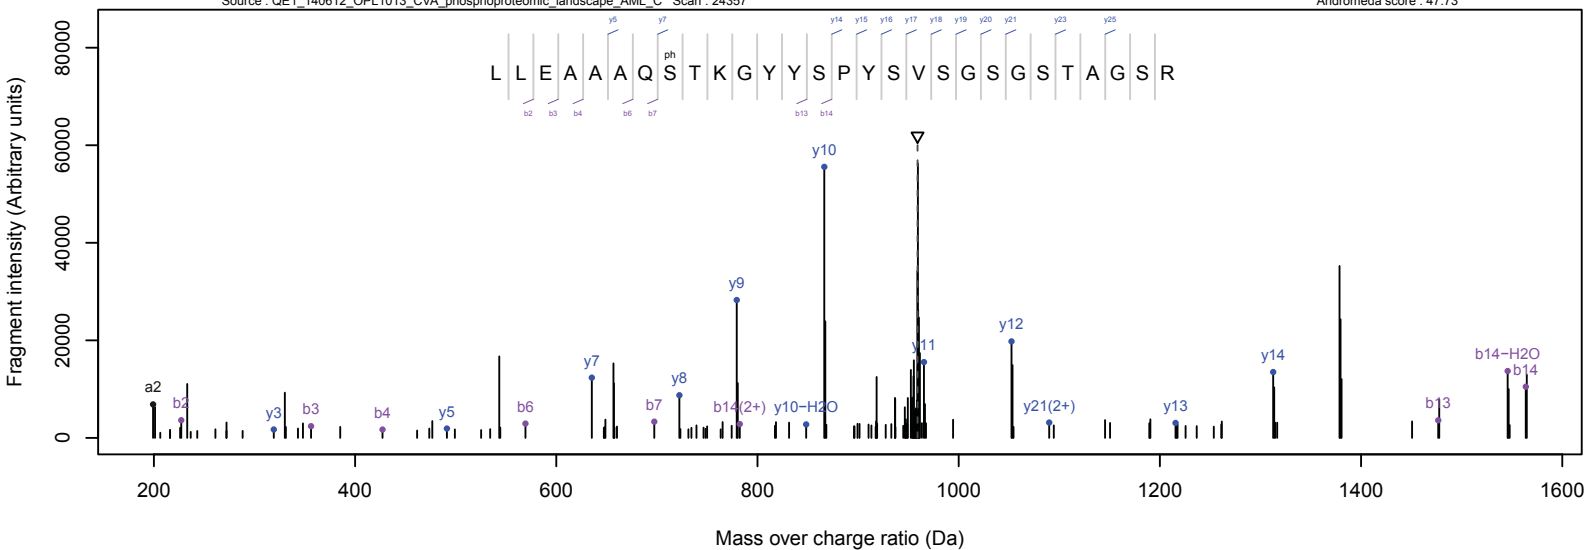

## GILDNTY(ph)NVVK-2+

Source: QE1\_140822\_OPL1013\_CvA\_pTyrIP\_AML\_cell\_lines\_part2\_B Scan: 30974

Andromeda score: 47.712

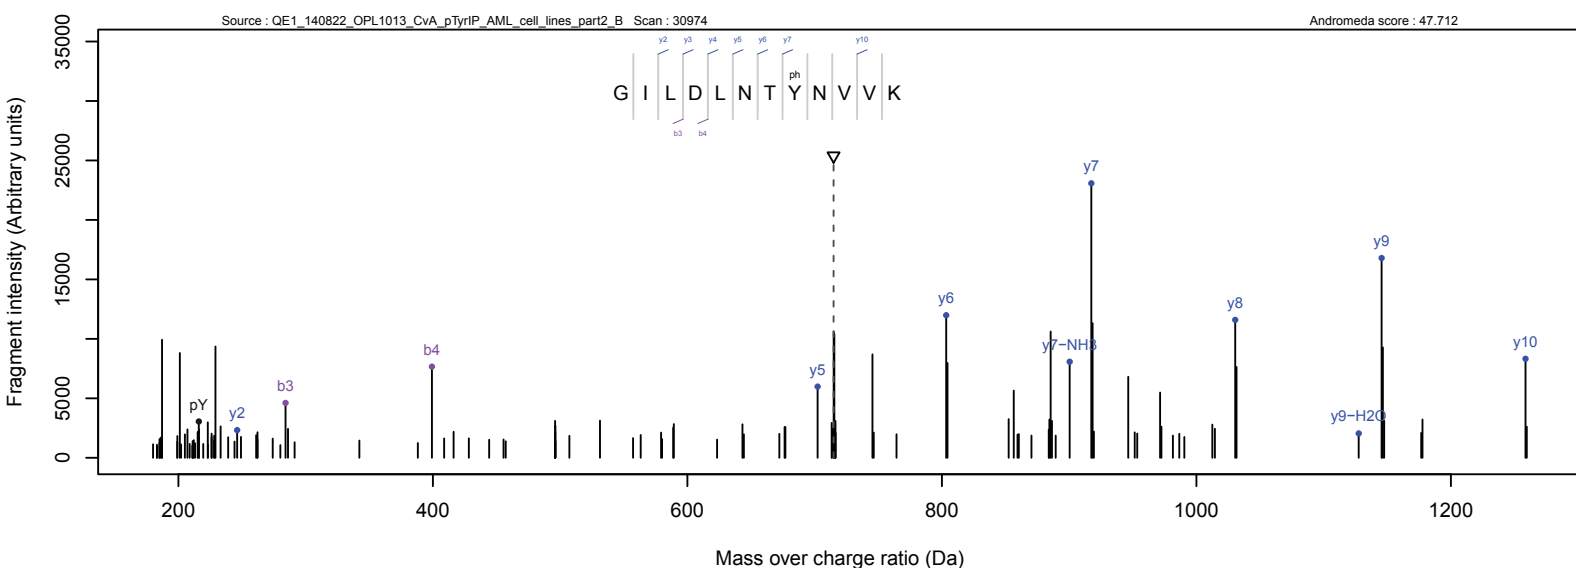



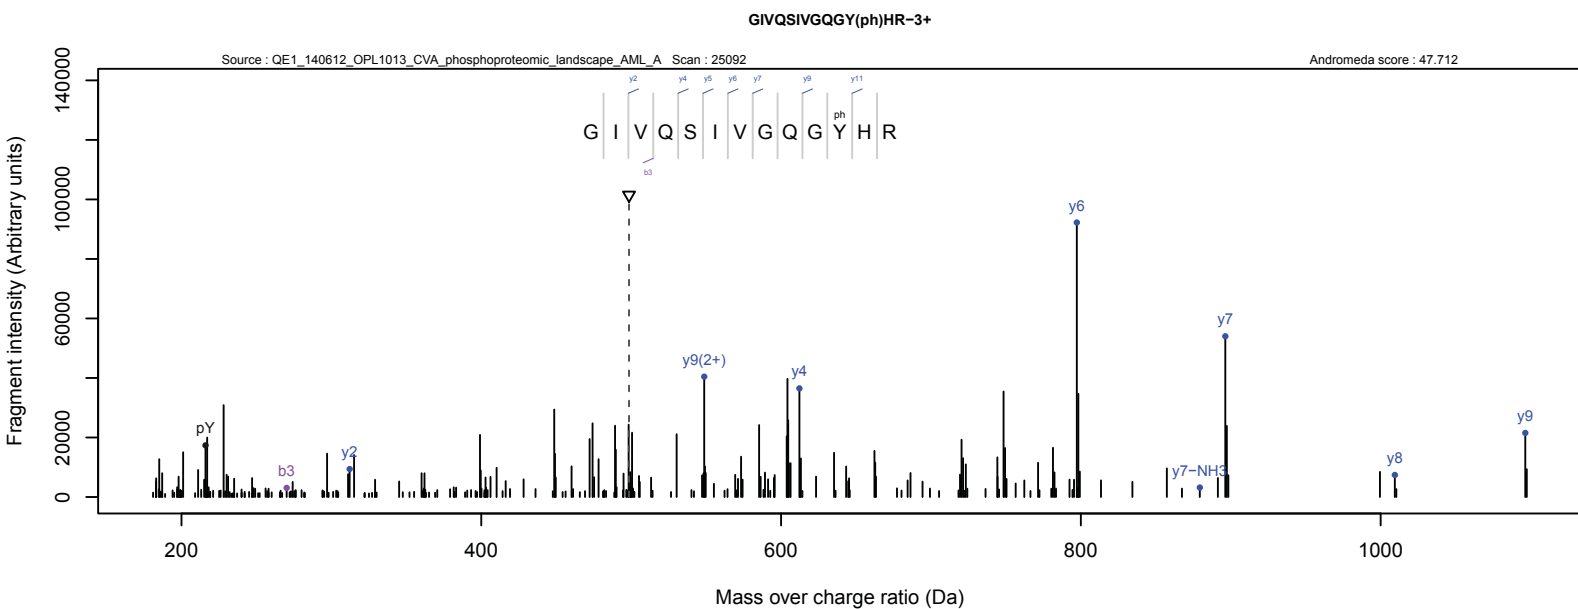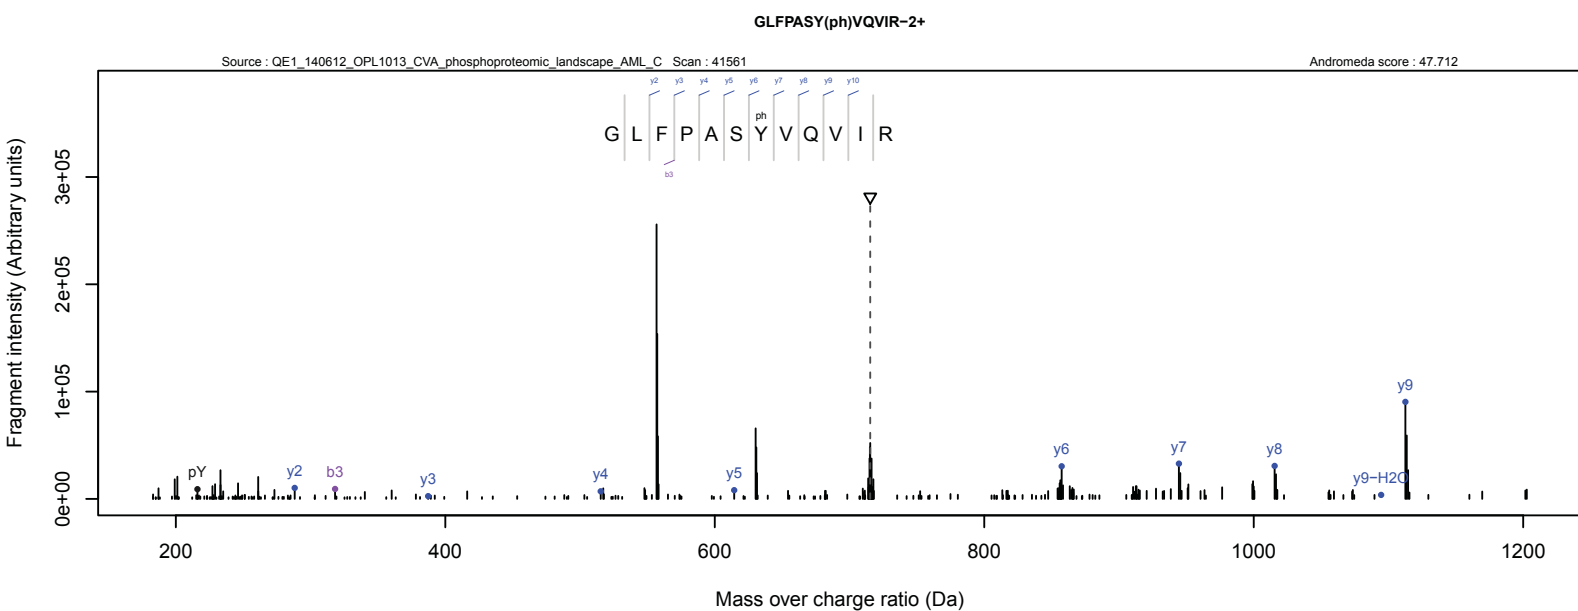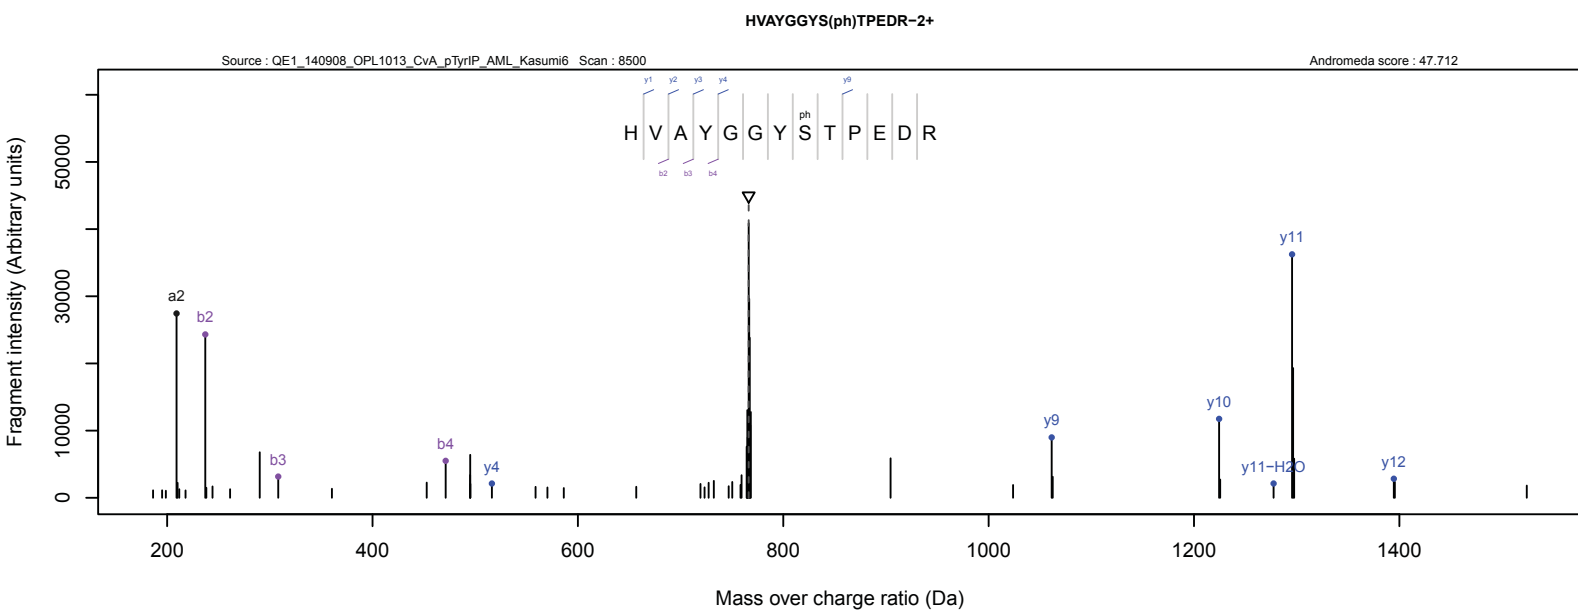

HVEAVAY(ph)YKK-3+

Source : Qe1\_141024\_OPL1013\_CvA\_AML\_pTyrIP\_MOLM13 Scan : 7614

Andromeda score : 47.706

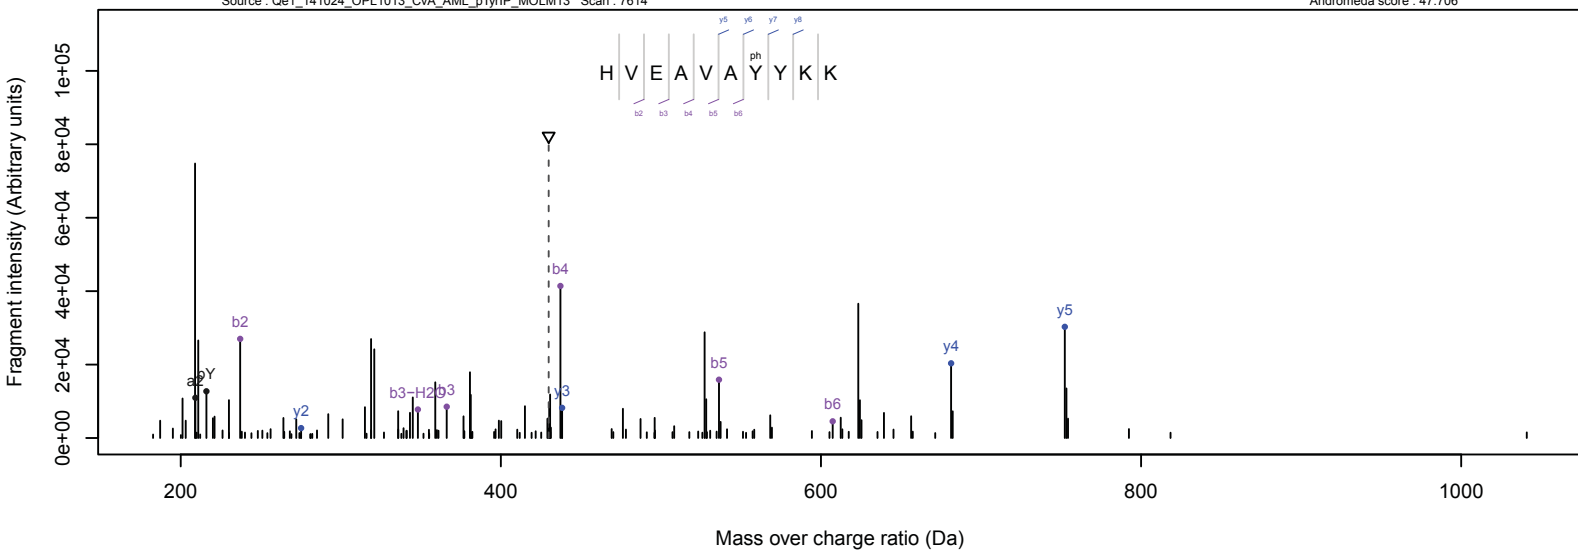

Y(ph)NFFTGPCPK-2+

Source : QE1\_140612\_OPL1013\_CVA\_phosphoproteomic\_landscape\_AML\_D Scan : 23376

Andromeda score : 47.706

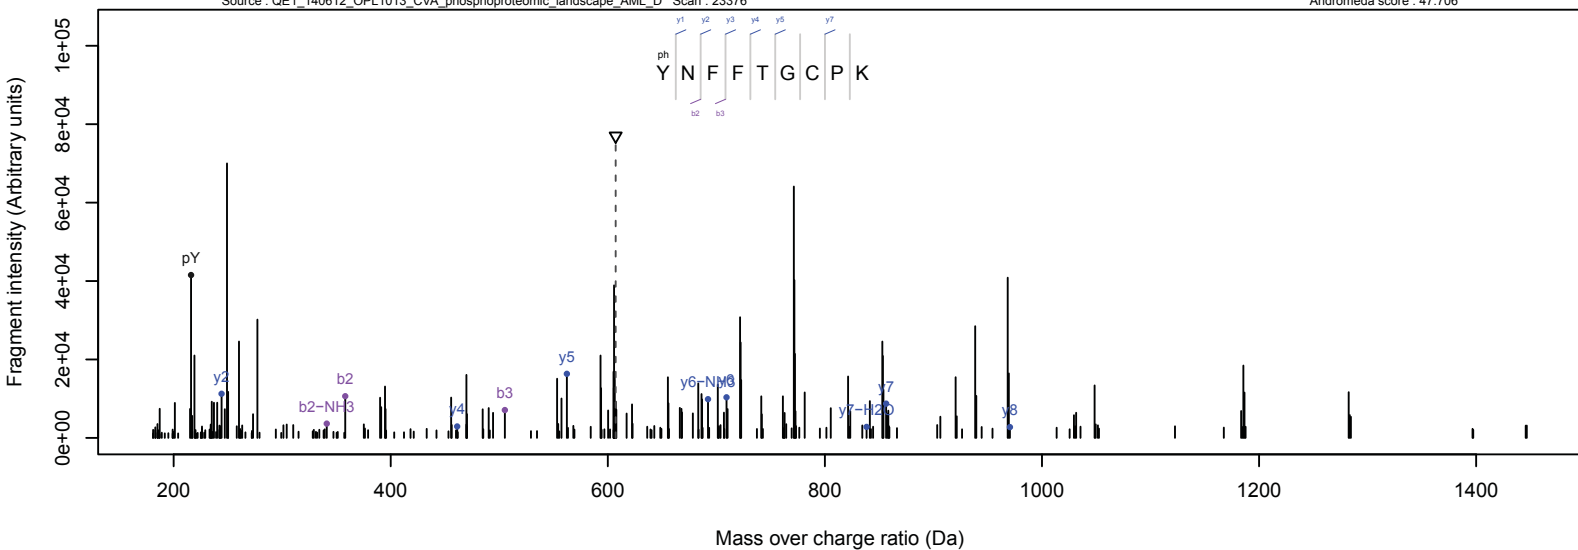

DLPIHACSYGIIHDPACVVY(ph)CNTSK-4+

Source : QE1\_140908\_OPL1013\_CvA\_pTyrIP\_AML\_HEL Scan : 32961

Andromeda score : 47.7

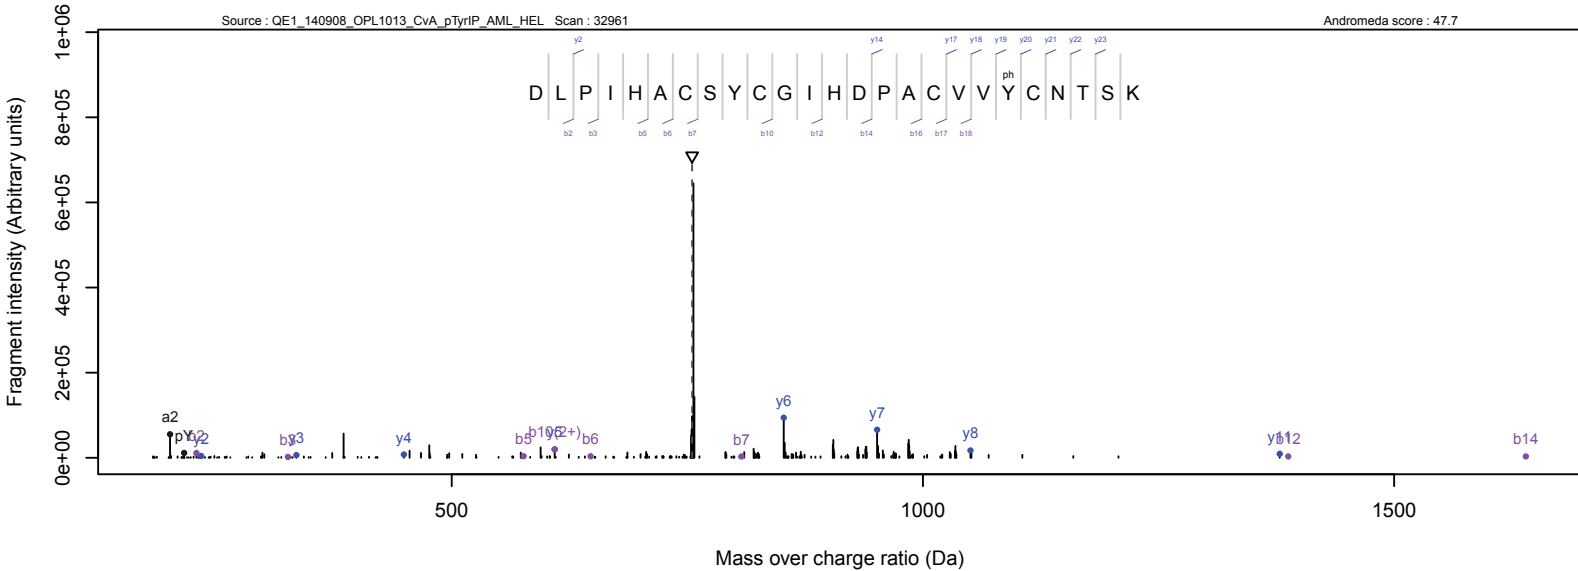

## AQAVHPG(ph)GFLSENKEFAR-3+

Source: QE1\_140612\_OPL1013\_CVA\_phosphoproteomic\_landscape\_AML\_E Scan: 25353

Andromeda score: 47.68

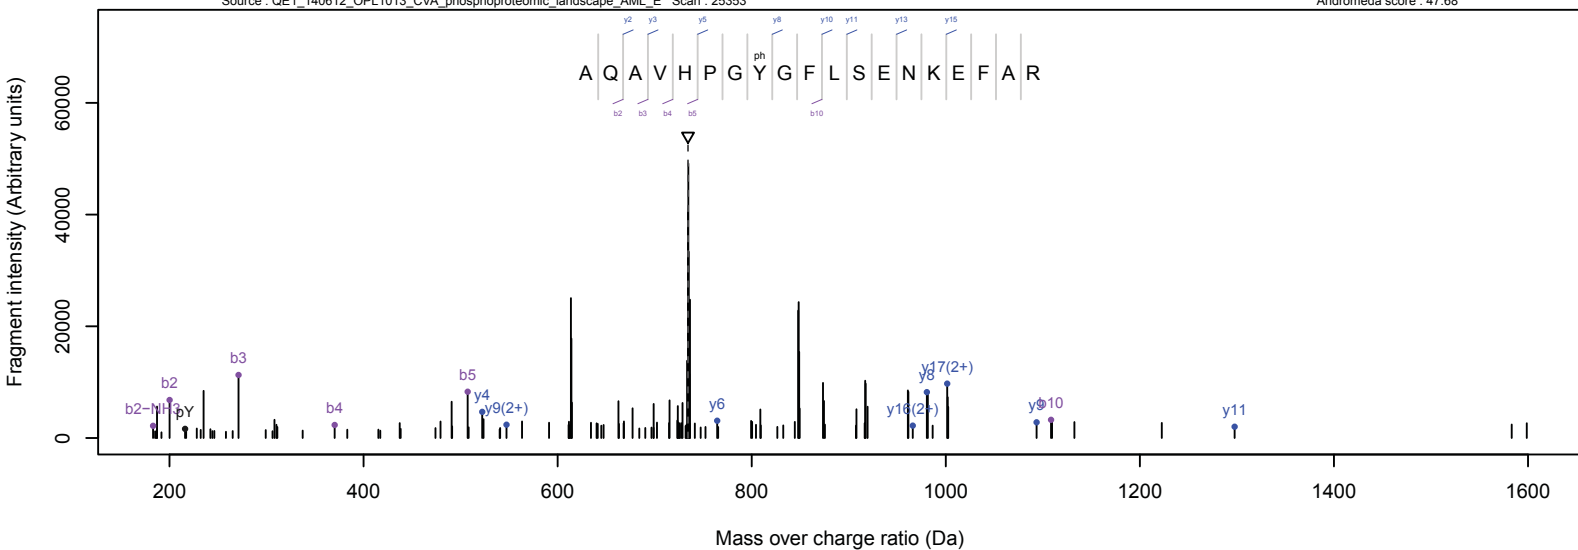

## KHYPYADLPAGYQITQQR-3+

Source: QE1\_140612\_OPL1013\_CVA\_phosphoproteomic\_landscape\_AML\_C Scan: 30130

Andromeda score: 47.68

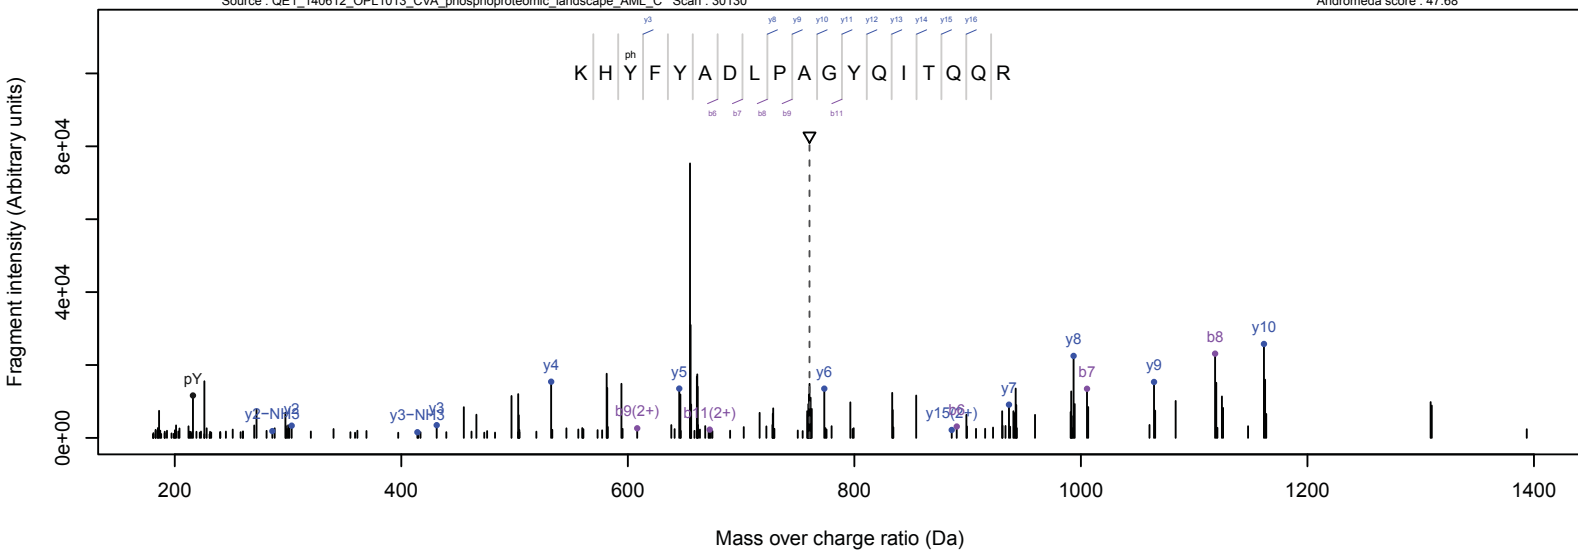

## ASHGY(ph)GGKFGVEQDR-3+

Source: QE1\_140612\_OPL1013\_CVA\_phosphoproteomic\_landscape\_AML\_C Scan: 7114

Andromeda score: 47.639

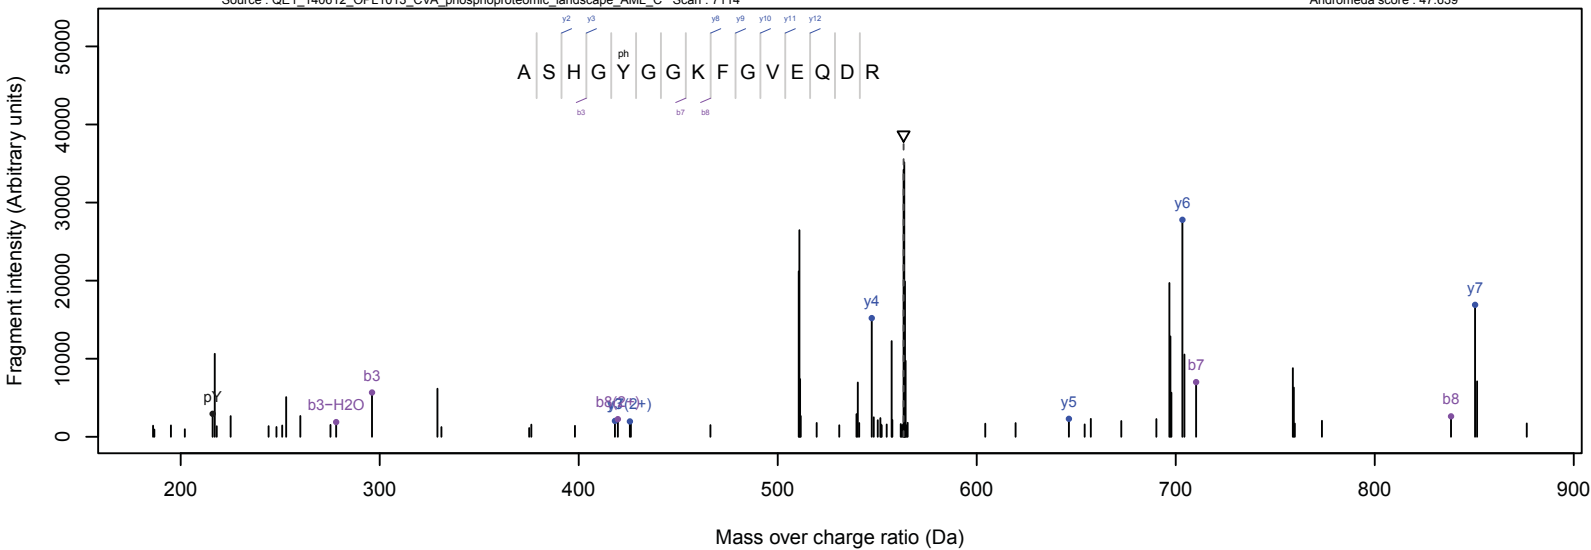

GRHETY(ph)LCYEVEVER-3+

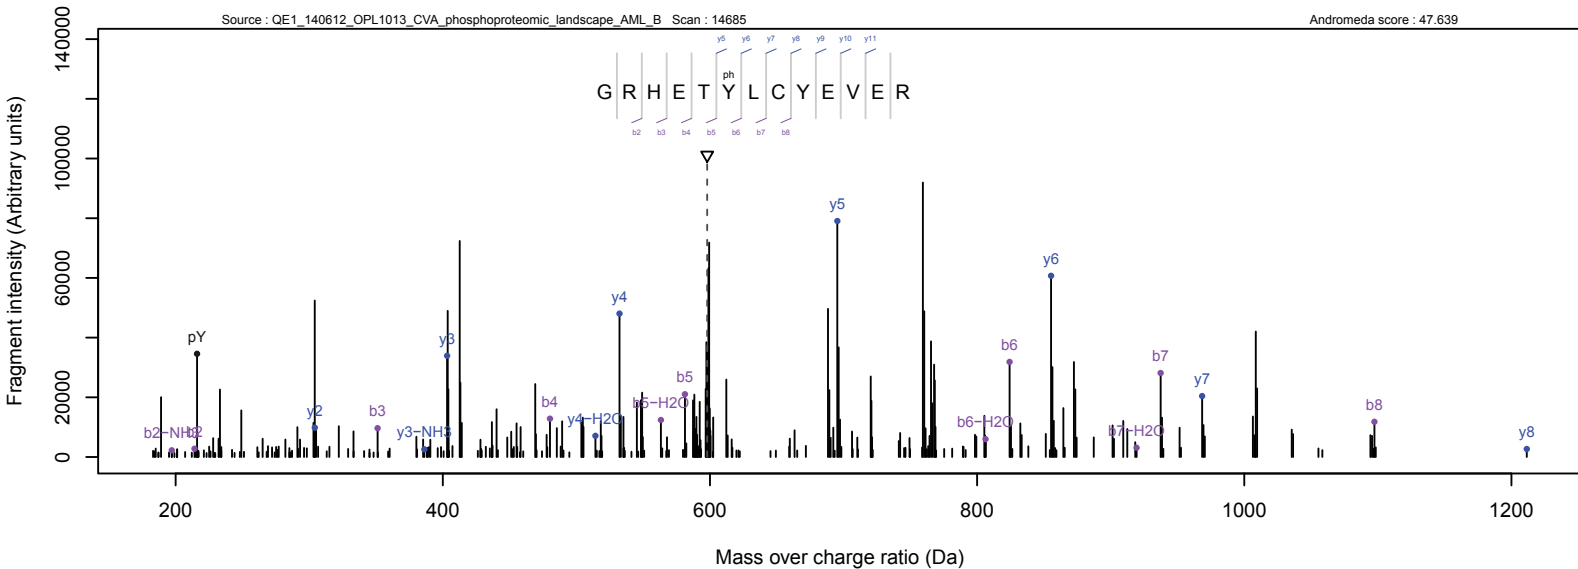

MNLY(ph)SLCK-2+

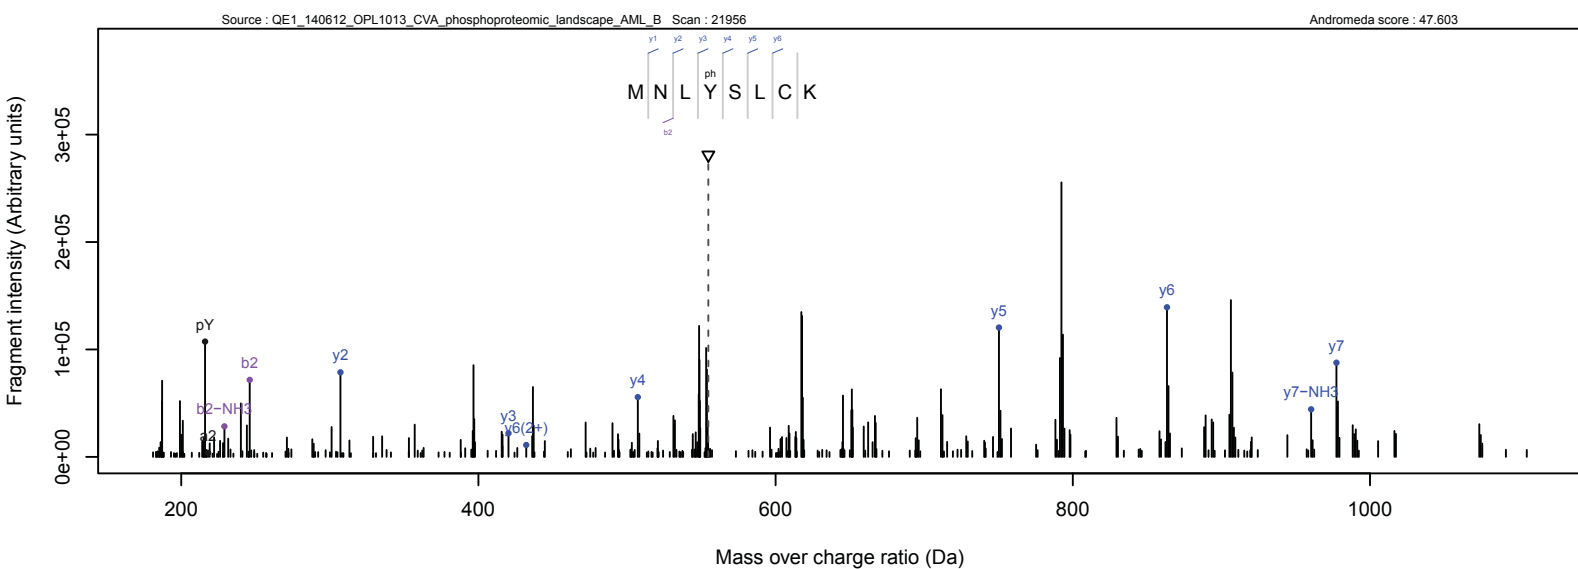

SISVPGSPGHAM(ox)ADTY(ph)AVVQKR-4+

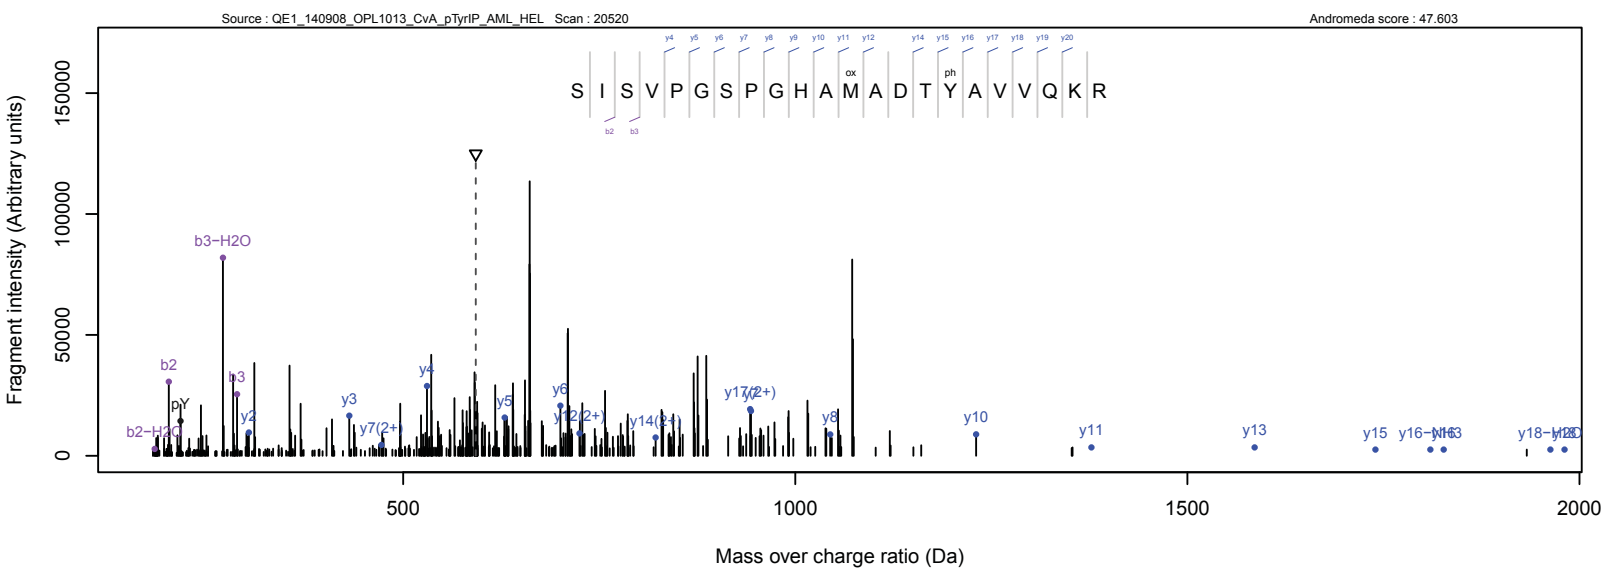

## TYFSGNY(ph)FR-2+

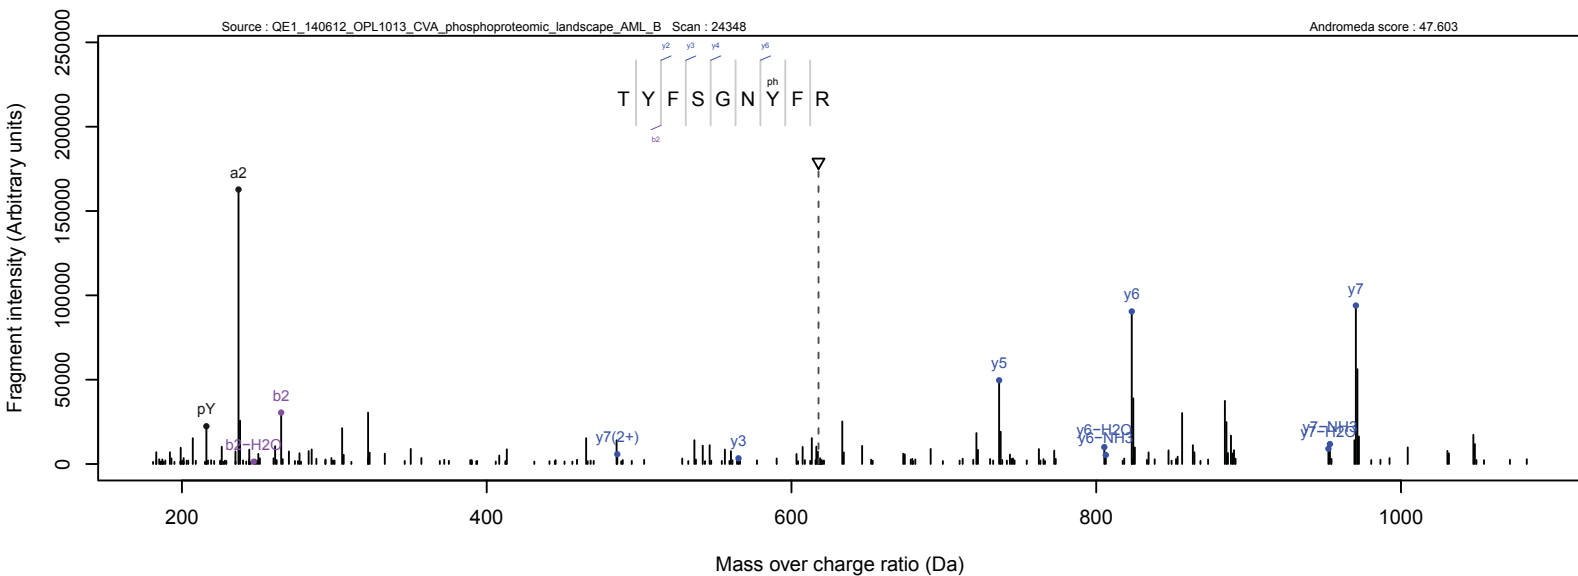

## VGMKHY(ph)HLK-3+

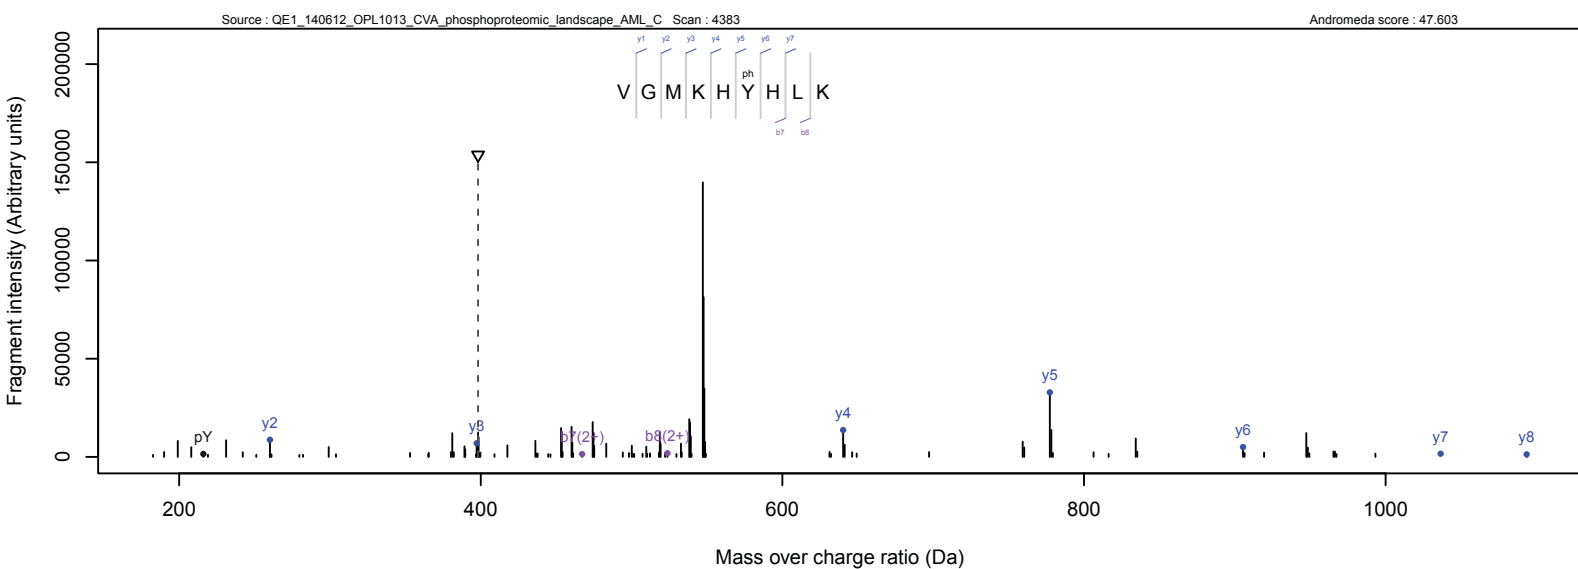

## VIIEKYT(ph)R-3+

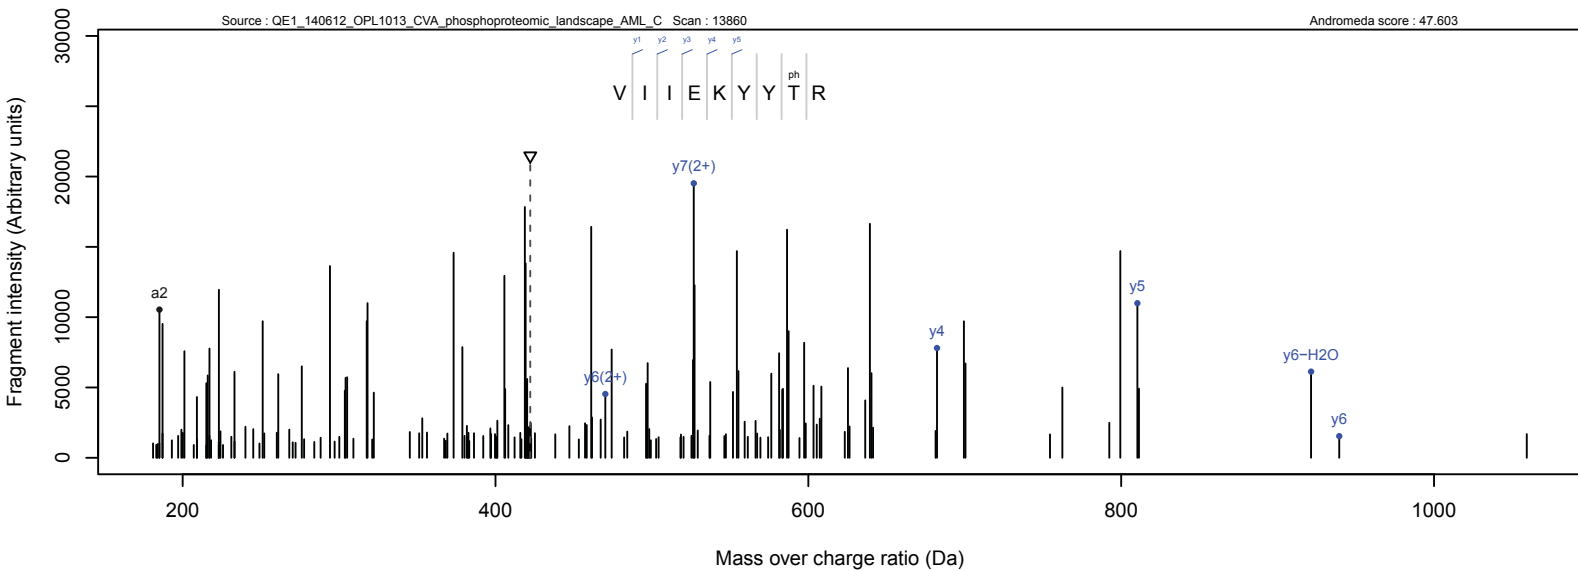

Y(ph)AYNISLK-2+

Source : QE1\_140908\_OPL1013\_CvA\_pTyrIP\_AML\_HL60 Scan : 24913

Andromeda score : 47.603

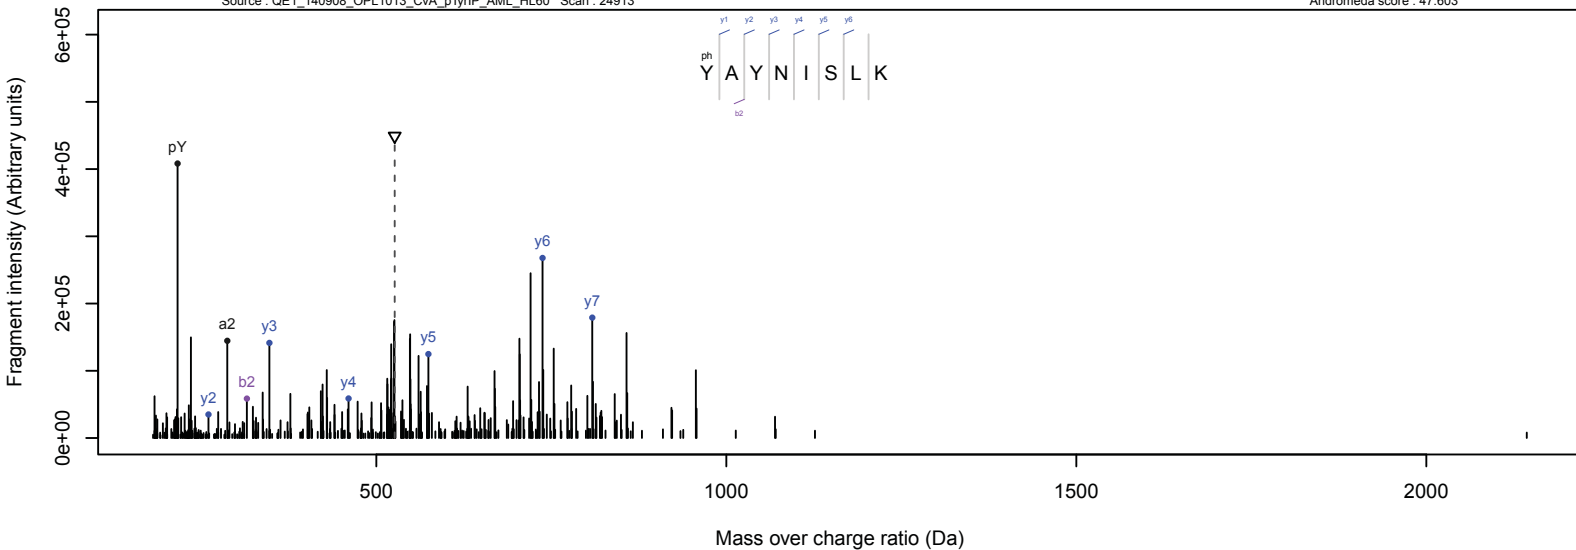

LSDHPPTLPLQQHQHPQPQY(ph)APAPQLQPPQQR-4+

Source : QE1\_140612\_OPL1013\_CVA\_phosphoproteomic\_landscape\_AML\_B Scan : 25628

Andromeda score : 47.59

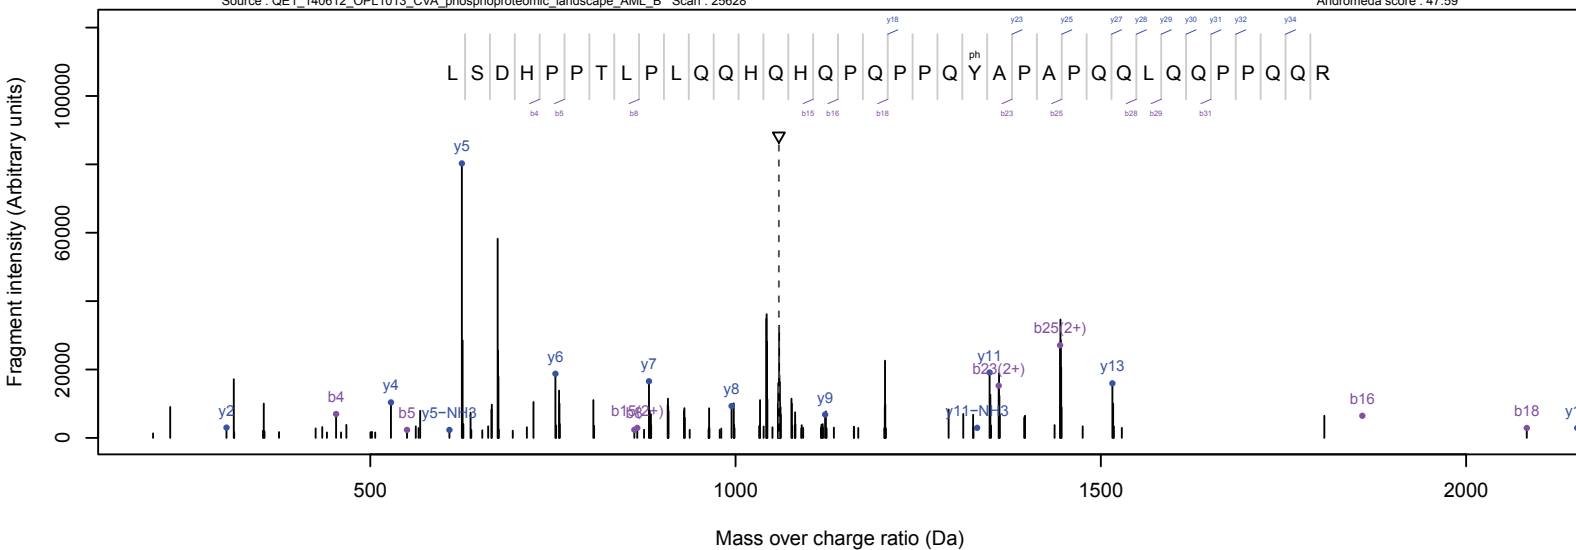

SRPEAVSHPLNTVTEDMY(ph)TNGSPAPGSPAQVK-4+

Source : QE1\_140908\_OPL1013\_CvA\_pTyrIP\_AML\_HEL Scan : 25900

Andromeda score : 47.59

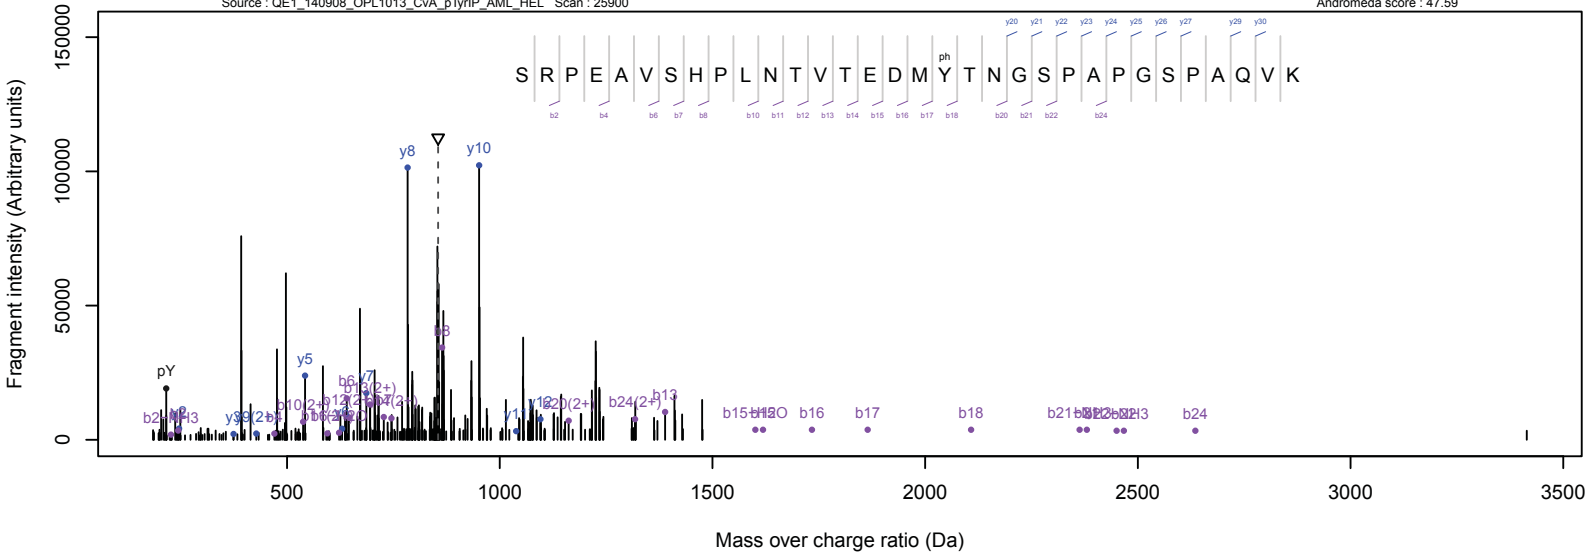

AWEDYY(ph)KK-2+

Source : QE1\_140612\_OPL1013\_CVA\_phosphoproteomic\_landscape\_AML\_C Scan : 12998

Andromeda score : 47.574

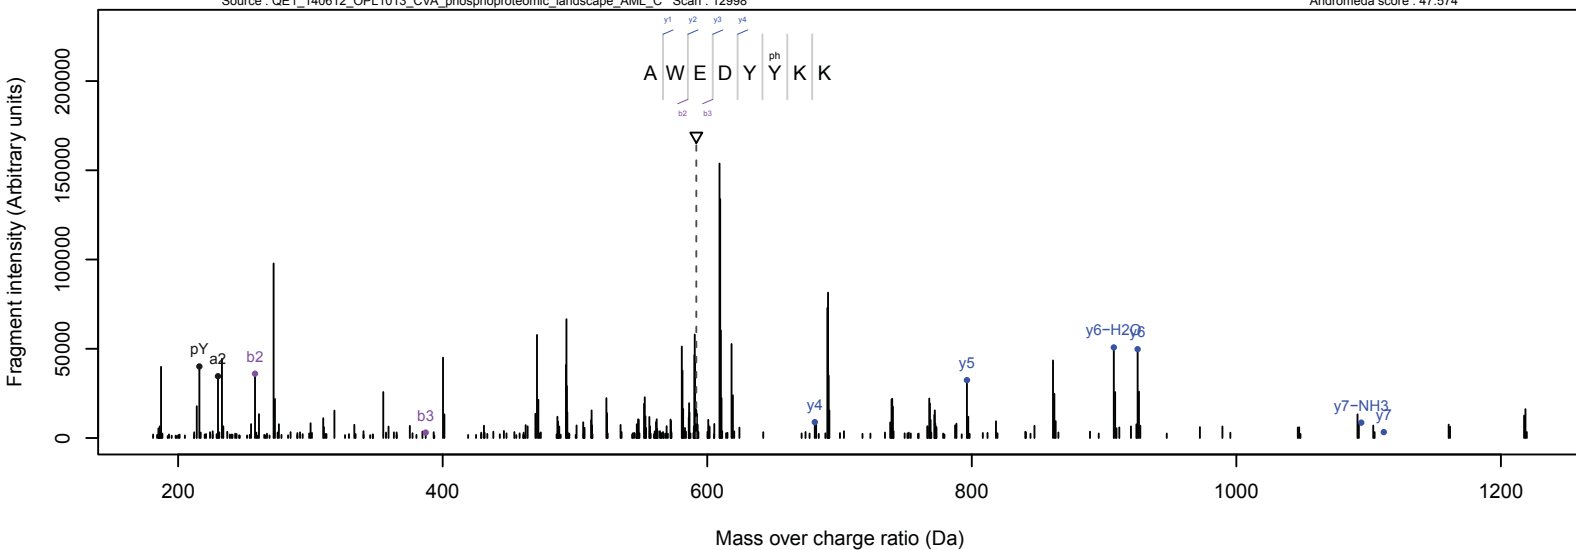

LTDY(ph)ISK-2+

Source : QE1\_140612\_OPL1013\_CVA\_phosphoproteomic\_landscape\_AML\_B Scan : 8734

Andromeda score : 47.574

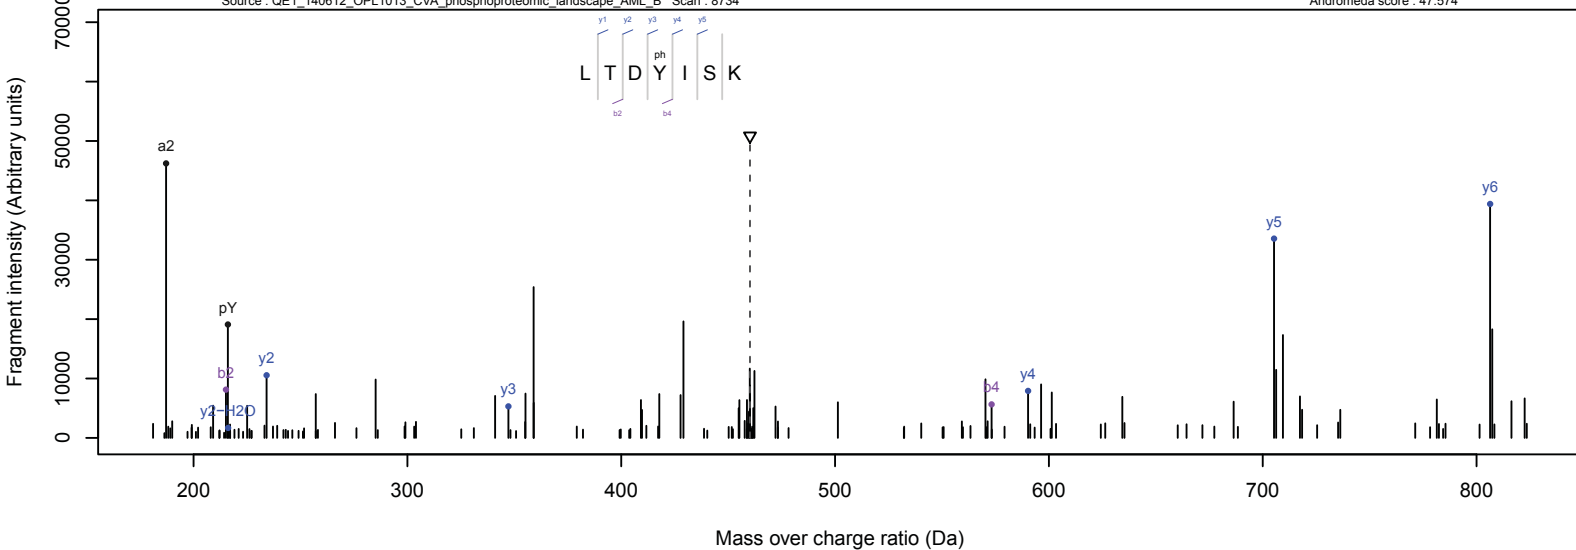

EVGY(ph)LEFTGPPQKPPR-3+

Source : QE1\_140908\_OPL1013\_CvA\_pTyrIP\_AML\_OCI\_AML3 Scan : 29048

Andromeda score : 47.548

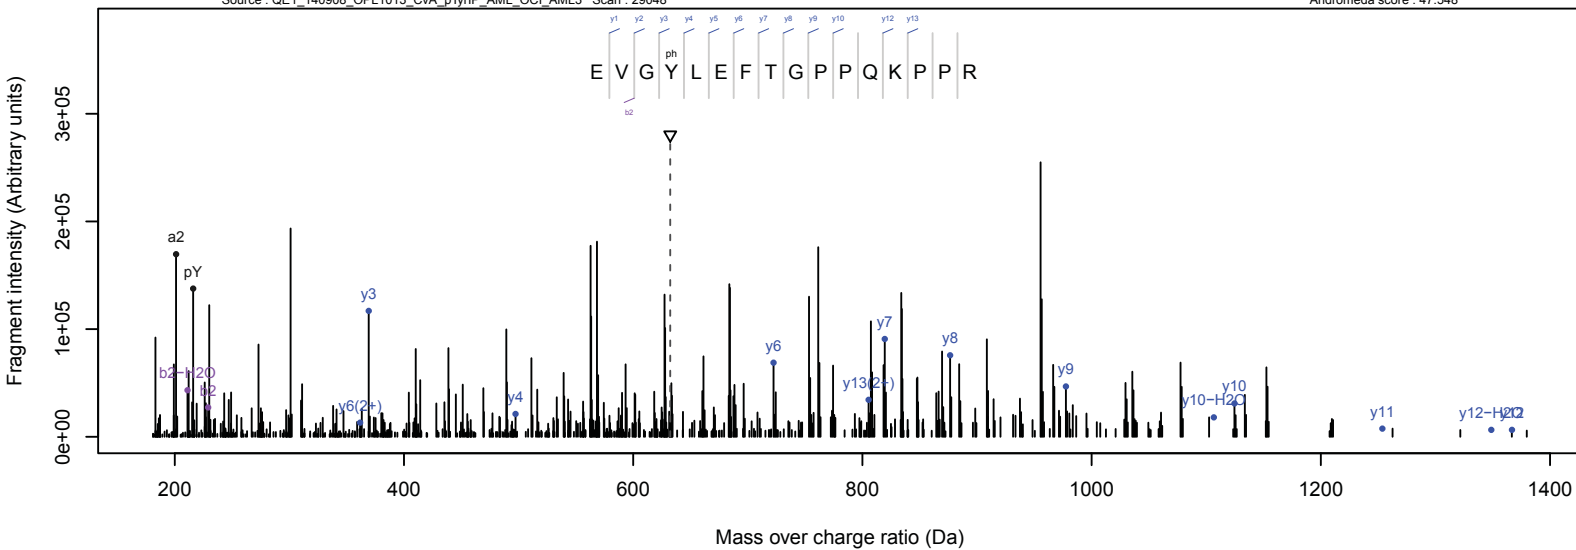

**NRTPY(ph)VTTTSAHSAK-3+**

Source : QE1\_140612\_OPL1013\_CVA\_phosphoproteomic\_landscape\_AML\_C Scan : 8510

Andromeda score : 47.548

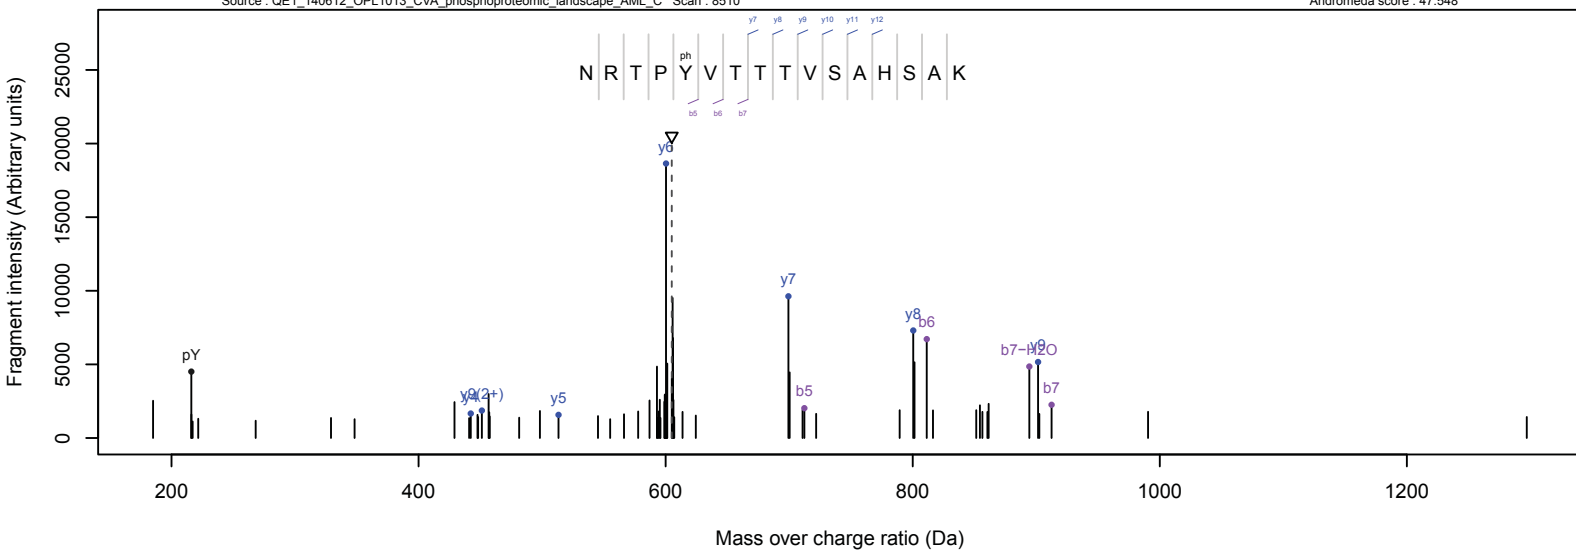

**TFHHVY(ph)SGKDLIAQAR-4+**

Source : QE1\_140908\_OPL1013\_CvA\_pTyrIP\_AML\_HEL Scan : 17886

Andromeda score : 47.548

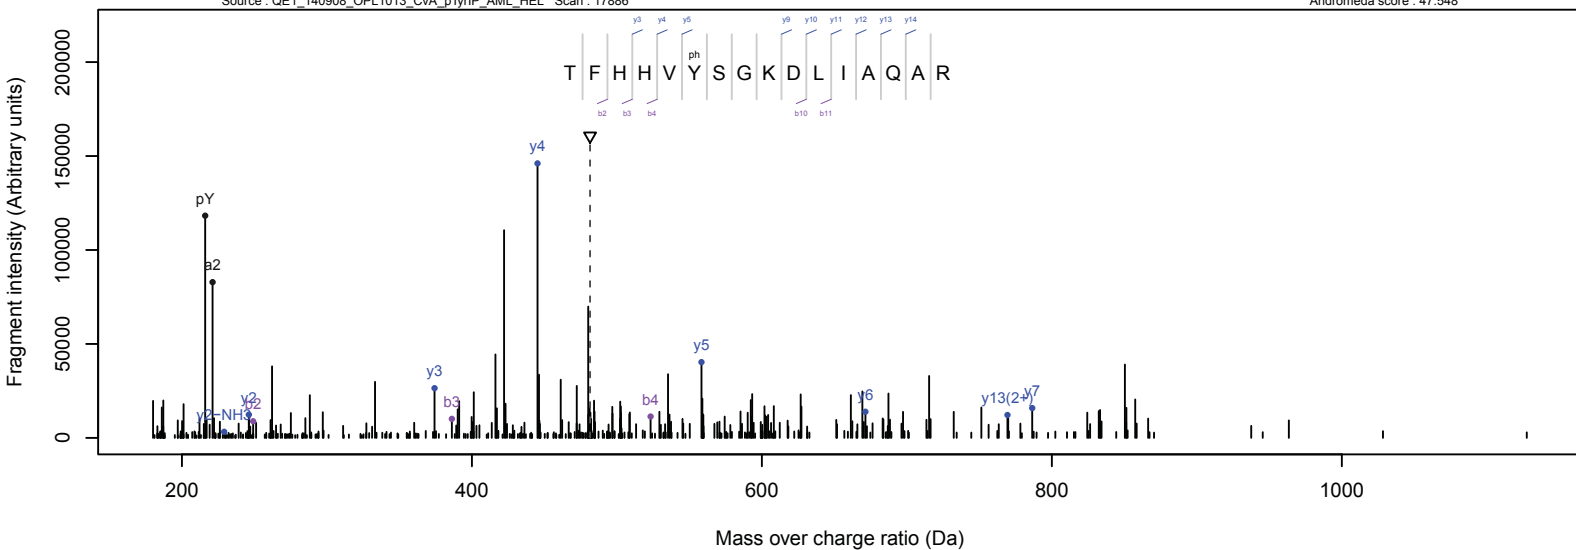

**YVPPSSTRSPY(ph)EK-3+**

Source : QE1\_140612\_OPL1013\_CVA\_phosphoproteomic\_landscape\_AML\_C Scan : 6848

Andromeda score : 47.506

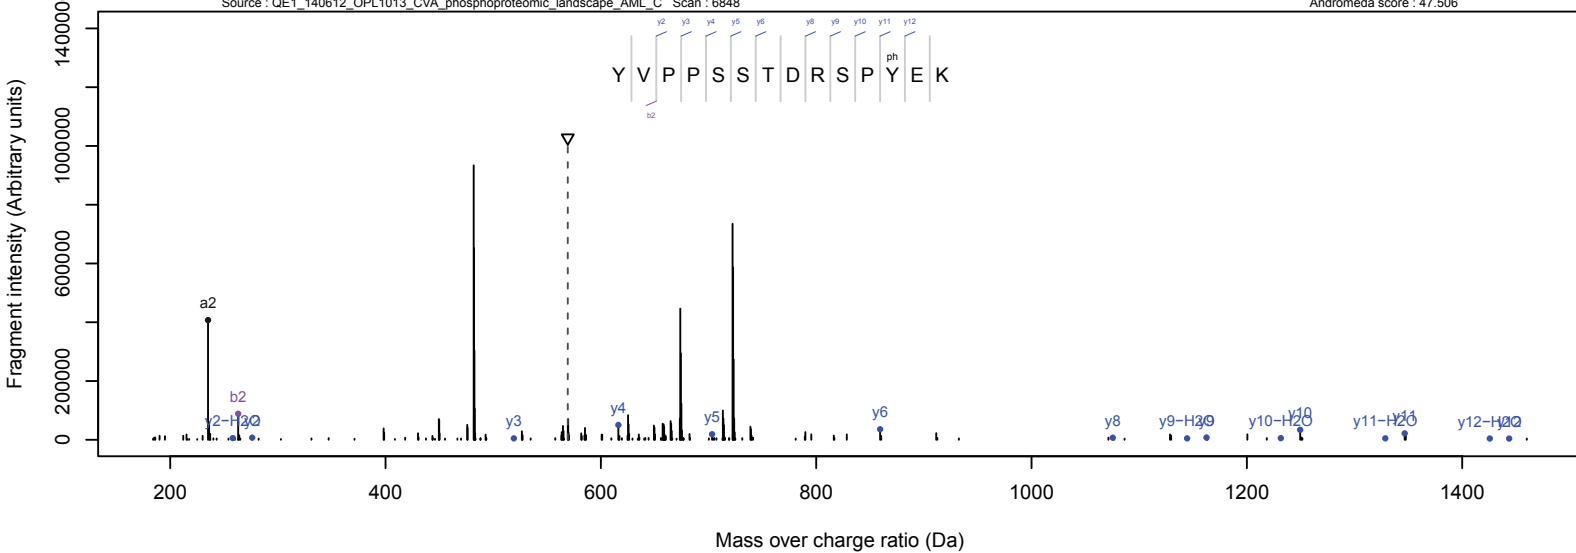



ALY(ph)PGALGRPPMPMNFDP-3+

Source : QE1\_140612\_OPL1013\_CVA\_phosphoproteomic\_landscape\_AML\_C Scan : 43626

Andromeda score : 47.499

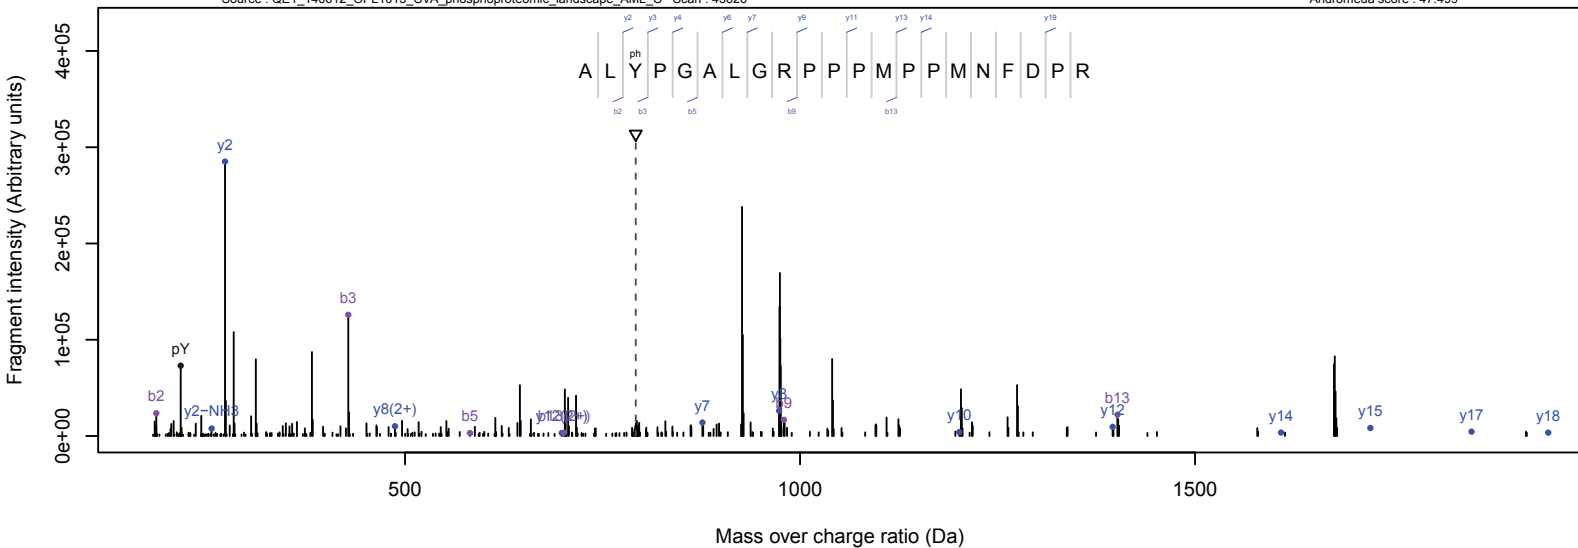

RTY(ph)VTPPGTGFLPGDTAR-3+

Source : QE1\_140612\_OPL1013\_CVA\_phosphoproteomic\_landscape\_AML\_B Scan : 29309

Andromeda score : 47.499

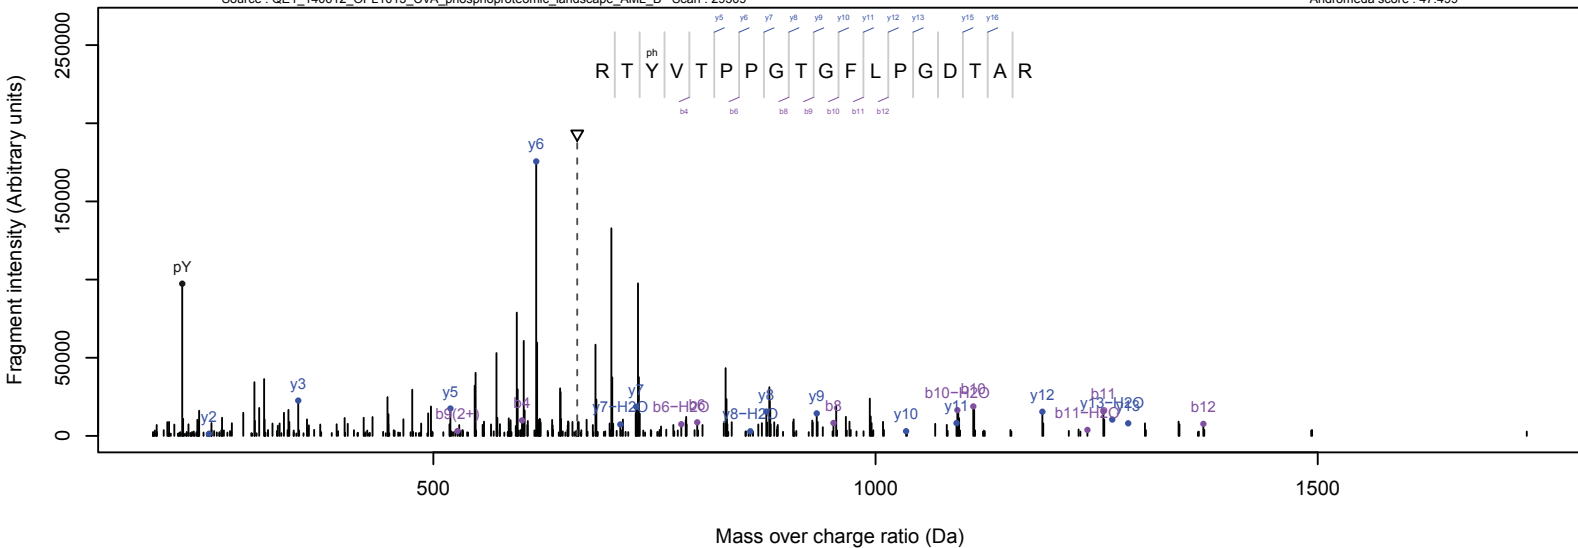

SST(ph)PLPTISSAENTR-2+

Source : QE1\_140908\_OPL1013\_CvA\_pTyrIP\_AML\_HL60 Scan : 22411

Andromeda score : 47.499

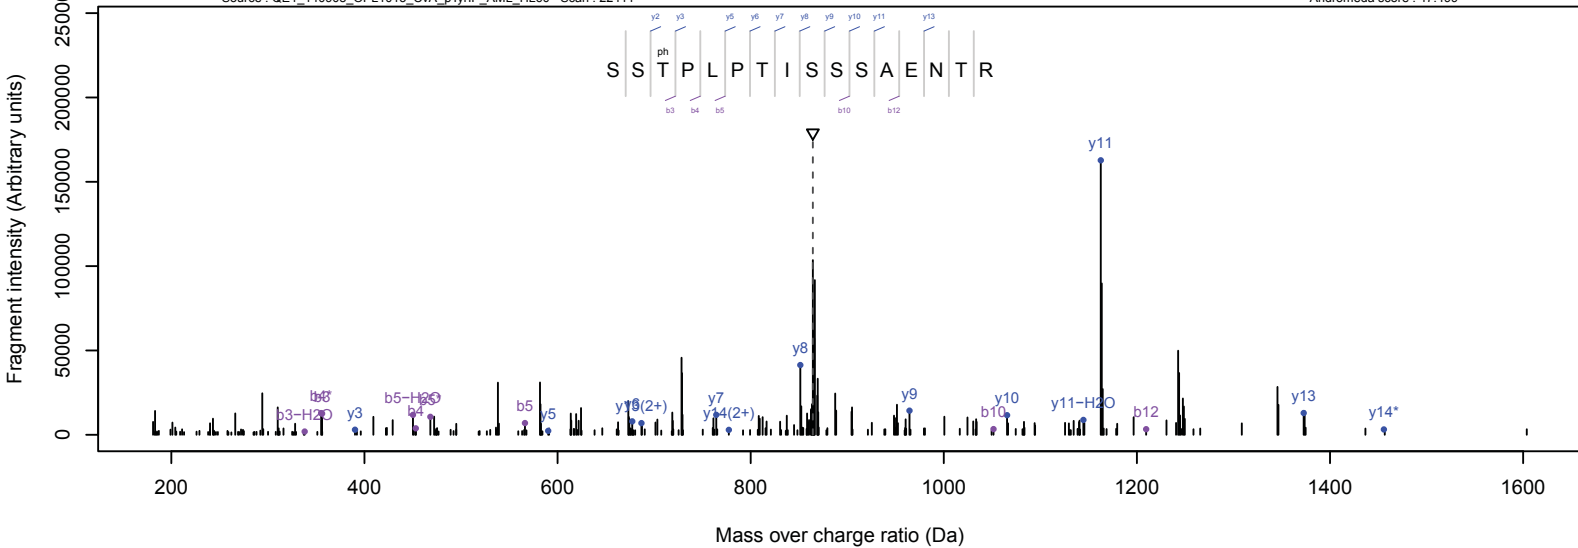

**FAFADAPNHY(ph)KK-3+**

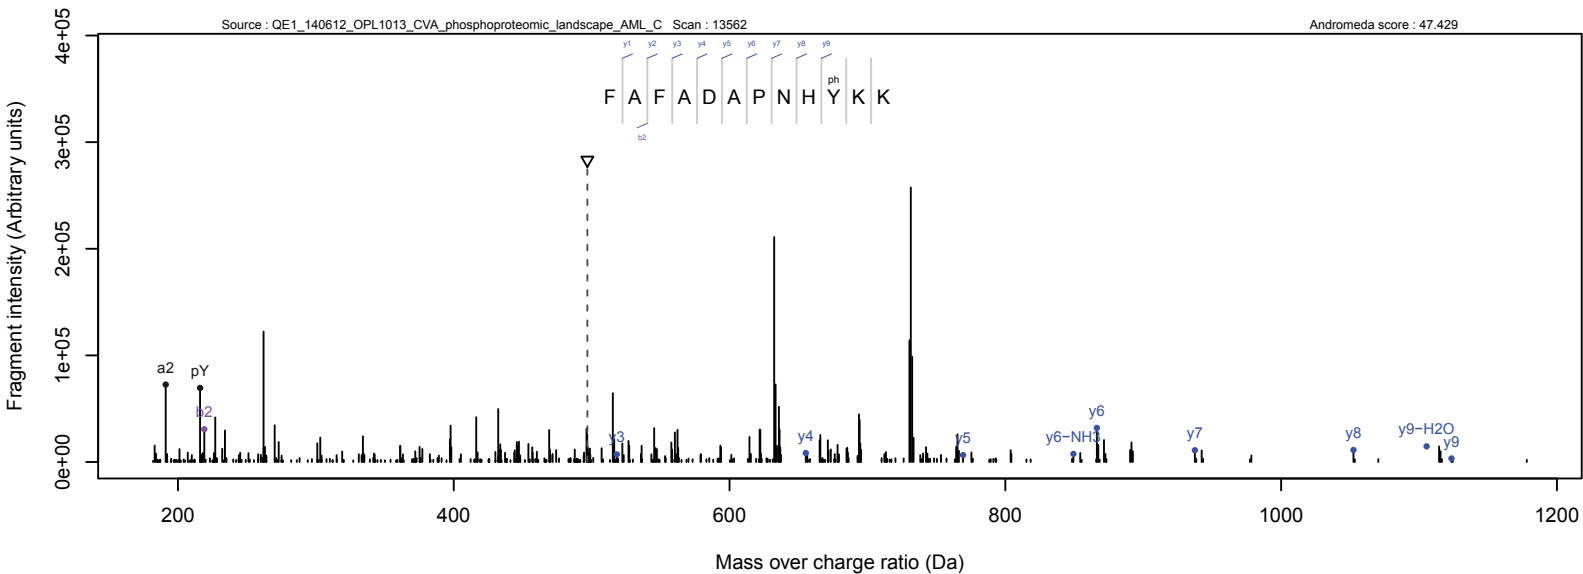

**AQLDY(ph)VDLYLHSPMSLKPGEEELSPTDENGK-4+**

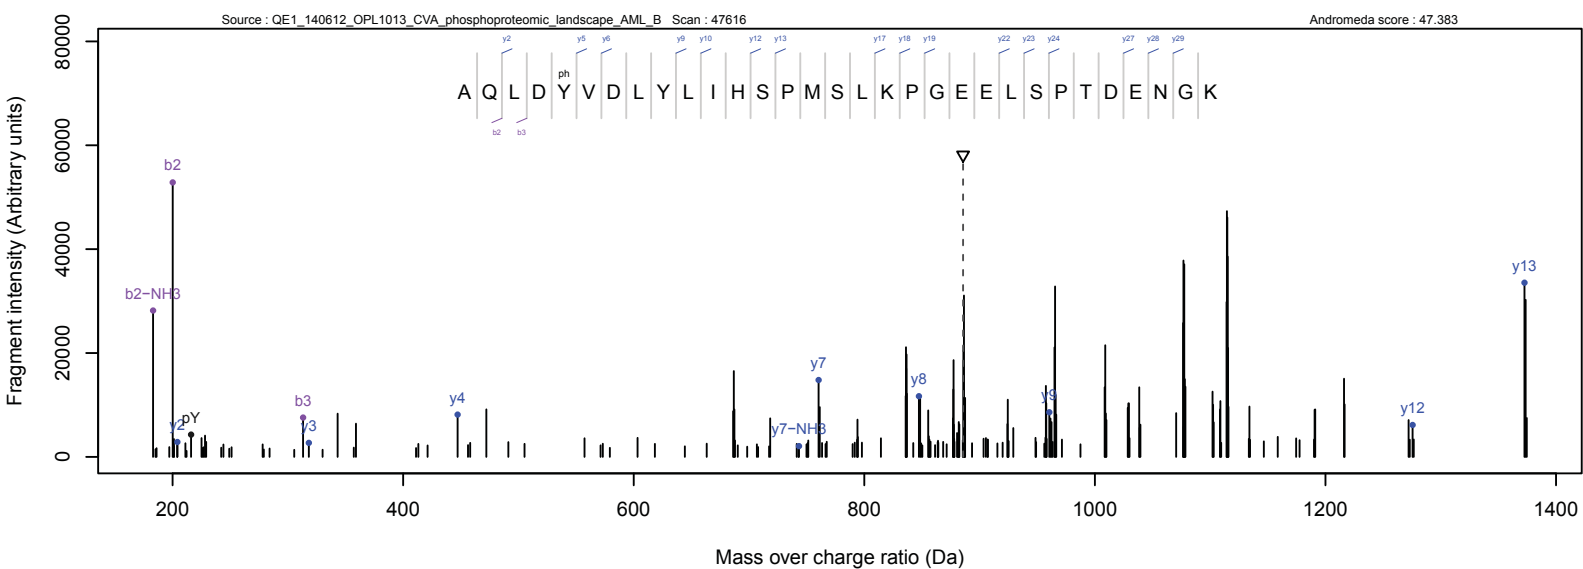

**AFDTAGNGY(ph)CR-2+**

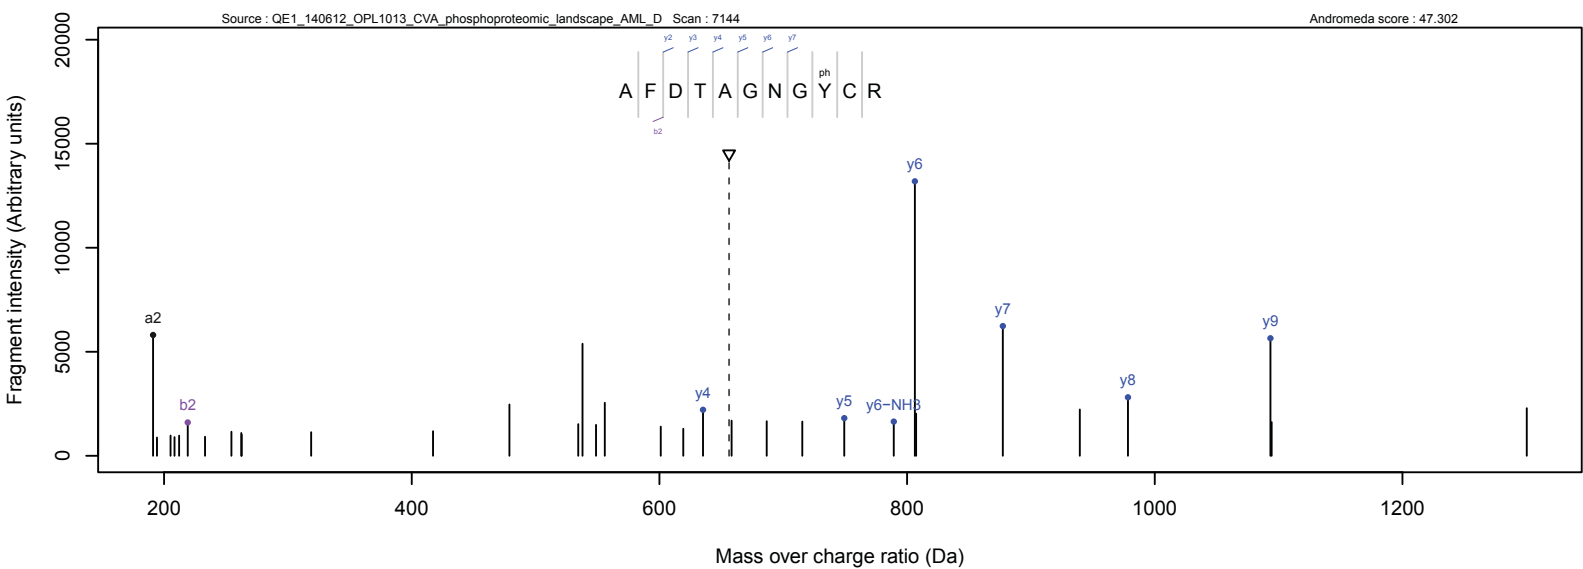

## FVATGHGKY(ph)EK-3+

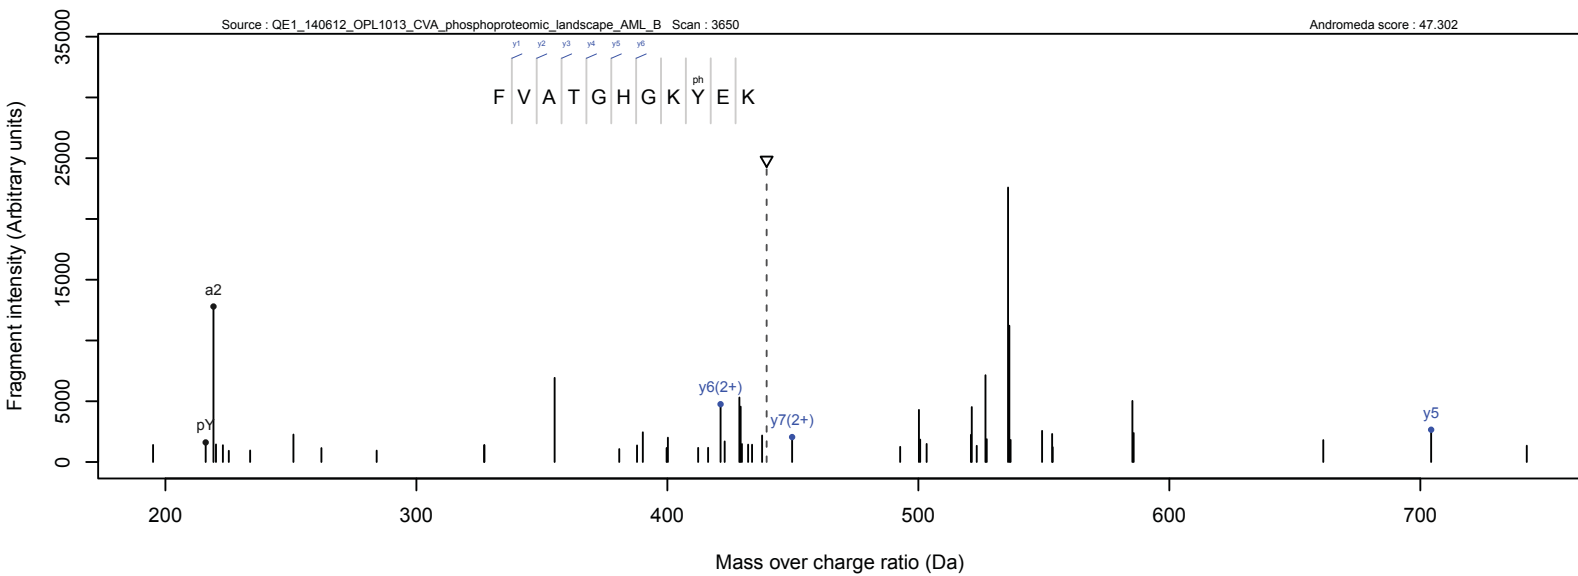

## VCVEHHTFY(ph)R-3+

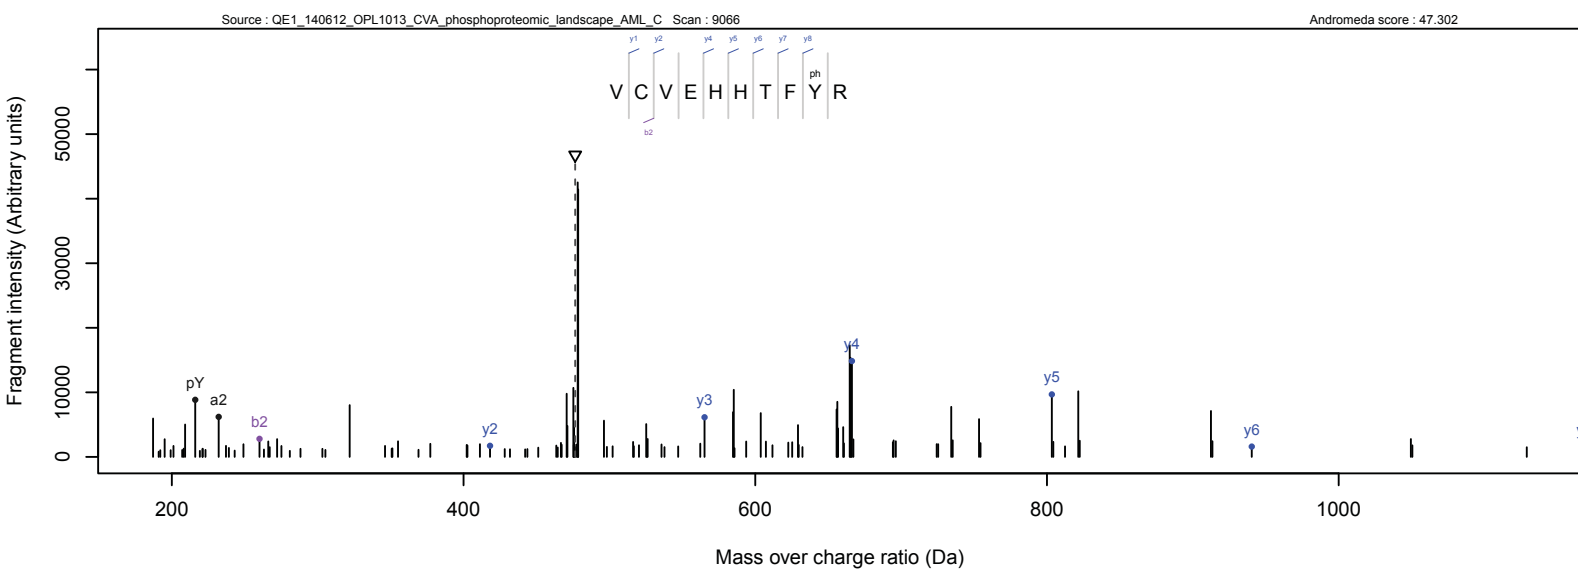

## Y(ph)WEAFLPEAK-2+

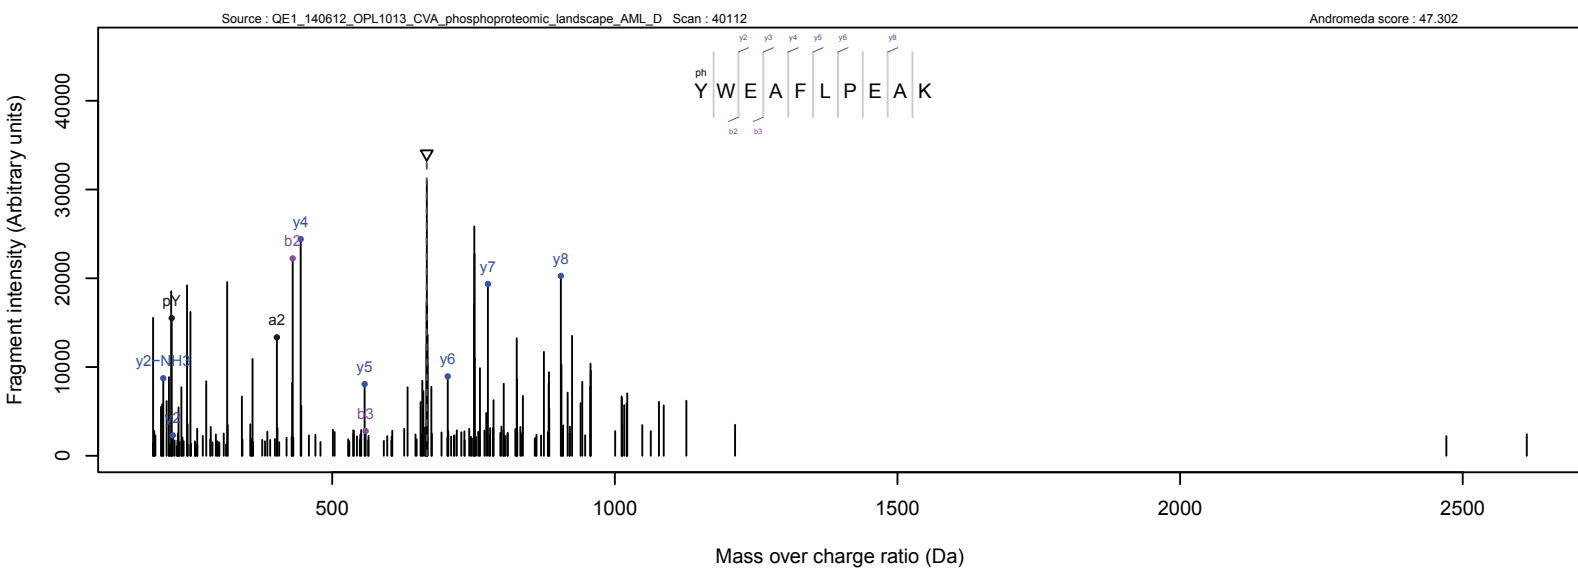

## SQPSPQAGLAGPGAGYS(ph)TARPTIPPR-3+

Source: QE1\_140612\_OPL1013\_CVA\_phosphoproteomic\_landscape\_AML\_C Scan: 24366

Andromeda score: 47.286

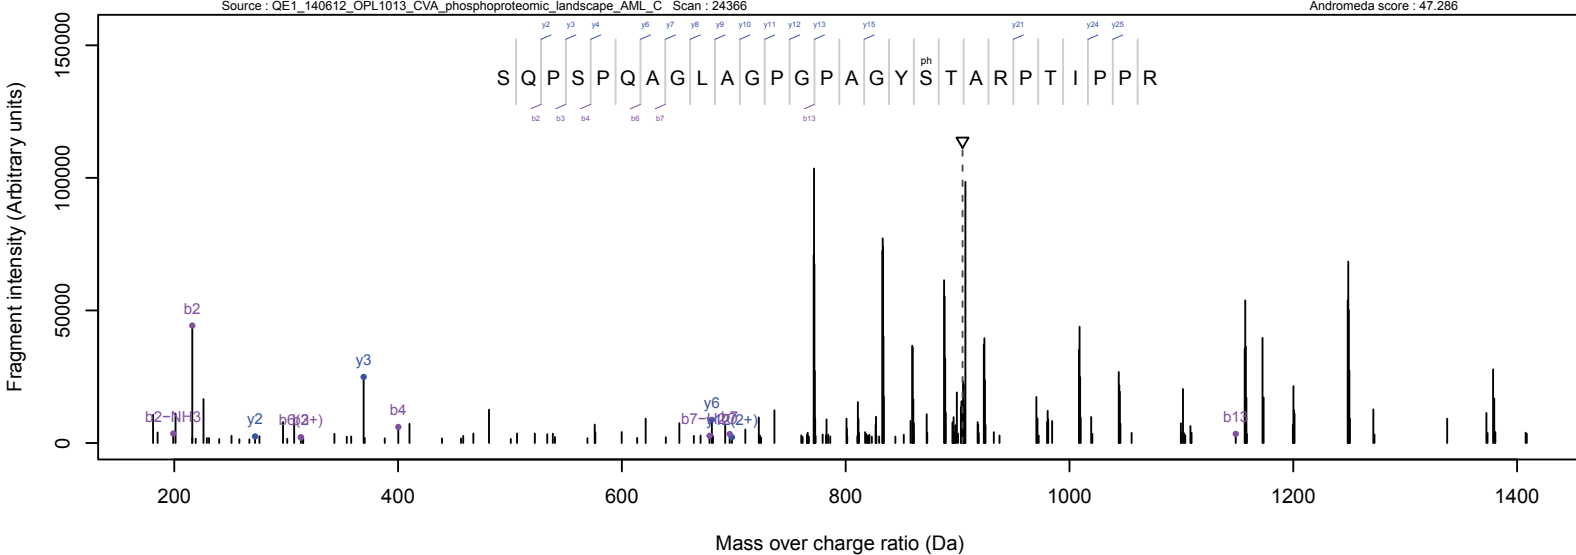

## TKDTSY(ph)PLGSQHS DGA FK-3+

Source: QE1\_140612\_OPL1013\_CVA\_phosphoproteomic\_landscape\_AML\_C Scan: 10660

Andromeda score: 47.223

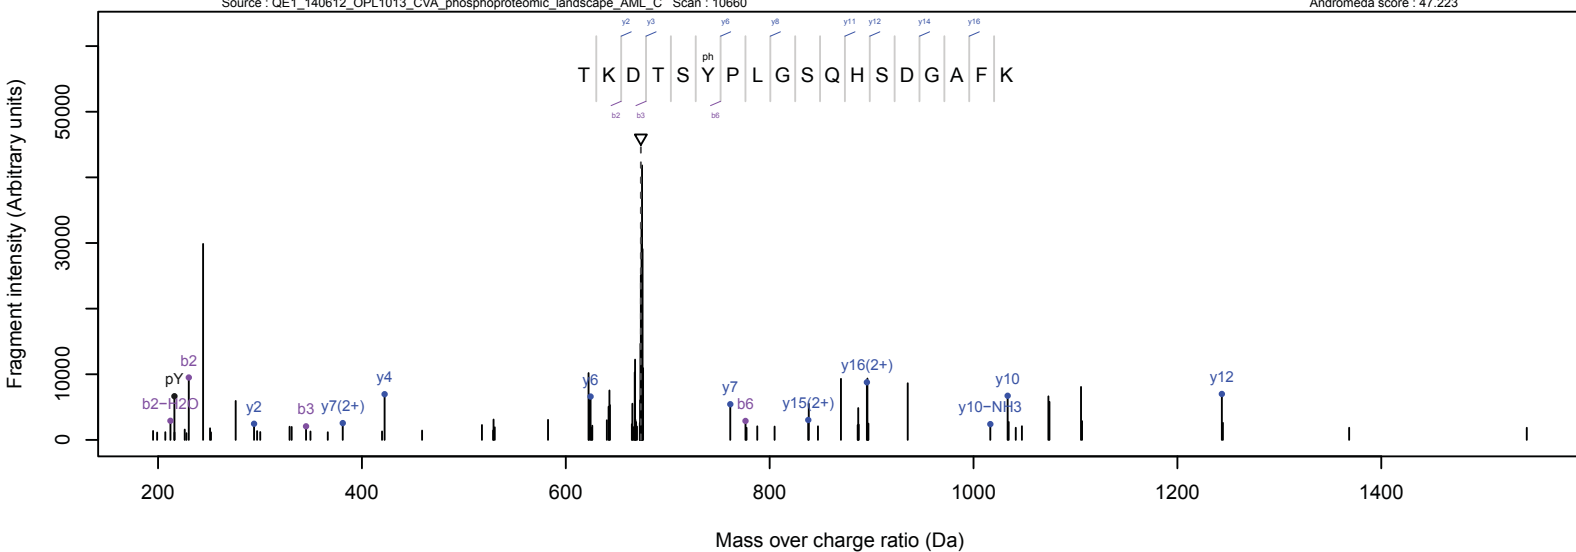

## VNFY(ph)VINGK-2+

Source: QE1\_140612\_OPL1013\_CVA\_phosphoproteomic\_landscape\_AML\_B Scan: 25486

Andromeda score: 47.187

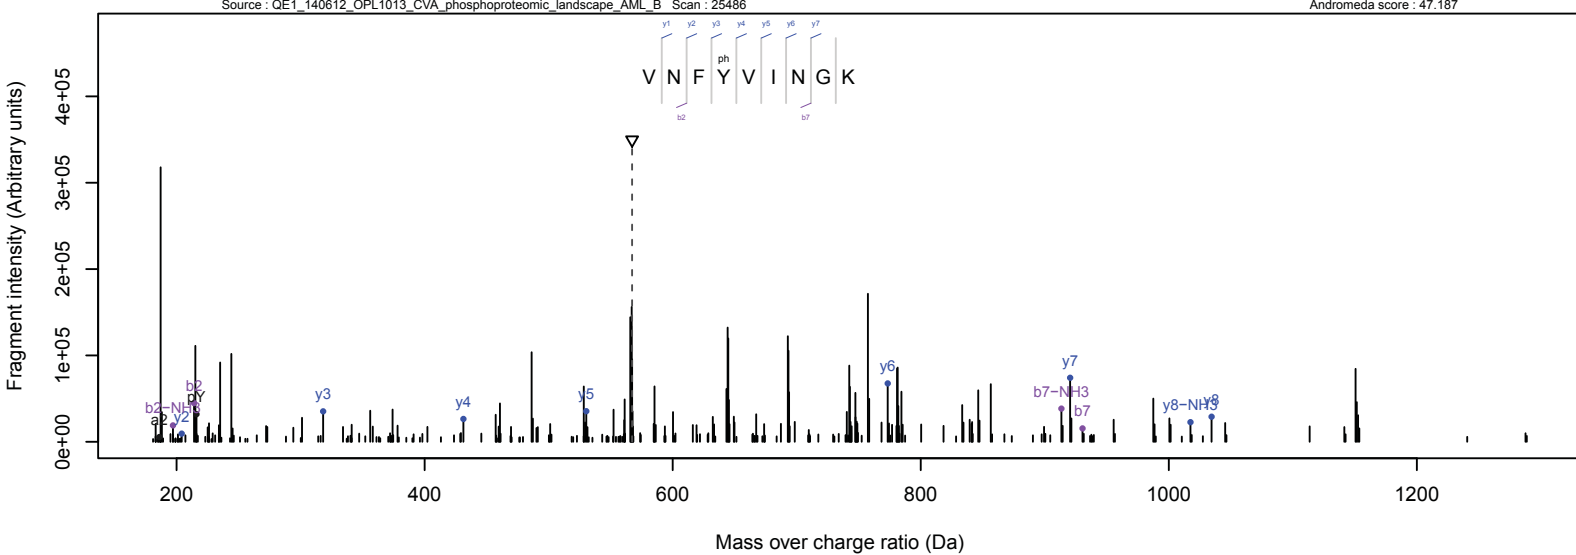

## AFDY(ph)PSLFR-2+

Source : QE1\_140908\_OPL1013\_CvA\_pTyrIP\_AML\_OCI\_AML3 Scan : 39845

Andromeda score : 47.097

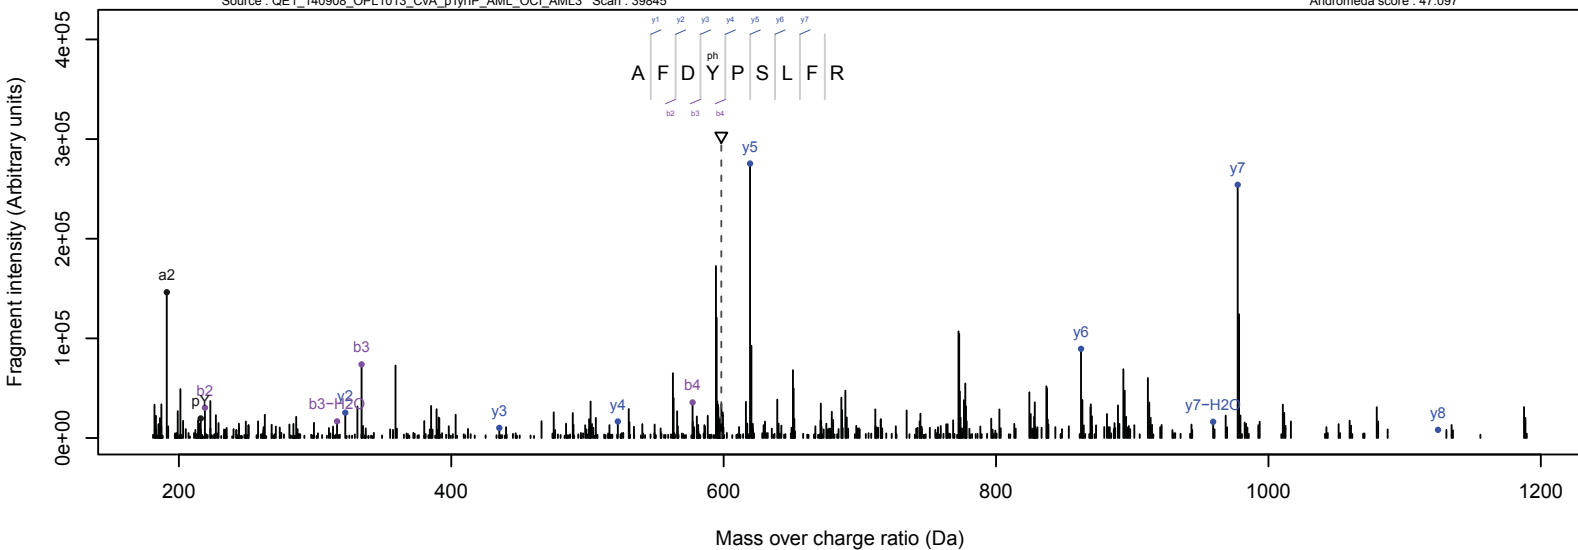

## (ac)AVPETRPNHTIY(ph)INNLNEK-3+

Source : QE1\_140908\_OPL1013\_CvA\_pTyrIP\_AML\_Kasumi1 Scan : 25635

Andromeda score : 47.088

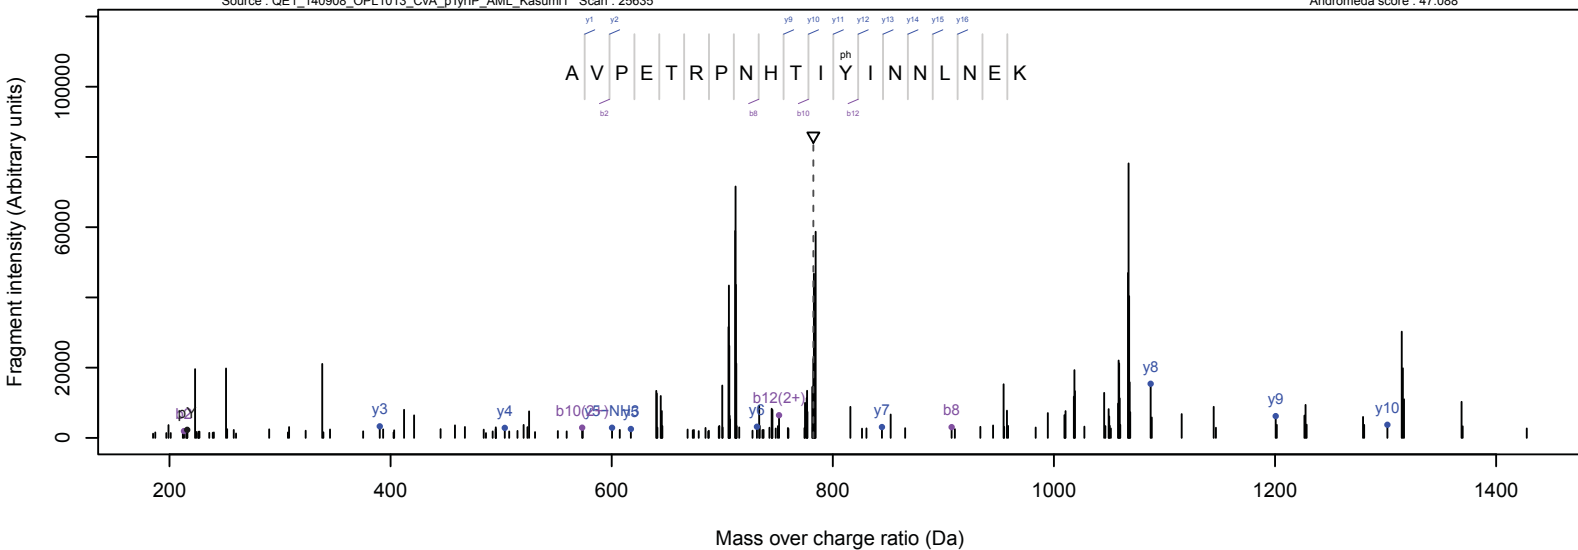

## IRGTSY(ph)QSPHGIPIDLLDR-3+

Source : QE1\_140612\_OPL1013\_CVA\_phosphoproteomic\_landscape\_AML\_A Scan : 33108

Andromeda score : 47.088

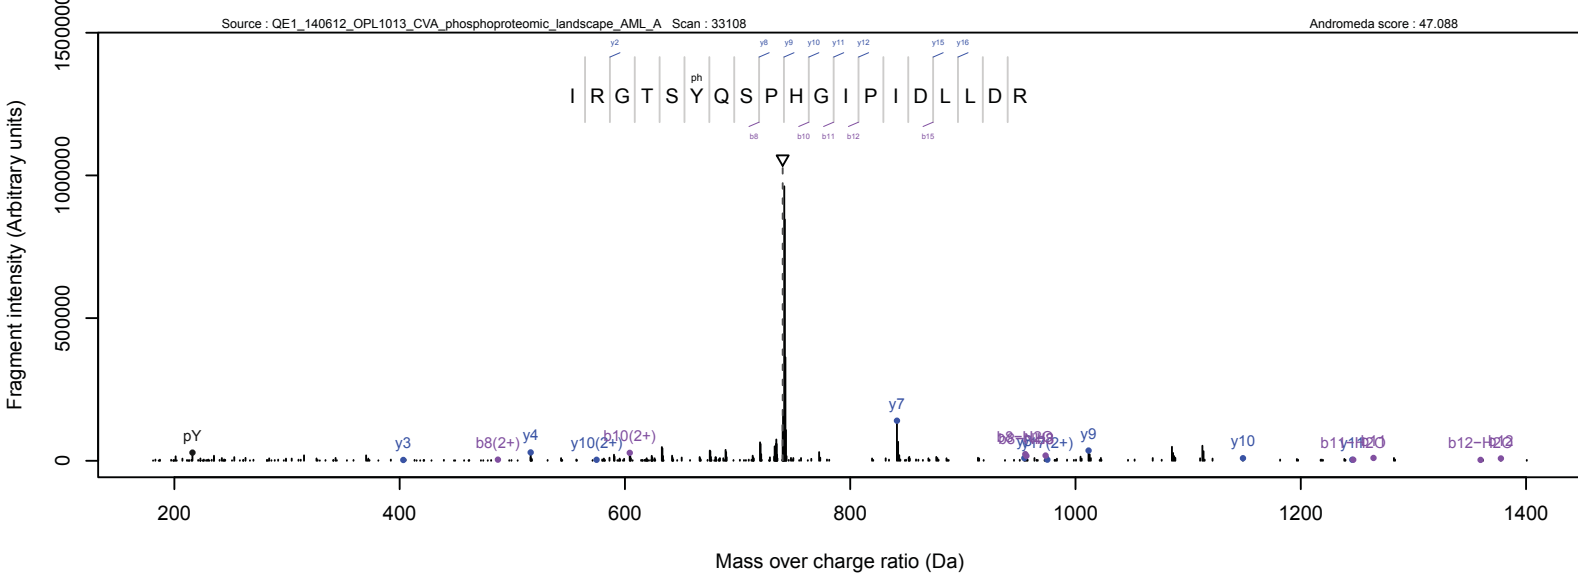

## KTGVAGEDMQDMSGTY(ph)GK-3+

Source : QE1\_140612\_OPL1013\_CVA\_phosphoproteomic\_landscape\_AML\_C Scan : 5537

Andromeda score : 47.082

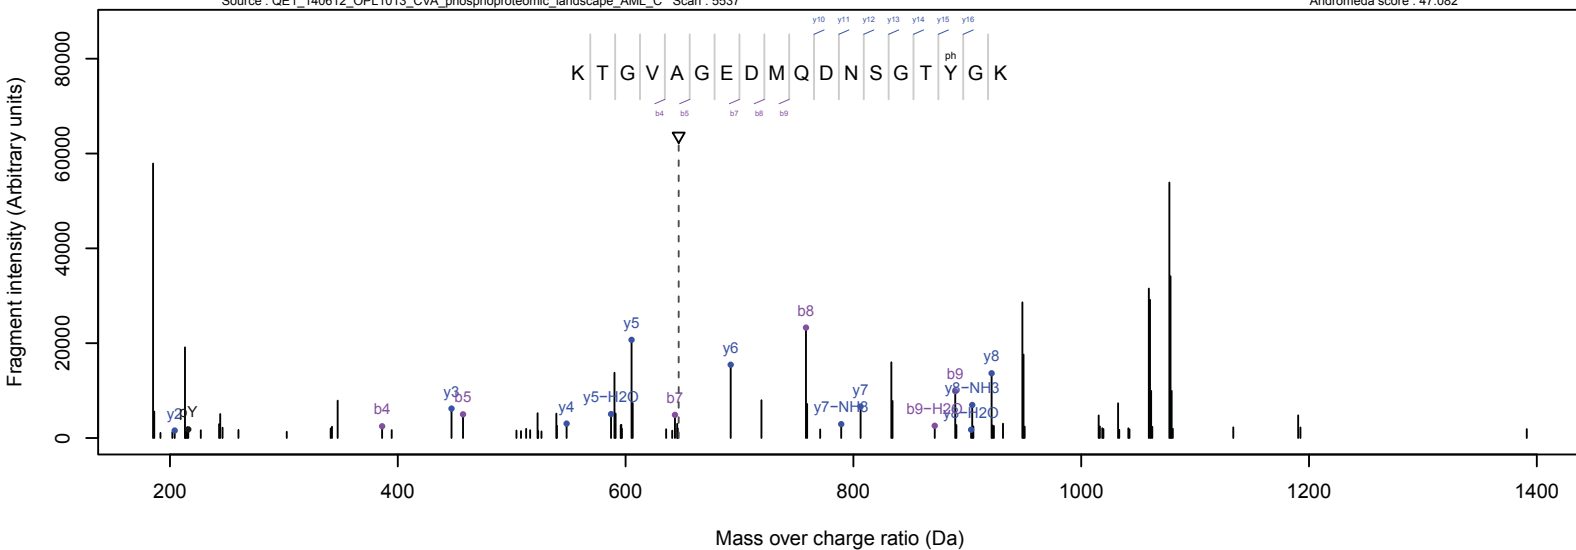

## RFTFY(ph)PCVLATEGFTSGR-3+

Source : QE1\_140612\_OPL1013\_CVA\_phosphoproteomic\_landscape\_AML\_B Scan : 44774

Andromeda score : 47.082

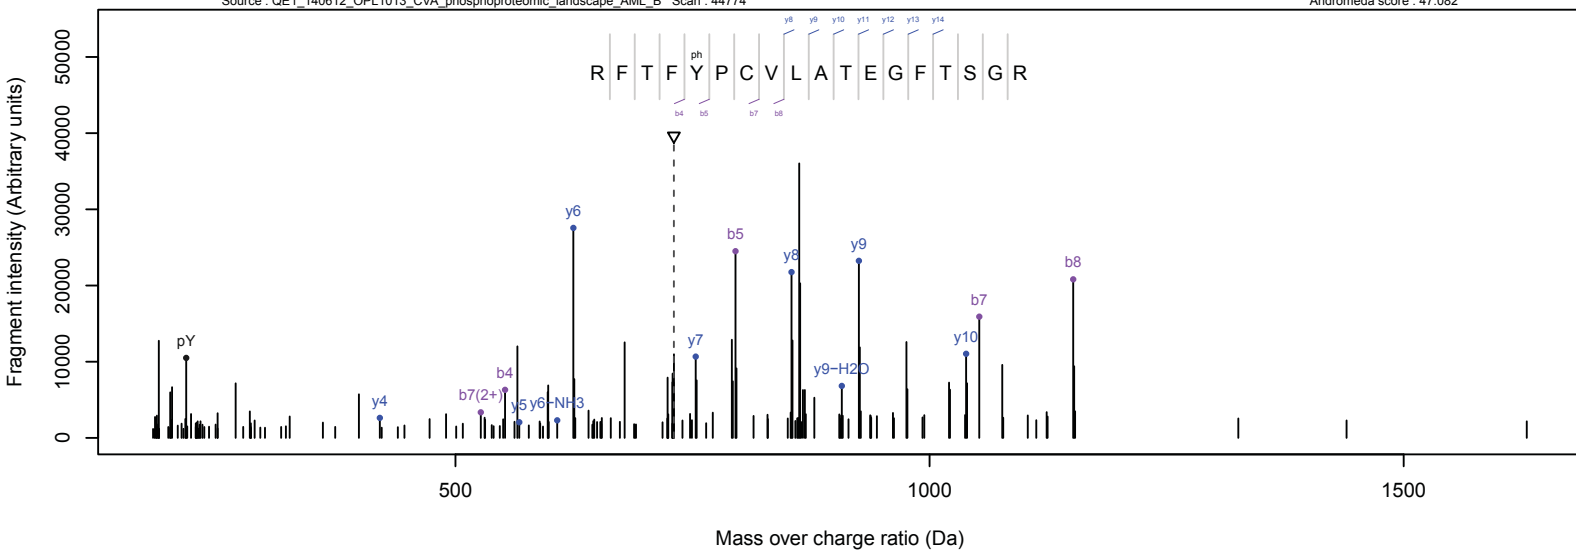

## RIY(ph)ANMFK-2+

Source : QE1\_140612\_OPL1013\_CVA\_phosphoproteomic\_landscape\_AML\_B Scan : 17902

Andromeda score : 47.082

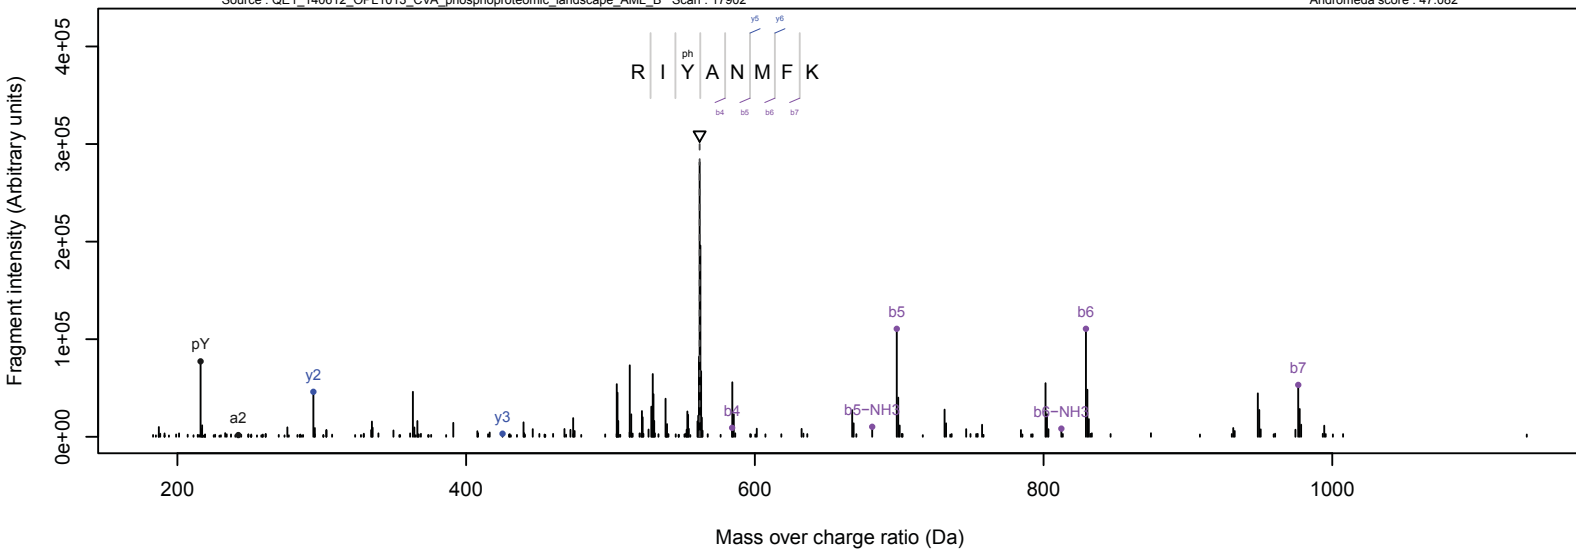

SETAPAETATPAPVEKS(ph)PAK-3+

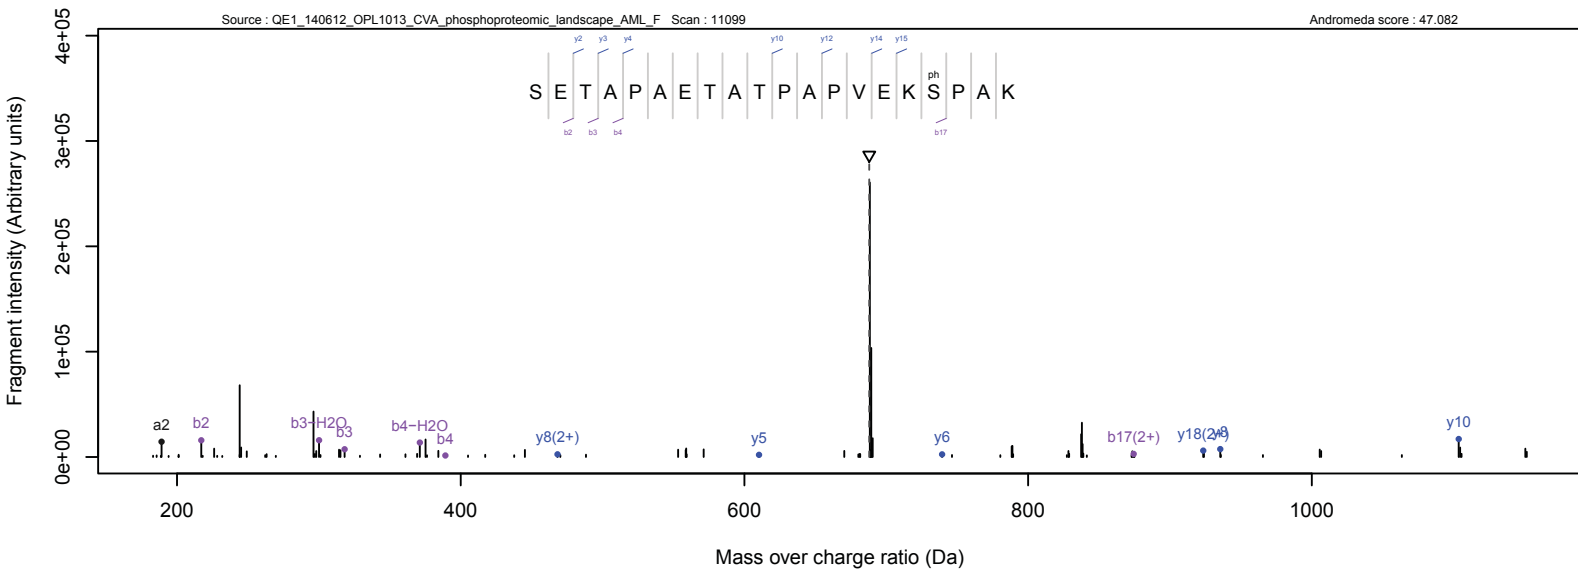

TMTSLYGSIH PADS VY(ph) LSTR-3+

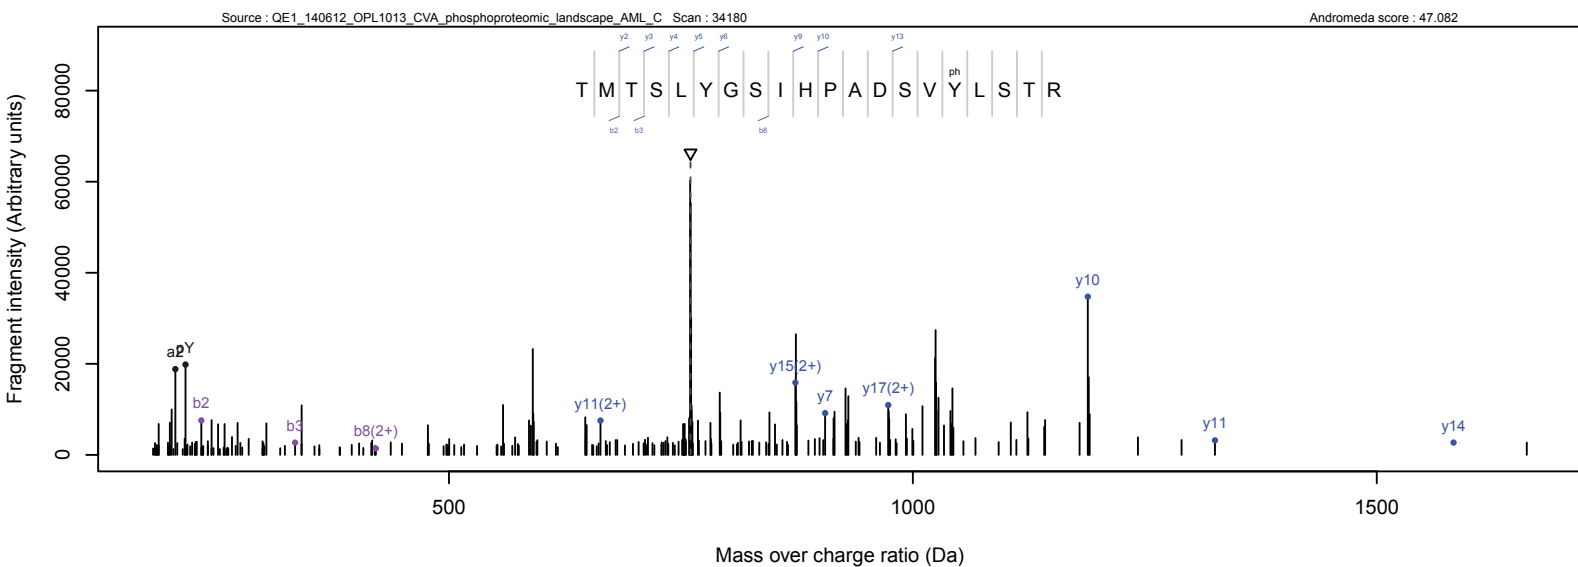

VDYVYFENSSNPY(ph)LVRR-3+

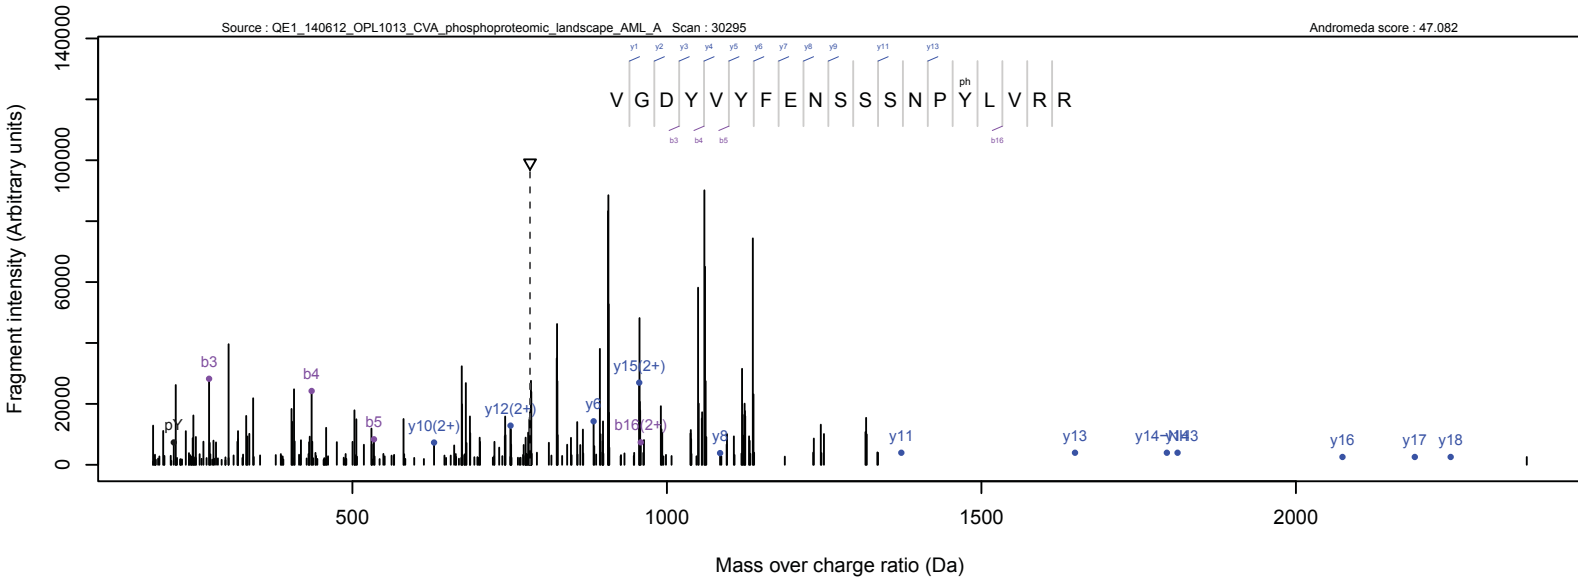

## FFY(ph)SDQNVDSRDPVQLNLLYQAR-3+

Source : QE1\_140612\_OPL1013\_CVA\_phosphoproteomic\_landscape\_AML\_C Scan : 46244

Andromeda score : 47.058

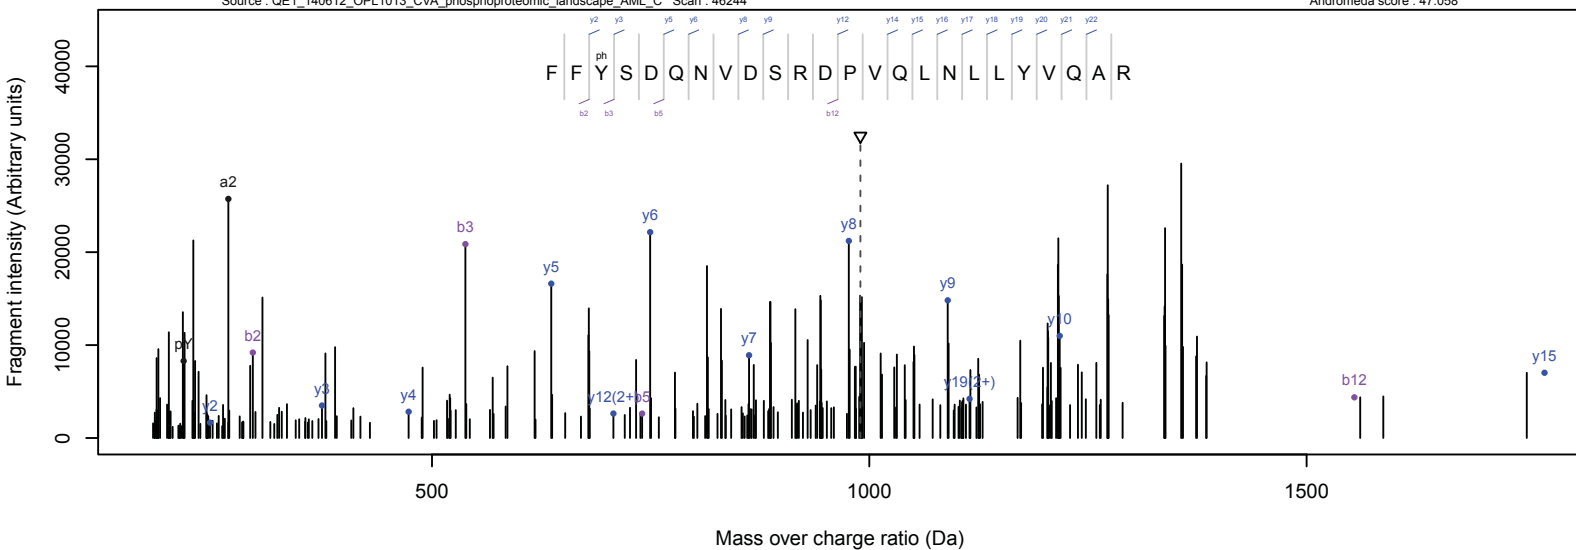

## KQGY(ph)ENLCLLR-3+

Source : QE1\_140612\_OPL1013\_CVA\_phosphoproteomic\_landscape\_AML\_B Scan : 12913

Andromeda score : 47.053

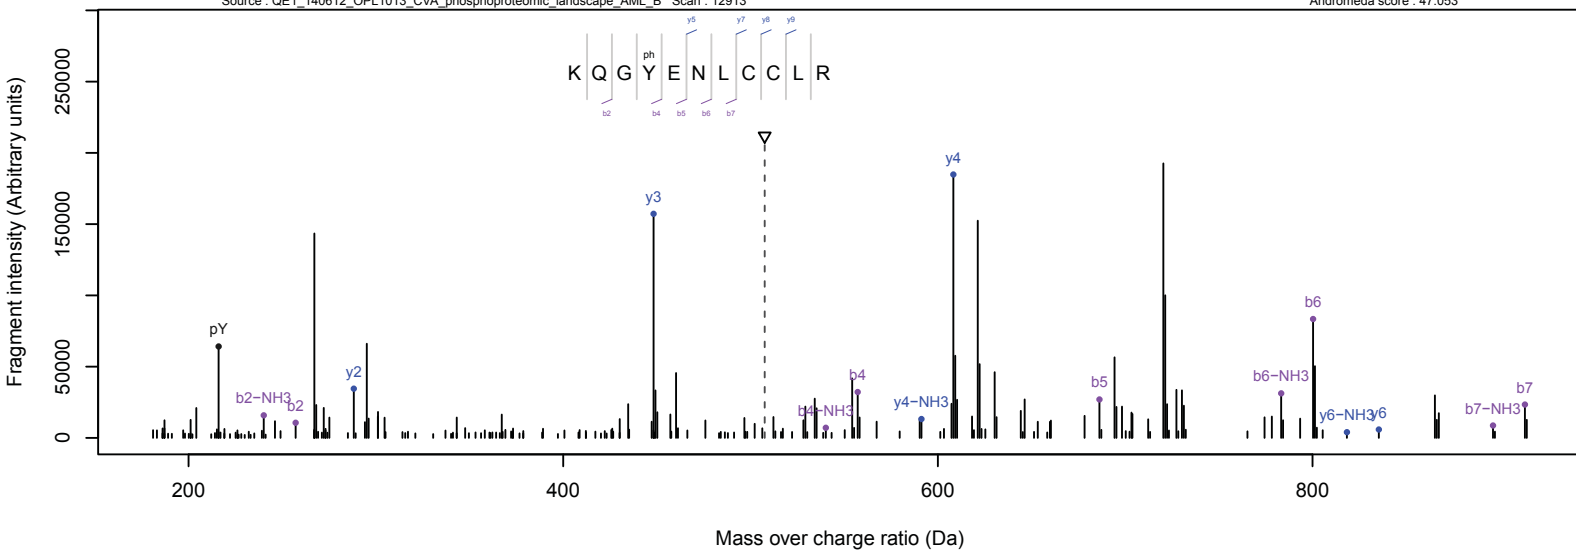

## GLIVY(ph)CVTSPK-2+

Source : QE1\_140612\_OPL1013\_CVA\_phosphoproteomic\_landscape\_AML\_C Scan : 27246

Andromeda score : 47.039

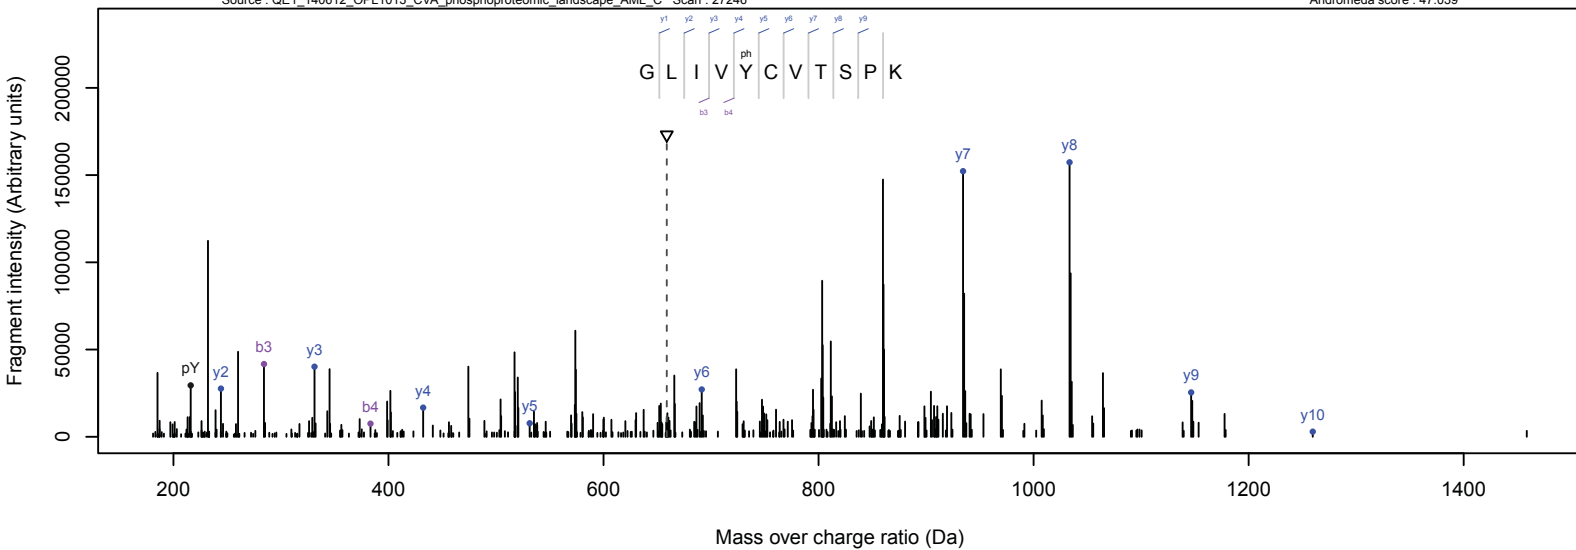



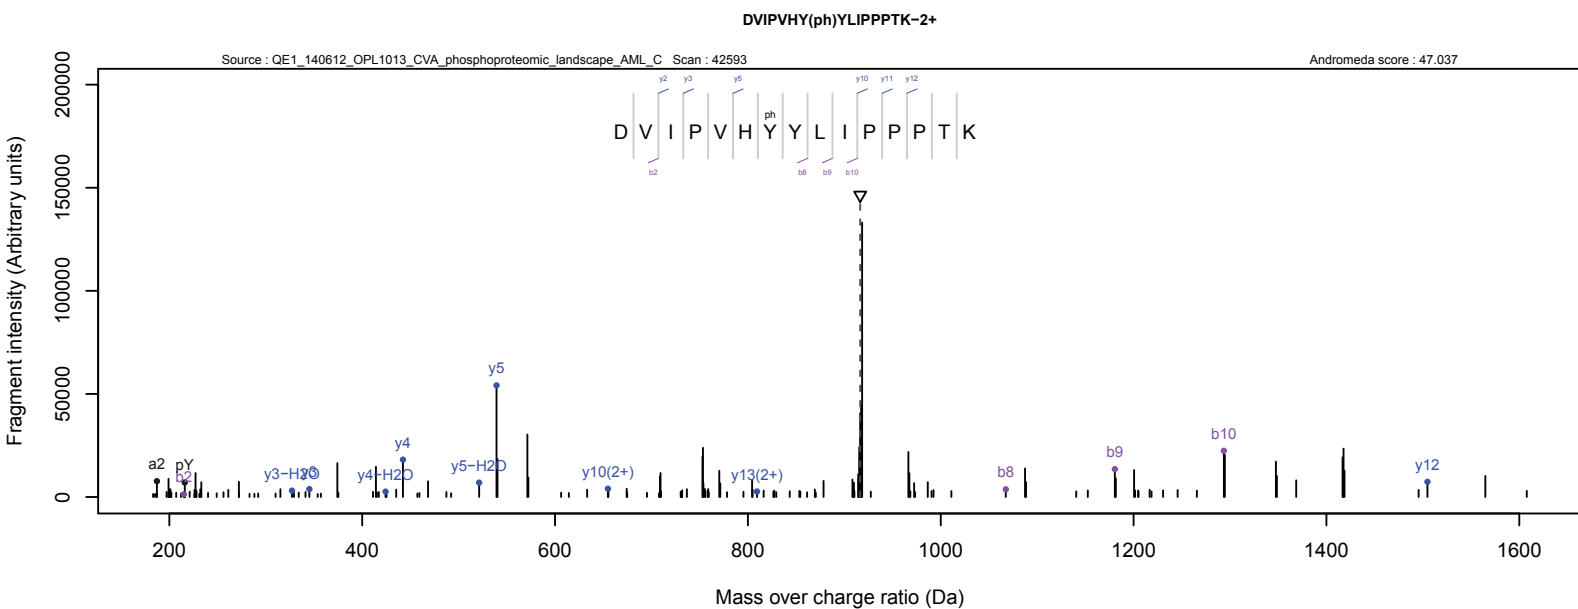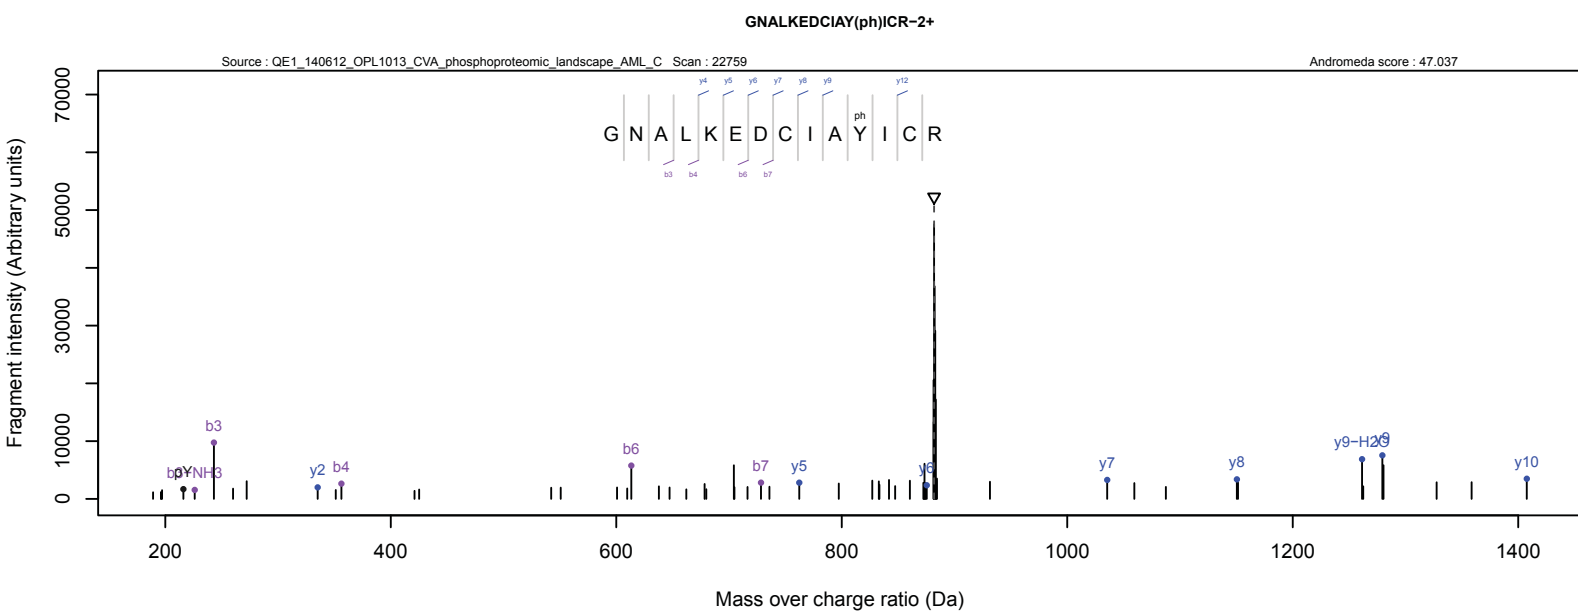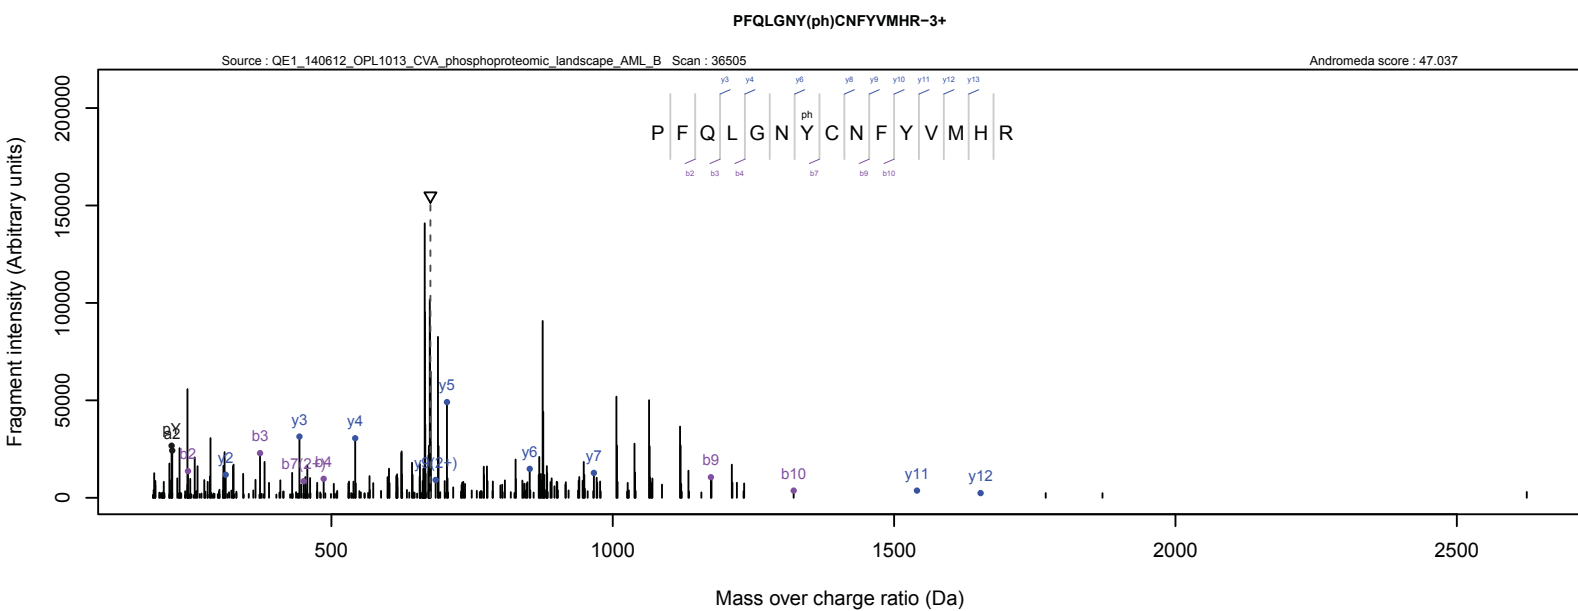

## CSNDSFSVIADY(ph)FGR-2+

Source : QE1\_140612\_OPL1013\_CVA\_phosphoproteomic\_landscape\_AML\_C Scan : 43574

Andromeda score : 47

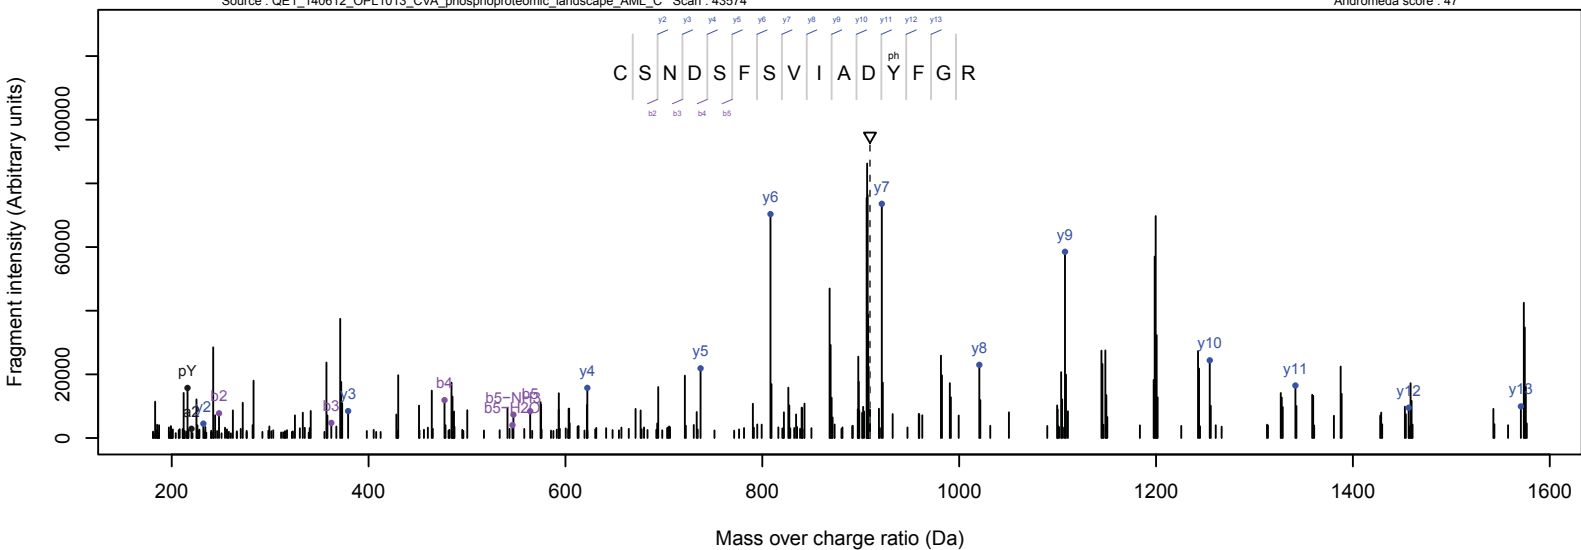

## (ac)AQYGHPSPLGMAAREELY(ph)SK-3+

Source : QE1\_140612\_OPL1013\_CVA\_phosphoproteomic\_landscape\_AML\_A Scan : 29765

Andromeda score : 46.953

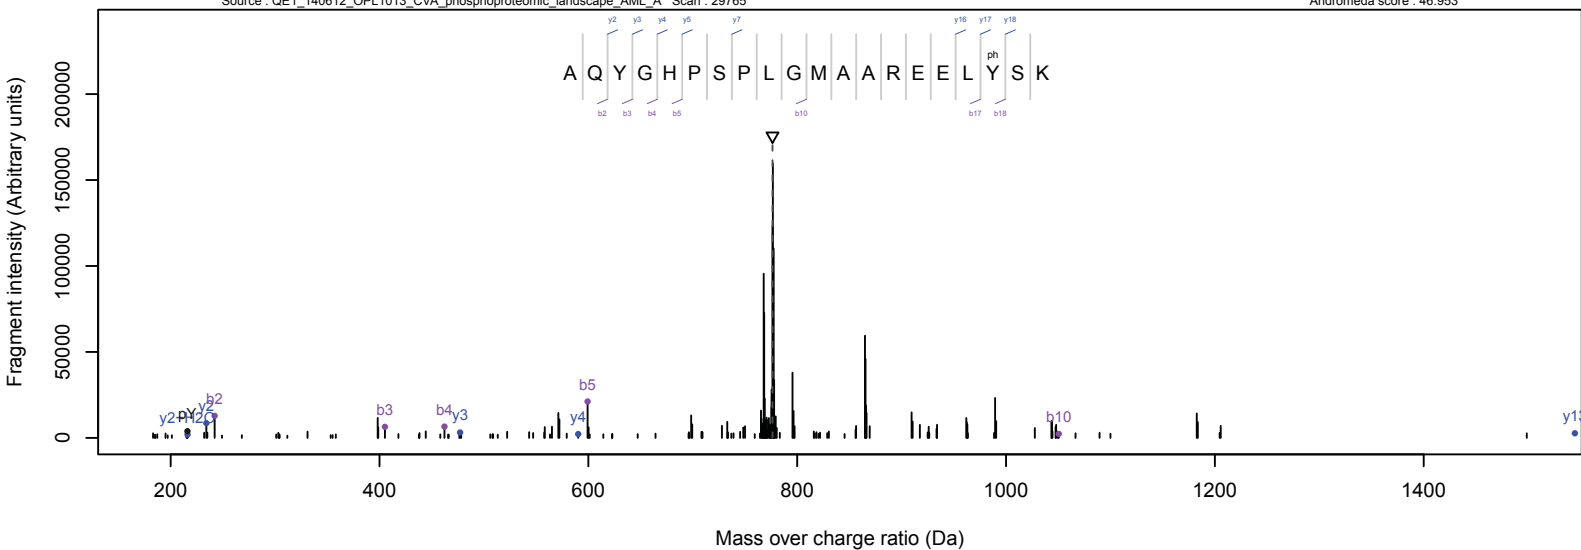

## GADLNLVDSLGY(ph)NALHYSK-3+

Source : QE1\_140612\_OPL1013\_CVA\_phosphoproteomic\_landscape\_AML\_C Scan : 45029

Andromeda score : 46.953

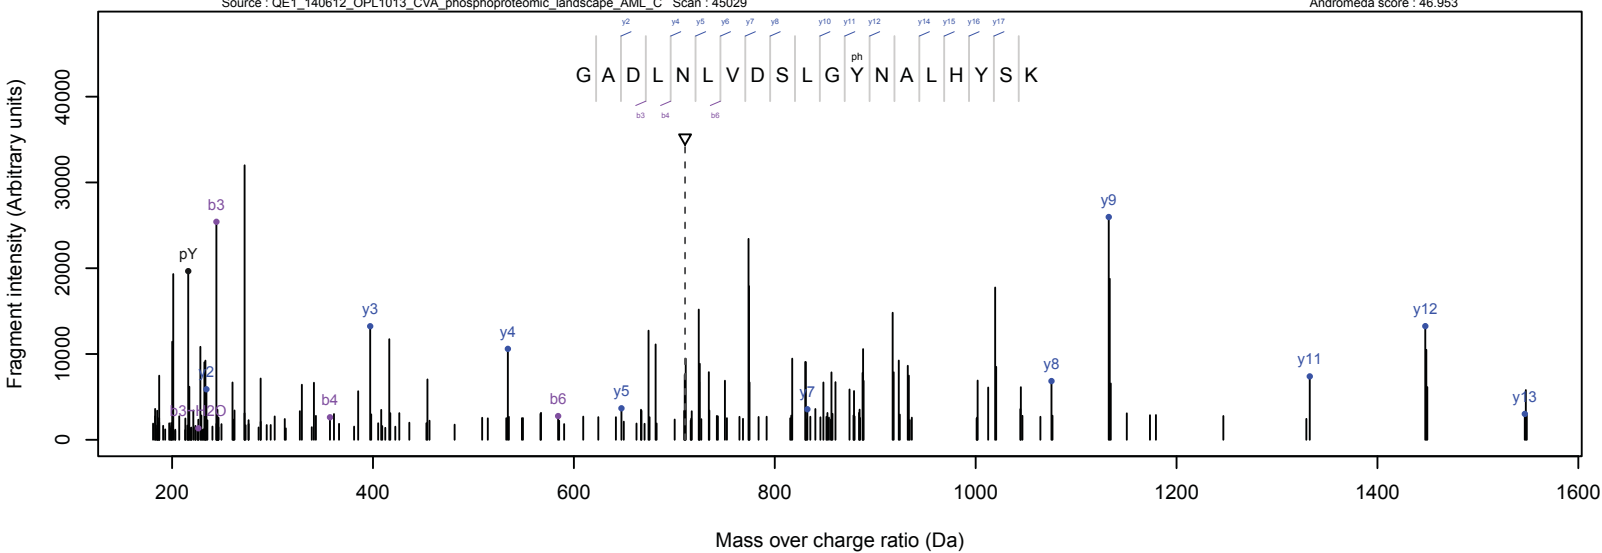

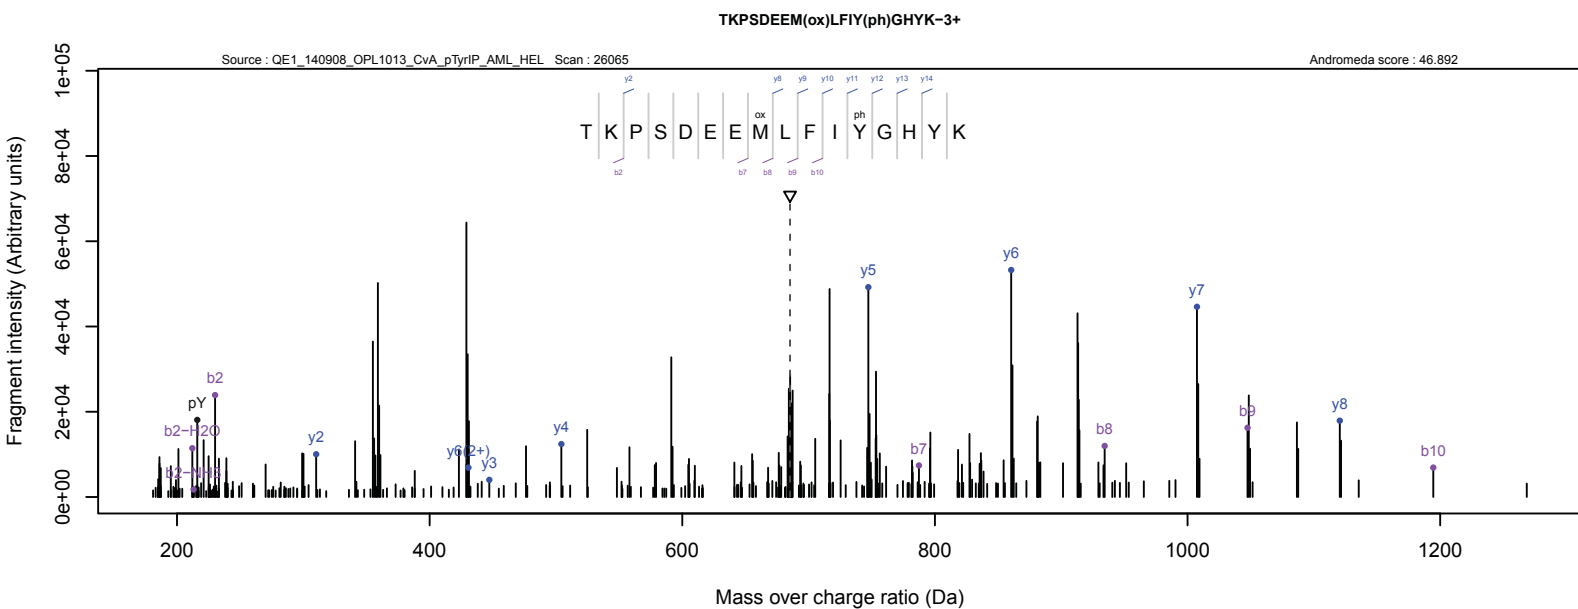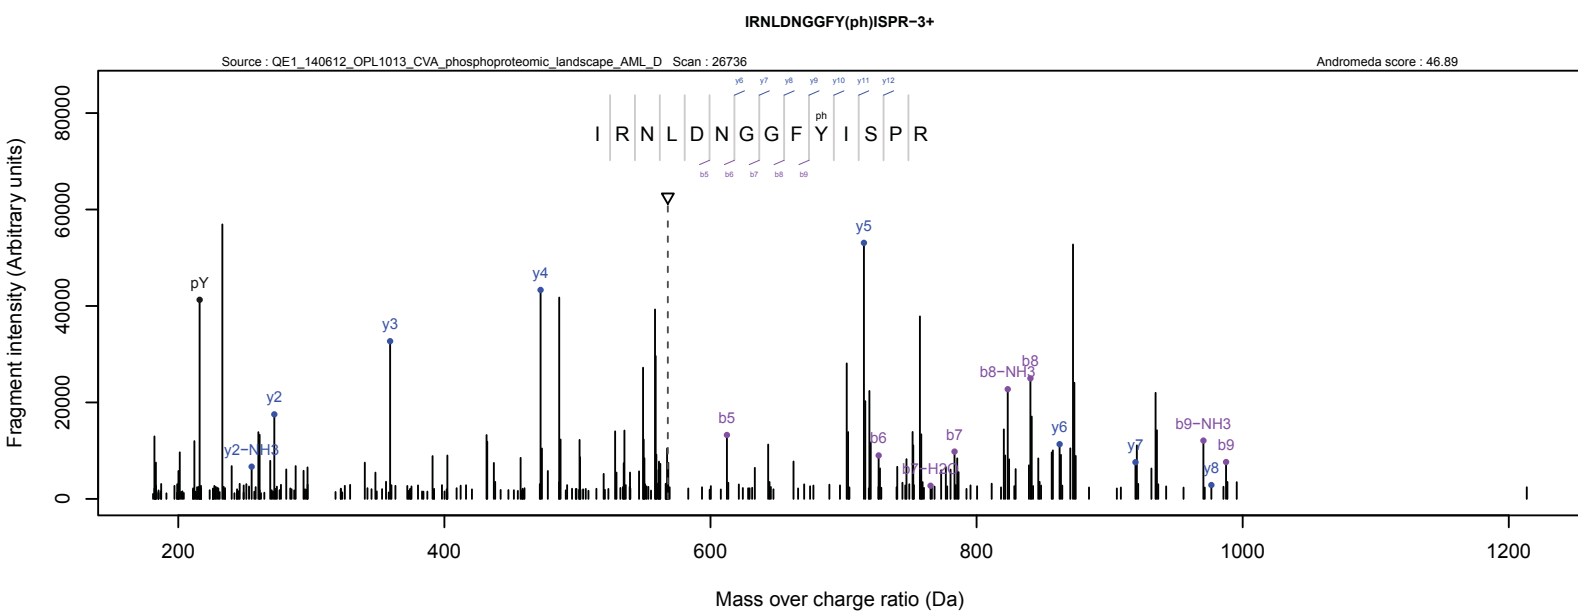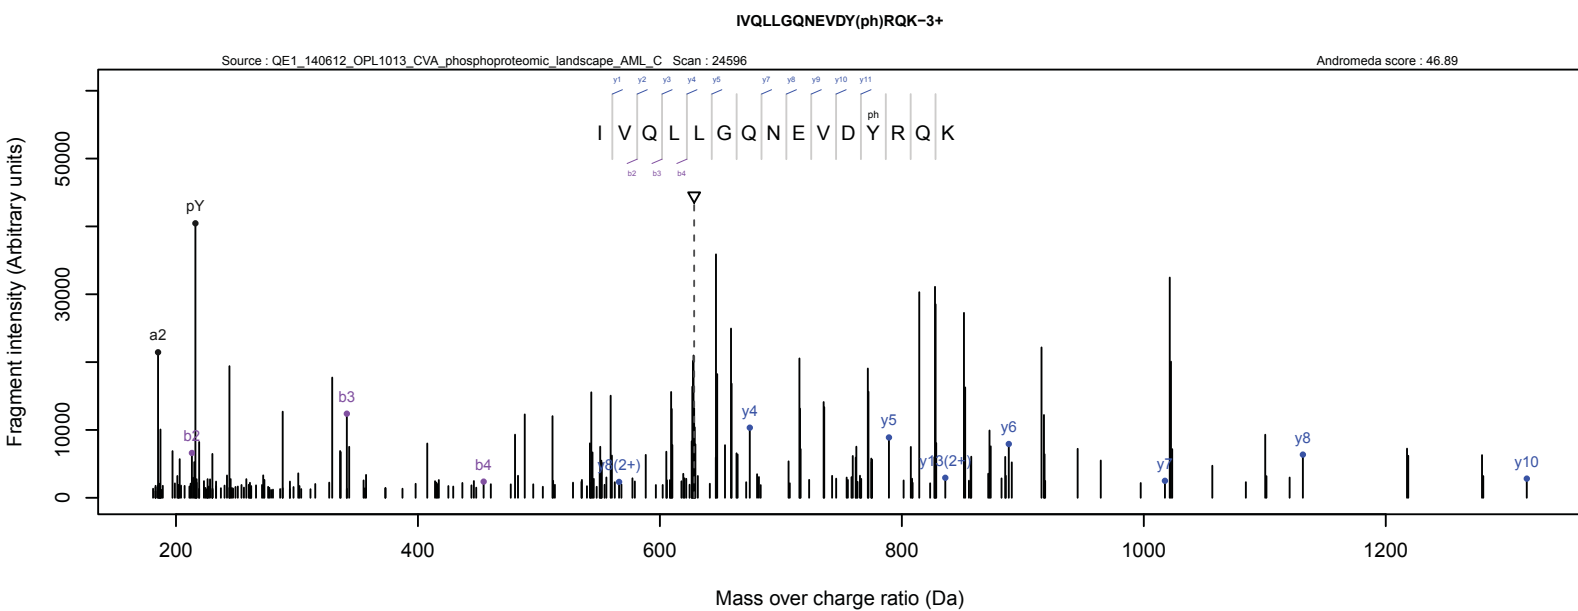

## QALSSHM(ox)Y(ph)SASLLR-3+

Source : QE1\_140908\_OPL1013\_CvA\_pTyrIP\_AML\_HEL Scan : 18747

Andromeda score : 46.89

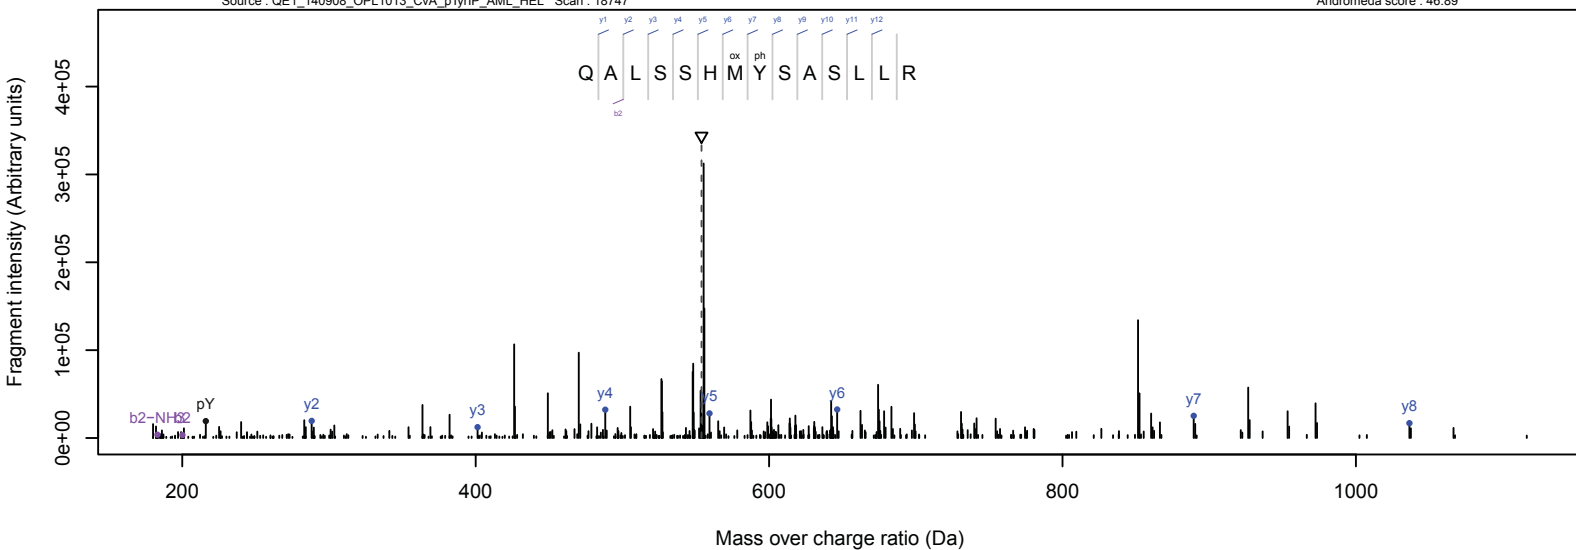

## EAQSIQYDPY(ph)SK-2+

Source : QE1\_140612\_OPL1013\_CVA\_phosphoproteomic\_landscape\_AML\_C Scan : 11071

Andromeda score : 46.88

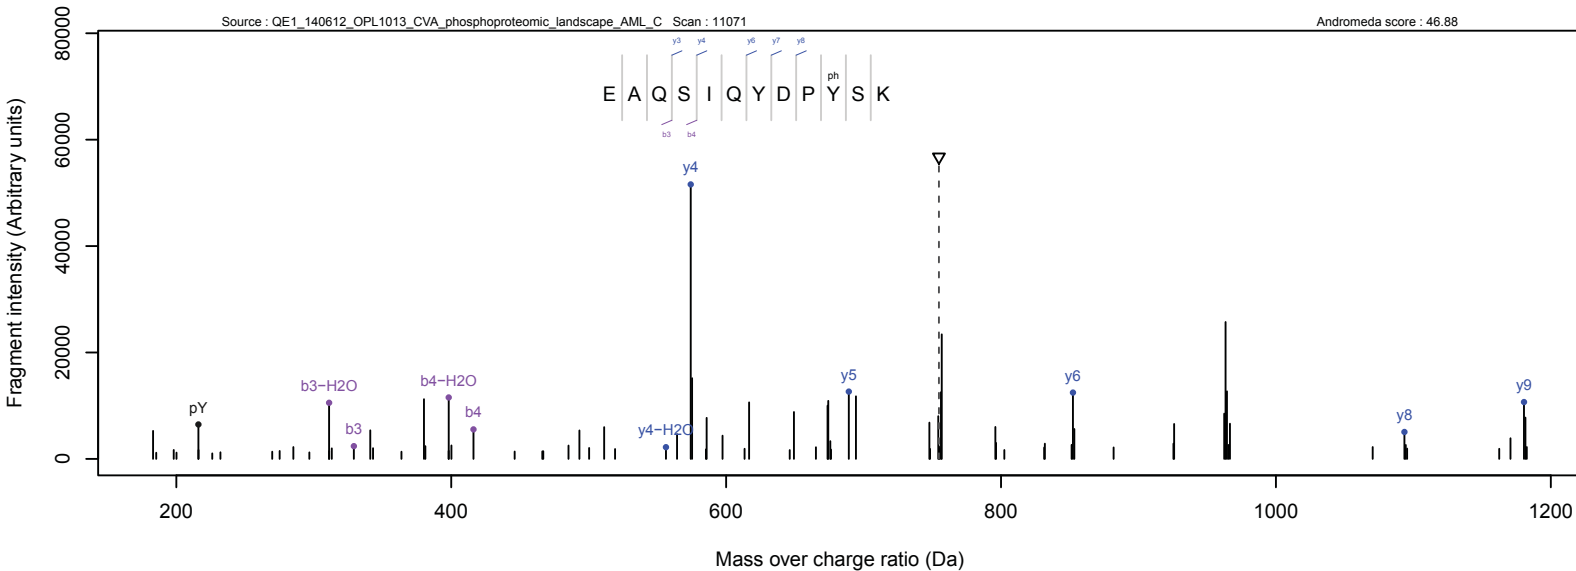

## EYPLY(ph)INQTCR-3+

Source : QE1\_140612\_OPL1013\_CVA\_phosphoproteomic\_landscape\_AML\_B Scan : 20466

Andromeda score : 46.88

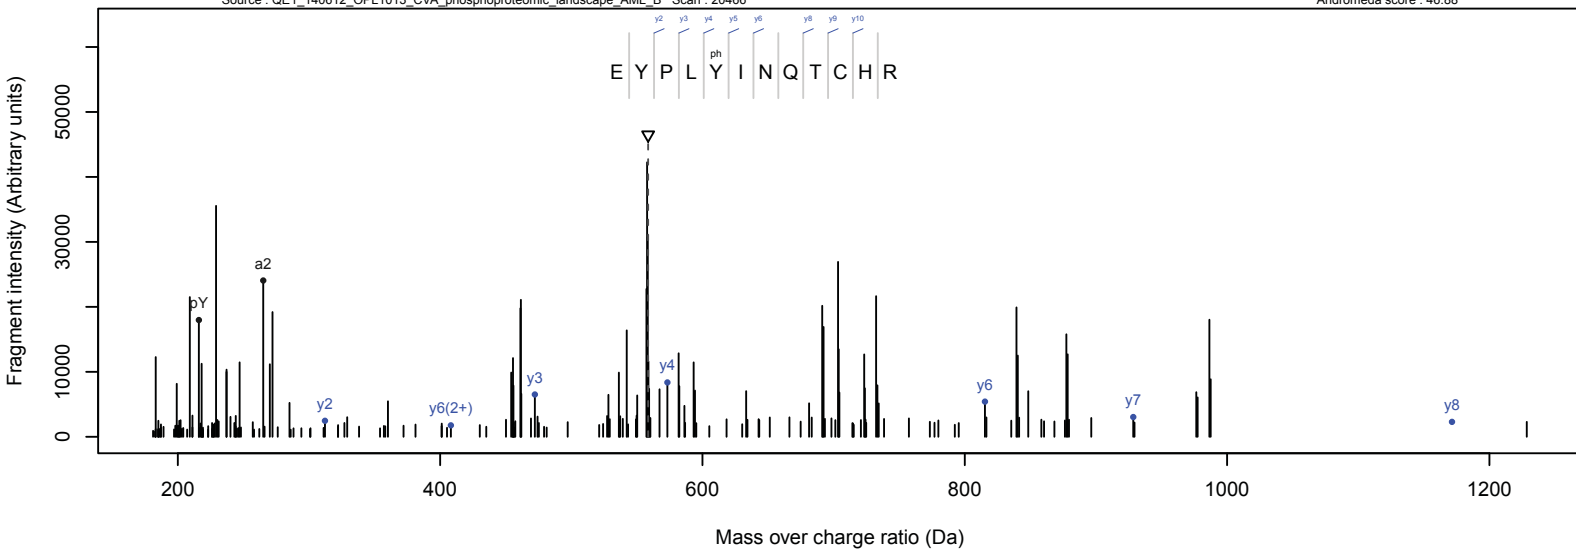

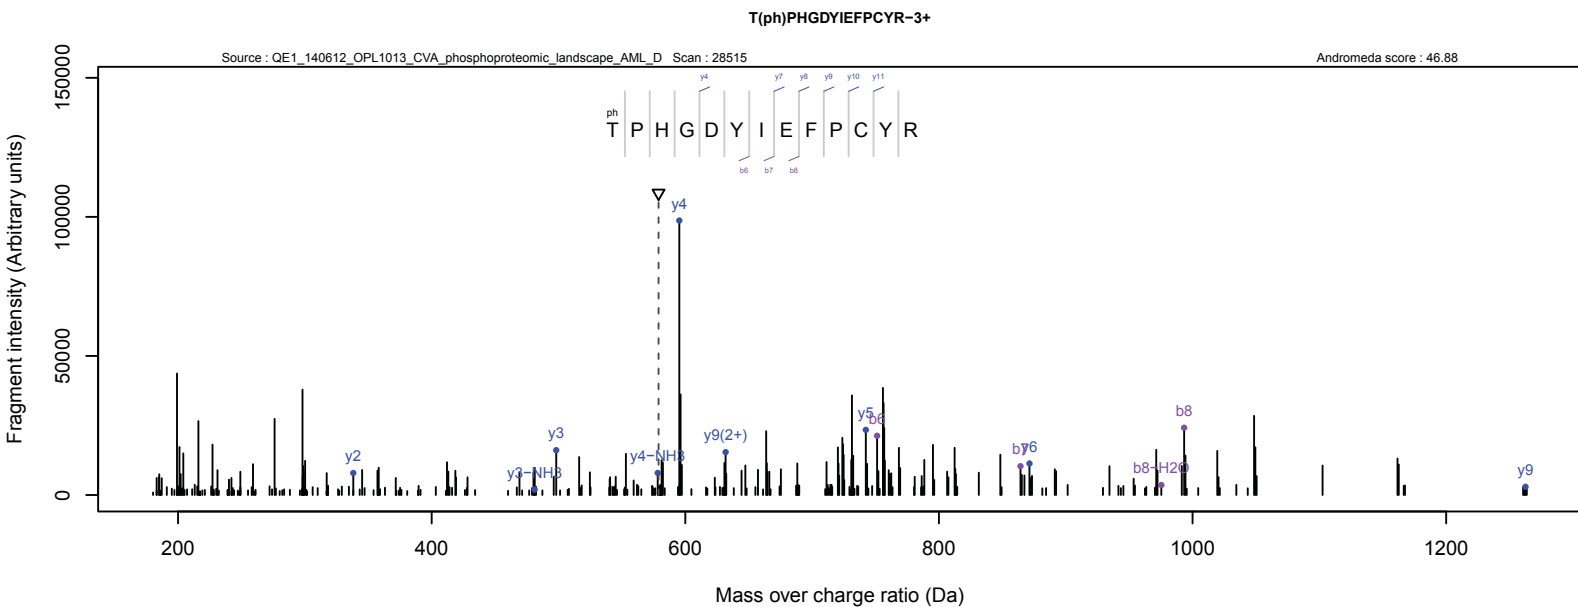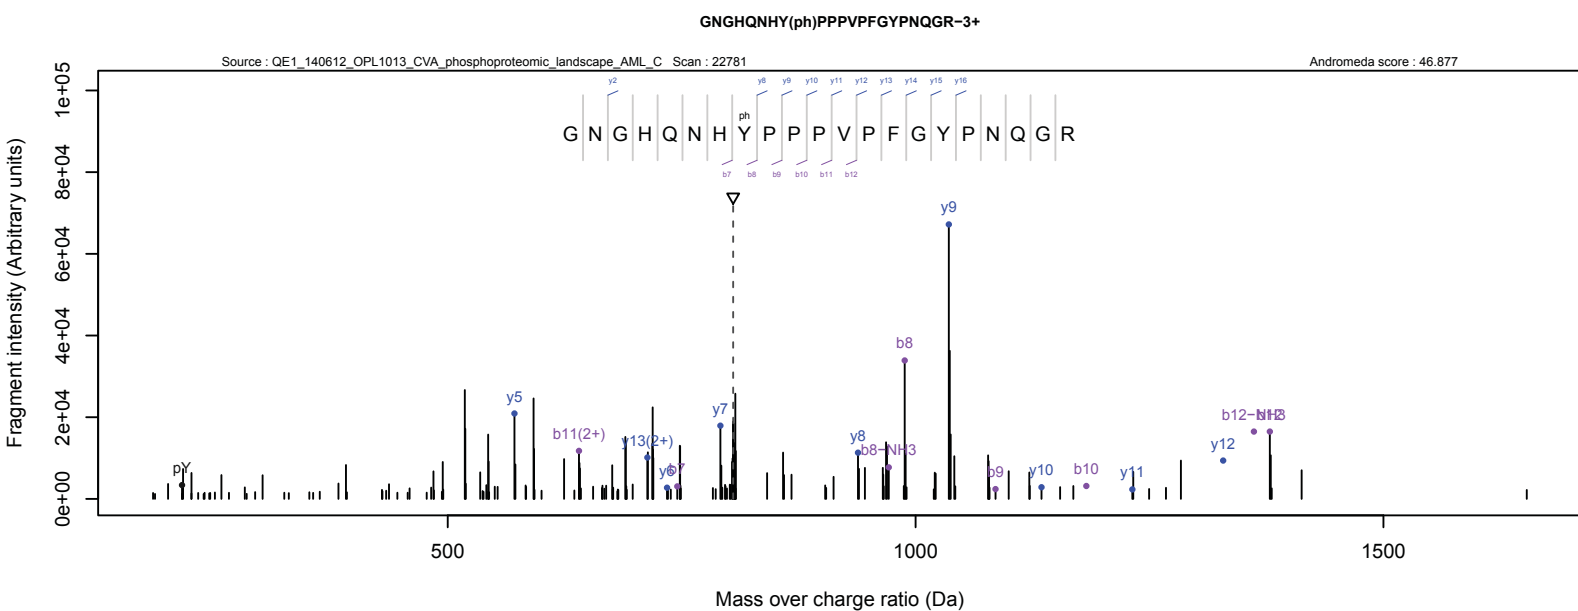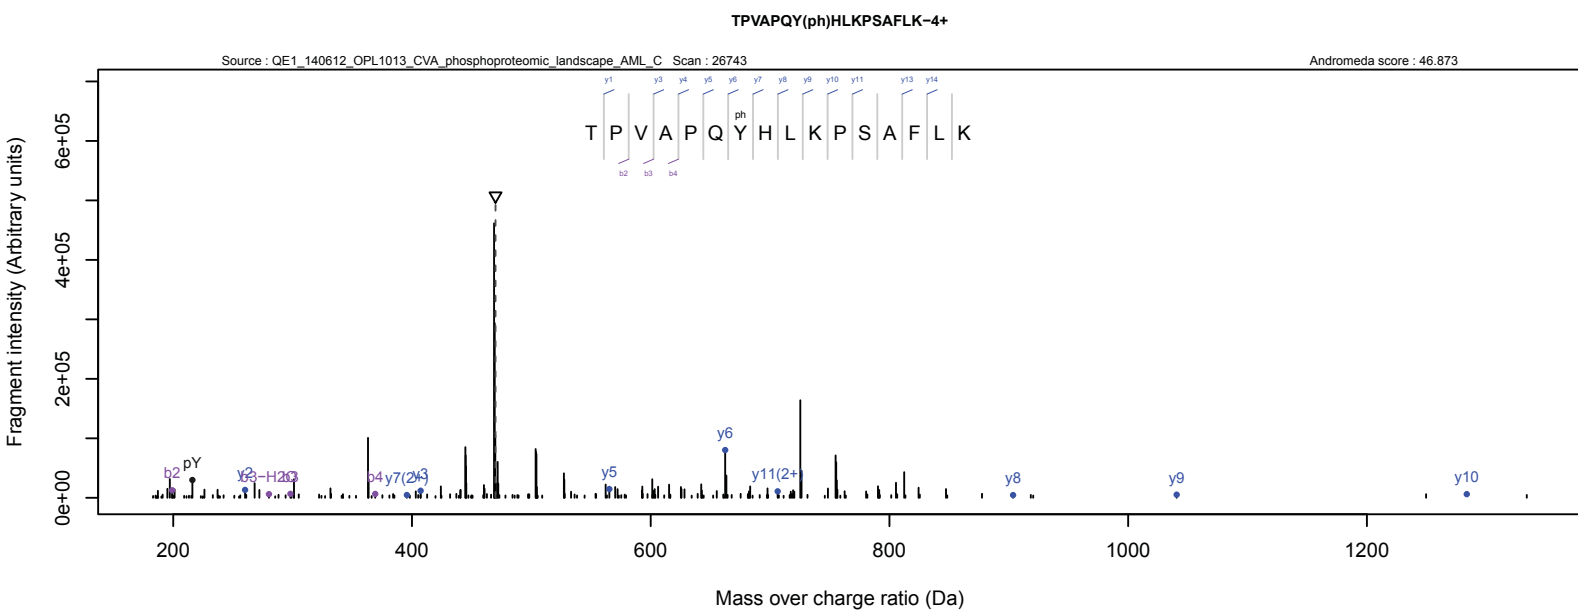

## DSNPY(ph)ATLPR-2+

Source: QE1\_140612\_OPL1013\_CVA\_phosphoproteomic\_landscape\_AML\_C Scan: 13278

Andromeda score: 46.844

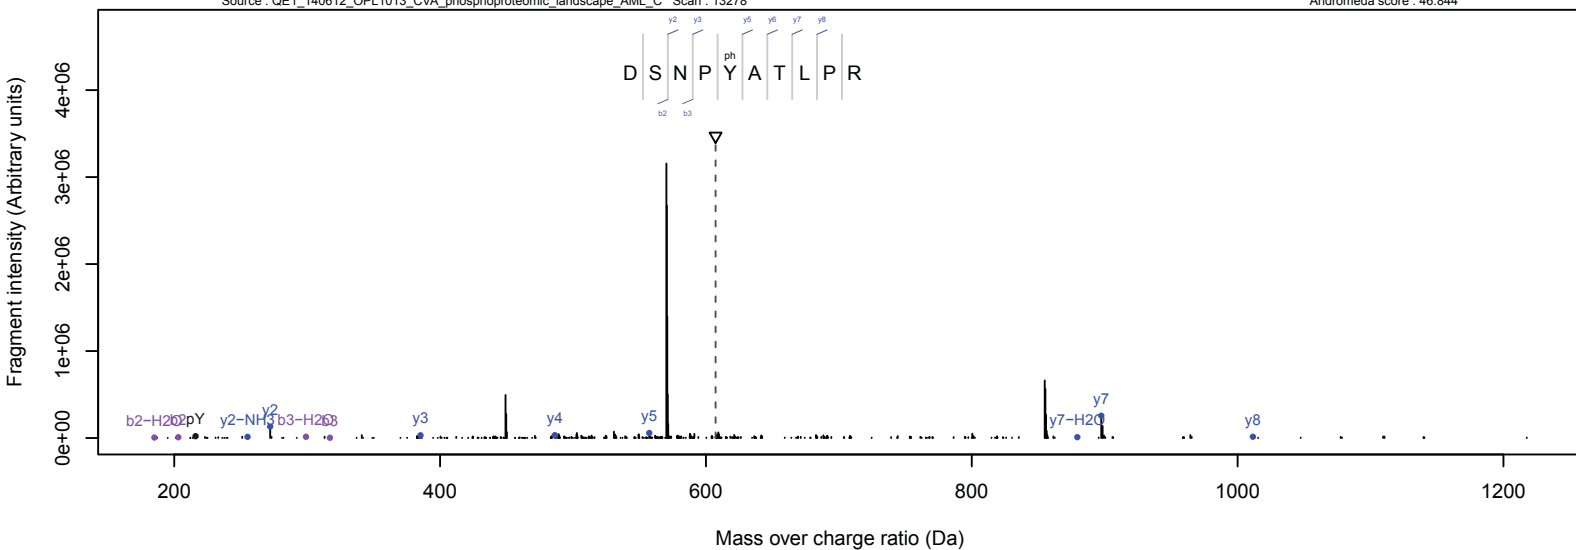

## Y(ph)GRAESPDLR-3+

Source: QE1\_140612\_OPL1013\_CVA\_phosphoproteomic\_landscape\_AML\_A Scan: 5704

Andromeda score: 46.844

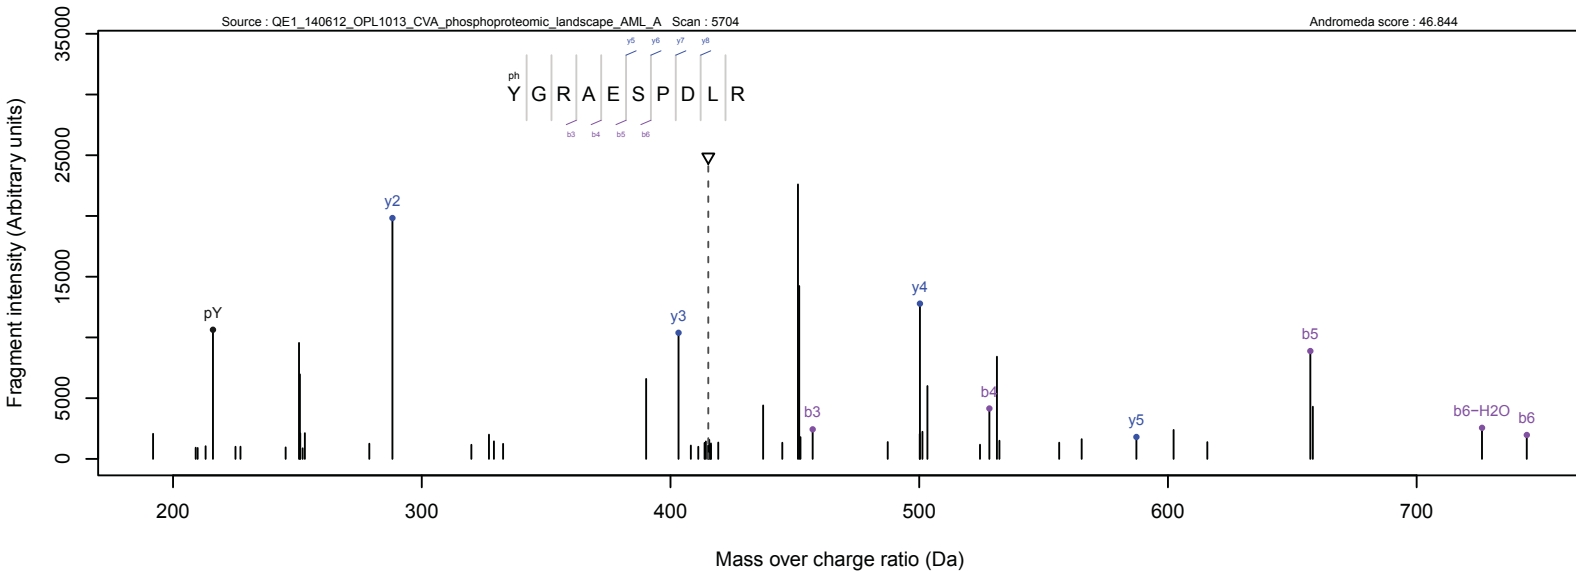

## M(ox)Y(ph)SYPAR-2+

Source: QE1\_140822\_OPL1013\_CvA\_pTyrIP\_AML\_cell\_lines\_part2\_B Scan: 4051

Andromeda score: 46.835

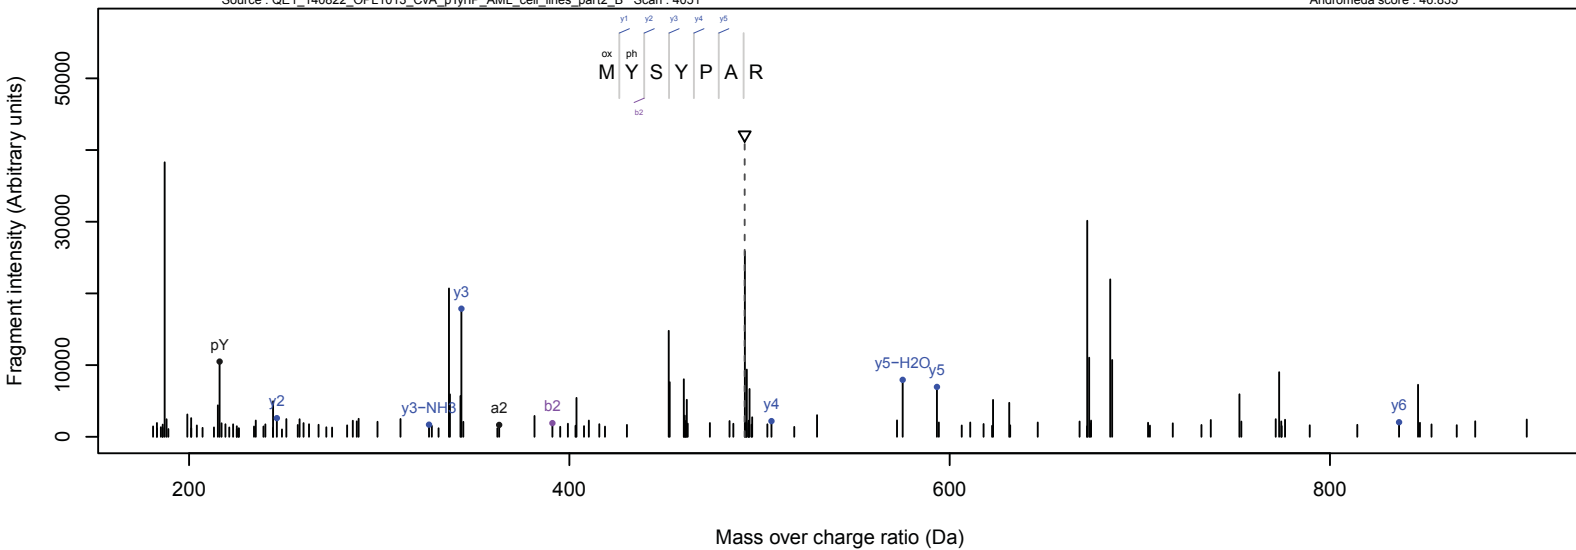

## HPLSY(ph)VAQR-2+

Source : QE1\_140908\_OPL1013\_CvA\_pTyrIP\_AML\_Kasumi6 Scan : 9986

Andromeda score : 46.819

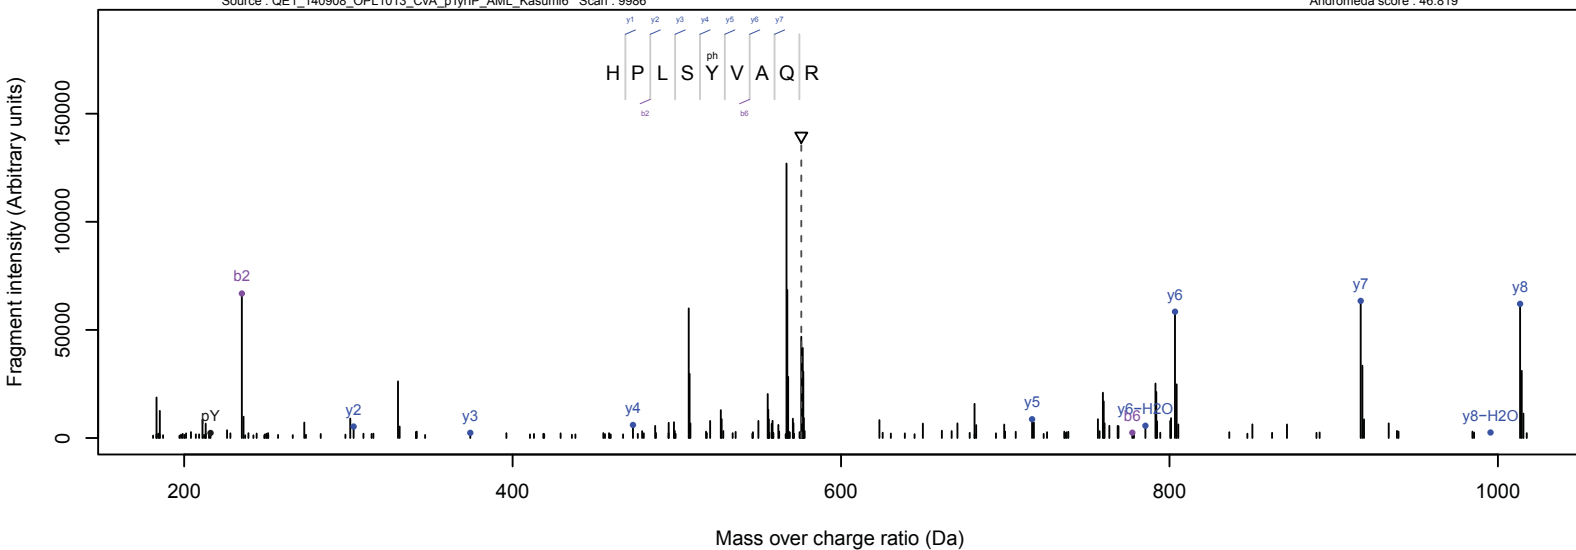

## INAQY(ph)LEVK-2+

Source : QE1\_140612\_OPL1013\_CVA\_phosphoproteomic\_landscape\_AML\_D Scan : 20637

Andromeda score : 46.819

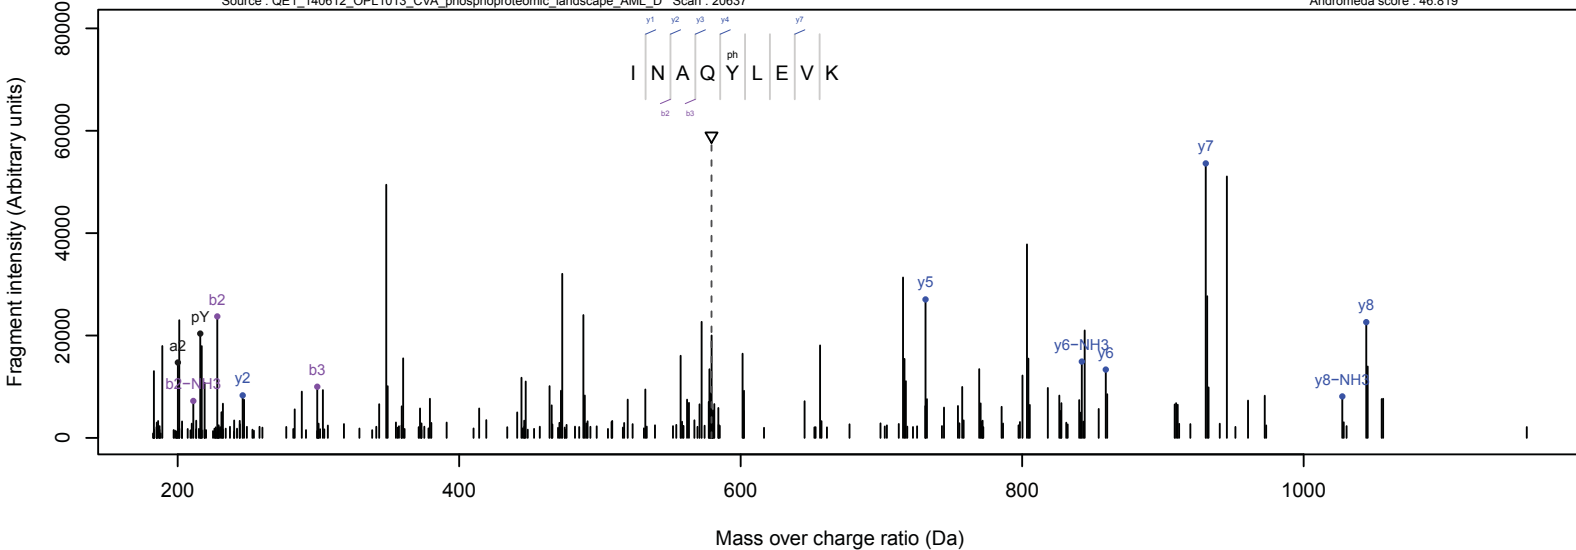

## YPHY(ph)FPLLK-3+

Source : QE1\_140612\_OPL1013\_CVA\_phosphoproteomic\_landscape\_AML\_A Scan : 27582

Andromeda score : 46.819

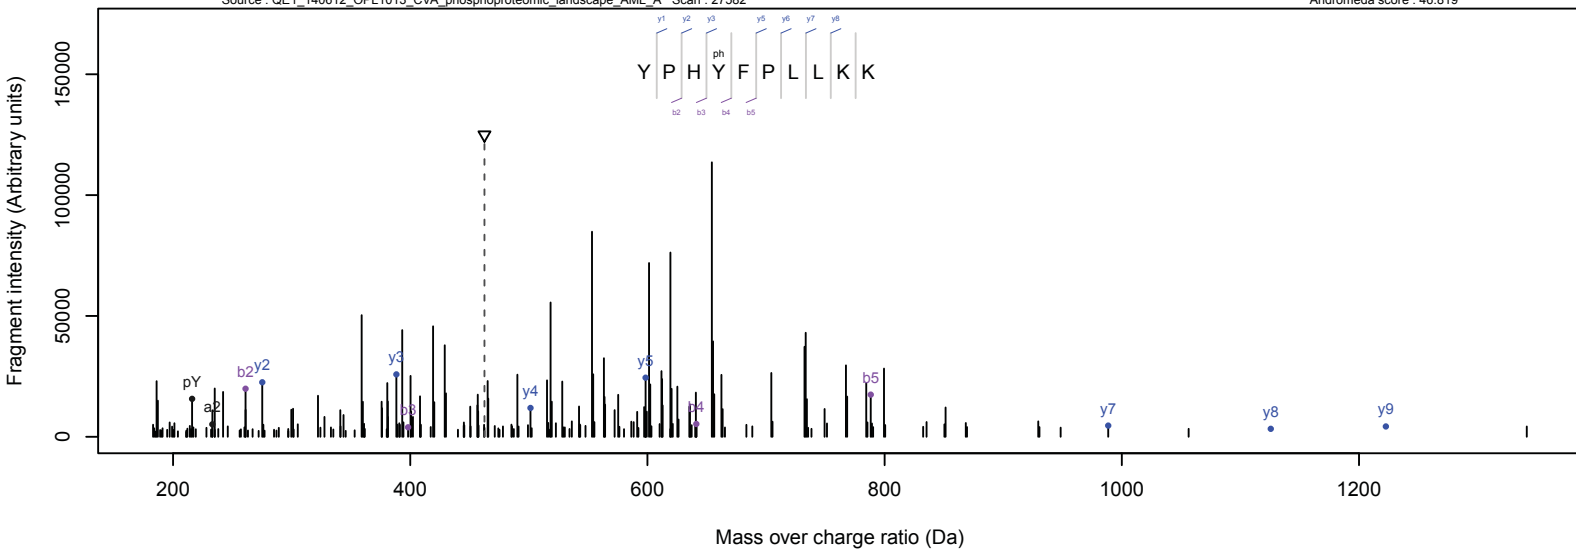

AGDNSQSVY(ph)IPM(ox)SPGAHHFDSLGY(ph)PSTTLPVHR-4+

Source: QE1\_140908\_OPL1013\_CVA\_pTyrIP\_AML\_Kasumi6 Scan: 35107

Andromeda score: 46.804

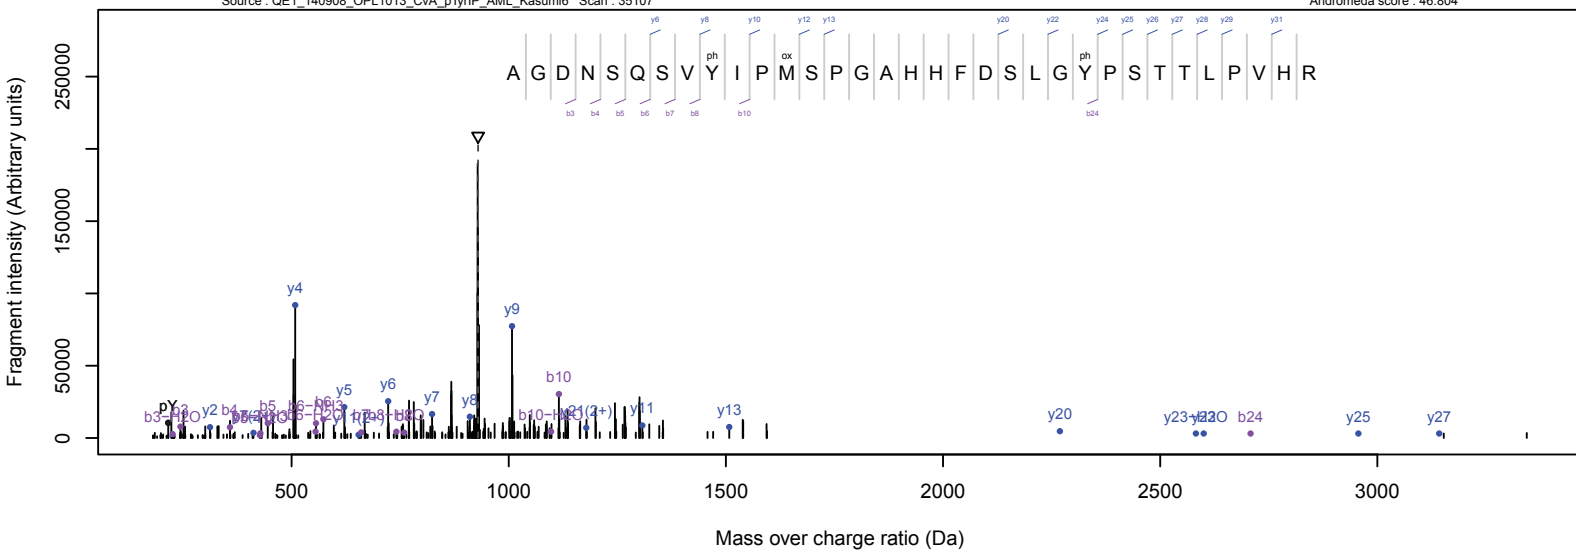

CGGIQY(ph)LQNAIESR-3+

Source: QE1\_140612\_OPL1013\_CVA\_phosphoproteomic\_landscape\_AML\_C Scan: 35483

Andromeda score: 46.797

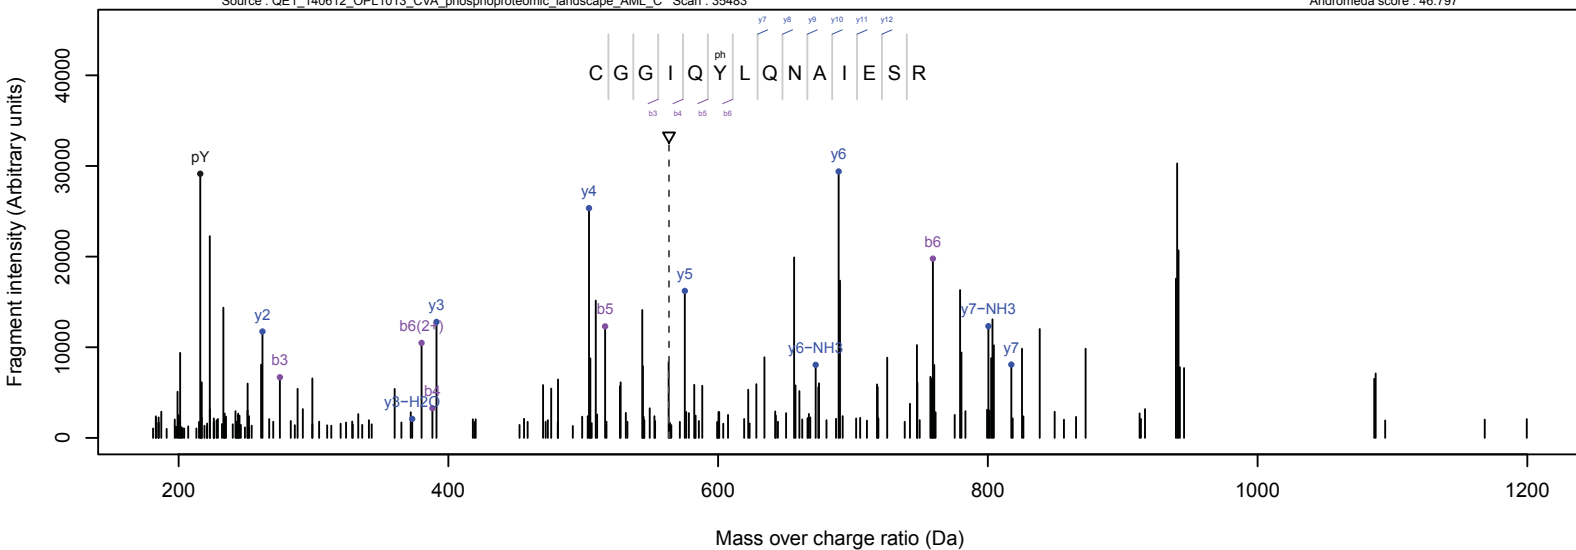

SQDPNPQY(ph)SPIIK-2+

Source: QE1\_140612\_OPL1013\_CVA\_phosphoproteomic\_landscape\_AML\_C Scan: 17257

Andromeda score: 46.797

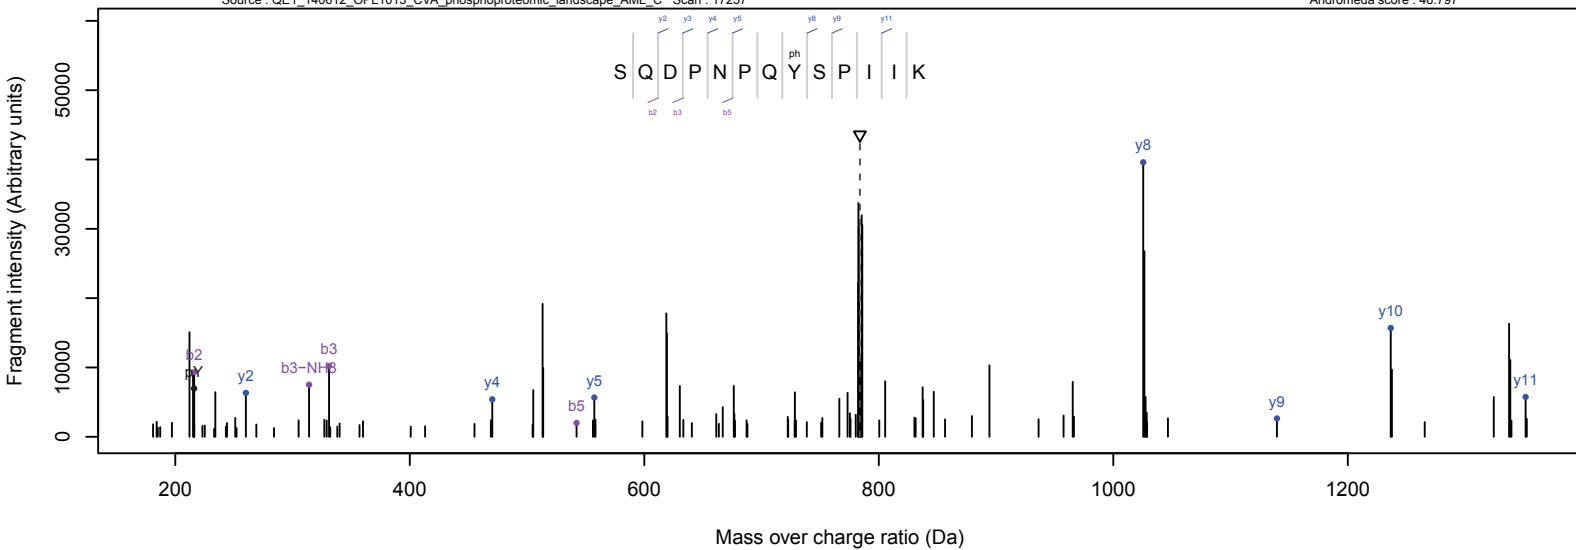



QM(ox)NY(ph)SSLPEK-2+

Source : QE1\_140908\_OPL1013\_CVA\_pTyrIP\_AML\_Kasumi1 Scan : 6652

Andromeda score : 46.796

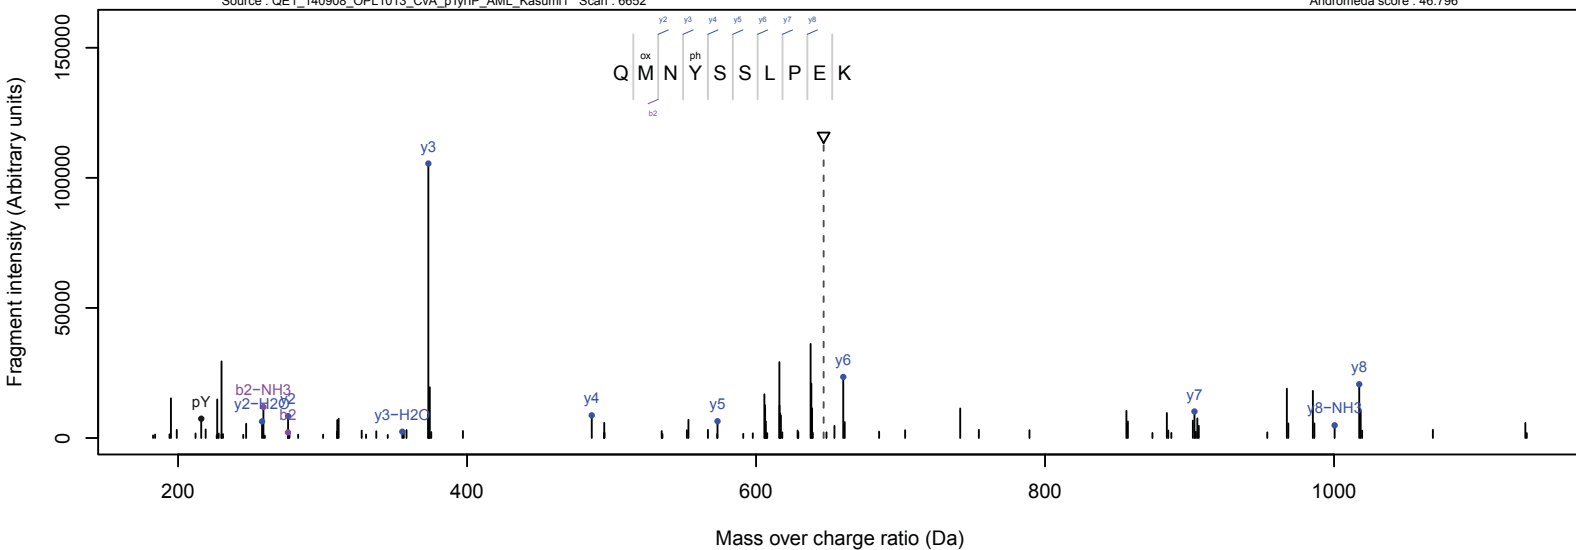

QPYY(ph)YPPFDK-2+

Source : QE1\_140612\_OPL1013\_CVA\_phosphoproteomic\_landscape\_AML\_A Scan : 27174

Andromeda score : 46.796

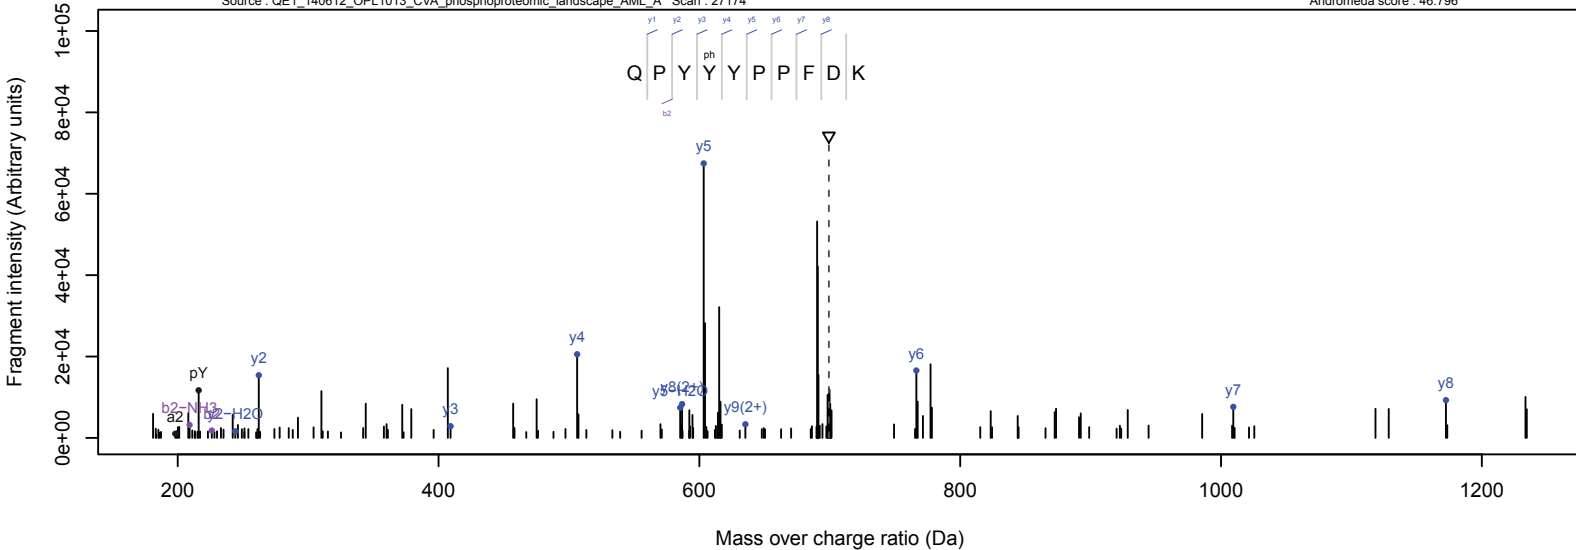

VLPY(ph)SNITVR-2+

Source : QE1\_140612\_OPL1013\_CVA\_phosphoproteomic\_landscape\_AML\_B Scan : 22839

Andromeda score : 46.796

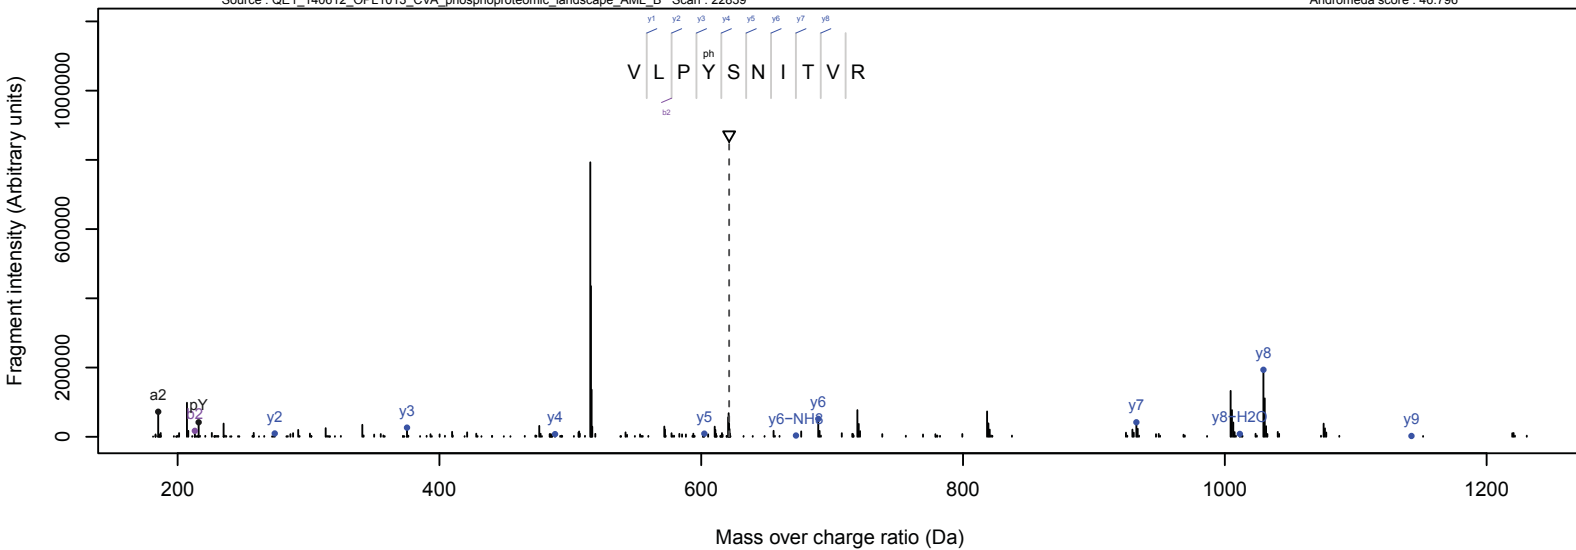

RPETPSSGLDEEGAVPVLANGHAPY<sup>ph</sup>SR-4+

Source : QE1\_140612\_OPL1013\_CVA\_phosphoproteomic\_landscape\_AML\_C Scan : 28605

Andromeda score : 46.709

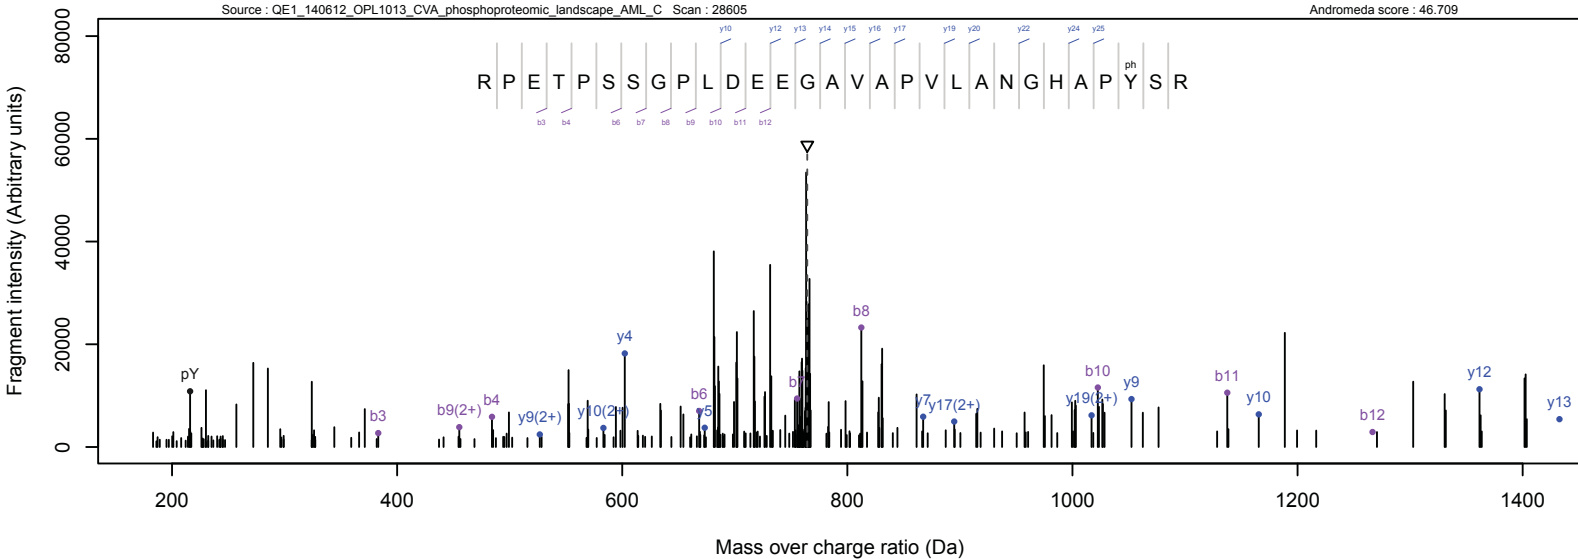

GY<sup>ph</sup>LGPEQLPDCLK-2+

Source : QE1\_140908\_OPL1013\_CvA\_pTyrIP\_AML\_Kasumi6 Scan : 35076

Andromeda score : 46.704

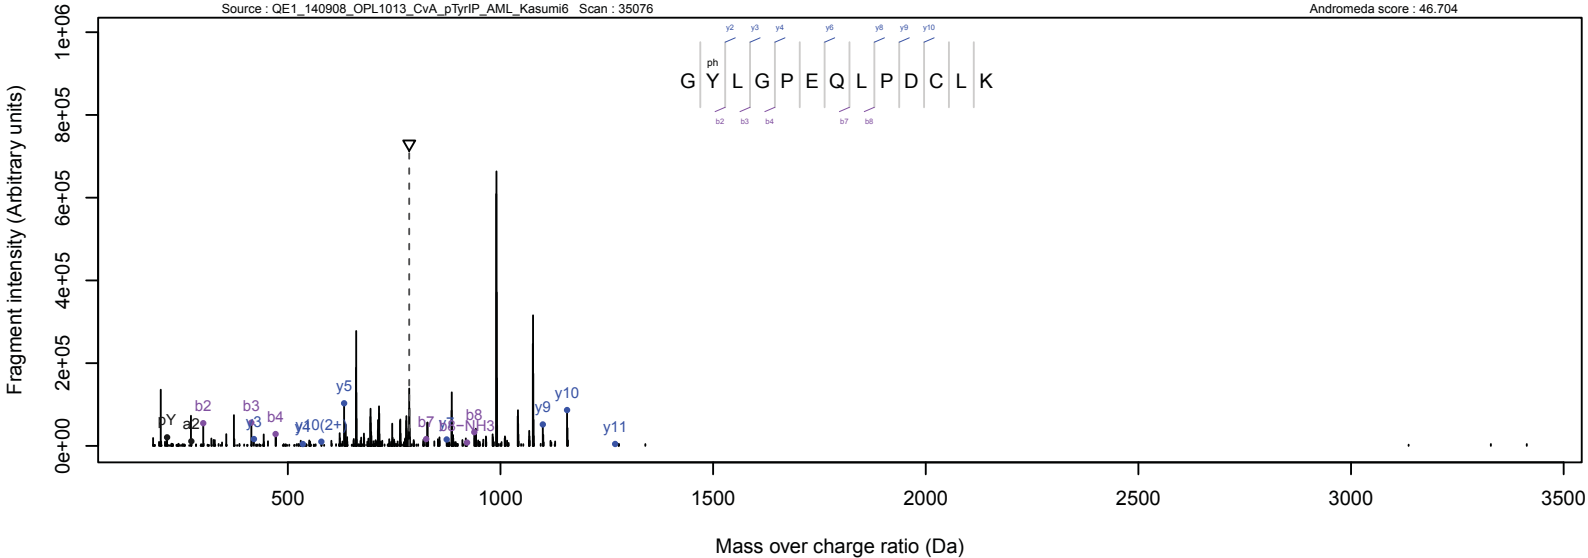

LMNEDPMSMY<sup>ph</sup>AK-2+

Source : QE1\_140612\_OPL1013\_CVA\_phosphoproteomic\_landscape\_AML\_C Scan : 27772

Andromeda score : 46.704

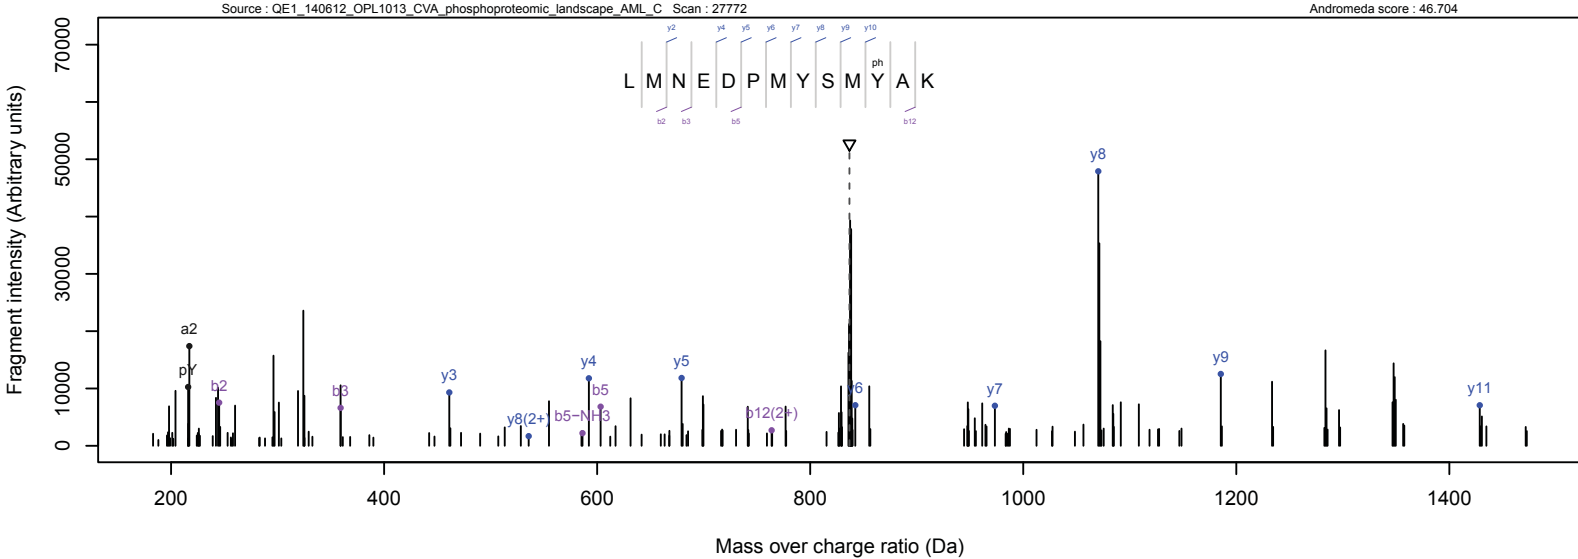

HNPTVTGHQEQT<sup>(ph)</sup>LQK-3+

Source : QE1\_140908\_OPL1013\_CvA\_pTyrIP\_AML\_HEL Scan : 7884

Andromeda score : 46.701

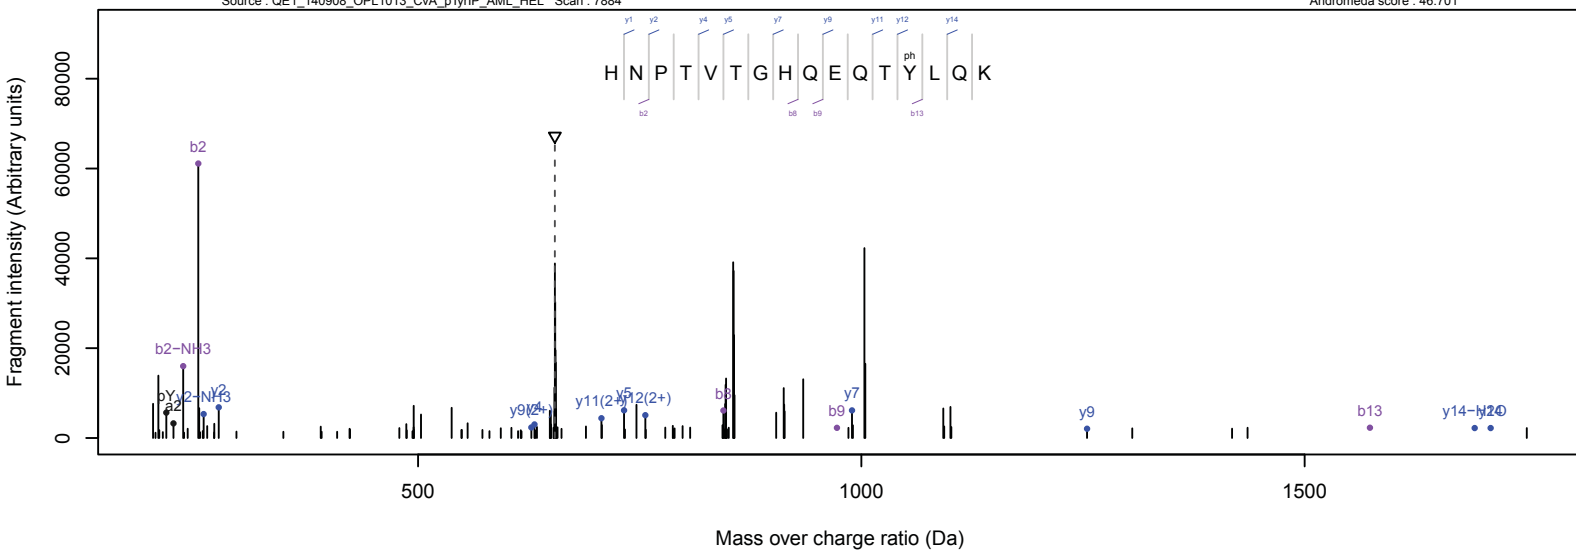

LQELGGTLEYR<sup>(ph)</sup>VTFR-3+

Source : QE1\_140612\_OPL1013\_CVA\_phosphoproteomic\_landscape\_AML\_A Scan : 33574

Andromeda score : 46.68

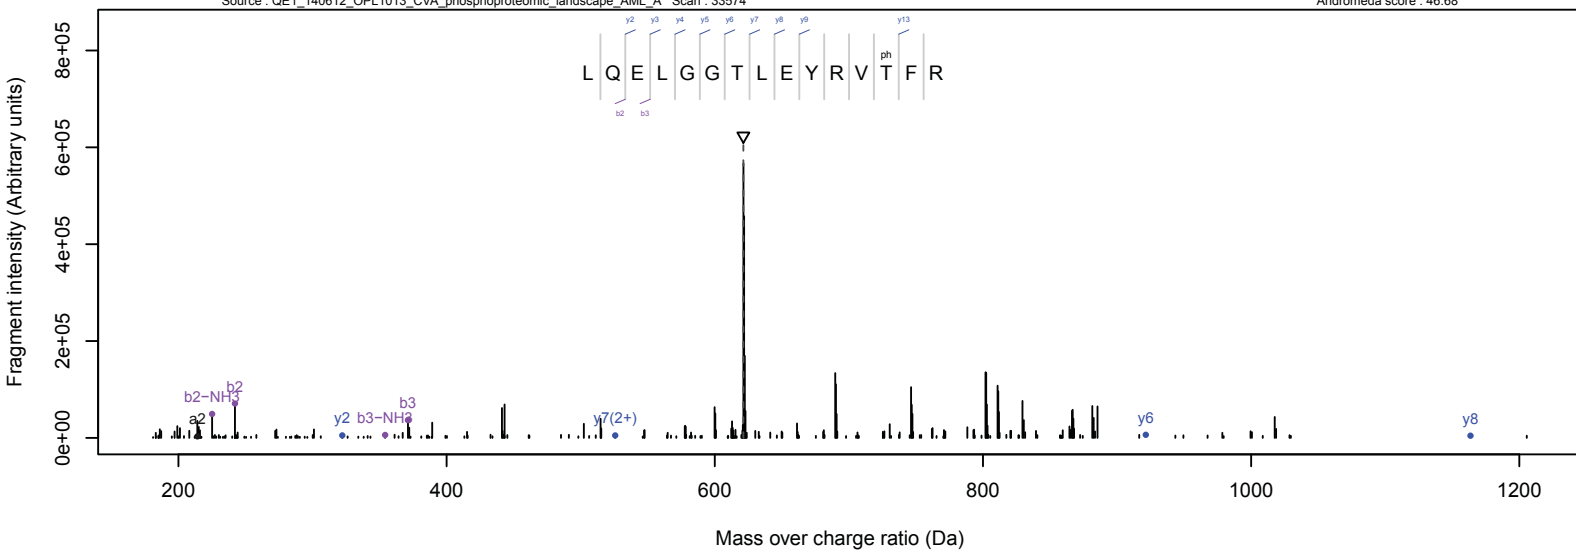

TGIDNPMFDTEEGIVLES<sup>(ph)</sup>PHYAVK-3+

Source : QE1\_140612\_OPL1013\_CVA\_phosphoproteomic\_landscape\_AML\_C Scan : 43306

Andromeda score : 46.558

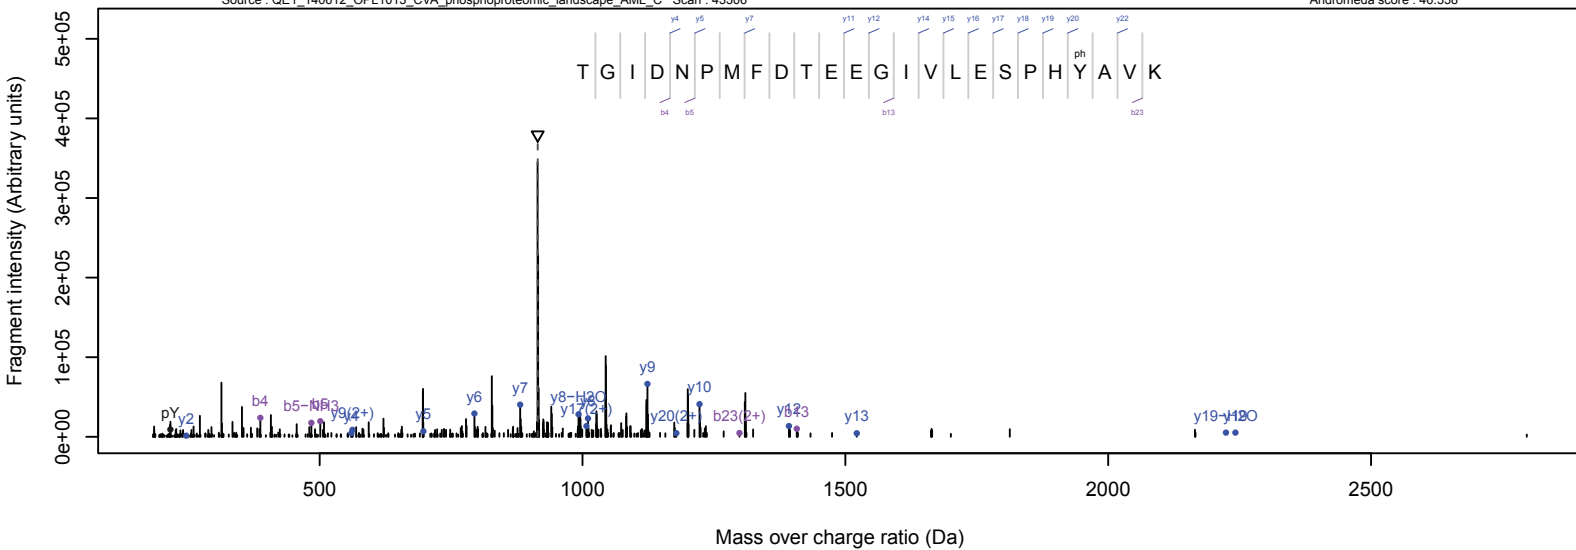



## VTNILDPSY(ph)HIPPLRER-3+

Source : QE1\_140612\_OPL1013\_CVA\_phosphoproteomic\_landscape\_AML\_C Scan : 34216

Andromeda score : 46.543

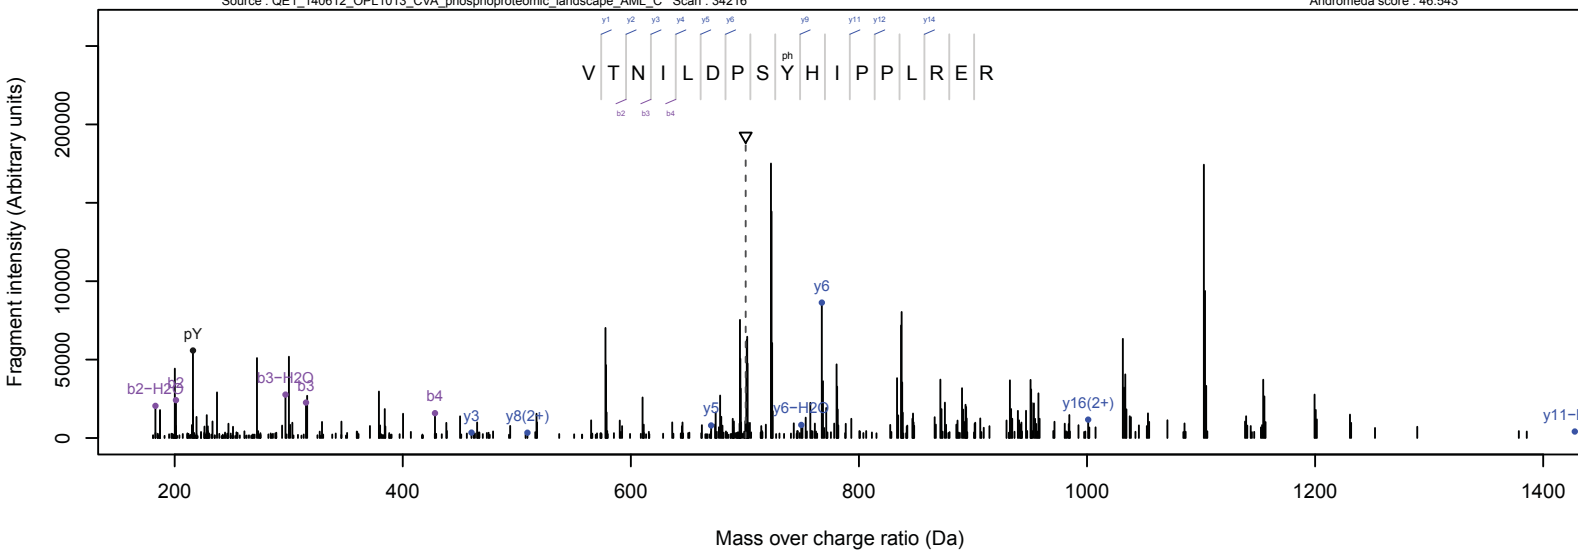

## FVPY(ph)LIAGIQHSCQDIGAK-3+

Source : QE1\_140908\_OPL1013\_CvA\_pTyrIP\_AML\_HEL Scan : 41742

Andromeda score : 46.494

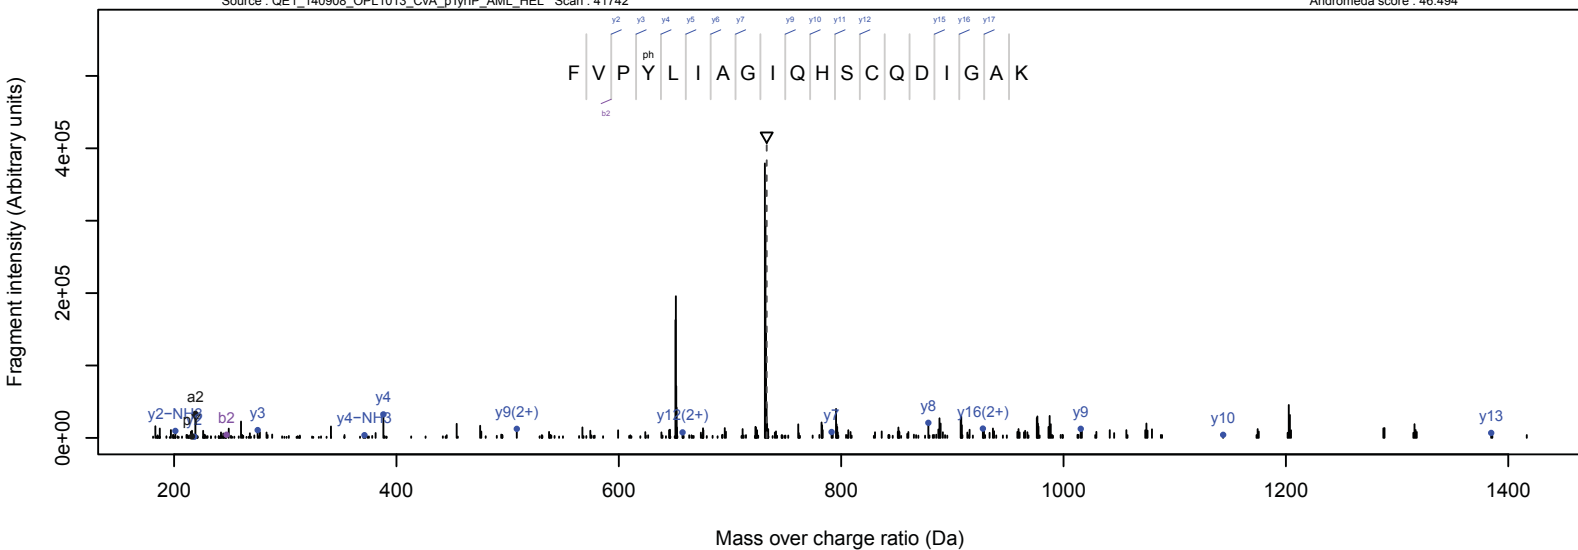

## GCEEDKNLPS(ph)GYRPARSR-3+

Source : QE1\_140612\_OPL1013\_CVA\_phosphoproteomic\_landscape\_AML\_C Scan : 11381

Andromeda score : 46.494

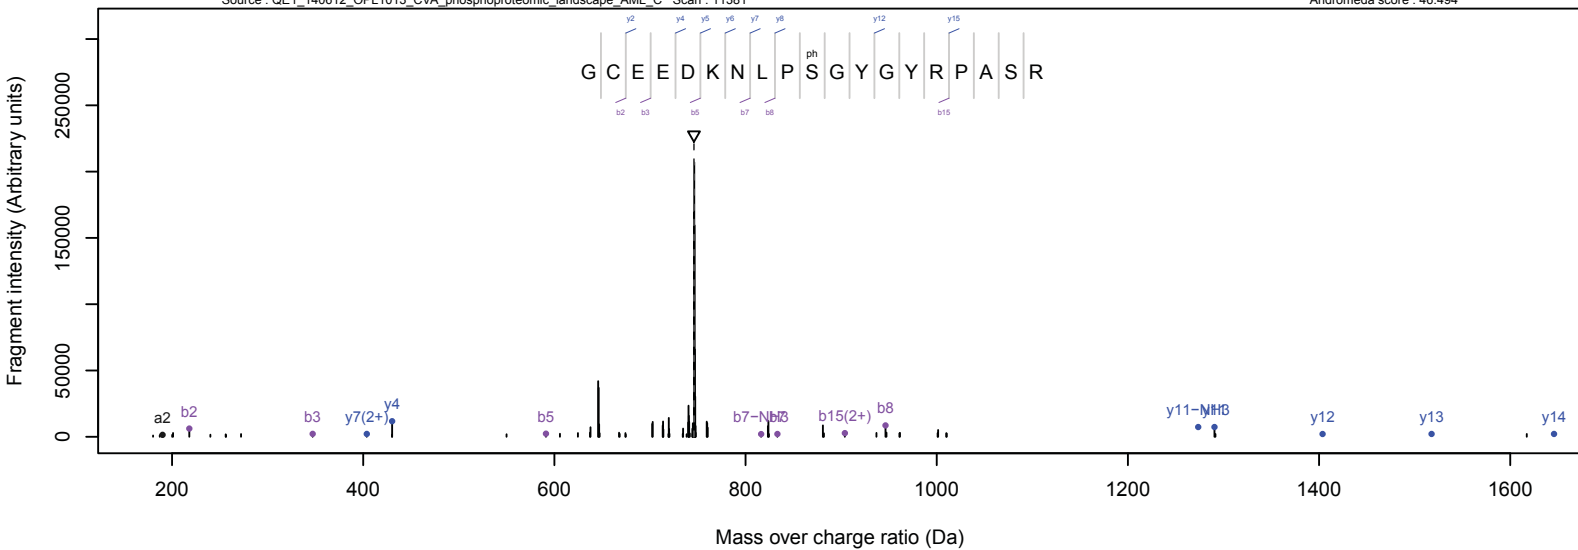

SFQPLGPGY(ph)GISQSSR-2+

Source : QE1\_140612\_OPL1013\_CVA\_phosphoproteomic\_landscape\_AML\_C Scan : 27328

Andromeda score : 46.494

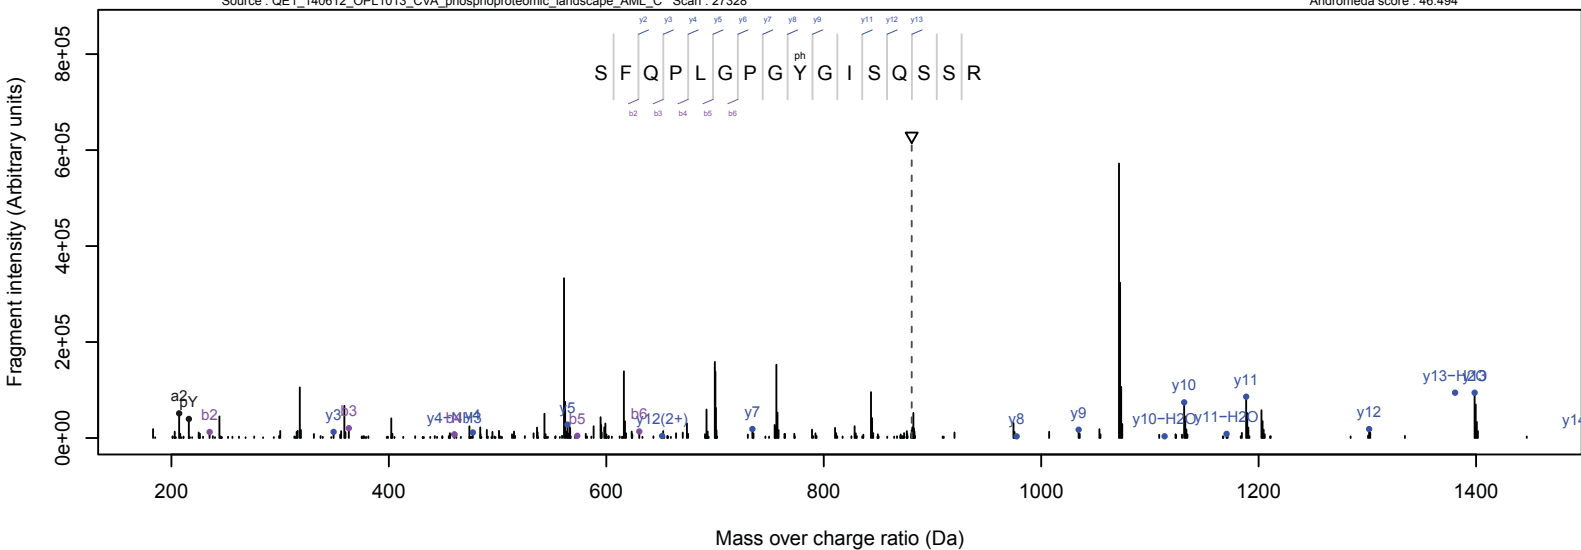

QY(ph)MFSSLK-2+

Source : QE1\_140612\_OPL1013\_CVA\_phosphoproteomic\_landscape\_AML\_B Scan : 23182

Andromeda score : 46.462

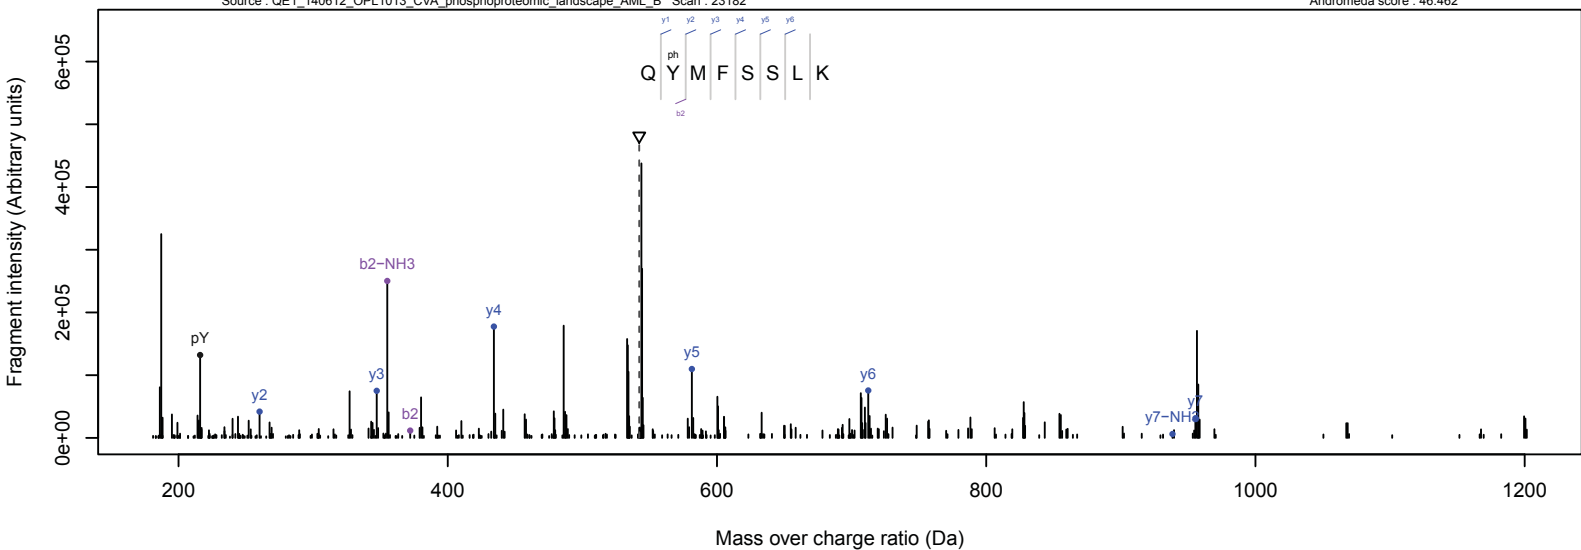

Y(ph)IMGYISK-2+

Source : QE1\_140612\_OPL1013\_CVA\_phosphoproteomic\_landscape\_AML\_C Scan : 22886

Andromeda score : 46.462

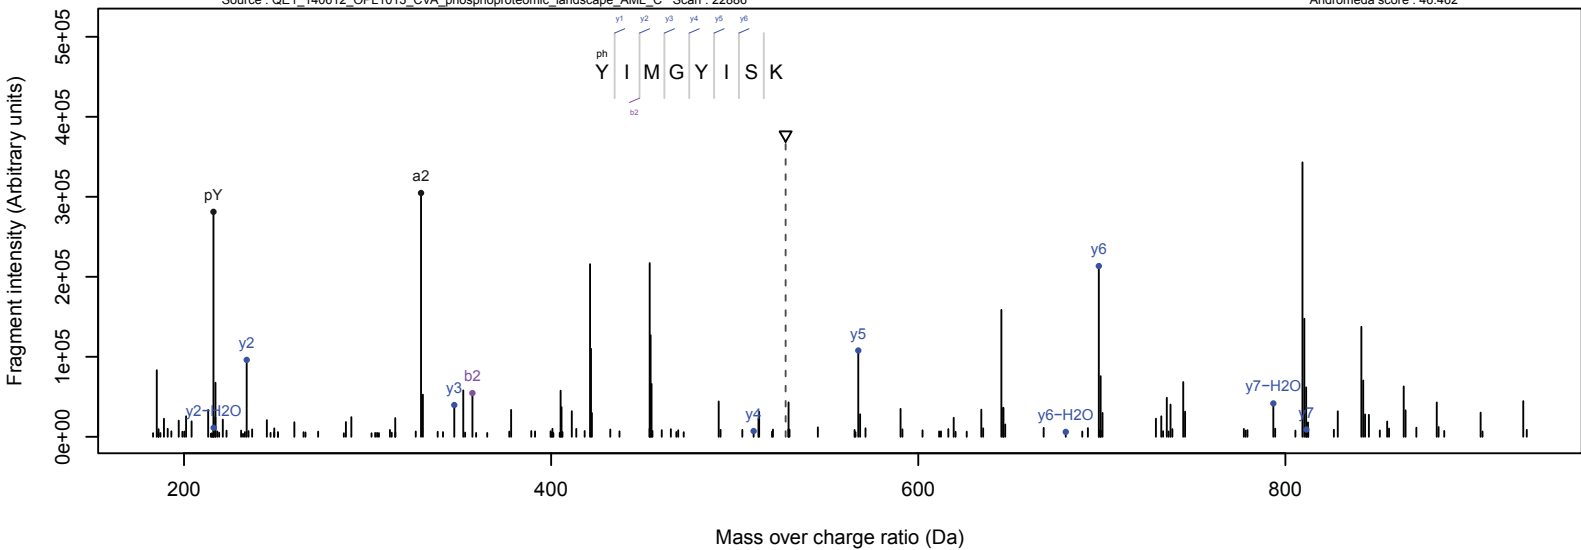

Y(ph)IYYLITK-2+

Source : QE1\_140612\_OPL1013\_CVA\_phosphoproteomic\_landscape\_AML\_D Scan : 33662

Andromeda score : 46.462

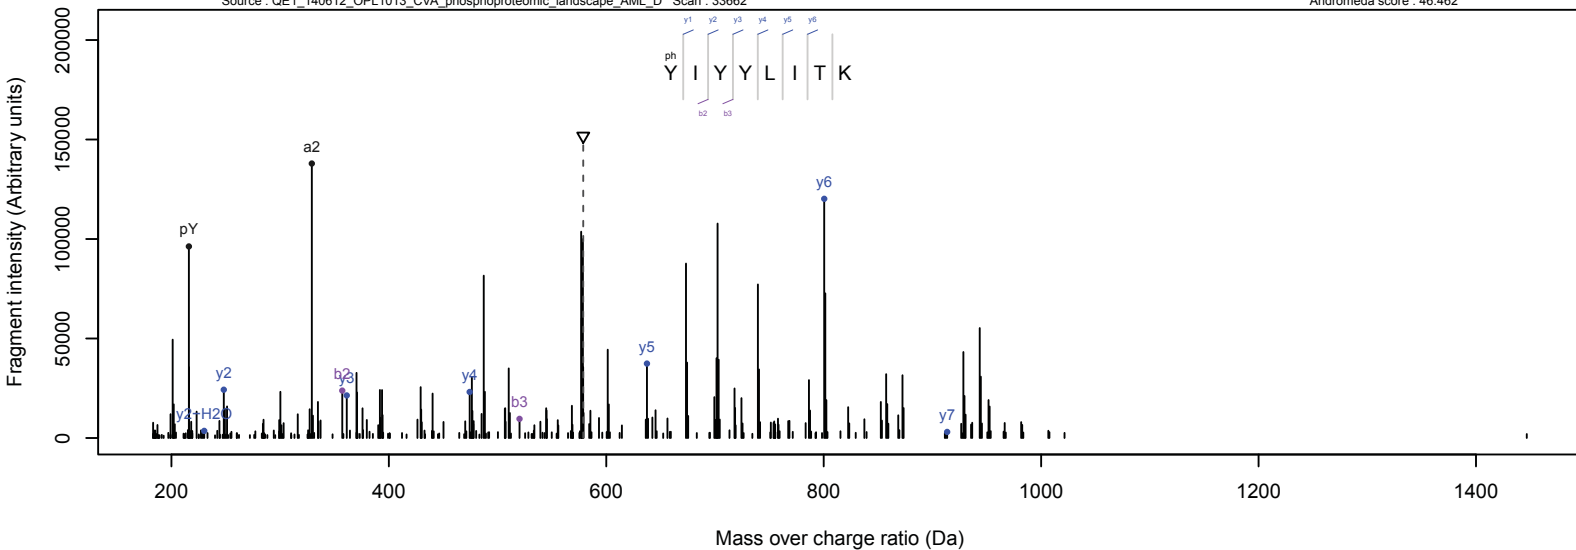

DQEKP(ph)FSSFDGASTNR-3+

Source : QE1\_140612\_OPL1013\_CVA\_phosphoproteomic\_landscape\_AML\_C Scan : 20990

Andromeda score : 46.461

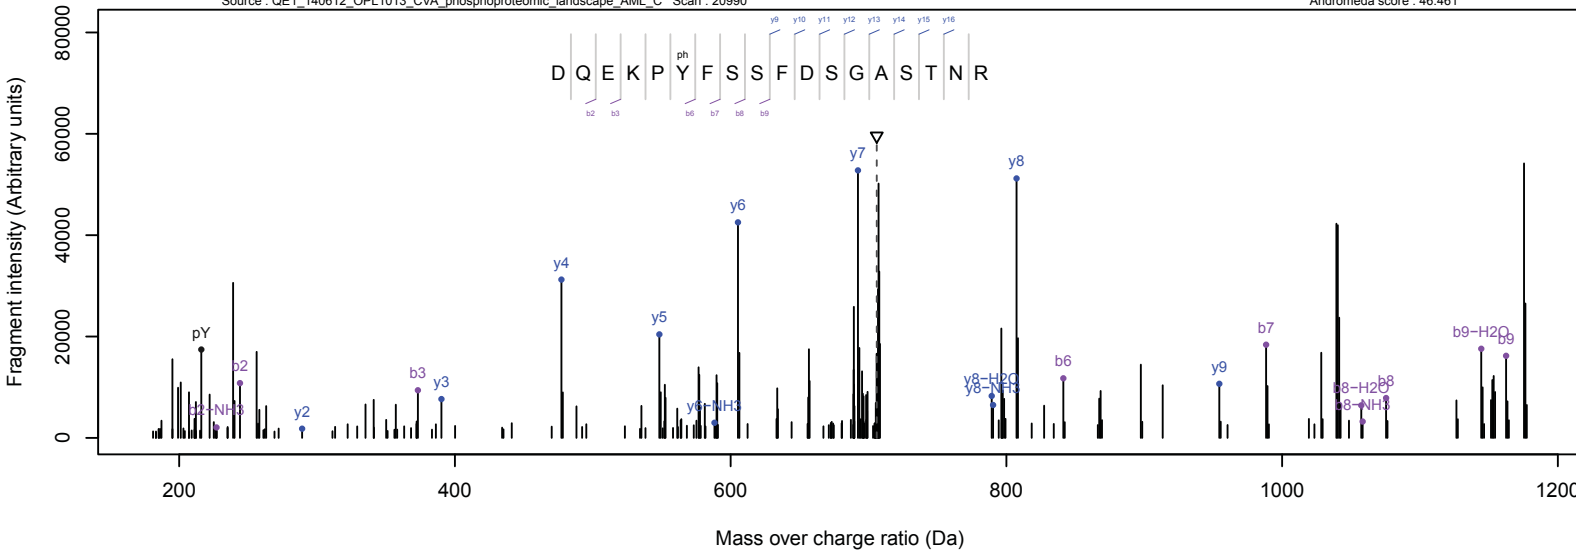

Y(ph)QHISFMPTLHCVMHNGAQK-4+

Source : QE1\_140612\_OPL1013\_CVA\_phosphoproteomic\_landscape\_AML\_B Scan : 30261

Andromeda score : 46.461

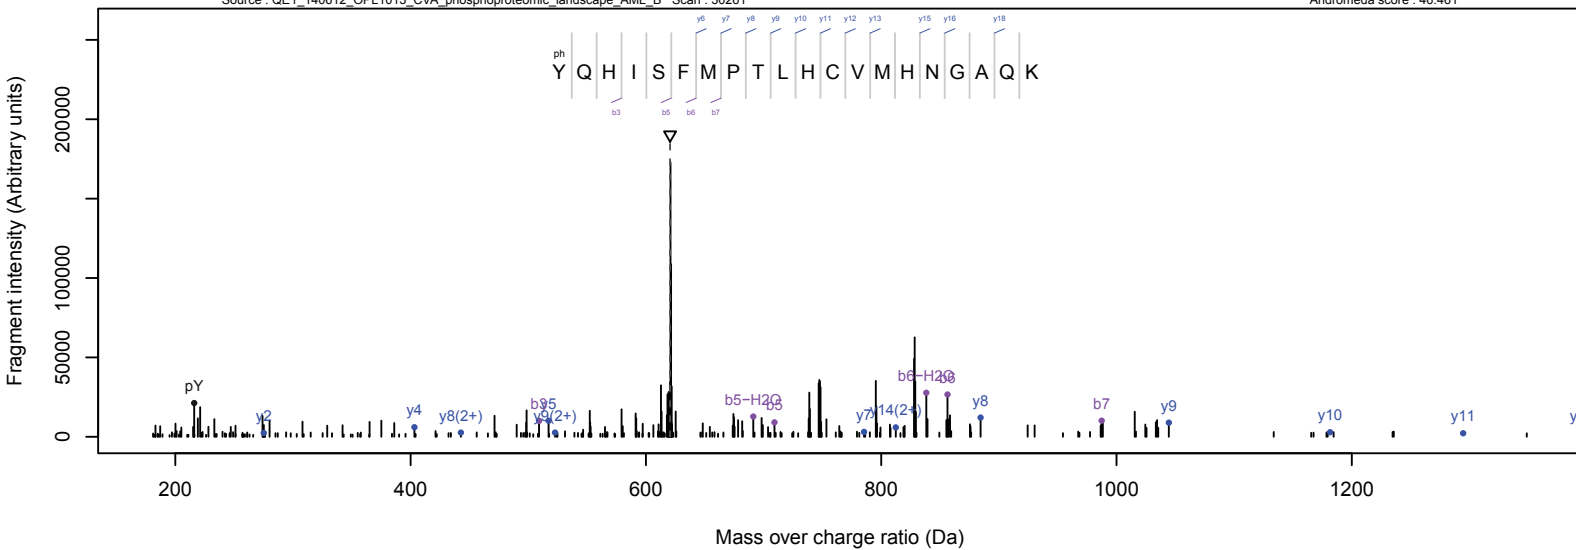

## Y(ph)GDF FIR-2+

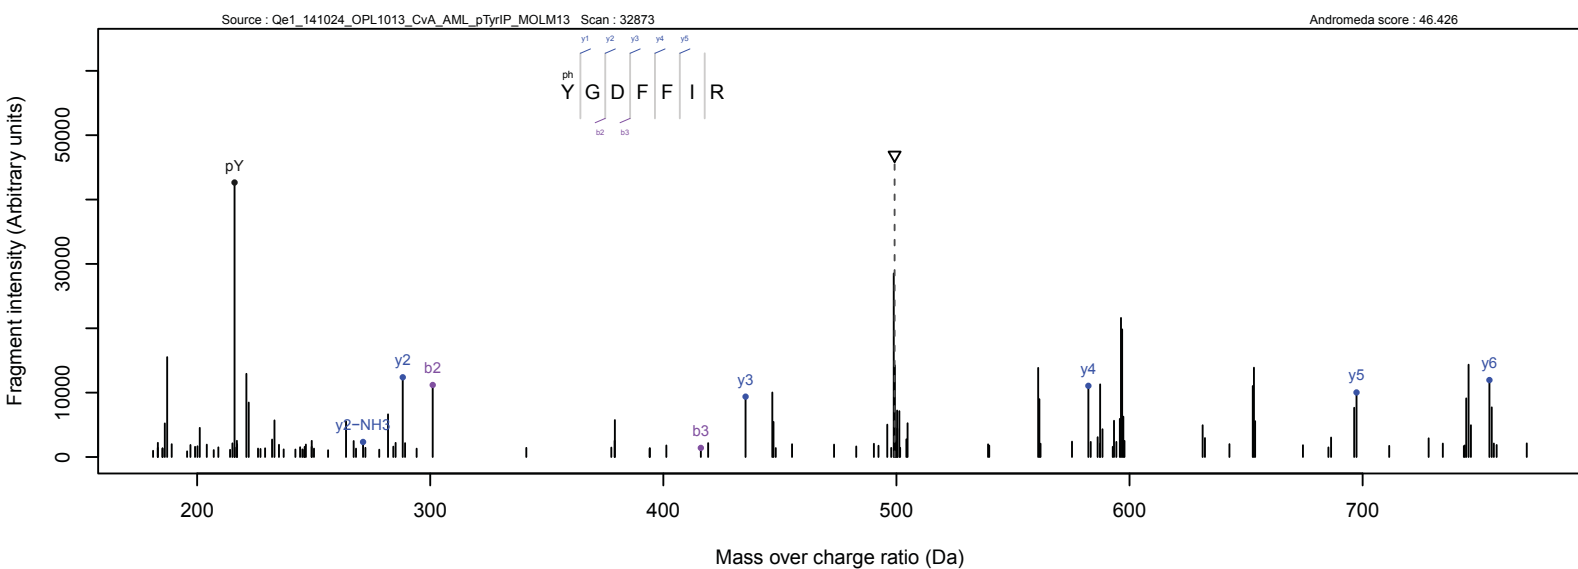

## Y(ph)YFEGIK-2+

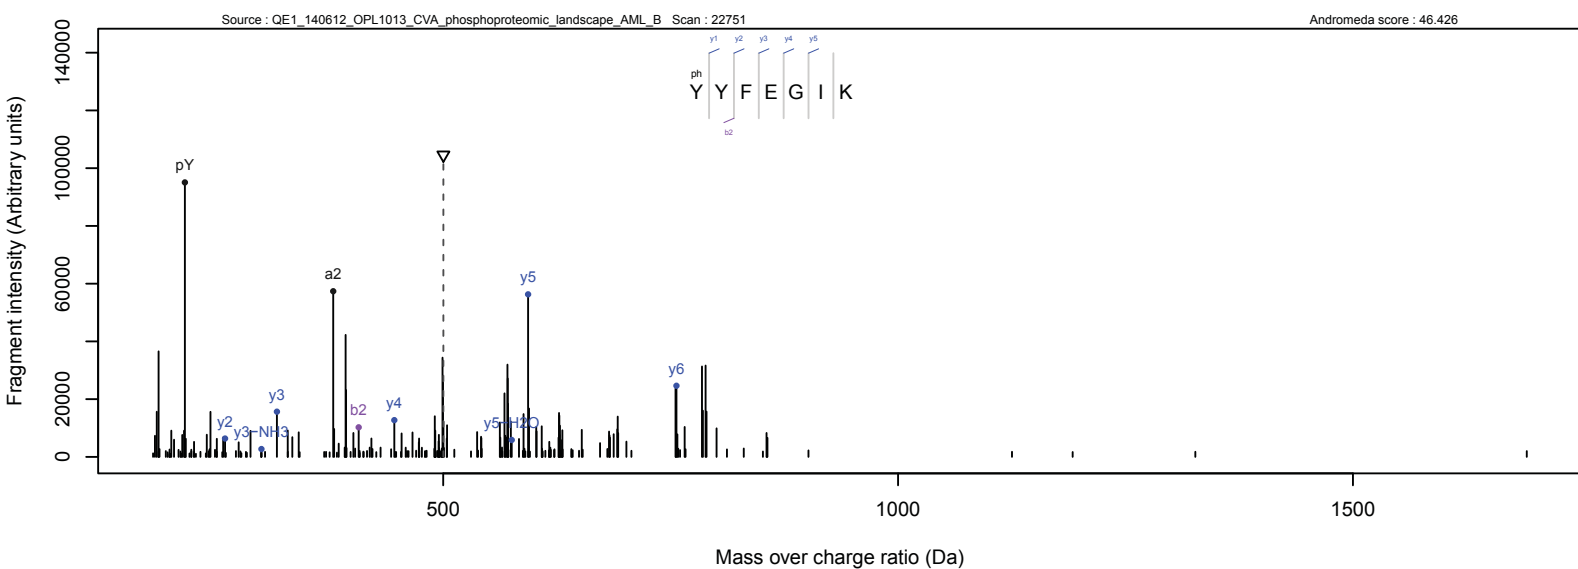

## SSPY(ph)GTLKPEEMSGPGLAEPK-3+

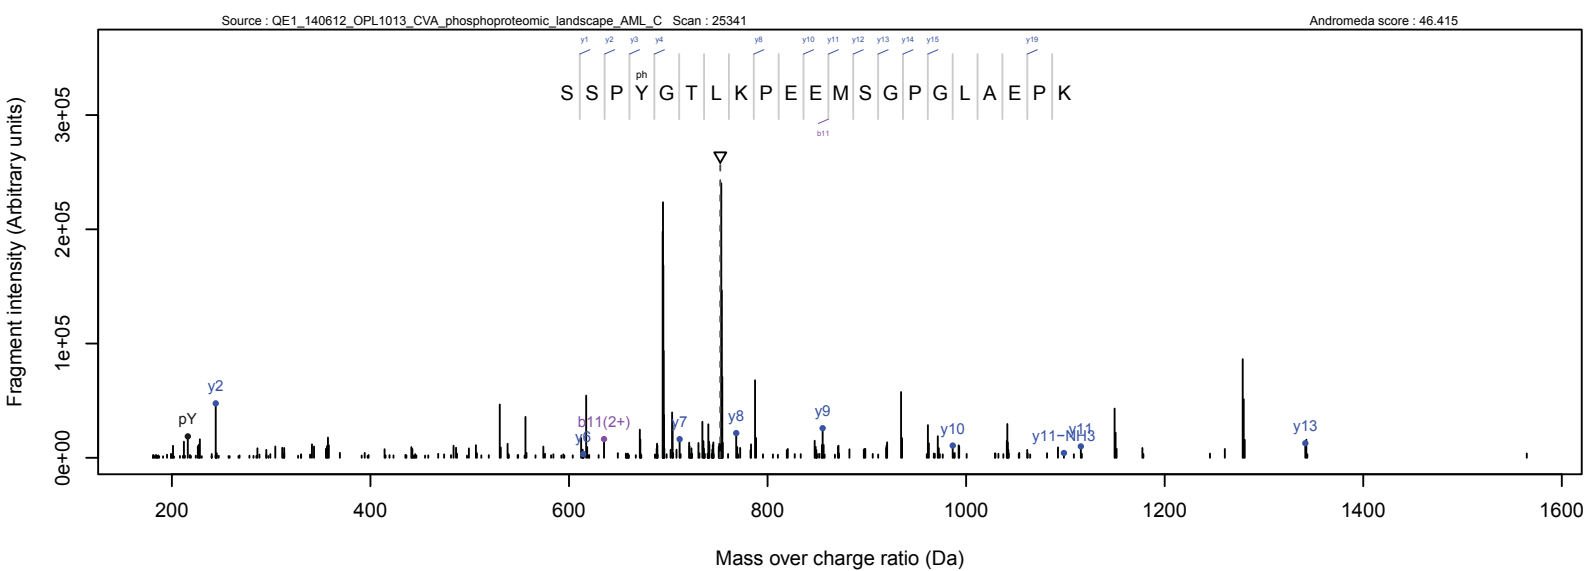





**KPDLQVY(ph)LPR-3+**

Source : QE1\_140612\_OPL1013\_CVA\_phosphoproteomic\_landscape\_AML\_C Scan : 25906

Andromeda score : 46.352

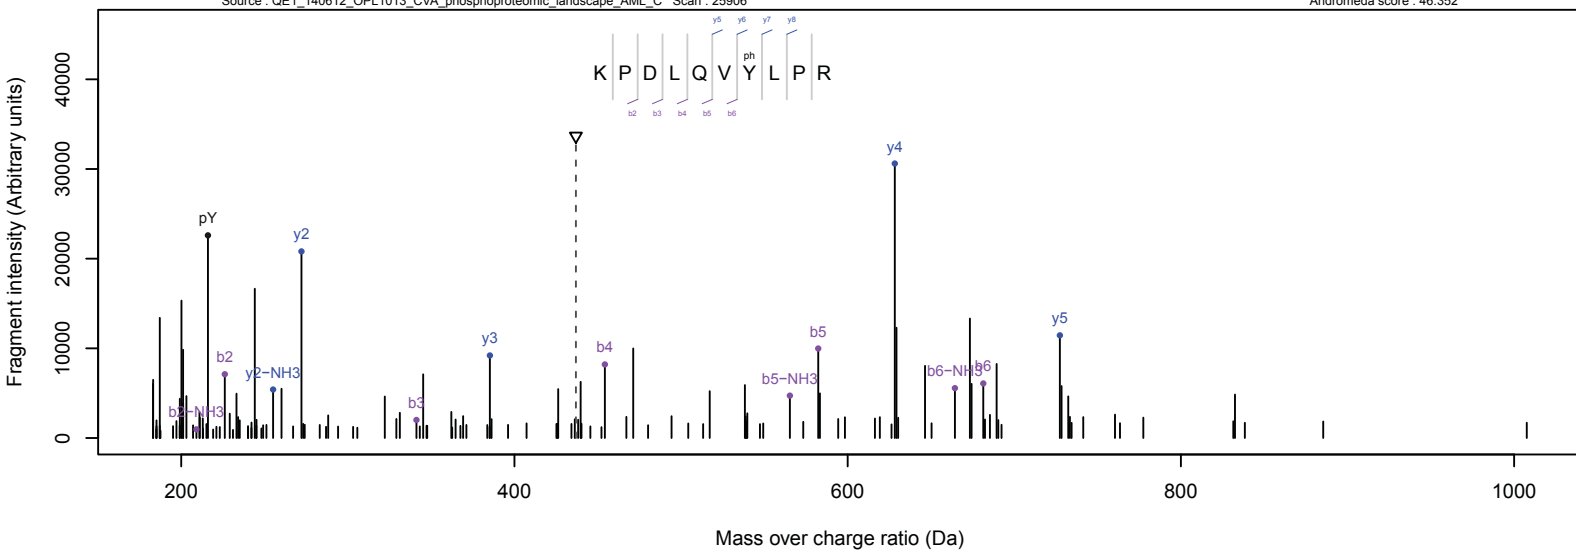

**TKQTLGYHVY(ph)PTCR-3+**

Source : QE1\_140612\_OPL1013\_CVA\_phosphoproteomic\_landscape\_AML\_B Scan : 12743

Andromeda score : 46.318

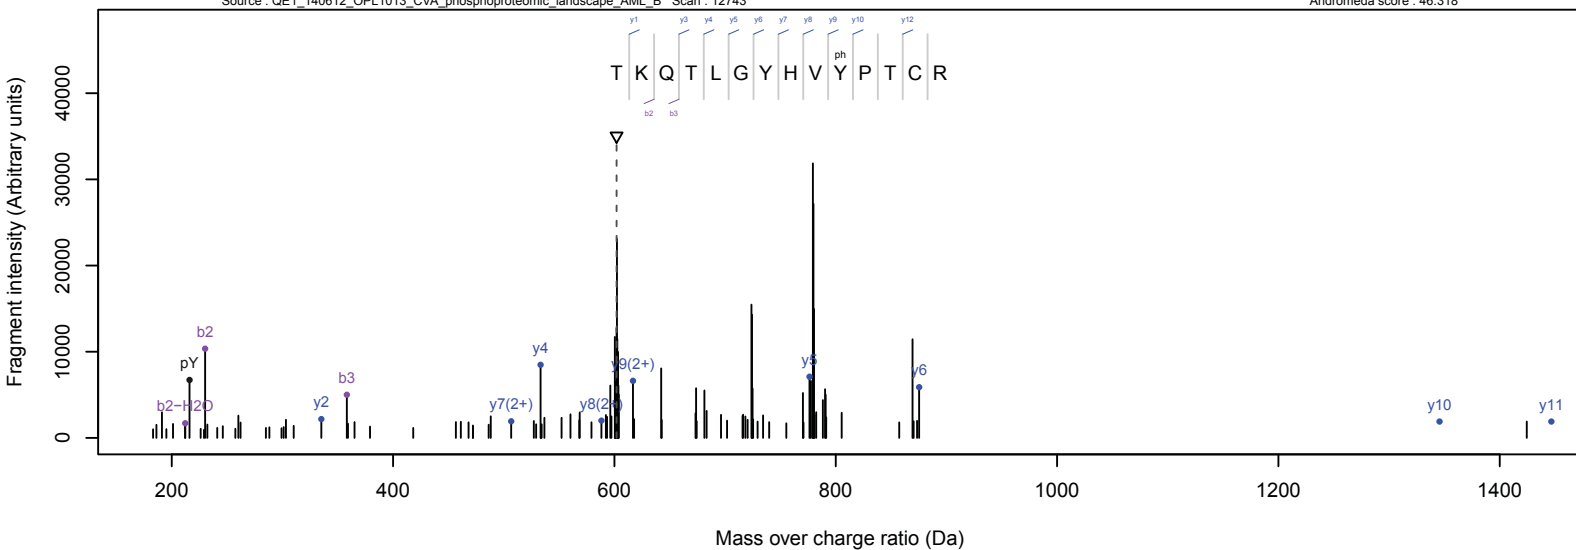

**GCNSALVTPGY(ph)ATIGGGGSNFDGLRPN GK-3+**

Source : QE1\_140612\_OPL1013\_CVA\_phosphoproteomic\_landscape\_AML\_C Scan : 41352

Andromeda score : 46.252

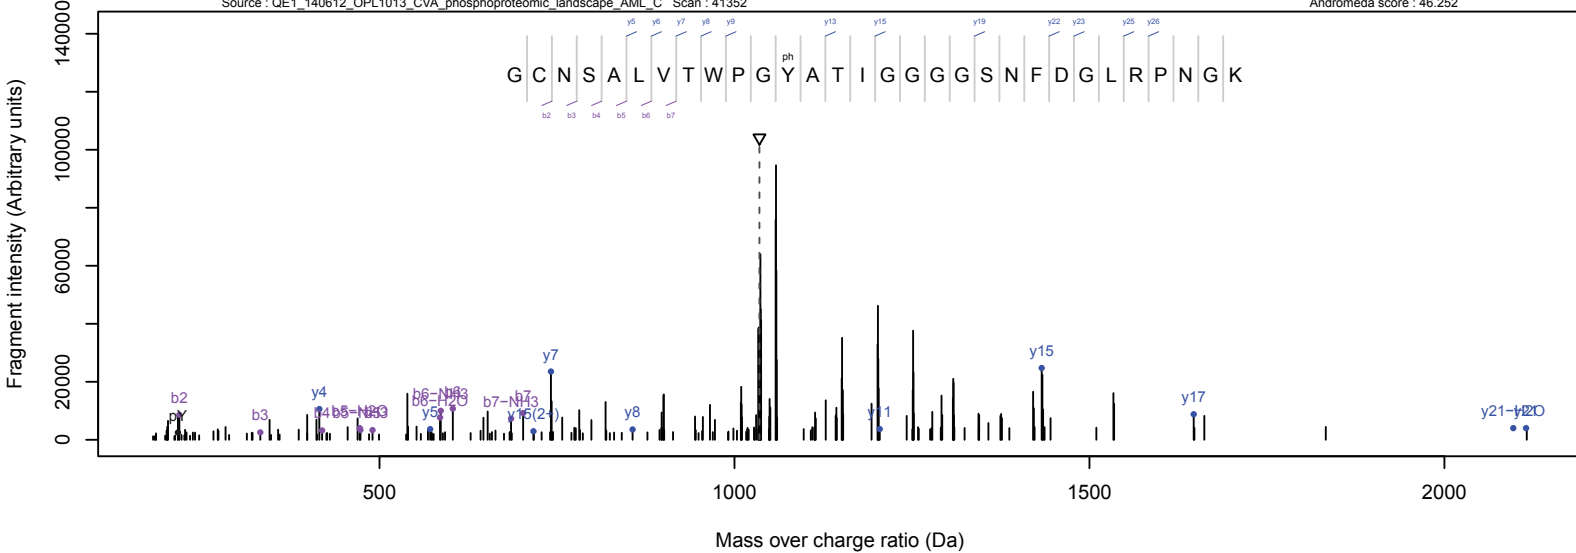

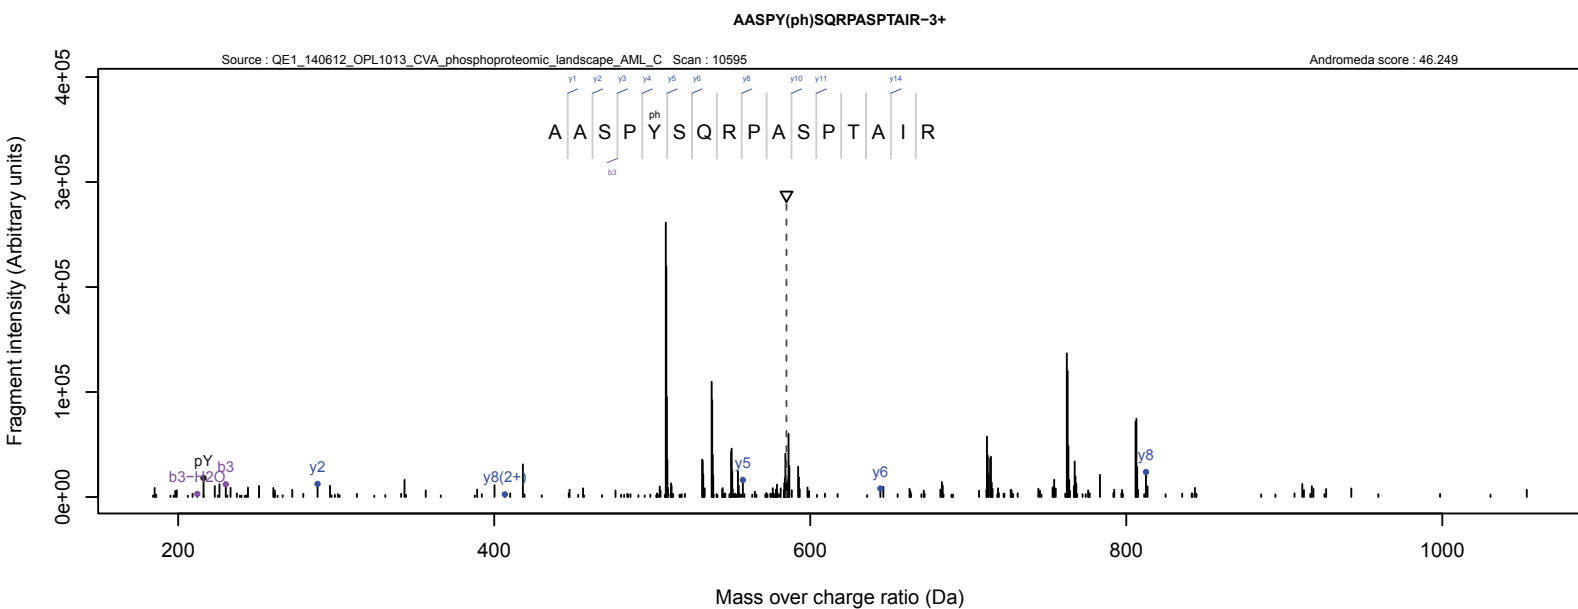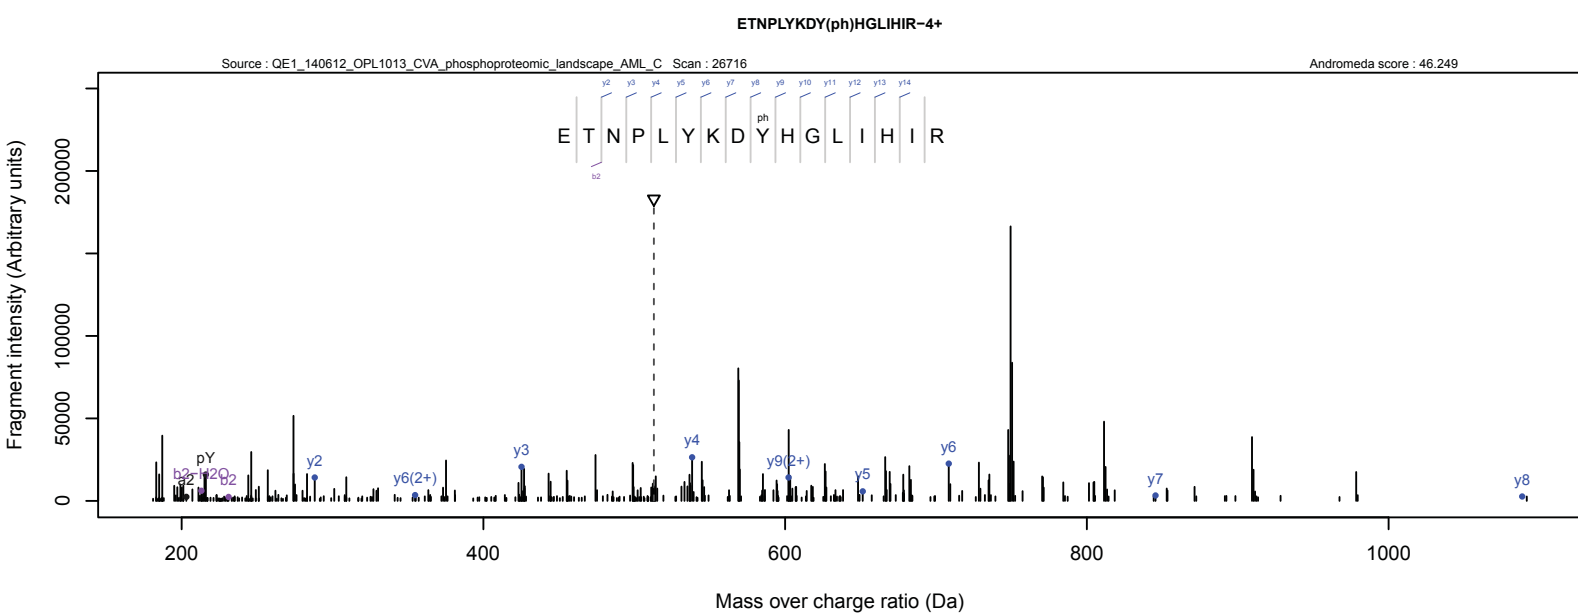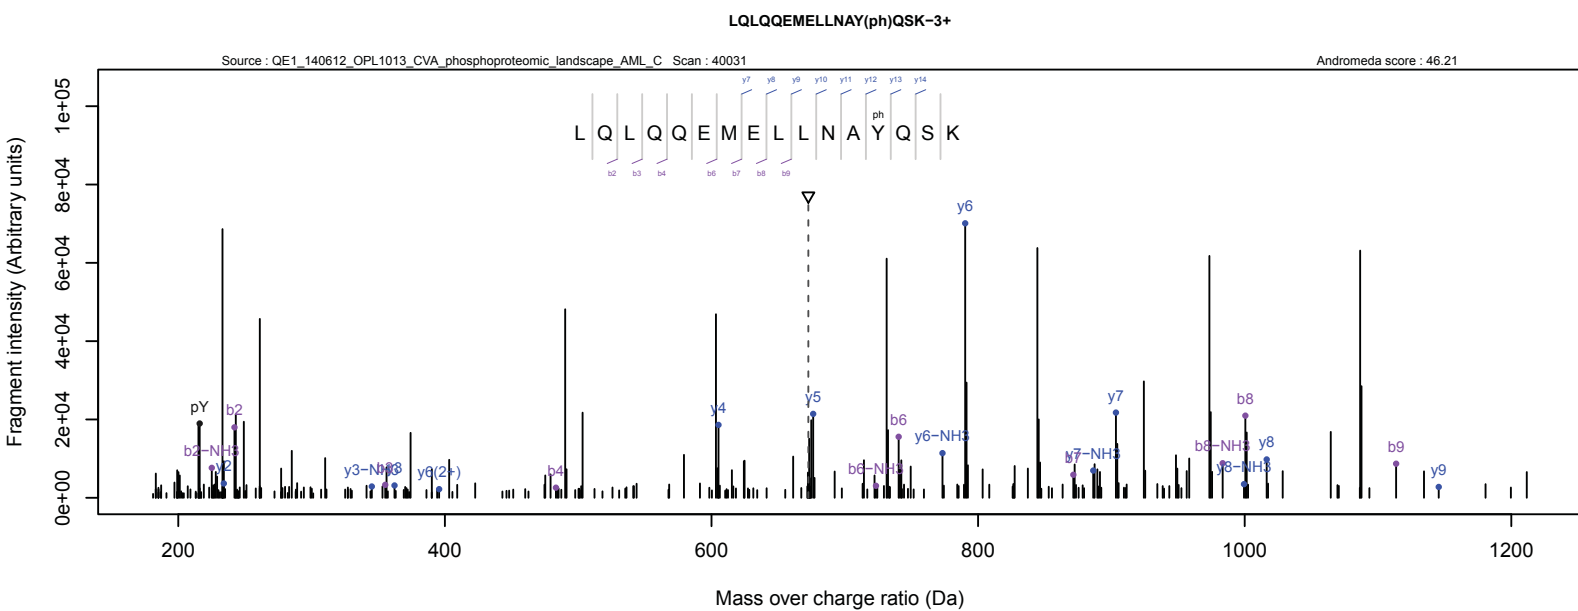

## FDNLY(ph)GCR-2+

Source : QE1\_140908\_OPL1013\_CVA\_pTyrIP\_AML\_HEL Scan : 13715

Andromeda score : 46.129

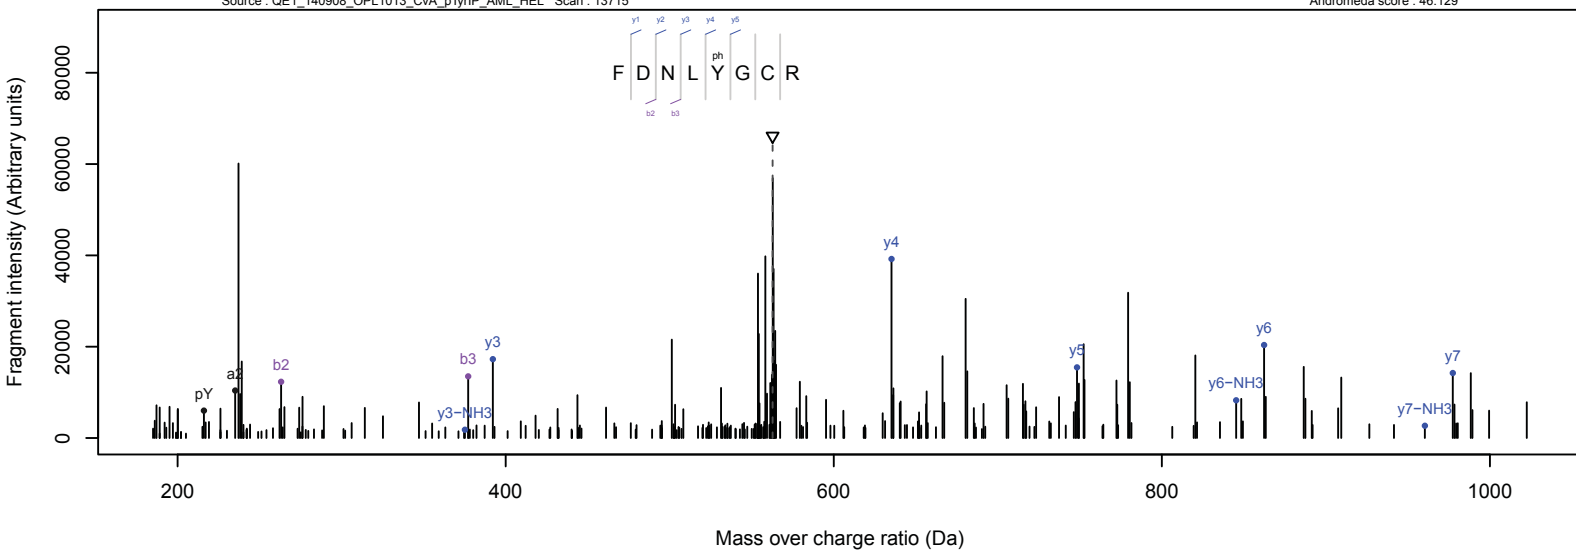

## IEAGY(ph)IQTGDR-2+

Source : QE1\_140612\_OPL1013\_CVA\_phosphoproteomic\_landscape\_AML\_C Scan : 11501

Andromeda score : 46.069

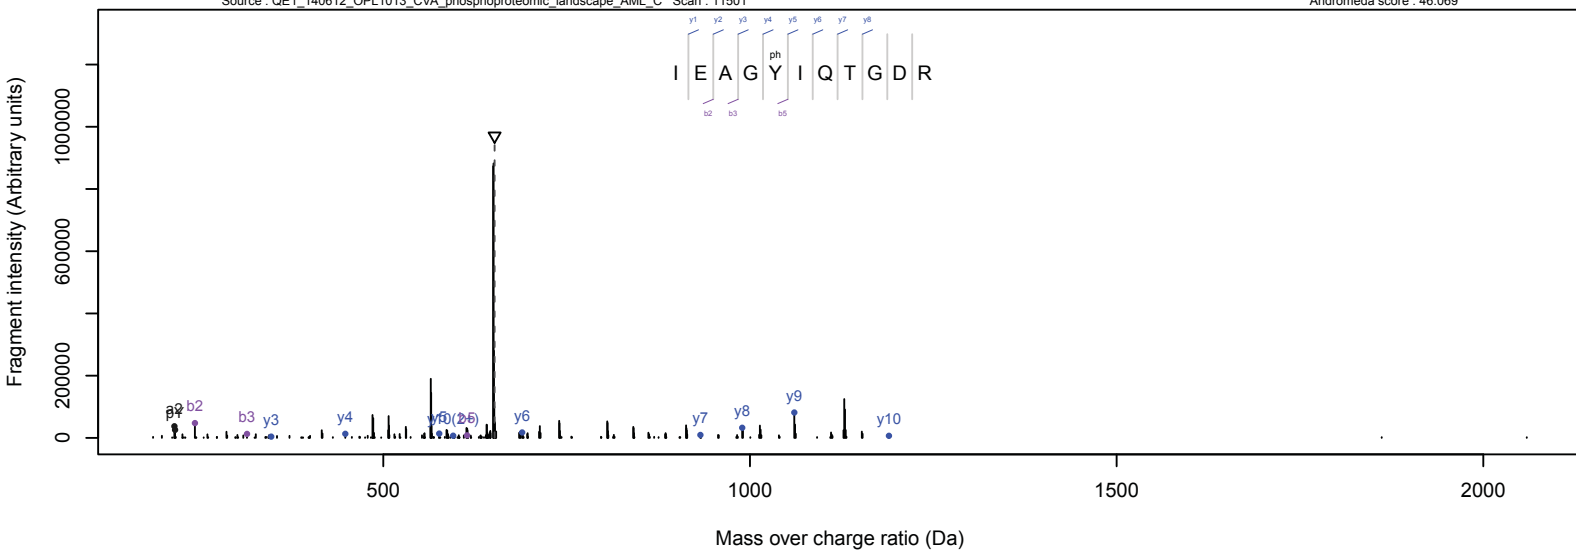

## KFSY(ph)FPSYVDK-2+

Source : QE1\_140612\_OPL1013\_CVA\_phosphoproteomic\_landscape\_AML\_B Scan : 25959

Andromeda score : 46.069

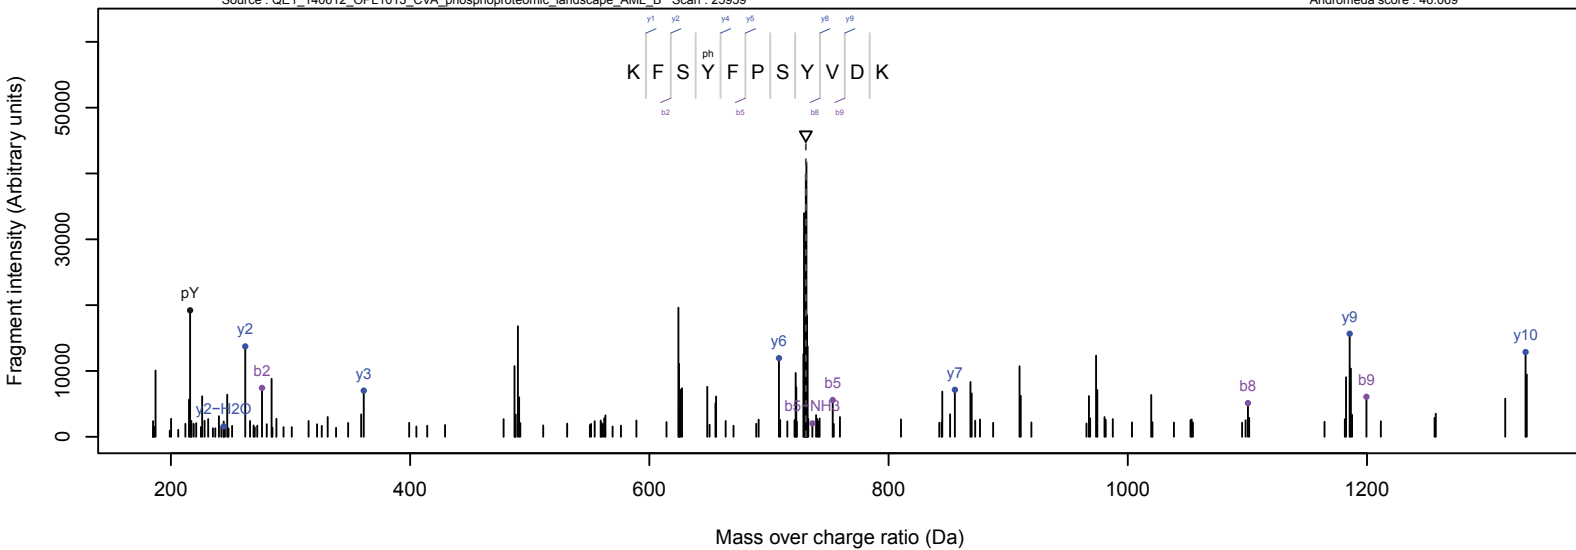

SASLDVEPIY(ph)TFR-2+

Source : QE1\_140908\_OPL1013\_CvA\_pTyrIP\_AML\_HEL Scan : 39463

Andromeda score : 46.069

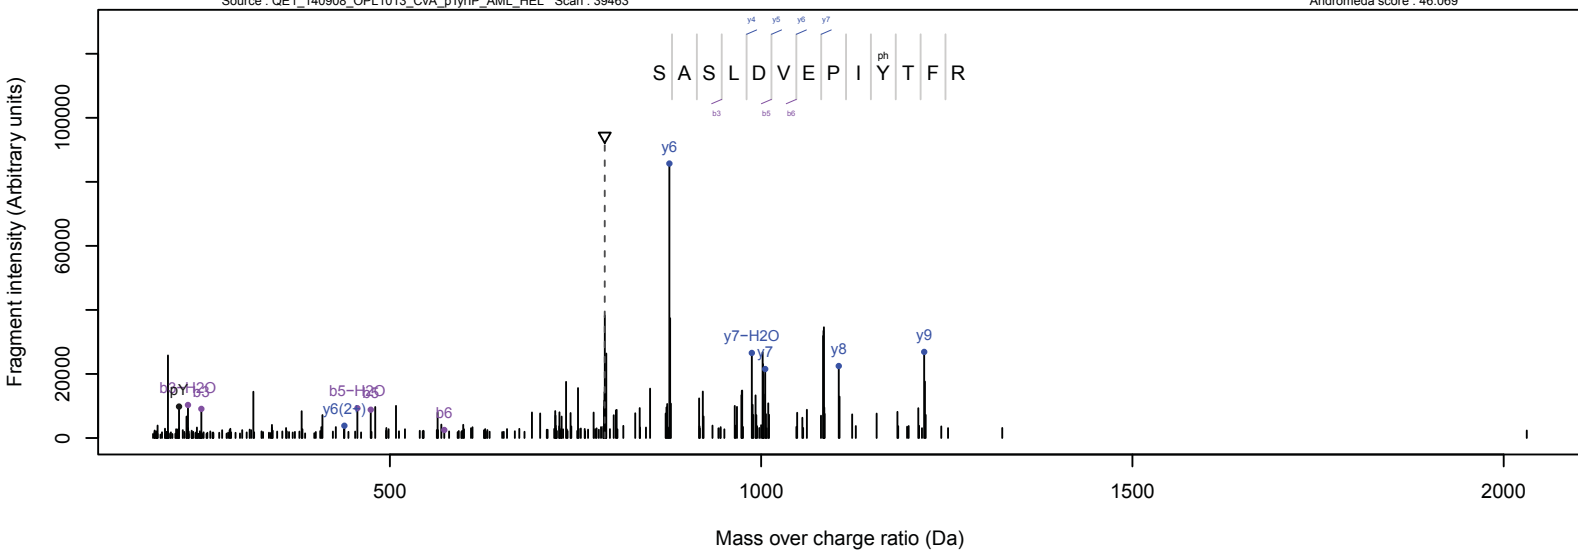

VTAY(ph)TVDTVTR-2+

Source : QE1\_140612\_OPL1013\_CVA\_phosphoproteomic\_landscape\_AML\_C Scan : 13781

Andromeda score : 46.069

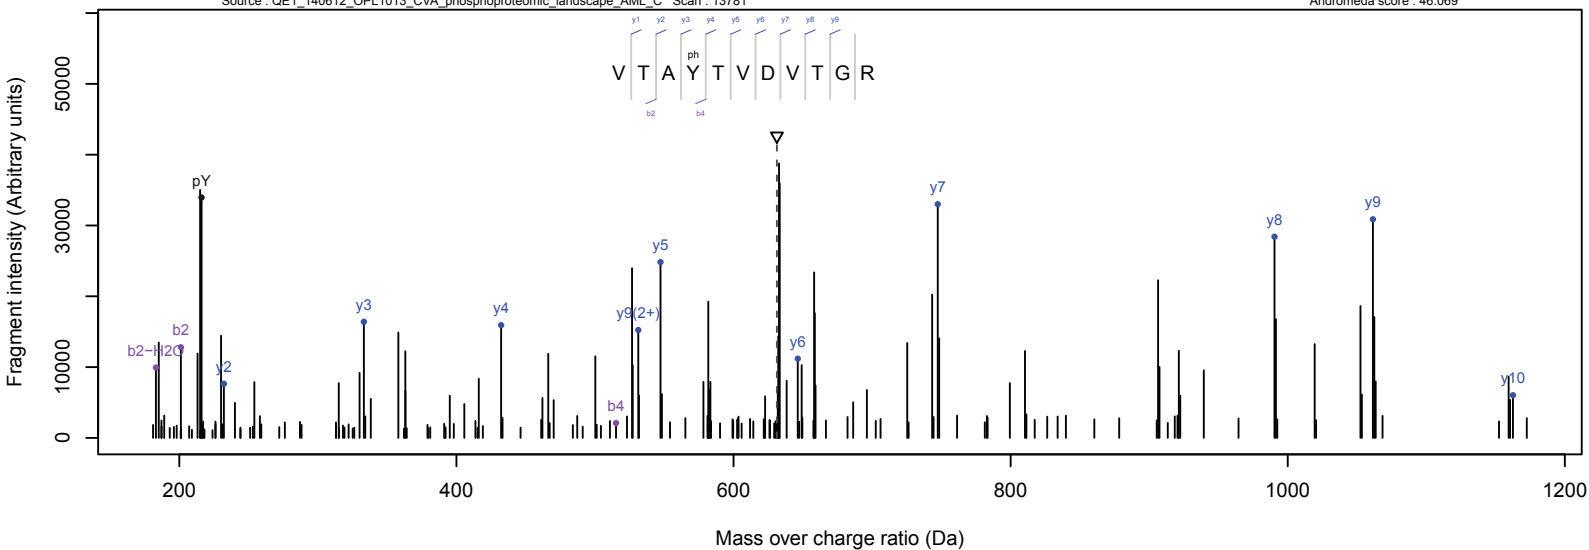

EEGSAHLAVPGVY(ph)FTCLTGATLR-3+

Source : QE1\_140612\_OPL1013\_CVA\_phosphoproteomic\_landscape\_AML\_C Scan : 46161

Andromeda score : 46.065

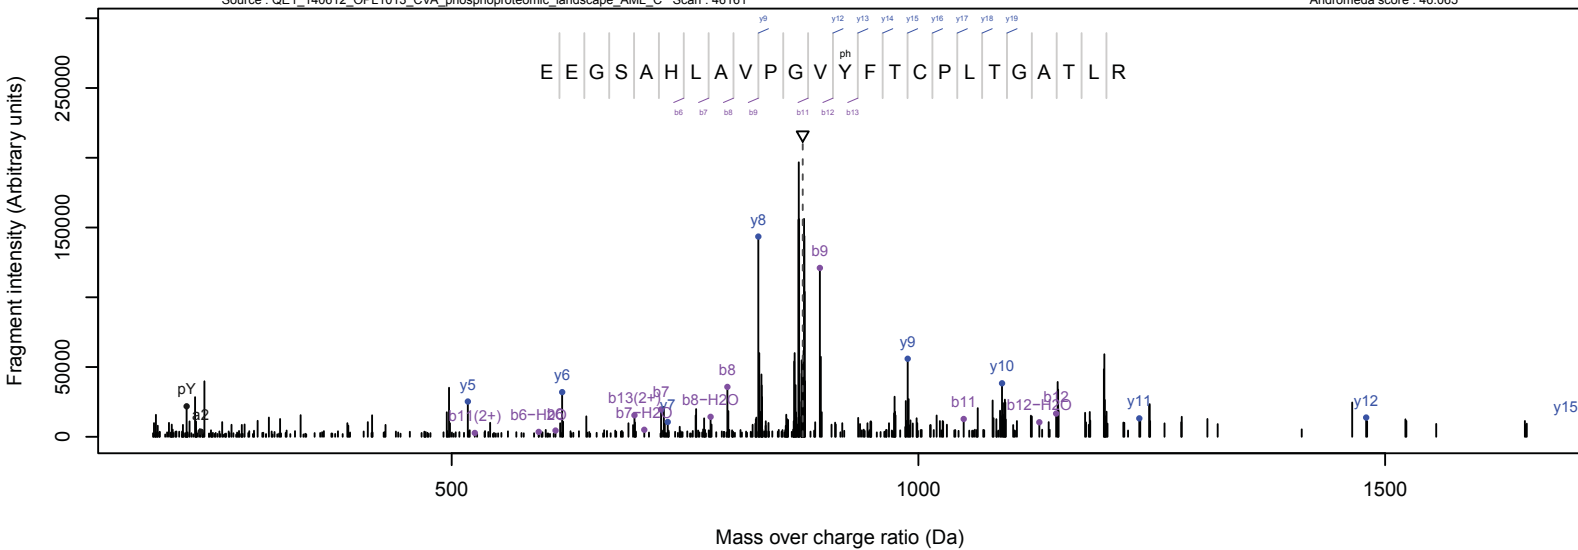

## TATPIY(ph)EELLYSDANIYQCIDHK-3+

Source: QE1\_140908\_OPL1013\_CVA\_pTyrIP\_AML\_Kasumi6 Scan: 47794

Andromeda score: 46.065

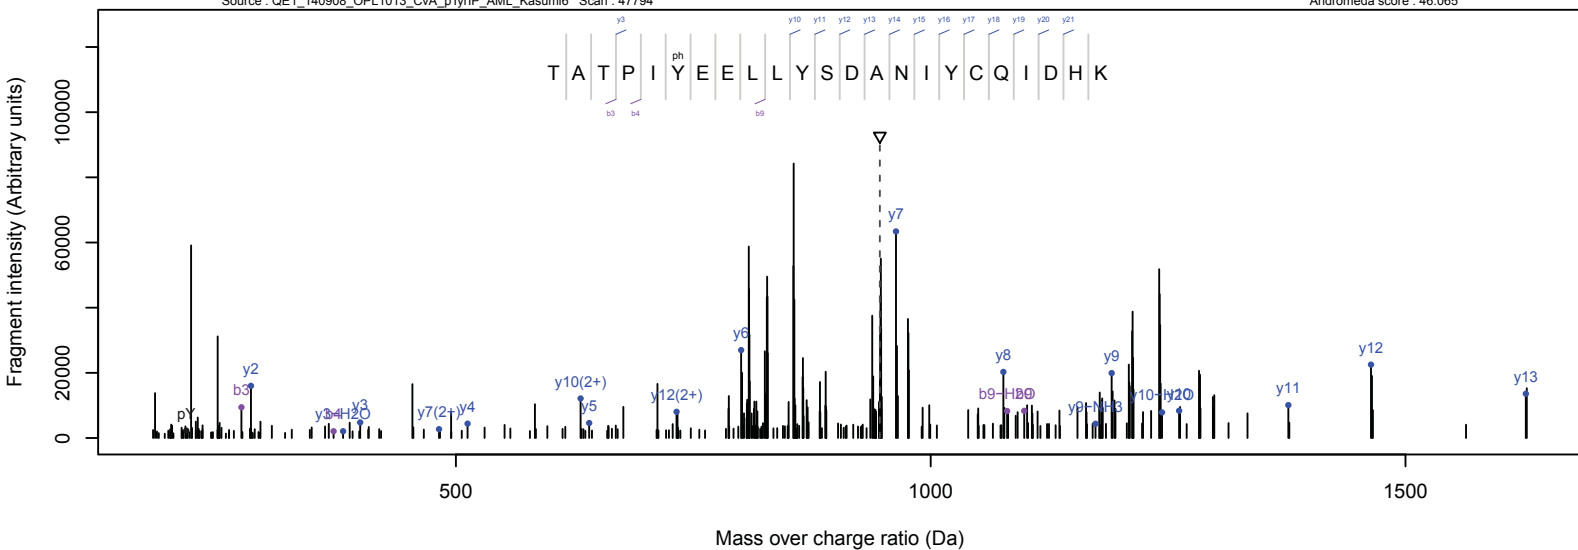

## Y(ph)VIHTVGPVIAAYGEPSSAQAAELR-3+

Source: QE1\_140612\_OPL1013\_CVA\_phosphoproteomic\_landscape\_AML\_C Scan: 33354

Andromeda score: 46.065

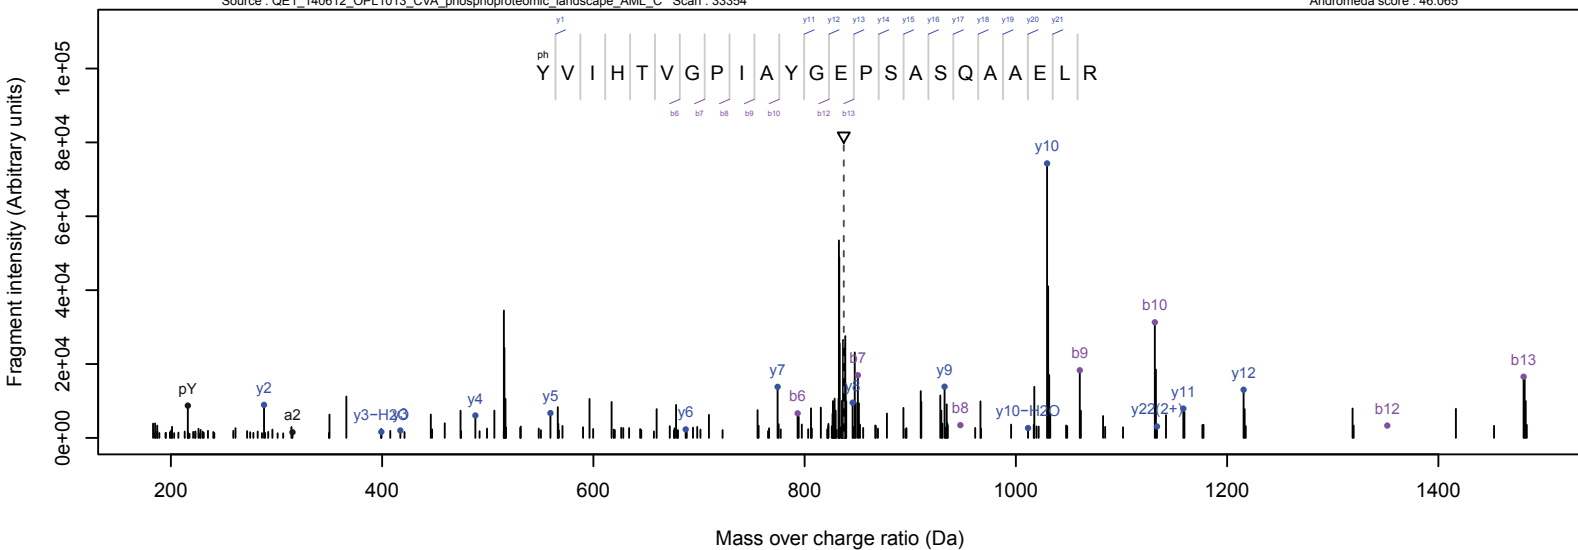

## KLFQIY(ph)SK-2+

Source: QE1\_140612\_OPL1013\_CVA\_phosphoproteomic\_landscape\_AML\_C Scan: 19731

Andromeda score: 46.033

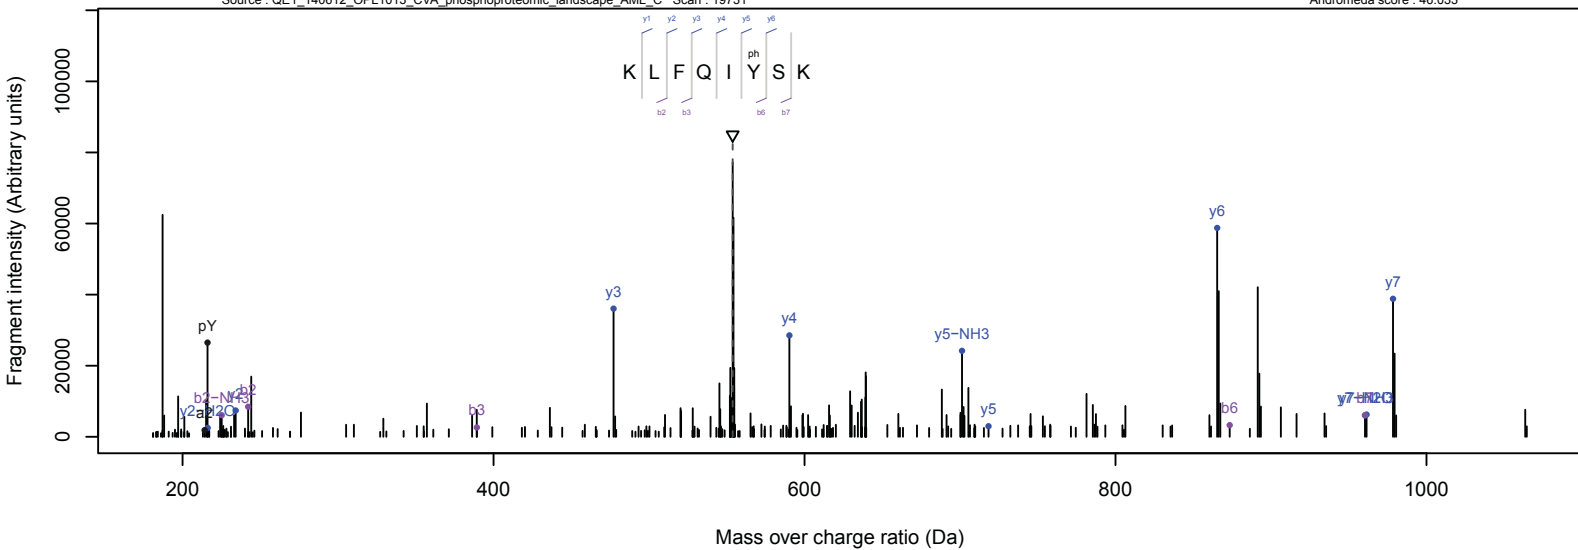

Y(ph)HSLGNISR-3+

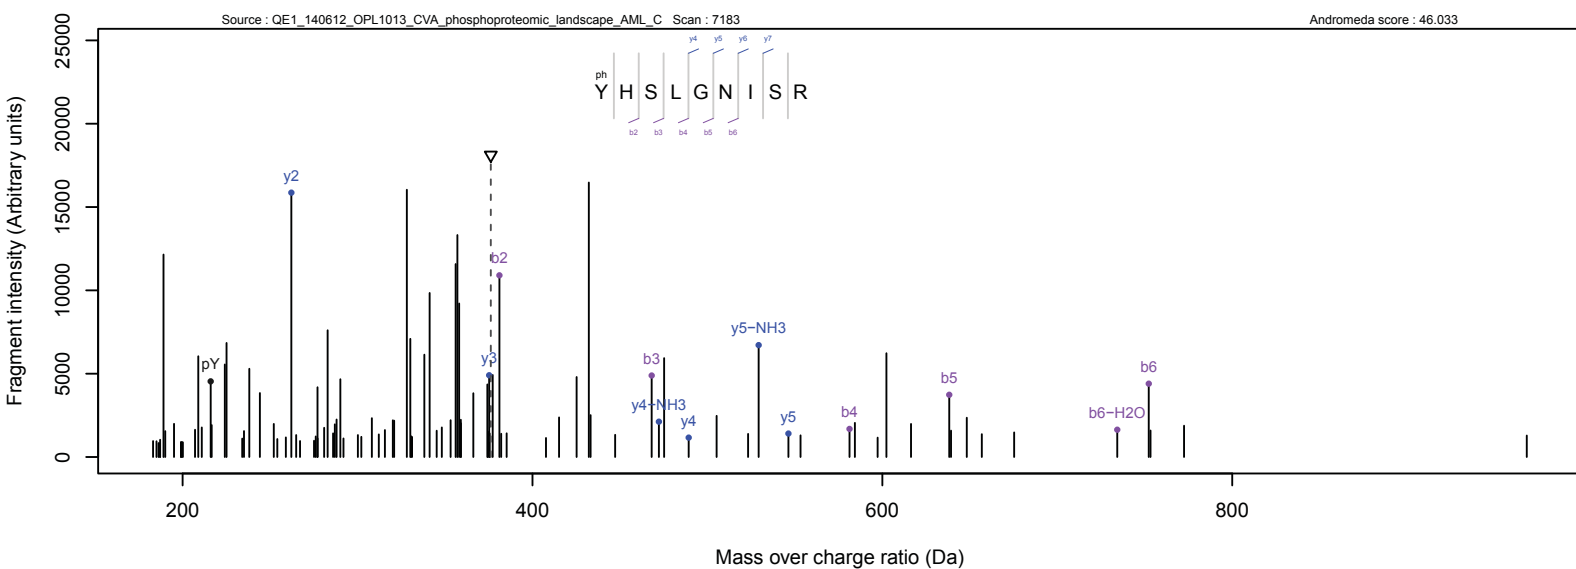

LSAPSY(ph)LAR-2+

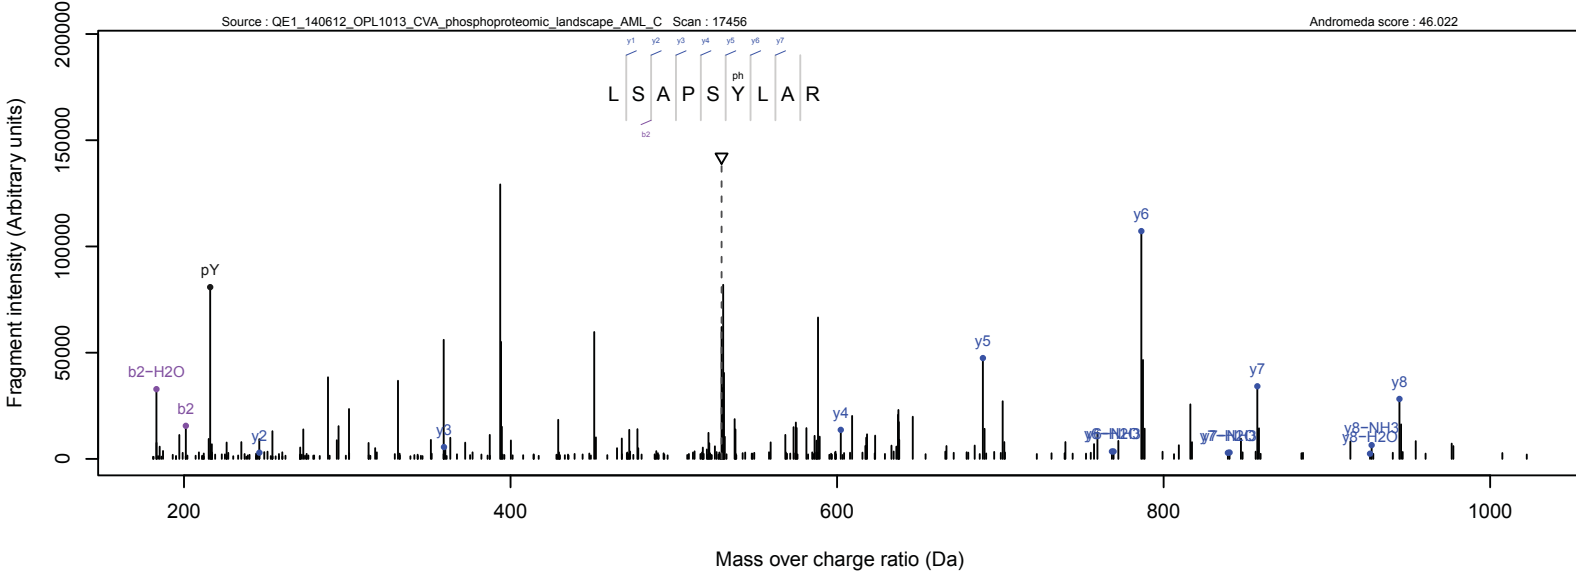

LVGLVHSGQASGGHYYS(ph)IIQR-3+

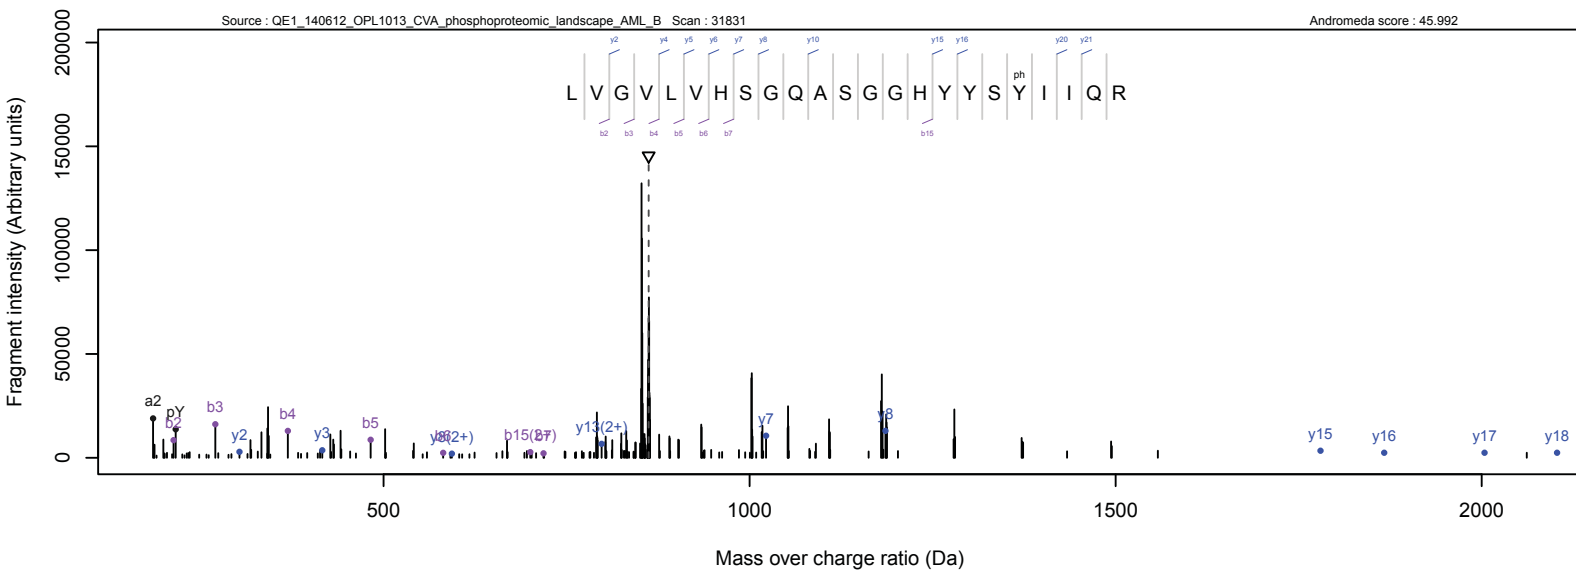

NISM(ox)SVEGDYT(ph)YLR-2+

Source : QE1\_140908\_OPL1013\_CvA\_pTyrIP\_AML\_Kasumi1 Scan : 25031

Andromeda score : 45.992

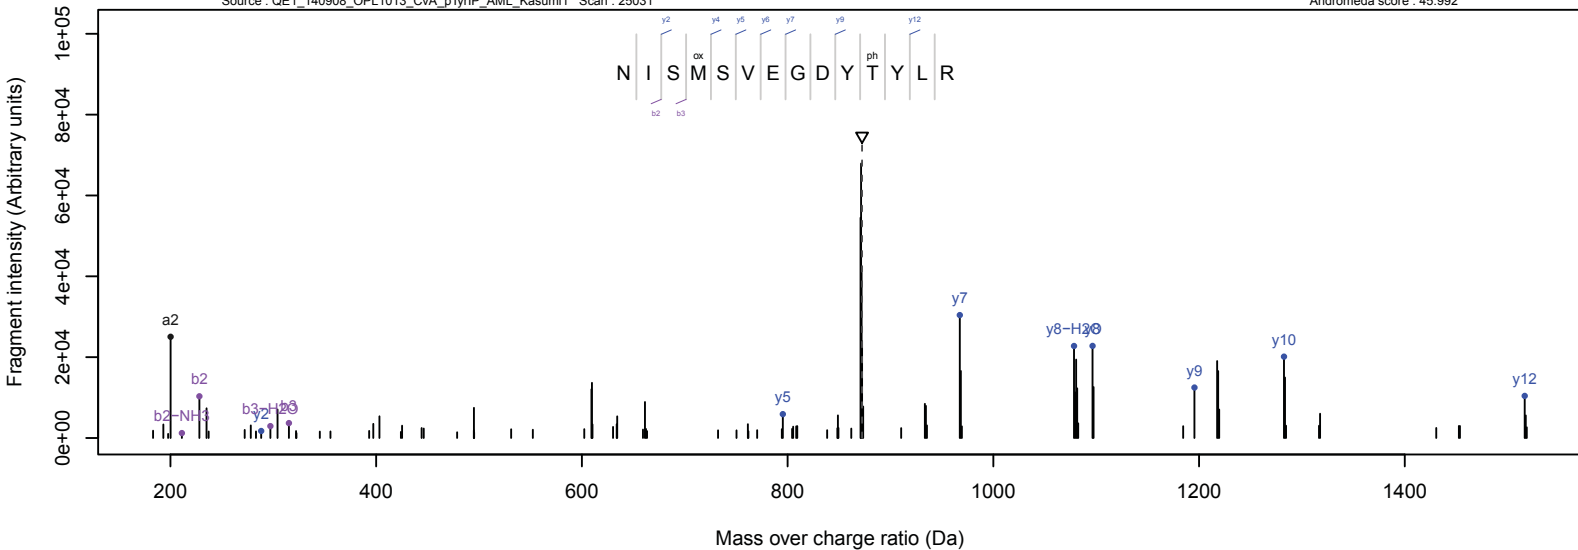

SEENIYTIENVY(ph)EVEEPNEYCYVSSR-3+

Source : QE1\_140822\_OPL1013\_CvA\_pTyrIP\_AML\_cell\_lines\_part2\_B Scan : 37924

Andromeda score : 45.983

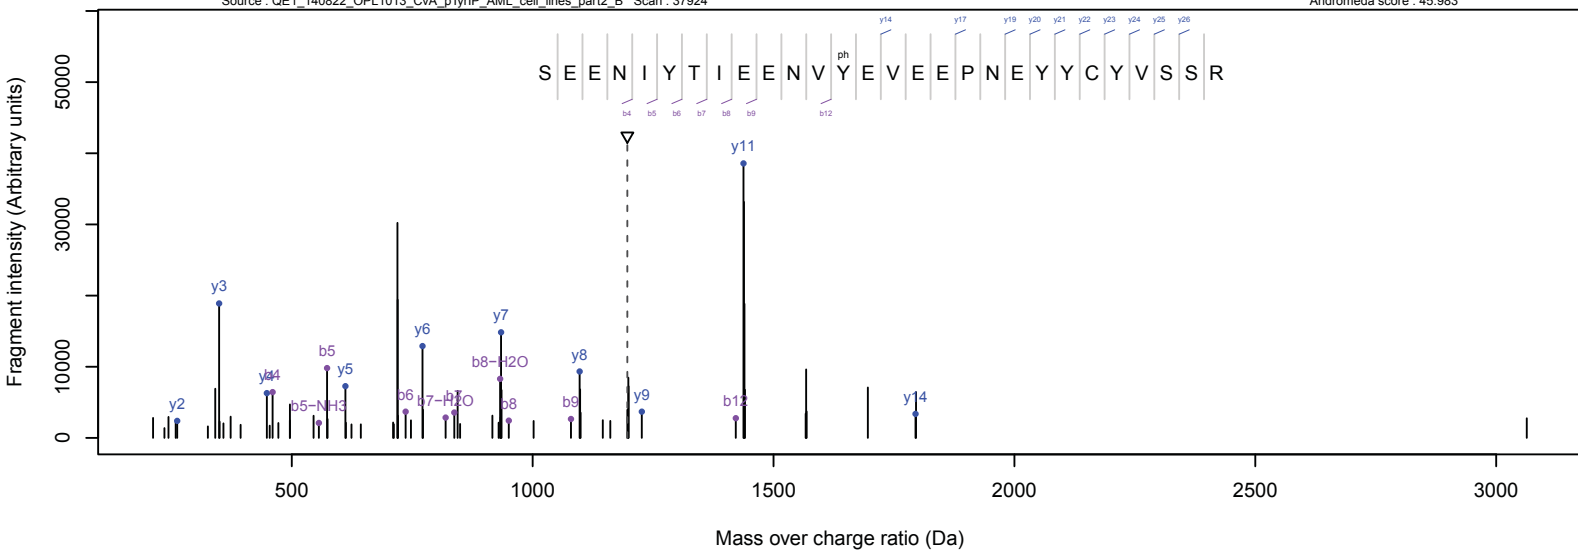

AMAFSTGY(ph)PGDFTIPRPSGGGVHQCQEP-4+

Source : QE1\_140612\_OPL1013\_CVA\_phosphoproteomic\_landscape\_AML\_C Scan : 33190

Andromeda score : 45.941

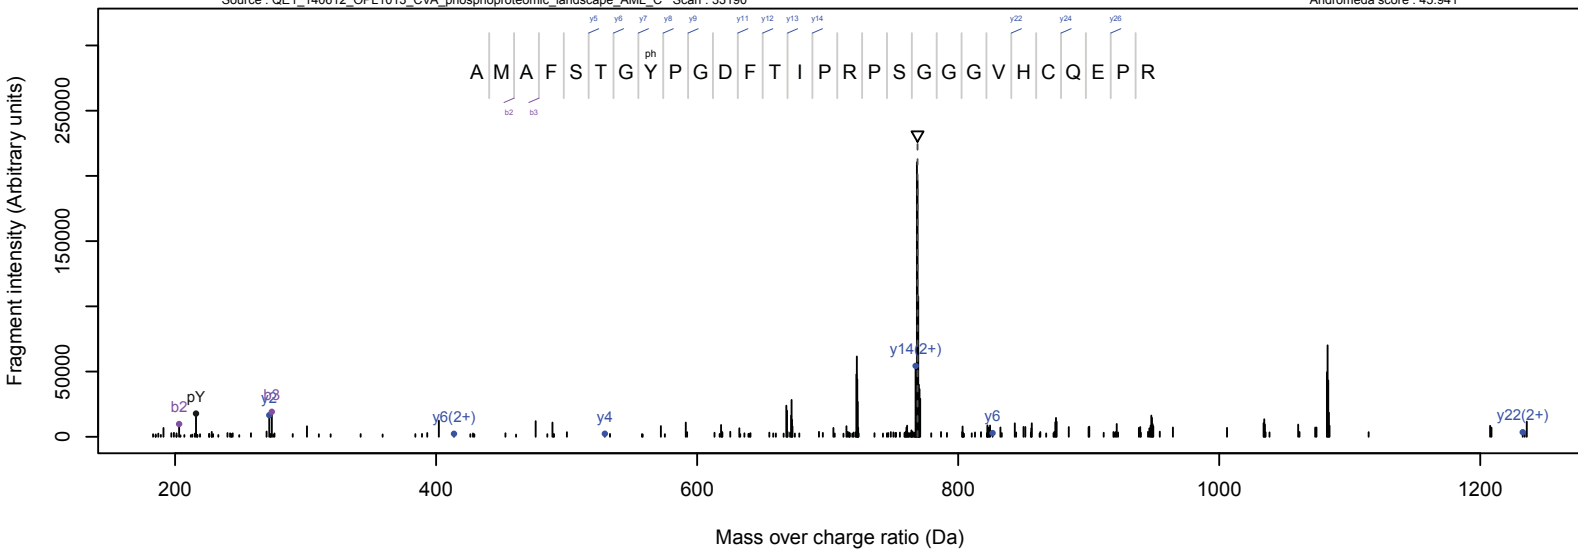



ESSKQGCY(ph)ACSVVDGEVK-3+

Source : QE1\_140612\_OPL1013\_CVA\_phosphoproteomic\_landscape\_AML\_B Scan : 15841

Andromeda score : 45.916

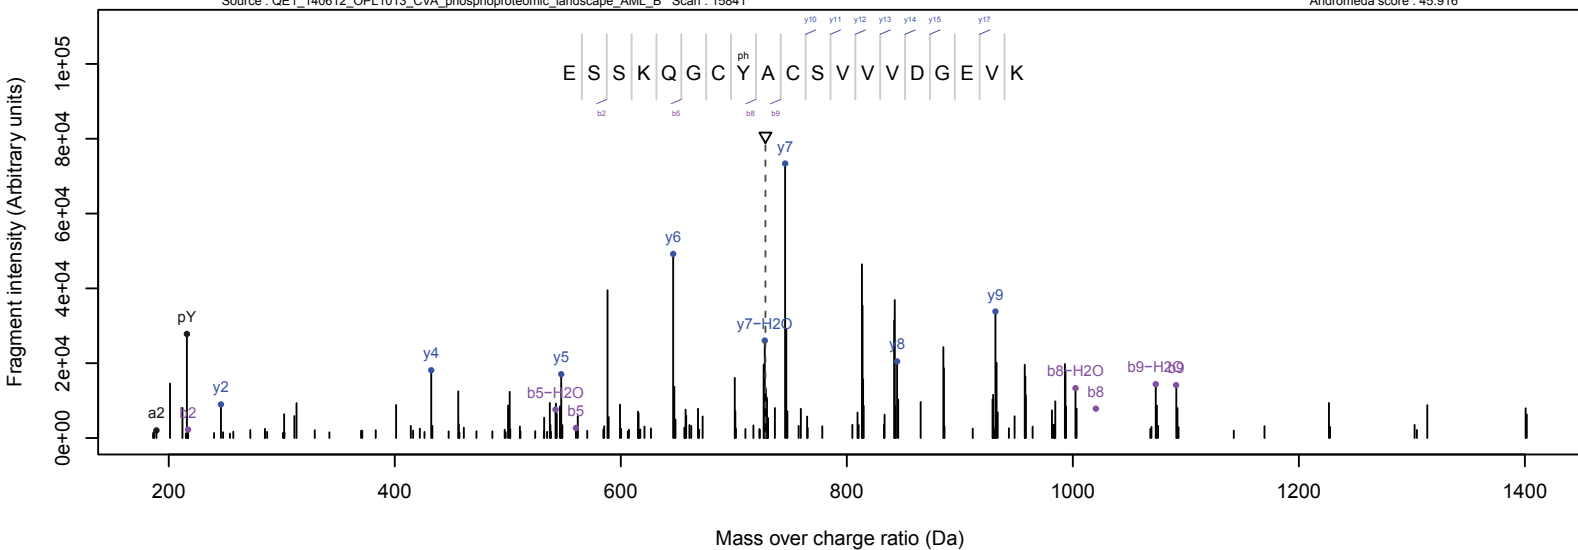

NIHYYP(ph)FMALKNDEIIDATQK-3+

Source : QE1\_140612\_OPL1013\_CVA\_phosphoproteomic\_landscape\_AML\_B Scan : 39396

Andromeda score : 45.916

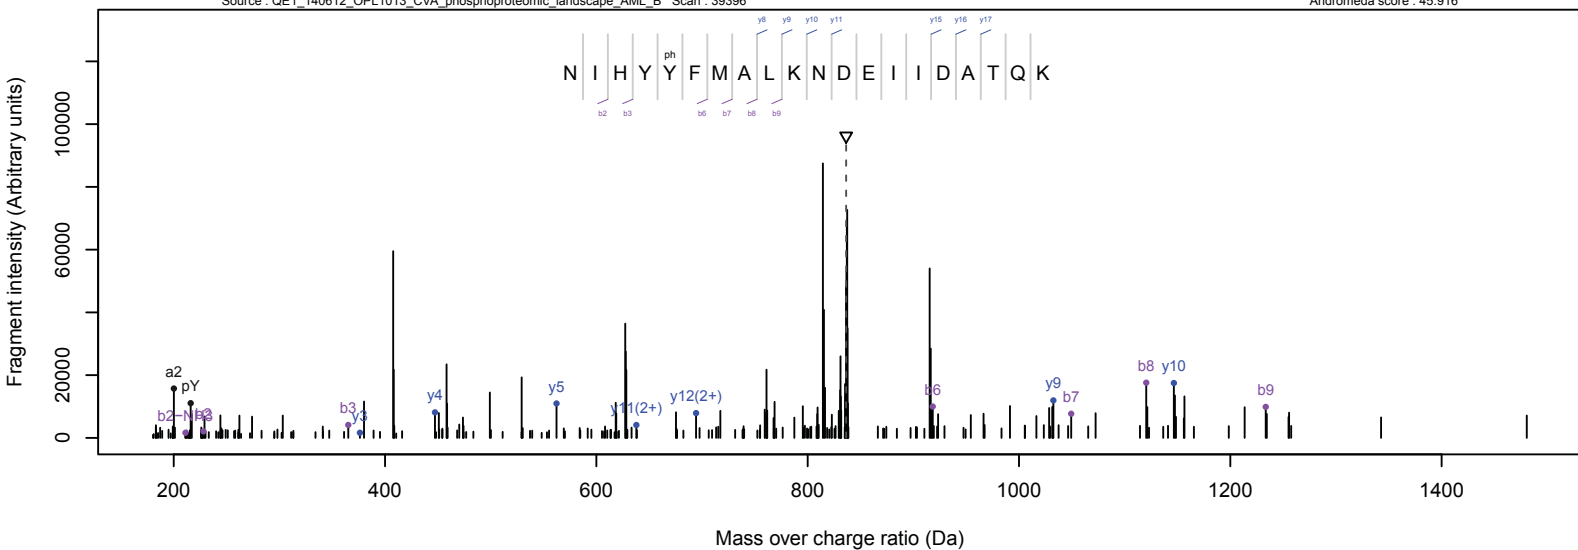

TENLLGSYP(ph)FPKK-2+

Source : QE1\_140612\_OPL1013\_CVA\_phosphoproteomic\_landscape\_AML\_C Scan : 25024

Andromeda score : 45.891

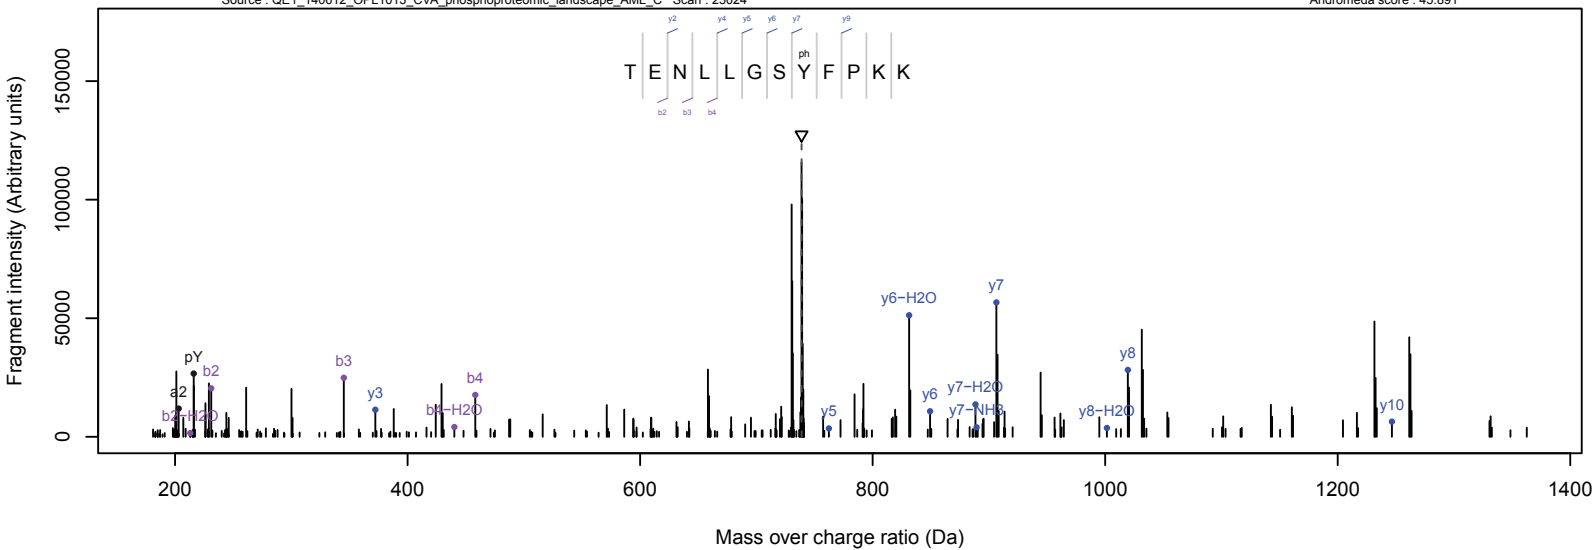

## GWQYSDHMENVY(ph)GYLMK-3+

Source : QE1\_140612\_OPL1013\_CVA\_phosphoproteomic\_landscape\_AML\_C Scan : 36132

Andromeda score : 45.883

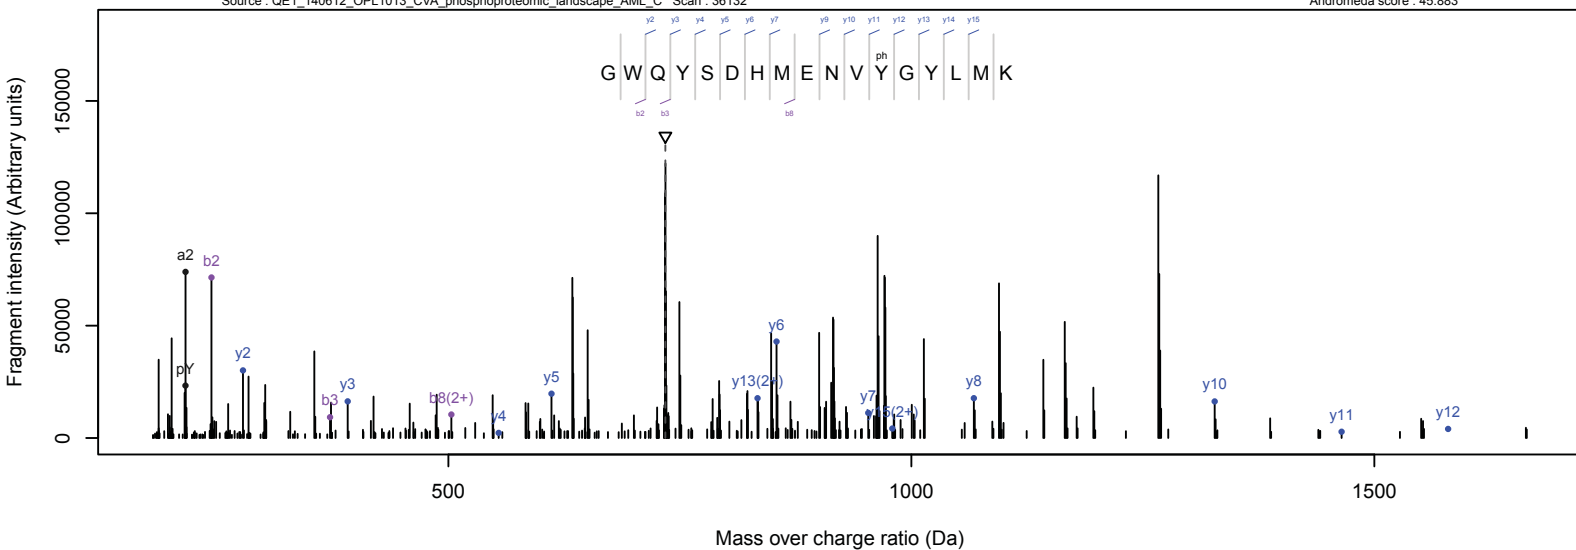

## SNAHY(ph)NLQNAFLAEQHLGLTK-3+

Source : QE1\_140612\_OPL1013\_CVA\_phosphoproteomic\_landscape\_AML\_B Scan : 42610

Andromeda score : 45.878

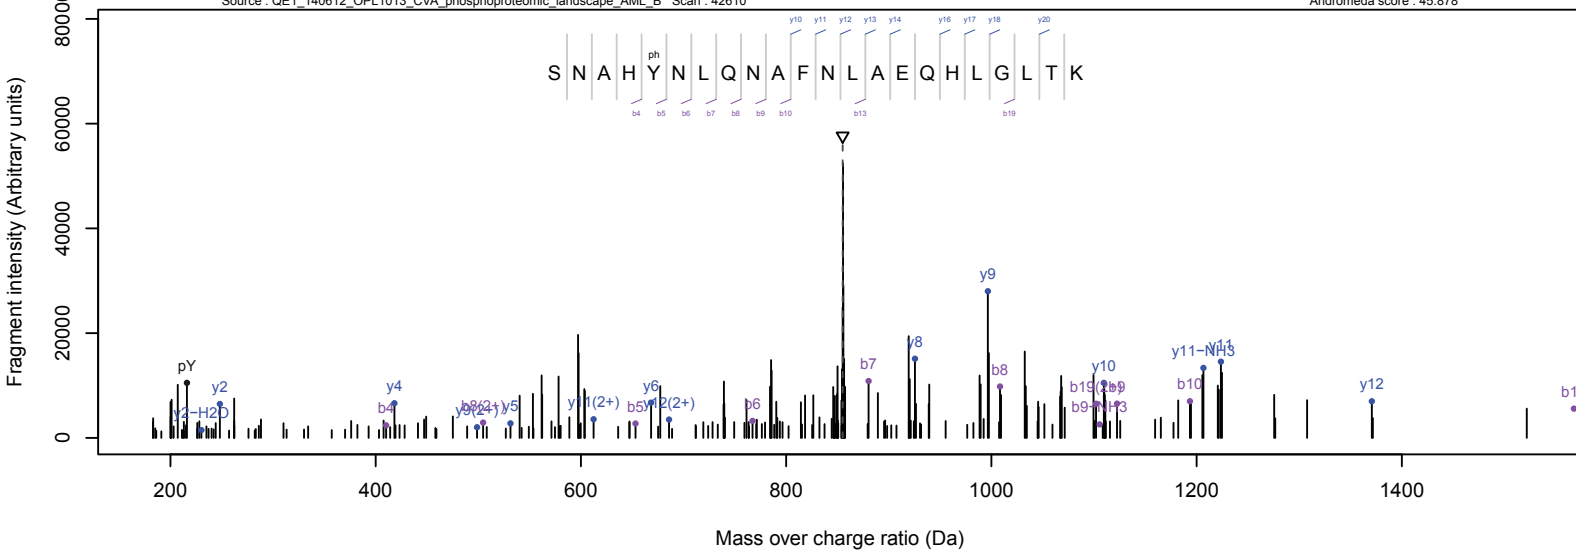

## AHTFSAQSGY(ph)RVPGPQGHK-4+

Source : QE1\_140908\_OPL1013\_CvA\_pTyrIP\_AML\_Kasumi1 Scan : 9716

Andromeda score : 45.876

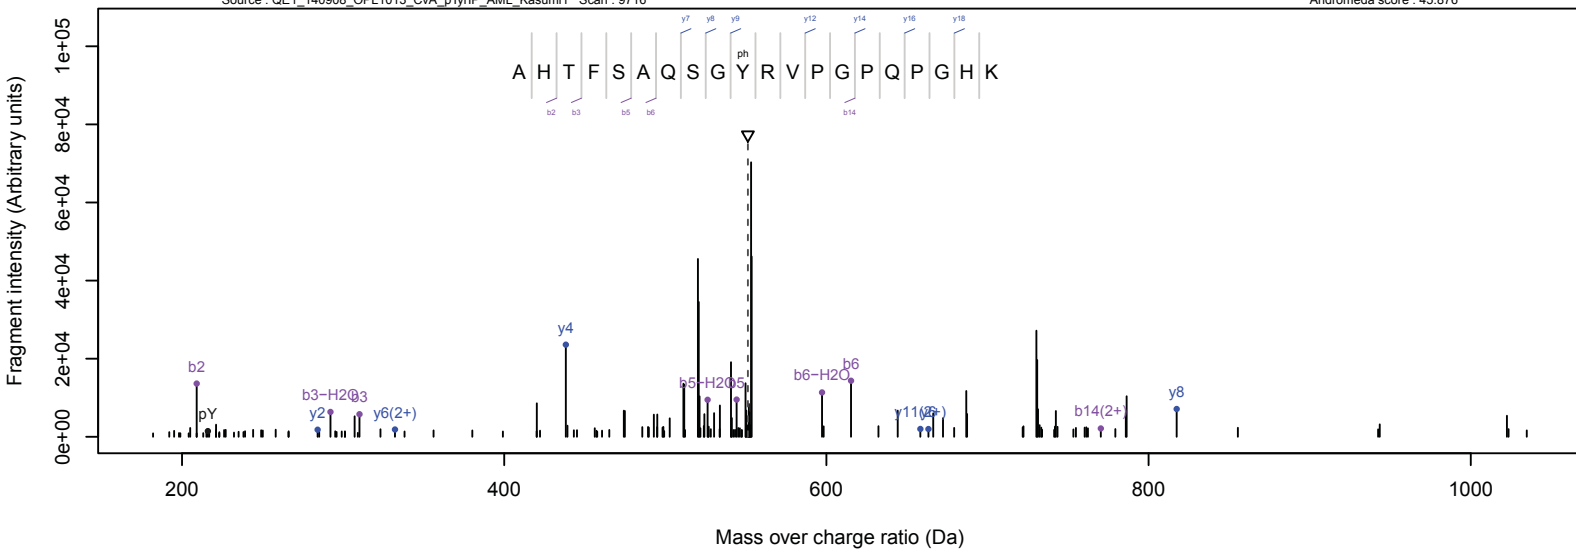

## SVNGFTY(ph)QDKLSSSK-3+

Source : QE1\_140612\_OPL1013\_CVA\_phosphoproteomic\_landscape\_AML\_C Scan : 14361

Andromeda score : 45.876

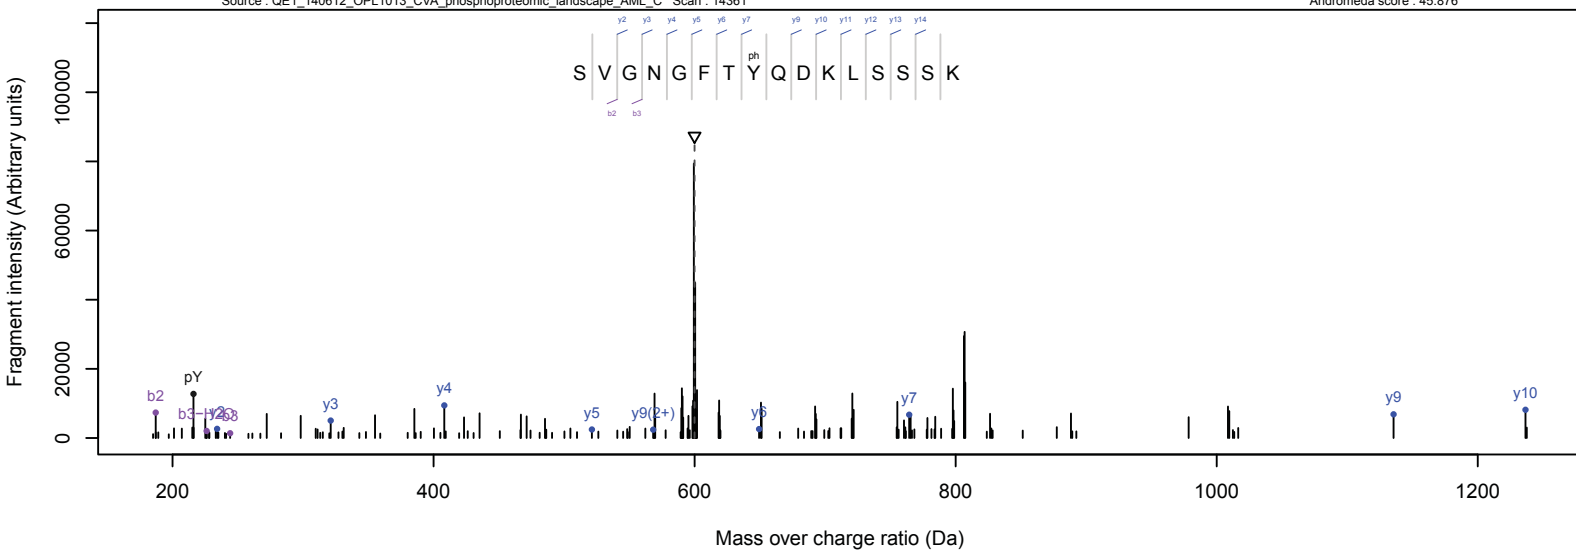

## Y(ph)MPAVTSTPTVNQHETSTSK-3+

Source : QE1\_140612\_OPL1013\_CVA\_phosphoproteomic\_landscape\_AML\_F Scan : 16320

Andromeda score : 45.844

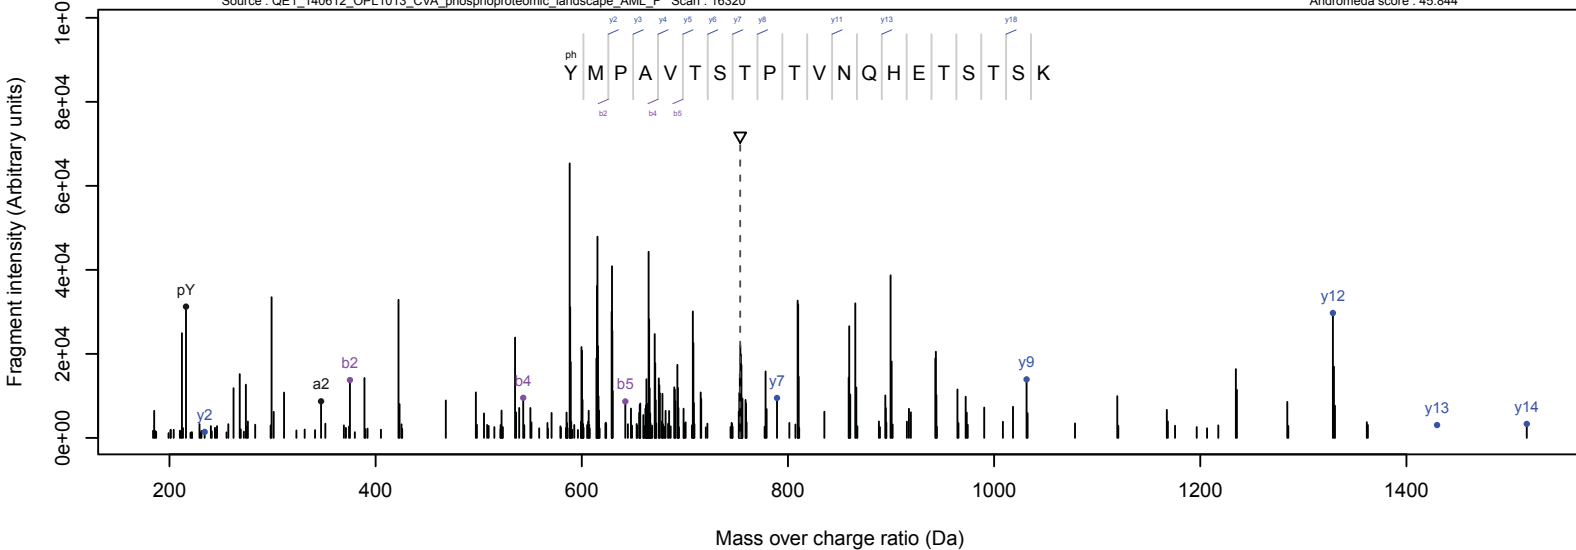

## LY(ph)SSITNQR-2+

Source : QE1\_140822\_OPL1013\_CvA\_pTyrIP\_AML\_cell\_lines\_part2\_B Scan : 6009

Andromeda score : 45.829

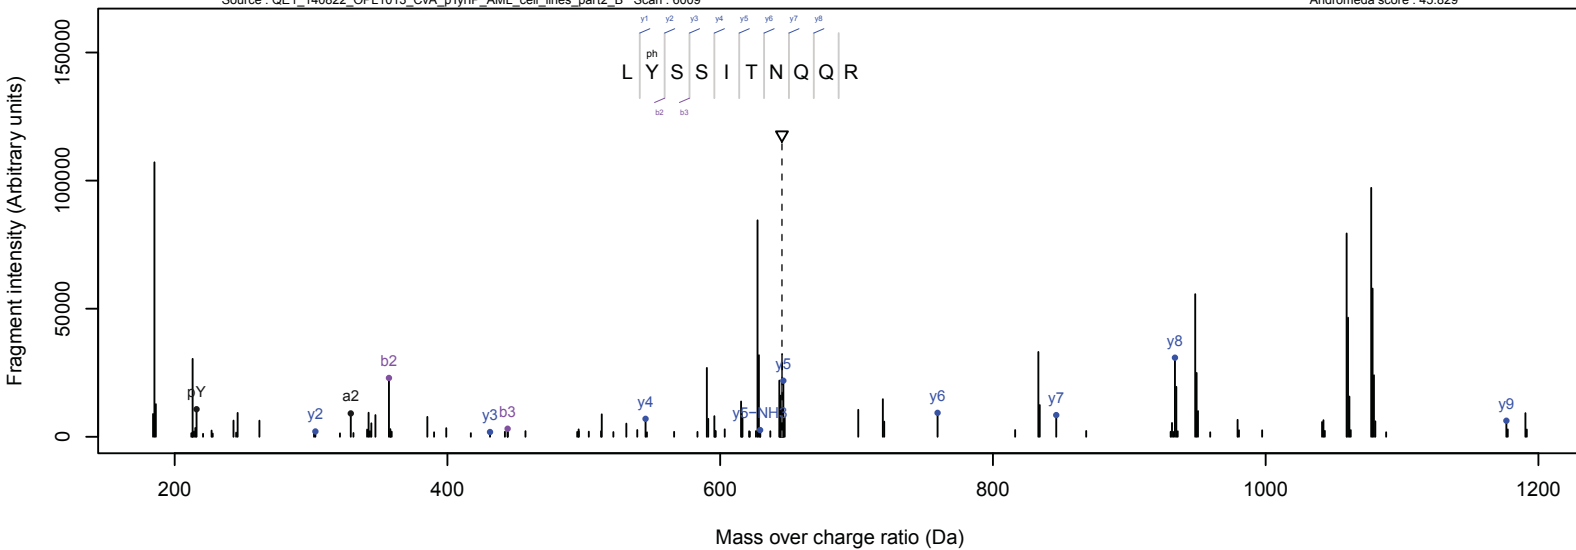

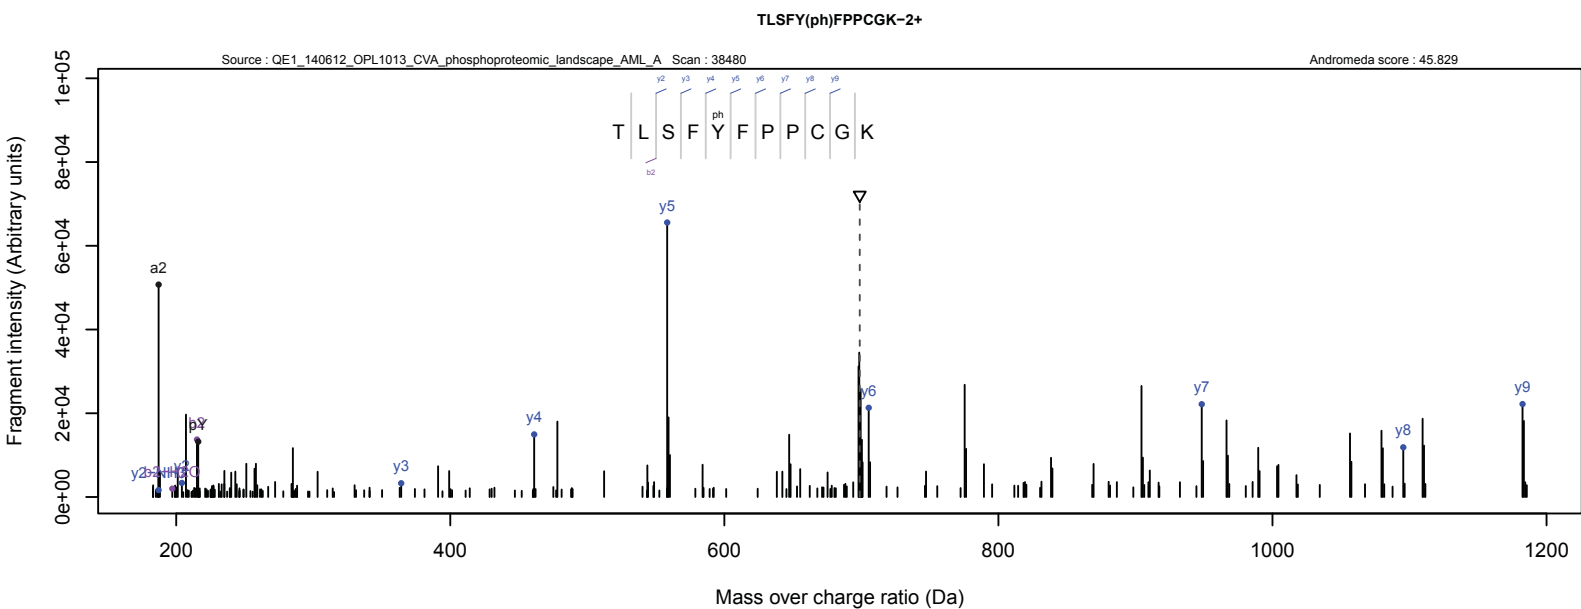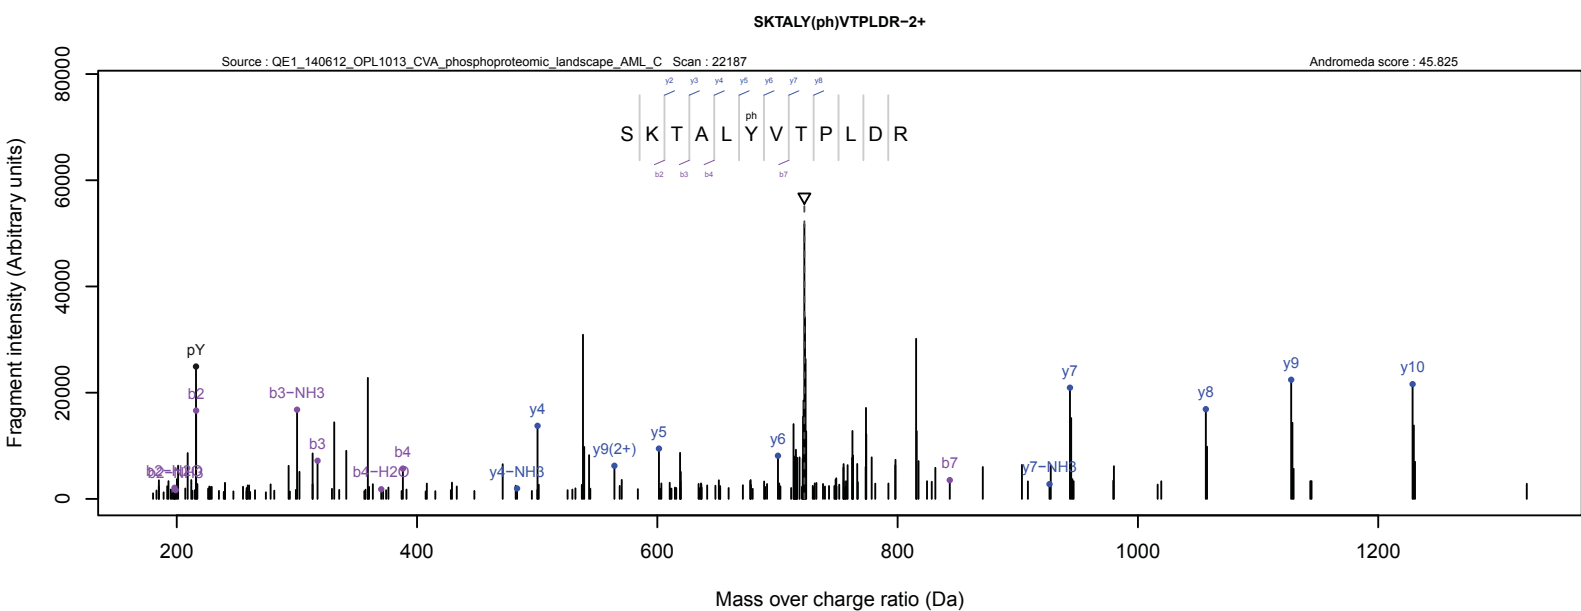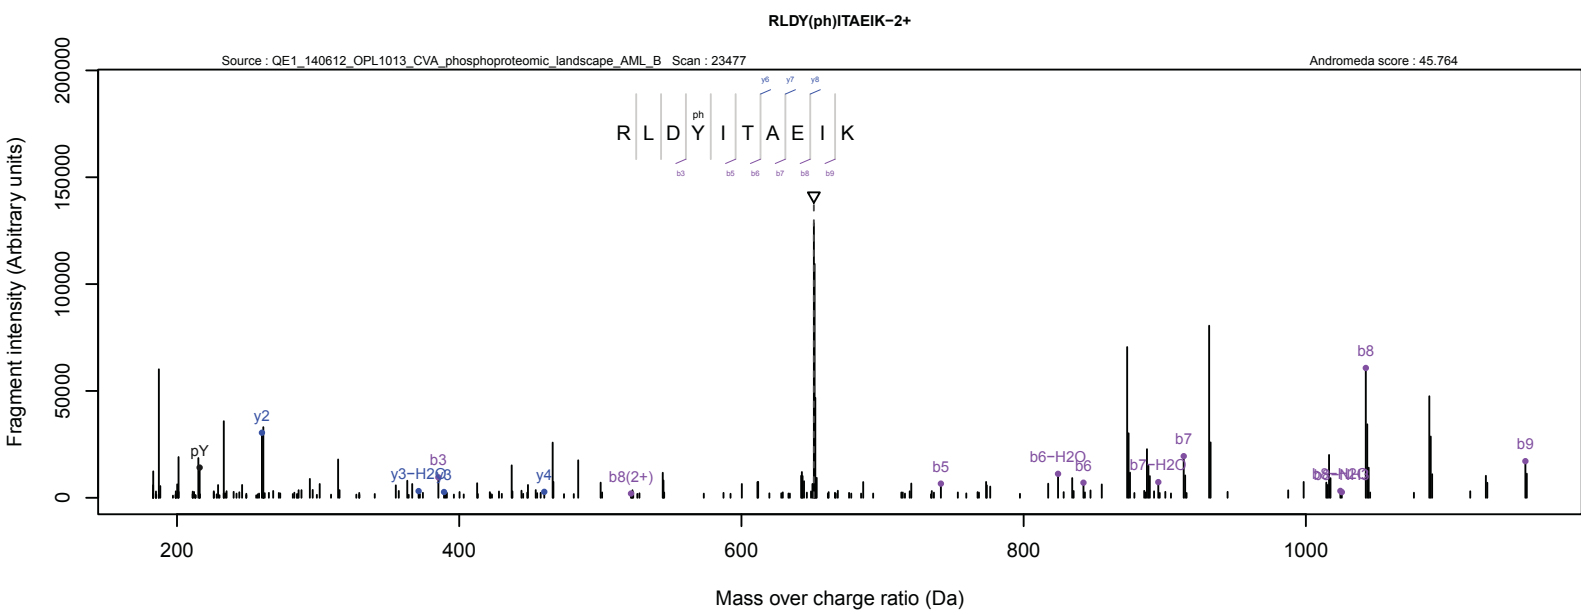

## LKEY(ph)LSV-2+

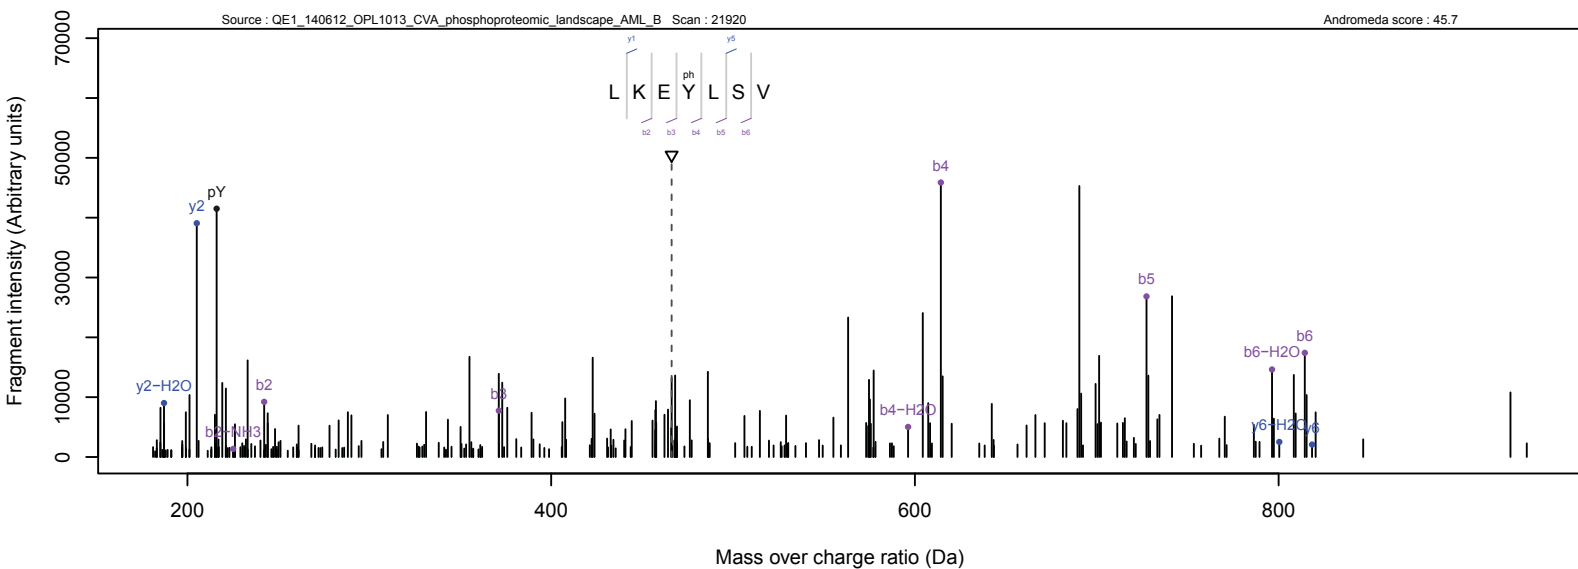

## GY(ph)CTPLVR-2+

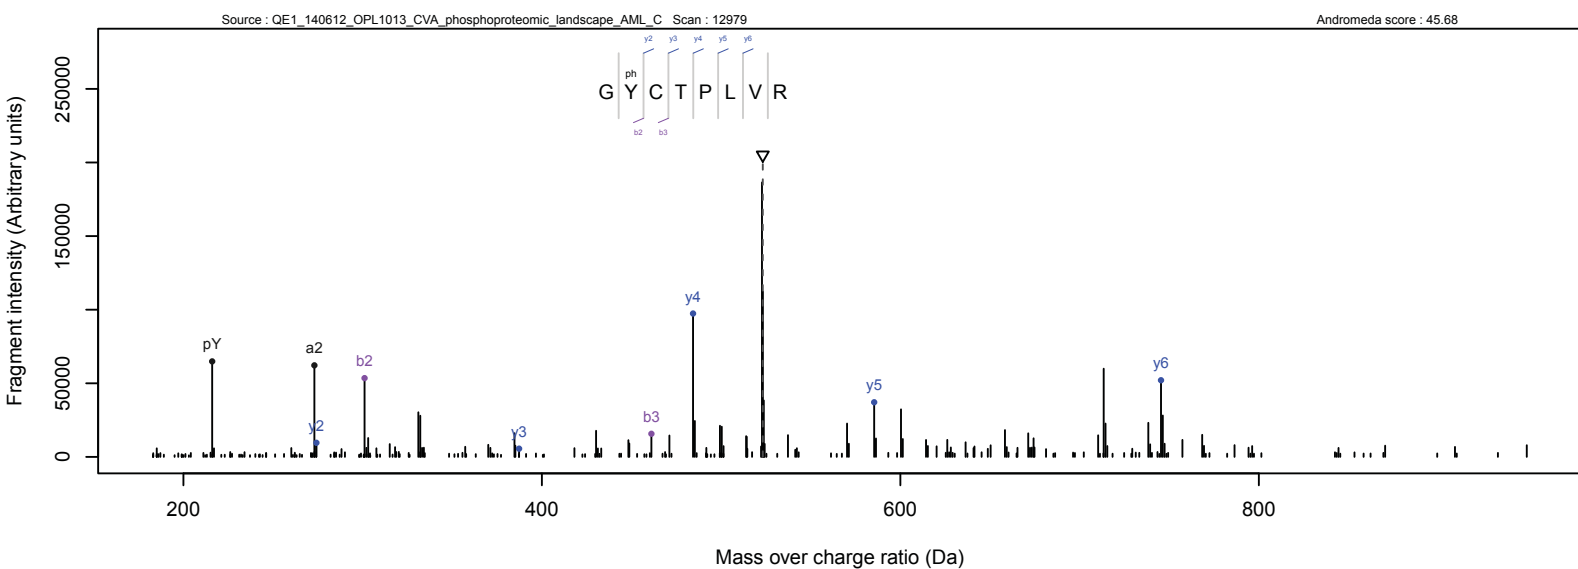

## NM(ox)AQY(ph)FKK-2+

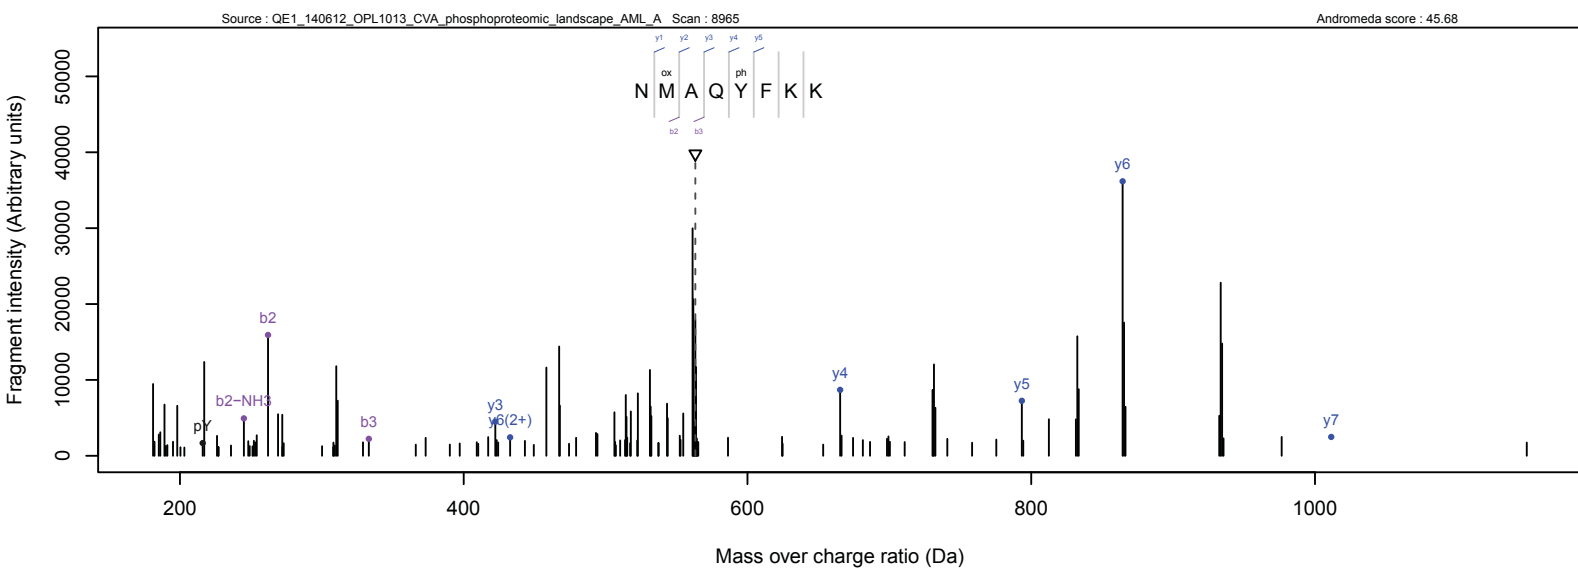

## QKLQY(ph)EGIFIK-2+

Source : QE1\_140612\_OPL1013\_CVA\_phosphoproteomic\_landscape\_AML\_B Scan : 26245

Andromeda score : 45.661

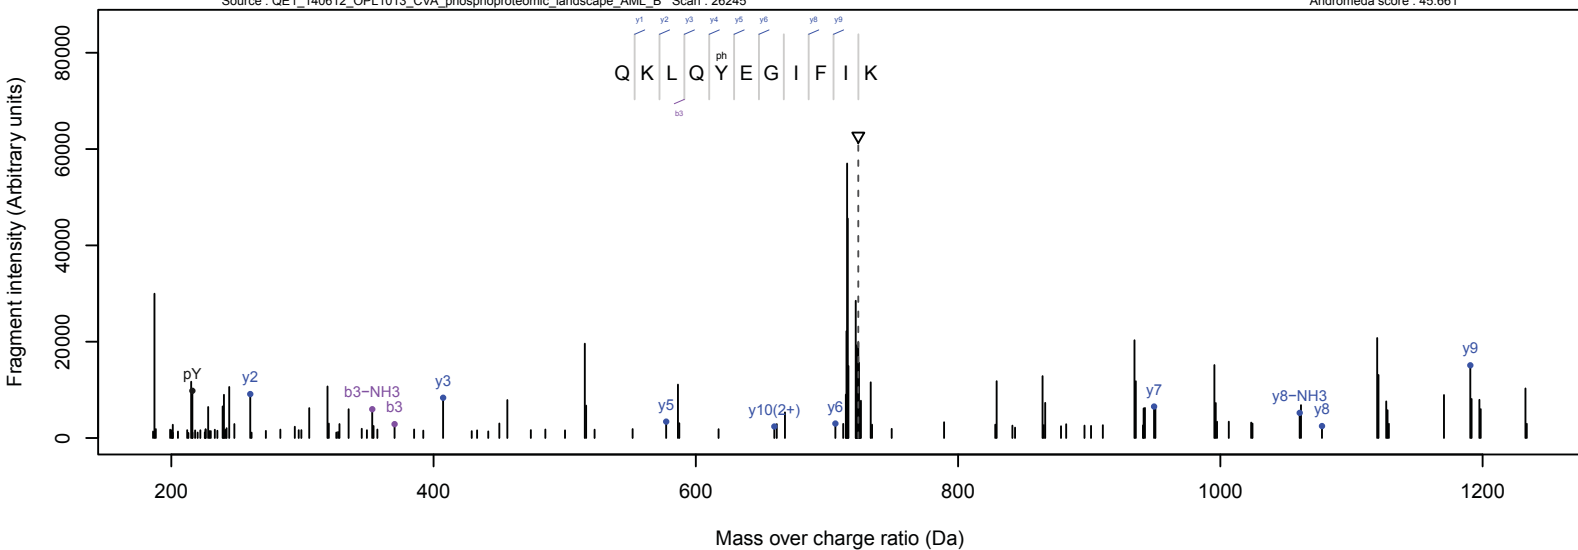

## GSSY(ph)SGLLER-2+

Source : QE1\_140908\_OPL1013\_CvA\_pTyrIP\_AML\_Kasumi6 Scan : 18739

Andromeda score : 45.653

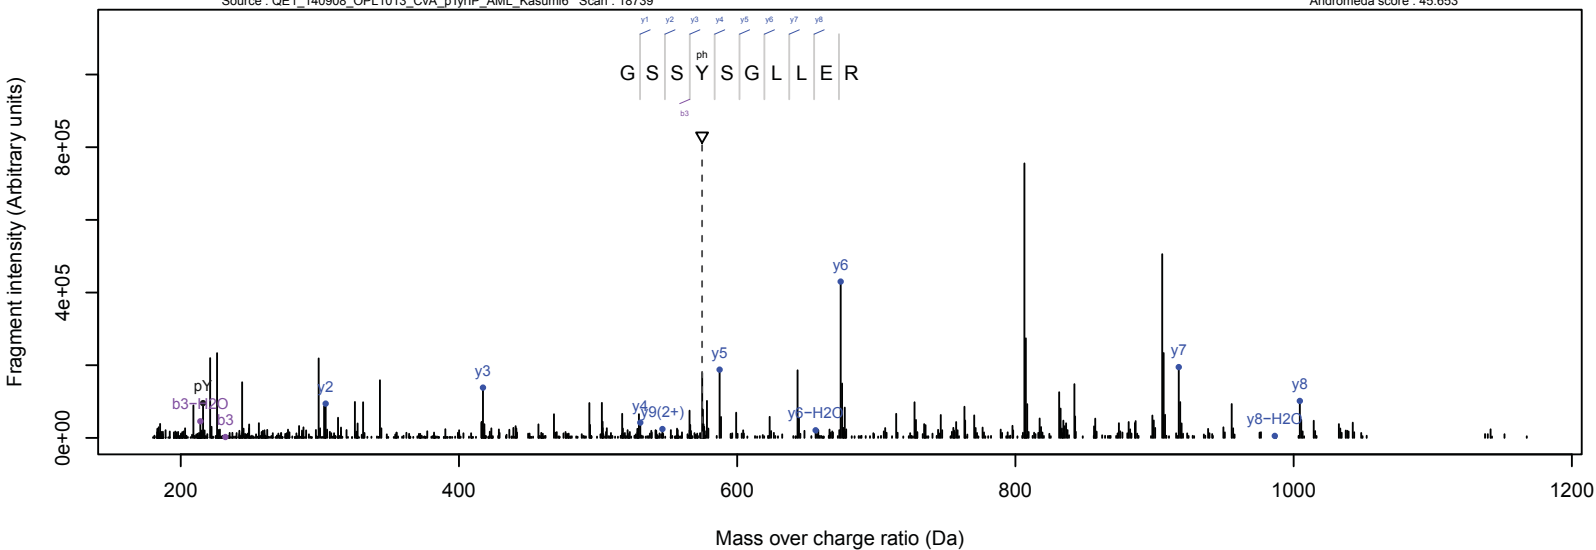

## AELHPVELKPFQDYQK-3+

Source : QE1\_140612\_OPL1013\_CVA\_phosphoproteomic\_landscape\_AML\_C Scan : 26336

Andromeda score : 45.618

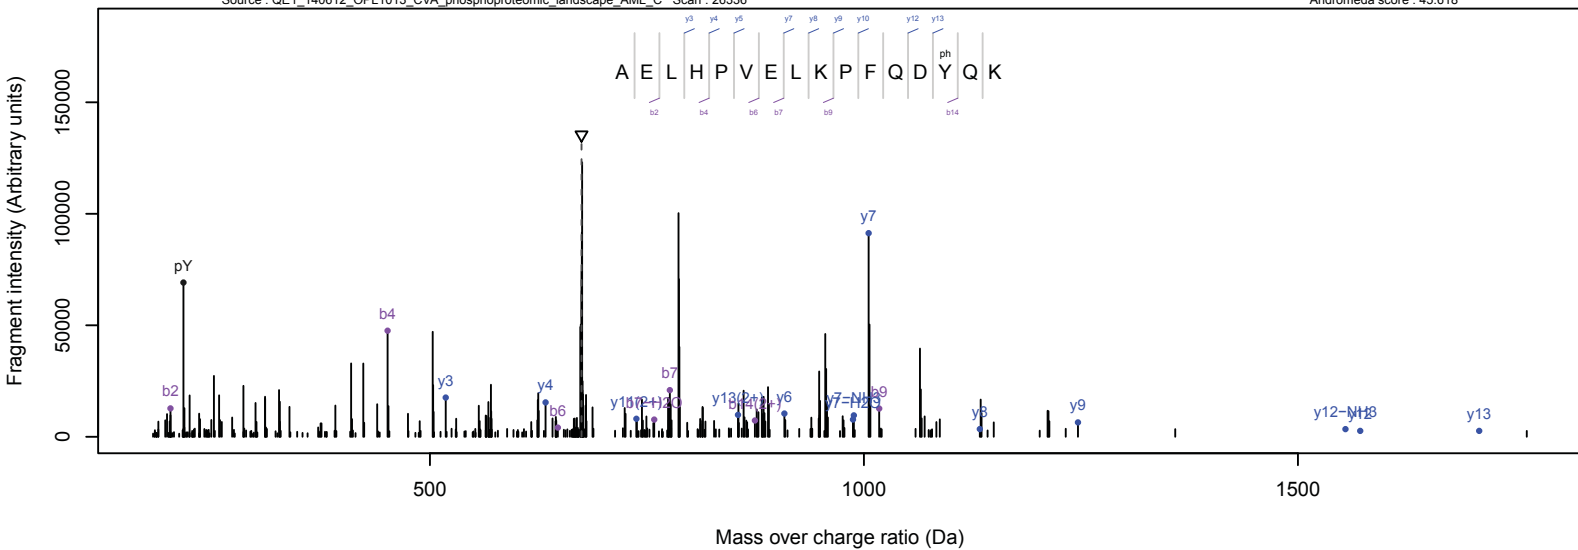

**KSDY(ph)LYSCGDETK-2+**

Source : QE1\_140908\_OPL1013\_CvA\_pTyrIP\_AML\_HEL Scan : 10364

Andromeda score : 45.614

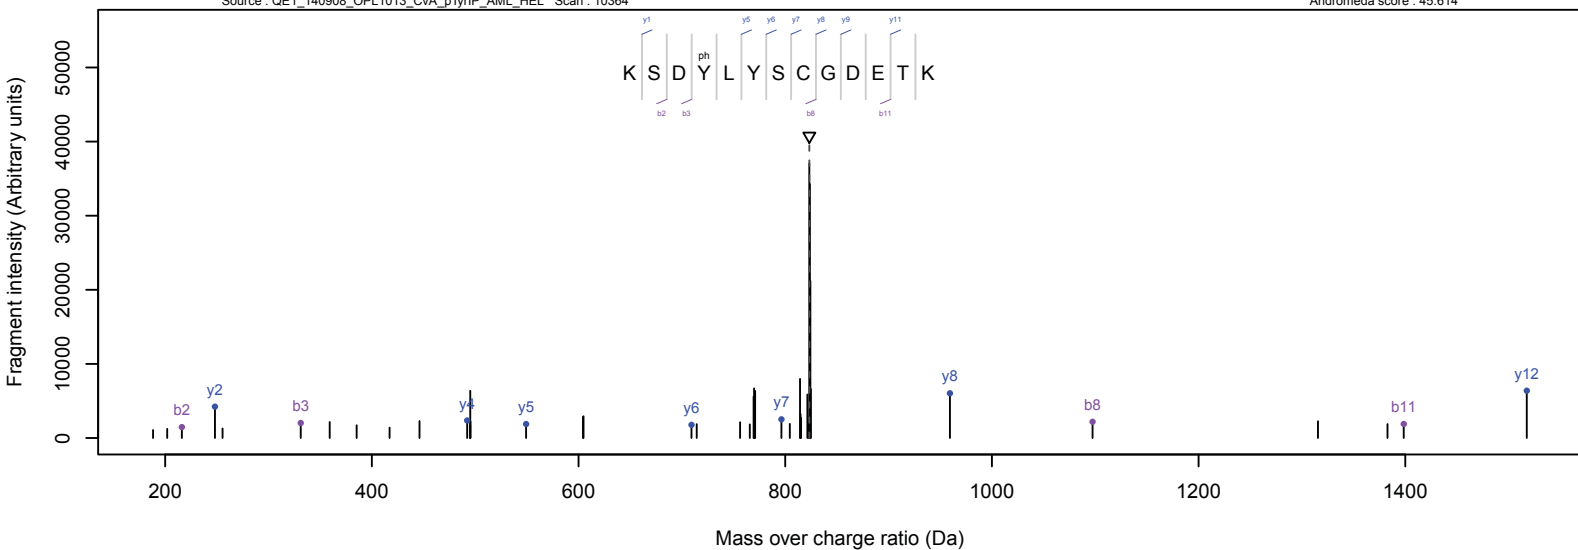

**KTGQAPG(ph)SYTAAANK-3+**

Source : QE1\_140612\_OPL1013\_CVA\_phosphoproteomic\_landscape\_AML\_C Scan : 5210

Andromeda score : 45.614

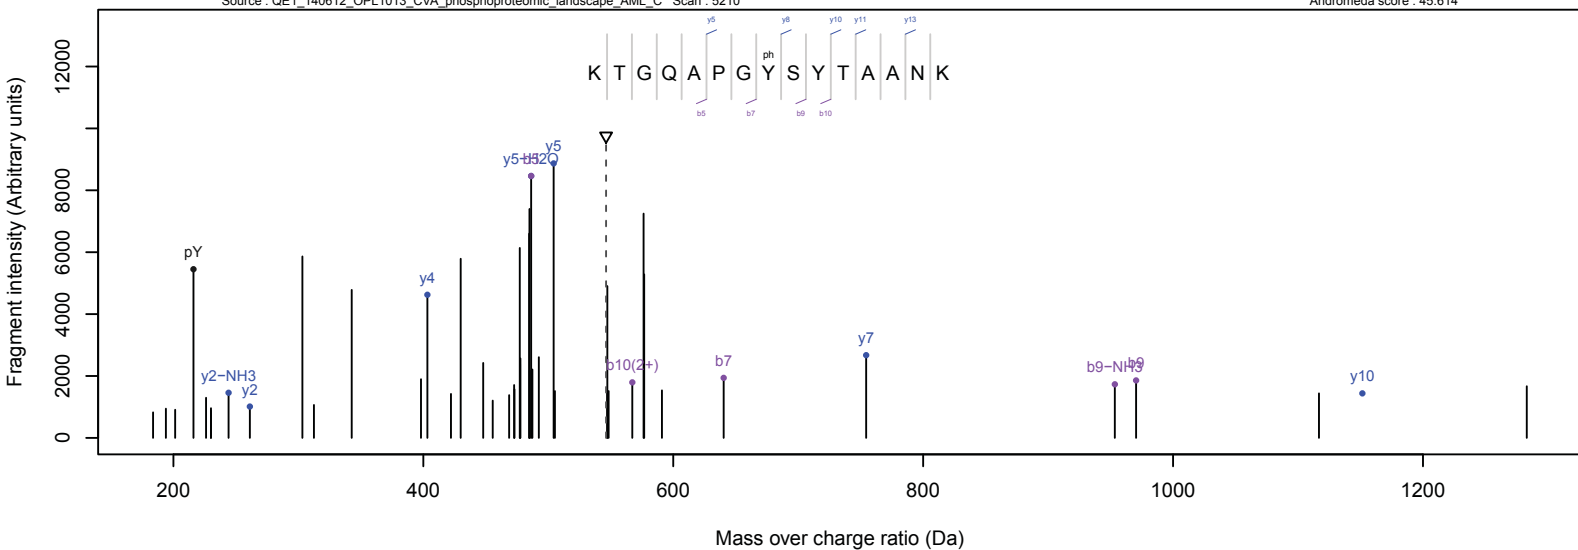

**LEPLGETHHNDFY(ph)R-3+**

Source : QE1\_140612\_OPL1013\_CVA\_phosphoproteomic\_landscape\_AML\_C Scan : 17506

Andromeda score : 45.614

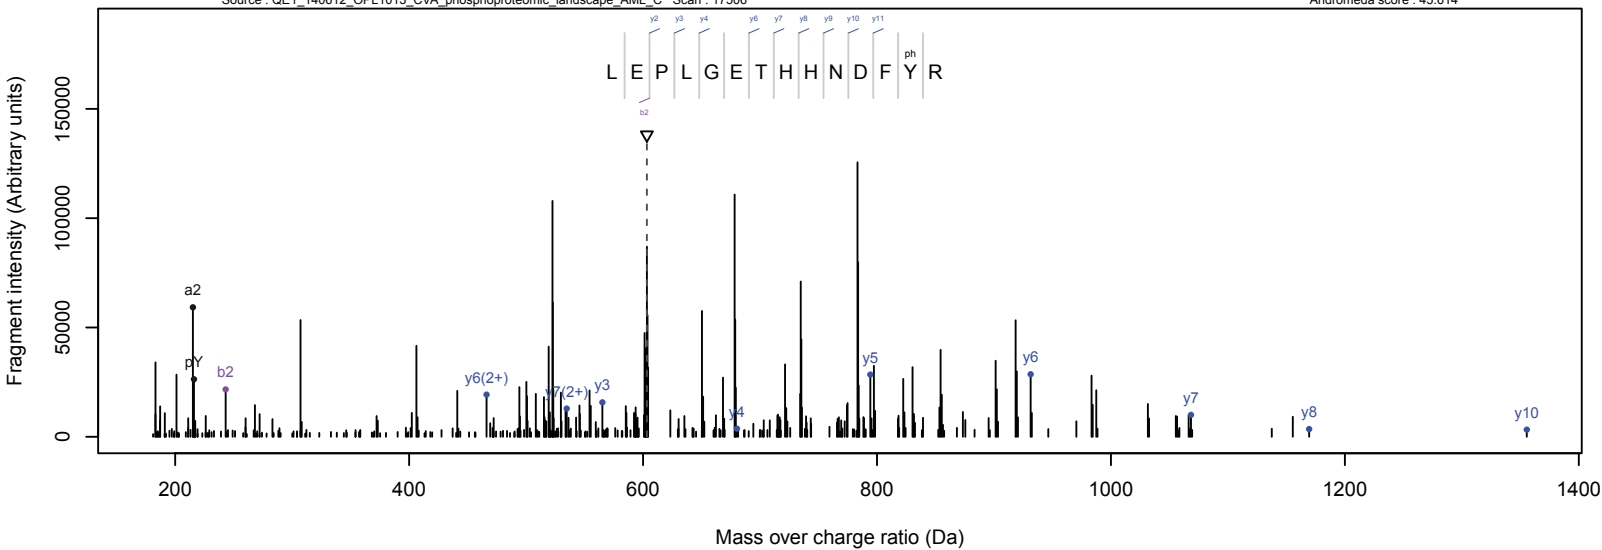

SSSY(ph)HLALQPPQR-3+

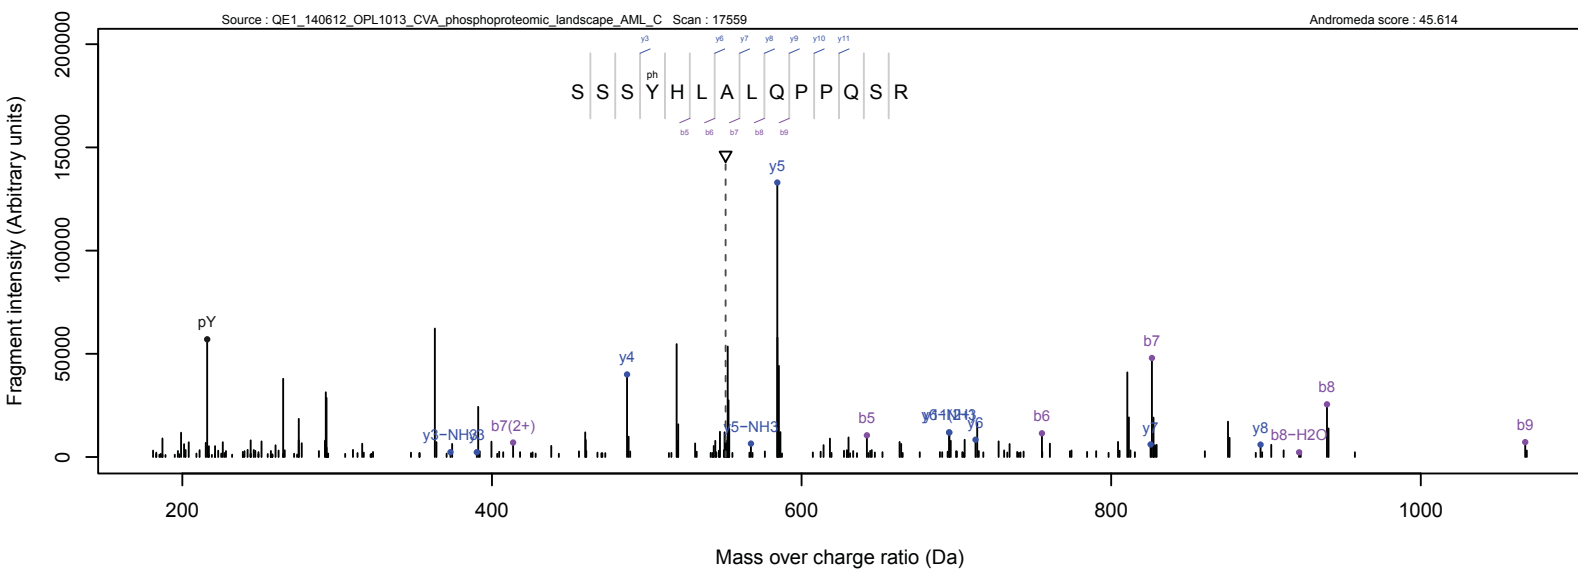

VINQY(ph)QVVKPTAER-3+

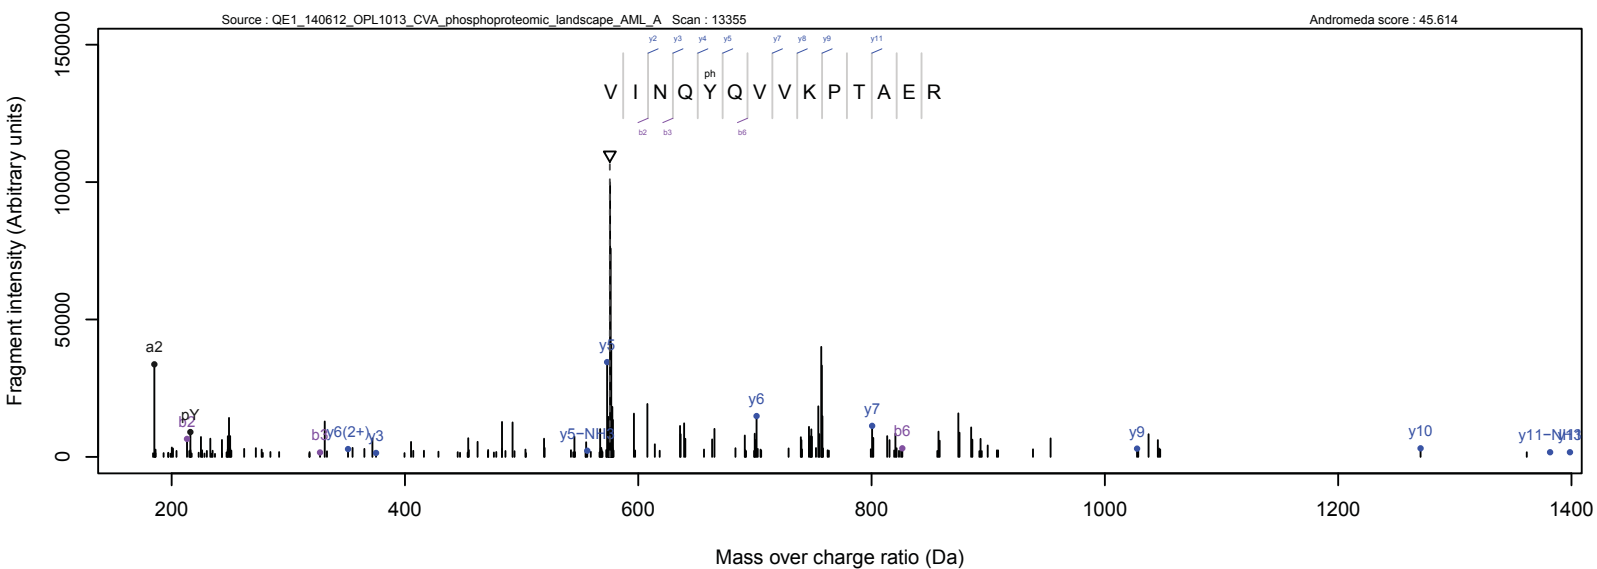

LY(ph)SCLDHR-3+

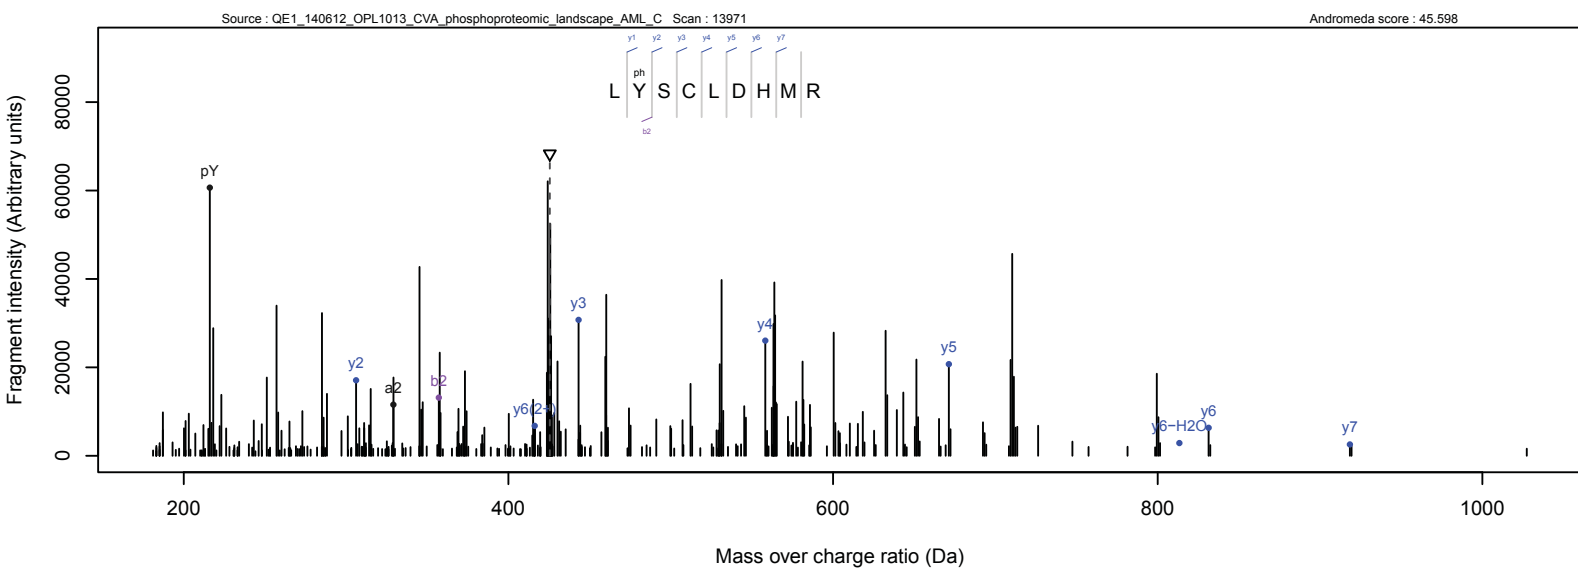



## S(ph)YVAWDREK-2+

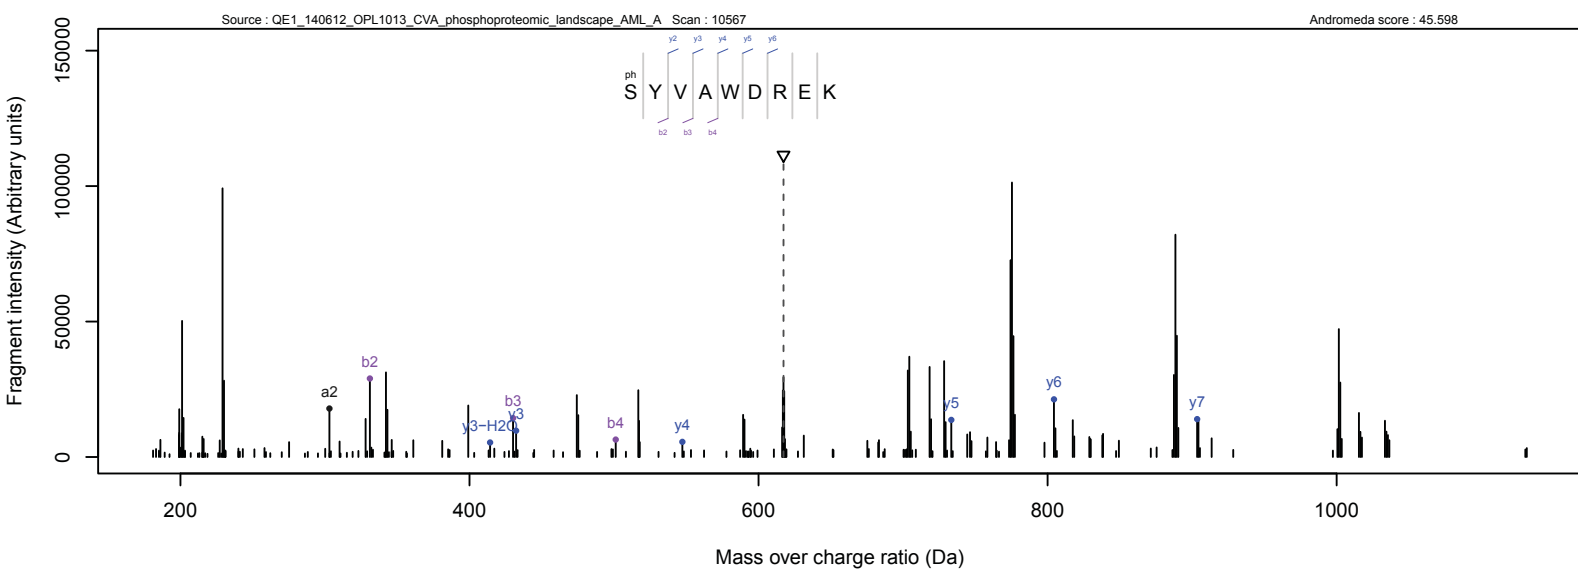

## VLPEIY(ph)LTR-2+

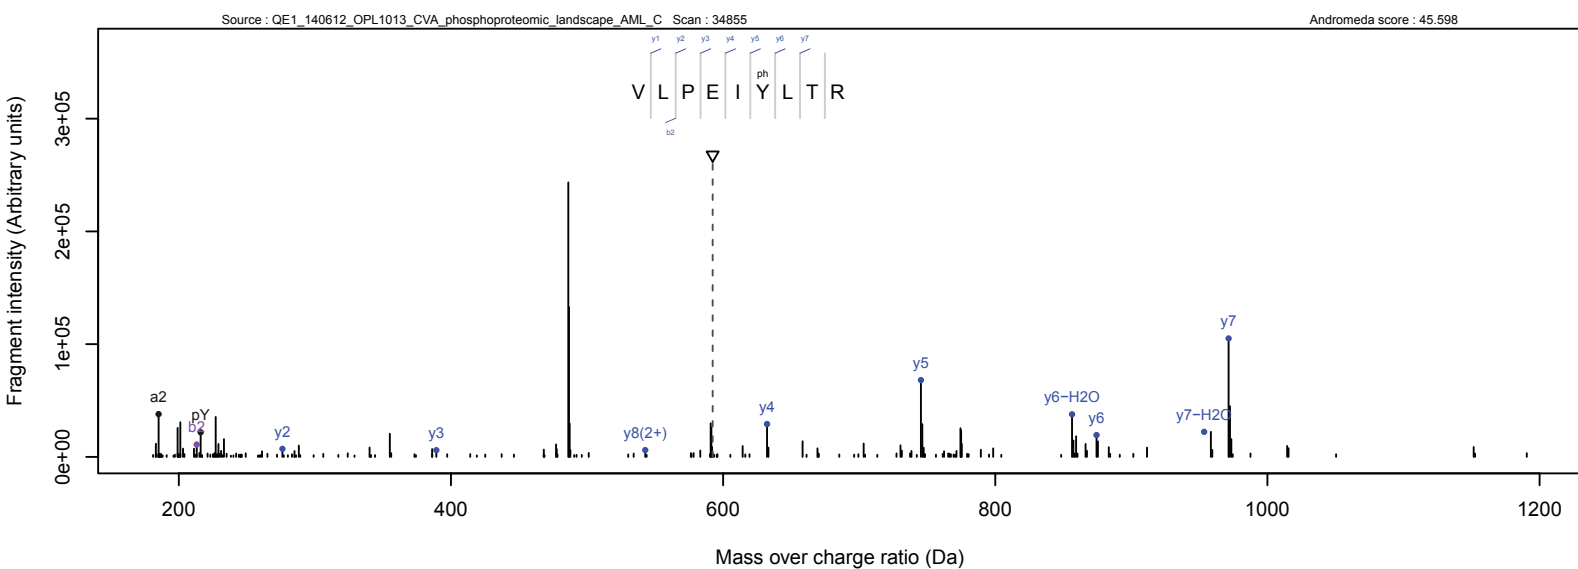

## Y(ph)LPALGYSK-2+

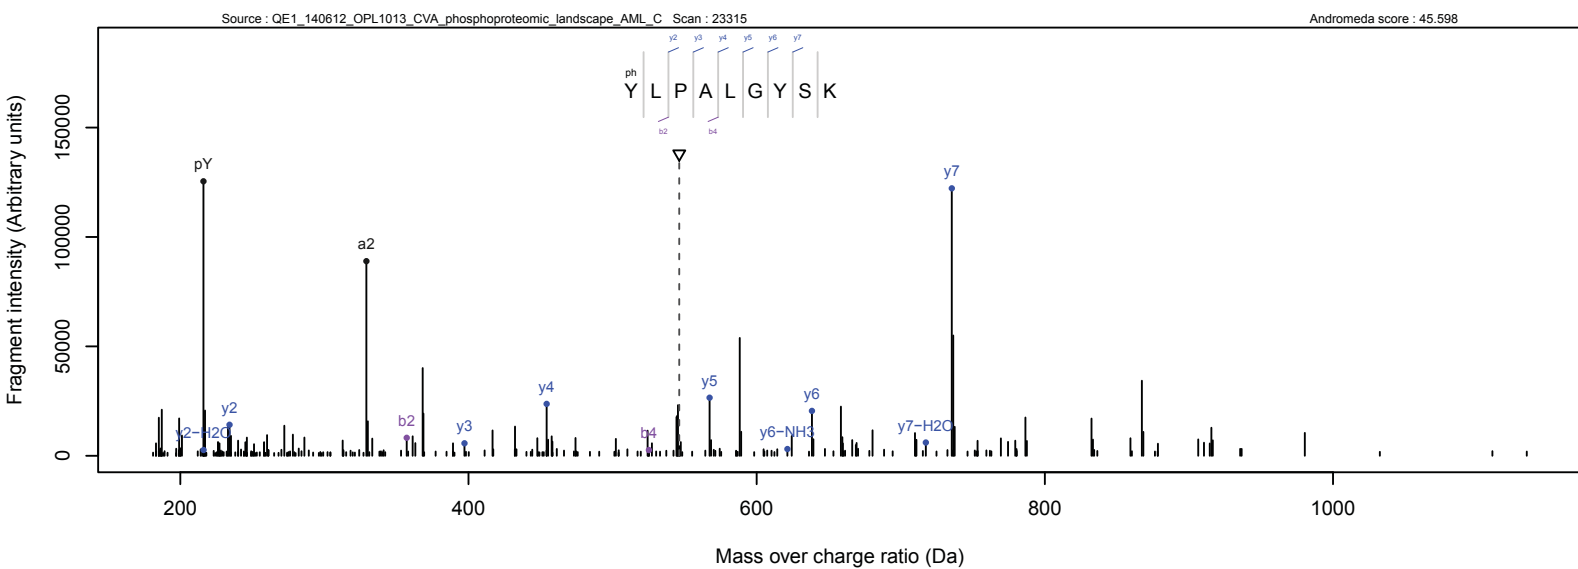

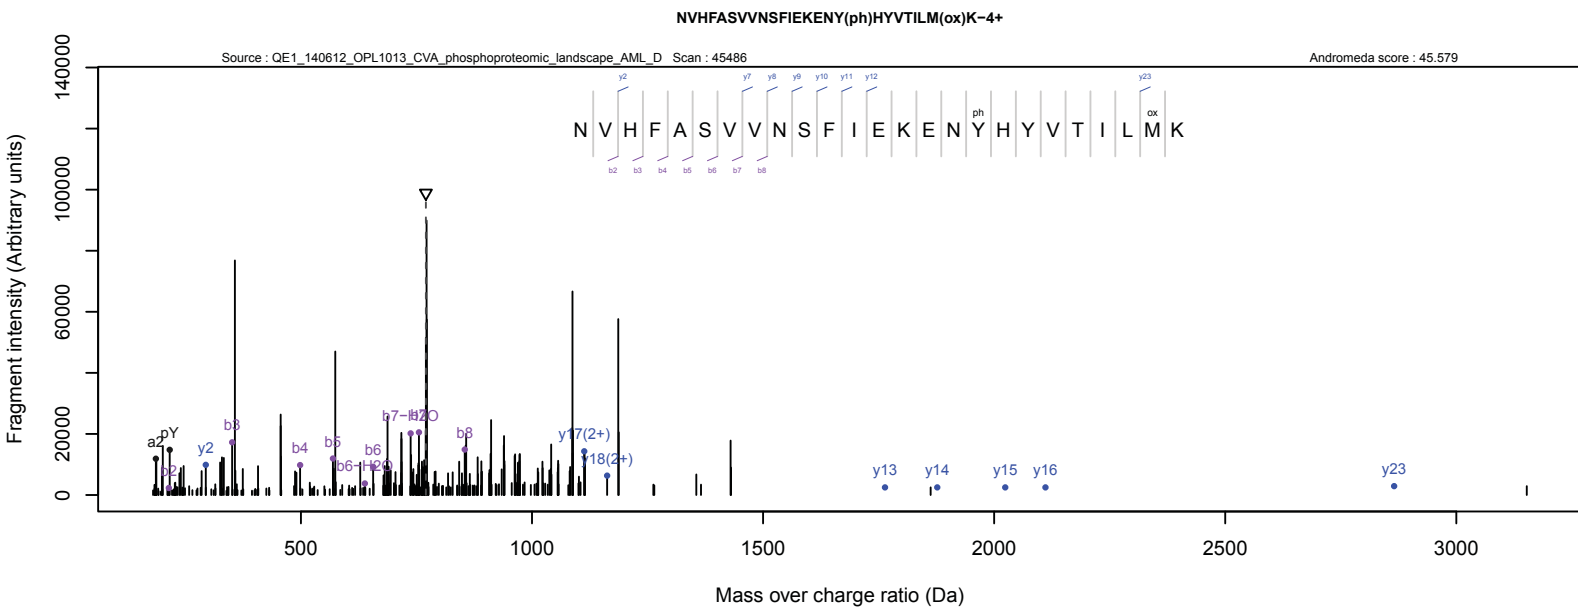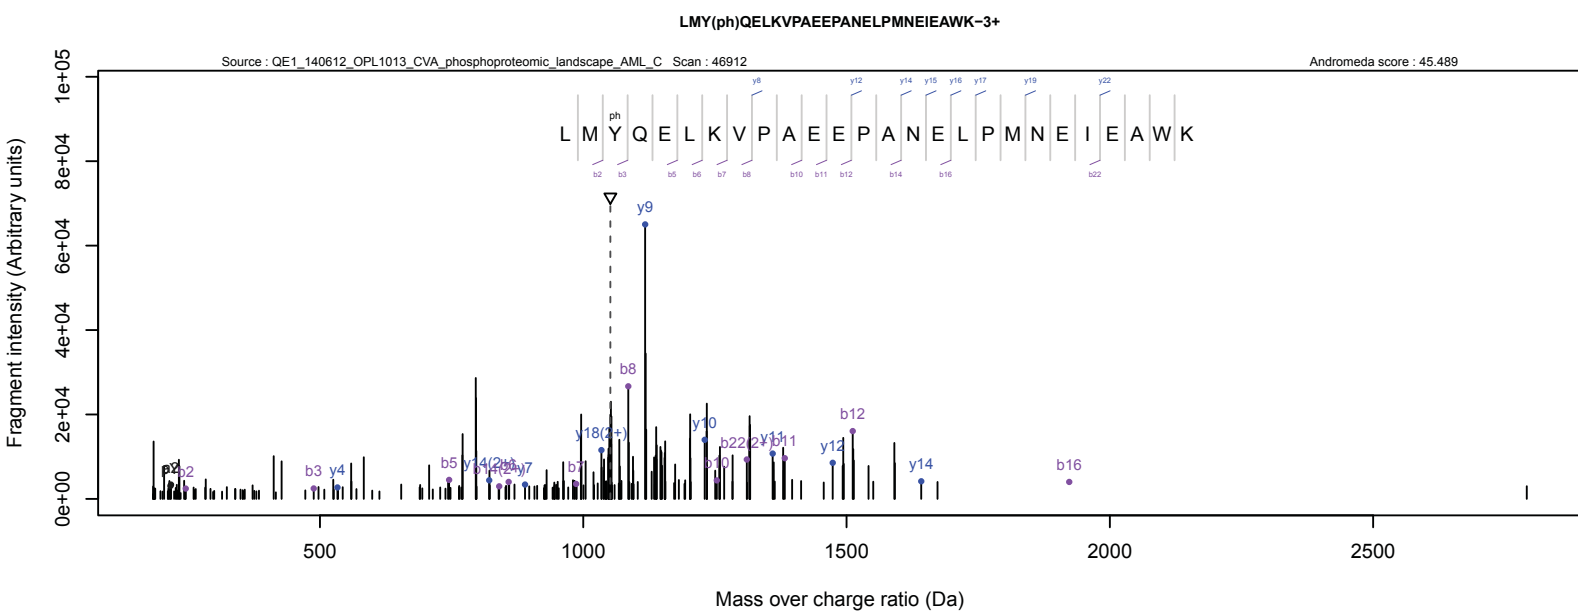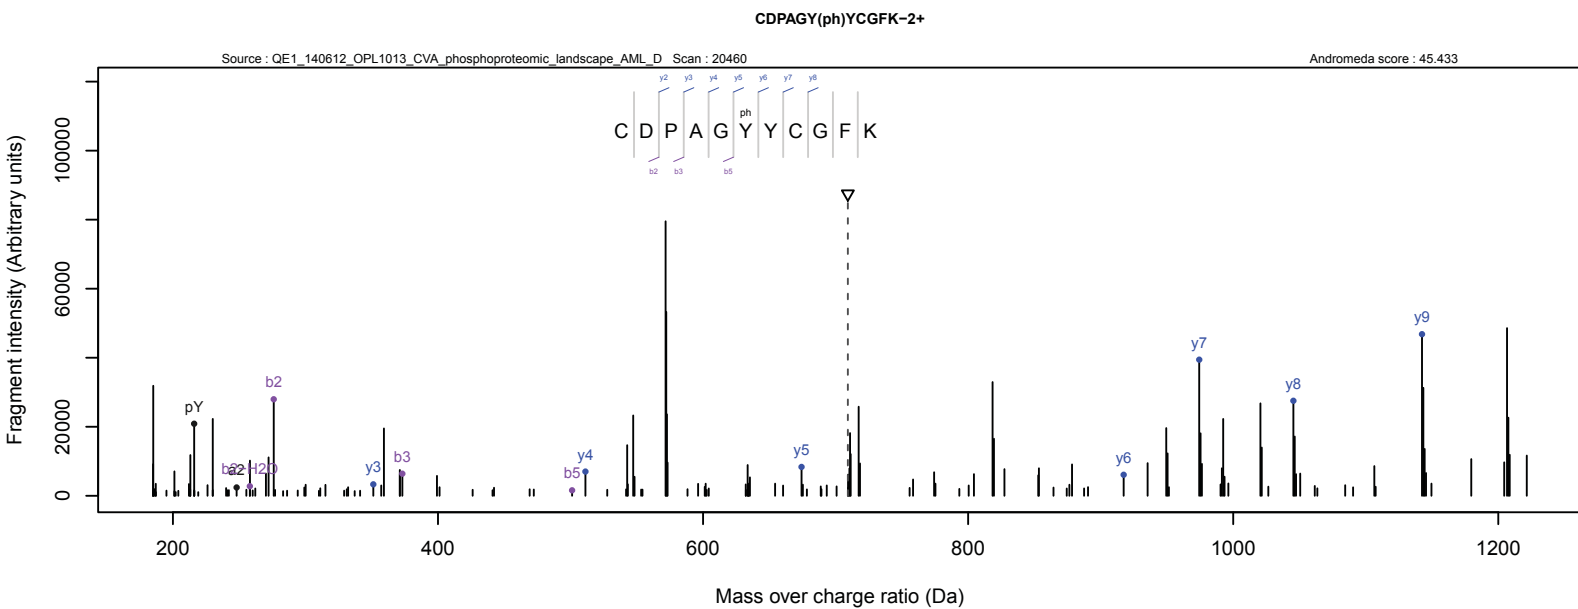

## FCLICNY(ph)VSR-2+

Source : QE1\_140612\_OPL1013\_CVA\_phosphoproteomic\_landscape\_AML\_C Scan : 30929

Andromeda score : 45.433

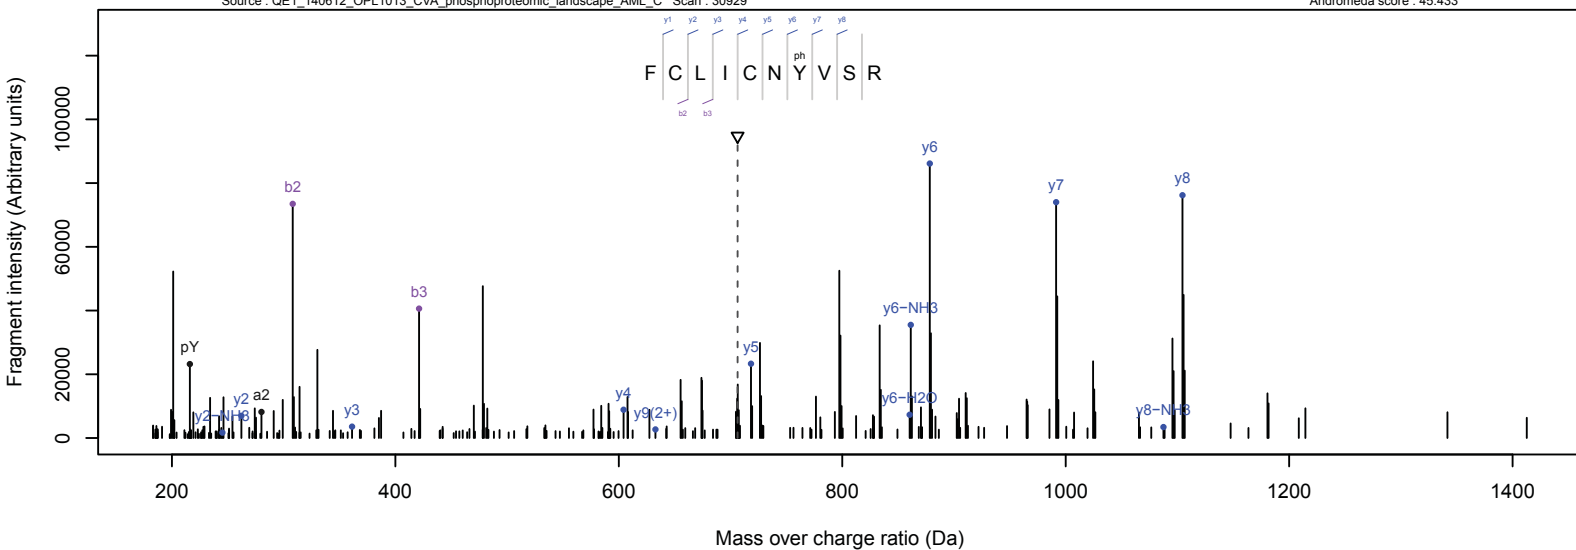

## LY(ph)LLAAPAAER-2+

Source : QE1\_140822\_OPL1013\_CvA\_pTyrIP\_AML\_cell\_lines\_part2\_E Scan : 25236

Andromeda score : 45.433

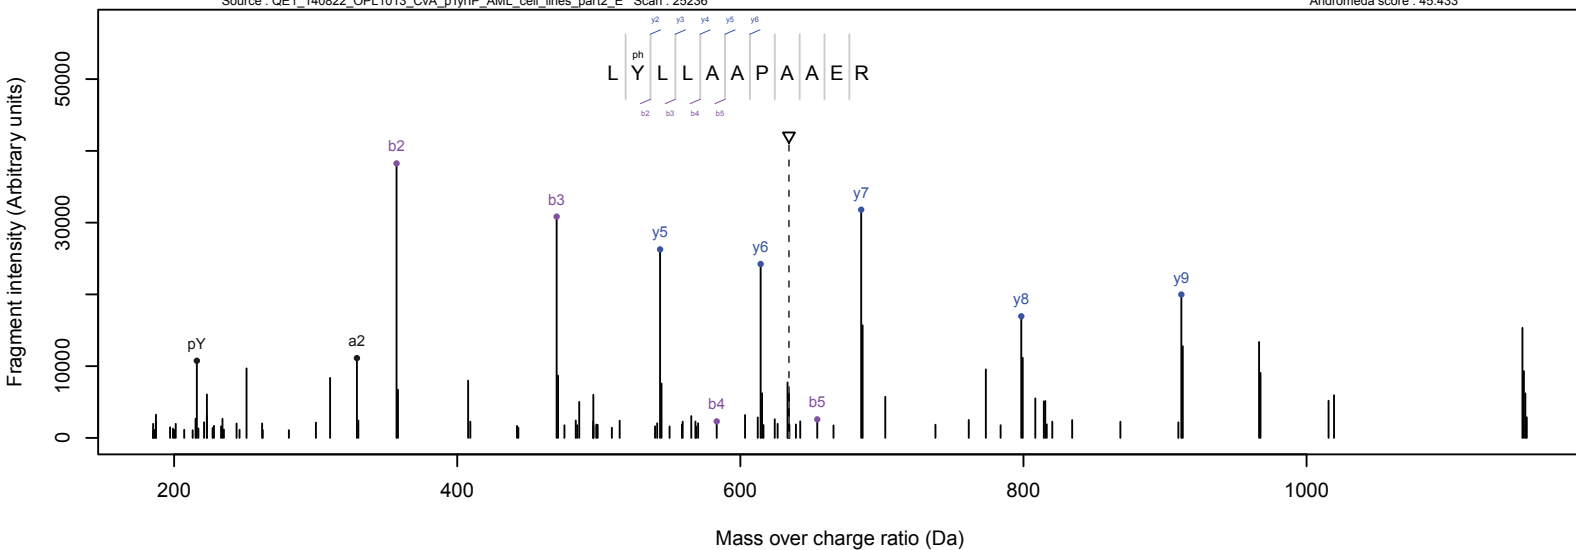

## TAQIGHVY(ph)PAR-2+

Source : QE1\_140612\_OPL1013\_CVA\_phosphoproteomic\_landscape\_AML\_C Scan : 9065

Andromeda score : 45.433

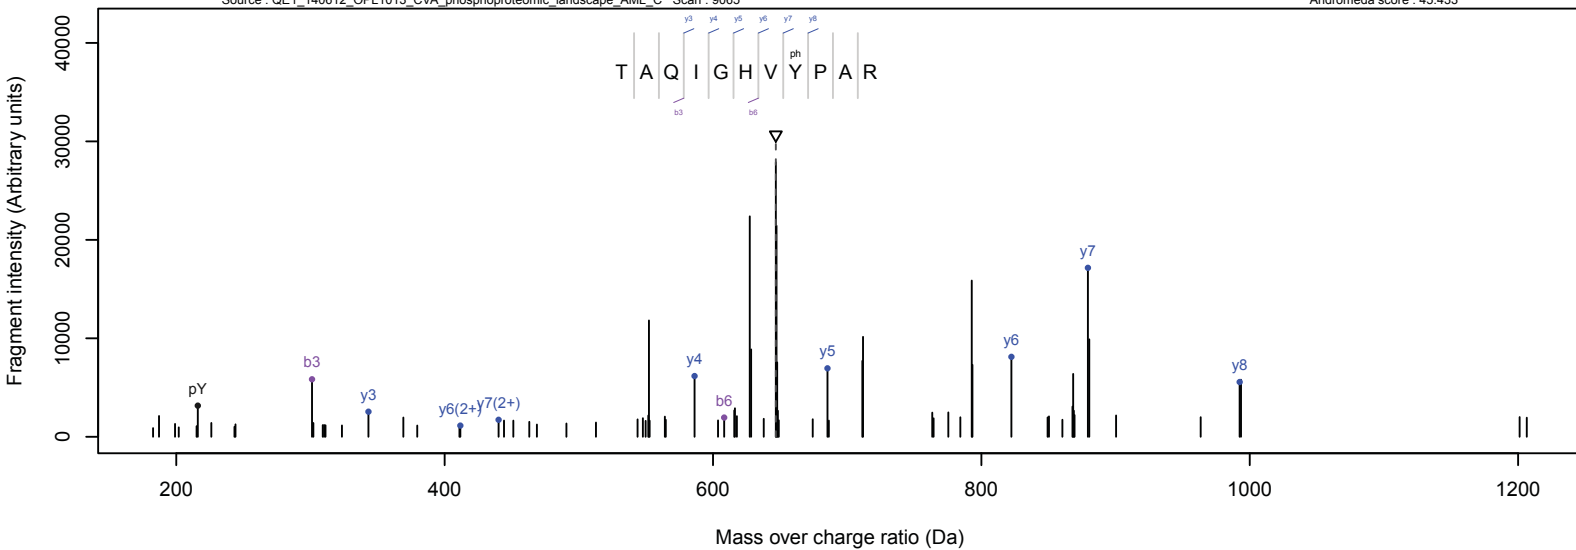

## TLSGM(ox)ES(ph)YCVR-2+

Source : QE1\_140908\_OPL1013\_CVA\_pTyrIP\_AML\_Kasumi6 Scan : 10311

Andromeda score : 45.433

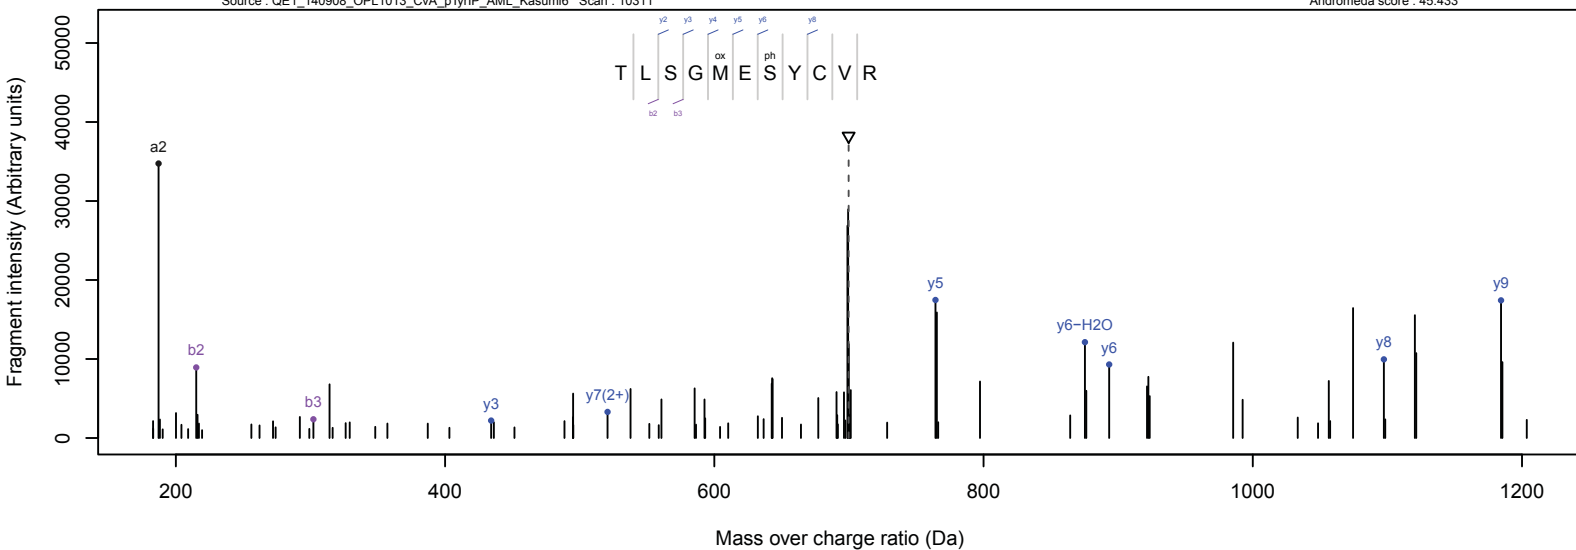

## VADMALHY(ph)ANK-2+

Source : QE1\_140612\_OPL1013\_CVA\_phosphoproteomic\_landscape\_AML\_A Scan : 12215

Andromeda score : 45.433

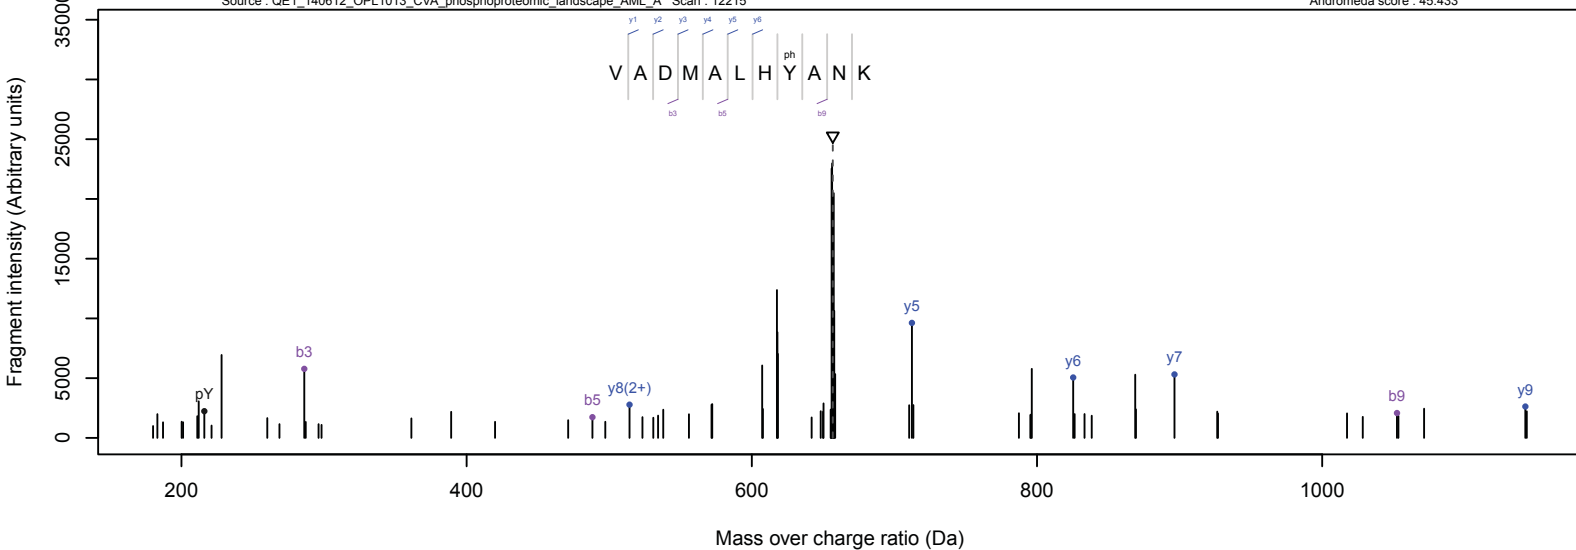

## AAGEPEAGSDY(ph)VKFSK-3+

Source : QE1\_140612\_OPL1013\_CVA\_phosphoproteomic\_landscape\_AML\_B Scan : 14218

Andromeda score : 45.384

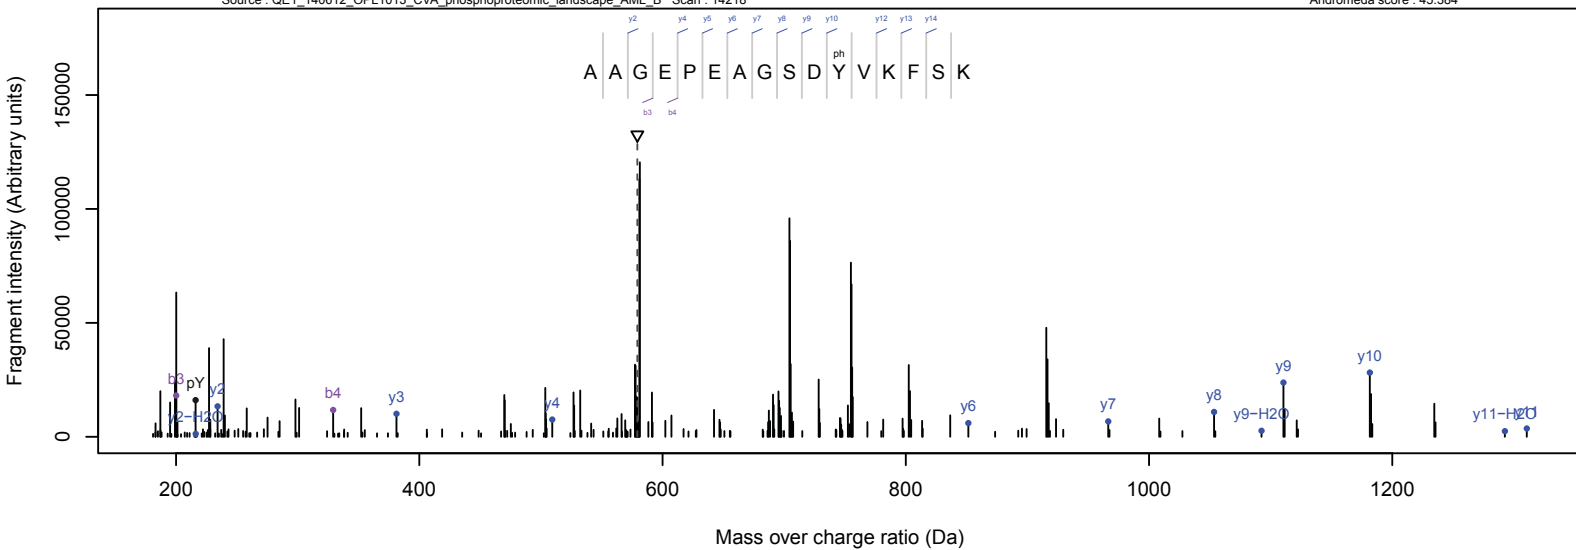

## PFPNSMY(ph)DRPPSGK-3+

Source : QE1\_140612\_OPL1013\_CVA\_phosphoproteomic\_landscape\_AML\_B Scan : 22463

Andromeda score : 45.384

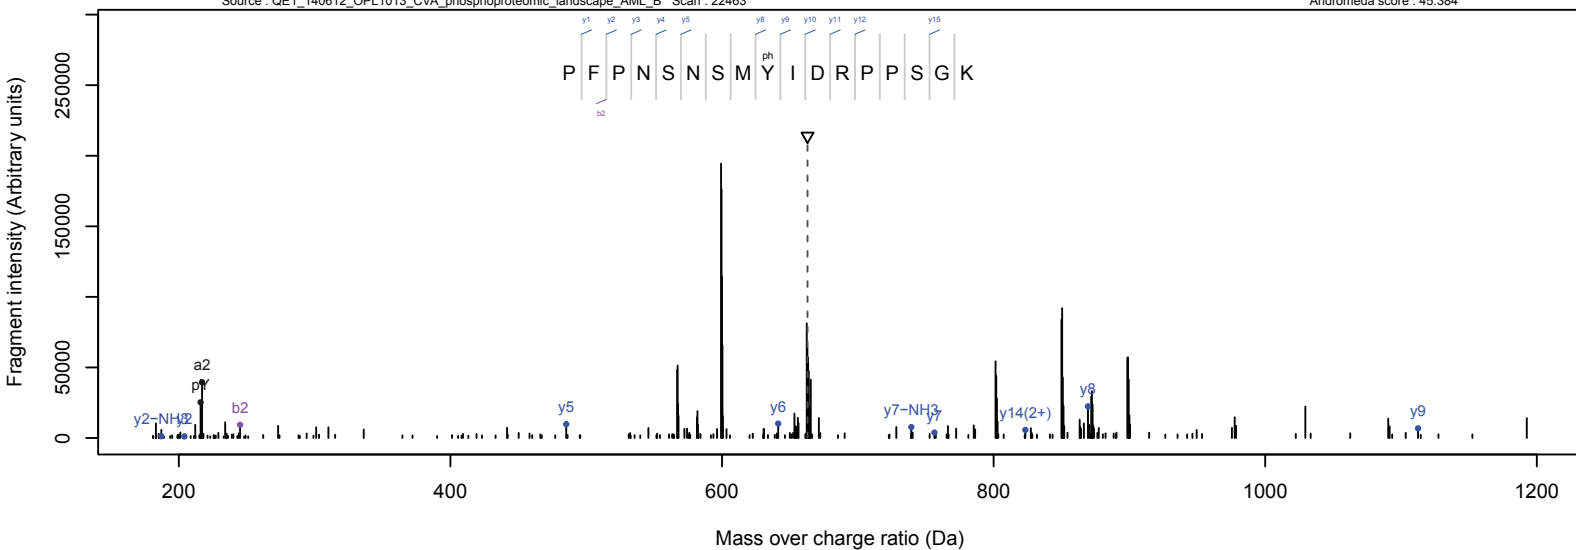

## EKPYFPIPEEY(ph)FIQNVPLEDR-3+

Source : QE1\_140822\_OPL1013\_CvA\_pTyrIP\_AML\_cell\_lines\_part2\_B Scan : 42552

Andromeda score : 45.363

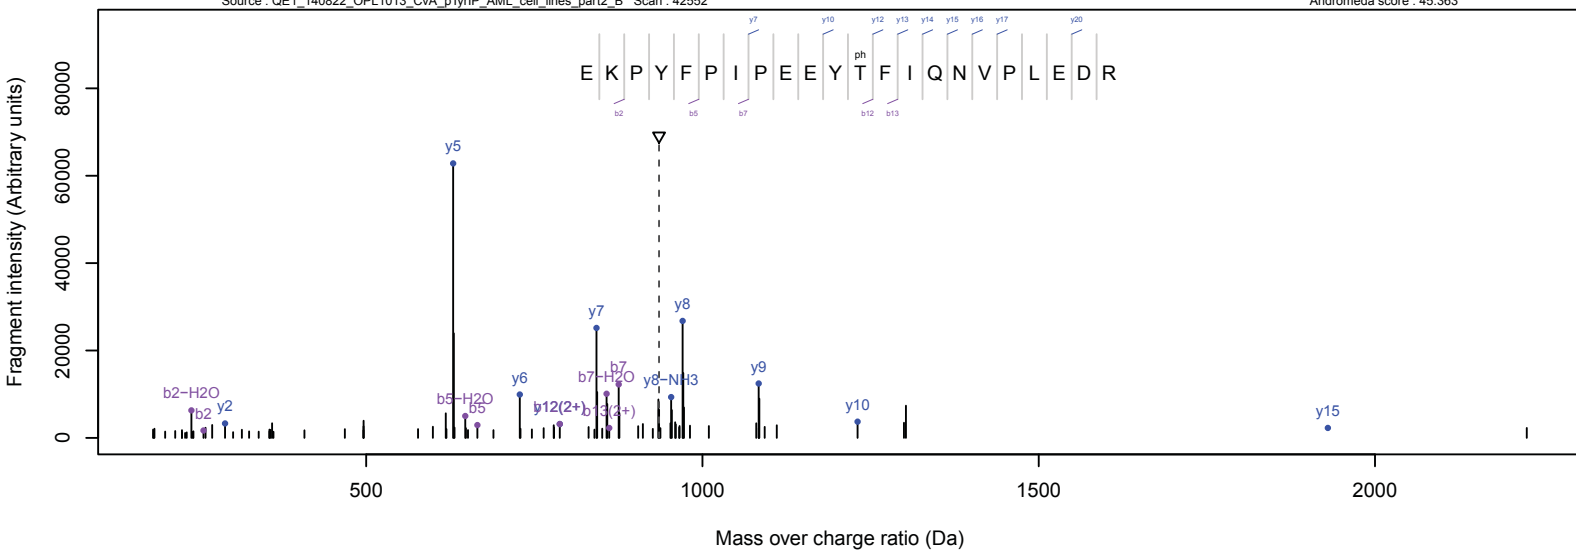

## QGVTSVTCGGY(ph)VYTTGR-3+

Source : QE1\_140612\_OPL1013\_CVA\_phosphoproteomic\_landscape\_AML\_B Scan : 15192

Andromeda score : 45.347

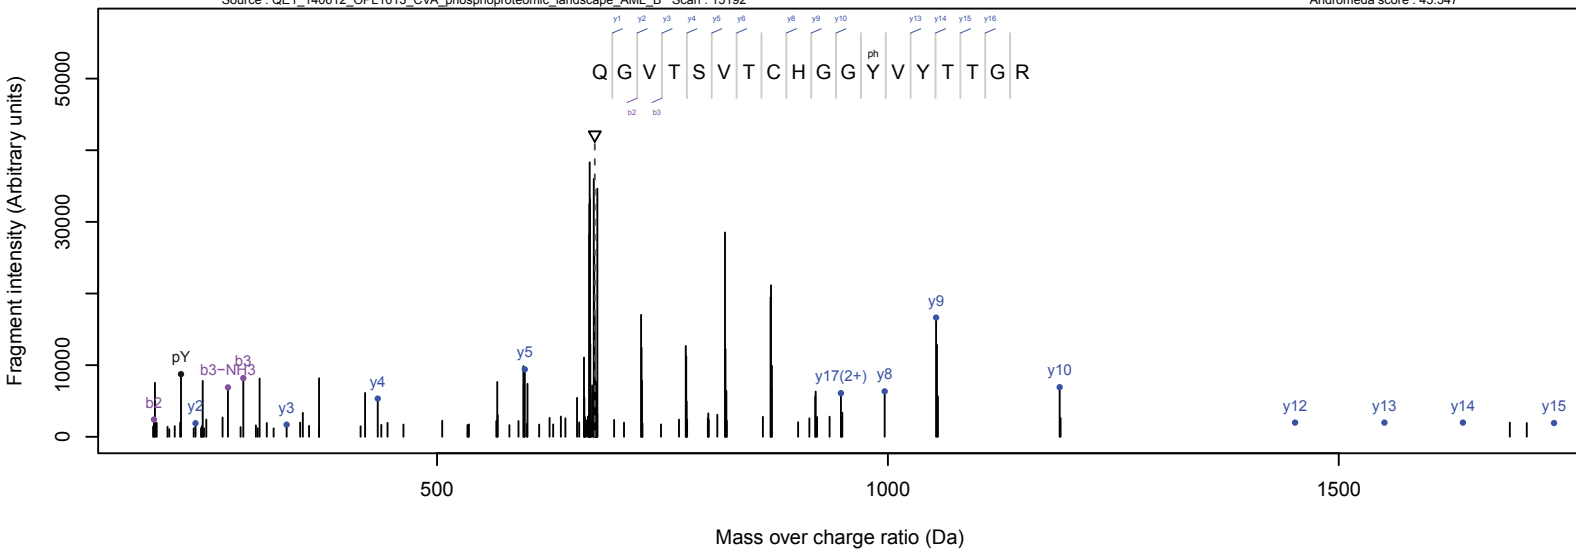

## LFQIQ(ph)SDGSDEVKR-3+

Source : QE1\_140612\_OPL1013\_CVA\_phosphoproteomic\_landscape\_AML\_B Scan : 21273

Andromeda score : 45.332

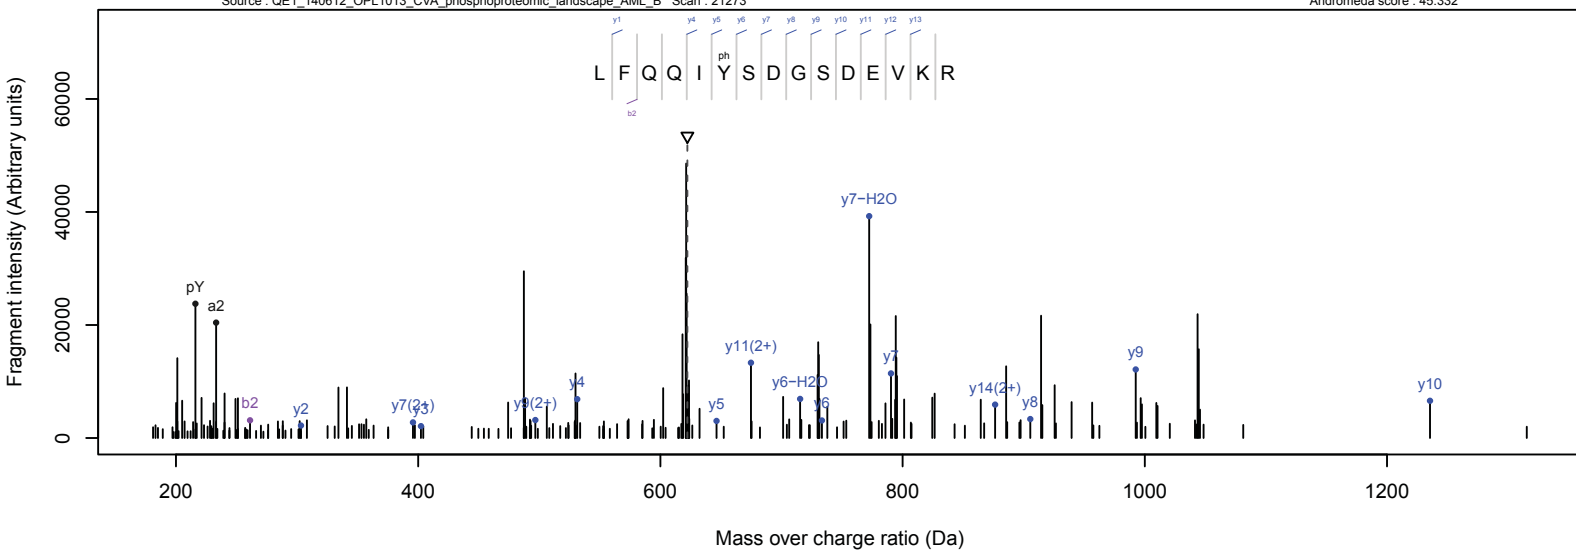

## GPEEKPAQESNY(ph)R-3+

Source : QE1\_140822\_OPL1013\_CvA\_pTyrIP\_AML\_cell\_lines\_part2\_E Scan : 2757

Andromeda score : 45.28

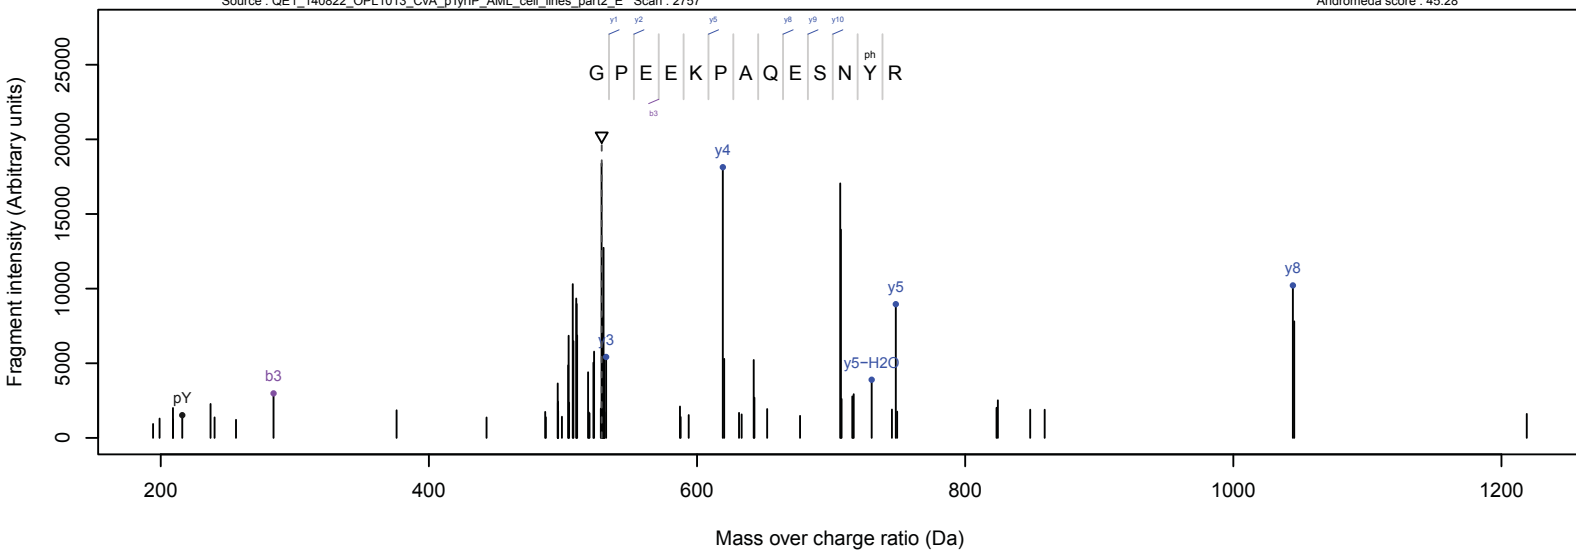

## KSTLY(ph)FNTQEK-2+

Source : QE1\_140612\_OPL1013\_CVA\_phosphoproteomic\_landscape\_AML\_C Scan : 13384

Andromeda score : 45.28

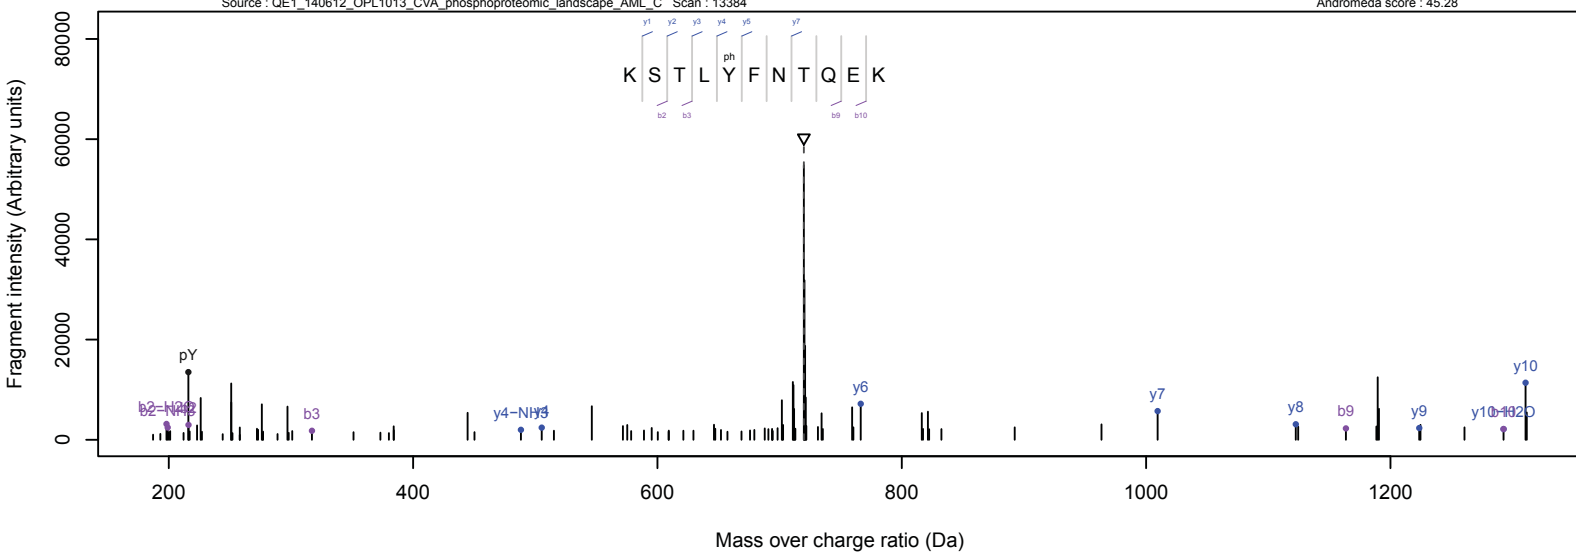

## LNVGGTY(ph)FLTR-2+

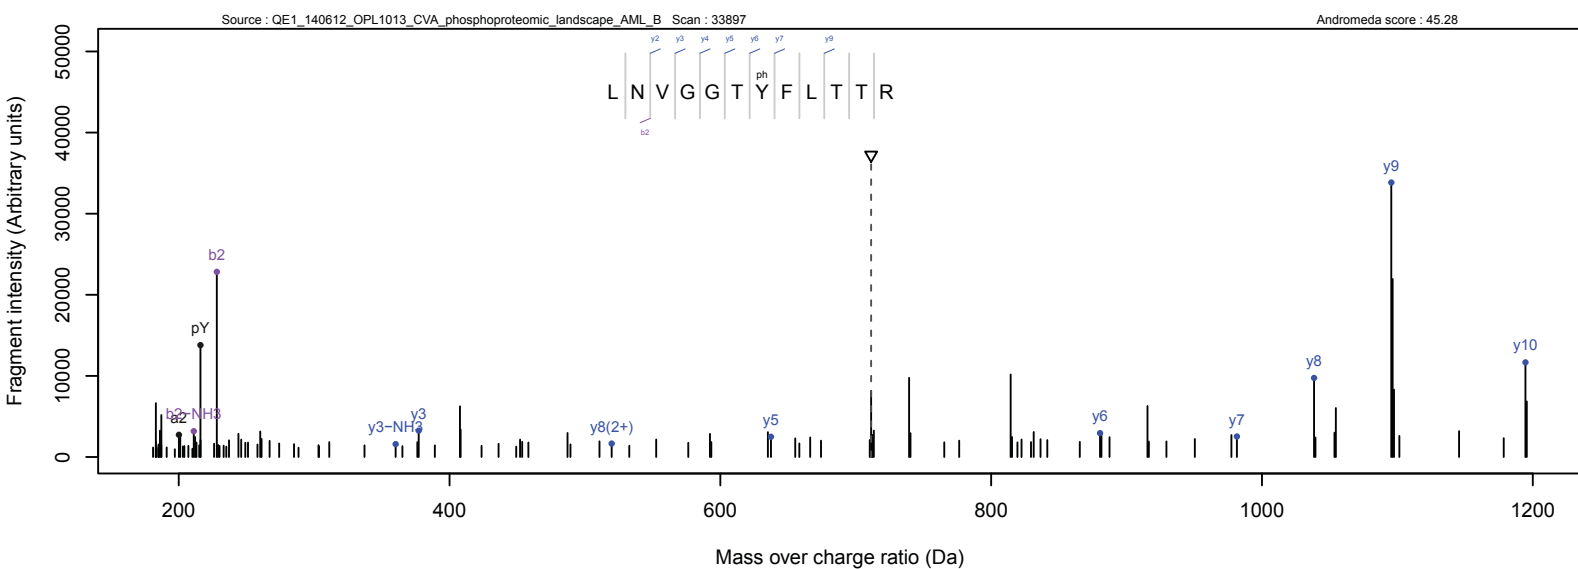

## NNASTDY(ph)DLSDK-2+

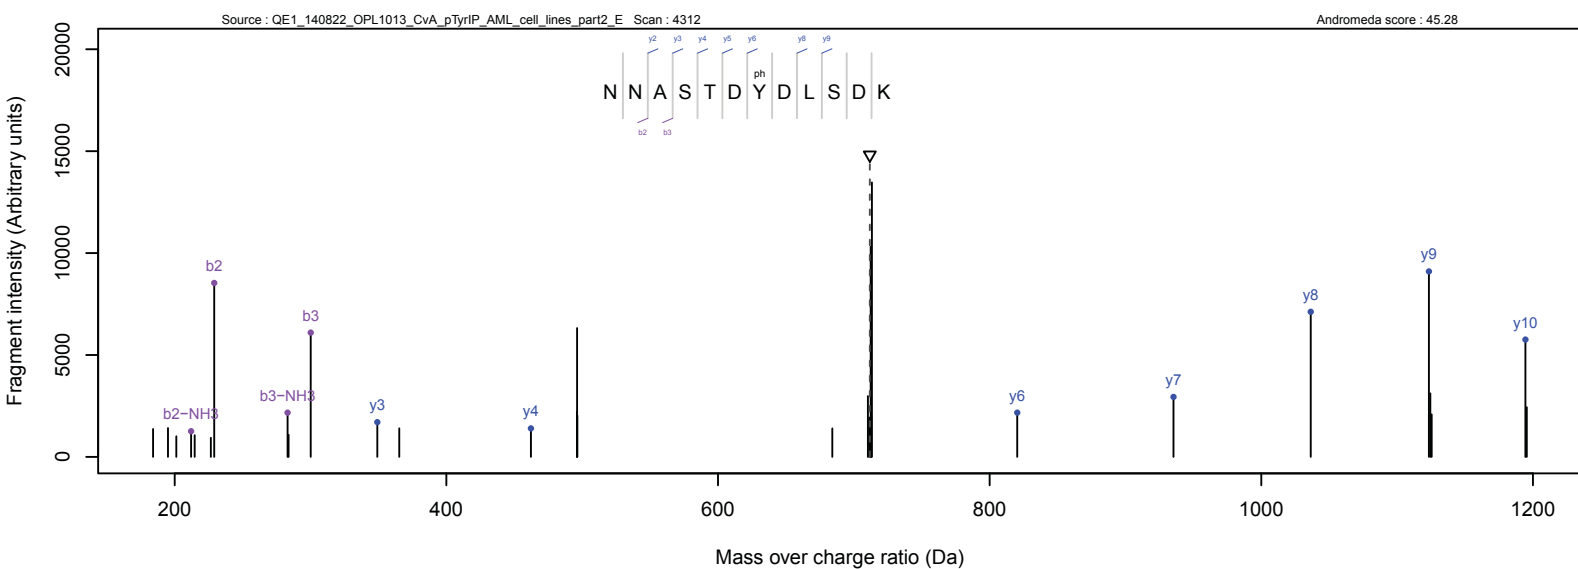

## VIEAY(ph)CTSANFQQGHGSSTR-3+

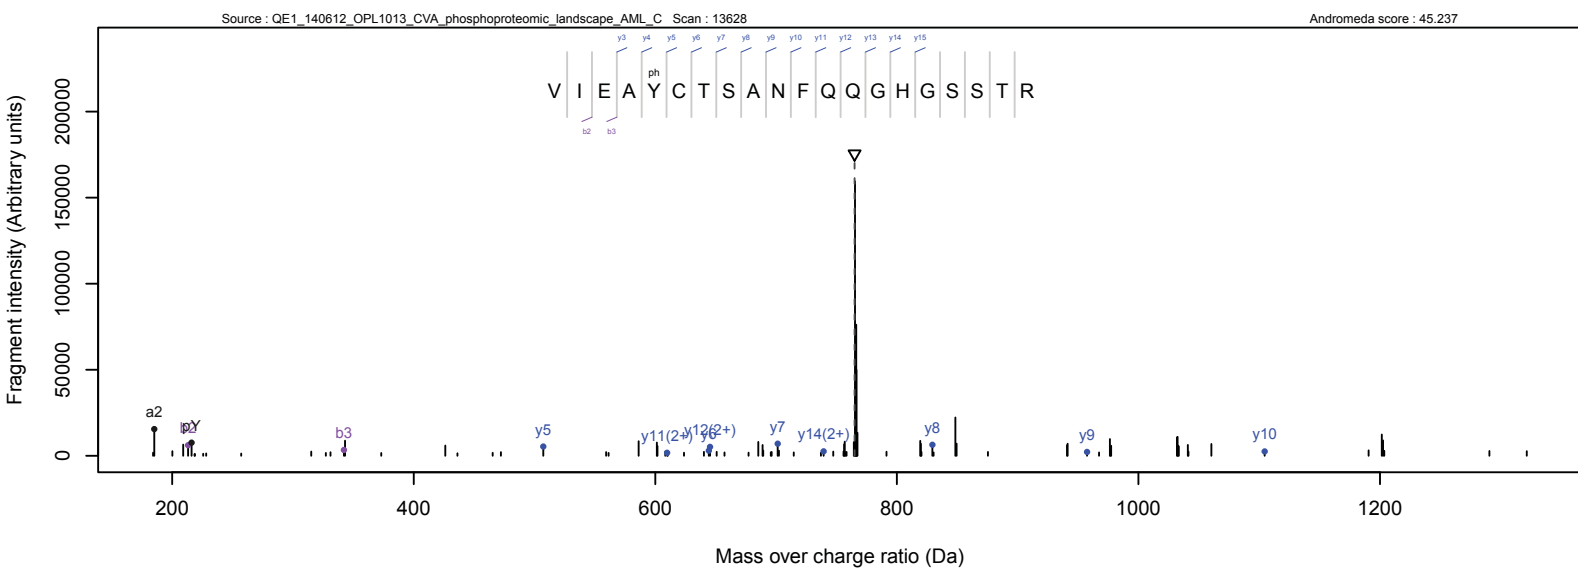

VSSYPVALIPGQFQEY<sup>ph</sup>YKR-2+

Source : QE1\_140612\_OPL1013\_CVA\_phosphoproteomic\_landscape\_AML\_C Scan : 39902

Andromeda score : 45.221

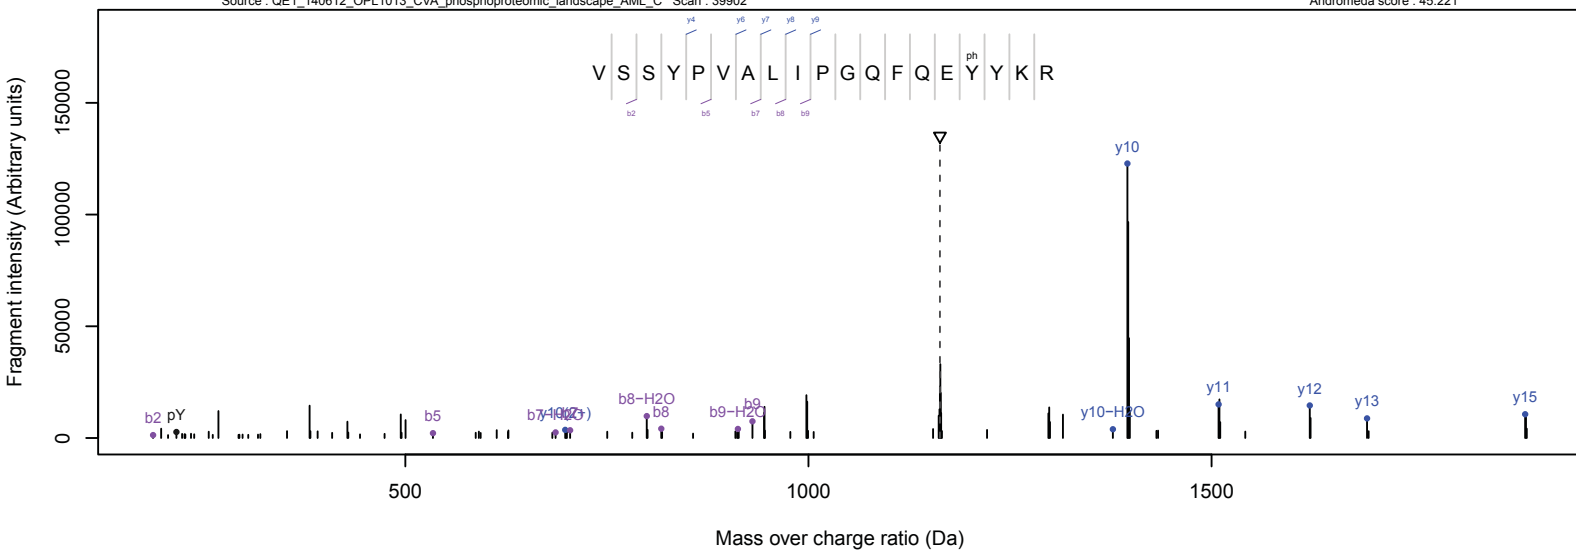NRLDY<sup>ph</sup>HISVQNMMR-3+

Source : QE1\_140612\_OPL1013\_CVA\_phosphoproteomic\_landscape\_AML\_B Scan : 26623

Andromeda score : 45.207

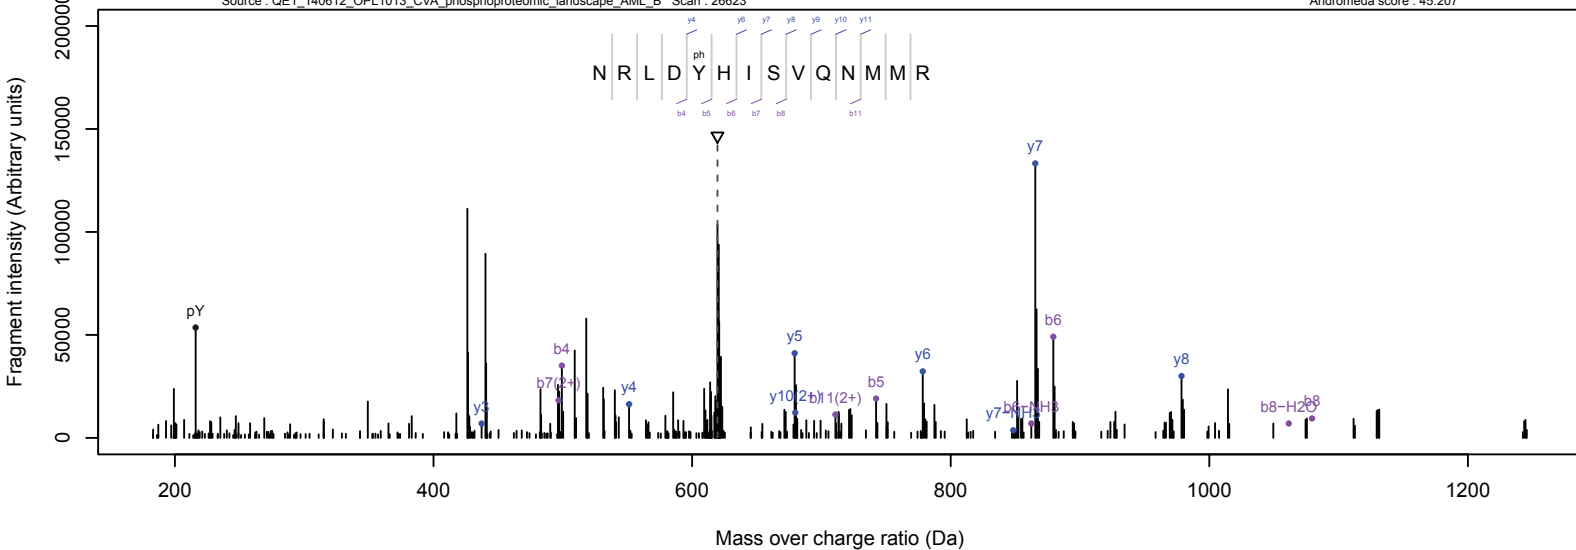LSEPVPQTNAHESKEWY<sup>ph</sup>HASLTR-4+

Source : QE1\_140612\_OPL1013\_CVA\_phosphoproteomic\_landscape\_AML\_A Scan : 20791

Andromeda score : 45.205

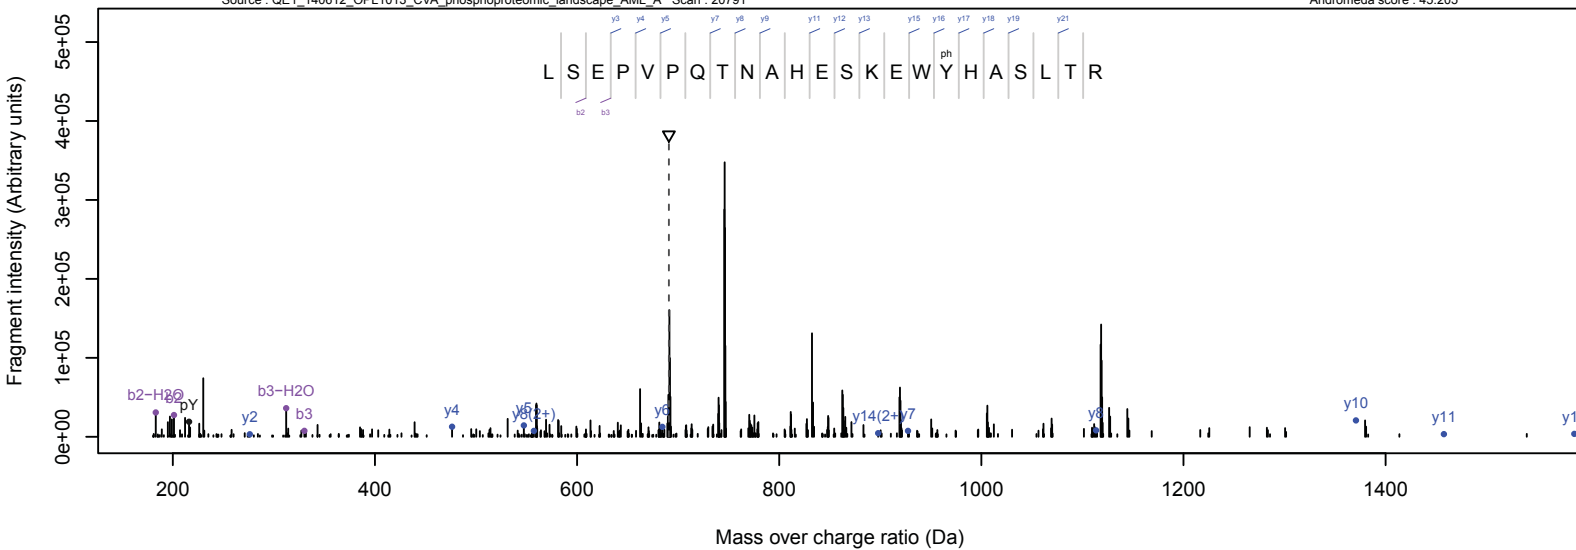



**NKGVY(ph)SSTNELTSTDSTPK-3+**

Source : QE1\_140908\_OPL1013\_CvA\_pTyrIP\_AML\_OCI\_AML3 Scan : 12931

Andromeda score : 45.138

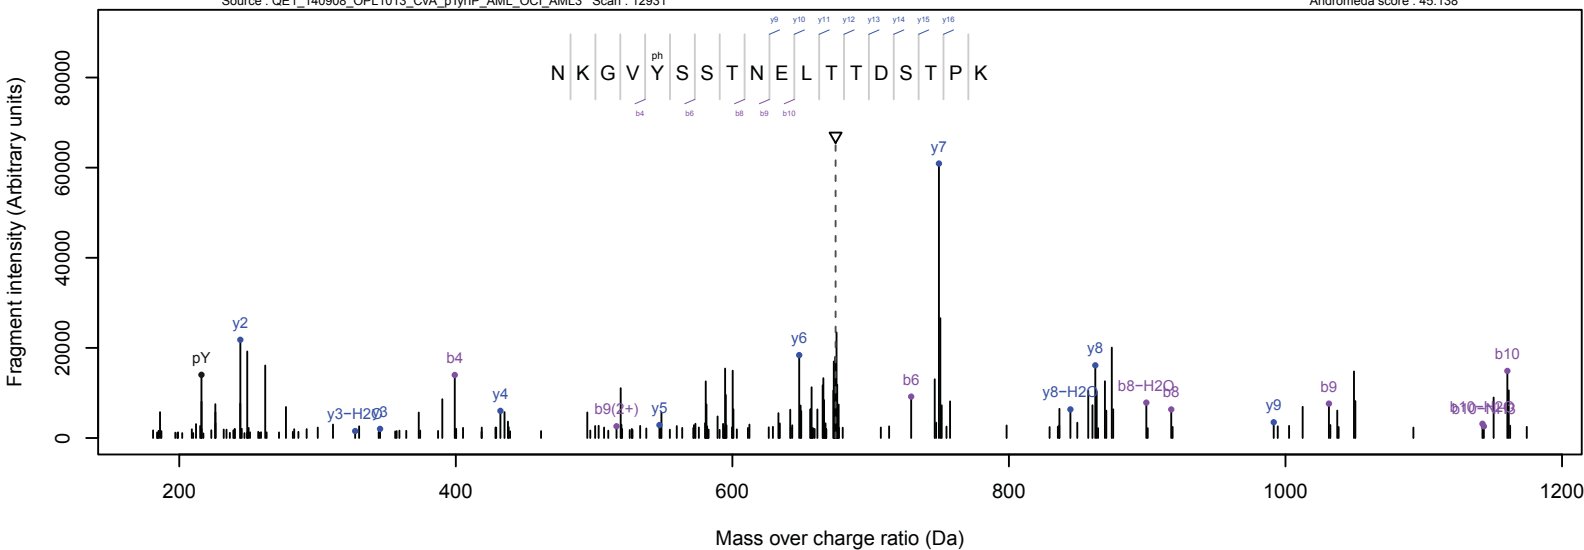

**FY(ph)EAFSK-2+**

Source : Qe1\_141024\_OPL1013\_CvA\_AML\_pTyrIP\_MOLM13 Scan : 18211

Andromeda score : 45.081

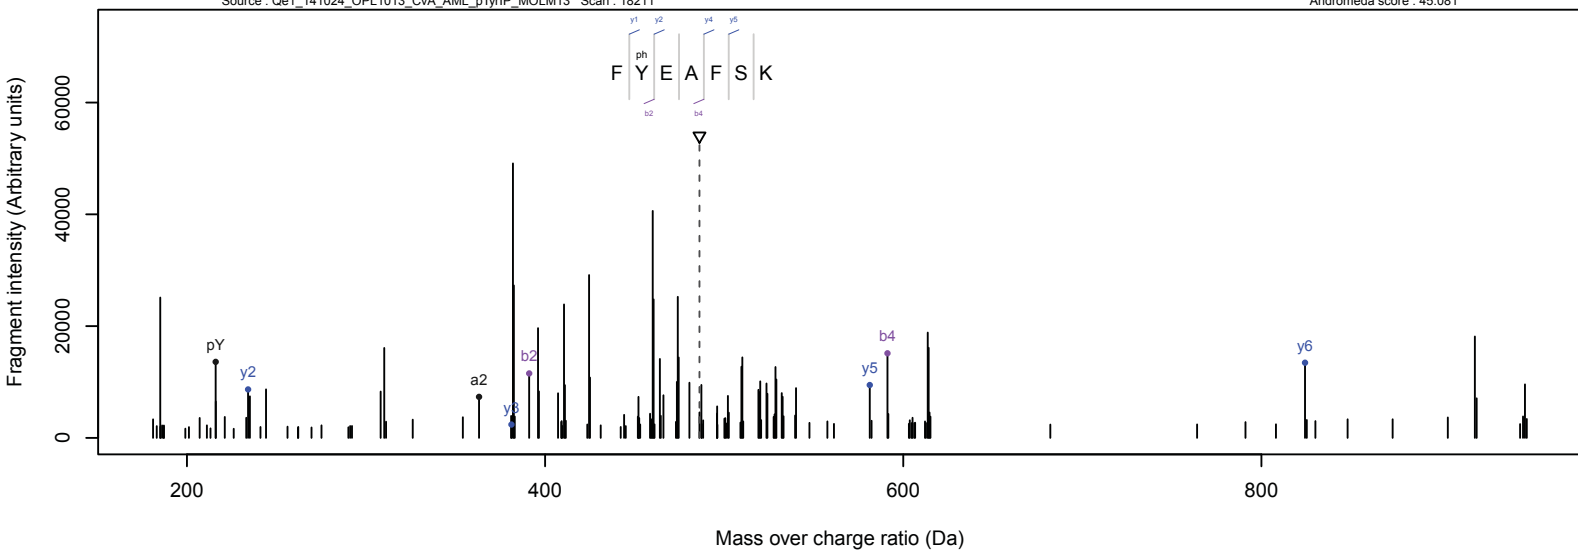

**LVY(ph)CYPVR-2+**

Source : QE1\_140612\_OPL1013\_CVA\_phosphoproteomic\_landscape\_AML\_B Scan : 17652

Andromeda score : 45.081

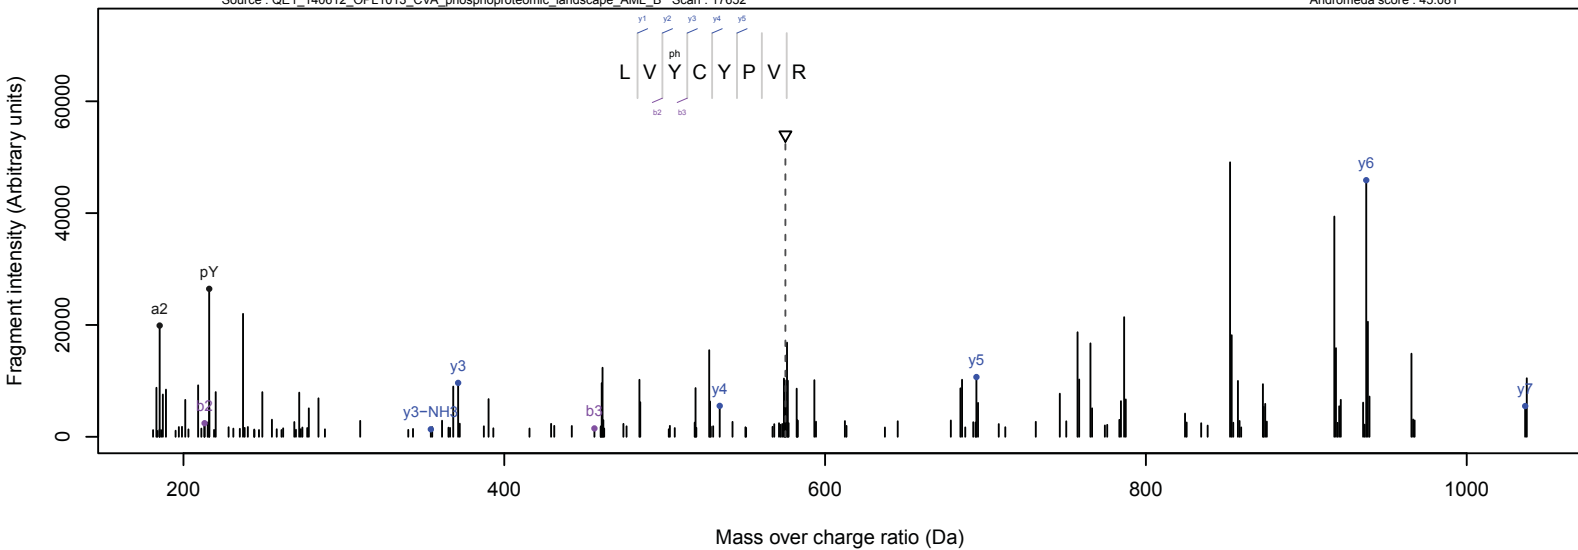

**FHGAFSGGFSAGYFNTVGSK-3+**

Source : QE1\_140612\_OPL1013\_CVA\_phosphoproteomic\_landscape\_AML\_C Scan : 34309

Andromeda score : 45.069

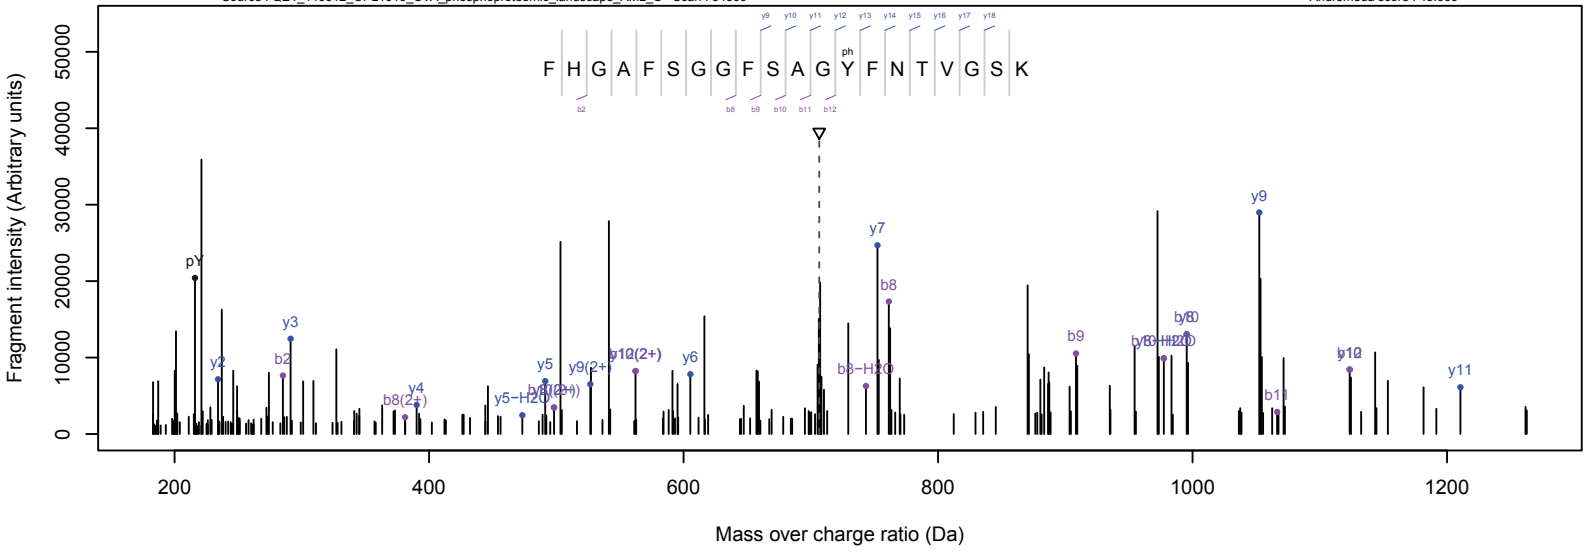

**ISTASGDGRHYCYPHFTCAVDTENIR-4+**

Source : QE1\_140612\_OPL1013\_CVA\_phosphoproteomic\_landscape\_AML\_A Scan : 24274

Andromeda score : 45.042

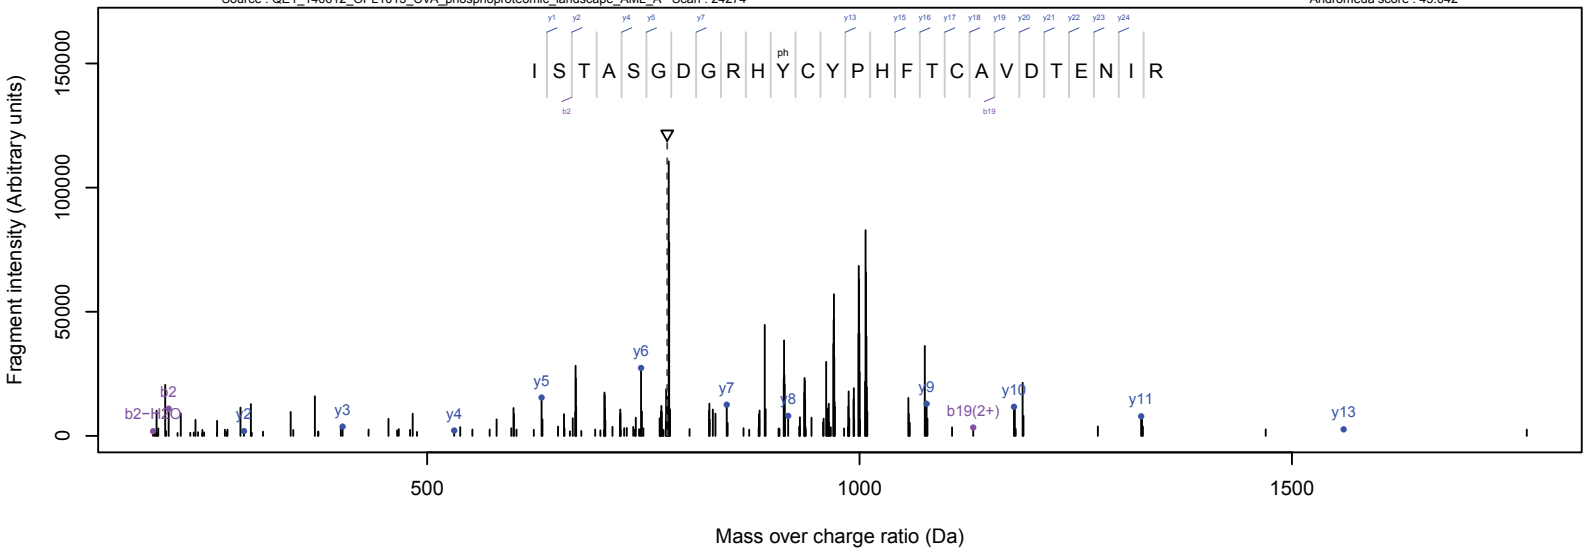

**NKPGPYSSVPPPSAPPK-3+**

Source : QE1\_140612\_OPL1013\_CVA\_phosphoproteomic\_landscape\_AML\_B Scan : 11813

Andromeda score : 44.998

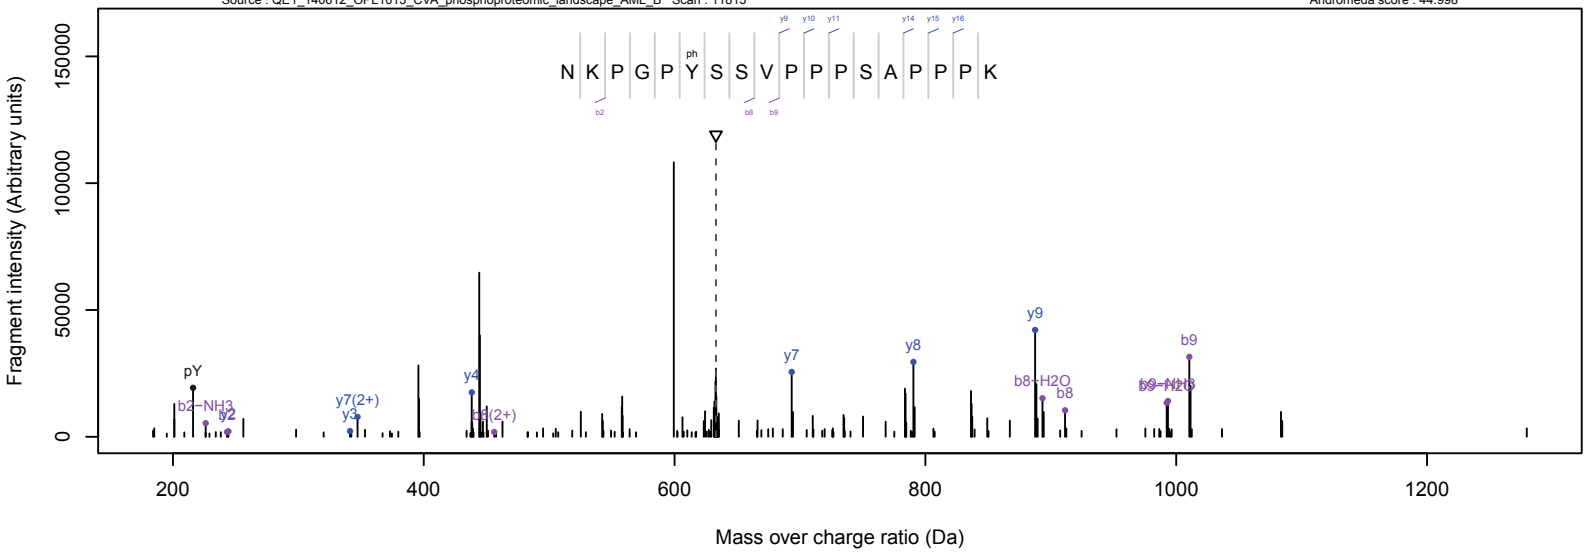

PVAVGPY(ph)GQSQPSCFDR-2+

Source : QE1\_140908\_OPL1013\_CvA\_pTyrIP\_AML\_ML2 Scan : 21883

Andromeda score : 44.998

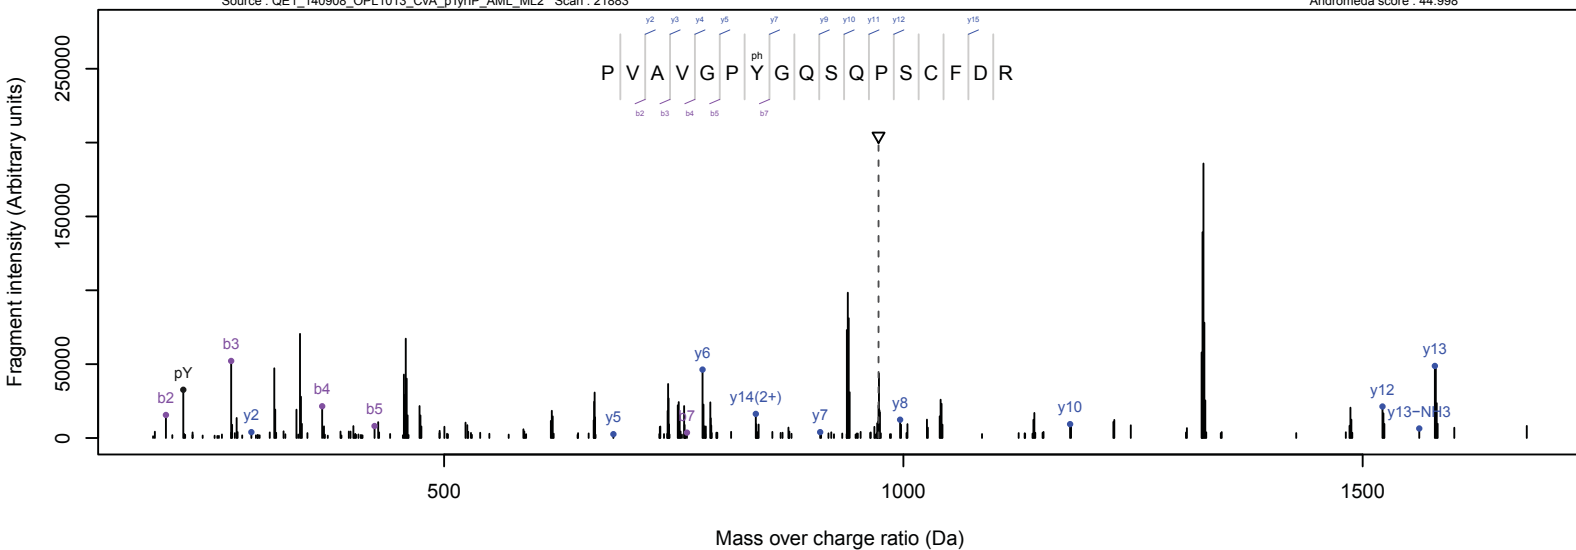

RALEYTIY(ph)NQELETNR-3+

Source : QE1\_140908\_OPL1013\_CvA\_pTyrIP\_AML\_Kasumi1 Scan : 23977

Andromeda score : 44.998

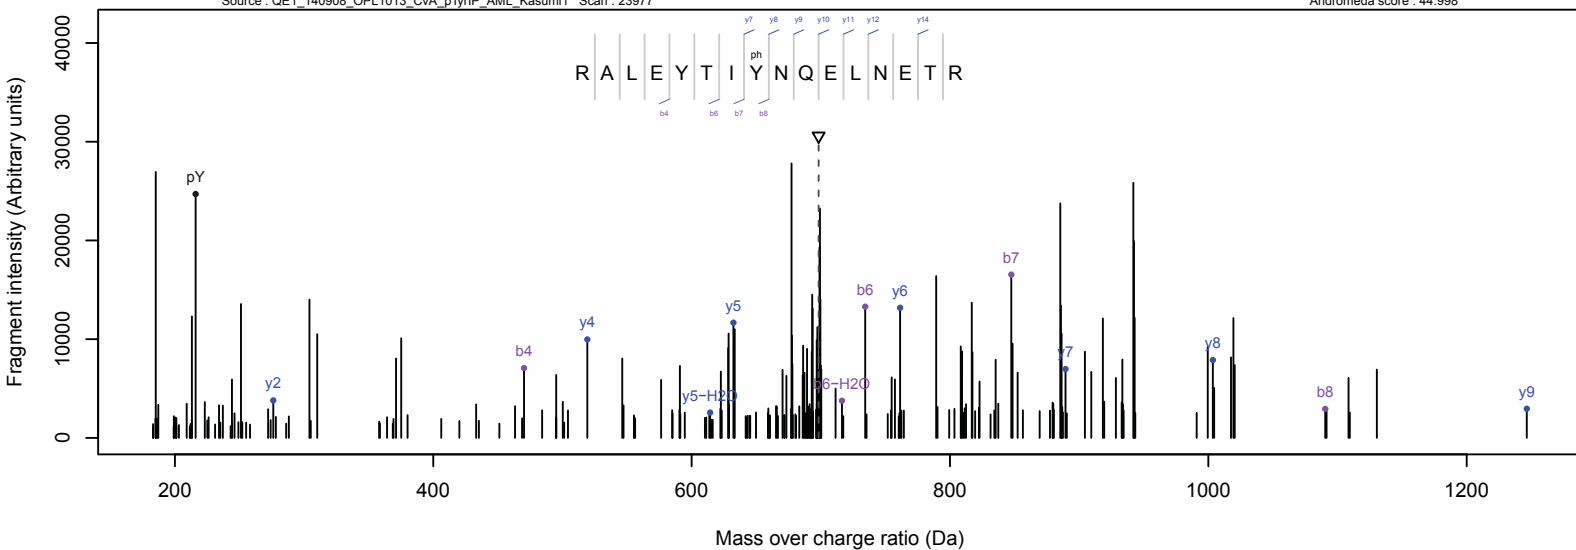

AY(ph)DATHLVK-2+

Source : QE1\_140612\_OPL1013\_CVA\_phosphoproteomic\_landscape\_AML\_D Scan : 9440

Andromeda score : 44.98

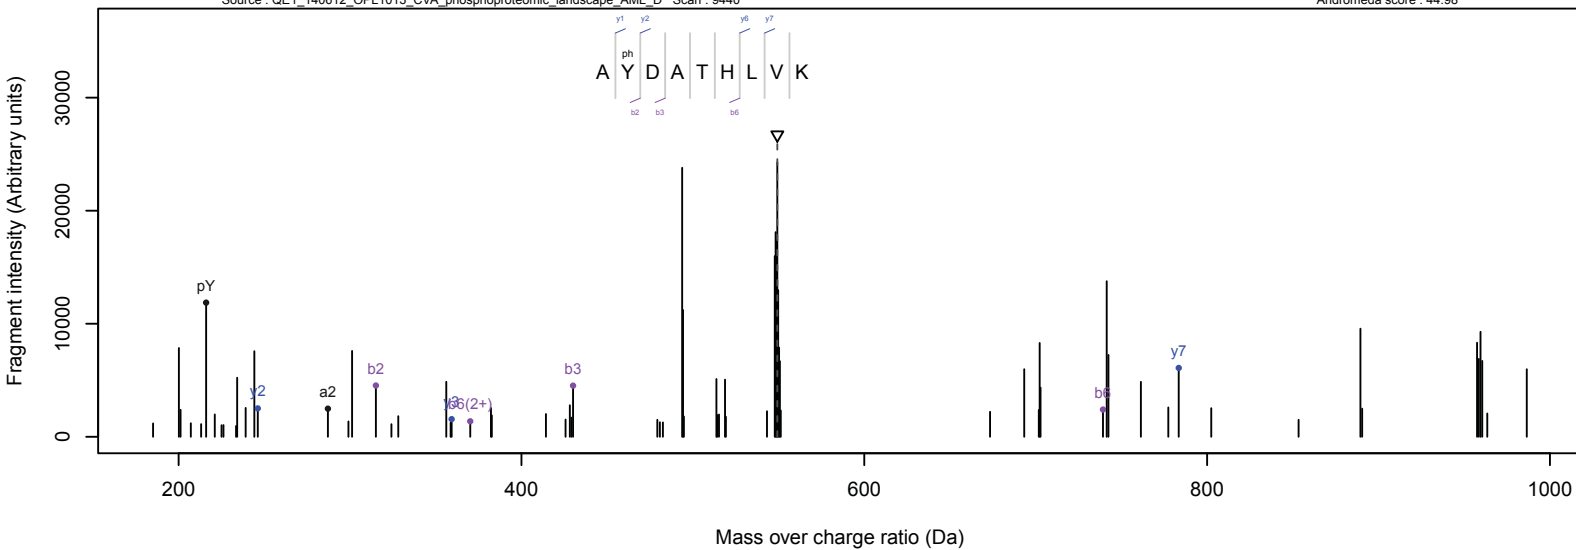

## LQQLY(ph)LQLR-2+

Source : QE1\_140612\_OPL1013\_CVA\_phosphoproteomic\_landscape\_AML\_C Scan : 33723

Andromeda score : 44.98

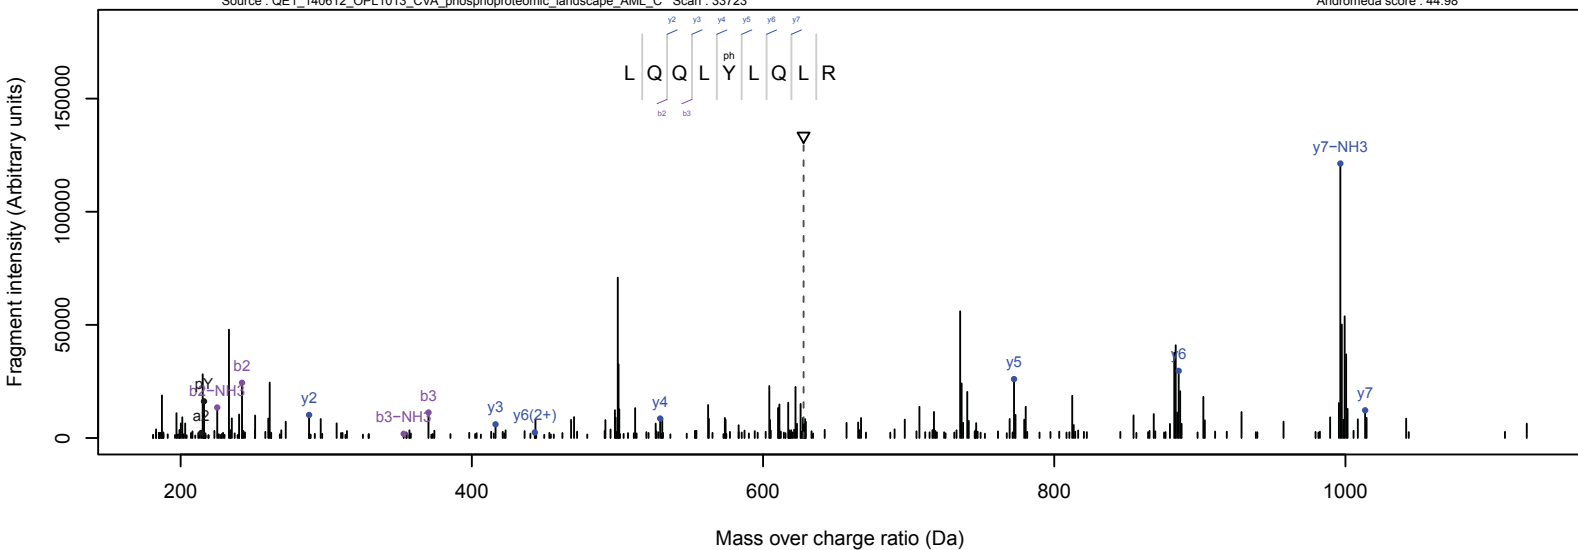

## DKLVY(ph)VHTNGPK-3+

Source : QE1\_140612\_OPL1013\_CVA\_phosphoproteomic\_landscape\_AML\_C Scan : 10063

Andromeda score : 44.89

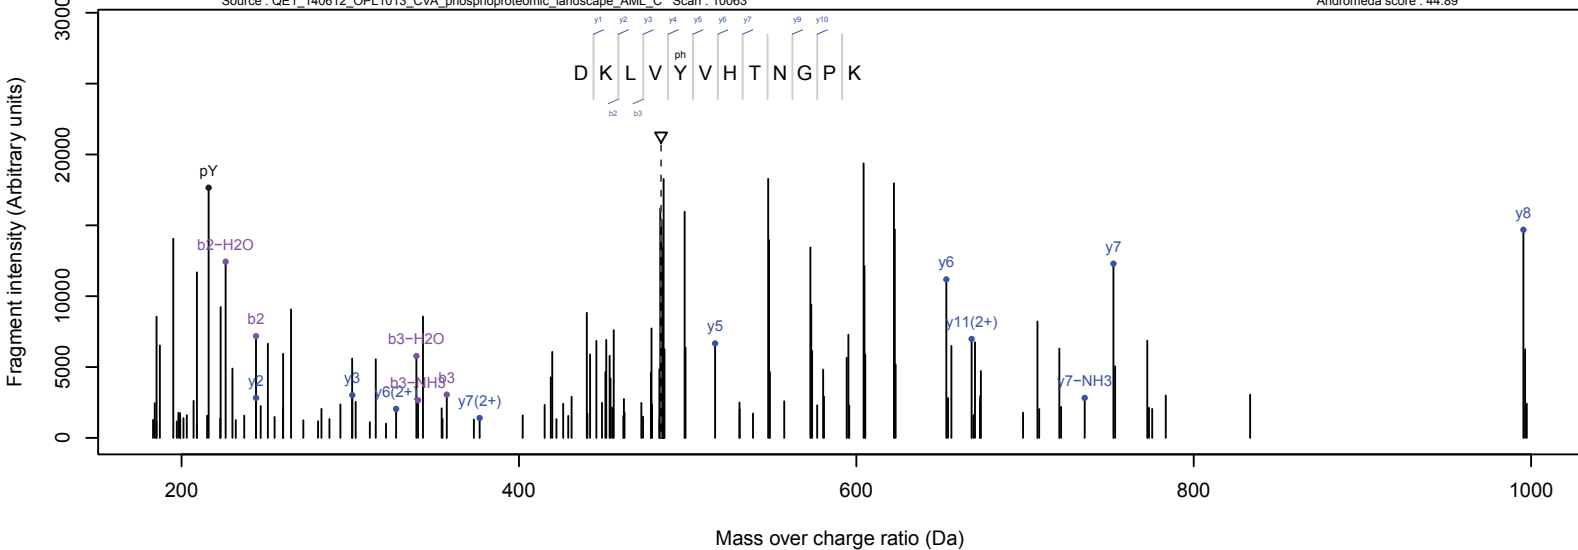

## GDY(ph)PLEAVR-2+

Source : QE1\_140612\_OPL1013\_CVA\_phosphoproteomic\_landscape\_AML\_B Scan : 17770

Andromeda score : 44.863

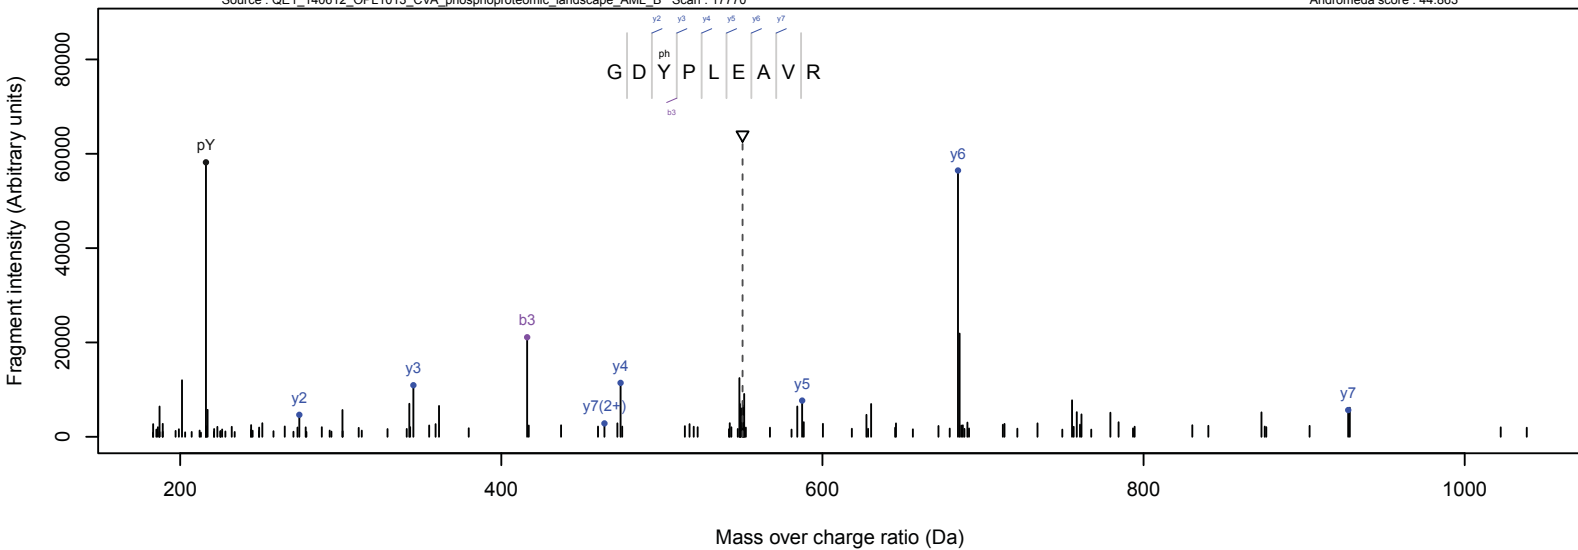

MPHLSKGY(ph)AYVEFENPDEAEK-3+

Source : QE1\_140612\_OPL1013\_CVA\_phosphoproteomic\_landscape\_AML\_B Scan : 23613

Andromeda score : 44.863

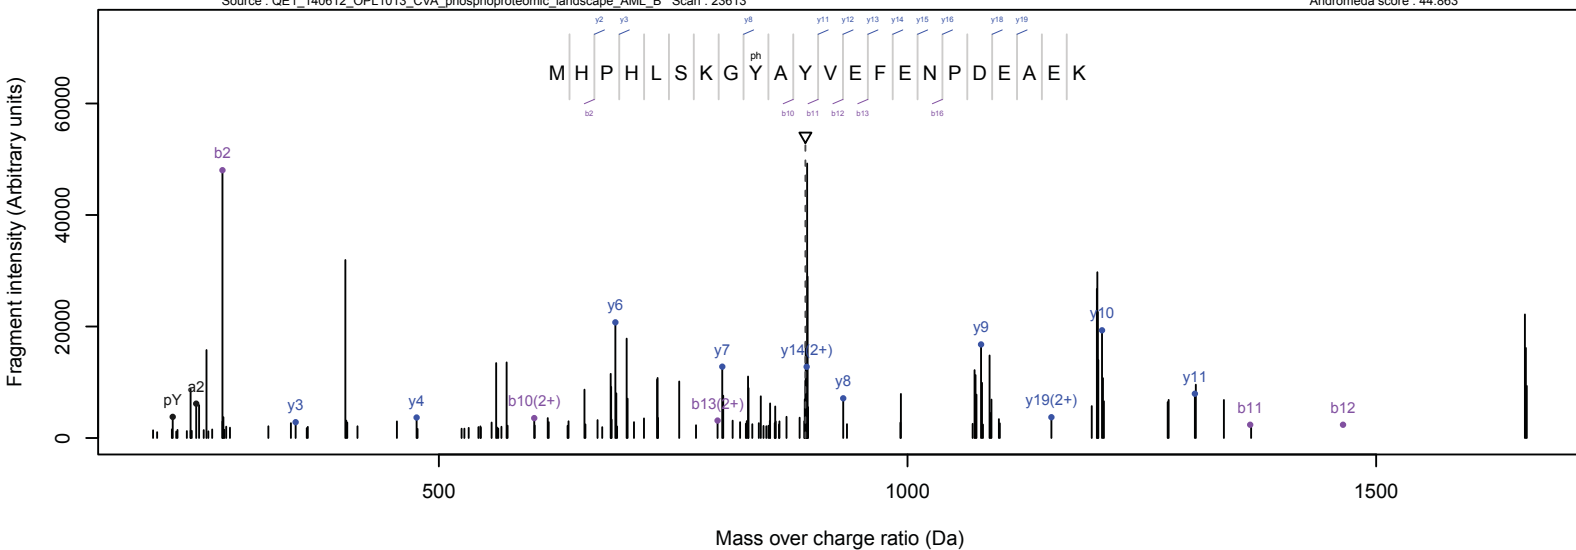

TY(ph)LGEEGKR-2+

Source : QE1\_140822\_OPL1013\_CvA\_pTyrIP\_AML\_cell\_lines\_part2\_E Scan : 3244

Andromeda score : 44.863

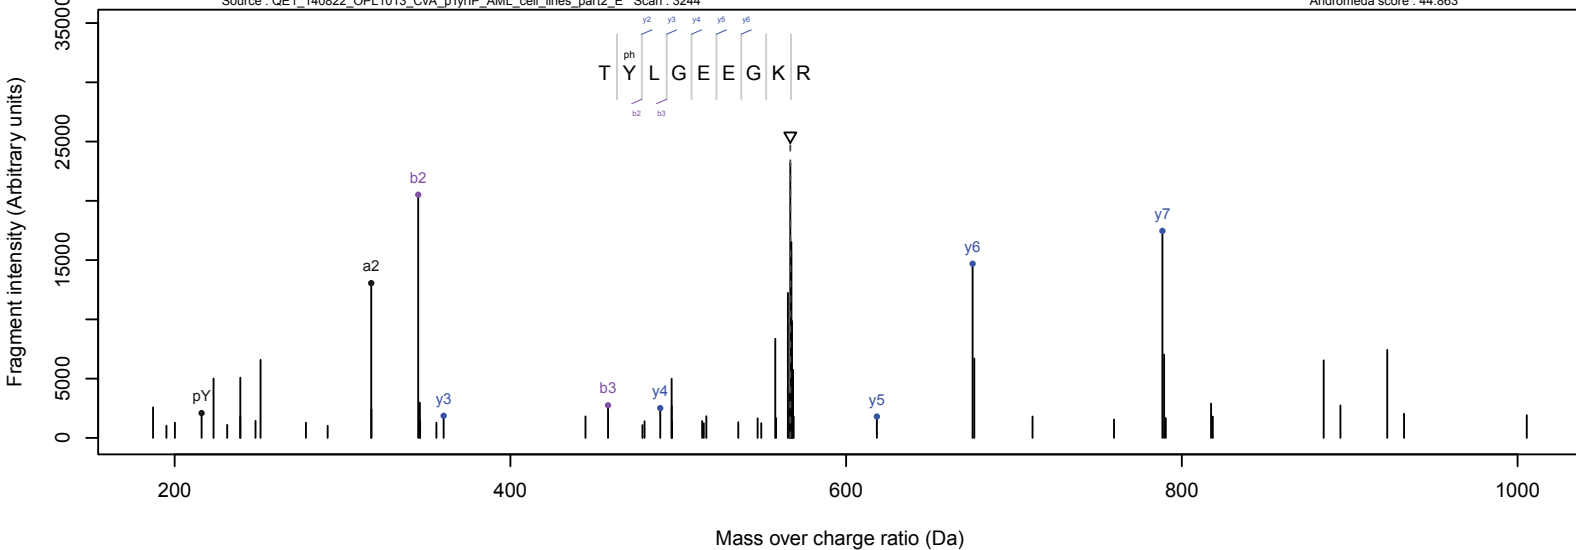

Y(ph)HSLAPM(ox)YYR-3+

Source : QE1\_140612\_OPL1013\_CVA\_phosphoproteomic\_landscape\_AML\_C Scan : 17156

Andromeda score : 44.863

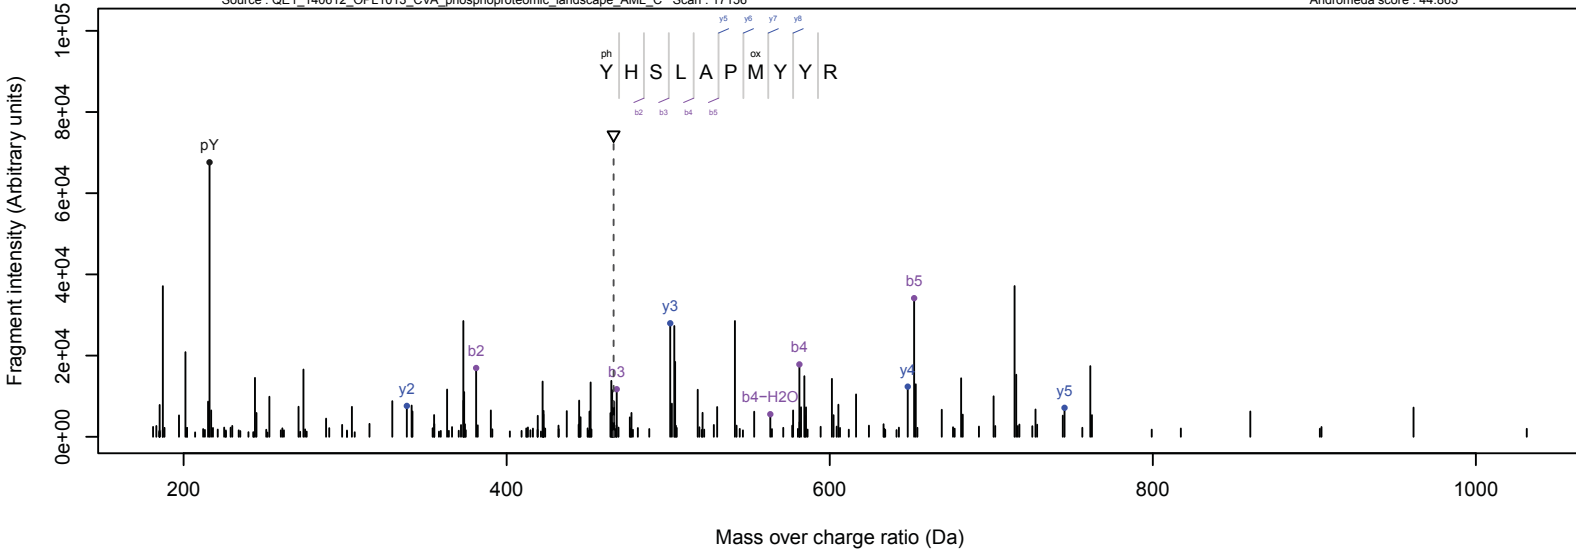

SSAPY(ph)FSAECPDPPKTLR-3+

Source : QE1\_140612\_OPL1013\_CVA\_phosphoproteomic\_landscape\_AML\_C Scan : 23760

Andromeda score : 44.848

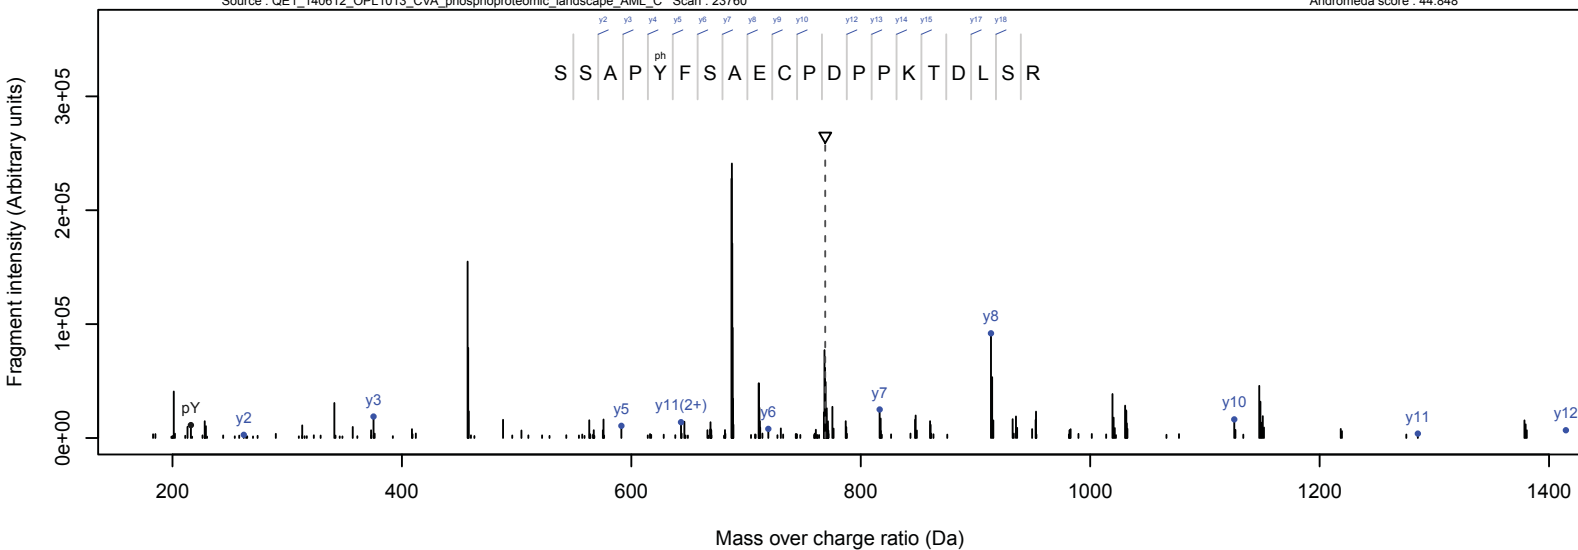

LY(ph)PEGLAQLAR-2+

Source : QE1\_140612\_OPL1013\_CVA\_phosphoproteomic\_landscape\_AML\_B Scan : 32521

Andromeda score : 44.847

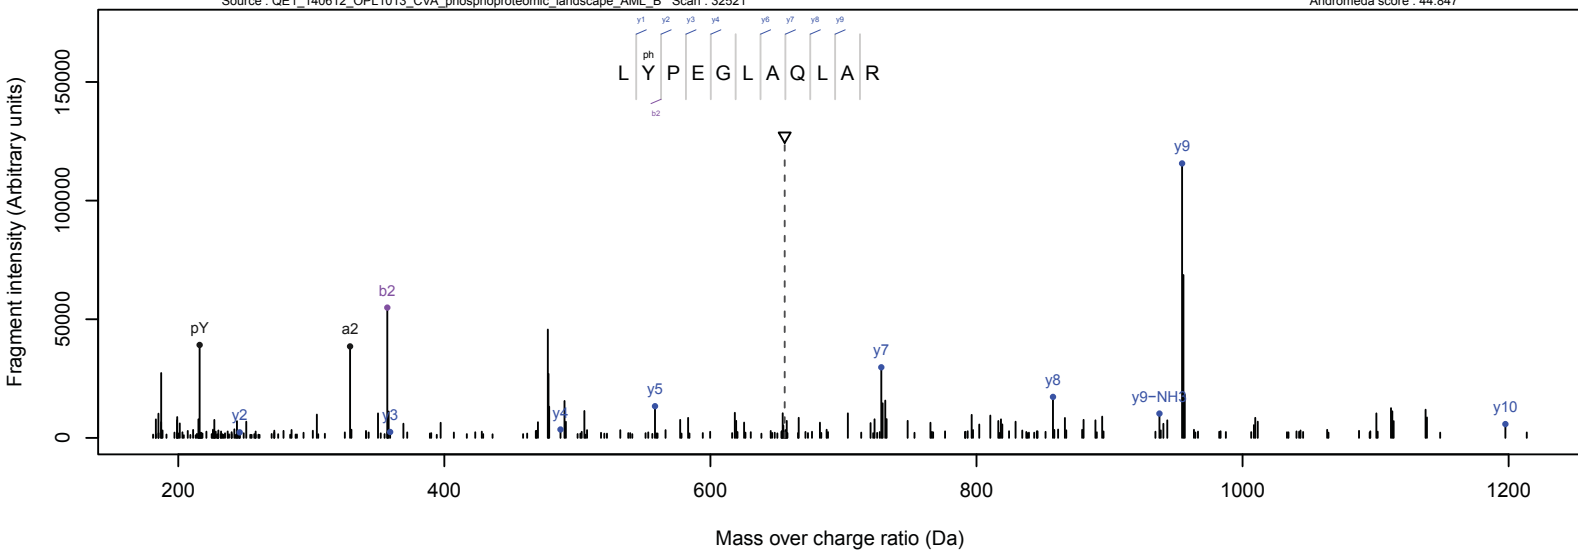

SIY(ph)SQIQEQR-2+

Source : QE1\_140612\_OPL1013\_CVA\_phosphoproteomic\_landscape\_AML\_C Scan : 15464

Andromeda score : 44.847

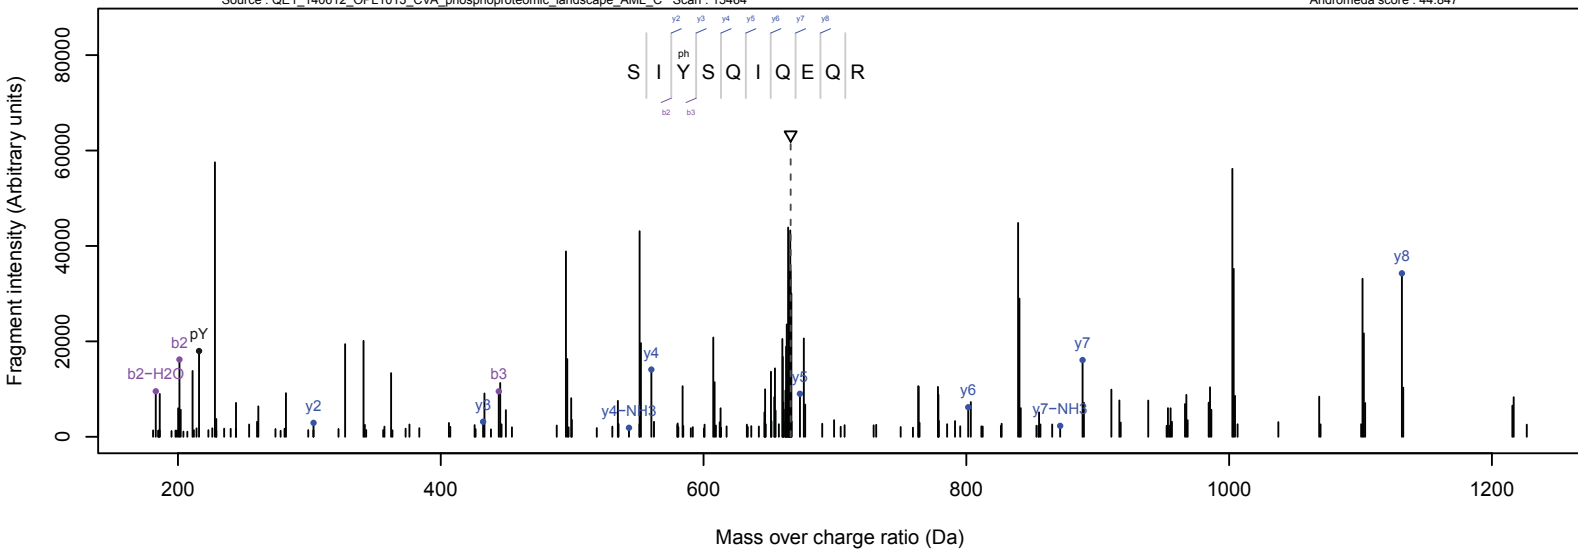

## Y(ph)IASTQRPDGTWR-3+

Source : QE1\_140612\_OPL1013\_CVA\_phosphoproteomic\_landscape\_AML\_C Scan : 13214

Andromeda score : 44.829

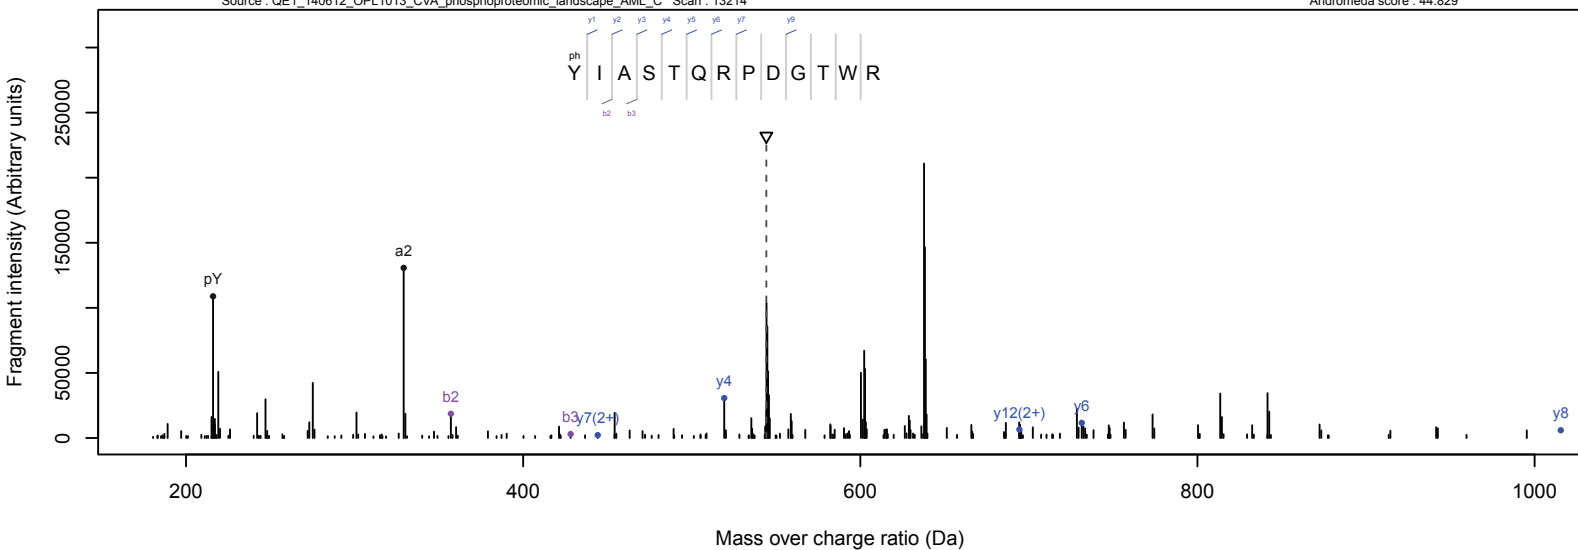

## LGHY(ph)ATQLQNTYDRCPMELVR-3+

Source : QE1\_140612\_OPL1013\_CVA\_phosphoproteomic\_landscape\_AML\_D Scan : 30498

Andromeda score : 44.788

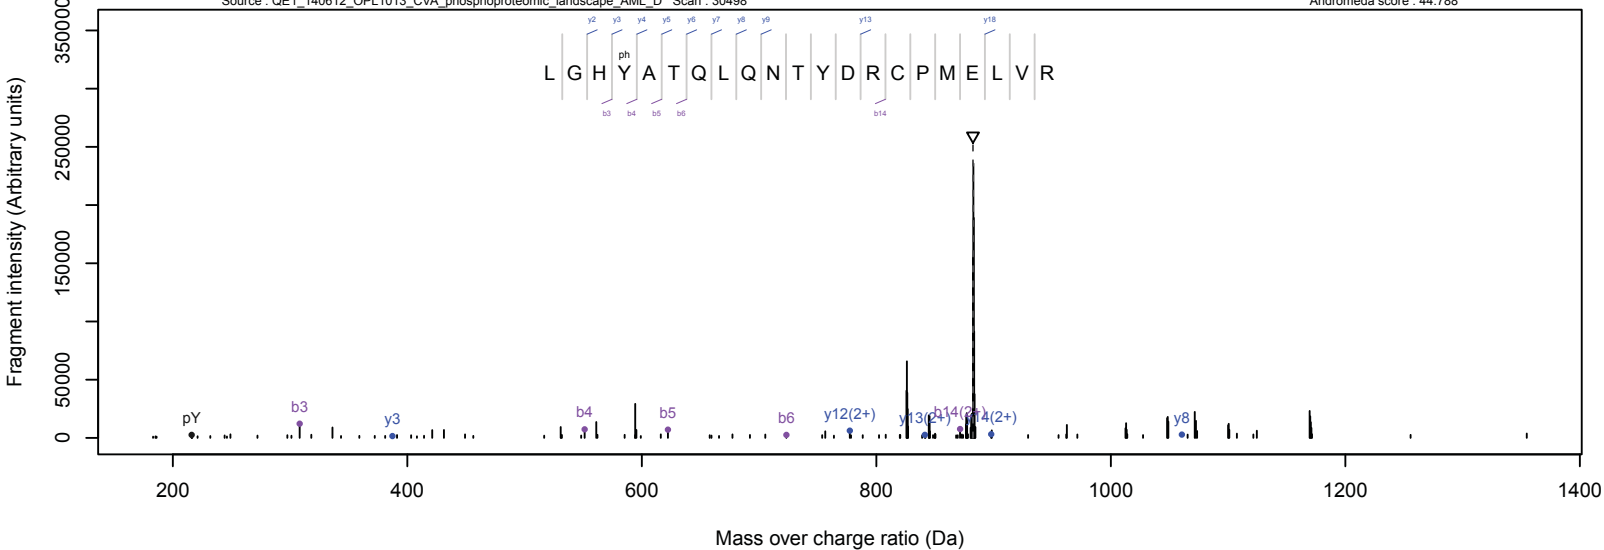

## LTFDY(ph)HQK-2+

Source : QE1\_140612\_OPL1013\_CVA\_phosphoproteomic\_landscape\_AML\_C Scan : 12024

Andromeda score : 44.753

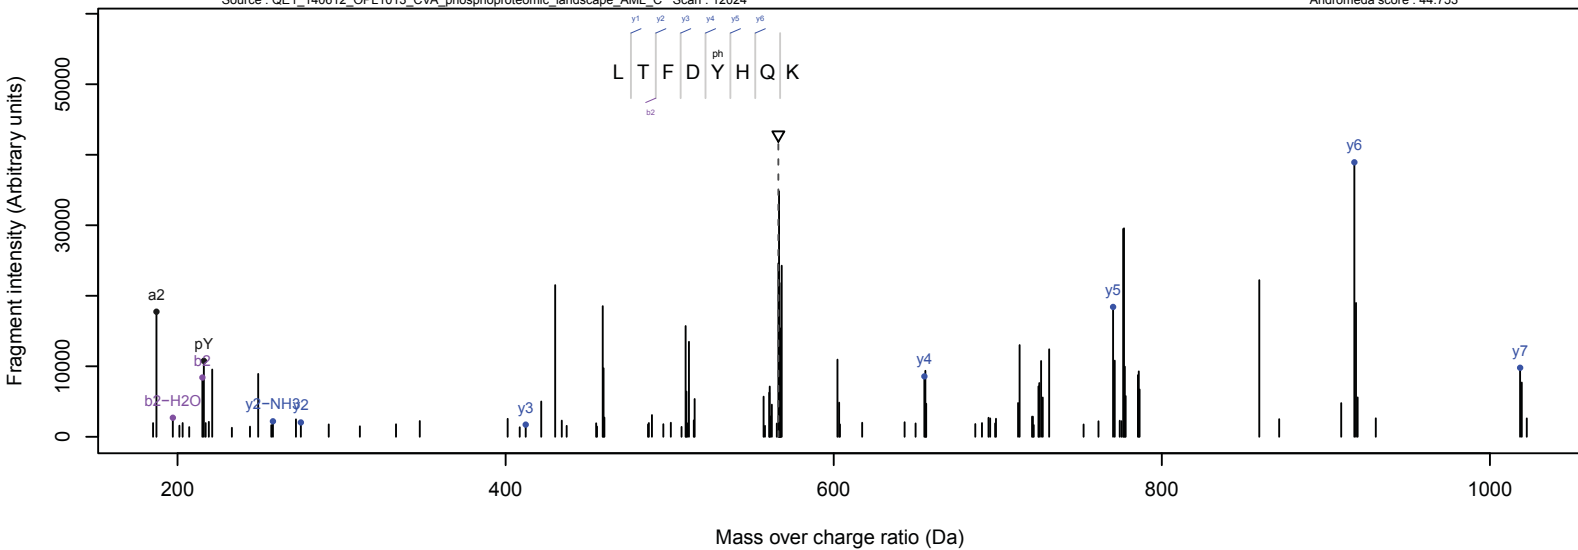

## GDNVY(ph)VVTEVLQTQK-3+

Source : QE1\_140612\_OPL1013\_CVA\_phosphoproteomic\_landscape\_AML\_B Scan : 37075

Andromeda score : 44.734

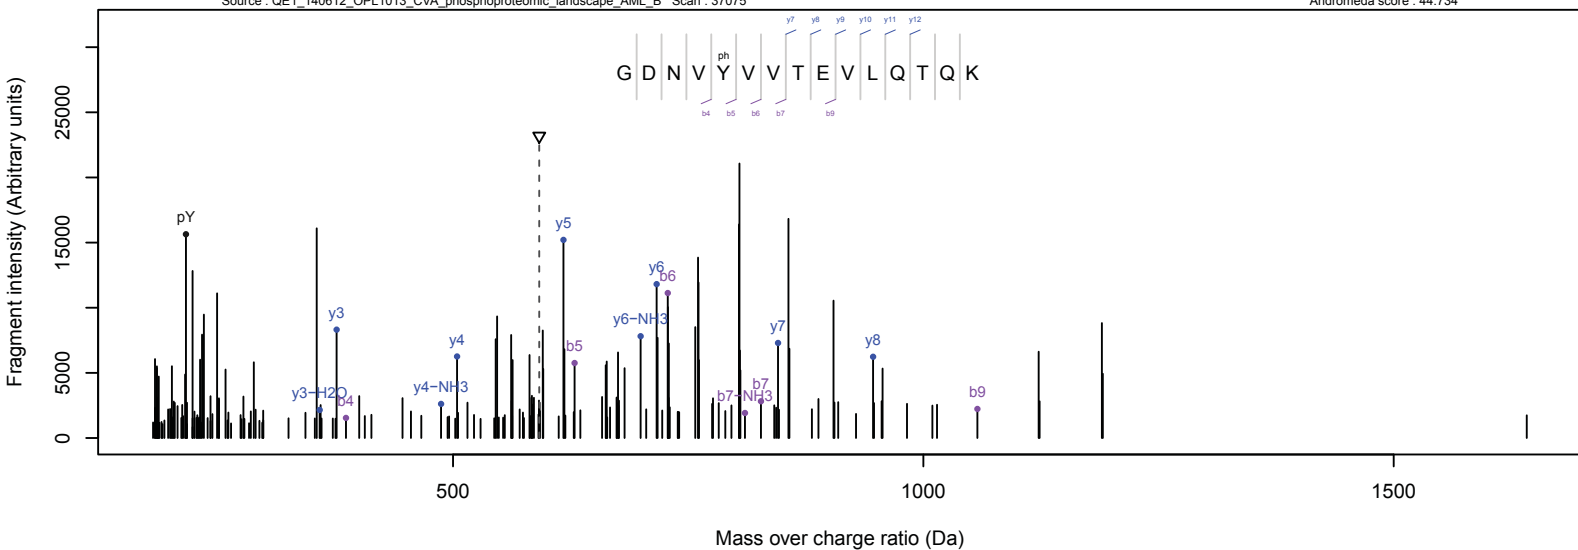

## SILCQY(ph)PASPDAHK-2+

Source : QE1\_140612\_OPL1013\_CVA\_phosphoproteomic\_landscape\_AML\_B Scan : 24003

Andromeda score : 44.734

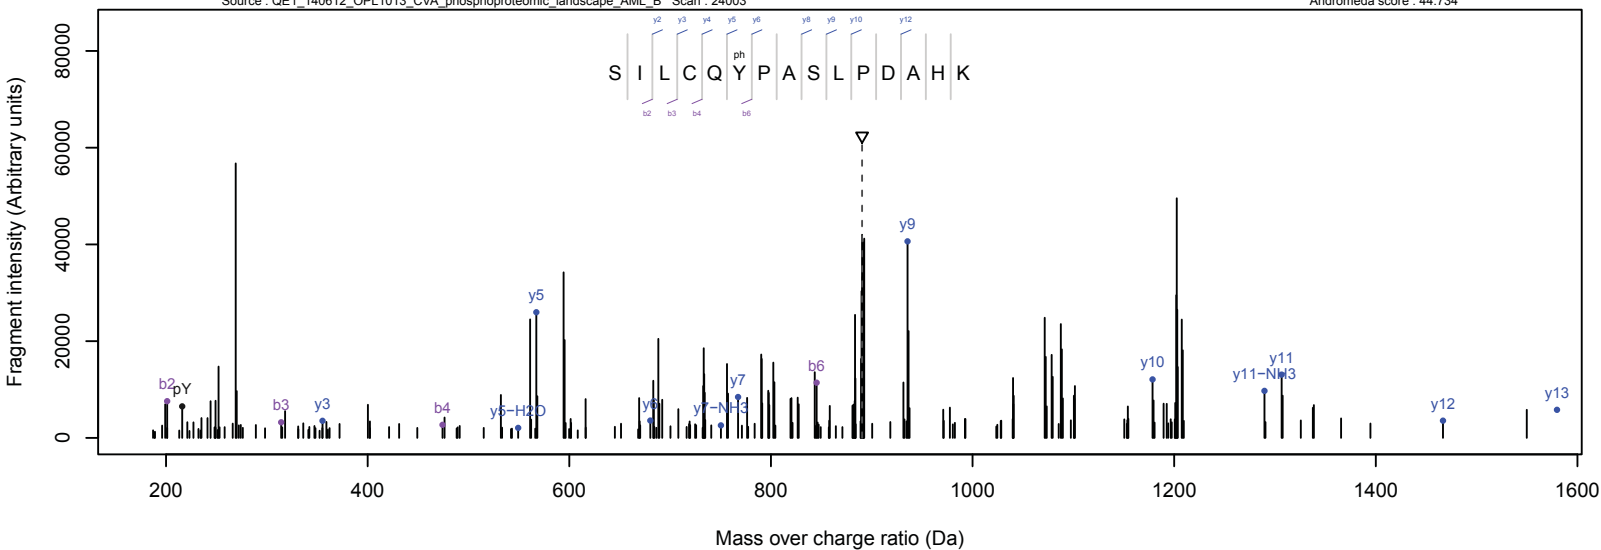

## Y(ph)VLGQLVGLNSPNSILK-2+

Source : QE1\_140612\_OPL1013\_CVA\_phosphoproteomic\_landscape\_AML\_C Scan : 47903

Andromeda score : 44.734

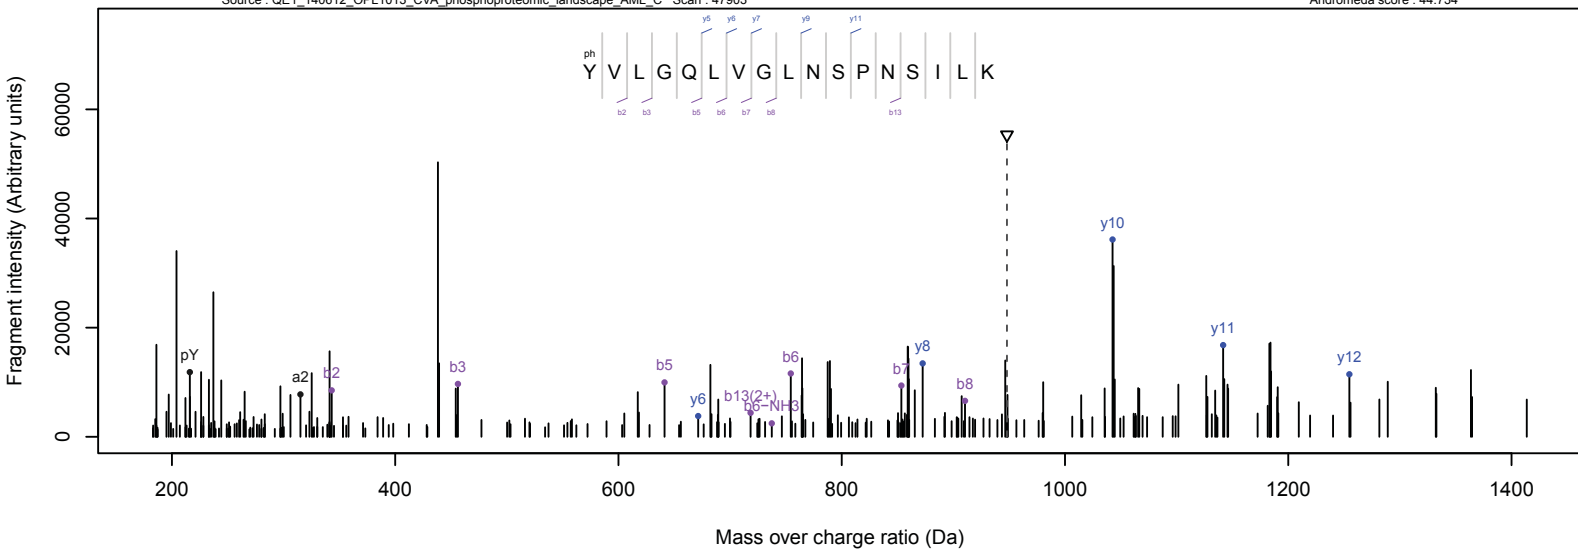



## AALY(ph)FQR-2+

Source : QE1\_140612\_OPL1013\_CVA\_phosphoproteomic\_landscape\_AML\_C Scan : 17318

Andromeda score : 44.692

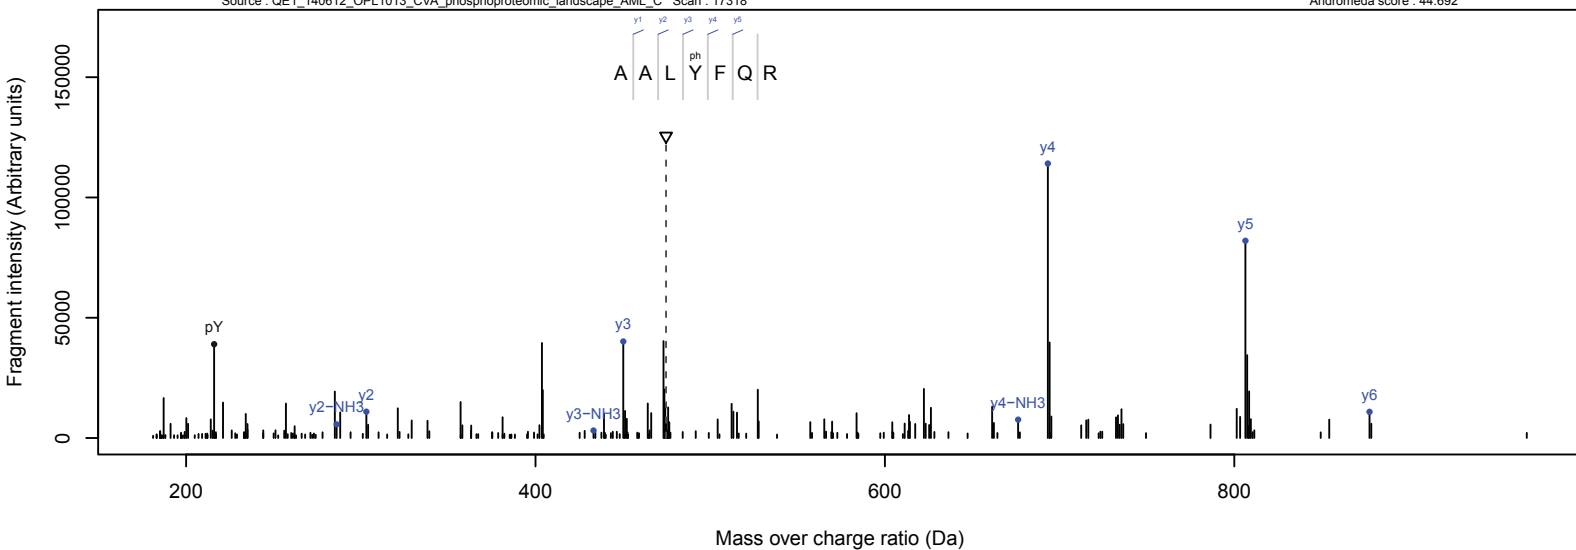

## RFY(ph)EQM(ox)NGPVAGASR-3+

Source : QE1\_140908\_OPL1013\_CvA\_pTyrIP\_AML\_HEL Scan : 10853

Andromeda score : 44.662

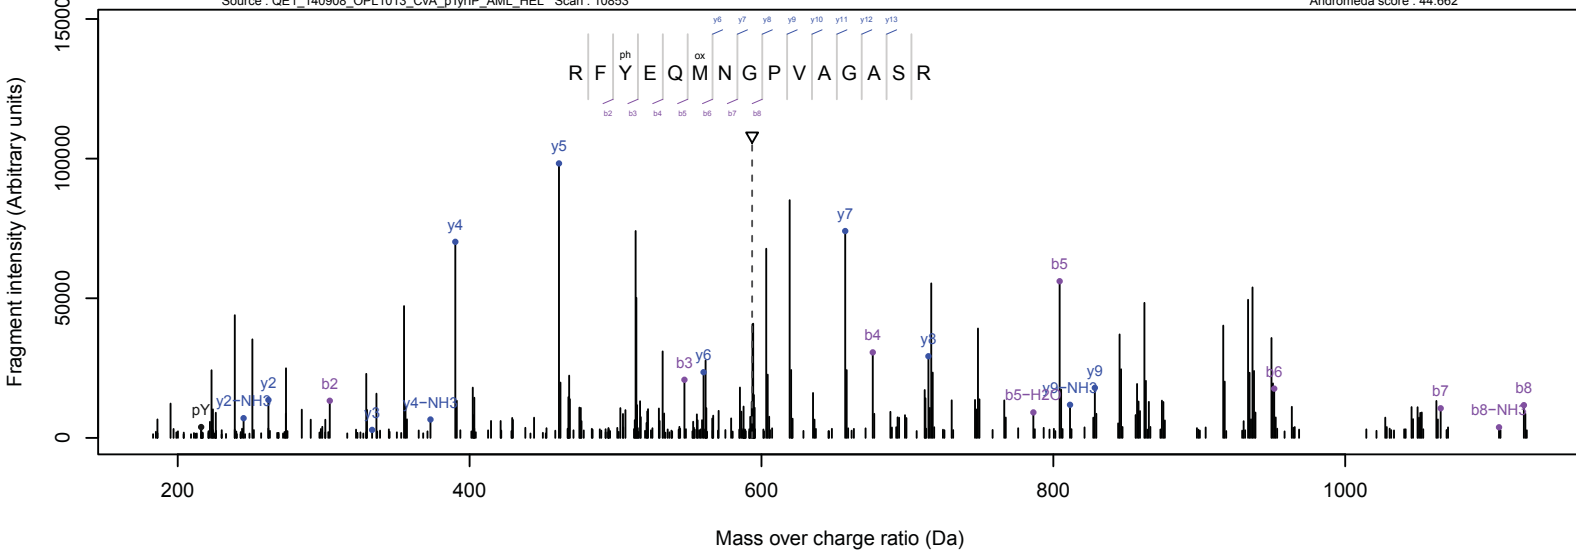

## TGADTTAAGPLFQQRYPSPGAVLR-3+

Source : QE1\_140612\_OPL1013\_CVA\_phosphoproteomic\_landscape\_AML\_A Scan : 34589

Andromeda score : 44.625

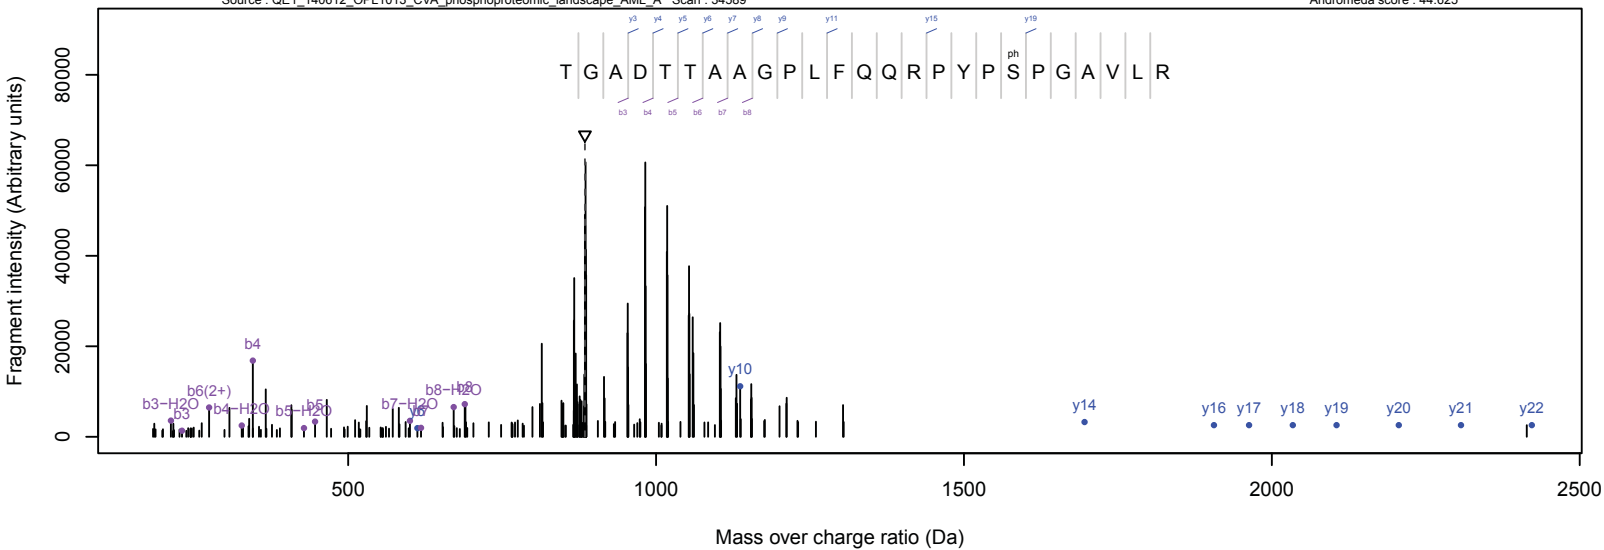

VYLCNQDENHKHAQDY(ph)VLTNYEGR-4+

Source : QE1\_140908\_OPL1013\_CvA\_pTyrIP\_AML\_Kasumi1 Scan : 23819

Andromeda score : 44.625

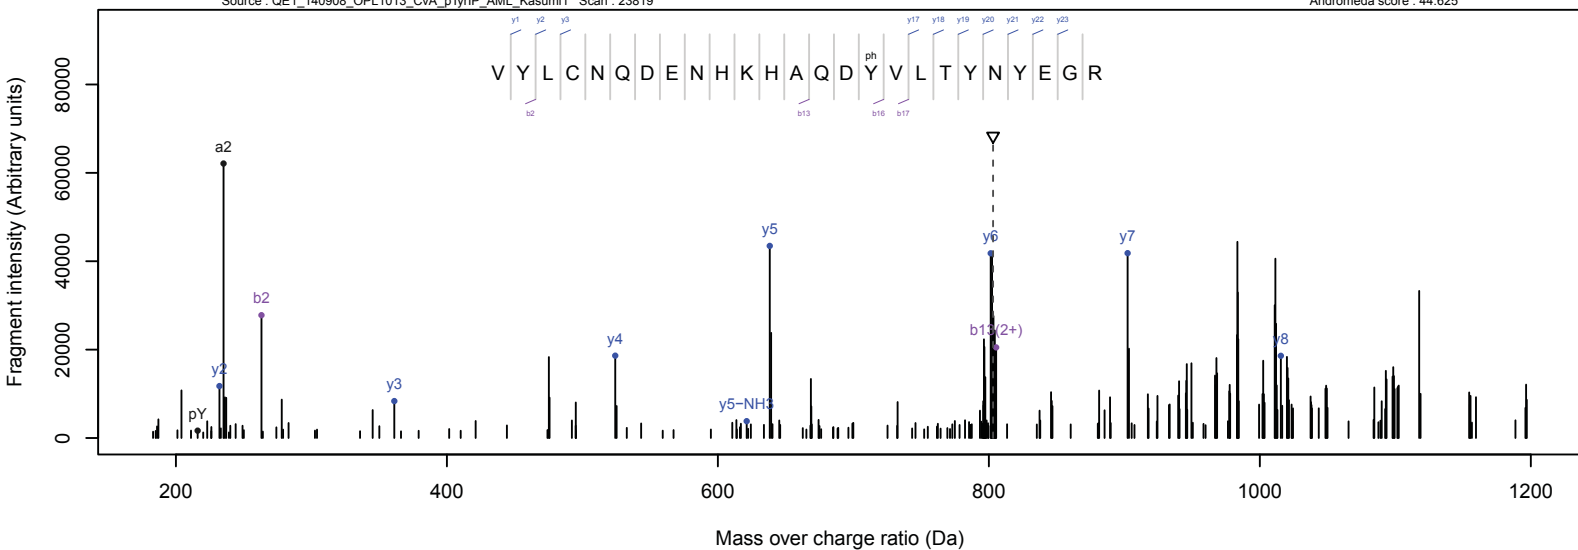

Y(ph)YEYNHDLFQR-3+

Source : QE1\_140612\_OPL1013\_CVA\_phosphoproteomic\_landscape\_AML\_C Scan : 23758

Andromeda score : 44.598

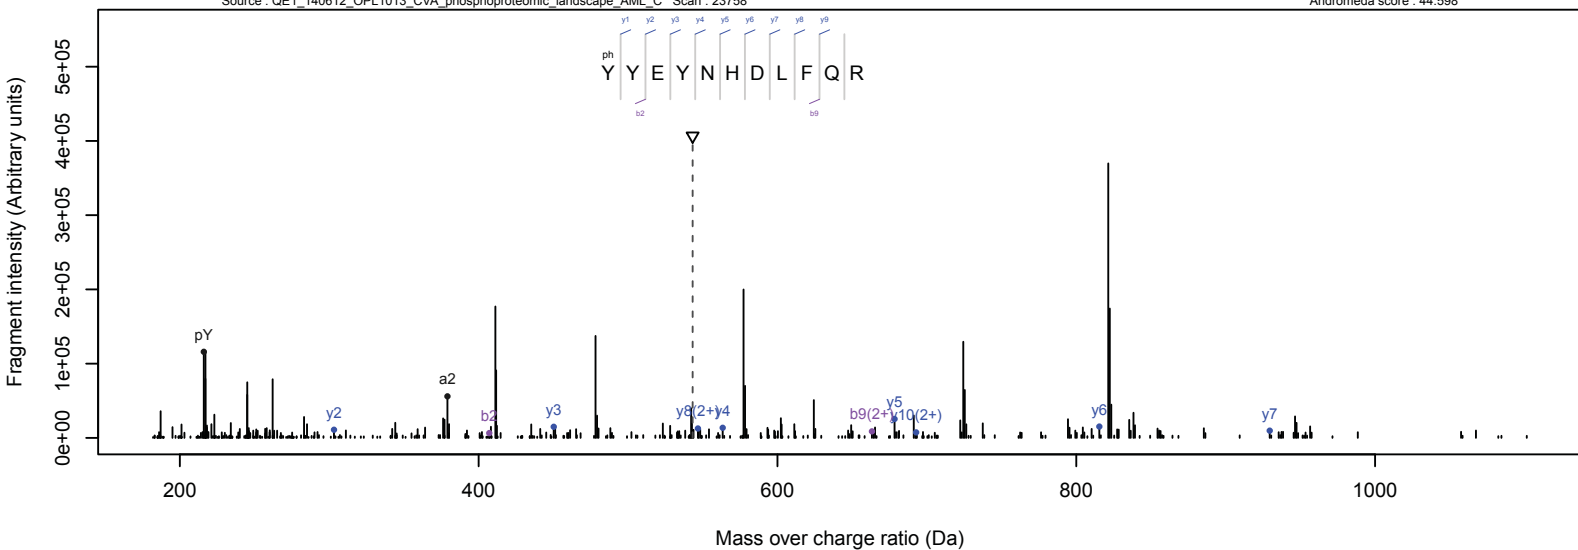

YQAY(ph)MSNLESHSAILDQK-3+

Source : QE1\_140612\_OPL1013\_CVA\_phosphoproteomic\_landscape\_AML\_C Scan : 27605

Andromeda score : 44.577

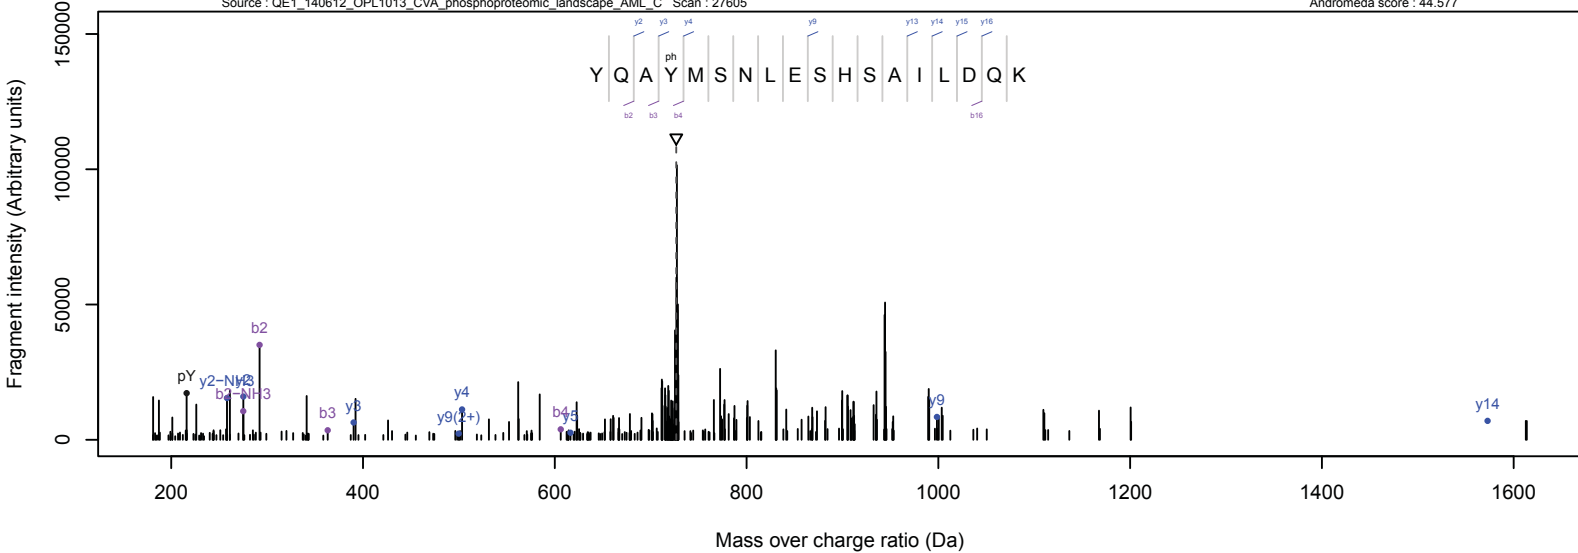

## KEGFIPSNY(ph)VAK-2+

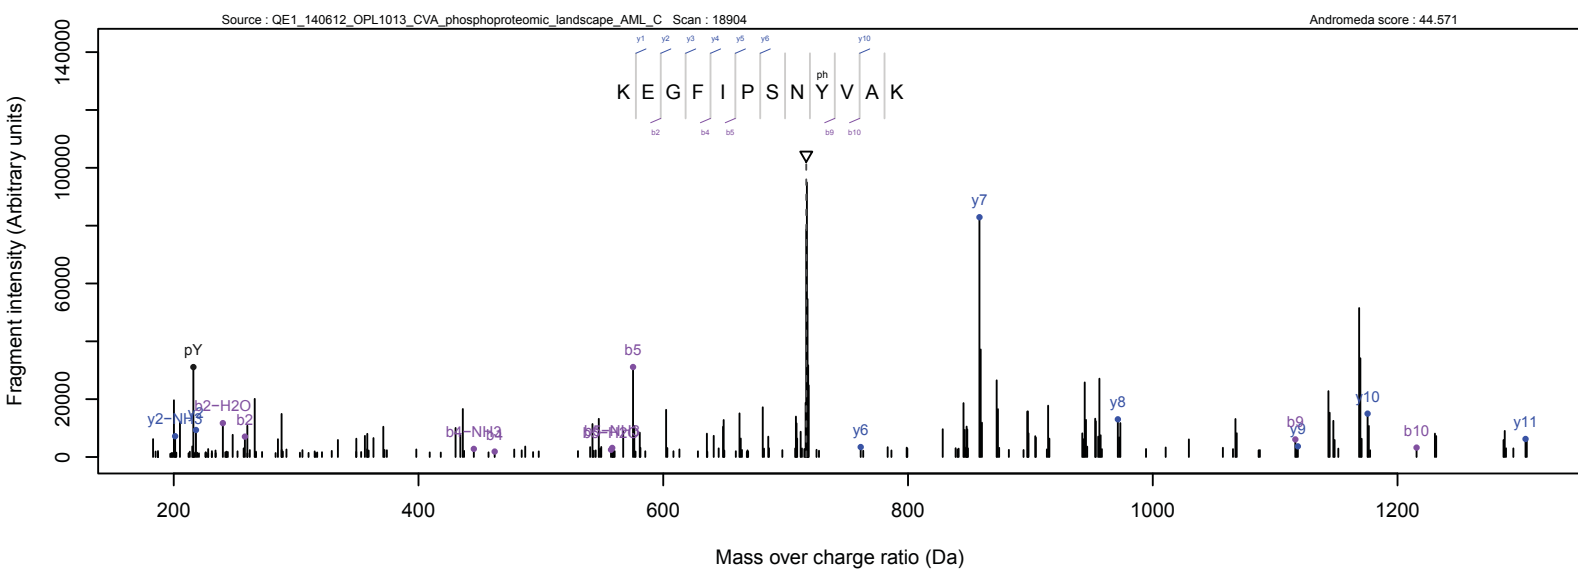

## QLDRTLKY(ph)PYK-3+

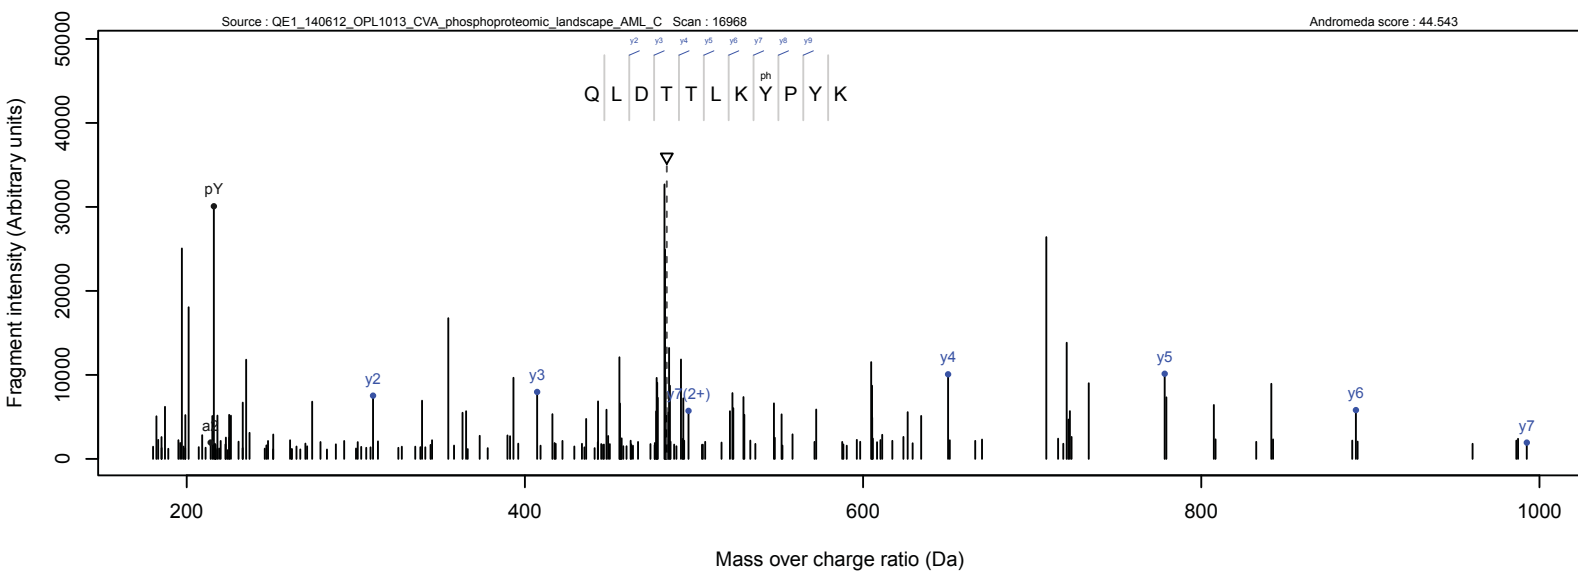

## Y(ph)VHLFPK-2+

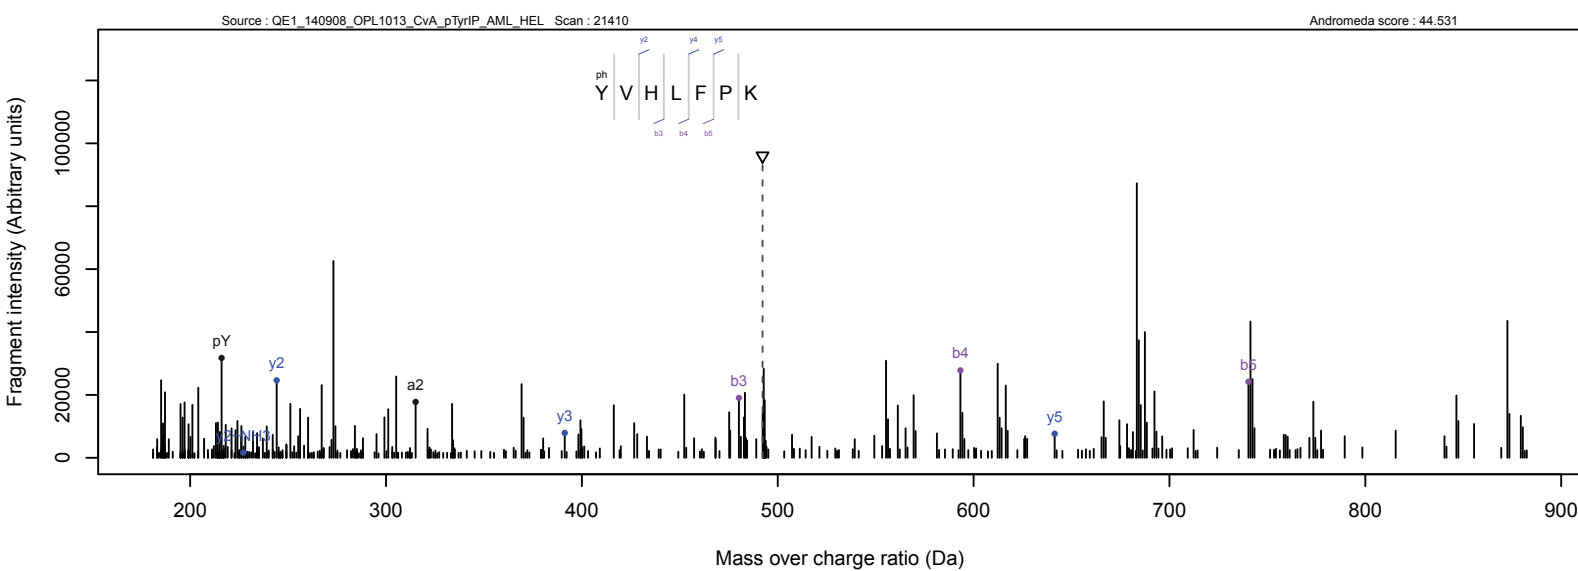

## SDSY(ph)VLLHSVK-2+

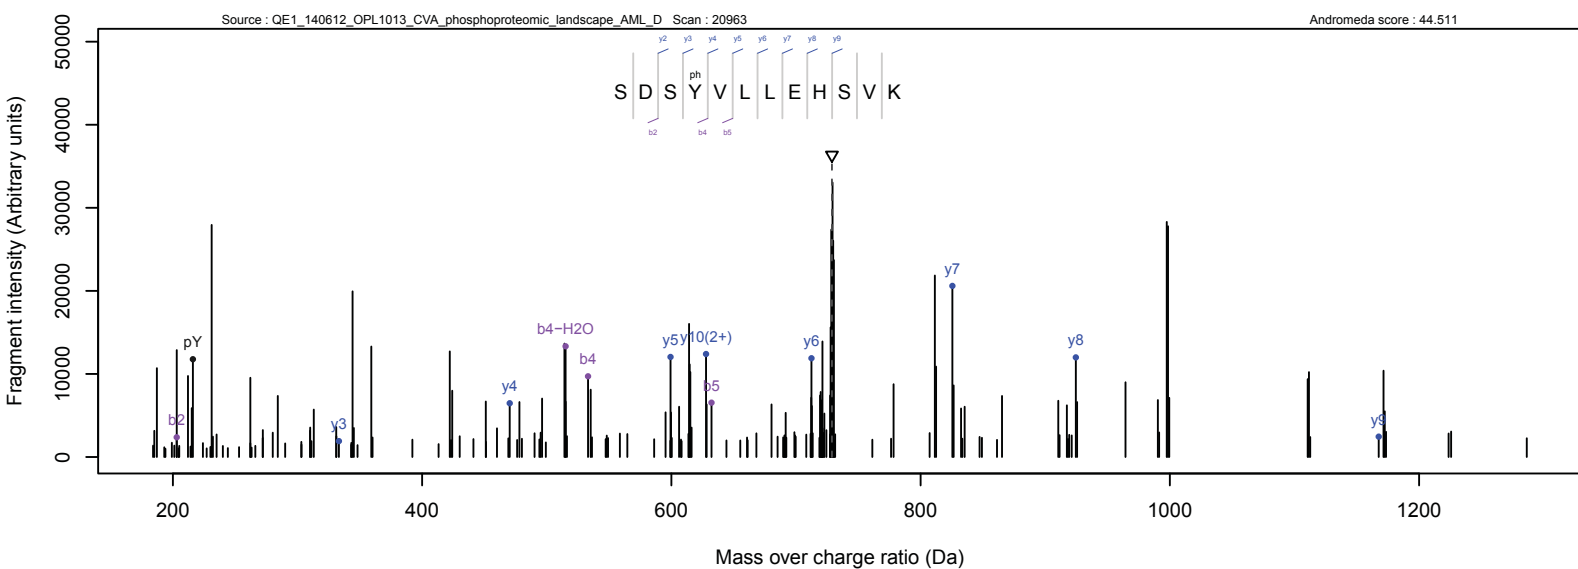

## TLEQHDNIVTHYK-3+

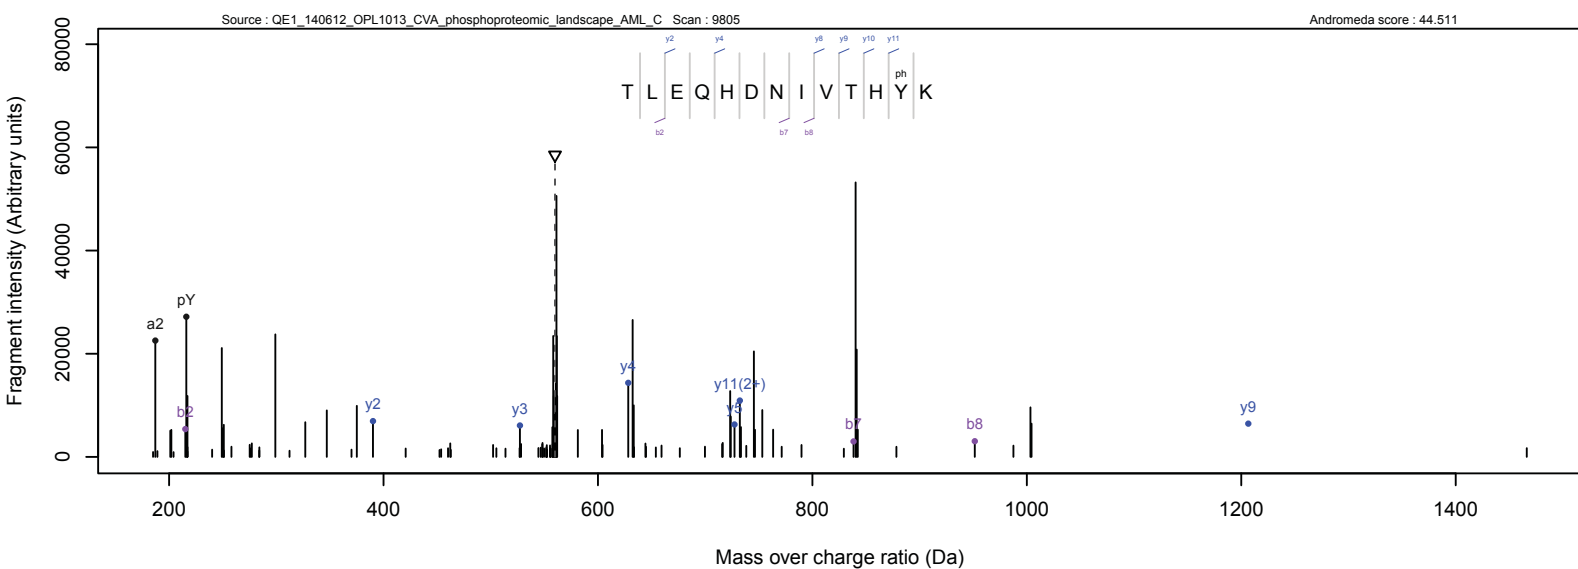

## Y(ph)LQTLTIAAEK-2+

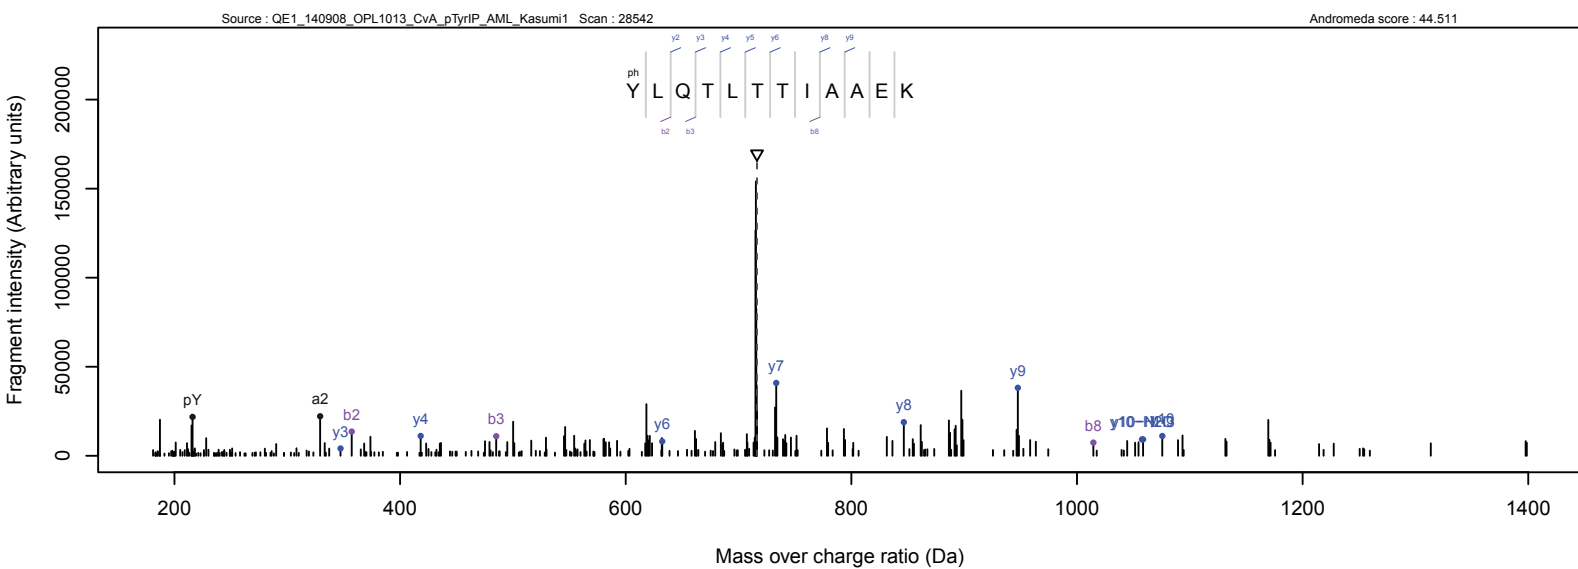

## Y(ph)YKEIPLSEILR-3+

Source : QE1\_140908\_OPL1013\_CvA\_pTyrIP\_AML\_HEL Scan : 41206

Andromeda score : 44.511

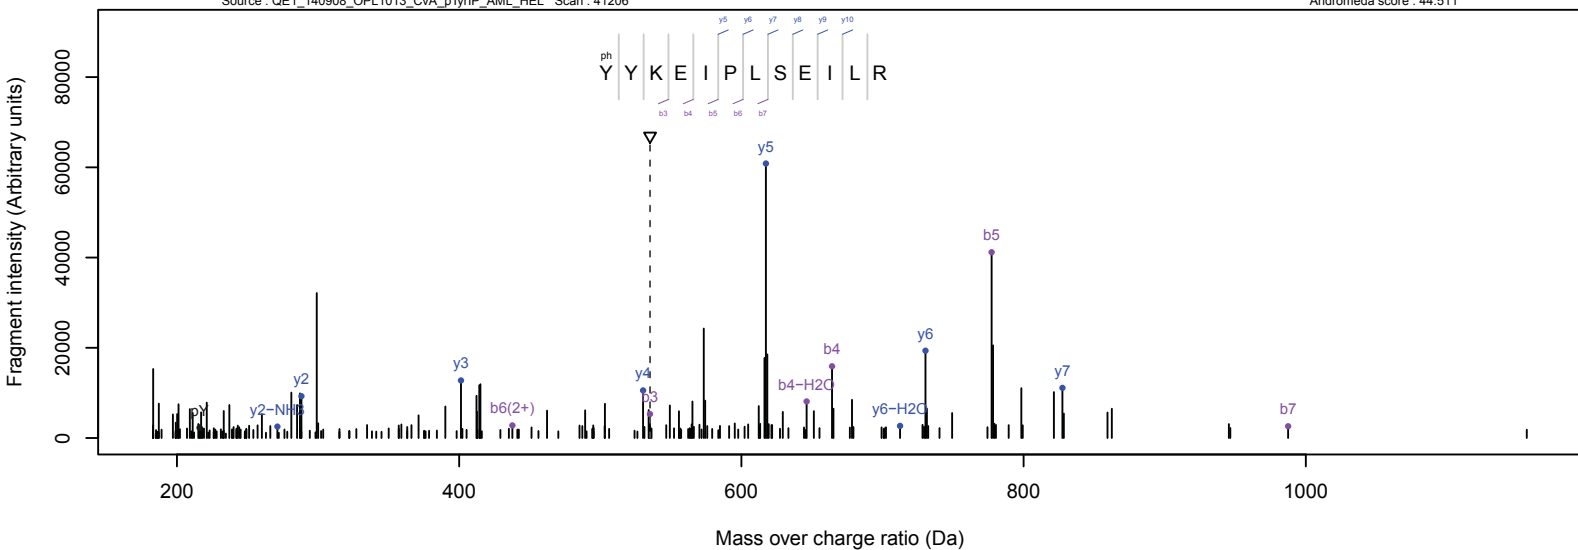

## QRGDFPGTY(ph)VEFLGPVALAR-3+

Source : QE1\_140612\_OPL1013\_CVA\_phosphoproteomic\_landscape\_AML\_A Scan : 47427

Andromeda score : 44.468

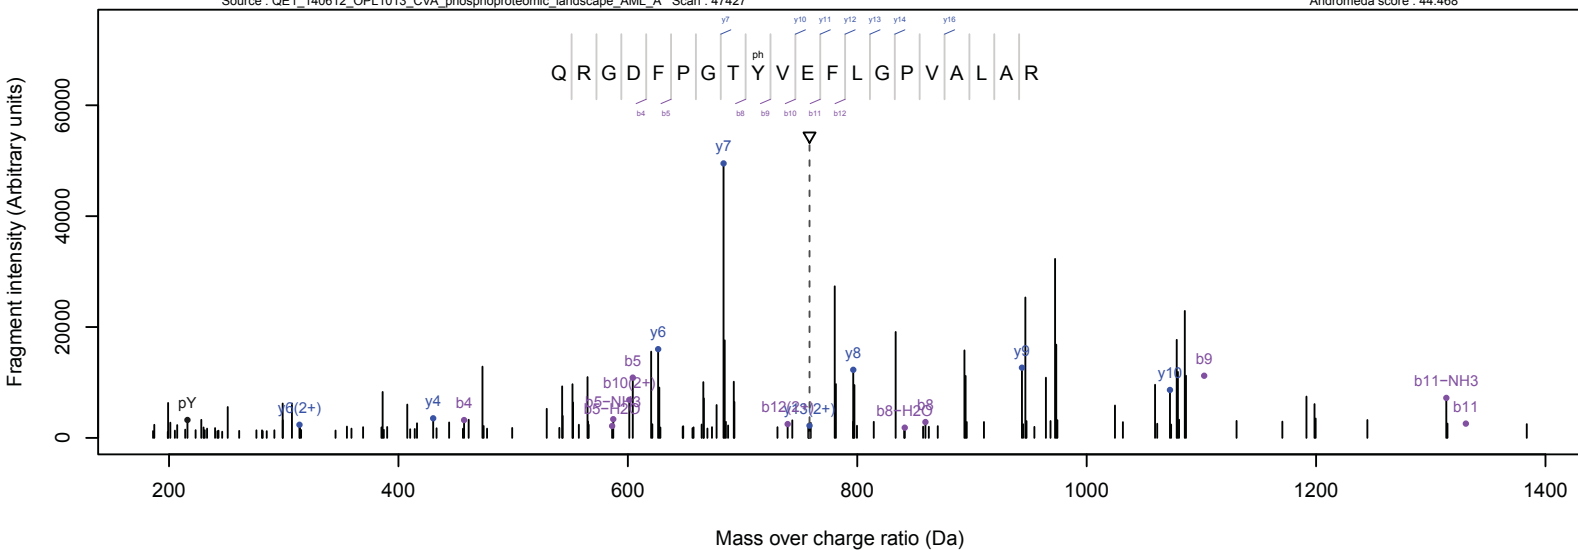

## FSNVY(ph)HLSIHISK-3+

Source : QE1\_140612\_OPL1013\_CVA\_phosphoproteomic\_landscape\_AML\_C Scan : 24662

Andromeda score : 44.44

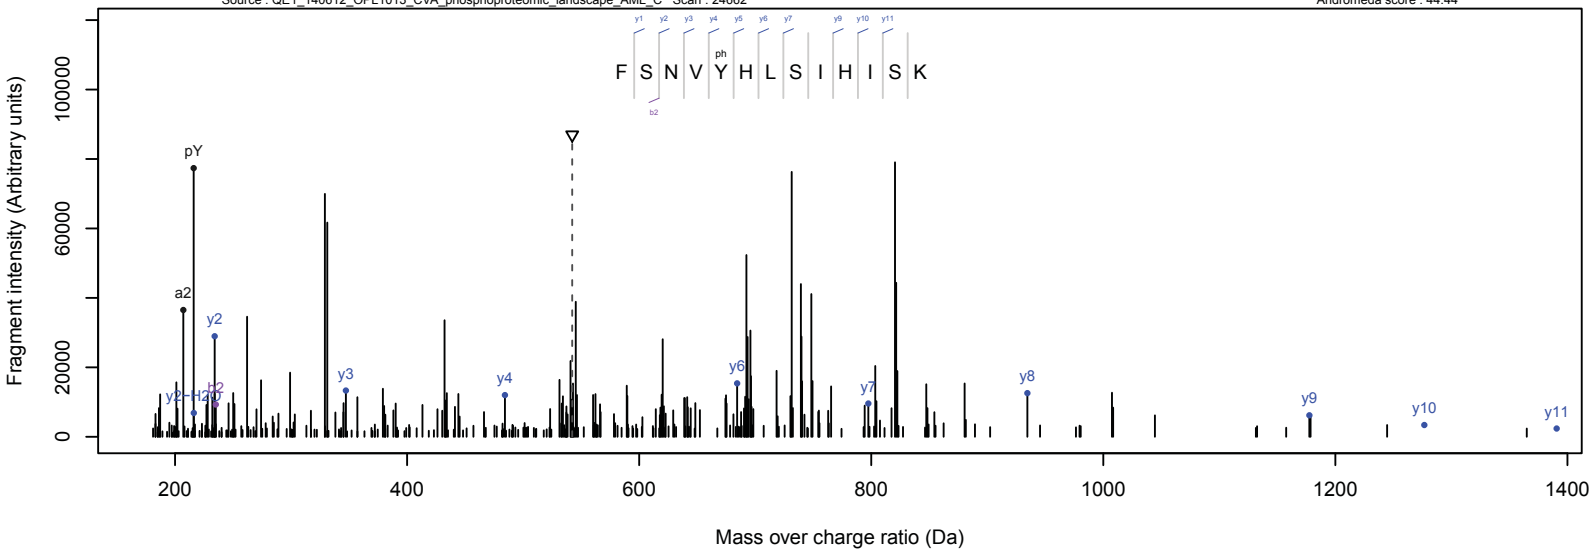

## QDVESCY(ph)FAAQTMK-2+

Source : QE1\_140612\_OPL1013\_CVA\_phosphoproteomic\_landscape\_AML\_C Scan : 22017

Andromeda score : 44.44

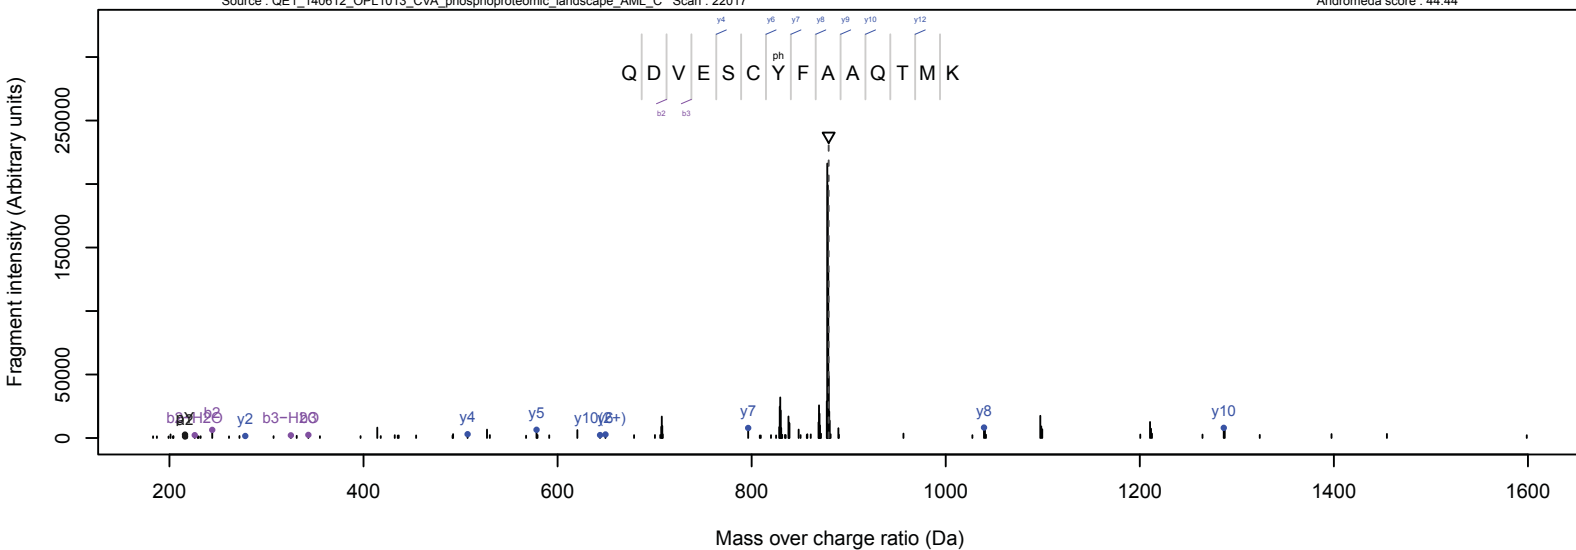

## DLPPTPAGEGY(ph)AVPVIQR-2+

Source : QE1\_140612\_OPL1013\_CVA\_phosphoproteomic\_landscape\_AML\_C Scan : 34403

Andromeda score : 44.391

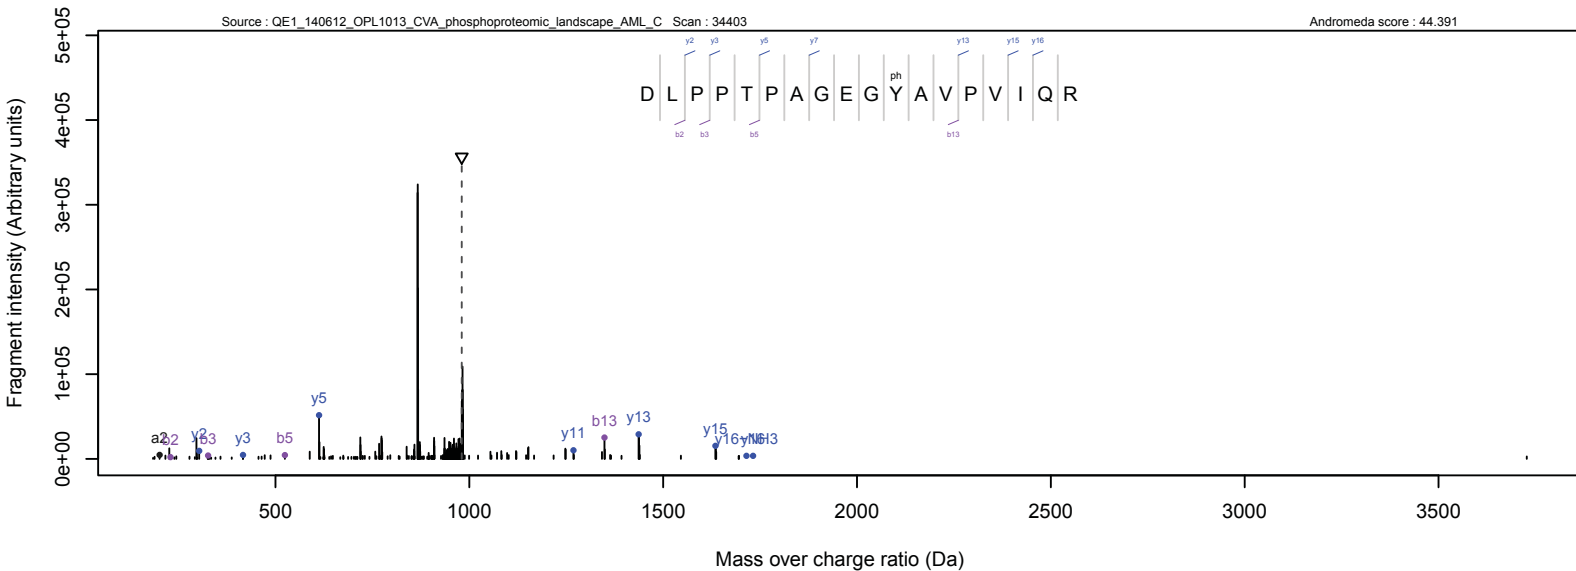

## NSSTY(ph)WEGKADMETLQR-3+

Source : QE1\_140612\_OPL1013\_CVA\_phosphoproteomic\_landscape\_AML\_B Scan : 23817

Andromeda score : 44.391

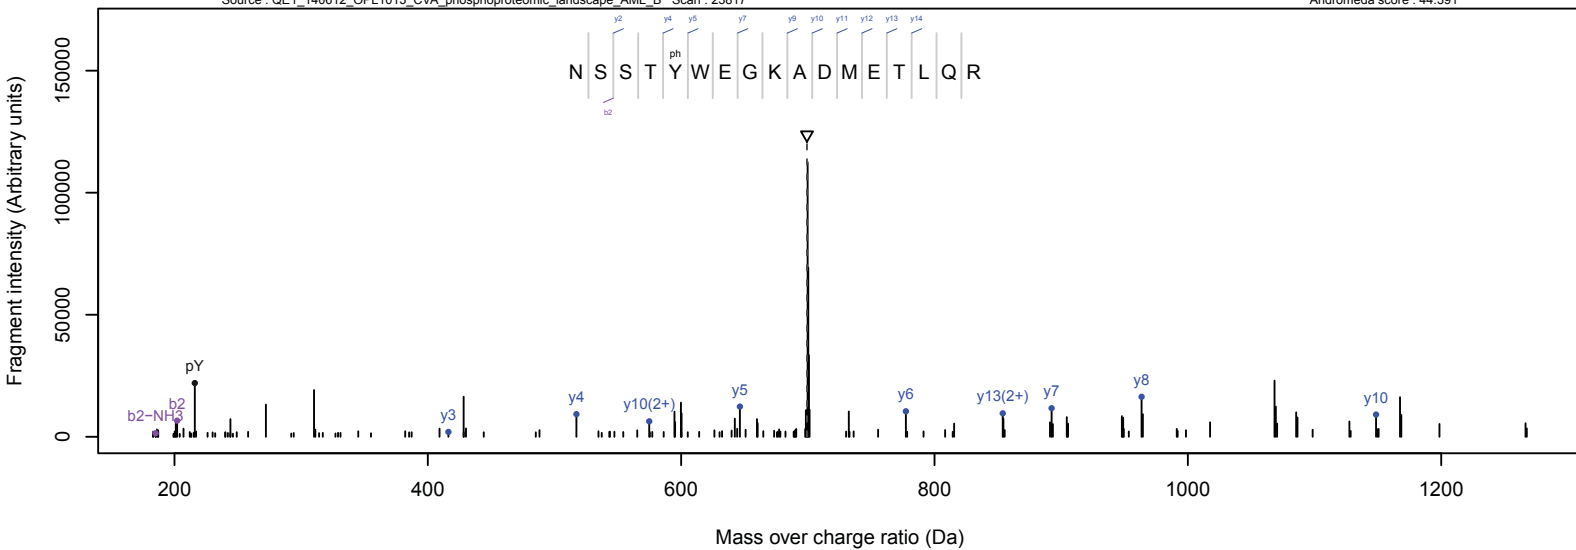

YSGAY(ph)GASVSDEELKR-3+

Source : QE1\_140908\_OPL1013\_CvA\_pTyrIP\_AML\_ML2 Scan : 15148

Andromeda score : 44.391

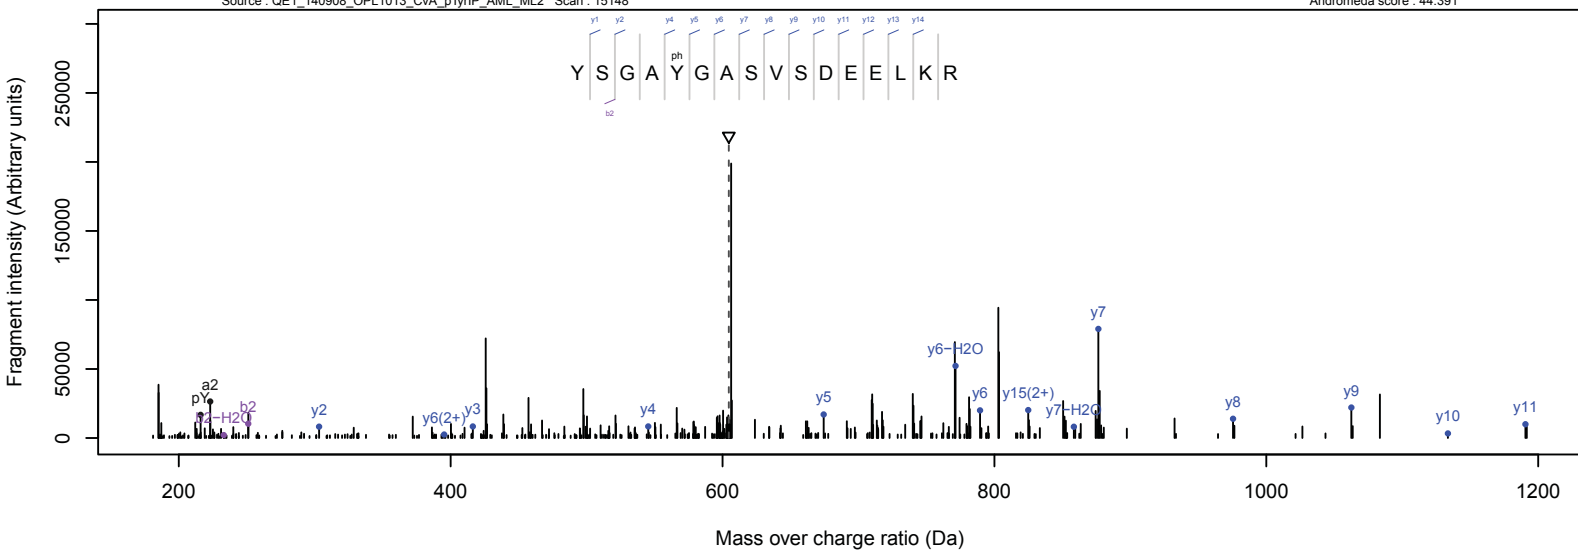

HIYY(ph)VDNK-2+

Source : QE1\_140612\_OPL1013\_CVA\_phosphoproteomic\_landscape\_AML\_E Scan : 10564

Andromeda score : 44.349

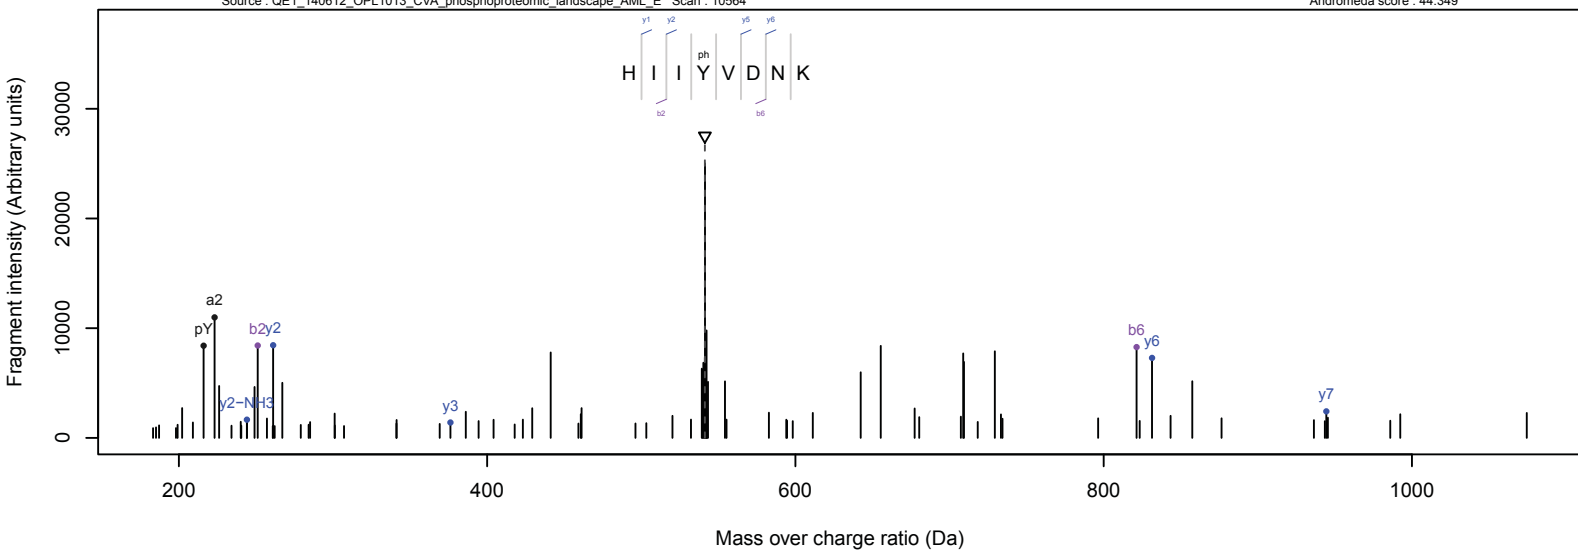

ITLDNAY(ph)M(ox)EKCDENILWLDYK-3+

Source : QE1\_140908\_OPL1013\_CvA\_pTyrIP\_AML\_HEL Scan : 44077

Andromeda score : 44.341

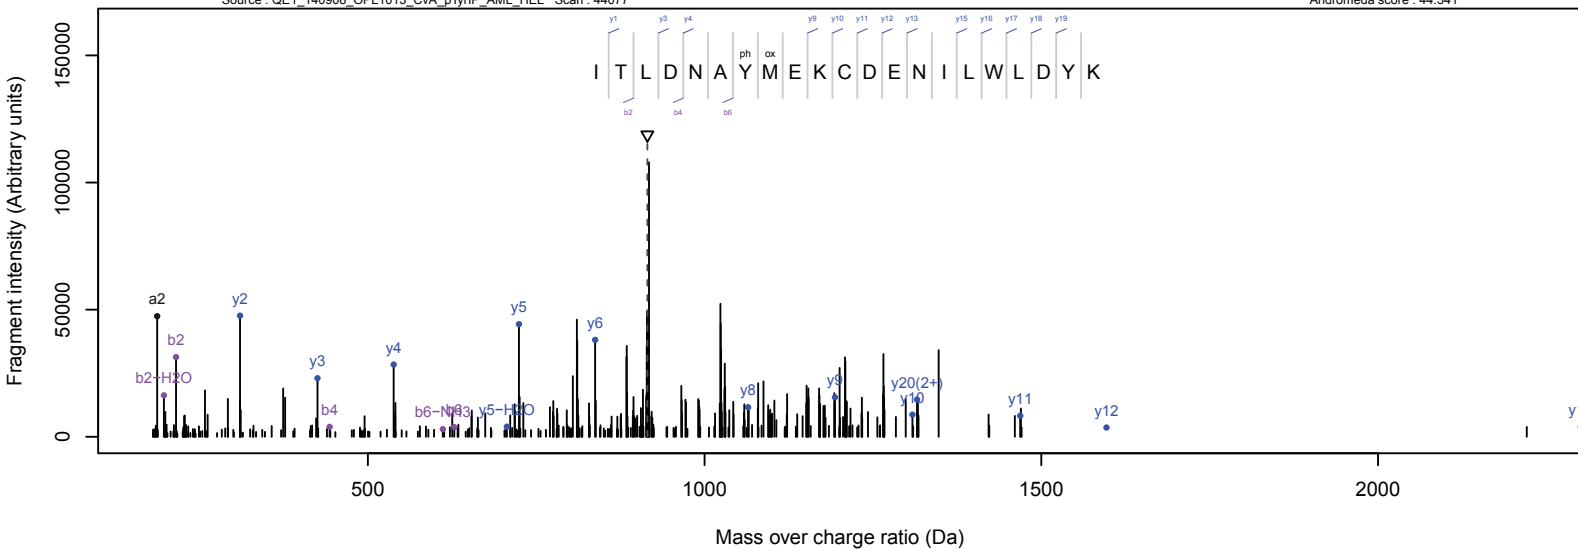

**GNNVMSNY(ph)EAYKPSTGAMGDR-3+**

Source : QE1\_140612\_OPL1013\_CVA\_phosphoproteomic\_landscape\_AML\_B Scan : 20134

Andromeda score : 44.312

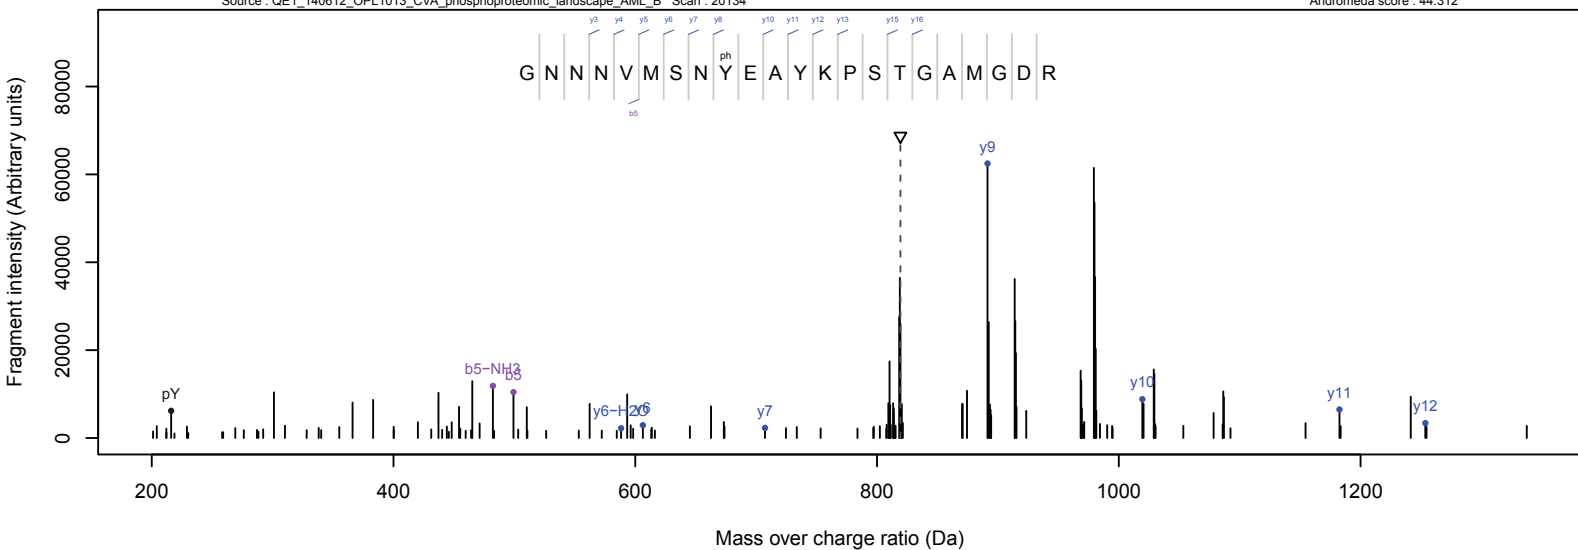

**NNHVINTPLQTMHIMADLGPYK-4+**

Source : QE1\_140612\_OPL1013\_CVA\_phosphoproteomic\_landscape\_AML\_C Scan : 36542

Andromeda score : 44.312

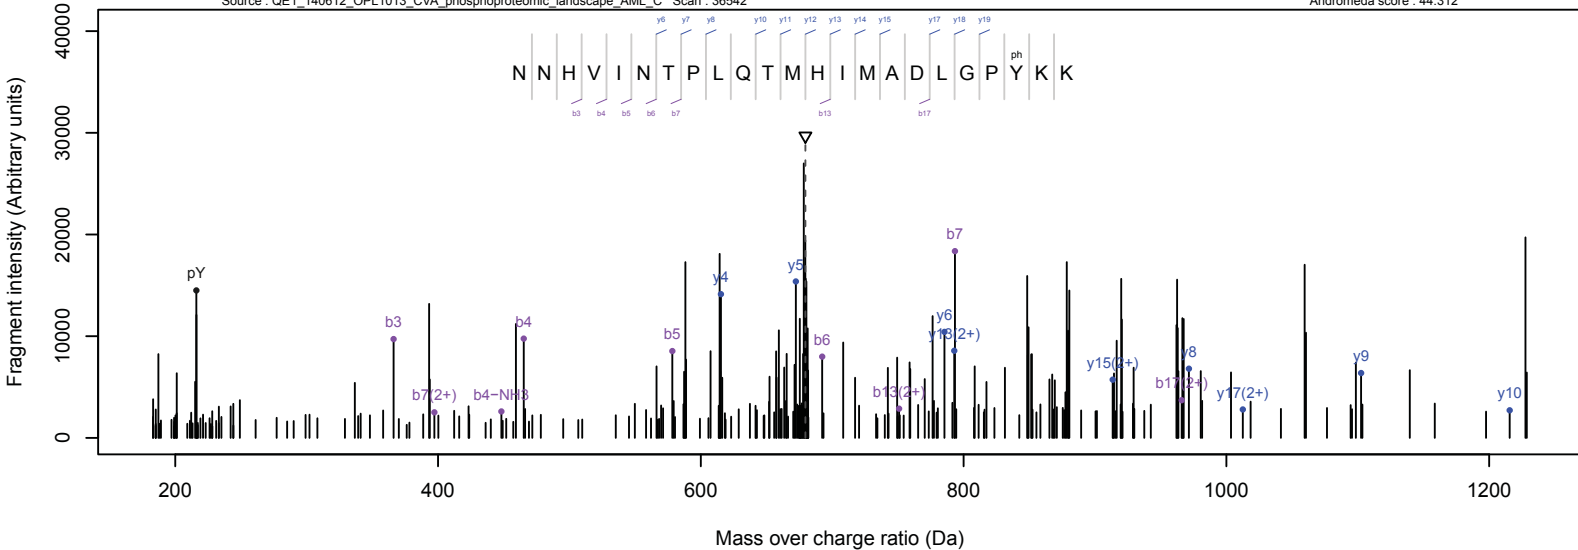

**RVVSEDTSHYILIK-3+**

Source : QE1\_140612\_OPL1013\_CVA\_phosphoproteomic\_landscape\_AML\_C Scan : 22119

Andromeda score : 44.312

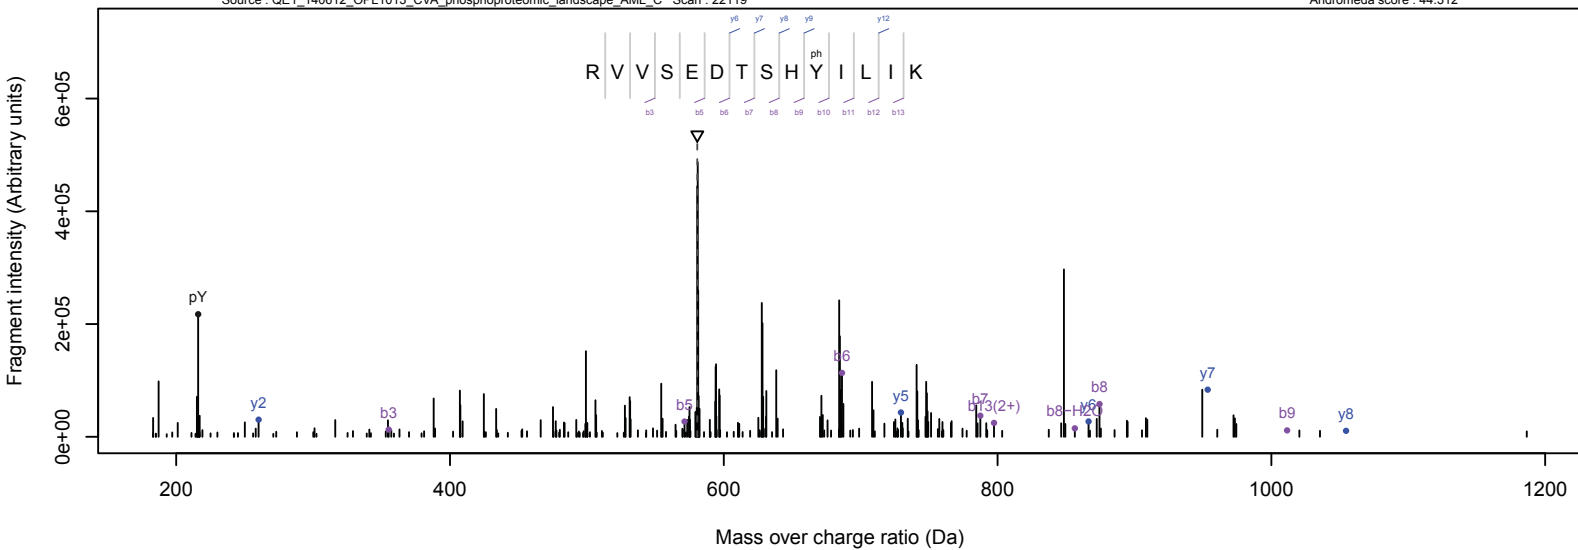



## IRPGEQEQY(ph)ESTIGFK-2+

Source : QE1\_140612\_OPL1013\_CVA\_phosphoproteomic\_landscape\_AML\_C Scan : 19884

Andromeda score : 44.252

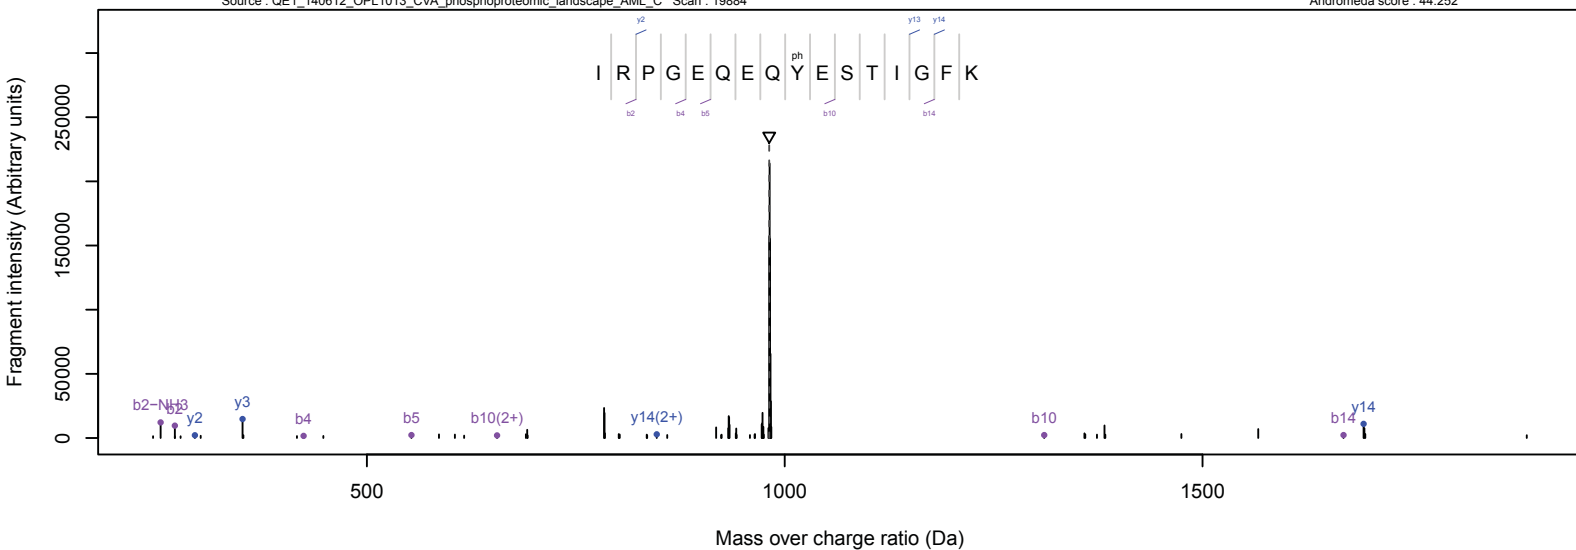

## KEGY(ph)IPSNYVAR-3+

Source : QE1\_140612\_OPL1013\_CVA\_phosphoproteomic\_landscape\_AML\_C Scan : 14894

Andromeda score : 44.193

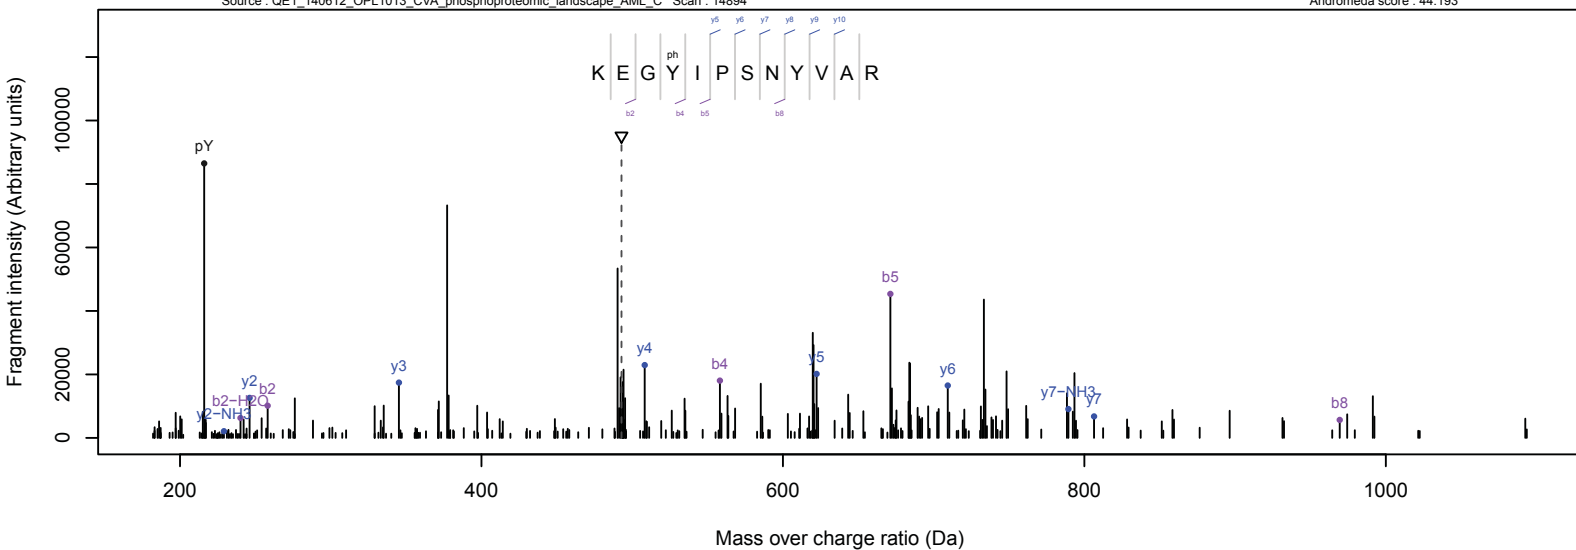

## LPVDVVNASNEDLKHY(ph)GGLAALSK-3+

Source : QE1\_140612\_OPL1013\_CVA\_phosphoproteomic\_landscape\_AML\_C Scan : 43047

Andromeda score : 44.164

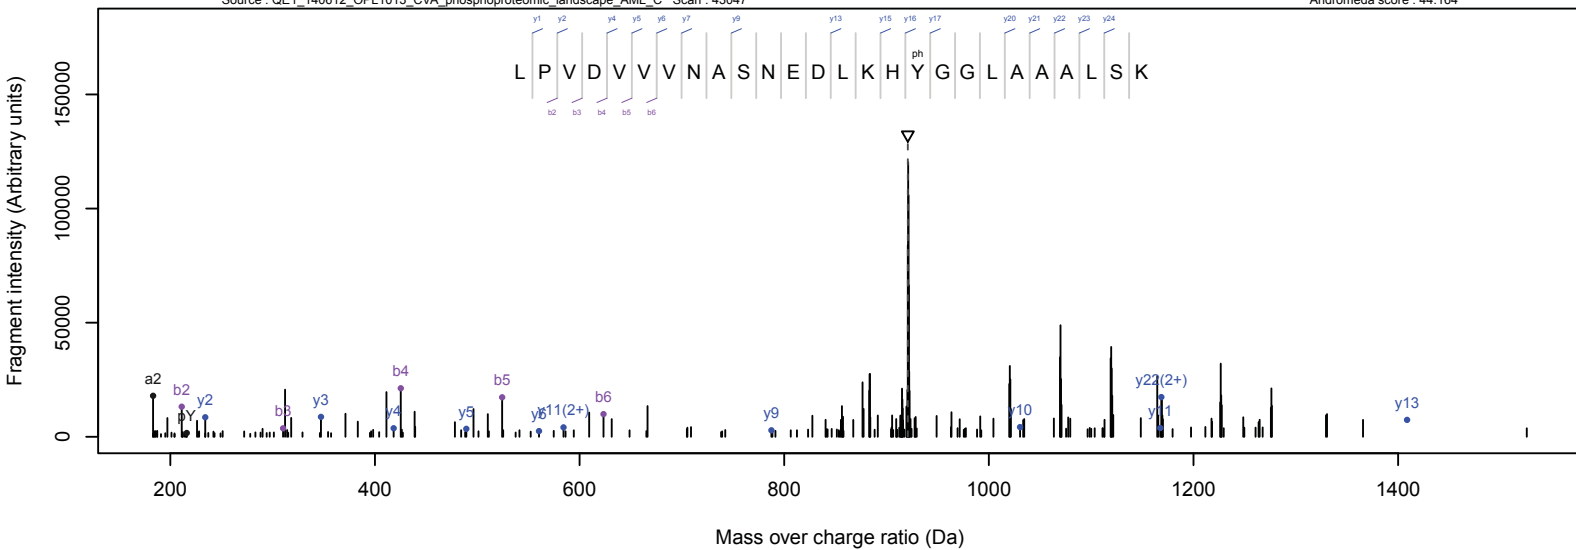

## SSEY(ph)PISQNP EGLSADKFEV SADSSTSK-3+

Source : QE1\_140612\_OPL1013\_CVA\_phosphoproteomic\_landscape\_AML\_D Scan : 29638

Andromeda score : 44.164

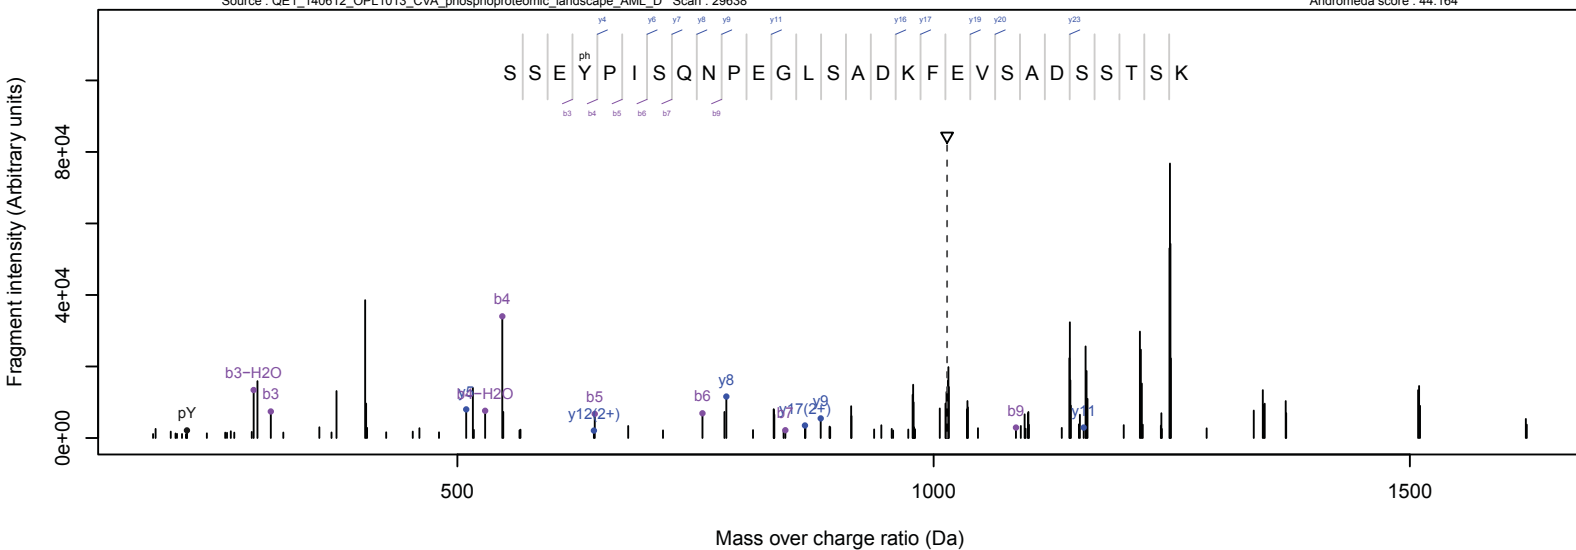

## LAGFPAT(ph)HYSTLCKPAPLTGTLEVR-4+

Source : QE1\_140612\_OPL1013\_CVA\_phosphoproteomic\_landscape\_AML\_C Scan : 36763

Andromeda score : 44.161

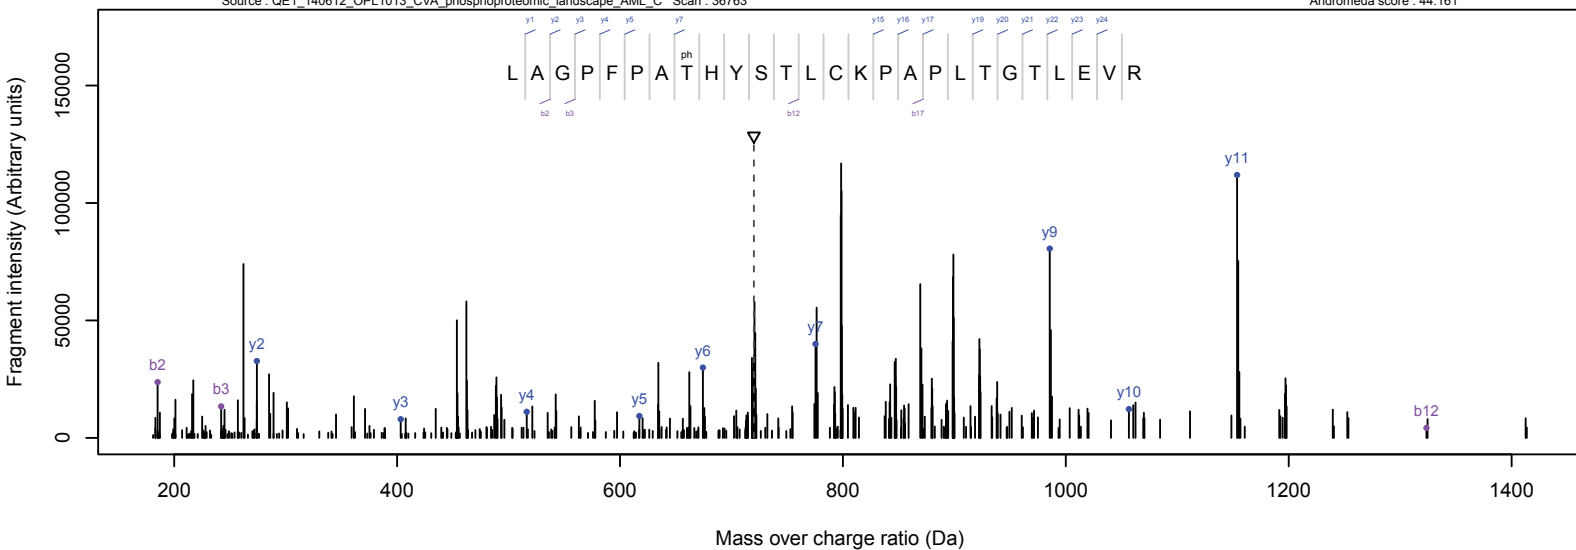

## SPFSFVY(ph)LPR-2+

Source : QE1\_140612\_OPL1013\_CVA\_phosphoproteomic\_landscape\_AML\_C Scan : 45701

Andromeda score : 44.097

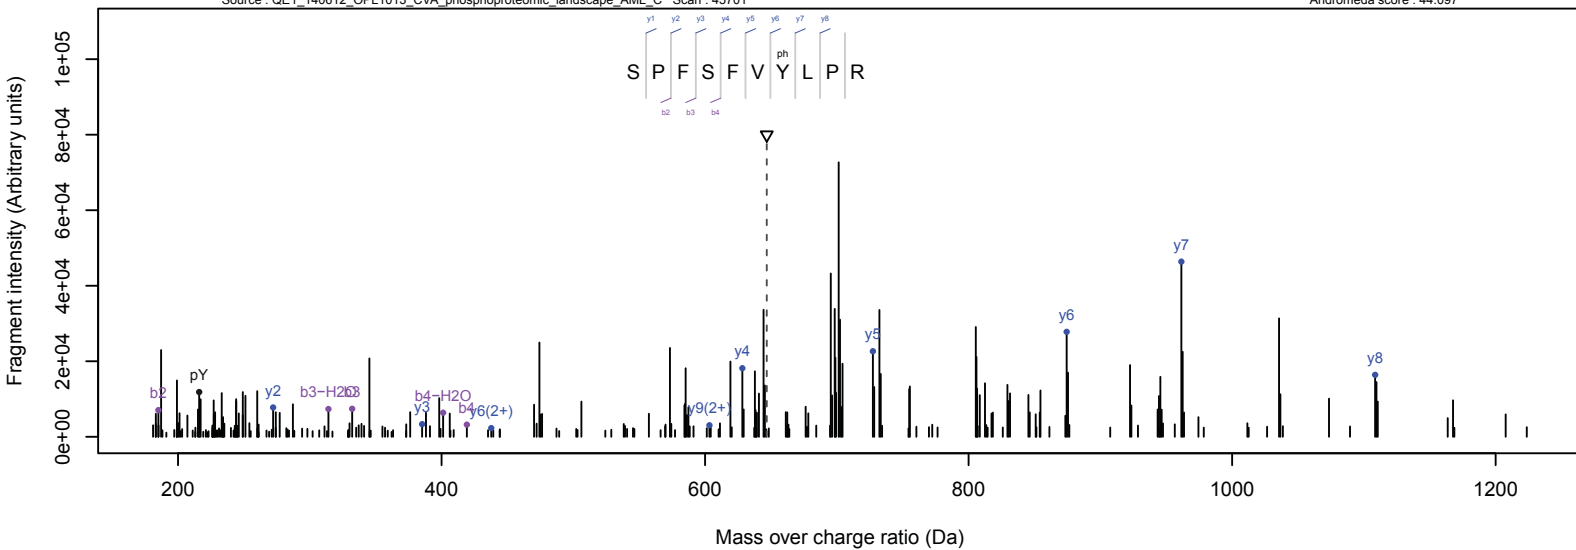



## SQIY(ph)TWDGR-2+

Source : QE1\_140612\_OPL1013\_CVA\_phosphoproteomic\_landscape\_AML\_D Scan : 17085

Andromeda score : 43.958

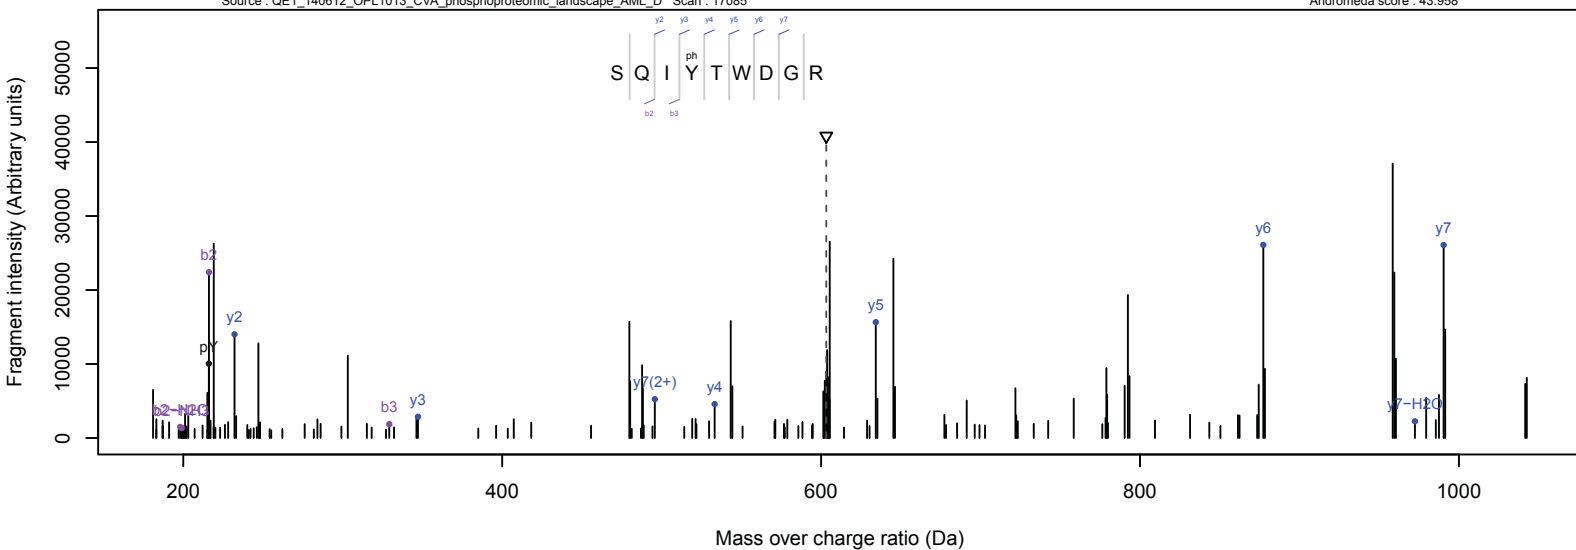

## YLQAHTQSVYNY(ph)HLSPR-3+

Source : QE1\_140612\_OPL1013\_CVA\_phosphoproteomic\_landscape\_AML\_B Scan : 18781

Andromeda score : 43.955

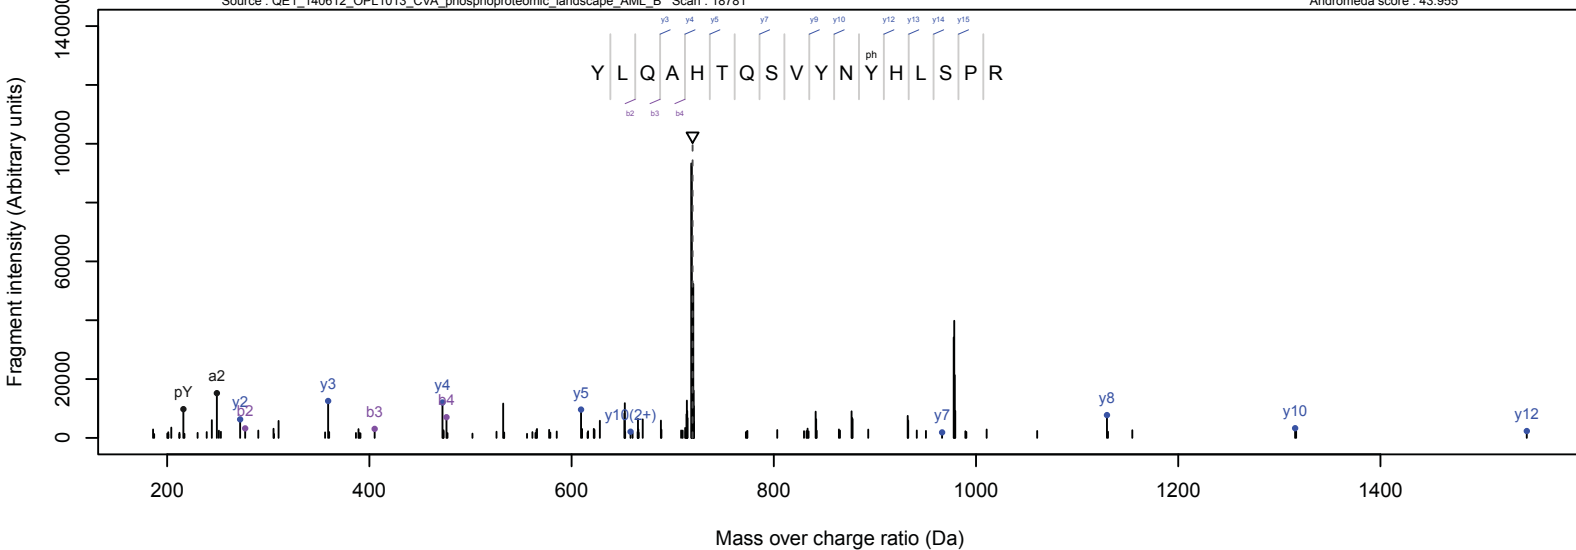

## EKDY(ph)DFPPM(ox)R-2+

Source : QE1\_140908\_OPL1013\_CvA\_pTyrIP\_AML\_OCI\_AML3 Scan : 12255

Andromeda score : 43.897

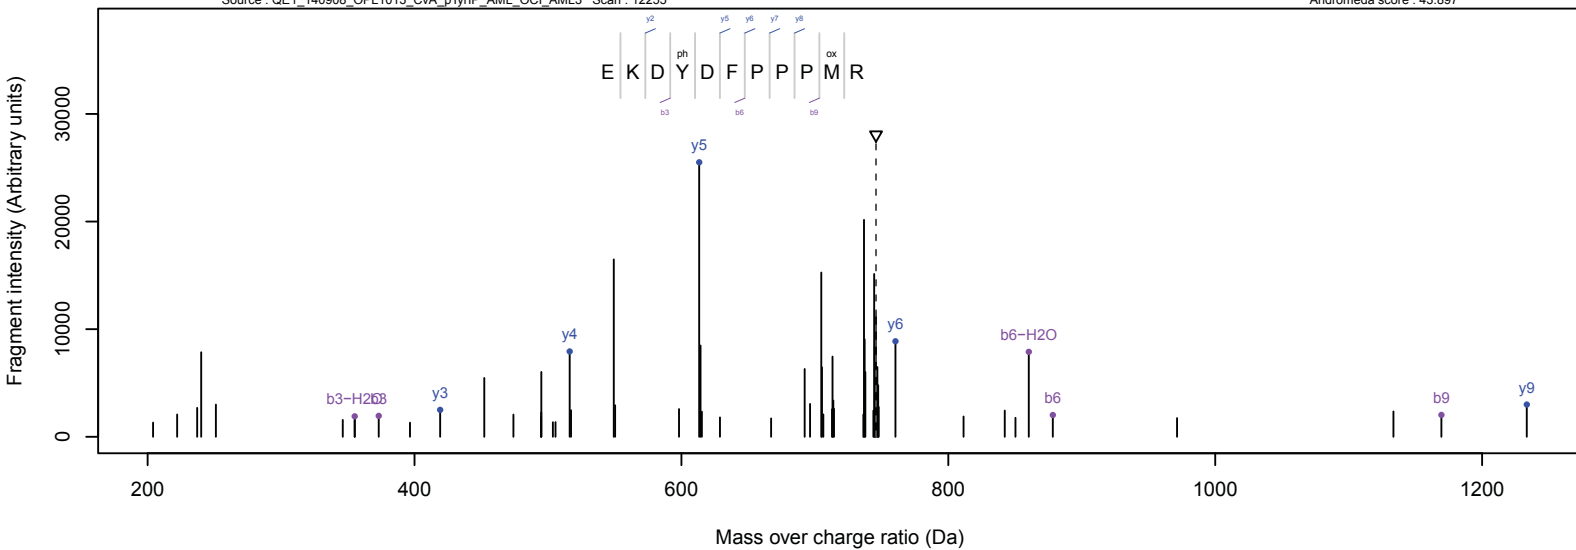



## (ac)MY(ph)TAIPQSGSPFPGSVQDPLHVWR-3+

Source : QE1\_140822\_OPL1013\_CVA\_pTyrIP\_AML\_cell\_lines\_part2\_B Scan : 41816

Andromeda score : 43.841

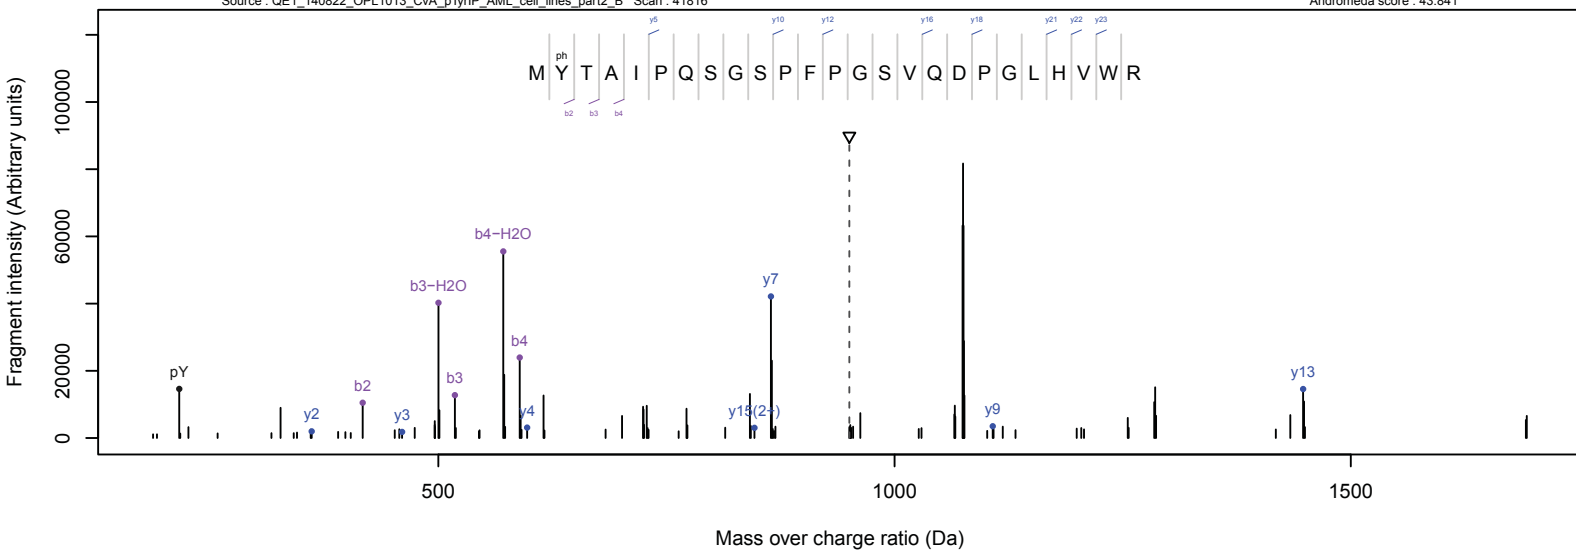

## GNINNY(ph)FK-2+

Source : QE1\_140612\_OPL1013\_CVA\_phosphoproteomic\_landscape\_AML\_D Scan : 16176

Andromeda score : 43.808

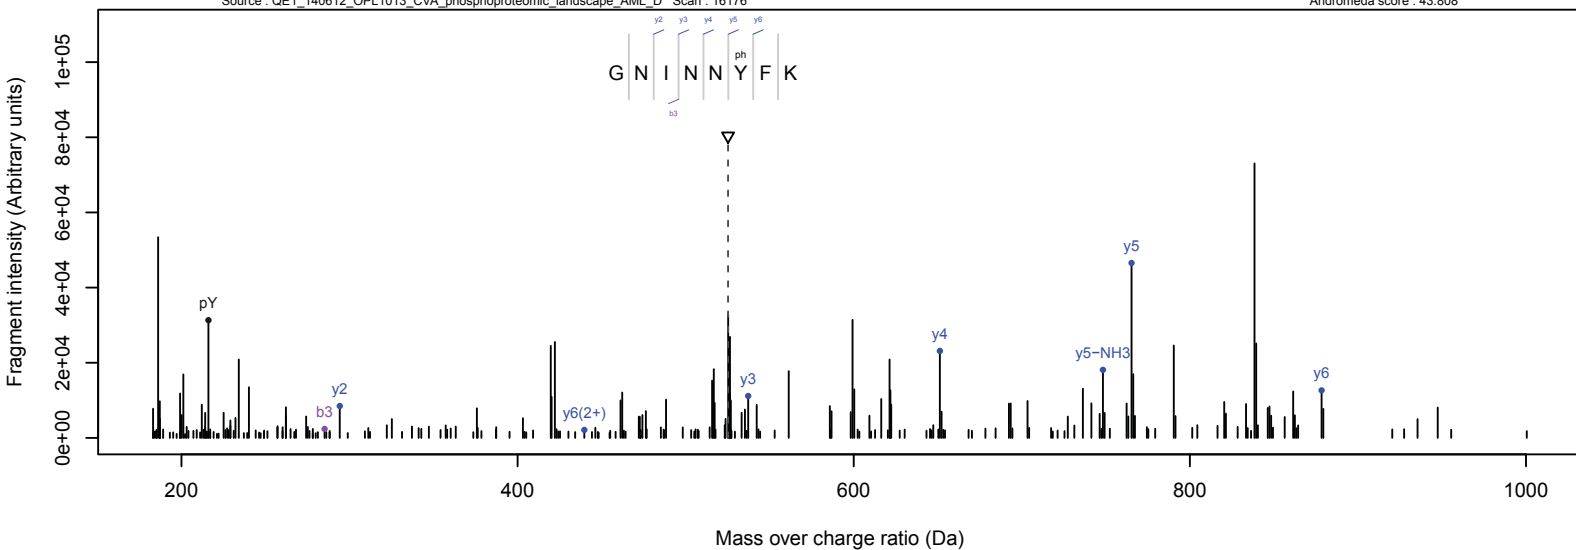

## Y(ph)REQMFR-2+

Source : QE1\_140612\_OPL1013\_CVA\_phosphoproteomic\_landscape\_AML\_D Scan : 9316

Andromeda score : 43.808

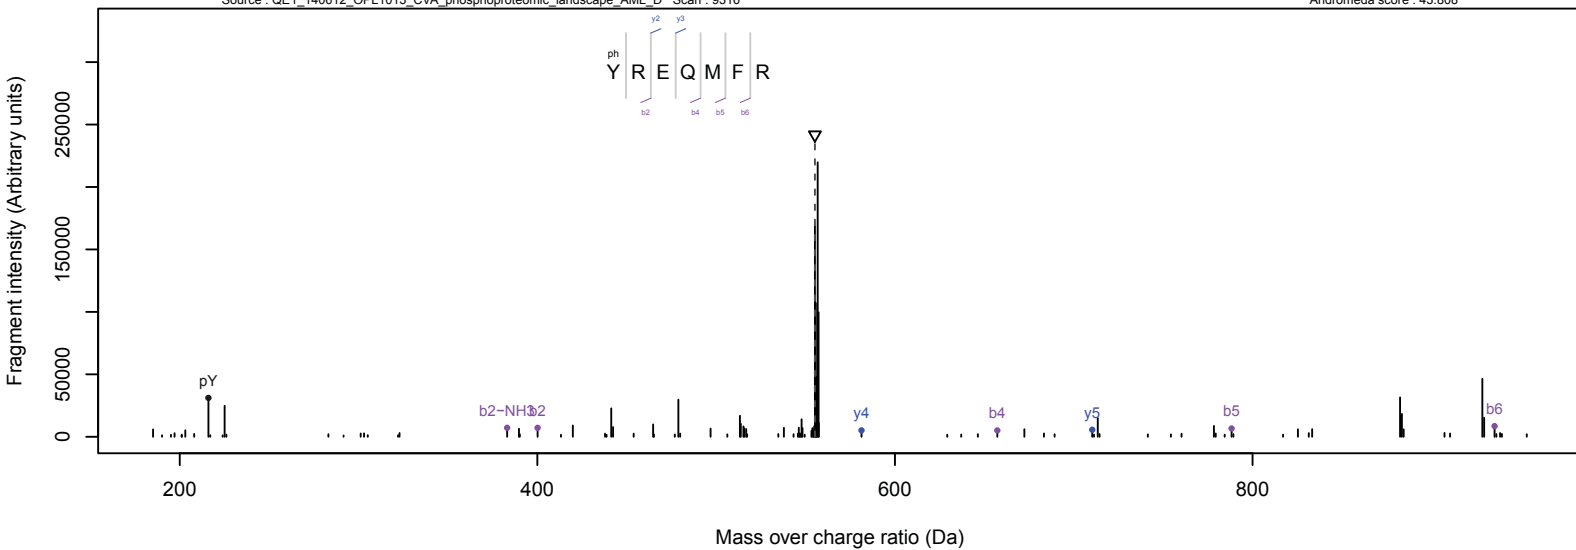

Y(ph)SPWGM(ox)KK-2+

Source : QE1\_140612\_OPL1013\_CVA\_phosphoproteomic\_landscape\_AML\_D Scan : 9275

Andromeda score : 43.808

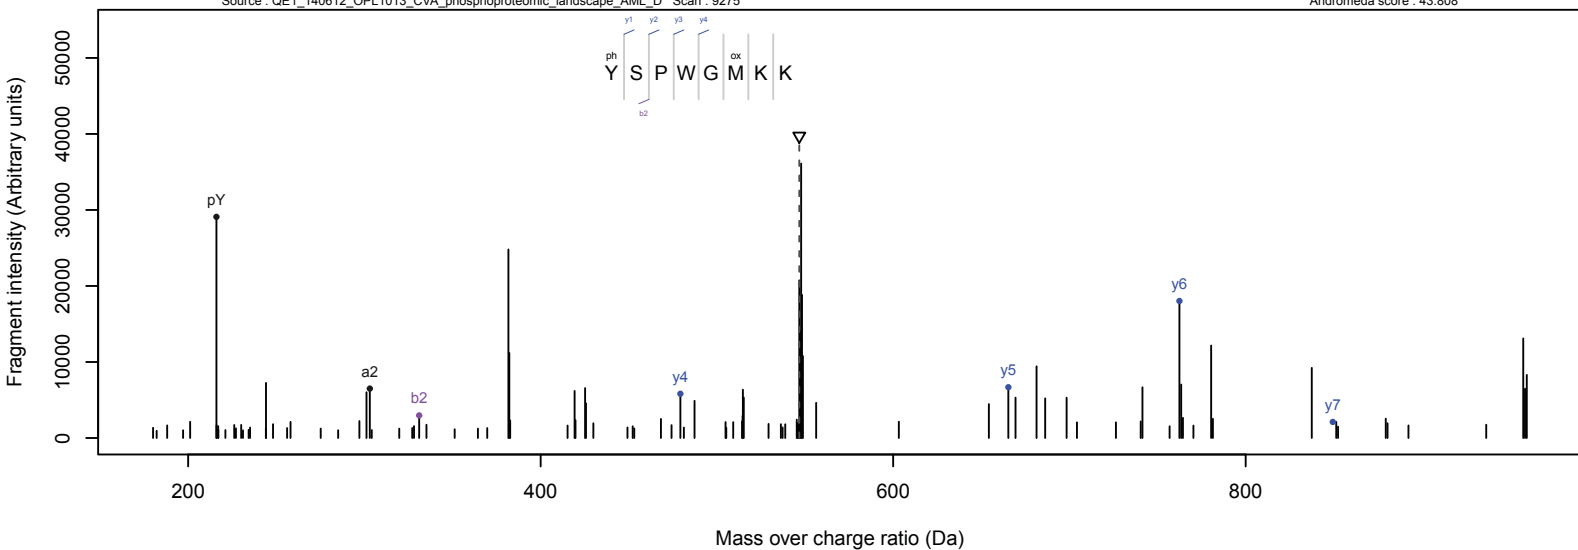

ERGY(ph)ETMVNFR-2+

Source : QE1\_140612\_OPL1013\_CVA\_phosphoproteomic\_landscape\_AML\_C Scan : 20350

Andromeda score : 43.798

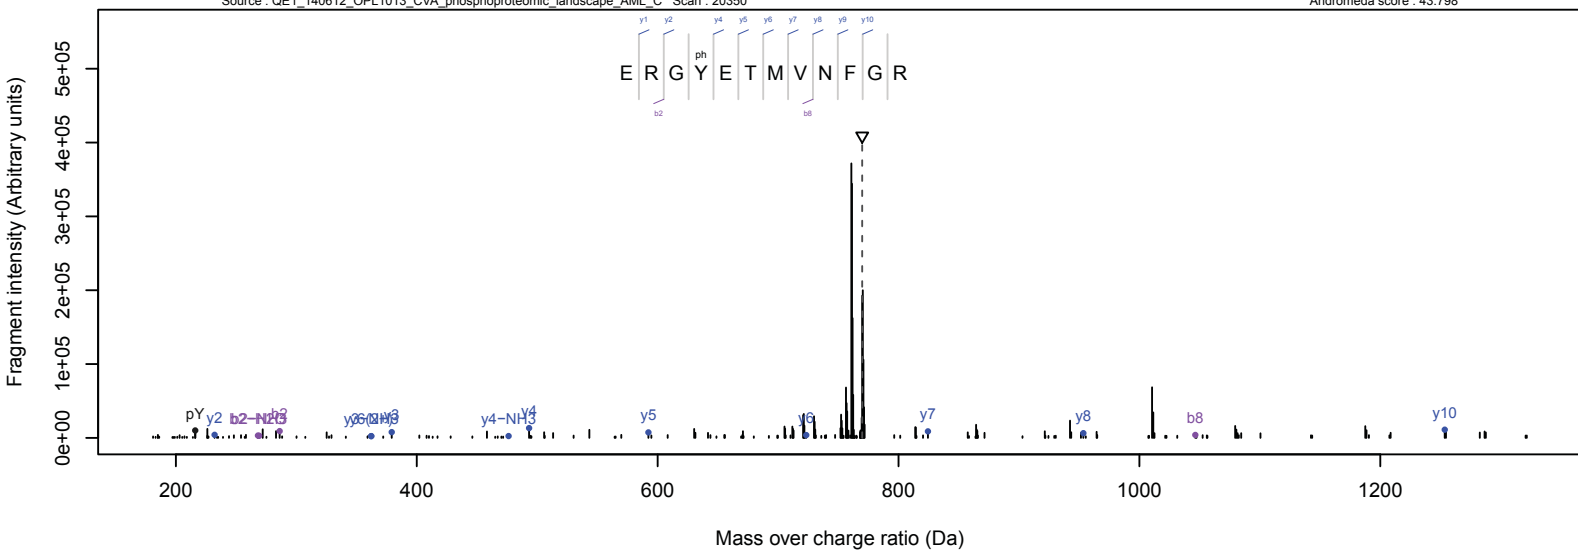

DSAY(ph)QSITHYRPVSAS(ph)R-3+

Source : QE1\_140612\_OPL1013\_CVA\_phosphoproteomic\_landscape\_AML\_C Scan : 15975

Andromeda score : 43.794

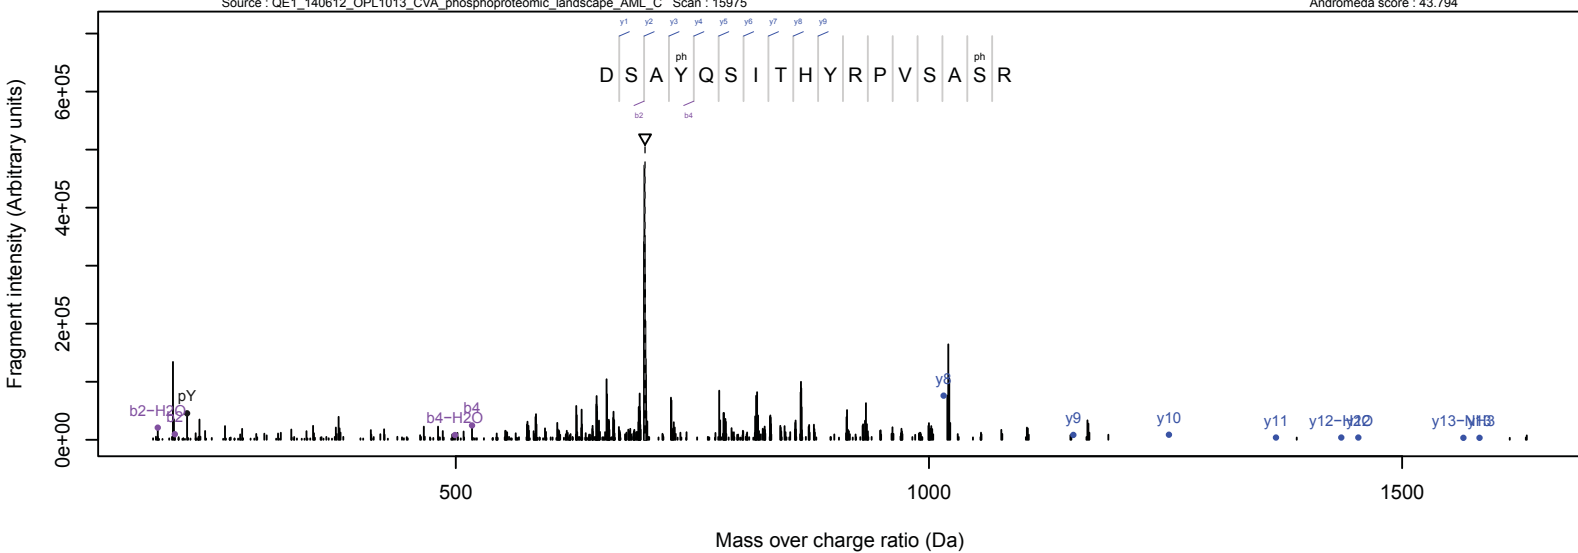

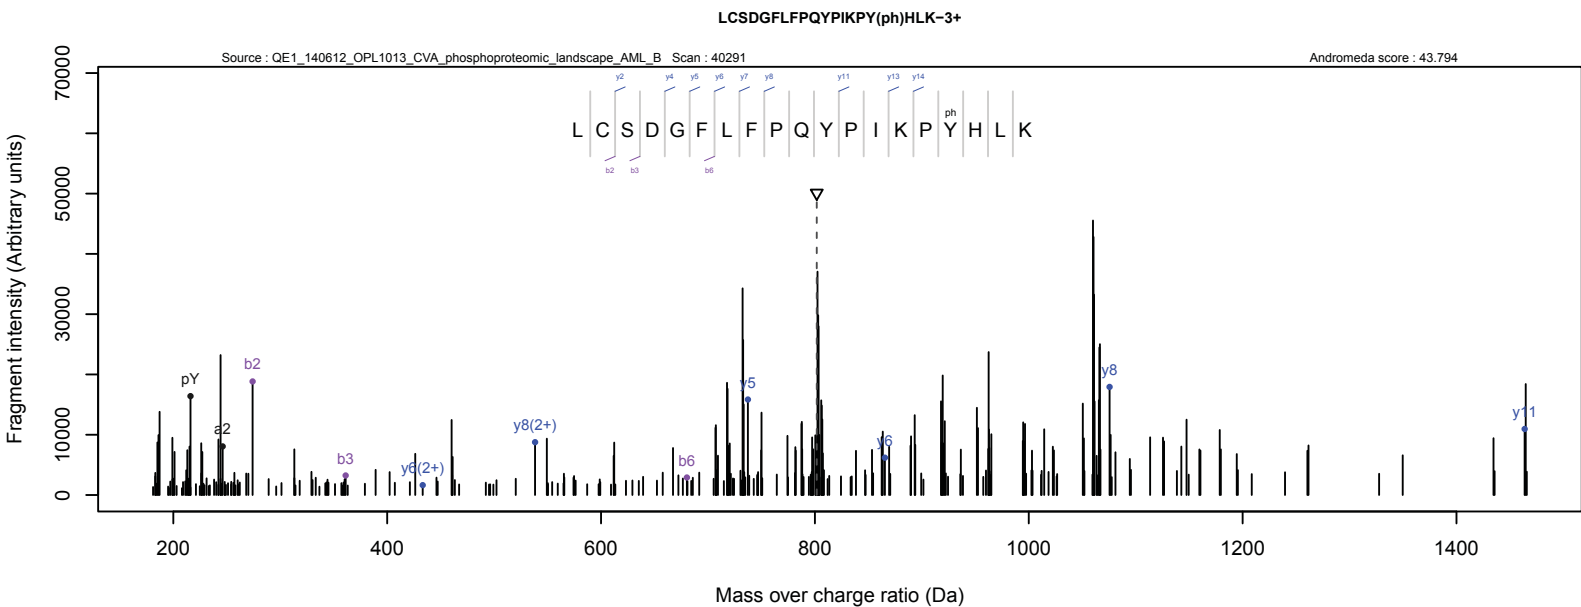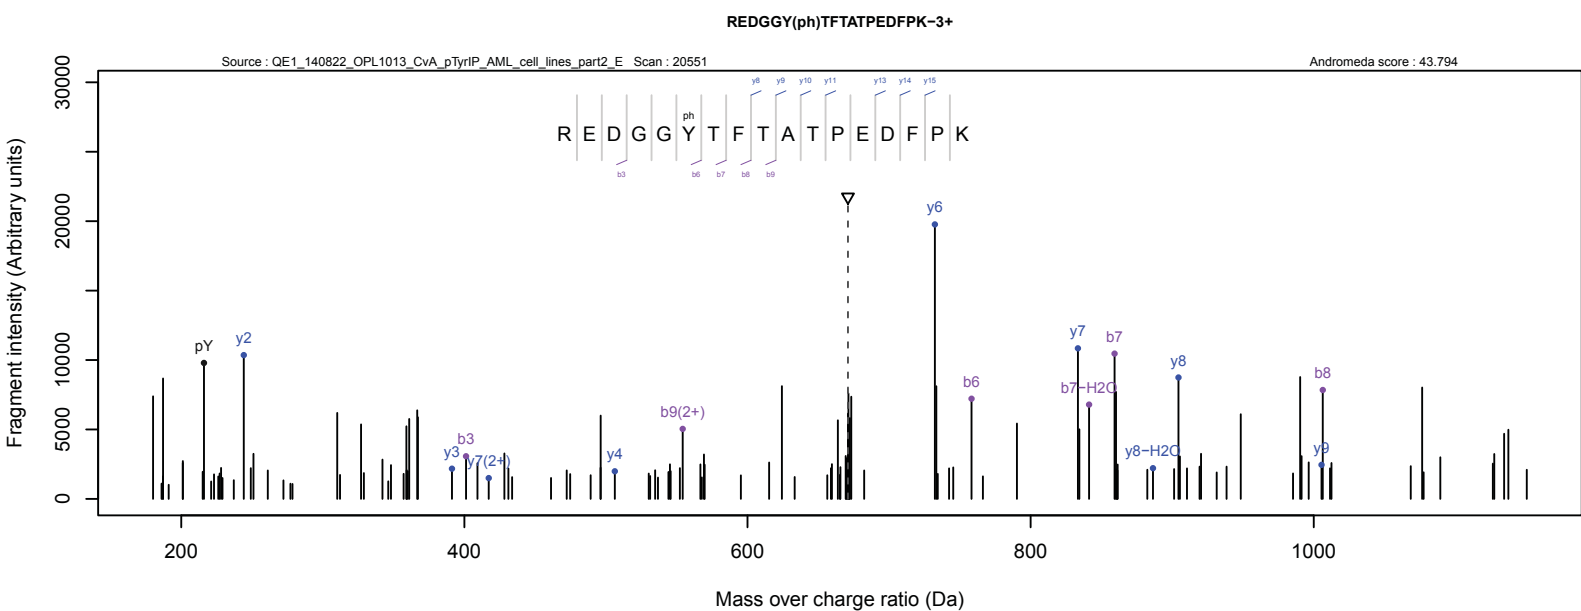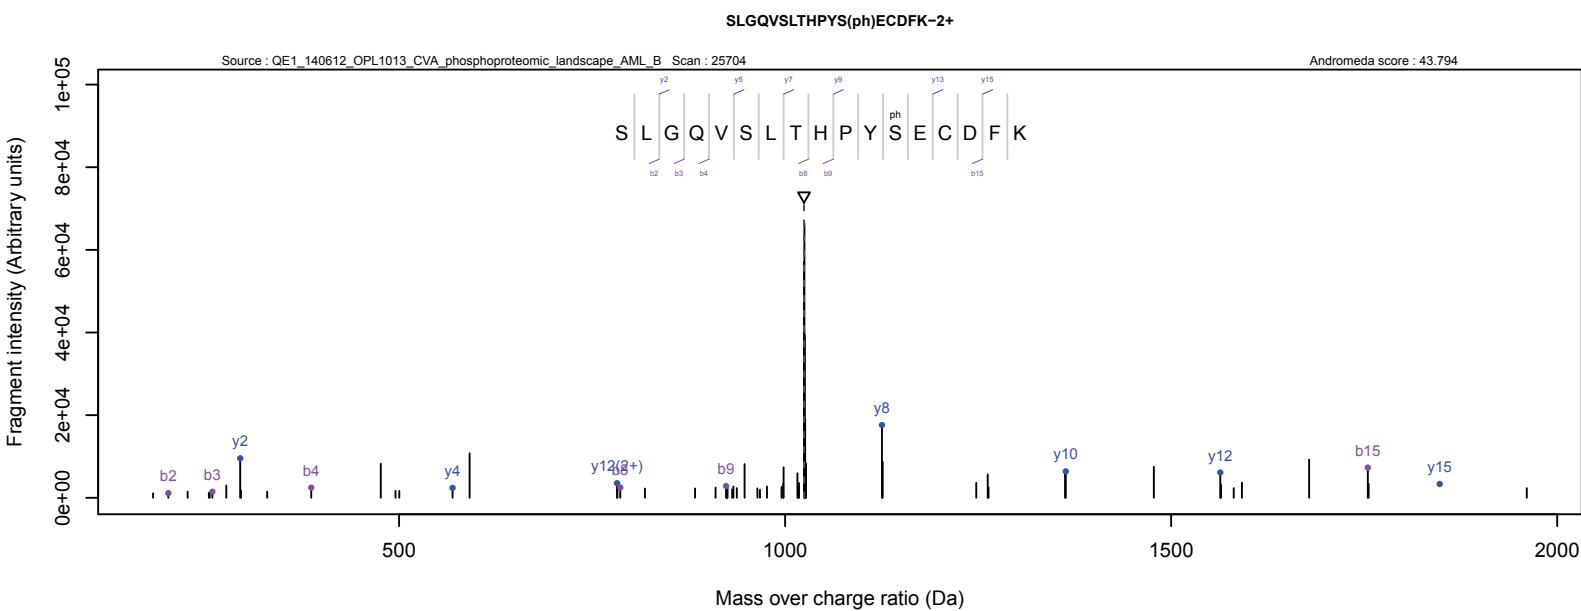



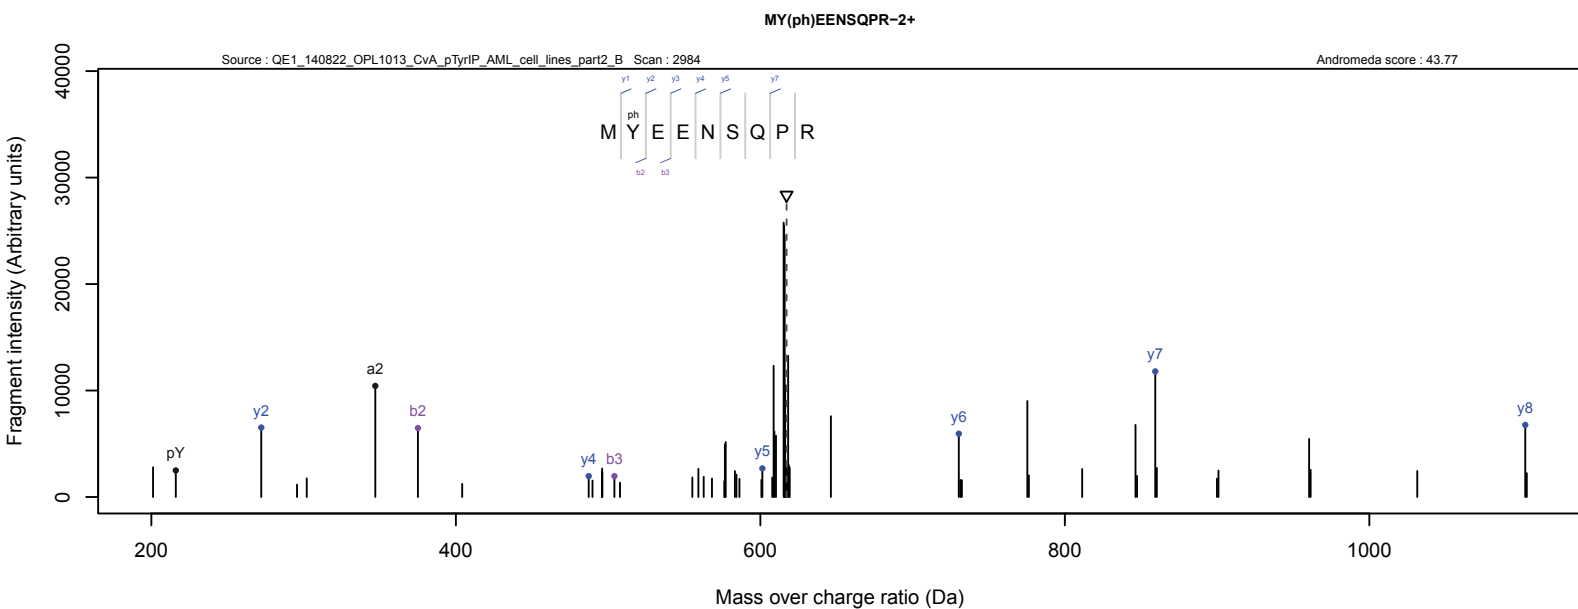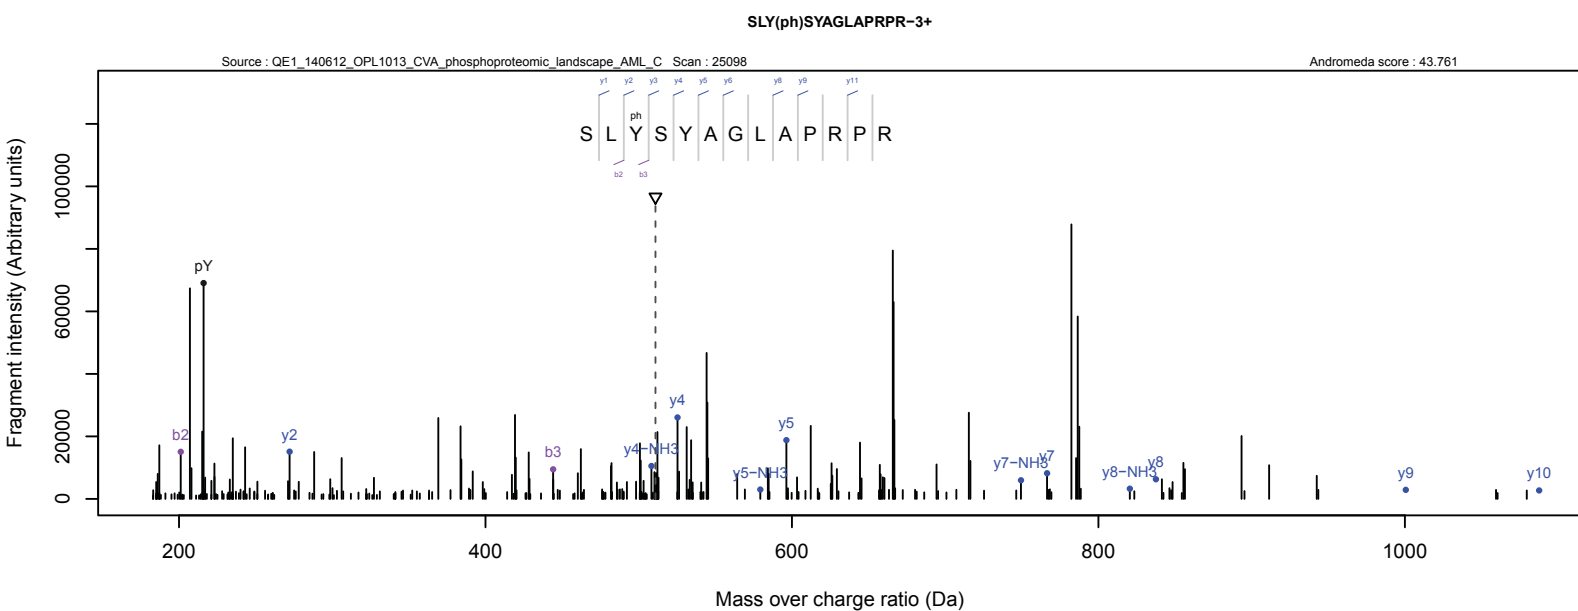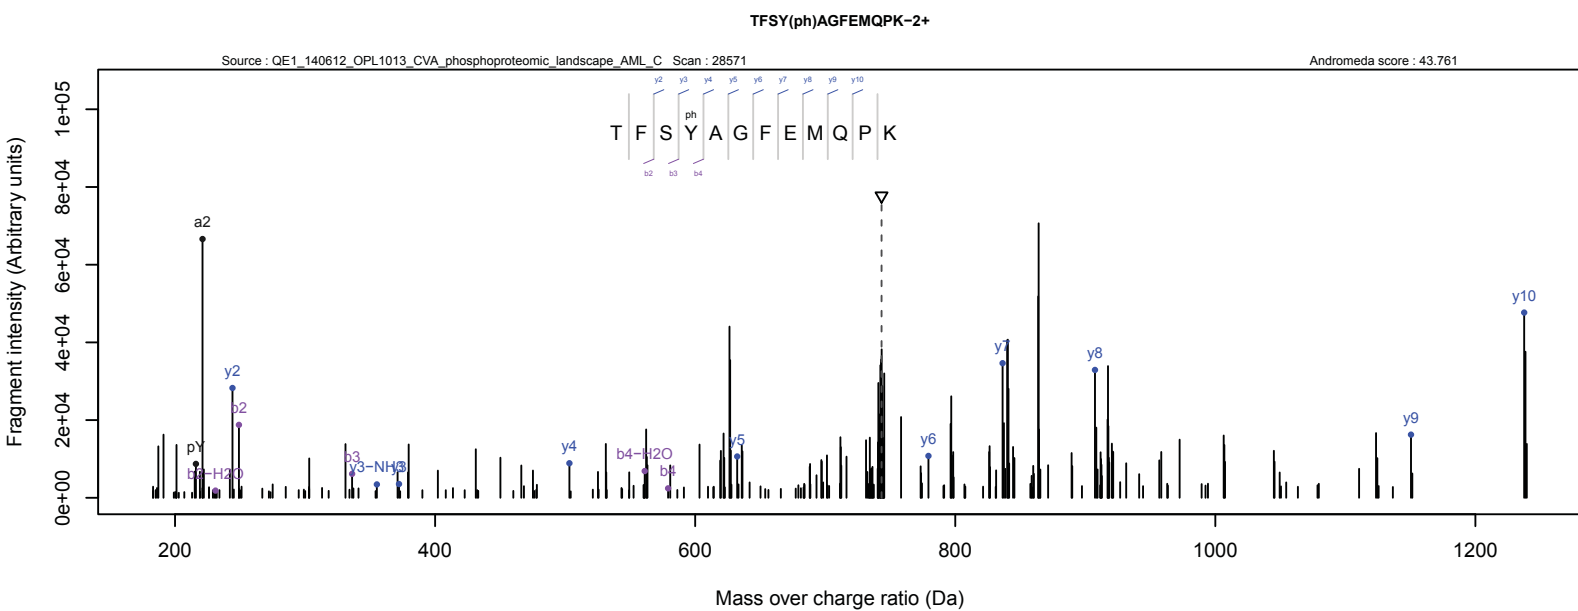

## TKLY(ph)DM(ox)IADLGDDDELPHIPSGIINQSR-3+

Source : QE1\_140612\_OPL1013\_CVA\_phosphoproteomic\_landscape\_AML\_B Scan : 45846

Andromeda score : 43.732

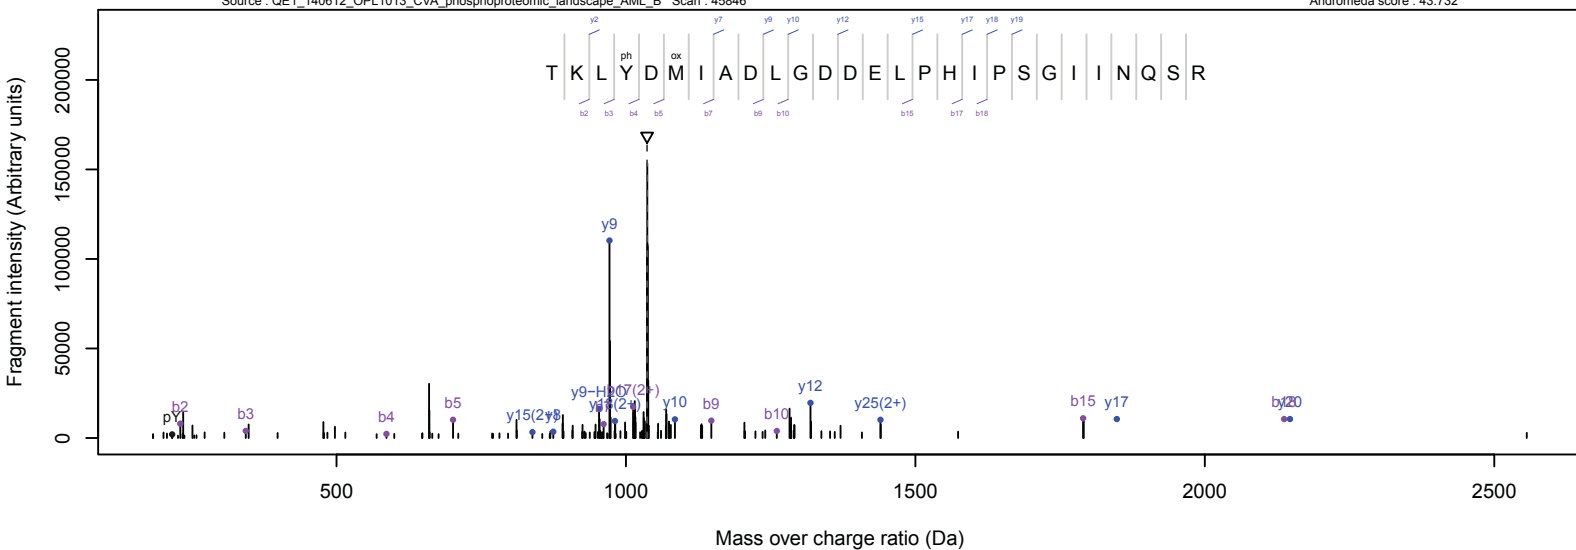

## AMKPEAAPLLGDY(ph)QDPFWNLLHHPK-4+

Source : QE1\_140612\_OPL1013\_CVA\_phosphoproteomic\_landscape\_AML\_B Scan : 46351

Andromeda score : 43.696

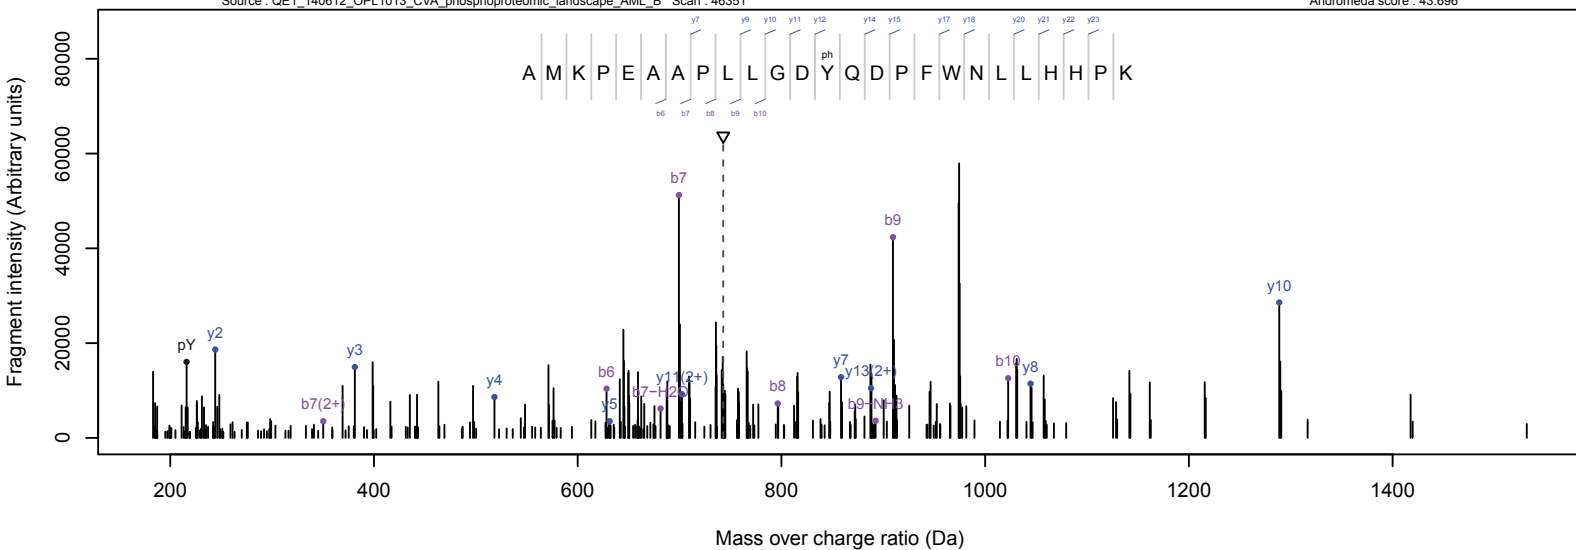

## ENPY(ph)ANAGKNPDEVSYAGDNFVR-3+

Source : QE1\_140908\_OPL1013\_CvA\_pTyrIP\_AML\_HL60 Scan : 25897

Andromeda score : 43.696

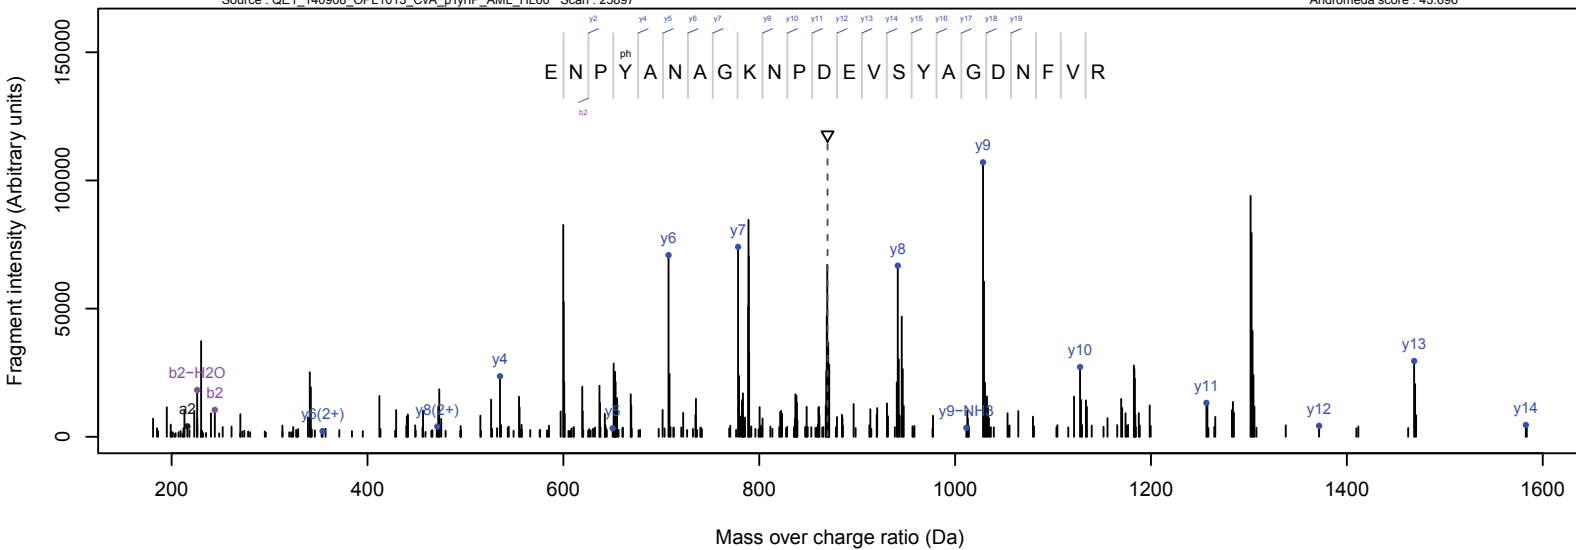

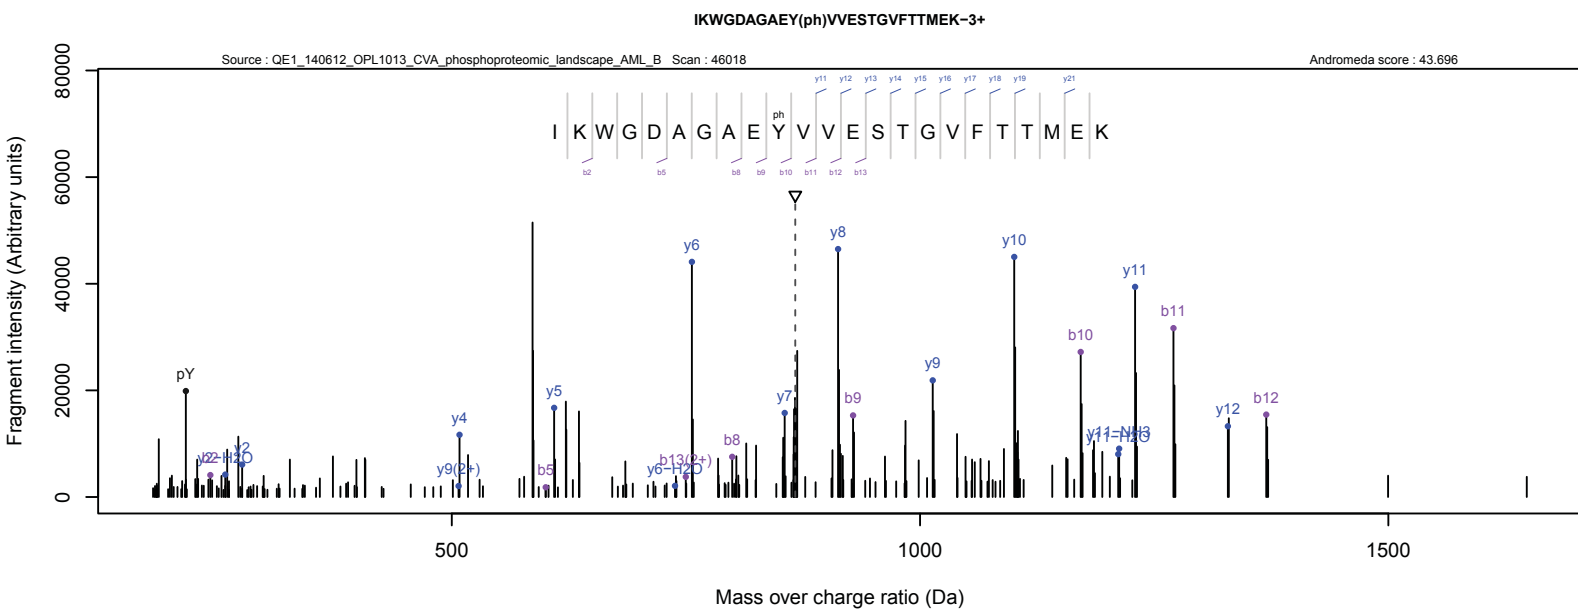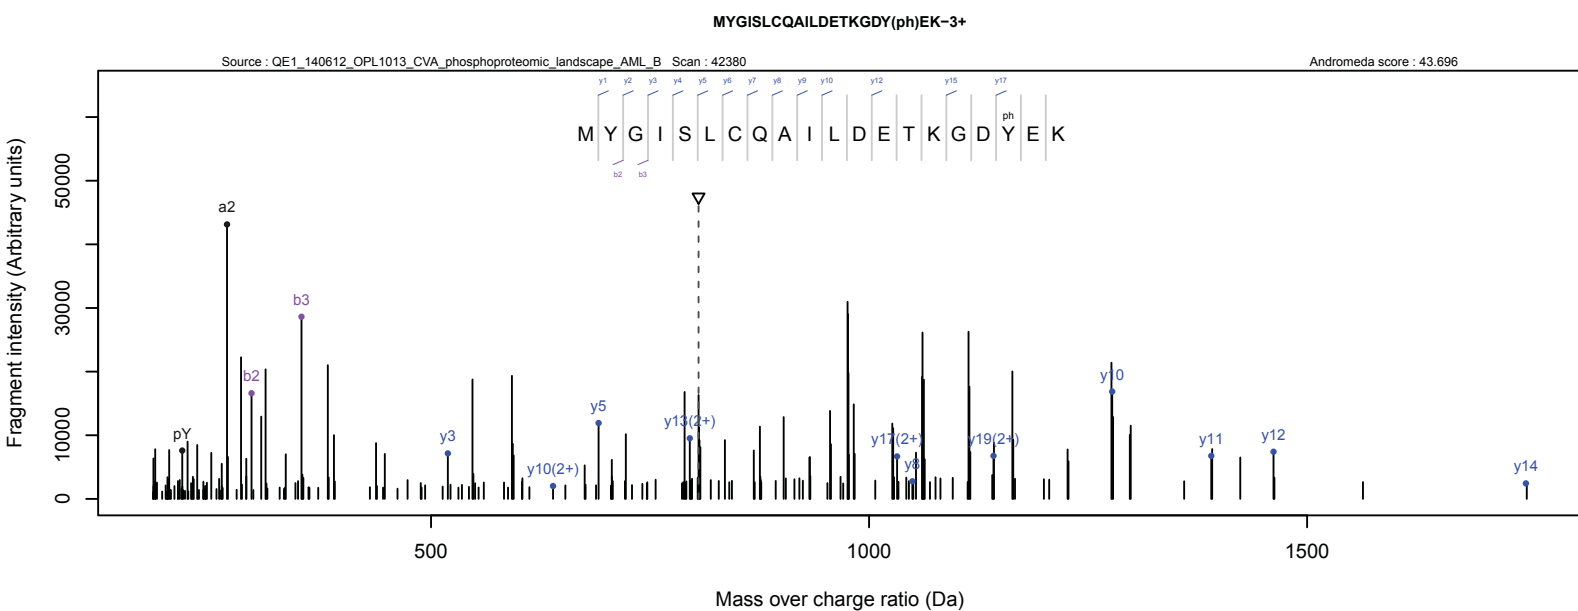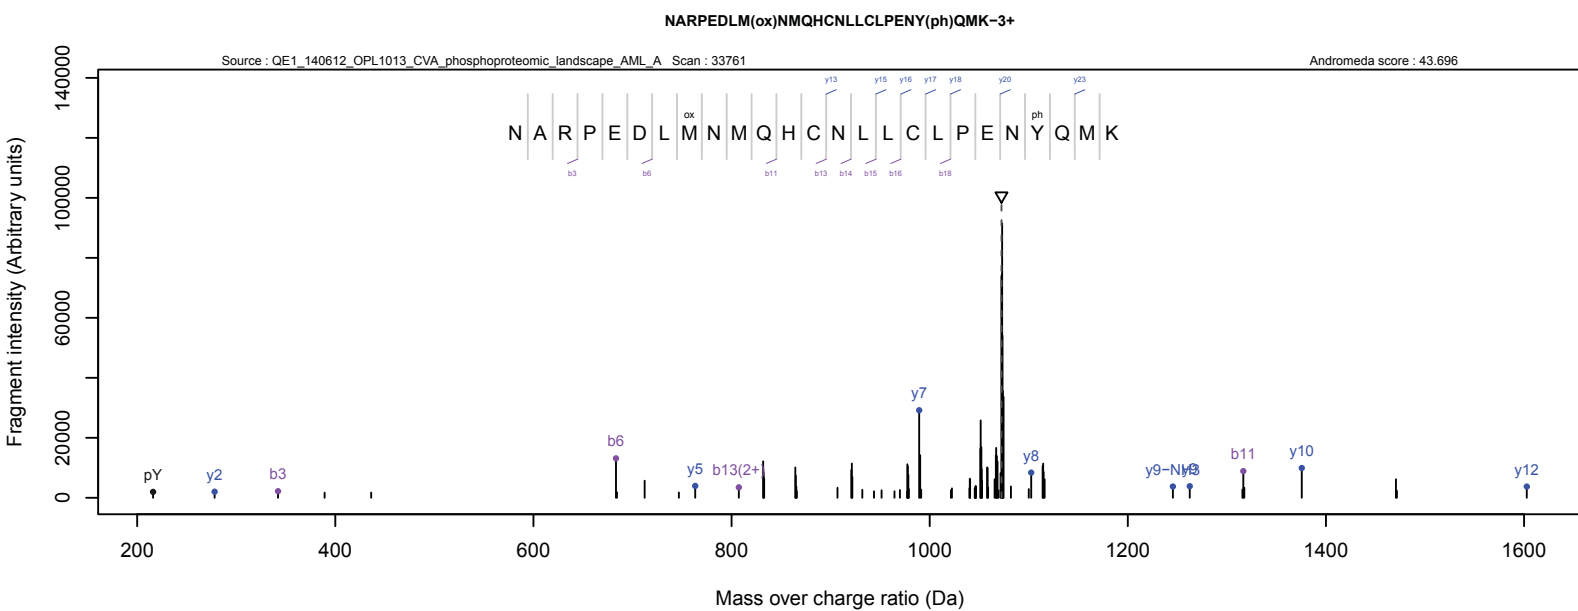

## RTAT(ph)YNGPPASPSLSHEATPLSQTR-3+

Source : QE1\_140612\_OPL1013\_CVA\_phosphoproteomic\_landscape\_AML\_C Scan : 18851

Andromeda score : 43.696

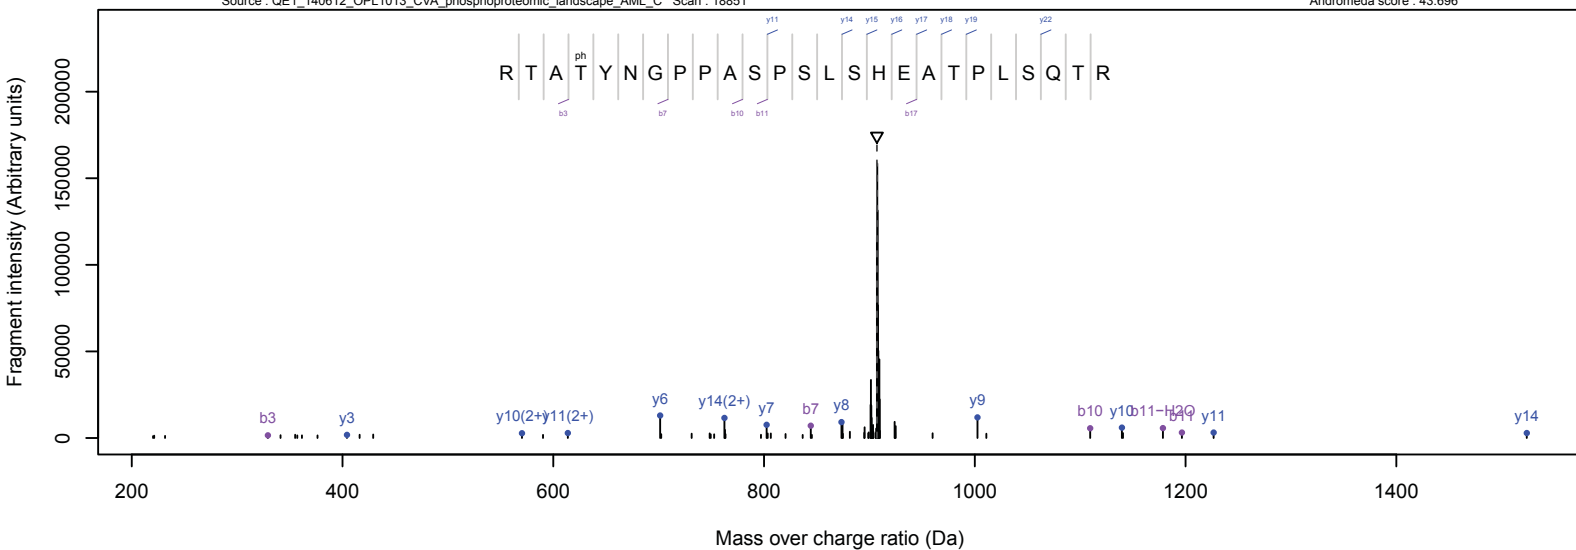

## GQVY(ph)SELKYHPEMR-3+

Source : QE1\_140612\_OPL1013\_CVA\_phosphoproteomic\_landscape\_AML\_B Scan : 17345

Andromeda score : 43.69

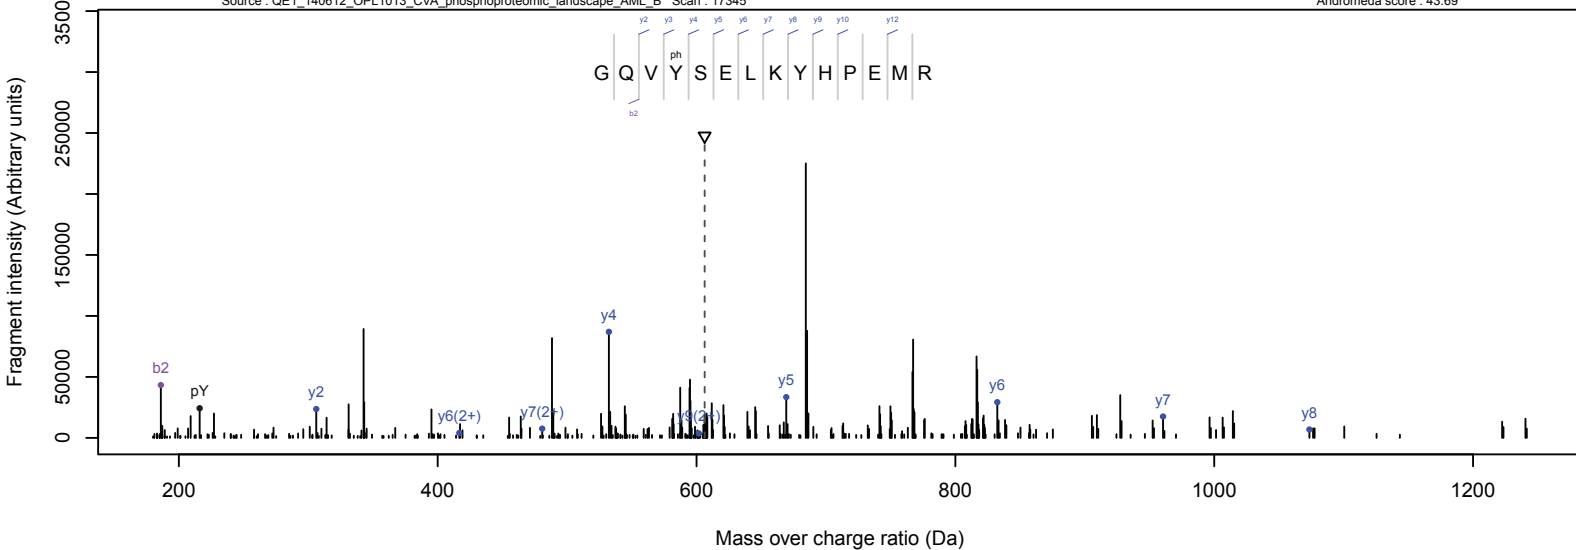

## GVGVALDDPY(ph)ENYRR-3+

Source : QE1\_140908\_OPL1013\_CvA\_pTyrIP\_AML\_Kasumi1 Scan : 21070

Andromeda score : 43.69

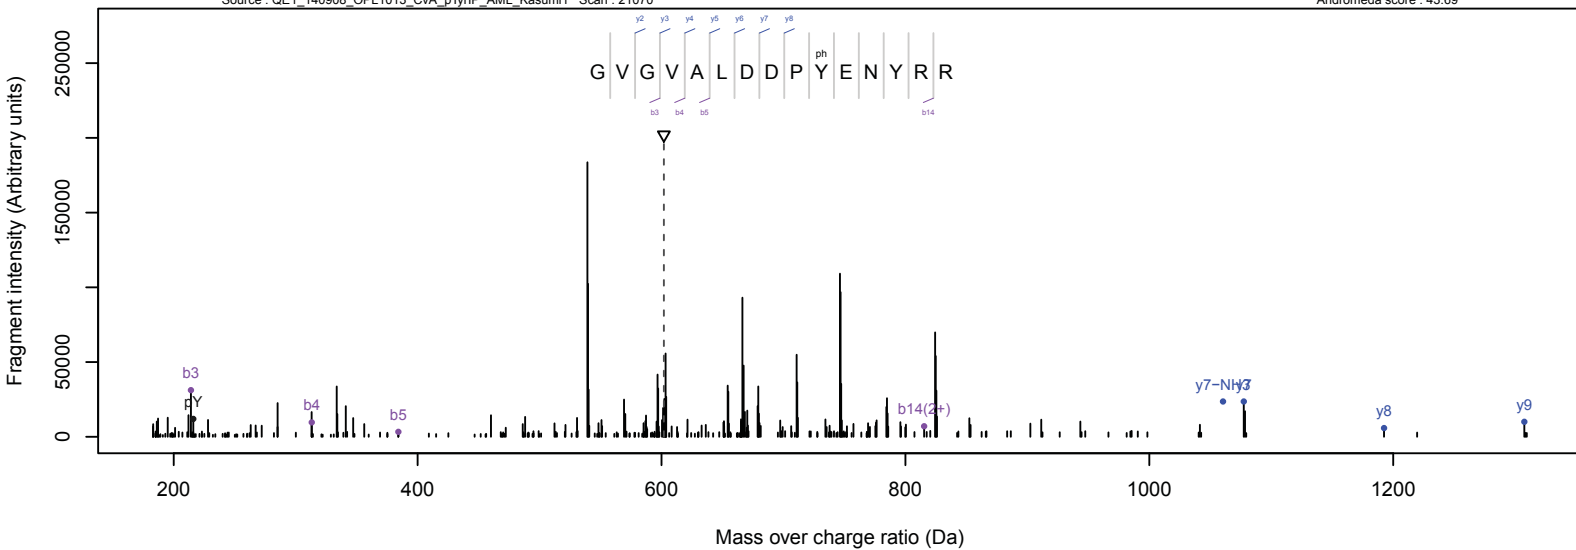

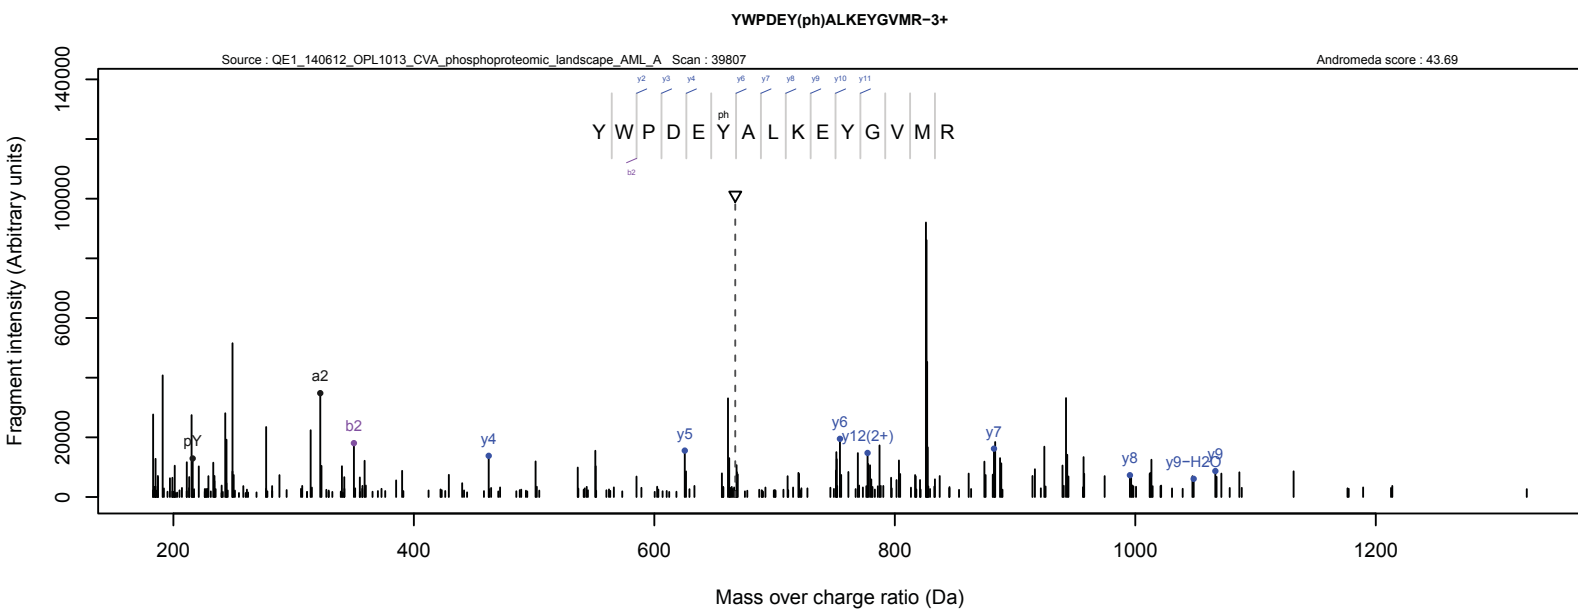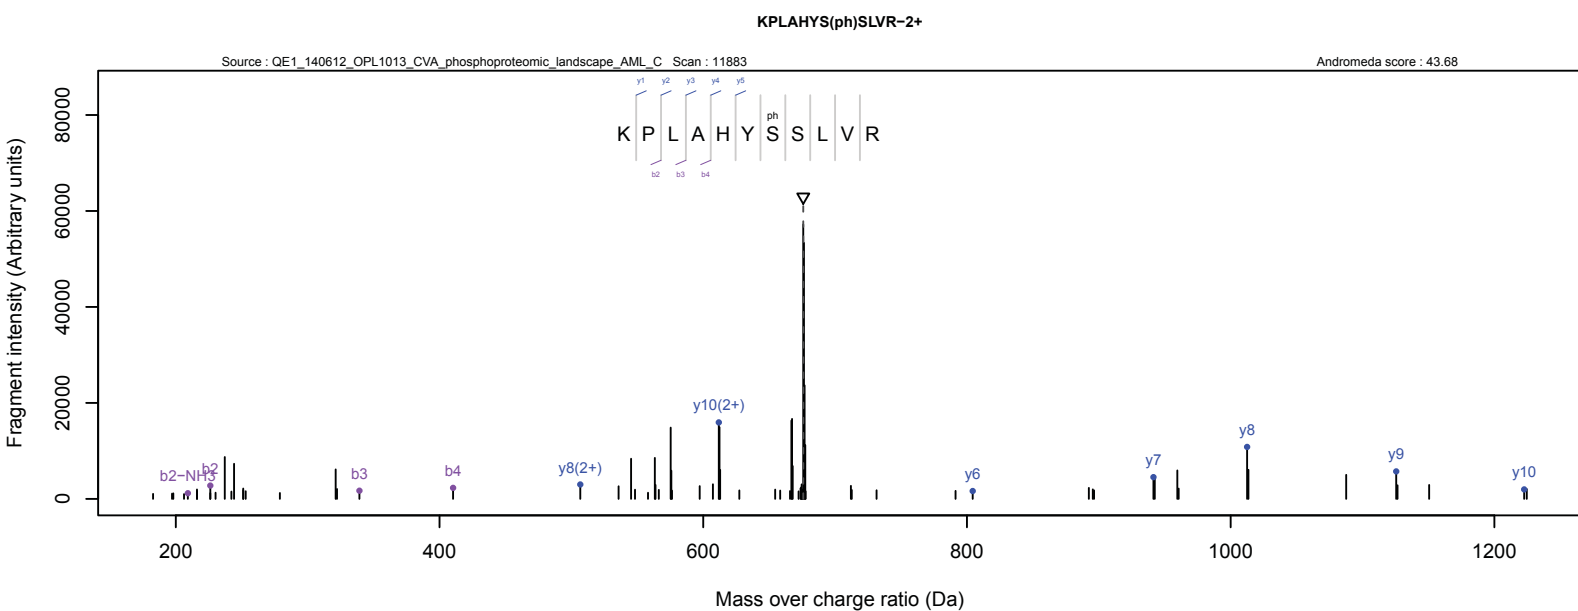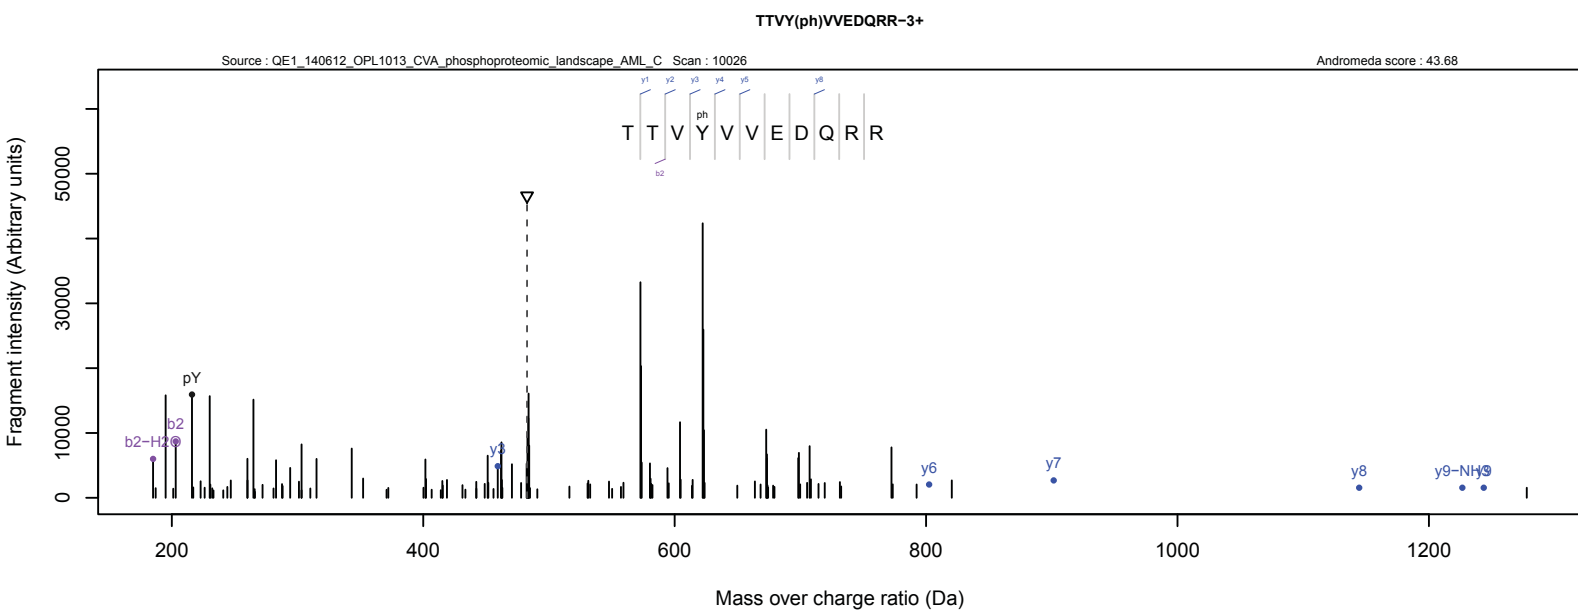

## NAY(ph)TMVLHK-2+

Source : QE1\_140612\_OPL1013\_CVA\_phosphoproteomic\_landscape\_AML\_A Scan : 12116

Andromeda score : 43.651

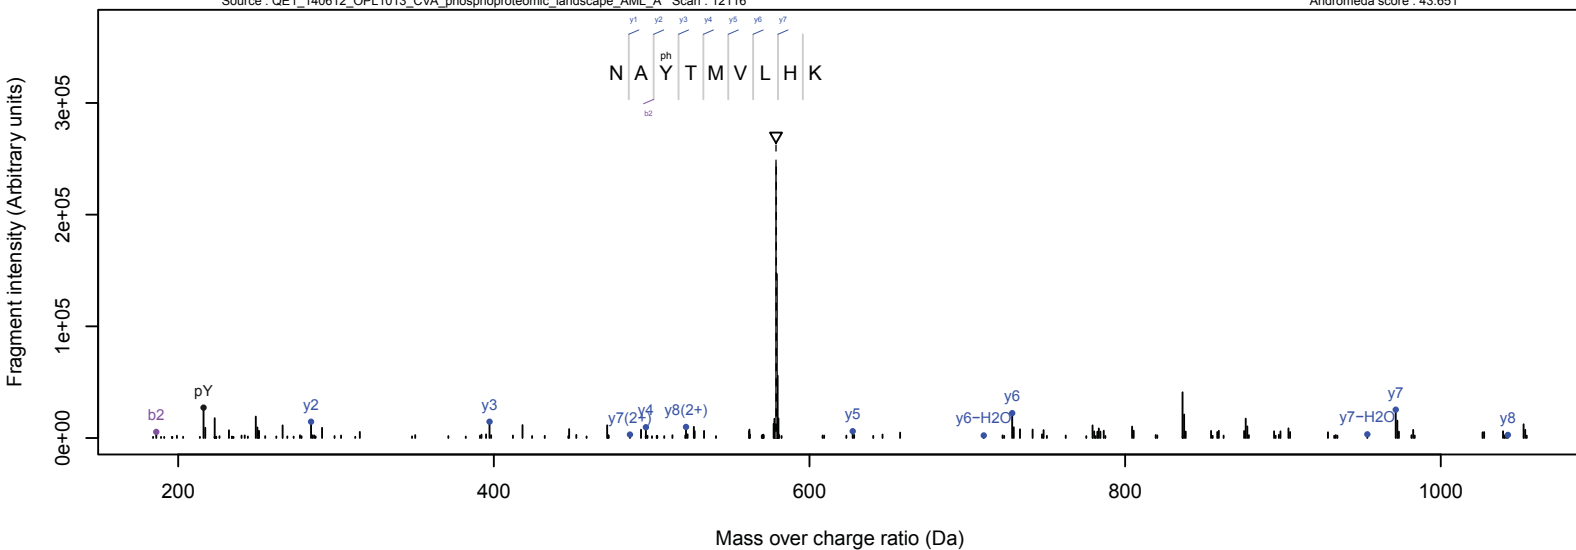

## MAEY(ph)TNSAGVPSLNAALM(ox)HTLQR-3+

Source : QE1\_140822\_OPL1013\_CvA\_pTyrIP\_AML\_cell\_lines\_part2\_B Scan : 33532

Andromeda score : 43.64

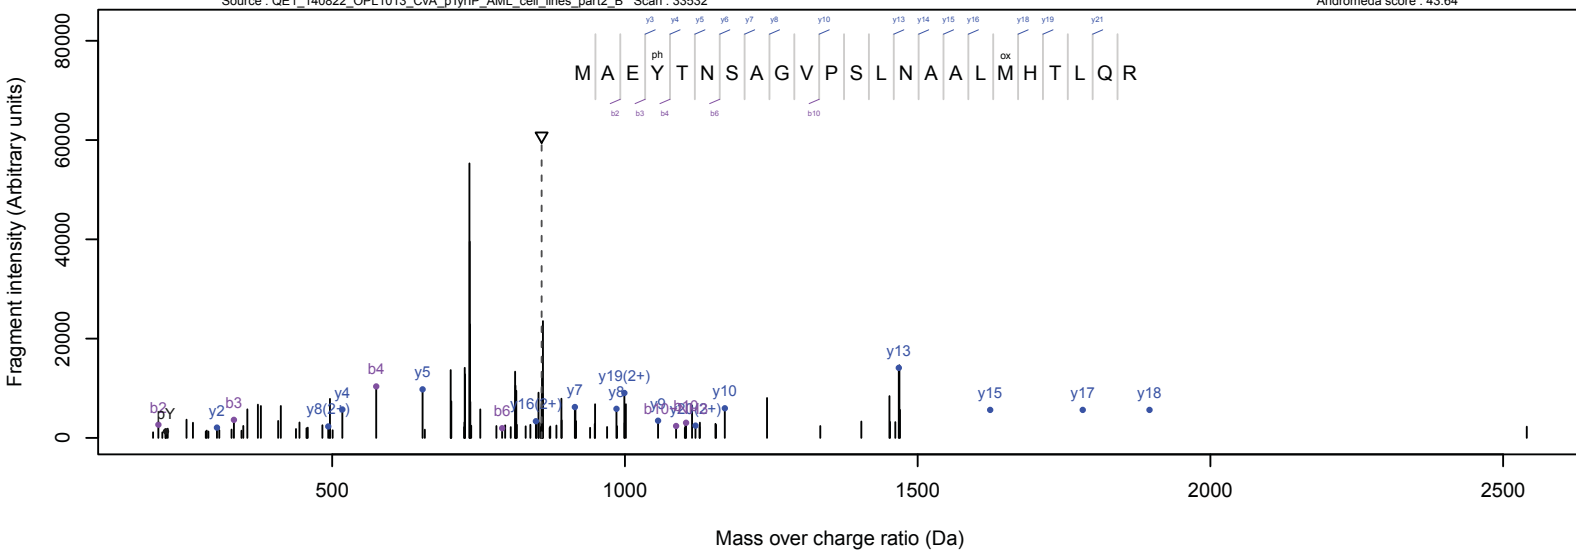

## TGY(ph)LGFVRR-2+

Source : QE1\_140612\_OPL1013\_CVA\_phosphoproteomic\_landscape\_AML\_C Scan : 18991

Andromeda score : 43.635

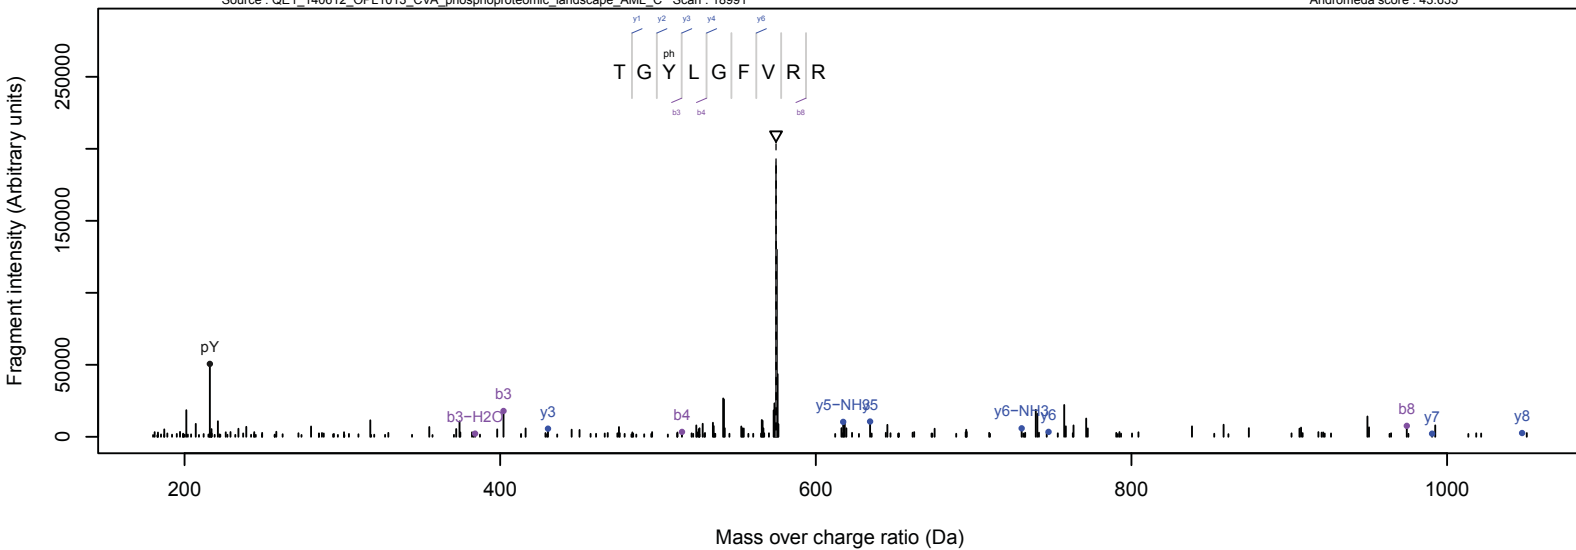

**SQY(ph)AYAAQNLLSHHDSHSSVILK-4+**

Source : QE1\_140908\_OPL1013\_CvA\_pTyrIP\_AML\_HEL Scan : 29231

Andromeda score : 43.633

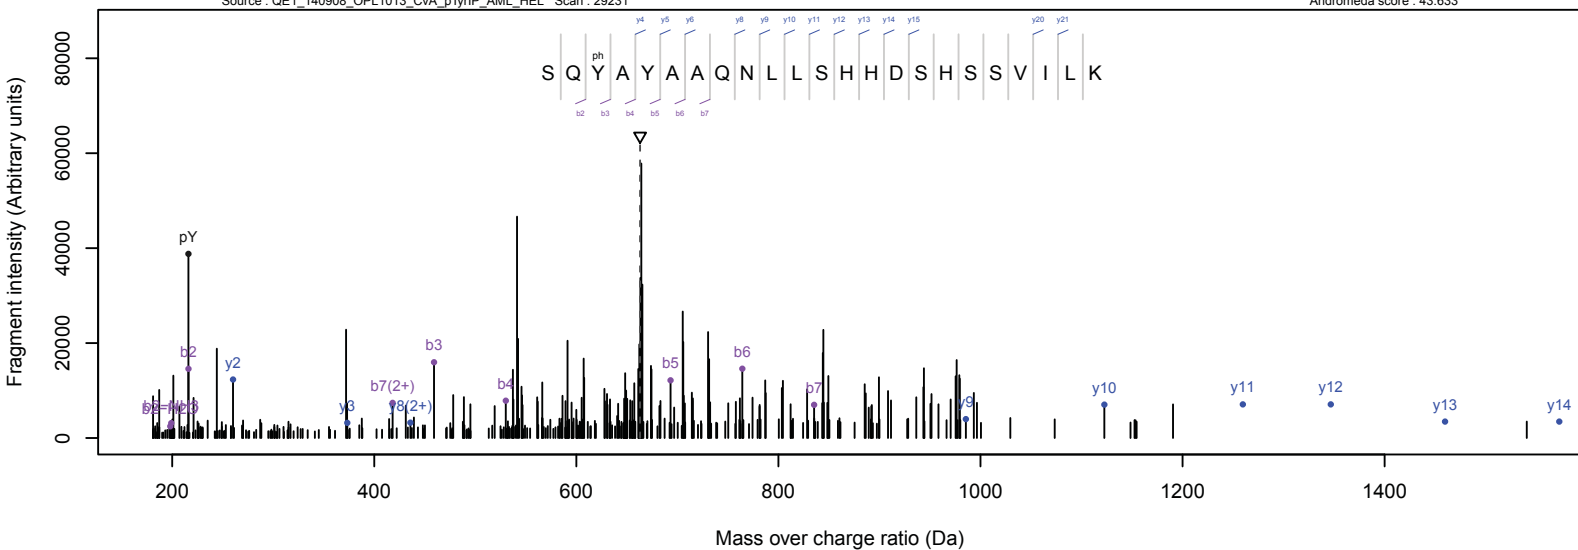

**CCMPYT(ph)PICI AK-2+**

Source : QE1\_140612\_OPL1013\_CVA\_phosphoproteomic\_landscape\_AML\_A Scan : 29615

Andromeda score : 43.604

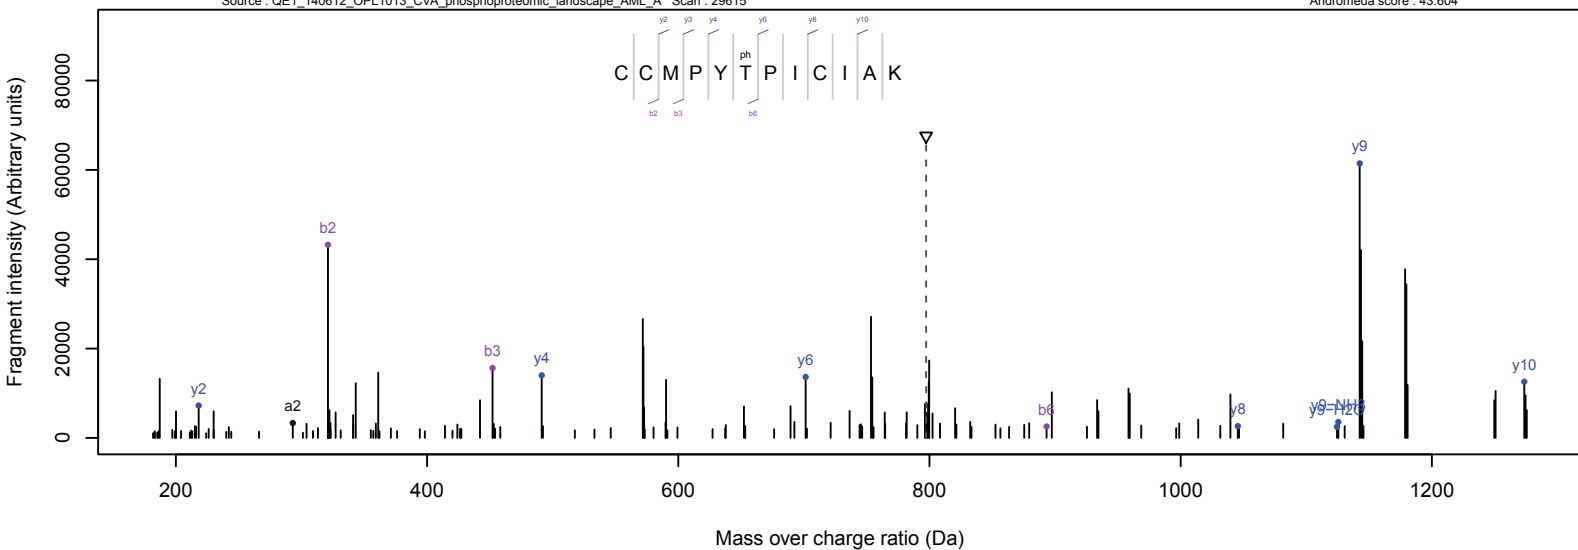

**Y(ph)FETEQAHA VR-3+**

Source : QE1\_140612\_OPL1013\_CVA\_phosphoproteomic\_landscape\_AML\_C Scan : 18731

Andromeda score : 43.604

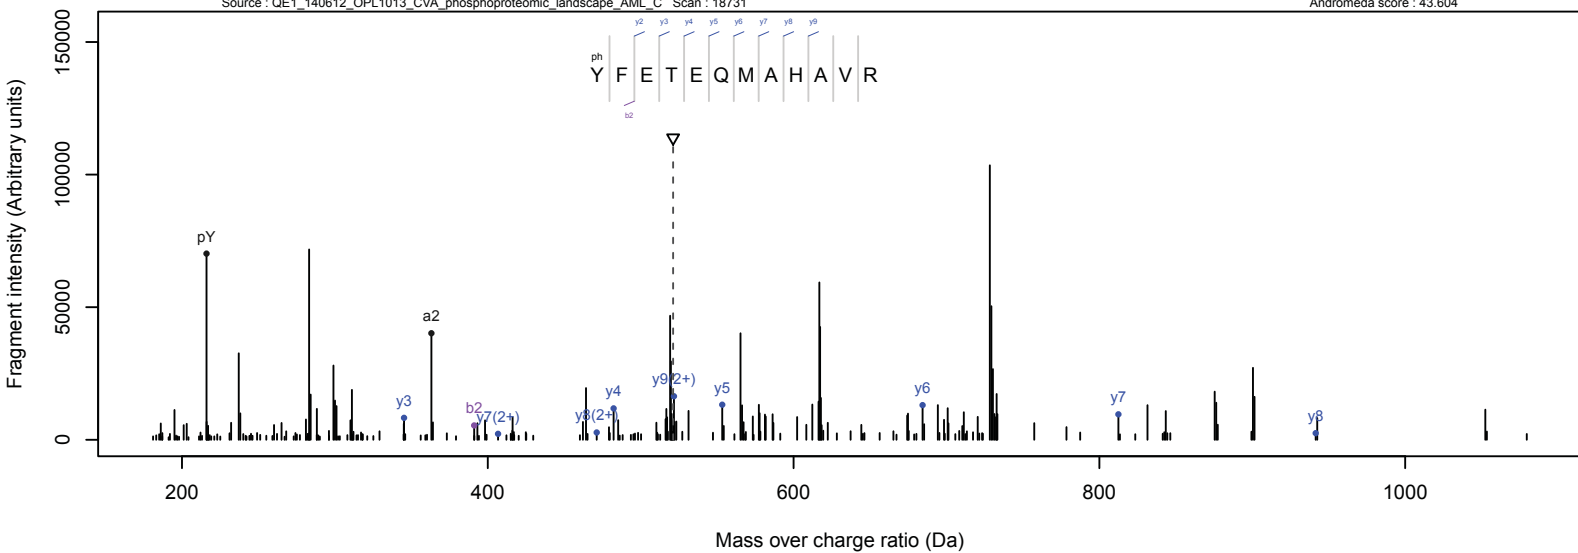

## (ac)MQPQESHVHY(ph)SR-3+

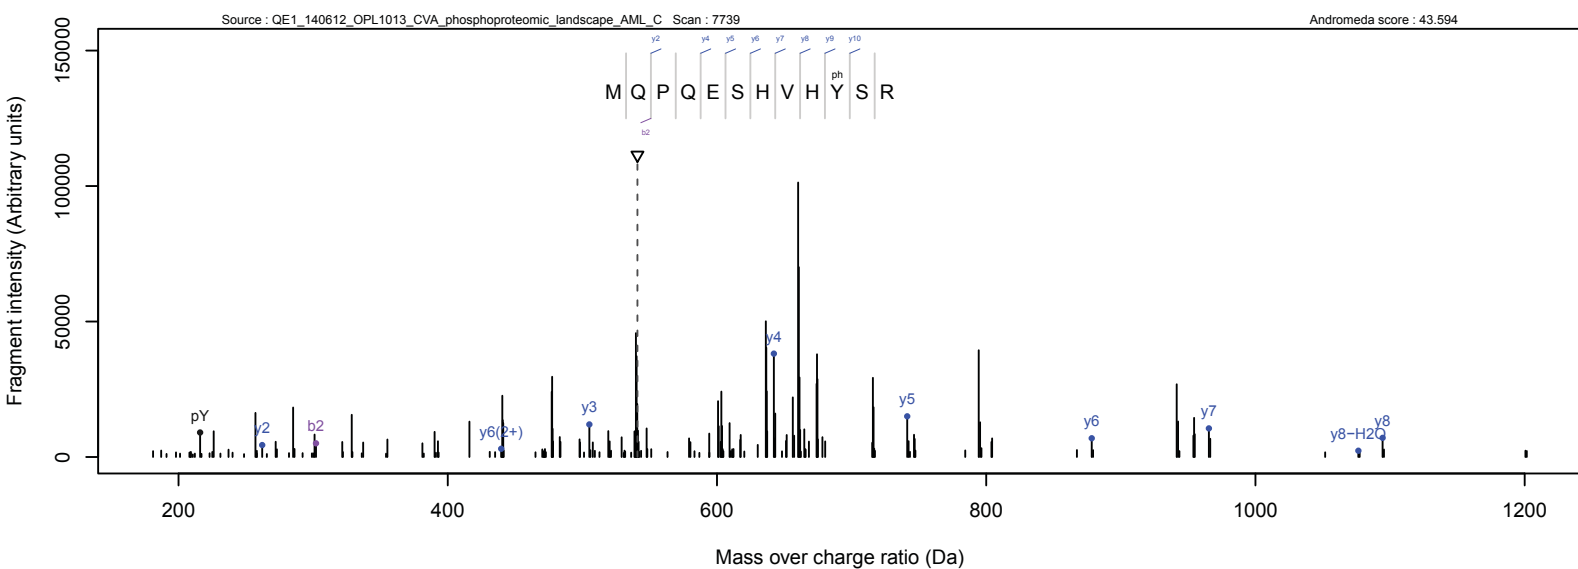

## AKHPEATVPQY(ph)HAVK-3+

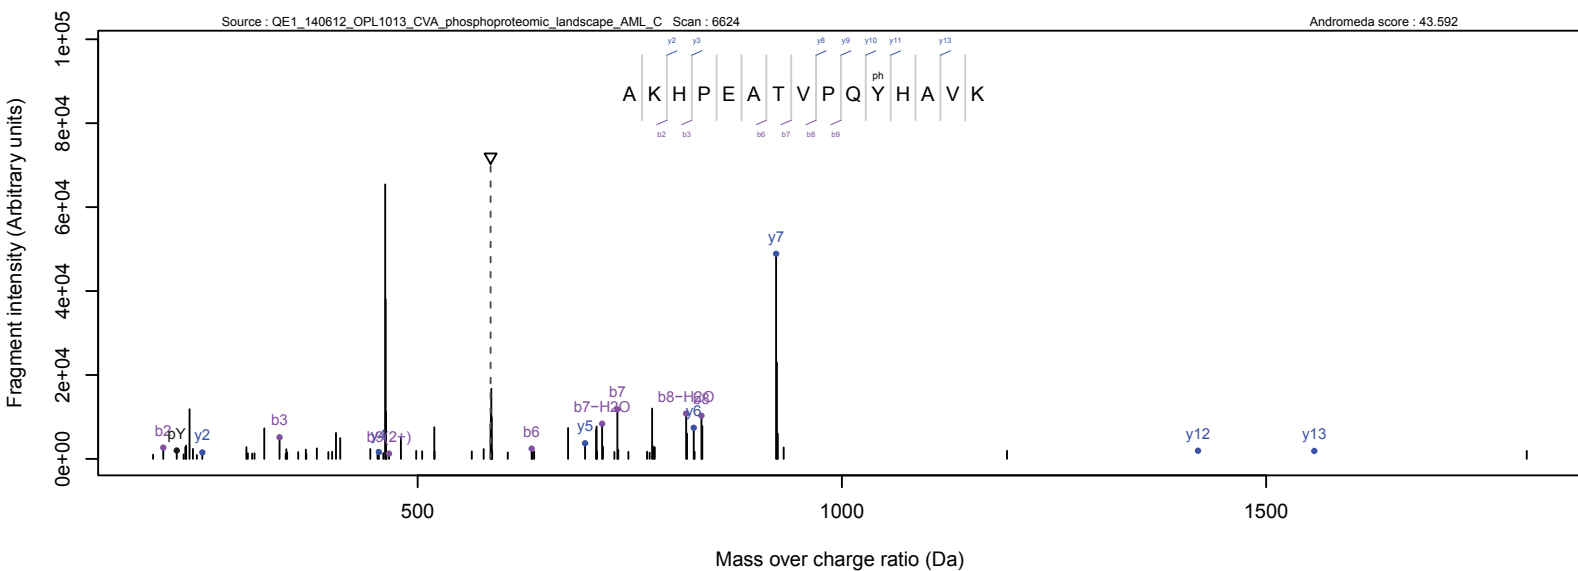

## AQADIY(ph)KADFQAER-3+

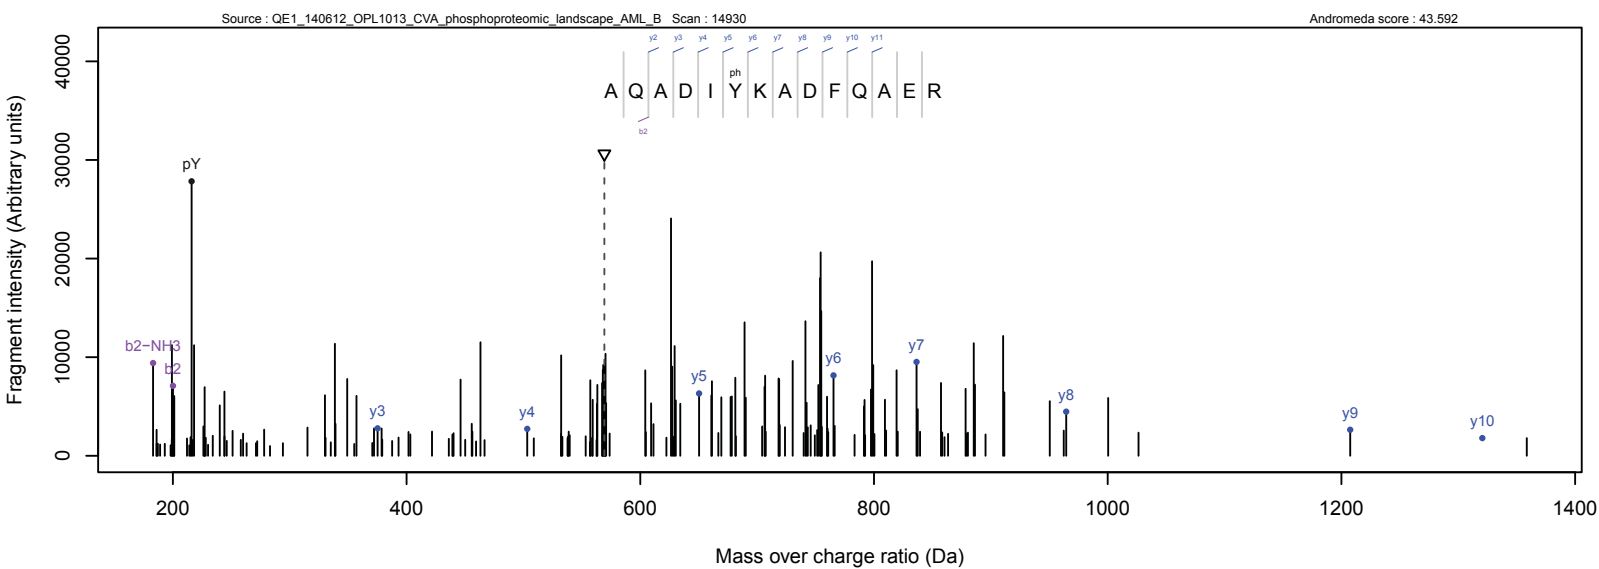



HRHS(ph)PTGPPGFPR-4+

Source : QE1\_140908\_OPL1013\_CvA\_pTyrIP\_AML\_HL60 Scan : 9592

Andromeda score : 43.592

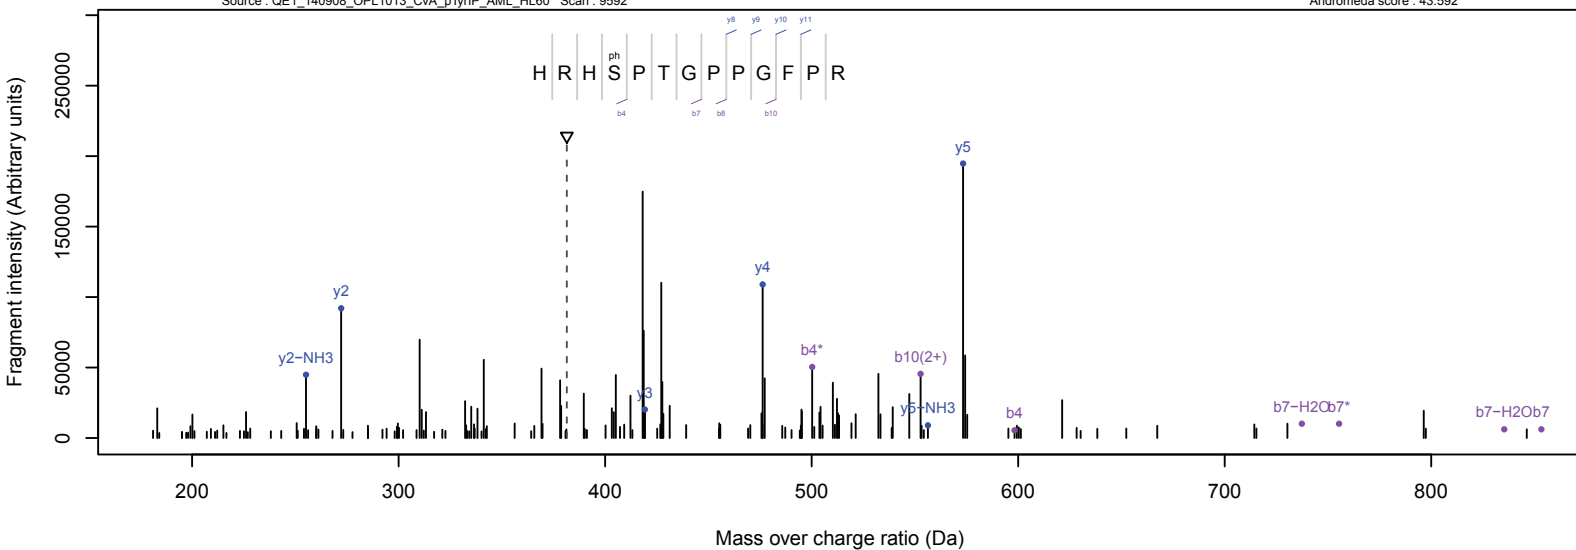

KPGY(ph)HSGATTSTM(ox)R-3+

Source : QE1\_140612\_OPL1013\_CVA\_phosphoproteomic\_landscape\_AML\_C Scan : 3690

Andromeda score : 43.592

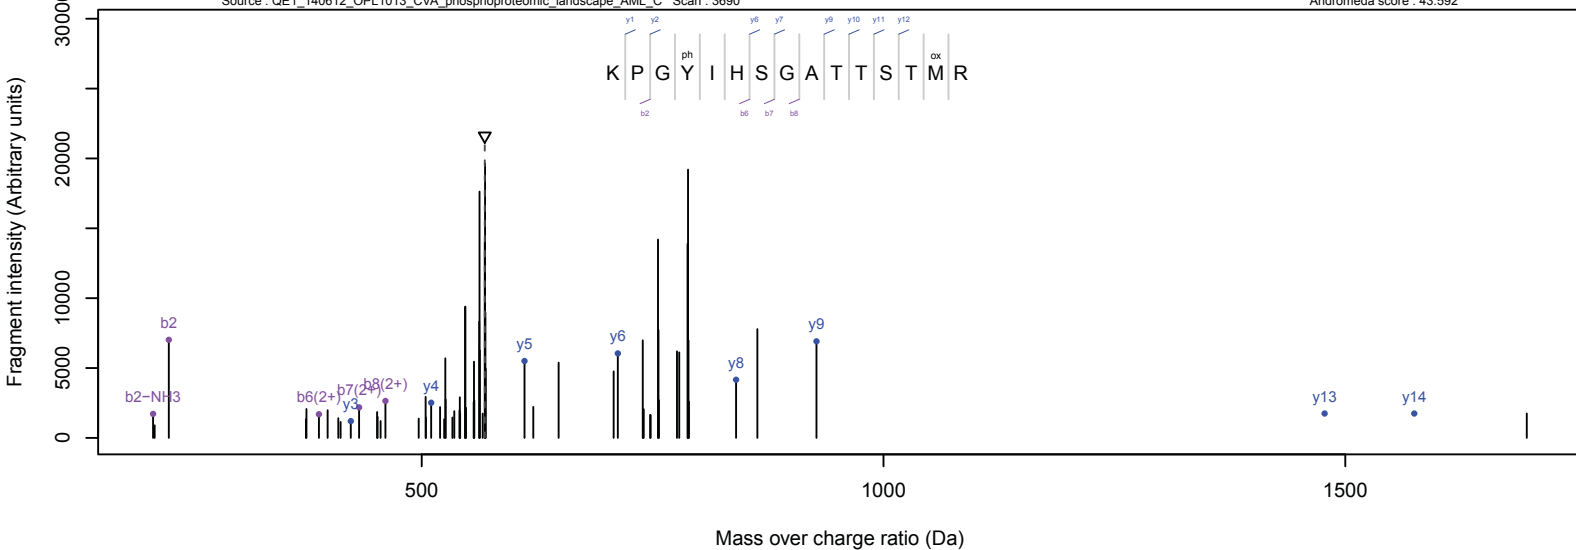

LSIY(ph)GDLEFMNEQK-2+

Source : Qe1\_141024\_OPL1013\_CvA\_AML\_pTyrIP\_MOLM13 Scan : 42156

Andromeda score : 43.592

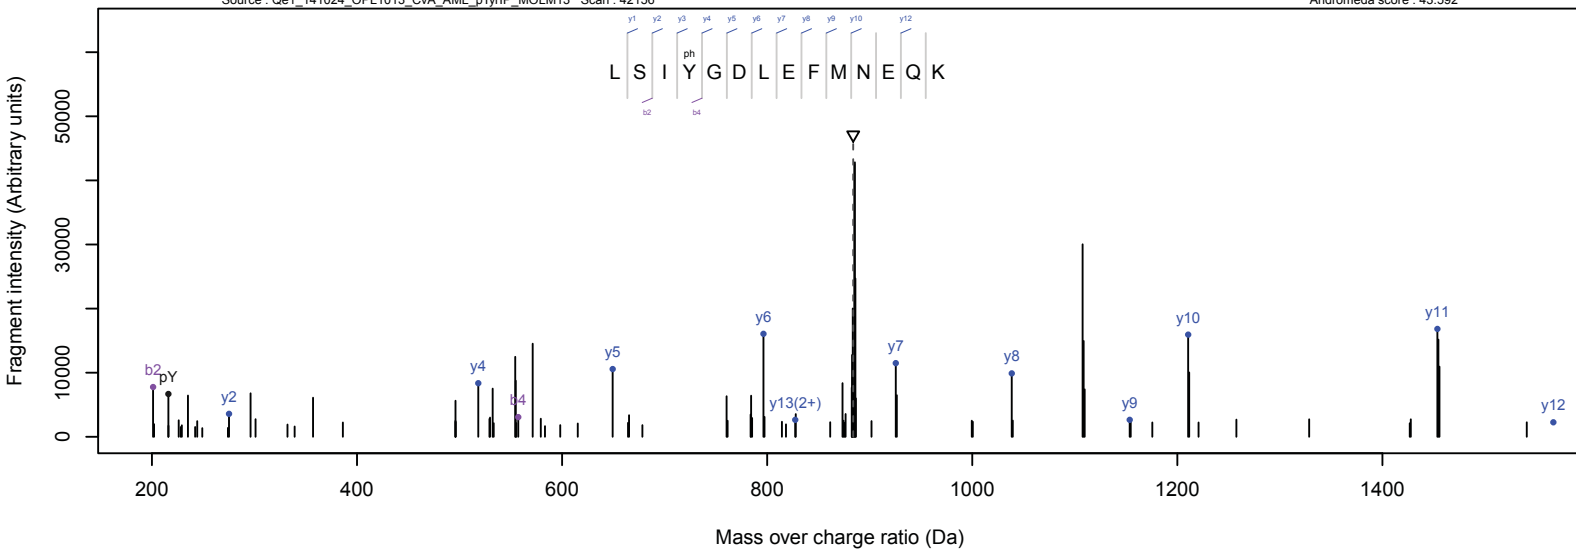

## NY(ph)GYNPSPVKPEGLR-3+

Source : QE1\_140612\_OPL1013\_CVA\_phosphoproteomic\_landscape\_AML\_C Scan : 19083

Andromeda score : 43.592

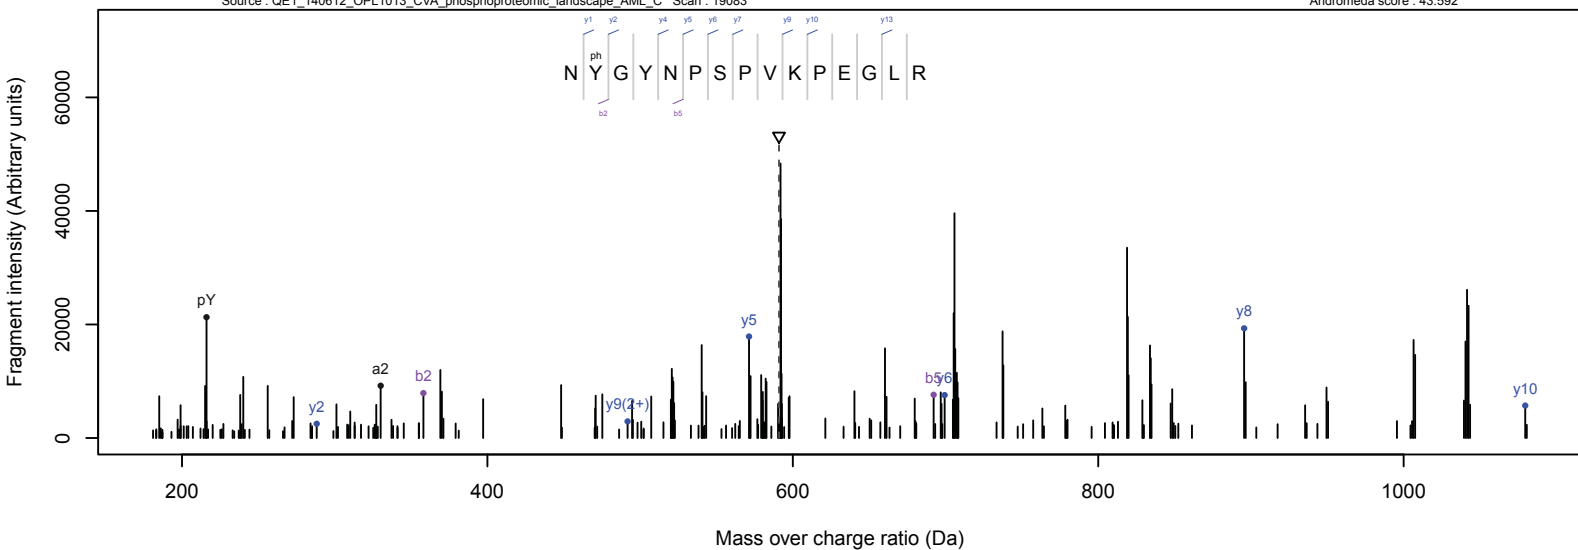

## HPWIVHWDQLPQYQLNR-3+

Source : QE1\_140612\_OPL1013\_CVA\_phosphoproteomic\_landscape\_AML\_C Scan : 38260

Andromeda score : 43.557

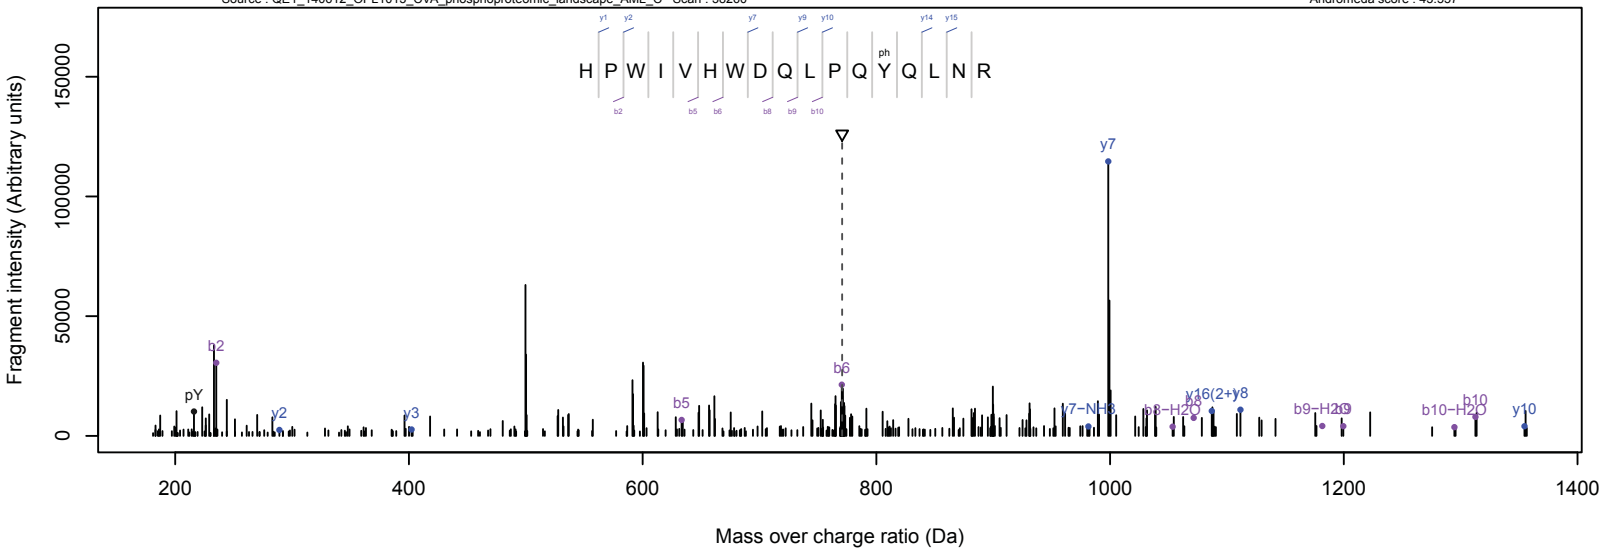

## LQFDYGVYLLNK-2+

Source : QE1\_140612\_OPL1013\_CVA\_phosphoproteomic\_landscape\_AML\_C Scan : 46355

Andromeda score : 43.549

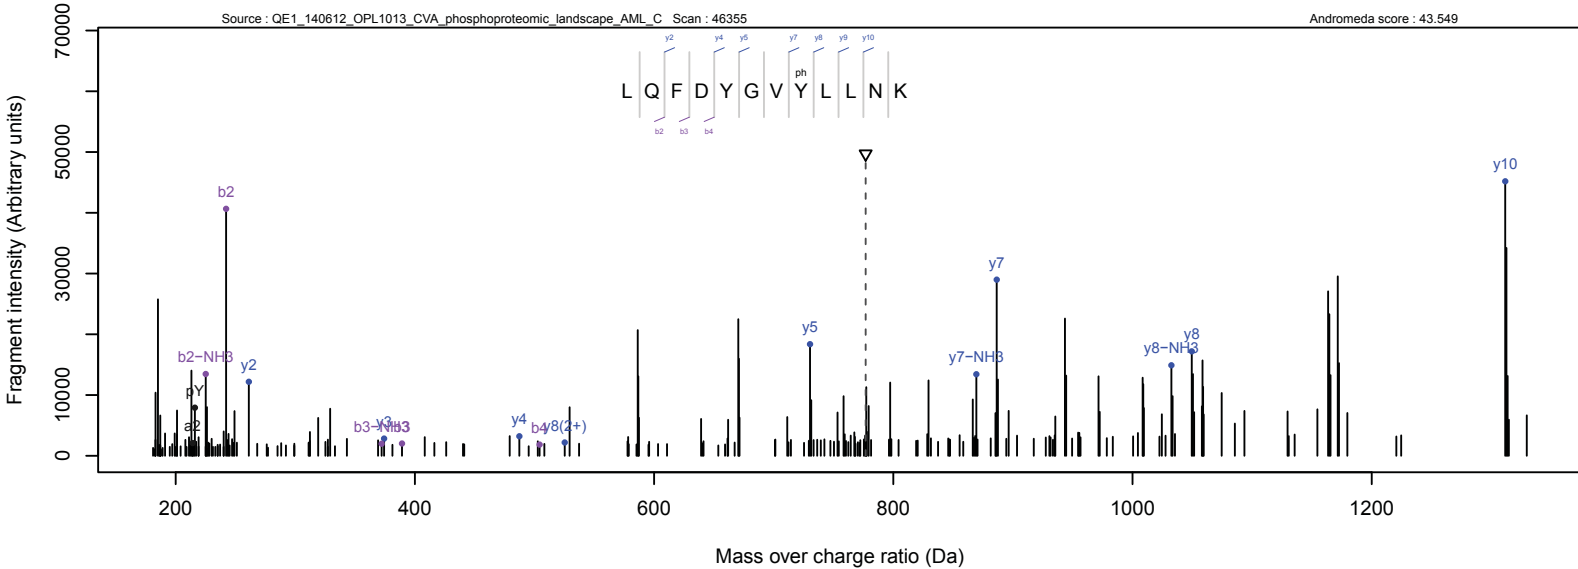

TGKFY(ph)LQDTK-3+

Source : QE1\_140612\_OPL1013\_CVA\_phosphoproteomic\_landscape\_AML\_B Scan : 12727

Andromeda score : 43.502

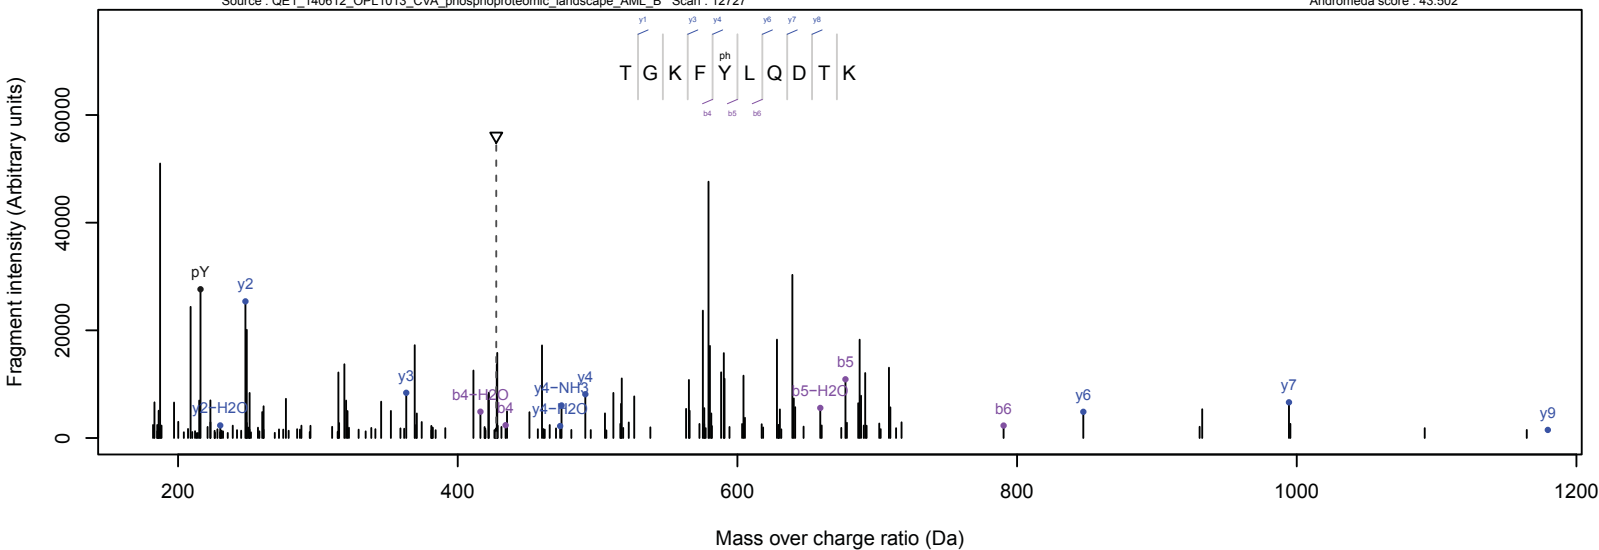

SREYQLNDSAAY(ph)YLNDLER-3+

Source : QE1\_140612\_OPL1013\_CVA\_phosphoproteomic\_landscape\_AML\_C Scan : 40022

Andromeda score : 43.476

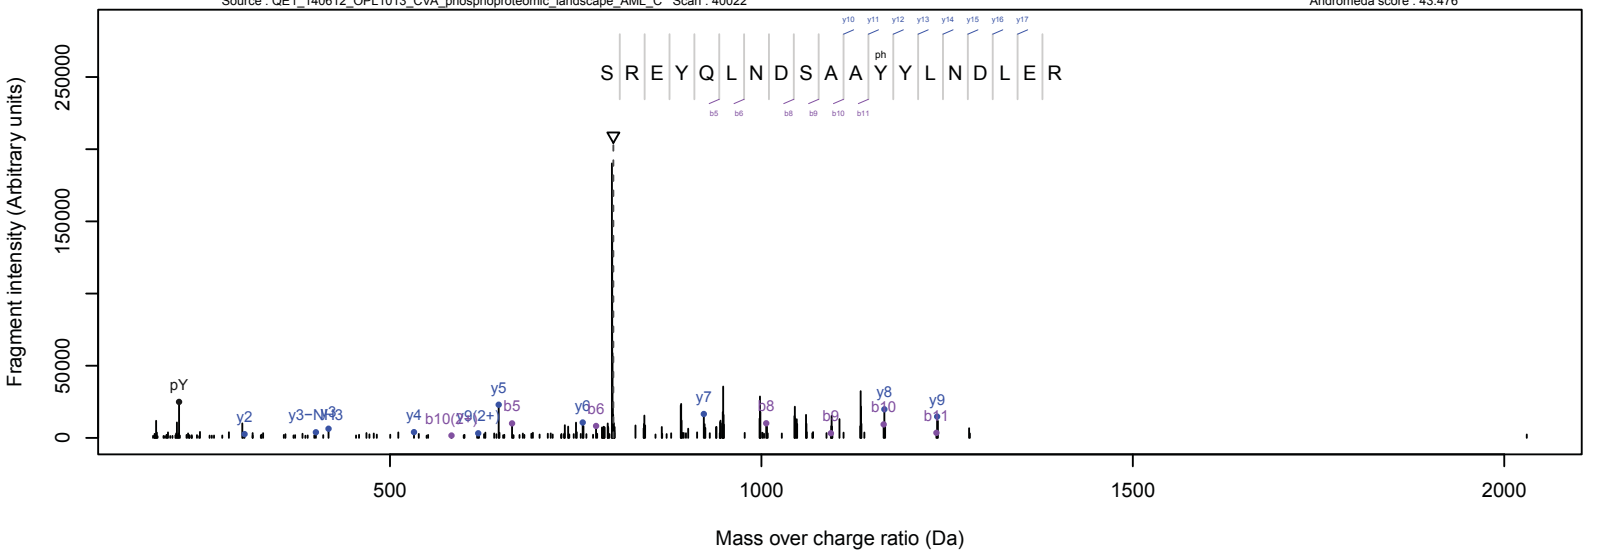

VGYP A Q V Y K-2+

Source : QE1\_140612\_OPL1013\_CVA\_phosphoproteomic\_landscape\_AML\_C Scan : 10856

Andromeda score : 43.442

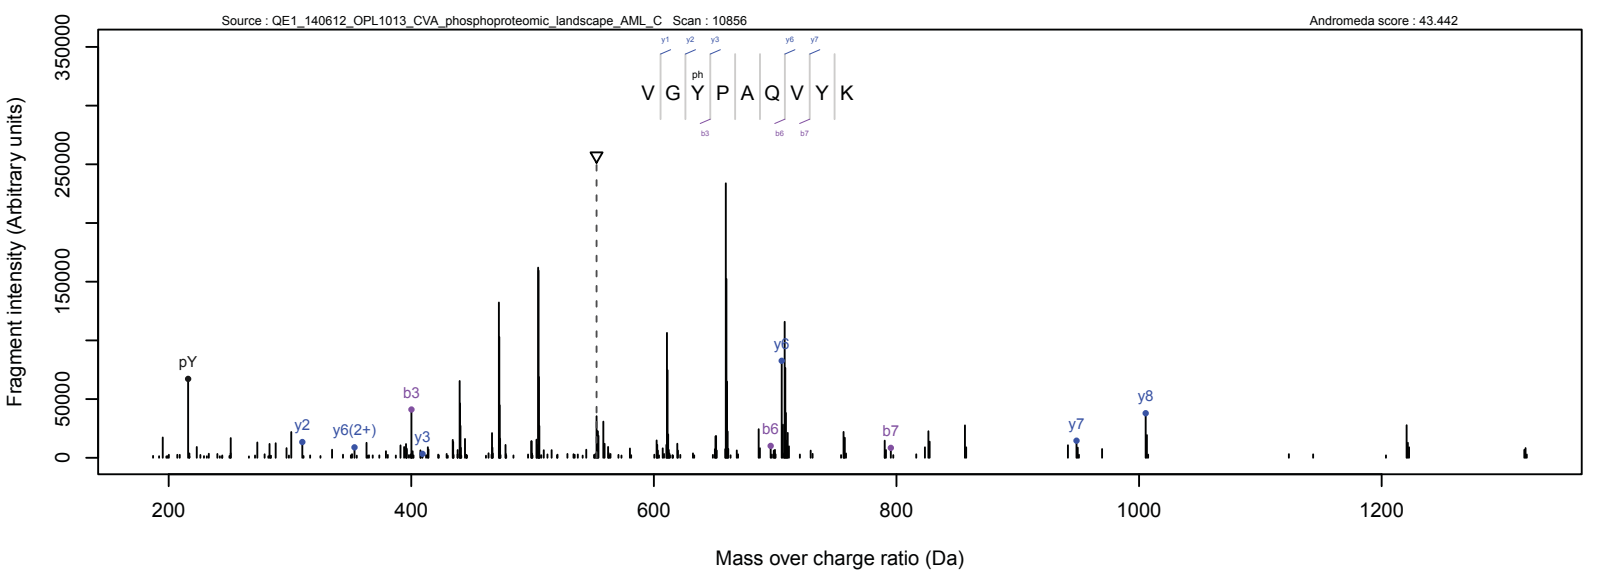

## AEFNY(ph)SVGFK-2+

Source : QE1\_140908\_OPL1013\_CvA\_pTyrIP\_AML\_HEL Scan : 26315

Andromeda score : 43.419

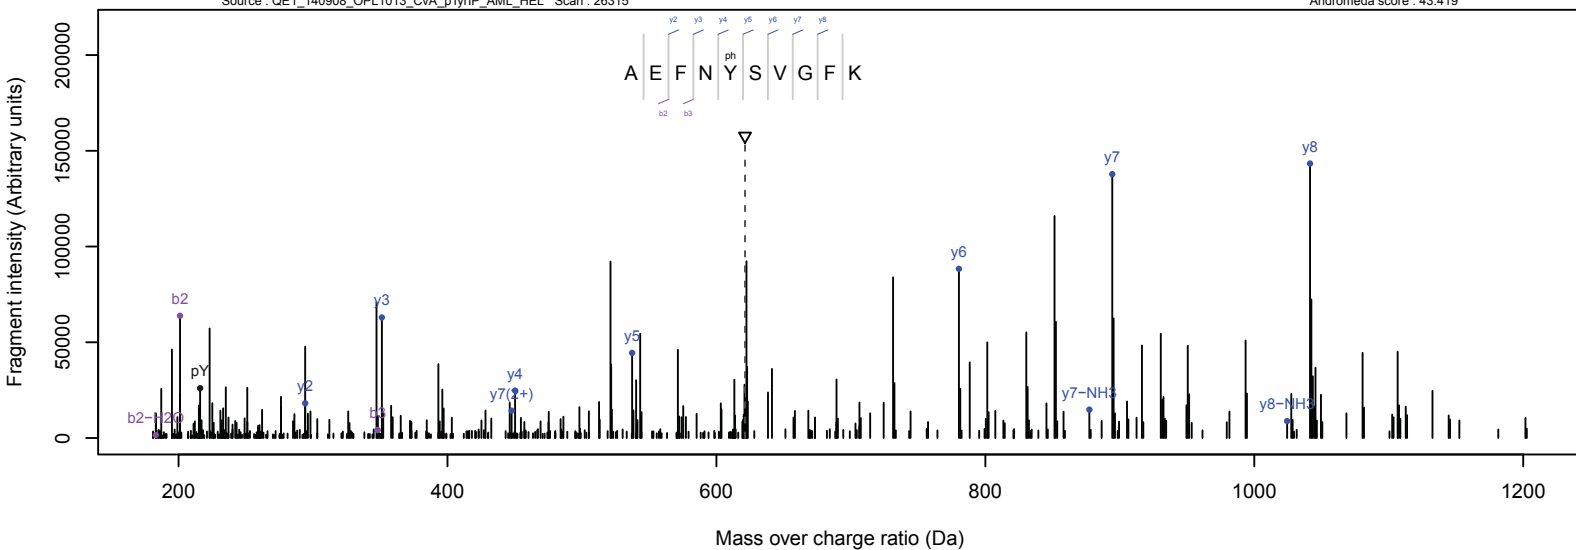

## ICHQIEY(ph)YFGDFNLPR-3+

Source : QE1\_140612\_OPL1013\_CVA\_phosphoproteomic\_landscape\_AML\_B Scan : 45630

Andromeda score : 43.37

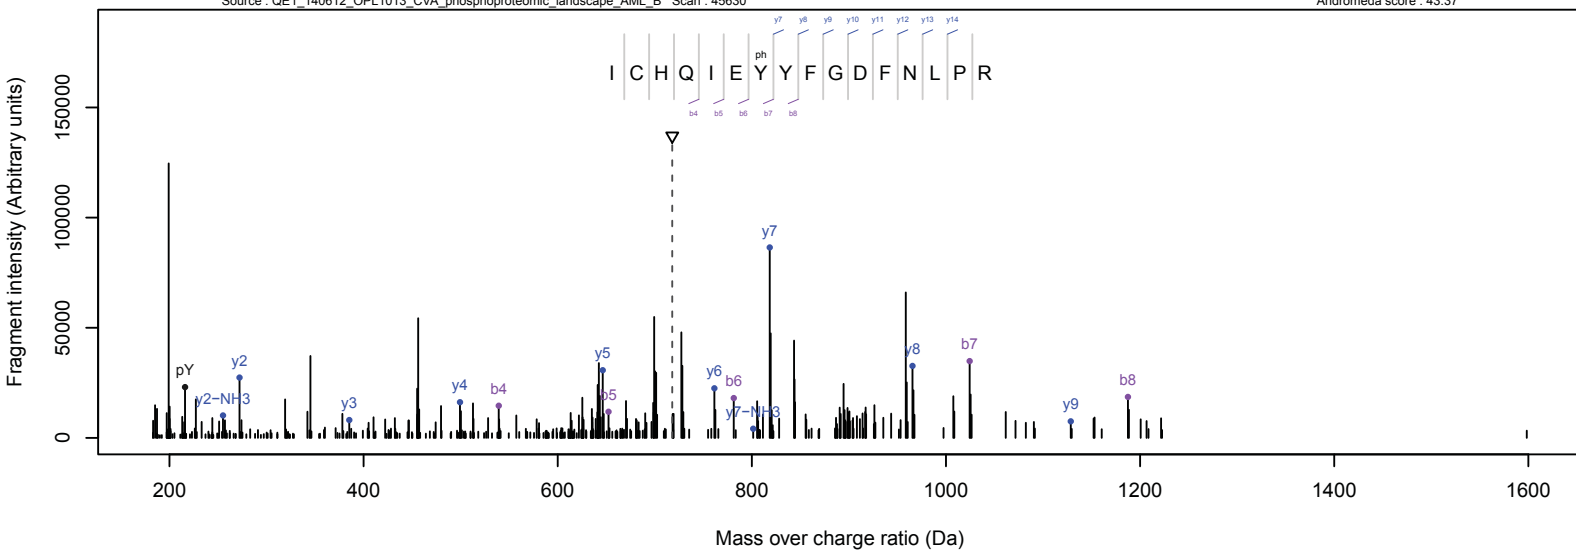

## VREELPDYHQY(ph)VVPK-3+

Source : QE1\_140612\_OPL1013\_CVA\_phosphoproteomic\_landscape\_AML\_B Scan : 28121

Andromeda score : 43.37

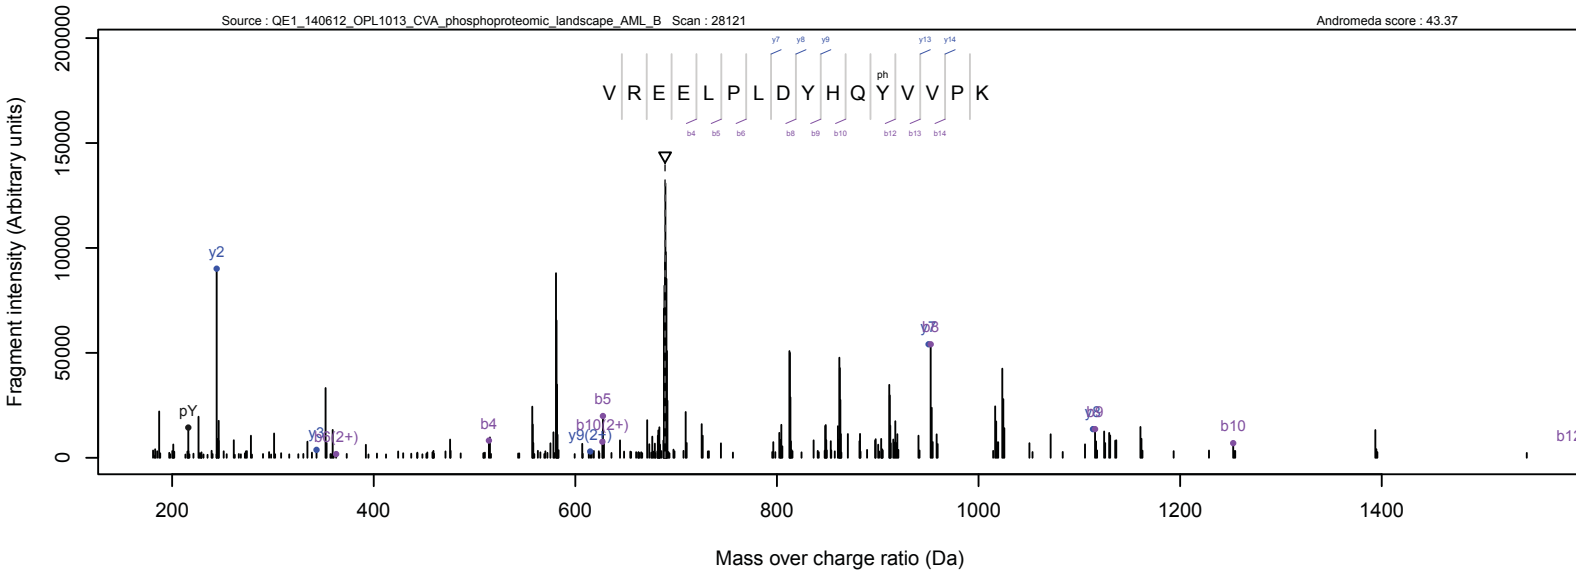

**QVDEEK(ox)Y(ph)ENLVNESPVQLPPLPPR-3+**

Source : QE1\_140822\_OPL1013\_CvA\_pTyrIP\_AML\_cell\_lines\_part2\_E Scan : 35569

Andromeda score : 43.349

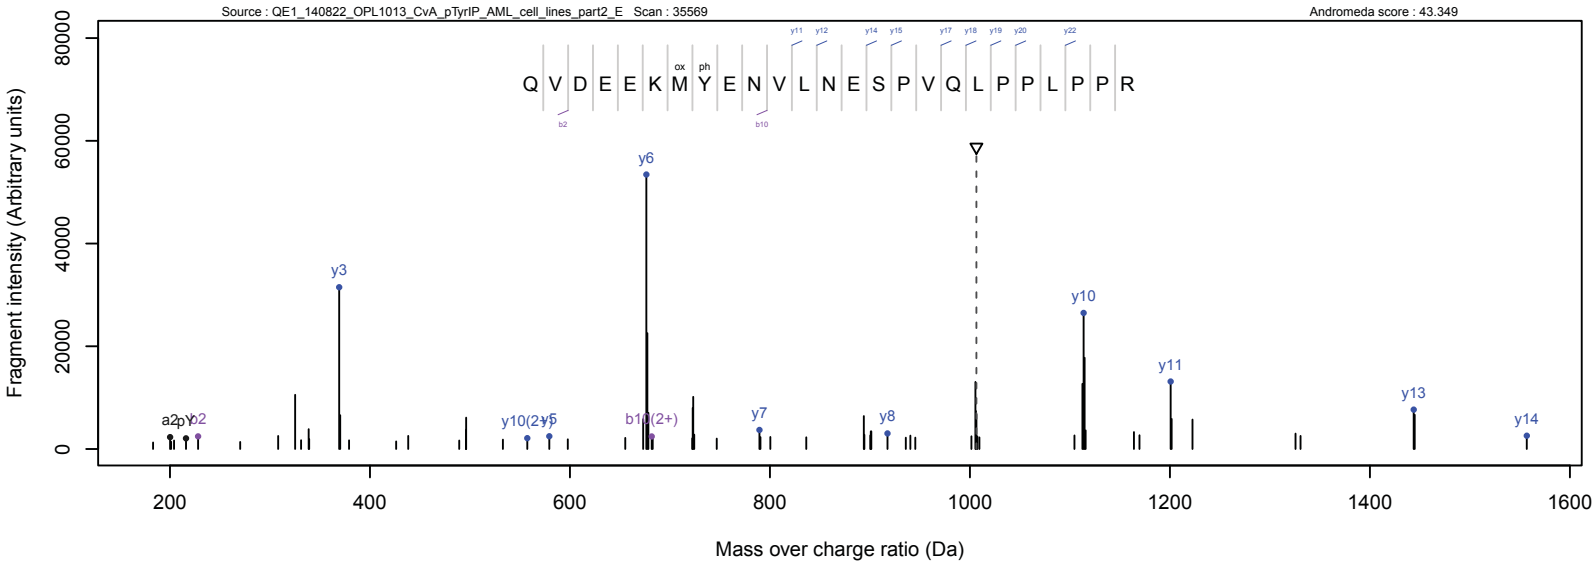

**Y(ph)NRFSGGPNLPTDVTTR-3+**

Source : QE1\_140612\_OPL1013\_CvA\_phosphoproteomic\_landscape\_AML\_C Scan : 25873

Andromeda score : 43.349

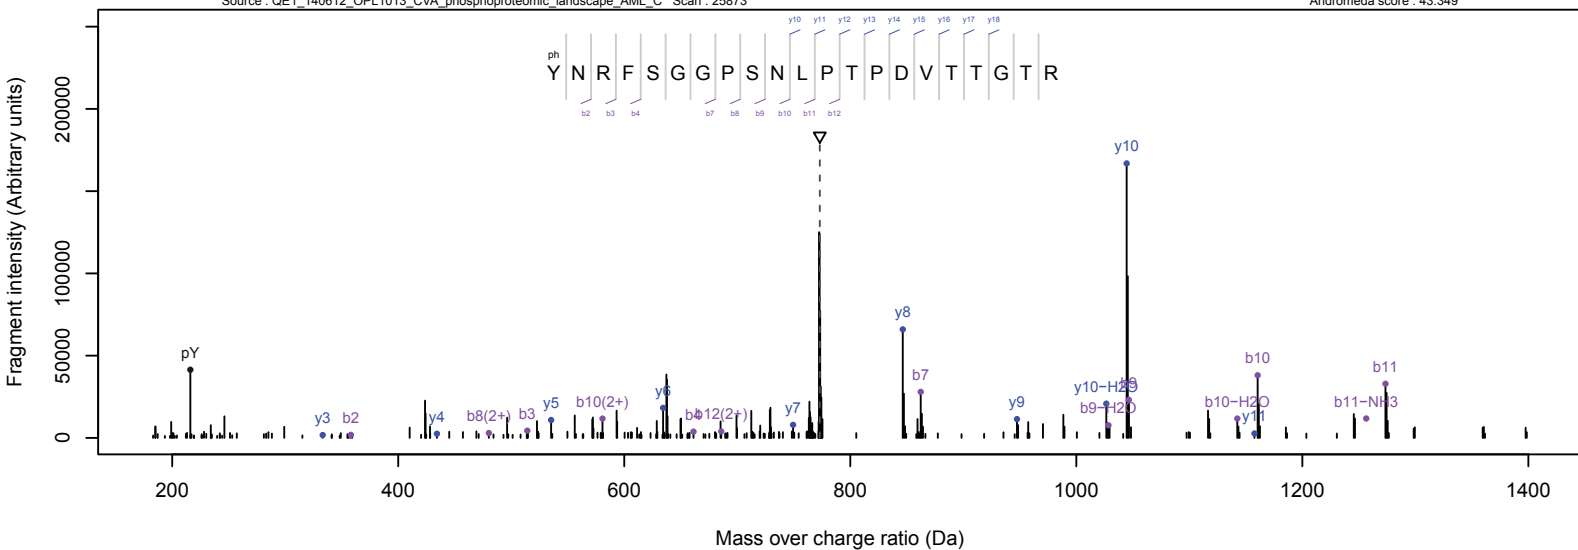

**AGKGESAGY(ph)MEPYEAQR-3+**

Source : QE1\_140612\_OPL1013\_CvA\_phosphoproteomic\_landscape\_AML\_C Scan : 11059

Andromeda score : 43.326

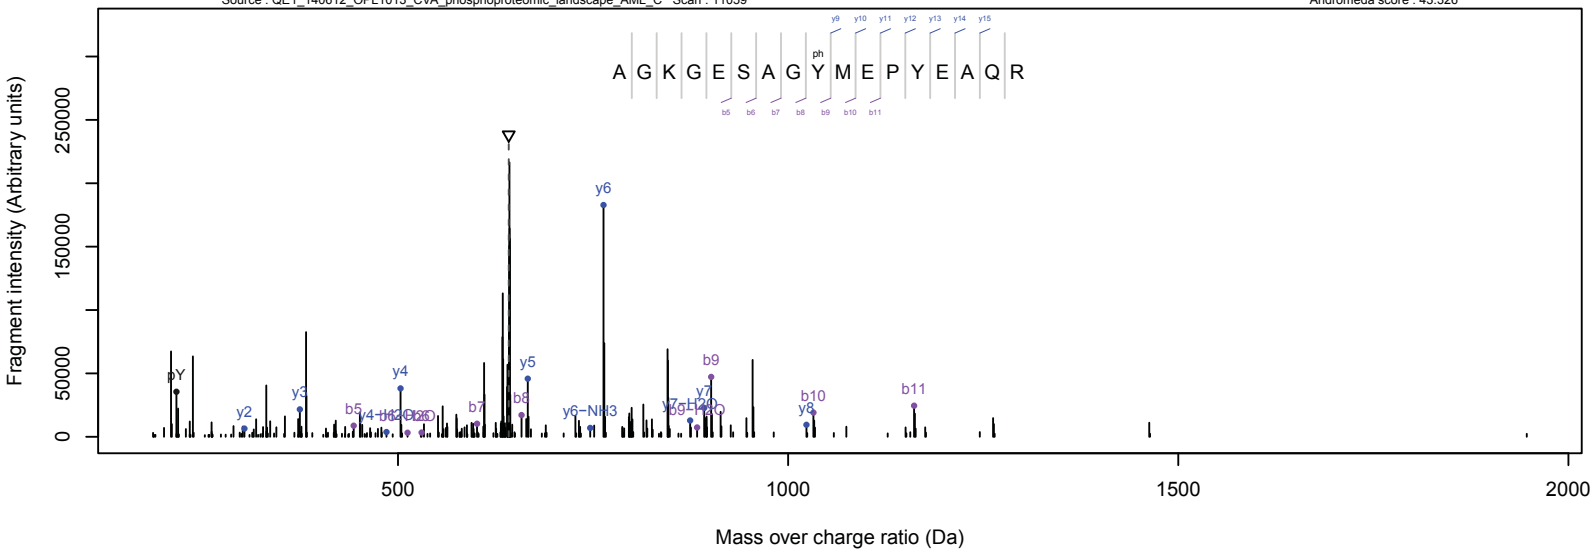

**RIY(ph)ALNENVSSFR-3+**

Source : QE1\_140612\_OPL1013\_CVA\_phosphoproteomic\_landscape\_AML\_B Scan : 24412

Andromeda score : 43.315

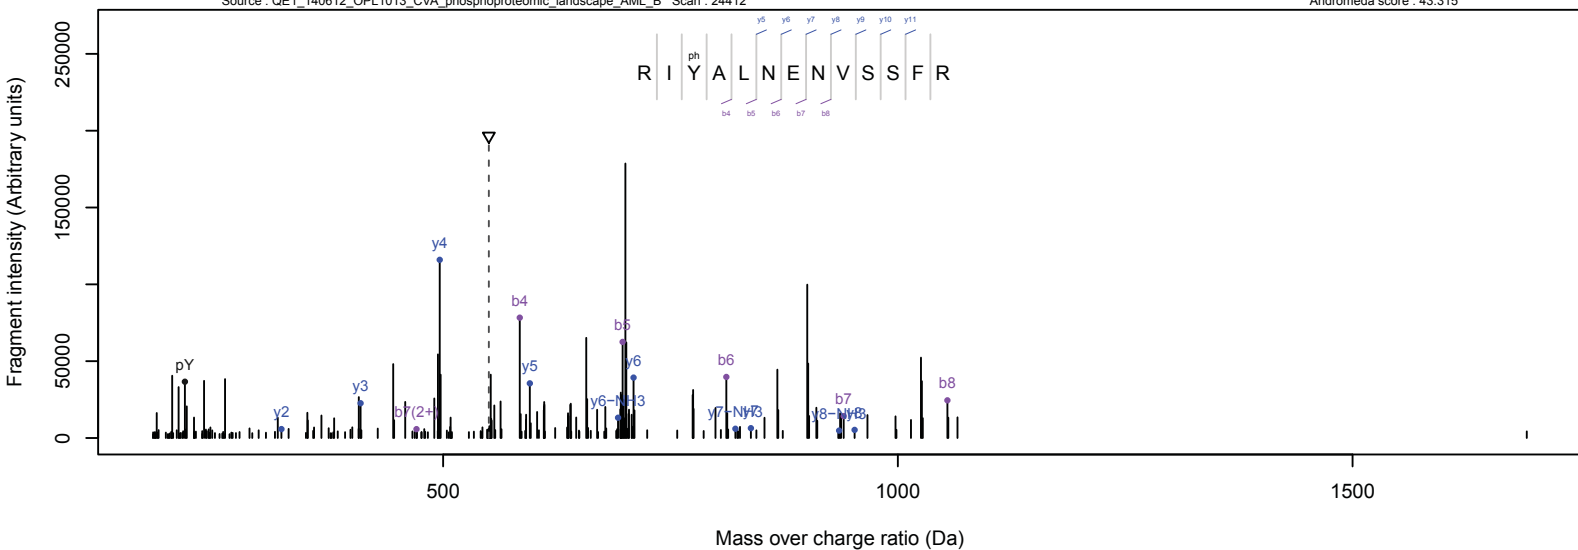

**NFHAFY(ph)QLLR-3+**

Source : QE1\_140612\_OPL1013\_CVA\_phosphoproteomic\_landscape\_AML\_C Scan : 37784

Andromeda score : 43.308

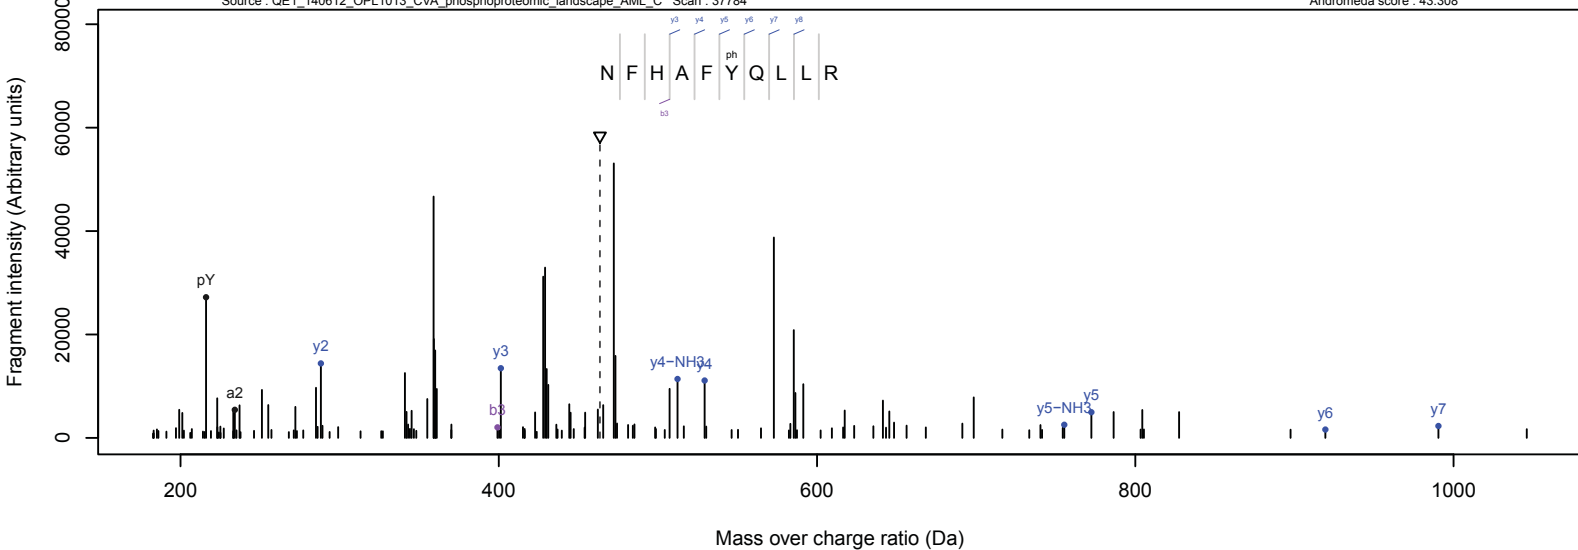

**Y(ph)ITLPAGTEK-2+**

Source : Qe1\_141024\_OPL1013\_CvA\_AML\_pTyrIP\_MOLM13 Scan : 20664

Andromeda score : 43.308

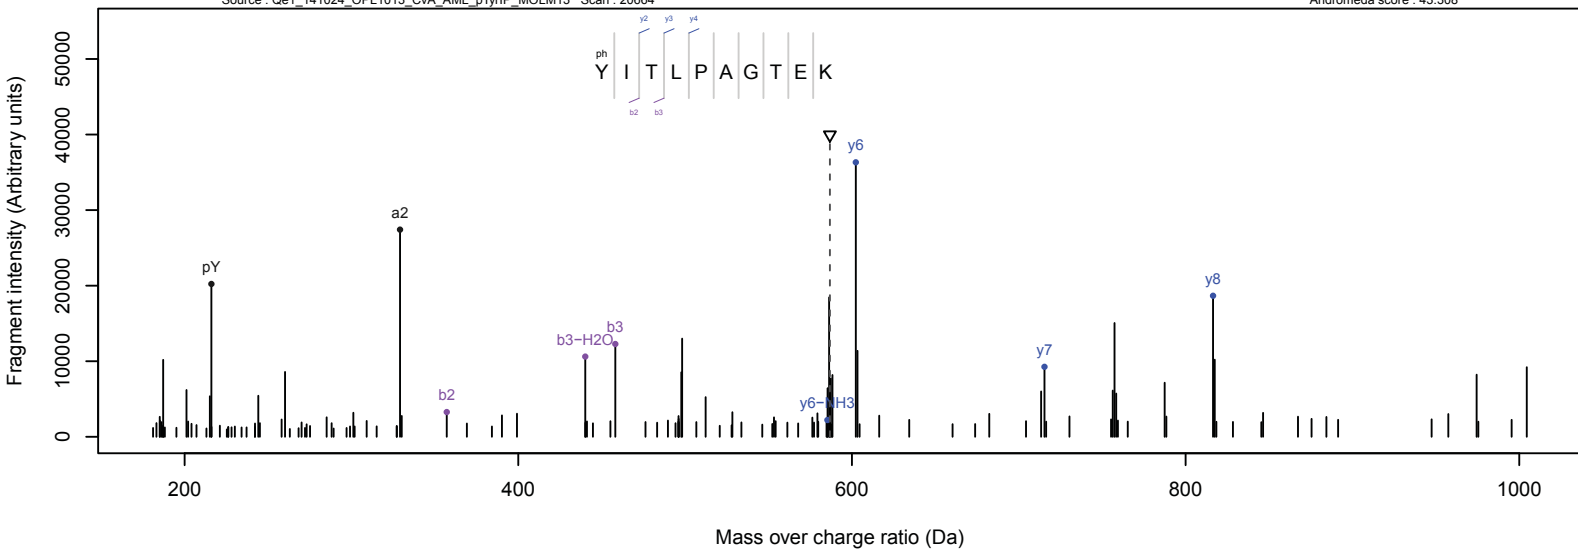

## QQY(ph)LRQEVLR-3+

Source : QE1\_140612\_OPL1013\_CVA\_phosphoproteomic\_landscape\_AML\_C Scan : 14092

Andromeda score : 43.297

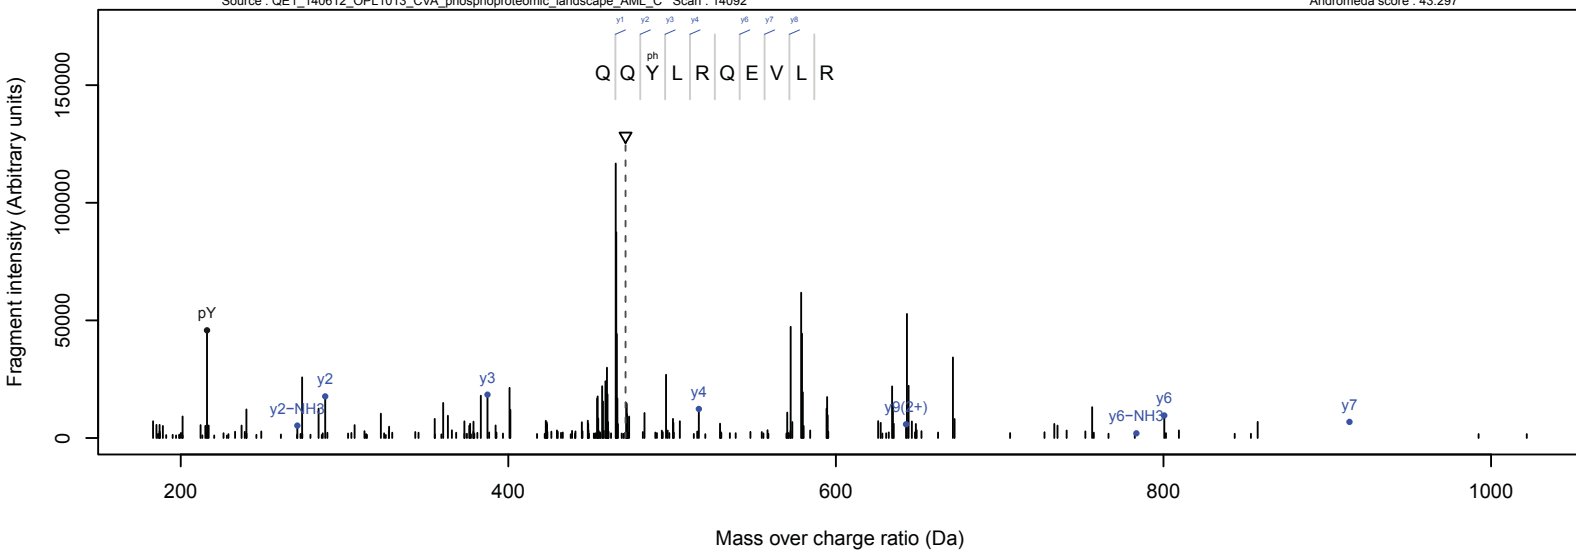

## QHPQPYIFPDSPPG(ph)TSYER-3+

Source : QE1\_140612\_OPL1013\_CVA\_phosphoproteomic\_landscape\_AML\_E Scan : 25877

Andromeda score : 43.261

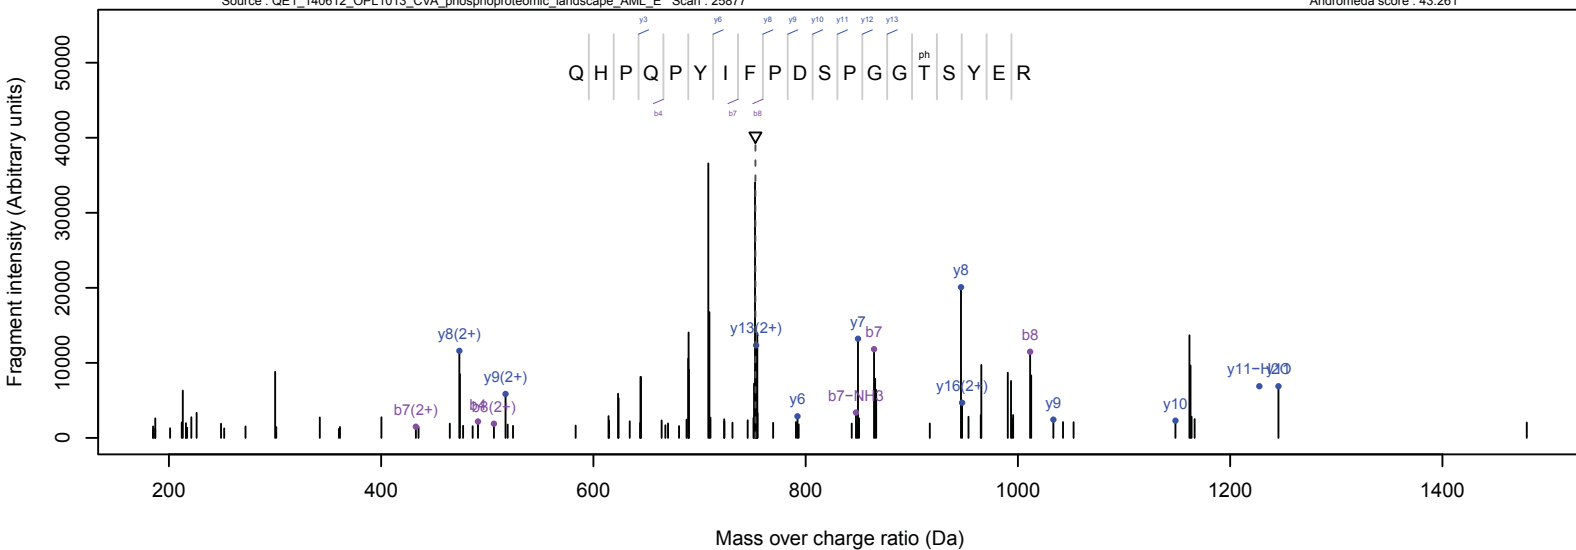

## VEMLDNLLDIEVAYS(ph)LLR-2+

Source : QE1\_140612\_OPL1013\_CVA\_phosphoproteomic\_landscape\_AML\_D Scan : 48063

Andromeda score : 43.261

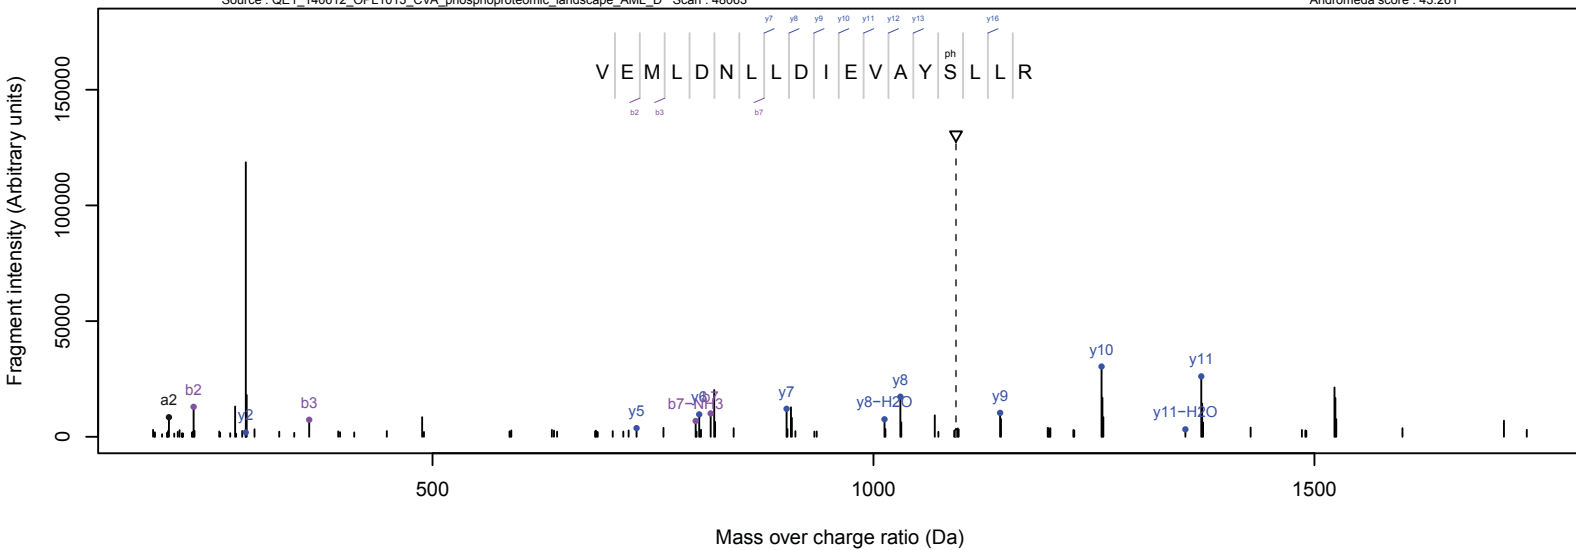

## SLADYRT(ph)EDSNAGNSGGNVPA PDSTK-3+

Source : QE1\_140612\_OPL1013\_CVA\_phosphoproteomic\_landscape\_AML\_C Scan : 13687

Andromeda score : 43.241

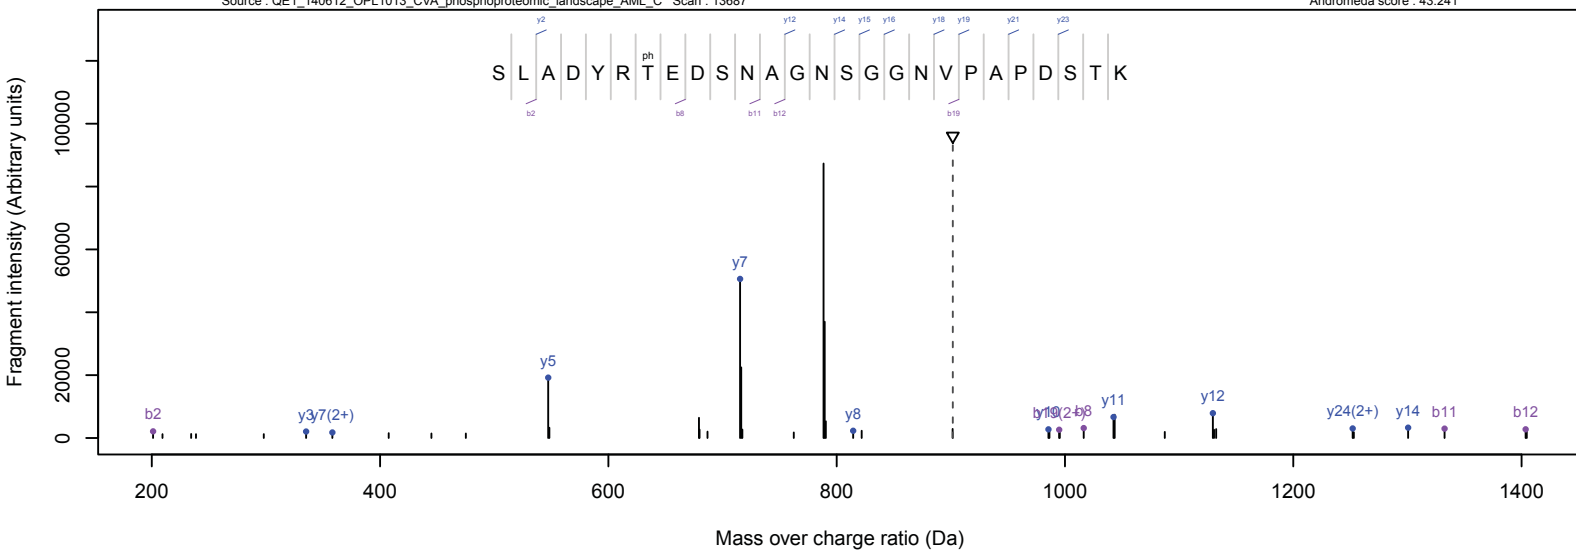

## TPCNAGTFSQPEKV(ph)YTLVSGDR-3+

Source : QE1\_140612\_OPL1013\_CVA\_phosphoproteomic\_landscape\_AML\_B Scan : 25029

Andromeda score : 43.233

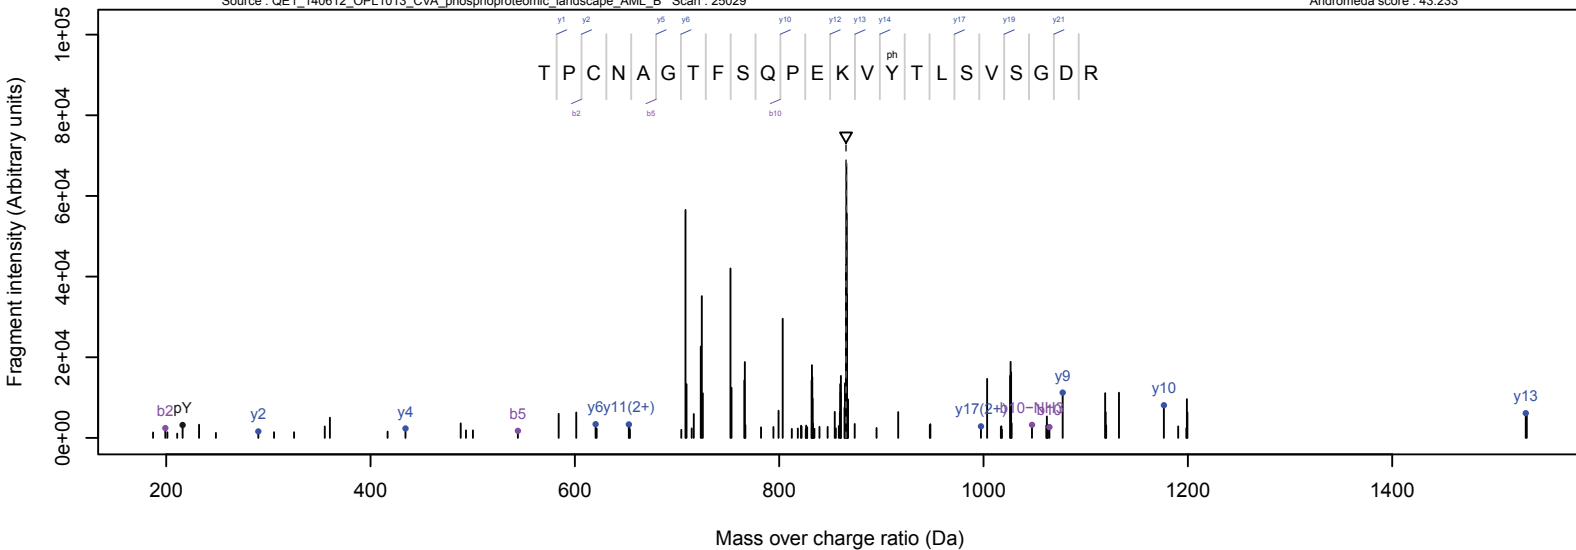

## FKVY(ph)NYK-2+

Source : QE1\_140612\_OPL1013\_CVA\_phosphoproteomic\_landscape\_AML\_D Scan : 10947

Andromeda score : 43.214

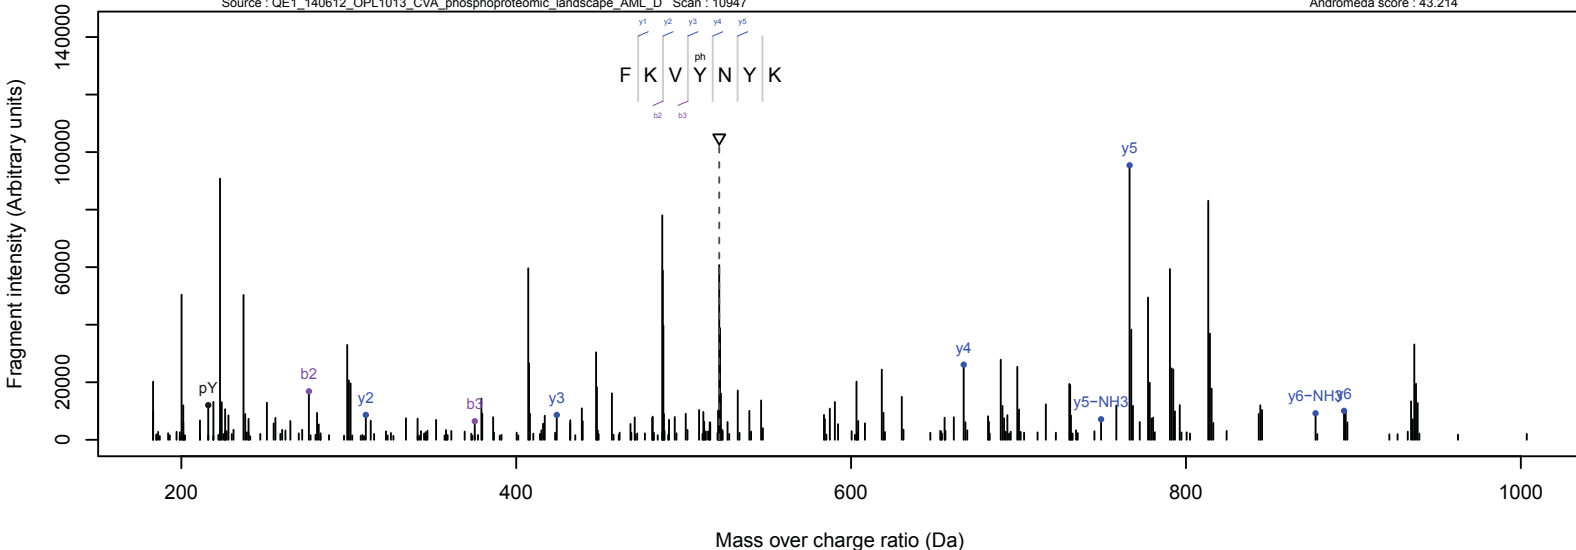



## ATTGLKPVDSGCVAY(ph)VLR-3+

Source : QE1\_140908\_OPL1013\_CvA\_pTyrIP\_AML\_HEL Scan : 32259

Andromeda score : 43.208

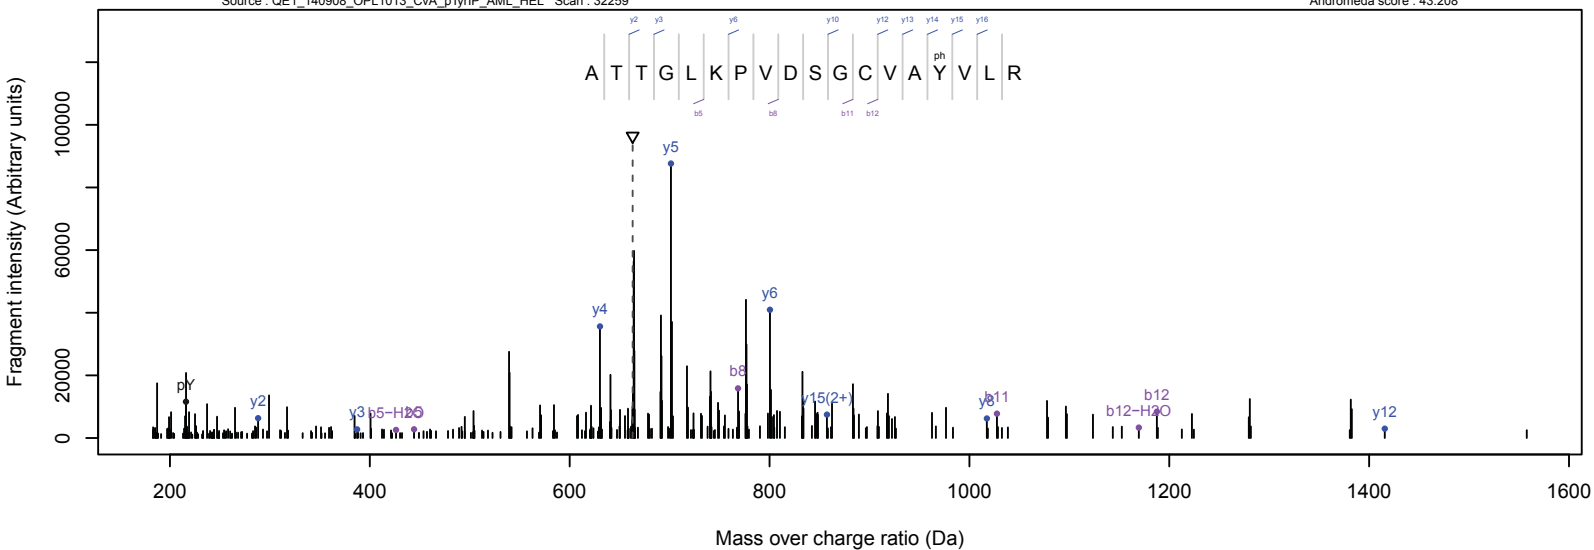

## IKEIHDGLDFYSSK-3+

Source : QE1\_140612\_OPL1013\_CvA\_phosphoproteomic\_landscape\_AML\_C Scan : 24915

Andromeda score : 43.208

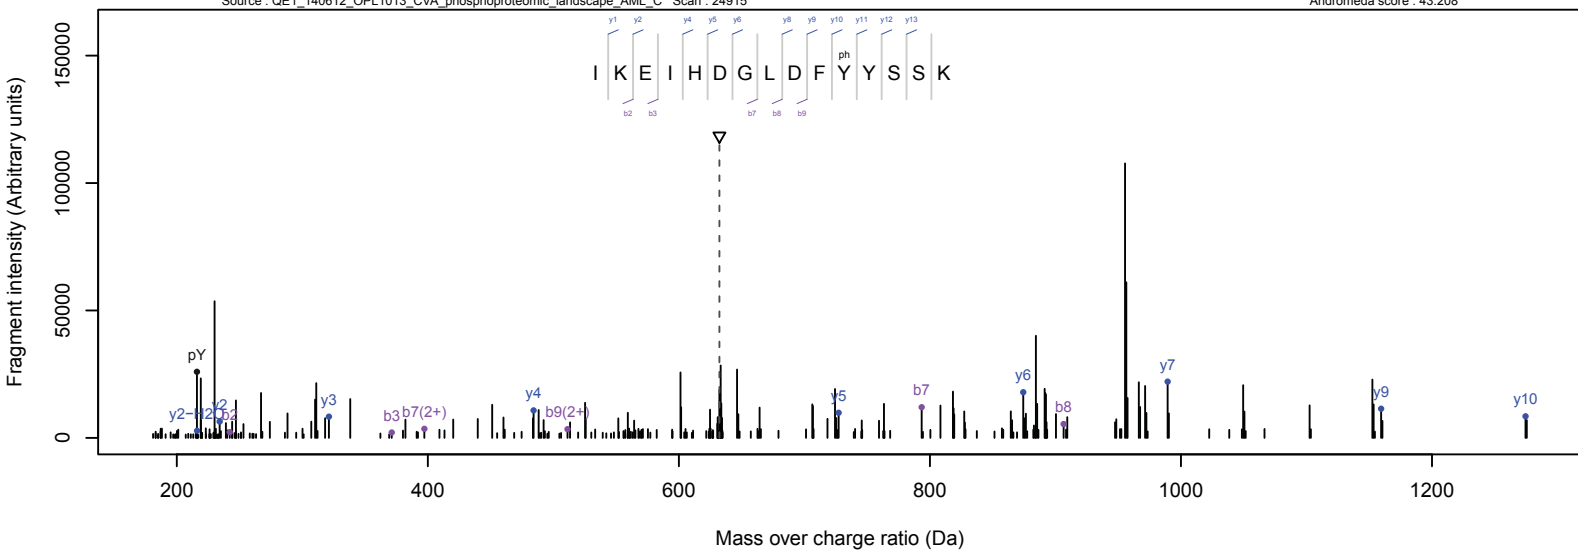

## NDLY(ph)PNPKPEVLHMIYMR-3+

Source : QE1\_140908\_OPL1013\_CvA\_pTyrIP\_AML\_HEL Scan : 40055

Andromeda score : 43.208

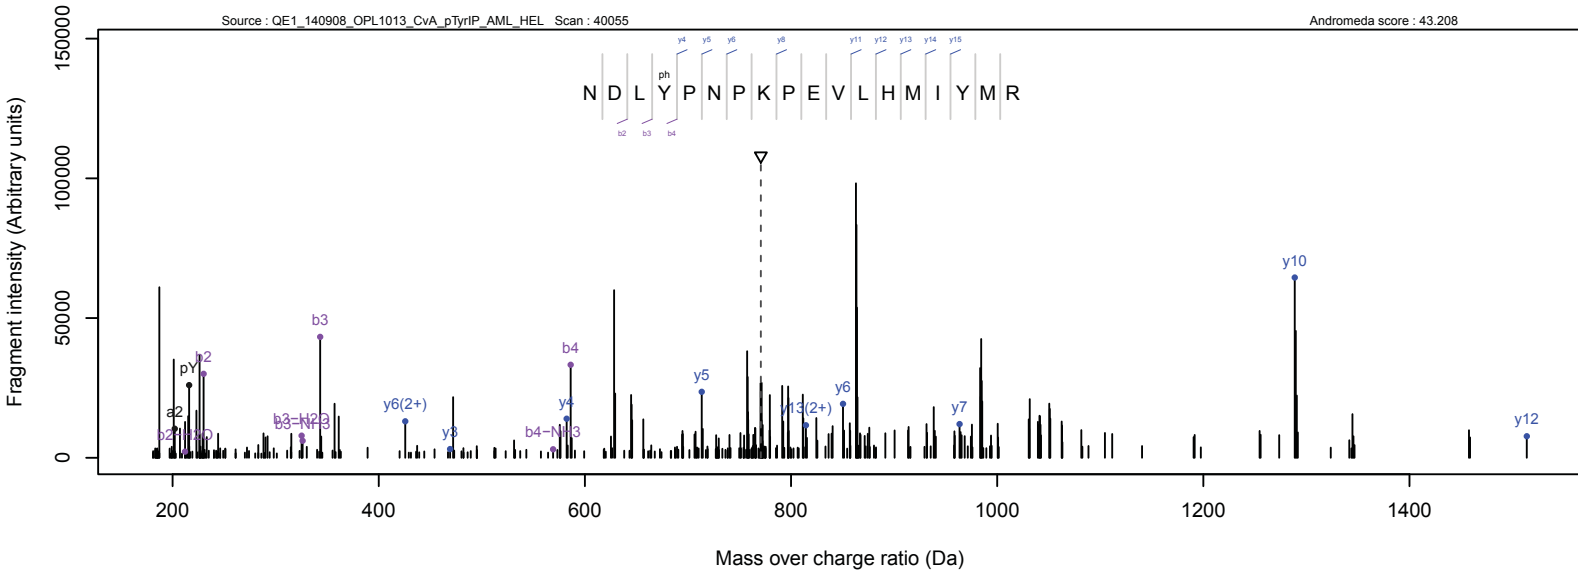

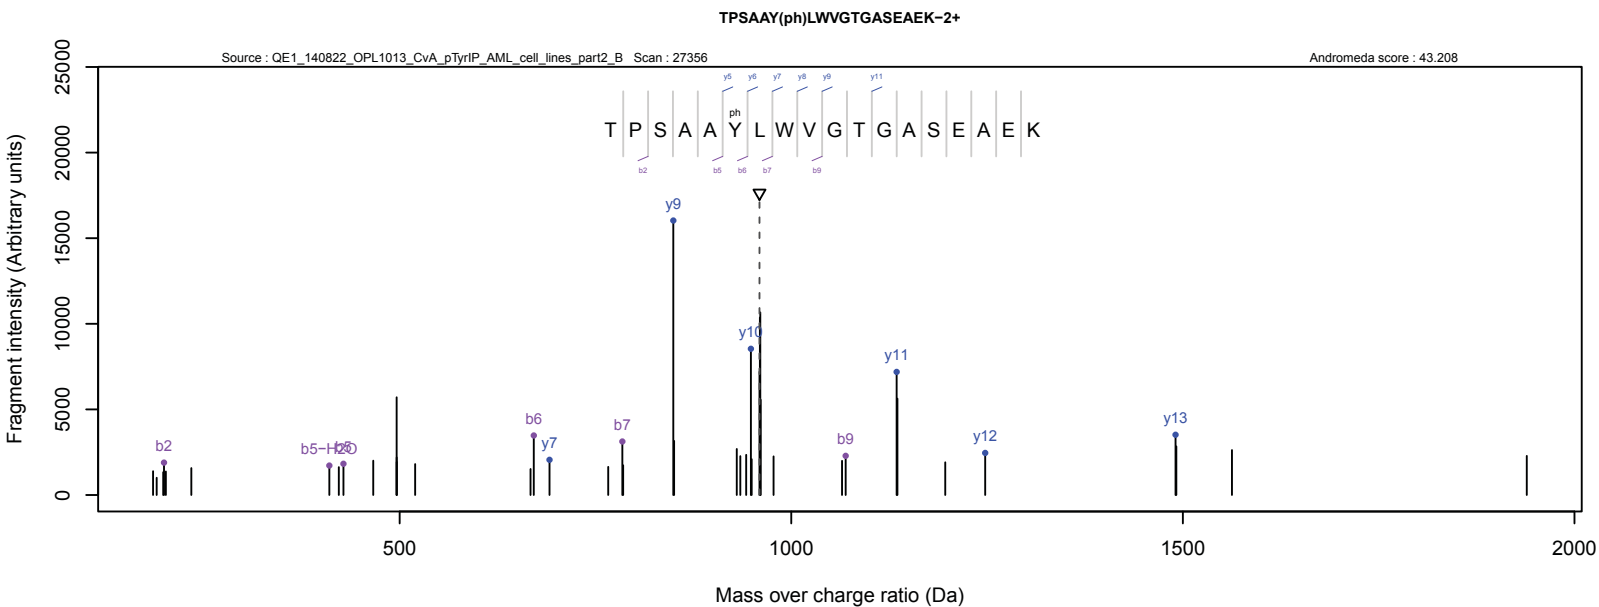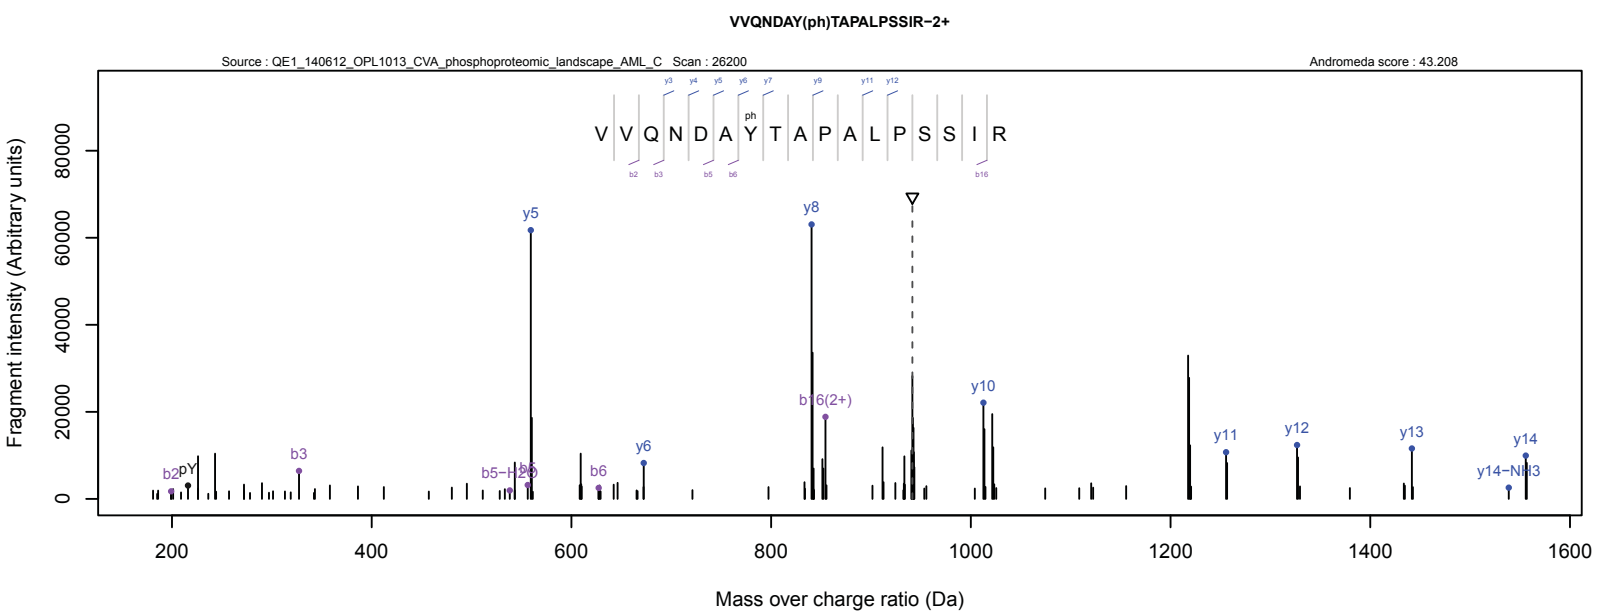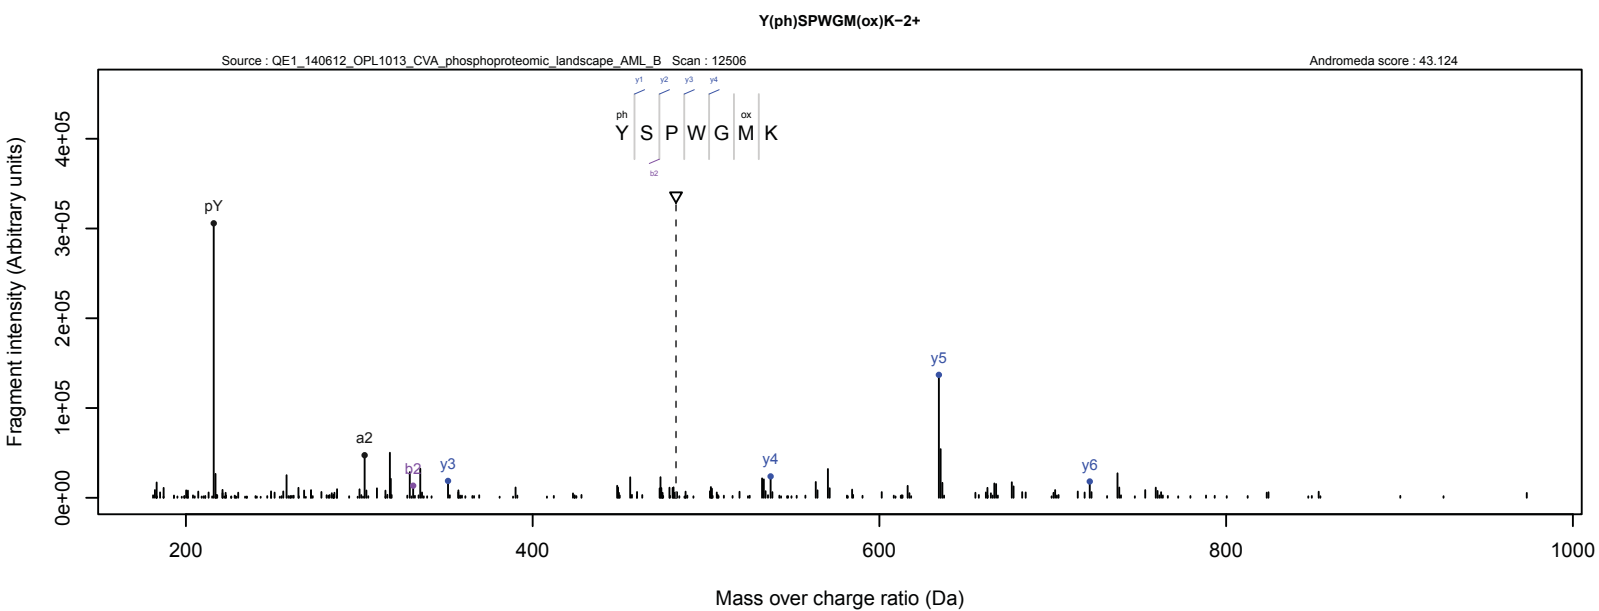

IY(ph)ISNTFSPSKAEGDSAGTAPGGTPAGDK-3+

Source : QE1\_140908\_OPL1013\_CVA\_pTyrIP\_AML\_HEL Scan : 27603

Andromeda score : 43.103

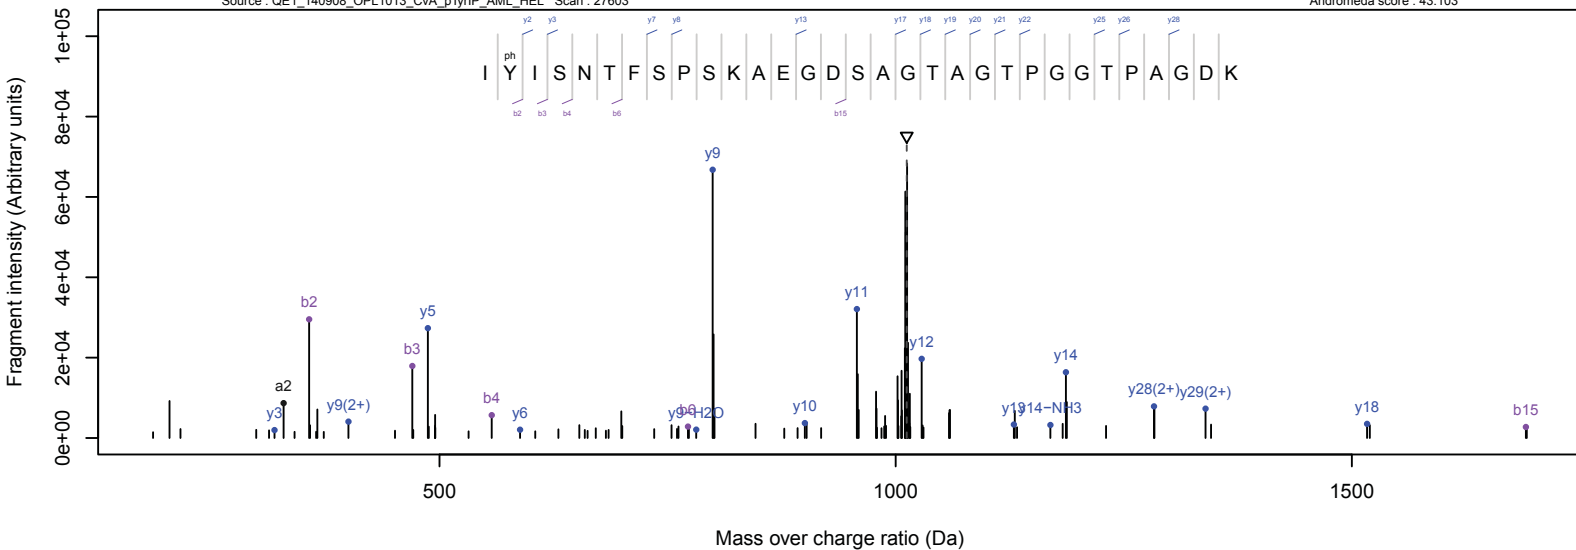

Y(ph)DSPINSASHIPSSK-3+

Source : QE1\_140612\_OPL1013\_CVA\_phosphoproteomic\_landscape\_AML\_B Scan : 14954

Andromeda score : 43.05

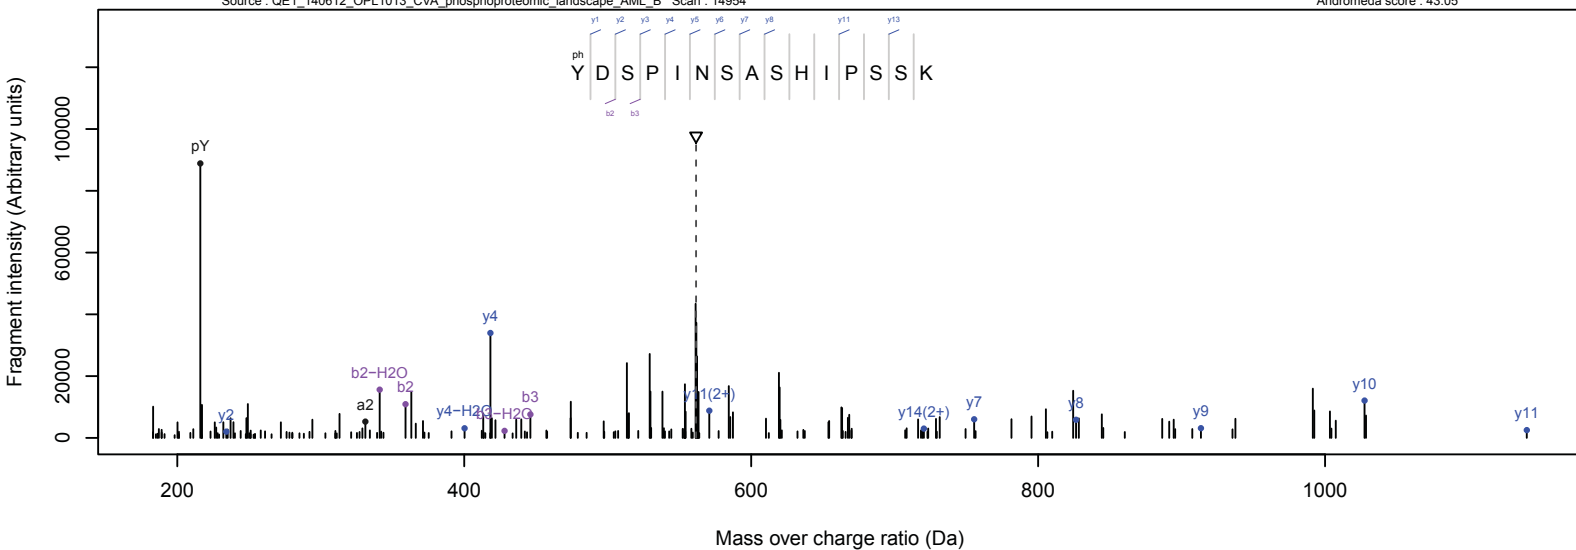

LPHSAHPGKPPSAPASAPQNVFSTTVSSGY(ph)NTK-4+

Source : QE1\_140612\_OPL1013\_CVA\_phosphoproteomic\_landscape\_AML\_C Scan : 22232

Andromeda score : 43.04

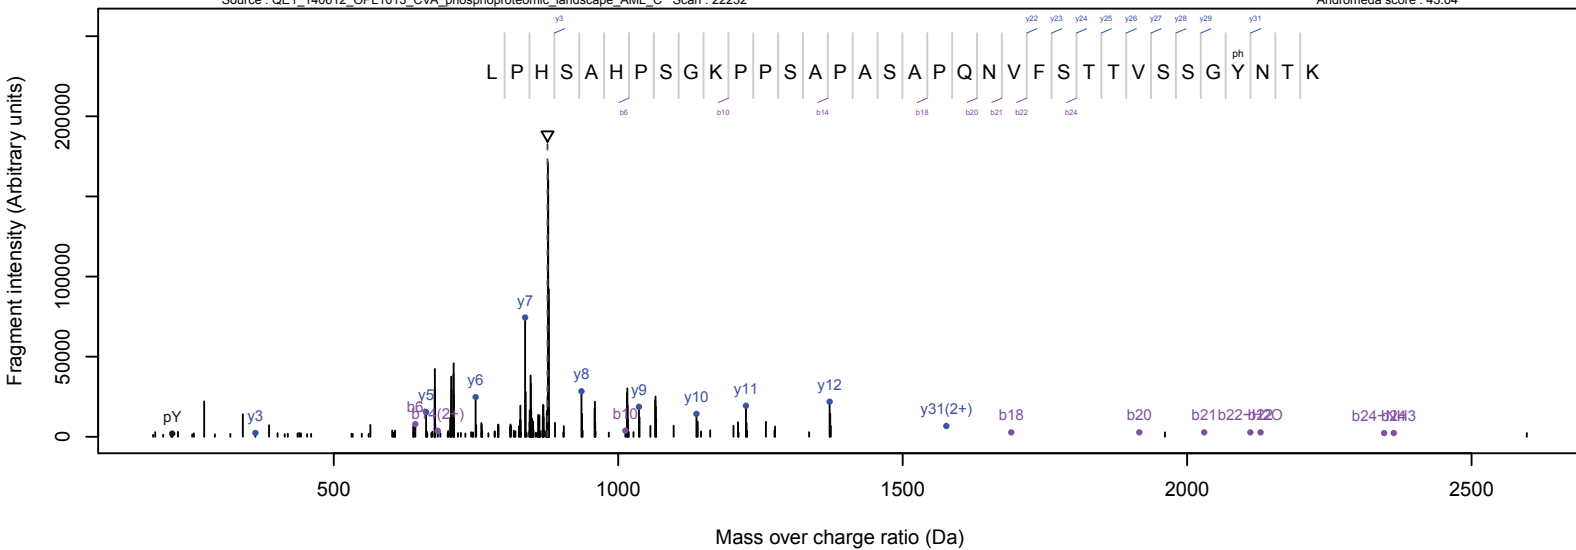

## AVLYADY(ph)RAPGAR-3+

Source: QE1\_140612\_OPL1013\_CVA\_phosphoproteomic\_landscape\_AML\_C Scan: 17225

Andromeda score: 43.03

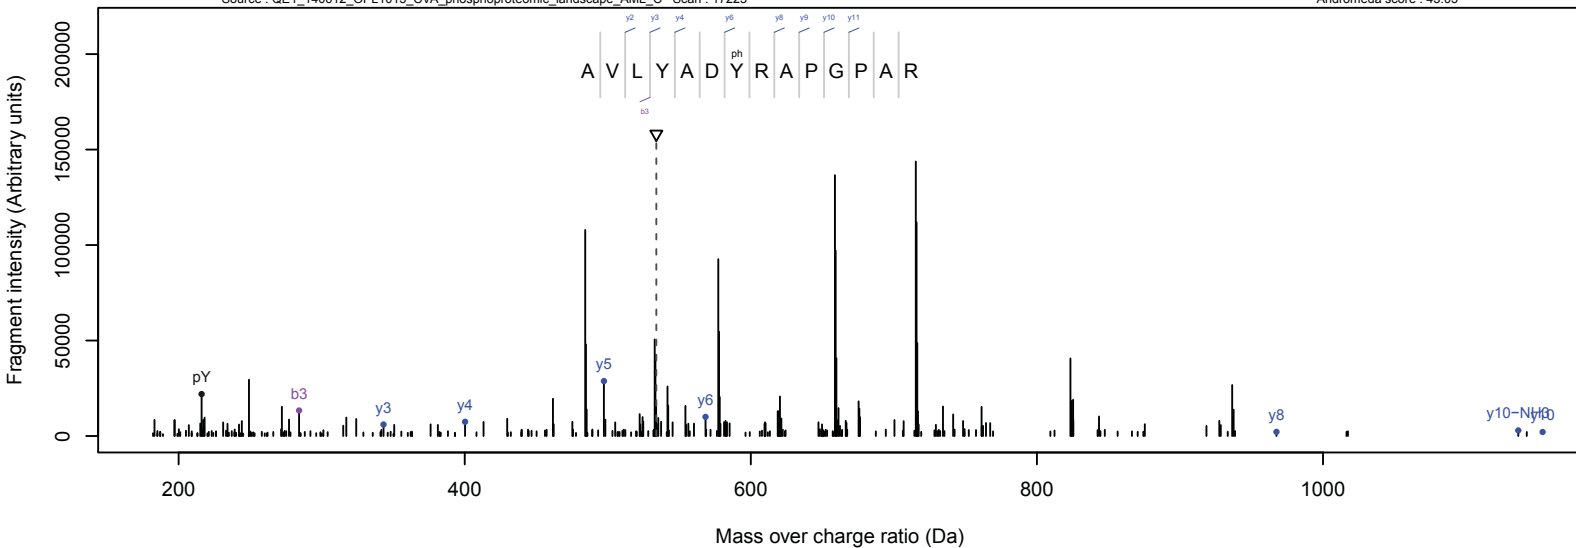

## GFPTIY(ph)FSPANKK-3+

Source: QE1\_140612\_OPL1013\_CVA\_phosphoproteomic\_landscape\_AML\_C Scan: 32645

Andromeda score: 43.03

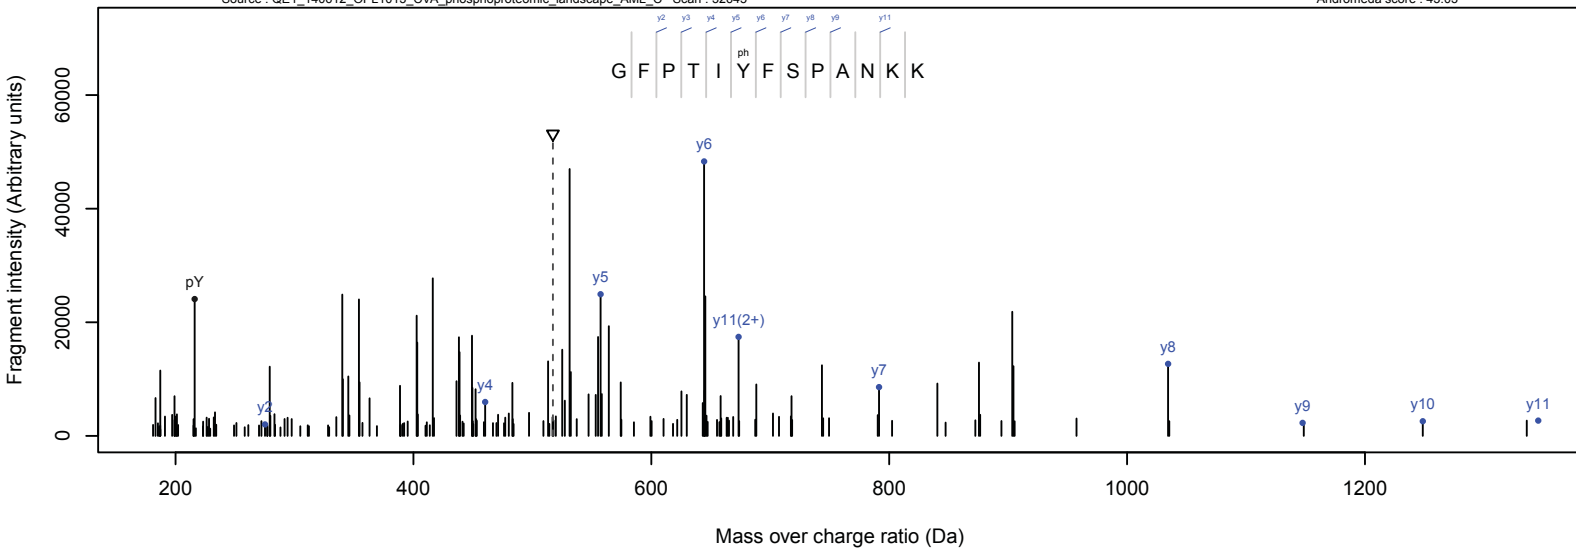

## GY(ph)VWNGSNPQANR-2+

Source: QE1\_140612\_OPL1013\_CVA\_phosphoproteomic\_landscape\_AML\_B Scan: 13989

Andromeda score: 43.03

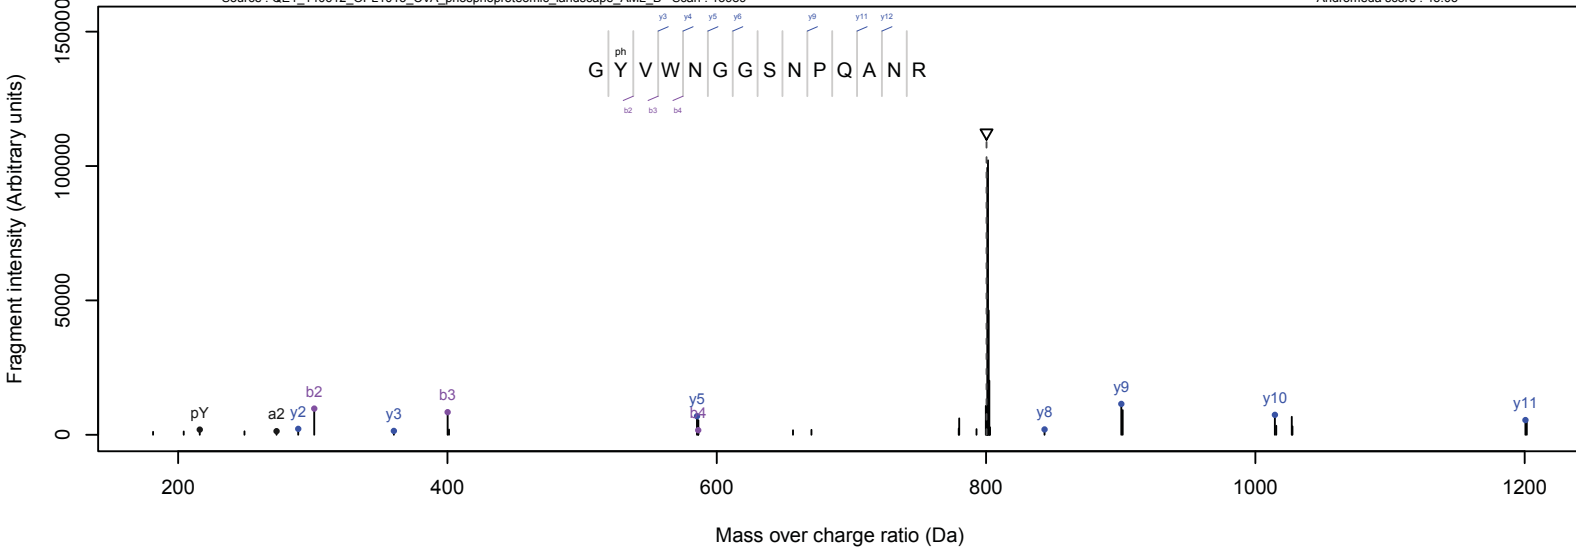

## IGSTIFGERDY(ph)SK-2+

Source: QE1\_140612\_OPL1013\_CVA\_phosphoproteomic\_landscape\_AML\_B Scan: 18802

Andromeda score: 43.03

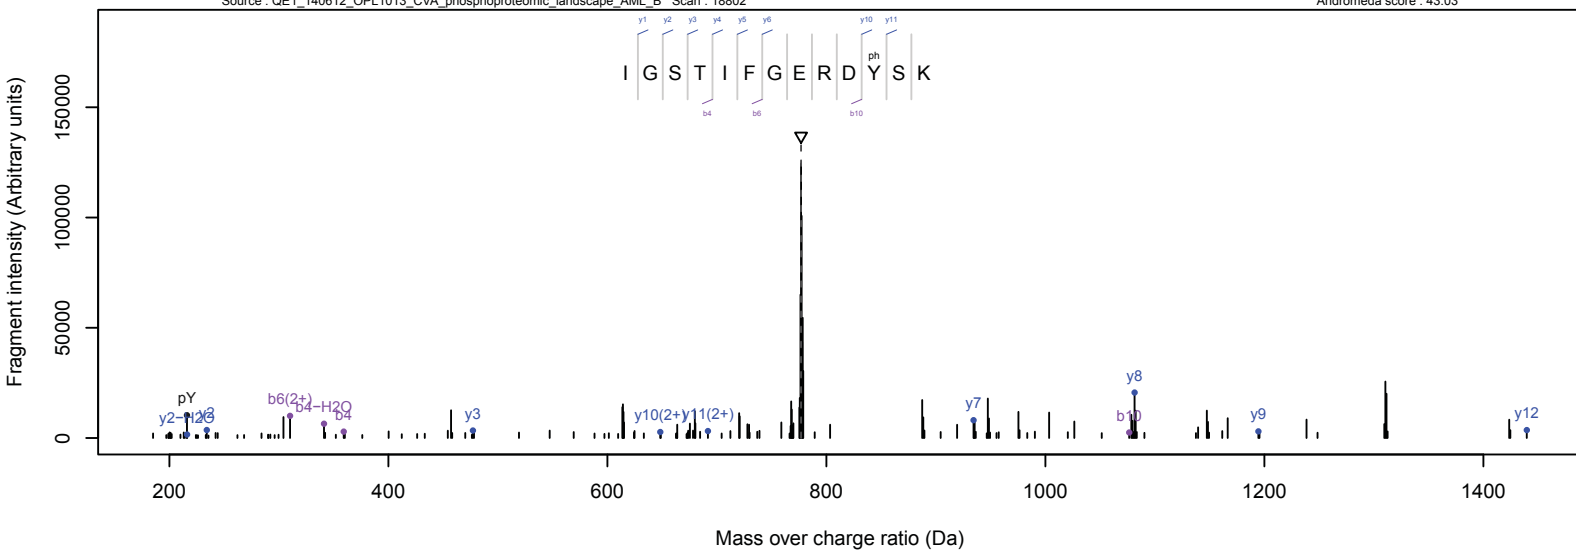

## QPAPMSTVLY(ph)NRK-3+

Source: QE1\_140612\_OPL1013\_CVA\_phosphoproteomic\_landscape\_AML\_B Scan: 18565

Andromeda score: 43.03

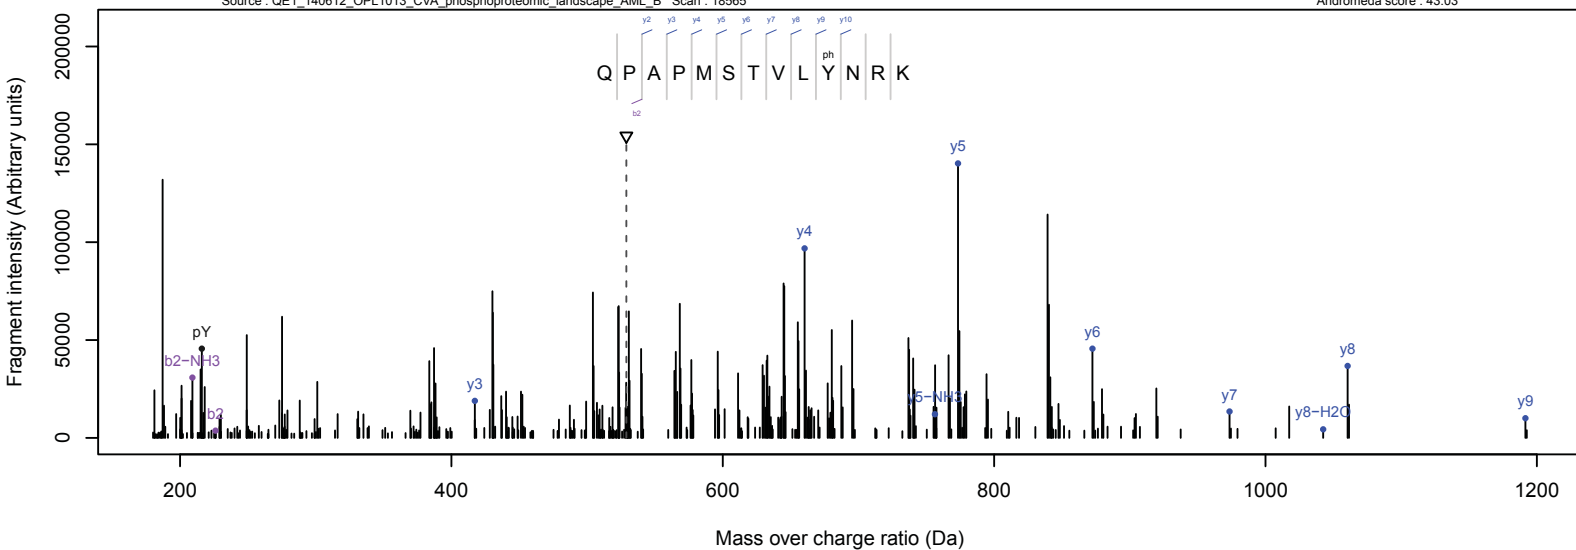

## Y(ph)PCNTFGKPHTEVK-3+

Source: QE1\_140612\_OPL1013\_CVA\_phosphoproteomic\_landscape\_AML\_C Scan: 8776

Andromeda score: 43.03

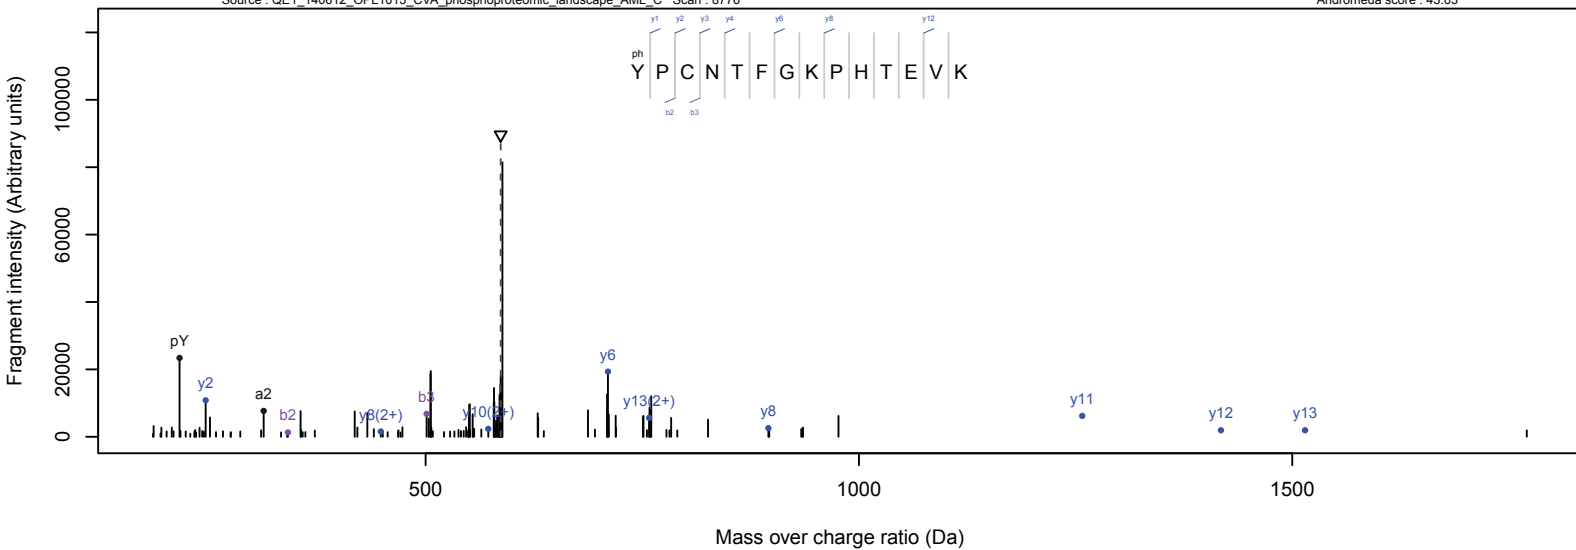

## Y(ph)TGYNAAGLLAAR-2+

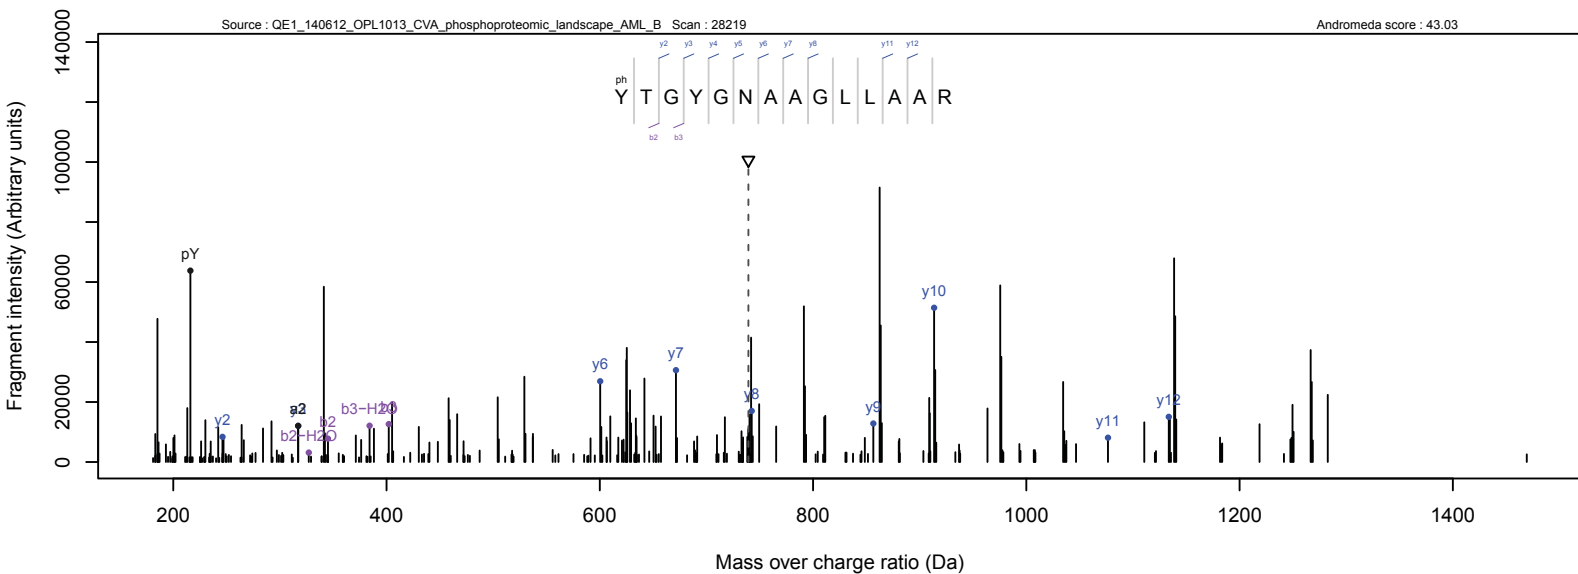

## LTTHKEELY(ph)PK-3+

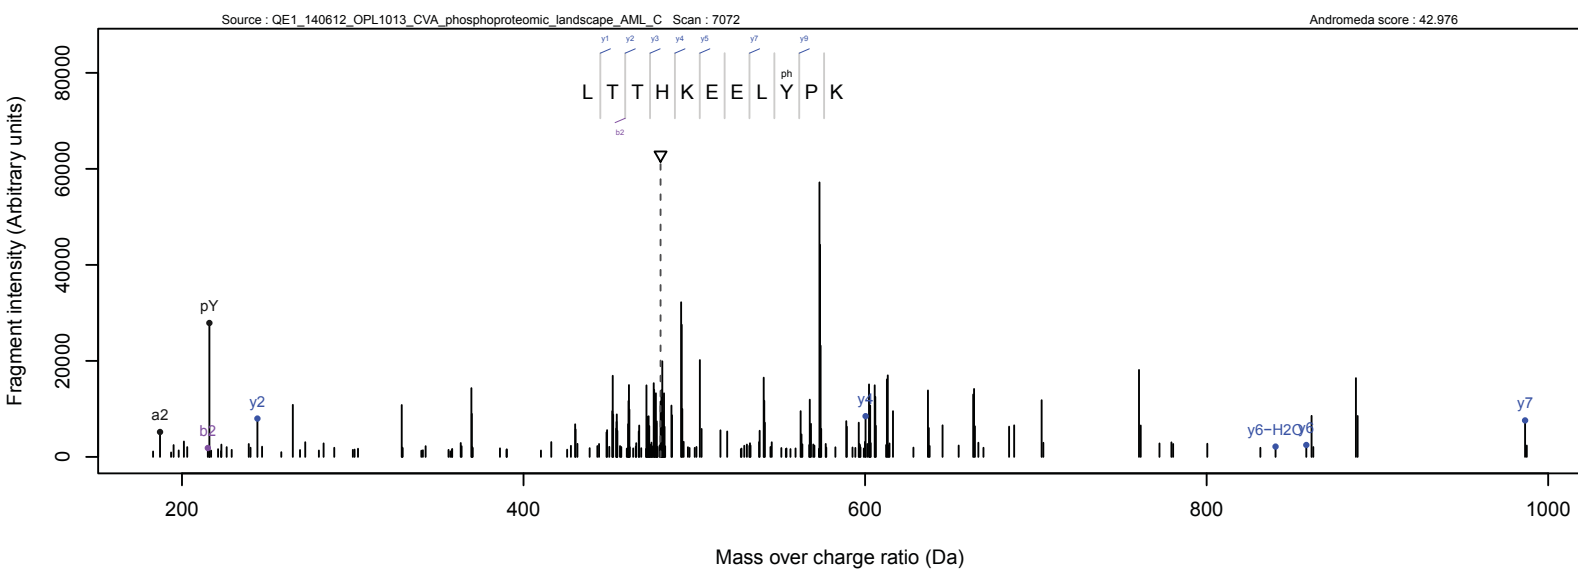

## VTNY(ph)IFDSLRL-2+

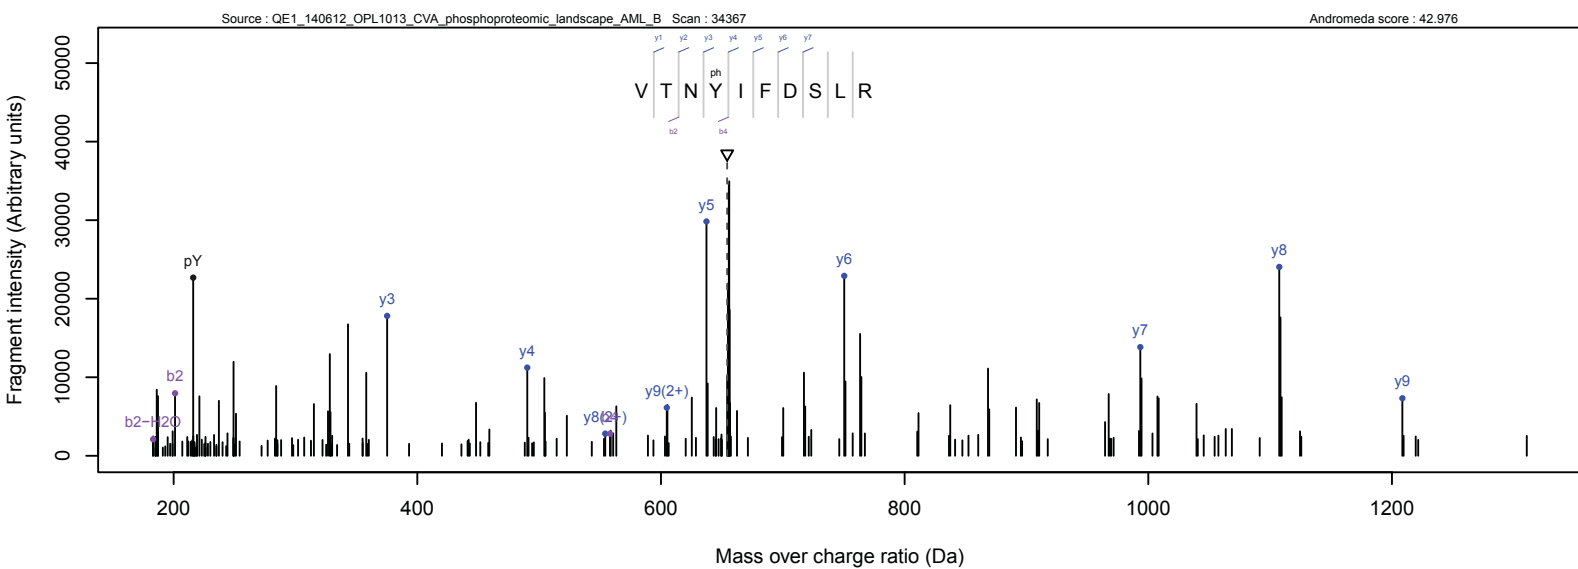

## EMVKAEDTQFNYPHHR-3+

Source : QE1\_140612\_OPL1013\_CVA\_phosphoproteomic\_landscape\_AML\_C Scan : 13018

Andromeda score : 42.958

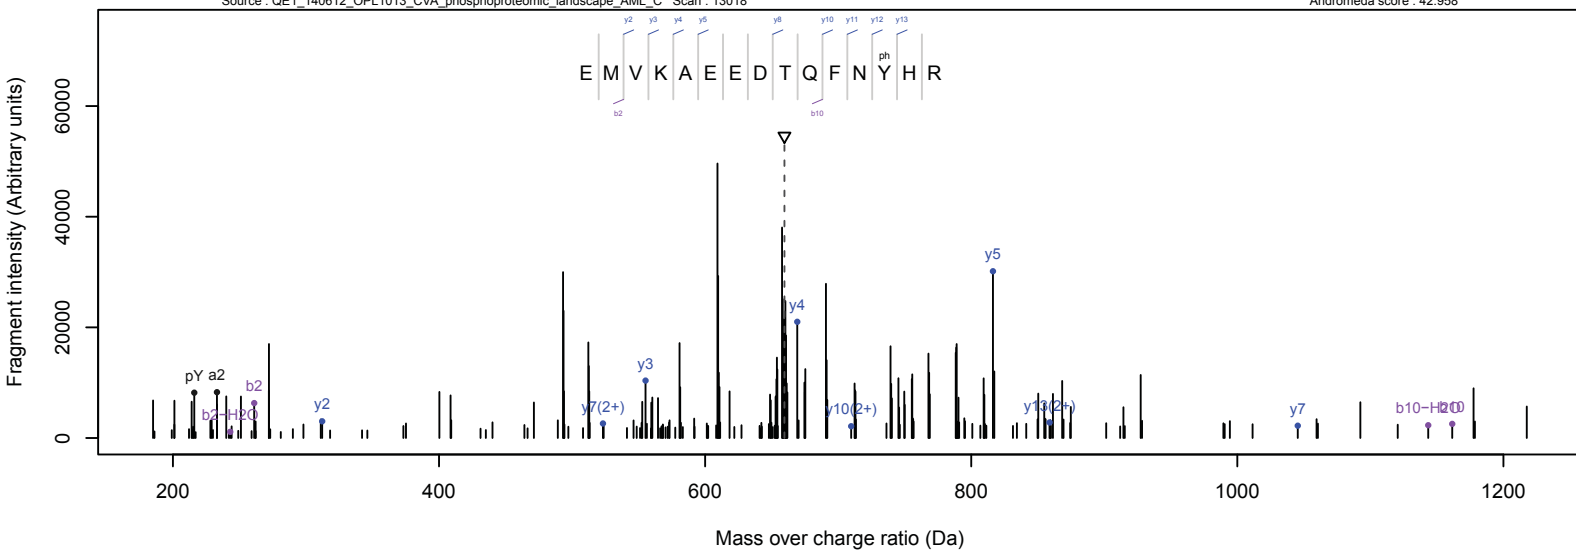

## GPSWDPFRDWYPHSR-3+

Source : QE1\_140612\_OPL1013\_CVA\_phosphoproteomic\_landscape\_AML\_C Scan : 38799

Andromeda score : 42.947

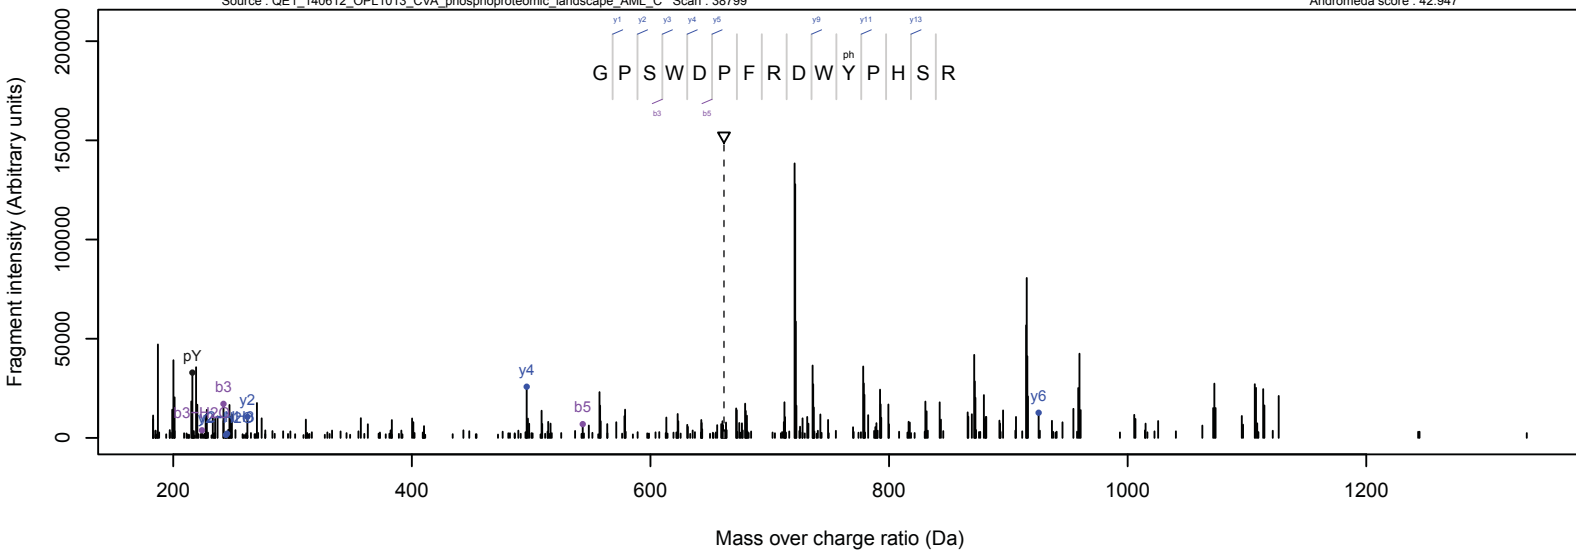

## LHVTALDYLAOPYAK-2+

Source : QE1\_140612\_OPL1013\_CVA\_phosphoproteomic\_landscape\_AML\_C Scan : 36764

Andromeda score : 42.947

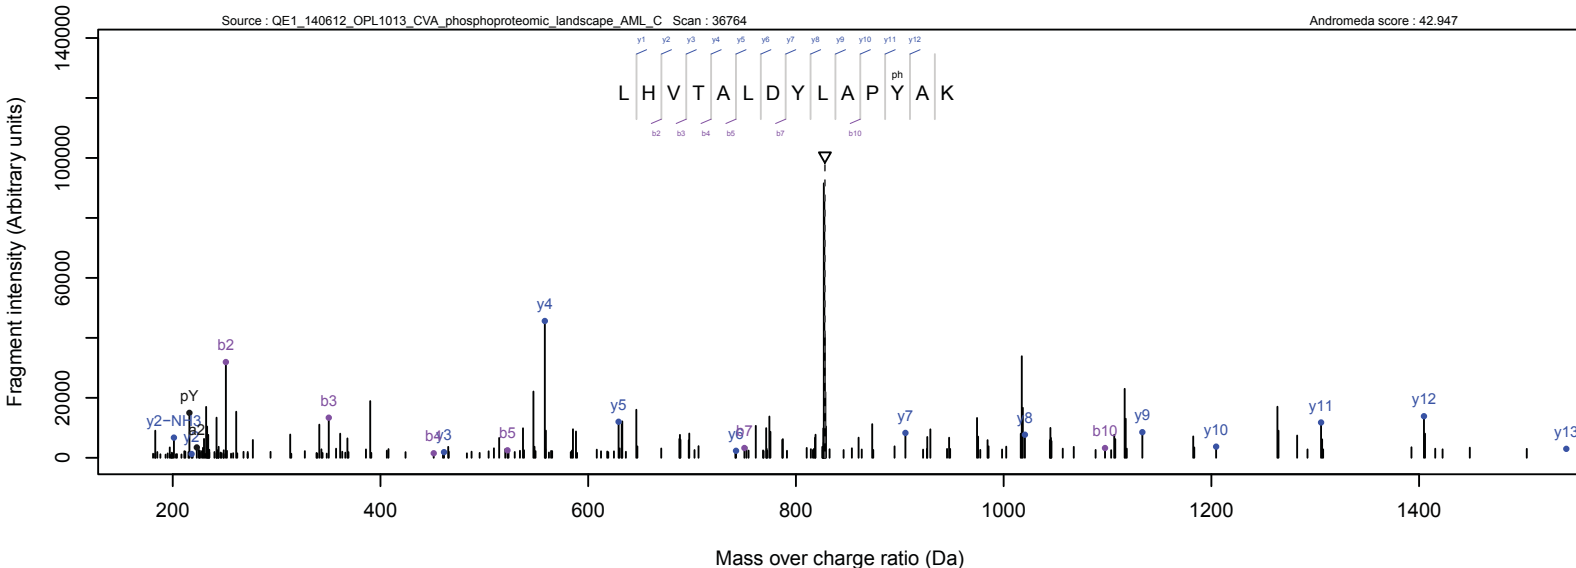

## KQSLY(ph)LK-2+

Source : QE1\_140612\_OPL1013\_CVA\_phosphoproteomic\_landscape\_AML\_D Scan : 9782

Andromeda score : 42.869

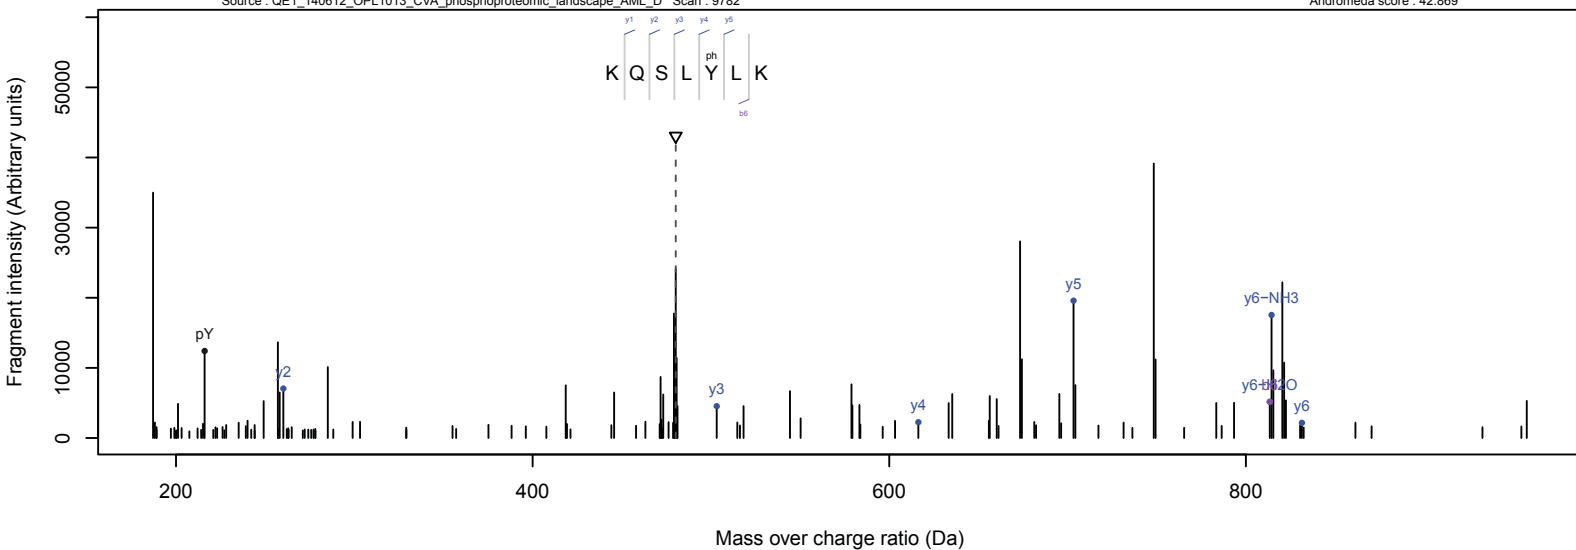

## NRSELY(ph)TLNGSSVDSQPQSK-3+

Source : QE1\_140612\_OPL1013\_CVA\_phosphoproteomic\_landscape\_AML\_A Scan : 28104

Andromeda score : 42.863

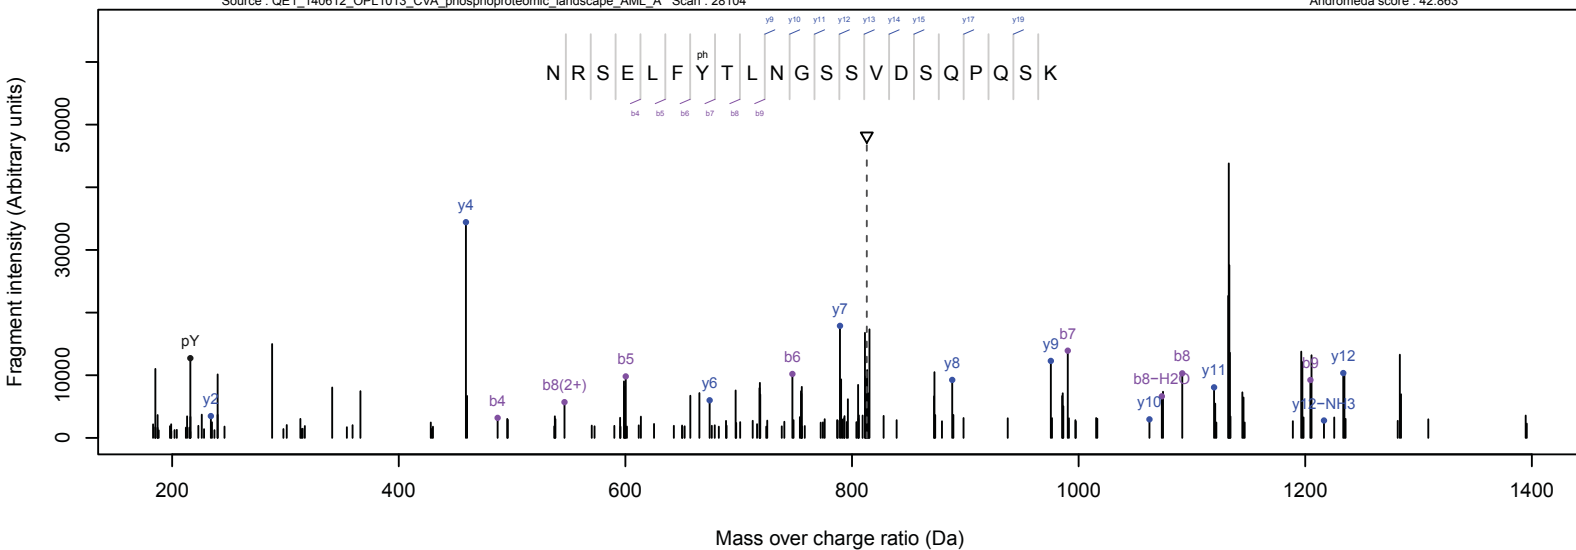



## ANPY(ph)FEYLQIR-2+

Source : QE1\_140612\_OPL1013\_CVA\_phosphoproteomic\_landscape\_AML\_B Scan : 37453

Andromeda score : 42.843

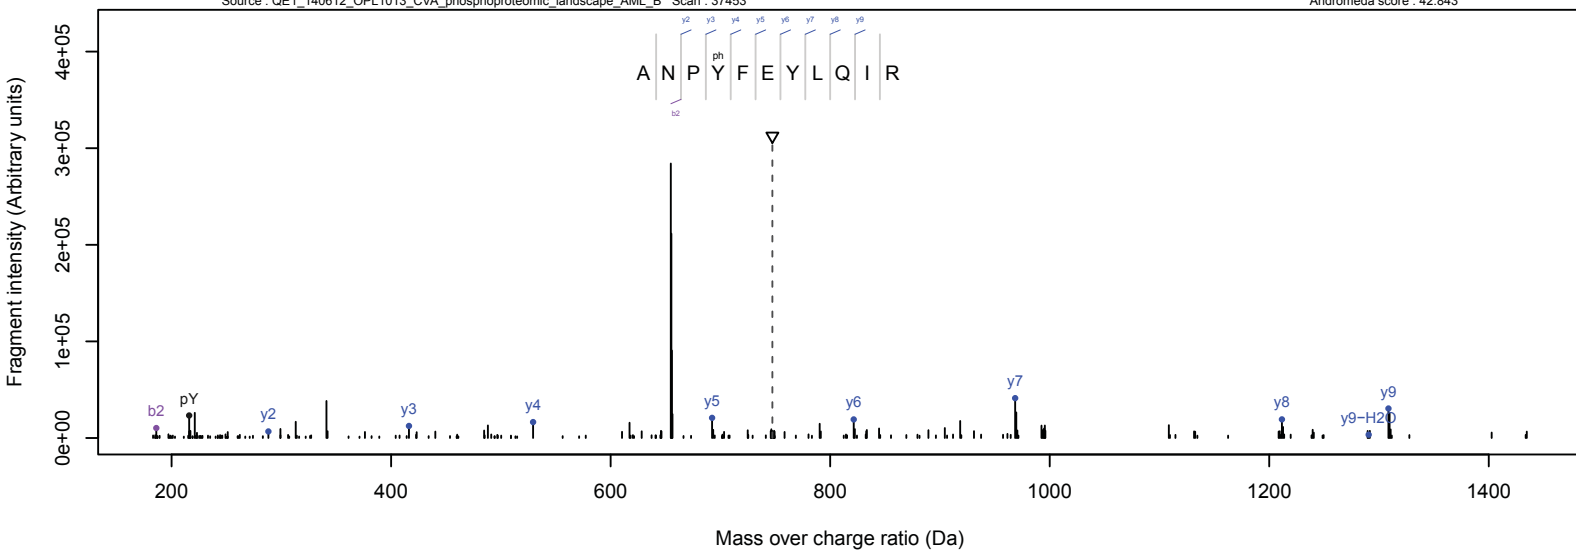

## ATDDYH(ph)EKFK-3+

Source : QE1\_140612\_OPL1013\_CVA\_phosphoproteomic\_landscape\_AML\_C Scan : 7202

Andromeda score : 42.843

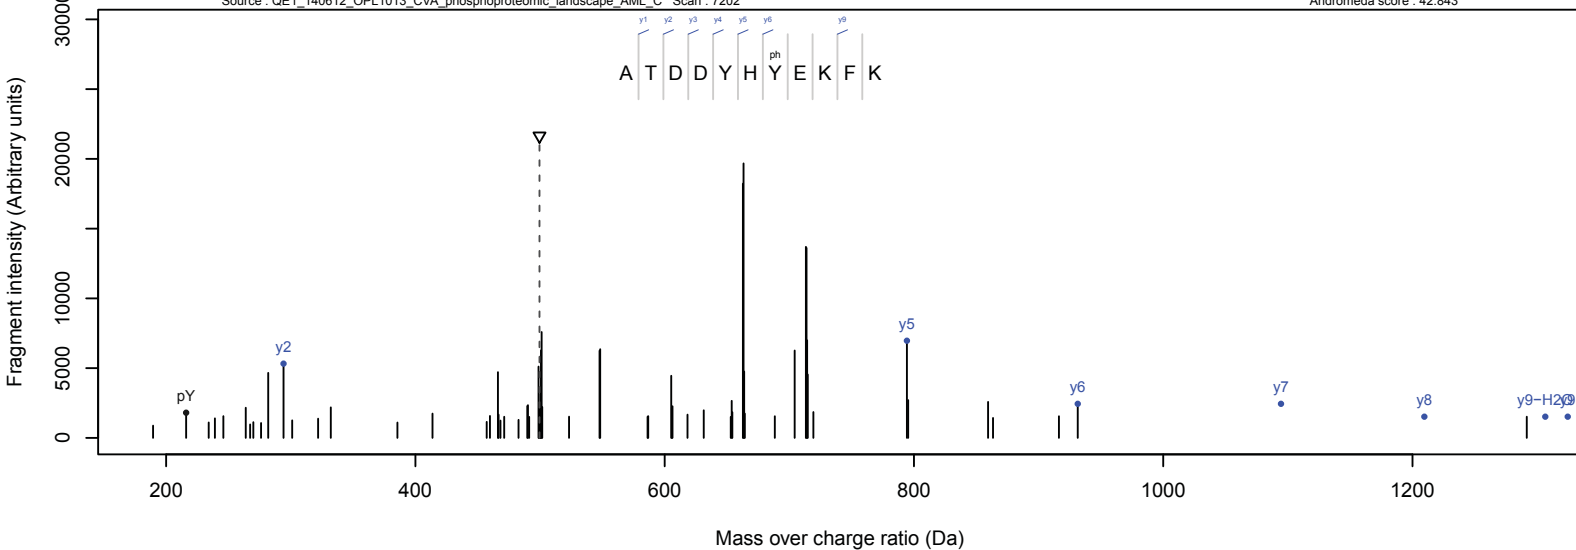

## FKDTAY(ph)CATFR-2+

Source : QE1\_140612\_OPL1013\_CVA\_phosphoproteomic\_landscape\_AML\_A Scan : 13773

Andromeda score : 42.843

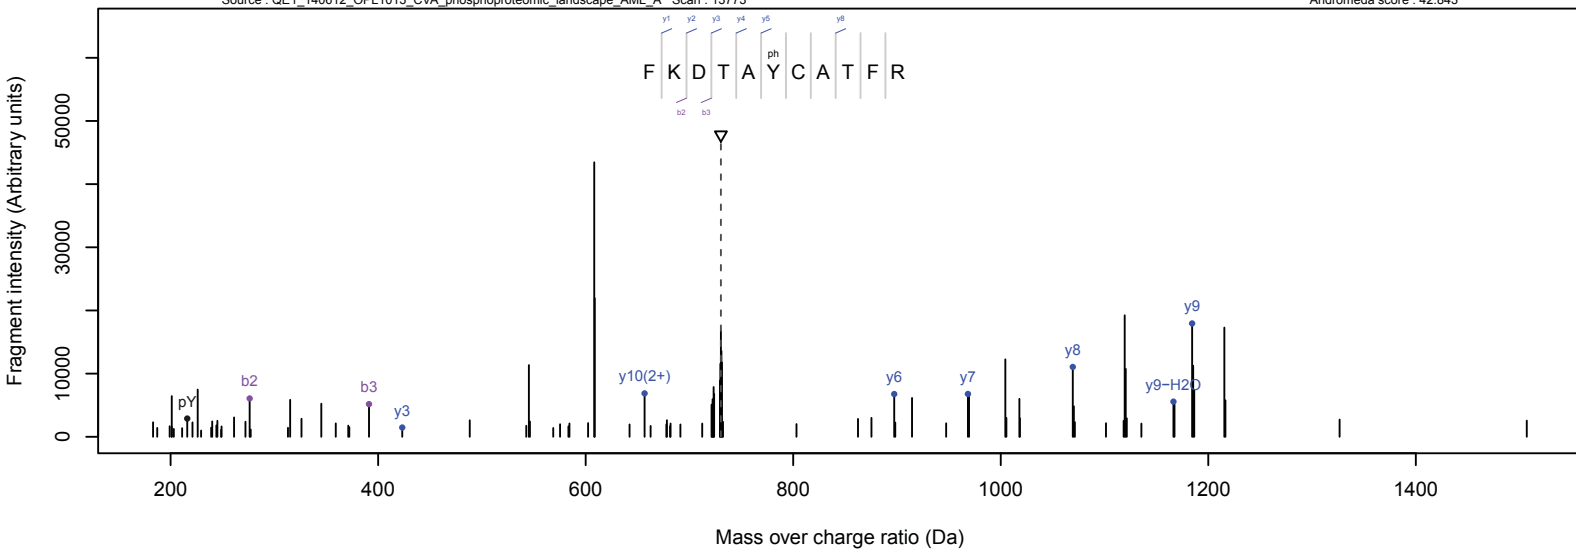

MVY(ph)YLDPSSQK-2+

Source : QE1\_140612\_OPL1013\_CVA\_phosphoproteomic\_landscape\_AML\_D Scan : 23432

Andromeda score : 42.843

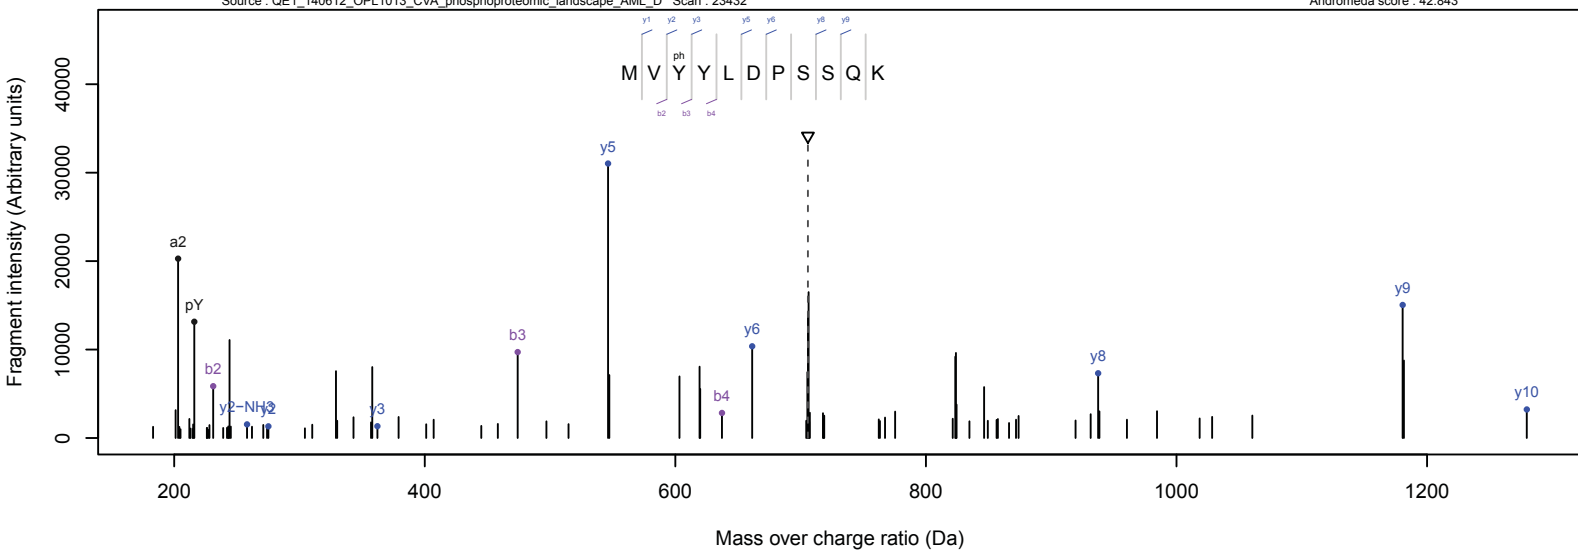

NGY(ph)LGGHGFNAR-3+

Source : QE1\_140612\_OPL1013\_CVA\_phosphoproteomic\_landscape\_AML\_C Scan : 11563

Andromeda score : 42.843

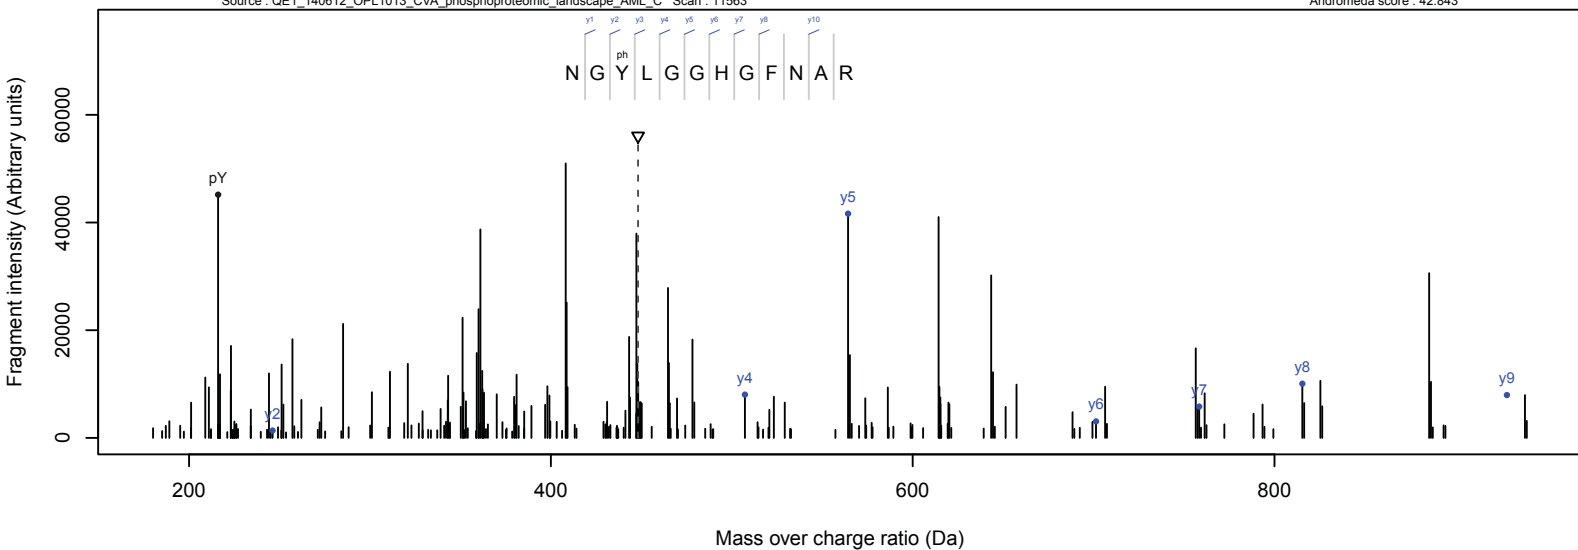

RLPDAHSDYAR-3+

Source : Qe1\_141024\_OPL1013\_CvA\_AML\_pTyrIP\_MOLM13 Scan : 6691

Andromeda score : 42.843

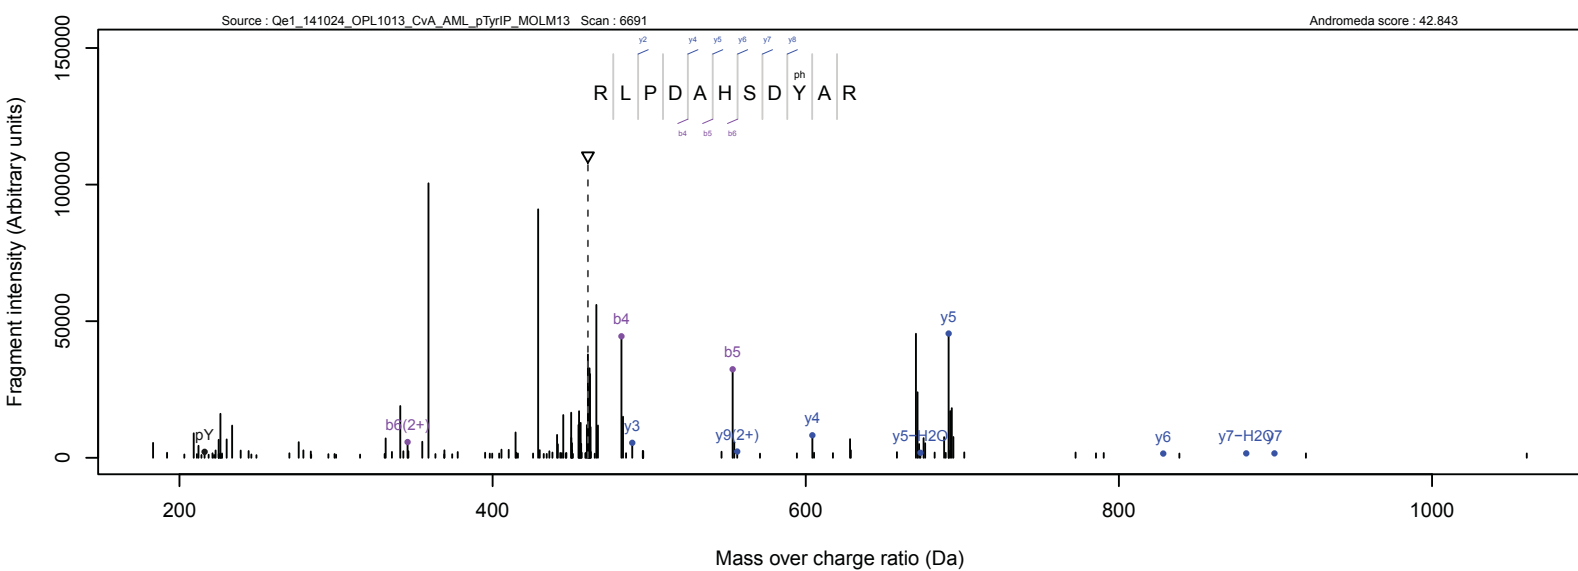

TPSYSIS(ph)STLNPQAPEFILGCTASK-3+

Source : QE1\_140612\_OPL1013\_CVA\_phosphoproteomic\_landscape\_AML\_B Scan : 45042

Andromeda score : 42.791

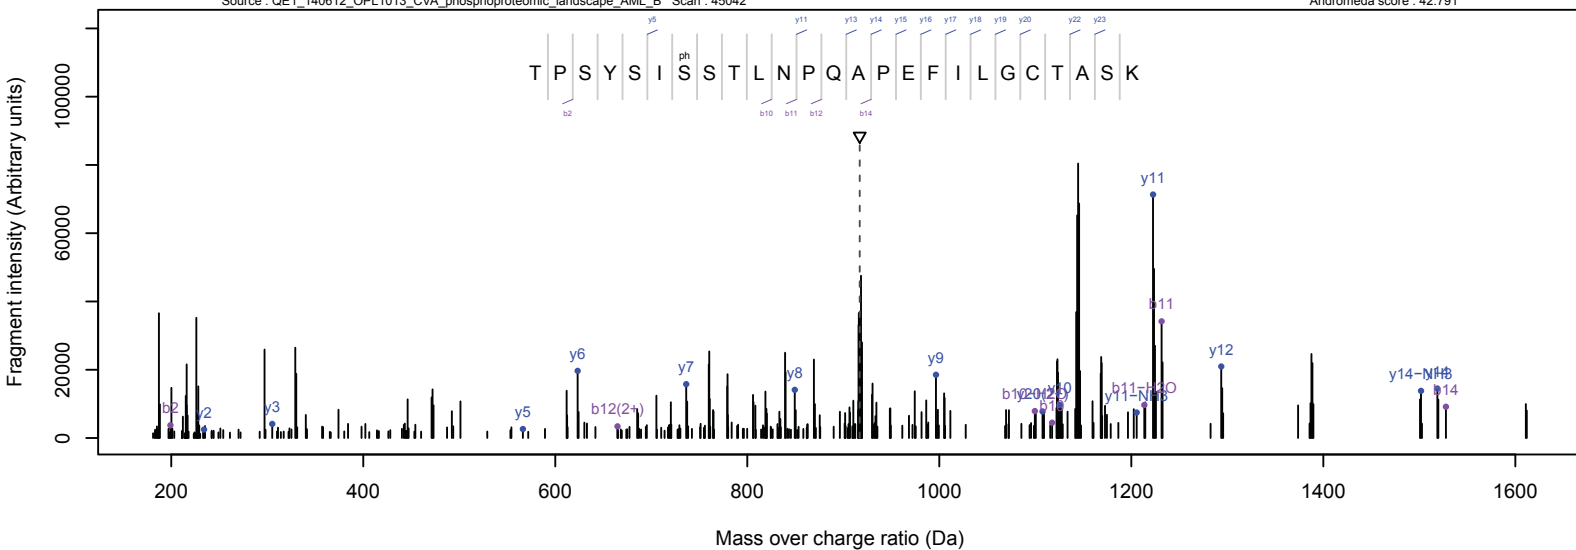

GNFNYPHIEFTR-2+

Source : QE1\_140612\_OPL1013\_CVA\_phosphoproteomic\_landscape\_AML\_C Scan : 30702

Andromeda score : 42.788

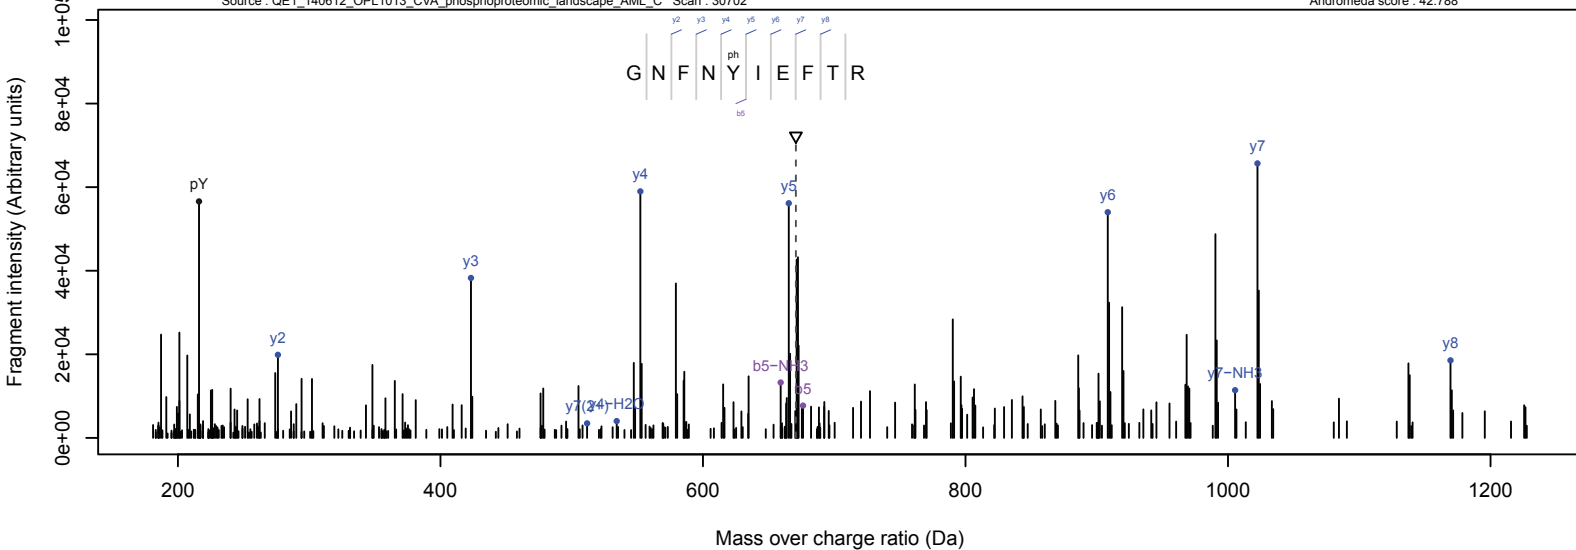

LDQLQY(ph)DVRK-3+

Source : QE1\_140612\_OPL1013\_CVA\_phosphoproteomic\_landscape\_AML\_C Scan : 12618

Andromeda score : 42.788

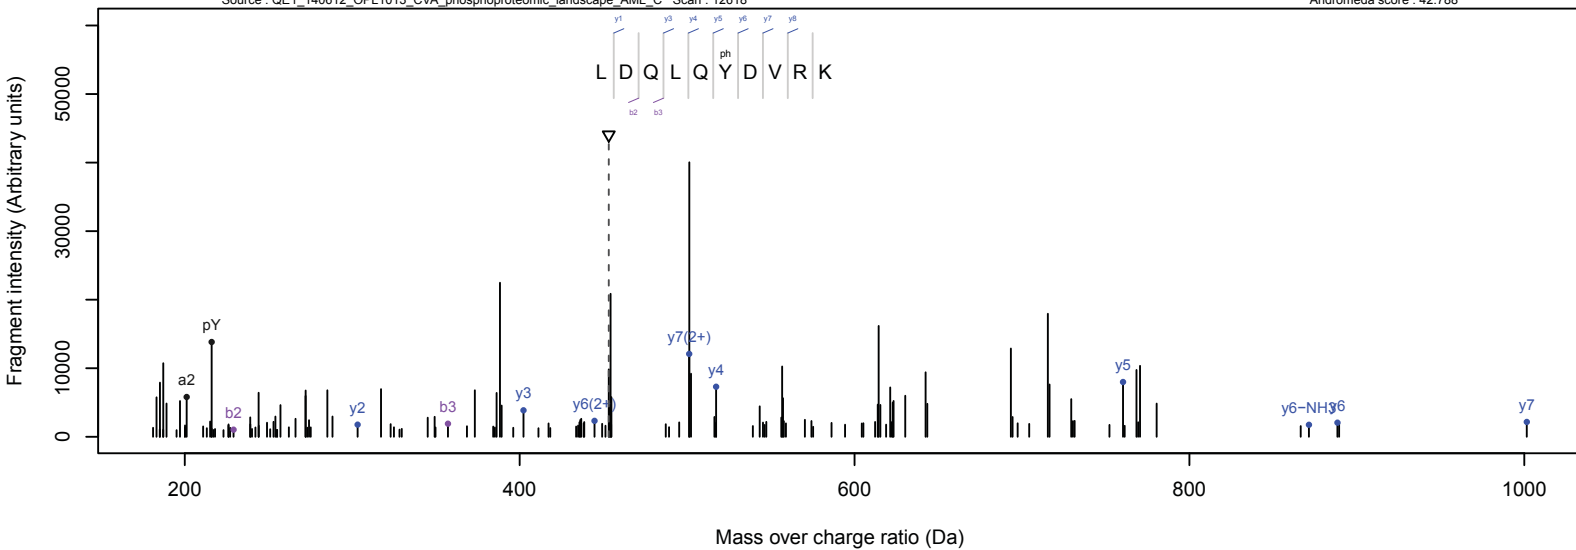

## KY(ph)ICTYINVQER-3+

Source : QE1\_140612\_OPL1013\_CVA\_phosphoproteomic\_landscape\_AML\_B Scan : 21736

Andromeda score : 42.785

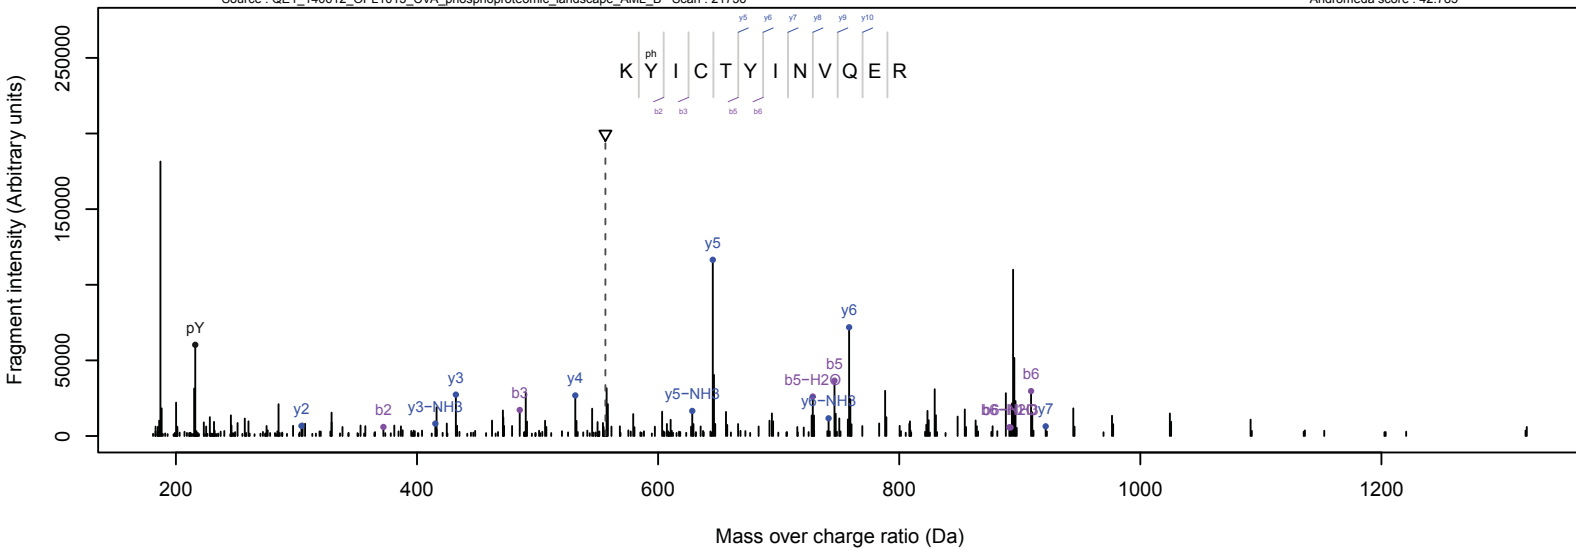

## DIYKNPDYVR-3+

Source : QE1\_140612\_OPL1013\_CVA\_phosphoproteomic\_landscape\_AML\_D Scan : 12513

Andromeda score : 42.718

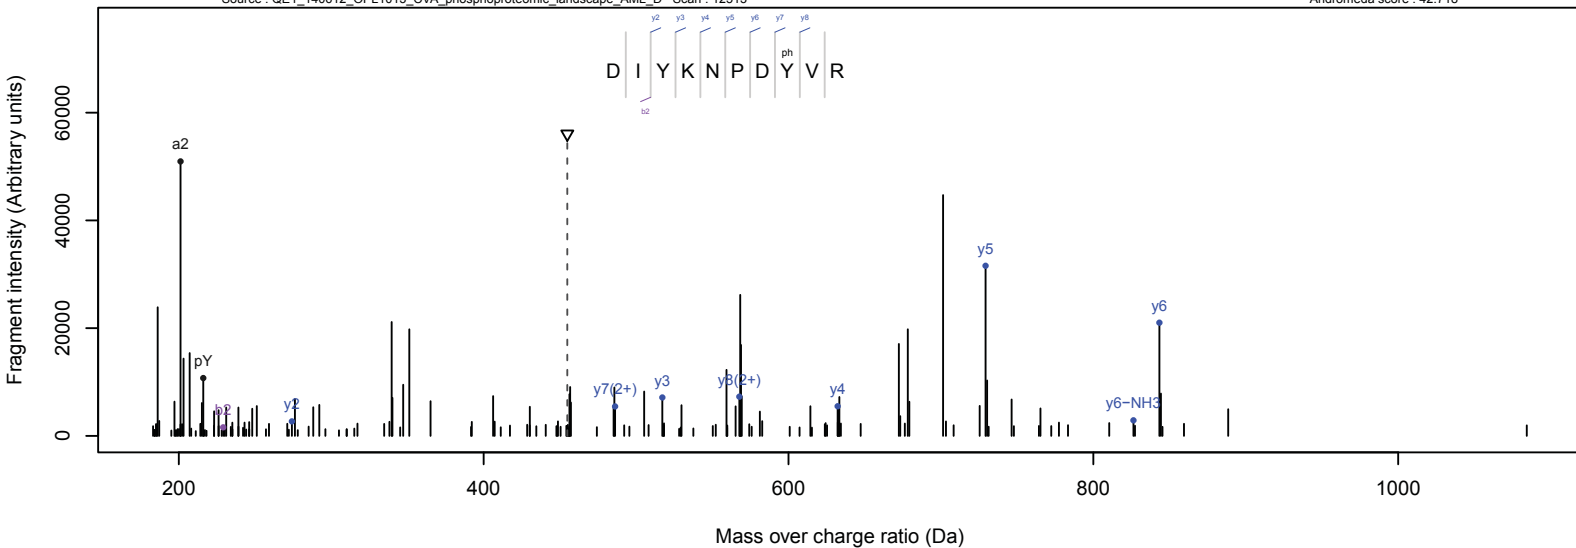

## AY(ph)HQKIDSLDEL S MGLGR-3+

Source : QE1\_140612\_OPL1013\_CVA\_phosphoproteomic\_landscape\_AML\_C Scan : 30361

Andromeda score : 42.716

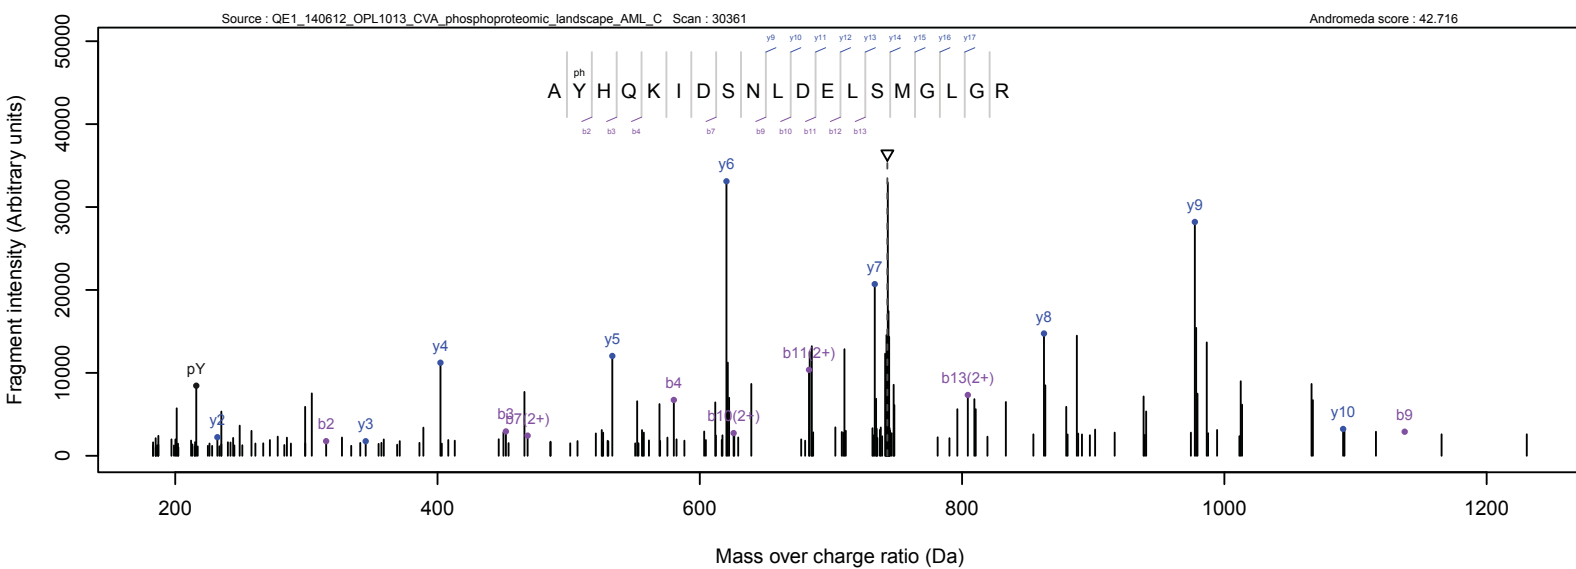

QQVAFY(ph)GQTLGQAQAHSEQ-3+

Source : QE1\_140612\_OPL1013\_CVA\_phosphoproteomic\_landscape\_AML\_C Scan : 22732

Andromeda score : 42.716

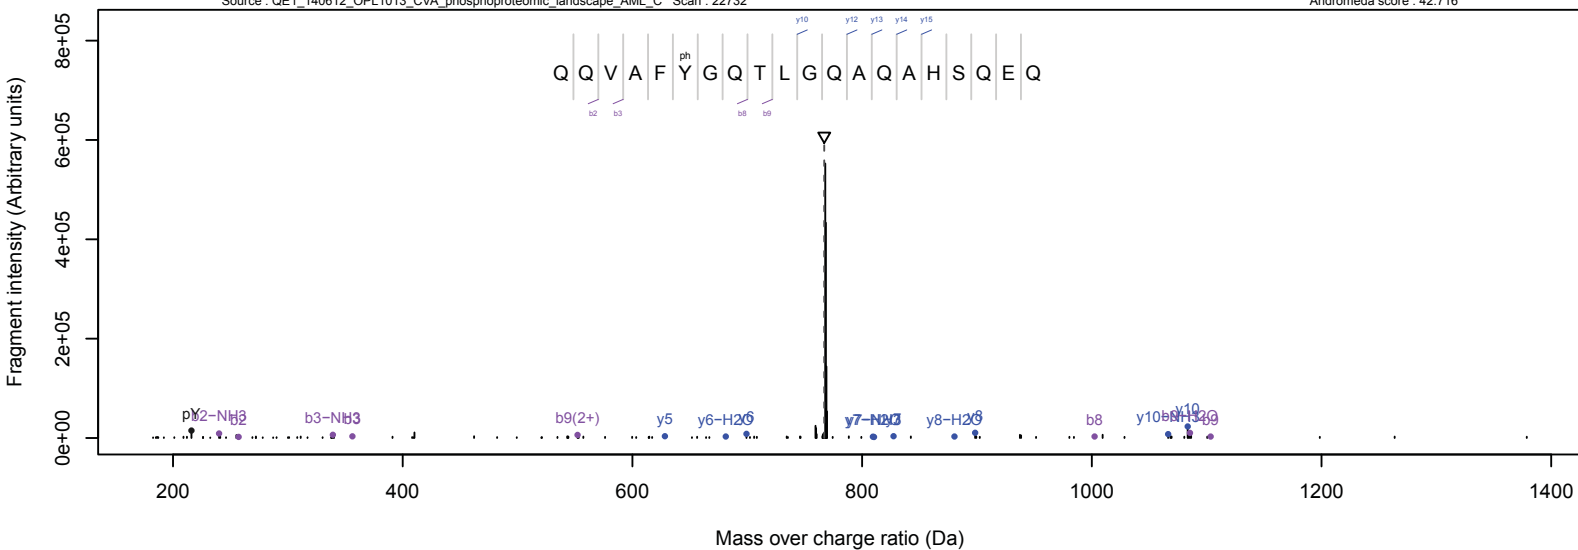

AFQNTATACAPVSHY(ph)R-3+

Source : QE1\_140612\_OPL1013\_CVA\_phosphoproteomic\_landscape\_AML\_C Scan : 12942

Andromeda score : 42.708

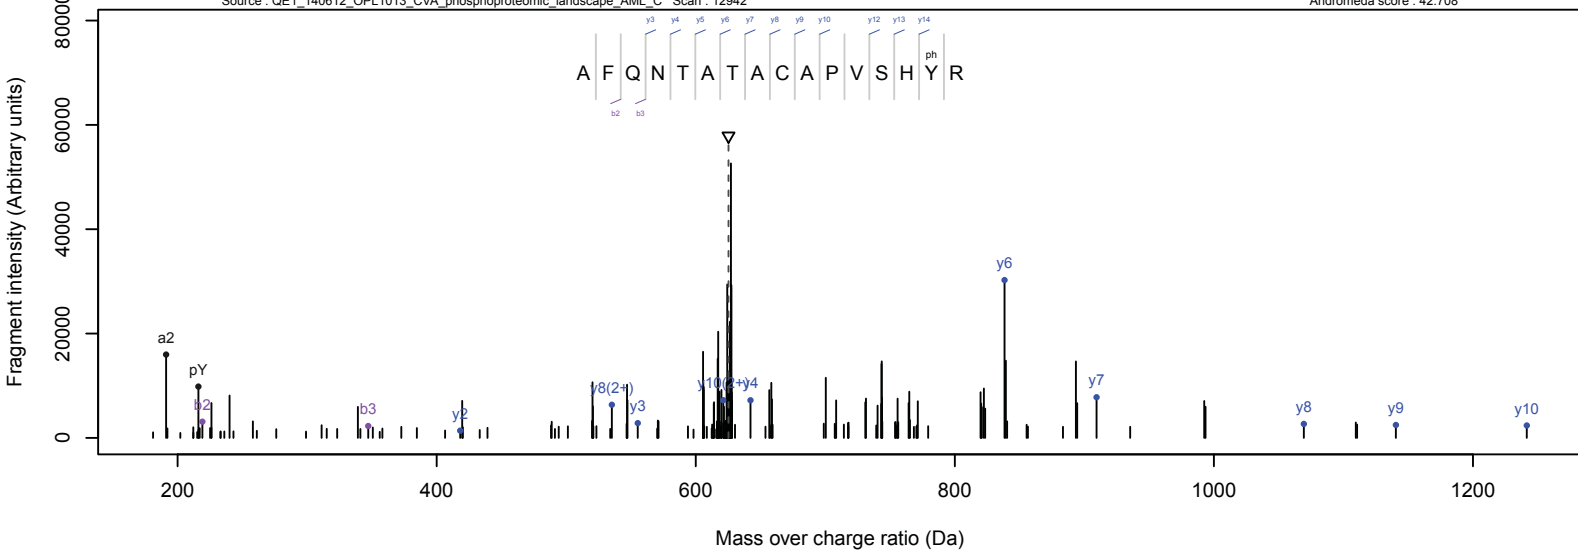

ITDHY(ph)KEYSQMQQNNTQK-3+

Source : QE1\_140612\_OPL1013\_CVA\_phosphoproteomic\_landscape\_AML\_C Scan : 7687

Andromeda score : 42.708

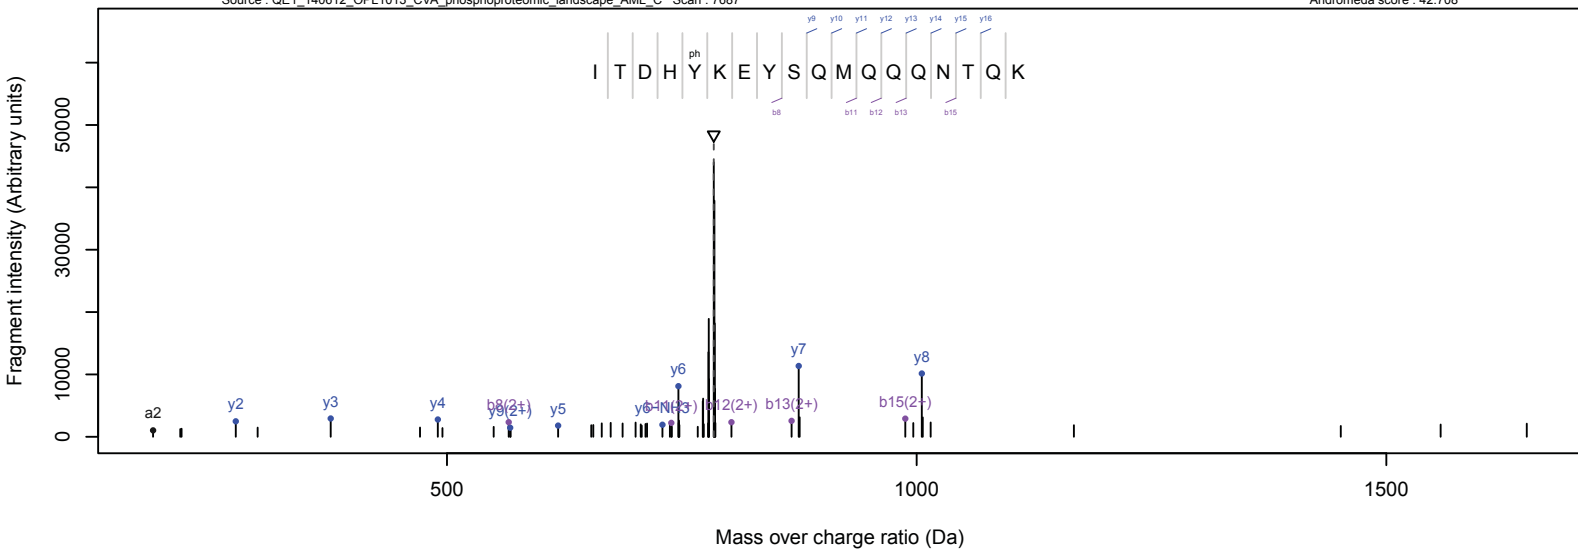

REPFHGDNY(ph)DQLVR-3+

Source : QE1\_140908\_OPL1013\_CvA\_pTyrIP\_AML\_OCI\_AML3 Scan : 26764

Andromeda score : 42.633

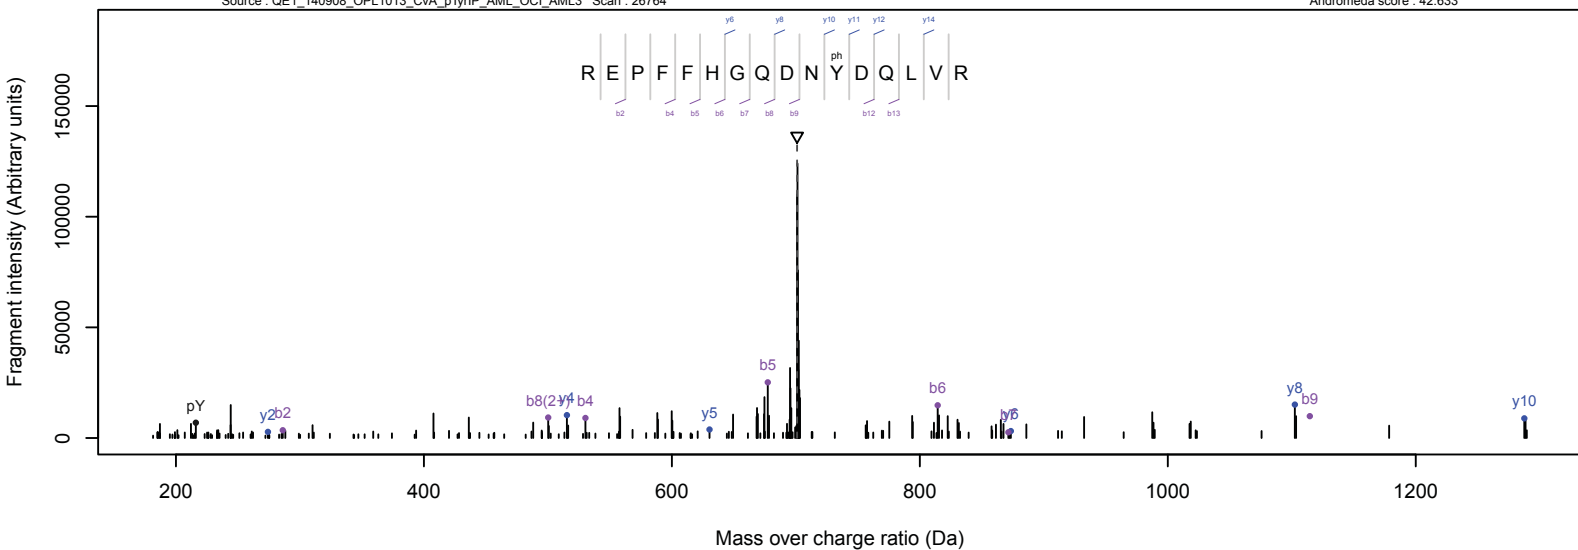

AY(ph)VVLGQFLVLLKK-3+

Source : QE1\_140612\_OPL1013\_CVA\_phosphoproteomic\_landscape\_AML\_B Scan : 44454

Andromeda score : 42.629

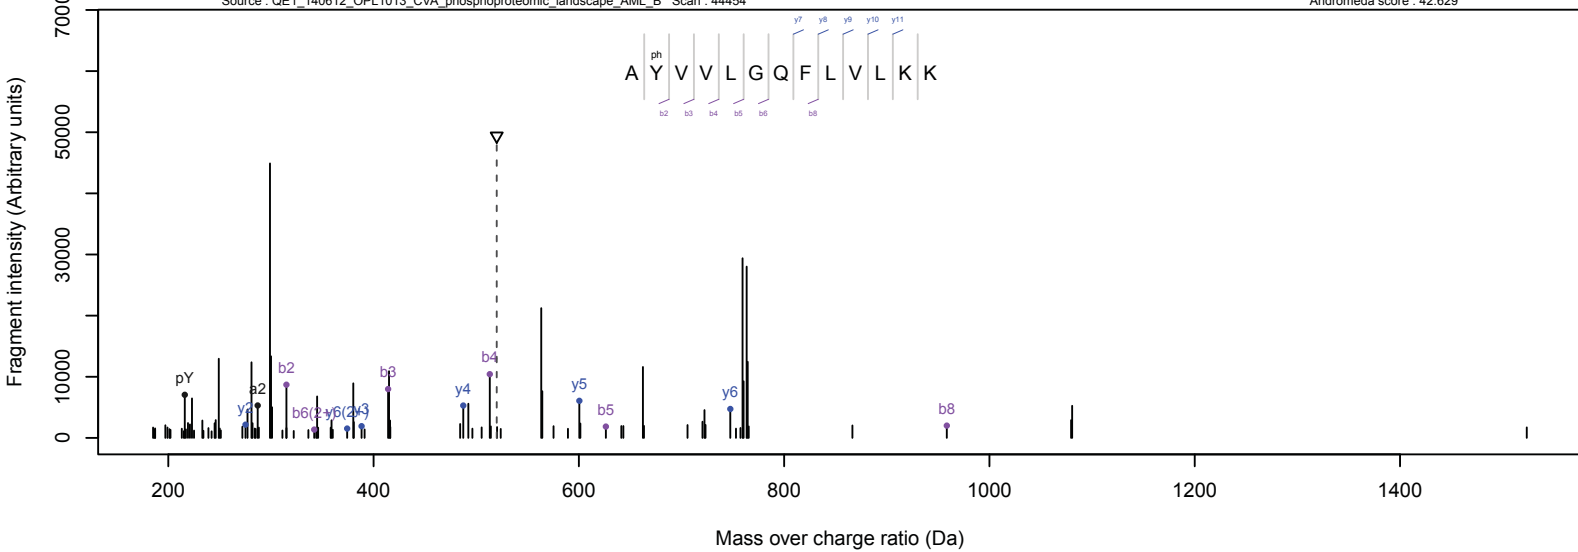

EATPY(ph)VKK-2+

Source : QE1\_140612\_OPL1013\_CVA\_phosphoproteomic\_landscape\_AML\_C Scan : 3761

Andromeda score : 42.599

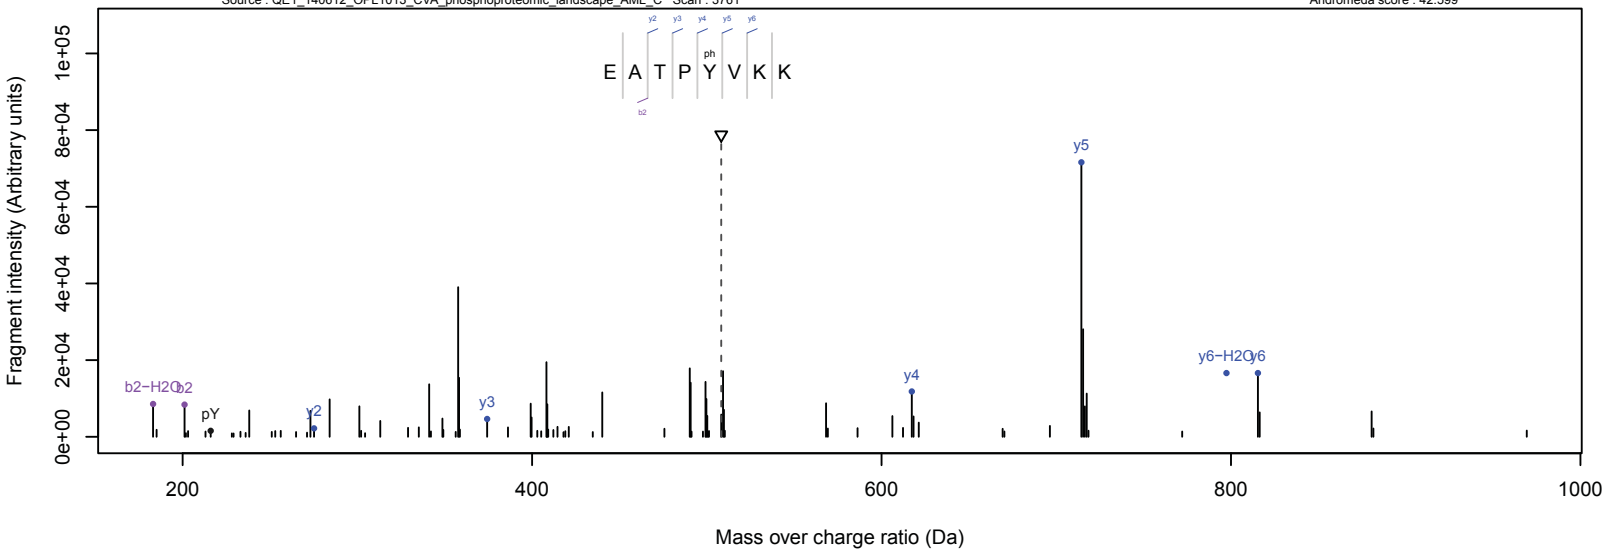

## MY(ph)AALGDPK-2+

Source : QE1\_140612\_OPL1013\_CVA\_phosphoproteomic\_landscape\_AML\_E Scan : 12691

Andromeda score : 42.599

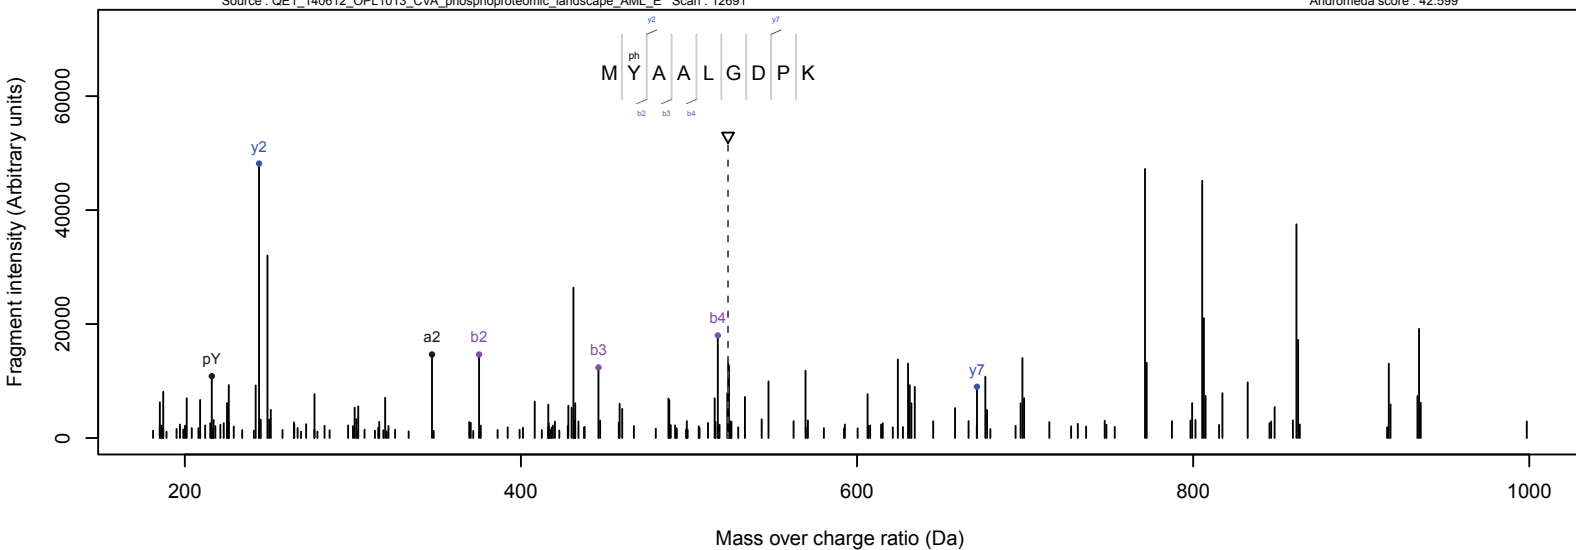

## QGFY(ph)VALR-2+

Source : QE1\_140612\_OPL1013\_CVA\_phosphoproteomic\_landscape\_AML\_C Scan : 29434

Andromeda score : 42.599

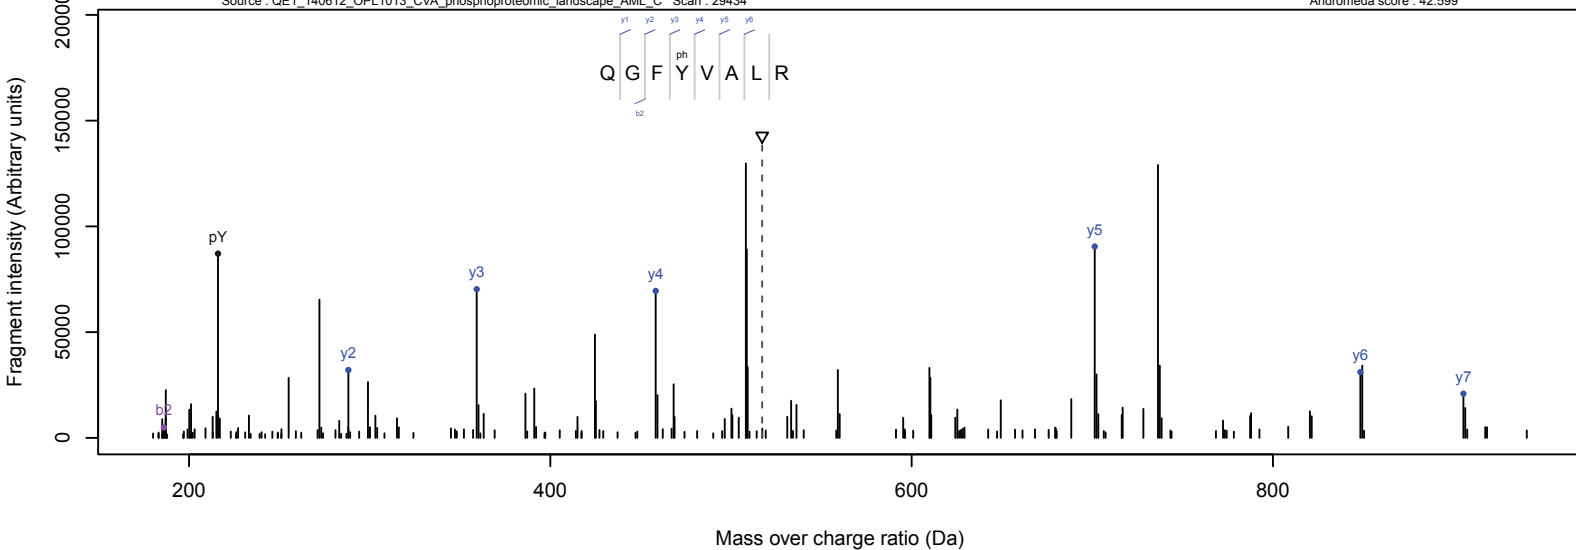

## VVALY(ph)DYM(ox)PMNANDLQLRK-3+

Source : QE1\_140908\_OPL1013\_CvA\_pTyrIP\_AML\_HEL Scan : 37049

Andromeda score : 42.58

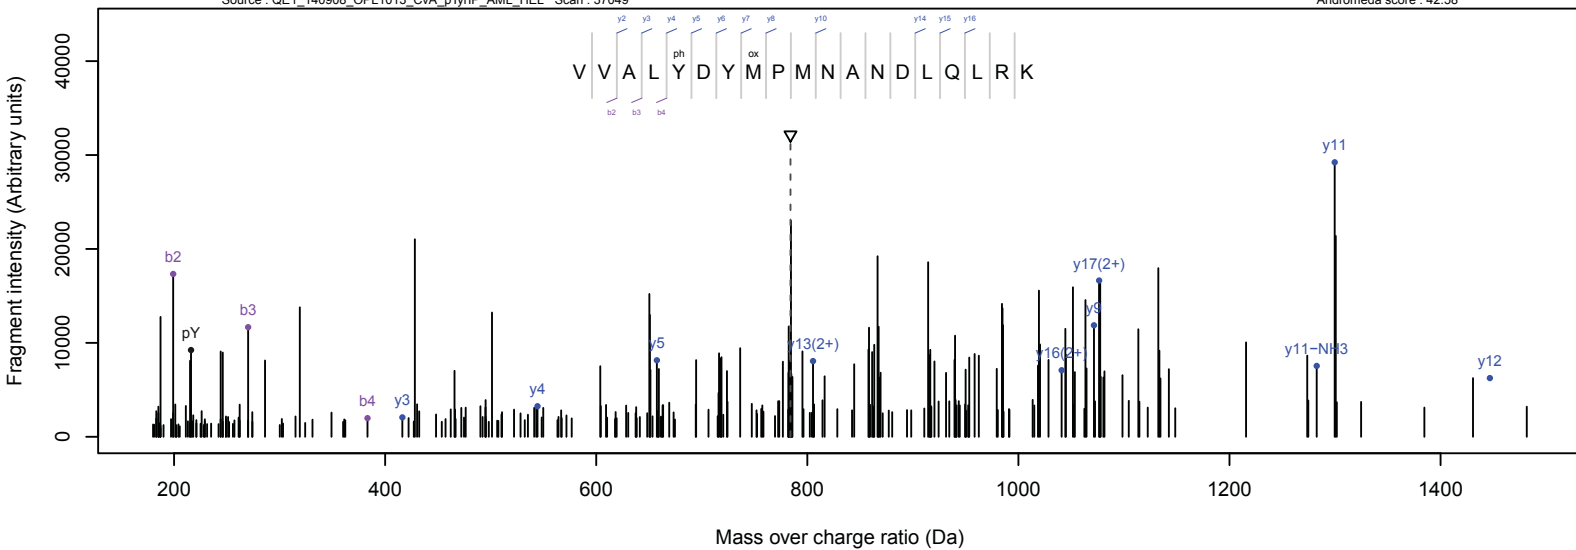

TVFY(ph)YGSDDK-2+

Source : QE1\_140908\_OPL1013\_CVA\_pTyrIP\_AML\_HEL Scan : 20137

Andromeda score : 42.579

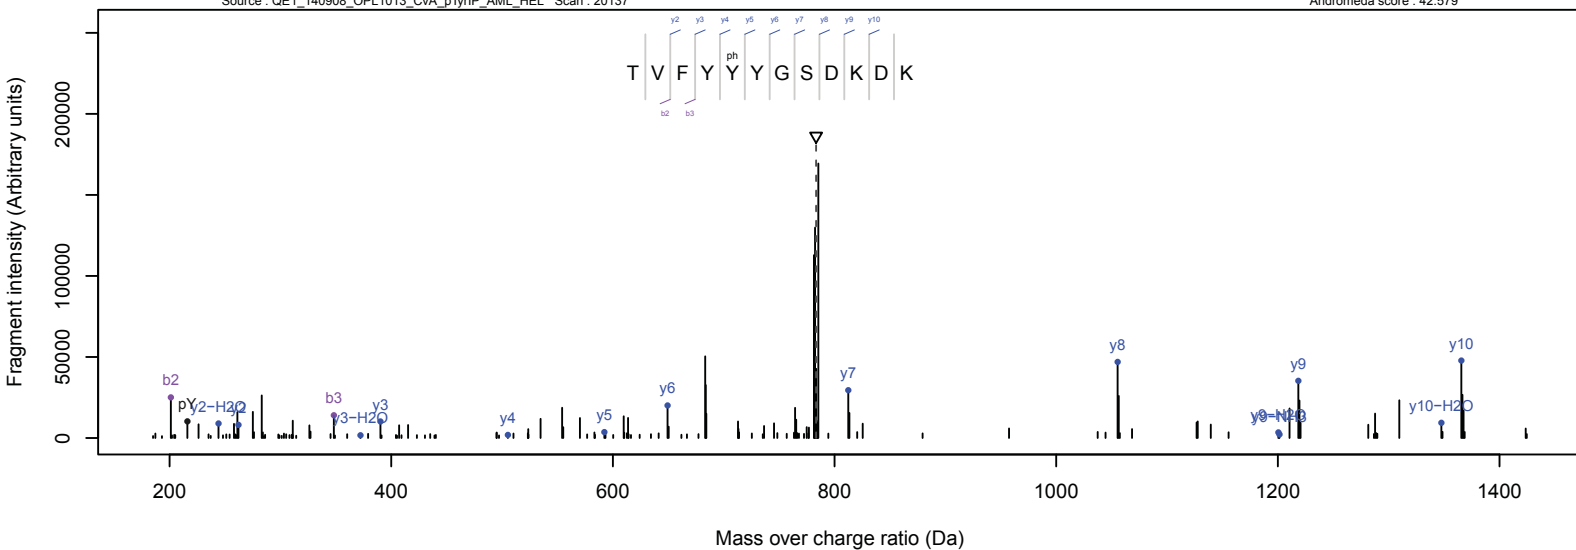

ISTSTGISQMEVTCVPTPTSTVSSIGNTNGEEVGPSVY(ph)LER-4+

Source : QE1\_140612\_OPL1013\_CVA\_phosphoproteomic\_landscape\_AML\_C Scan : 45425

Andromeda score : 42.462

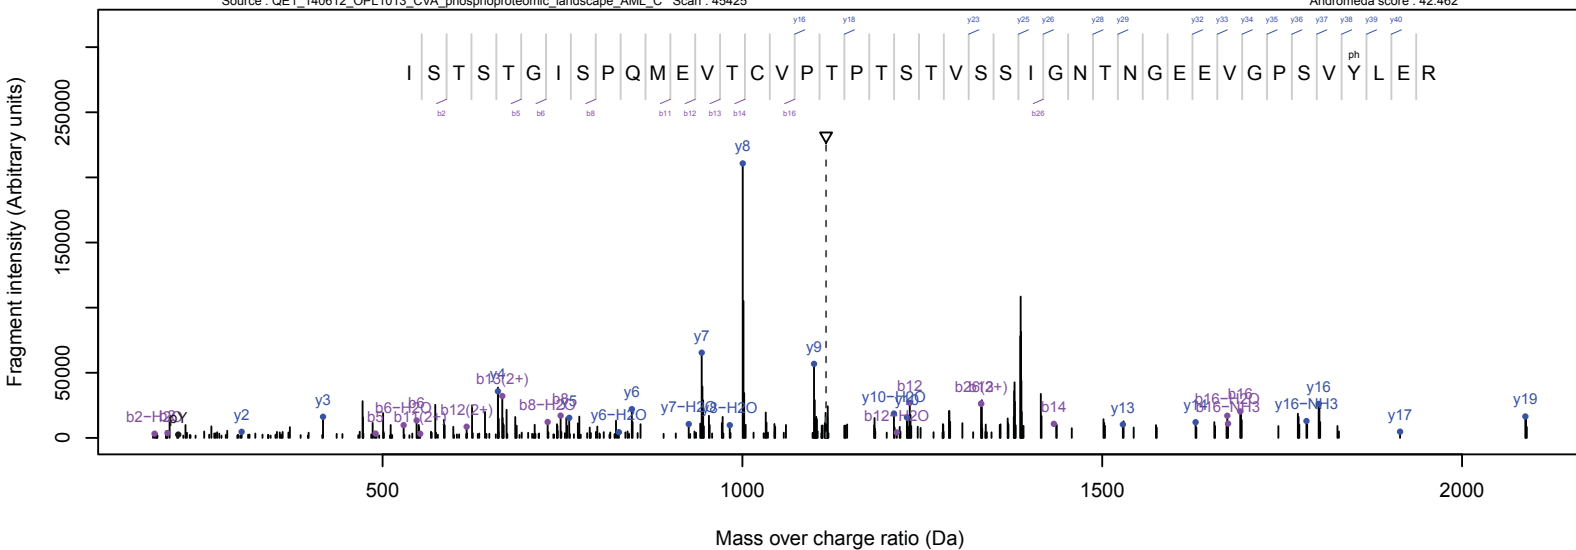

AY(ph)YHLLQVAPK-3+

Source : QE1\_140612\_OPL1013\_CVA\_phosphoproteomic\_landscape\_AML\_C Scan : 27806

Andromeda score : 42.446

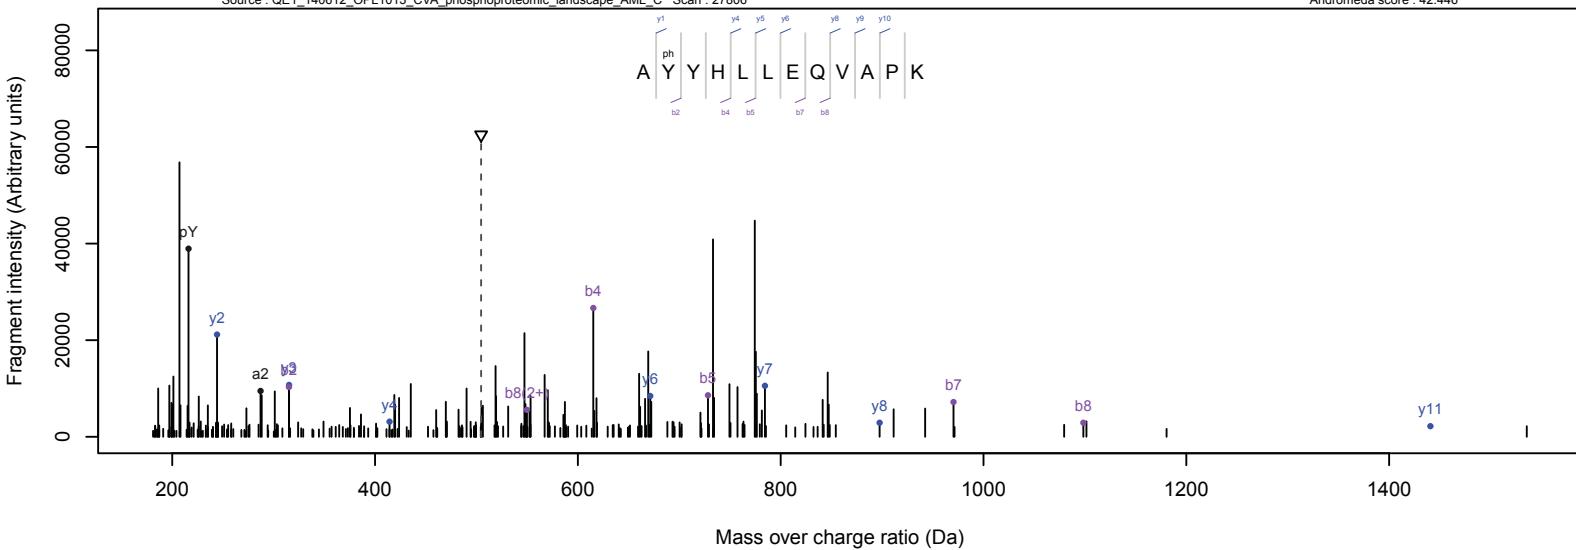



## IY(ph)VGNLPTDVR-2+

Source: QE1\_140908\_OPL1013\_CvA\_pTyrIP\_AML\_Kasumi1 Scan: 28488

Andromeda score: 42.425

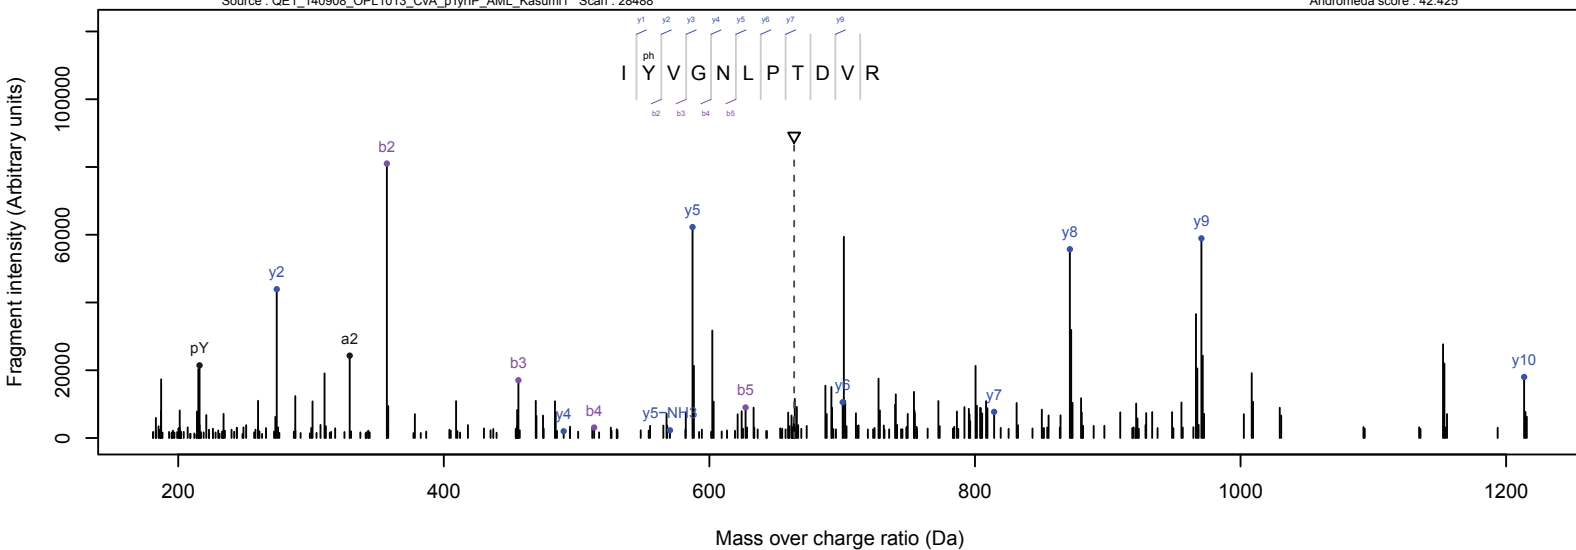

## SLY(ph)SM(ox)IK-2+

Source: QE1\_140822\_OPL1013\_CvA\_pTyrIP\_AML\_cell\_lines\_part2\_E Scan: 12448

Andromeda score: 42.396

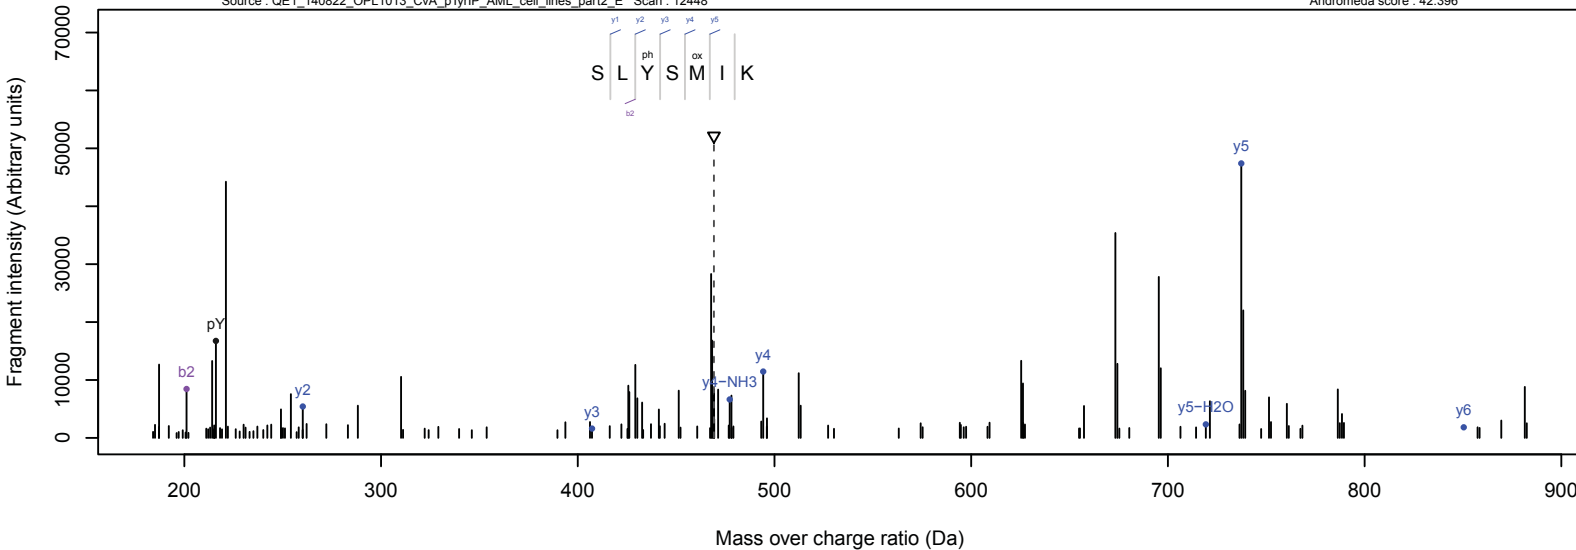

## VAVEY(ph)LDPSPEVQK-2+

Source: QE1\_140612\_OPL1013\_CvA\_phosphoproteomic\_landscape\_AML\_D Scan: 26540

Andromeda score: 42.388

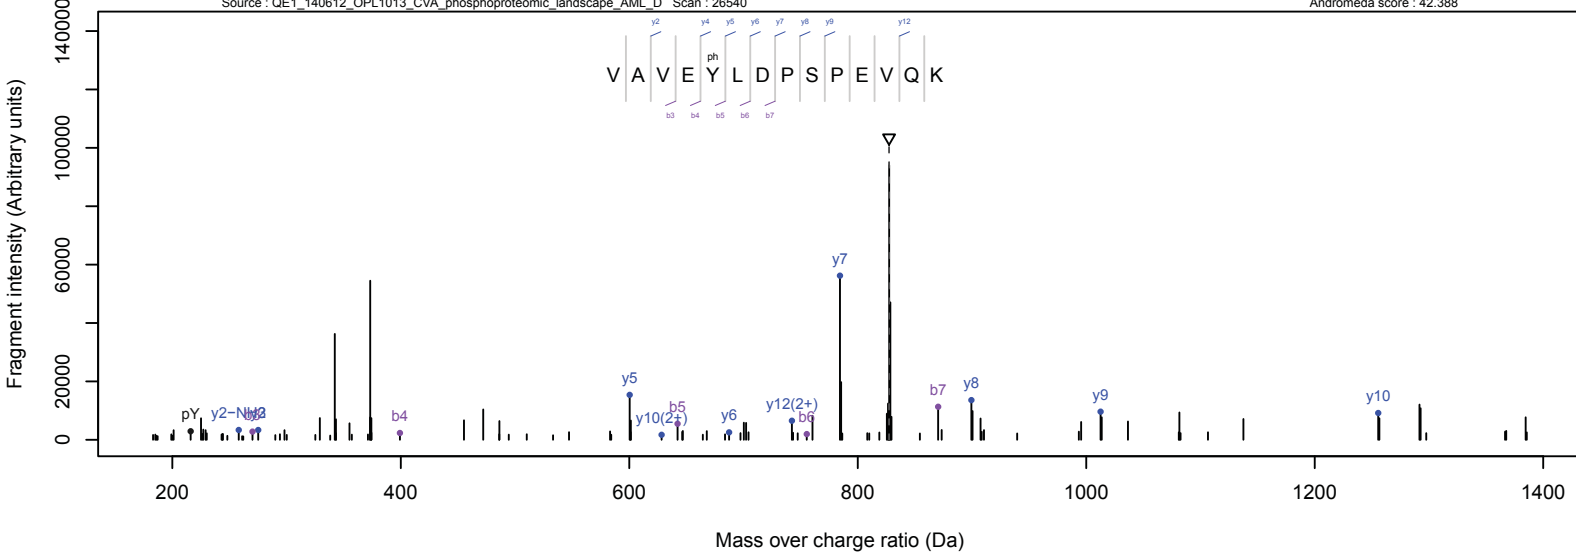

**EALPMDTEVYESPY(ph)ADPEEIRPK-3+**

Source : QE1\_140612\_OPL1013\_CVA\_phosphoproteomic\_landscape\_AML\_B Scan : 33347

Andromeda score : 42.384

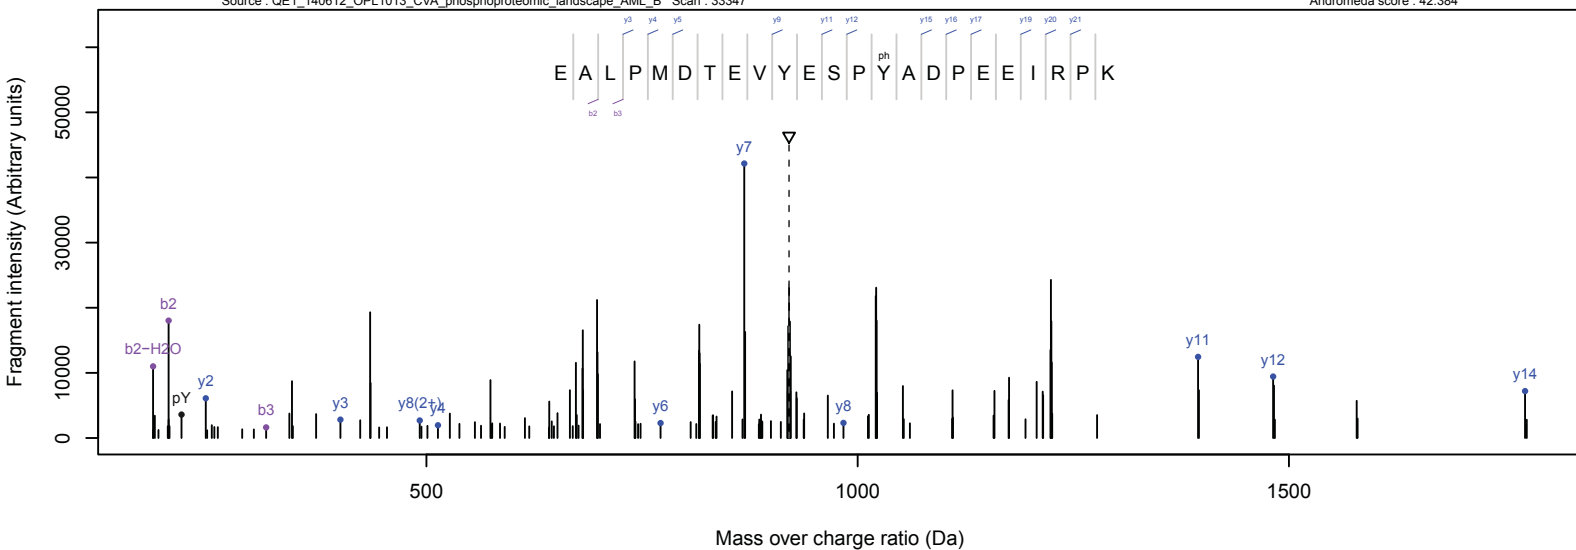

**NAAPATPQPQPATIPASLRPDPSPYS(ph)R-3+**

Source : QE1\_140908\_OPL1013\_CvA\_pTyrIP\_AML\_ML2 Scan : 30820

Andromeda score : 42.347

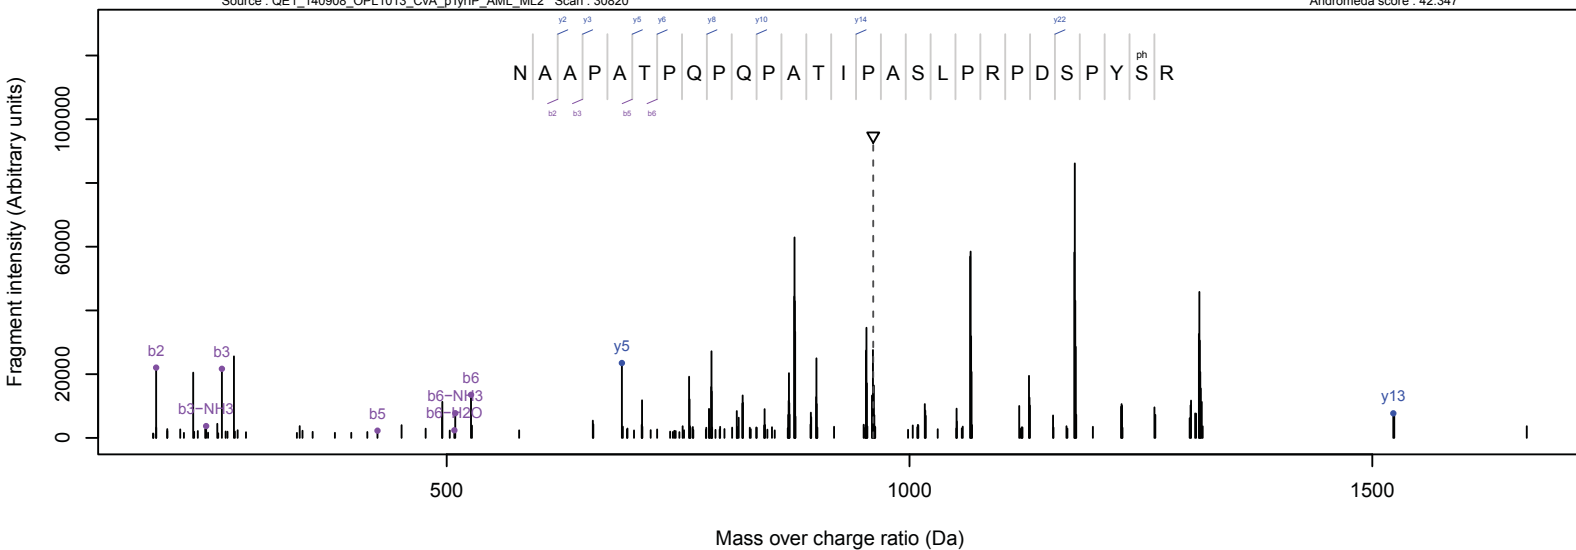

**QGWTVLHEAVSTGDPVMVY(ph)TVLQHR-4+**

Source : QE1\_140908\_OPL1013\_CvA\_pTyrIP\_AML\_Kasumi1 Scan : 43761

Andromeda score : 42.347

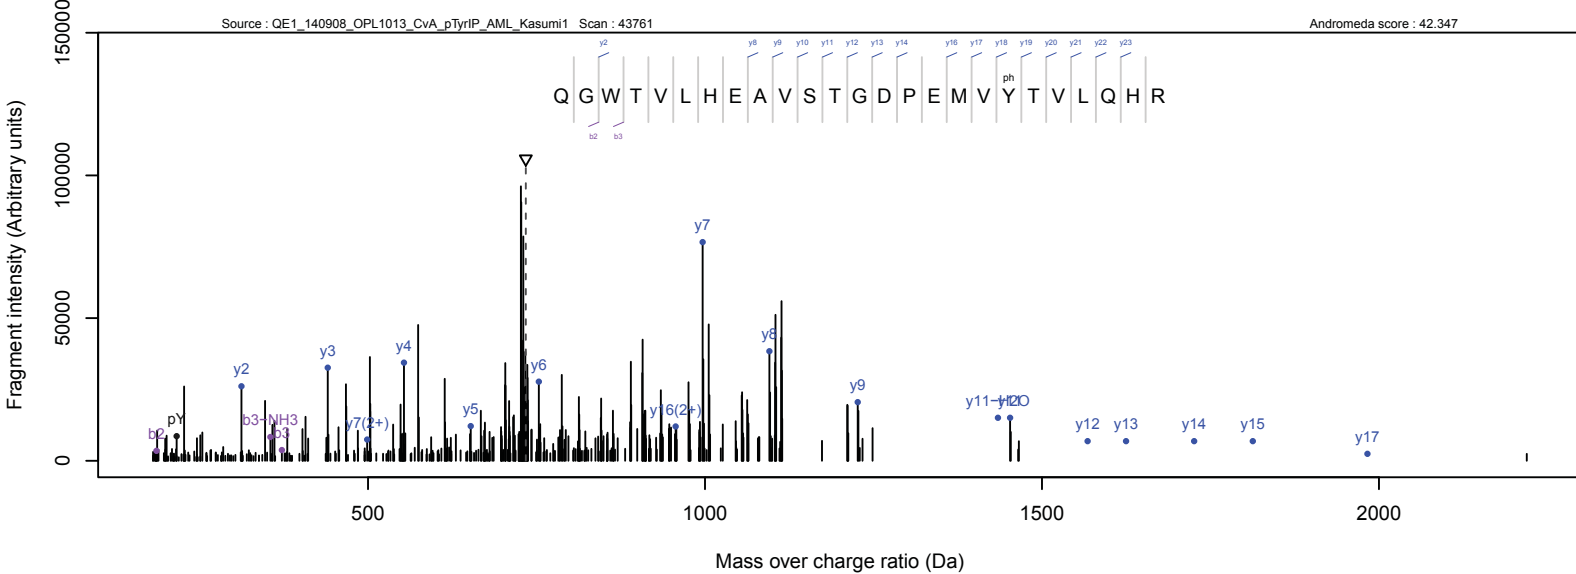

CY(ph)EMASHLRR-3+

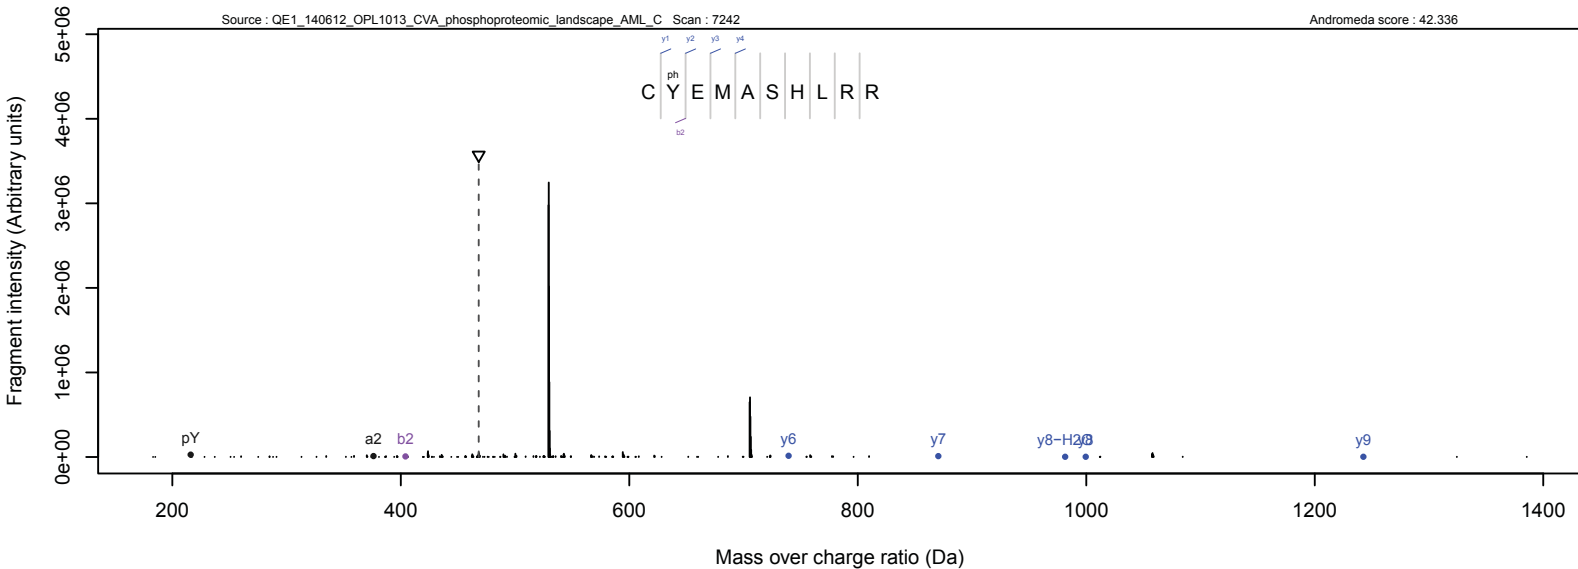

GWPLY(ph)LSTK-2+

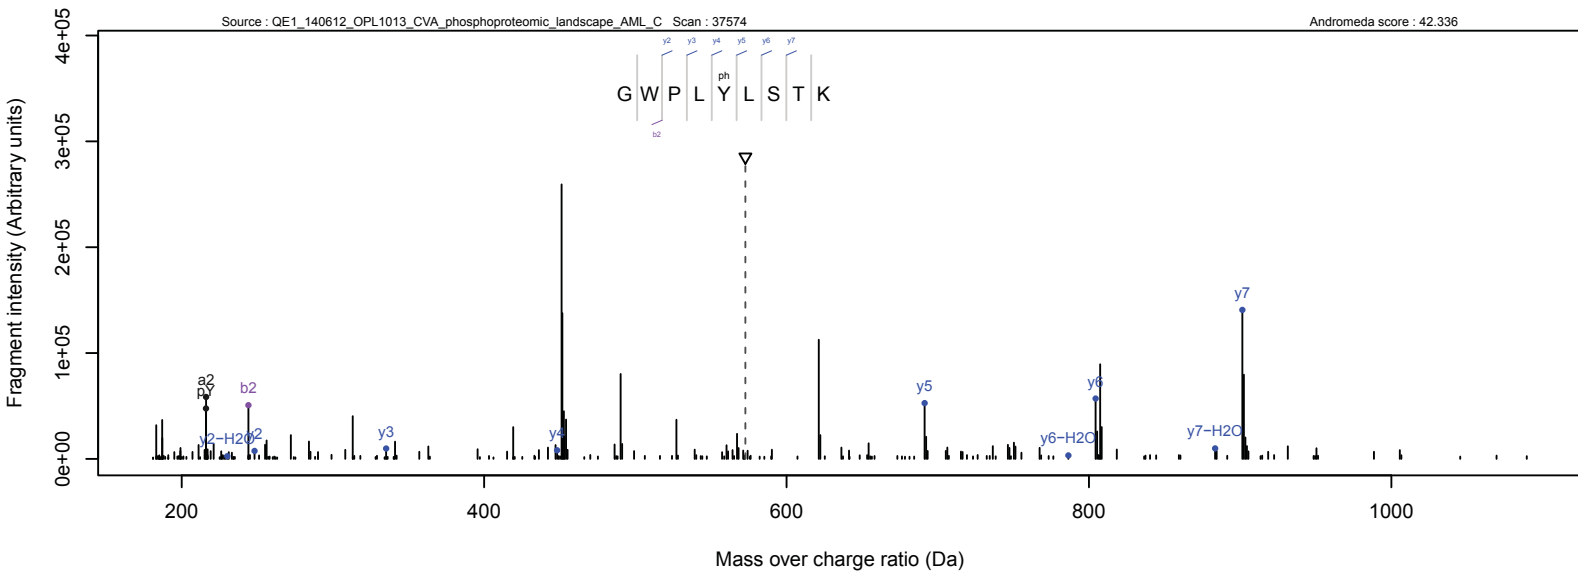

LFGSPAIIYK-2+

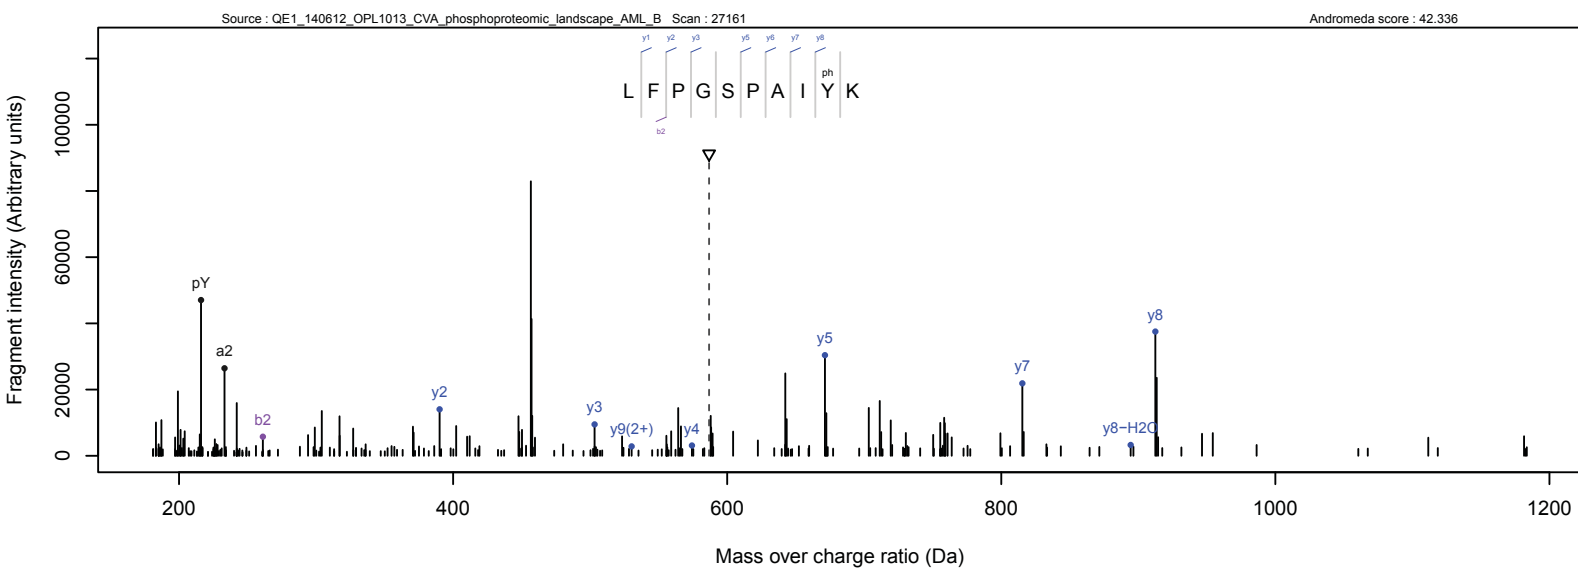

## LVRPPQVY(ph)GIEGR-3+

Source: QE1\_140612\_OPL1013\_CVA\_phosphoproteomic\_landscape\_AML\_A Scan: 27584

Andromeda score: 42.317

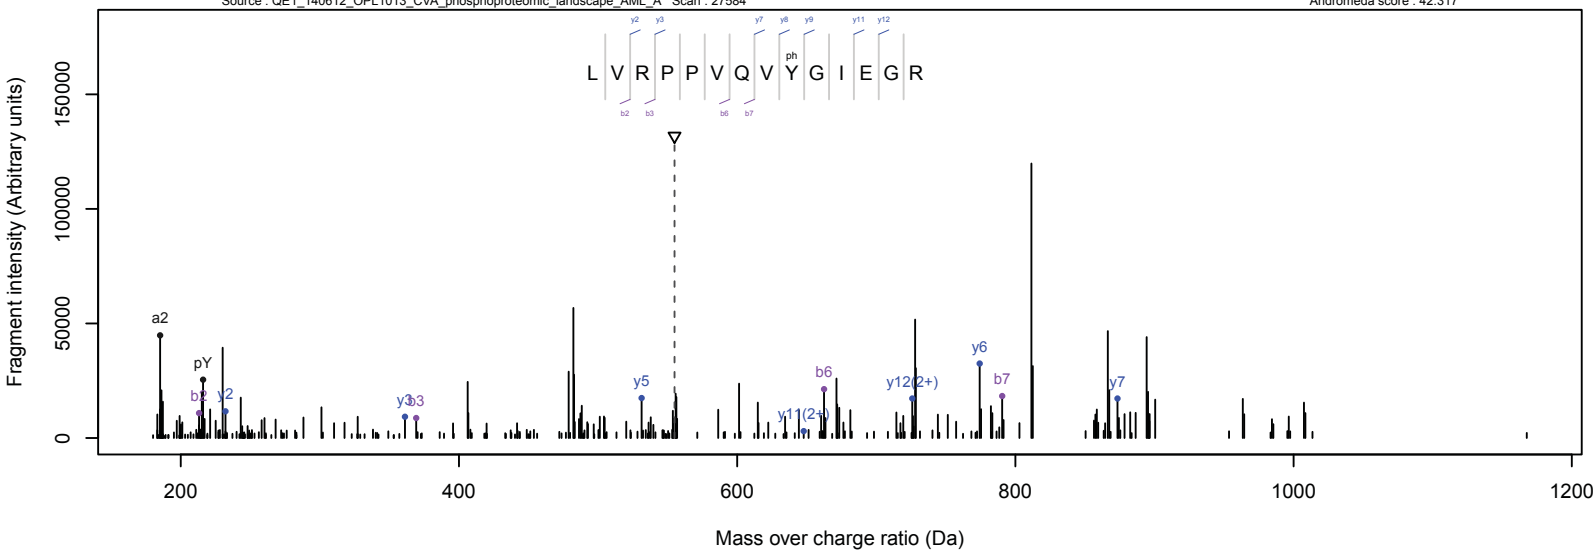

## LY(ph)RPPVLDALGR-3+

Source: QE1\_140612\_OPL1013\_CVA\_phosphoproteomic\_landscape\_AML\_A Scan: 32202

Andromeda score: 42.317

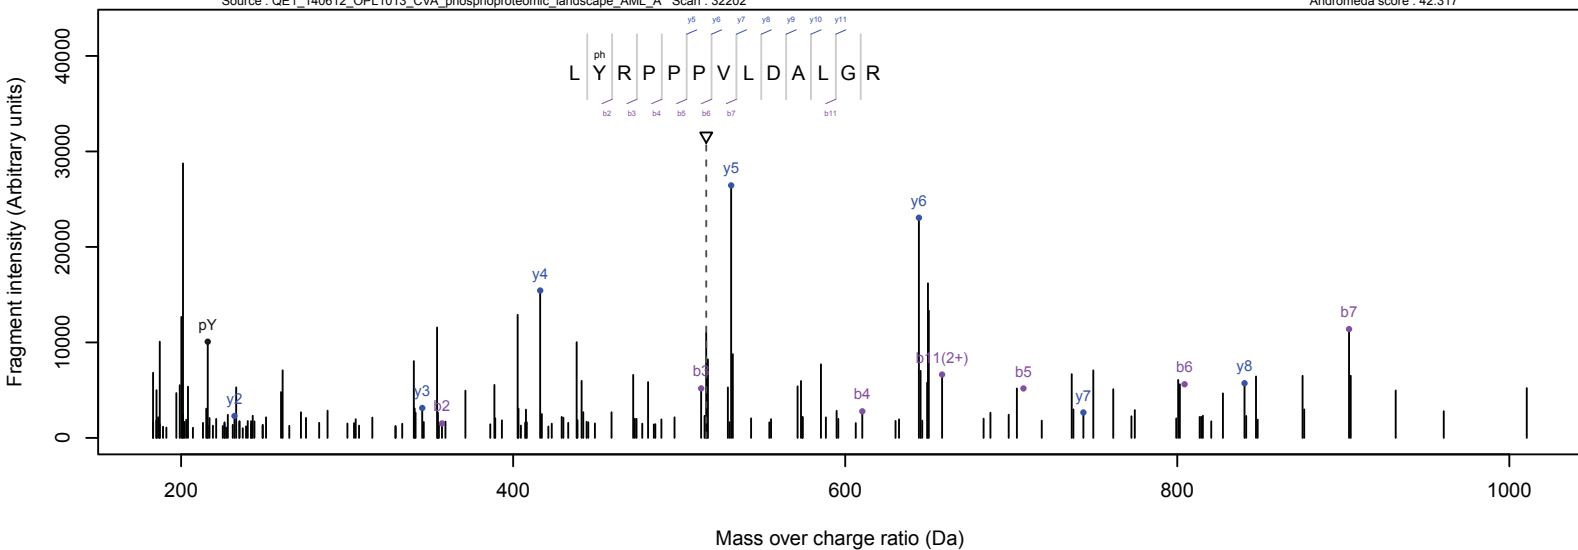

## SSLY(ph)EGLEKPEESR-3+

Source: QE1\_140612\_OPL1013\_CVA\_phosphoproteomic\_landscape\_AML\_B Scan: 15557

Andromeda score: 42.317

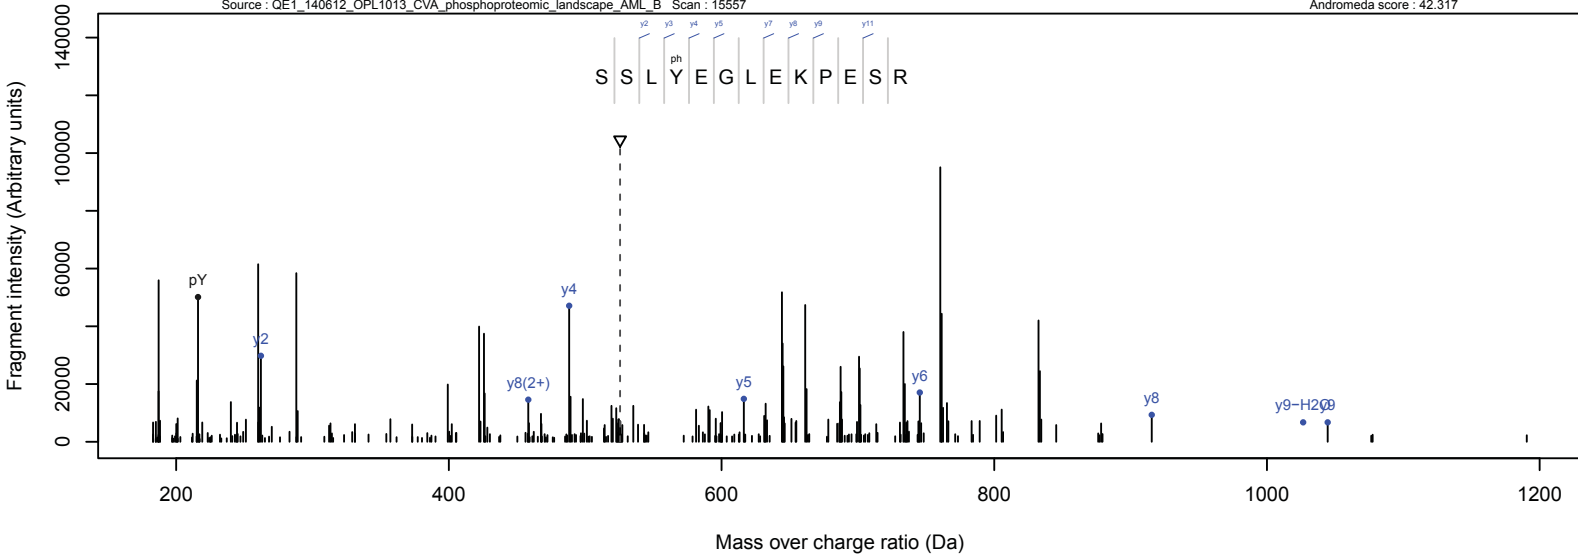

## SSSSGHY(ph)VSWVK-3+

Source : QE1\_140612\_OPL1013\_CVA\_phosphoproteomic\_landscape\_AML\_C Scan : 11294

Andromeda score : 42.317

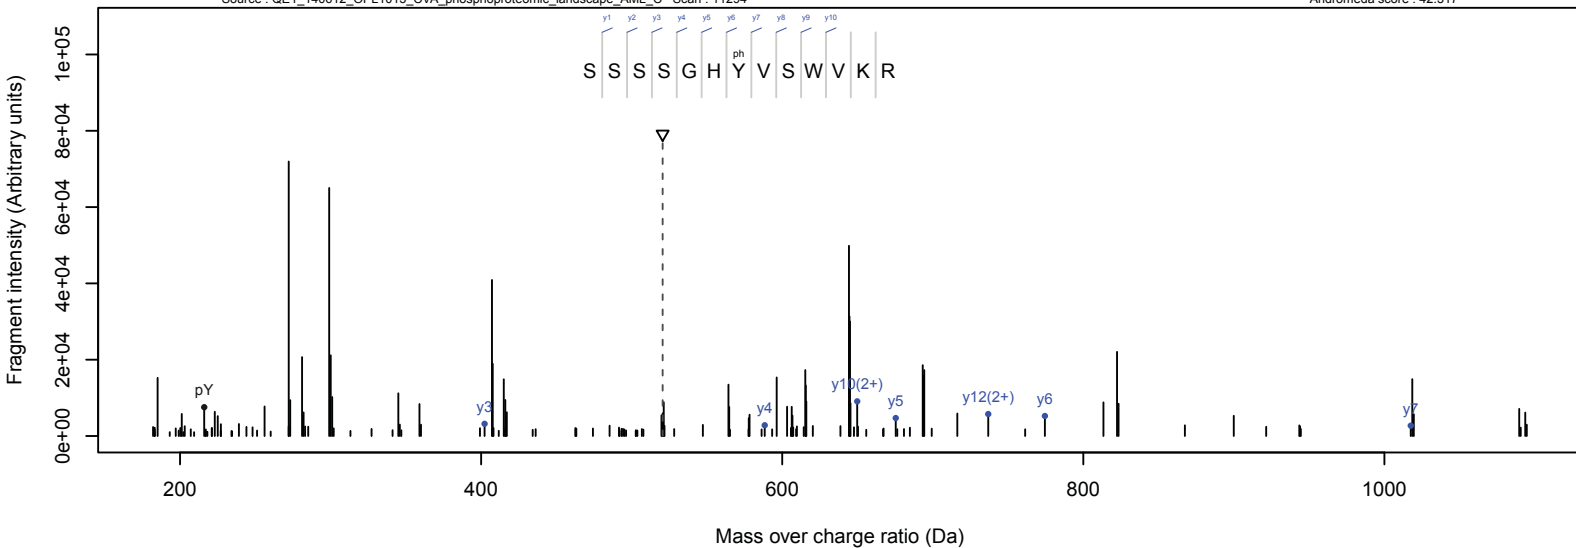

## TGLEDPERY(ph)LFVDR-3+

Source : QE1\_140612\_OPL1013\_CVA\_phosphoproteomic\_landscape\_AML\_C Scan : 37830

Andromeda score : 42.317

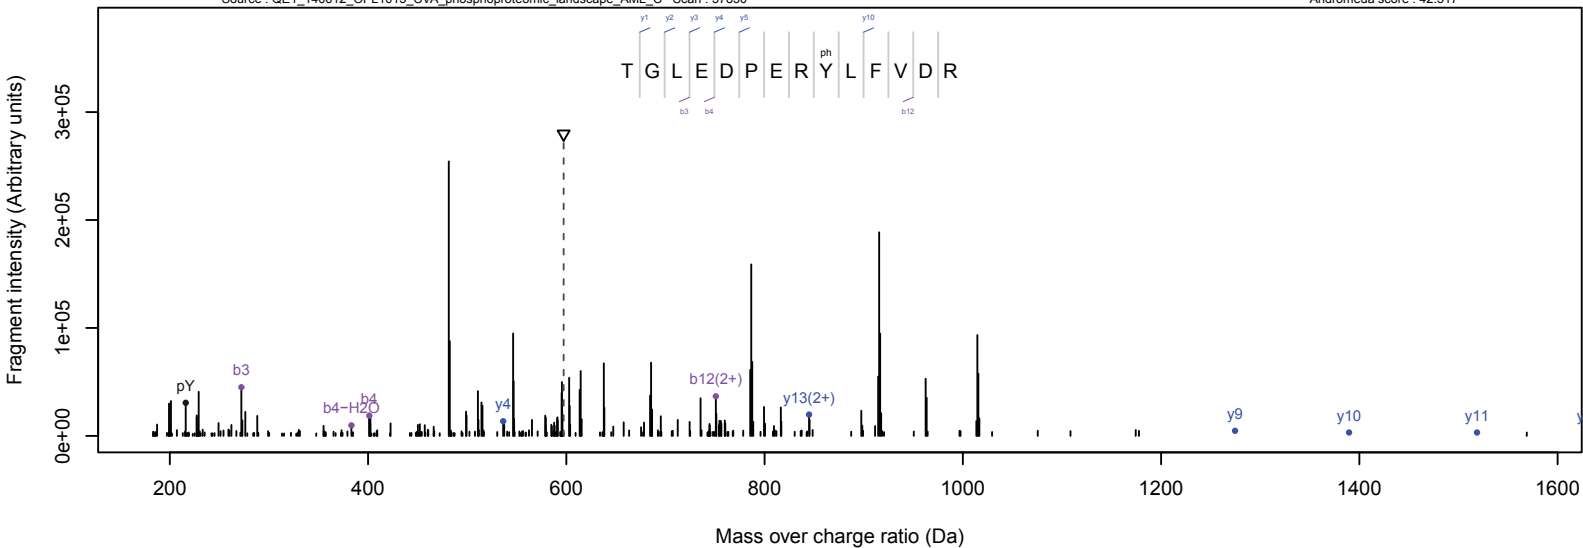

## TKPLWHNY(ph)FLCGLK-3+

Source : QE1\_140612\_OPL1013\_CVA\_phosphoproteomic\_landscape\_AML\_D Scan : 36159

Andromeda score : 42.317

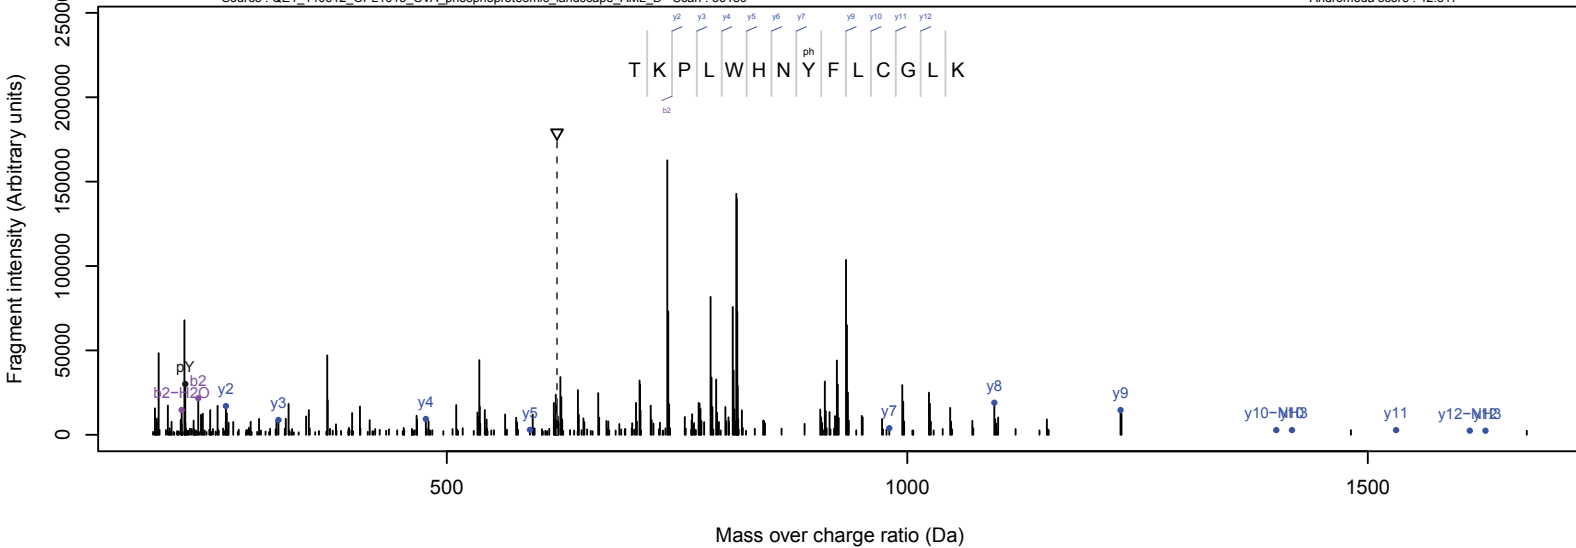

## VTVSPY(ph)TEIHLKK-3+

Source: QE1\_140612\_OPL1013\_CVA\_phosphoproteomic\_landscape\_AML\_A Scan: 18444

Andromeda score: 42.317

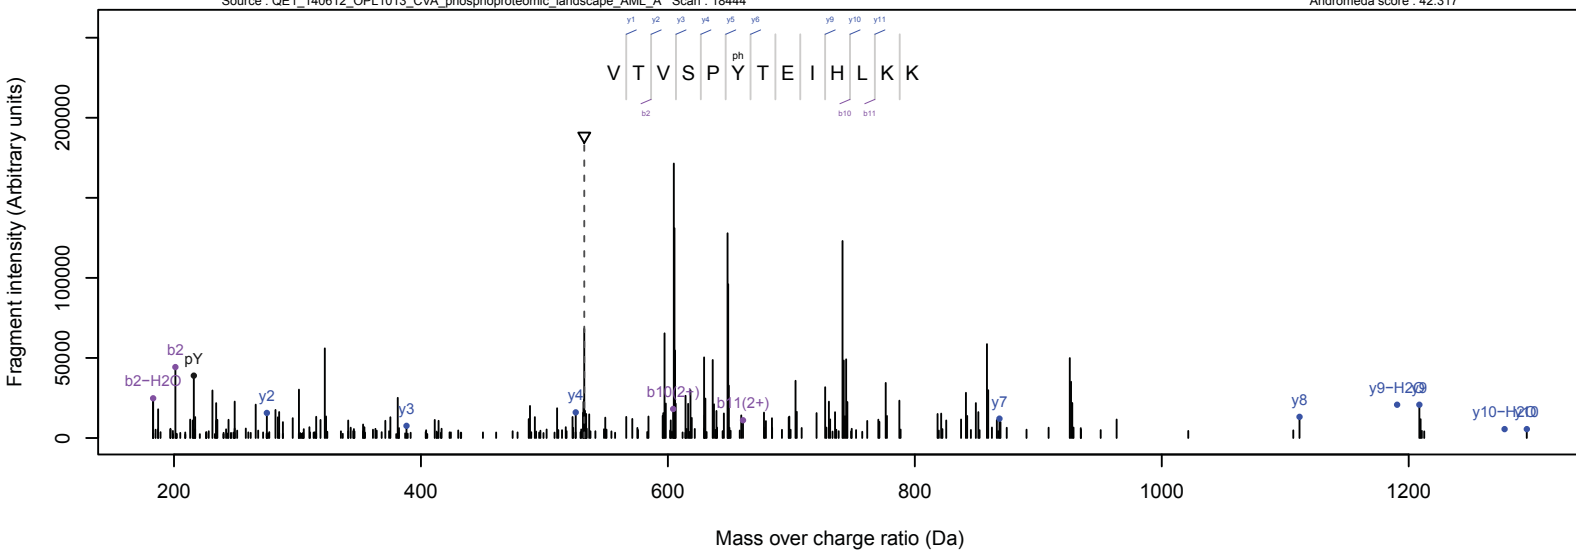

## ELSY(ph)PKNESFNQSR-3+

Source: QE1\_140612\_OPL1013\_CVA\_phosphoproteomic\_landscape\_AML\_C Scan: 12768

Andromeda score: 42.314

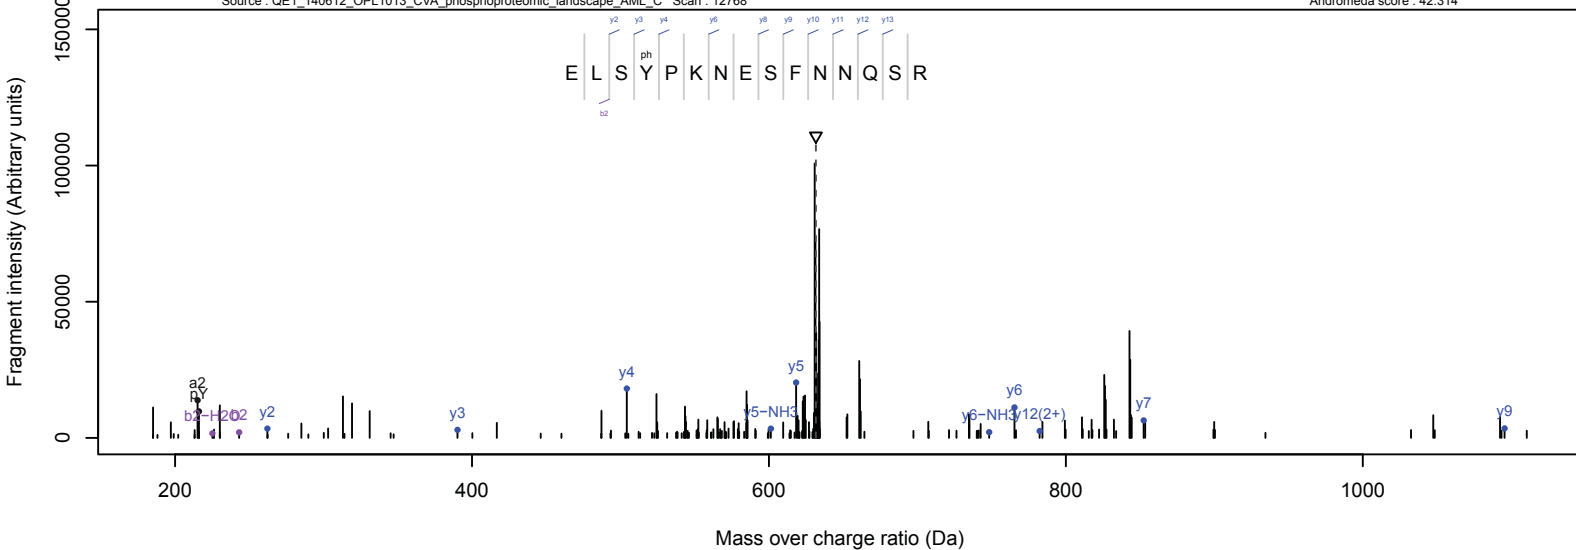

## LPEEEAECY(ph)FHSRPK-3+

Source: QE1\_140612\_OPL1013\_CVA\_phosphoproteomic\_landscape\_AML\_C Scan: 15981

Andromeda score: 42.314

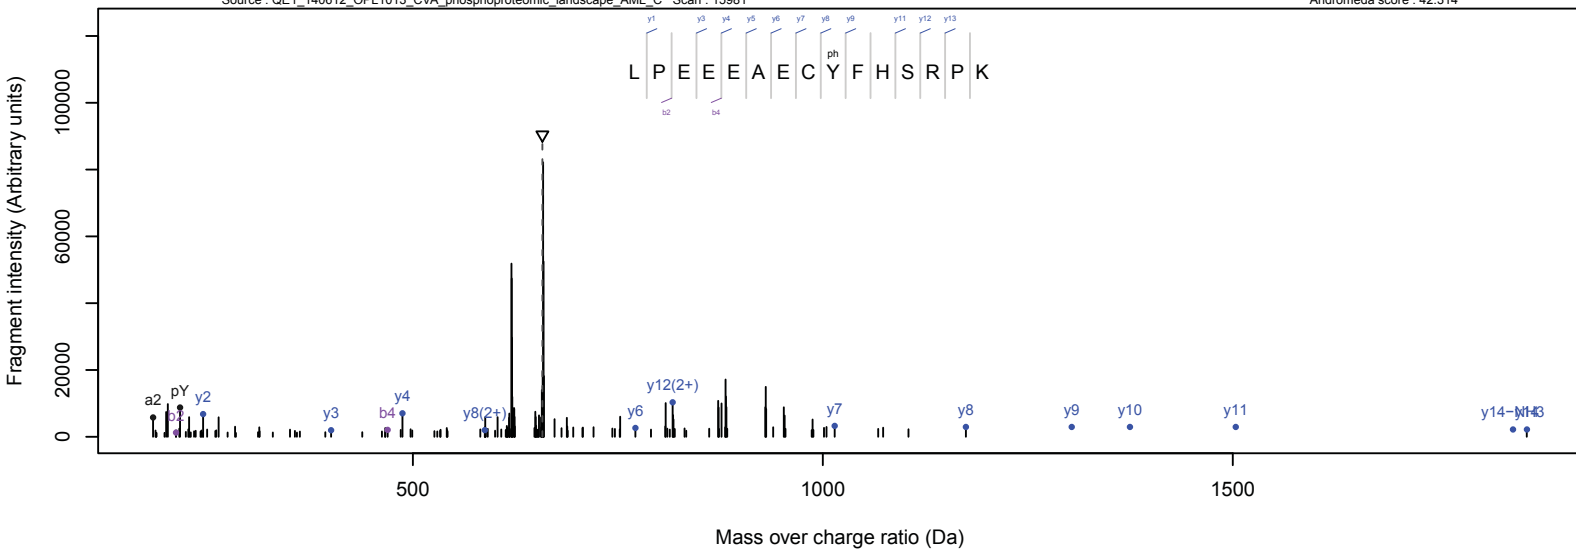

## Y(ph)FYITPGICPSLSTMK-2+

Source : QE1\_140612\_OPL1013\_CVA\_phosphoproteomic\_landscape\_AML\_B Scan : 44984

Andromeda score : 42.314

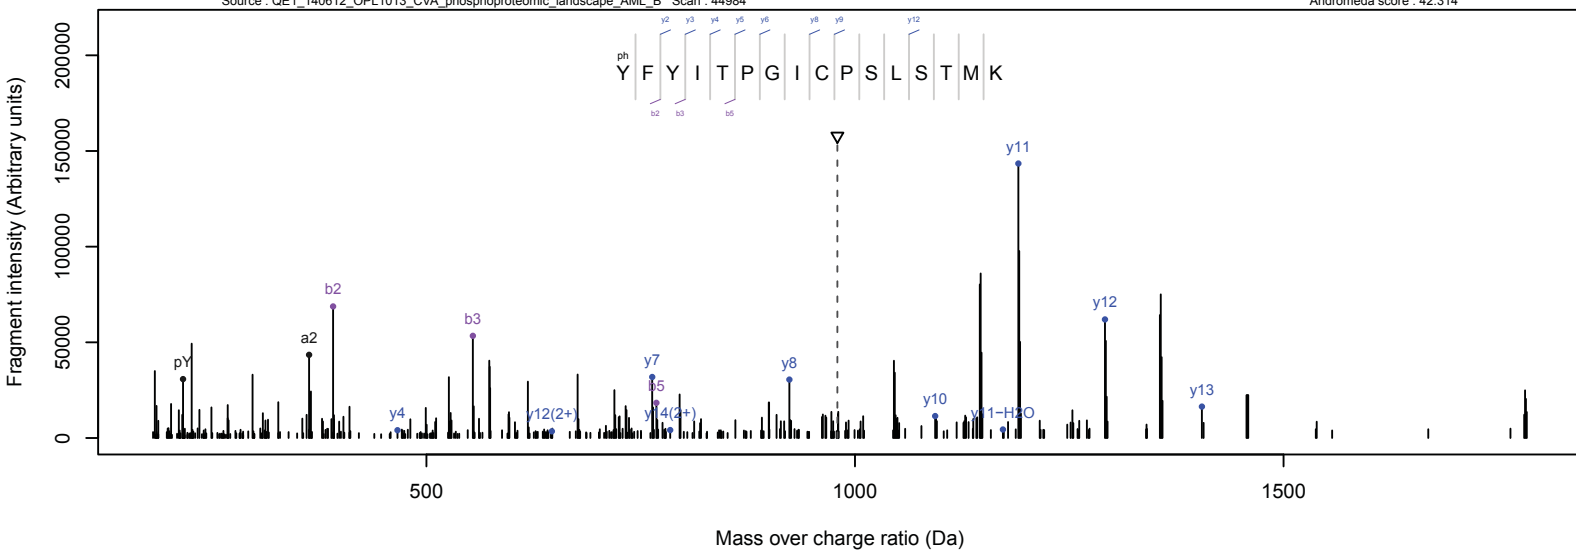

## KPHIY(ph)YGSLEEK-3+

Source : QE1\_140612\_OPL1013\_CVA\_phosphoproteomic\_landscape\_AML\_C Scan : 14059

Andromeda score : 42.3

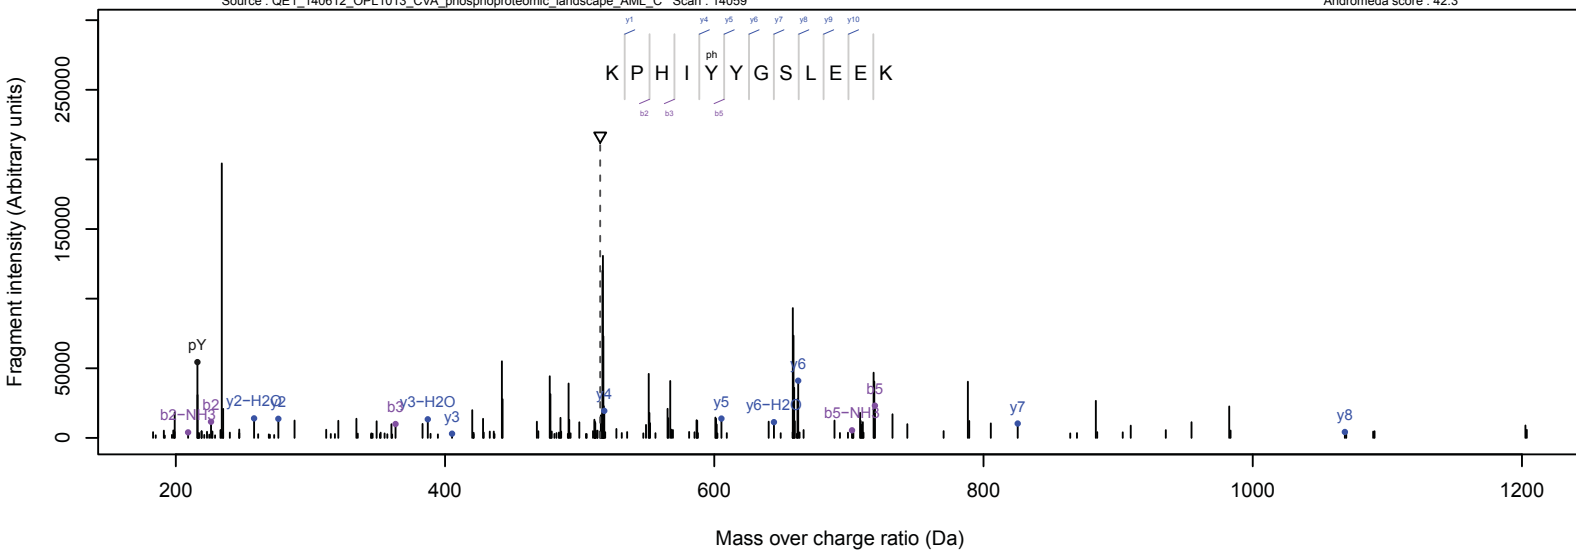

## TLPADVQNYYSR-2+

Source : QE1\_140612\_OPL1013\_CVA\_phosphoproteomic\_landscape\_AML\_C Scan : 21511

Andromeda score : 42.3

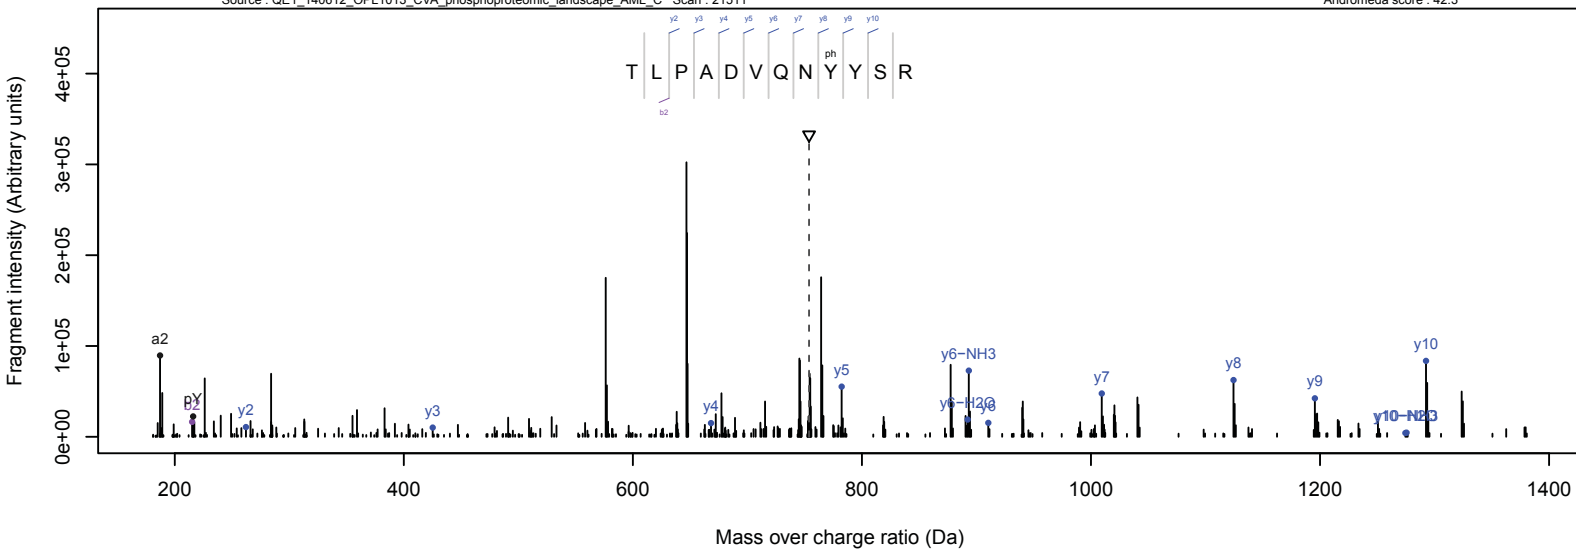

LSTQNY(ph)FR-2+

Source : QE1\_140822\_OPL1013\_CVA\_pTyrIP\_AML\_cell\_lines\_part2\_E Scan : 9625

Andromeda score : 42.287

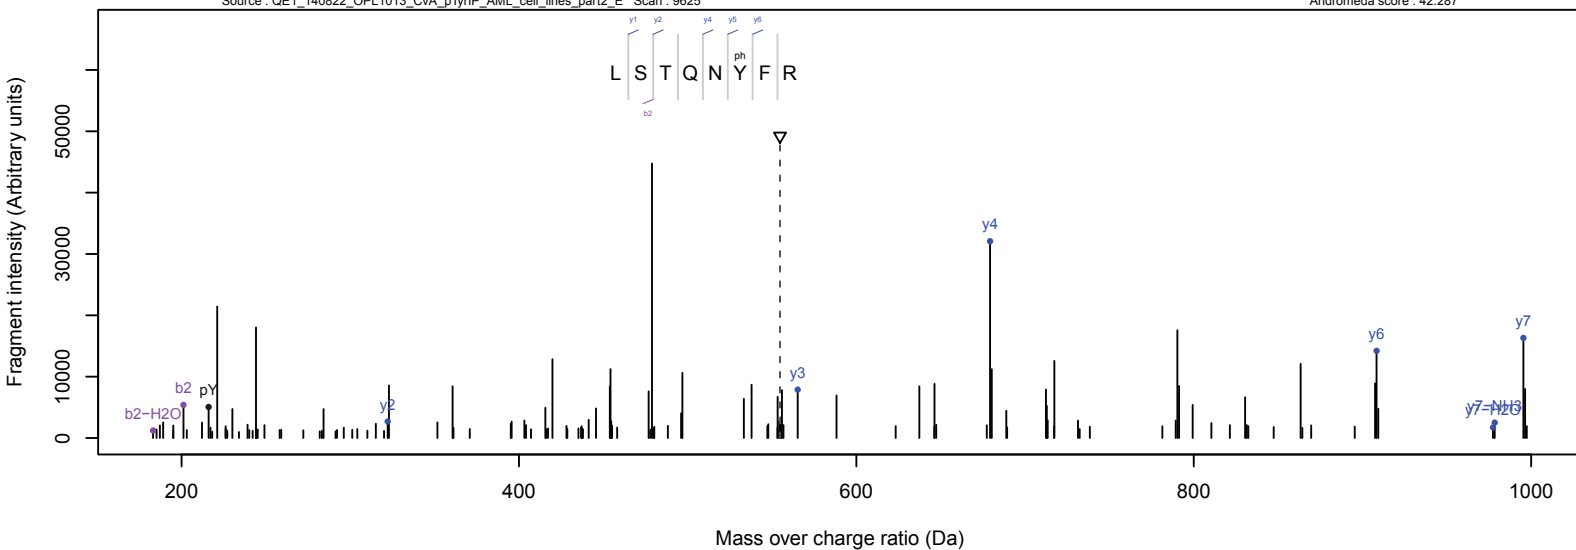

Y(ph)VLCTAPR-2+

Source : QE1\_140612\_OPL1013\_CVA\_phosphoproteomic\_landscape\_AML\_D Scan : 12616

Andromeda score : 42.287

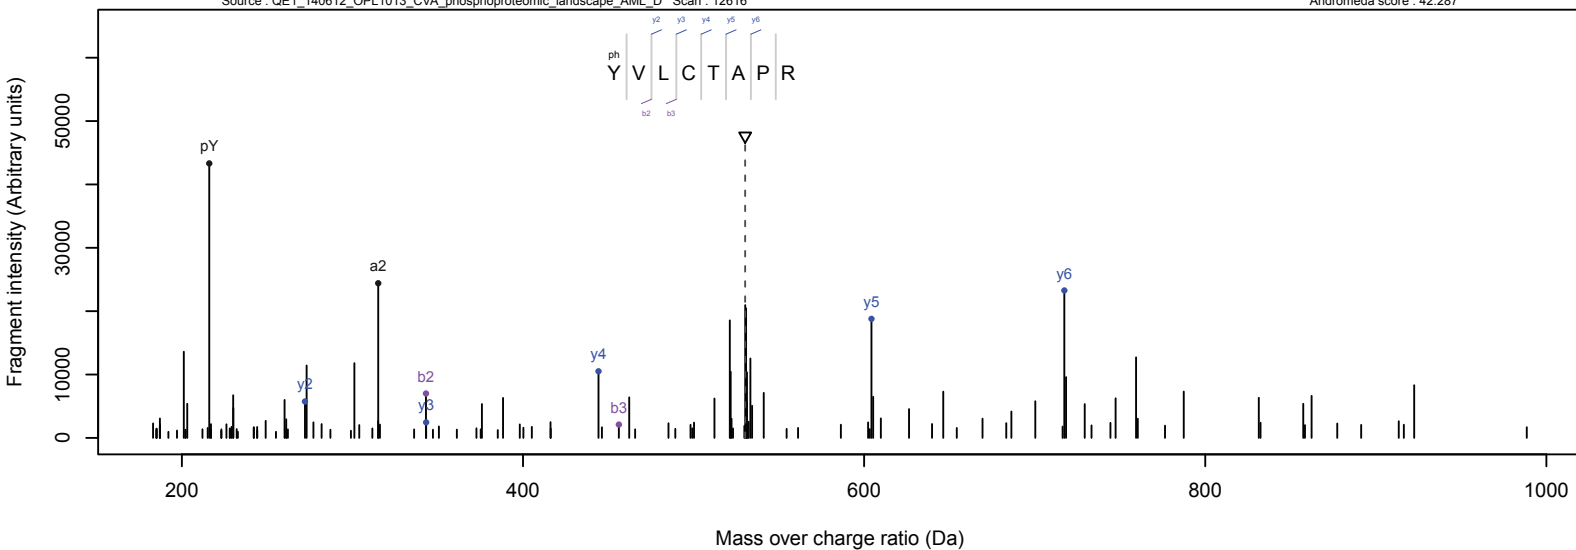

ILT(ph)VEDHYEGGIGEAVSSAVVGEPIVTHLAVNR-4+

Source : QE1\_140612\_OPL1013\_CVA\_phosphoproteomic\_landscape\_AML\_C Scan : 47582

Andromeda score : 42.253

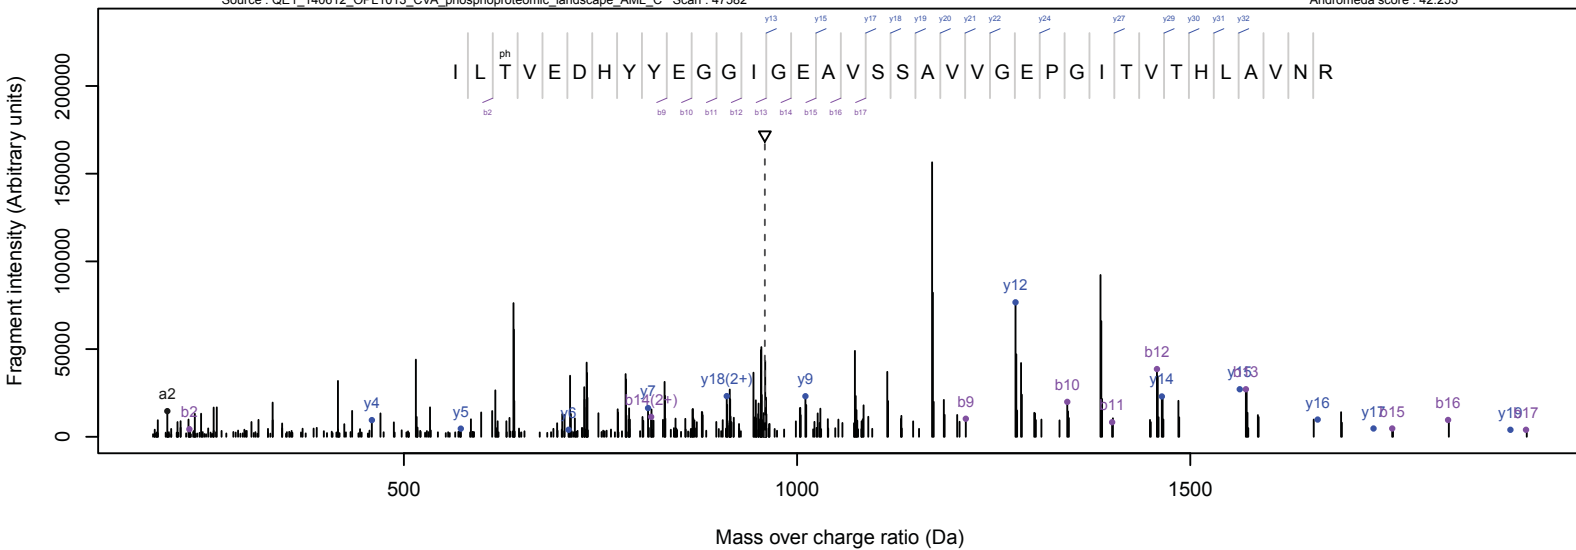



FQLQYMGHY(ph)LIRDER-3+

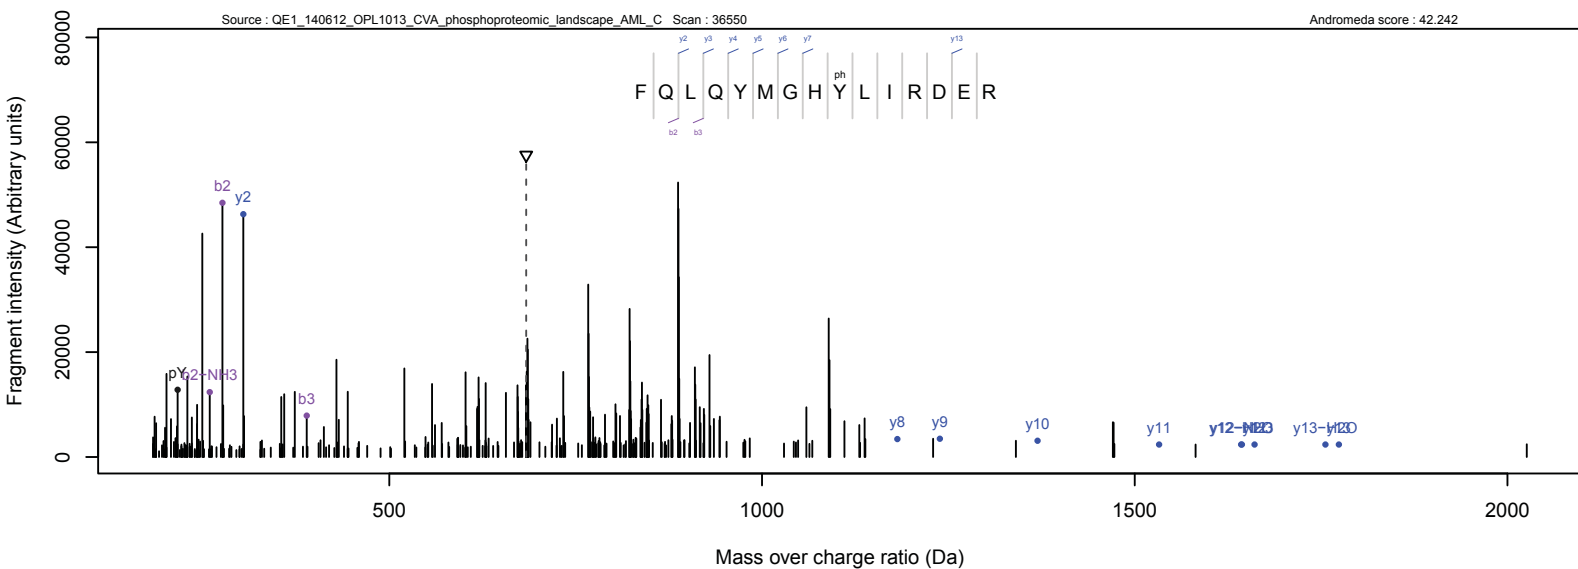

RLS(ph)TSPDVIQGHQPR-3+

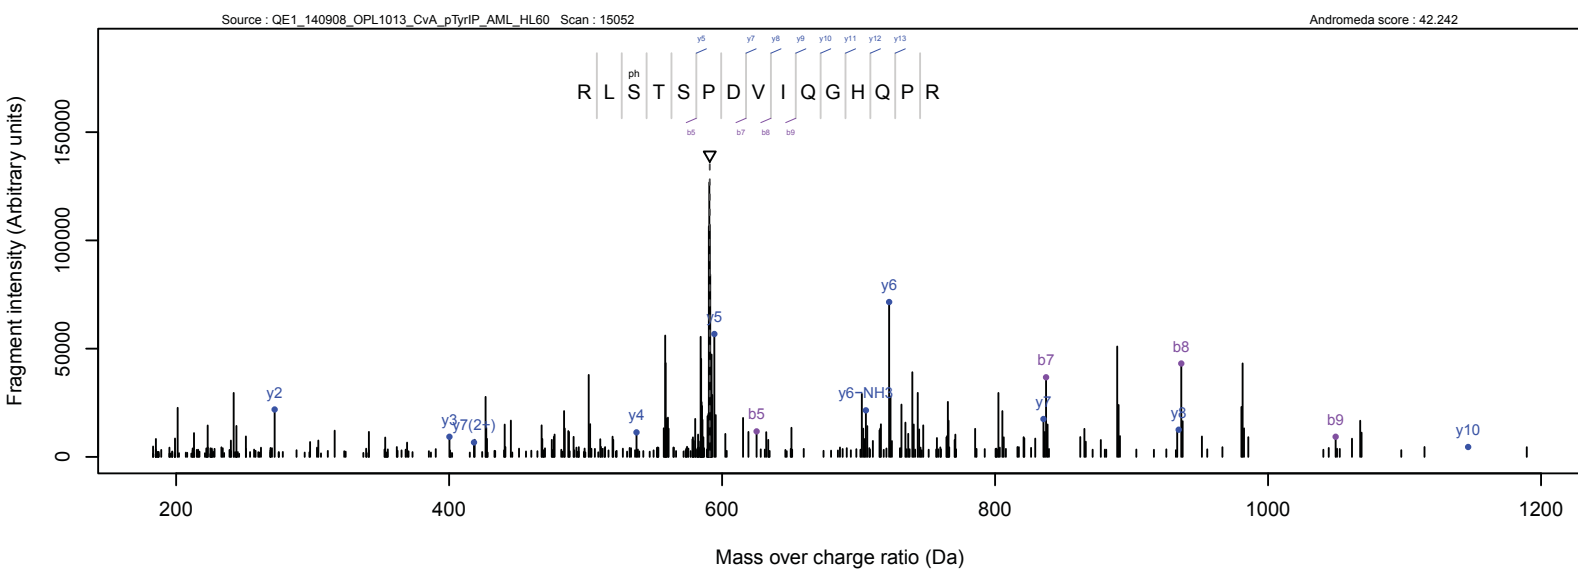

Y(ph)FLQAAK-2+

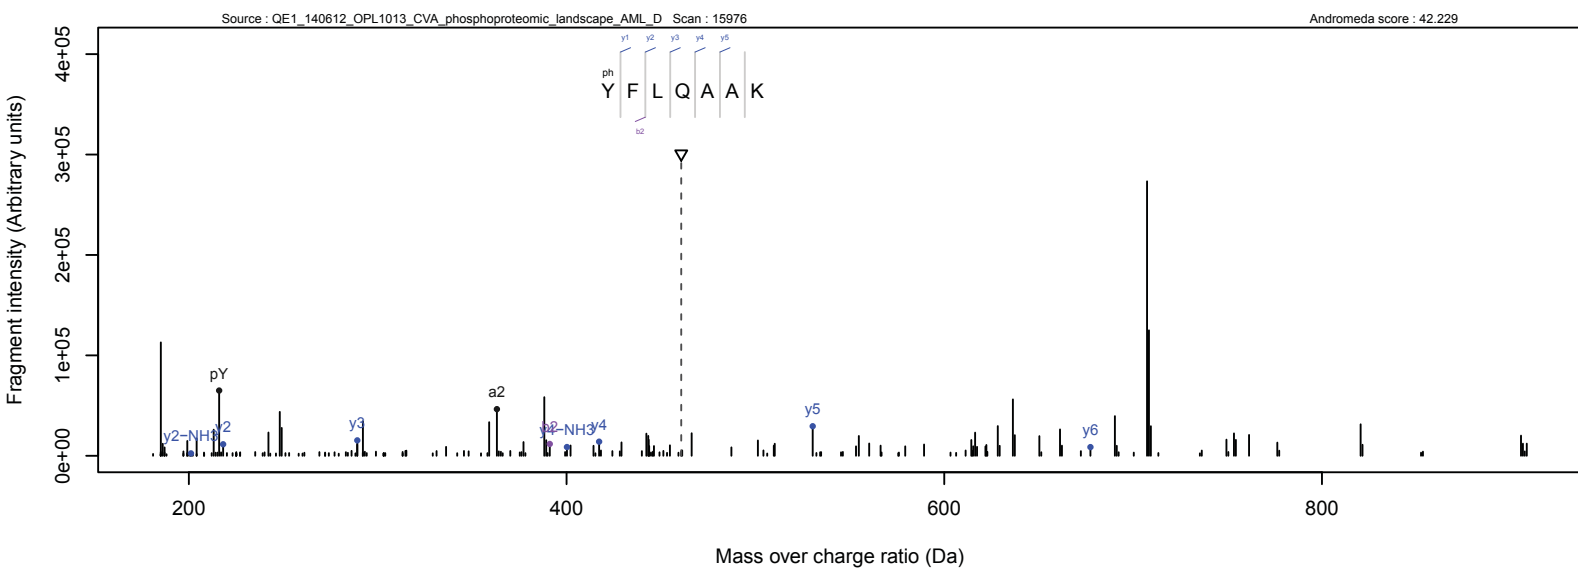

## AGTFIAPPVY(ph)SNITPYQSHLR-3+

Source: QE1\_140612\_OPL1013\_CVA\_phosphoproteomic\_landscape\_AML\_B Scan: 36906

Andromeda score: 42.123

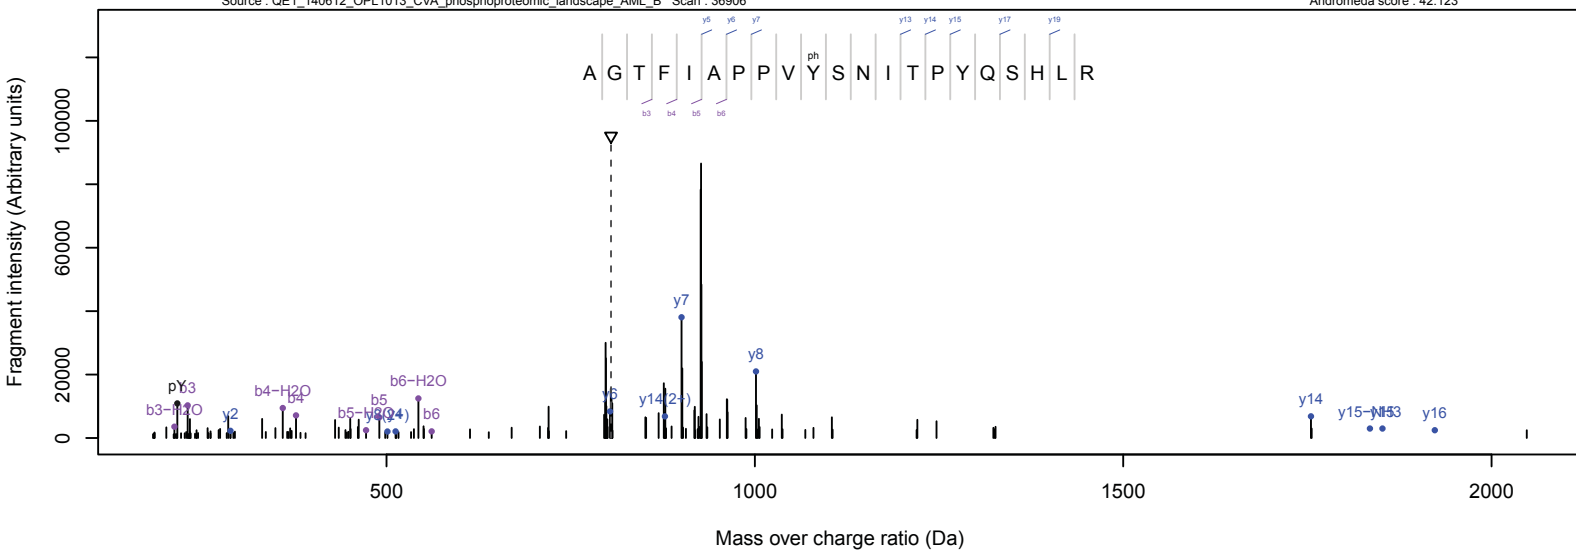

## FVDGLM(ox)IHSGDPVNY(ph)YVDTAVR-3+

Source: QE1\_140822\_OPL1013\_CvA\_pTyrIP\_AML\_cell\_lines\_part2\_E Scan: 34890

Andromeda score: 42.123

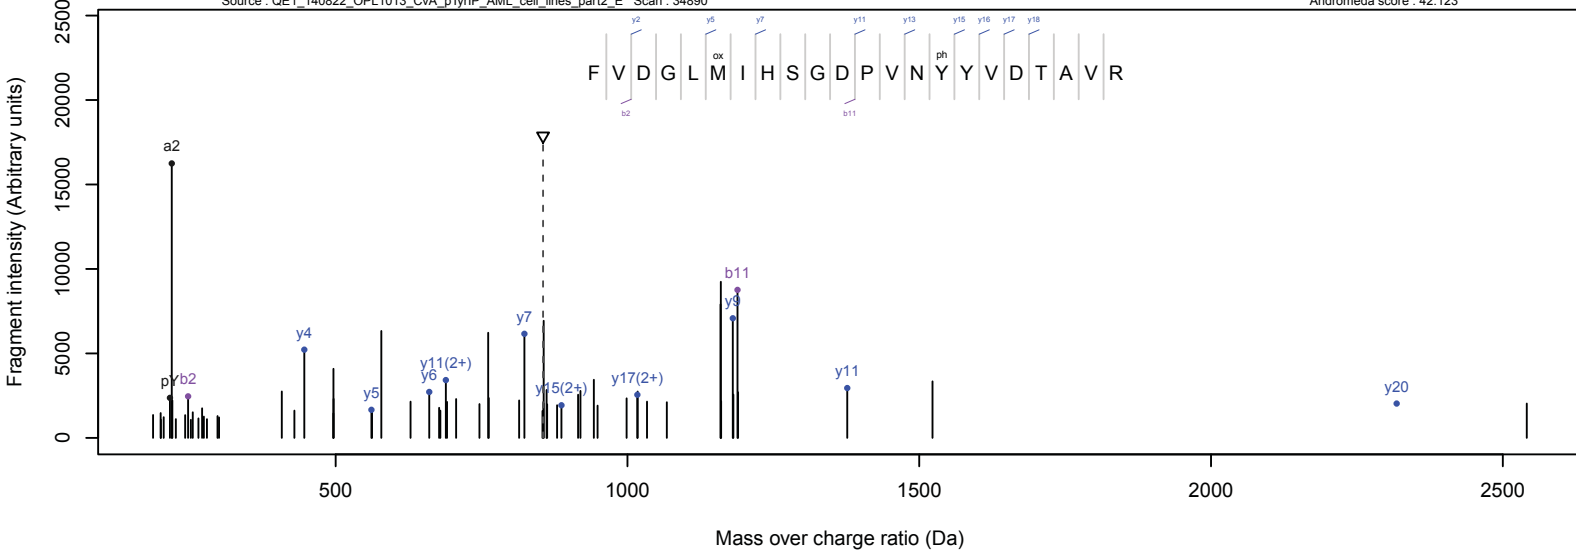

## KTEGY(ph)TIIGVEQTAK-3+

Source: QE1\_140612\_OPL1013\_CVA\_phosphoproteomic\_landscape\_AML\_B Scan: 18835

Andromeda score: 42.095

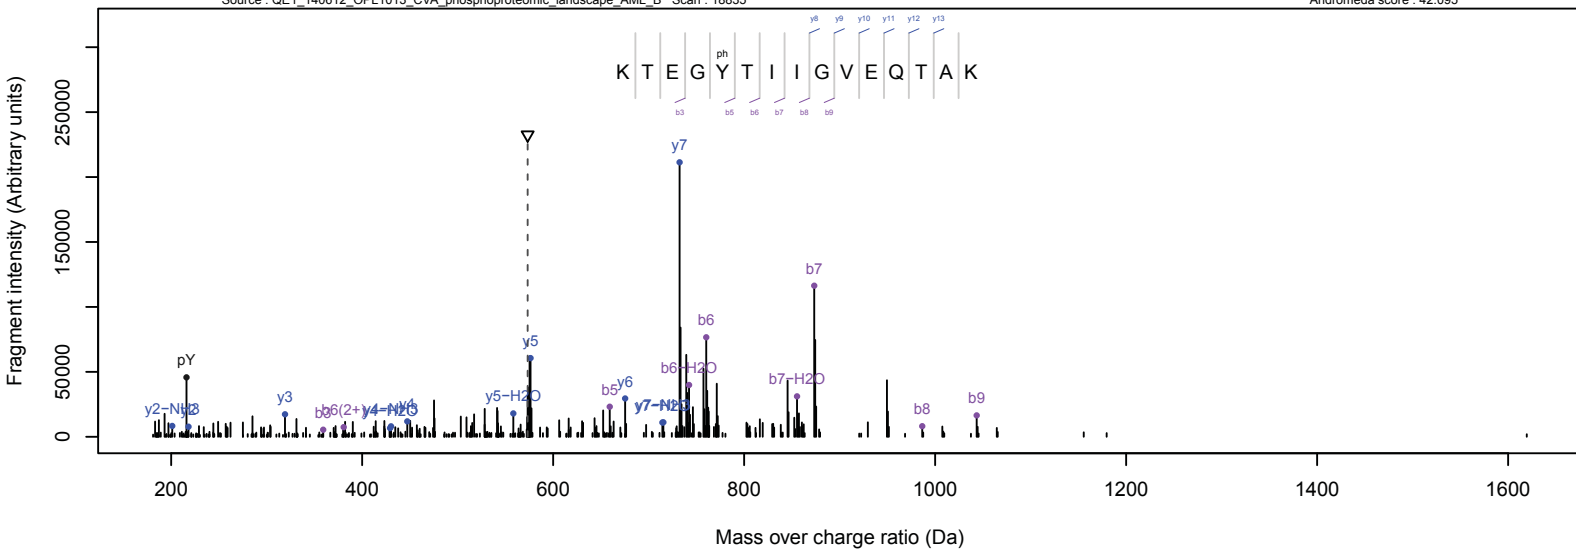

## FPSSPLKPY(ph)PK-3+

Source : QE1\_140612\_OPL1013\_CVA\_phosphoproteomic\_landscape\_AML\_C Scan : 21343

Andromeda score : 42.083

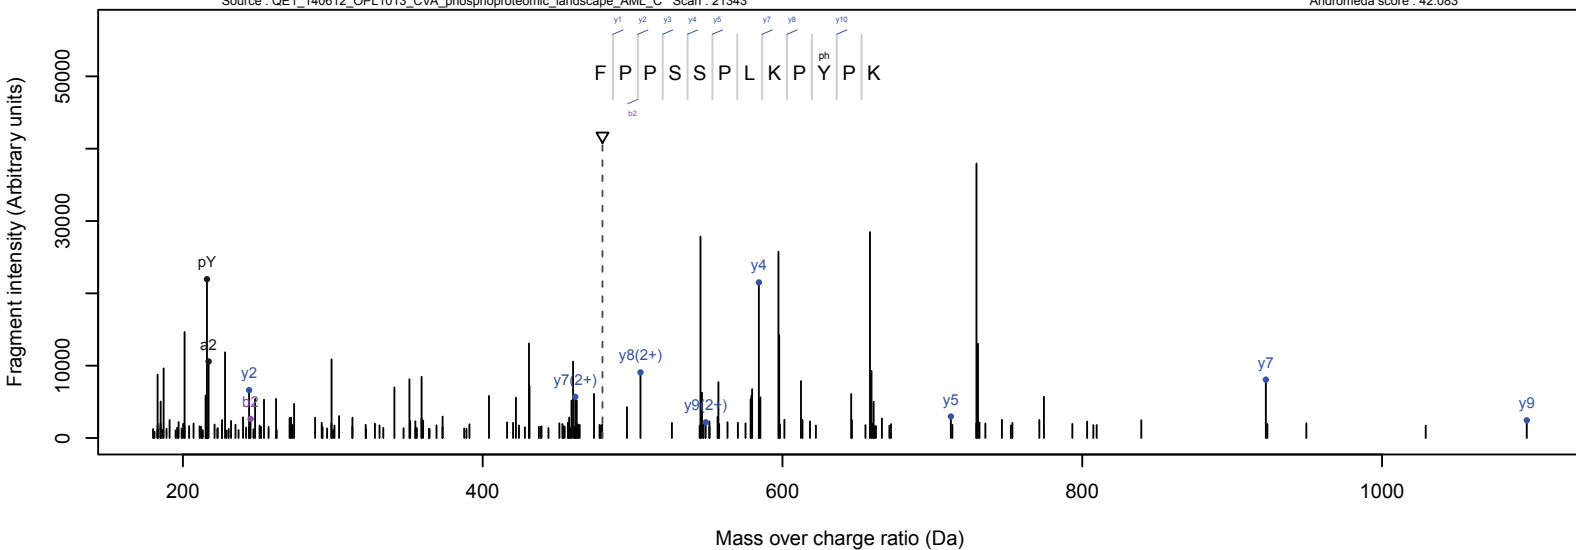

## NILAASPY(ph)IR-2+

Source : QE1\_140612\_OPL1013\_CVA\_phosphoproteomic\_landscape\_AML\_A Scan : 29087

Andromeda score : 42.083

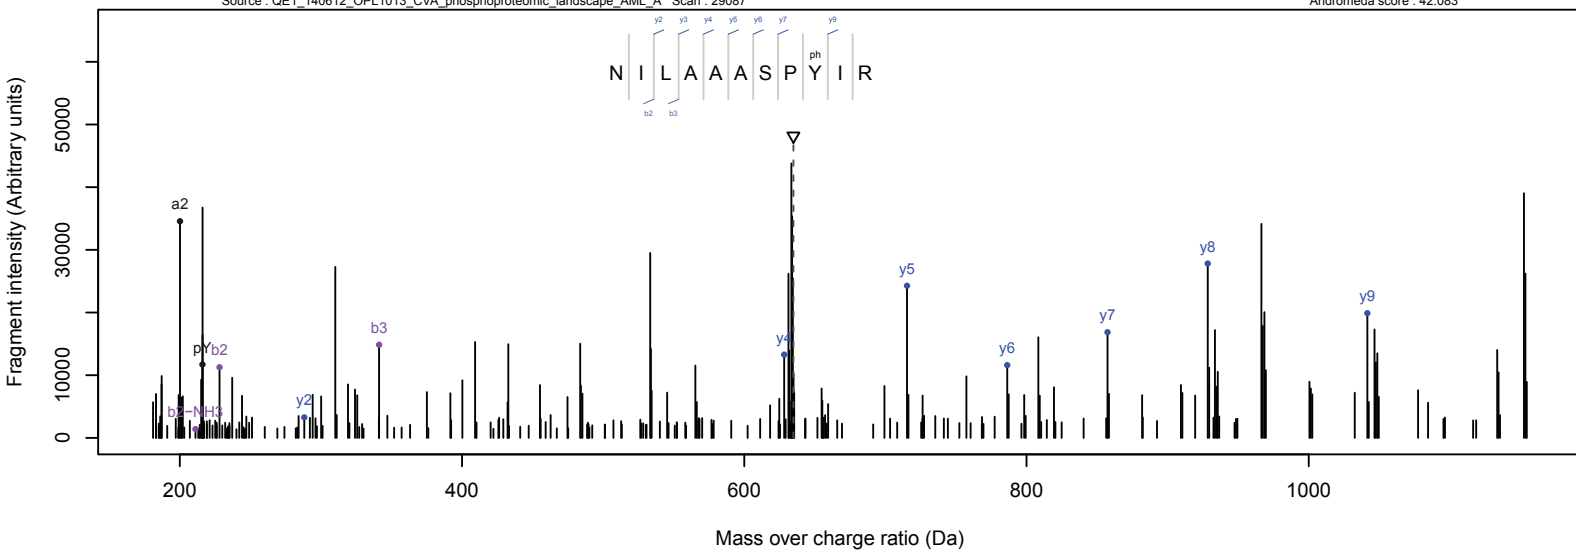

## NFGLY(ph)NER-2+

Source : QE1\_140908\_OPL1013\_CvA\_pTyrIP\_AML\_Kasumi6 Scan : 19205

Andromeda score : 42.075

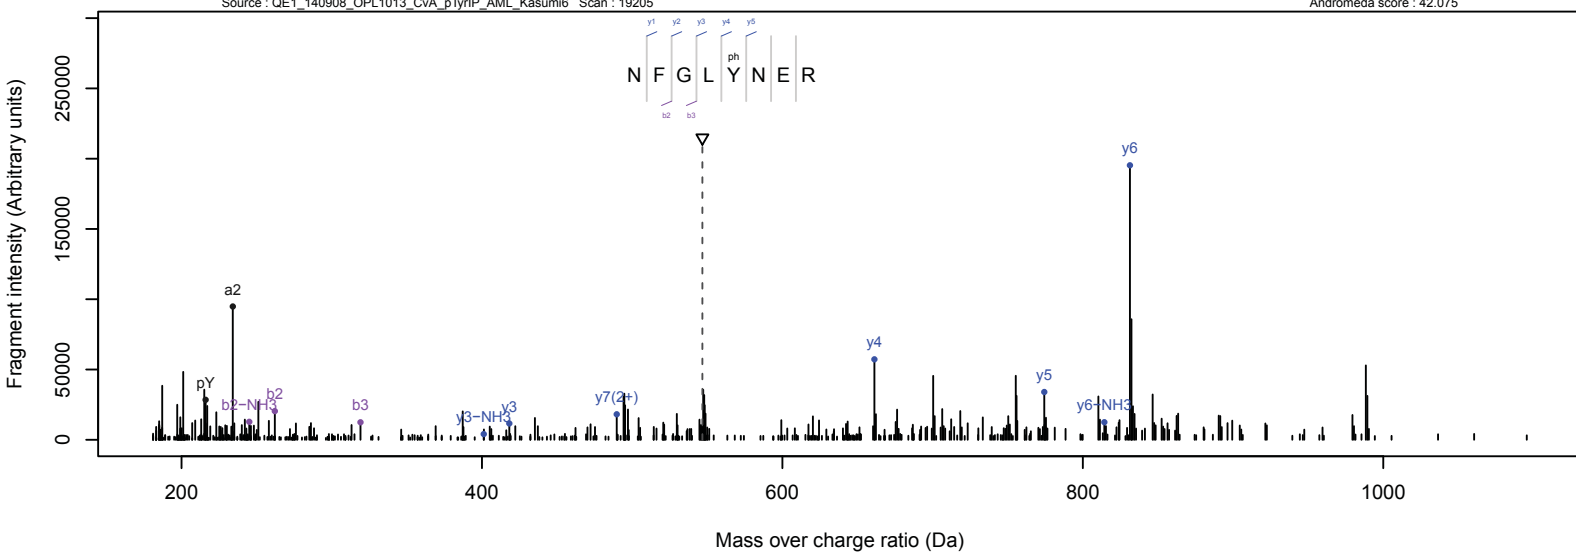

LRGPGSGGEEPALSYQR-3+

Source : QE1\_140612\_OPL1013\_CVA\_phosphoproteomic\_landscape\_AML\_D Scan : 13676

Andromeda score : 42.068

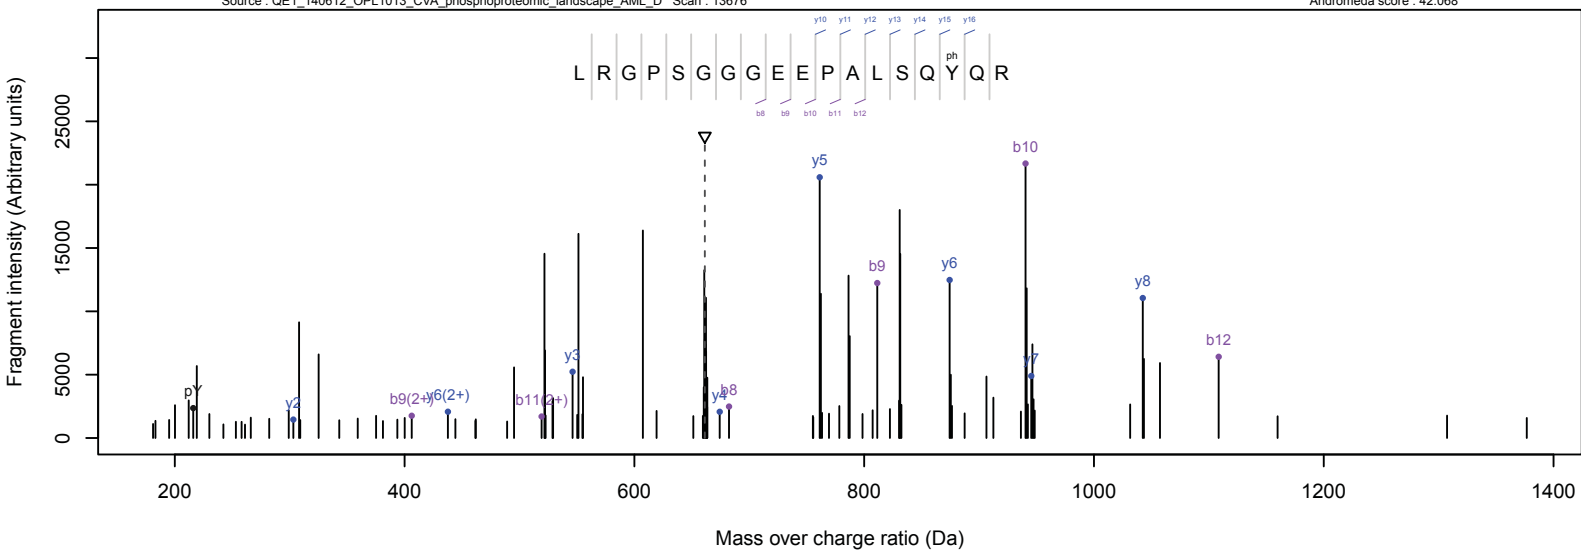

ASVY(ph)LNDSLNK-2+

Source : QE1\_140612\_OPL1013\_CVA\_phosphoproteomic\_landscape\_AML\_D Scan : 18635

Andromeda score : 42.031

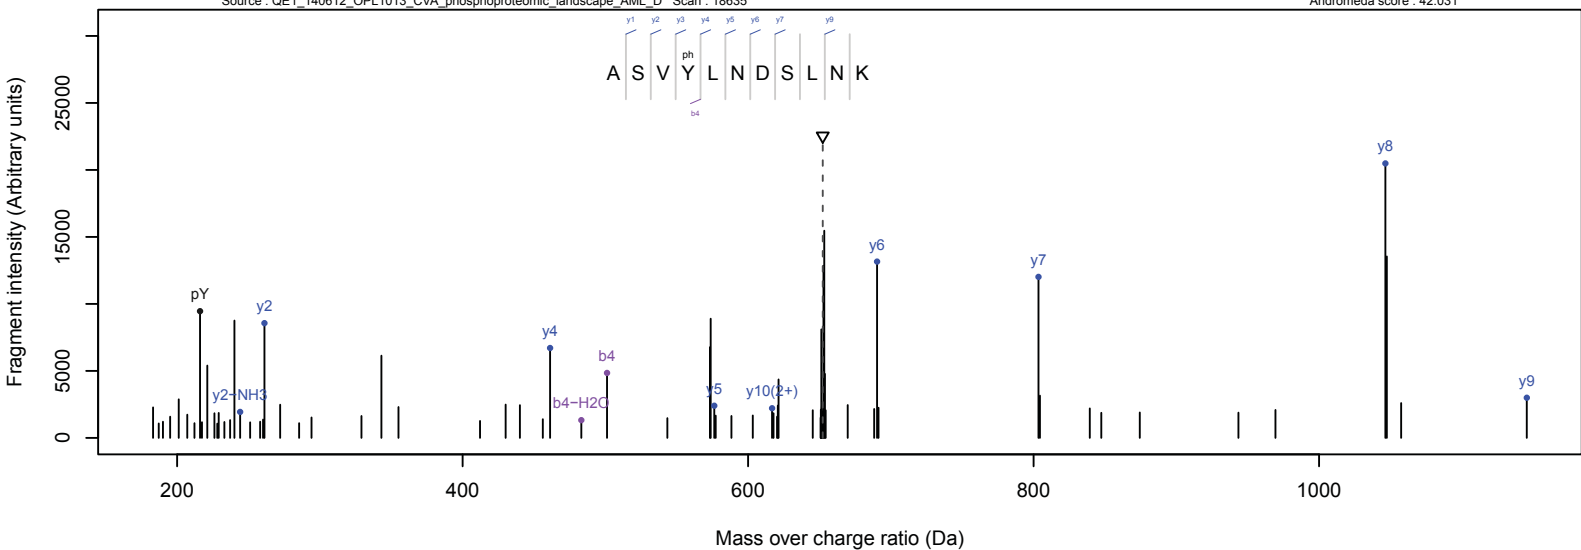

GY(ph)DAPLCLNLLFKK-3+

Source : QE1\_140612\_OPL1013\_CVA\_phosphoproteomic\_landscape\_AML\_C Scan : 44793

Andromeda score : 41.996

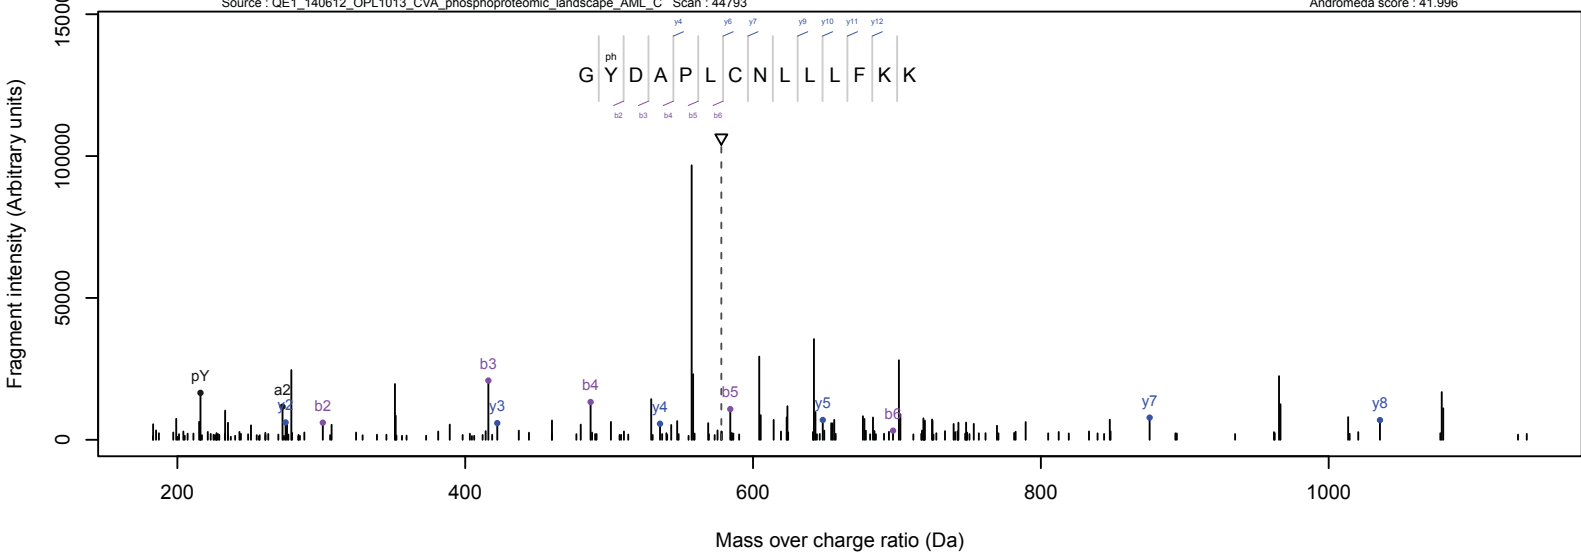

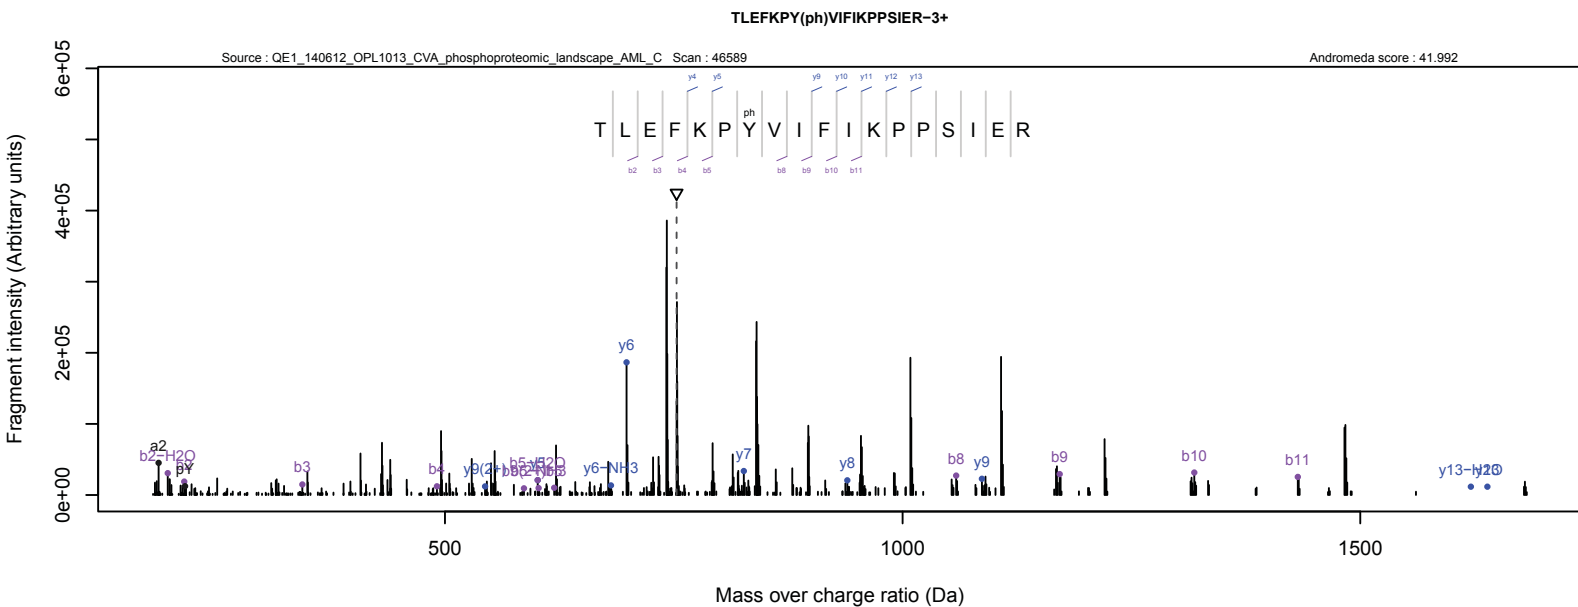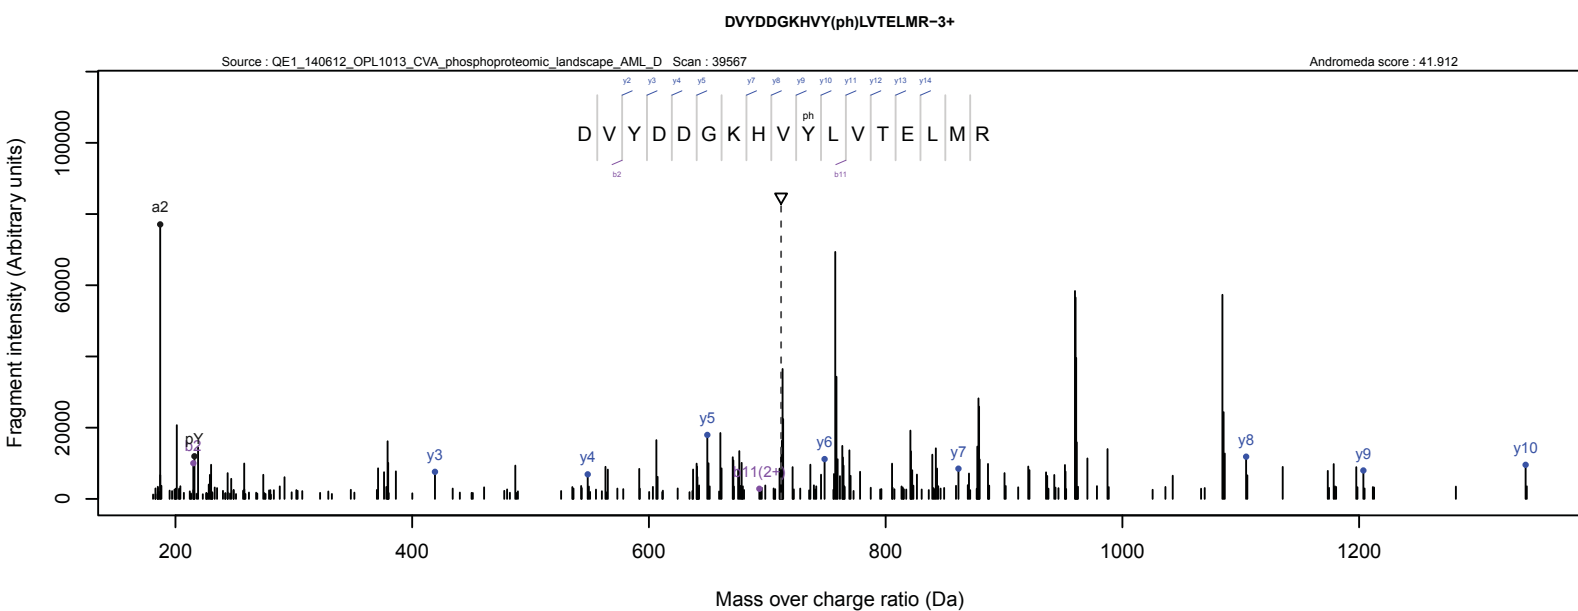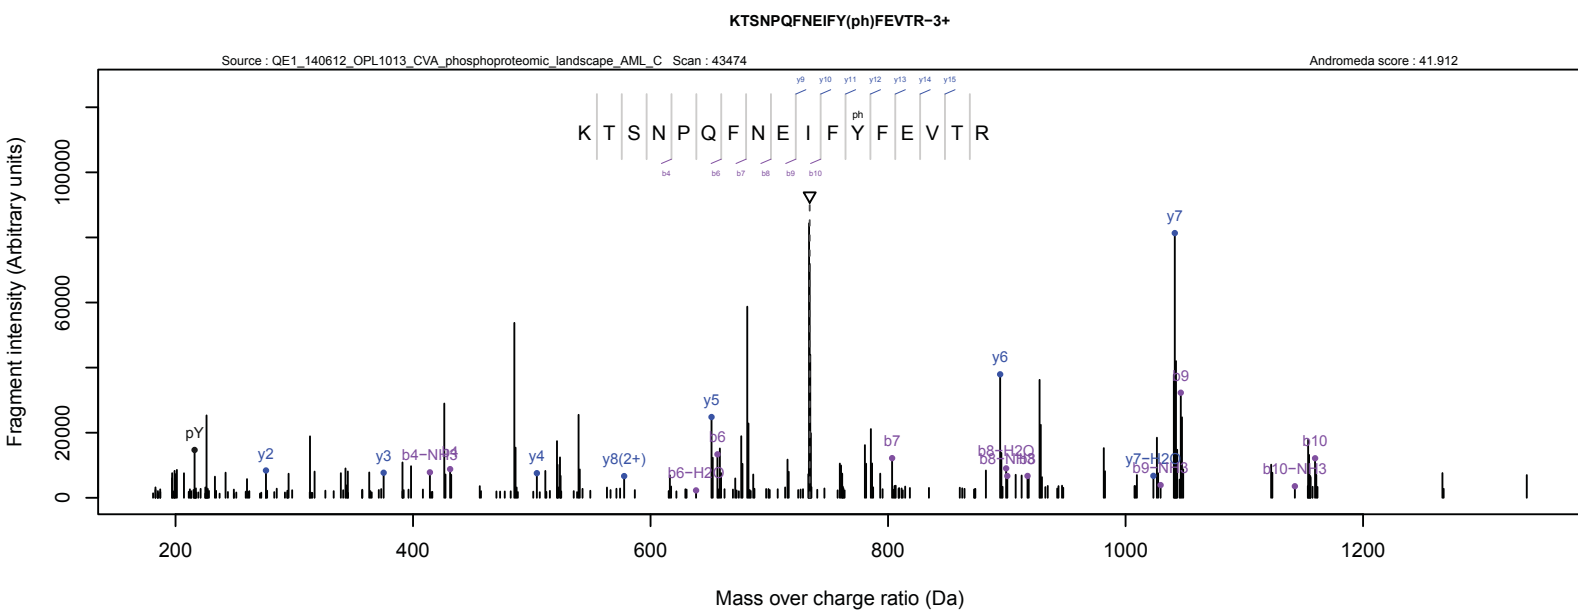

## NDIASHPPEGSY(ph)APR-3+

Source : QE1\_140612\_OPL1013\_CVA\_phosphoproteomic\_landscape\_AML\_F Scan : 13395

Andromeda score : 41.912

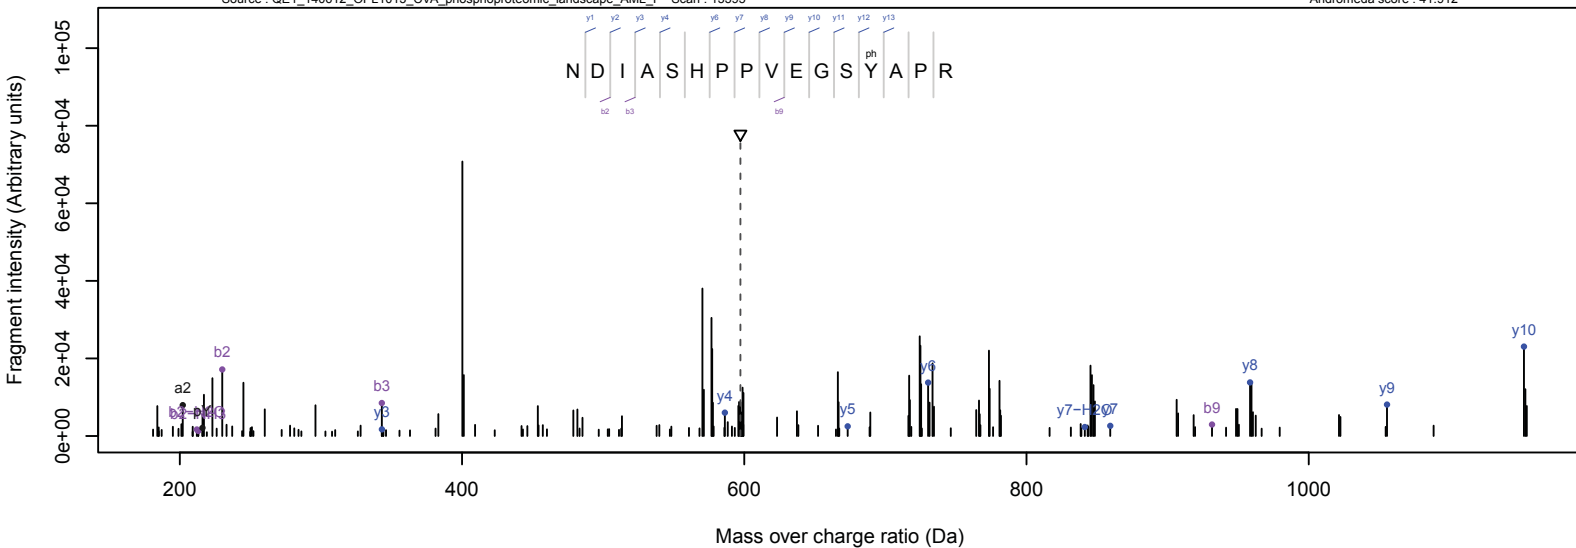

## M(ox)LQHIDY(ph)R-2+

Source : QE1\_140908\_OPL1013\_CvA\_pTyrIP\_AML\_Kasumi6 Scan : 9088

Andromeda score : 41.876

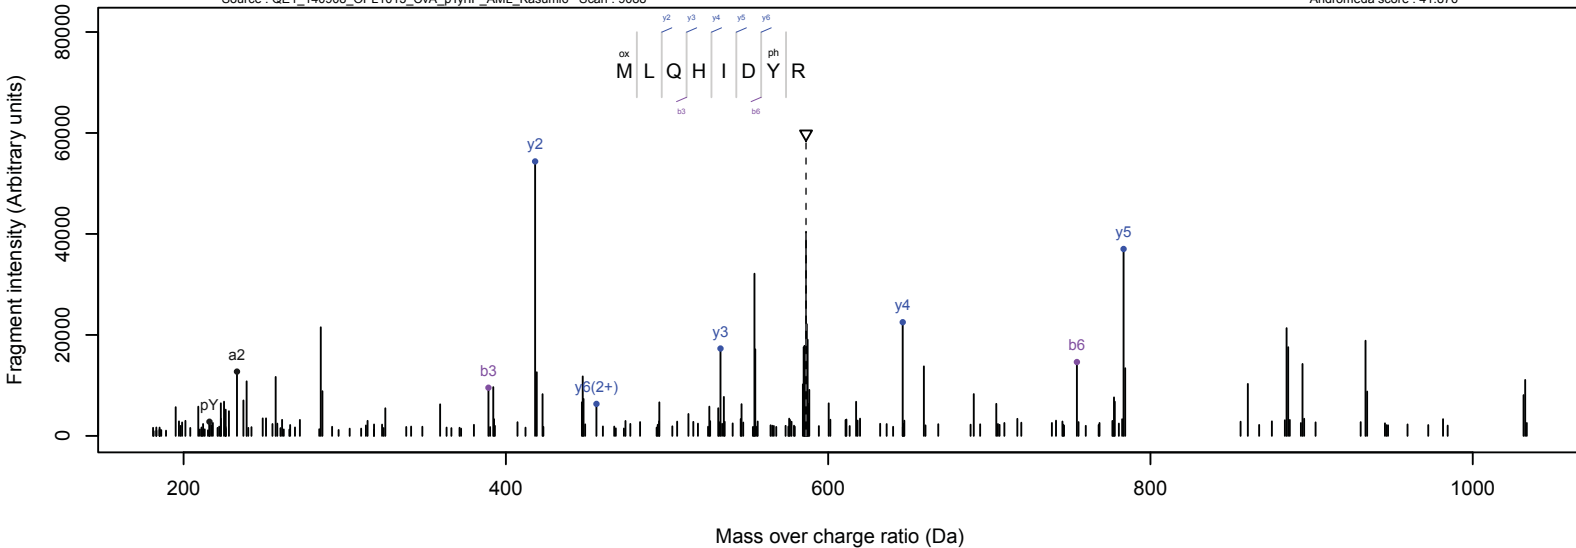

## Y(ph)QGVNLYIK-2+

Source : QE1\_140612\_OPL1013\_CVA\_phosphoproteomic\_landscape\_AML\_C Scan : 24881

Andromeda score : 41.876

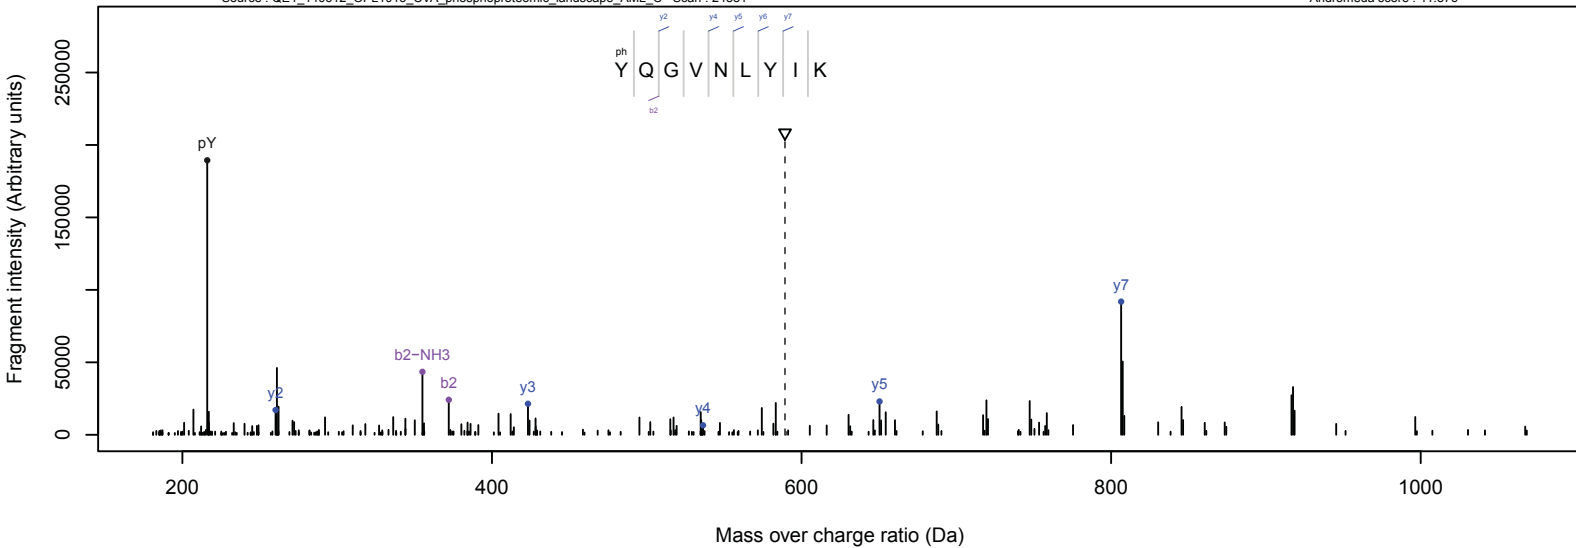

**LY(ph)VSNLGIGHTR-3+**

Source : QE1\_140908\_OPL1013\_CVA\_pTyrIP\_AML\_HEL Scan : 24584

Andromeda score : 41.87

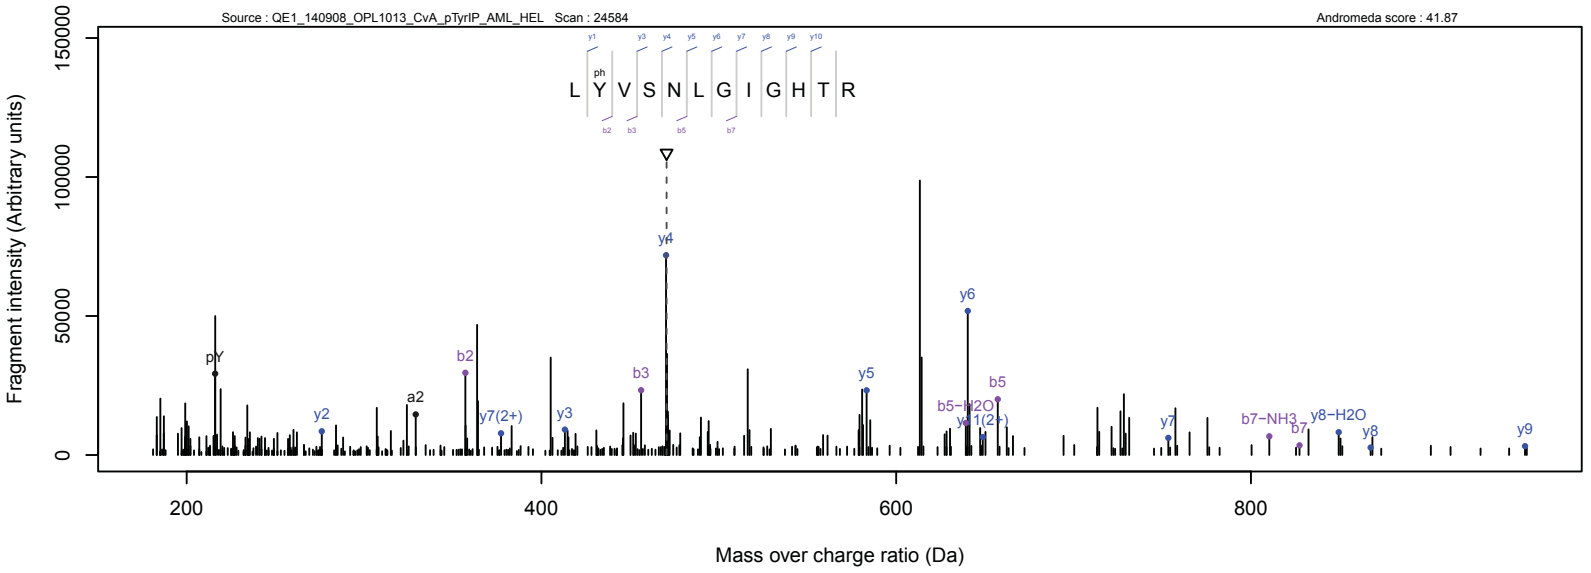

**SAQPSPHY(ph)MAAPSSGQIYGSGPQGYNTQPVPVSGQCPPPSTR-4+**

Source : QE1\_140612\_OPL1013\_CVA\_phosphoproteomic\_landscape\_AML\_C Scan : 29309

Andromeda score : 41.832

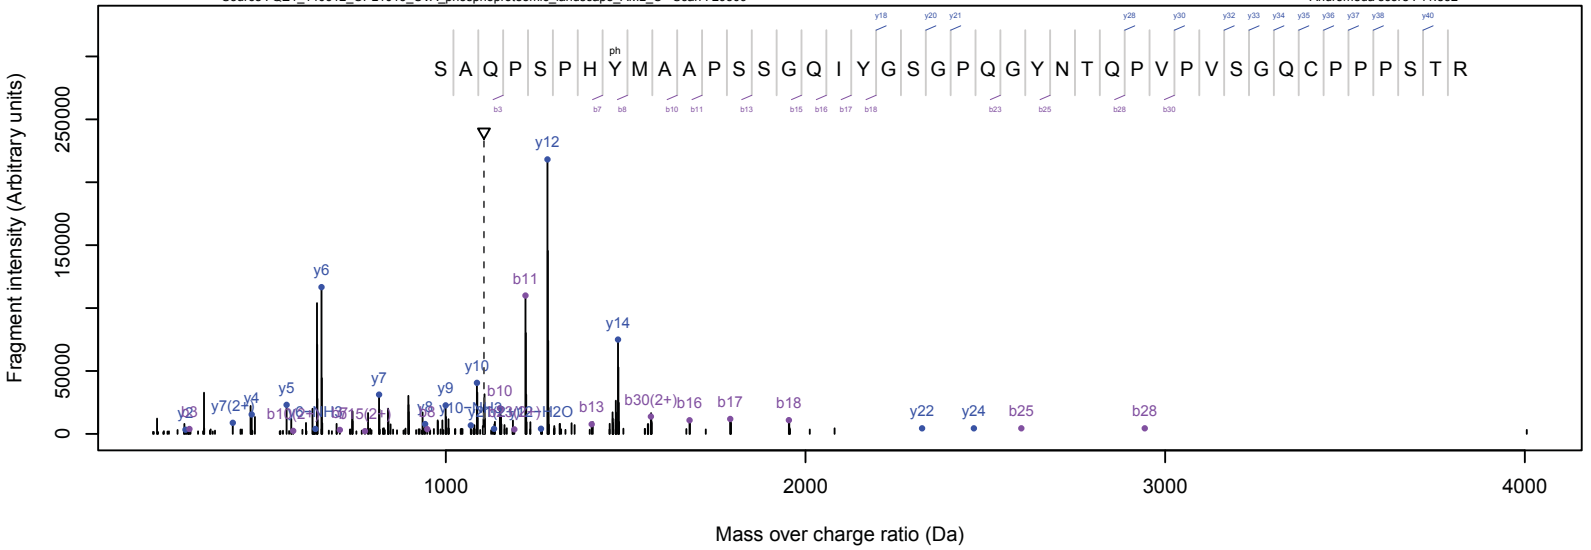

**AHQLVHEGY(ph)KFMFDEK-4+**

Source : QE1\_140612\_OPL1013\_CVA\_phosphoproteomic\_landscape\_AML\_B Scan : 24249

Andromeda score : 41.743

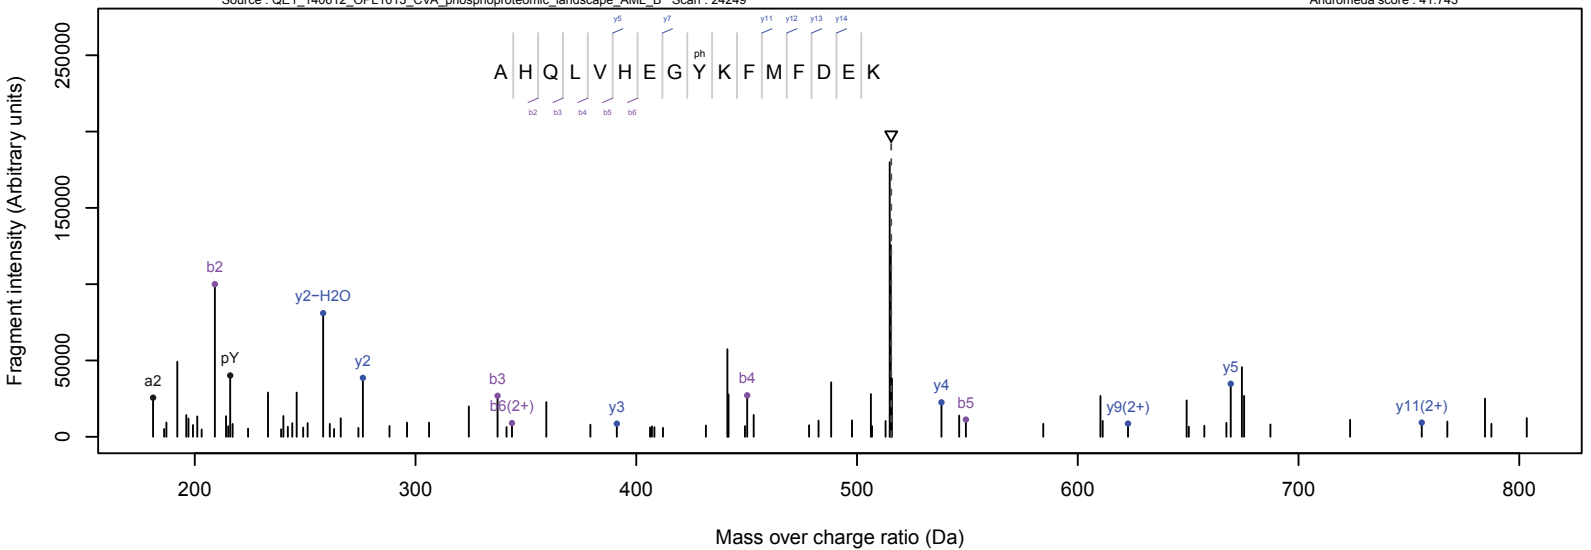

## TLAEY(ph)CPVLR-2+

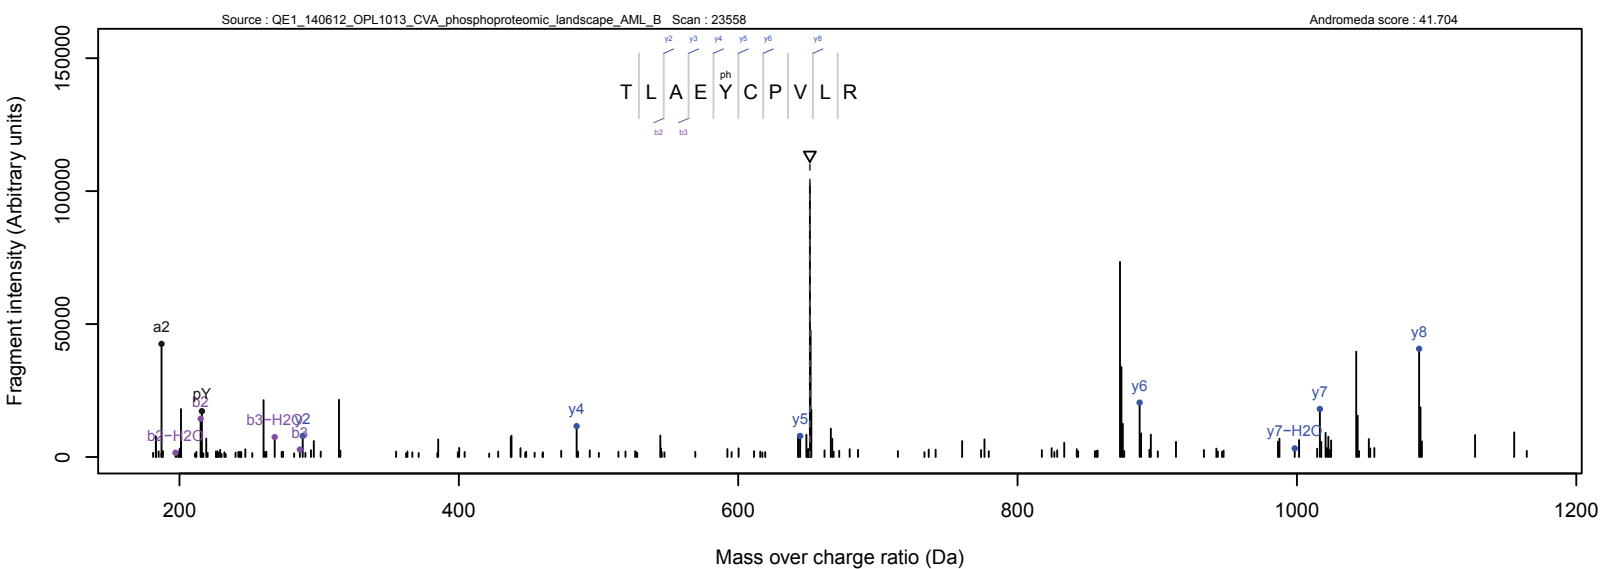

## ARLIY(ph)EDYVSILSPK-3+

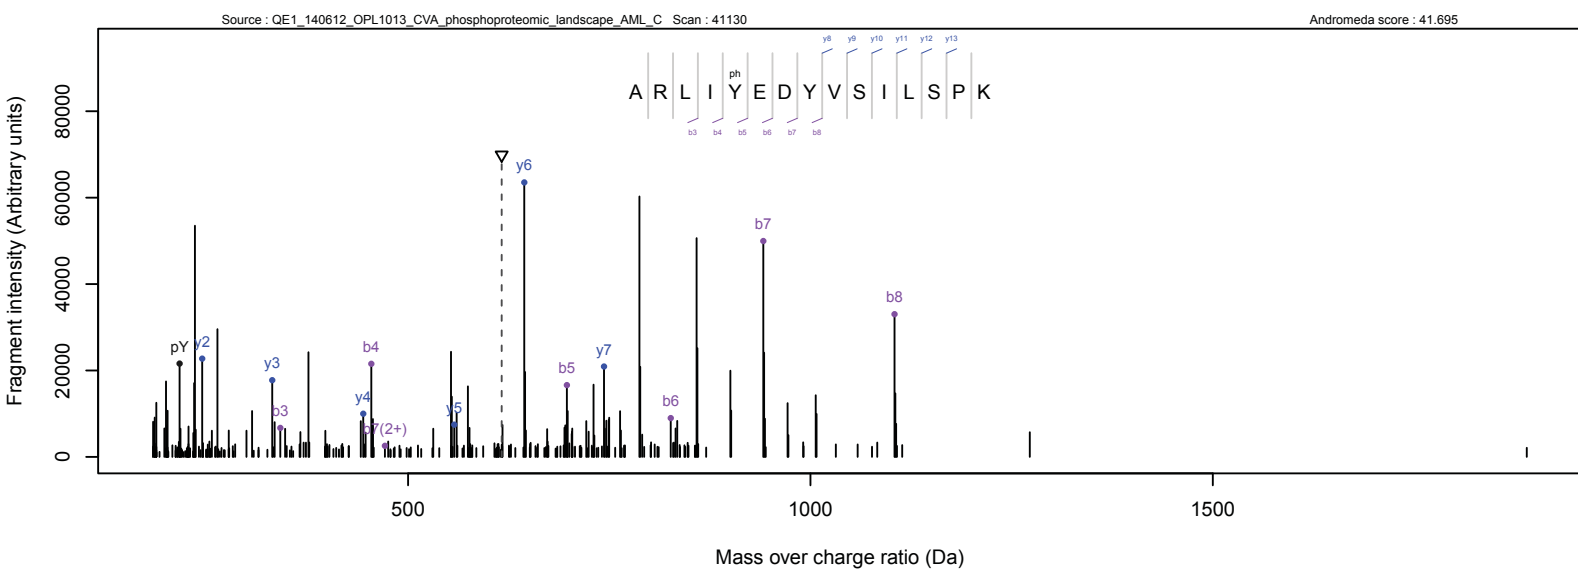

## LALVGNWGTGLTY(ph)PK-2+

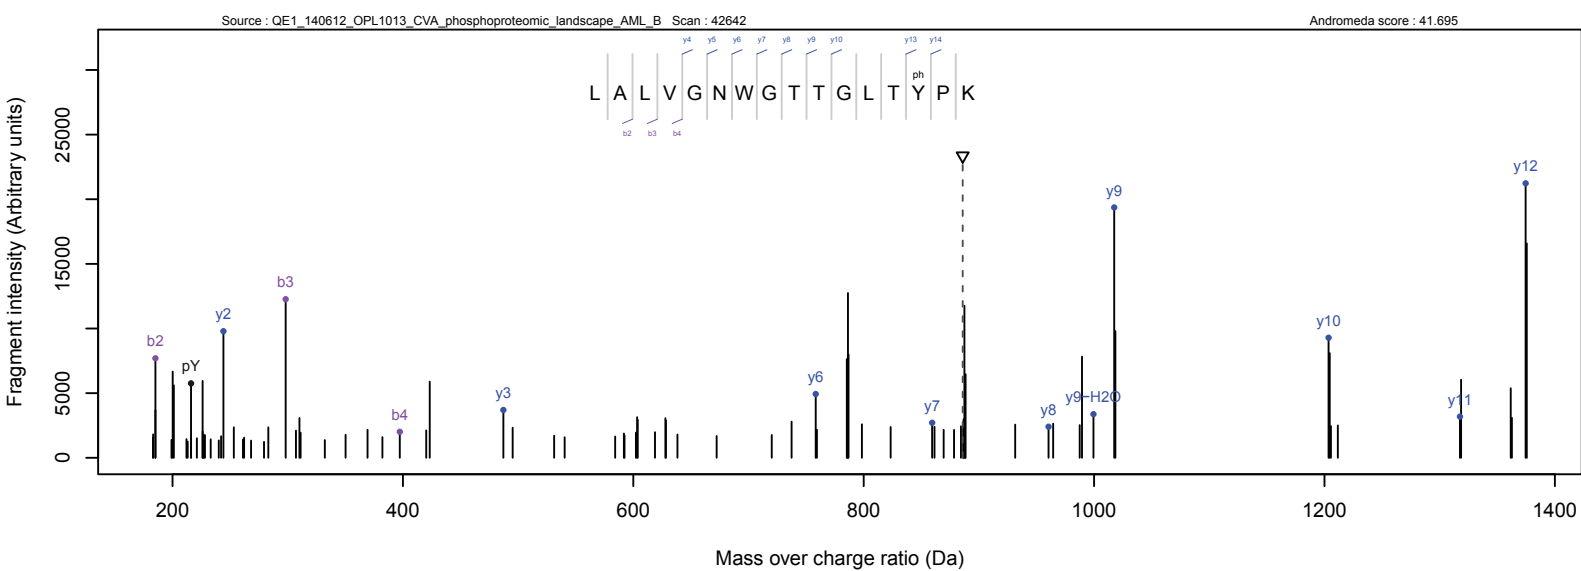



## NEIPFLCHSSTDY(ph)AK-3+

Source: QE1\_140612\_OPL1013\_CVA\_phosphoproteomic\_landscape\_AML\_B Scan: 28439

Andromeda score: 41.695

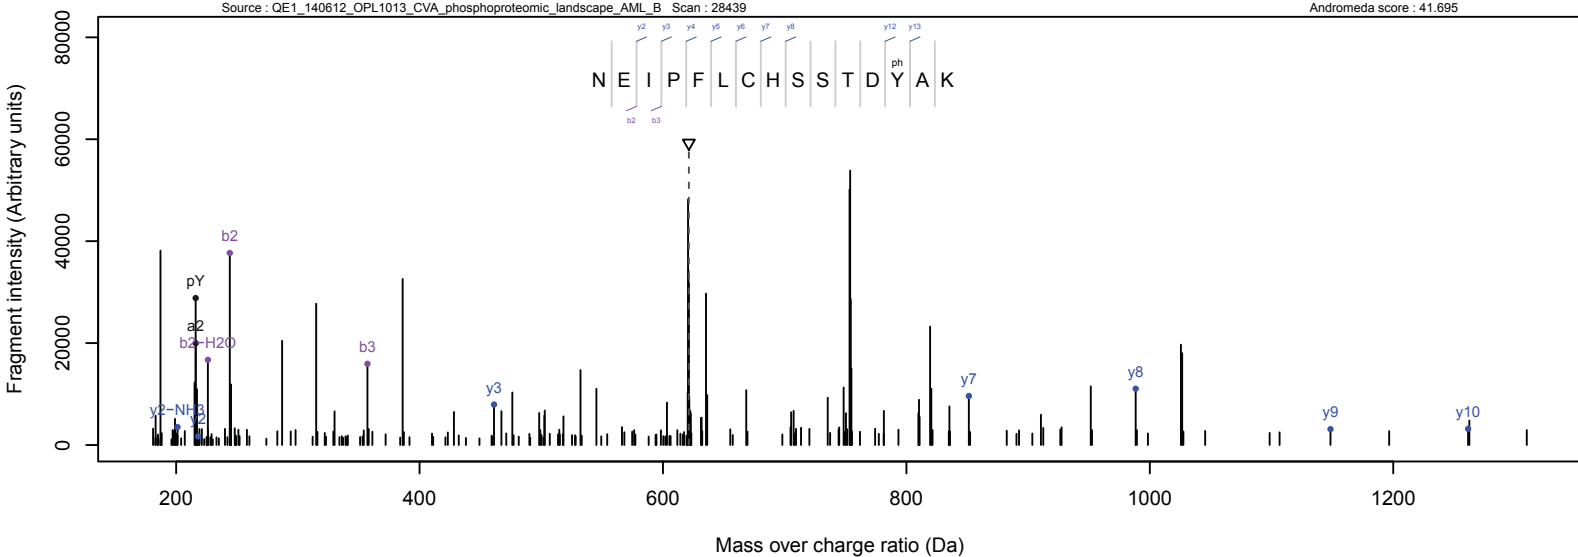

## Y(ph)EQGFITDPVVLSPK-2+

Source: QE1\_140612\_OPL1013\_CVA\_phosphoproteomic\_landscape\_AML\_E Scan: 39542

Andromeda score: 41.695

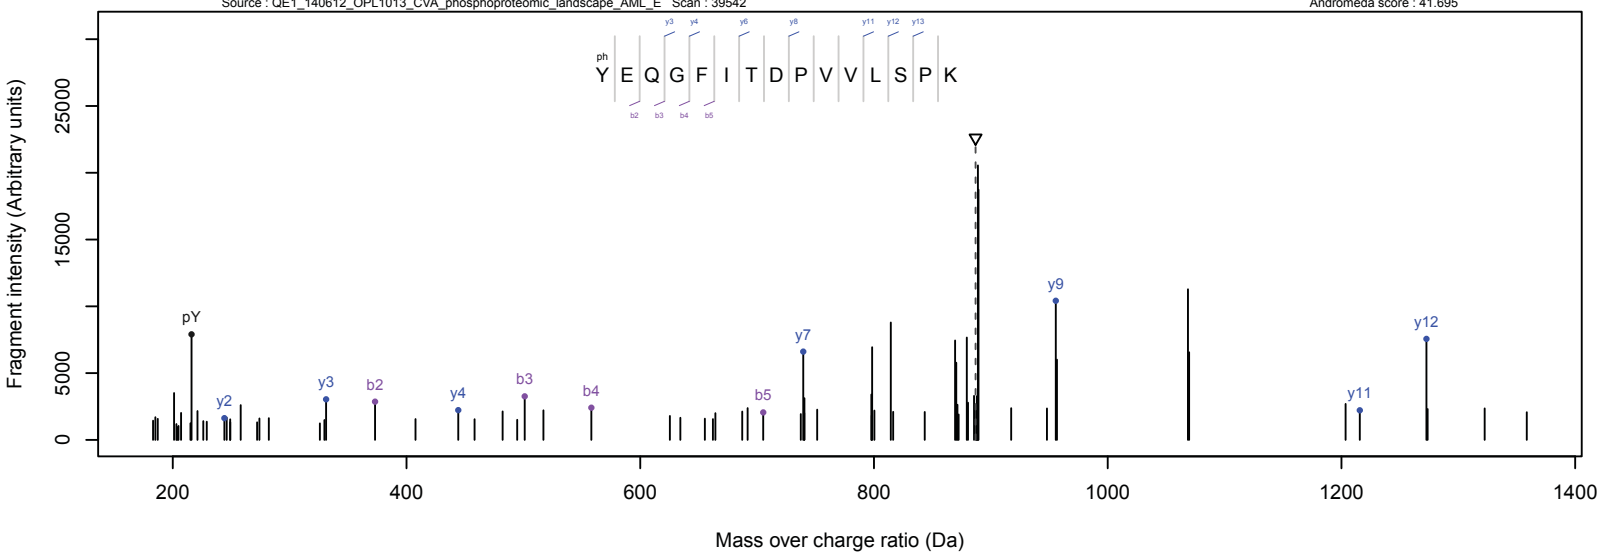

## YQELQVLF EAYQIKK-3+

Source: QE1\_140822\_OPL1013\_CvA\_pTyrIP\_AML\_cell\_lines\_part2\_B Scan: 32769

Andromeda score: 41.695

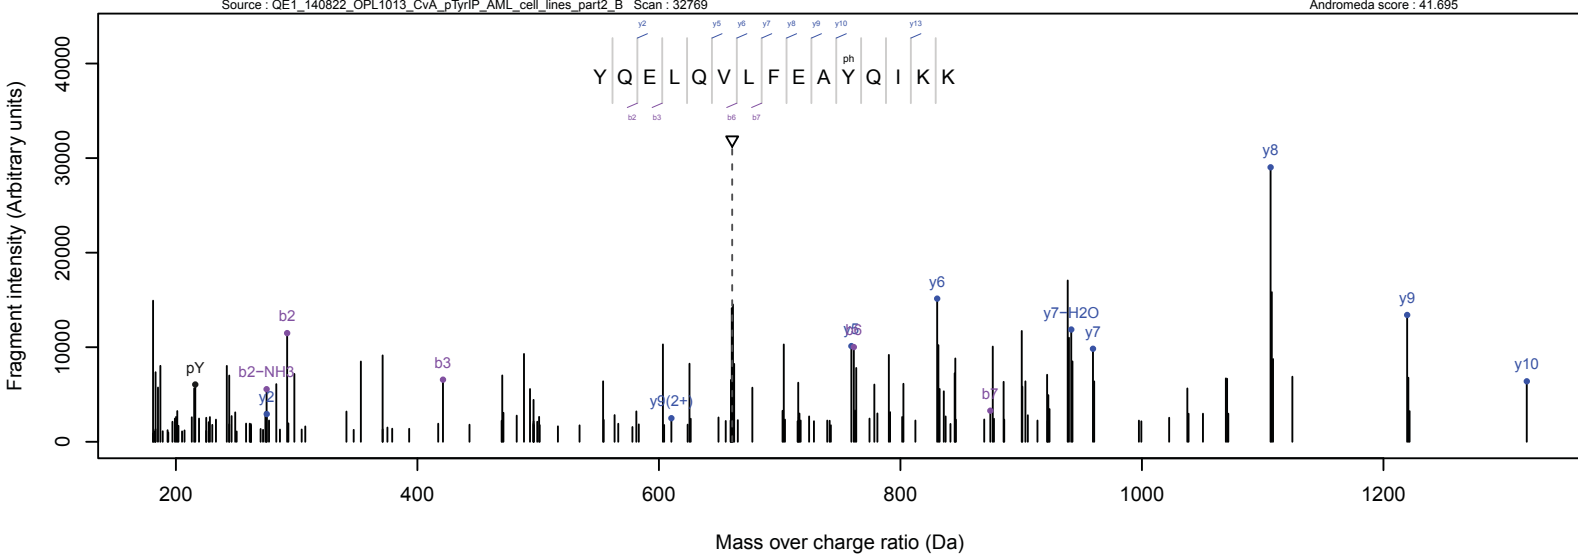

## SYDY(ph)EAWAK-2+

Source: QE1\_140612\_OPL1013\_CVA\_phosphoproteomic\_landscape\_AML\_B Scan: 18678

Andromeda score: 41.664

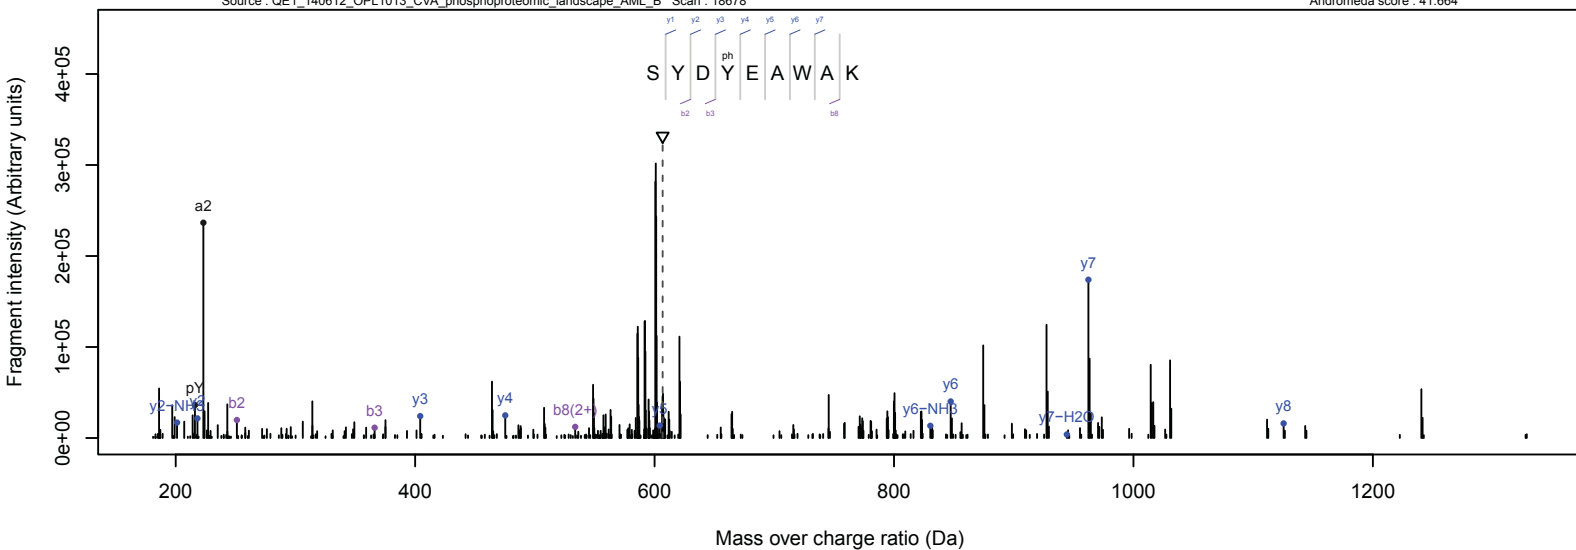

## FY(ph)WRPHCR-2+

Source: QE1\_140908\_OPL1013\_CvA\_pTyrIP\_AML\_ML2 Scan: 22087

Andromeda score: 41.652

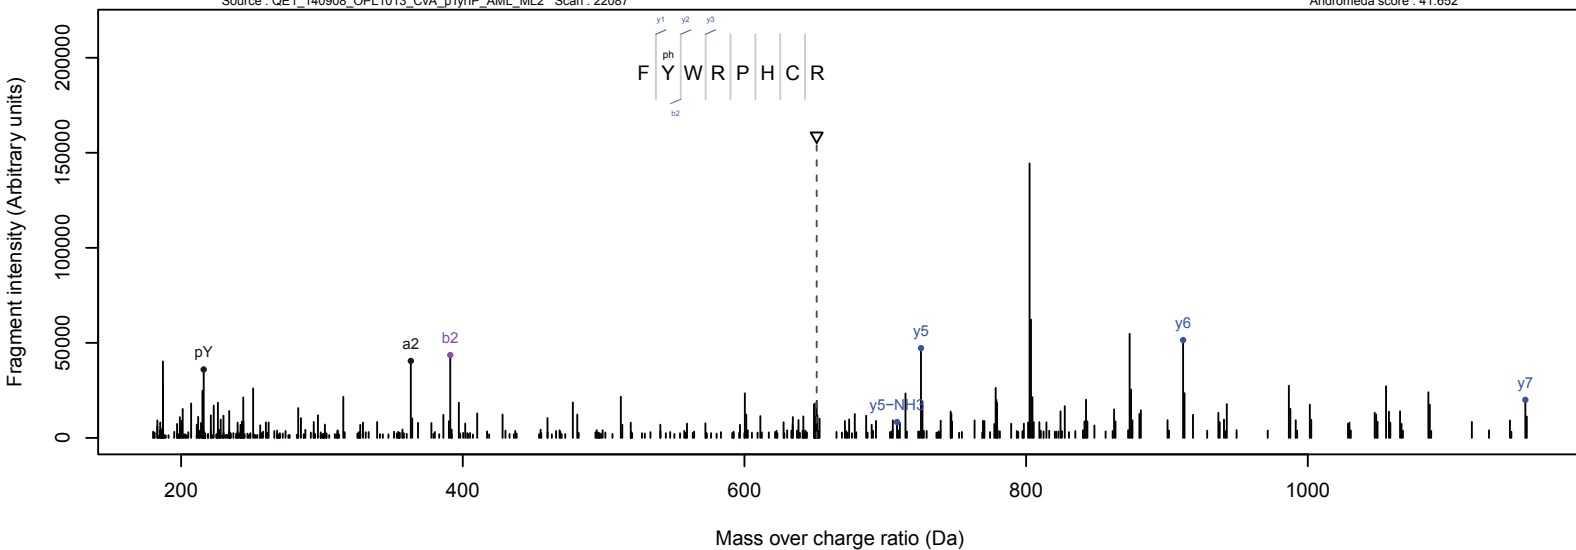

## LLY(ph)DSPK-2+

Source: QE1\_140612\_OPL1013\_CVA\_phosphoproteomic\_landscape\_AML\_B Scan: 8504

Andromeda score: 41.652

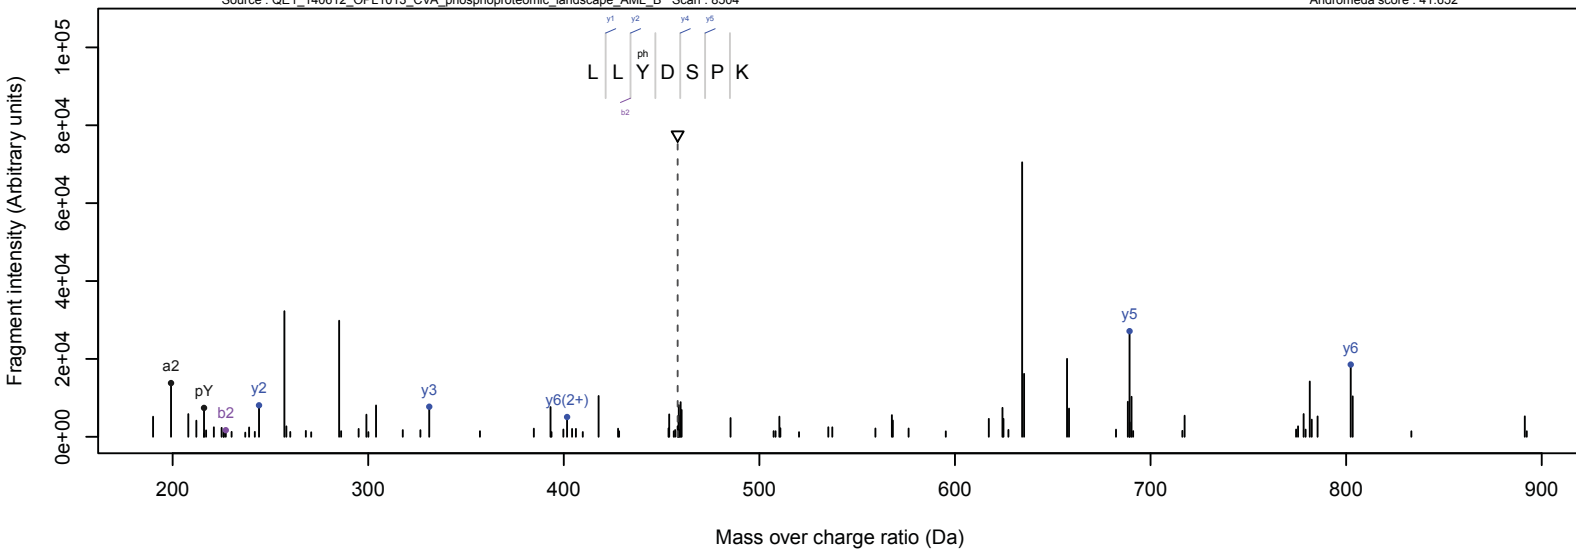

EVPEDSNNFDGSHVYMHSY(ph)NVYR-4+

Source : QE1\_140908\_OPL1013\_CVA\_pTyrIP\_AML\_HEL Scan : 25913

Andromeda score : 41.648

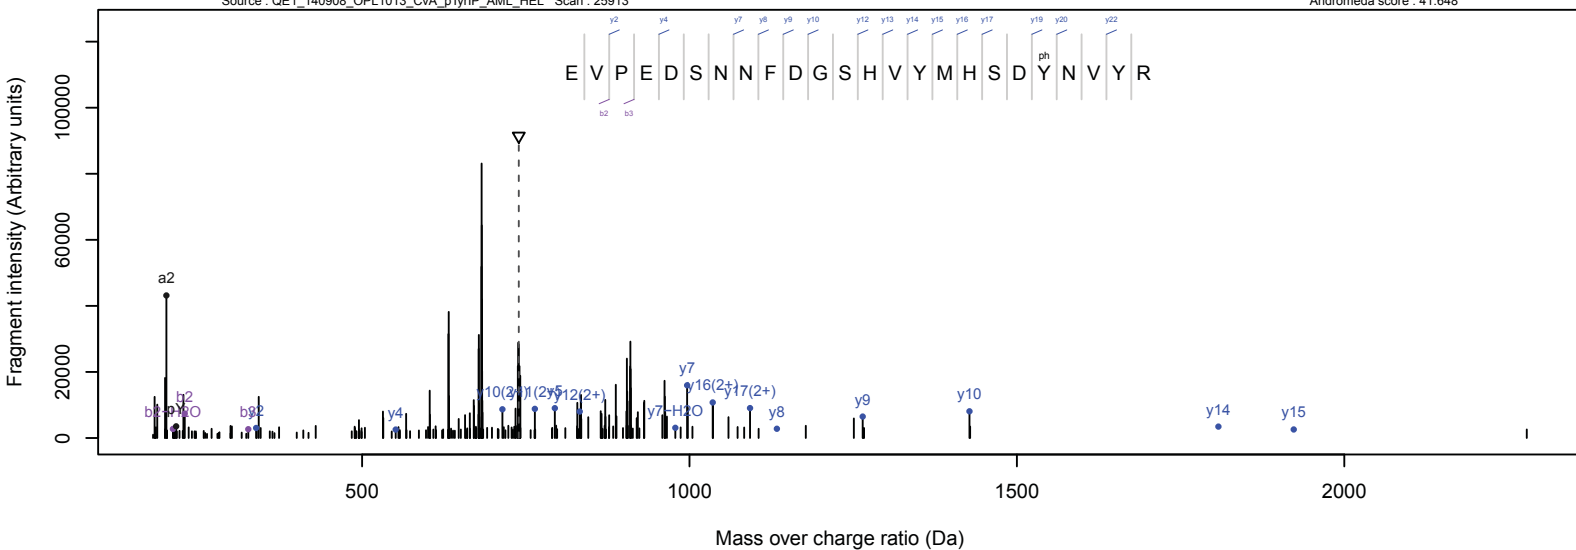

ALEQKPDDAQY(ph)YCQR-3+

Source : QE1\_140612\_OPL1013\_CVA\_phosphoproteomic\_landscape\_AML\_B Scan : 10070

Andromeda score : 41.621

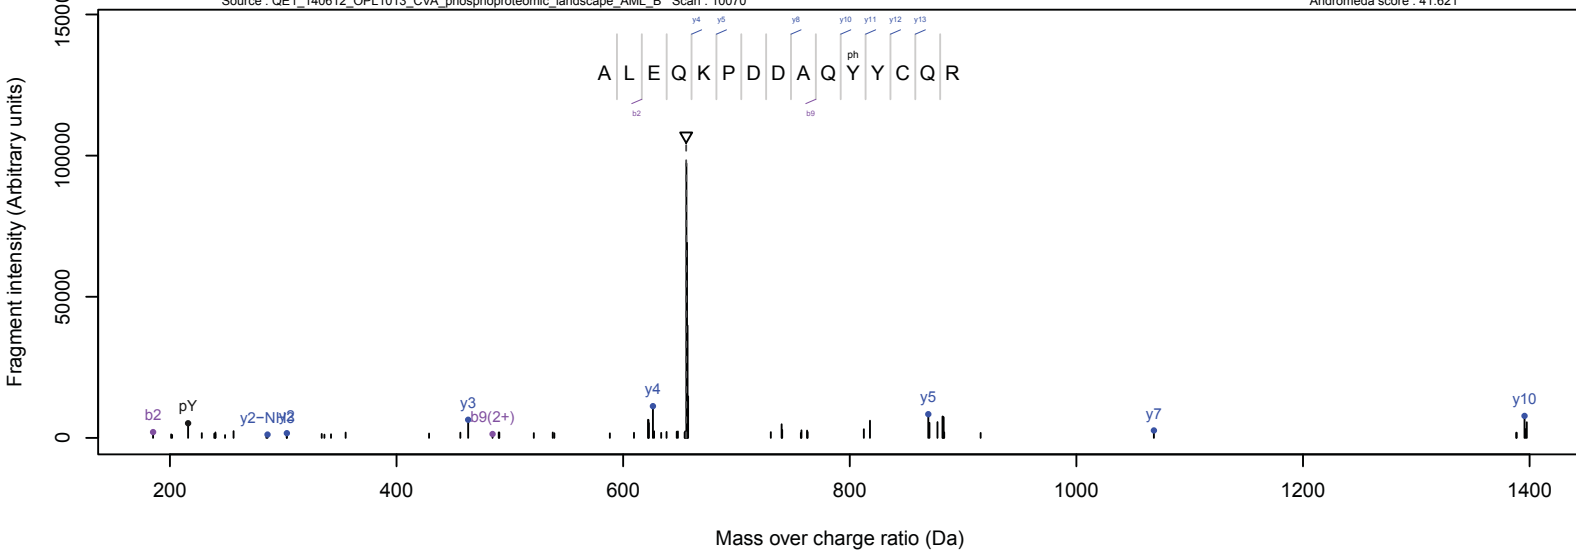

STY(ph)NYSLPITVK-2+

Source : QE1\_140612\_OPL1013\_CVA\_phosphoproteomic\_landscape\_AML\_C Scan : 32266

Andromeda score : 41.621

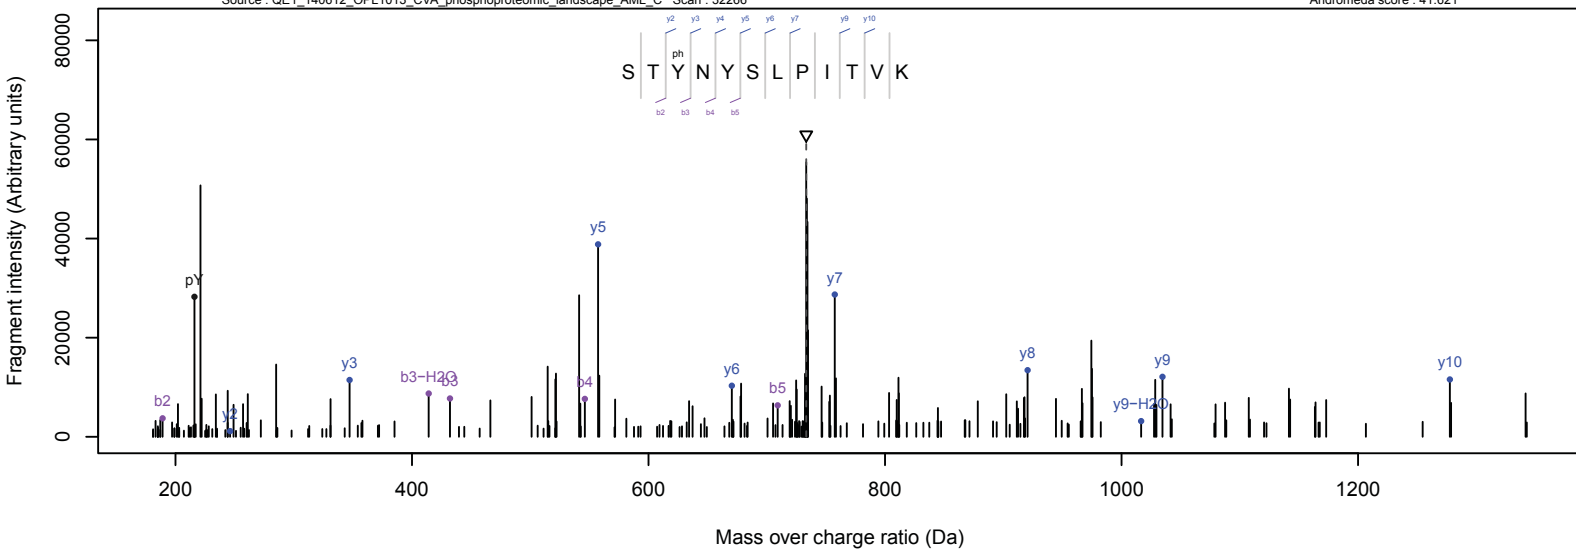

FINHSCEPN<sup>ph</sup>YSR-3+

Source: QE1\_140612\_OPL1013\_CVA\_phosphoproteomic\_landscape\_AML\_B Scan: 7141

Andromeda score: 41.577

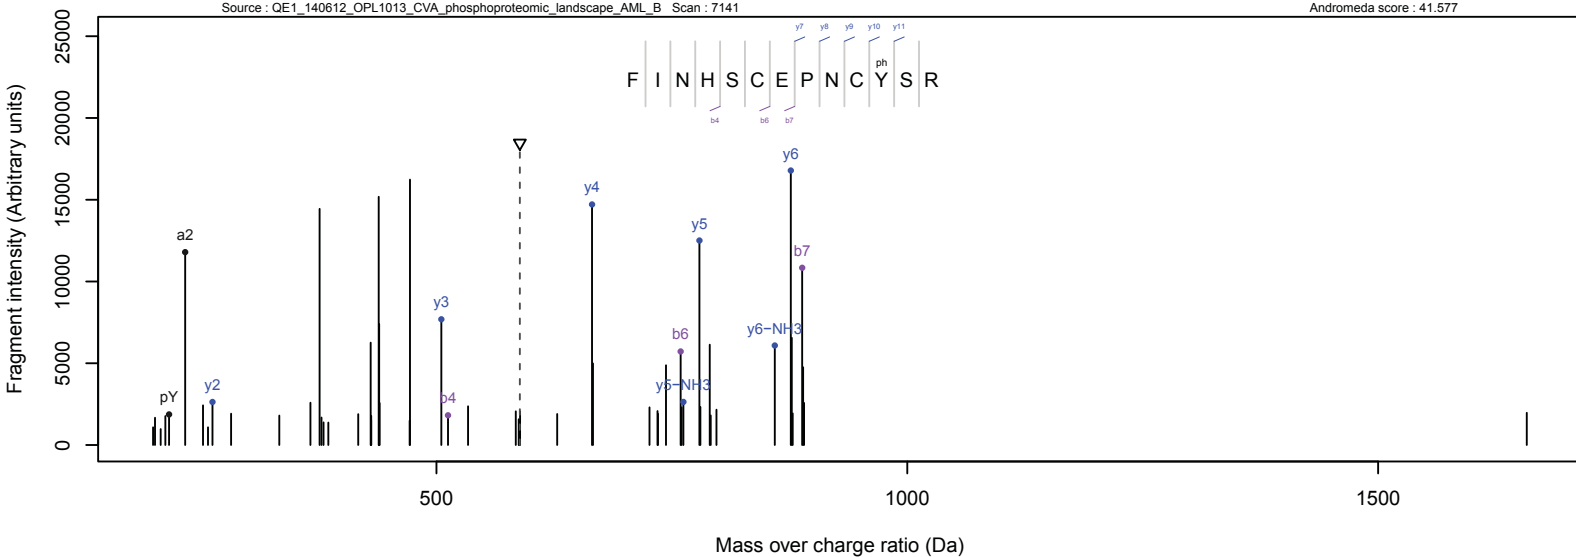DAQY<sup>ph</sup>LYLK-2+

Source: QE1\_140612\_OPL1013\_CVA\_phosphoproteomic\_landscape\_AML\_D Scan: 21483

Andromeda score: 41.575

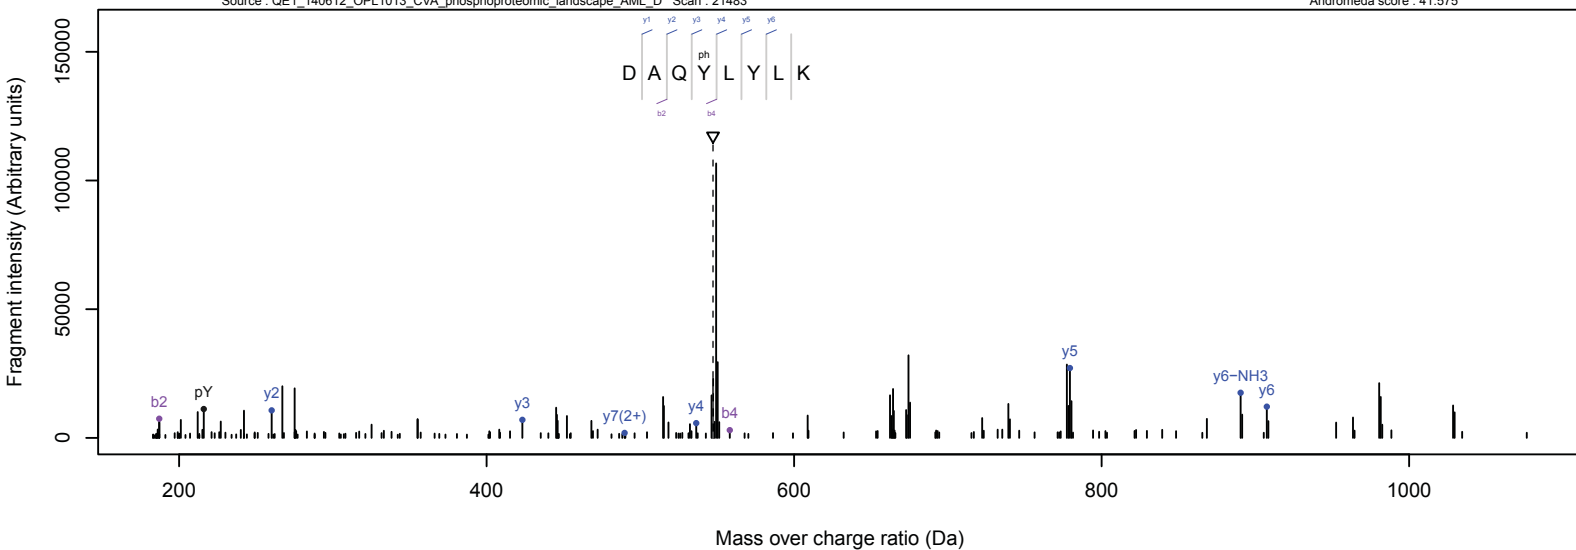LAAVTY<sup>ph</sup>NGVDNKNK-3+

Source: QE1\_140612\_OPL1013\_CVA\_phosphoproteomic\_landscape\_AML\_B Scan: 8313

Andromeda score: 41.542

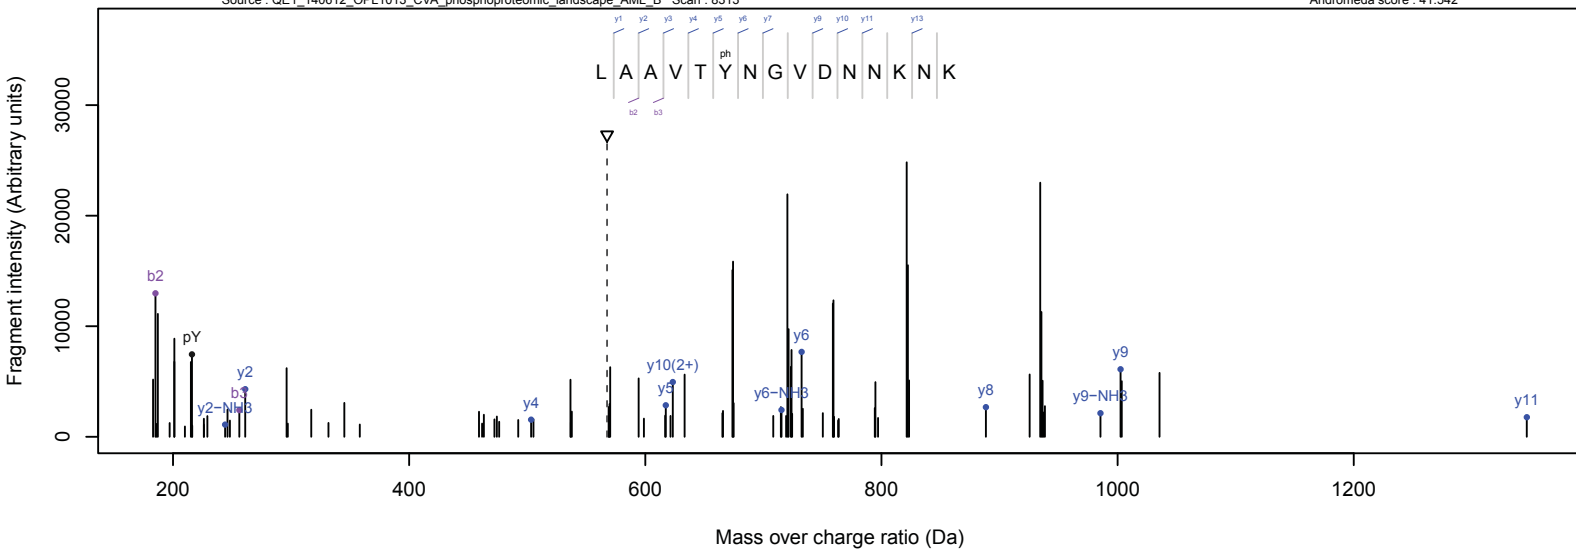

## HEYLYGSY(ph)PLCQFVQKPR-3+

Source : QE1\_140612\_OPL1013\_CVA\_phosphoproteomic\_landscape\_AML\_A Scan : 31212

Andromeda score : 41.524

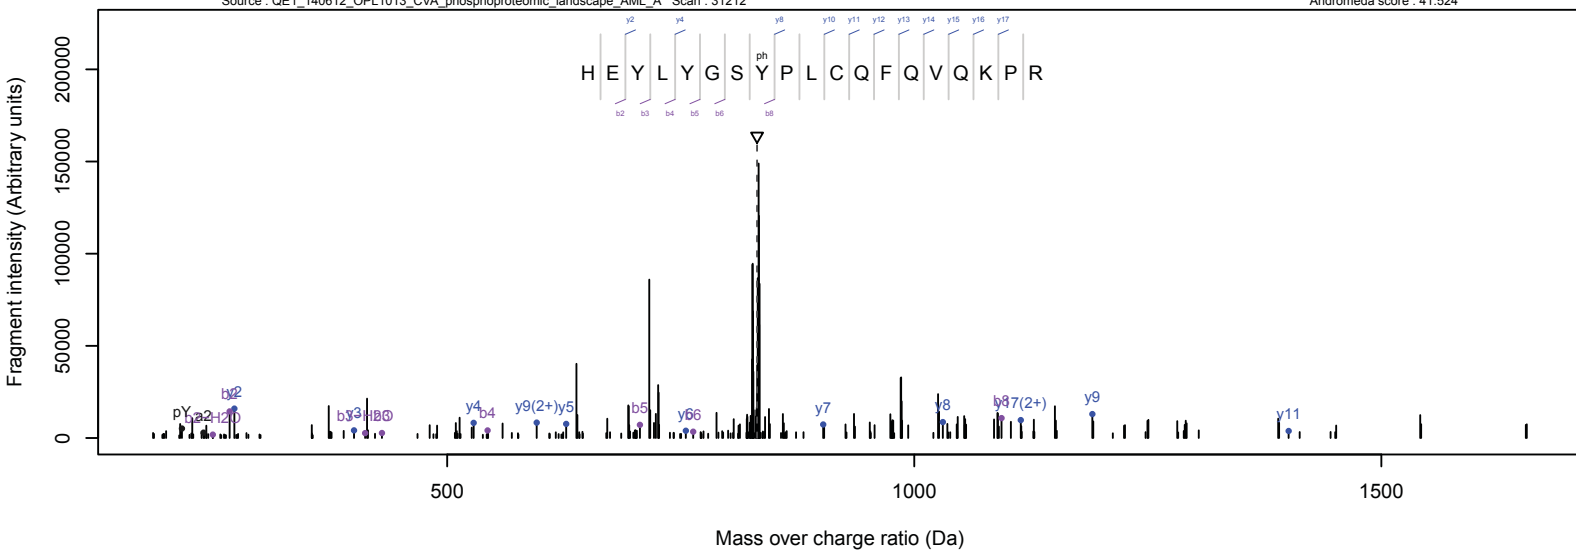

## GVPLYASCTATQSFSTR-2+

Source : QE1\_140612\_OPL1013\_CVA\_phosphoproteomic\_landscape\_AML\_C Scan : 29689

Andromeda score : 41.513

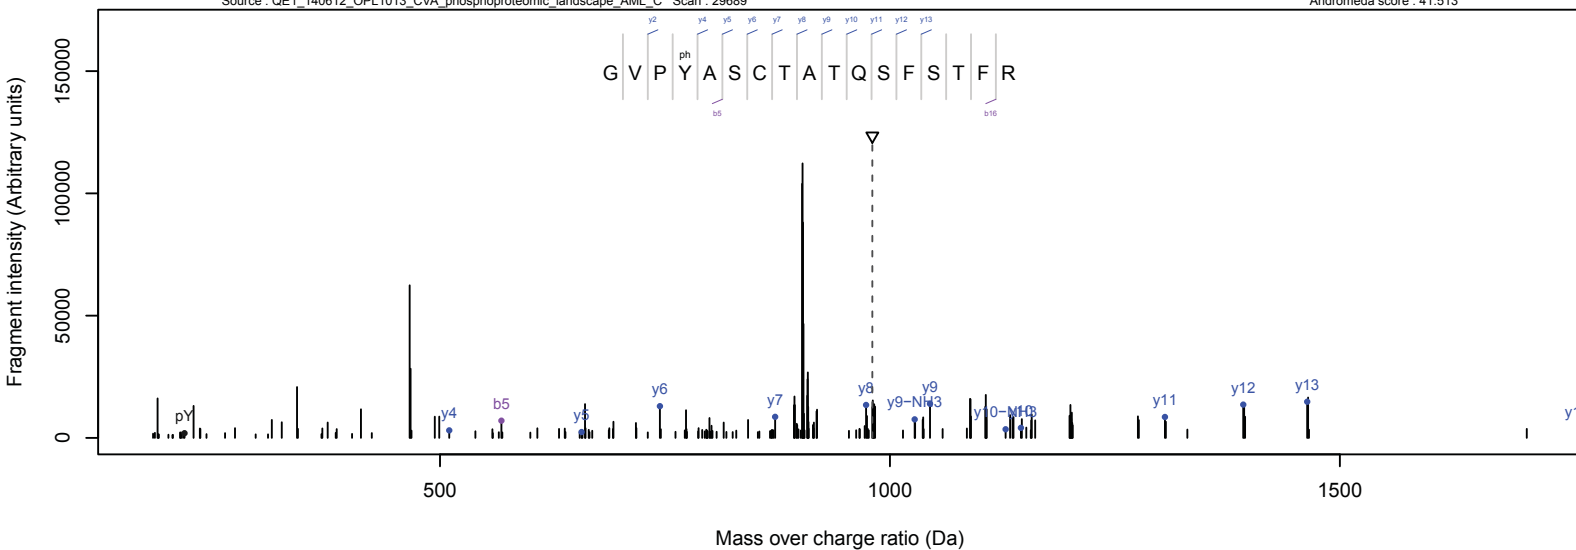

## QLLLETPHLYYVDPVVK-3+

Source : QE1\_140612\_OPL1013\_CVA\_phosphoproteomic\_landscape\_AML\_C Scan : 40525

Andromeda score : 41.513

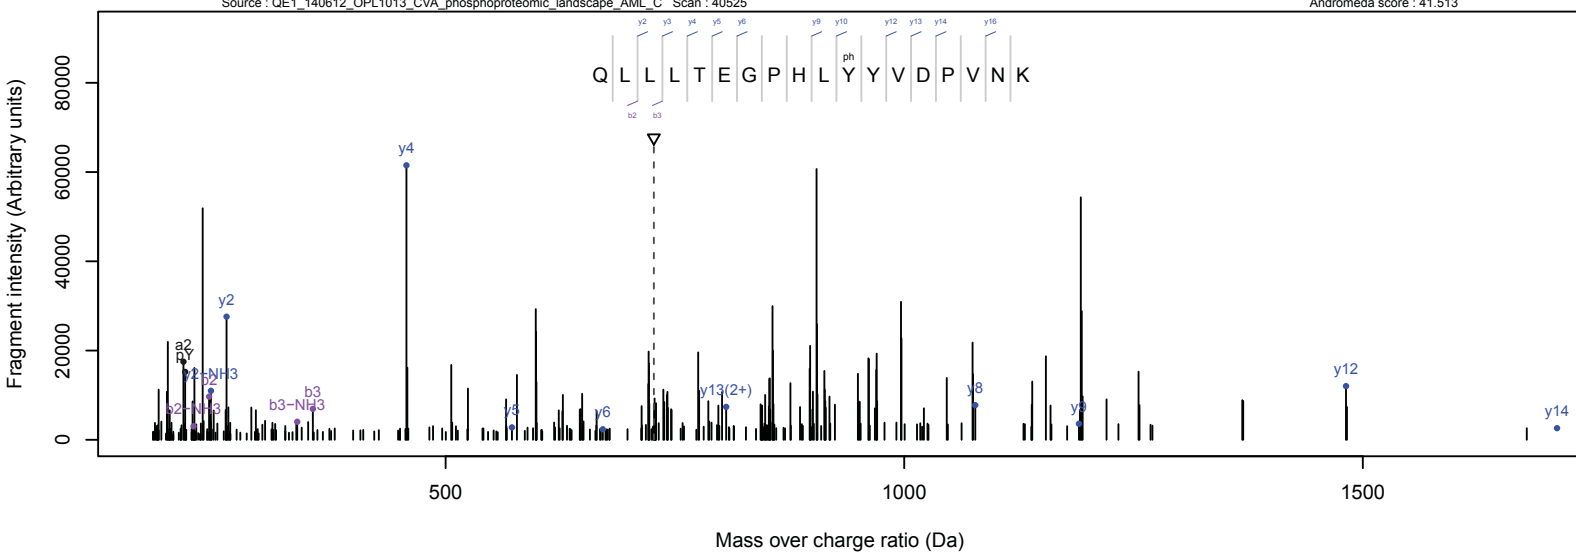



## Y(ph)STPHAFNTSSPSSEGLSQR-3+

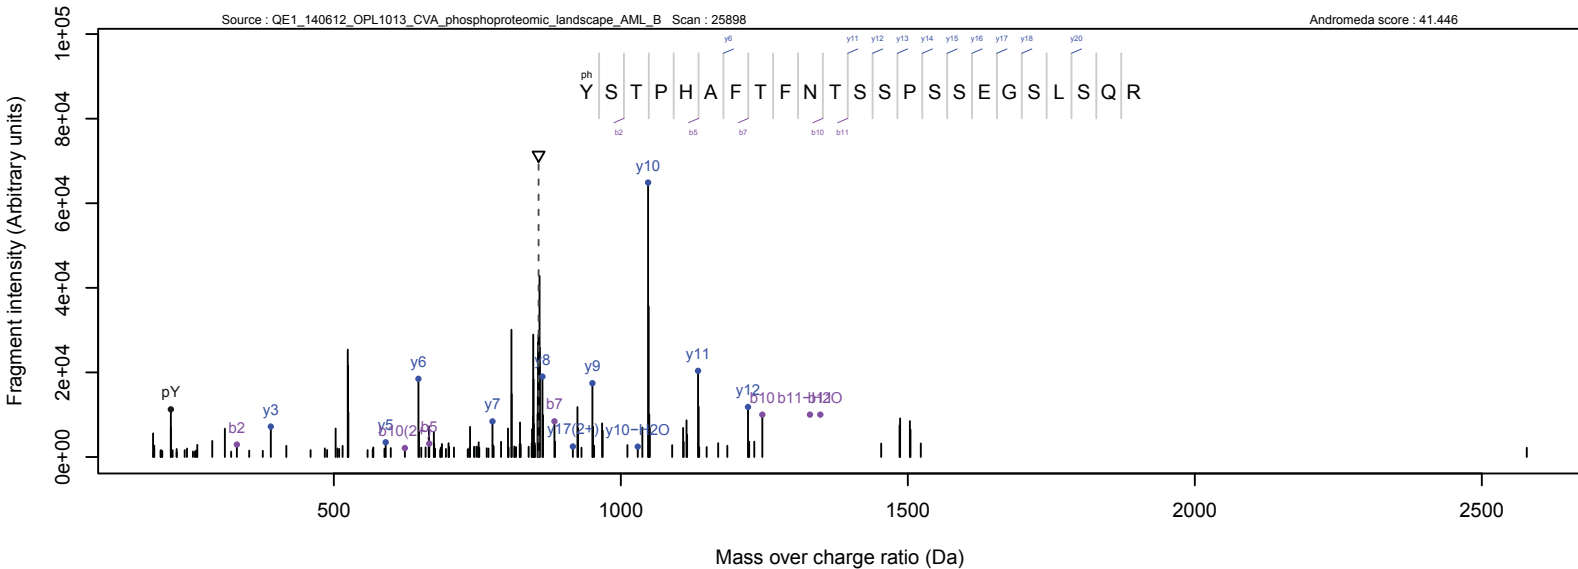

## YLNRNY(ph)WEK-2+

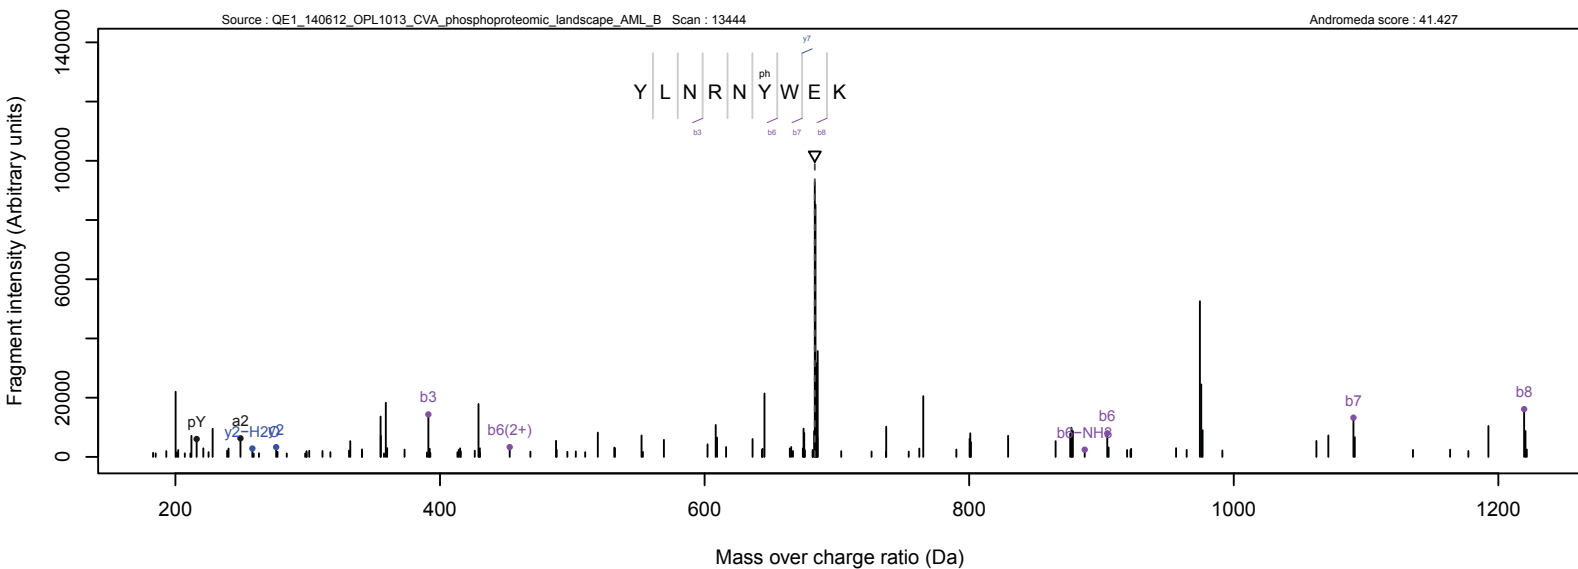

## DGY(ph)NYTLISK-2+

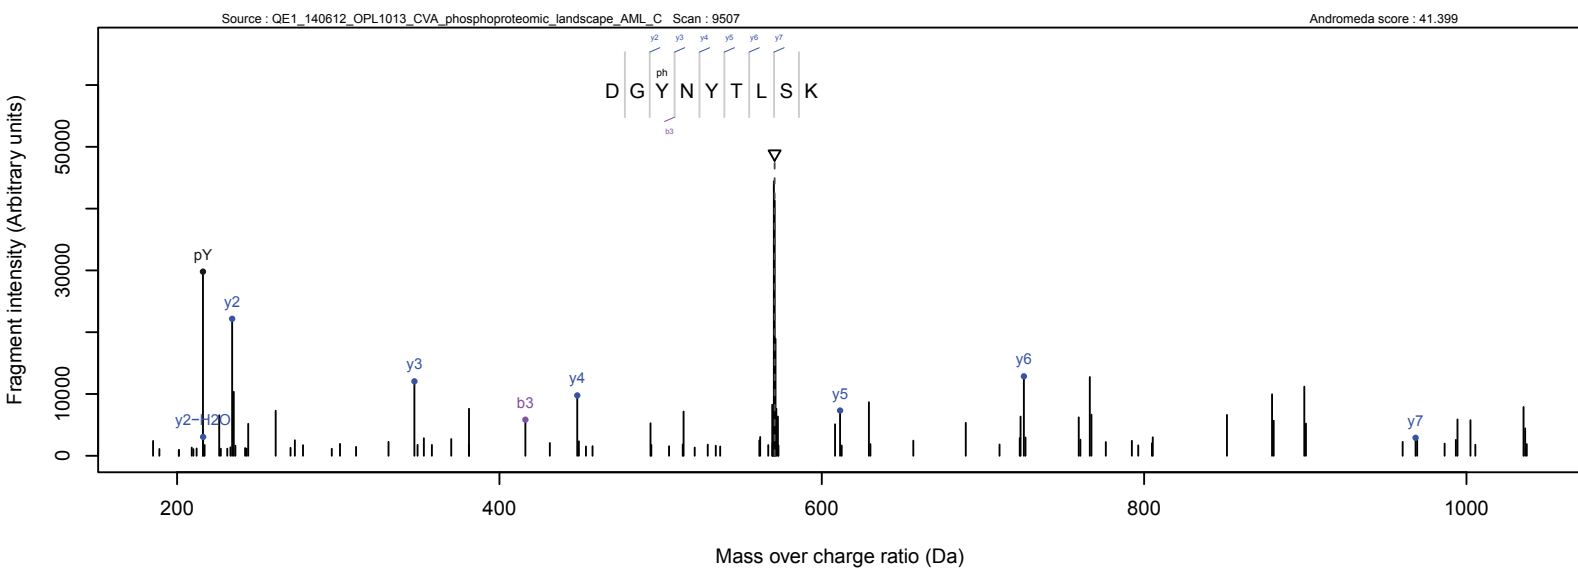

## KM(ox)GVPY(ph)CIK-2+

Source : QE1\_140908\_OPL1013\_CvA\_pTyrIP\_AML\_OCI\_AML3 Scan : 19729

Andromeda score : 41.399

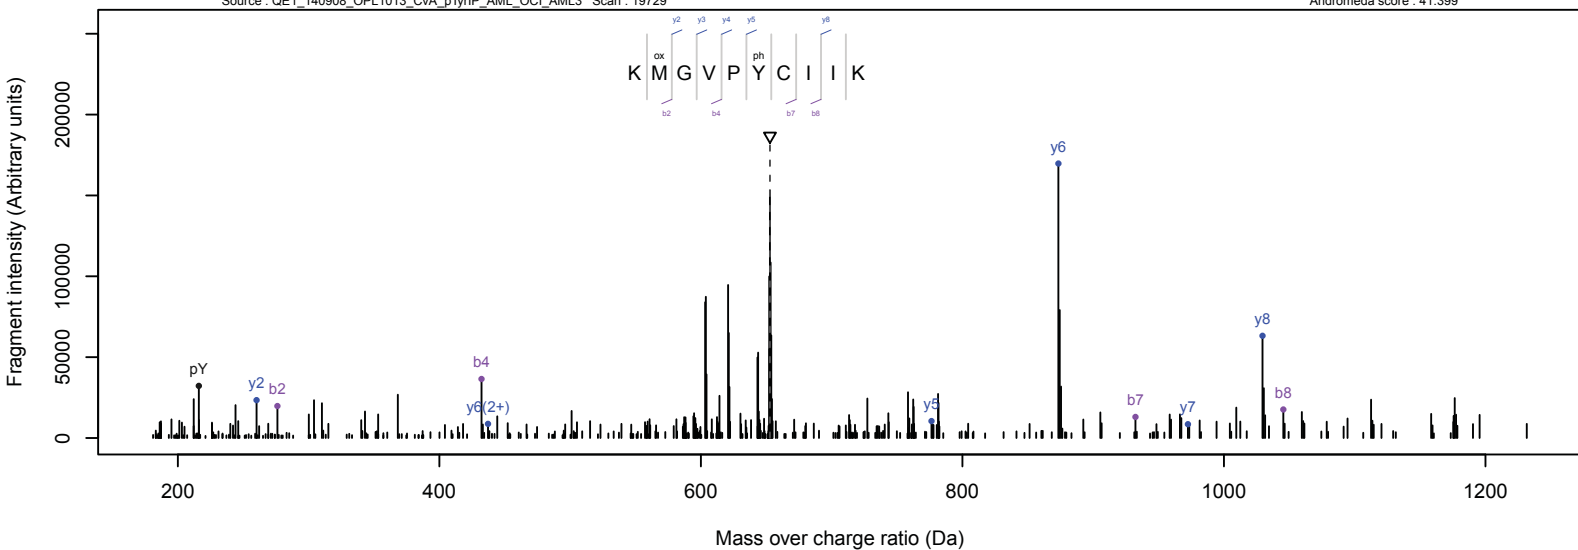

## LALALDEY(ph)VR-2+

Source : QE1\_140908\_OPL1013\_CvA\_pTyrIP\_AML\_HEL Scan : 34818

Andromeda score : 41.399

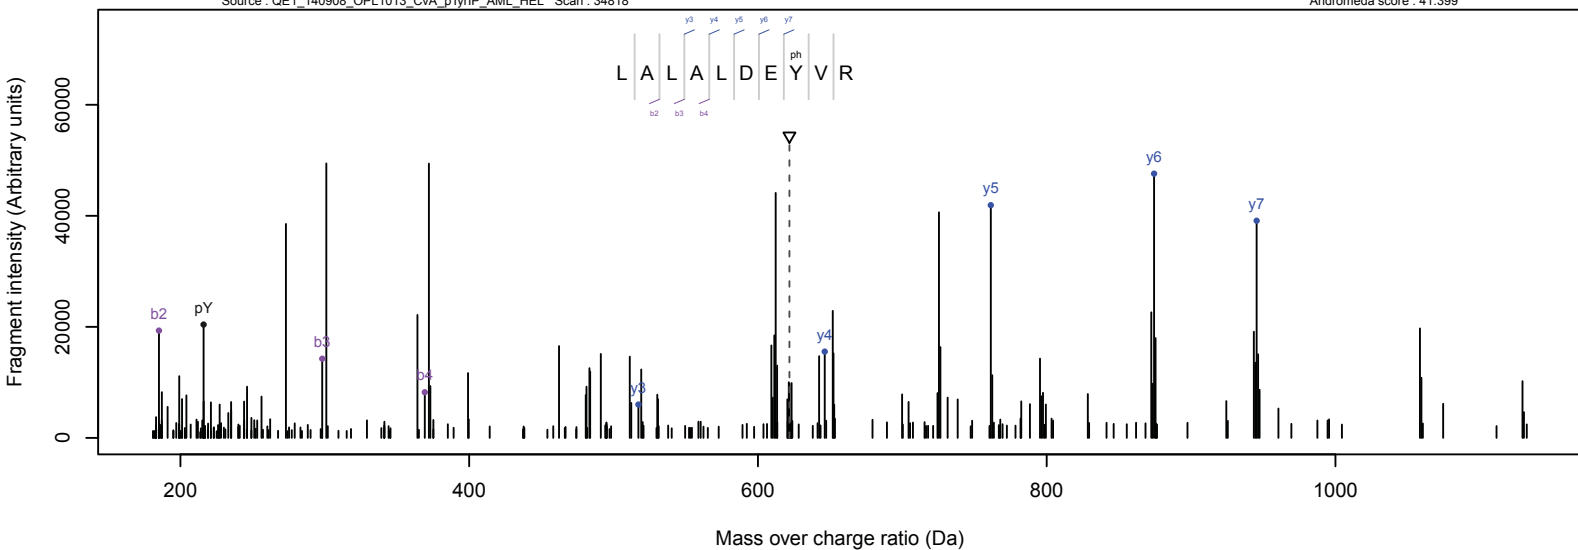

## DCQLNAHKDHQ(ph)QFLEDAVR-4+

Source : QE1\_140908\_OPL1013\_CvA\_pTyrIP\_AML\_HEL Scan : 24600

Andromeda score : 41.292

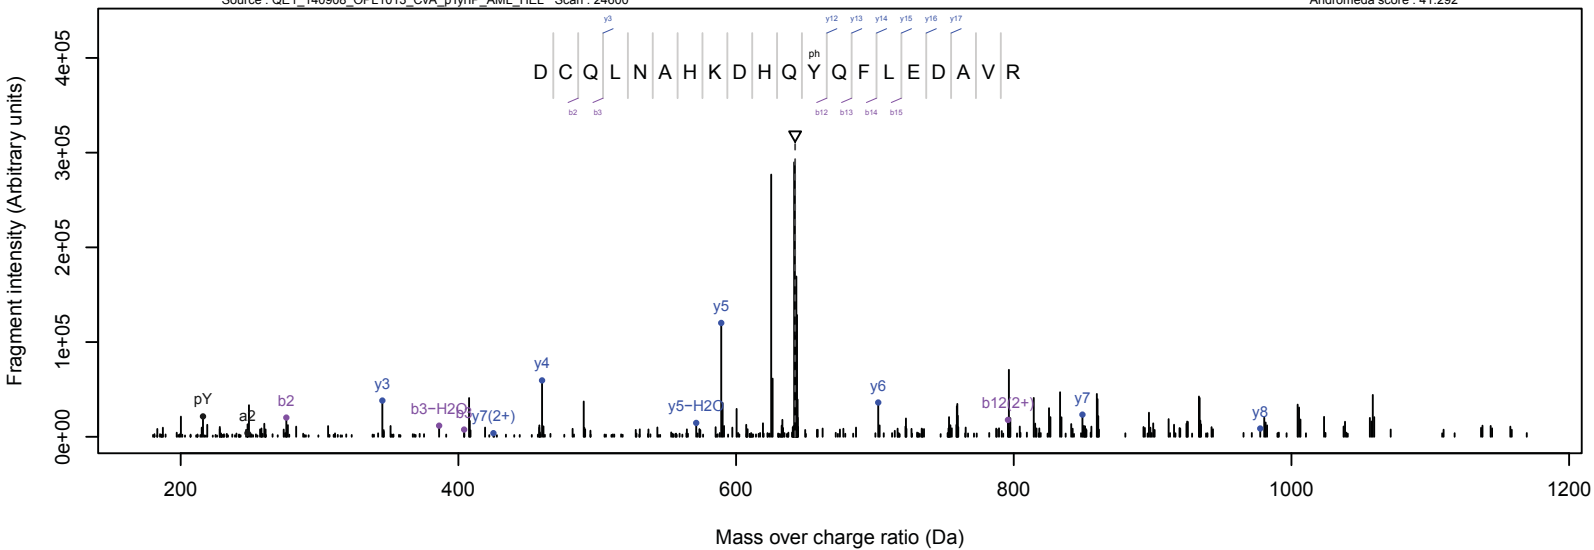



APLRPGANPQLEWQY(ph)YQNK-3+

Source : QE1\_140612\_OPL1013\_CVA\_phosphoproteomic\_landscape\_AML\_C Scan : 29526

Andromeda score : 41.257

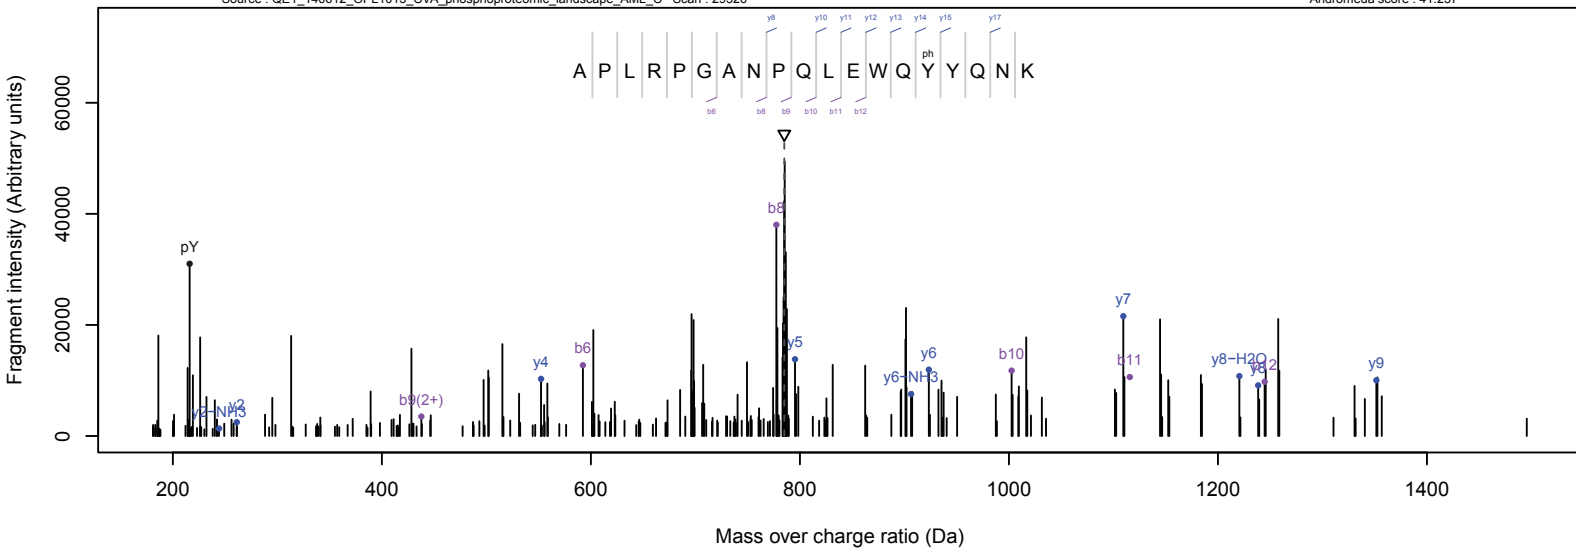

PGFTSLPGSTM(ox)TPPPSGPNP(ph)AR-3+

Source : QE1\_140908\_OPL1013\_CvA\_pTyrIP\_AML\_HEL Scan : 29903

Andromeda score : 41.256

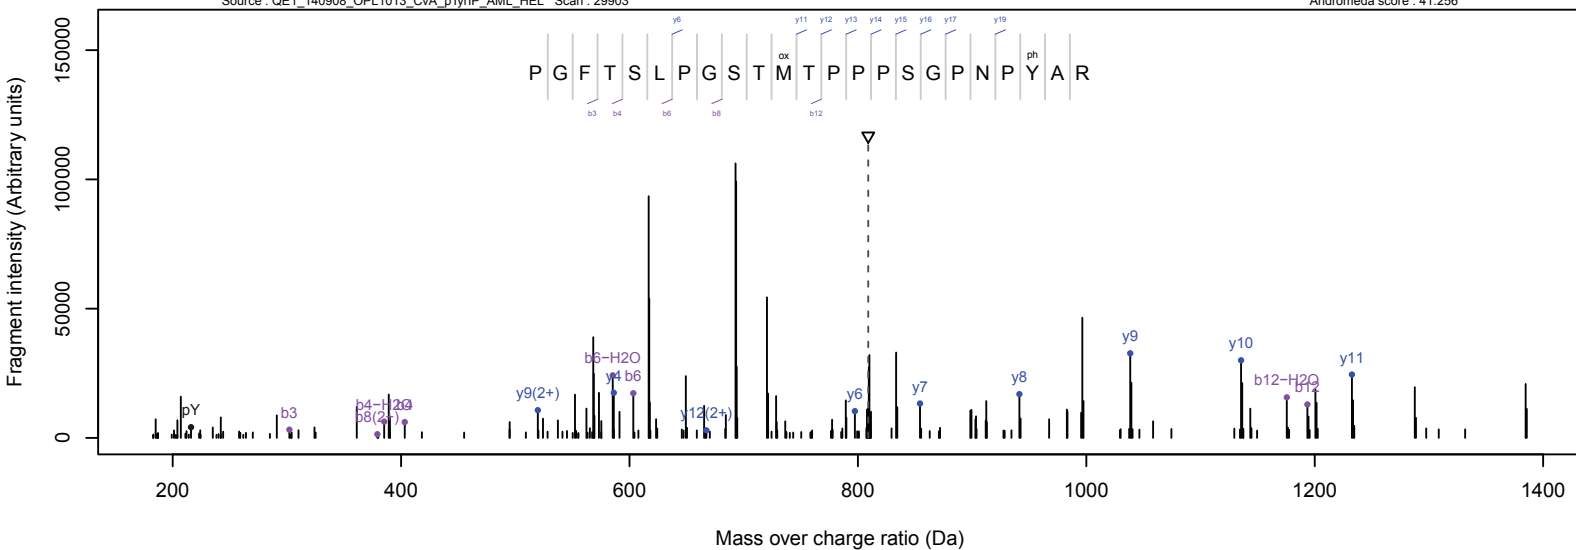

IEGSNKVPVDPAT(ph)YGQFYGGDSYIILYNYR-3+

Source : QE1\_140822\_OPL1013\_CvA\_pTyrIP\_AML\_cell\_lines\_part2\_B Scan : 37872

Andromeda score : 41.247

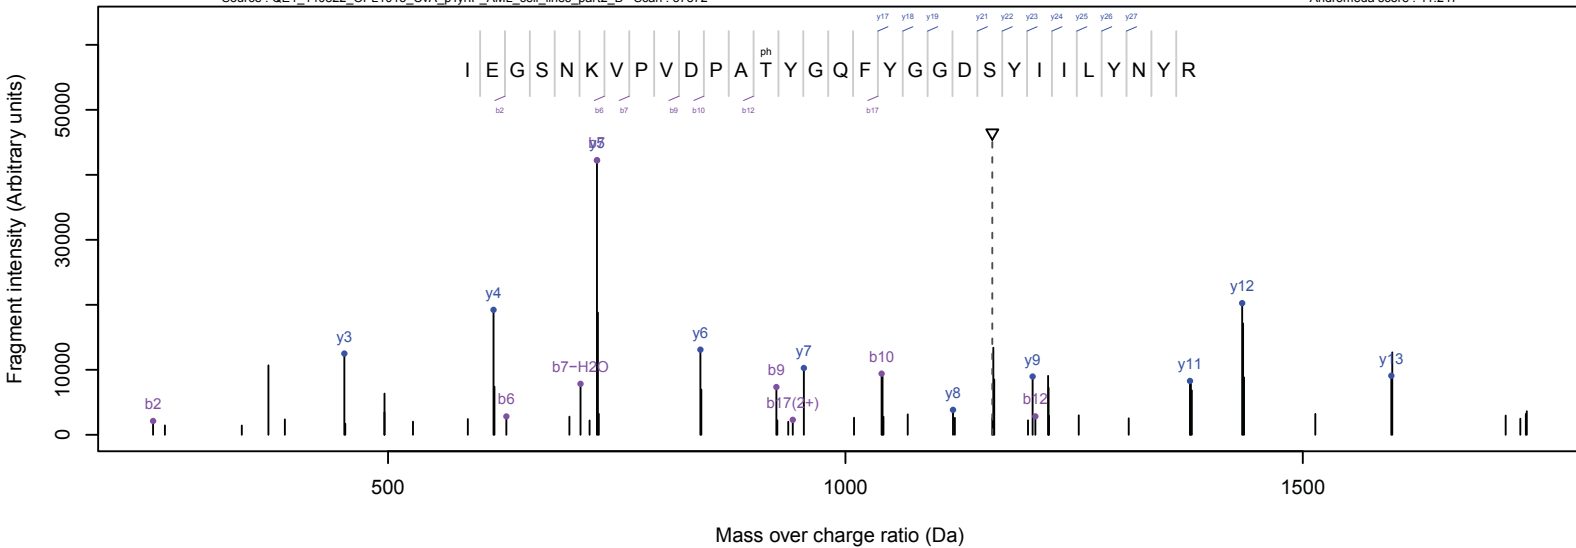

## EYLLQY(ph)NDPNRR-3+

Source : QE1\_140612\_OPL1013\_CVA\_phosphoproteomic\_landscape\_AML\_B Scan : 17471

Andromeda score : 41.242

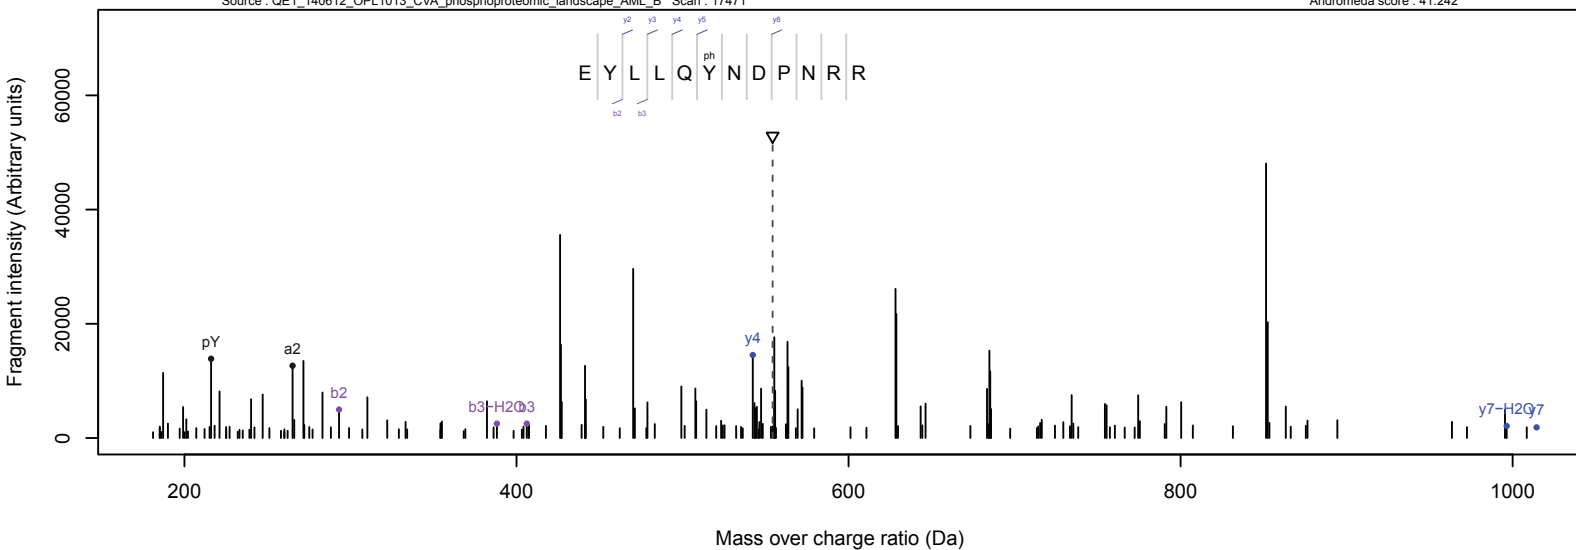

## FSY(ph)FPSYVDK-2+

Source : QE1\_140612\_OPL1013\_CVA\_phosphoproteomic\_landscape\_AML\_D Scan : 30069

Andromeda score : 41.242

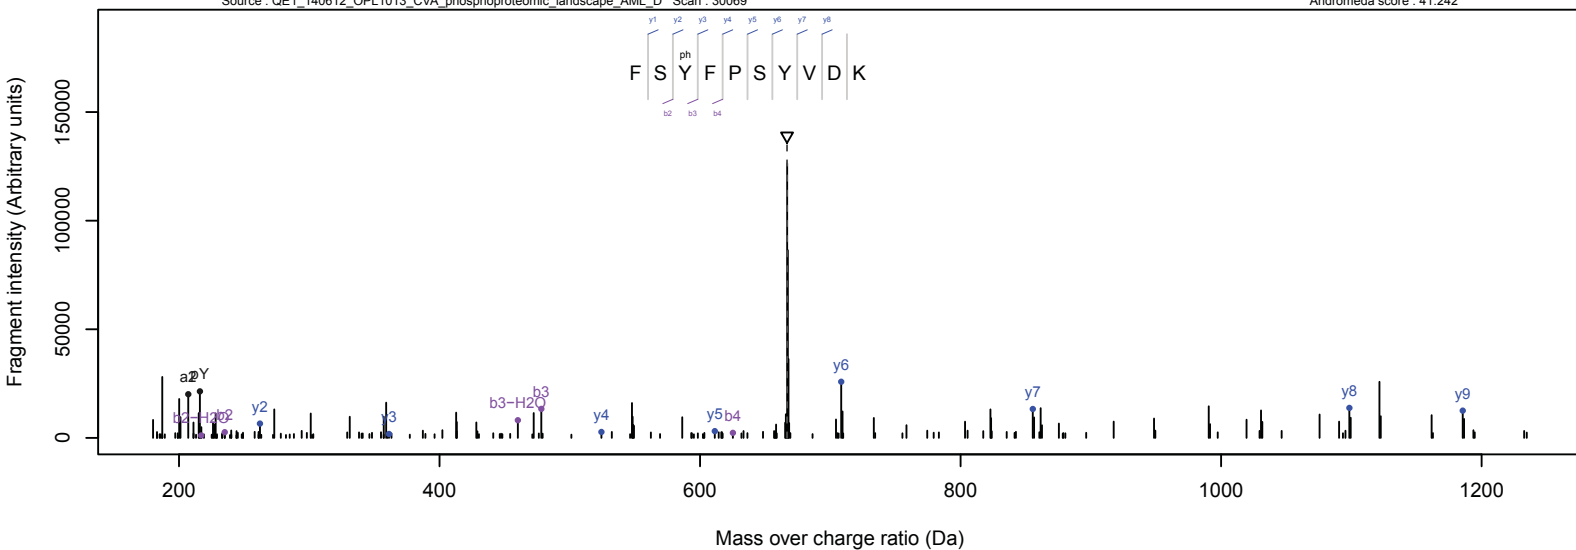

## HLVQTHY(ph)YNYR-3+

Source : QE1\_140612\_OPL1013\_CVA\_phosphoproteomic\_landscape\_AML\_D Scan : 12619

Andromeda score : 41.242

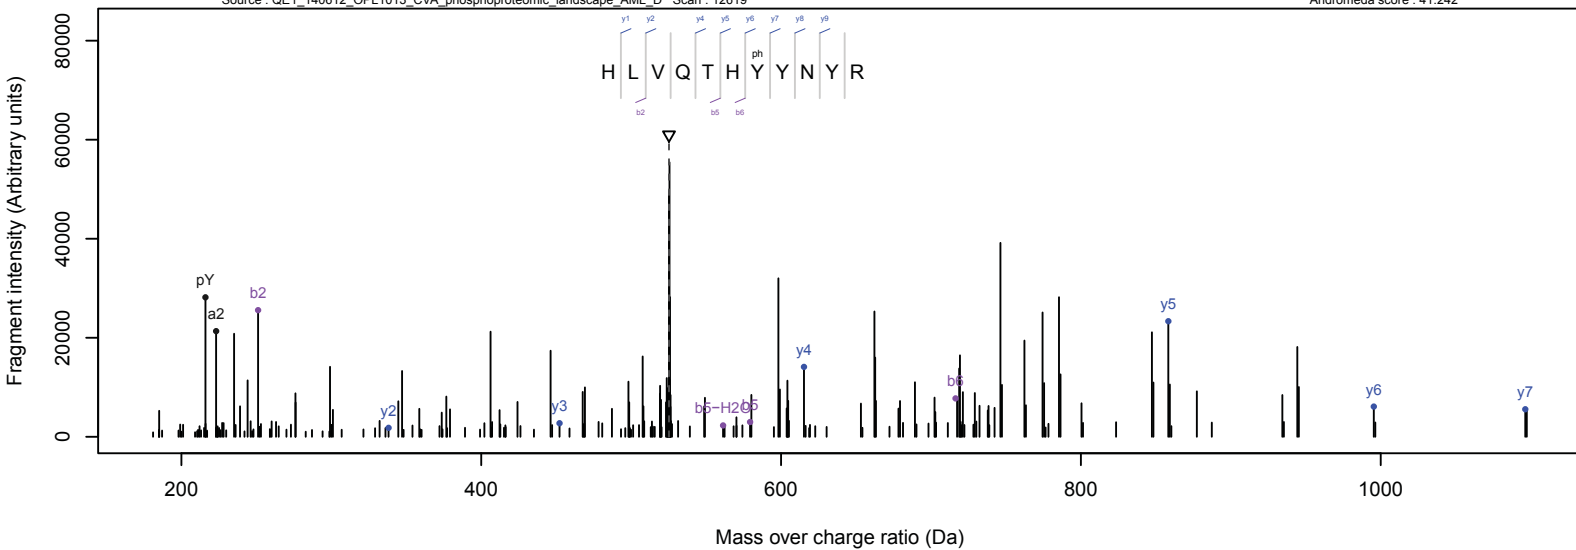

## TGTCGY(ph)CGLQFR-2+

Source : QE1\_140612\_OPL1013\_CVA\_phosphoproteomic\_landscape\_AML\_C Scan : 19491

Andromeda score : 41.242

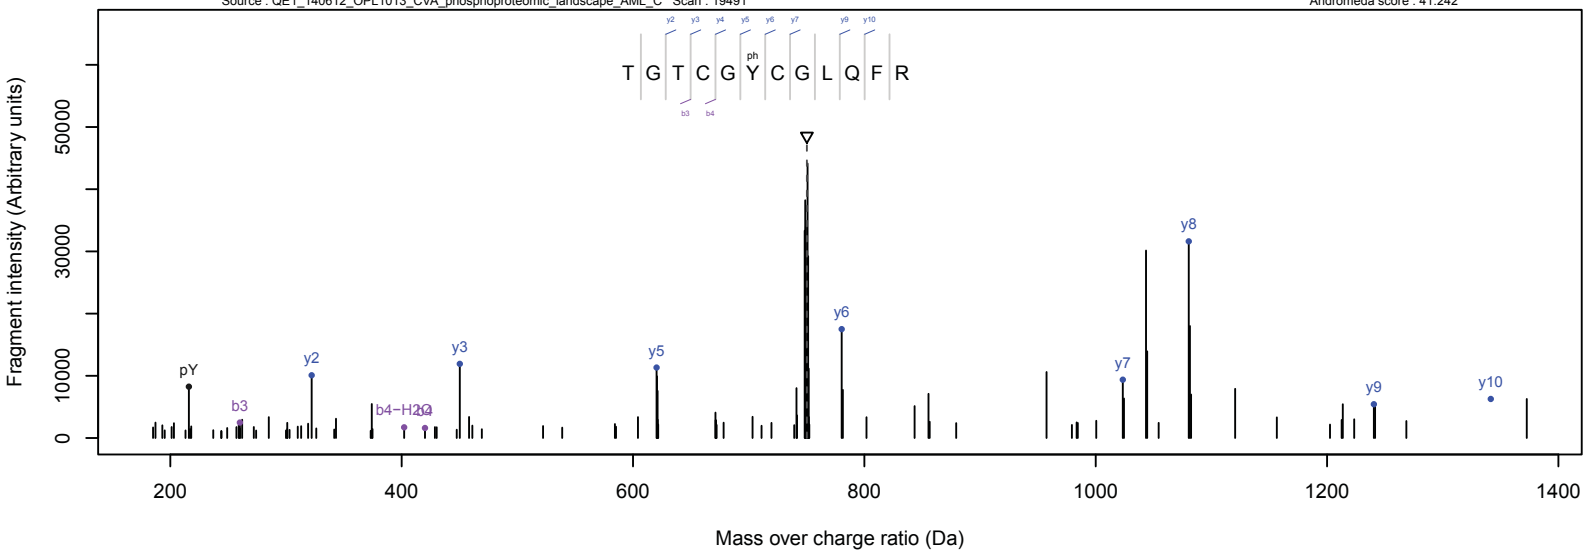

## VAIHYP(h)INPPPAK-3+

Source : QE1\_140612\_OPL1013\_CVA\_phosphoproteomic\_landscape\_AML\_C Scan : 21360

Andromeda score : 41.242

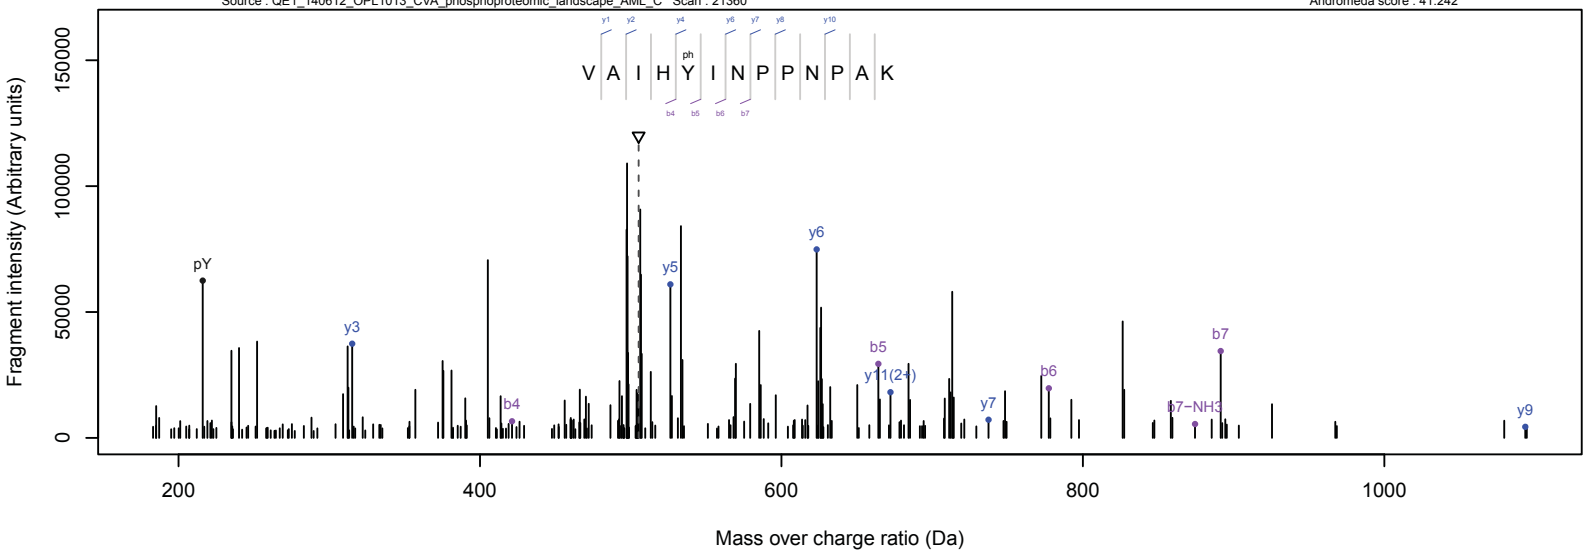

## VISSVY(ph)YTHR-3+

Source : QE1\_140612\_OPL1013\_CVA\_phosphoproteomic\_landscape\_AML\_C Scan : 15685

Andromeda score : 41.242

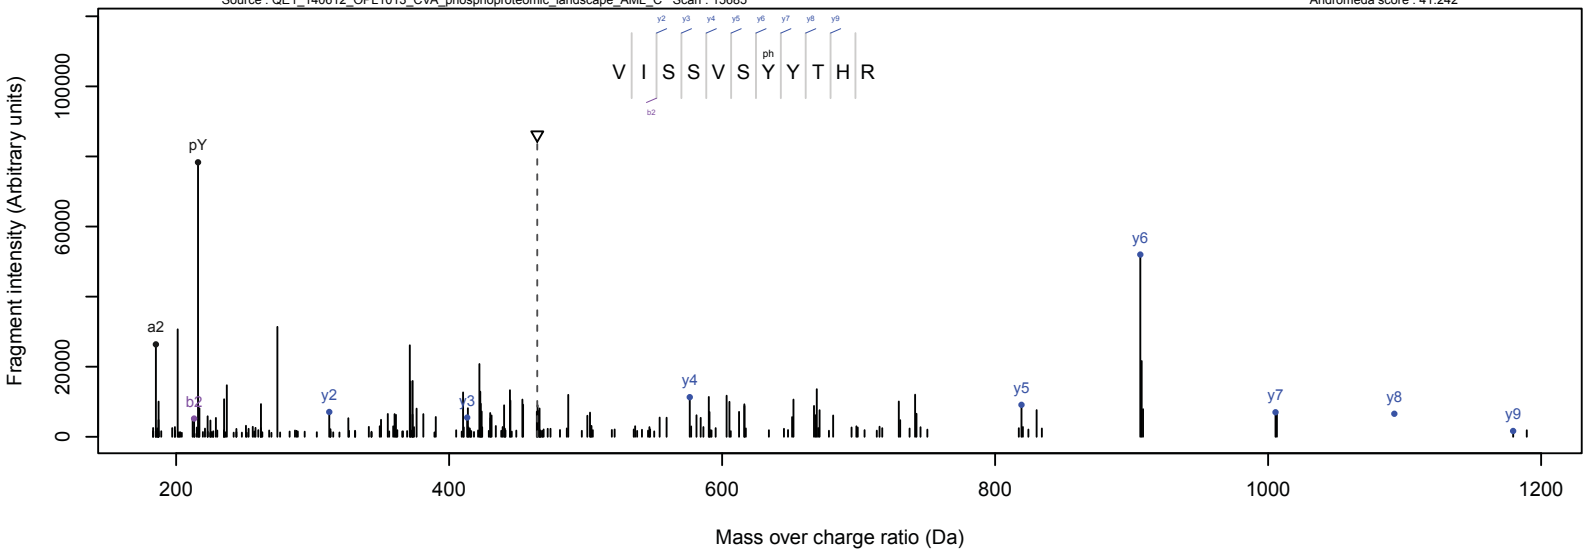

## IYANFFYPYGDASK-2+

Source: QE1\_140612\_OPL1013\_CVA\_phosphoproteomic\_landscape\_AML\_C Scan: 34476

Andromeda score: 41.227

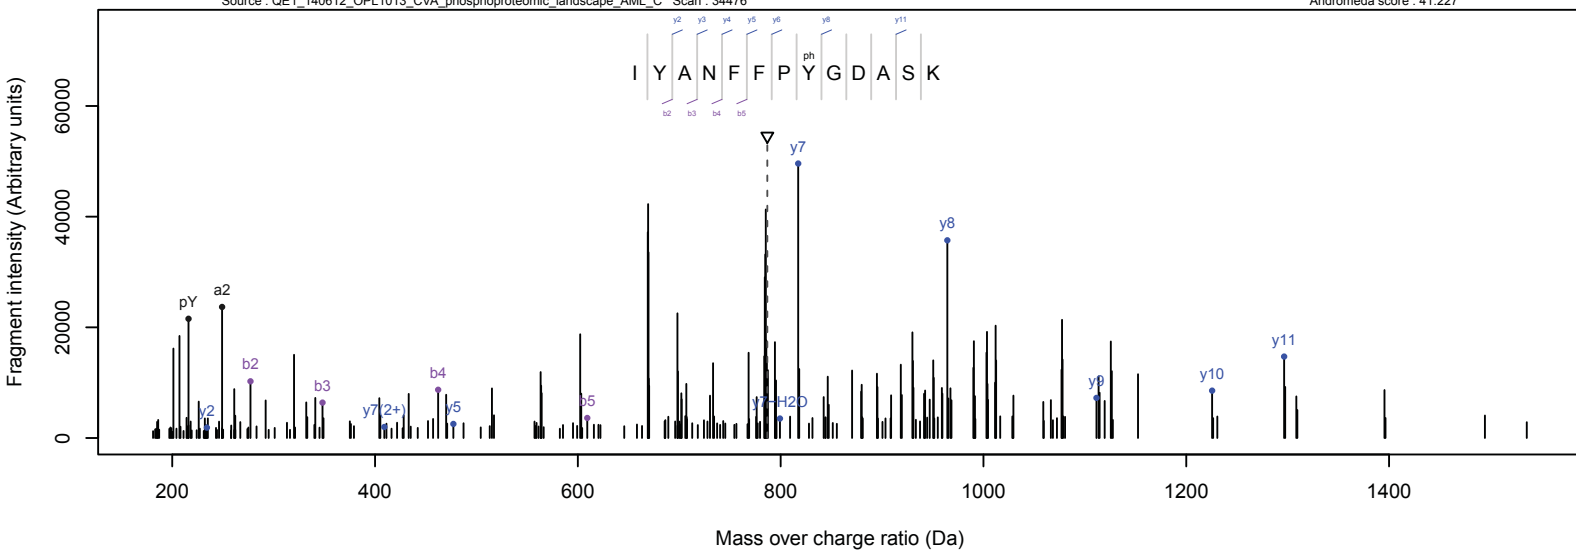

## CSPIGVY(TSGK)-2+

Source: QE1\_140612\_OPL1013\_CVA\_phosphoproteomic\_landscape\_AML\_D Scan: 12747

Andromeda score: 41.218

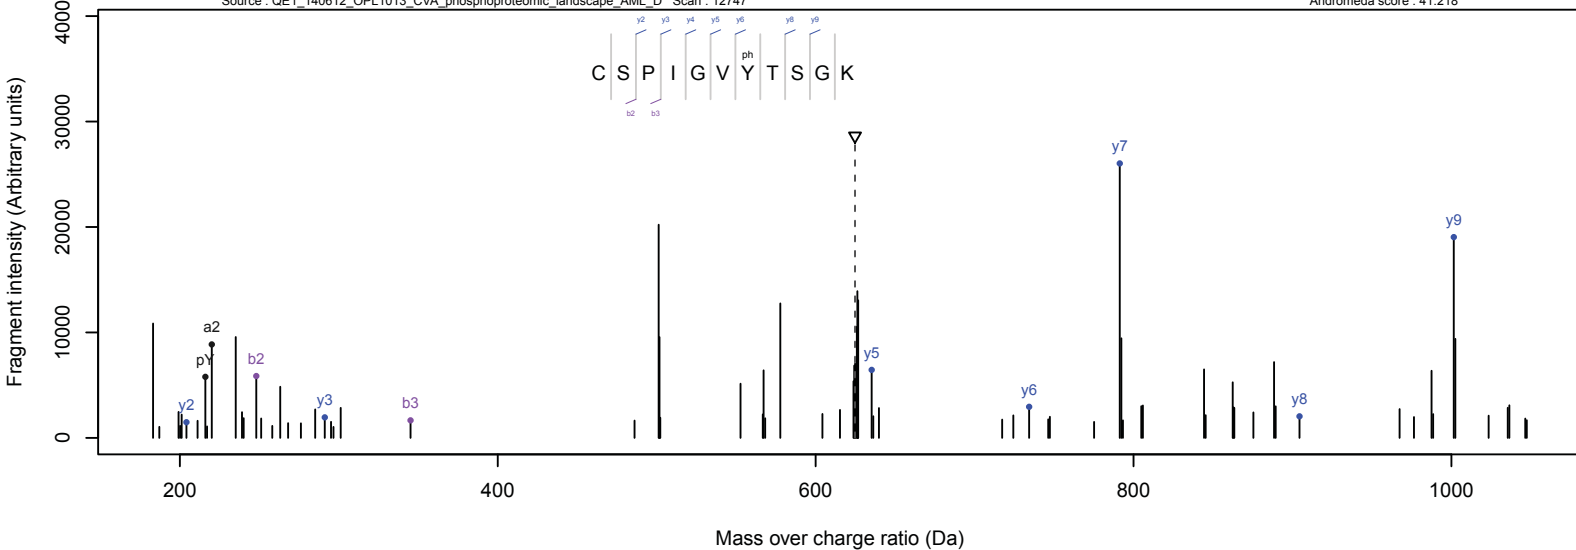

## QVDEEKMY(ph)ENVLNEPVLPLPPR-3+

Source: QE1\_140822\_OPL1013\_CvA\_pTyrIP\_AML\_cell\_lines\_part2\_E Scan: 36933

Andromeda score: 41.166

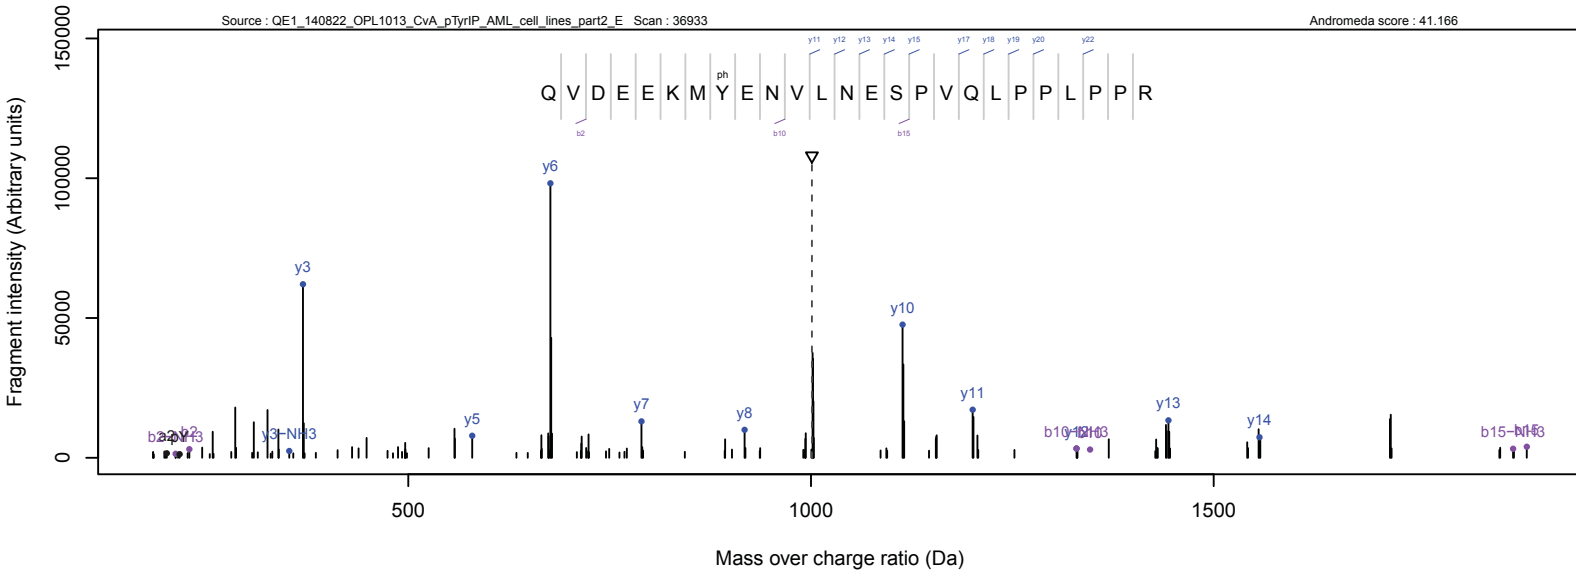

## EAIIPGSVY(ph)DR-2+

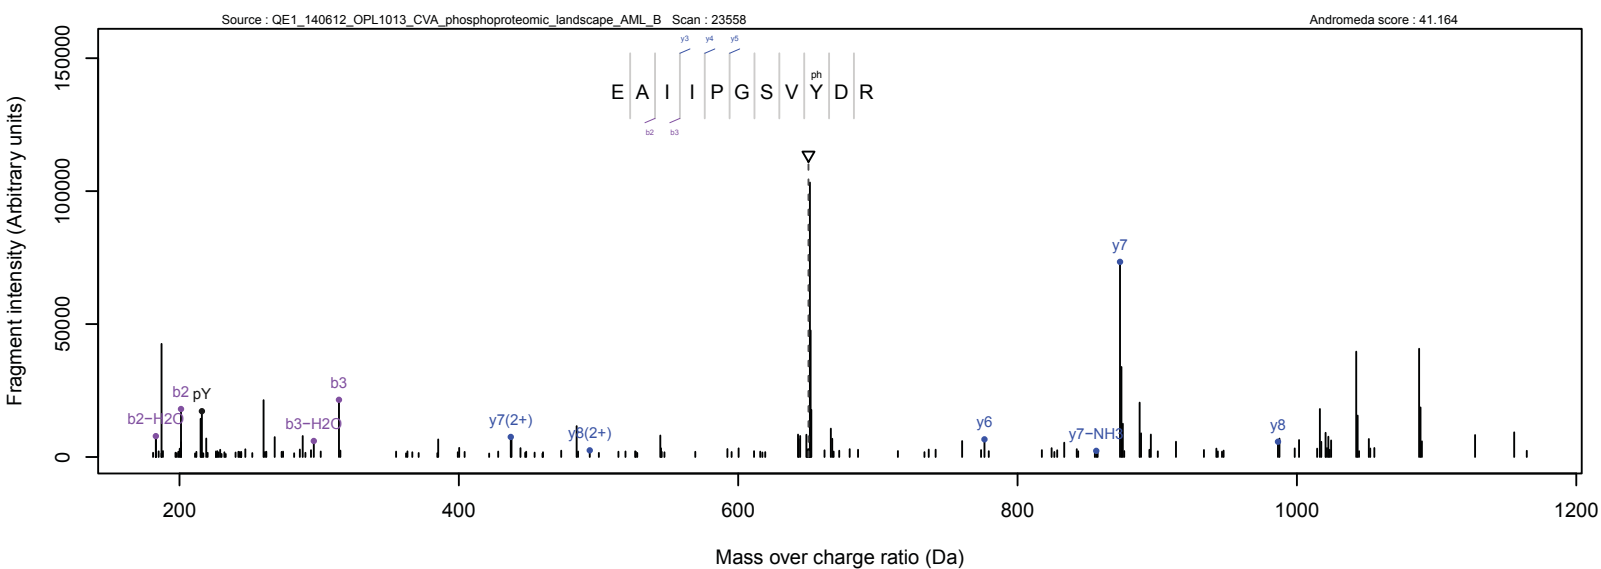

## GLDNGY(ph)SISK-2+

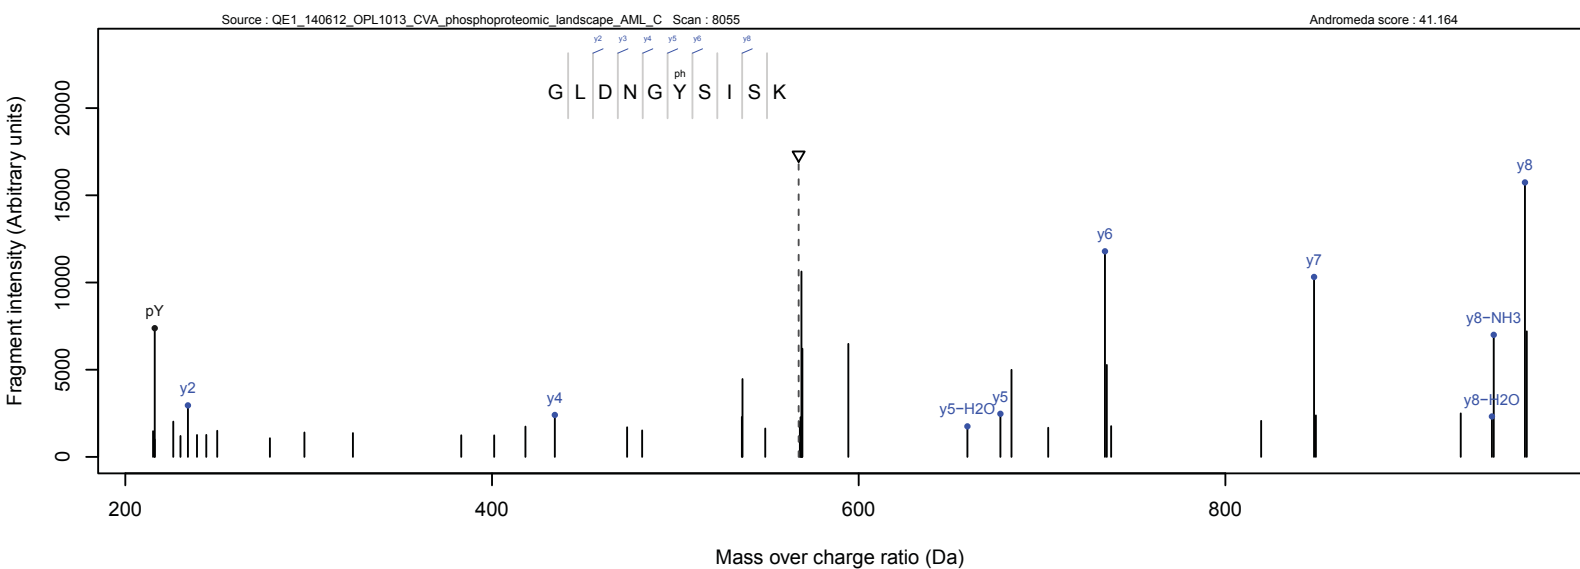

## YIYIMGIQER-2+

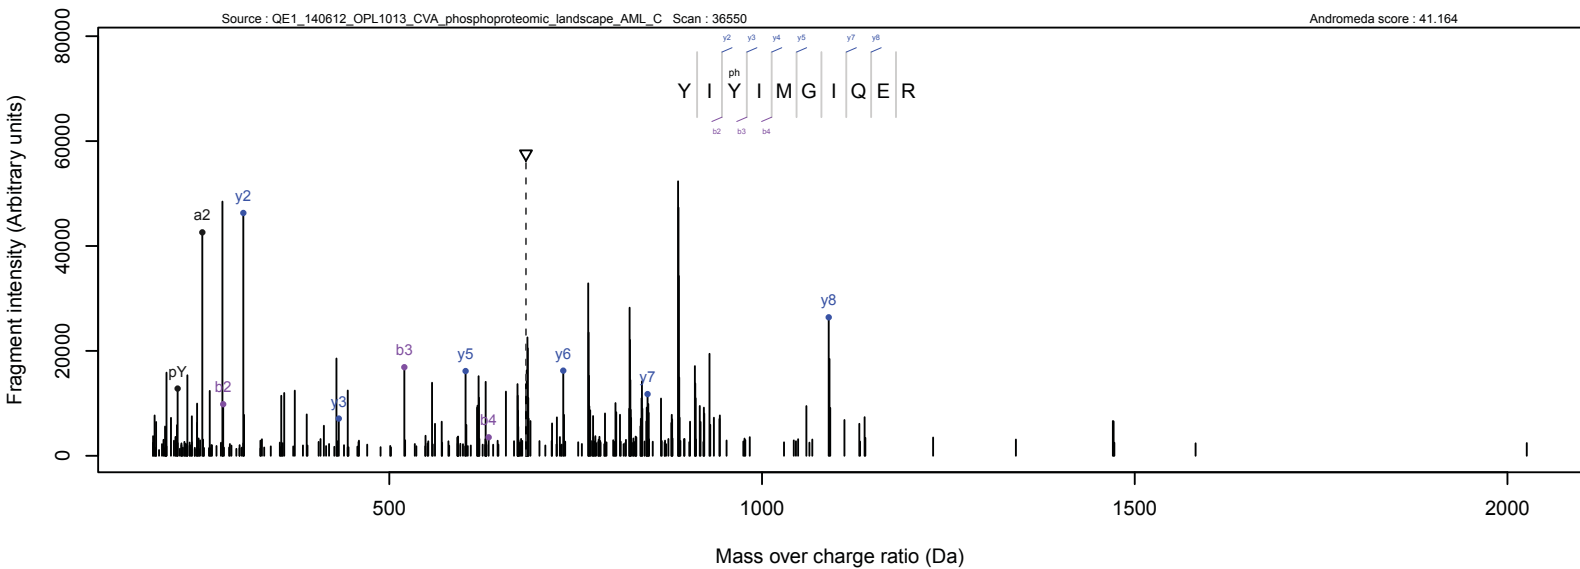

## ADLIAY(ph)LKK-2+

Source : QE1\_140612\_OPL1013\_CVA\_phosphoproteomic\_landscape\_AML\_C Scan : 26259

Andromeda score : 41.117

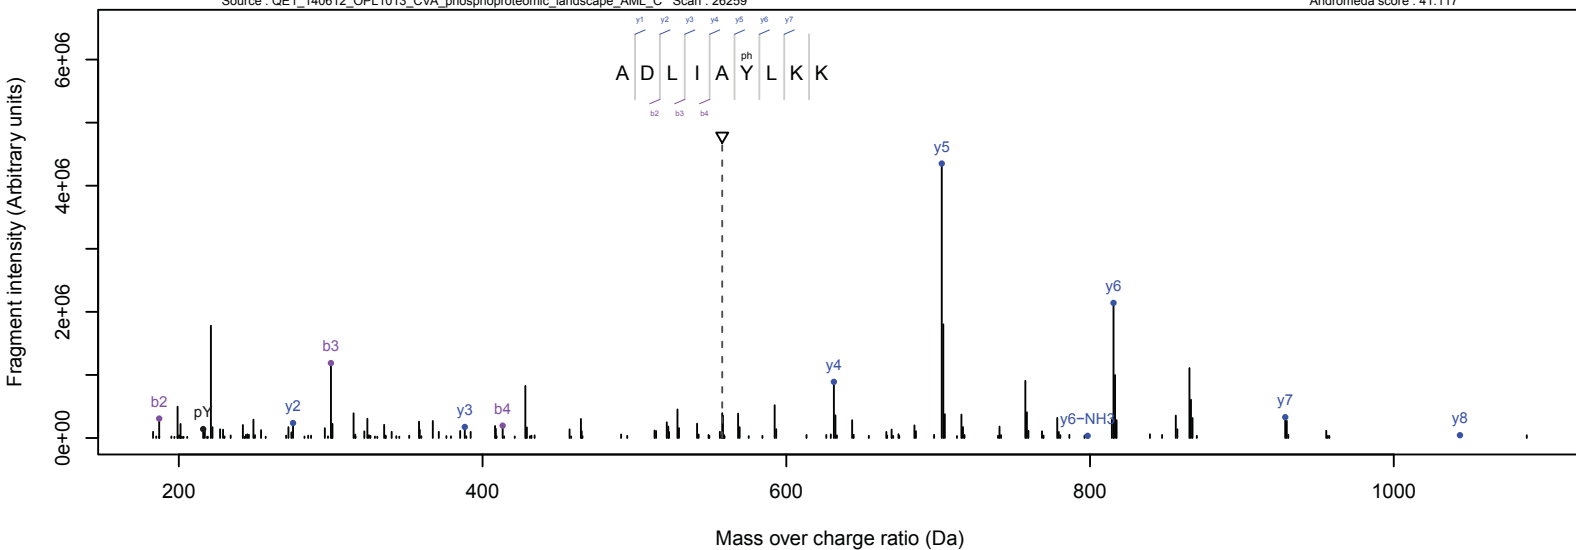

## MVLNAVY(ph)FK-2+

Source : QE1\_140612\_OPL1013\_CVA\_phosphoproteomic\_landscape\_AML\_A Scan : 38554

Andromeda score : 41.117

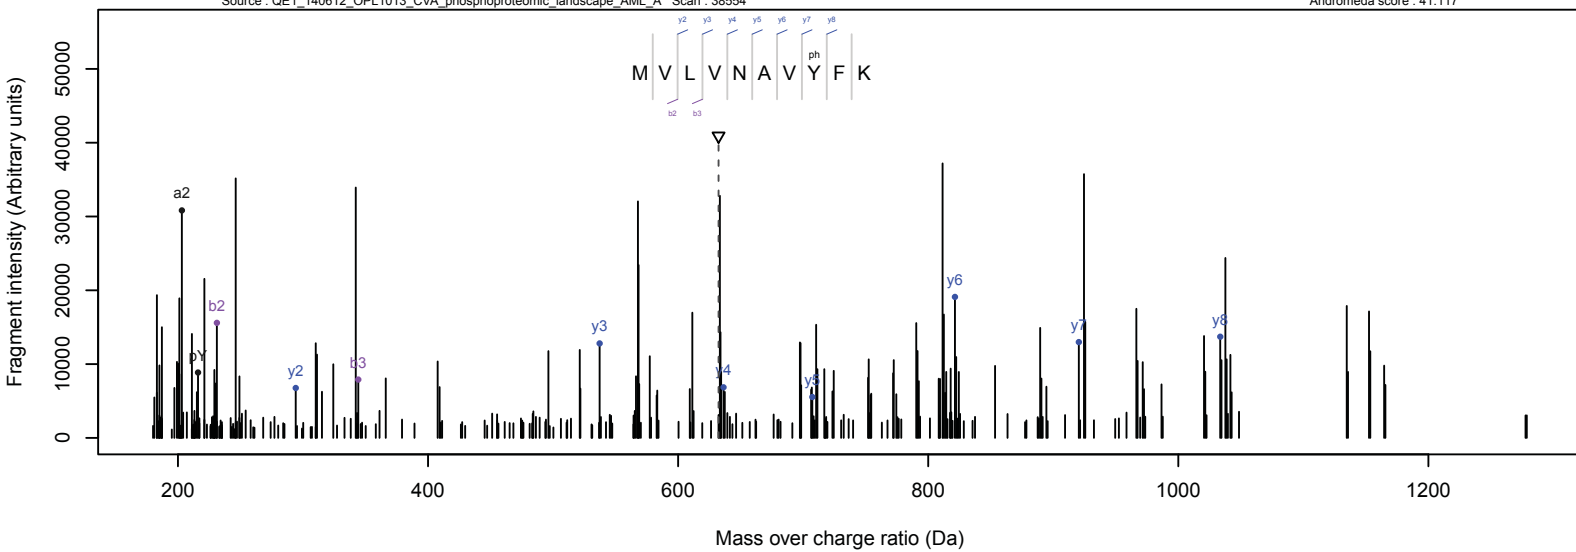

## SHDFY(ph)SHELSSPVDSPLSR-3+

Source : QE1\_140612\_OPL1013\_CVA\_phosphoproteomic\_landscape\_AML\_C Scan : 23544

Andromeda score : 41.115

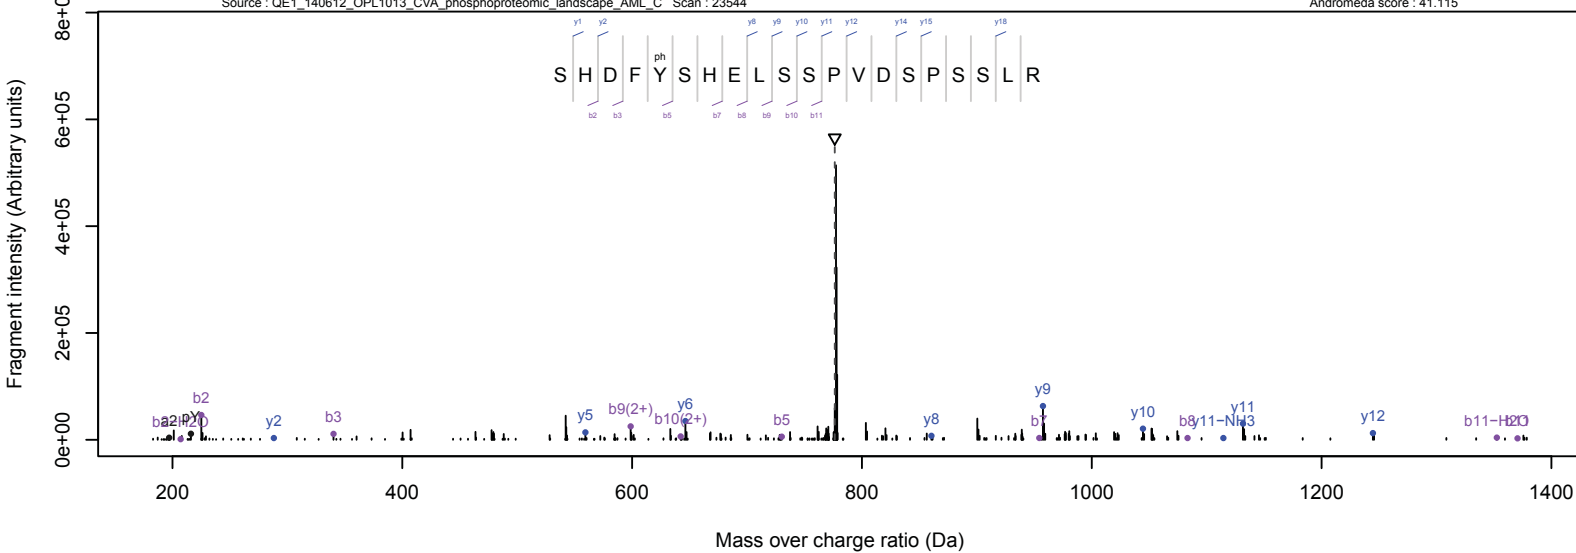

## GY(ph)TIPLDKR-2+

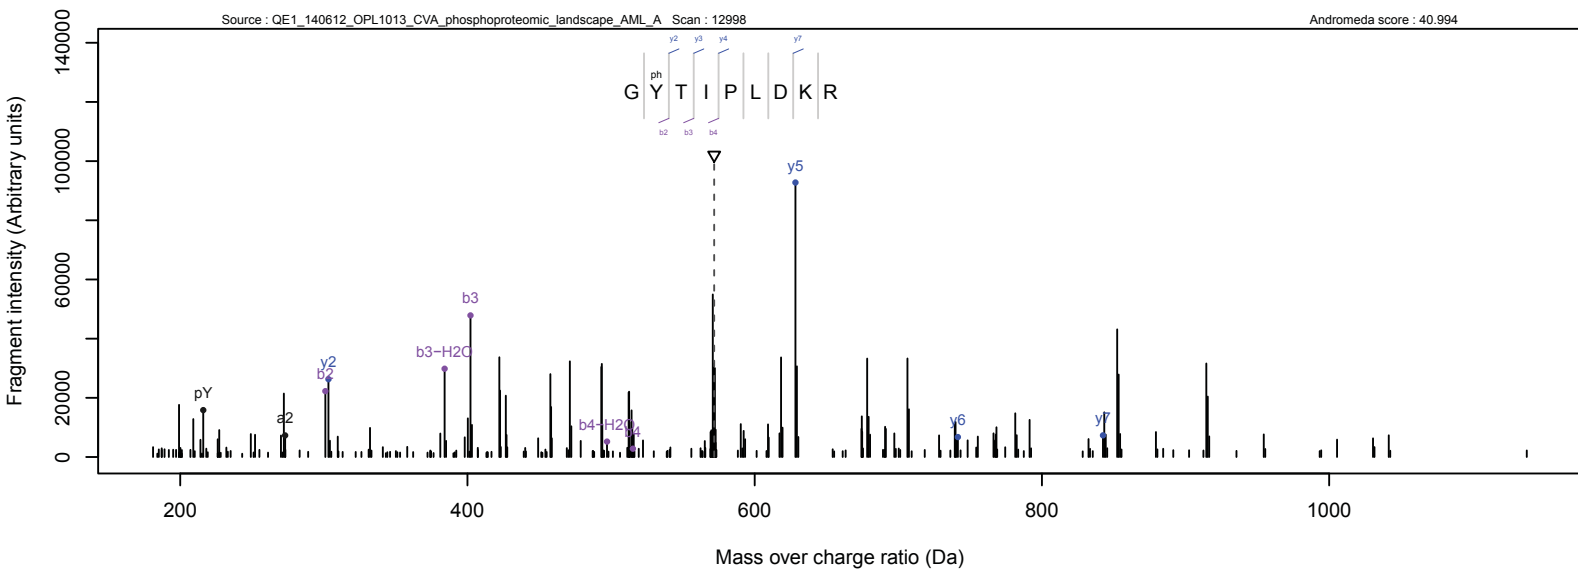

## HY(ph)YKVDYSR-3+

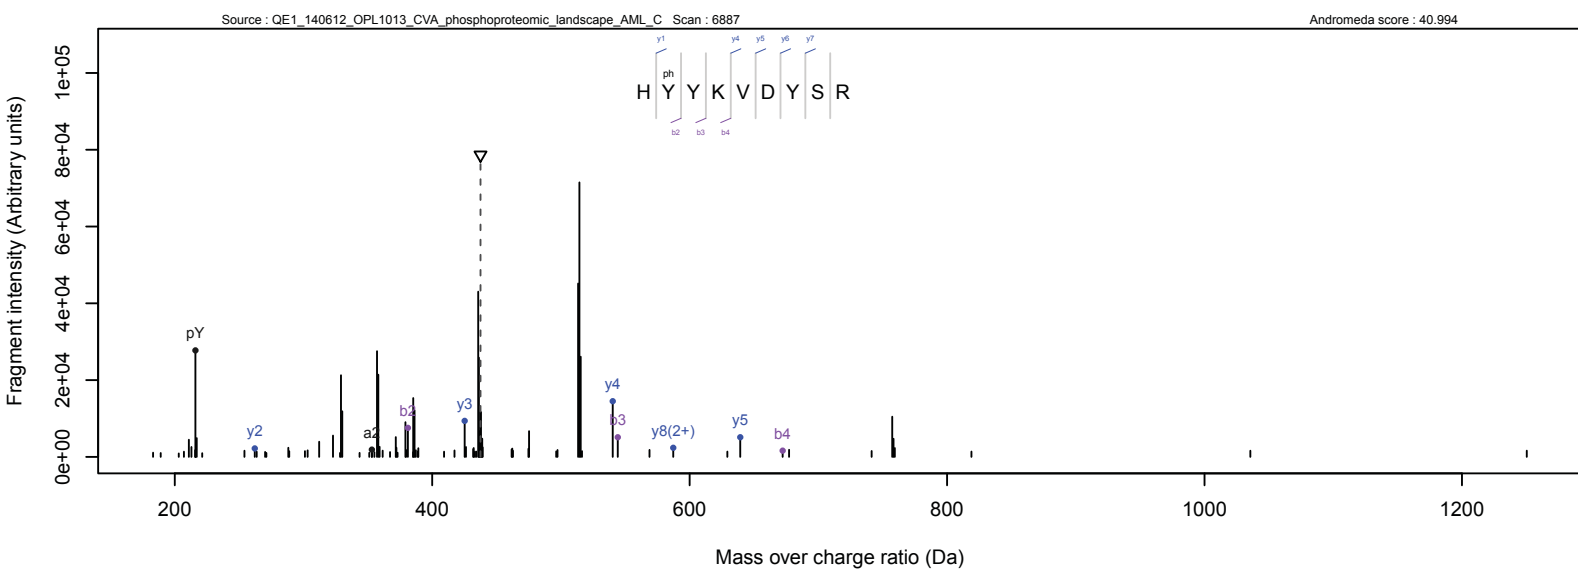

## IY(ph)GFYDECK-2+

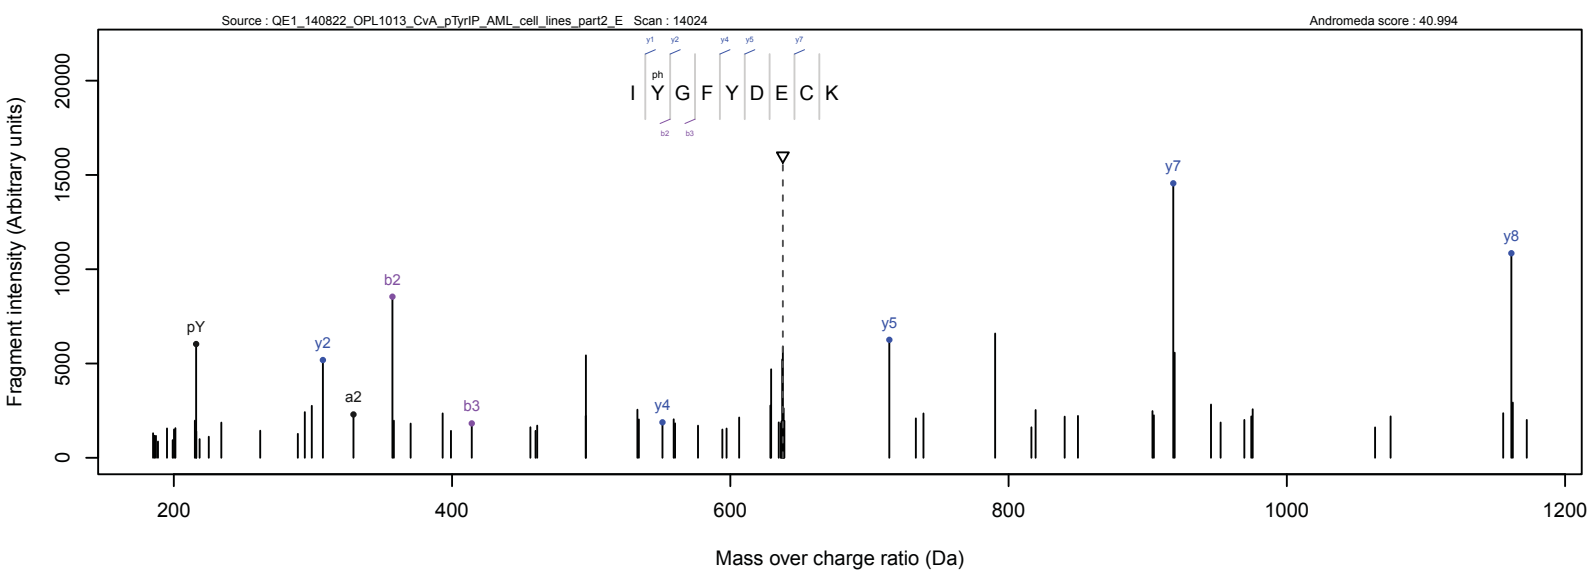

## VVALY(ph)DYM(ox)PM(ox)NANDLQLRK-3+

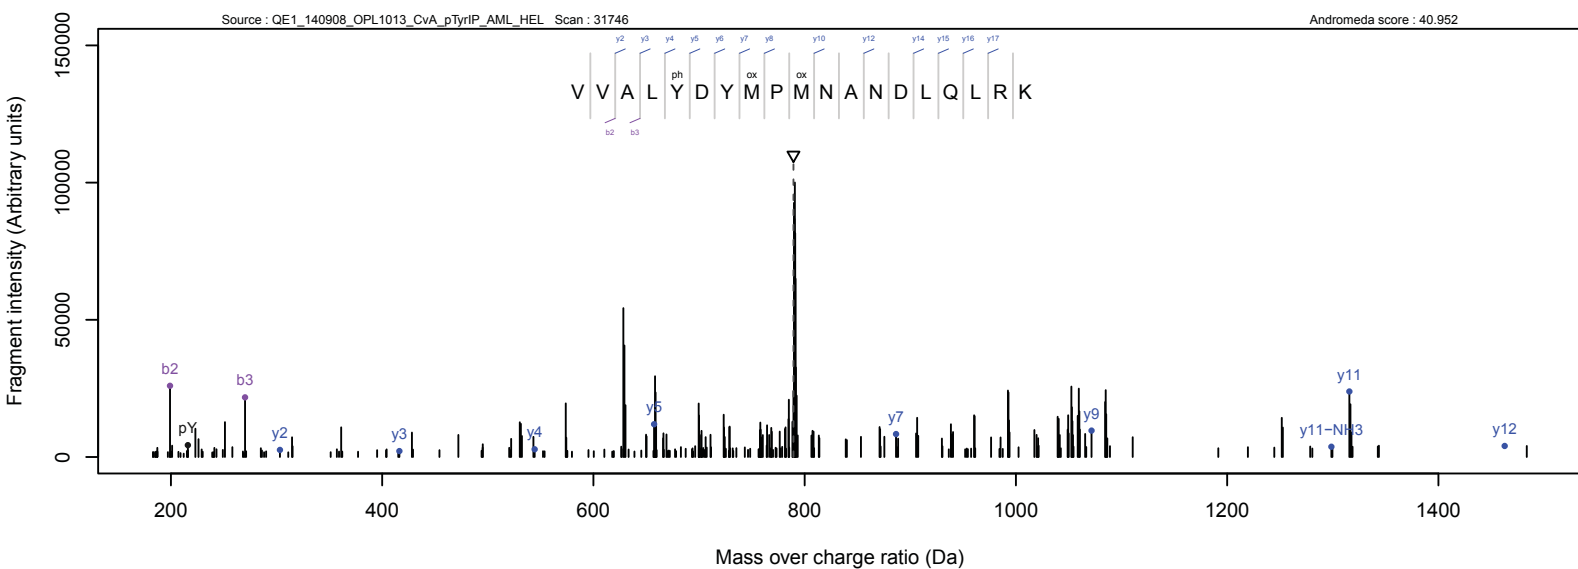

## ACQSIY(ph)PLHDVFVR-3+

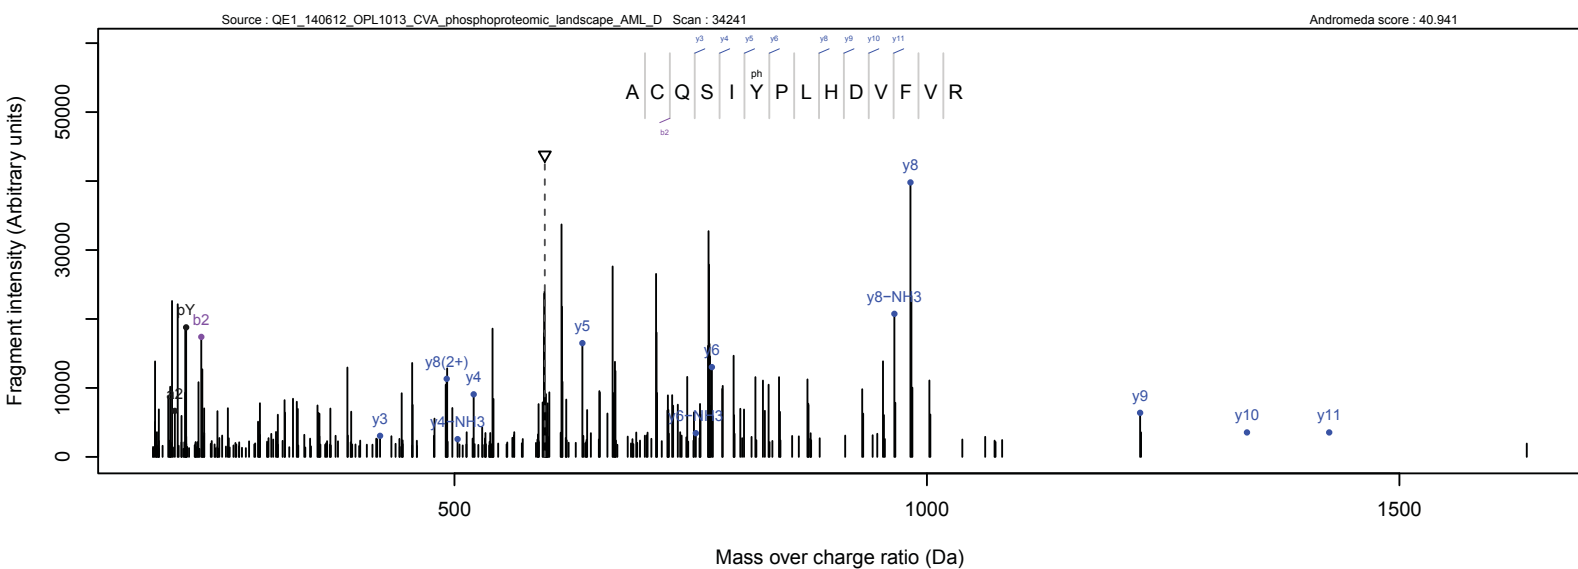

## GWQDVTATSAY(ph)KK-2+

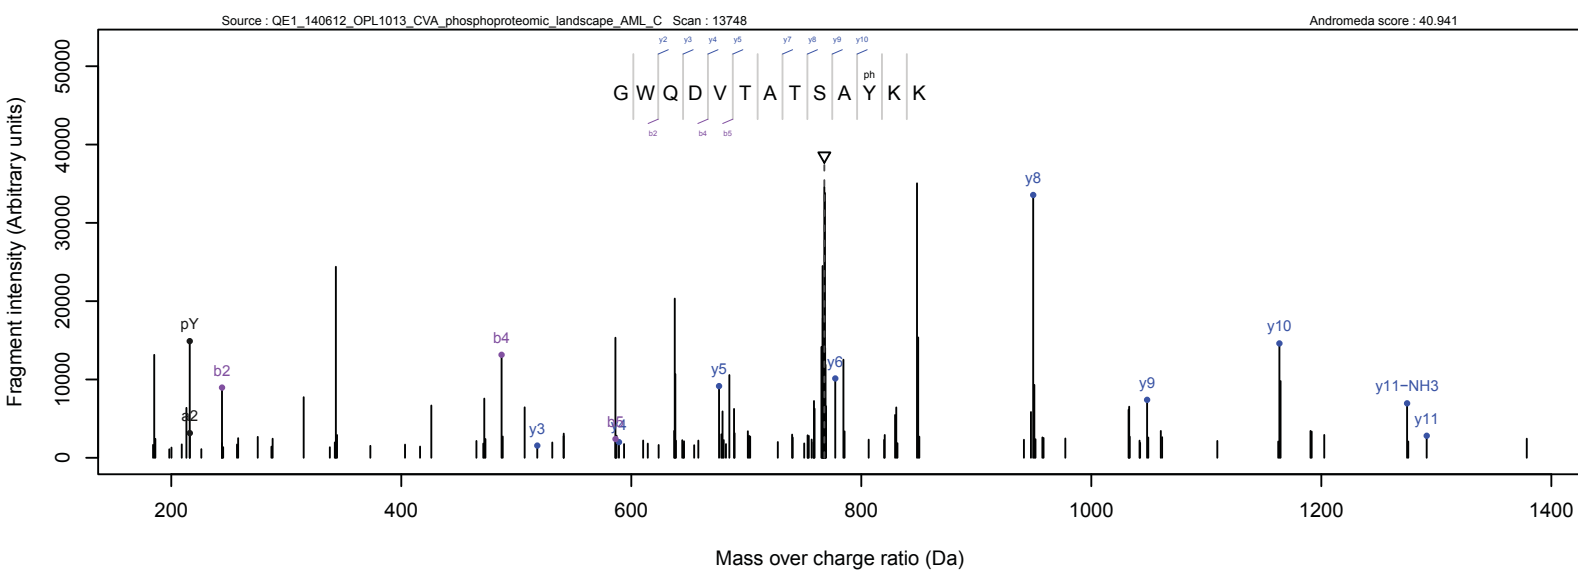



SLDNNY(ph)STPNER-2+

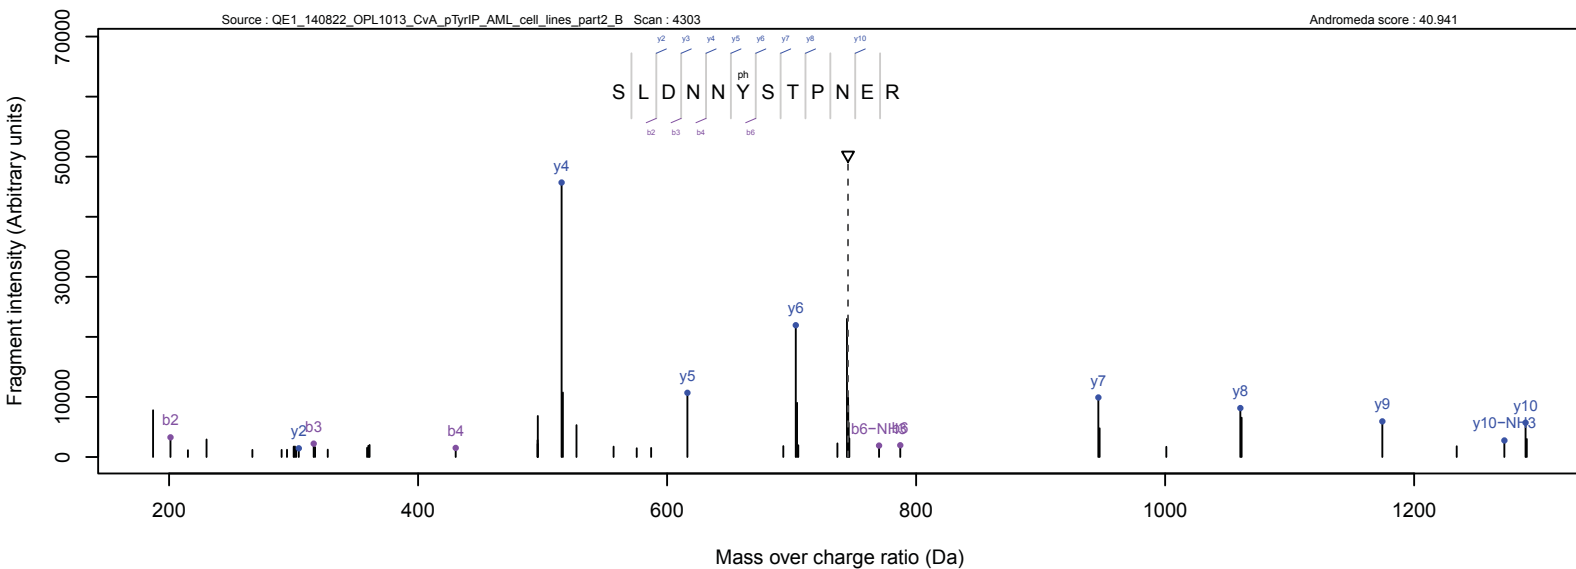

Y(ph)SPPAISPLVSEK-2+

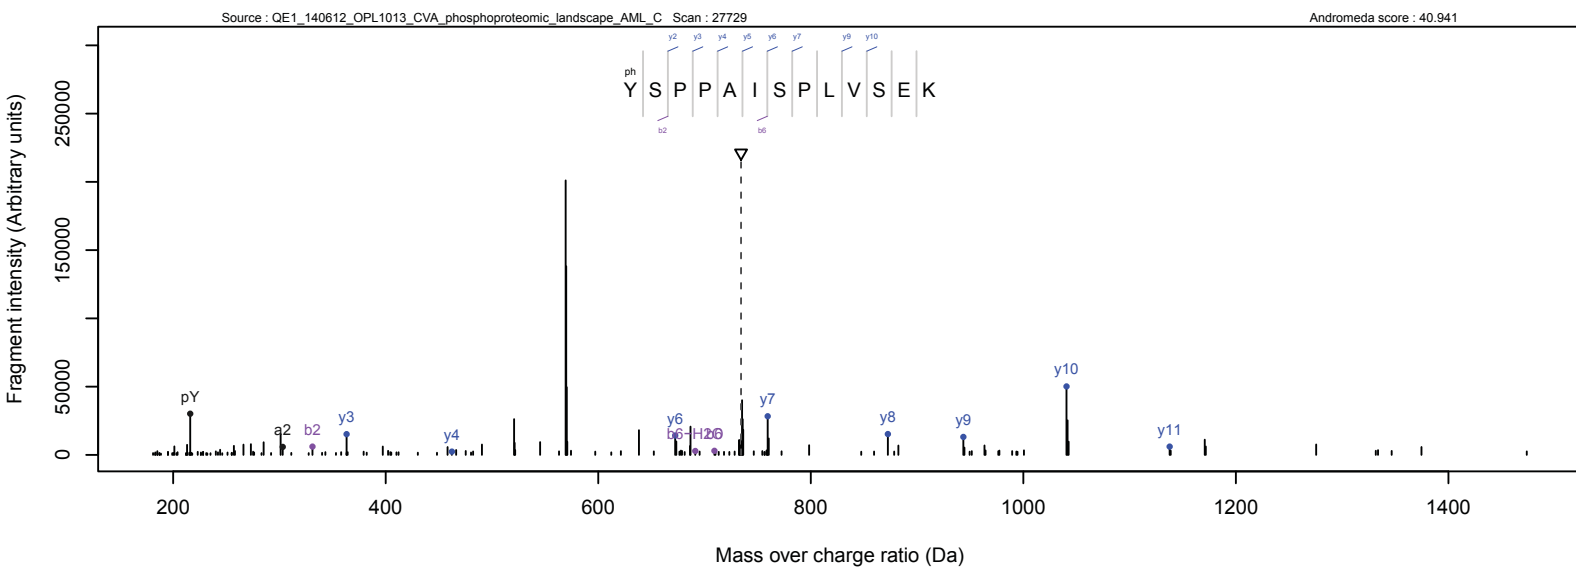

HITLY(ph)DIR-2+

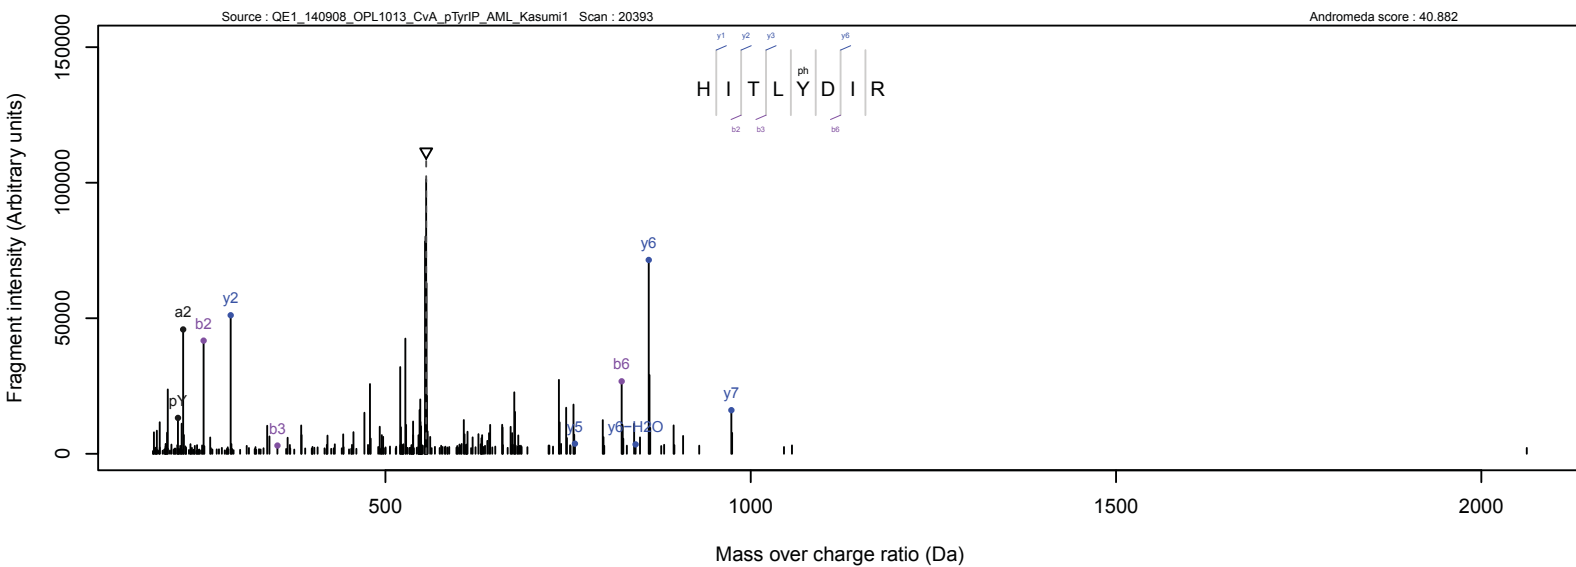

## WMAIESLNYS(ph)VYTTK-2+

Source : QE1\_140908\_OPL1013\_CvA\_pTyrIP\_AML\_HEL Scan : 43585

Andromeda score : 40.857

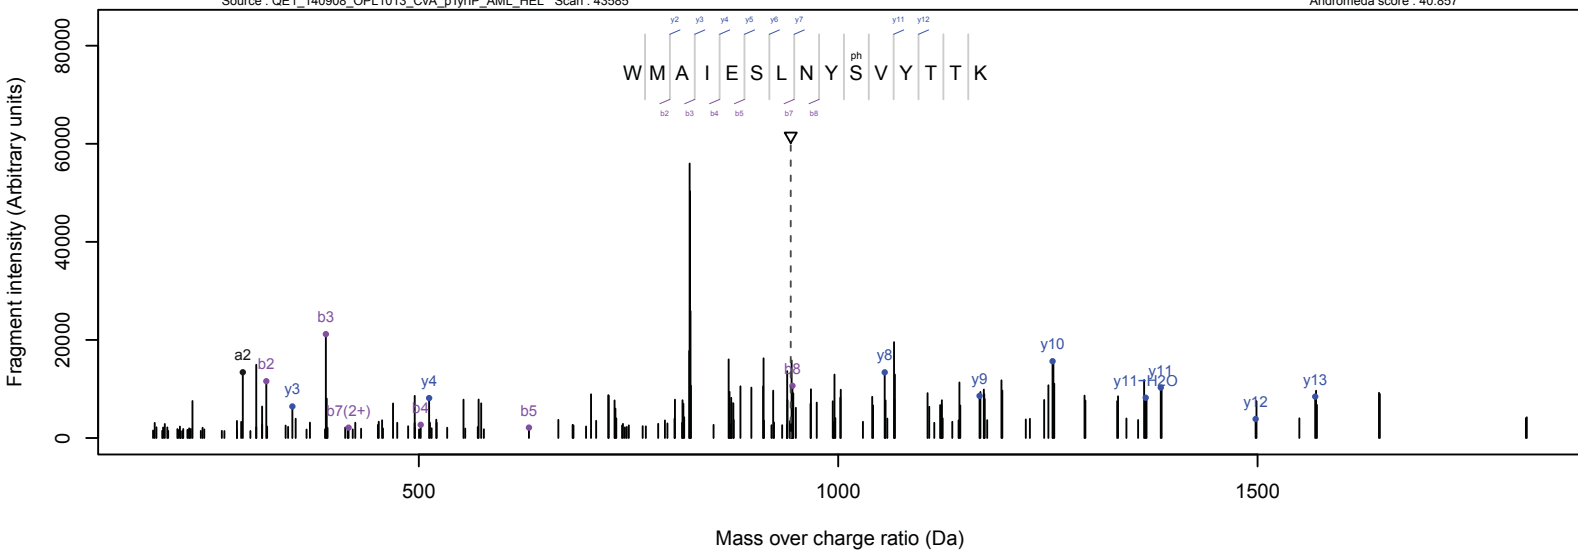

## HFY(ph)YFVK-2+

Source : QE1\_140612\_OPL1013\_CVA\_phosphoproteomic\_landscape\_AML\_C Scan : 23758

Andromeda score : 40.852

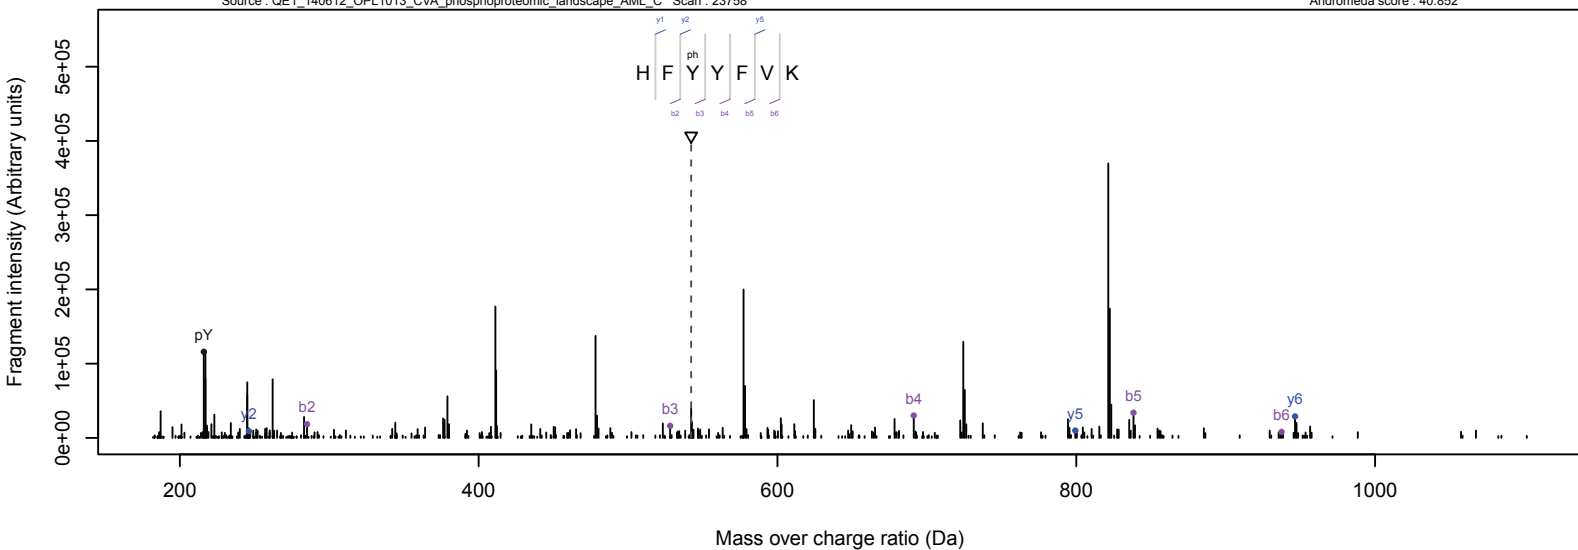

## HNPTVTGHQEQT(ph)LQKETSTLQVEQNGDYGR-4+

Source : QE1\_140908\_OPL1013\_CvA\_pTyrIP\_AML\_HL60 Scan : 24481

Andromeda score : 40.8

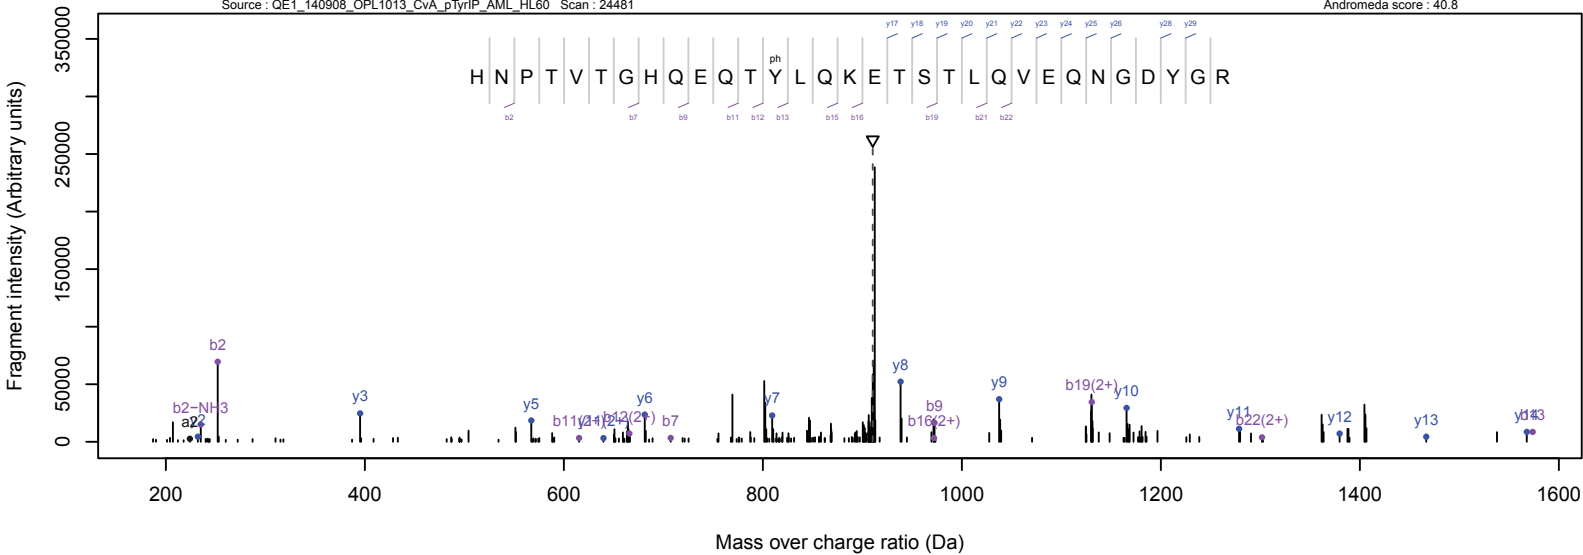

**AEGHVMY(ph)LAR-3+**

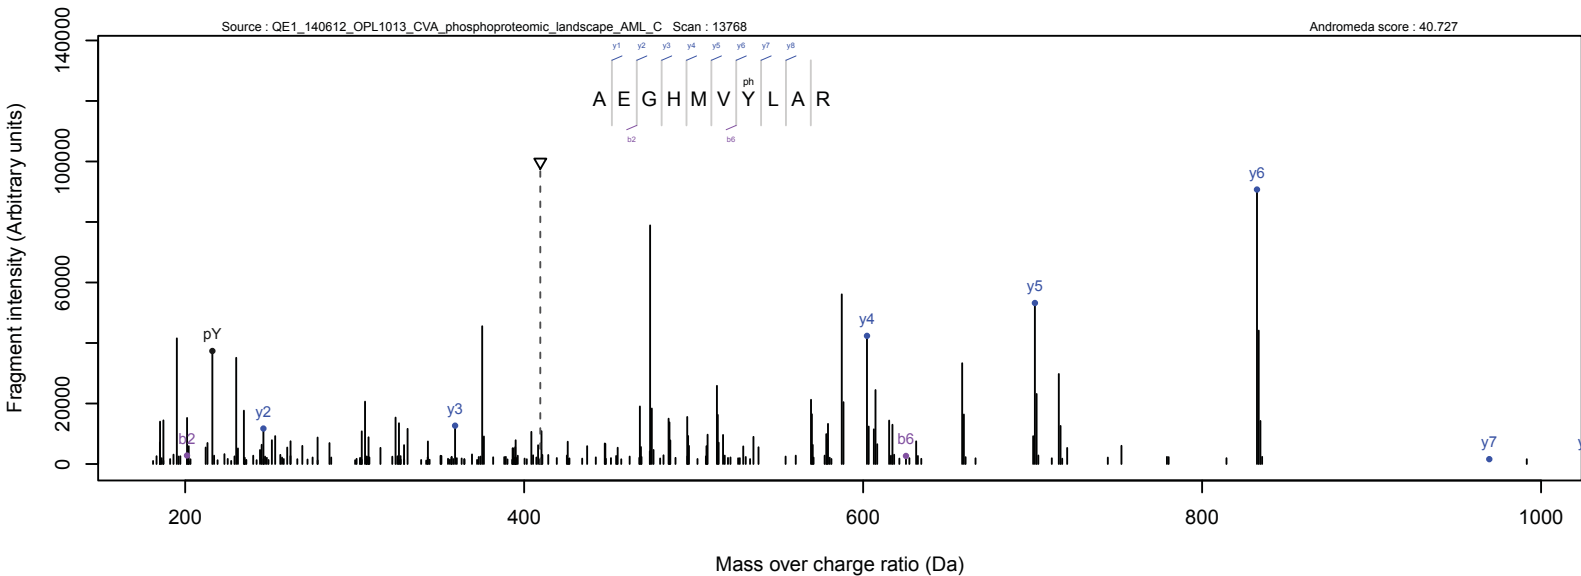

**LSNLPGY(ph)LQK-2+**

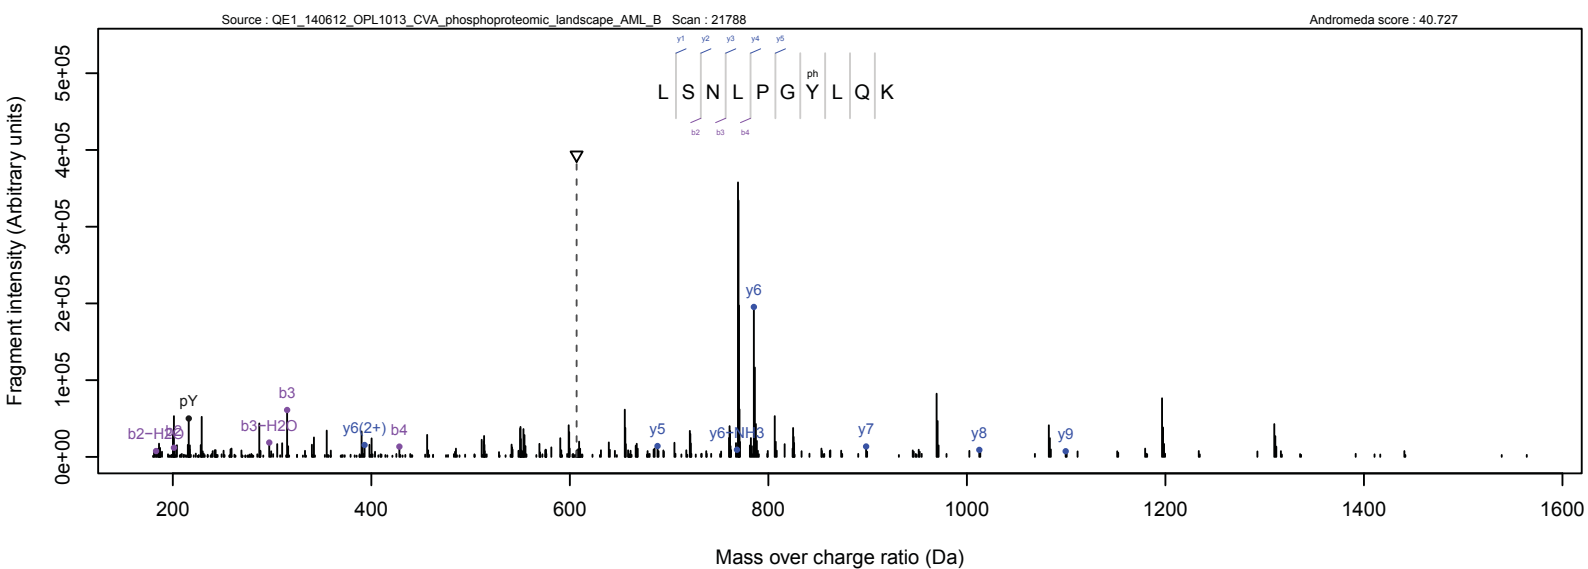

**SLVHY(ph)CFDLR-2+**

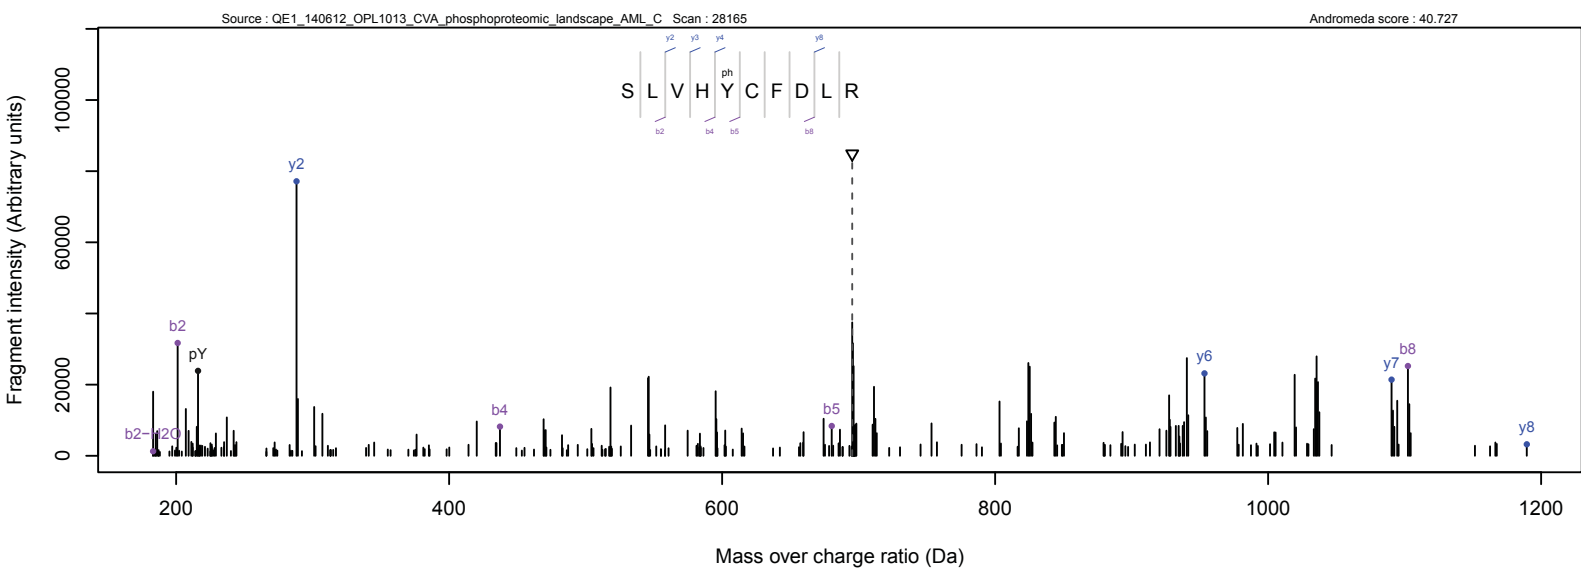

Y(ph)RYPFTHGK-3+

Source : QE1\_140612\_OPL1013\_CVA\_phosphoproteomic\_landscape\_AML\_C Scan : 15974

Andromeda score : 40.727

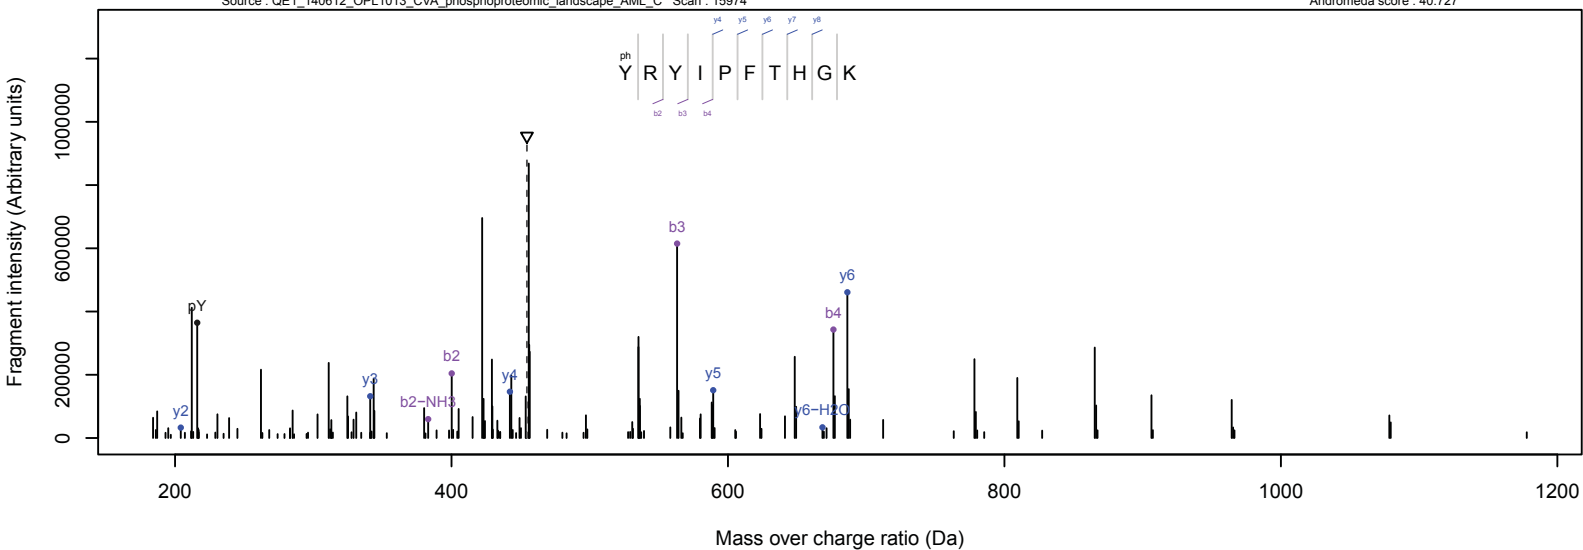

GDNIY(ph)EWR-2+

Source : QE1\_140612\_OPL1013\_CVA\_phosphoproteomic\_landscape\_AML\_D Scan : 18137

Andromeda score : 40.724

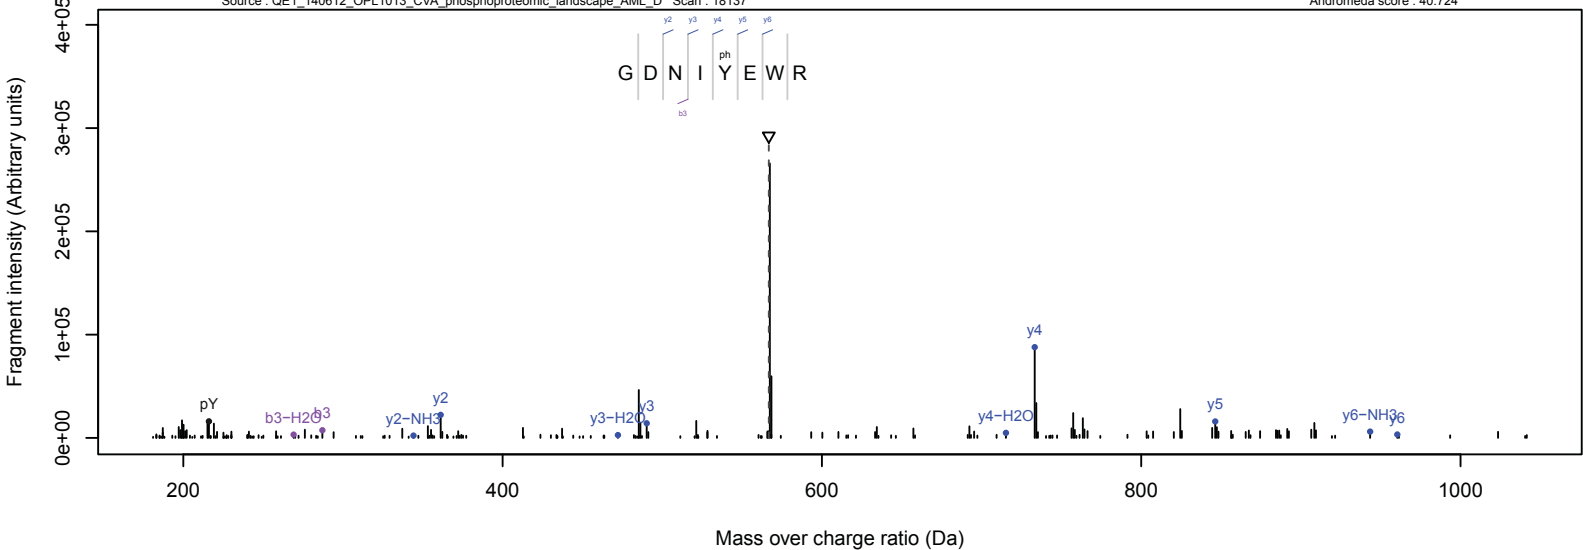

DTIQVPPS(ph)YQNQGIYQVPTGHGTQEVEYQVPPSVQR-4+

Source : QE1\_140908\_OPL1013\_CvA\_pTyrIP\_AML\_OCI\_AML3 Scan : 37514

Andromeda score : 40.682

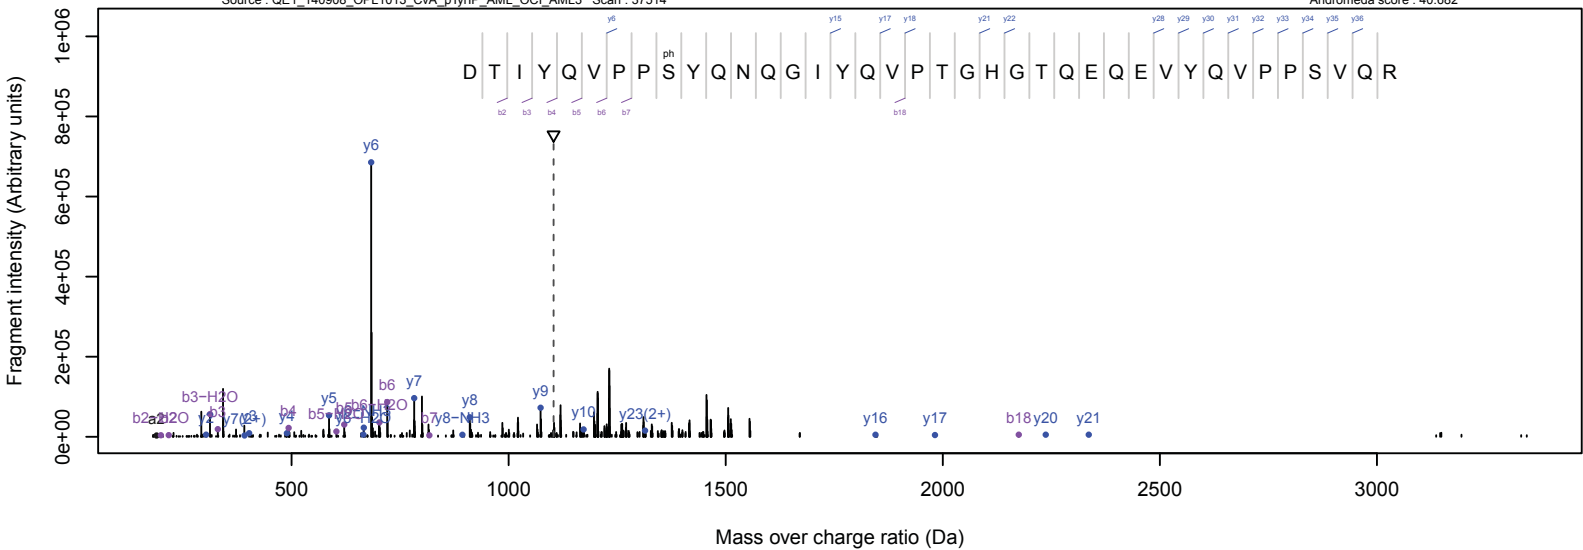

## HGSGADSDY(ph)ENTQSGDPLLEGLK-3+

Source: QE1\_140612\_OPL1013\_CVA\_phosphoproteomic\_landscape\_AML\_B Scan: 28366

Andromeda score: 40.668

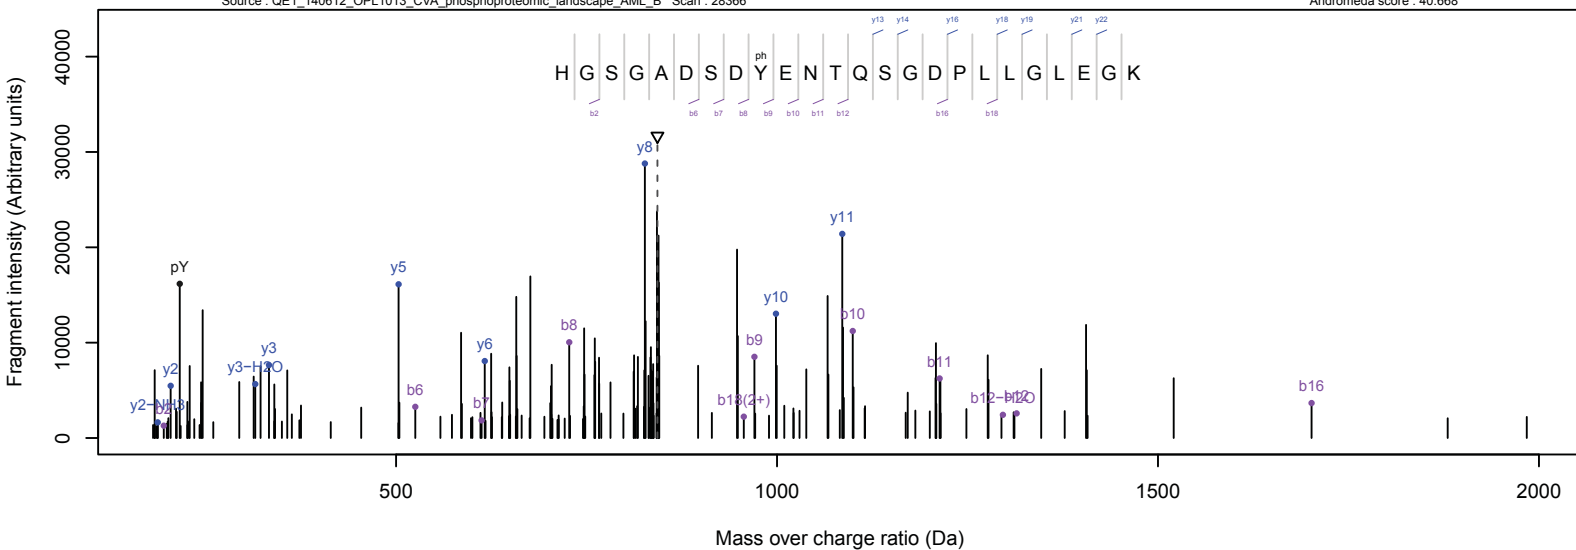

## ASPAEADSPSGYPYSGPPPPAY(ph)HYR-3+

Source: QE1\_140612\_OPL1013\_CVA\_phosphoproteomic\_landscape\_AML\_C Scan: 23255

Andromeda score: 40.626

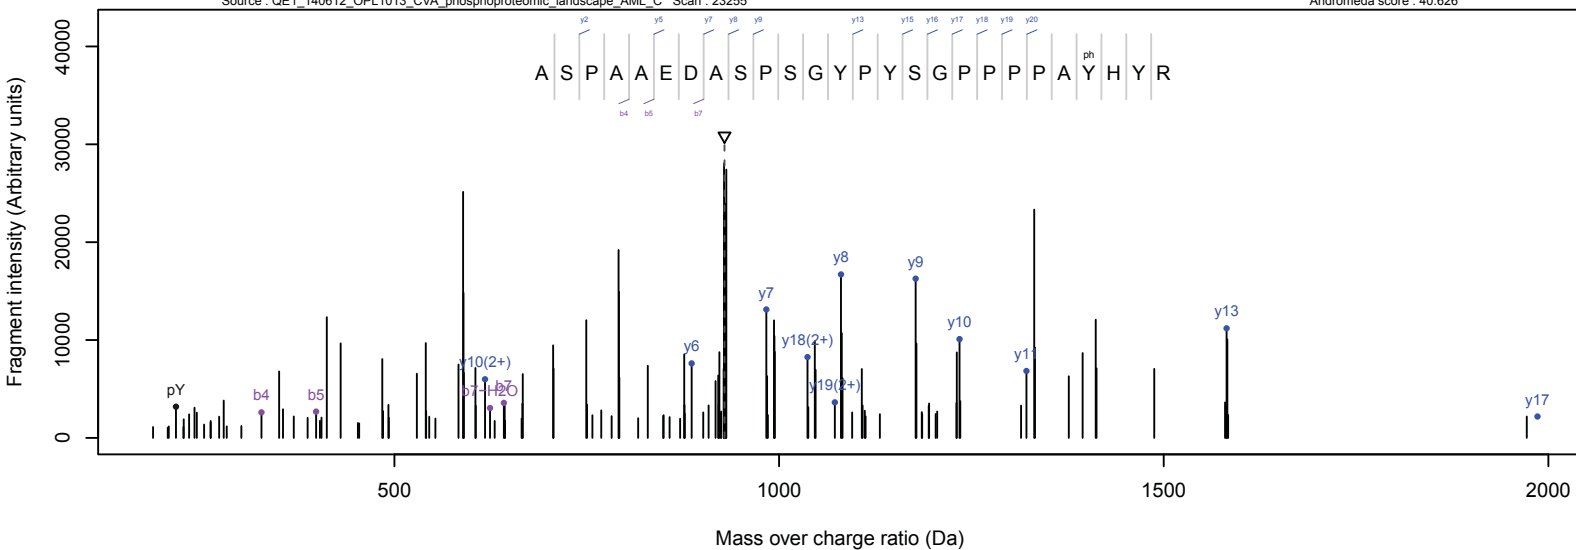

## EQSLHY(ph)GSVLLITELPEDGCTEEDVRK-4+

Source: QE1\_140612\_OPL1013\_CVA\_phosphoproteomic\_landscape\_AML\_B Scan: 39632

Andromeda score: 40.625

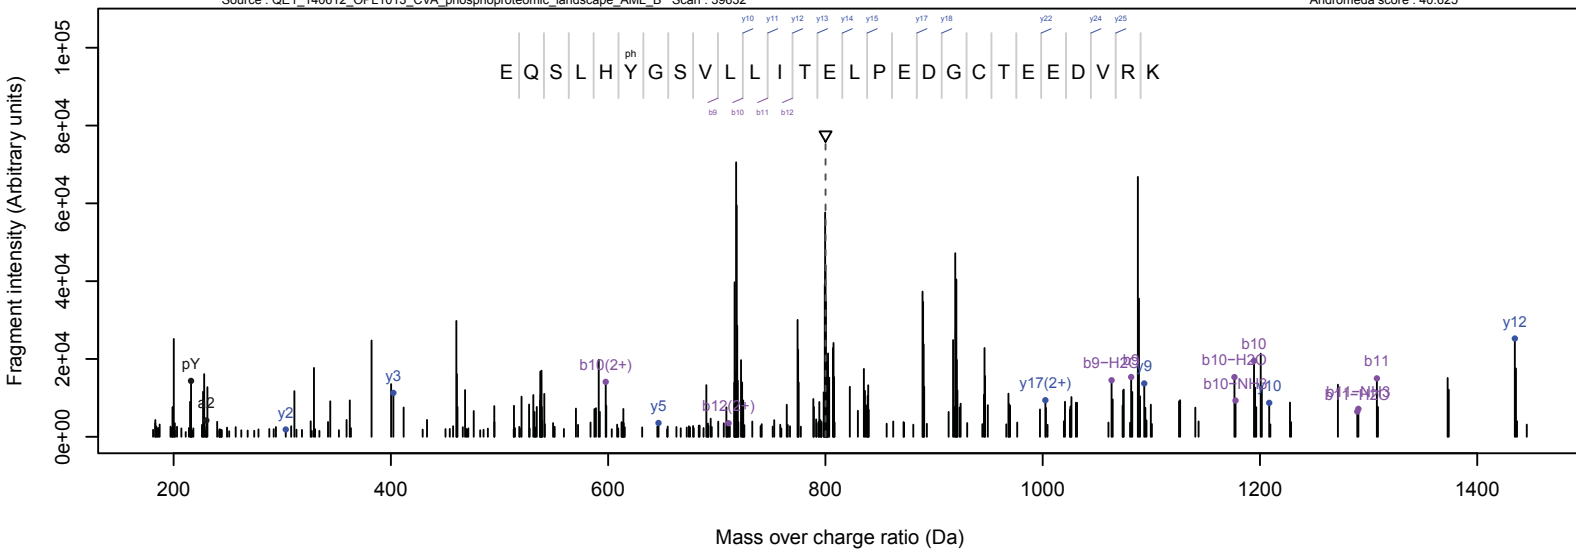

## VKAENGFQDNY(ph)SVVASGLK-3+

Source : QE1\_140612\_OPL1013\_CVA\_phosphoproteomic\_landscape\_AML\_B Scan : 27010

Andromeda score : 40.622

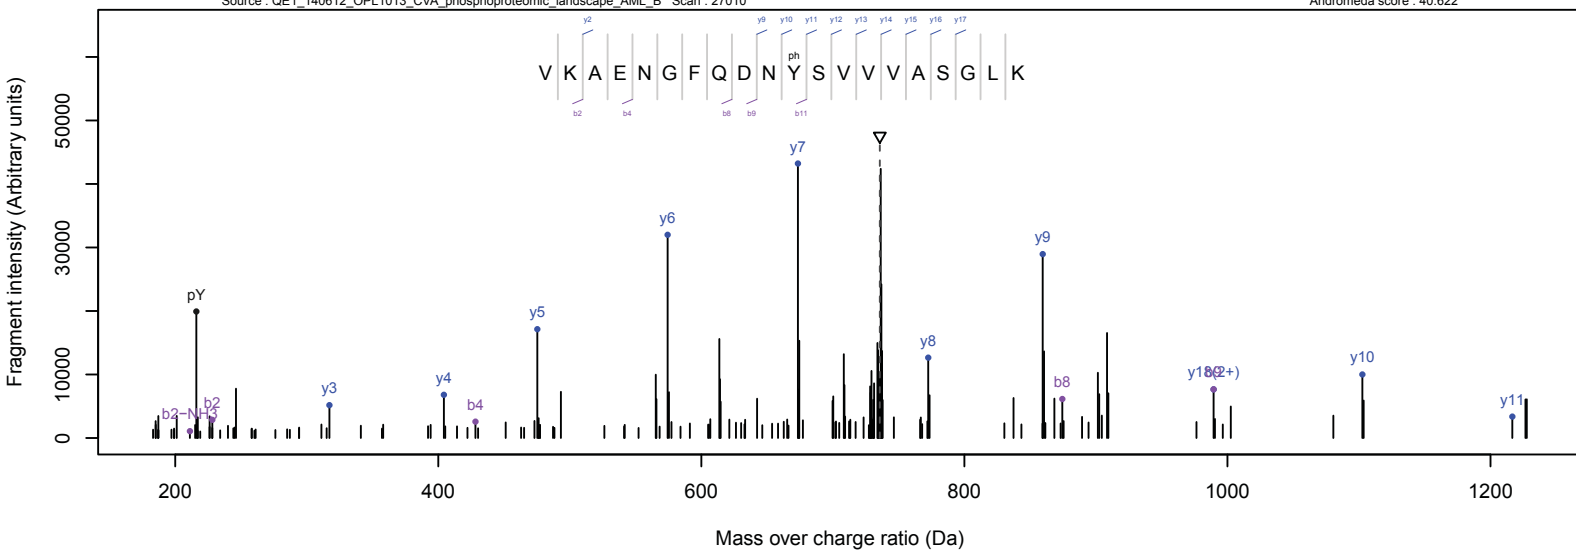

## GVY(ph)AIPPSACR-2+

Source : QE1\_140612\_OPL1013\_CVA\_phosphoproteomic\_landscape\_AML\_C Scan : 16515

Andromeda score : 40.616

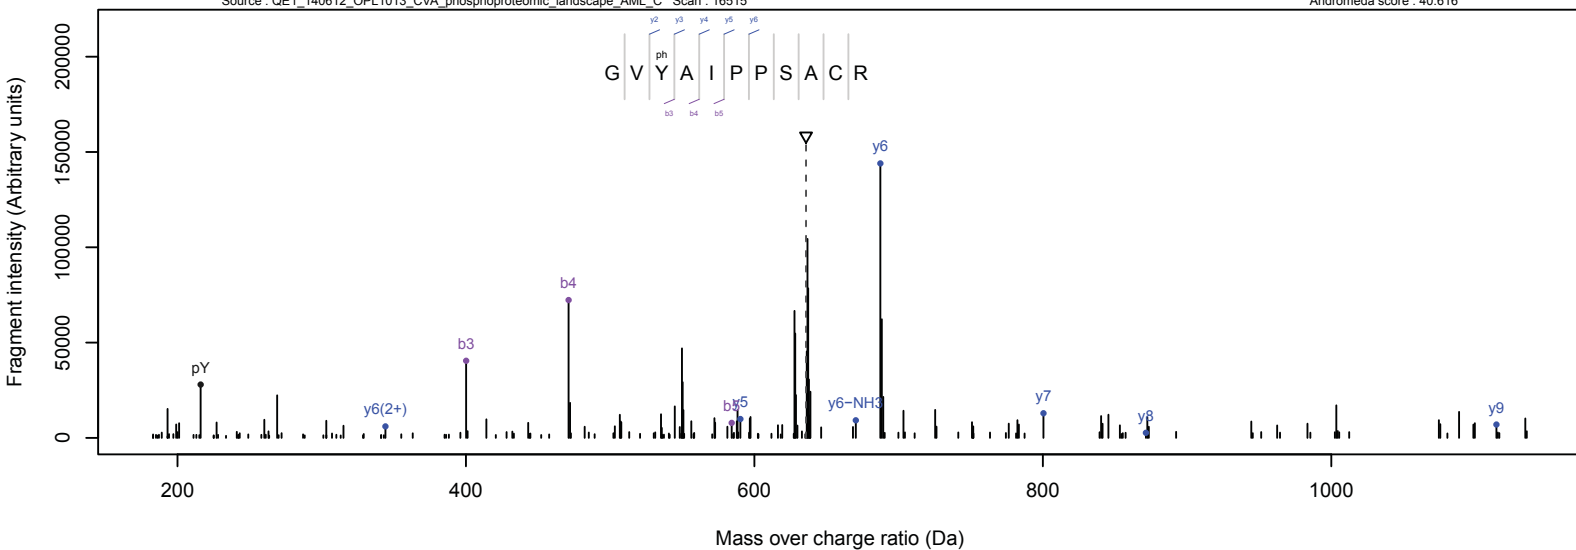

## LSDLY(ph)YDIHR-3+

Source : QE1\_140612\_OPL1013\_CVA\_phosphoproteomic\_landscape\_AML\_C Scan : 23276

Andromeda score : 40.616

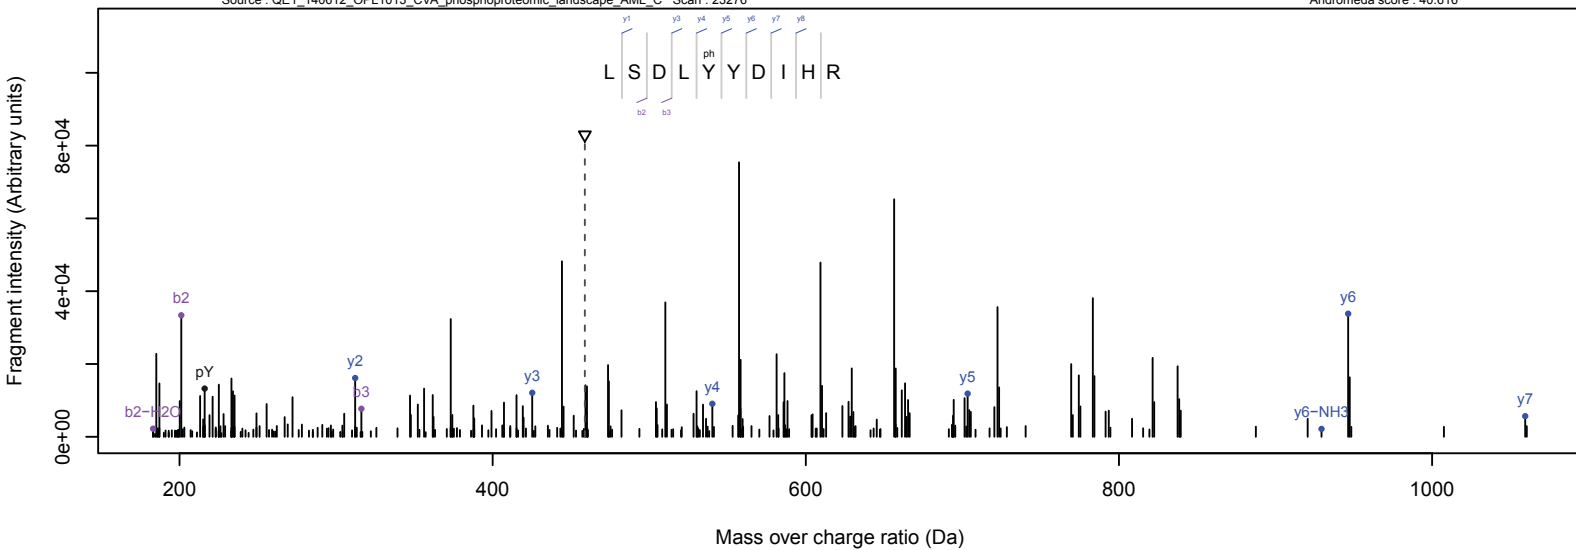

Y(ph)NSQFNPQLAR-2+

Source : QE1\_140612\_OPL1013\_CVA\_phosphoproteomic\_landscape\_AML\_C Scan : 17207

Andromeda score : 40.616

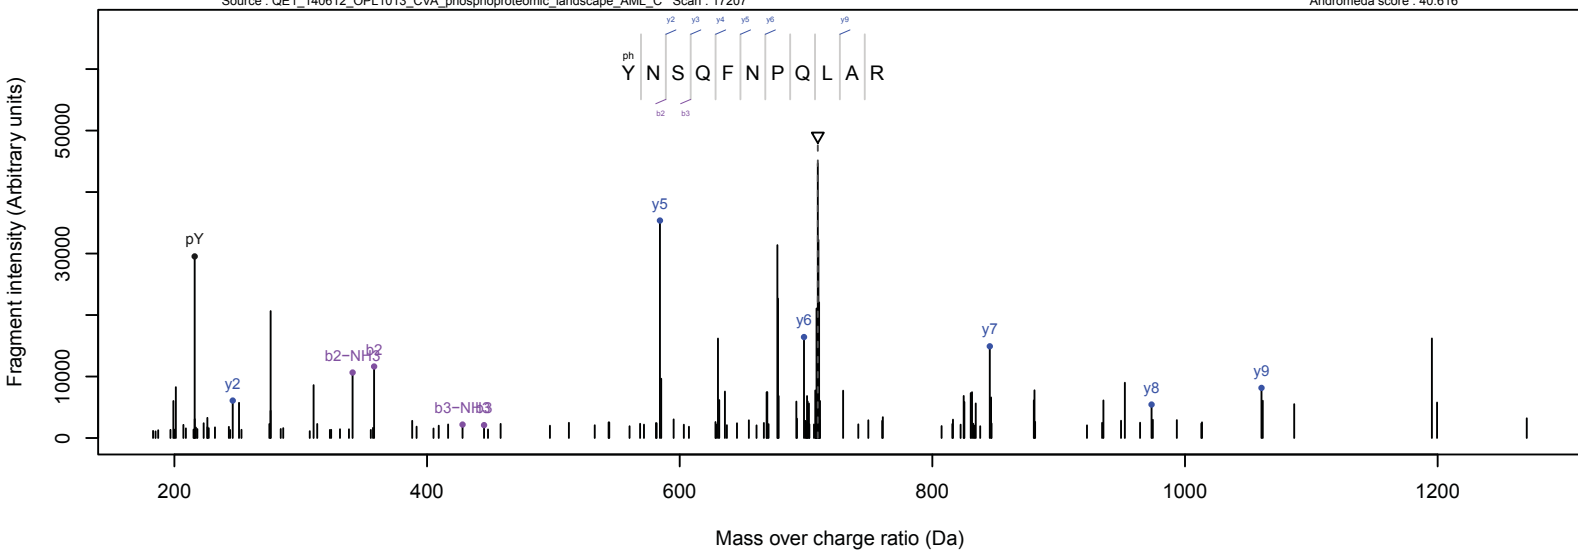

GAMAATY(ph)SALNR-2+

Source : QE1\_140612\_OPL1013\_CVA\_phosphoproteomic\_landscape\_AML\_C Scan : 14662

Andromeda score : 40.516

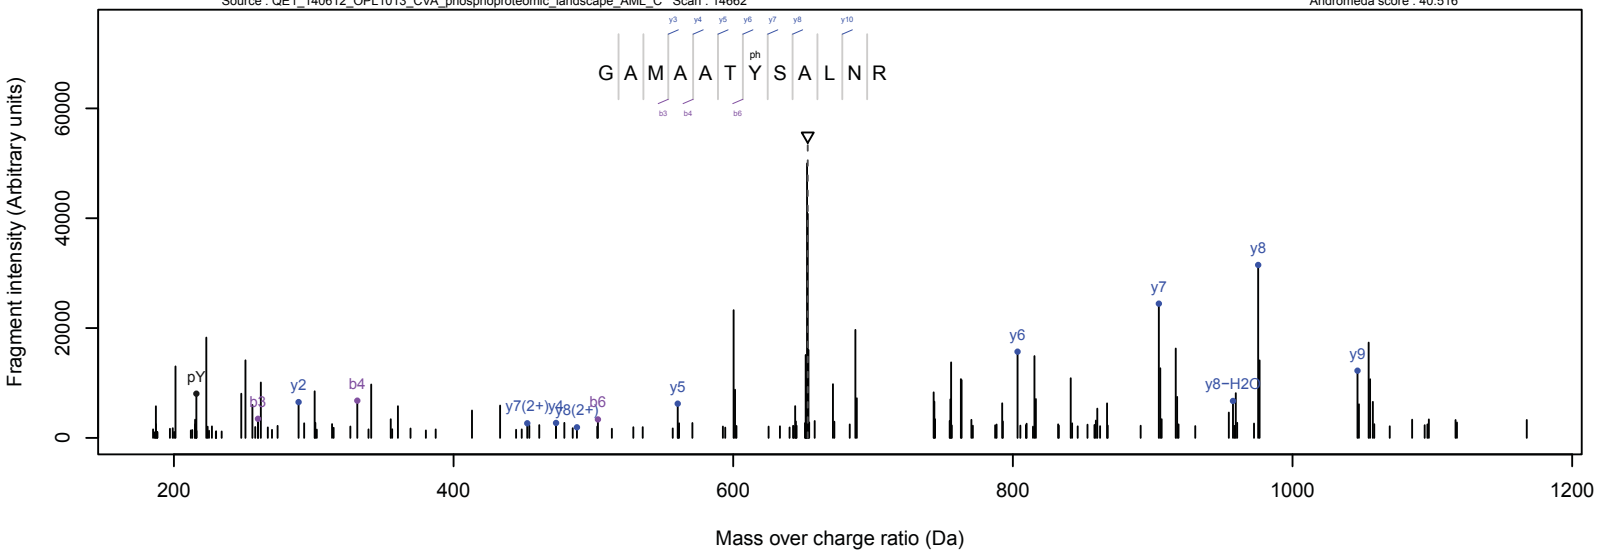

PLY(ph)EGLSGGGEK-2+

Source : QE1\_140822\_OPL1013\_CvA\_pTyrIP\_AML\_cell\_lines\_part2\_B Scan : 9622

Andromeda score : 40.516

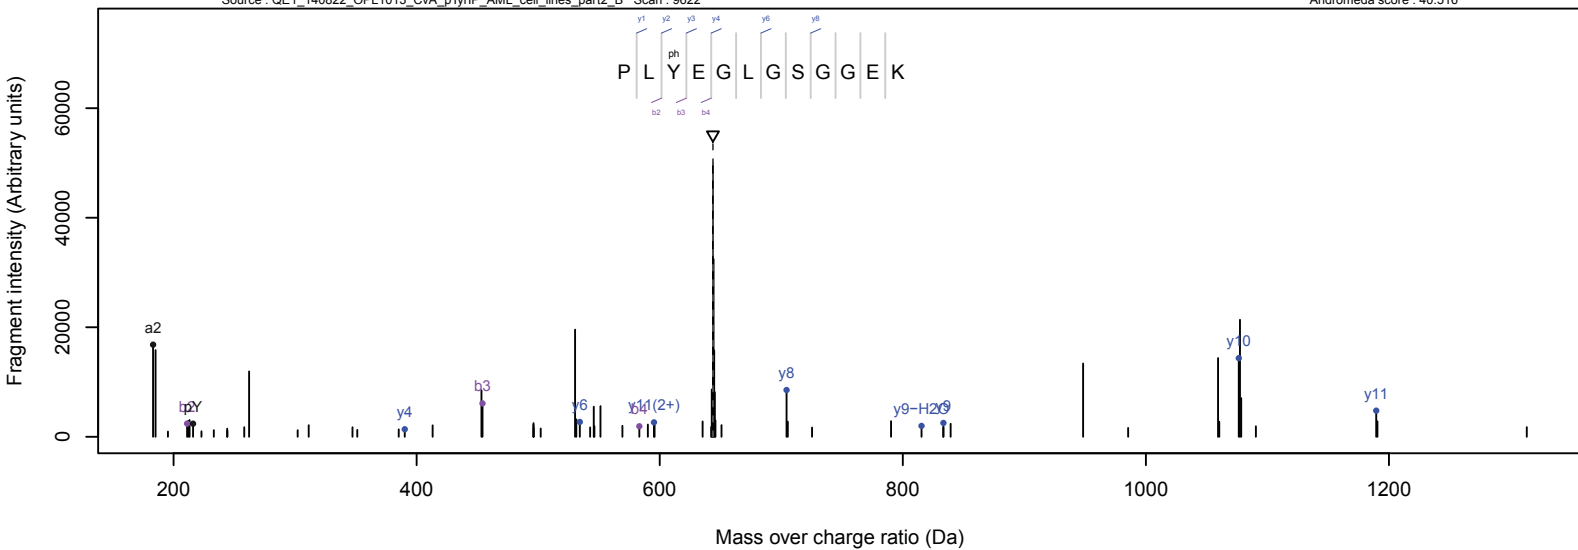

QLVALIPY(ph)GDQR-2+

Source : QE1\_140822\_OPL1013\_CVA\_pTyrIP\_AML\_cell\_lines\_part2\_B Scan : 27980

Andromeda score : 40.516

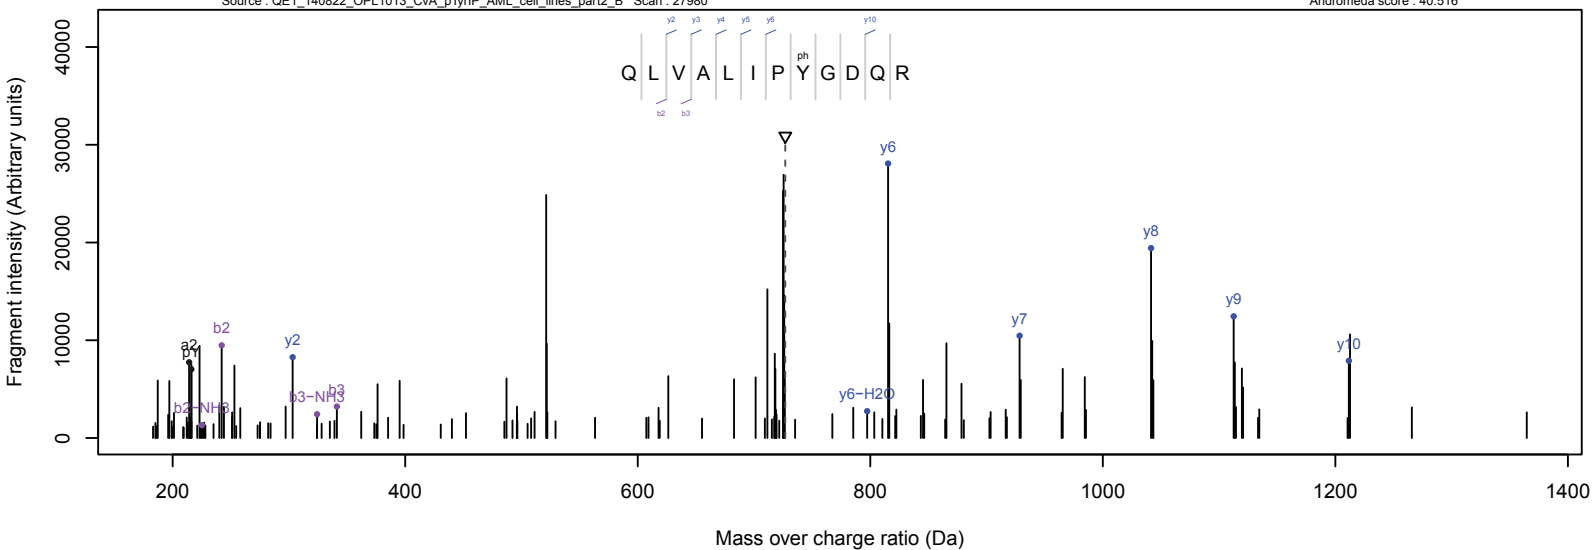

AMYPDY(ph)FAKR-3+

Source : QE1\_140612\_OPL1013\_CVA\_phosphoproteomic\_landscape\_AML\_E Scan : 20557

Andromeda score : 40.496

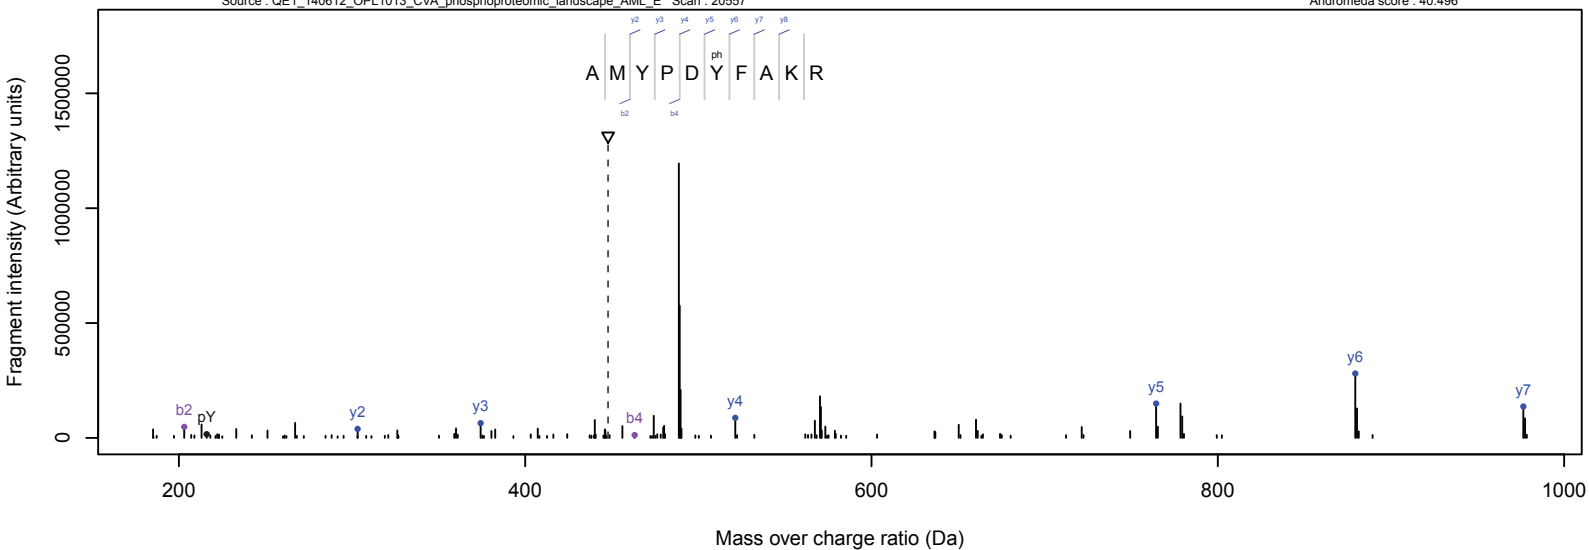

SESSPEAY(ph)IR-2+

Source : QE1\_140612\_OPL1013\_CVA\_phosphoproteomic\_landscape\_AML\_A Scan : 11115

Andromeda score : 40.496

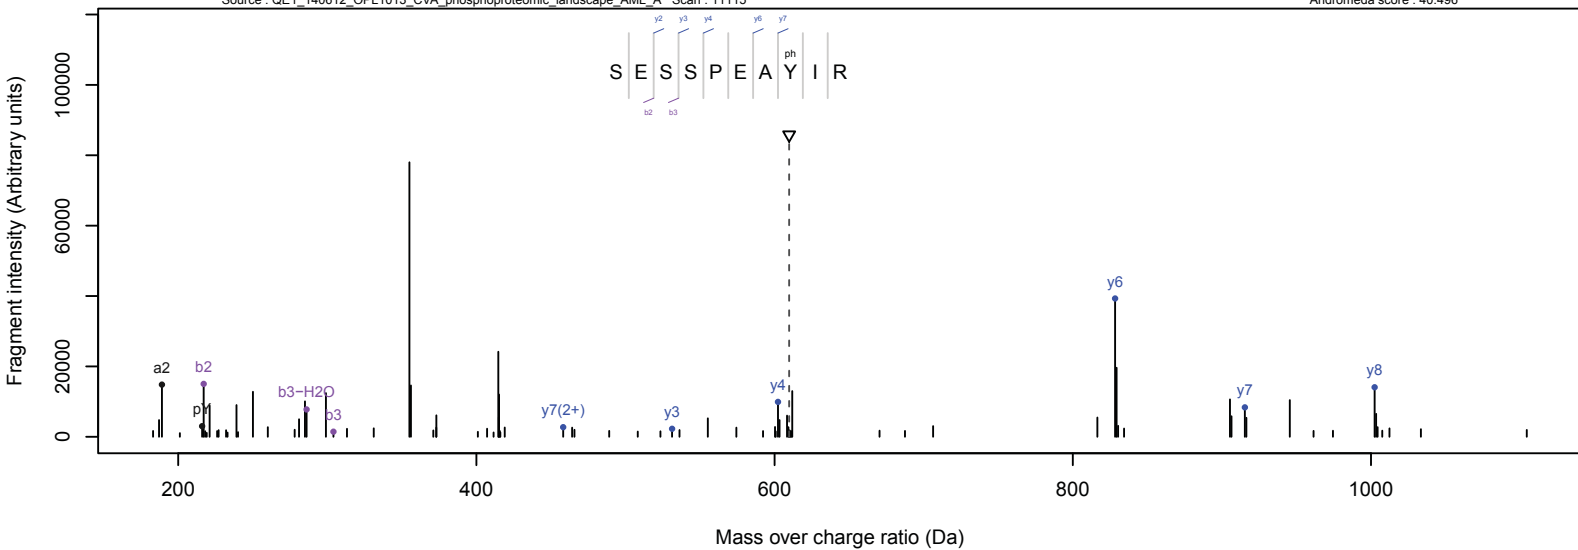



## Y(ph)LT(ph)NLQVQDLR-3+

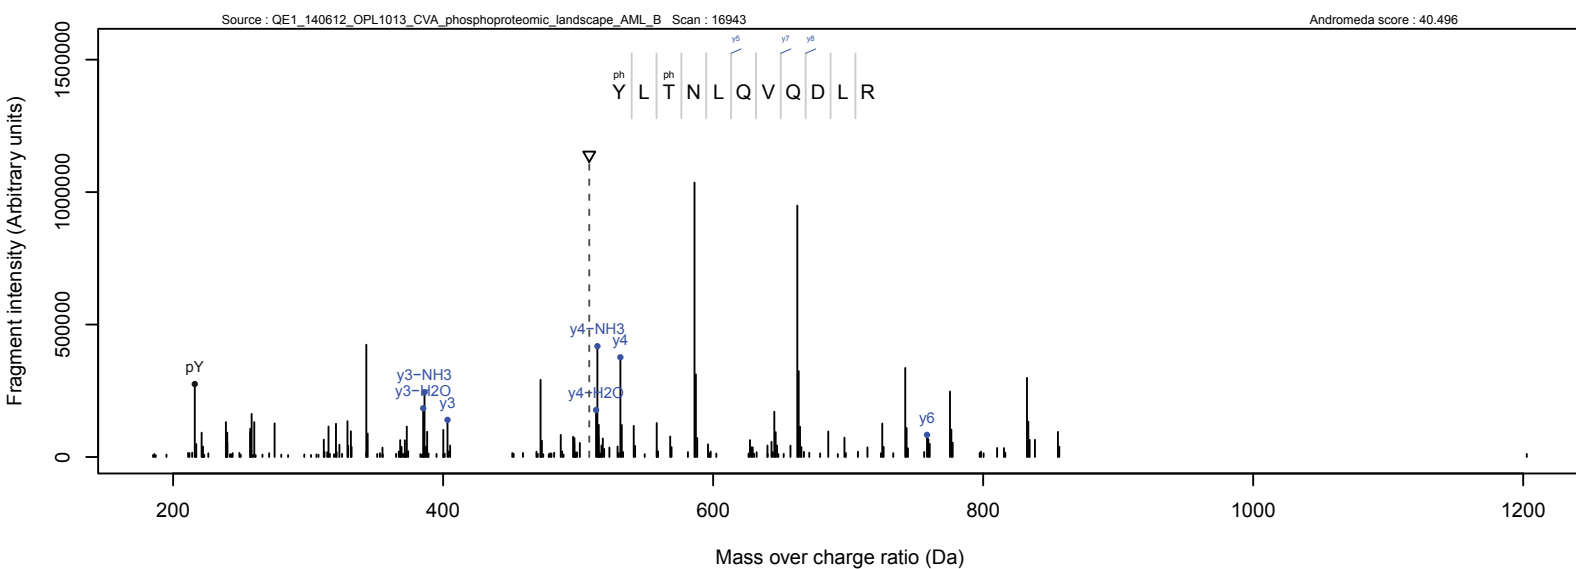

## IIYEQGVY(ph)HSSCGK-3+

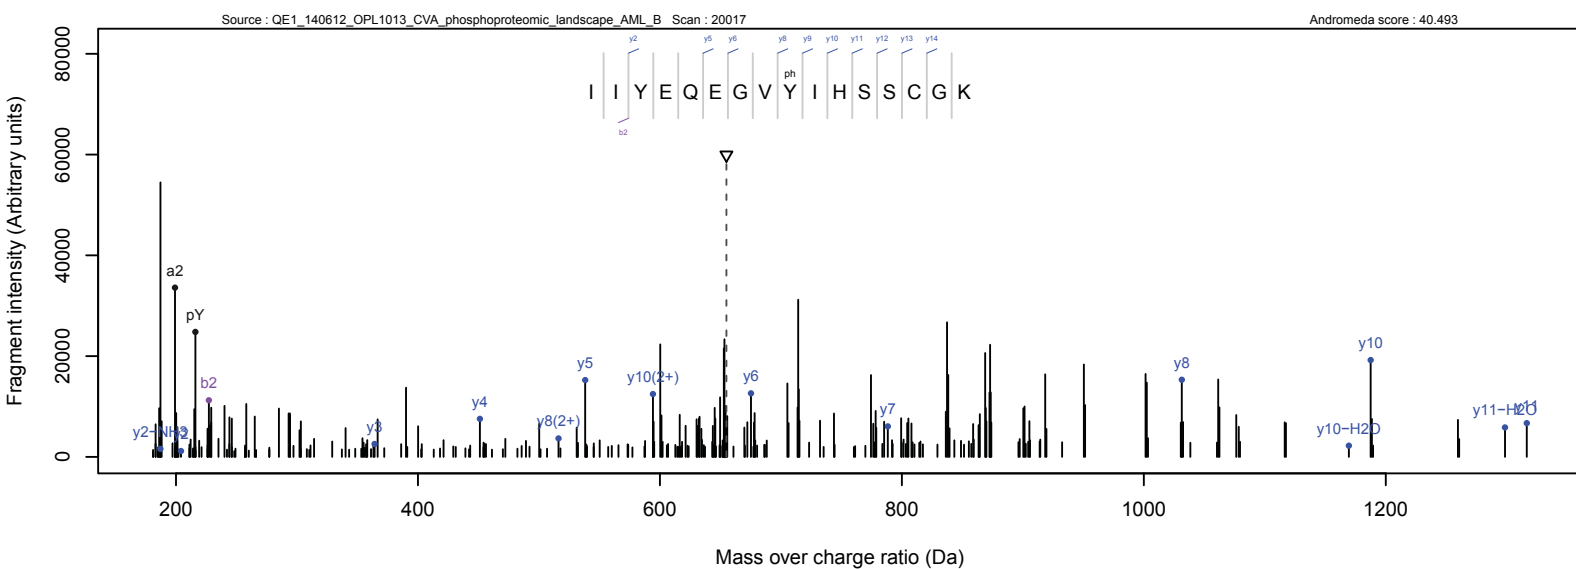

## KLY(ph)ESLLVGLPDM(ox)NK-2+

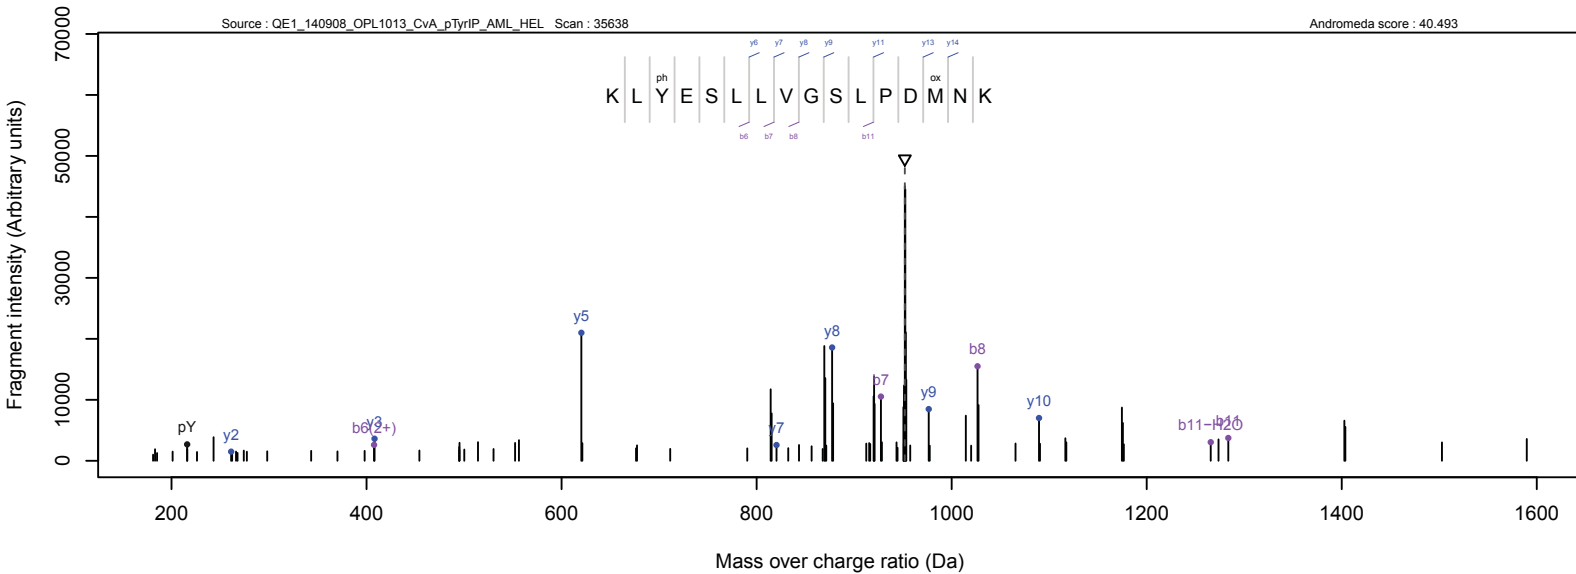

## NPEGT(ph)QYSSHPQMAAMRPR-3+

Source : QE1\_140612\_OPL1013\_CVA\_phosphoproteomic\_landscape\_AML\_B Scan : 11212

Andromeda score : 40.493

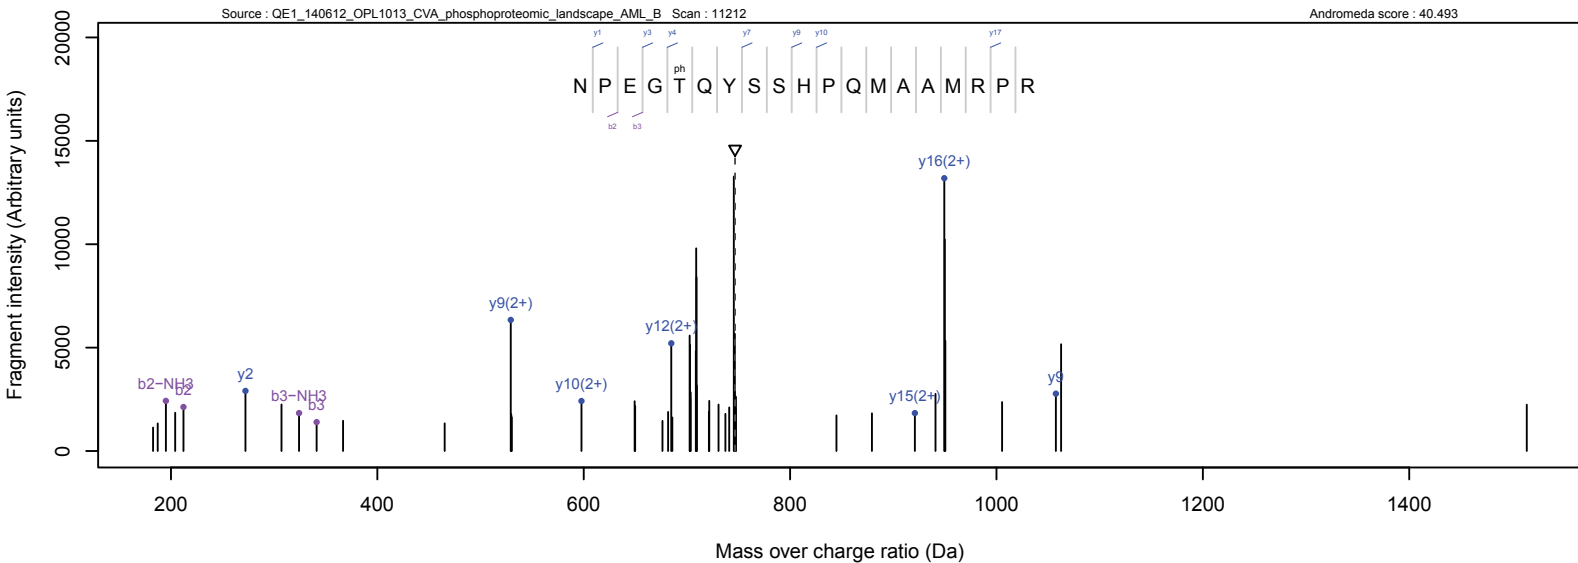

## CNLVPTDEITVYK-2+

Source : QE1\_140612\_OPL1013\_CVA\_phosphoproteomic\_landscape\_AML\_C Scan : 35550

Andromeda score : 40.477

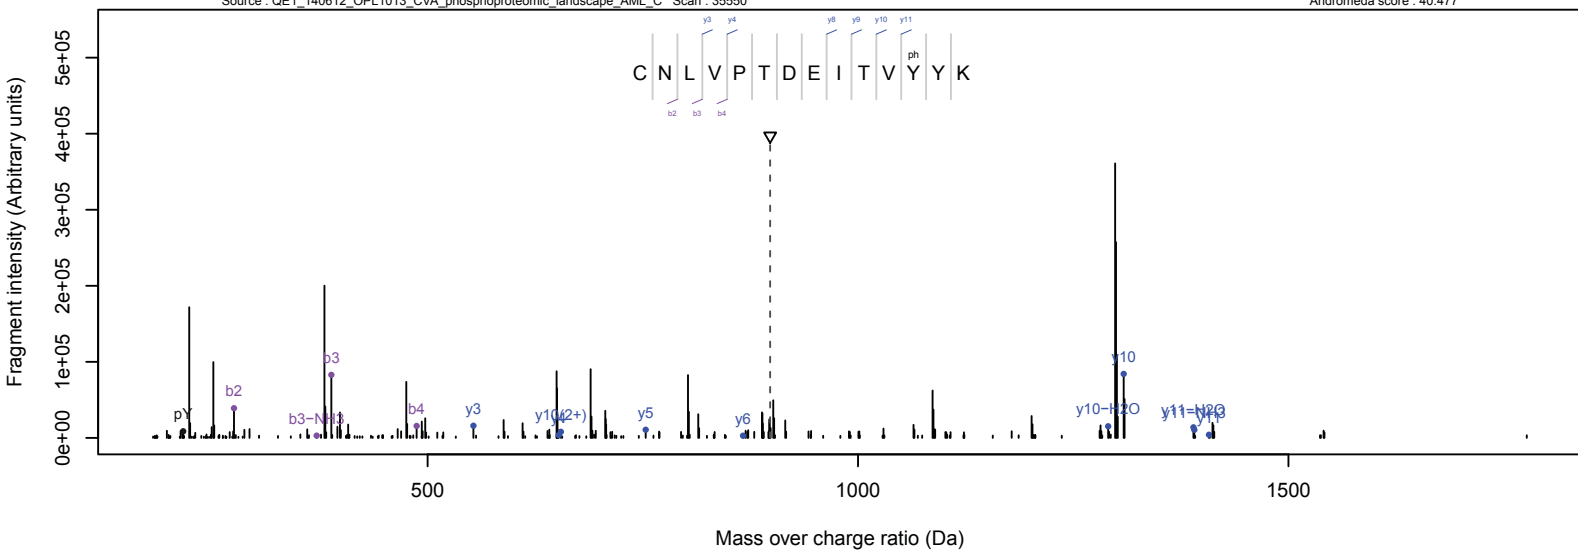

## Y(ph)CFQITSFDGKK-3+

Source : QE1\_140612\_OPL1013\_CVA\_phosphoproteomic\_landscape\_AML\_B Scan : 25872

Andromeda score : 40.475

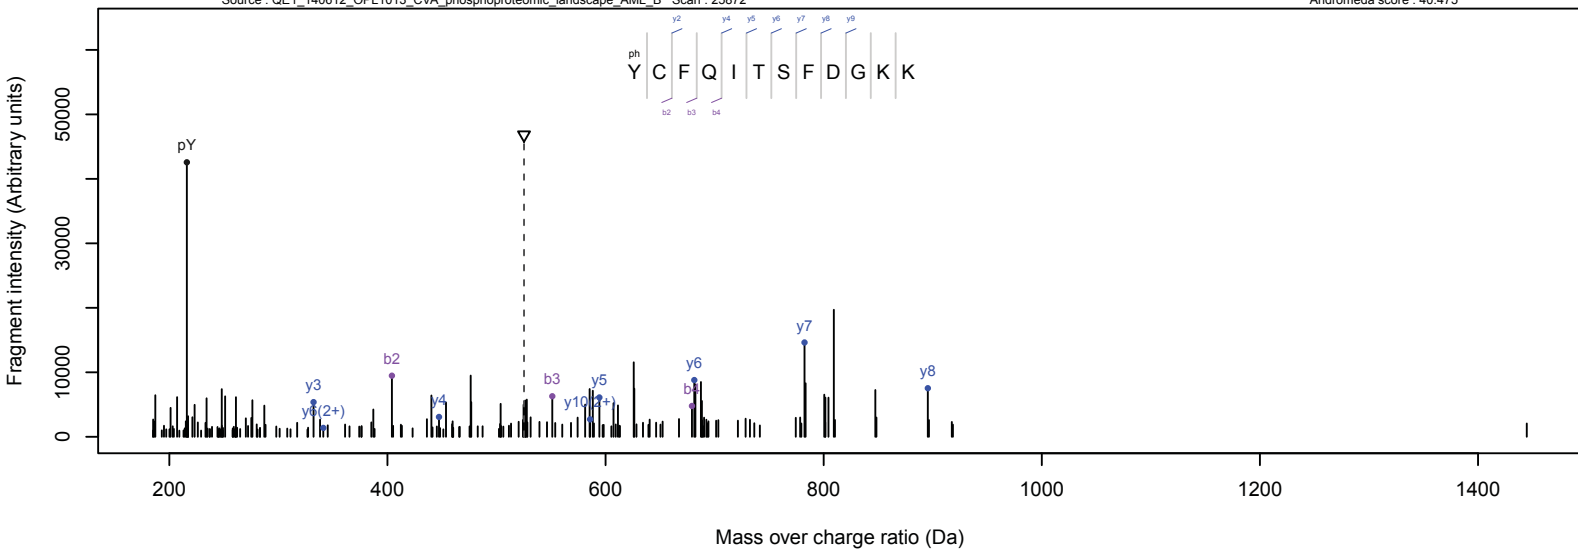

ALILGIY(ph)KQGLK-3+

Source : QE1\_140612\_OPL1013\_CVA\_phosphoproteomic\_landscape\_AML\_B Scan : 30179

Andromeda score : 40.449

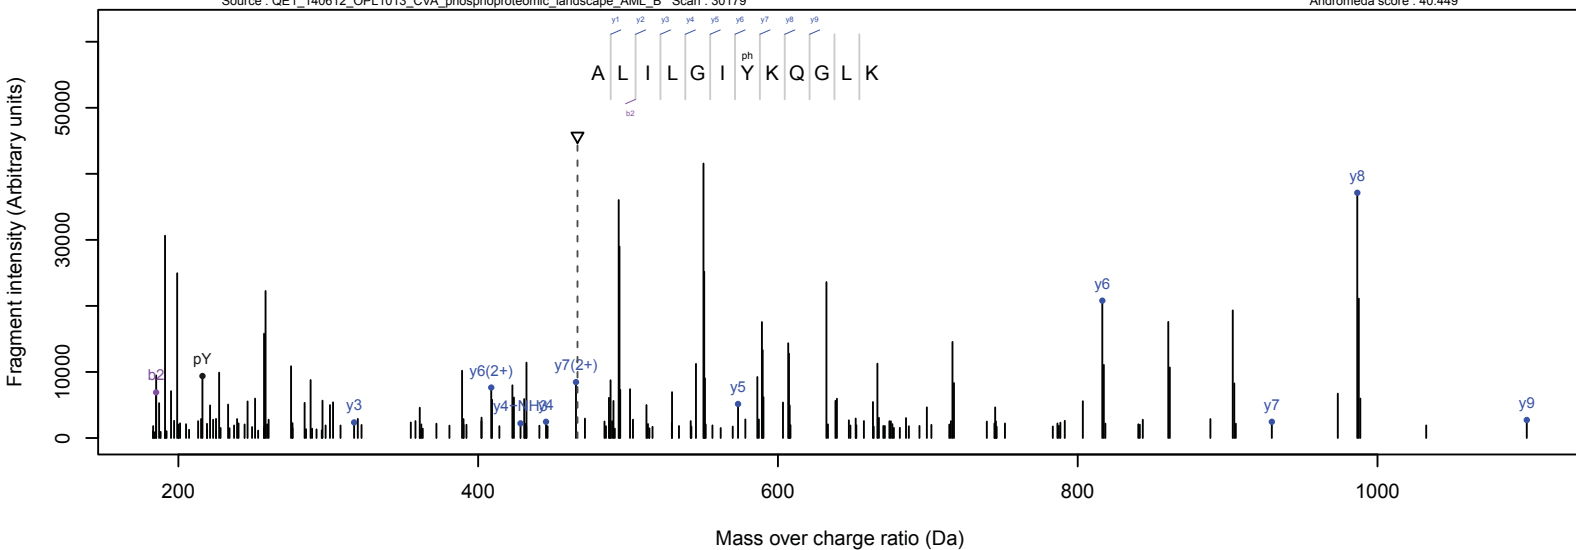

VGVEEPSEEDQNEHHWQYFR-3+

Source : QE1\_140908\_OPL1013\_CvA\_pTyrIP\_AML\_Kasumi1 Scan : 23145

Andromeda score : 40.432

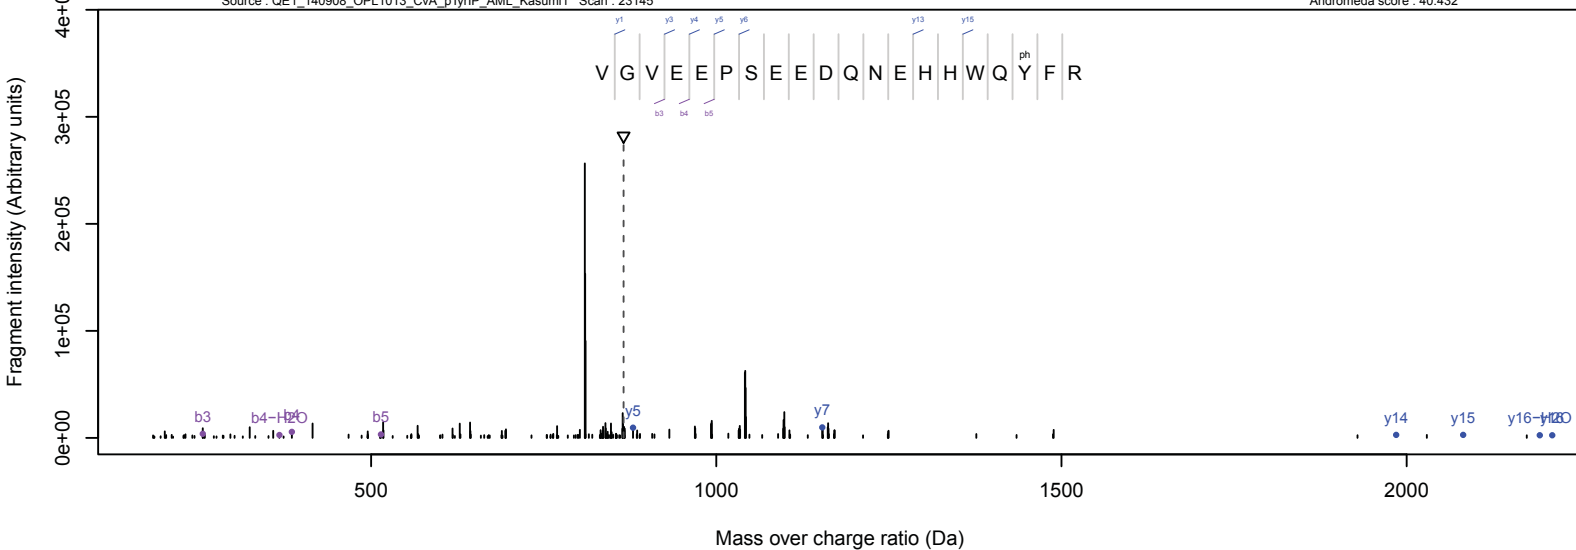

ERPISMINEASNYNTSDYAVHPMSPVGR-4+

Source : QE1\_140612\_OPL1013\_CVA\_phosphoproteomic\_landscape\_AML\_B Scan : 33559

Andromeda score : 40.393

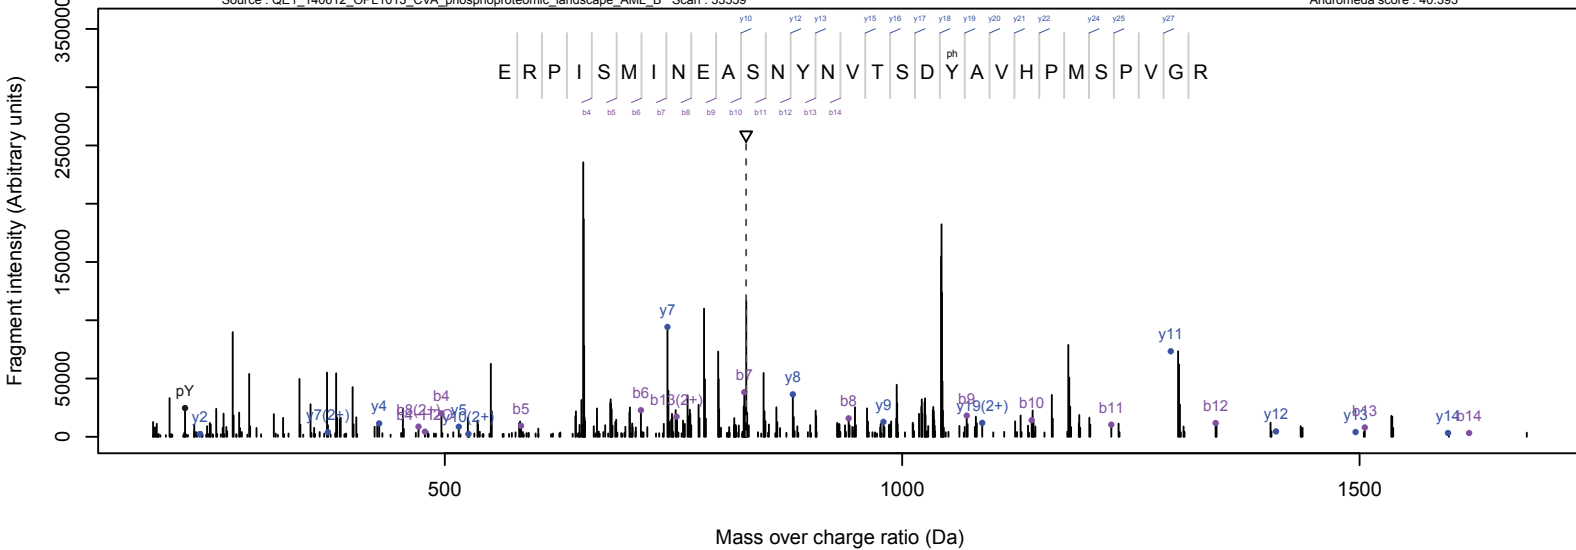

## VDQYLY(ph)HMR-2+

Source : QE1\_140612\_OPL1013\_CVA\_phosphoproteomic\_landscape\_AML\_C Scan : 15874

Andromeda score : 40.386

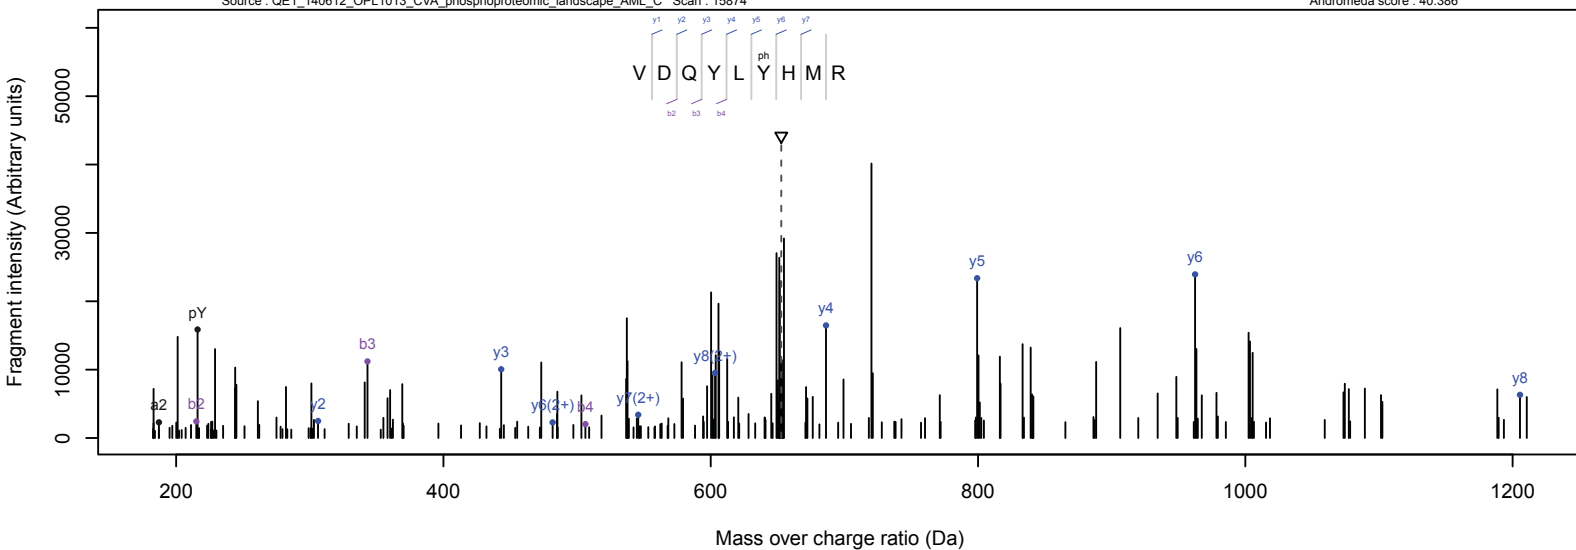

## ARDHGLLIY(ph)HIPQVEPR-4+

Source : QE1\_140612\_OPL1013\_CVA\_phosphoproteomic\_landscape\_AML\_C Scan : 30522

Andromeda score : 40.384

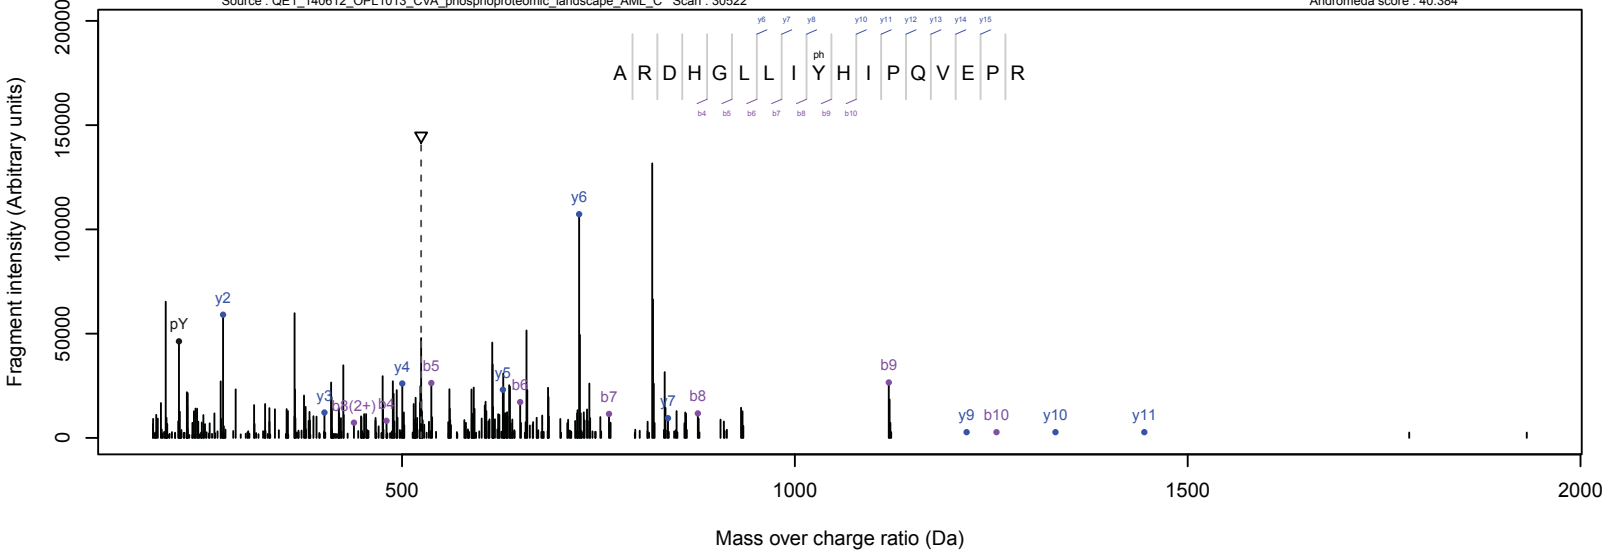

## HGDLSFLLYS(ph)R-3+

Source : QE1\_140908\_OPL1013\_CvA\_pTyrIP\_AML\_ML2 Scan : 29912

Andromeda score : 40.373

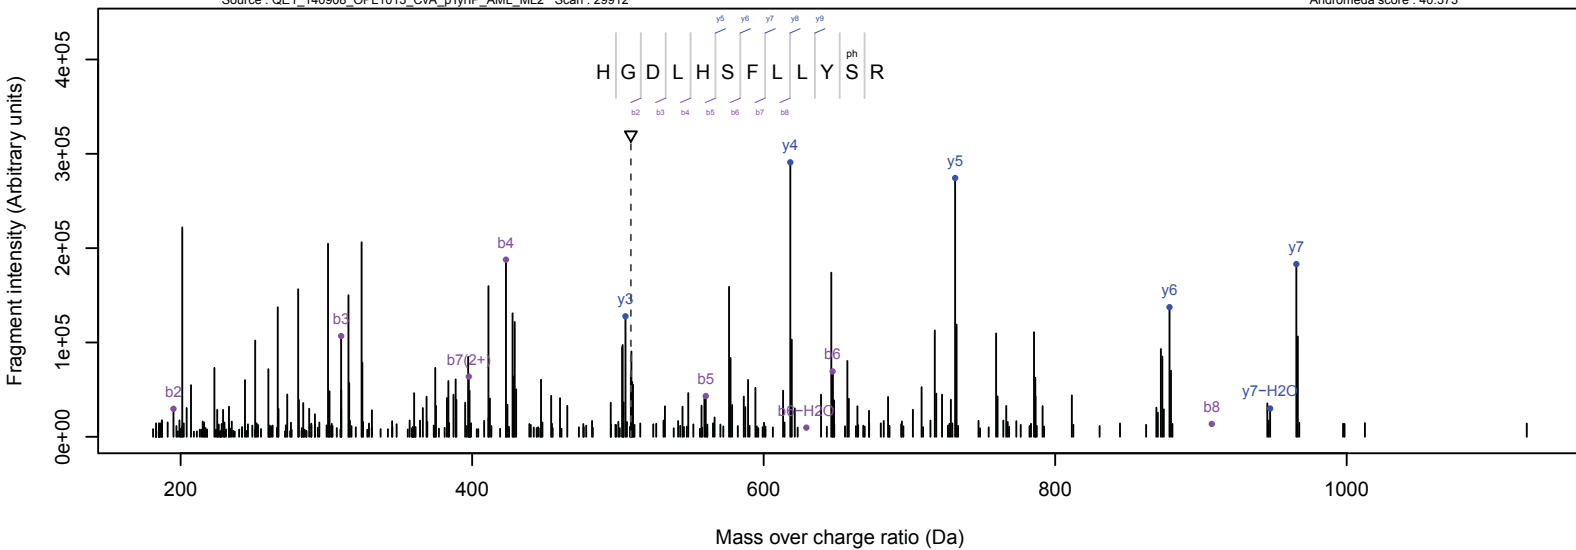

ADLIAY(ph)LK-2+

Source : QE1\_140612\_OPL1013\_CVA\_phosphoproteomic\_landscape\_AML\_C Scan : 33946

Andromeda score : 40.352

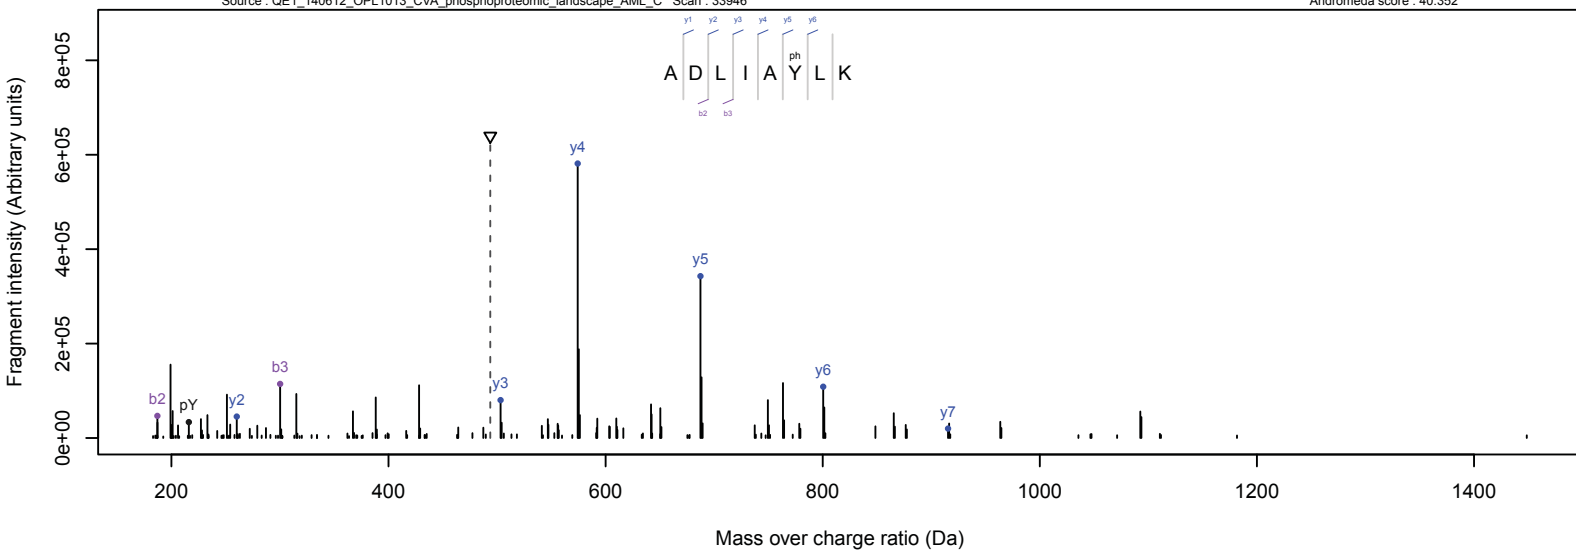

DSTY(ph)DLPR-2+

Source : QE1\_140908\_OPL1013\_CvA\_pTyrIP\_AML\_Kasumi6 Scan : 12657

Andromeda score : 40.352

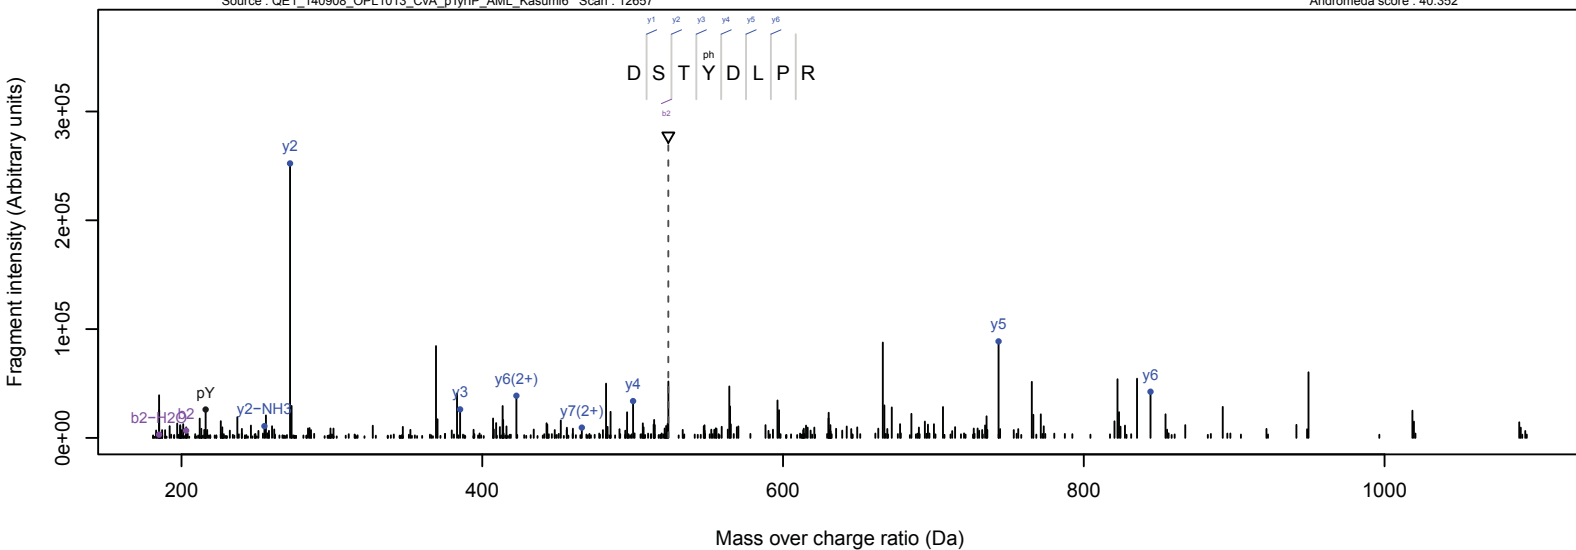

LPDY(ph)ICPR-2+

Source : QE1\_140612\_OPL1013\_CVA\_phosphoproteomic\_landscape\_AML\_B Scan : 18742

Andromeda score : 40.352

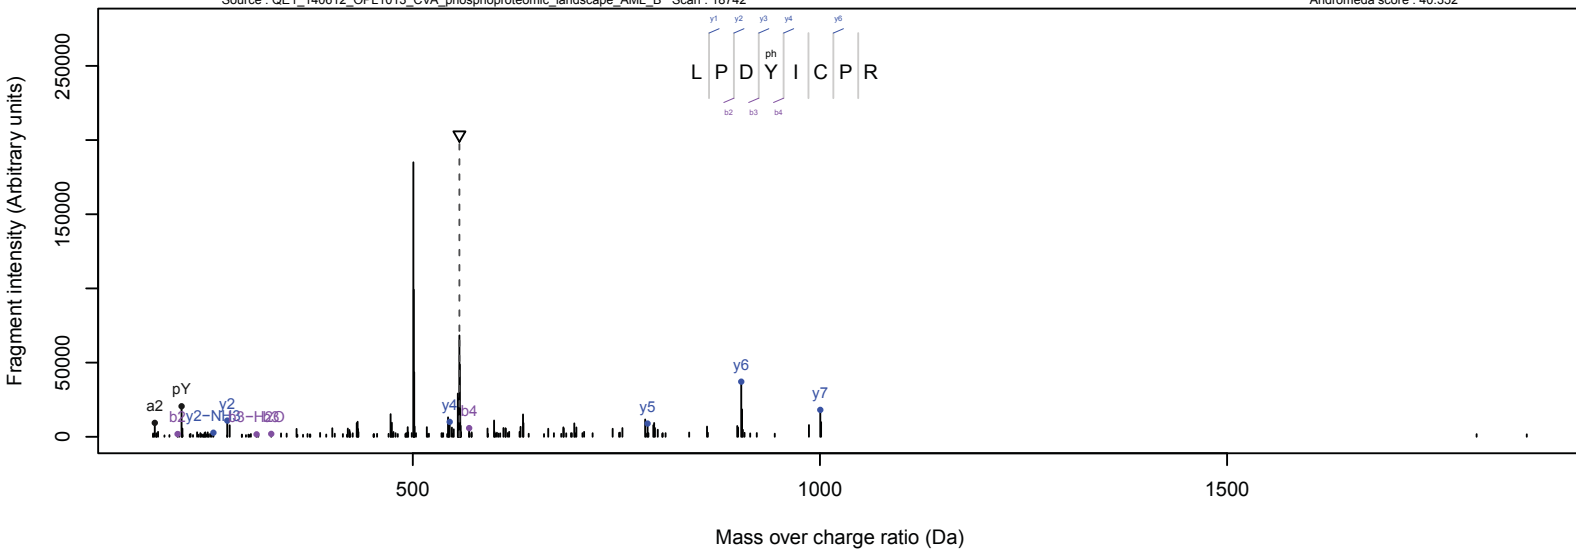

VGDVY(ph)IPR-2+

Source: QE1\_140612\_OPL1013\_CVA\_phosphoproteomic\_landscape\_AML\_A Scan: 19209

Andromeda score: 40.352

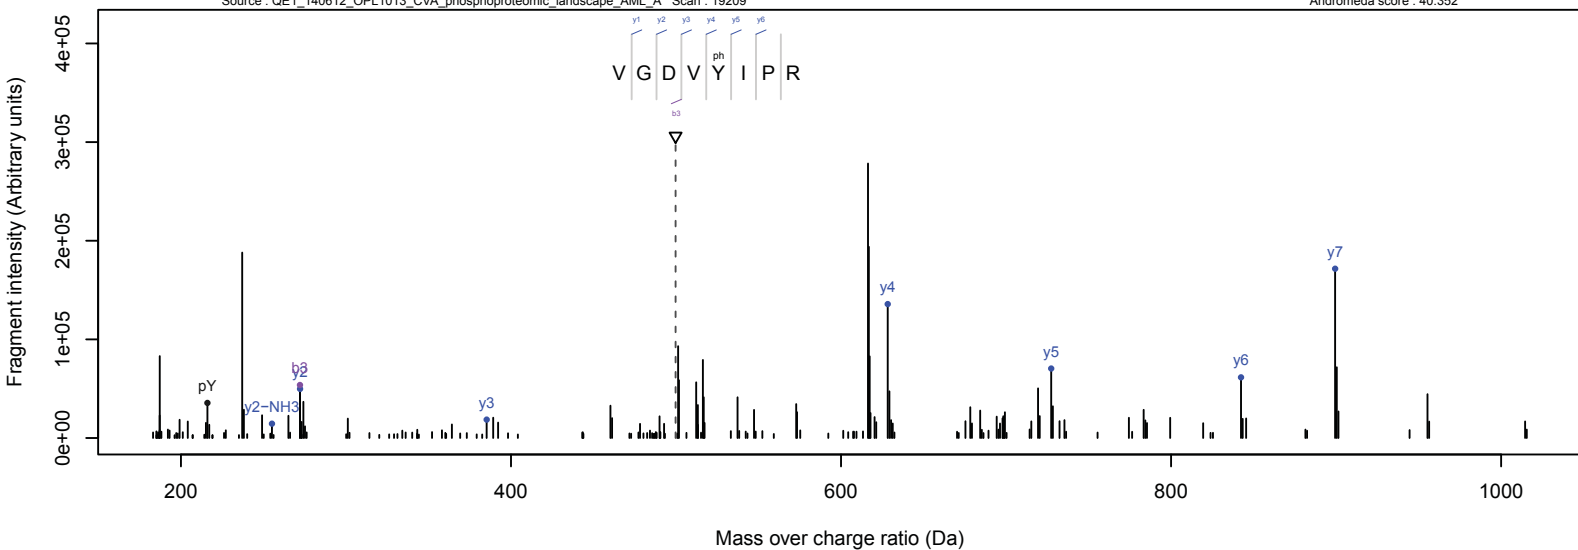

Y(ph)KVLPTER-2+

Source: QE1\_140612\_OPL1013\_CVA\_phosphoproteomic\_landscape\_AML\_C Scan: 8034

Andromeda score: 40.352

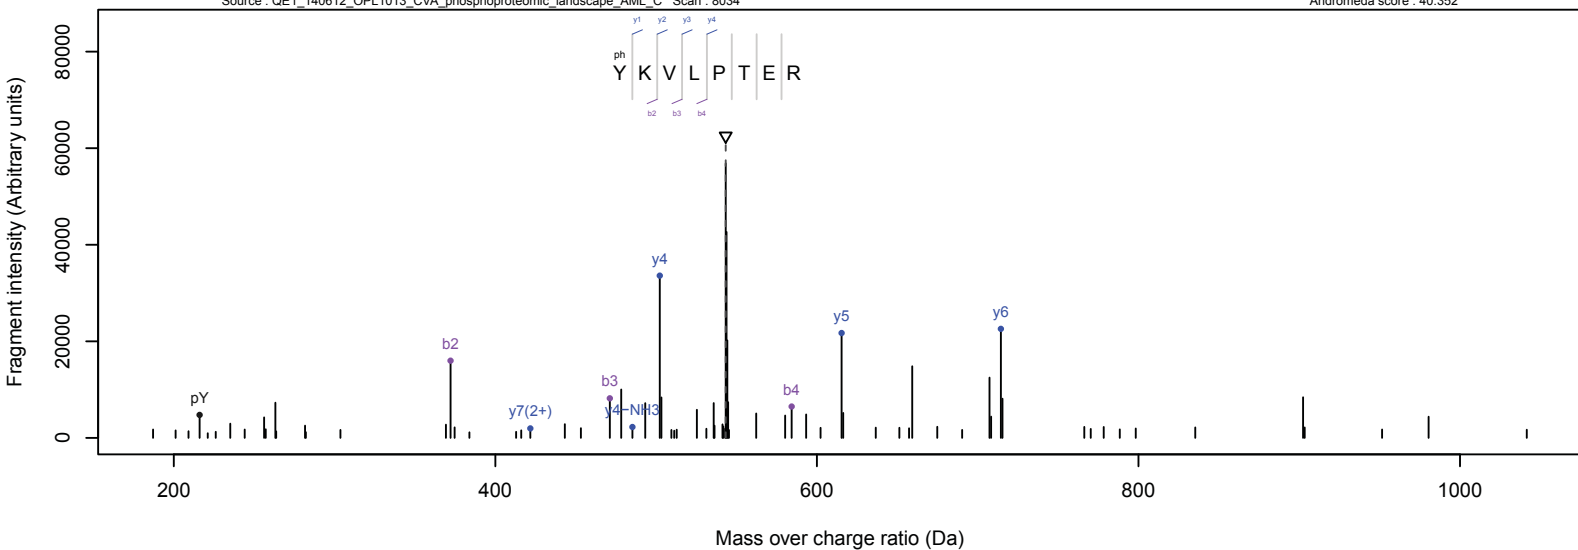

DRDSEFTPLASLQSPGY(ph)QSTCPSAAWYSSHSQQVTLAAWK-4+

Source: QE1\_140612\_OPL1013\_CVA\_phosphoproteomic\_landscape\_AML\_C Scan: 47101

Andromeda score: 40.351

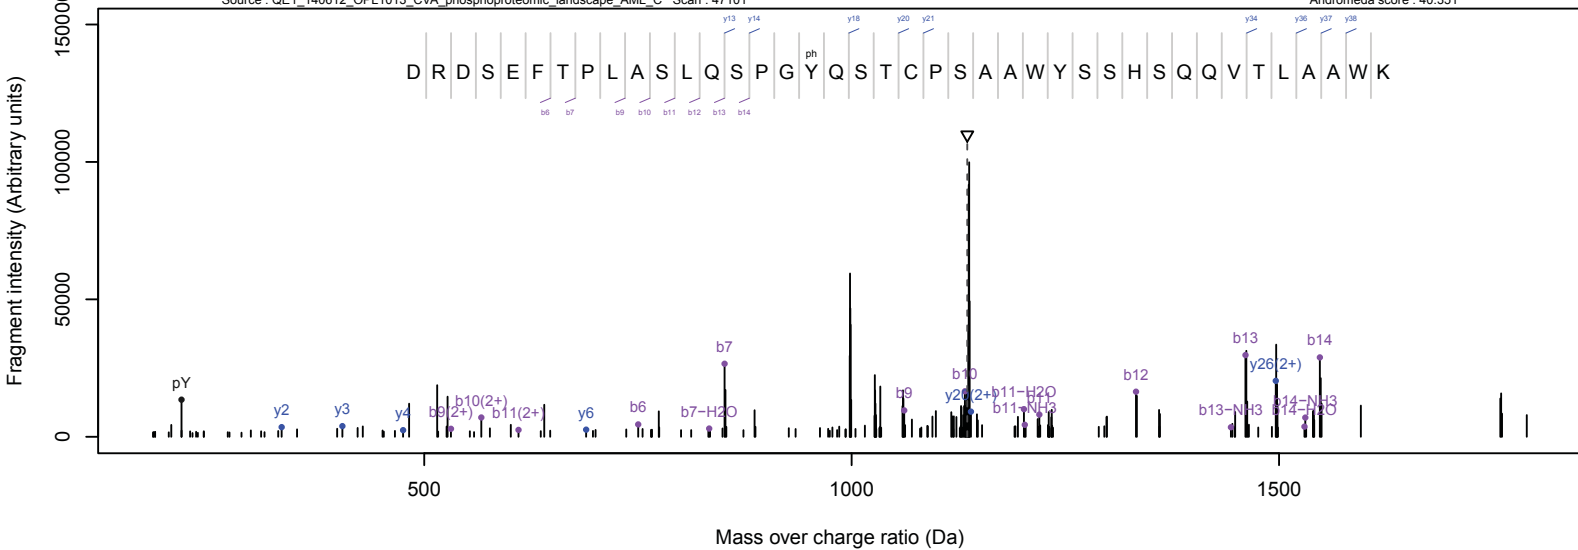

**KNY(ph)LLEEK-2+**

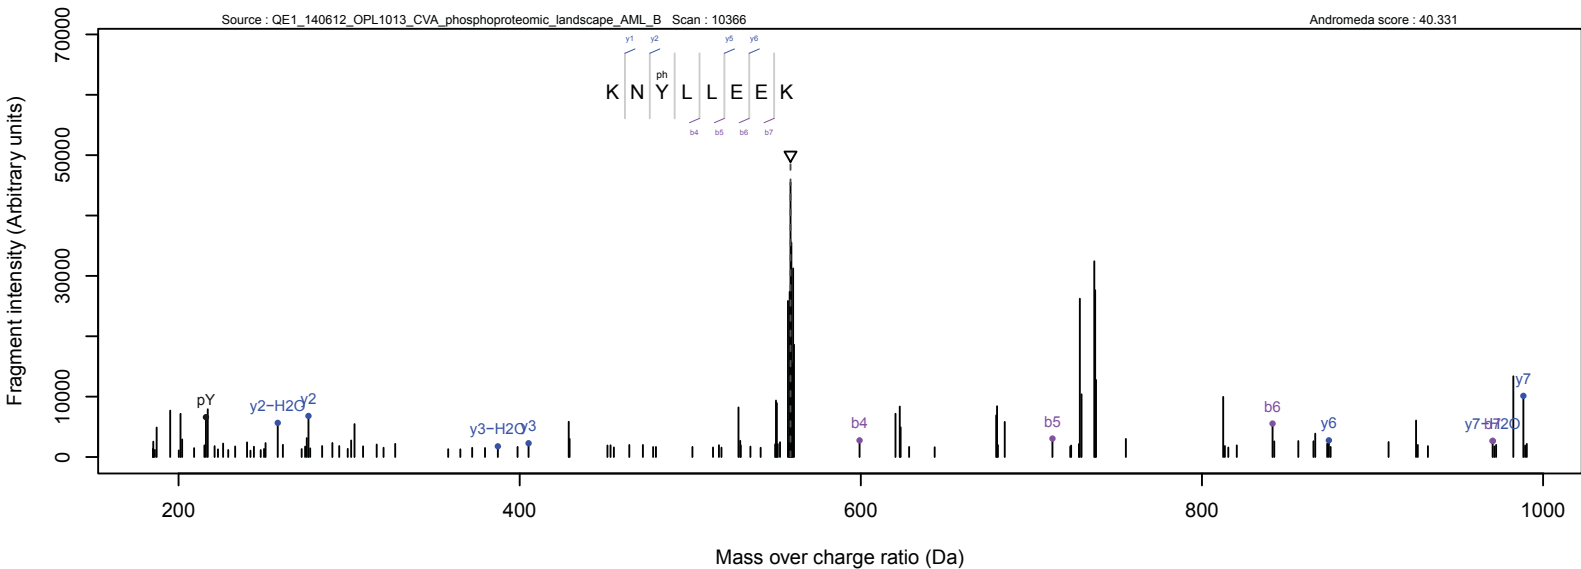

**AIETDKEY(ph)YTVK-2+**

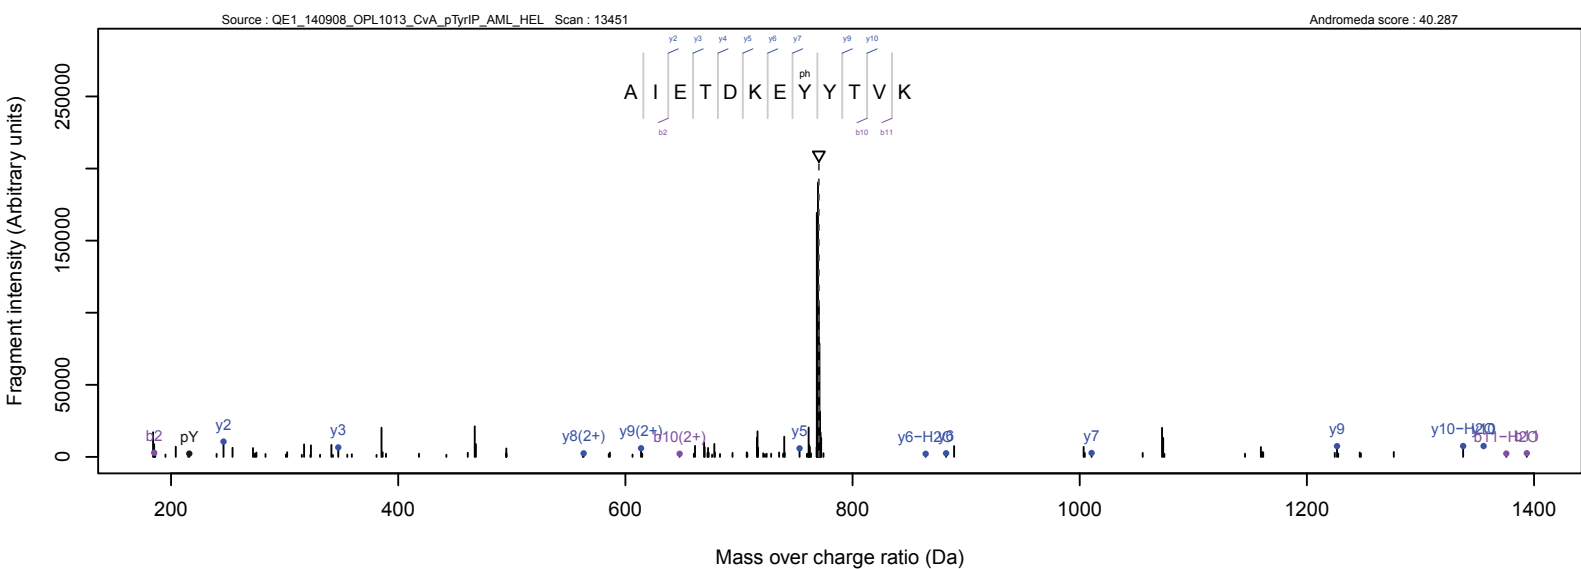

**GPPPTDPY(ph)GRPPPYDR-3+**

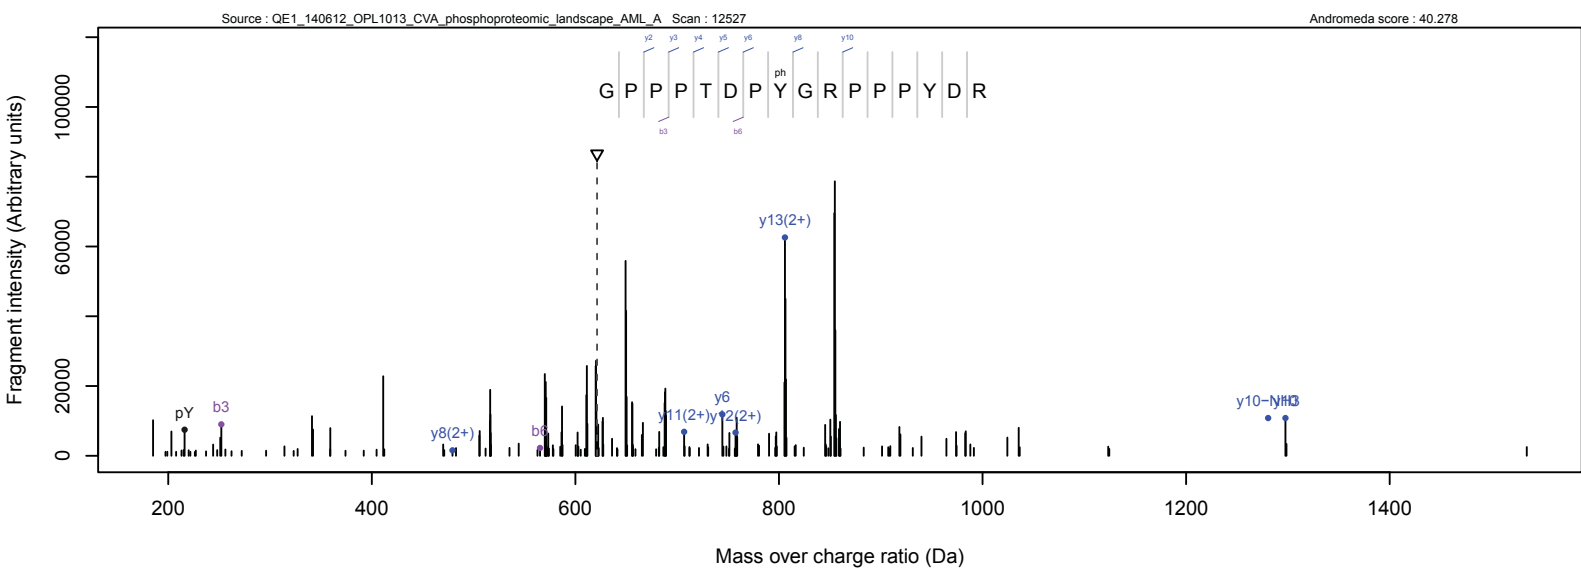

## LSEIHLHPEY(ph)VR-4+

Source : QE1\_140612\_OPL1013\_CVA\_phosphoproteomic\_landscape\_AML\_B Scan : 13863

Andromeda score : 40.278

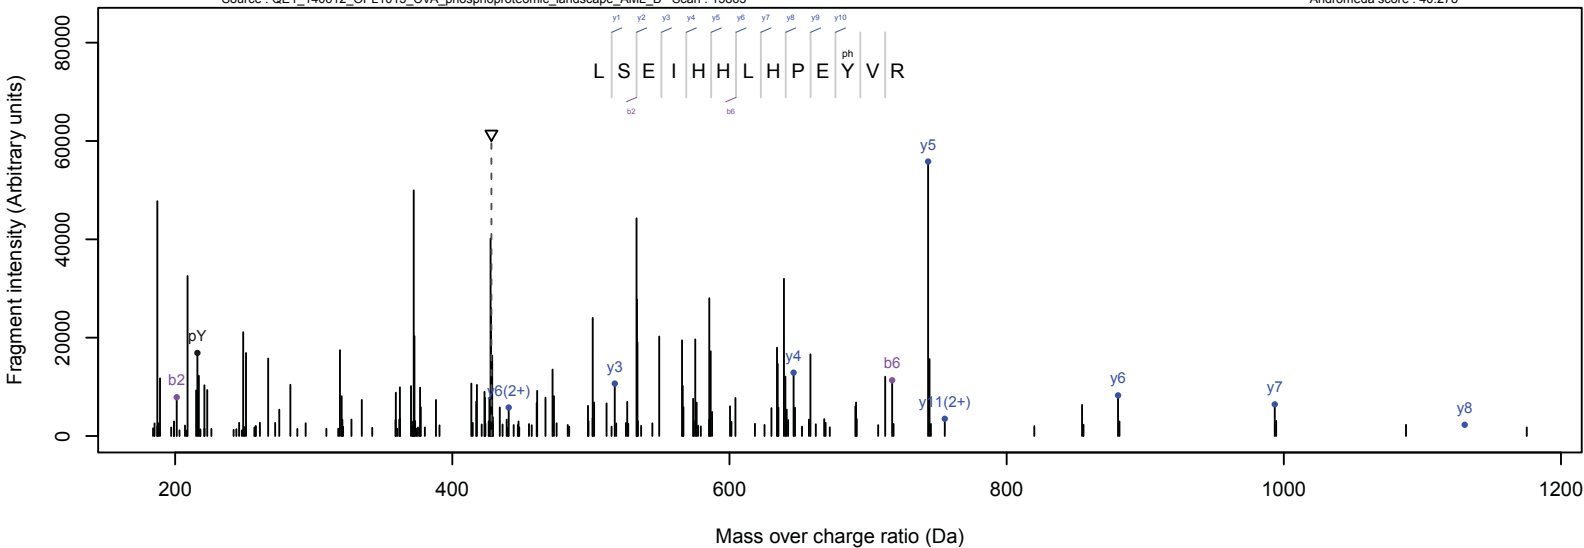

## STSQGSINSPV(ph)SR-2+

Source : QE1\_140822\_OPL1013\_CvA\_pTyrIP\_AML\_cell\_lines\_part2\_B Scan : 7129

Andromeda score : 40.278

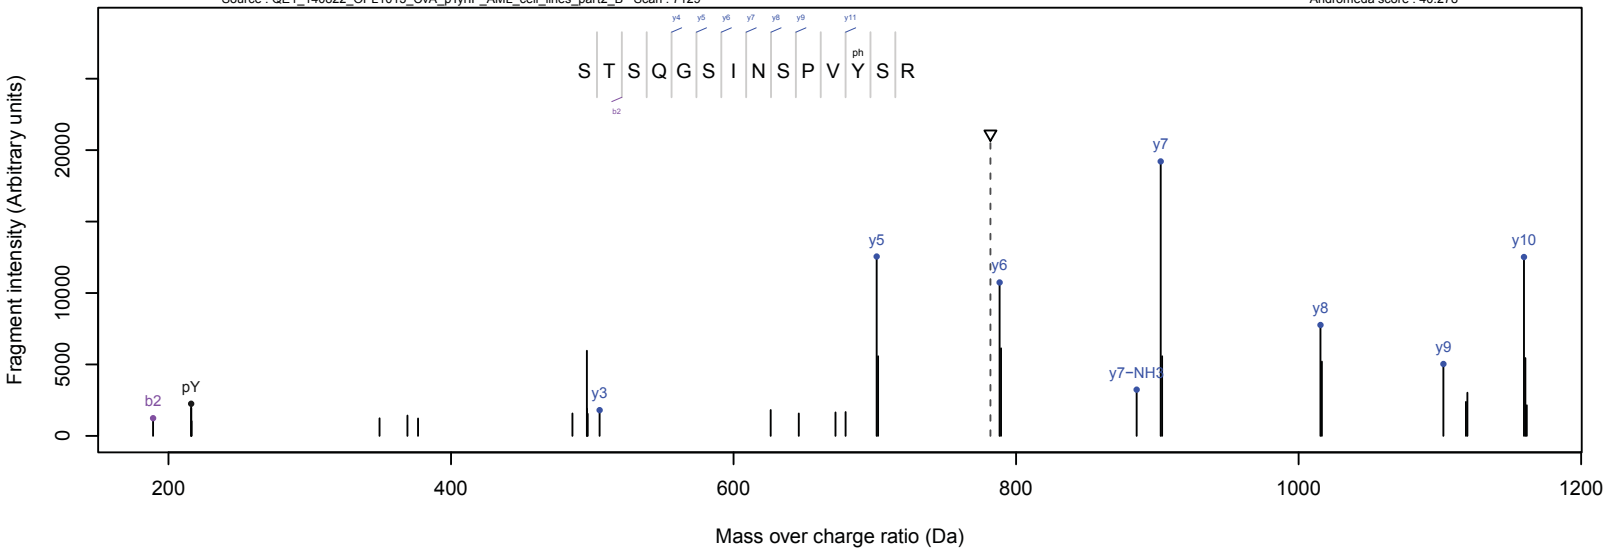

## ALILGIY(ph)K-2+

Source : QE1\_140612\_OPL1013\_CVA\_phosphoproteomic\_landscape\_AML\_B Scan : 32517

Andromeda score : 40.268

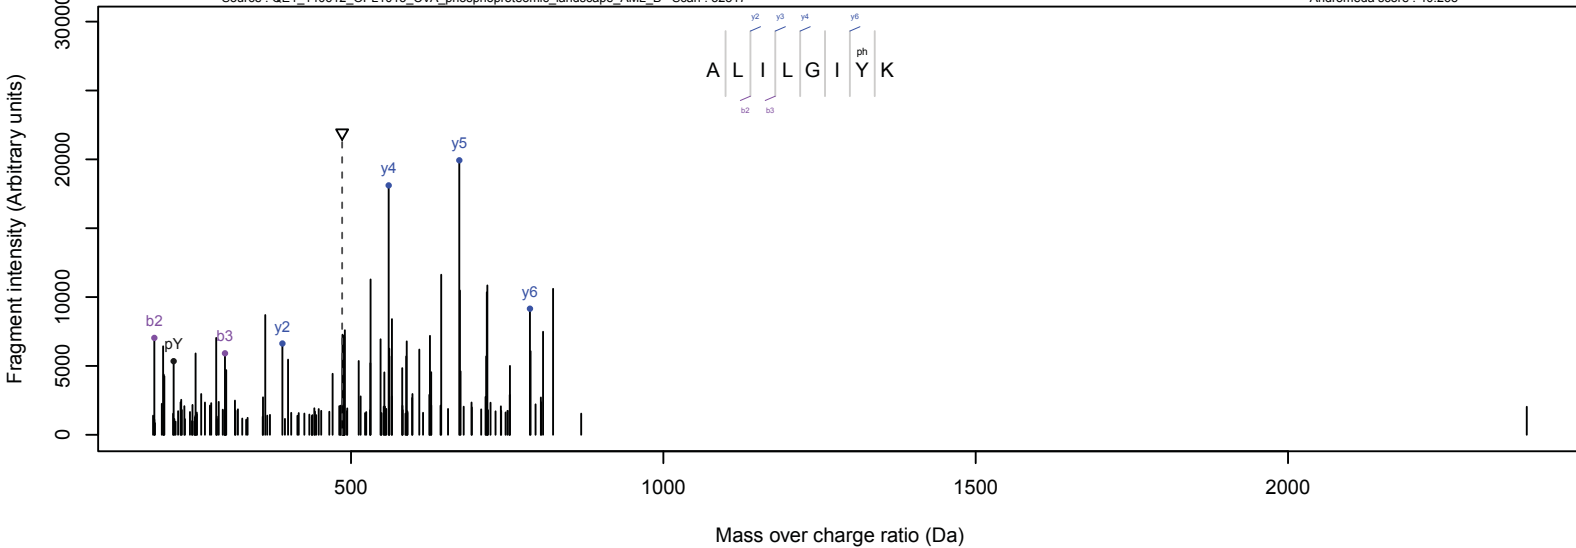



**EGLY(ph)QYKNICQQVNIK-3+**

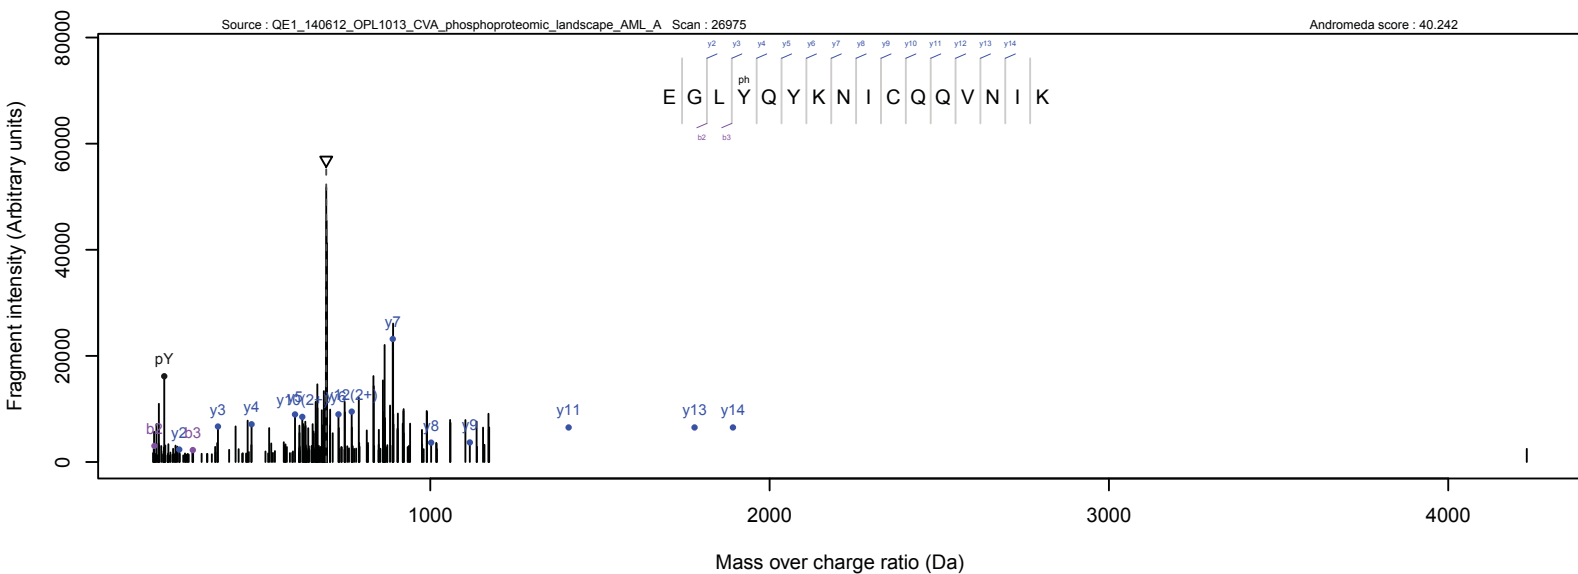

**NQDATVY(ph)VGGLEDEK-2+**

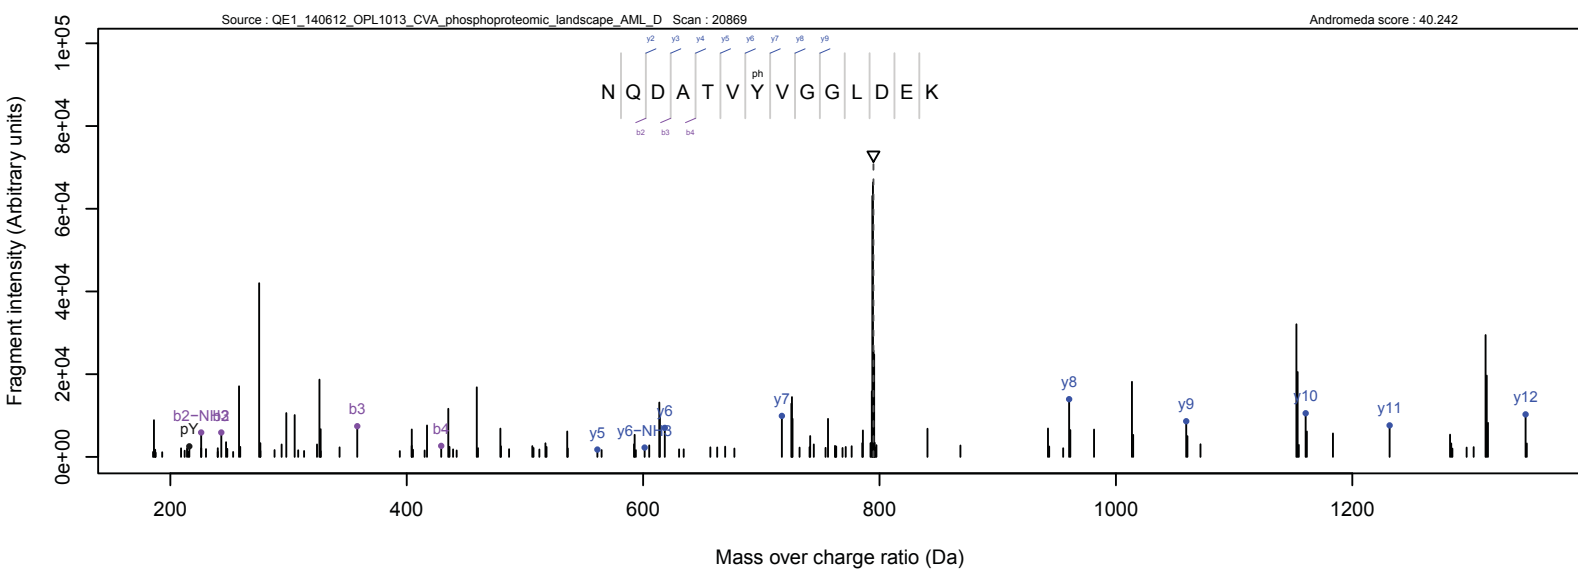

**YGY(ph)LSLPK-2+**

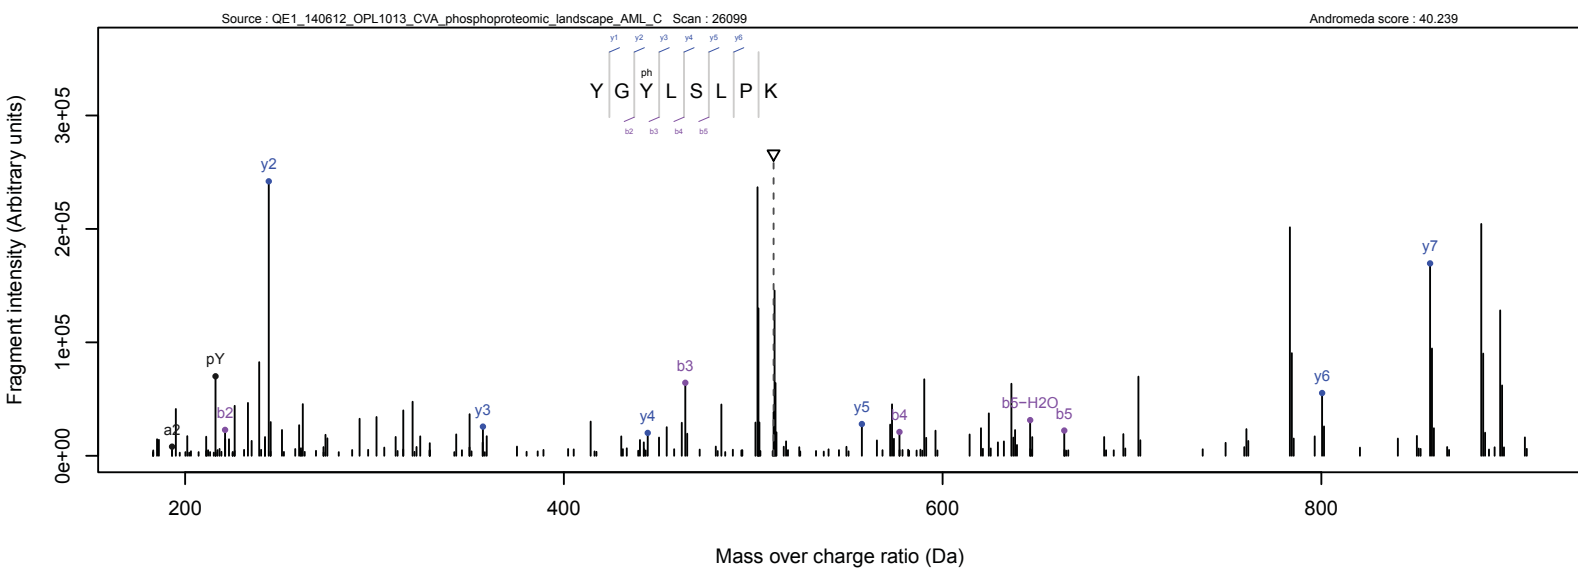

## PYPAHY(ph)MDTAIQTYR-3+

Source : QE1\_140612\_OPL1013\_CVA\_phosphoproteomic\_landscape\_AML\_D Scan : 28968

Andromeda score : 40.187

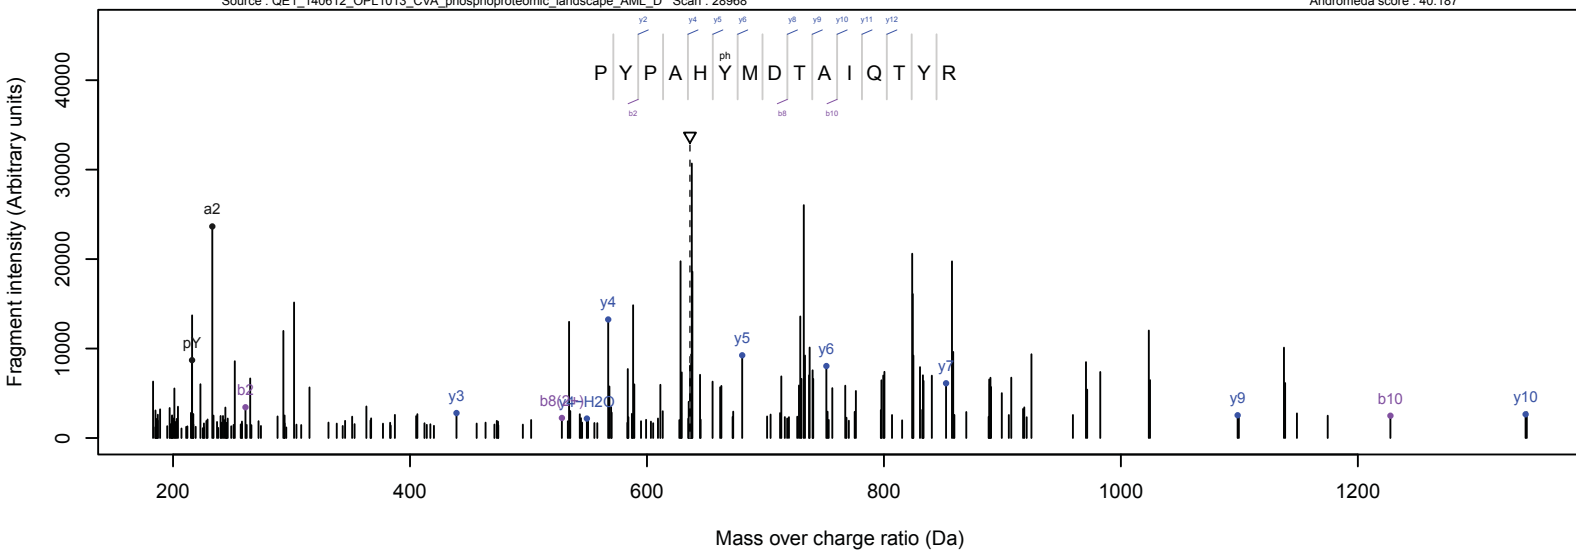

## RNHY(ph)LDLAGIENYTSR-3+

Source : QE1\_140612\_OPL1013\_CVA\_phosphoproteomic\_landscape\_AML\_C Scan : 30473

Andromeda score : 40.186

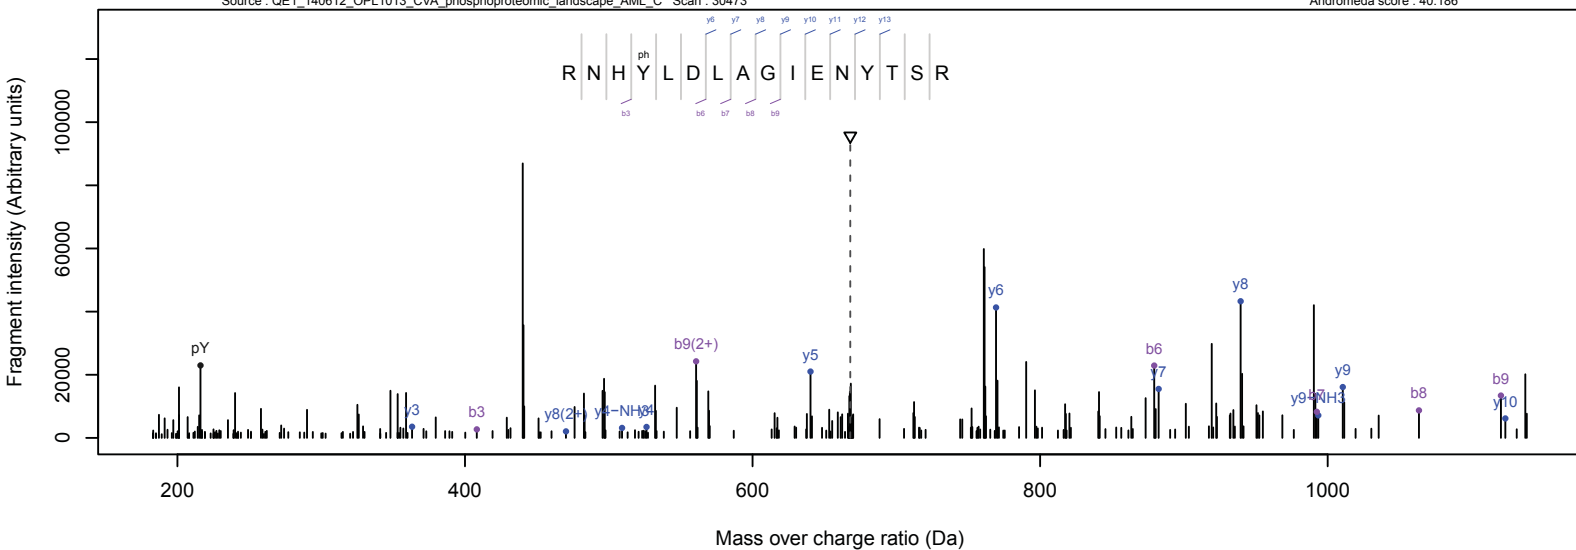

## SPAIGLNNLDKAY(ph)VER-3+

Source : QE1\_140612\_OPL1013\_CVA\_phosphoproteomic\_landscape\_AML\_B Scan : 26842

Andromeda score : 40.186

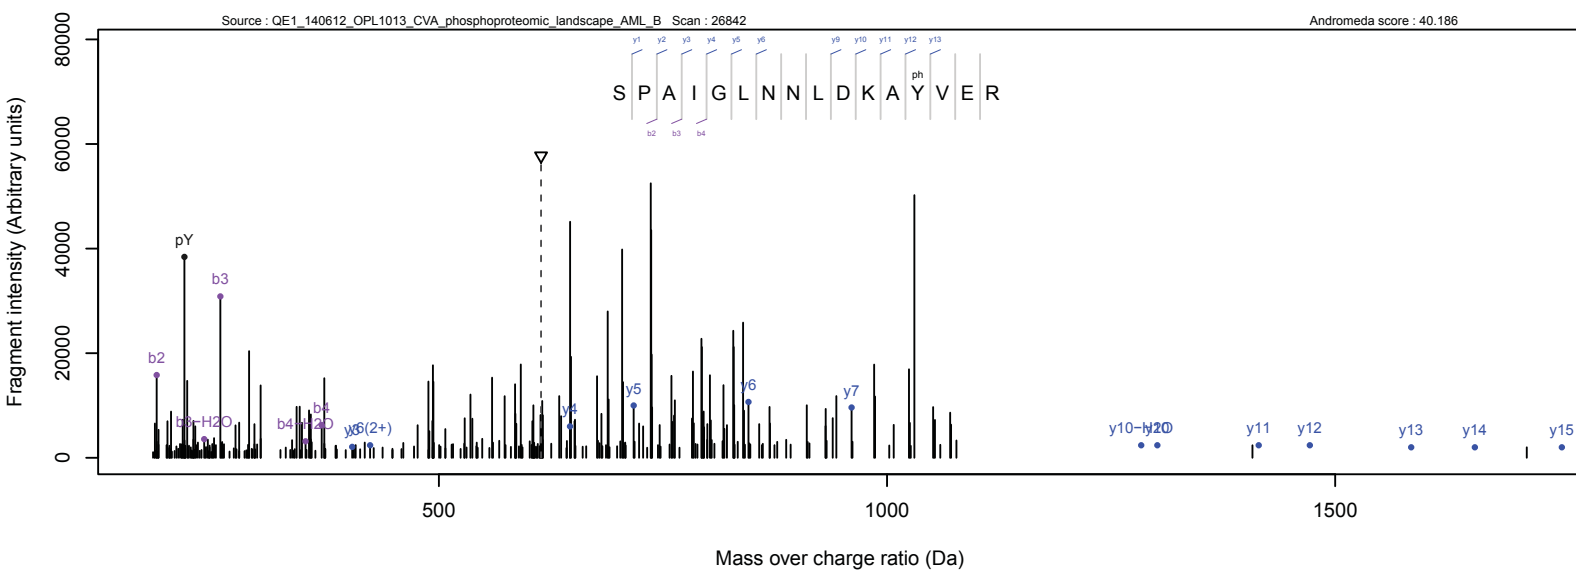

## NGGIY(ph)EGVFK-2+

Source: QE1\_140908\_OPL1013\_CvA\_pTyrIP\_AML\_Kasumi1 Scan: 23533

Andromeda score: 40.154

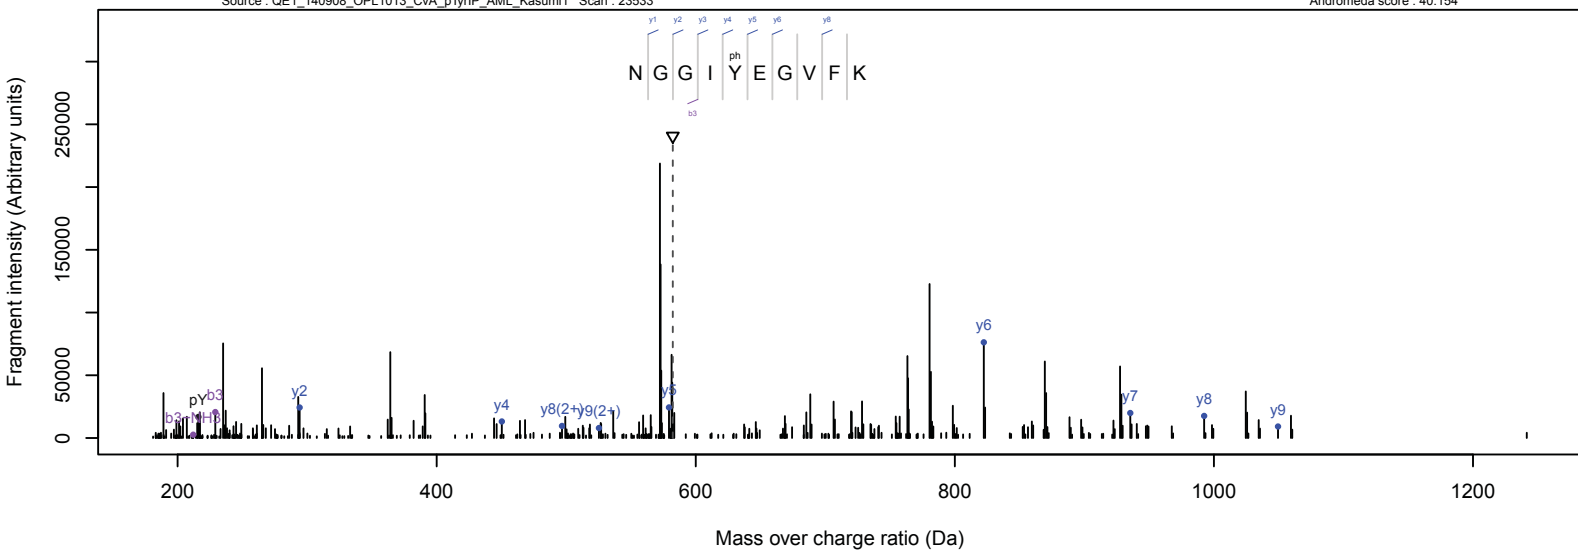

## FFANPVSREDEES(ph)YIEMEEHR-3+

Source: QE1\_140908\_OPL1013\_CvA\_pTyrIP\_AML\_Kasumi6 Scan: 31412

Andromeda score: 40.137

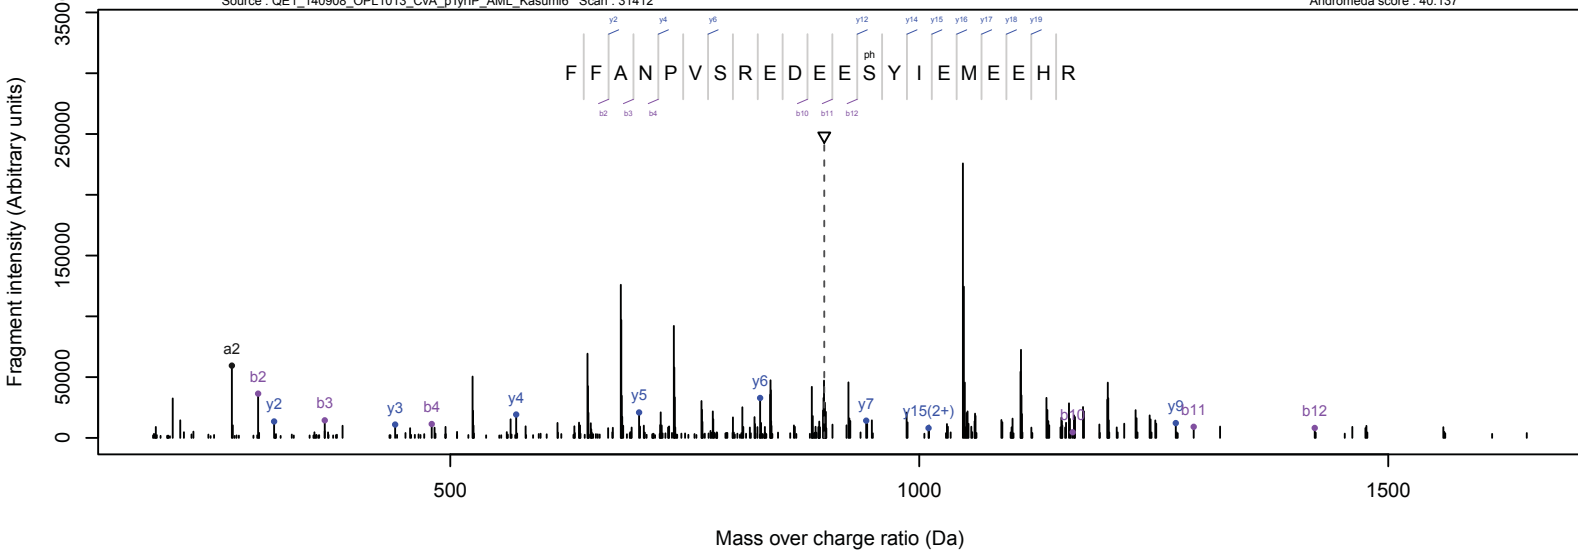

## MIPSQISYPASQGA(ph)YIPGQR-3+

Source: QE1\_140612\_OPL1013\_CvA\_phosphoproteomic\_landscape\_AML\_C Scan: 37153

Andromeda score: 40.137

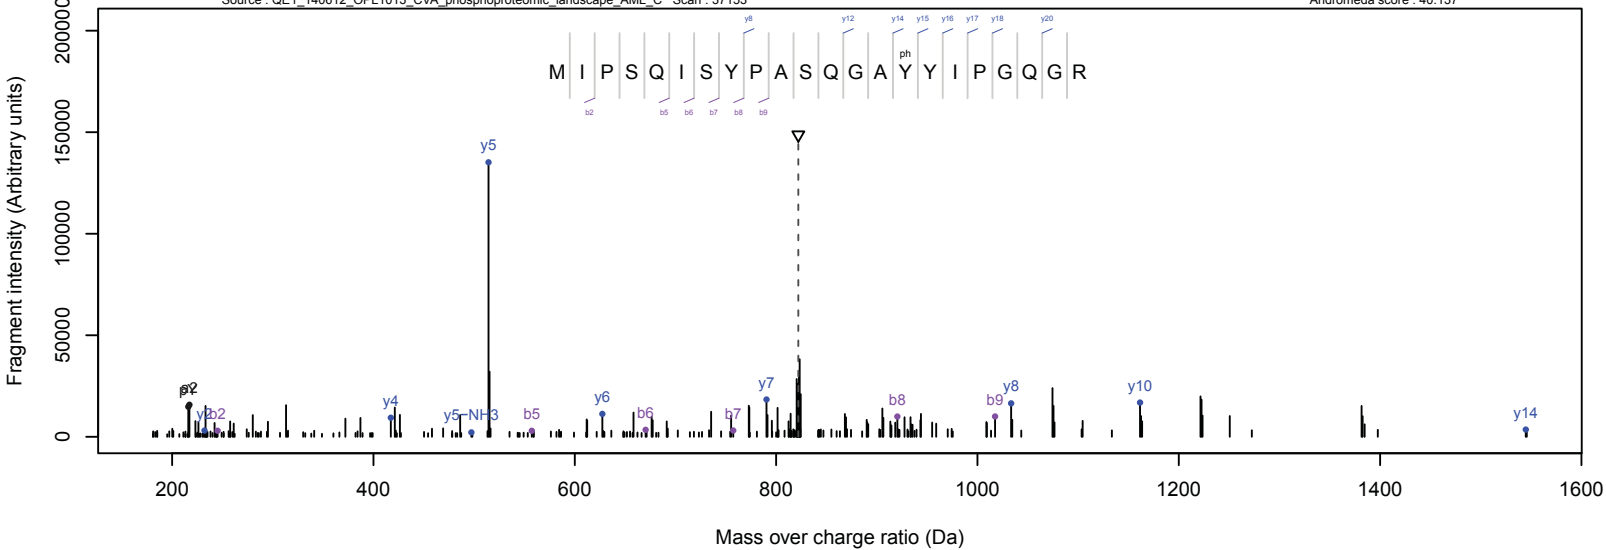

## TGMYY(ph)LR-2+

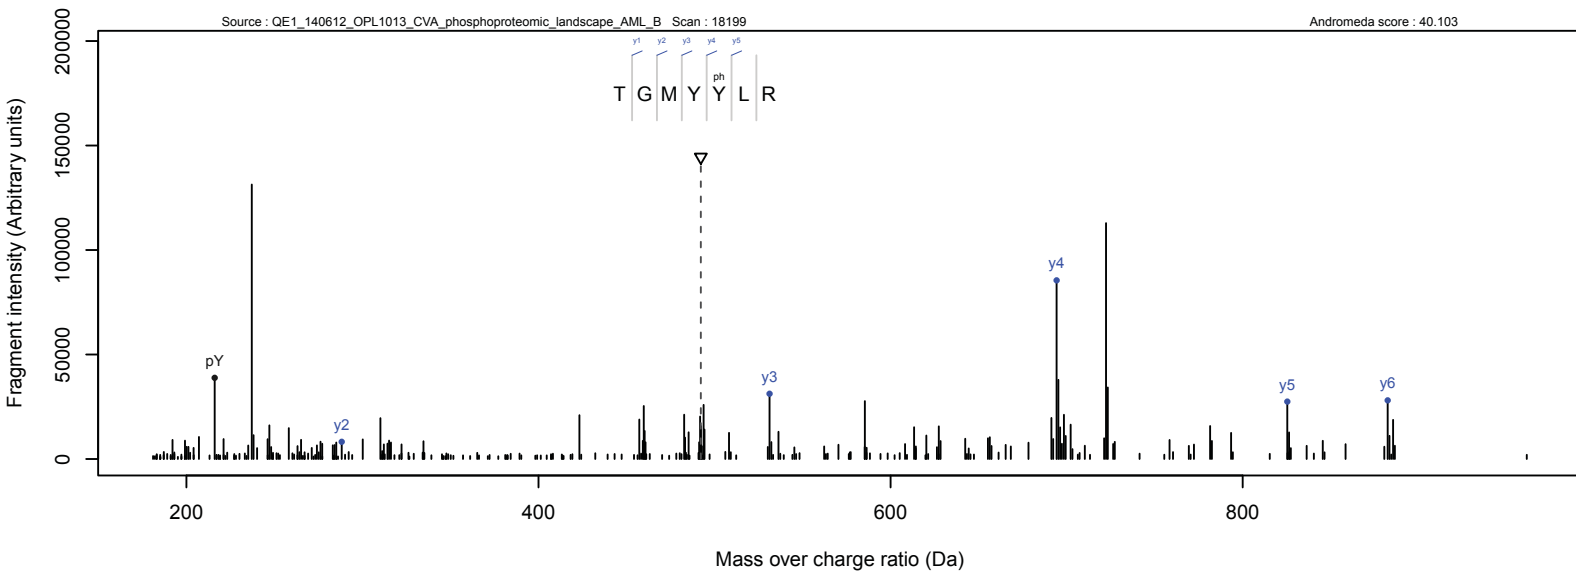

## TSFY(ph)LPK-2+

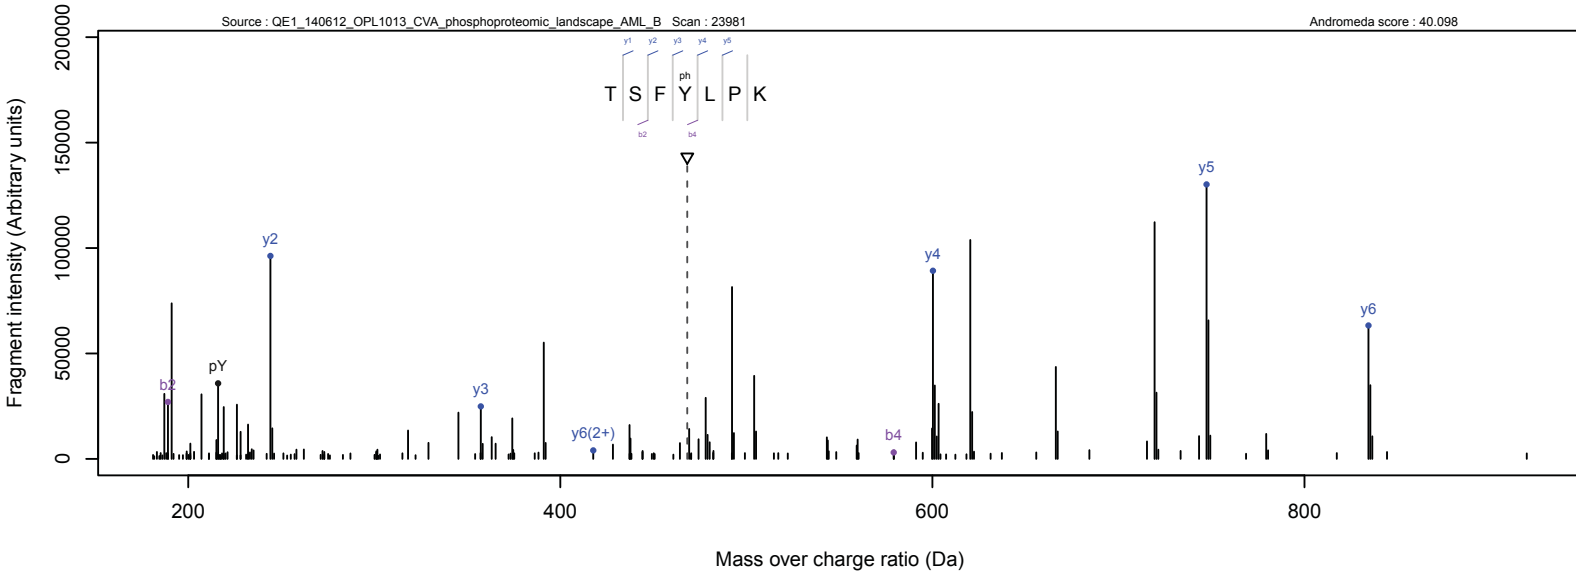

# Supplemental Figure 9

Annotated MS/MS spectra of phosphopeptides  
identified in clinical AML patient samples

## HTDDEMTGY(ph)VATR-2+

Source: QE1\_160411\_OPL1013\_CvA\_pTyrIP\_blood\_patient\_bench\_B Scan: 7661

Andromeda score: 309.89

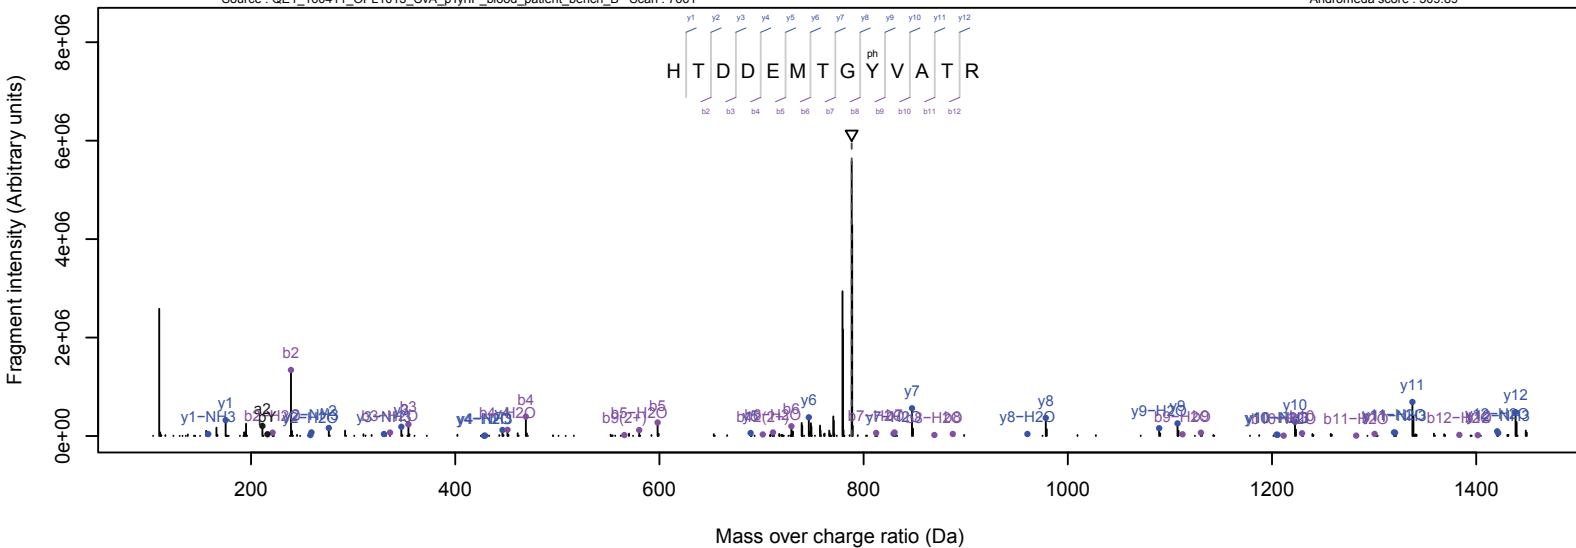

## LGAGQFGEVWM(ox)GY(ph)YNNSTK-2+

Source: QE1\_160411\_OPL1013\_CvA\_pTyrIP\_blood\_patient\_bench\_C Scan: 34271

Andromeda score: 290.42

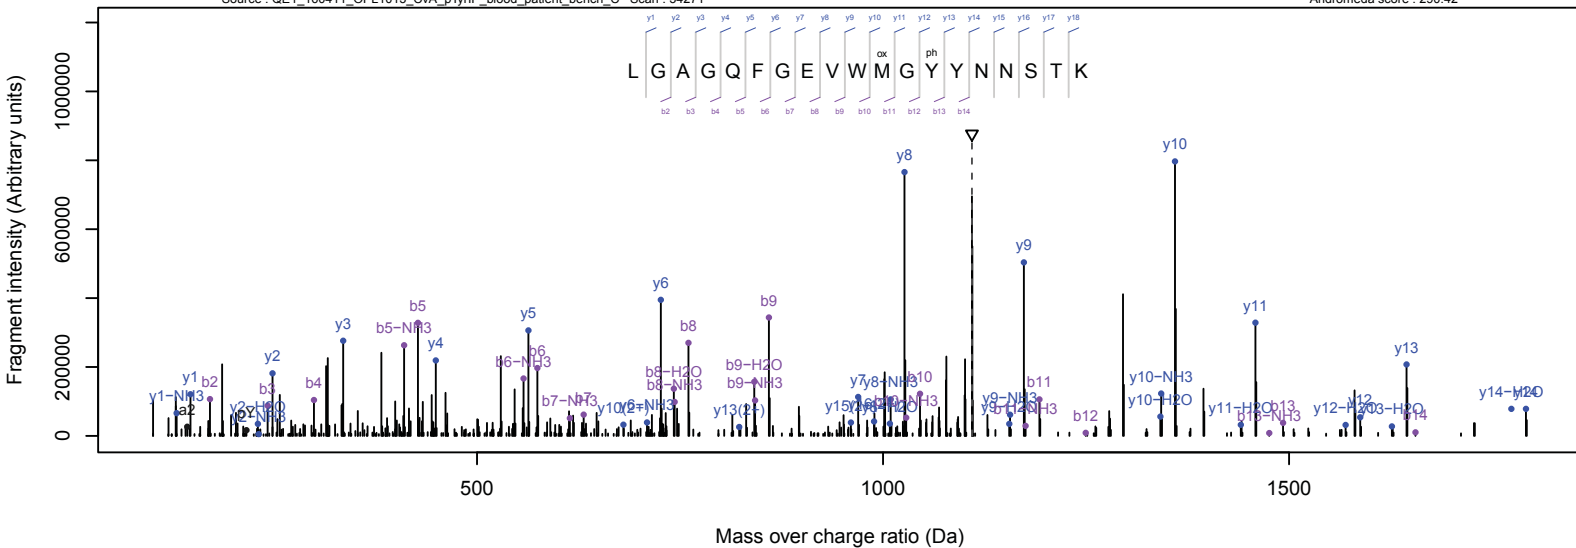

## HTDDEM(ox)TGY(ph)VATR-2+

Source: QE1\_160411\_OPL1013\_CvA\_pTyrIP\_blood\_patient\_bench\_A Scan: 2917

Andromeda score: 284.67

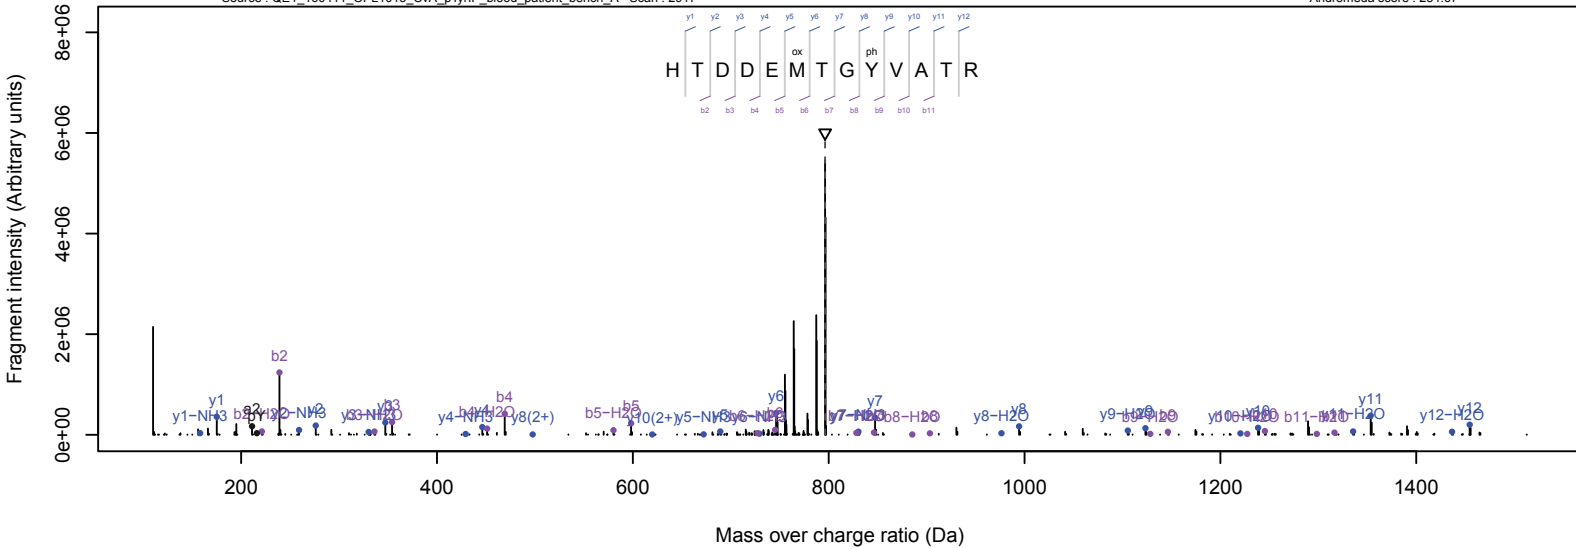

**LCDFGSASHVADNDITPYLVSR-2+**

Source: QE1\_160411\_OPL1013\_CvA\_pTyrIP\_blood\_patient\_bench\_B Scan: 30708

Andromeda score: 284.43

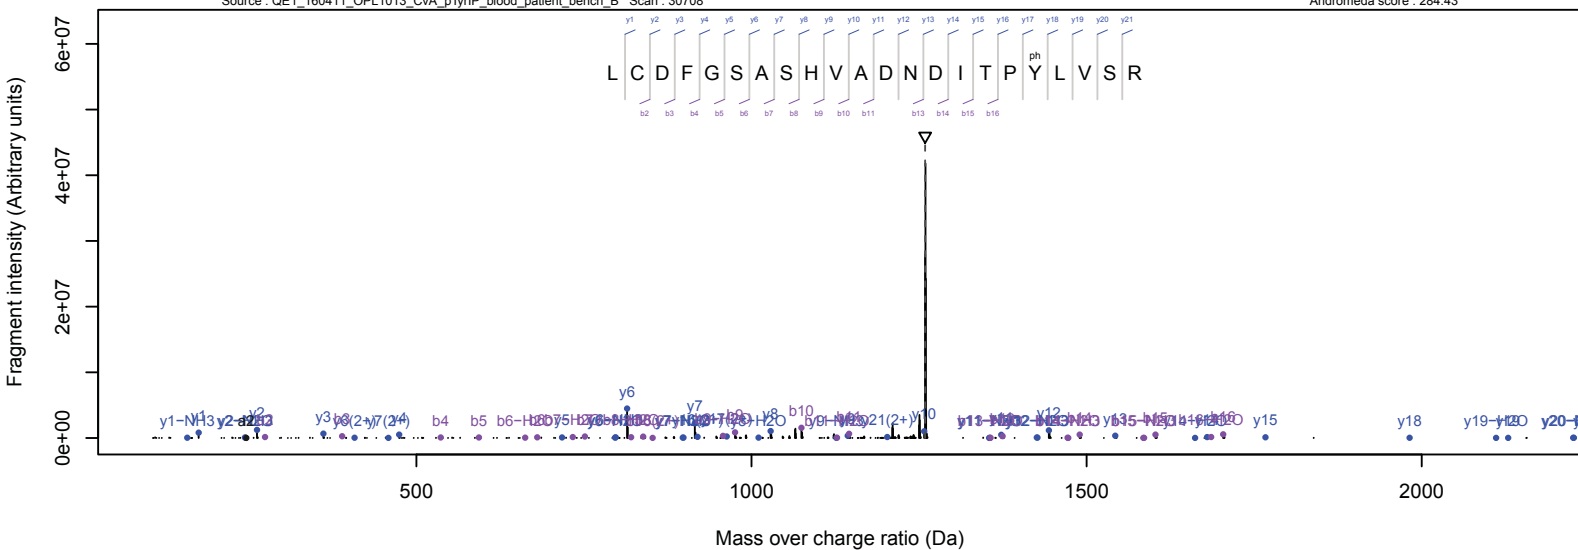

**ELFDDPSYVNVQLDK-2+**

Source: QE1\_160411\_OPL1013\_CvA\_pTyrIP\_blood\_patient\_bench\_C Scan: 36132

Andromeda score: 280.5

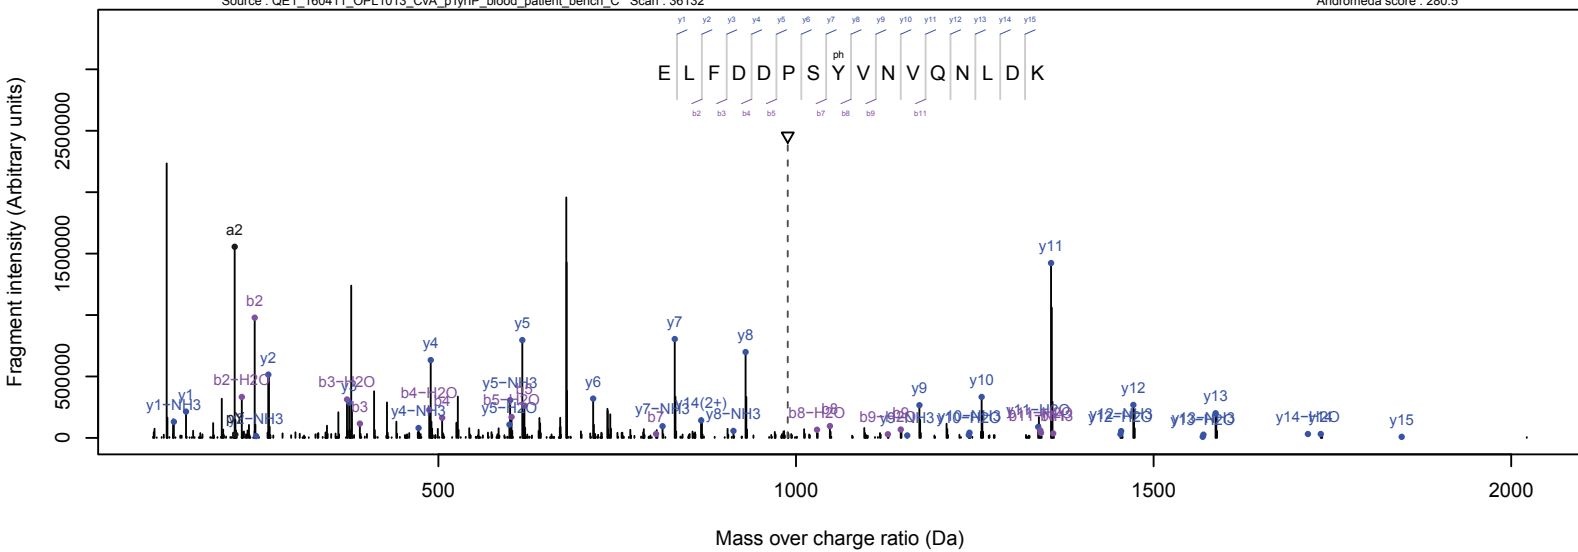

**GSLTGSETDNEDVYTFKTPSNTLCR-3+**

Source: QE1\_160411\_OPL1013\_CvA\_pTyrIP\_blood\_patient\_bench\_B Scan: 22614

Andromeda score: 246.92

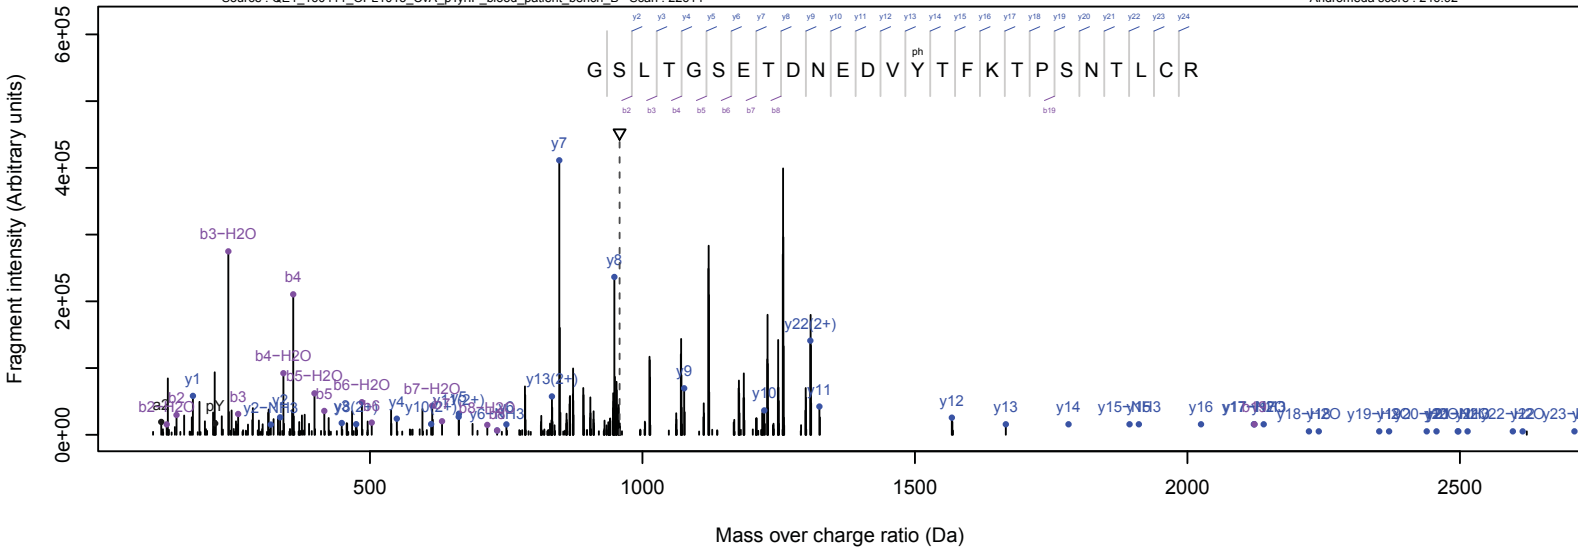

SIYSLDKLY(ph)PESQGSDTAWR-3+

Source : QE1\_160411\_OPL1013\_CvA\_pTyrIP\_blood\_patient\_bench\_C Scan : 32639

Andromeda score : 245.61

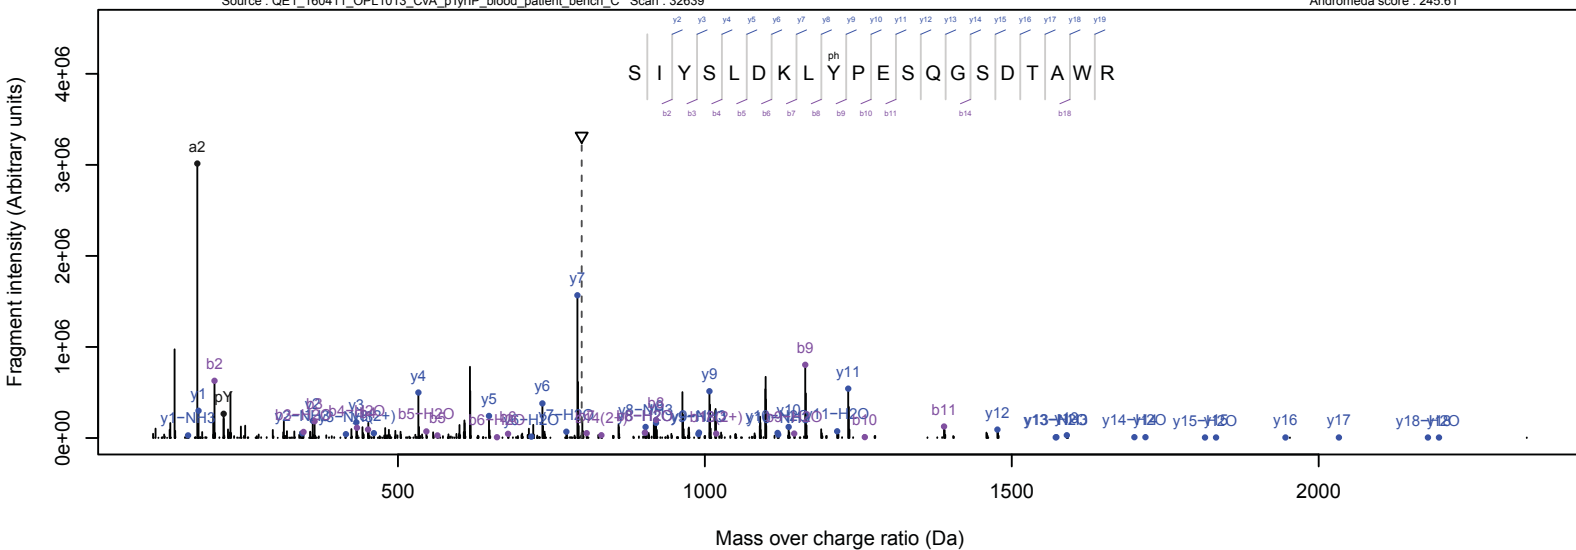

KPTY(ph)DPVSEDQDPLSSDFKR-3+

Source : QE1\_160411\_OPL1013\_CvA\_pTyrIP\_blood\_patient\_bench\_B Scan : 19542

Andromeda score : 244.01

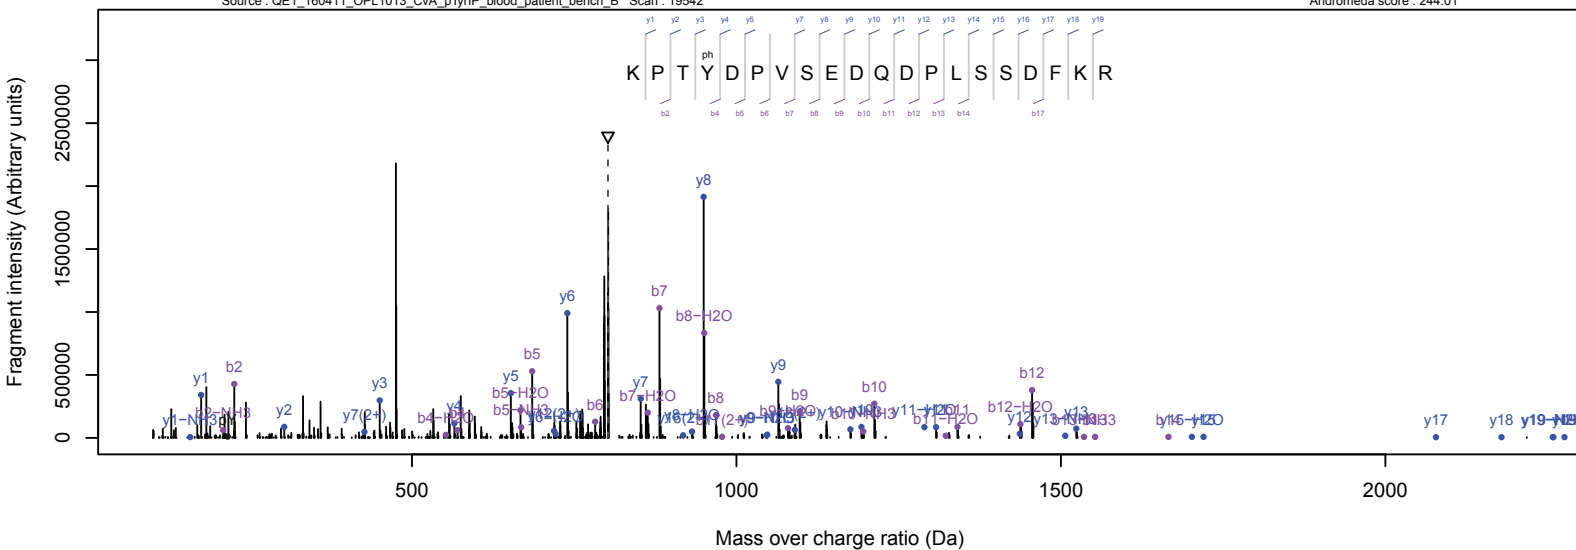

KGHGQPGADAEKPHYVNVFHHHER-5+

Source : QE1\_160411\_OPL1013\_CvA\_pTyrIP\_blood\_patient\_bench\_C Scan : 17939

Andromeda score : 243.91

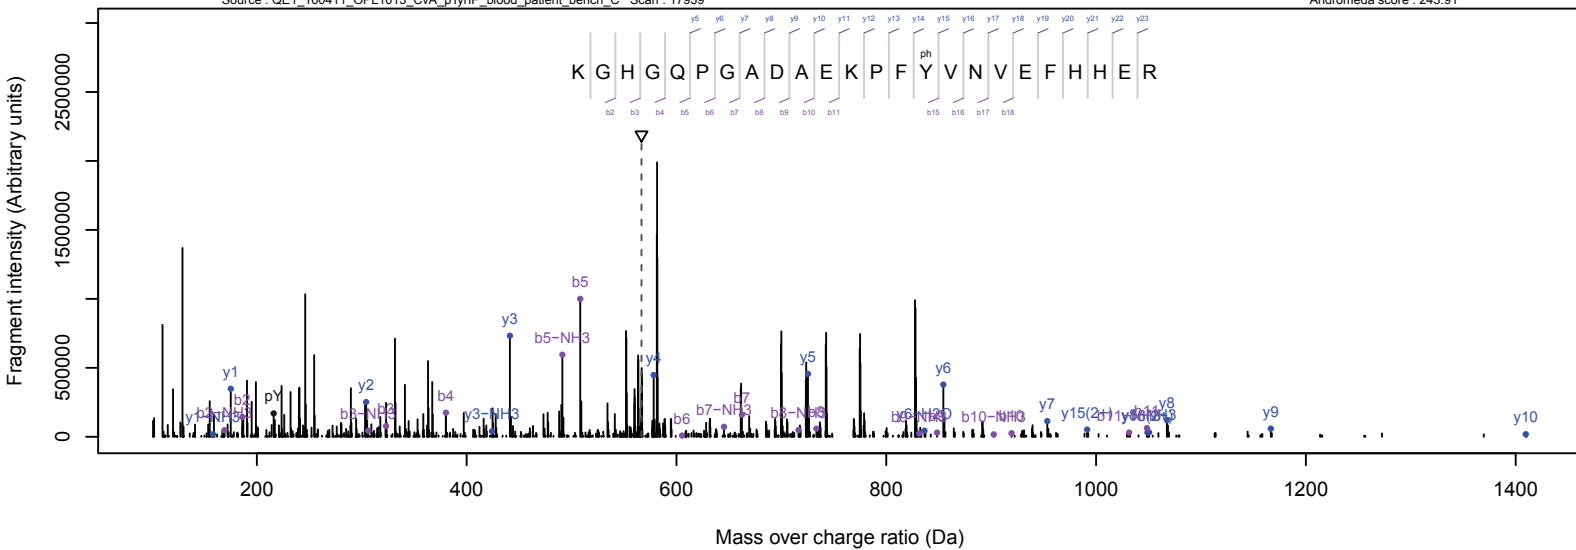



LGAGQFGEVWMGY(ph)YNNSTK-2+

Source: QE1\_160411\_OPL1013\_CvA\_pTyrIP\_blood\_patient\_bench\_D Scan: 39190

Andromeda score: 242.45

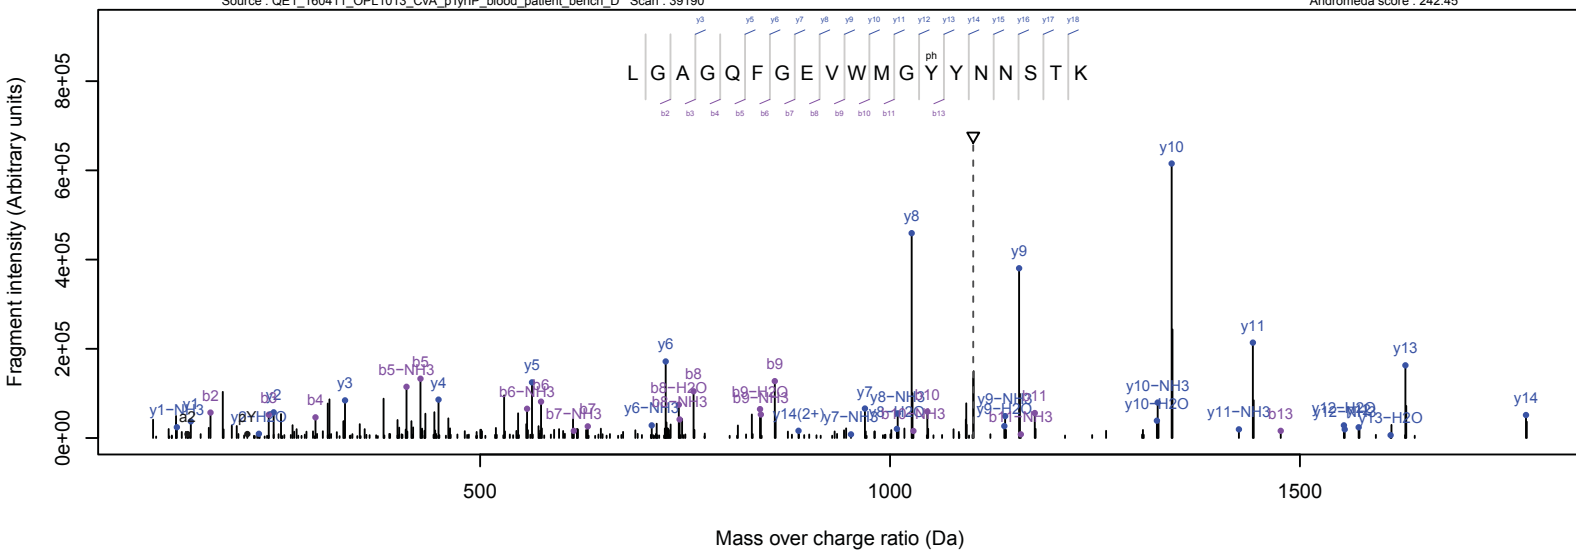

VVQEYIDAFSDY(ph)ANFK-2+

Source: QE1\_160411\_OPL1013\_CvA\_pTyrIP\_blood\_patient\_bench\_A Scan: 37906

Andromeda score: 242.19

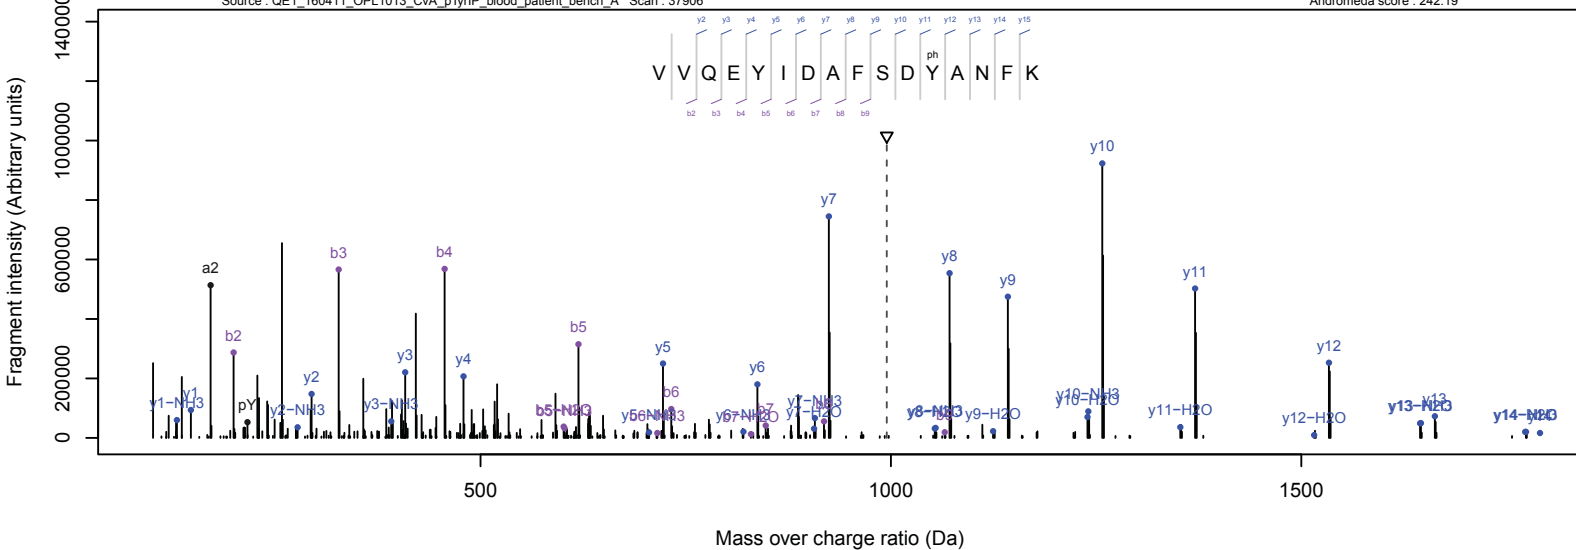

VY(ph)ENVGLMQQK-2+

Source: QE1\_160411\_OPL1013\_CvA\_pTyrIP\_blood\_patient\_bench\_D Scan: 15076

Andromeda score: 241.39

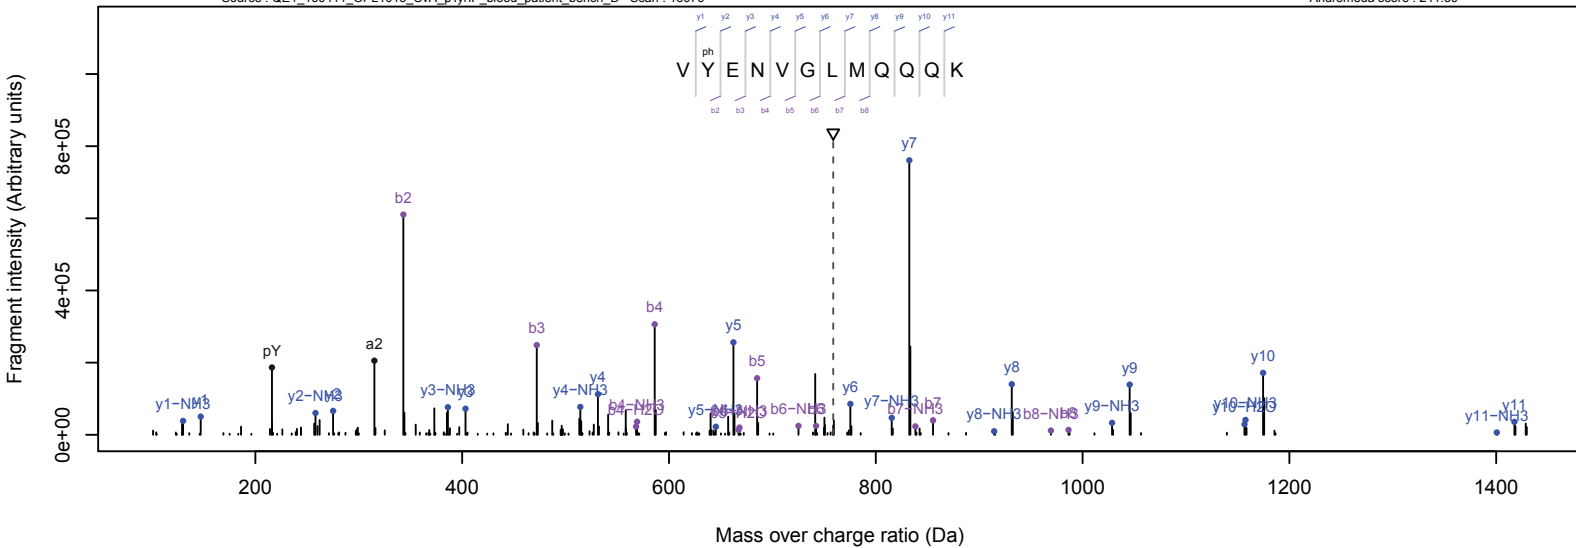



**GQESEY(ph)GNITYPPAMK-2+**

Source : QE1\_160411\_OPL1013\_CvA\_pTyrIP\_blood\_patient\_bench\_D Scan : 20878

Andromeda score : 235.78

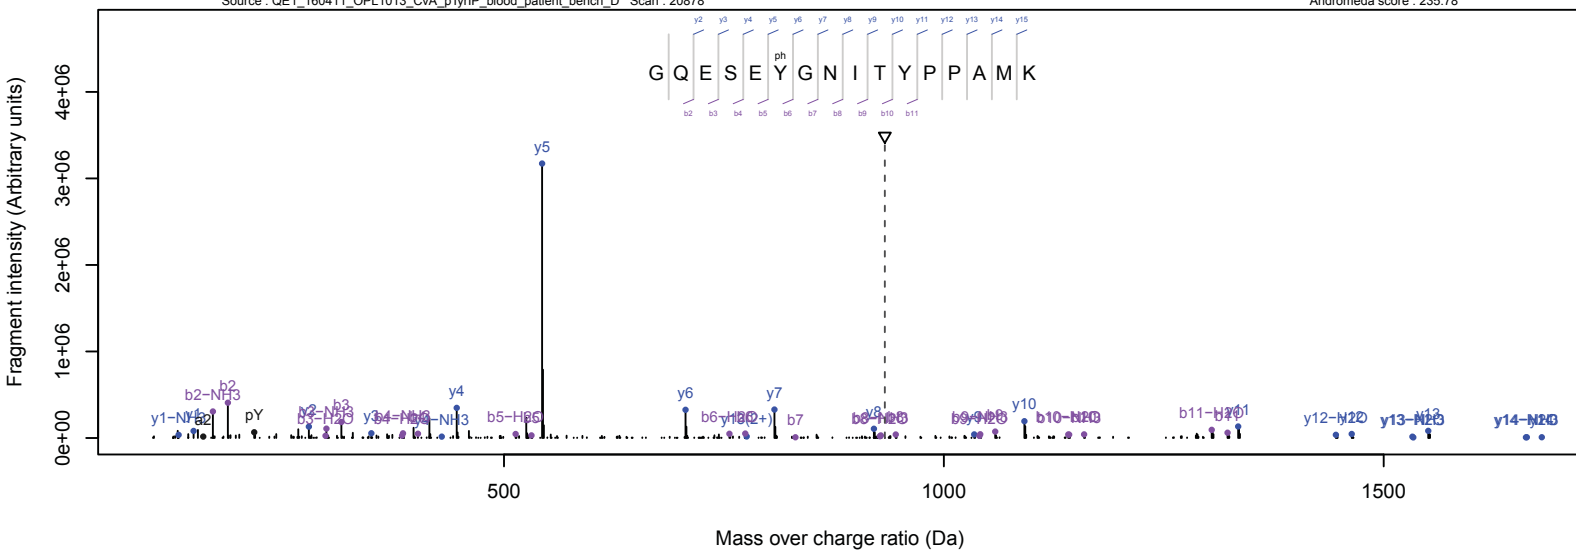

**HTDDEMT(ph)GYVATR-2+**

Source : QE1\_160411\_OPL1013\_CvA\_pTyrIP\_blood\_patient\_bench\_B Scan : 8610

Andromeda score : 232.78

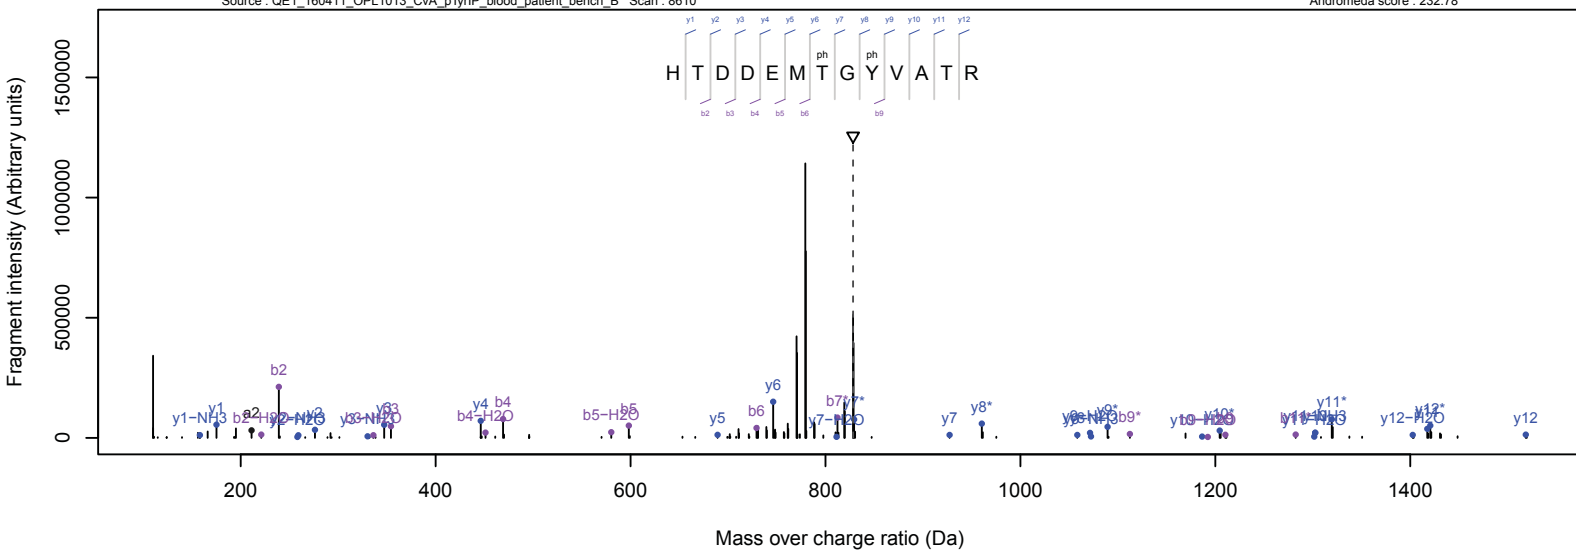

**LHEY(ph)NTQFQEK-2+**

Source : QE1\_160411\_OPL1013\_CvA\_pTyrIP\_blood\_patient\_bench\_C Scan : 7064

Andromeda score : 231.66

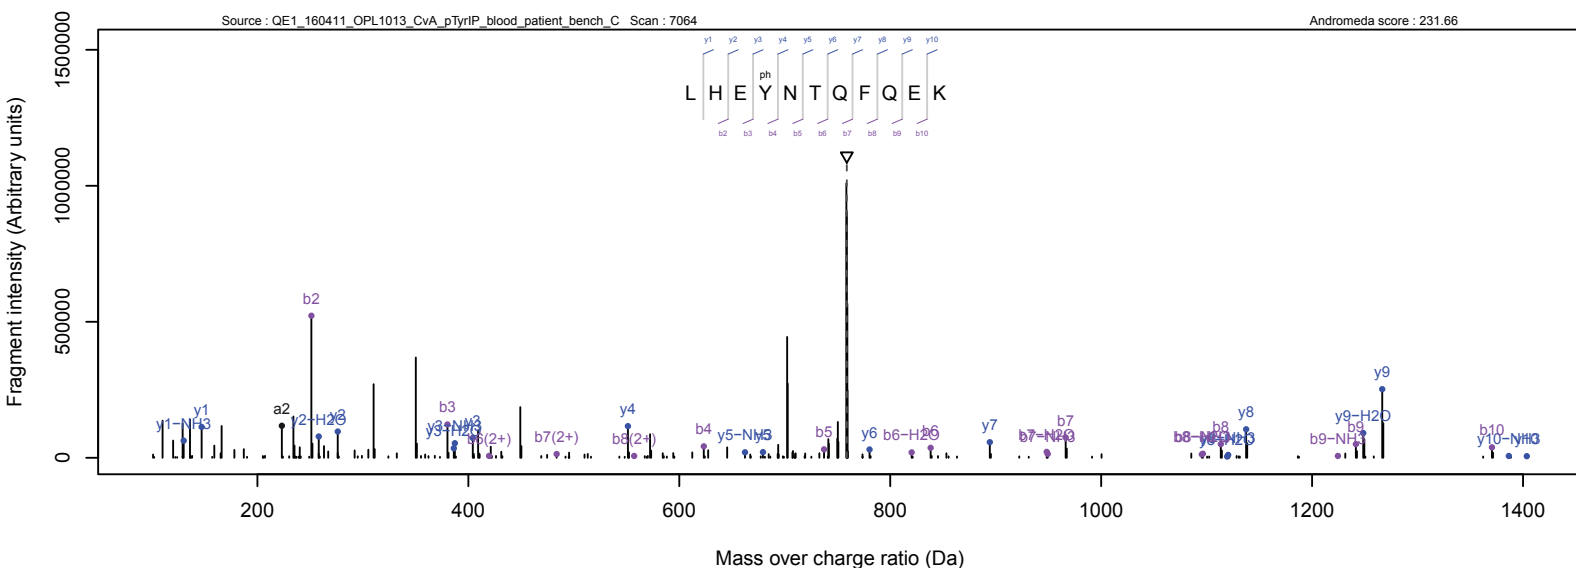

**QADSEMTGY(ph)VVTR-2+**

Source : QE1\_160411\_OPL1013\_CvA\_pTyrIP\_blood\_patient\_bench\_D Scan : 13036

Andromeda score : 229.97

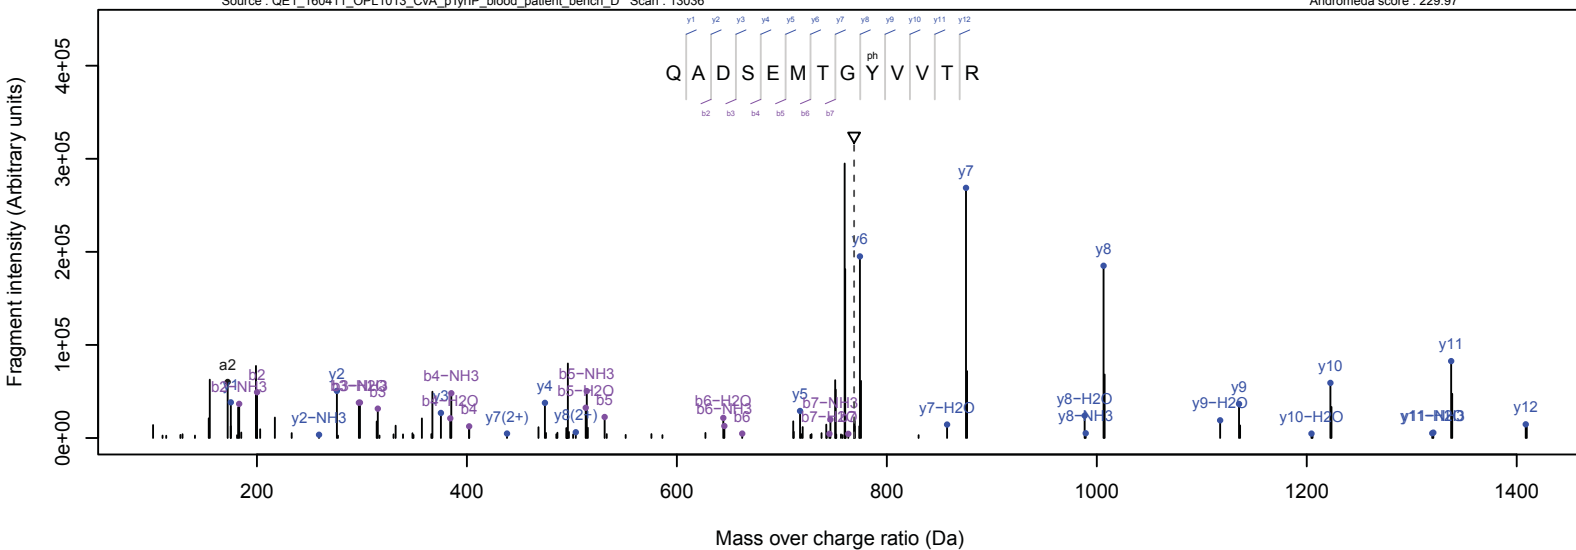

**YCRPESQEHPEADPGSAAPY(ph)LK-3+**

Source : QE1\_160411\_OPL1013\_CvA\_pTyrIP\_blood\_patient\_bench\_D Scan : 12440

Andromeda score : 227.2

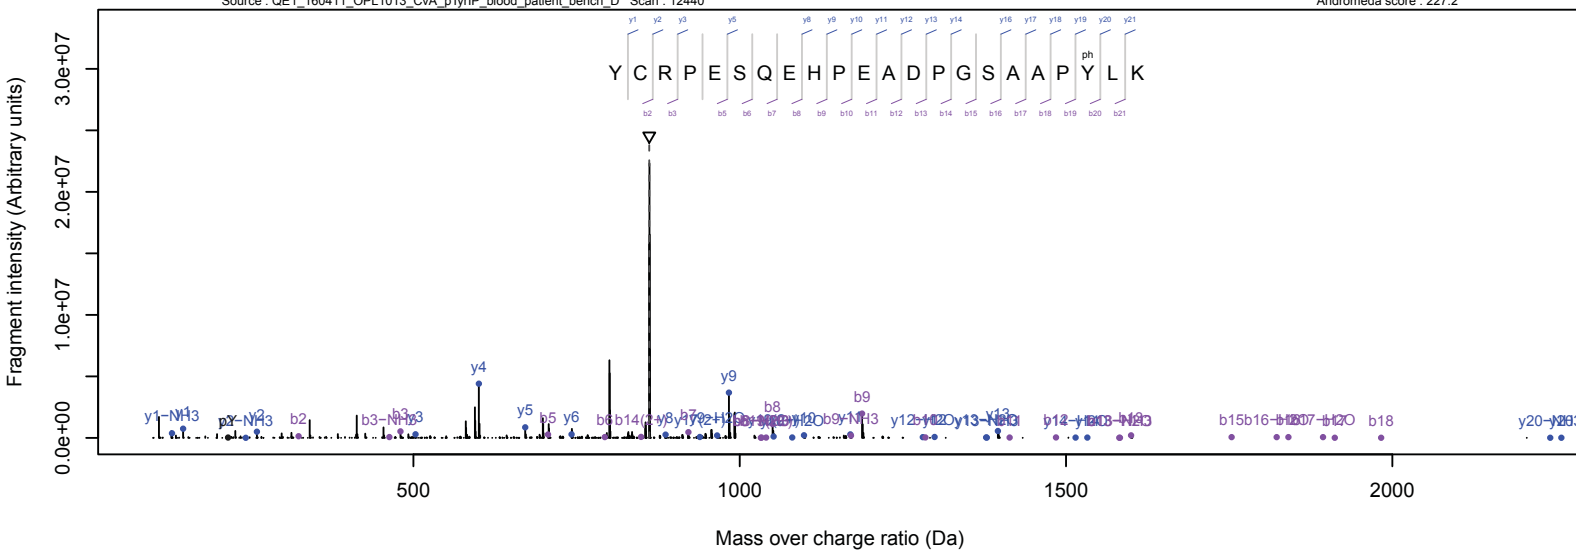

**QADSEM(ox)TGY(ph)VVTR-2+**

Source : QE1\_160411\_OPL1013\_CvA\_pTyrIP\_blood\_patient\_bench\_C Scan : 6659

Andromeda score : 225.21

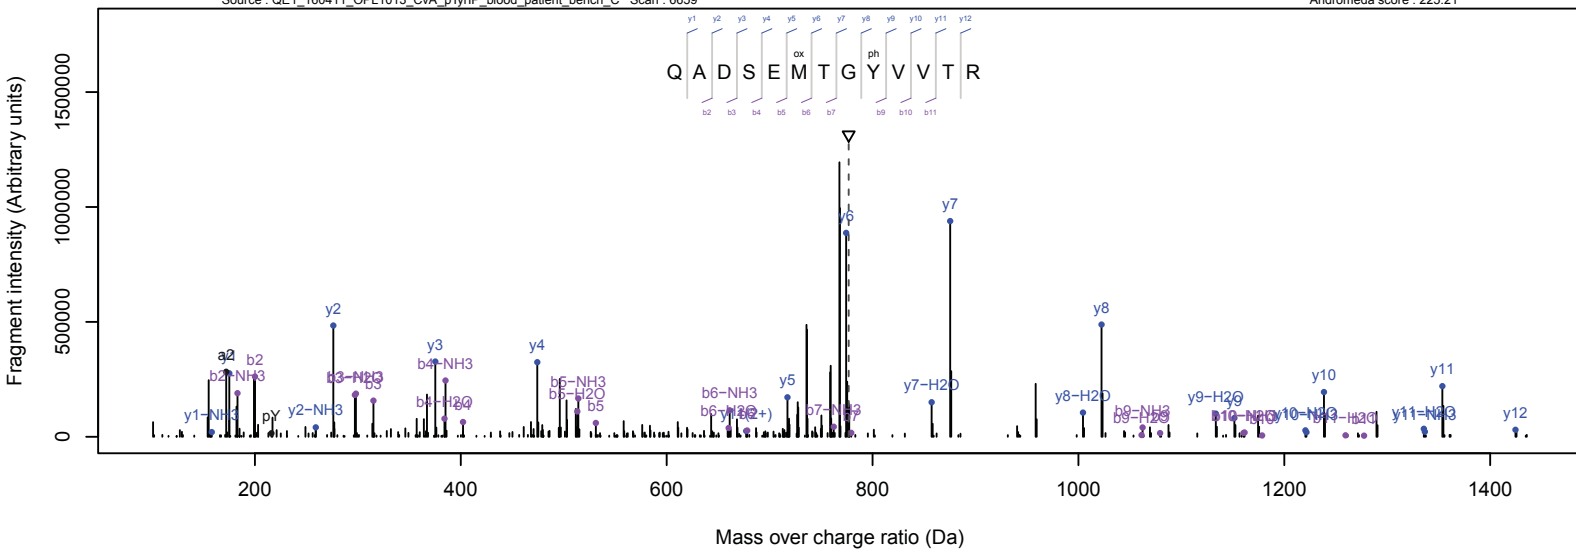

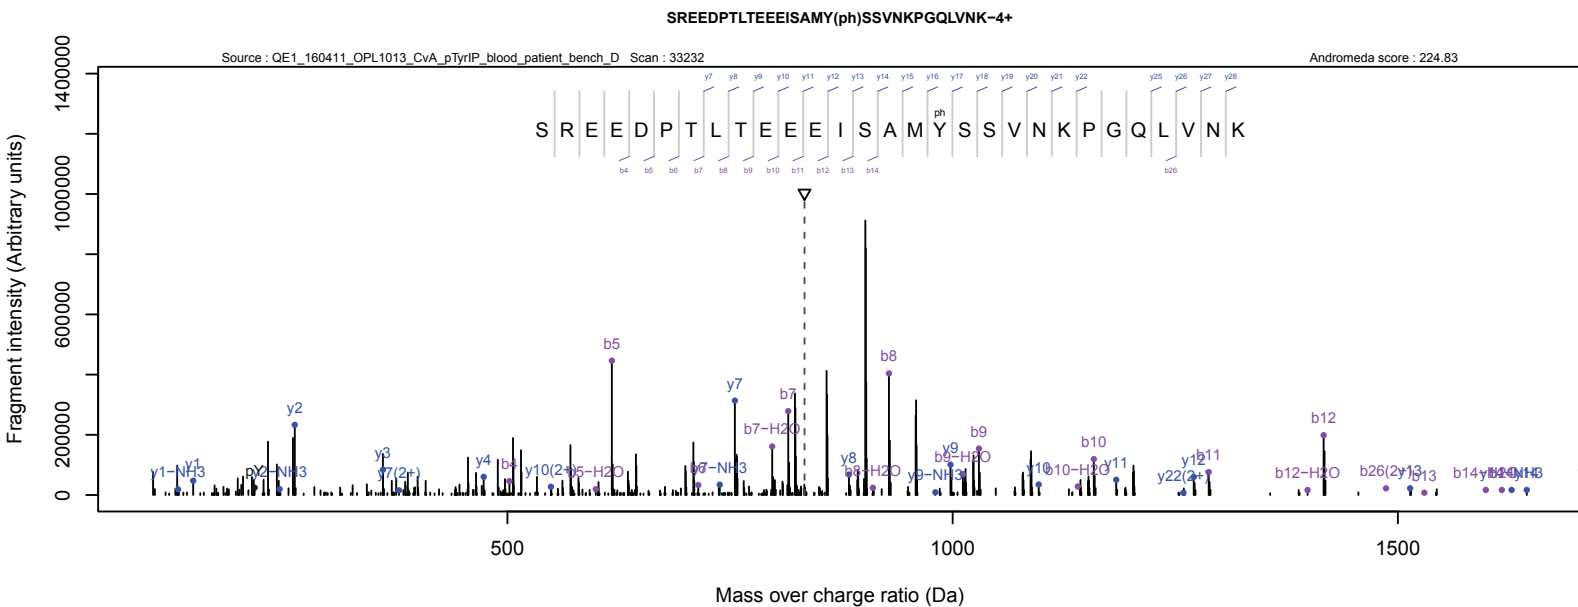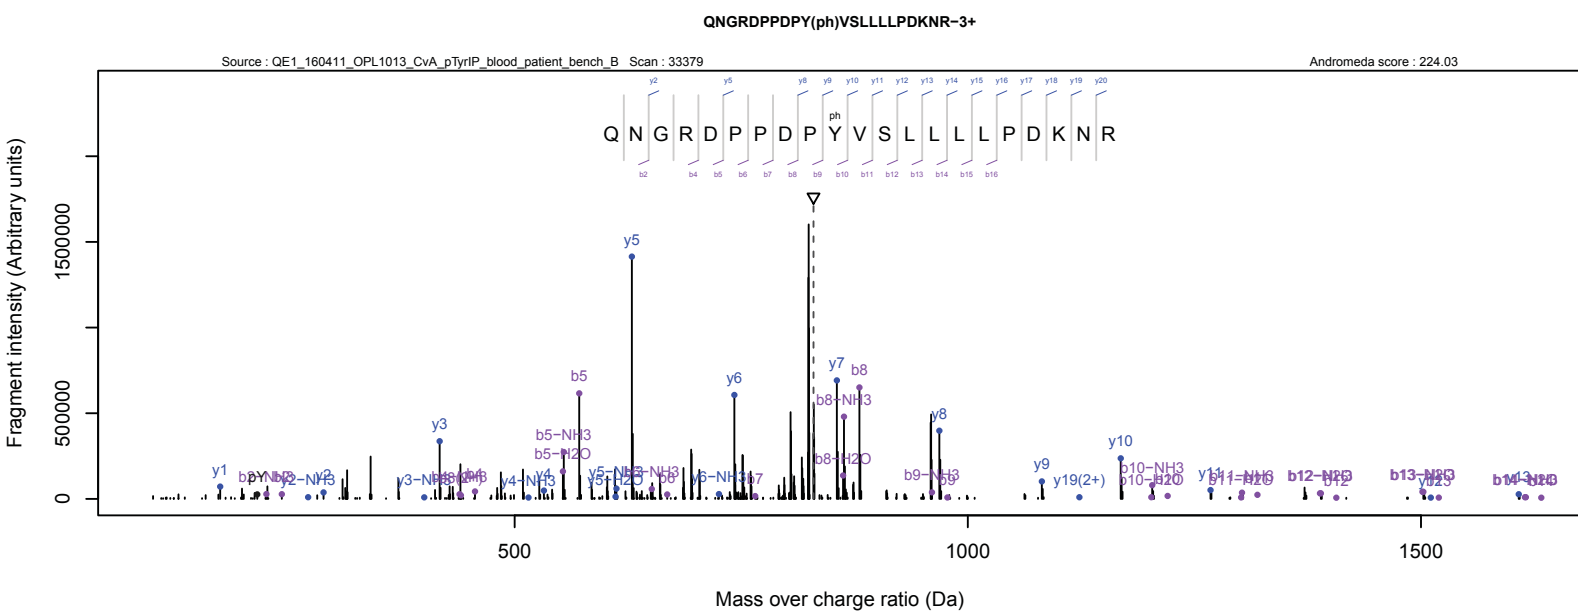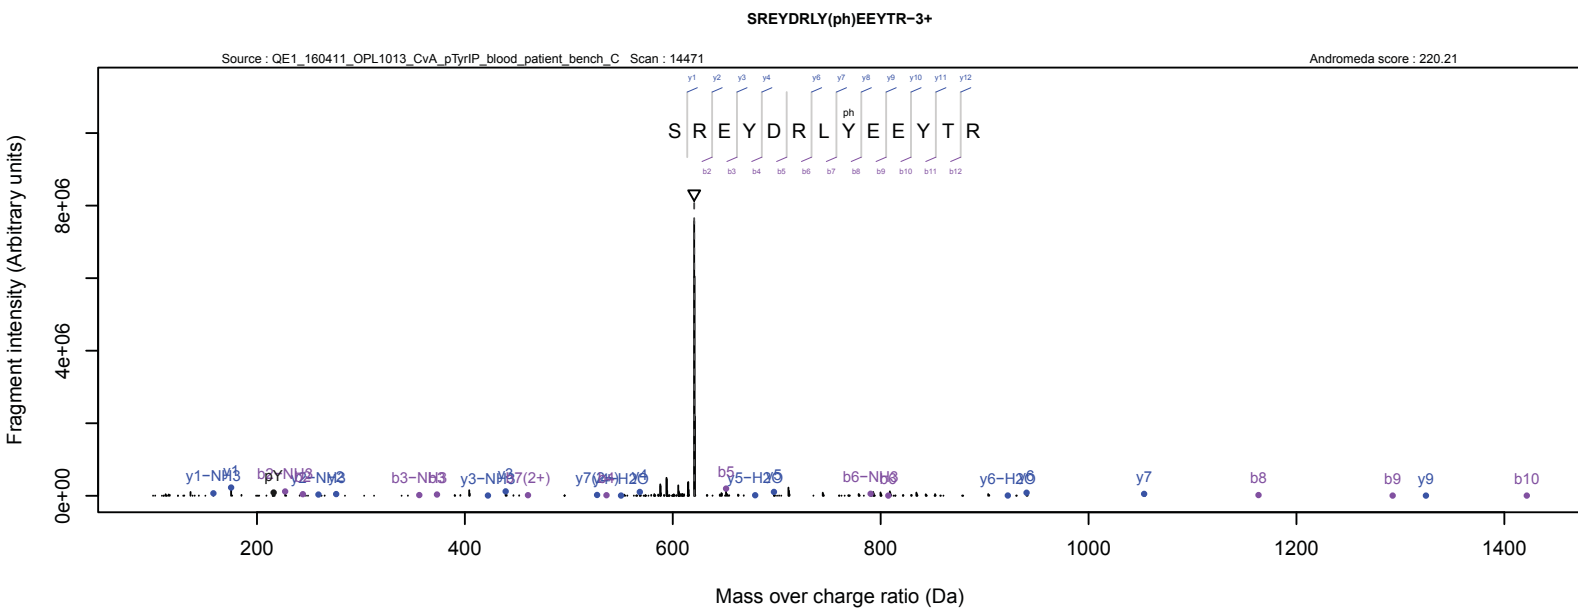



## IY(ph)DEILQSK-2+

Source: QE1\_160411\_OPL1013\_CvA\_pTyrIP\_blood\_patient\_bench\_D Scan: 17159

Andromeda score: 214.83

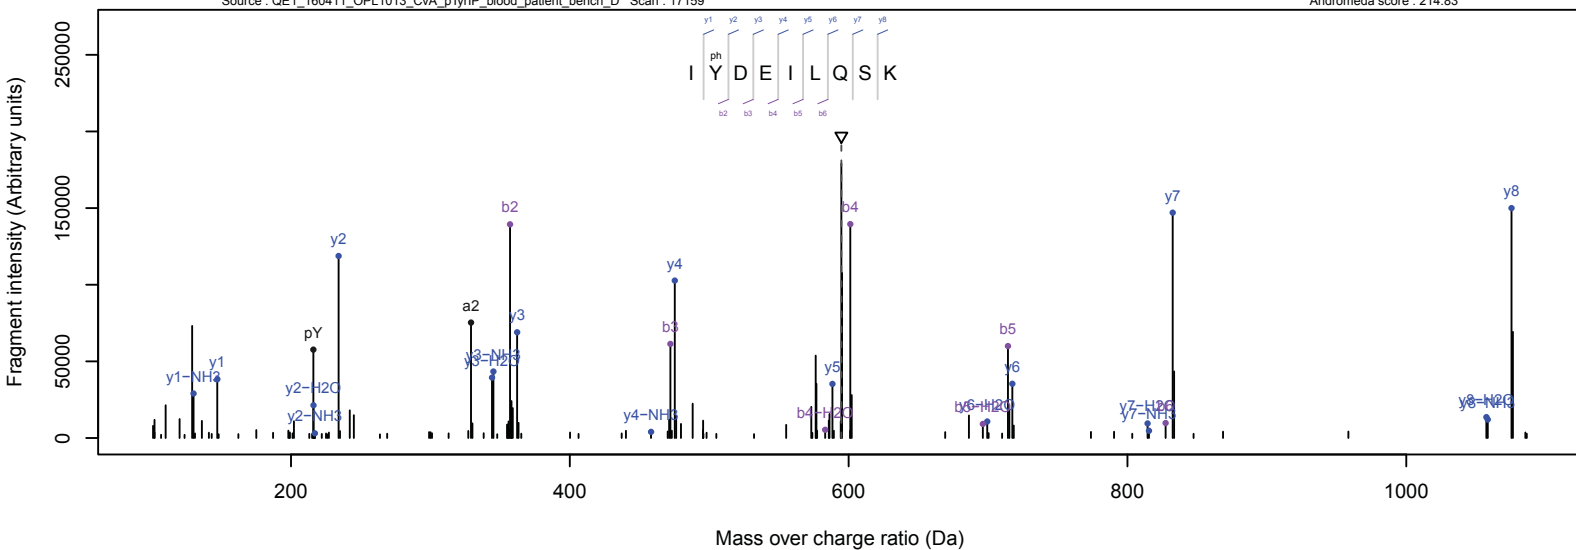

## VY(ph)ENVGLM(ox)QQQK-2+

Source: QE1\_160411\_OPL1013\_CvA\_pTyrIP\_blood\_patient\_bench\_D Scan: 9196

Andromeda score: 210.44

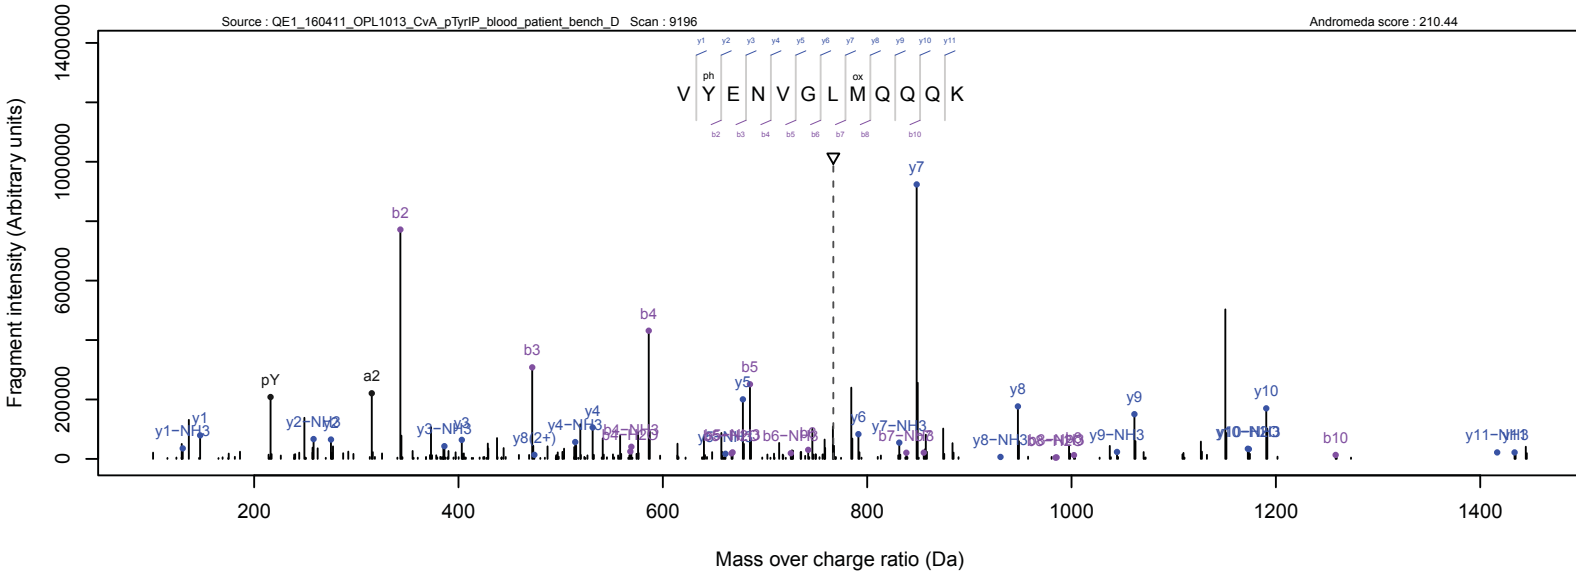

## EDSARVY(ph)ENVGLM(ox)QQQK-3+

Source: QE1\_160411\_OPL1013\_CvA\_pTyrIP\_blood\_patient\_bench\_B Scan: 11135

Andromeda score: 208.47

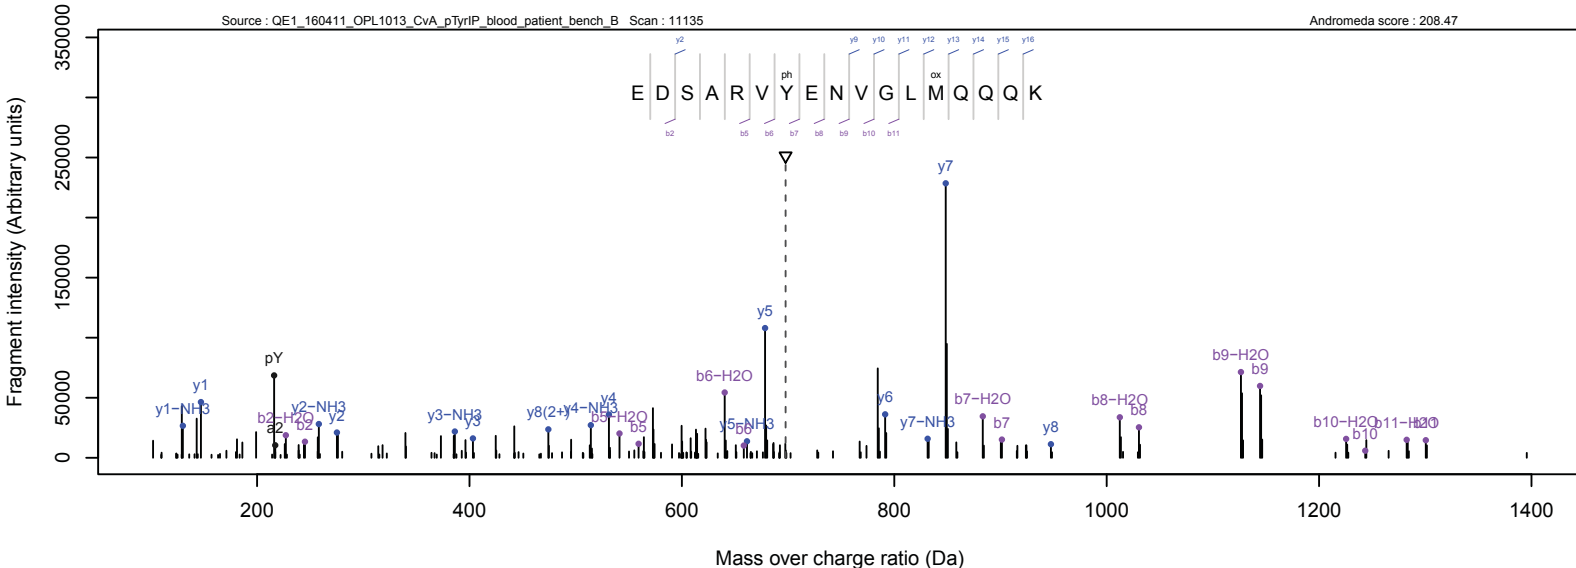

**EHALLAY(ph)TLGVK-2+**

Source: QE1\_160411\_OPL1013\_CvA\_pTyrIP\_blood\_patient\_bench\_B Scan: 29240

Andromeda score: 208.27

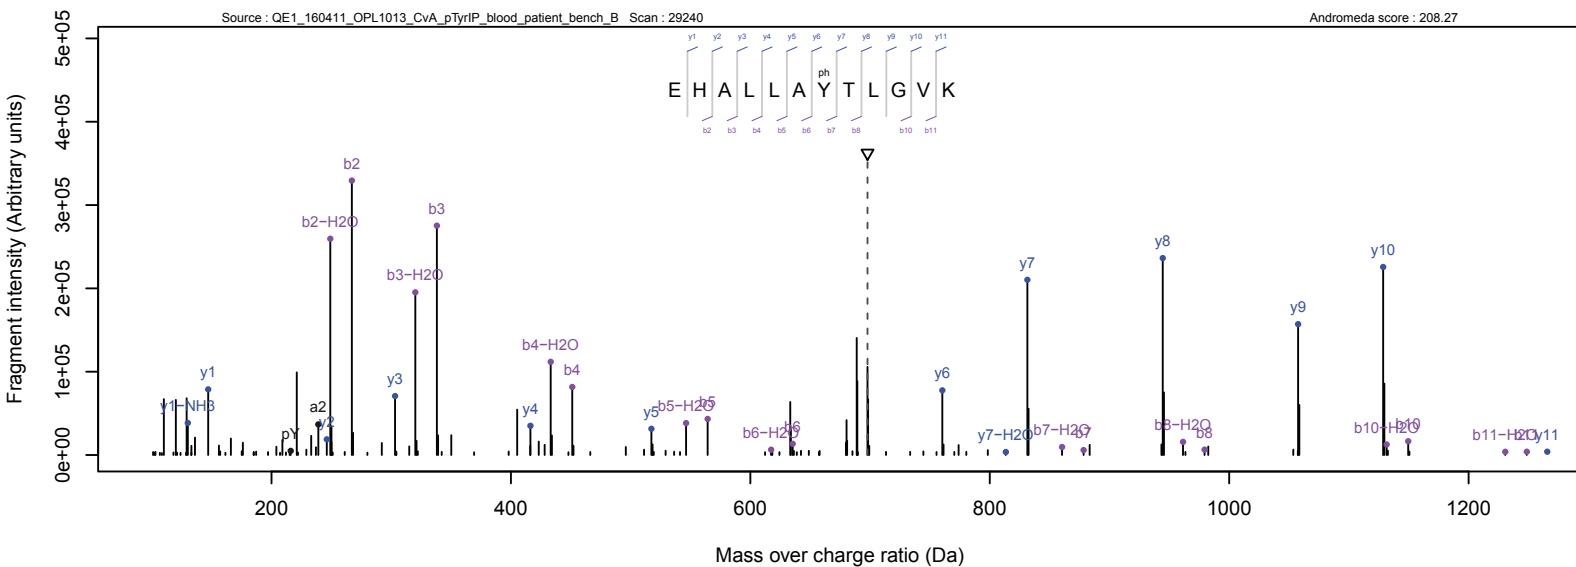

**SLY(ph)ASSPGVYATR-2+**

Source: QE1\_160411\_OPL1013\_CvA\_pTyrIP\_blood\_patient\_bench\_B Scan: 15288

Andromeda score: 206.2

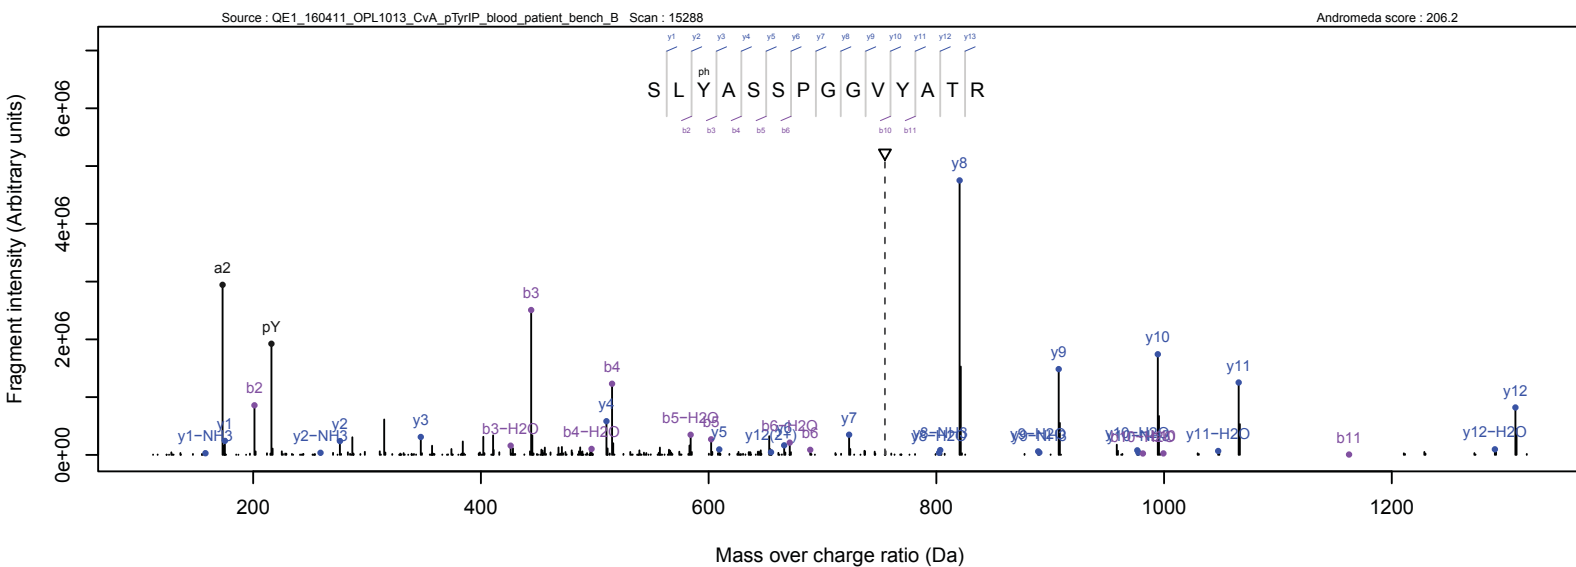

**Y(ph)HTVNGHNCVVR-3+**

Source: QE1\_160411\_OPL1013\_CvA\_pTyrIP\_blood\_patient\_bench\_D Scan: 1724

Andromeda score: 206.18

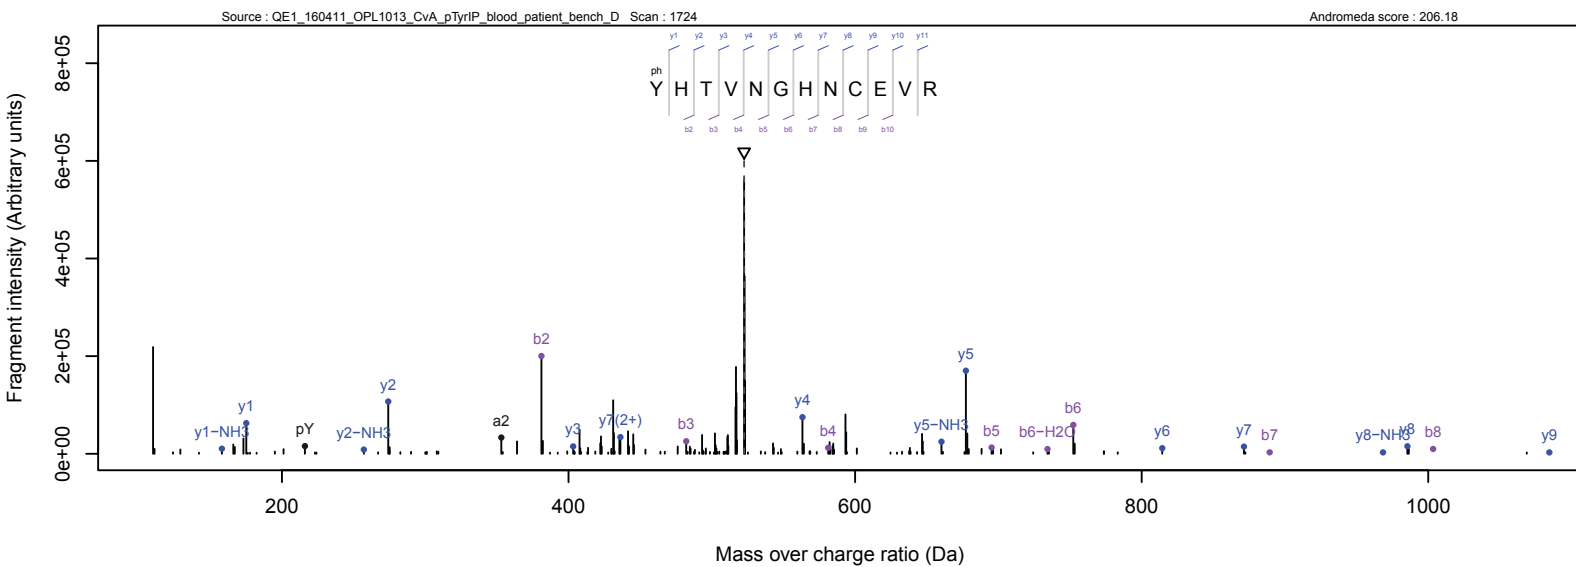





## Y(ph)HTINGHNAEVRK-3+

Source: QE1\_160411\_OPL1013\_CvA\_pTyrIP\_blood\_patient\_bench\_C Scan: 1765

Andromeda score: 201.3

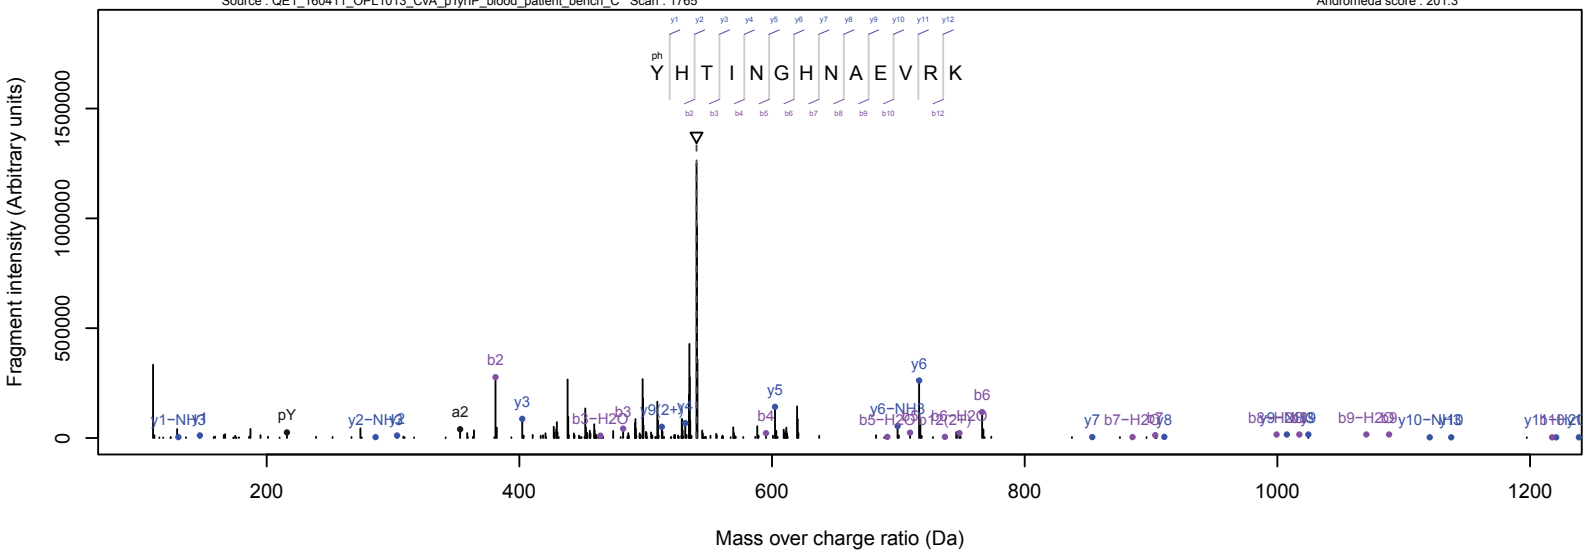

## HKEDVY(ph)ENLHTK-3+

Source: QE1\_160411\_OPL1013\_CvA\_pTyrIP\_blood\_patient\_bench\_C Scan: 3670

Andromeda score: 200.76

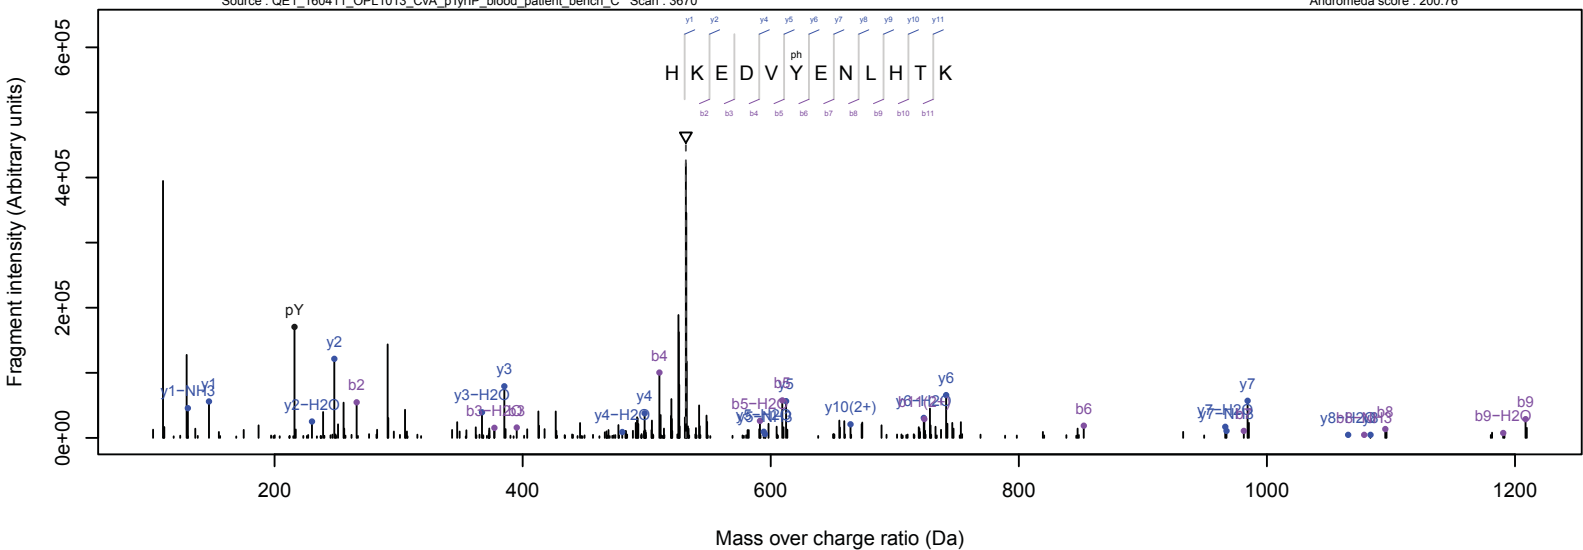

## KLHEY(ph)NTQFQEK-3+

Source: QE1\_160411\_OPL1013\_CvA\_pTyrIP\_blood\_patient\_bench\_D Scan: 4883

Andromeda score: 200.21

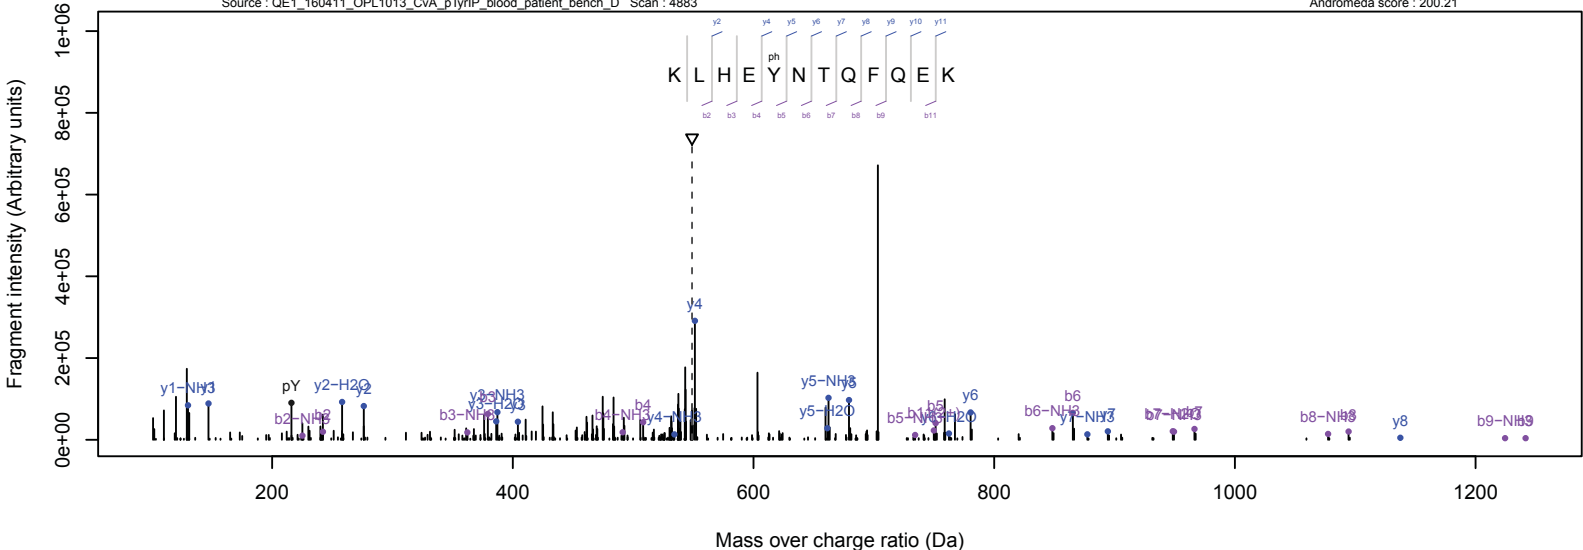

**YSEEGVY(ph)NVQYSFIK-2+**

Source: QE1\_160411\_OPL1013\_CvA\_pTyrIP\_blood\_patient\_bench\_D Scan: 31801

Andromeda score: 200.19

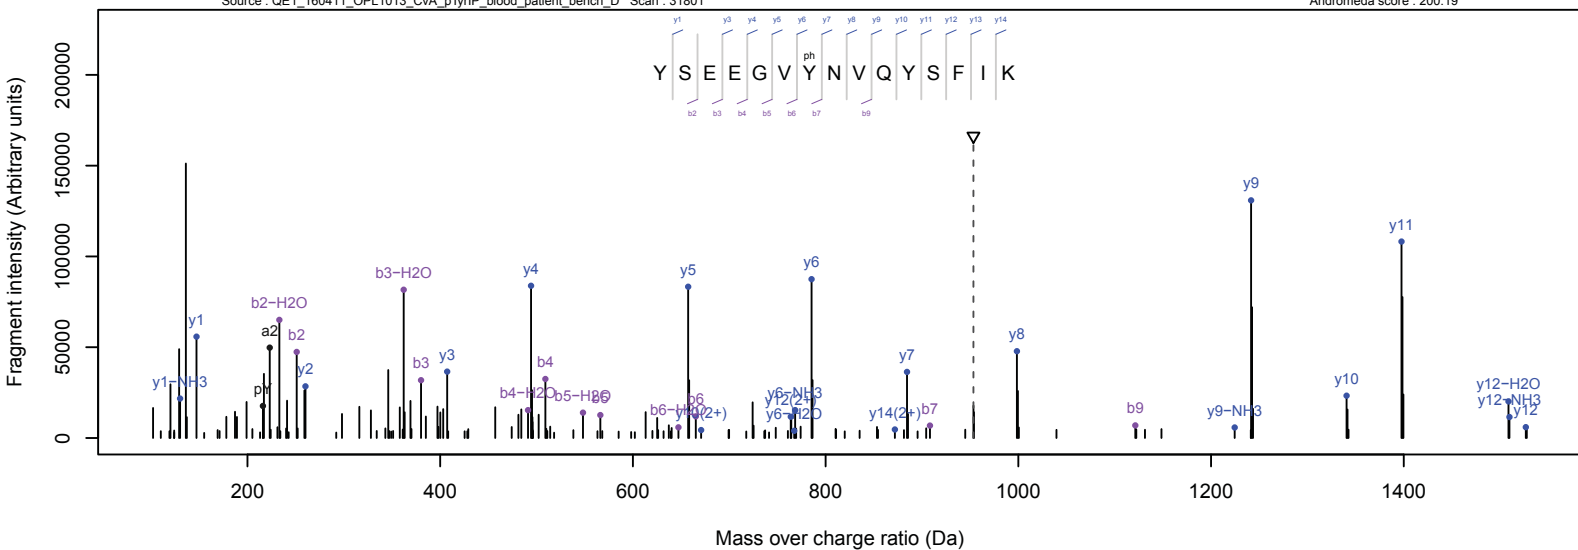

**LLLSEEQRVYD(ph)VQVDEQK-3+**

Source: QE1\_160411\_OPL1013\_CvA\_pTyrIP\_blood\_patient\_bench\_B Scan: 22876

Andromeda score: 197.45

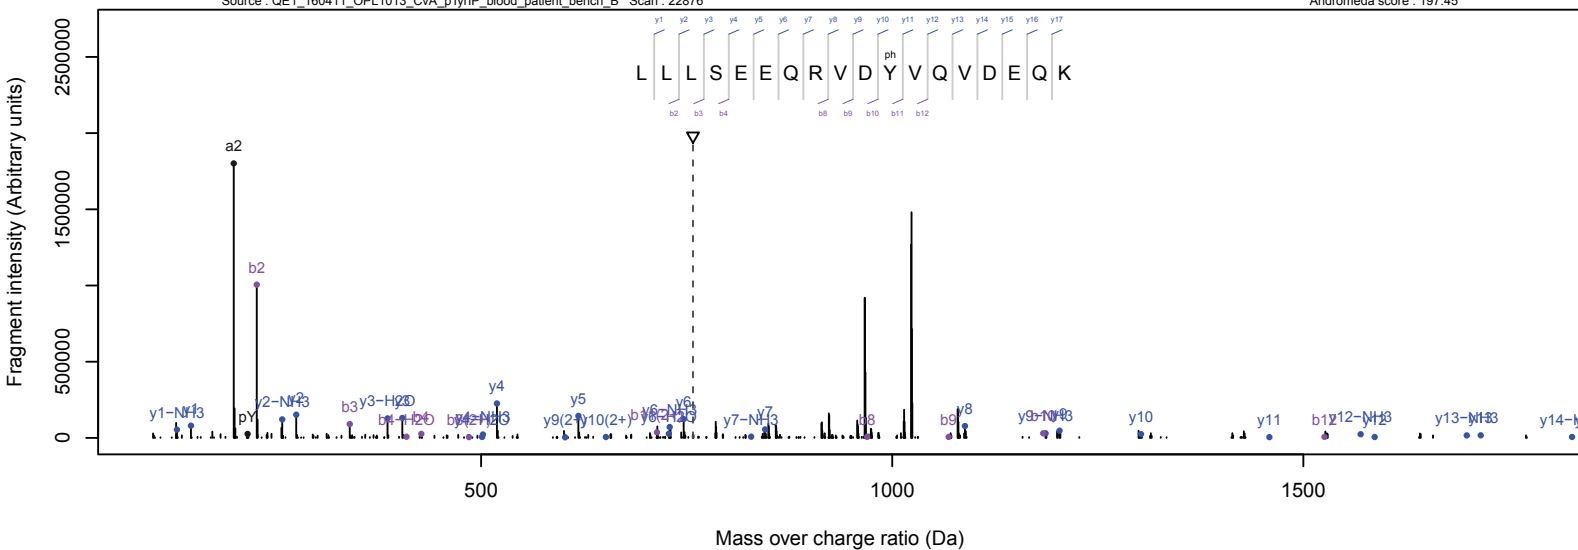

**HTDDEM(ox)T(ph)GYVATR-3+**

Source: QE1\_160411\_OPL1013\_CvA\_pTyrIP\_blood\_patient\_bench\_A Scan: 2548

Andromeda score: 196.52

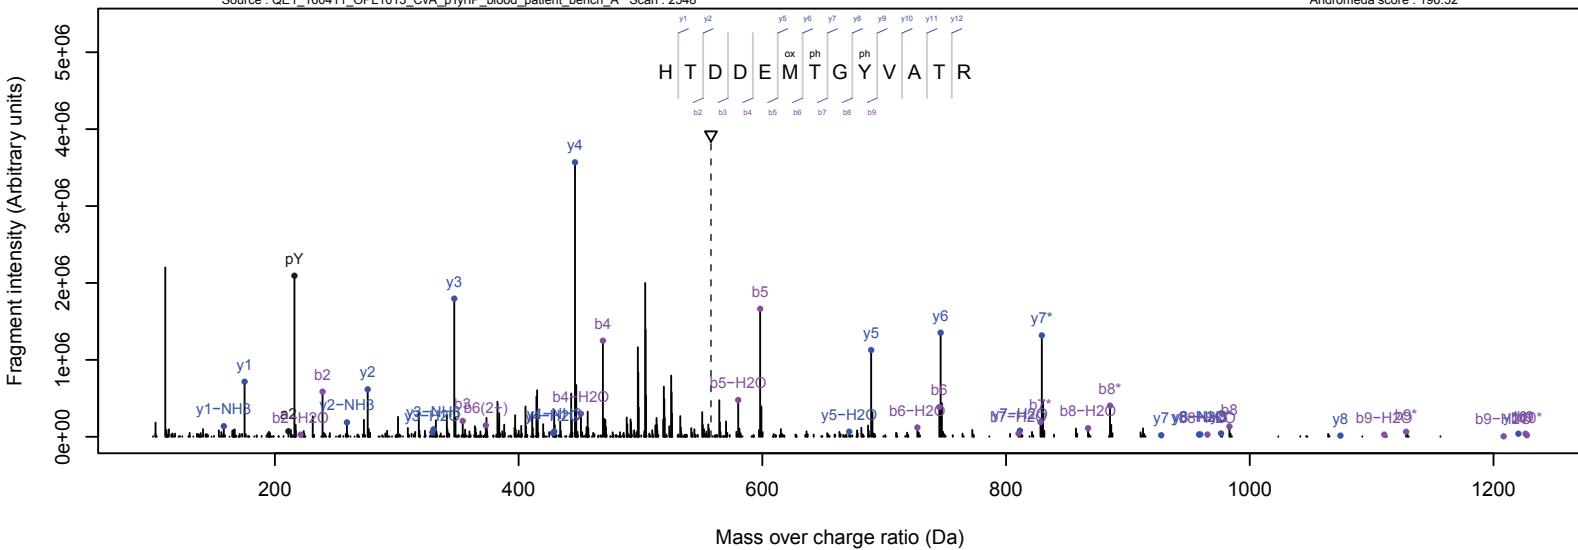

## Y(ph)ATPQVIQAPGR-2+

Source : QE1\_160411\_OPL1013\_CvA\_pTyrIP\_blood\_patient\_bench\_C Scan : 19510

Andromeda score : 196.02

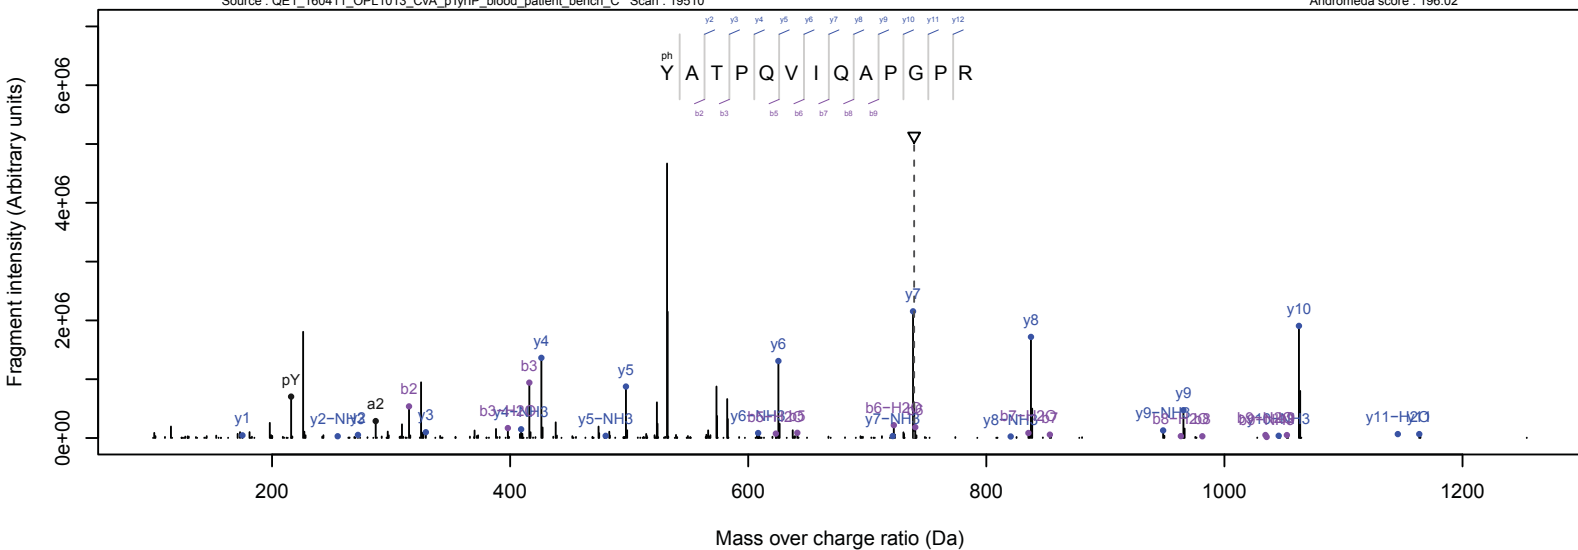

## IYQY(ph)IQSR-2+

Source : QE1\_160411\_OPL1013\_CvA\_pTyrIP\_blood\_patient\_bench\_C Scan : 9869

Andromeda score : 195.88

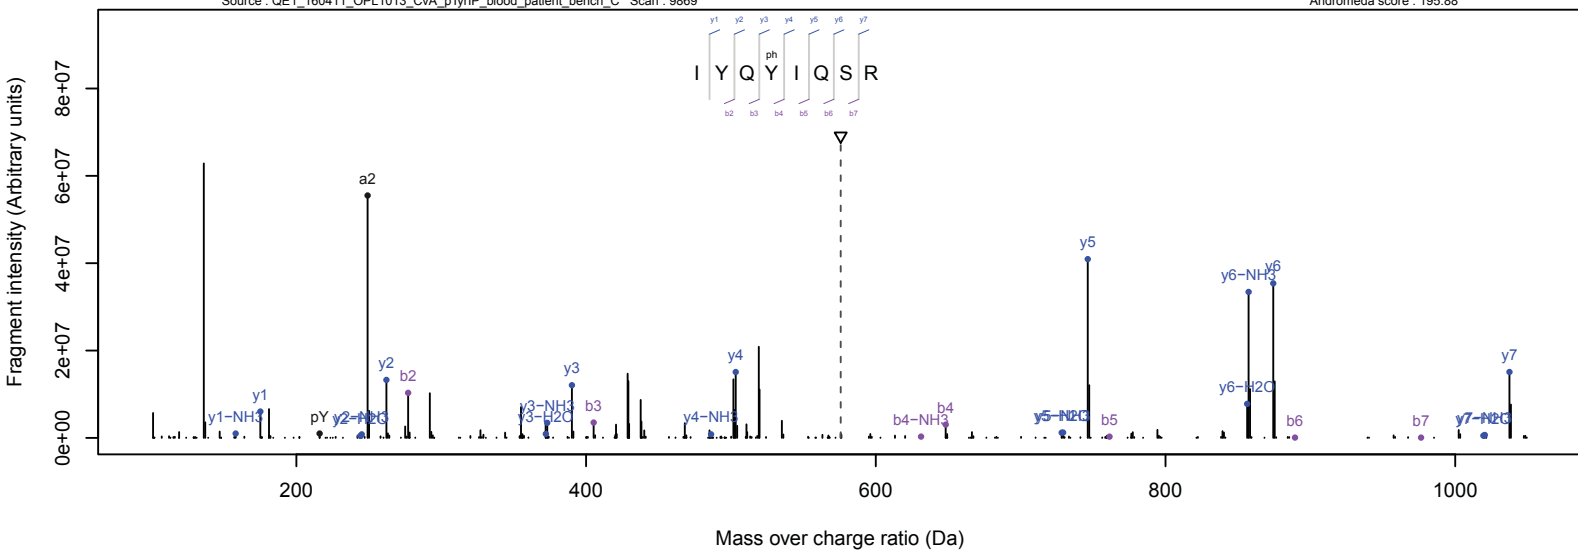

## HIY(ph)YITGETK-2+

Source : QE1\_160411\_OPL1013\_CvA\_pTyrIP\_blood\_patient\_bench\_D Scan : 11629

Andromeda score : 195.27

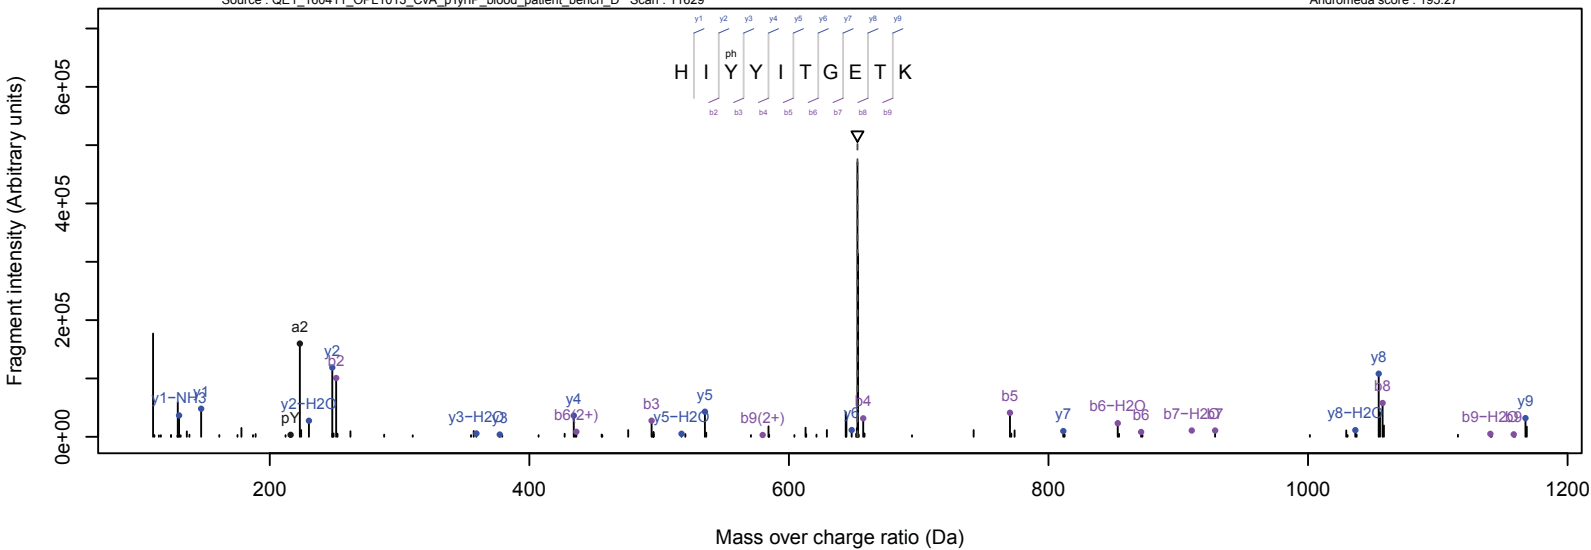

NLEYVSVSPTNNTVY(ph)ASVTHSNR-3+

Source: QE1\_160411\_OPL1013\_CvA\_pTyrIP\_blood\_patient\_bench\_D Scan: 26184

Andromeda score: 195.13

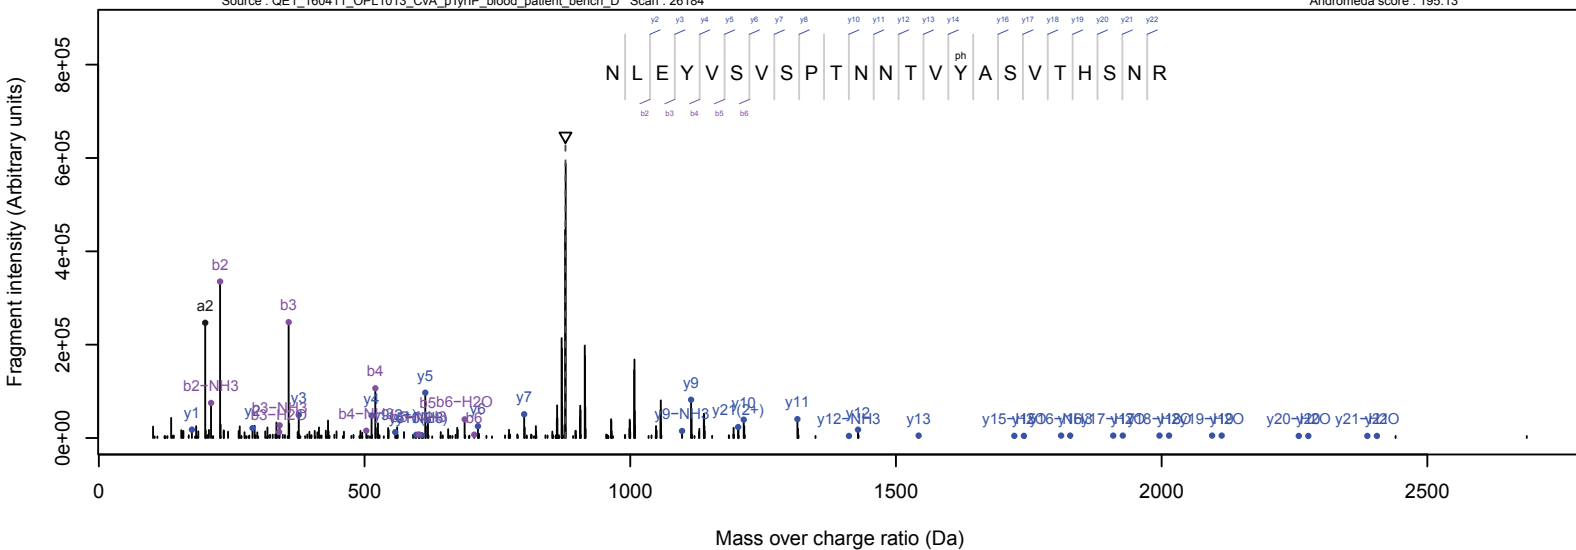

SSGSGSSVADERVDY(ph)VVDQK-3+

Source: QE1\_160411\_OPL1013\_CvA\_pTyrIP\_blood\_patient\_bench\_C Scan: 18474

Andromeda score: 194.24

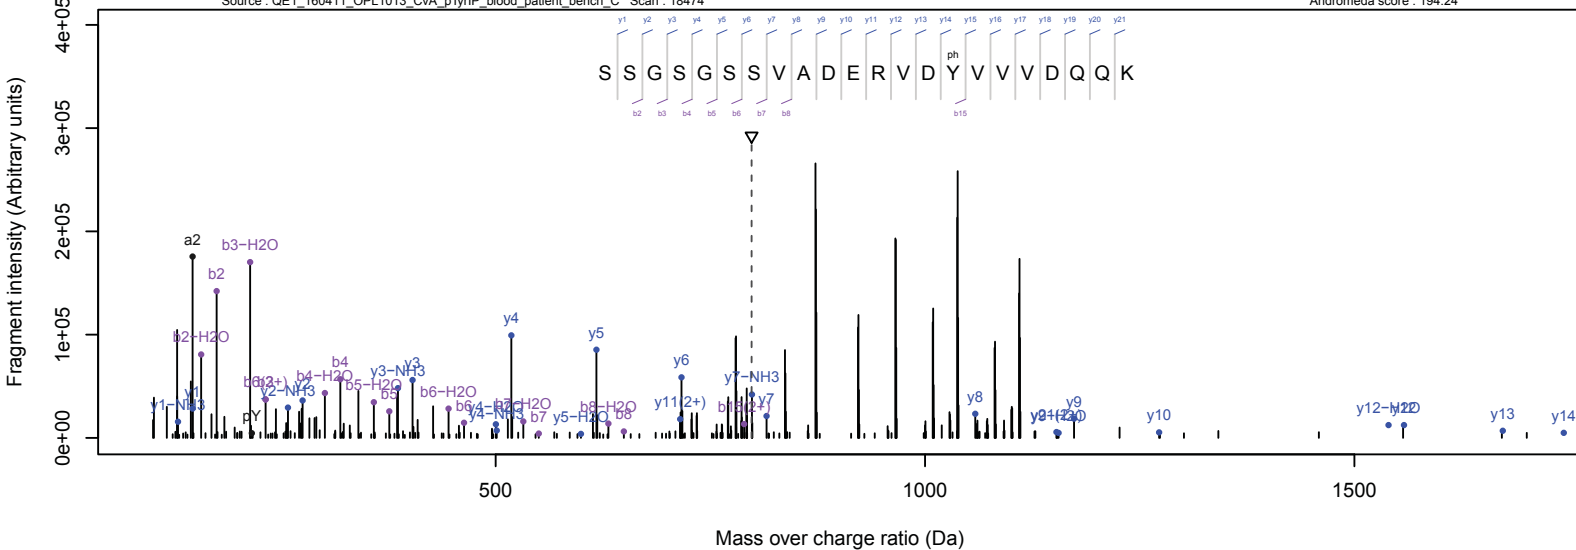

YGLFKEENPYAR-2+

Source: QE1\_160411\_OPL1013\_CvA\_pTyrIP\_blood\_patient\_bench\_D Scan: 16840

Andromeda score: 194.06

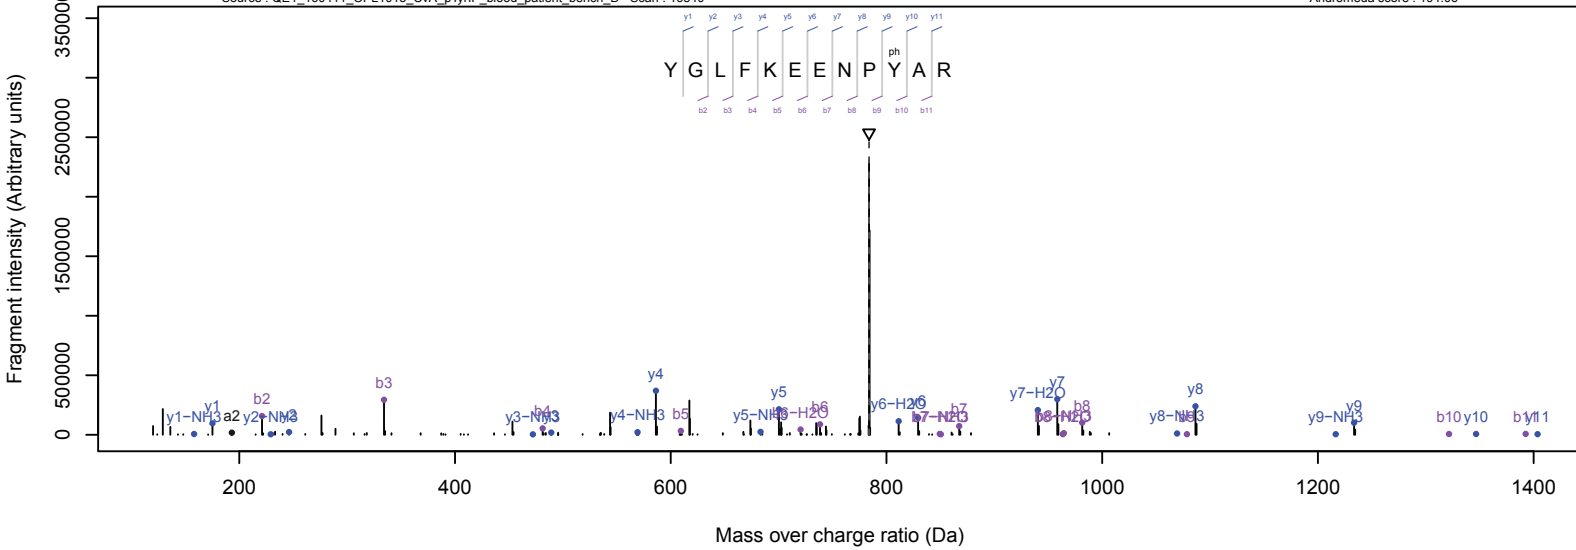



VFDKDGNGY(ph)ISAAELR-3+

Source : QE1\_160411\_OPL1013\_CvA\_pTyrIP\_blood\_patient\_bench\_C Scan : 22187

Andromeda score : 191.36

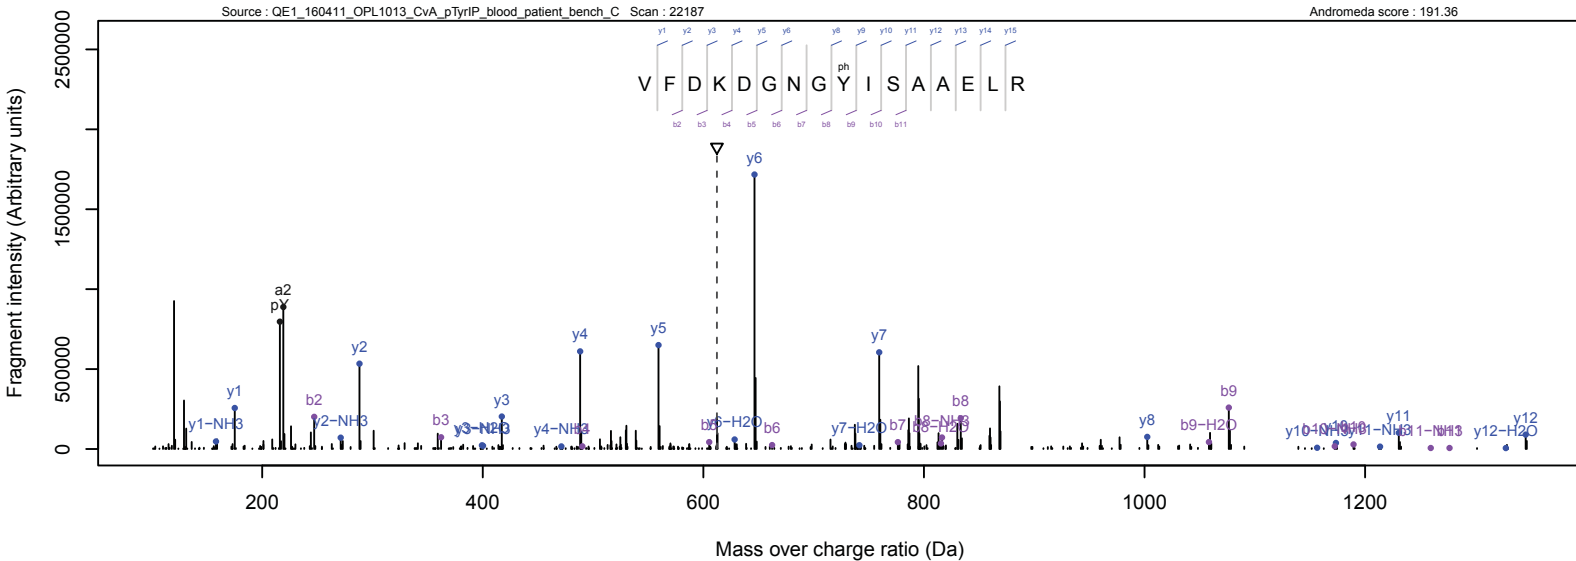

DQY(ph)LMWLTQK-2+

Source : QE1\_160411\_OPL1013\_CvA\_pTyrIP\_blood\_patient\_bench\_D Scan : 38579

Andromeda score : 189.17

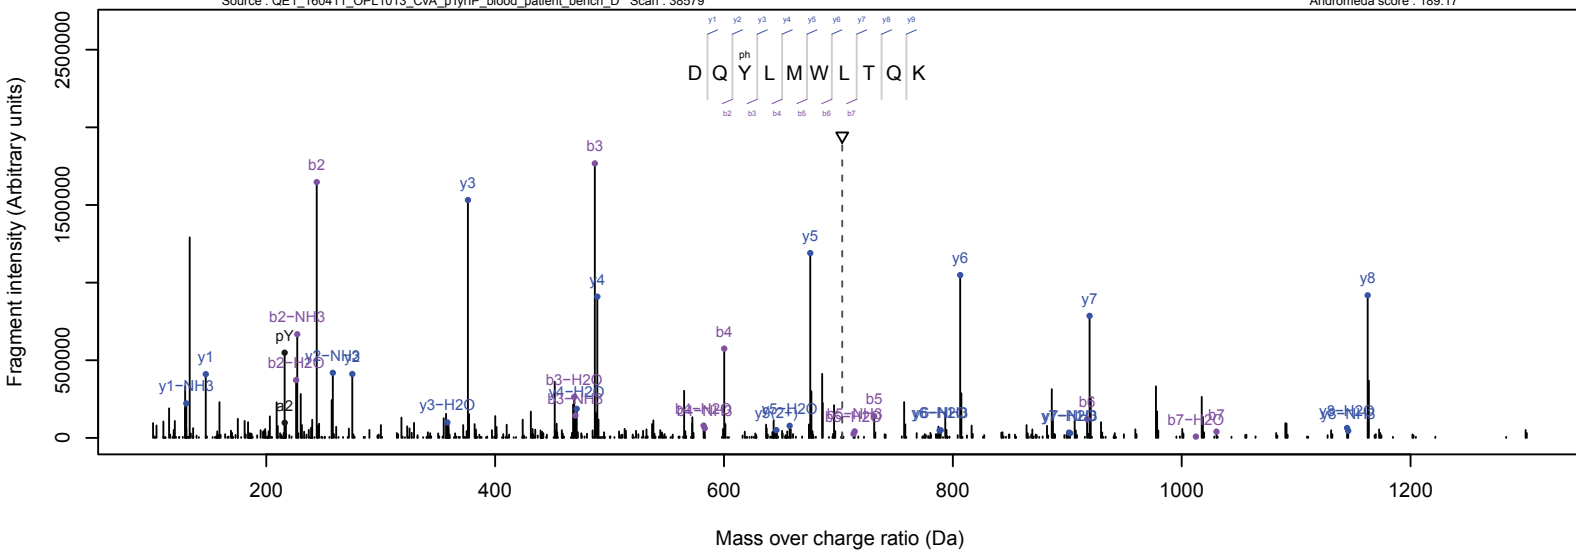

EELY(ph)SKVTPR-2+

Source : QE1\_160411\_OPL1013\_CvA\_pTyrIP\_blood\_patient\_bench\_C Scan : 8239

Andromeda score : 189.17

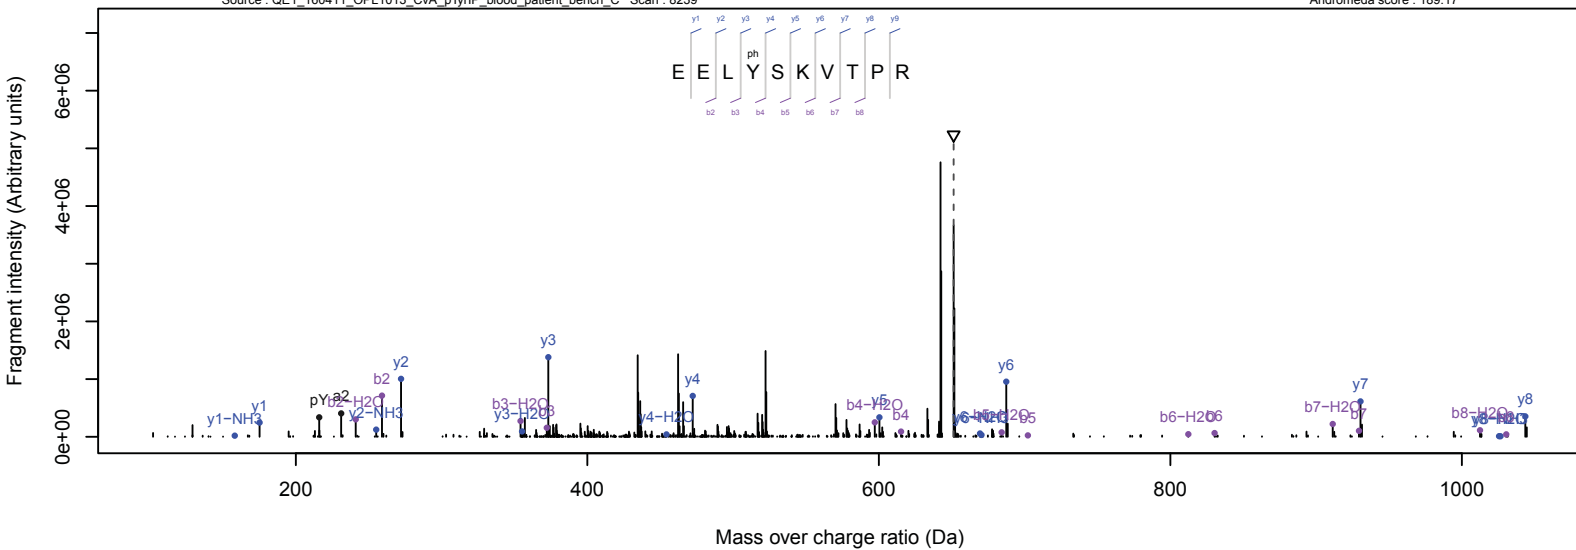

## Y(ph)KNILPFDHTR-2+

Source : QE1\_160411\_OPL1013\_CvA\_pTyrIP\_blood\_patient\_bench\_D Scan : 18375

Andromeda score : 187.85

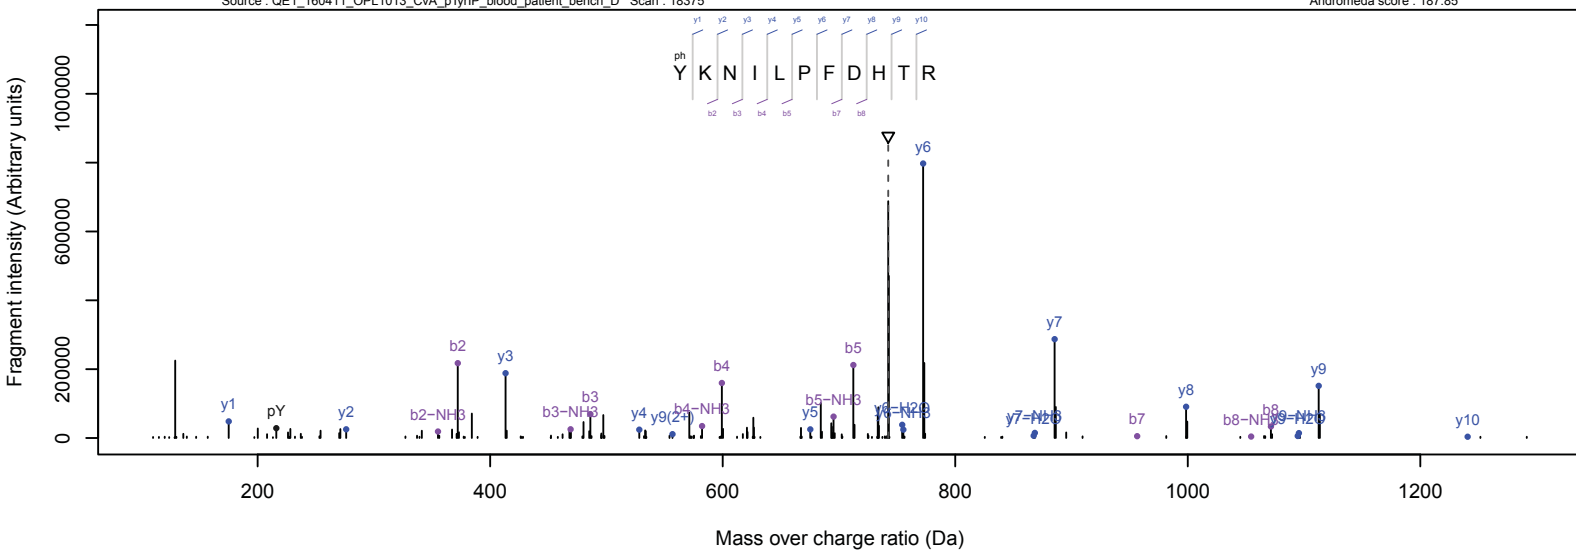

## IGEGT(ph)Y(ph)GVVYK-2+

Source : QE1\_160411\_OPL1013\_CvA\_pTyrIP\_blood\_patient\_bench\_A Scan : 15356

Andromeda score : 187.6

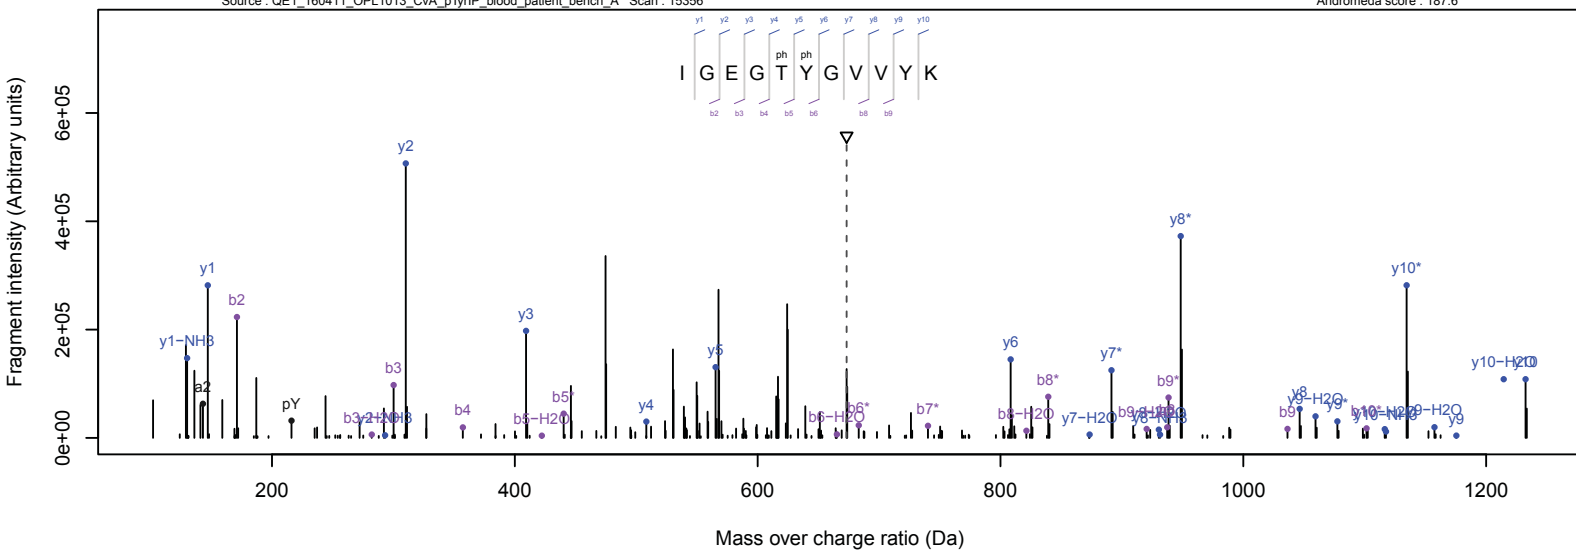

## TSGSVY(ph)ITLKK-2+

Source : QE1\_160411\_OPL1013\_CvA\_pTyrIP\_blood\_patient\_bench\_B Scan : 13067

Andromeda score : 186.46

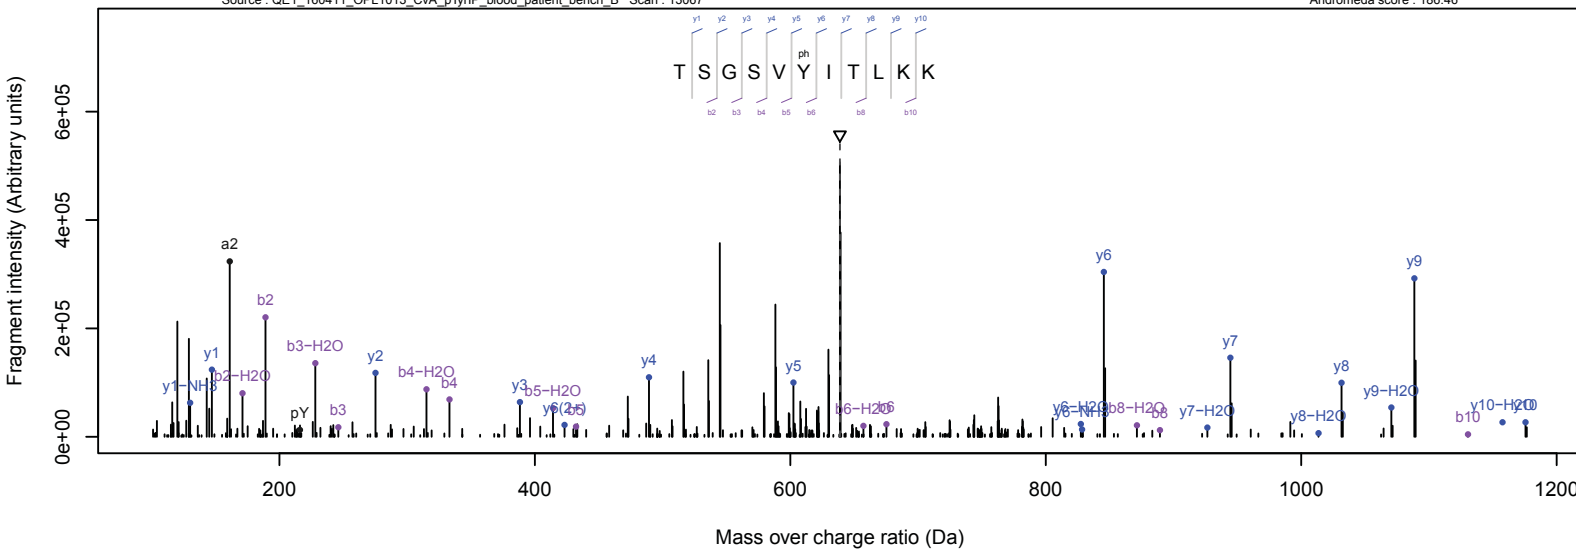



## DTETVY(ph)SEVRK-2+

Source : QE1\_160411\_OPL1013\_CvA\_pTyrIP\_blood\_patient\_bench\_D Scan : 6688

Andromeda score : 184.24

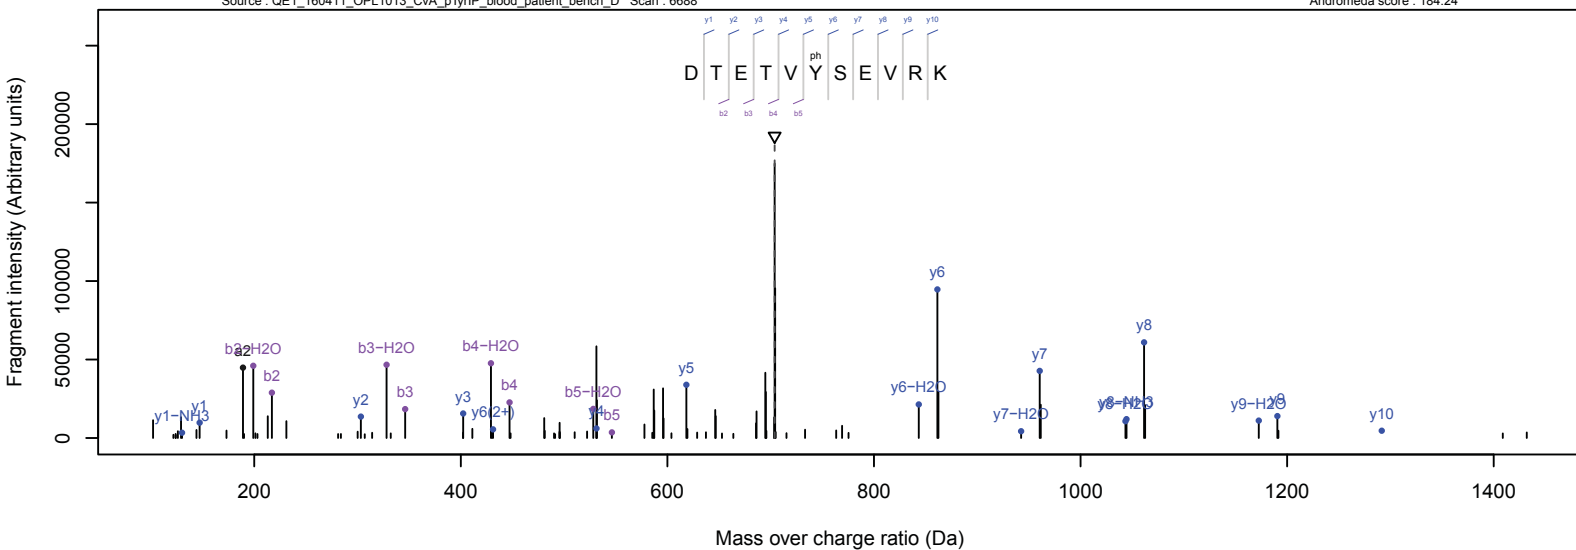

## EDSARVY(ph)ENVGLMQQK-3+

Source : QE1\_160411\_OPL1013\_CvA\_pTyrIP\_blood\_patient\_bench\_D Scan : 16436

Andromeda score : 184.22

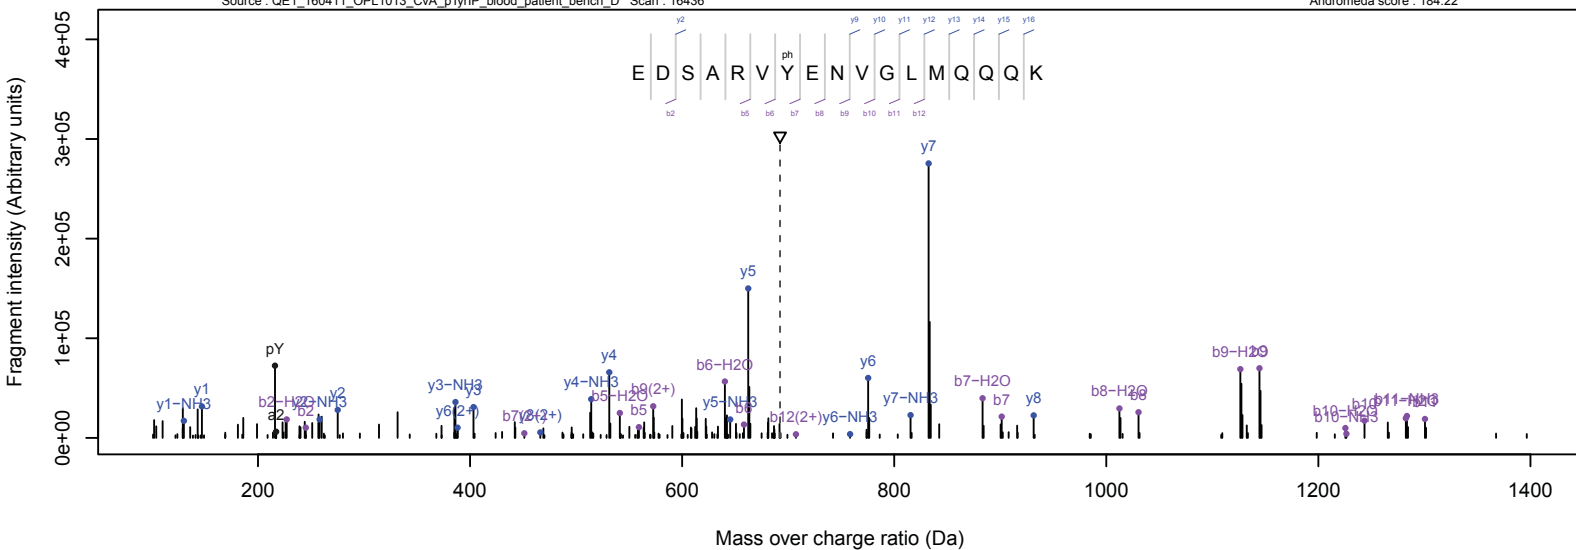

## LSLEGDHSTPPSAY(ph)GSVK-3+

Source : QE1\_160411\_OPL1013\_CvA\_pTyrIP\_blood\_patient\_bench\_C Scan : 16028

Andromeda score : 182.31

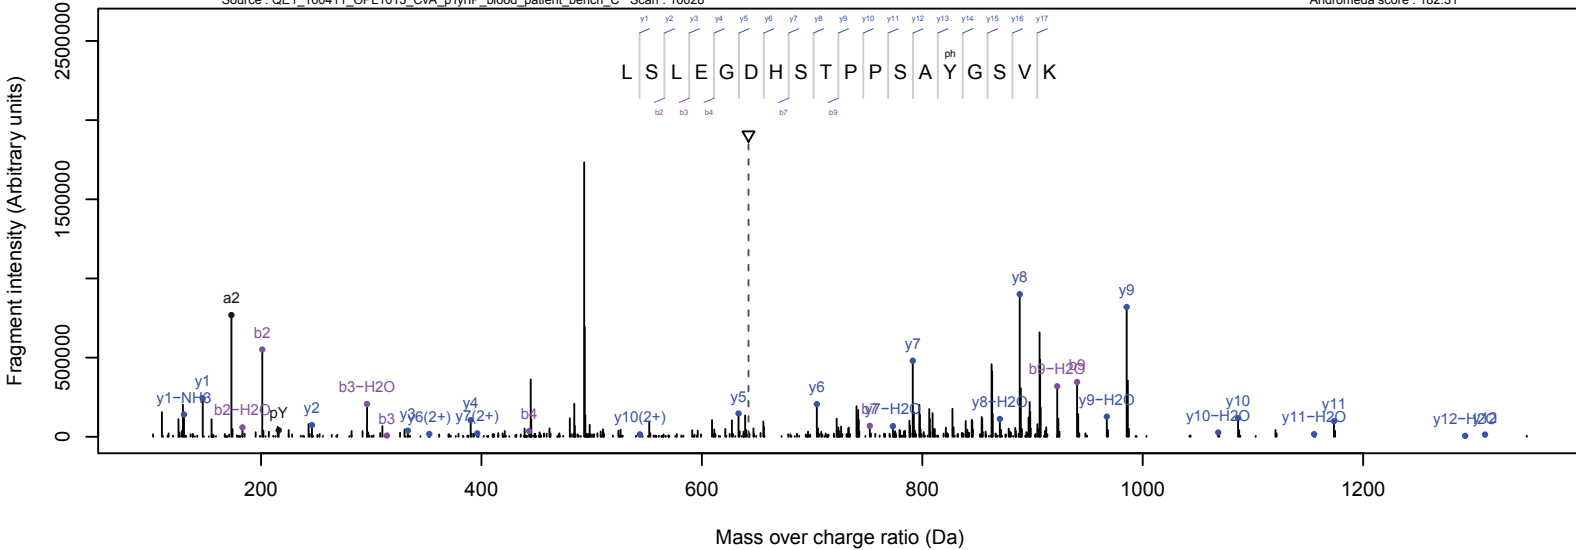

TSS(ph)KHKEDVY(ph)ENLHTK-4+

Source : QE1\_160411\_OPL1013\_CvA\_pTyrIP\_blood\_patient\_bench\_C Scan : 3743

Andromeda score : 180.8

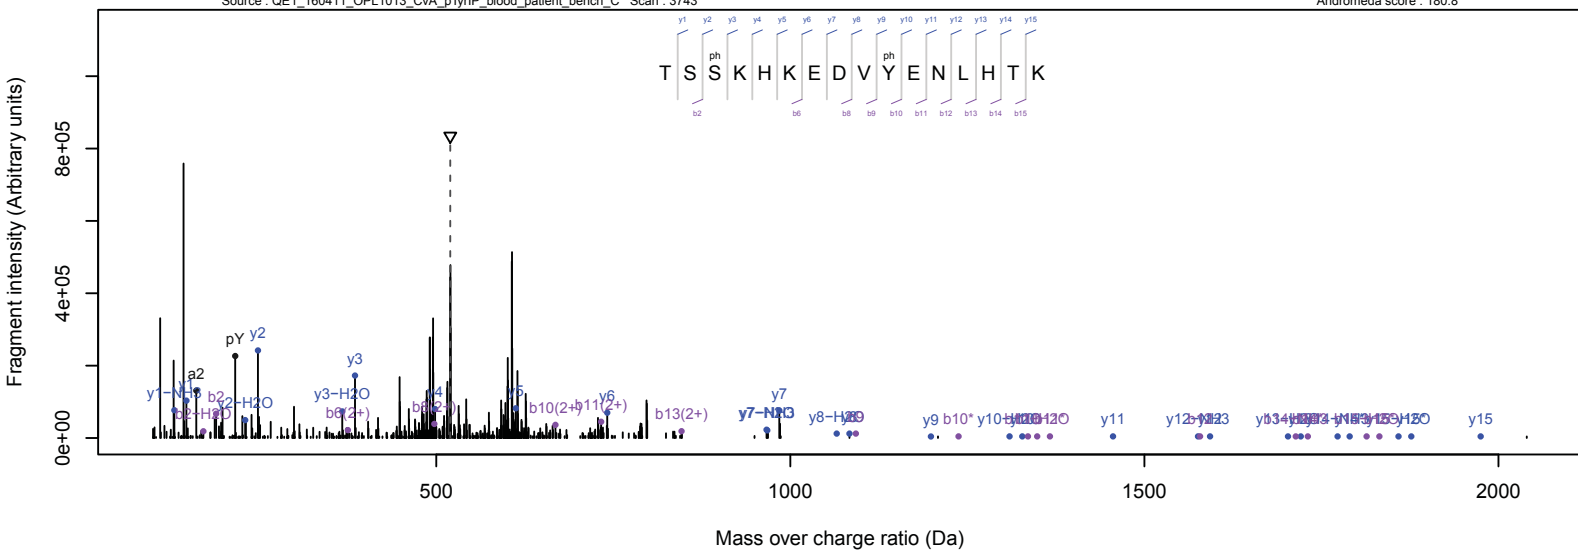

FANY(ph)IDKVR-2+

Source : QE1\_160411\_OPL1013\_CvA\_pTyrIP\_blood\_patient\_bench\_B Scan : 13445

Andromeda score : 180.74

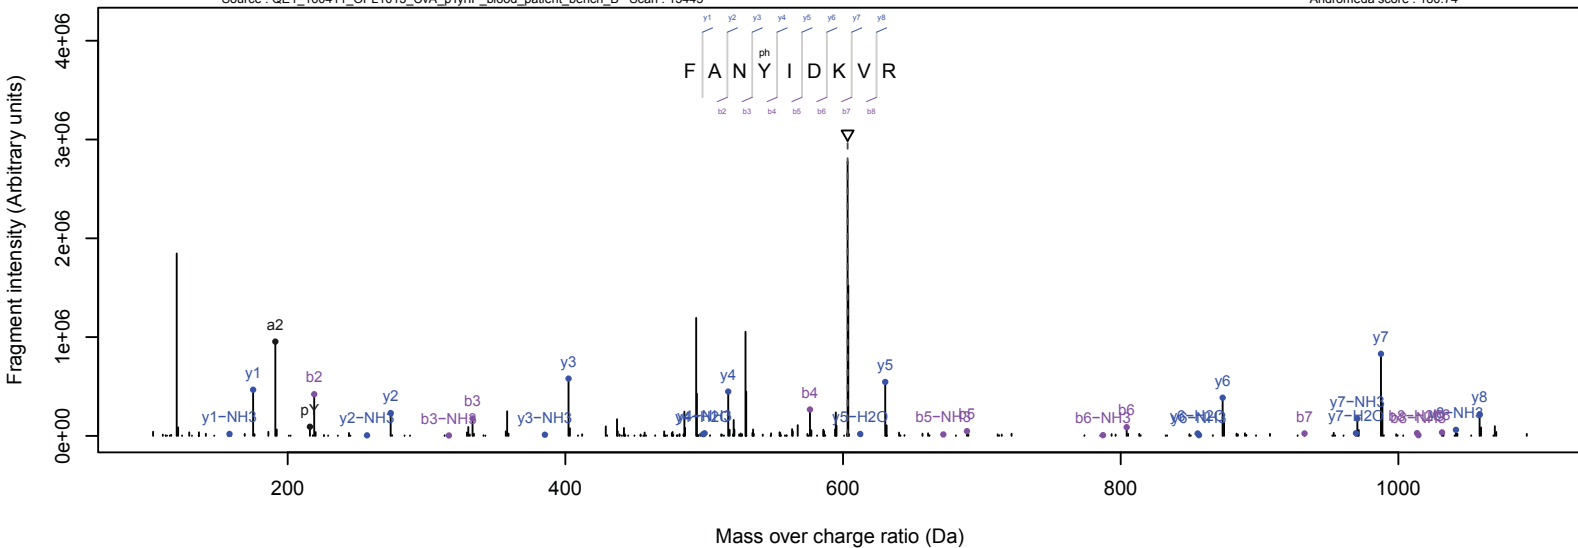

AVCSTY(ph)LQSR-2+

Source : QE1\_160411\_OPL1013\_CvA\_pTyrIP\_blood\_patient\_bench\_D Scan : 7126

Andromeda score : 180.07

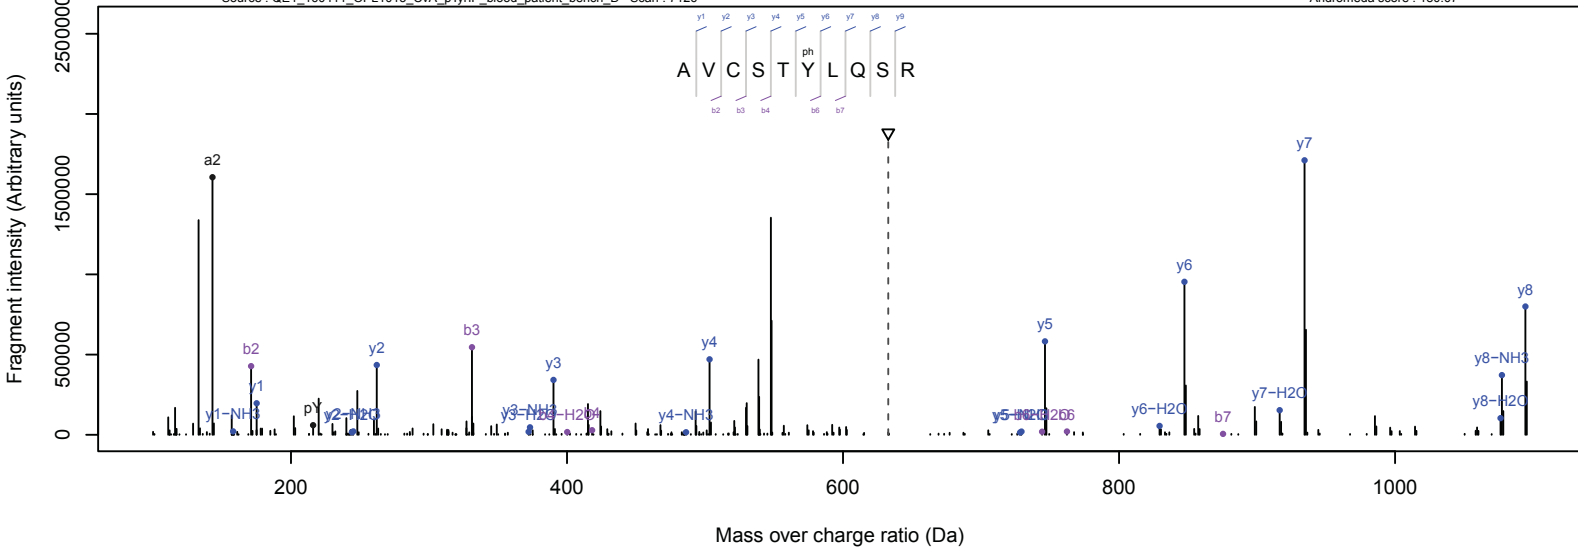

REEPEALY(ph)AAVNK-2+

Source : QE1\_160411\_OPL1013\_CvA\_pTyrIP\_blood\_patient\_bench\_D Scan : 15668

Andromeda score : 178.84

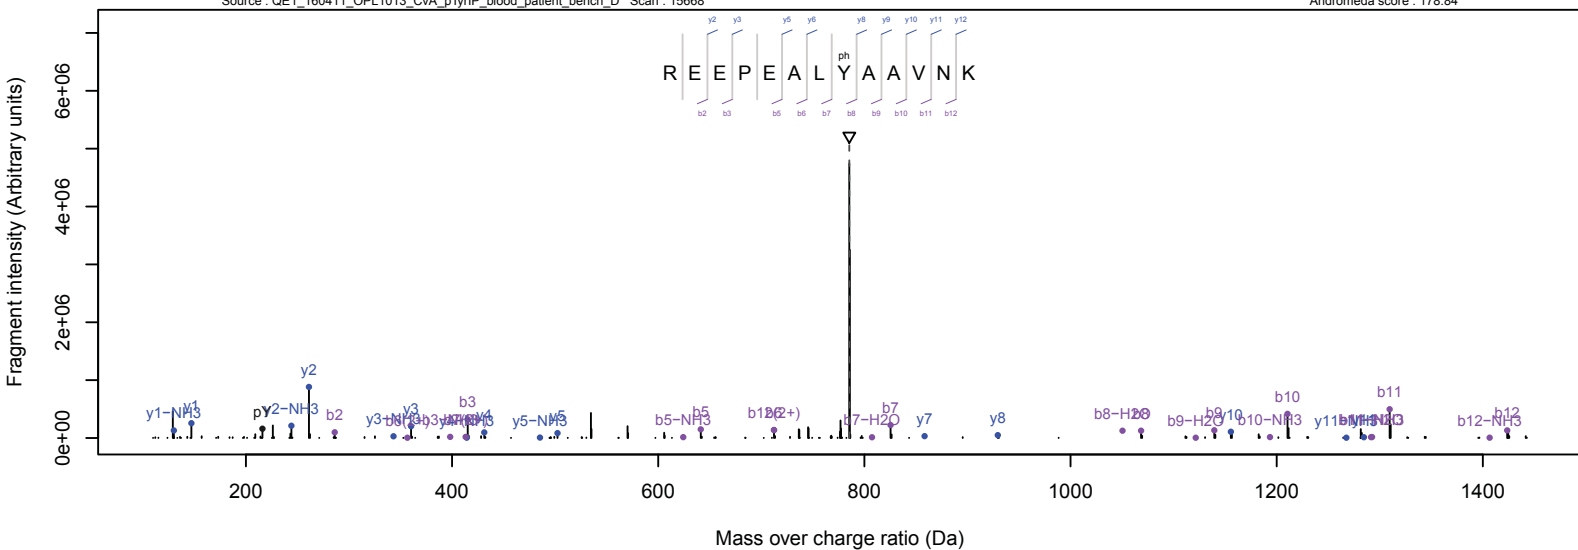

KPYCNAHY(ph)PK-3+

Source : QE1\_160411\_OPL1013\_CvA\_pTyrIP\_blood\_patient\_bench\_B Scan : 1778

Andromeda score : 178.55

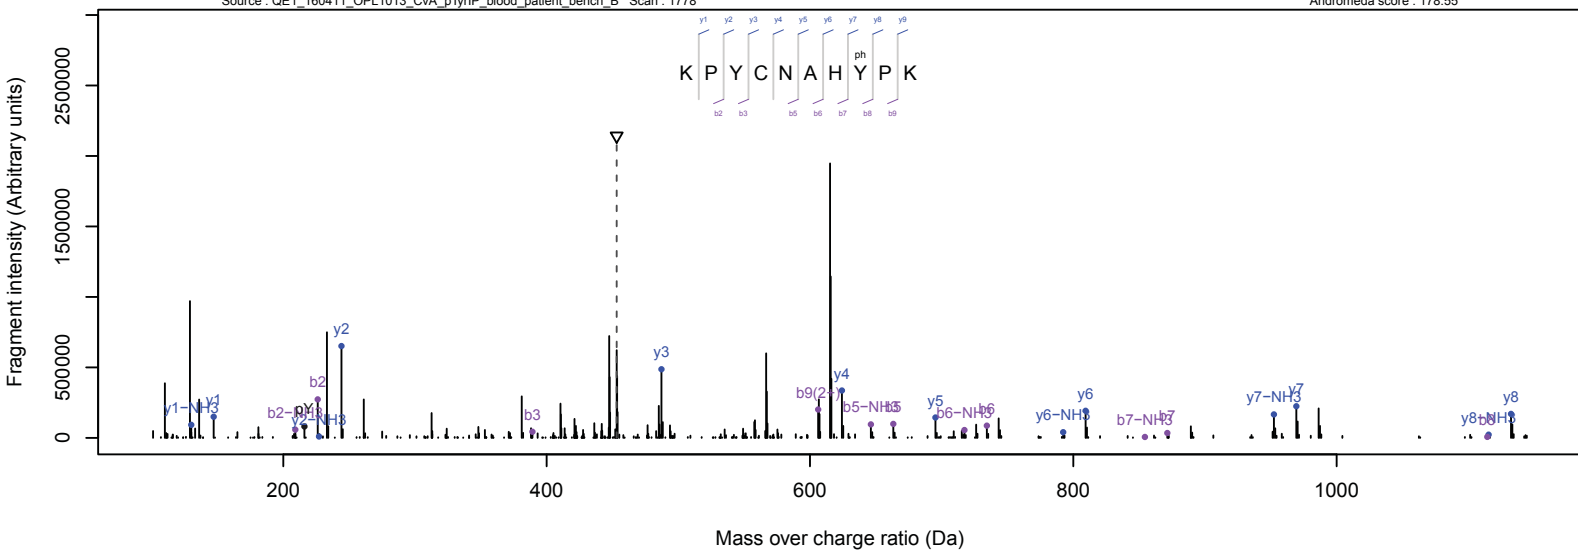

EGY(ph)SALPLDIER-2+

Source : QE1\_160411\_OPL1013\_CvA\_pTyrIP\_blood\_patient\_bench\_D Scan : 31400

Andromeda score : 175.21

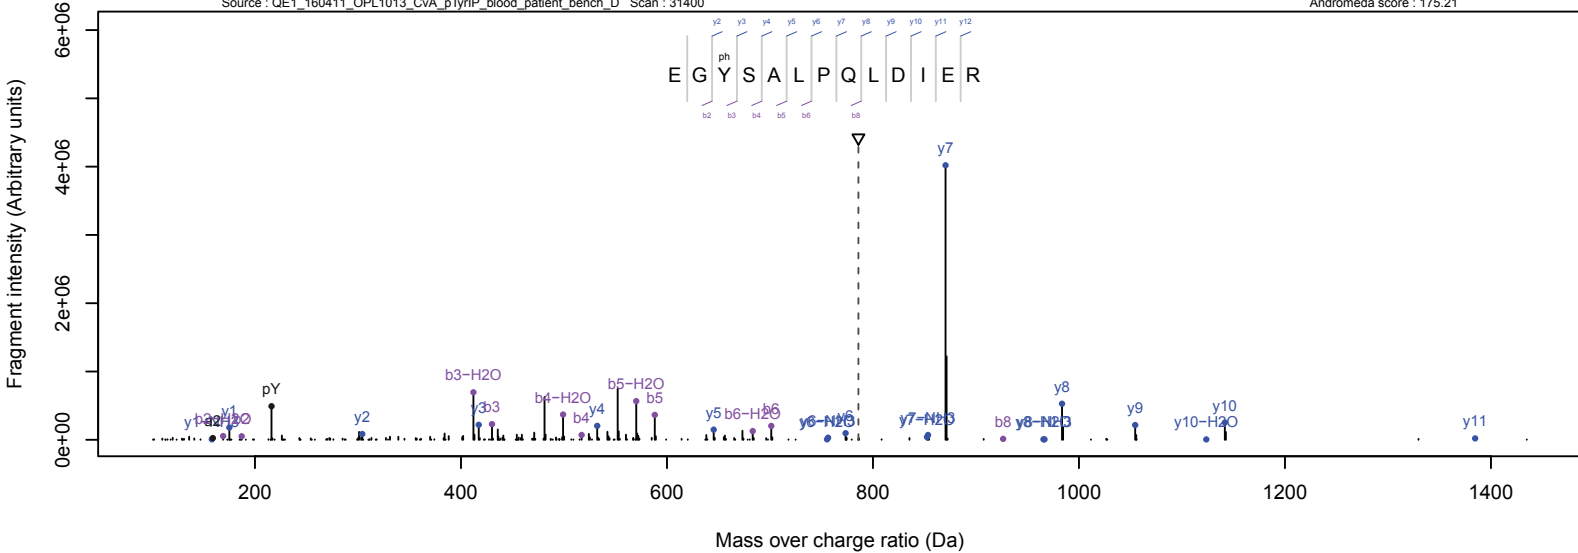

## REVGDY(ph)GQLHETEVLLK-3+

Source: QE1\_160411\_OPL1013\_CvA\_pTyrIP\_blood\_patient\_bench\_C Scan: 24229

Andromeda score: 173.37

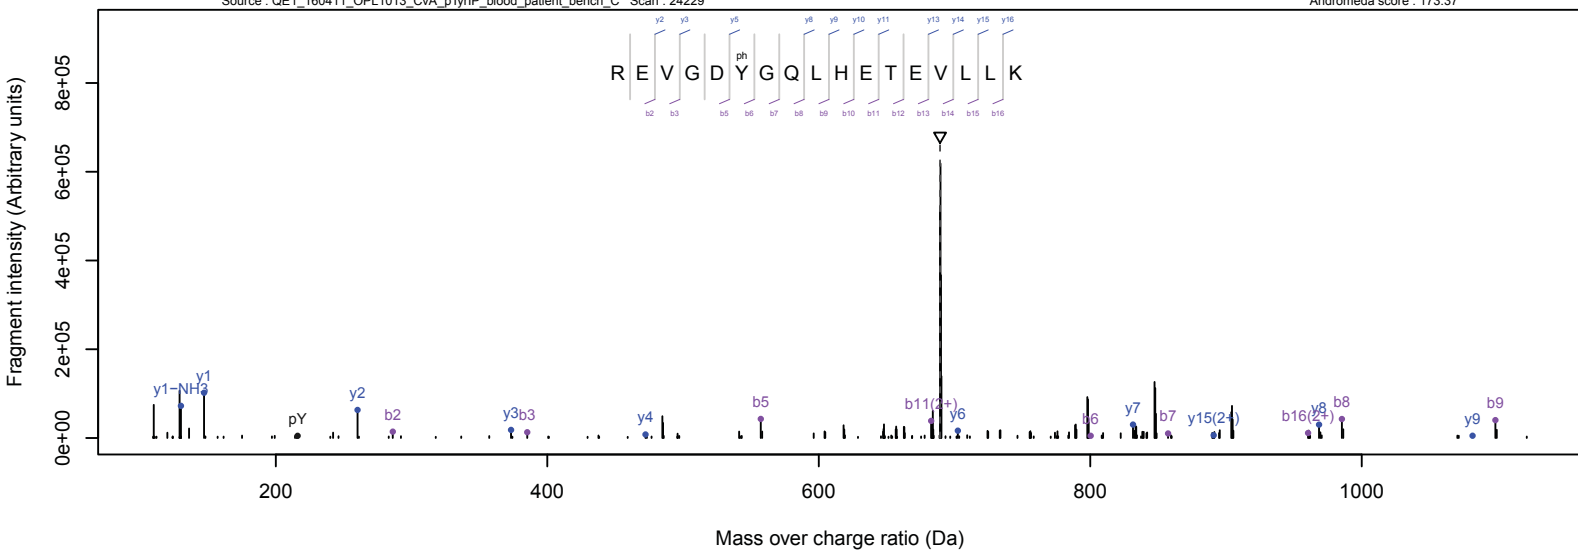

## DYGHSSRDYPSR-3+

Source: QE1\_160411\_OPL1013\_CvA\_pTyrIP\_blood\_patient\_bench\_A Scan: 1699

Andromeda score: 172.85

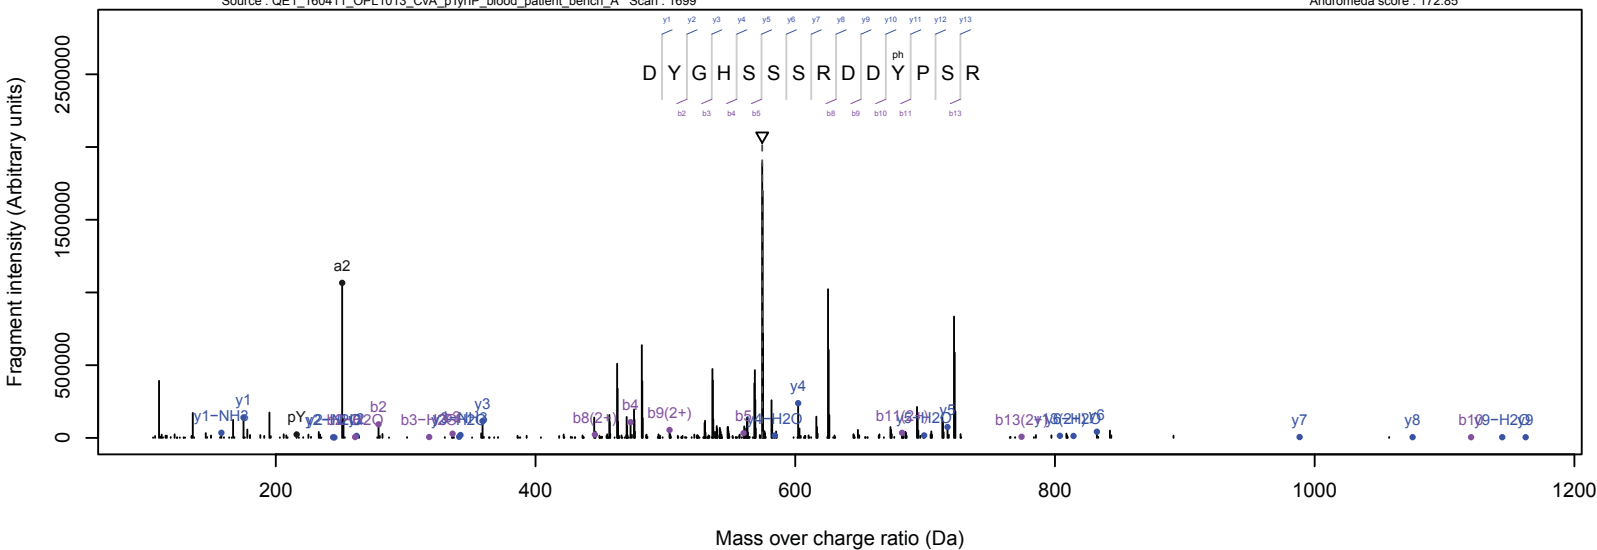

## AGDNSQSVY(ph)IPMSPGAHHFDLSLGY PSTTLPVHR-4+

Source: QE1\_160411\_OPL1013\_CvA\_pTyrIP\_blood\_patient\_bench\_C Scan: 31758

Andromeda score: 172.11

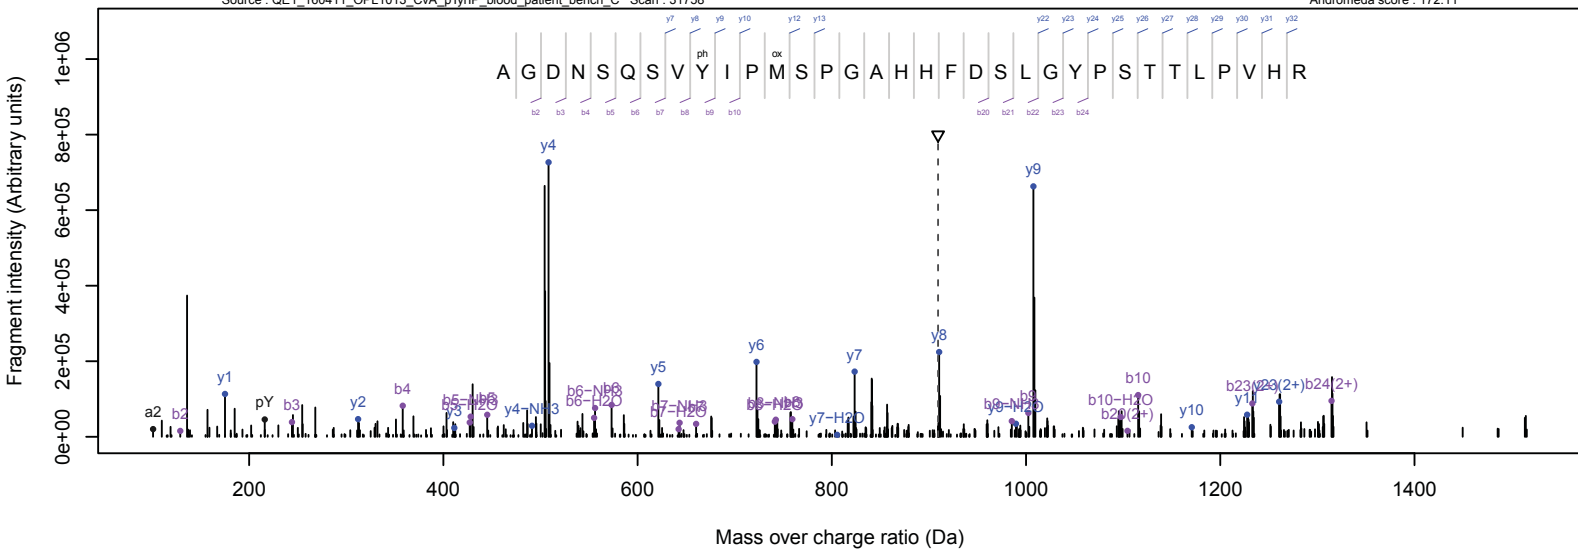

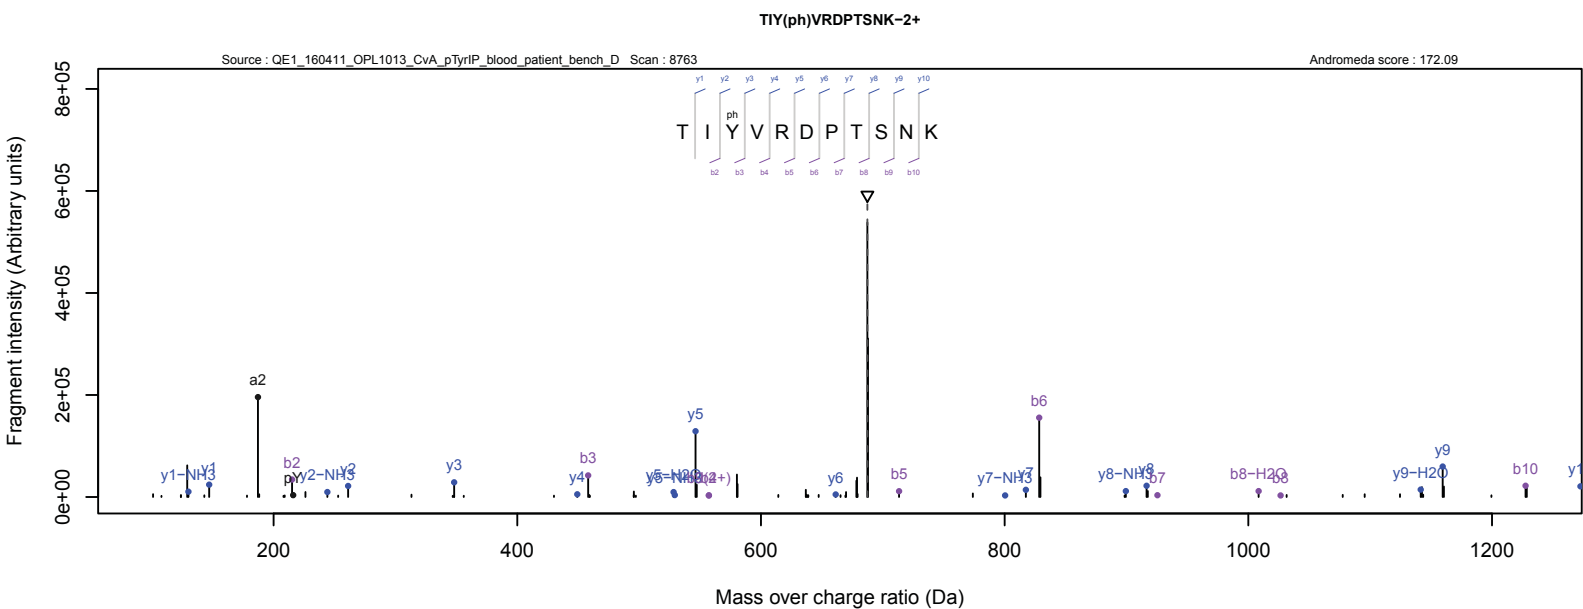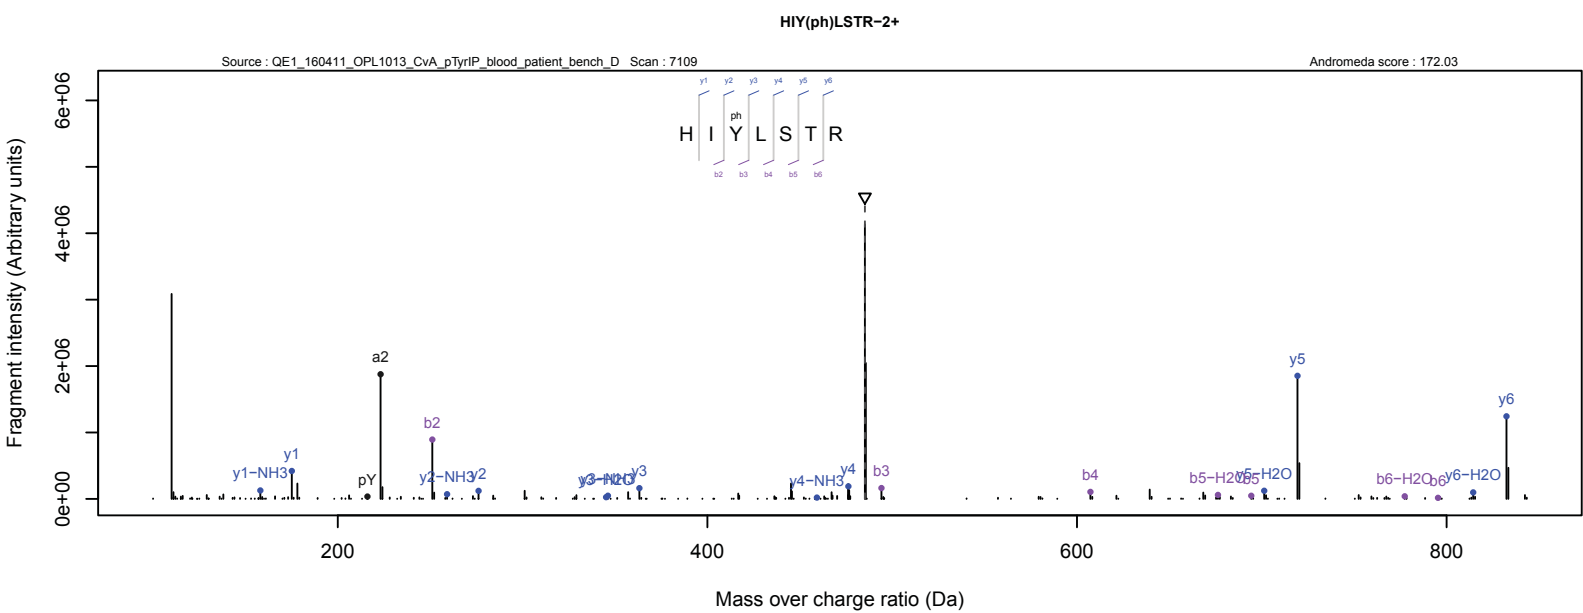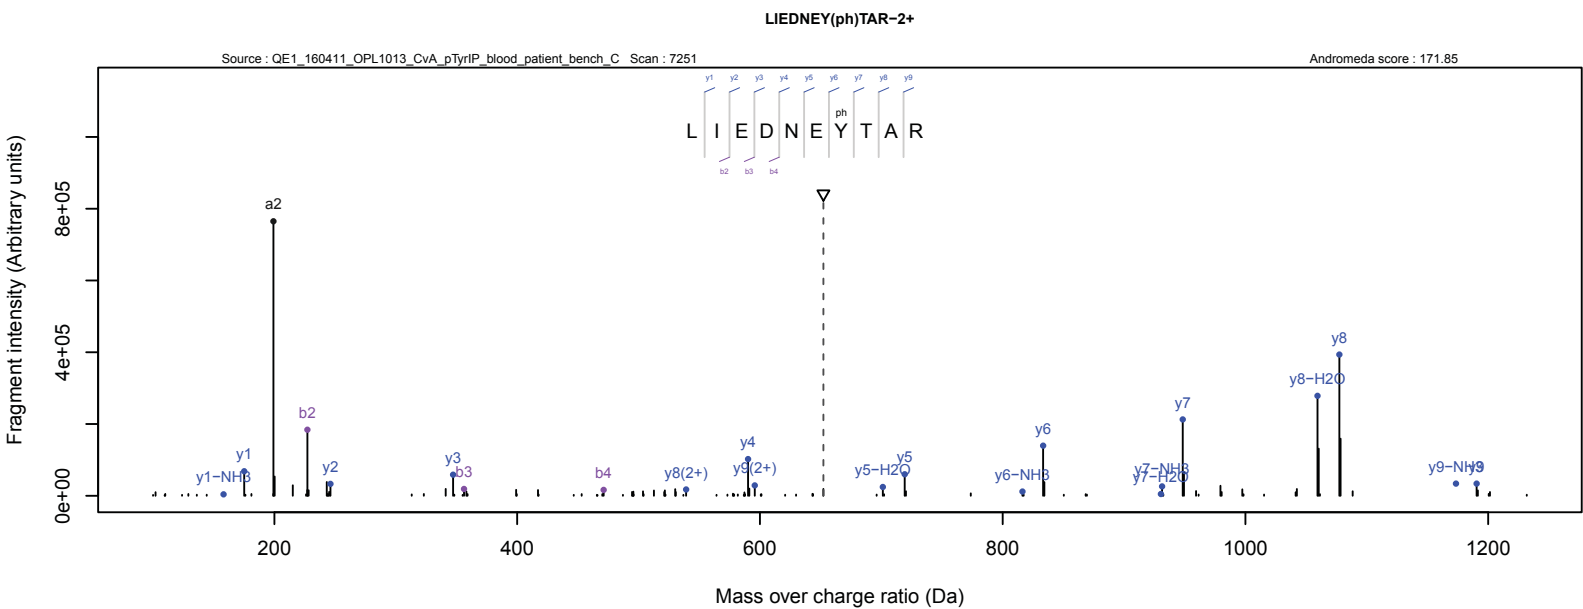

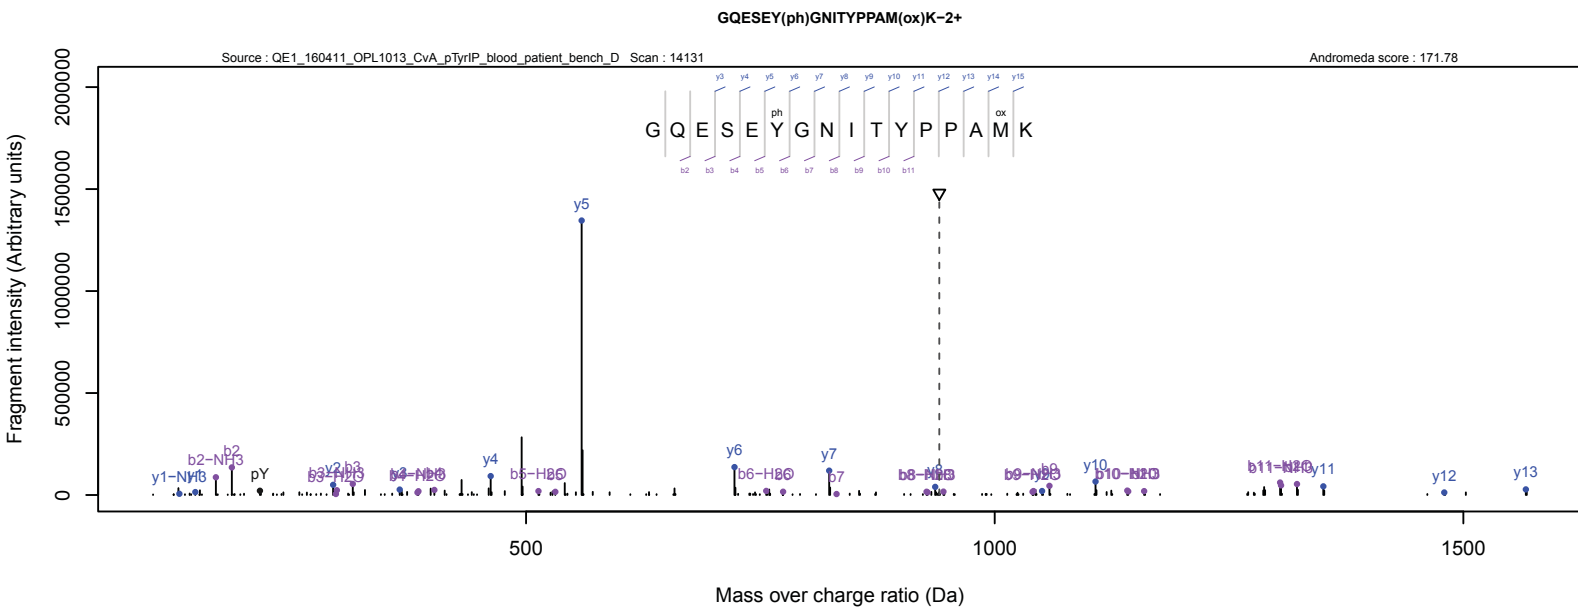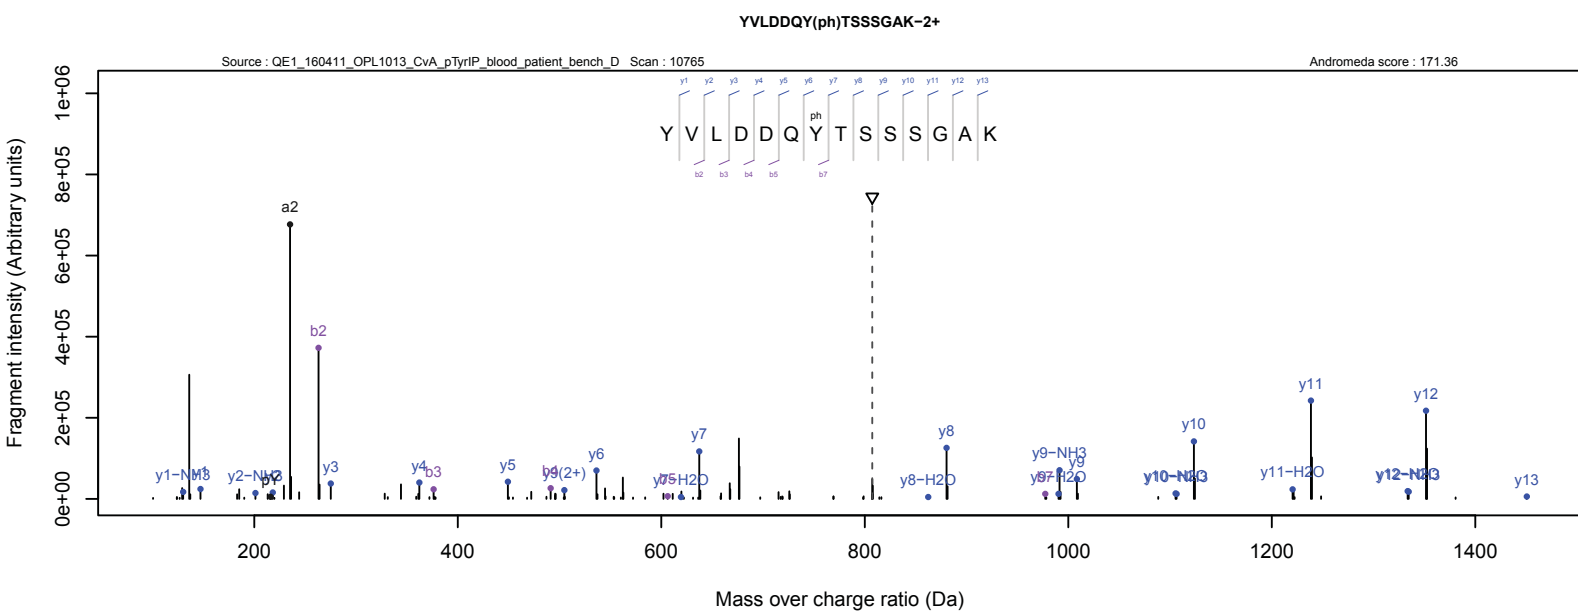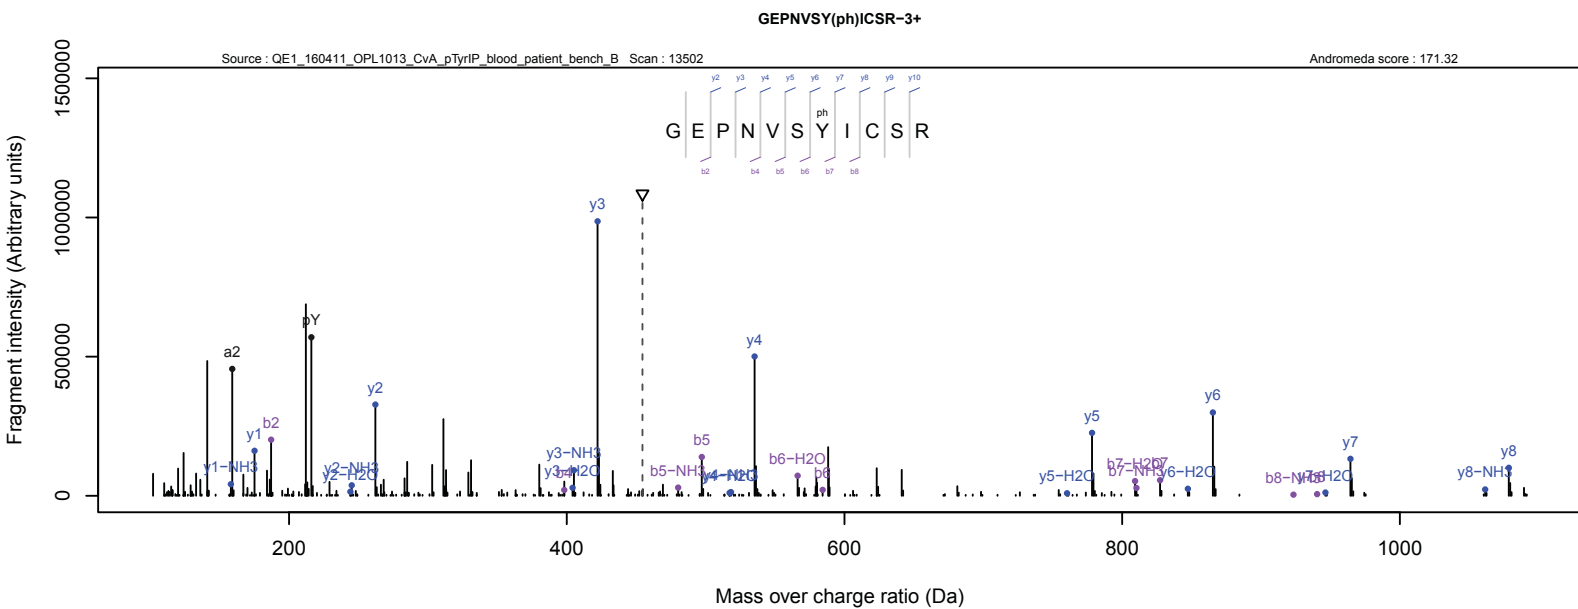

GTGY(ph)IKTELISVSEVHPSR-3+

Source : QE1\_160411\_OPL1013\_CvA\_pTyrIP\_blood\_patient\_bench\_D Scan : 25614

Andromeda score : 169.59

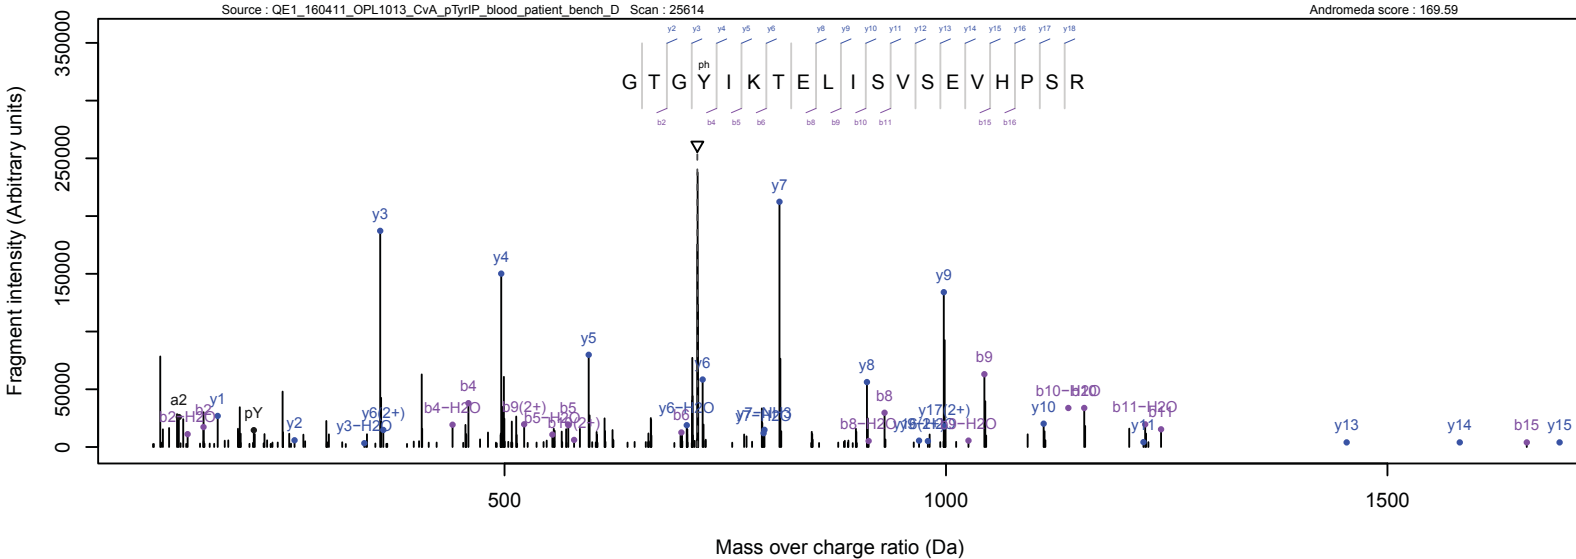

GGPGSAVSPY(ph)PTFNPSSDVAALHK-3+

Source : QE1\_160411\_OPL1013\_CvA\_pTyrIP\_blood\_patient\_bench\_C Scan : 29760

Andromeda score : 167.45

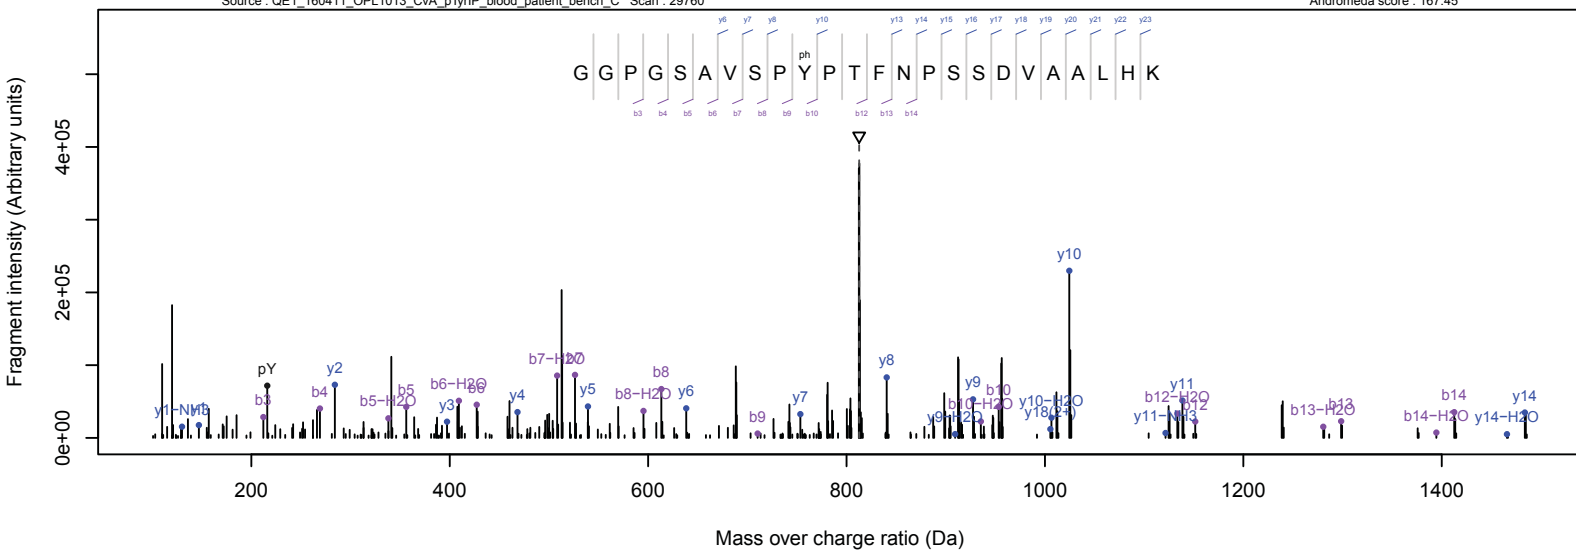

IQNTGDY(ph)YDLYGGEK-2+

Source : QE1\_160411\_OPL1013\_CvA\_pTyrIP\_blood\_patient\_bench\_A Scan : 18417

Andromeda score : 166.9

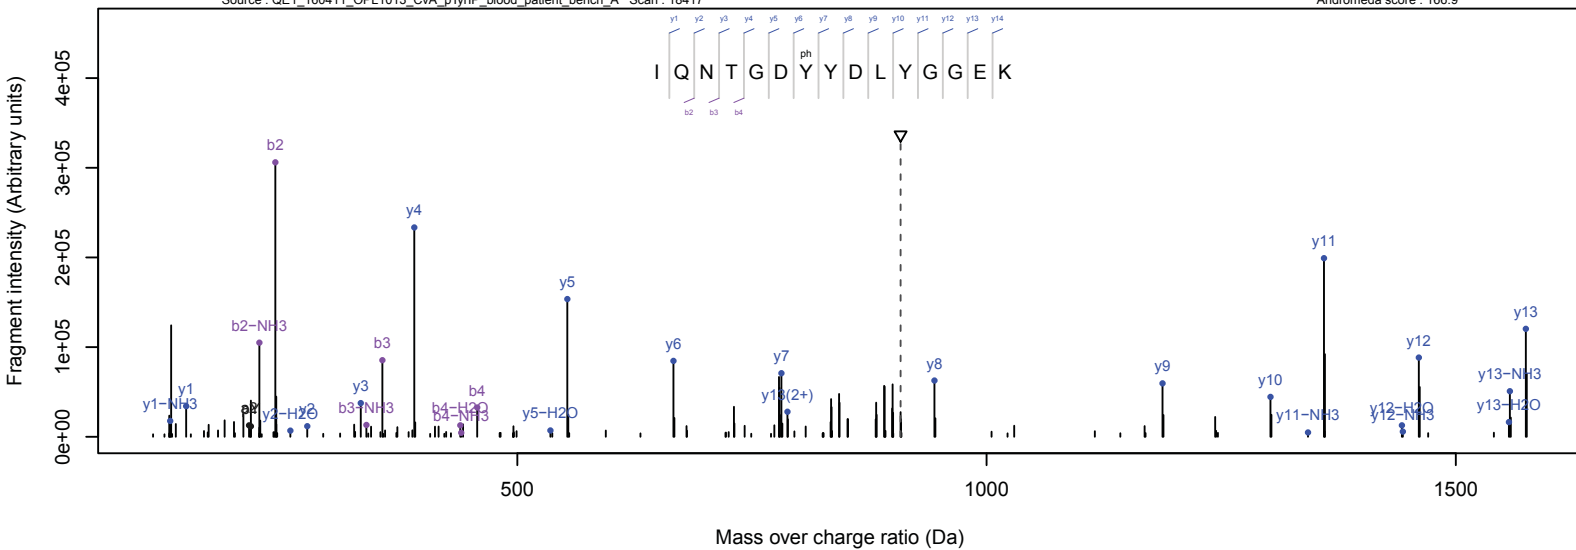

DIM( $\alpha$ )SDSNY(ph)VVR-2+

Source : QE1\_160411\_OPL1013\_CvA\_pTyrIP\_blood\_patient\_bench\_A Scan : 11464

Andromeda score : 166.69

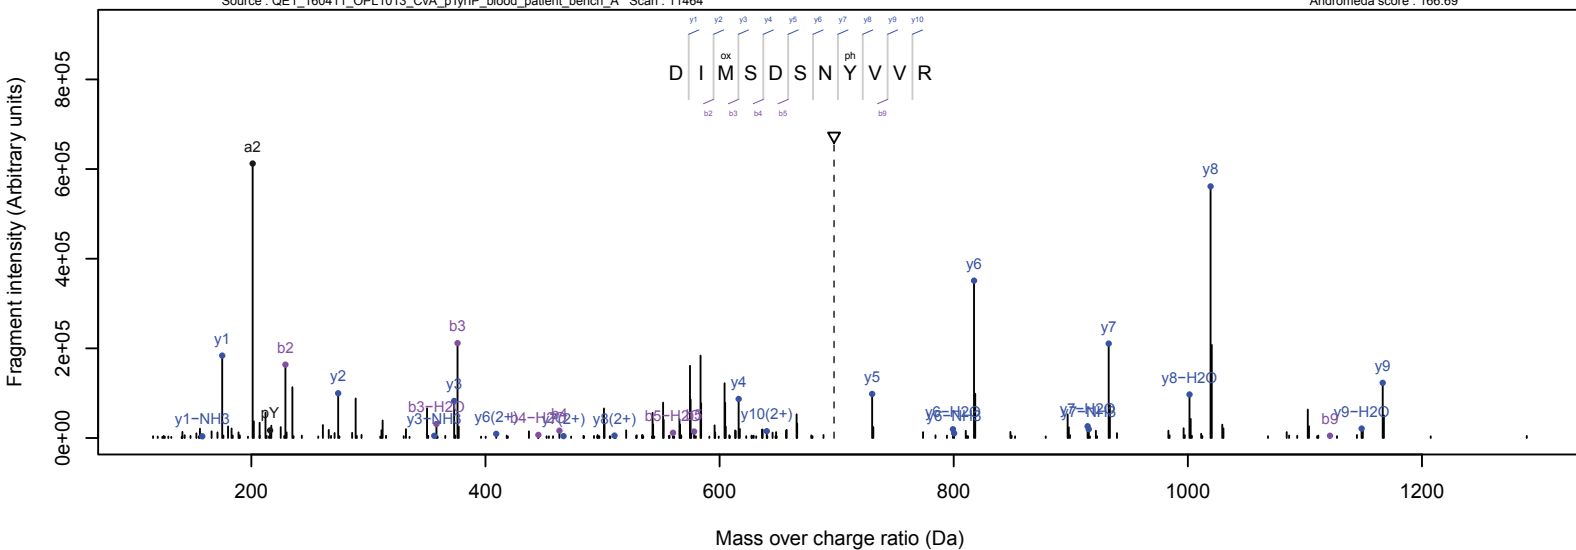

## VYTY(ph)QSR-2+

Source : QE1\_160411\_OPL1013\_CvA\_pTyrIP\_blood\_patient\_bench\_B Scan : 8095

Andromeda score : 166.52

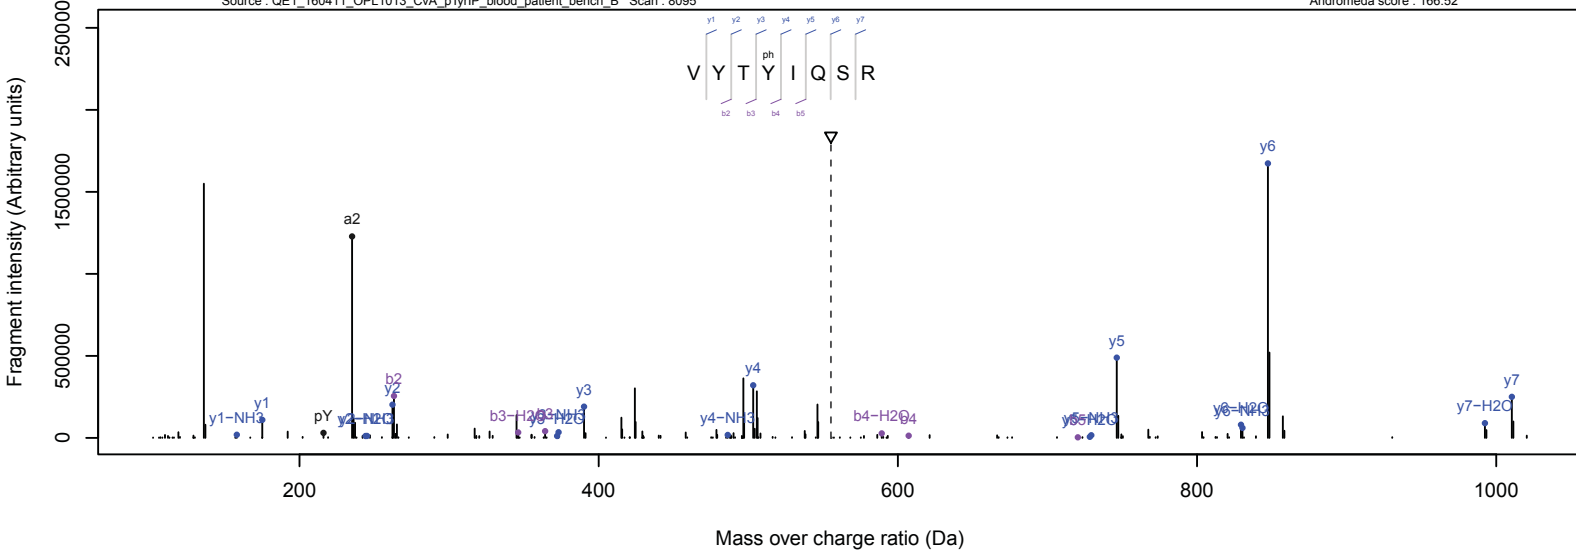

## IADPEHDHTGLTEY(ph)VATR-3+

Source : QE1\_160411\_OPL1013\_CvA\_pTyrIP\_blood\_patient\_bench\_A Scan : 22868

Andromeda score : 165.3

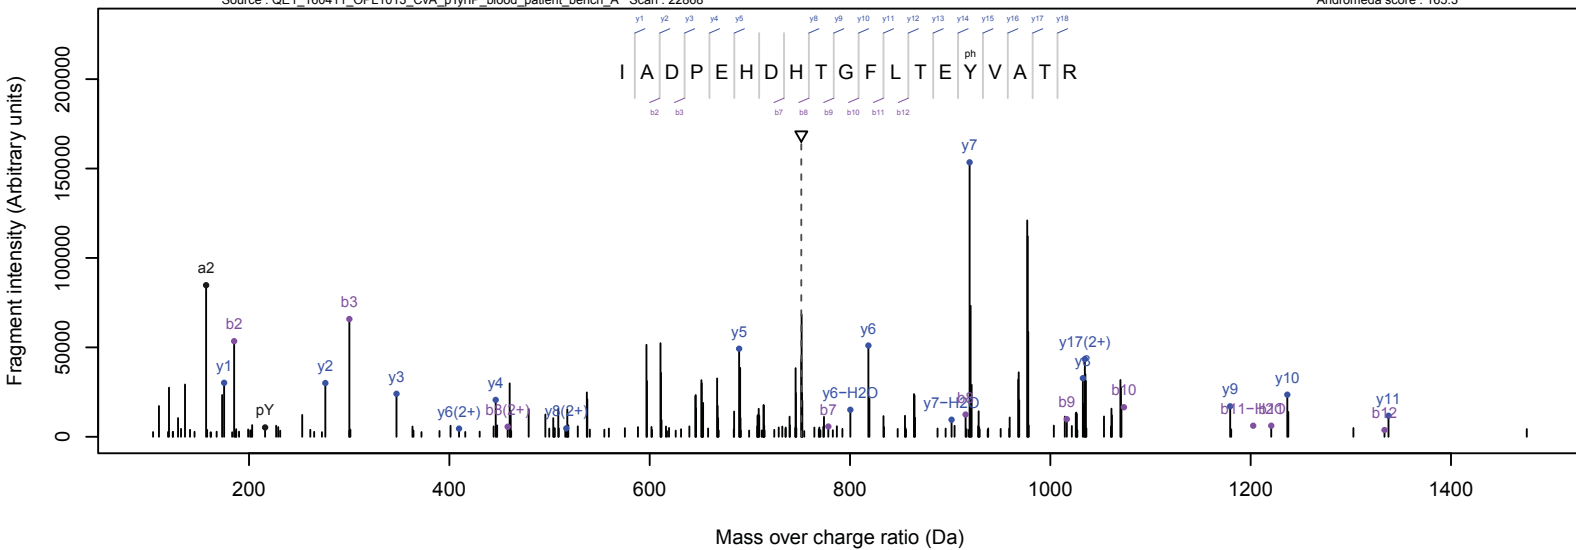



LPPGEQCEGEEDTEY(ph)MTPSSRPLRLDTSQSSR-4+

Source: QE1\_160411\_OPL1013\_CvA\_pTyrIP\_blood\_patient\_bench\_D Scan: 21894

Andromeda score: 165

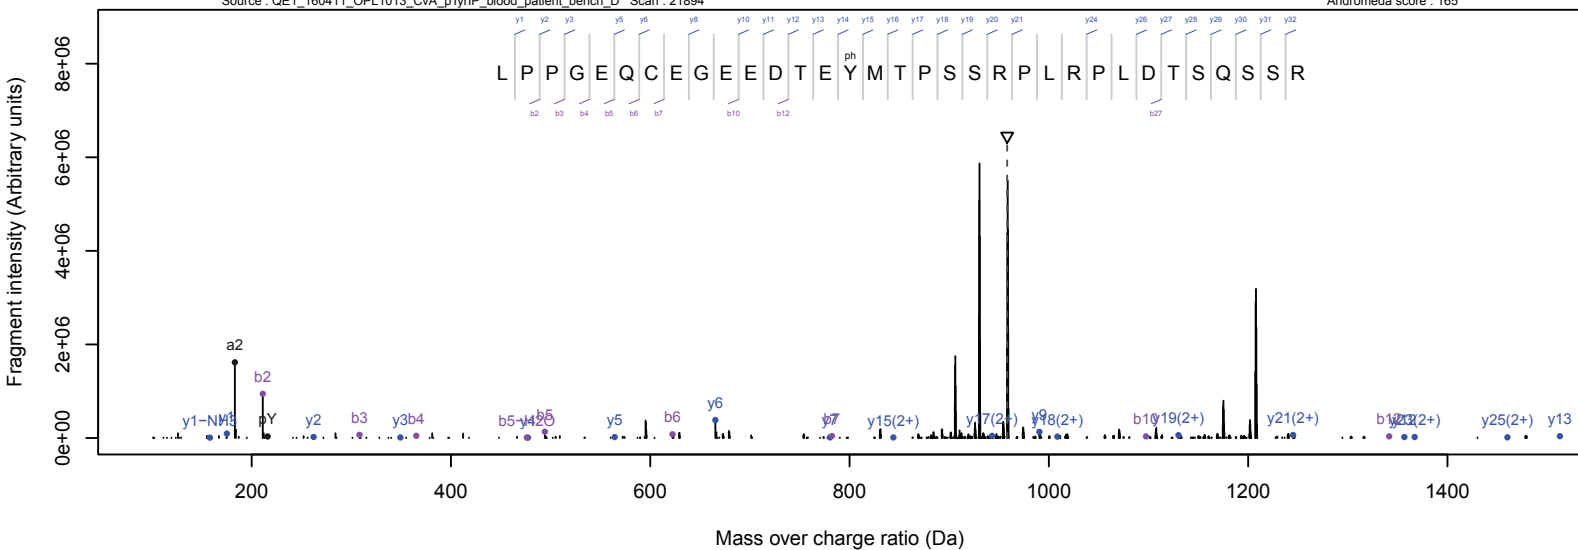

Y(ph)GM(ox)NPHQTPAQLYTLQPK-3+

Source: QE1\_160411\_OPL1013\_CvA\_pTyrIP\_blood\_patient\_bench\_C Scan: 22218

Andromeda score: 164.53

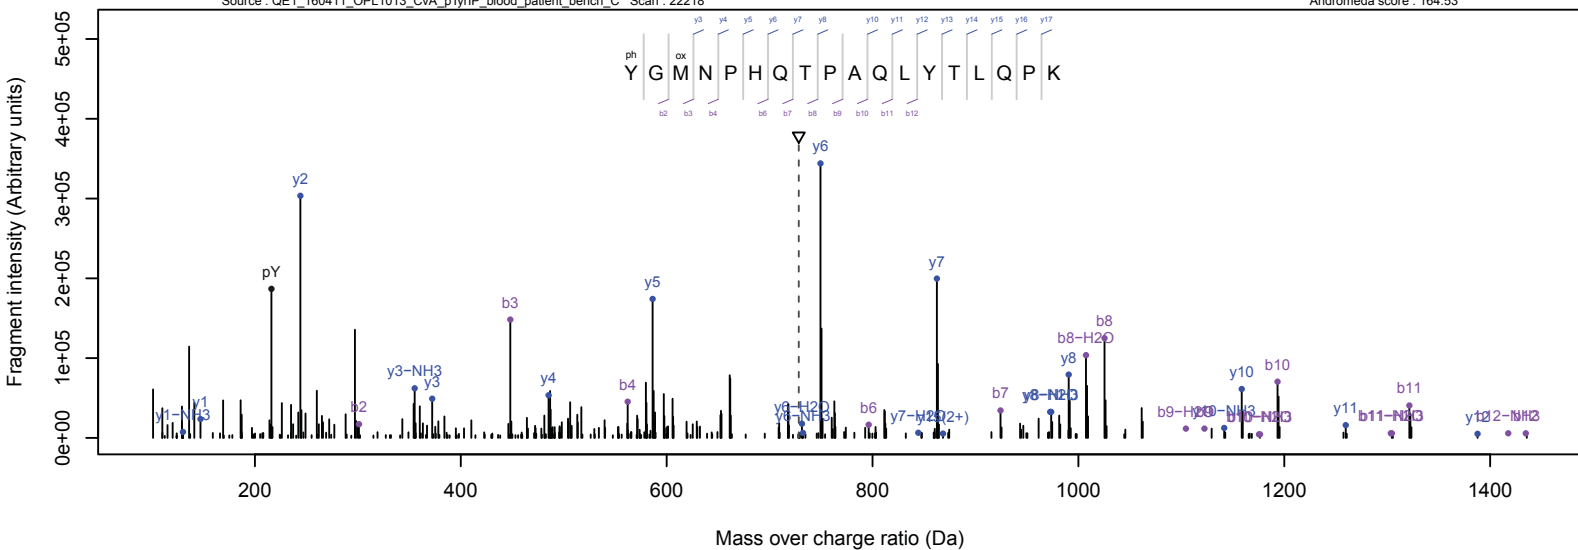

GSLSTDKDTAYG(SF)QNGHGIRK-4+

Source: QE1\_160411\_OPL1013\_CvA\_pTyrIP\_blood\_patient\_bench\_C Scan: 9850

Andromeda score: 163.85

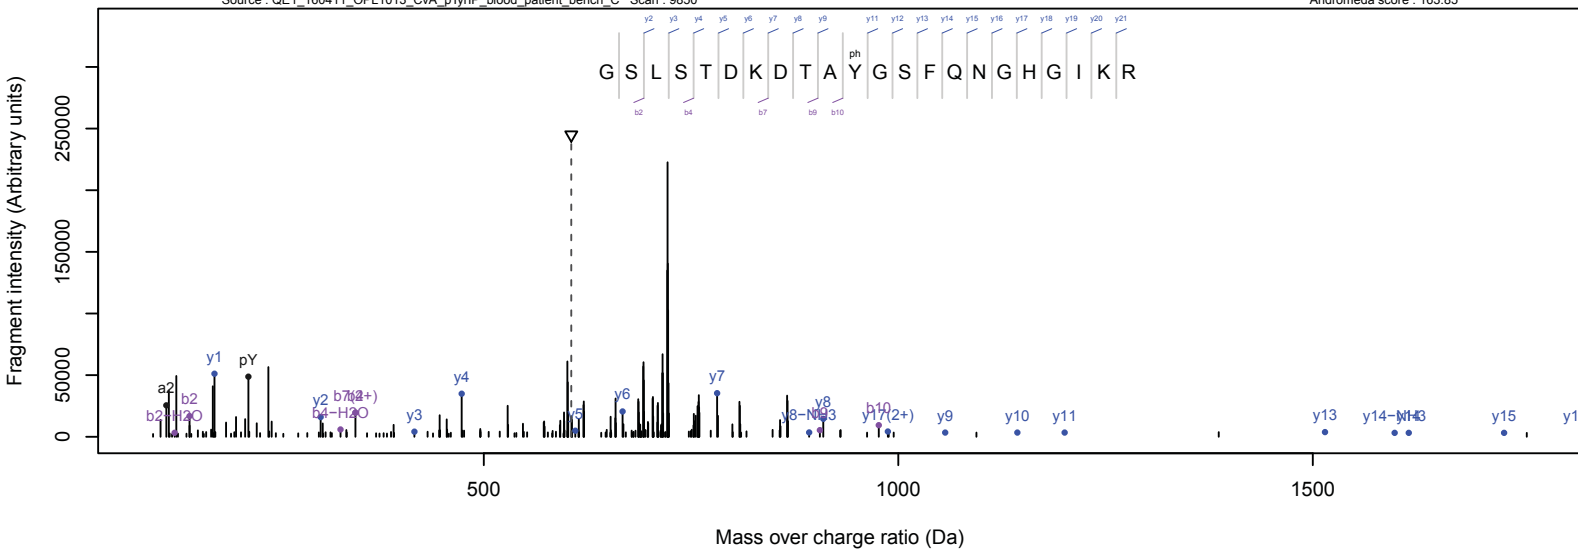

## VDY(ph)VQVDEQK-2+

Source: QE1\_160411\_OPL1013\_CvA\_pTyrIP\_blood\_patient\_bench\_B Scan: 7904

Andromeda score: 163.84

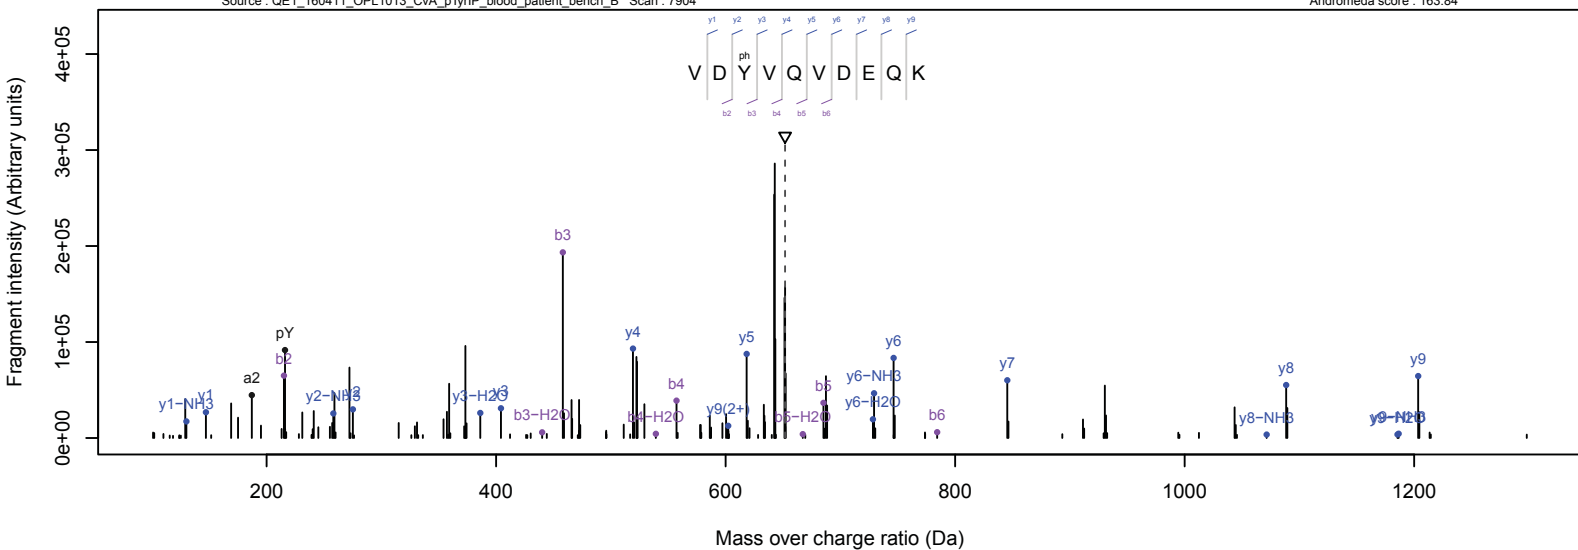

## KQPY(ph)YPPFDK-2+

Source: QE1\_160411\_OPL1013\_CvA\_pTyrIP\_blood\_patient\_bench\_C Scan: 21718

Andromeda score: 163.09

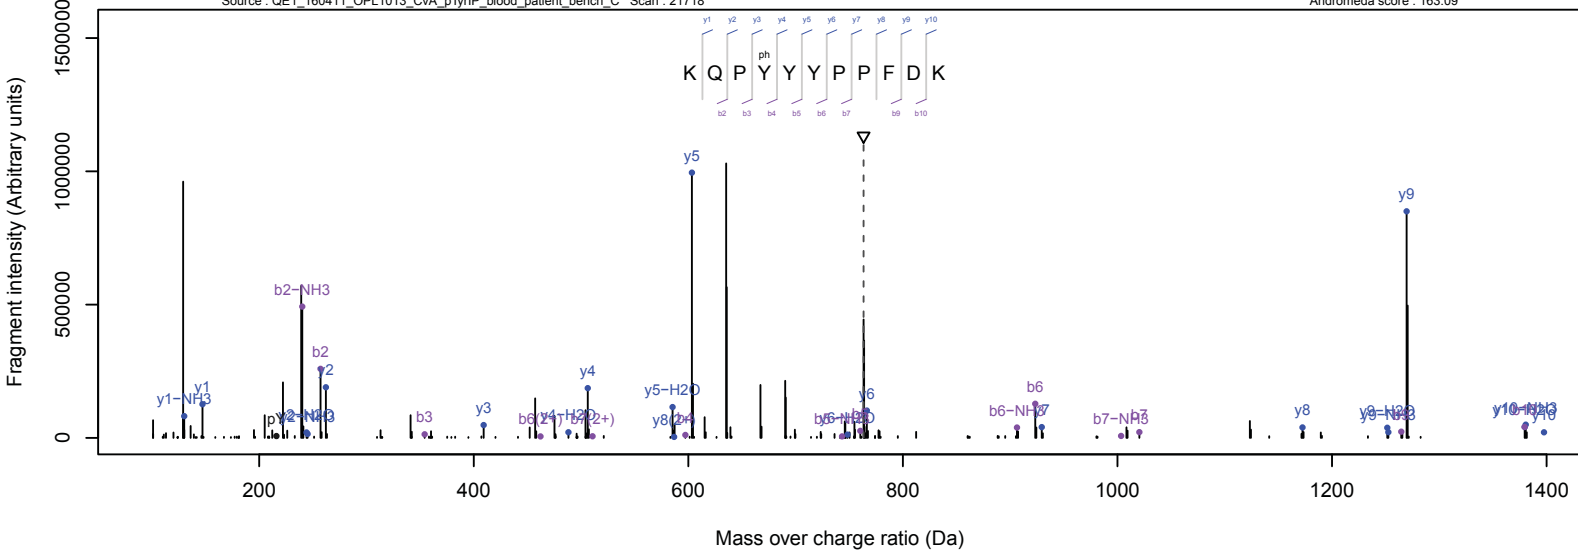

## IGEGTY(ph)GVVYK-2+

Source: QE1\_160411\_OPL1013\_CvA\_pTyrIP\_blood\_patient\_bench\_A Scan: 13912

Andromeda score: 162.26

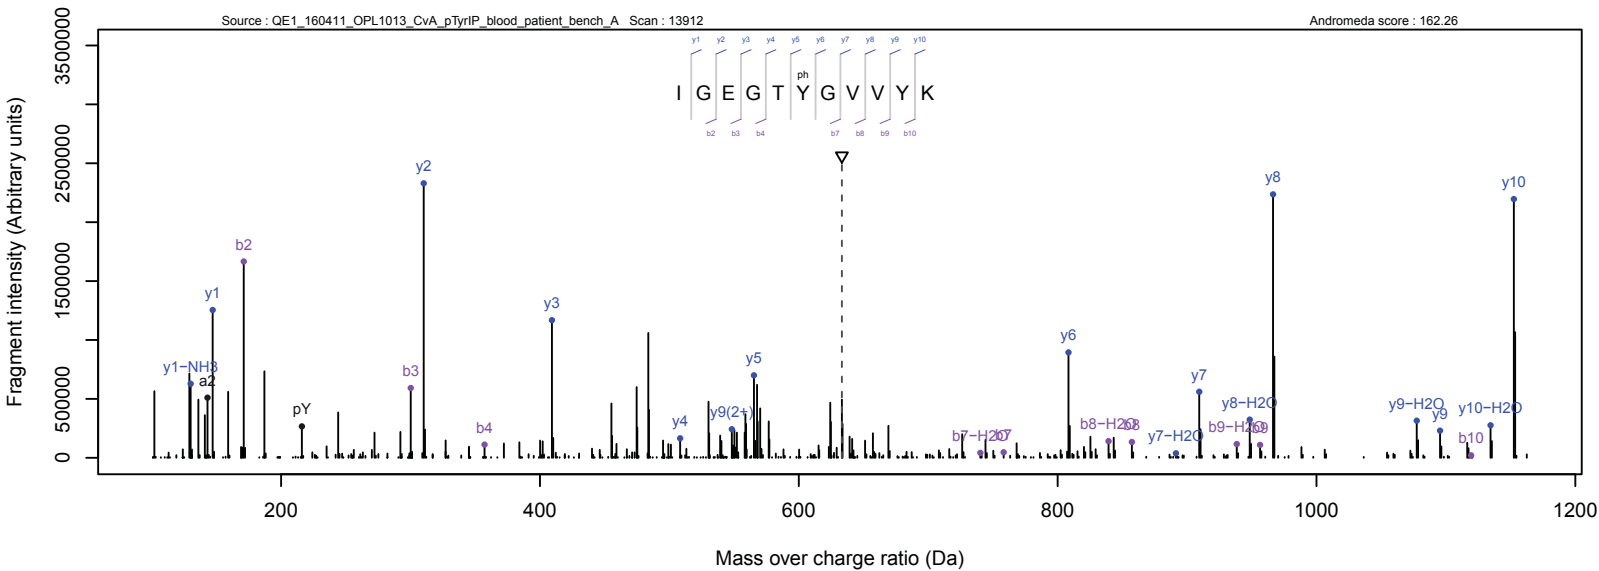

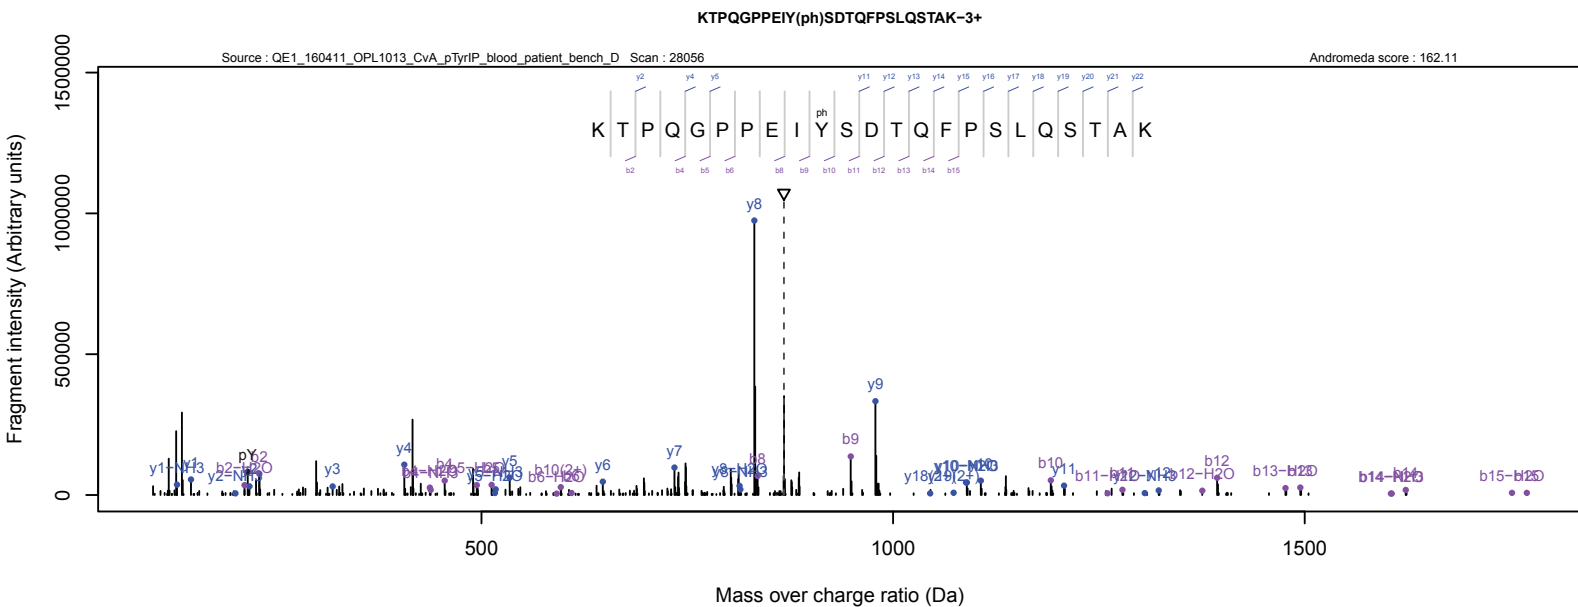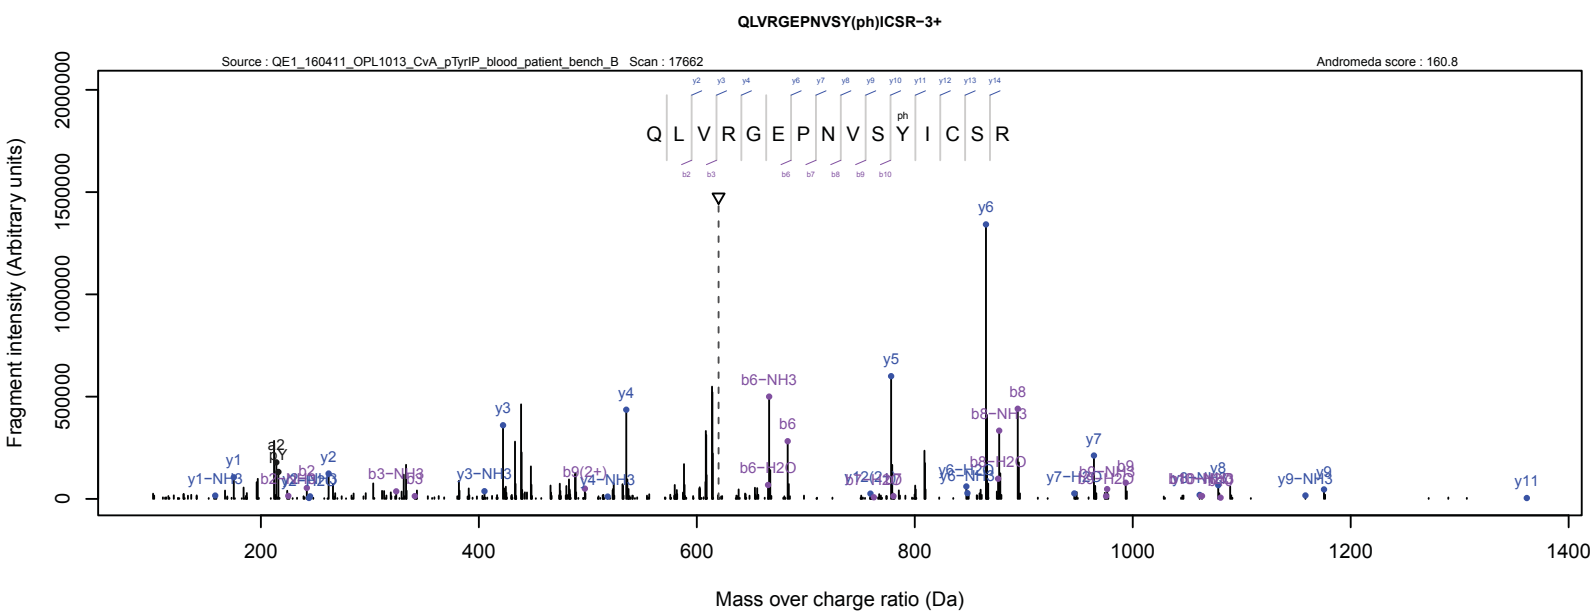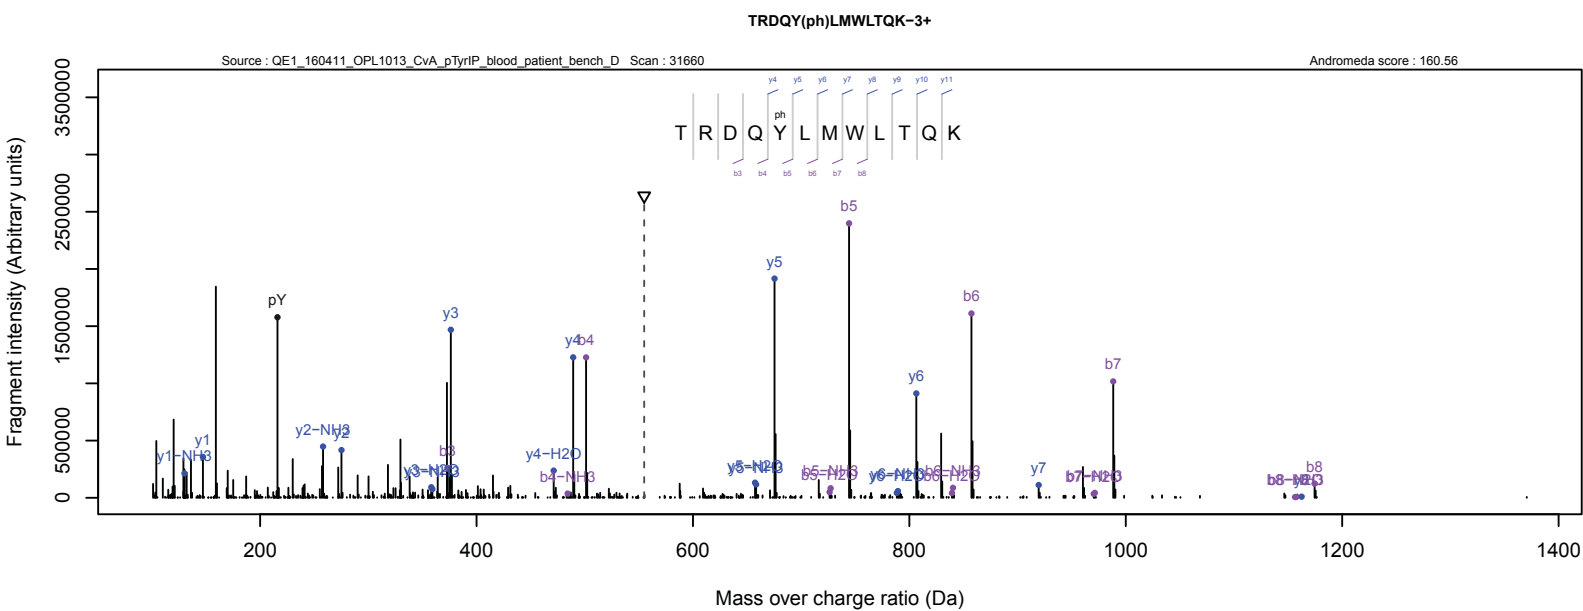

**Y(ph)KNILPFDHSR-2+**

Source : QE1\_160411\_OPL1013\_CvA\_pTyrIP\_blood\_patient\_bench\_D Scan : 17783

Andromeda score : 158.3

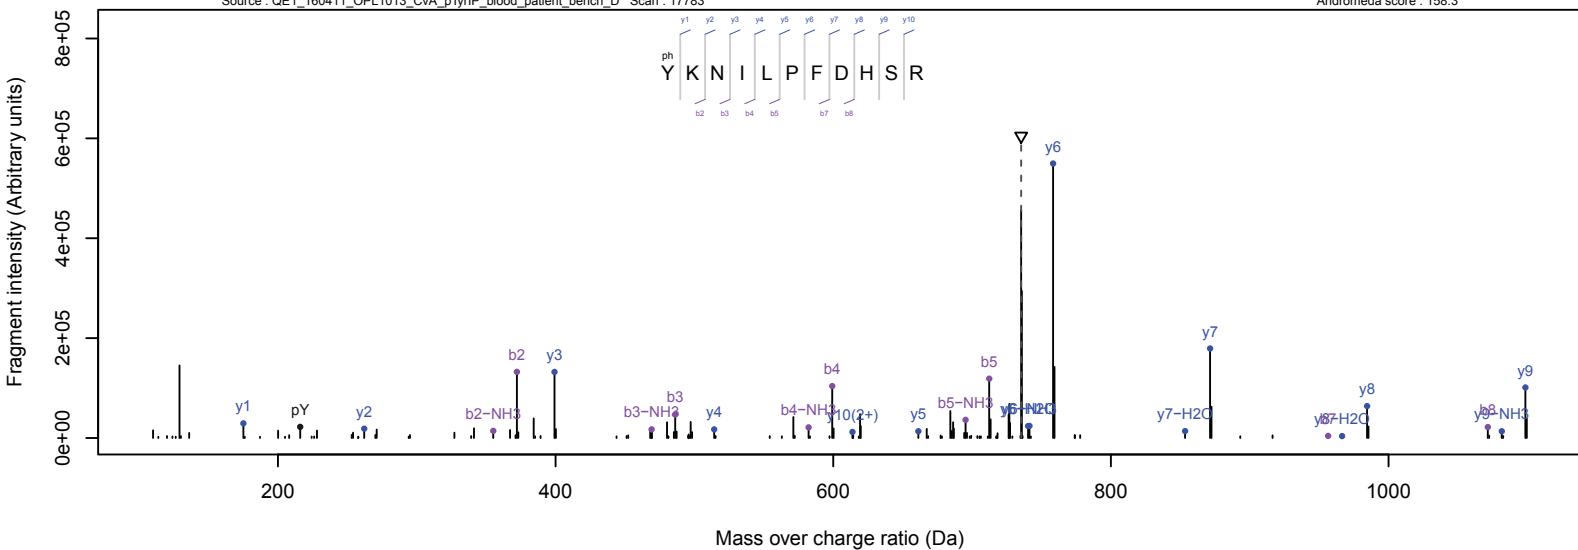

**EKLY(ph)DFVK-2+**

Source : QE1\_160411\_OPL1013\_CvA\_pTyrIP\_blood\_patient\_bench\_D Scan : 18431

Andromeda score : 156.83

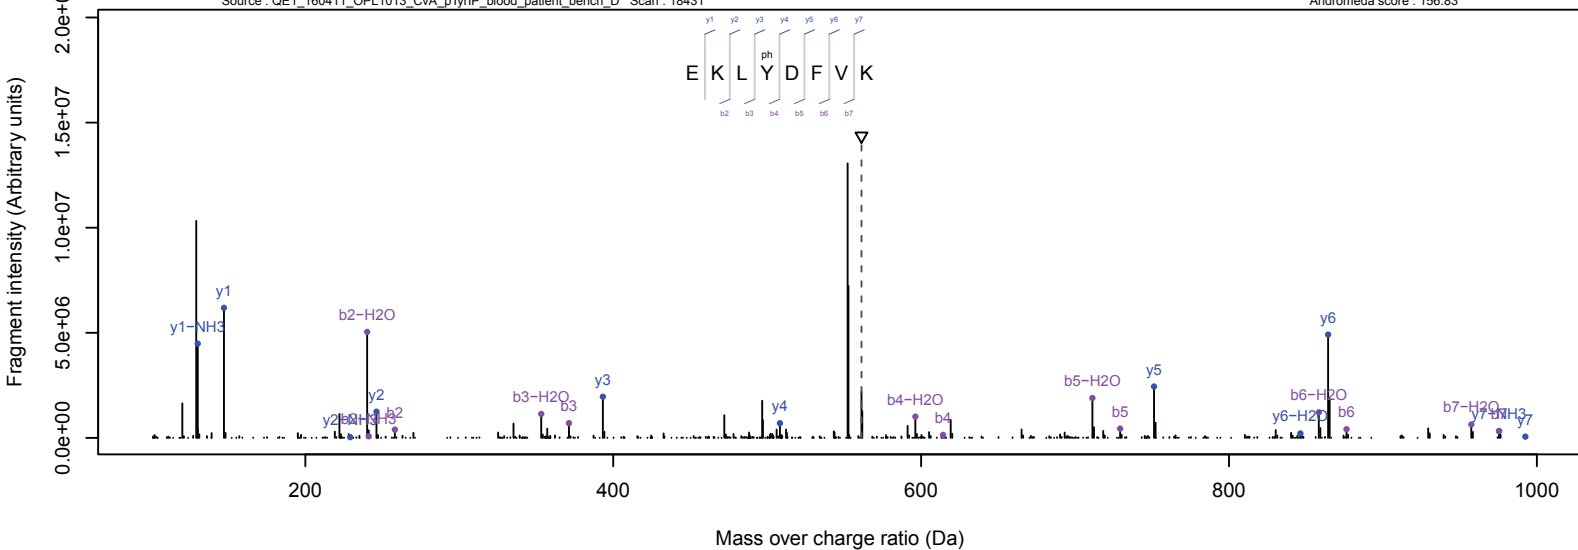

**TVAEHVEAIEGSGVPTTIY(ph)MLAGKPR-4+**

Source : QE1\_160411\_OPL1013\_CvA\_pTyrIP\_blood\_patient\_bench\_C Scan : 42314

Andromeda score : 156.7

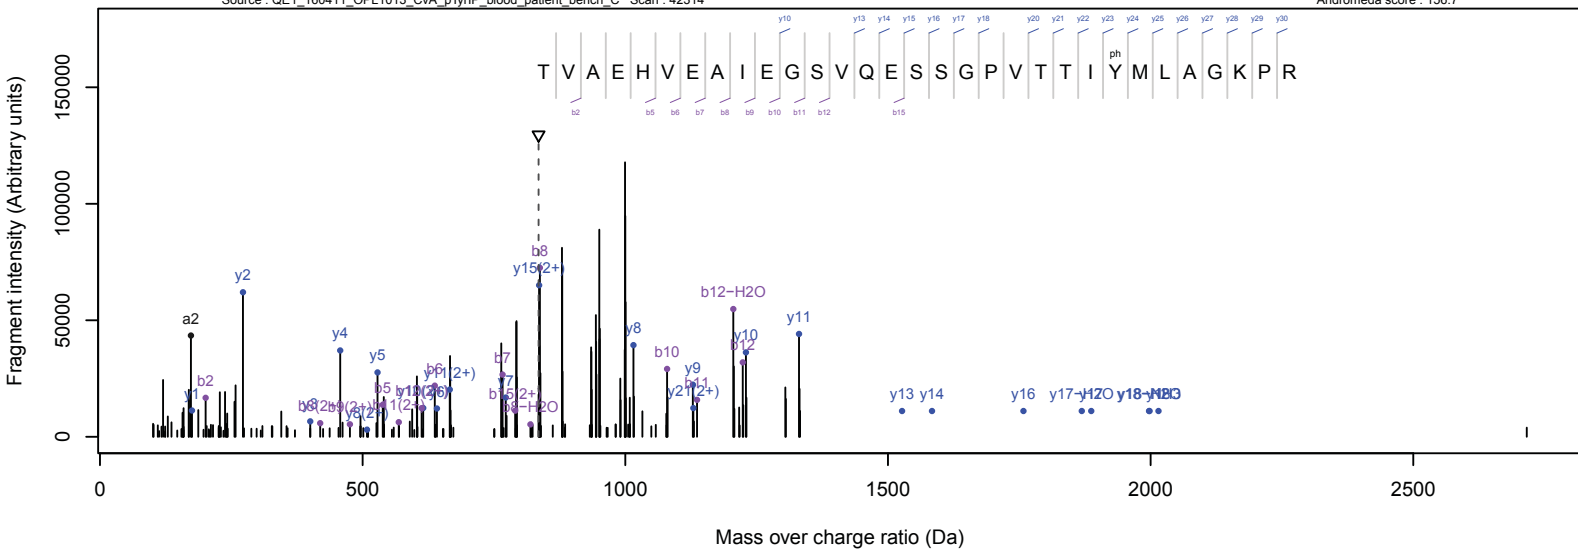

VSECPHTY(ph)QNR-2+

Source : QE1\_160411\_OPL1013\_CvA\_pTyrIP\_blood\_patient\_bench\_D Scan : 1834

Andromeda score : 155.97

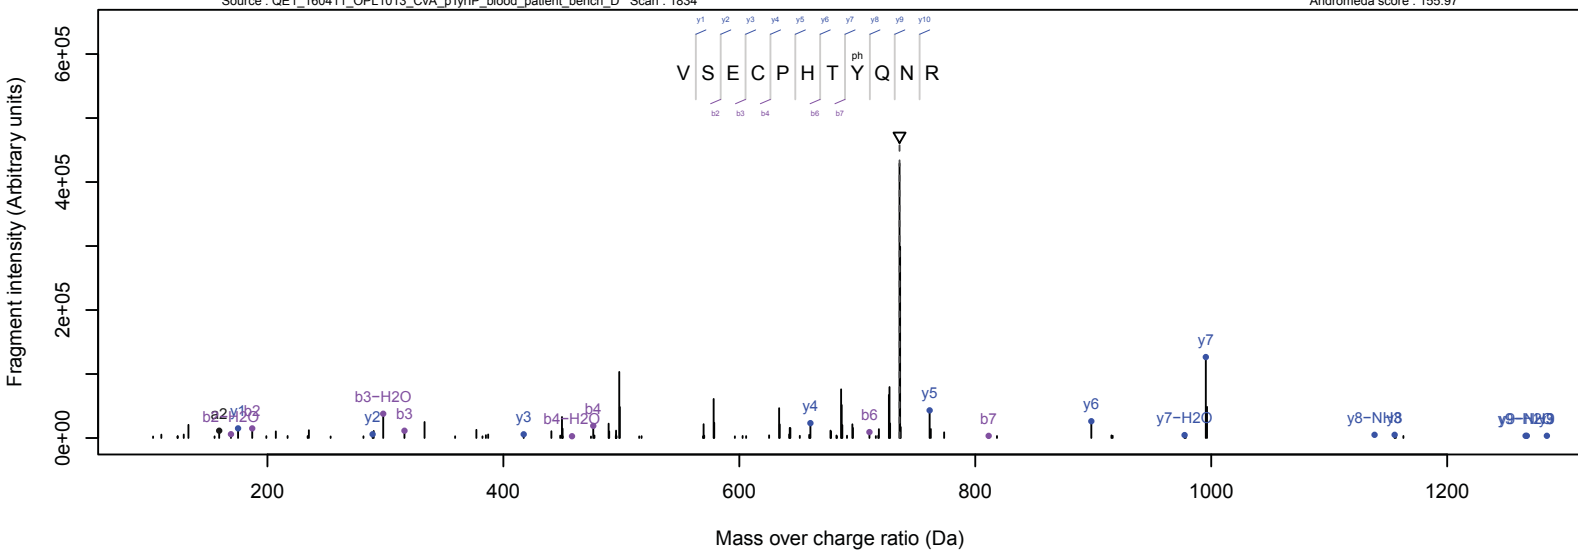

FSKPPEDDDANSY(ph)ENVLICK-3+

Source : QE1\_160411\_OPL1013\_CvA\_pTyrIP\_blood\_patient\_bench\_B Scan : 20631

Andromeda score : 155.94

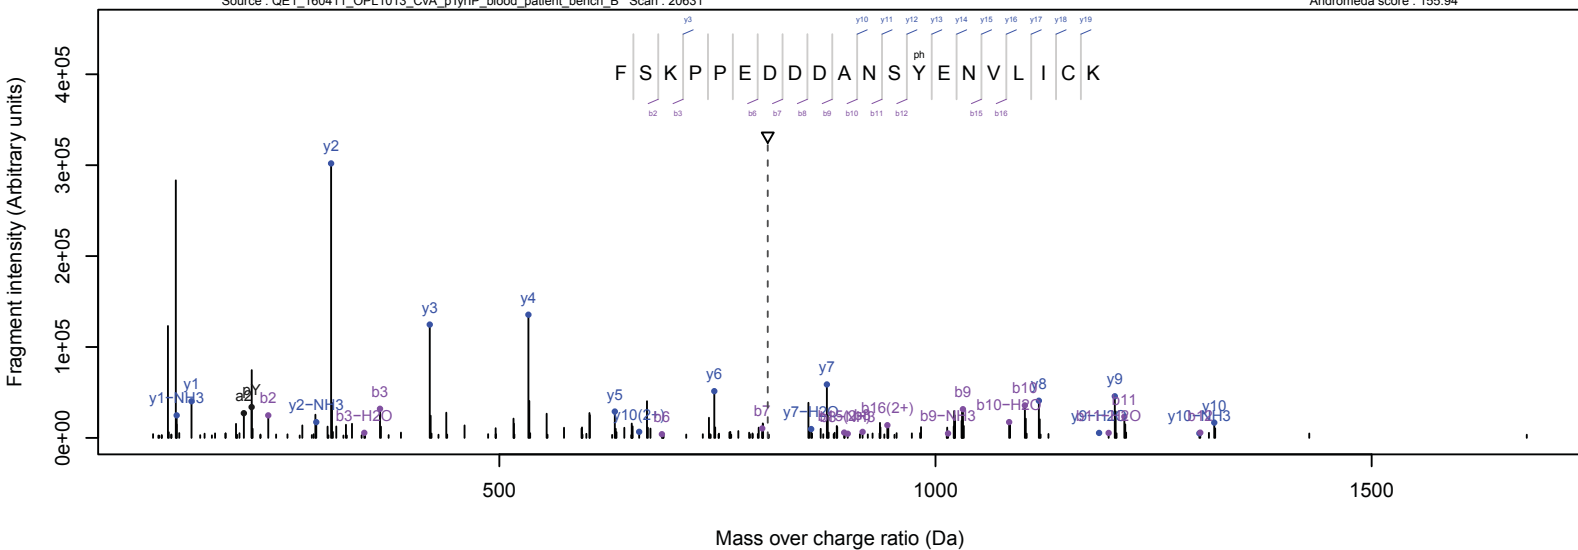

KDLY(ph)ANTVLSGGTTMYPGIADR-3+

Source : QE1\_160411\_OPL1013\_CvA\_pTyrIP\_blood\_patient\_bench\_C Scan : 29040

Andromeda score : 155.11

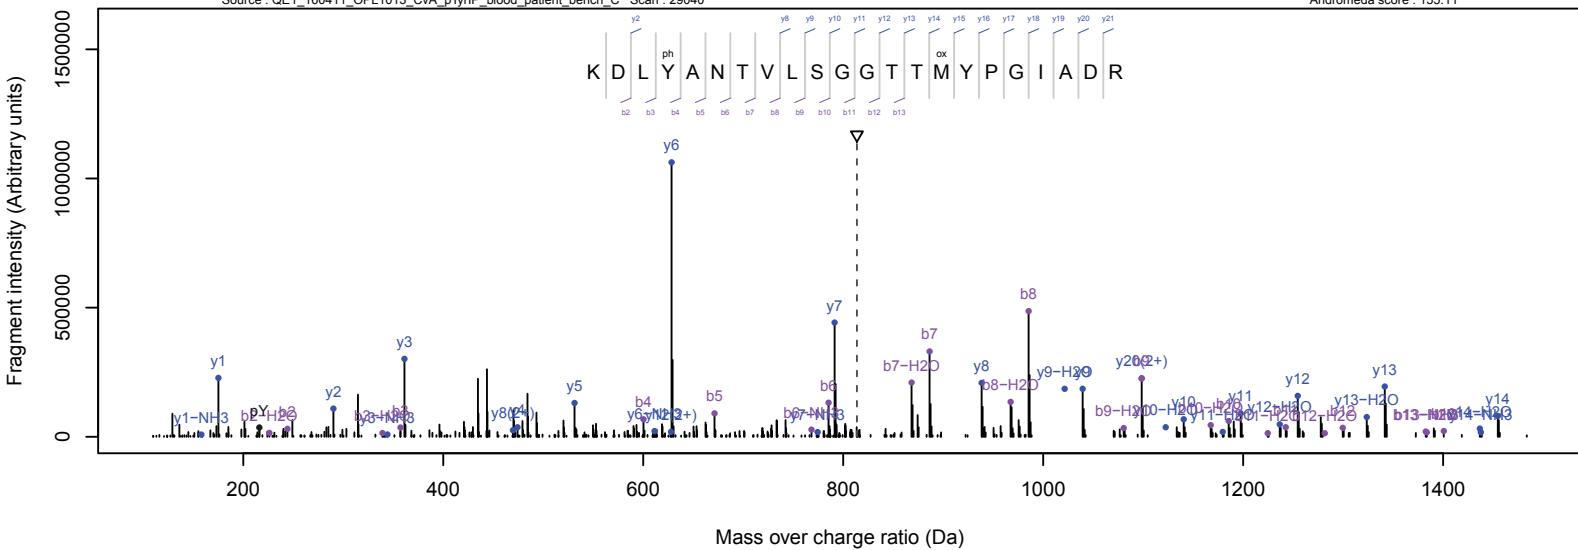

HLFSTIPELINY<sup>ph</sup>HQHNSAGLISR-4+

Source: QE1\_160411\_OPL1013\_CvA\_pTyrIP\_blood\_patient\_bench\_D Scan: 36983

Andromeda score: 154.84

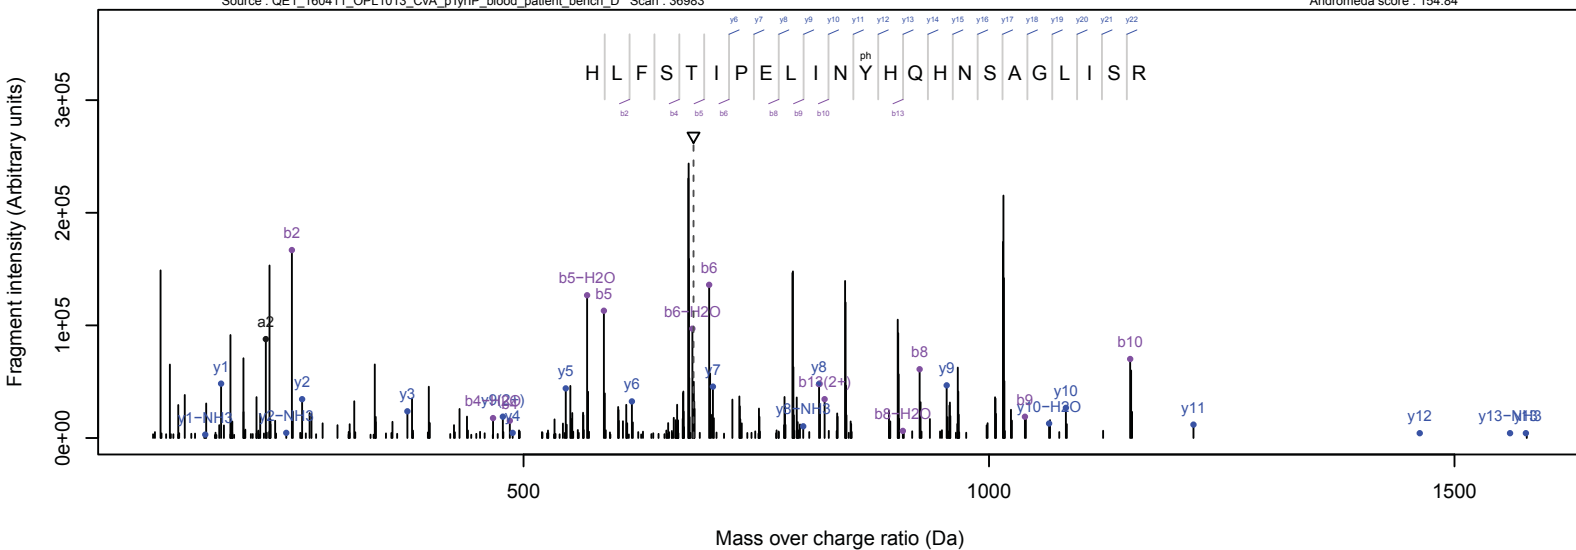NLIAFSEGDSPY<sup>ph</sup>VR-2+

Source: QE1\_160411\_OPL1013\_CvA\_pTyrIP\_blood\_patient\_bench\_A Scan: 28312

Andromeda score: 154.65

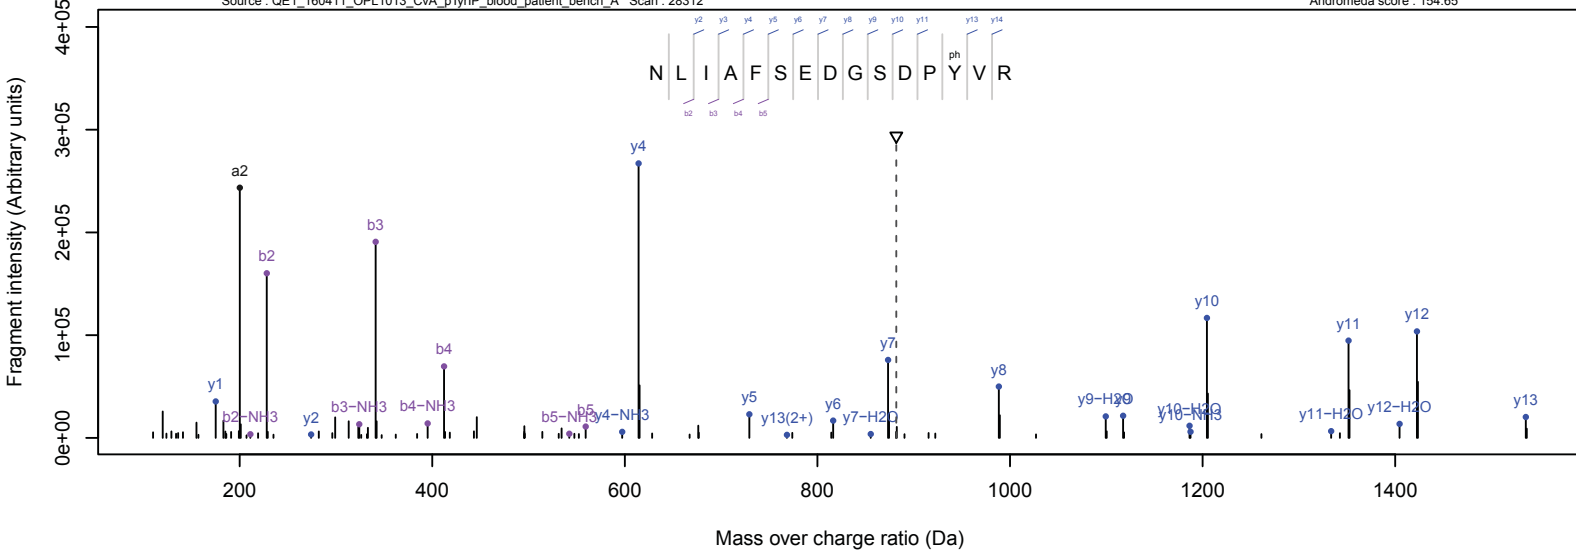AGDNSQSVY<sup>ph</sup>IPMSPGAHHFDSLGYPTTLPVHR-4+

Source: QE1\_160411\_OPL1013\_CvA\_pTyrIP\_blood\_patient\_bench\_B Scan: 32861

Andromeda score: 154.19

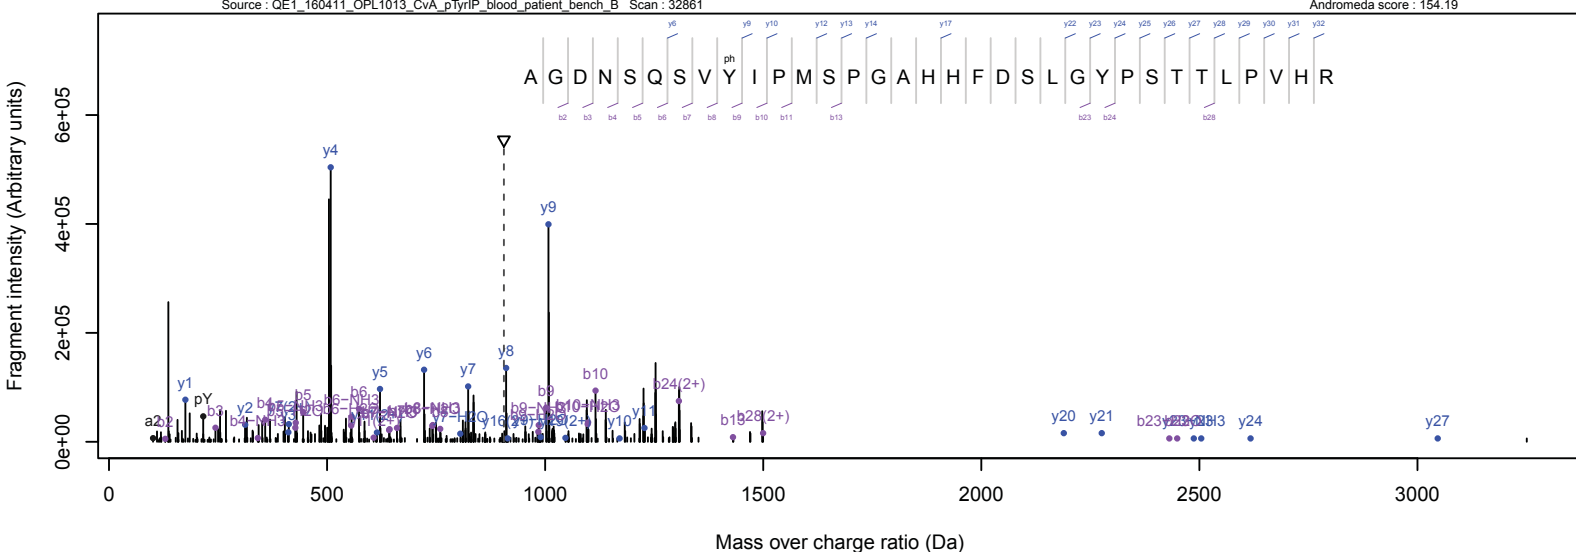

VIEDNEY(ph)TAR-2+

Source: QE1\_160411\_OPL1013\_CvA\_pTyrIP\_blood\_patient\_bench\_D Scan: 4237

Andromeda score: 154.05

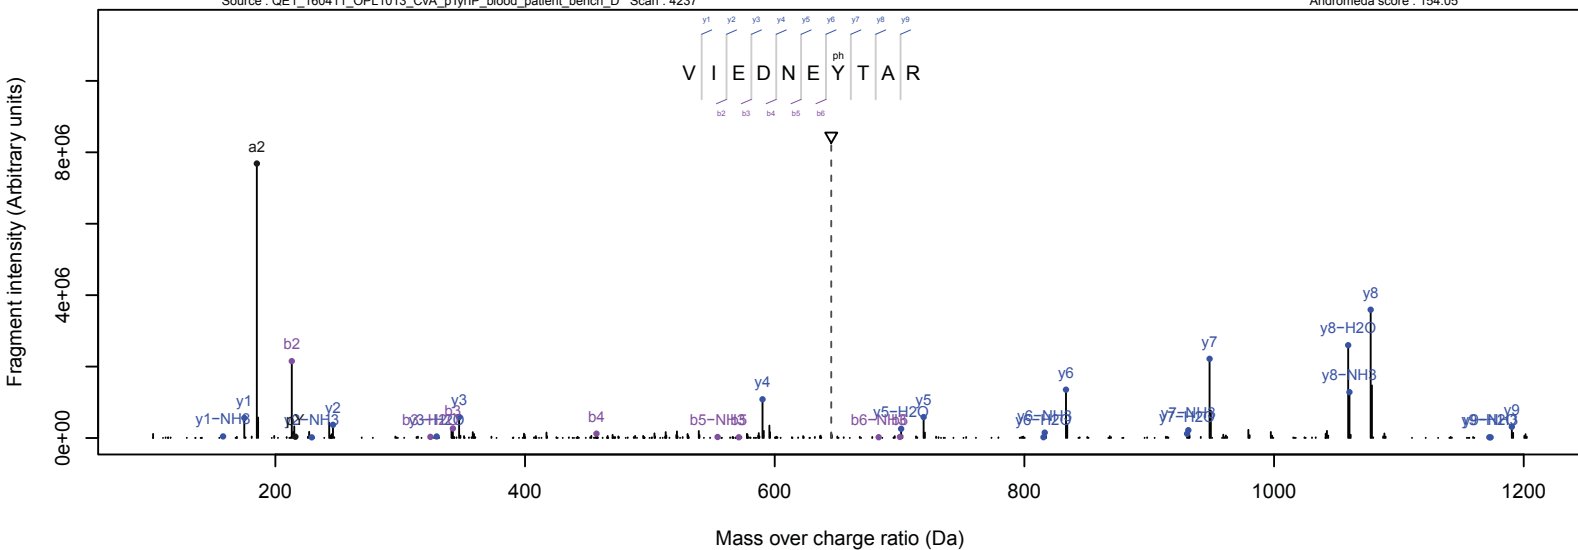

VIEDNEY(ph)TAREGAK-2+

Source: QE1\_160411\_OPL1013\_CvA\_pTyrIP\_blood\_patient\_bench\_C Scan: 4428

Andromeda score: 153.81

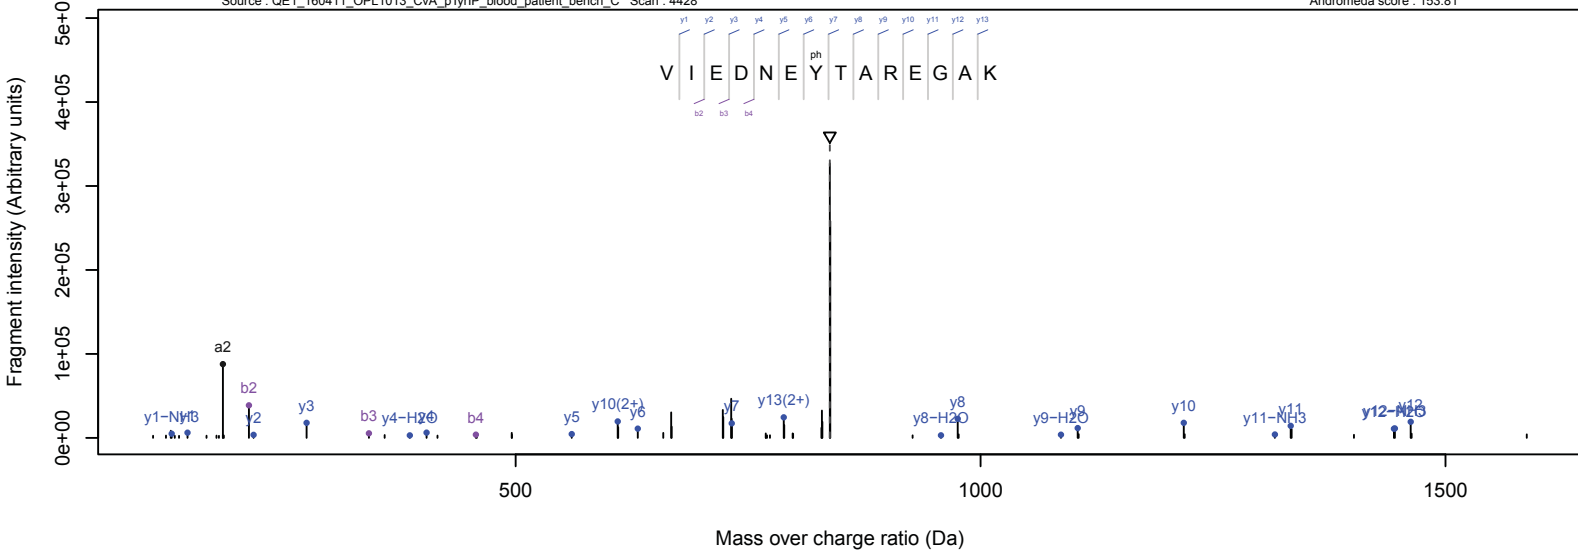

TRDQY(ph)LMWLTQK-3+

Source: QE1\_160411\_OPL1013\_CvA\_pTyrIP\_blood\_patient\_bench\_C Scan: 28939

Andromeda score: 153.64

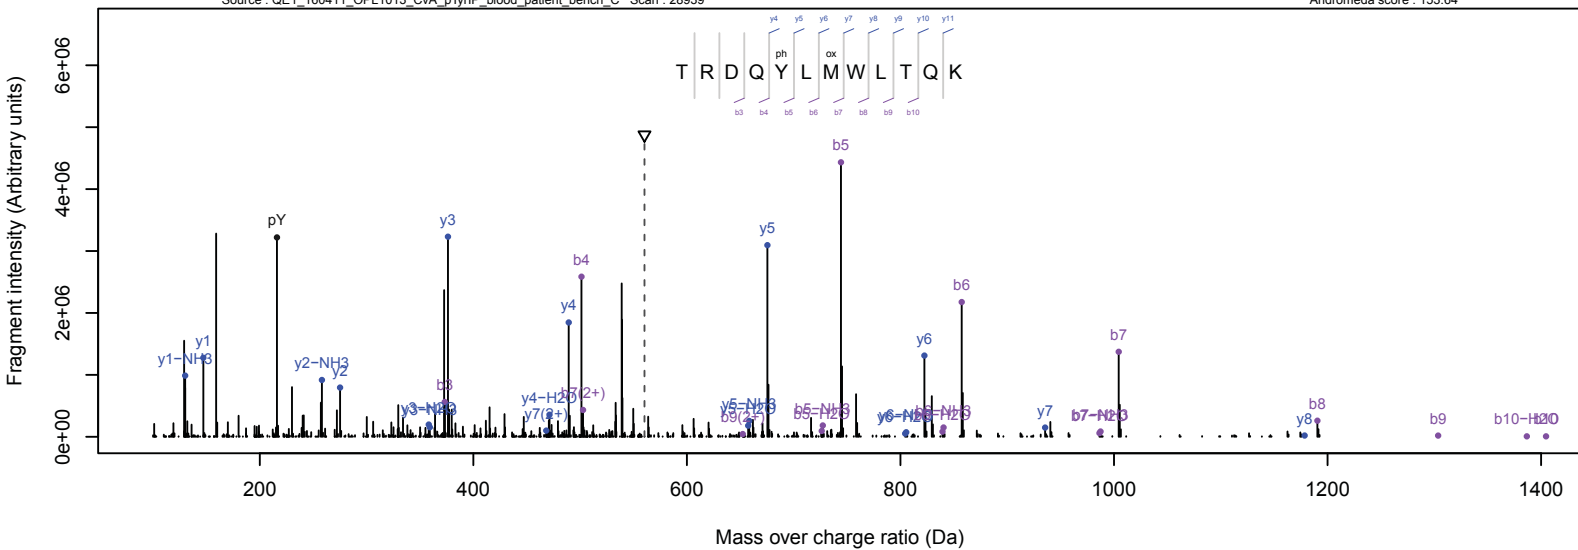

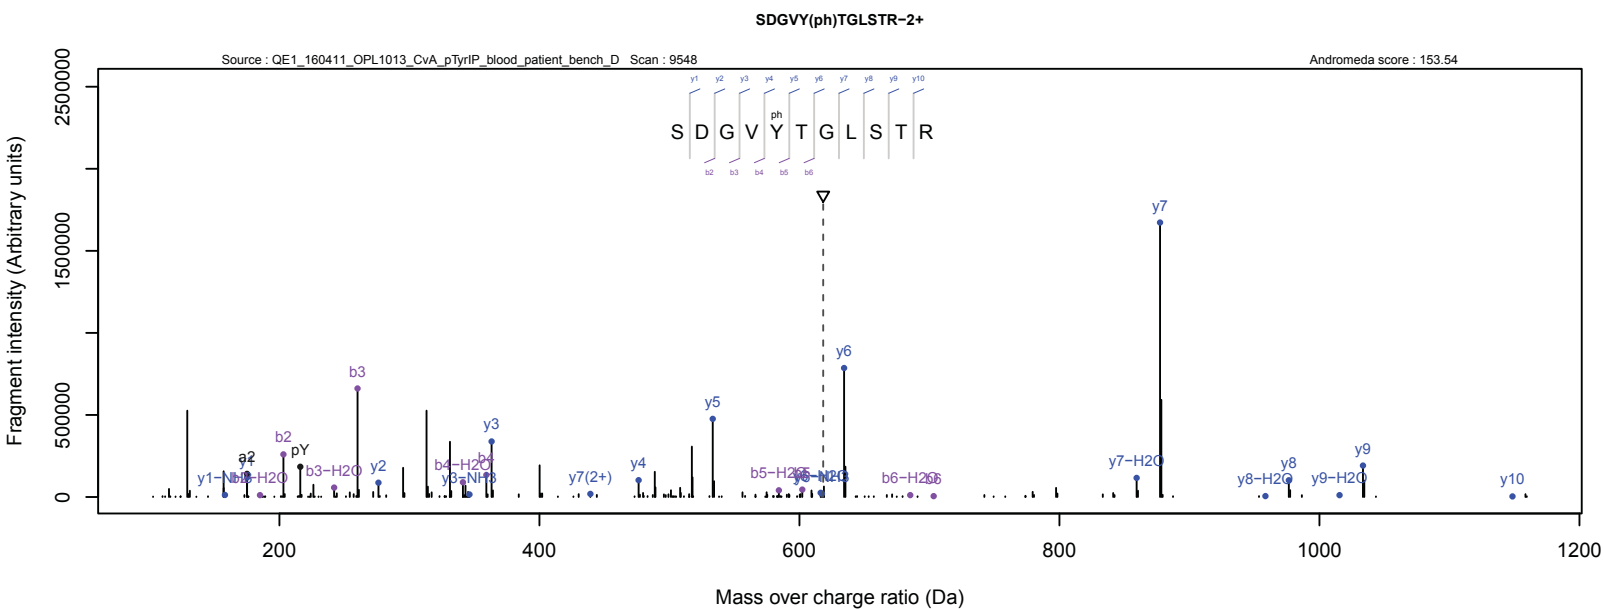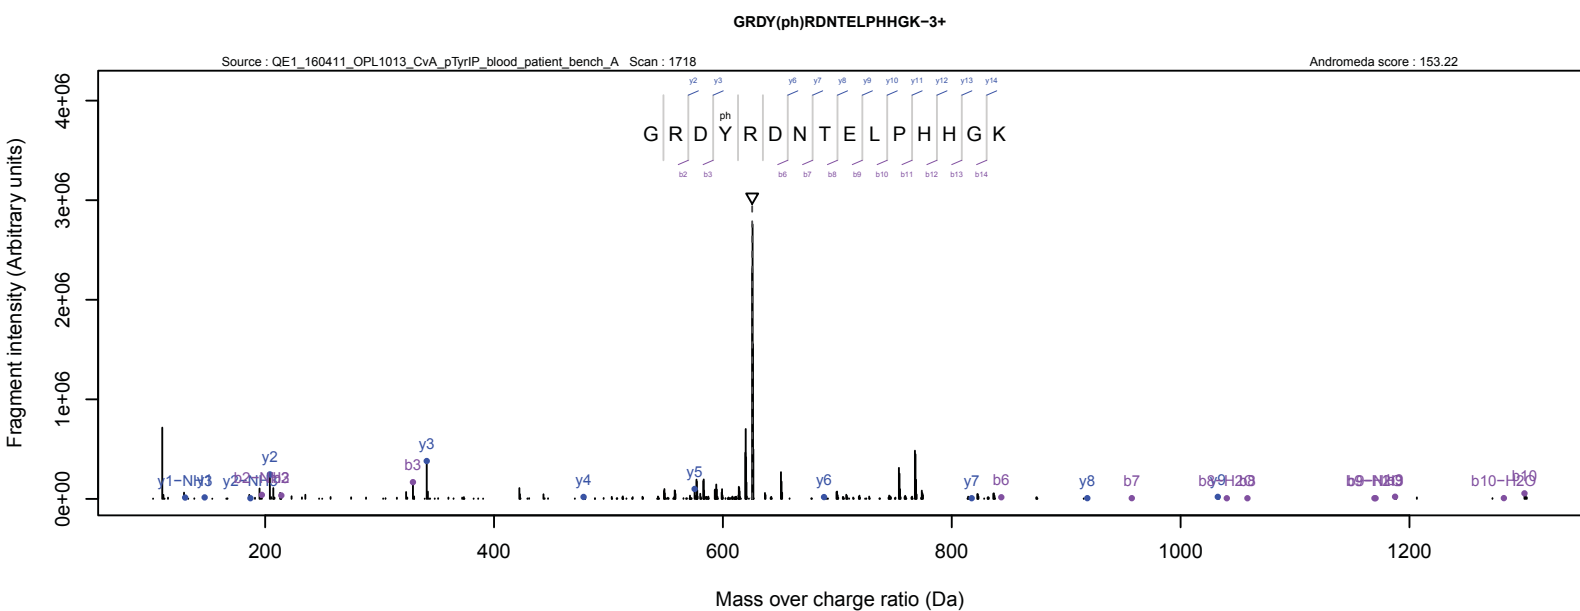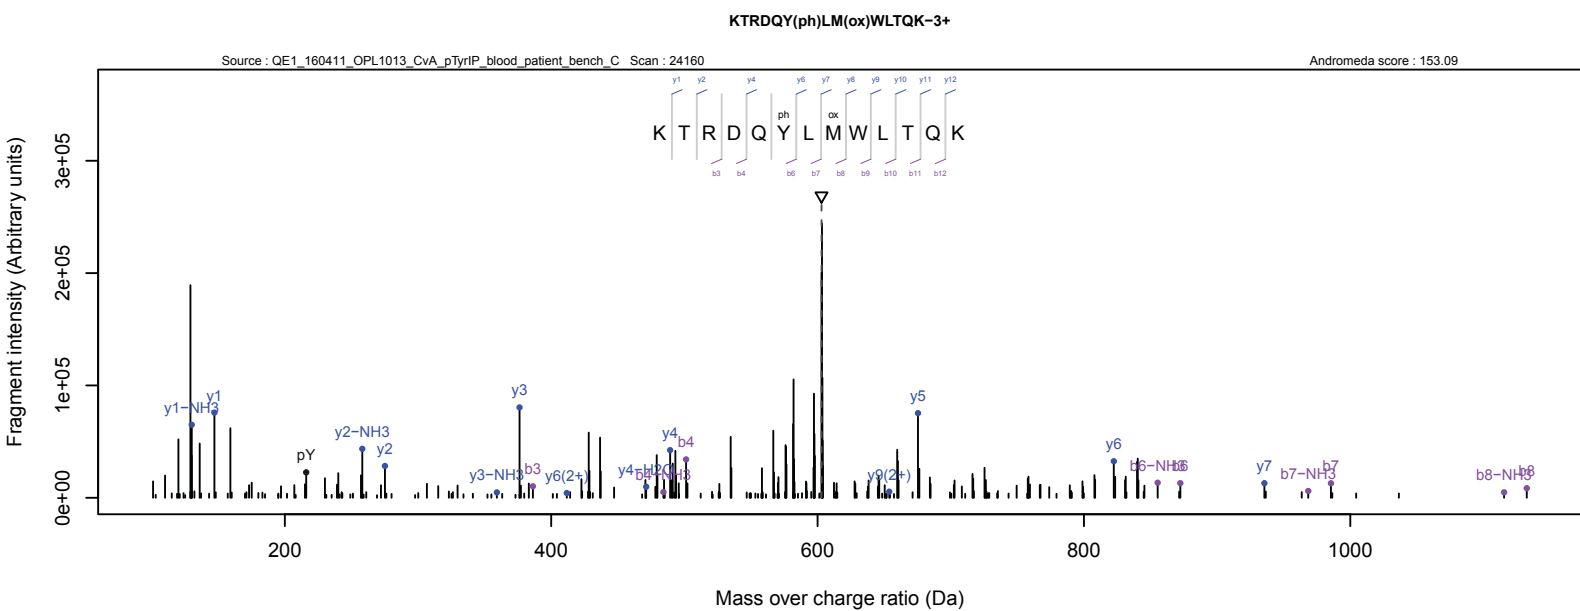



RLGAGQFGEVWMGYPHNNSTK-3+

Source : QE1\_160411\_OPL1013\_CvA\_pTyrIP\_blood\_patient\_bench\_D Scan : 28516

Andromeda score : 152.86

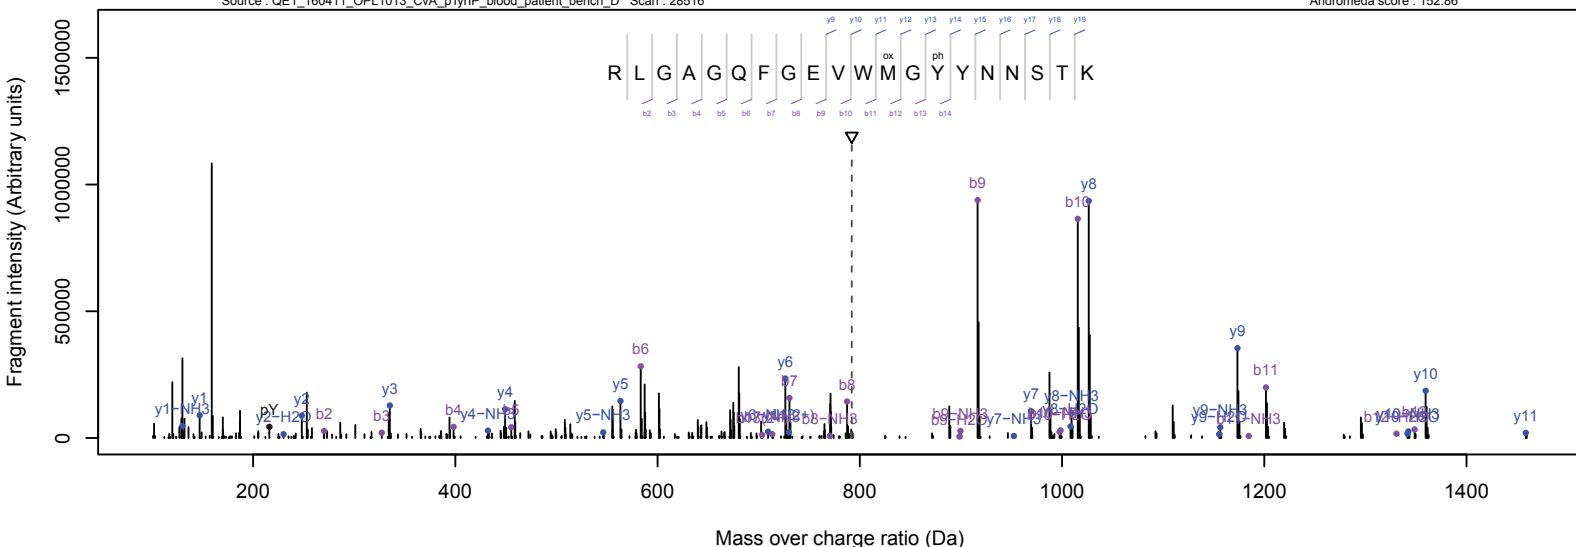

TVTAMDVVYPHALKR-2+

Source : QE1\_160411\_OPL1013\_CvA\_pTyrIP\_blood\_patient\_bench\_B Scan : 37191

Andromeda score : 152.47

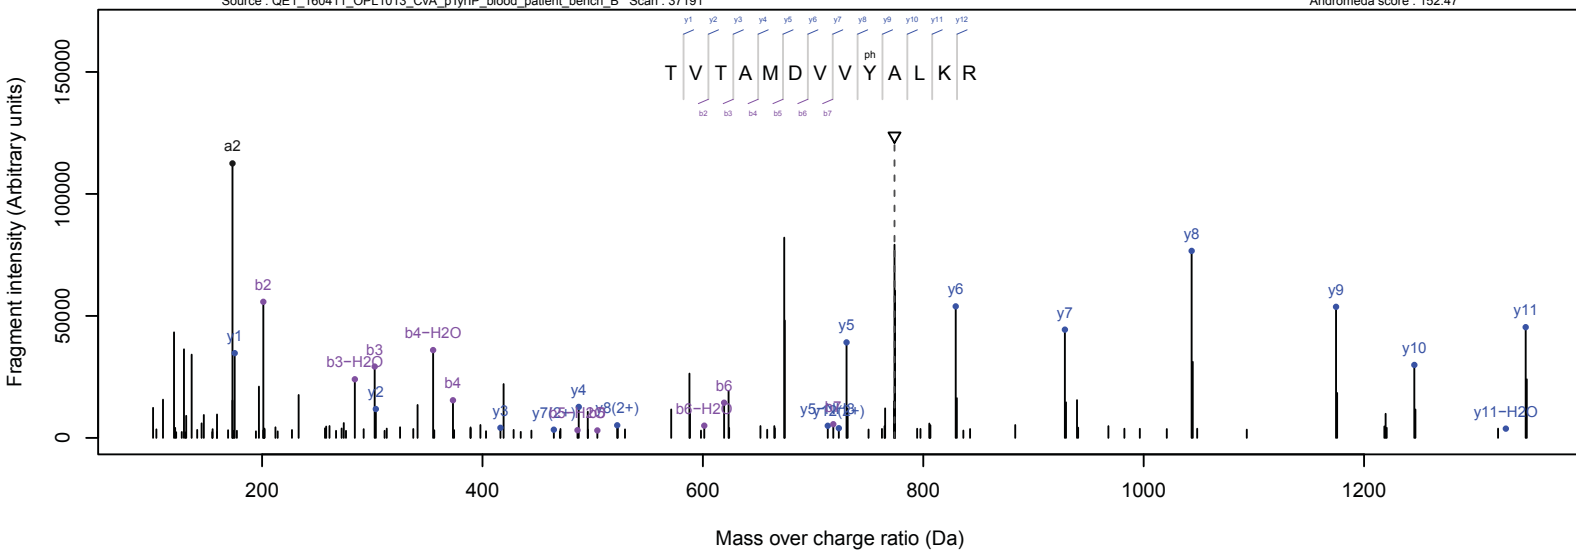

VDTDNGYIPHSFNELNDFK-2+

Source : QE1\_160411\_OPL1013\_CvA\_pTyrIP\_blood\_patient\_bench\_D Scan : 44367

Andromeda score : 152.01

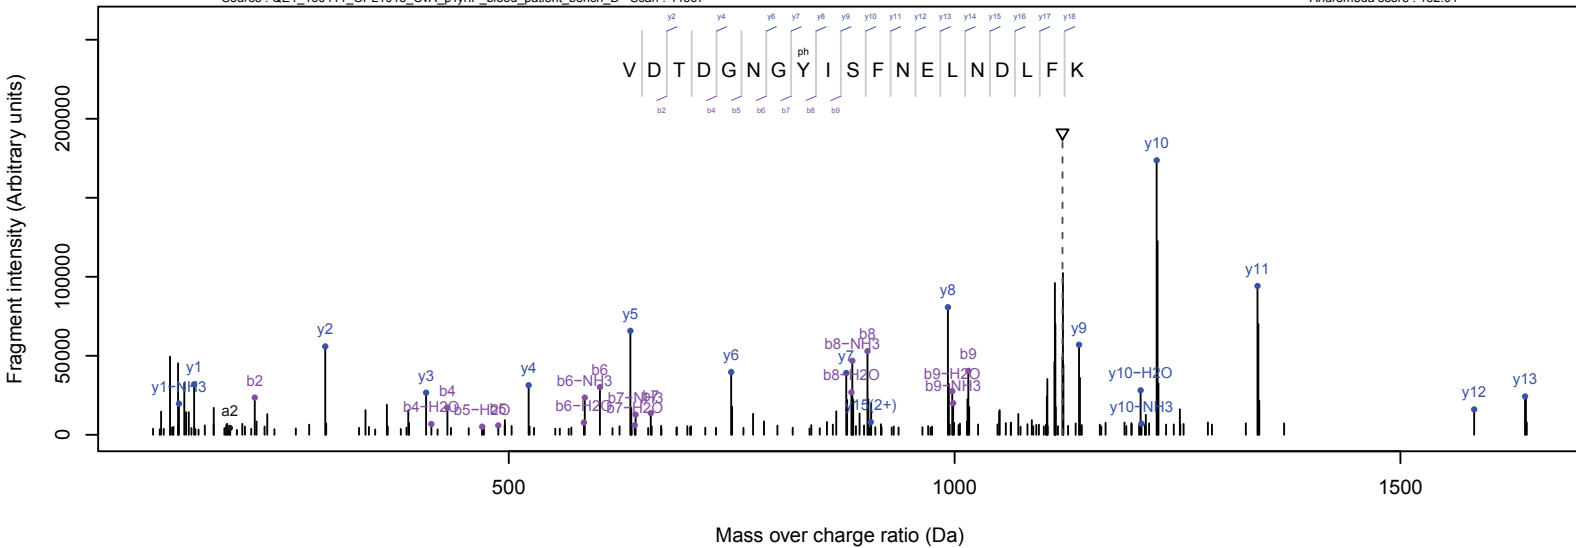

LQAEAQELLY(ph)QVDPR-2+

Source: QE1\_160411\_OPL1013\_CvA\_pTyrIP\_blood\_patient\_bench\_C Scan: 31482

Andromeda score: 151.04

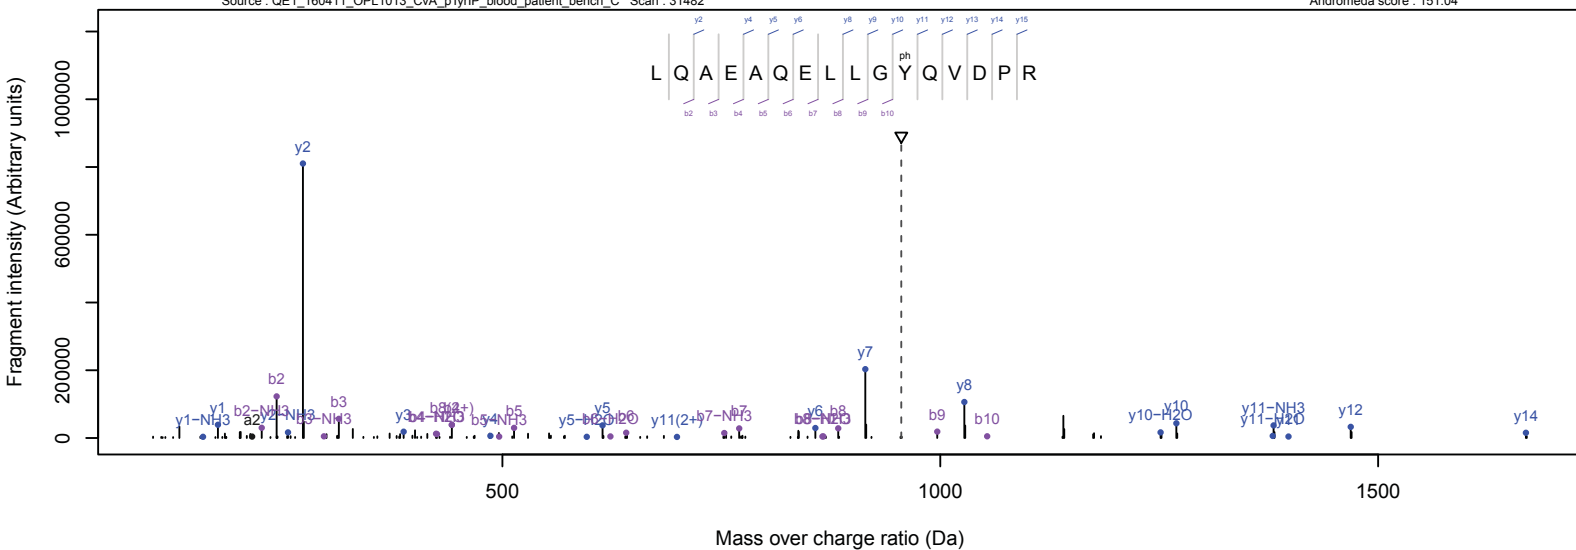

SQNNIY(ph)SACPR-2+

Source: QE1\_160411\_OPL1013\_CvA\_pTyrIP\_blood\_patient\_bench\_D Scan: 5026

Andromeda score: 147.62

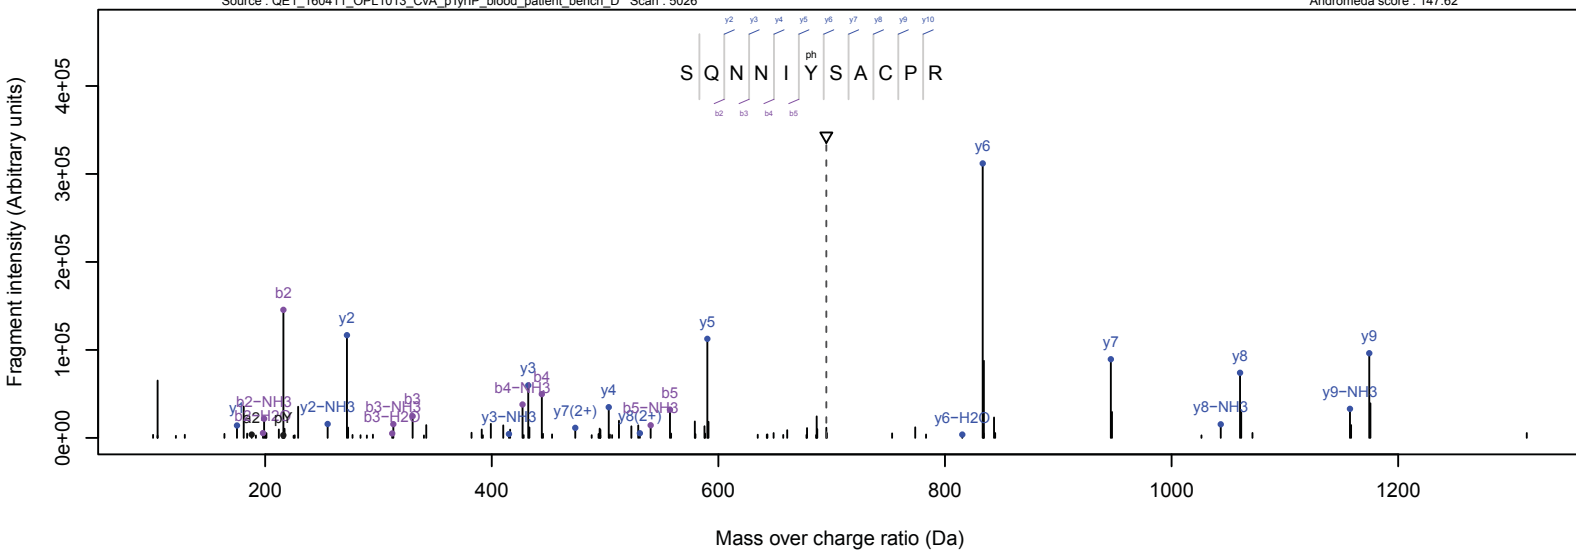

IKPSSANAIY(ph)SLAARPLVPK-3+

Source: QE1\_160411\_OPL1013\_CvA\_pTyrIP\_blood\_patient\_bench\_D Scan: 30734

Andromeda score: 147.1

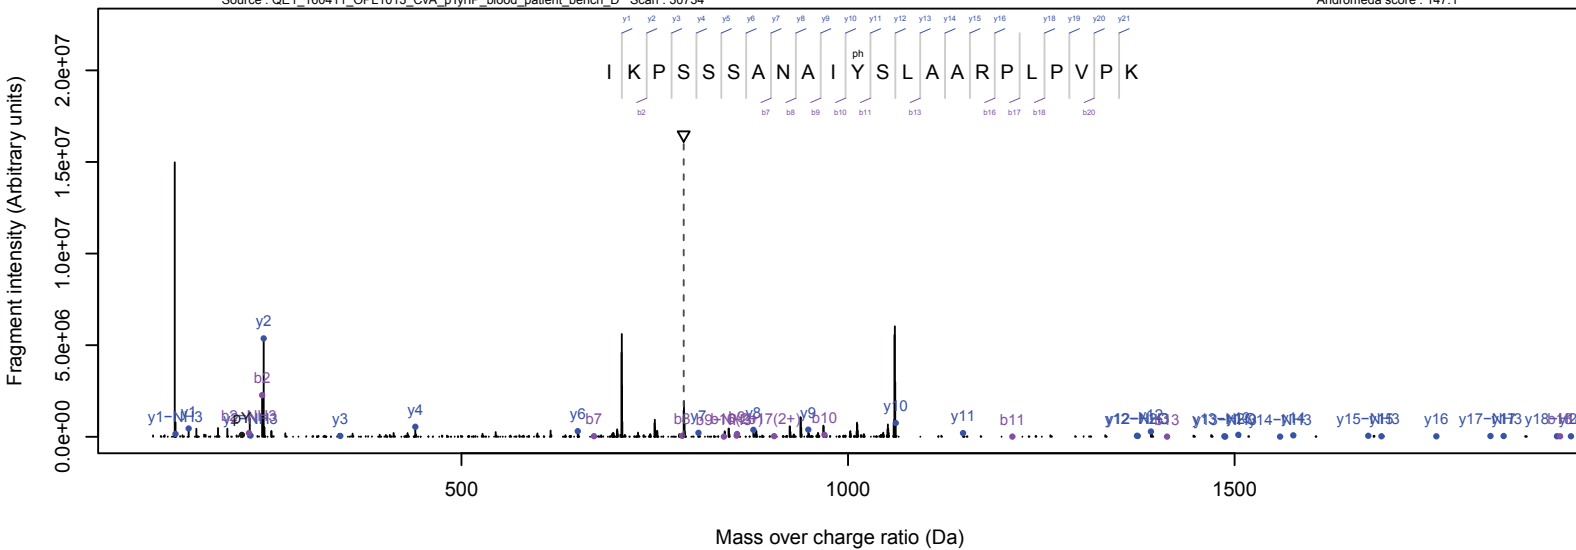



## ALPAQVDDPPEPVY(ph)ANIER-2+

Source : QE1\_160411\_OPL1013\_CvA\_pTyrIP\_blood\_patient\_bench\_D Scan : 28409

Andromeda score : 145.52

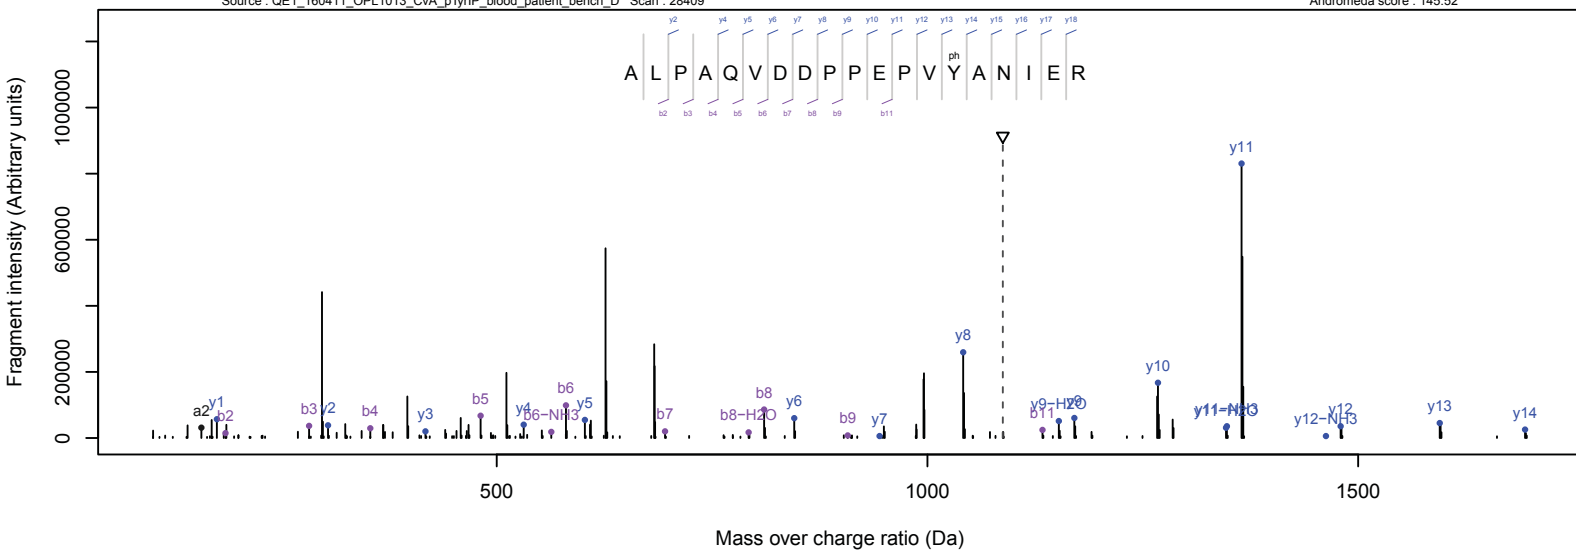

## SAEEAPLYSK-2+

Source : QE1\_160411\_OPL1013\_CvA\_pTyrIP\_blood\_patient\_bench\_D Scan : 6253

Andromeda score : 145.28

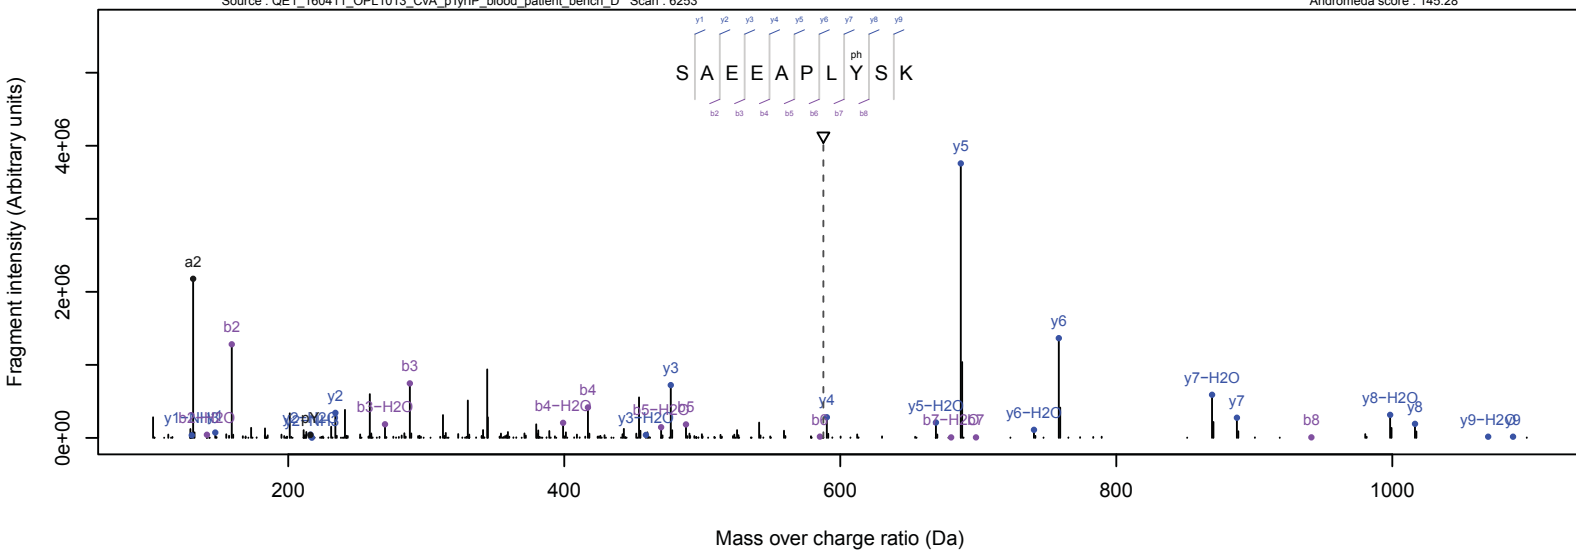

## AVSPQSTKPMAESIT(ph)YAAVAR-3+

Source : QE1\_160411\_OPL1013\_CvA\_pTyrIP\_blood\_patient\_bench\_D Scan : 24097

Andromeda score : 145.02

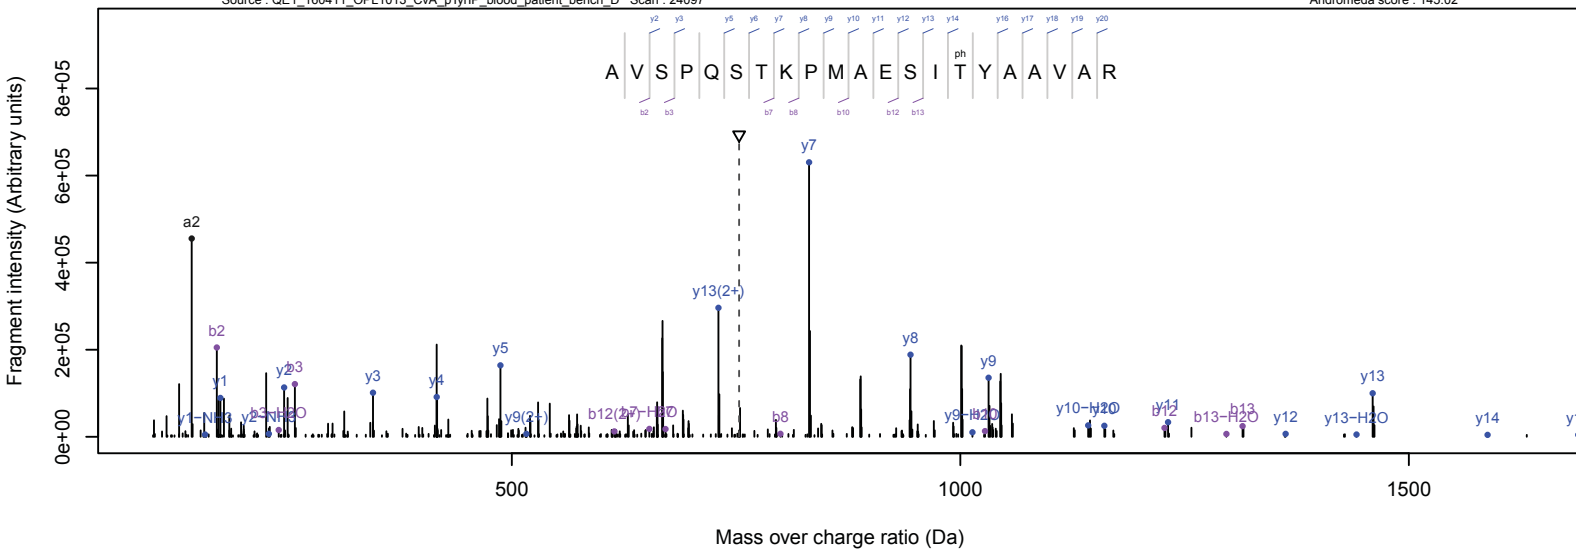

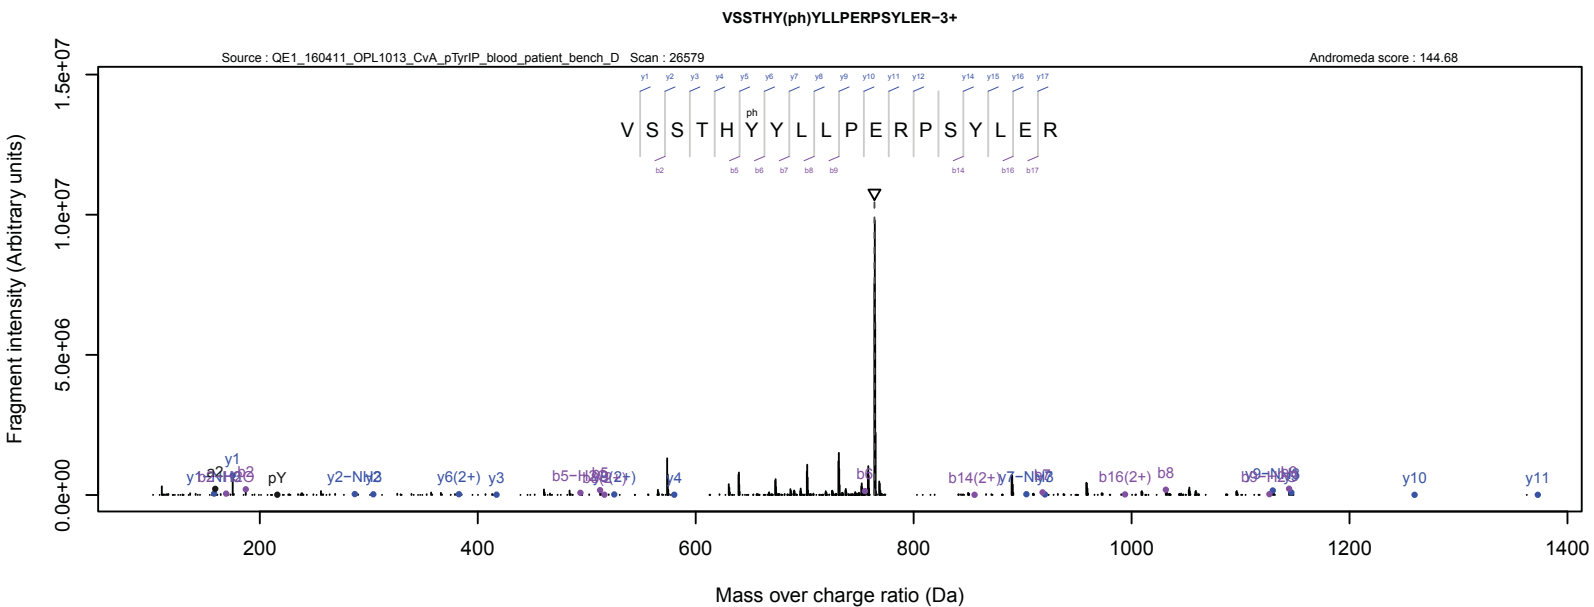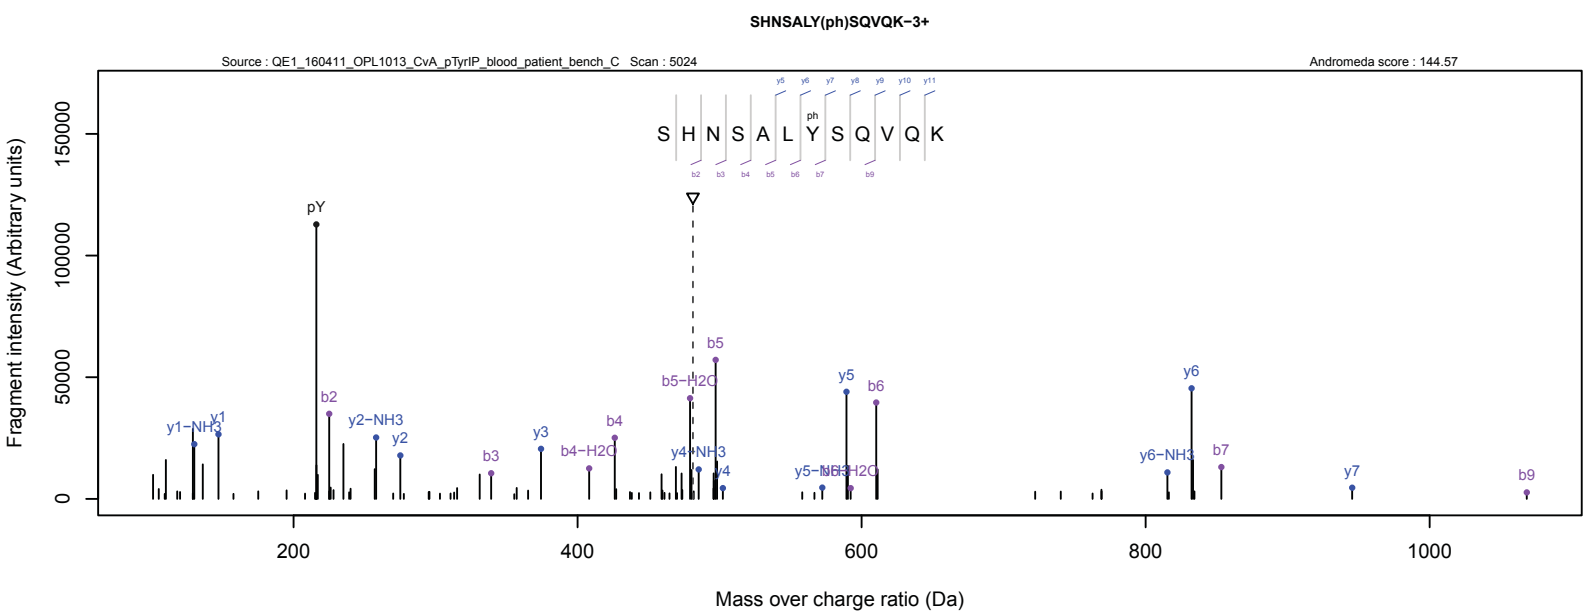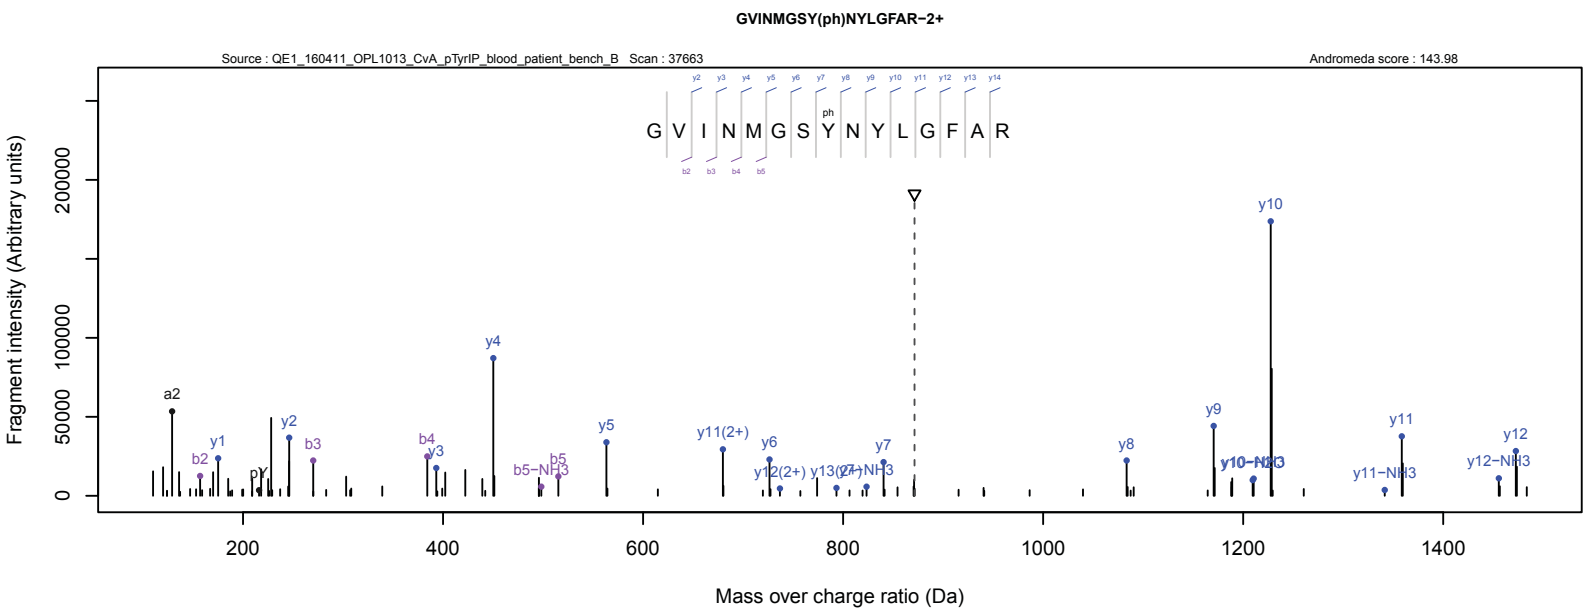

LKKEDIY(ph)AVEIVGGATR-3+

Source : QE1\_160411\_OPL1013\_CvA\_pTyrIP\_blood\_patient\_bench\_D Scan : 24687

Andromeda score : 143.46

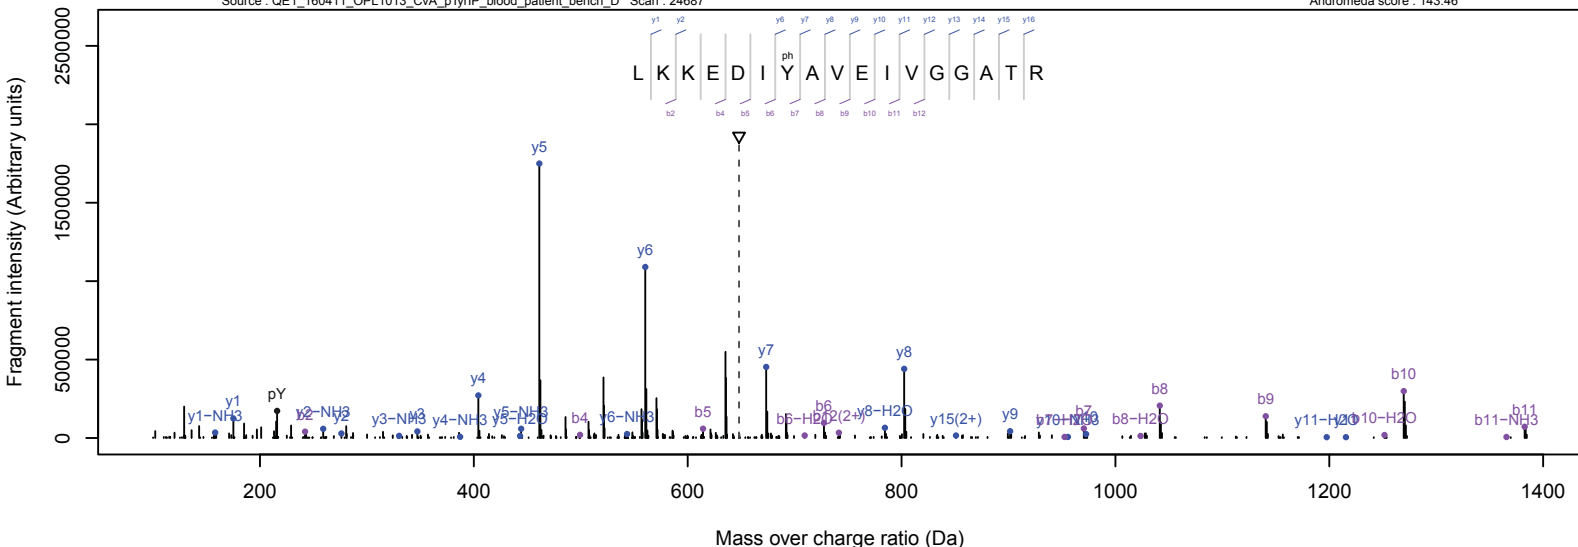

DHVVEGEPY(ph)AGYDRHNAEVAAFHLDR-4+

Source : QE1\_160411\_OPL1013\_CvA\_pTyrIP\_blood\_patient\_bench\_B Scan : 21150

Andromeda score : 143.32

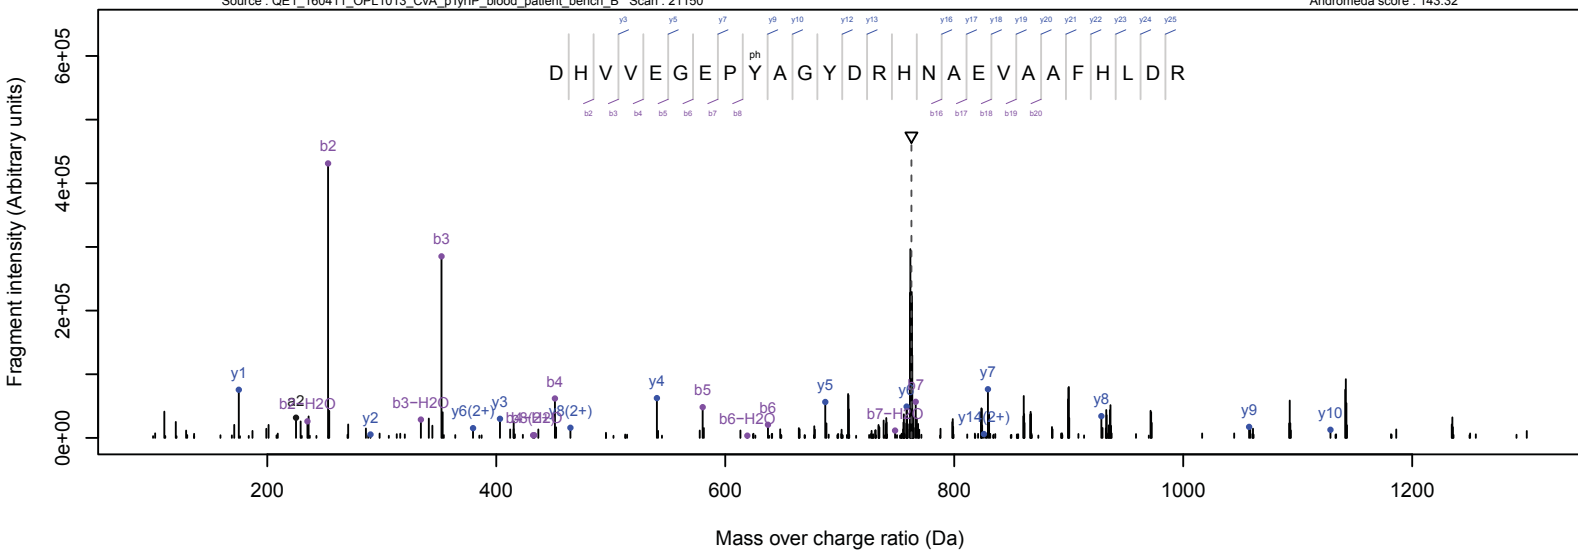

AGEEHY(ph)NCISALHK-3+

Source : QE1\_160411\_OPL1013\_CvA\_pTyrIP\_blood\_patient\_bench\_D Scan : 8479

Andromeda score : 143.05

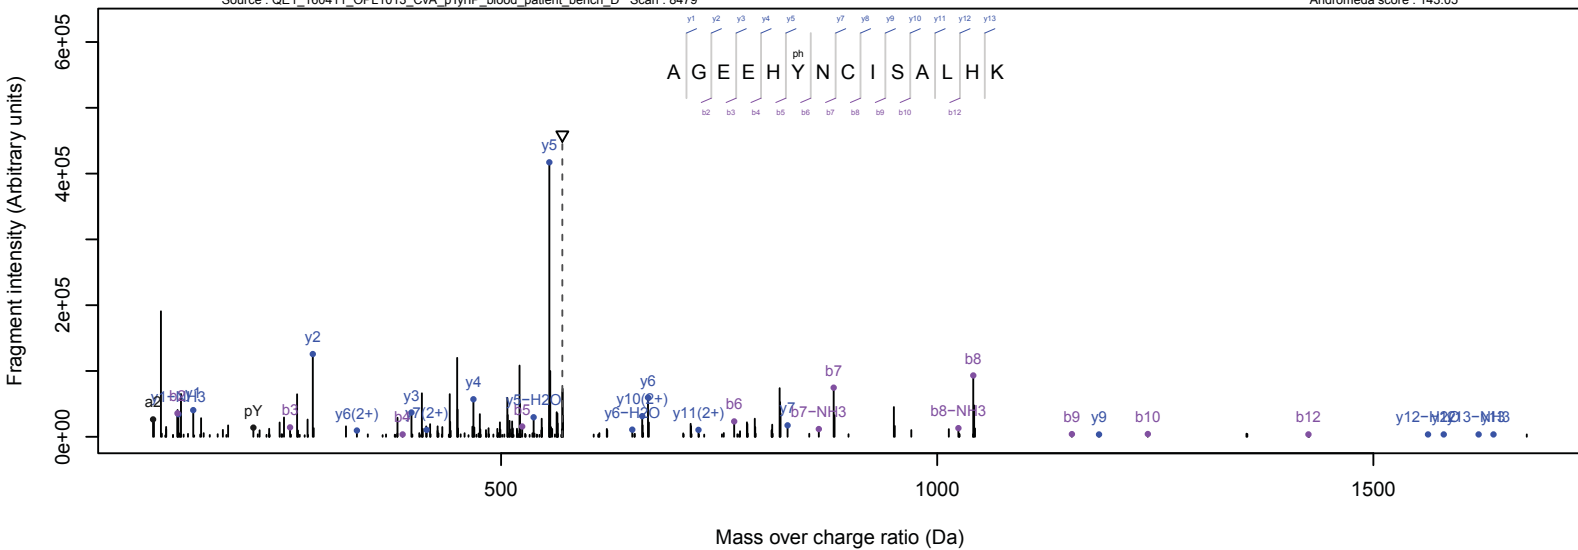

SAEEAPLY(ph)SKVTPR-2+

Source : QE1\_160411\_OPL1013\_CvA\_pTyrIP\_blood\_patient\_bench\_C Scan : 13259

Andromeda score : 143.05

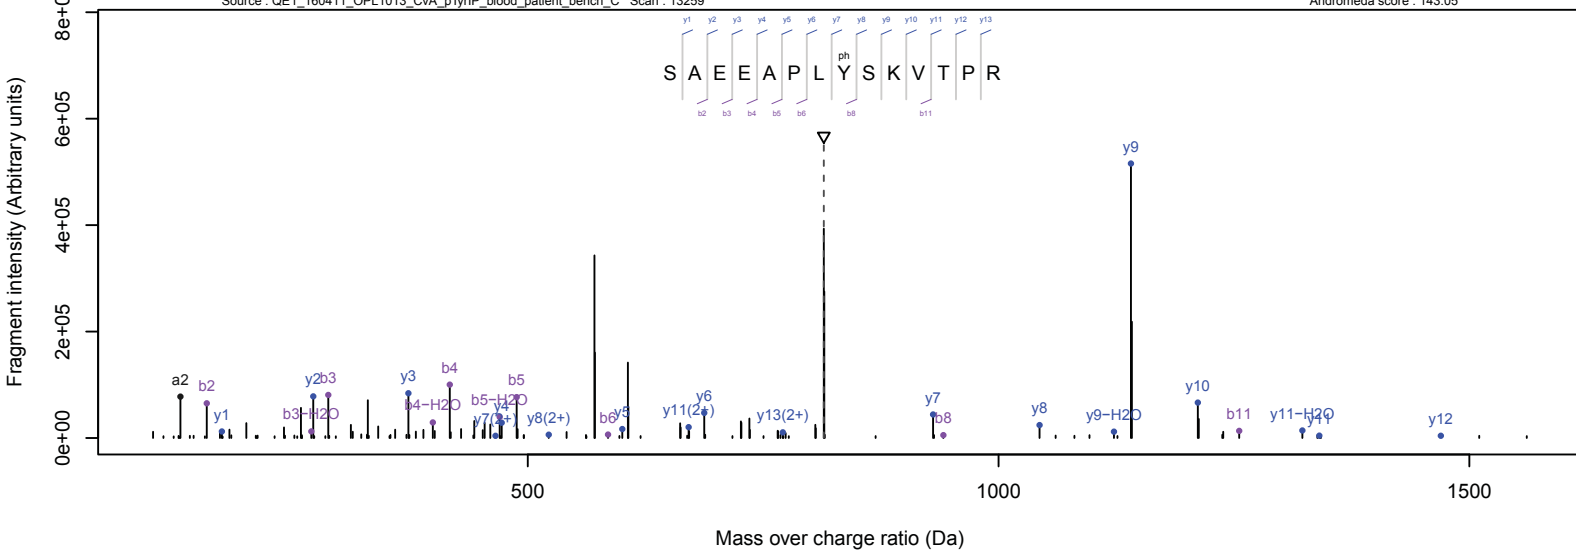

VELQELNDRFANY(ph)IDKVR-3+

Source : QE1\_160411\_OPL1013\_CvA\_pTyrIP\_blood\_patient\_bench\_A Scan : 36144

Andromeda score : 142.94

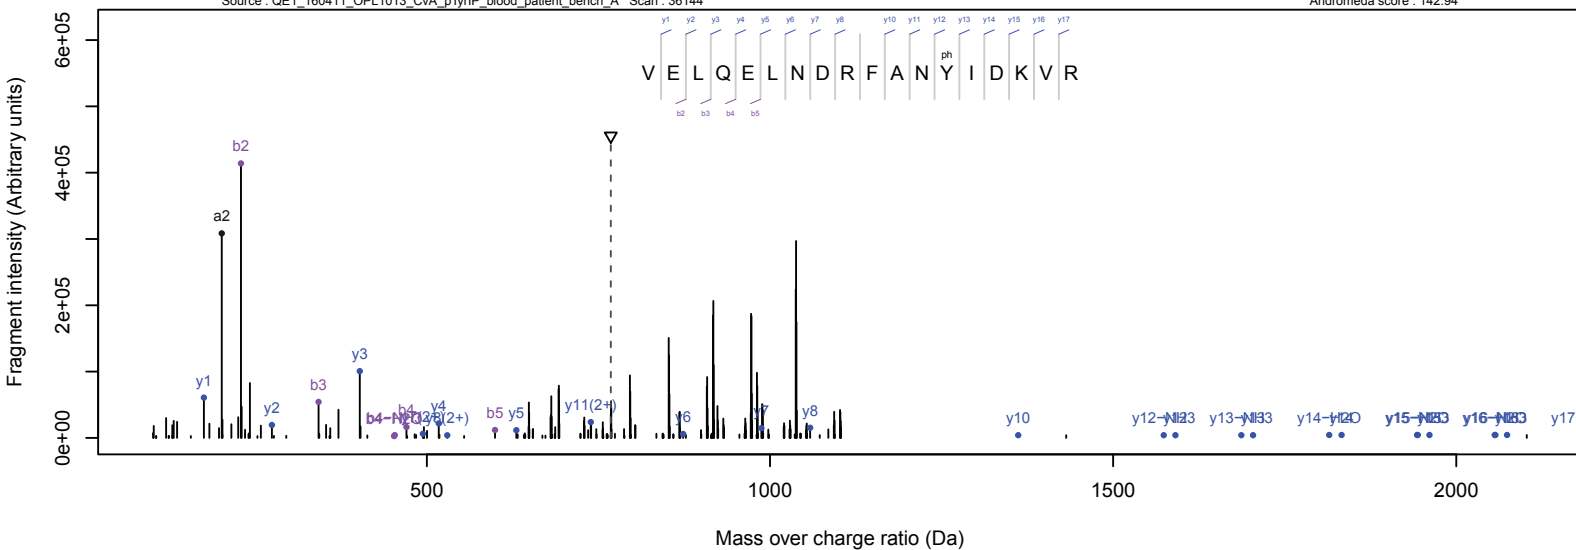

TWTEIFKEHNFSFY(ph)PTFQSHPNSSM(ox)PGSR-4+

Source : QE1\_160411\_OPL1013\_CvA\_pTyrIP\_blood\_patient\_bench\_C Scan : 41824

Andromeda score : 142.65

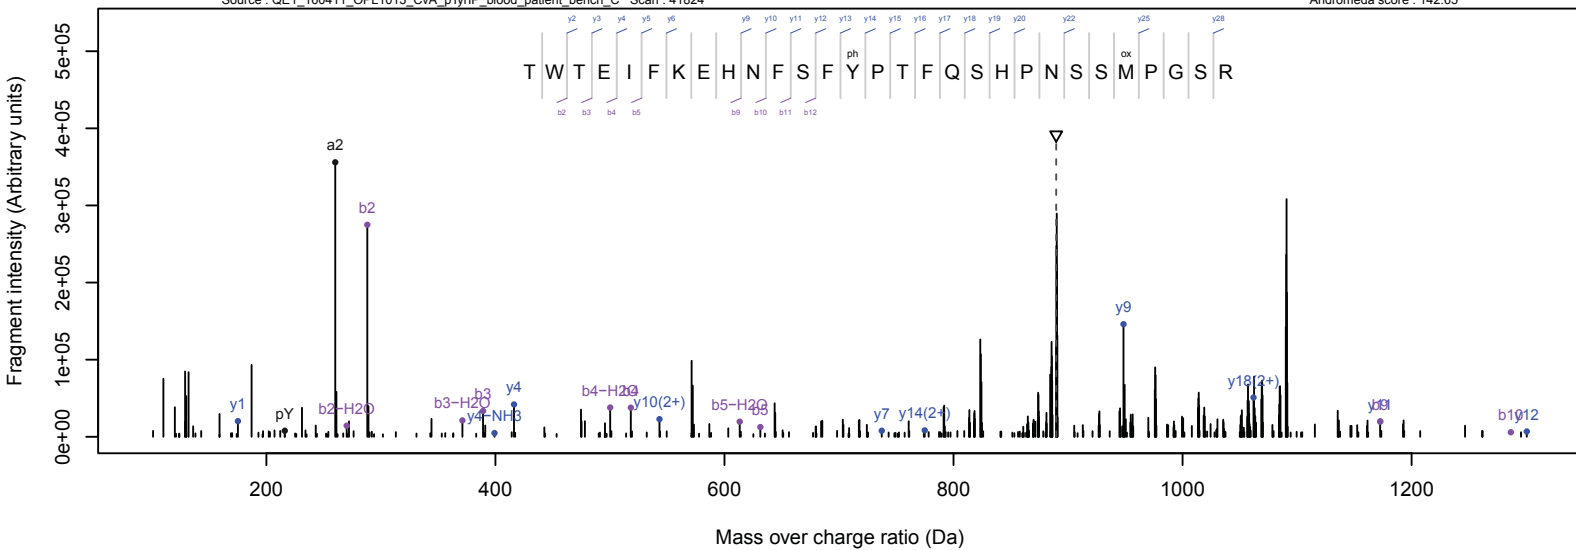

## SGDSEVY(ph)QLGDVSK-2+

Source : QE1\_160411\_OPL1013\_CvA\_pTyrIP\_blood\_patient\_bench\_D Scan : 16725

Andromeda score : 142.45

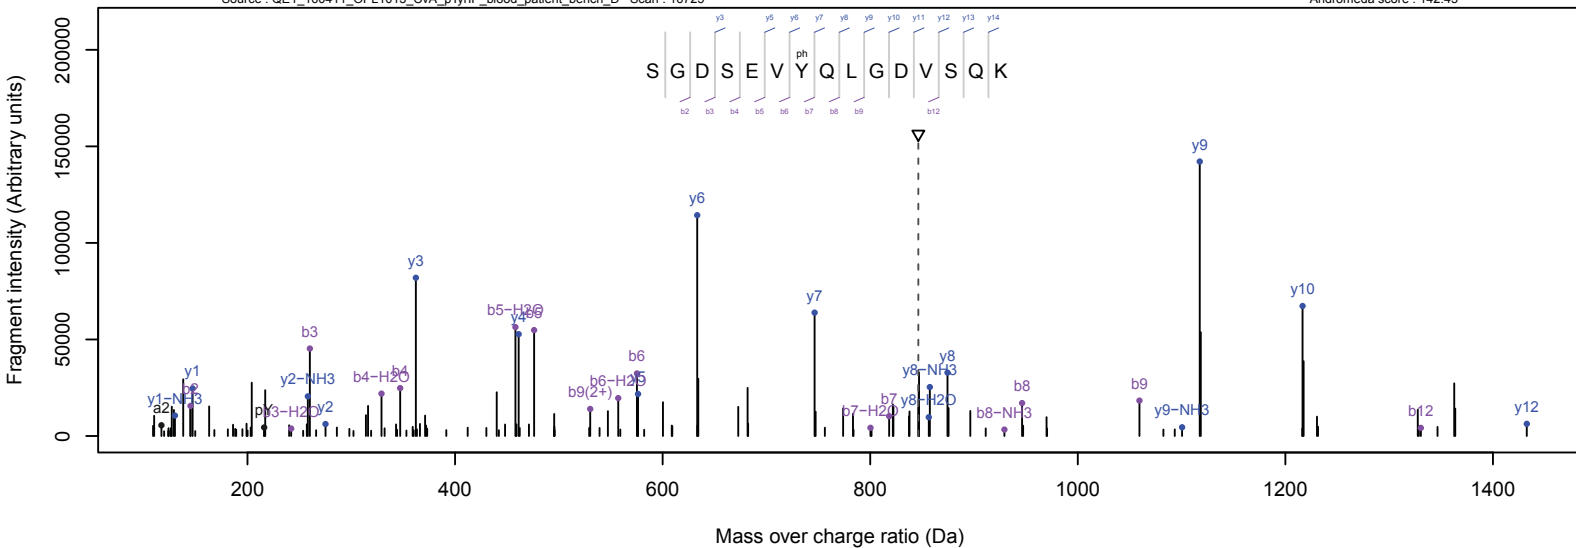

## EVGDY(ph)QLHETEVLK-2+

Source : QE1\_160411\_OPL1013\_CvA\_pTyrIP\_blood\_patient\_bench\_D Scan : 27320

Andromeda score : 142.39

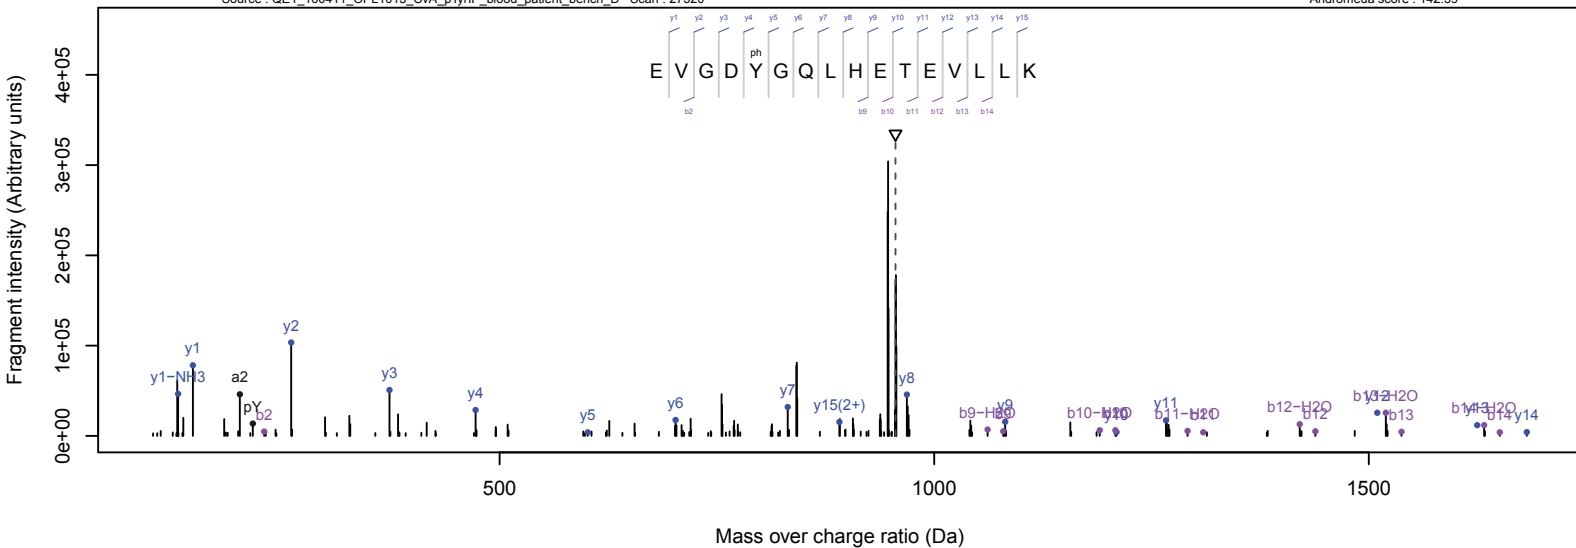

## AHDGGIY(ph)AISWSPDSTHLLSASGDK-3+

Source : QE1\_160411\_OPL1013\_CvA\_pTyrIP\_blood\_patient\_bench\_D Scan : 34470

Andromeda score : 141.15

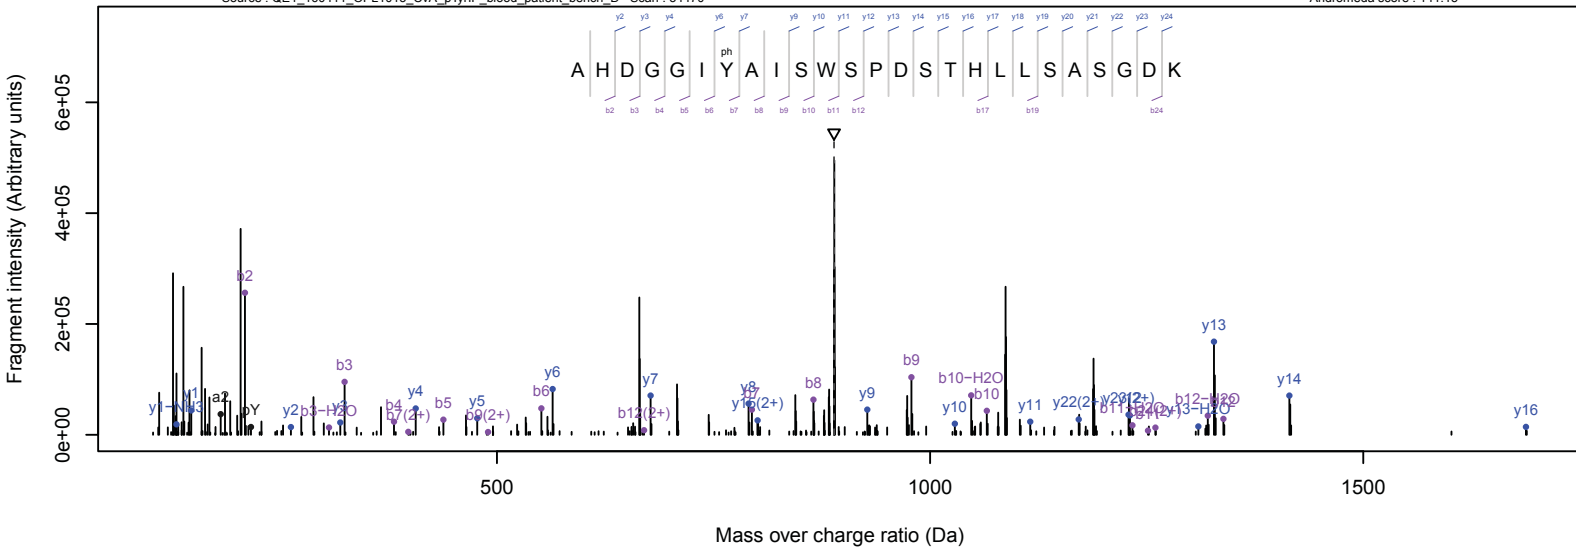



APSASVDSL(ph)NLPR-2+

Source : QE1\_160411\_OPL1013\_CvA\_pTyrIP\_blood\_patient\_bench\_B Scan : 23542

Andromeda score : 141

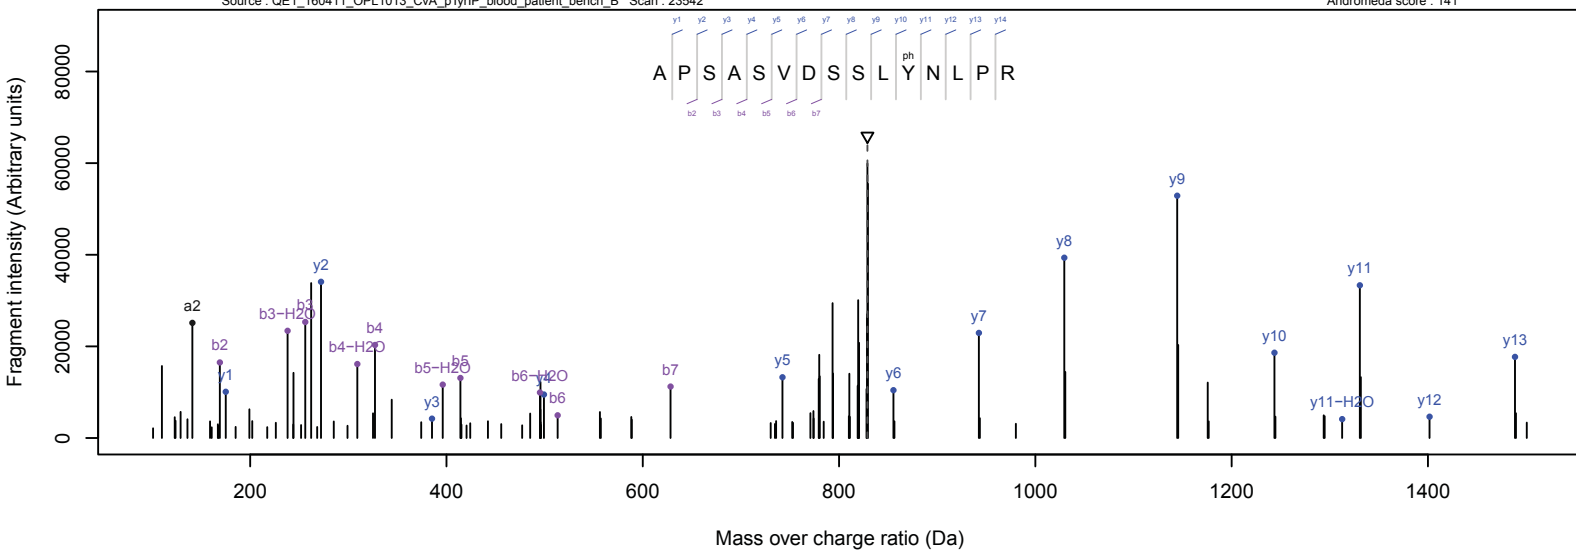

YCRPESQEHPEADPGAAPY(ph)LK-3+

Source : QE1\_160411\_OPL1013\_CvA\_pTyrIP\_blood\_patient\_bench\_D Scan : 11887

Andromeda score : 139.95

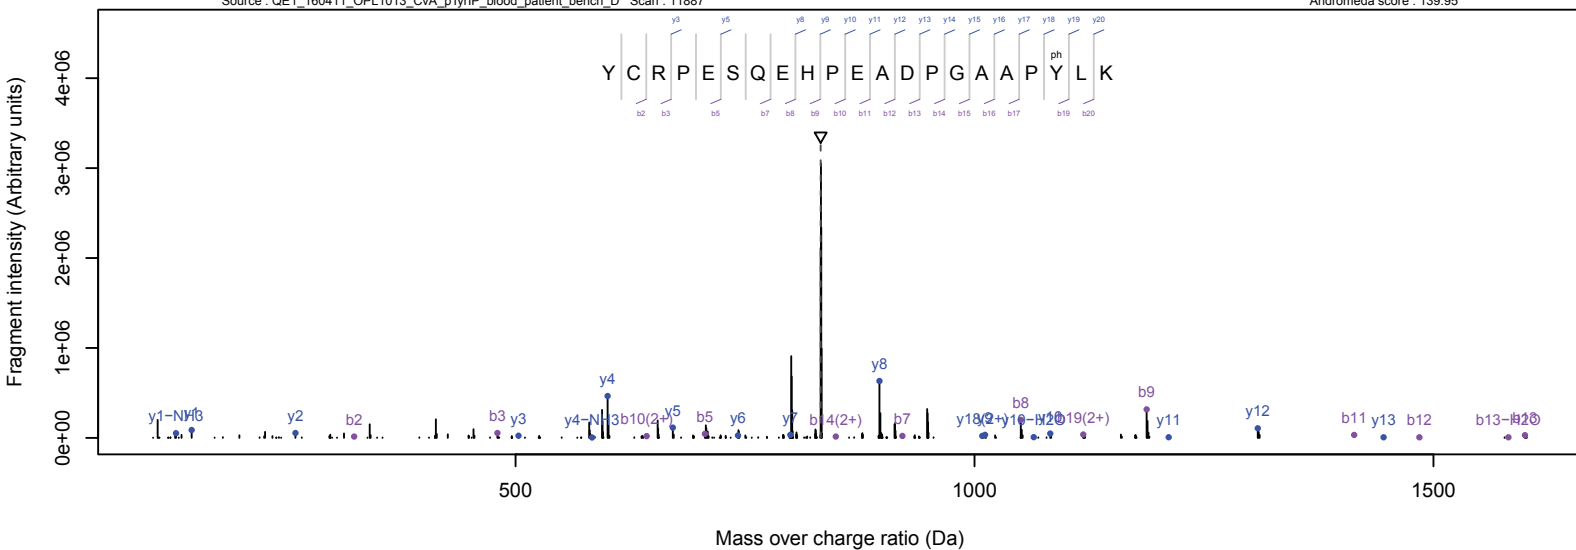

GLCTSPAETHQYFMTEY(ph)VATR-3+

Source : QE1\_160411\_OPL1013\_CvA\_pTyrIP\_blood\_patient\_bench\_D Scan : 27549

Andromeda score : 139.9

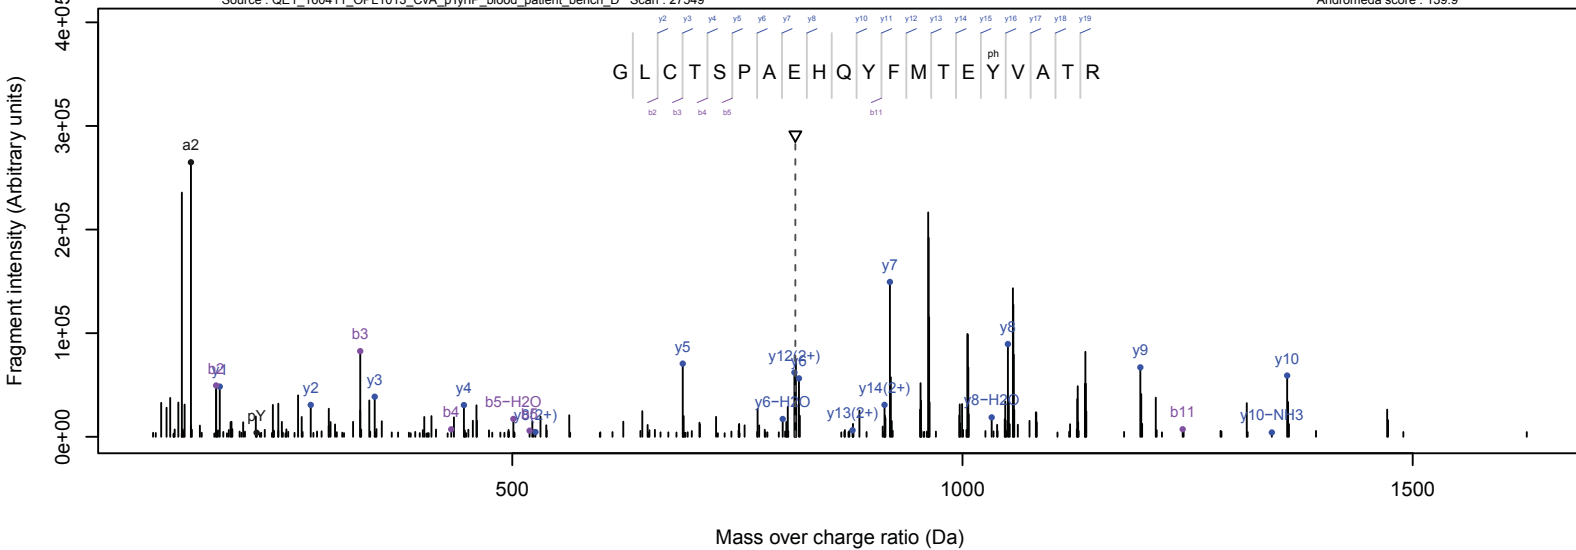

GLCTSPA<sup>ox</sup>EHQYFMTEYVATR-3+

Source: QE1\_160411\_OPL1013\_CvA\_pTyrIP\_blood\_patient\_bench\_C Scan: 23806

Andromeda score: 139.11

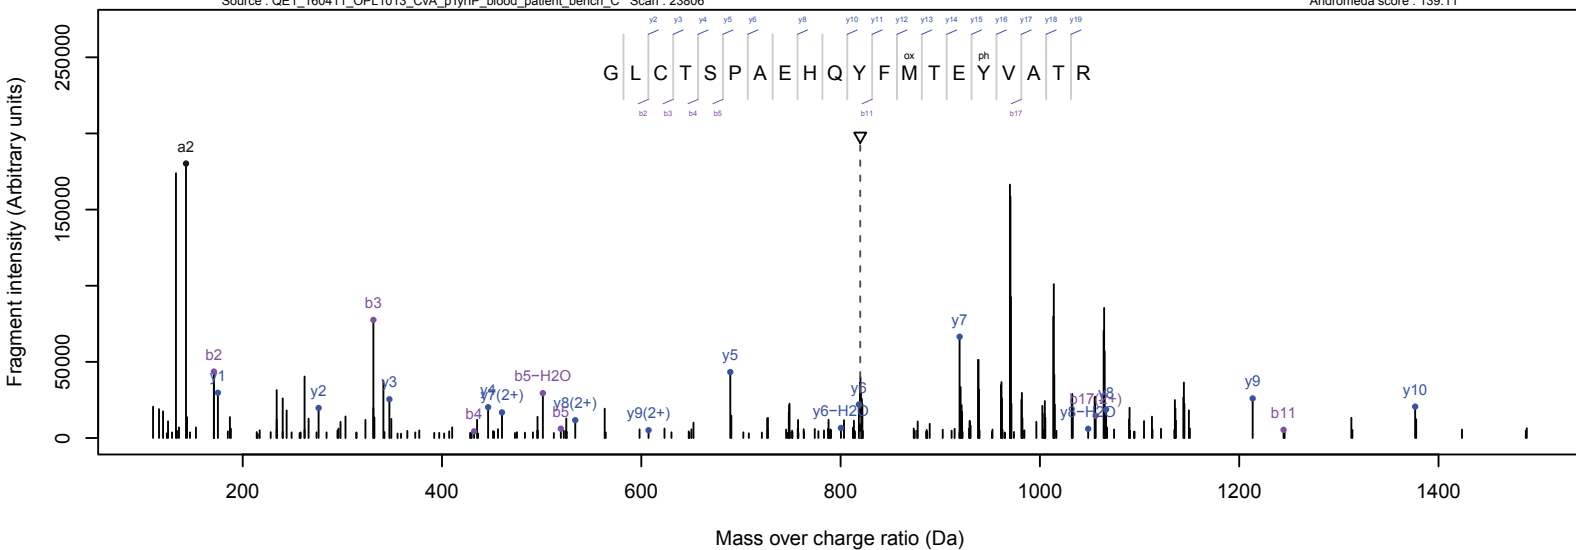PYQY<sup>ph</sup>PALTP<sup>ox</sup>EQK-2+

Source: QE1\_160411\_OPL1013\_CvA\_pTyrIP\_blood\_patient\_bench\_D Scan: 15264

Andromeda score: 138.45

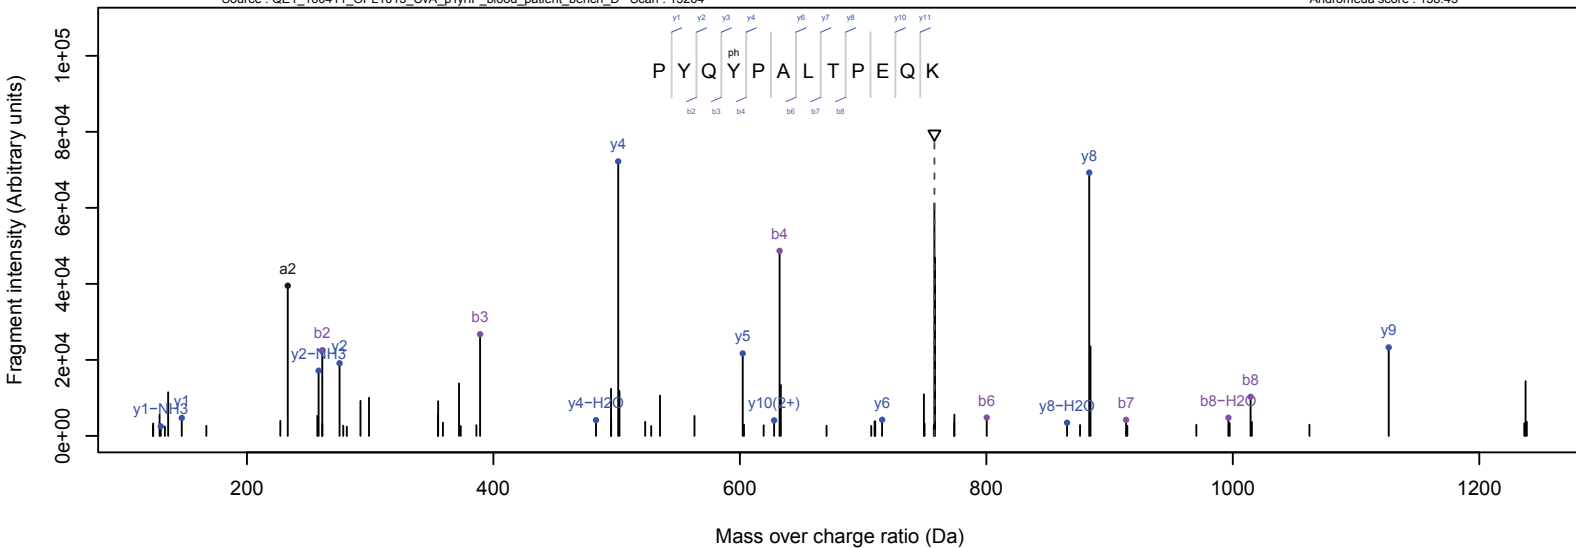TSGSVY<sup>ph</sup>ITLK-2+

Source: QE1\_160411\_OPL1013\_CvA\_pTyrIP\_blood\_patient\_bench\_B Scan: 19820

Andromeda score: 138.22

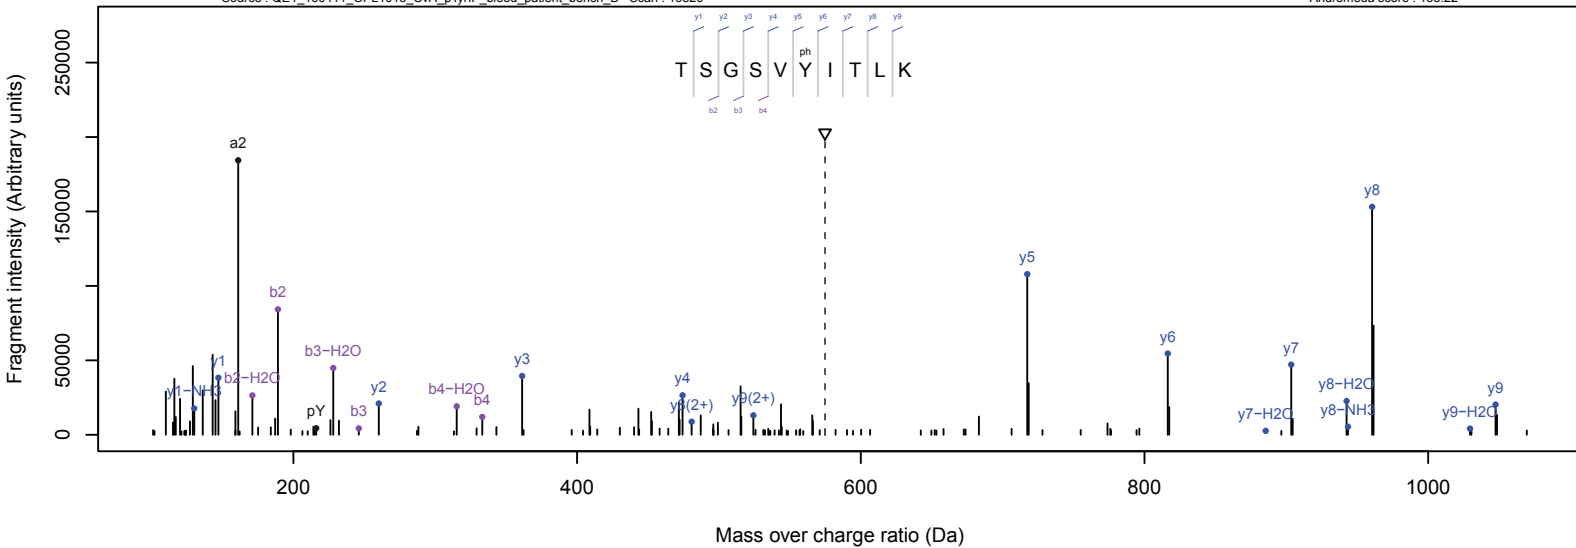

NKVVDDY(ph)IKR-3+

Source : QE1\_160411\_OPL1013\_CvA\_pTyrIP\_blood\_patient\_bench\_C Scan : 5416

Andromeda score : 137.98

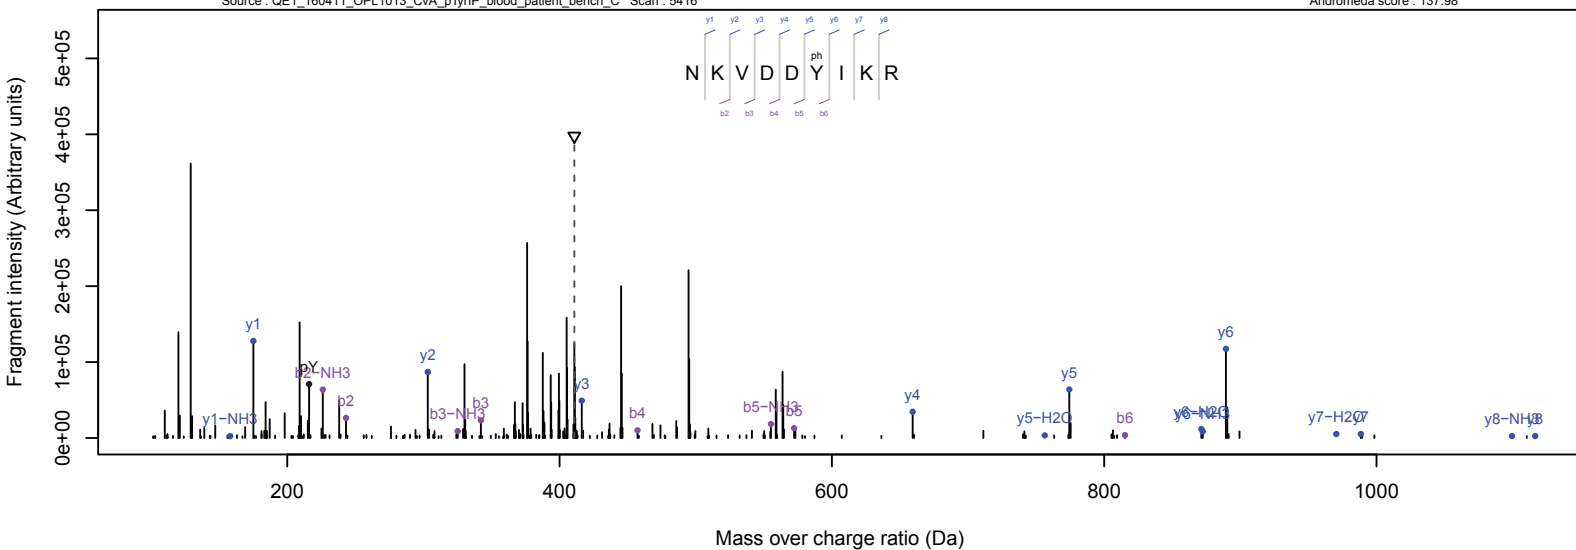

TREKLY(ph)DFVK-3+

Source : QE1\_160411\_OPL1013\_CvA\_pTyrIP\_blood\_patient\_bench\_C Scan : 15461

Andromeda score : 136.96

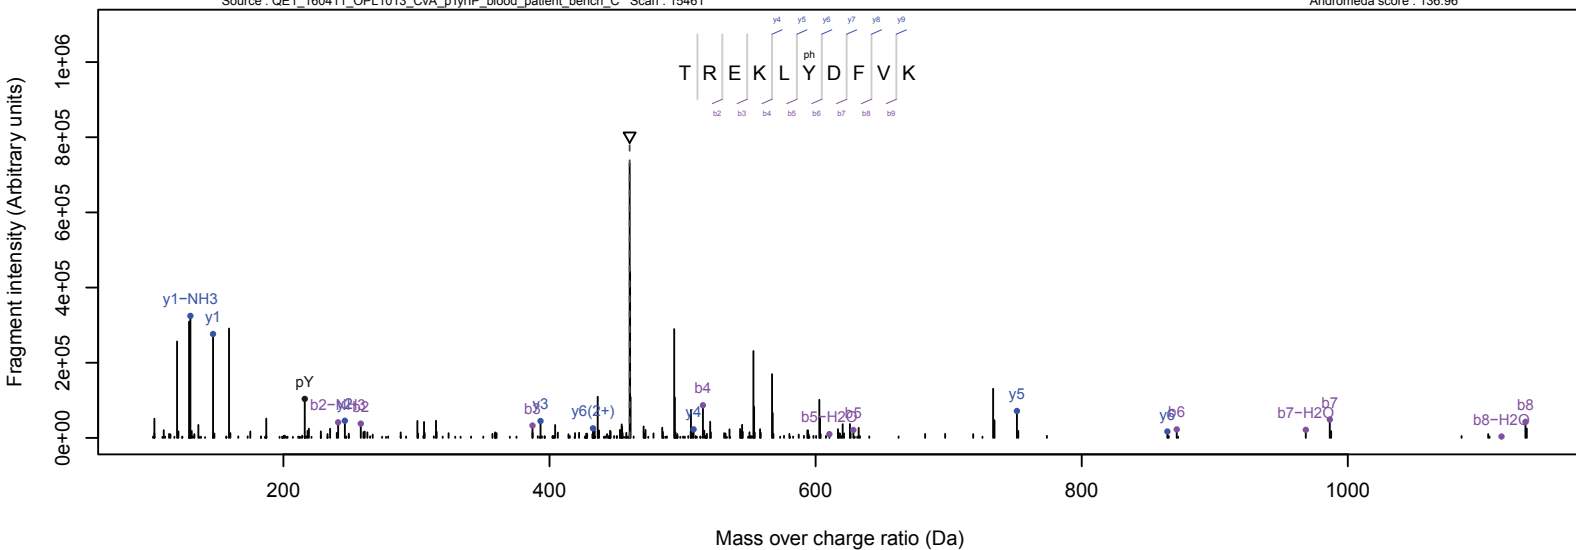

(ac)ANRGPAY(ph)GLSR-2+

Source : QE1\_160411\_OPL1013\_CvA\_pTyrIP\_blood\_patient\_bench\_C Scan : 10453

Andromeda score : 136.81

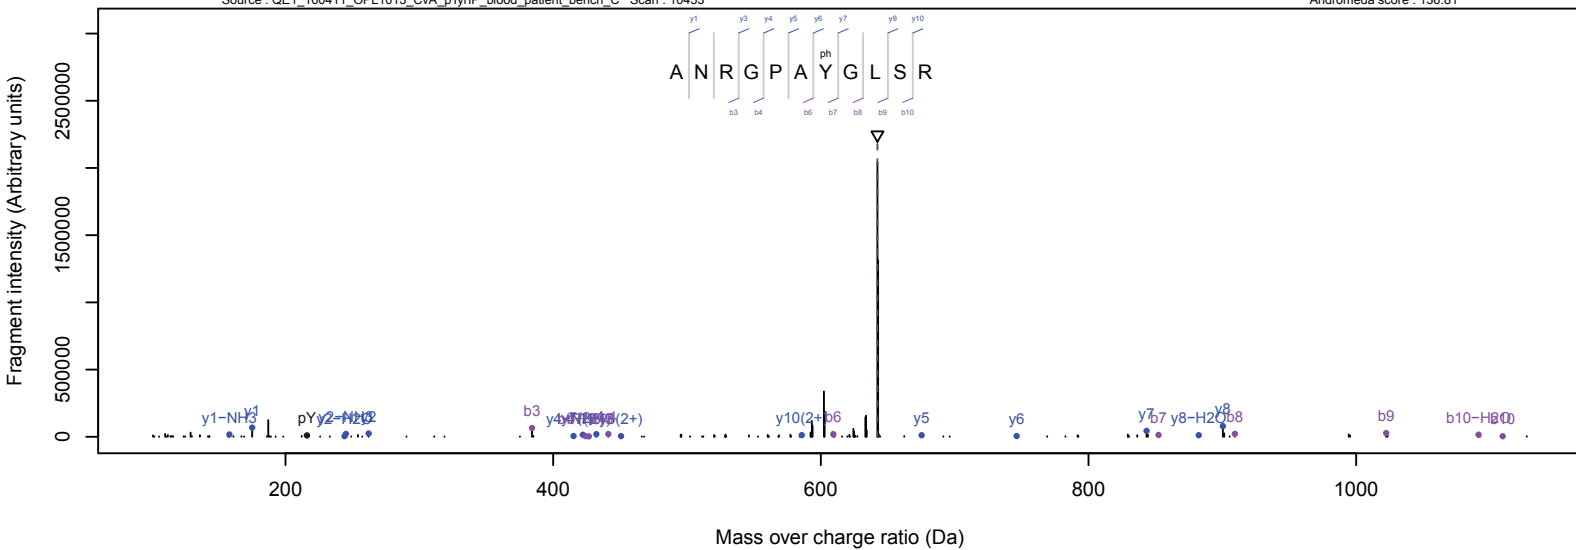

## LIKDDEY(ph)NPCQGSK-3+

Source : QE1\_160411\_OPL1013\_CvA\_pTyrIP\_blood\_patient\_bench\_D Scan : 5719

Andromeda score : 136.6

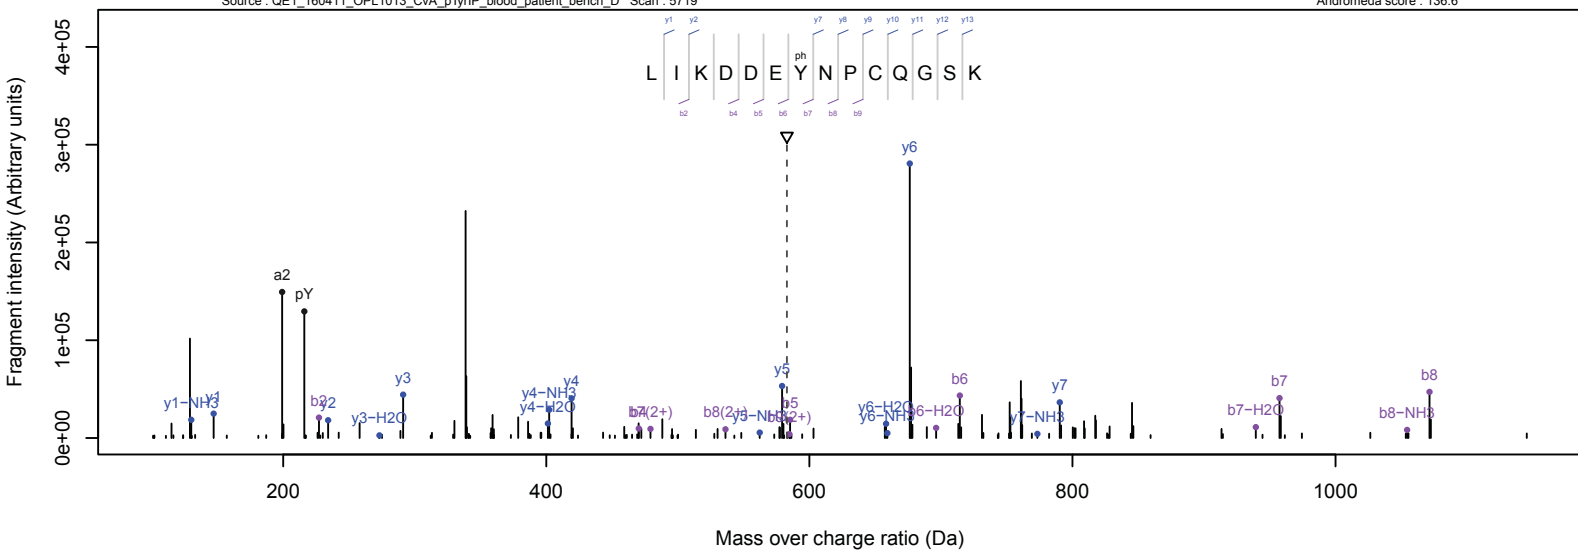

## SPSSCNLDY(ph)ATVKDFEK-3+

Source : QE1\_160411\_OPL1013\_CvA\_pTyrIP\_blood\_patient\_bench\_C Scan : 33083

Andromeda score : 135.95

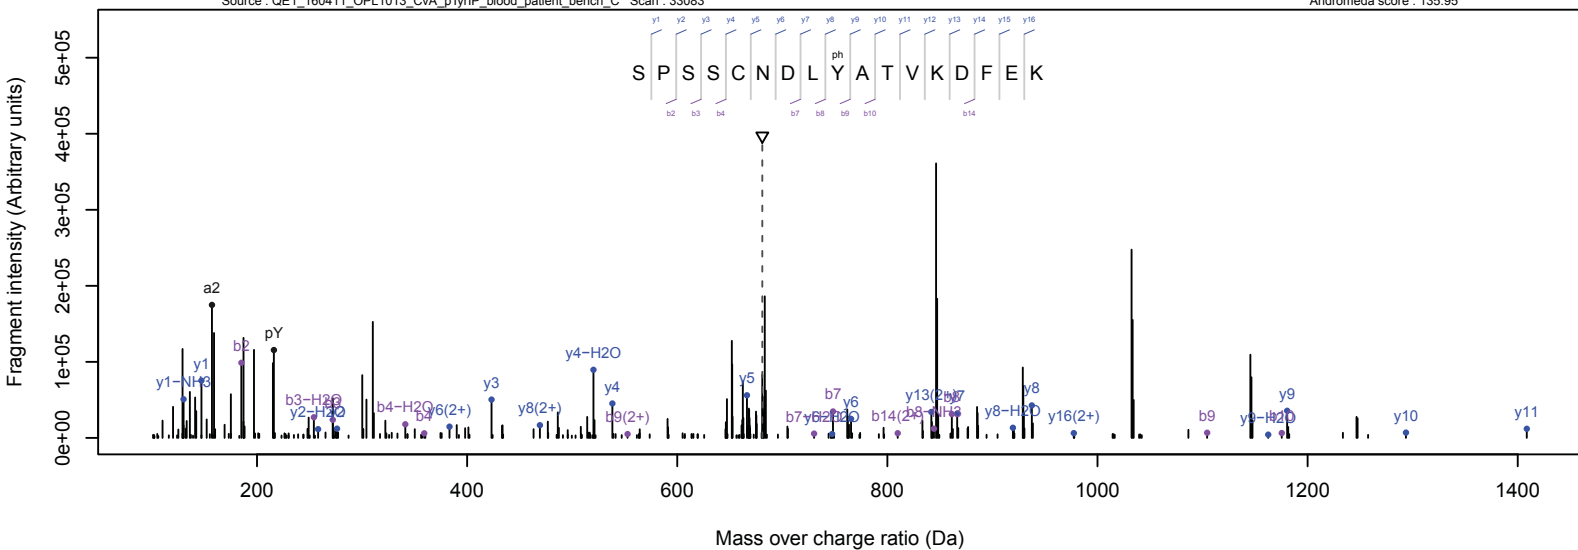

## LY(ph)DFVKTERDESSGPK-3+

Source : QE1\_160411\_OPL1013\_CvA\_pTyrIP\_blood\_patient\_bench\_C Scan : 14639

Andromeda score : 135.47

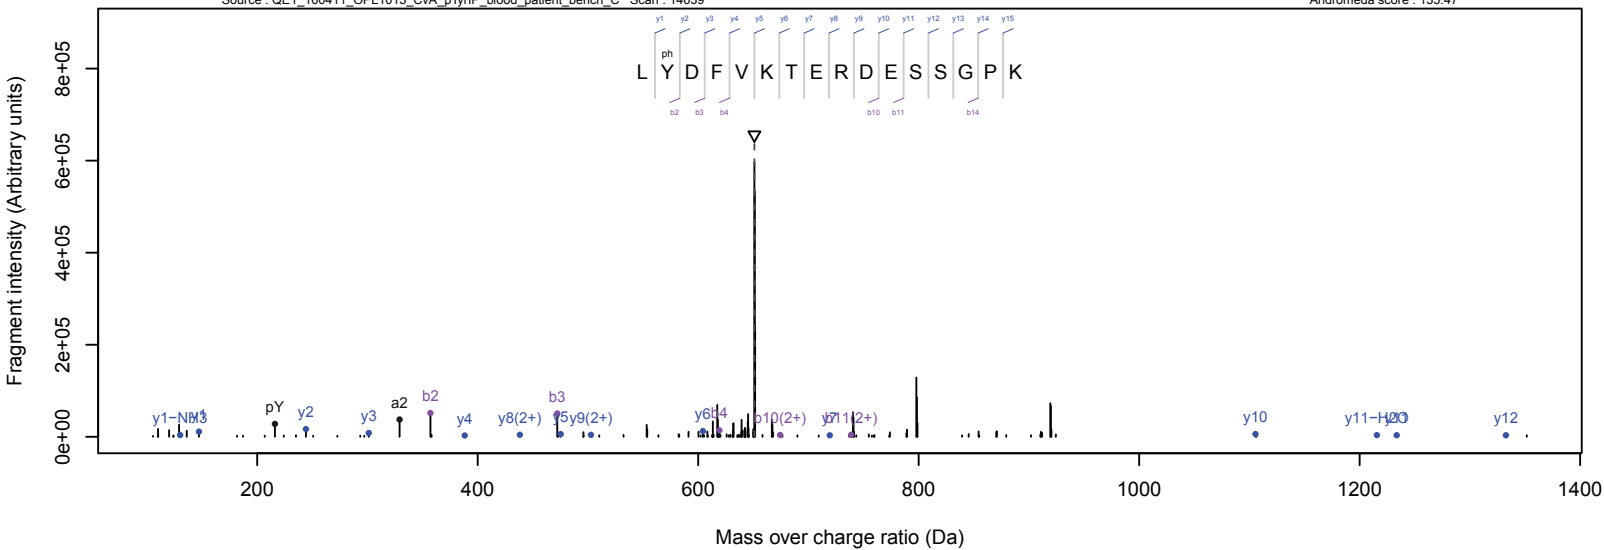

## HIAEEADRKY(ph)EEVAR-4+

Source : QE1\_160411\_OPL1013\_CvA\_pTyrIP\_blood\_patient\_bench\_C Scan : 4943

Andromeda score : 134.88

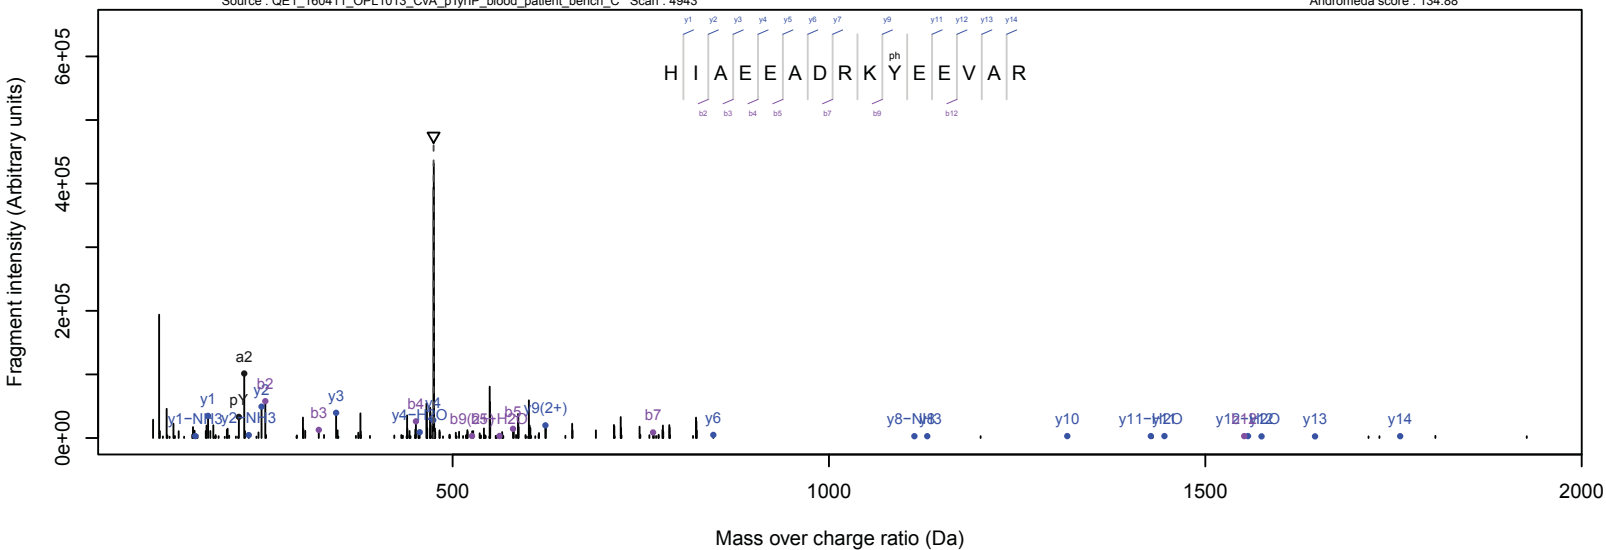

## GVINM(ox)GSY(ph)NYLGFAR-2+

Source : QE1\_160411\_OPL1013\_CvA\_pTyrIP\_blood\_patient\_bench\_C Scan : 33782

Andromeda score : 133.16

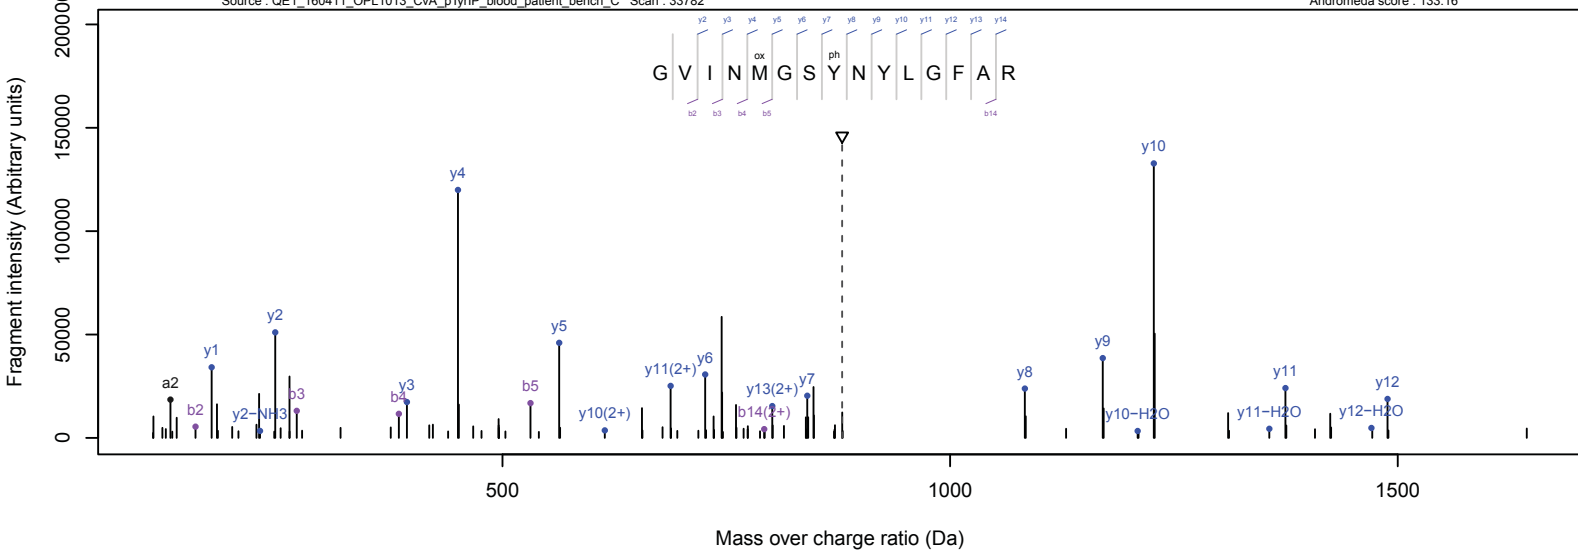

## HIVIDGSNVAMVHGLQHYP(ph)FSSR-4+

Source : QE1\_160411\_OPL1013\_CvA\_pTyrIP\_blood\_patient\_bench\_B Scan : 32069

Andromeda score : 132.83

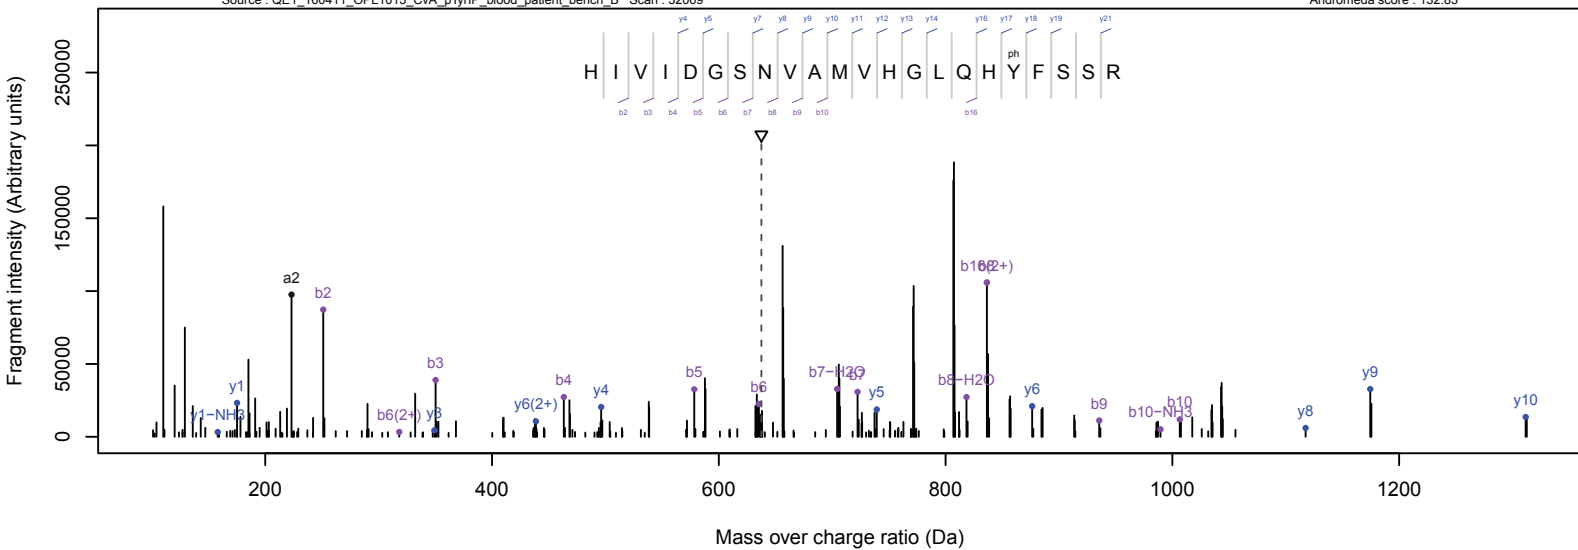

NEEENIY(ph)SVPHDSTQGK-3+

Source : QE1\_160411\_OPL1013\_CvA\_pTyrIP\_blood\_patient\_bench\_D Scan : 9343

Andromeda score : 132.64

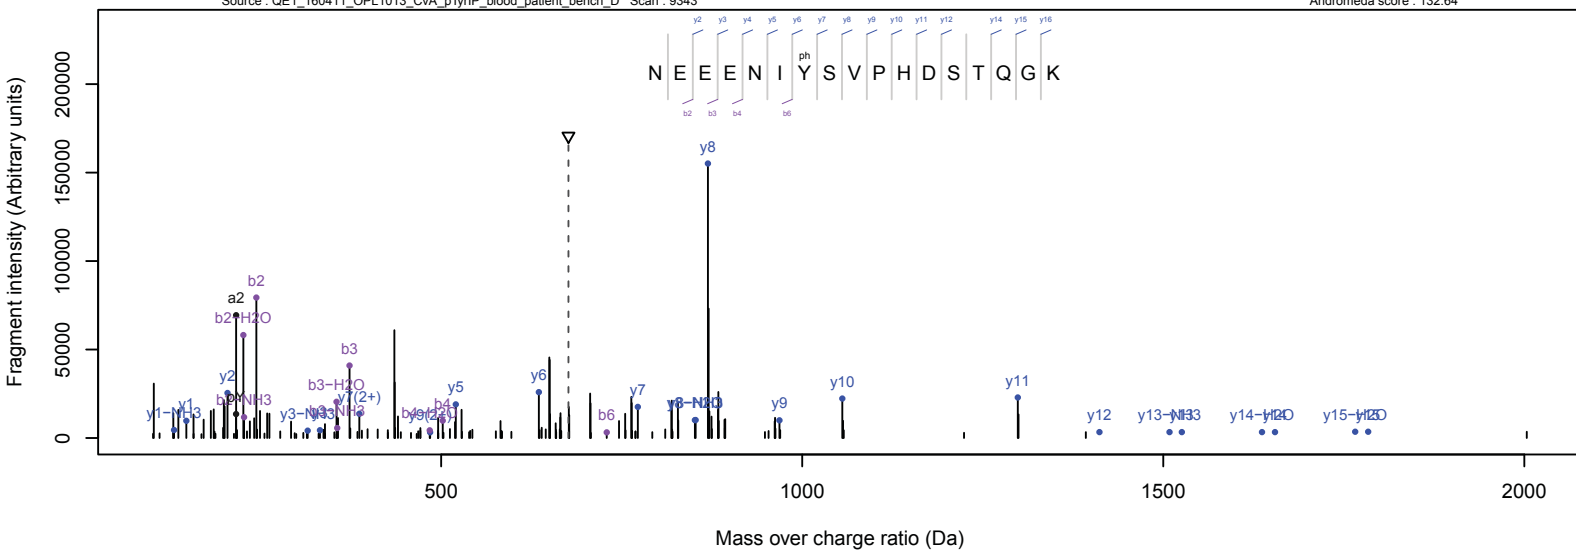

SLDNGGY(ph)ISPR-2+

Source : QE1\_160411\_OPL1013\_CvA\_pTyrIP\_blood\_patient\_bench\_D Scan : 17731

Andromeda score : 131.69

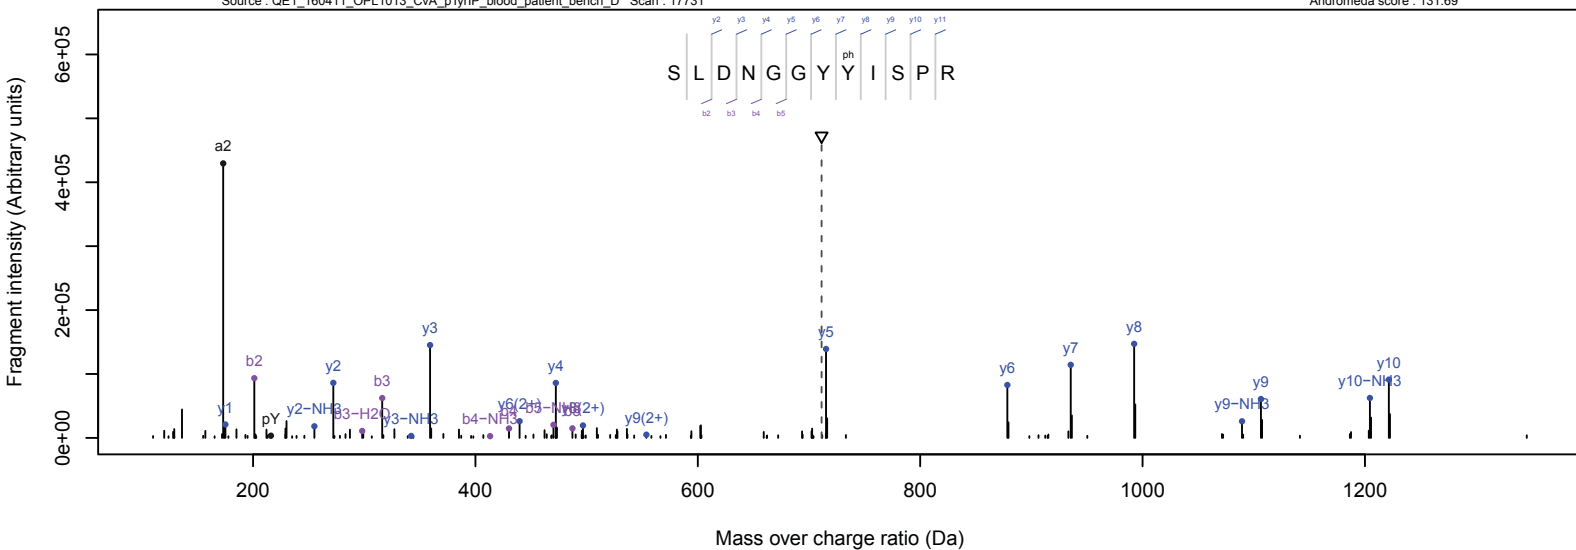

DSAY(ph)QSITHYRPVSA SR-3+

Source : QE1\_160411\_OPL1013\_CvA\_pTyrIP\_blood\_patient\_bench\_D Scan : 15890

Andromeda score : 131.56

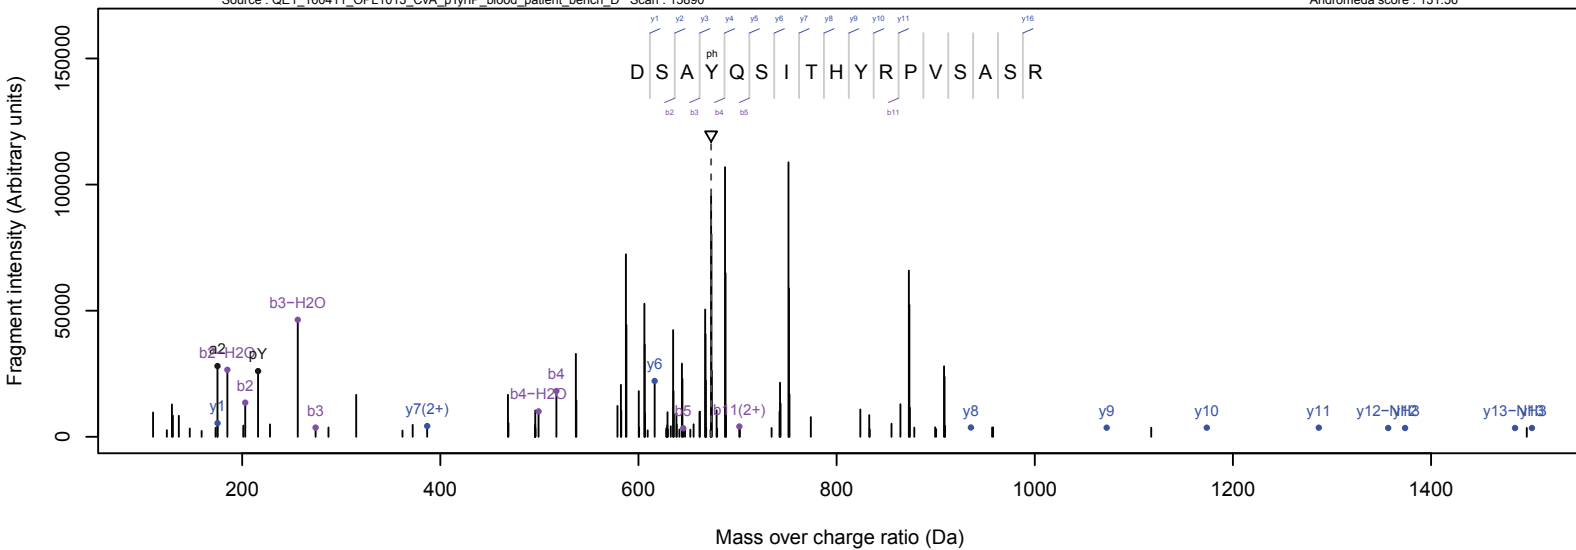

RLGAGQFGEVWVG<sup>ph</sup>YNNSTK-3+

Source : QE1\_160411\_OPL1013\_CvA\_pTyrIP\_blood\_patient\_bench\_D Scan : 33688

Andromeda score : 131.31

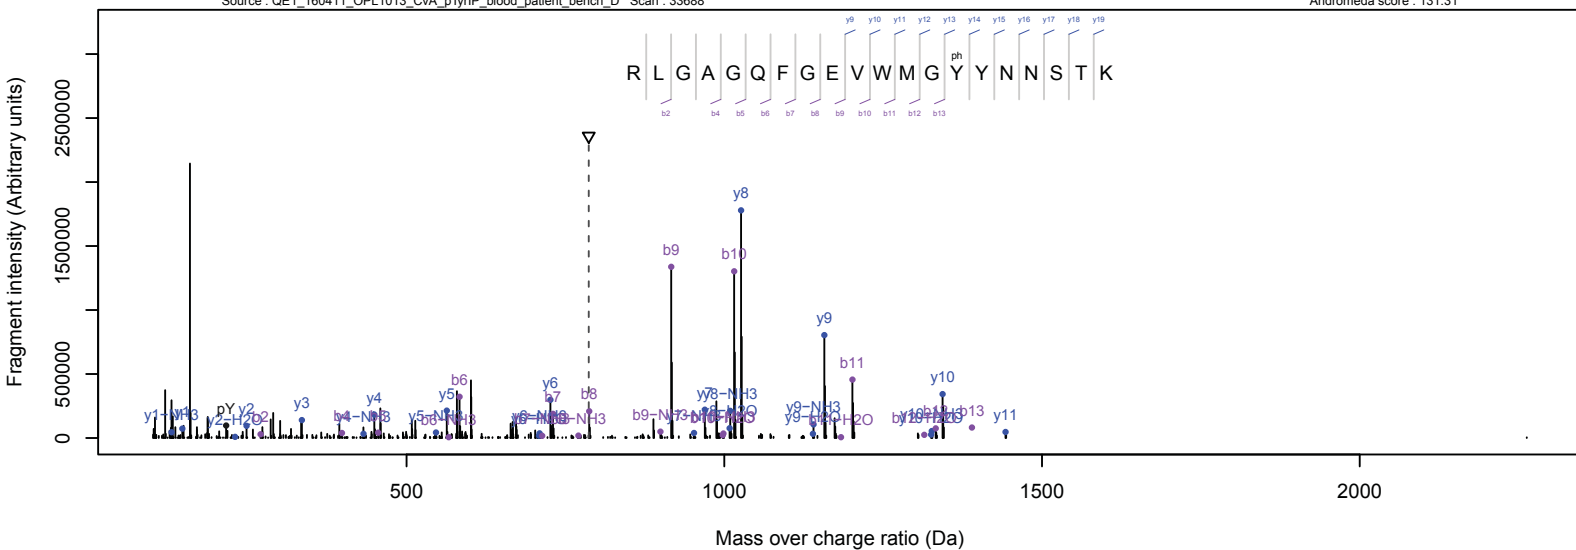

QY<sup>ph</sup>ATLDVYNPFETR-2+

Source : QE1\_160411\_OPL1013\_CvA\_pTyrIP\_blood\_patient\_bench\_D Scan : 40114

Andromeda score : 130.47

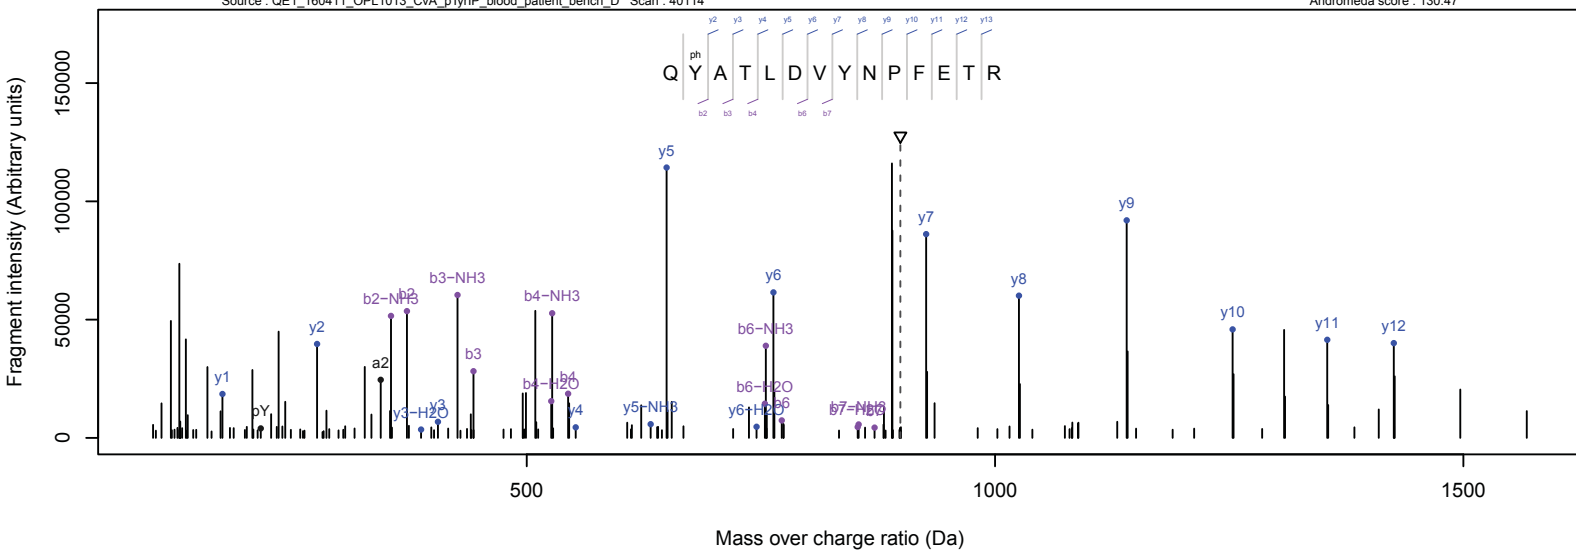

Y<sup>ph</sup>YRPTEVDFLQGDCTK-3+

Source : QE1\_160411\_OPL1013\_CvA\_pTyrIP\_blood\_patient\_bench\_D Scan : 26834

Andromeda score : 130.21

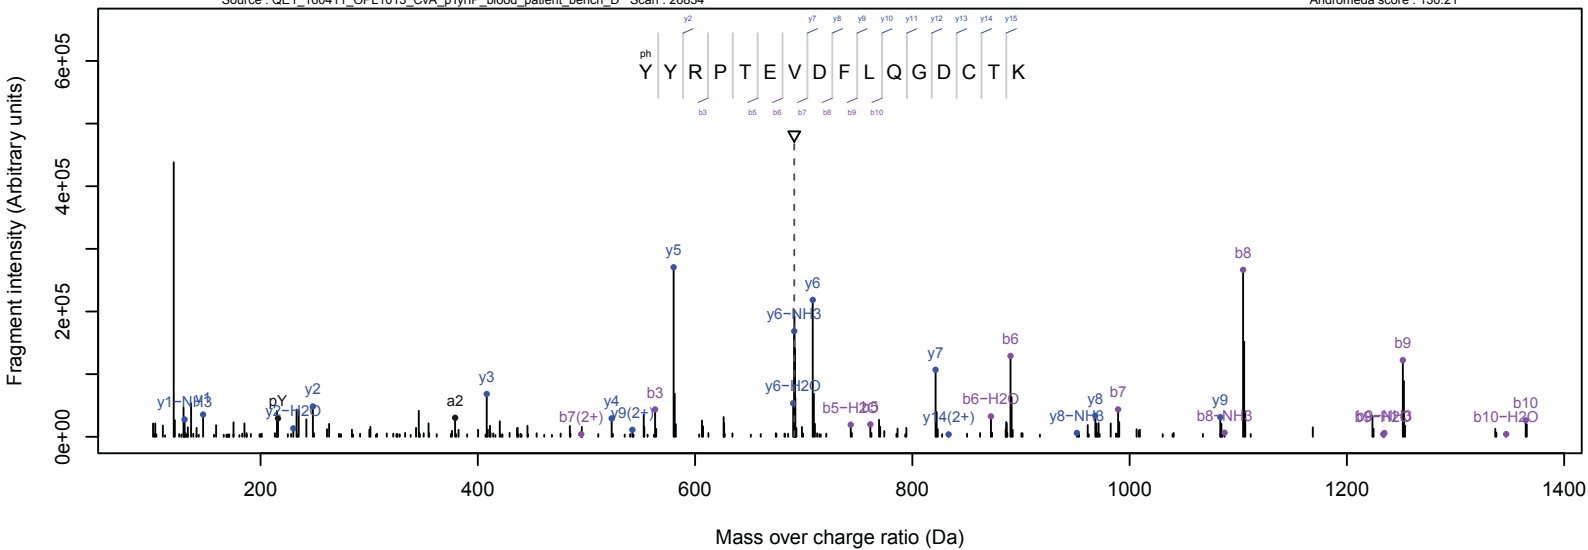

## DIMSDSNY(ph)VVR-2+

Source: QE1\_160411\_OPL1013\_CvA\_pTyrIP\_blood\_patient\_bench\_B Scan: 19554

Andromeda score: 129.89

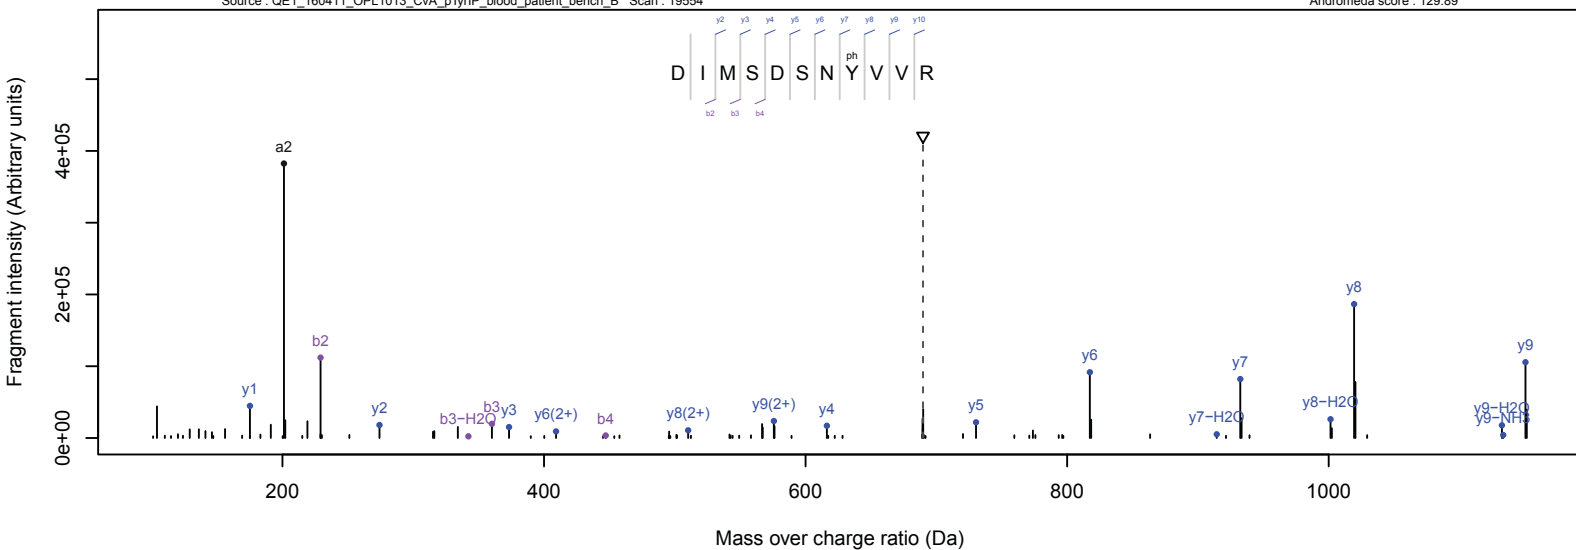

## TVCSSTY(ph)LQSR-2+

Source: QE1\_160411\_OPL1013\_CvA\_pTyrIP\_blood\_patient\_bench\_B Scan: 7274

Andromeda score: 129.88

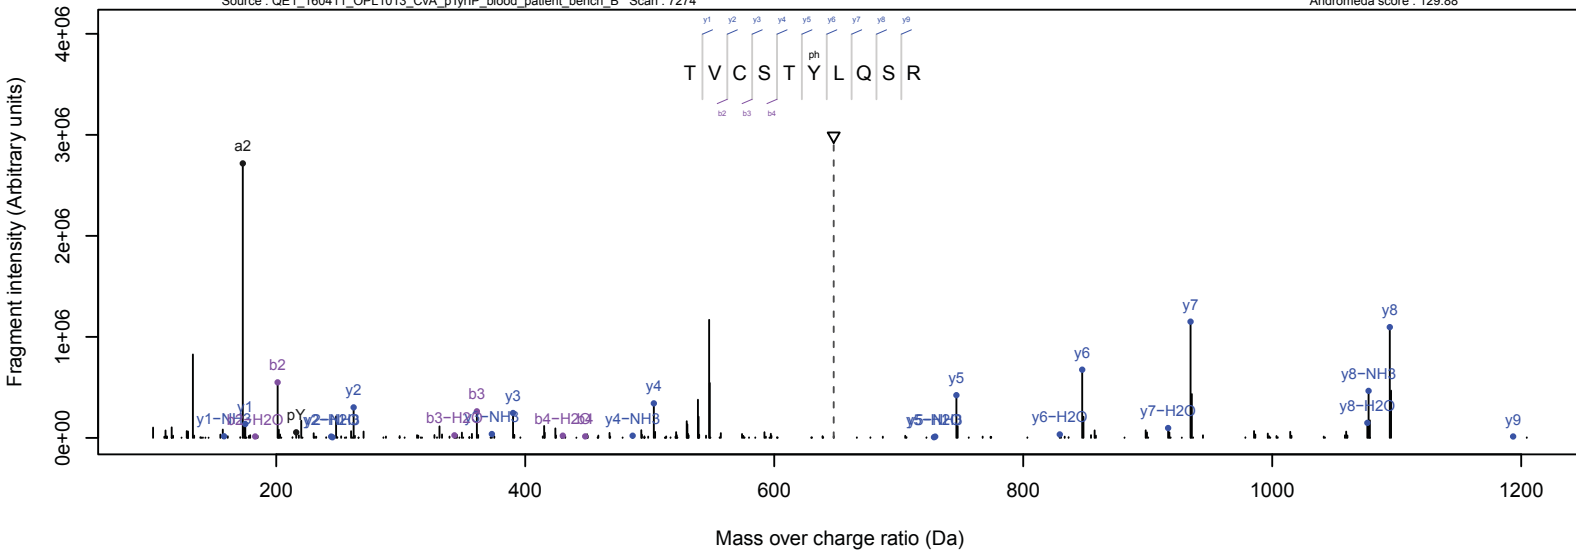

## TQQHYD(ph)KCPK-3+

Source: QE1\_160411\_OPL1013\_CvA\_pTyrIP\_blood\_patient\_bench\_D Scan: 1722

Andromeda score: 129.74

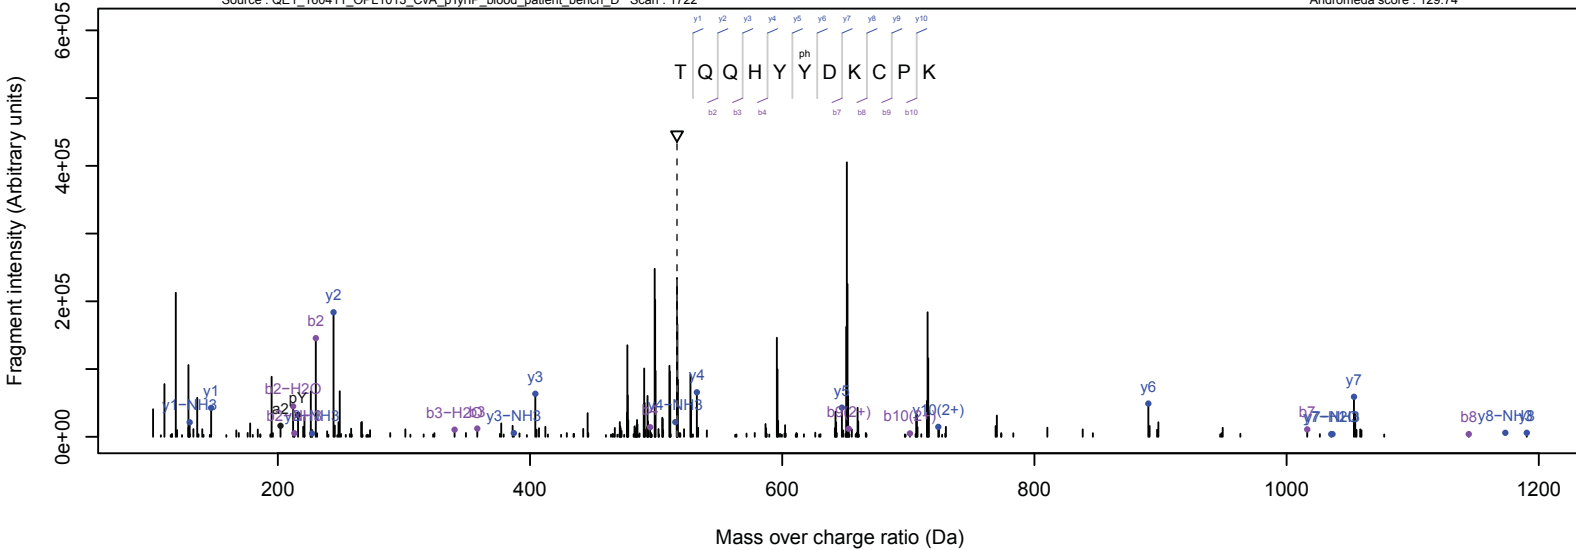



RKGHEY(ph)TNIK-3+

Source : QE1\_160411\_OPL1013\_CvA\_pTyrIP\_blood\_patient\_bench\_B Scan : 1623

Andromeda score : 129

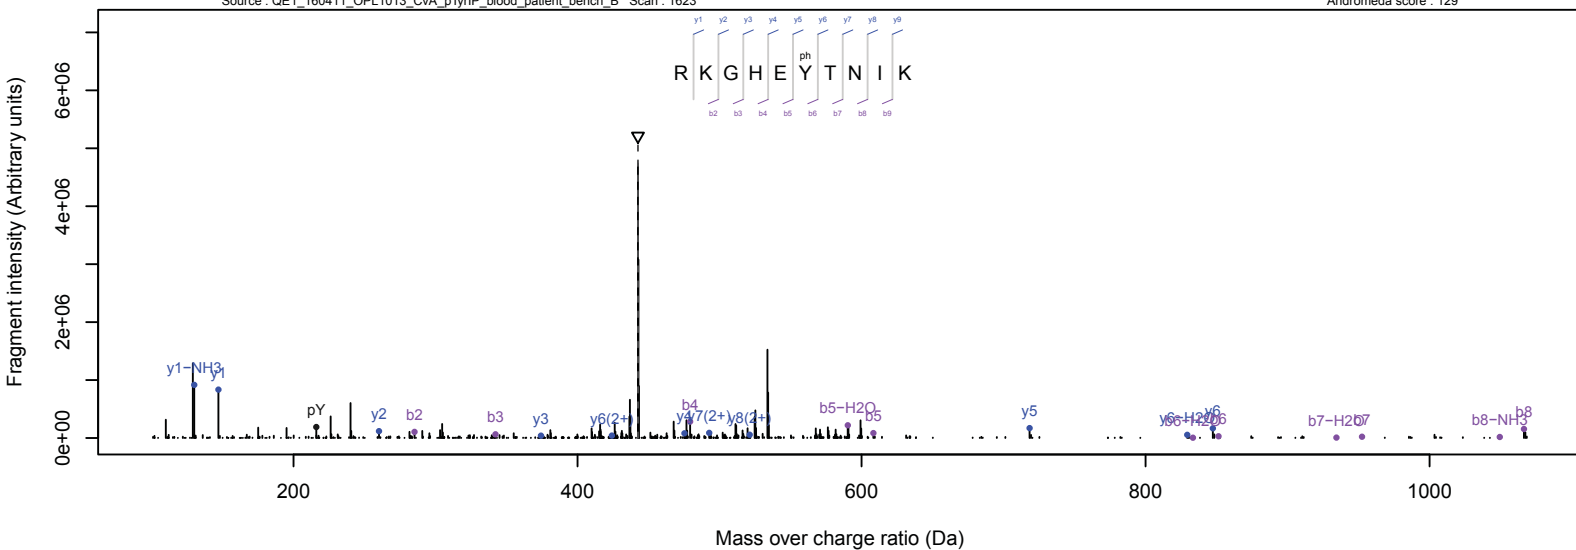

ISIEM(ox)NGTLEDQLSHLKQY(ph)ER-3+

Source : QE1\_160411\_OPL1013\_CvA\_pTyrIP\_blood\_patient\_bench\_A Scan : 30656

Andromeda score : 128.01

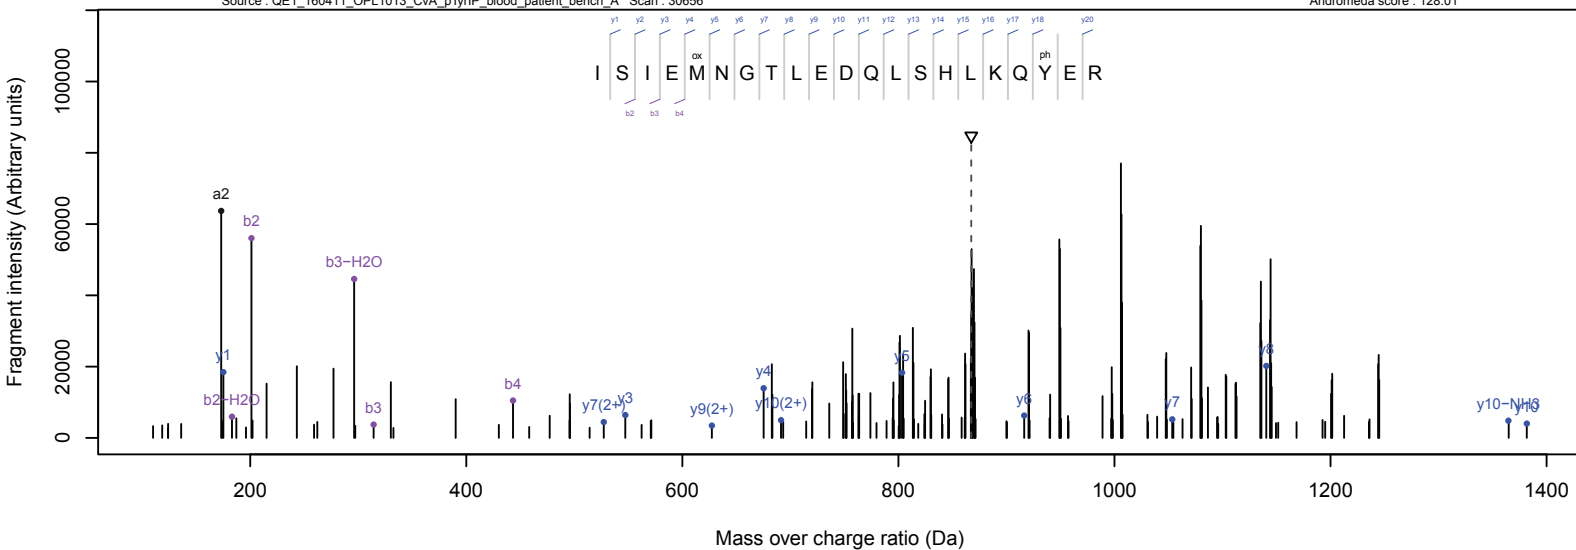

LGHY(ph)ATLQK-2+

Source : QE1\_160411\_OPL1013\_CvA\_pTyrIP\_blood\_patient\_bench\_C Scan : 5903

Andromeda score : 128.01

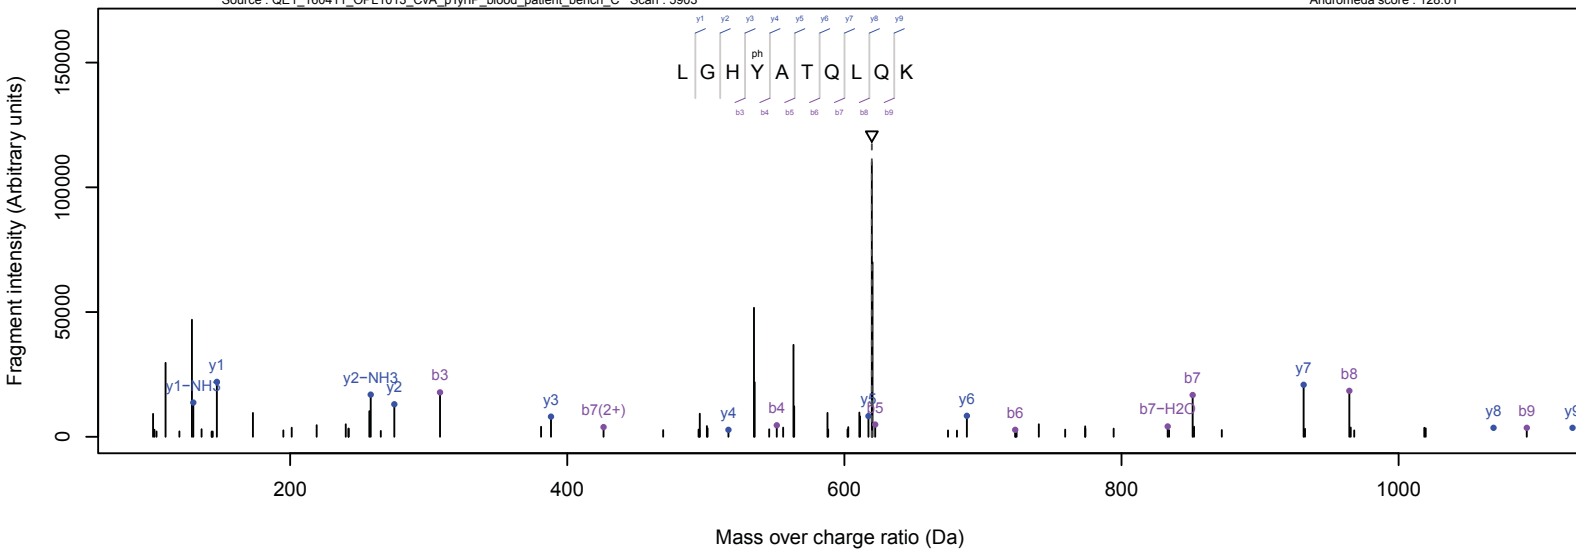

AAVPSGASTGIY(ph)EALELRDNDKTR-4+

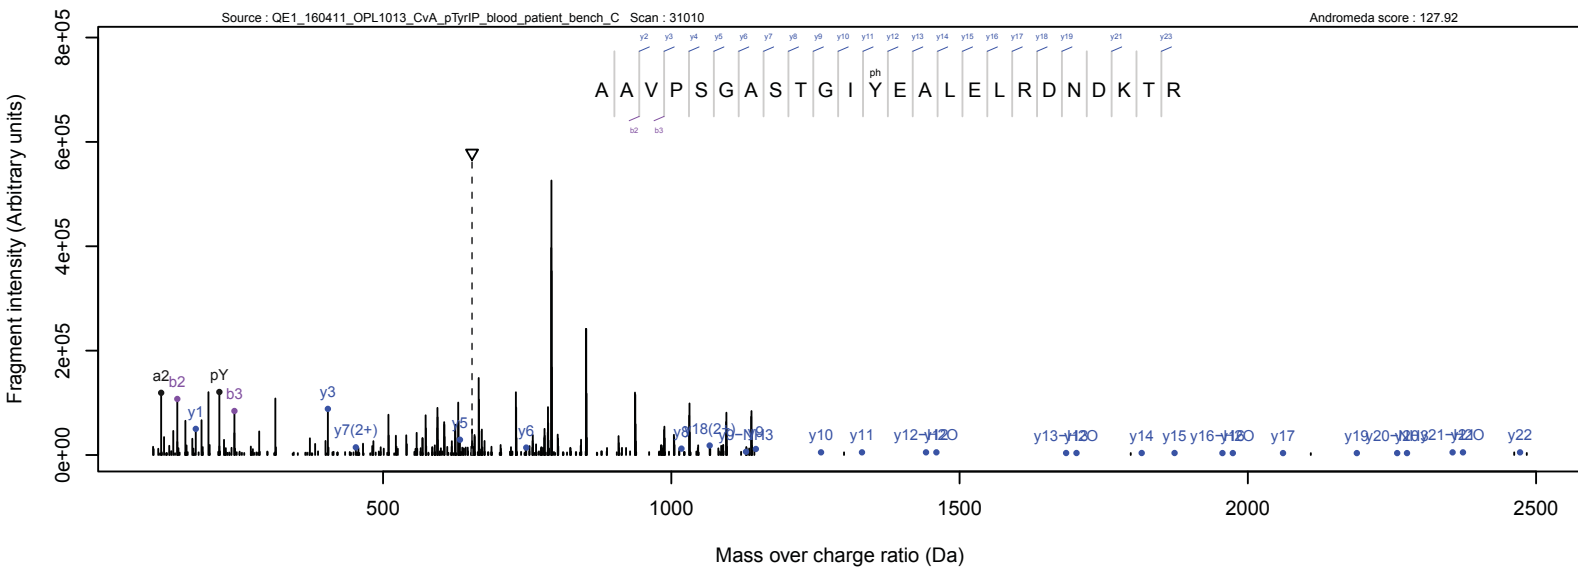

GGHSDDL(ph)AVPHR-3+

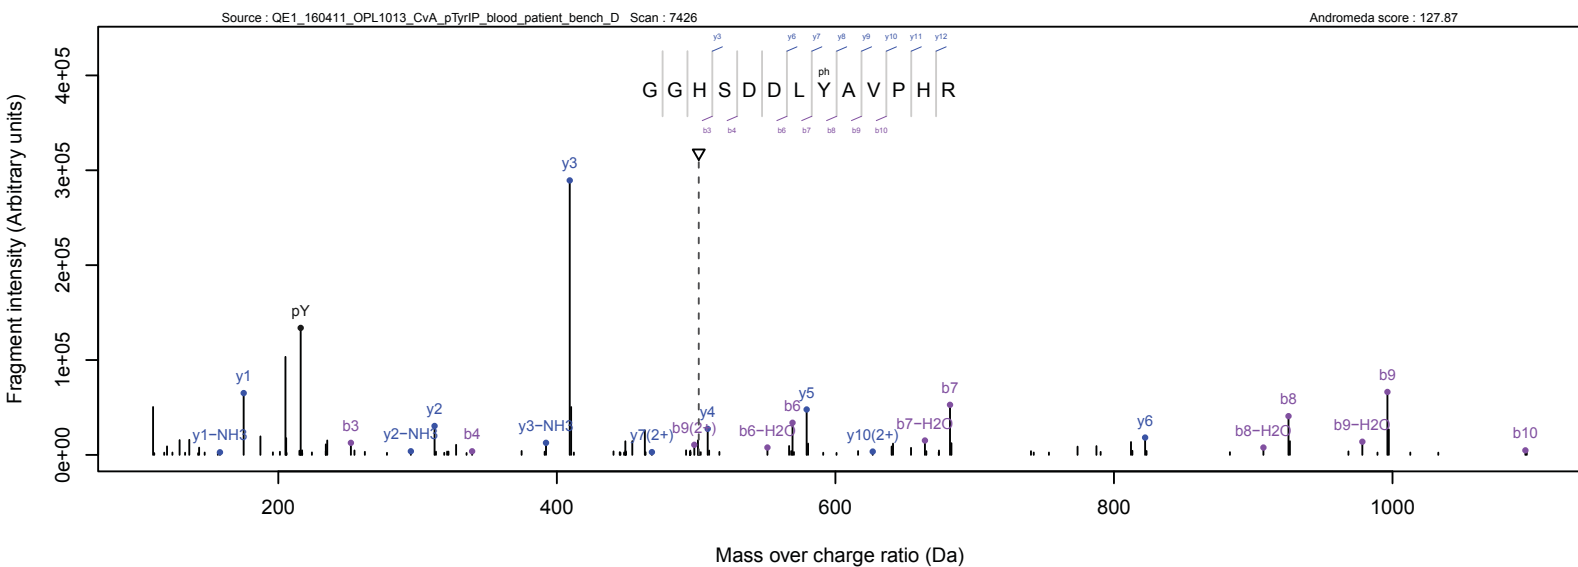

Y(ph)AGSALQYEDVSTAVQNLQK-2+

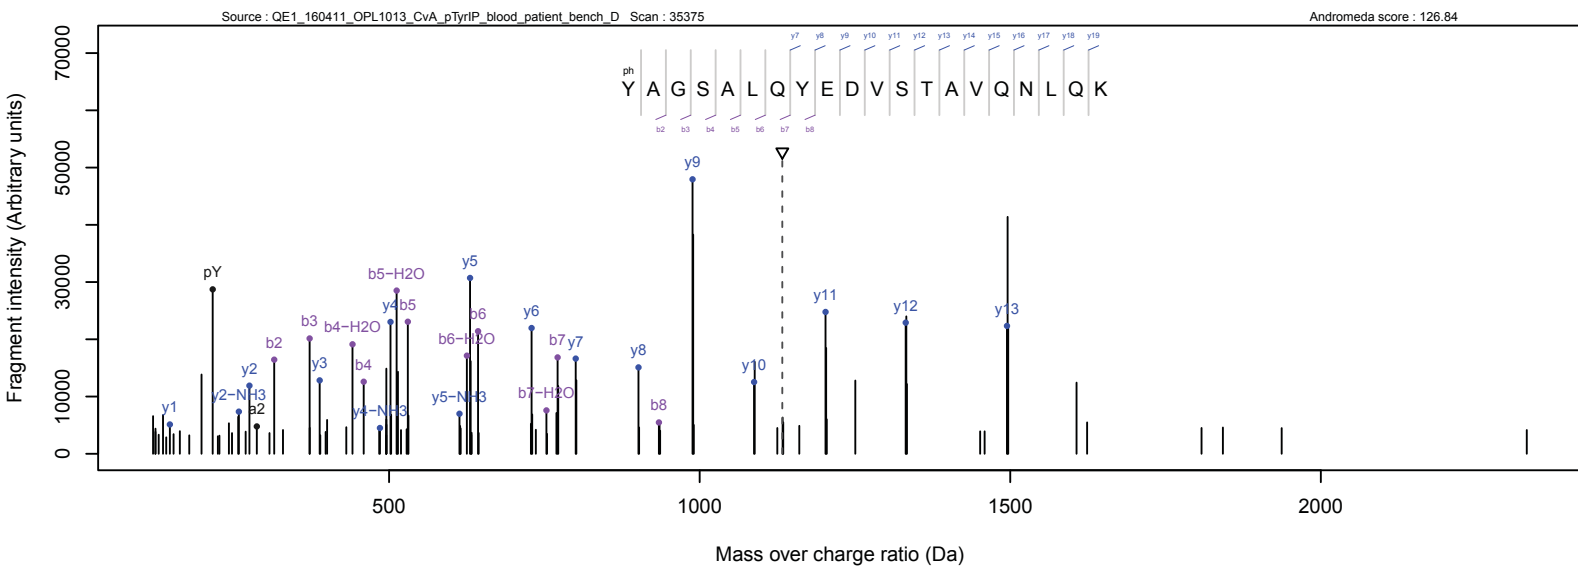



**KDLY(ph)ANTVLSGGTTMYPGIADR-2+**

Source : QE1\_160411\_OPL1013\_CvA\_pTyrIP\_blood\_patient\_bench\_D Scan : 32170

Andromeda score : 126.04

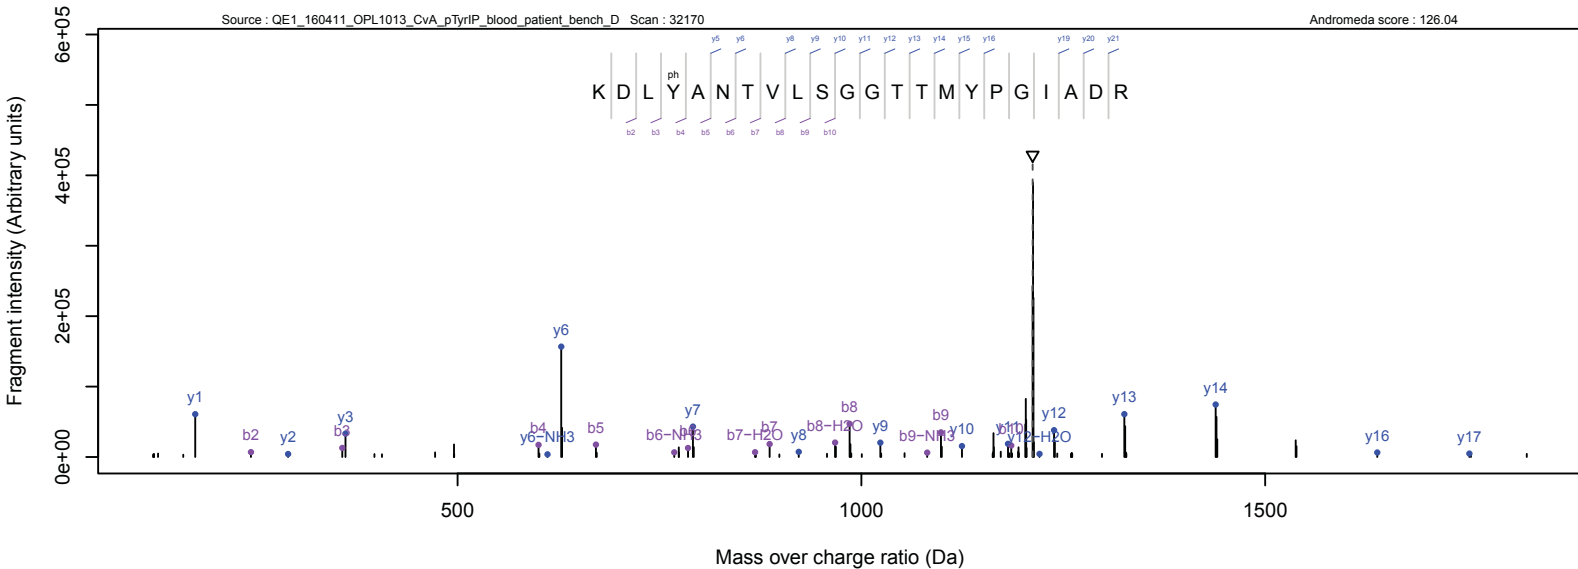

**GQEGEY(ph)AVPFDAVAR-2+**

Source : QE1\_160411\_OPL1013\_CvA\_pTyrIP\_blood\_patient\_bench\_D Scan : 27242

Andromeda score : 125.67

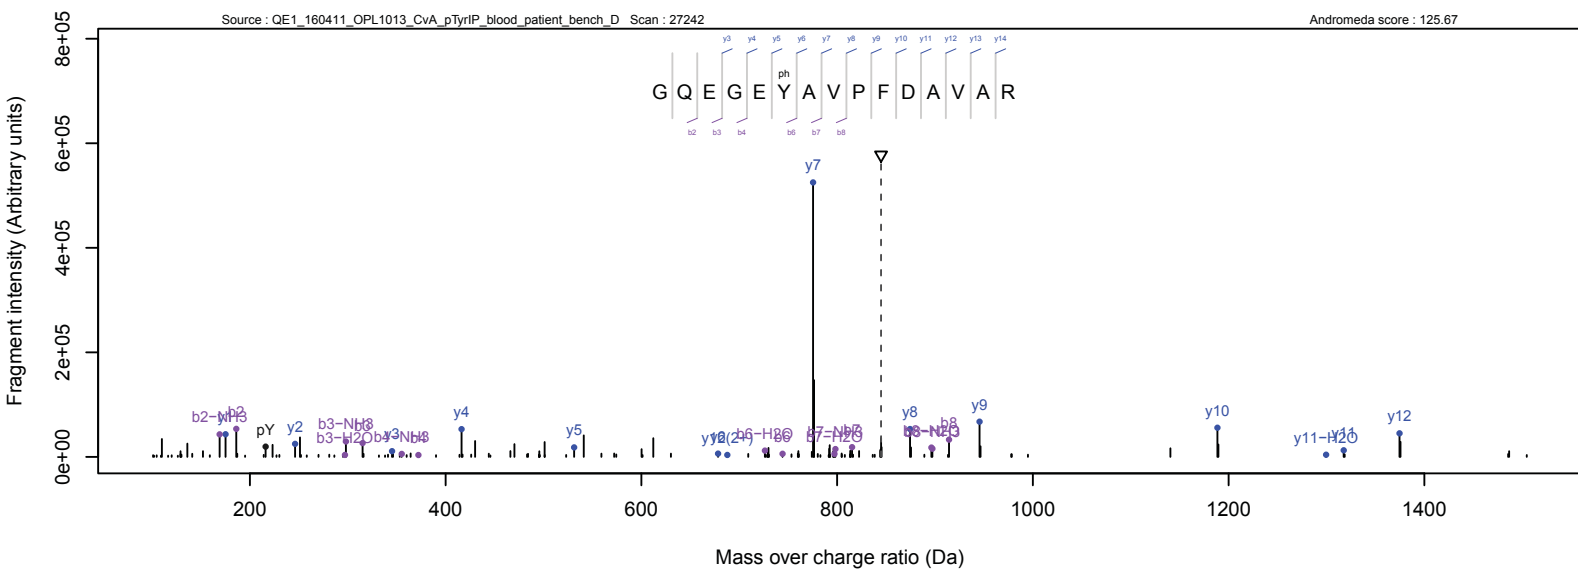

**VRHPLSY(ph)VAQR-3+**

Source : QE1\_160411\_OPL1013\_CvA\_pTyrIP\_blood\_patient\_bench\_C Scan : 9781

Andromeda score : 124.42

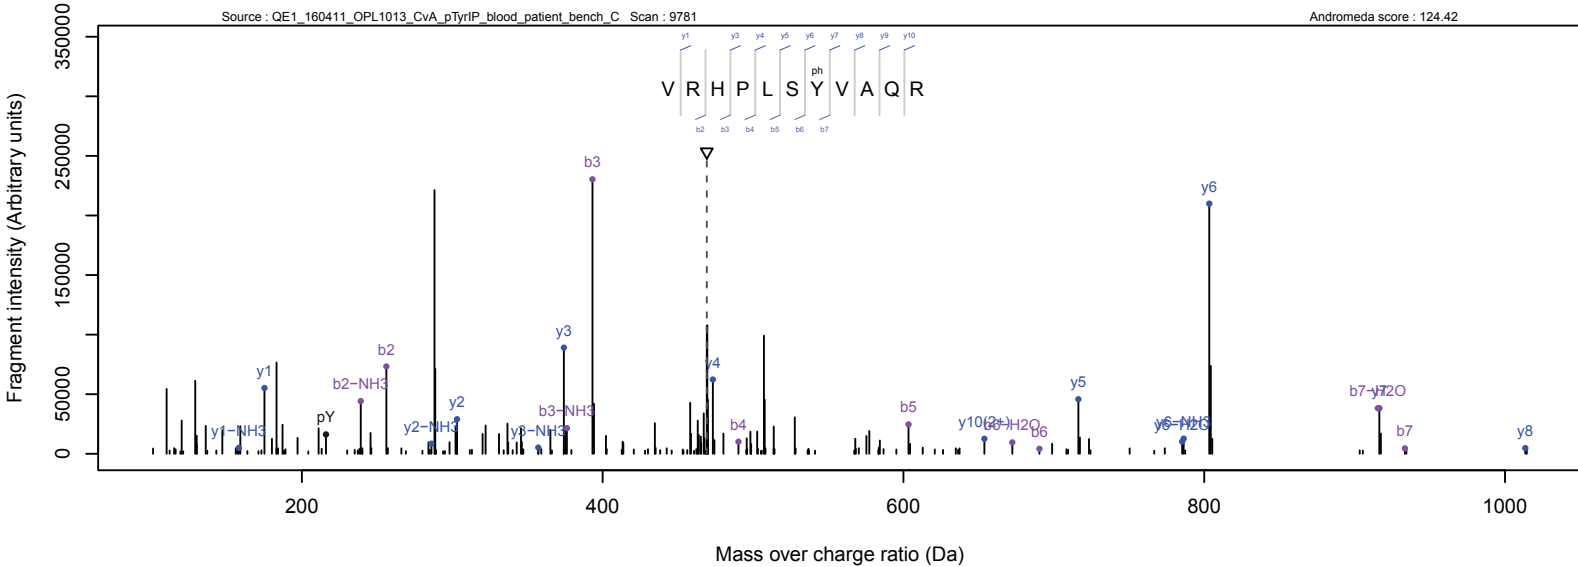

Y(ph)GIVDYMI EQSGPPSK-2+

Source : QE1\_160411\_OPL1013\_CvA\_pTyrIP\_blood\_patient\_bench\_B Scan : 36103

Andromeda score : 124.25

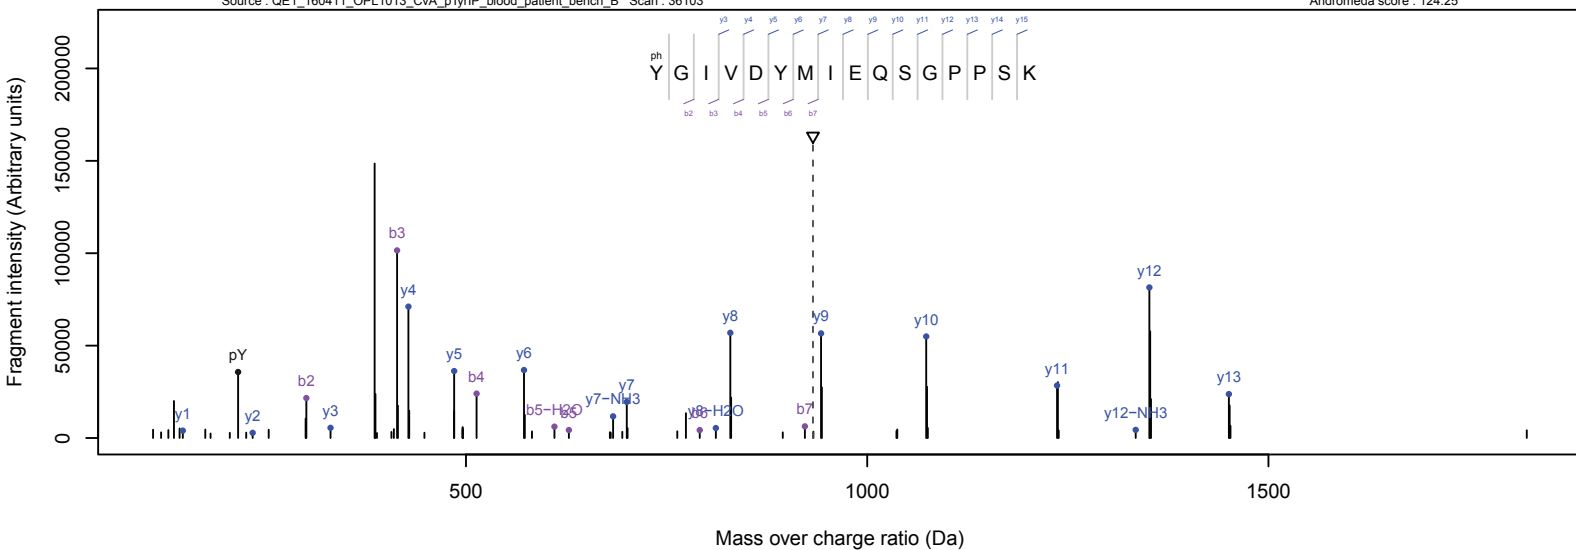

TIY(ph)TYIM(ox)ASR-2+

Source : QE1\_160411\_OPL1013\_CvA\_pTyrIP\_blood\_patient\_bench\_C Scan : 20254

Andromeda score : 122.69

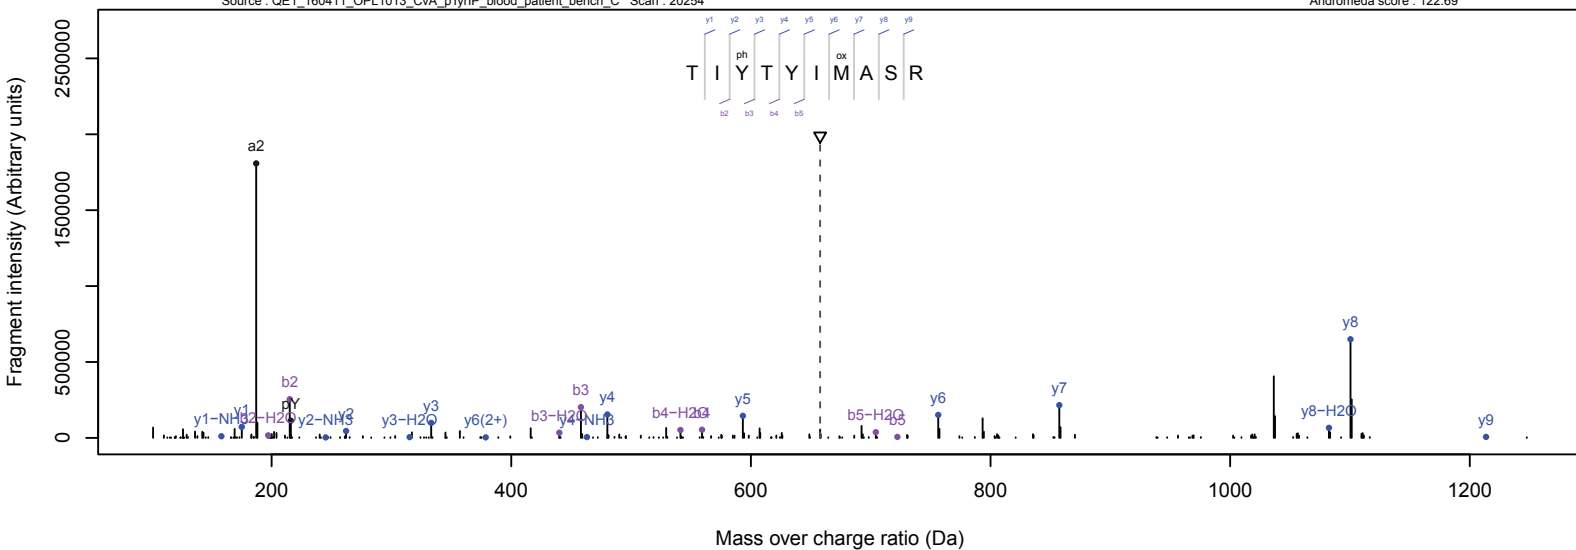

EY(ph)GM(ox)IYL GK-2+

Source : QE1\_160411\_OPL1013\_CvA\_pTyrIP\_blood\_patient\_bench\_C Scan : 17230

Andromeda score : 122.44

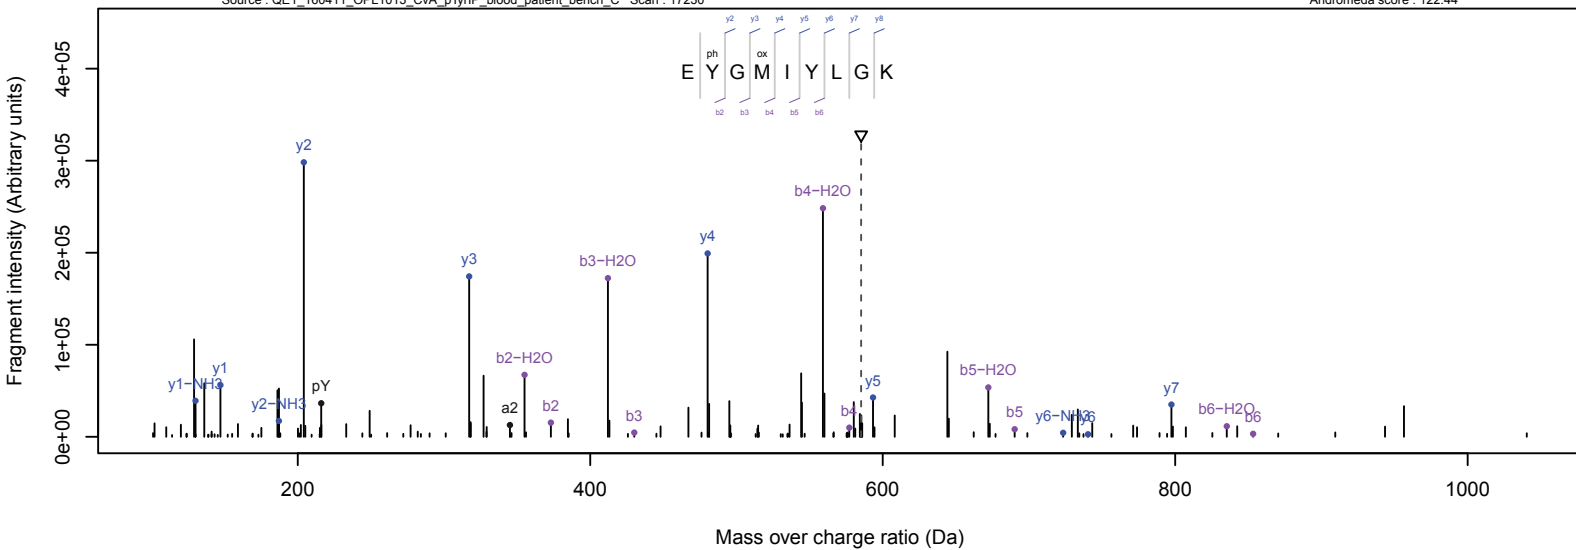



**YVLDDDEY(ph)TSSVGSKFPVR-3+**

Source: QE1\_160411\_OPL1013\_CvA\_pTyrIP\_blood\_patient\_bench\_C Scan: 28076

Andromeda score: 120.63

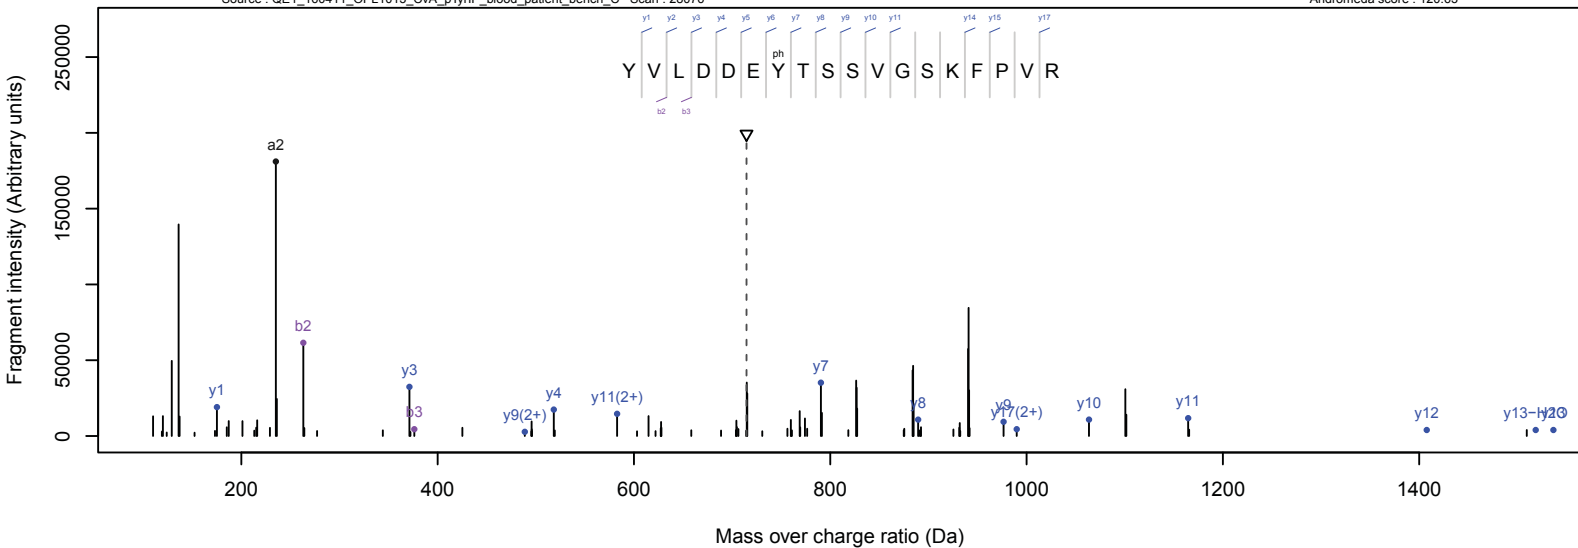

**KVSSTHY(ph)YLLPERPSYLER-4+**

Source: QE1\_160411\_OPL1013\_CvA\_pTyrIP\_blood\_patient\_bench\_C Scan: 24151

Andromeda score: 120.4

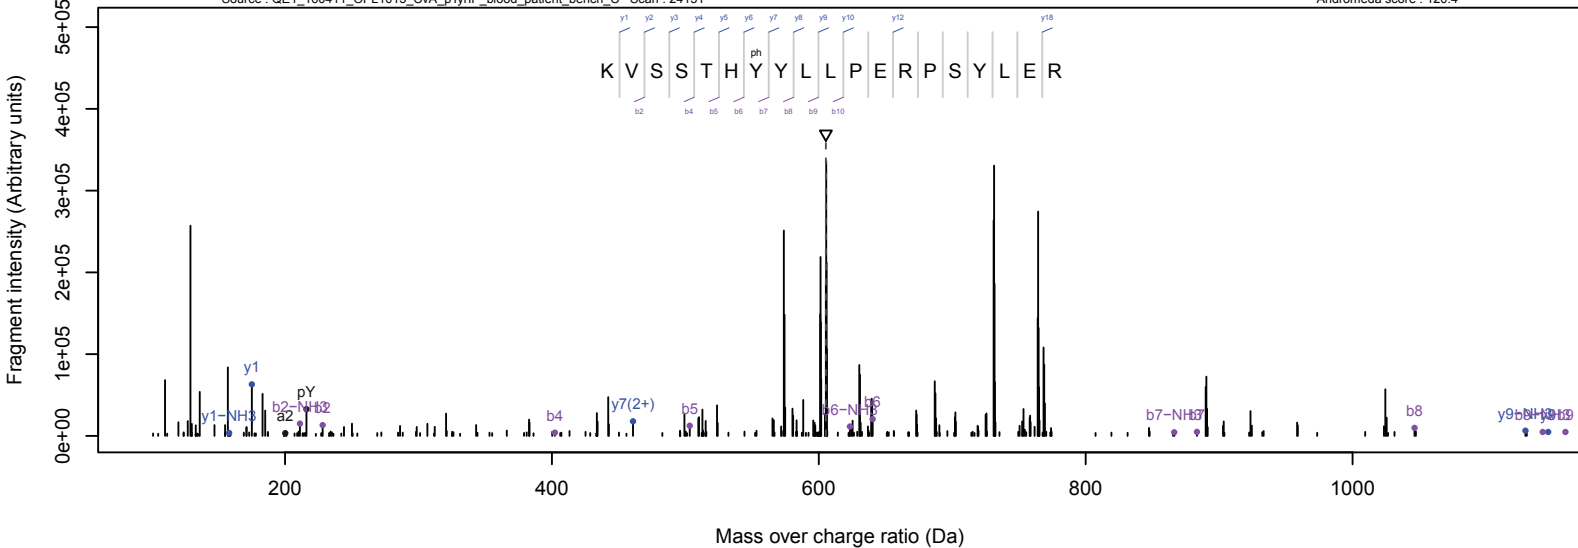

**LTGIKHELQANCY(ph)EEVKDR-4+**

Source: QE1\_160411\_OPL1013\_CvA\_pTyrIP\_blood\_patient\_bench\_D Scan: 11625

Andromeda score: 120.4

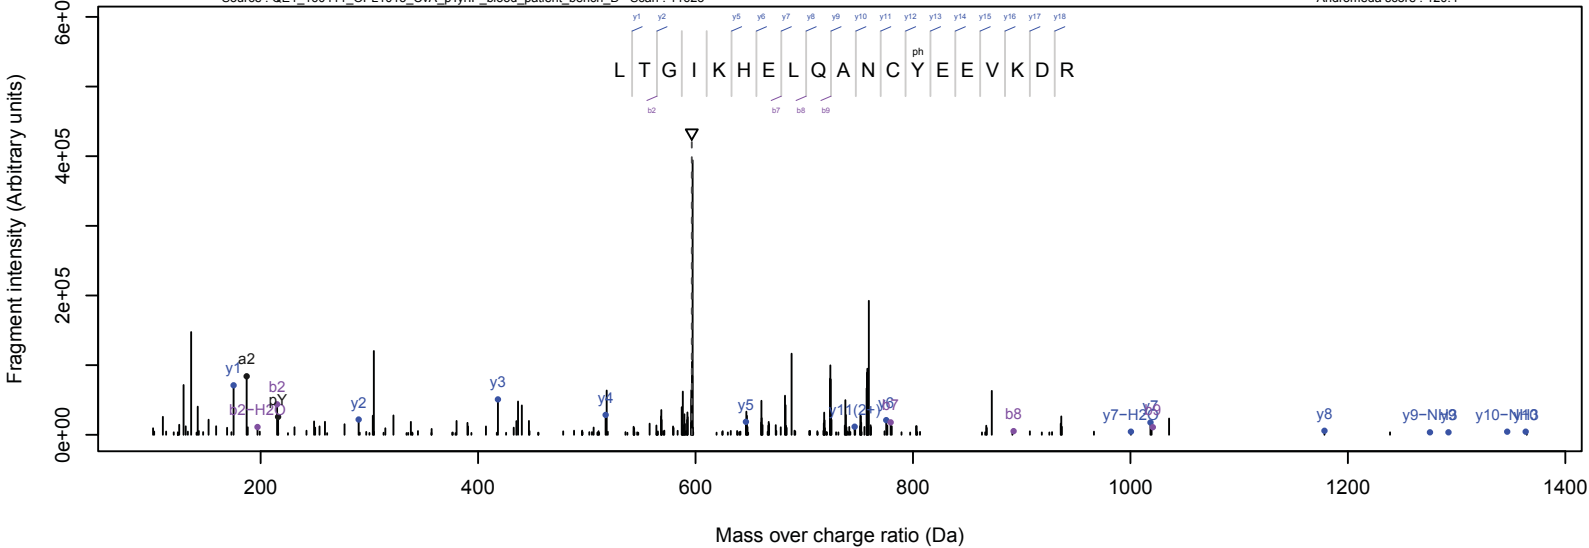

**EKLY(ph)DFVKTER-2+**

Source : QE1\_160411\_OPL1013\_CvA\_pTyrIP\_blood\_patient\_bench\_C Scan : 19007

Andromeda score : 119.39

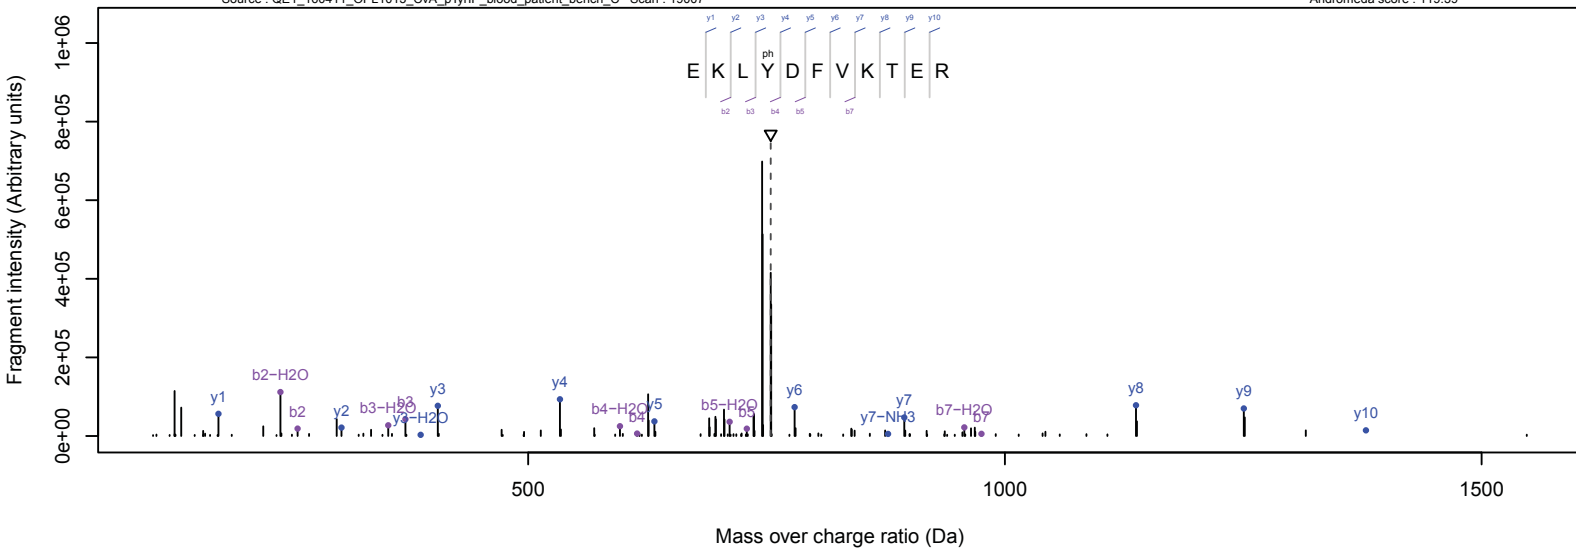

**ALDY(ph)YMLR-2+**

Source : QE1\_160411\_OPL1013\_CvA\_pTyrIP\_blood\_patient\_bench\_B Scan : 25630

Andromeda score : 119.17

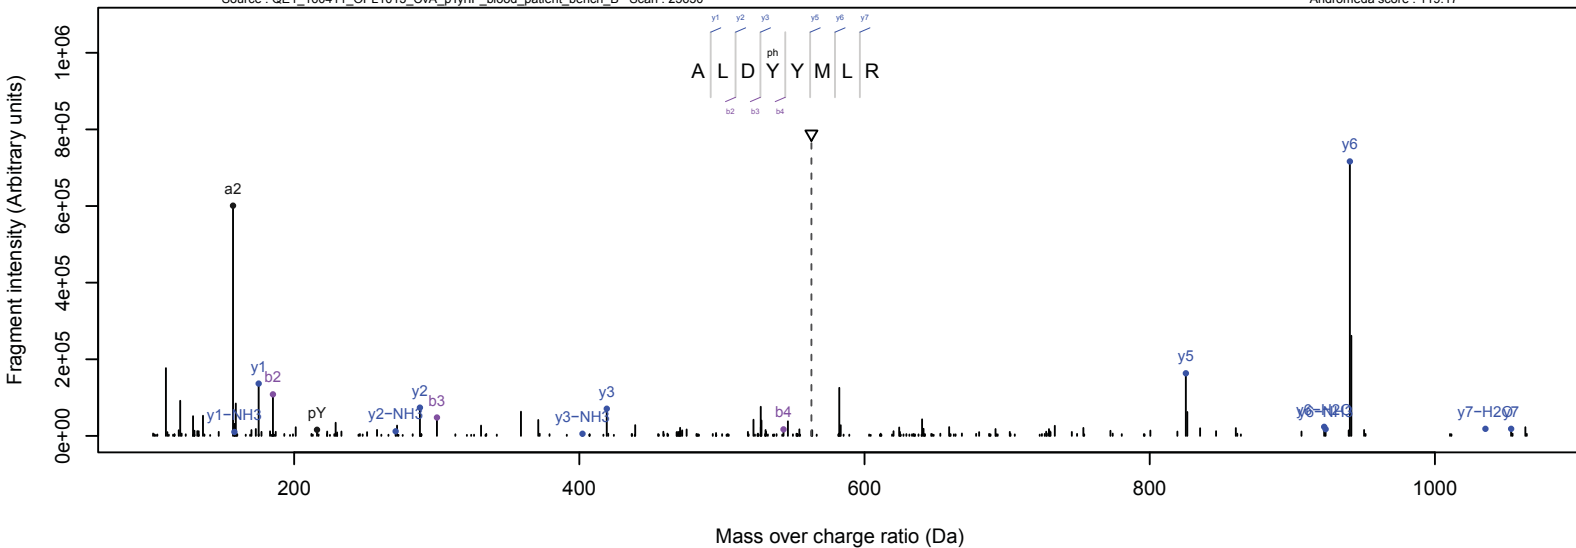

**DSNY(ph)HLLM(ox)SVQESLER-2+**

Source : QE1\_160411\_OPL1013\_CvA\_pTyrIP\_blood\_patient\_bench\_C Scan : 35937

Andromeda score : 118.72

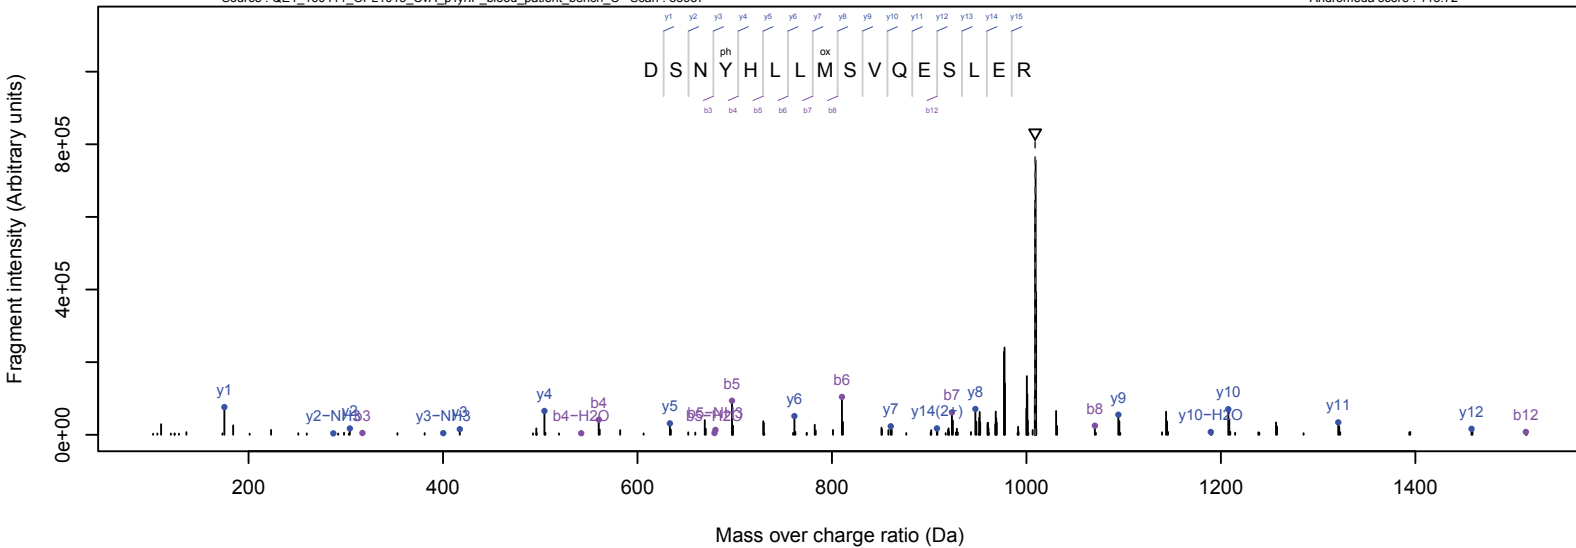



CDVDIRKDL(ph)ANTVLSGGTTM(ox)YPGIADR-3+

Source: QE1\_160411\_OPL1013\_CvA\_pTyrIP\_blood\_patient\_bench\_C Scan: 35532

Andromeda score: 117.83

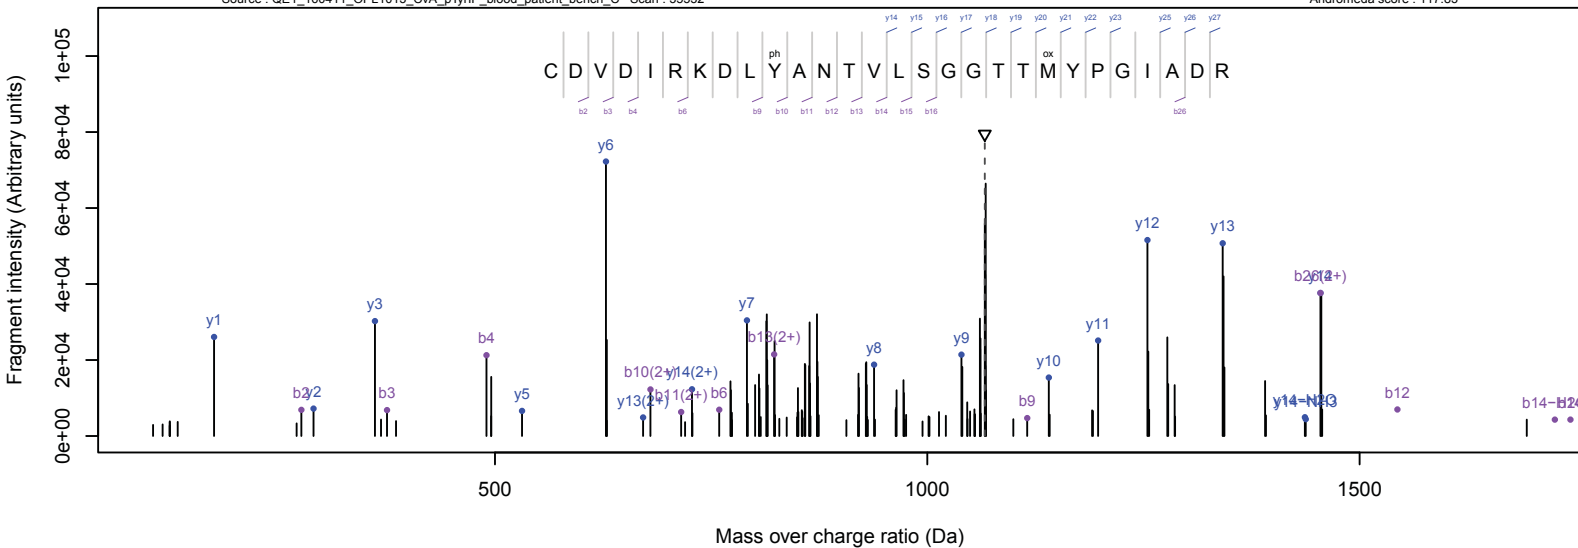

SREEDPTLTEEEISAM(ox)YS(ph)SVNKPGLVNK-4+

Source: QE1\_160411\_OPL1013\_CvA\_pTyrIP\_blood\_patient\_bench\_C Scan: 24464

Andromeda score: 117.83

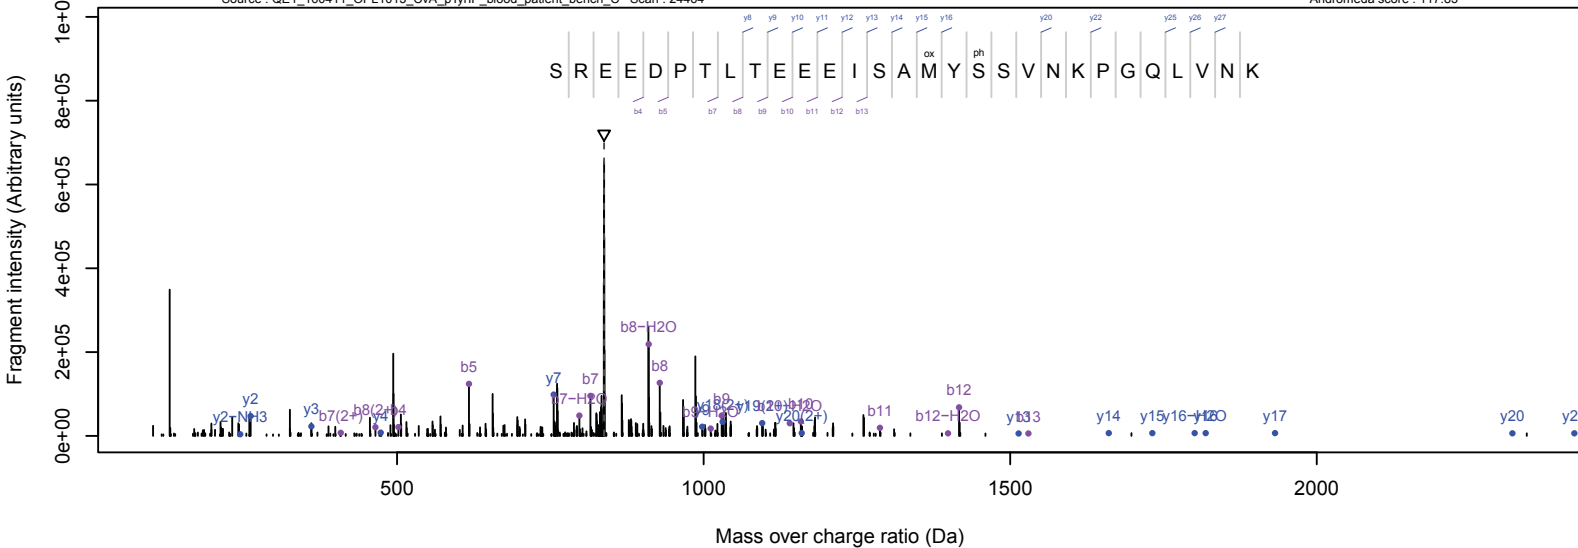

QRPVPQPSSASLDEYTLMR-3+

Source: QE1\_160411\_OPL1013\_CvA\_pTyrIP\_blood\_patient\_bench\_B Scan: 23313

Andromeda score: 117.65

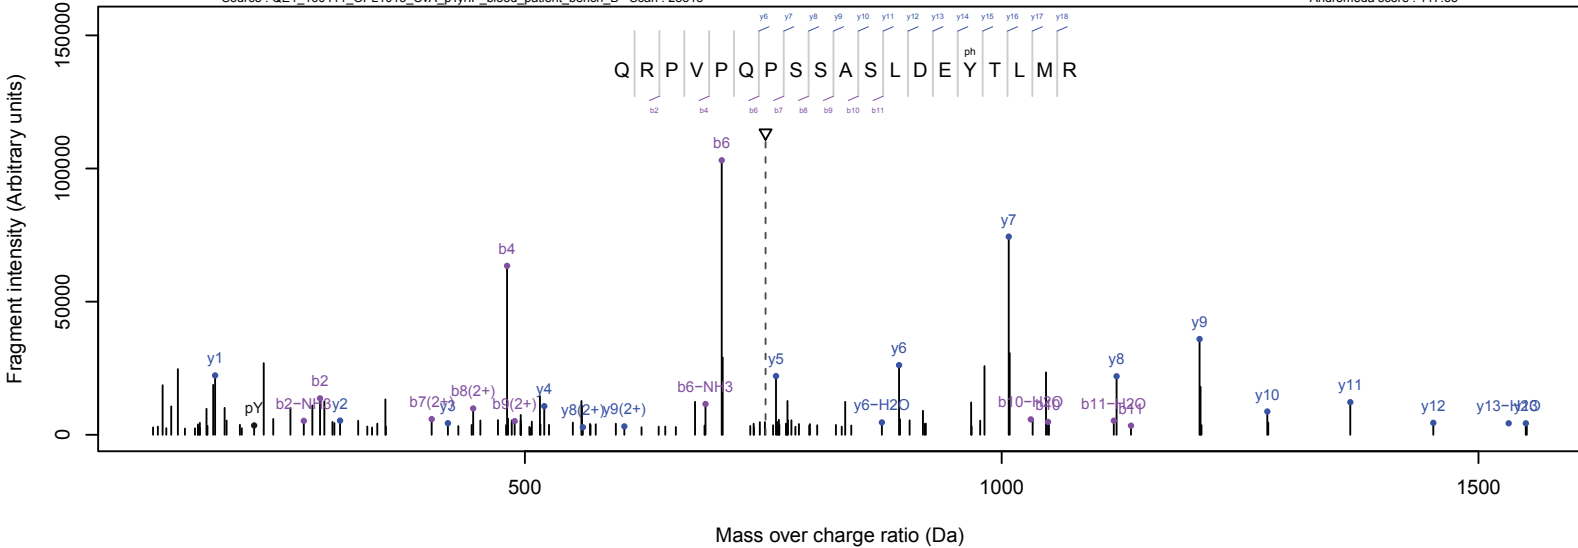

EEDPTLTEEISAMYS(ph)SVNKPGQLVNK-3+

Source : QE1\_160411\_OPL1013\_CvA\_pTyrIP\_blood\_patient\_bench\_D Scan : 37119

Andromeda score : 117.62

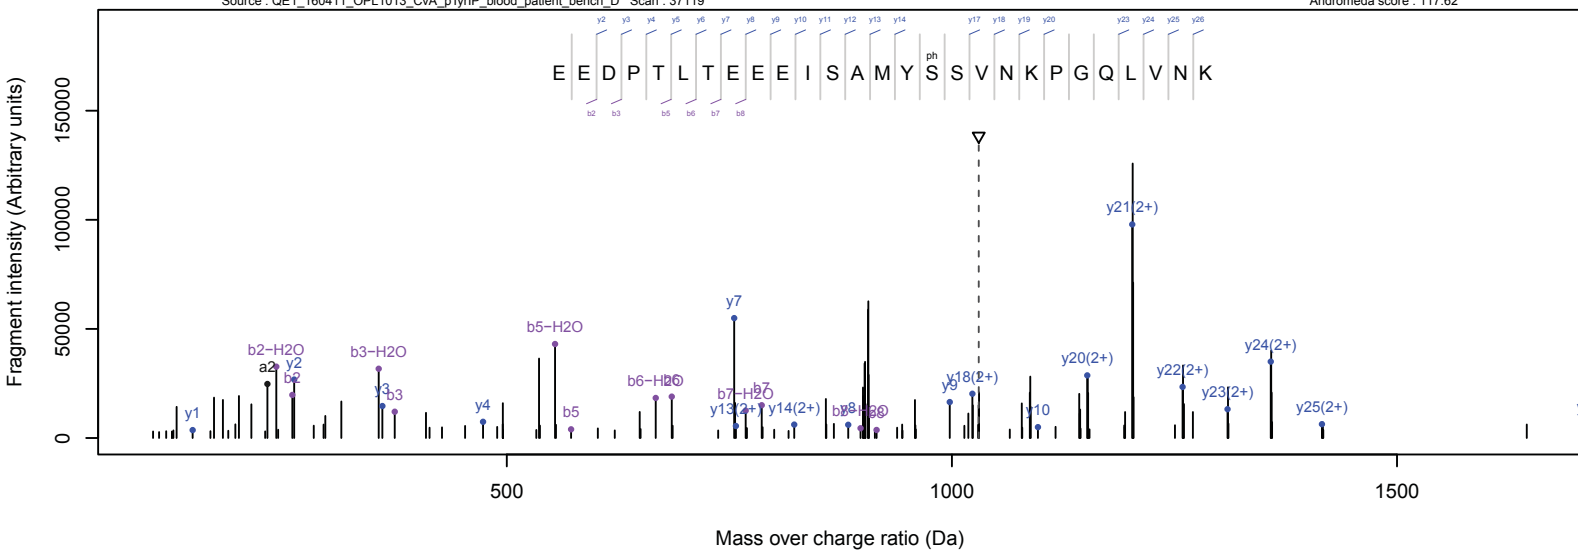

HGSEEA YIDPIAMEY(ph)YNWGR-3+

Source : QE1\_160411\_OPL1013\_CvA\_pTyrIP\_blood\_patient\_bench\_D Scan : 40912

Andromeda score : 117.3

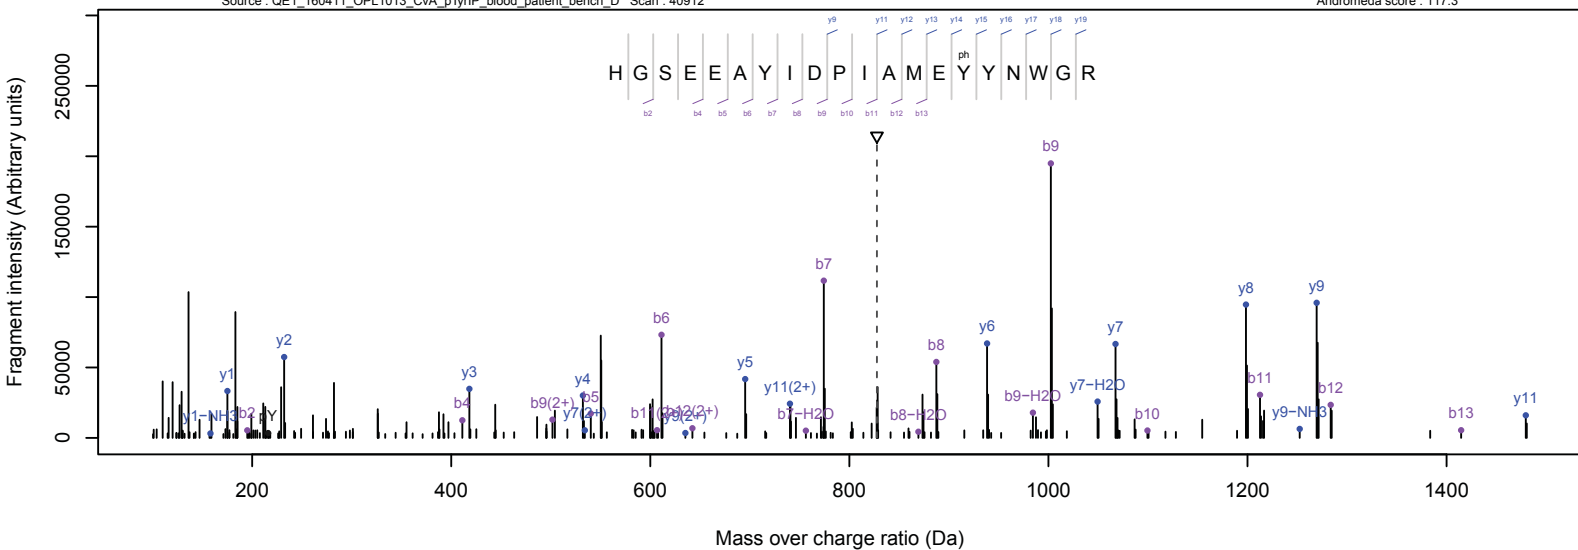

LKQFDAY(ph)PK-2+

Source : QE1\_160411\_OPL1013\_CvA\_pTyrIP\_blood\_patient\_bench\_D Scan : 8424

Andromeda score : 117.28

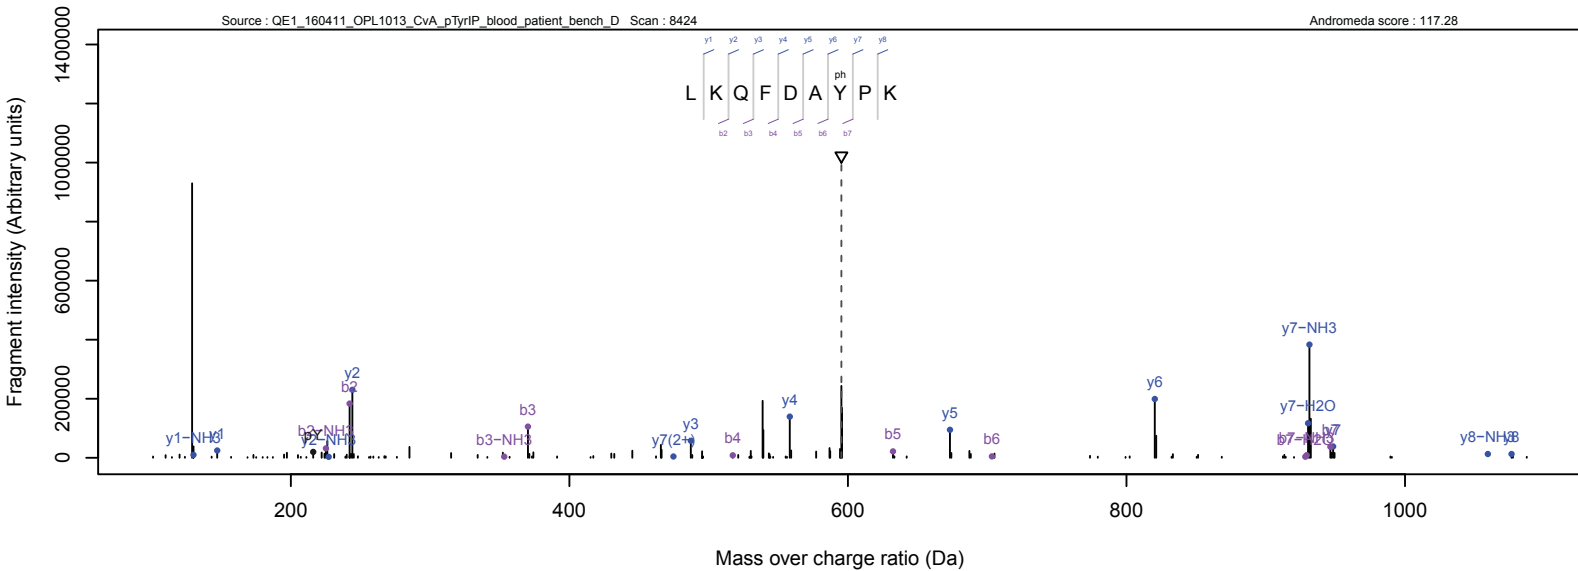

VIQAQTAFSANPANPAILSEASAPIPHDGNLYPR-4+

Source : QE1\_160411\_OPL1013\_CvA\_pTyrIP\_blood\_patient\_bench\_C Scan : 41841

Andromeda score : 117.21

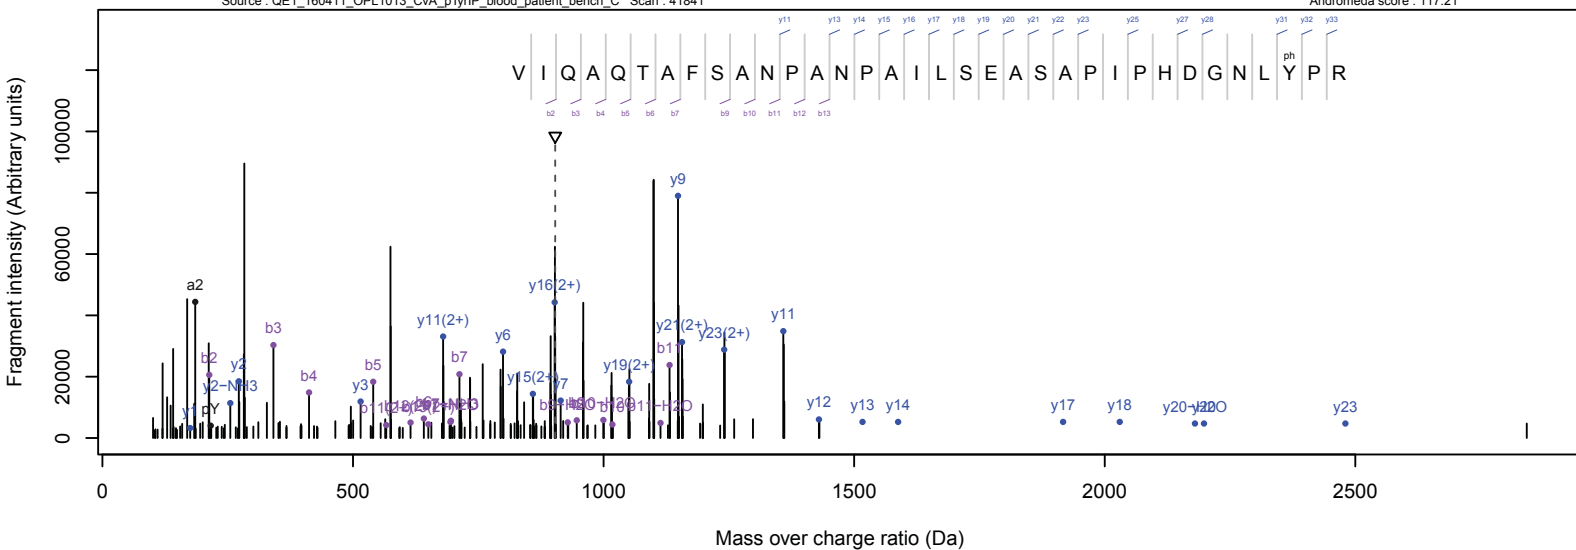

TGFSTSPESPYTHWK-3+

Source : QE1\_160411\_OPL1013\_CvA\_pTyrIP\_blood\_patient\_bench\_C Scan : 18614

Andromeda score : 117.2

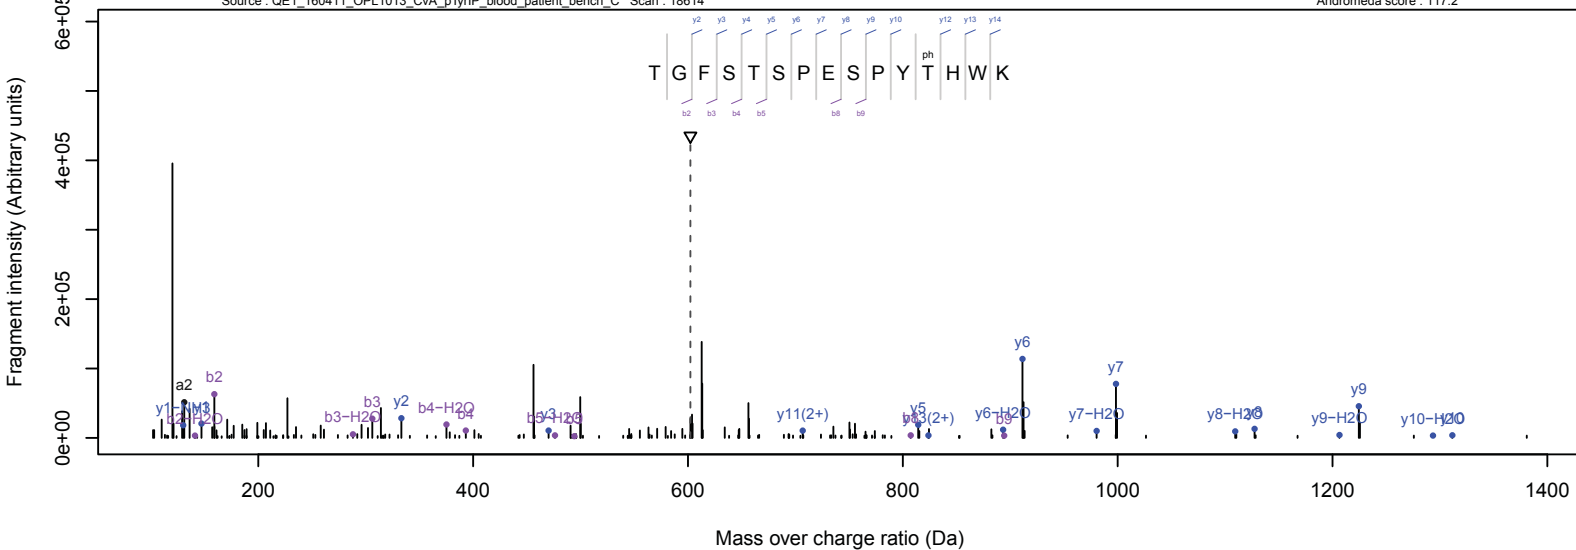

Y(ph)GMNPHQTPAQLYTLQPK-3+

Source : QE1\_160411\_OPL1013\_CvA\_pTyrIP\_blood\_patient\_bench\_B Scan : 23532

Andromeda score : 117.18

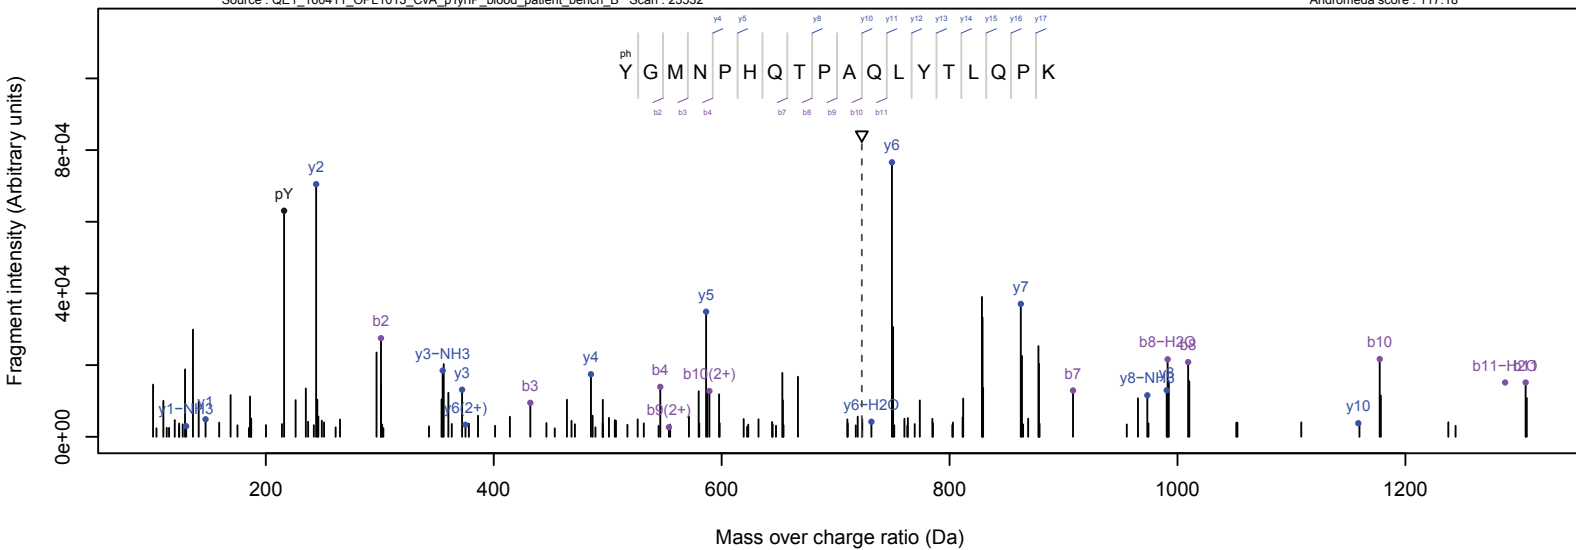

AAVPSGASTGIY(ph)EALELR-2+

Source : QE1\_160411\_OPL1013\_CvA\_pTyrIP\_blood\_patient\_bench\_C Scan : 39053

Andromeda score : 116.87

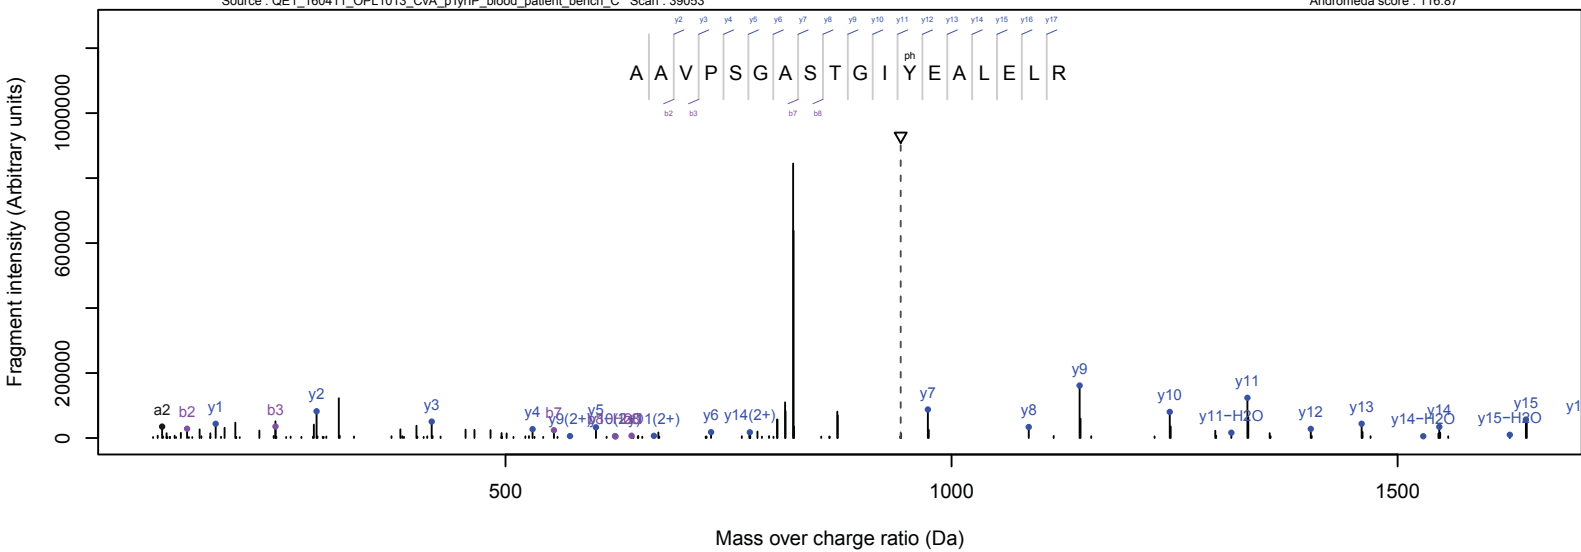

ALDY(ph)YM(ox)LR-2+

Source : QE1\_160411\_OPL1013\_CvA\_pTyrIP\_blood\_patient\_bench\_B Scan : 18518

Andromeda score : 116.73

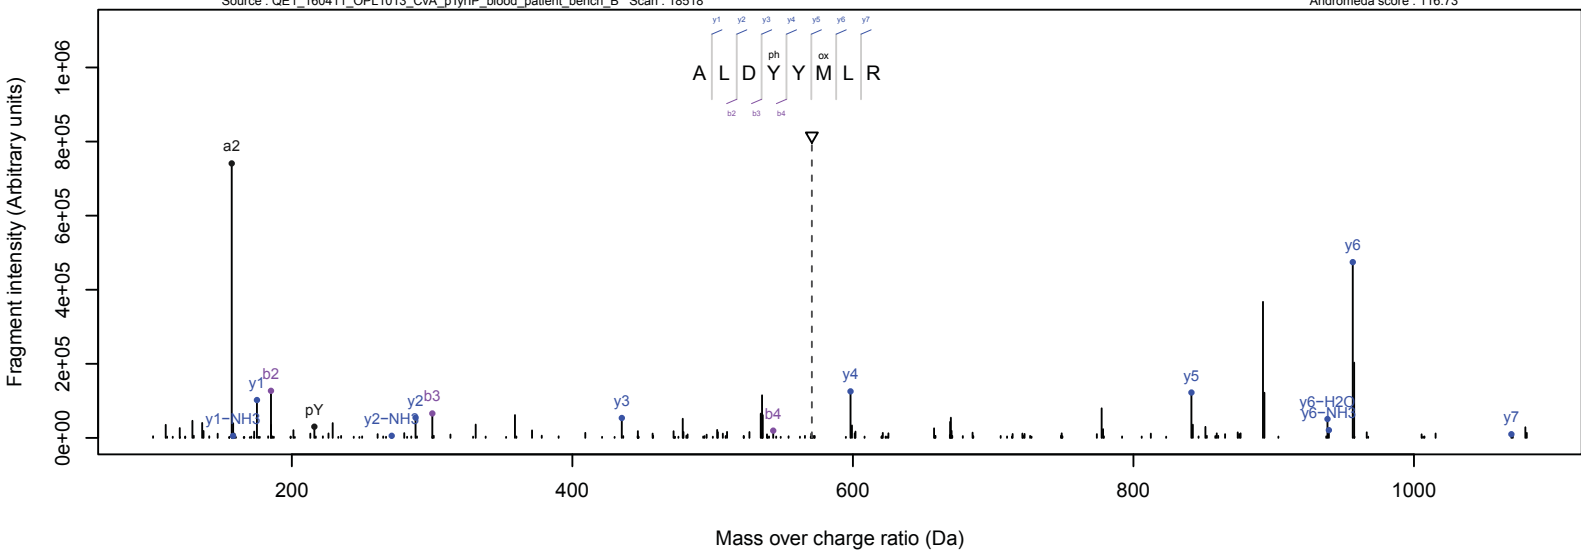

DSNY(ph)HLLMSVQESLER-3+

Source : QE1\_160411\_OPL1013\_CvA\_pTyrIP\_blood\_patient\_bench\_D Scan : 37978

Andromeda score : 116.04

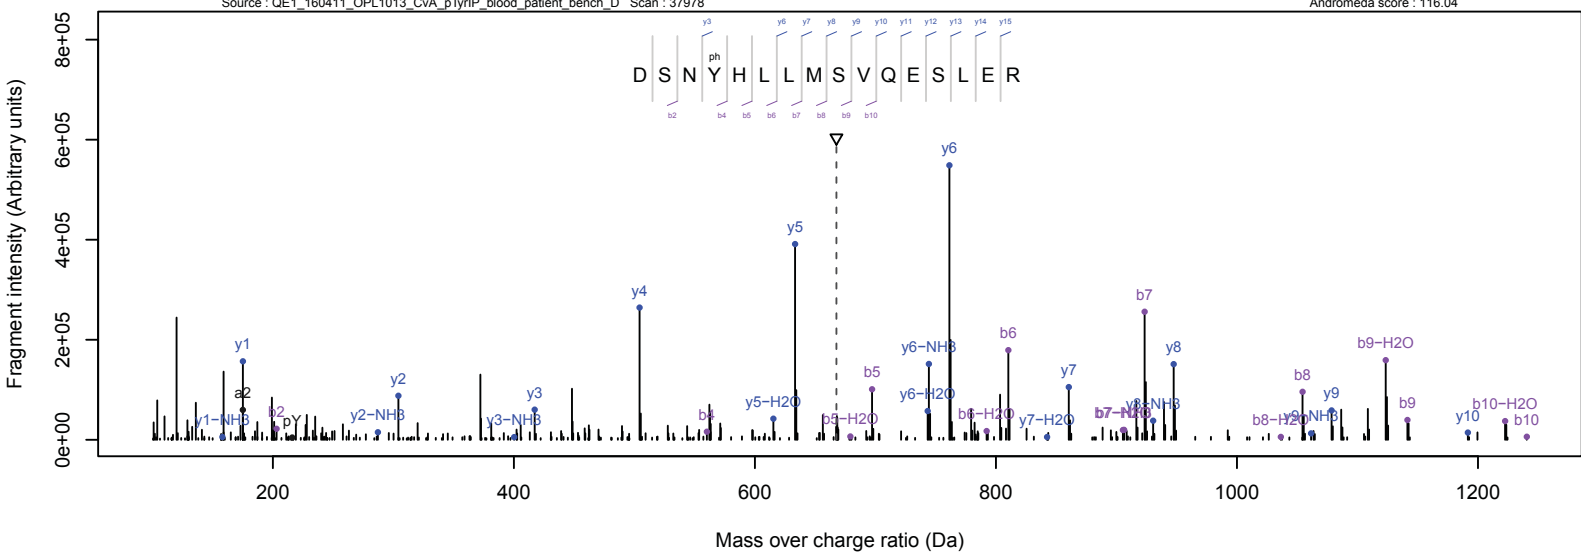

## NLNHVSY(ph)GR-2+

Source: QE1\_160411\_OPL1013\_CvA\_pTyrIP\_blood\_patient\_bench\_D Scan: 3057

Andromeda score: 115.78

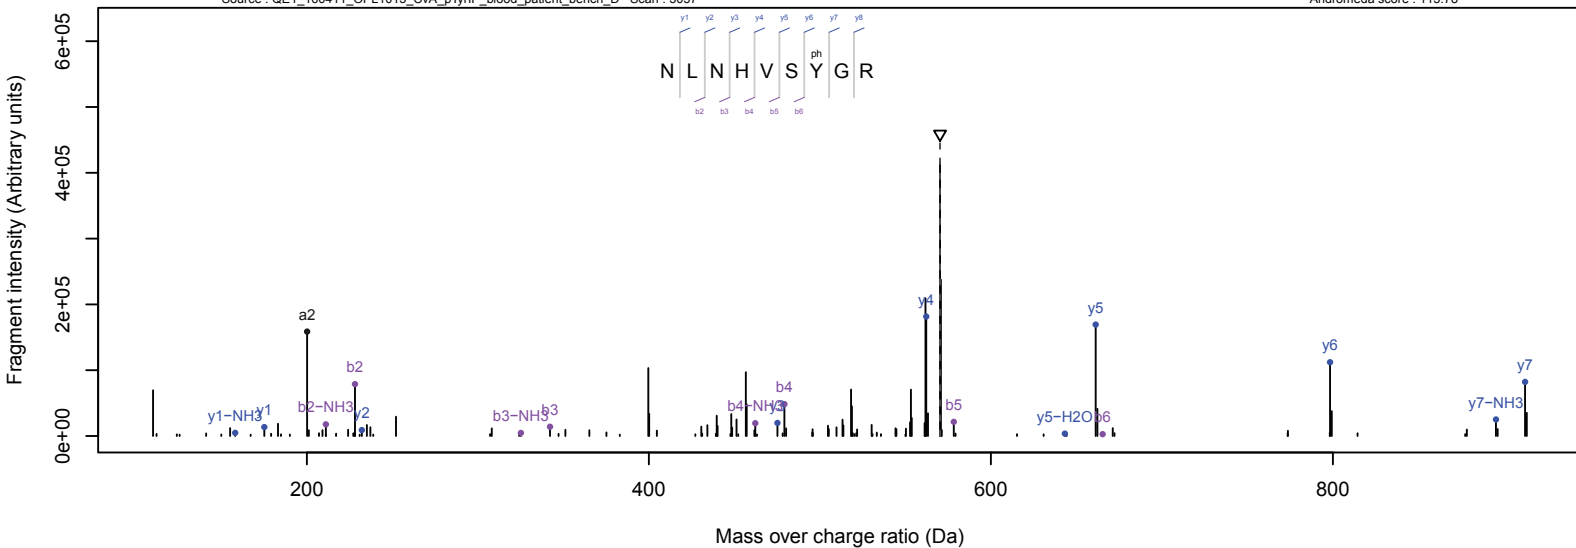

## KDTEVY(ph)SEVRK-3+

Source: QE1\_160411\_OPL1013\_CvA\_pTyrIP\_blood\_patient\_bench\_C Scan: 4108

Andromeda score: 115.57

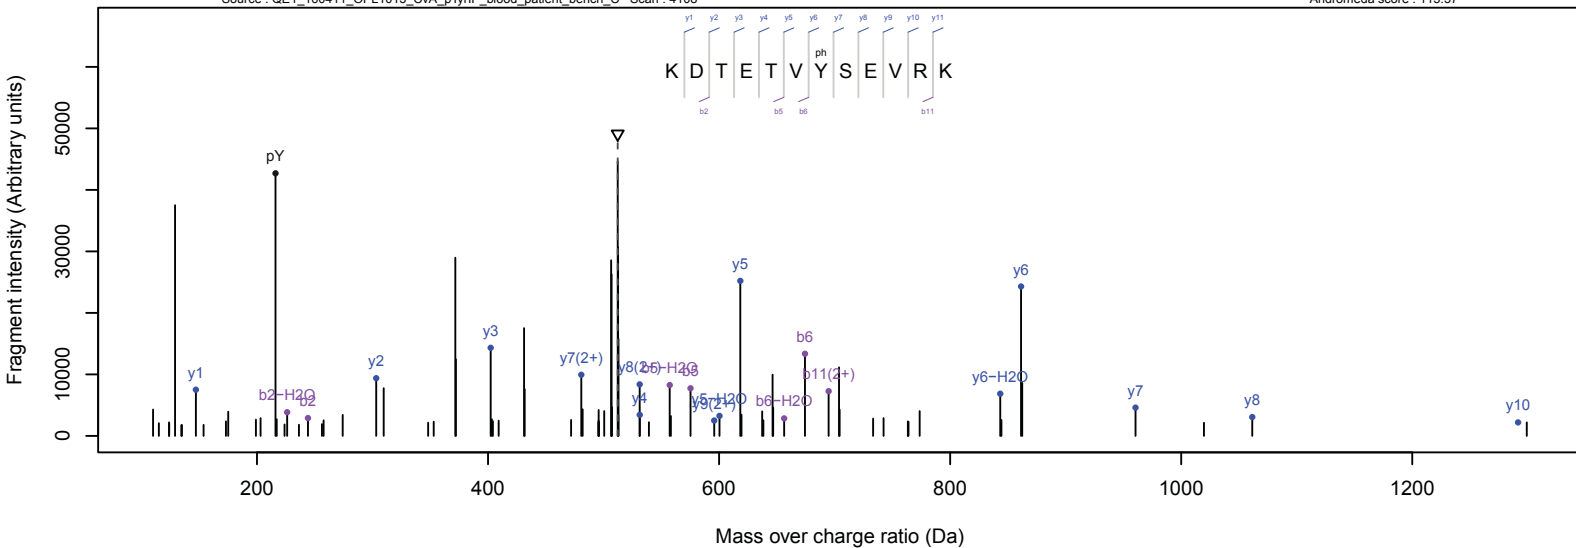

## HY(ph)SVLVPTVSHSGFLYK-3+

Source: QE1\_160411\_OPL1013\_CvA\_pTyrIP\_blood\_patient\_bench\_D Scan: 29947

Andromeda score: 114.63

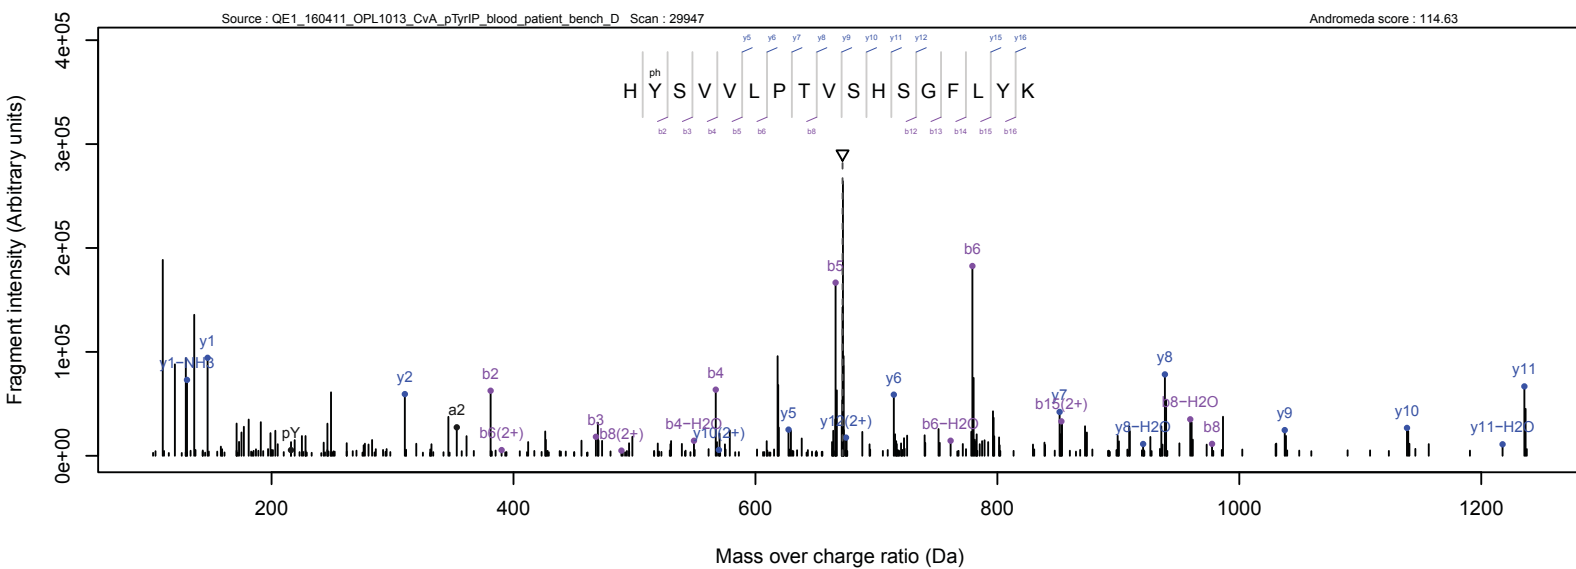

## NTQPAES(ph)RIYDEILQSK-2+

Source : QE1\_160411\_OPL1013\_CvA\_pTyrIP\_blood\_patient\_bench\_D Scan : 24457

Andromeda score : 114.63

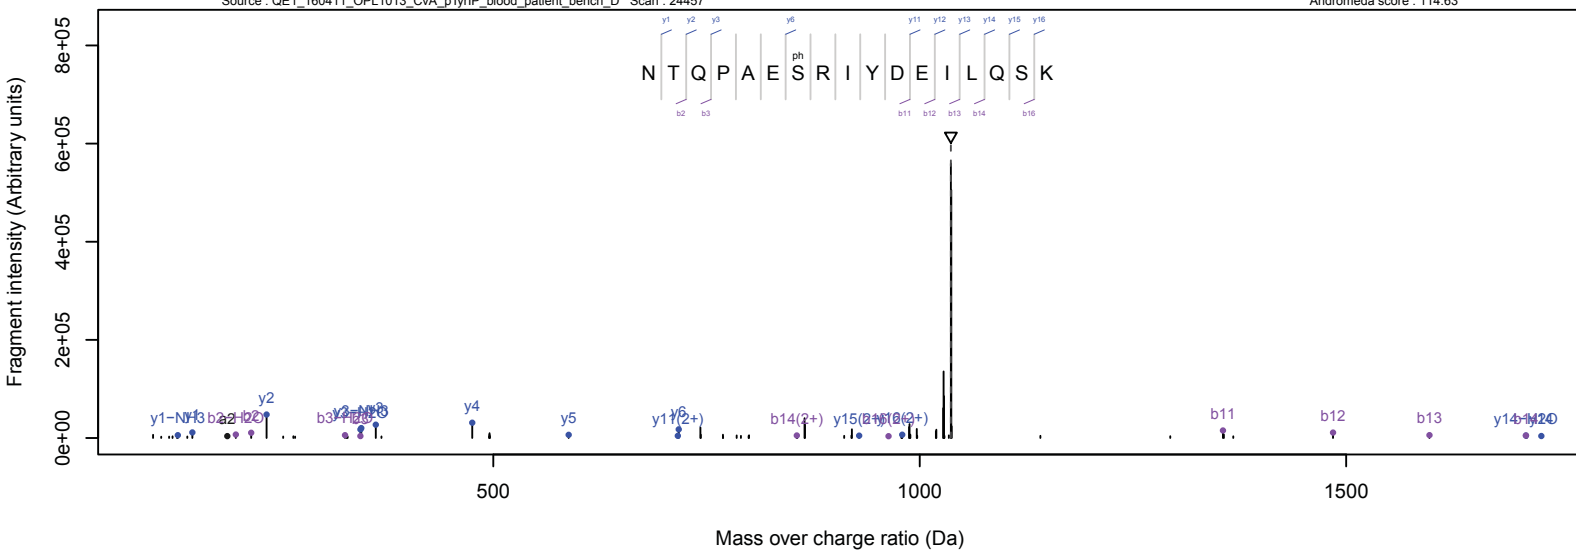

## STTTGHLIY(ph)K-2+

Source : QE1\_160411\_OPL1013\_CvA\_pTyrIP\_blood\_patient\_bench\_D Scan : 6138

Andromeda score : 113.93

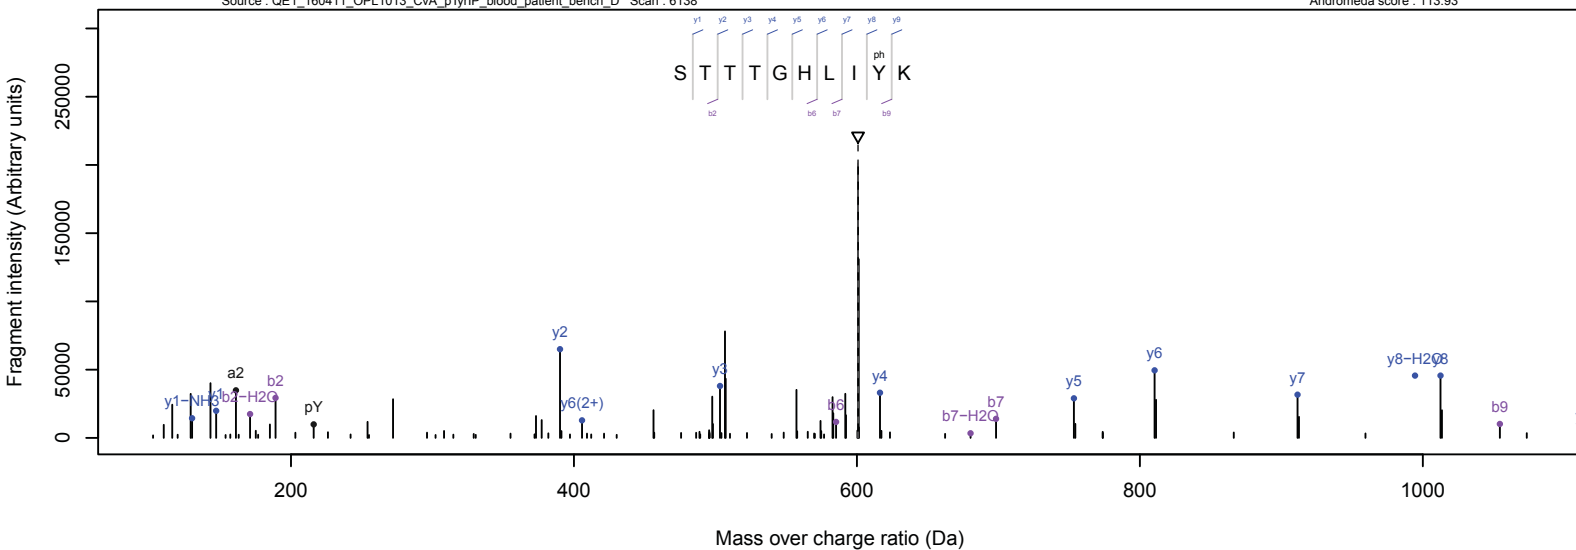

## TY(ph)SLGSALRPSTSR-3+

Source : QE1\_160411\_OPL1013\_CvA\_pTyrIP\_blood\_patient\_bench\_C Scan : 16017

Andromeda score : 113.76

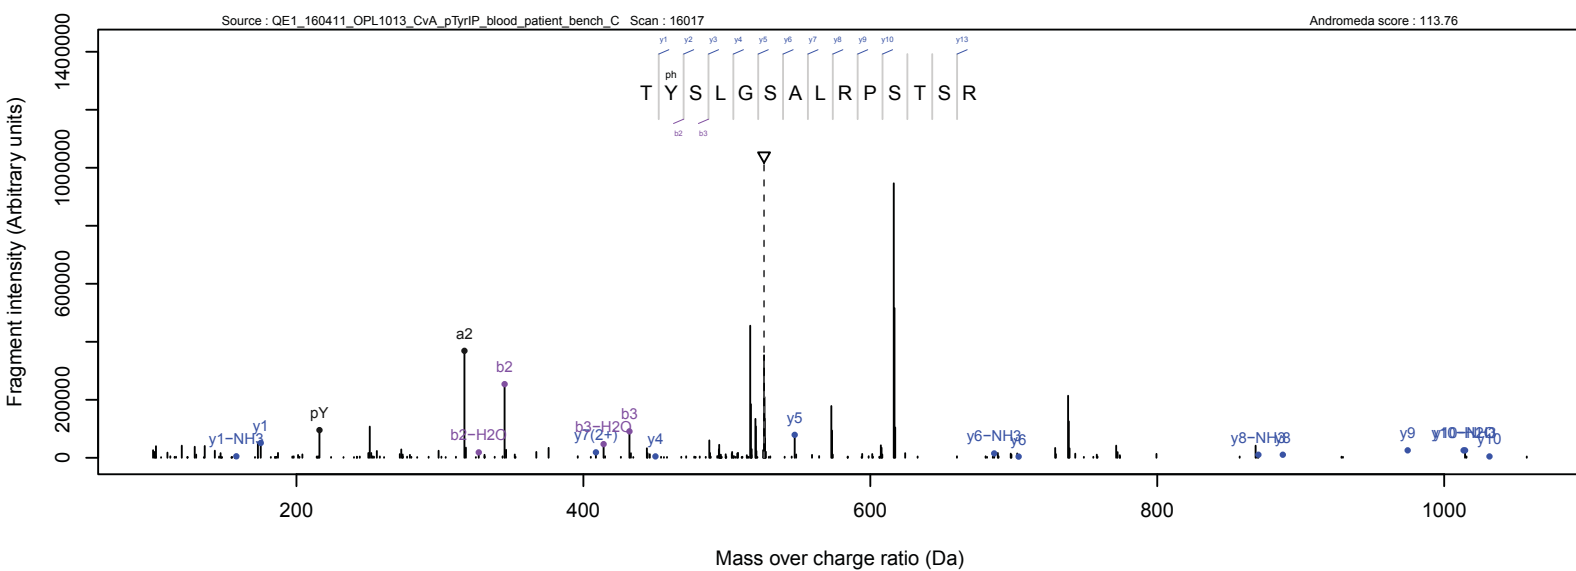

**KRGWDENVY<sup>ph</sup>YTVPLVR-3+**

Source : QE1\_160411\_OPL1013\_CvA\_pTyrIP\_blood\_patient\_bench\_D Scan : 28605

Andromeda score : 113.47

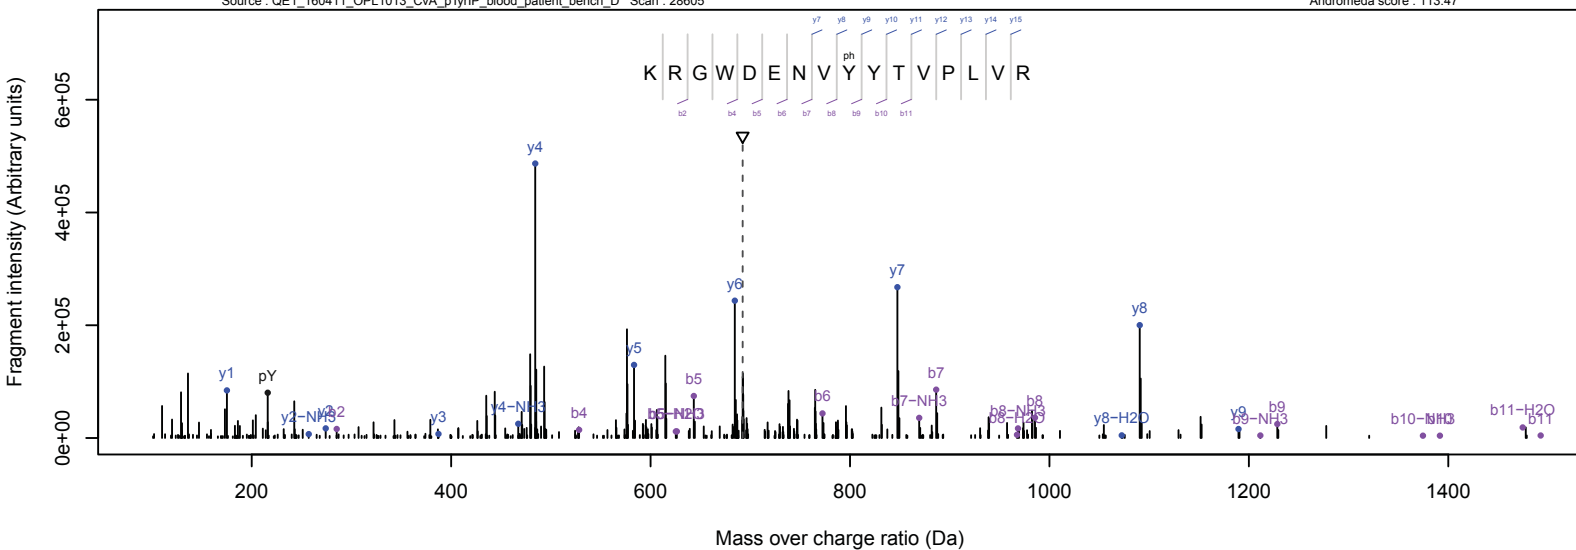

**ITETESPY<sup>ph</sup>QELQGQR-2+**

Source : QE1\_160411\_OPL1013\_CvA\_pTyrIP\_blood\_patient\_bench\_D Scan : 14546

Andromeda score : 113.25

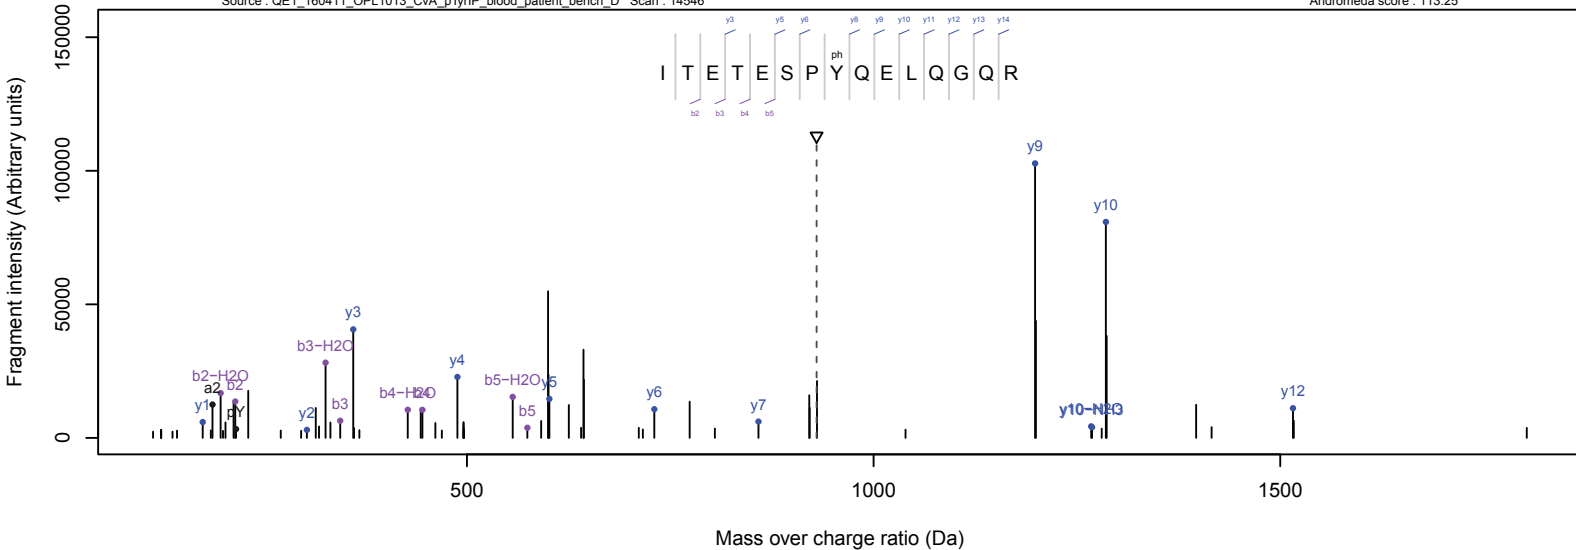

**SYQY<sup>ph</sup>LVESIR-2+**

Source : QE1\_160411\_OPL1013\_CvA\_pTyrIP\_blood\_patient\_bench\_C Scan : 30420

Andromeda score : 113.22

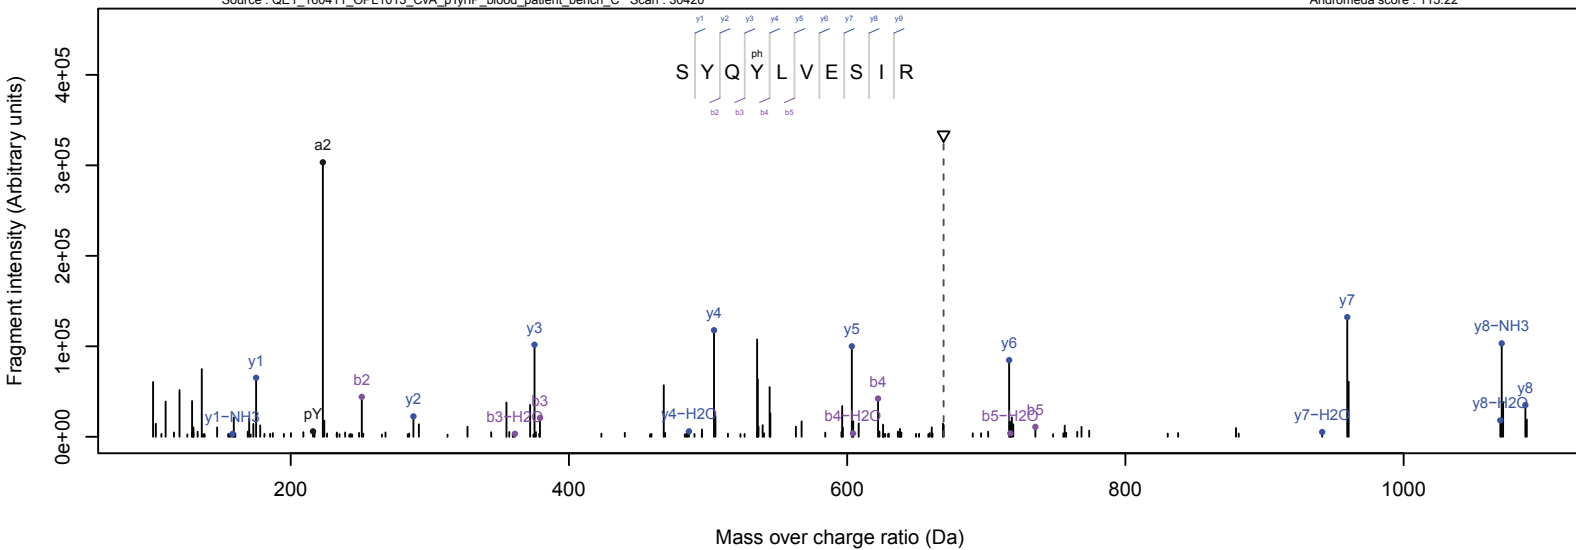

TINPSKY(ph)QTIR-3+

Source: QE1\_160411\_OPL1013\_CvA\_pTyrIP\_blood\_patient\_bench\_D Scan: 8953

Andromeda score: 113.22

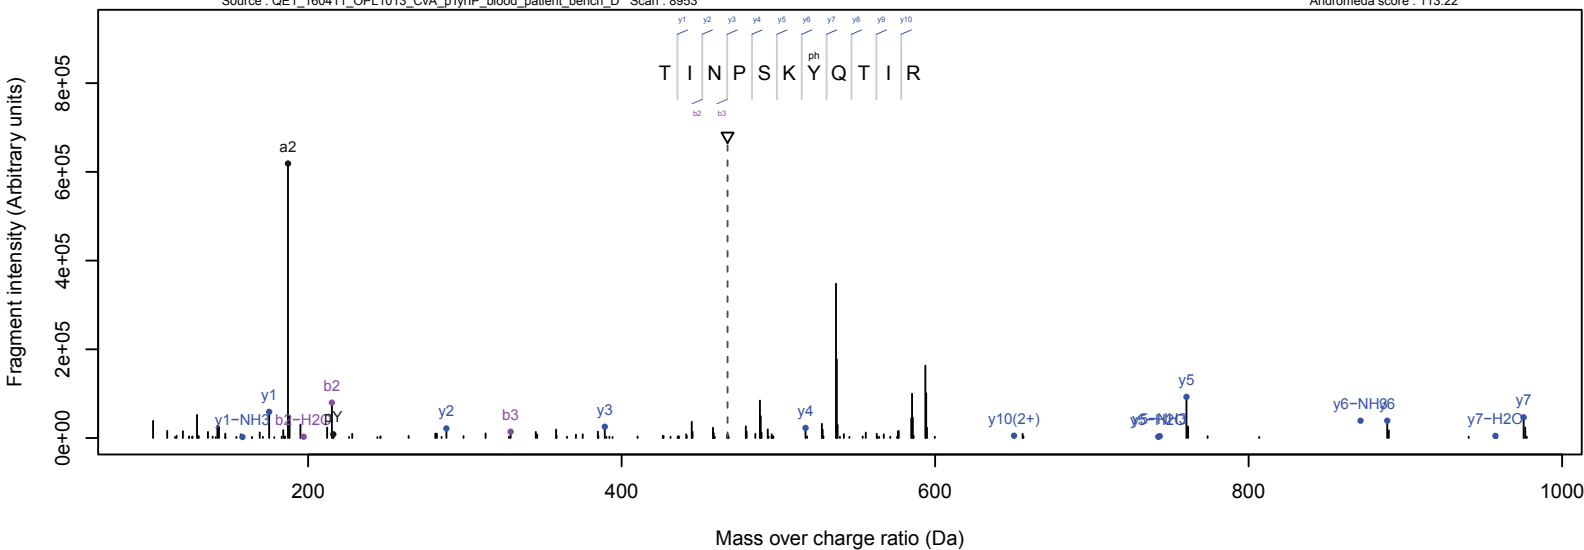

LY(ph)EWISIDKDEAGAK-3+

Source: QE1\_160411\_OPL1013\_CvA\_pTyrIP\_blood\_patient\_bench\_C Scan: 28820

Andromeda score: 112.96

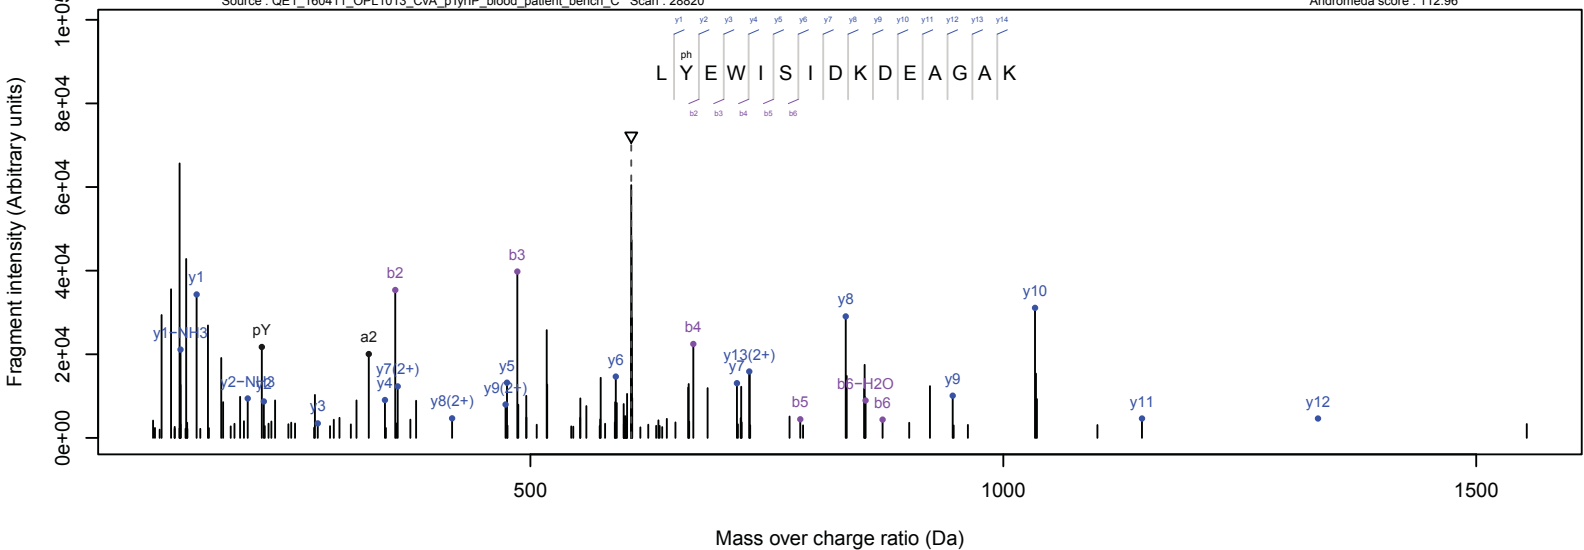

VVQDFIDIFSDYANF K-2+

Source: QE1\_160411\_OPL1013\_CvA\_pTyrIP\_blood\_patient\_bench\_D Scan: 44335

Andromeda score: 112.34

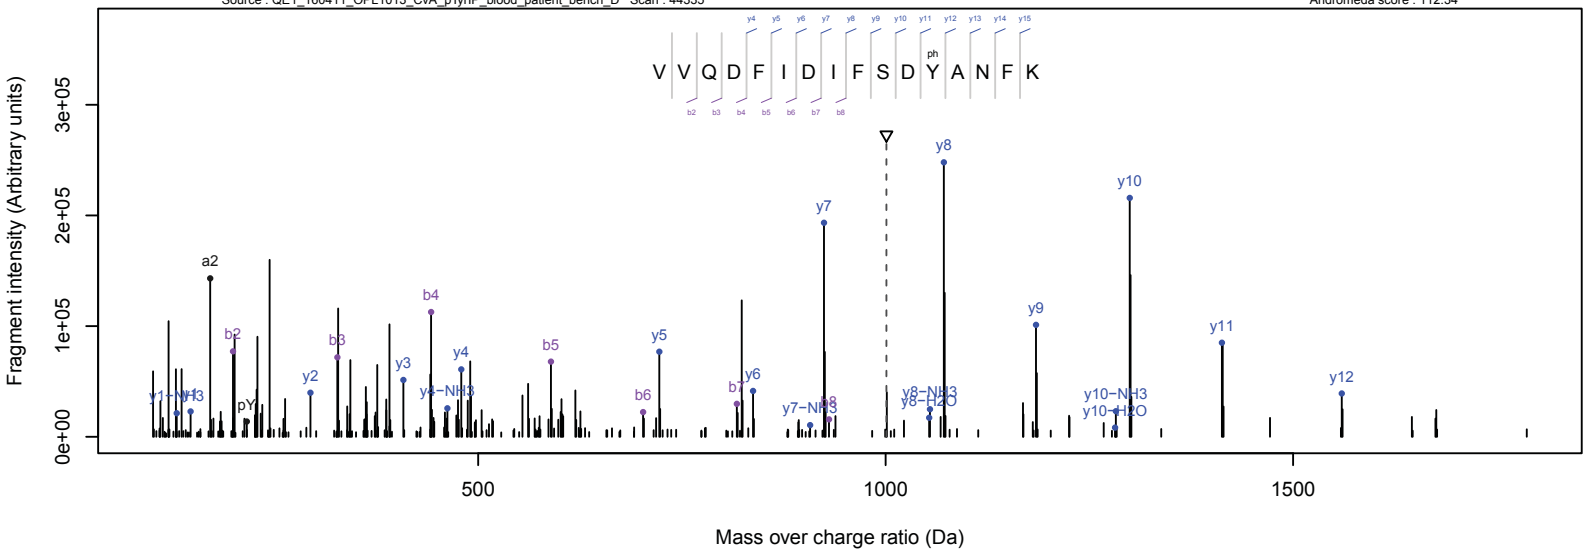



## EATQPEPIY(ph)AESTKR-3+

Source: QE1\_160411\_OPL1013\_CvA\_pTyrIP\_blood\_patient\_bench\_D Scan: 8581

Andromeda score: 112.24

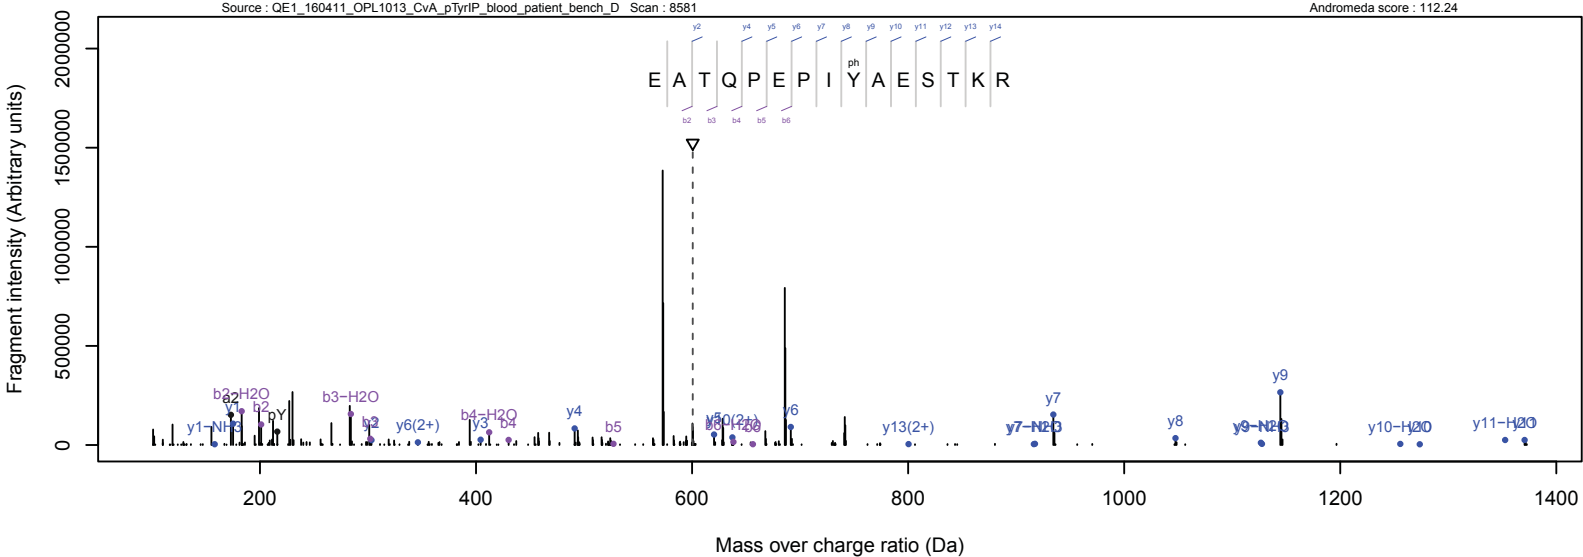

## GY(ph)SFTTTAER-2+

Source: QE1\_160411\_OPL1013\_CvA\_pTyrIP\_blood\_patient\_bench\_D Scan: 9094

Andromeda score: 112.13

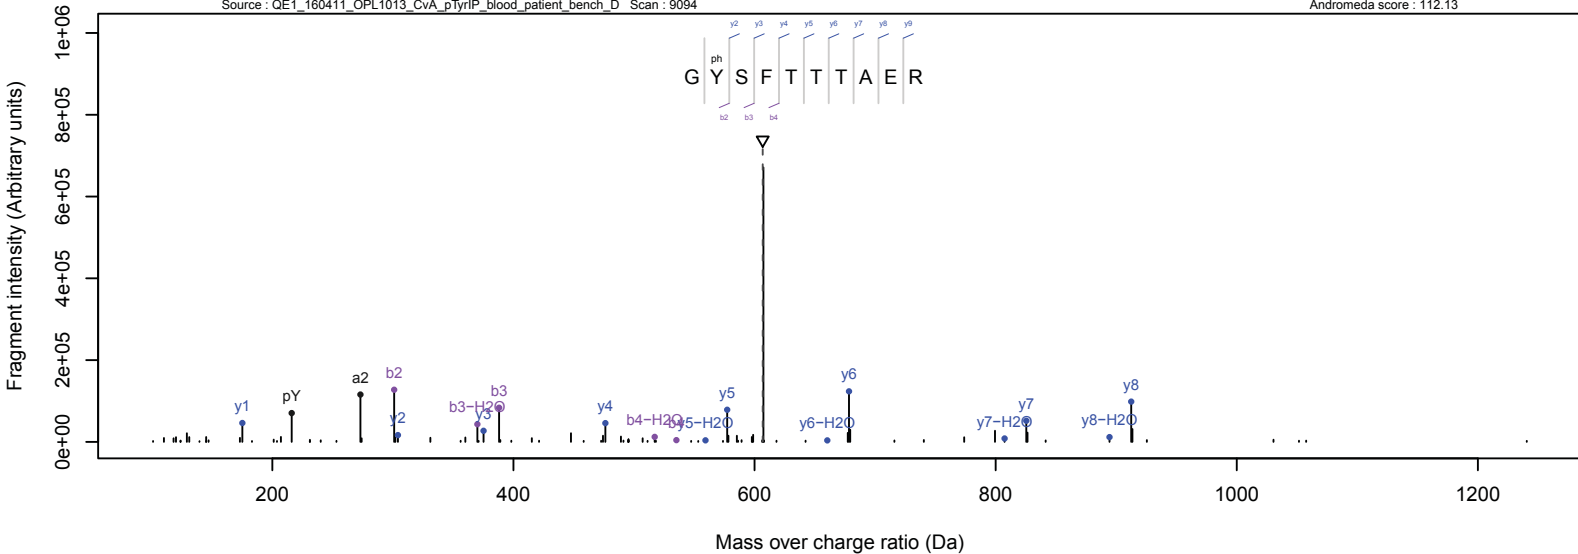

## VCEPCY(ph)EQLNR-2+

Source: QE1\_160411\_OPL1013\_CvA\_pTyrIP\_blood\_patient\_bench\_B Scan: 10314

Andromeda score: 111.86

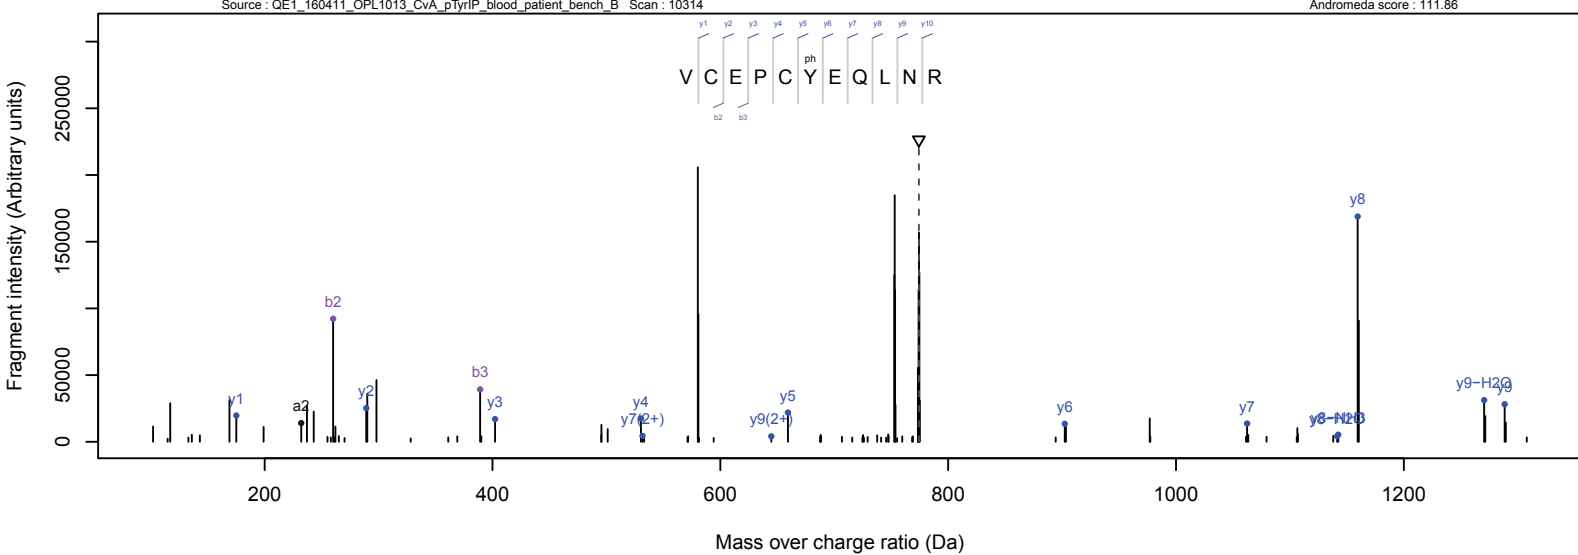

ELFDDPSY(ph)VNVQLDKAR-3+

Source : QE1\_160411\_OPL1013\_CvA\_pTyrIP\_blood\_patient\_bench\_C Scan : 33194

Andromeda score : 111.77

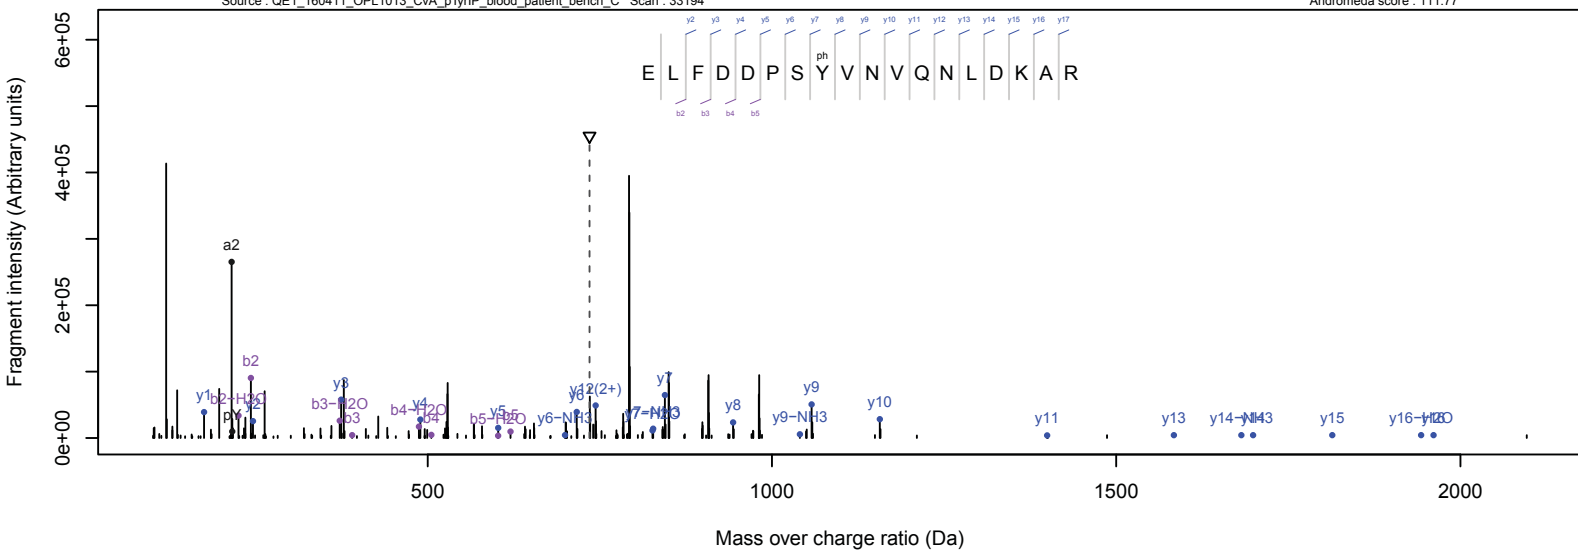

KPT(ph)YDPVSEDQDPLSSDFK-3+

Source : QE1\_160411\_OPL1013\_CvA\_pTyrIP\_blood\_patient\_bench\_B Scan : 22821

Andromeda score : 111.57

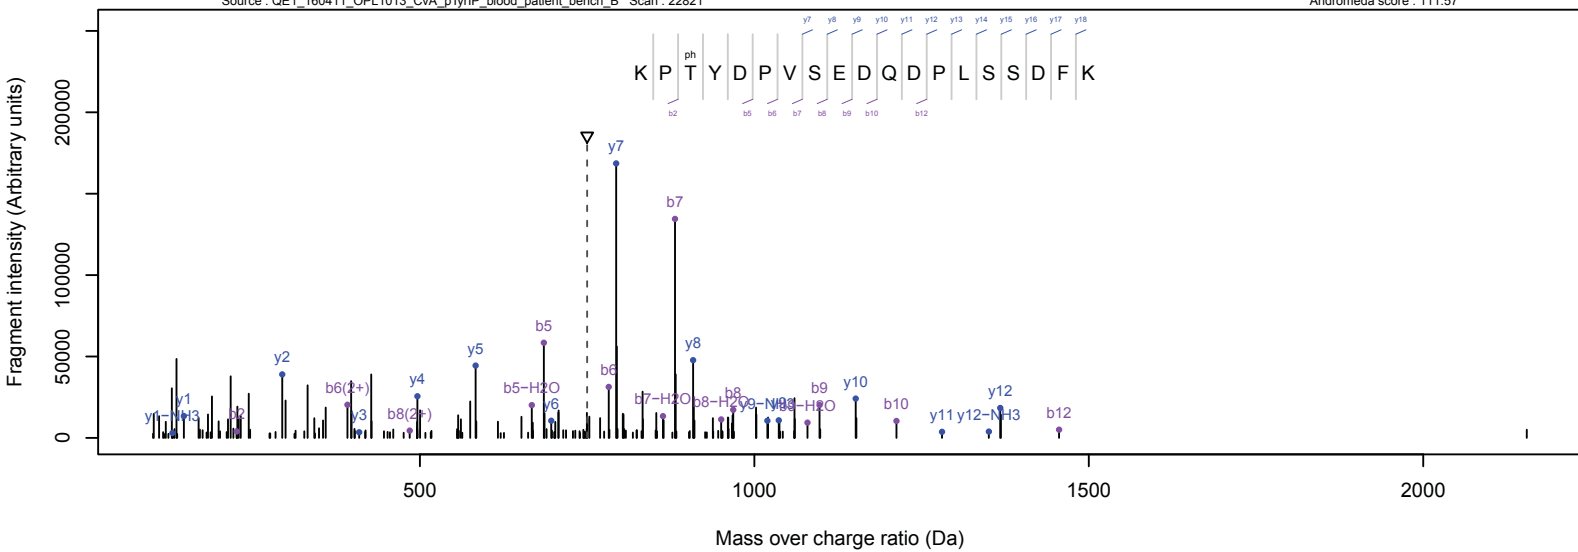

GFGGQY(ph)GIQK-2+

Source : QE1\_160411\_OPL1013\_CvA\_pTyrIP\_blood\_patient\_bench\_D Scan : 9473

Andromeda score : 111.46

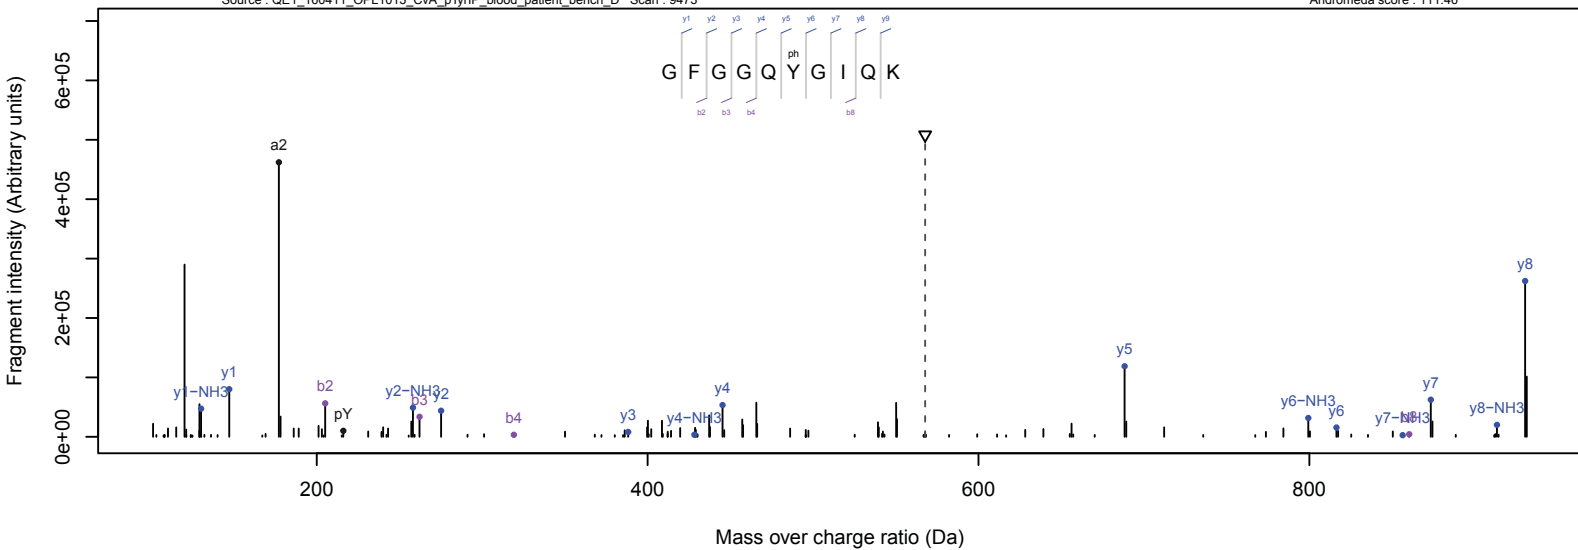

## Y(ph)YKETSGLM(ox)LDVGPYM(ox)K-3+

Source : QE1\_160411\_OPL1013\_CvA\_pTyrIP\_blood\_patient\_bench\_A Scan : 25073

Andromeda score : 111.22

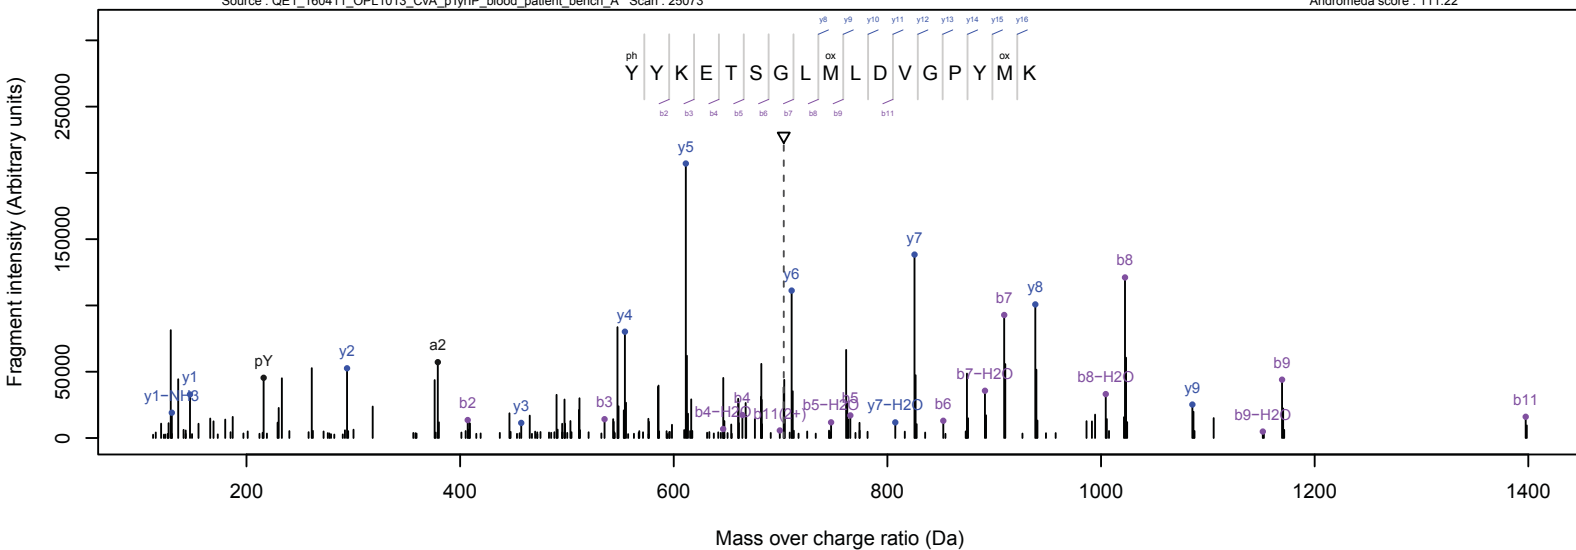

## LIY(ph)DFIEDQGGLEAVR-2+

Source : QE1\_160411\_OPL1013\_CvA\_pTyrIP\_blood\_patient\_bench\_C Scan : 43854

Andromeda score : 110.97

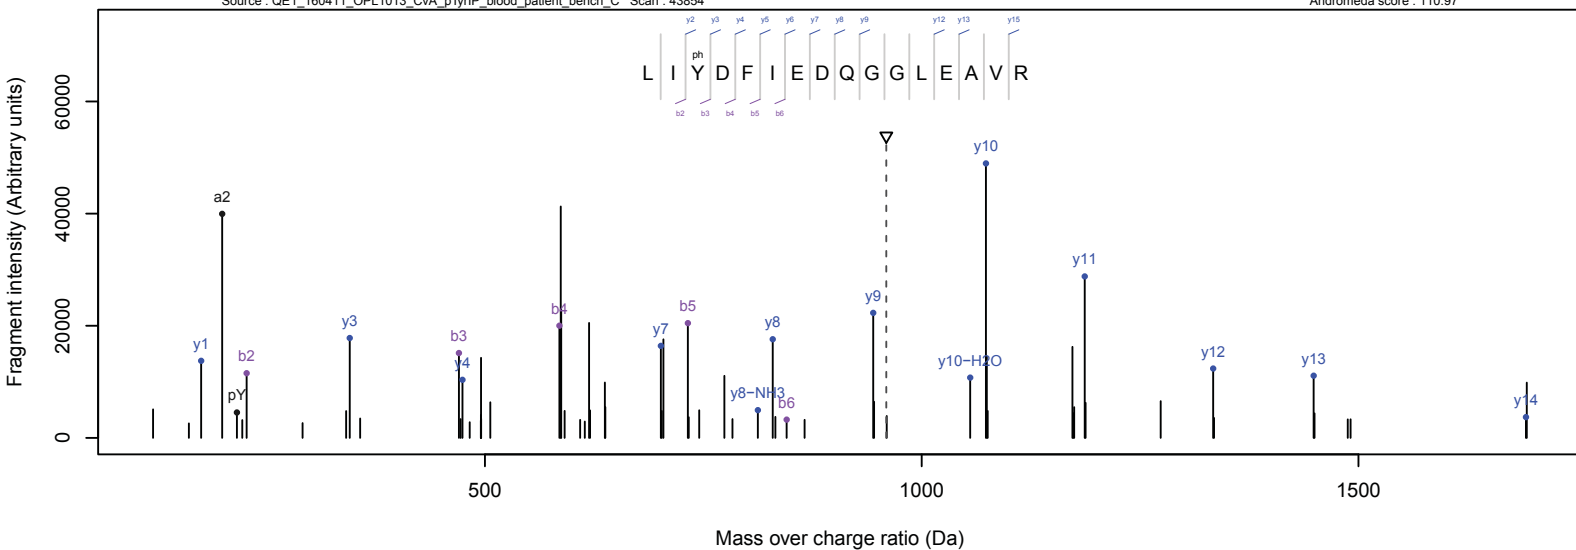

## YCRPESQEHPEADPGSAAPY(ph)LKTK-4+

Source : QE1\_160411\_OPL1013\_CvA\_pTyrIP\_blood\_patient\_bench\_D Scan : 11061

Andromeda score : 110.94

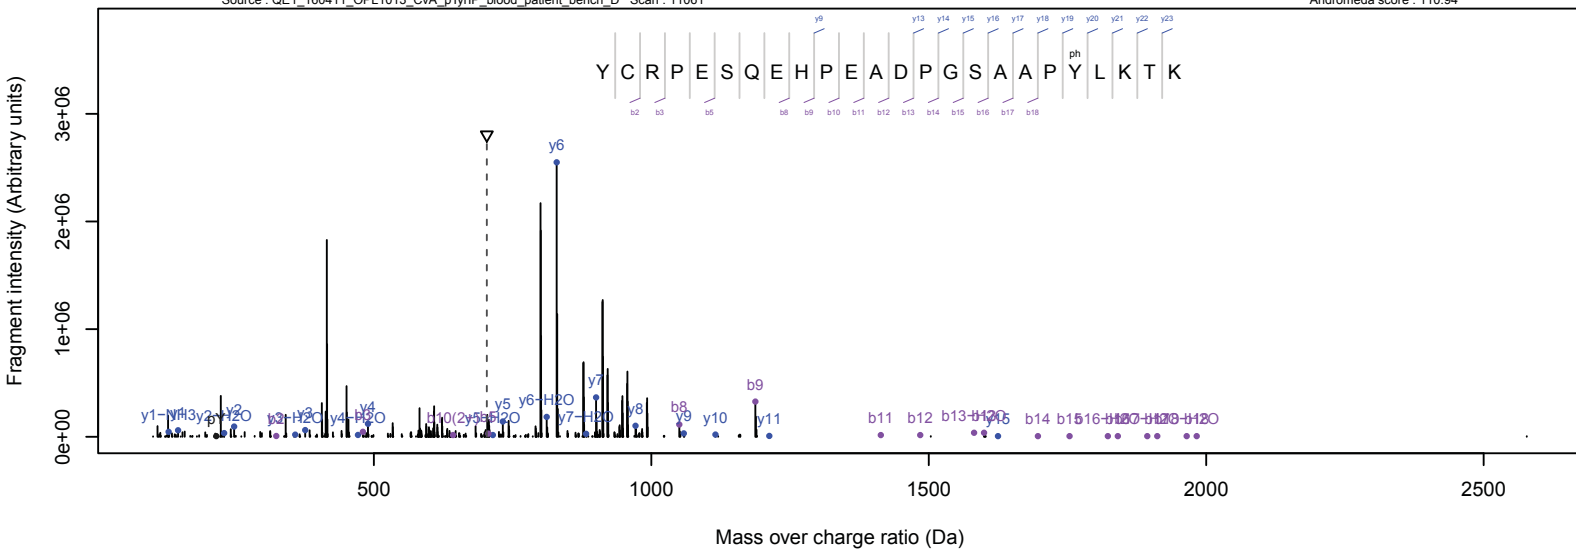

Y(ph)LLKQPVR-2+

Source : QE1\_160411\_OPL1013\_CvA\_pTyrIP\_blood\_patient\_bench\_B Scan : 10191

Andromeda score : 110.81

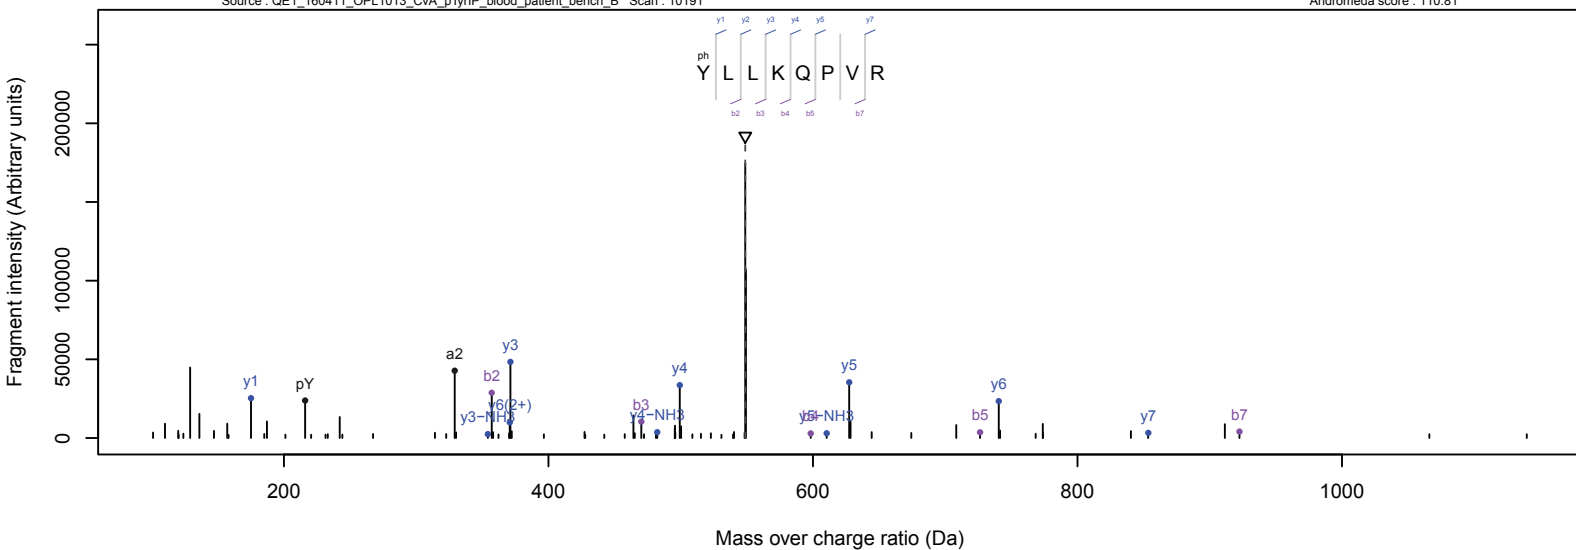

GQPIYIQFSNHK-3+

Source : QE1\_160411\_OPL1013\_CvA\_pTyrIP\_blood\_patient\_bench\_B Scan : 20384

Andromeda score : 110.64

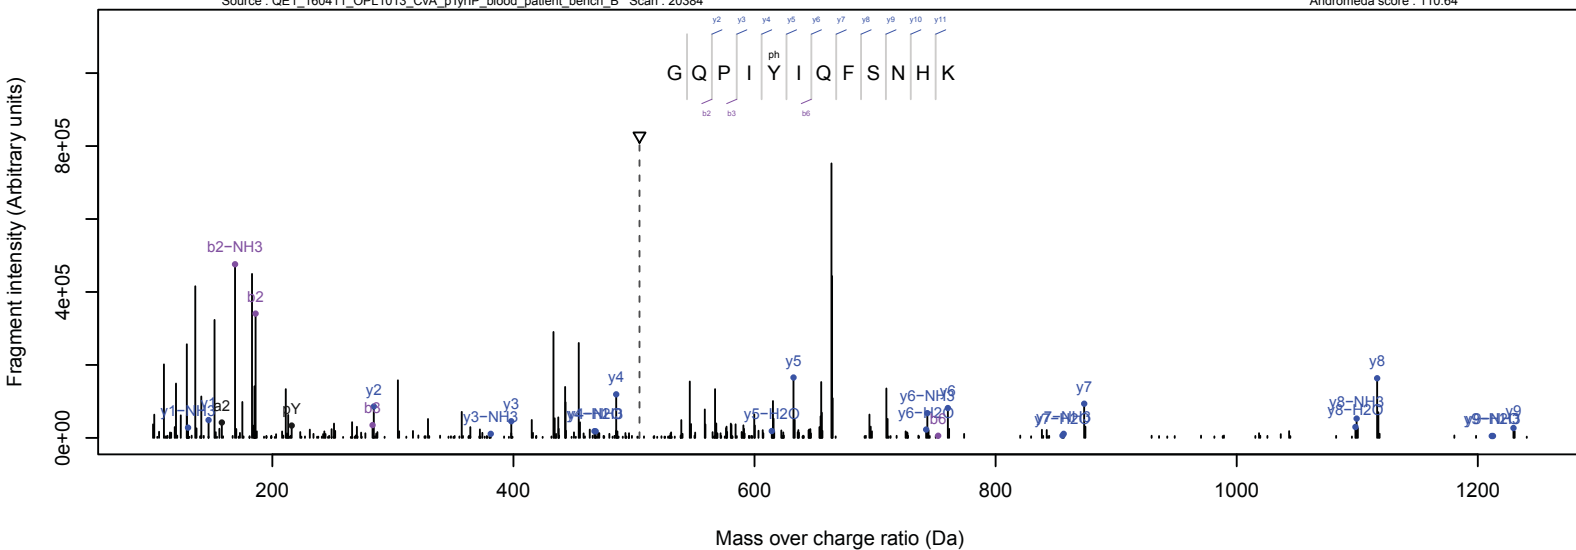

LPPGEQCEGEDTEY(ph)M(ox)TPSSRPLRPLDTSQSSR-4+

Source : QE1\_160411\_OPL1013\_CvA\_pTyrIP\_blood\_patient\_bench\_C Scan : 18871

Andromeda score : 110.44

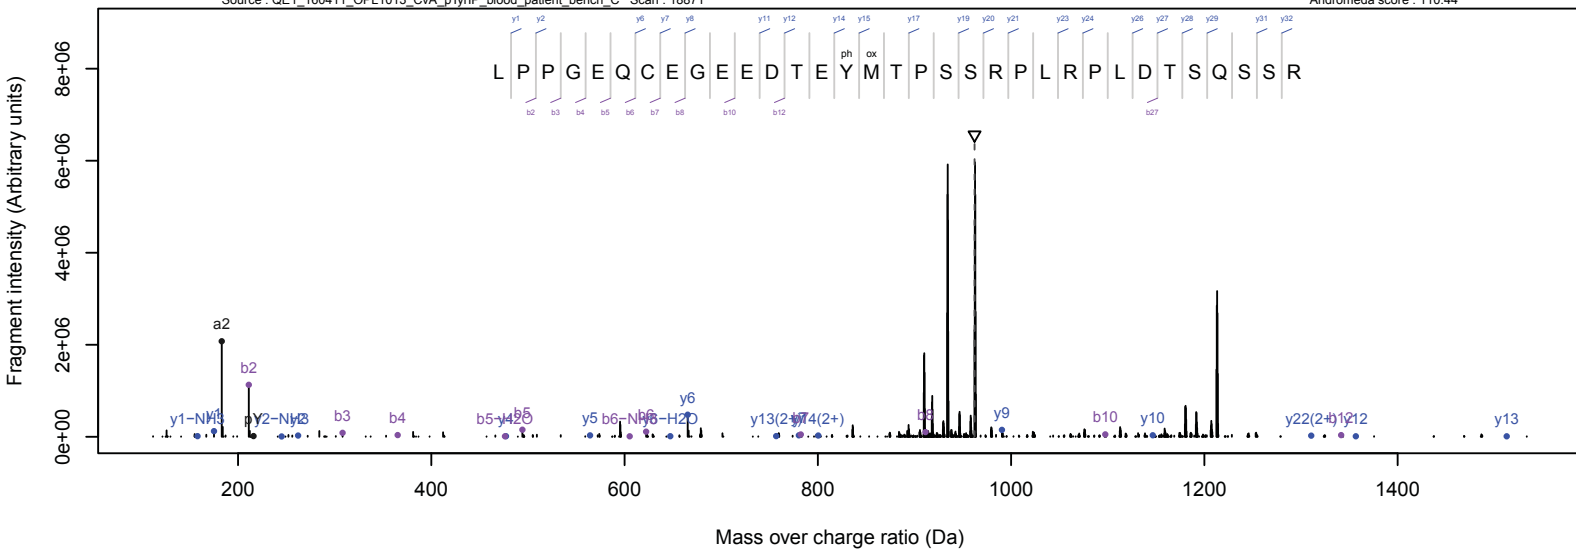

**IKLGHY(ph)ATQLQK-3+**

Source : QE1\_160411\_OPL1013\_CvA\_pTyrIP\_blood\_patient\_bench\_B Scan : 12078

Andromeda score : 110.38

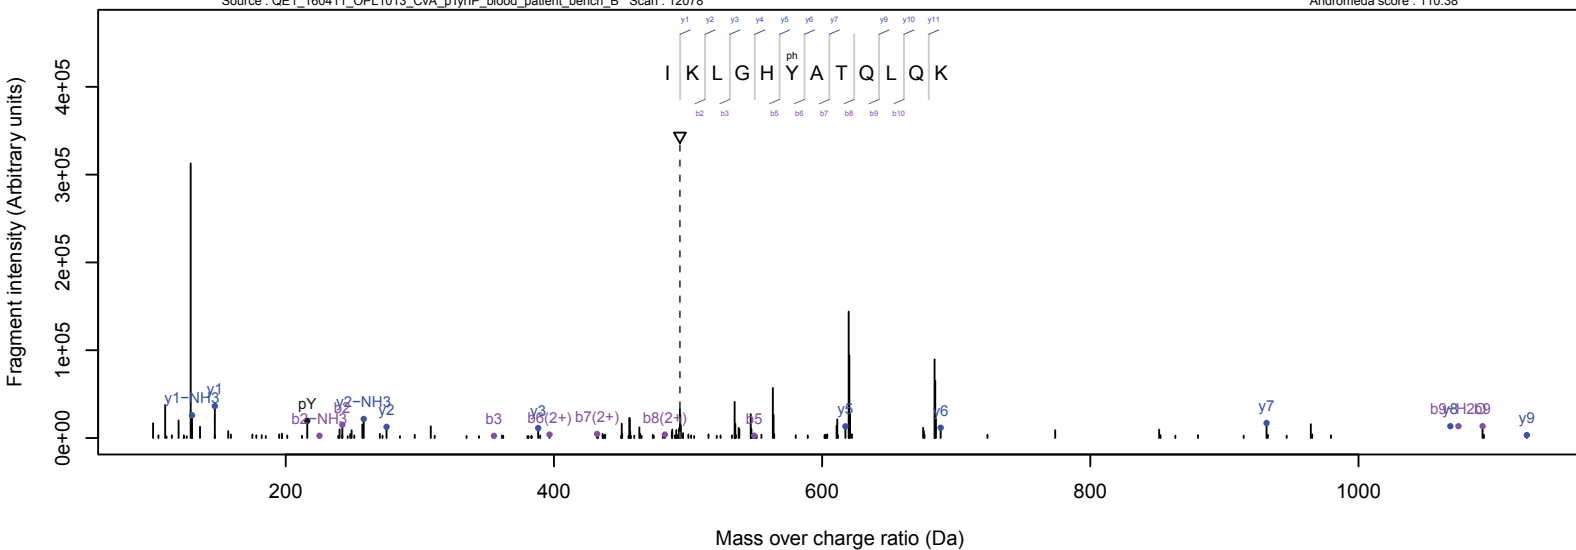

**RGSGELY(ph)EHEKDLVWK-4+**

Source : QE1\_160411\_OPL1013\_CvA\_pTyrIP\_blood\_patient\_bench\_C Scan : 18931

Andromeda score : 110.32

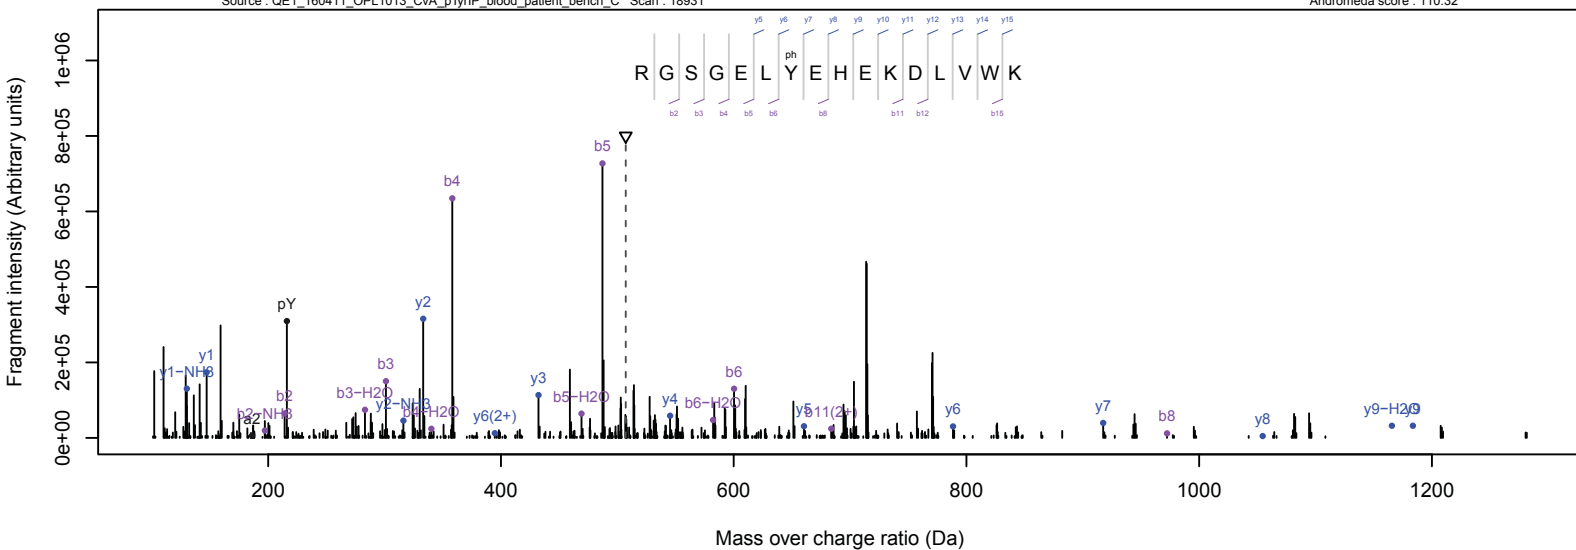

**VGEEEHVY(ph)SFPNK-2+**

Source : QE1\_160411\_OPL1013\_CvA\_pTyrIP\_blood\_patient\_bench\_D Scan : 11414

Andromeda score : 110.08

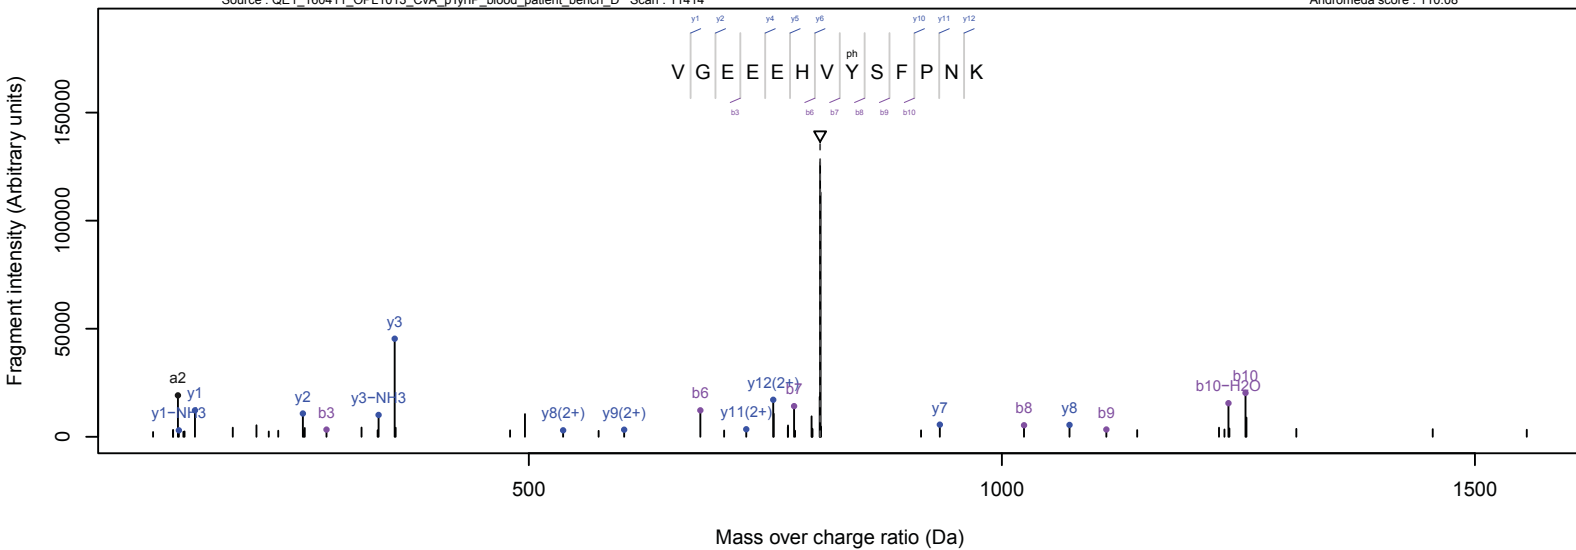

## SKS(ph)YSFHQSQR-4+

Source: QE1\_160411\_OPL1013\_CvA\_pTyrIP\_blood\_patient\_bench\_A Scan: 1744

Andromeda score: 108.58

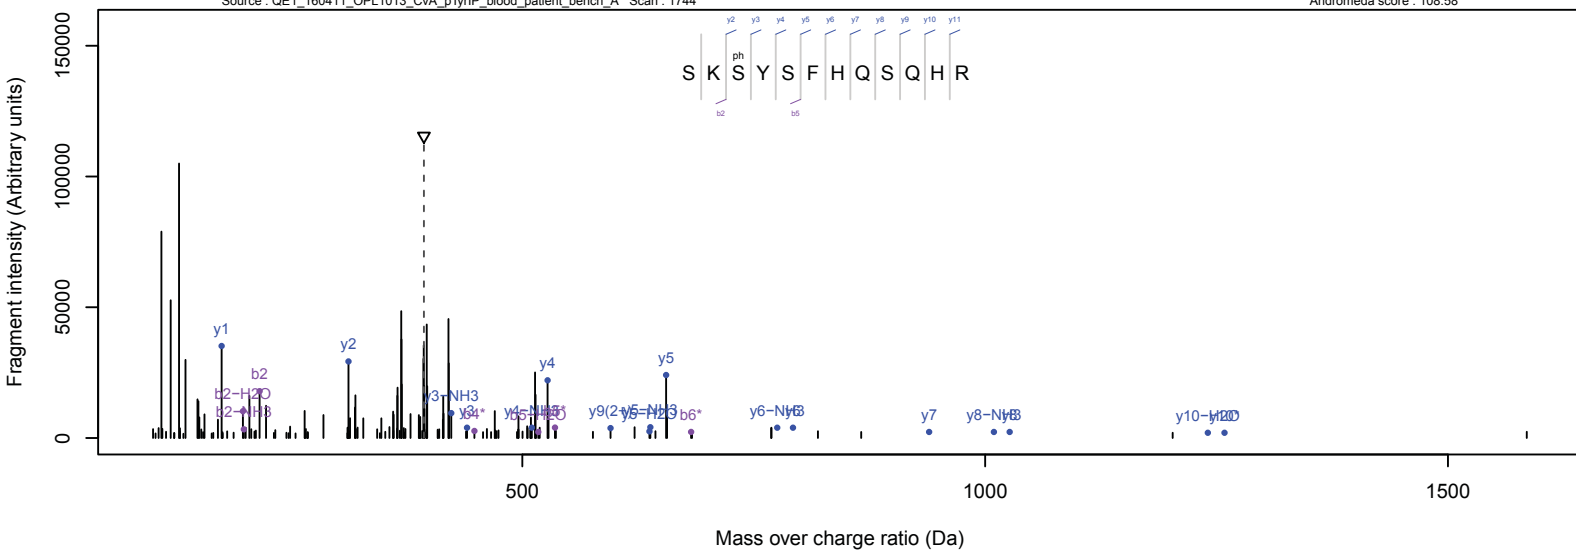

## EEPEALY(ph)AAVNK-2+

Source: QE1\_160411\_OPL1013\_CvA\_pTyrIP\_blood\_patient\_bench\_D Scan: 19389

Andromeda score: 108.53

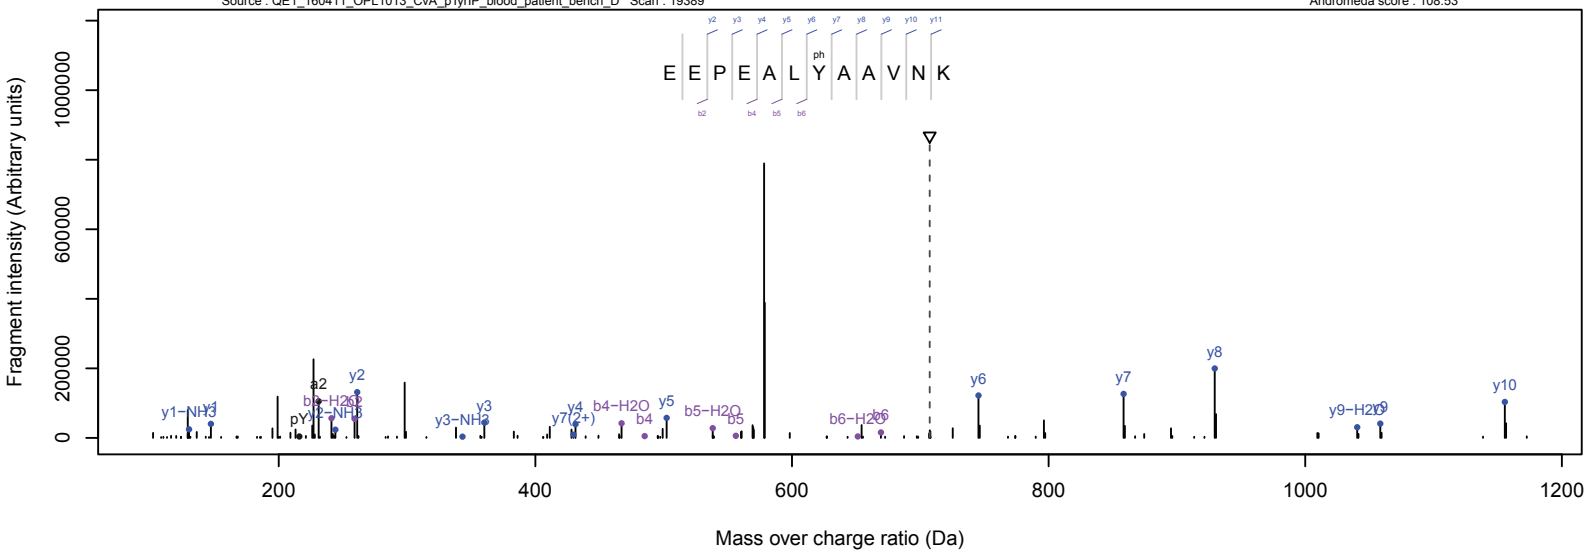

## IWHHTFY(ph)NELR-3+

Source: QE1\_160411\_OPL1013\_CvA\_pTyrIP\_blood\_patient\_bench\_A Scan: 16735

Andromeda score: 108.35

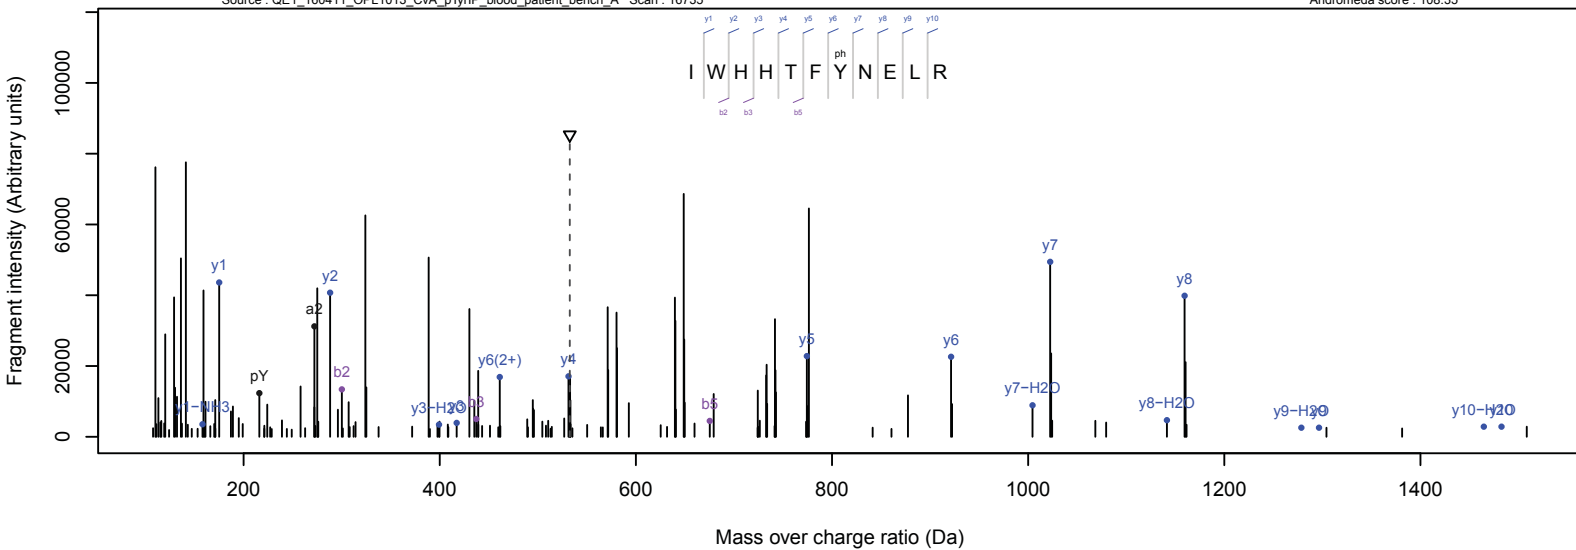

**KSTGSDY(ph)LALDFQPSS(ph)PSPHR-3+**

Source : QE1\_160411\_OPL1013\_CvA\_pTyrIP\_blood\_patient\_bench\_B Scan : 29526

Andromeda score : 108.23

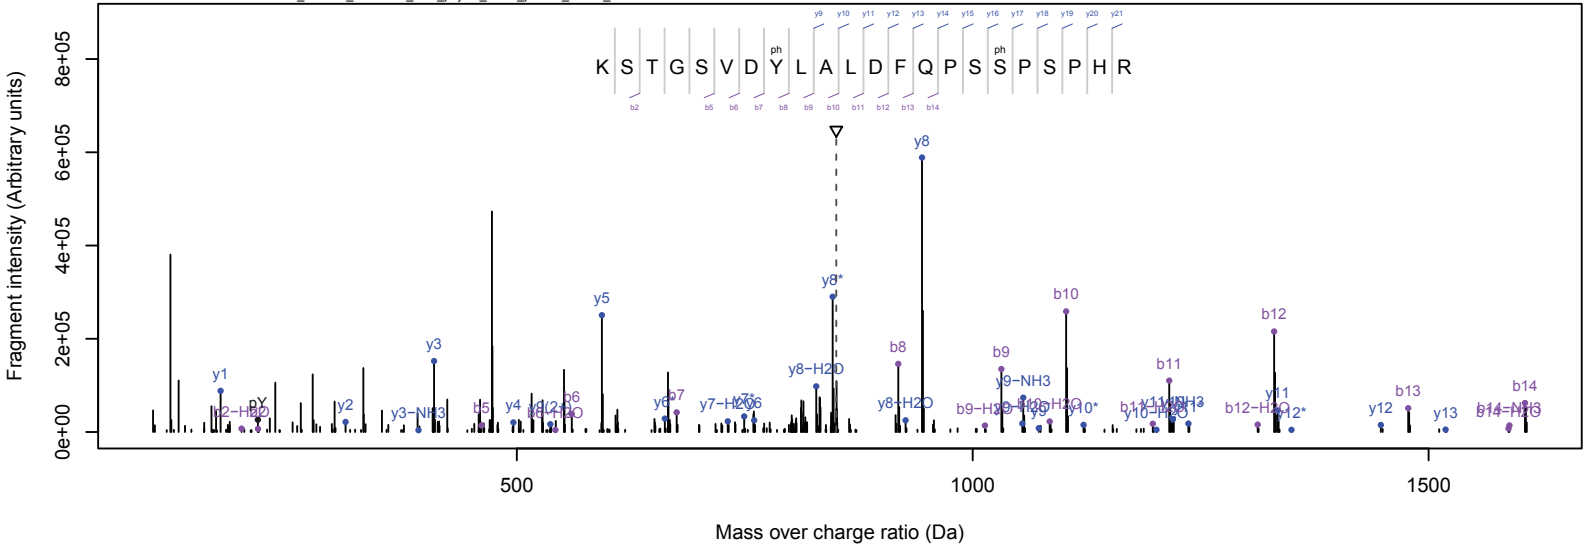

**EFEVY(ph)GPIKR-2+**

Source : QE1\_160411\_OPL1013\_CvA\_pTyrIP\_blood\_patient\_bench\_B Scan : 18197

Andromeda score : 107.79

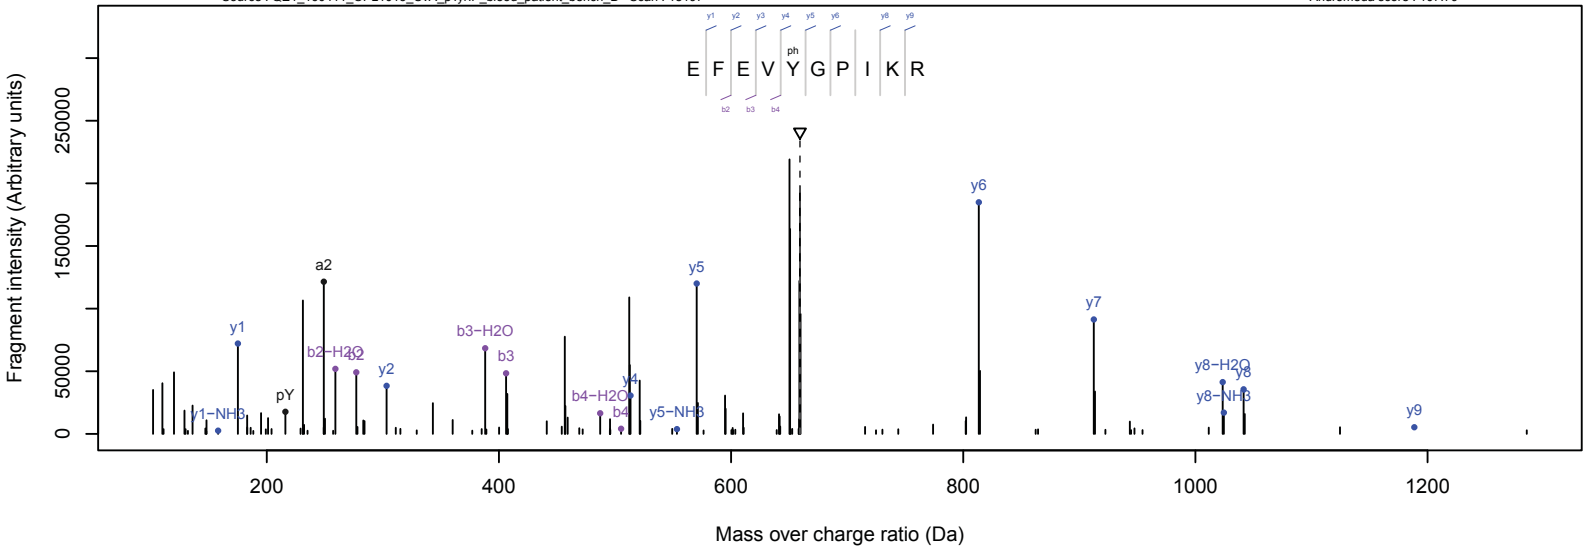

**ADENY(ph)KAQTHGK-3+**

Source : QE1\_160411\_OPL1013\_CvA\_pTyrIP\_blood\_patient\_bench\_D Scan : 1721

Andromeda score : 107.65

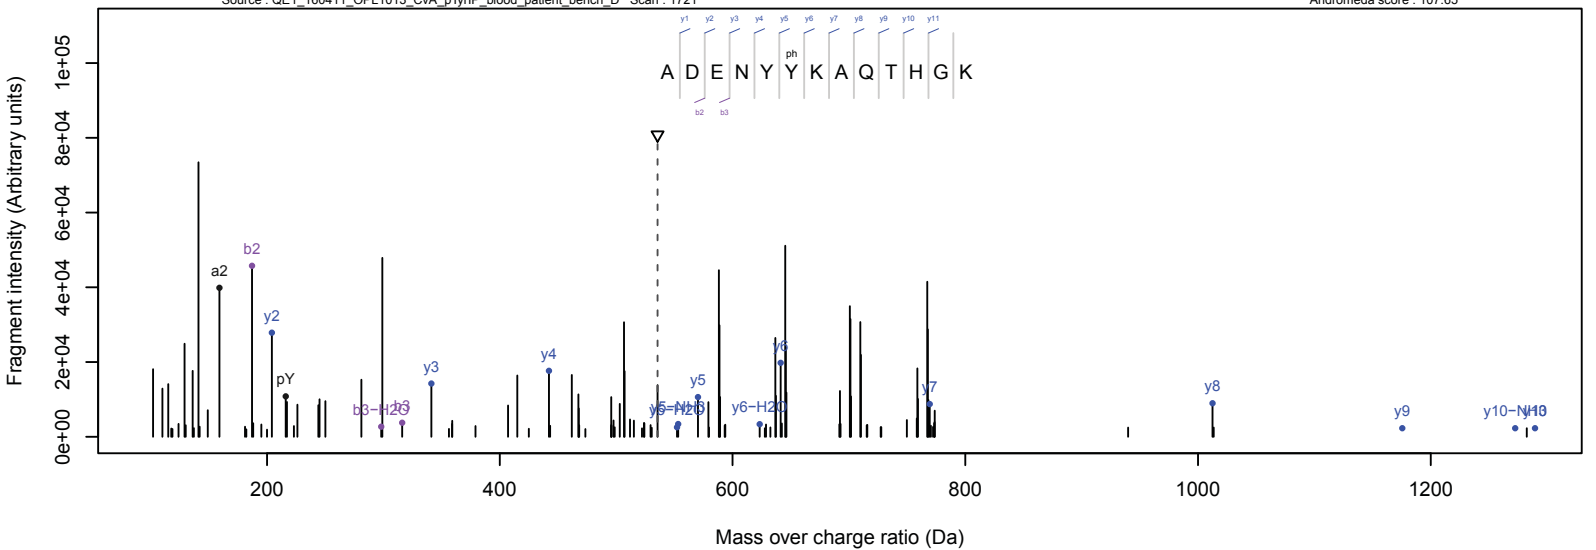

**EKY(ph)GIVDYMIEQSGPPSK-3+**

Source : QE1\_160411\_OPL1013\_CvA\_pTyrIP\_blood\_patient\_bench\_B Scan : 30718

Andromeda score : 106.87

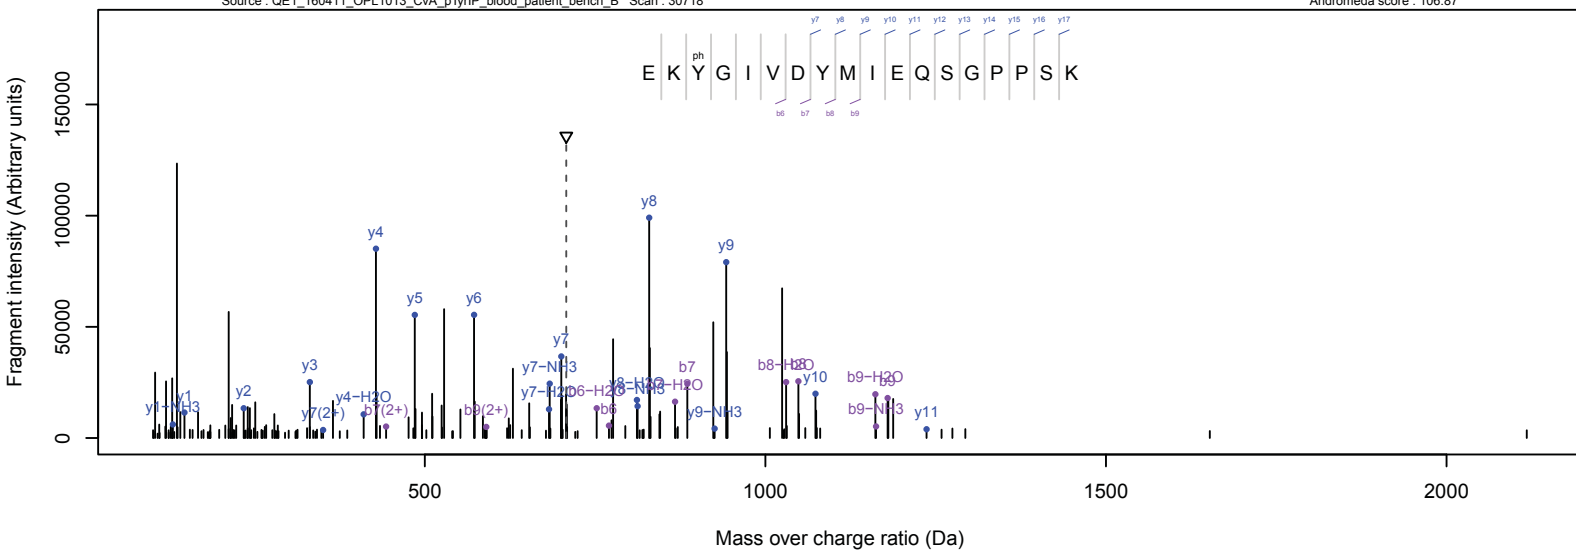

**LY(ph)KVPDGPENQFAFNGEFK-3+**

Source : QE1\_160411\_OPL1013\_CvA\_pTyrIP\_blood\_patient\_bench\_C Scan : 27154

Andromeda score : 106.39

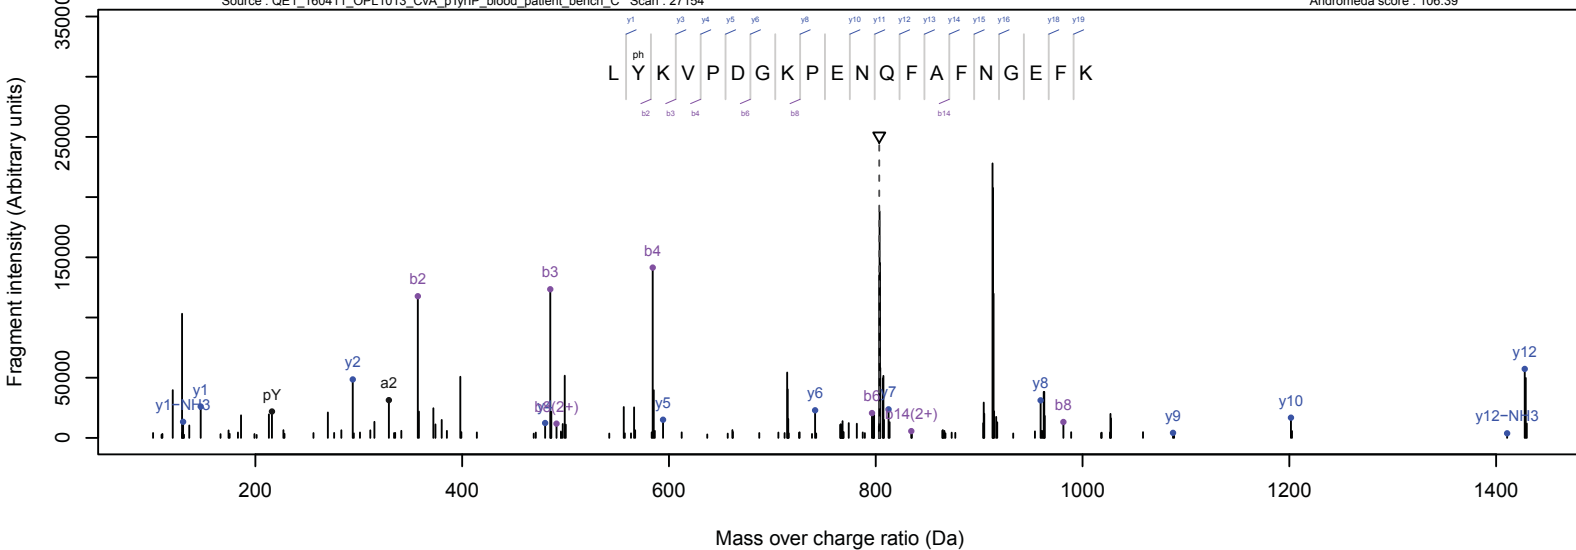

**YHEYS(ph)HYKEQDGGM(ox)K-3+**

Source : QE1\_160411\_OPL1013\_CvA\_pTyrIP\_blood\_patient\_bench\_C Scan : 1725

Andromeda score : 106.3

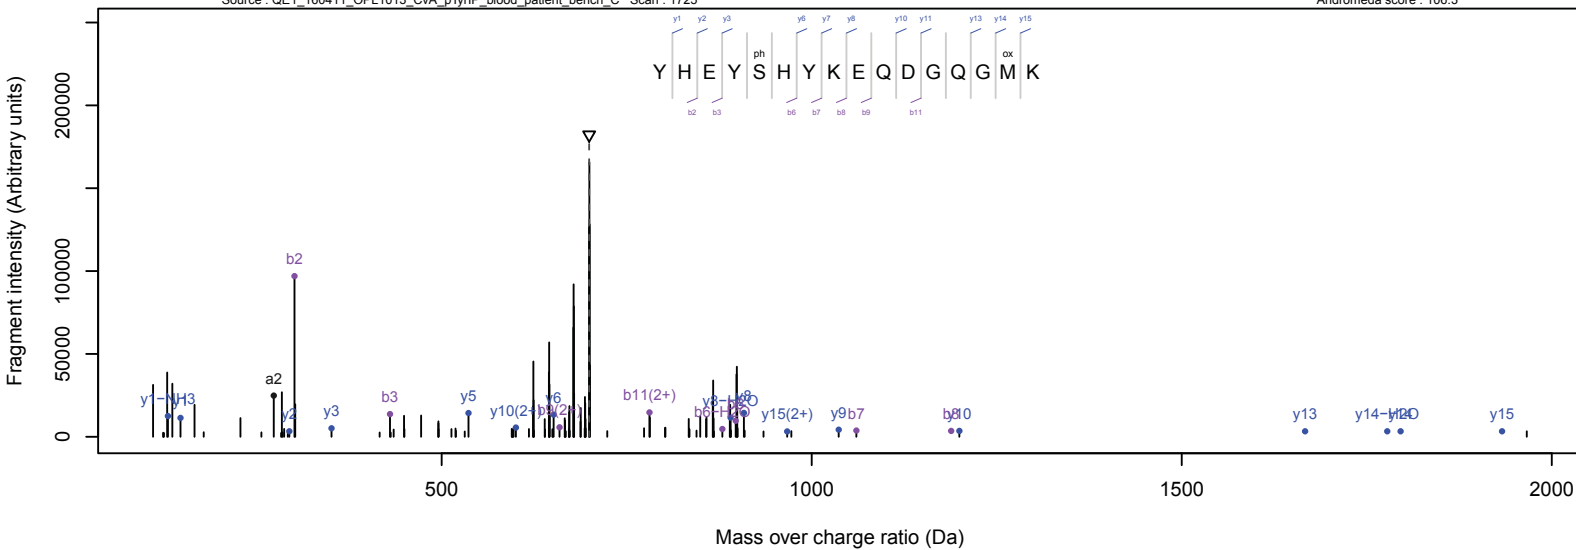



ERLY(ph)EWISIDKDEAGK-3+

Source : QE1\_160411\_OPL1013\_CvA\_pTyrIP\_blood\_patient\_bench\_C Scan : 28479

Andromeda score : 106.29

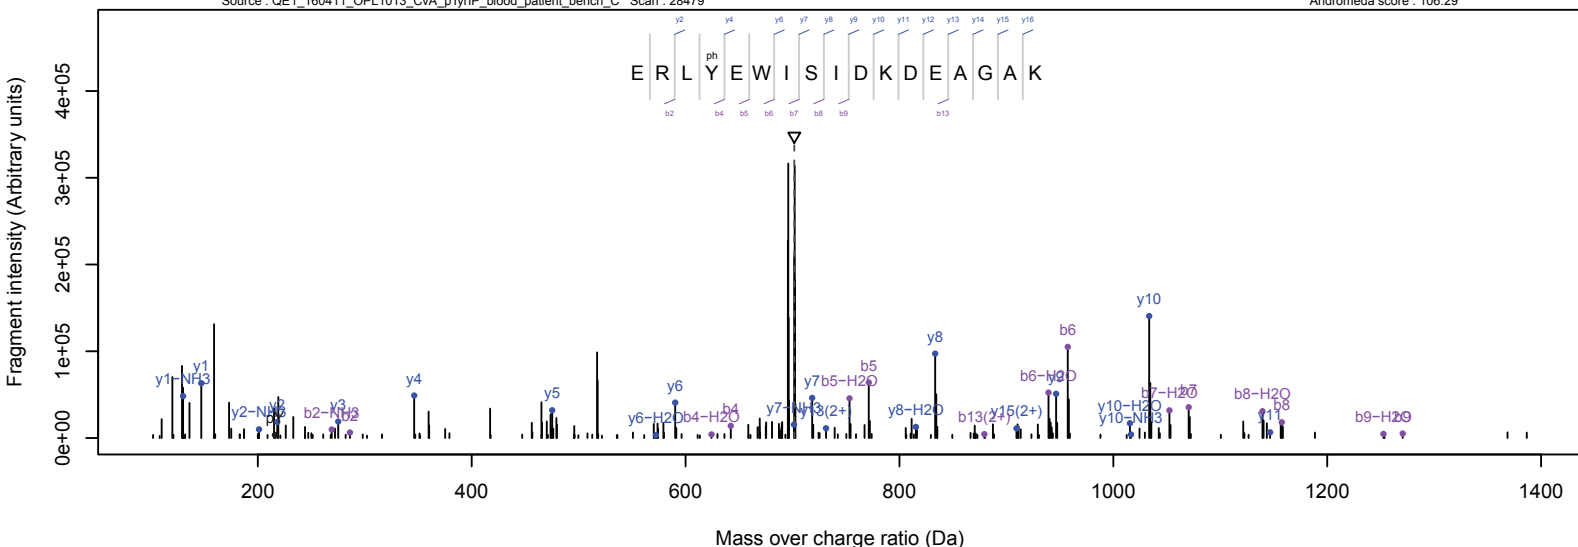

YRGSIHDFPGFDPNQDAEAL(ph)YTAMK-3+

Source : QE1\_160411\_OPL1013\_CvA\_pTyrIP\_blood\_patient\_bench\_D Scan : 40116

Andromeda score : 106.11

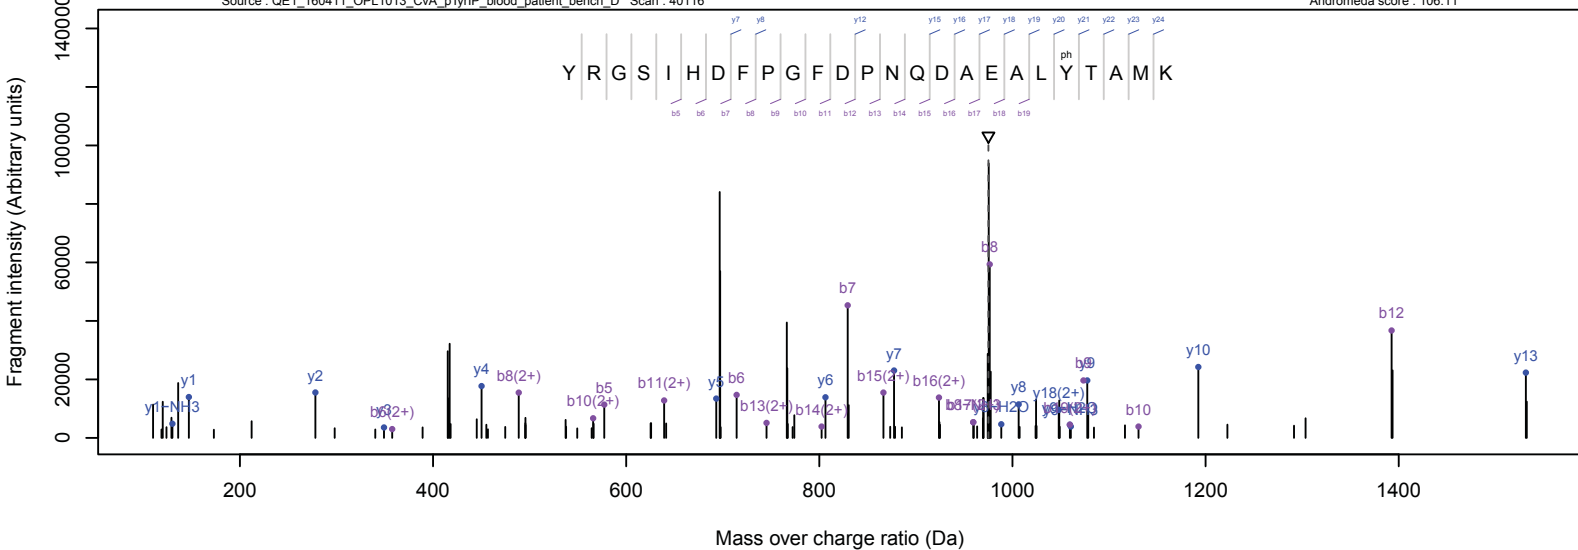

AAASTDY(ph)YKR-3+

Source : QE1\_160411\_OPL1013\_CvA\_pTyrIP\_blood\_patient\_bench\_C Scan : 2360

Andromeda score : 105.98

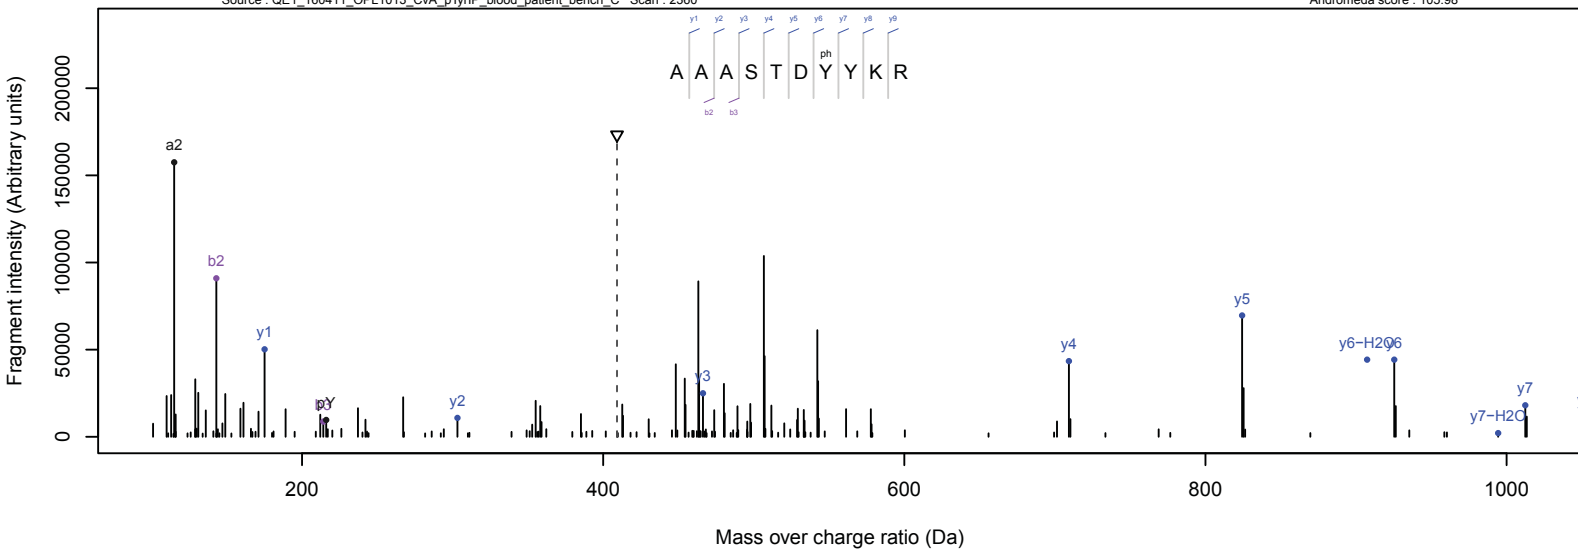

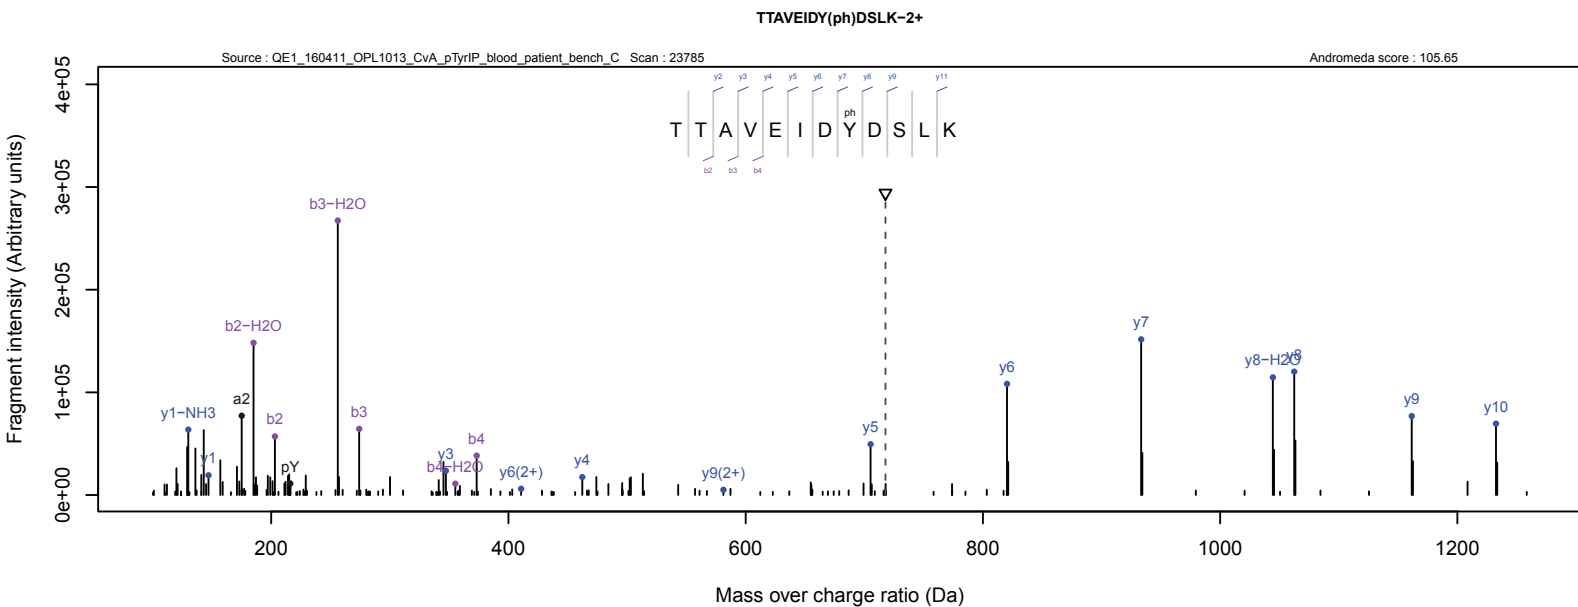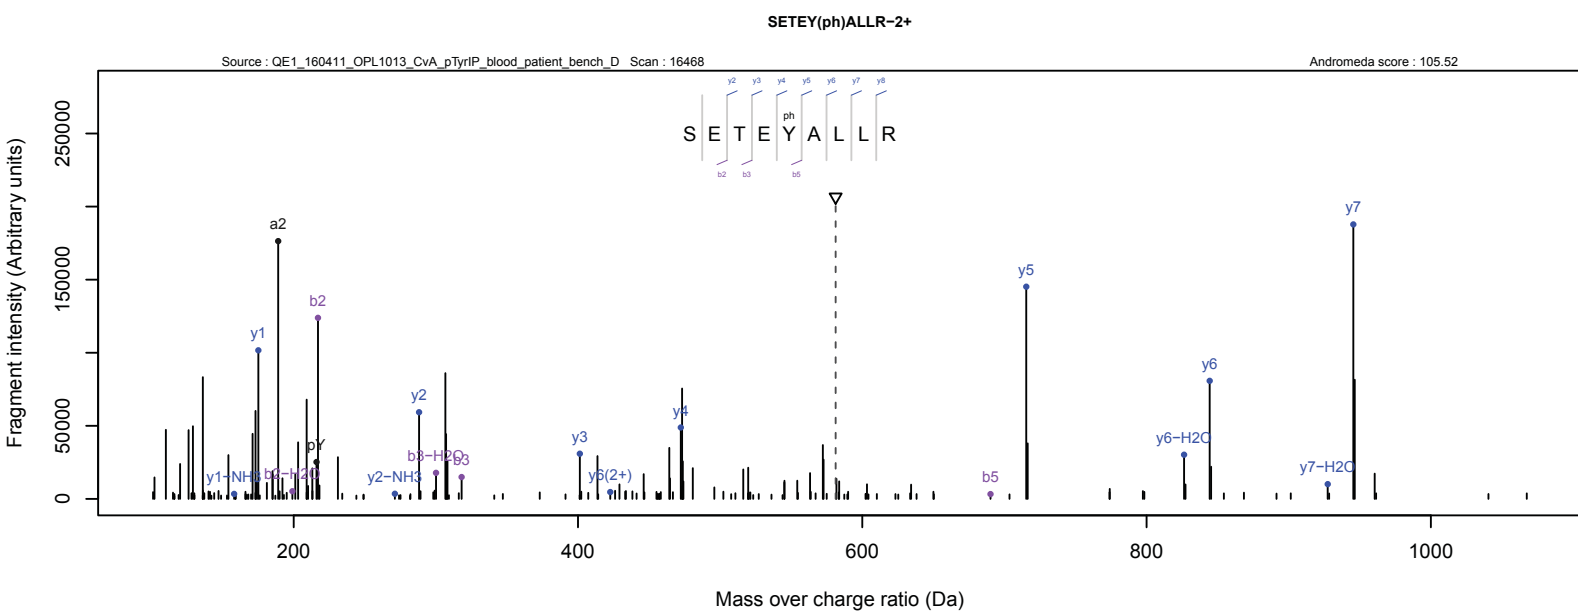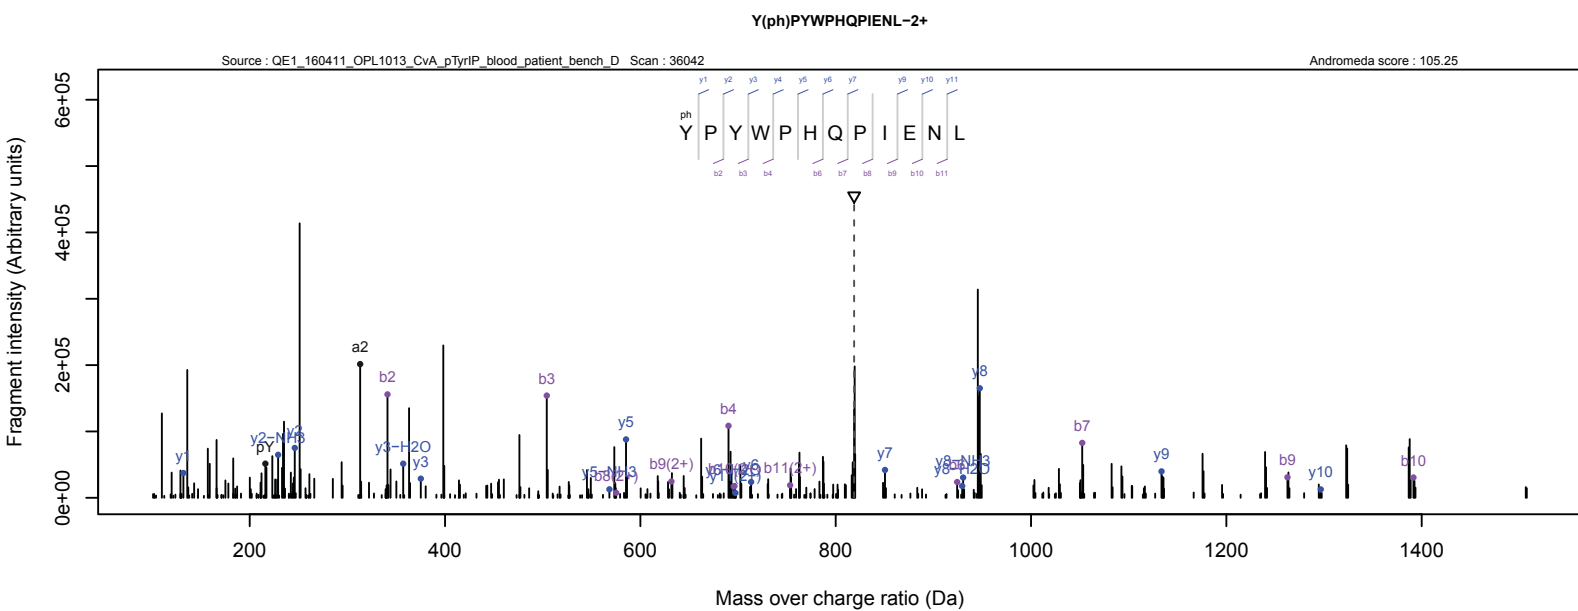



QAAEY(ph)REIDKR-3+

Source: QE1\_160411\_OPL1013\_CvA\_pTyrIP\_blood\_patient\_bench\_D Scan: 2986

Andromeda score: 104.3

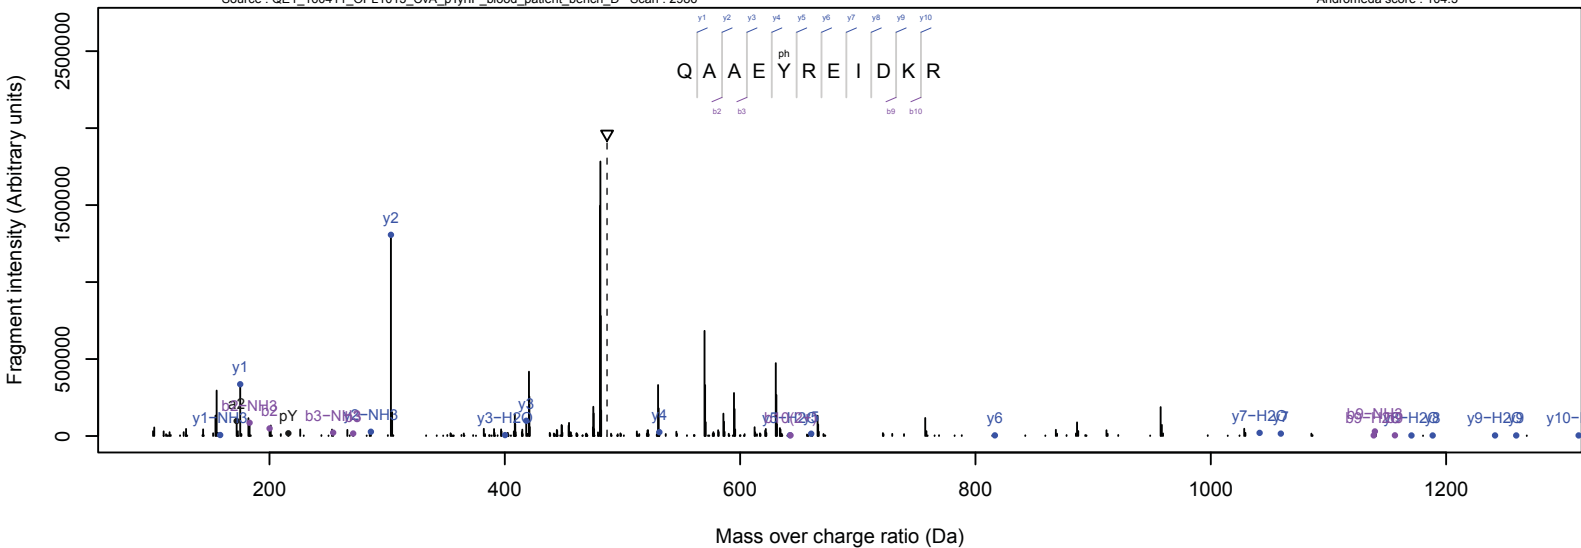

ELNY(ph)FAK-2+

Source: QE1\_160411\_OPL1013\_CvA\_pTyrIP\_blood\_patient\_bench\_A Scan: 11881

Andromeda score: 104.11

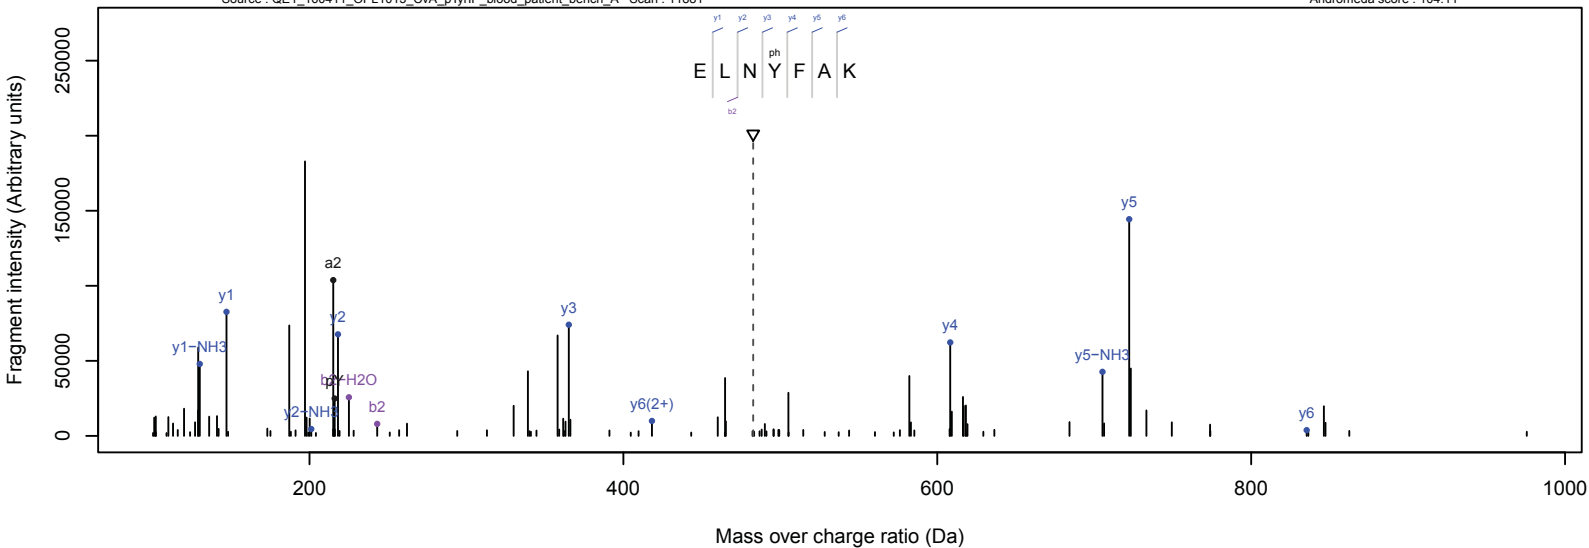

KSTGSVDY(ph)LALDFQPSSPSHR-3+

Source: QE1\_160411\_OPL1013\_CvA\_pTyrIP\_blood\_patient\_bench\_D Scan: 28702

Andromeda score: 103.92

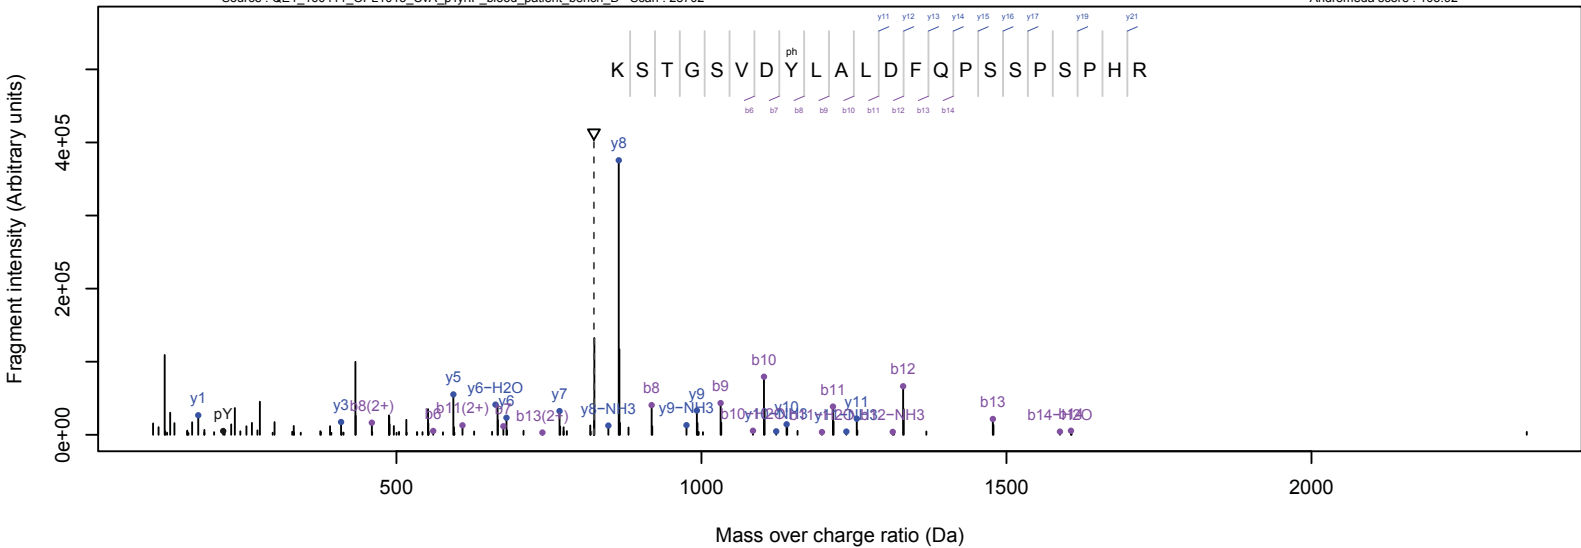

LLY(ph)PVSK-2+

Source : QE1\_160411\_OPL1013\_CvA\_pTyrIP\_blood\_patient\_bench\_C Scan : 13006

Andromeda score : 103.91

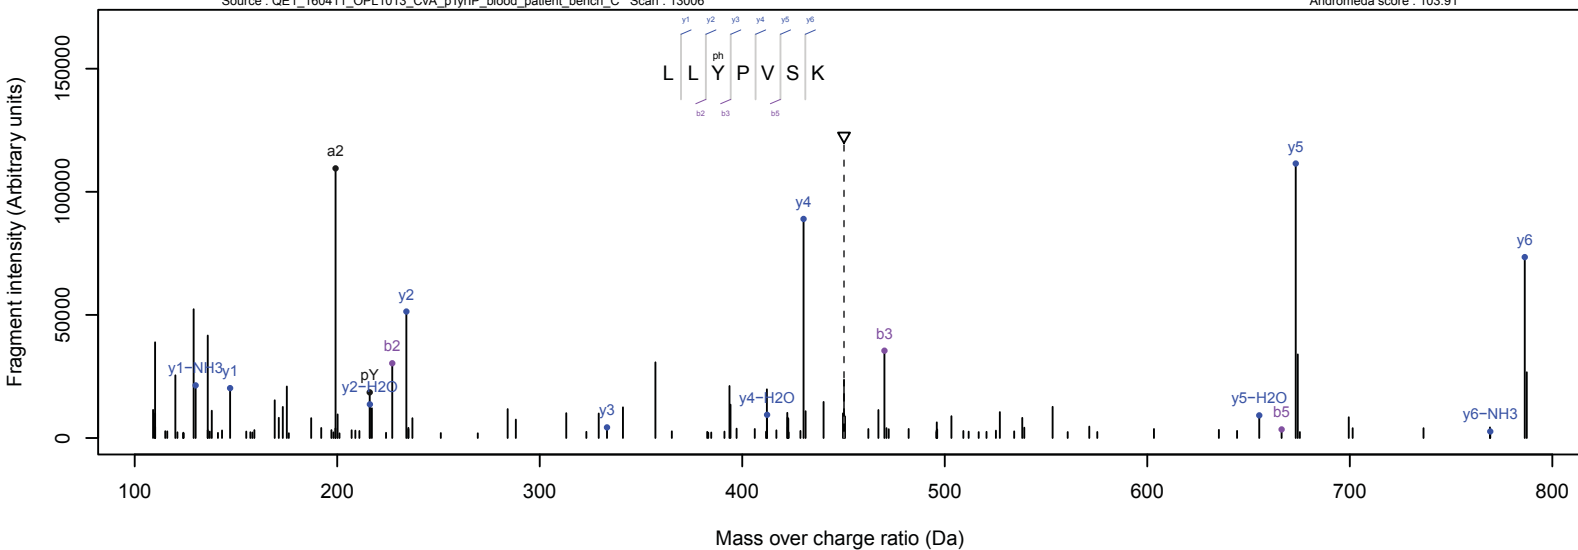

SQERPGNFY(ph)VSSEIR-3+

Source : QE1\_160411\_OPL1013\_CvA\_pTyrIP\_blood\_patient\_bench\_C Scan : 18970

Andromeda score : 103.88

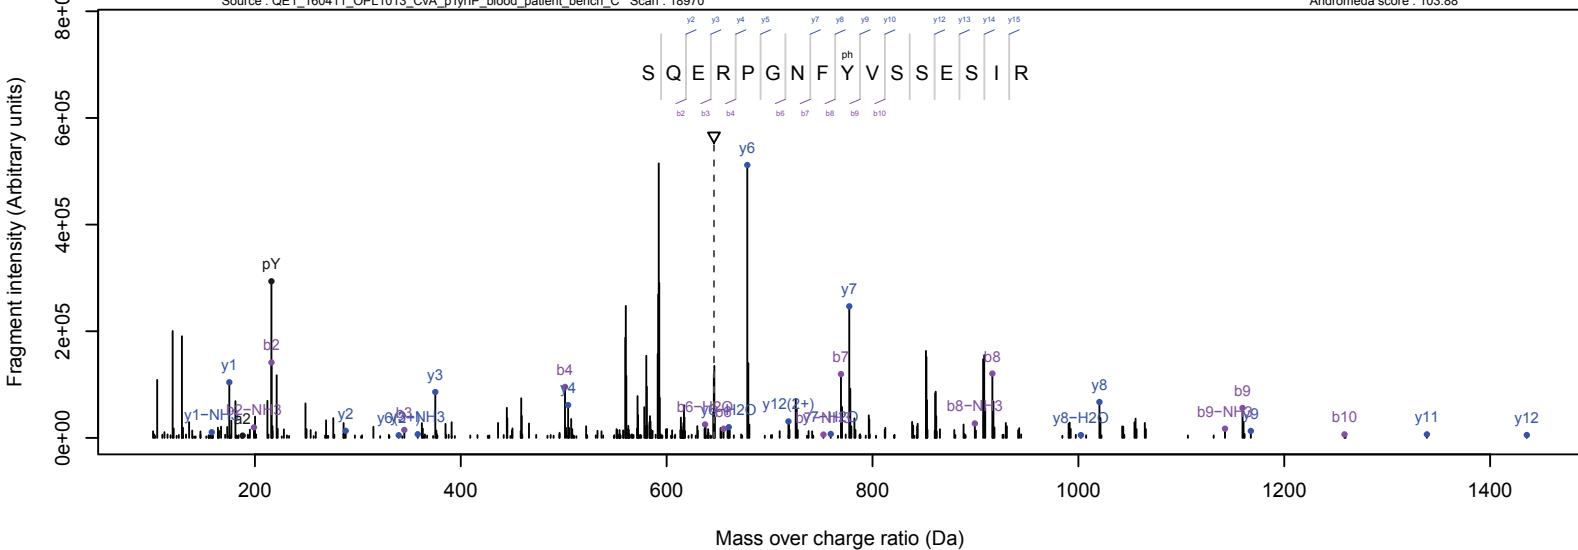

VSECPHTY(ph)QNRPF SR-4+

Source : QE1\_160411\_OPL1013\_CvA\_pTyrIP\_blood\_patient\_bench\_D Scan : 5076

Andromeda score : 103.88

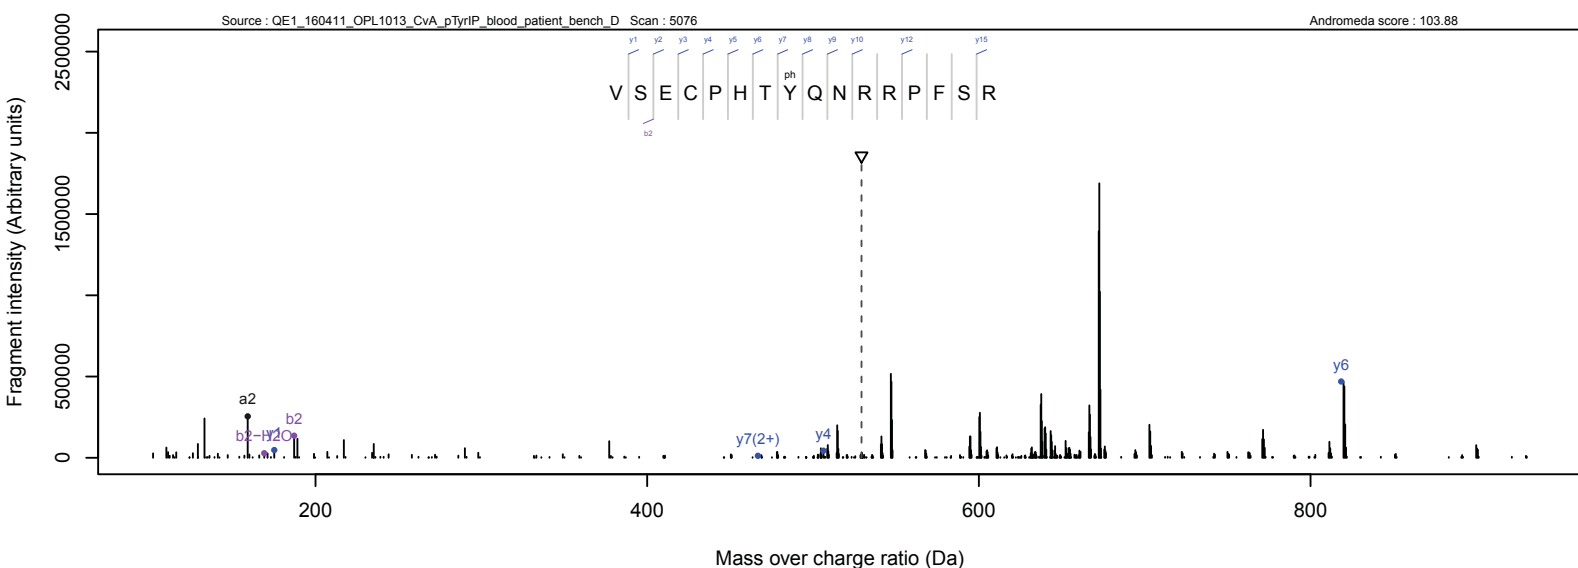

VY(ph)FKDTHPK-3+

Source : QE1\_160411\_OPL1013\_CvA\_pTyrIP\_blood\_patient\_bench\_D Scan : 4061

Andromeda score : 103.88

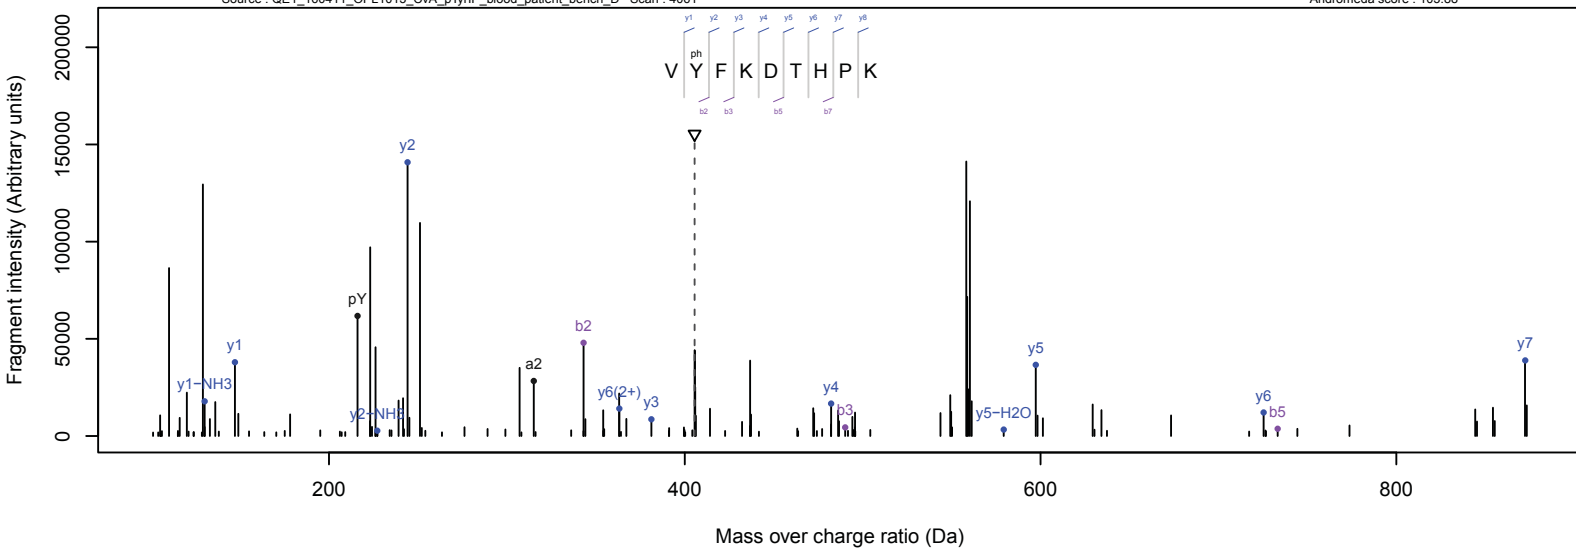

EVQIHPDSDQISGLHGNSFHSEDEIEY(ph)ENQKR-5+

Source : QE1\_160411\_OPL1013\_CvA\_pTyrIP\_blood\_patient\_bench\_D Scan : 20786

Andromeda score : 103.34

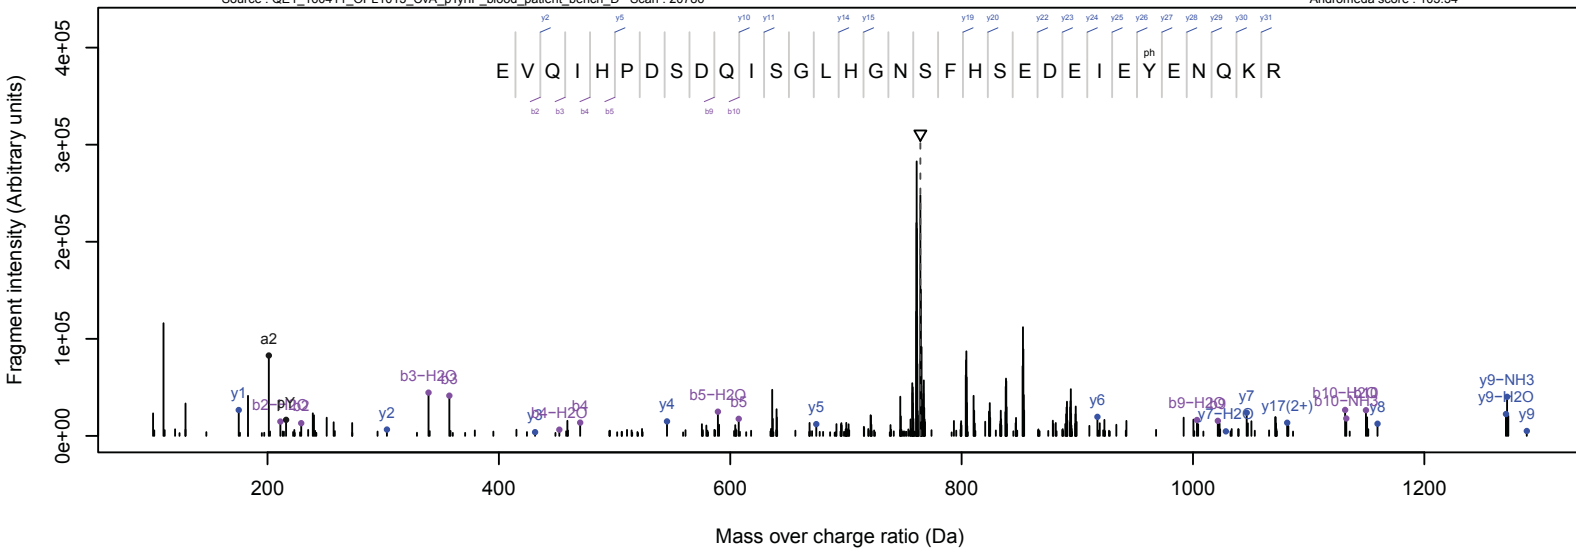

SY(ph)LLPDKQSK-2+

Source : QE1\_160411\_OPL1013\_CvA\_pTyrIP\_blood\_patient\_bench\_C Scan : 9425

Andromeda score : 102.52

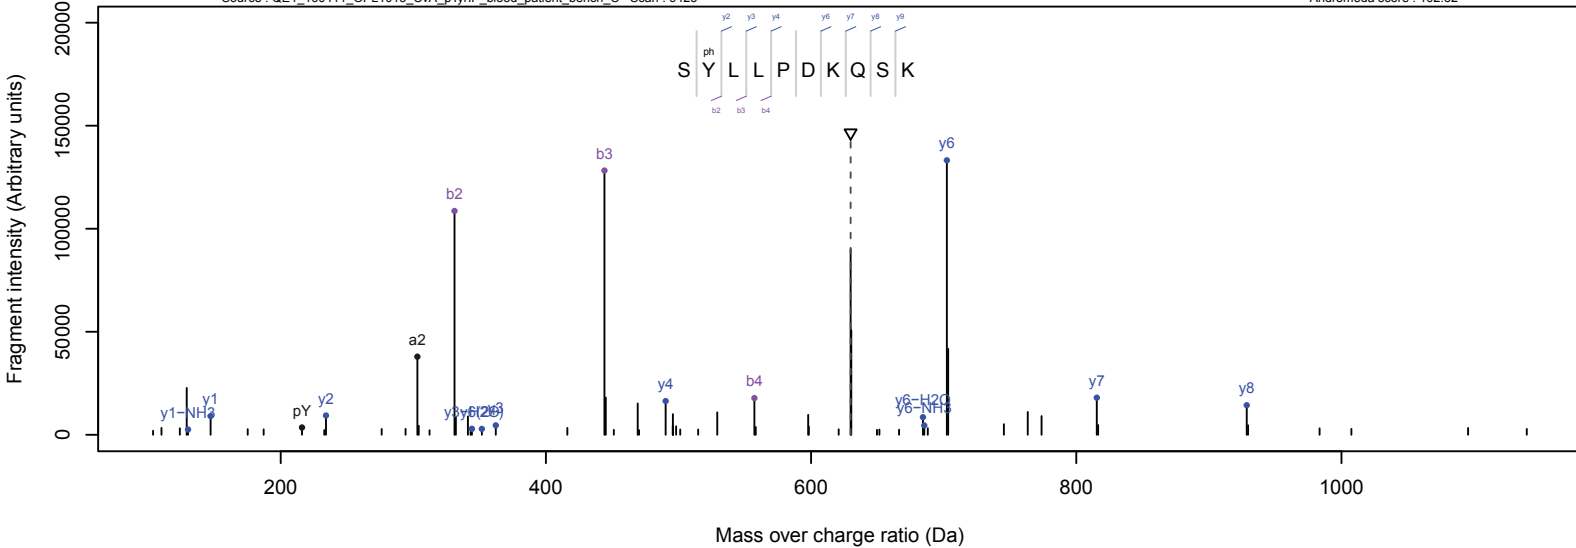

**CIELDCWDGPKVIY<sup>ph</sup>HGWTR-3+**

Source : QE1\_160411\_OPL1013\_CvA\_pTyrIP\_blood\_patient\_bench\_D Scan : 36422

Andromeda score : 102.45

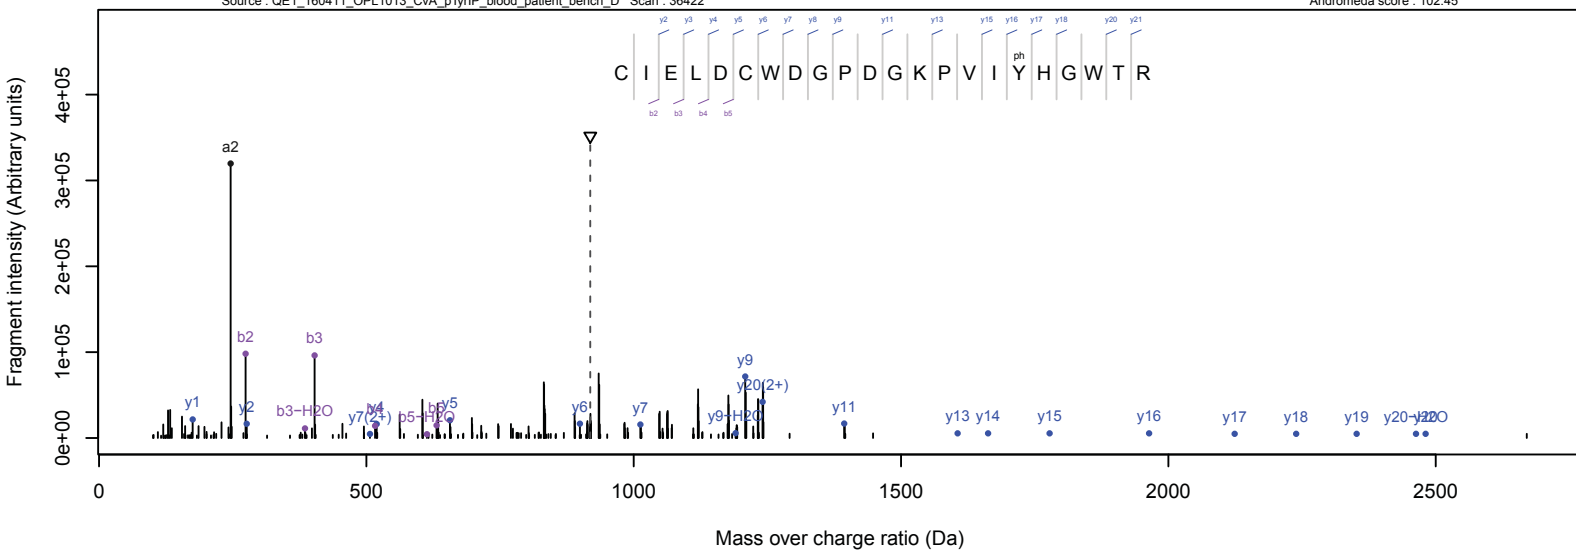

**NM(ox)GGPYGGNYGPGSGGGY<sup>ph</sup>GGR-3+**

Source : QE1\_160411\_OPL1013\_CvA\_pTyrIP\_blood\_patient\_bench\_C Scan : 10449

Andromeda score : 102.44

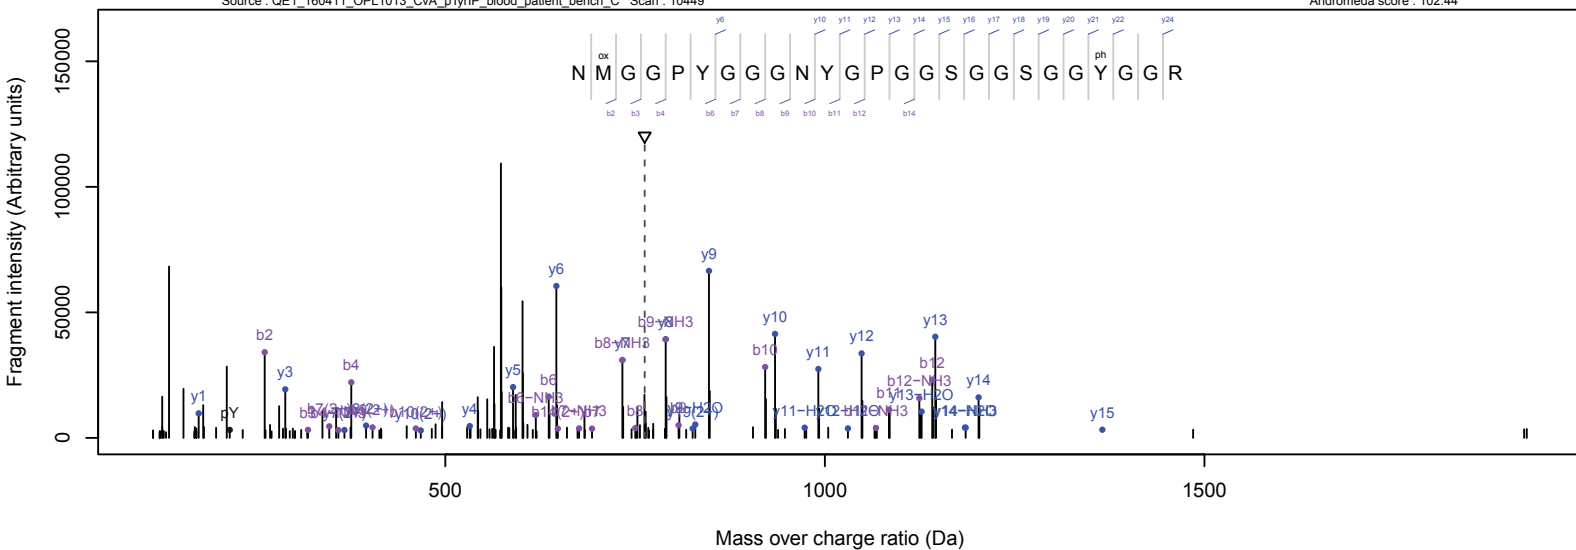

**HEM(ox)PPHIY<sup>ph</sup>AITDTAYR-3+**

Source : QE1\_160411\_OPL1013\_CvA\_pTyrIP\_blood\_patient\_bench\_C Scan : 20908

Andromeda score : 102.29

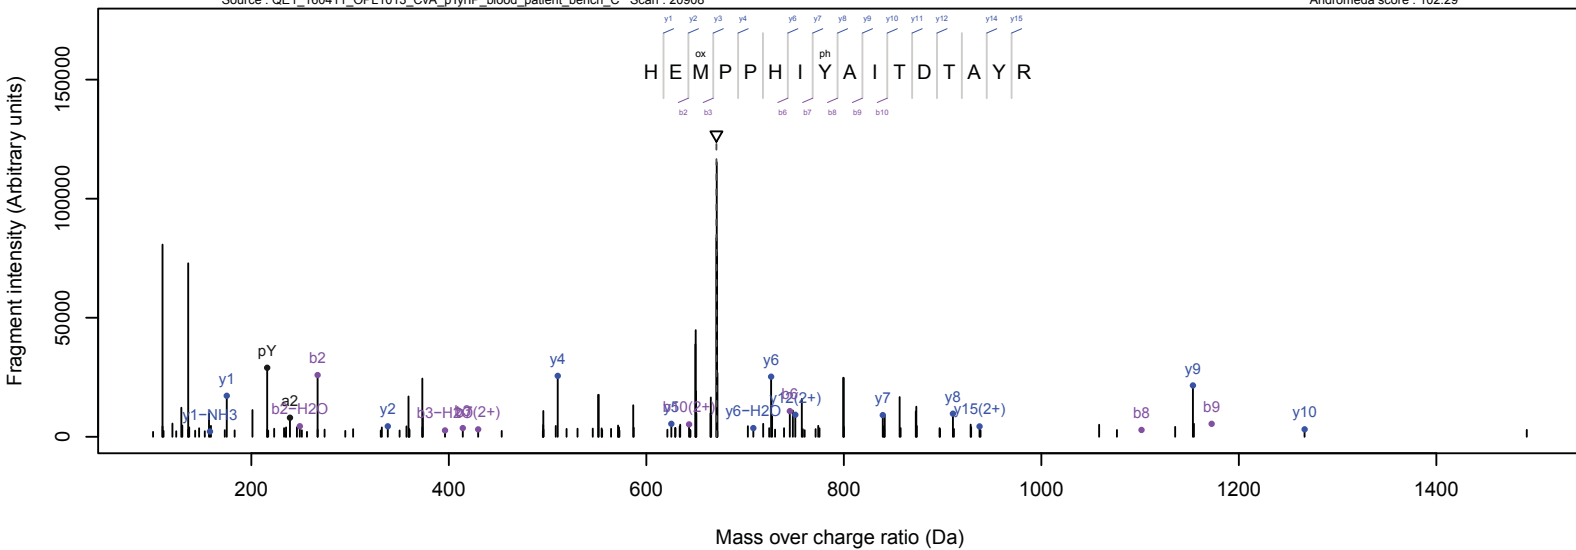

**Y(ph)FSLKPEEK-2+**

Source : QE1\_160411\_OPL1013\_CvA\_pTyrIP\_blood\_patient\_bench\_D Scan : 14121

Andromeda score : 102.06

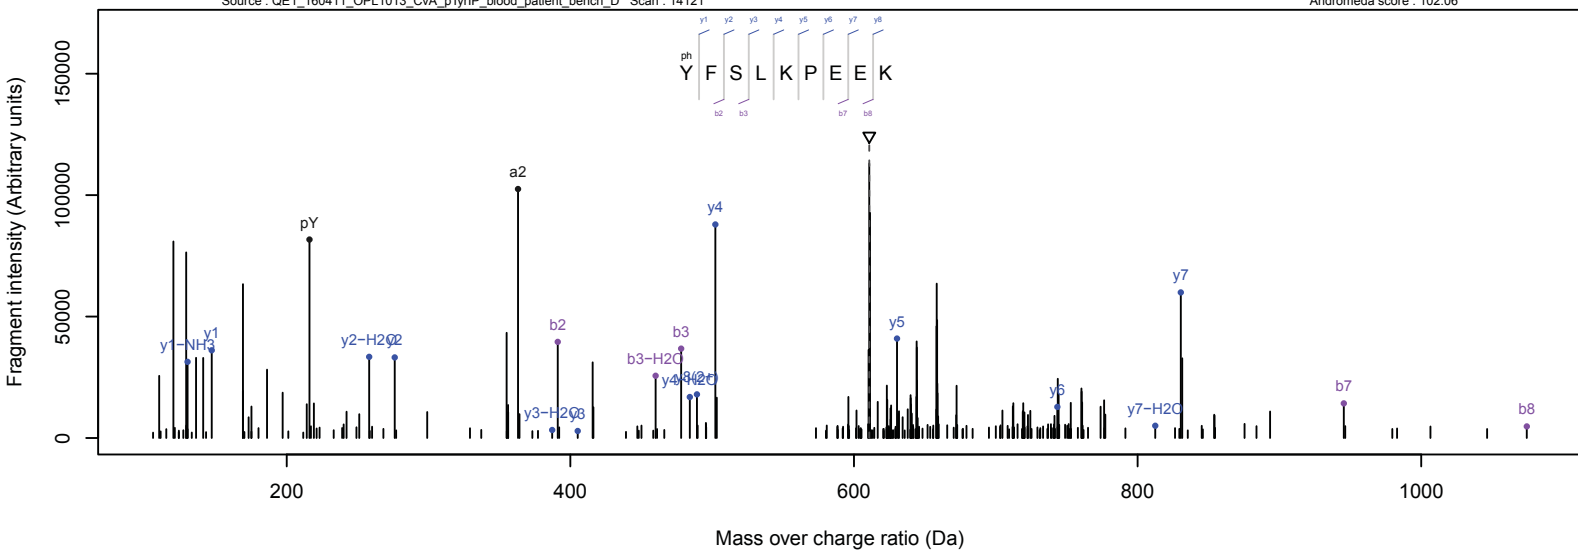

**SPSSCNDLY(ph)ATVK-2+**

Source : QE1\_160411\_OPL1013\_CvA\_pTyrIP\_blood\_patient\_bench\_D Scan : 11524

Andromeda score : 101.43

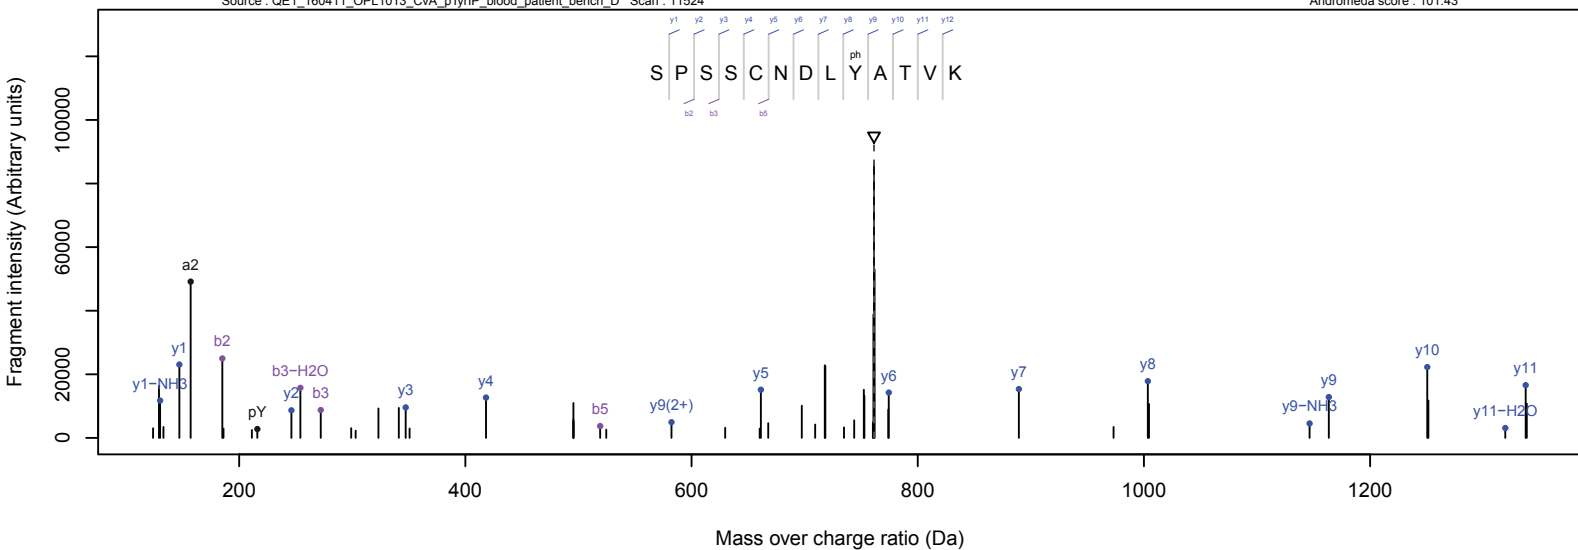

**SYKAPYTCGGDSQY(ph)VLMSSPVGR-3+**

Source : QE1\_160411\_OPL1013\_CvA\_pTyrIP\_blood\_patient\_bench\_A Scan : 20920

Andromeda score : 101.41

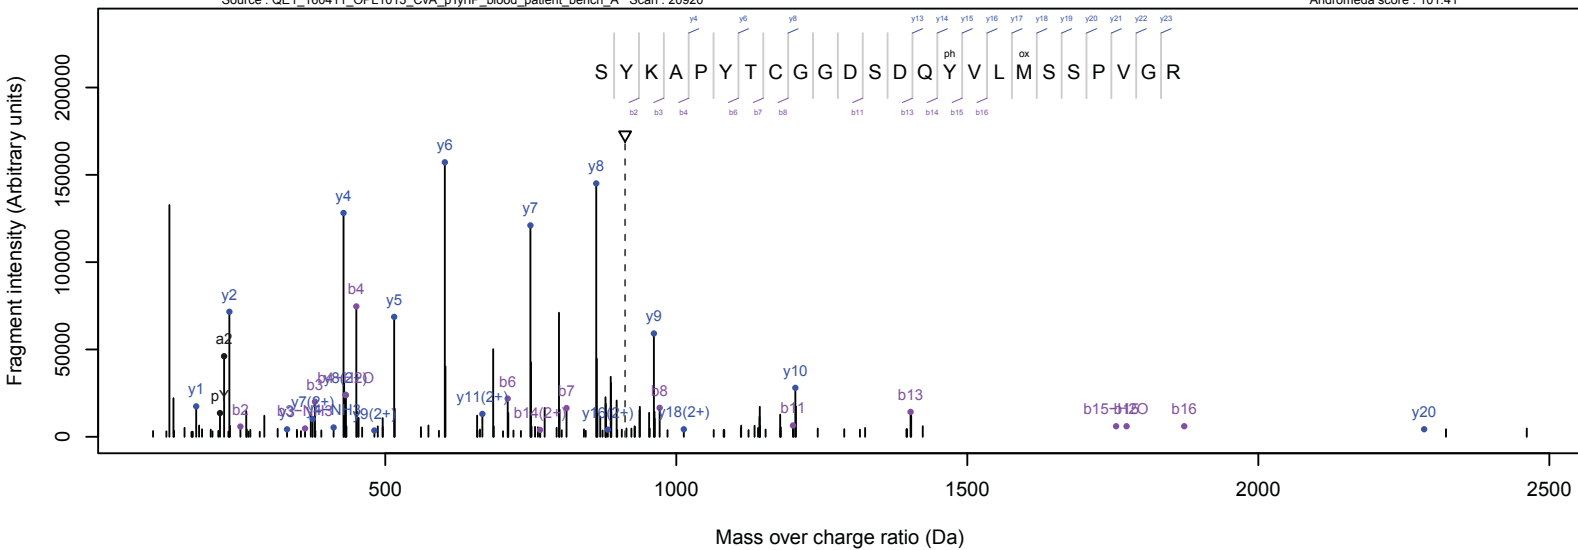



**NY(ph)ISAWELQR-2+**

Source : QE1\_160411\_OPL1013\_CvA\_pTyrIP\_blood\_patient\_bench\_C Scan : 28266

Andromeda score : 101.39

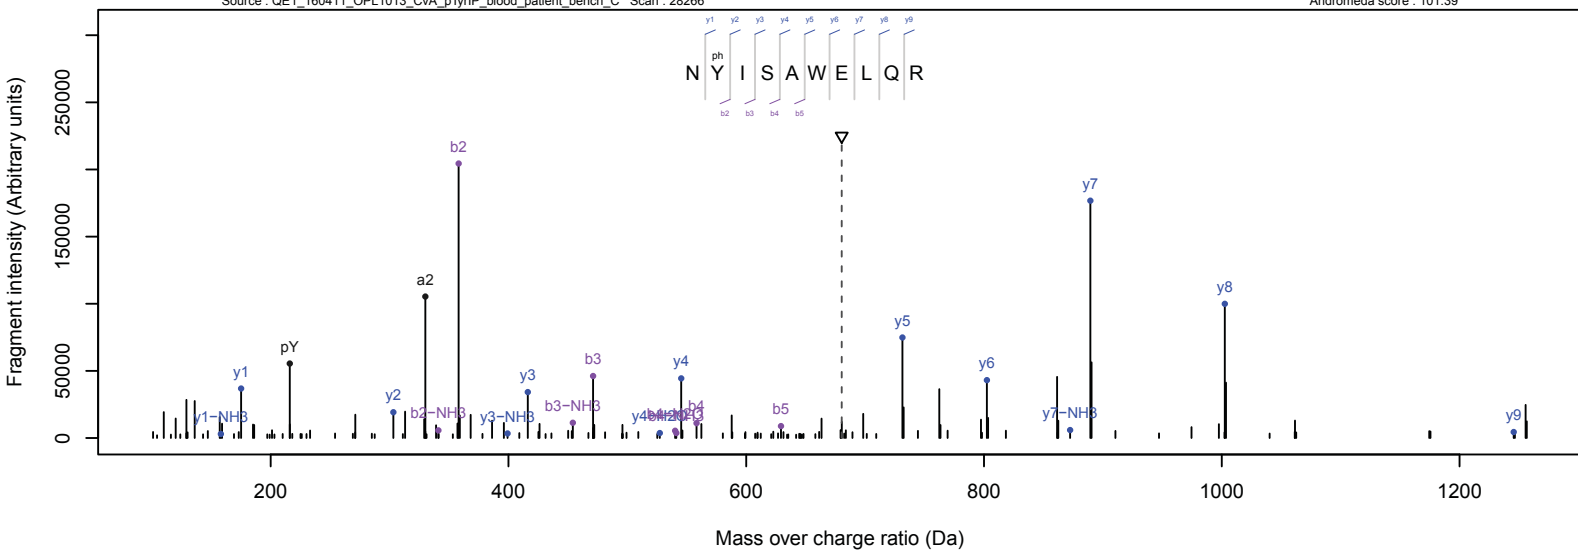

**Y(ph)HTINGHNCVKK-4+**

Source : QE1\_160411\_OPL1013\_CvA\_pTyrIP\_blood\_patient\_bench\_B Scan : 1661

Andromeda score : 101.39

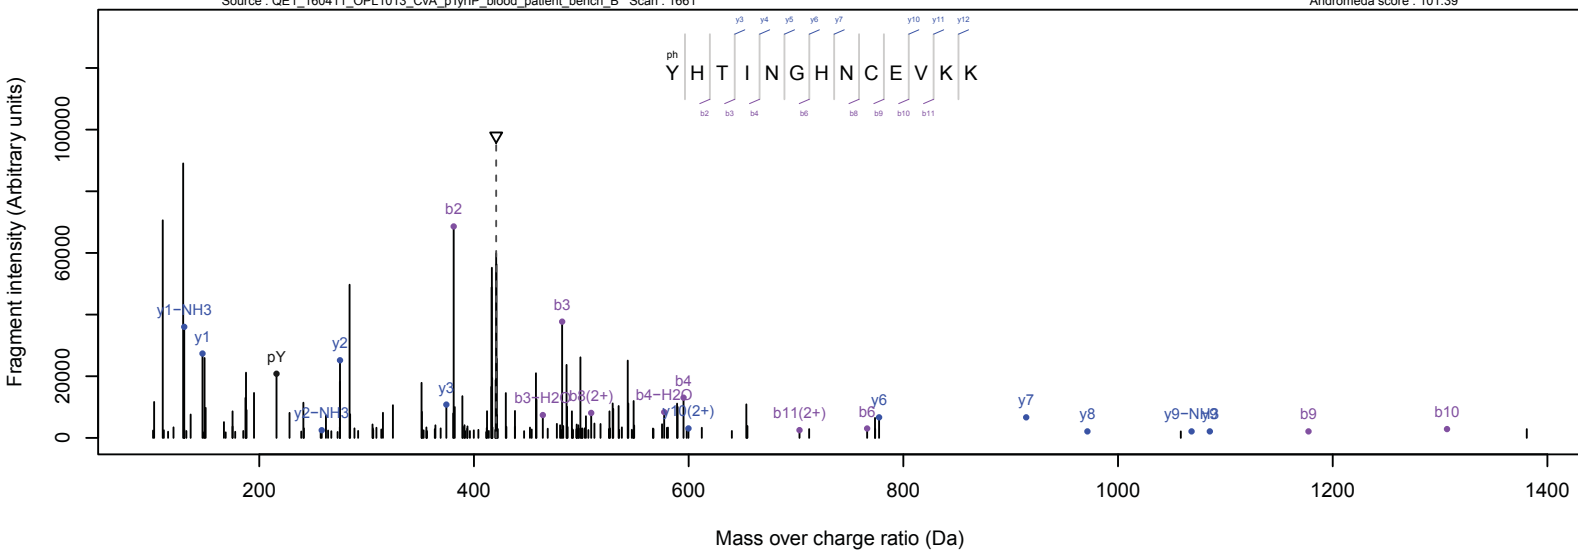

**YQQDQIVKEDSVEAVGAQLKV(ph)HQYQDK-4+**

Source : QE1\_160411\_OPL1013\_CvA\_pTyrIP\_blood\_patient\_bench\_D Scan : 25322

Andromeda score : 100.95

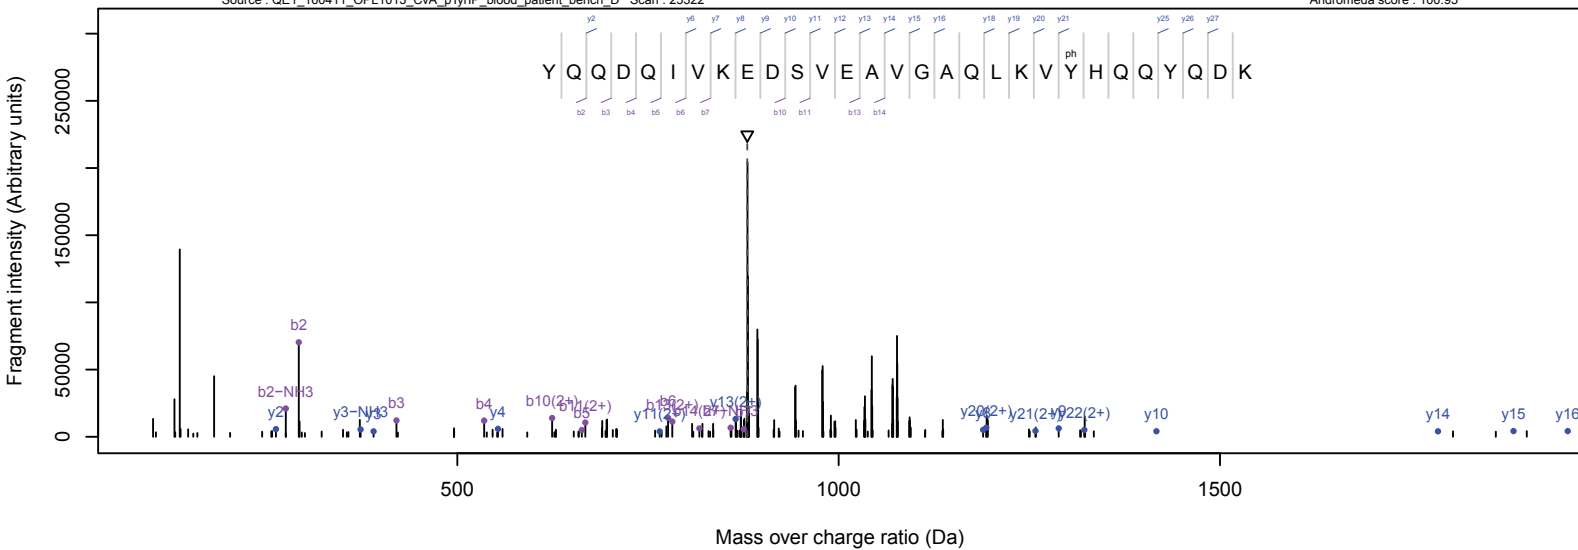

LY(ph)DLNM(ox)PAYVK-2+

Source : QE1\_160411\_OPL1013\_CvA\_pTyrIP\_blood\_patient\_bench\_A Scan : 18627

Andromeda score : 100.93

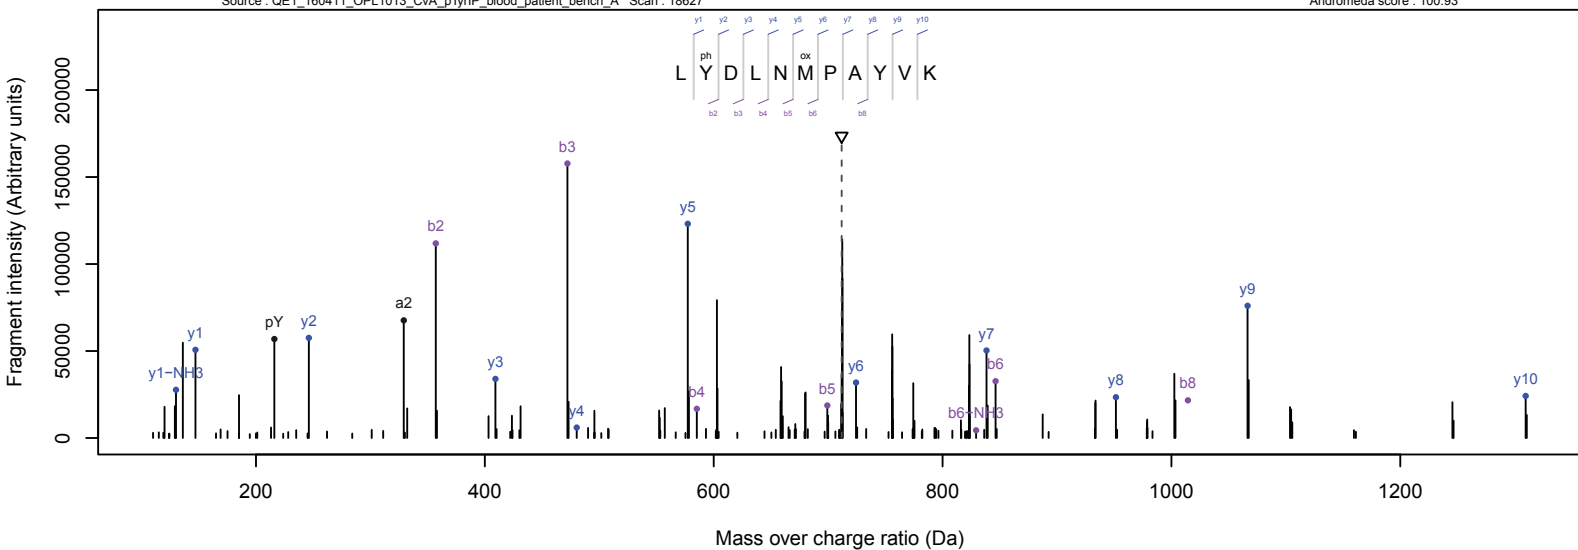

QLFHPEQLITGKEDAANNY(ph)AR-4+

Source : QE1\_160411\_OPL1013\_CvA\_pTyrIP\_blood\_patient\_bench\_C Scan : 28368

Andromeda score : 100.82

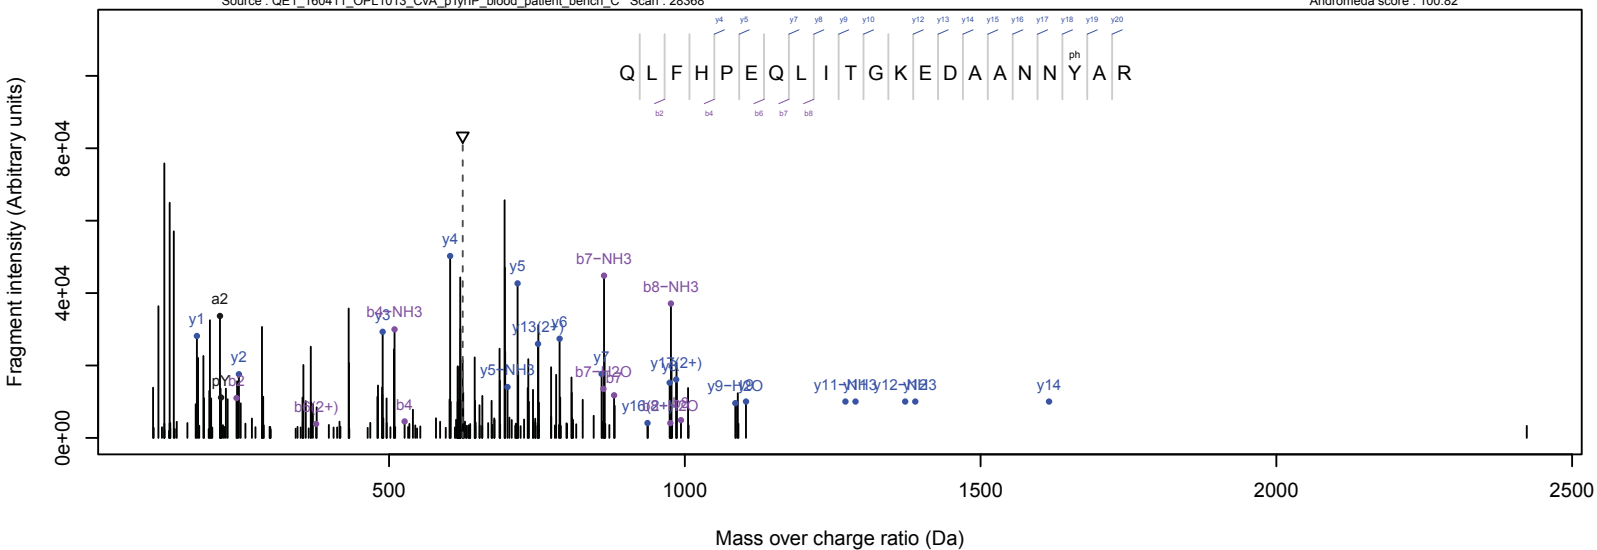

Y(ph)SEFTSTTSGTGHNQTR-3+

Source : QE1\_160411\_OPL1013\_CvA\_pTyrIP\_blood\_patient\_bench\_D Scan : 5109

Andromeda score : 100.43

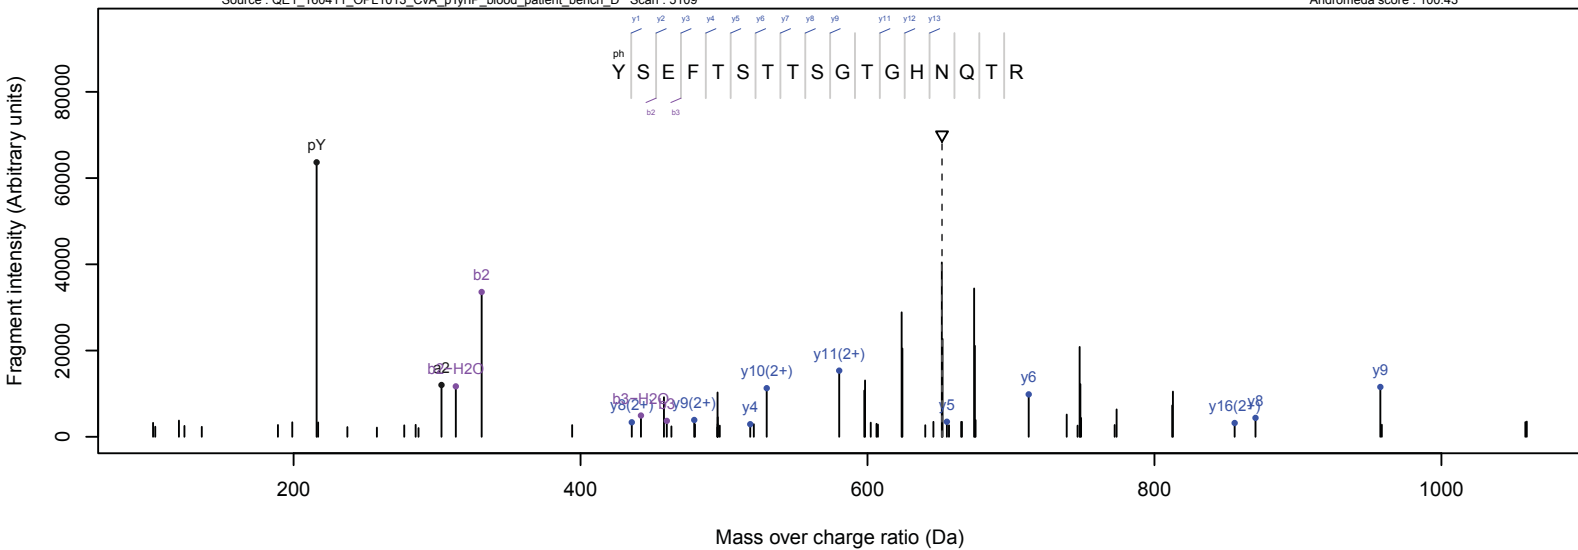

**HNTEFRDSTY(ph)DLPR-3+**

Source : QE1\_160411\_OPL1013\_CvA\_pTyrIP\_blood\_patient\_bench\_B Scan : 12010

Andromeda score : 100.22

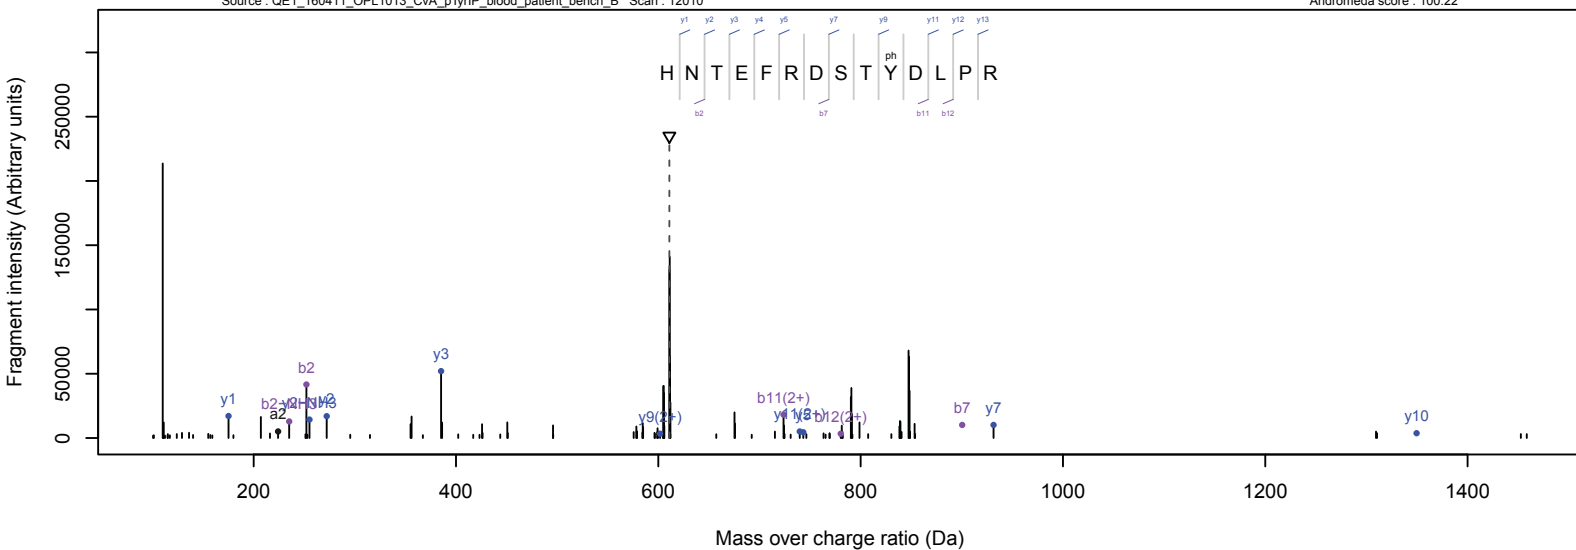

**VGNGEETPM(ox)IGDKVY(ph)VHYK-3+**

Source : QE1\_160411\_OPL1013\_CvA\_pTyrIP\_blood\_patient\_bench\_C Scan : 18783

Andromeda score : 100.02

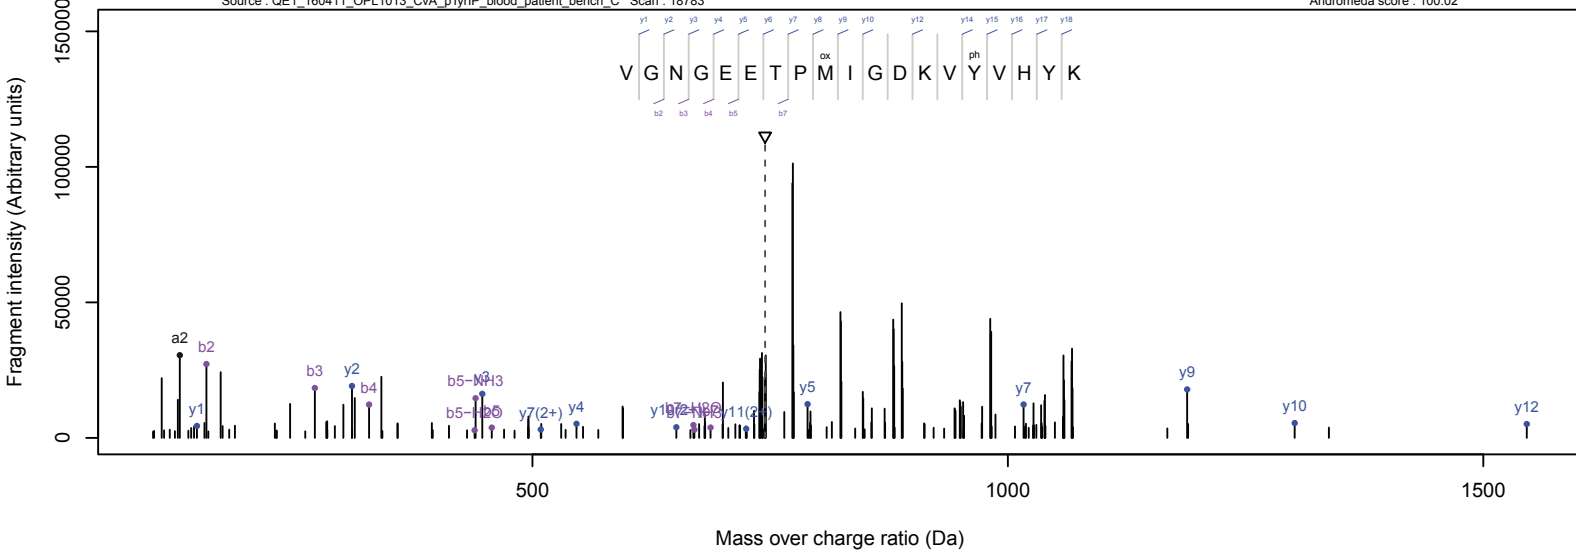

**HSQHLPKVEFGVY(ph)ESGPR-4+**

Source : QE1\_160411\_OPL1013\_CvA\_pTyrIP\_blood\_patient\_bench\_D Scan : 16927

Andromeda score : 99.407

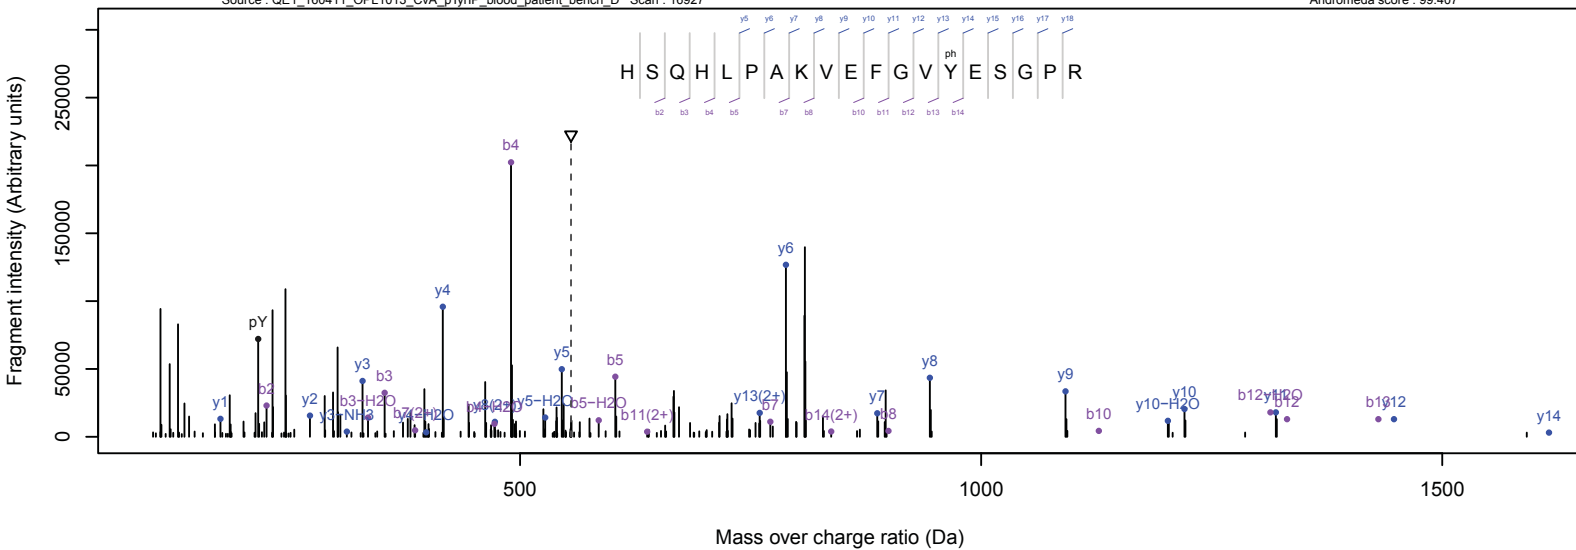



## AKYDTPY(ph)IWR-3+

Source: QE1\_160411\_OPL1013\_CvA\_pTyrIP\_blood\_patient\_bench\_A Scan: 27548

Andromeda score: 98.156

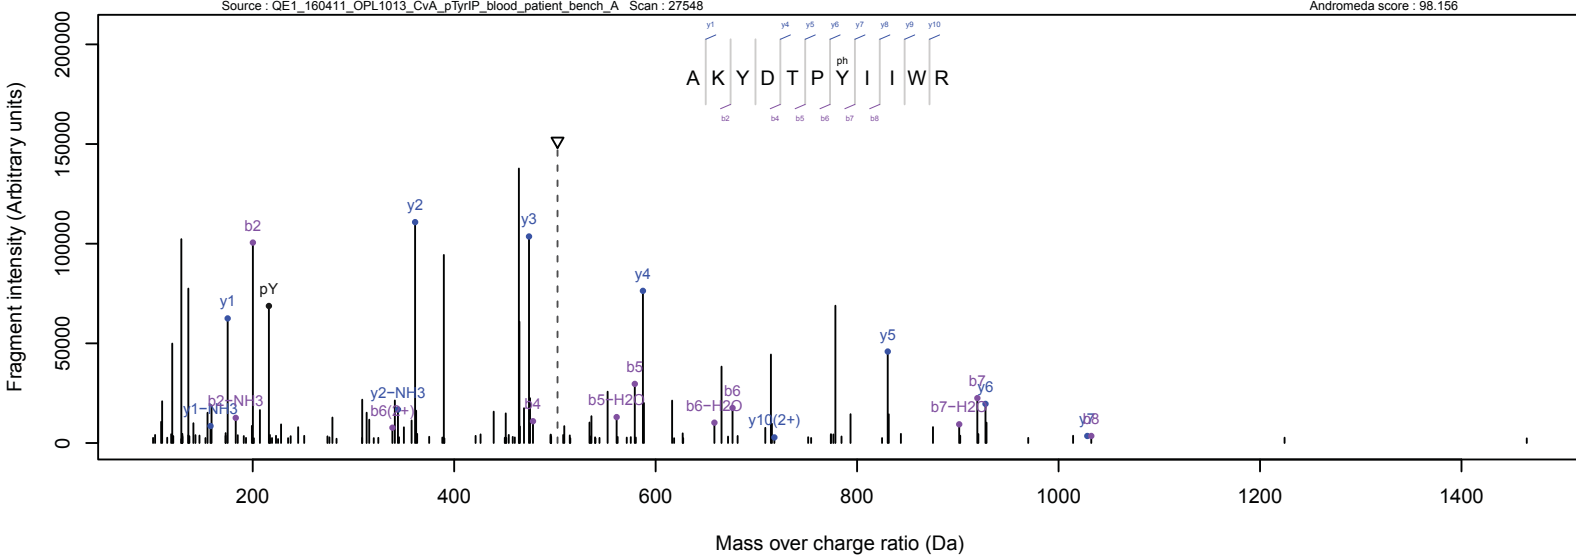

## NWYVDDPY(ph)QKYHDR-3+

Source: QE1\_160411\_OPL1013\_CvA\_pTyrIP\_blood\_patient\_bench\_C Scan: 17537

Andromeda score: 97.797

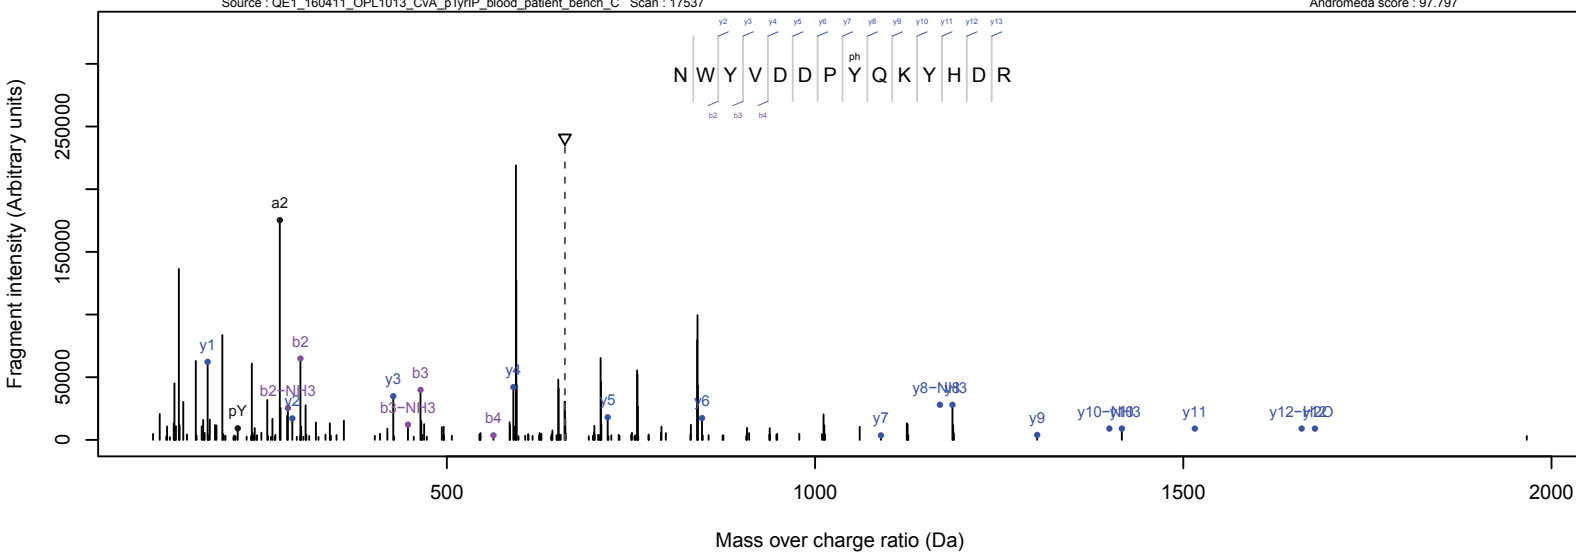

## LIY(ph)LVPEK-2+

Source: QE1\_160411\_OPL1013\_CvA\_pTyrIP\_blood\_patient\_bench\_D Scan: 27883

Andromeda score: 97.635

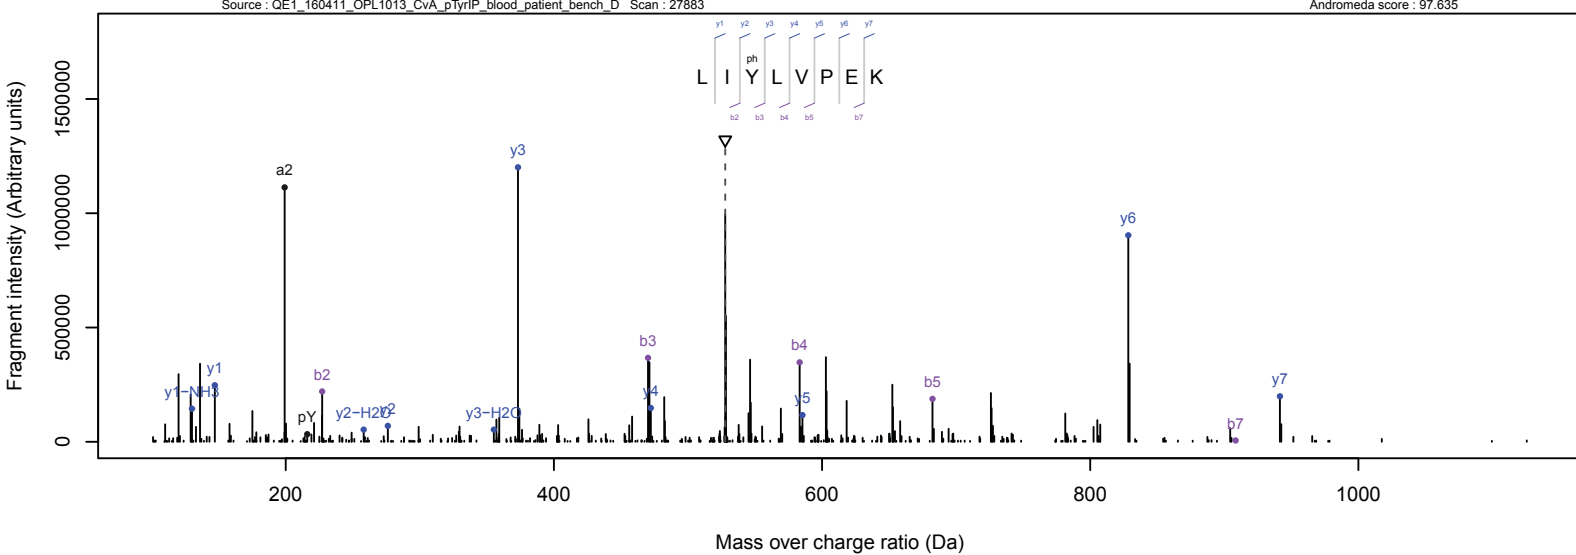

## KYGLFKEENPYAR-3+

Source: QE1\_160411\_OPL1013\_CvA\_pTyrIP\_blood\_patient\_bench\_D Scan: 12295

Andromeda score: 97.297

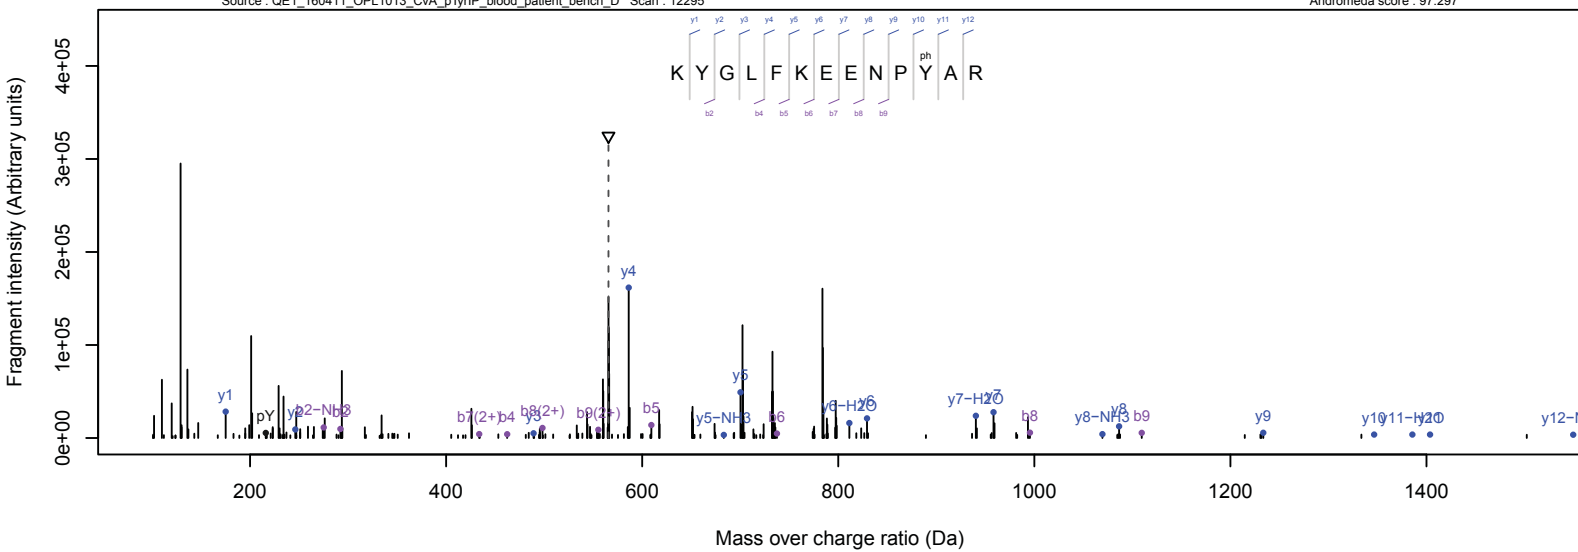

## VVALY(ph)DYM(ox)PM(ox)NANDLQLR-2+

Source: QE1\_160411\_OPL1013\_CvA\_pTyrIP\_blood\_patient\_bench\_C Scan: 34655

Andromeda score: 97.235

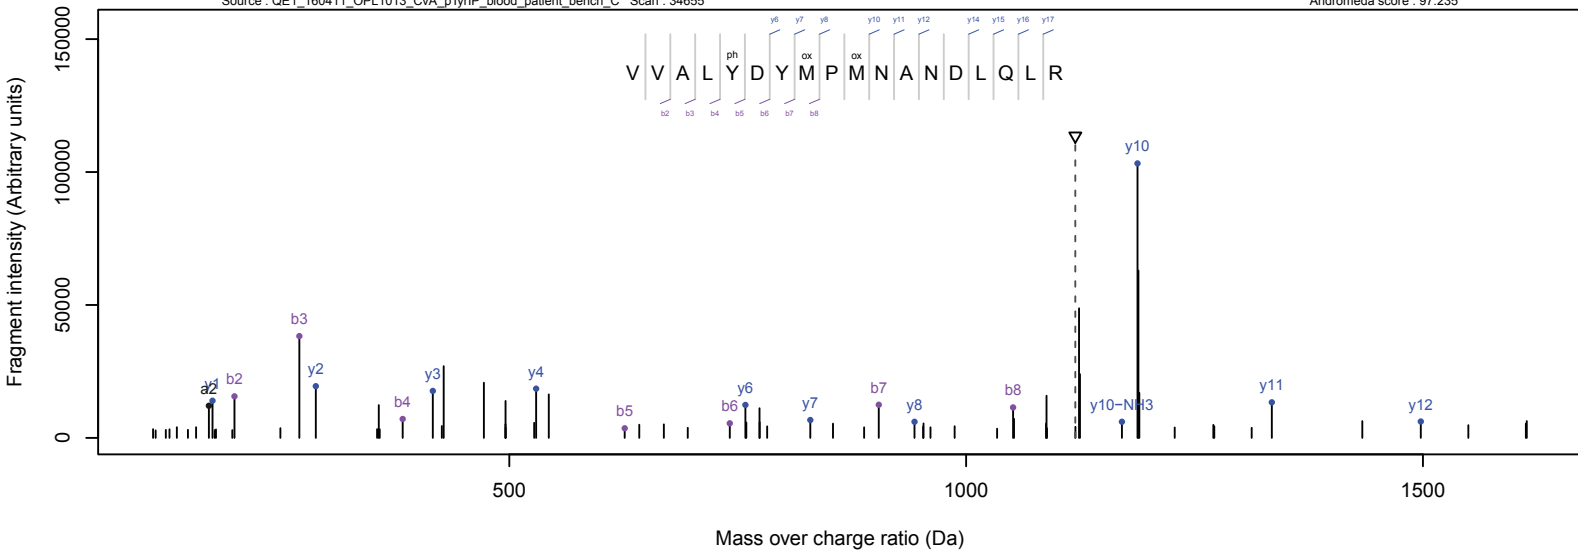

## EGLY(ph)QYK-2+

Source: QE1\_160411\_OPL1013\_CvA\_pTyrIP\_blood\_patient\_bench\_C Scan: 8040

Andromeda score: 97.071

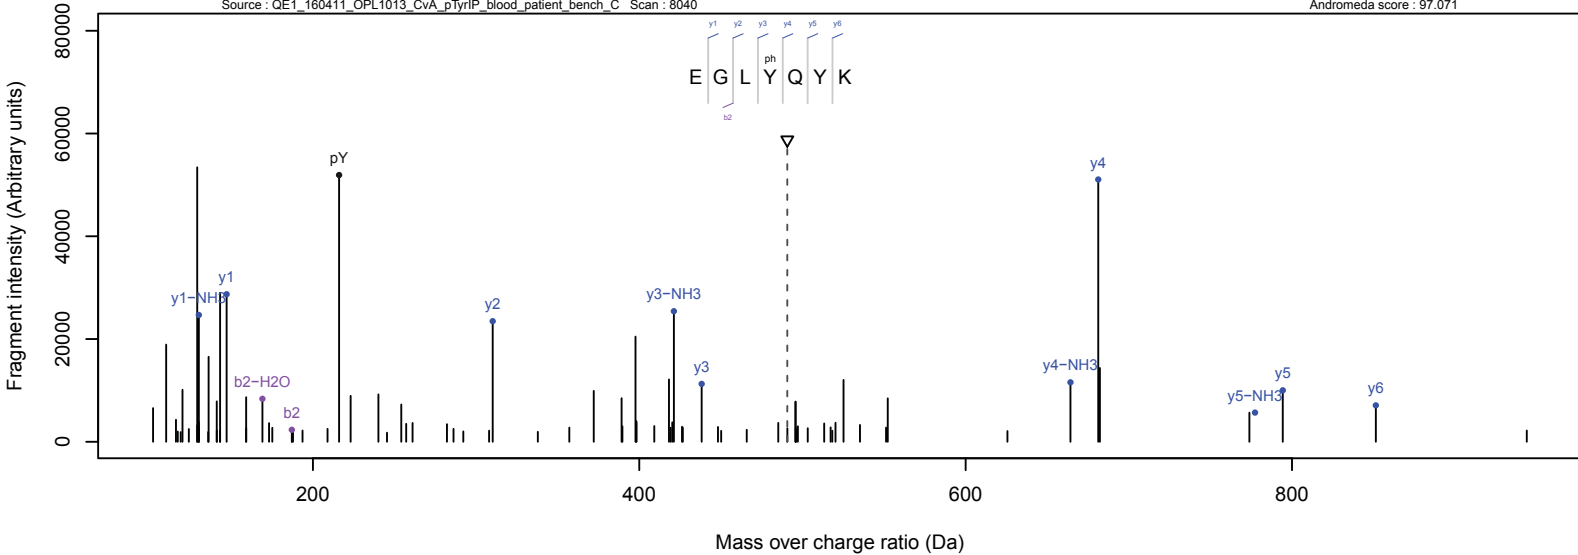

**SYKAPYTCGGDSDQY<sup>ph</sup>VLMSSPVGR-3+**

Source : QE1\_160411\_OPL1013\_CvA\_pTyrIP\_blood\_patient\_bench\_B Scan : 25103

Andromeda score : 96.793

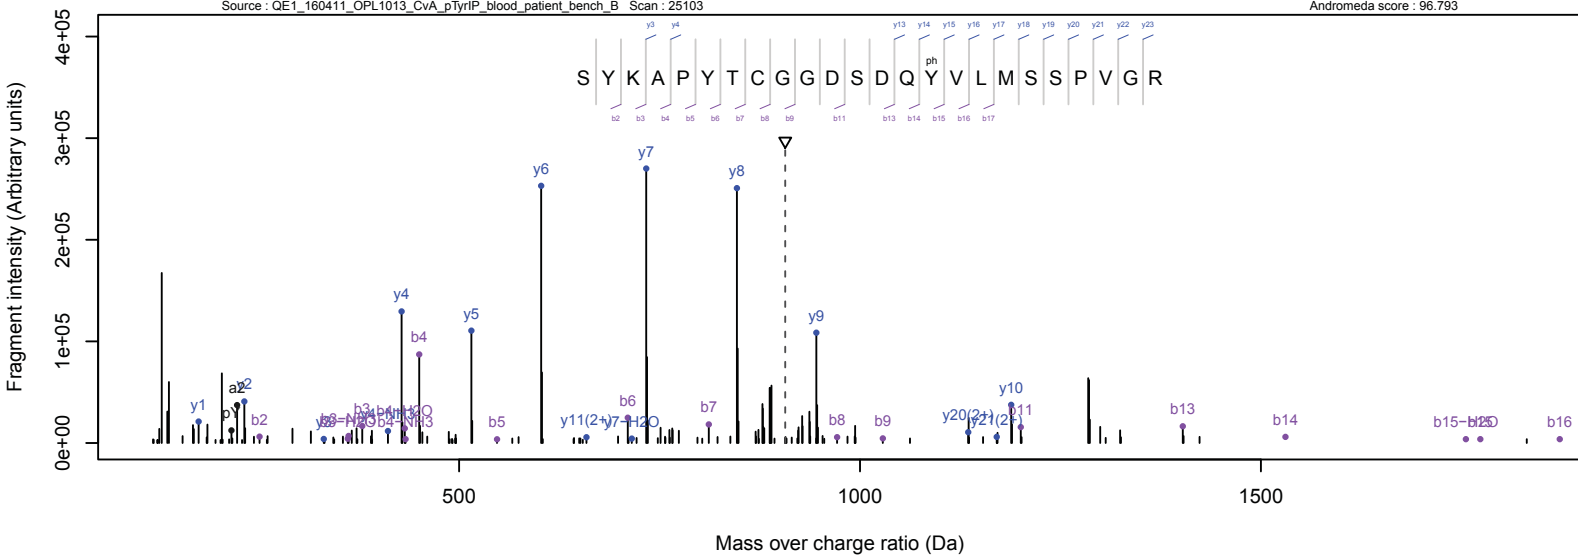

**FIHQQPQSSPVY<sup>ph</sup>GSSAK-3+**

Source : QE1\_160411\_OPL1013\_CvA\_pTyrIP\_blood\_patient\_bench\_D Scan : 7914

Andromeda score : 96.773

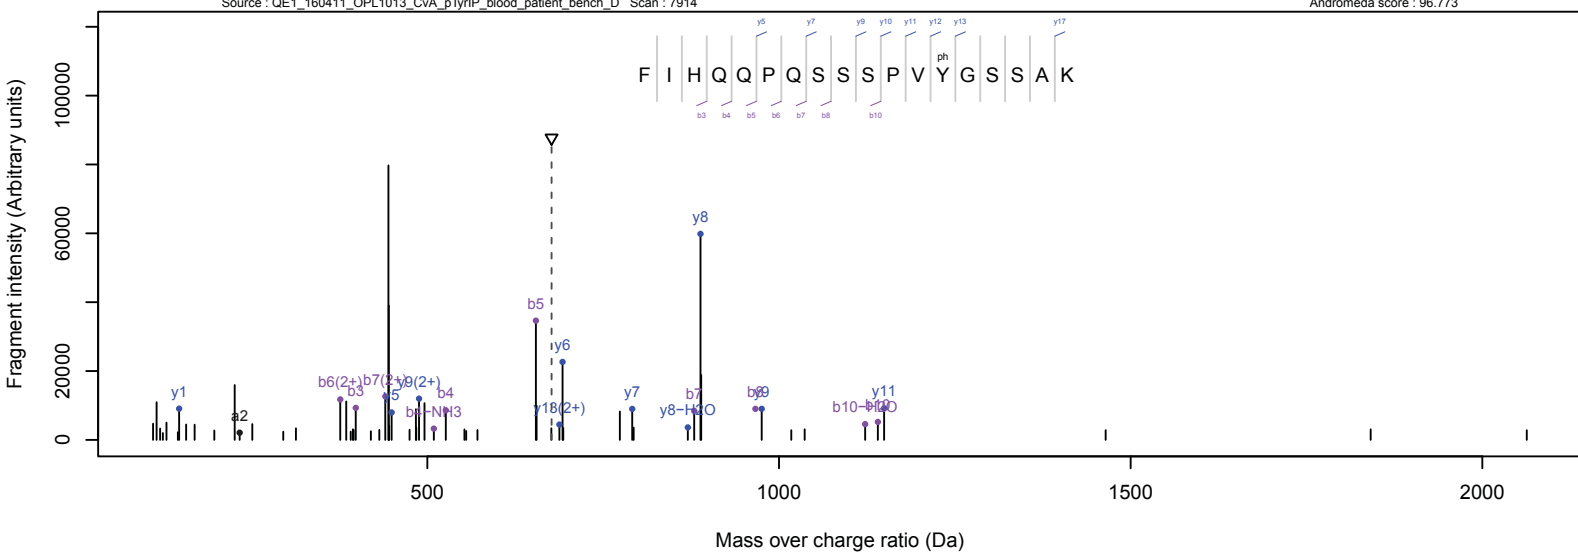

**NQETY<sup>ph</sup>ETLKHEKPPQ-3+**

Source : QE1\_160411\_OPL1013\_CvA\_pTyrIP\_blood\_patient\_bench\_C Scan : 8249

Andromeda score : 96.673

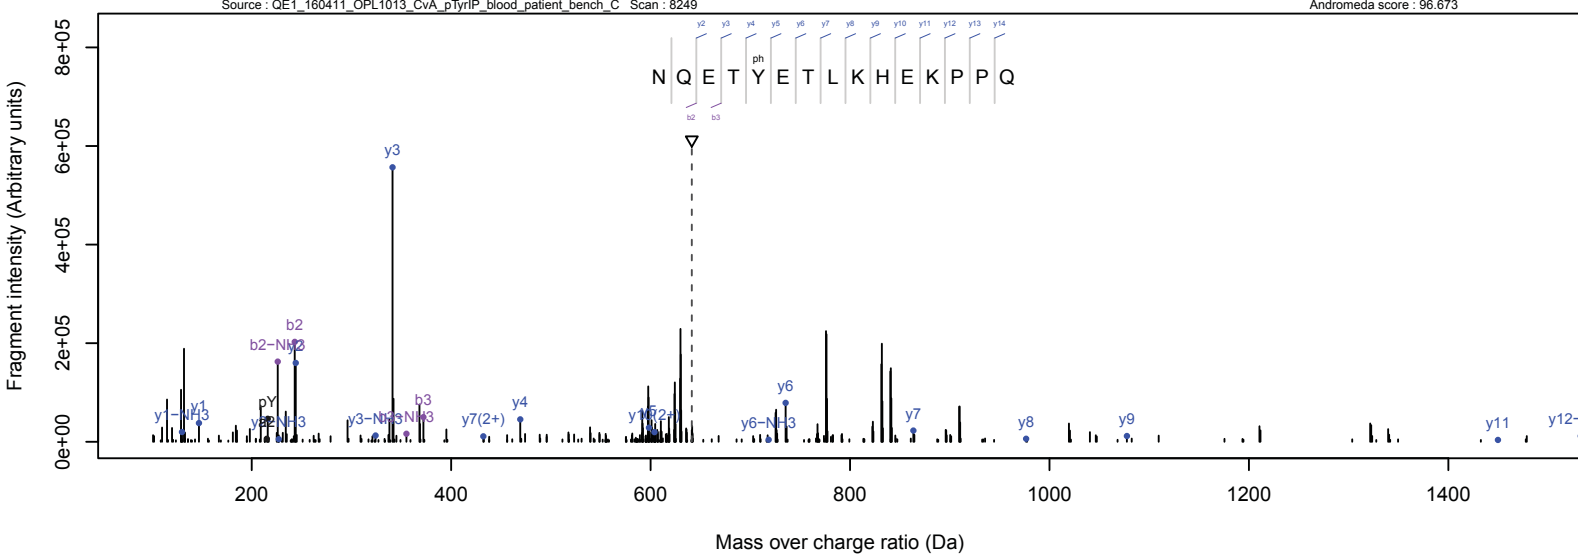

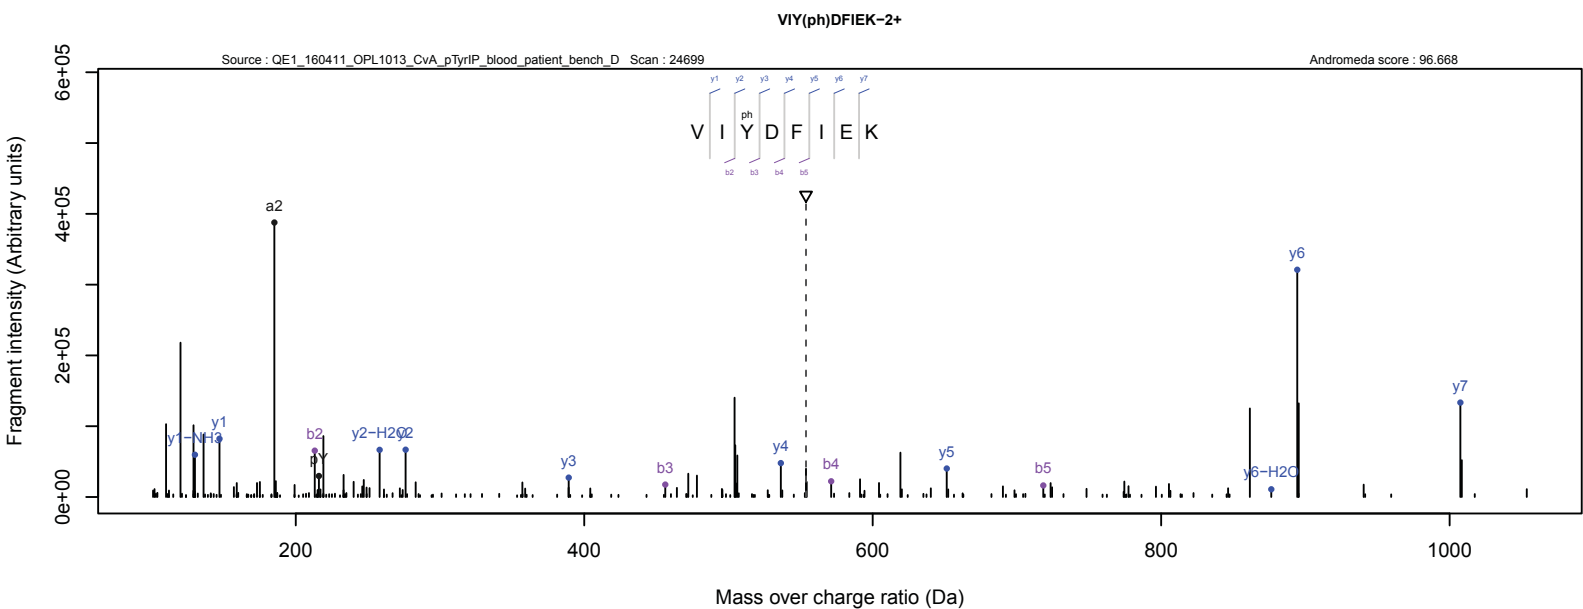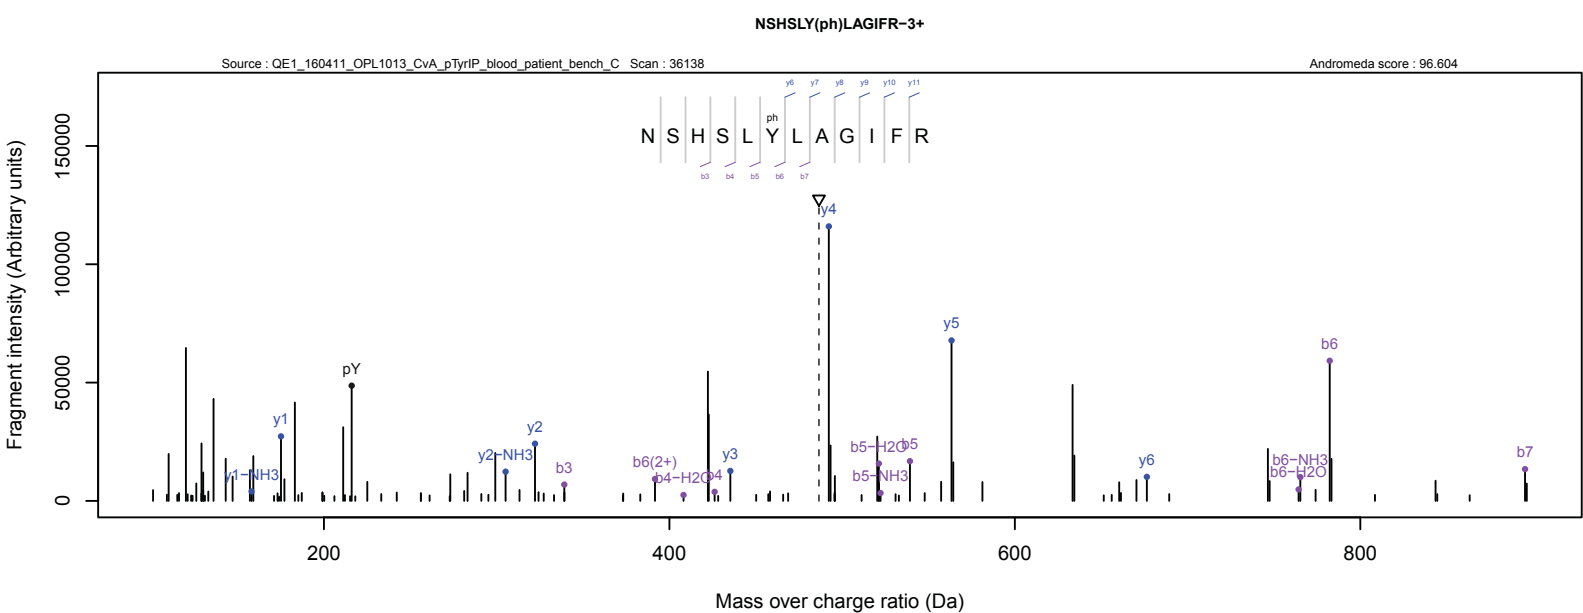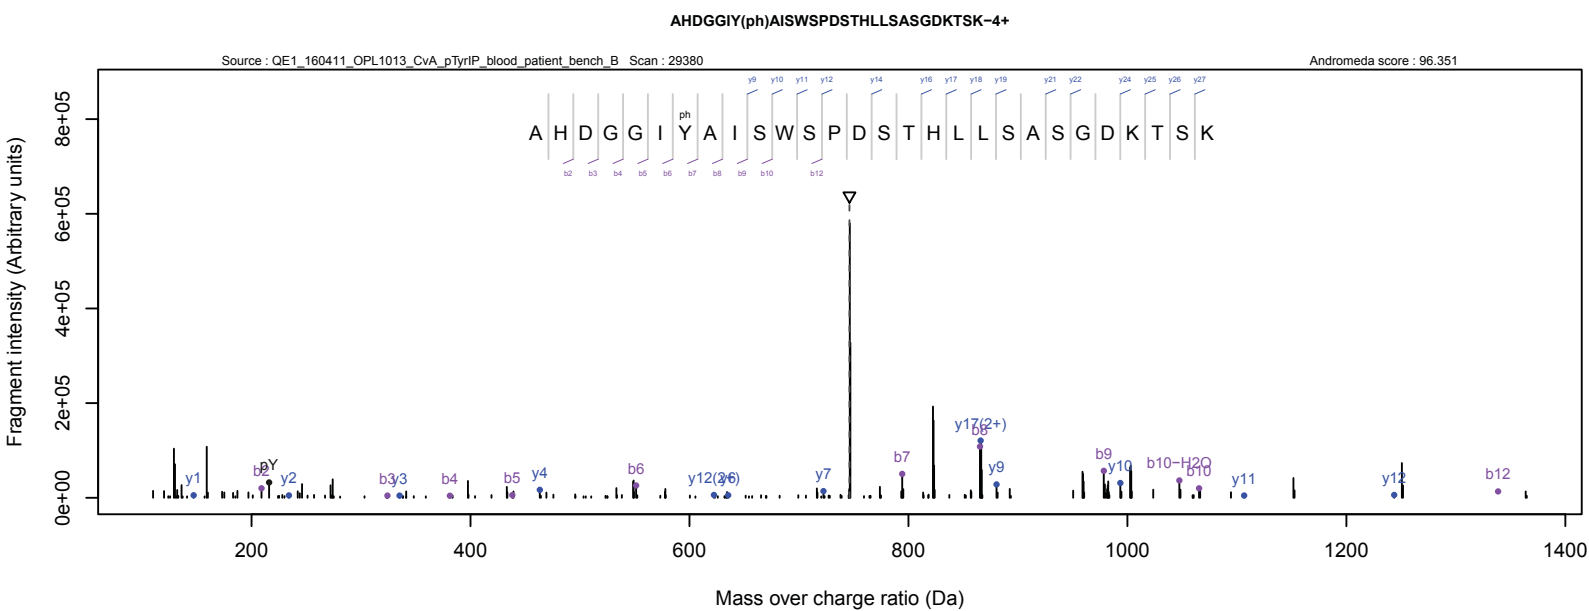



LAQNGHCVNGISGQVHGFYS(ph)LPKPSR-4+

Source : QE1\_160411\_OPL1013\_CvA\_pTyrIP\_blood\_patient\_bench\_B Scan : 20674

Andromeda score : 96.351

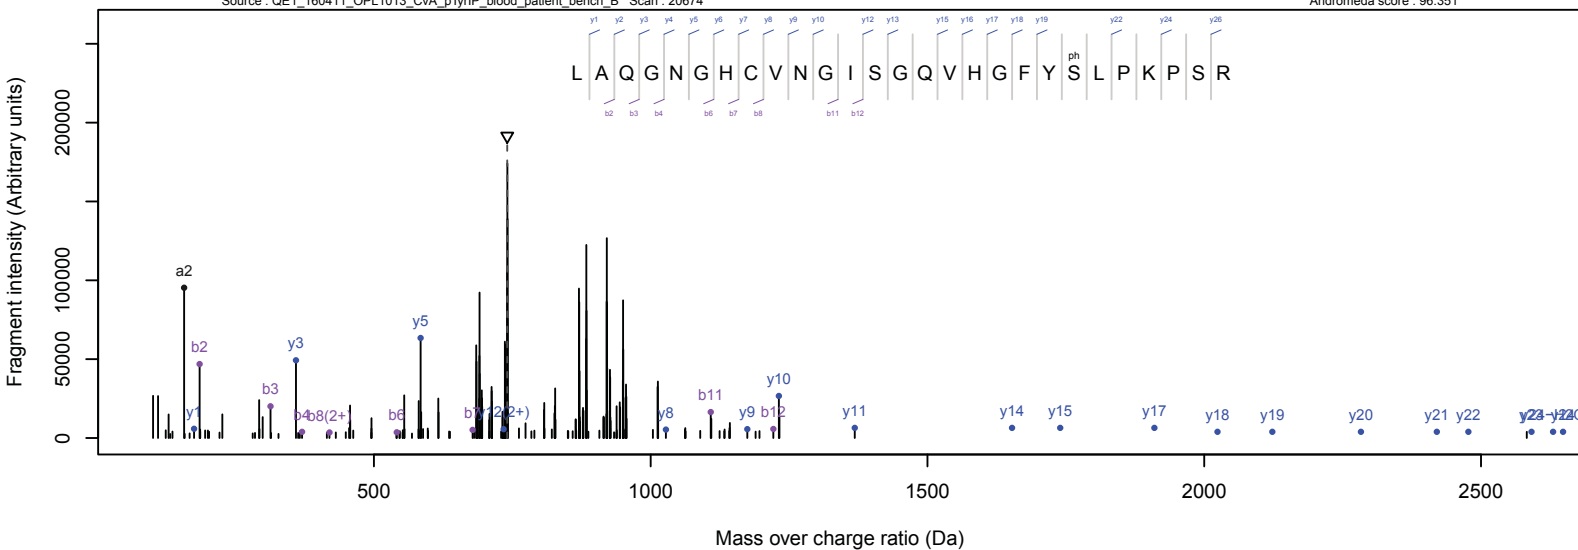

SIY(ph)YITGESK-2+

Source : QE1\_160411\_OPL1013\_CvA\_pTyrIP\_blood\_patient\_bench\_A Scan : 15459

Andromeda score : 96.229

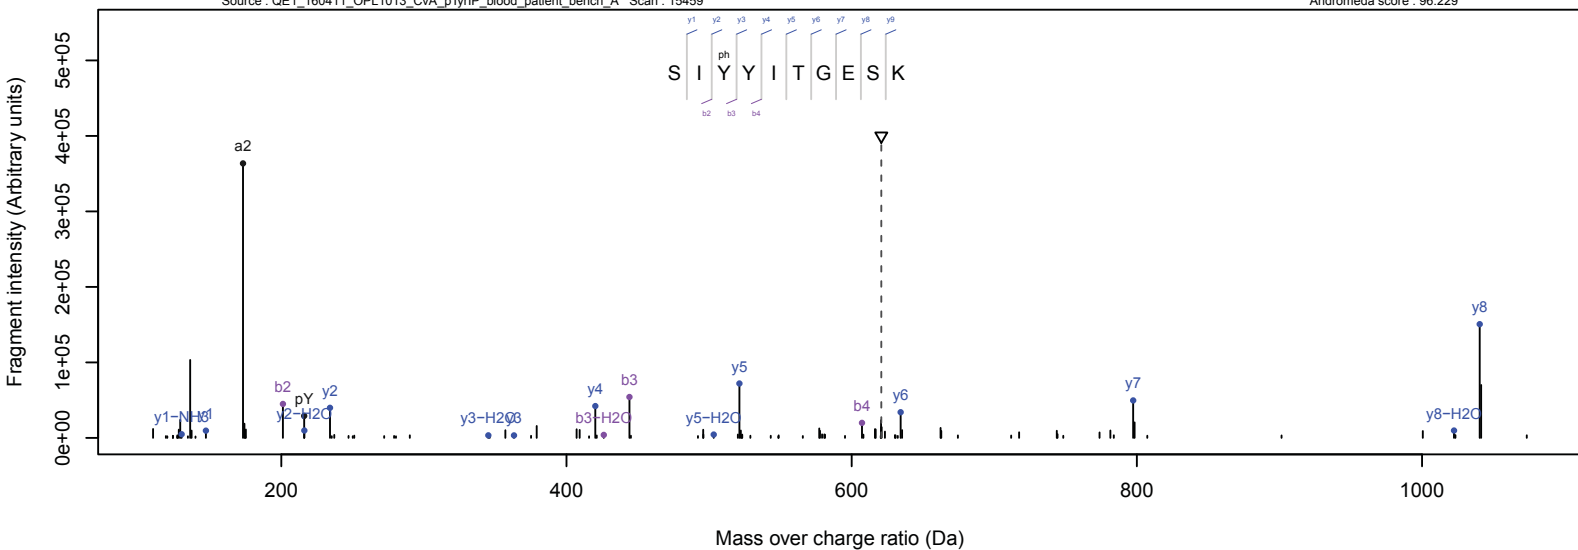

RLSTADPADASTIY(ph)AVVV-2+

Source : QE1\_160411\_OPL1013\_CvA\_pTyrIP\_blood\_patient\_bench\_C Scan : 35437

Andromeda score : 96.208

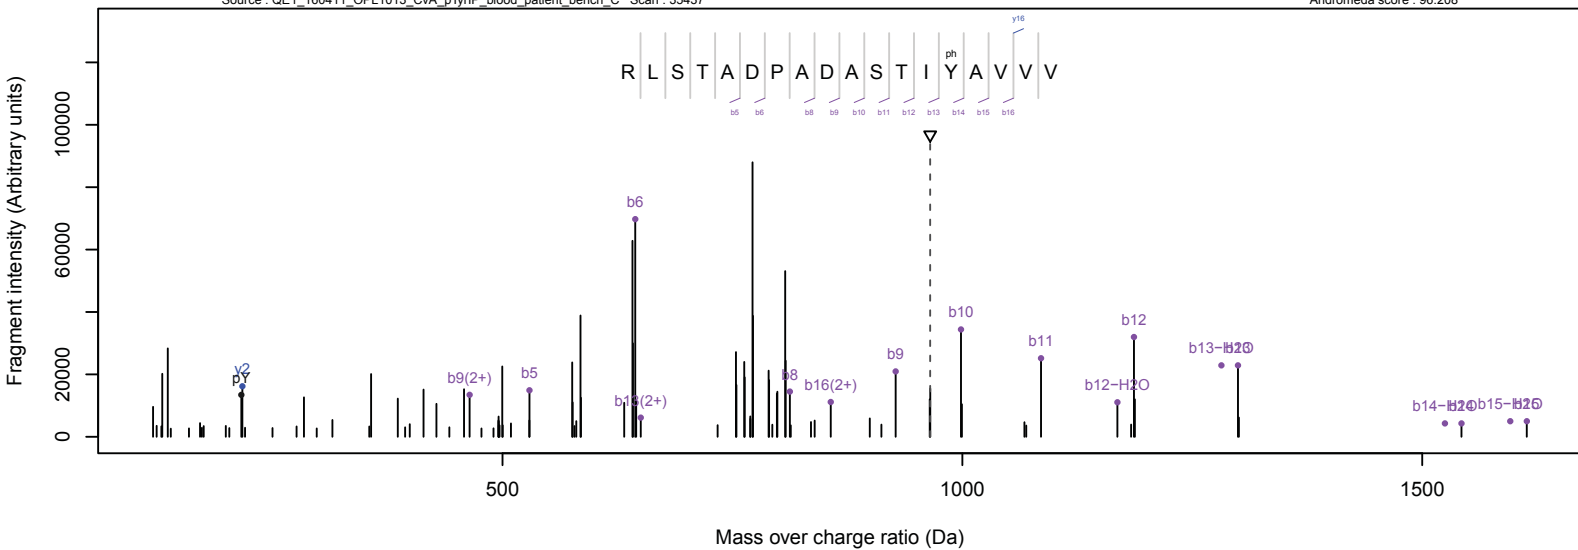

**GKELKDPDQLYT(ph)TLK-3+**

Source : QE1\_160411\_OPL1013\_CvA\_pTyrIP\_blood\_patient\_bench\_C Scan : 16685

Andromeda score : 95.751

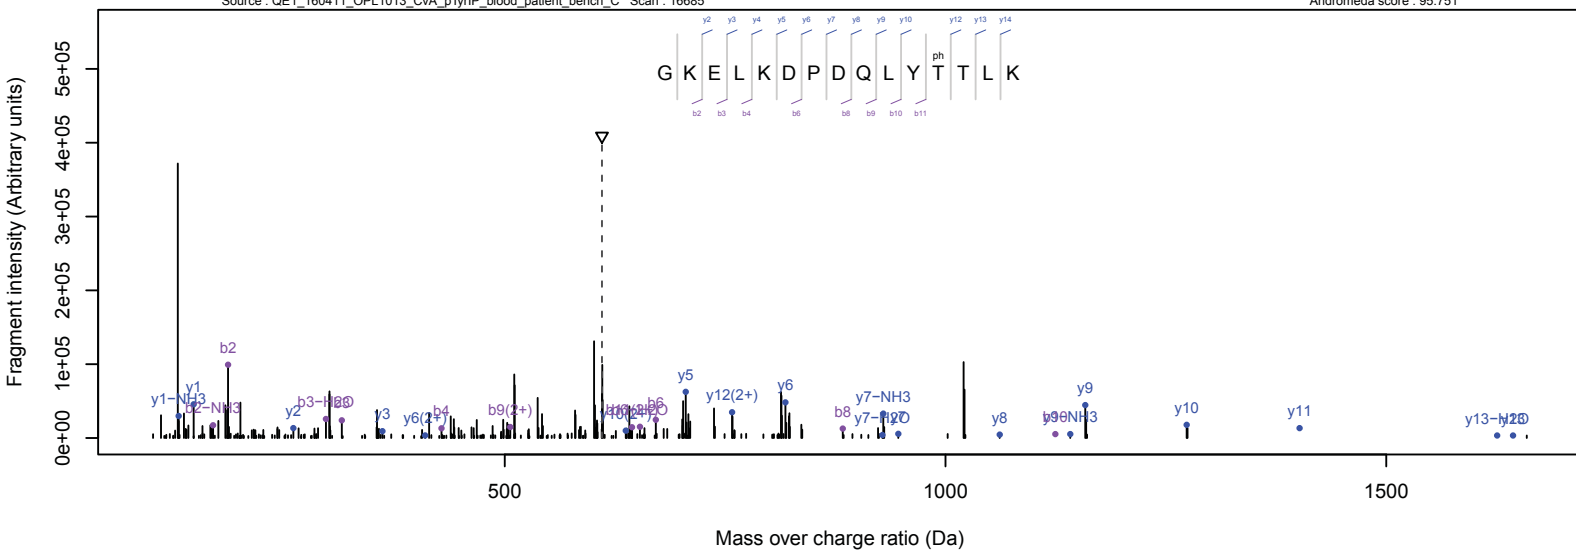

**YCRPESQEHPDPAAPY(ph)LKTK-4+**

Source : QE1\_160411\_OPL1013\_CvA\_pTyrIP\_blood\_patient\_bench\_D Scan : 10445

Andromeda score : 95.666

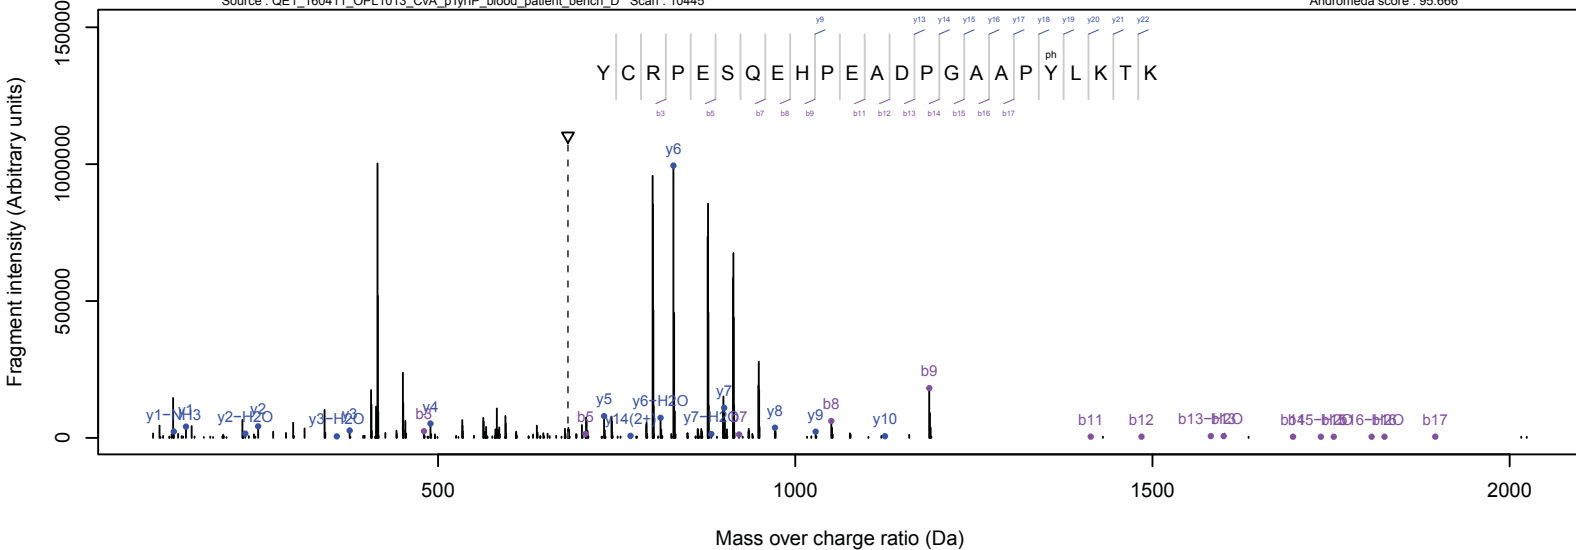

**AVSPQSTKPM(ox)AESITYA(AVAR)-3+**

Source : QE1\_160411\_OPL1013\_CvA\_pTyrIP\_blood\_patient\_bench\_C Scan : 18510

Andromeda score : 95.5

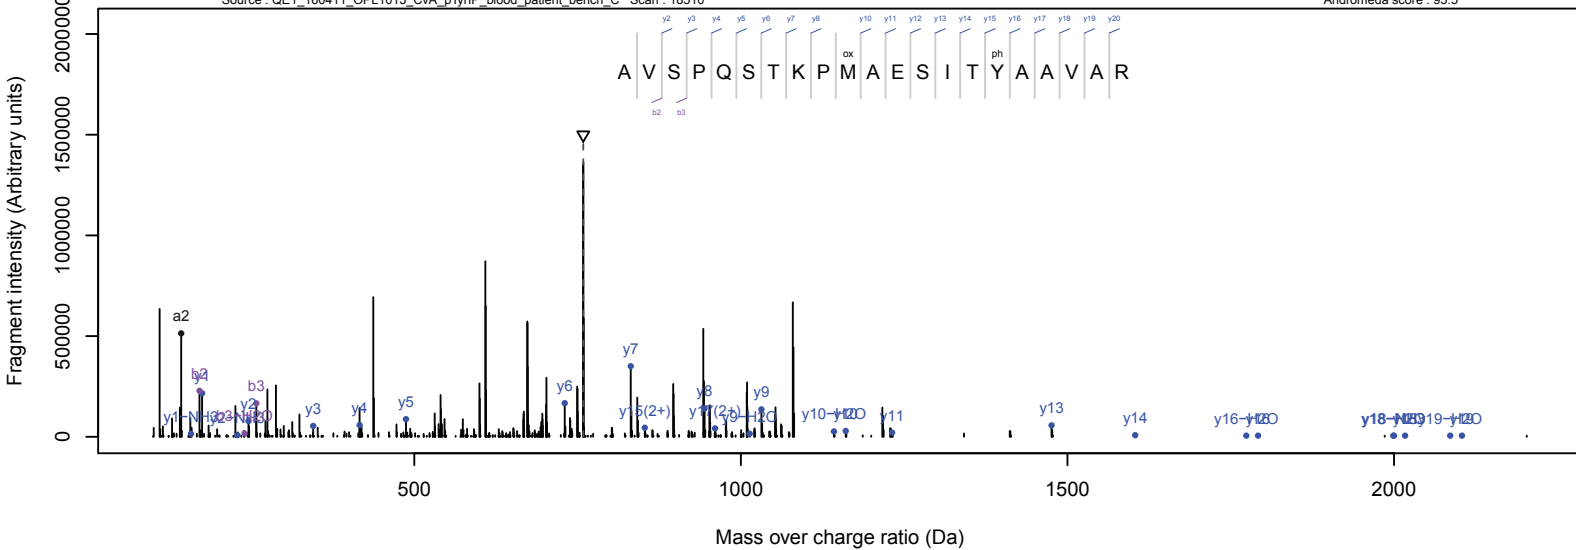

YFEITDESPY<sup>ph</sup>VHYLNTFSSK-3+

Source: QE1\_160411\_OPL1013\_CvA\_pTyrIP\_blood\_patient\_bench\_A Scan: 37261

Andromeda score: 95.5

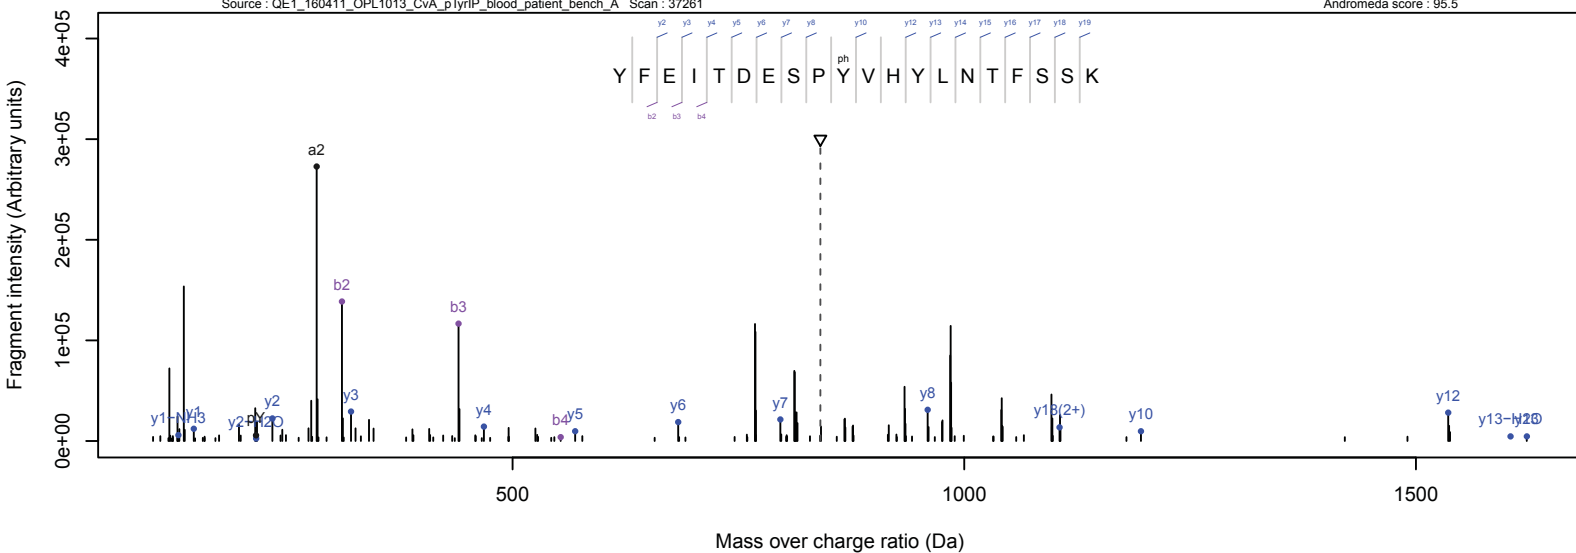NRPEERPTFEYIQSVLDDFYTATES<sup>ph</sup>QYQQP-3+

Source: QE1\_160411\_OPL1013\_CvA\_pTyrIP\_blood\_patient\_bench\_D Scan: 44334

Andromeda score: 95.459

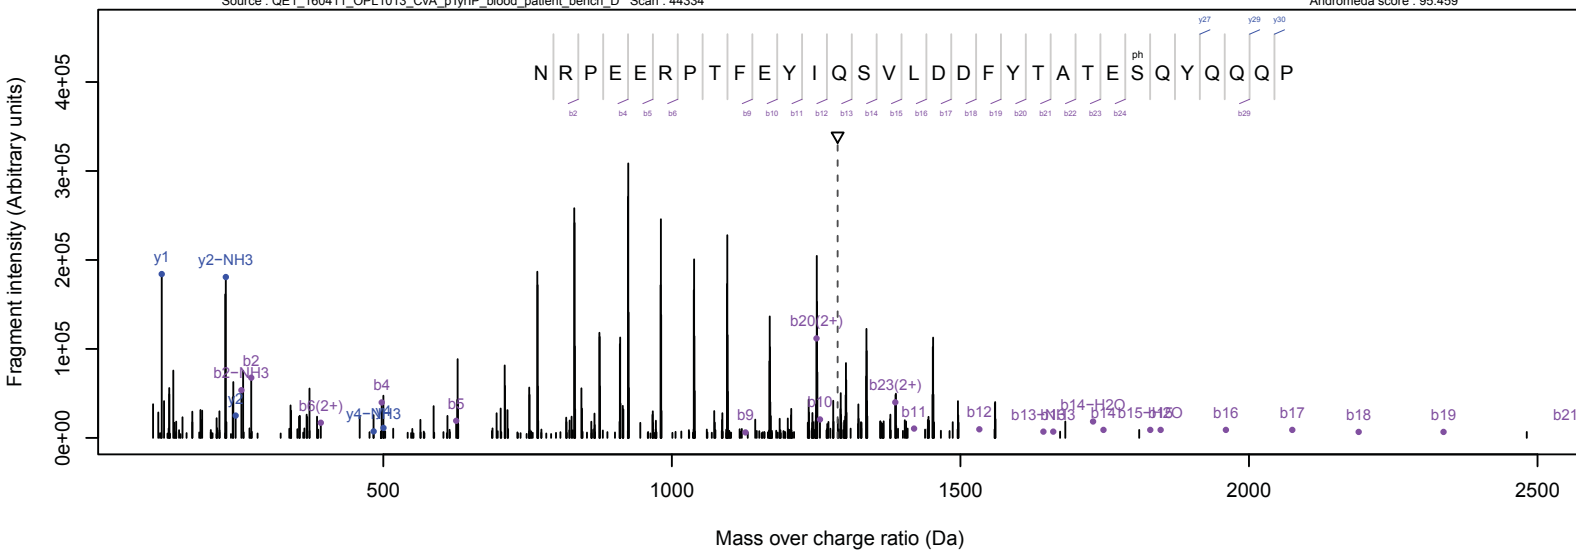SSSSNLGADDGY<sup>ph</sup>M<sup>(ox)</sup>PM<sup>(ox)</sup>TPGAALAGSGSGSCR-3+

Source: QE1\_160411\_OPL1013\_CvA\_pTyrIP\_blood\_patient\_bench\_A Scan: 17332

Andromeda score: 95.459

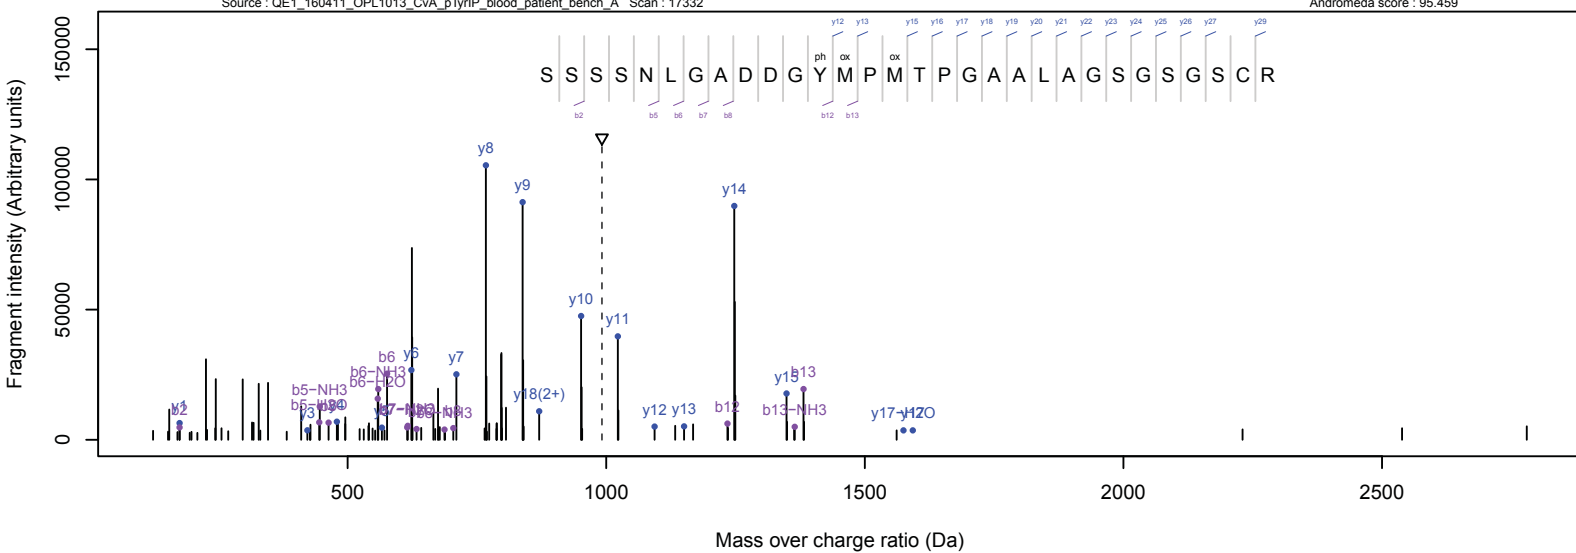

**FLRENPY(ph)YDSR-3+**

Source: QE1\_160411\_OPL1013\_CvA\_pTyrIP\_blood\_patient\_bench\_C Scan: 11025

Andromeda score: 95.417

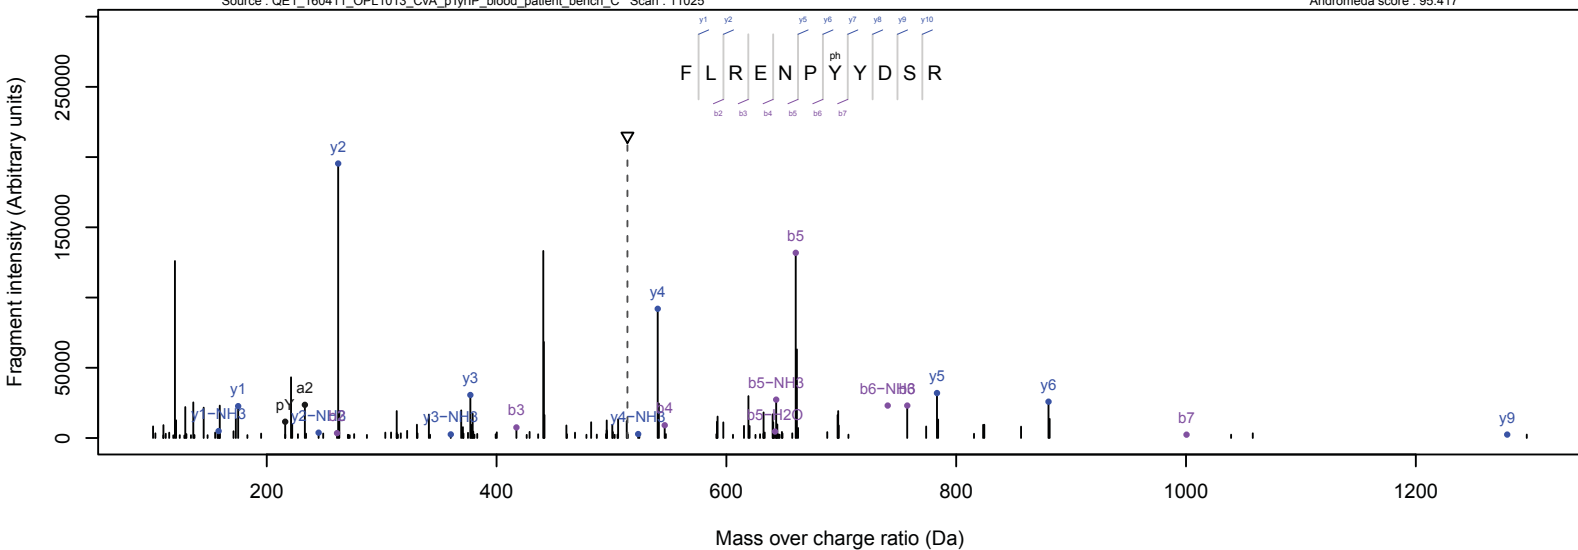

**DQEAPSTTEYS(ph)EIK-2+**

Source: QE1\_160411\_OPL1013\_CvA\_pTyrIP\_blood\_patient\_bench\_C Scan: 10006

Andromeda score: 95.264

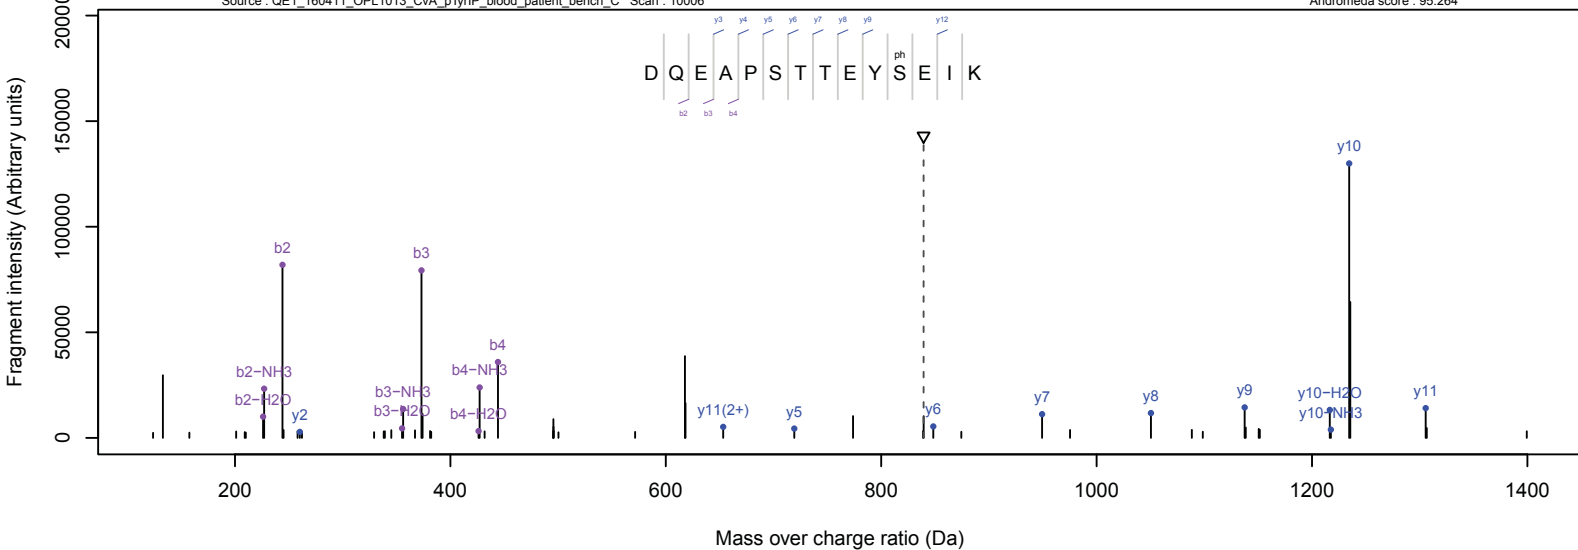

**YVLENHPGTSNY(ph)QM(ox)HLLKK-4+**

Source: QE1\_160411\_OPL1013\_CvA\_pTyrIP\_blood\_patient\_bench\_A Scan: 11662

Andromeda score: 95.205

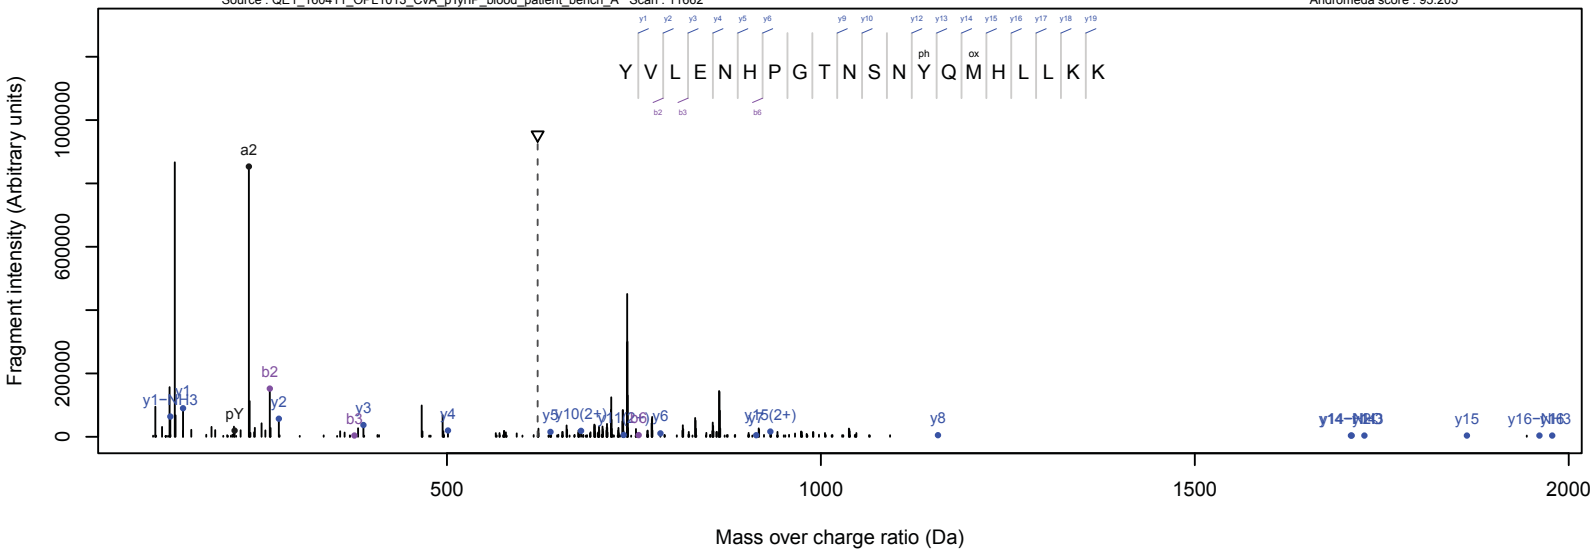

ALPQNDDHY(ph)VMQEHK-4+

Source : QE1\_160411\_OPL1013\_CvA\_pTyrIP\_blood\_patient\_bench\_D Scan : 7216

Andromeda score : 94.487

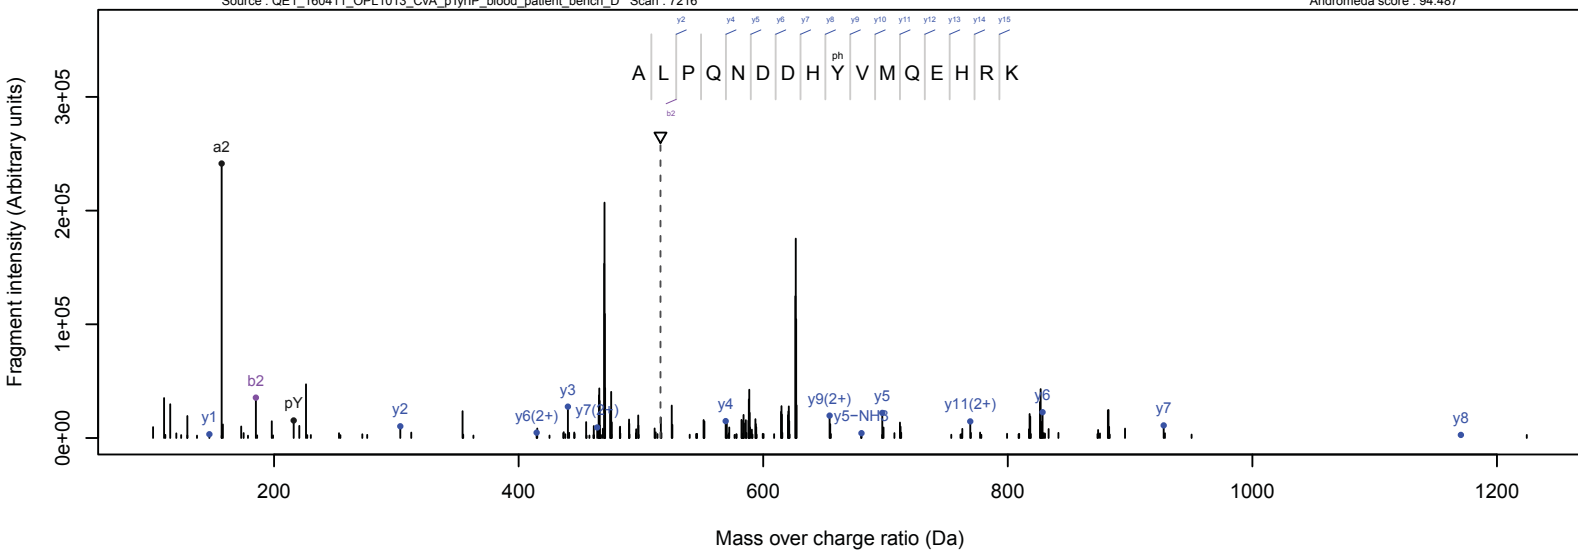

TACTNFMMPY(ph)VVTR-2+

Source : QE1\_160411\_OPL1013\_CvA\_pTyrIP\_blood\_patient\_bench\_B Scan : 32146

Andromeda score : 94.487

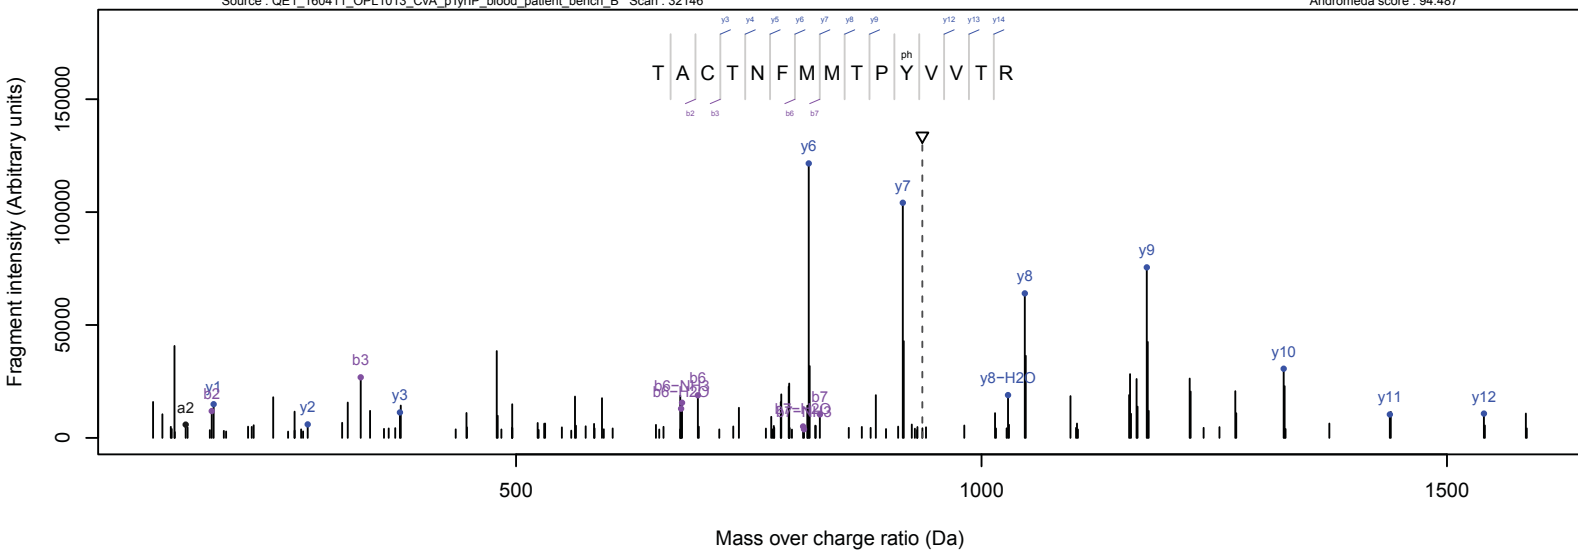

GHGGLY(ph)QLSTATK-3+

Source : QE1\_160411\_OPL1013\_CvA\_pTyrIP\_blood\_patient\_bench\_D Scan : 11009

Andromeda score : 93.859

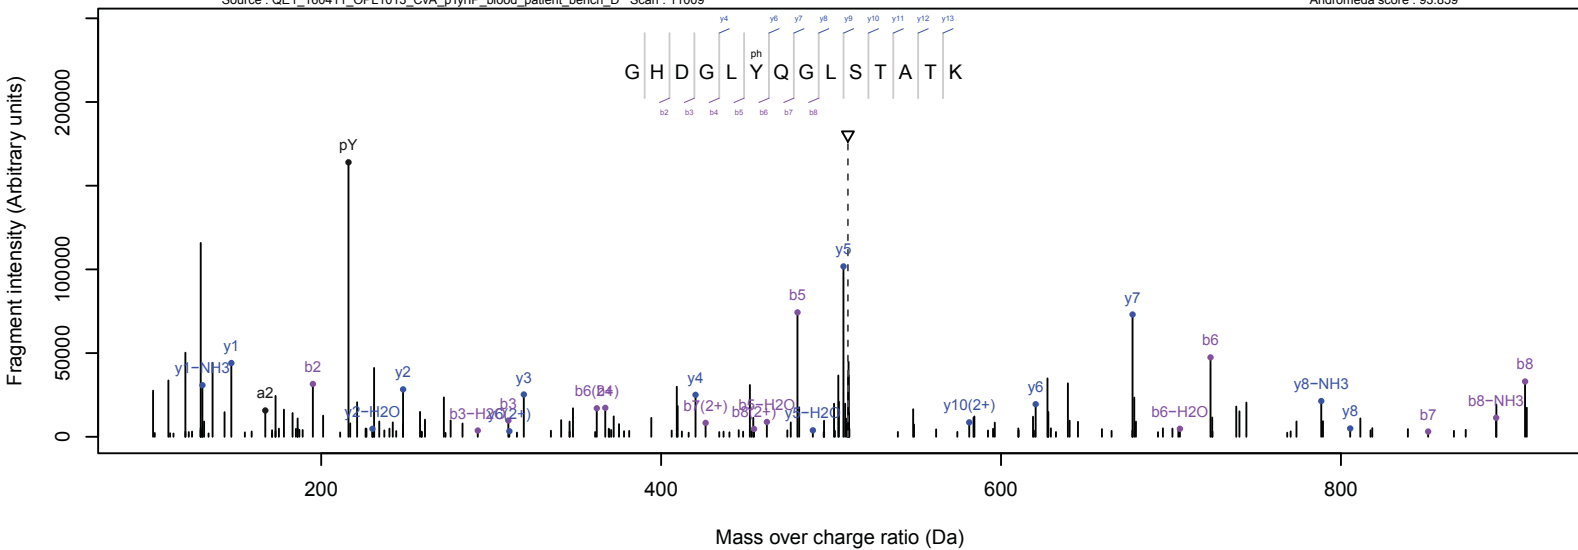

**IGEGTY(ph)GTVFK-2+**

Source : QE1\_160411\_OPL1013\_CvA\_pTyrIP\_blood\_patient\_bench\_D Scan : 17164

Andromeda score : 93.839

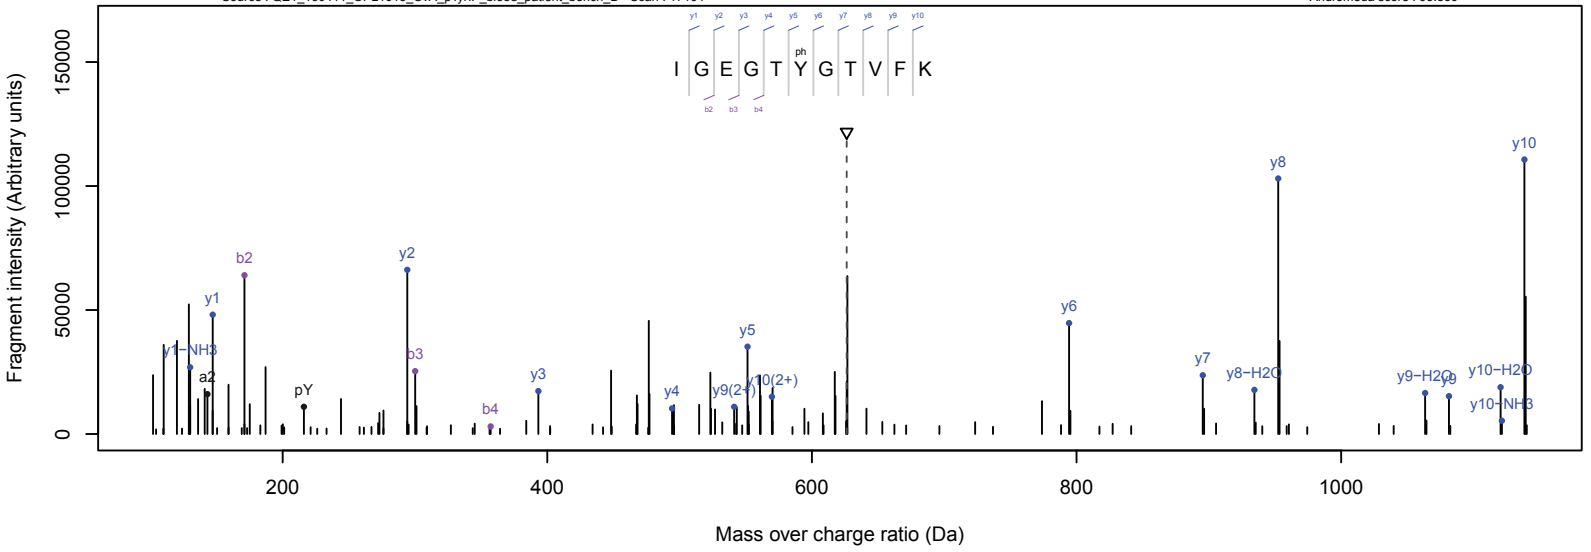

**CLKDEDPY(ph)VRK-3+**

Source : QE1\_160411\_OPL1013\_CvA\_pTyrIP\_blood\_patient\_bench\_C Scan : 4105

Andromeda score : 93.561

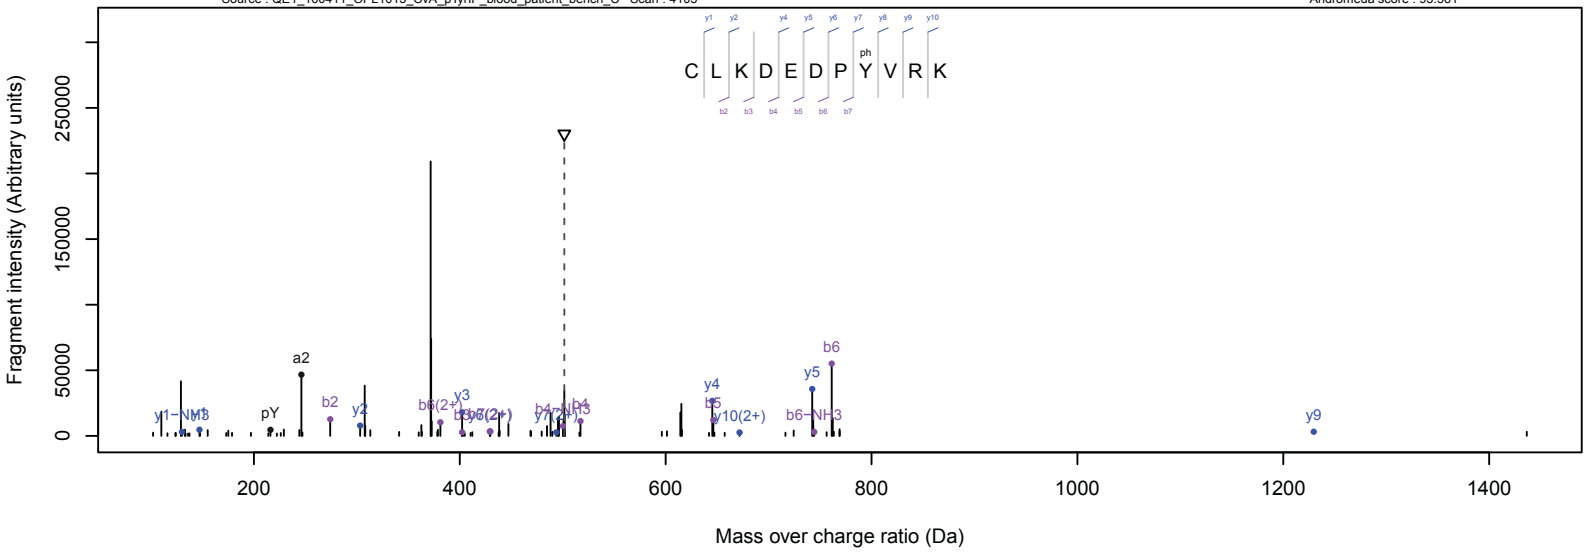

**GKGHDGLY(ph)QLSTATK-3+**

Source : QE1\_160411\_OPL1013\_CvA\_pTyrIP\_blood\_patient\_bench\_D Scan : 7984

Andromeda score : 93.495

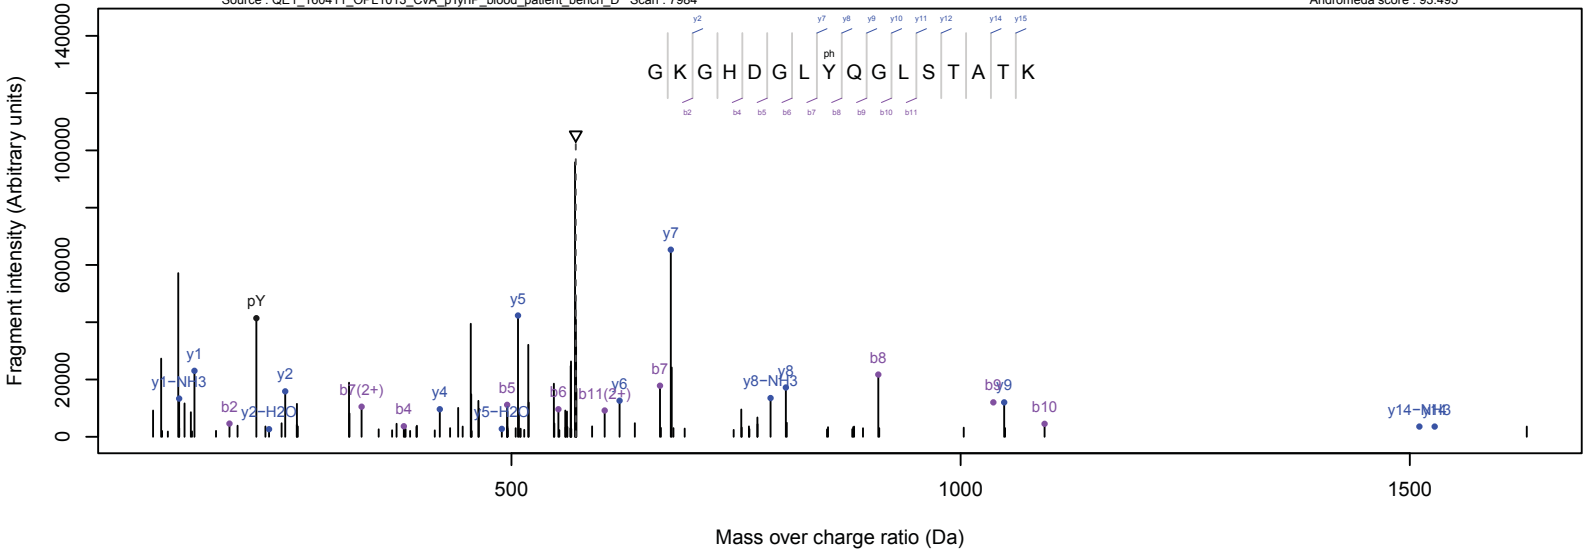

LKHY(ph)GPGWVSM(ox)ANAGK-3+

Source : QE1\_160411\_OPL1013\_CvA\_pTyrIP\_blood\_patient\_bench\_C Scan : 10808

Andromeda score : 93.424

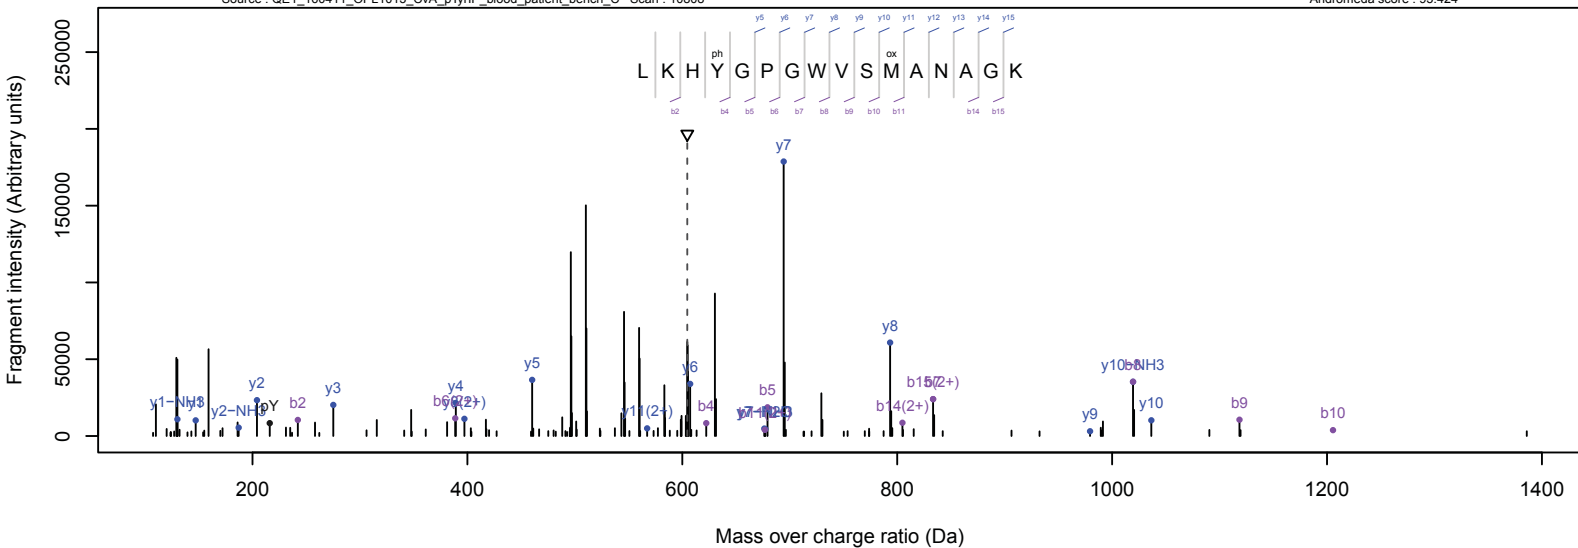

VDY(ph)VVDQK-2+

Source : QE1\_160411\_OPL1013\_CvA\_pTyrIP\_blood\_patient\_bench\_A Scan : 9939

Andromeda score : 92.611

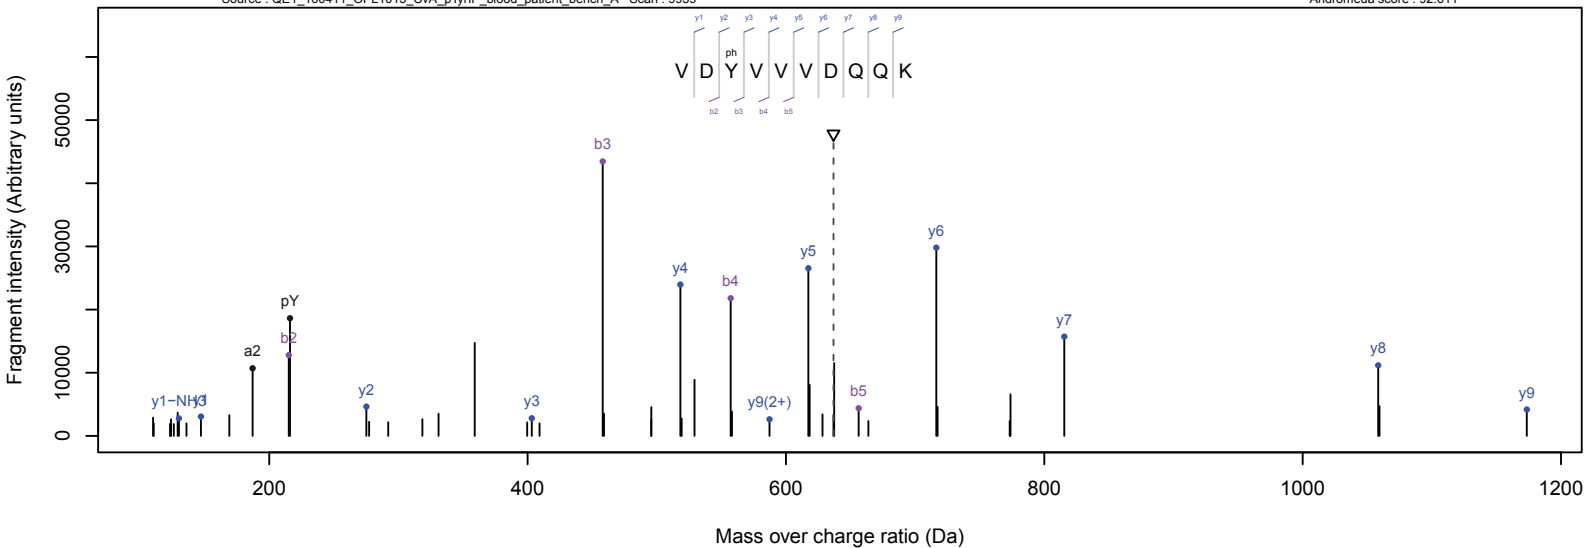

VSSTHY(ph)Y(ph)LLPERPSYLER-3+

Source : QE1\_160411\_OPL1013\_CvA\_pTyrIP\_blood\_patient\_bench\_C Scan : 28863

Andromeda score : 92.264

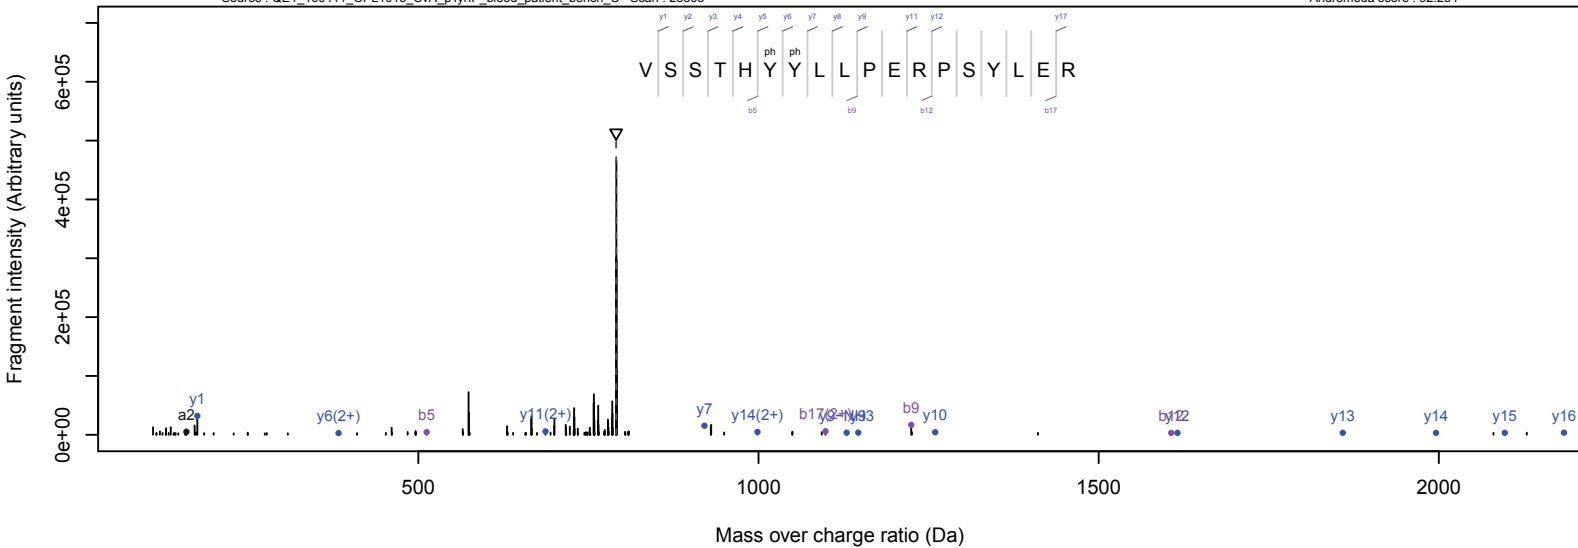

**GSGELY(ph)EHEKDLVWK-3+**

Source : QE1\_160411\_OPL1013\_CvA\_pTyrIP\_blood\_patient\_bench\_D Scan : 20954

Andromeda score : 91.969

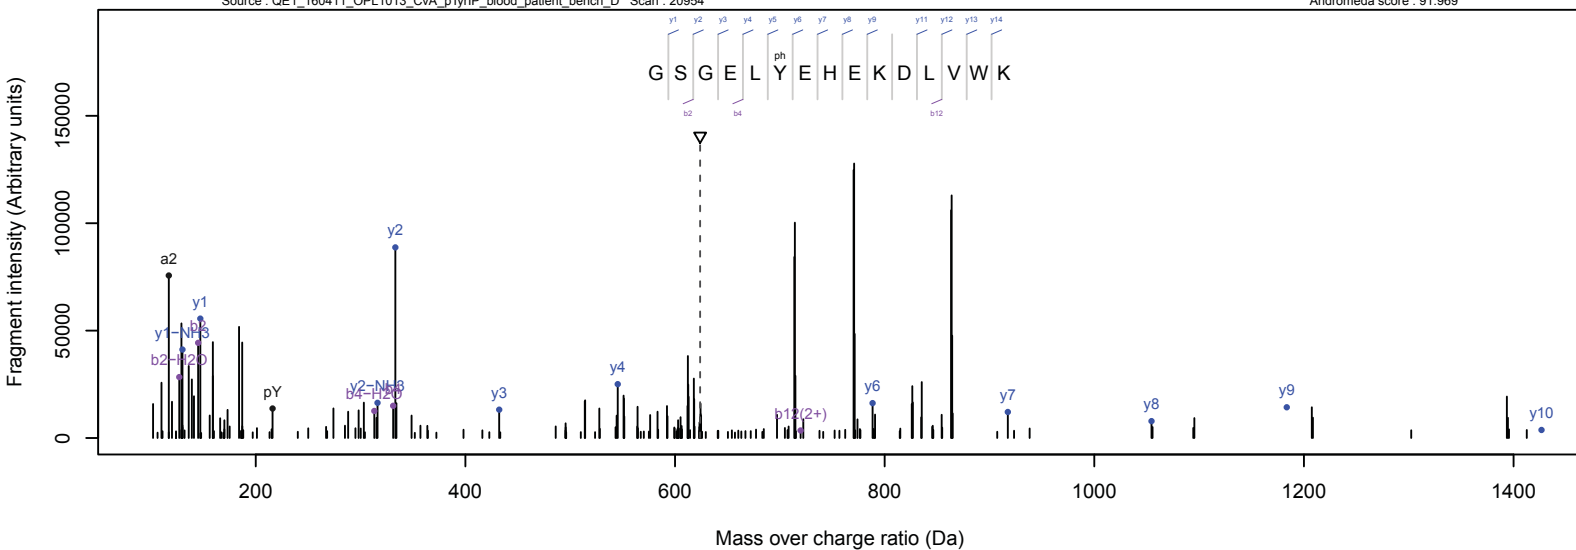

**AY(ph)HEQLSVAEITNACFEPANQMVK-3+**

Source : QE1\_160411\_OPL1013\_CvA\_pTyrIP\_blood\_patient\_bench\_D Scan : 36283

Andromeda score : 91.733

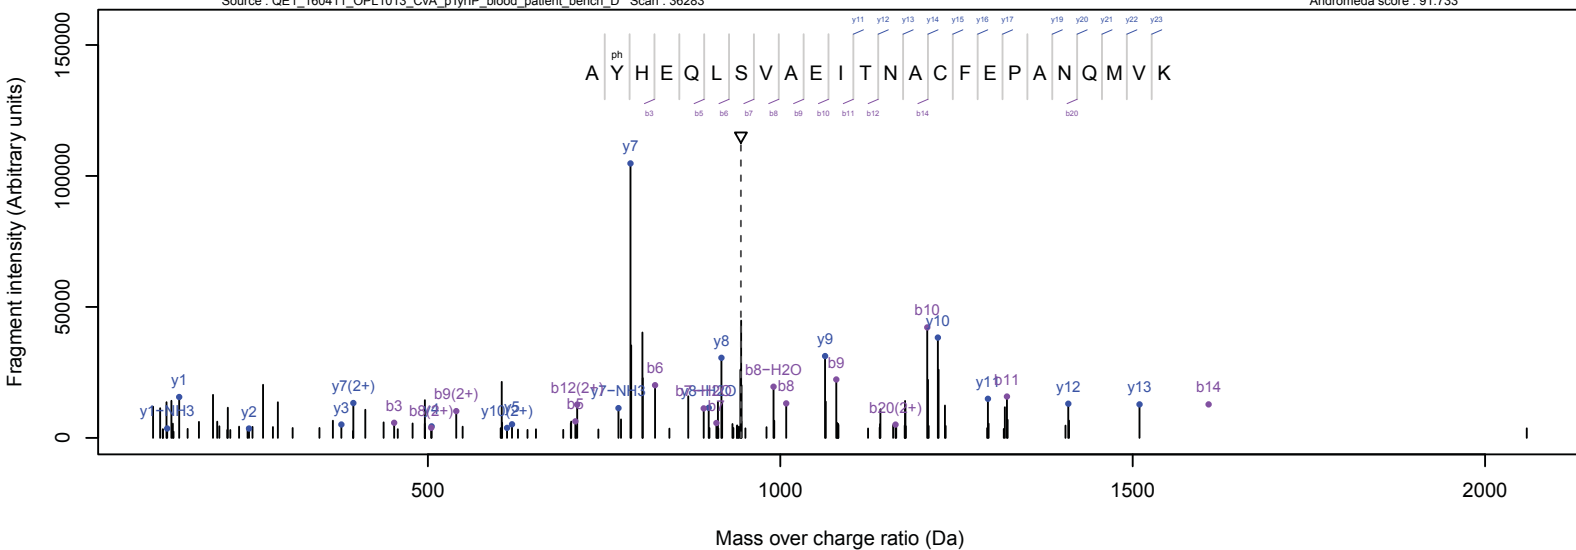

**SSSNLGADDG(ph)MPMPGAALAGSGSGSCR-3+**

Source : QE1\_160411\_OPL1013\_CvA\_pTyrIP\_blood\_patient\_bench\_B Scan : 27953

Andromeda score : 91.67

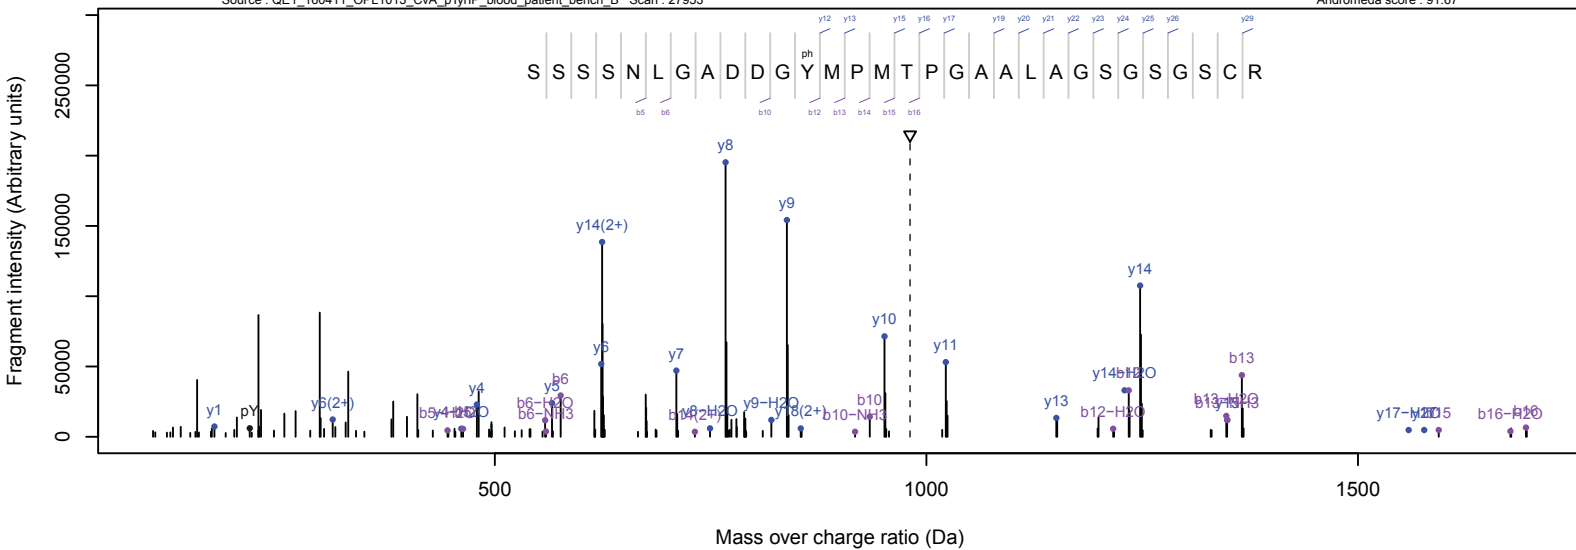



**KVEEPSIY(ph)ESVR-3+**

Source: QE1\_160411\_OPL1013\_CvA\_pTyrIP\_blood\_patient\_bench\_C Scan: 13945

Andromeda score: 91.62

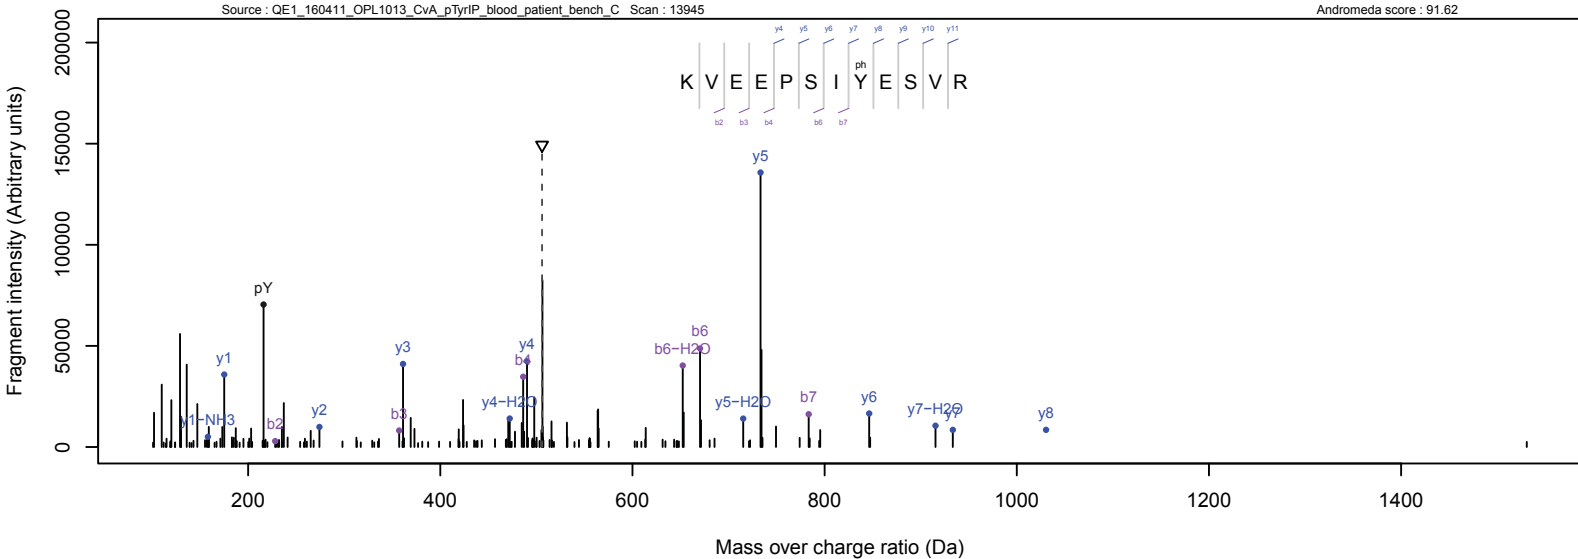

**RQEELNNQLFLY(ph)DTHQNL R-3+**

Source: QE1\_160411\_OPL1013\_CvA\_pTyrIP\_blood\_patient\_bench\_C Scan: 26777

Andromeda score: 91.589

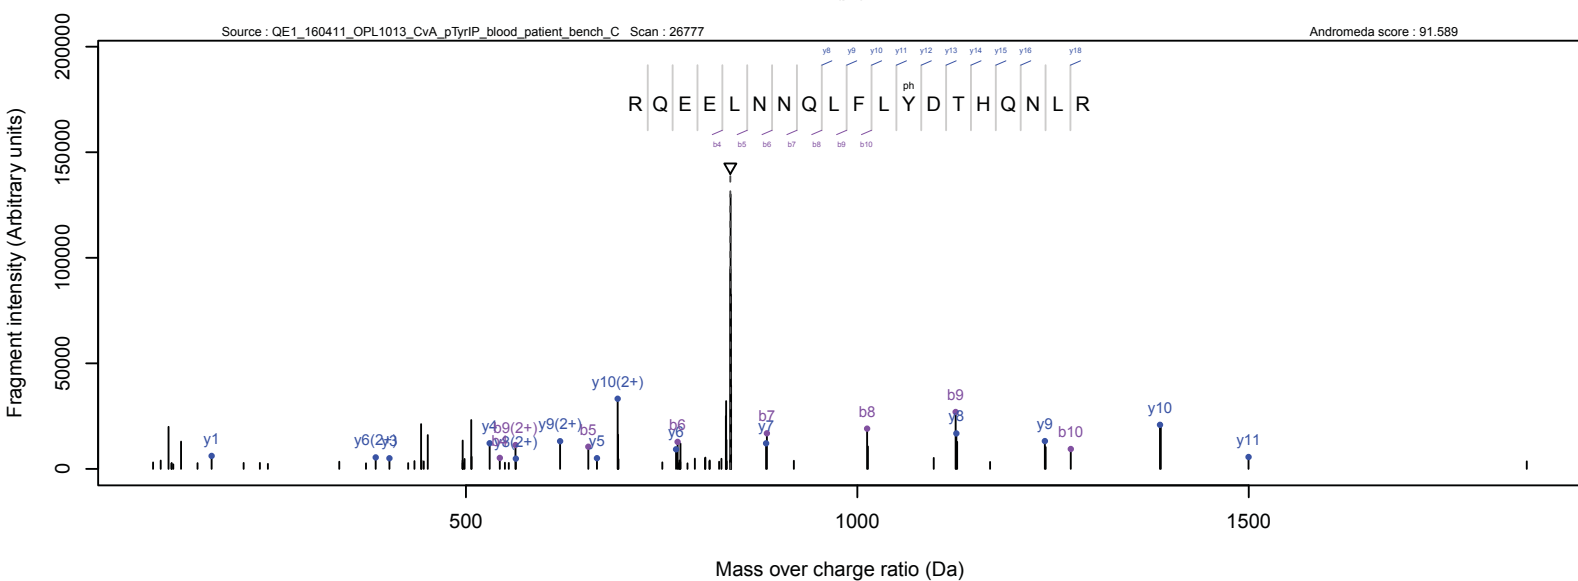

**KLDMGGY(ph)YITTR-3+**

Source: QE1\_160411\_OPL1013\_CvA\_pTyrIP\_blood\_patient\_bench\_C Scan: 13229

Andromeda score: 91.307

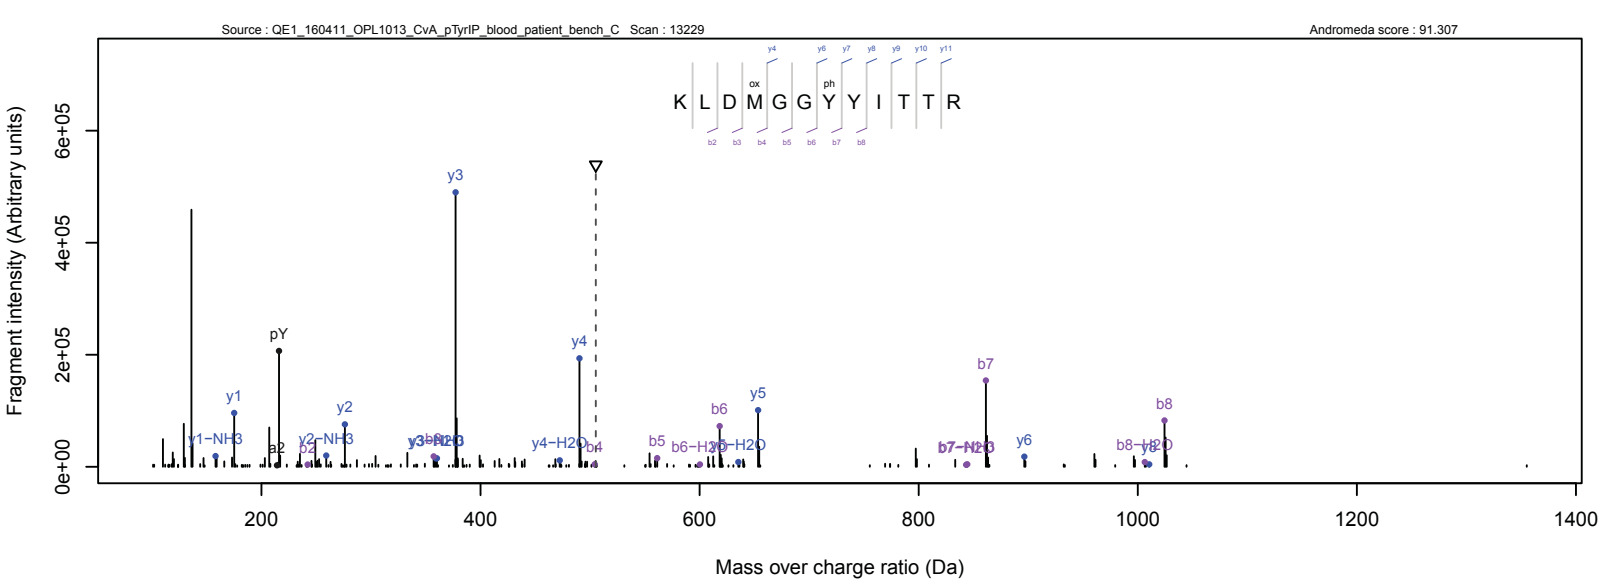

## TIY(ph)TYIMASR-2+

Source: QE1\_160411\_OPL1013\_CvA\_pTyrIP\_blood\_patient\_bench\_D Scan: 26336

Andromeda score: 90.913

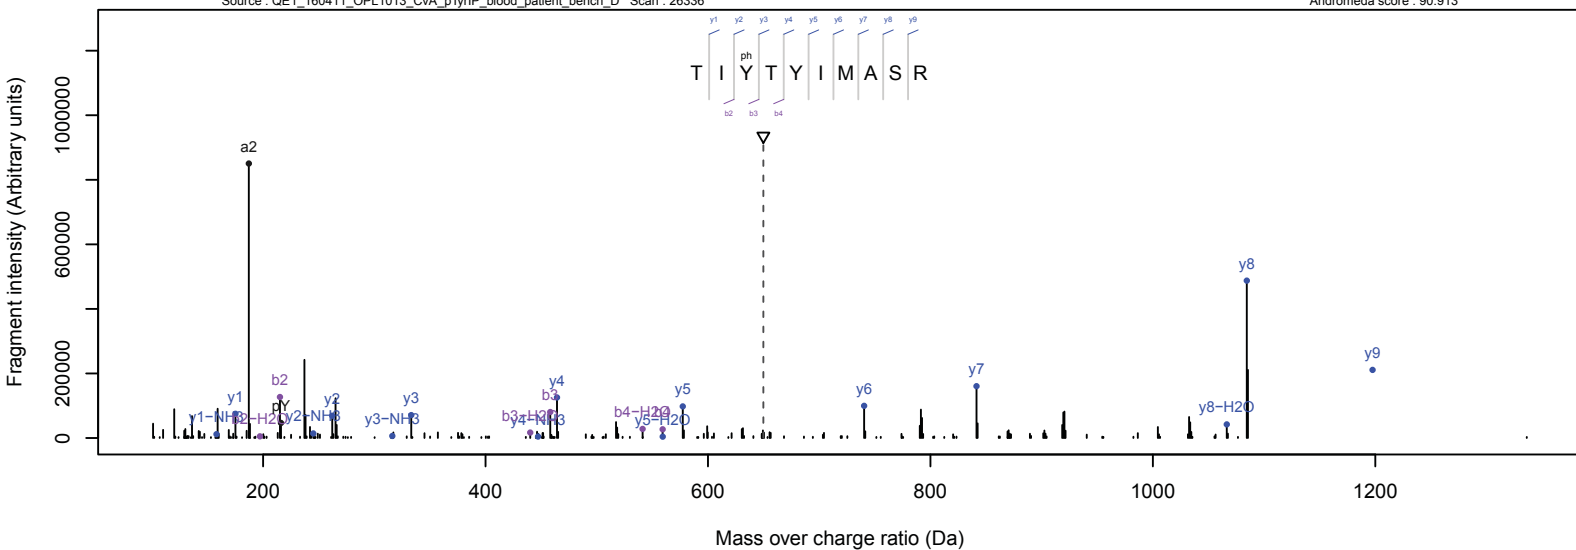

## PY(ph)QYPALTPQKK-3+

Source: QE1\_160411\_OPL1013\_CvA\_pTyrIP\_blood\_patient\_bench\_D Scan: 13405

Andromeda score: 90.861

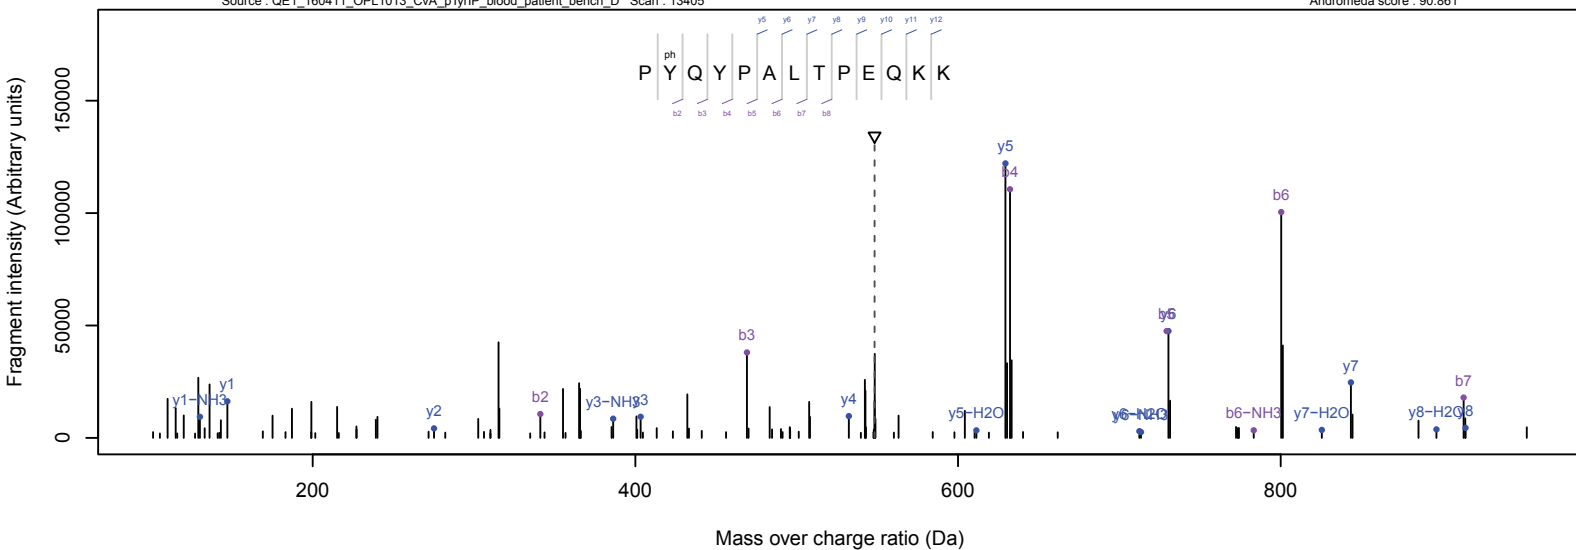

## LNLHY(ph)AVVSK-2+

Source: QE1\_160411\_OPL1013\_CvA\_pTyrIP\_blood\_patient\_bench\_D Scan: 16088

Andromeda score: 90.827

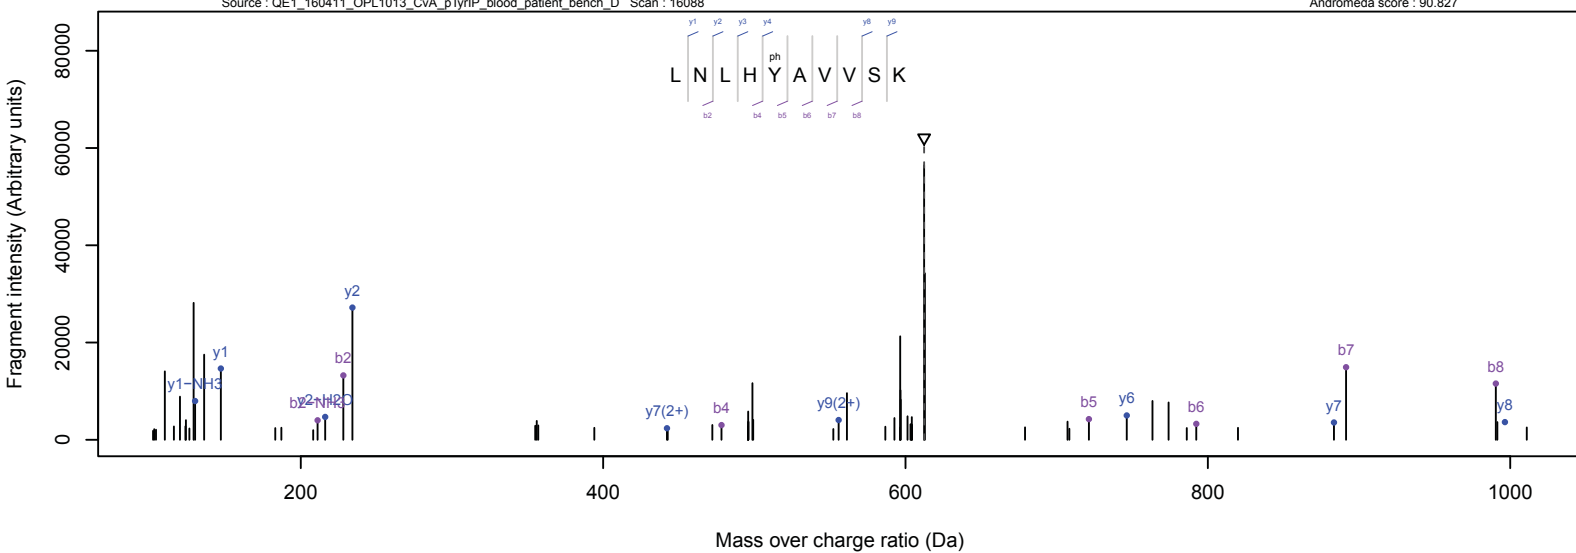

**TAGTSM(ox)M(ox)TPY(ph)VVTR-2+**

Source : QE1\_160411\_OPL1013\_CvA\_pTyrIP\_blood\_patient\_bench\_A Scan : 18435

Andromeda score : 90.707

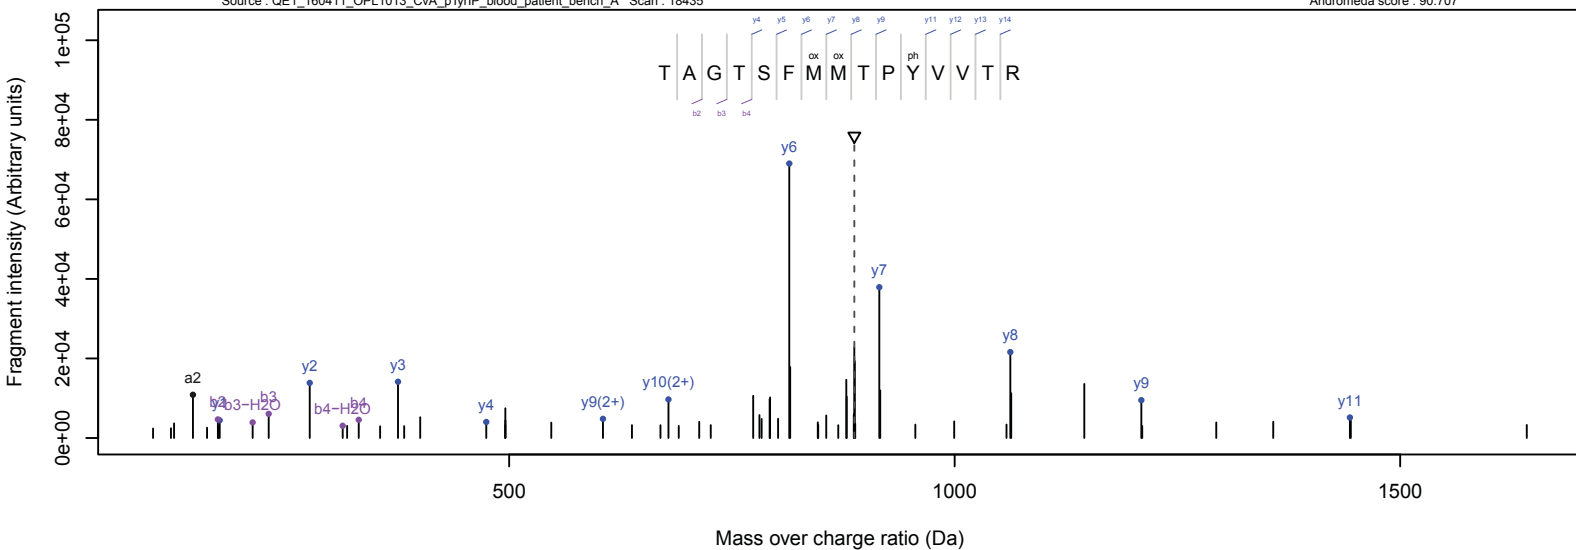

**KKPLY(ph)WDLYEHAQQQLK-4+**

Source : QE1\_160411\_OPL1013\_CvA\_pTyrIP\_blood\_patient\_bench\_C Scan : 33685

Andromeda score : 90.422

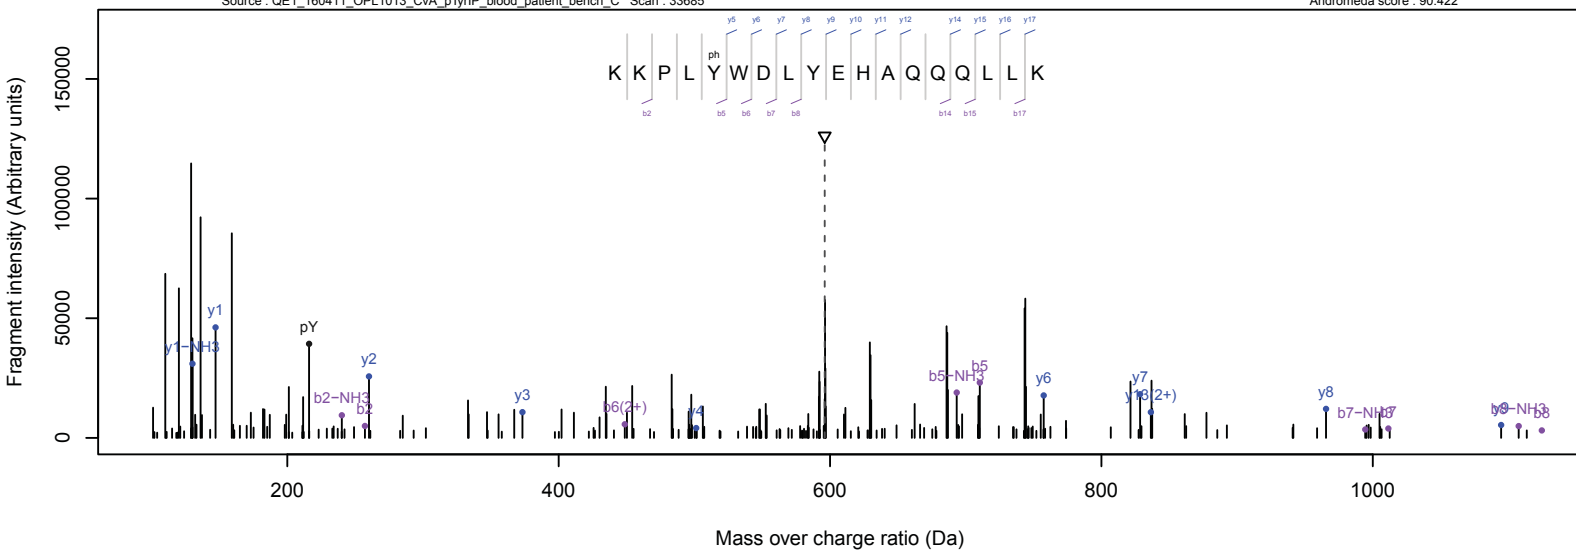

**KELNY(ph)FAK-2+**

Source : QE1\_160411\_OPL1013\_CvA\_pTyrIP\_blood\_patient\_bench\_D Scan : 8621

Andromeda score : 89.886

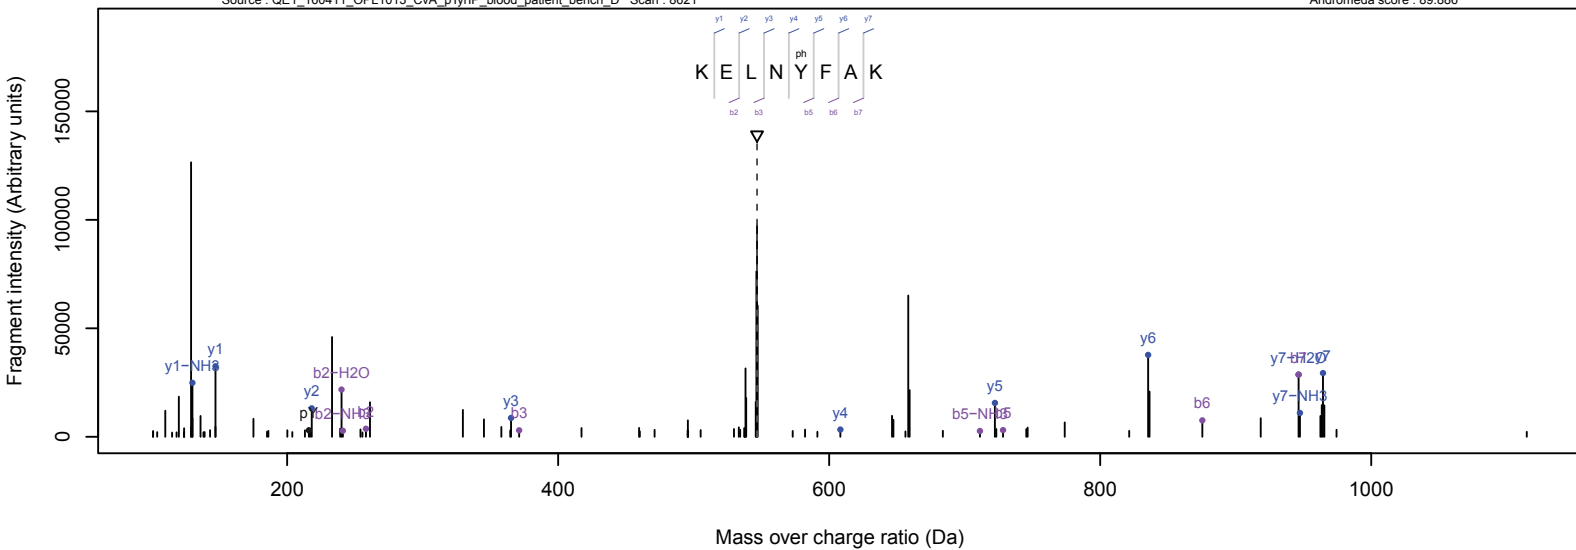



## EKY(ph)GIVDYM(ox)EQSGPPSK-3+

Source: QE1\_160411\_OPL1013\_CvA\_pTyrIP\_blood\_patient\_bench\_A Scan: 20054

Andromeda score: 89.374

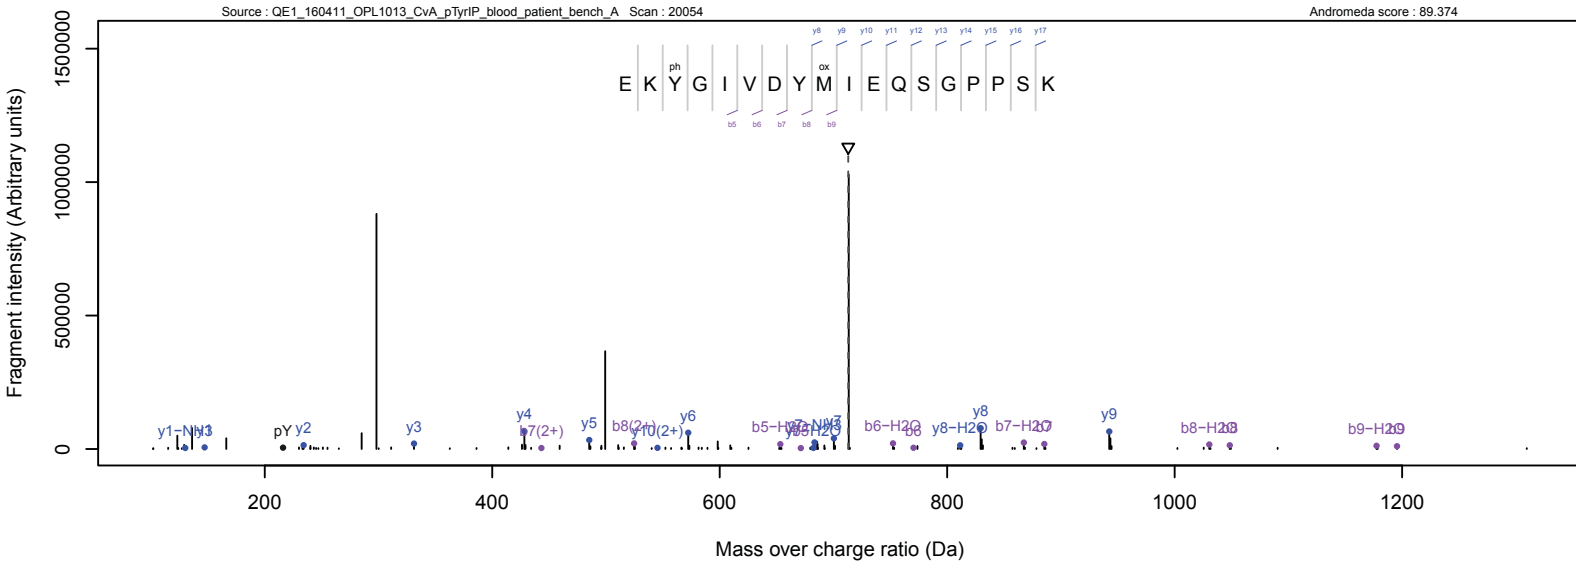

## GASQAGMTG(ph)GMPR-2+

Source: QE1\_160411\_OPL1013\_CvA\_pTyrIP\_blood\_patient\_bench\_D Scan: 10917

Andromeda score: 89.231

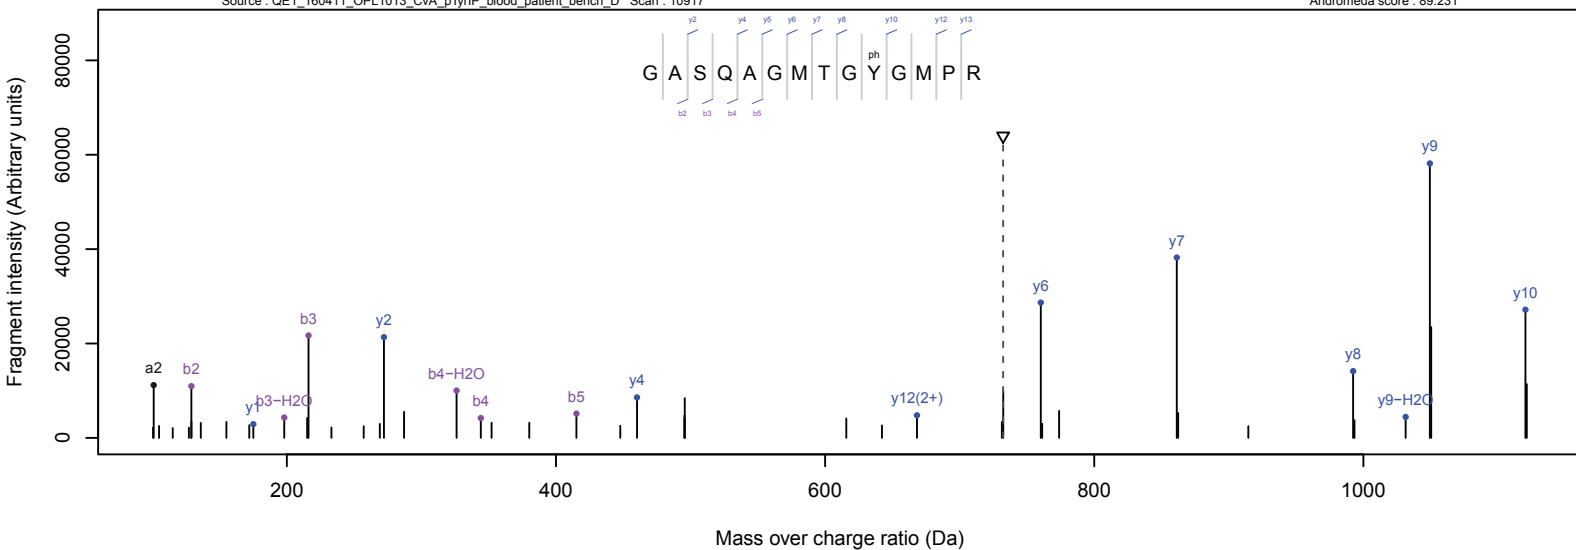

## NLDNGGFY(ph)ISPR-2+

Source: QE1\_160411\_OPL1013\_CvA\_pTyrIP\_blood\_patient\_bench\_D Scan: 25719

Andromeda score: 89.231

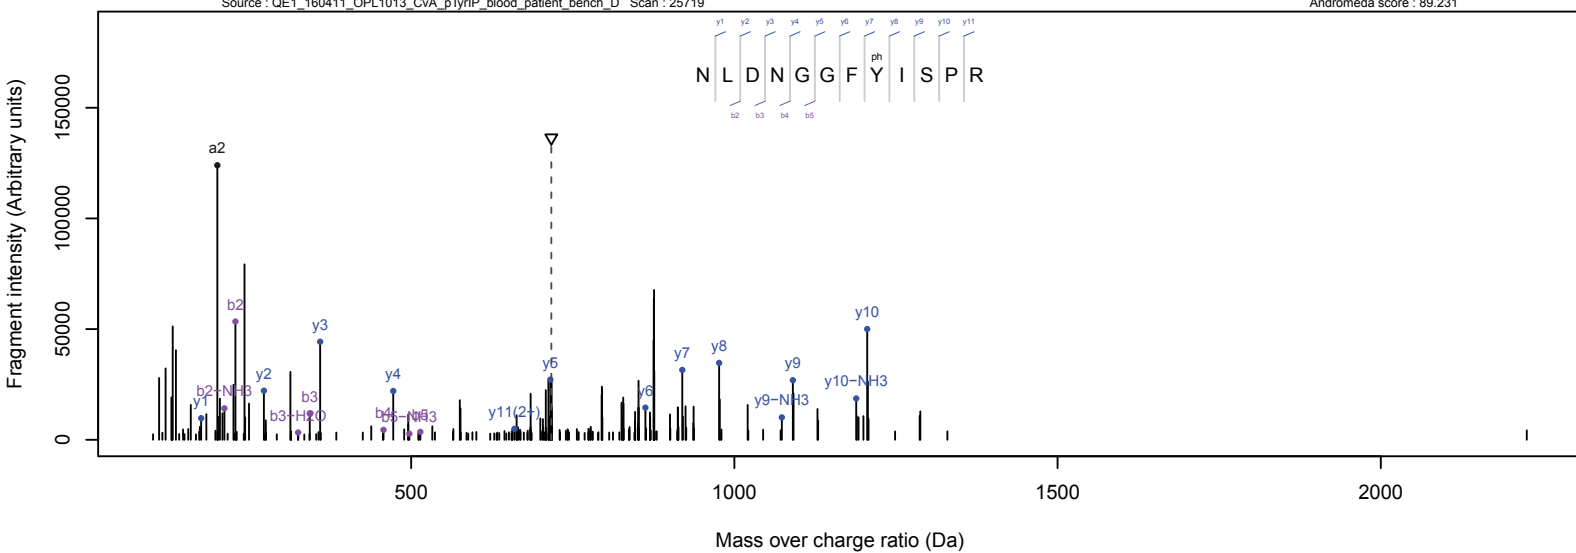

## YISLIY(ph)TNYEAGKDDYVK-3+

Source : QE1\_160411\_OPL1013\_CvA\_pTyrIP\_blood\_patient\_bench\_A Scan : 29427

Andromeda score : 88.565

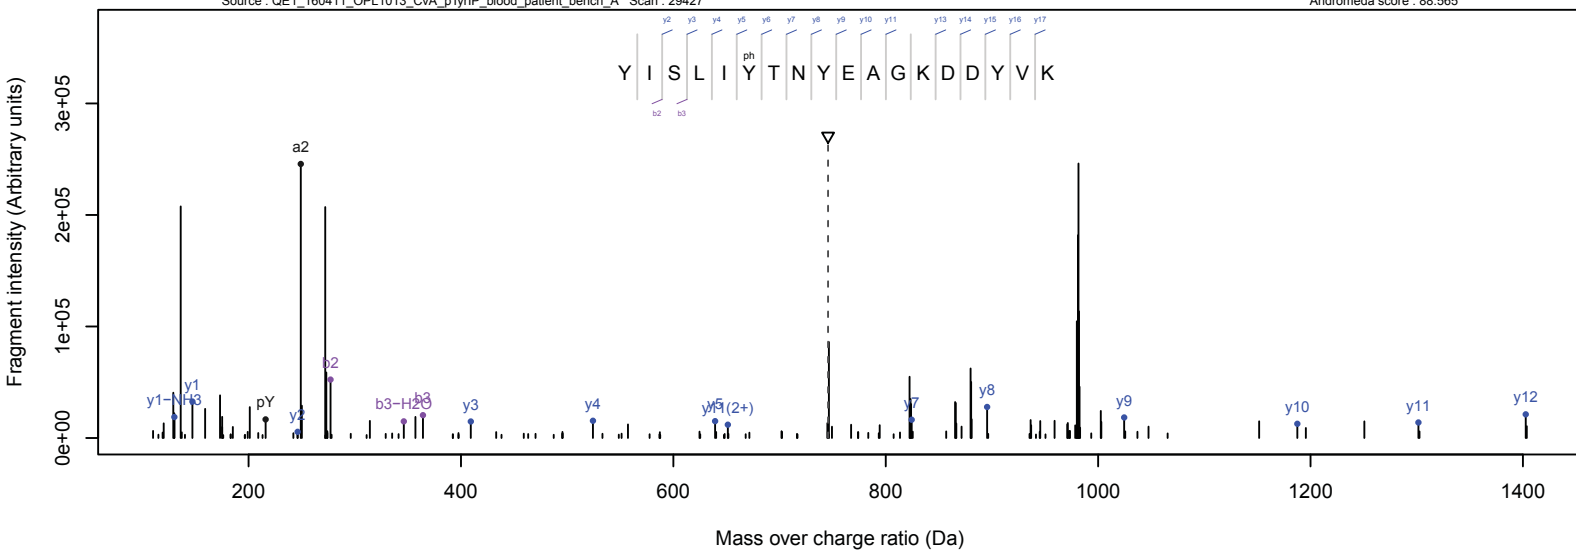

## TQTPPVPAPQPT(ph)EERLPSSPVYEDAASFK-3+

Source : QE1\_160411\_OPL1013\_CvA\_pTyrIP\_blood\_patient\_bench\_D Scan : 29306

Andromeda score : 88.394

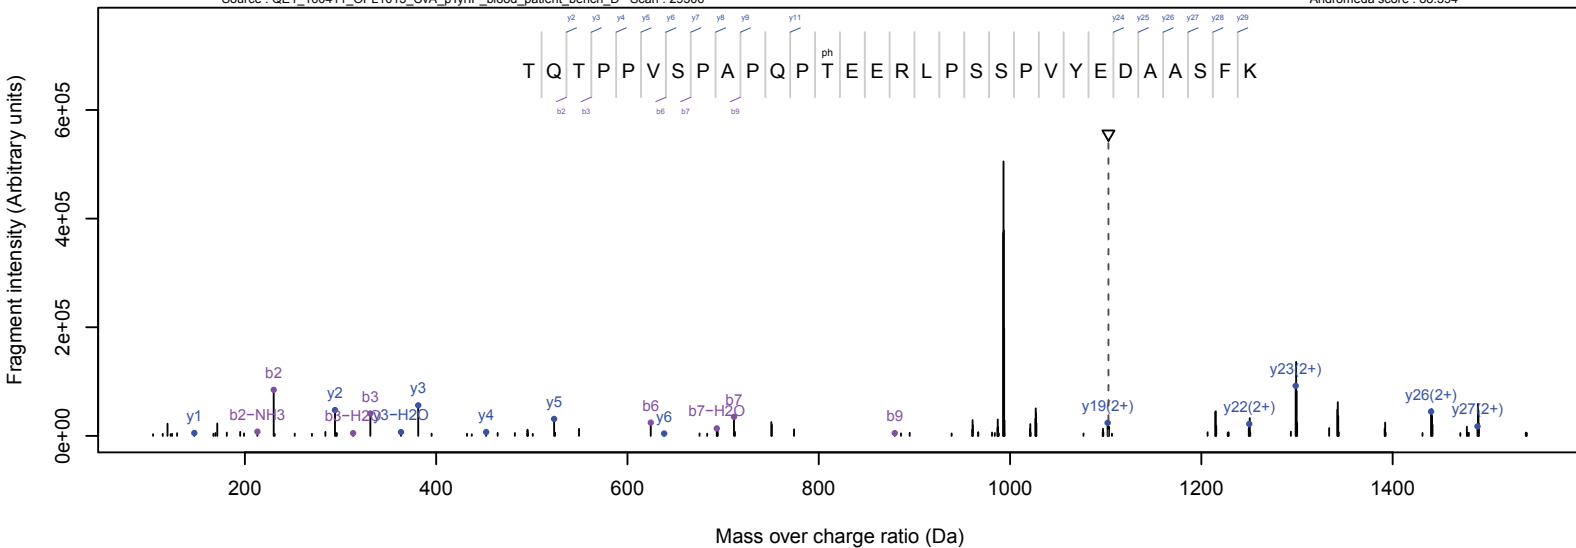

## Y(ph)GIVDYM(ox)IEQSGPPSK-2+

Source : QE1\_160411\_OPL1013\_CvA\_pTyrIP\_blood\_patient\_bench\_A Scan : 23696

Andromeda score : 88.385

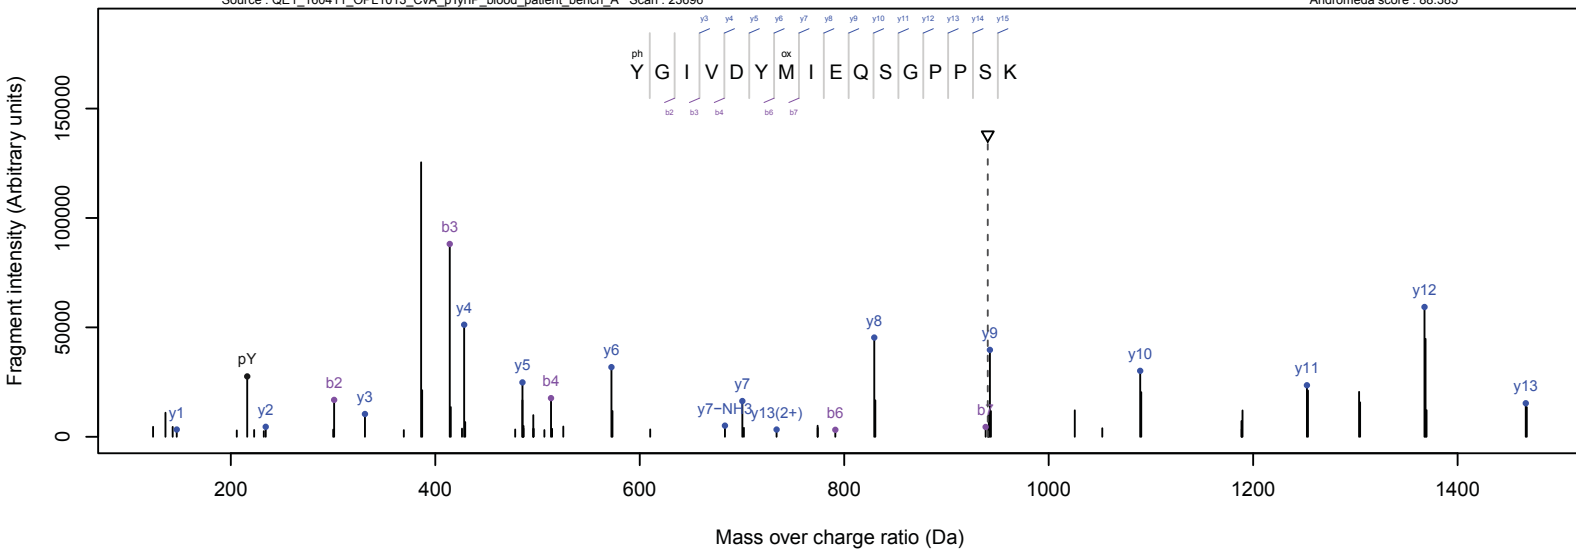

VQIY(ph)HNPTANSFR-3+

Source: QE1\_160411\_OPL1013\_CvA\_pTyrIP\_blood\_patient\_bench\_C Scan: 14511

Andromeda score: 88.282

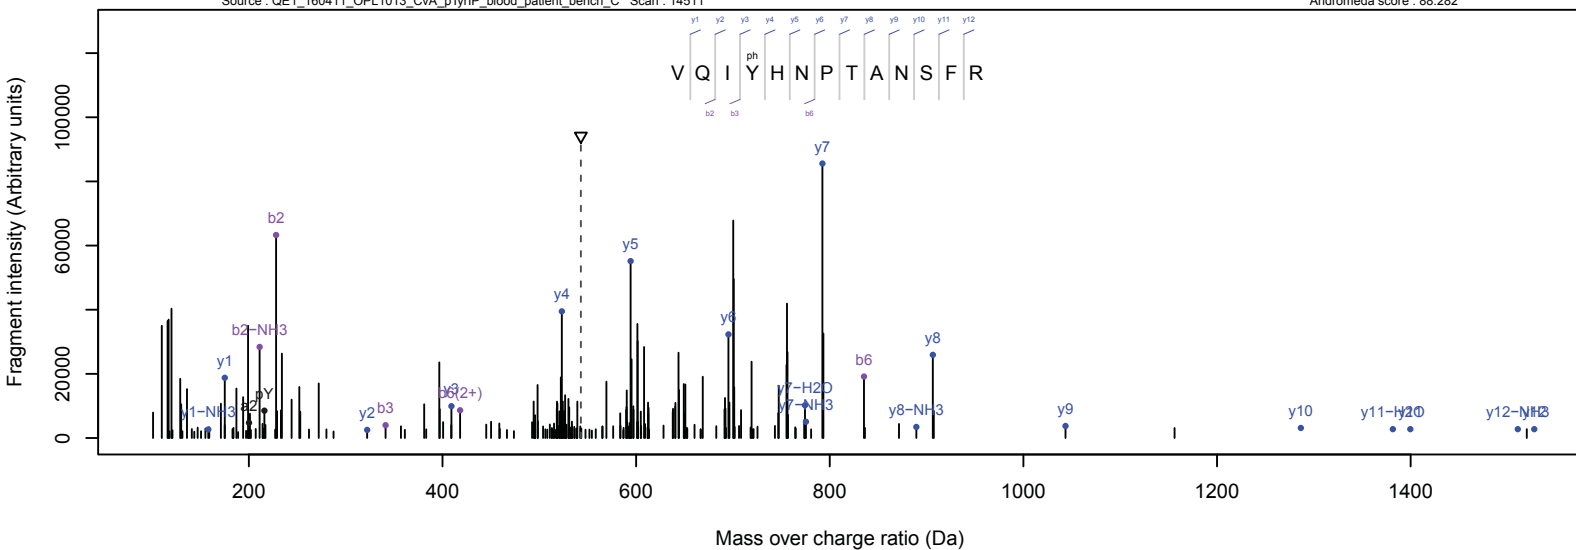

IVATKPLY(ph)VALAQR-3+

Source: QE1\_160411\_OPL1013\_CvA\_pTyrIP\_blood\_patient\_bench\_D Scan: 27786

Andromeda score: 88.075

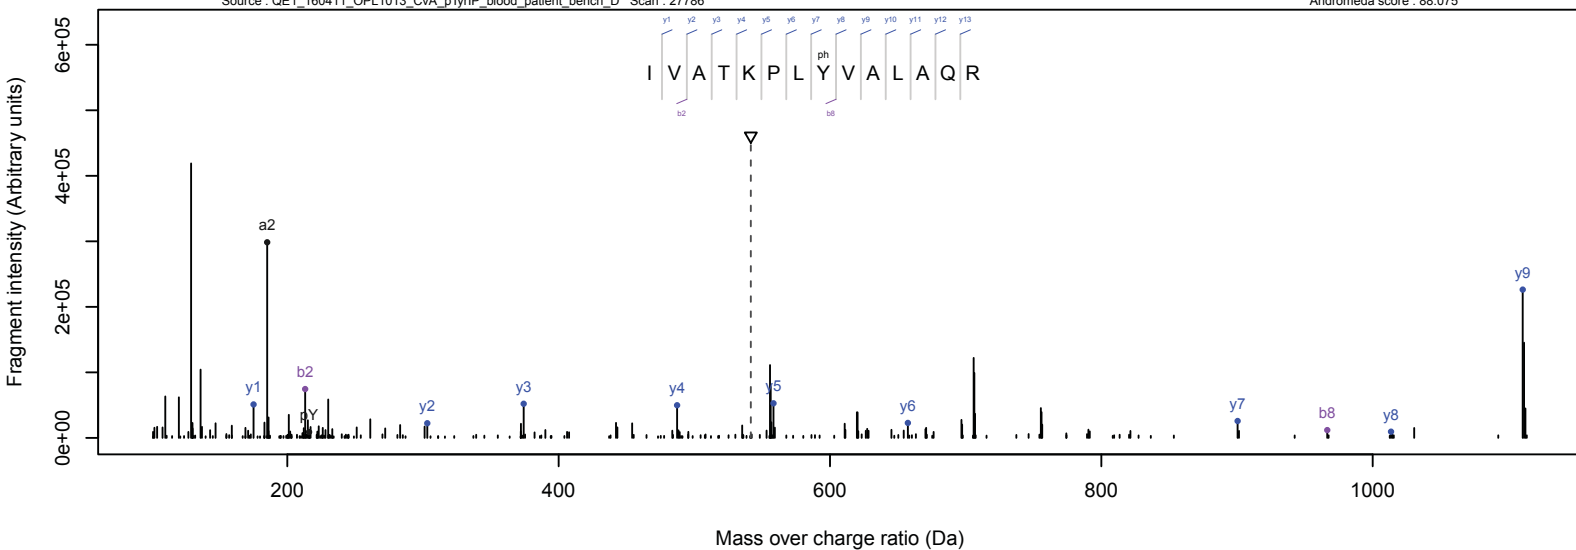

KLDMGY(ph)YITTR-2+

Source: QE1\_160411\_OPL1013\_CvA\_pTyrIP\_blood\_patient\_bench\_D Scan: 19677

Andromeda score: 88.075

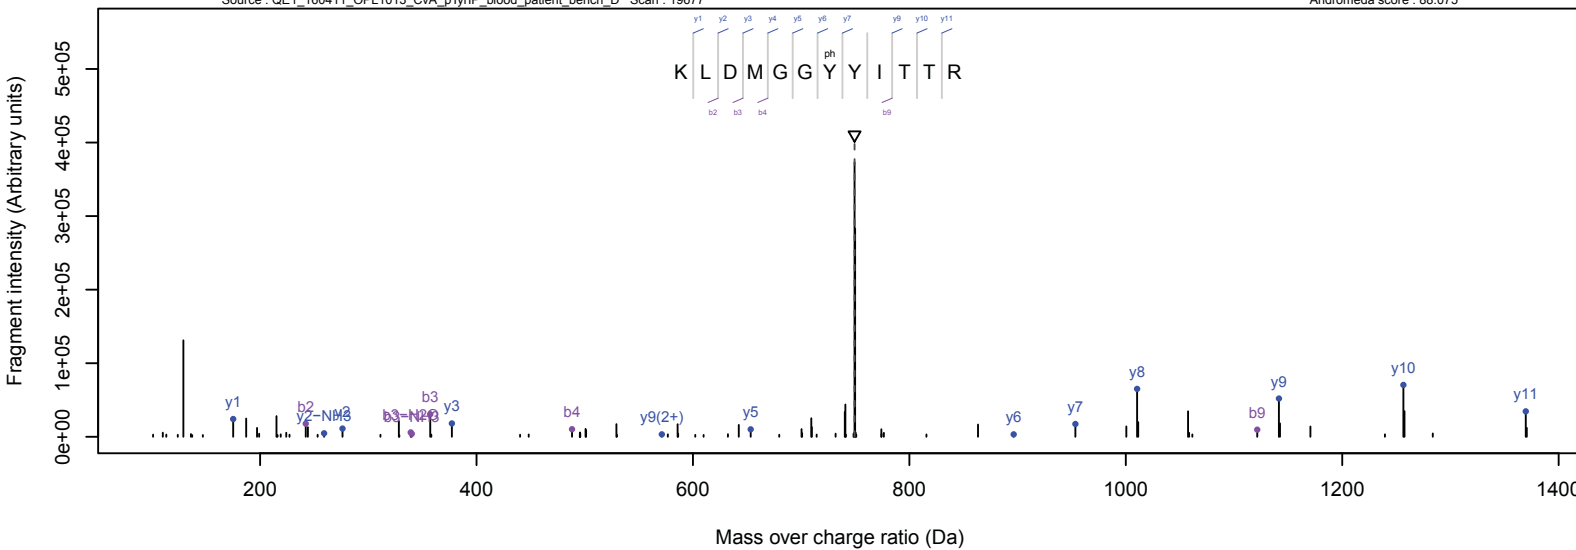

## Y(ph)SYVCPDLVK-2+

Source : QE1\_160411\_OPL1013\_CvA\_pTyrIP\_blood\_patient\_bench\_D Scan : 22092

Andromeda score : 88.056

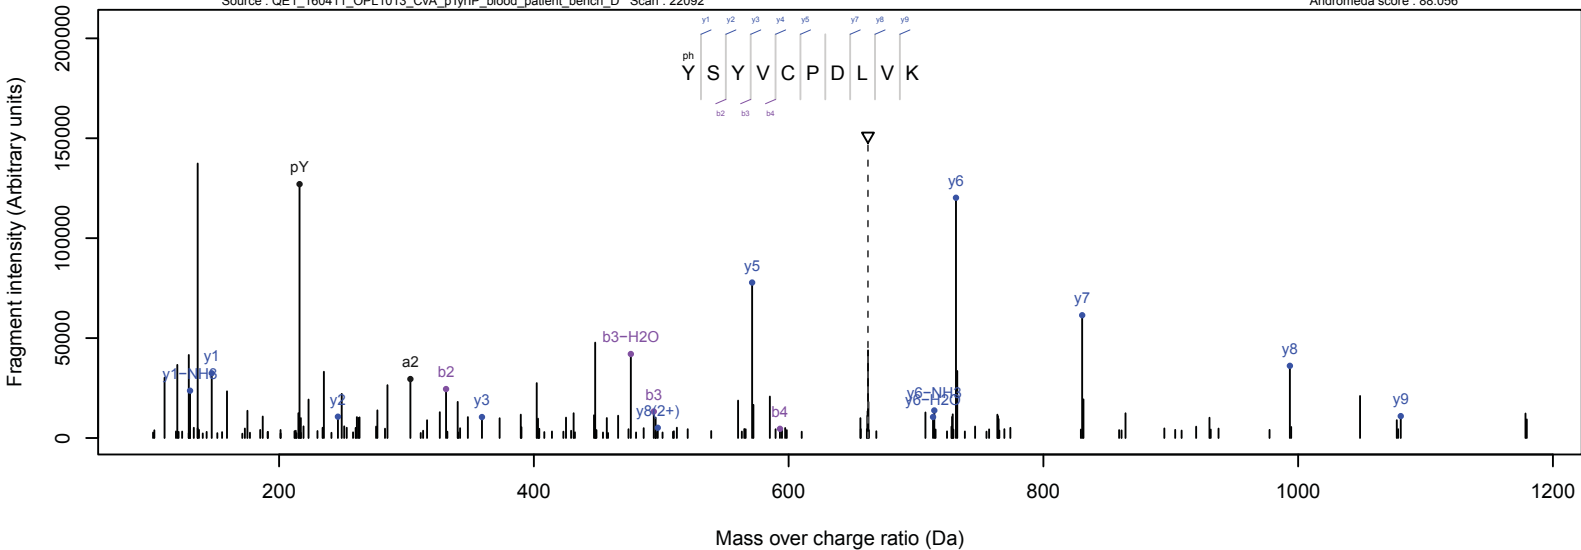

## GAY(ph)SLSIR-2+

Source : QE1\_160411\_OPL1013\_CvA\_pTyrIP\_blood\_patient\_bench\_A Scan : 12707

Andromeda score : 87.639

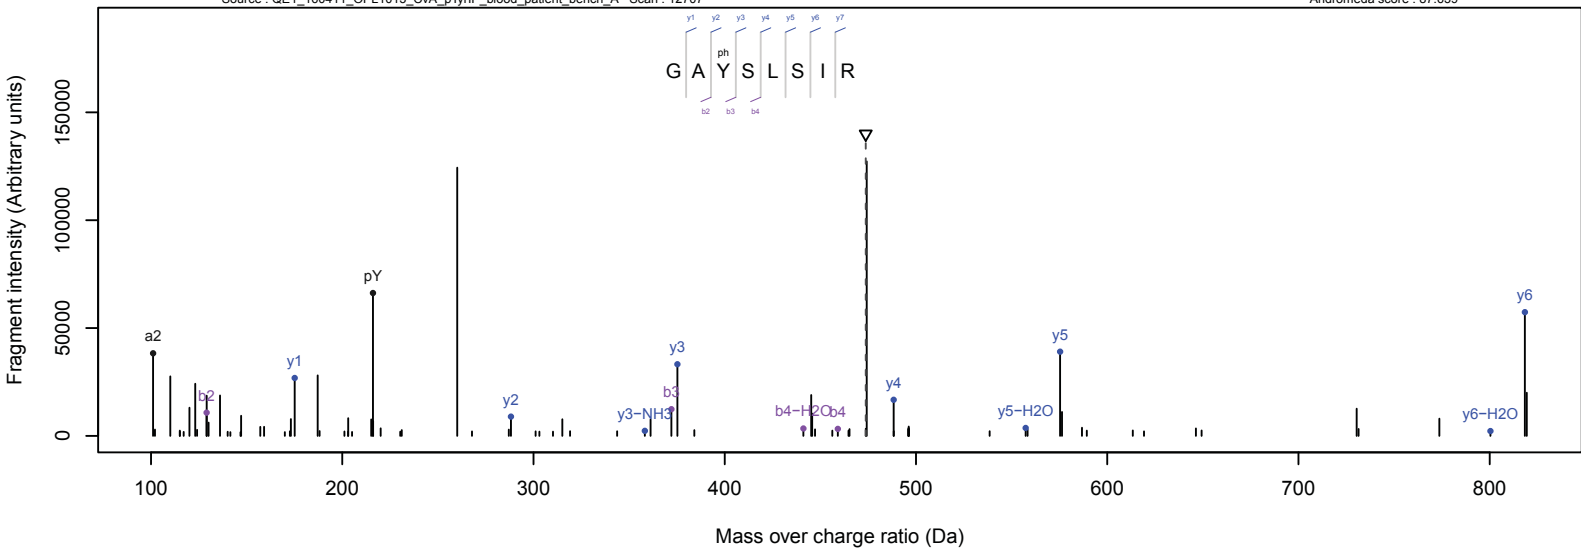

## LYTY(ph)QSR-2+

Source : QE1\_160411\_OPL1013\_CvA\_pTyrIP\_blood\_patient\_bench\_C Scan : 12417

Andromeda score : 87.476

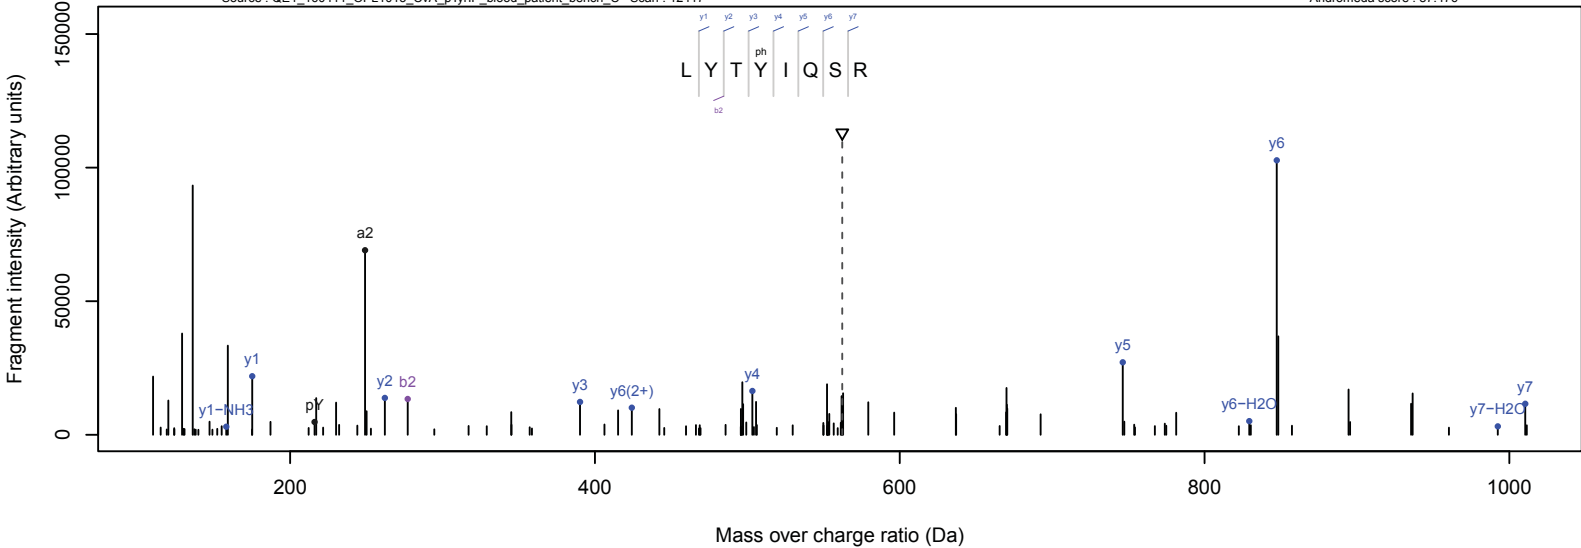



**QESTVSFNPY(ph)EPELAPWAADKGPQR-3+**

Source : QE1\_160411\_OPL1013\_CvA\_pTyrIP\_blood\_patient\_bench\_D Scan : 35122

Andromeda score : 86.946

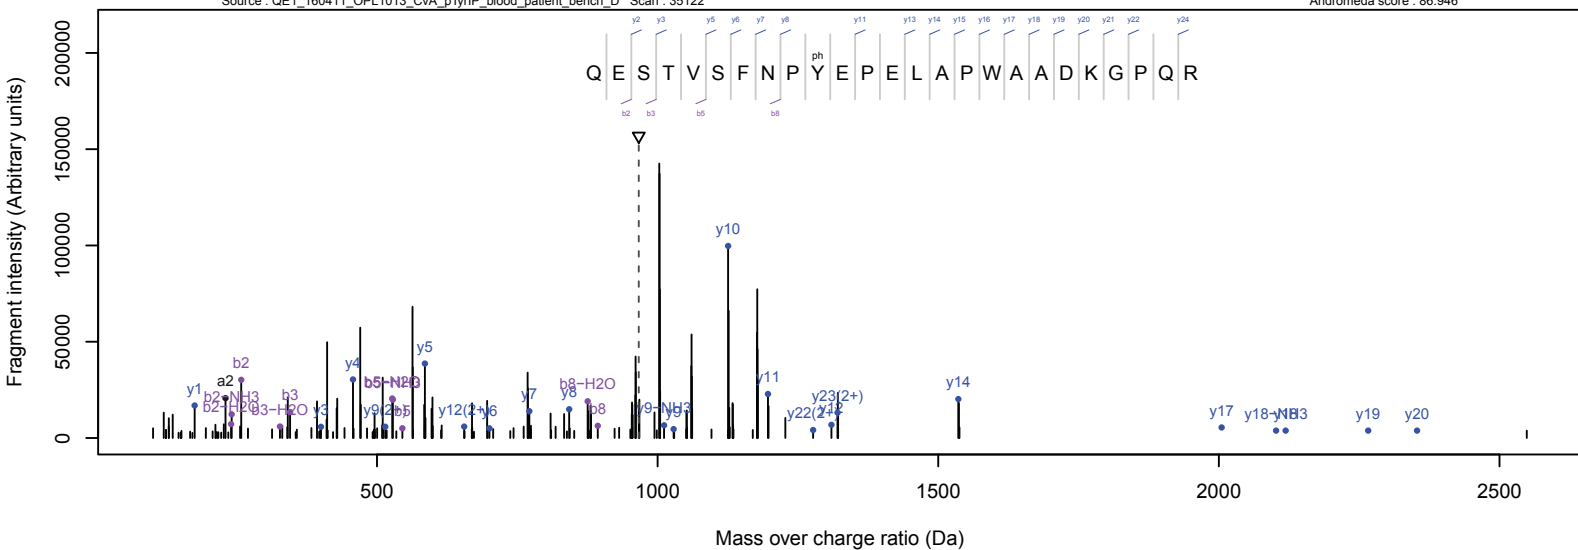

**YANNSNY(ph)KNDVMOIR-3+**

Source : QE1\_160411\_OPL1013\_CvA\_pTyrIP\_blood\_patient\_bench\_A Scan : 7225

Andromeda score : 86.944

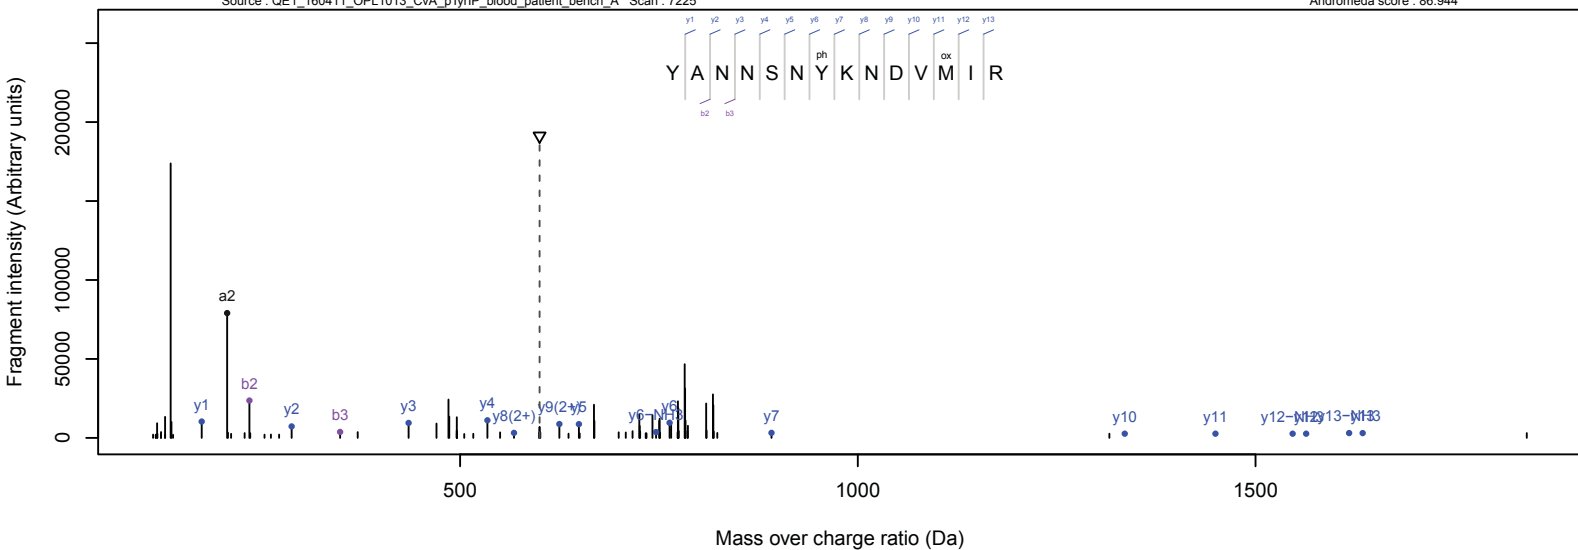

**SHEGETAY(ph)IR-3+**

Source : QE1\_160411\_OPL1013\_CvA\_pTyrIP\_blood\_patient\_bench\_C Scan : 3864

Andromeda score : 86.898

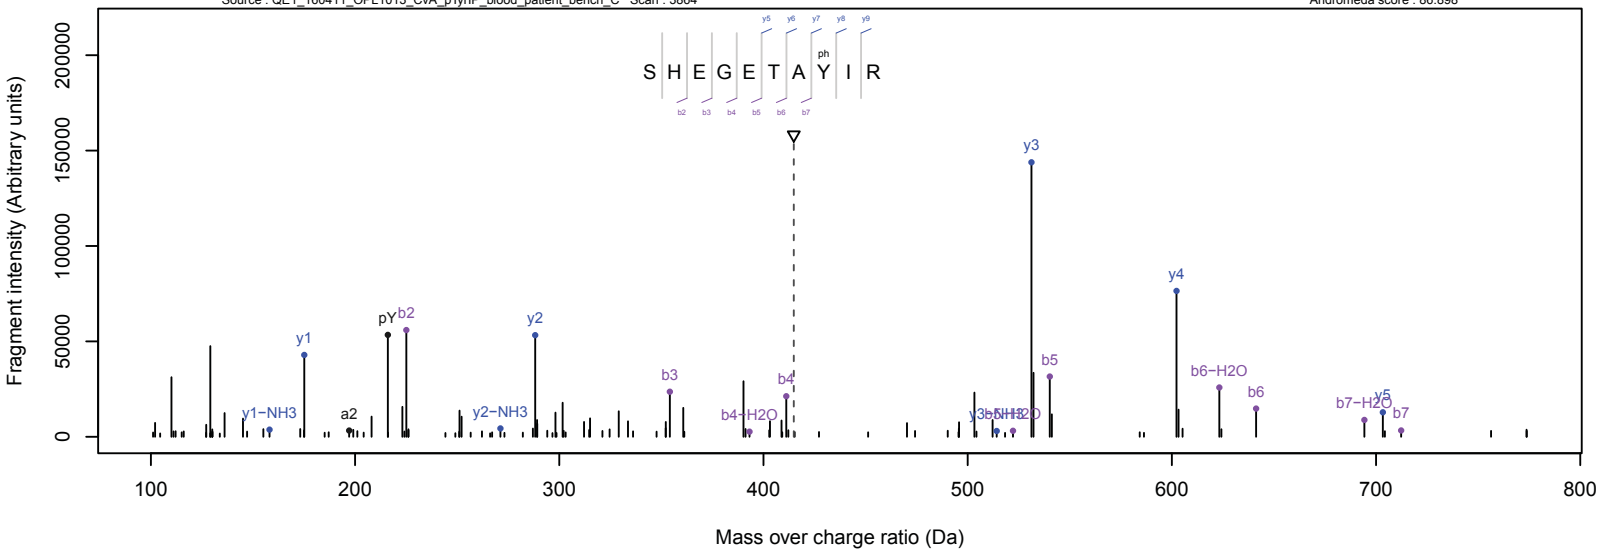

## KKY(ph)PYWPHQPIENL-3+

Source : QE1\_160411\_OPL1013\_CvA\_pTyrIP\_blood\_patient\_bench\_D Scan : 24525

Andromeda score : 86.772

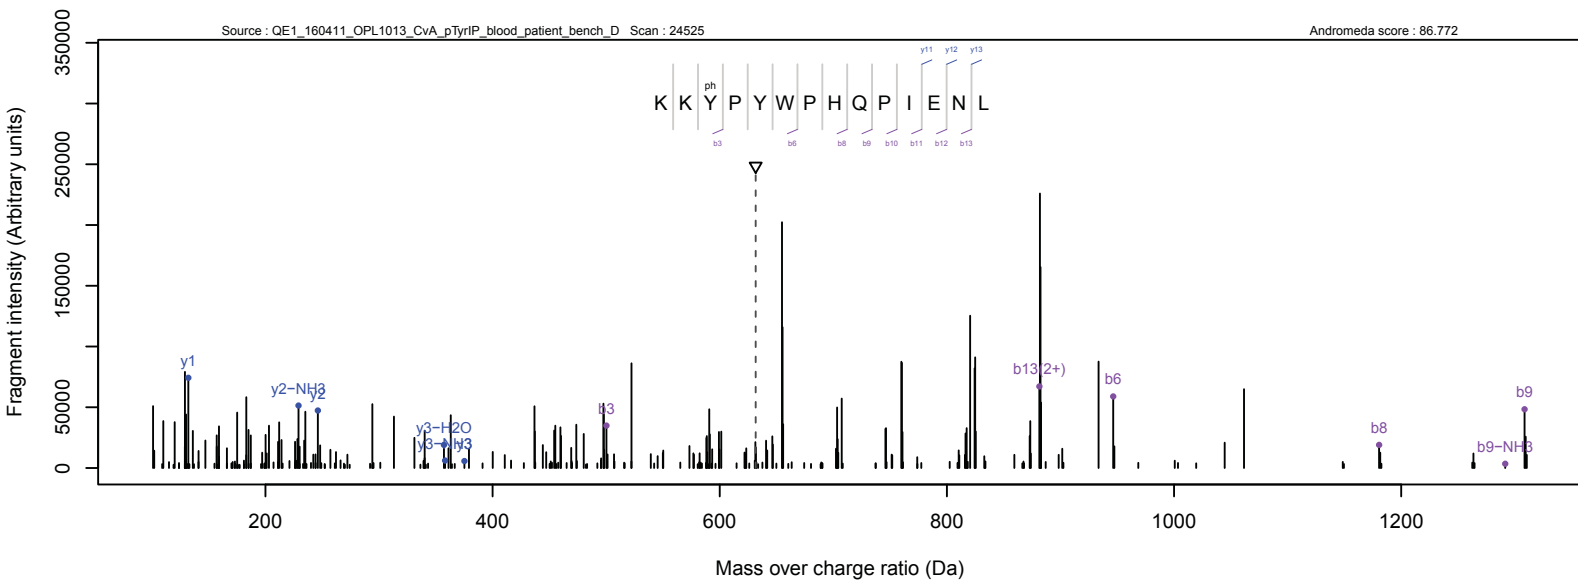

## SLY(ph)PSSEIQLNKK-2+

Source : QE1\_160411\_OPL1013\_CvA\_pTyrIP\_blood\_patient\_bench\_D Scan : 20960

Andromeda score : 86.772

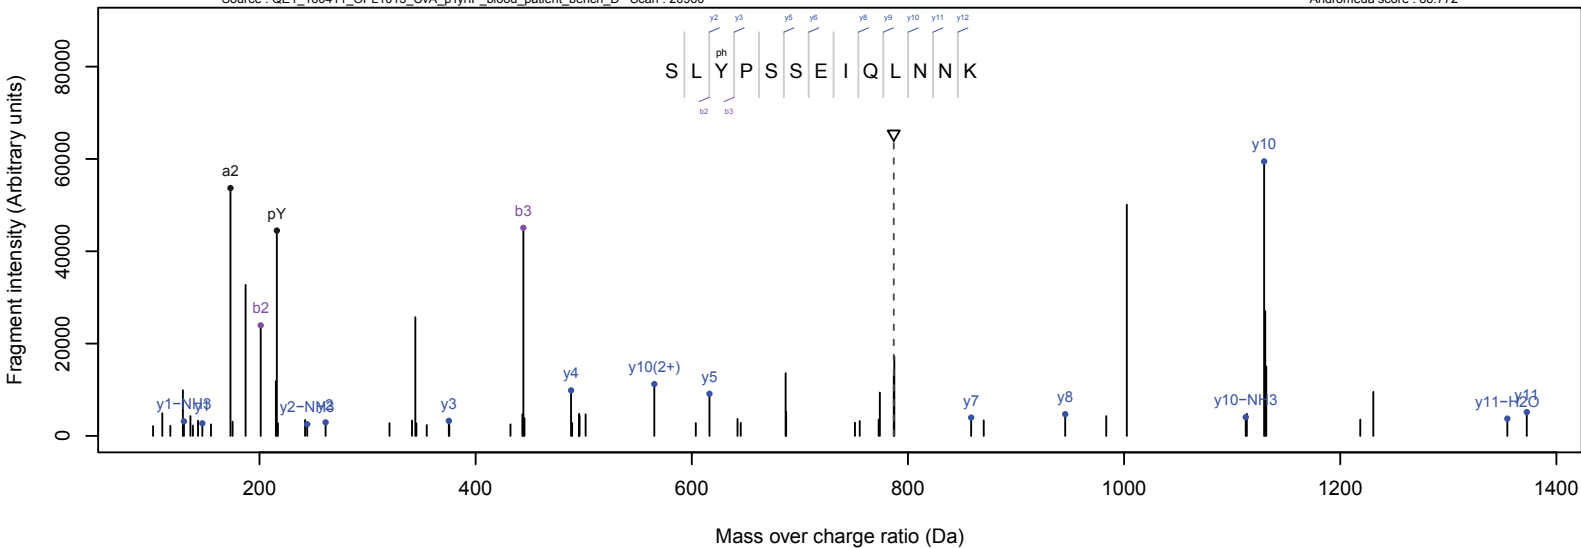

## Y(ph)PLHAIR-2+

Source : QE1\_160411\_OPL1013\_CvA\_pTyrIP\_blood\_patient\_bench\_D Scan : 7068

Andromeda score : 86.512

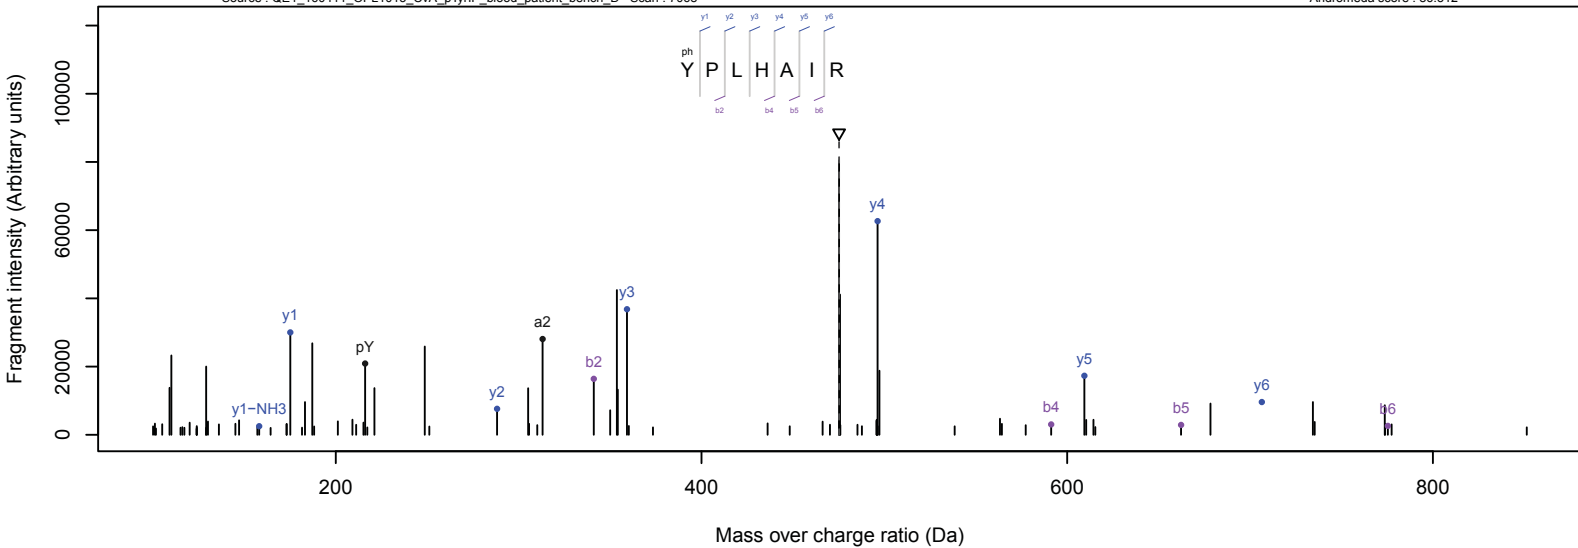

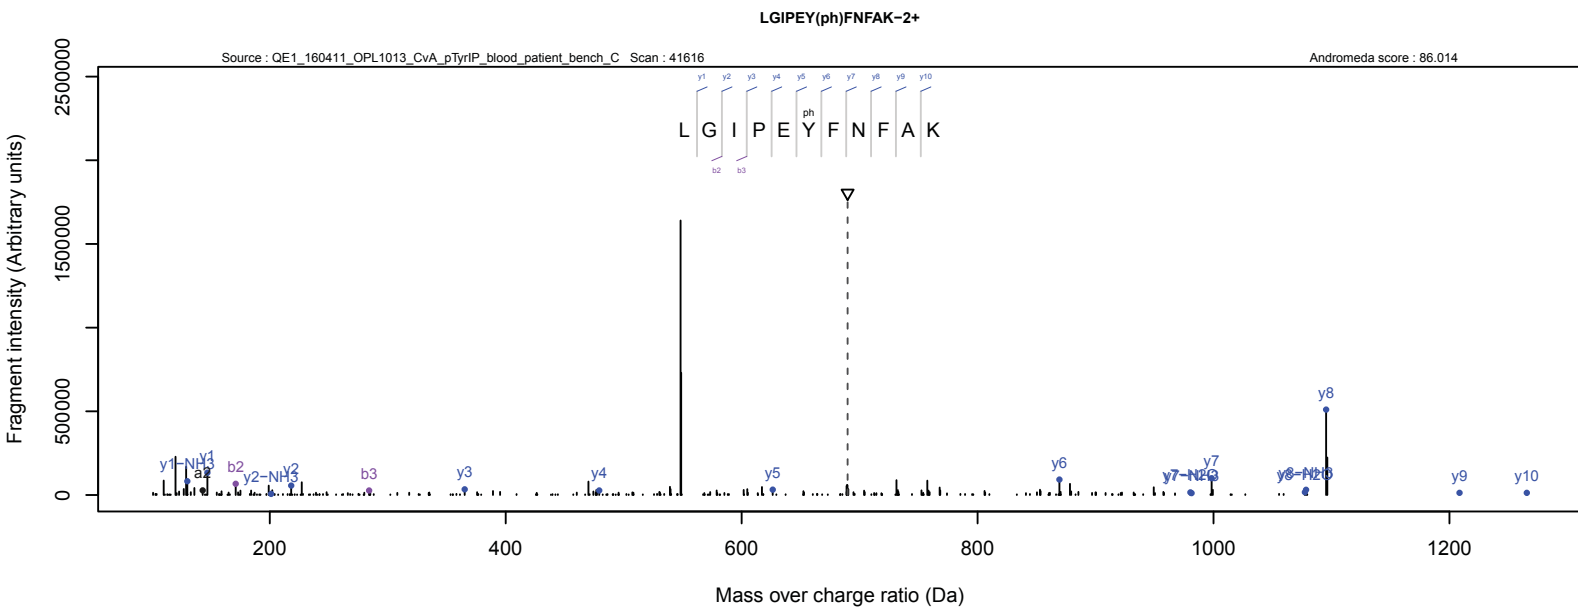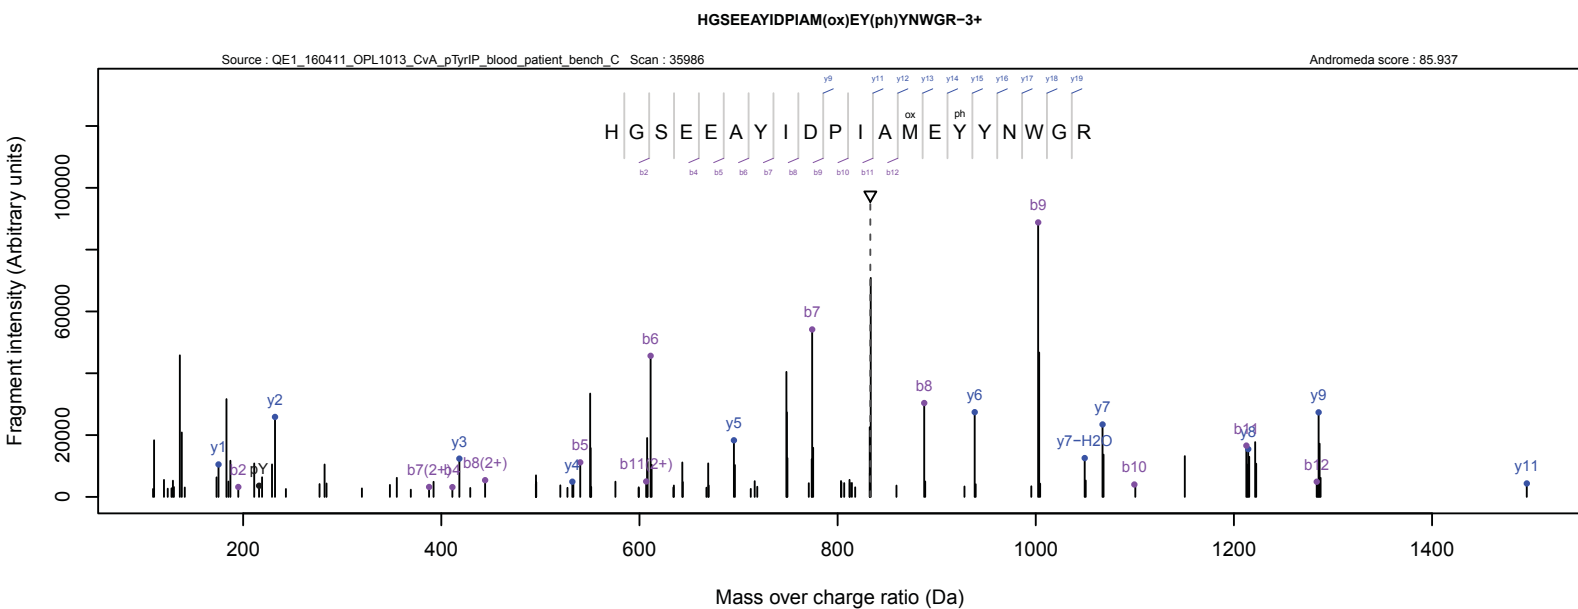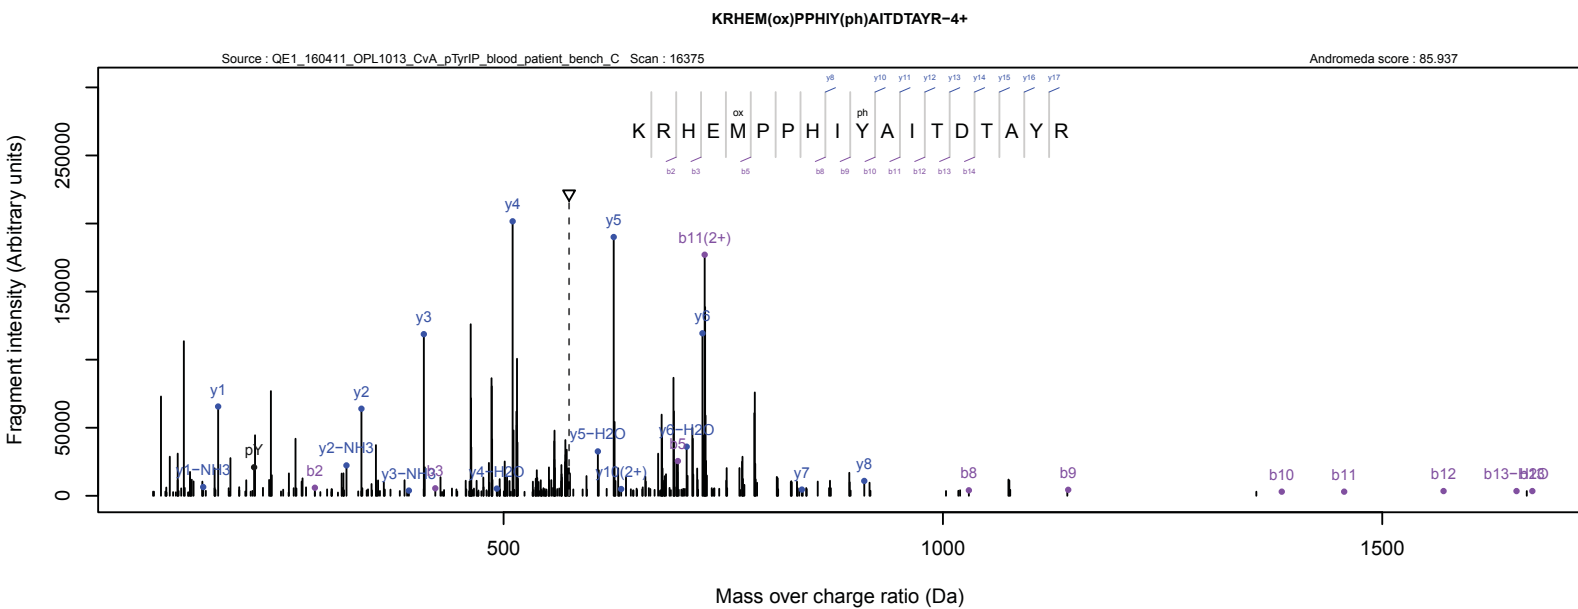



**IKPSSANAIY(ph)SLAAR-2+**

Source: QE1\_160411\_OPL1013\_CvA\_pTyrIP\_blood\_patient\_bench\_C Scan: 21159

Andromeda score: 85.563

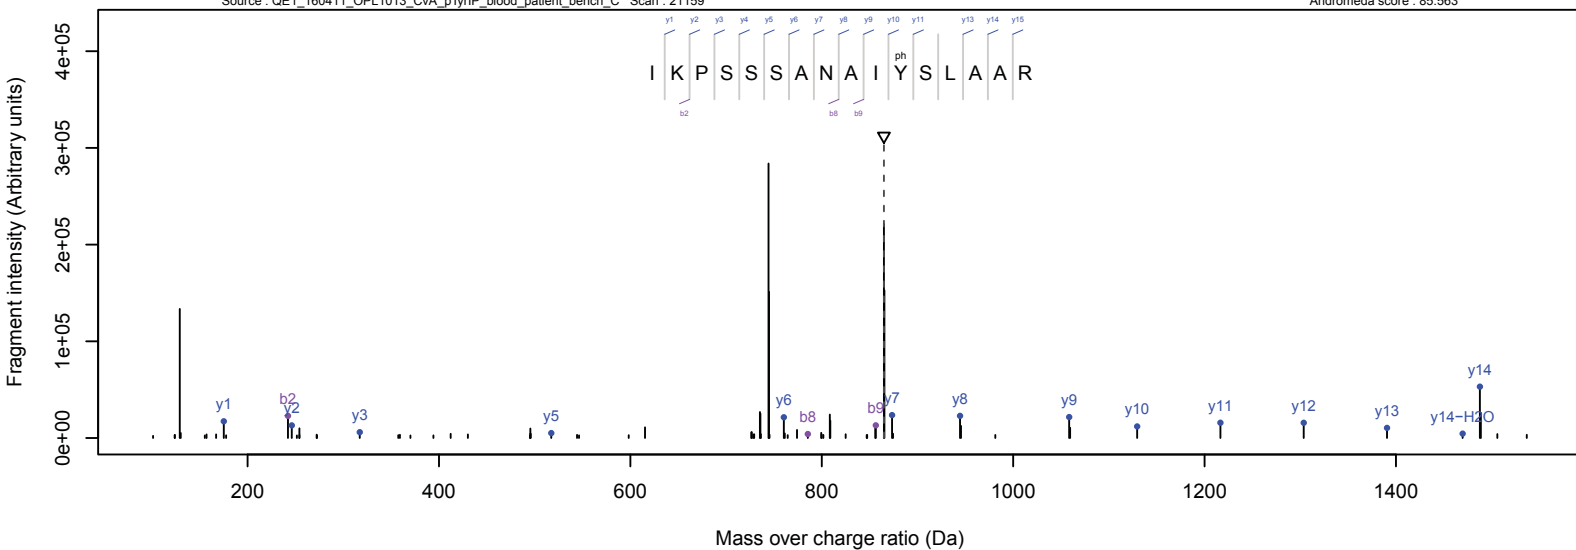

**AVCSTY(ph)LQS(ph)R-2+**

Source: QE1\_160411\_OPL1013\_CvA\_pTyrIP\_blood\_patient\_bench\_B Scan: 7250

Andromeda score: 85.554

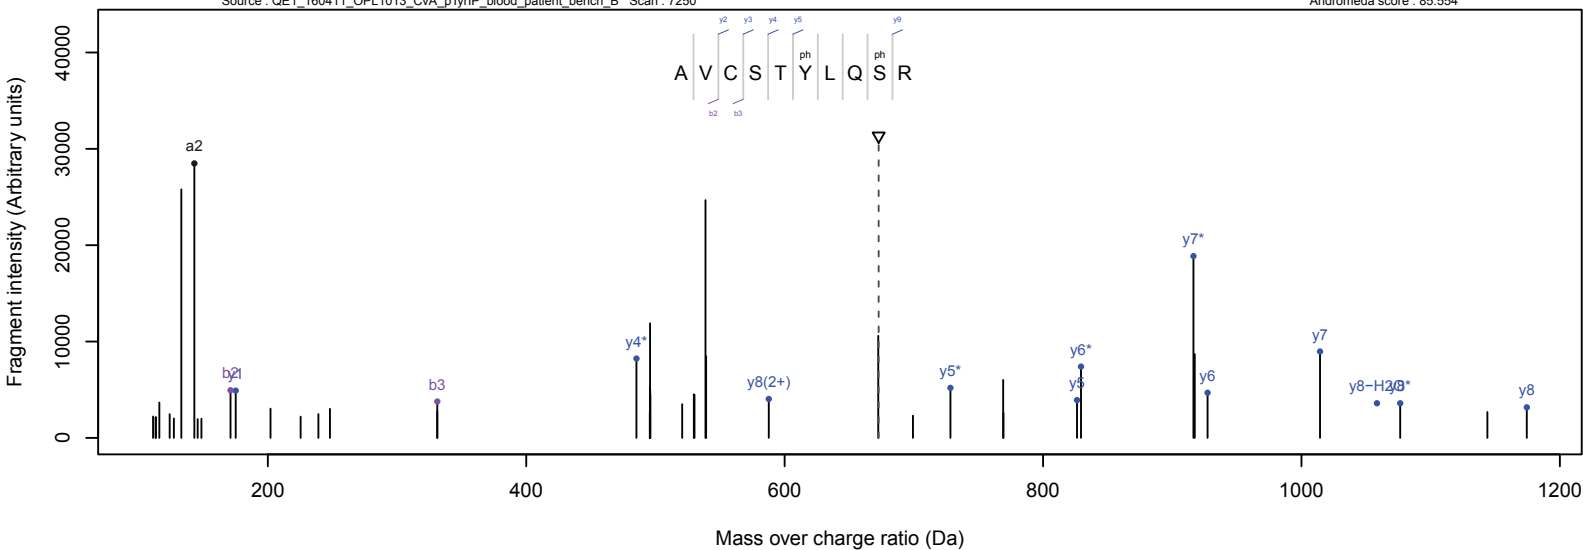

**LQQTY(ph)AALNSK-2+**

Source: QE1\_160411\_OPL1013\_CvA\_pTyrIP\_blood\_patient\_bench\_B Scan: 7709

Andromeda score: 85.522

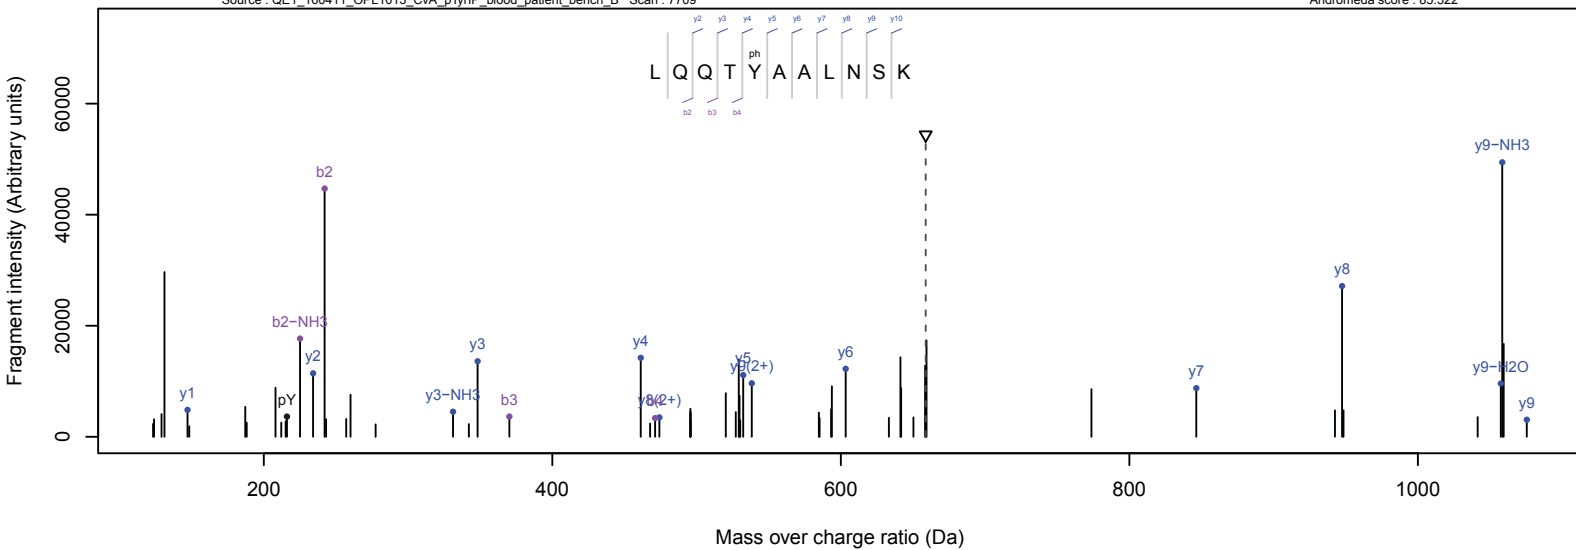

ATVNLPEKRETDTSALAAAGSSQEV<sup>ph</sup>YAQLDHWALTQR-5+

Source : QE1\_160411\_OPL1013\_CvA\_pTyrIP\_blood\_patient\_bench\_D Scan : 33088

Andromeda score : 85.412

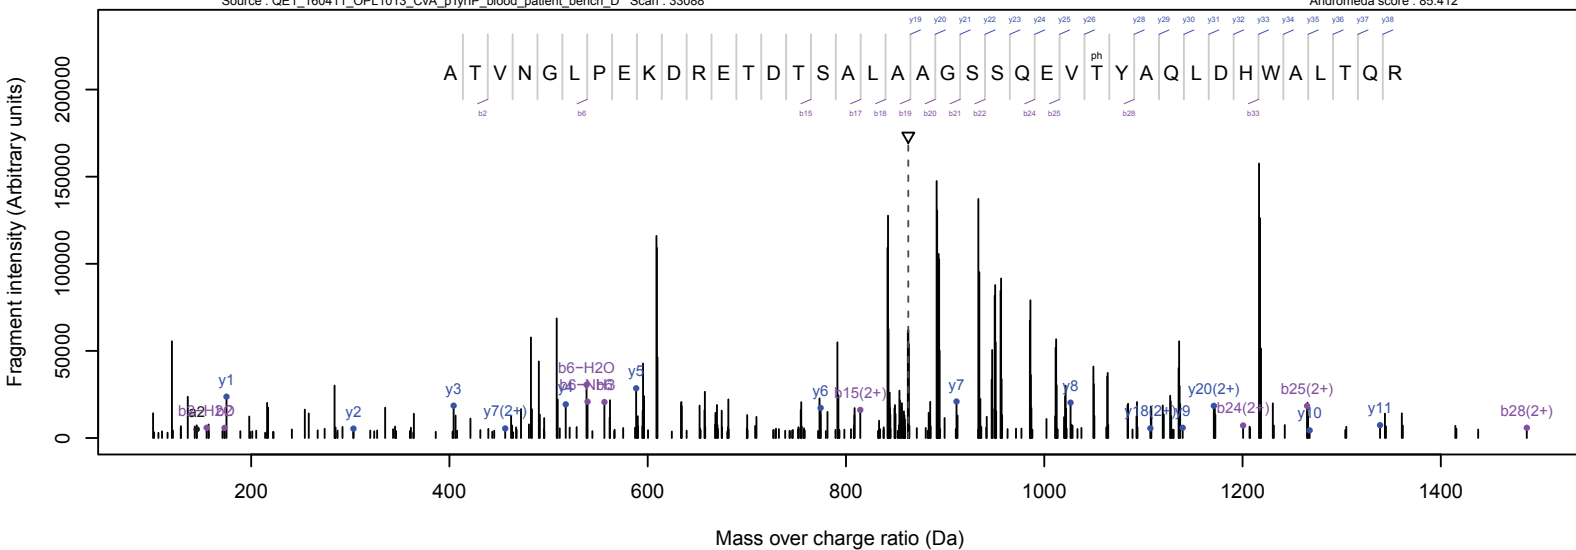

LY<sup>ph</sup>DFVKTER-3+

Source : QE1\_160411\_OPL1013\_CvA\_pTyrIP\_blood\_patient\_bench\_C Scan : 15496

Andromeda score : 85.355

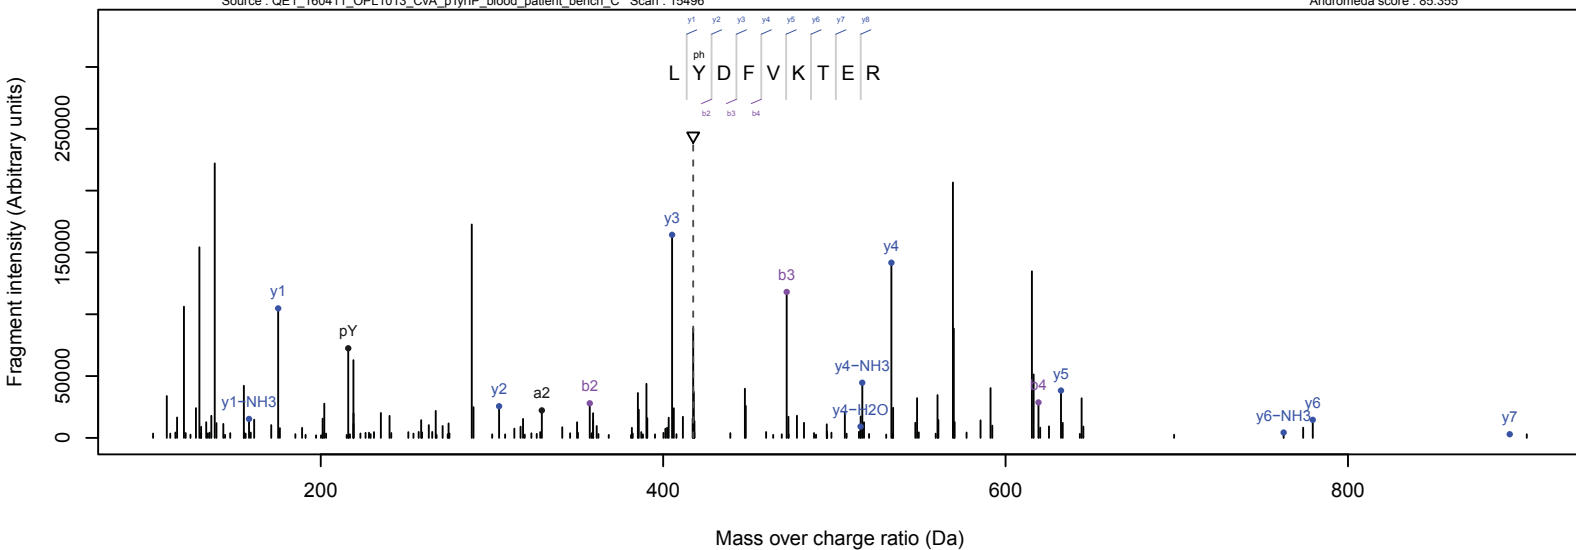

RVNGEETPMIGDKV<sup>ph</sup>VHYK-4+

Source : QE1\_160411\_OPL1013\_CvA\_pTyrIP\_blood\_patient\_bench\_B Scan : 17243

Andromeda score : 85.087

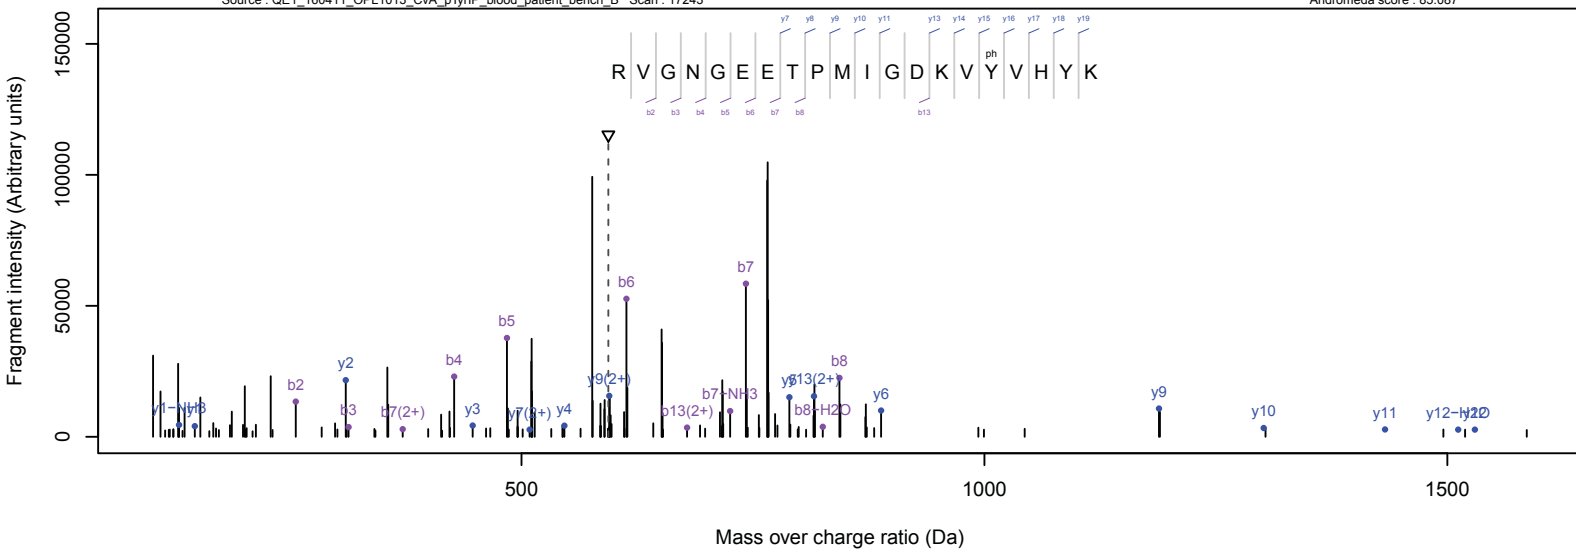

APYTCGGSDQY(ph)VLMSSPVGR-3+

Source : QE1\_160411\_OPL1013\_CvA\_pTyrIP\_blood\_patient\_bench\_B Scan : 26278

Andromeda score : 84.946

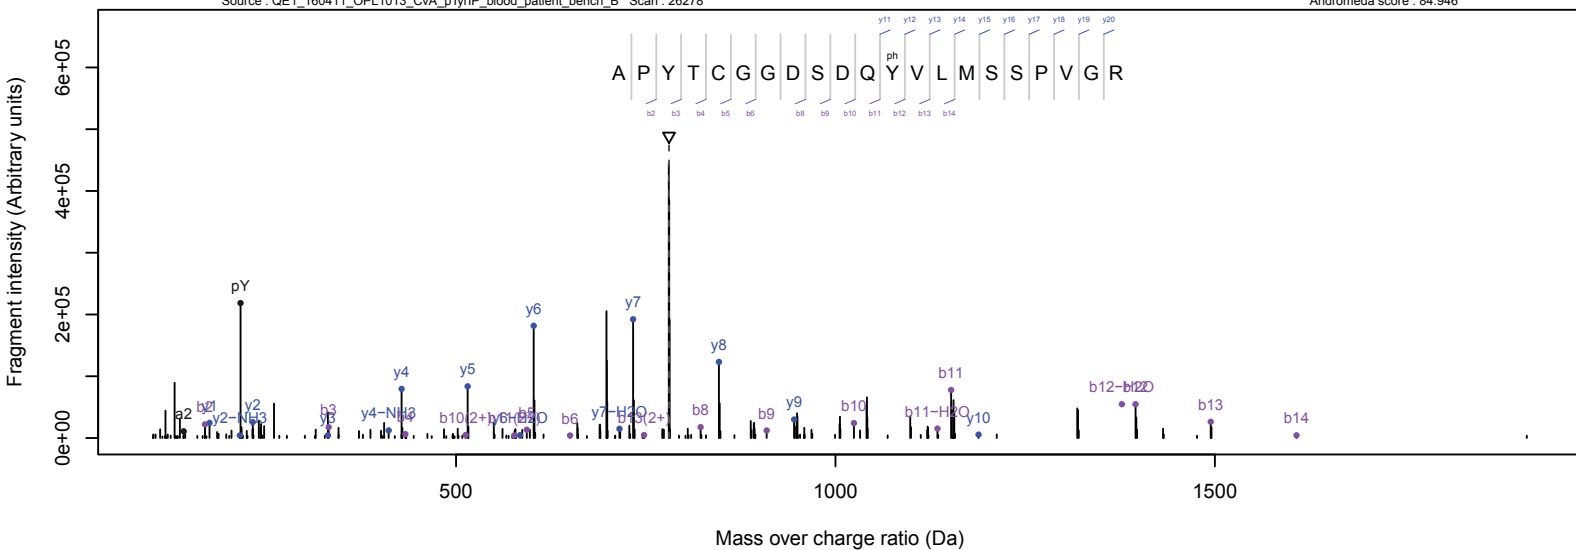

TWTEIFKEHNFSFY(ph)PTFQSHPNSSMPGSR-4+

Source : QE1\_160411\_OPL1013\_CvA\_pTyrIP\_blood\_patient\_bench\_D Scan : 41368

Andromeda score : 84.561

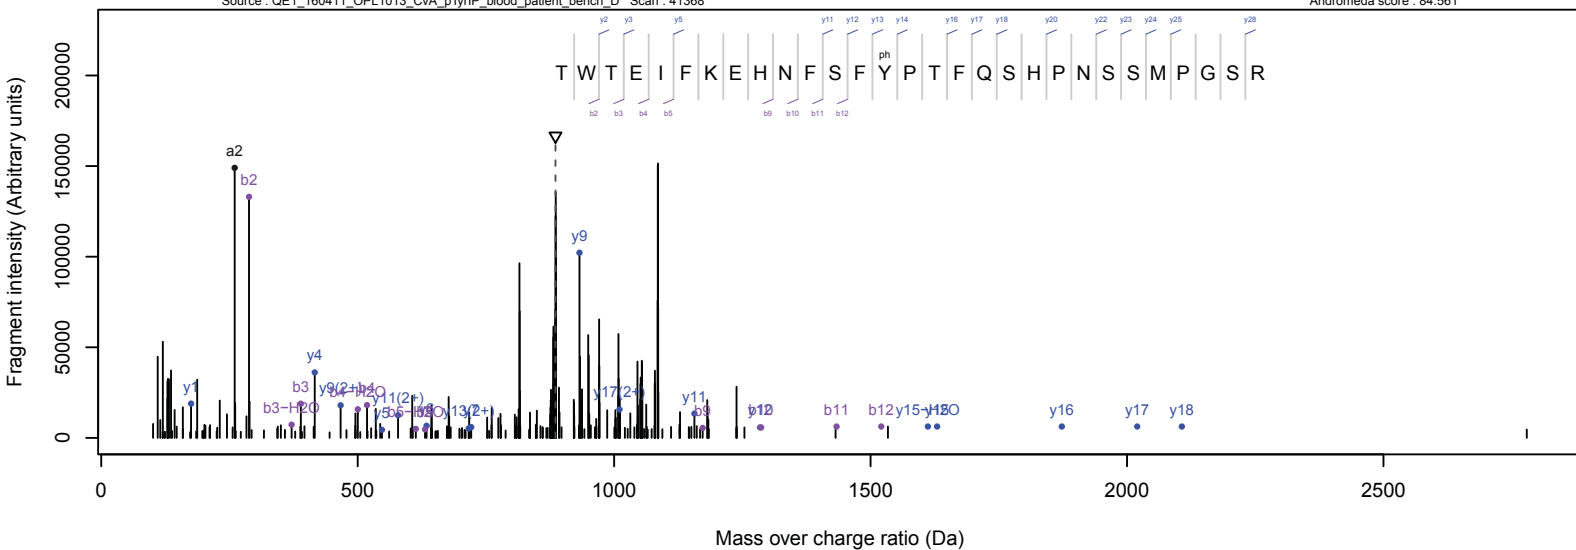

ERSETEY(ph)ALLR-2+

Source : QE1\_160411\_OPL1013\_CvA\_pTyrIP\_blood\_patient\_bench\_D Scan : 13651

Andromeda score : 84.365

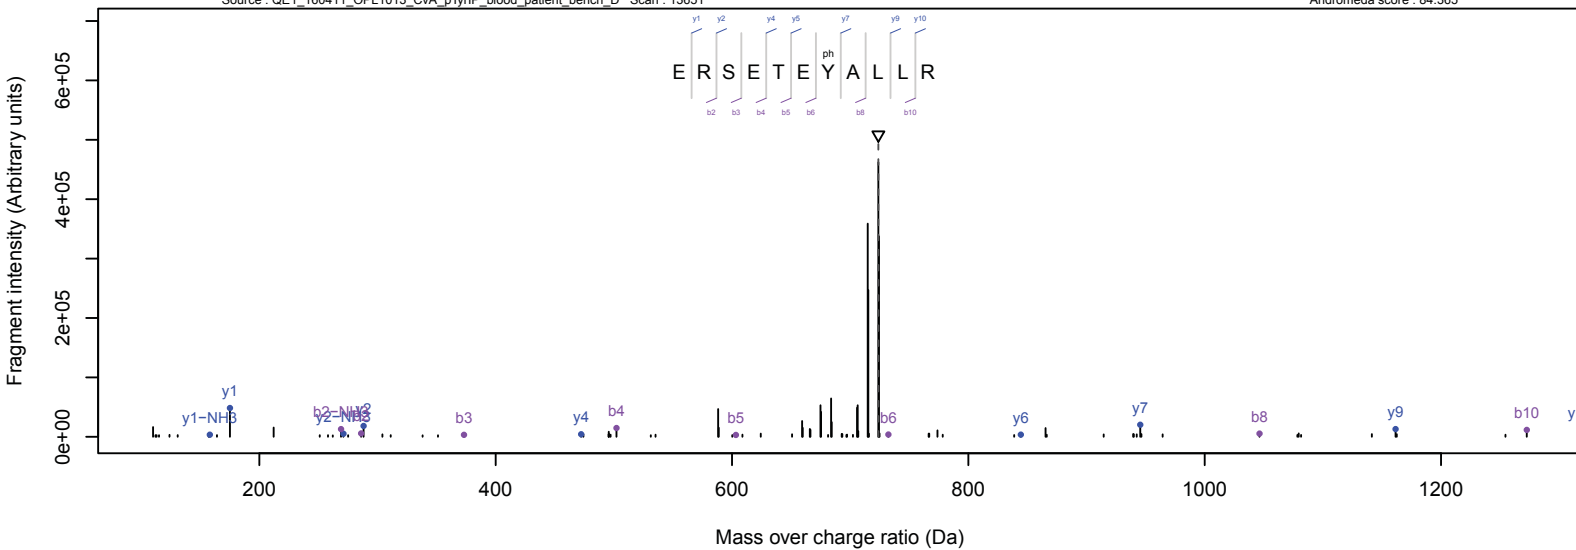

**QGHYIY<sup>ph</sup>M<sup>ox</sup>EM<sup>ox</sup>NFTNK-3+**

Source : QE1\_160411\_OPL1013\_CvA\_pTyrIP\_blood\_patient\_bench\_C Scan : 8227

Andromeda score : 84.169

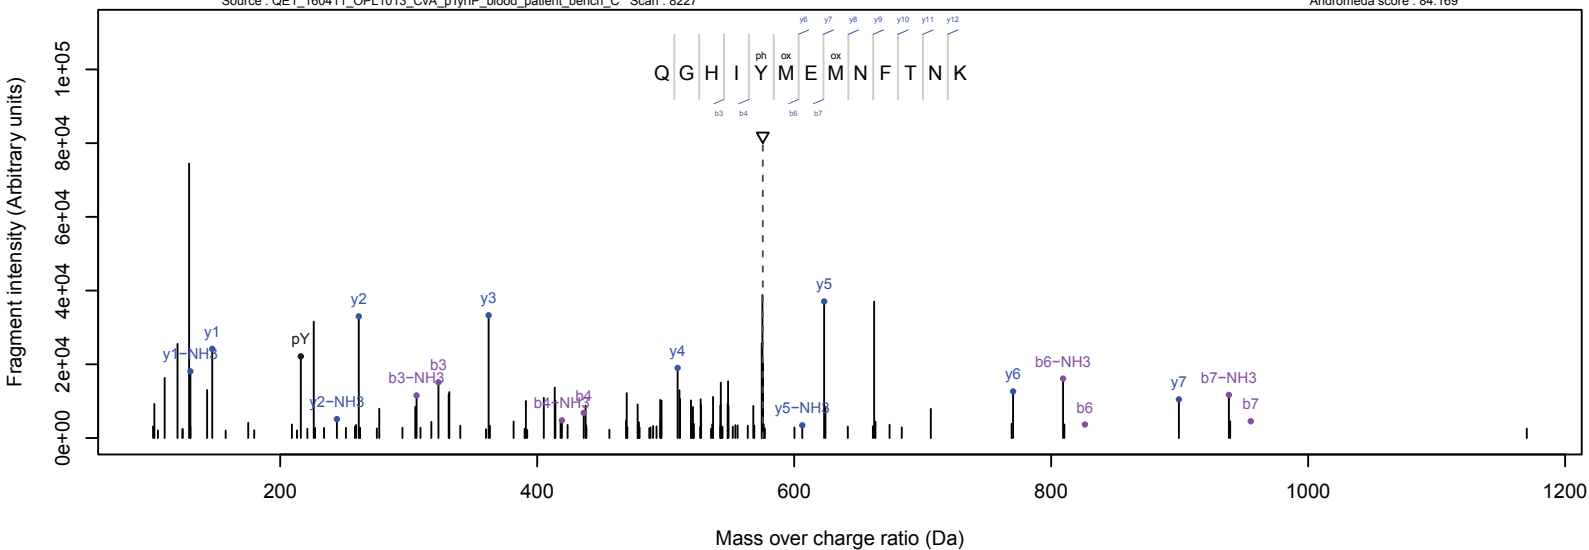

**ISIEMNGTLEDQLSHLKQY<sup>ph</sup>ER-4+**

Source : QE1\_160411\_OPL1013\_CvA\_pTyrIP\_blood\_patient\_bench\_D Scan : 37496

Andromeda score : 84.166

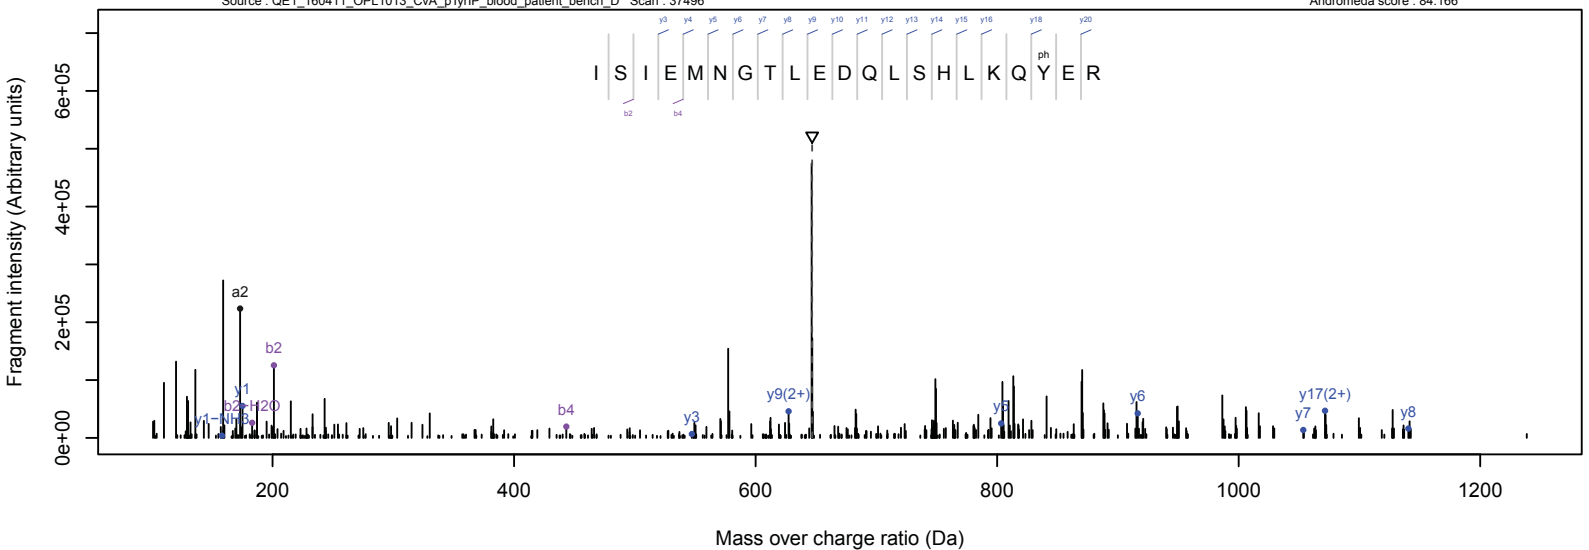

**VELHVHLDGSIKPETILY<sup>ph</sup>YGR-4+**

Source : QE1\_160411\_OPL1013\_CvA\_pTyrIP\_blood\_patient\_bench\_A Scan : 36311

Andromeda score : 84.166

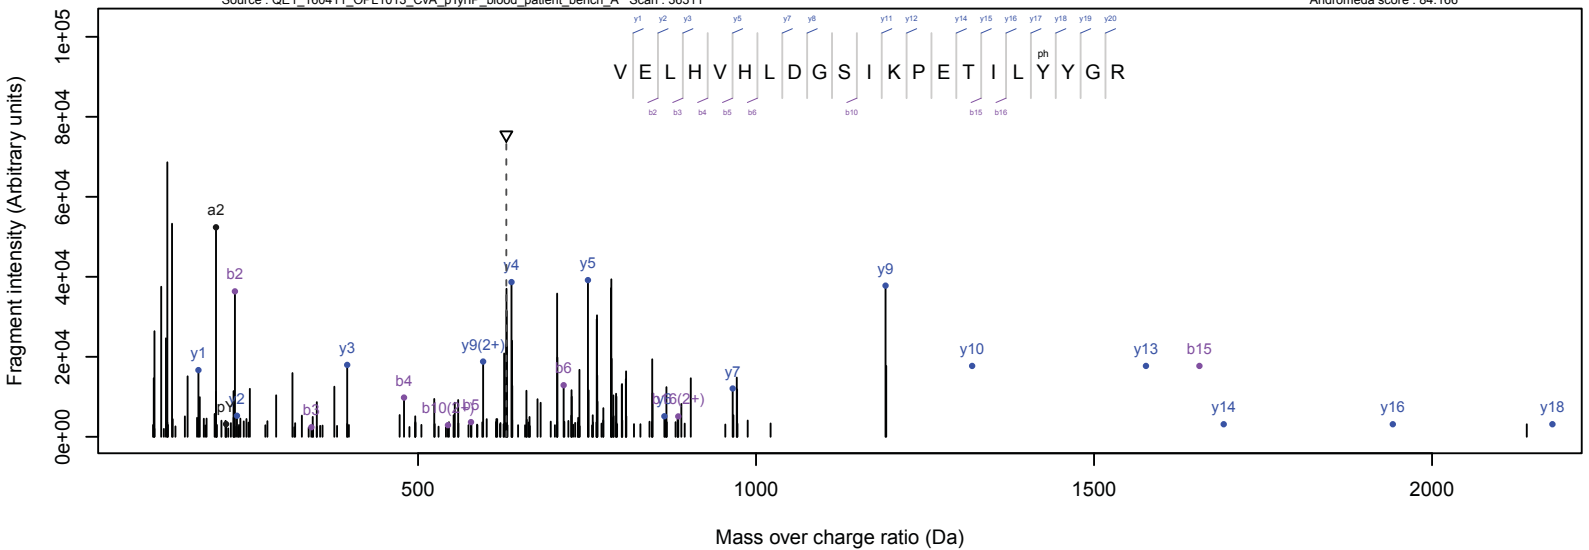



ALPQDDHY(ph)VMQEHR-3+

Source : QE1\_160411\_OPL1013\_CvA\_pTyrIP\_blood\_patient\_bench\_D Scan : 10045

Andromeda score : 83.692

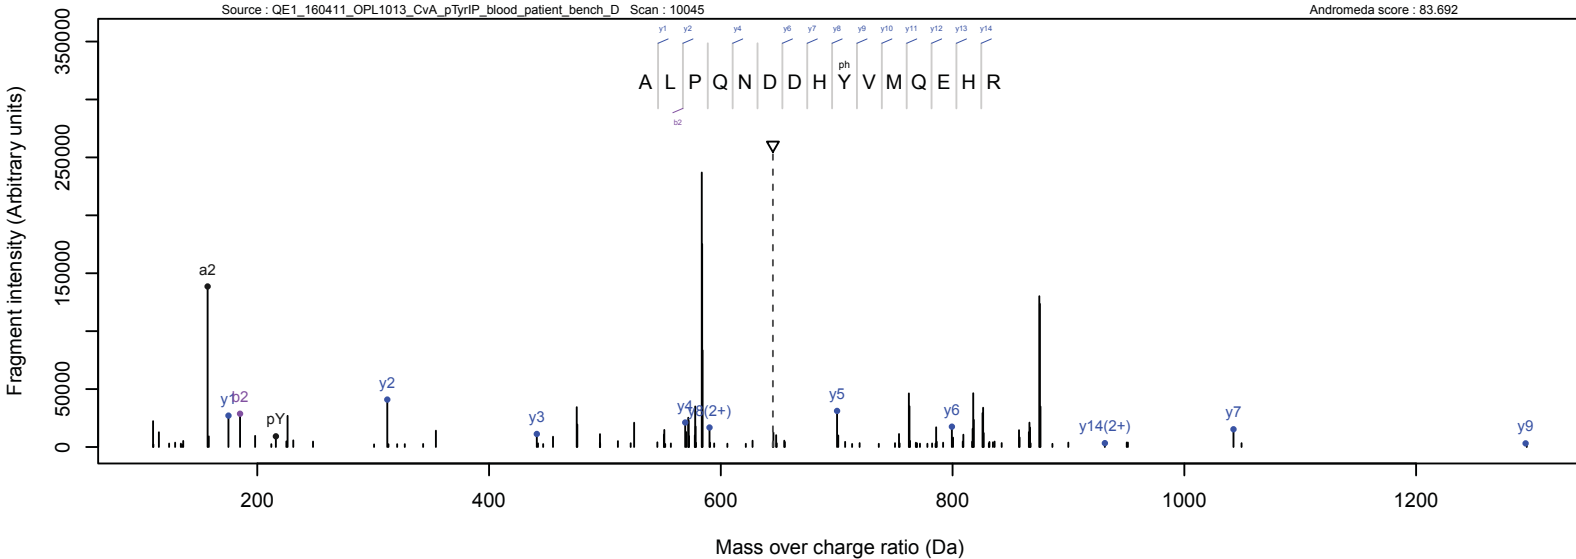

ARPEY(ph)M(ox)LPVHFYGR-3+

Source : QE1\_160411\_OPL1013\_CvA\_pTyrIP\_blood\_patient\_bench\_C Scan : 25623

Andromeda score : 83.692

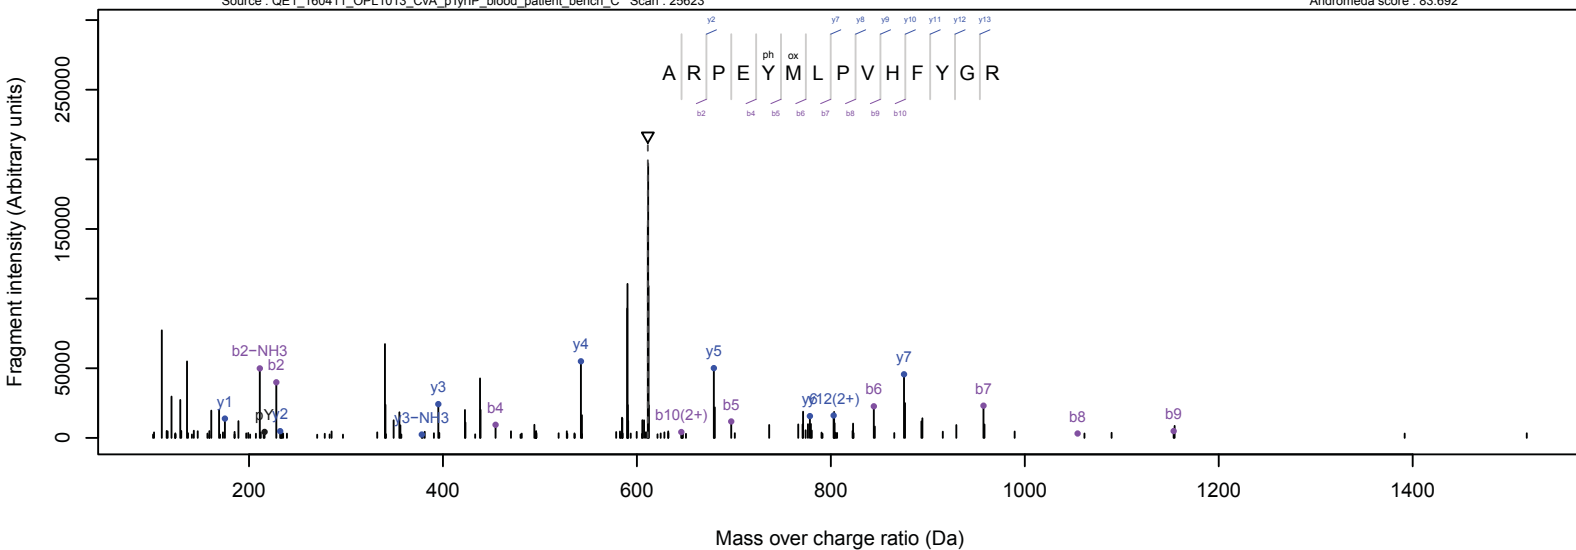

TVAEHVEAIEGSSGPVTT(ph)IYM(ox)LAGKPR-4+

Source : QE1\_160411\_OPL1013\_CvA\_pTyrIP\_blood\_patient\_bench\_C Scan : 39307

Andromeda score : 83.467

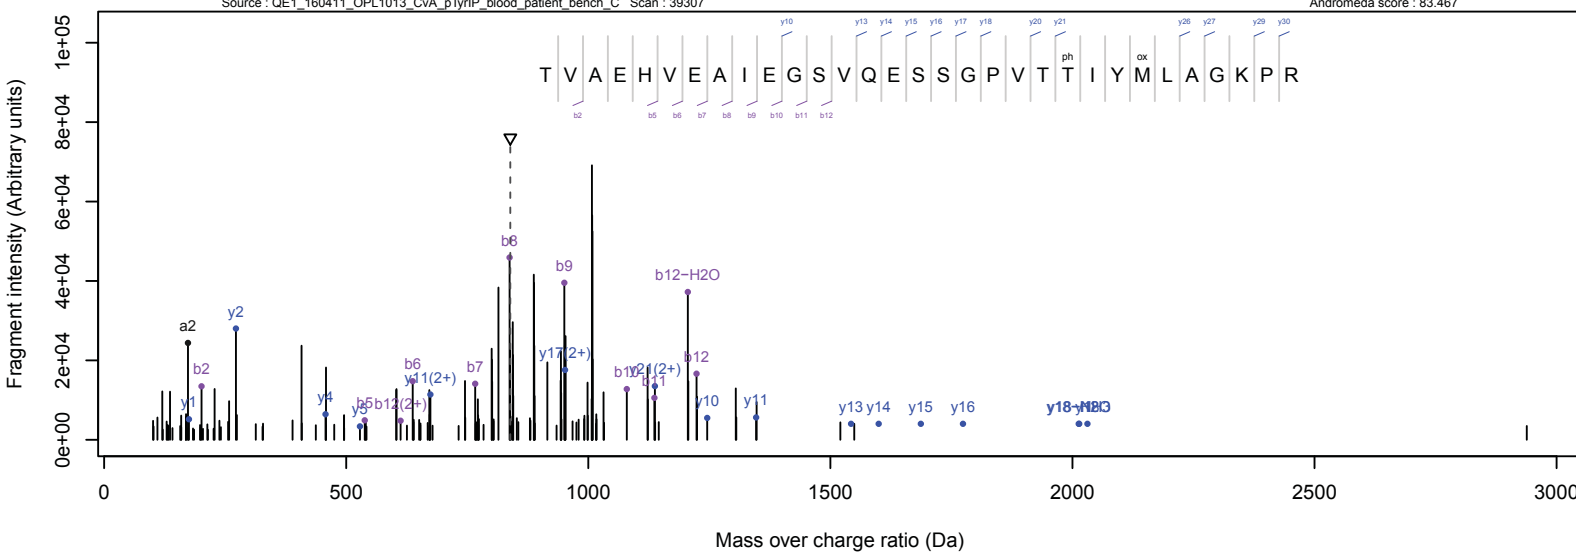

QSRPCMEENEELYS(A)SSAVTVGPHK-3+

Source: QE1\_160411\_OPL1013\_CvA\_pTyrIP\_blood\_patient\_bench\_D Scan: 17855

Andromeda score: 83.395

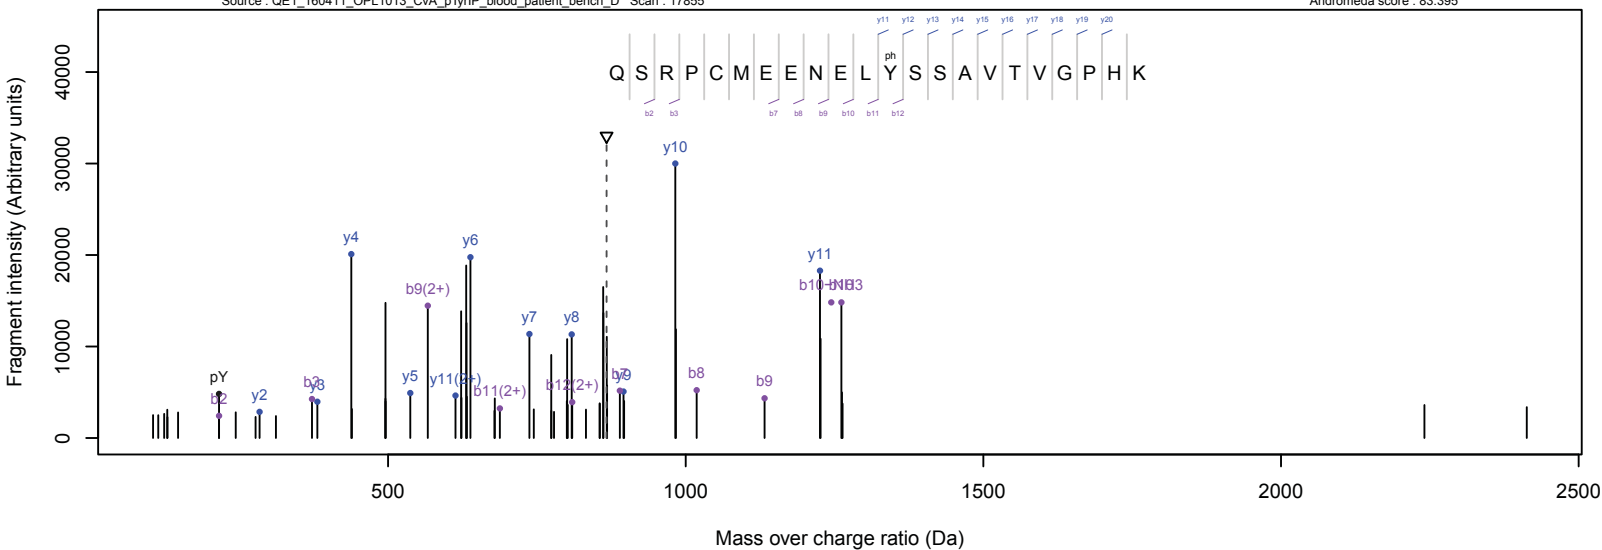

AEFAEY(A)ASVDR-2+

Source: QE1\_160411\_OPL1013\_CvA\_pTyrIP\_blood\_patient\_bench\_D Scan: 15397

Andromeda score: 83.182

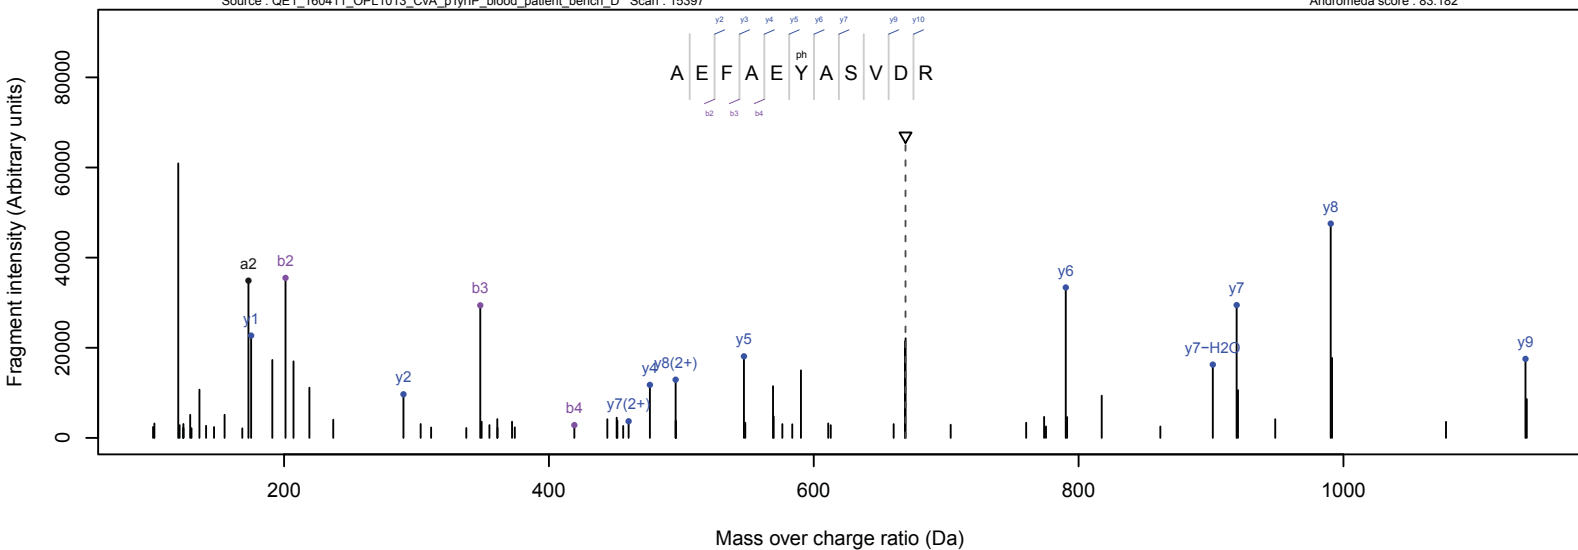

SYGAADHY(A)GPDPTK-3+

Source: QE1\_160411\_OPL1013\_CvA\_pTyrIP\_blood\_patient\_bench\_C Scan: 6823

Andromeda score: 82.651

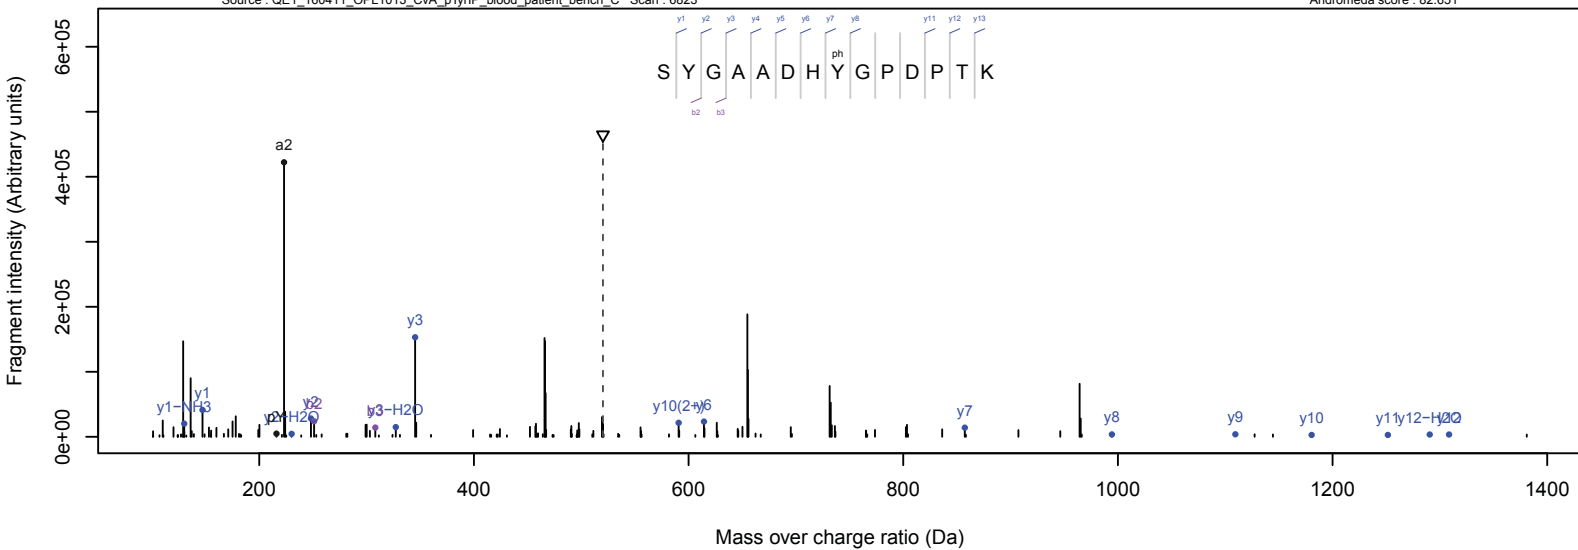

**DQEAPSTTEYS(ph)EIKTSK-3+**

Source : QE1\_160411\_OPL1013\_CvA\_pTyrIP\_blood\_patient\_bench\_D Scan : 8188

Andromeda score : 82.449

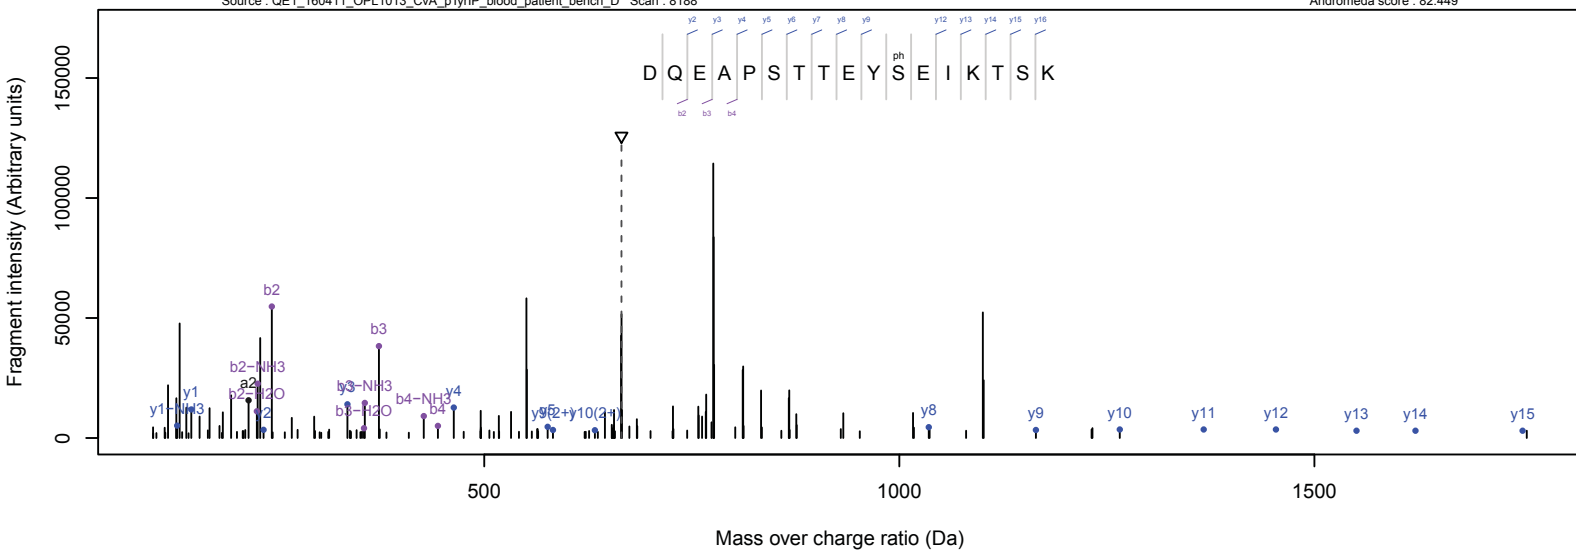

**TATGY(ph)GFAEPYNLYSSLK-2+**

Source : QE1\_160411\_OPL1013\_CvA\_pTyrIP\_blood\_patient\_bench\_D Scan : 39386

Andromeda score : 82.244

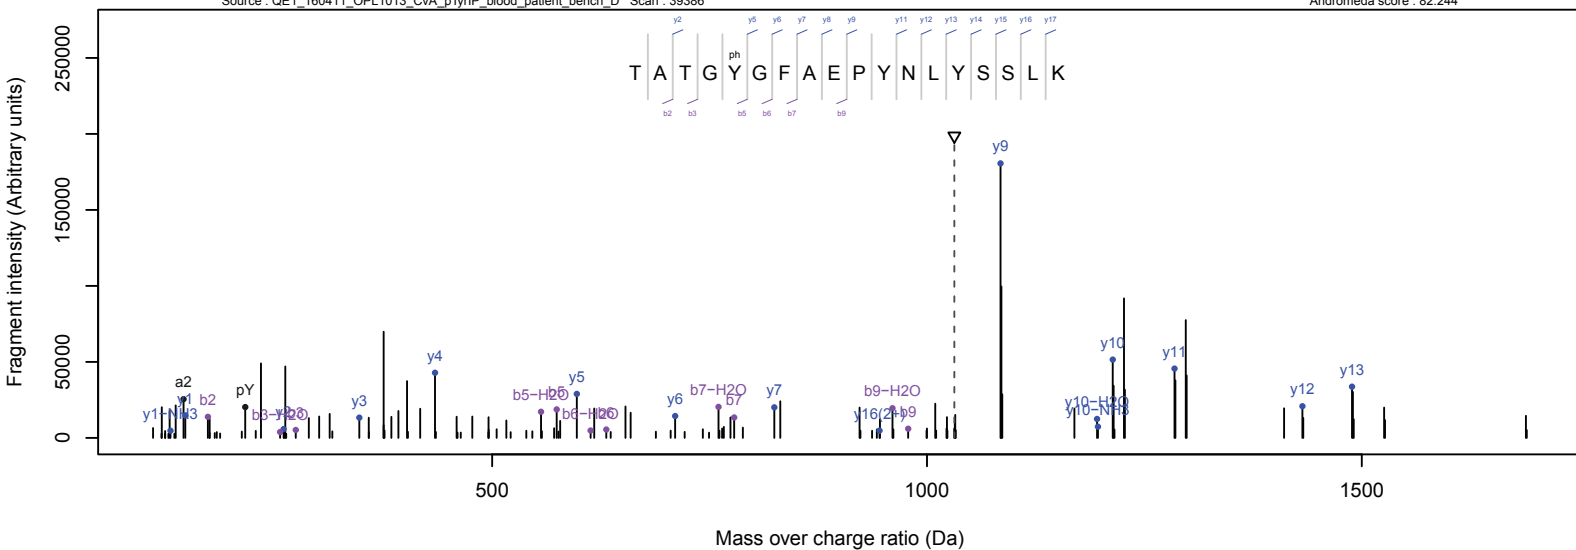

**AAASTDY(ph)YKRGDFIPGLR-3+**

Source : QE1\_160411\_OPL1013\_CvA\_pTyrIP\_blood\_patient\_bench\_C Scan : 25542

Andromeda score : 81.656

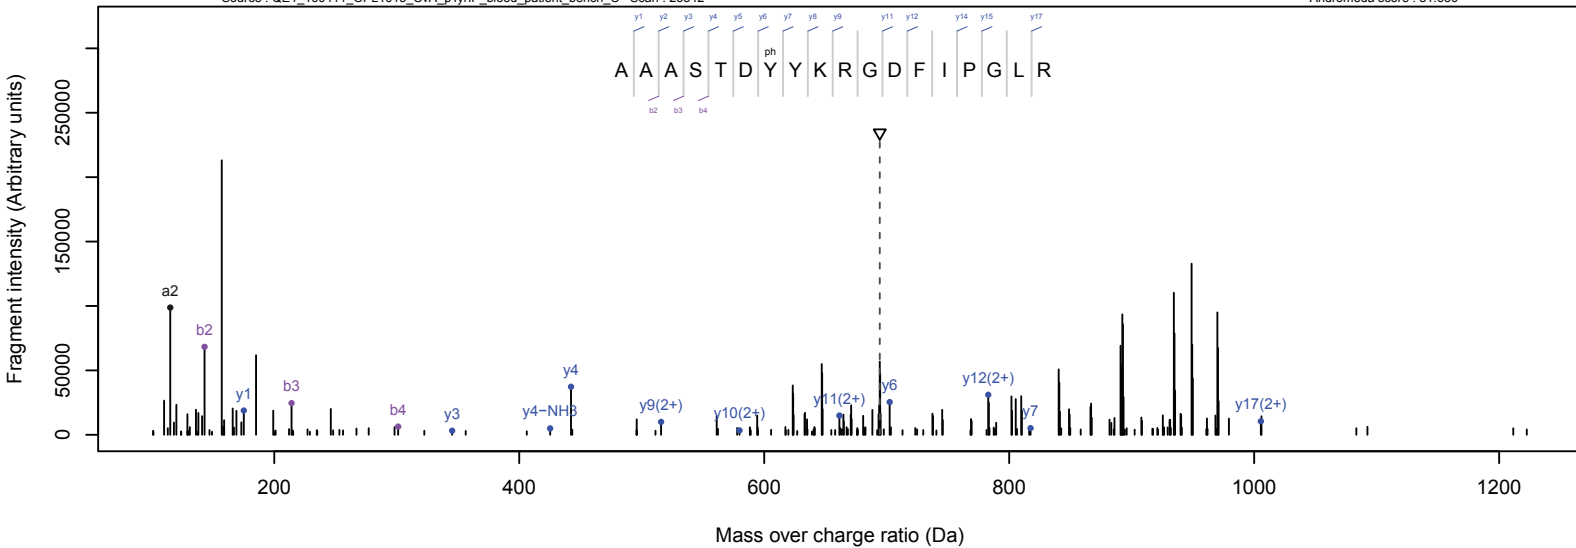

TVTAM(ox)DVVY(ph)ALKR-2+

Source : QE1\_160411\_OPL1013\_CvA\_pTyrIP\_blood\_patient\_bench\_A Scan : 30143

Andromeda score : 81.565

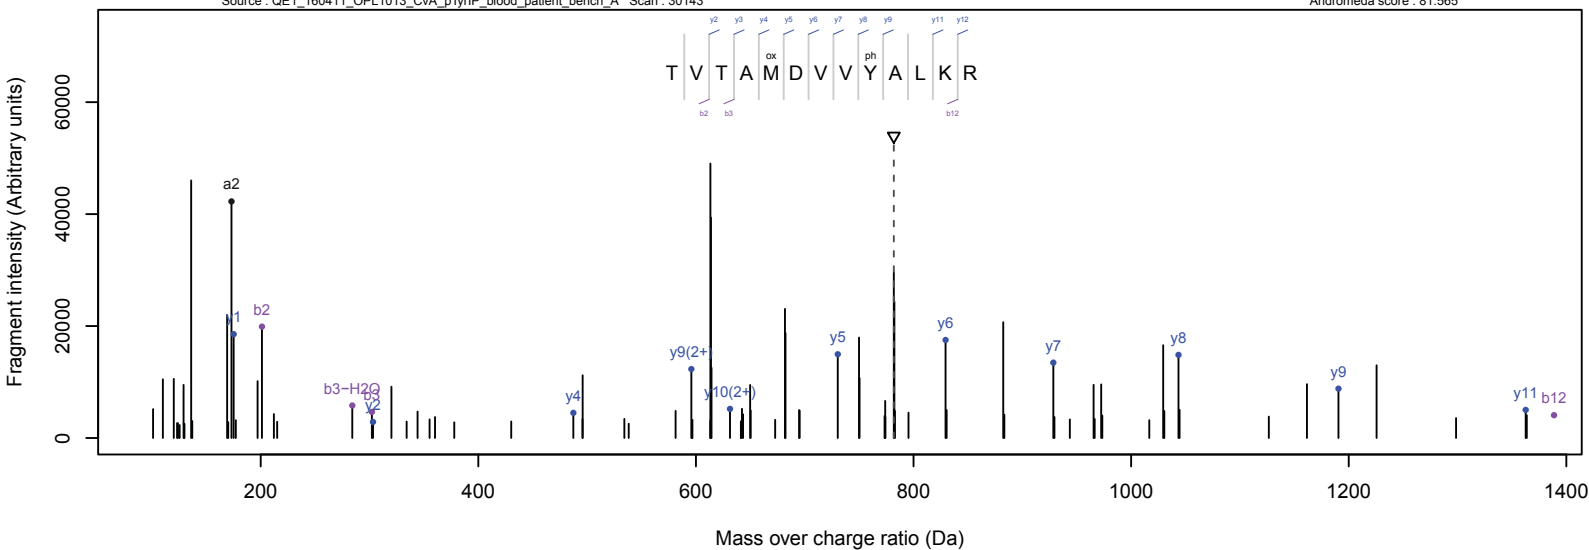

VY(ph)ENVGLM(ox)QQQS(ph)FR-3+

Source : QE1\_160411\_OPL1013\_CvA\_pTyrIP\_blood\_patient\_bench\_C Scan : 15891

Andromeda score : 81.51

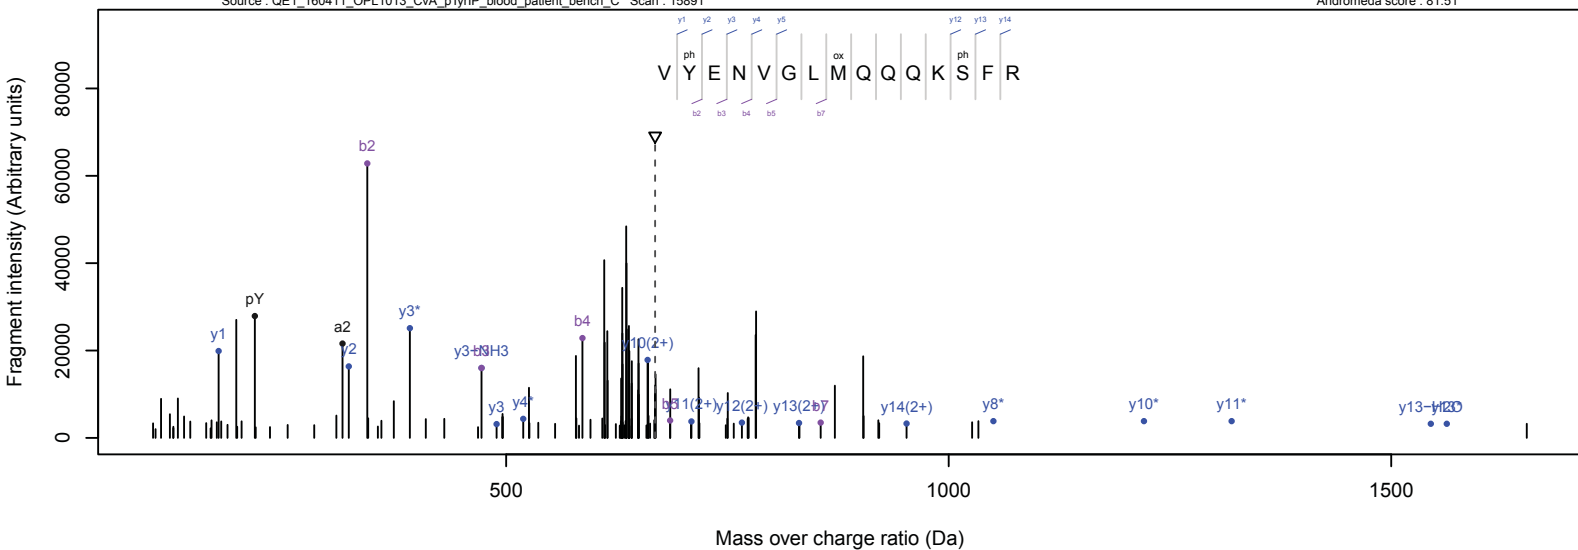

ARPQYPQEQAIGYEYS(ph)EINIPK-3+

Source : QE1\_160411\_OPL1013\_CvA\_pTyrIP\_blood\_patient\_bench\_D Scan : 28295

Andromeda score : 81.144

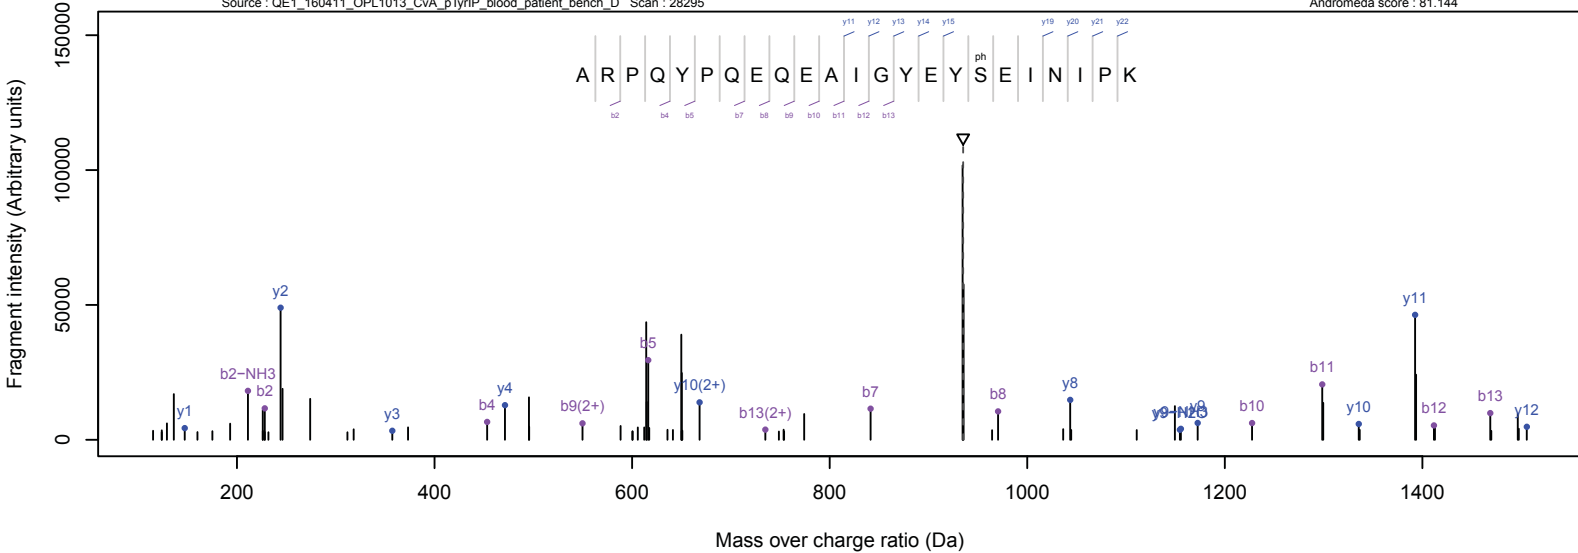

## IYQY(ph)IQS(ph)R-2+

Source : QE1\_160411\_OPL1013\_CvA\_pTyrIP\_blood\_patient\_bench\_C Scan : 10380

Andromeda score : 81.017

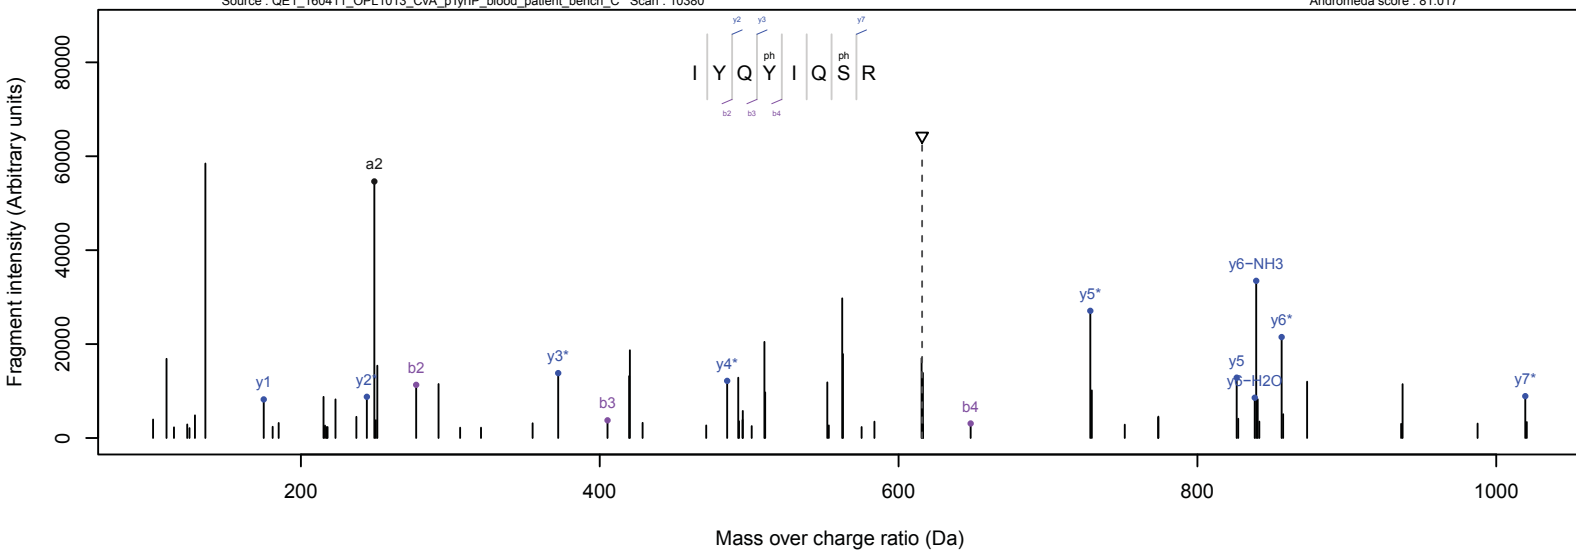

## QQPTQFINPETPGYVGFANLPNQVHR-3+

Source : QE1\_160411\_OPL1013\_CvA\_pTyrIP\_blood\_patient\_bench\_D Scan : 37687

Andromeda score : 80.868

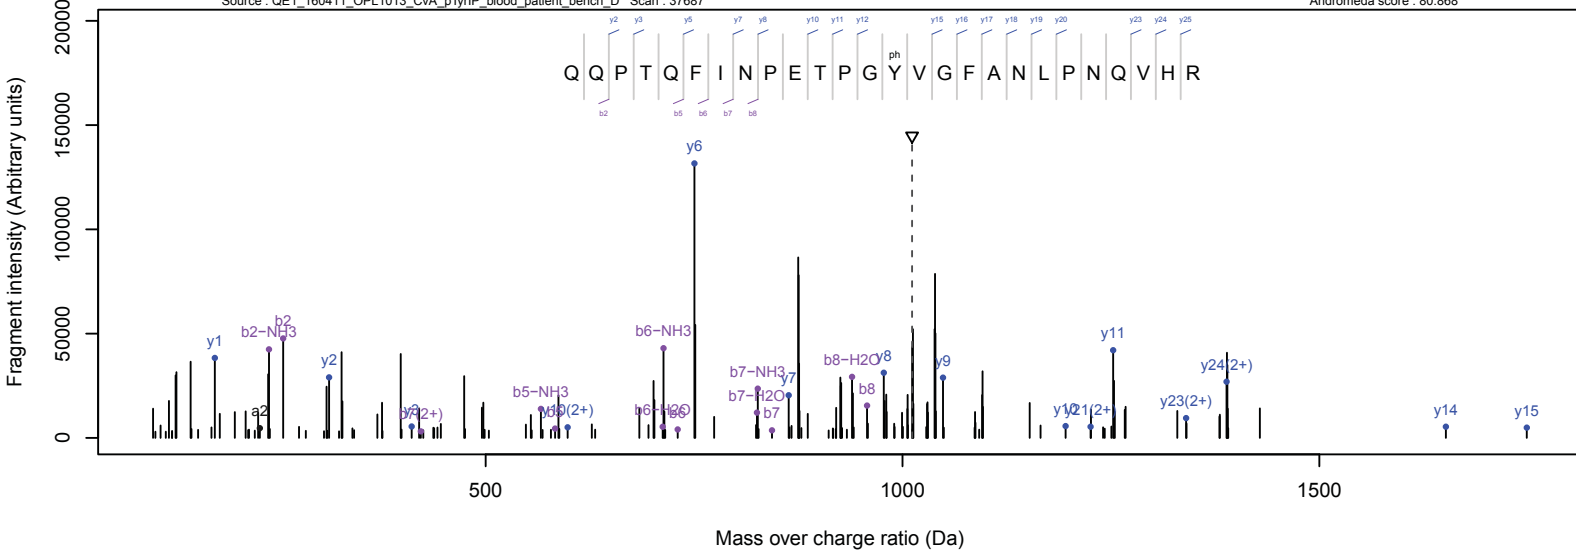

## DKYGENEYI PSNYVTGK-3+

Source : QE1\_160411\_OPL1013\_CvA\_pTyrIP\_blood\_patient\_bench\_D Scan : 18698

Andromeda score : 80.738

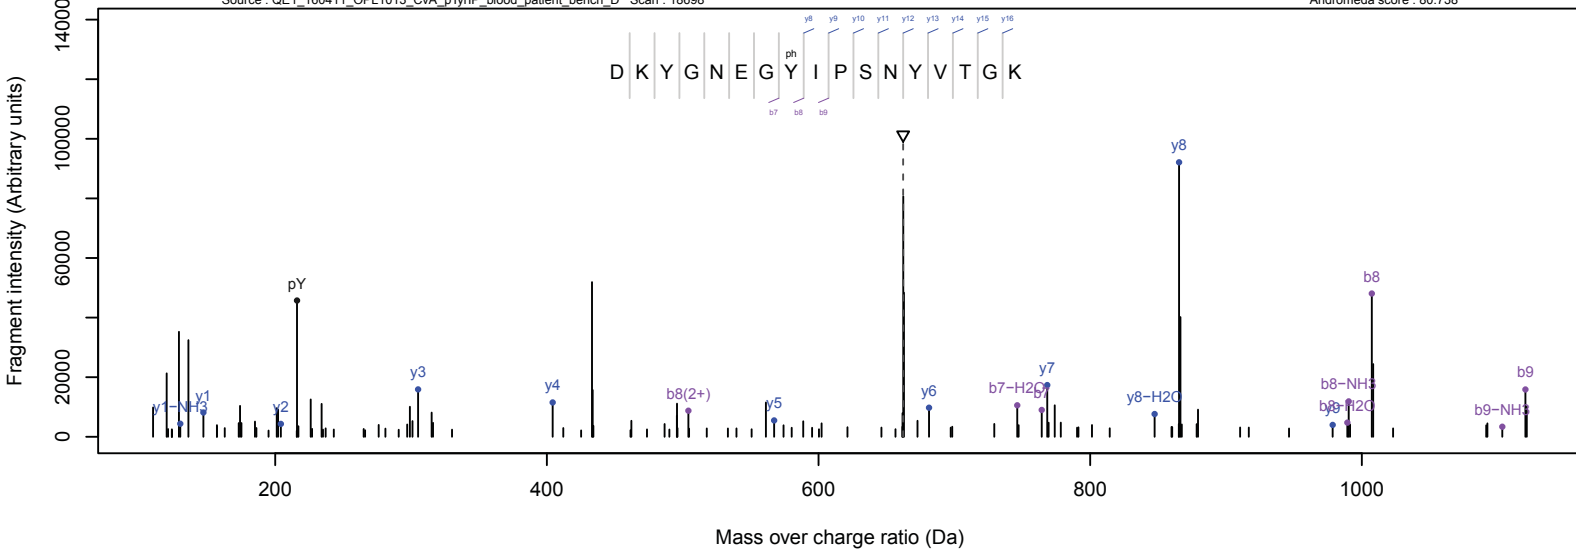

## TSQDY(ph)DQLPSCDGSQAPARPPKPR-4+

Source : QE1\_160411\_OPL1013\_CvA\_pTyrIP\_blood\_patient\_bench\_B Scan : 11246

Andromeda score : 80.702

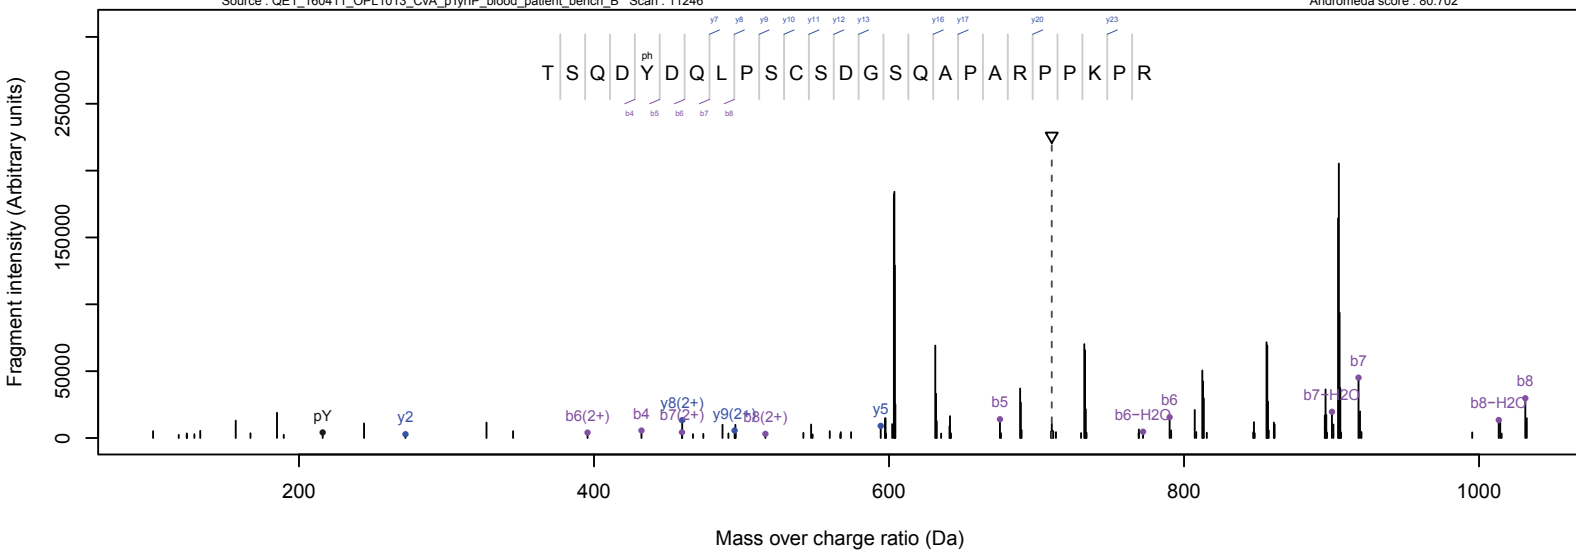

## Y(ph)RAPQGCSGVDECAR-3+

Source : QE1\_160411\_OPL1013\_CvA\_pTyrIP\_blood\_patient\_bench\_B Scan : 4167

Andromeda score : 80.387

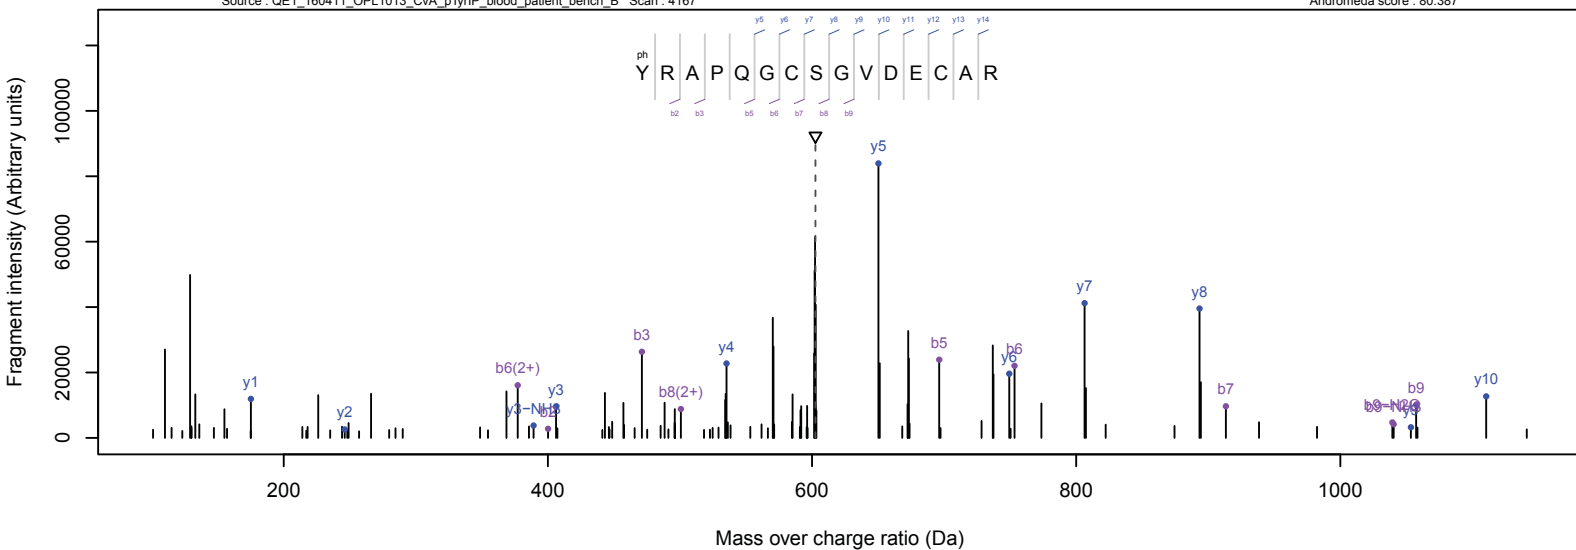

## KTIY(ph)TYIMASR-2+

Source : QE1\_160411\_OPL1013\_CvA\_pTyrIP\_blood\_patient\_bench\_D Scan : 19804

Andromeda score : 80.312

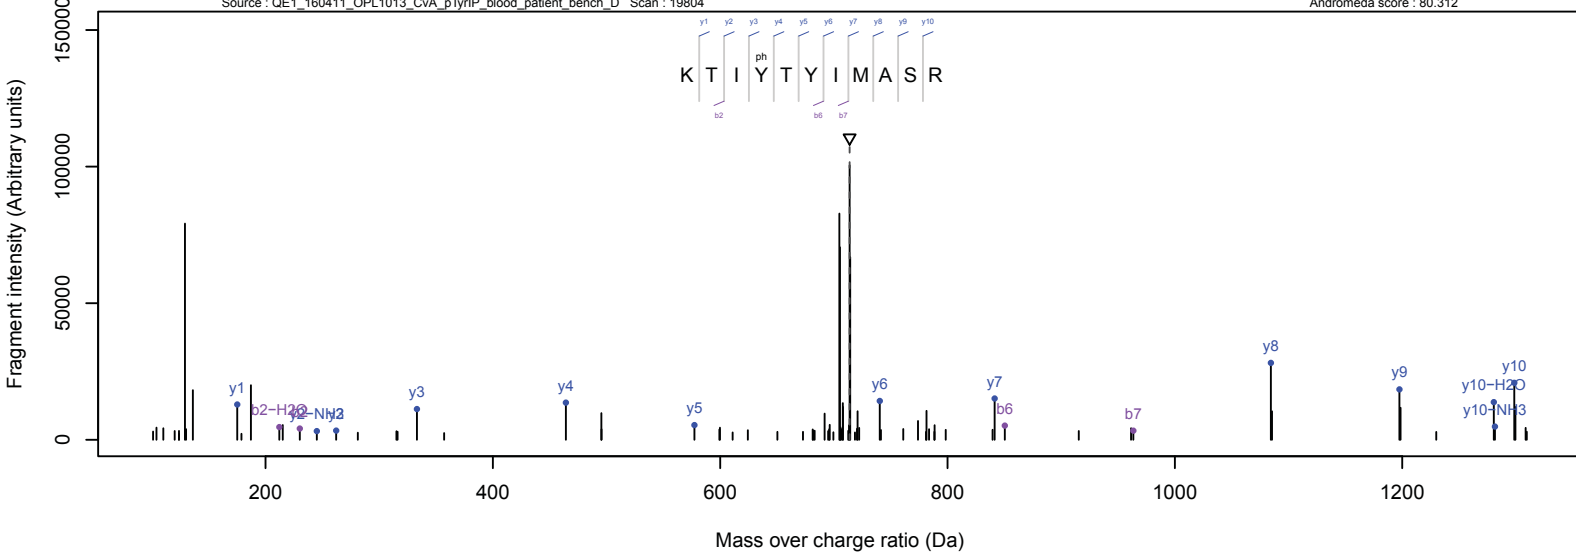

VQPNEAVYTK-2+

Source: QE1\_160411\_OPL1013\_CvA\_pTyrIP\_blood\_patient\_bench\_D Scan: 5025

Andromeda score: 80.24

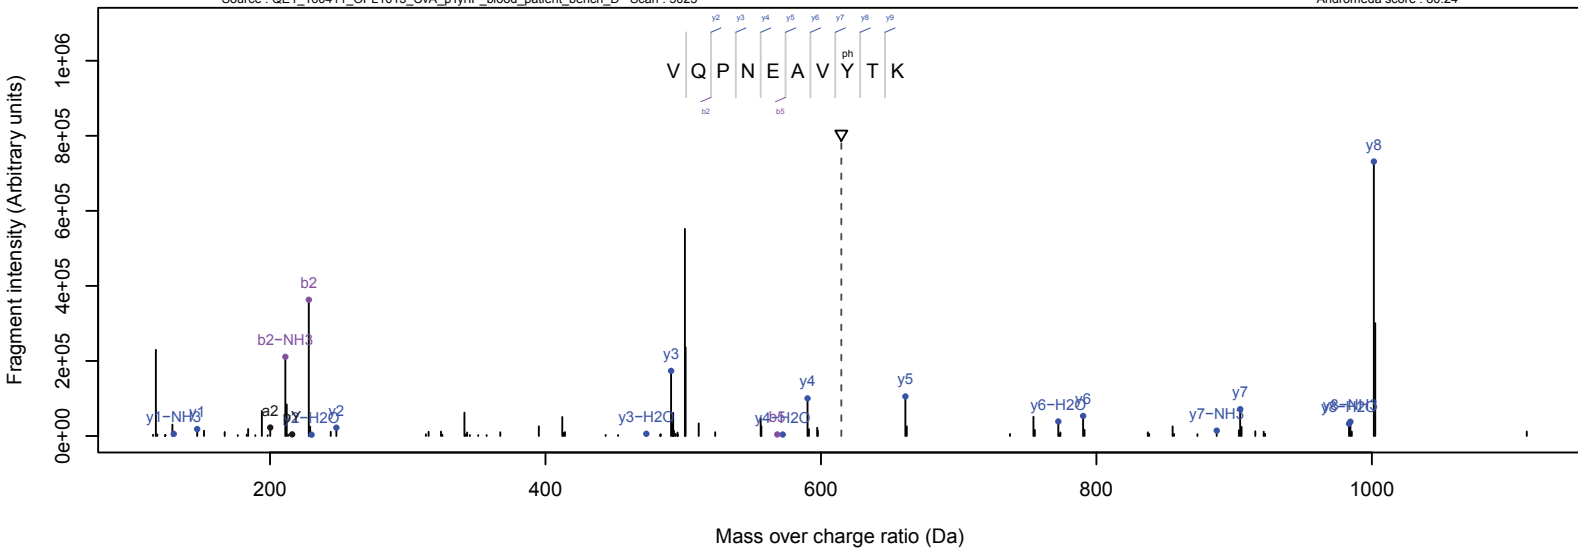

EHNFSFYPTFQSHPNSSMPGSR-4+

Source: QE1\_160411\_OPL1013\_CvA\_pTyrIP\_blood\_patient\_bench\_A Scan: 22381

Andromeda score: 80.236

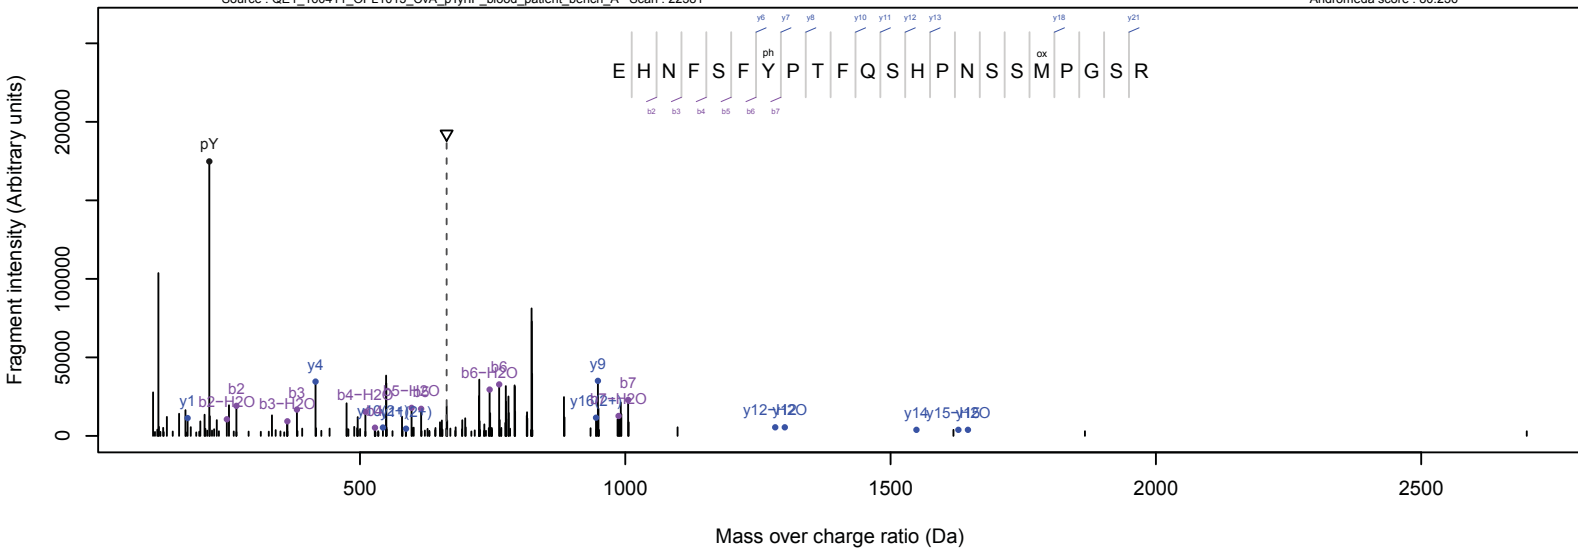

Y(ph)GVAWEK-2+

Source: QE1\_160411\_OPL1013\_CvA\_pTyrIP\_blood\_patient\_bench\_A Scan: 10969

Andromeda score: 80.229

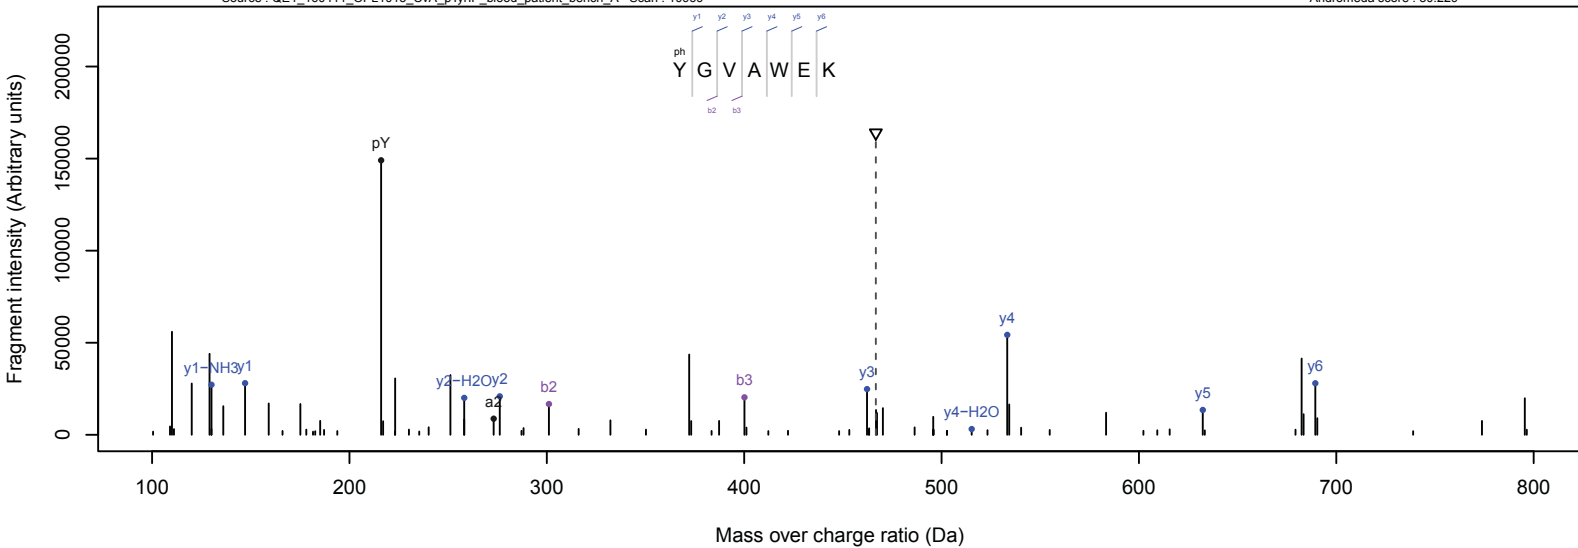

## IKEEM(ox)SKDQPDYAM(ox)Y(ph)SR-3+

Source : QE1\_160411\_OPL1013\_CvA\_pTyrIP\_blood\_patient\_bench\_C Scan : 5229

Andromeda score : 79.88

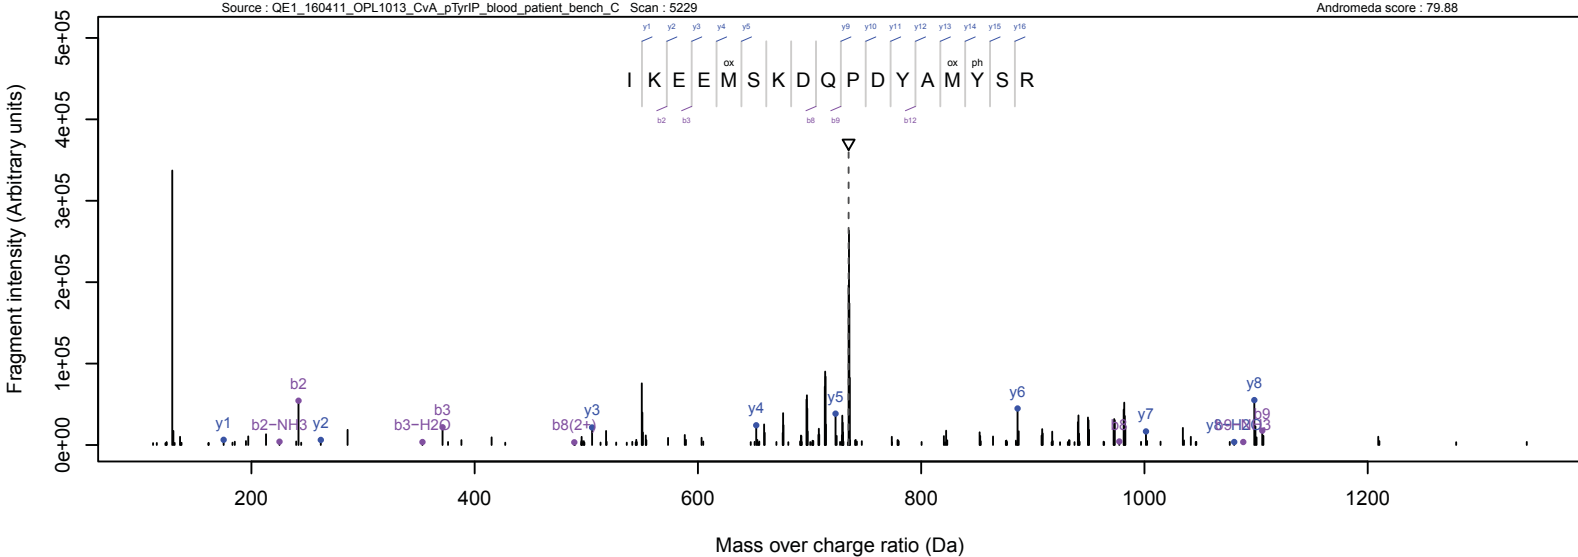

## ADGGAEY(ph)ATYQTK-2+

Source : QE1\_160411\_OPL1013\_CvA\_pTyrIP\_blood\_patient\_bench\_C Scan : 4915

Andromeda score : 79.875

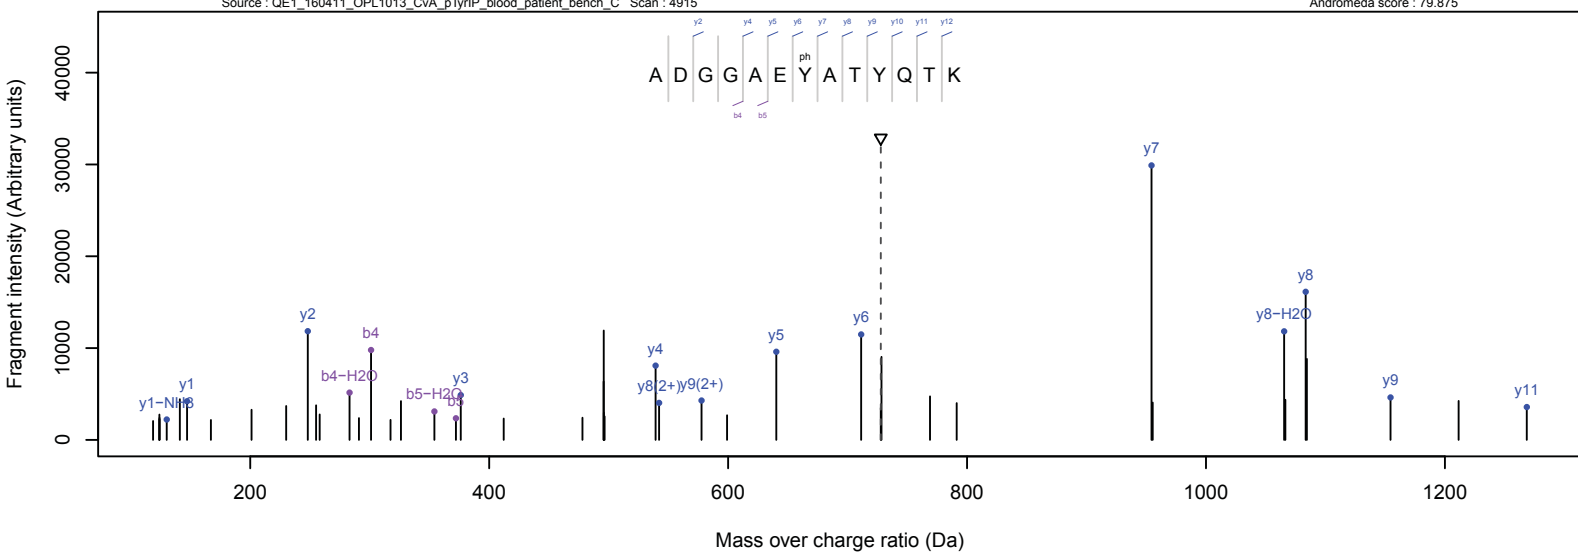

## LTDY(ph)ISK-2+

Source : QE1\_160411\_OPL1013\_CvA\_pTyrIP\_blood\_patient\_bench\_C Scan : 7802

Andromeda score : 79.809

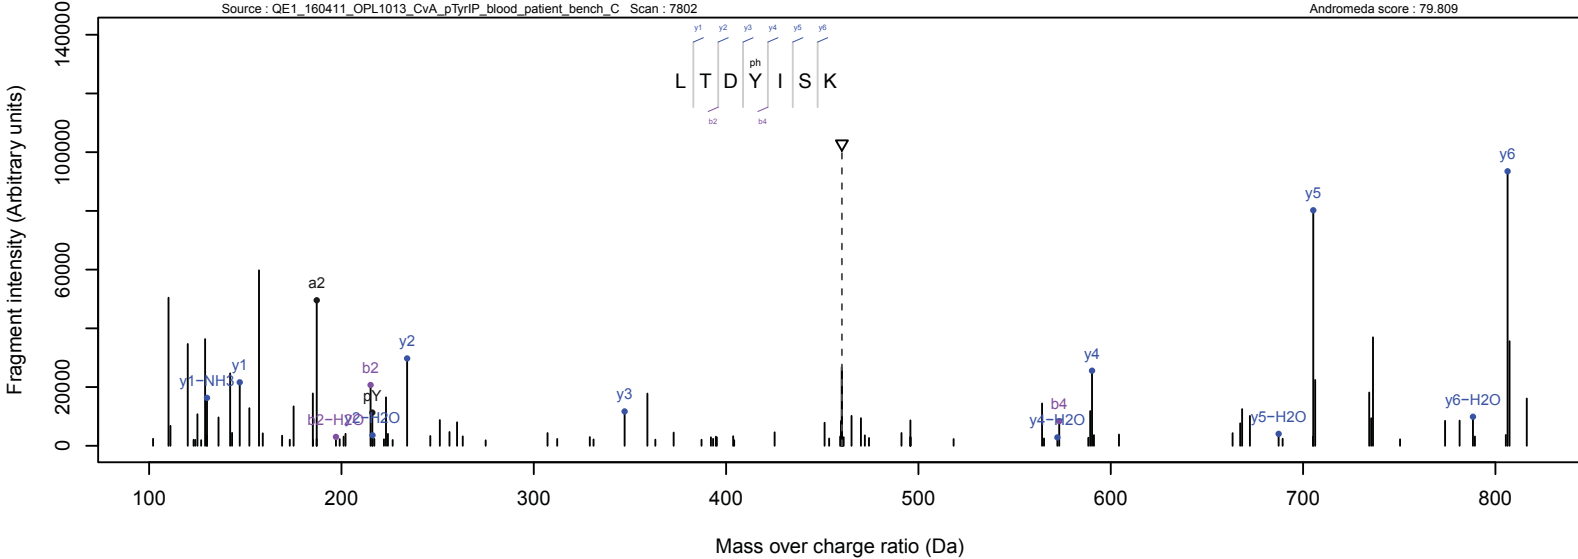



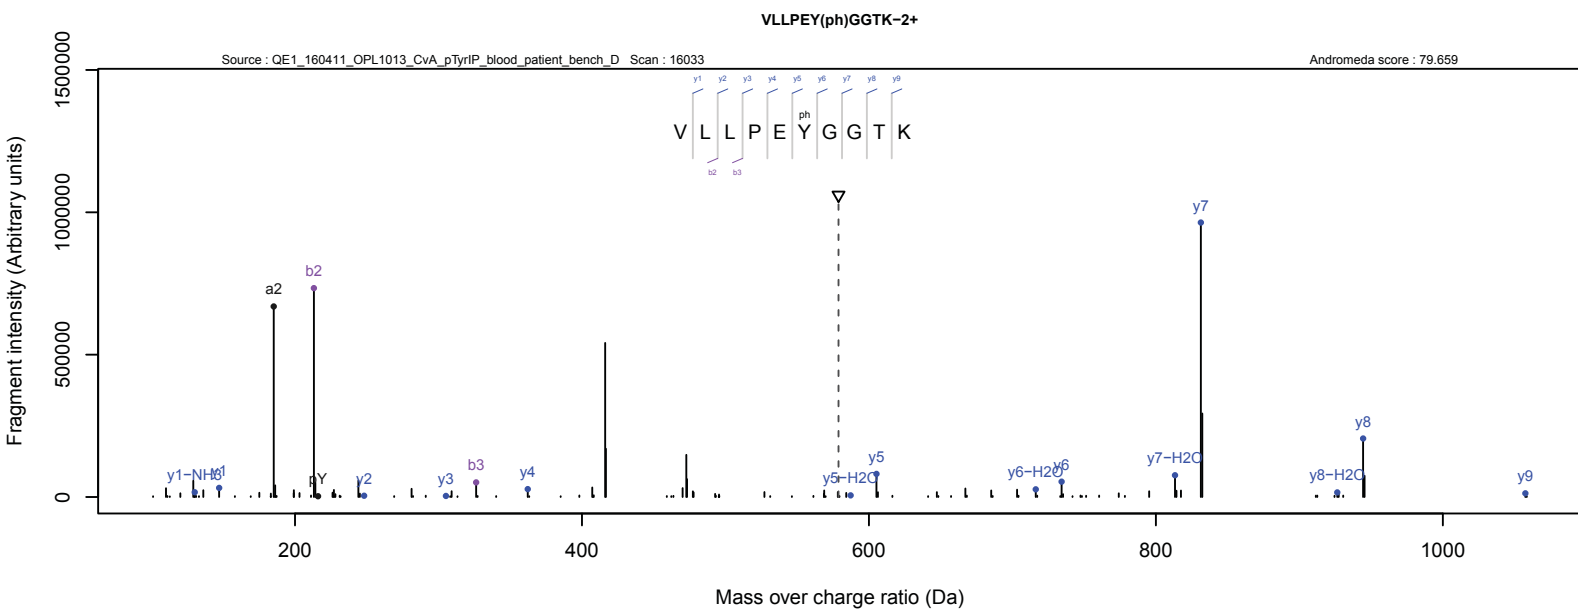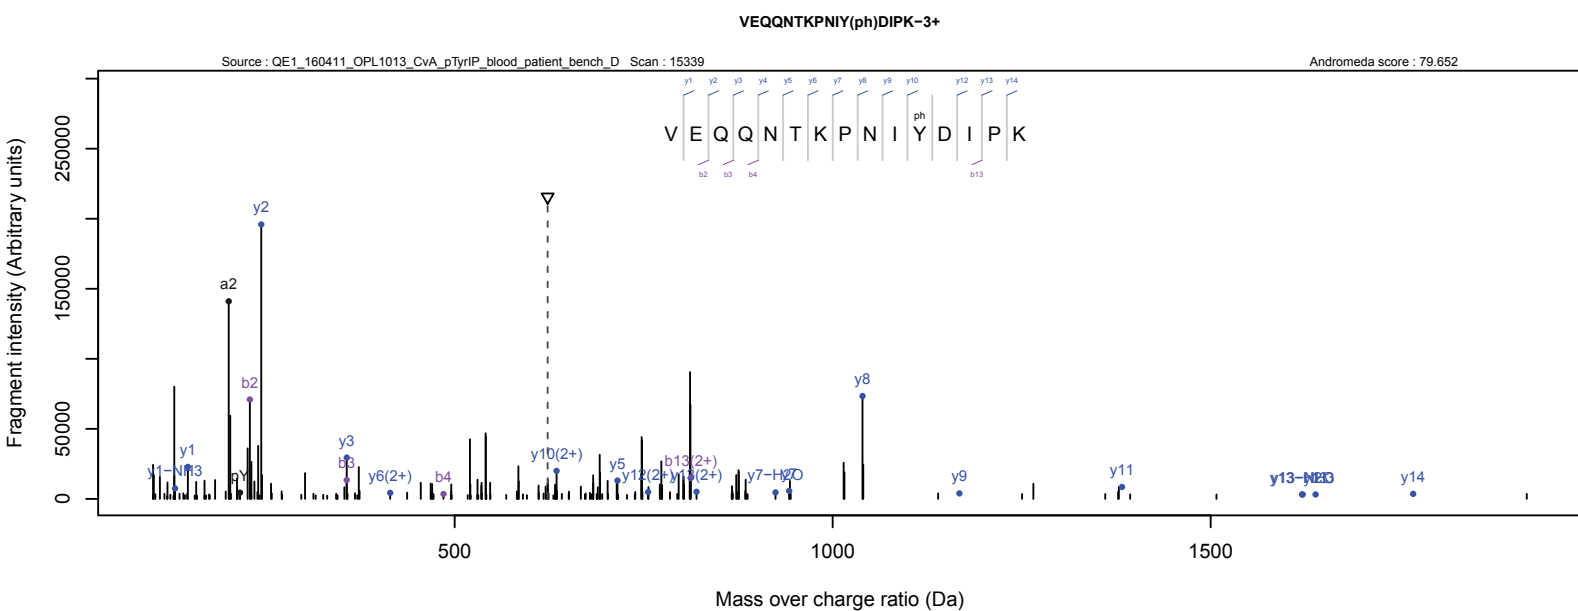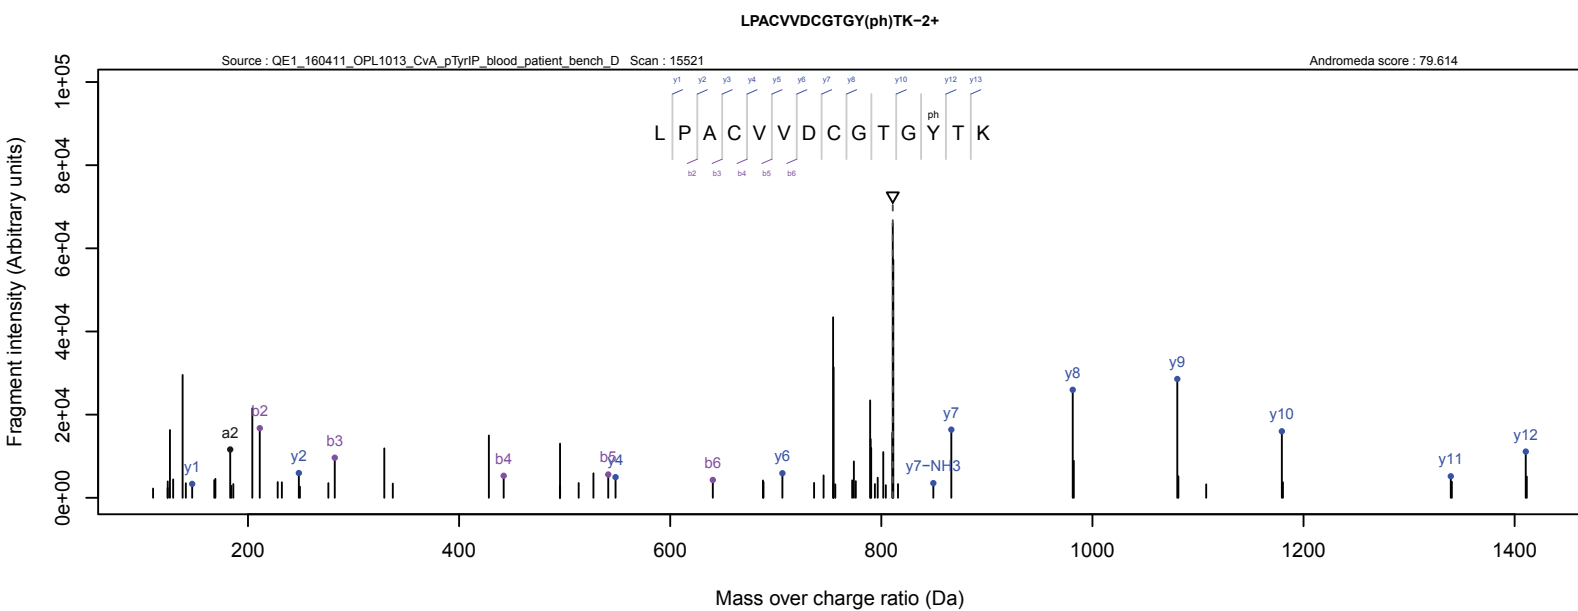

VAAY(ph)DKLEK-2+

Source : QE1\_160411\_OPL1013\_CvA\_pTyrIP\_blood\_patient\_bench\_C Scan : 4908

Andromeda score : 79.489

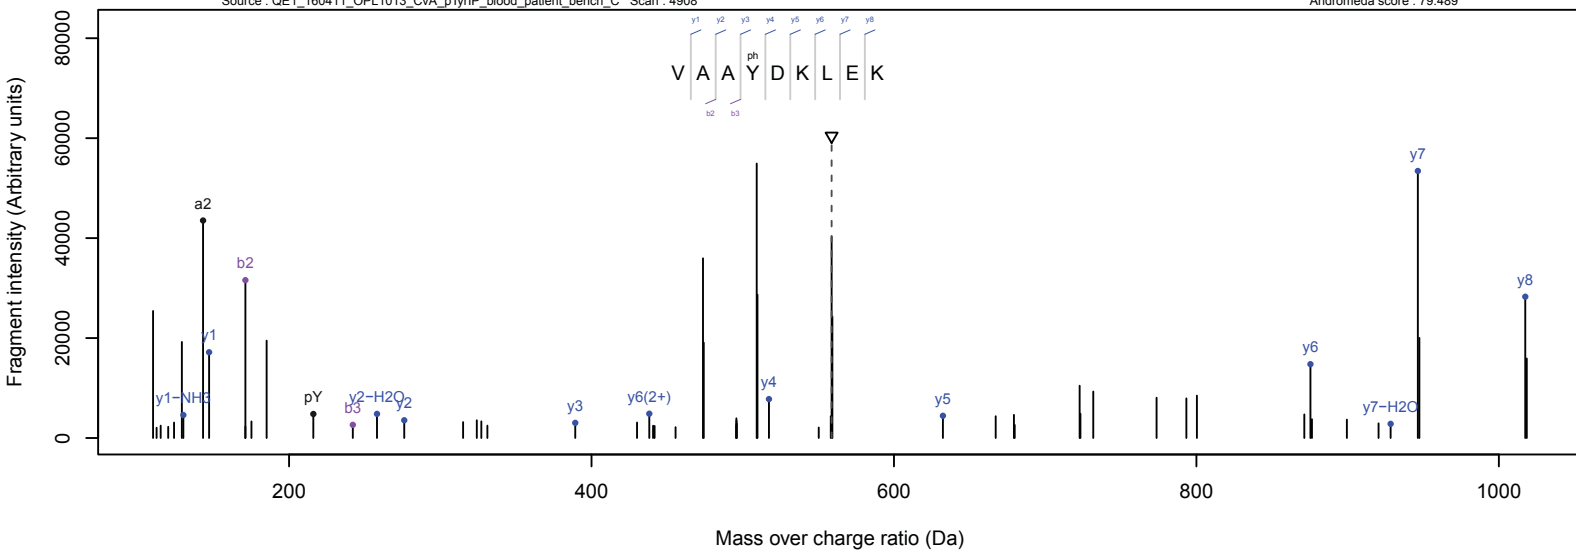

NYGSY(ph)STQASAAAATAELLK-2+

Source : QE1\_160411\_OPL1013\_CvA\_pTyrIP\_blood\_patient\_bench\_D Scan : 33572

Andromeda score : 79.467

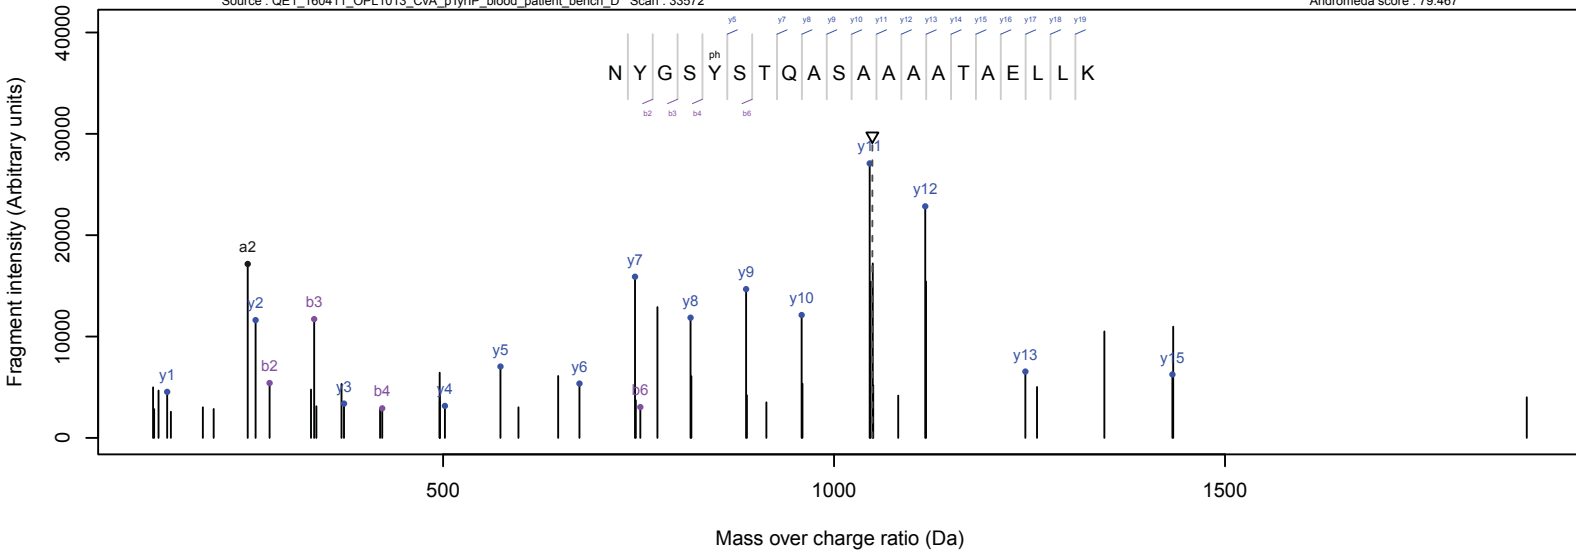

APYTCGGDSDQY(ph)VLMSSPVGGR-3+

Source : QE1\_160411\_OPL1013\_CvA\_pTyrIP\_blood\_patient\_bench\_B Scan : 21392

Andromeda score : 79.293

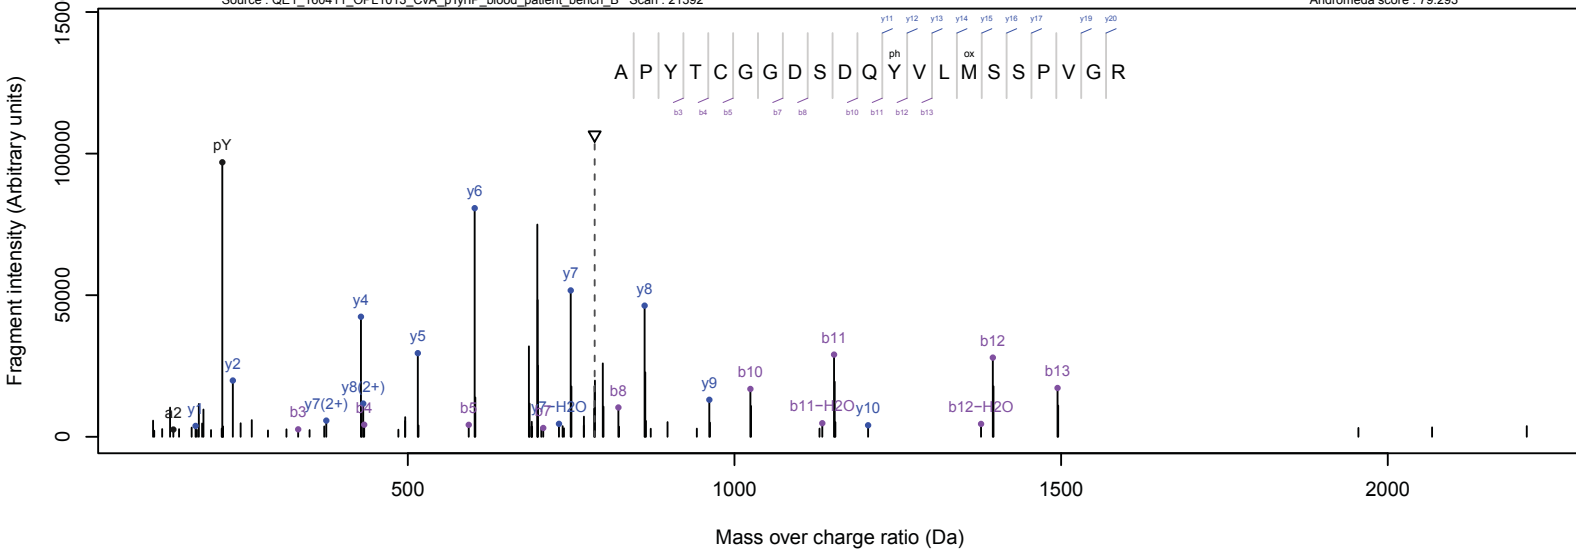

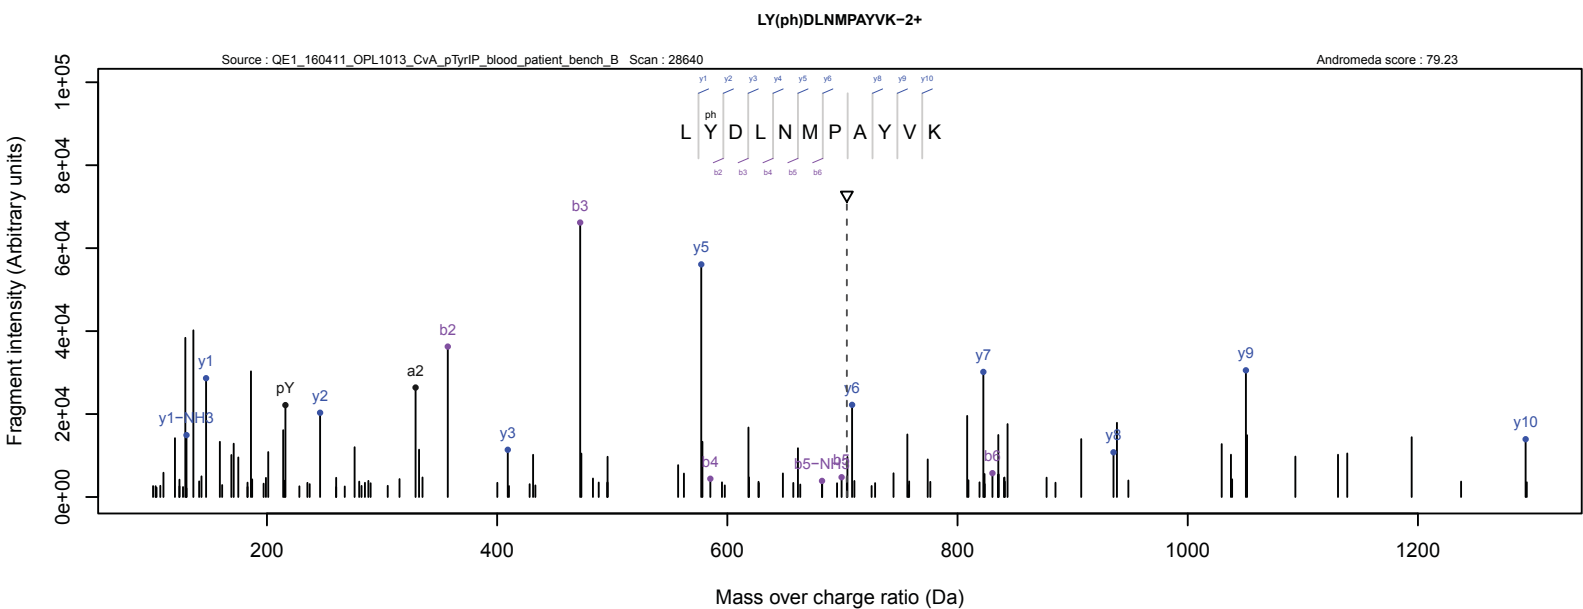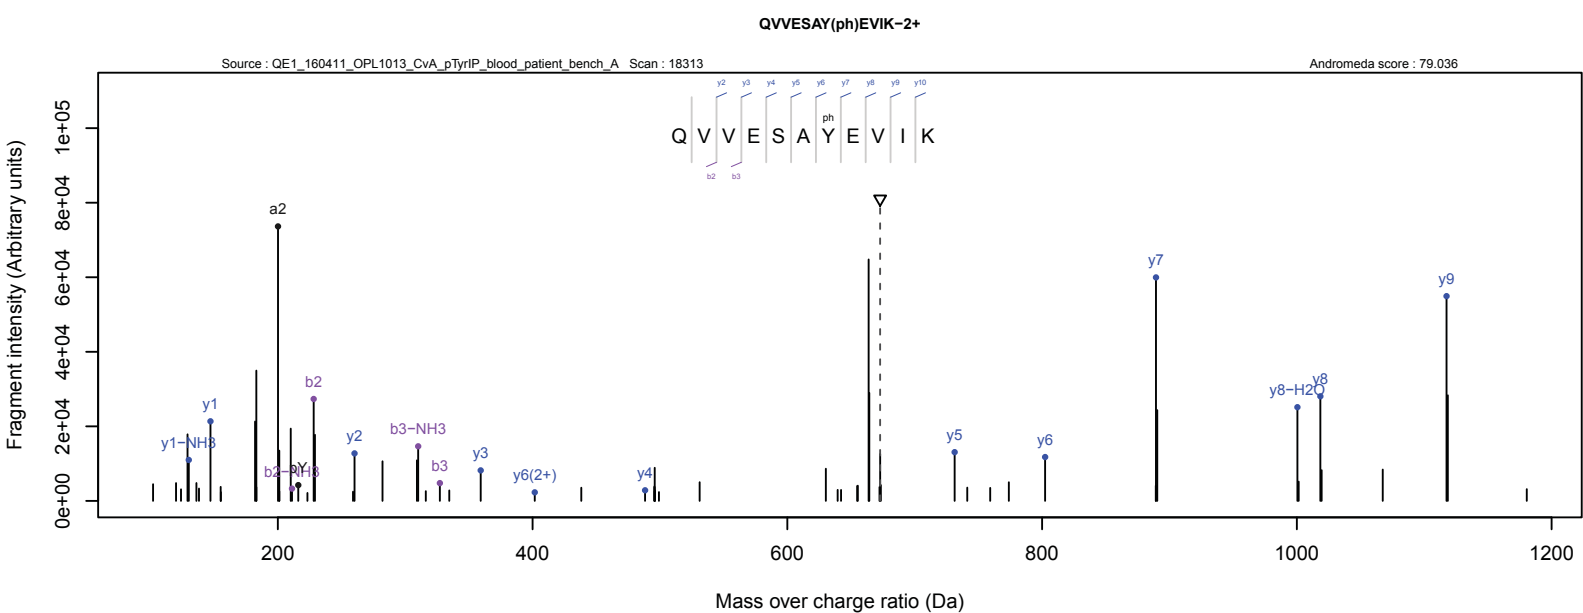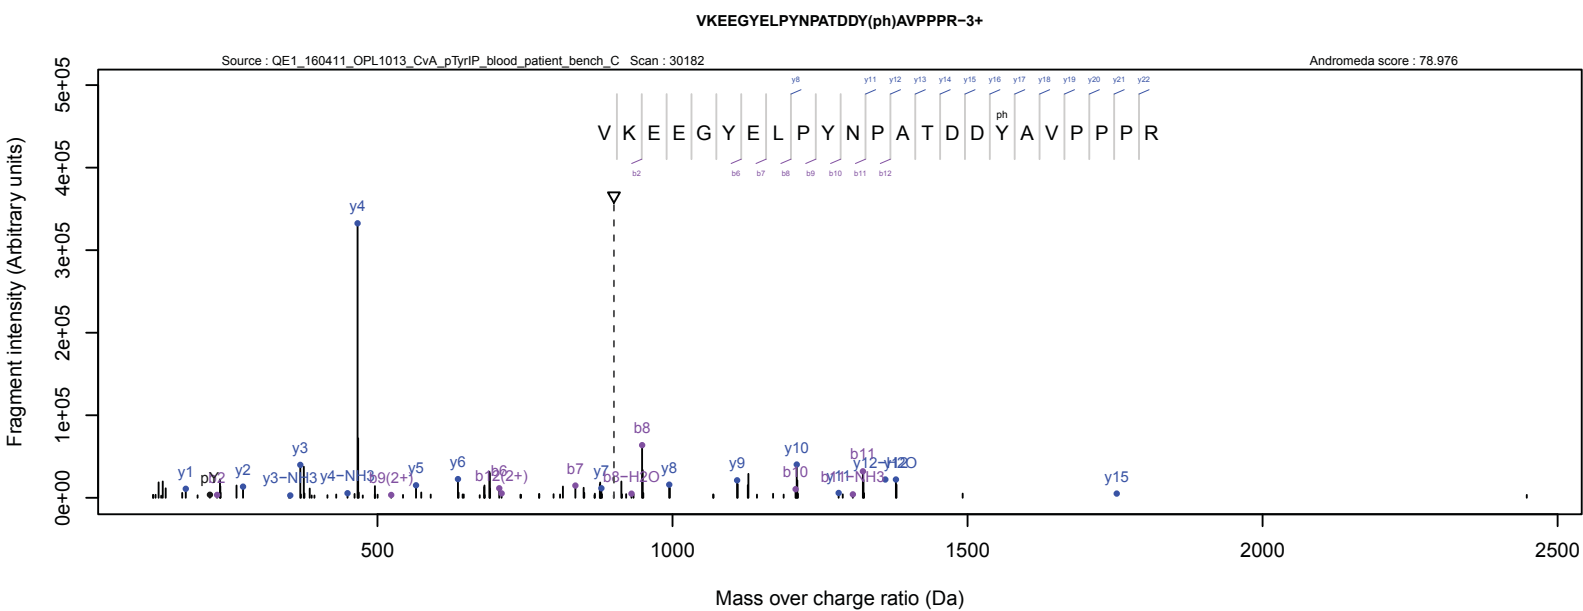

LKY(ph)PVSQQNK-3+

Source : QE1\_160411\_OPL1013\_CvA\_pTyrIP\_blood\_patient\_bench\_C Scan : 3352

Andromeda score : 78.939

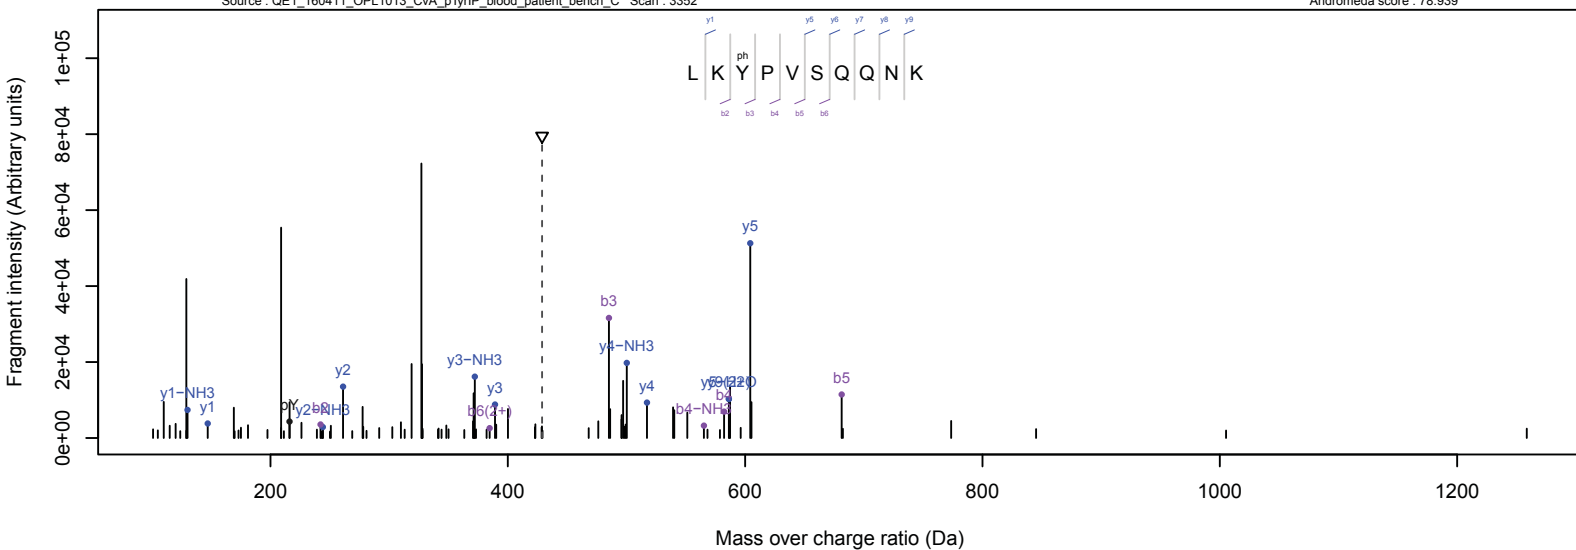

SGLSSPIY>IDLR-2+

Source : QE1\_160411\_OPL1013\_CvA\_pTyrIP\_blood\_patient\_bench\_B Scan : 36034

Andromeda score : 78.705

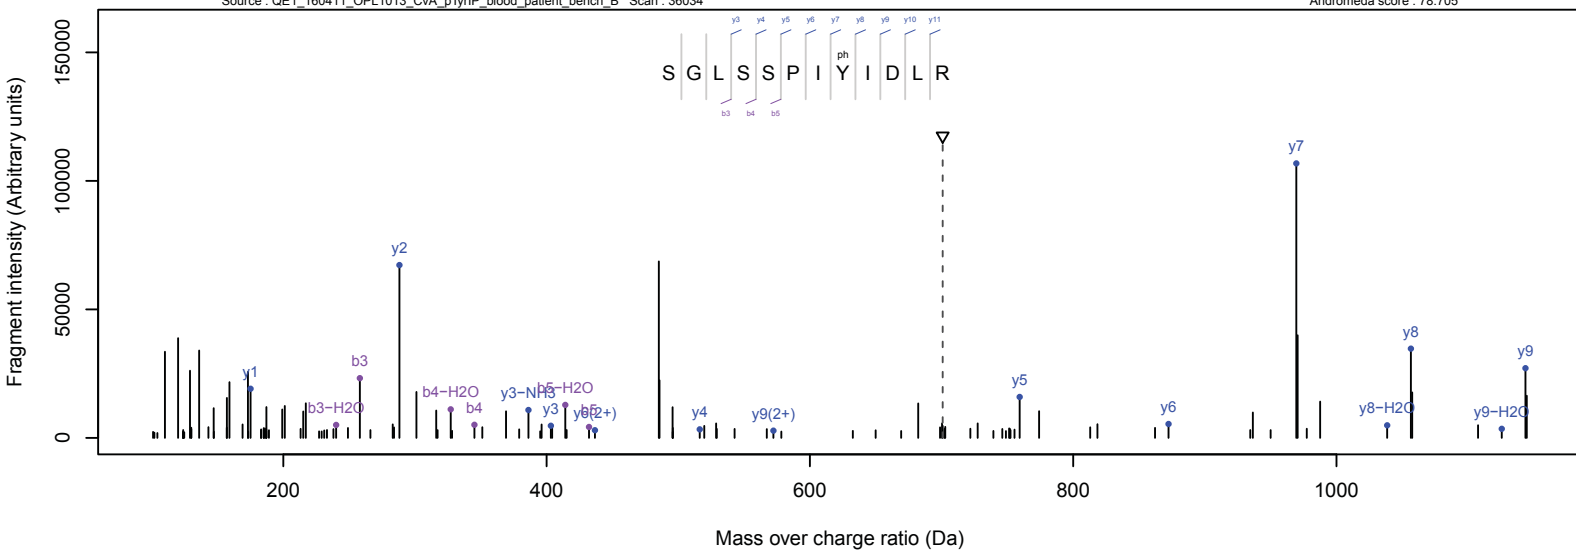

HELQANCY(ph)EEVKDR-3+

Source : QE1\_160411\_OPL1013\_CvA\_pTyrIP\_blood\_patient\_bench\_D Scan : 5984

Andromeda score : 78.69

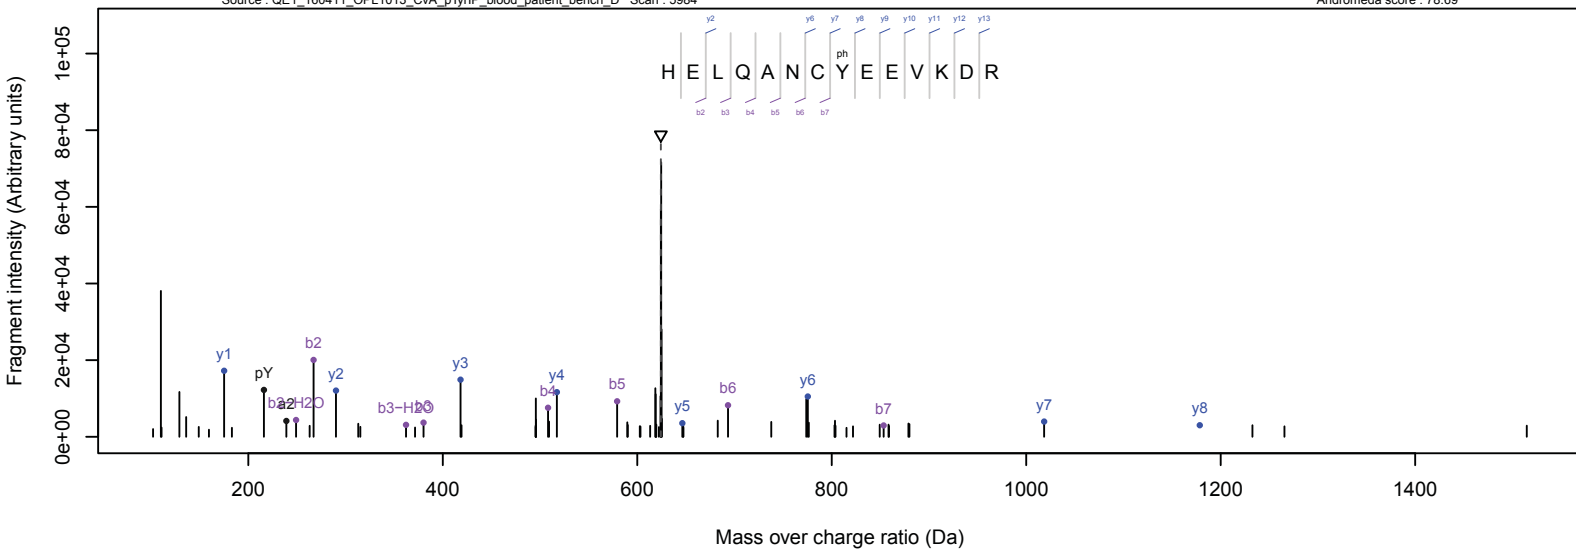

PPYTVVY(ph)FPVR-2+

Source : QE1\_160411\_OPL1013\_CvA\_pTyrIP\_blood\_patient\_bench\_C Scan : 38834

Andromeda score : 78.342

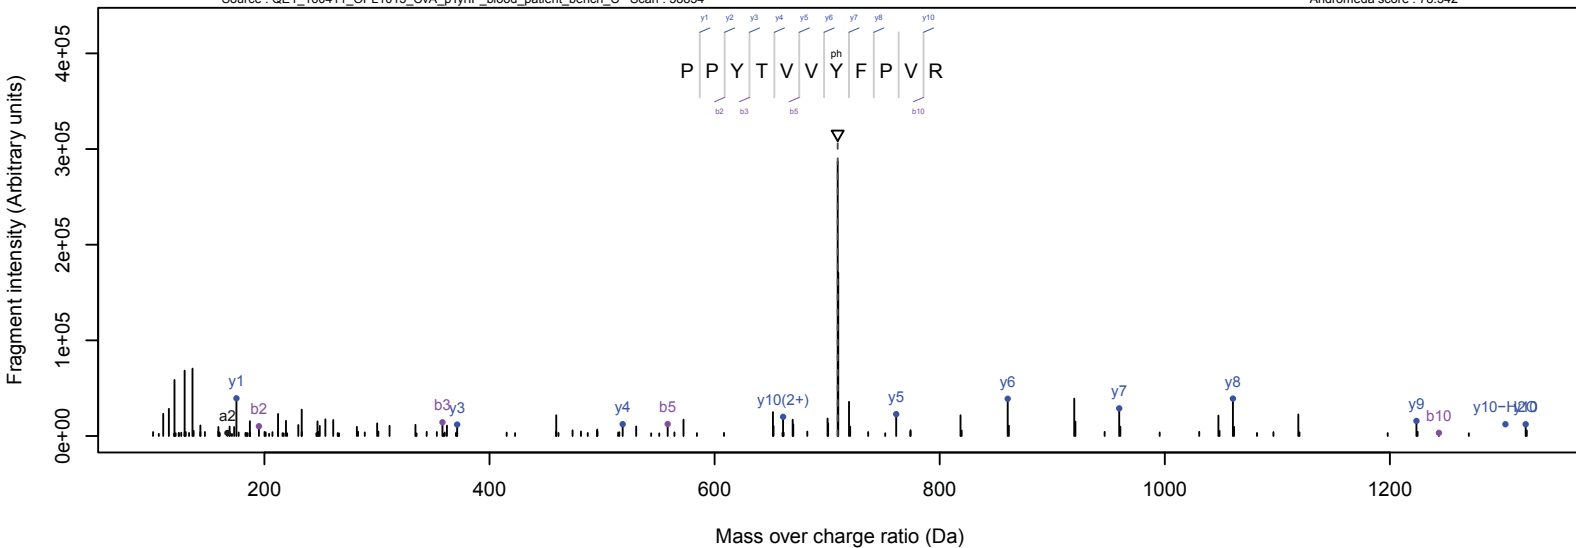

HPLEY(ph)LR-2+

Source : QE1\_160411\_OPL1013\_CvA\_pTyrIP\_blood\_patient\_bench\_C Scan : 11141

Andromeda score : 78.149

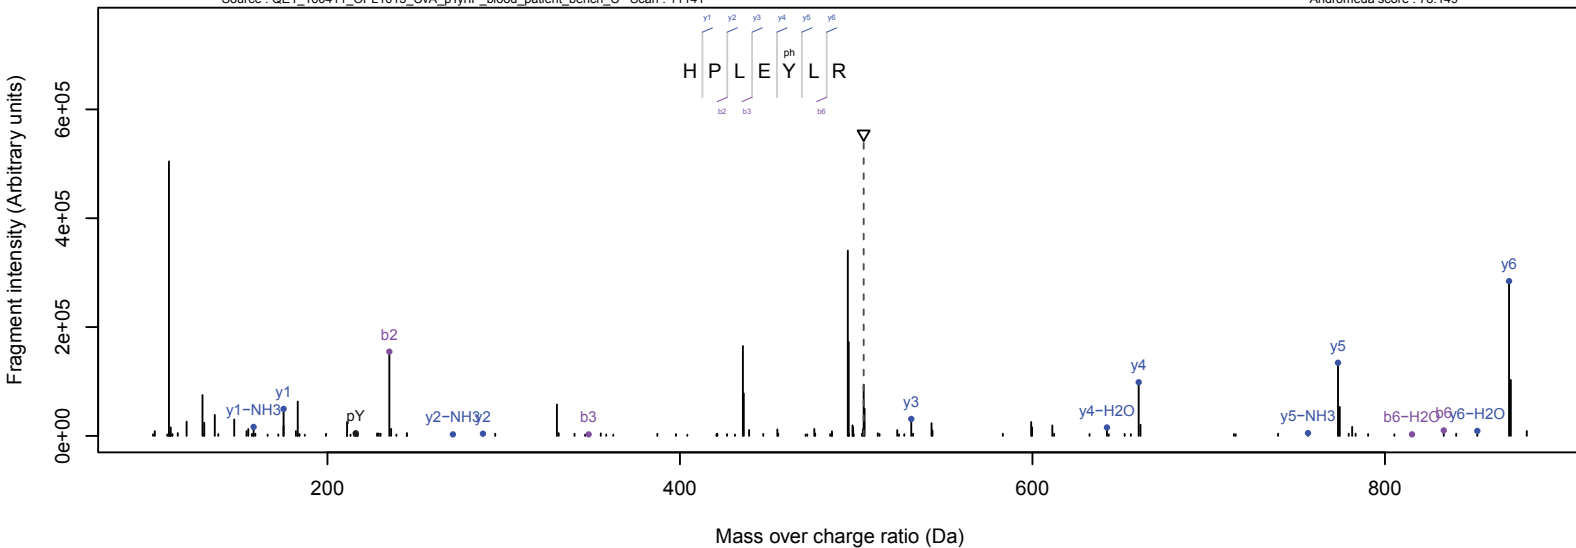

LDS(ph)M(ox)KPLEKHYSVVLPTVSHSGFLYK-5+

Source : QE1\_160411\_OPL1013\_CvA\_pTyrIP\_blood\_patient\_bench\_C Scan : 29110

Andromeda score : 78.098

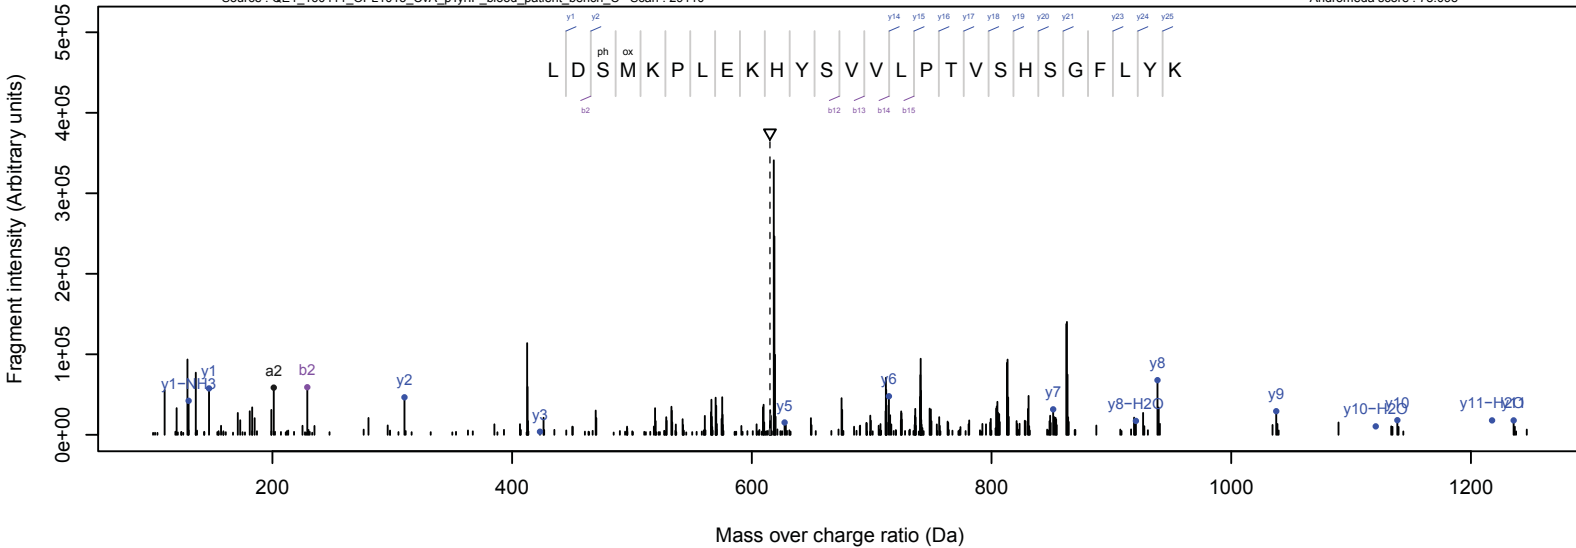

T(ph)YSLVGQAWPGPLADM(ox)APTRK-3+

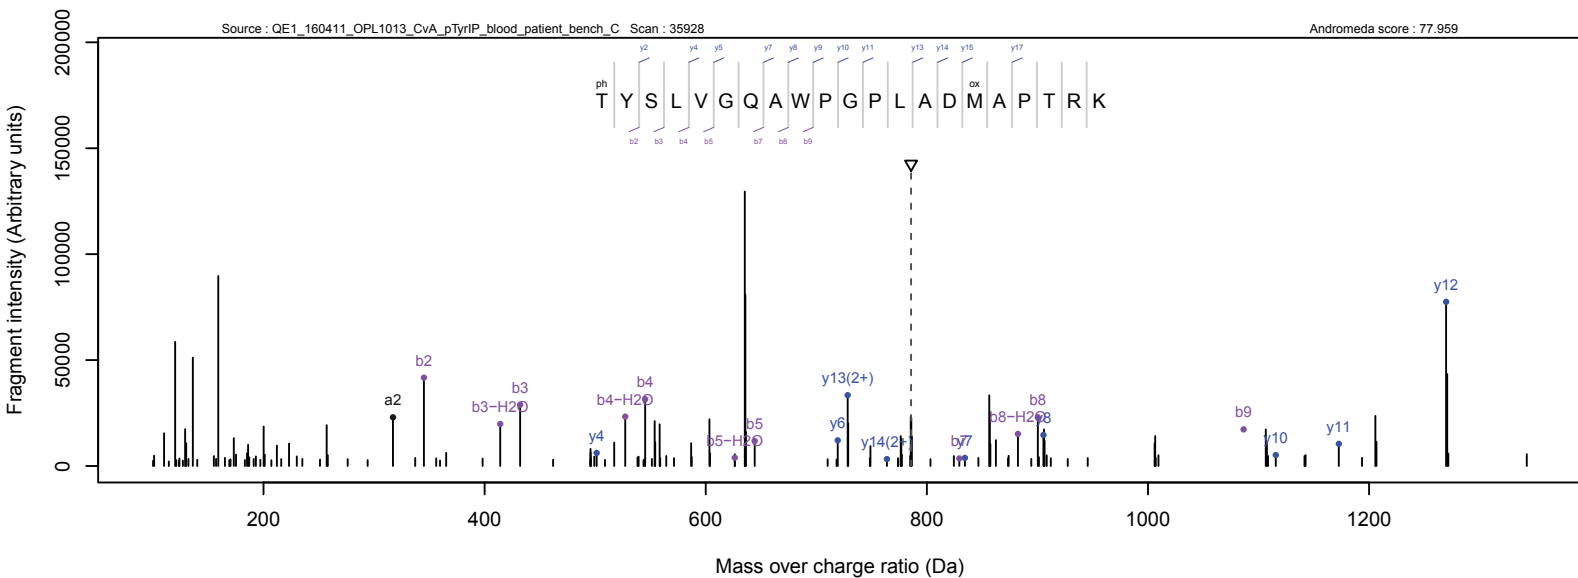

QISESTNHIY(ph)SNLANCSPNR-3+

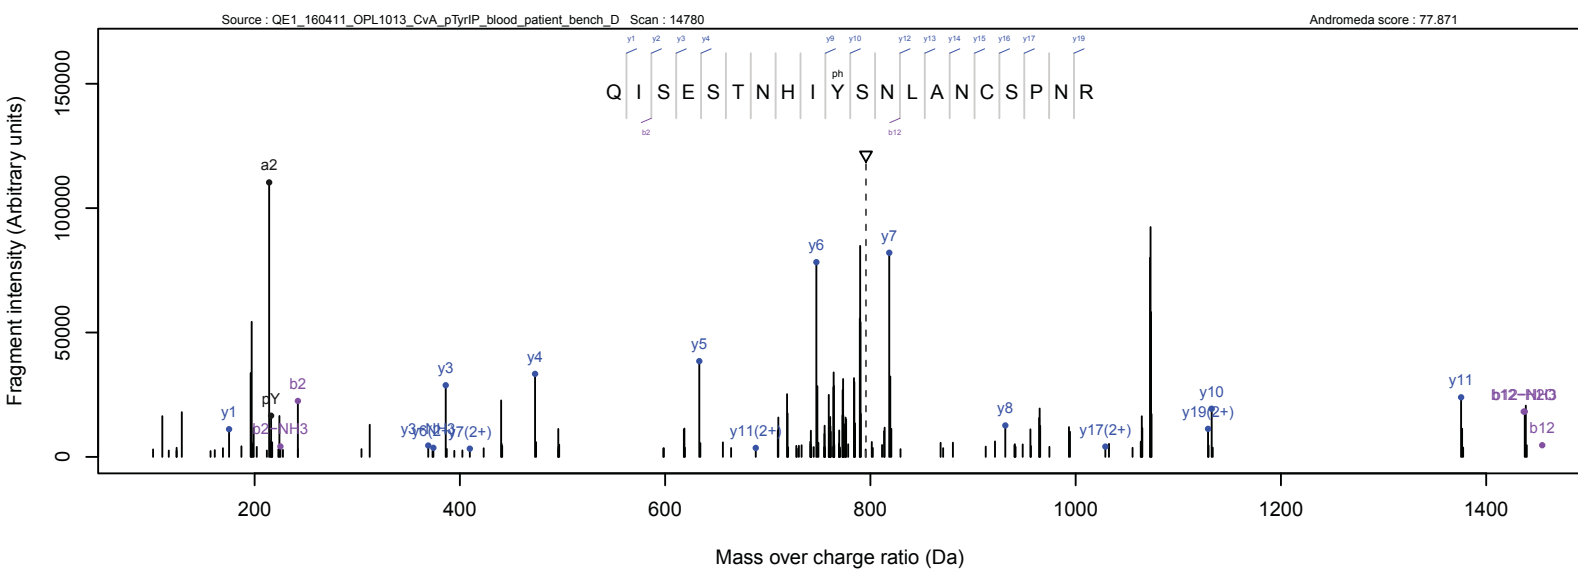

KLSKPVY(ph)LR-3+

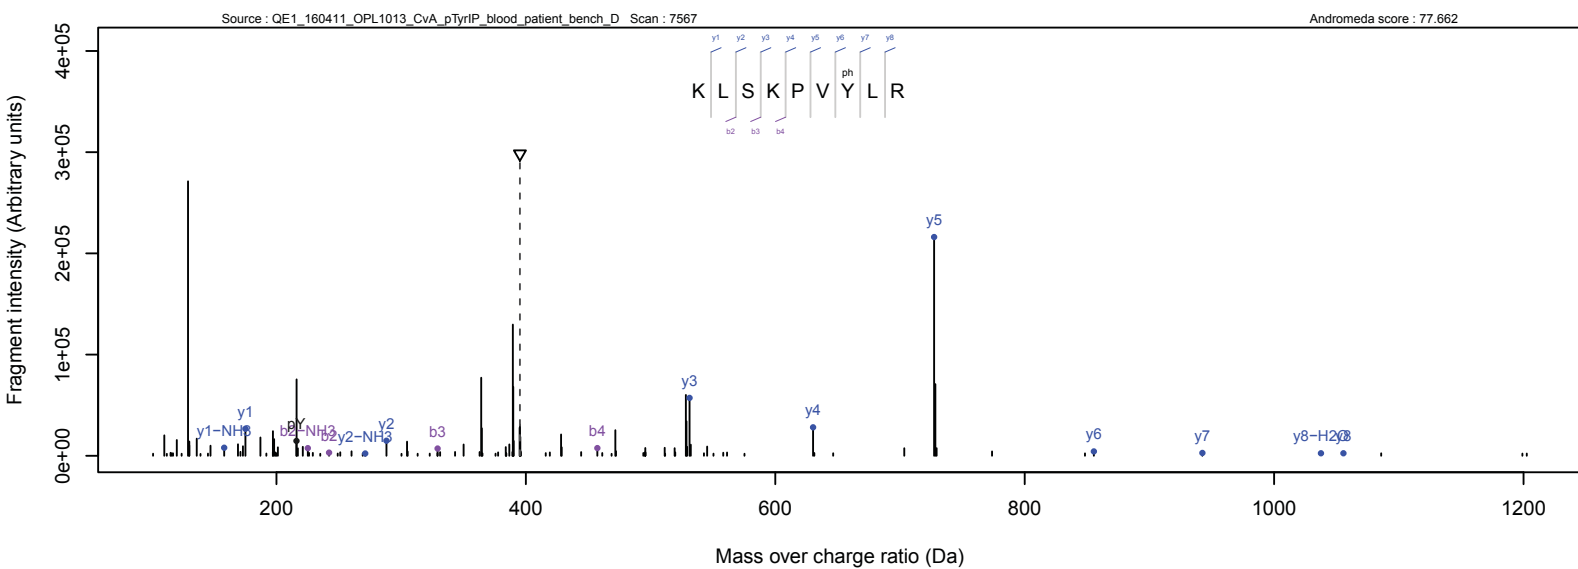

VKGEY(ph)DVTVPK-2+

Source : QE1\_160411\_OPL1013\_CvA\_pTyrIP\_blood\_patient\_bench\_D Scan : 8955

Andromeda score : 77.597

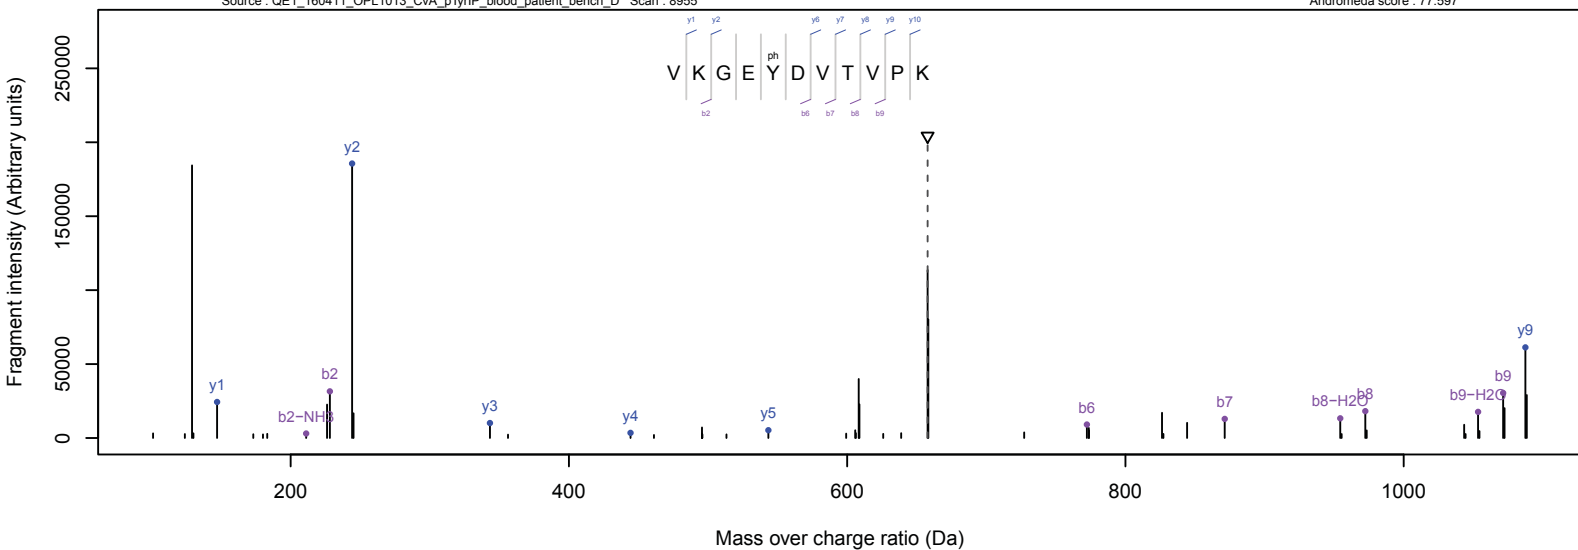

NLVPM(ox)DPNGLSDPY(ph)VKLK-3+

Source : QE1\_160411\_OPL1013\_CvA\_pTyrIP\_blood\_patient\_bench\_C Scan : 29554

Andromeda score : 77.506

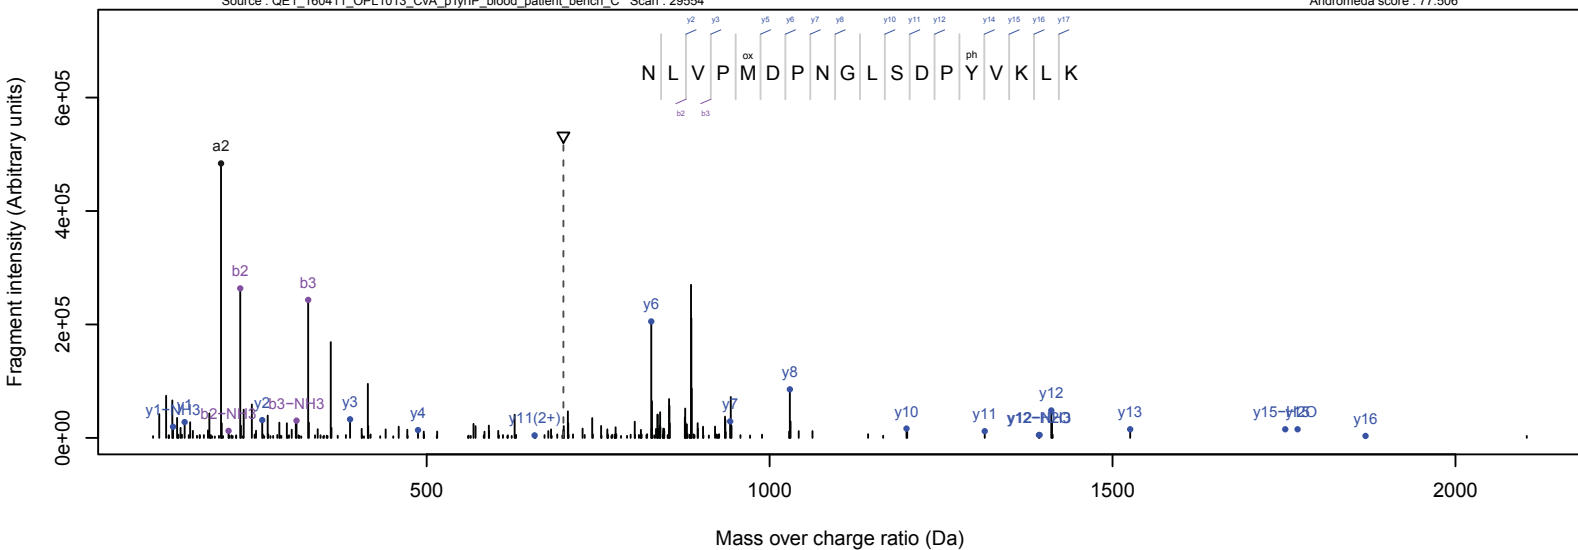

GVTIYRKPSSSPVIFAGGQAYTIQQGYAIPQDLTK-4+

Source : QE1\_160411\_OPL1013\_CvA\_pTyrIP\_blood\_patient\_bench\_D Scan : 38779

Andromeda score : 77.464

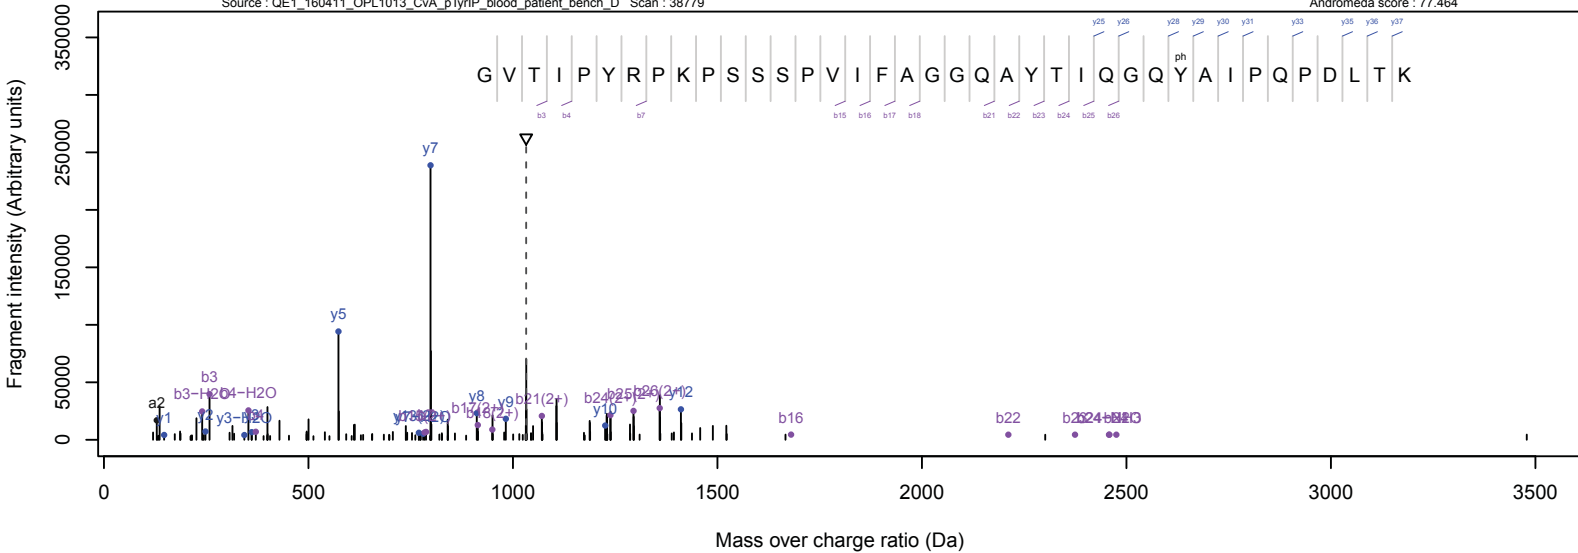

EATQPEIY(ph)AESTK-2+

Source : QE1\_160411\_OPL1013\_CvA\_pTyrIP\_blood\_patient\_bench\_D Scan : 10071

Andromeda score : 77.42

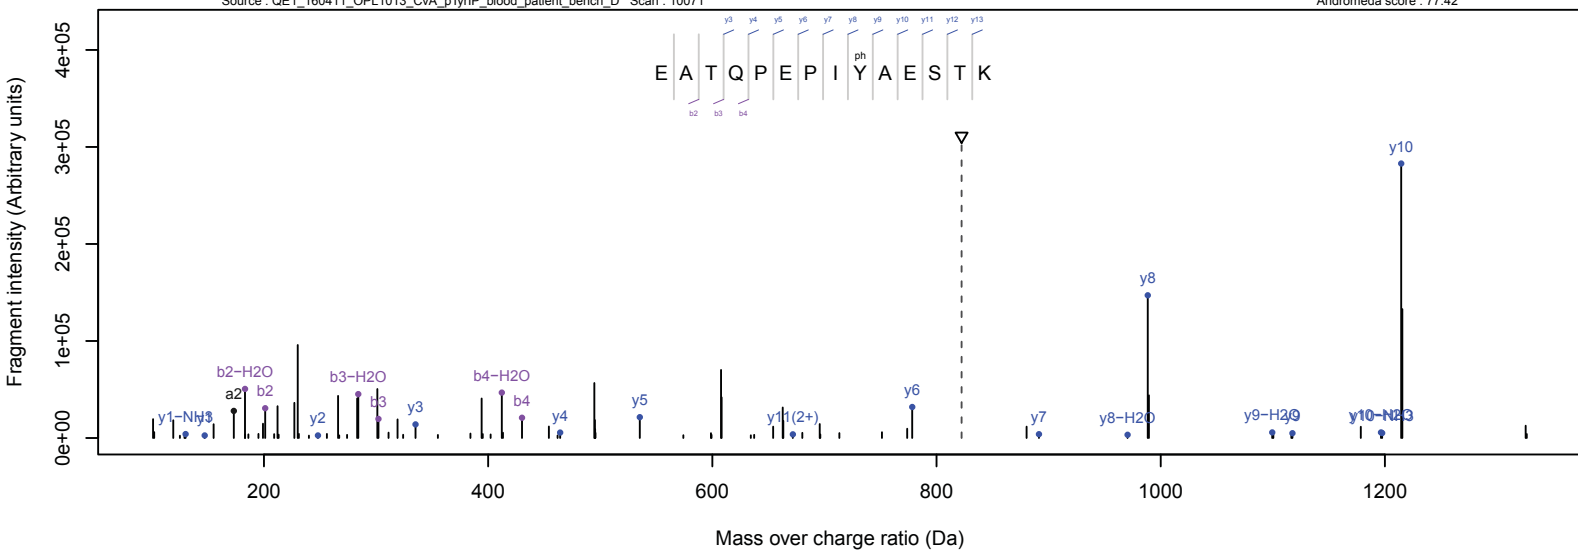

AVTNHSVY(ph)CSTK-3+

Source : QE1\_160411\_OPL1013\_CvA\_pTyrIP\_blood\_patient\_bench\_C Scan : 2404

Andromeda score : 77.185

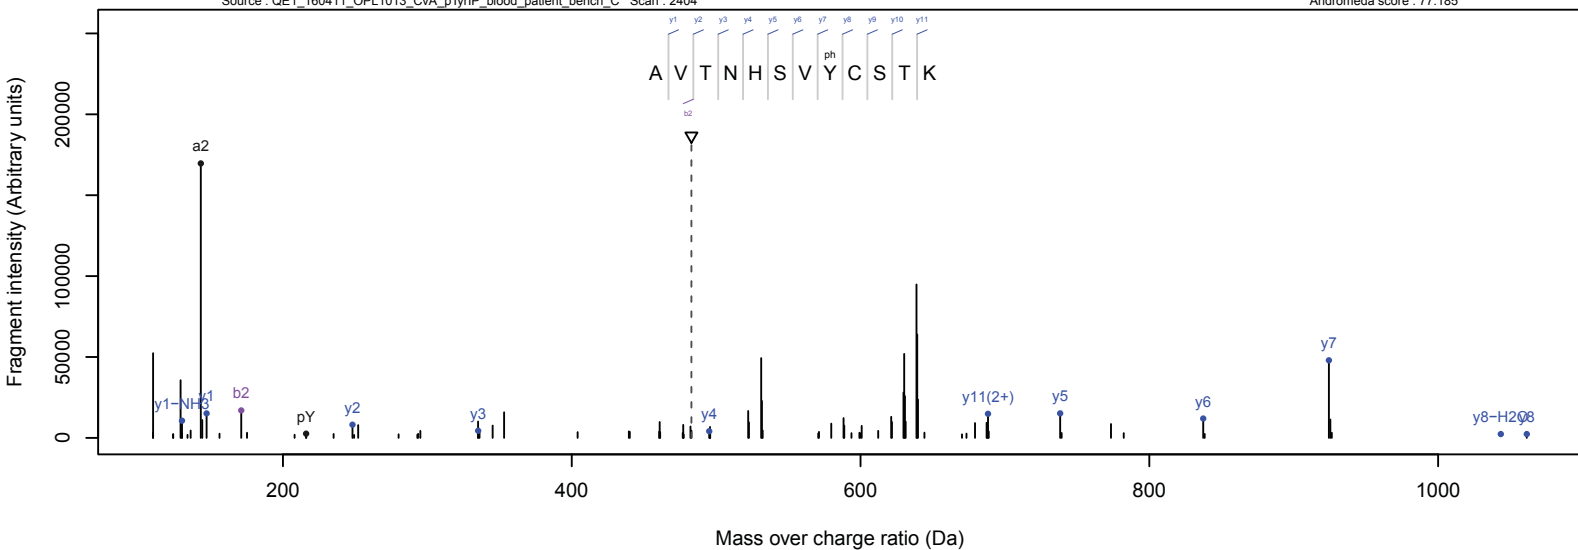

DASIPQFKPEIQVYENIHLAR-3+

Source : QE1\_160411\_OPL1013\_CvA\_pTyrIP\_blood\_patient\_bench\_C Scan : 38950

Andromeda score : 77.08

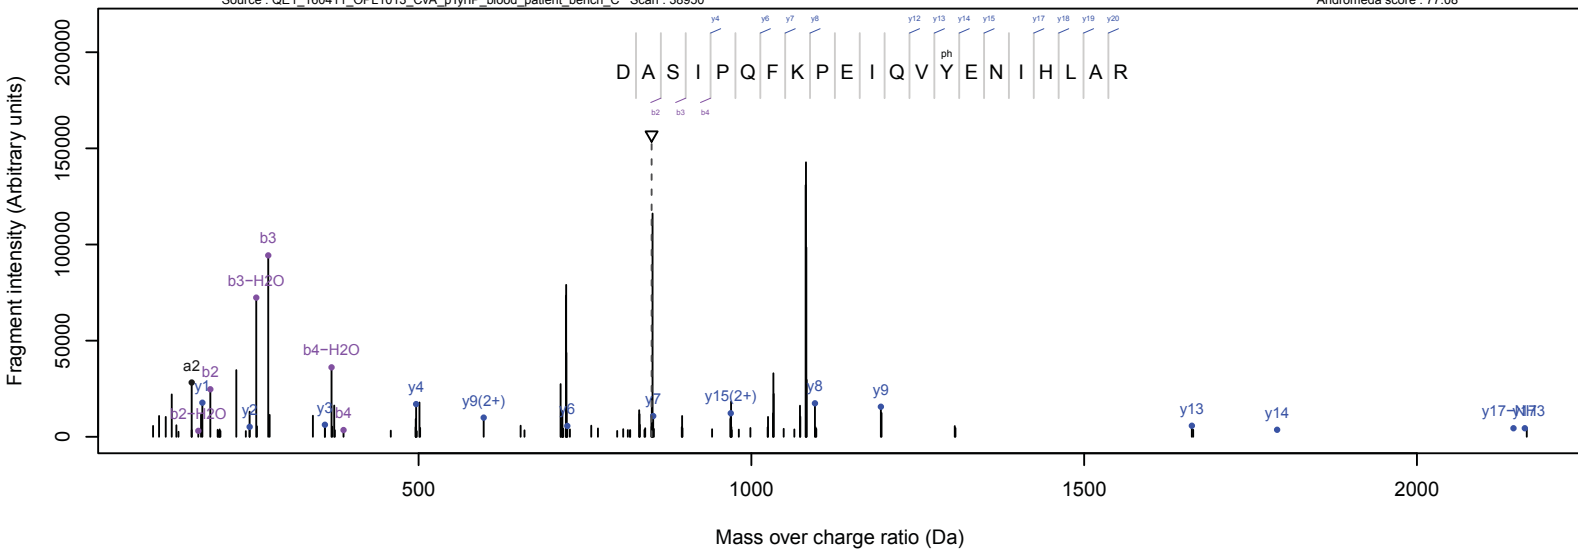



IIPGSEVKREEPEALY(ph)AAVNK-3+

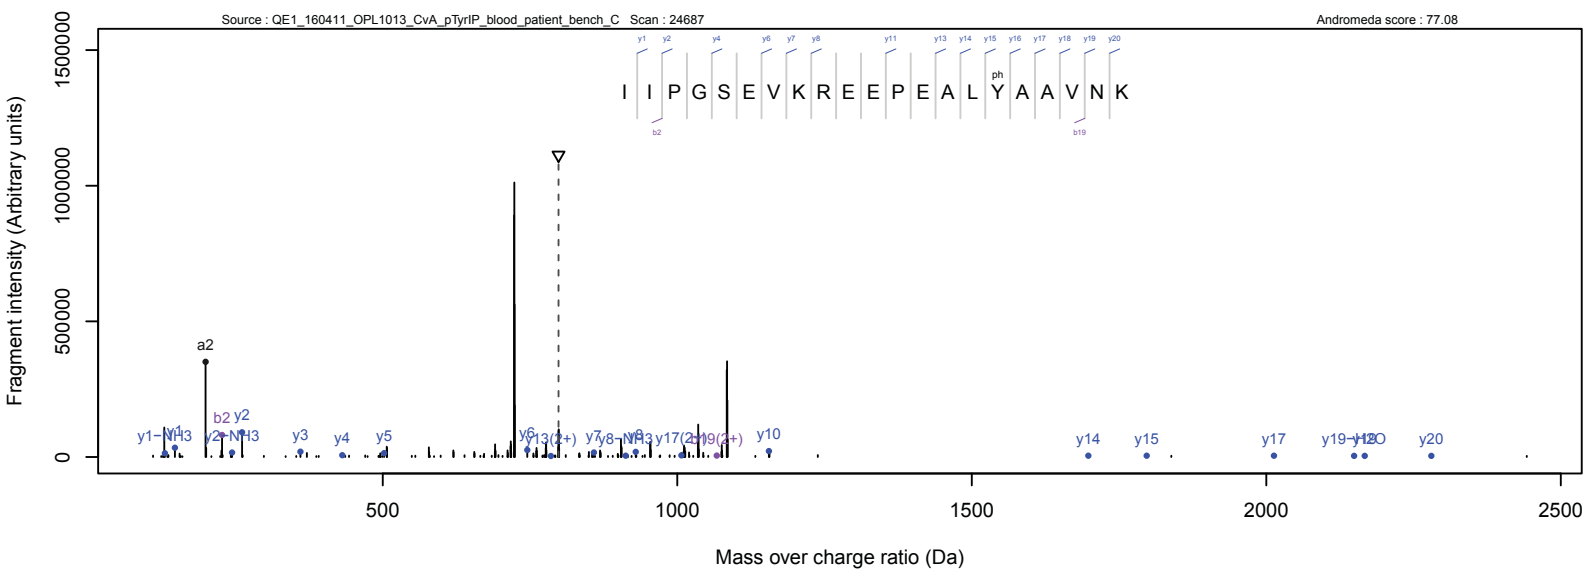

FQDVGPQAPVGSVY(ph)QK-2+

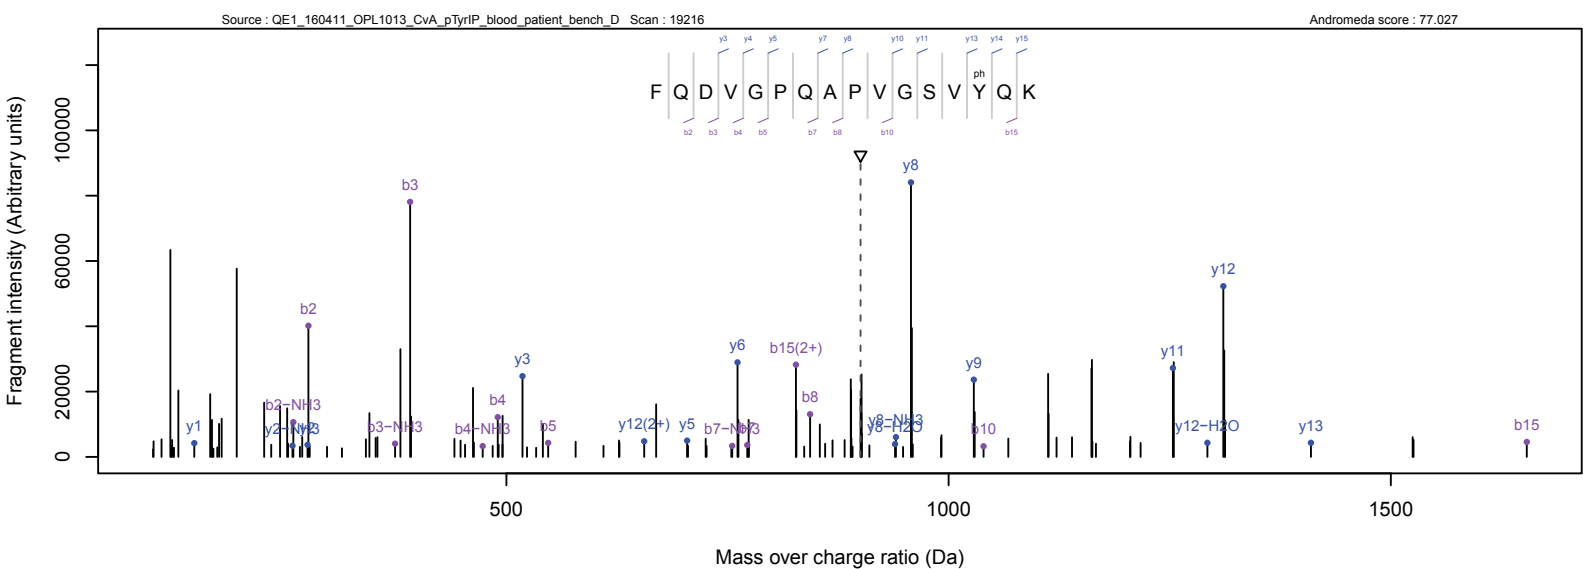

HVHSEY(ph)SKVPKY-3+

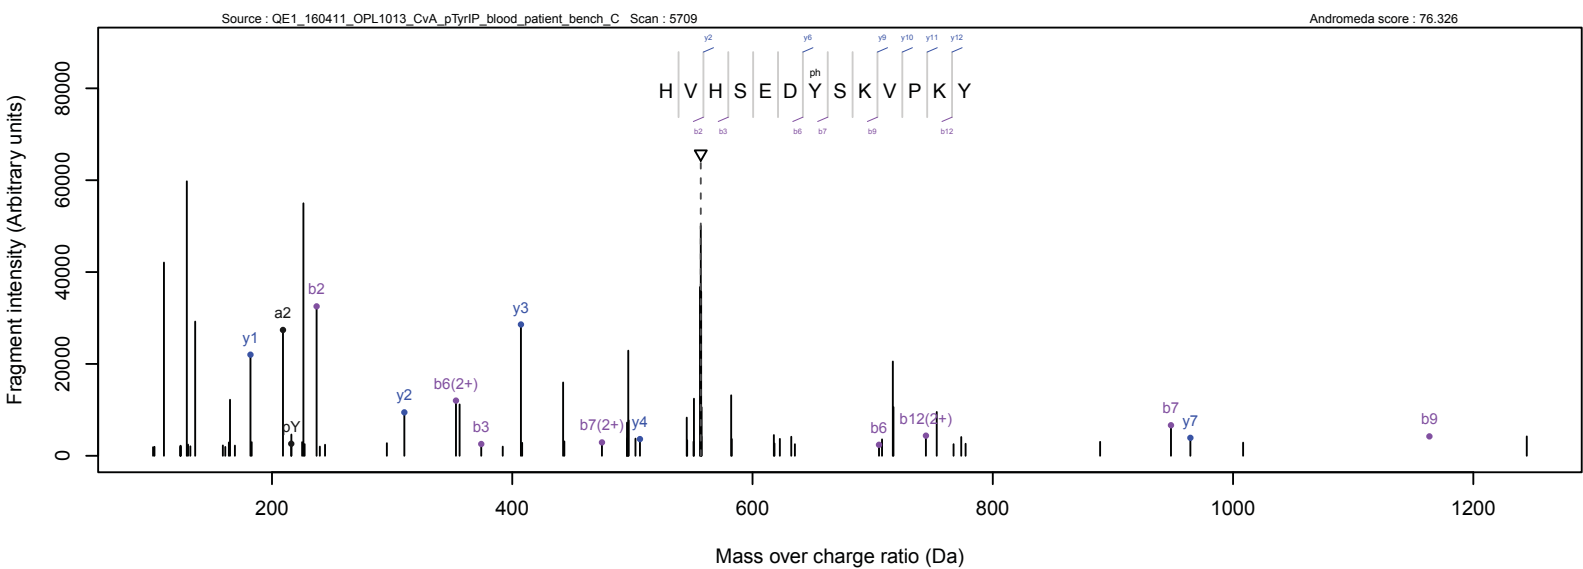

SFHEDEVDRVPHNPYATLR-4+

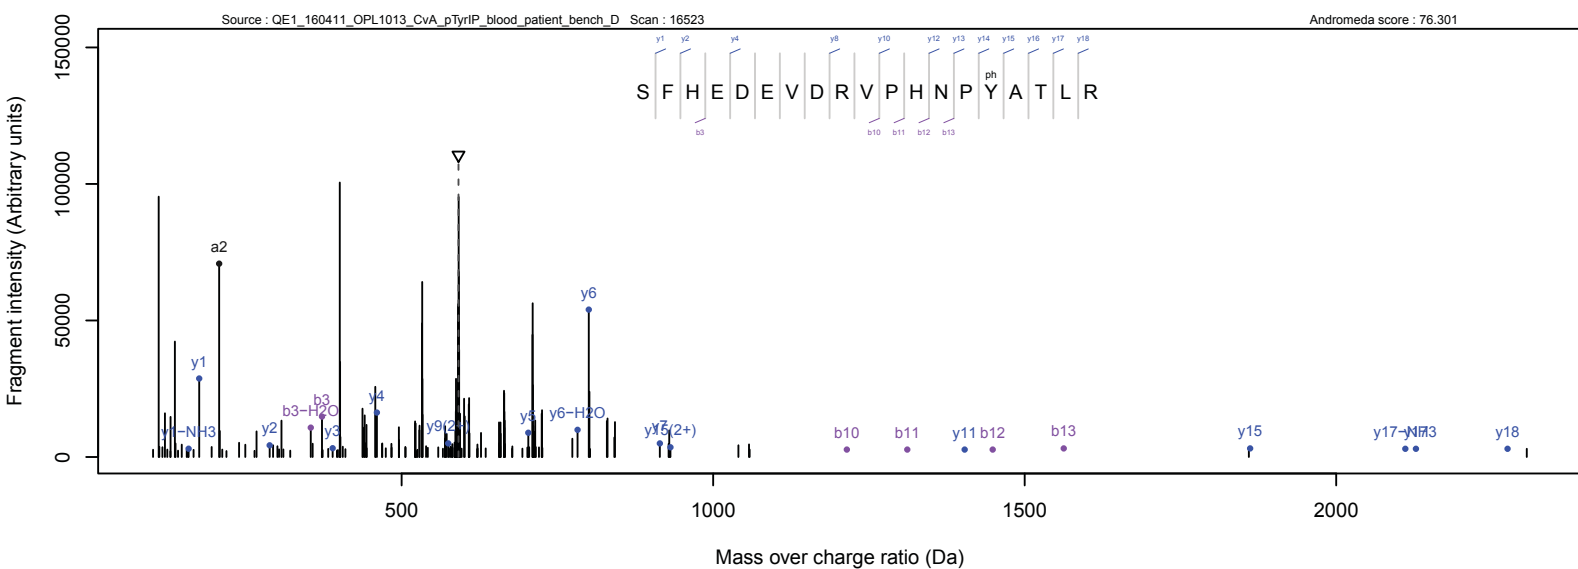

QRVPQPSSASLDEYTLMR-3+

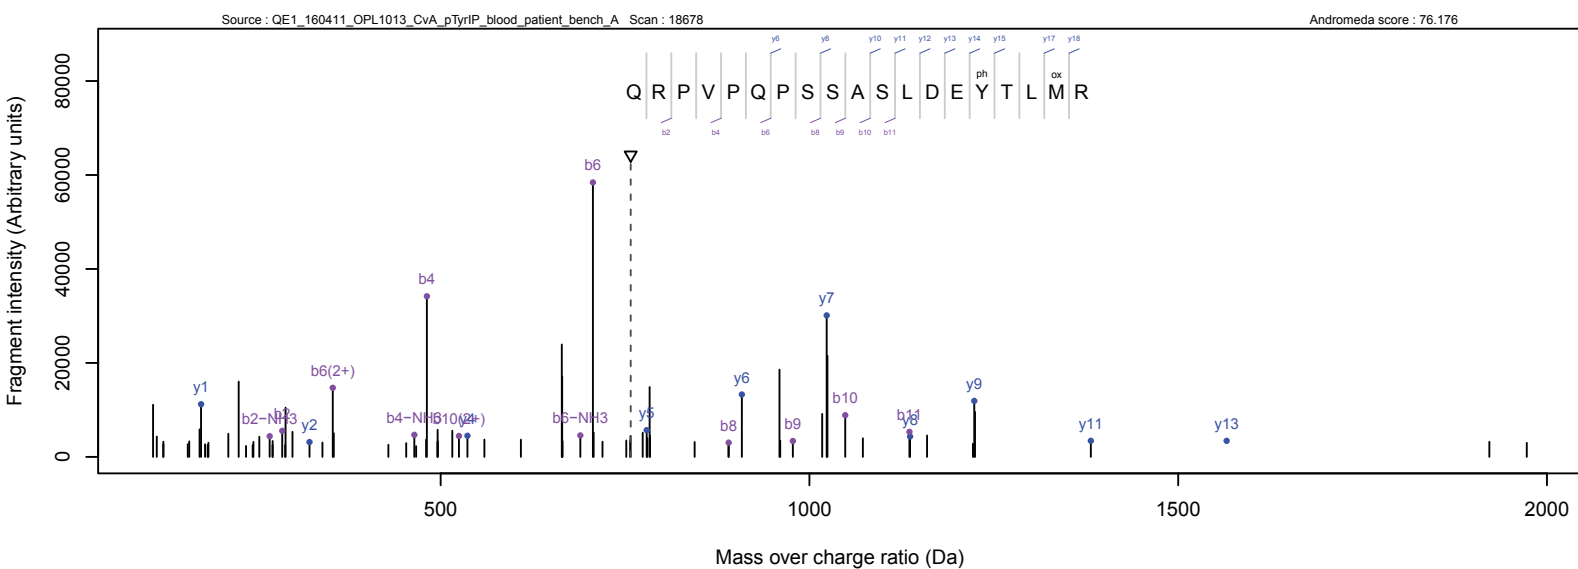

TLDNGGFYISPR-2+

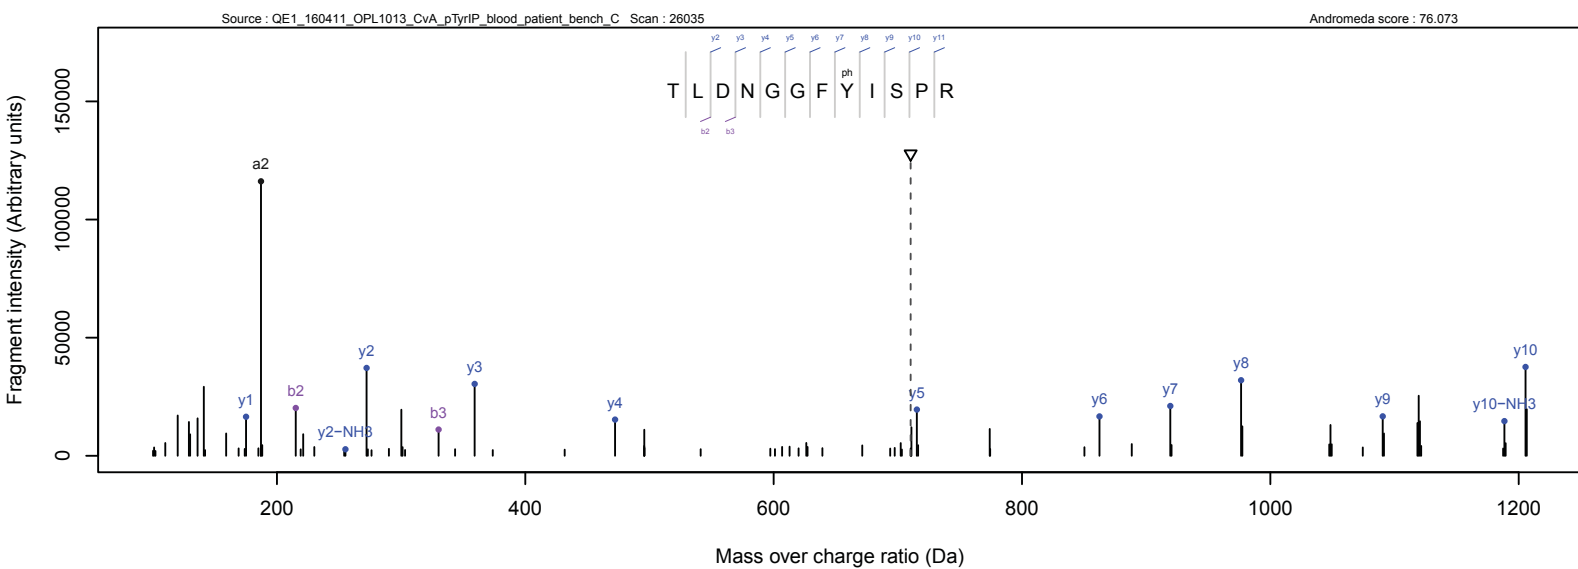

## VIY(ph)SQPSAR-2+

Source : QE1\_160411\_OPL1013\_CvA\_pTyrIP\_blood\_patient\_bench\_C Scan : 3954

Andromeda score : 76.064

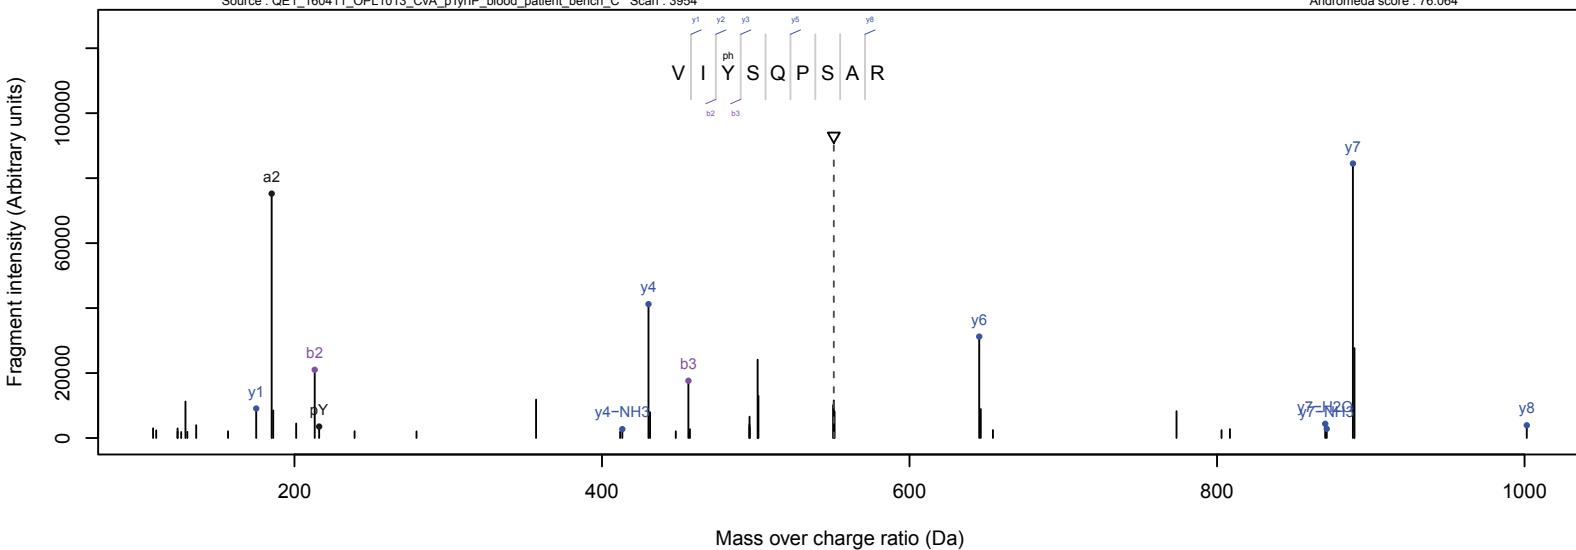

## MLGEALSKNPGY(ph)IK-2+

Source : QE1\_160411\_OPL1013\_CvA\_pTyrIP\_blood\_patient\_bench\_D Scan : 18901

Andromeda score : 75.764

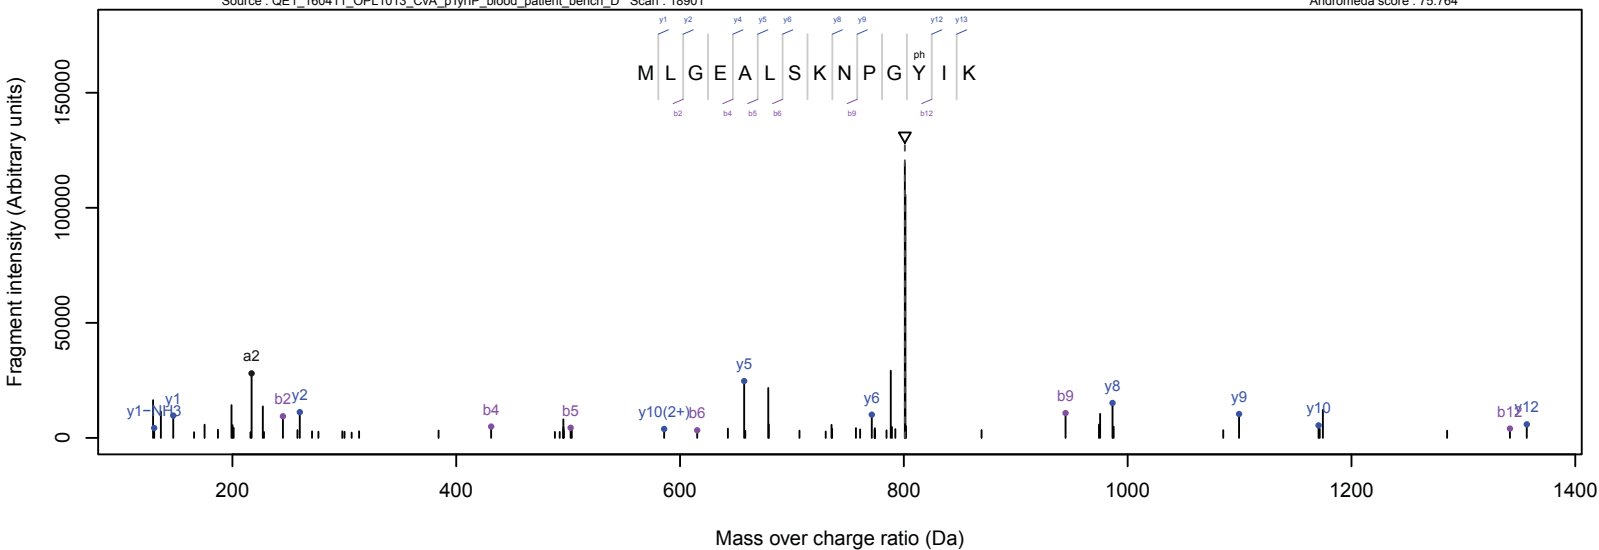

## LNY(ph)LDPR-2+

Source : QE1\_160411\_OPL1013\_CvA\_pTyrIP\_blood\_patient\_bench\_A Scan : 11327

Andromeda score : 75.692

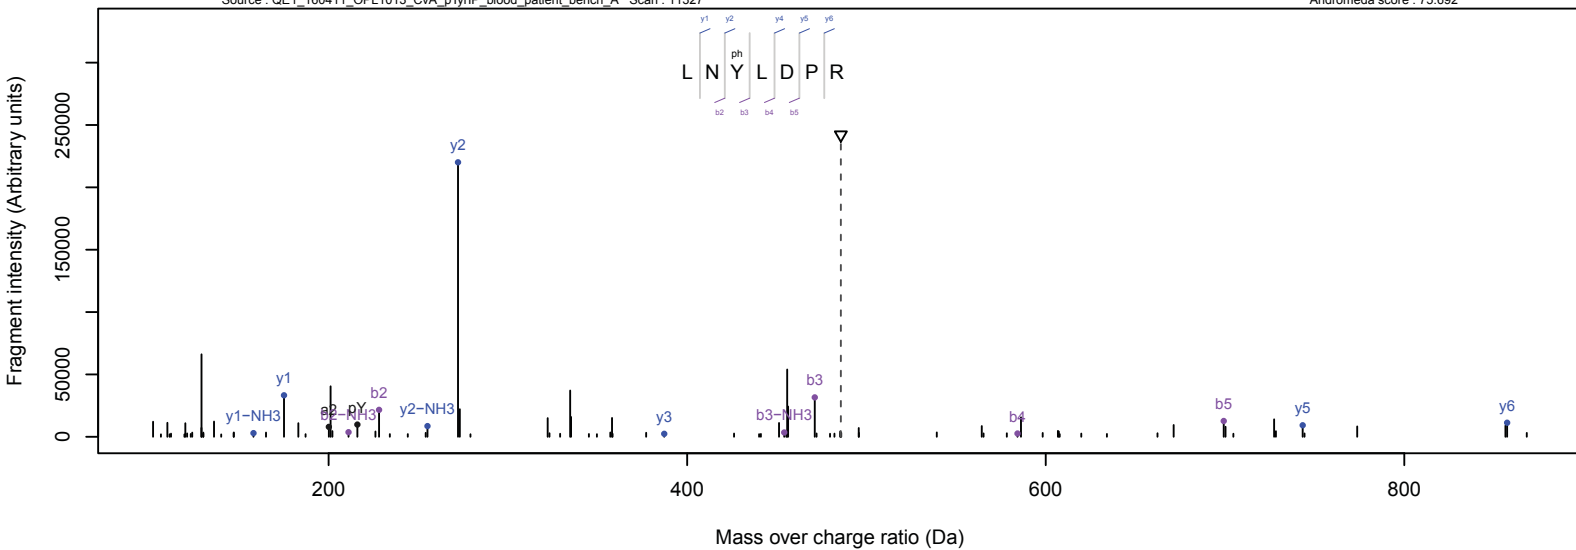

## SREYDQLY(ph)EEYTR-3+

Source : QE1\_160411\_OPL1013\_CvA\_pTyrIP\_blood\_patient\_bench\_D Scan : 17180

Andromeda score : 75.589

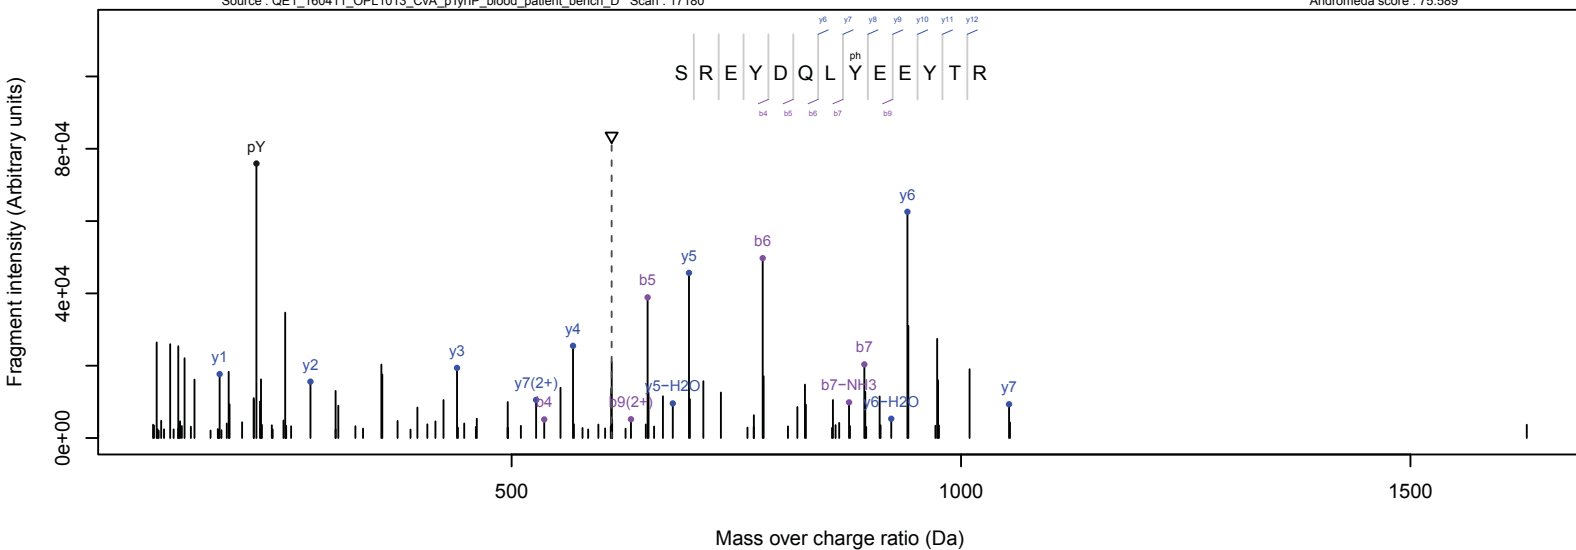

## LNGPQDHSLLY(ph)STIPR-3+

Source : QE1\_160411\_OPL1013\_CvA\_pTyrIP\_blood\_patient\_bench\_D Scan : 20792

Andromeda score : 75.376

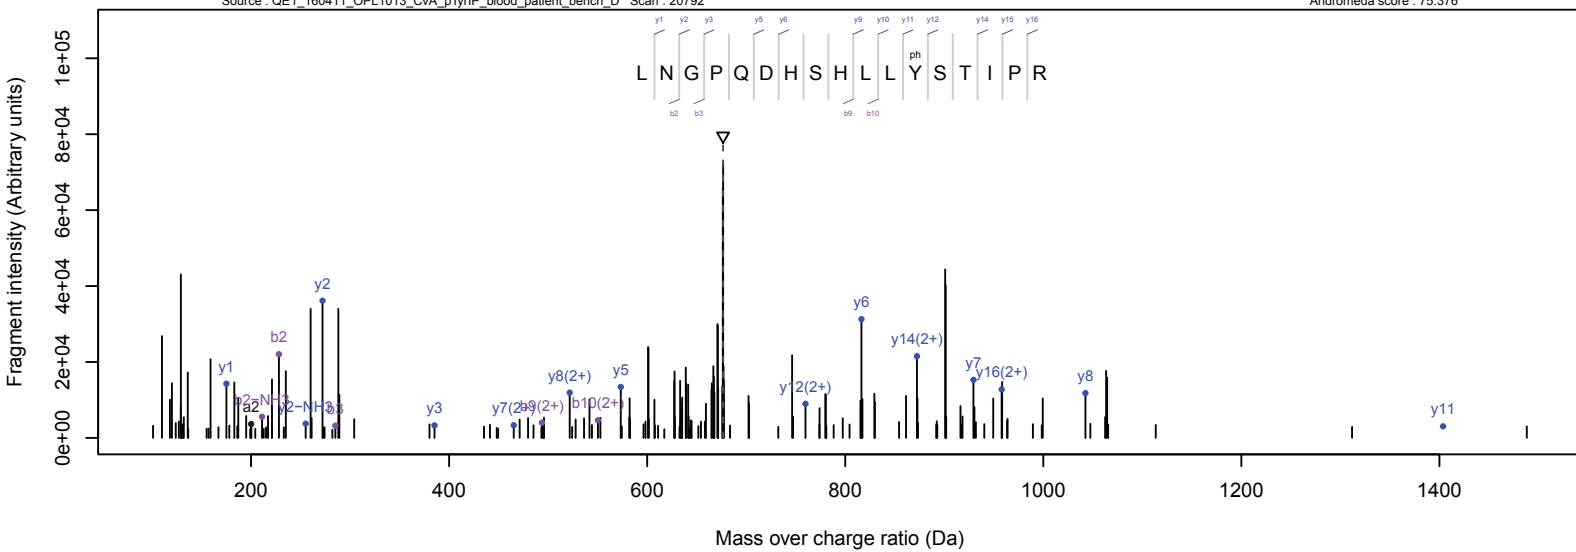

## CEGEKHIY(ph)SPIIVR-3+

Source : QE1\_160411\_OPL1013\_CvA\_pTyrIP\_blood\_patient\_bench\_D Scan : 16646

Andromeda score : 74.649

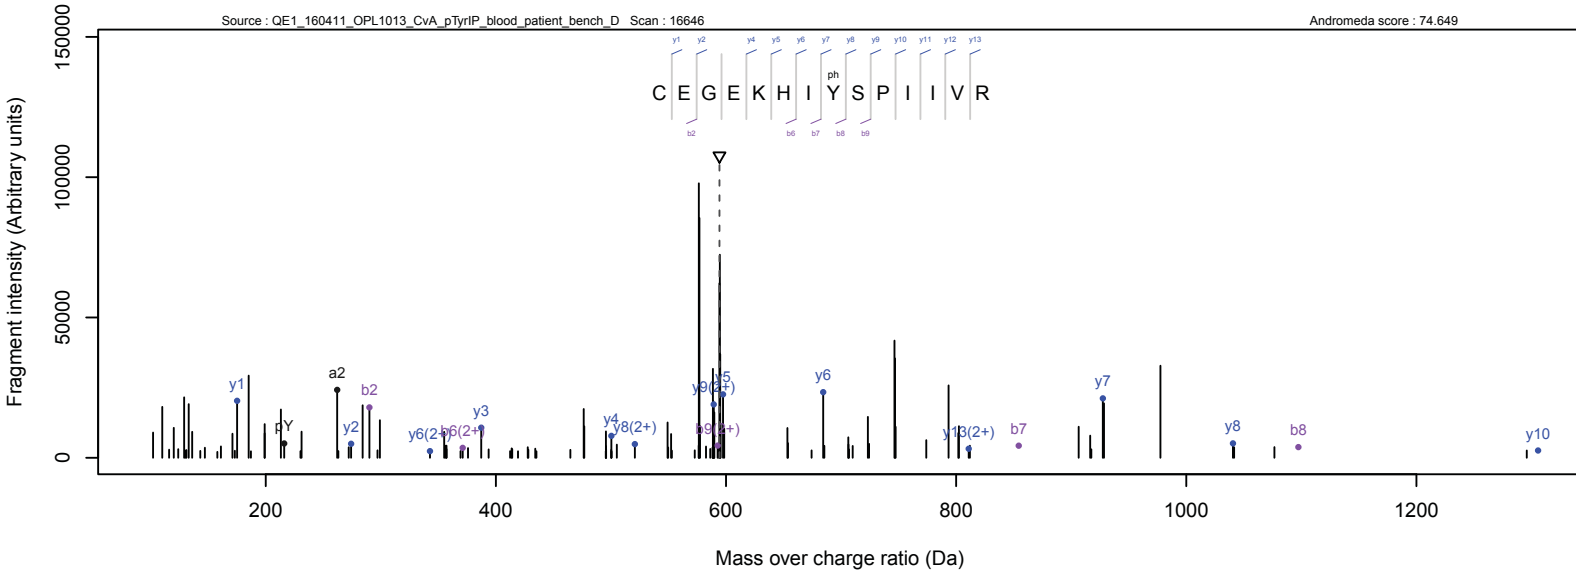

## VSECPHTY(ph)QNR-3+

Source: QE1\_160411\_OPL1013\_CvA\_pTyrIP\_blood\_patient\_bench\_D Scan: 1649

Andromeda score: 74.611

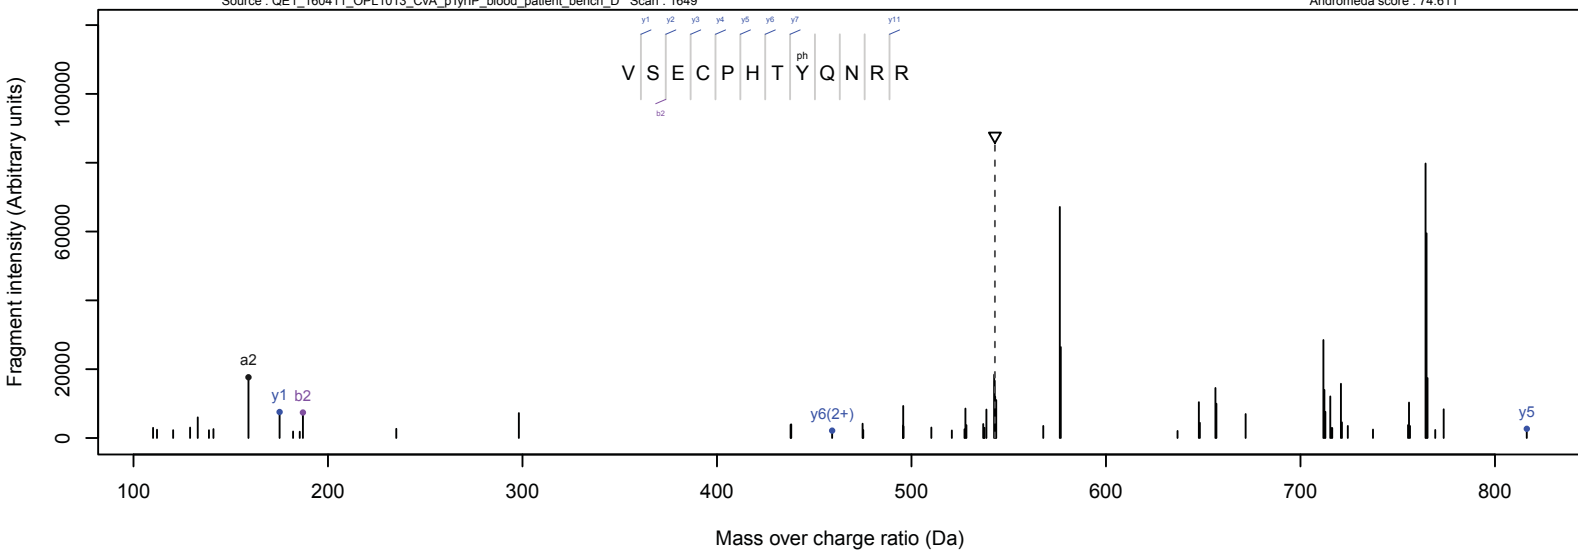

## Y(ph)KLLVELVQK-2+

Source: QE1\_160411\_OPL1013\_CvA\_pTyrIP\_blood\_patient\_bench\_A Scan: 26417

Andromeda score: 74.611

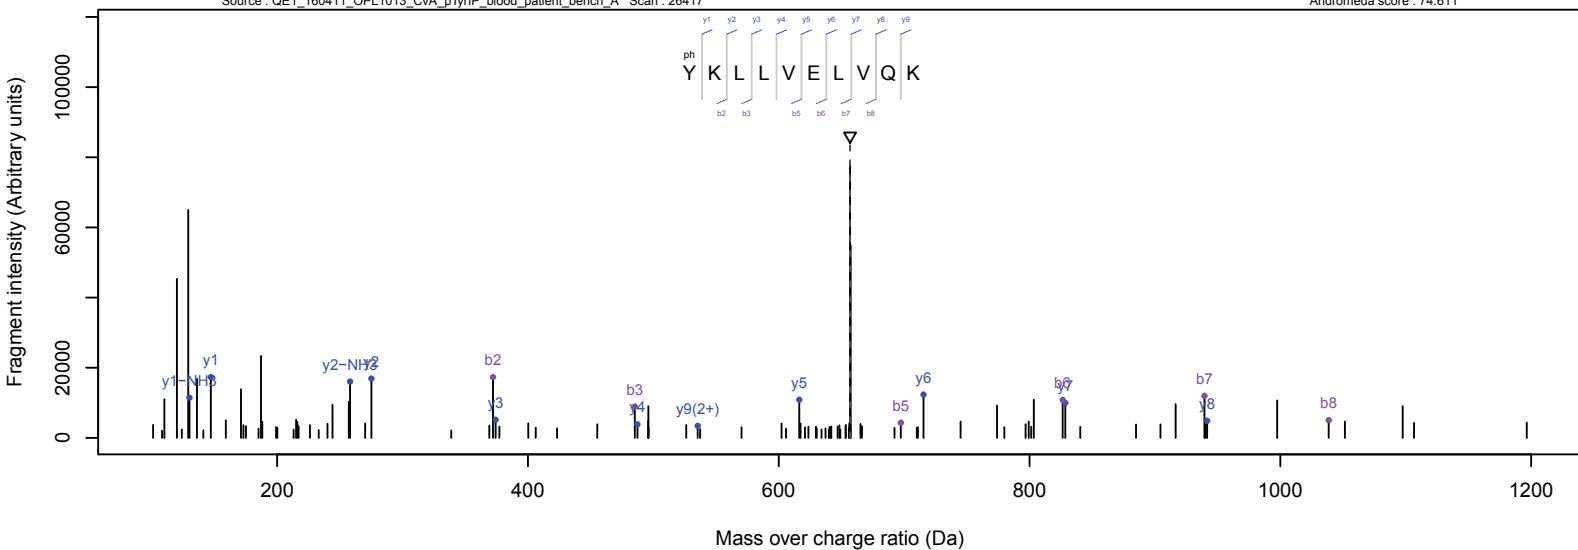

## VWPHKDY(ph)PLIPVGK-3+

Source: QE1\_160411\_OPL1013\_CvA\_pTyrIP\_blood\_patient\_bench\_B Scan: 22947

Andromeda score: 74.475

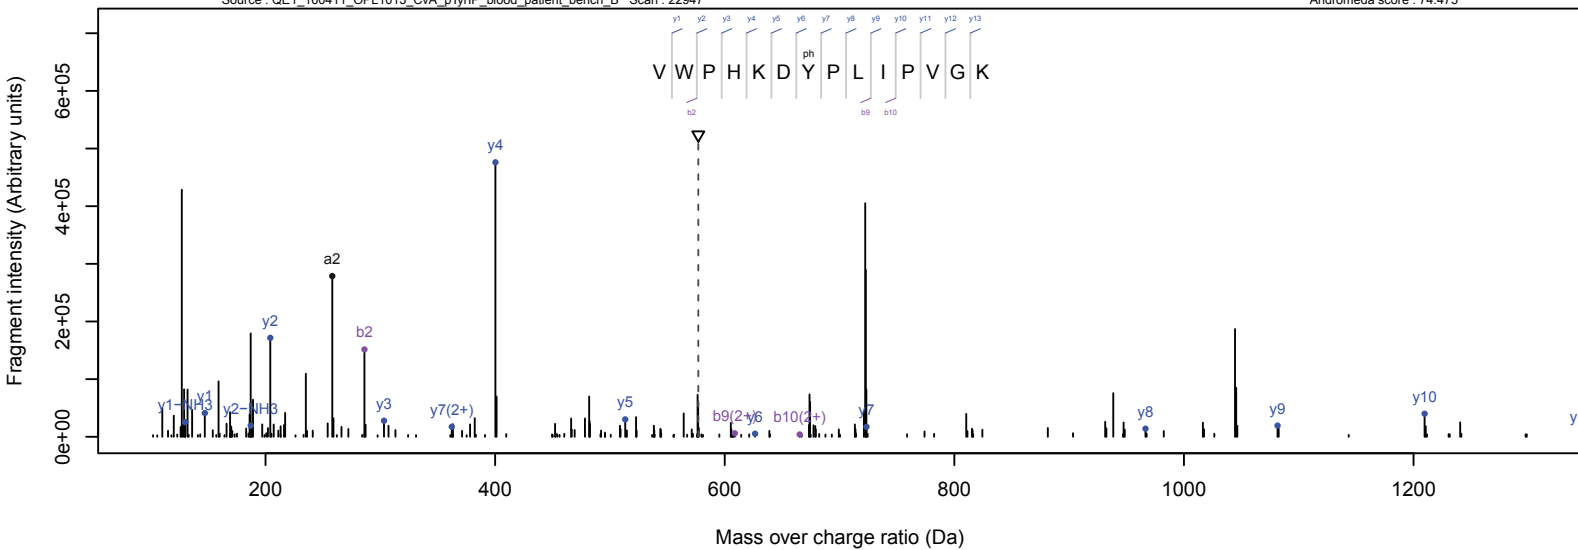

## YDTPY(ph)IWR-2+

Source : QE1\_160411\_OPL1013\_CvA\_pTyrIP\_blood\_patient\_bench\_A Scan : 33056

Andromeda score : 74.464

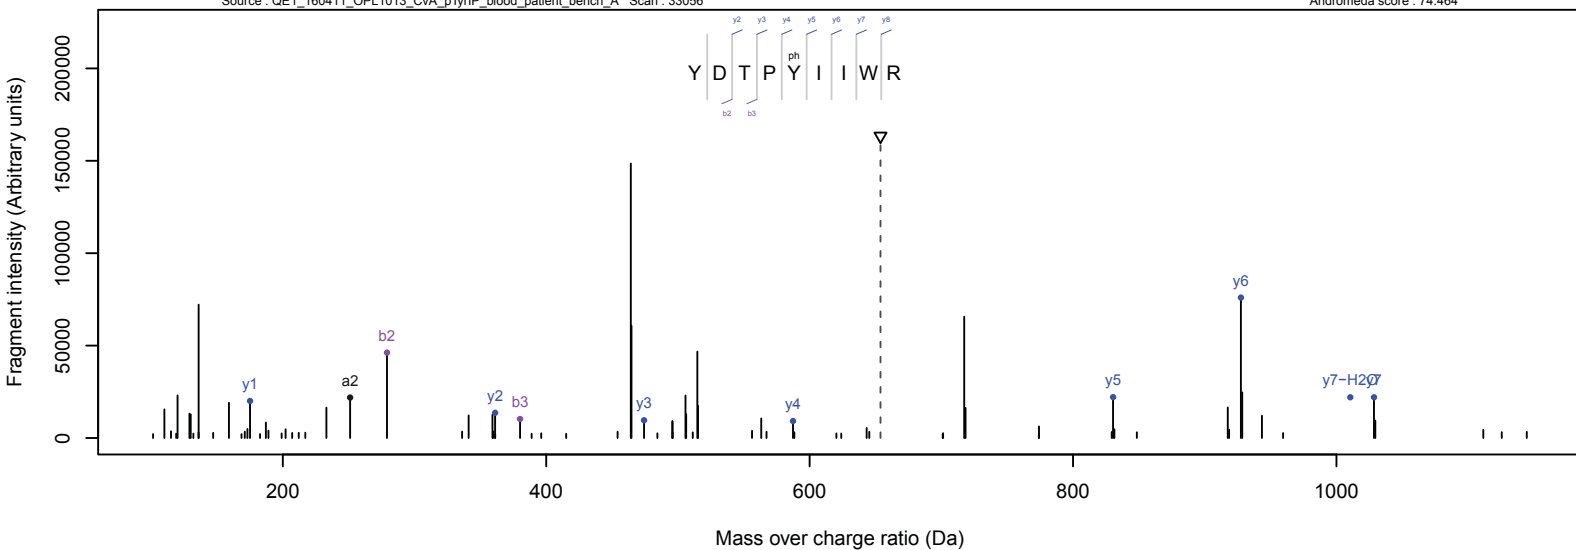

## KGGYS(ph)QAASSDAQSDVSLTACKV-3+

Source : QE1\_160411\_OPL1013\_CvA\_pTyrIP\_blood\_patient\_bench\_D Scan : 14913

Andromeda score : 74.287

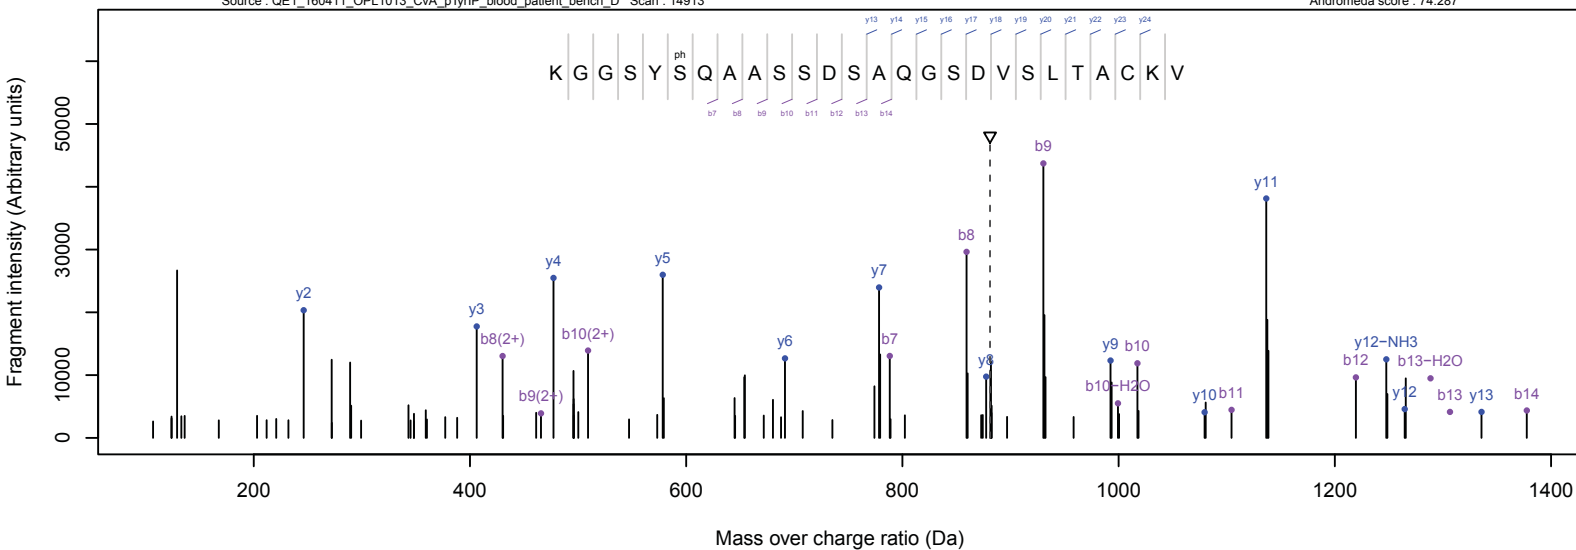

## GSLSTDKDTAY(ph)GSFQNGHGK-3+

Source : QE1\_160411\_OPL1013\_CvA\_pTyrIP\_blood\_patient\_bench\_C Scan : 12118

Andromeda score : 73.928

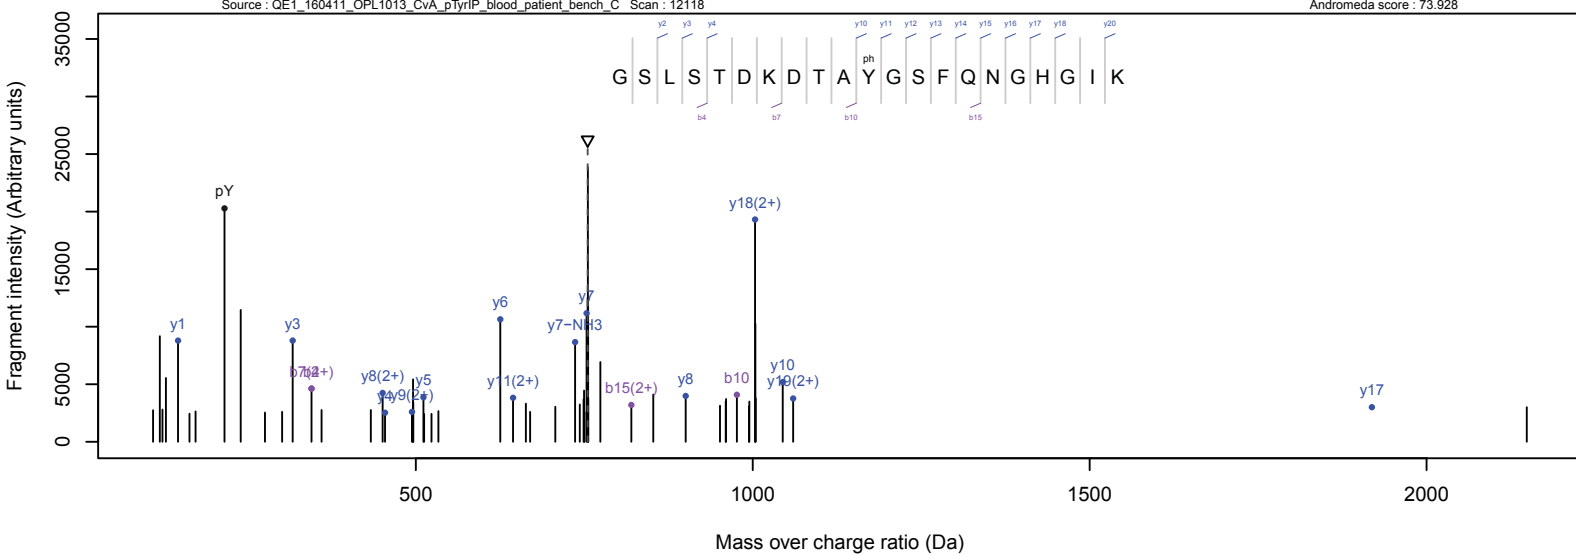

**VNGEETPMIGDKVY(ph)VHYK-3+**

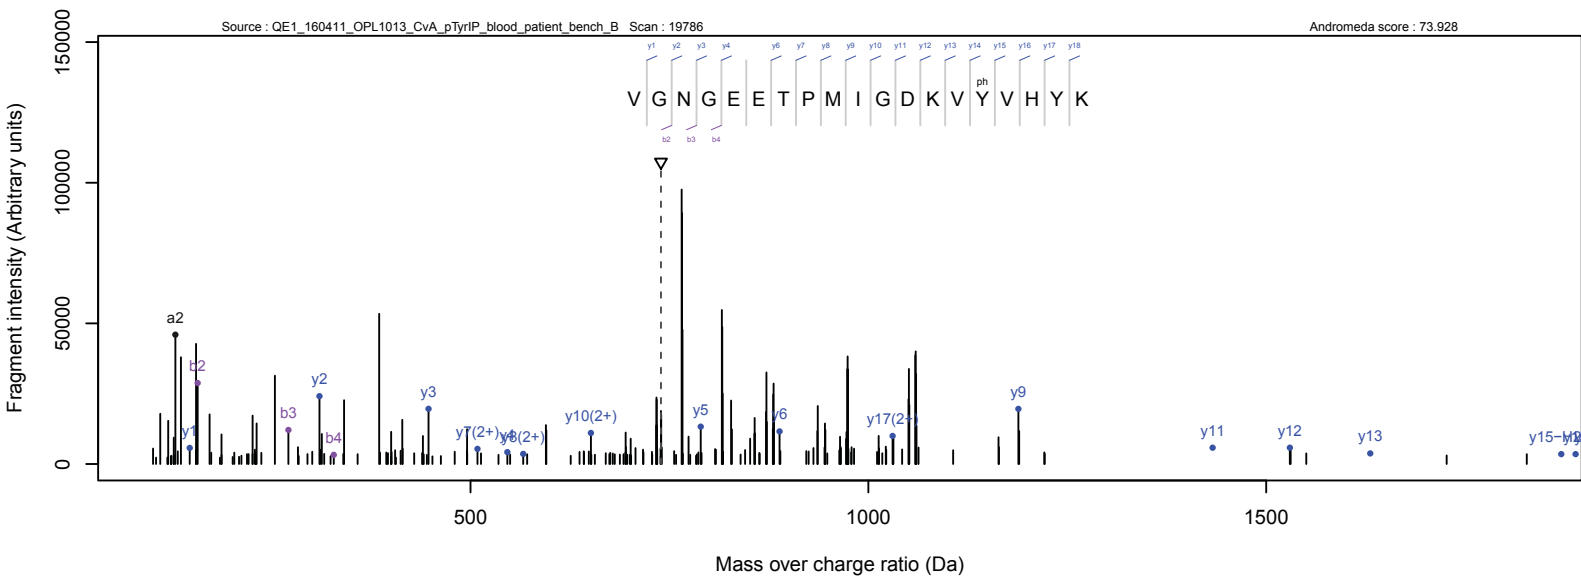

**GASQAGM(oX)TGY(ph)GM(oX)PR-2+**

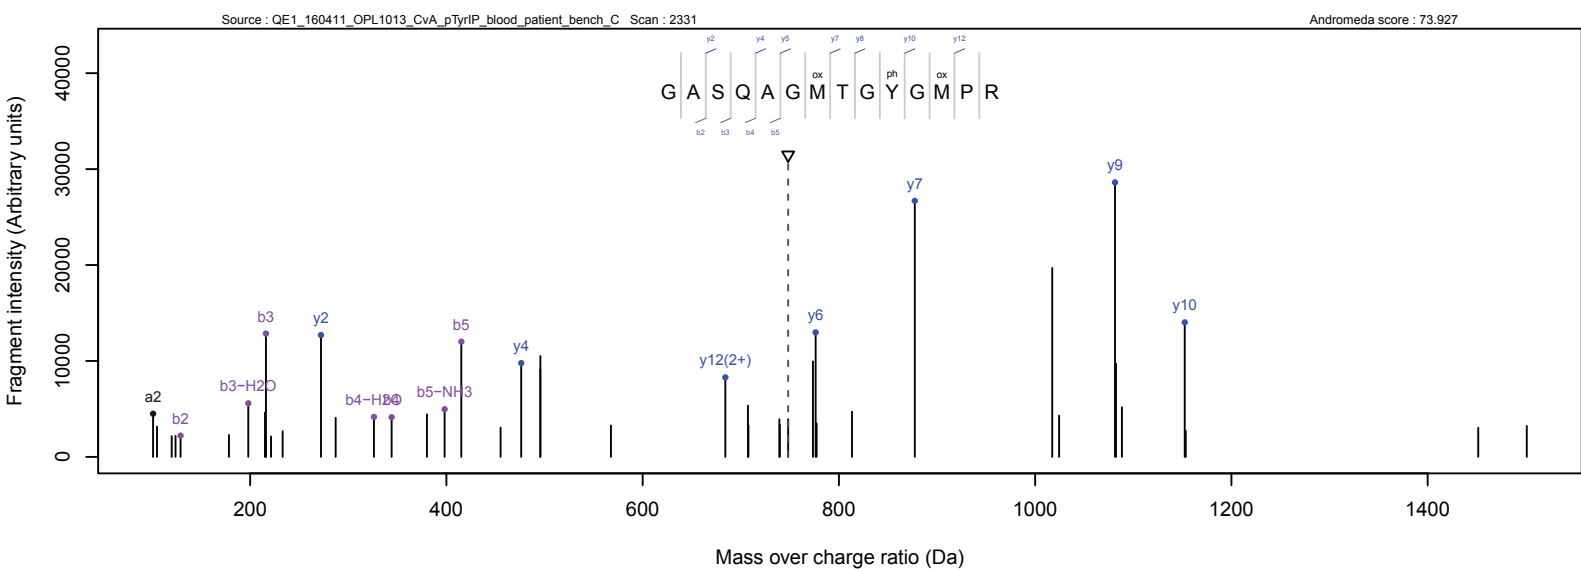

**SRGDNVY(ph)VVTEVLQTK-3+**

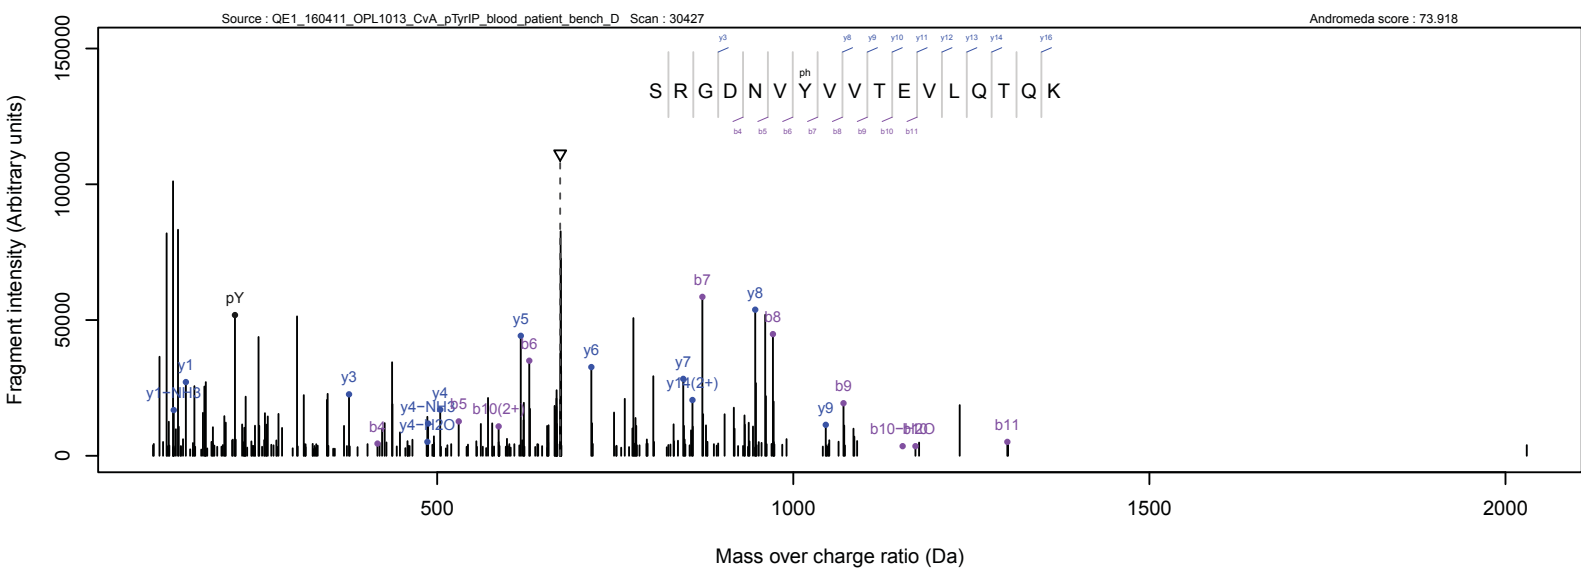

HIGLVY(ph)SGM(ox)GPDYR-3+

Source : QE1\_160411\_OPL1013\_CvA\_pTyrIP\_blood\_patient\_bench\_A Scan : 17143

Andromeda score : 73.877

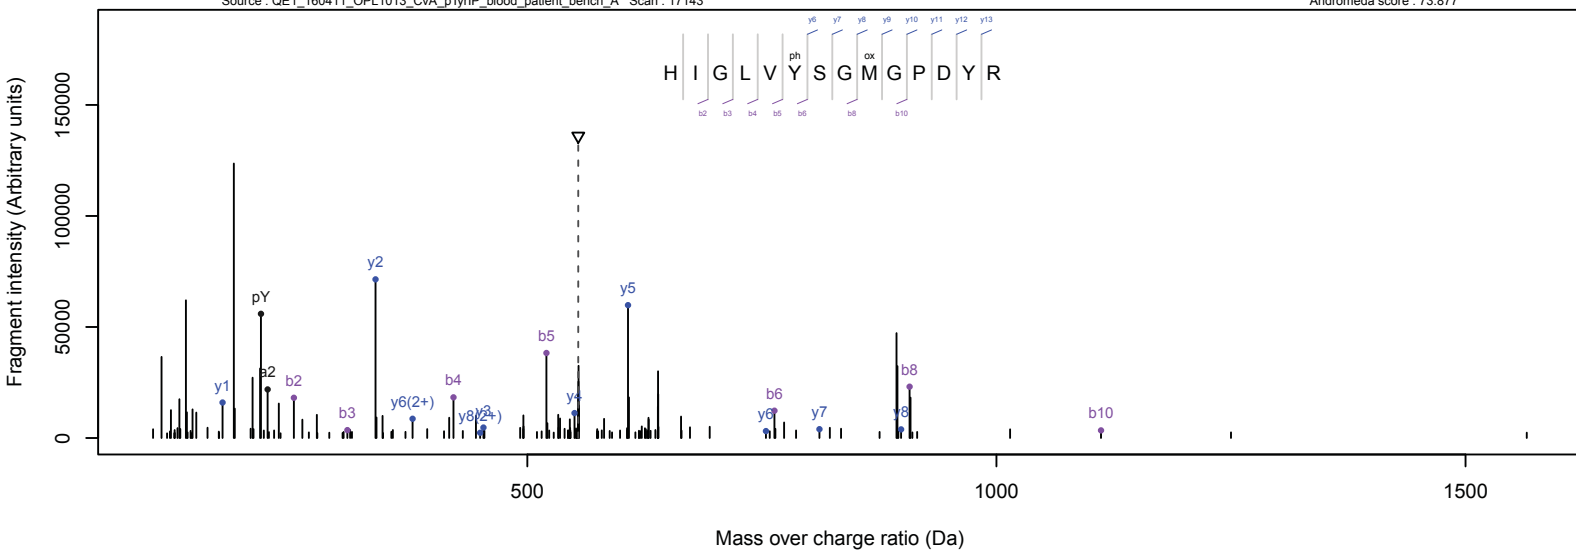

IHFPLATY(ph)APVISA EK-3+

Source : QE1\_160411\_OPL1013\_CvA\_pTyrIP\_blood\_patient\_bench\_B Scan : 36264

Andromeda score : 73.834

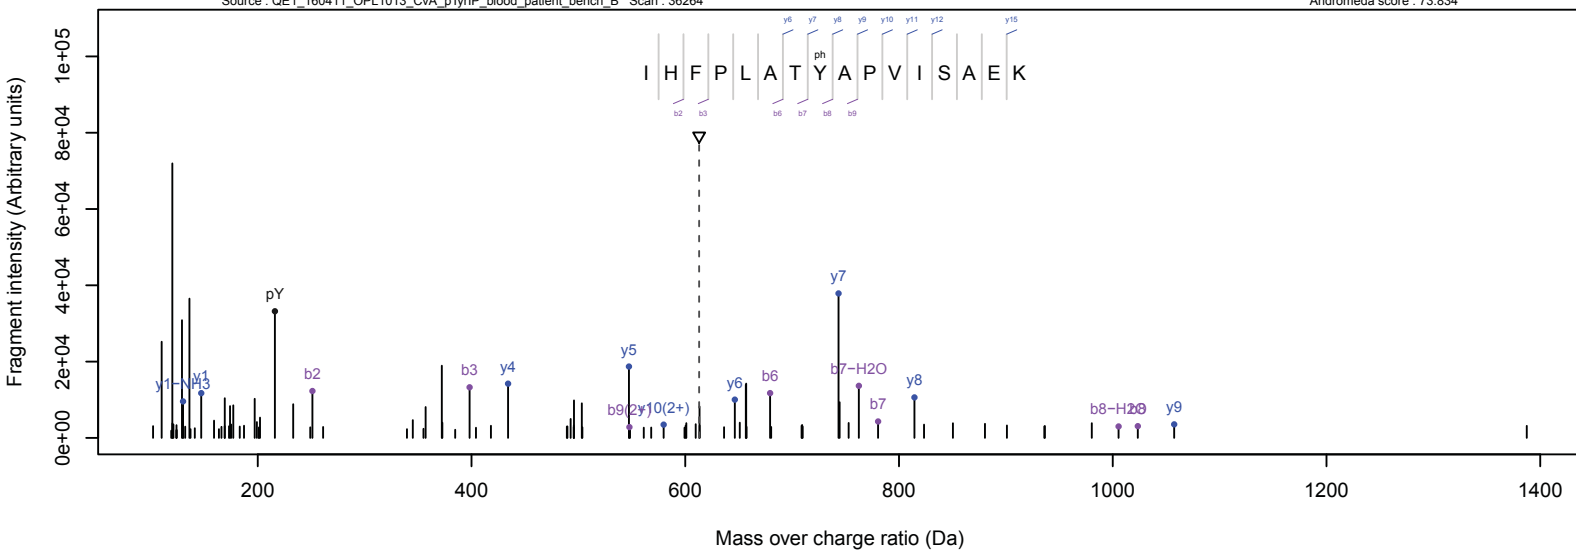

SSGPYGGGQY(ph)FAKPR-3+

Source : QE1\_160411\_OPL1013\_CvA\_pTyrIP\_blood\_patient\_bench\_D Scan : 11296

Andromeda score : 73.834

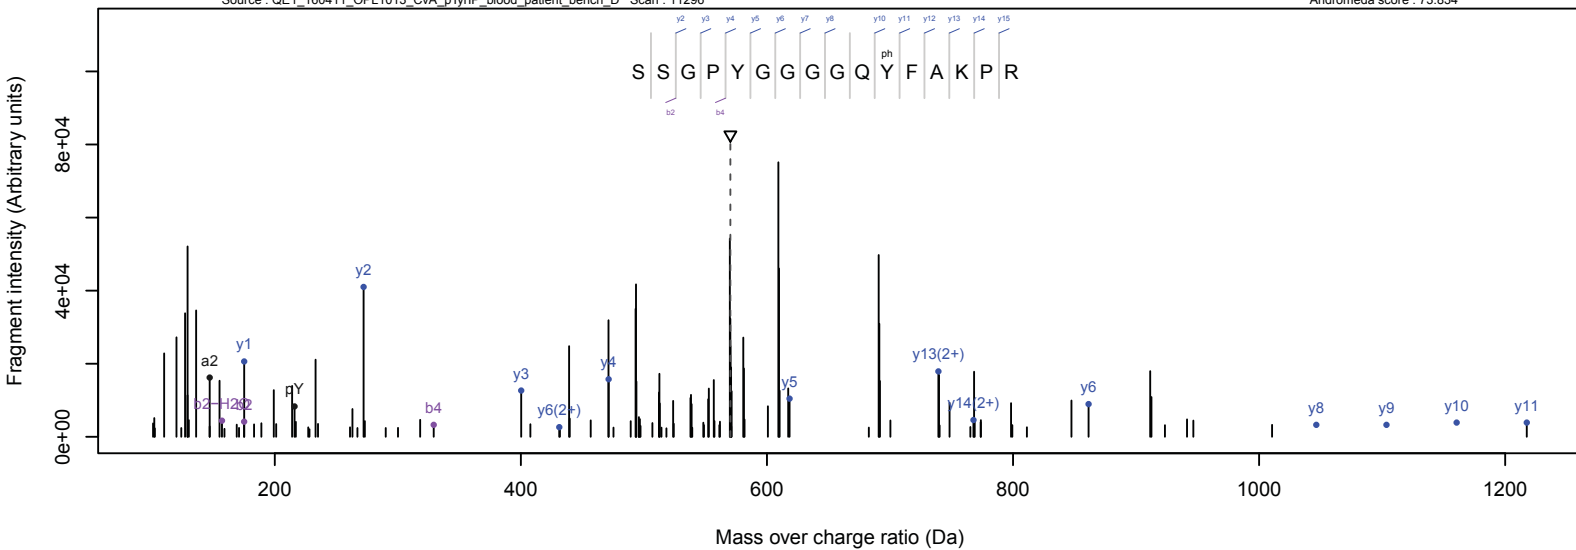



## DTETVY(ph)SEVR-2+

Source: QE1\_160411\_OPL1013\_CvA\_pTyrIP\_blood\_patient\_bench\_D Scan: 8538

Andromeda score: 73.499

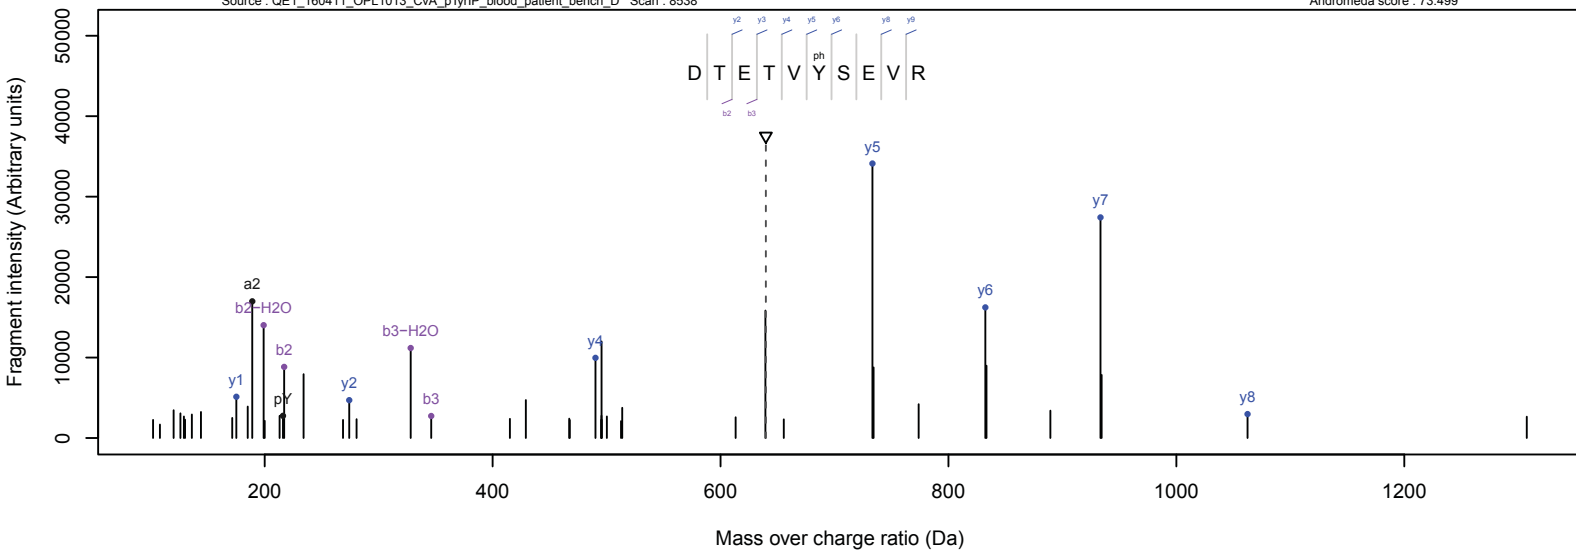

## M(ox)HGDY(ph)TLTLR-2+

Source: QE1\_160411\_OPL1013\_CvA\_pTyrIP\_blood\_patient\_bench\_C Scan: 13797

Andromeda score: 73.499

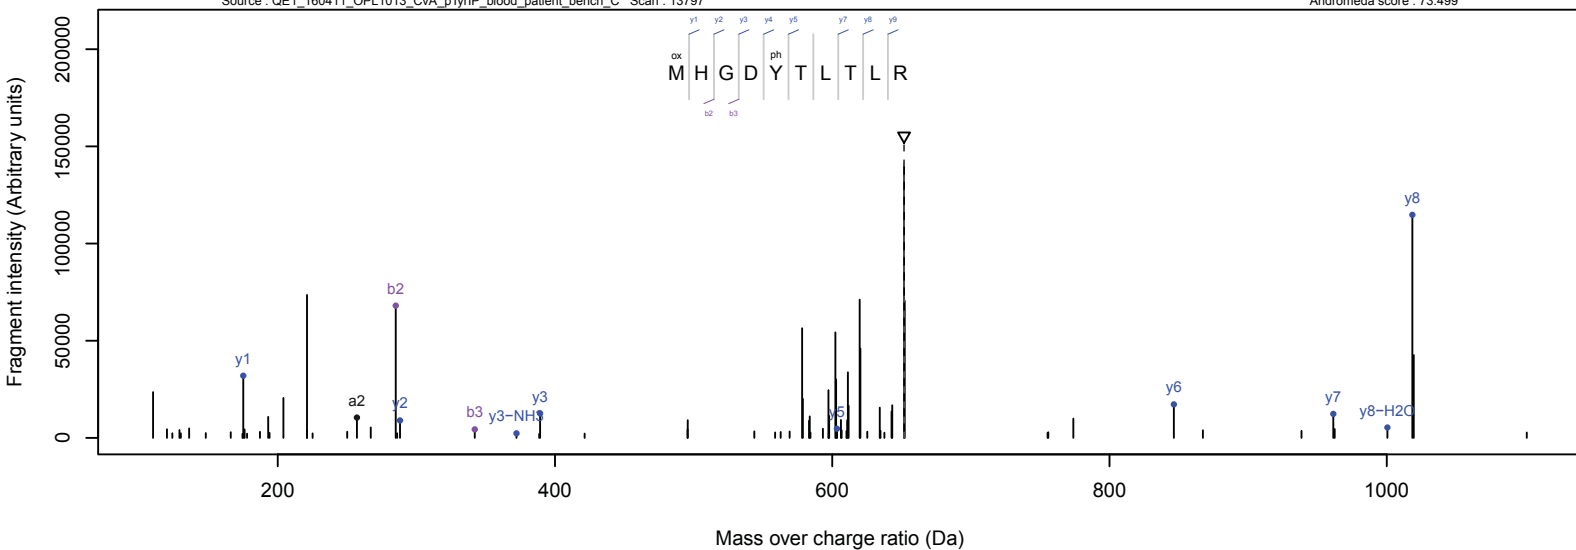

## REFEVY(ph)GPIKR-3+

Source: QE1\_160411\_OPL1013\_CvA\_pTyrIP\_blood\_patient\_bench\_A Scan: 13979

Andromeda score: 73.435

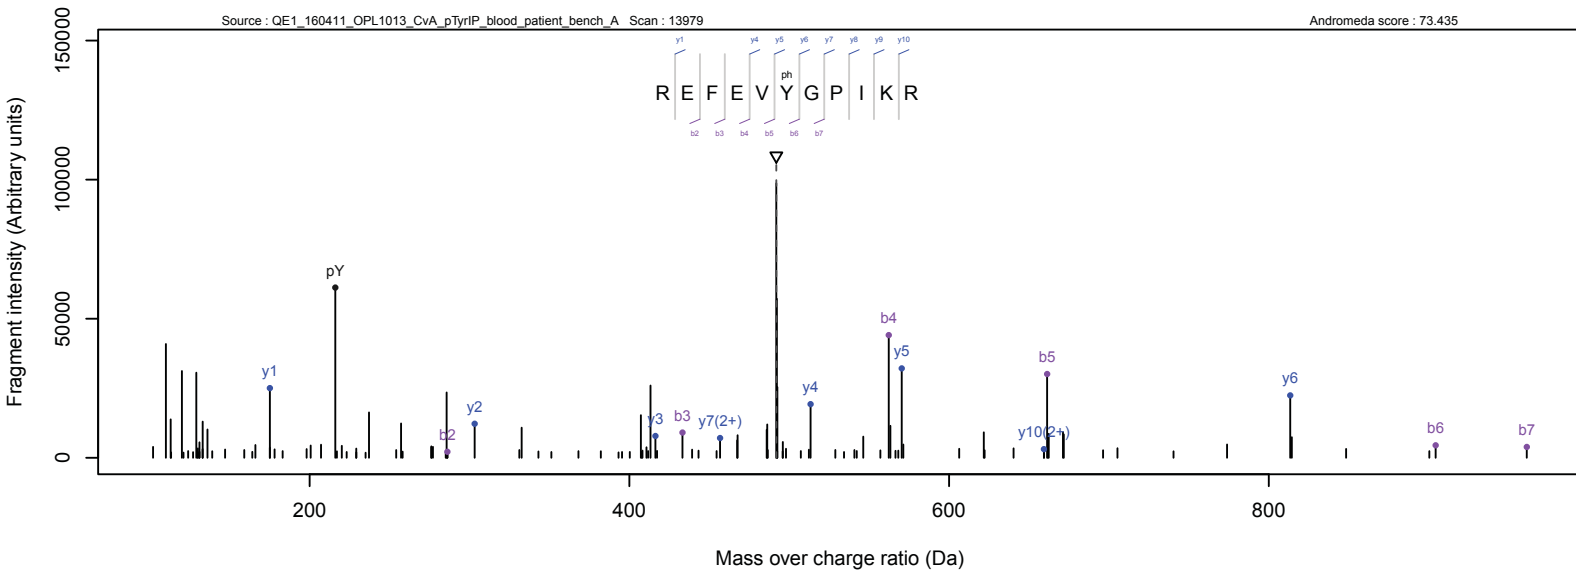

LEAVSHTSDM(ox)HRGY(ph)ADSPSK-4+

Source : QE1\_160411\_OPL1013\_CvA\_pTyrIP\_blood\_patient\_bench\_C Scan : 3116

Andromeda score : 73.294

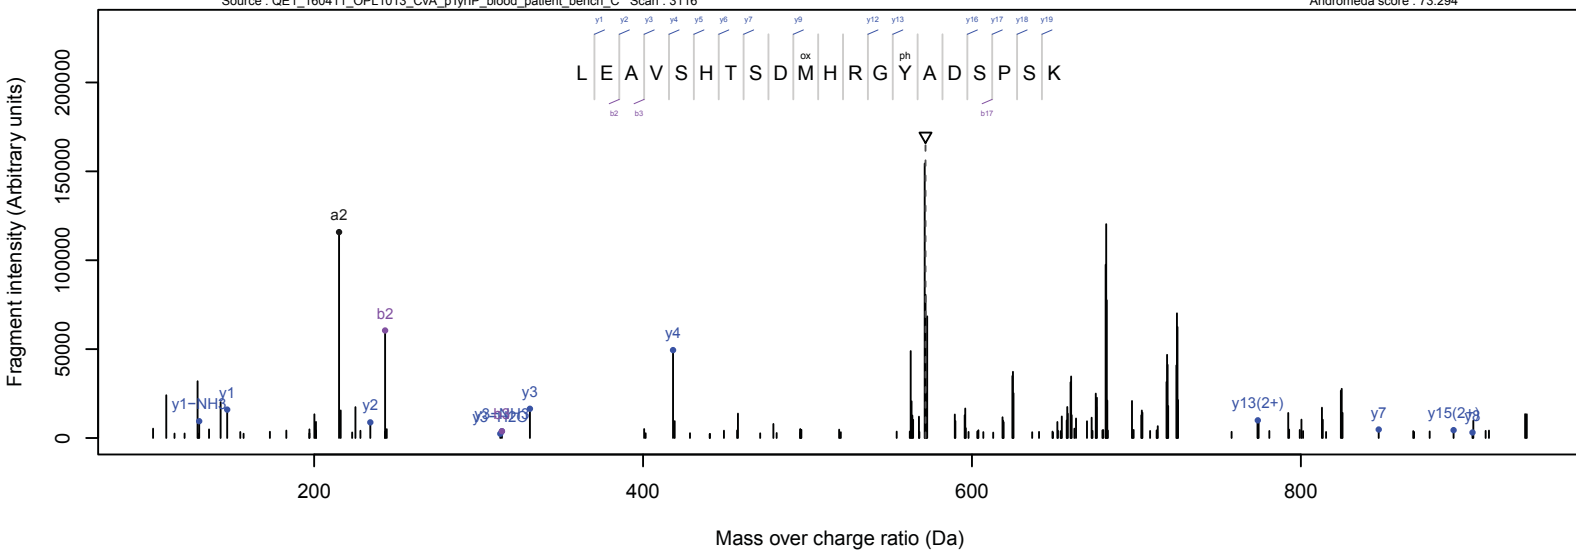

SYS(ph)PDGKESPSDKK-3+

Source : QE1\_160411\_OPL1013\_CvA\_pTyrIP\_blood\_patient\_bench\_A Scan : 1673

Andromeda score : 73.279

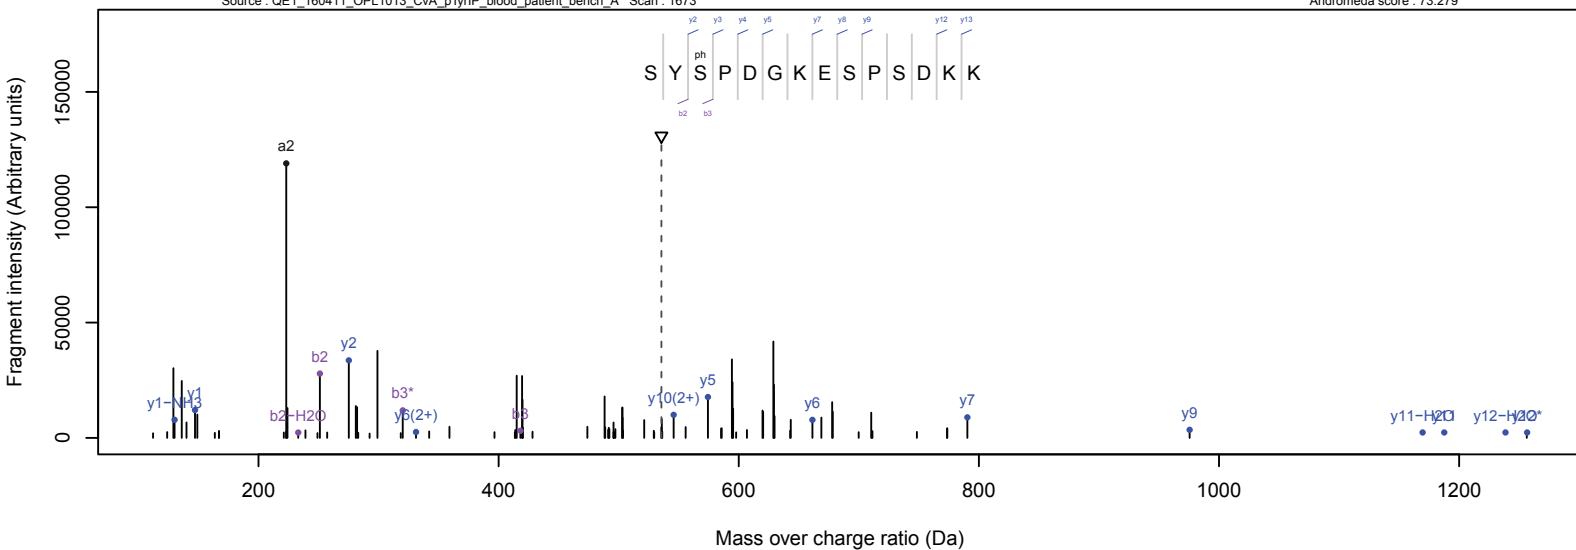

QADSEM(ox)T(ph)GY(ph)VVTR-2+

Source : QE1\_160411\_OPL1013\_CvA\_pTyrIP\_blood\_patient\_bench\_A Scan : 4869

Andromeda score : 73.168

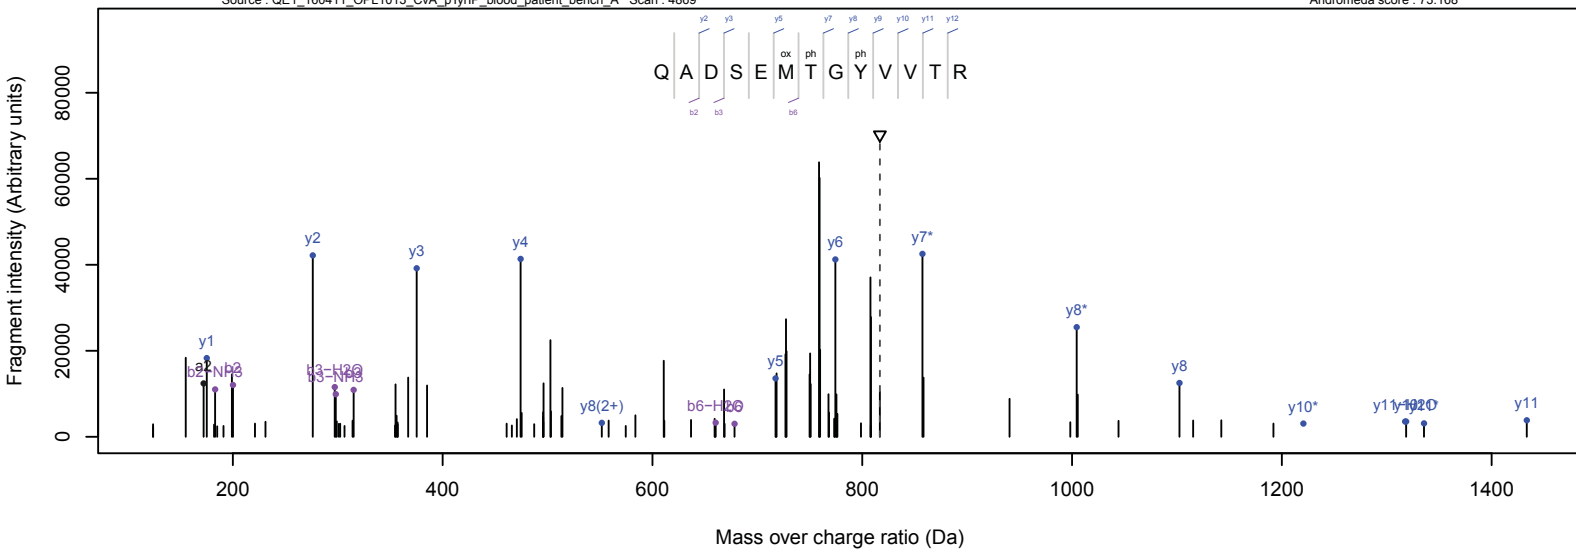

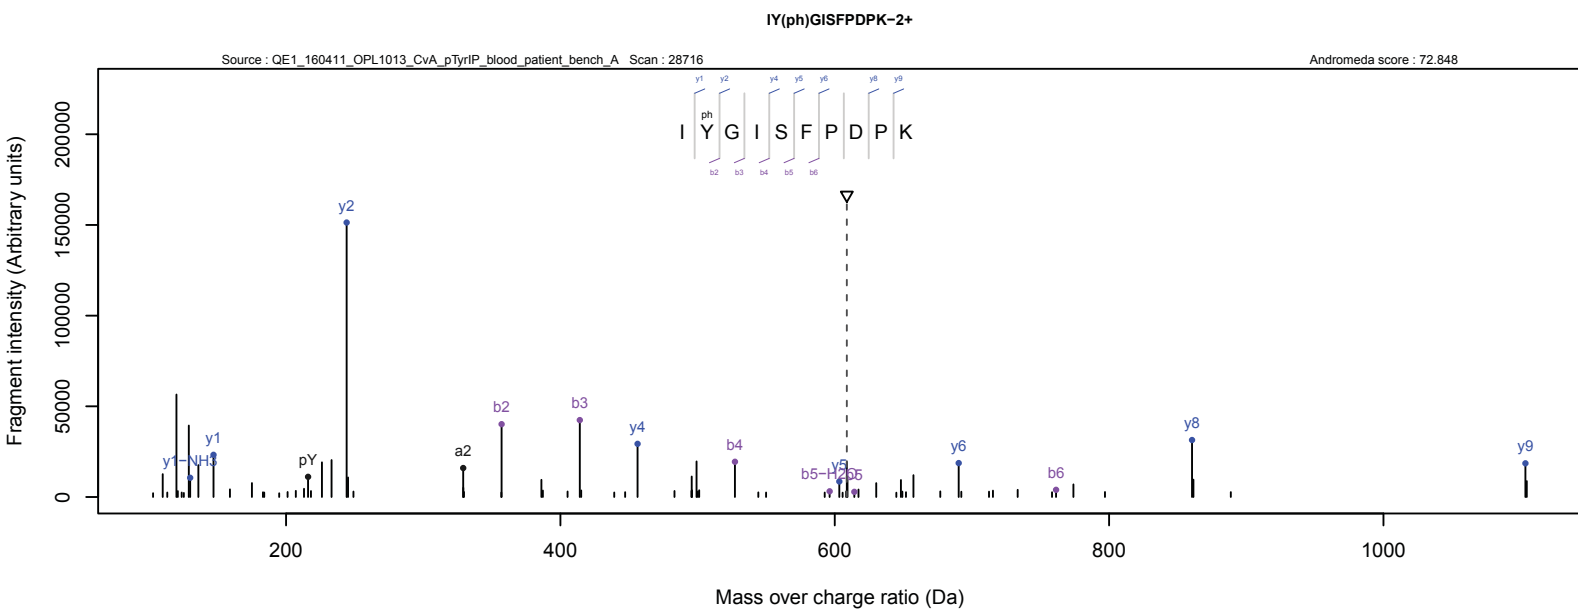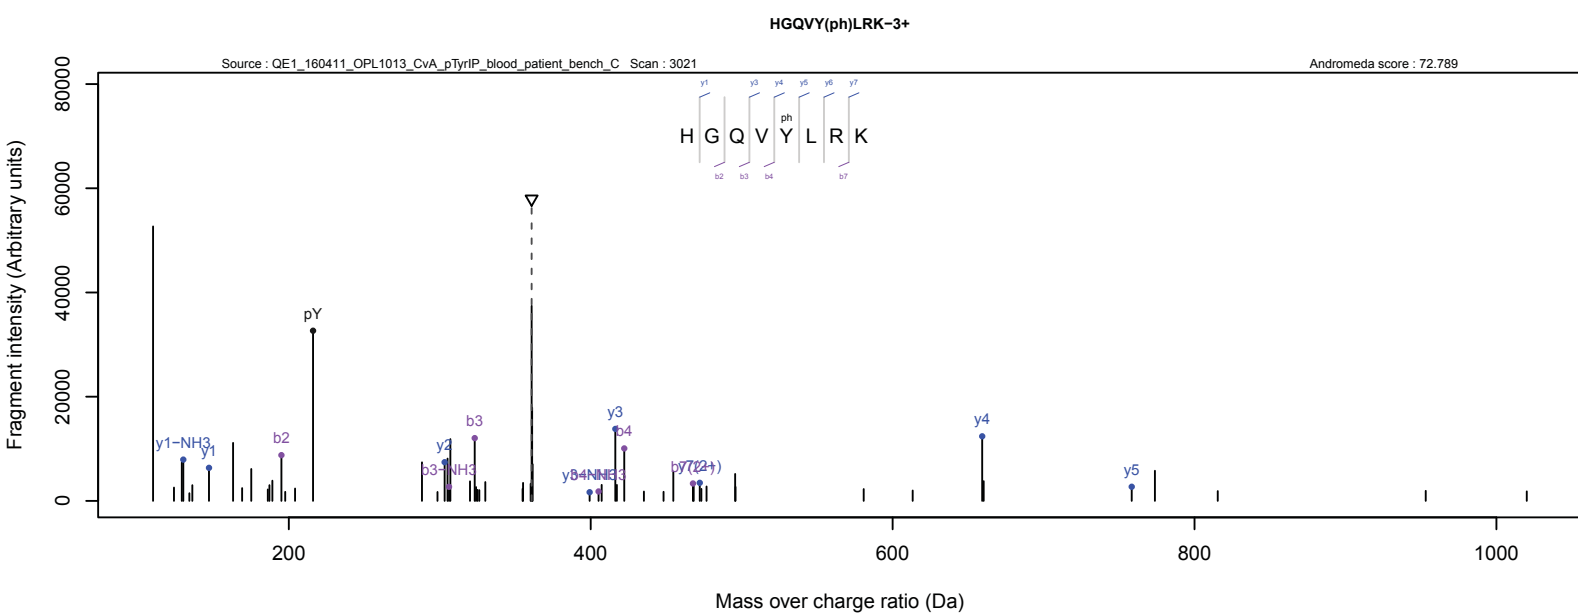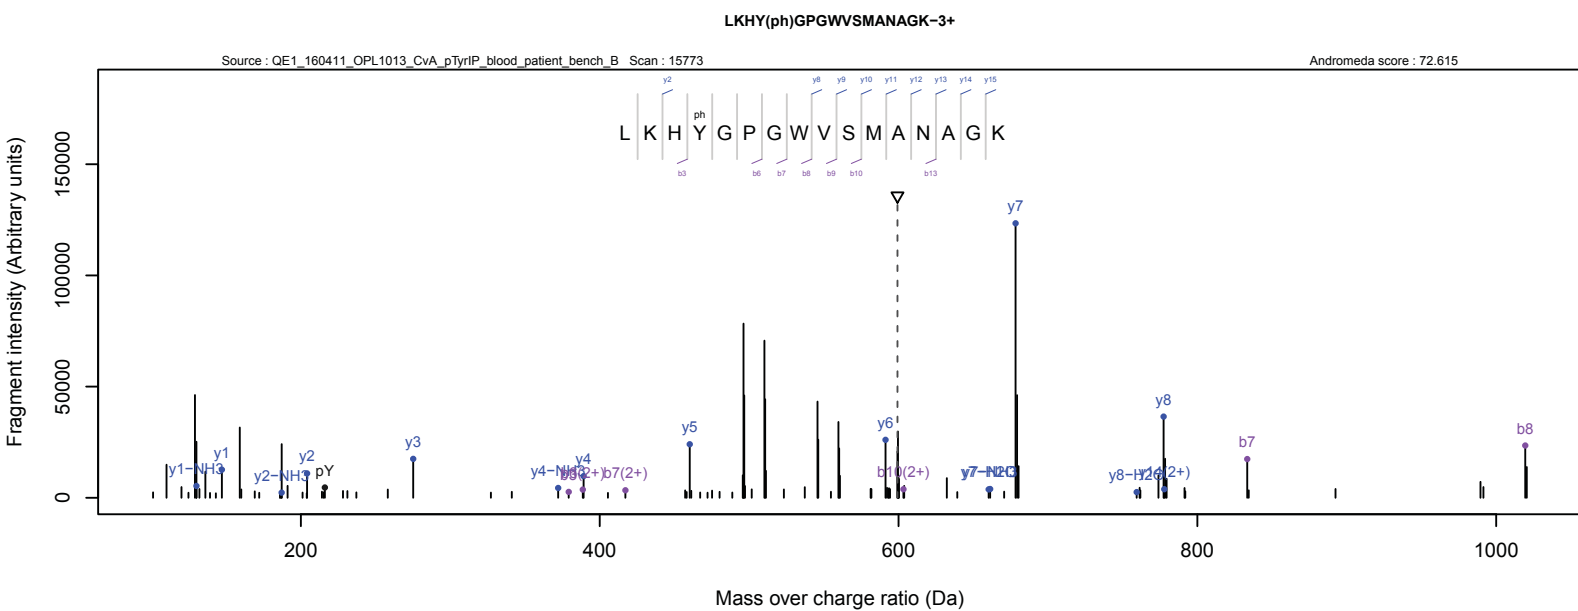

Y(ph)RDVSPFDHSR-3+

Source: QE1\_160411\_OPL1013\_CvA\_pTyrIP\_blood\_patient\_bench\_C Scan: 8558

Andromeda score: 72.29

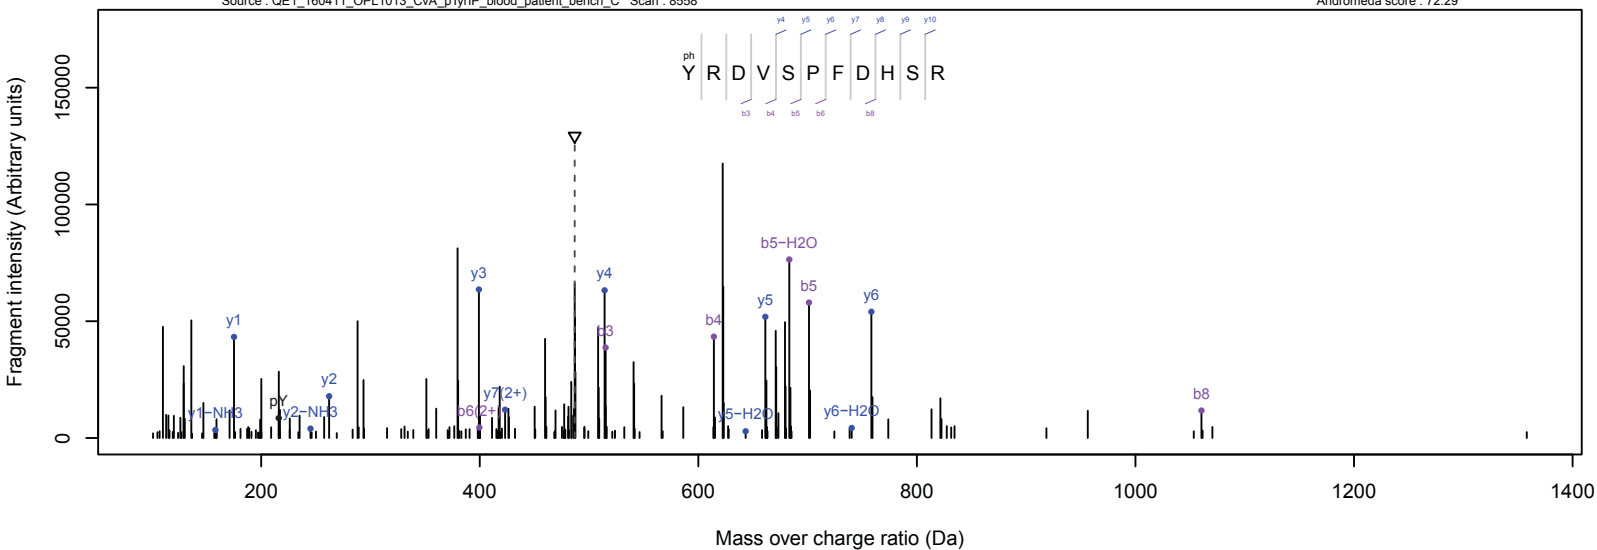

GVWSM(ox)PSKYSEEGV(ph)NVQYSFIK-3+

Source: QE1\_160411\_OPL1013\_CvA\_pTyrIP\_blood\_patient\_bench\_C Scan: 36360

Andromeda score: 72.167

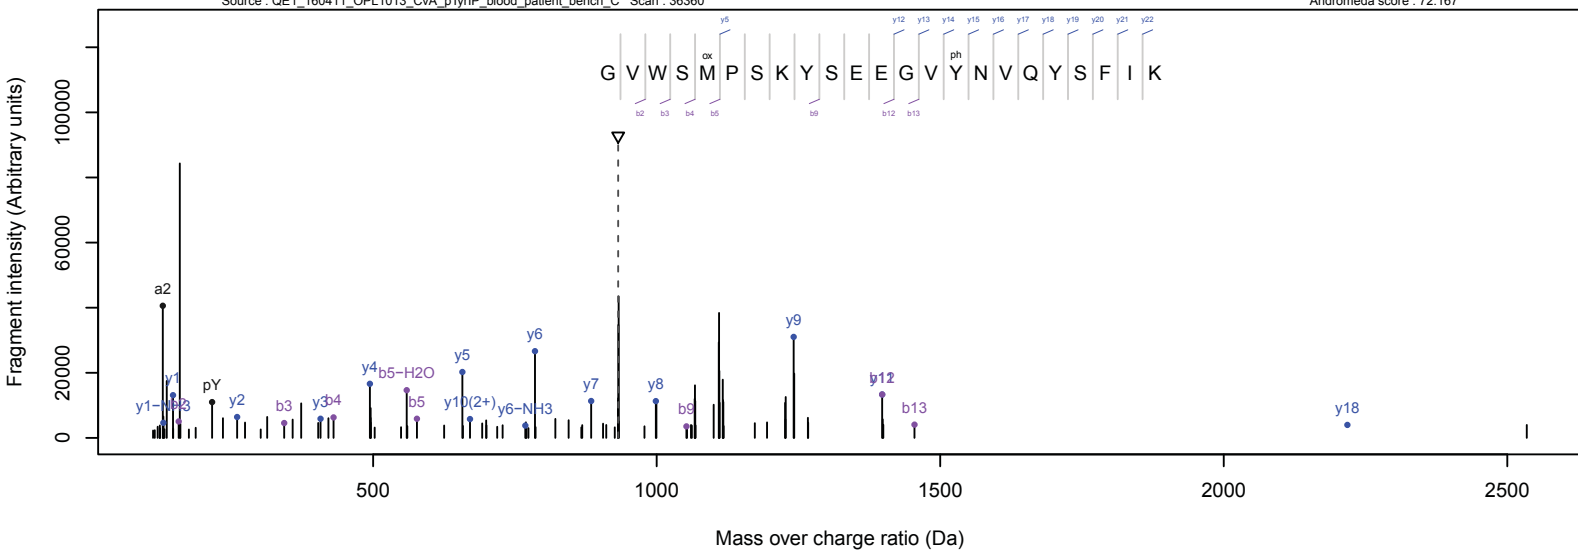

ARDDY(ph)KTLVGSENPPLTVIR-3+

Source: QE1\_160411\_OPL1013\_CvA\_pTyrIP\_blood\_patient\_bench\_D Scan: 26888

Andromeda score: 72.09

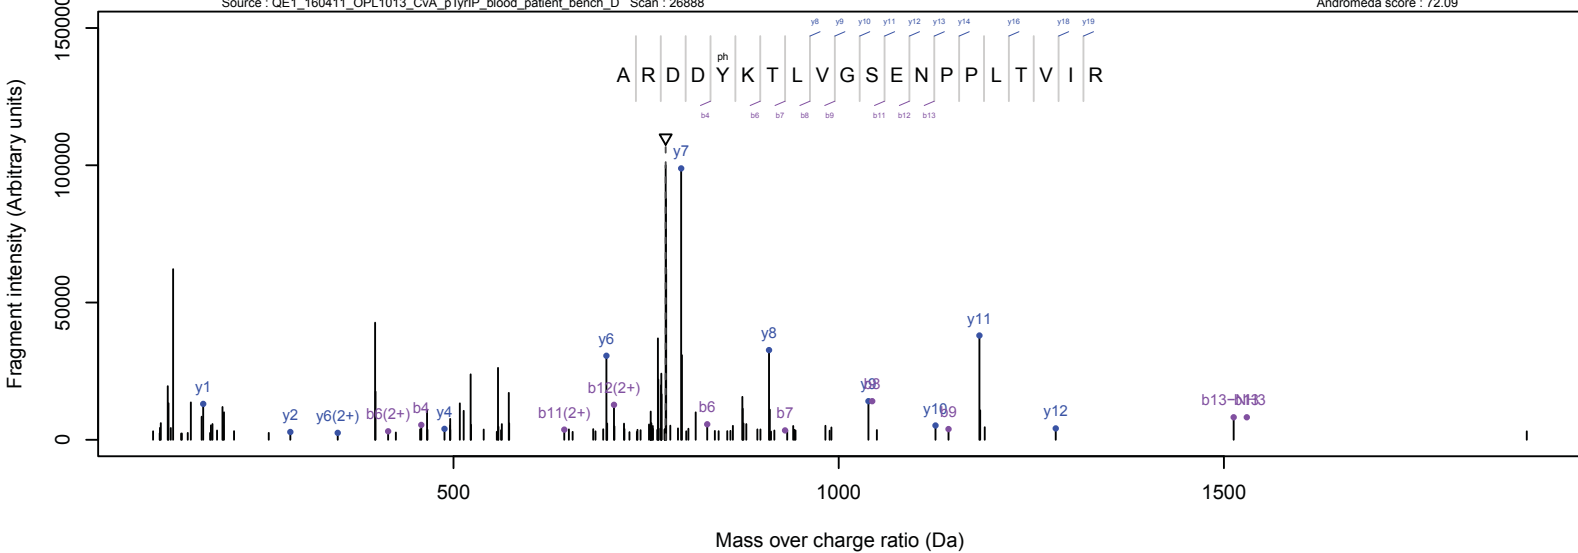

## QEDGGV(ph)SSGLK-2+

Source : QE1\_160411\_OPL1013\_CvA\_pTyrIP\_blood\_patient\_bench\_D Scan : 5658

Andromeda score : 71.879

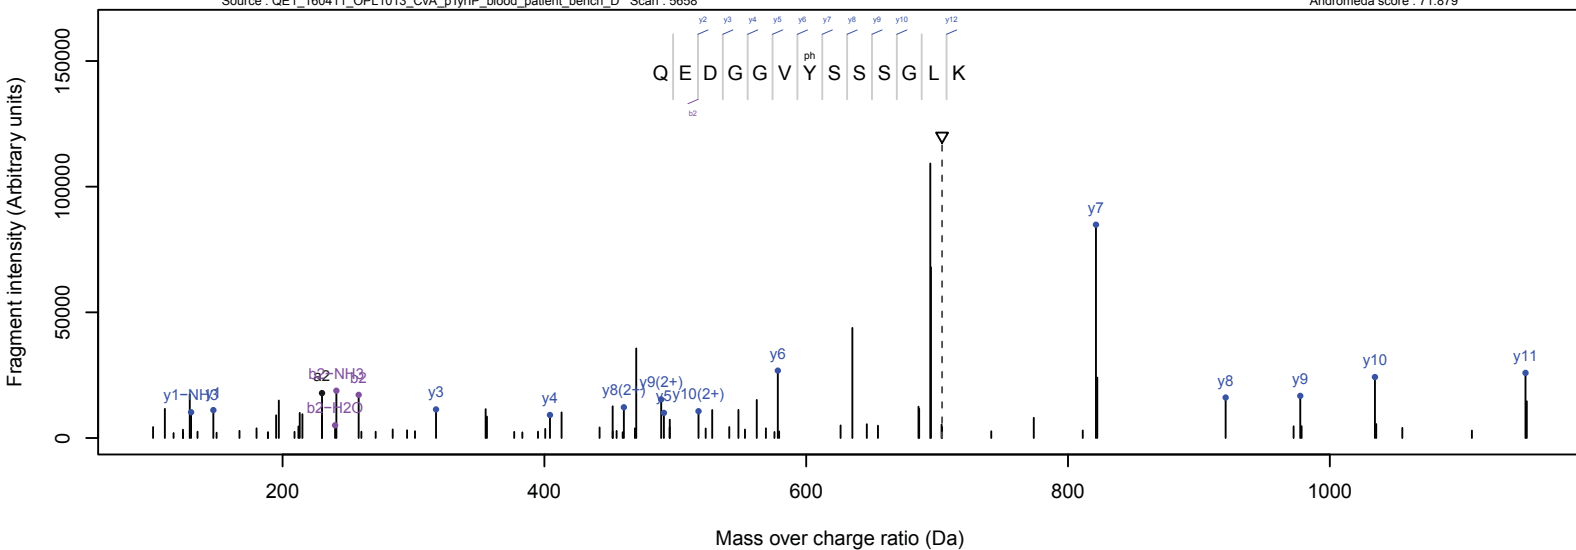

## KNPQEGLY(ph)NELQDK-3+

Source : QE1\_160411\_OPL1013\_CvA\_pTyrIP\_blood\_patient\_bench\_D Scan : 11162

Andromeda score : 71.354

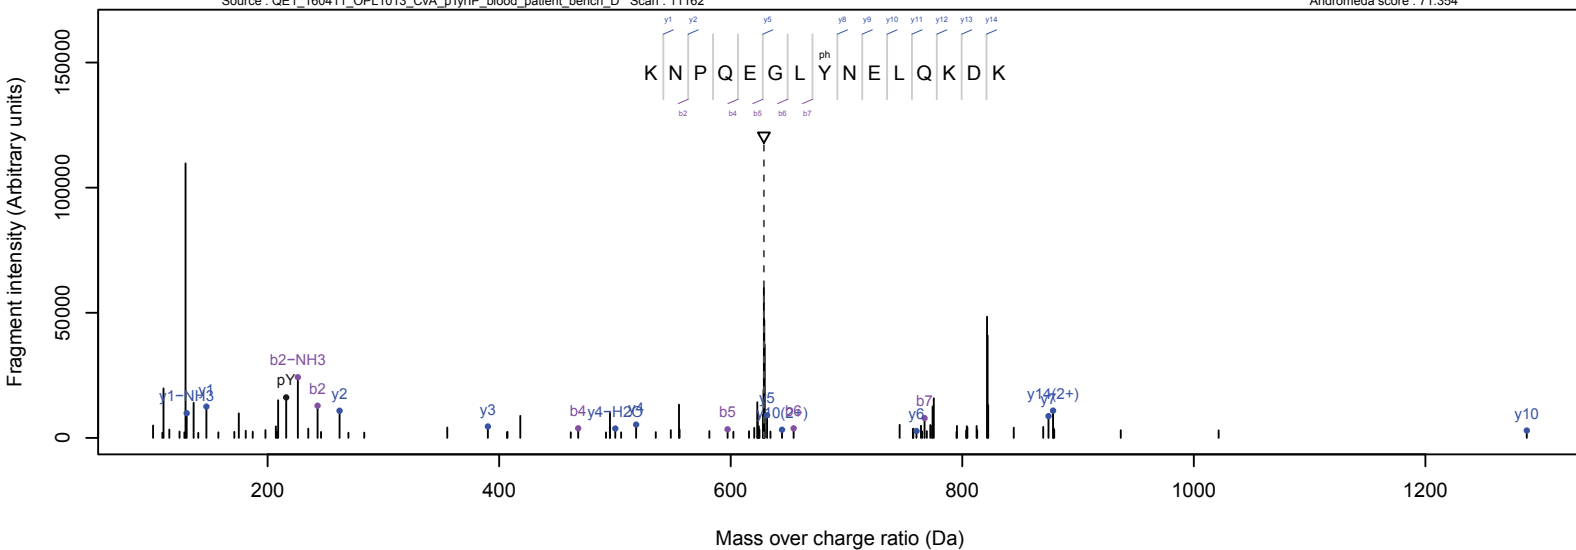

## YEEIVKEVSTY(ph)IKK-3+

Source : QE1\_160411\_OPL1013\_CvA\_pTyrIP\_blood\_patient\_bench\_A Scan : 22225

Andromeda score : 71.279

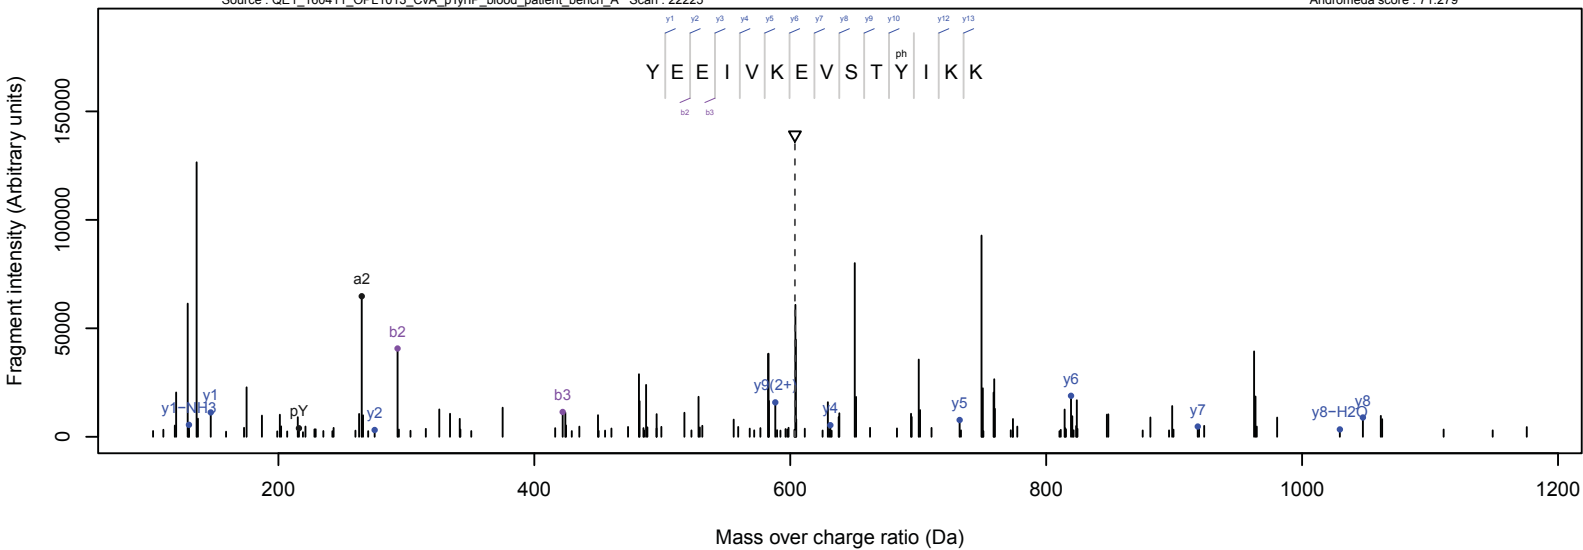

YYADGEDAYAM<sup>ph</sup>KR-3+

Source: QE1\_160411\_OPL1013\_CvA\_pTyrIP\_blood\_patient\_bench\_C Scan: 5444

Andromeda score: 71.176

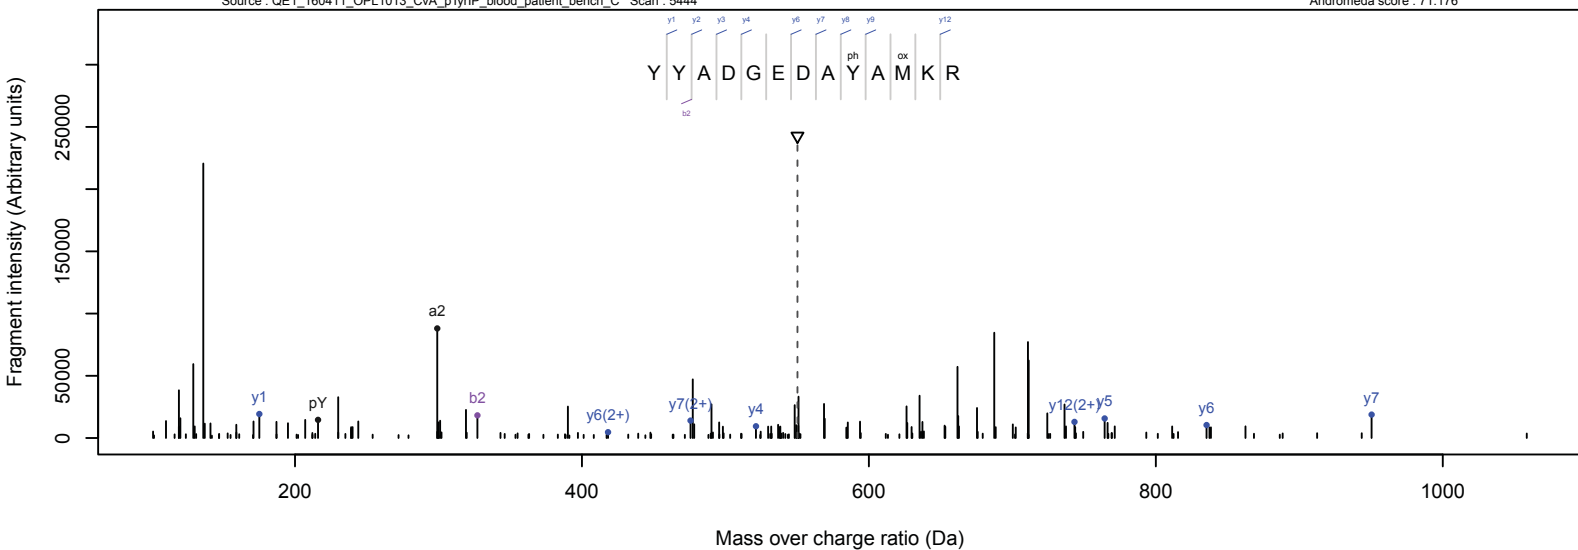GHASAPY<sup>ph</sup>FGKEEPSVAPSSSTGK-3+

Source: QE1\_160411\_OPL1013\_CvA\_pTyrIP\_blood\_patient\_bench\_D Scan: 13152

Andromeda score: 71.148

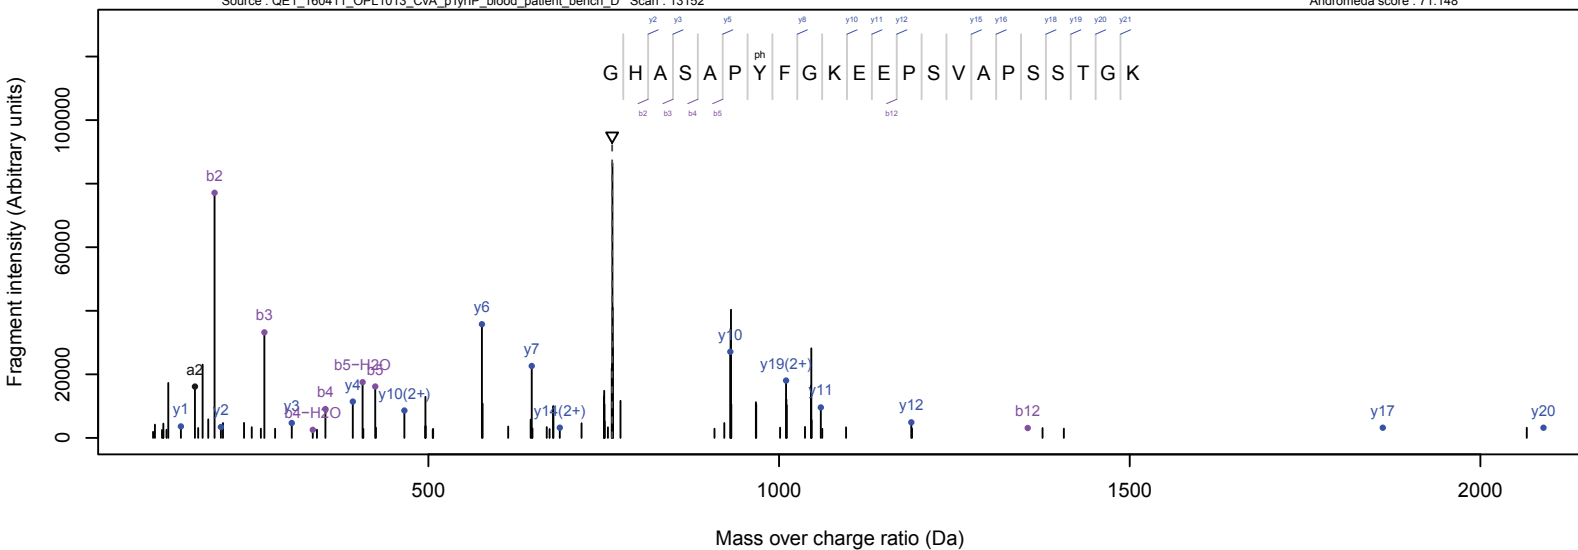LIEDNEY<sup>ph</sup>TAREGAK-3+

Source: QE1\_160411\_OPL1013\_CvA\_pTyrIP\_blood\_patient\_bench\_C Scan: 6428

Andromeda score: 71.031

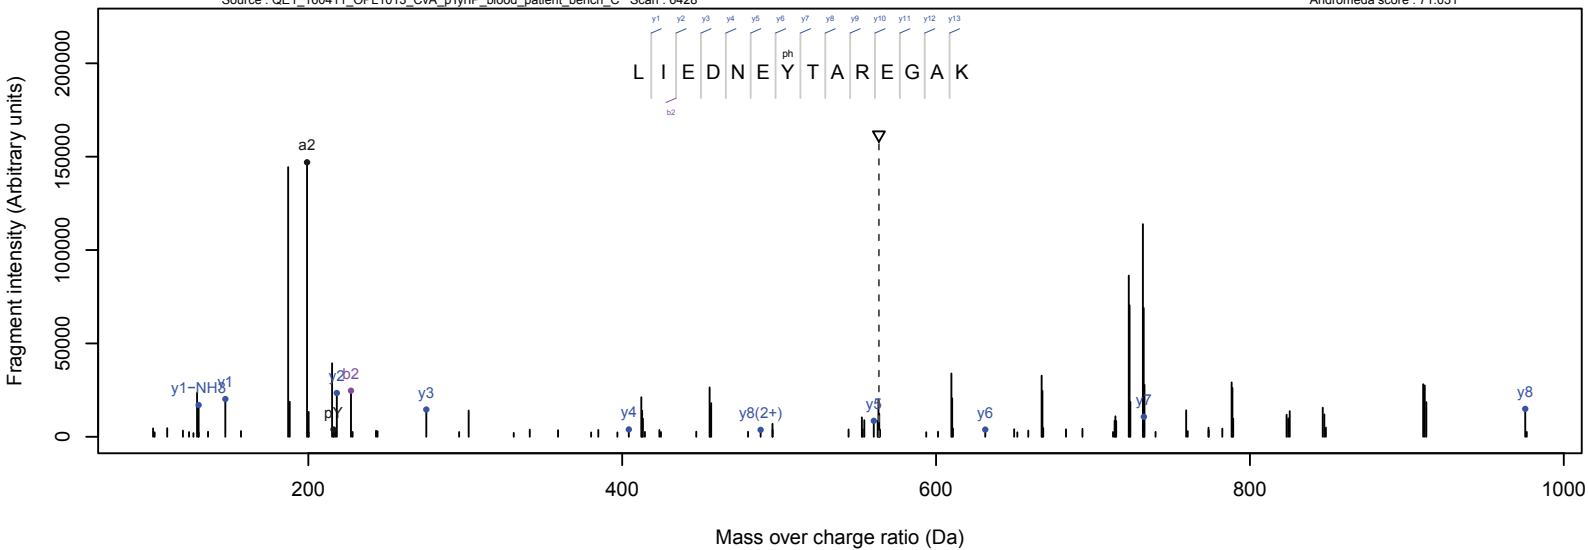

TTDGVY(ph)EGVAIGGDRYPGSTFMDHVL R-3+

Source : QE1\_160411\_OPL1013\_CvA\_pTyrIP\_blood\_patient\_bench\_D Scan : 38158

Andromeda score : 71.002

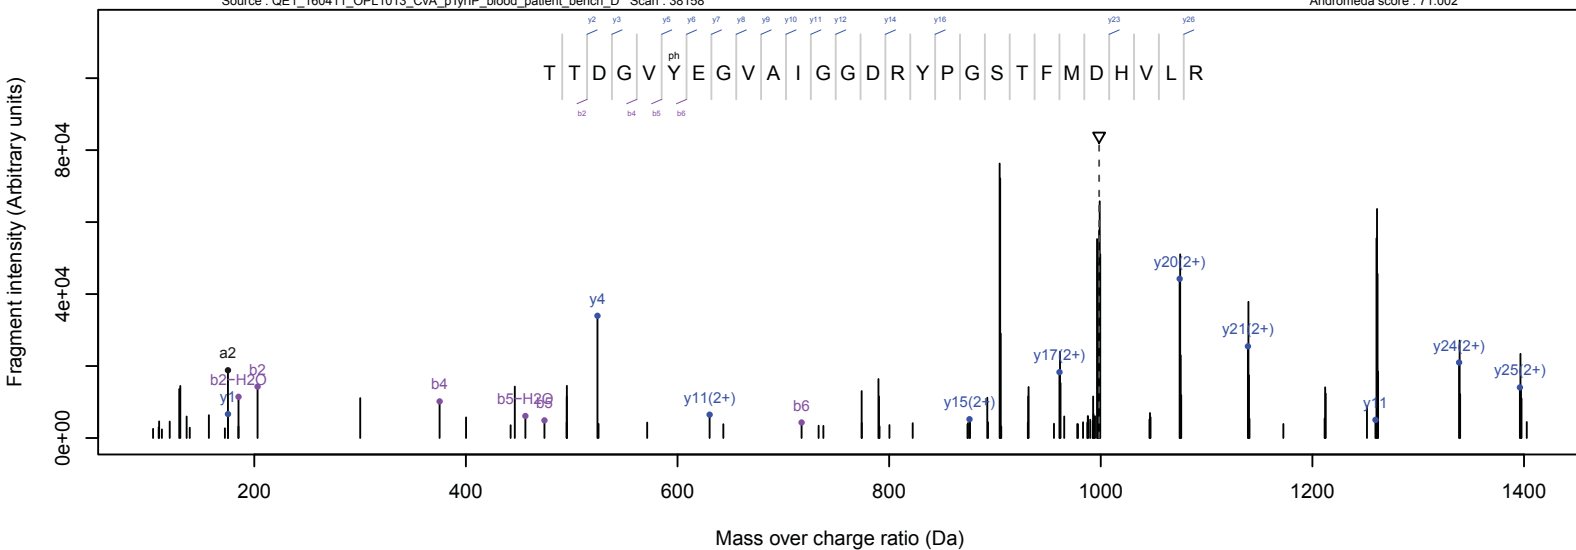

VGSGTY(ph)GDVYK-2+

Source : QE1\_160411\_OPL1013\_CvA\_pTyrIP\_blood\_patient\_bench\_C Scan : 7032

Andromeda score : 70.942

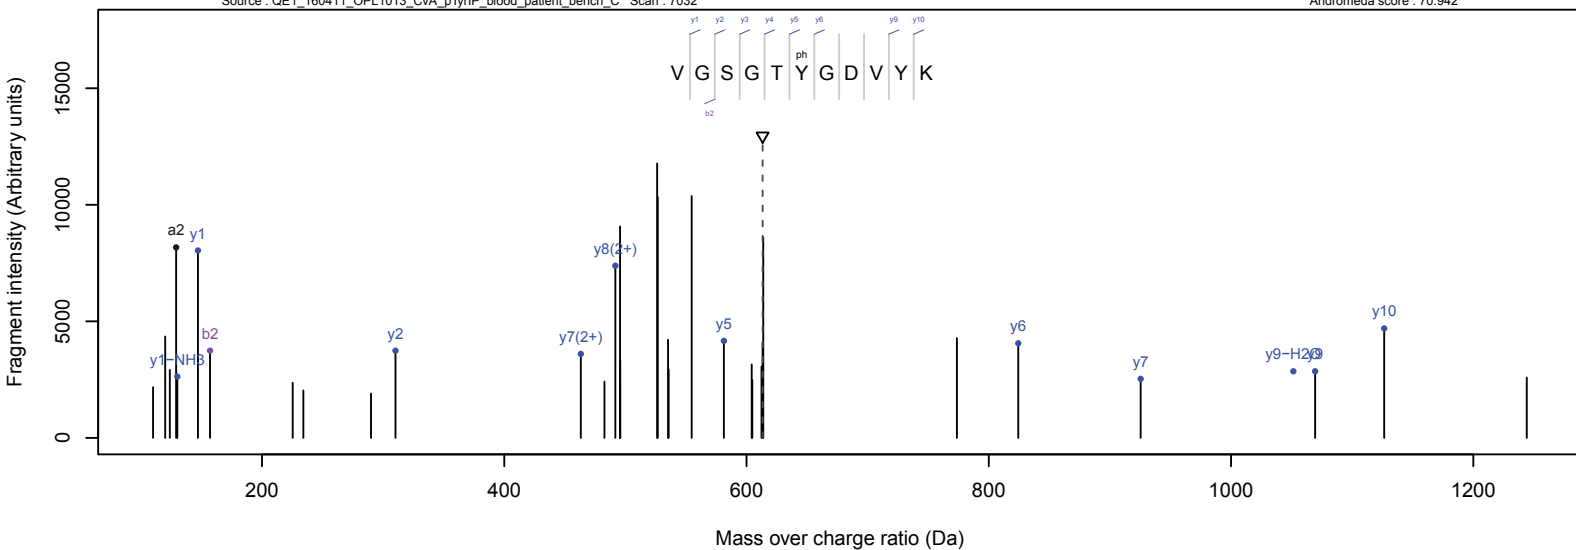

VGEEHVYS(ph)FPNKQK-3+

Source : QE1\_160411\_OPL1013\_CvA\_pTyrIP\_blood\_patient\_bench\_C Scan : 8882

Andromeda score : 70.889

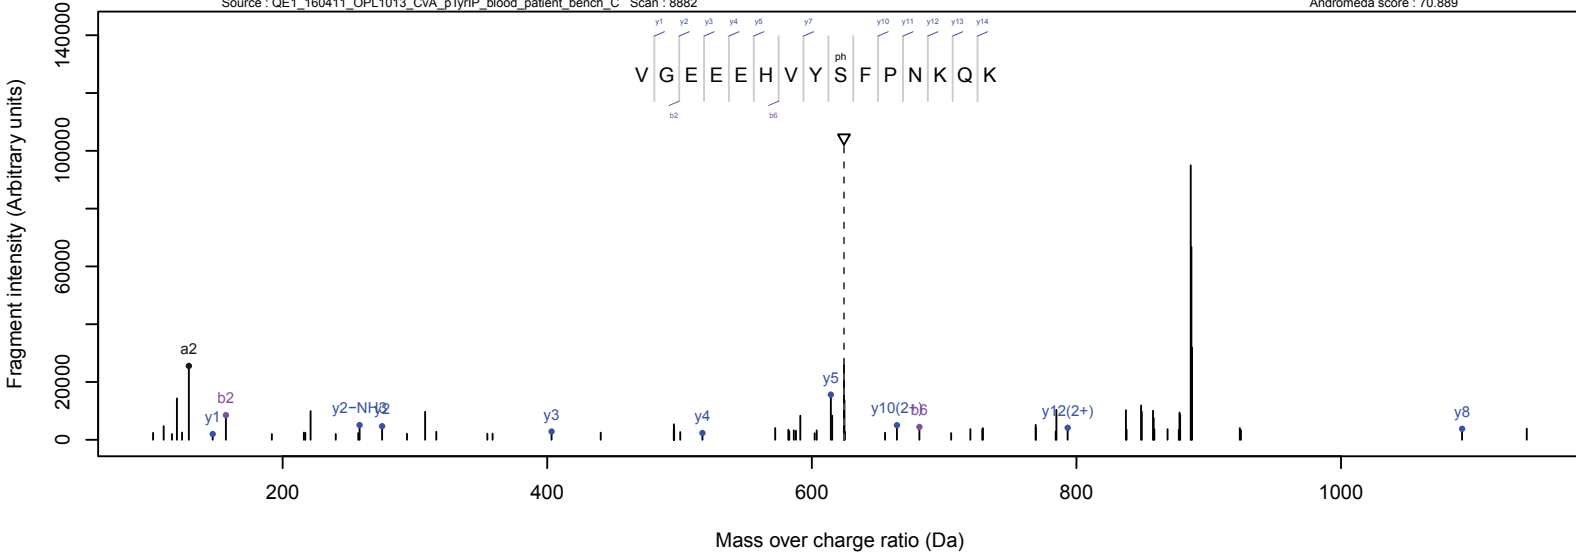

DHVVEGEPY(ph)AGYDR-3+

Source : QE1\_160411\_OPL1013\_CvA\_pTyrIP\_blood\_patient\_bench\_A Scan : 9222

Andromeda score : 70.373

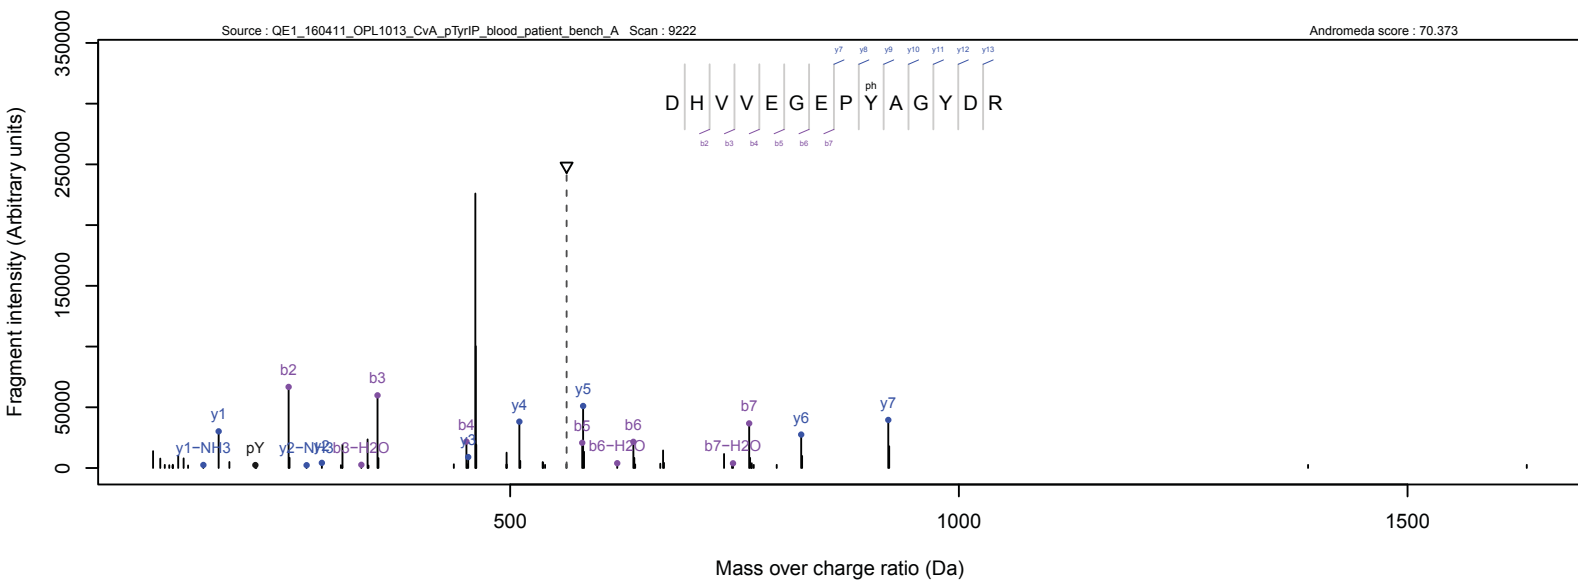

SGPKPFSAPKQT(ph)SPSPK-3+

Source : QE1\_160411\_OPL1013\_CvA\_pTyrIP\_blood\_patient\_bench\_B Scan : 9354

Andromeda score : 70.174

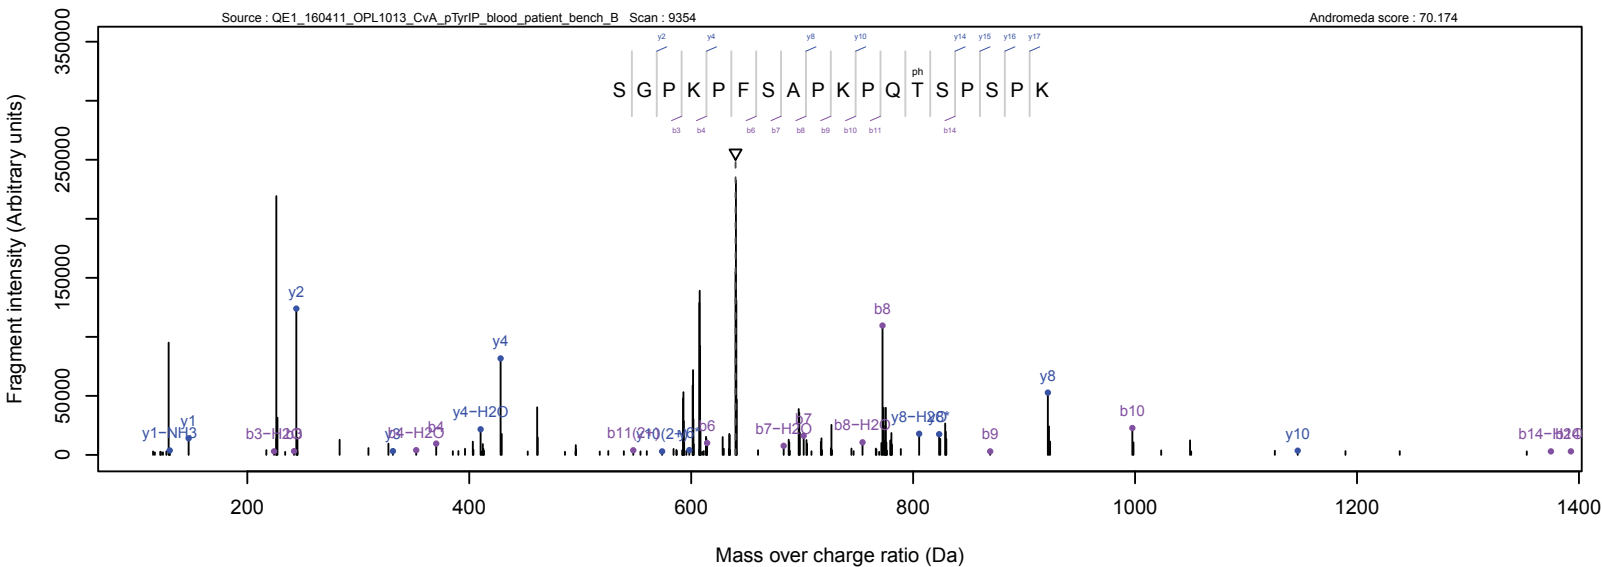

VWY(ph)HVCSSR-2+

Source : QE1\_160411\_OPL1013\_CvA\_pTyrIP\_blood\_patient\_bench\_D Scan : 9323

Andromeda score : 70.056

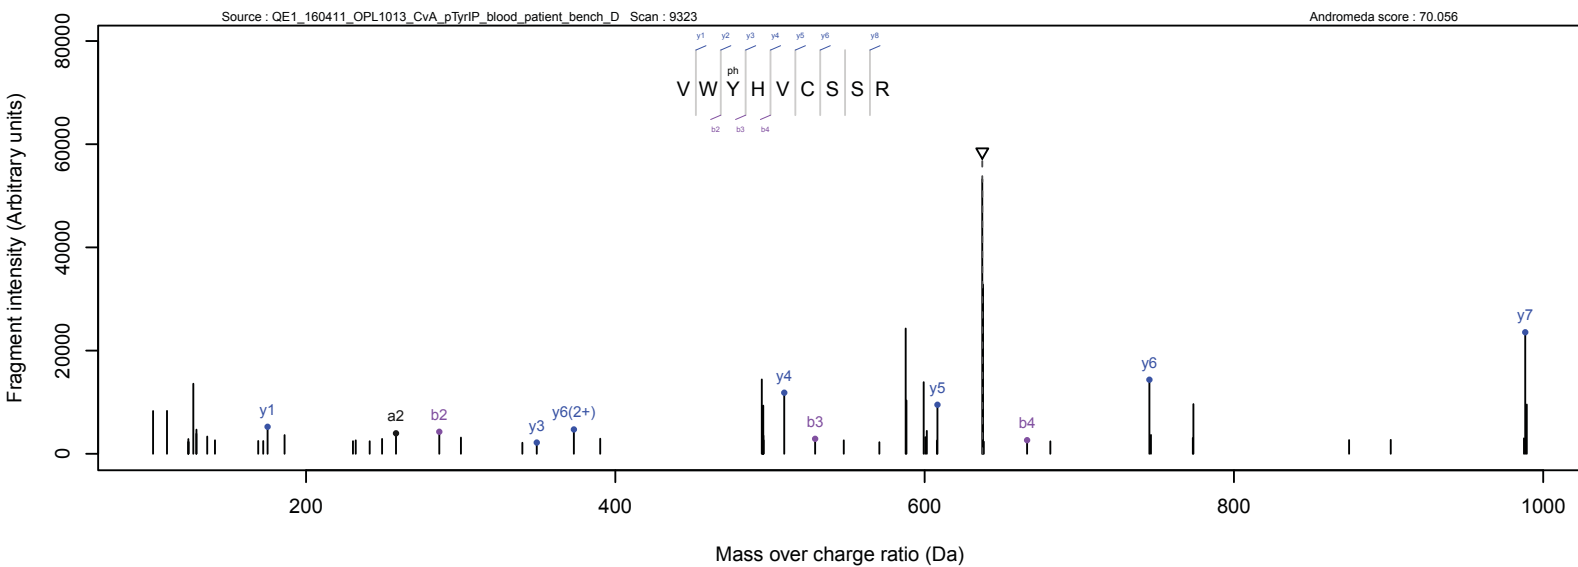



## SSFREEDNTY(ph)R-3+

Source: QE1\_160411\_OPL1013\_CvA\_pTyrIP\_blood\_patient\_bench\_D Scan: 3396

Andromeda score: 69.864

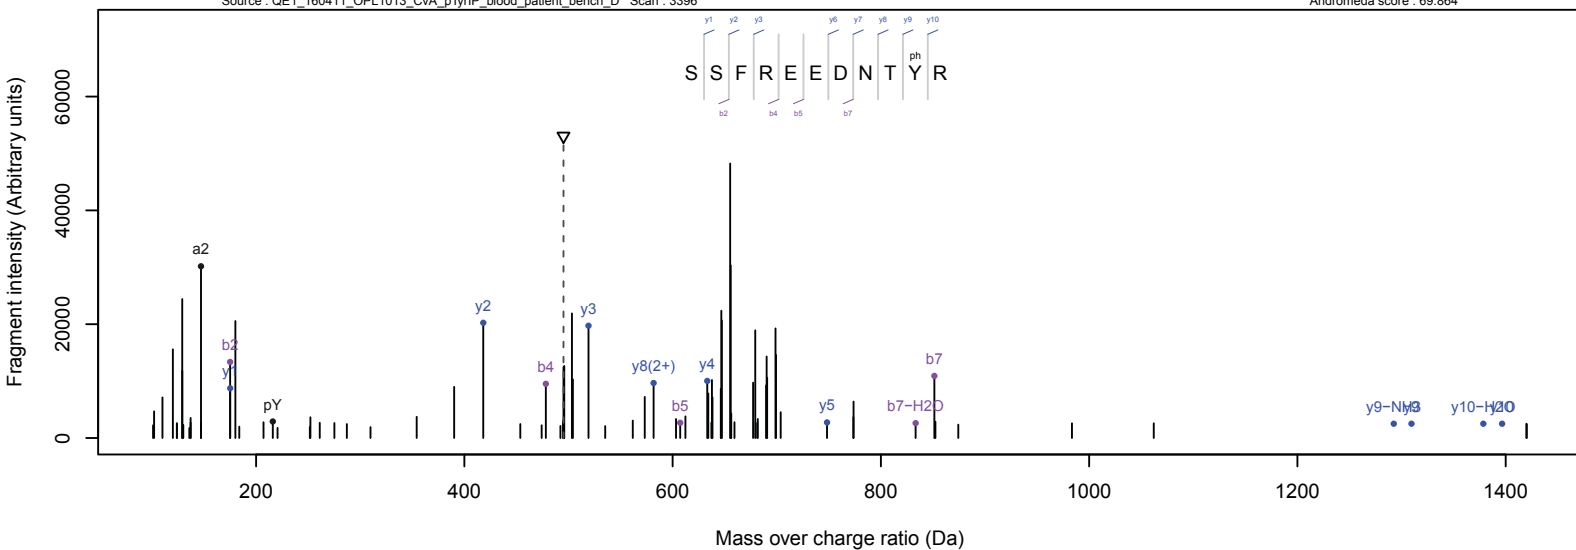

## EHNFSFY(ph)PTFQSHPNSSMPGSR-3+

Source: QE1\_160411\_OPL1013\_CvA\_pTyrIP\_blood\_patient\_bench\_D Scan: 26432

Andromeda score: 69.765

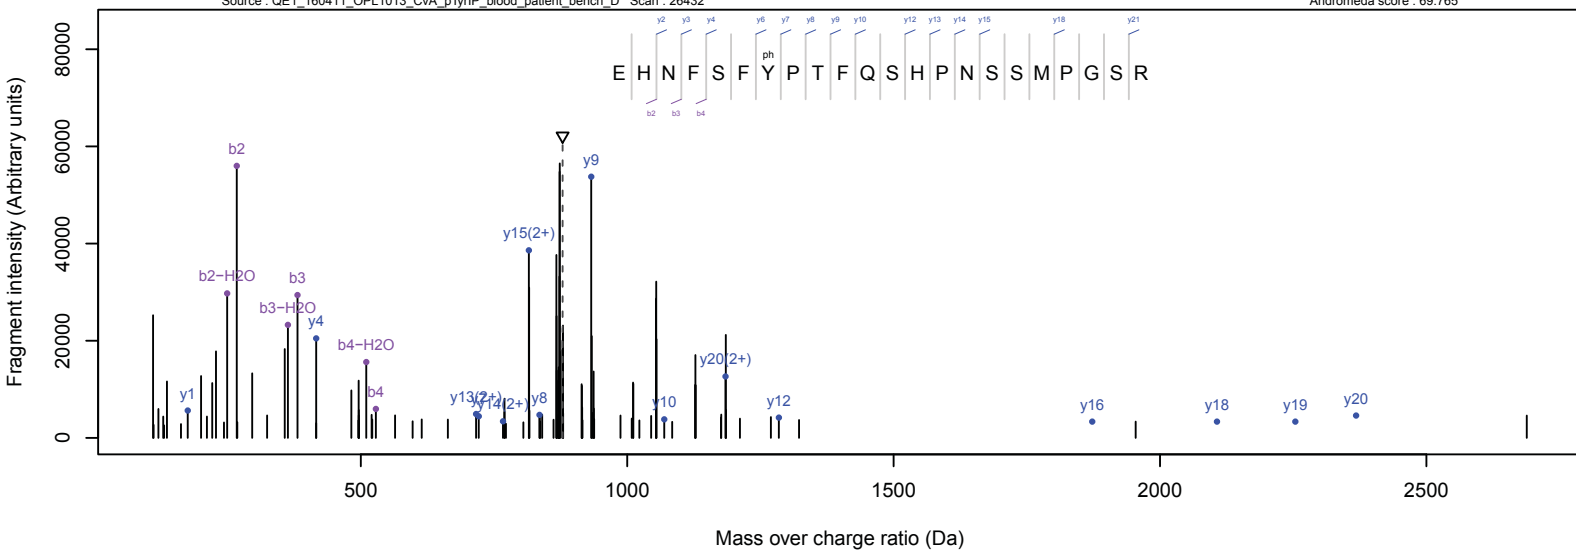

## NLDHVY(ph)NR-2+

Source: QE1\_160411\_OPL1013\_CvA\_pTyrIP\_blood\_patient\_bench\_D Scan: 3227

Andromeda score: 69.598

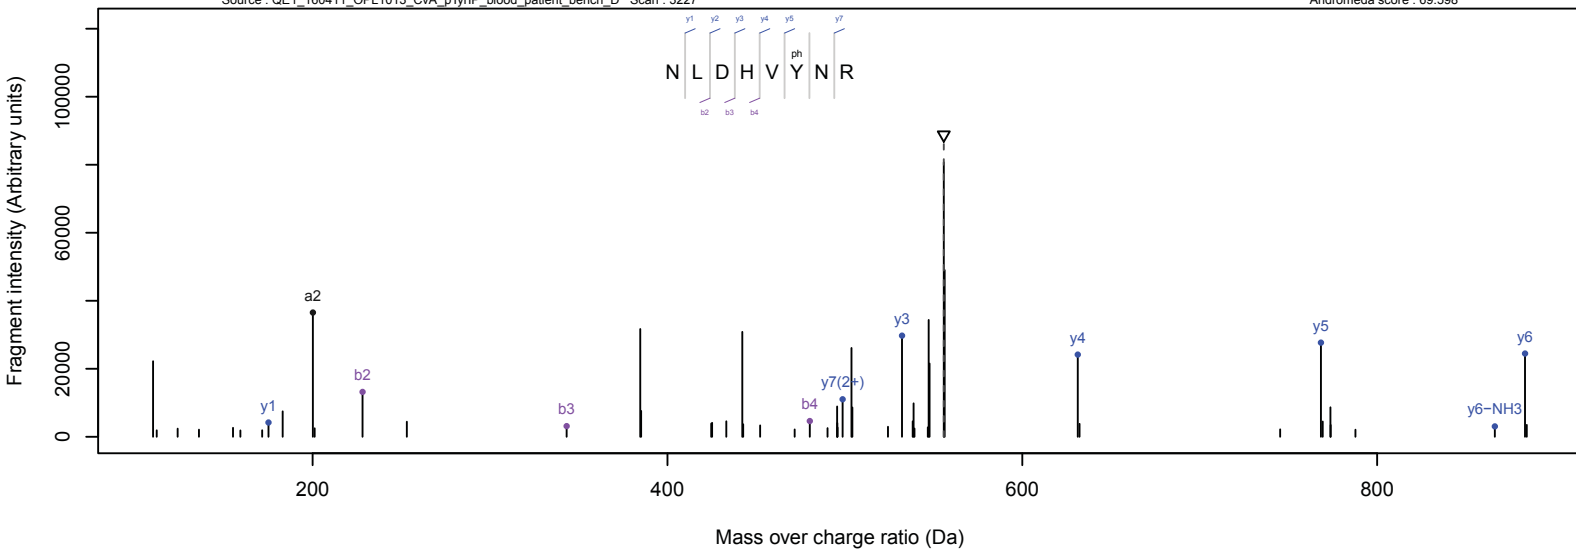

NY(ph)VTPVNR-2+

Source : QE1\_160411\_OPL1013\_CvA\_pTyrIP\_blood\_patient\_bench\_D Scan : 5172

Andromeda score : 69.598

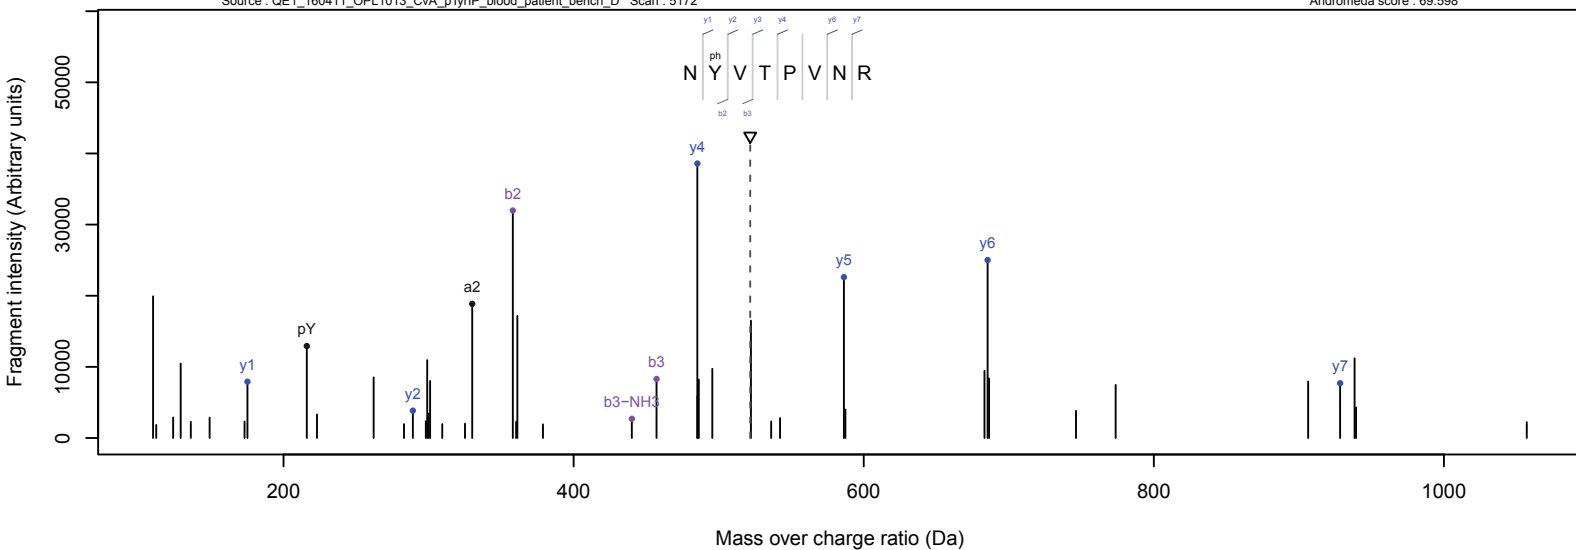

LVSSPCCIVTSTY(ph)GWTANMER-3+

Source : QE1\_160411\_OPL1013\_CvA\_pTyrIP\_blood\_patient\_bench\_D Scan : 37470

Andromeda score : 69.361

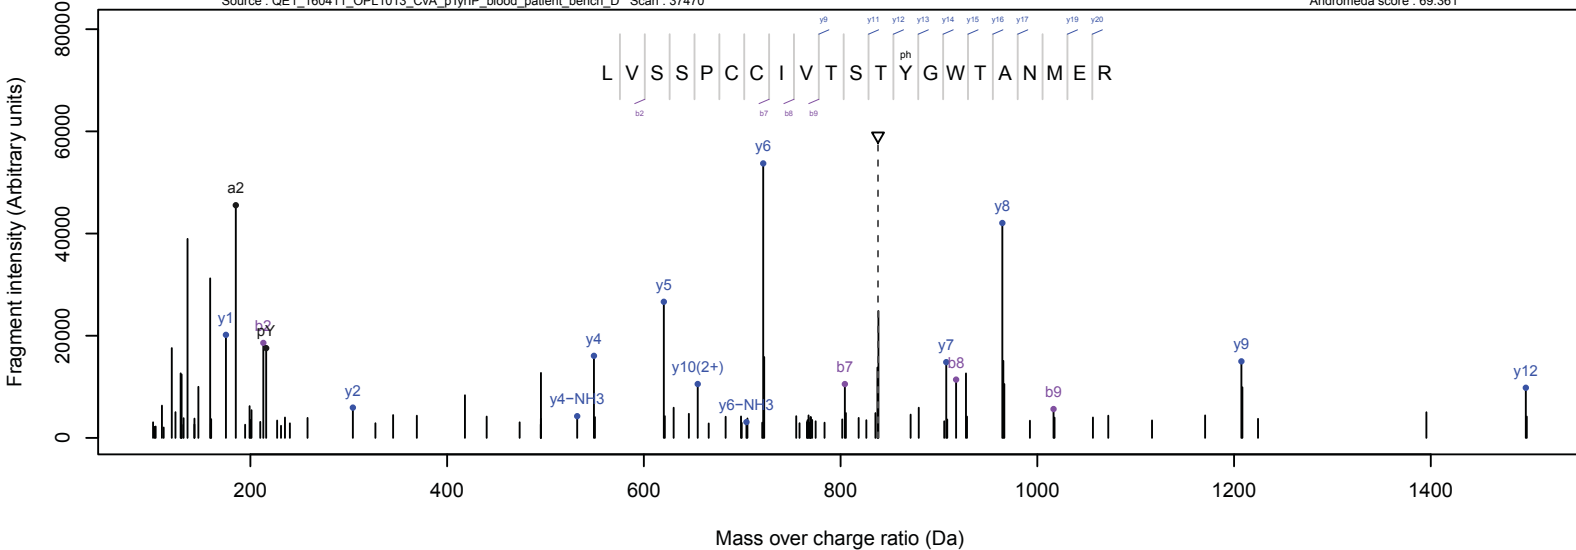

SDDY(ph)MPMPASVSAPK-2+

Source : QE1\_160411\_OPL1013\_CvA\_pTyrIP\_blood\_patient\_bench\_B Scan : 22449

Andromeda score : 69.331

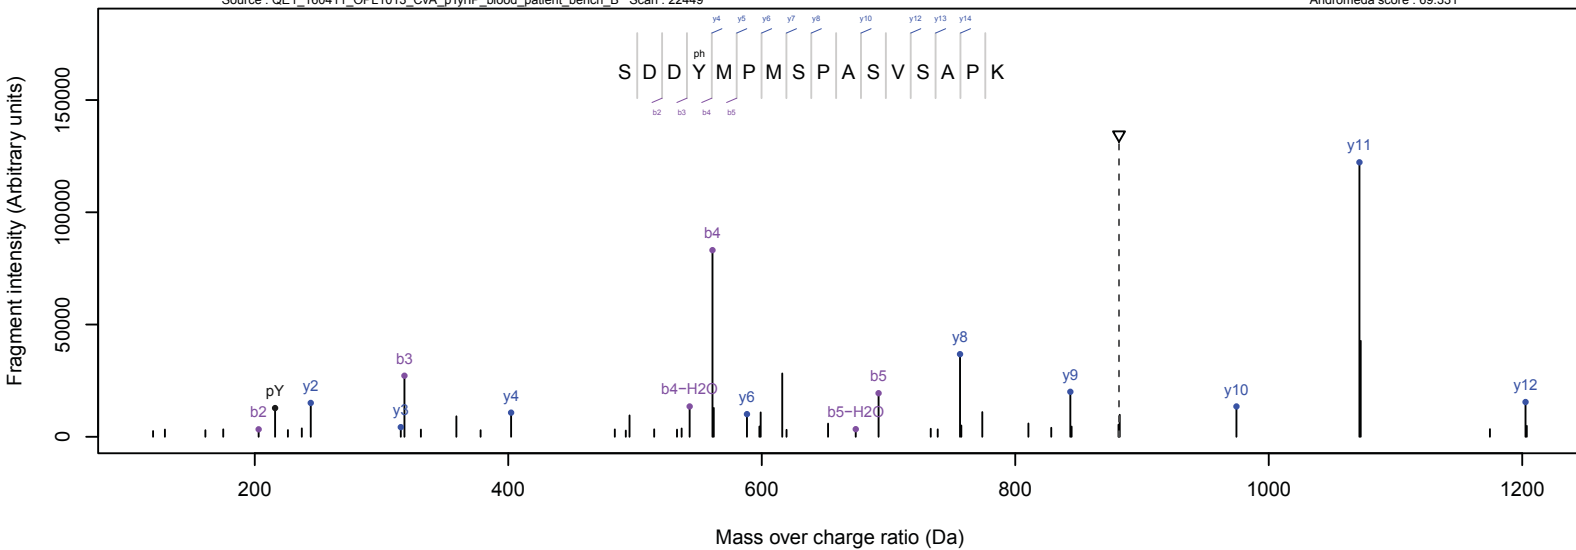

## SGPLEACY(ph)GELGQSR-2+

Source : QE1\_160411\_OPL1013\_CvA\_pTyrIP\_blood\_patient\_bench\_D Scan : 17980

Andromeda score : 69.331

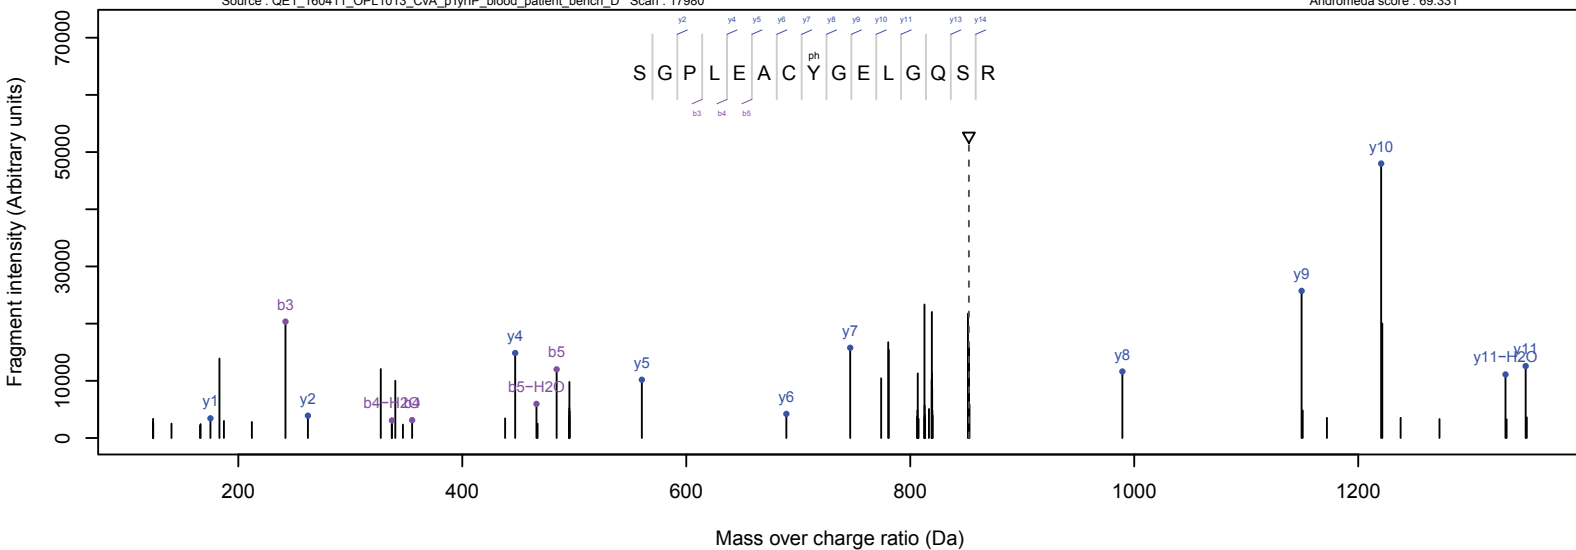

## Y(ph)KFVATGHGKYEK-3+

Source : QE1\_160411\_OPL1013\_CvA\_pTyrIP\_blood\_patient\_bench\_C Scan : 4068

Andromeda score : 69.229

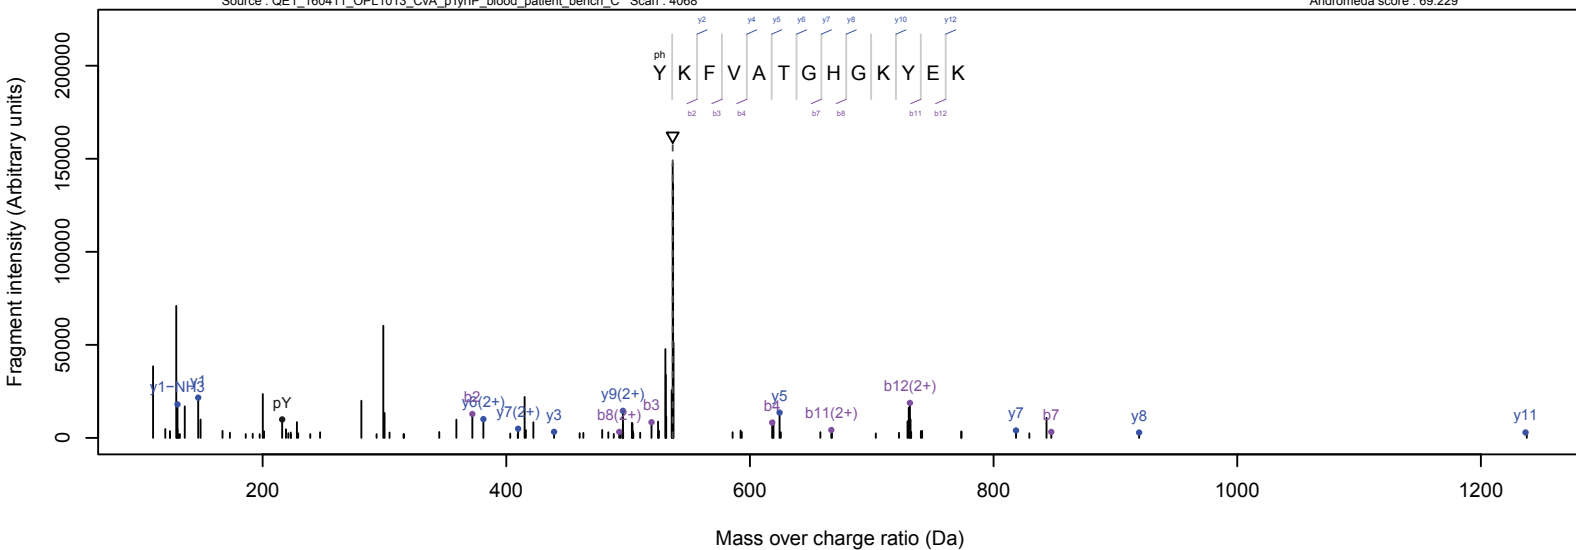

## SSLY(ph)FPR-2+

Source : QE1\_160411\_OPL1013\_CvA\_pTyrIP\_blood\_patient\_bench\_C Scan : 20959

Andromeda score : 69.176

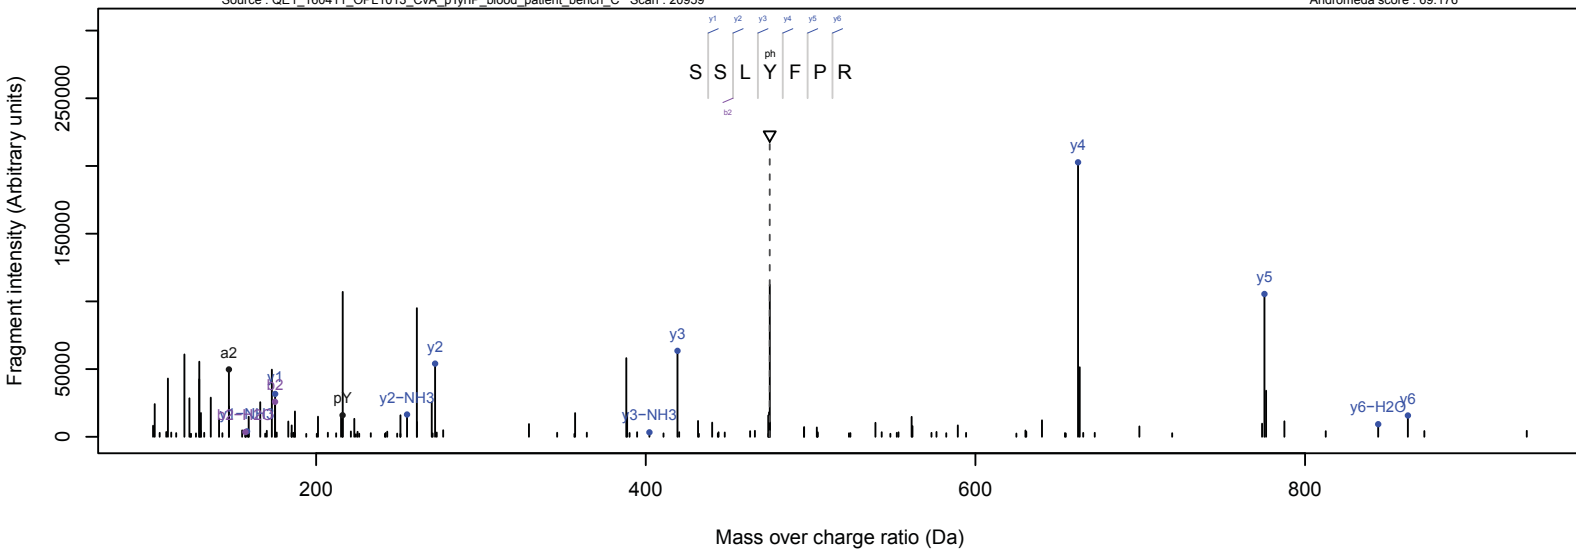

## M(ox)LEGGEDPLY(ph)VAR-2+

Source : QE1\_160411\_OPL1013\_CvA\_pTyrIP\_blood\_patient\_bench\_C Scan : 24914

Andromeda score : 69.03

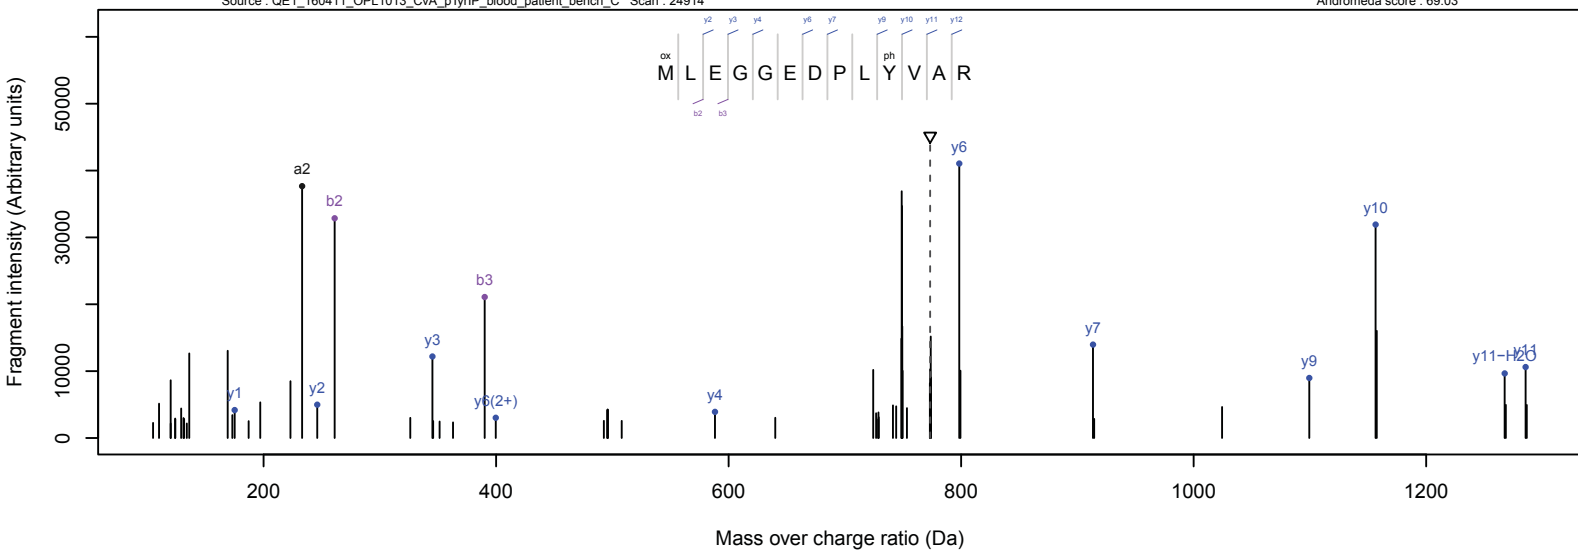

## TTAVEIDYDS(ph)LK LK K-3+

Source : QE1\_160411\_OPL1013\_CvA\_pTyrIP\_blood\_patient\_bench\_C Scan : 22851

Andromeda score : 68.972

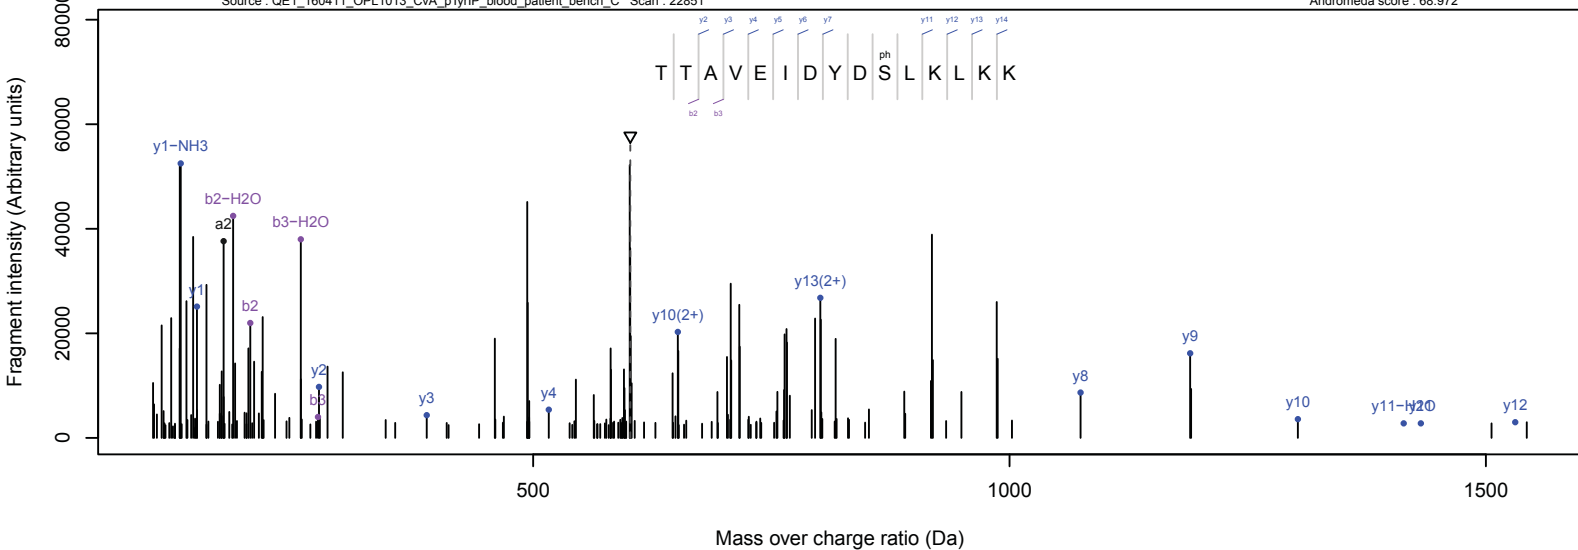

## M(ox)VVESAY(ph)EVIK-2+

Source : QE1\_160411\_OPL1013\_CvA\_pTyrIP\_blood\_patient\_bench\_C Scan : 20274

Andromeda score : 68.536

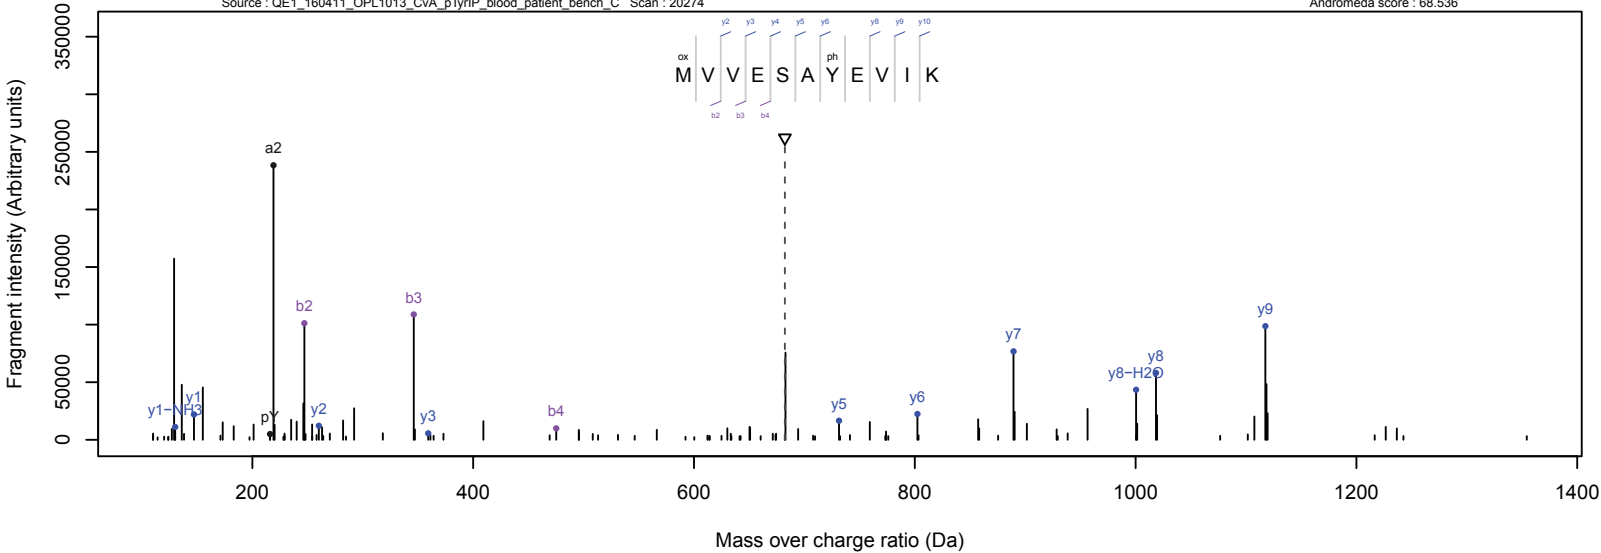

**AY(ph)TNFDAERDALNIETAIK-3+**

Source : QE1\_160411\_OPL1013\_CvA\_pTyrIP\_blood\_patient\_bench\_C Scan : 37271

Andromeda score : 68.525

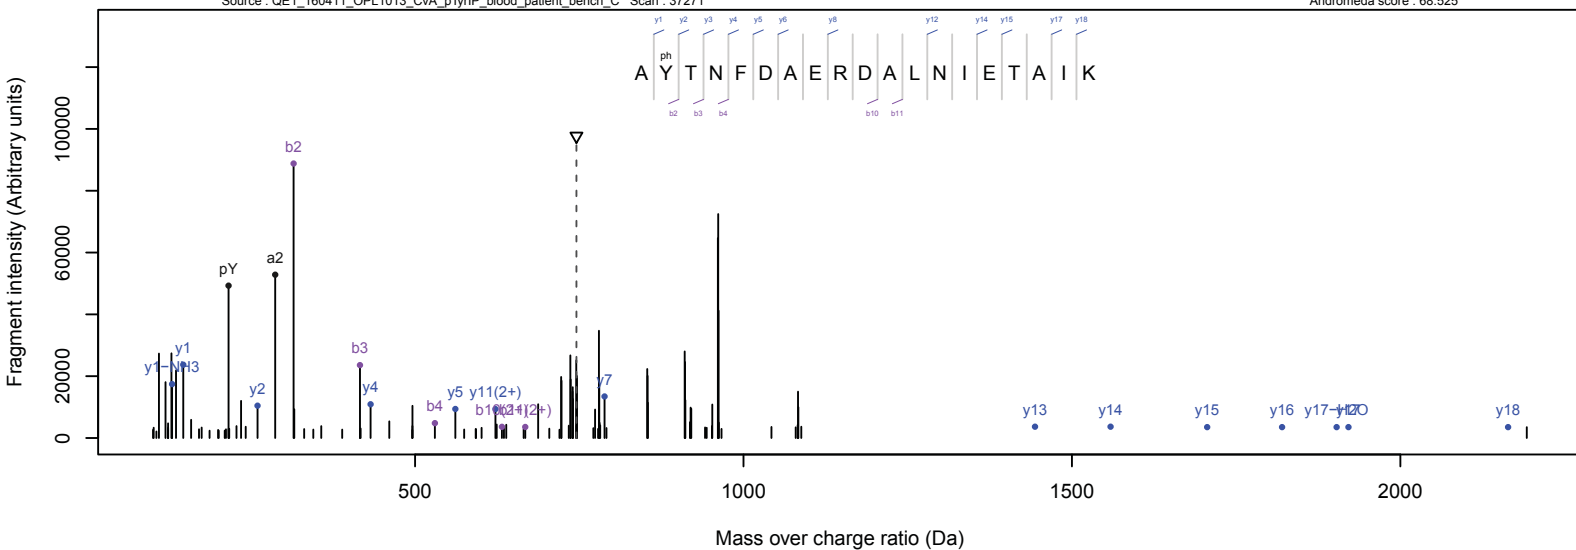

**NDGY(ph)VHIHPSSVNYQVR-3+**

Source : QE1\_160411\_OPL1013\_CvA\_pTyrIP\_blood\_patient\_bench\_A Scan : 14794

Andromeda score : 68.481

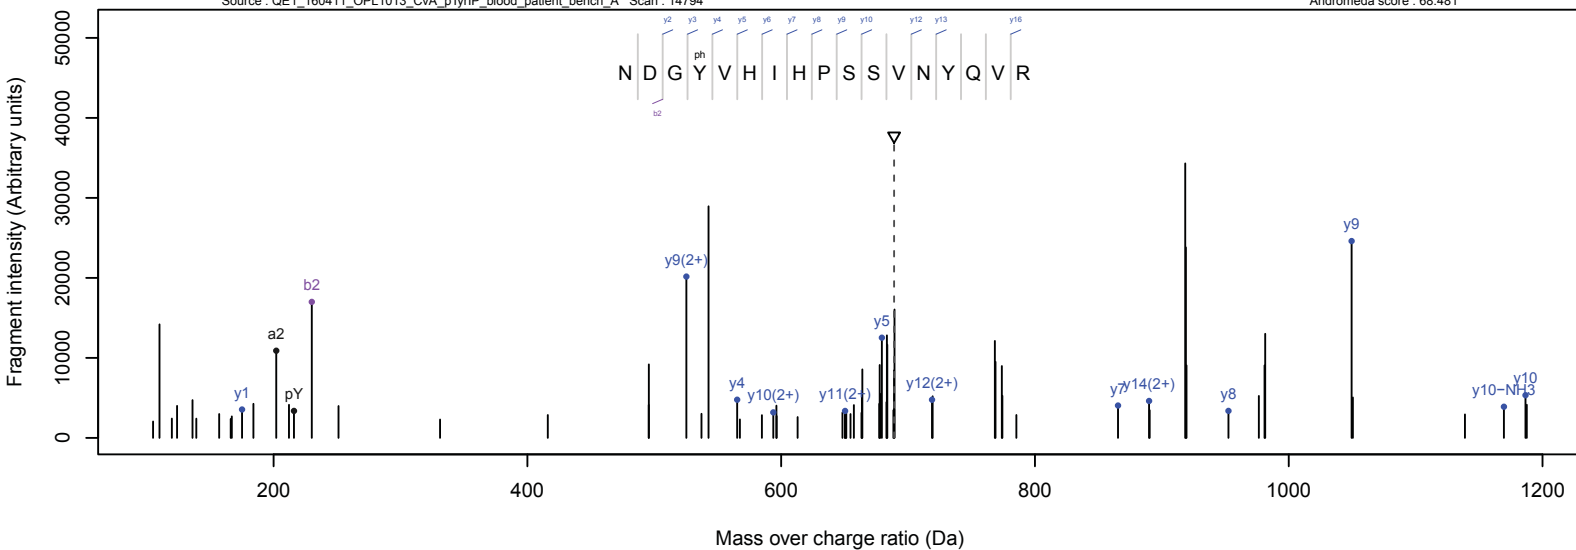

**REDGGY(ph)TFTATPEDFPK-3+**

Source : QE1\_160411\_OPL1013\_CvA\_pTyrIP\_blood\_patient\_bench\_A Scan : 22258

Andromeda score : 68.41

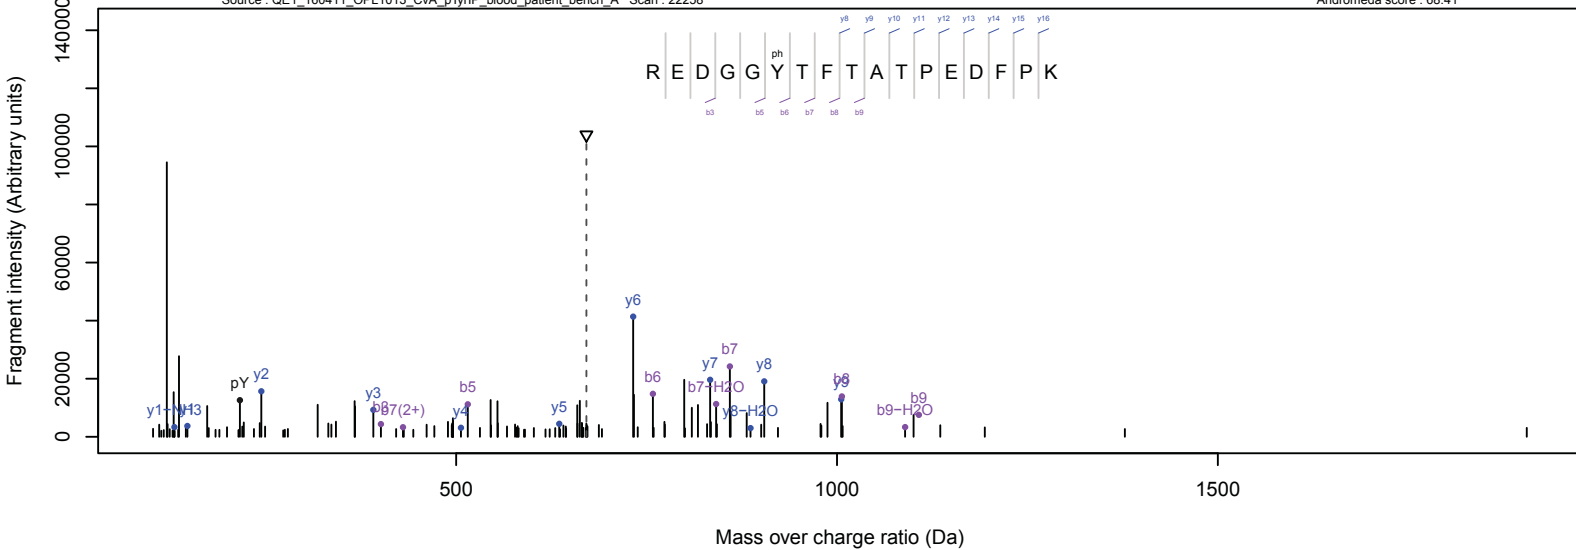

EIADY(ph)LAAGKDER-2+

Source : QE1\_160411\_OPL1013\_CvA\_pTyrIP\_blood\_patient\_bench\_D Scan : 17592

Andromeda score : 68.277

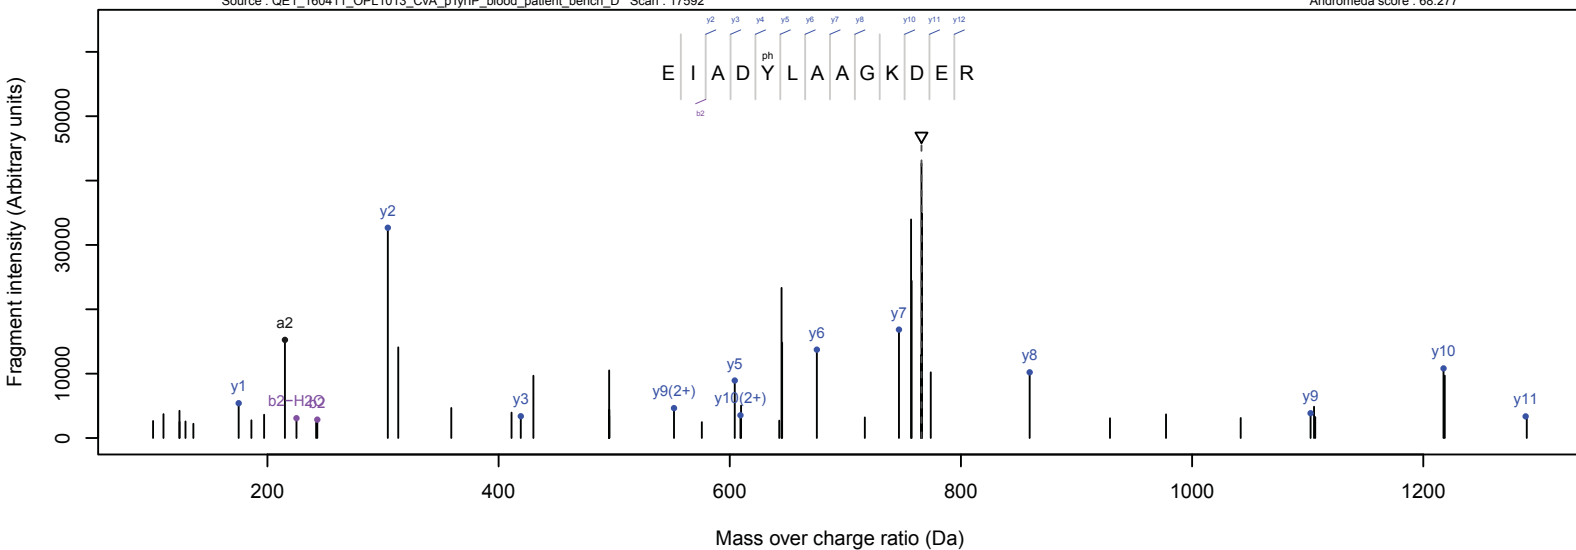

TLEPVKPTVPNDY(ph)M(ox)TSPAR-3+

Source : QE1\_160411\_OPL1013\_CvA\_pTyrIP\_blood\_patient\_bench\_C Scan : 22154

Andromeda score : 68.189

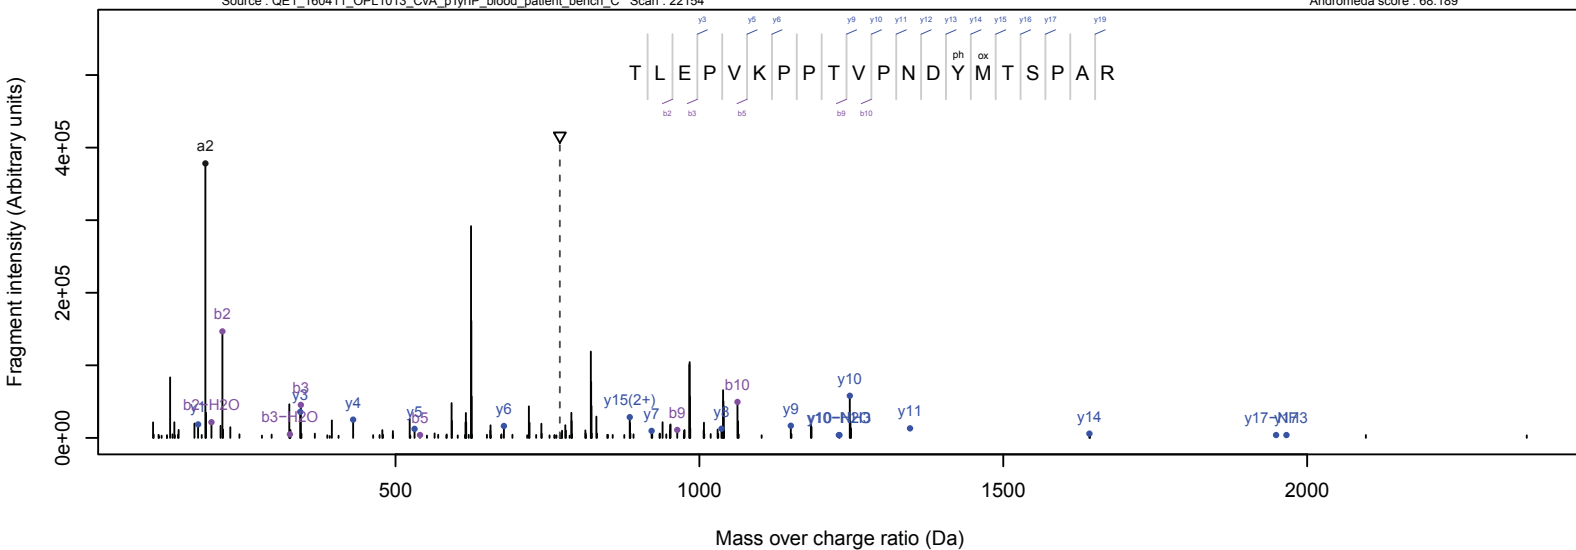

SQPVYI QYSNHR-3+

Source : QE1\_160411\_OPL1013\_CvA\_pTyrIP\_blood\_patient\_bench\_C Scan : 12452

Andromeda score : 67.997

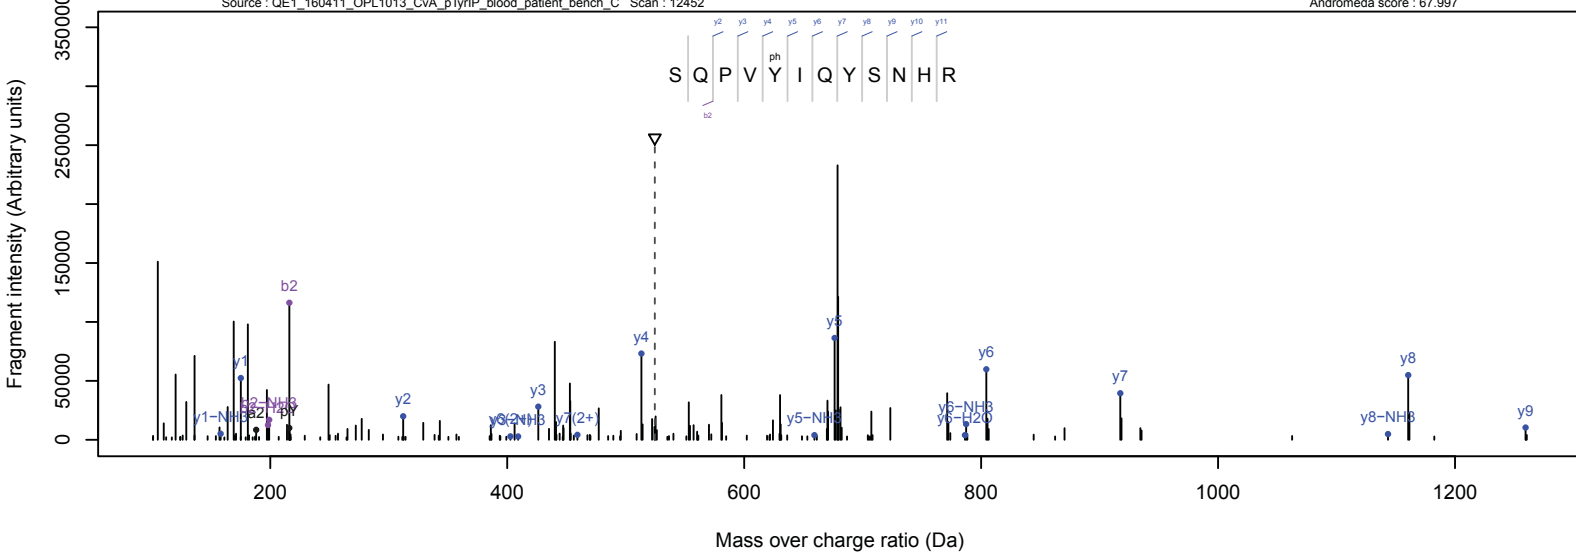

HRIY(ph)EYVESR-3+

Source: QE1\_160411\_OPL1013\_CvA\_pTyrIP\_blood\_patient\_bench\_D Scan: 7617

Andromeda score: 67.93

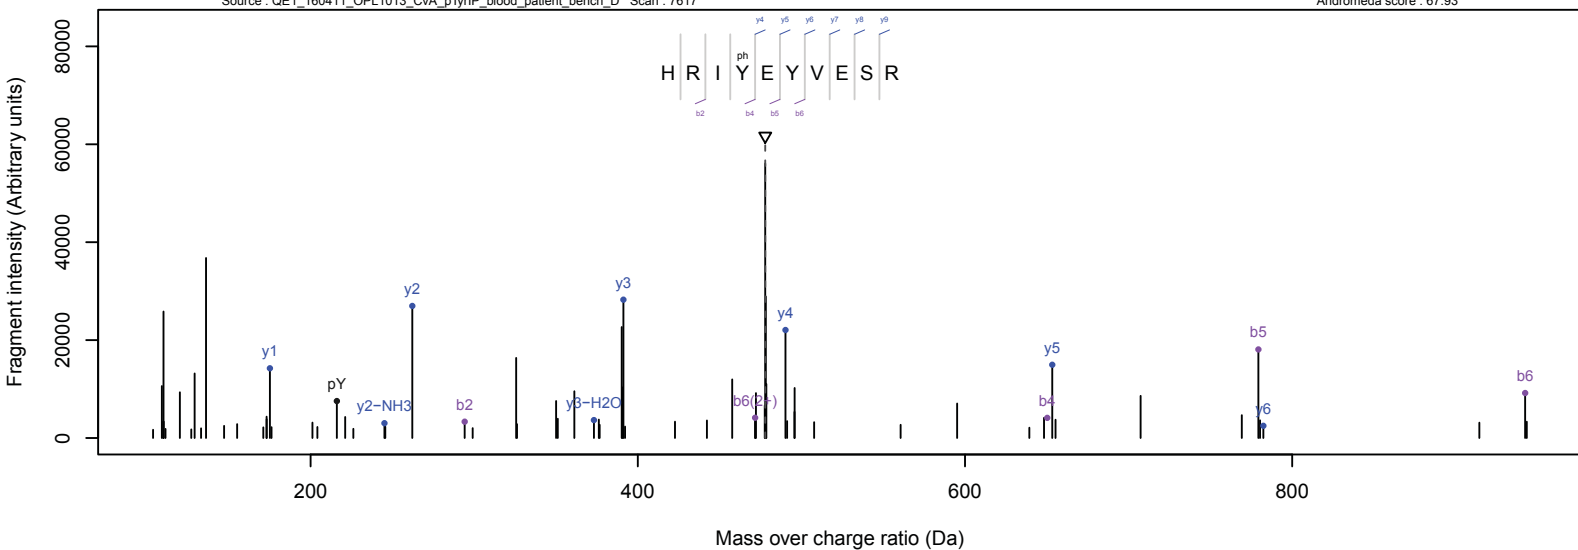

VLPKEEPVNTVY(ph)SEVQFADK-3+

Source: QE1\_160411\_OPL1013\_CvA\_pTyrIP\_blood\_patient\_bench\_D Scan: 27244

Andromeda score: 67.76

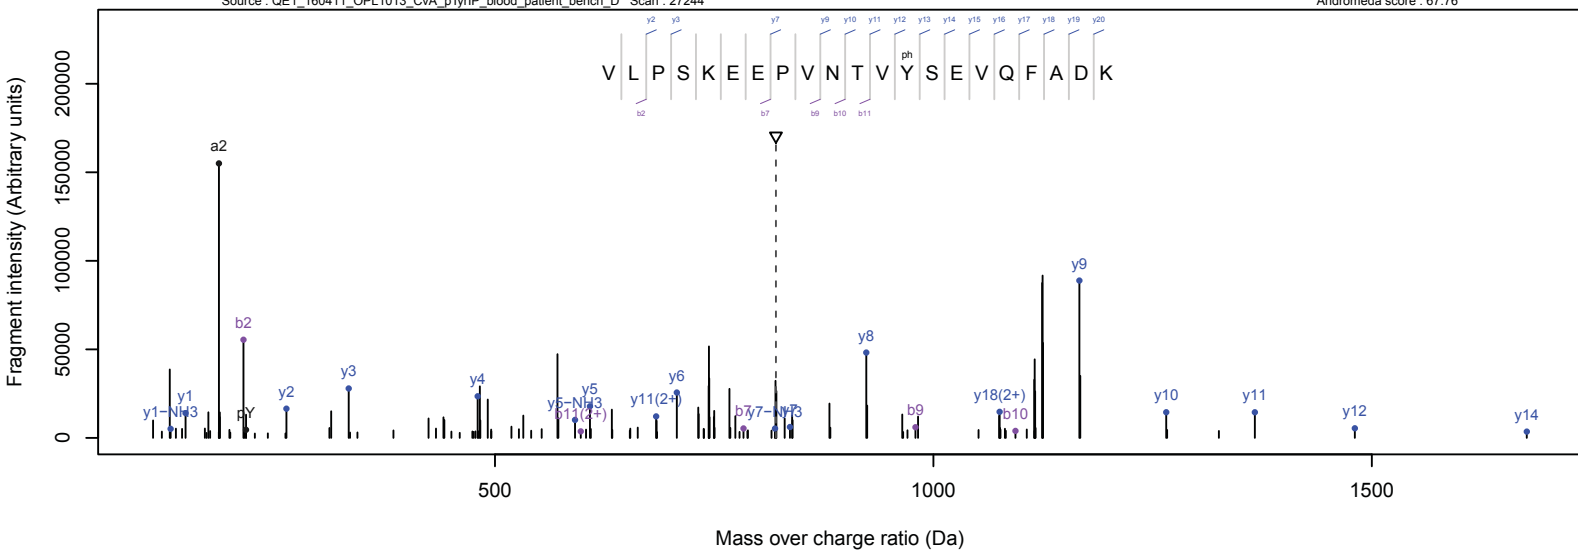

EVIEEPEKSEAT(ph)YMTMHPVWPSLR-4+

Source: QE1\_160411\_OPL1013\_CvA\_pTyrIP\_blood\_patient\_bench\_D Scan: 35562

Andromeda score: 67.655

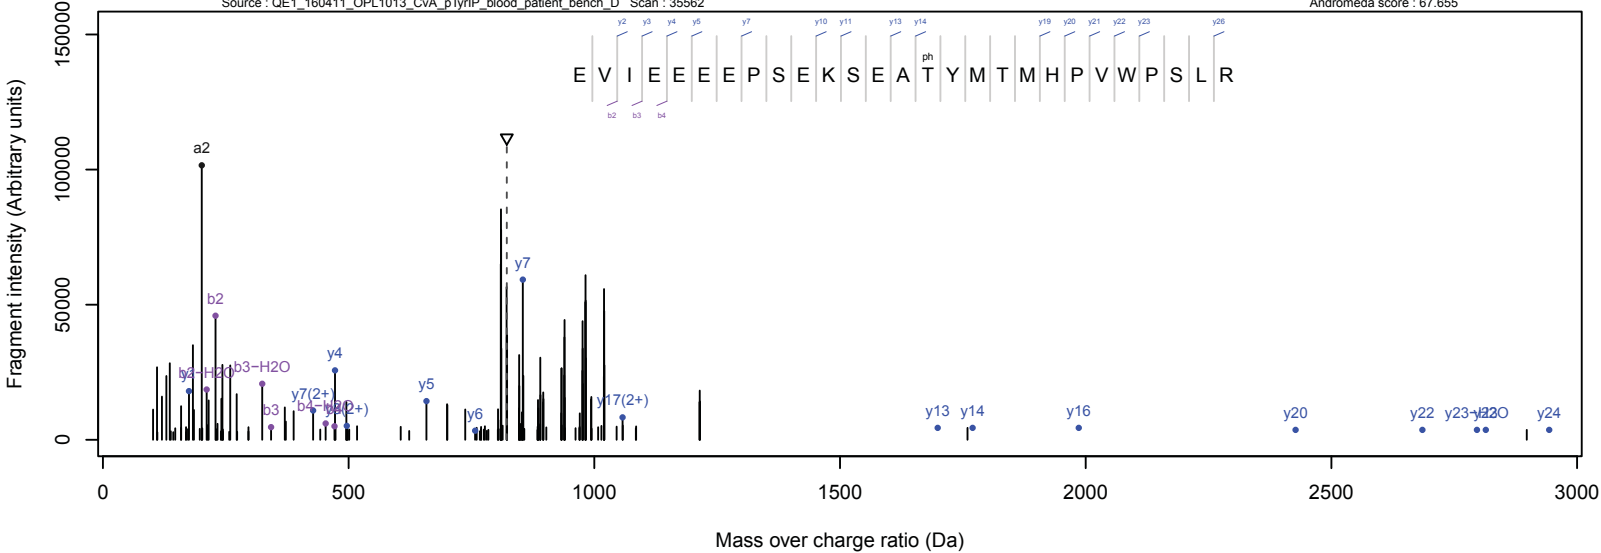

**KQM(ox)PPPPPCGRELFDDPSY(ph)VNVQNLDK-4+**

Source : QE1\_160411\_OPL1013\_CvA\_pTyrIP\_blood\_patient\_bench\_C Scan : 31611

Andromeda score : 67.496

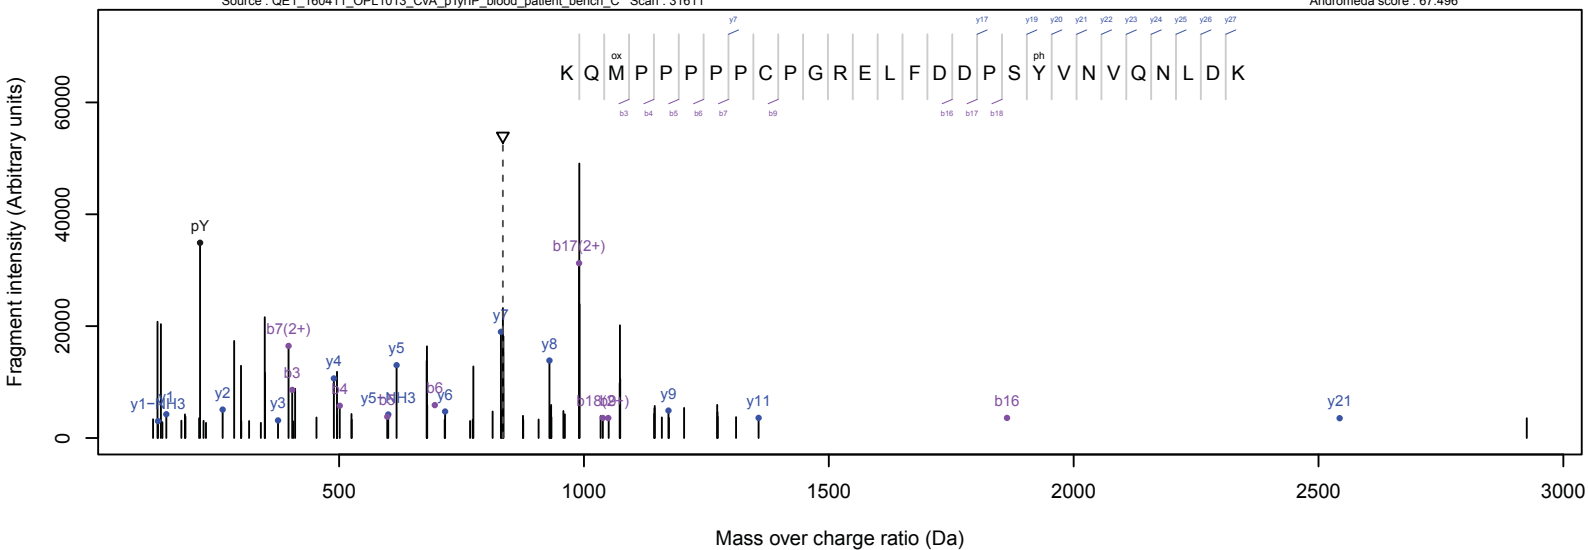

**NLDKEY(ph)LPIGGLAEFCK-3+**

Source : QE1\_160411\_OPL1013\_CvA\_pTyrIP\_blood\_patient\_bench\_D Scan : 39608

Andromeda score : 67.418

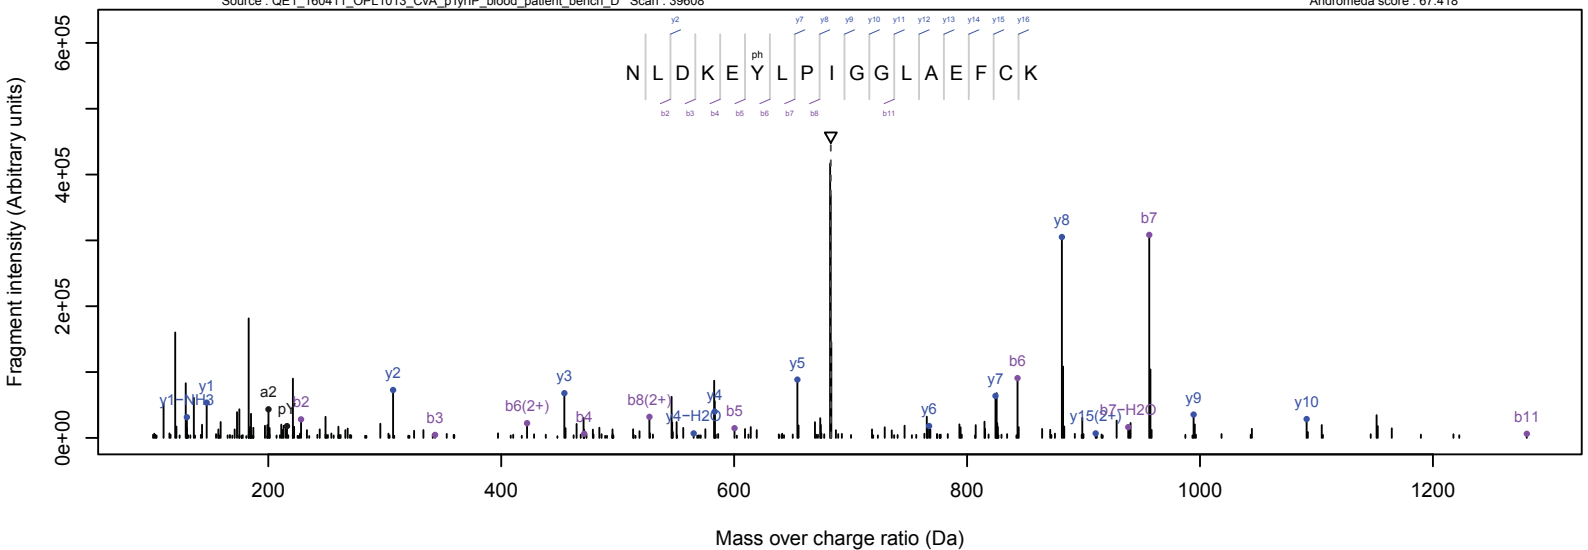

**ERHPLEY(ph)LR-3+**

Source : QE1\_160411\_OPL1013\_CvA\_pTyrIP\_blood\_patient\_bench\_D Scan : 12053

Andromeda score : 67.414

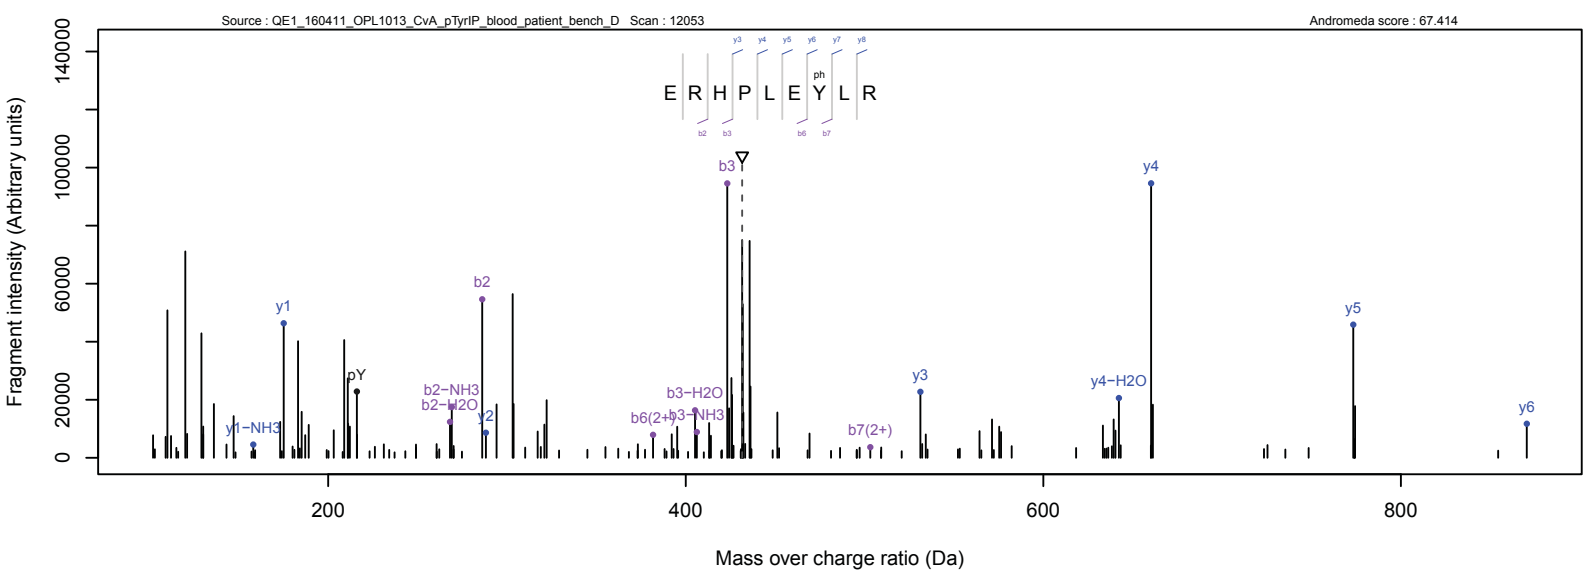



**IKY(ph)YAELCAPPGNSDPEQLKK-3+**

Source : QE1\_160411\_OPL1013\_CvA\_pTyrIP\_blood\_patient\_bench\_D Scan : 20032

Andromeda score : 67.396

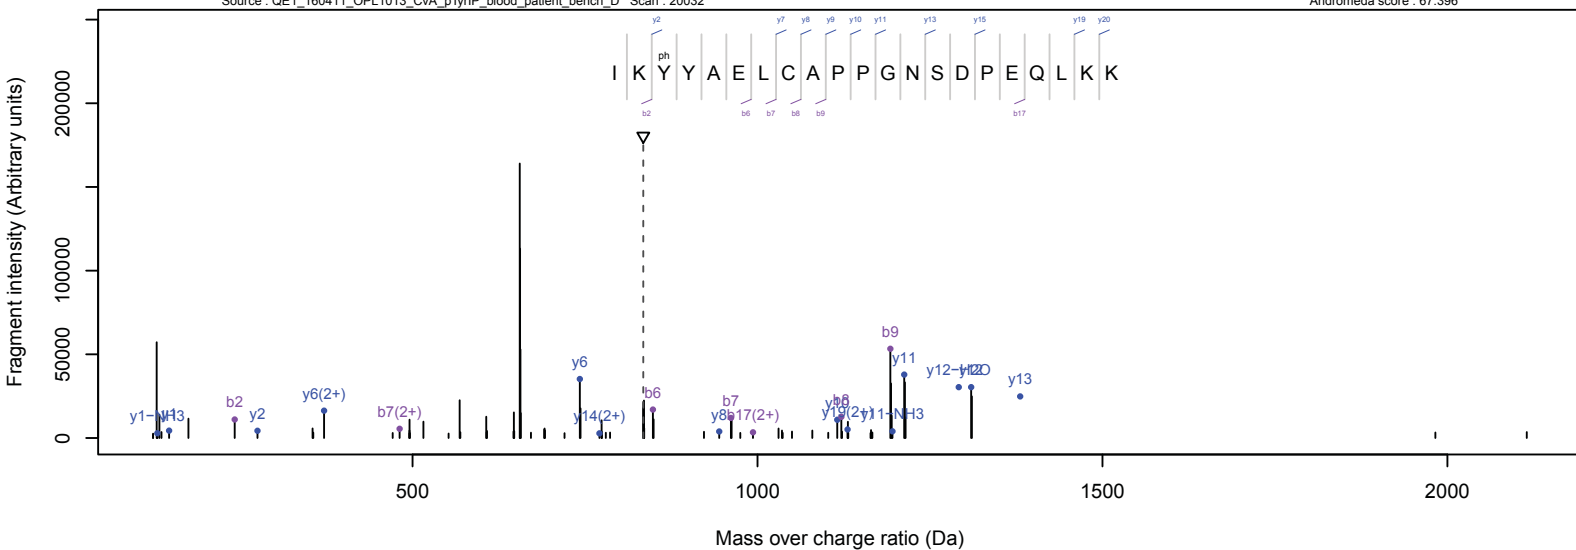

**RGSDY(ph)ETFK-2+**

Source : QE1\_160411\_OPL1013\_CvA\_pTyrIP\_blood\_patient\_bench\_D Scan : 4108

Andromeda score : 67.334

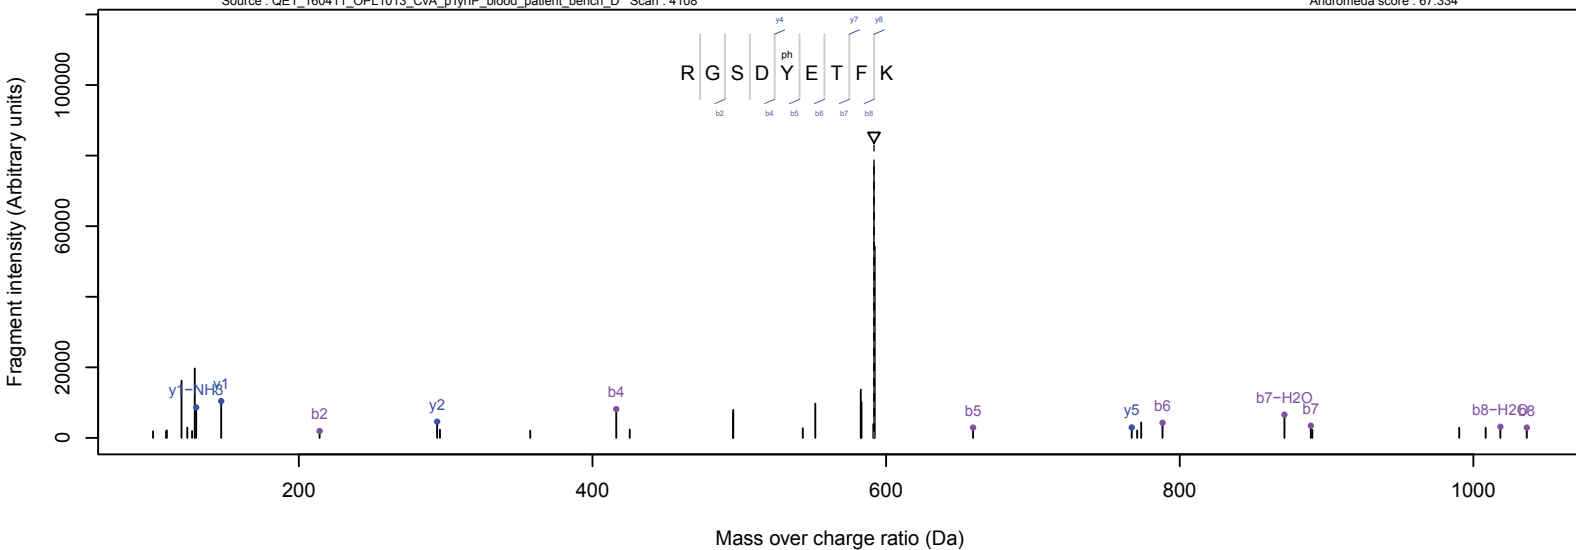

**EKAEERPTFDYLSVLDLDFYATGQY(ph)QQQP-3+**

Source : QE1\_160411\_OPL1013\_CvA\_pTyrIP\_blood\_patient\_bench\_D Scan : 44407

Andromeda score : 67.055

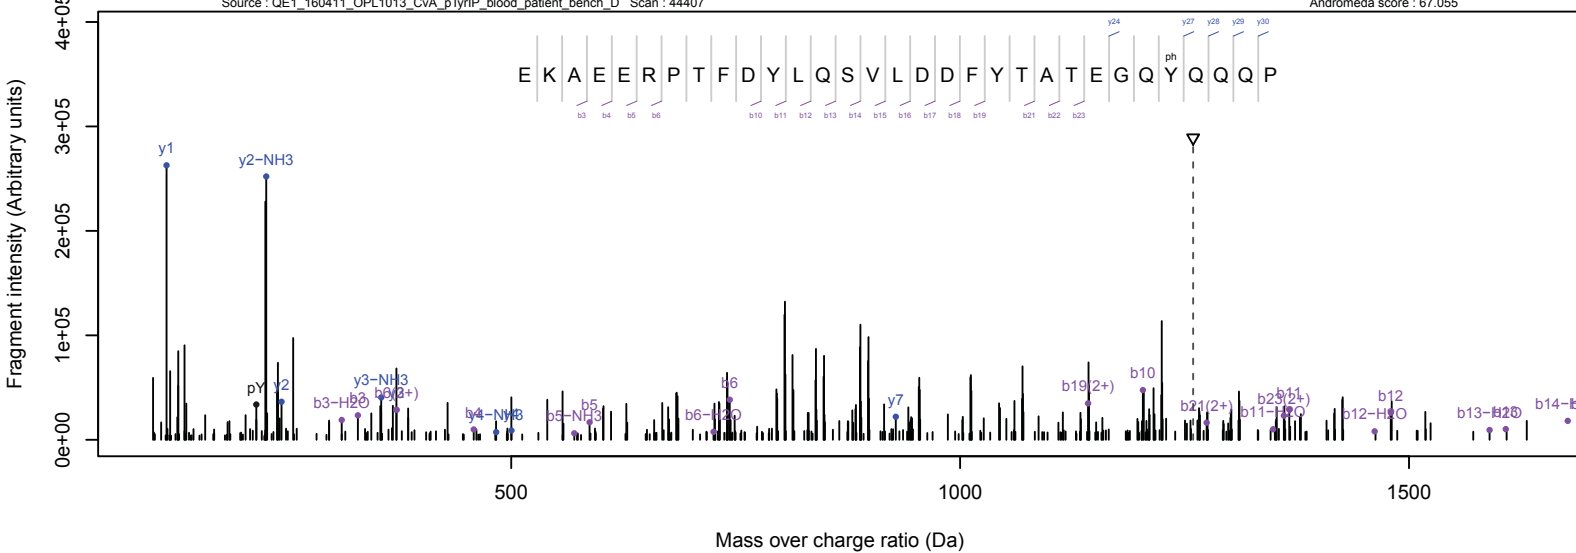

SAVGHEY(ph)VAEVEK-2+

Source : QE1\_160411\_OPL1013\_CvA\_pTyrIP\_blood\_patient\_bench\_D Scan : 8875

Andromeda score : 66.989

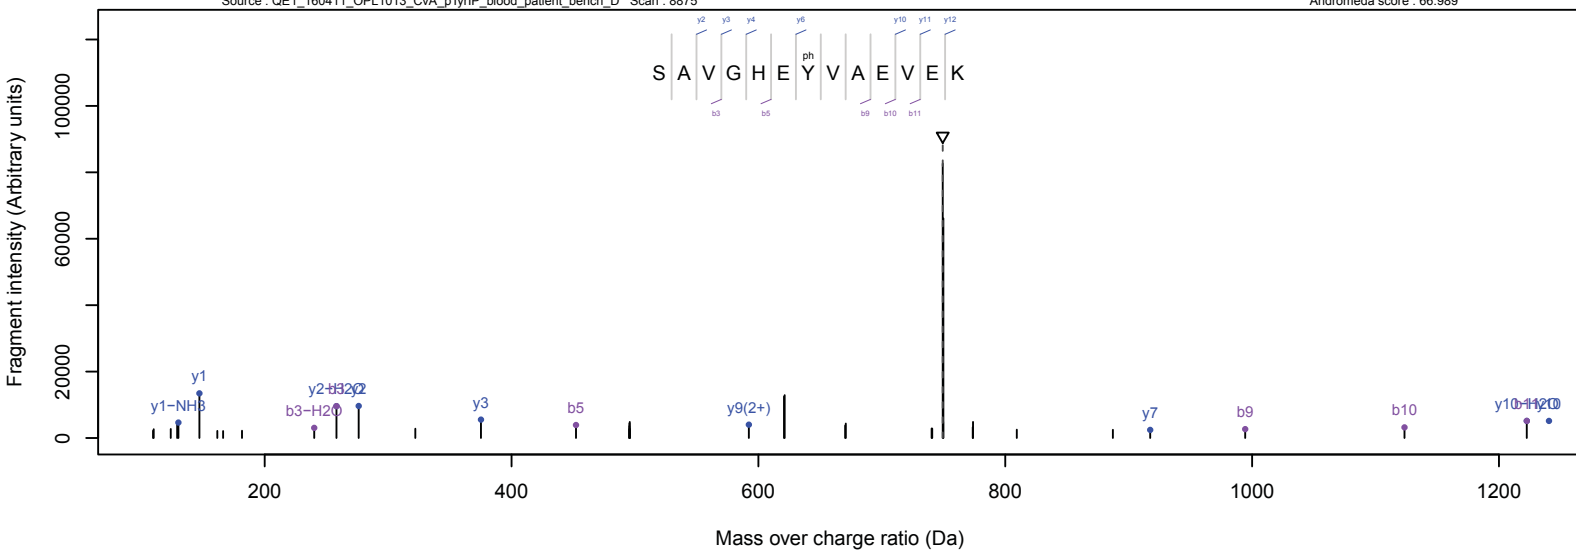

Y(ph)KASITALEAK-2+

Source : QE1\_160411\_OPL1013\_CvA\_pTyrIP\_blood\_patient\_bench\_C Scan : 12562

Andromeda score : 66.708

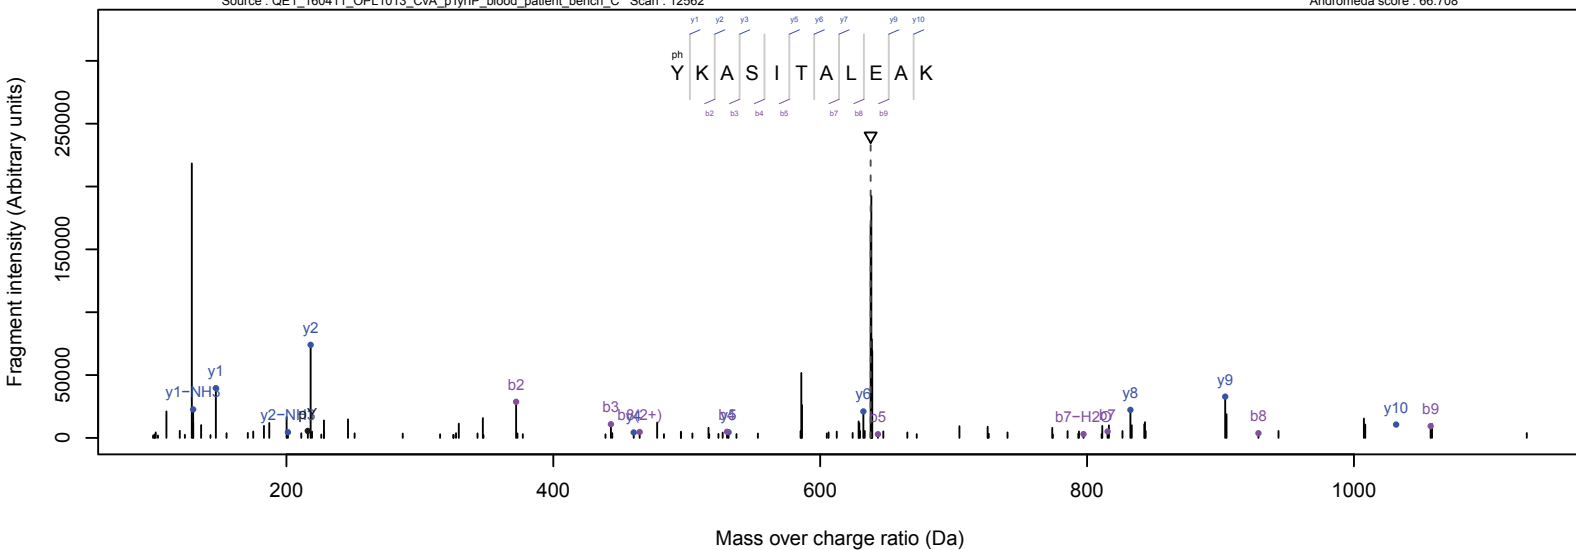

Y(ph)GIVDYM(ox)IEQSGPPSKEILTK-3+

Source : QE1\_160411\_OPL1013\_CvA\_pTyrIP\_blood\_patient\_bench\_A Scan : 35504

Andromeda score : 66.636

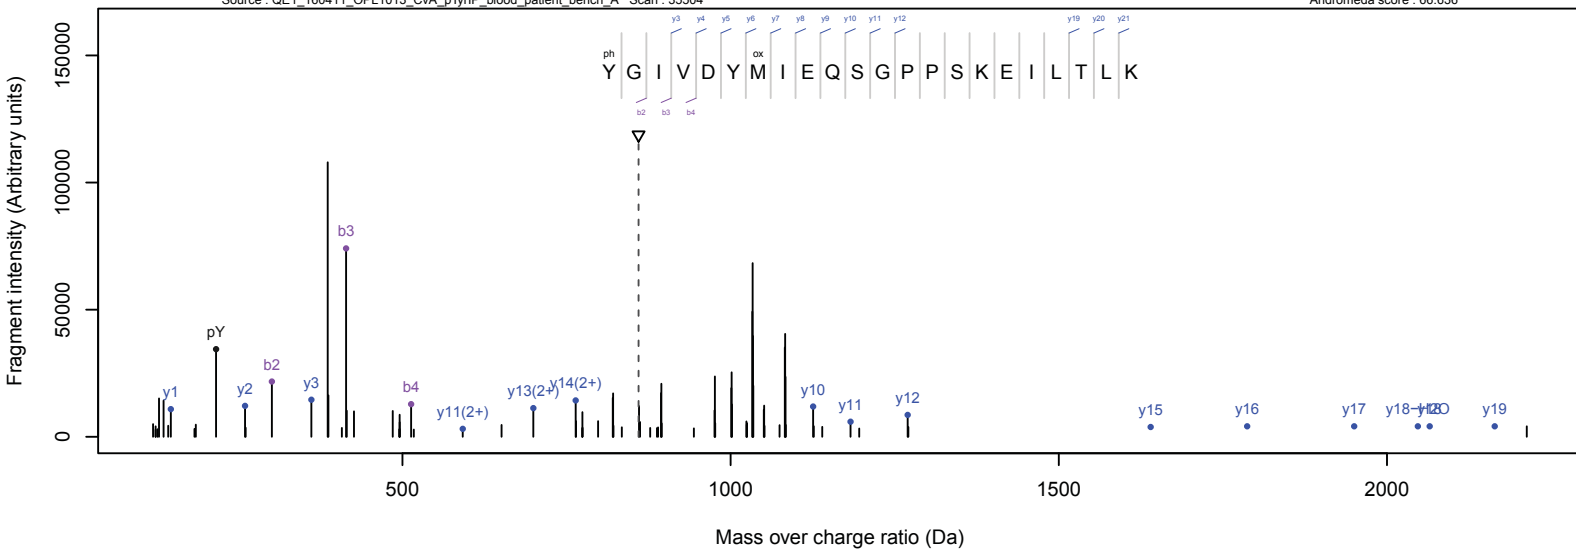

**SQGLS<sup>(ph)</sup>QLYHNQSQGLLSQLQGQSK-3+**

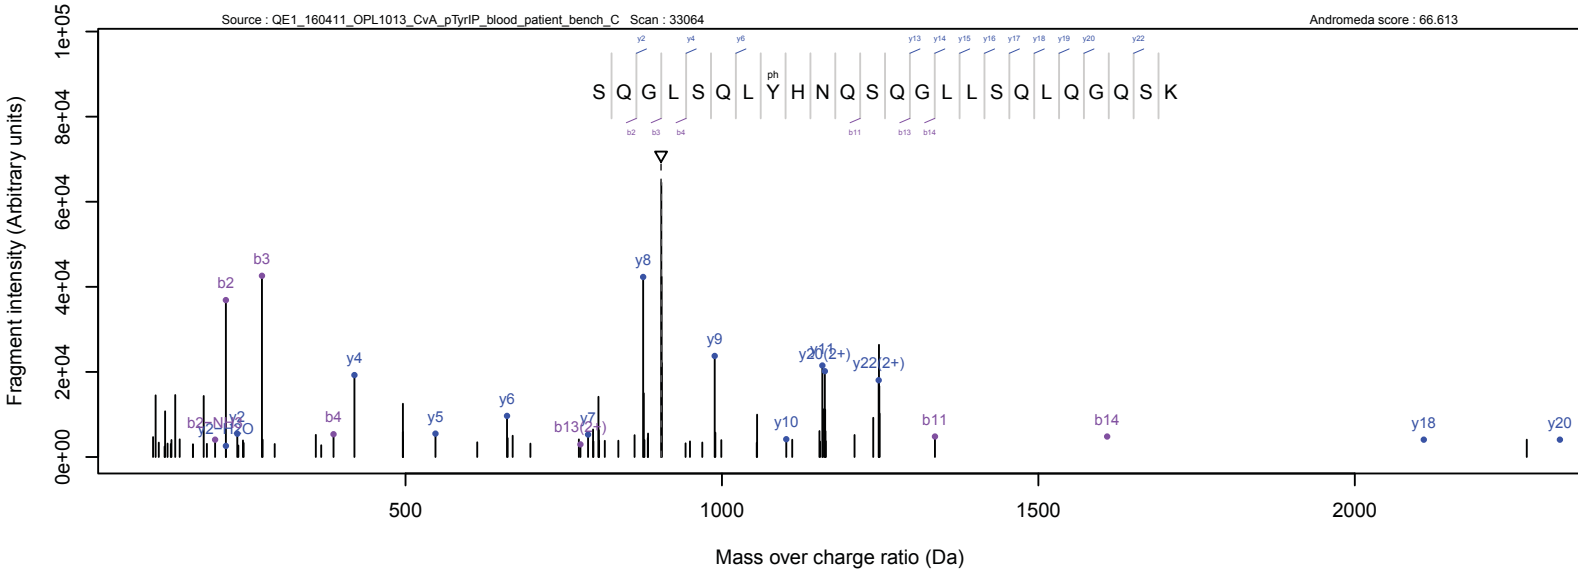

**CSDAAGY<sup>(ph)</sup>PHATHDLEGPPLDAYSIQGQHTISPLDLAK-4+**

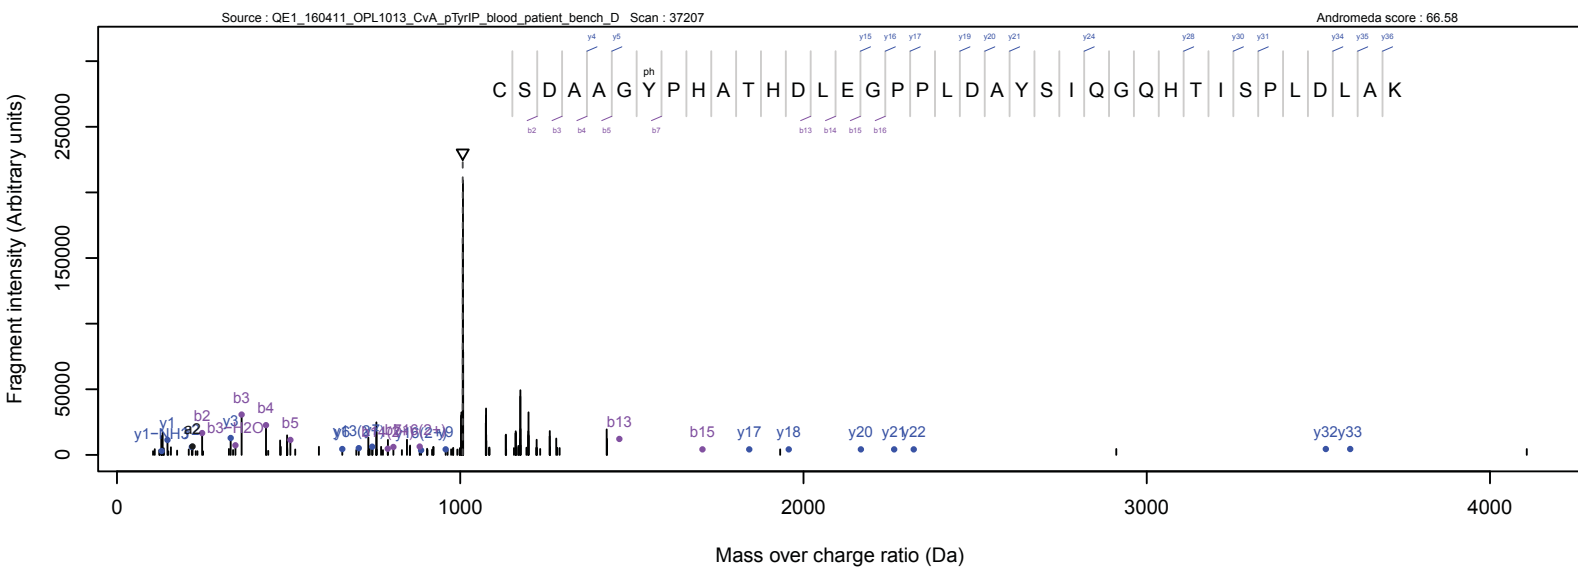

**KGLDPY<sup>(ph)</sup>NVLAPK-2+**

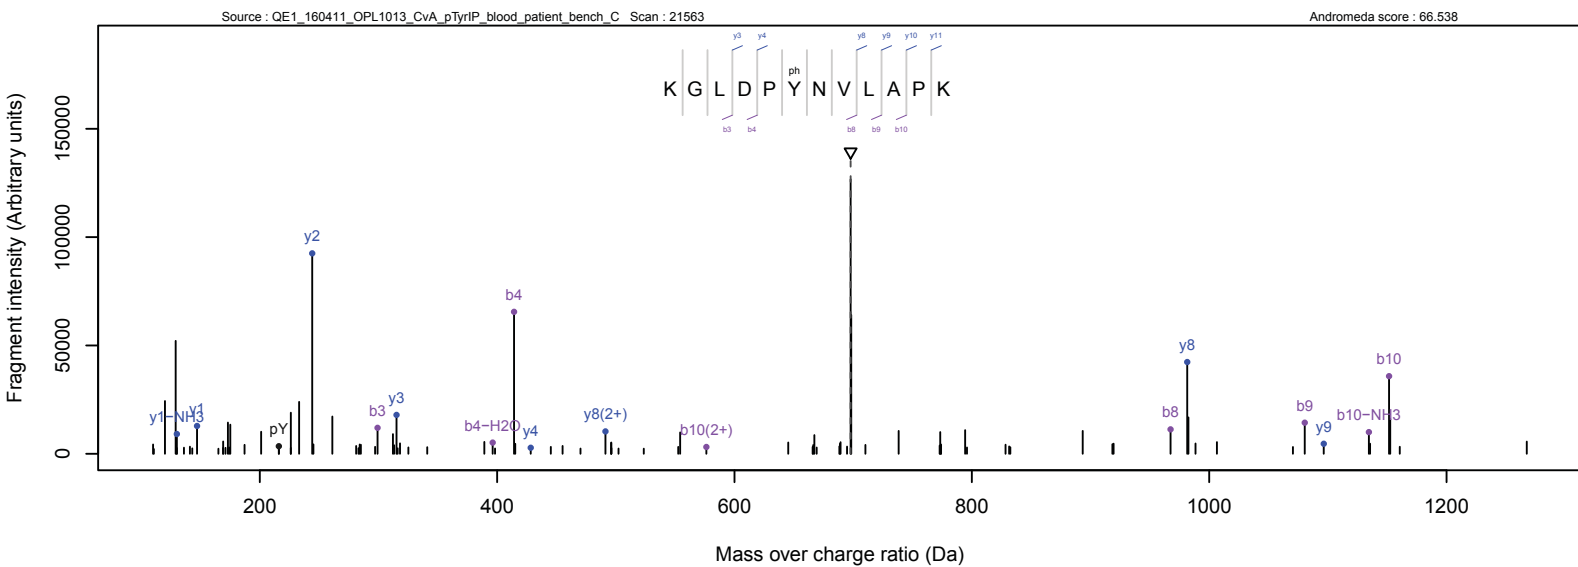

## VTQEYELY(ph)CEM(ox)GSTFLCK-3+

Source: QE1\_160411\_OPL1013\_CvA\_pTyrIP\_blood\_patient\_bench\_A Scan: 27010

Andromeda score: 66.536

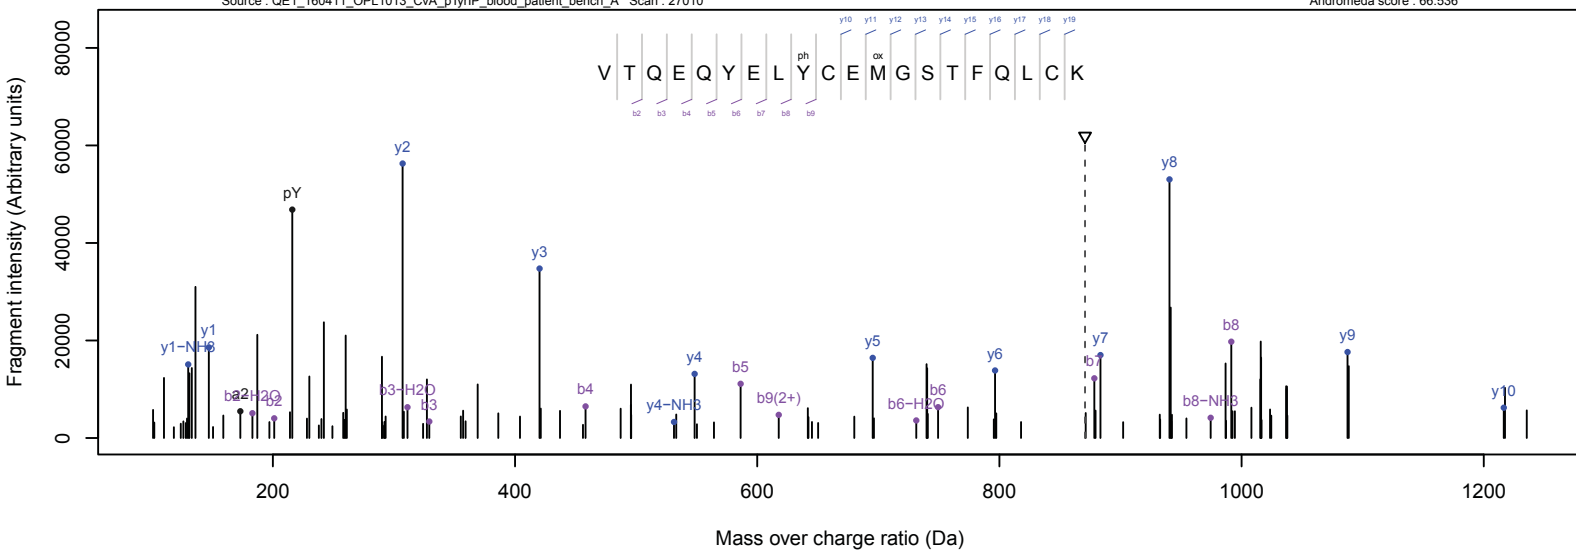

## SLY(ph)SM(ox)IK-2+

Source: QE1\_160411\_OPL1013\_CvA\_pTyrIP\_blood\_patient\_bench\_D Scan: 11830

Andromeda score: 66.429

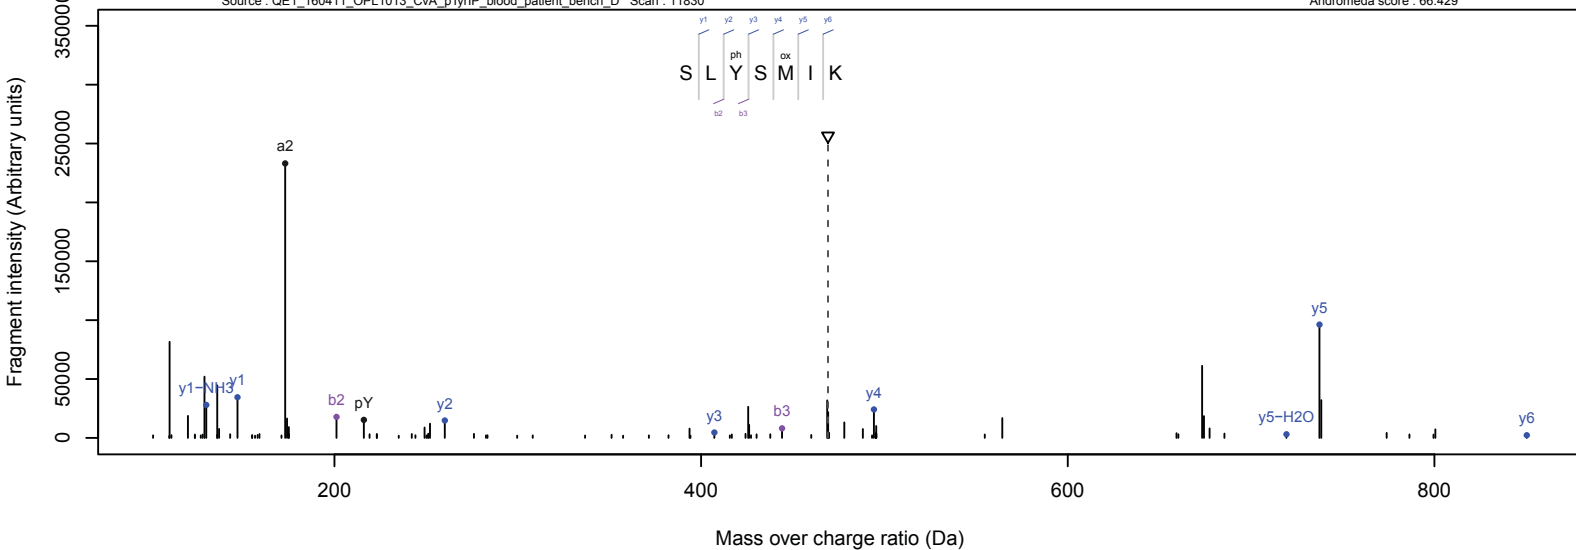

## Y(ph)LTVAAVFR-2+

Source: QE1\_160411\_OPL1013\_CvA\_pTyrIP\_blood\_patient\_bench\_A Scan: 34203

Andromeda score: 66.27

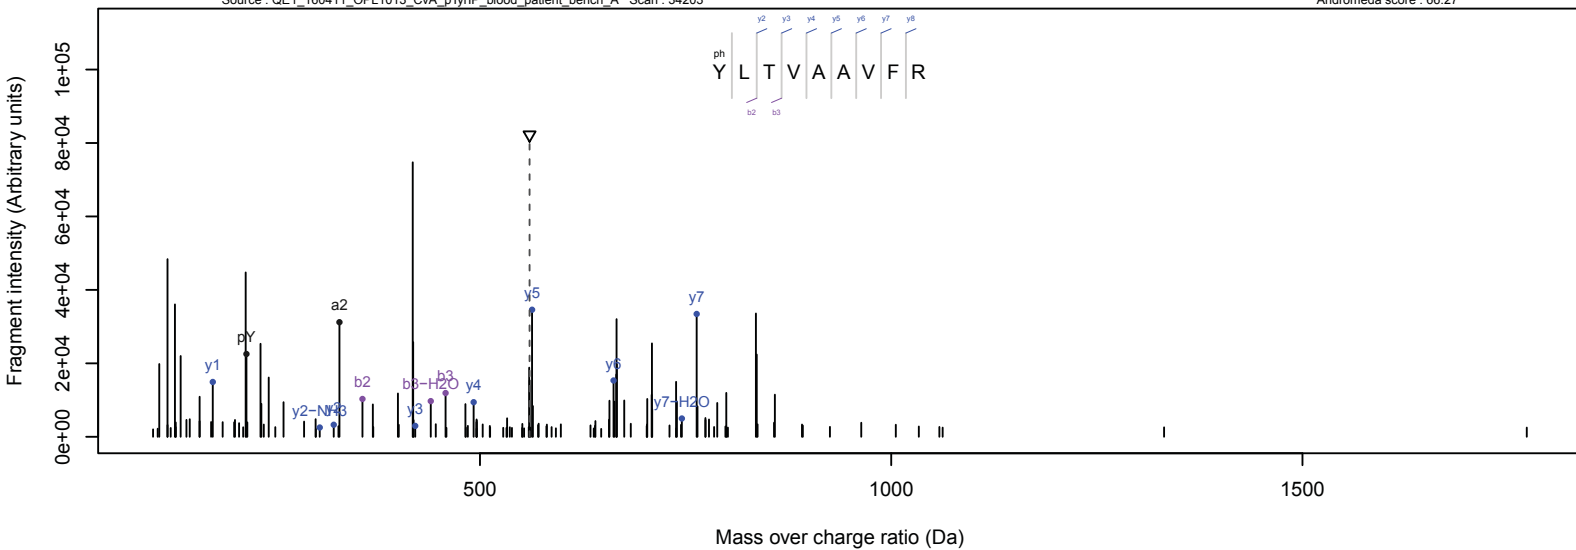

## GYPTFHYHY(ph)GK-3+

Source: QE1\_160411\_OPL1013\_CvA\_pTyrIP\_blood\_patient\_bench\_D Scan: 16201

Andromeda score: 66.267

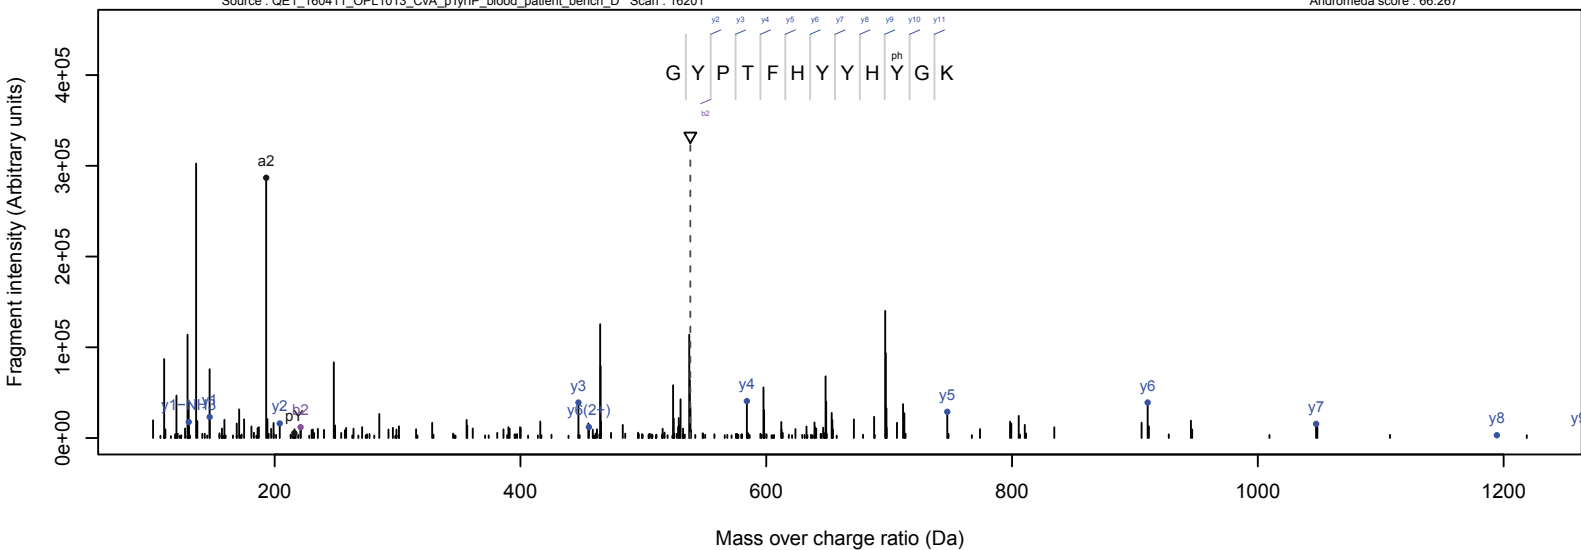

LEPQIASASEY(ph)AHR-3+

Source: QE1\_160411\_OPL1013\_CvA\_pTyrIP\_blood\_patient\_bench\_D Scan: 12899

Andromeda score: 66.215

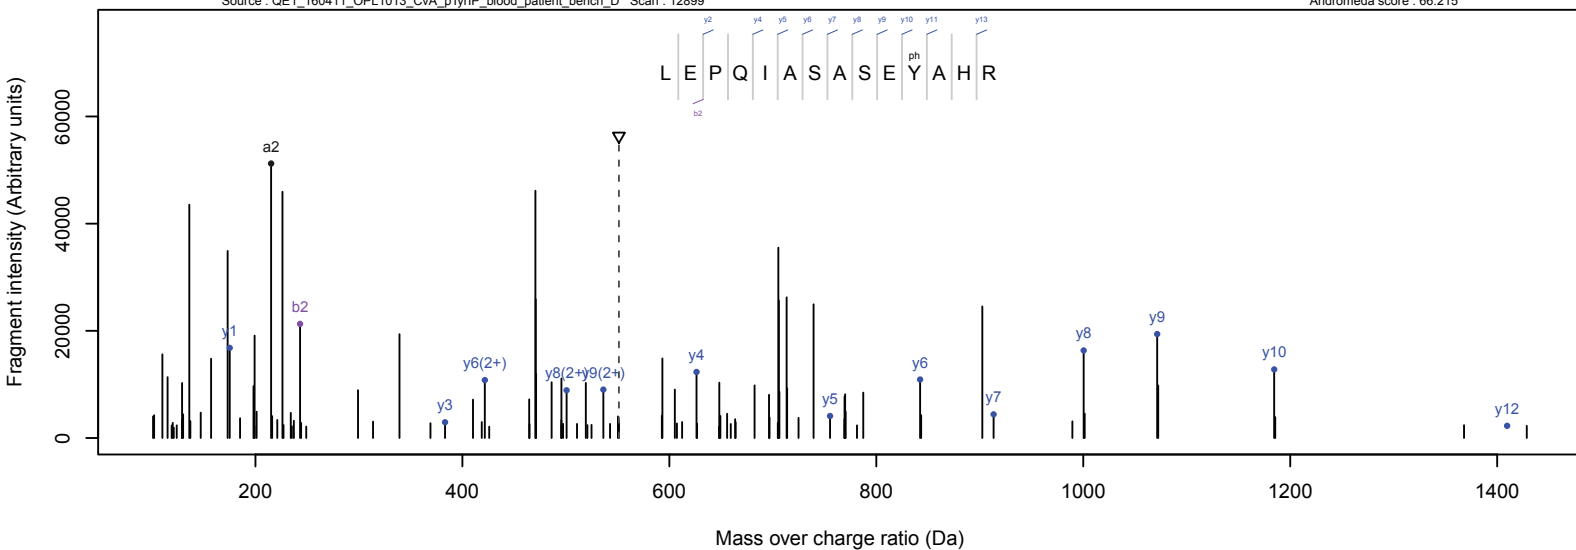

AVSPQSTKPM(ox)AESIT(ph)YAAVARH-3+

Source: QE1\_160411\_OPL1013\_CvA\_pTyrIP\_blood\_patient\_bench\_C Scan: 17021

Andromeda score: 66.152

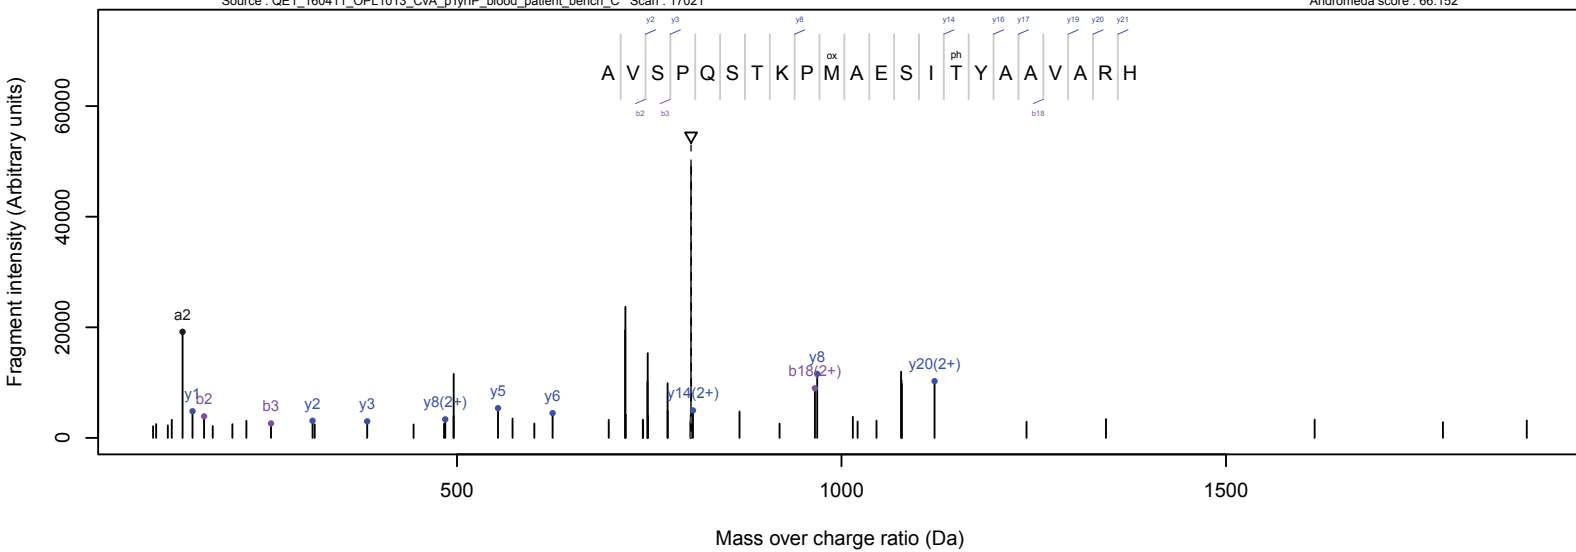

SILY(ph)DER-2+

Source: QE1\_160411\_OPL1013\_CvA\_pTyrIP\_blood\_patient\_bench\_C Scan: 9921

Andromeda score: 66.073

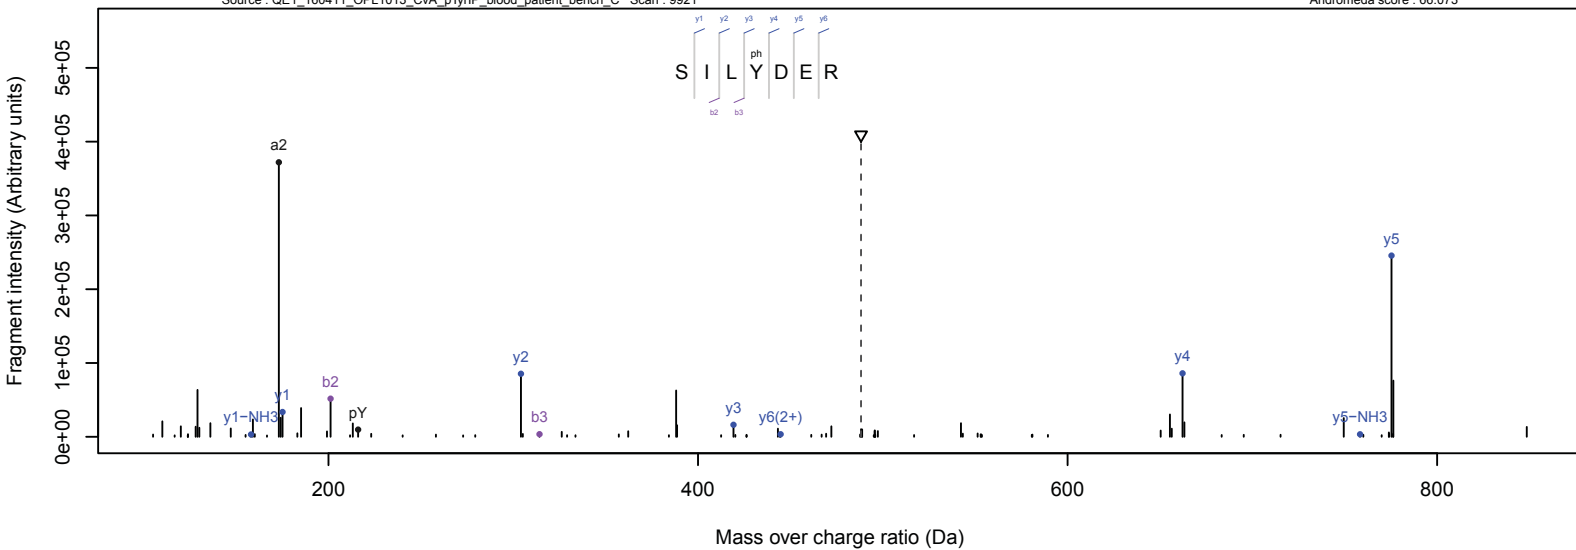

## GY(ph)AFITFCGK-2+

Source : QE1\_160411\_OPL1013\_CvA\_pTyrIP\_blood\_patient\_bench\_B Scan : 28767

Andromeda score : 66.056

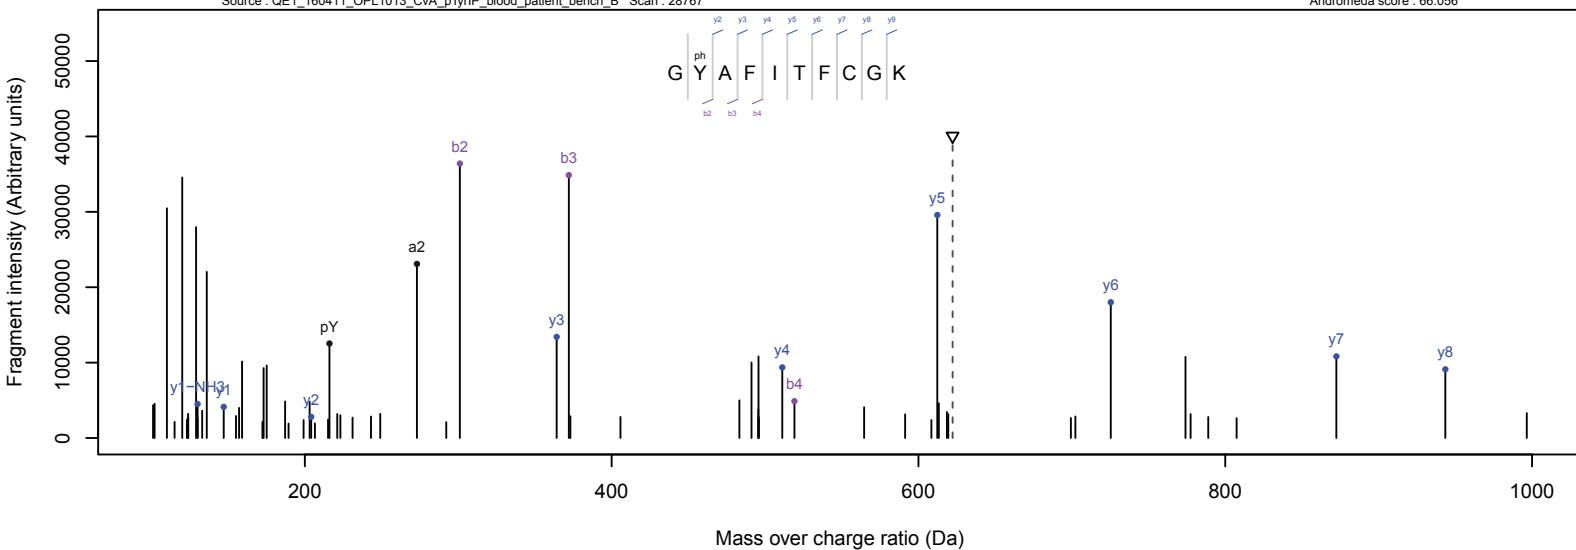

## YM(ox)EDST(ph)YYK-2+

Source : QE1\_160411\_OPL1013\_CvA\_pTyrIP\_blood\_patient\_bench\_C Scan : 4862

Andromeda score : 65.224

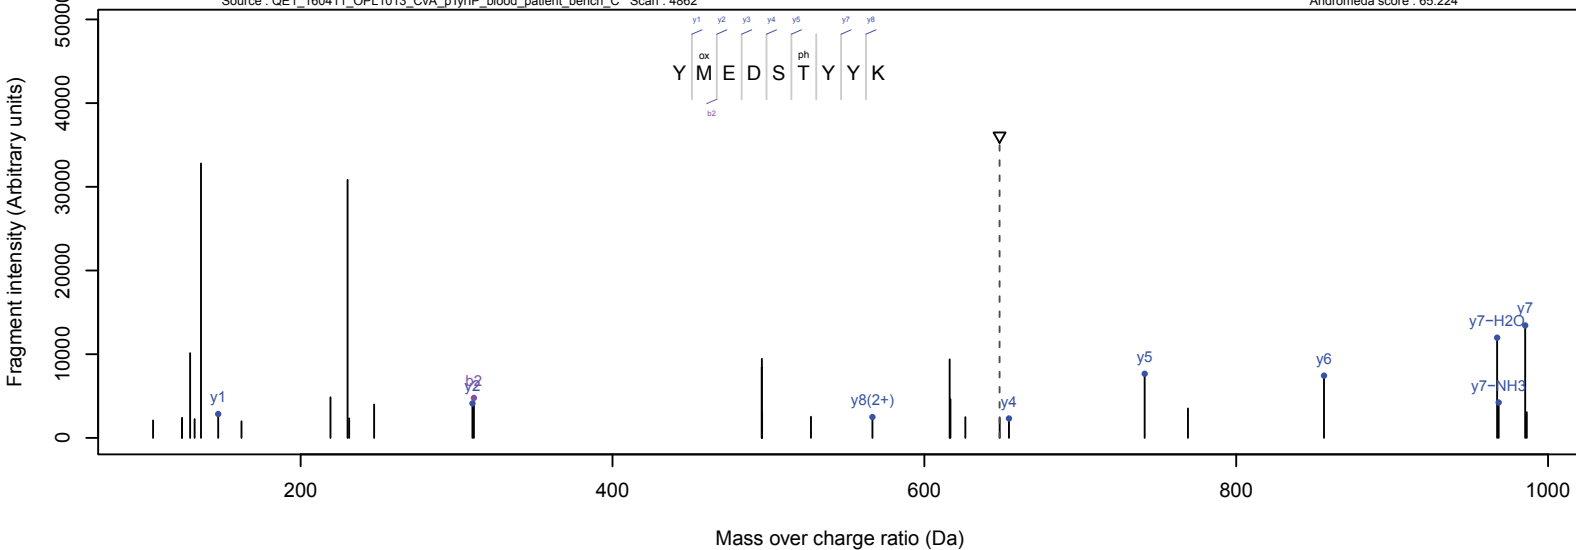

## SSFSHY(ph)SGLK-2+

Source : QE1\_160411\_OPL1013\_CvA\_pTyrIP\_blood\_patient\_bench\_C Scan : 8614

Andromeda score : 64.82

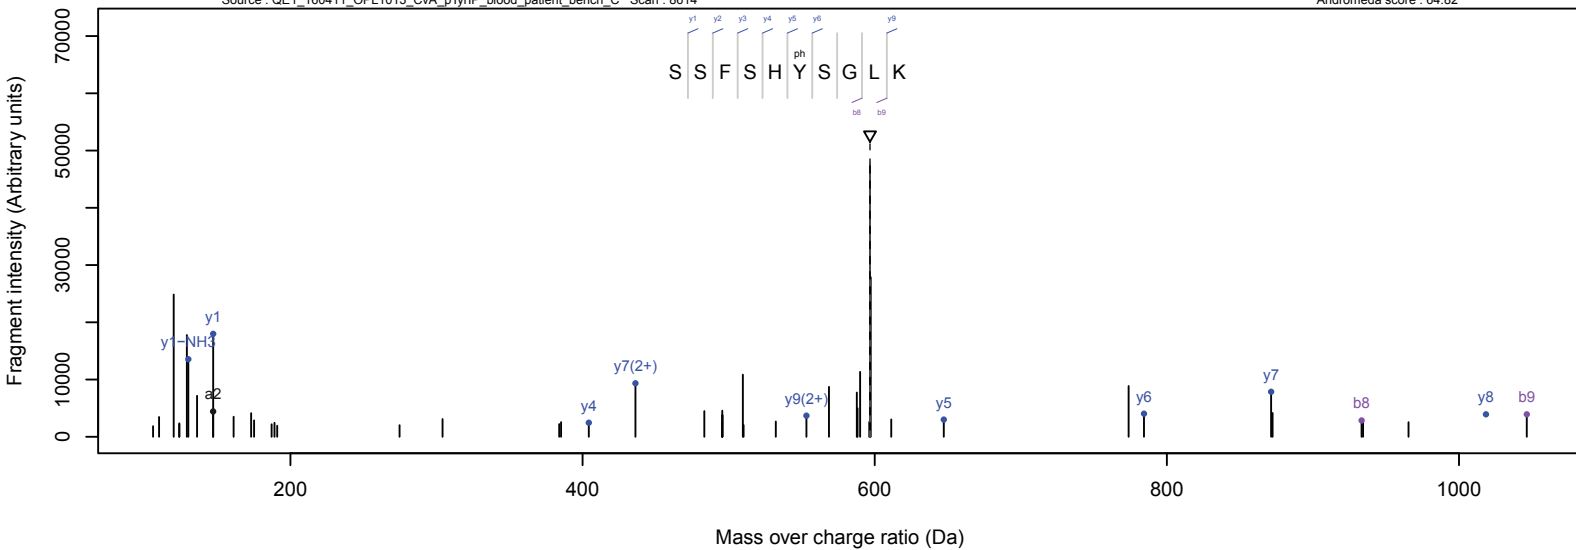

**ALELDSNLY(ph)R-2+**

Source: QE1\_160411\_OPL1013\_CvA\_pTyrIP\_blood\_patient\_bench\_B Scan: 21172

Andromeda score: 64.73

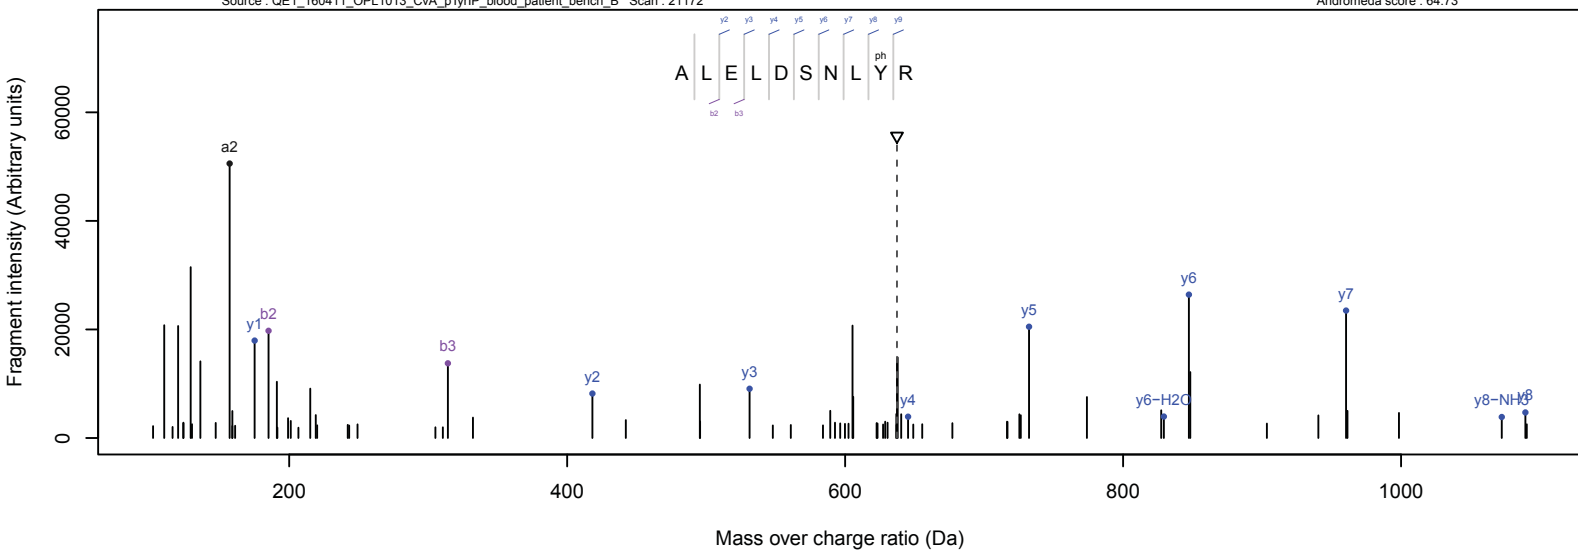

**GPVSGTEPEP VY S MEAADYR-2+**

Source: QE1\_160411\_OPL1013\_CvA\_pTyrIP\_blood\_patient\_bench\_D Scan: 26730

Andromeda score: 64.705

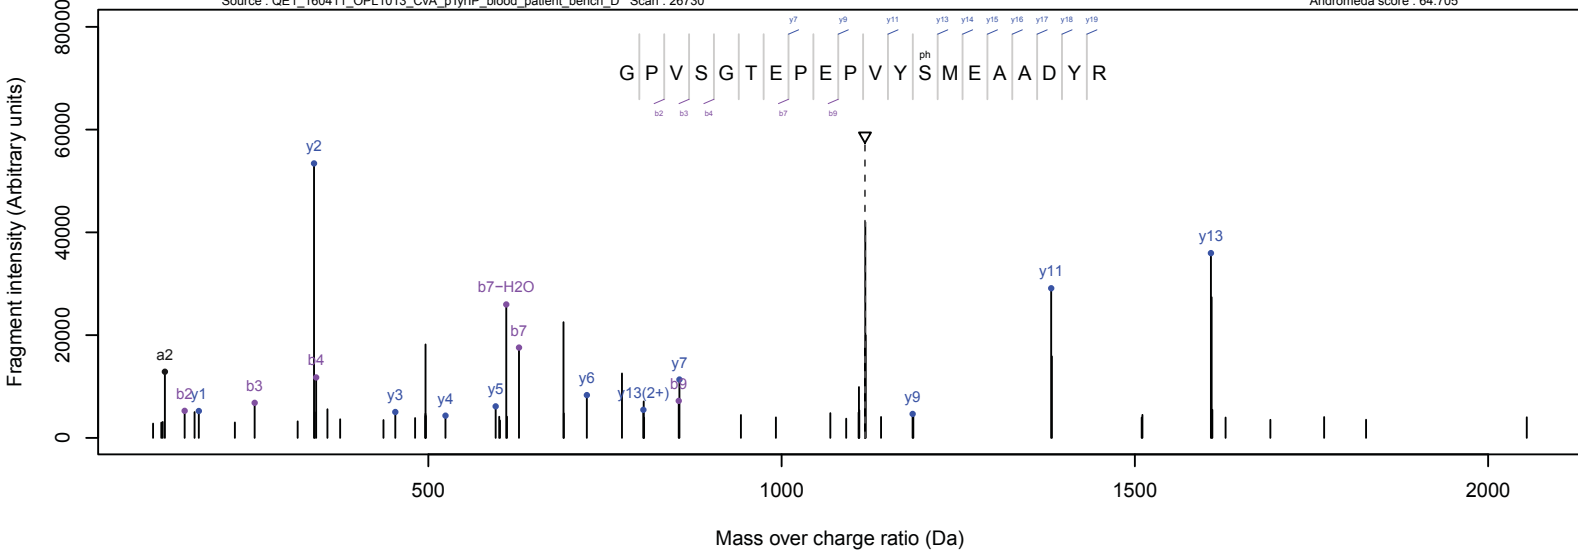

**TEY M(ox)AFP KPFESSSSIGAEKPR-3+**

Source: QE1\_160411\_OPL1013\_CvA\_pTyrIP\_blood\_patient\_bench\_C Scan: 24289

Andromeda score: 64.377

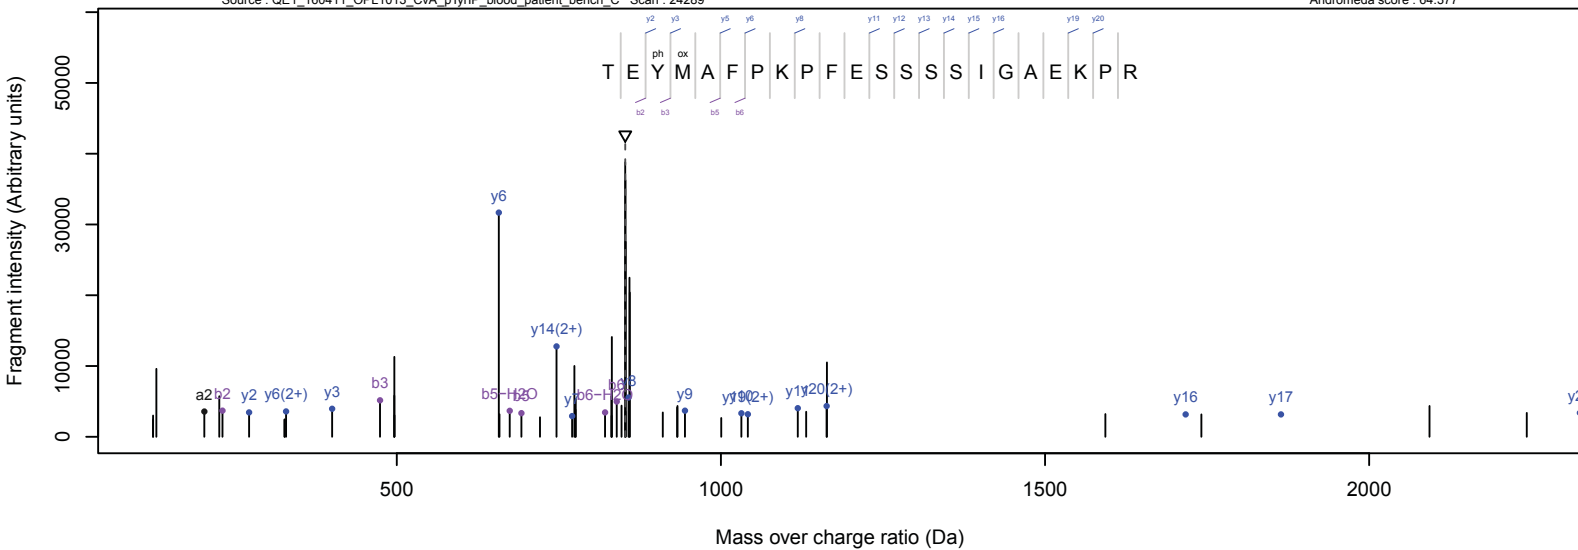



**ALSDHHIY(ph)LEGTL LKPNMVT P GHACTQK-4+**

Source : QE1\_160411\_OPL1013\_CvA\_pTyrIP\_blood\_patient\_bench\_D Scan : 28699

Andromeda score : 64.27

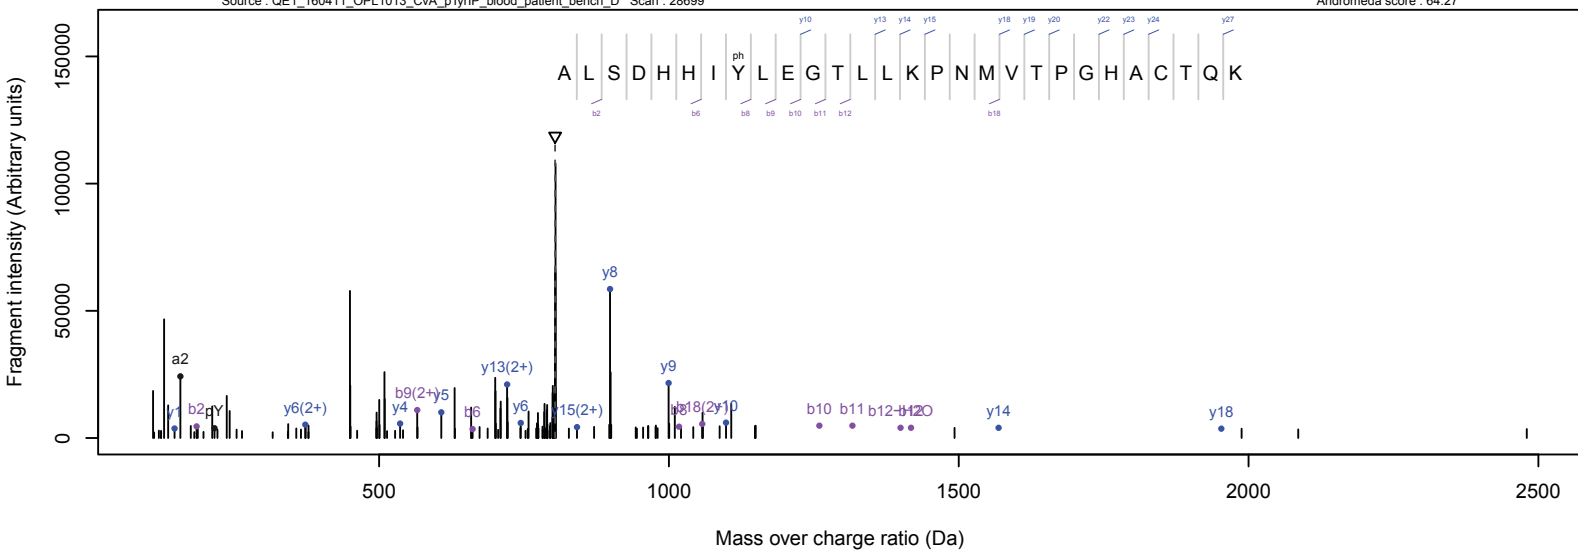

**KVVALY(ph)DYM(ox)PM(ox)NANDLQLR-3+**

Source : QE1\_160411\_OPL1013\_CvA\_pTyrIP\_blood\_patient\_bench\_C Scan : 31012

Andromeda score : 64.249

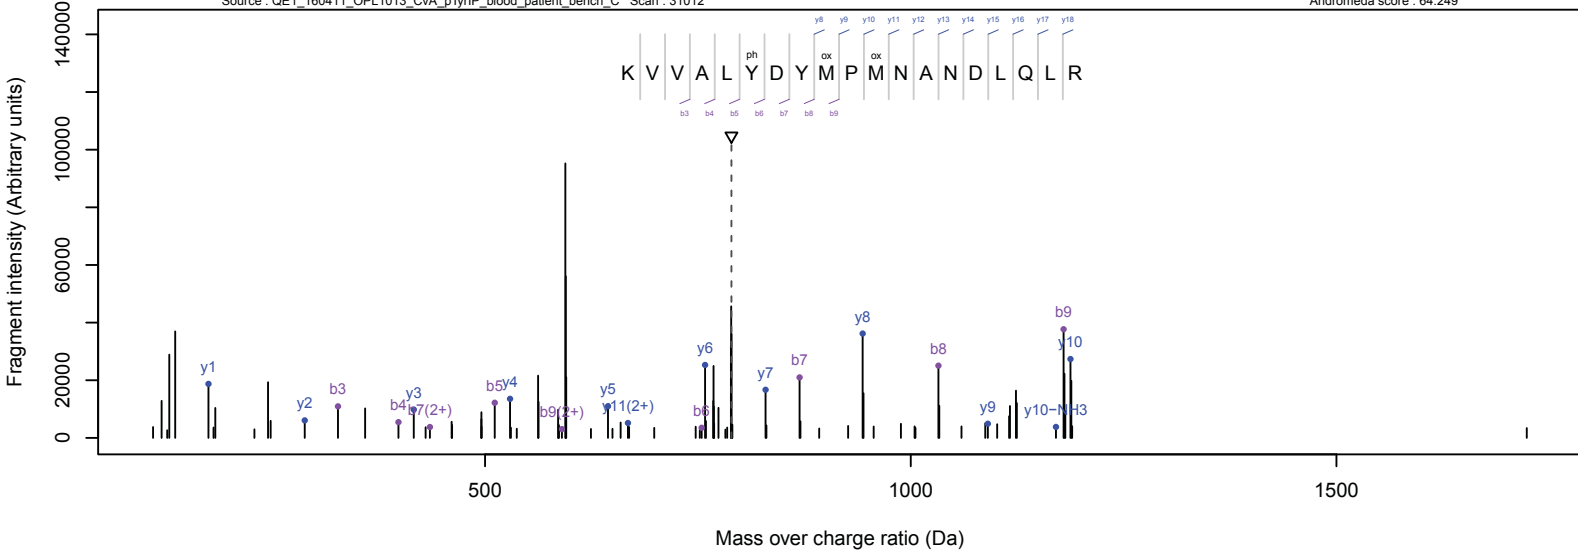

**AVNY(ph)FSK-2+**

Source : QE1\_160411\_OPL1013\_CvA\_pTyrIP\_blood\_patient\_bench\_C Scan : 6567

Andromeda score : 64.207

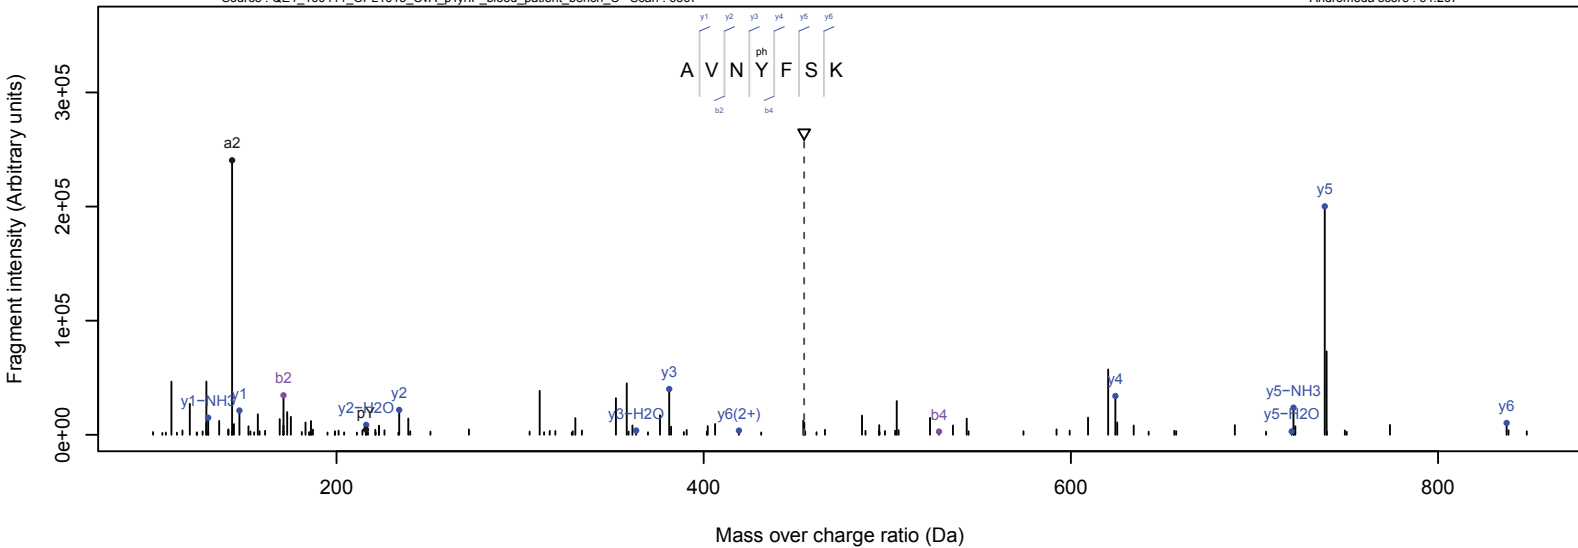

## CDVDIRKDL(ph)ANTVLSGGTTMYPGIADR-3+

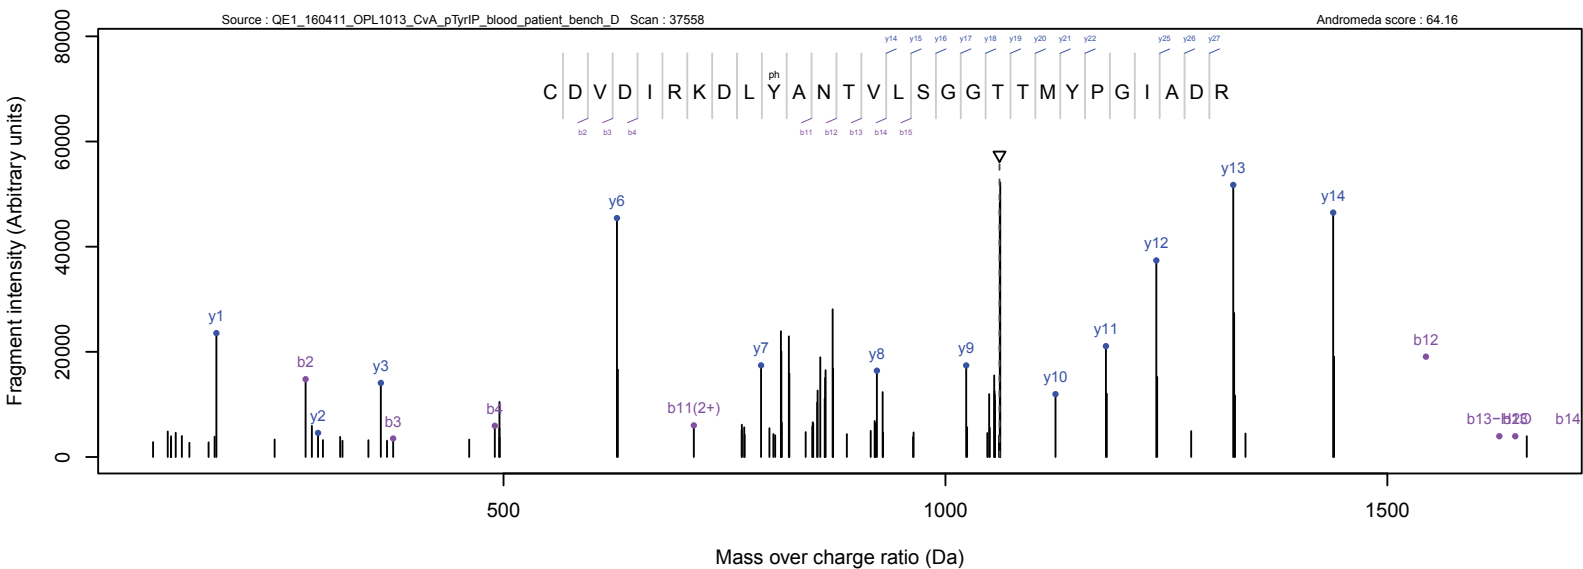

## KT(ph)RDQYLMWLTQK-3+

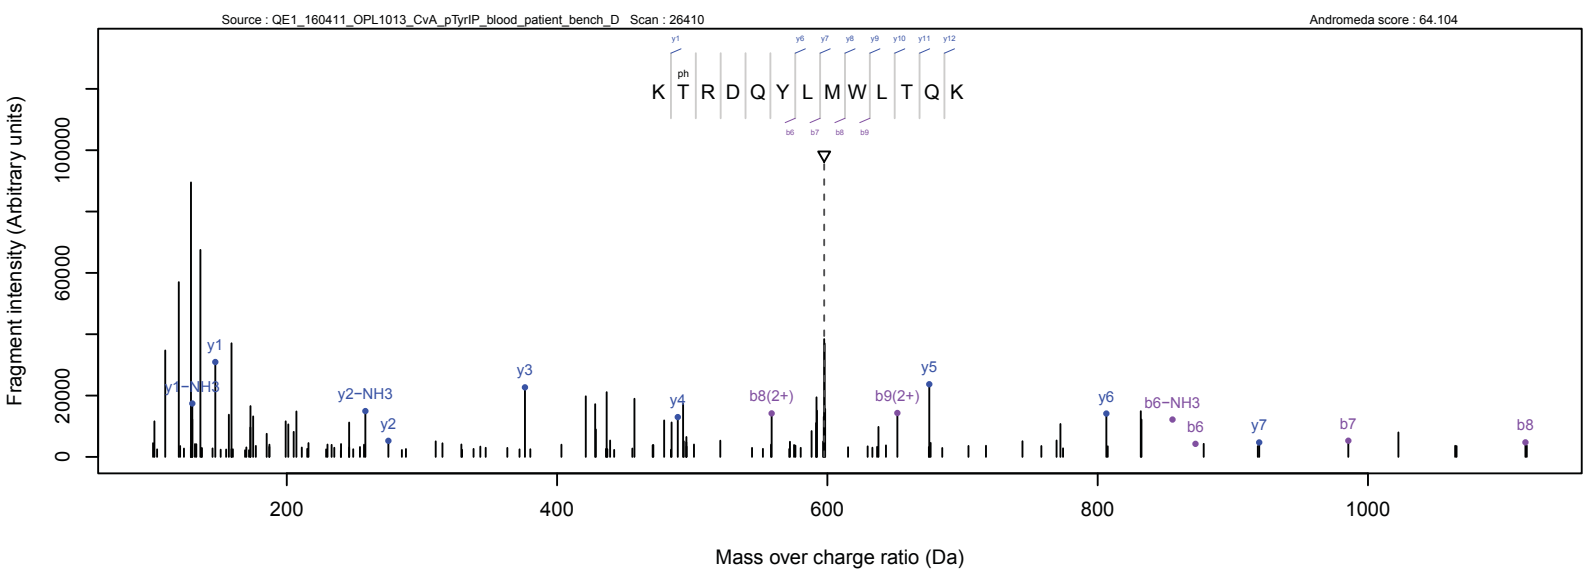

## LM(ox)TGDTY(ph)TAHAGAK-3+

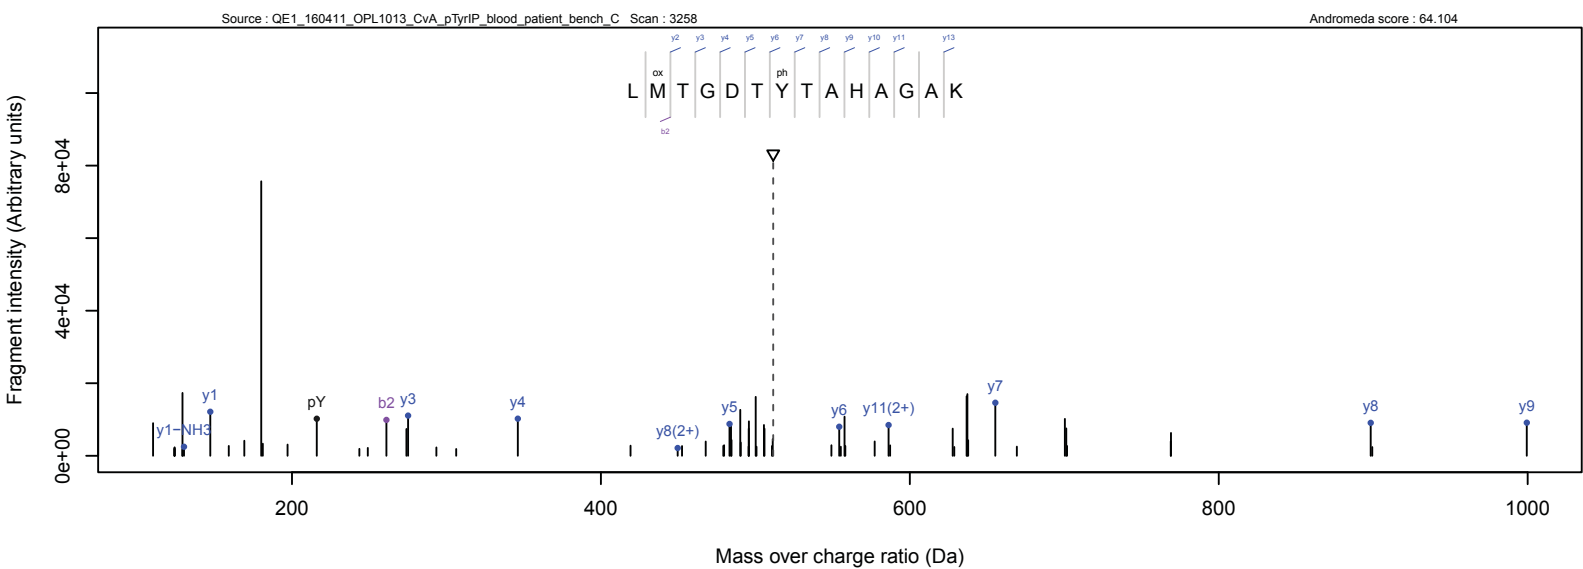

**KLNEWLGNENTEDQ(ph)SLVEDDEDLPHHDEK-4+**

Source : QE1\_160411\_OPL1013\_CvA\_pTyrIP\_blood\_patient\_bench\_C Scan : 28528

Andromeda score : 63.706

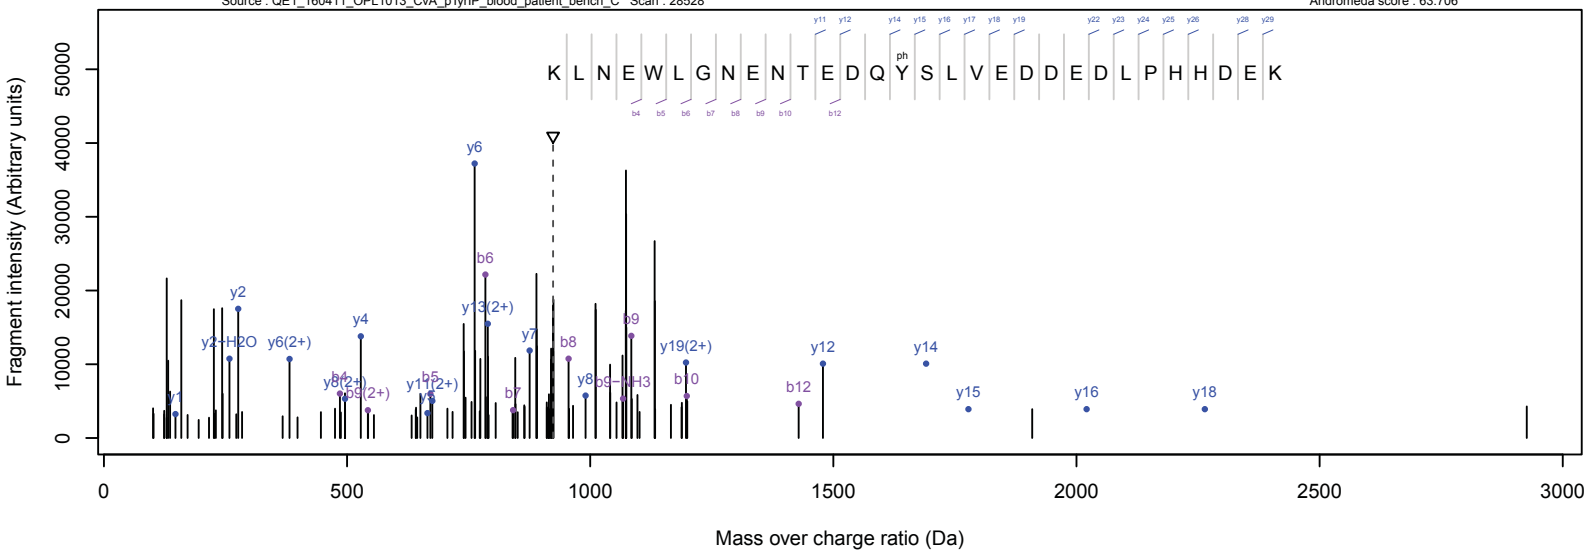

**KVYENAY(ph)GQFIGPHR-3+**

Source : QE1\_160411\_OPL1013\_CvA\_pTyrIP\_blood\_patient\_bench\_C Scan : 18744

Andromeda score : 63.682

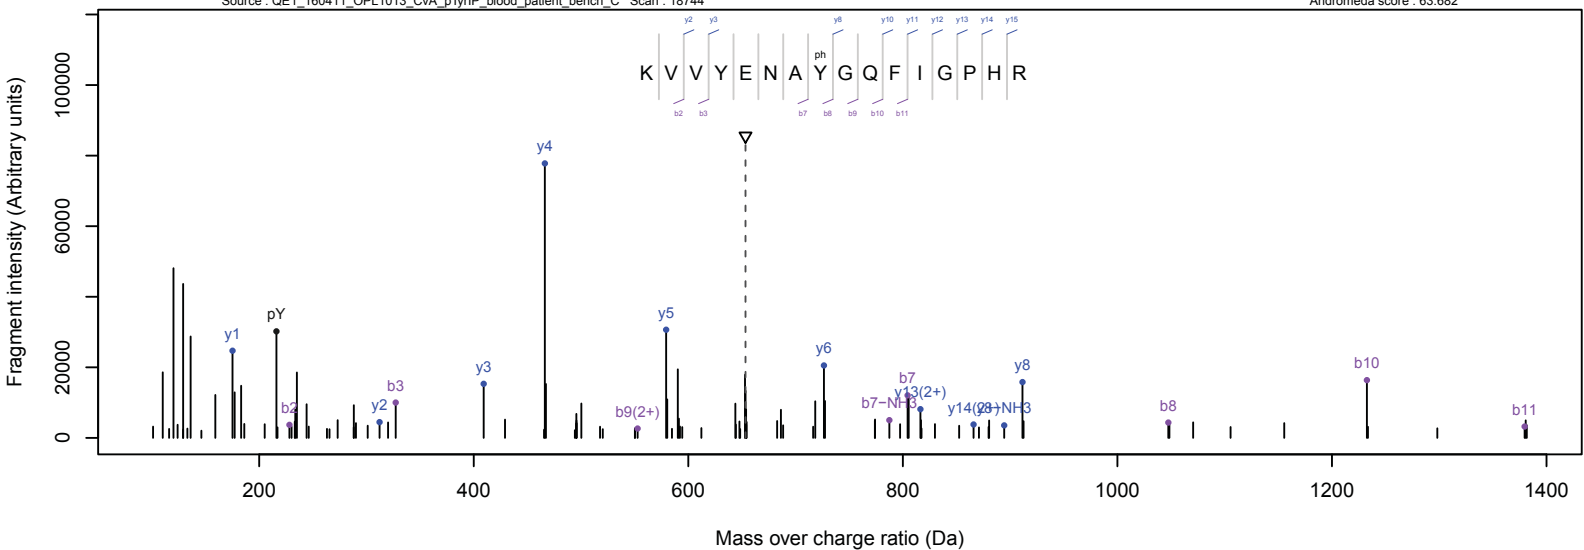

**M(ox)EIAATKEP(ox)NPIKQ(ph)YVK-3+**

Source : QE1\_160411\_OPL1013\_CvA\_pTyrIP\_blood\_patient\_bench\_C Scan : 13814

Andromeda score : 63.682

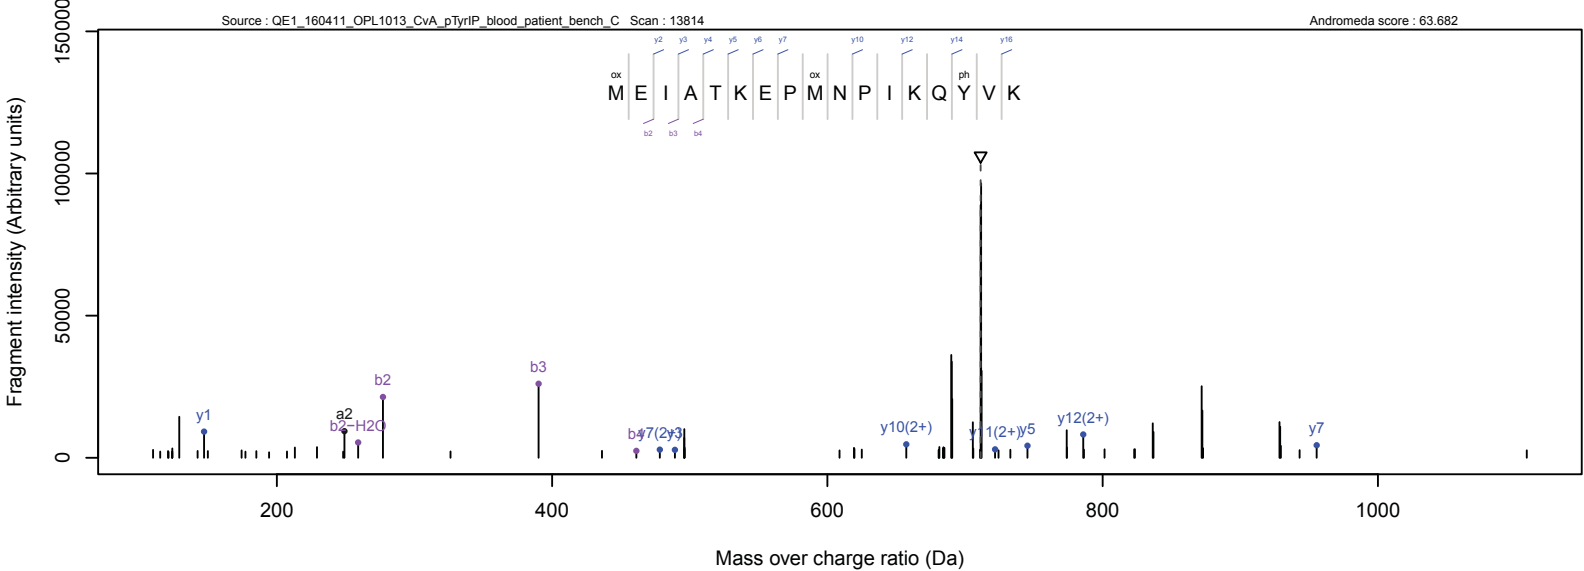

## NGY(ph)VTVEIK-2+

Source : QE1\_160411\_OPL1013\_CvA\_pTyrIP\_blood\_patient\_bench\_A Scan : 13405

Andromeda score : 63.624

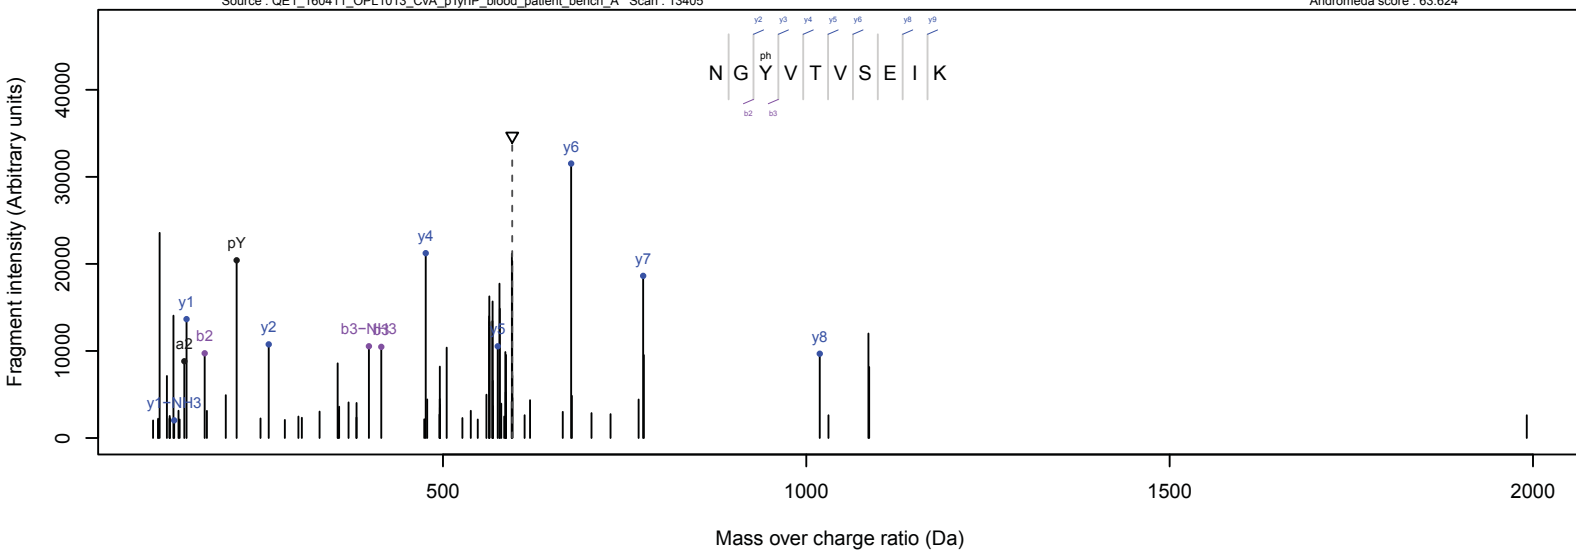

## SISLY(ph)YTGEK-2+

Source : QE1\_160411\_OPL1013\_CvA\_pTyrIP\_blood\_patient\_bench\_A Scan : 18279

Andromeda score : 63.624

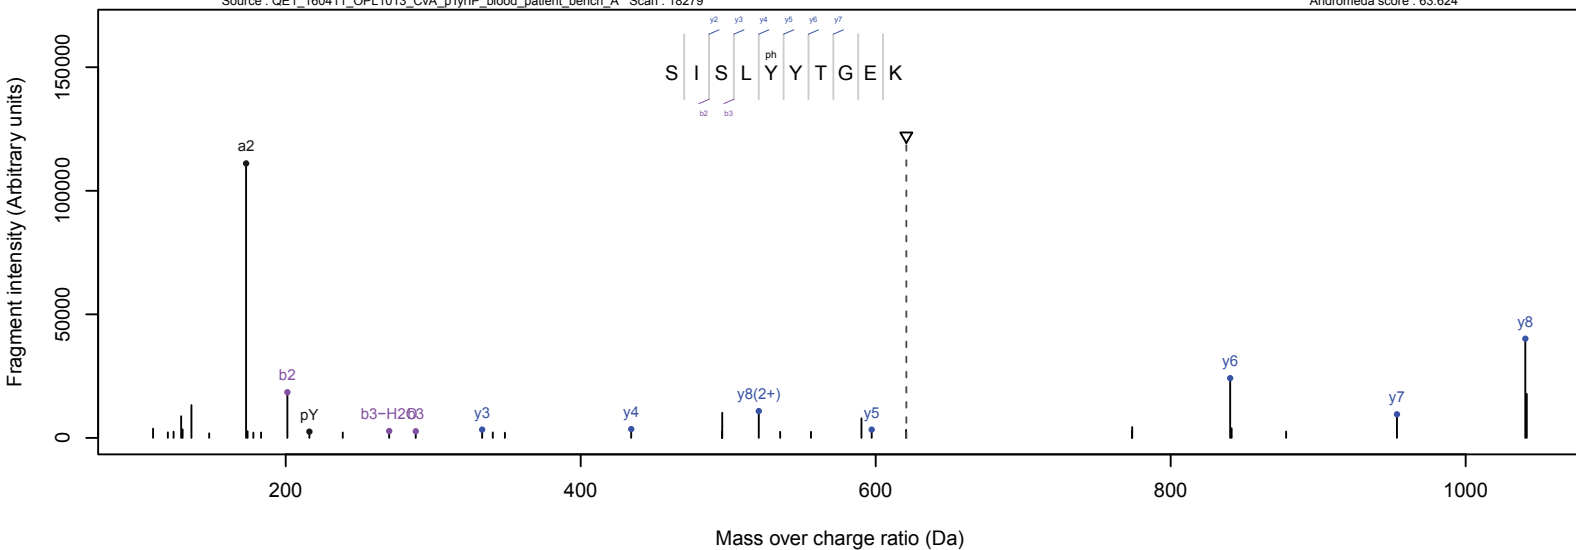

## RFTAQGLPDLNHSQVY(ph)AVK-3+

Source : QE1\_160411\_OPL1013\_CvA\_pTyrIP\_blood\_patient\_bench\_D Scan : 24147

Andromeda score : 63.302

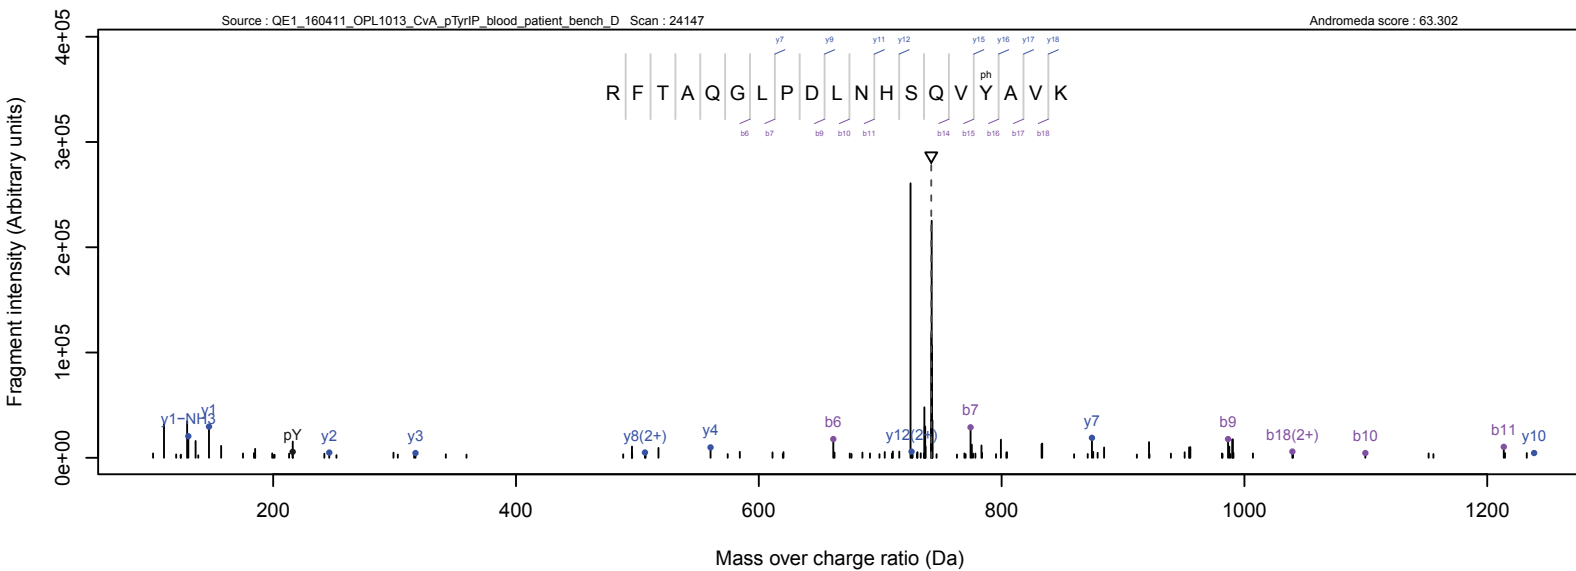

**STVLQQY(ph)NR-2+**

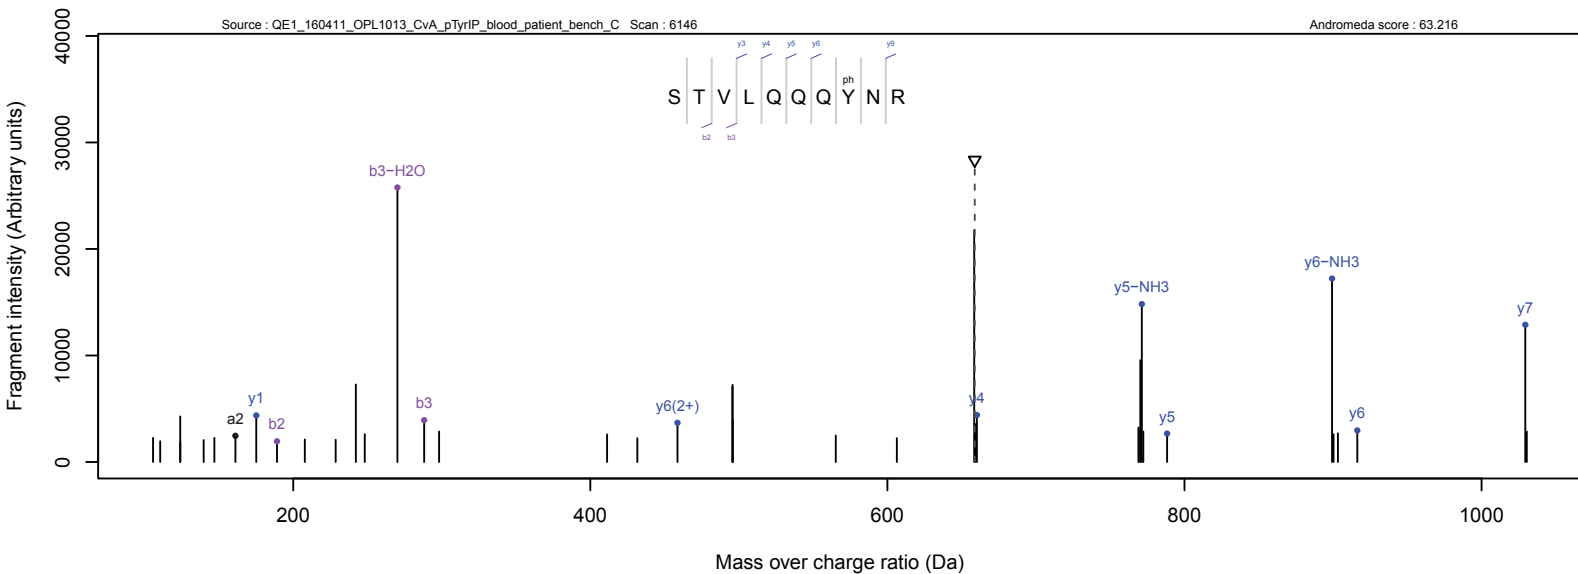

**DSY(ph)VGDEAQSQR-2+**

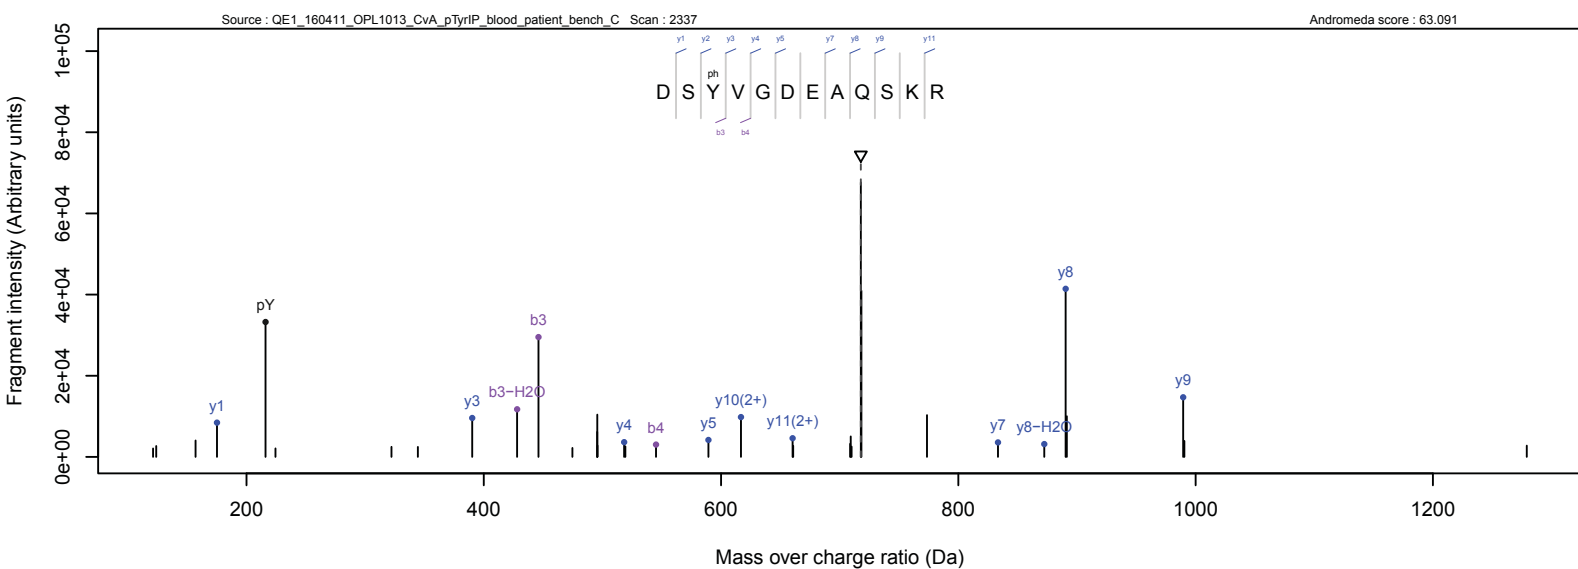

**TTDGVY(ph)EGVAIGDRYPGSTFMDHVL R-4+**

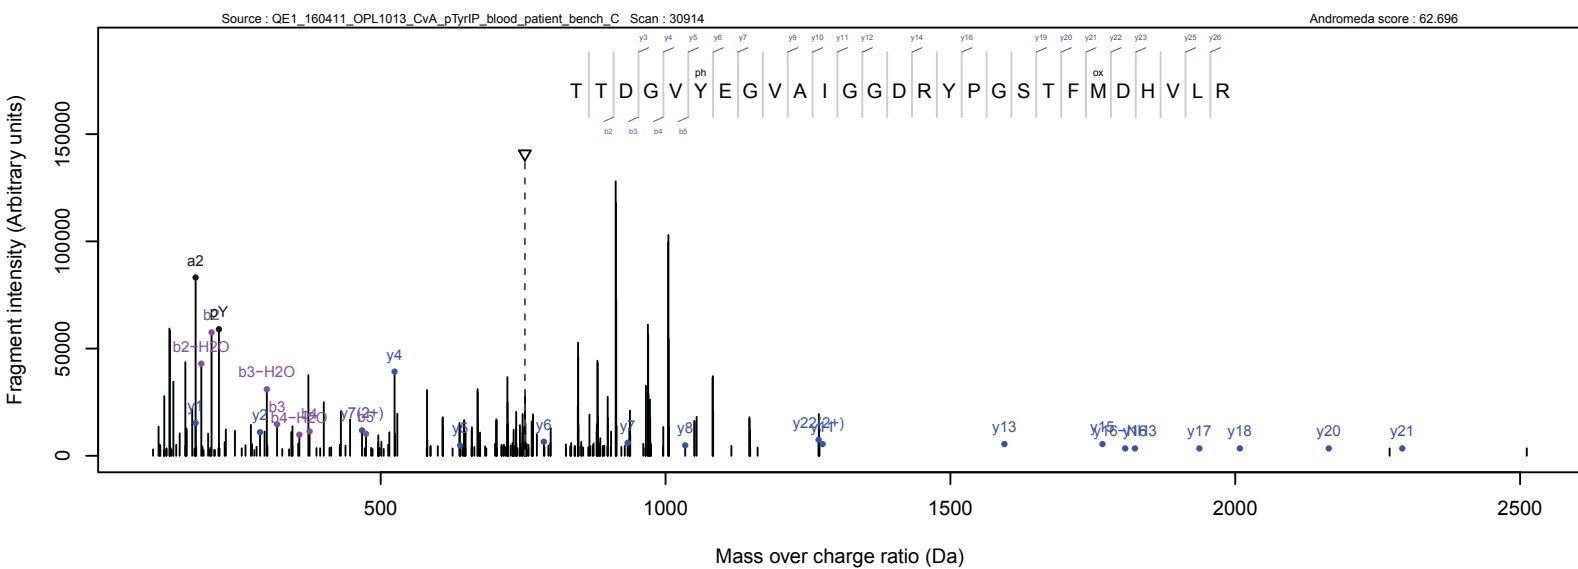

**AEDPSQPSAGY(ph)TALHYASR-3+**

Source : QE1\_160411\_OPL1013\_CvA\_pTyrIP\_blood\_patient\_bench\_A Scan : 18588

Andromeda score : 62.617

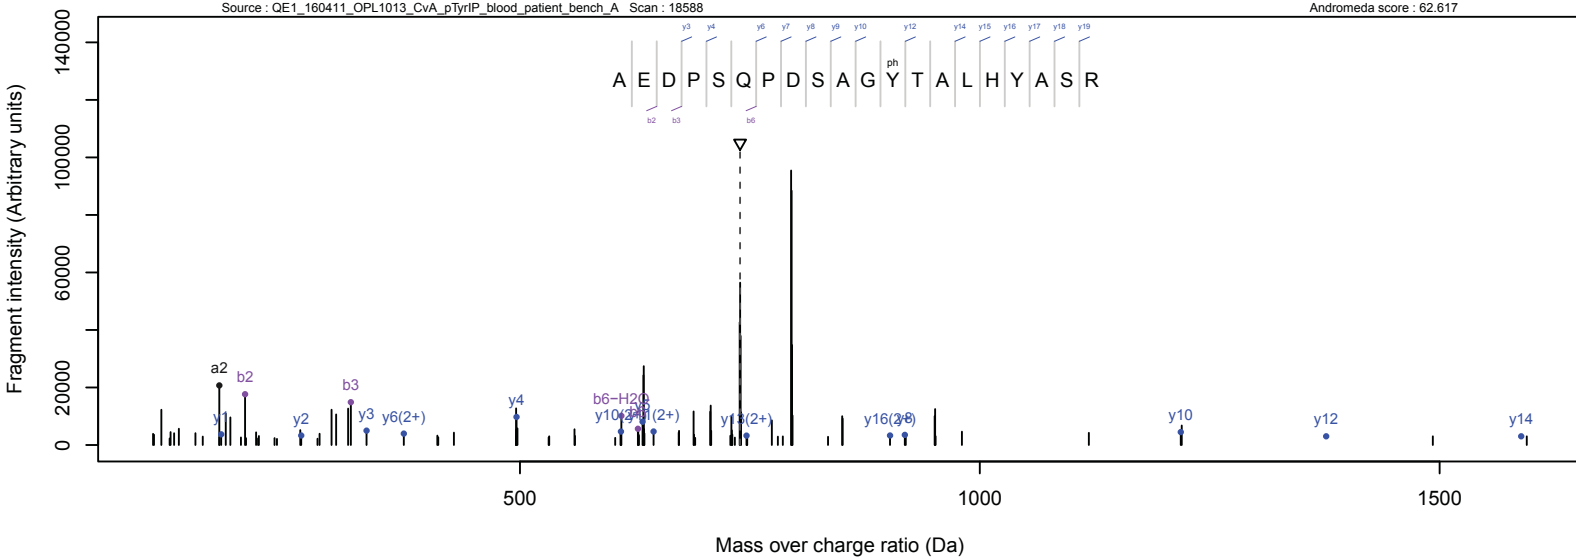

**QGTY(ph)GGYFR-2+**

Source : QE1\_160411\_OPL1013\_CvA\_pTyrIP\_blood\_patient\_bench\_C Scan : 12675

Andromeda score : 62.463

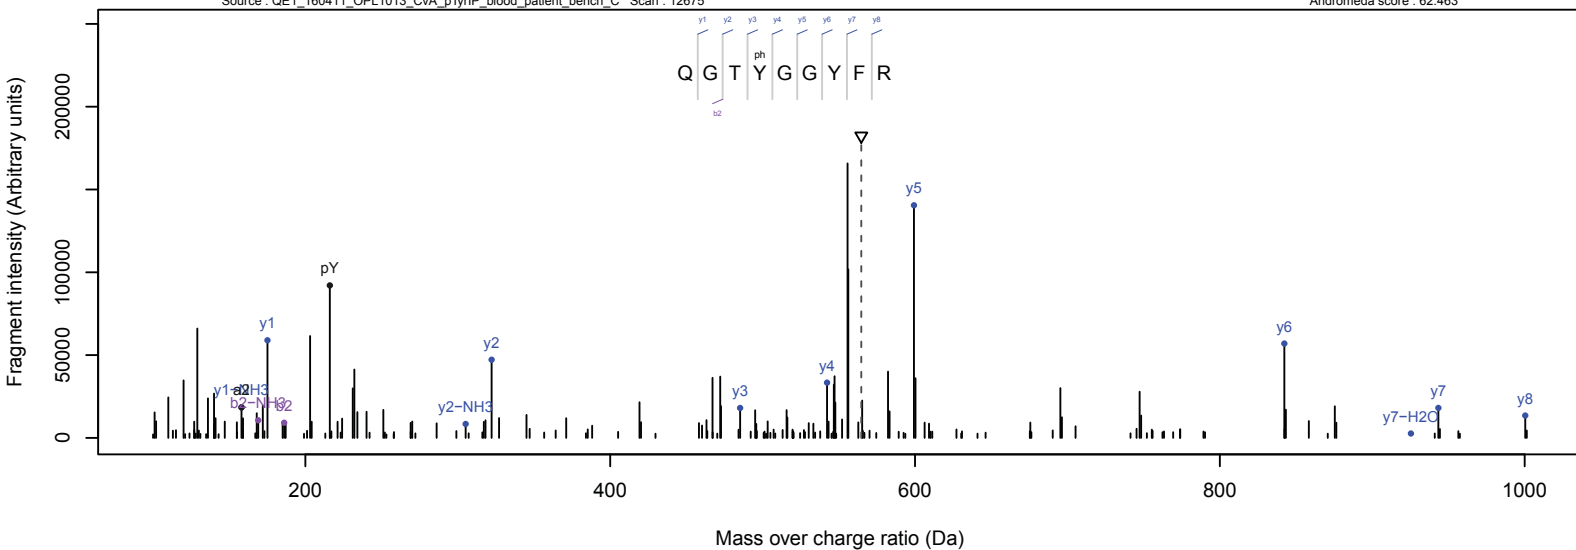

**Y(ph)LATCADDR-2+**

Source : QE1\_160411\_OPL1013\_CvA\_pTyrIP\_blood\_patient\_bench\_B Scan : 4330

Andromeda score : 62.463

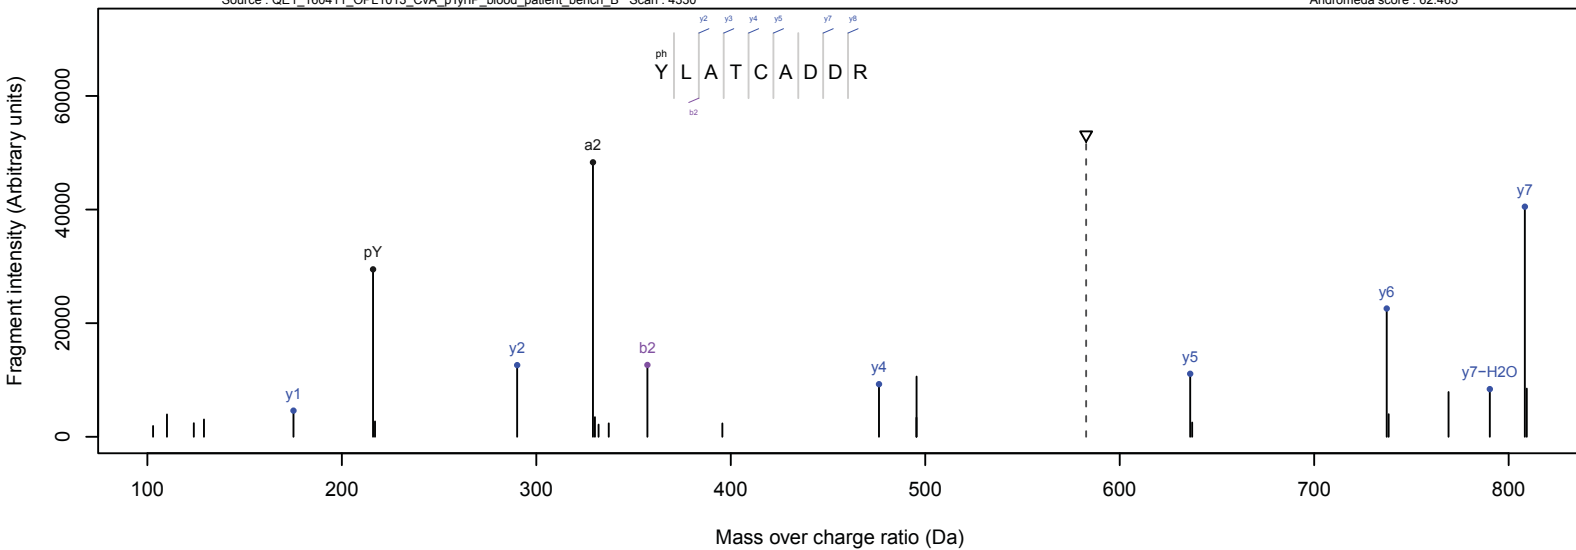

## ENDY(ph)ESISDLQQGR-2+

Source : QE1\_160411\_OPL1013\_CvA\_pTyrIP\_blood\_patient\_bench\_C Scan : 17760

Andromeda score : 62.287

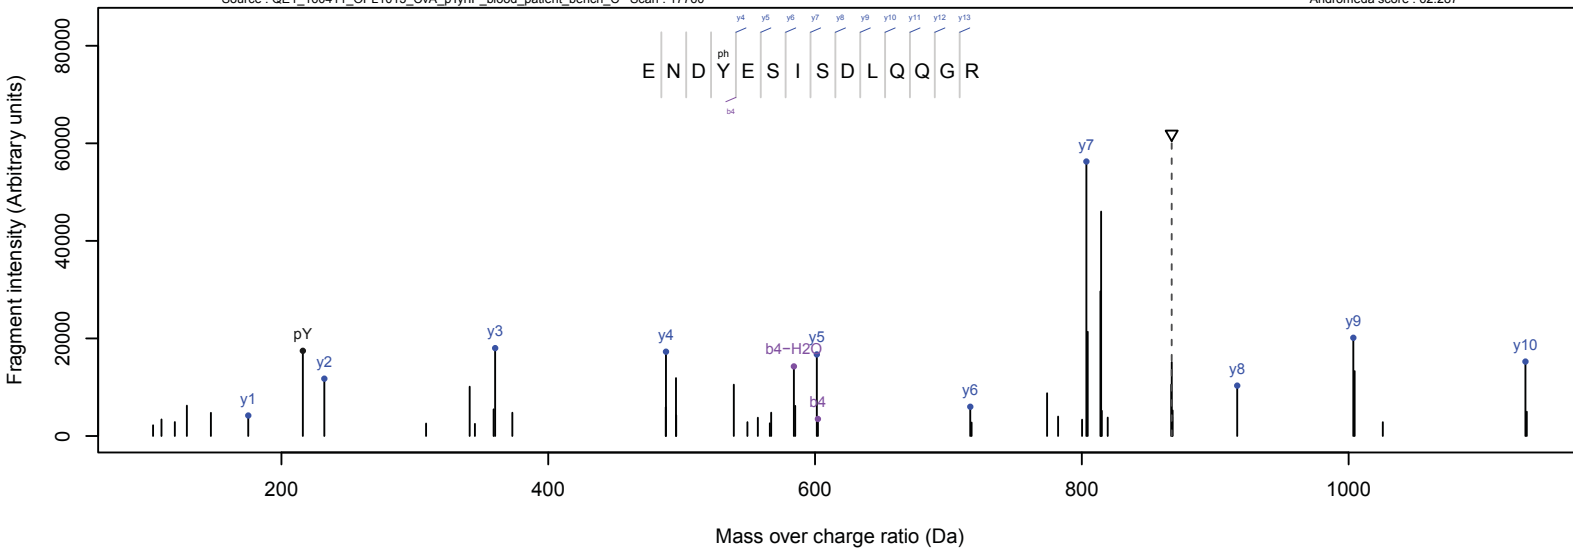

## REDGGY(ph)TFTATPEDFPKK-3+

Source : QE1\_160411\_OPL1013\_CvA\_pTyrIP\_blood\_patient\_bench\_C Scan : 18956

Andromeda score : 62.203

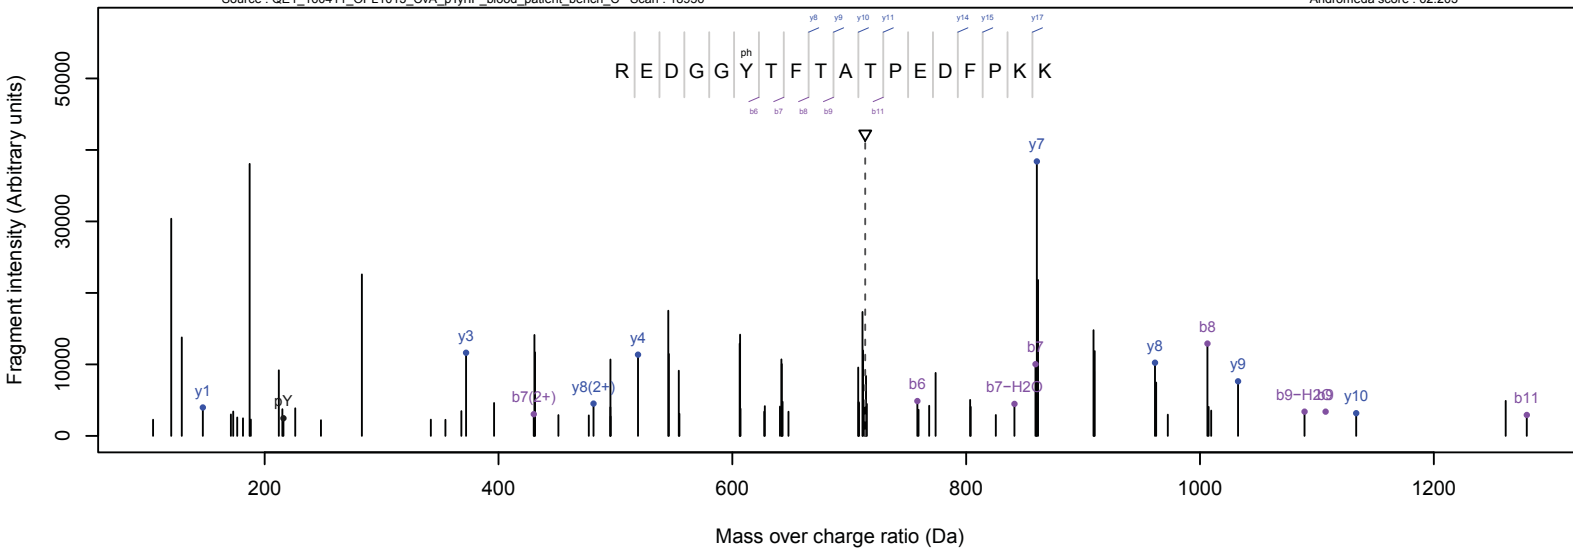

## KREGSDSY(ph)AITFR-3+

Source : QE1\_160411\_OPL1013\_CvA\_pTyrIP\_blood\_patient\_bench\_C Scan : 10728

Andromeda score : 62.162

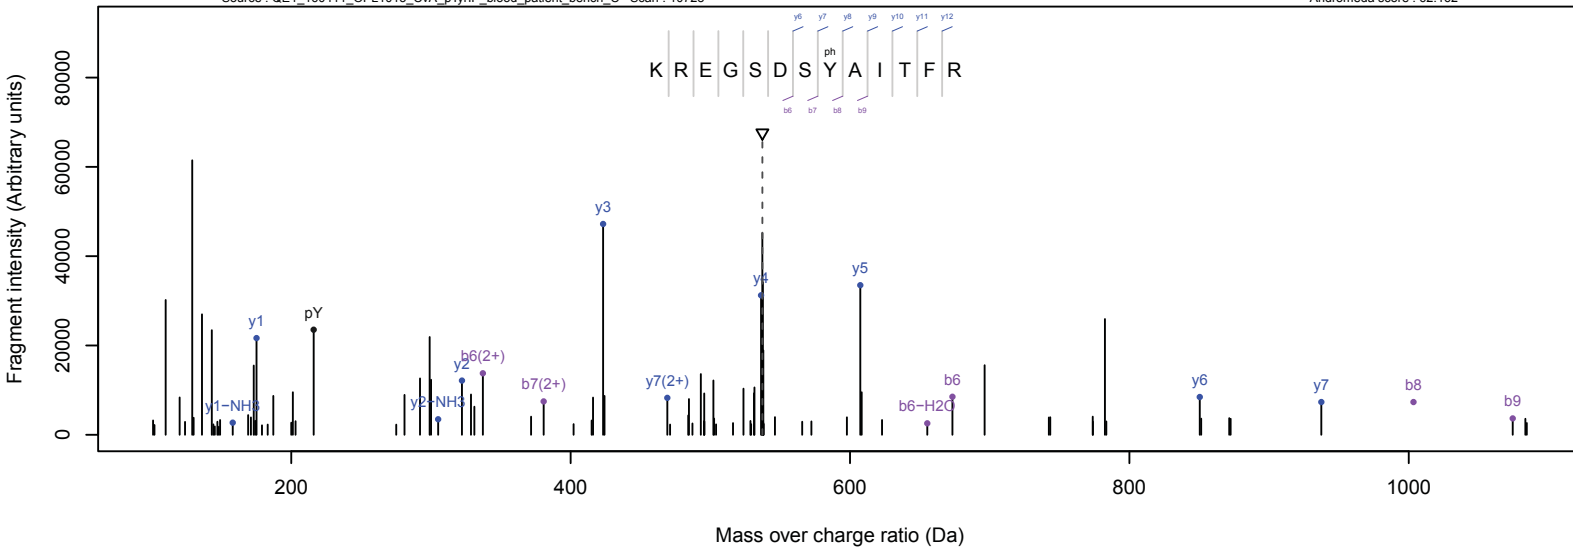

GPVVLKEPEKQLYDIPASPK-3+

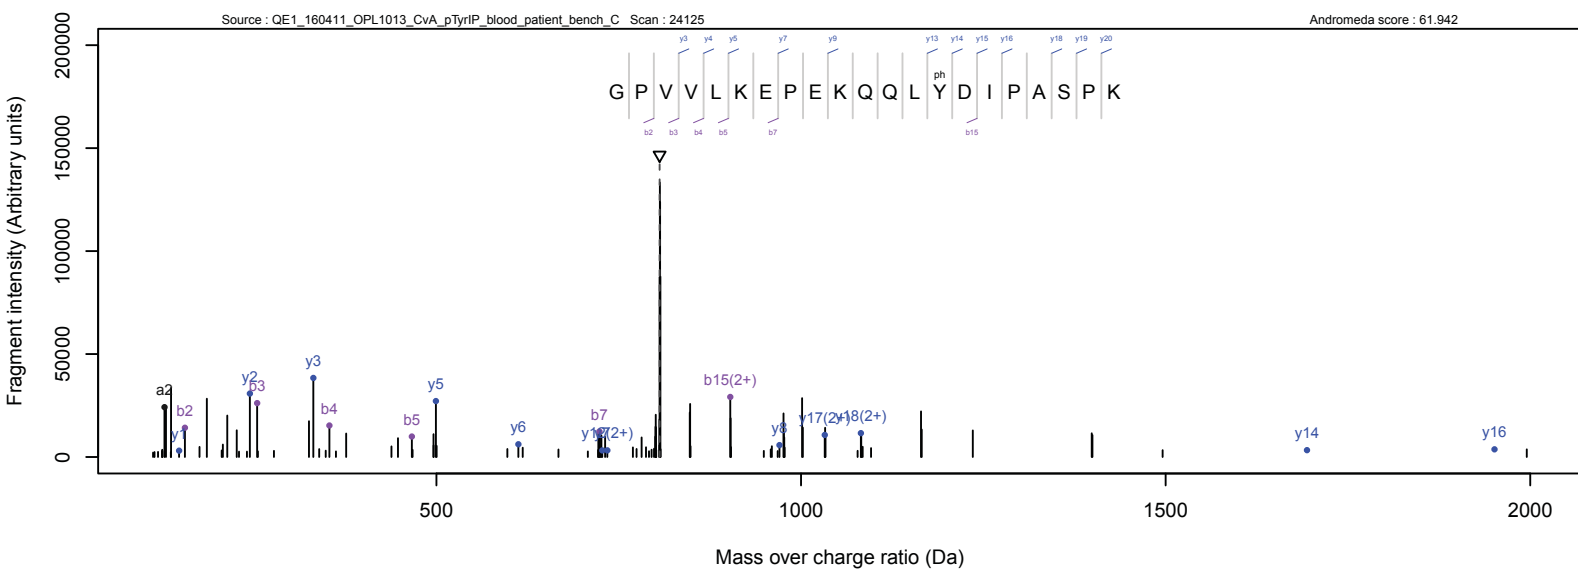

GYPGDYTK-2+

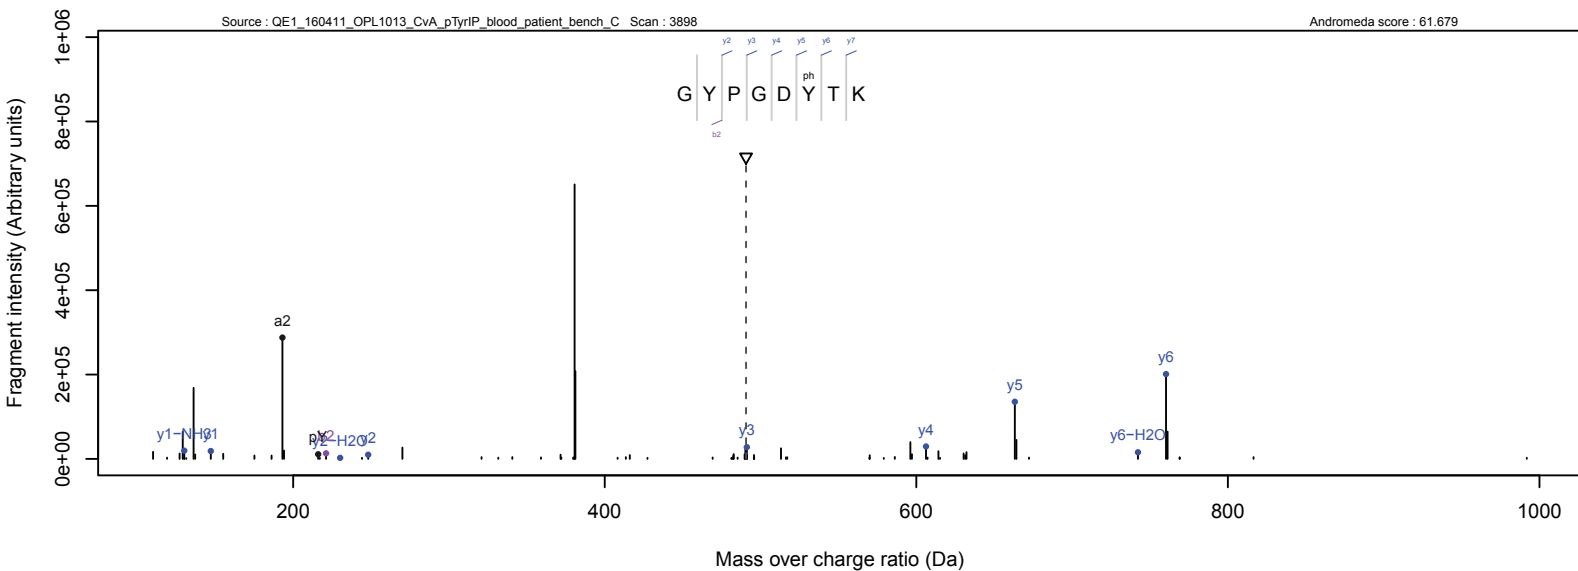

AKEIYMTFLSSK-2+

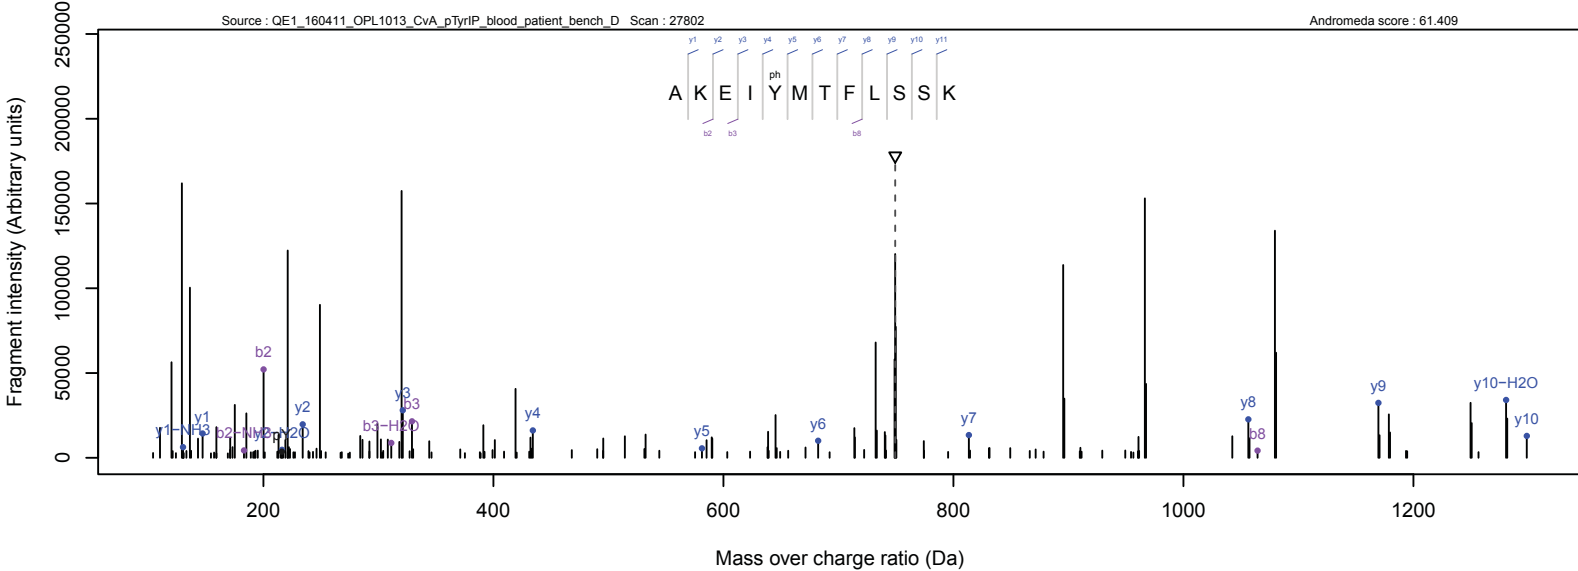



ASSPAESSPESGYM(ox)R-2+

Source : QE1\_160411\_OPL1013\_CvA\_pTyrIP\_blood\_patient\_bench\_B Scan : 3587

Andromeda score : 61.265

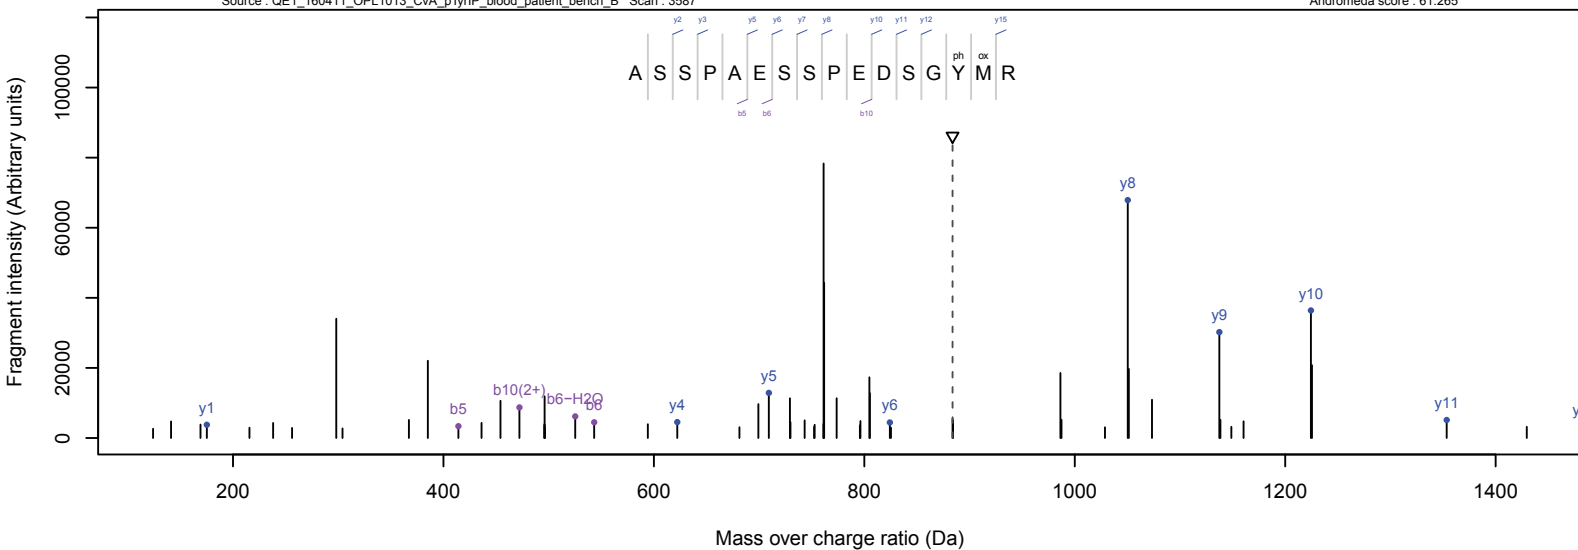

HFTNPY(ph)CNIYLSVQVAK-3+

Source : QE1\_160411\_OPL1013\_CvA\_pTyrIP\_blood\_patient\_bench\_D Scan : 27557

Andromeda score : 61.256

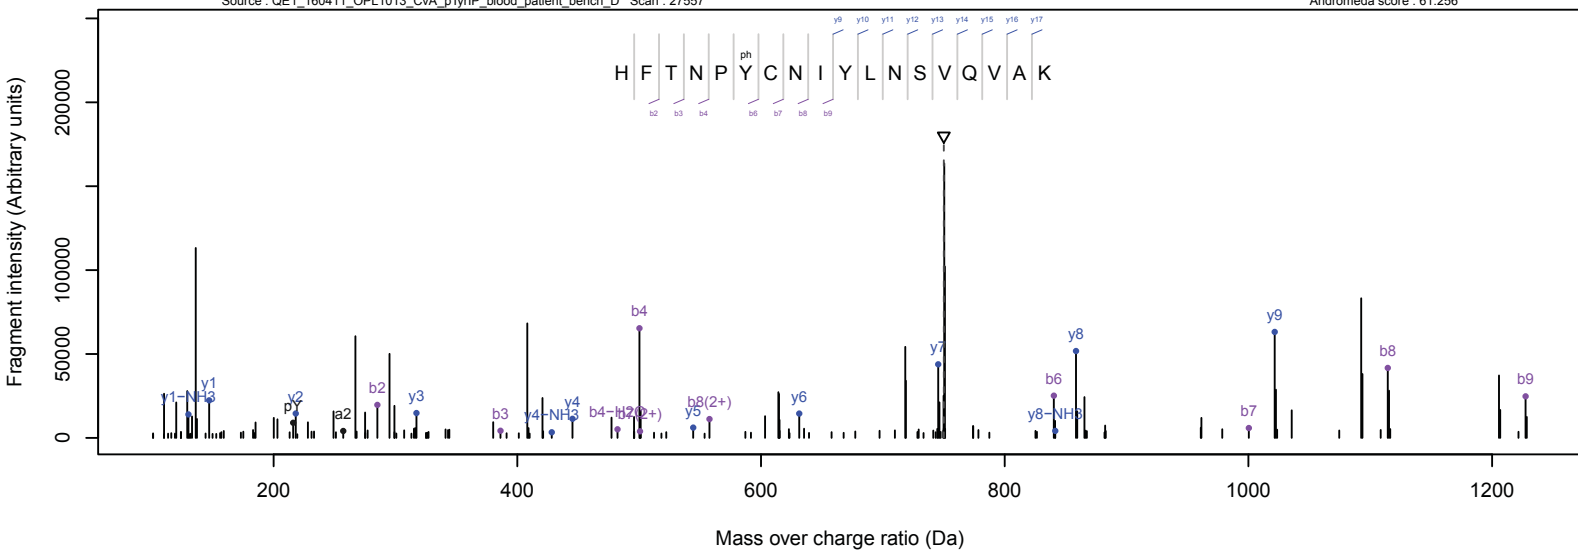

EKVWY(ph)HVCSSR-3+

Source : QE1\_160411\_OPL1013\_CvA\_pTyrIP\_blood\_patient\_bench\_D Scan : 10217

Andromeda score : 61.235

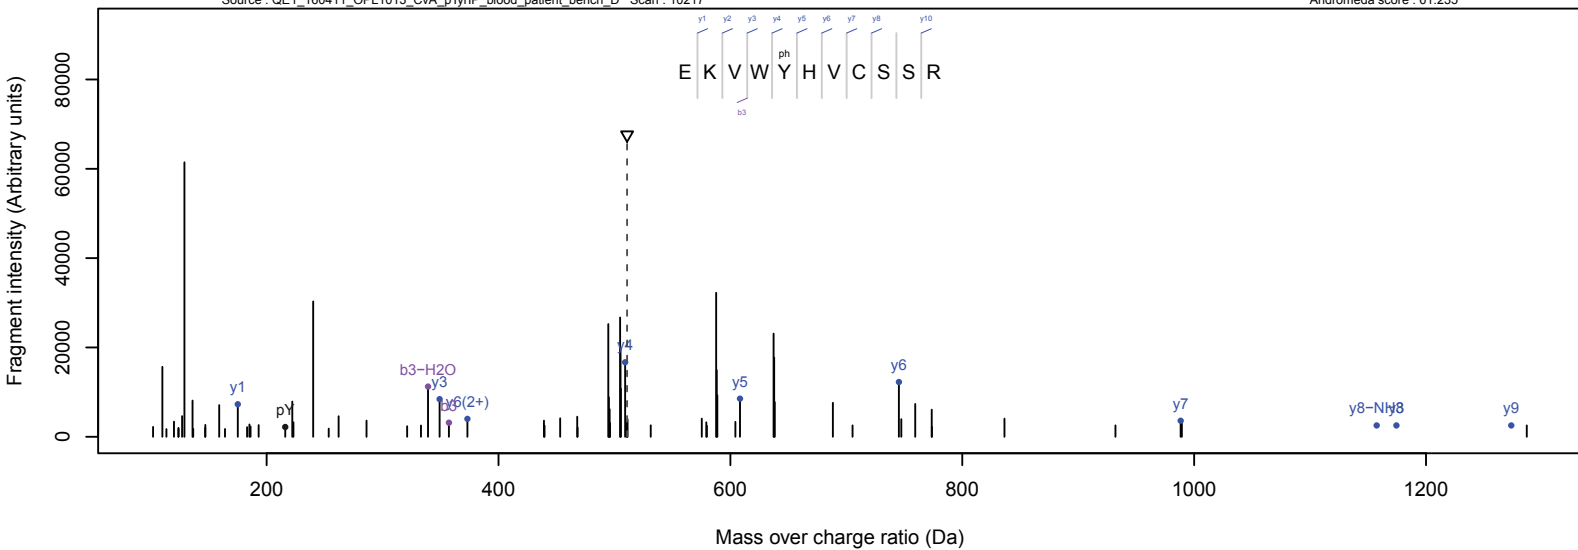

ISVY(ph)YNEATGGK-2+

Source : QE1\_160411\_OPL1013\_CvA\_pTyrIP\_blood\_patient\_bench\_A Scan : 13563

Andromeda score : 61.11

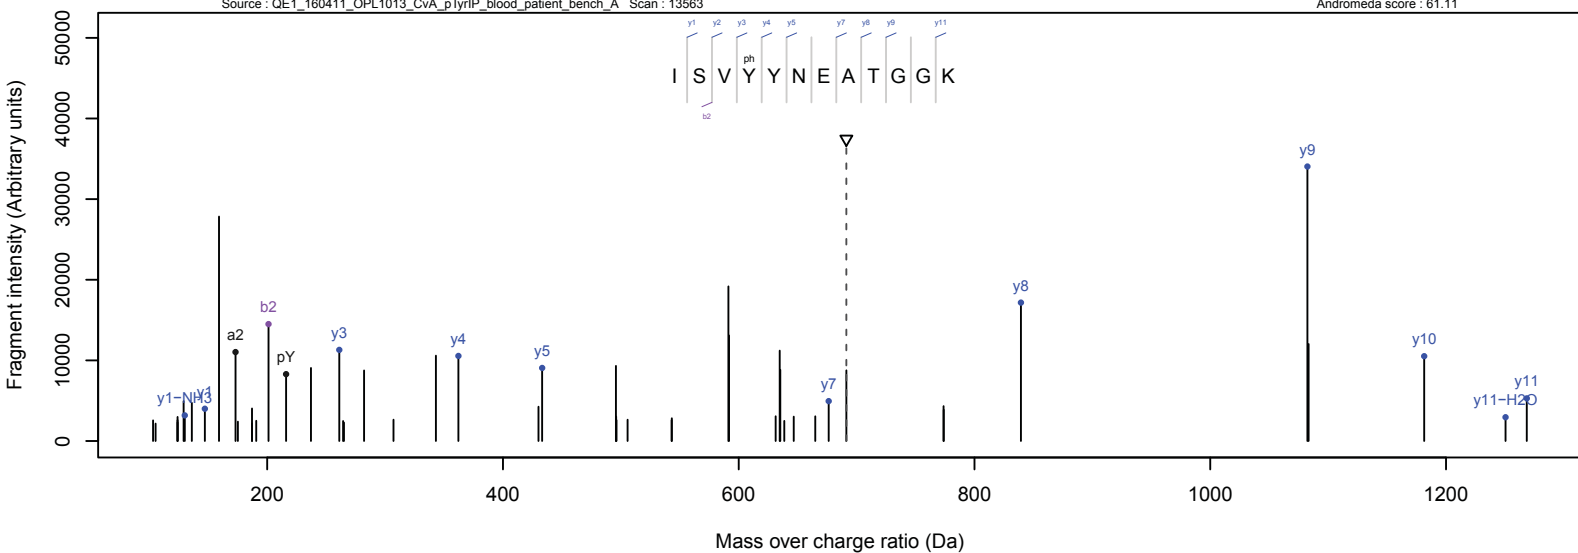

LYPELSQY(ph)M(ox)GLSNEEEIR-3+

Source : QE1\_160411\_OPL1013\_CvA\_pTyrIP\_blood\_patient\_bench\_C Scan : 37866

Andromeda score : 61.096

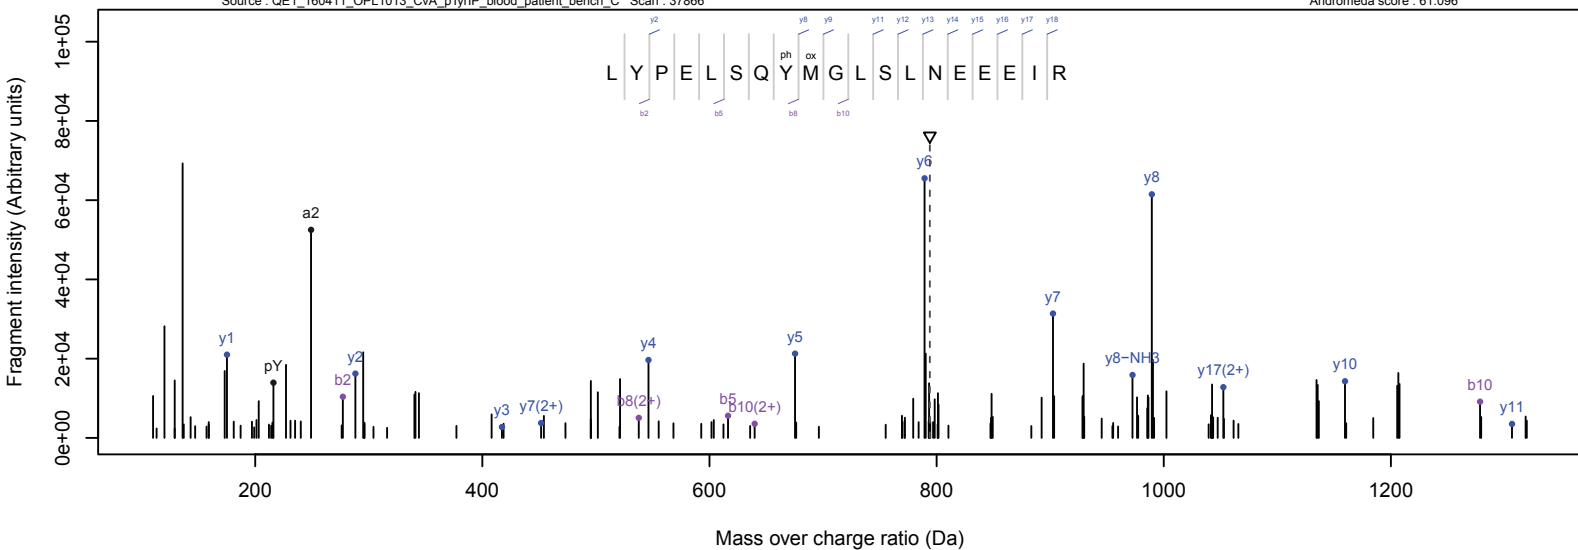

RPHGDIY(ph)GINQALGATAK-3+

Source : QE1\_160411\_OPL1013\_CvA\_pTyrIP\_blood\_patient\_bench\_C Scan : 19865

Andromeda score : 61.096

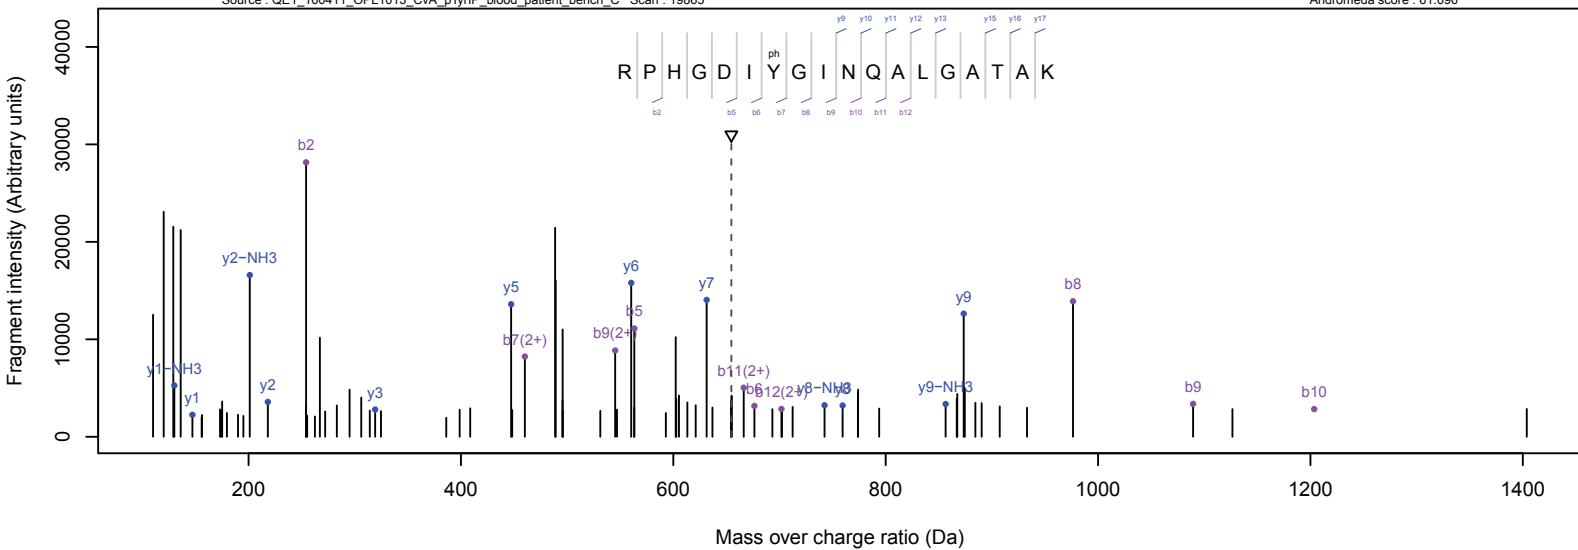

**QGY(ph)VIYR-2+**

Source : QE1\_160411\_OPL1013\_CvA\_pTyrIP\_blood\_patient\_bench\_A Scan : 9841

Andromeda score : 60.788

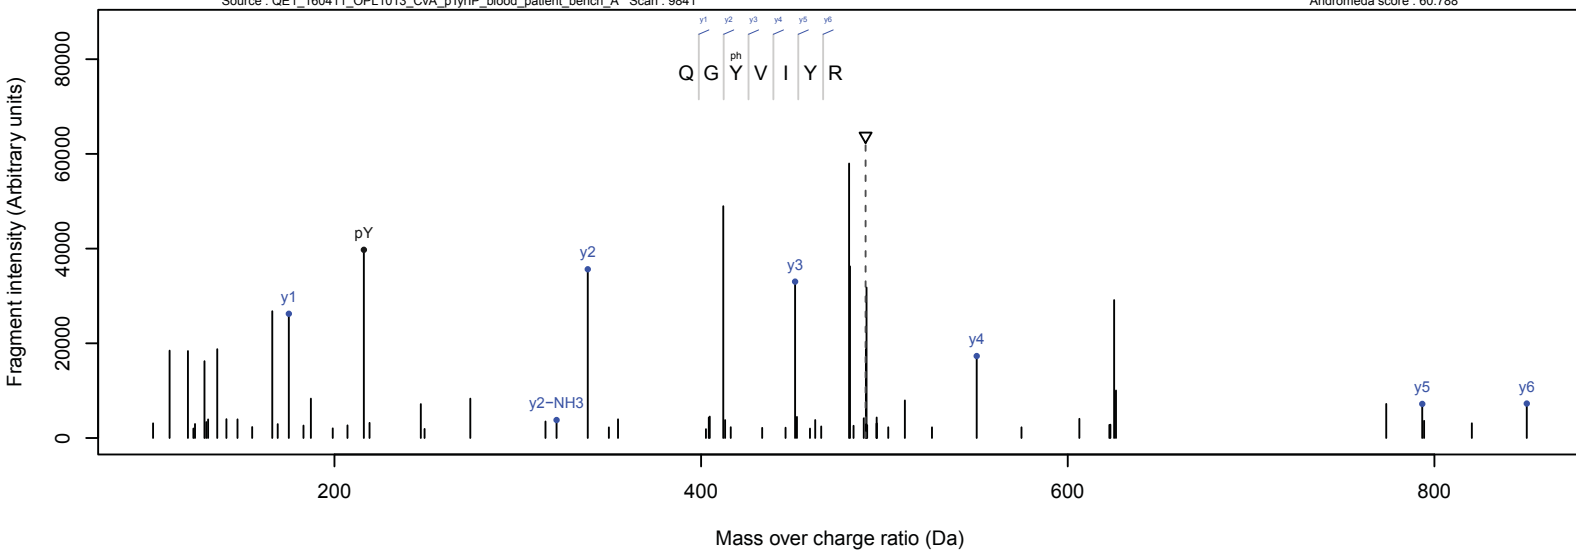

**AAVPSGASTGIY(ph)EALERDNDK-3+**

Source : QE1\_160411\_OPL1013\_CvA\_pTyrIP\_blood\_patient\_bench\_C Scan : 33478

Andromeda score : 60.735

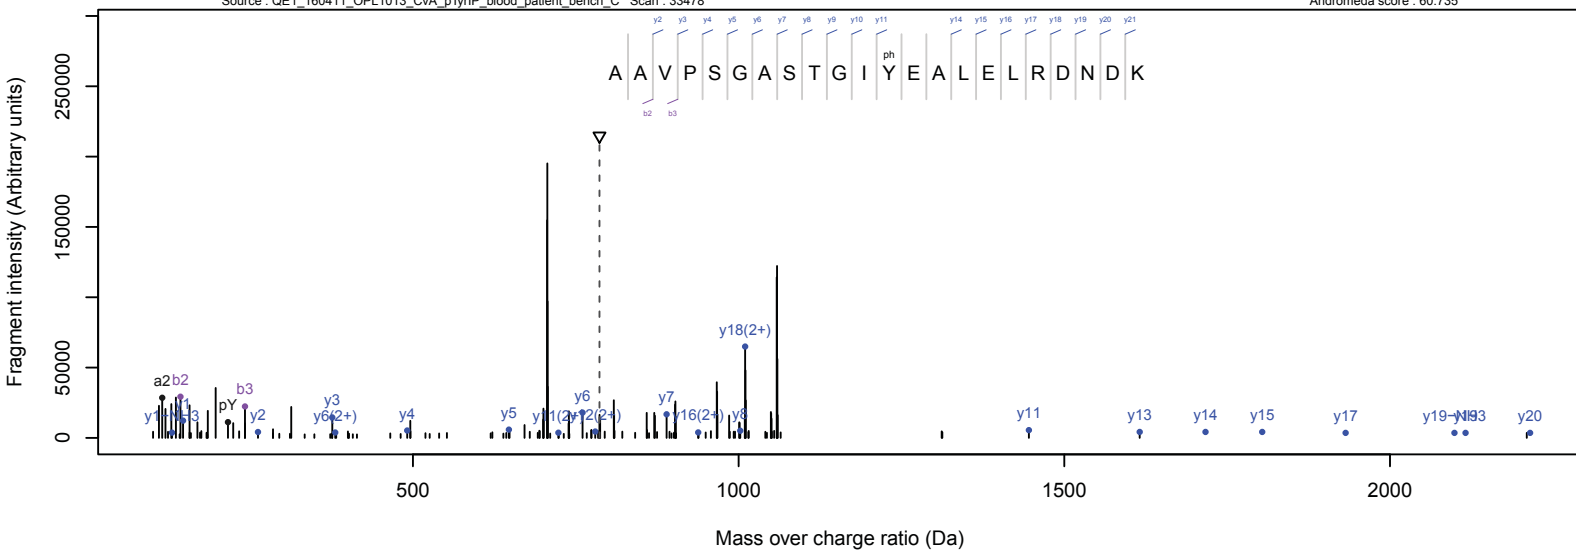

**HSQHLPKVEFGVY(ph)ESGPRK-5+**

Source : QE1\_160411\_OPL1013\_CvA\_pTyrIP\_blood\_patient\_bench\_C Scan : 15304

Andromeda score : 60.621

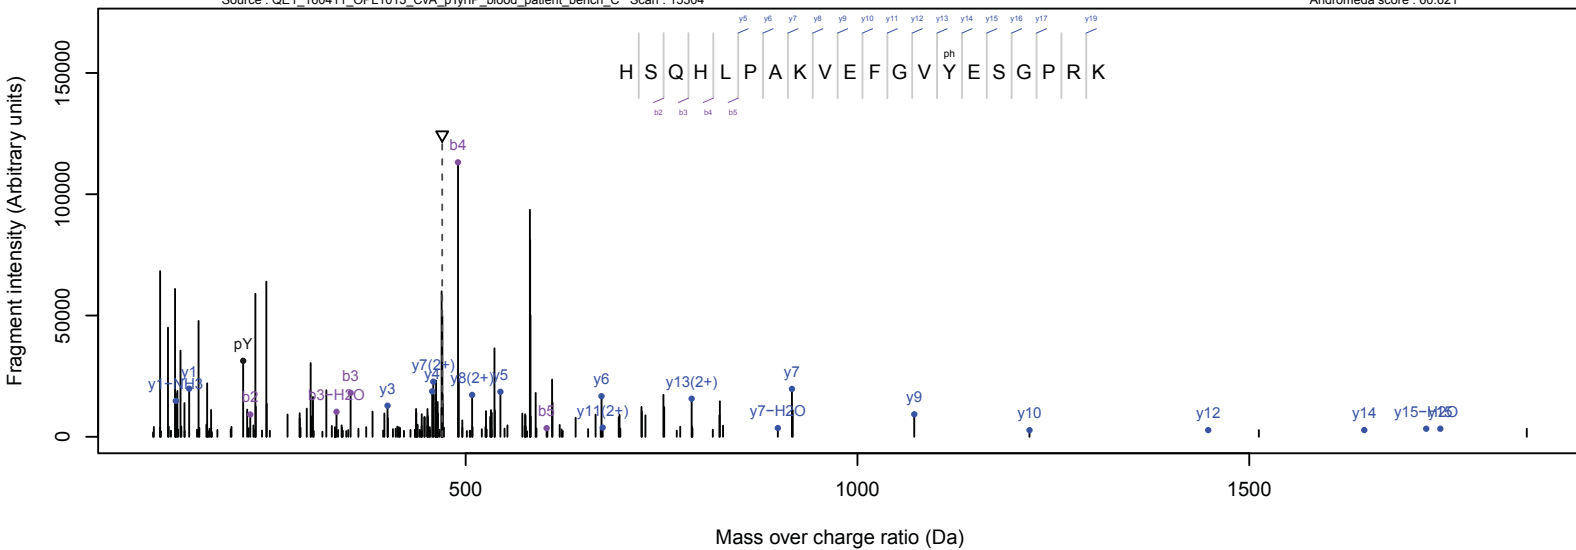

## LCY(ph)YIGATDDAATK-2+

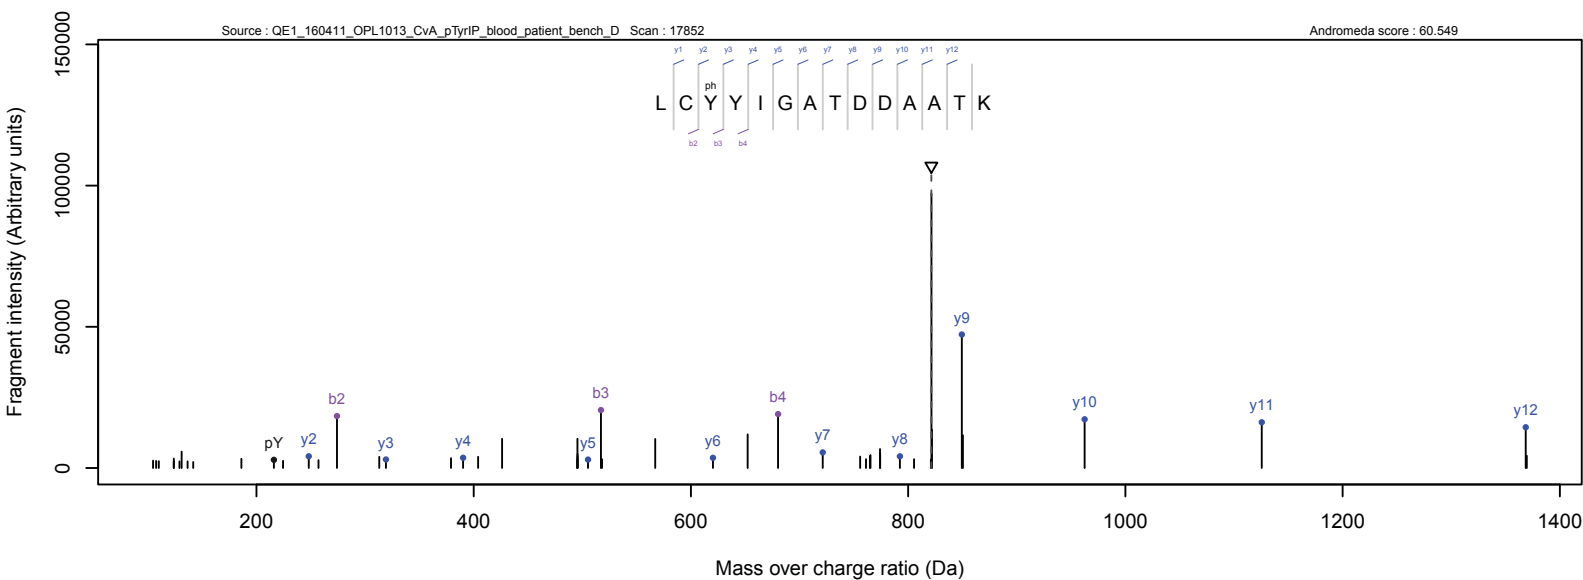

## KGHEY(ph)TNIK-3+

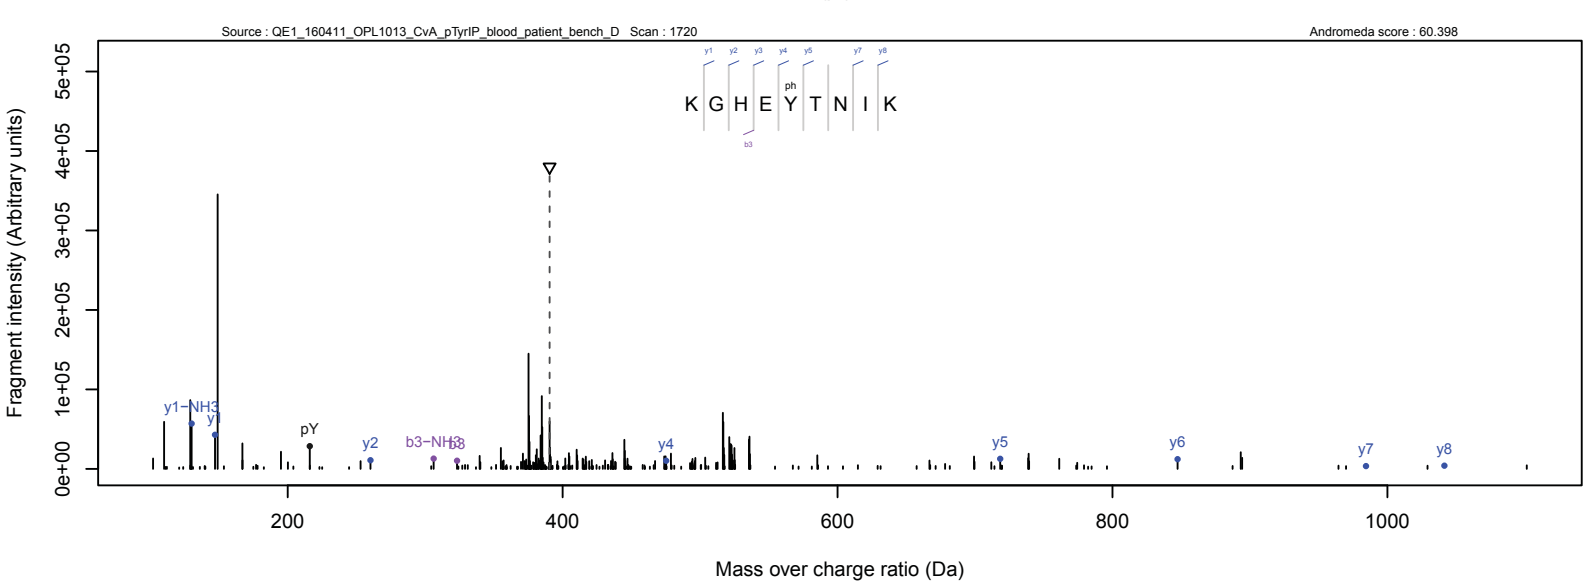

## STCIY(ph)GGAPK-2+

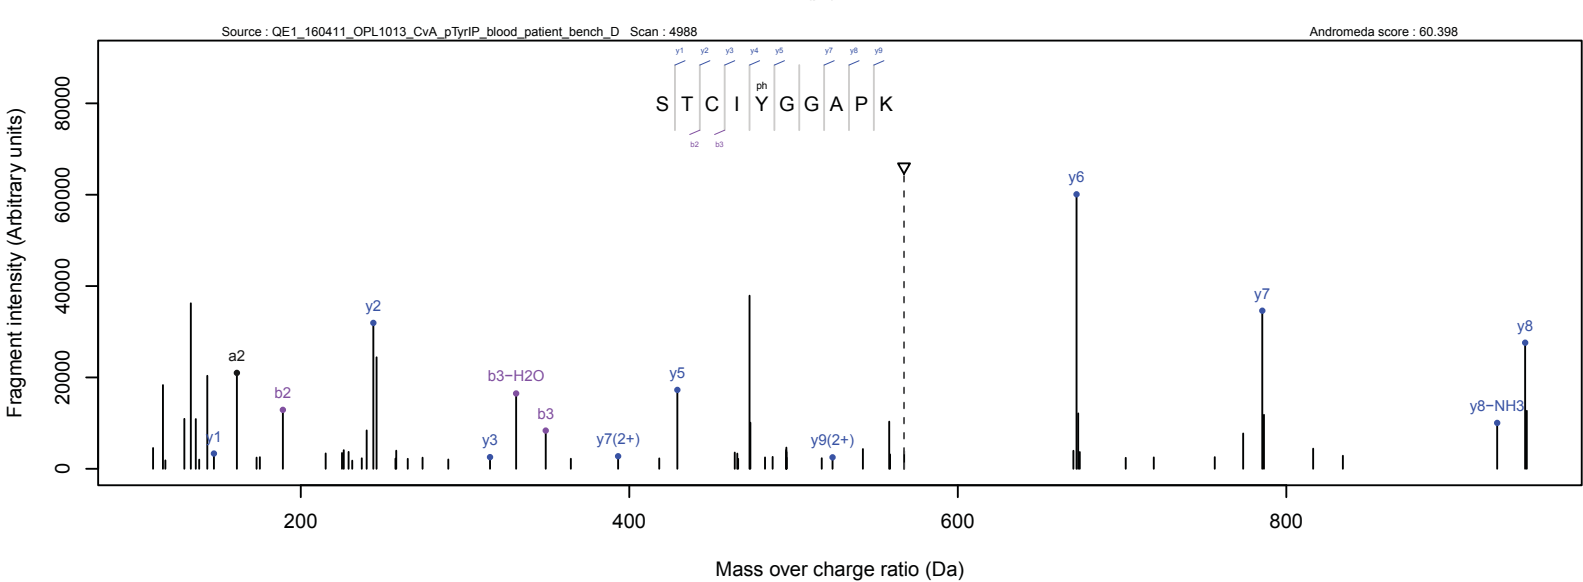

TAFPQQ(ph)R-2+

Source : QE1\_160411\_OPL1013\_CvA\_pTyrIP\_blood\_patient\_bench\_D Scan : 4541

Andromeda score : 60.398

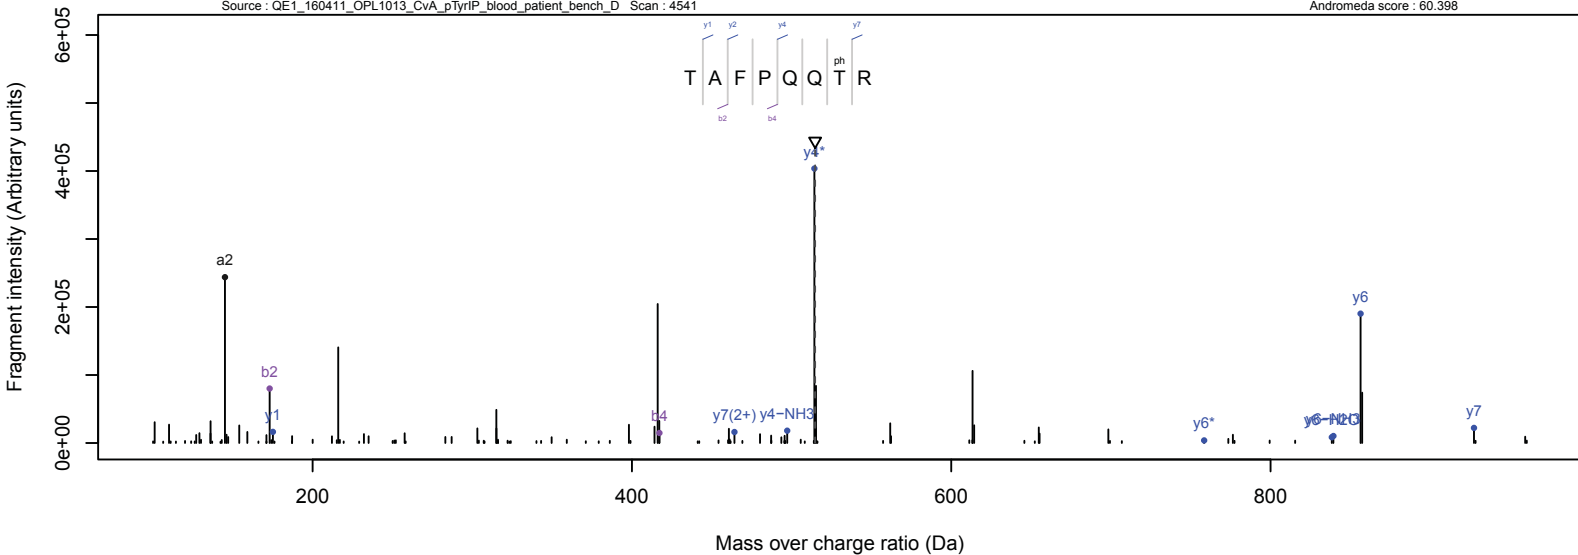

GPVSGTEPEPV(ph)SM(ox)EAADYR-3+

Source : QE1\_160411\_OPL1013\_CvA\_pTyrIP\_blood\_patient\_bench\_C Scan : 18915

Andromeda score : 60.134

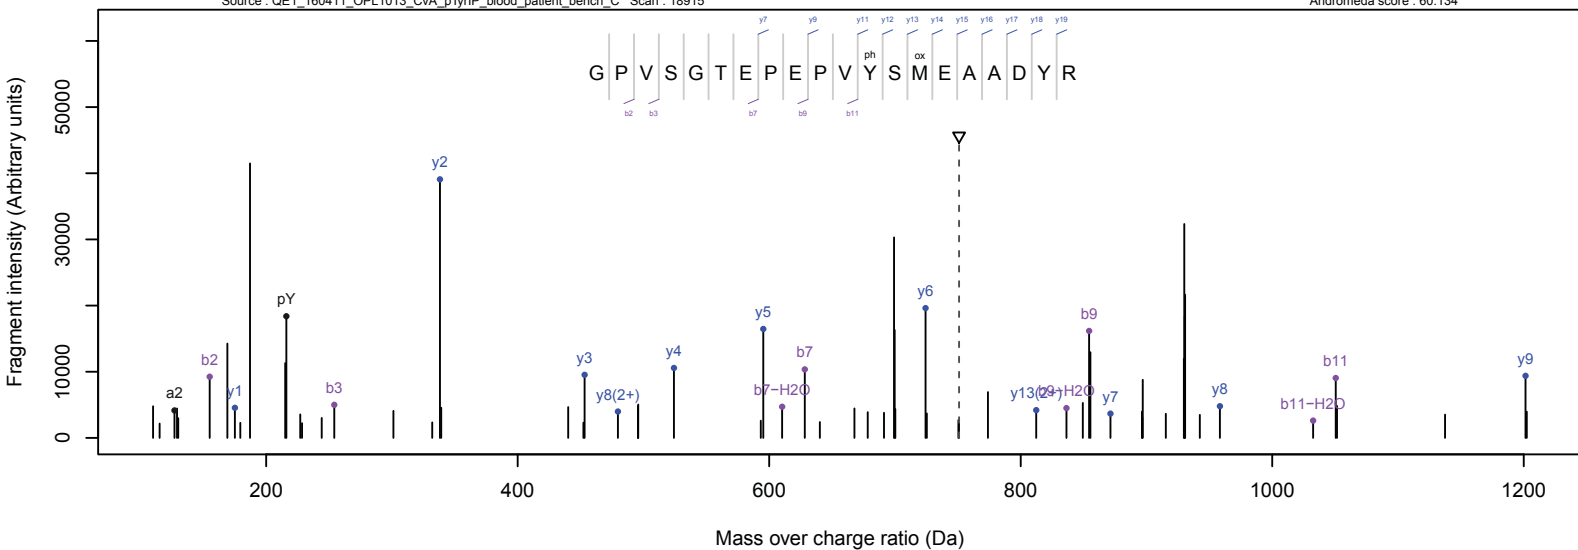

LIY(ph)DFIEDQGGLEAVRQEM(ox)R-3+

Source : QE1\_160411\_OPL1013\_CvA\_pTyrIP\_blood\_patient\_bench\_C Scan : 39690

Andromeda score : 60.062

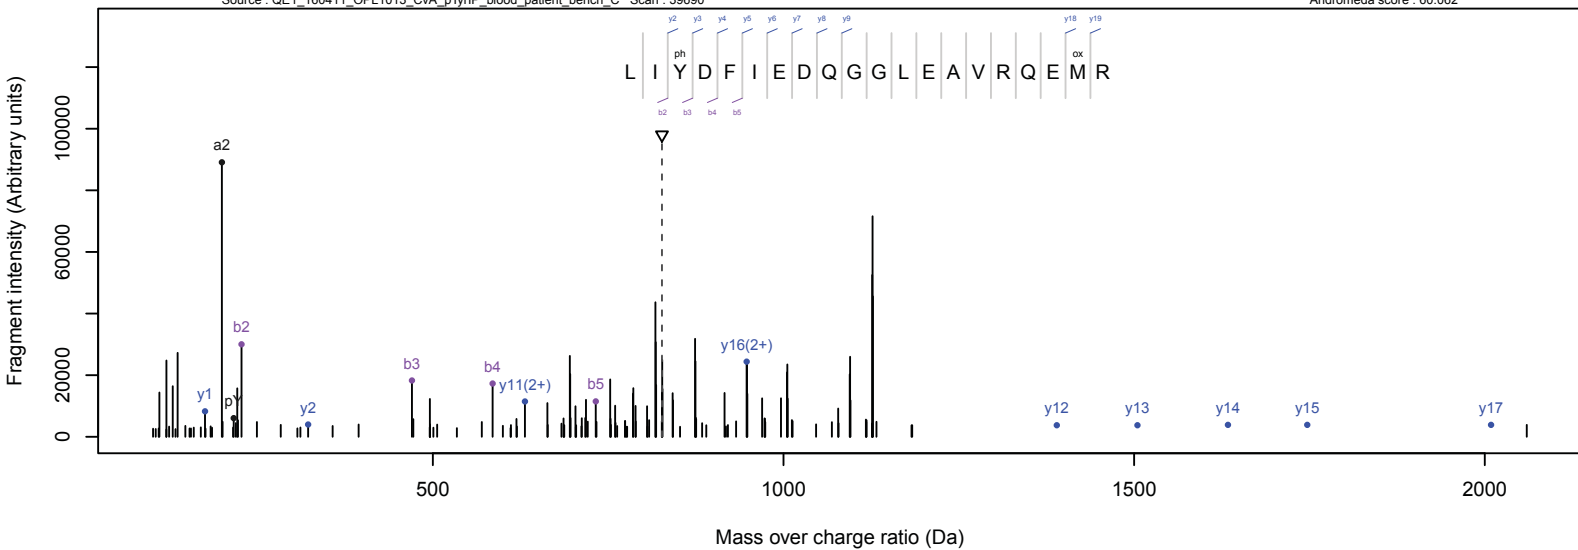

**YVLENHPG(ph)NSNYQMHLKK-4+**

Source : QE1\_160411\_OPL1013\_CvA\_pTyrIP\_blood\_patient\_bench\_B Scan : 16196

Andromeda score : 60.062

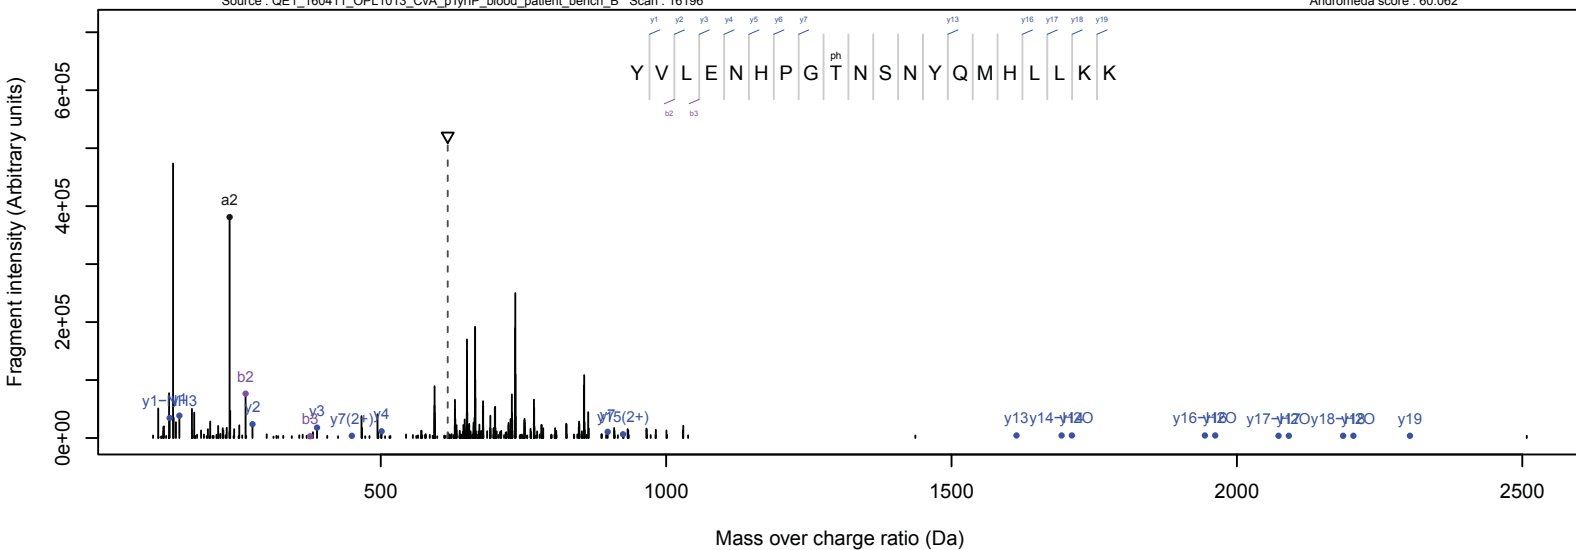

**Y(ph)VDILPYDYNR-2+**

Source : QE1\_160411\_OPL1013\_CvA\_pTyrIP\_blood\_patient\_bench\_D Scan : 32812

Andromeda score : 59.84

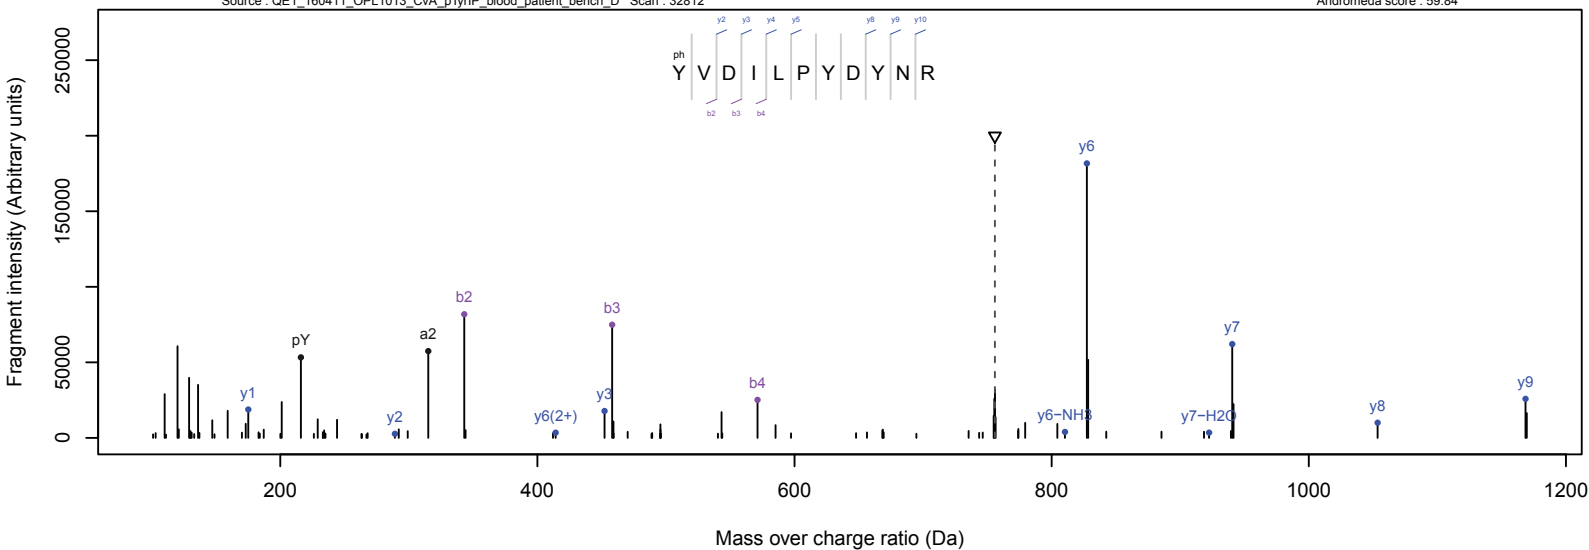

**ASGPPGNEHLY(ph)ENLCVLEASPTLHGGEPEPEHGGPSR-5+**

Source : QE1\_160411\_OPL1013\_CvA\_pTyrIP\_blood\_patient\_bench\_C Scan : 30938

Andromeda score : 59.748

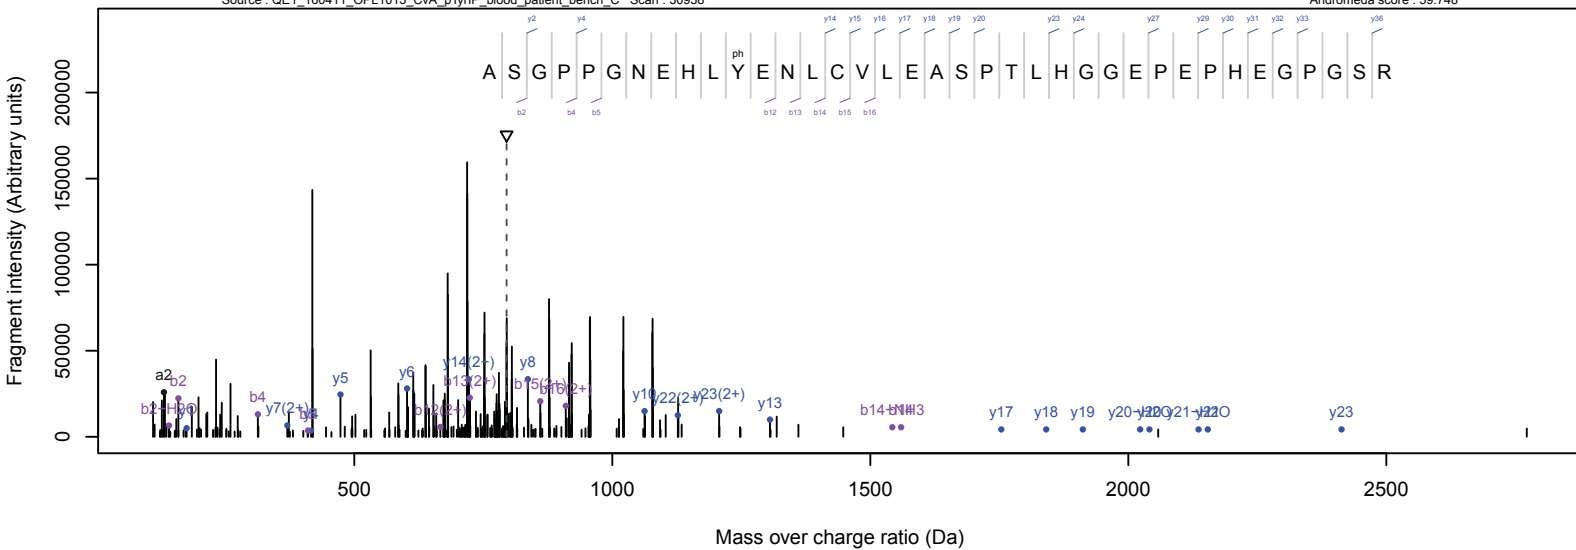

AGDNSQS(ph)VYIPMSPGAHHFDSLGY(ph)PSTTLPVHR-4+

Source : QE1\_160411\_OPL1013\_CvA\_pTyrIP\_blood\_patient\_bench\_D Scan : 34463

Andromeda score : 59.567

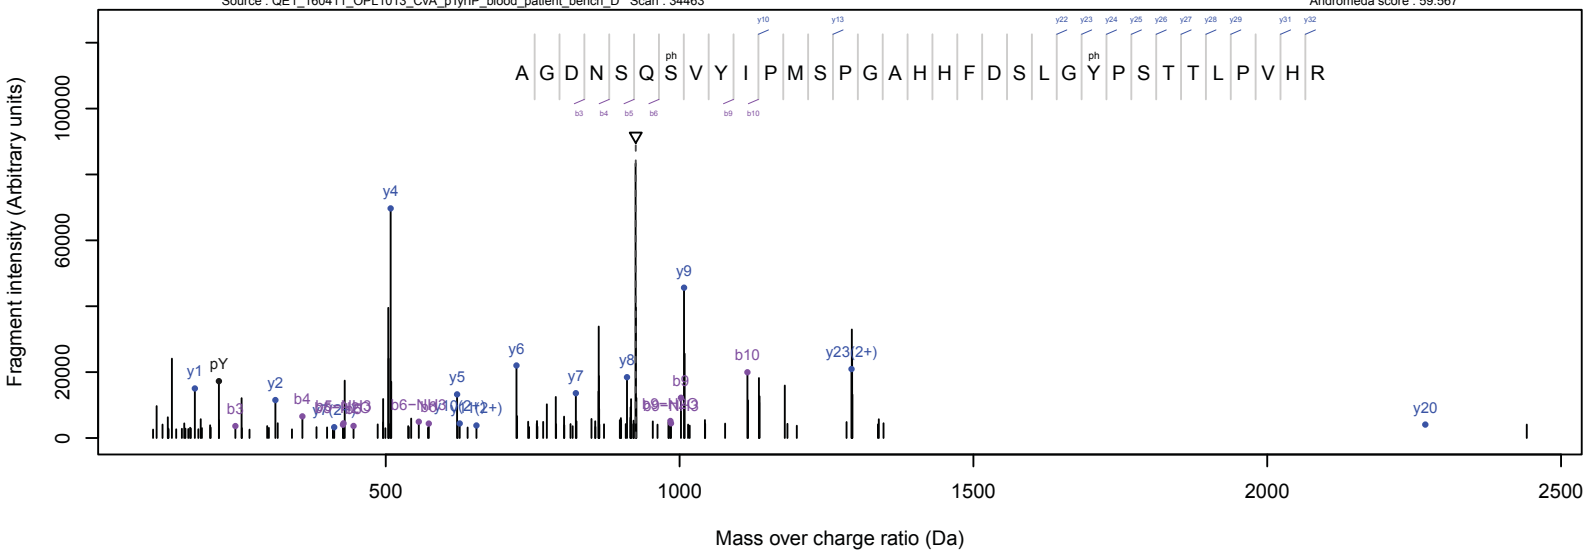

VQLVDNVY(ph)CIGQR-2+

Source : QE1\_160411\_OPL1013\_CvA\_pTyrIP\_blood\_patient\_bench\_D Scan : 24910

Andromeda score : 59.227

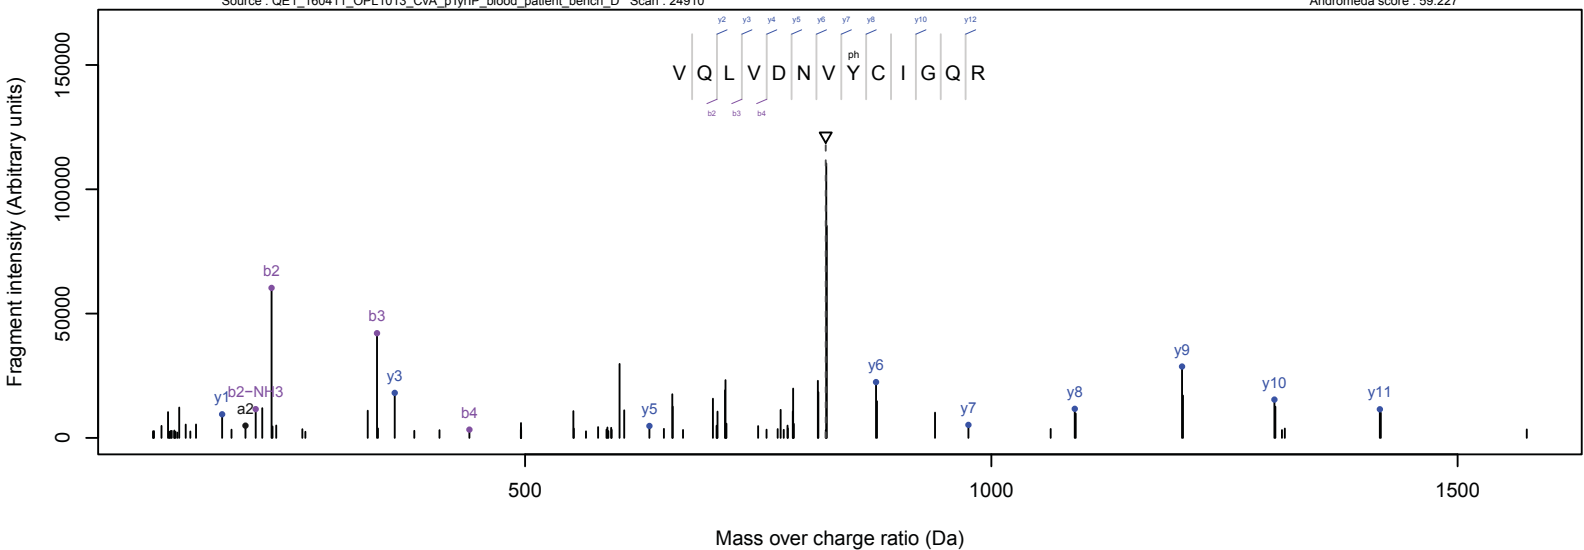

VTDEY(ph)SEIKHK-3+

Source : QE1\_160411\_OPL1013\_CvA\_pTyrIP\_blood\_patient\_bench\_C Scan : 9347

Andromeda score : 59.227

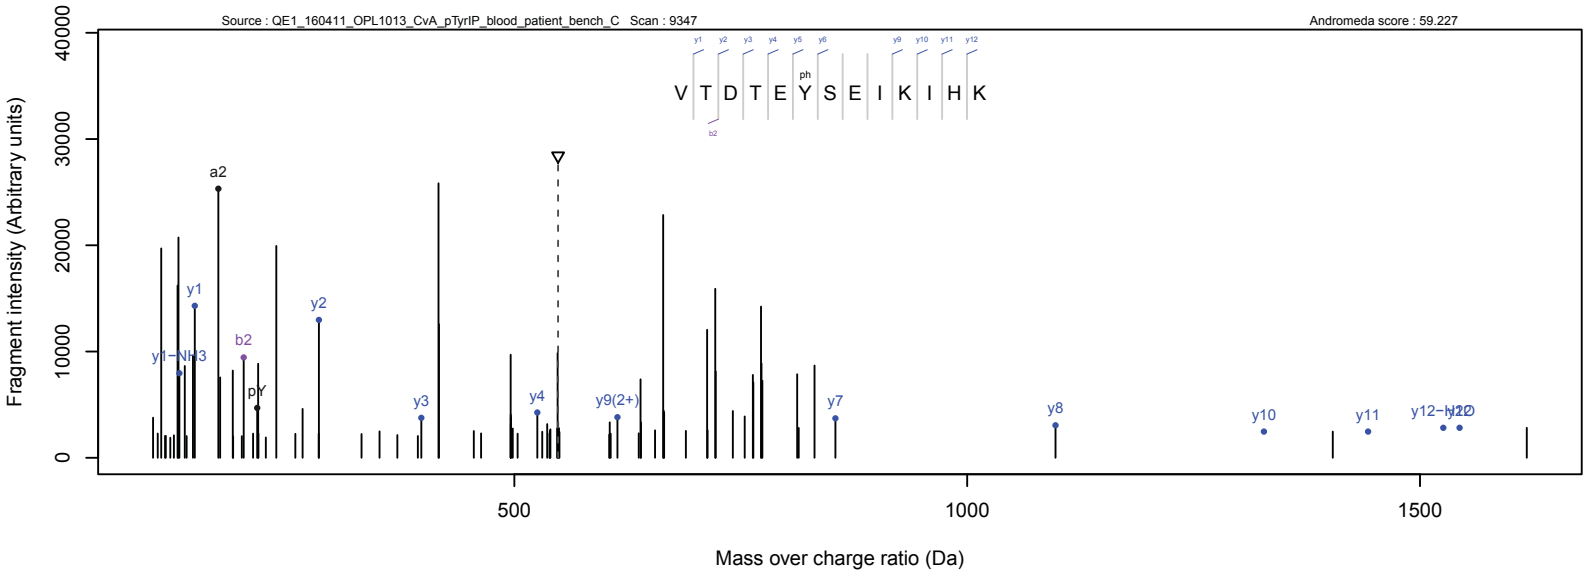

## HVHSEDY(ph)SKVPKY(ph)-3+

Source : QE1\_160411\_OPL1013\_CvA\_pTyrIP\_blood\_patient\_bench\_C Scan : 4034

Andromeda score : 59.198

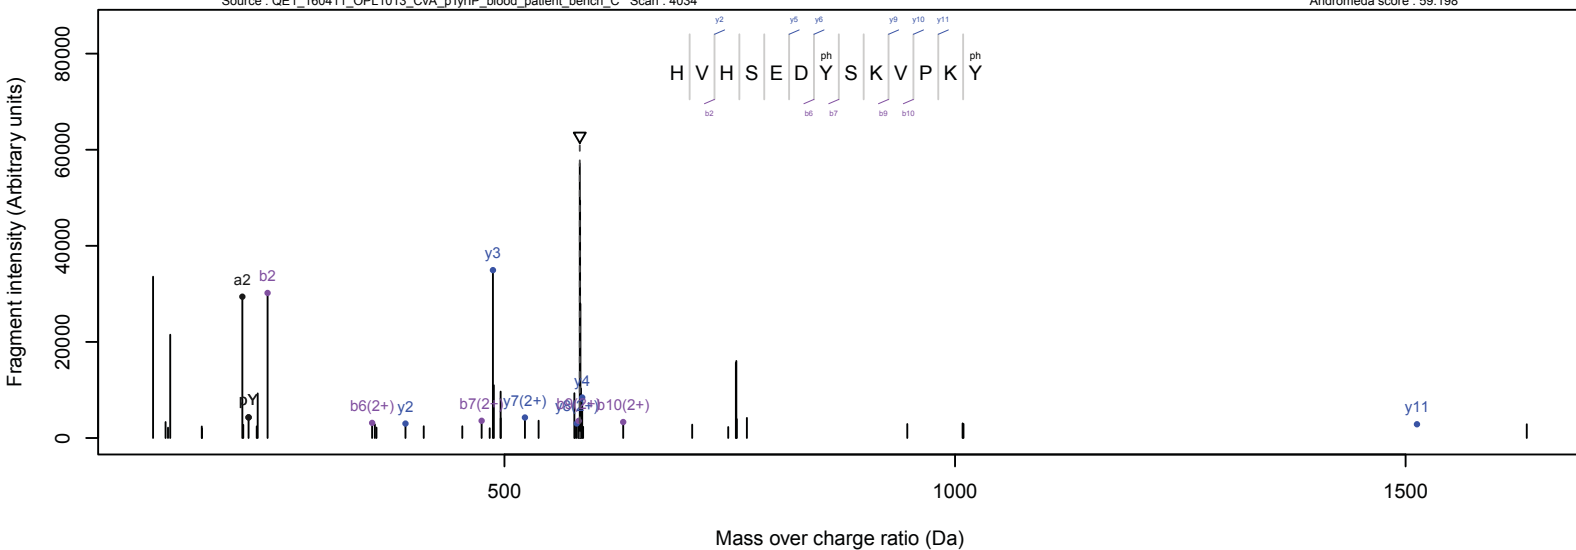

## RVGFQY(ph)EGTYK-2+

Source : QE1\_160411\_OPL1013\_CvA\_pTyrIP\_blood\_patient\_bench\_D Scan : 10588

Andromeda score : 59.198

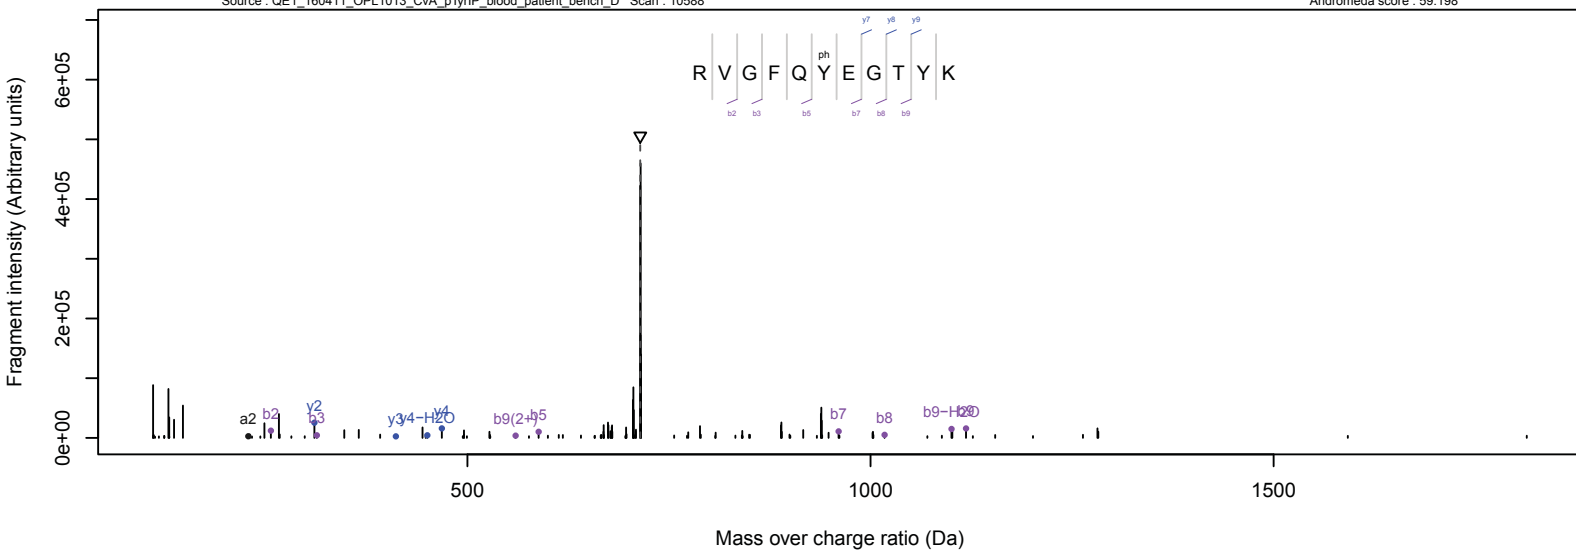

## YALYDAT(ph)YETK-2+

Source : QE1\_160411\_OPL1013\_CvA\_pTyrIP\_blood\_patient\_bench\_D Scan : 17949

Andromeda score : 59.198

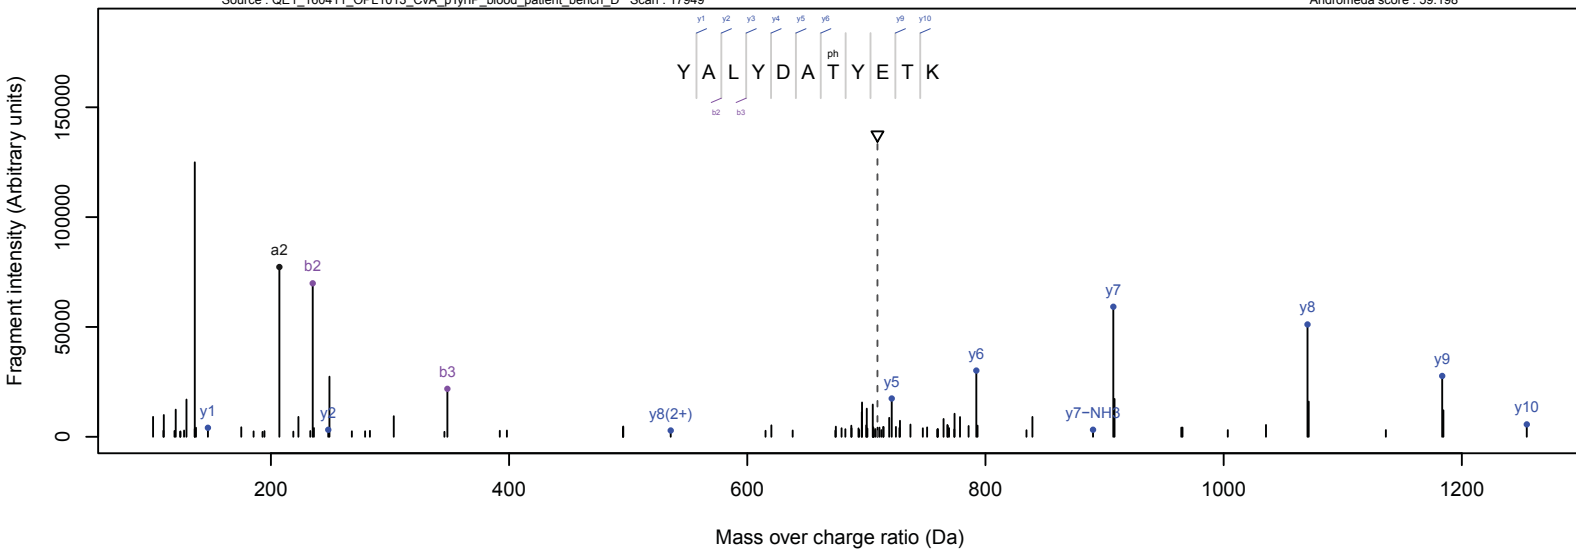



Y(ph)KTILPNPQSR-3+

Source : QE1\_160411\_OPL1013\_CvA\_pTyrIP\_blood\_patient\_bench\_D Scan : 12441

Andromeda score : 59.13

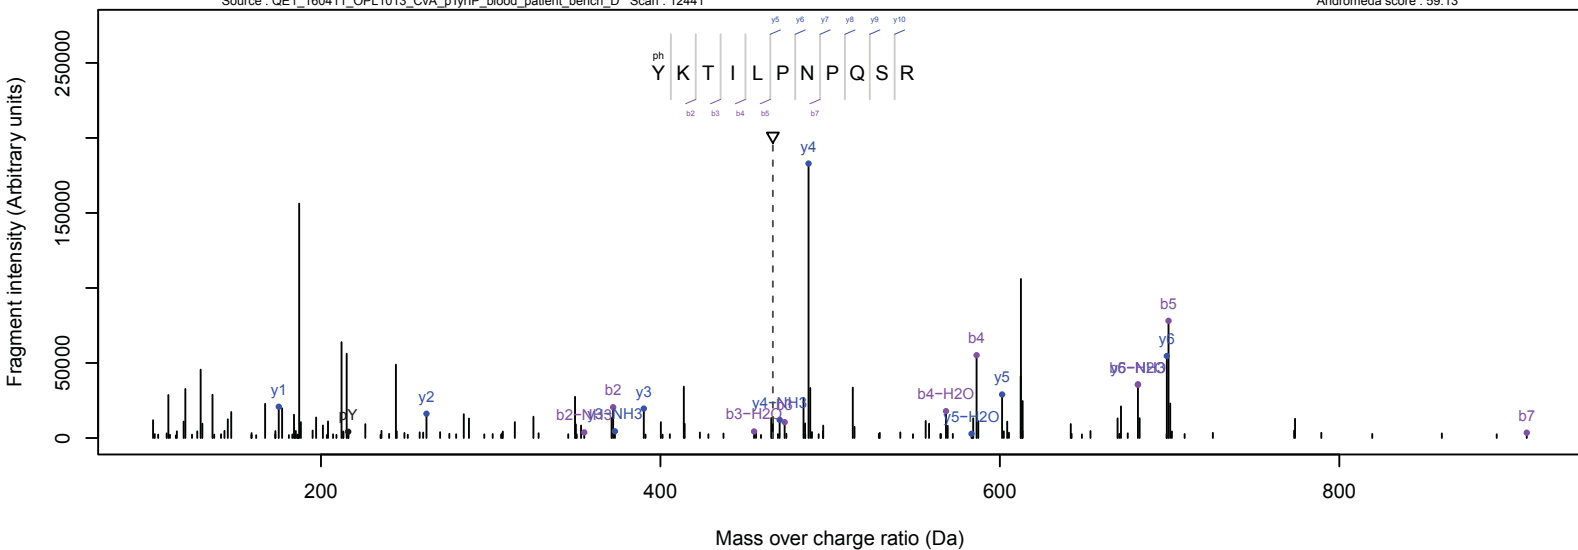

GTQADYAEVKFQ-2+

Source : QE1\_160411\_OPL1013\_CvA\_pTyrIP\_blood\_patient\_bench\_C Scan : 16542

Andromeda score : 59.116

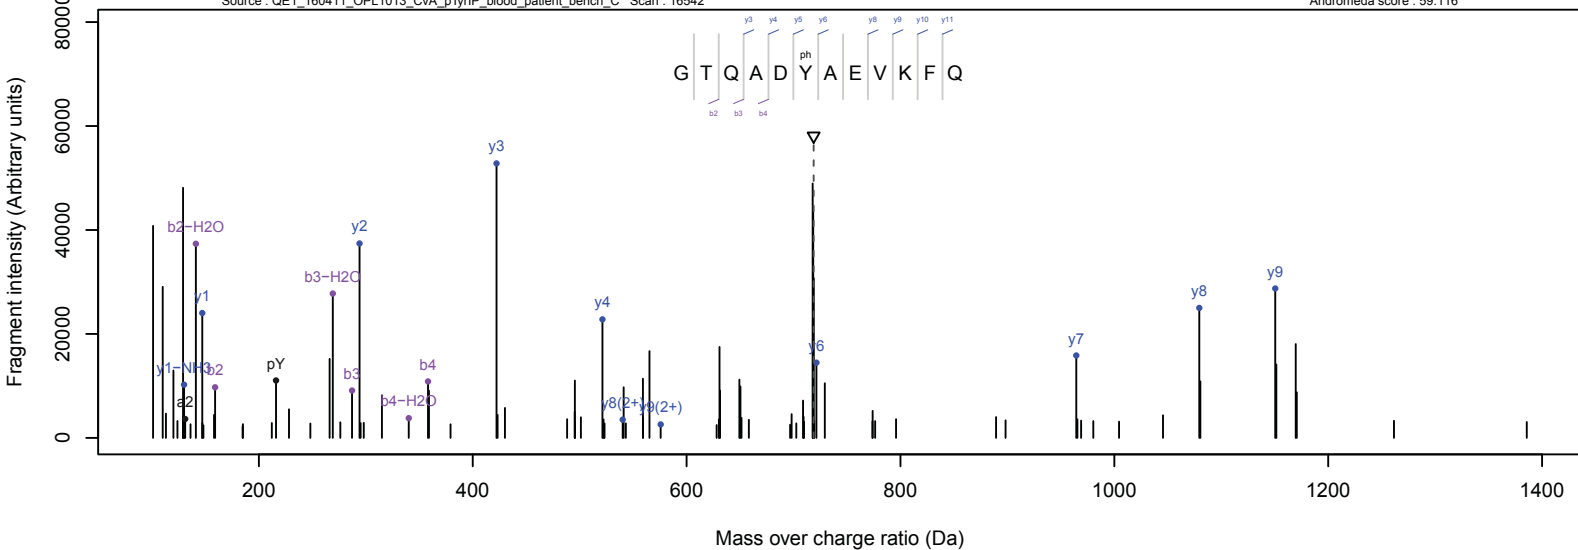

LDHKFDLM(ox)Y(ph)AKR-4+

Source : QE1\_160411\_OPL1013\_CvA\_pTyrIP\_blood\_patient\_bench\_C Scan : 11990

Andromeda score : 59.038

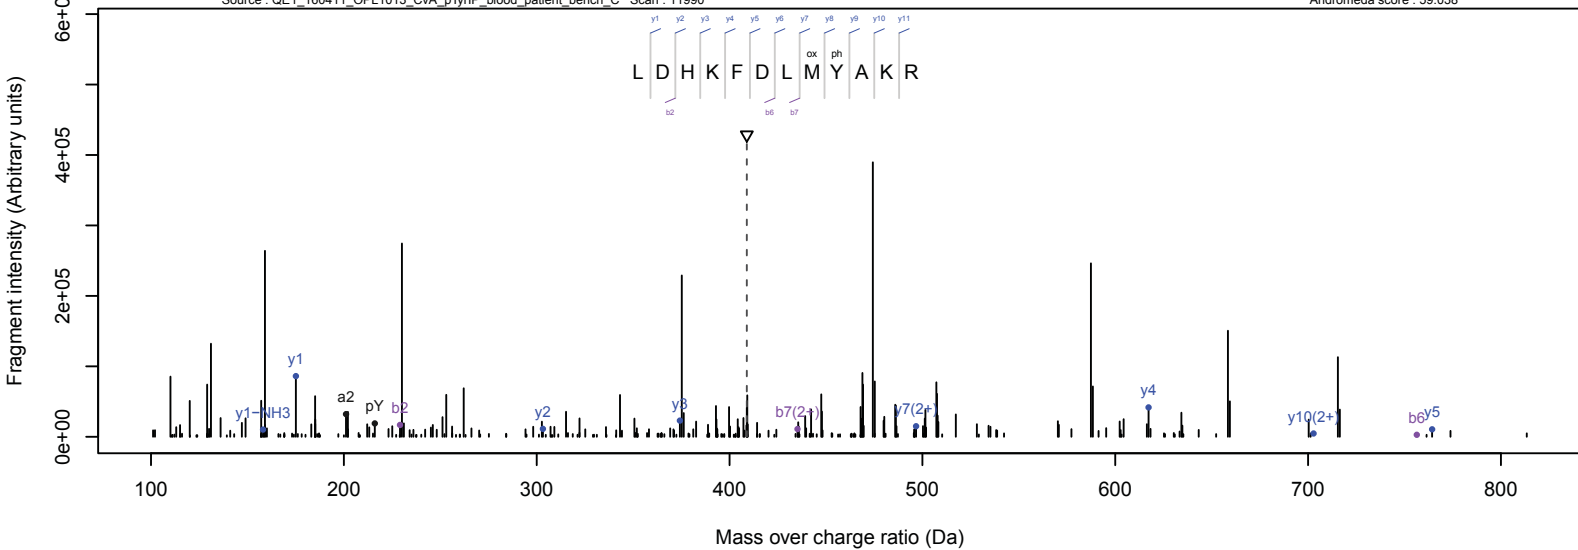

## IEGVY(ph)AR-2+

Source: QE1\_160411\_OPL1013\_CvA\_pTyrIP\_blood\_patient\_bench\_A Scan: 8550

Andromeda score: 58.981

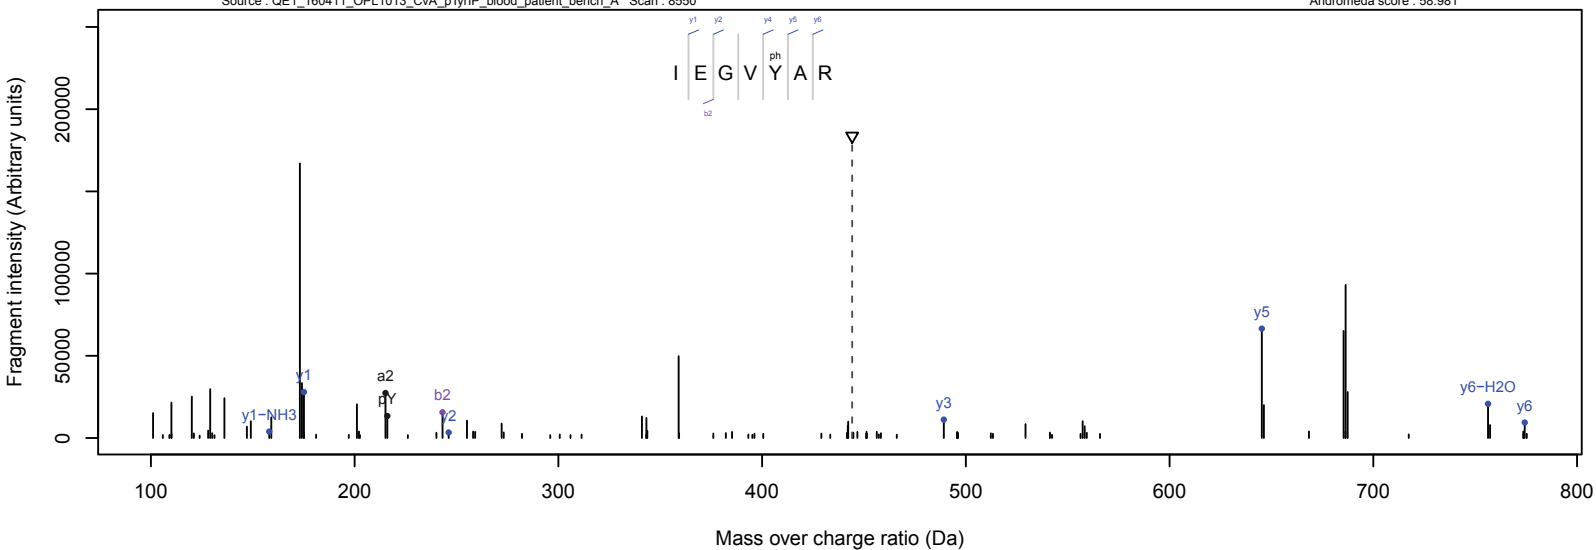

## AY(ph)HEQLSVAEITNACFEPANQM(ox)VK-3+

Source: QE1\_160411\_OPL1013\_CvA\_pTyrIP\_blood\_patient\_bench\_C Scan: 33791

Andromeda score: 58.952

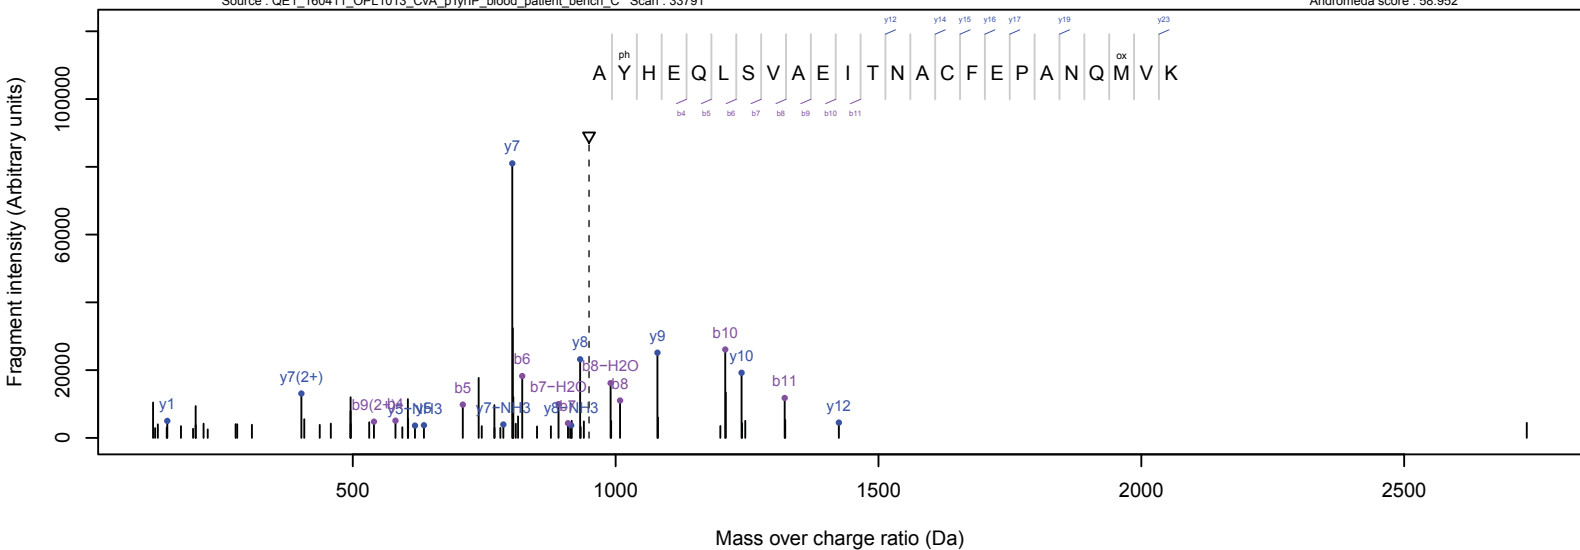

## IKLGHY(ph)ATQLQNTYDR-3+

Source: QE1\_160411\_OPL1013\_CvA\_pTyrIP\_blood\_patient\_bench\_C Scan: 20287

Andromeda score: 58.814

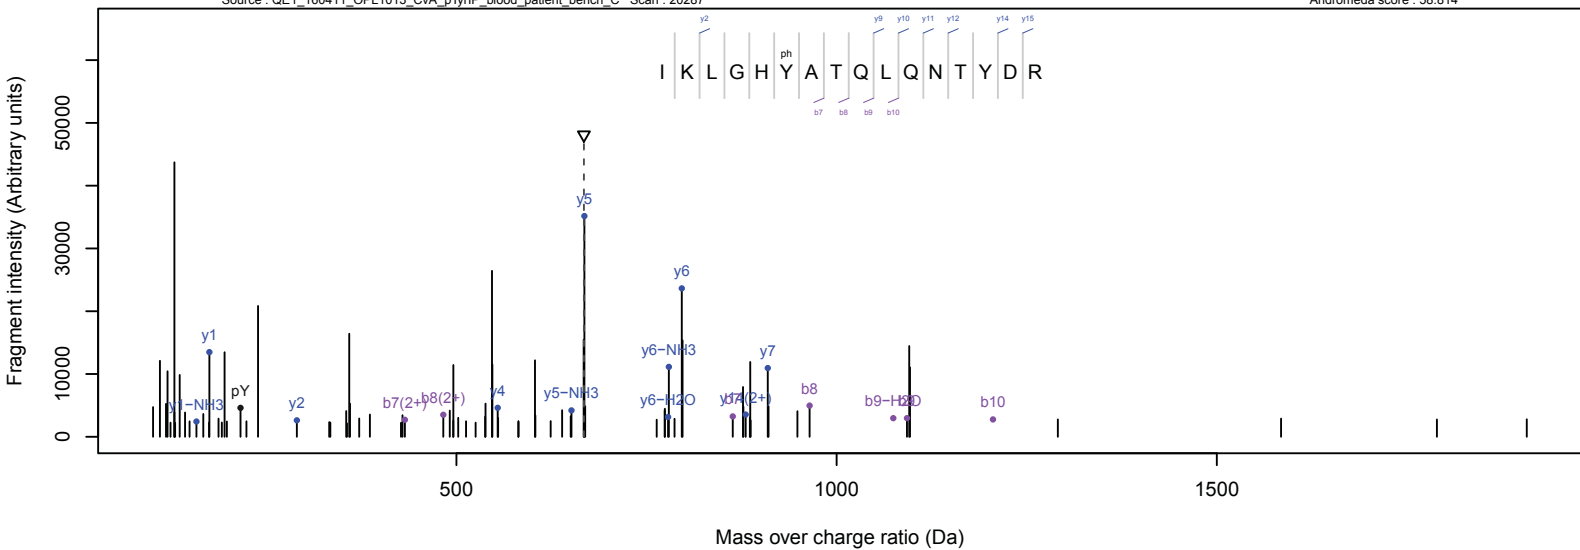

FANY(ph)IDK-2+

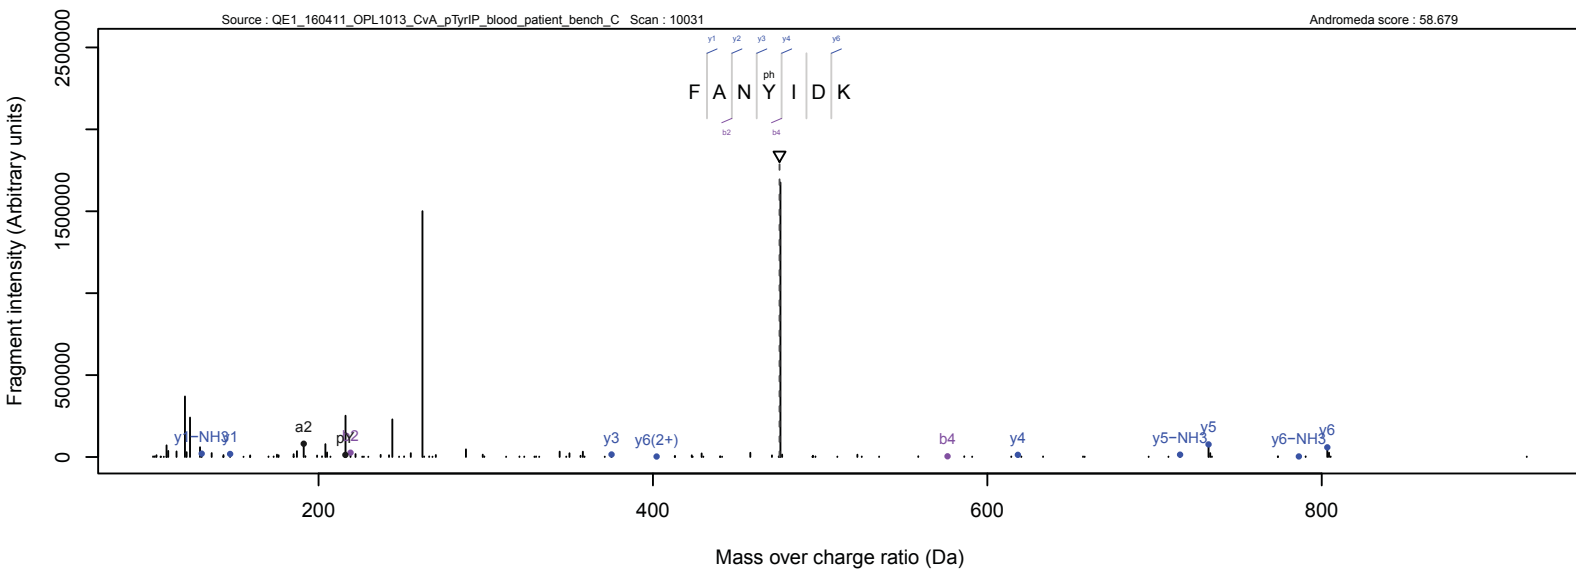

HVSISYDIPPTGNT(ph)YQIPR-3+

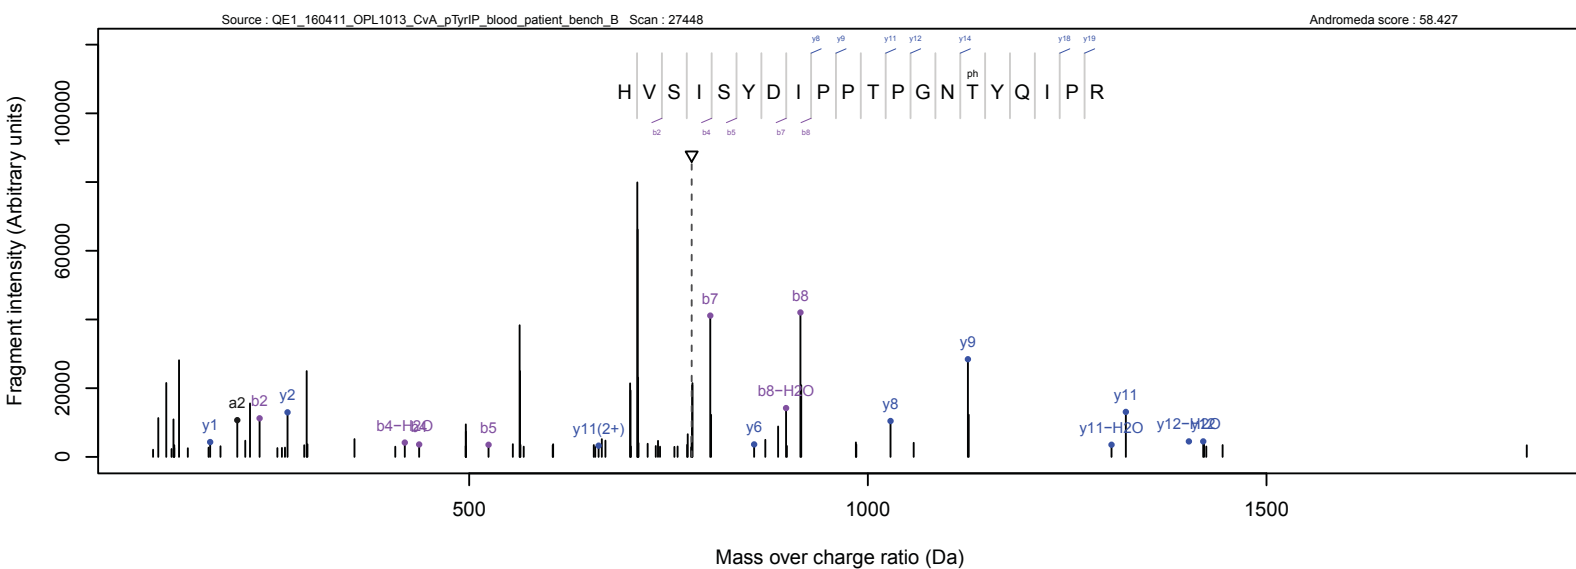

HADAEM(ox)TGY(ph)VVTR-3+

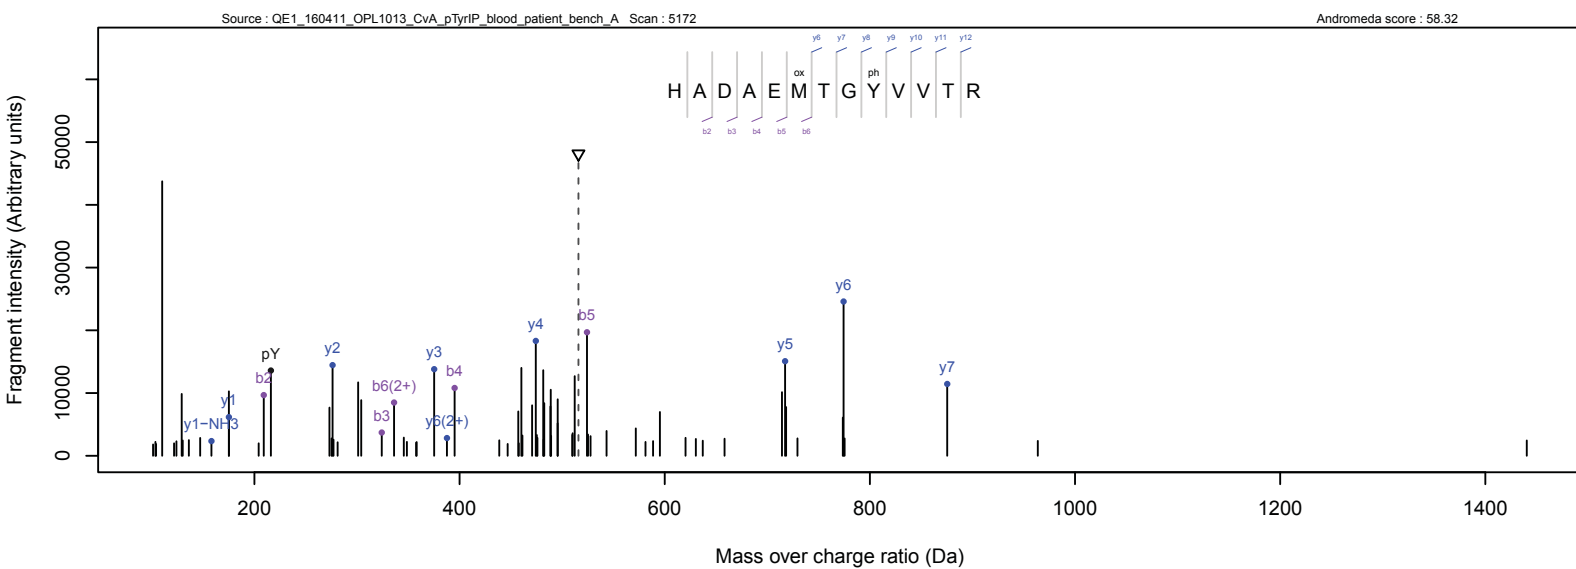

## IKLYS(ph)SITNQQR-3+

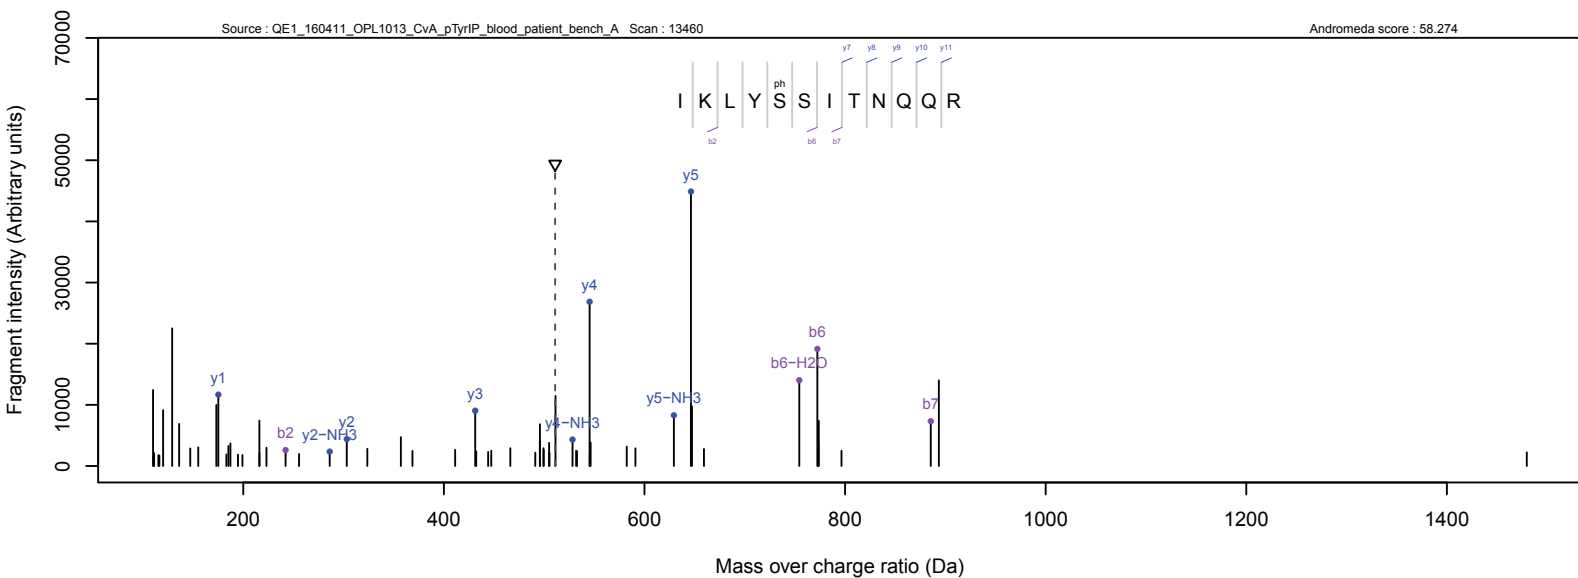

## SLGY(ph)AYVNFQQPADAER-2+

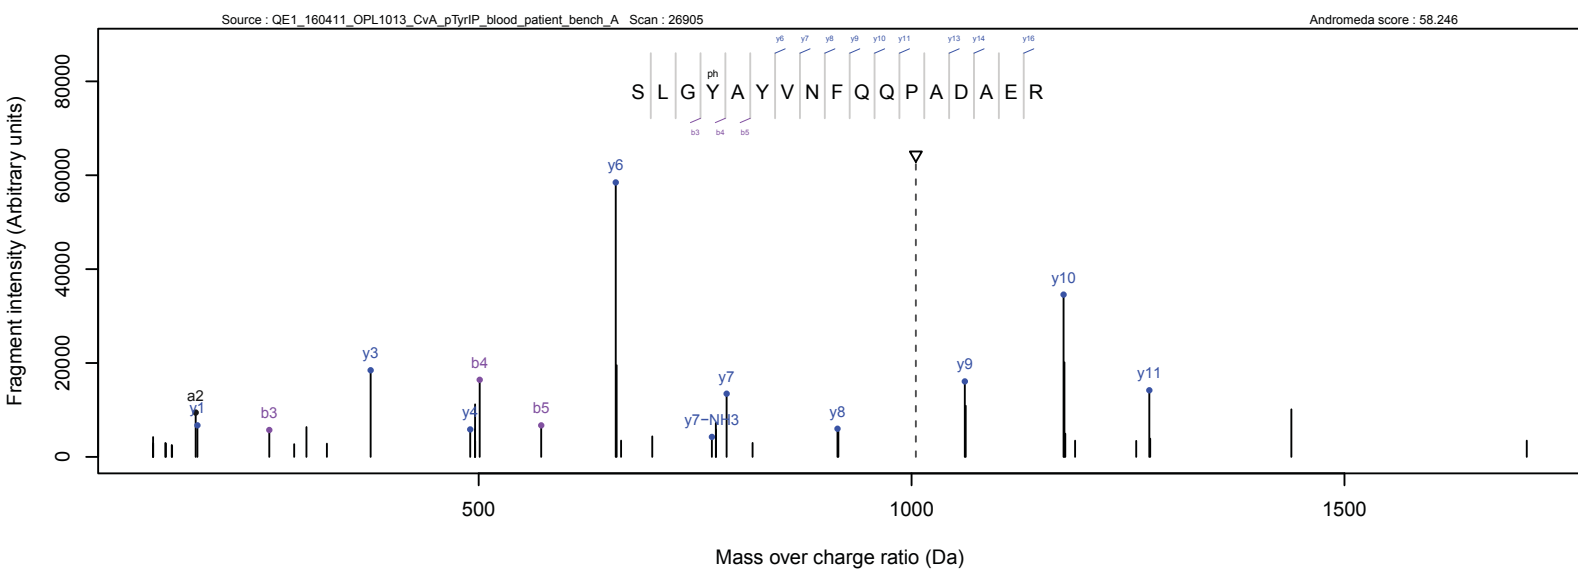

## HIVIDGSNVA(ox)VHGLQHY(ph)FSSR-3+

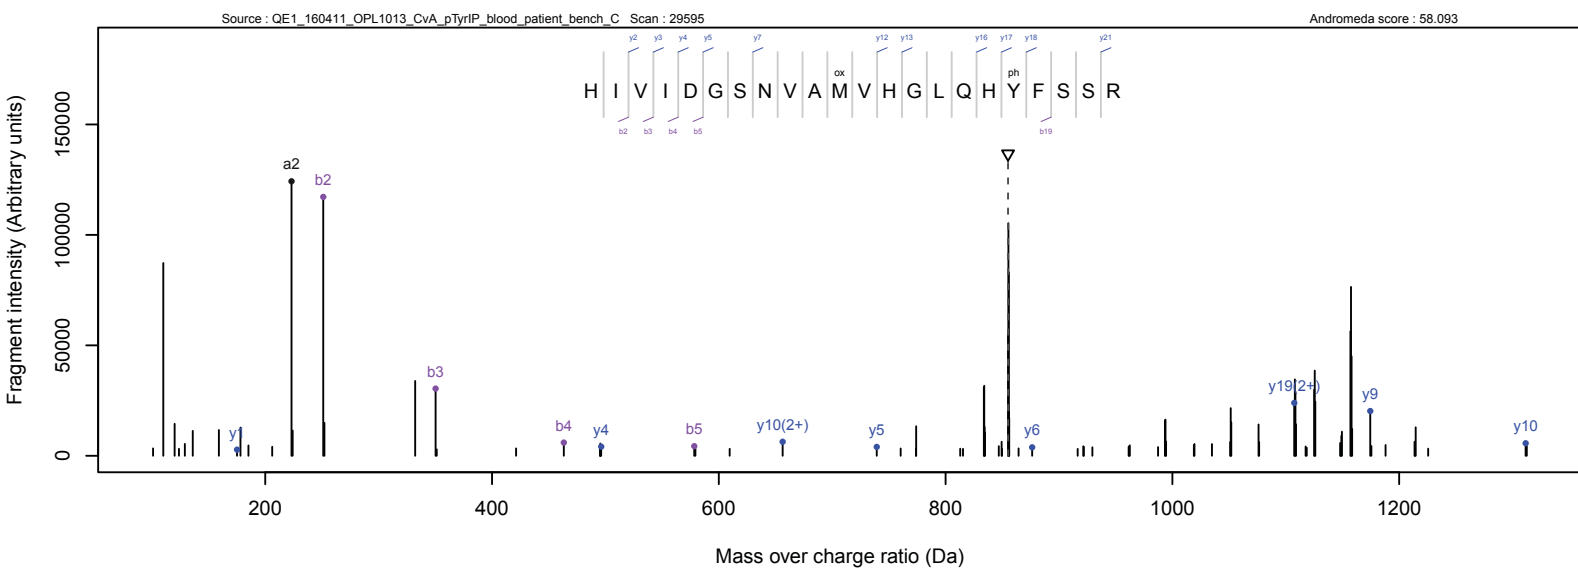

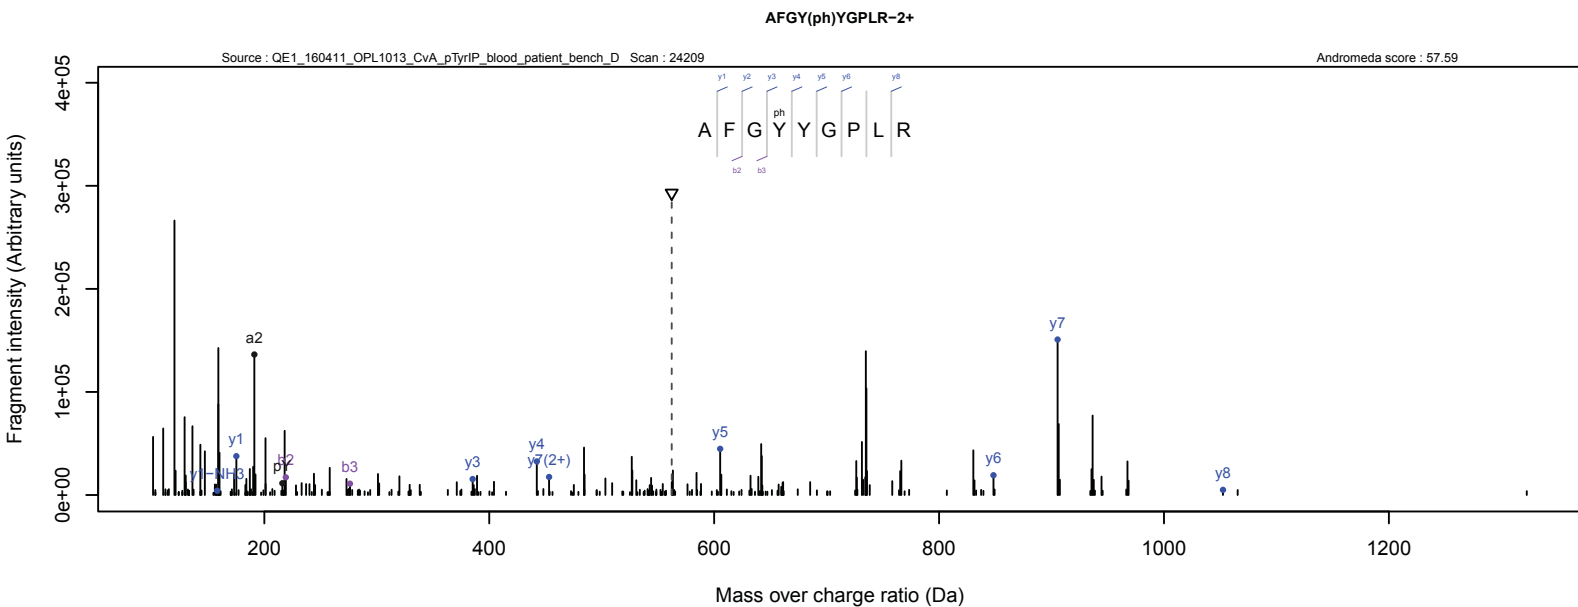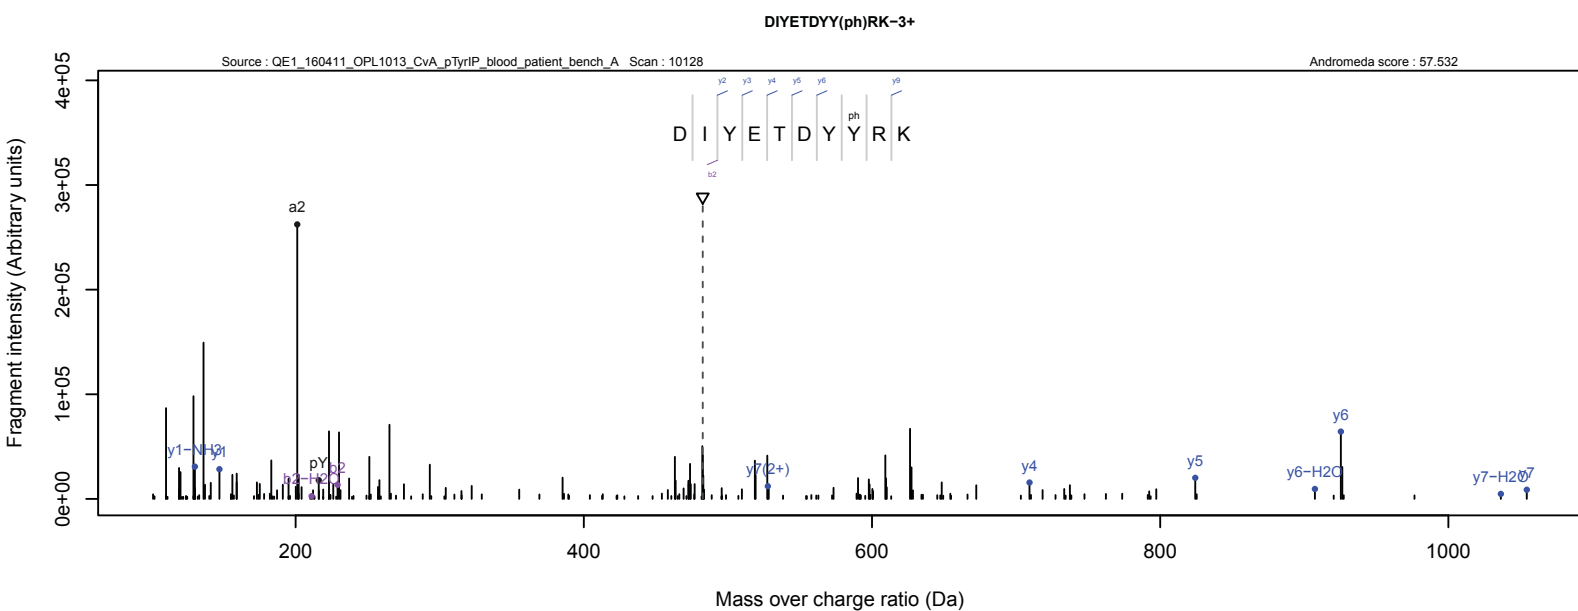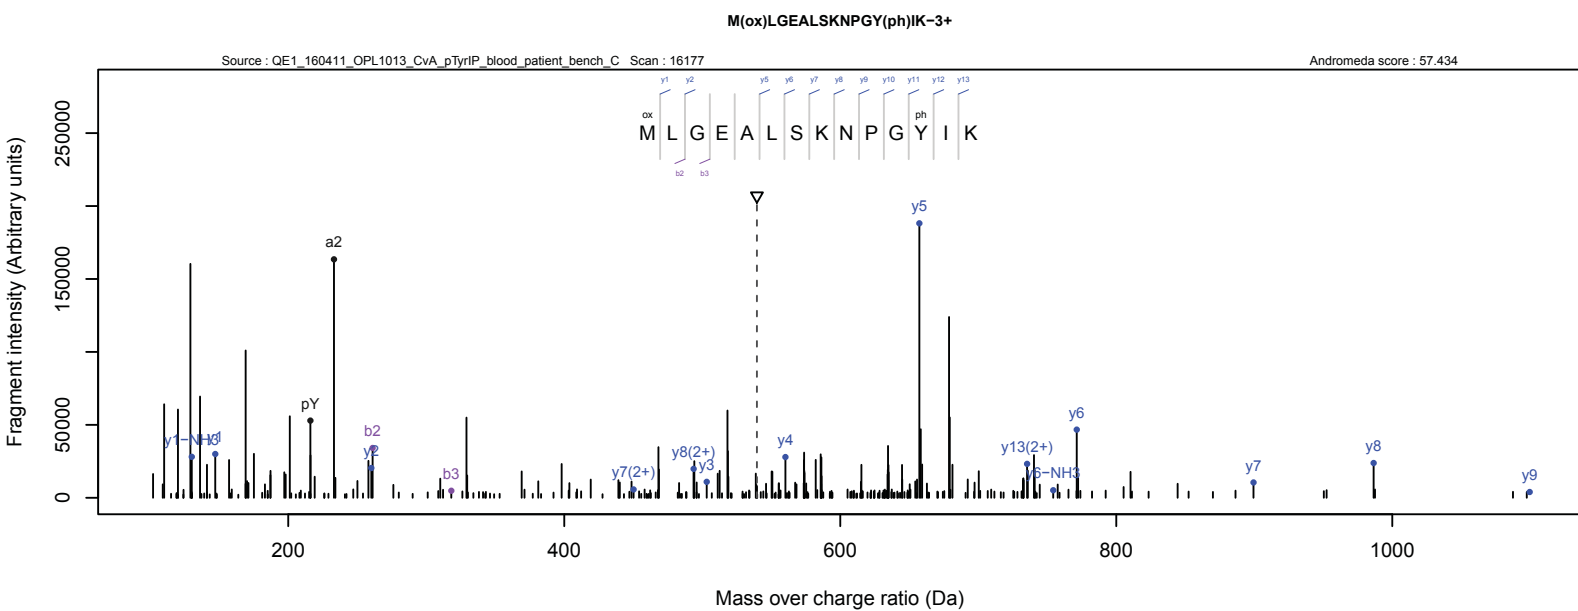

ASEEHLKQHY(ph)IDLK-3+

Source : QE1\_160411\_OPL1013\_CvA\_pTyrIP\_blood\_patient\_bench\_C Scan : 10642

Andromeda score : 57.288

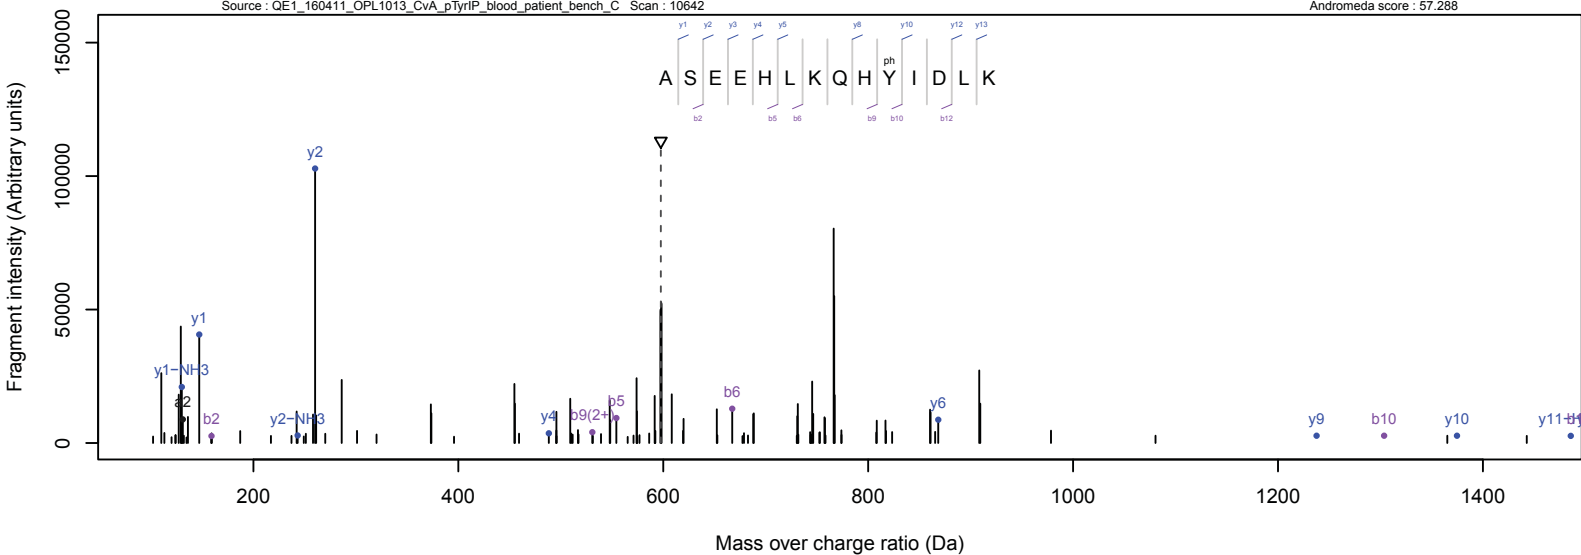

RGWDENVY(ph)YTVPLVR-3+

Source : QE1\_160411\_OPL1013\_CvA\_pTyrIP\_blood\_patient\_bench\_A Scan : 32543

Andromeda score : 57.288

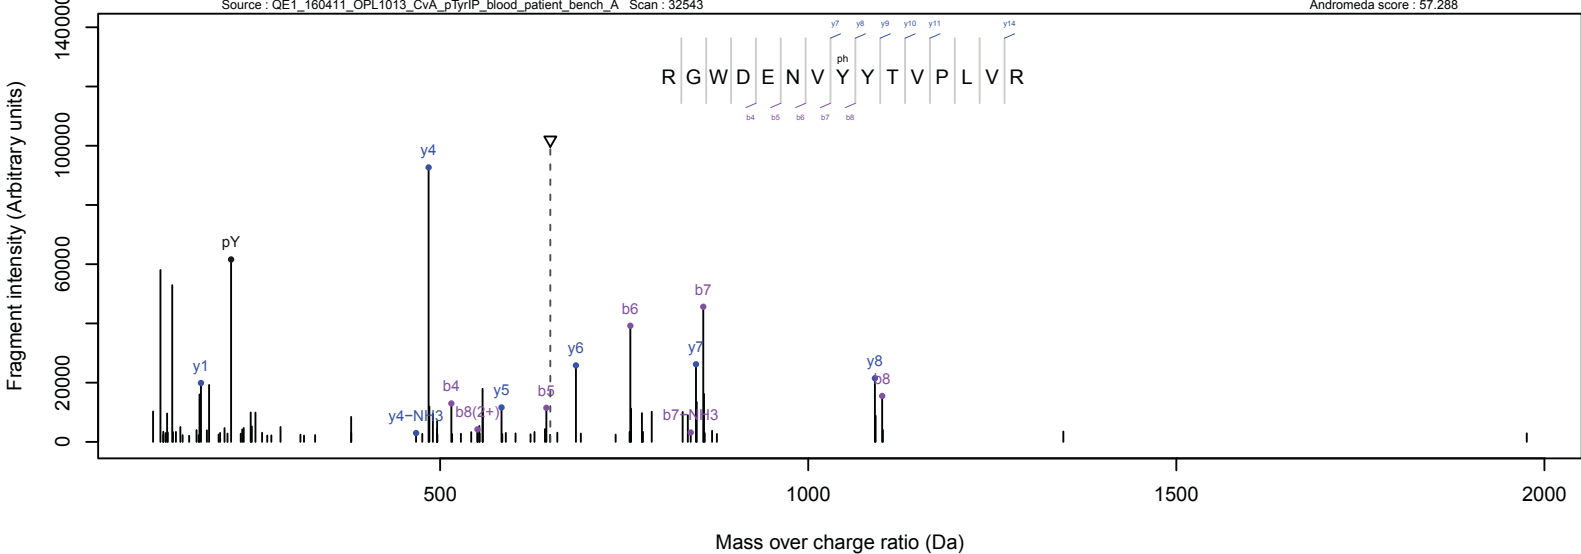

NTPYKT(ph)LEPVKPPPTVPNDYMTSPAR-4+

Source : QE1\_160411\_OPL1013\_CvA\_pTyrIP\_blood\_patient\_bench\_C Scan : 23608

Andromeda score : 57.238

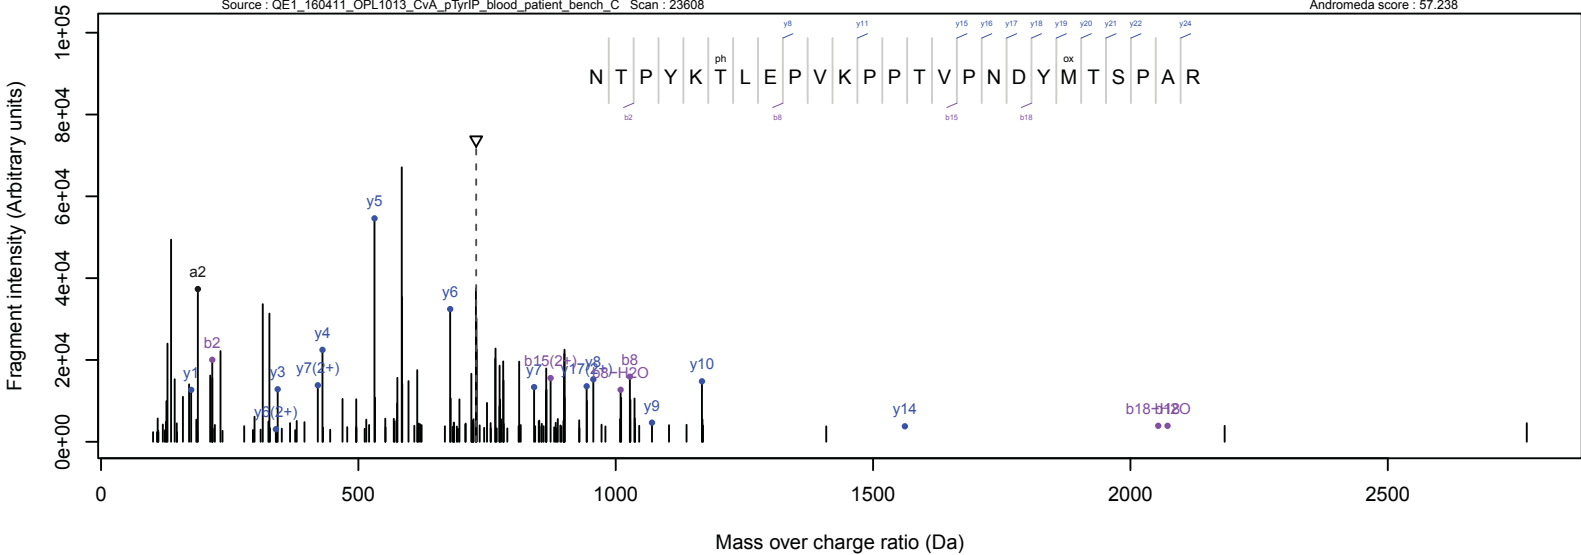

**QNADPSLISWDEPGLVDFY(ph)KPAIR-3+**

Source : QE1\_160411\_OPL1013\_CvA\_pTyrIP\_blood\_patient\_bench\_D Scan : 37325

Andromeda score : 57.188

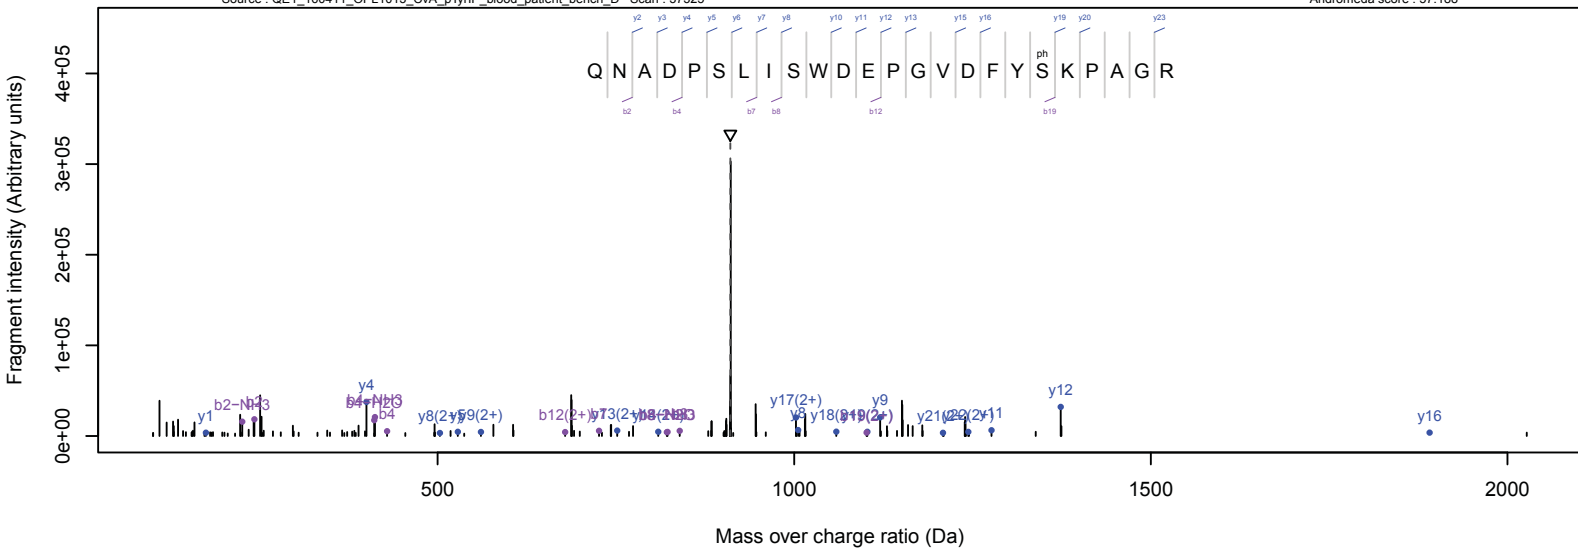

**IY(ph)SYVSRPQPR-3+**

Source : QE1\_160411\_OPL1013\_CvA\_pTyrIP\_blood\_patient\_bench\_D Scan : 12869

Andromeda score : 57.175

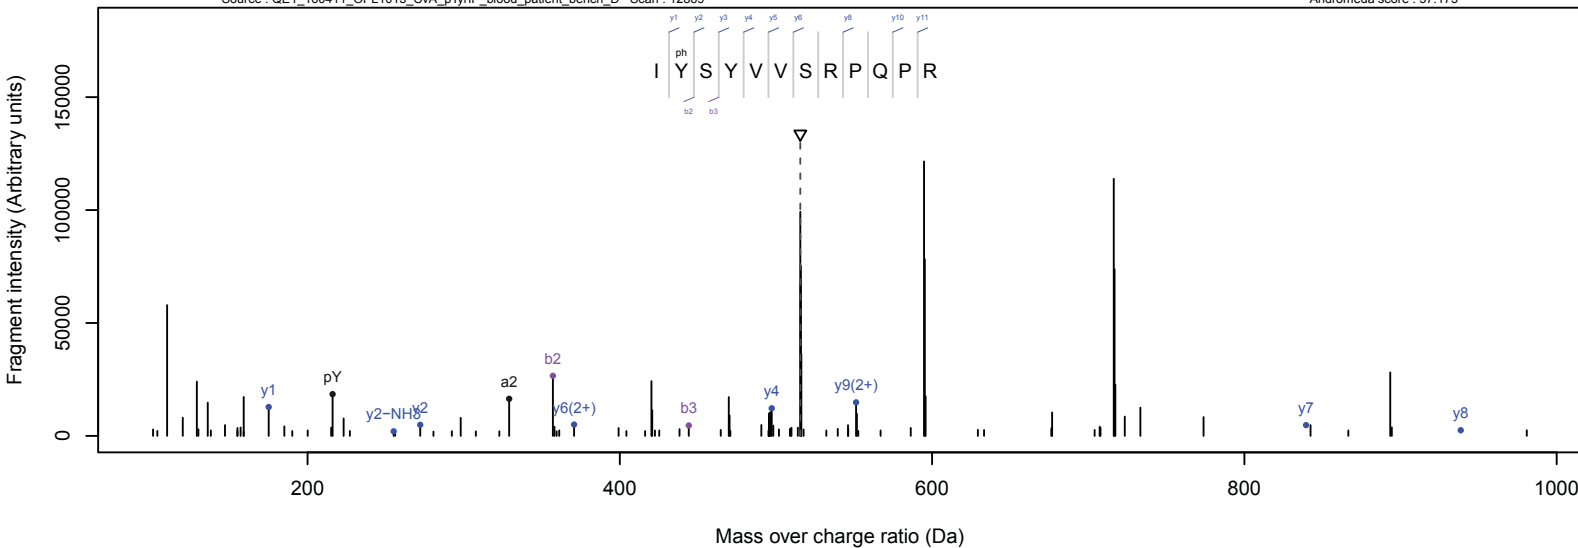

**KDETIVY(ph)SEVR-3+**

Source : QE1\_160411\_OPL1013\_CvA\_pTyrIP\_blood\_patient\_bench\_D Scan : 5008

Andromeda score : 57.175

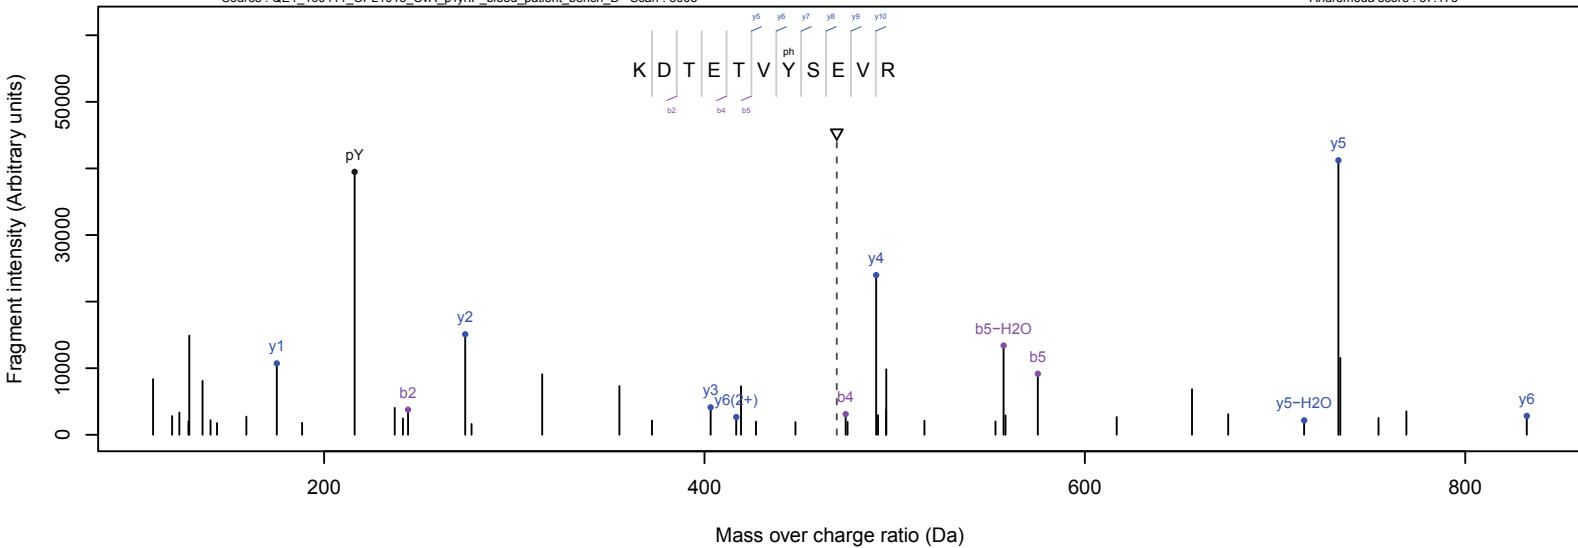

## VM(ox)NATAY(ph)GISK-2+

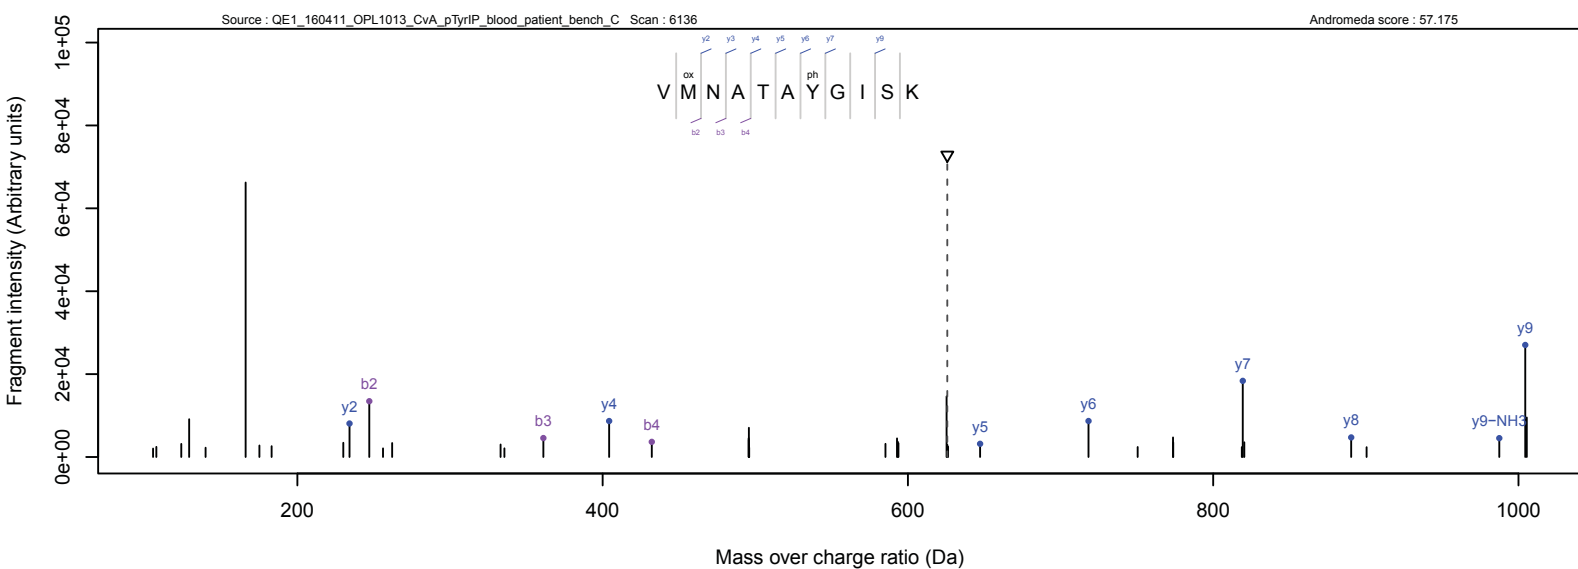

## NKPLFFADKLYK-3+

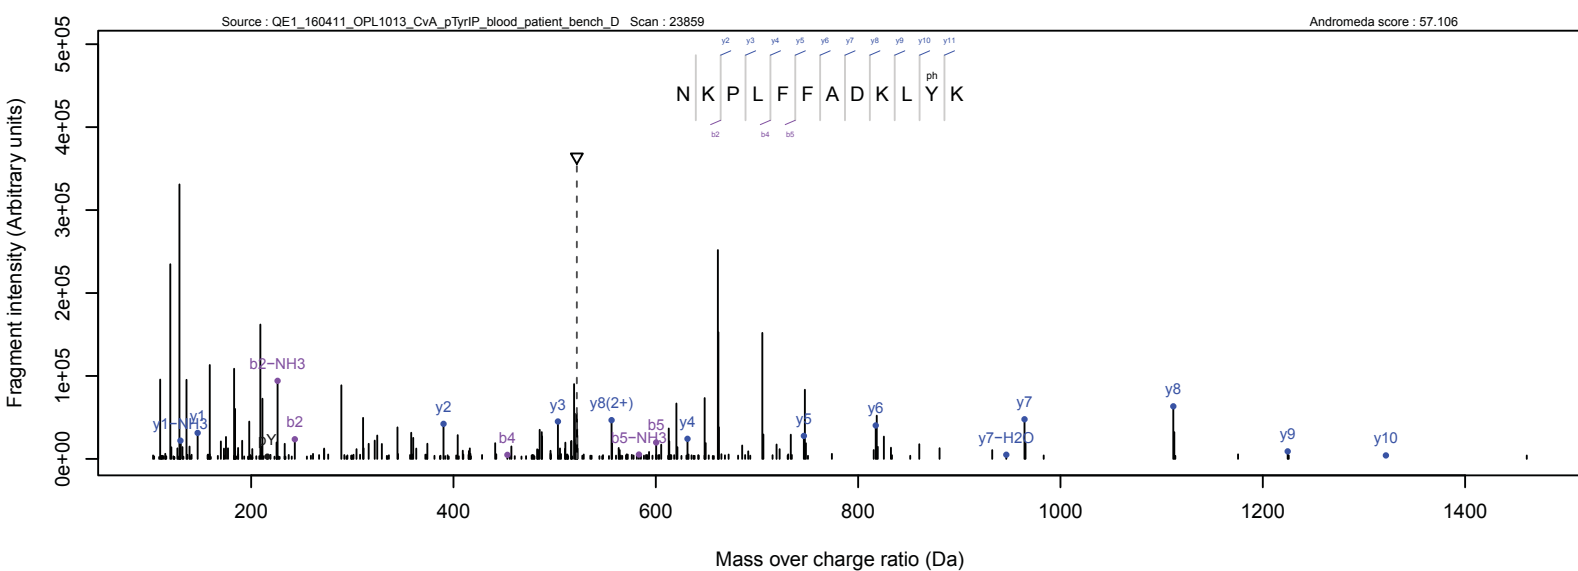

## (ac)MYHS(ph)LSETRHPLQPEEQEVGIDPLSSYSNK-4+

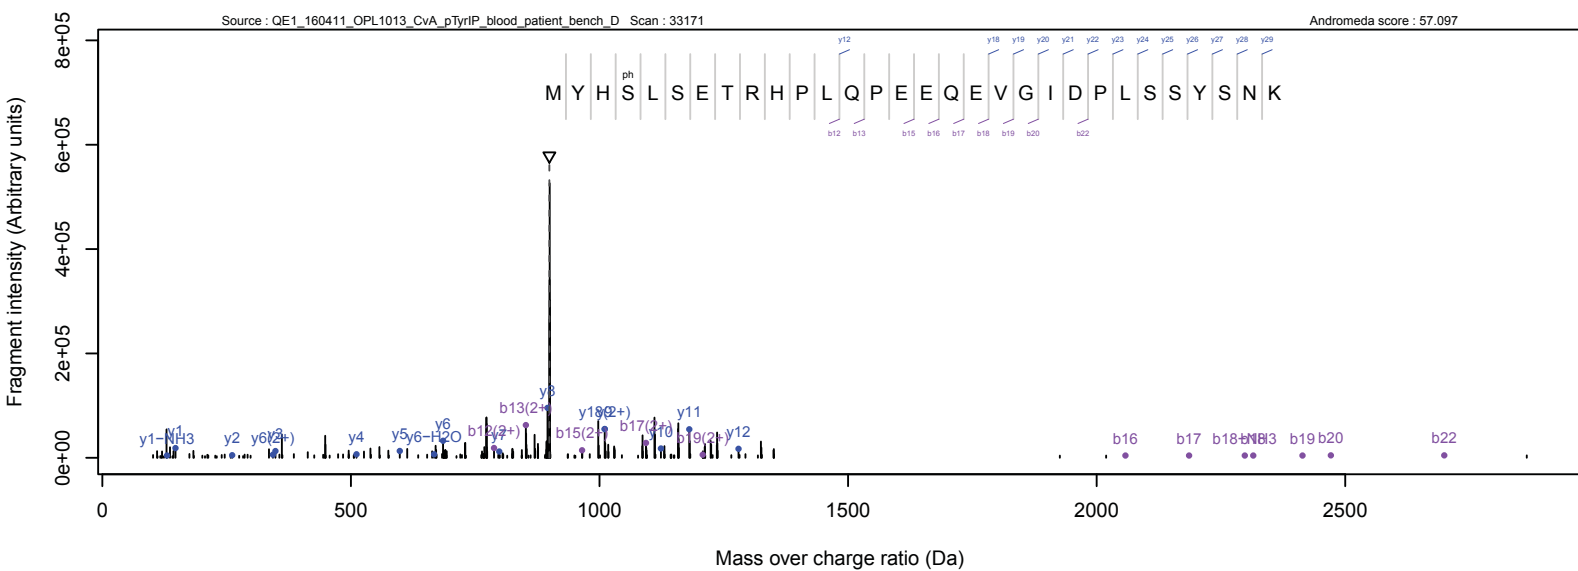





## ELEKLY(ph)QER-2+

Source : QE1\_160411\_OPL1013\_CvA\_pTyrIP\_blood\_patient\_bench\_D Scan : 7613

Andromeda score : 56.432

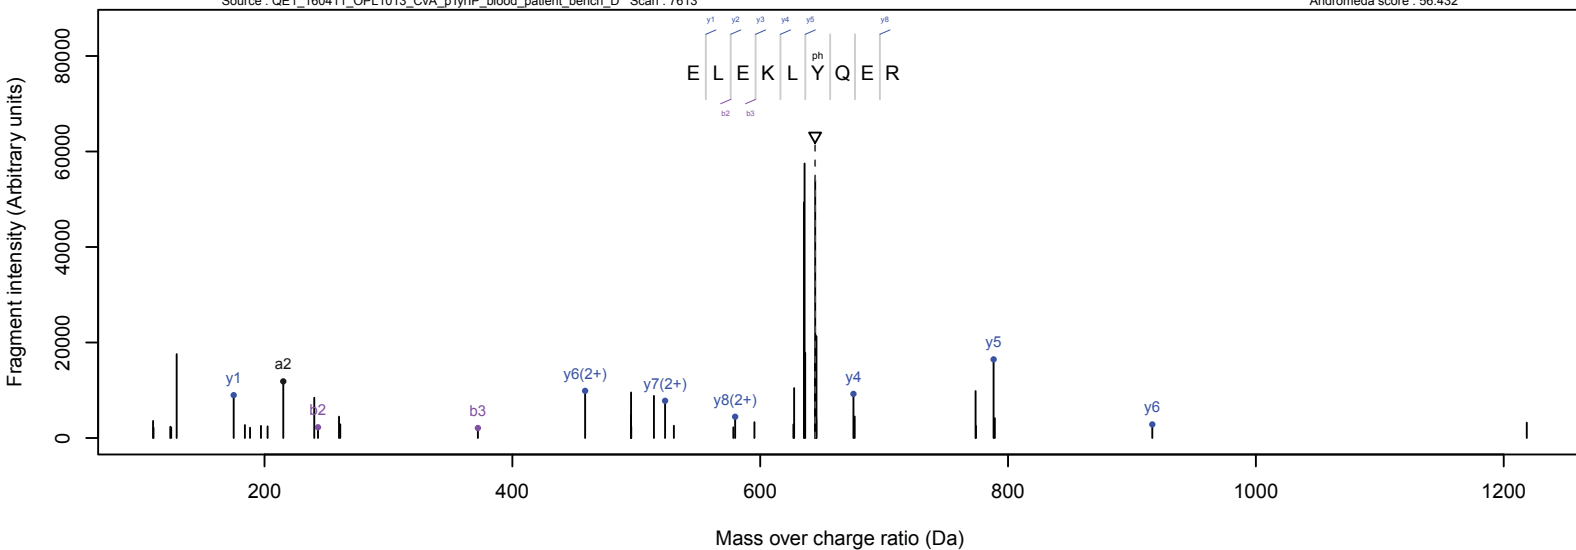

## VQLNVFDEQGEEDS(ph)YDLKGR-3+

Source : QE1\_160411\_OPL1013\_CvA\_pTyrIP\_blood\_patient\_bench\_C Scan : 28948

Andromeda score : 56.424

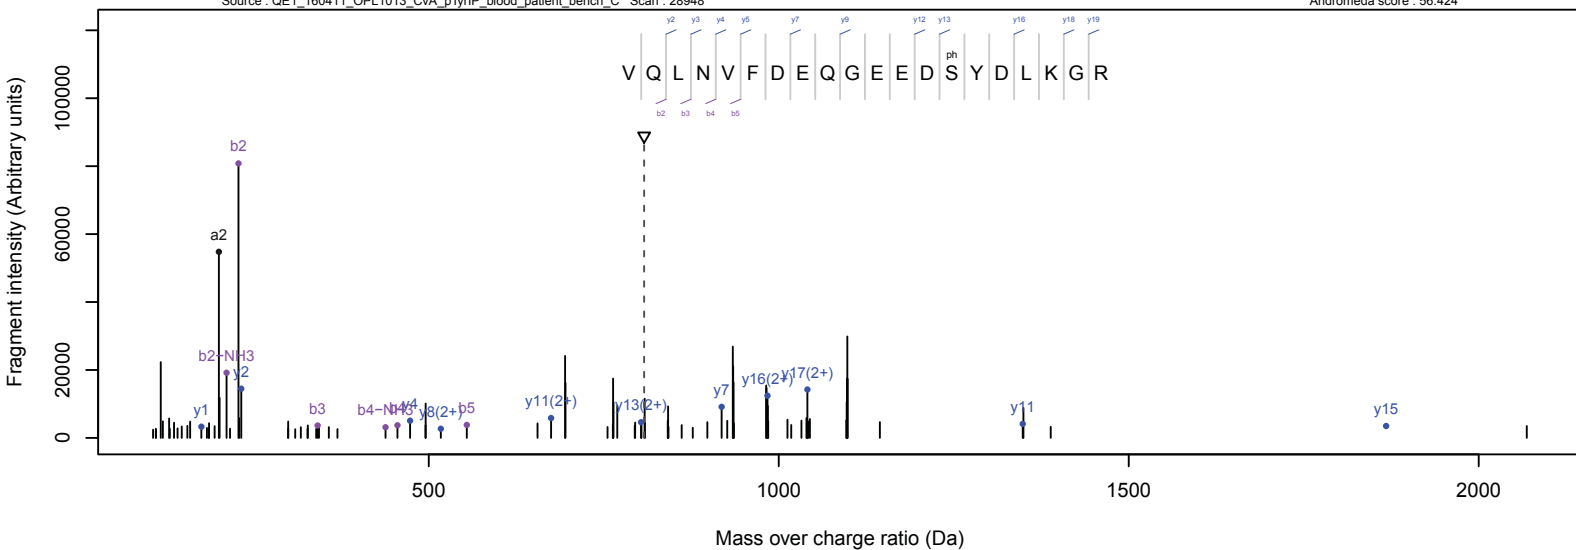

## HLAILY(ph)KK-2+

Source : QE1\_160411\_OPL1013\_CvA\_pTyrIP\_blood\_patient\_bench\_D Scan : 12796

Andromeda score : 56.27

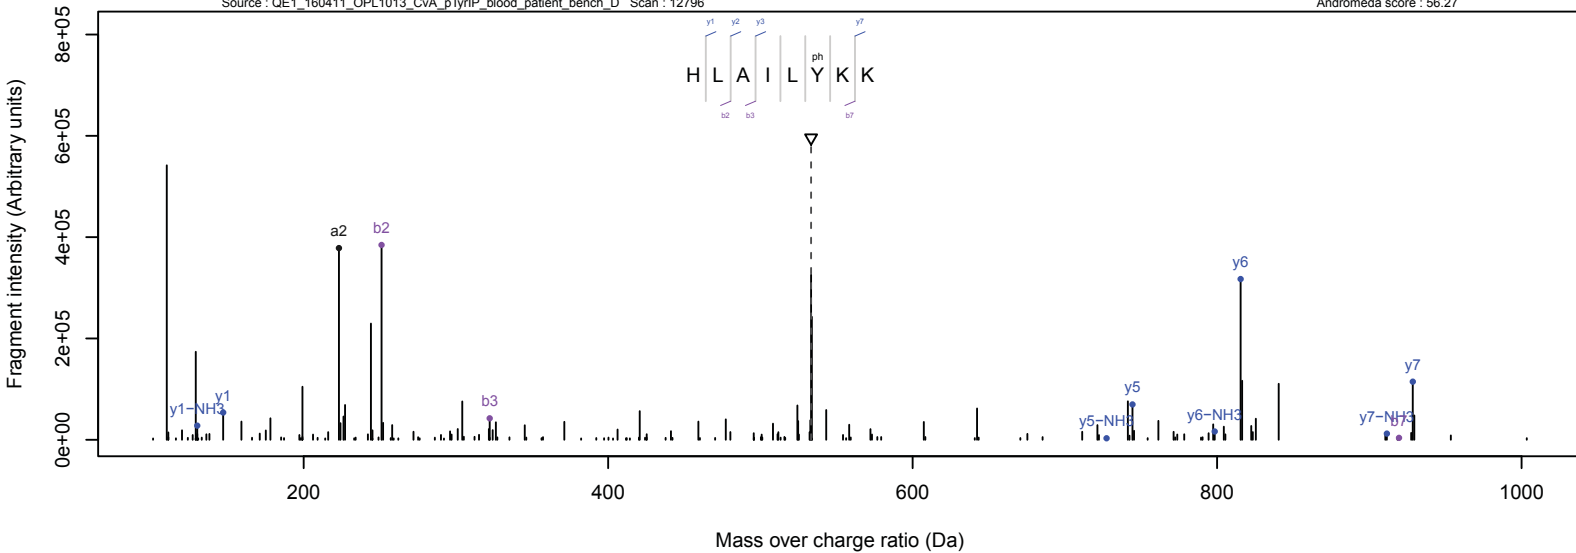

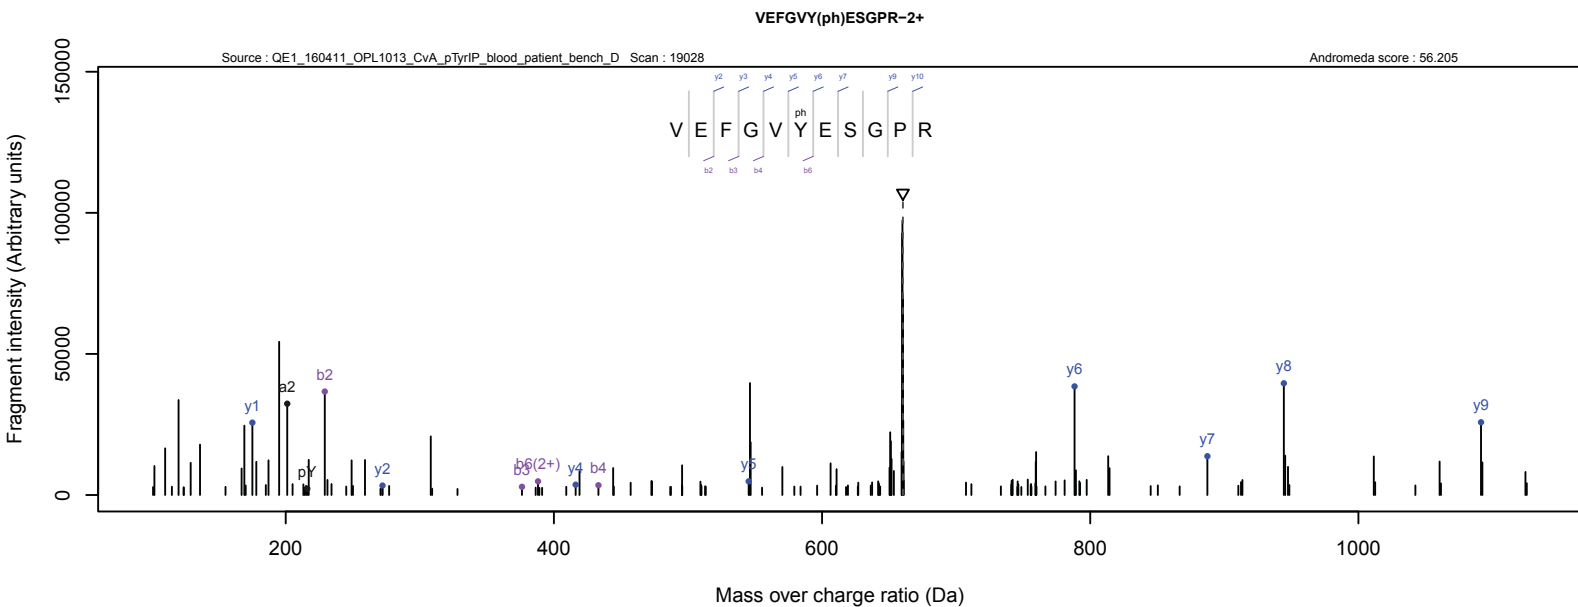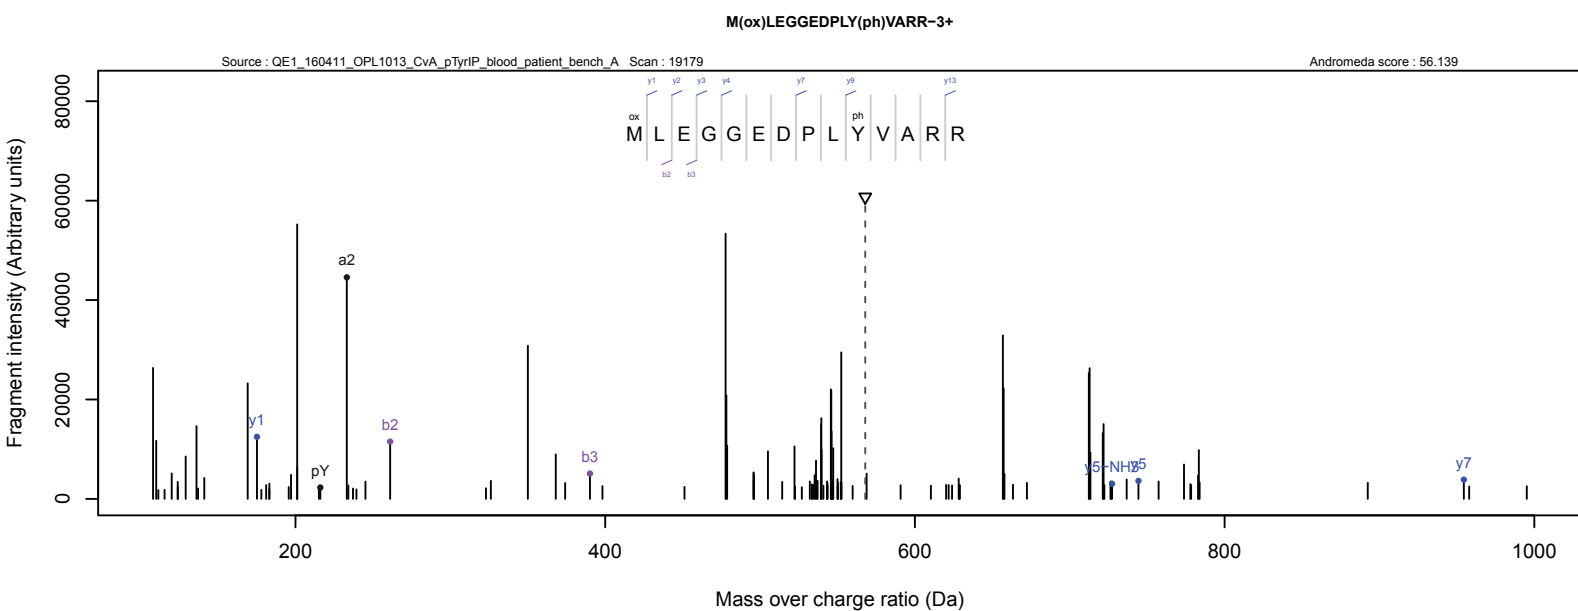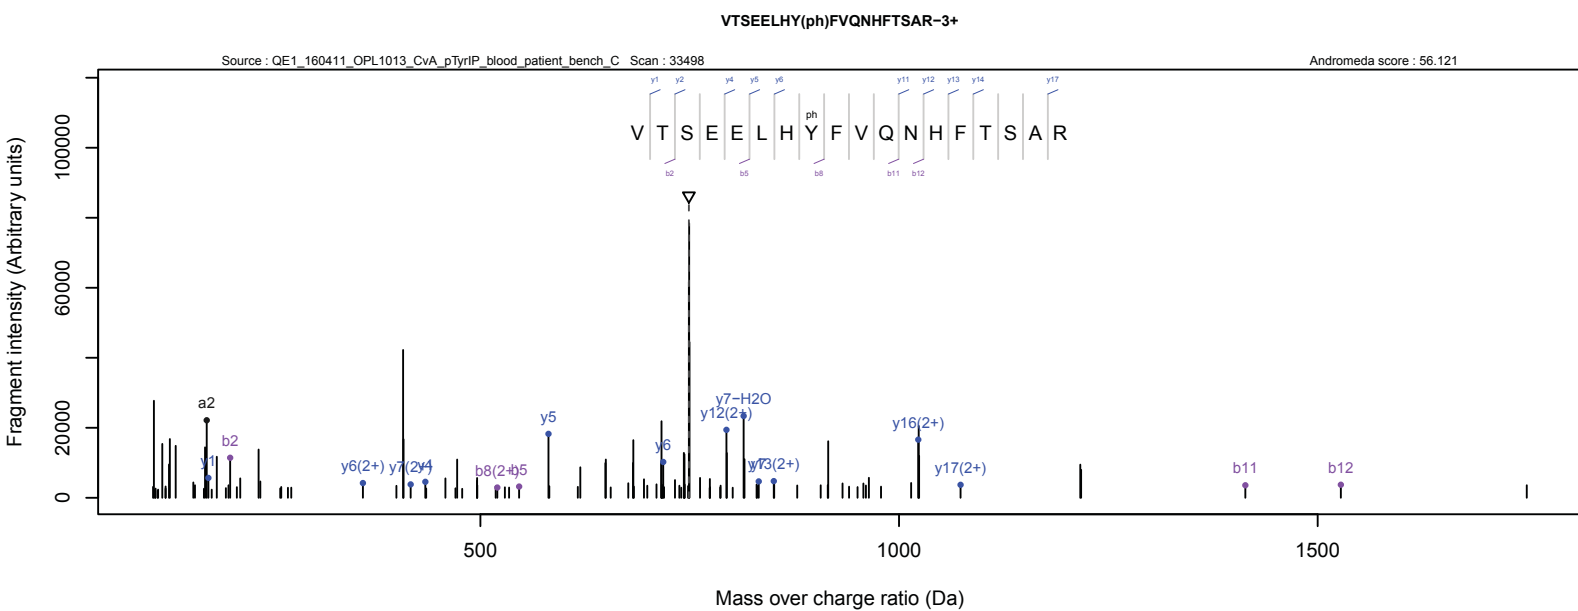

## DTCYSPKPSVY(ph)LSTPSSASK-3+

Source : QE1\_160411\_OPL1013\_CvA\_pTyrIP\_blood\_patient\_bench\_D Scan : 19538

Andromeda score : 56.081

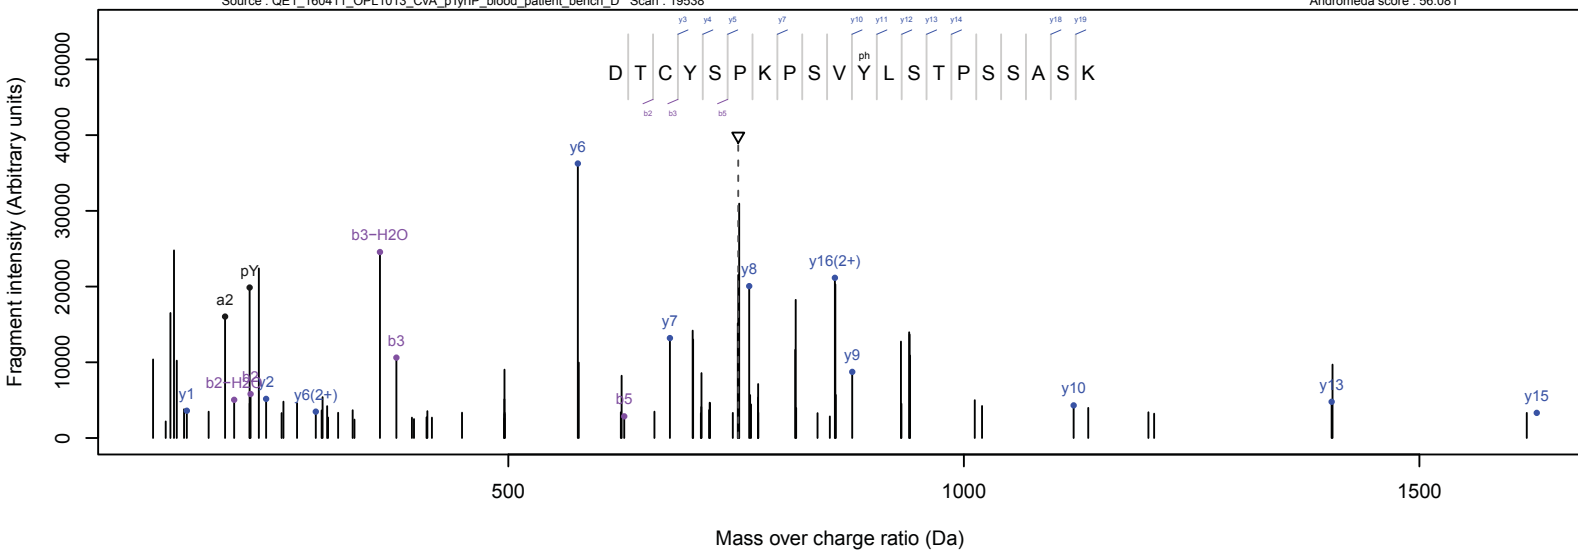

## GHTRDY(ph)PQYR-3+

Source : QE1\_160411\_OPL1013\_CvA\_pTyrIP\_blood\_patient\_bench\_C Scan : 2283

Andromeda score : 56.013

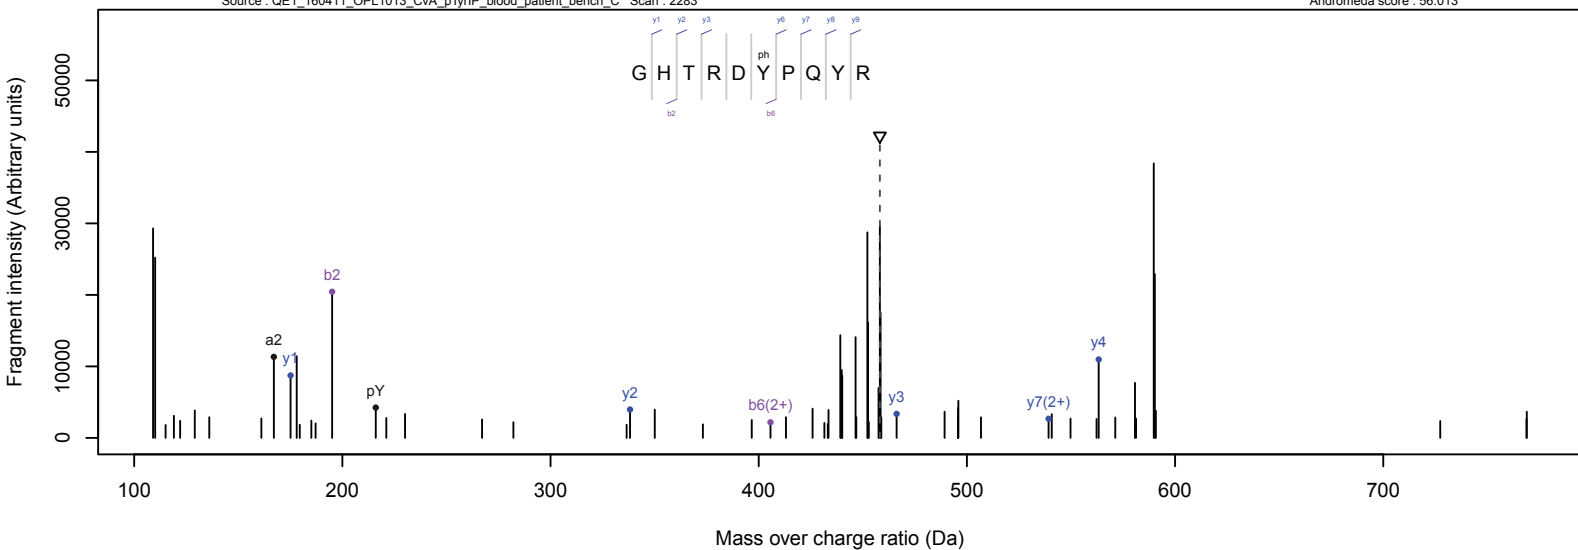

## AIRDEAIY(ph)HFR-3+

Source : QE1\_160411\_OPL1013\_CvA\_pTyrIP\_blood\_patient\_bench\_C Scan : 16086

Andromeda score : 55.98

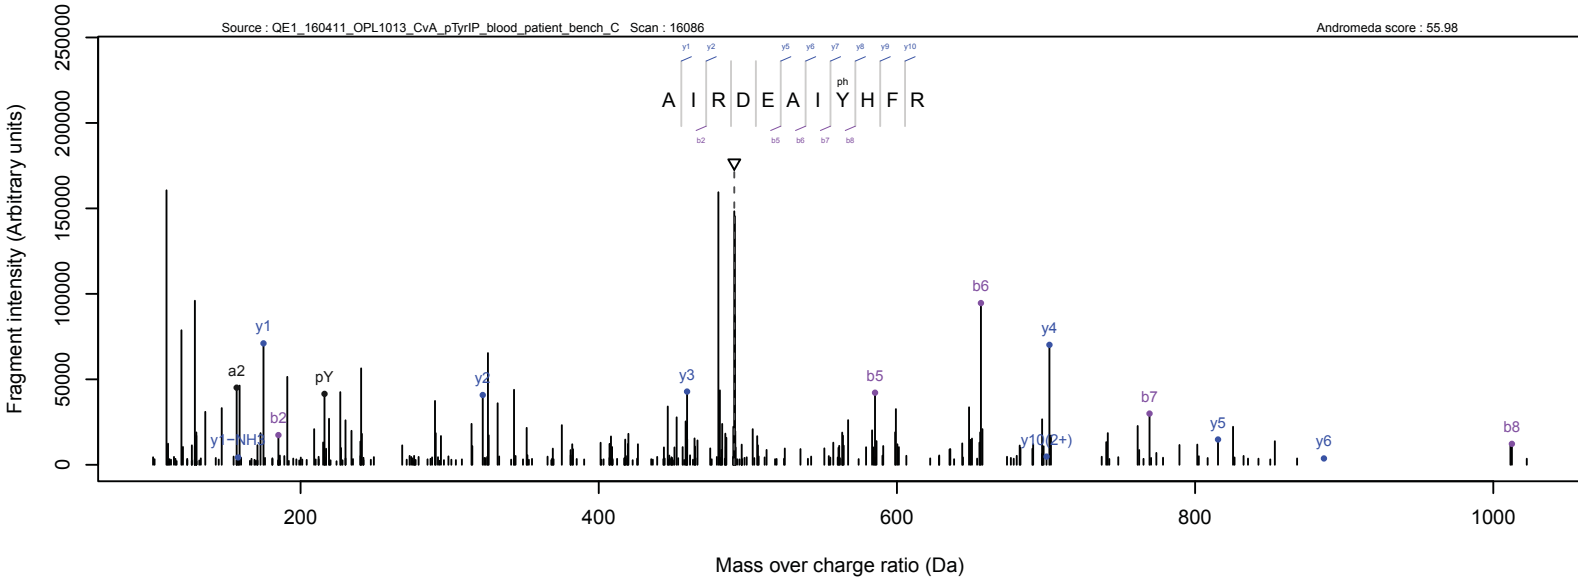

## Y(ph)LFTGLK-2+

Source: QE1\_160411\_OPL1013\_CvA\_pTyrIP\_blood\_patient\_bench\_A Scan: 24530

Andromeda score: 55.902

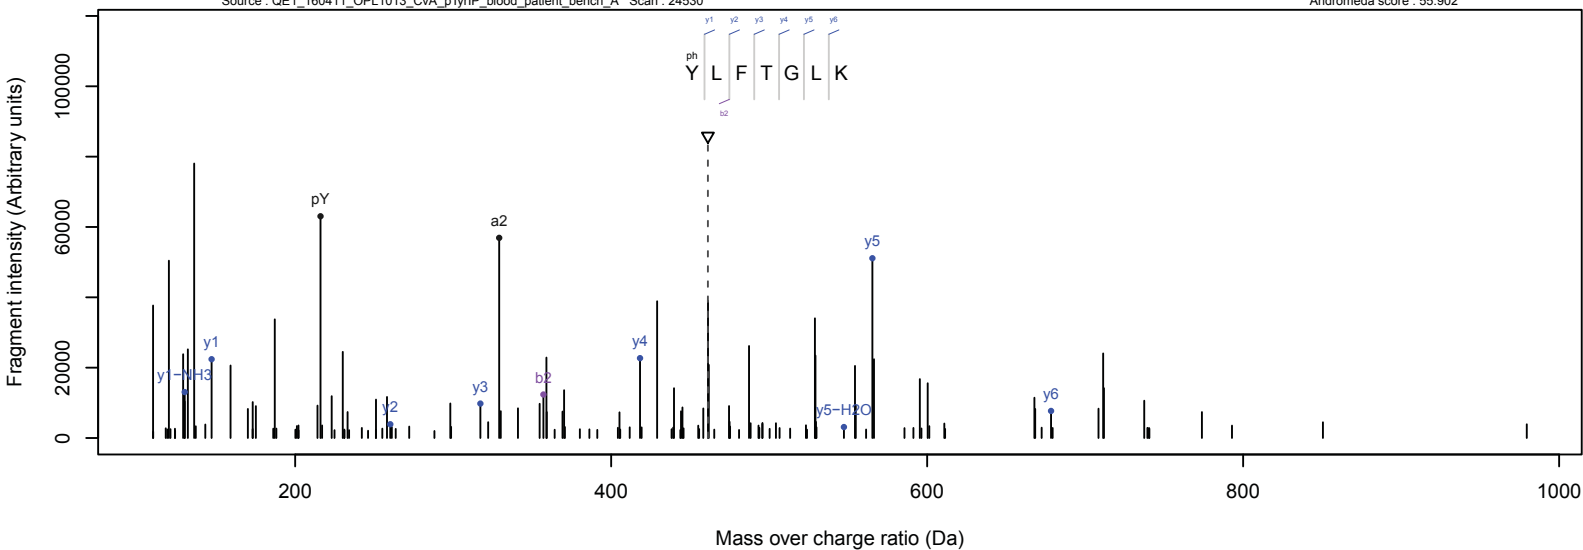

## HRLDLGEDY(ph)PSGK-3+

Source: QE1\_160411\_OPL1013\_CvA\_pTyrIP\_blood\_patient\_bench\_D Scan: 8511

Andromeda score: 55.755

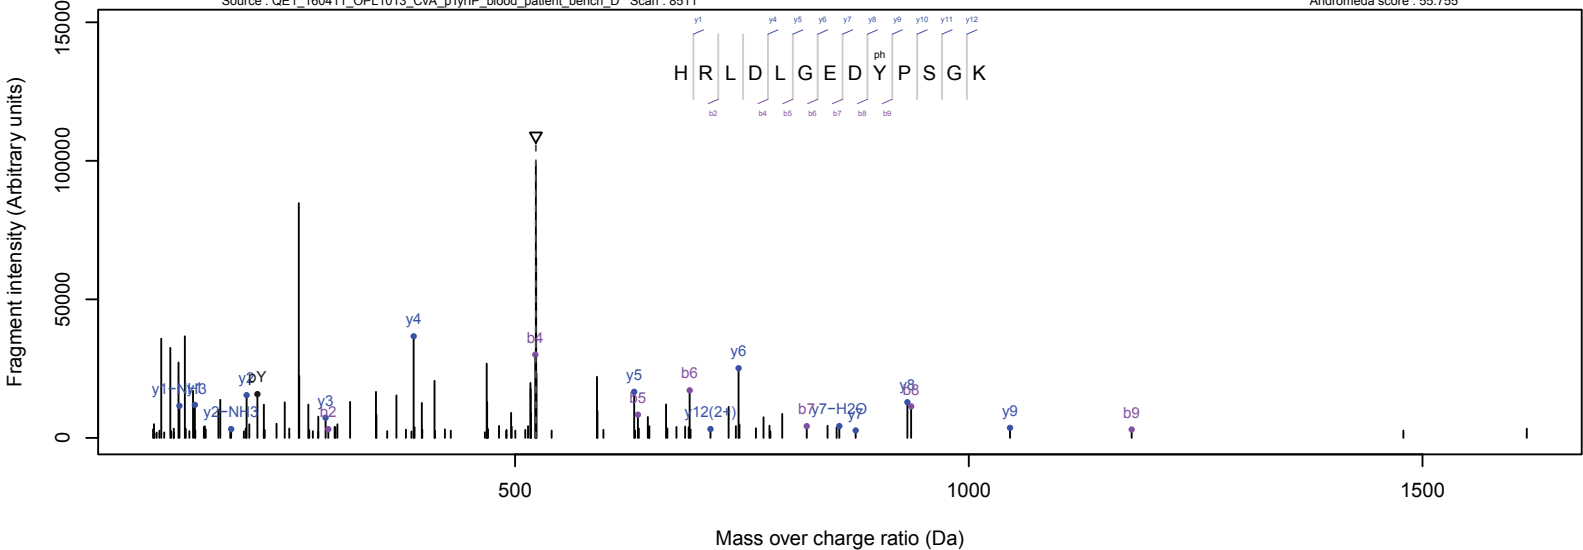

## ETSKVIY(ph)DFIEK-2+

Source: QE1\_160411\_OPL1013\_CvA\_pTyrIP\_blood\_patient\_bench\_C Scan: 30708

Andromeda score: 55.724

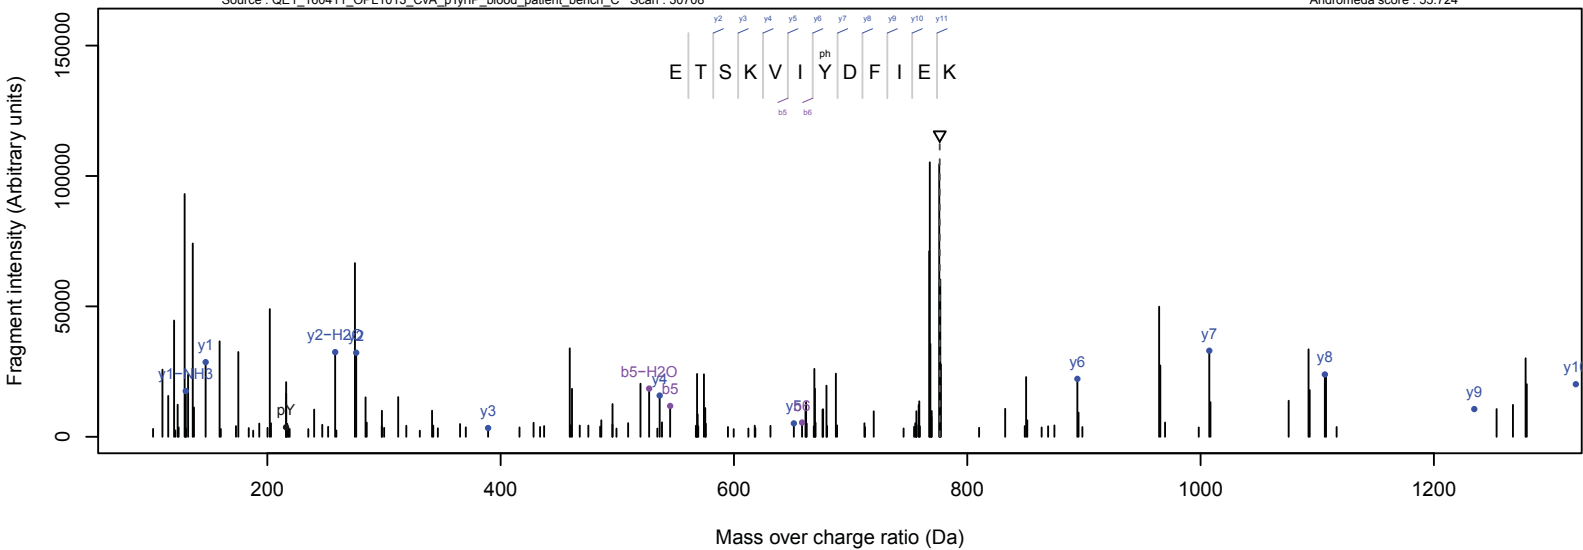

**QADEEM(ox)TGY(ph)VATR-2+**

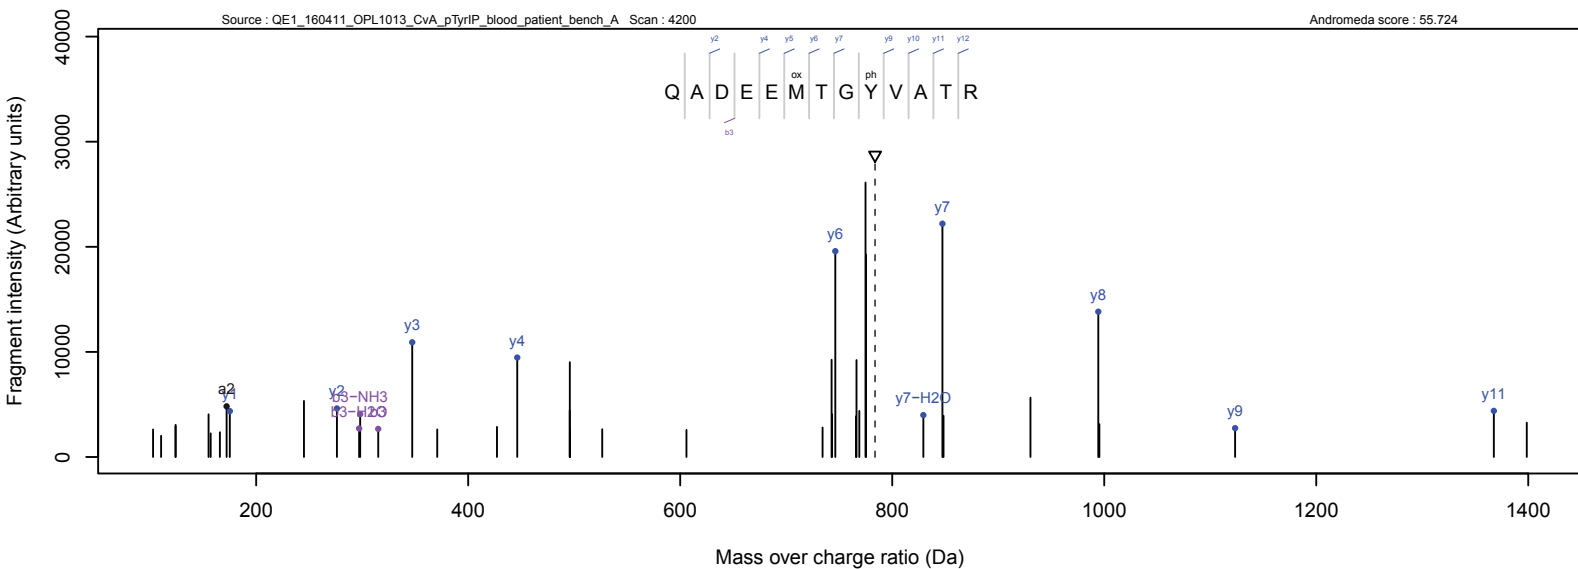

**SEWIY(ph)DTPVSPGK-2+**

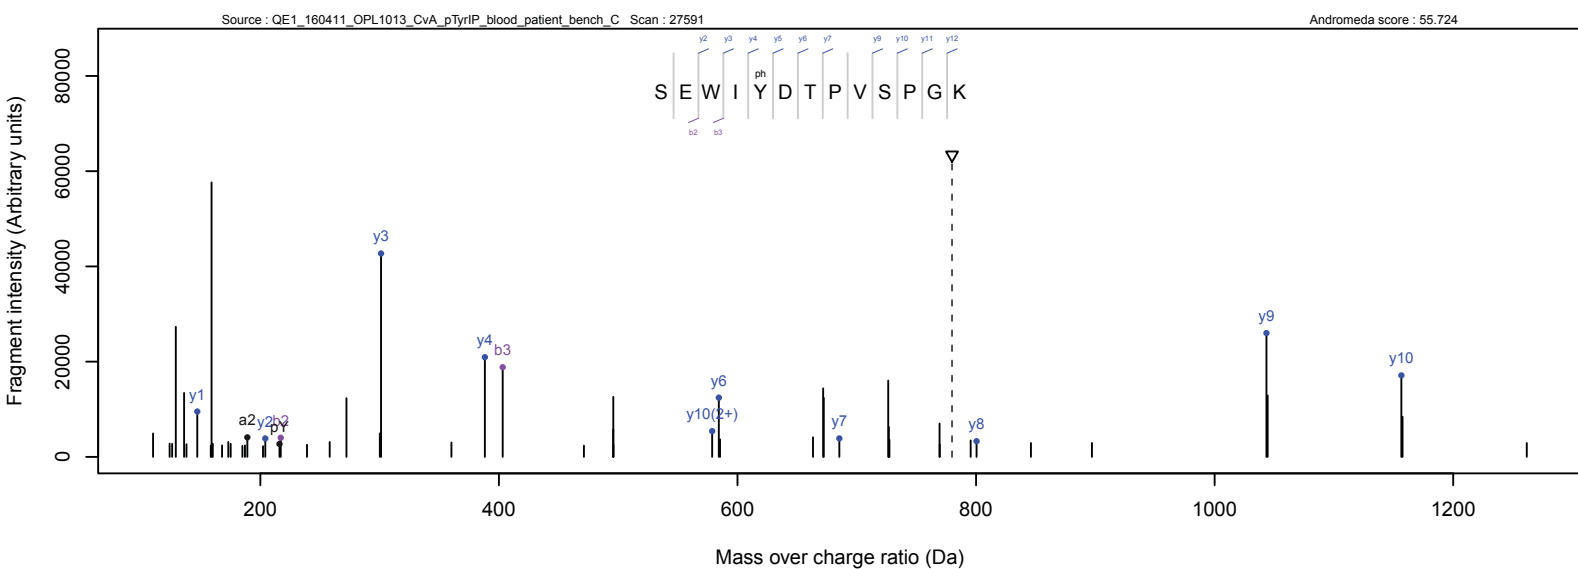

**AVS(ph)PQSTKPMAESIT(ph)YAAVAR-3+**

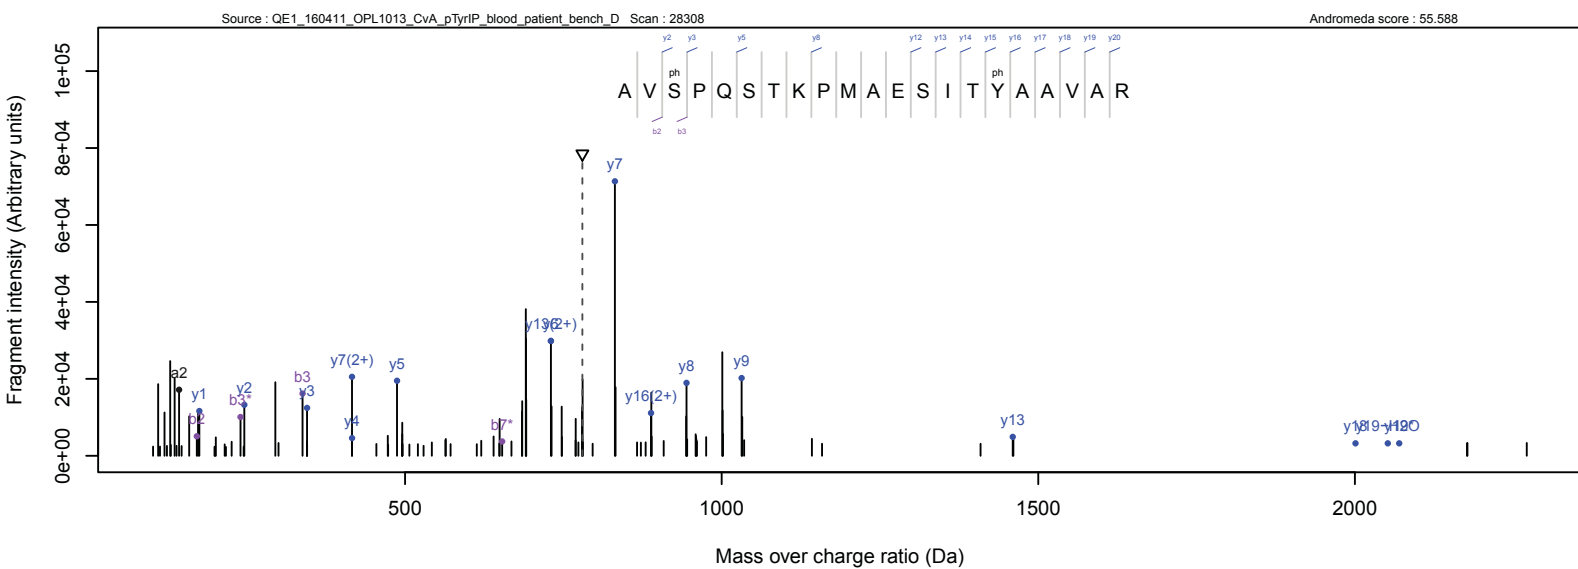

## TLT(ph)FSTKKS-2+

Source: QE1\_160411\_OPL1013\_CvA\_pTyrIP\_blood\_patient\_bench\_C Scan: 7801

Andromeda score: 55.461

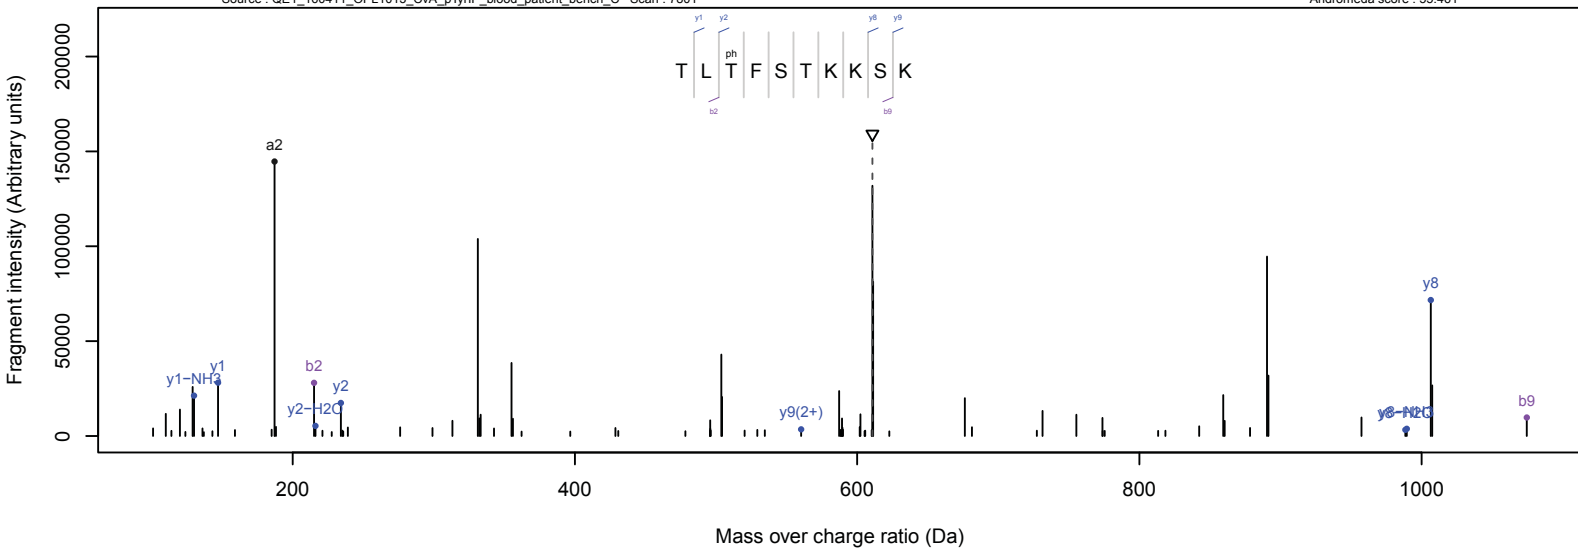

## VVCFNHDNTLLATGGTDGY(ph)VR-3+

Source: QE1\_160411\_OPL1013\_CvA\_pTyrIP\_blood\_patient\_bench\_A Scan: 24420

Andromeda score: 55.453

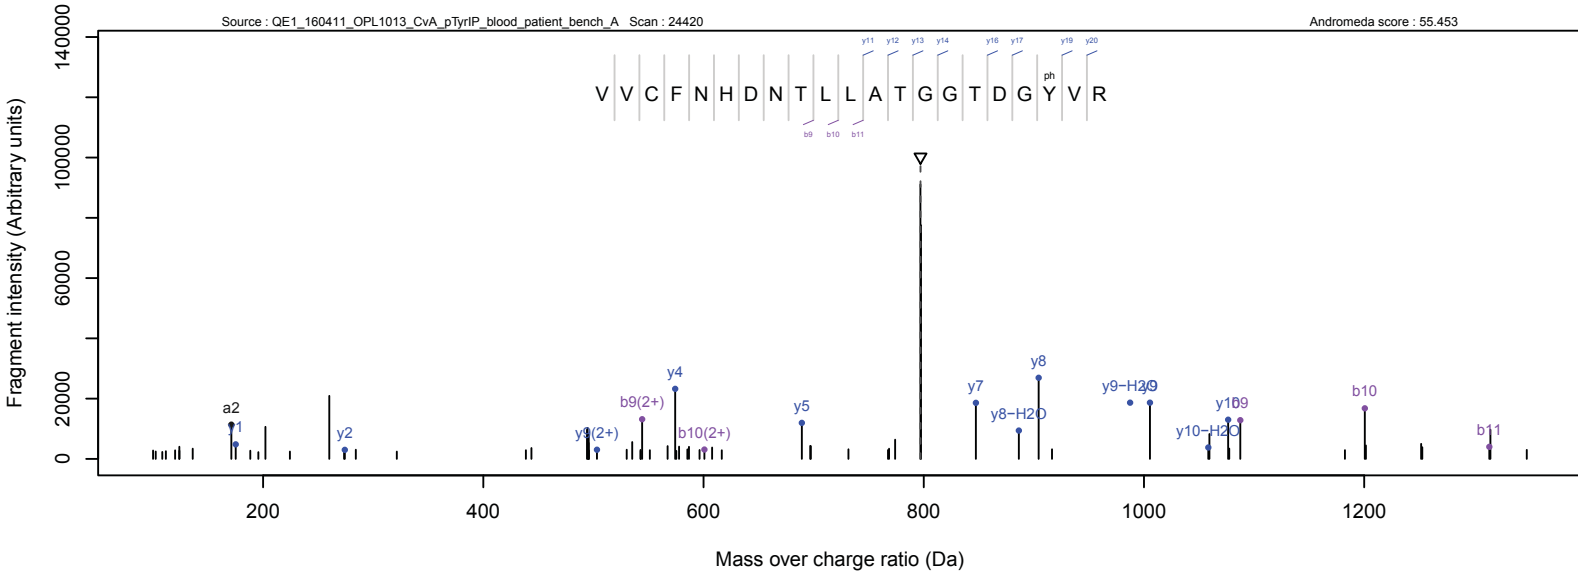

## HGM(ox)NGFFQQM(ox)IY(ph)DSPPSR-3+

Source: QE1\_160411\_OPL1013\_CvA\_pTyrIP\_blood\_patient\_bench\_C Scan: 21919

Andromeda score: 55.437

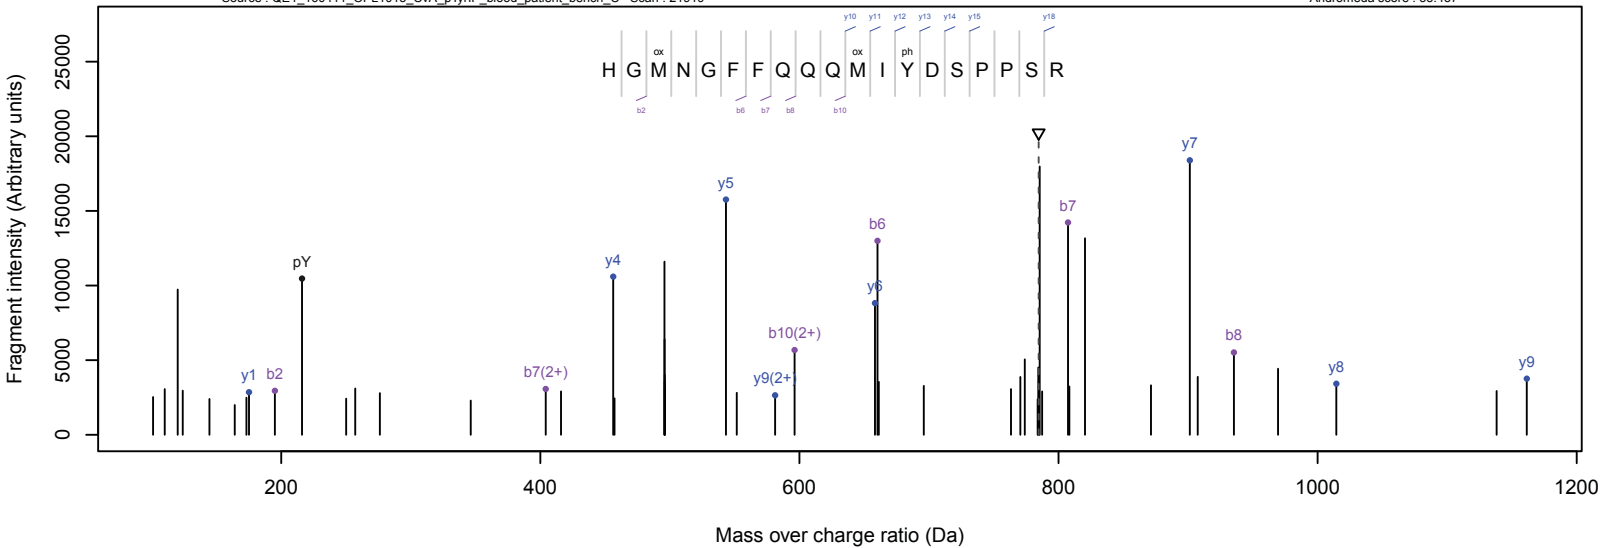

VLLGEEVAQYDGAYKVS(ph)R-3+

Source : QE1\_160411\_OPL1013\_CvA\_pTyrIP\_blood\_patient\_bench\_C Scan : 38806

Andromeda score : 55.437

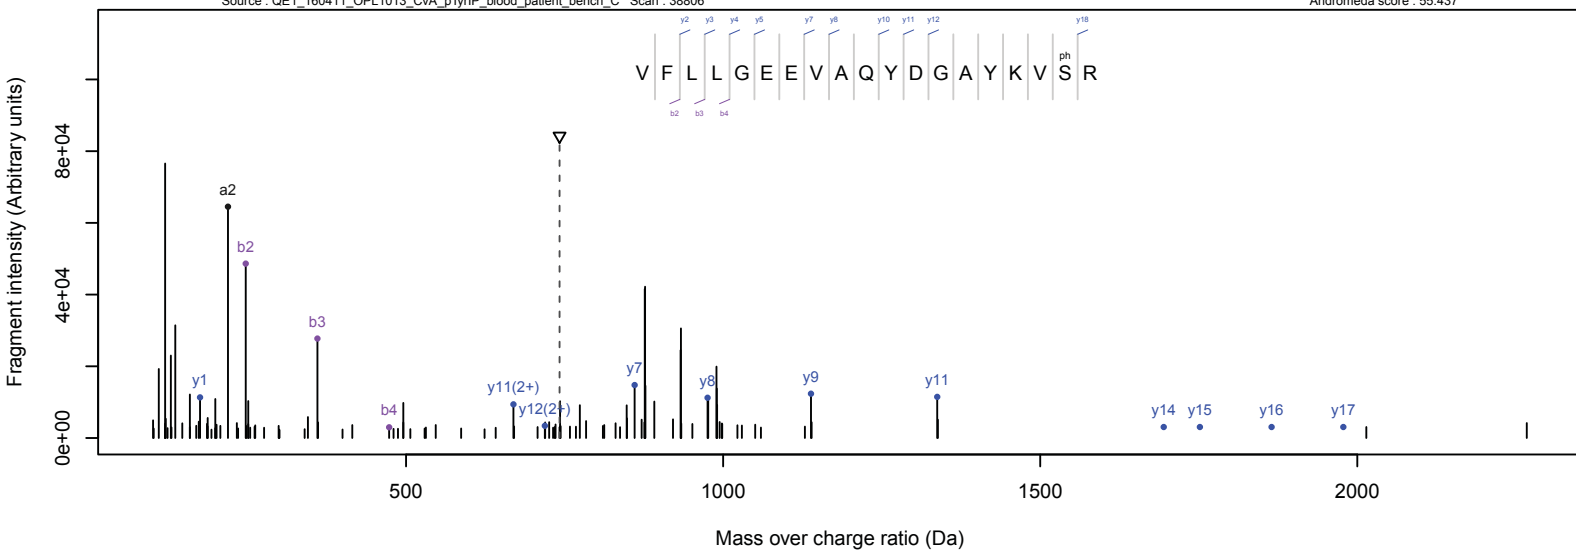

STGSVDY(ph)LALDFQPSSPSHR-3+

Source : QE1\_160411\_OPL1013\_CvA\_pTyrIP\_blood\_patient\_bench\_A Scan : 31928

Andromeda score : 55.337

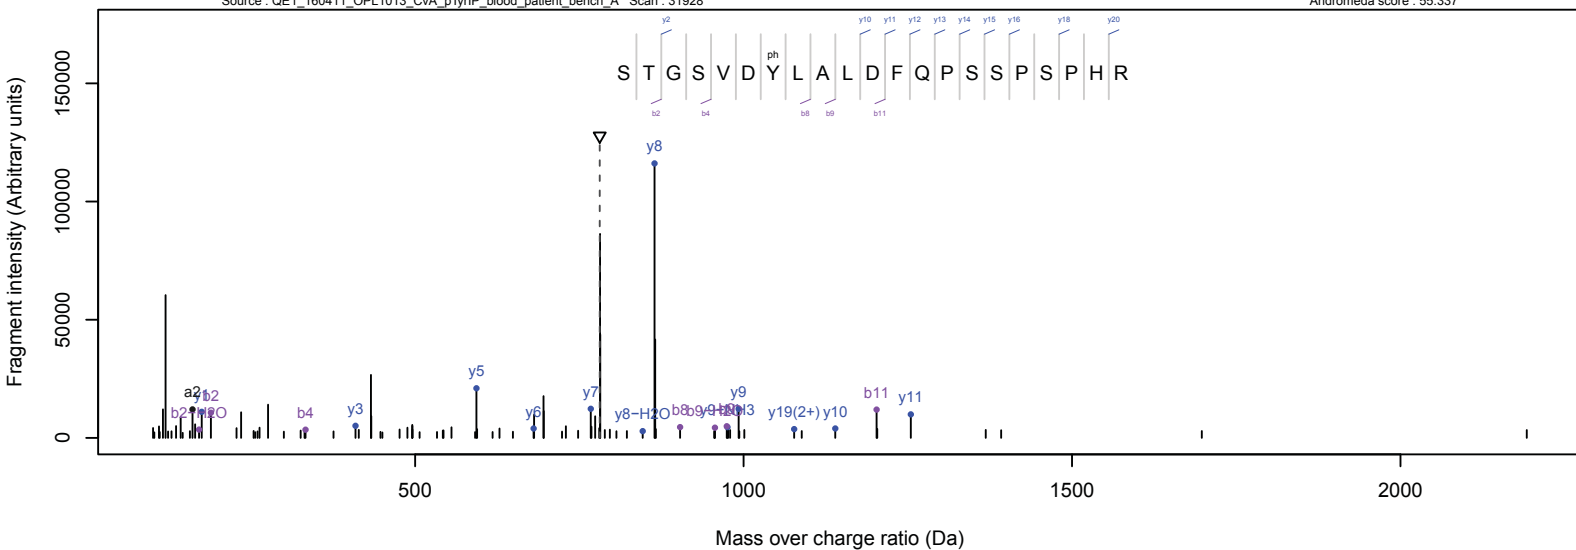

VRPDY(ph)TAQNLDHGK-3+

Source : QE1\_160411\_OPL1013\_CvA\_pTyrIP\_blood\_patient\_bench\_D Scan : 5639

Andromeda score : 55.335

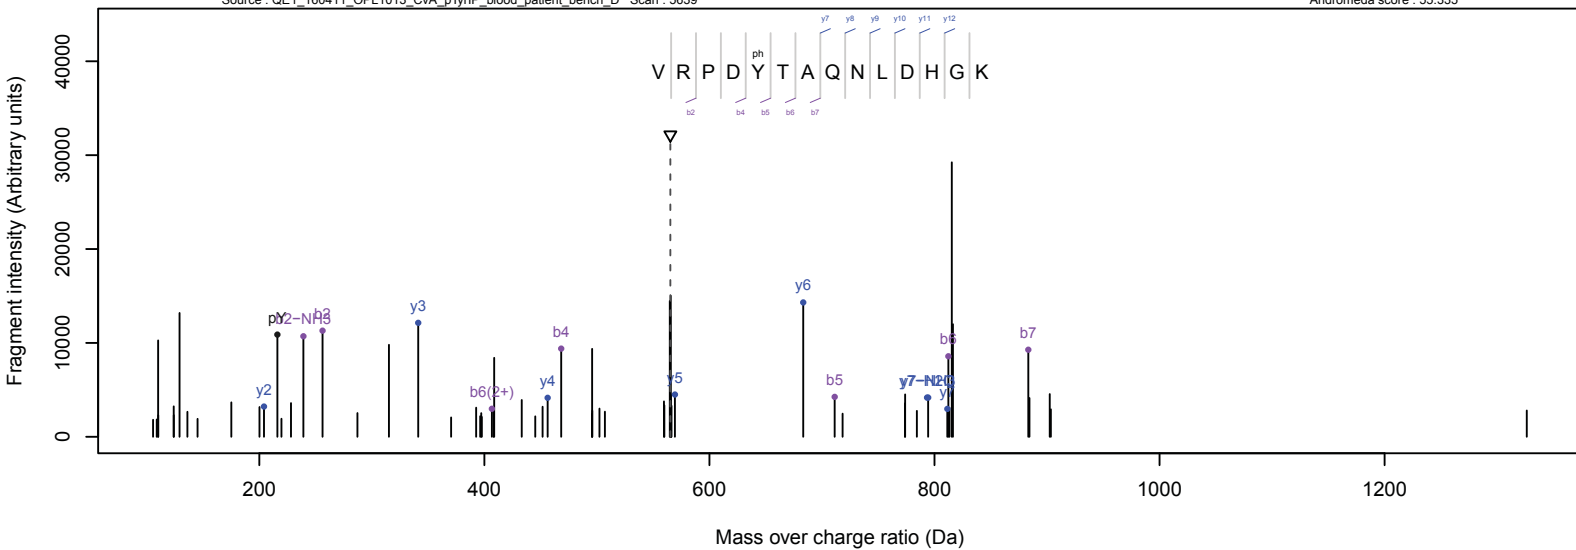



Y(ph)ISITVPSK-2+

Source : QE1\_160411\_OPL1013\_CvA\_pTyrIP\_blood\_patient\_bench\_A Scan : 20017

Andromeda score : 55.084

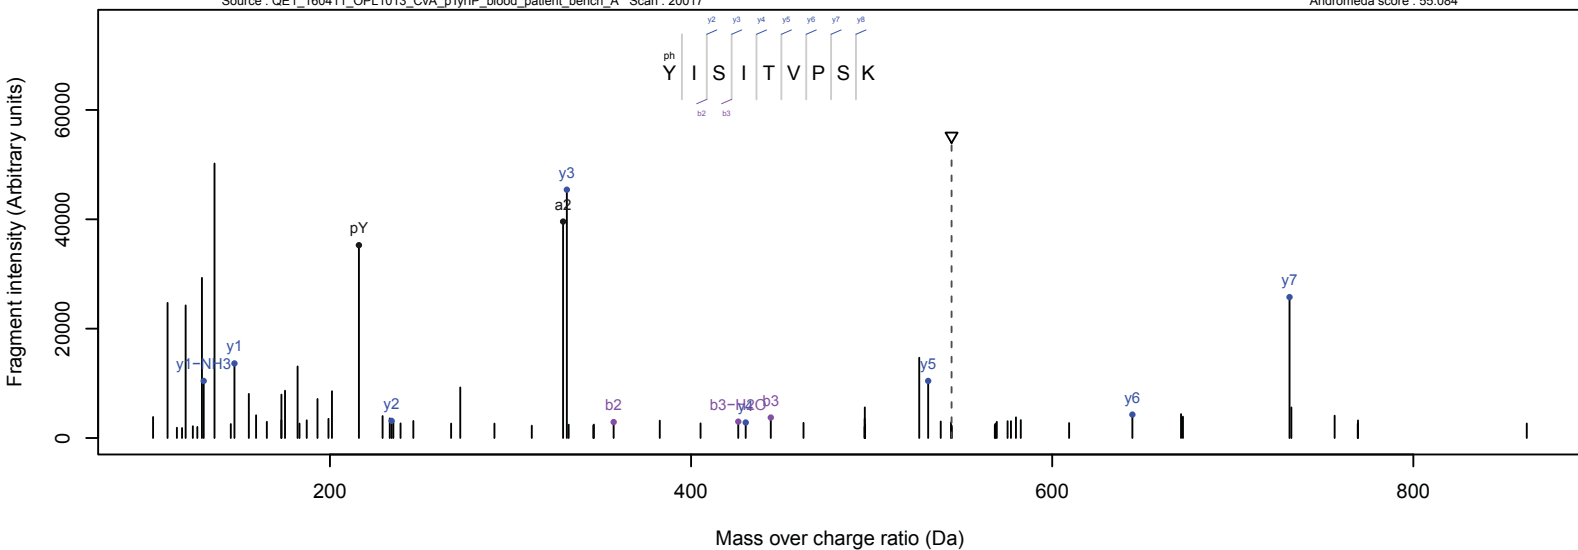

GLPSDY(ph)GRPLSFPPR-3+

Source : QE1\_160411\_OPL1013\_CvA\_pTyrIP\_blood\_patient\_bench\_C Scan : 28588

Andromeda score : 55.011

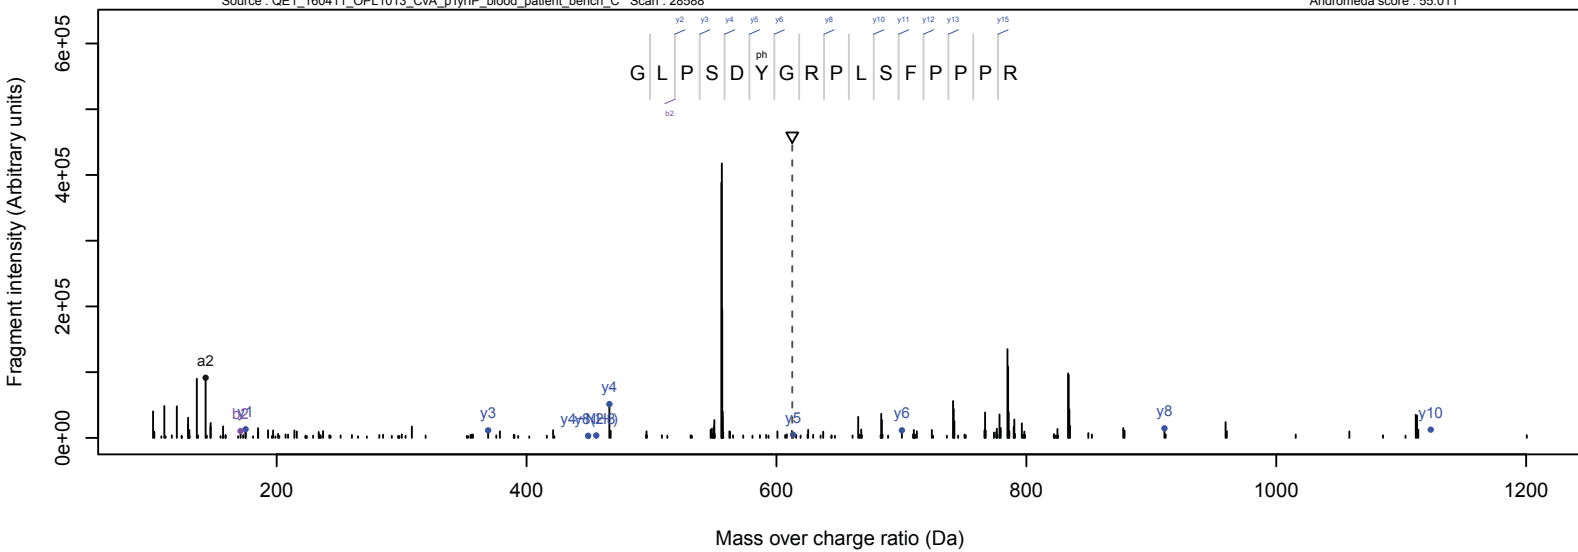

VMHVSSAELNY(ph)SLPYDSK-3+

Source : QE1\_160411\_OPL1013\_CvA\_pTyrIP\_blood\_patient\_bench\_D Scan : 25581

Andromeda score : 54.964

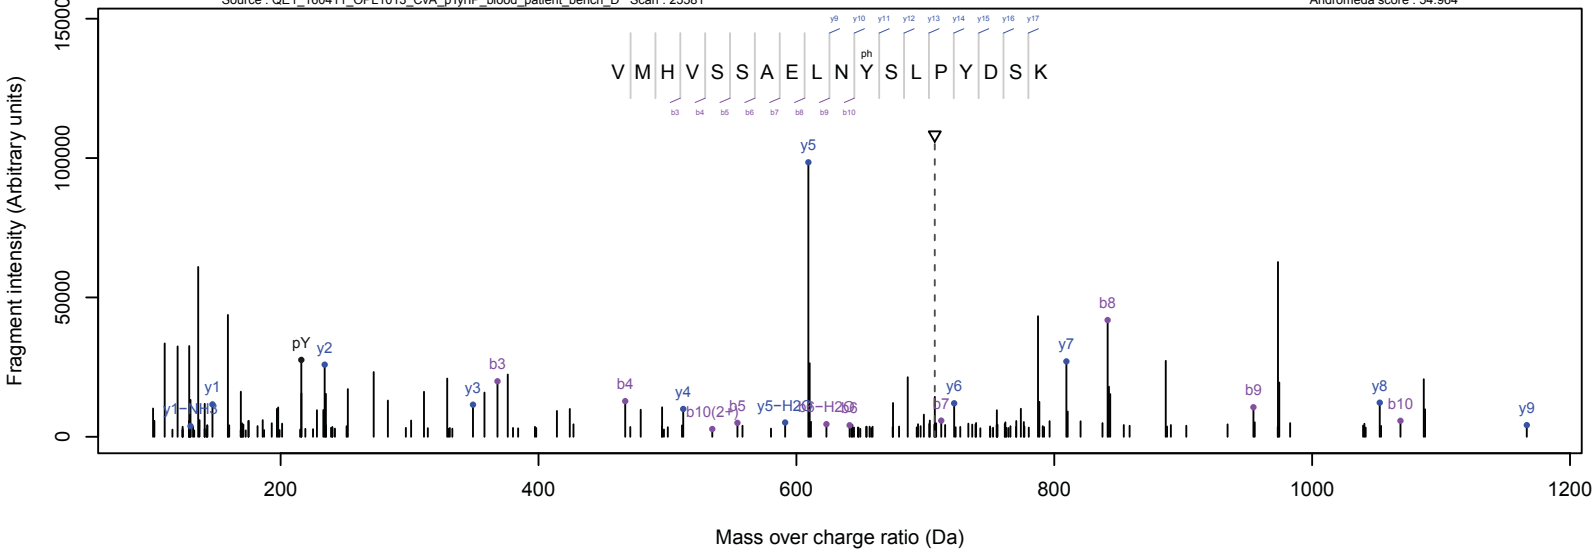

**ASLKG<sup>(ph)</sup>QWLKDK-3+**

Source : QE1\_160411\_OPL1013\_CvA\_pTyrIP\_blood\_patient\_bench\_A Scan : 14554

Andromeda score : 54.898

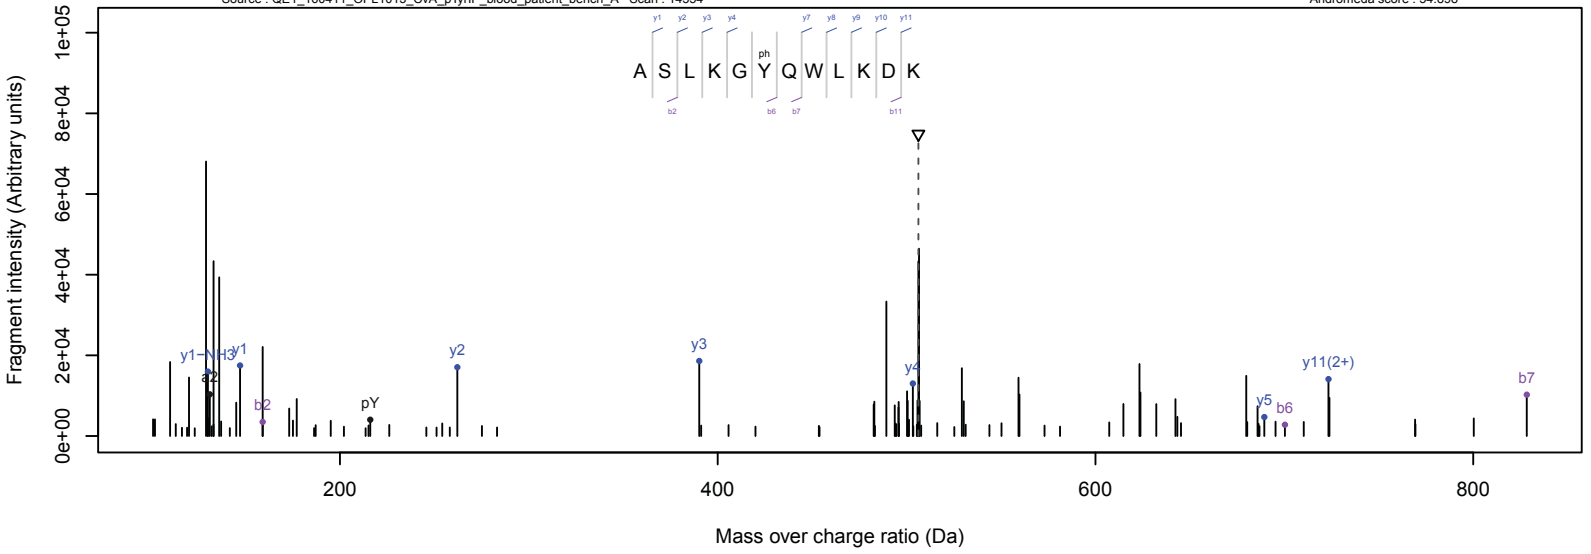

**LQDEANYHLY<sup>(ph)</sup>GSR-3+**

Source : QE1\_160411\_OPL1013\_CvA\_pTyrIP\_blood\_patient\_bench\_D Scan : 11379

Andromeda score : 54.898

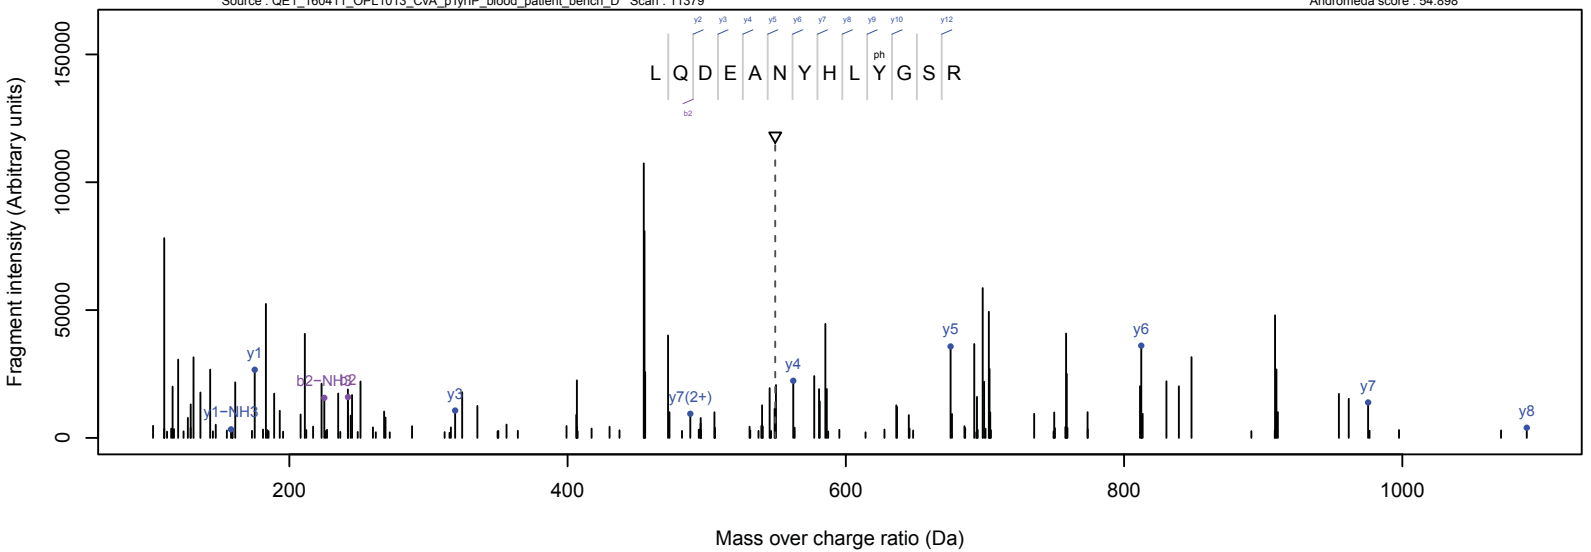

**YANNS<sup>(ph)</sup>KNVDMIR-3+**

Source : QE1\_160411\_OPL1013\_CvA\_pTyrIP\_blood\_patient\_bench\_D Scan : 10010

Andromeda score : 54.898

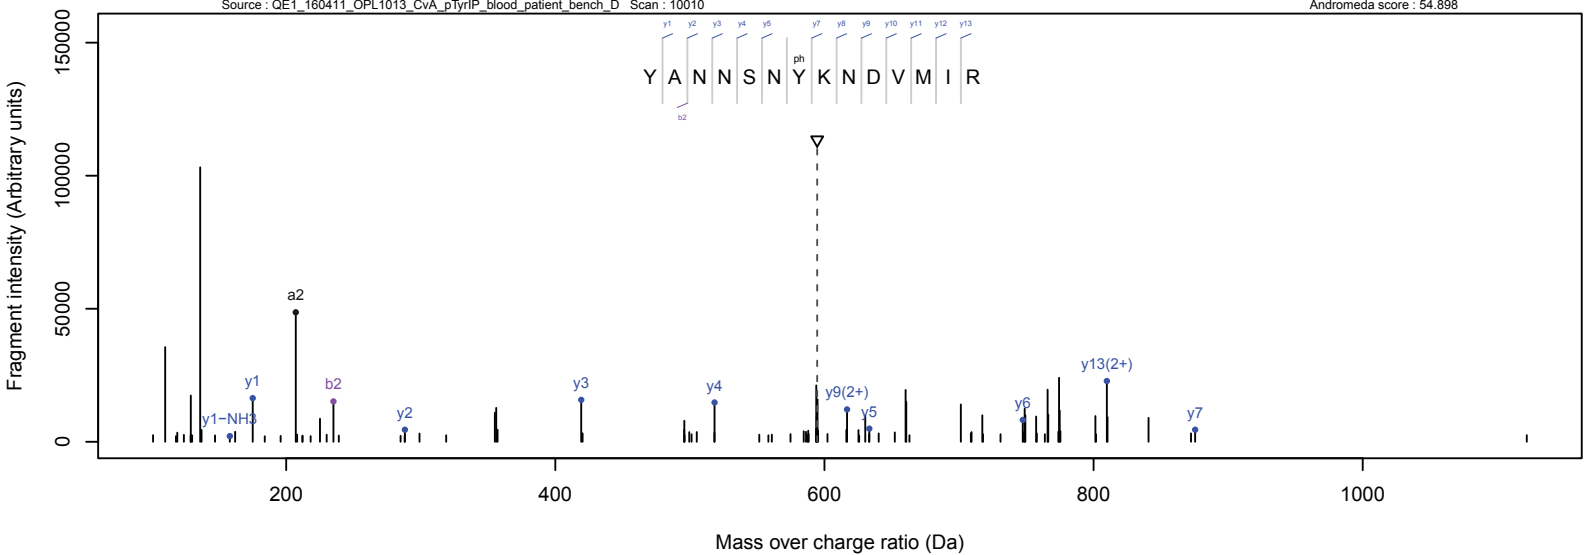



GAGSAM(ox)STDAY(ph)PKNPHLR-3+

Source : QE1\_160411\_OPL1013\_CvA\_pTyrIP\_blood\_patient\_bench\_C Scan : 5557

Andromeda score : 54.812

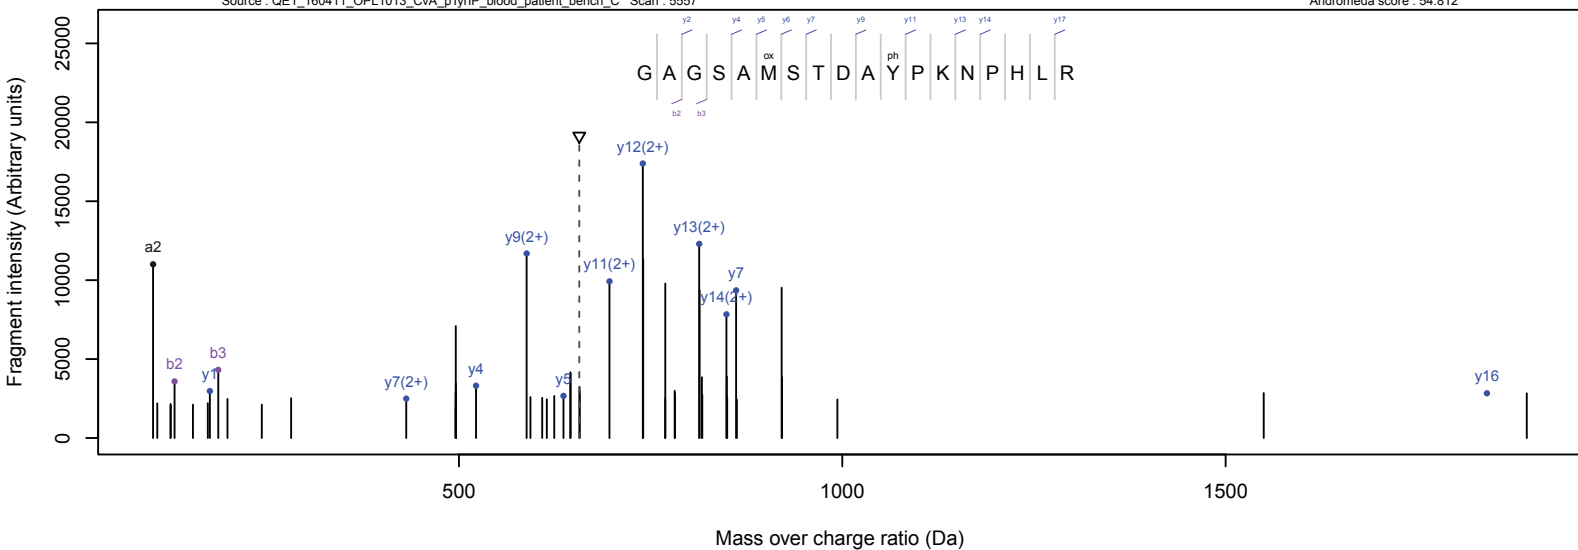

Y(ph)QCTLTHAAGYP-2+

Source : QE1\_160411\_OPL1013\_CvA\_pTyrIP\_blood\_patient\_bench\_D Scan : 15619

Andromeda score : 54.772

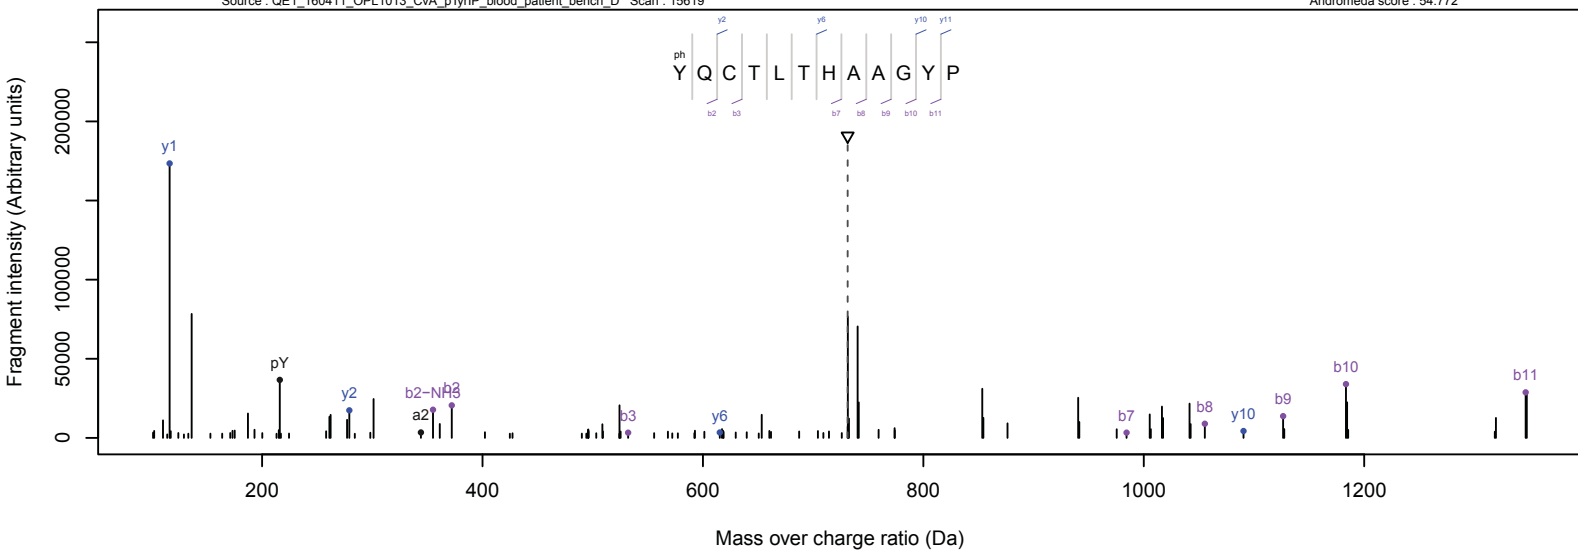

LAELEEFINGPNNNAHIQQVGDRCY(ph)DEK-3+

Source : QE1\_160411\_OPL1013\_CvA\_pTyrIP\_blood\_patient\_bench\_C Scan : 34136

Andromeda score : 54.521

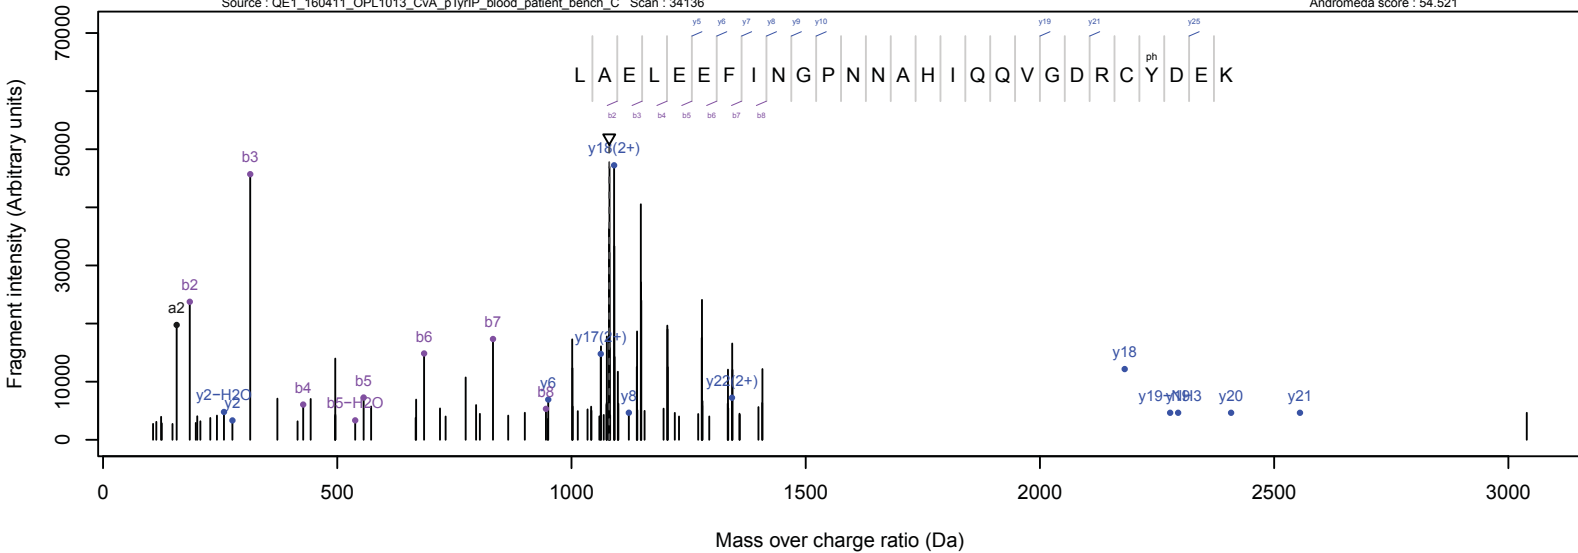

**KTIY(ph)TYIM(ox)ASR-3+**

Source: QE1\_160411\_OPL1013\_CvA\_pTyrIP\_blood\_patient\_bench\_C Scan: 15099

Andromeda score: 54.343

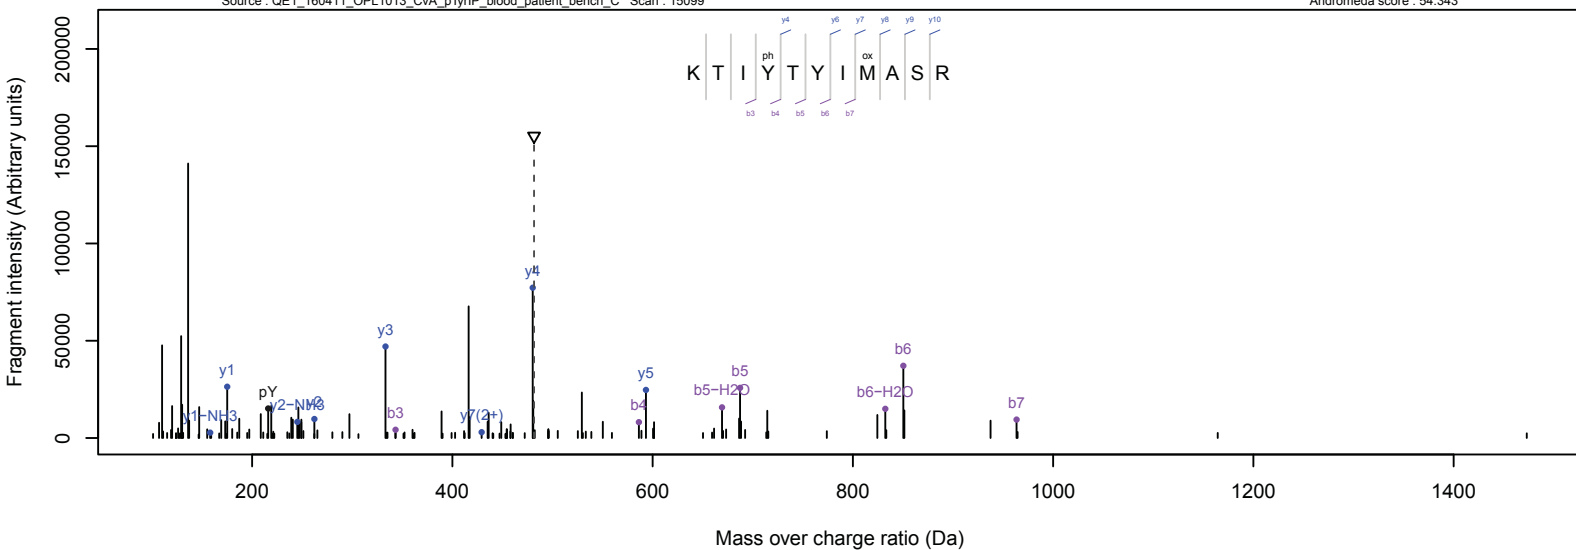

**Y(ph)LAEVAAGDDK-2+**

Source: QE1\_160411\_OPL1013\_CvA\_pTyrIP\_blood\_patient\_bench\_D Scan: 6630

Andromeda score: 54.343

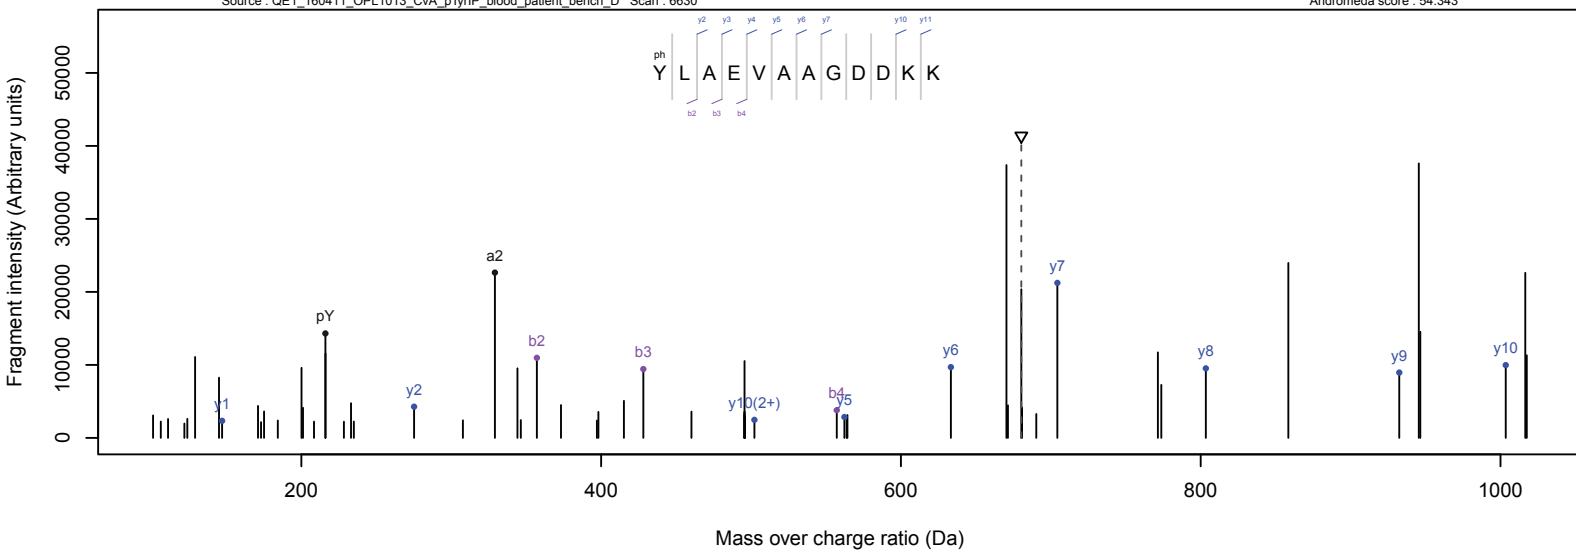

**ALNGAEPNY(ph)HSLPSAR-3+**

Source: QE1\_160411\_OPL1013\_CvA\_pTyrIP\_blood\_patient\_bench\_D Scan: 14166

Andromeda score: 54.281

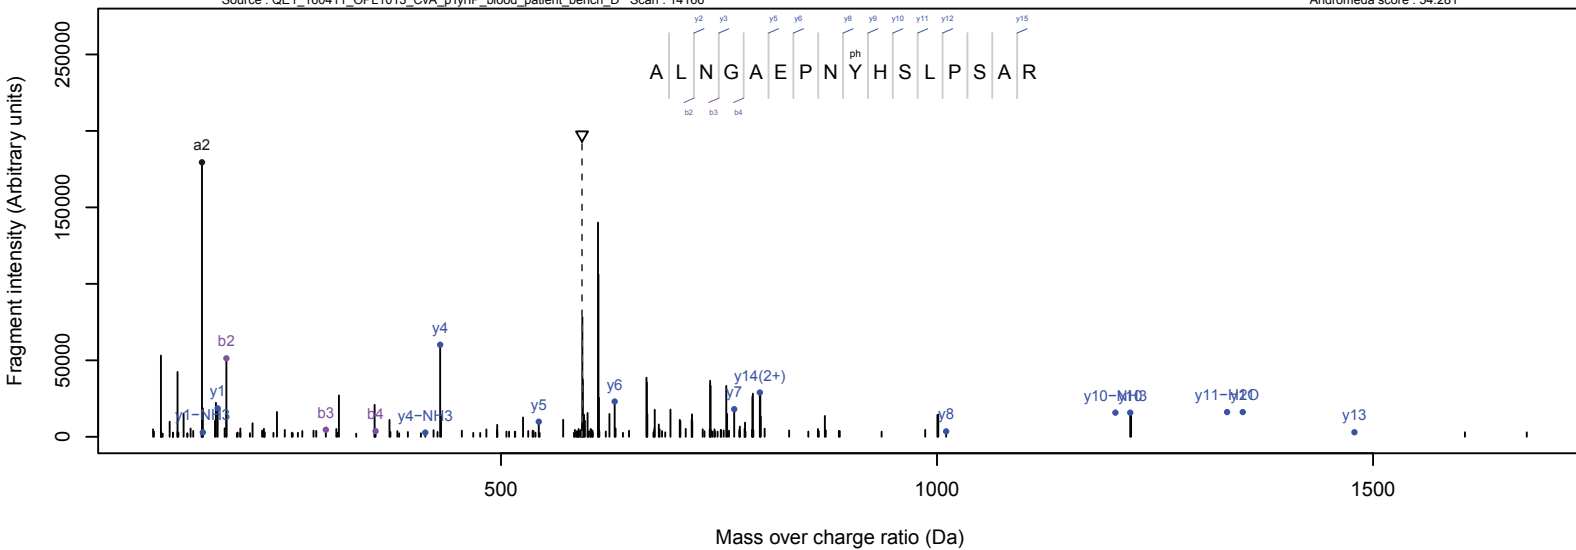

MEIATKEPMNPIK<sup>ph</sup>VK-3+

Source: QE1\_160411\_OPL1013\_CvA\_pTyrIP\_blood\_patient\_bench\_D Scan: 19894

Andromeda score: 54.281

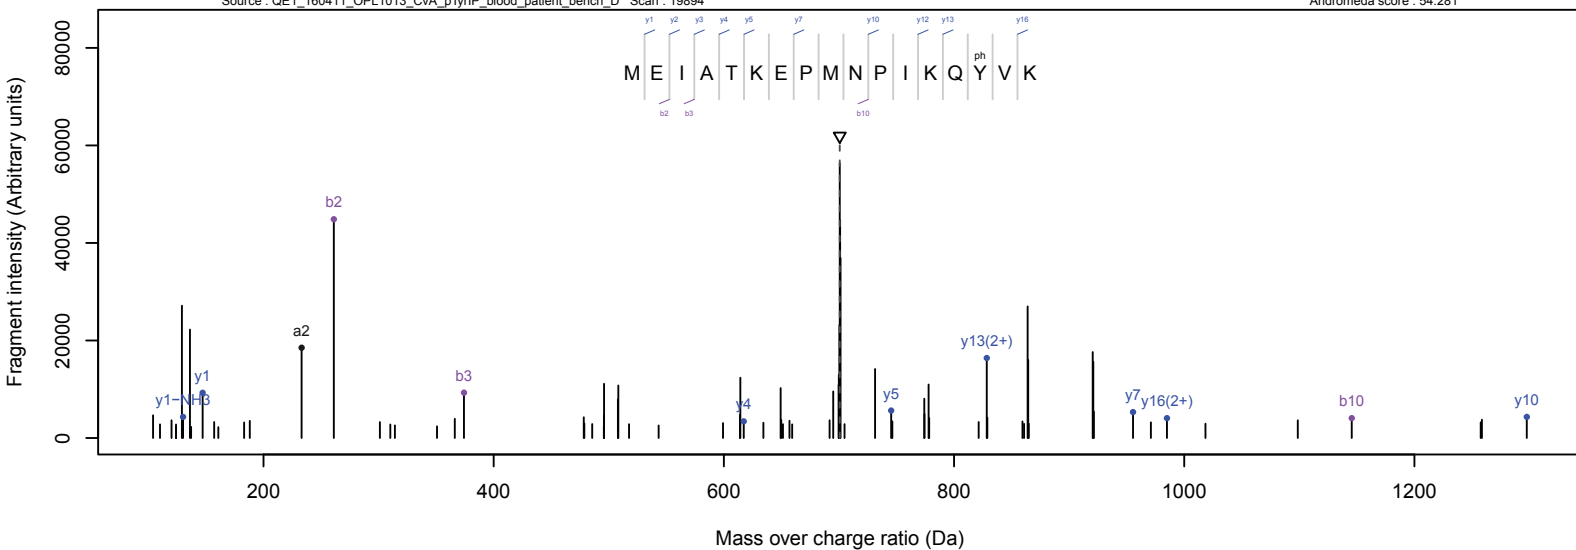SESVVY<sup>ph</sup>ADIR-2+

Source: QE1\_160411\_OPL1013\_CvA\_pTyrIP\_blood\_patient\_bench\_A Scan: 14473

Andromeda score: 54.259

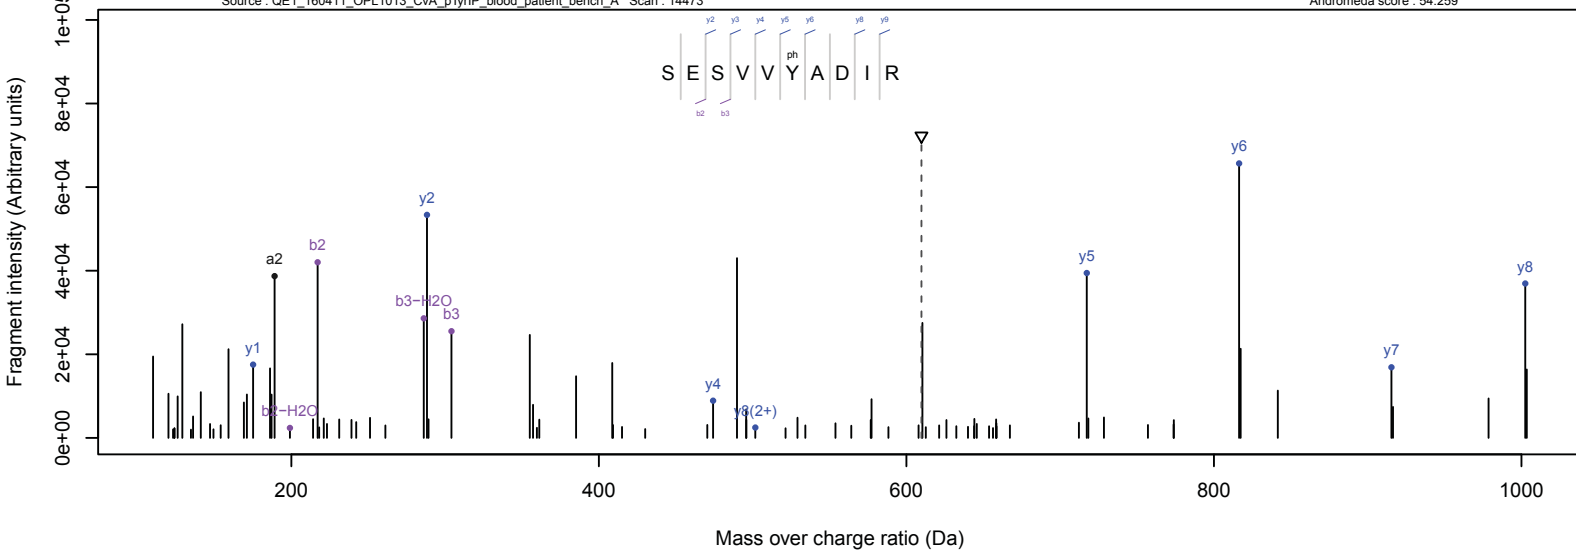WDTGENPIY<sup>ph</sup>K-2+

Source: QE1\_160411\_OPL1013\_CvA\_pTyrIP\_blood\_patient\_bench\_D Scan: 17224

Andromeda score: 54.259

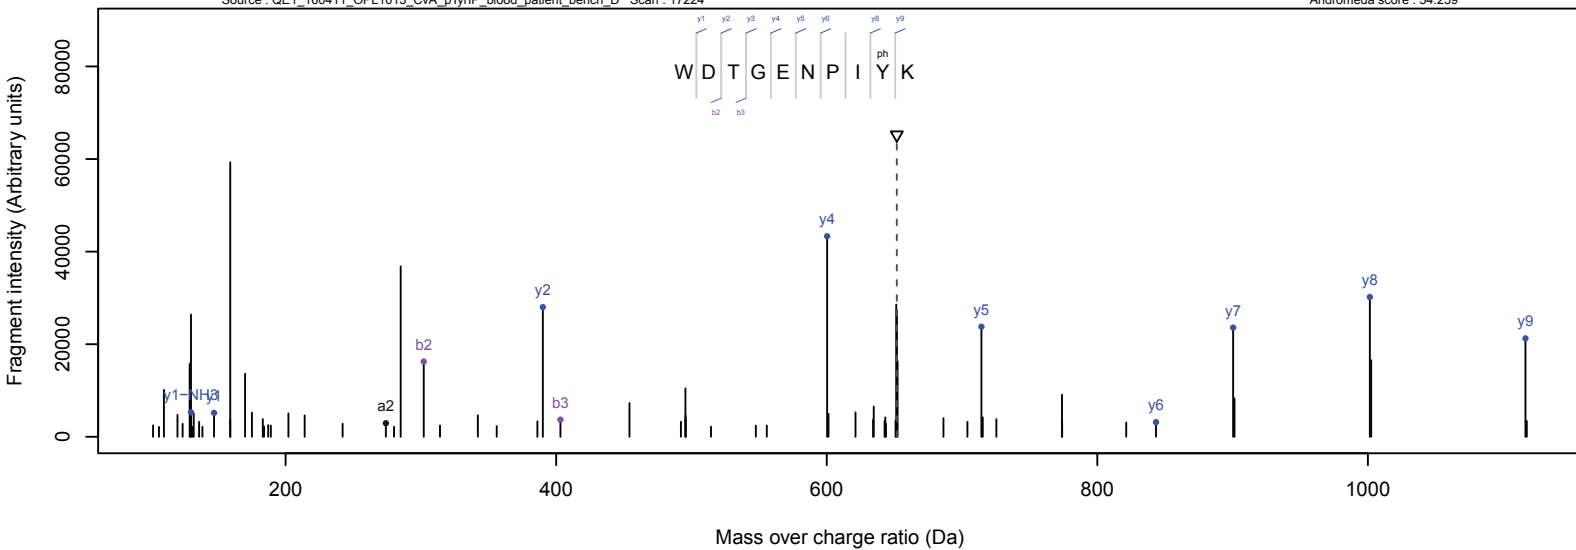

**DLPPPPDRPYS(ph)VGAESRPQR-4+**

Source : QE1\_160411\_OPL1013\_CvA\_pTyrIP\_blood\_patient\_bench\_C Scan : 16344

Andromeda score : 54.225

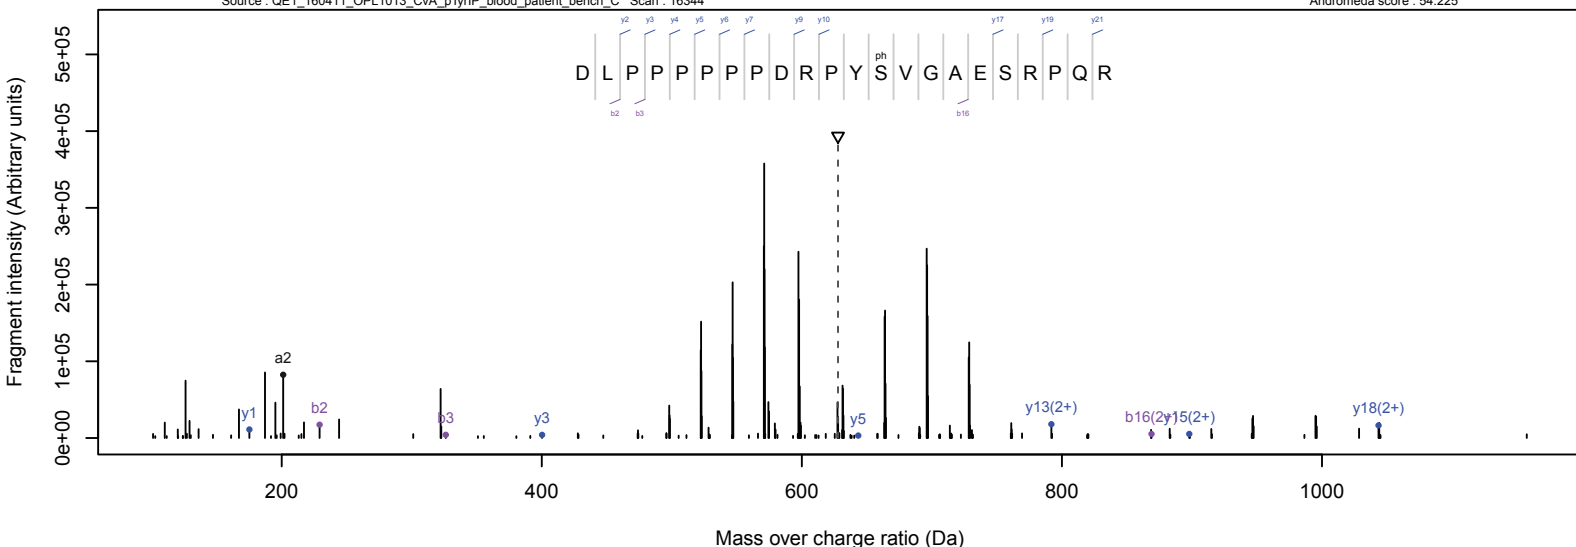

**EESTY(ph)LPLTSM(ox)QPTEAM(ox)GEEPSRAE-3+**

Source : QE1\_160411\_OPL1013\_CvA\_pTyrIP\_blood\_patient\_bench\_C Scan : 25372

Andromeda score : 53.481

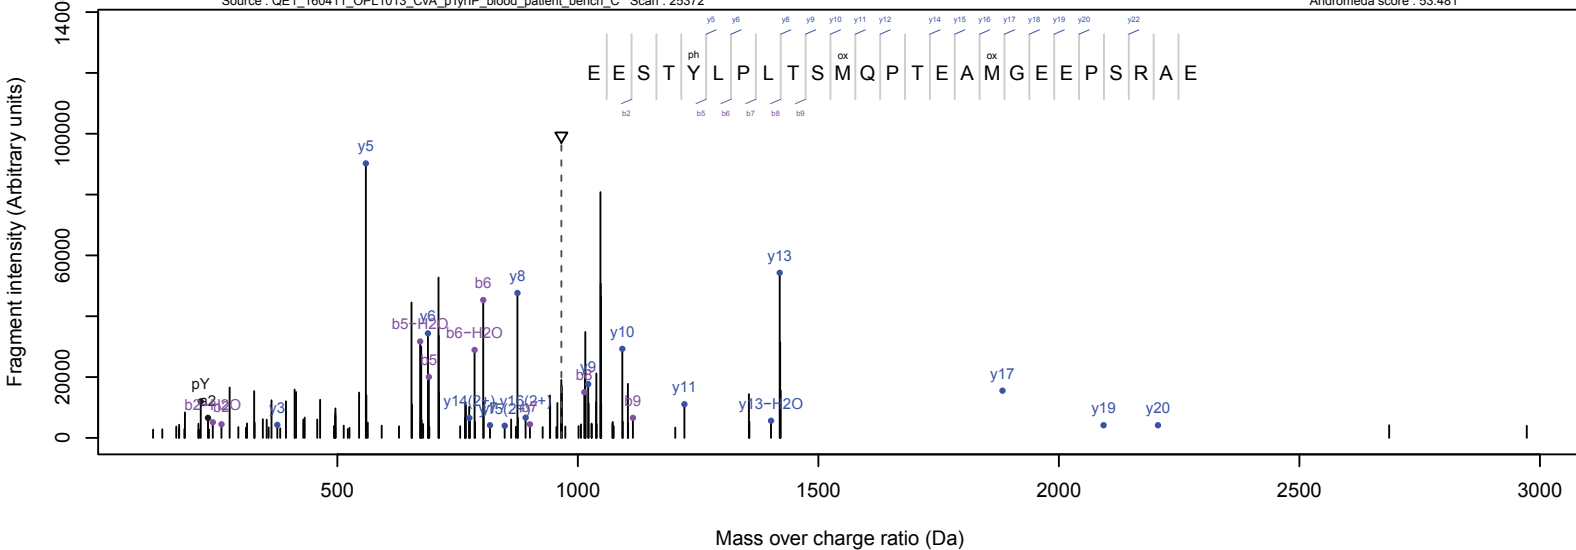

**TMPTTQSFASDPKYAT(ph)PQVIQAPGPR-3+**

Source : QE1\_160411\_OPL1013\_CvA\_pTyrIP\_blood\_patient\_bench\_D Scan : 28743

Andromeda score : 53.444

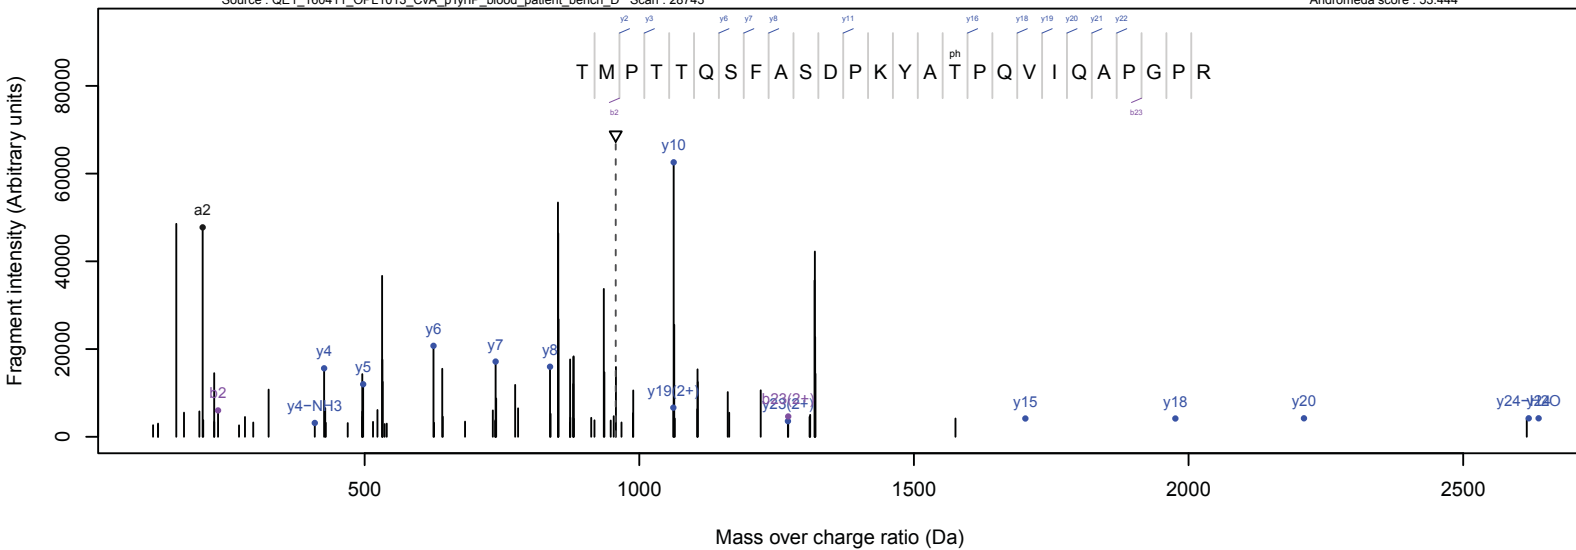

**DIM(ox)NDS(ph)NYIVK-2+**

Source : QE1\_160411\_OPL1013\_CvA\_pTyrIP\_blood\_patient\_bench\_A Scan : 13284

Andromeda score : 53.237

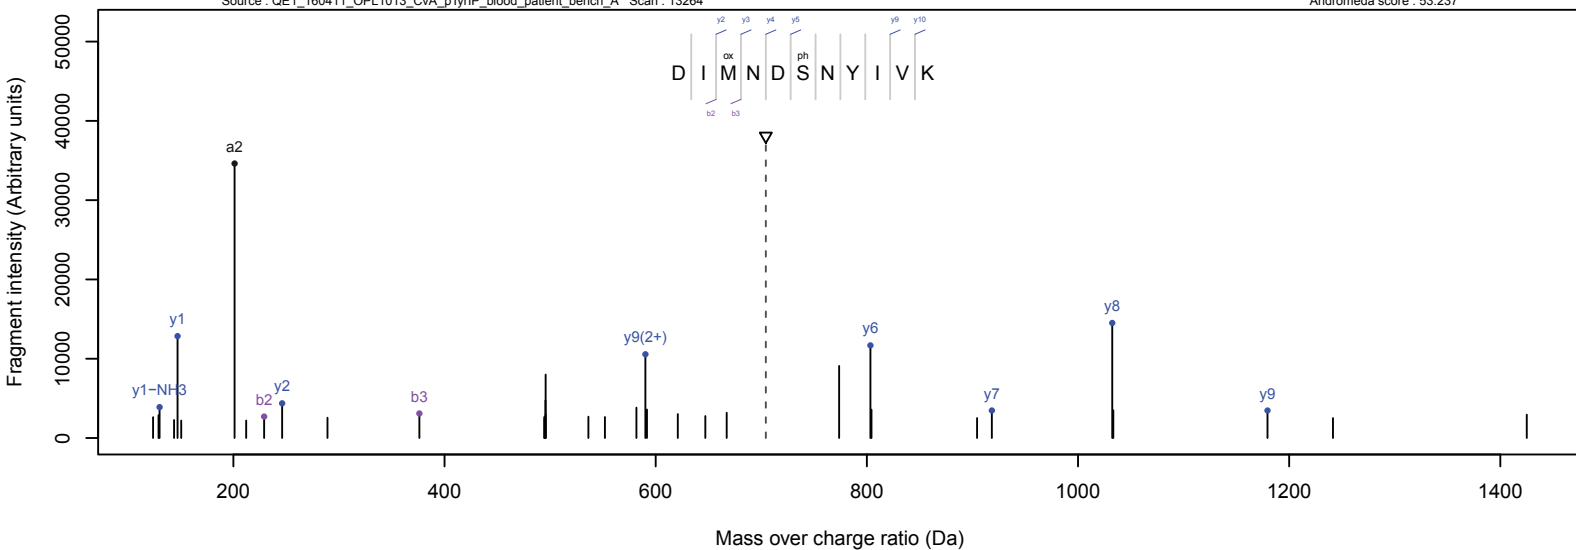

**AKPEPDILEEEKIYAYPSNITSETGFR-3+**

Source : QE1\_160411\_OPL1013\_CvA\_pTyrIP\_blood\_patient\_bench\_D Scan : 34914

Andromeda score : 53.209

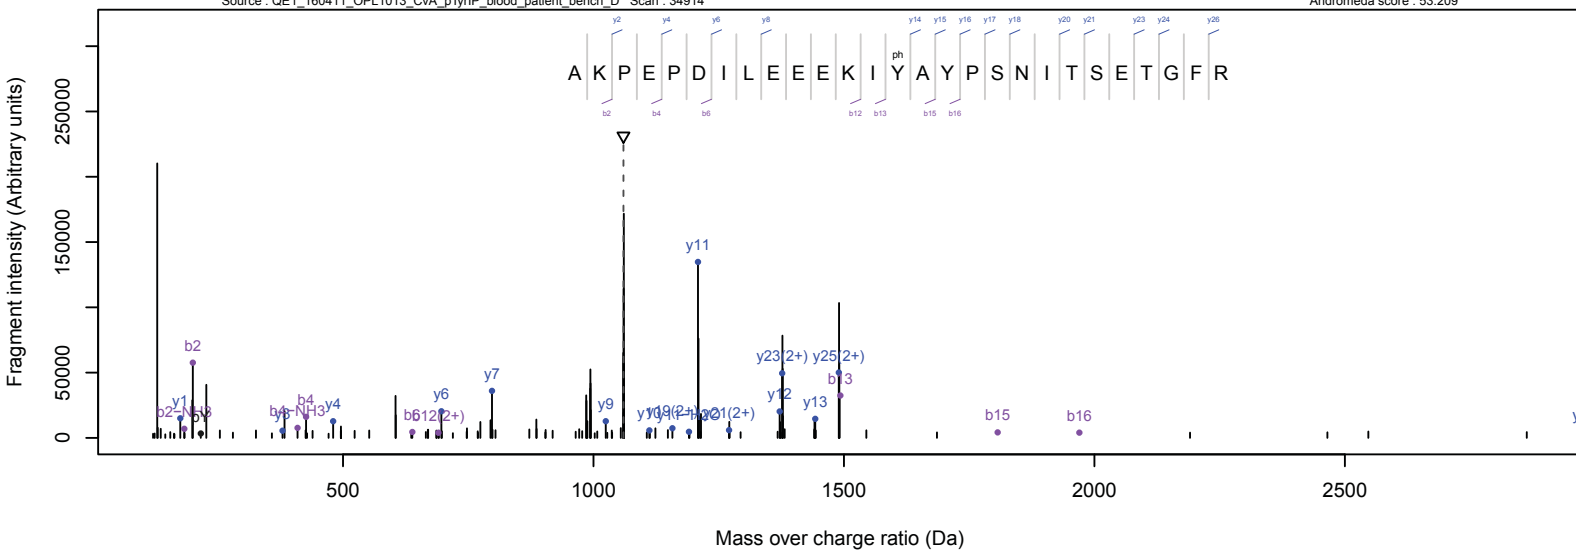

**SAVGFNEMEAPTAYK-3+**

Source : QE1\_160411\_OPL1013\_CvA\_pTyrIP\_blood\_patient\_bench\_D Scan : 18058

Andromeda score : 53.168

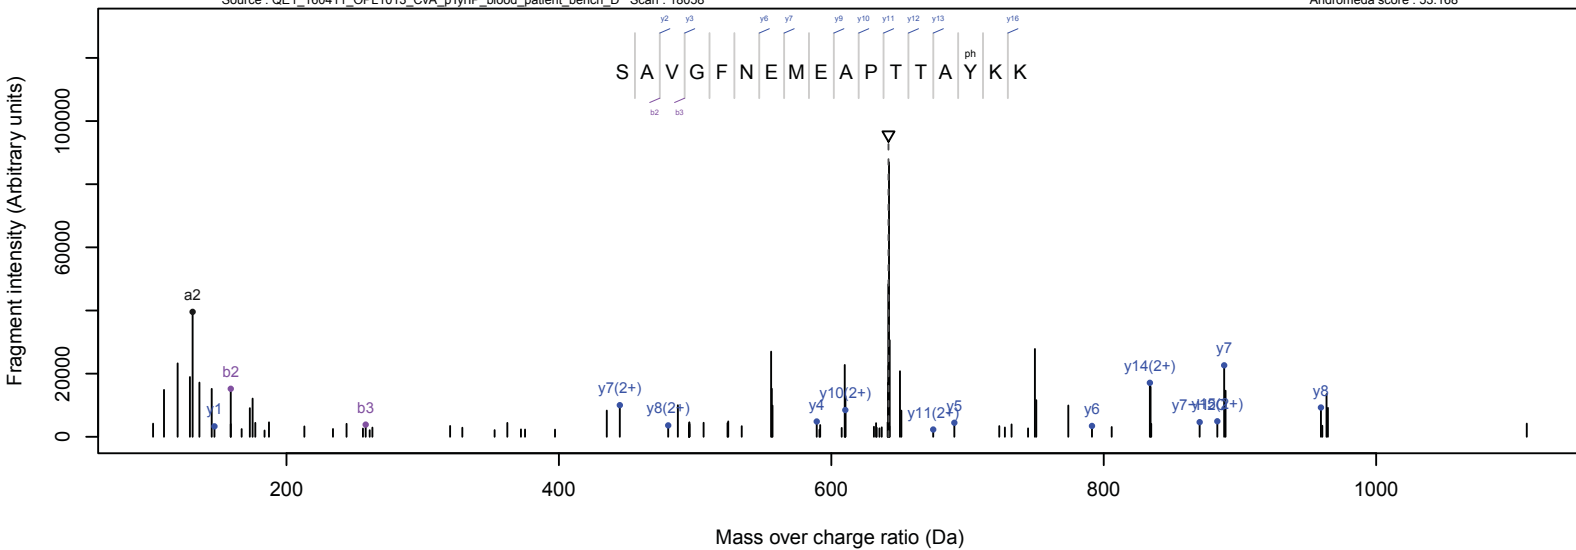



**GSY(ph)GDLGGPIITTQVTIPK-2+**

Source : QE1\_160411\_OPL1013\_CvA\_pTyrIP\_blood\_patient\_bench\_C Scan : 38882

Andromeda score : 52.814

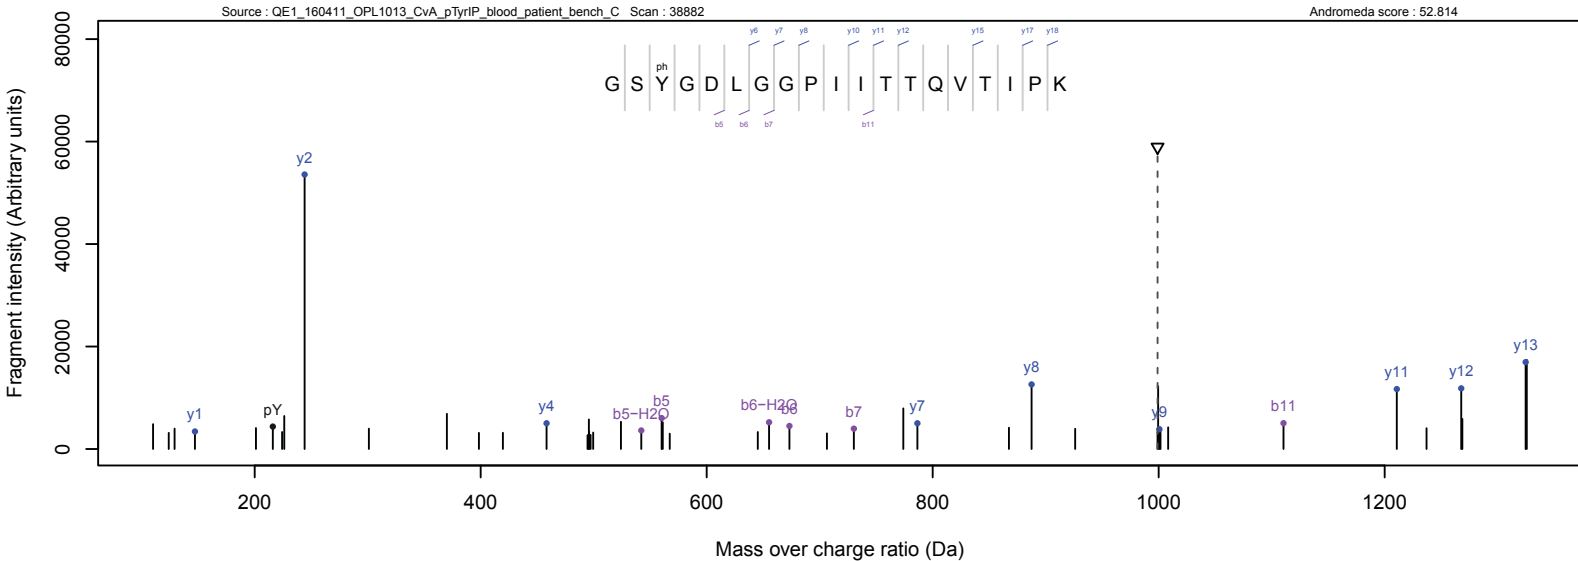

**AAQDRDQIY(ph)R-3+**

Source : QE1\_160411\_OPL1013\_CvA\_pTyrIP\_blood\_patient\_bench\_D Scan : 2749

Andromeda score : 52.725

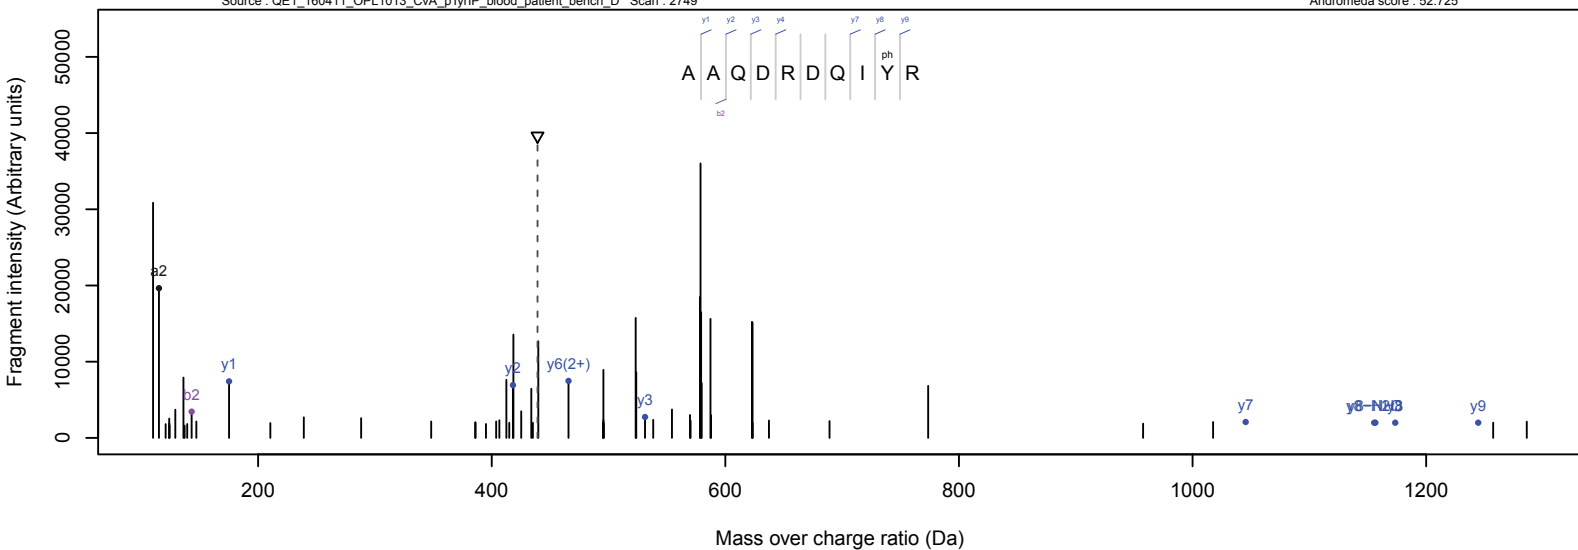

**NRYY(ph)YYHR-3+**

Source : QE1\_160411\_OPL1013\_CvA\_pTyrIP\_blood\_patient\_bench\_C Scan : 5094

Andromeda score : 52.716

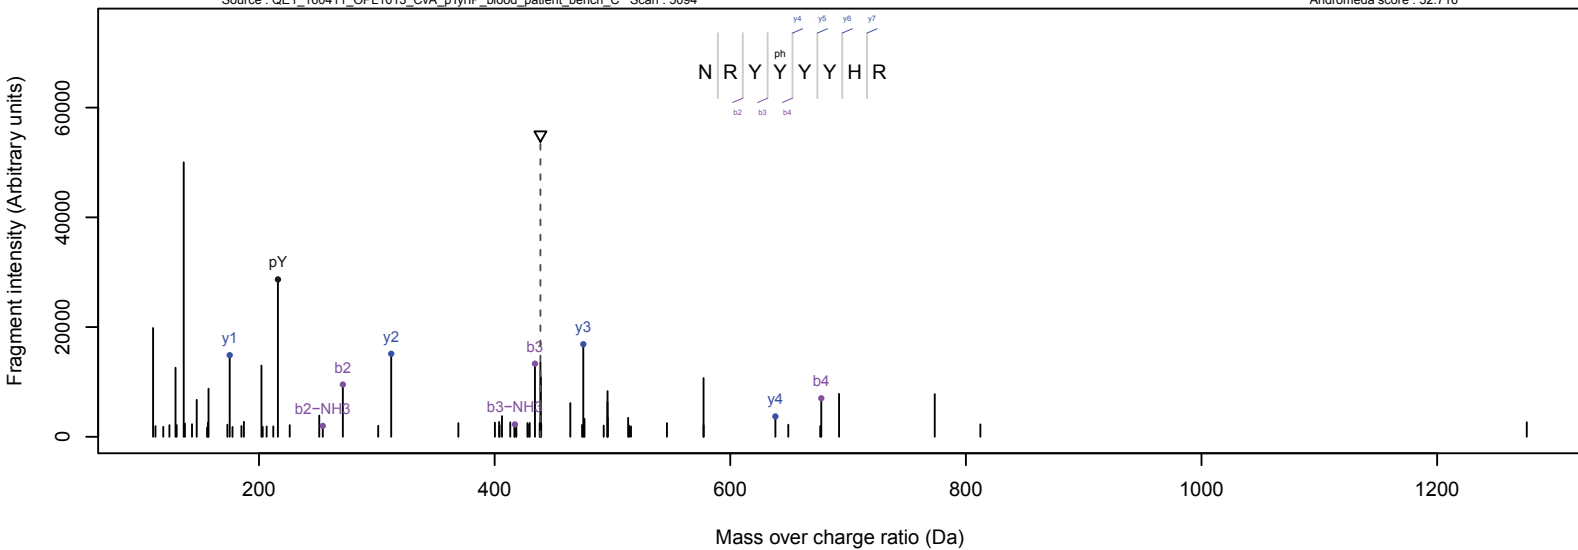

GEPNVS(ph)ICS(ph)R-2+

Source : QE1\_160411\_OPL1013\_CvA\_pTyrIP\_blood\_patient\_bench\_B Scan : 13001

Andromeda score : 52.527

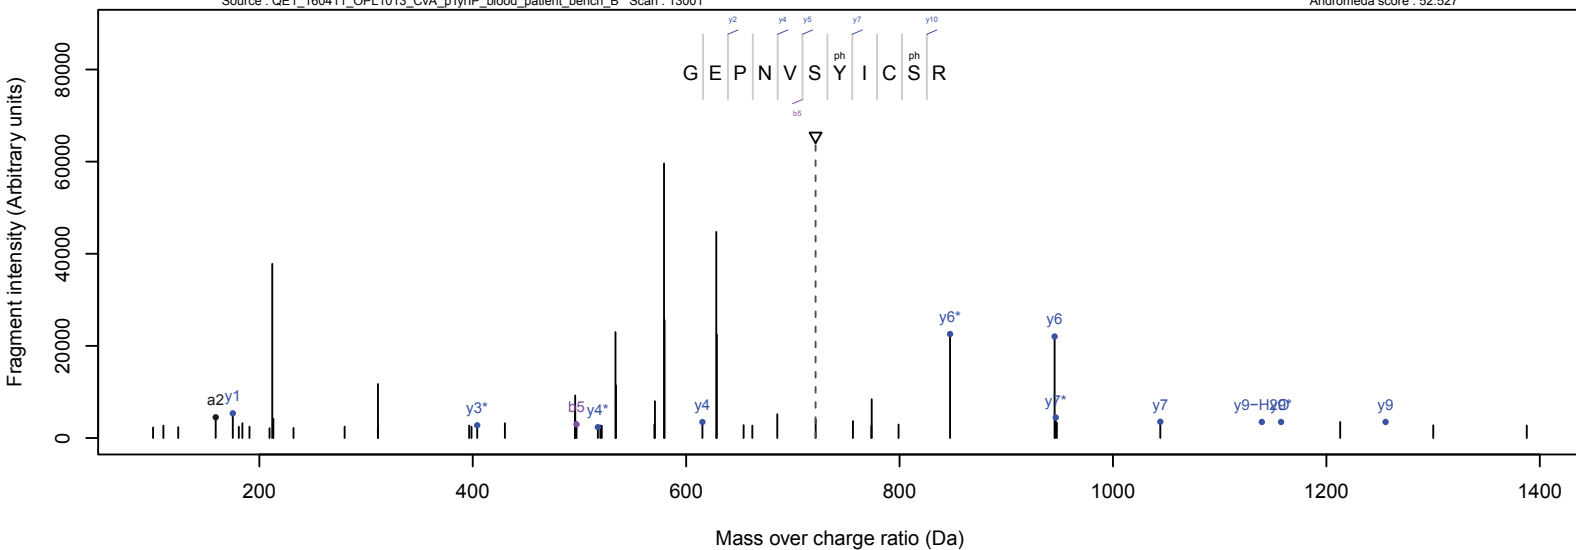

GGNRFEPY(ph)ANPTKR-3+

Source : QE1\_160411\_OPL1013\_CvA\_pTyrIP\_blood\_patient\_bench\_D Scan : 7106

Andromeda score : 52.527

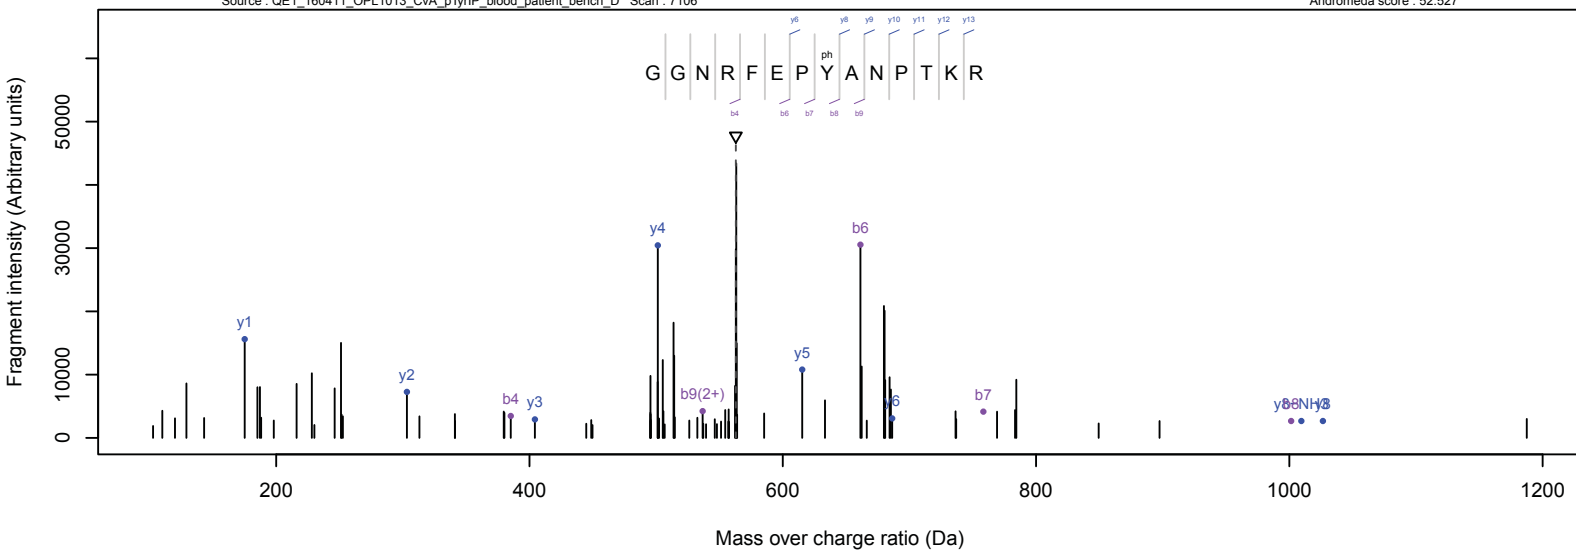

YIEDEDY(ph)KASVTR-3+

Source : QE1\_160411\_OPL1013\_CvA\_pTyrIP\_blood\_patient\_bench\_D Scan : 12668

Andromeda score : 52.527

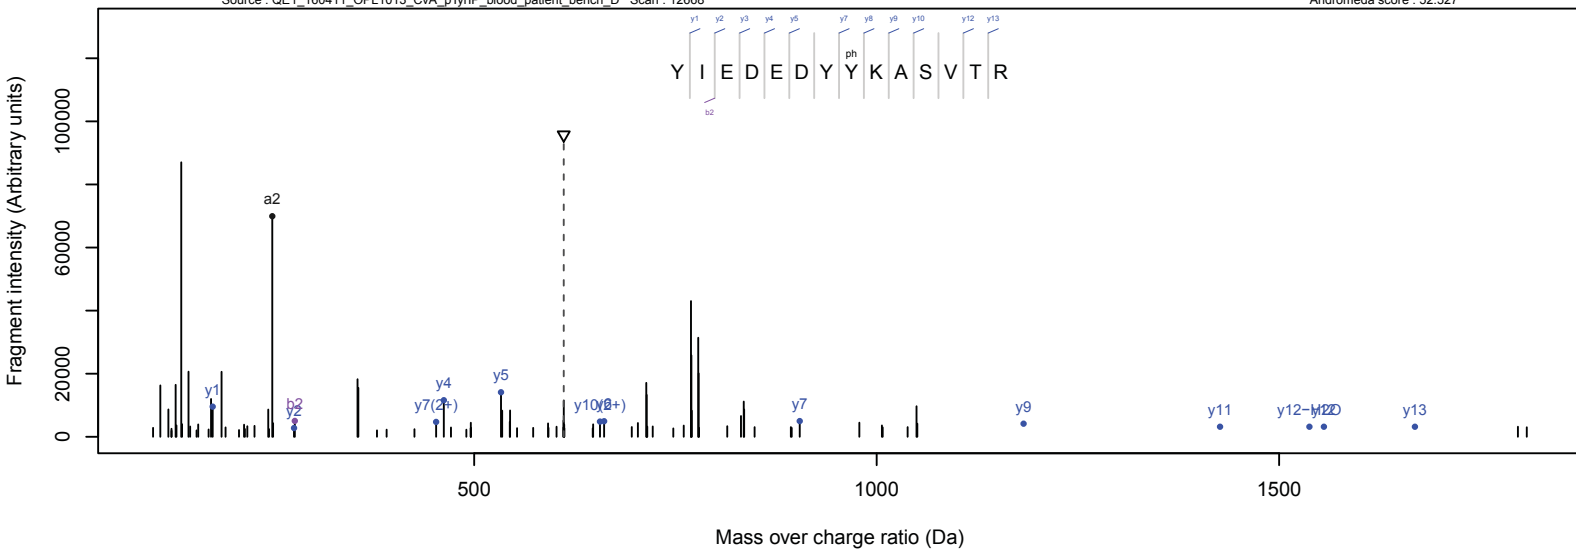

GTGLY(ph)ELWK-2+

Source : QE1\_160411\_OPL1013\_CvA\_pTyrIP\_blood\_patient\_bench\_B Scan : 32019

Andromeda score : 52.49

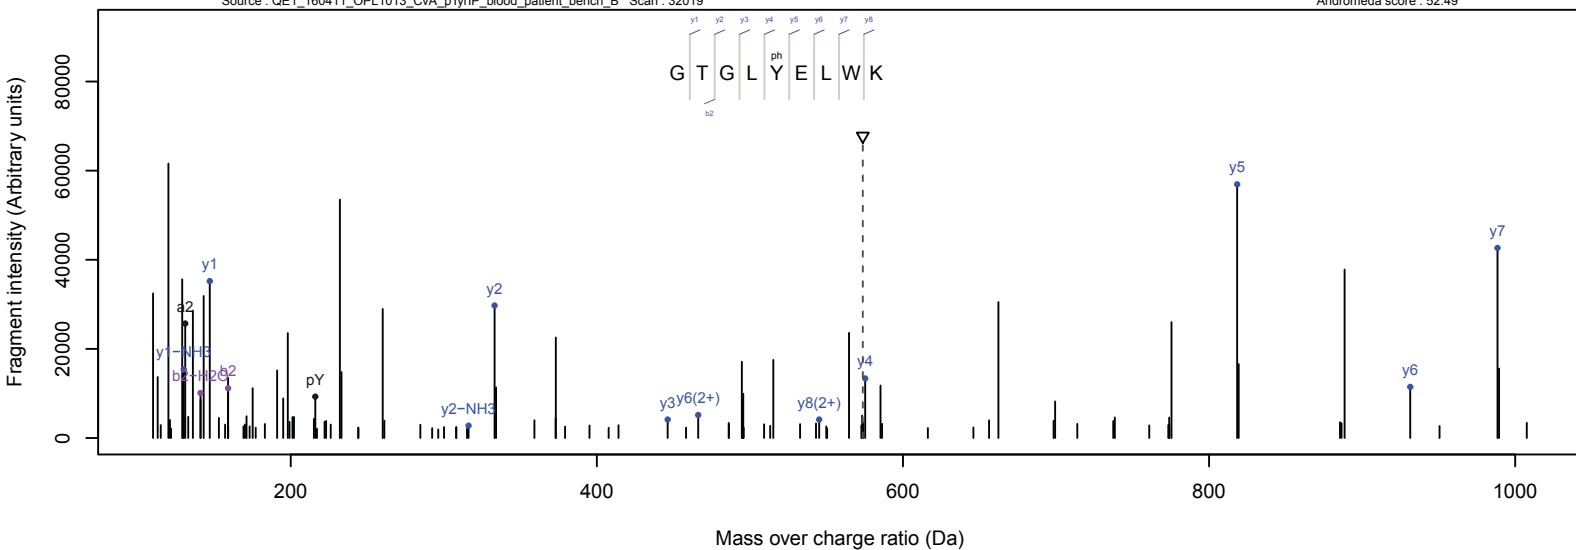

HY(ph)LFDVQR-2+

Source : QE1\_160411\_OPL1013\_CvA\_pTyrIP\_blood\_patient\_bench\_D Scan : 19392

Andromeda score : 52.482

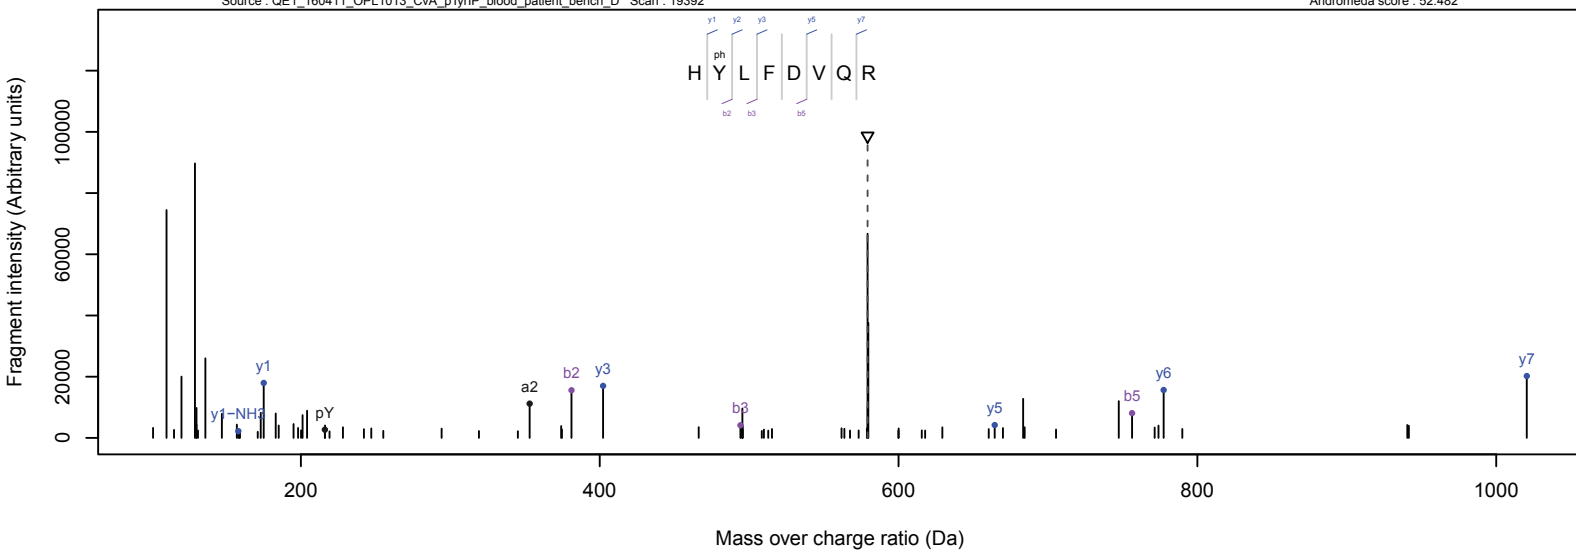

TNEKVELQELNDRFANY(ph)IDK-4+

Source : QE1\_160411\_OPL1013\_CvA\_pTyrIP\_blood\_patient\_bench\_B Scan : 32339

Andromeda score : 52.318

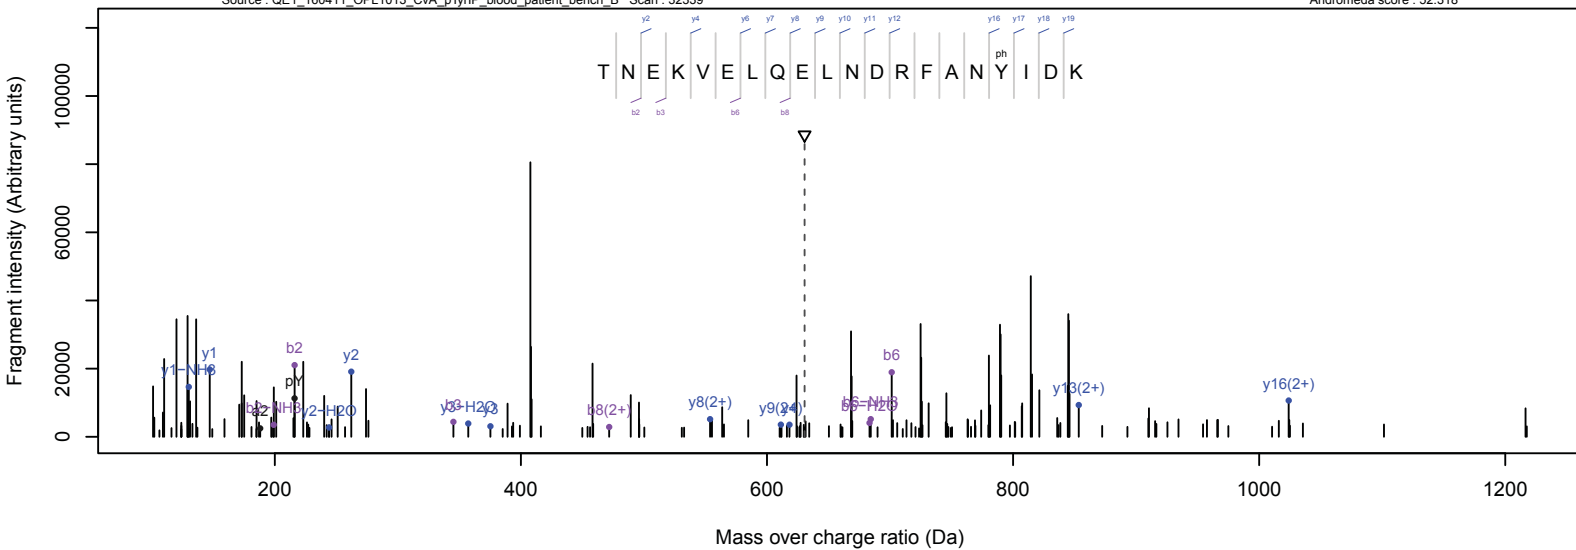

YLNRNY(ph)WEK-3+

Source : QE1\_160411\_OPL1013\_CvA\_pTyrIP\_blood\_patient\_bench\_A Scan : 11040

Andromeda score : 52.255

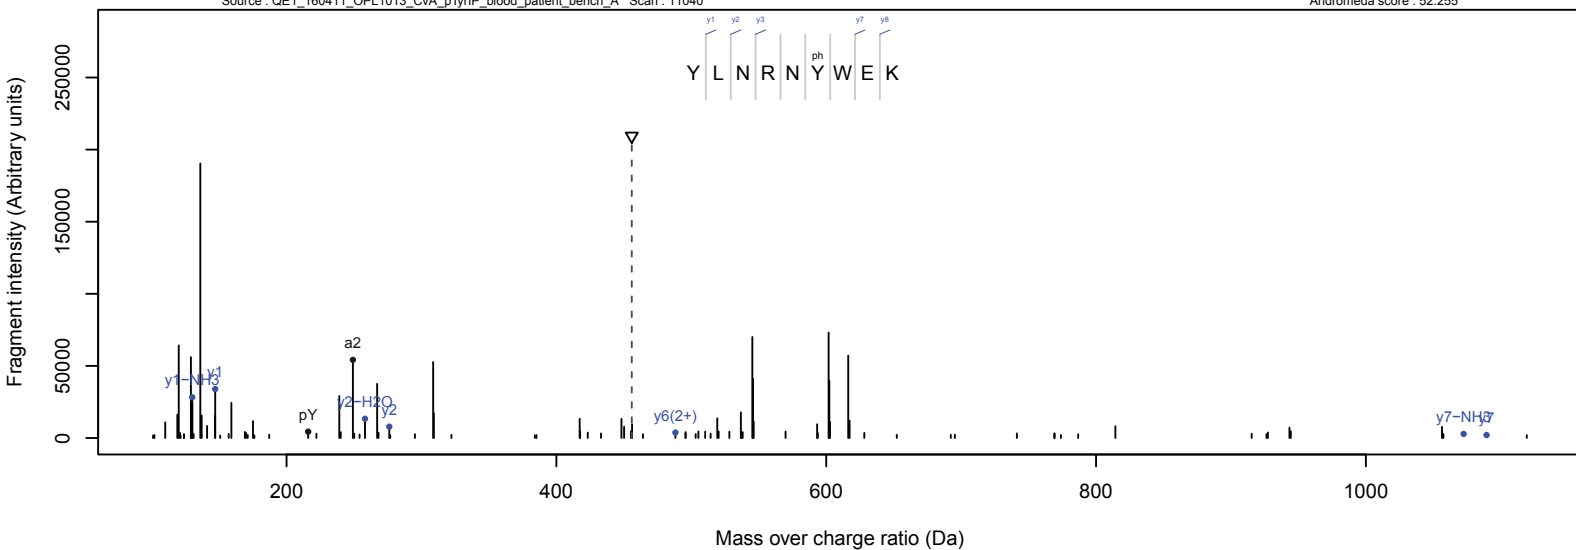

YKAPT(ph)DYCFVLK-2+

Source : QE1\_160411\_OPL1013\_CvA\_pTyrIP\_blood\_patient\_bench\_D Scan : 24835

Andromeda score : 52.247

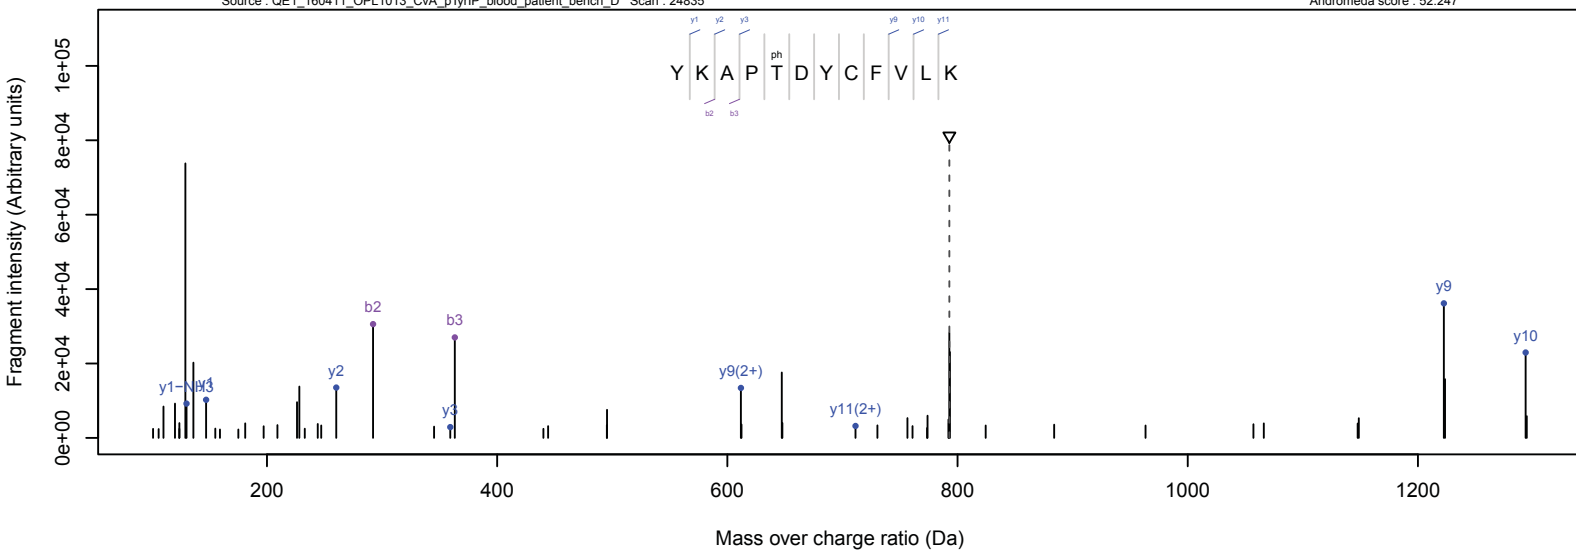

IEKIGEGT(ph)Y(ph)GVVYK-2+

Source : QE1\_160411\_OPL1013\_CvA\_pTyrIP\_blood\_patient\_bench\_B Scan : 17518

Andromeda score : 52.172

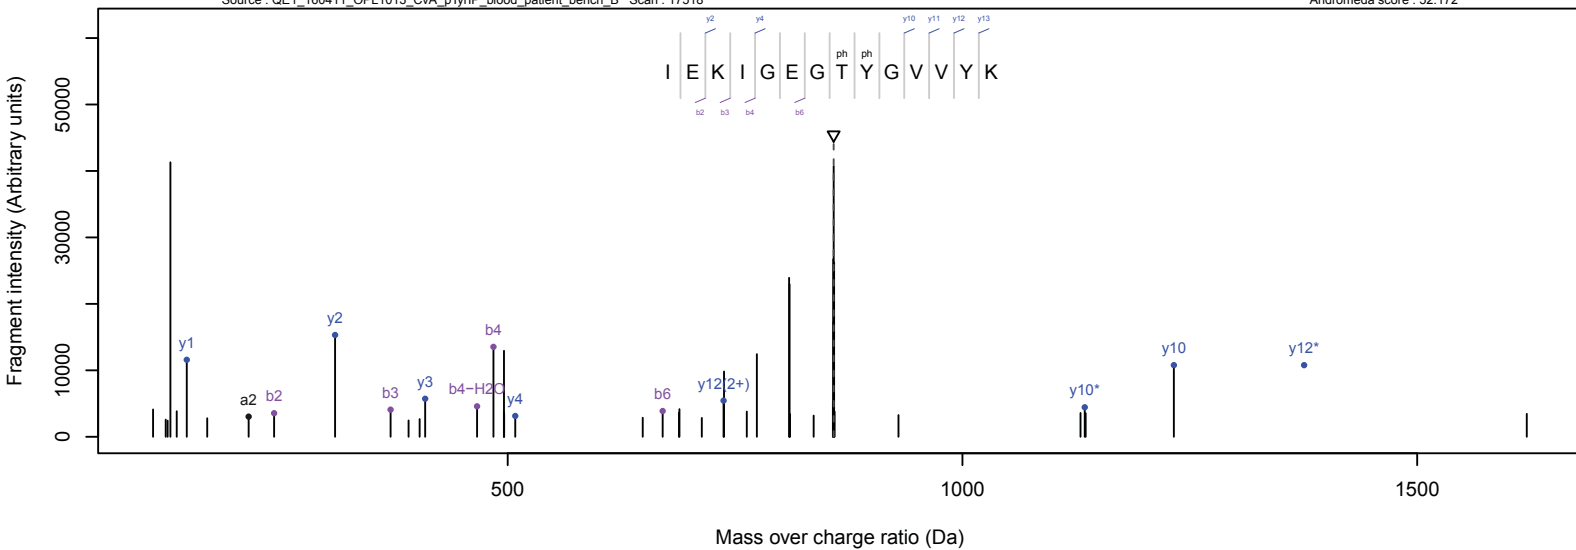

## HSSVY(ph)PTQEELEAVQNMVSHTER-3+

Source : QE1\_160411\_OPL1013\_CvA\_pTyrIP\_blood\_patient\_bench\_B Scan : 36924

Andromeda score : 52.162

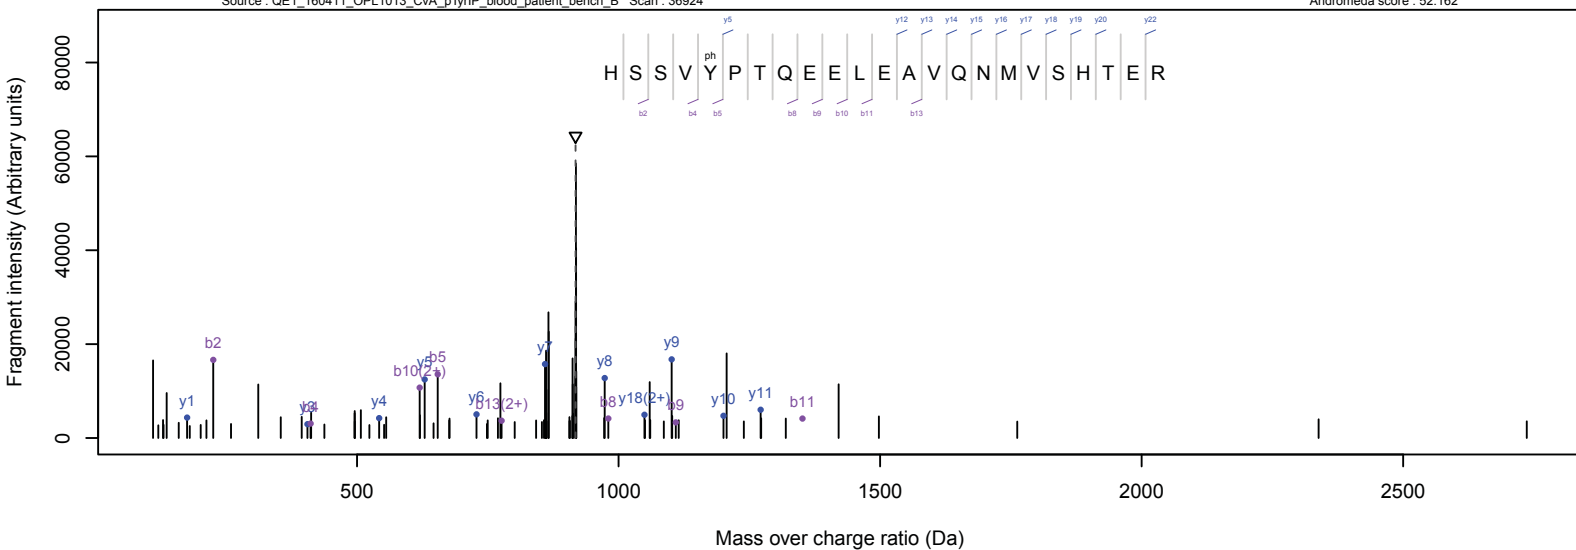

## SLY(ph)SM(ox)IKNDTSGEYKK-3+

Source : QE1\_160411\_OPL1013\_CvA\_pTyrIP\_blood\_patient\_bench\_C Scan : 18042

Andromeda score : 52.112

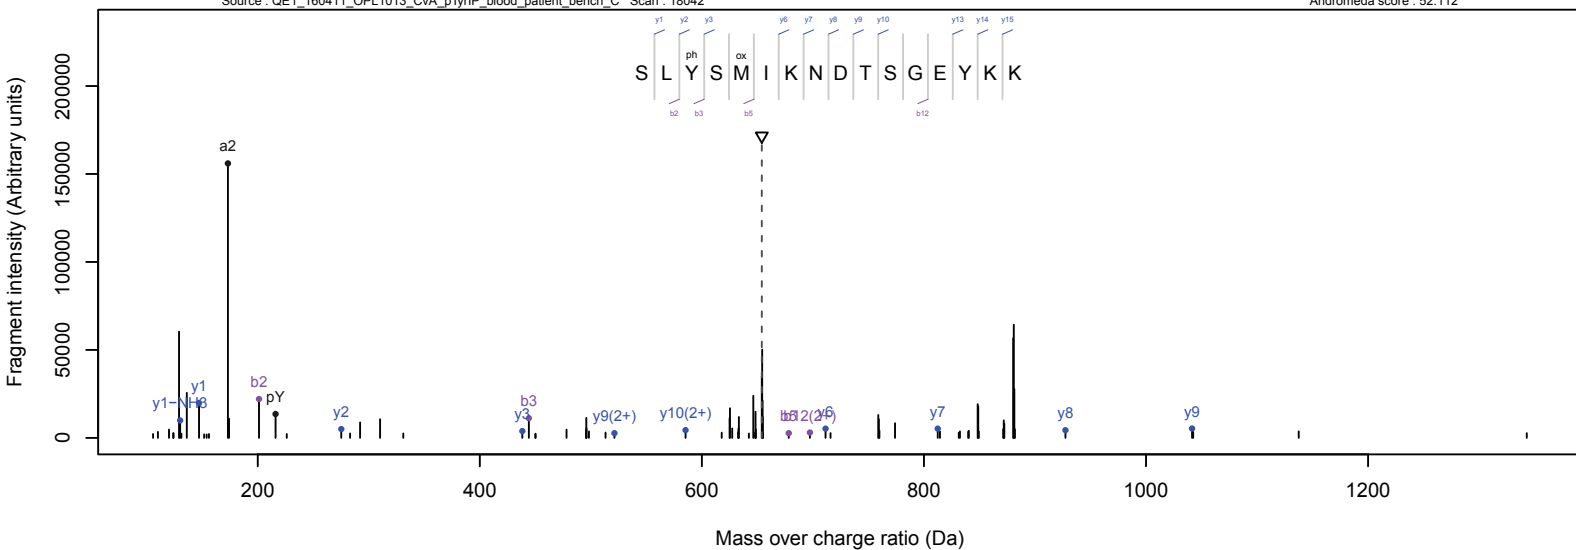

## DLY(ph)ANTVLSGGTTMYPGIADR-2+

Source : QE1\_160411\_OPL1013\_CvA\_pTyrIP\_blood\_patient\_bench\_D Scan : 44355

Andromeda score : 52.095

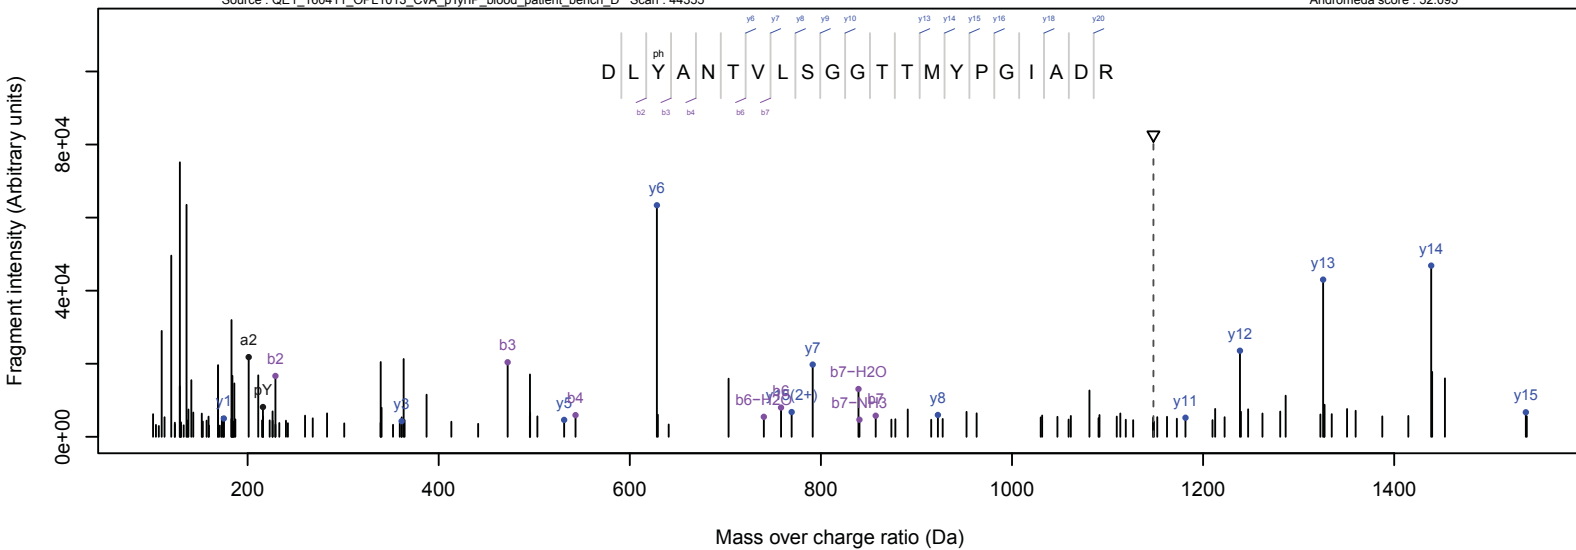

ANPALY(ph)VLR-2+

Source : QE1\_160411\_OPL1013\_CvA\_pTyrIP\_blood\_patient\_bench\_A Scan : 26602

Andromeda score : 51.949

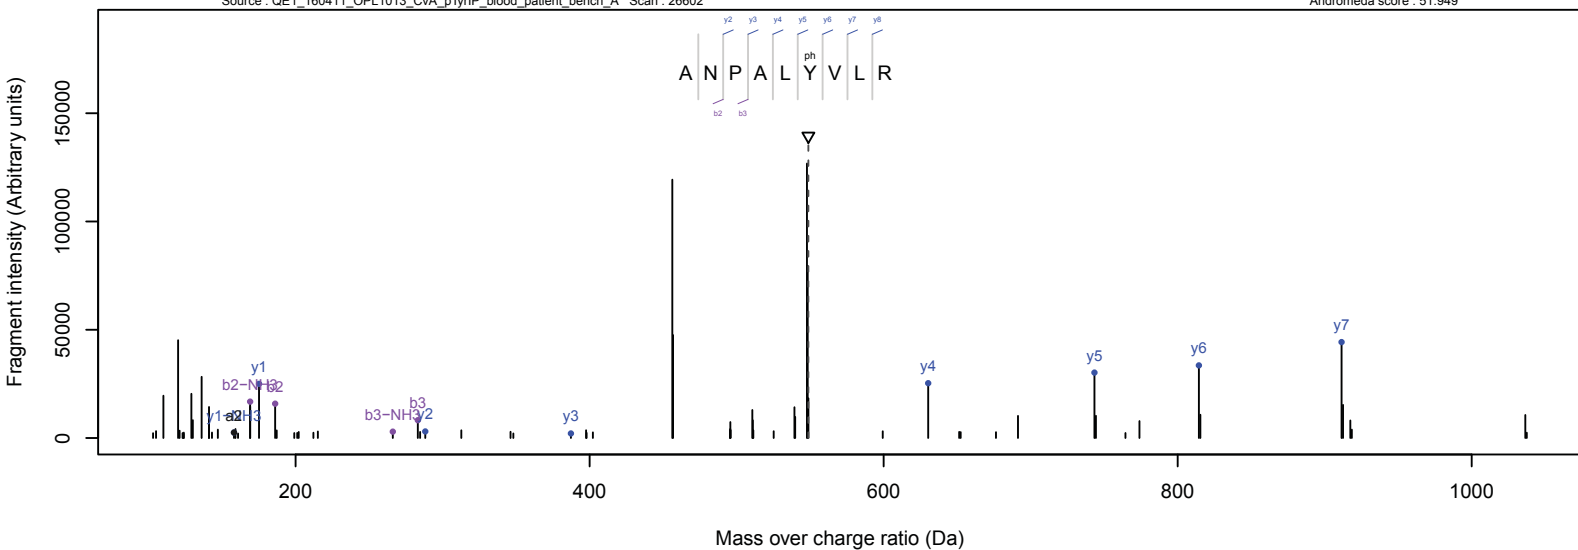

DGGGGGEFYGY(ph)MTMDRPLSHCGR-3+

Source : QE1\_160411\_OPL1013\_CvA\_pTyrIP\_blood\_patient\_bench\_B Scan : 25562

Andromeda score : 51.876

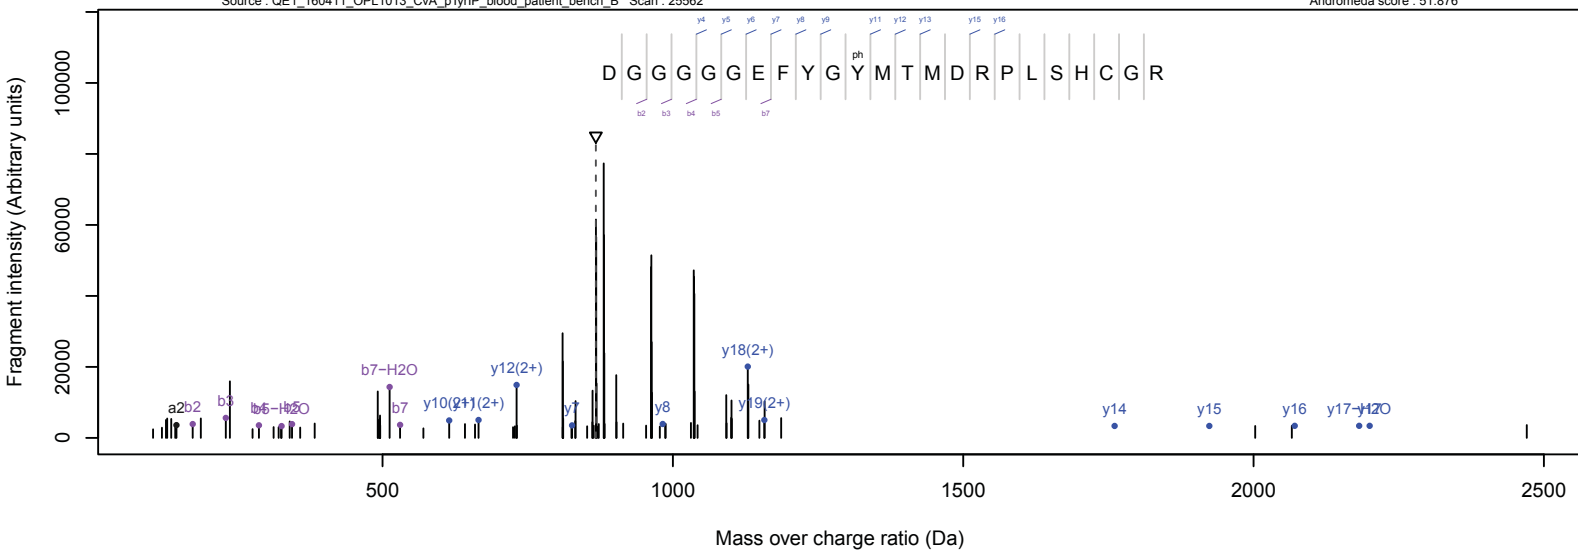

SSFHYS(ph)GLKHEDKR-4+

Source : QE1\_160411\_OPL1013\_CvA\_pTyrIP\_blood\_patient\_bench\_C Scan : 3455

Andromeda score : 51.771

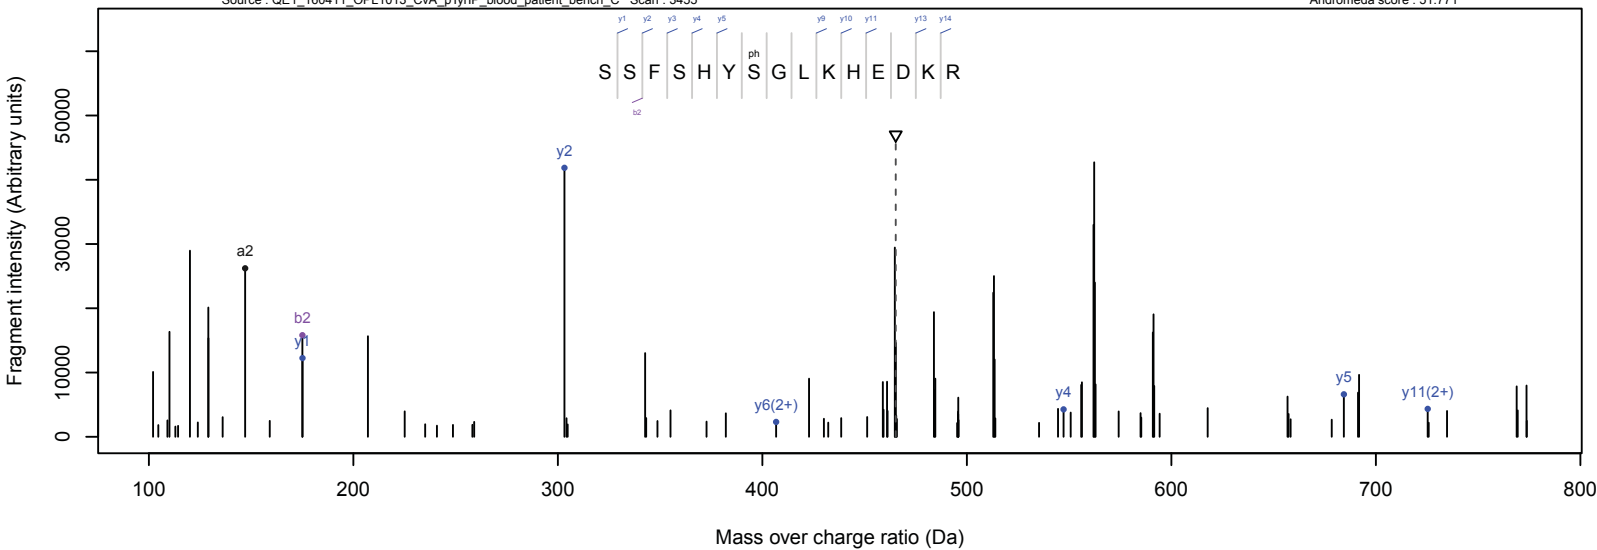

## AAVKGY(ph)LGPEQLPDCLK-3+

Source : QE1\_160411\_OPL1013\_CvA\_pTyrIP\_blood\_patient\_bench\_C Scan : 28054

Andromeda score : 51.76

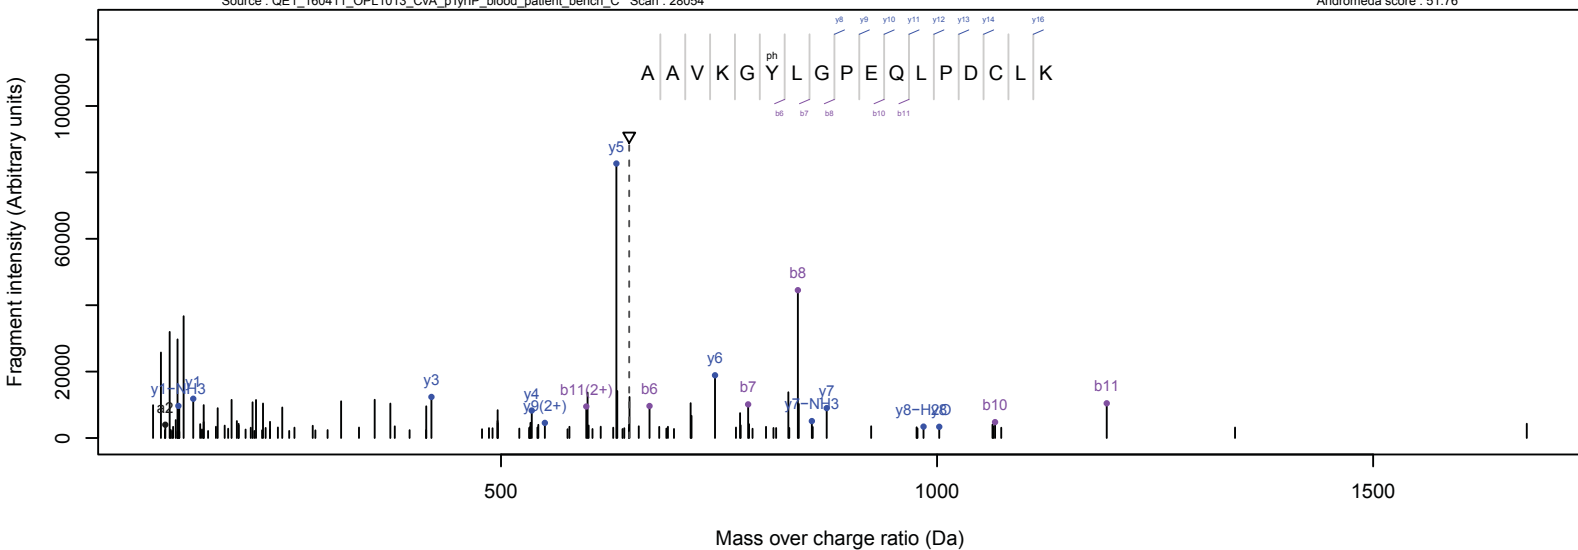

## VVNPYY(ph)LR-2+

Source : QE1\_160411\_OPL1013\_CvA\_pTyrIP\_blood\_patient\_bench\_D Scan : 19656

Andromeda score : 51.736

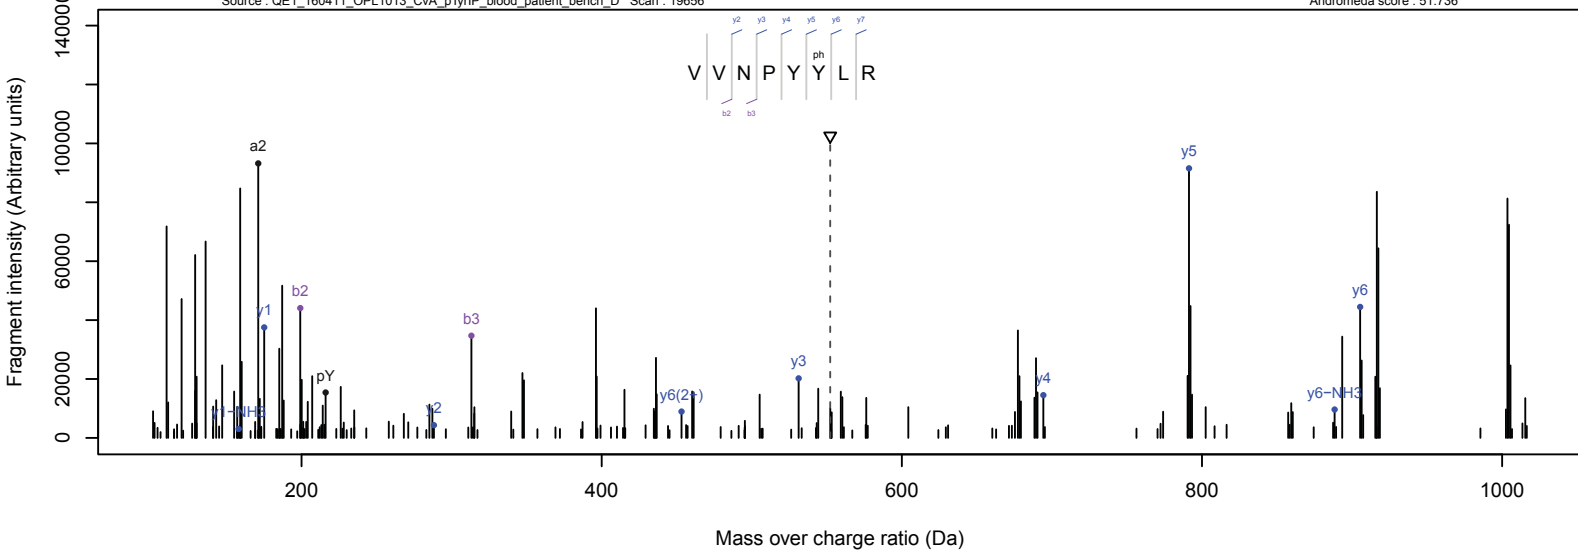

## M(ox)DY(ph)VEINIDHK-3+

Source : QE1\_160411\_OPL1013\_CvA\_pTyrIP\_blood\_patient\_bench\_A Scan : 15790

Andromeda score : 51.727

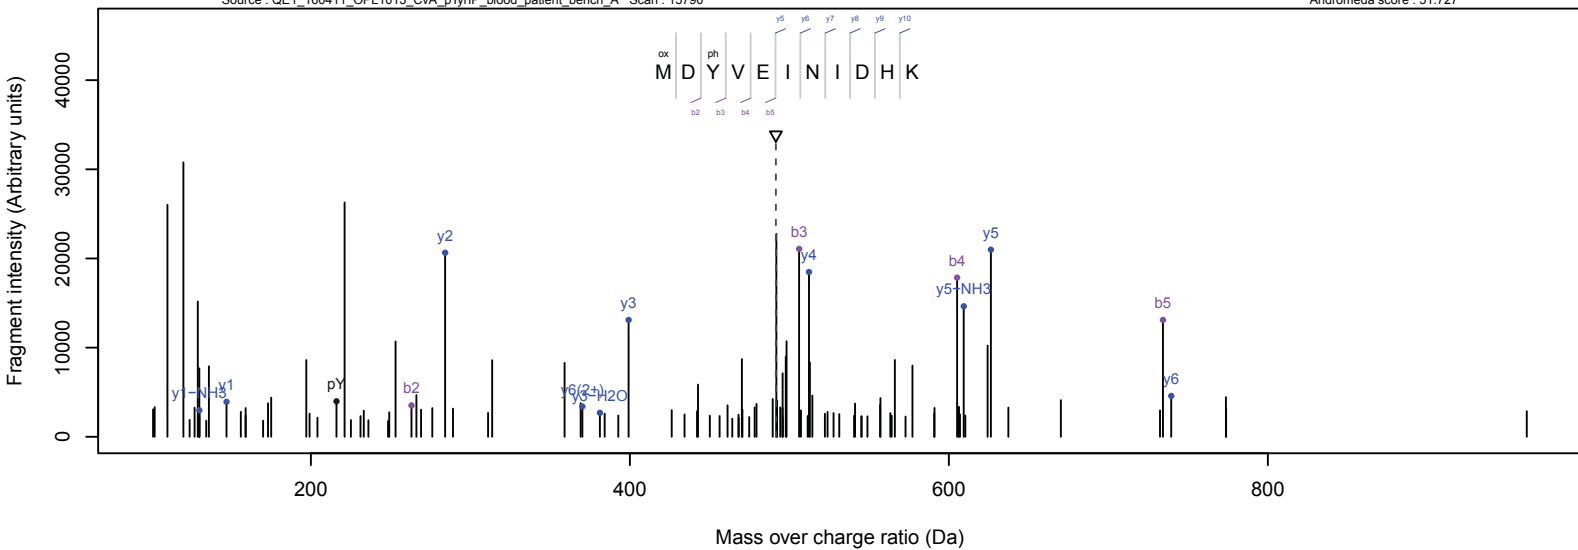

## INTASDGKLY(ph)VSESR-3+

Source: QE1\_160411\_OPL1013\_CvA\_pTyrIP\_blood\_patient\_bench\_A Scan: 9764

Andromeda score: 51.591

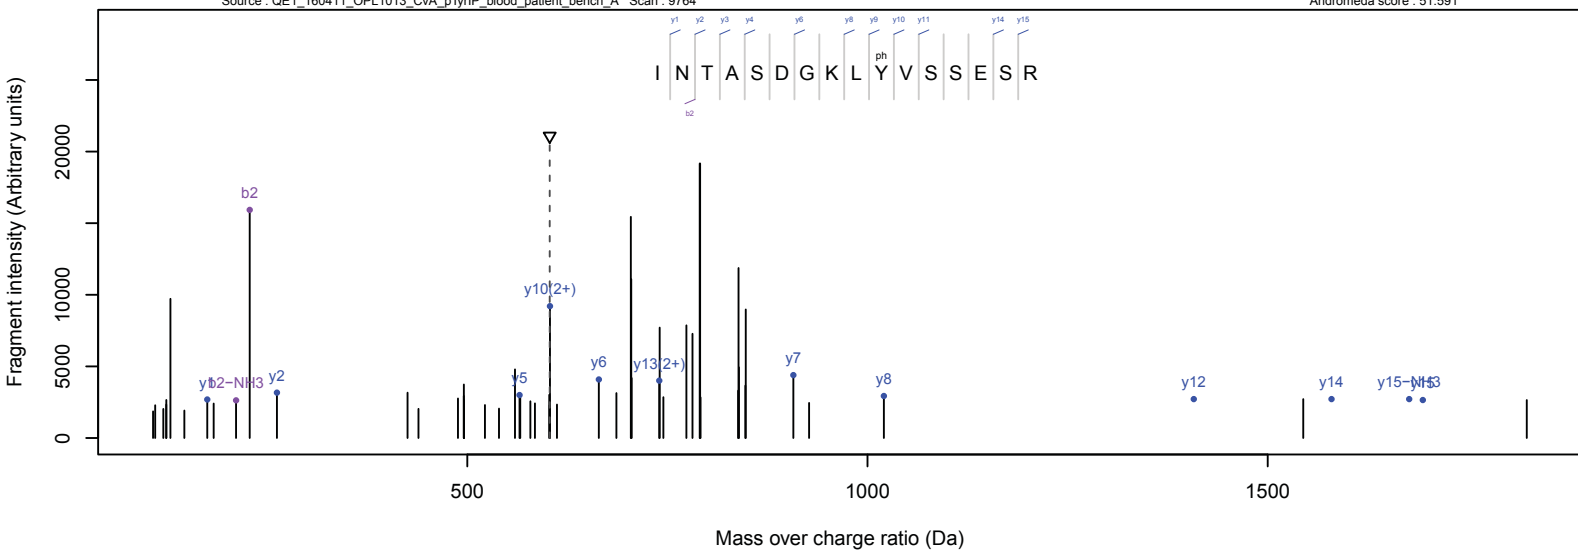

## NLHDALSGHTSNII(ph)EAVK-3+

Source: QE1\_160411\_OPL1013\_CvA\_pTyrIP\_blood\_patient\_bench\_D Scan: 19097

Andromeda score: 51.566

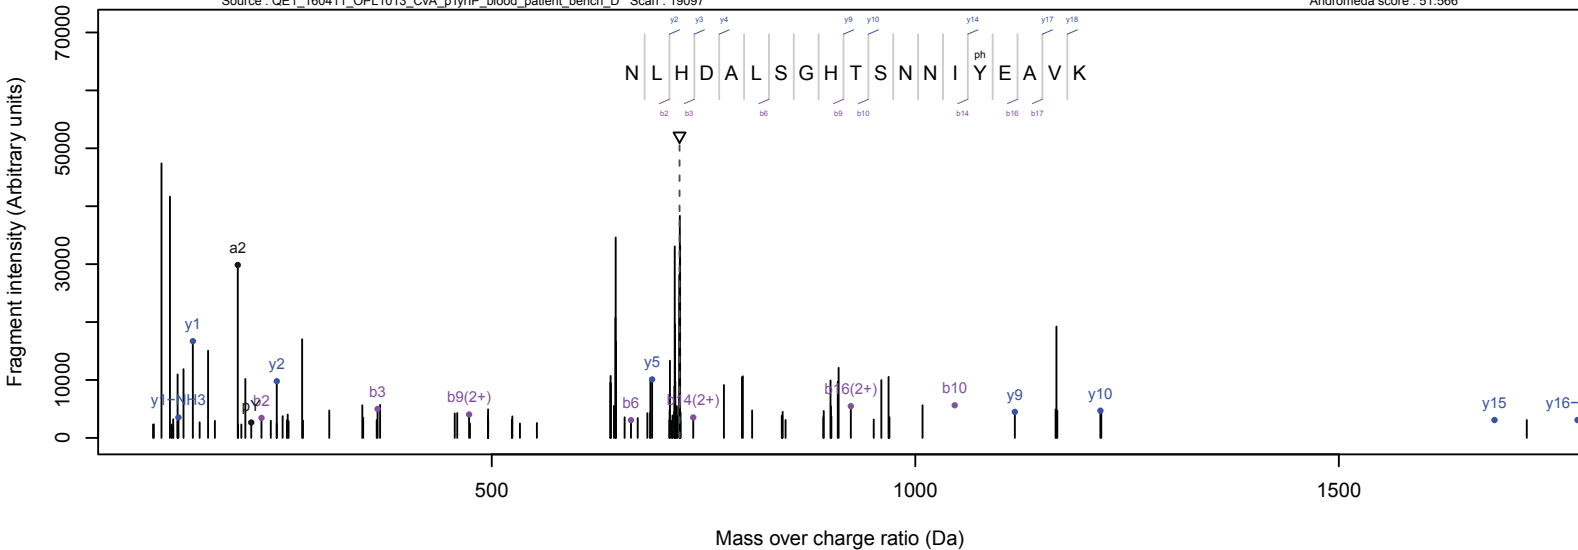

## NKDKY(ph)VGSSDSVGGFR-3+

Source: QE1\_160411\_OPL1013\_CvA\_pTyrIP\_blood\_patient\_bench\_D Scan: 12541

Andromeda score: 51.495

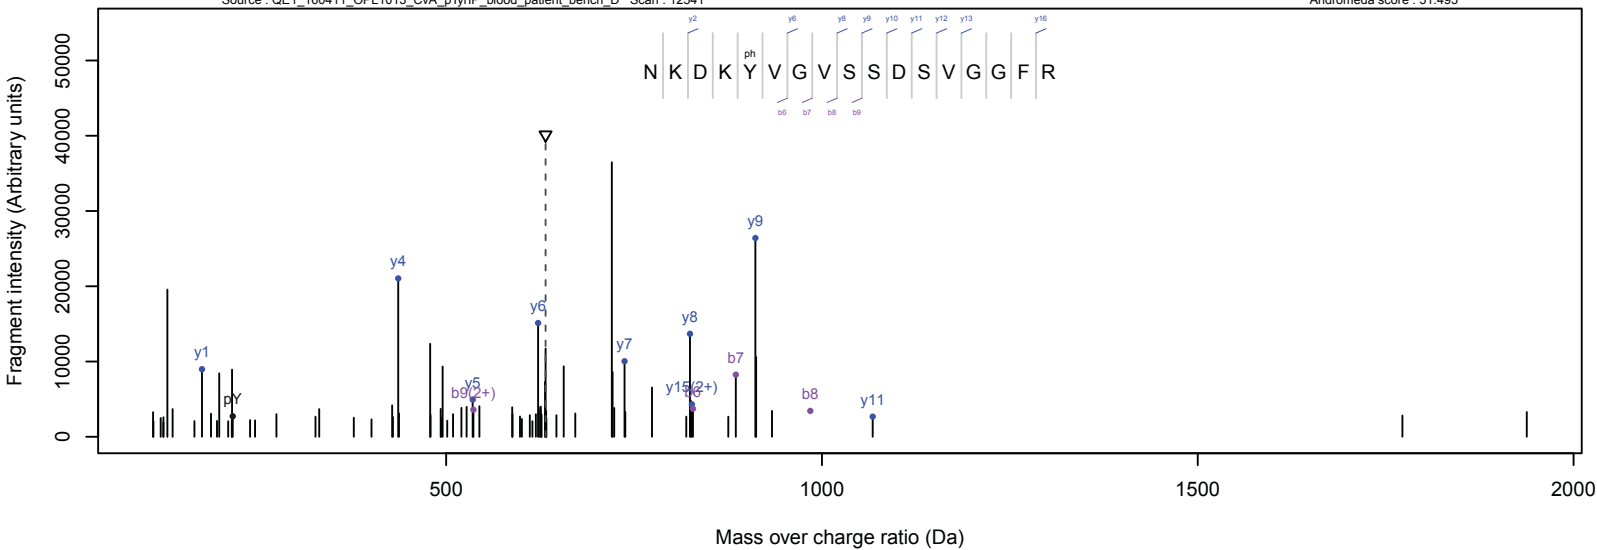



NHAM(ox)KPINDNKEPLNSDVQYTEVQVSSAESHK-5+

Source : QE1\_160411\_OPL1013\_CvA\_pTyrIP\_blood\_patient\_bench\_C Scan : 17754

Andromeda score : 51.321

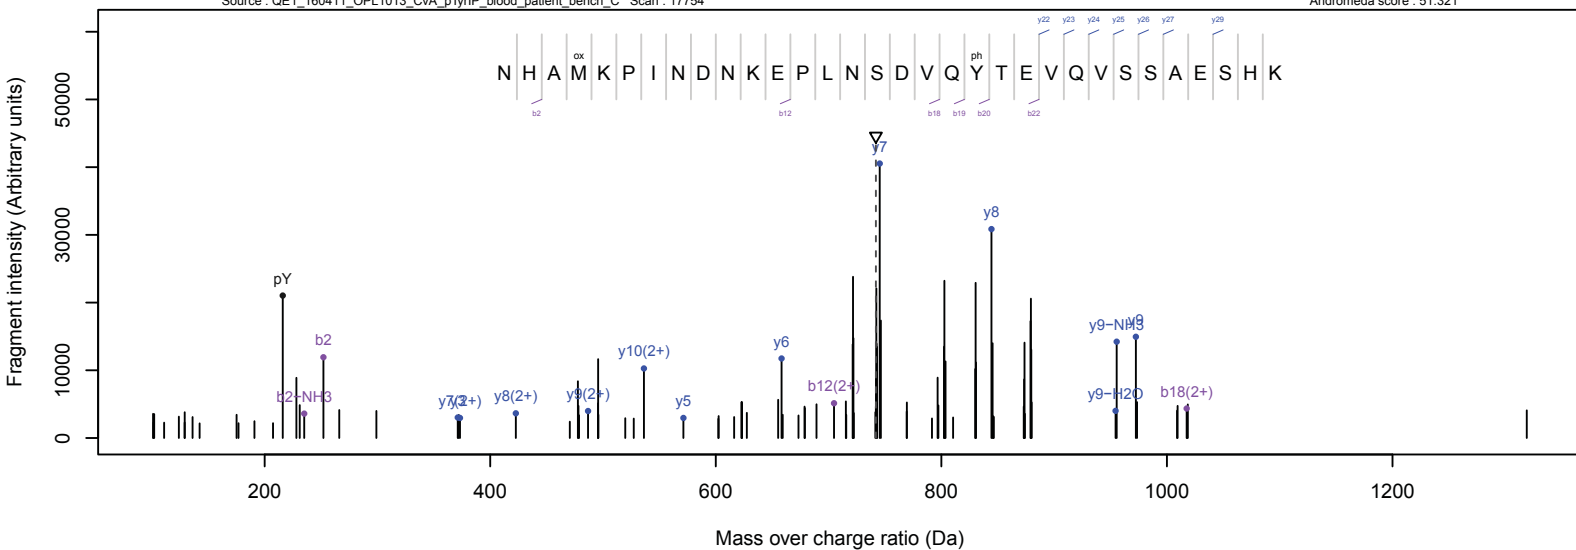

TTPSY(ph)VAFTDTER-2+

Source : QE1\_160411\_OPL1013\_CvA\_pTyrIP\_blood\_patient\_bench\_C Scan : 19140

Andromeda score : 51.009

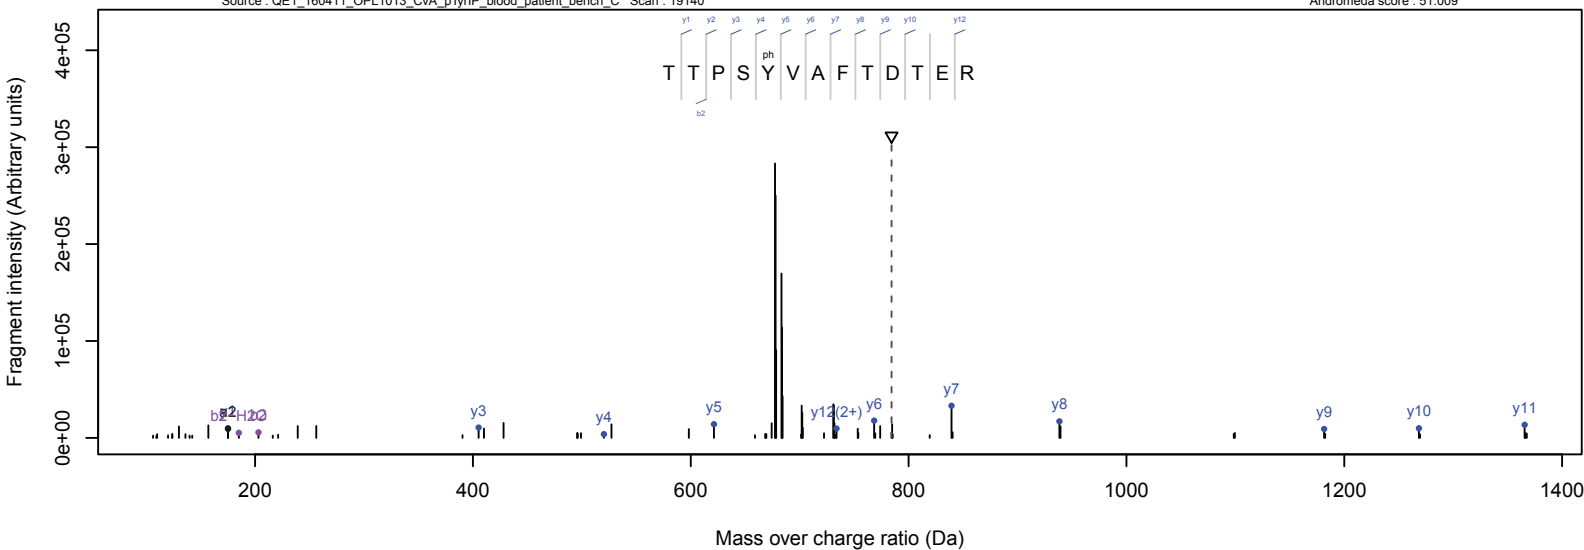

QMPPPPCPGRELFD DP SYVNVQNLDK-3+

Source : QE1\_160411\_OPL1013\_CvA\_pTyrIP\_blood\_patient\_bench\_D Scan : 37038

Andromeda score : 50.986

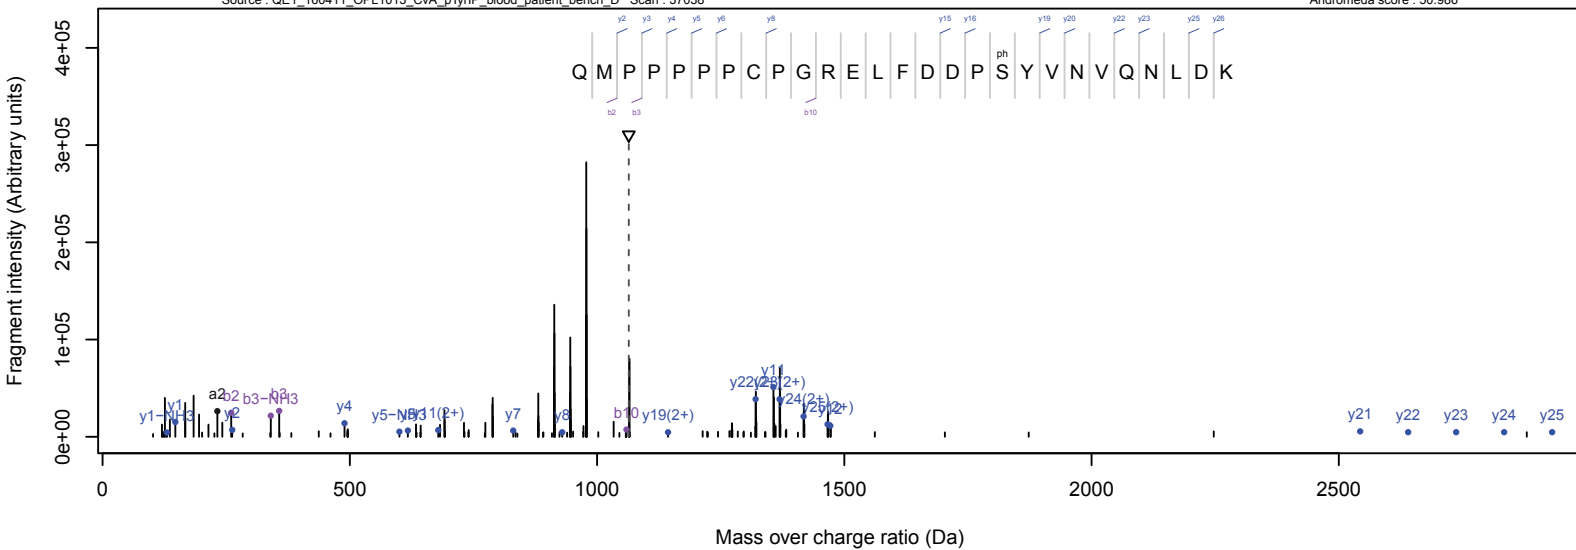

QNGRDPPD<sup>ph</sup>YVSLLLPDK-3+

Source : QE1\_160411\_OPL1013\_CvA\_pTyrIP\_blood\_patient\_bench\_B Scan : 38027

Andromeda score : 50.957

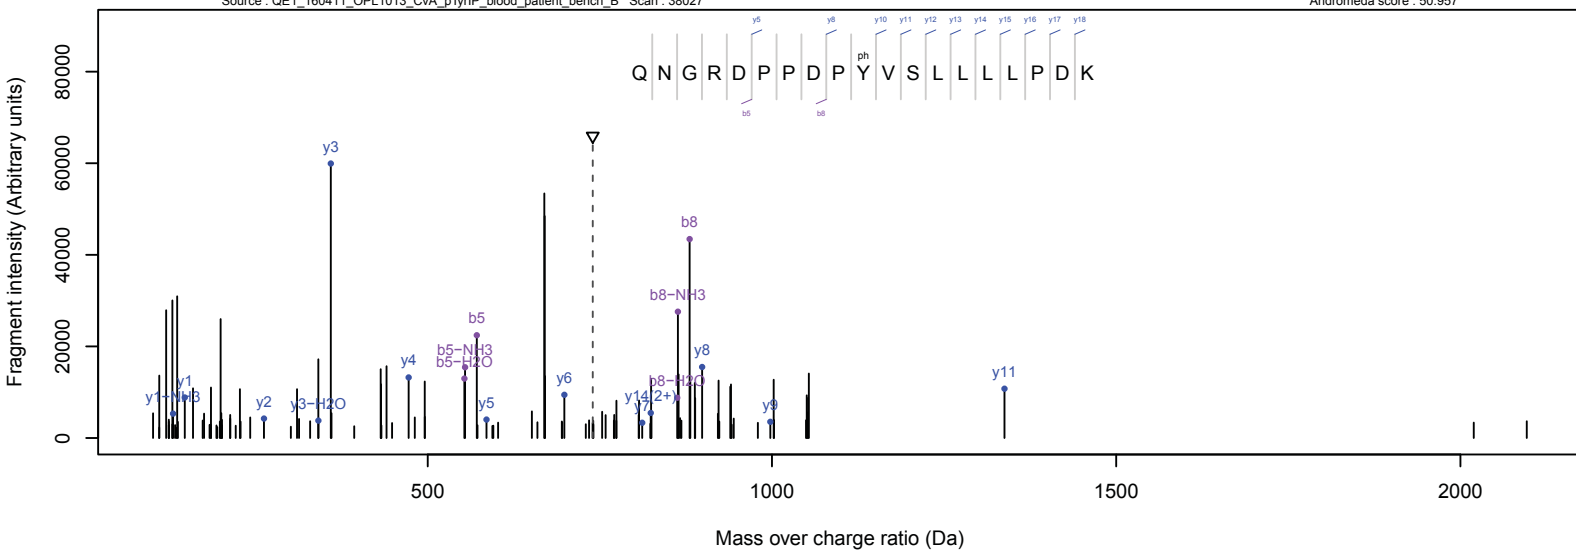KDASSQDC<sup>ph</sup>YDIPR-3+

Source : QE1\_160411\_OPL1013\_CvA\_pTyrIP\_blood\_patient\_bench\_D Scan : 6375

Andromeda score : 50.897

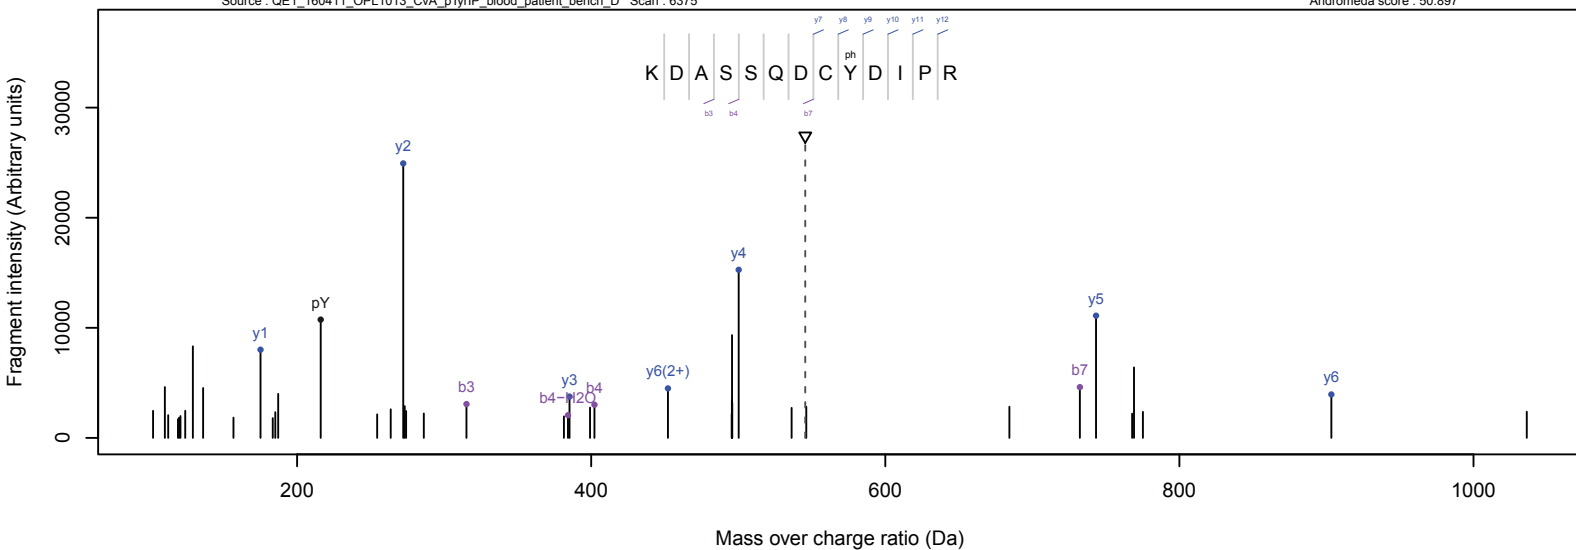Y<sup>ph</sup>REWHHFLVNMK-3+

Source : QE1\_160411\_OPL1013\_CvA\_pTyrIP\_blood\_patient\_bench\_D Scan : 24659

Andromeda score : 50.897

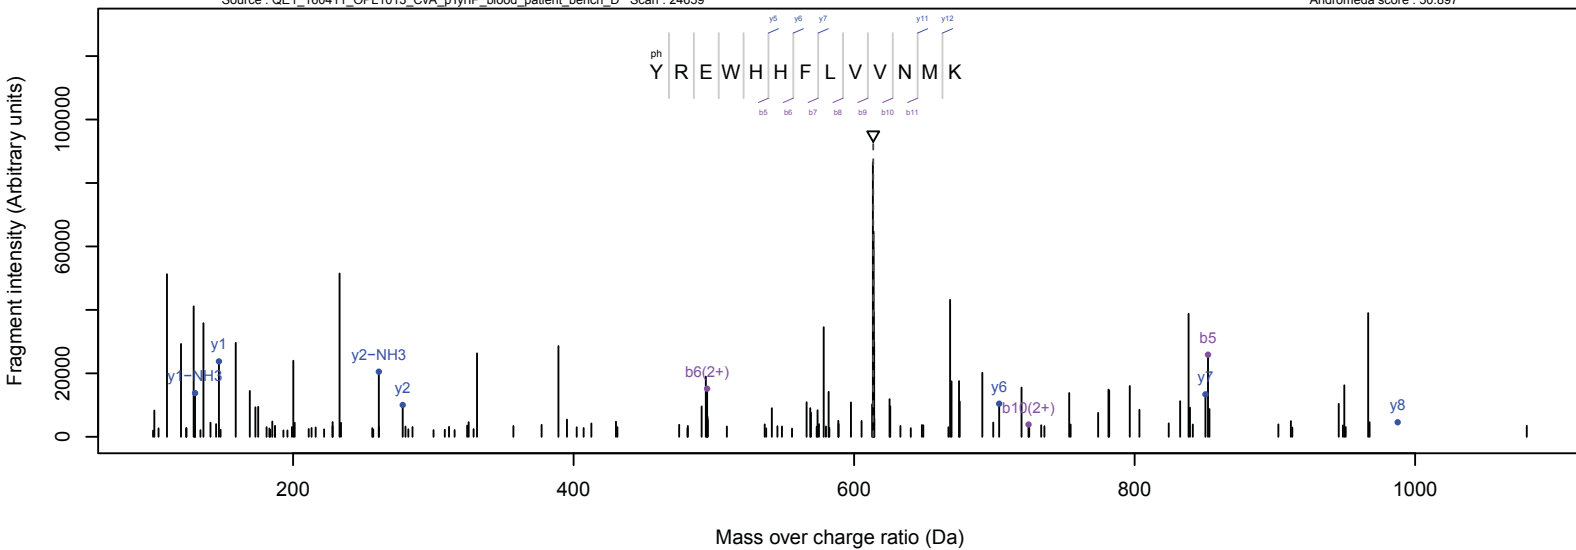



SSTQAPESQESQEELHYAT(ph)LNFGVVRPPEAR-4+

Source : QE1\_160411\_OPL1013\_CvA\_pTyrIP\_blood\_patient\_bench\_C Scan : 28609

Andromeda score : 50.493

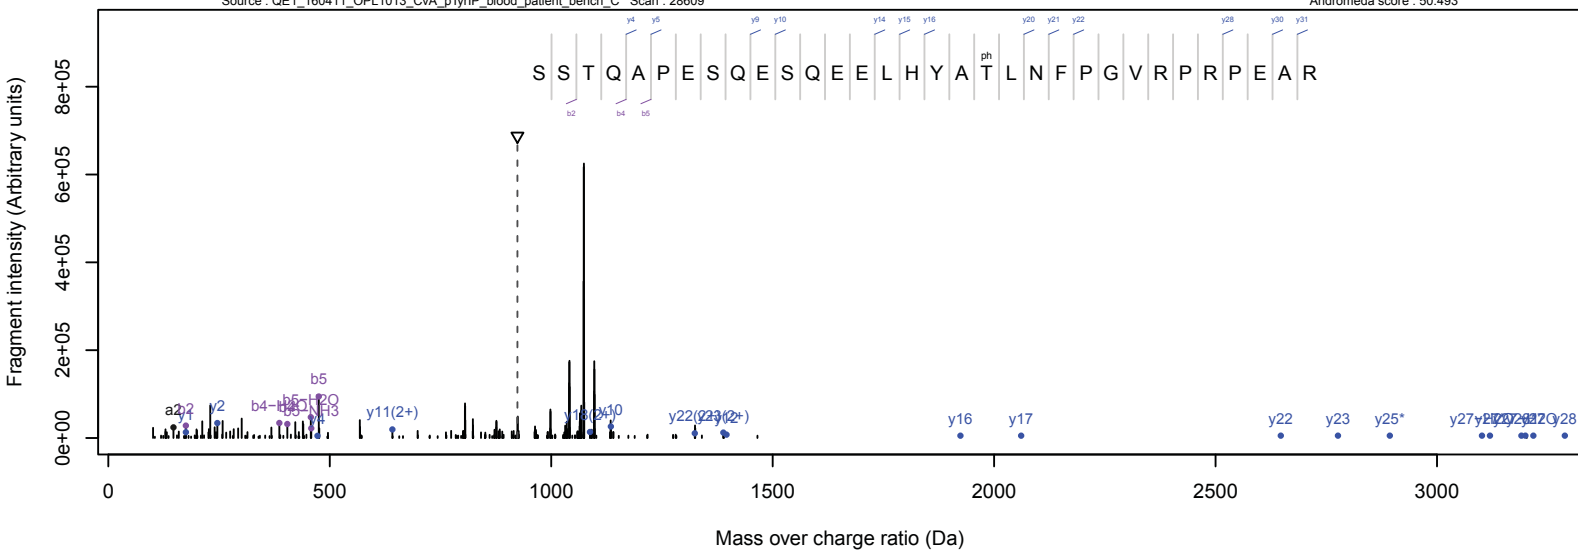

S(ph)GRDYSTVSASPTALSTLK-3+

Source : QE1\_160411\_OPL1013\_CvA\_pTyrIP\_blood\_patient\_bench\_C Scan : 21760

Andromeda score : 50.358

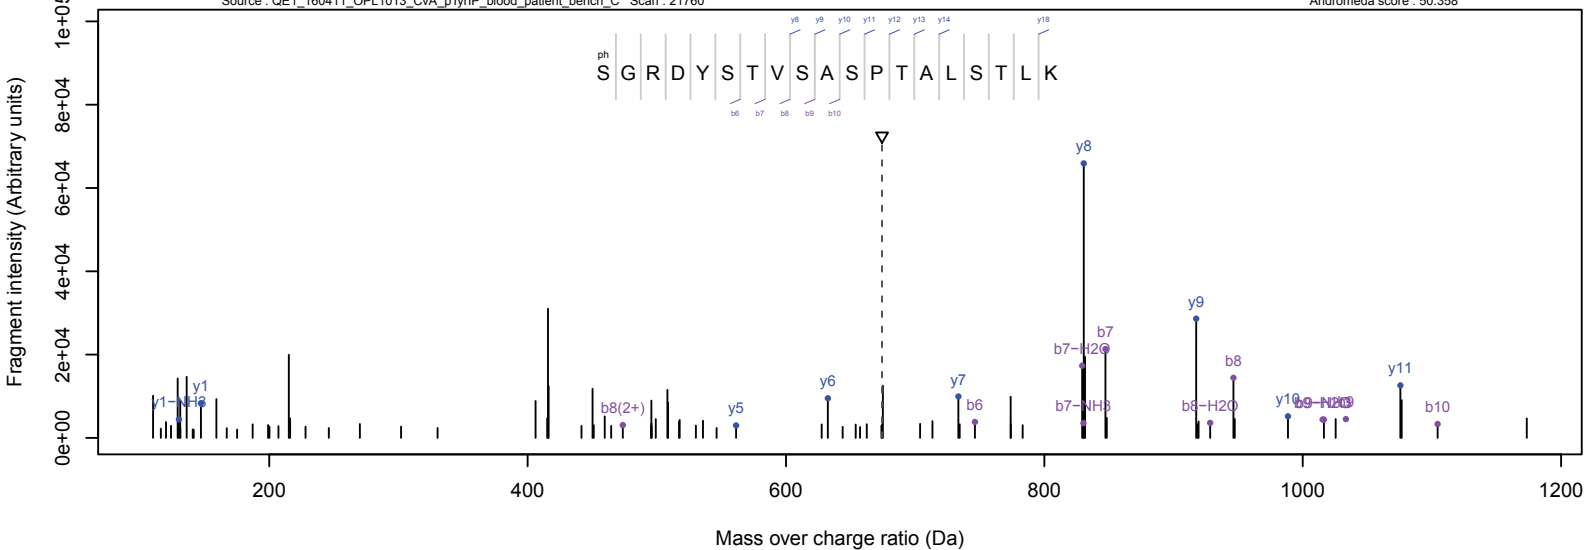

SGQLTVPESTY(ph)TSIQGDPQR-3+

Source : QE1\_160411\_OPL1013\_CvA\_pTyrIP\_blood\_patient\_bench\_C Scan : 22011

Andromeda score : 50.255

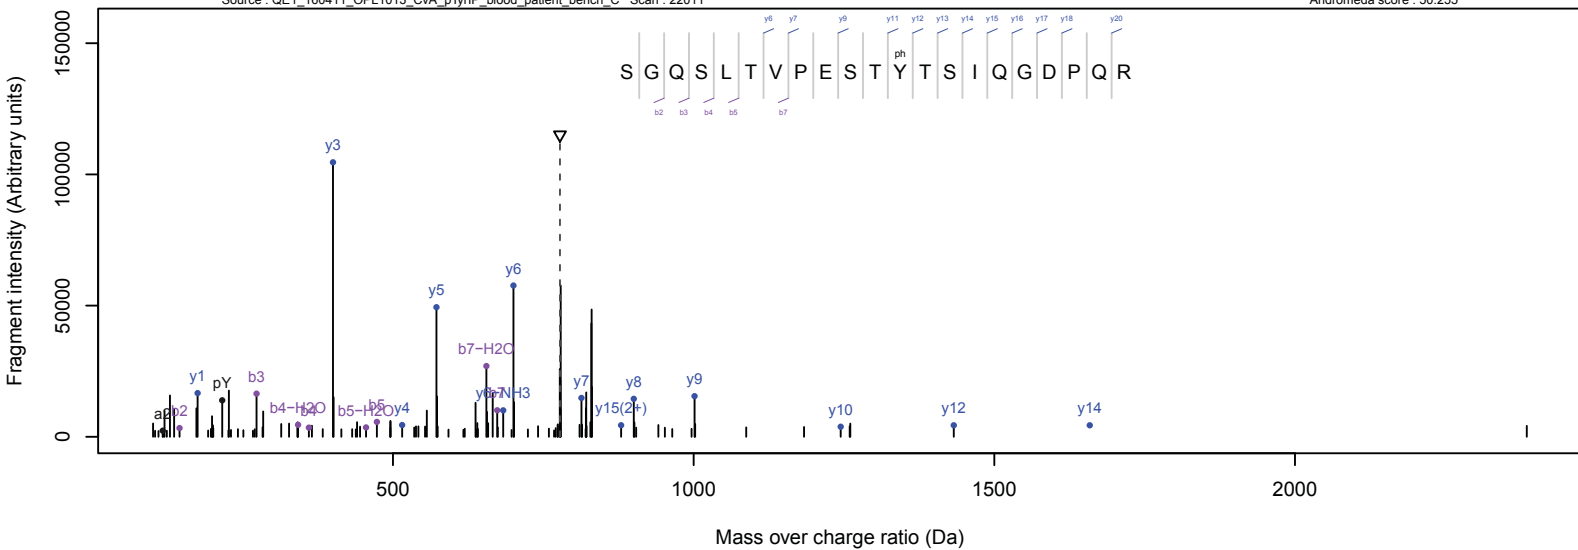

**FFANPVSREDEESY(ph)IEMEEHR-3+**

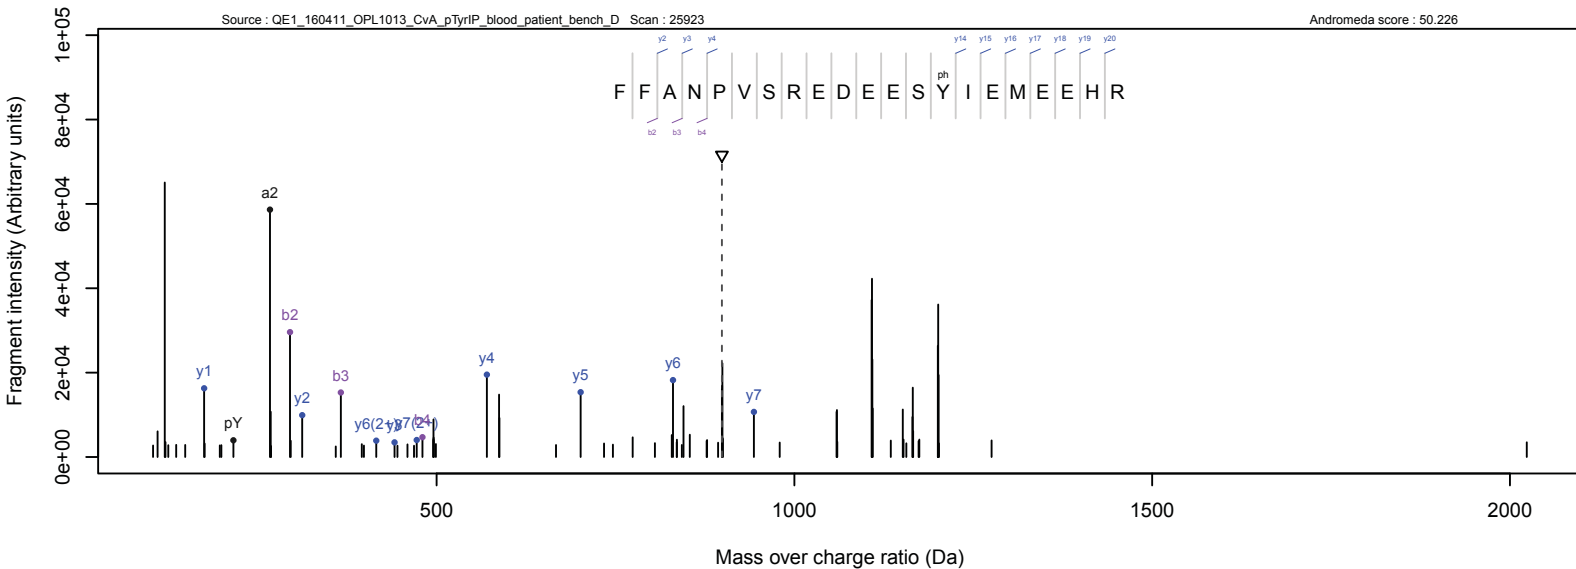

**SKS(ph)PLPPEEEAKDEEEDQTLVNLDTYTSDDLHFQVSK-4+**

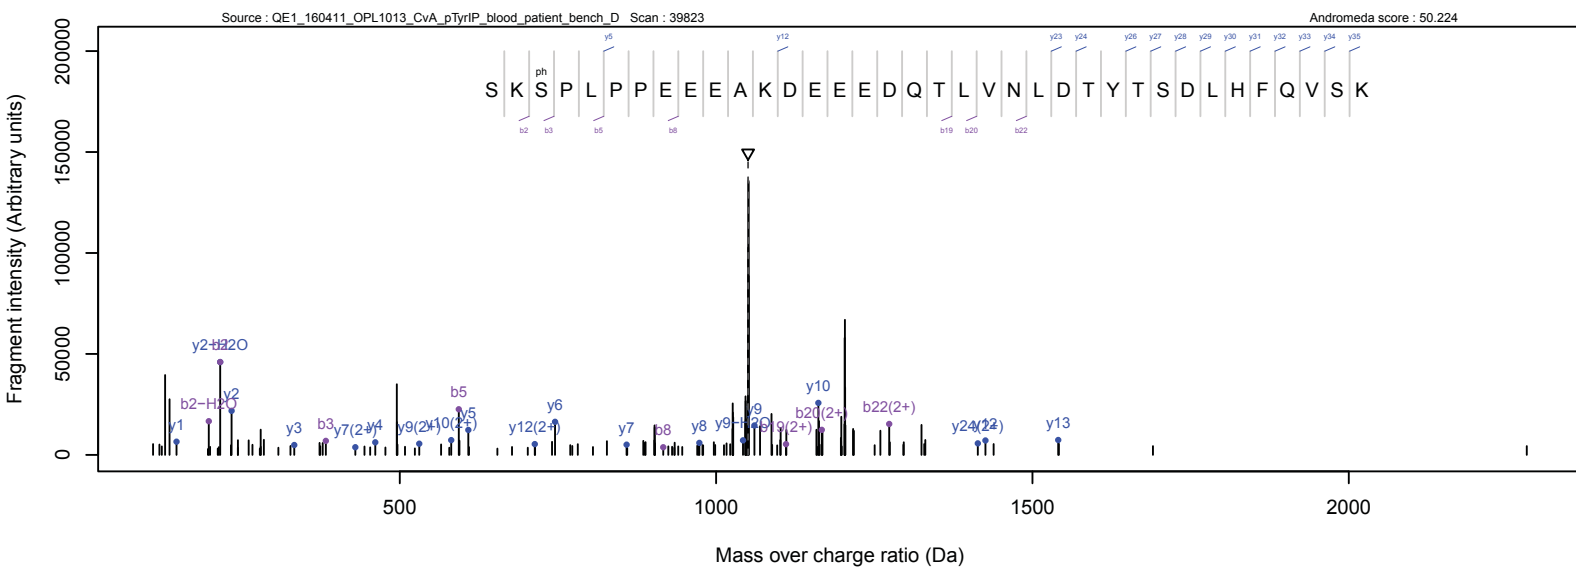

**YVFTDISY(ph)SIPHR-3+**

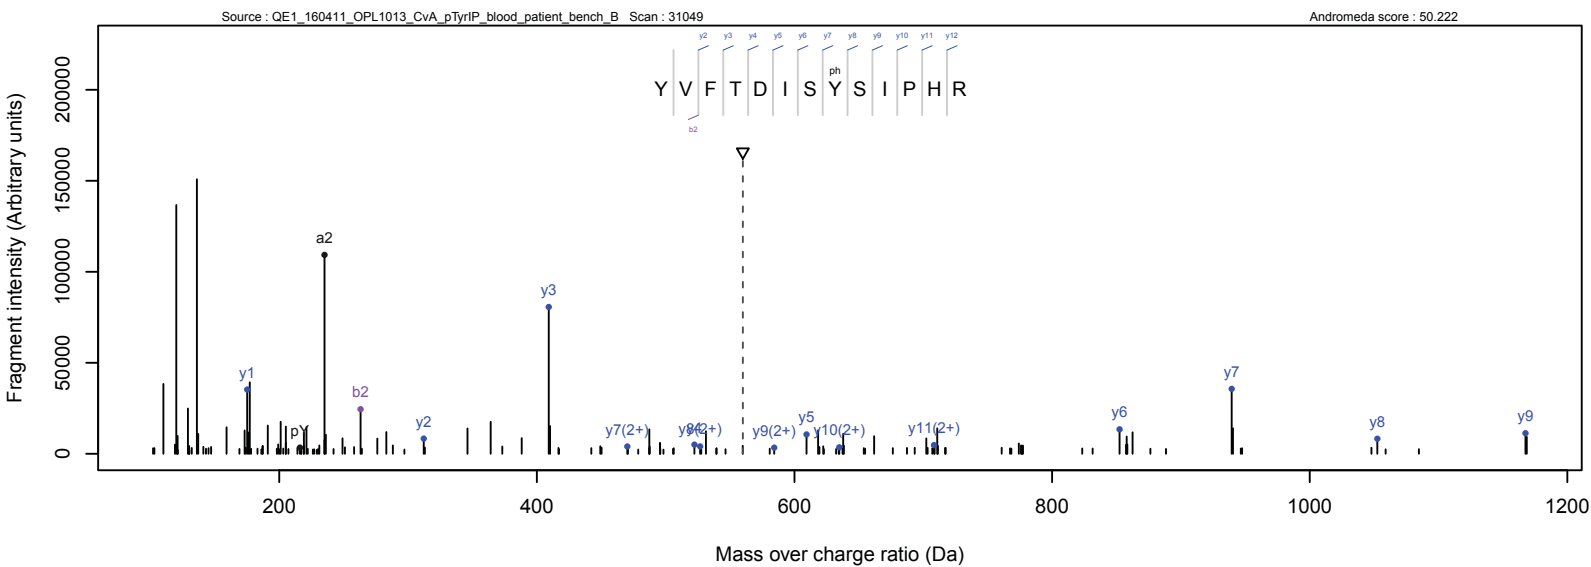

## RLEPVVSDAIY(ph)DSKAPNASNLK-3+

Source : QE1\_160411\_OPL1013\_CvA\_pTyrIP\_blood\_patient\_bench\_D Scan : 24378

Andromeda score : 50.202

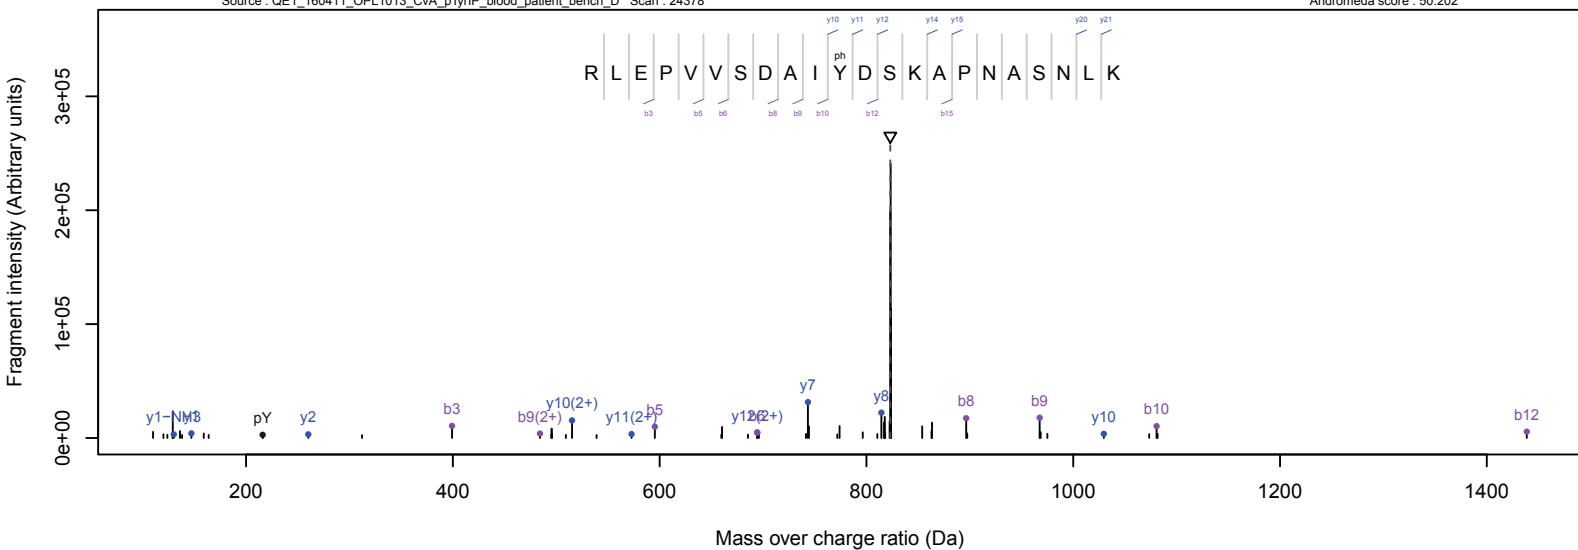

## LIKDDEY(ph)NPCQGSKFPIK-3+

Source : QE1\_160411\_OPL1013\_CvA\_pTyrIP\_blood\_patient\_bench\_C Scan : 18081

Andromeda score : 50.178

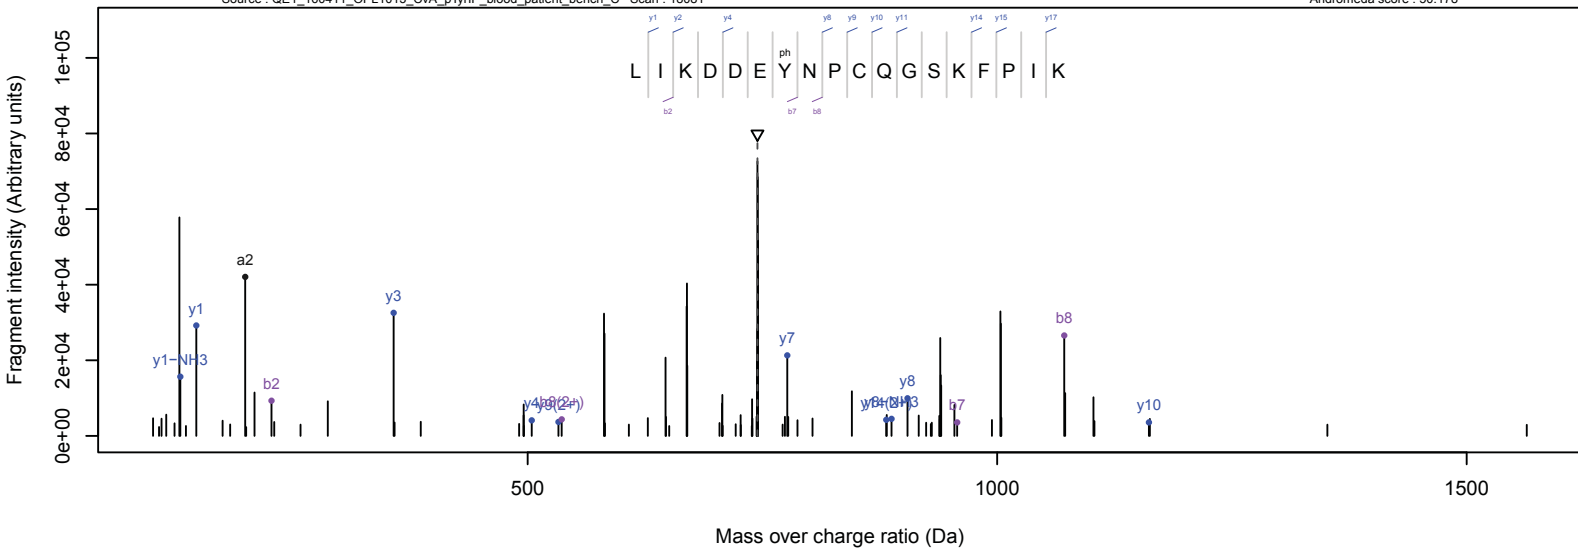

## LSPGESAY(ph)QK-2+

Source : QE1\_160411\_OPL1013\_CvA\_pTyrIP\_blood\_patient\_bench\_D Scan : 3238

Andromeda score : 50.108

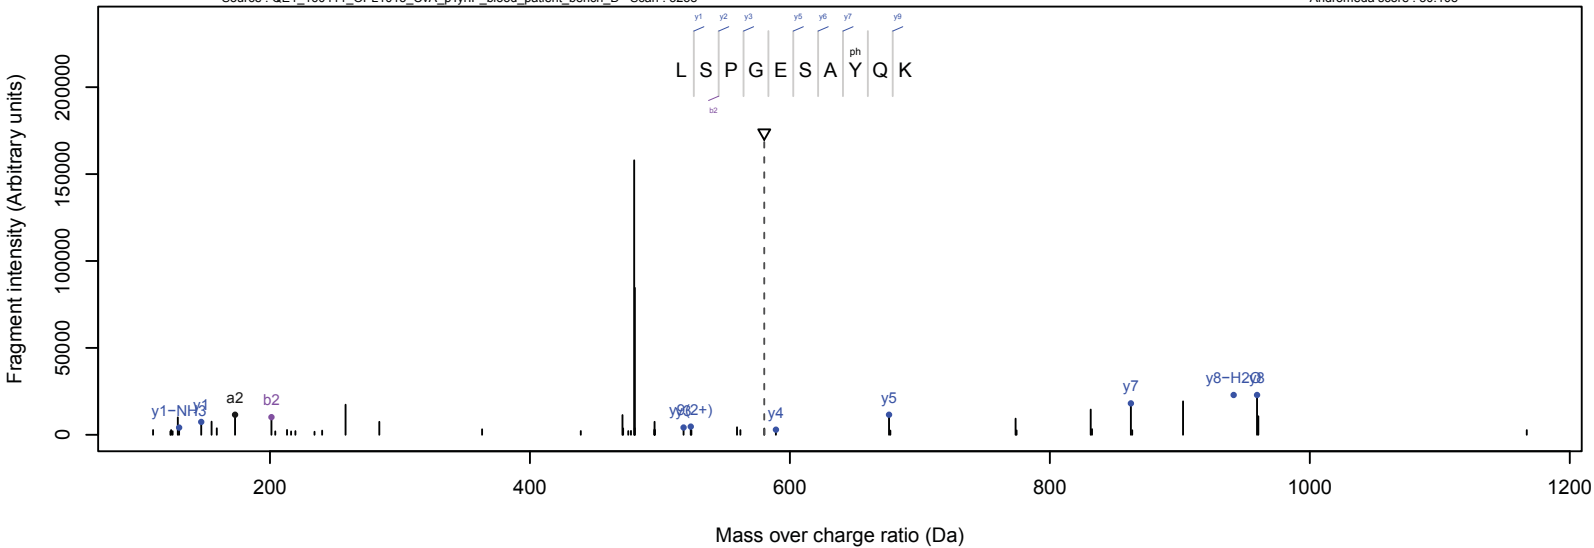

## IEKIGEGT(ph)YGVVYK-3+

Source : QE1\_160411\_OPL1013\_CvA\_pTyrIP\_blood\_patient\_bench\_C Scan : 17551

Andromeda score : 50.088

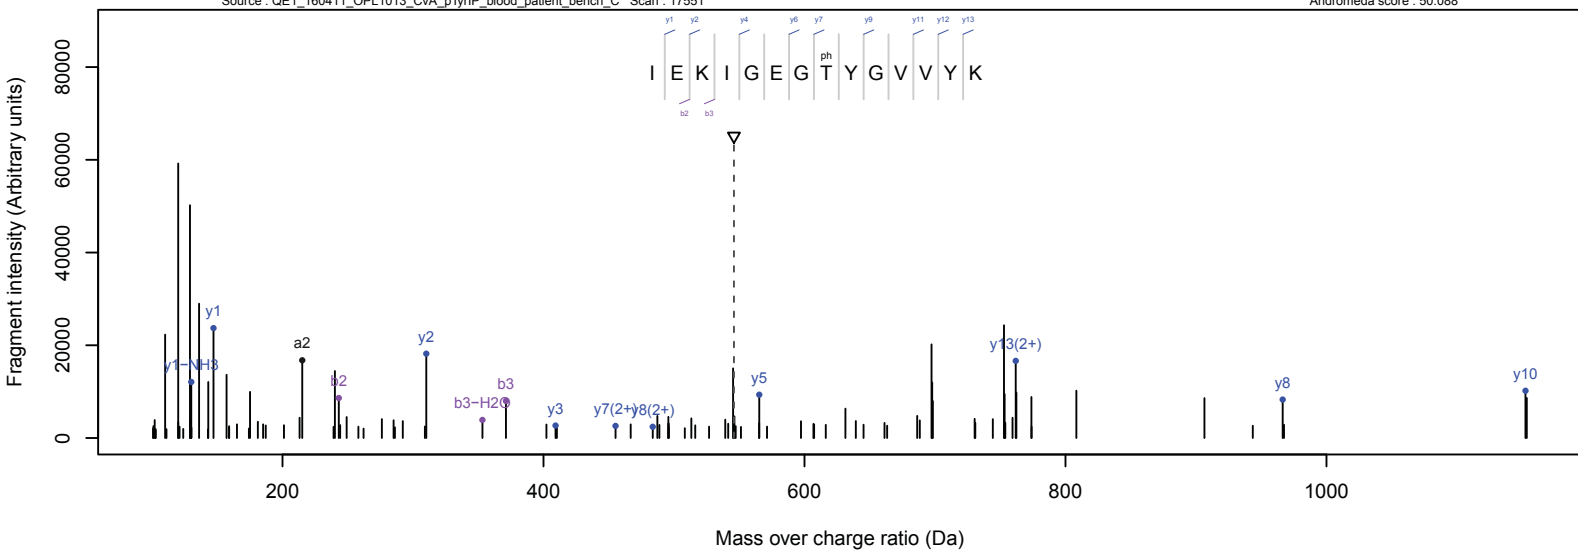

## VITNQYNNPAGLY(ph)SSENI SNFNNALESK-3+

Source : QE1\_160411\_OPL1013\_CvA\_pTyrIP\_blood\_patient\_bench\_C Scan : 35962

Andromeda score : 50.029

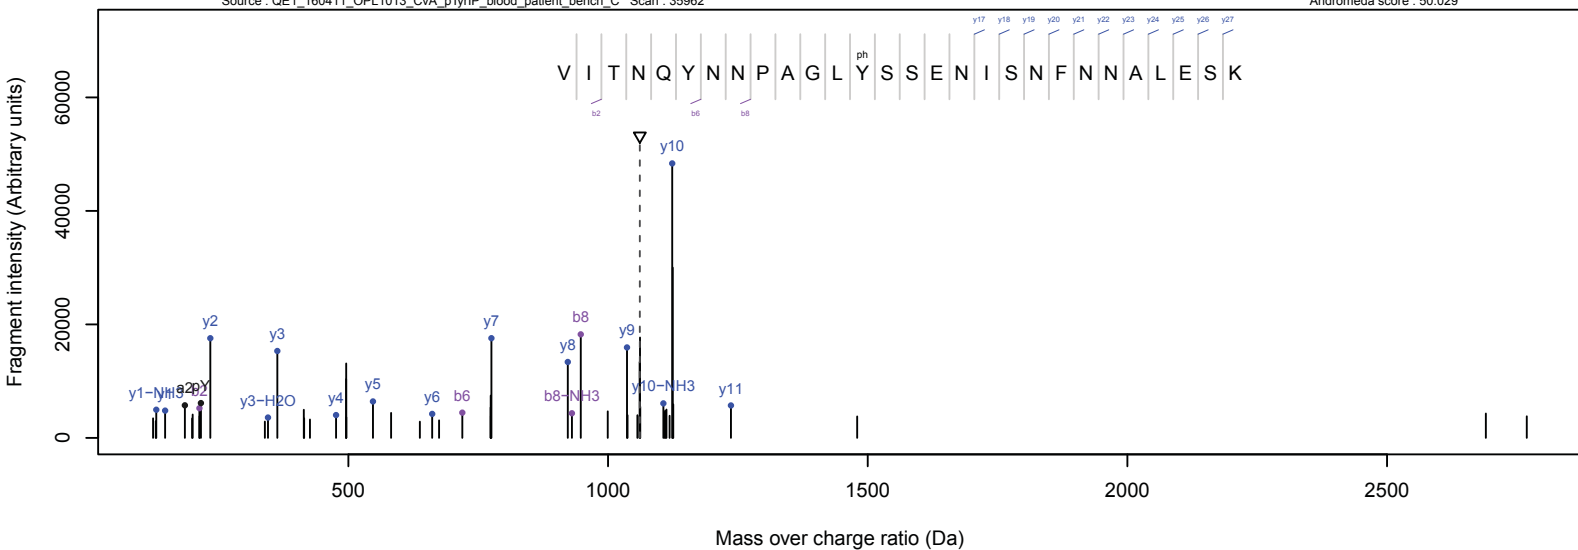

## EVIEEEPSEKSEATY M T M H P V W P S L R-4+

Source : QE1\_160411\_OPL1013\_CvA\_pTyrIP\_blood\_patient\_bench\_C Scan : 28269

Andromeda score : 49.765

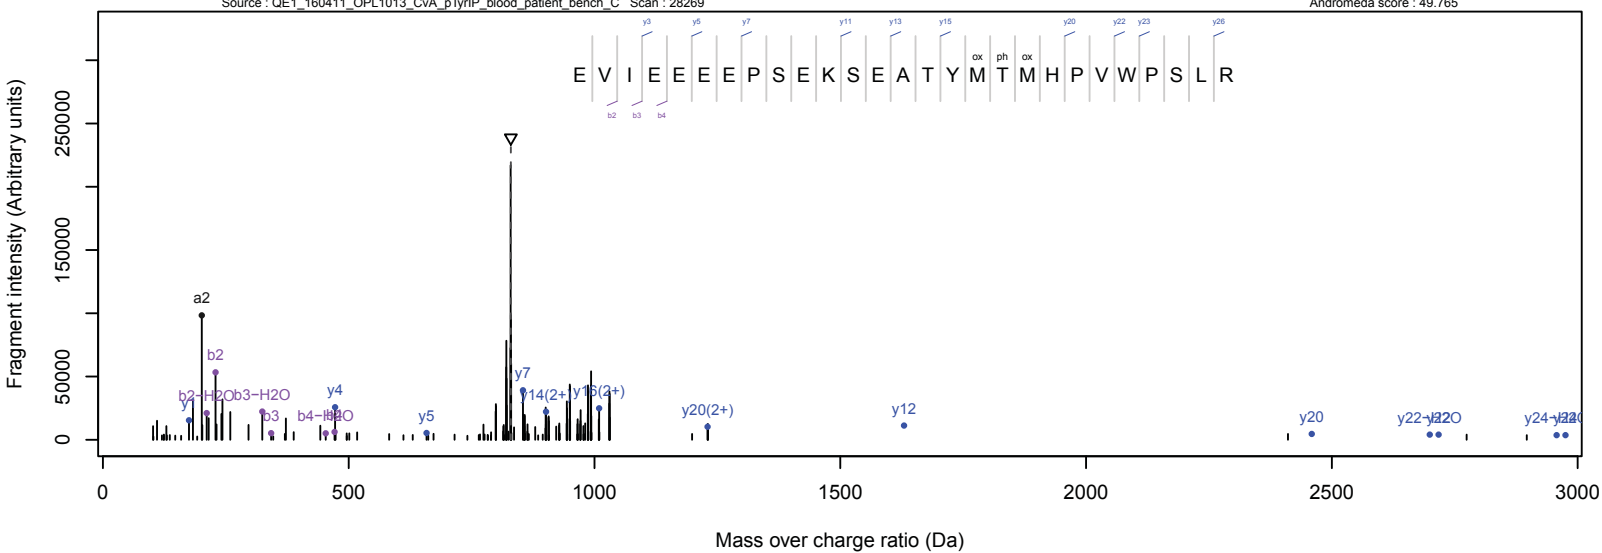

SY<sup>(ph)</sup>Y<sup>(ph)</sup>LKPSK-2+

Source: QE1\_160411\_OPL1013\_CvA\_pTyrIP\_blood\_patient\_bench\_C Scan: 6773

Andromeda score: 49.715

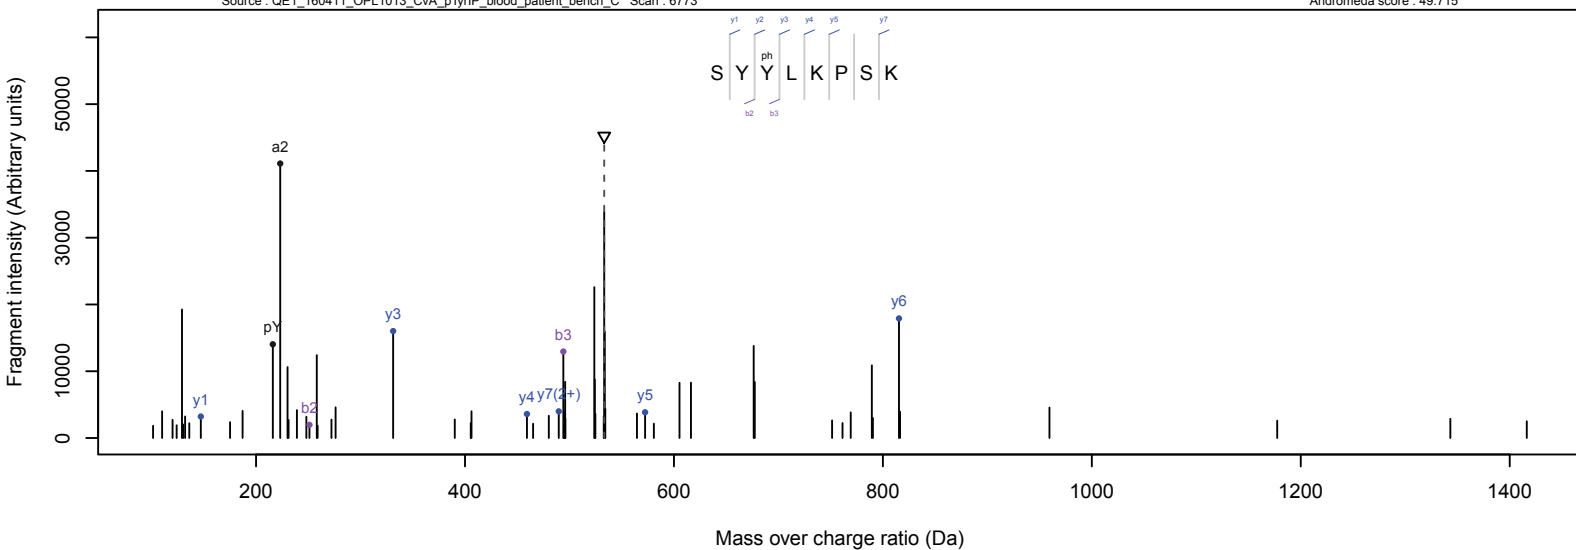ALPQNDDHY<sup>(ph)</sup>VM<sup>(ox)</sup>QEHRK-4+

Source: QE1\_160411\_OPL1013\_CvA\_pTyrIP\_blood\_patient\_bench\_A Scan: 4610

Andromeda score: 49.621

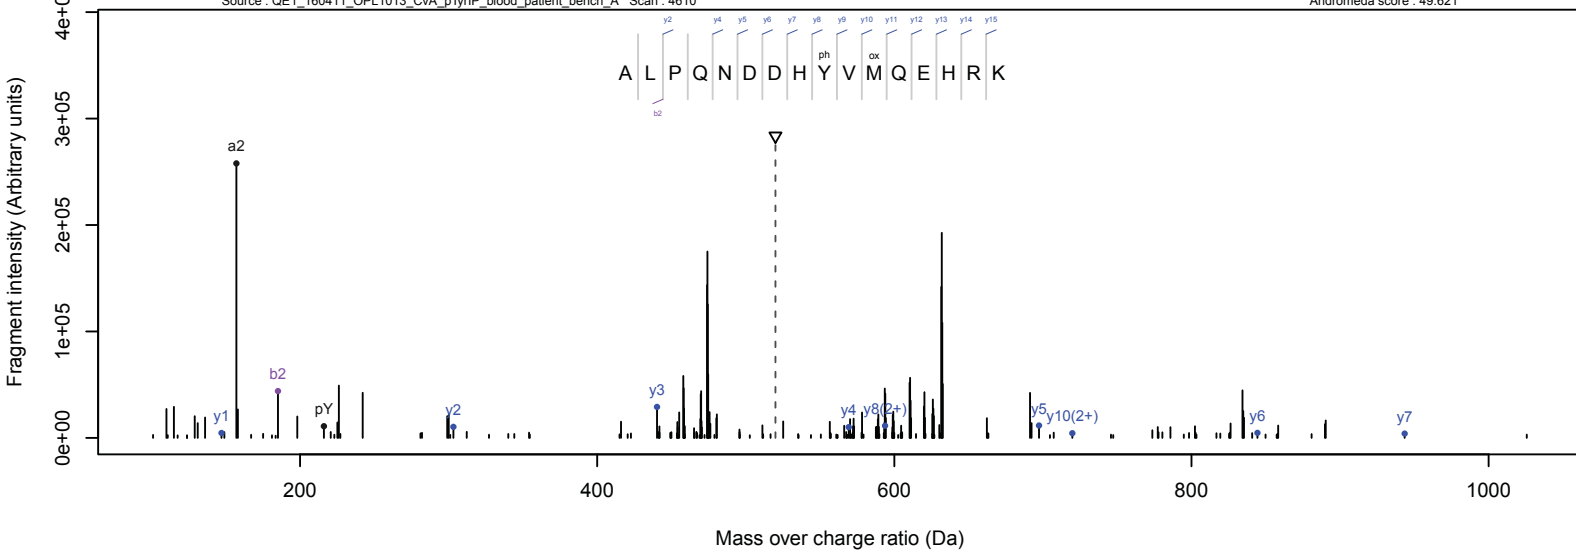SPFEVY<sup>(ph)</sup>VDKSQGDASK-3+

Source: QE1\_160411\_OPL1013\_CvA\_pTyrIP\_blood\_patient\_bench\_C Scan: 18801

Andromeda score: 49.535

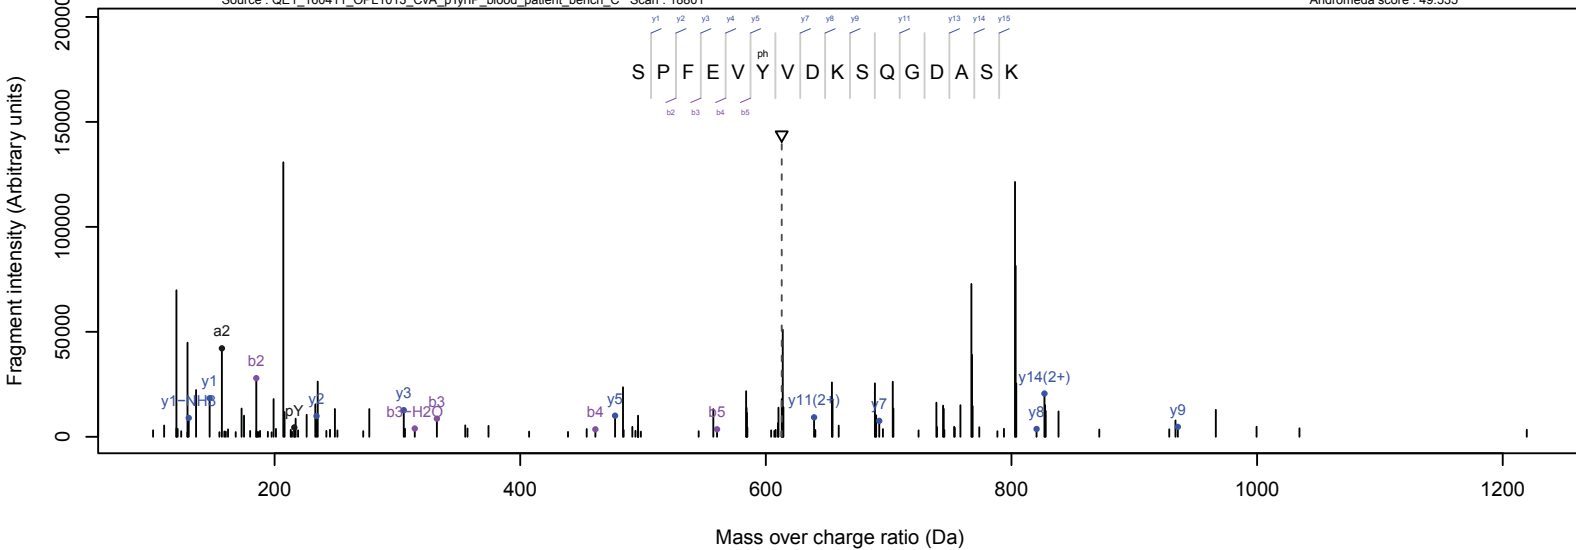



**EAPEPM(ox)ELDGPKG(ph)GYIKTELISVSEVHPSR-4+**

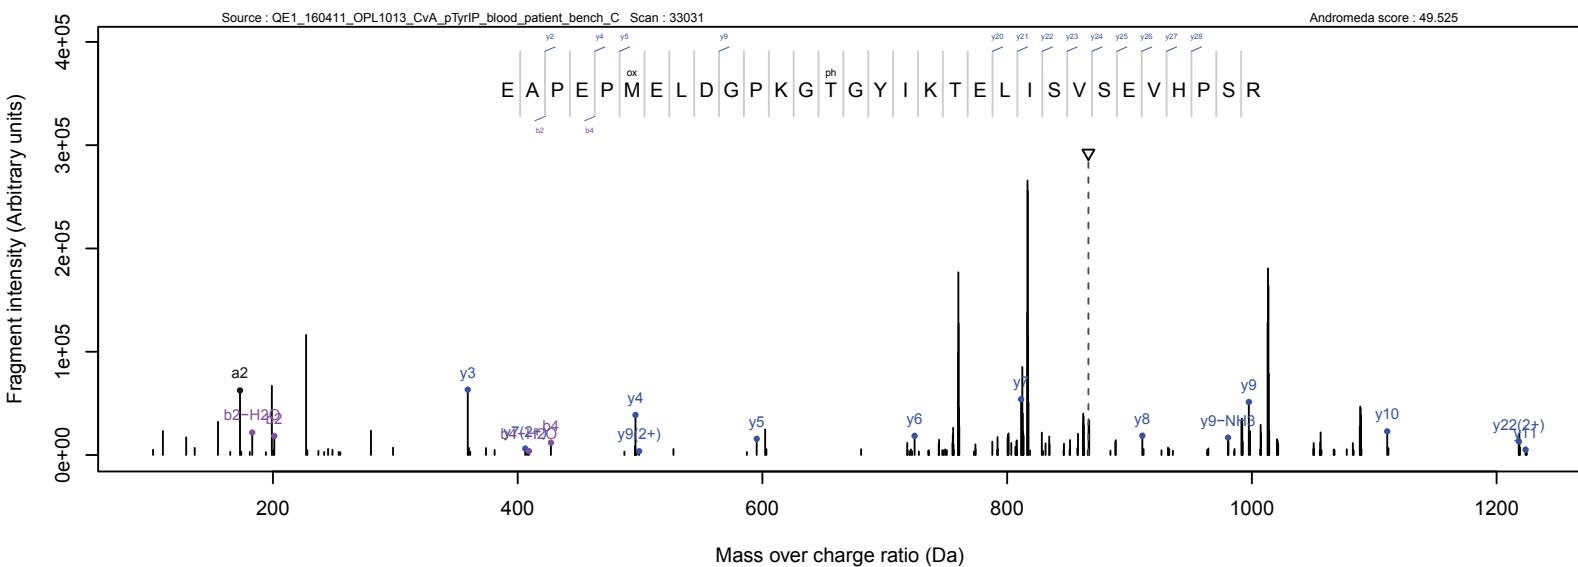

**GASQAGM(ox)TGY(ph)GMPR-2+**

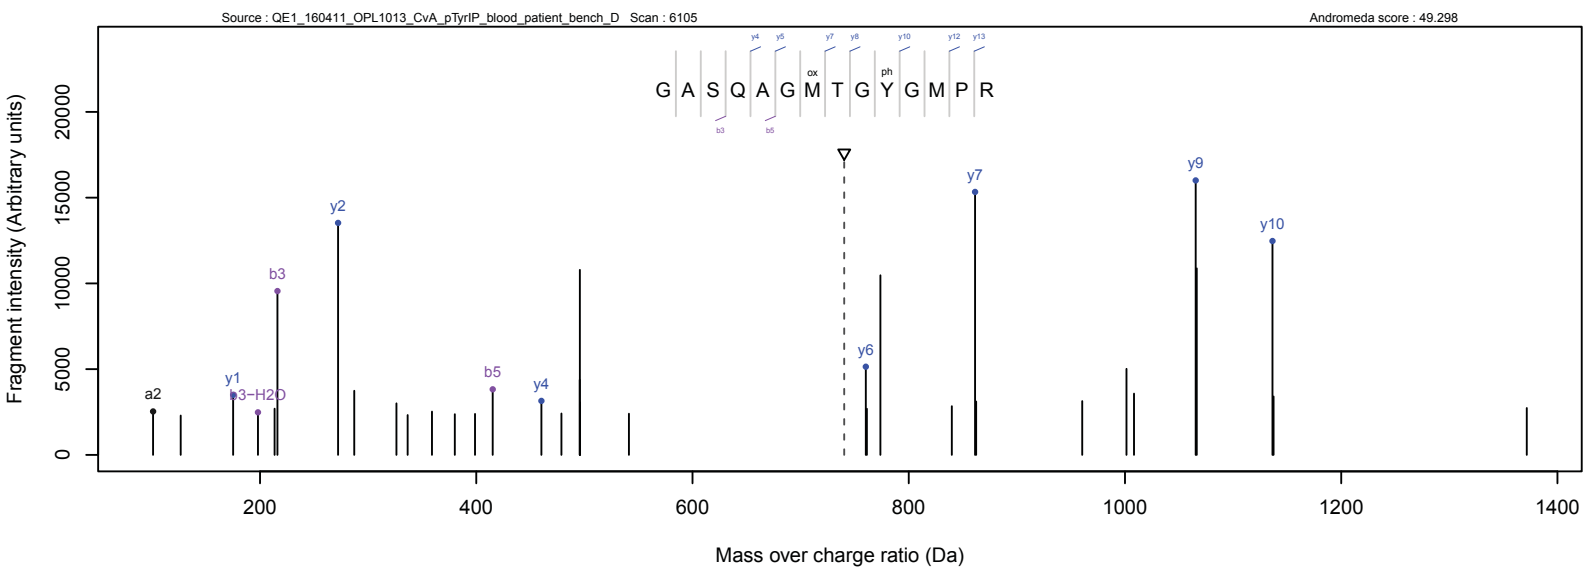

**LPSSPVY(ph)EDAASFK-2+**

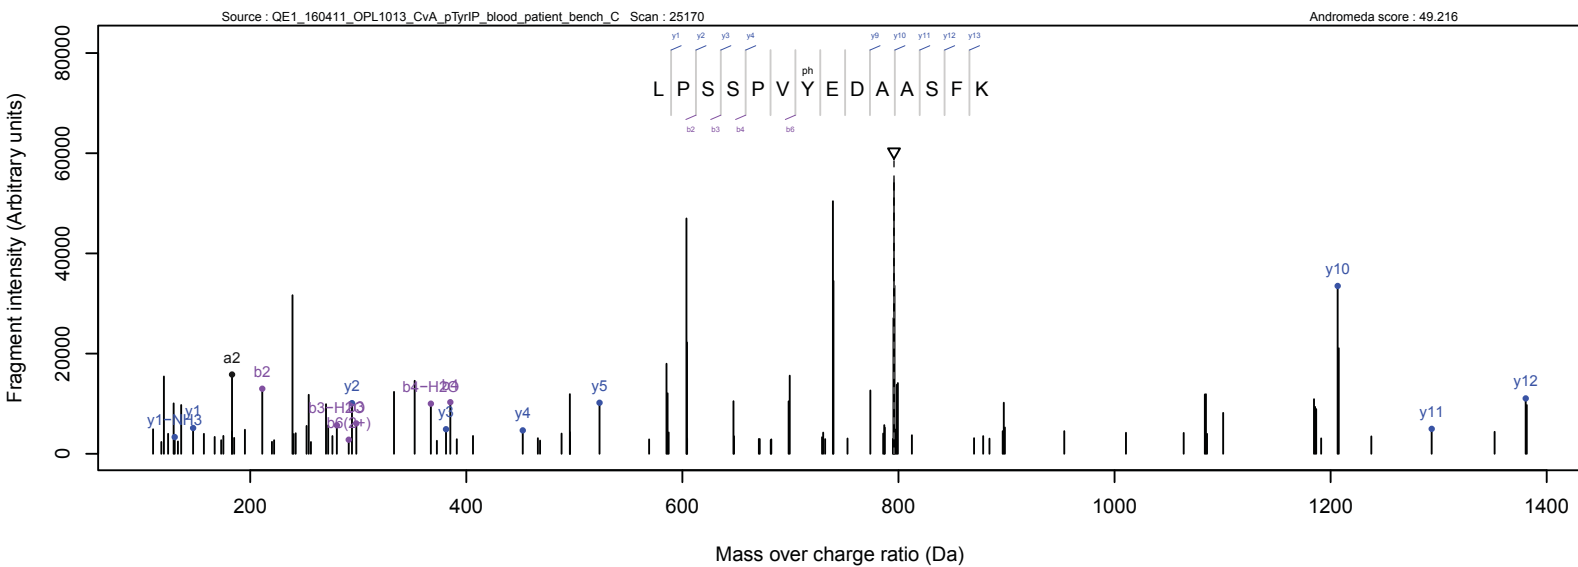

## TY(ph)EVSLR-2+

Source : QE1\_160411\_OPL1013\_CvA\_pTyrIP\_blood\_patient\_bench\_D Scan : 9659

Andromeda score : 49.097

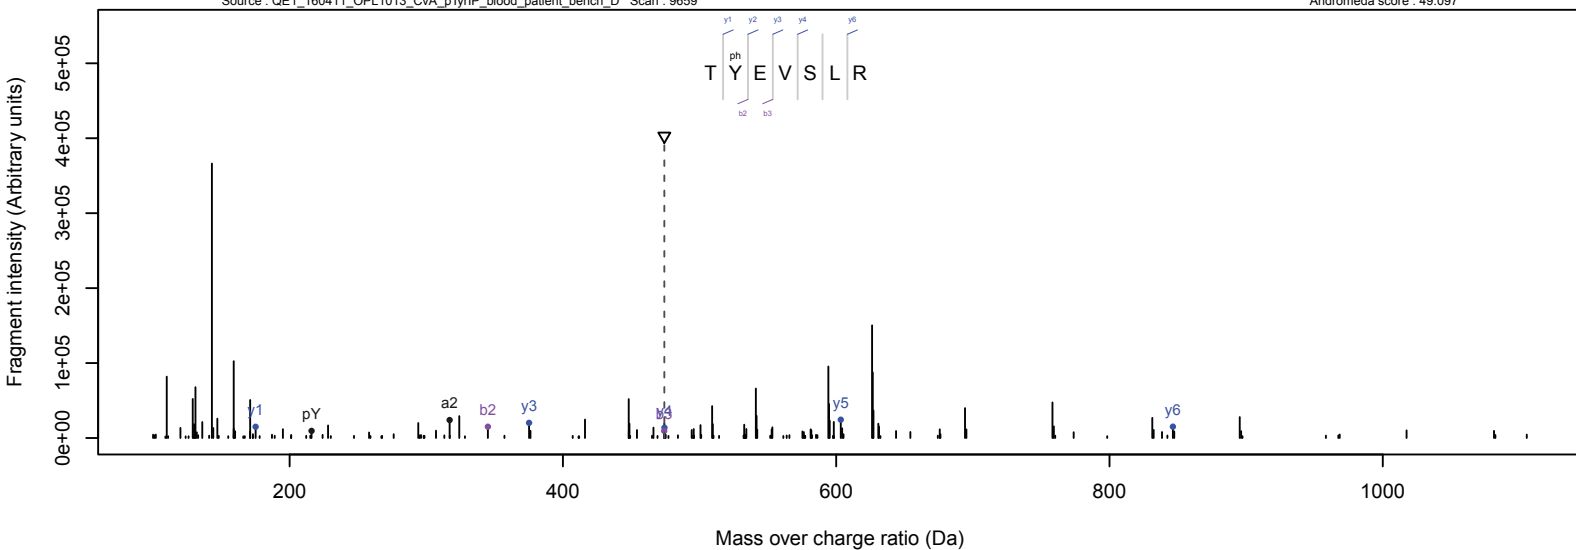

## LHAVPAANT(ph)VK-2+

Source : QE1\_160411\_OPL1013\_CvA\_pTyrIP\_blood\_patient\_bench\_B Scan : 3271

Andromeda score : 48.981

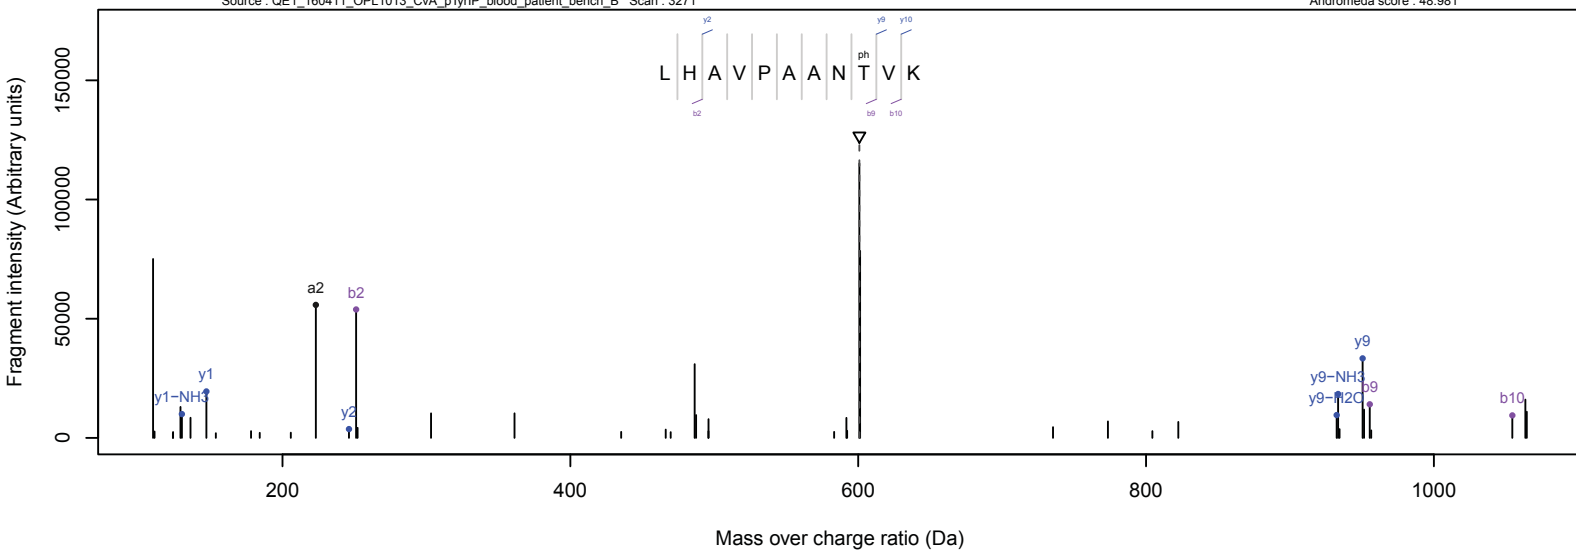

## ALQY(ph)ACGNALVCDNVEDARR-3+

Source : QE1\_160411\_OPL1013\_CvA\_pTyrIP\_blood\_patient\_bench\_B Scan : 19325

Andromeda score : 48.907

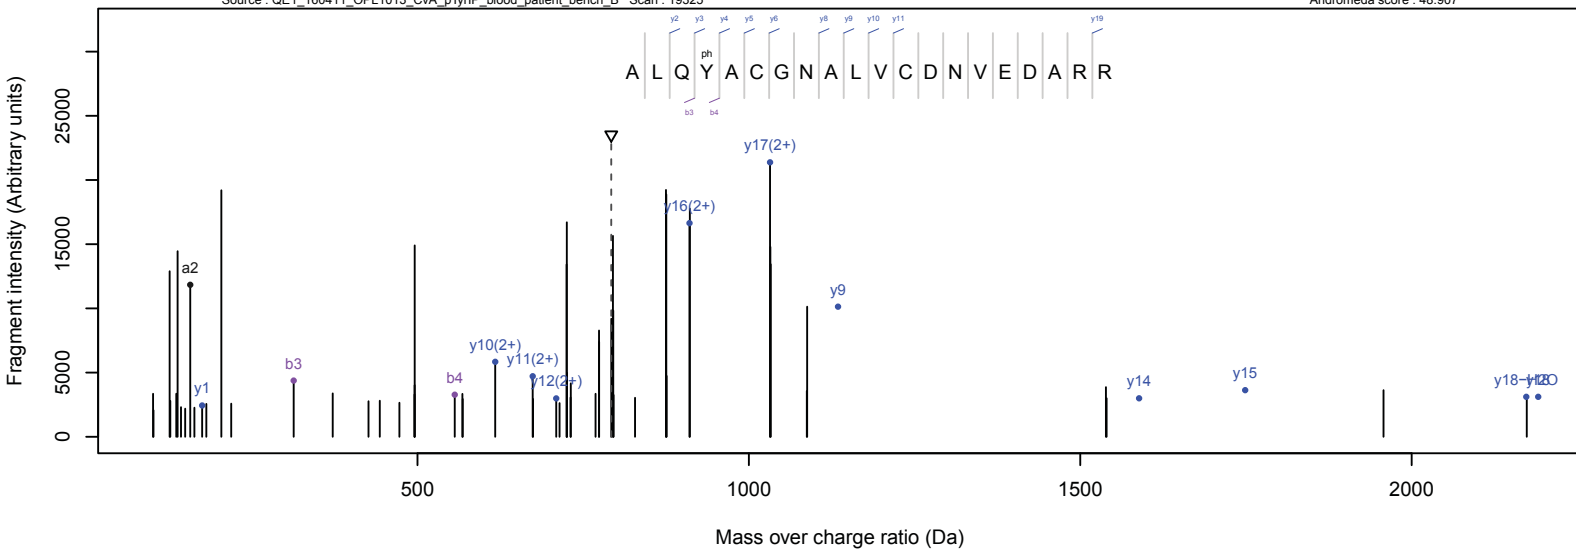

**EKYDY(ph)VGR-2+**

Source: QE1\_160411\_OPL1013\_CvA\_pTyrIP\_blood\_patient\_bench\_A Scan: 4105

Andromeda score: 48.794

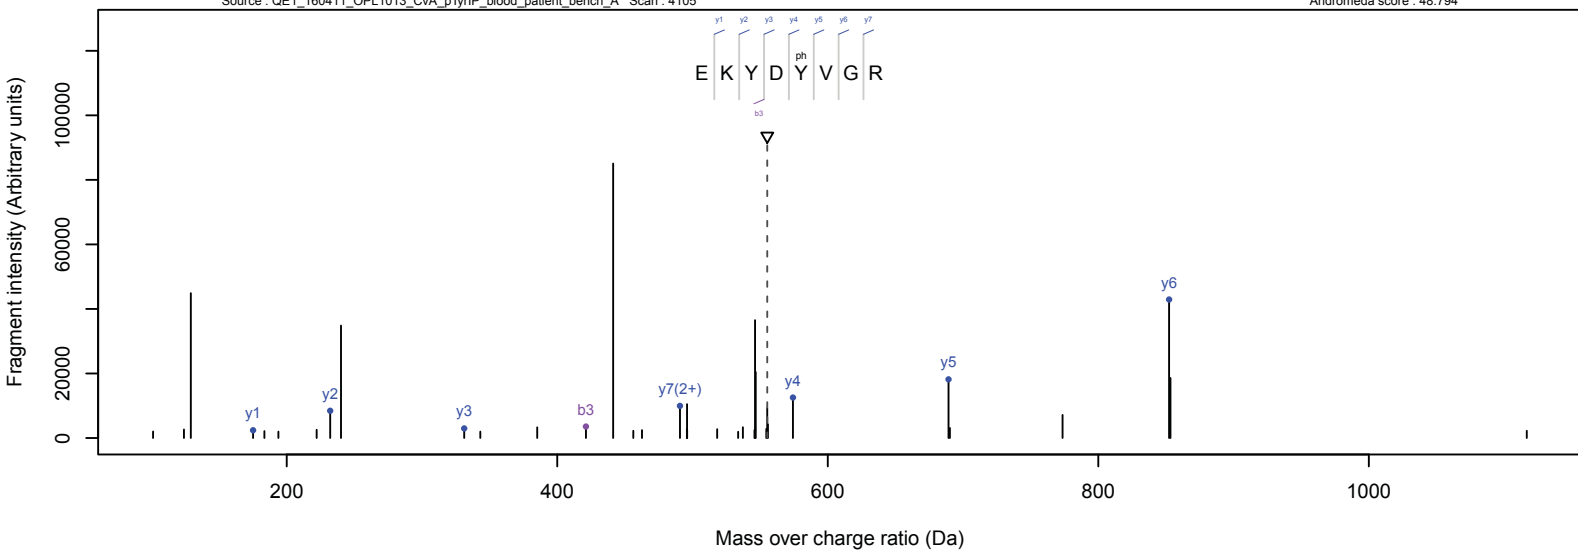

**GGALGEGPGASPCNQHSY(ph)WAPPCYTLKPET-3+**

Source: QE1\_160411\_OPL1013\_CvA\_pTyrIP\_blood\_patient\_bench\_D Scan: 32014

Andromeda score: 48.634

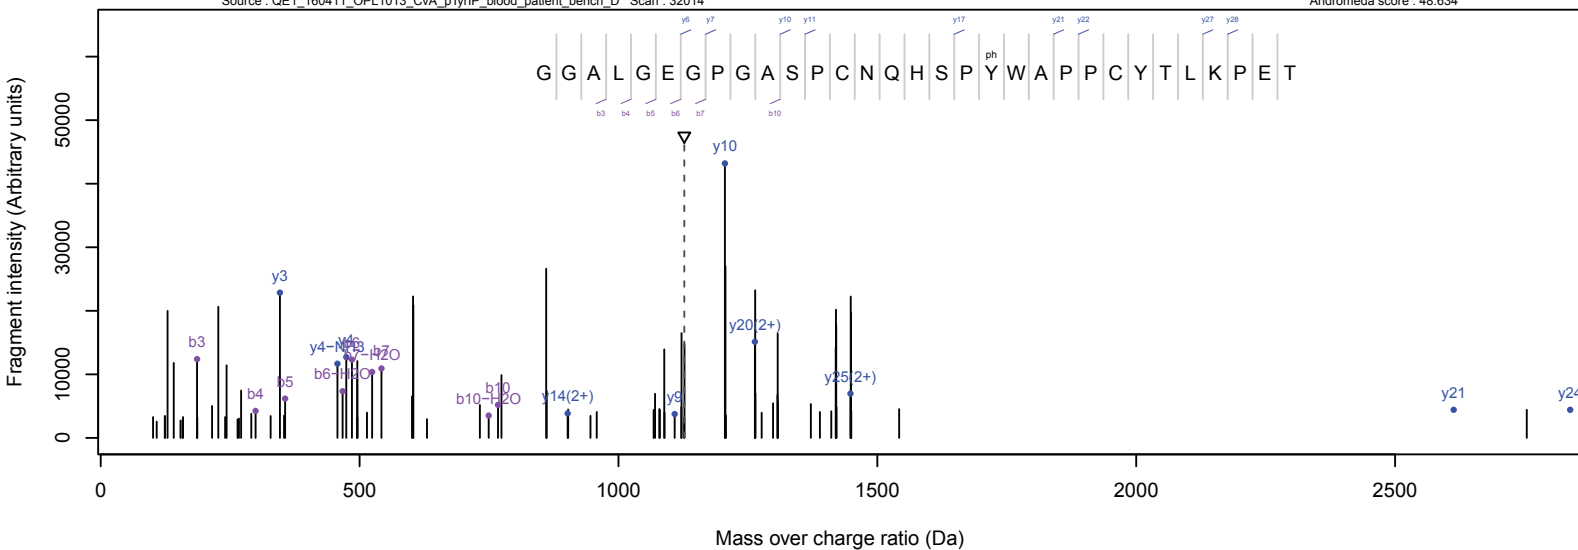

**MQLPELPKDISYK-3+**

Source: QE1\_160411\_OPL1013\_CvA\_pTyrIP\_blood\_patient\_bench\_D Scan: 14233

Andromeda score: 48.467

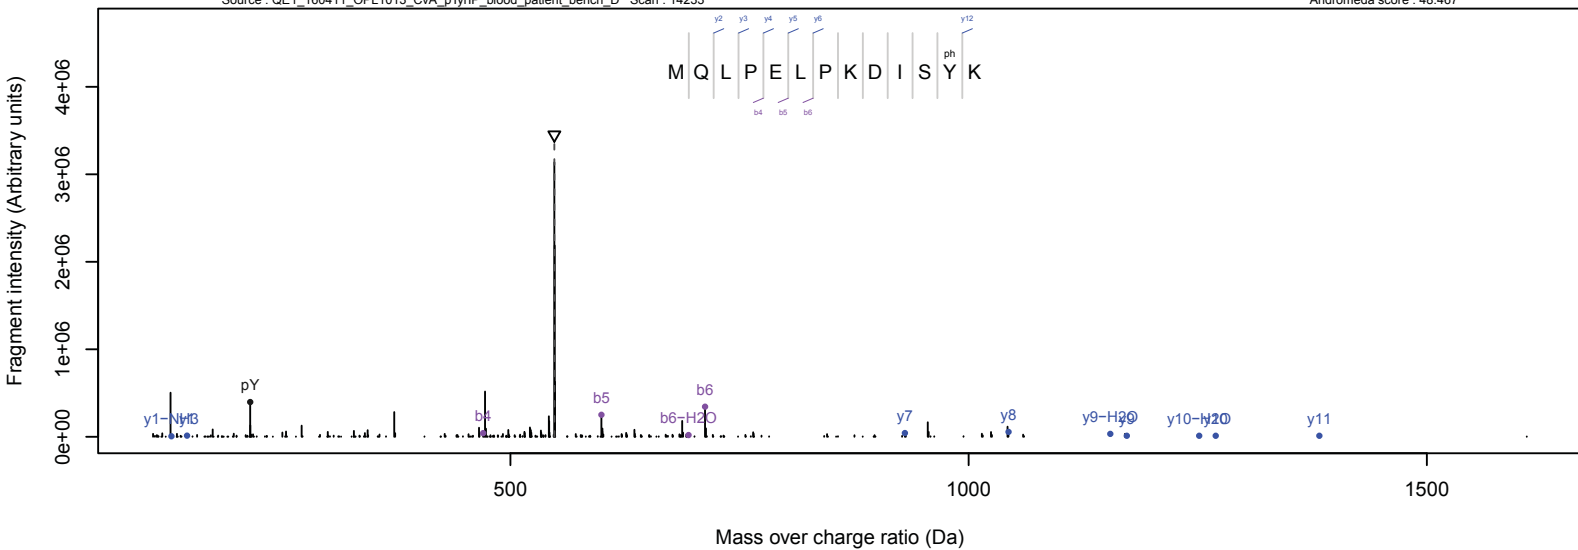

ALERPYP(ph)SK-3+

Source : QE1\_160411\_OPL1013\_CvA\_pTyrIP\_blood\_patient\_bench\_A Scan : 2957

Andromeda score : 48.423

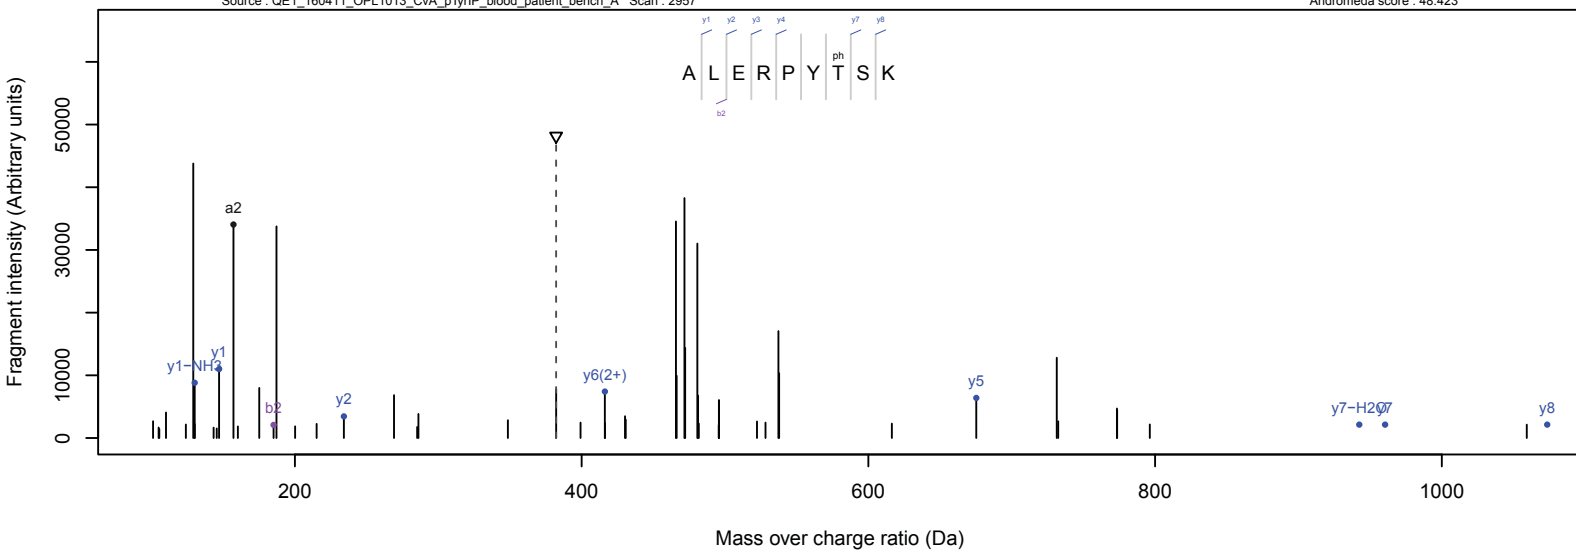

TNHIYVSSDDIKET(ph)GYTYILPK-3+

Source : QE1\_160411\_OPL1013\_CvA\_pTyrIP\_blood\_patient\_bench\_C Scan : 29972

Andromeda score : 48.354

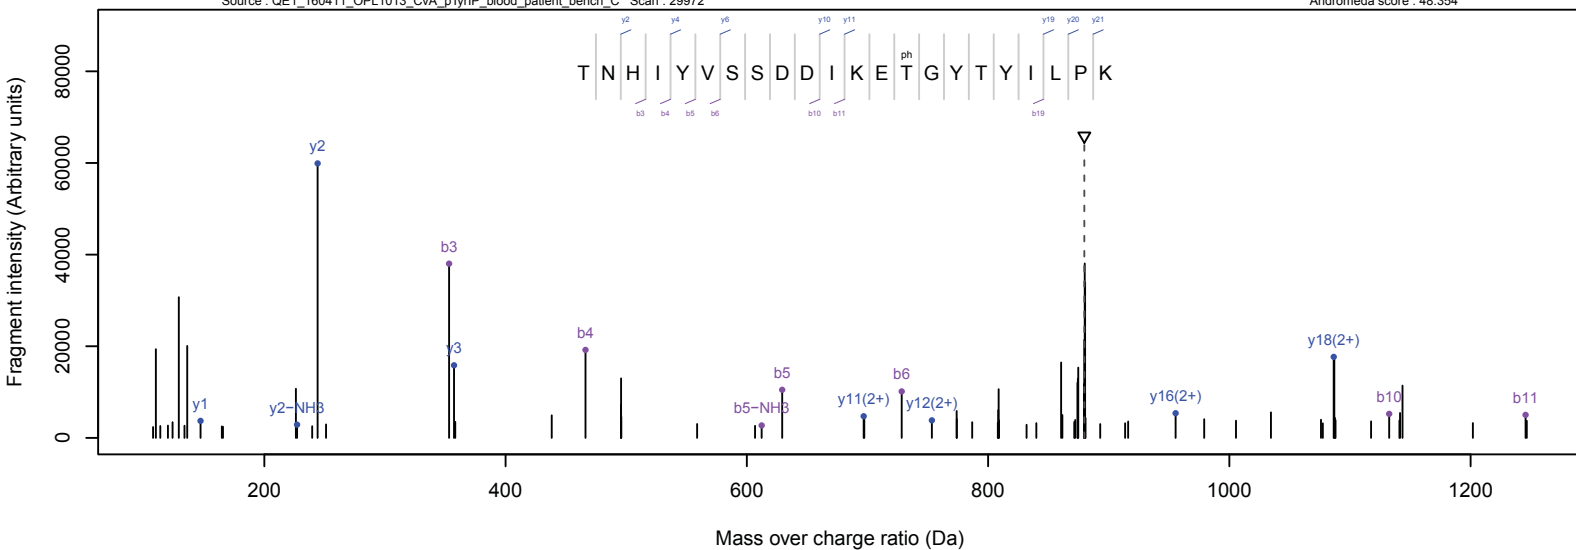

LFTAHHNNM(ph)ATVWASK-3+

Source : QE1\_160411\_OPL1013\_CvA\_pTyrIP\_blood\_patient\_bench\_C Scan : 24086

Andromeda score : 48.288

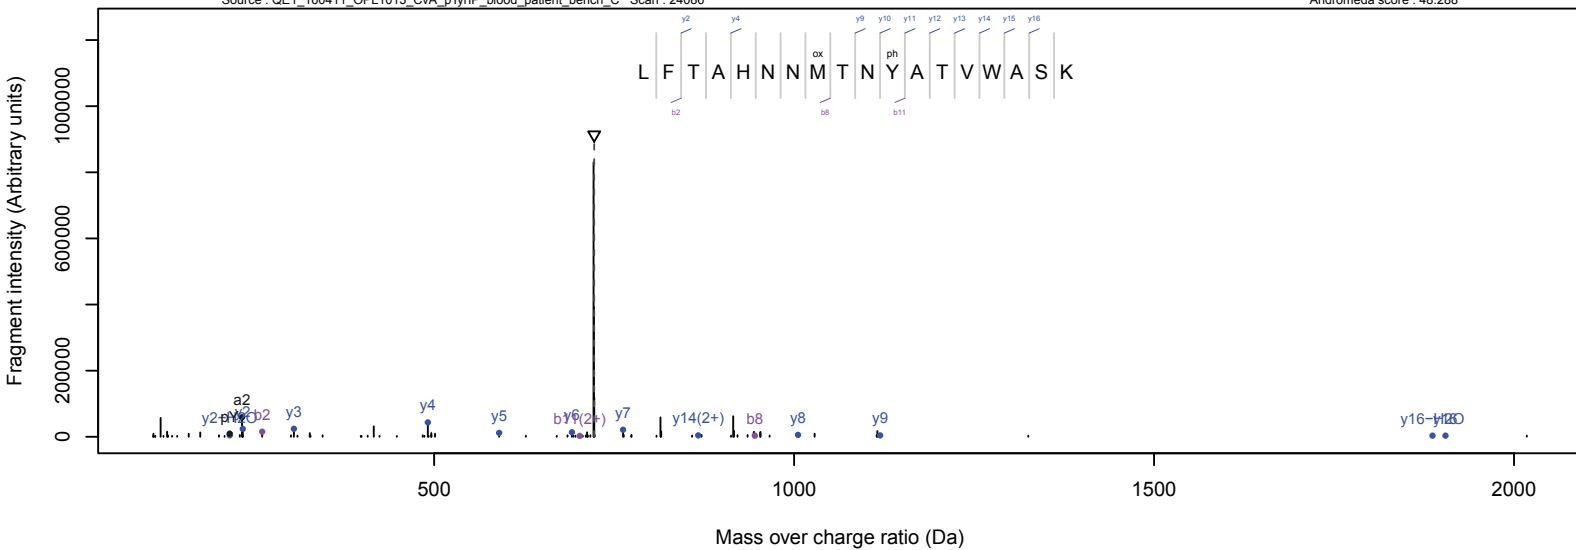

## KVIV(ph)SQPSAR-3+

Source: QE1\_160411\_OPL1013\_CvA\_pTyrIP\_blood\_patient\_bench\_C Scan: 3440

Andromeda score: 48.284

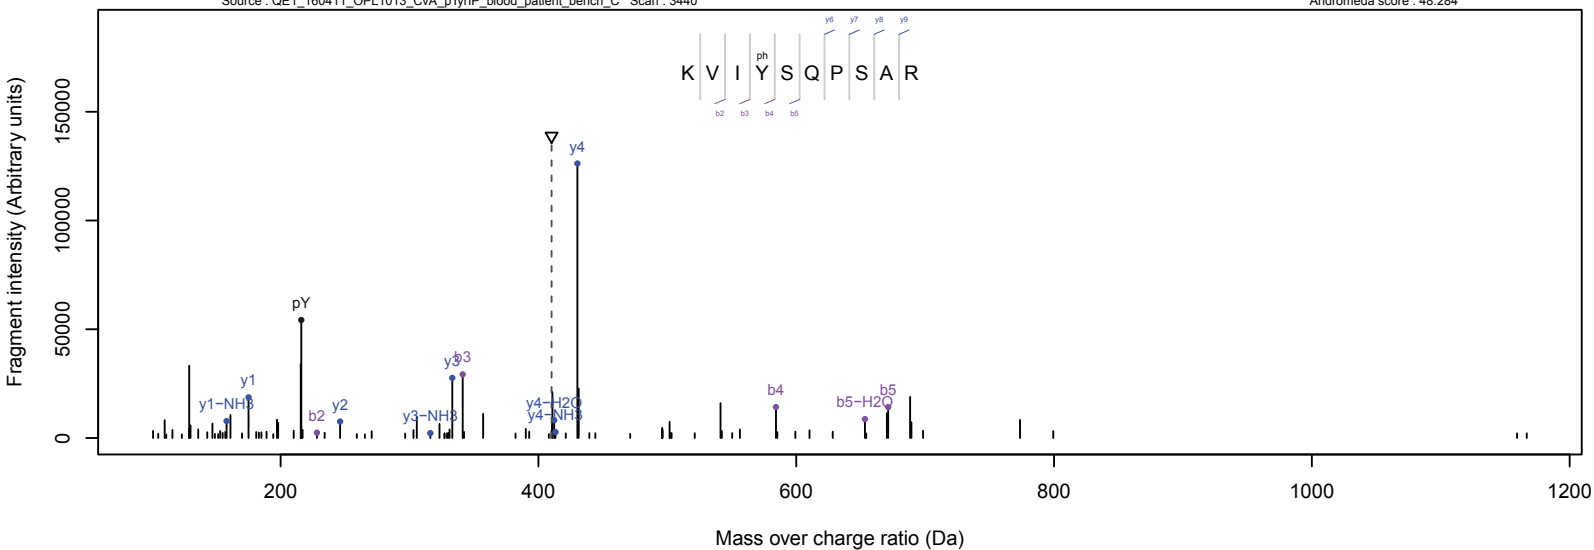

## LNEKNY(ph)ELLK-2+

Source: QE1\_160411\_OPL1013\_CvA\_pTyrIP\_blood\_patient\_bench\_C Scan: 13799

Andromeda score: 48.284

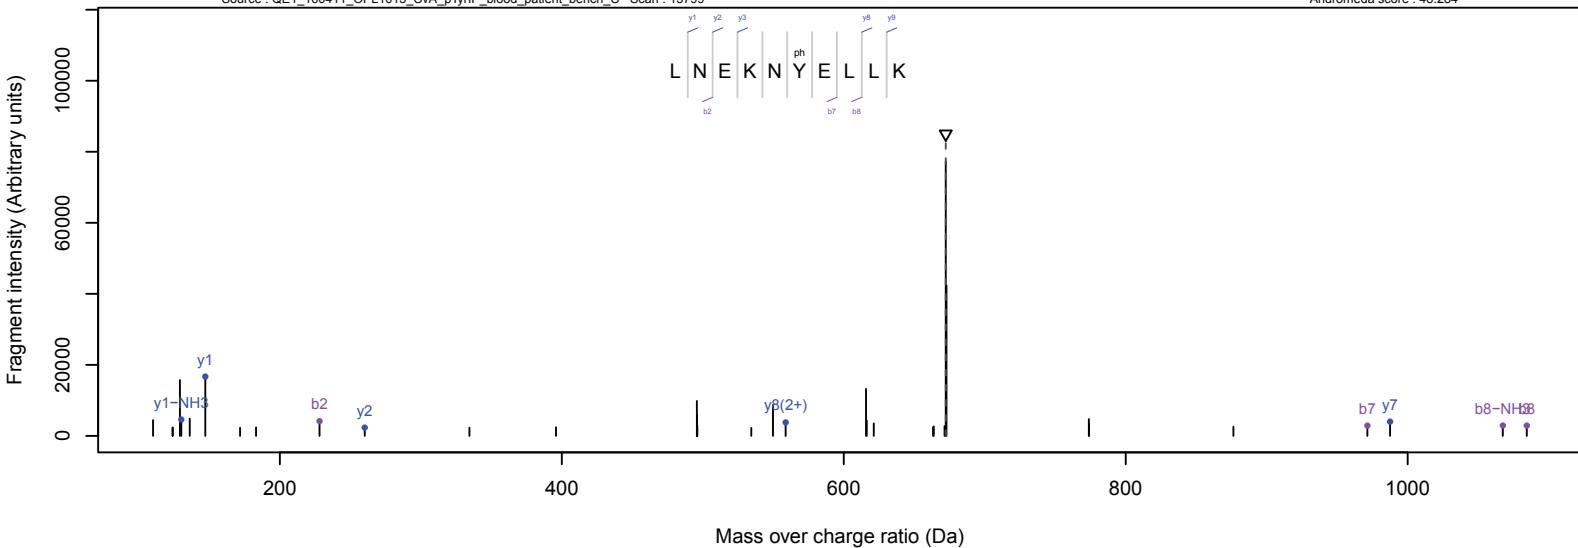

## LGAQSVY(ph)HLIHVLGGR-4+

Source: QE1\_160411\_OPL1013\_CvA\_pTyrIP\_blood\_patient\_bench\_A Scan: 22669

Andromeda score: 48.216

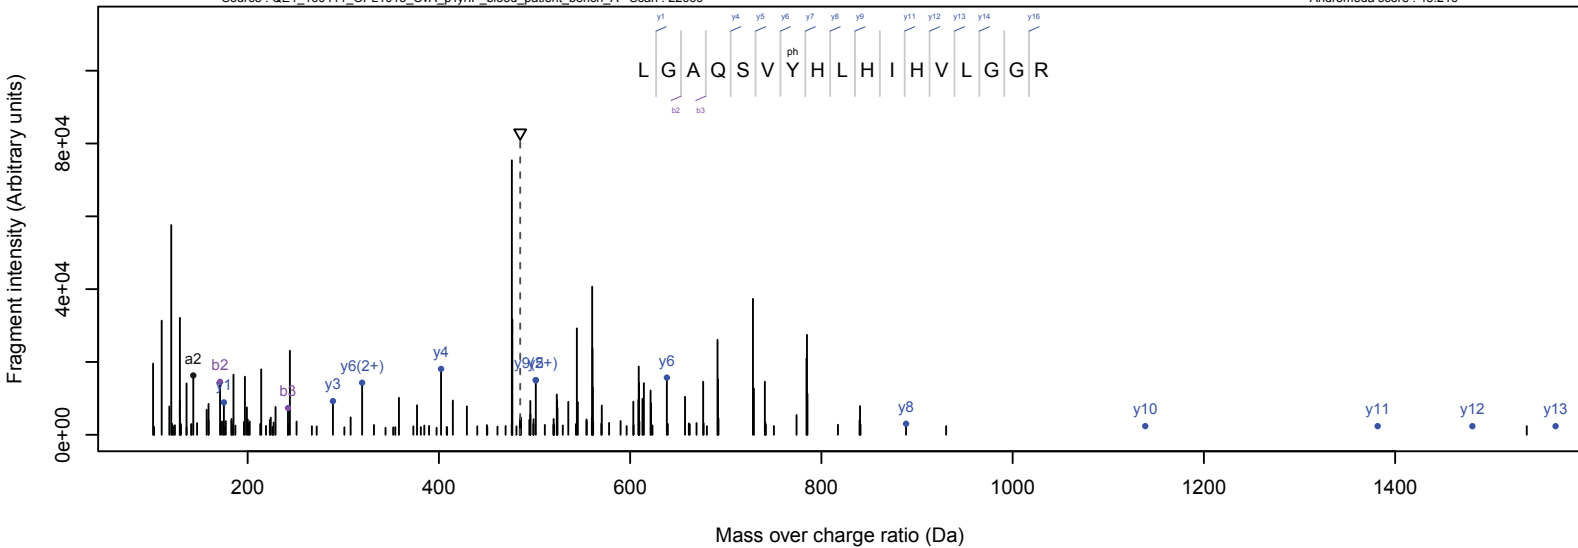

## AIGGILTAS(ph)HNPGGPNGDFGIK-3+

Source : QE1\_160411\_OPL1013\_CvA\_pTyrIP\_blood\_patient\_bench\_D Scan : 35634

Andromeda score : 48.18

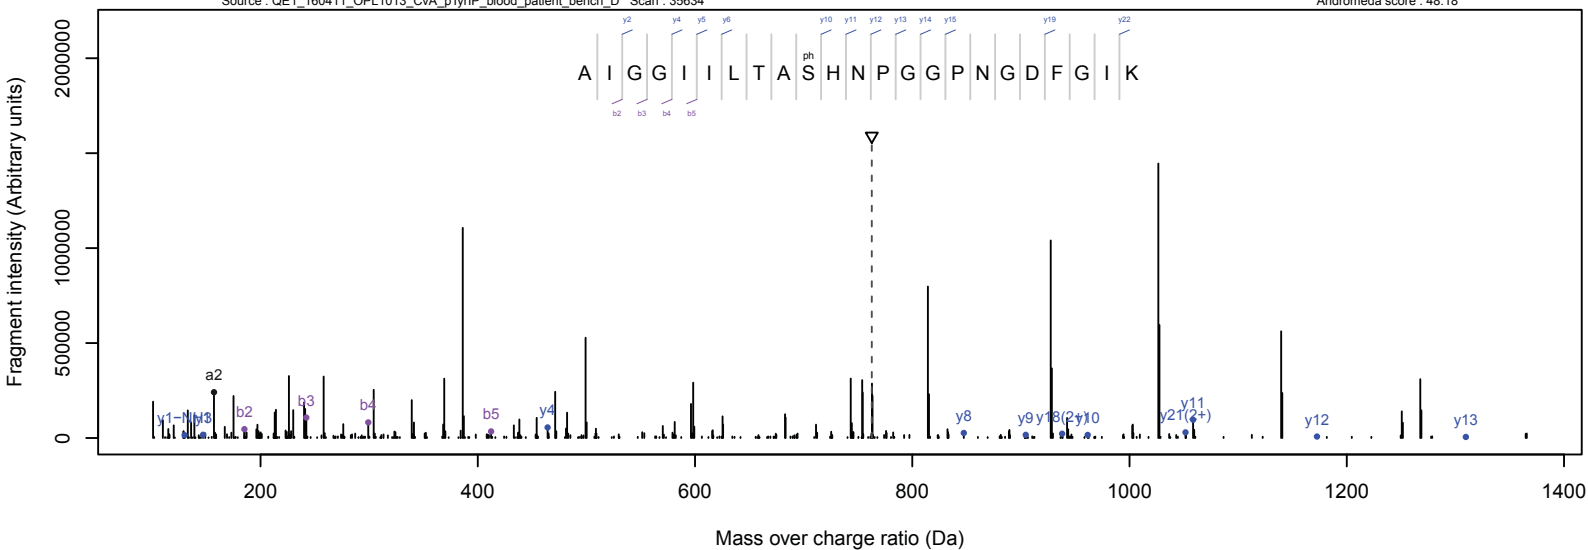

## ALSSEGKPYVT(ph)KEELYQLNLR-3+

Source : QE1\_160411\_OPL1013\_CvA\_pTyrIP\_blood\_patient\_bench\_C Scan : 24927

Andromeda score : 48.053

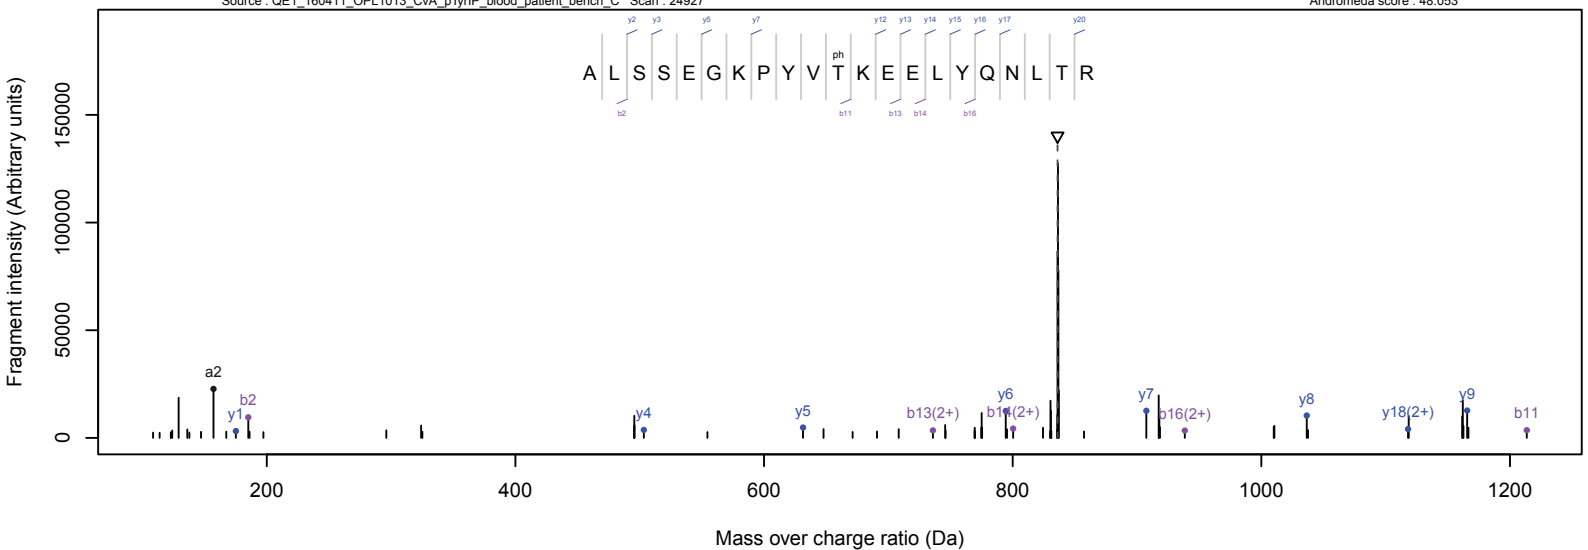

LIVGLM(ox)RPPAY(ph)CDAK-2+

Source : QE1\_160411\_OPL1013\_CvA\_pTyrIP\_blood\_patient\_bench\_C Scan : 22547

Andromeda score : 47.774

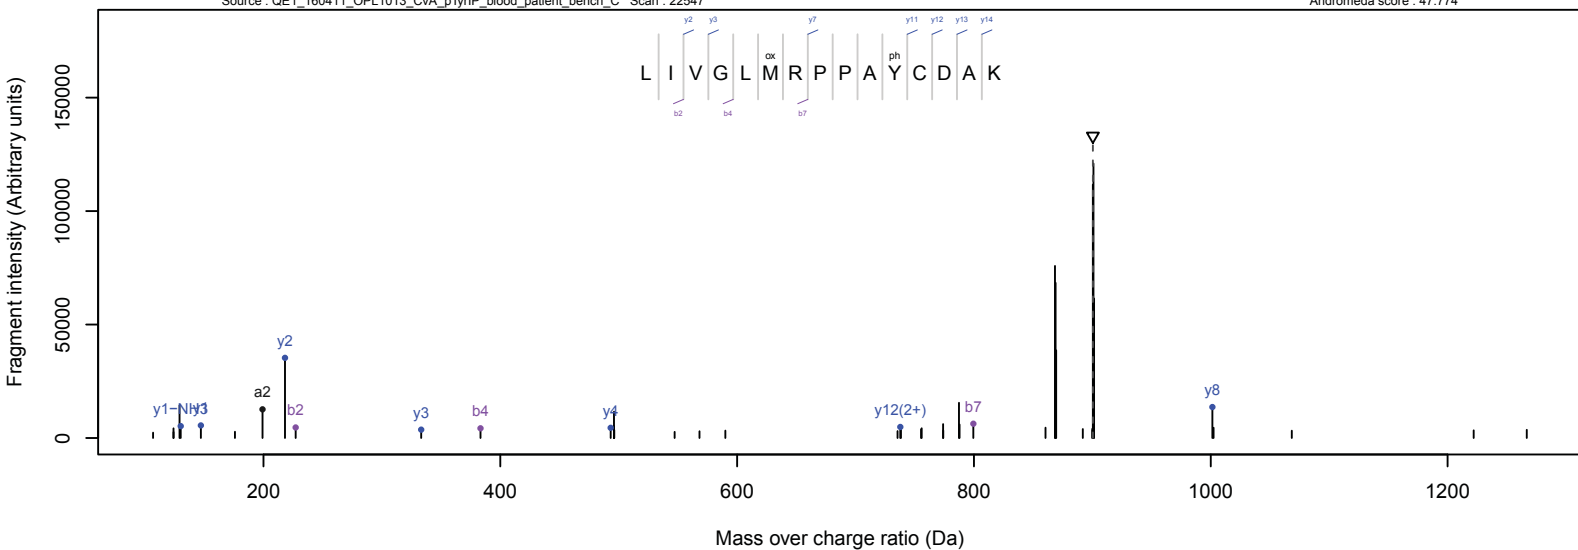

LQLDNQY(ph)AVLENQK-2+

Source : QE1\_160411\_OPL1013\_CvA\_pTyrIP\_blood\_patient\_bench\_C Scan : 23790

Andromeda score : 47.774

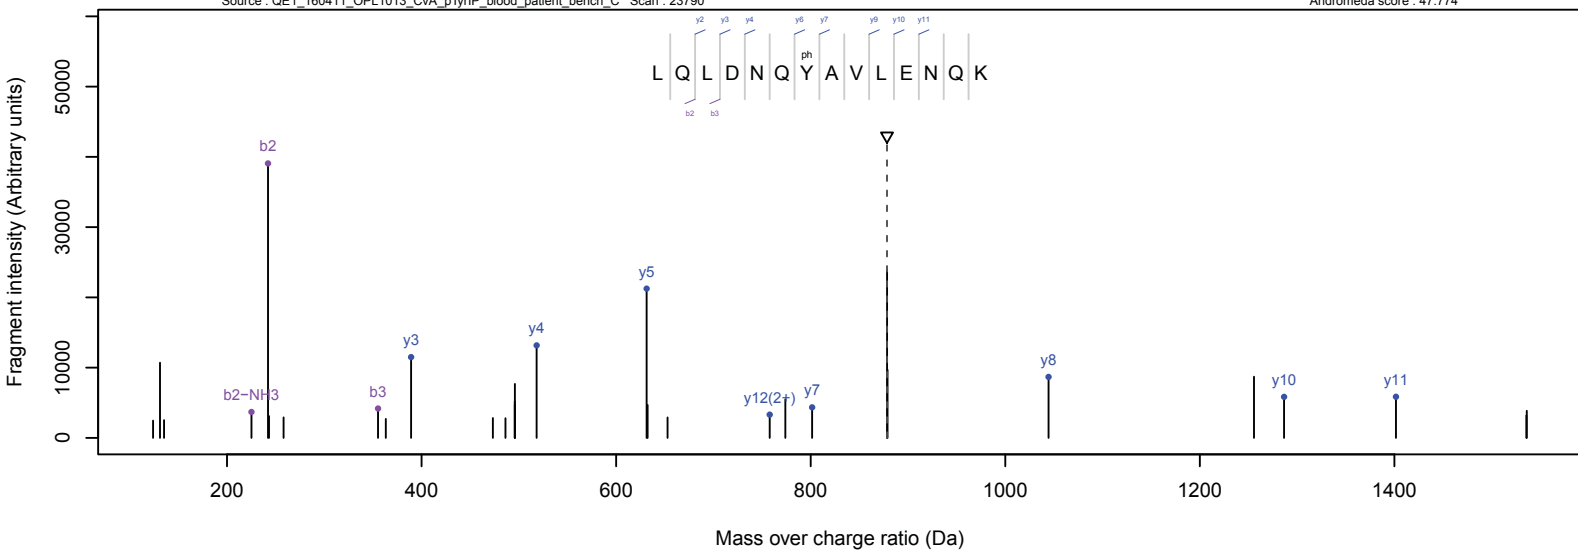

LDM(ox)GGY(ph)YITTR-2+

Source : QE1\_160411\_OPL1013\_CvA\_pTyrIP\_blood\_patient\_bench\_C Scan : 15542

Andromeda score : 47.712

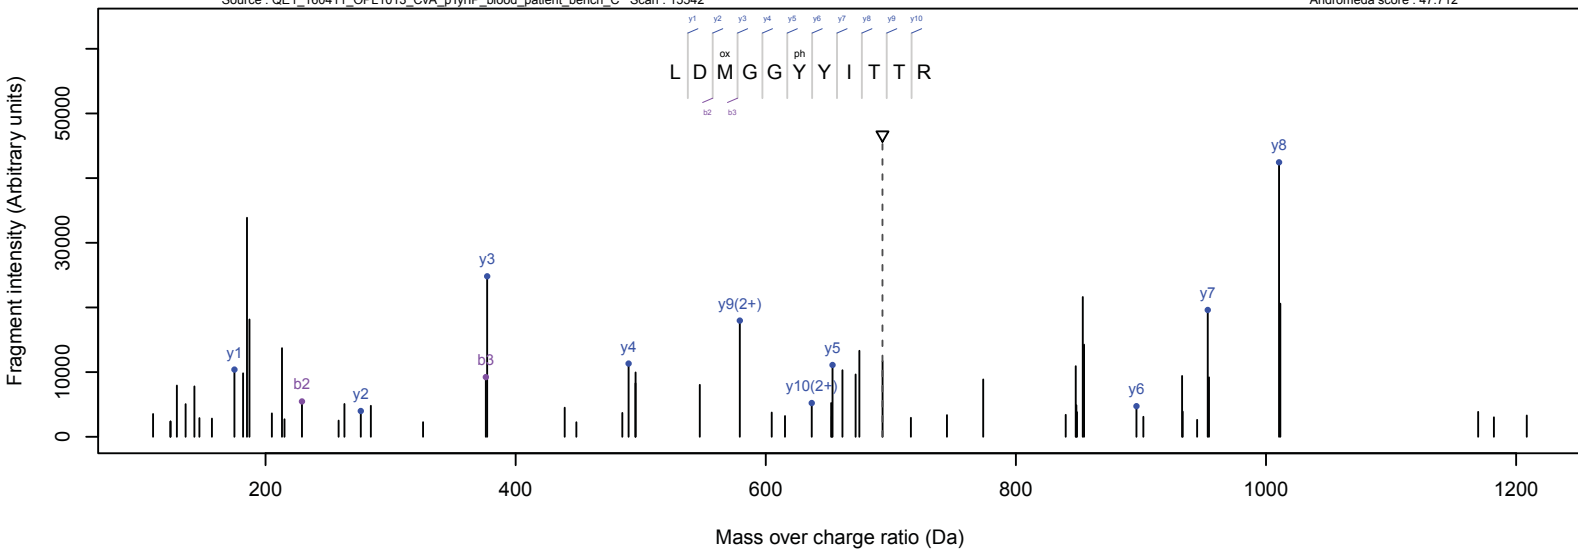

ALSDHIIY(ph)LEGTLKPNM(ox)VTPGHACTQK-5+

Source : QE1\_160411\_OPL1013\_CvA\_pTyrIP\_blood\_patient\_bench\_C Scan : 26610

Andromeda score : 47.616

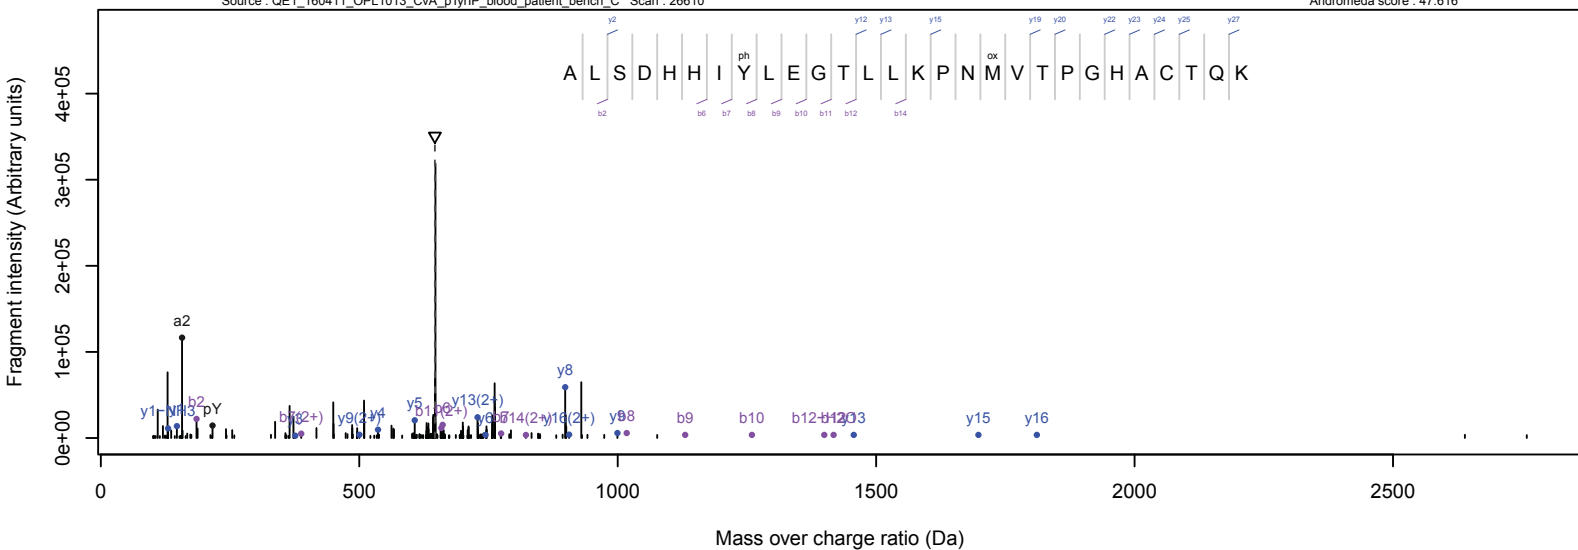

ALY(ph)EAGER-2+

Source : QE1\_160411\_OPL1013\_CvA\_pTyrIP\_blood\_patient\_bench\_C Scan : 3891

Andromeda score : 47.603

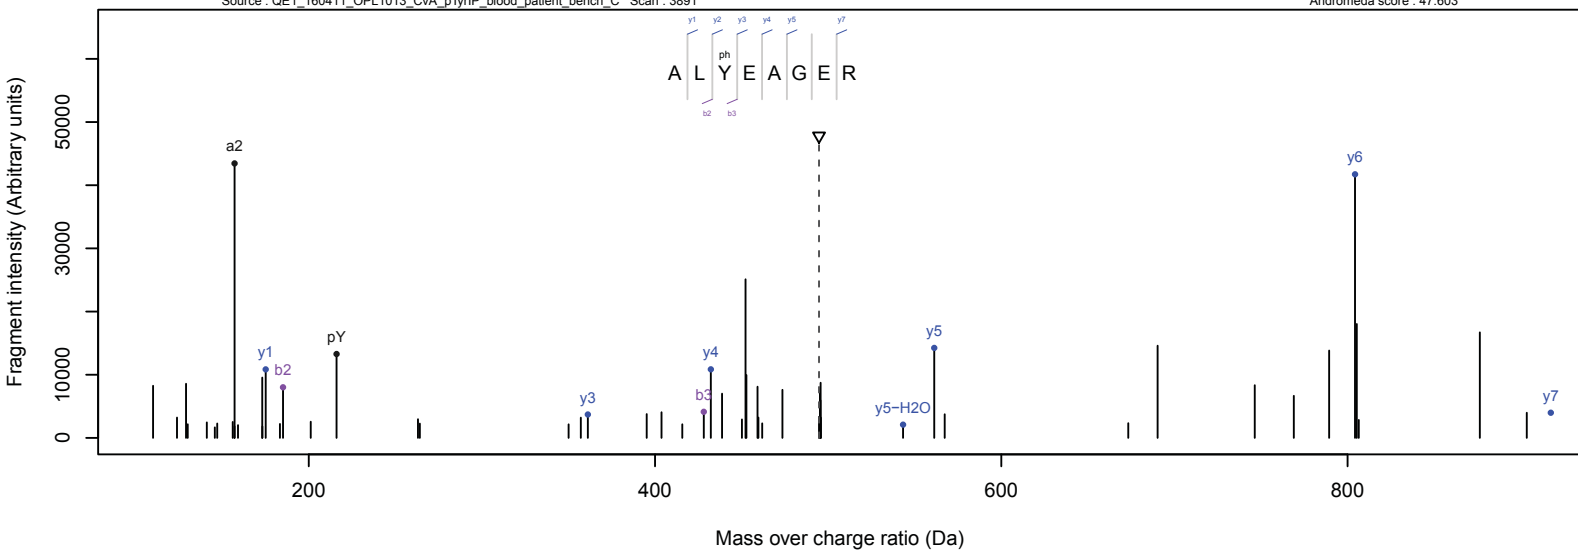

Y(ph)M(ox)ACLLYR-2+

Source : QE1\_160411\_OPL1013\_CvA\_pTyrIP\_blood\_patient\_bench\_D Scan : 19615

Andromeda score : 47.603

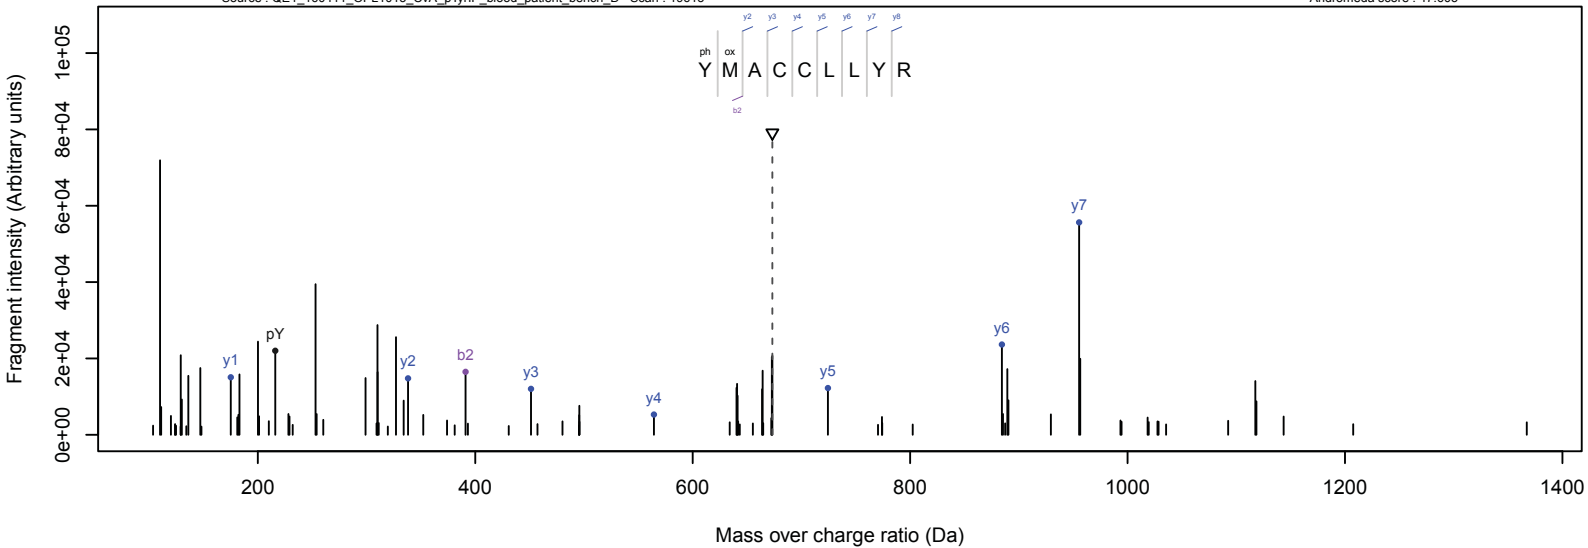



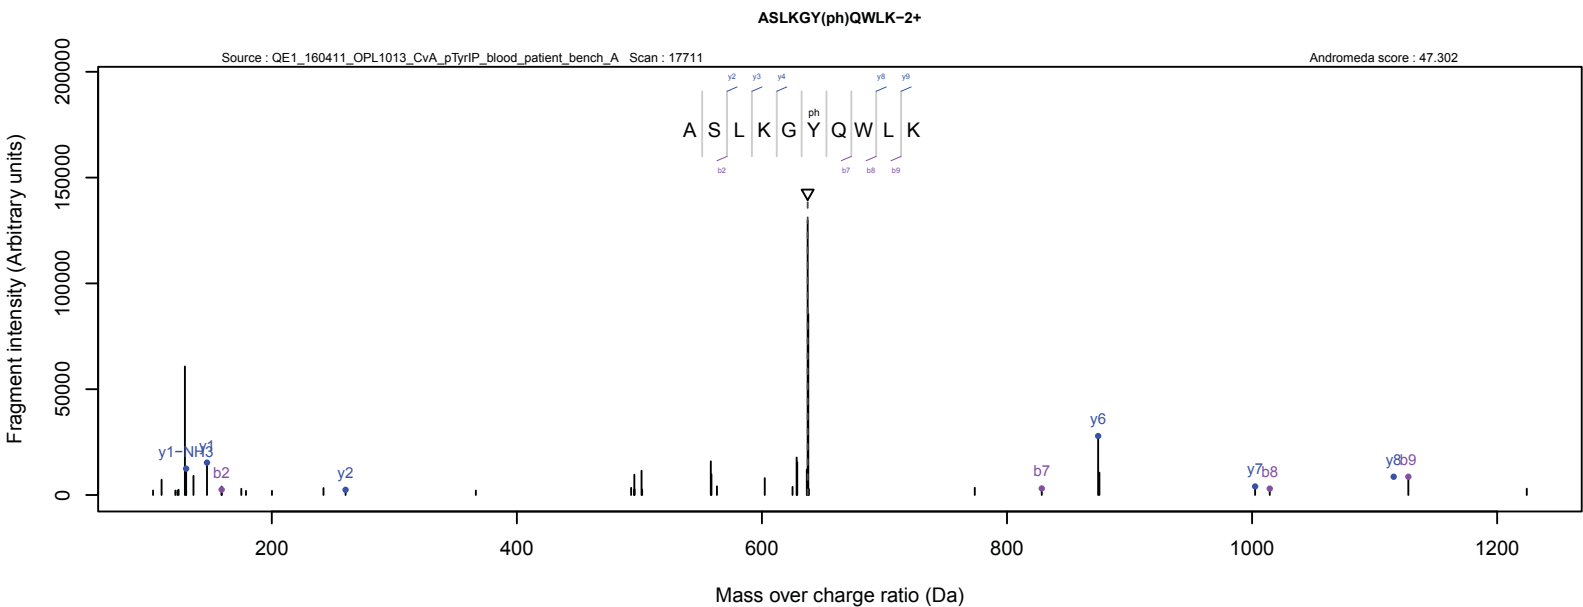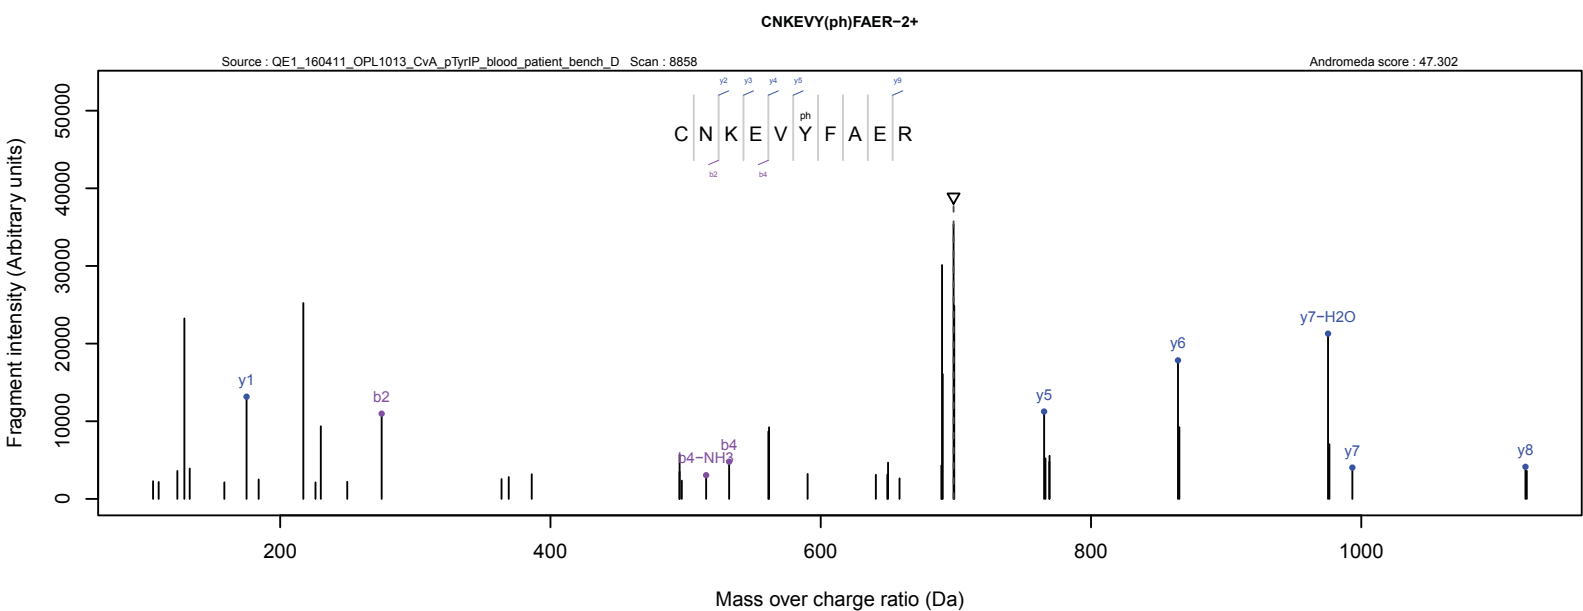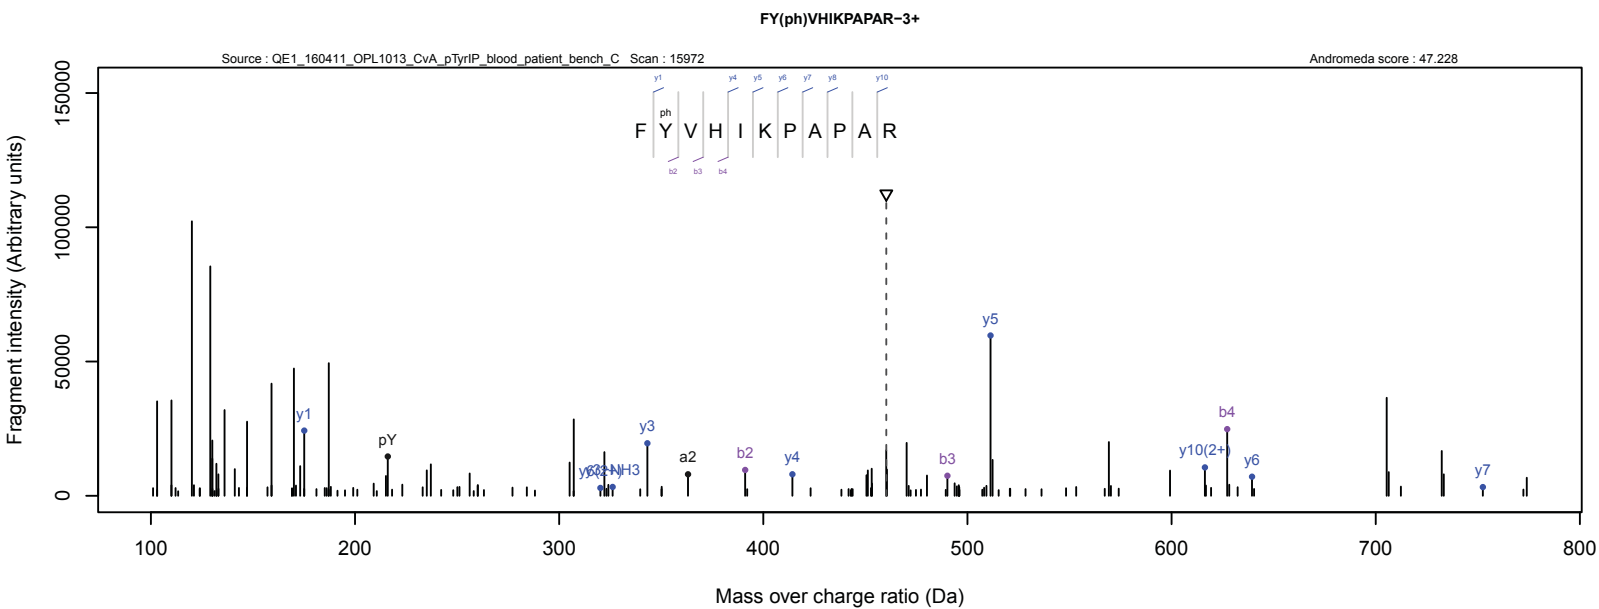

**DKDAY(ph)SSFGSR-2+**

Source : QE1\_160411\_OPL1013\_CvA\_pTyrIP\_blood\_patient\_bench\_D Scan : 4527

Andromeda score : 47.062

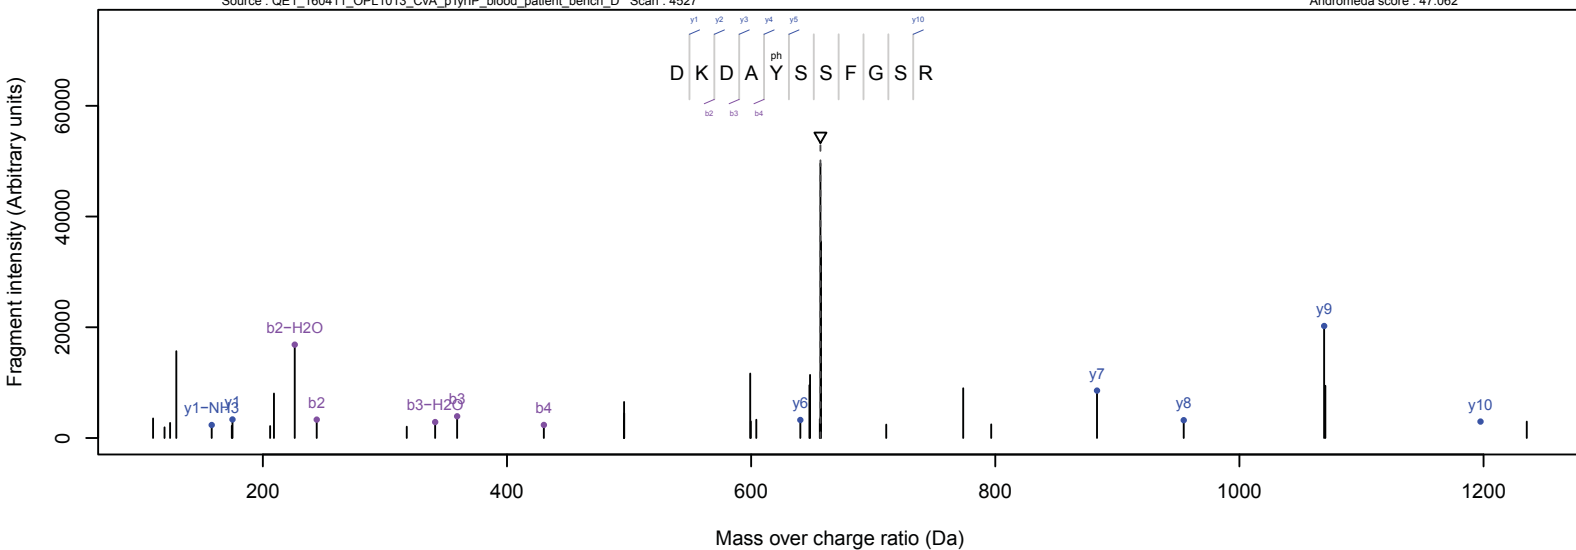

**NPRPGEENGKDY(ph)YFVTR-3+**

Source : QE1\_160411\_OPL1013\_CvA\_pTyrIP\_blood\_patient\_bench\_D Scan : 12631

Andromeda score : 46.877

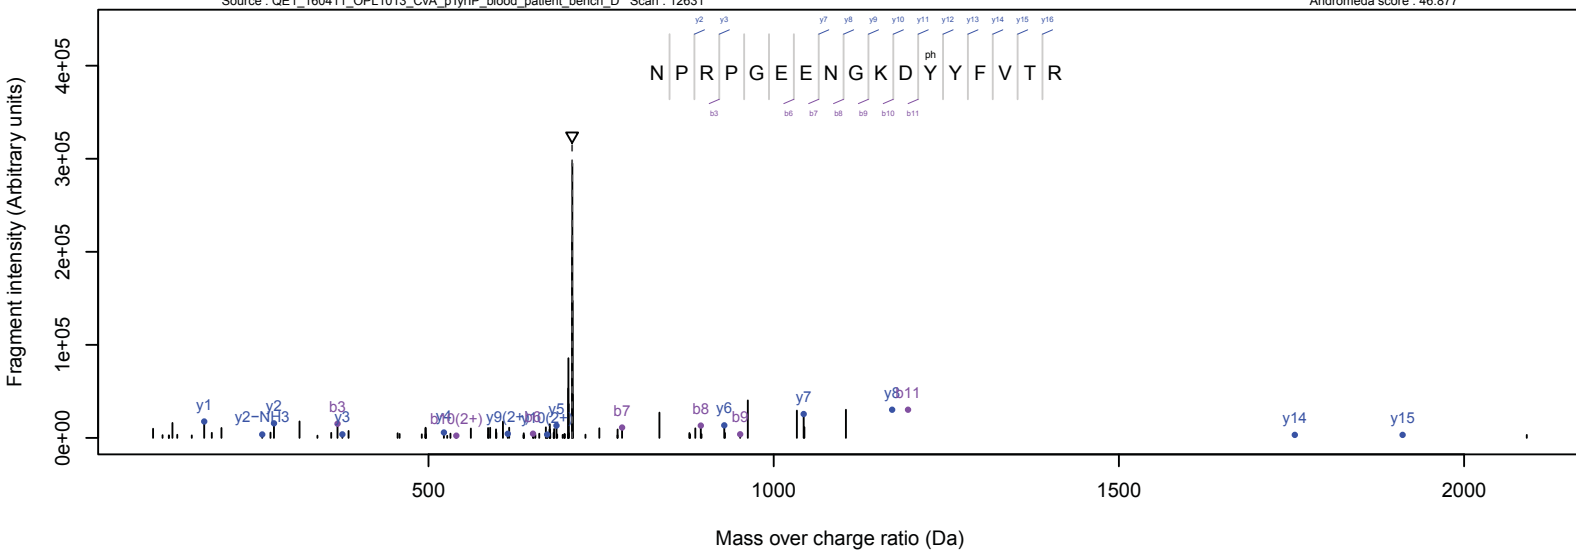

**EKLCY(ph)VALDFEQEM(ox)ATAASSSSLEK-3+**

Source : QE1\_160411\_OPL1013\_CvA\_pTyrIP\_blood\_patient\_bench\_A Scan : 36675

Andromeda score : 46.862

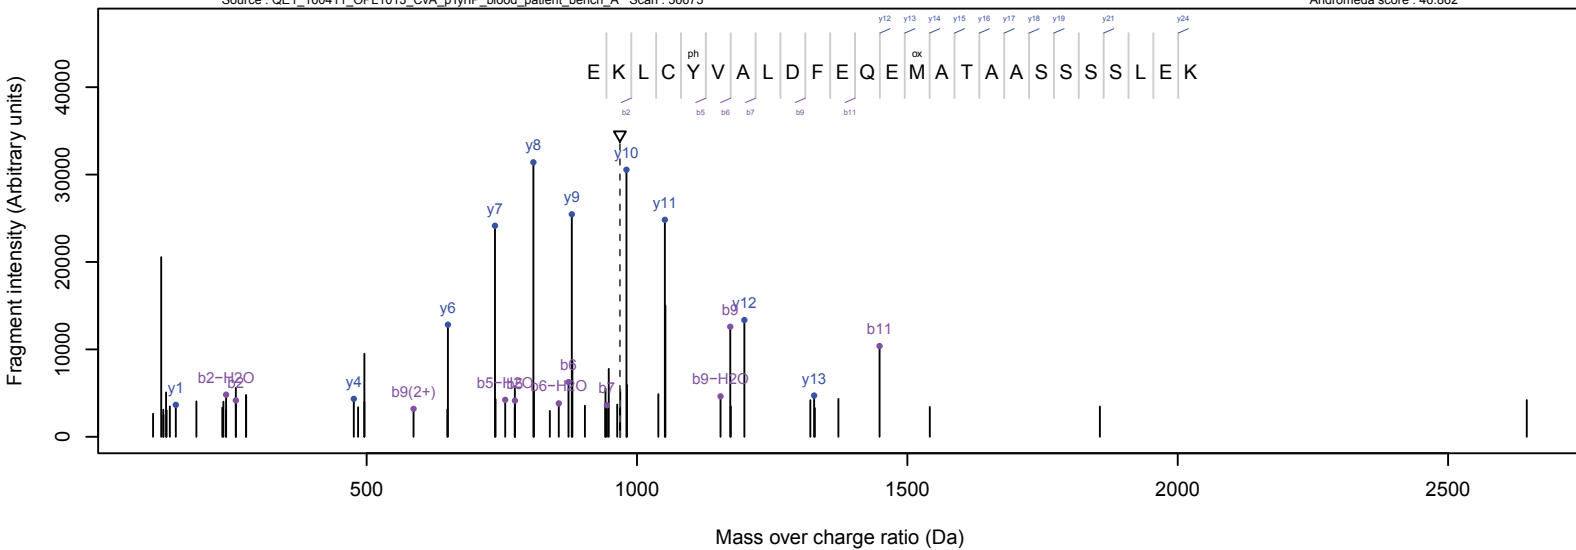

**NTPYK(ph)LEPVKPTVPNDYMTSPAR-4+**

Source : QE1\_160411\_OPL1013\_CvA\_pTyrIP\_blood\_patient\_bench\_D Scan : 26409

Andromeda score : 46.862

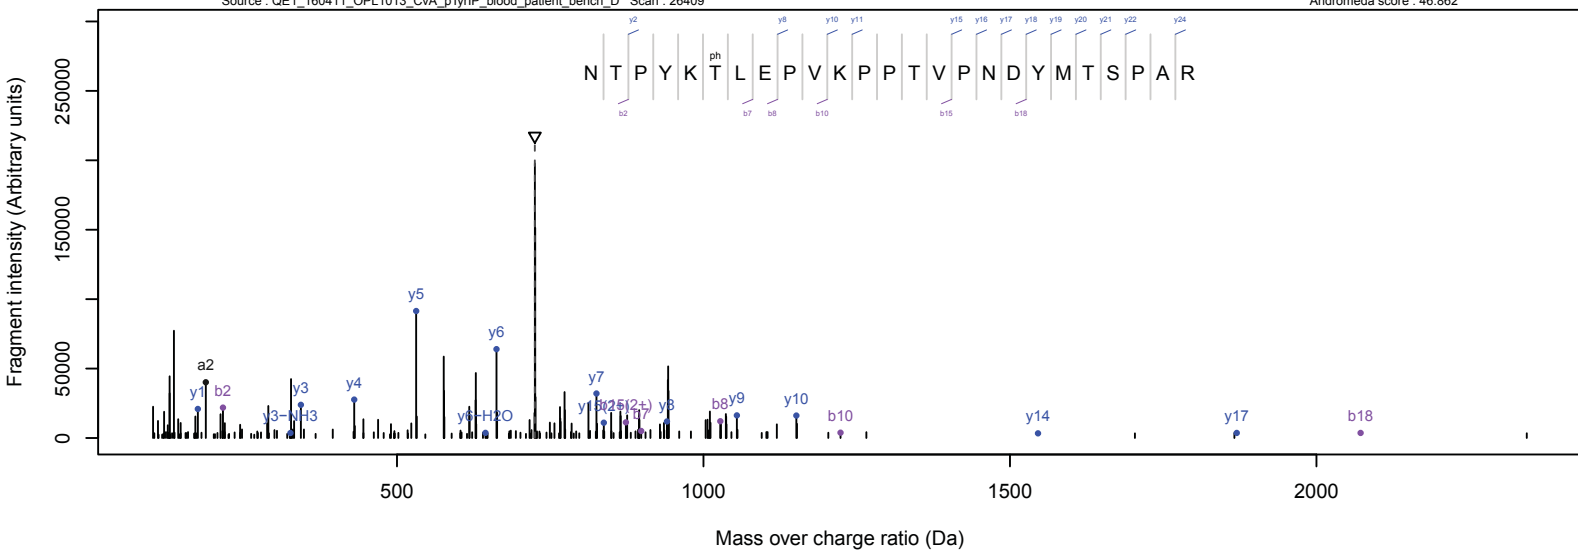

**YHGHSM(ox)SDPGVS(ph)Y(ph)RTREEIQEVR-4+**

Source : QE1\_160411\_OPL1013\_CvA\_pTyrIP\_blood\_patient\_bench\_C Scan : 14029

Andromeda score : 46.862

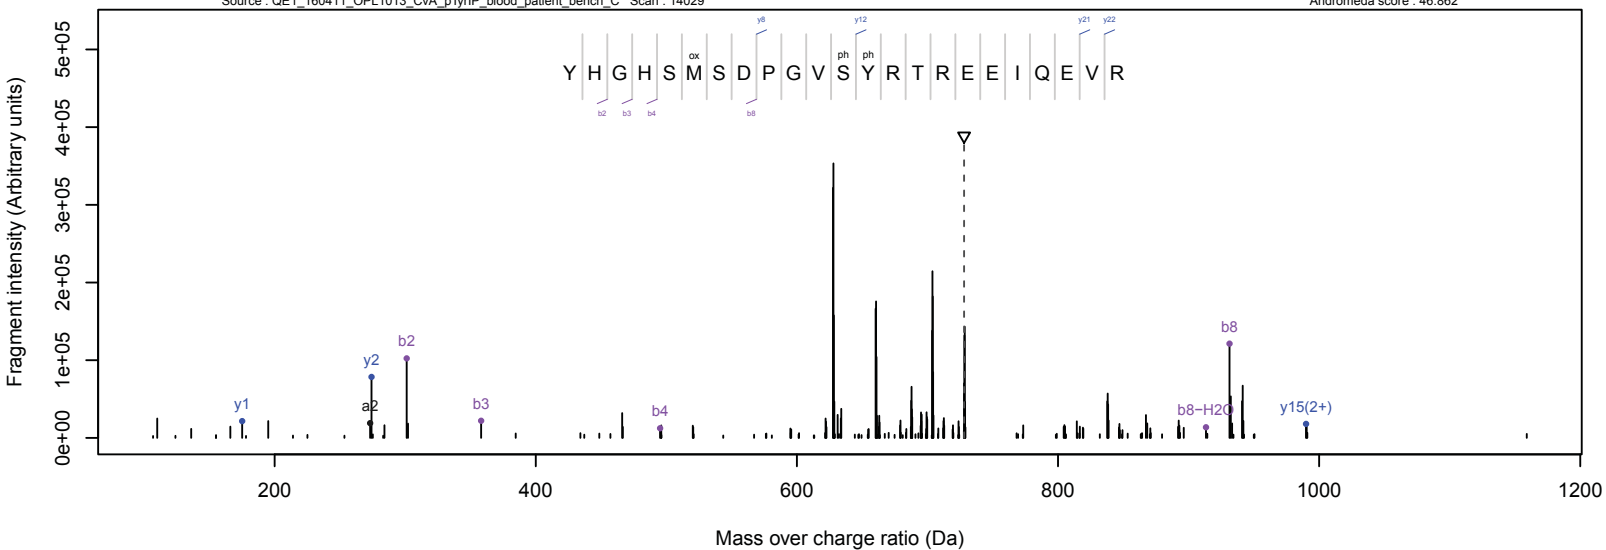

**LY(ph)WGDAK-2+**

Source : QE1\_160411\_OPL1013\_CvA\_pTyrIP\_blood\_patient\_bench\_B Scan : 10768

Andromeda score : 46.835

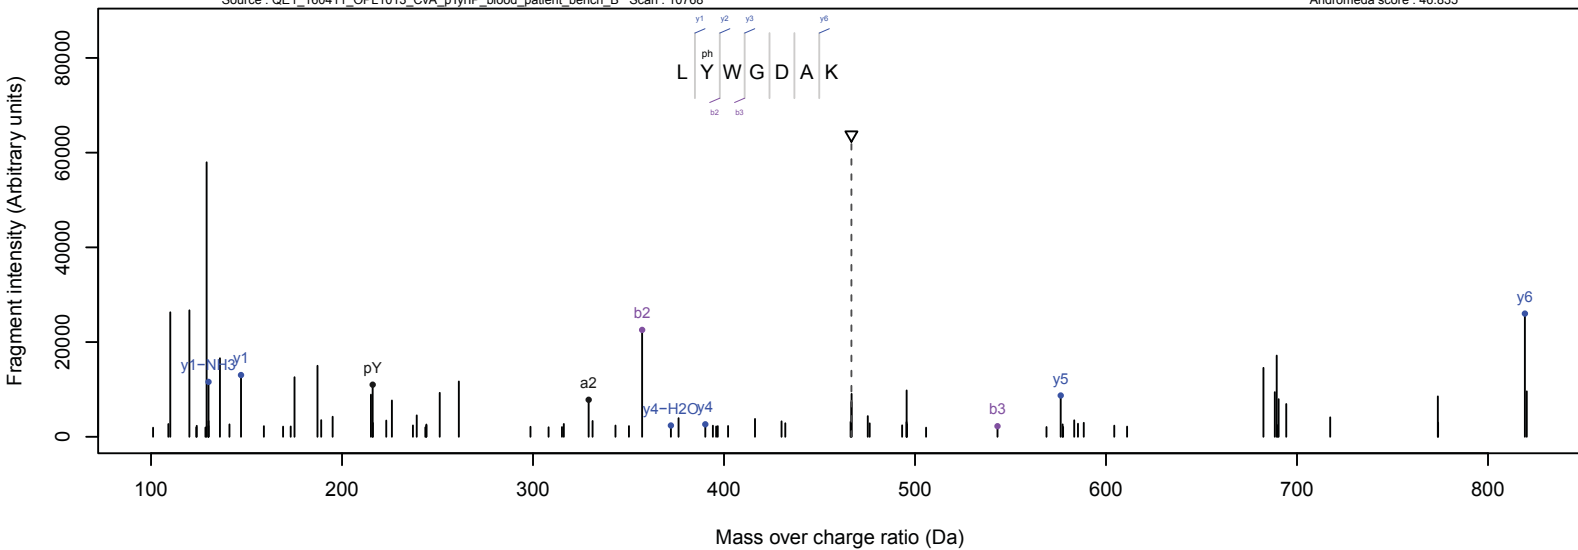

## LVGVFHTYEY(ph)GALNR-3+

Source: QE1\_160411\_OPL1013\_CvA\_pTyrIP\_blood\_patient\_bench\_D Scan: 24069

Andromeda score: 46.797

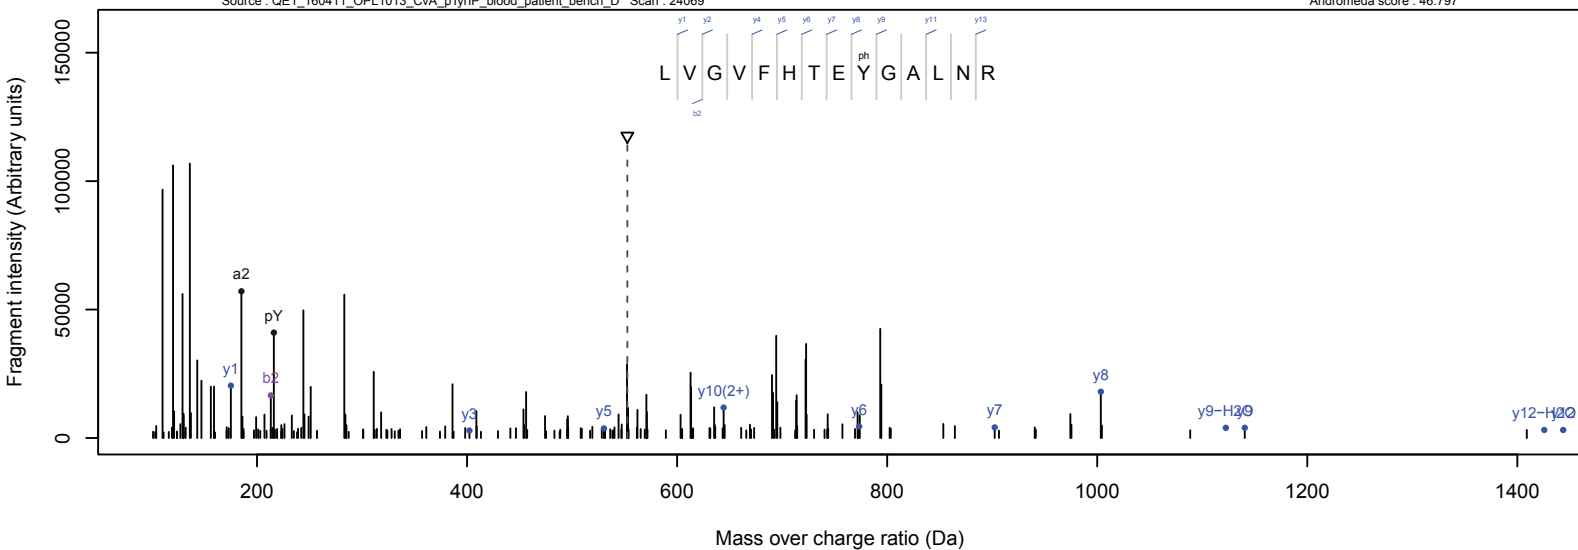

## YHGHSMDPGVS(ph)YR-3+

Source: QE1\_160411\_OPL1013\_CvA\_pTyrIP\_blood\_patient\_bench\_D Scan: 5221

Andromeda score: 46.797

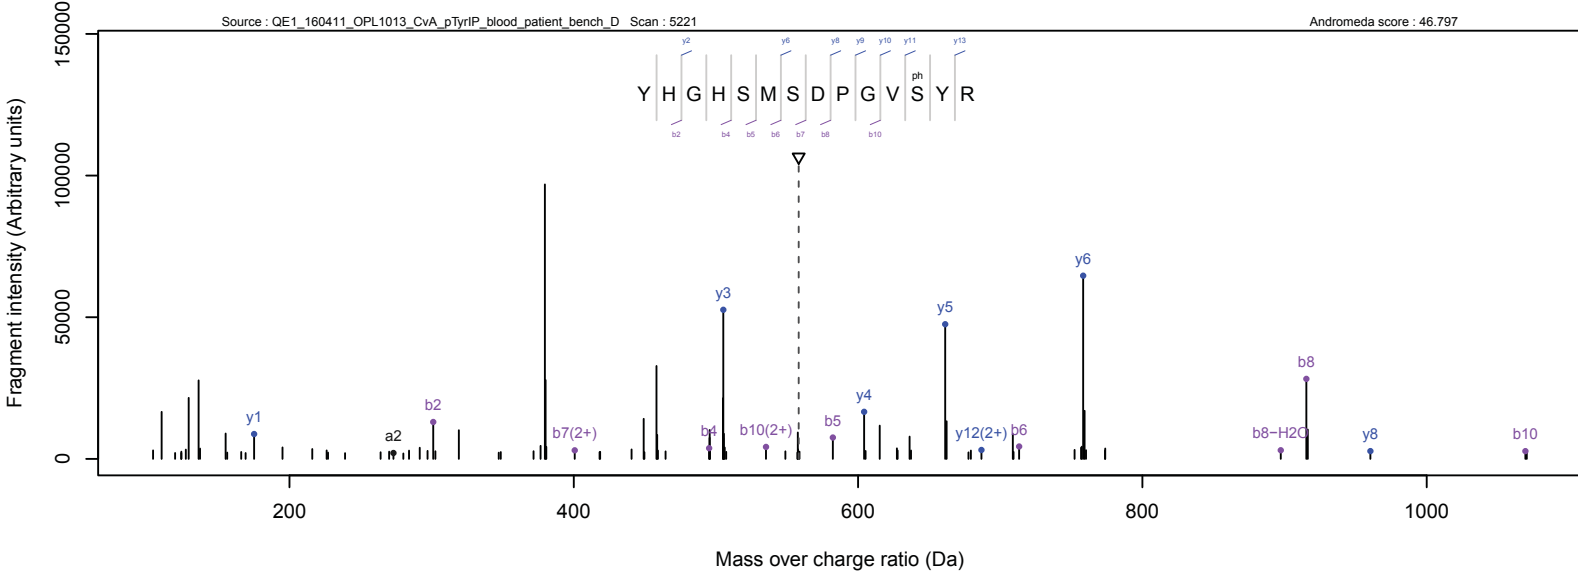

## KELTYQNT(ph)DLSEIKEEEQVK-3+

Source: QE1\_160411\_OPL1013\_CvA\_pTyrIP\_blood\_patient\_bench\_C Scan: 19465

Andromeda score: 46.494

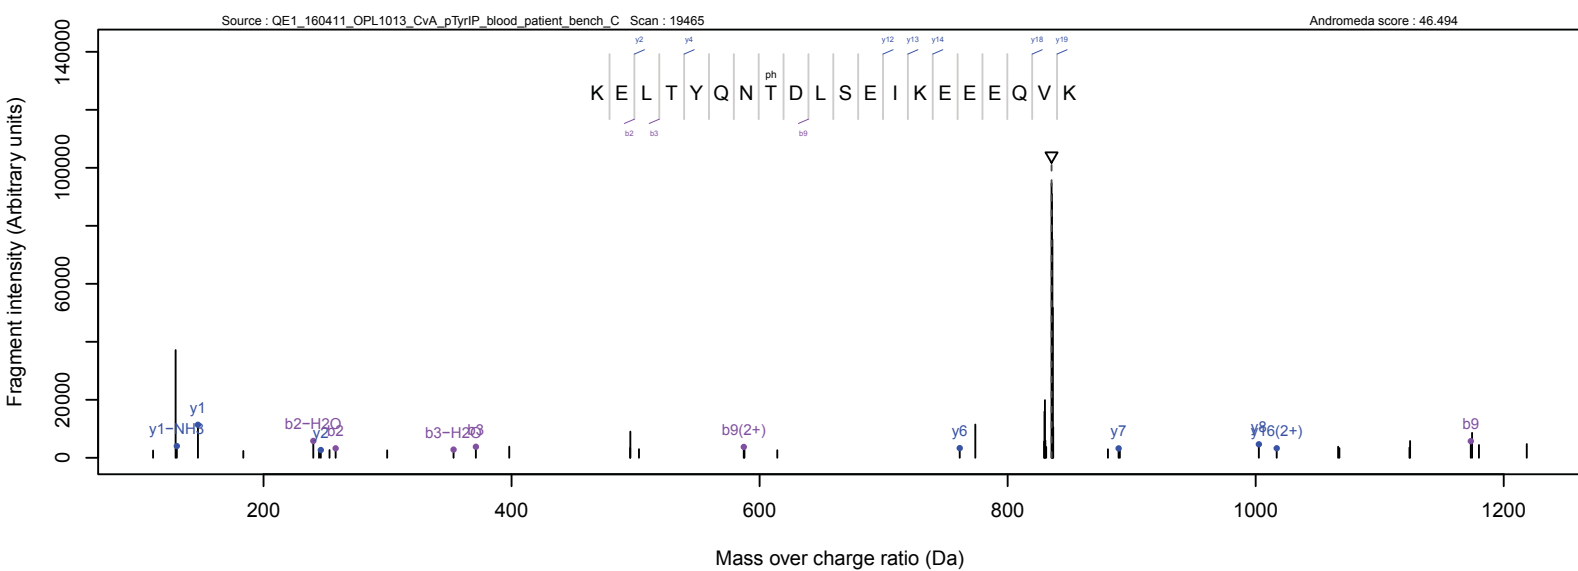

**KKLS(ph)ELLR-2+**

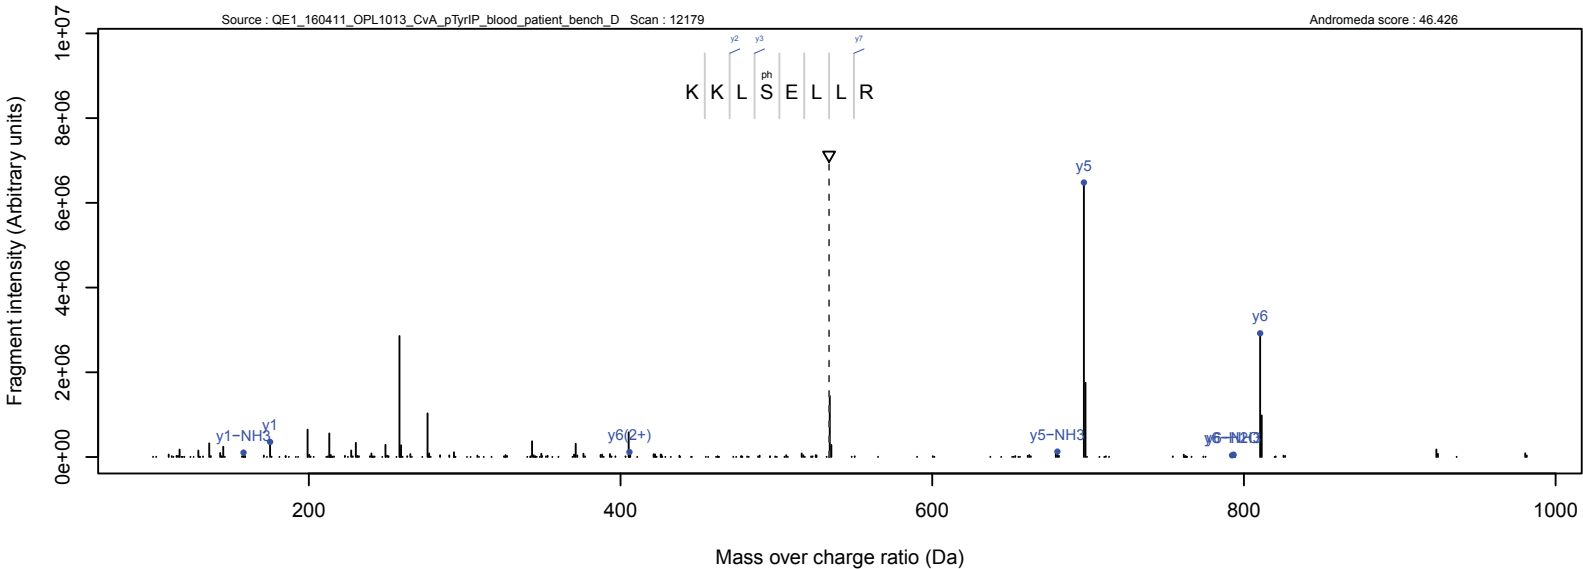

**KGEQTSSGTLSAFAS(ph)YFNSK-3+**

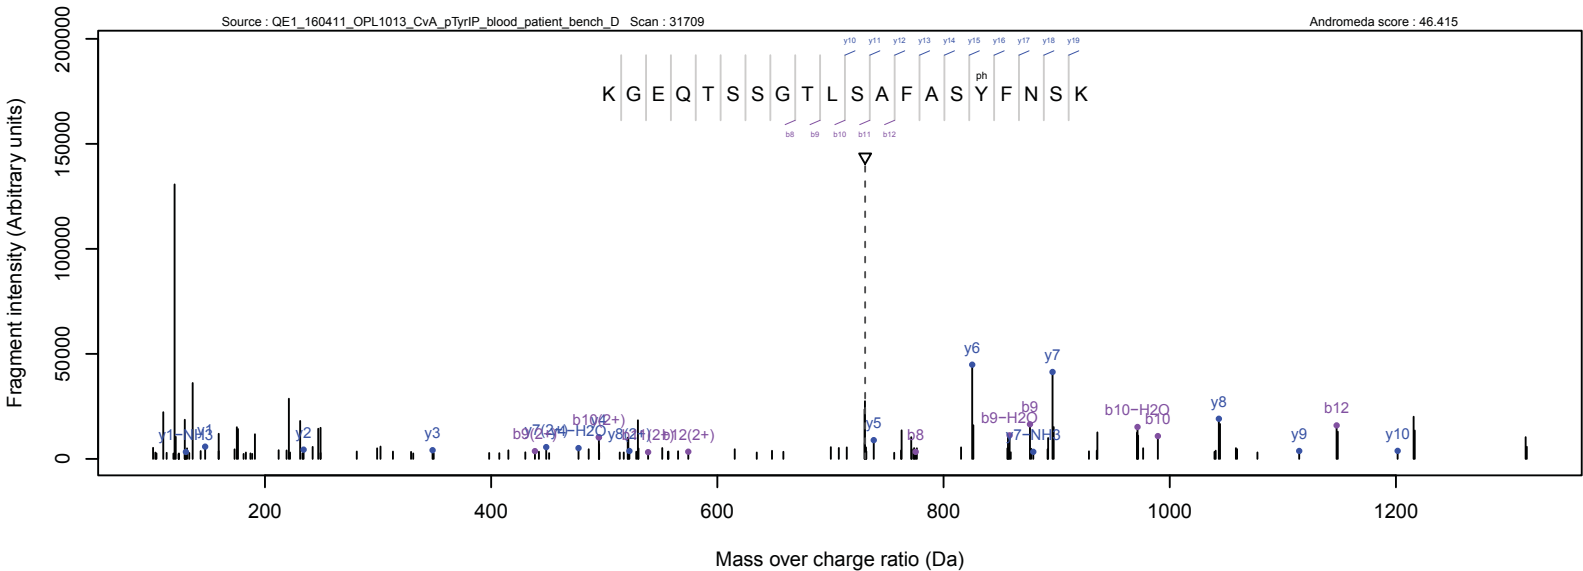

**VQY(ph)VIQGYHK-3+**

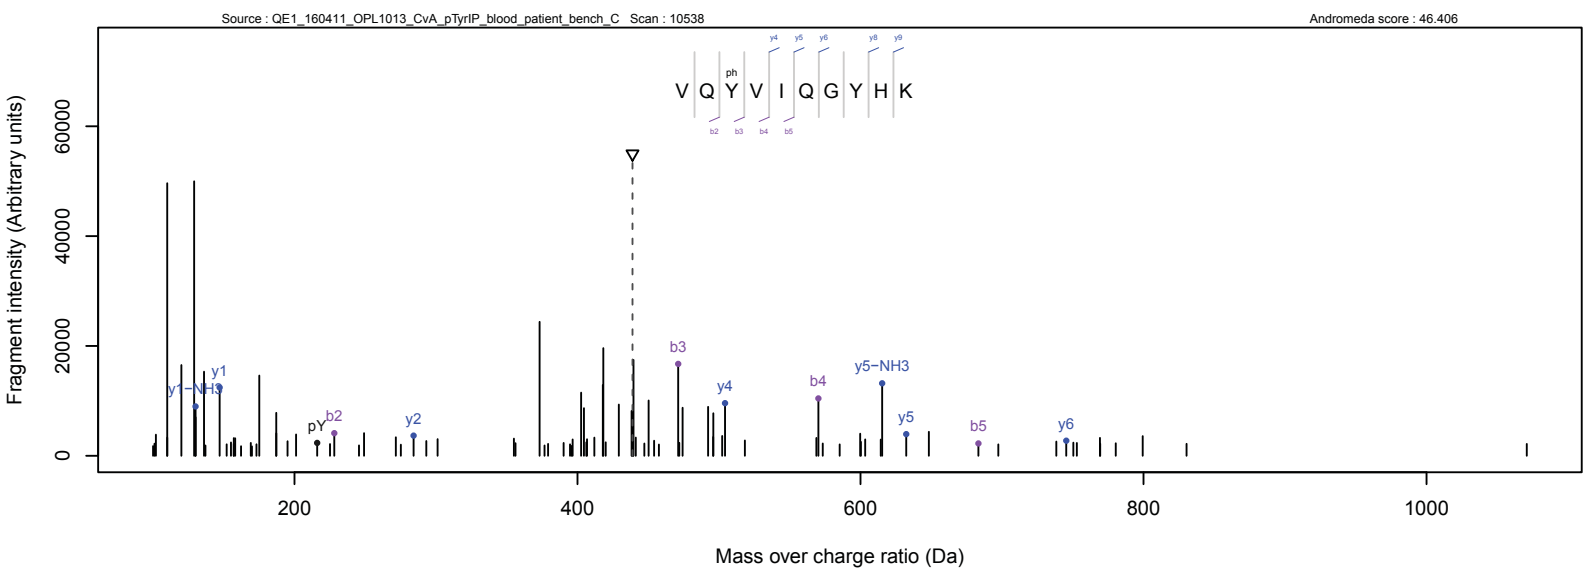

GTQADY(ph)AEVK-2+

Source : QE1\_160411\_OPL1013\_CvA\_pTyrIP\_blood\_patient\_bench\_C Scan : 3618

Andromeda score : 46.352

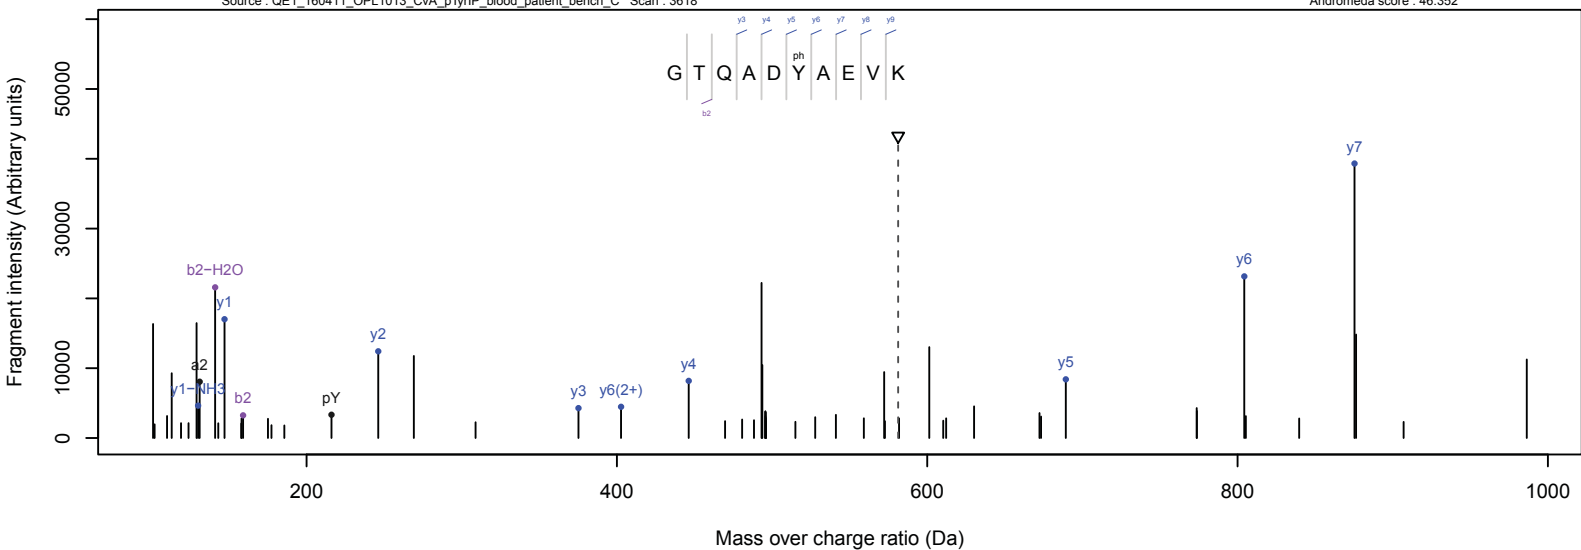

LVNANGEAVY(ph)CKFHYK-3+

Source : QE1\_160411\_OPL1013\_CvA\_pTyrIP\_blood\_patient\_bench\_C Scan : 16865

Andromeda score : 46.318

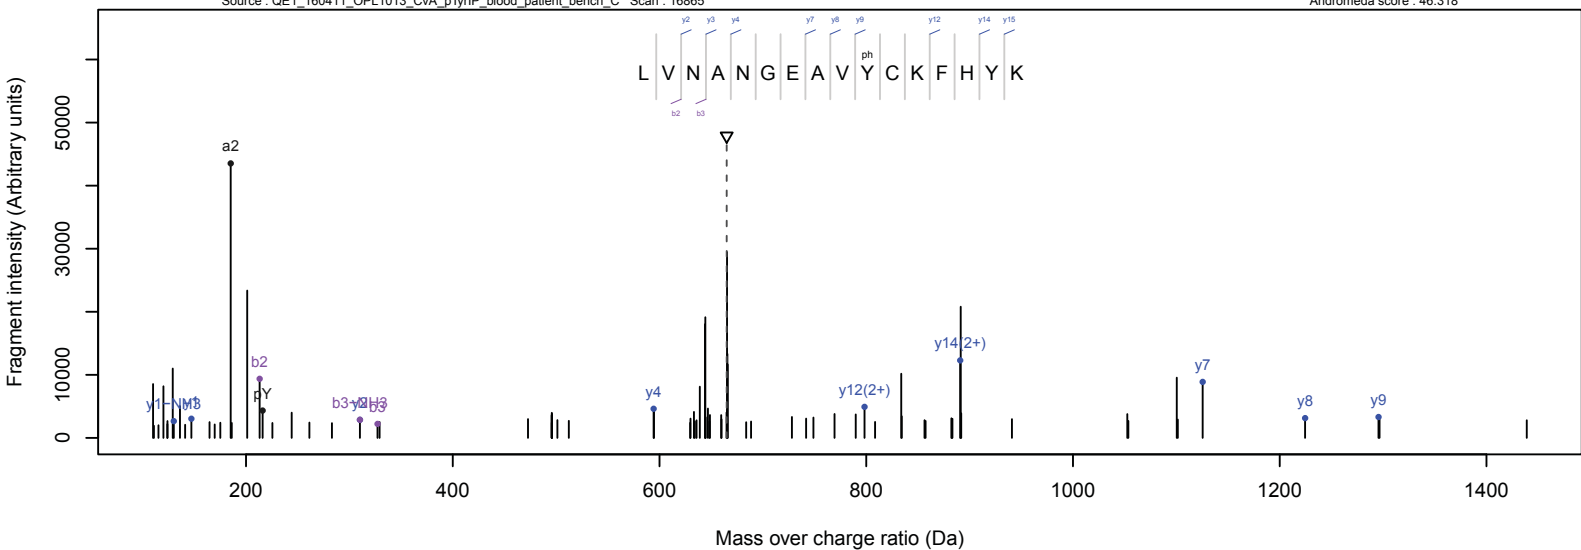

TVNS(ph)TRETTPKSK-3+

Source : QE1\_160411\_OPL1013\_CvA\_pTyrIP\_blood\_patient\_bench\_B Scan : 1658

Andromeda score : 46.318

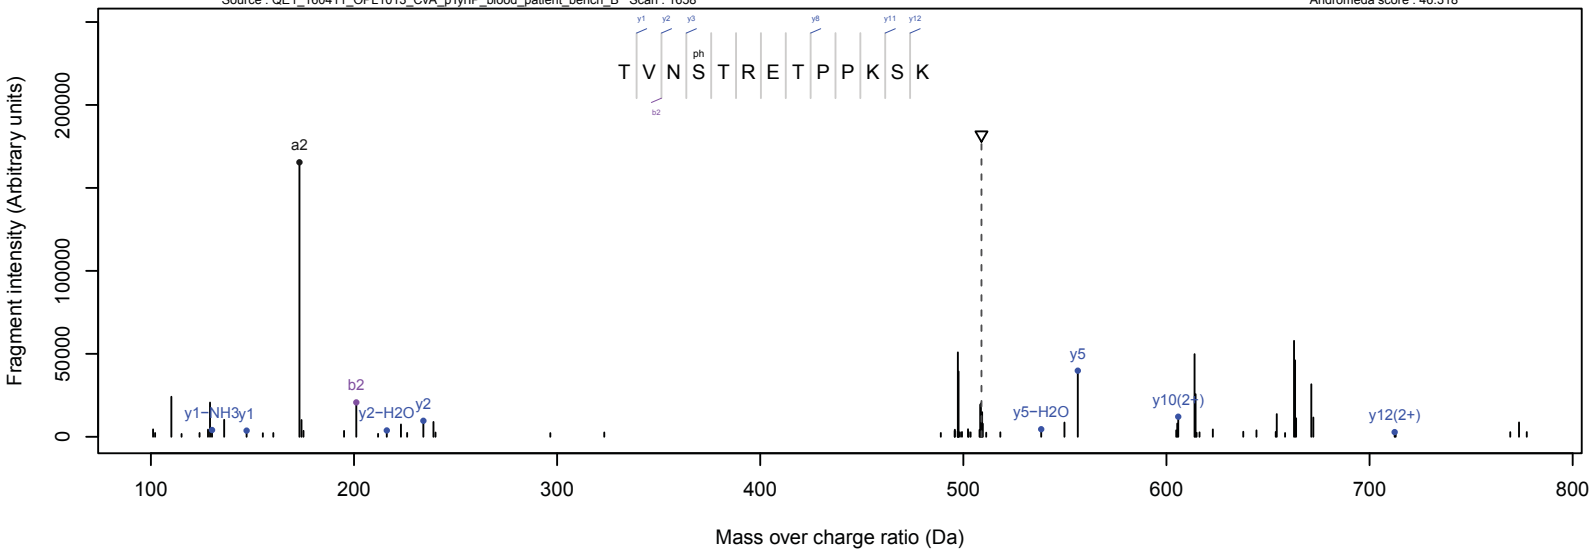

## NLVPMDPNGLSDPY(ph)VKLK-3+

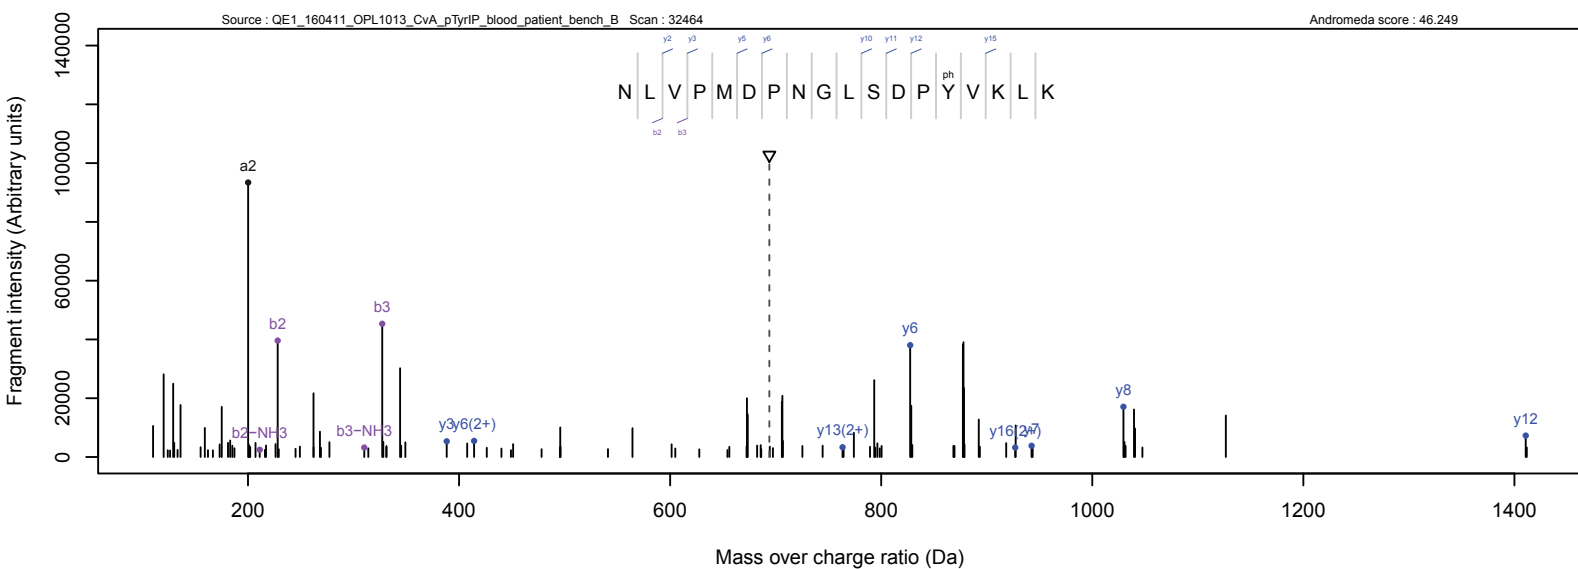

## VFSNGLGSEEY(ph)DVPPR-3+

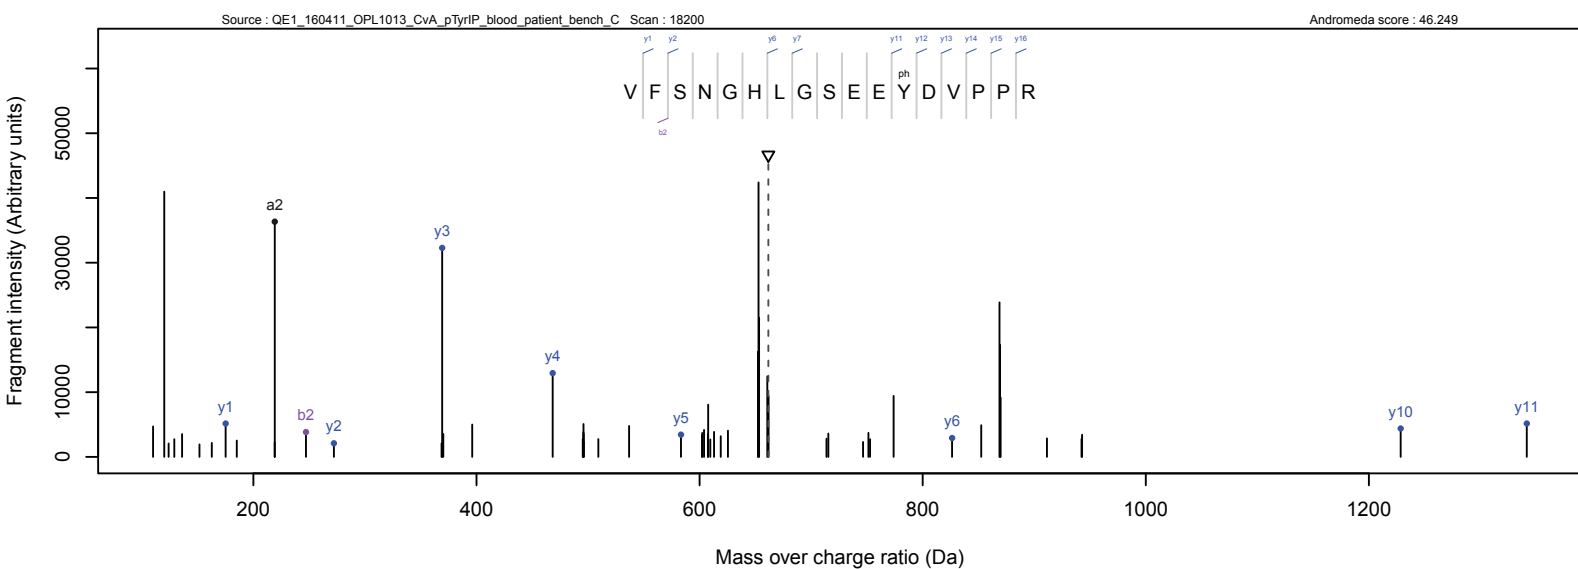

## YQLAVALDS(ph)SYVTNK-2+

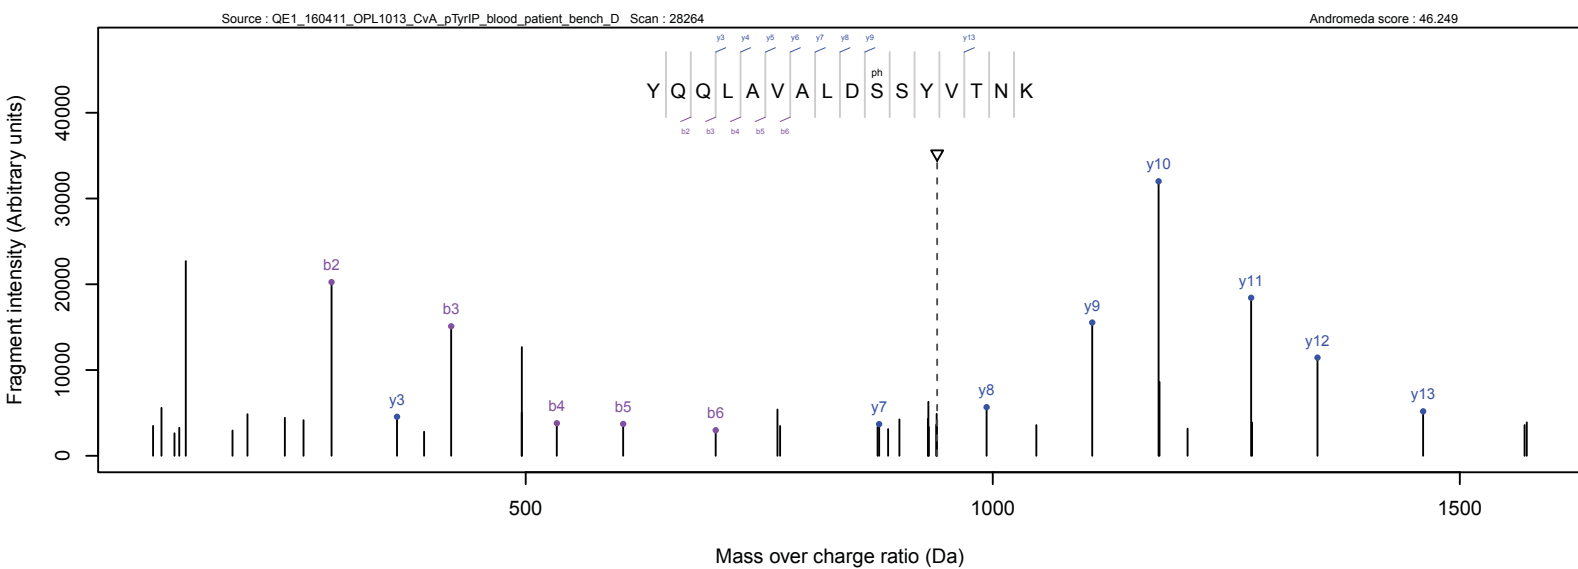

## LLLRRT(ph)YAR-2+

Source : QE1\_160411\_OPL1013\_CvA\_pTyrIP\_blood\_patient\_bench\_C Scan : 23929

Andromeda score : 46.129

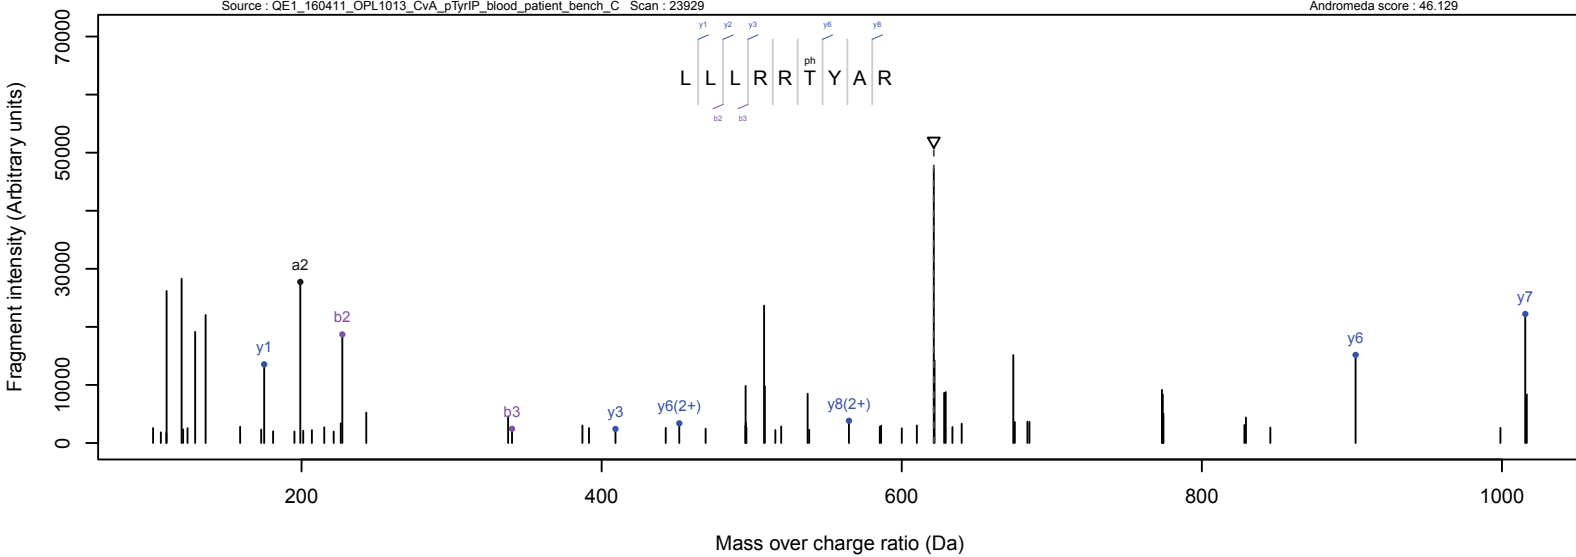

## Y(ph)AFVNWINK-2+

Source : QE1\_160411\_OPL1013\_CvA\_pTyrIP\_blood\_patient\_bench\_A Scan : 31720

Andromeda score : 46.129

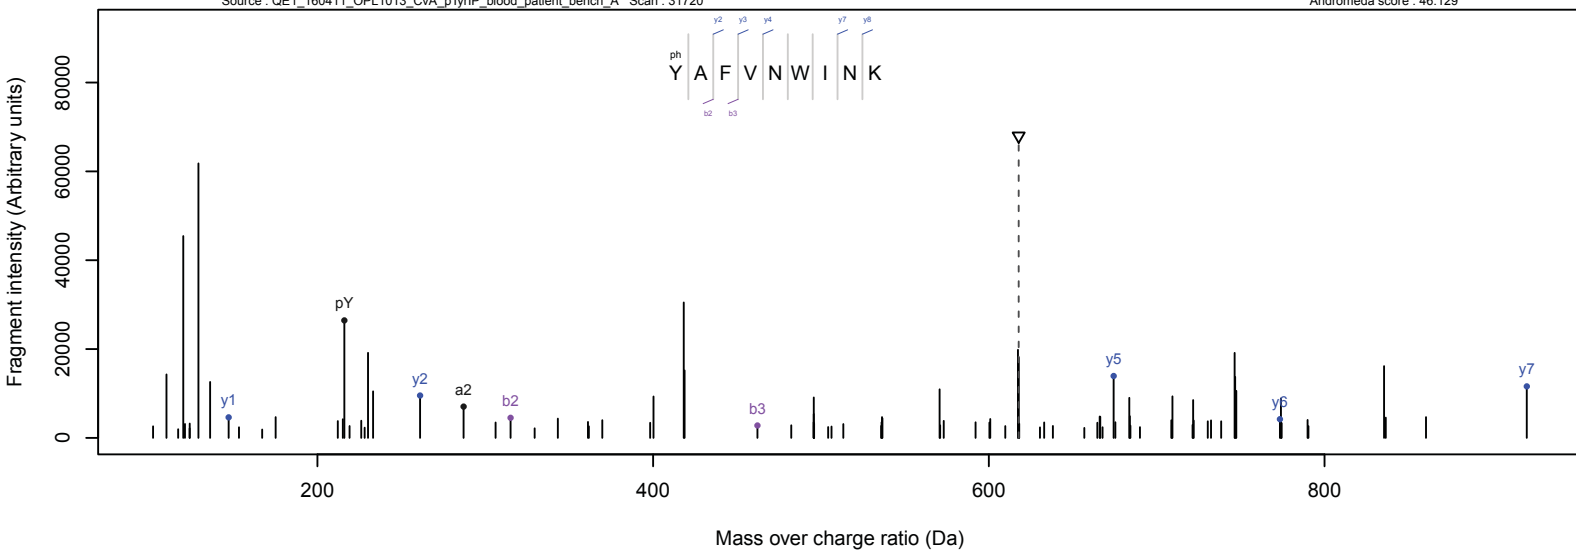

## CSILAAANPAY(ph)GR-2+

Source : QE1\_160411\_OPL1013\_CvA\_pTyrIP\_blood\_patient\_bench\_B Scan : 21595

Andromeda score : 46.069

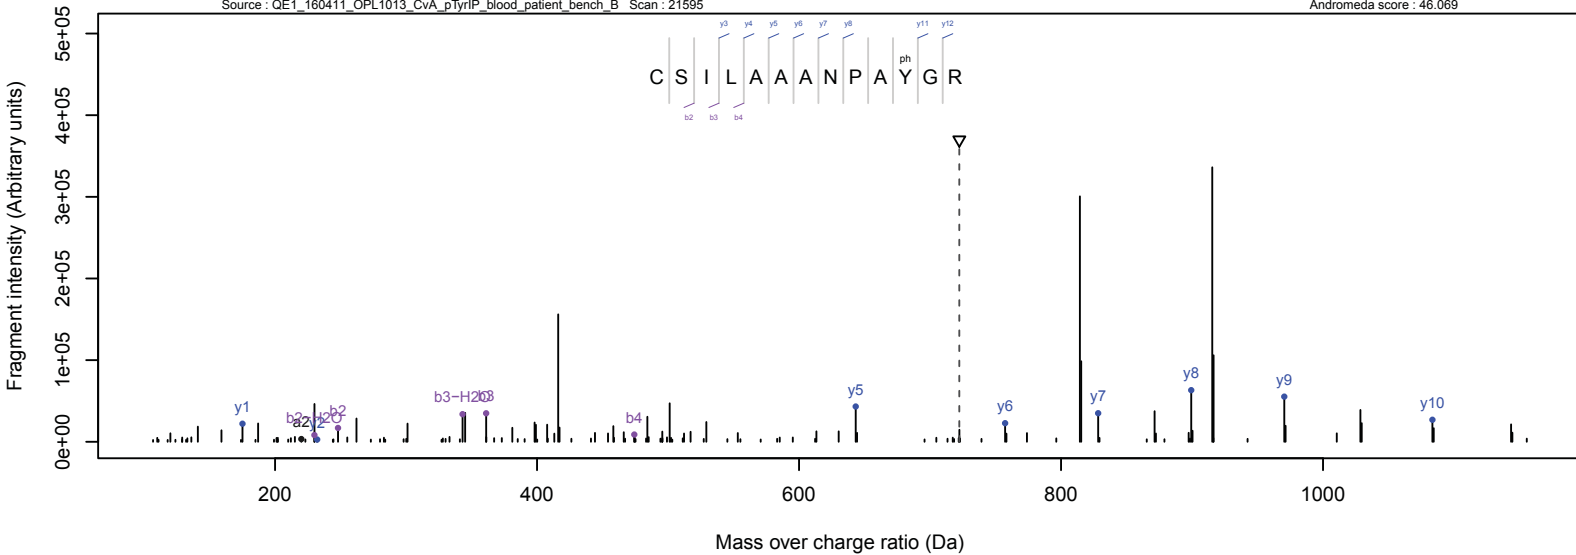



## QYAGY(ph)DYSQQGR-2+

Source : QE1\_160411\_OPL1013\_CvA\_pTyrIP\_blood\_patient\_bench\_D Scan : 6152

Andromeda score : 46.069

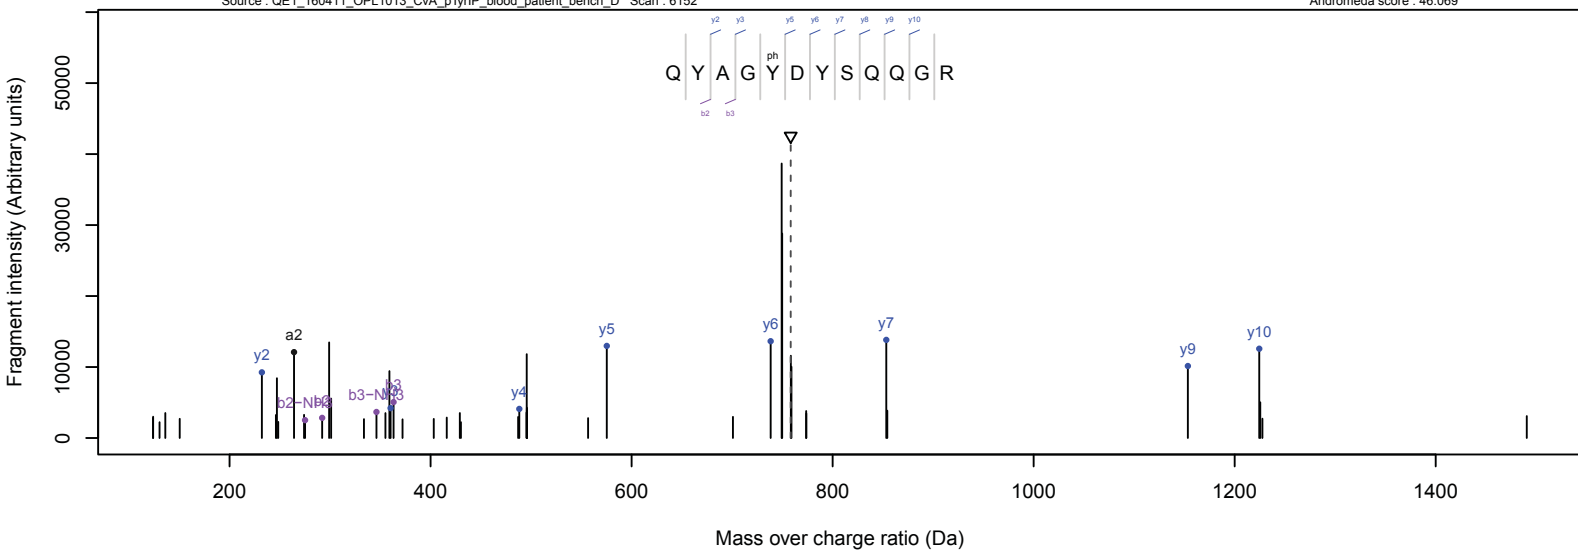

## SM(ox)SGY(ph)LSGFQAR-2+

Source : QE1\_160411\_OPL1013\_CvA\_pTyrIP\_blood\_patient\_bench\_C Scan : 17482

Andromeda score : 46.069

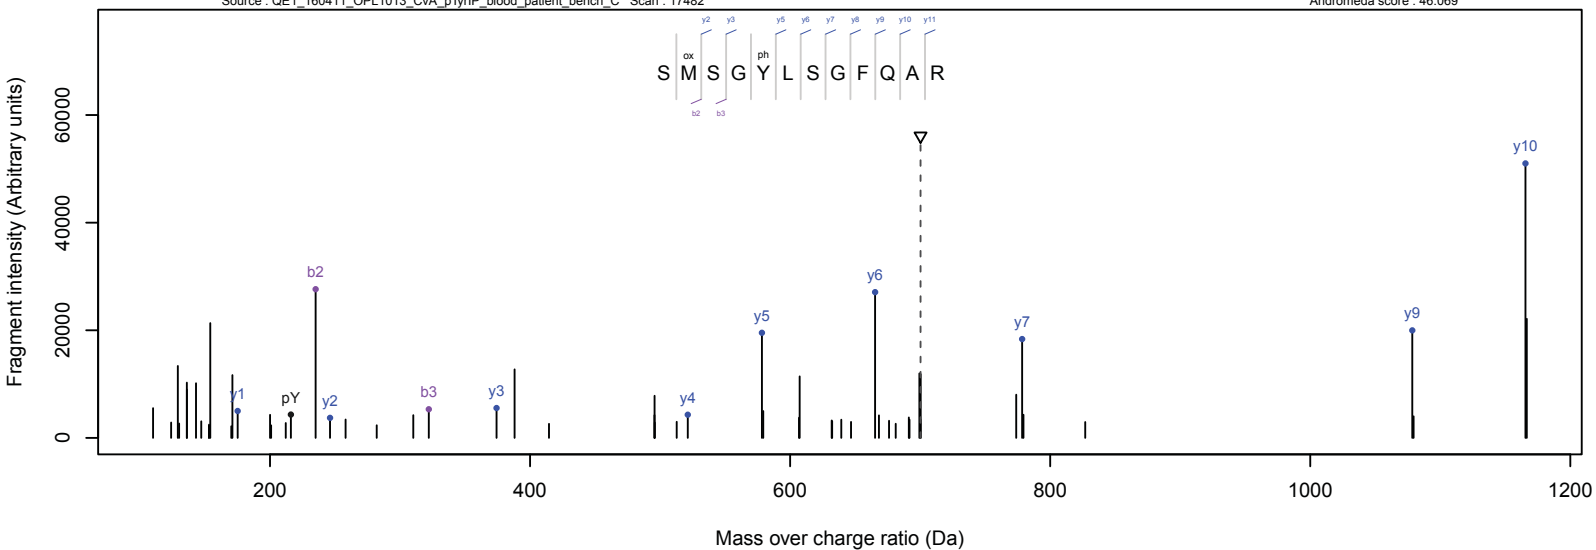

## WFTIQSNQLVY(ph)QKK-2+

Source : QE1\_160411\_OPL1013\_CvA\_pTyrIP\_blood\_patient\_bench\_C Scan : 32703

Andromeda score : 46.069

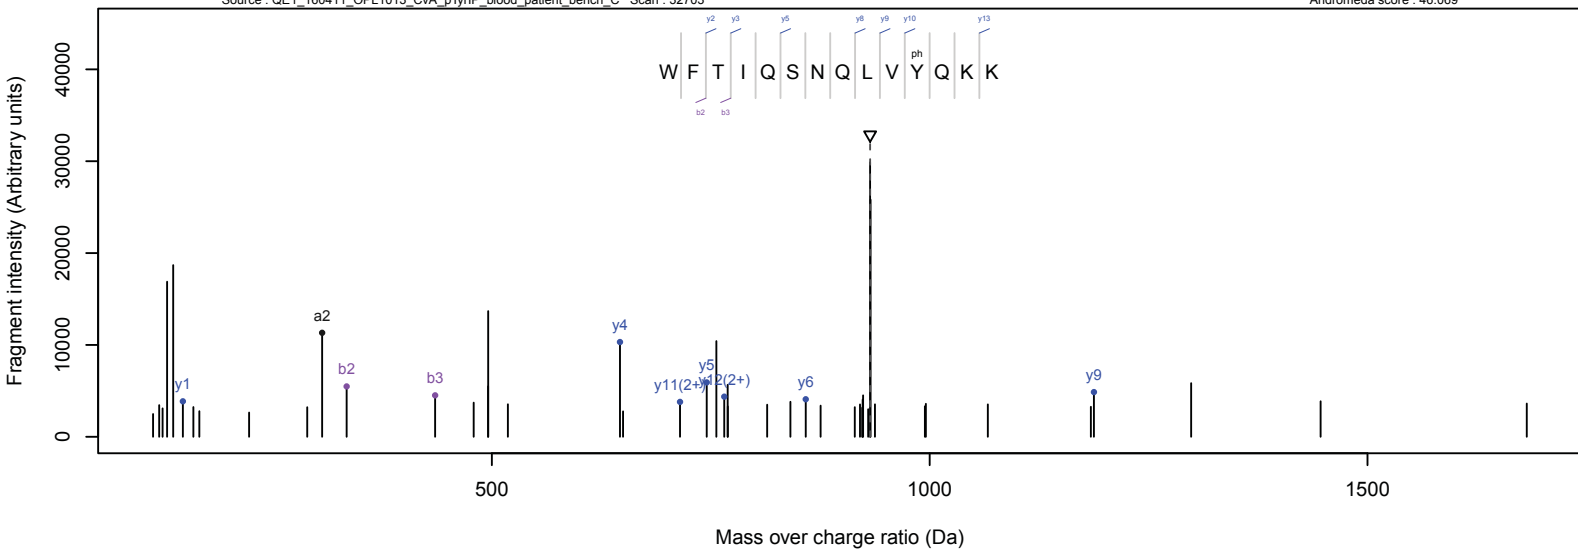

**SNGYEEAY(ph)SVFKK-3+**

Source : QE1\_160411\_OPL1013\_CvA\_pTyrIP\_blood\_patient\_bench\_D Scan : 19832

Andromeda score : 45.992

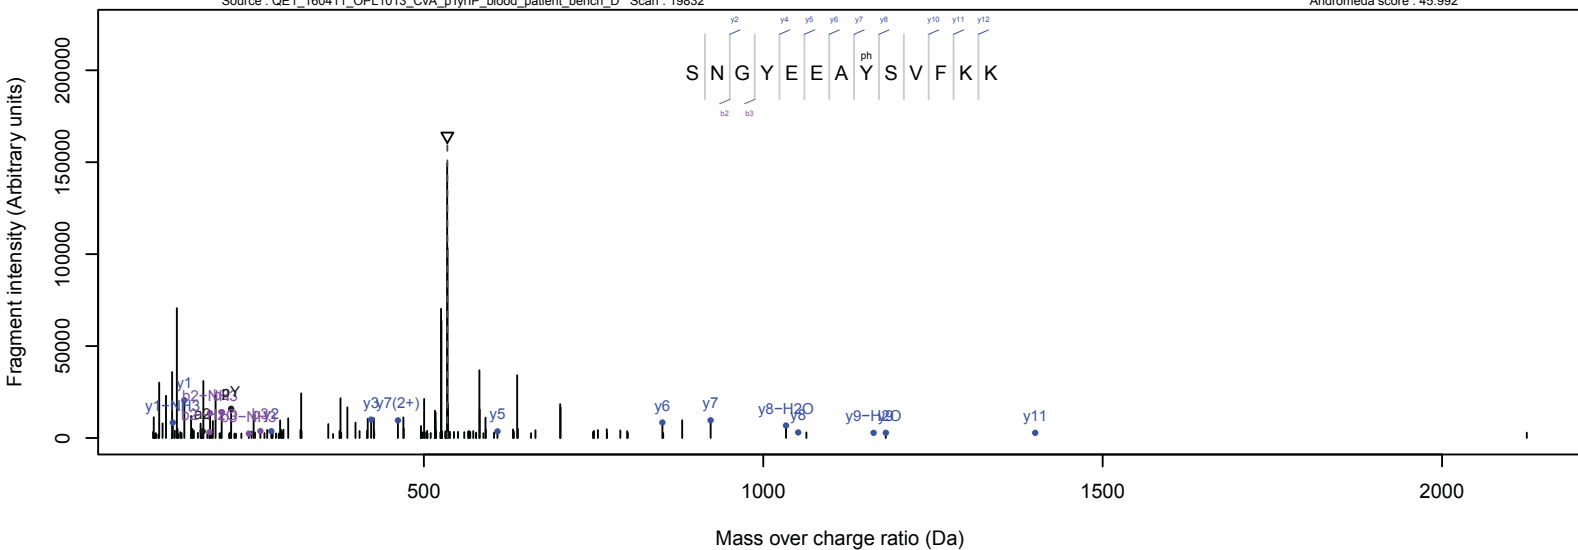

**TLHKAFKGS(ph)IFVVFDSIESAK-4+**

Source : QE1\_160411\_OPL1013\_CvA\_pTyrIP\_blood\_patient\_bench\_D Scan : 10372

Andromeda score : 45.916

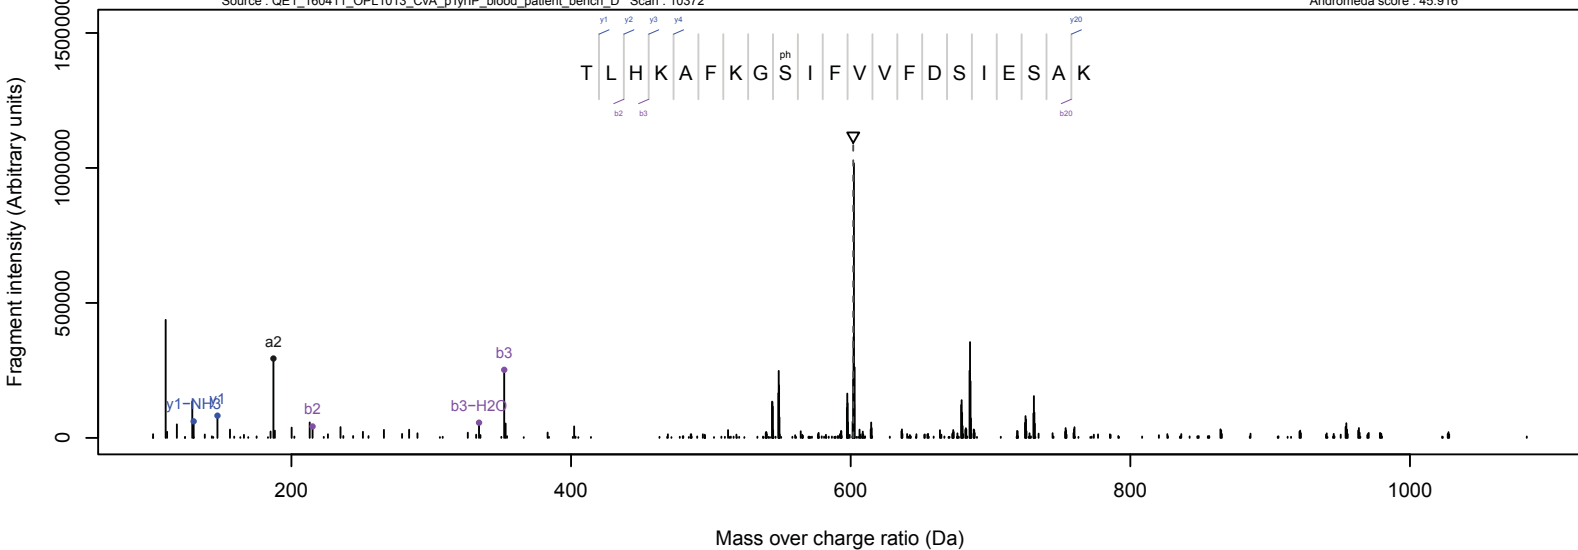

**LDHKFDLM(ox)Y(ph)AK-3+**

Source : QE1\_160411\_OPL1013\_CvA\_pTyrIP\_blood\_patient\_bench\_C Scan : 14714

Andromeda score : 45.764

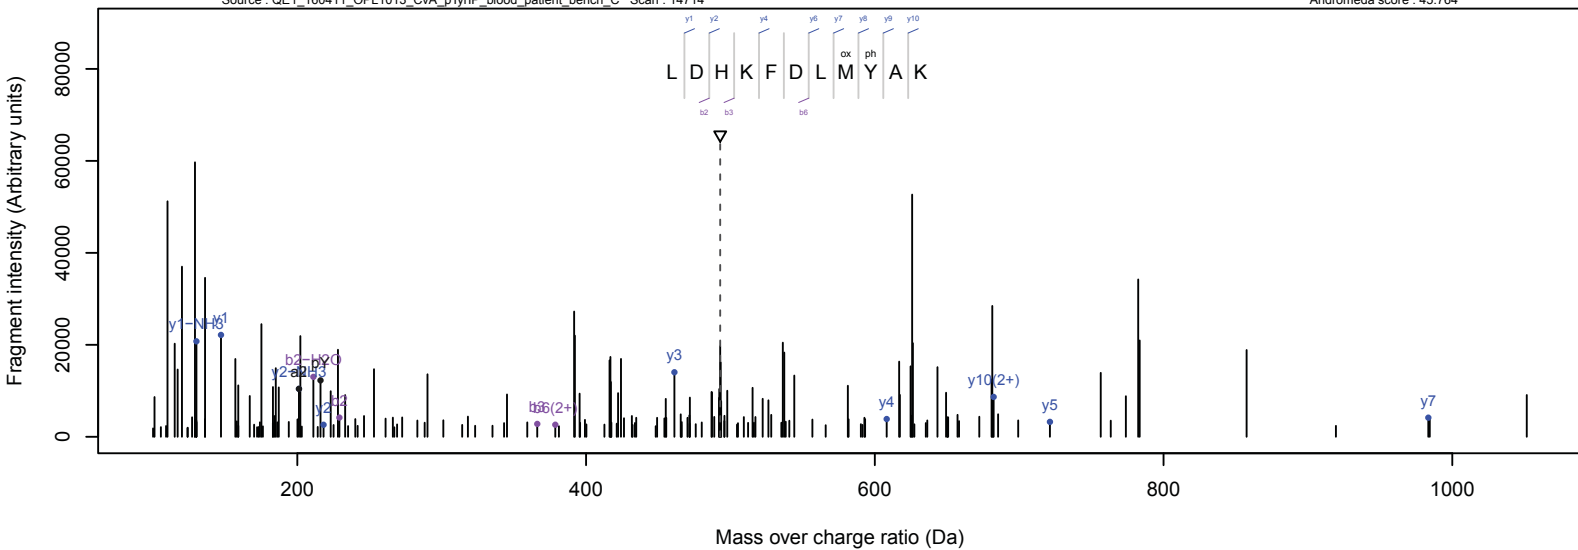

LLY(ph)NSTDPTLR-2+

Source : QE1\_160411\_OPL1013\_CvA\_pTyrIP\_blood\_patient\_bench\_D Scan : 16666

Andromeda score : 45.653

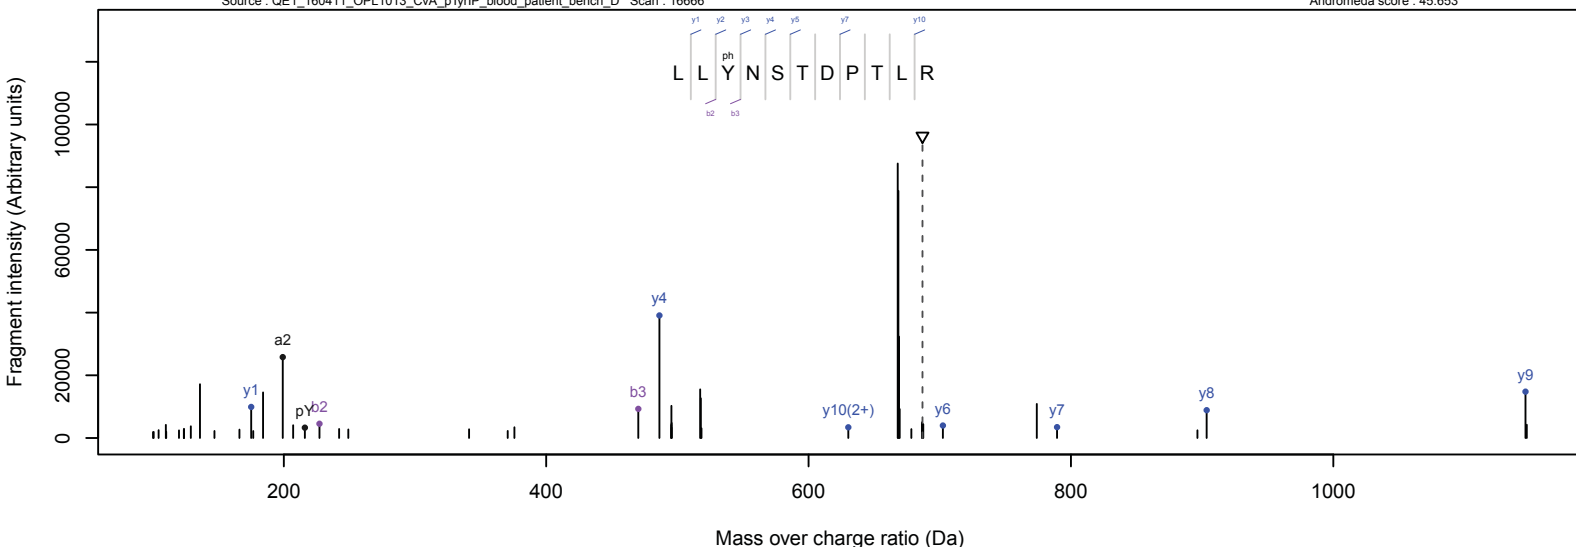

NLIPM(ox)DPNGLSDPY(ph)VKLK-3+

Source : QE1\_160411\_OPL1013\_CvA\_pTyrIP\_blood\_patient\_bench\_C Scan : 32407

Andromeda score : 45.618

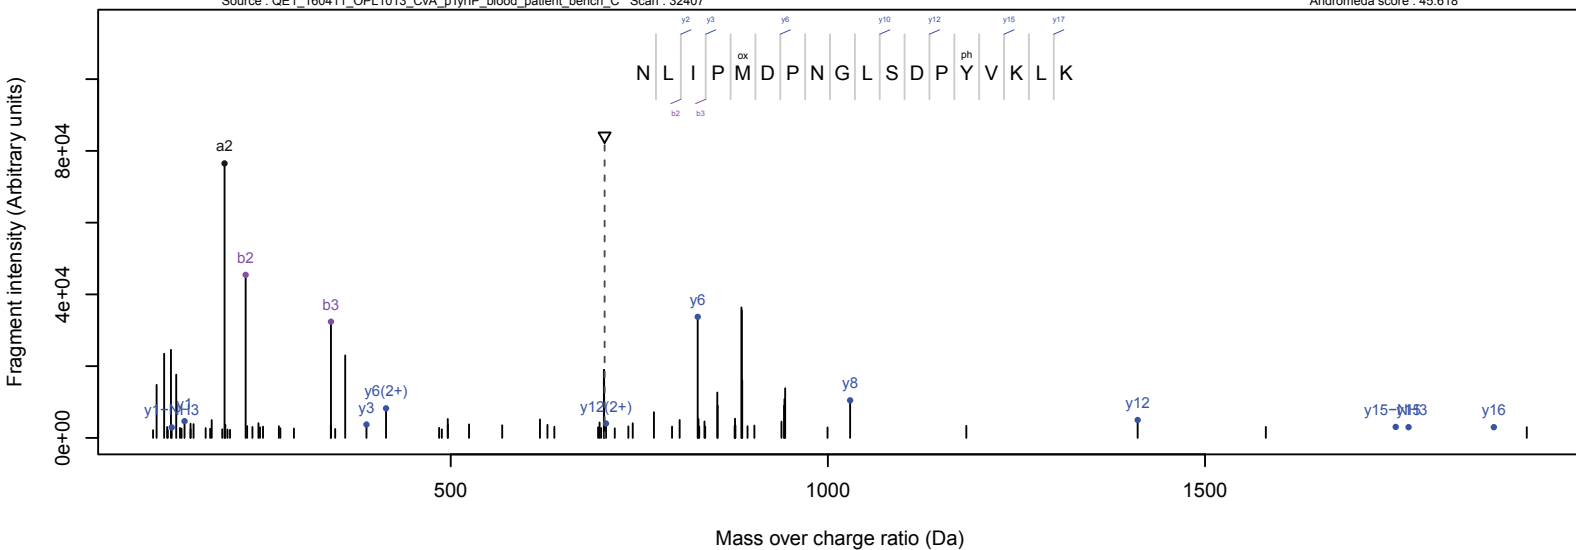

GHNPLGLMY(ph)HDASR-3+

Source : QE1\_160411\_OPL1013\_CvA\_pTyrIP\_blood\_patient\_bench\_D Scan : 17058

Andromeda score : 45.614

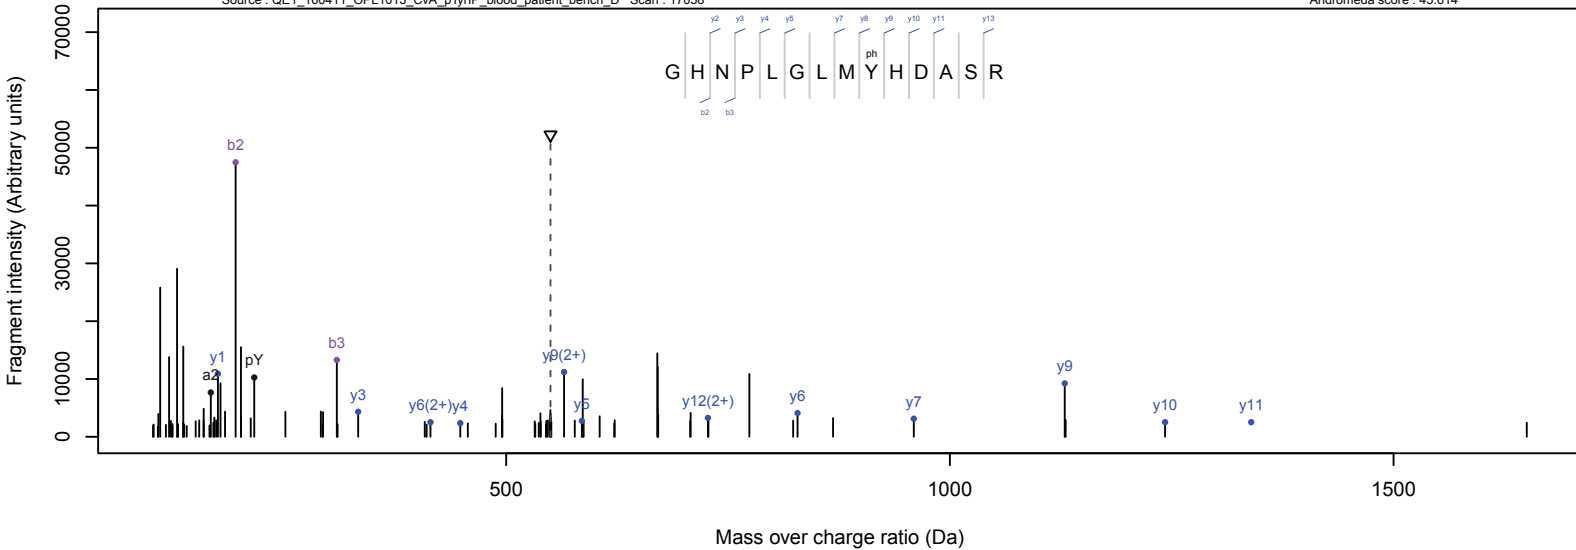

**M(ox)Y(ph)VDPSEINP<sup>ox</sup>SMPQR-2+**

Source : QE1\_160411\_OPL1013\_CvA\_pTyrIP\_blood\_patient\_bench\_C Scan : 17820

Andromeda score : 45.614

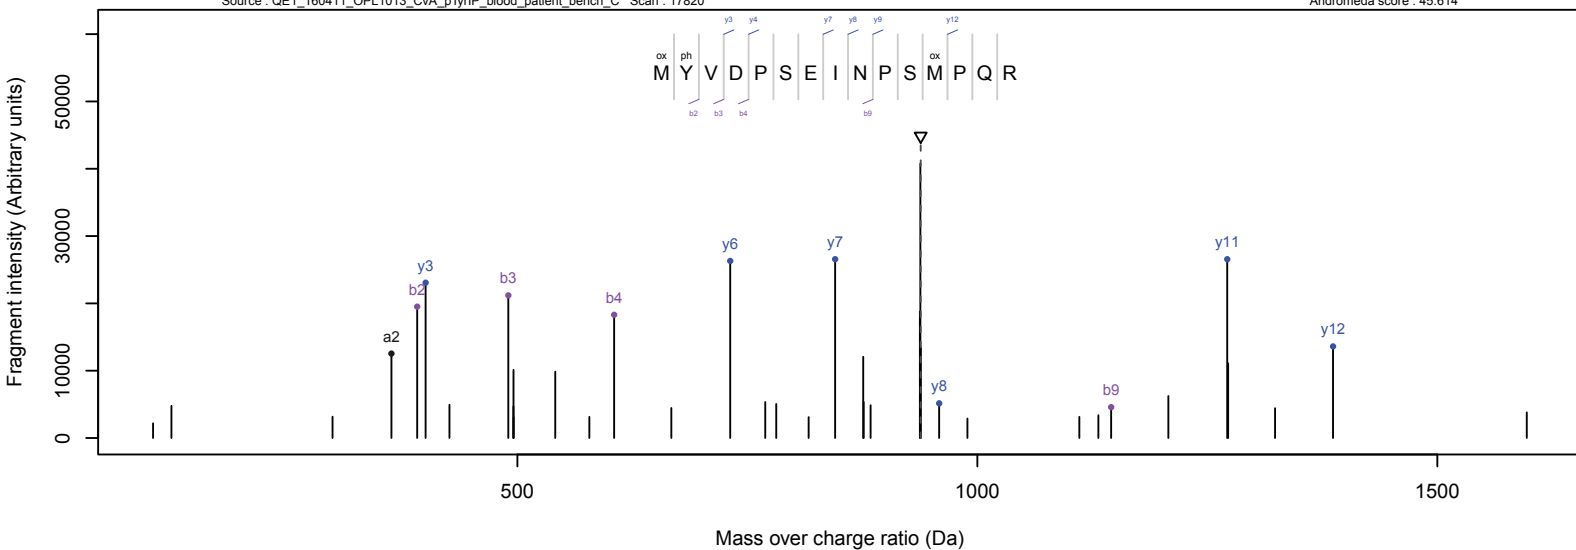

**Y(ph)RGLPAPGPSADK-3+**

Source : QE1\_160411\_OPL1013\_CvA\_pTyrIP\_blood\_patient\_bench\_C Scan : 11682

Andromeda score : 45.614

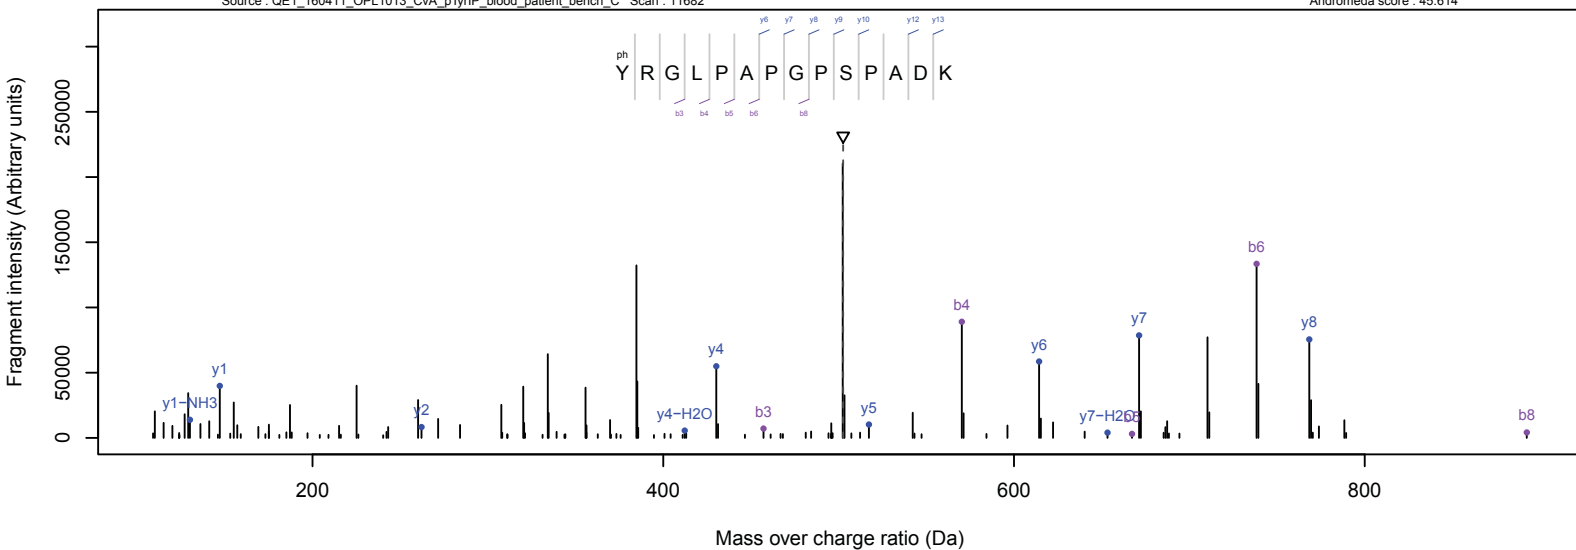

**NSFNNPAY(ph)YVLEGVPHQLLPPEPPSPAR-3+**

Source : QE1\_160411\_OPL1013\_CvA\_pTyrIP\_blood\_patient\_bench\_C Scan : 44170

Andromeda score : 45.489

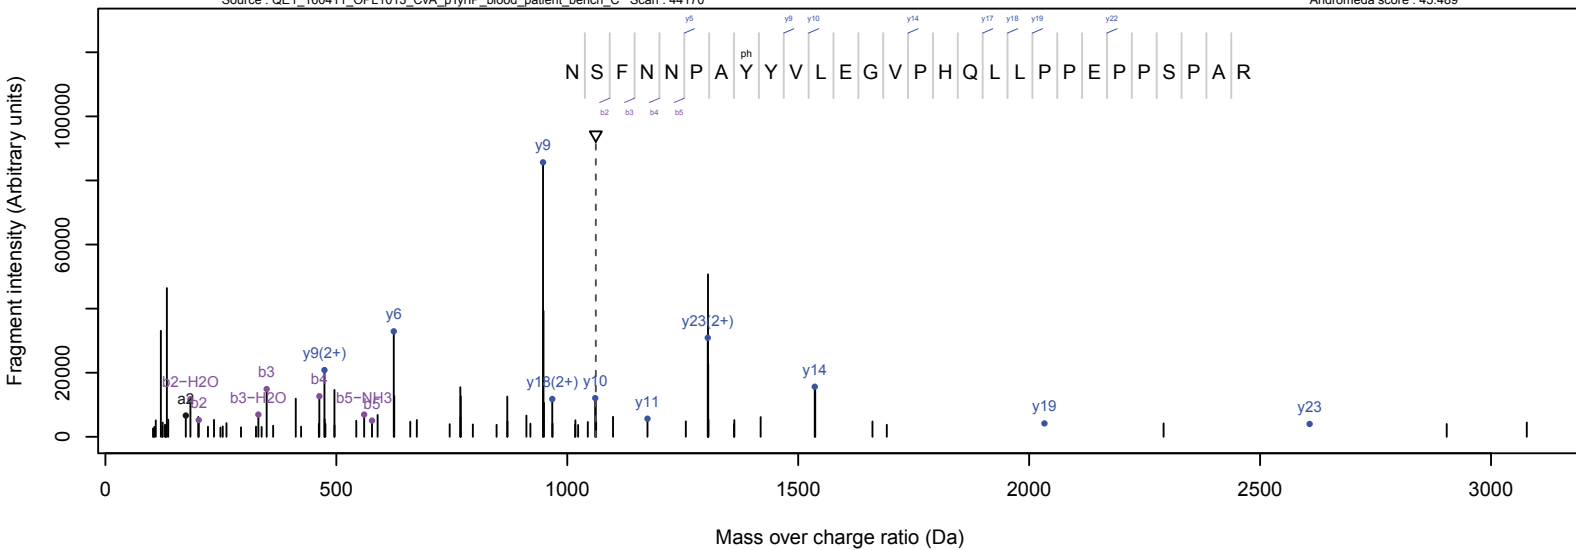

**NNIFM(ox)S(ph)NSYPR-2+**

Source : QE1\_160411\_OPL1013\_CvA\_pTyrIP\_blood\_patient\_bench\_B Scan : 14954

Andromeda score : 45.433

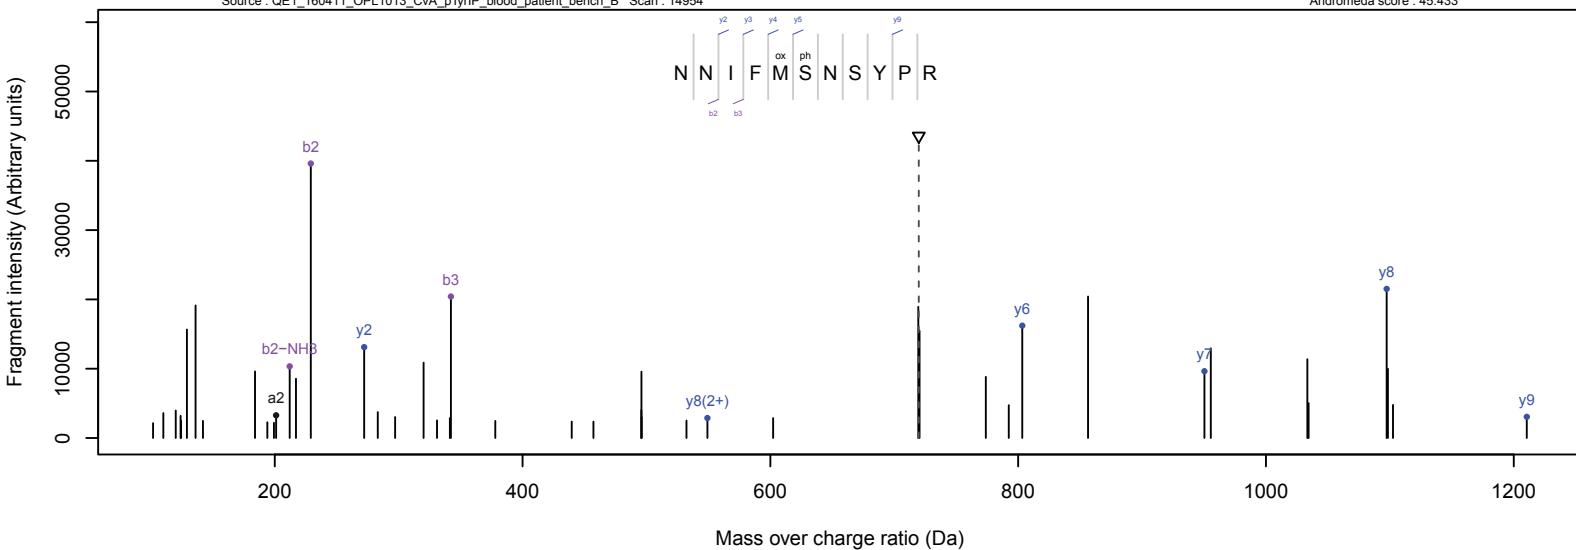

**AVS(ph)PQSTKPM(ox)AESIT(ph)YAAVAR-3+**

Source : QE1\_160411\_OPL1013\_CvA\_pTyrIP\_blood\_patient\_bench\_C Scan : 21741

Andromeda score : 45.347

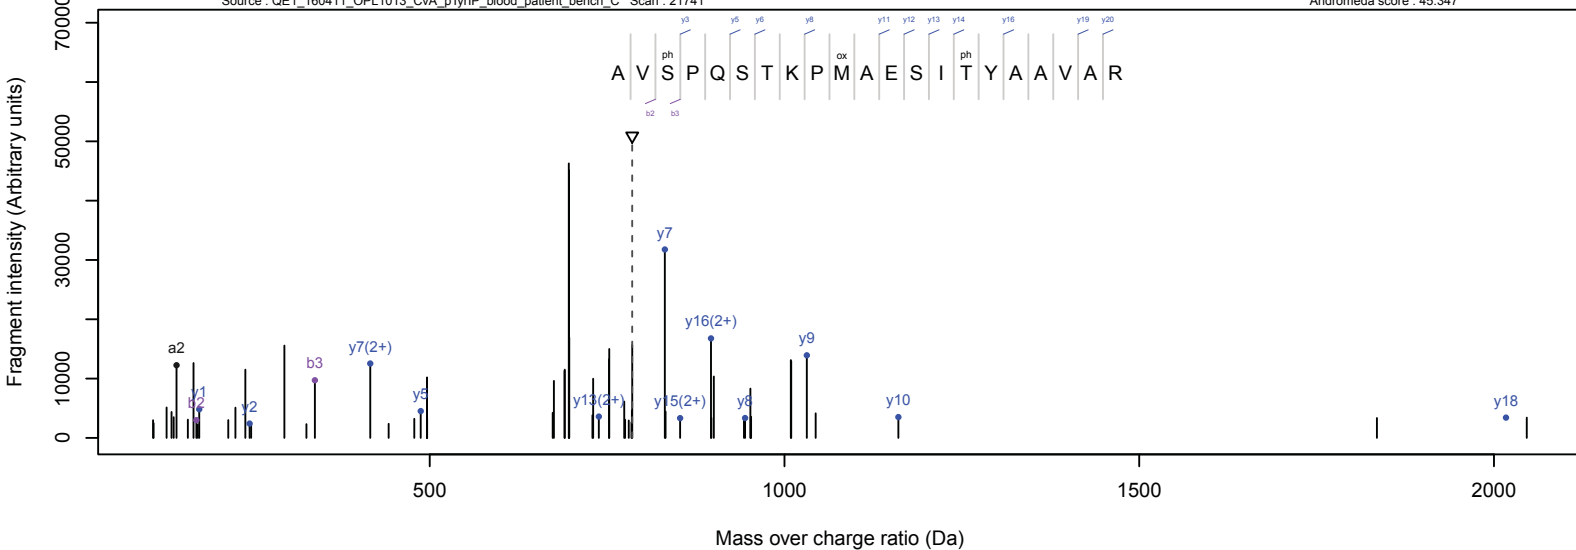

**VDKVIQAQTAFSANPANPAI LSEASAPIPHDGNLY(ph)PR-4+**

Source : QE1\_160411\_OPL1013\_CvA\_pTyrIP\_blood\_patient\_bench\_D Scan : 38573

Andromeda score : 45.308

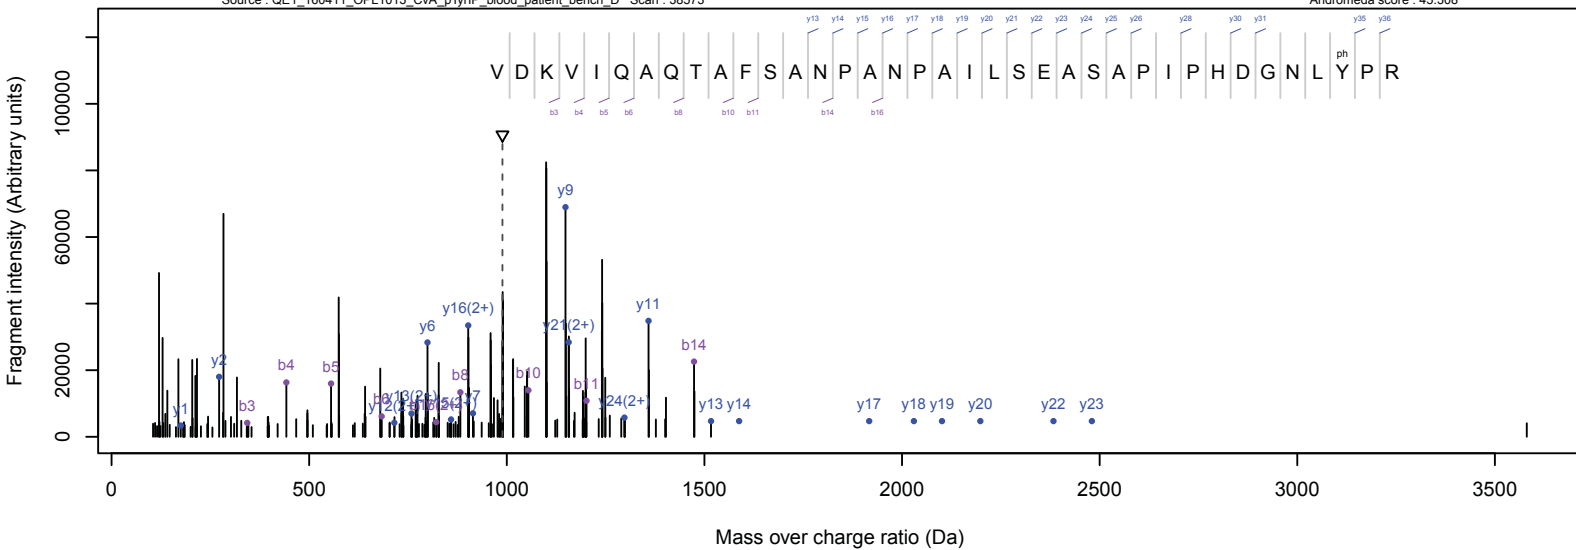

M(ox)AEAY(ph)SEIGMKGER-3+

Source : QE1\_160411\_OPL1013\_CvA\_pTyrIP\_blood\_patient\_bench\_C Scan : 5185

Andromeda score : 45.28

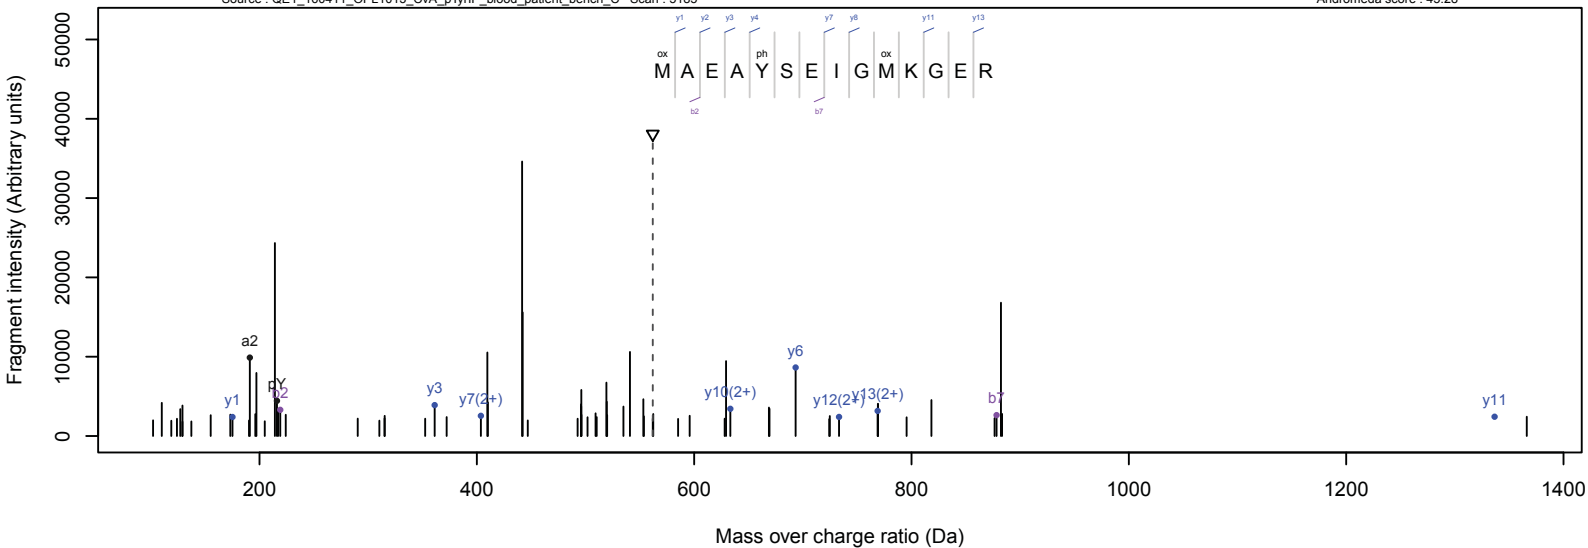

NY(ph)PATFWVNPQFK-2+

Source : QE1\_160411\_OPL1013\_CvA\_pTyrIP\_blood\_patient\_bench\_B Scan : 37205

Andromeda score : 45.28

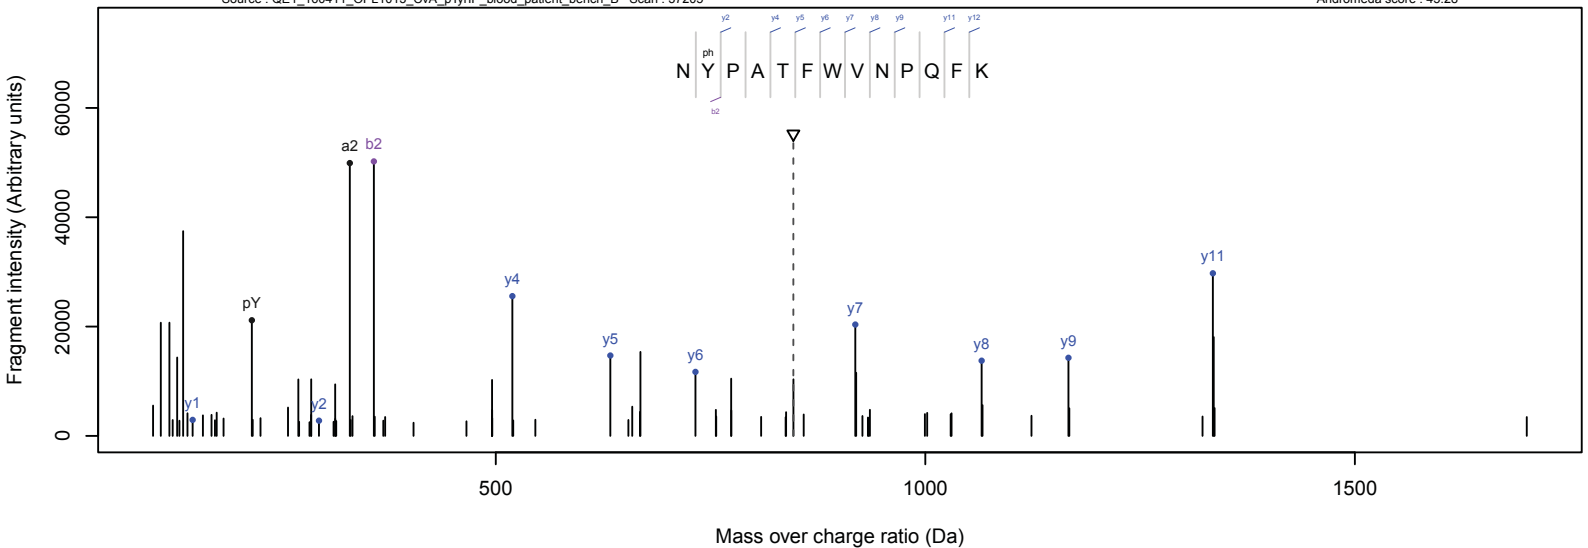

VEFGVY(ph)ESGPRK-3+

Source : QE1\_160411\_OPL1013\_CvA\_pTyrIP\_blood\_patient\_bench\_D Scan : 12946

Andromeda score : 45.28

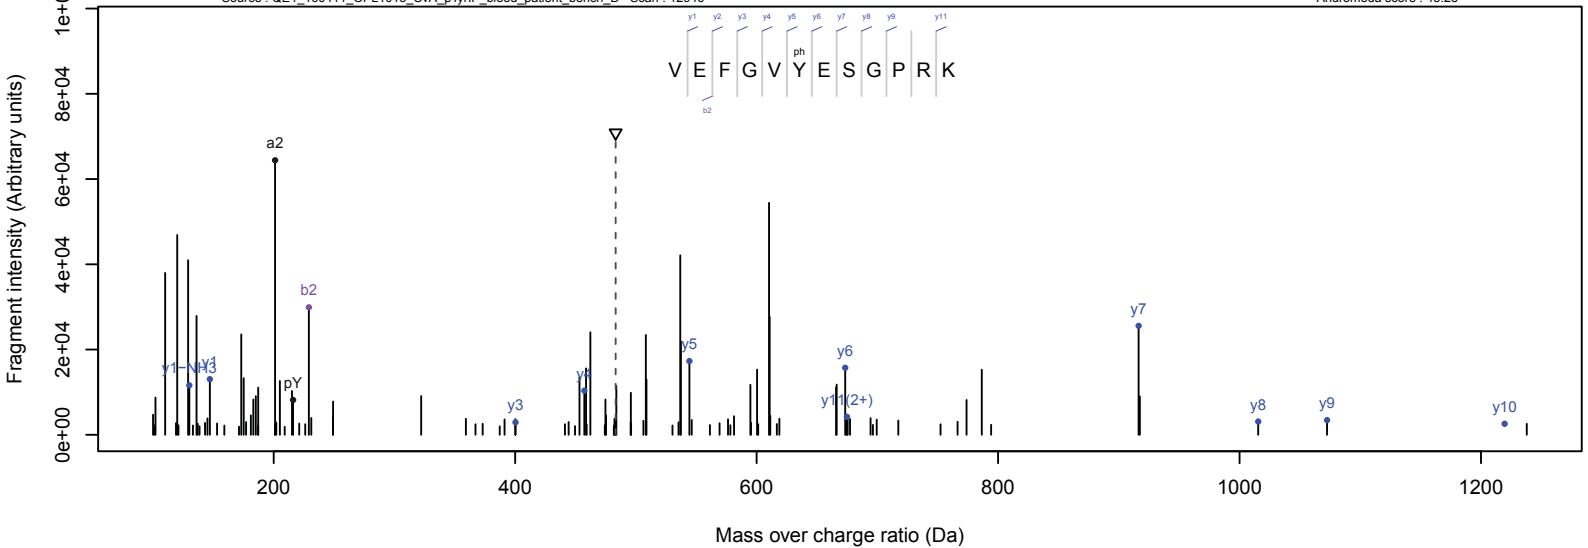

DGGGGGEFYGYM(ox)TMDRPLSHCGR-3+

Source : QE1\_160411\_OPL1013\_CvA\_pTyrIP\_blood\_patient\_bench\_B Scan : 21628

Andromeda score : 45.237

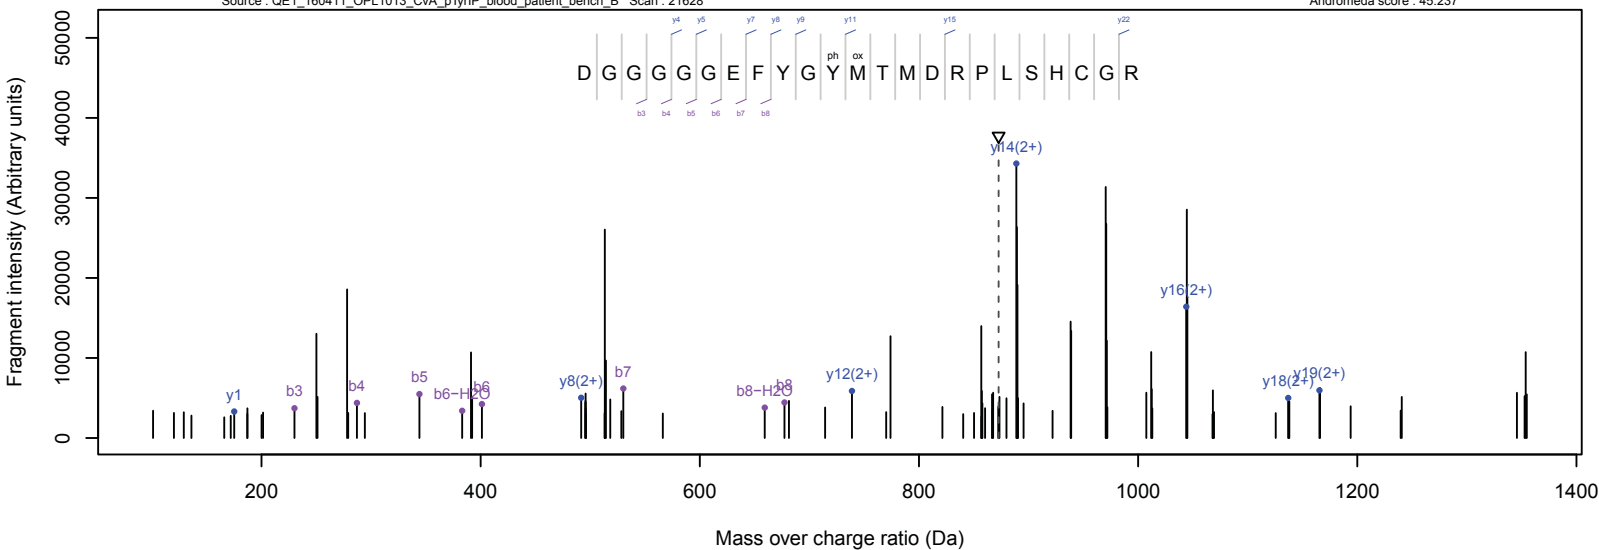

KEIADYLAAGKDER-3+

Source : QE1\_160411\_OPL1013\_CvA\_pTyrIP\_blood\_patient\_bench\_D Scan : 15744

Andromeda score : 45.083

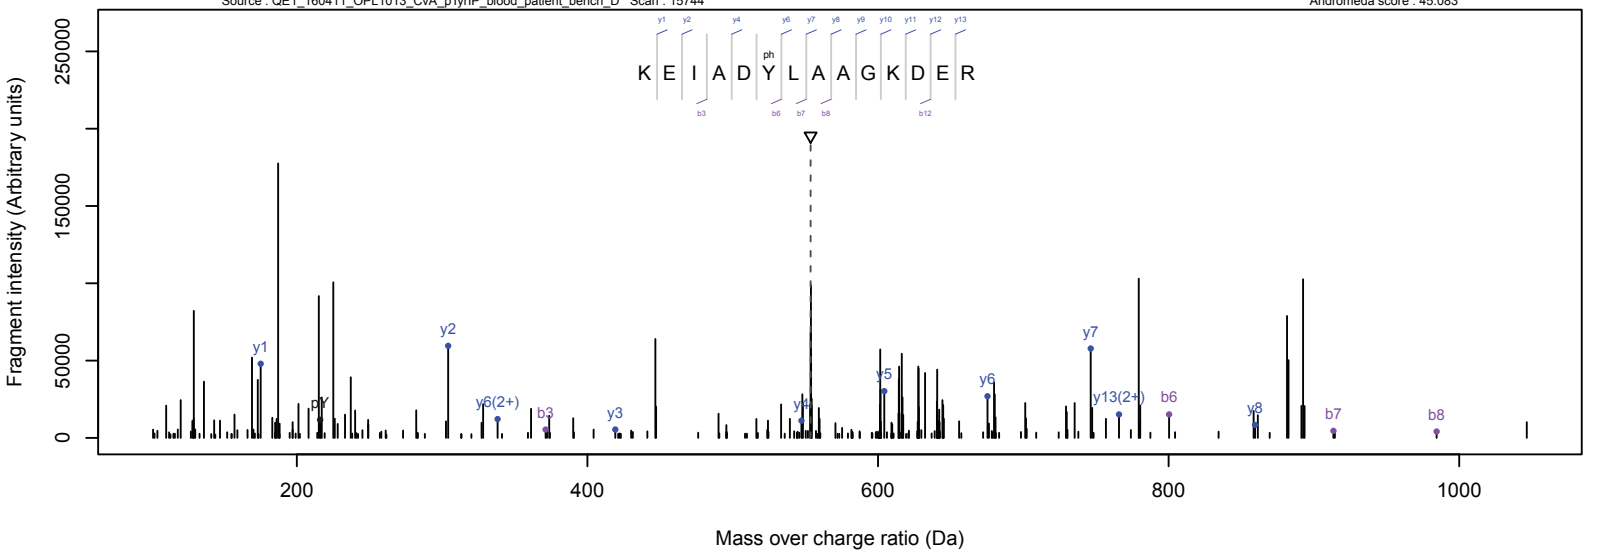

(ac)AGRLPACVVDCGTGYTK-2+

Source : QE1\_160411\_OPL1013\_CvA\_pTyrIP\_blood\_patient\_bench\_B Scan : 23098

Andromeda score : 44.998

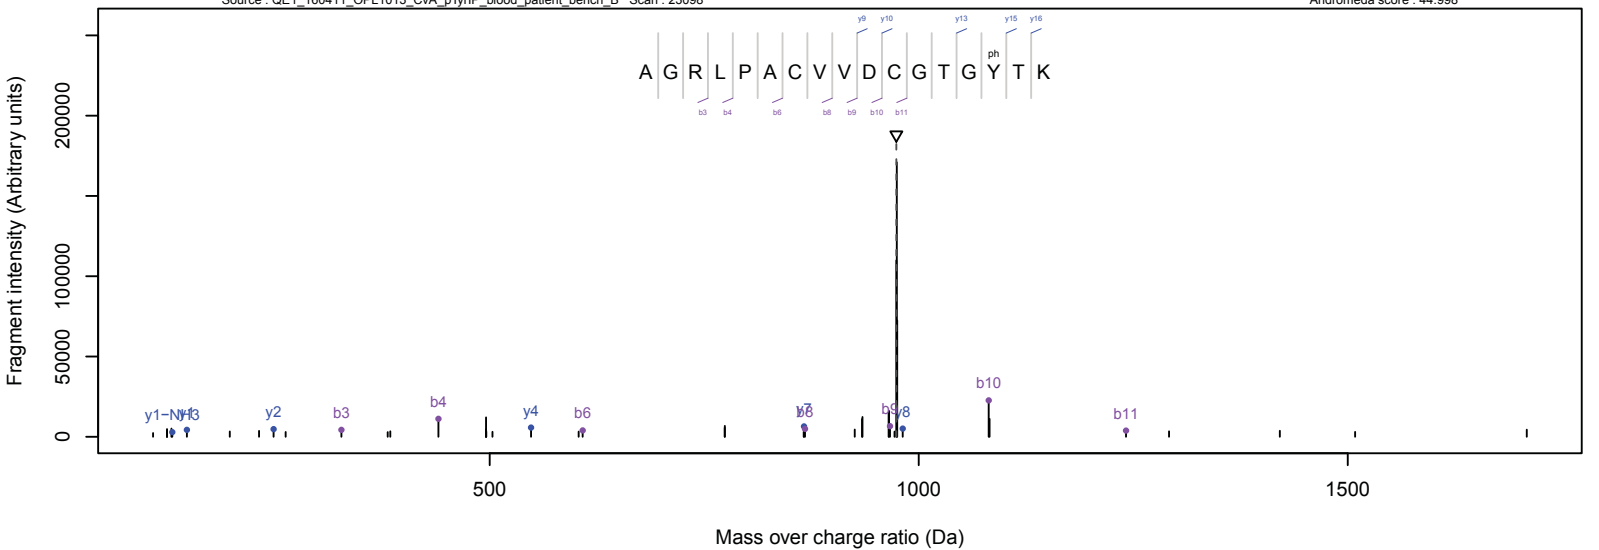

## Y(ph)QQDQVVKEDNIEAVGKK-3+

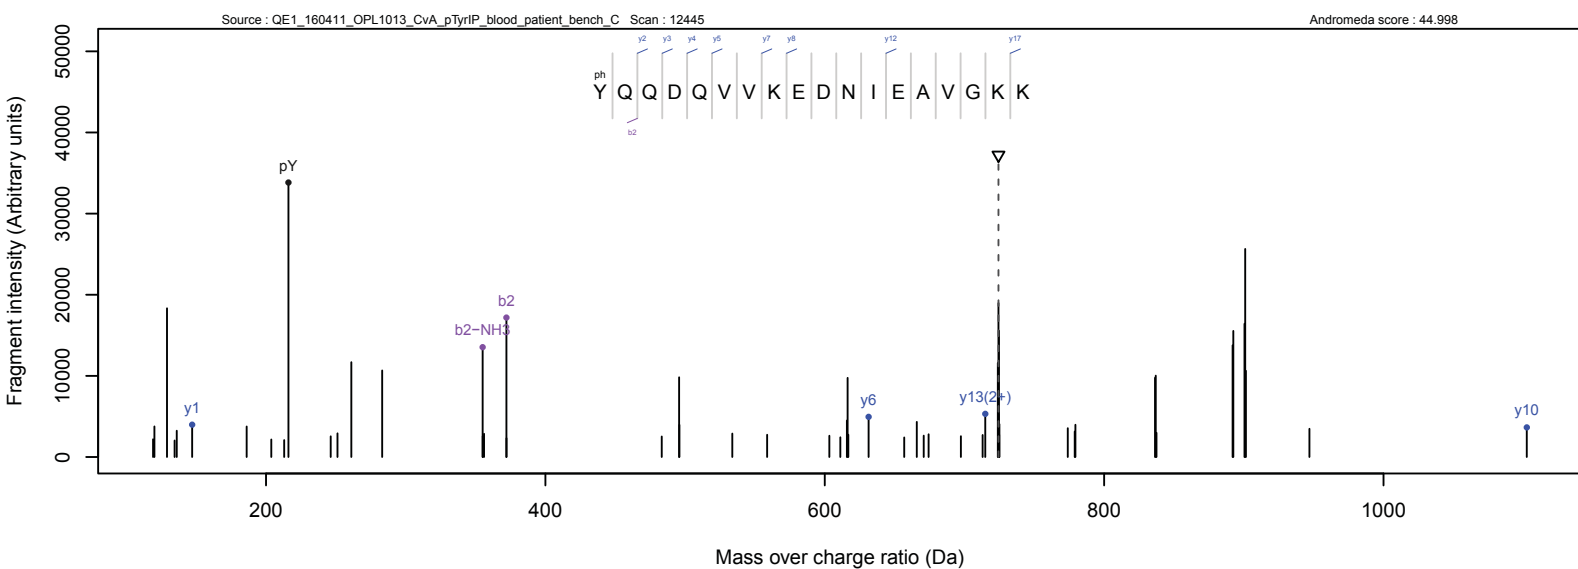

## LLAQAEGPCY(ph)IR-2+

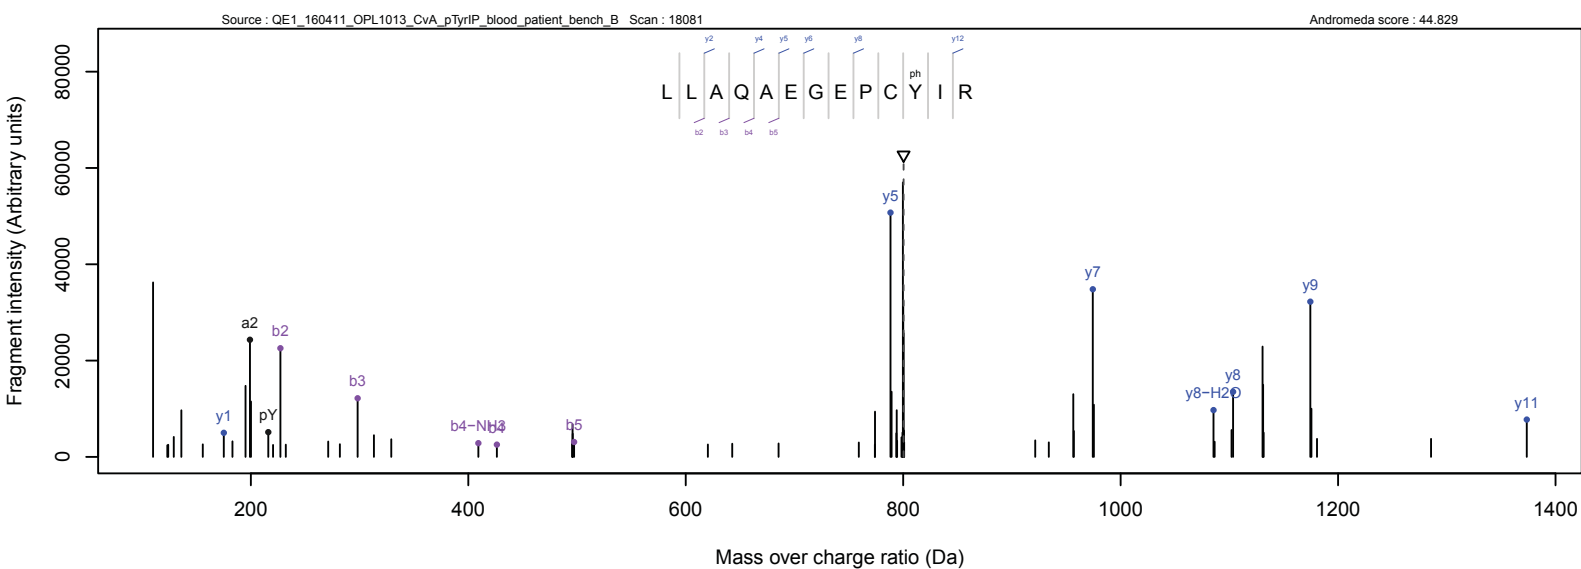

## QFDAY(ph)PK-2+

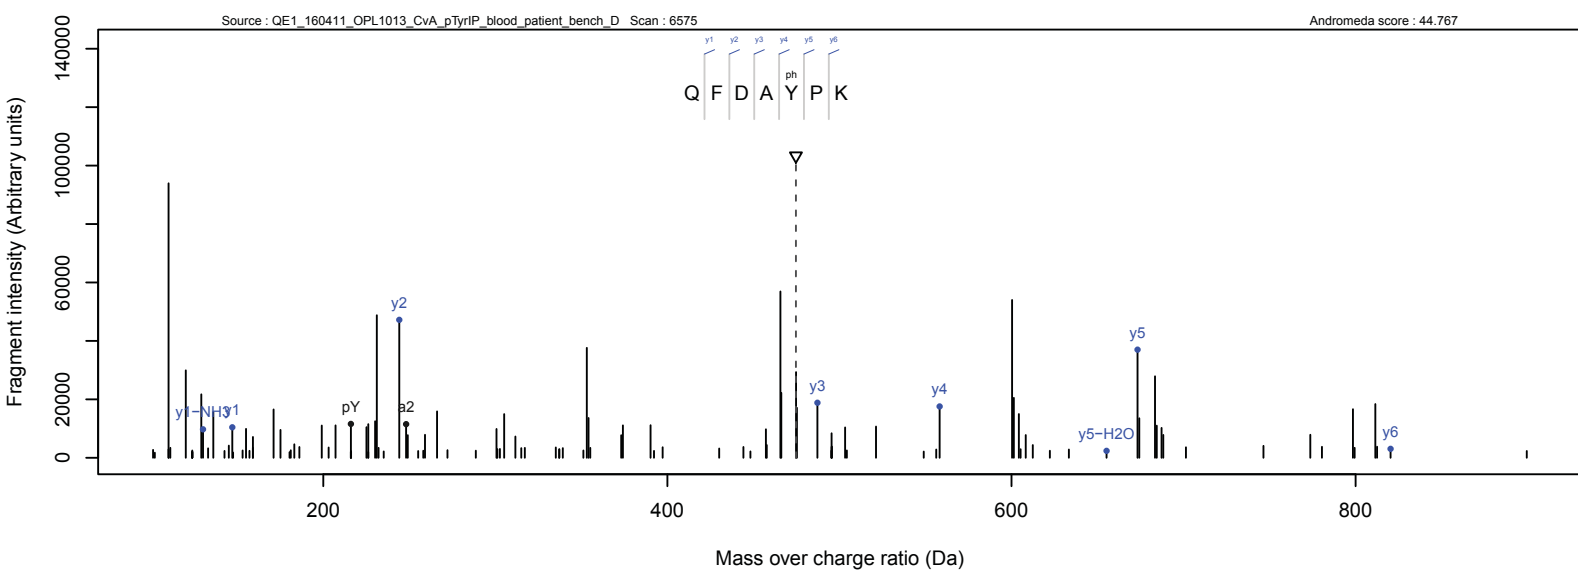



## M(ox)TVVQAY(ph)INEK-2+

Source : QE1\_160411\_OPL1013\_CvA\_pTyrIP\_blood\_patient\_bench\_C Scan : 14886

Andromeda score : 44.543

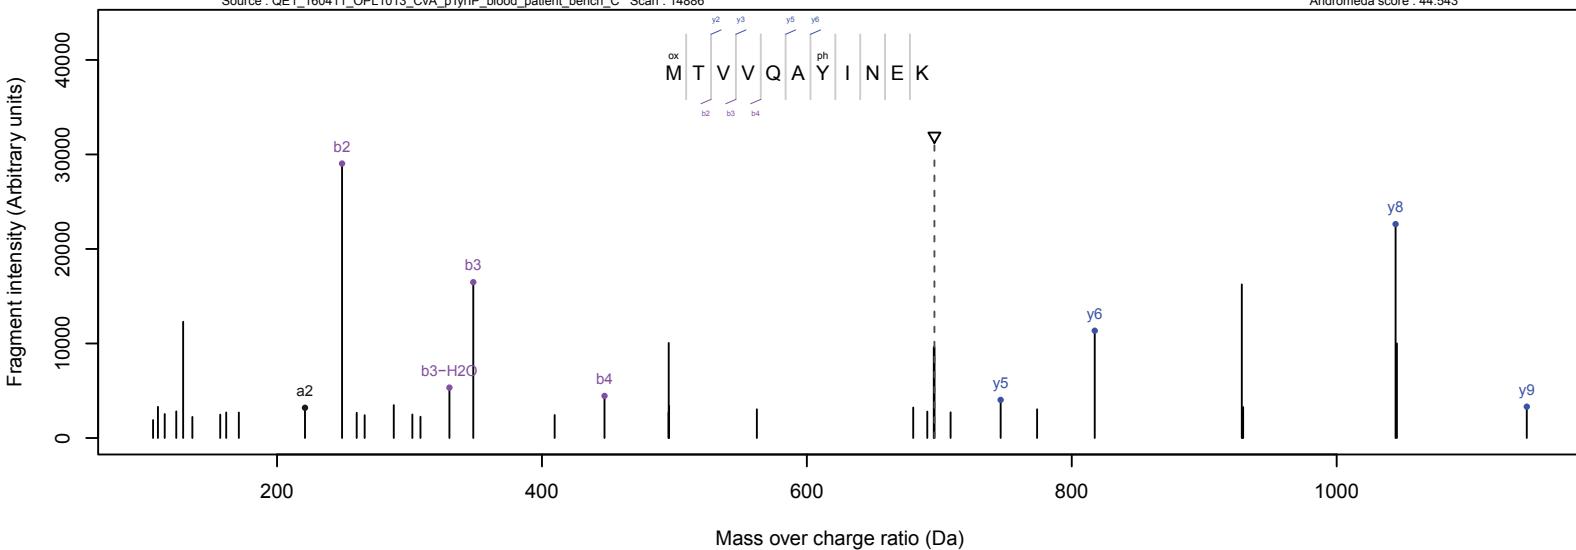

## YHGHSM(ox)SDPGVS(ph)YR-3+

Source : QE1\_160411\_OPL1013\_CvA\_pTyrIP\_blood\_patient\_bench\_D Scan : 2775

Andromeda score : 44.511

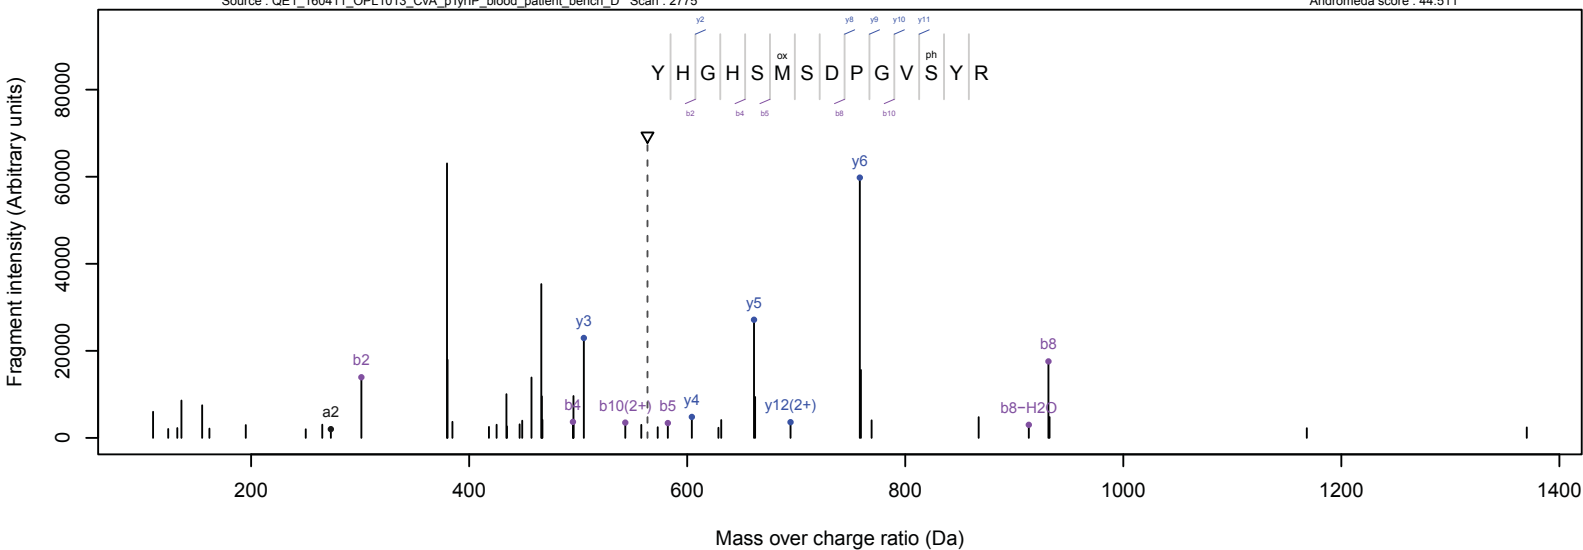

## T(ph)YSLVGAWPGPLADMAPTRK-3+

Source : QE1\_160411\_OPL1013\_CvA\_pTyrIP\_blood\_patient\_bench\_D Scan : 41777

Andromeda score : 44.441

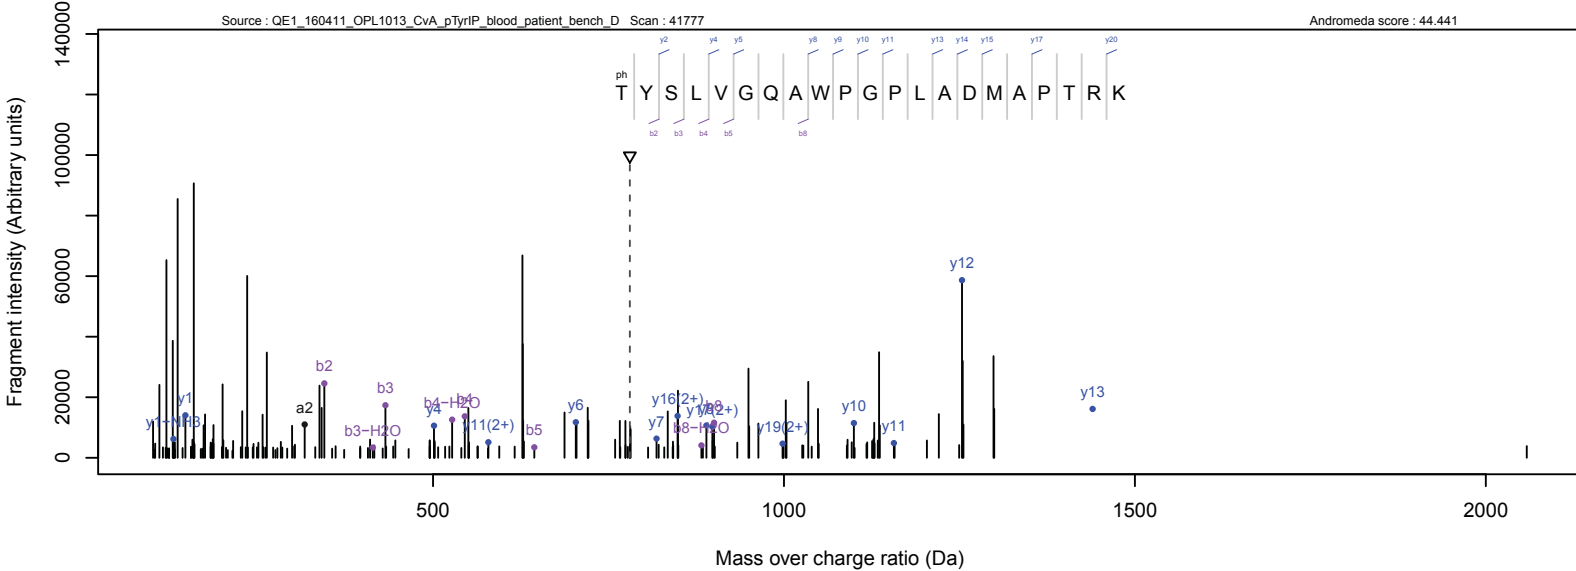

YNPY(ph)TTRPNR-3+

Source : QE1\_160411\_OPL1013\_CvA\_pTyrIP\_blood\_patient\_bench\_D Scan : 3219

Andromeda score : 44.425

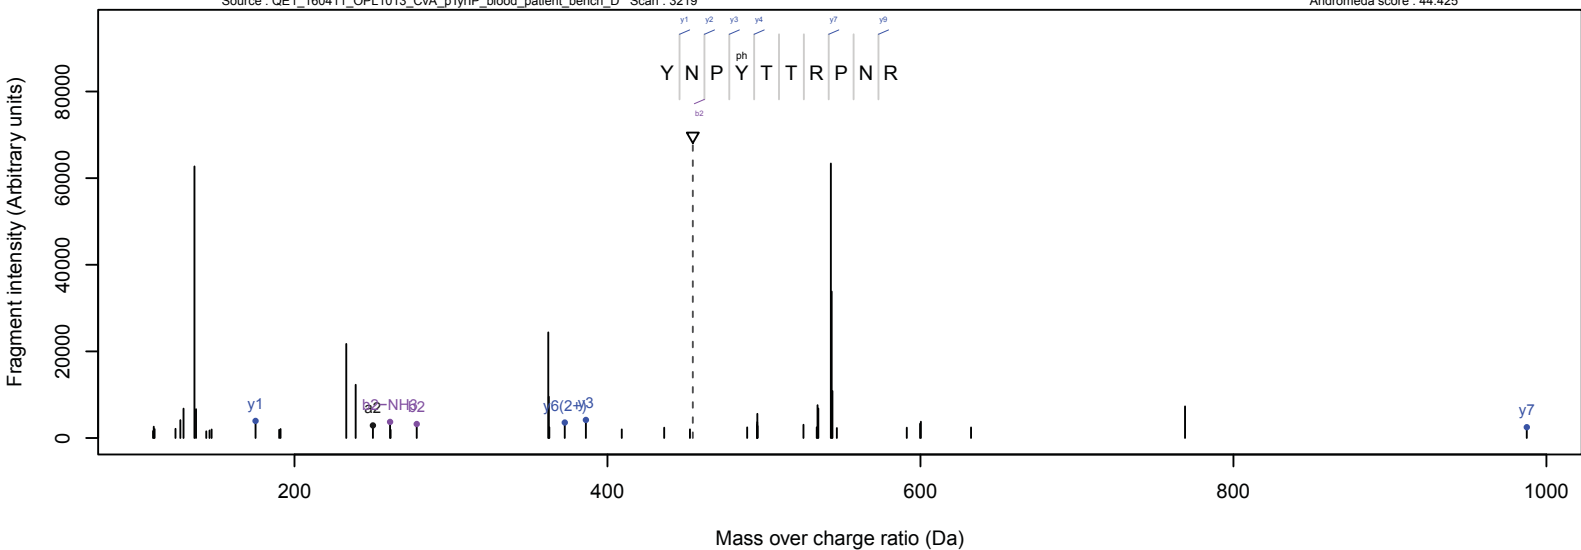

LKEESRDEESPY(ph)ATSLYHS-4+

Source : QE1\_160411\_OPL1013\_CvA\_pTyrIP\_blood\_patient\_bench\_C Scan : 12181

Andromeda score : 44.391

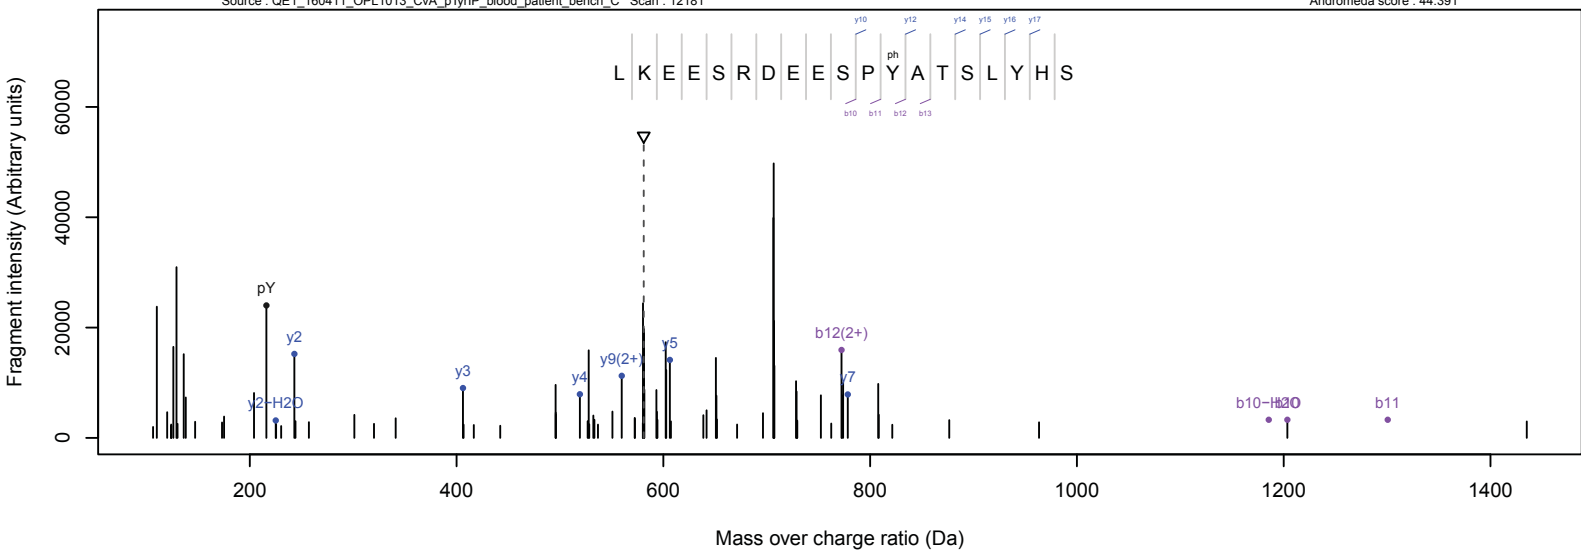

PNPSTSSPY(ph)PLPEEIR-2+

Source : QE1\_160411\_OPL1013\_CvA\_pTyrIP\_blood\_patient\_bench\_C Scan : 23566

Andromeda score : 44.391

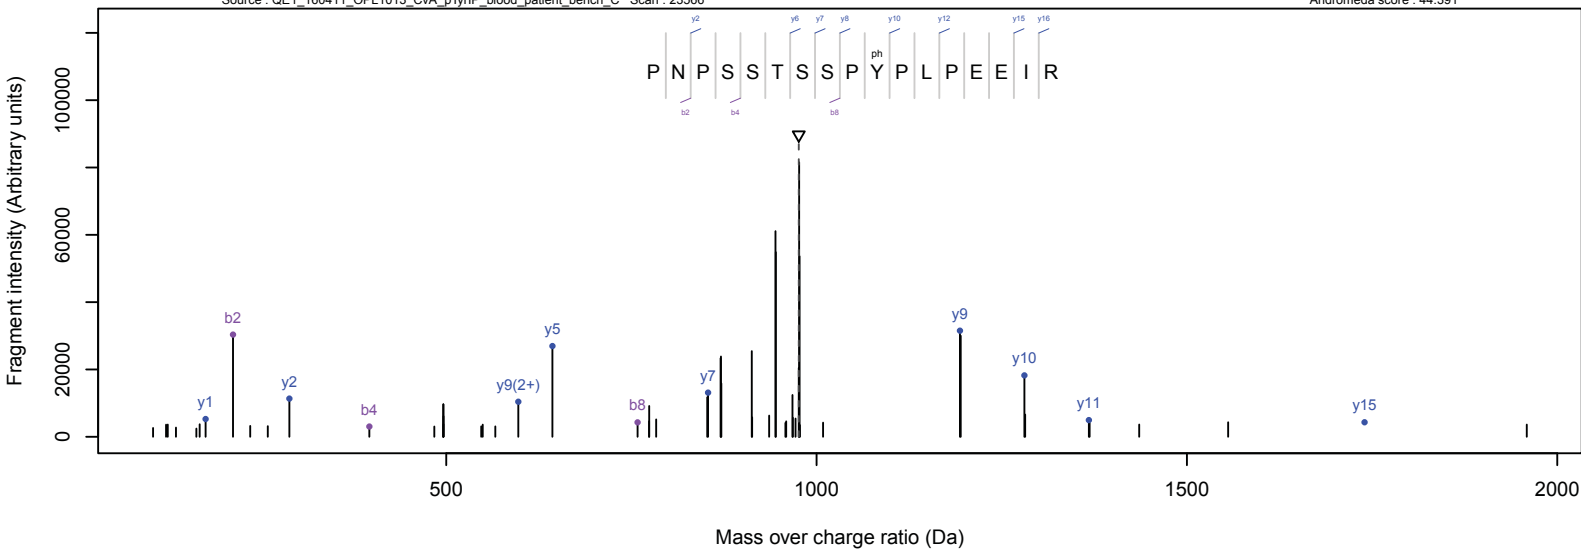

AGEY(ph)IFER-2+

Source : QE1\_160411\_OPL1013\_CvA\_pTyrIP\_blood\_patient\_bench\_D Scan : 17339

Andromeda score : 44.318

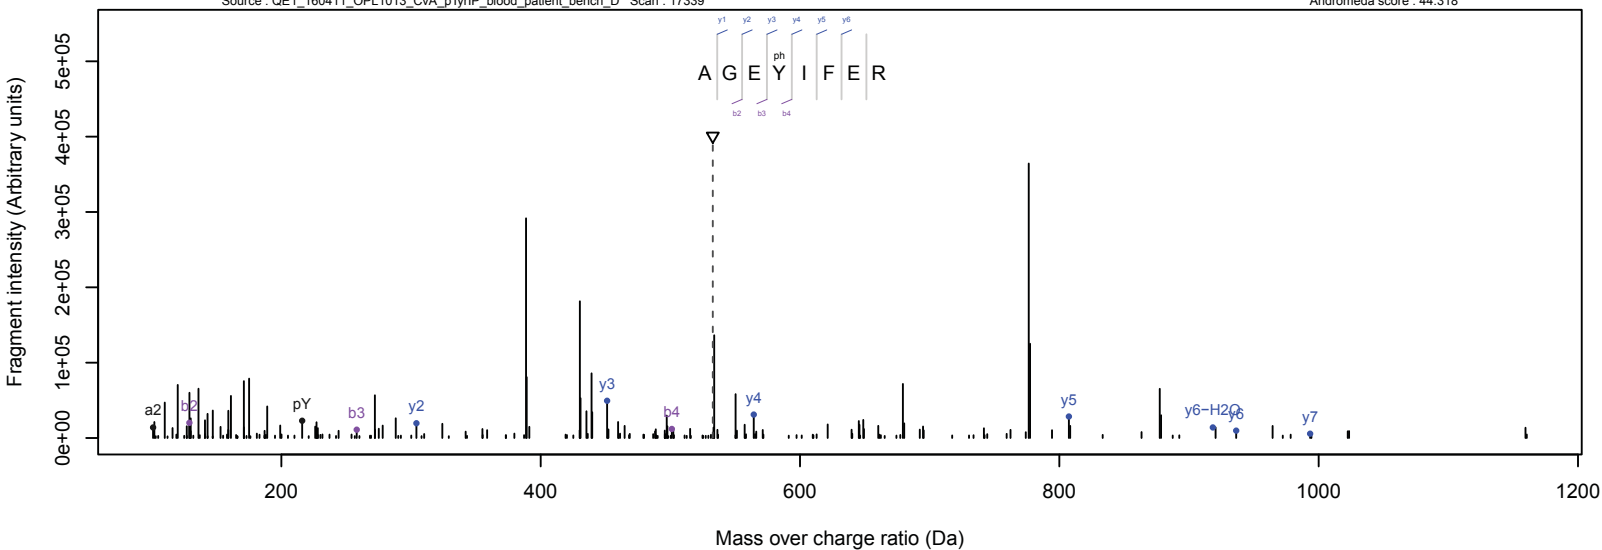

AWVGGVGN(ph)K-2+

Source : QE1\_160411\_OPL1013\_CvA\_pTyrIP\_blood\_patient\_bench\_D Scan : 13962

Andromeda score : 44.318

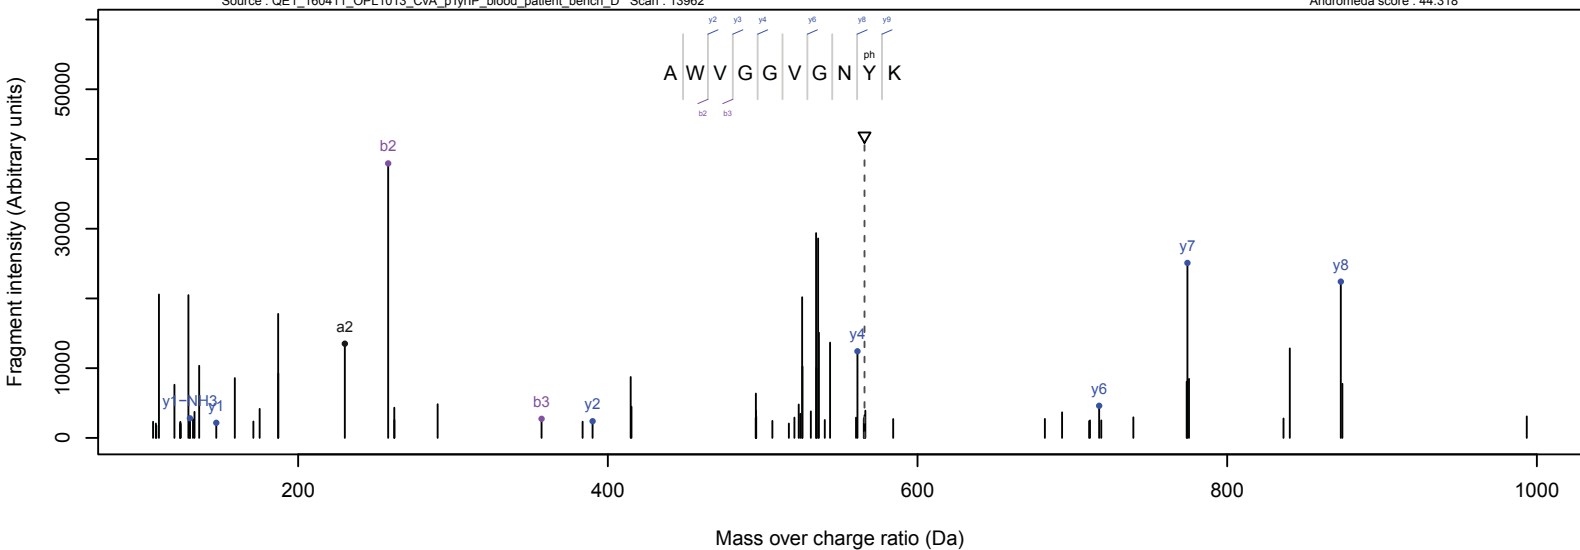

ESYSVY(ph)VYK-2+

Source : QE1\_160411\_OPL1013\_CvA\_pTyrIP\_blood\_patient\_bench\_A Scan : 16044

Andromeda score : 44.318

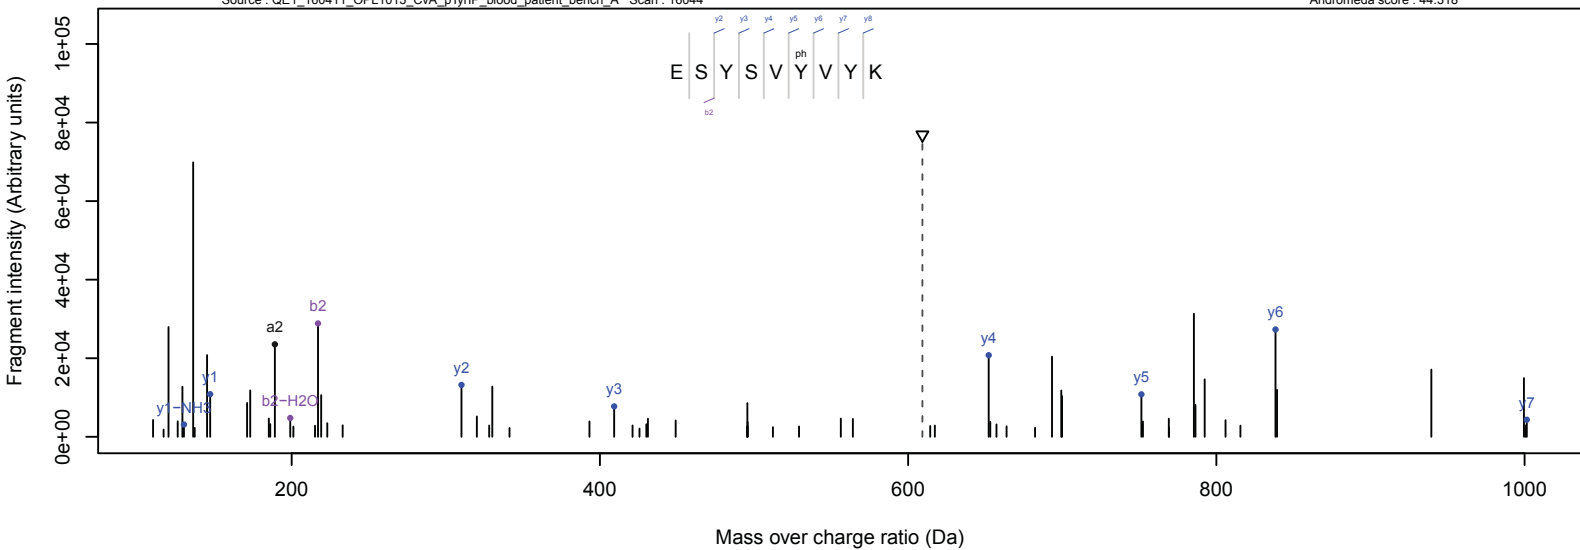

**S(ph)YVAWDREK-2+**

Source : QE1\_160411\_OPL1013\_CvA\_pTyrIP\_blood\_patient\_bench\_B Scan : 8920

Andromeda score : 44.318

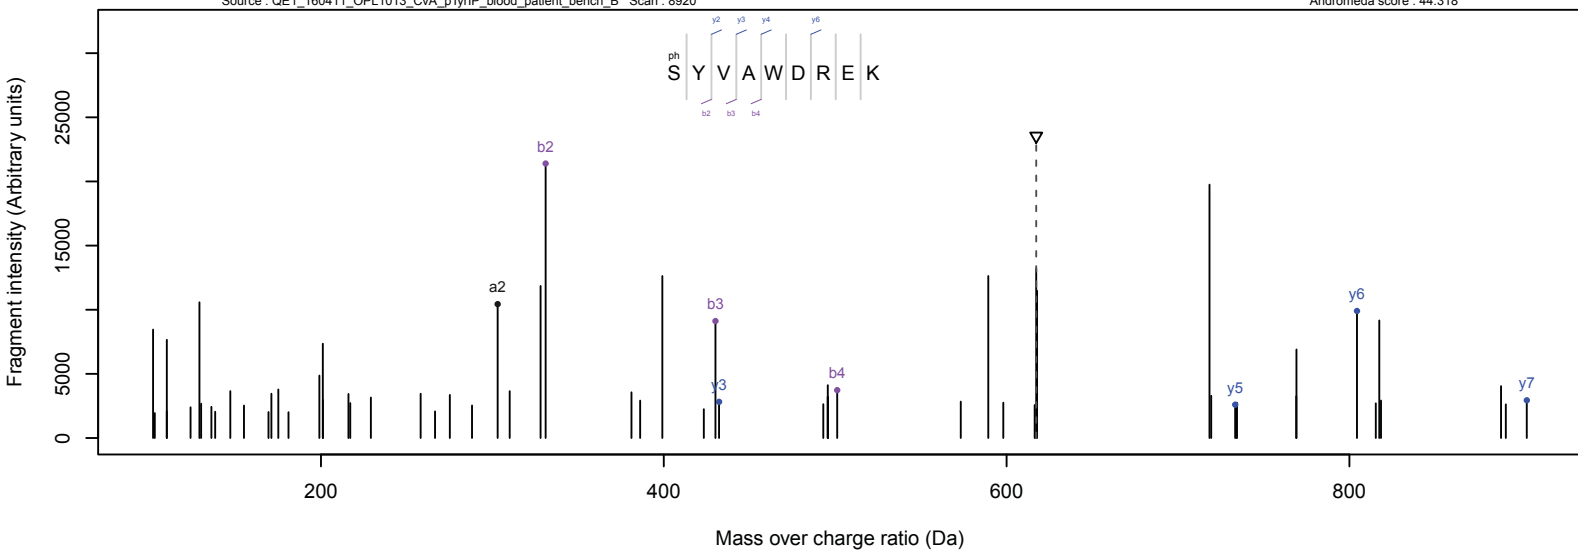

**S(ph)DSTNSEDNYPVPMNPGSSSTLLAMER-3+**

Source : QE1\_160411\_OPL1013\_CvA\_pTyrIP\_blood\_patient\_bench\_C Scan : 25097

Andromeda score : 44.158

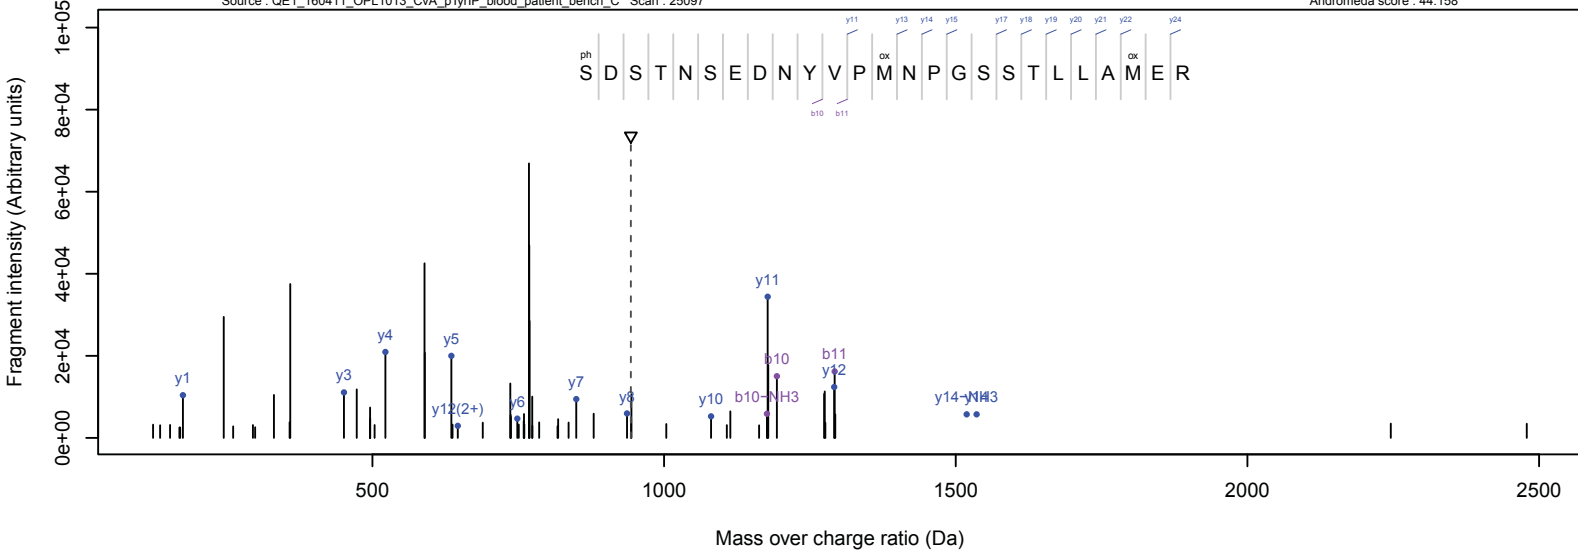

**KQPY(ph)YPPFDK-2+**

Source : QE1\_160411\_OPL1013\_CvA\_pTyrIP\_blood\_patient\_bench\_D Scan : 18540

Andromeda score : 43.897

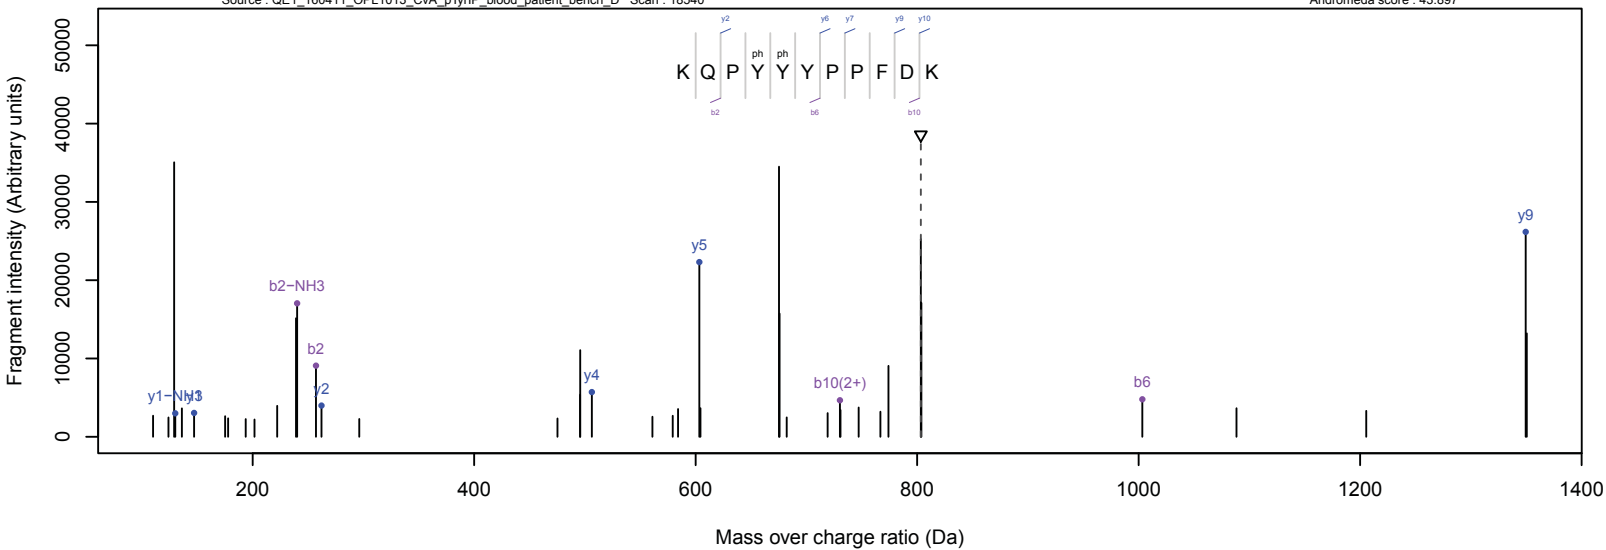

**KSTVLQQQY(ph)NR-3+**

Source : QE1\_160411\_OPL1013\_CvA\_pTyrIP\_blood\_patient\_bench\_D Scan : 3579

Andromeda score : 43.897

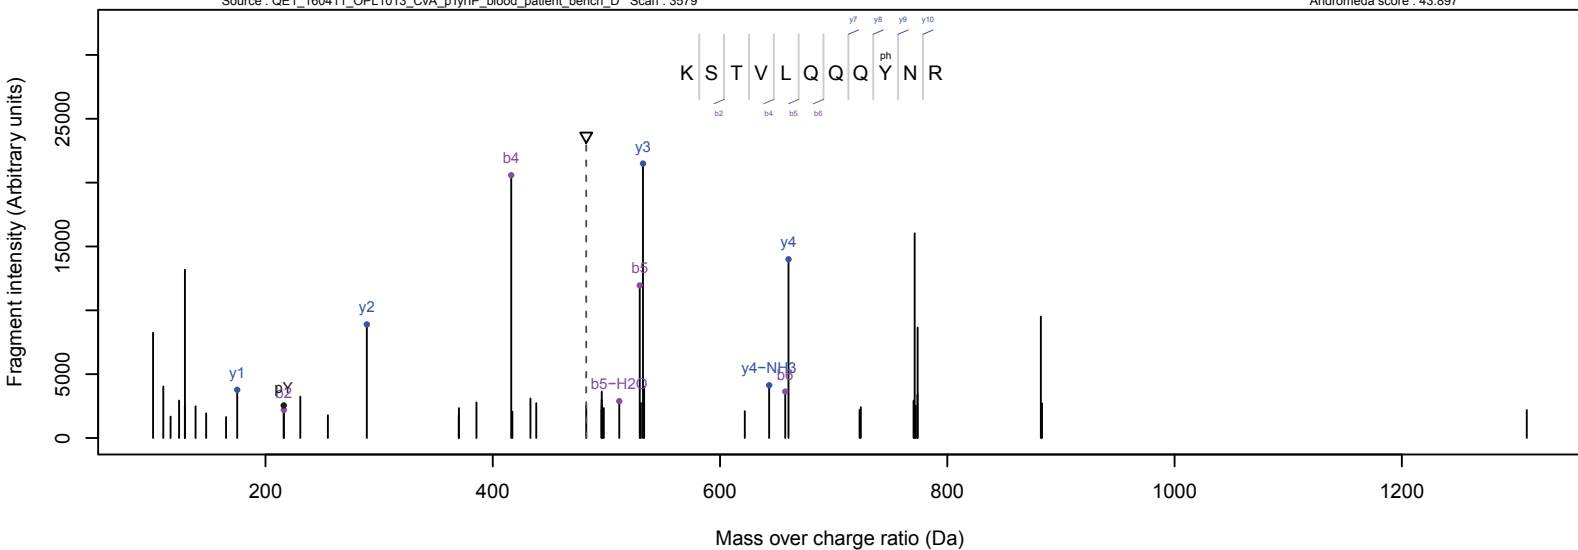

**QVAYIY(ph)K-2+**

Source : QE1\_160411\_OPL1013\_CvA\_pTyrIP\_blood\_patient\_bench\_B Scan : 9764

Andromeda score : 43.814

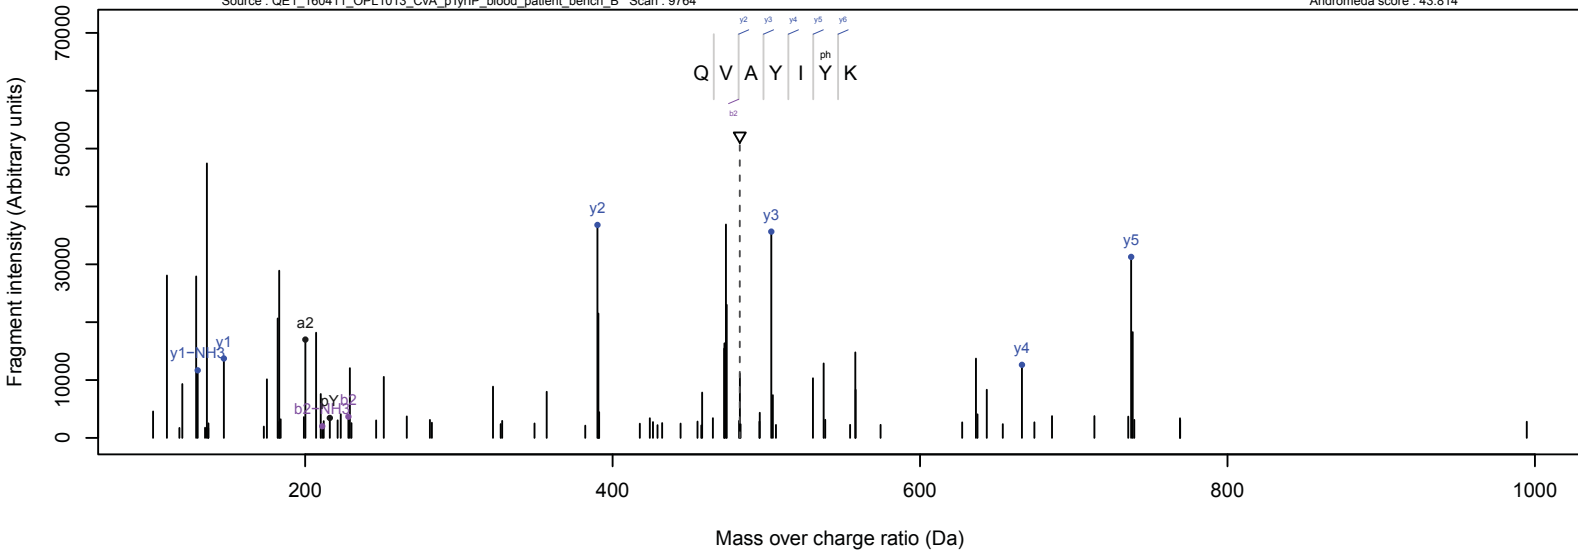

**YSKEY(ph)IEK-3+**

Source : QE1\_160411\_OPL1013\_CvA\_pTyrIP\_blood\_patient\_bench\_A Scan : 3316

Andromeda score : 43.769

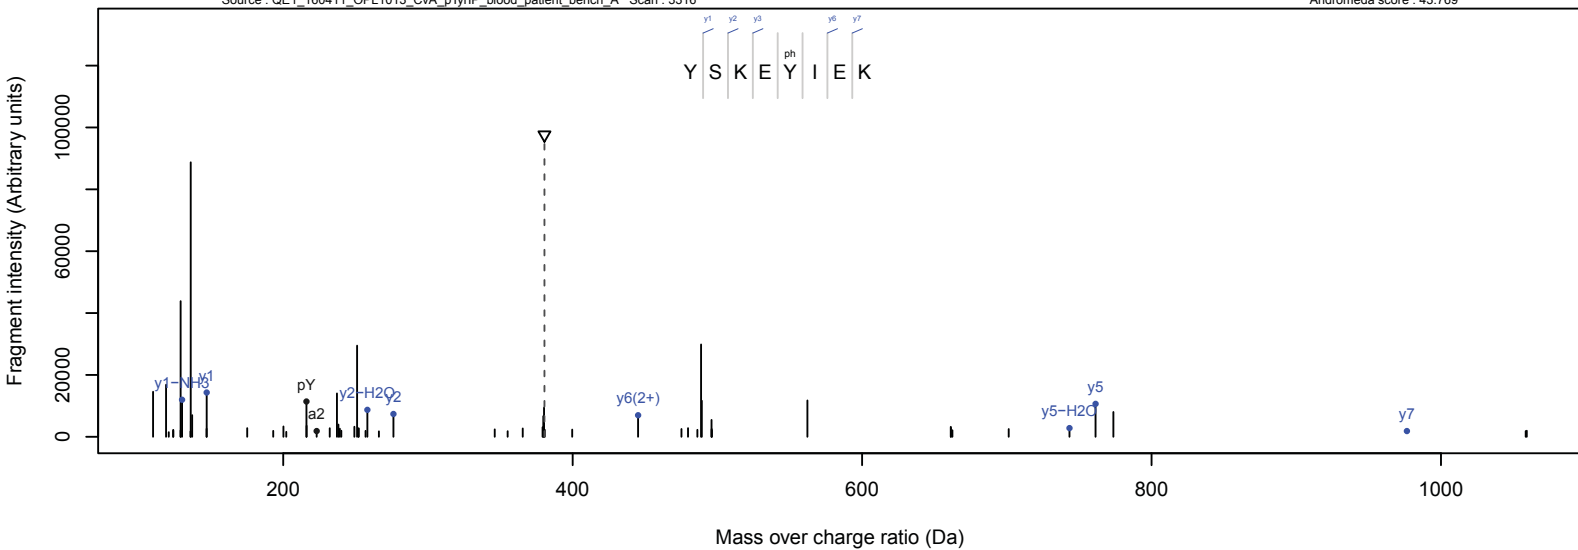

## LNERHY(ph)GGLTGLNK-3+

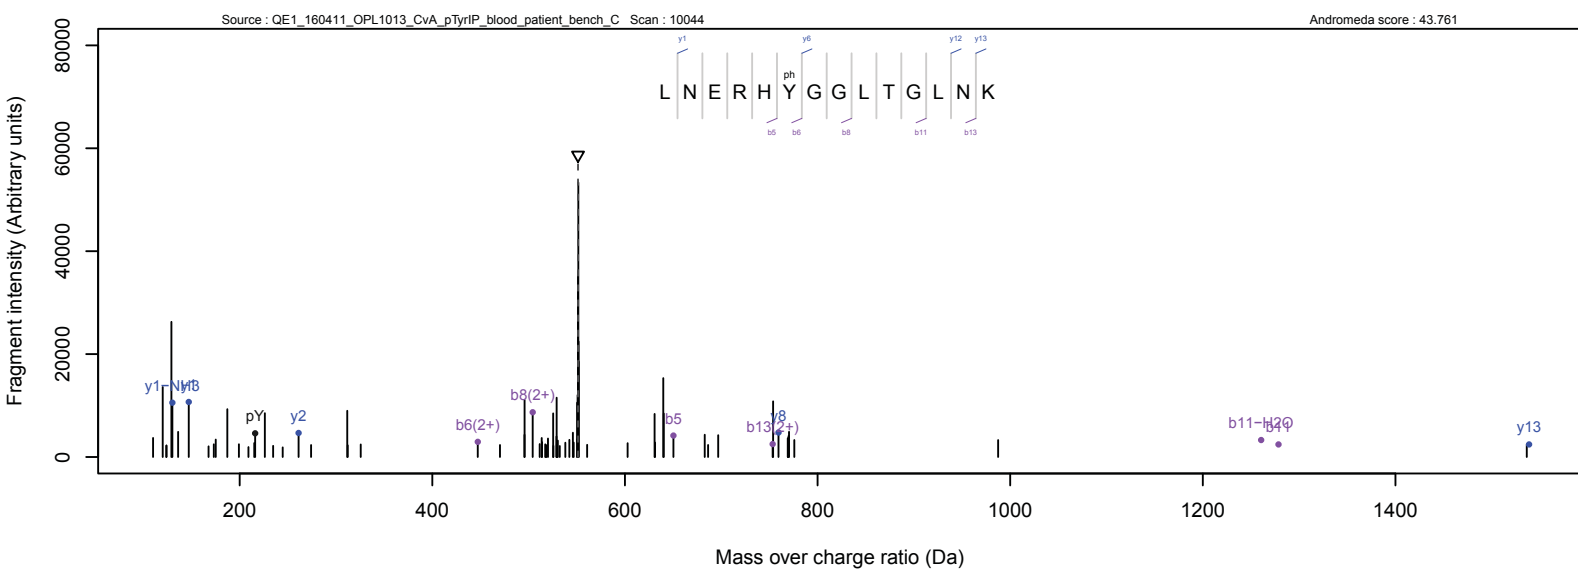

## LVNEAPVYSVYS(ph)K-2+

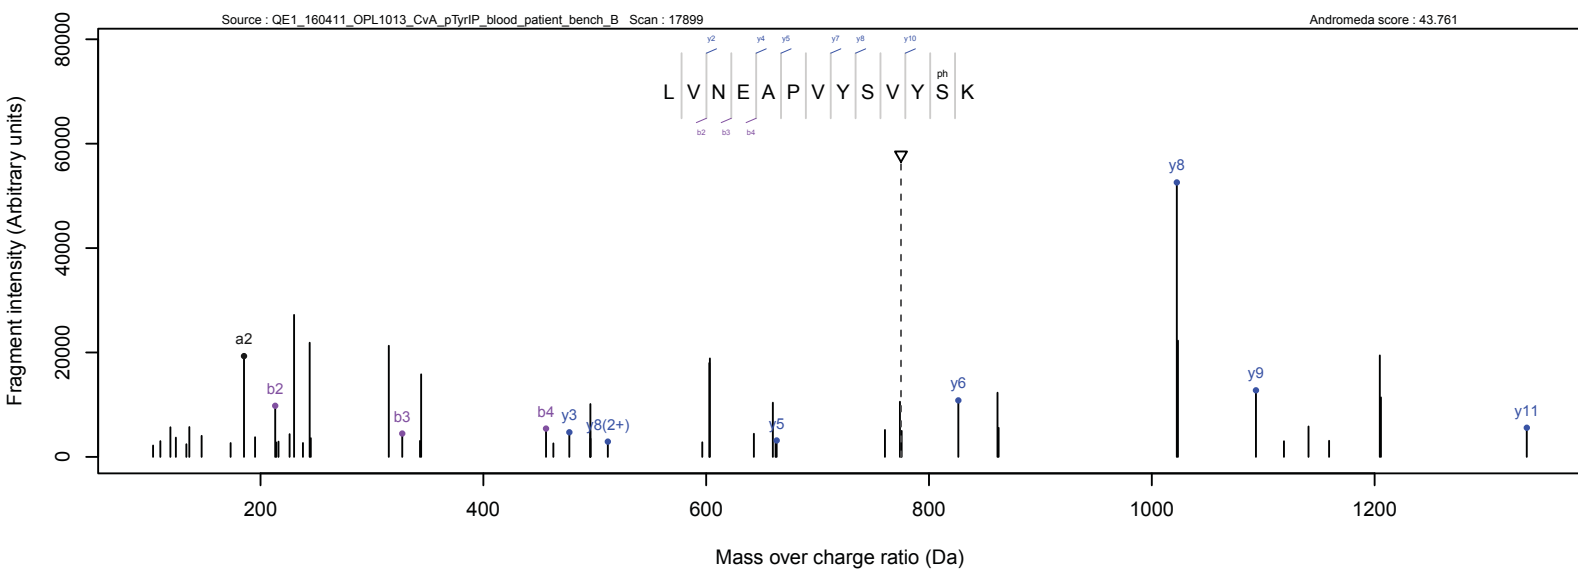

## VIQYLAYVASSHK-3+

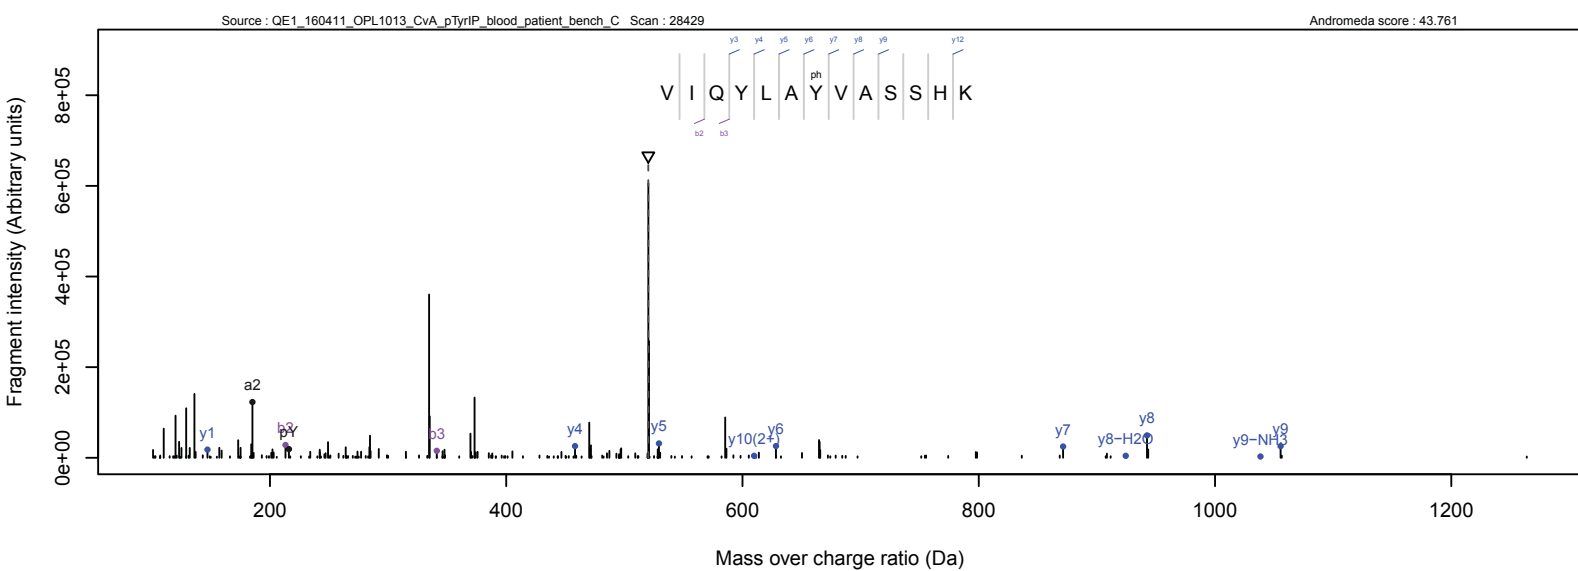

**TKPSDEEMLFY(ph)GHYK-3+**

Source: QE1\_160411\_OPL1013\_CvA\_pTyrIP\_blood\_patient\_bench\_B Scan: 25919

Andromeda score: 43.557

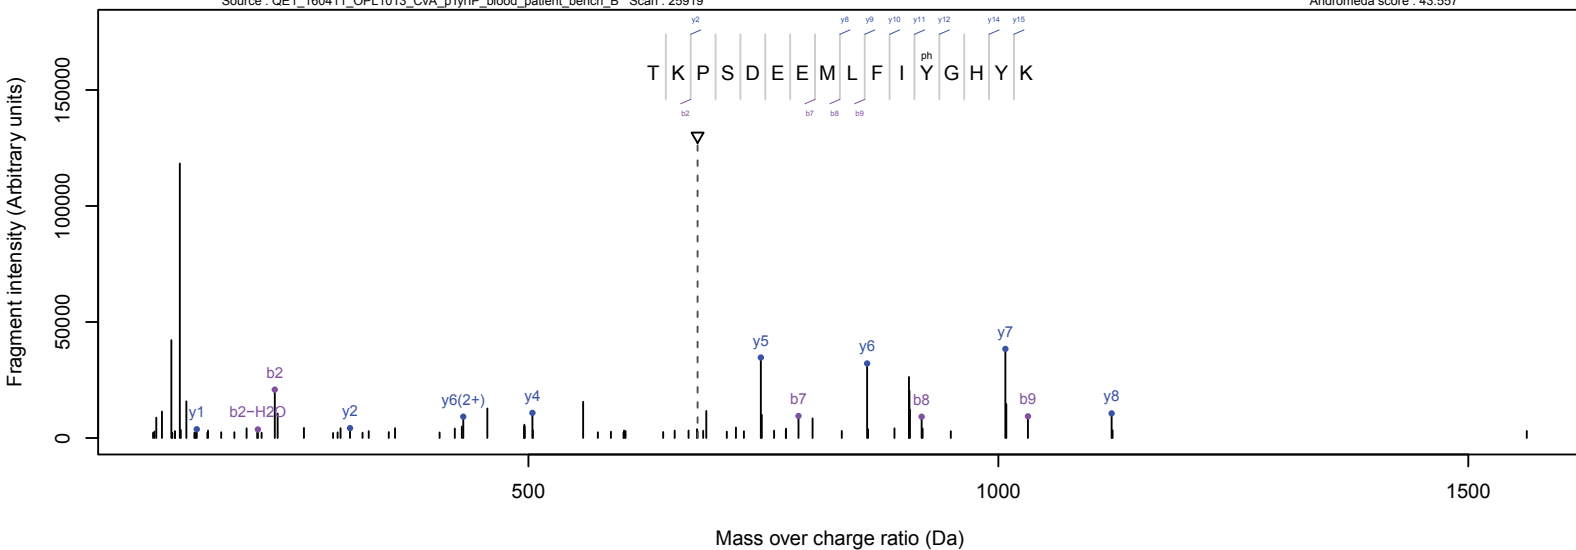

**(ac)AYHSGYGAHGSK-3+**

Source: QE1\_160411\_OPL1013\_CvA\_pTyrIP\_blood\_patient\_bench\_C Scan: 2315

Andromeda score: 43.549

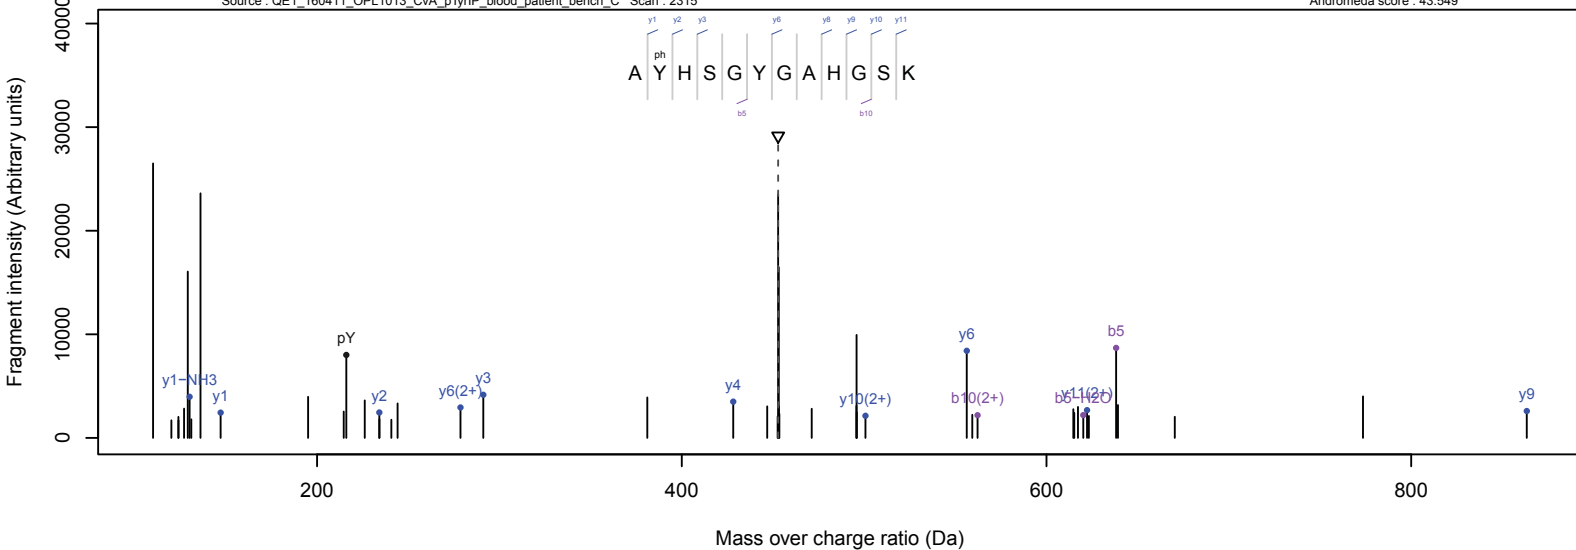

**QATADRDPAQLQHVQPAGQDFASGWPQTEY(ph)DNVVLK-4+**

Source: QE1\_160411\_OPL1013\_CvA\_pTyrIP\_blood\_patient\_bench\_D Scan: 31962

Andromeda score: 43.444

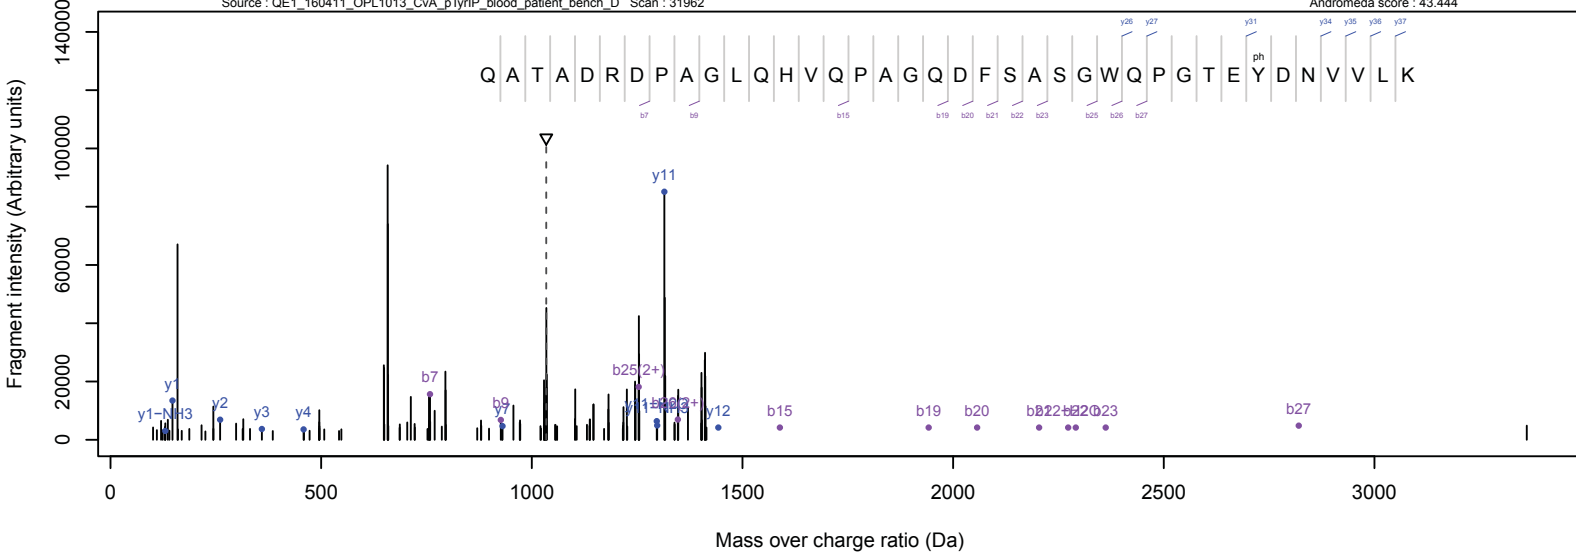

APSVPAEPEY(ph)PKGIR-3+

Source : QE1\_160411\_OPL1013\_CvA\_pTyrIP\_blood\_patient\_bench\_B Scan : 15530

Andromeda score : 43.316

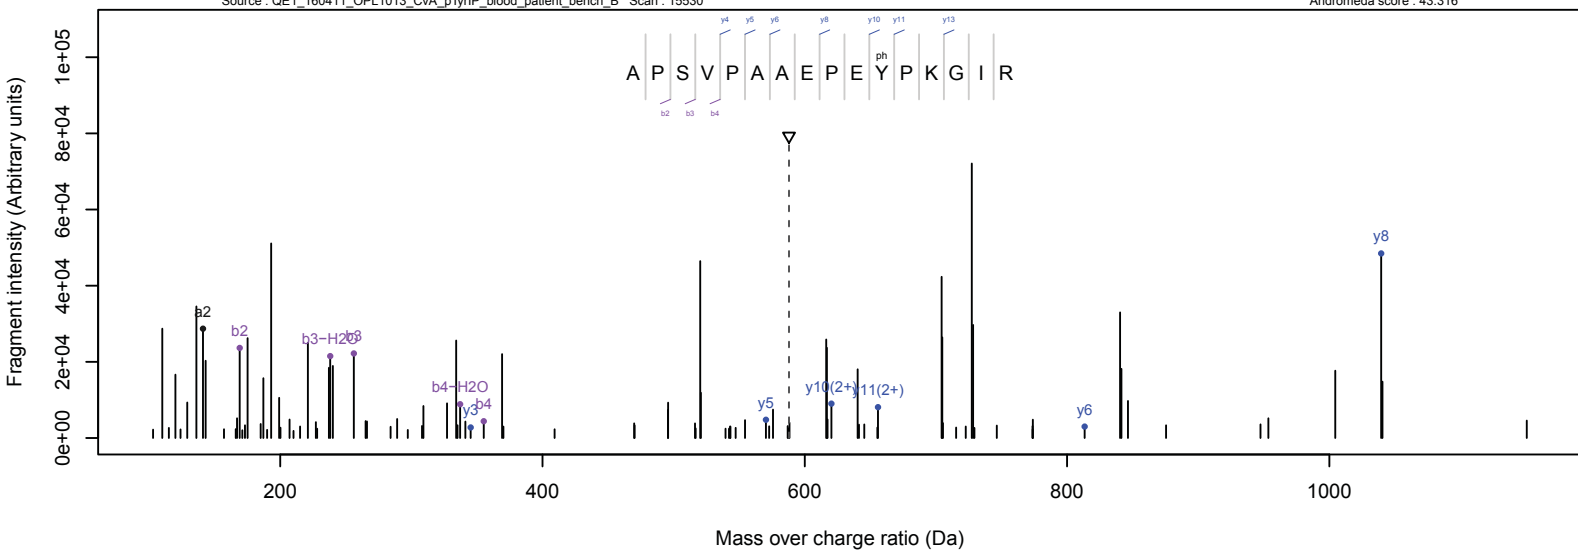

SLPSGSHQGPVIY(ph)AQLDHSGHHSDKINK-6+

Source : QE1\_160411\_OPL1013\_CvA\_pTyrIP\_blood\_patient\_bench\_D Scan : 12520

Andromeda score : 43.306

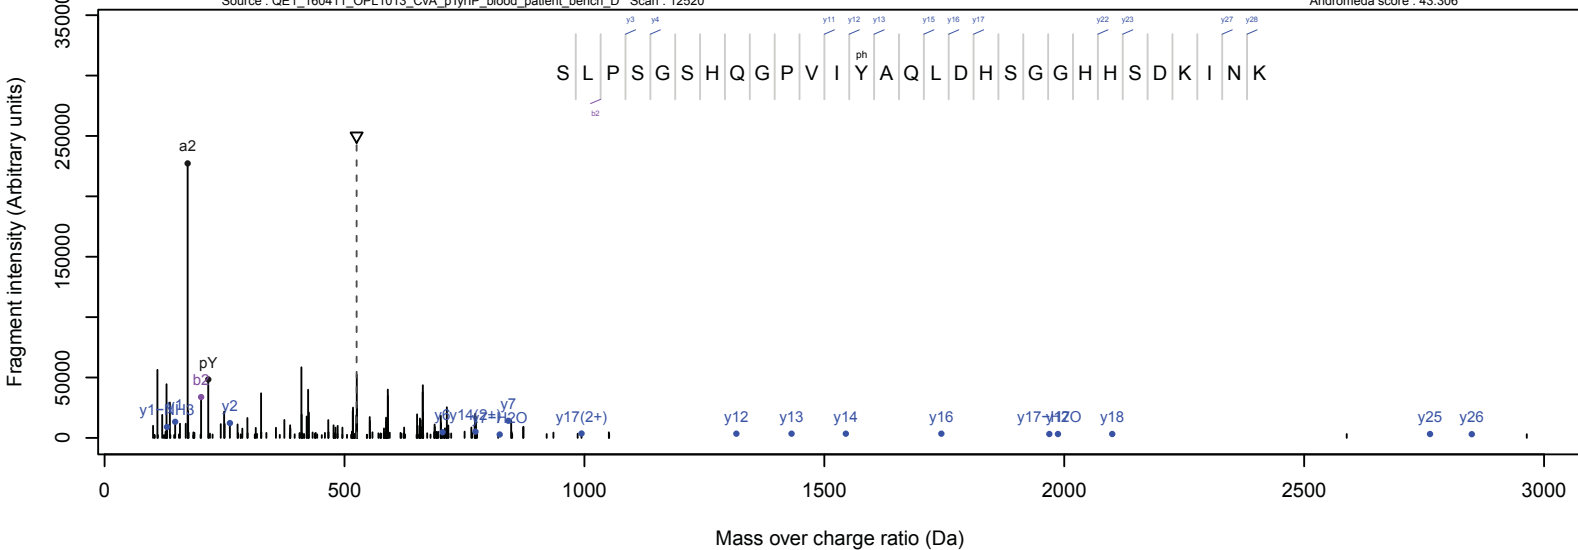

EYLY(ph)VYK-2+

Source : QE1\_160411\_OPL1013\_CvA\_pTyrIP\_blood\_patient\_bench\_A Scan : 18371

Andromeda score : 43.124

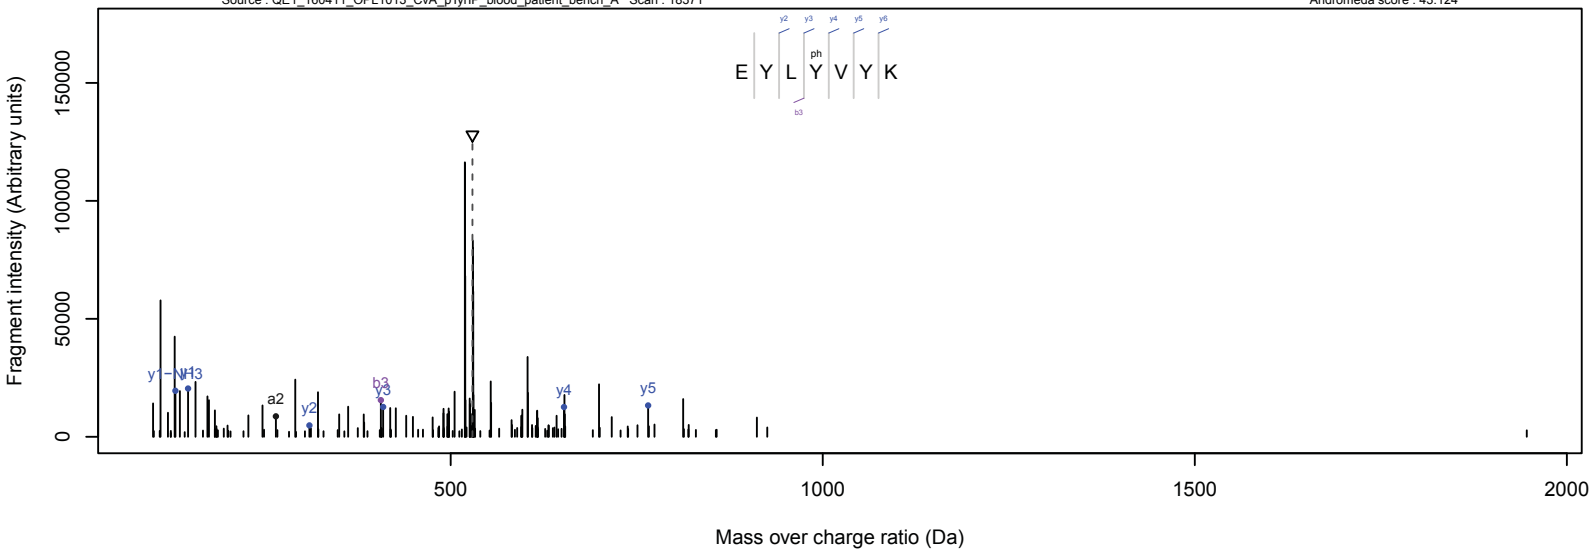



IHSS(ph)HVR-2+

Source : QE1\_160411\_OPL1013\_CvA\_pTyrIP\_blood\_patient\_bench\_D Scan : 7017

Andromeda score : 43.066

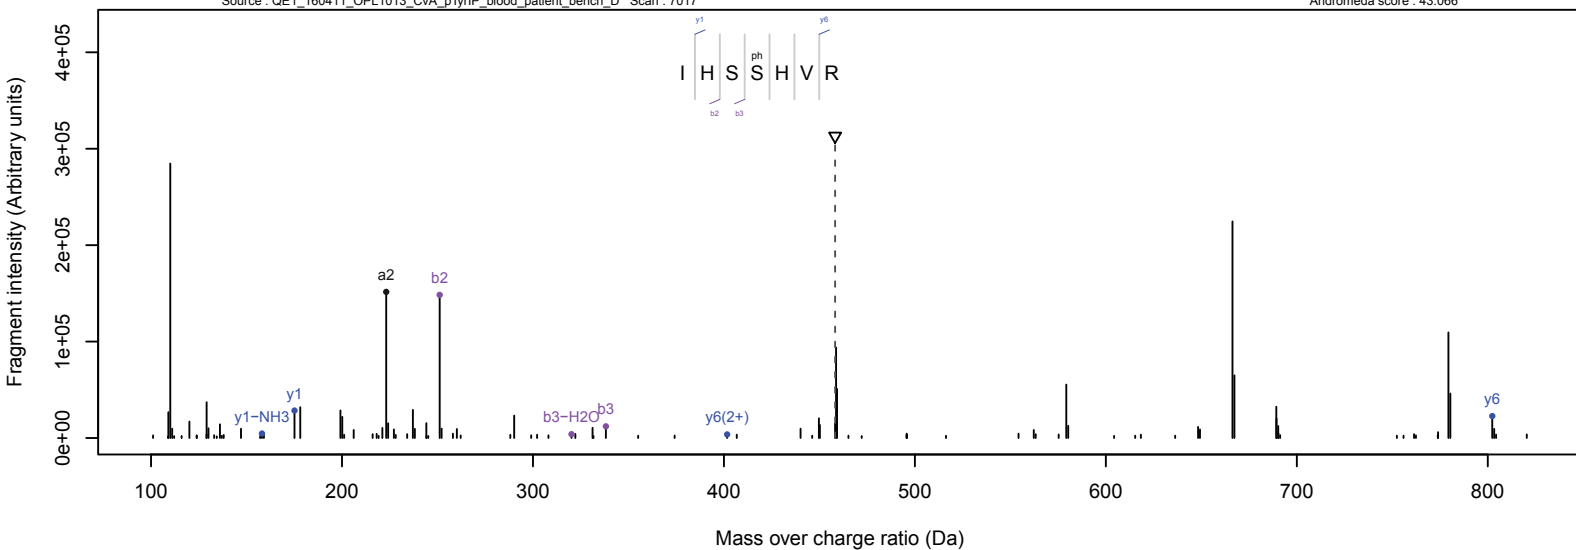

M(ox)EKGEHSIVY(ph)LKPSYAFGSV GK-4+

Source : QE1\_160411\_OPL1013\_CvA\_pTyrIP\_blood\_patient\_bench\_C Scan : 27930

Andromeda score : 43.035

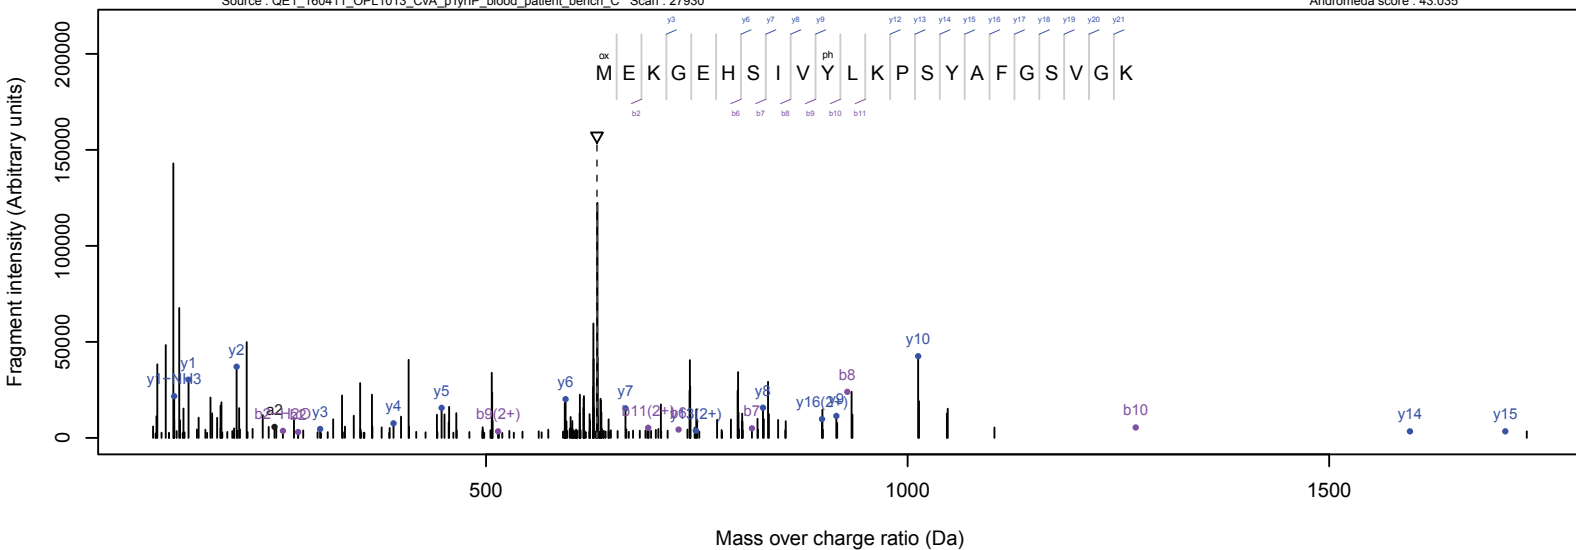

Y(ph)HTINGHNC EVK-3+

Source : QE1\_160411\_OPL1013\_CvA\_pTyrIP\_blood\_patient\_bench\_B Scan : 2031

Andromeda score : 42.976

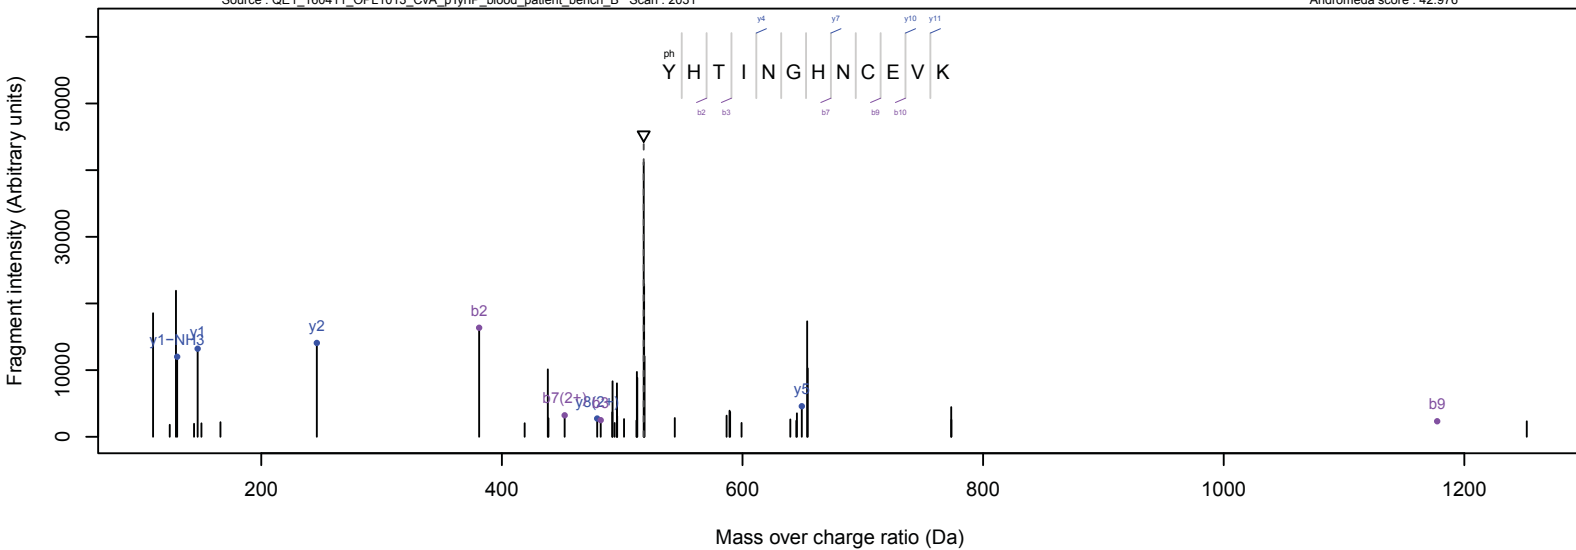

## FNPETDY(ph)LTGTDGKK-3+

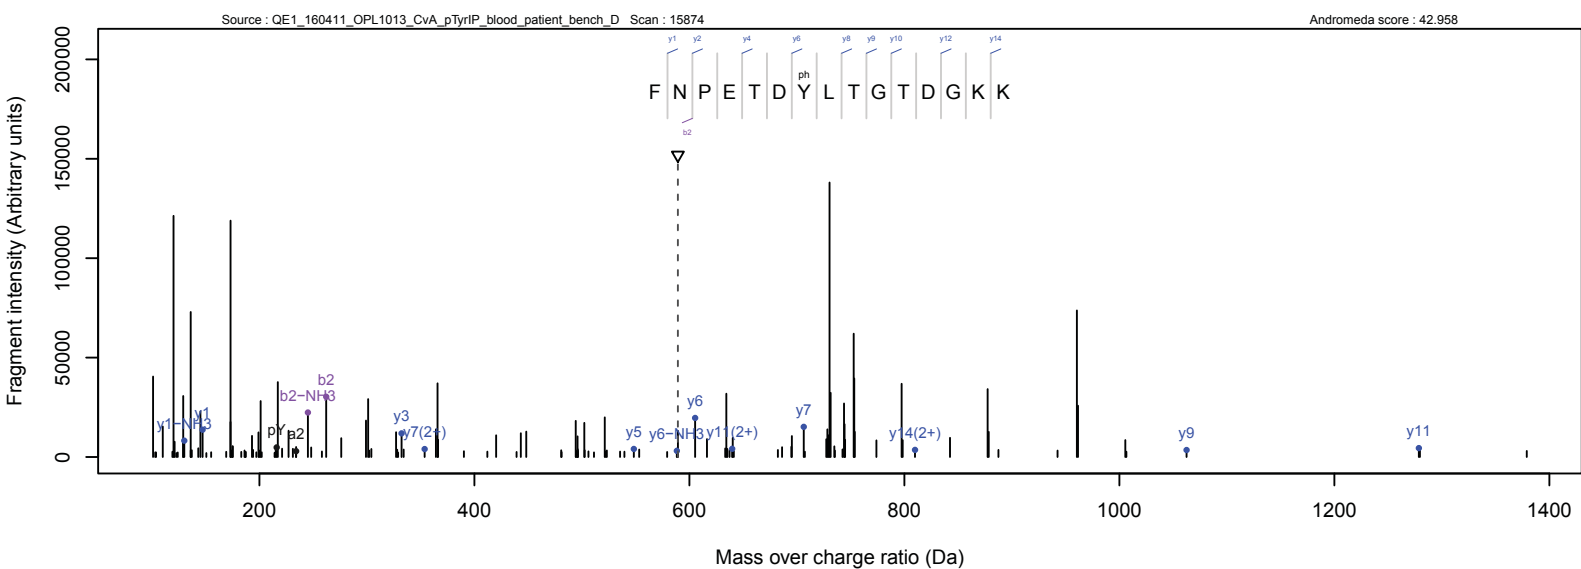

## Y(ph)RHPGCYTCADCGLNLLK-3+

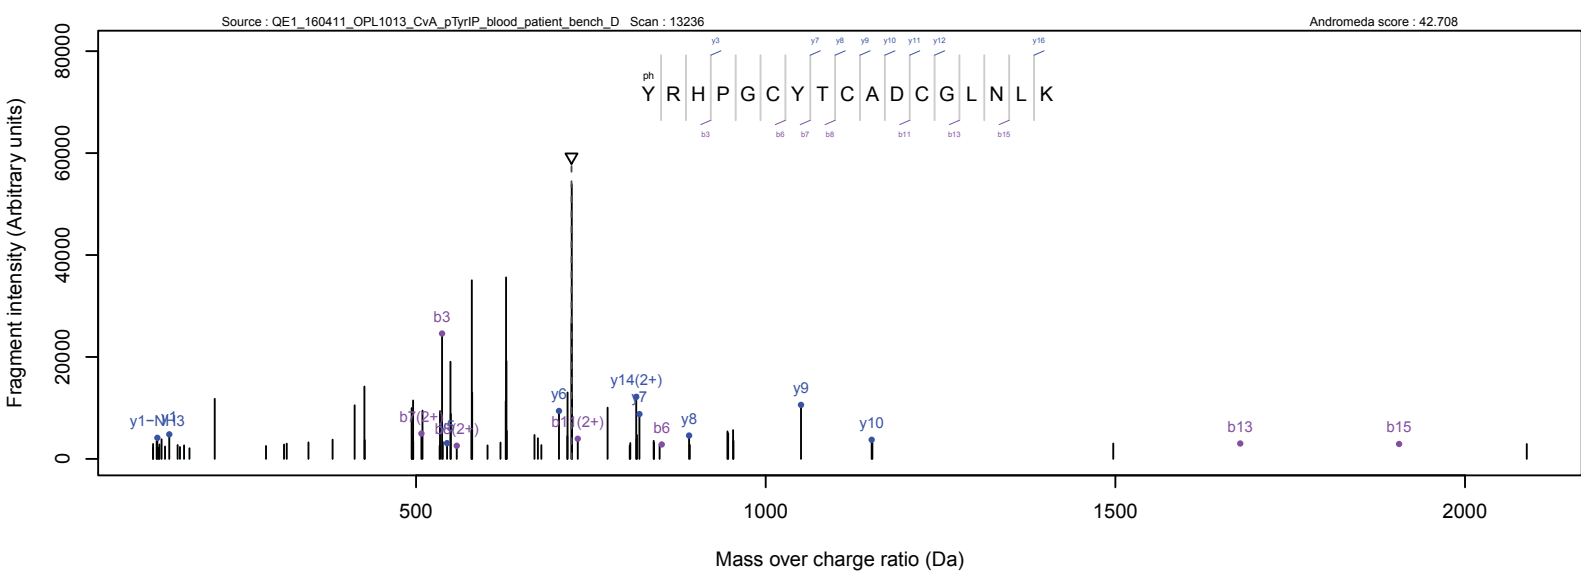

## LYKELY(ph)AR-2+

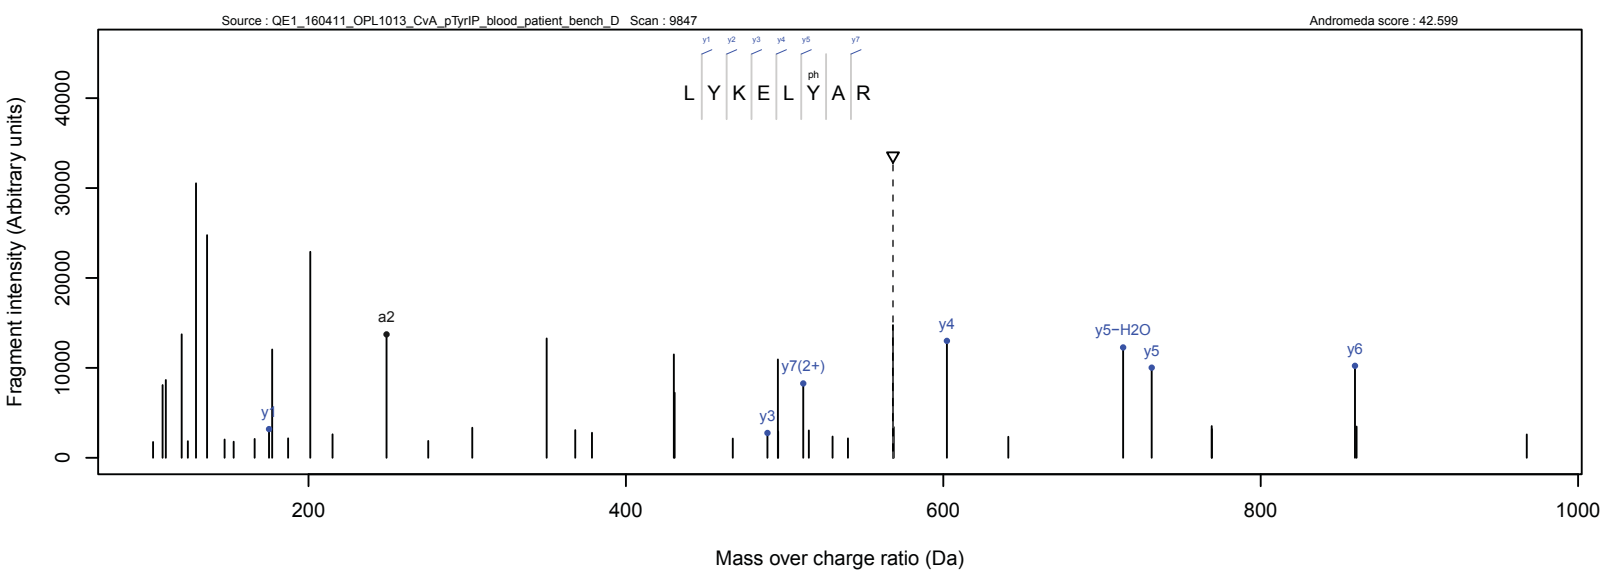

## AAFYGIY(ph)DTAK-2+

Source : QE1\_160411\_OPL1013\_CvA\_pTyrIP\_blood\_patient\_bench\_A Scan : 23092

Andromeda score : 42.475

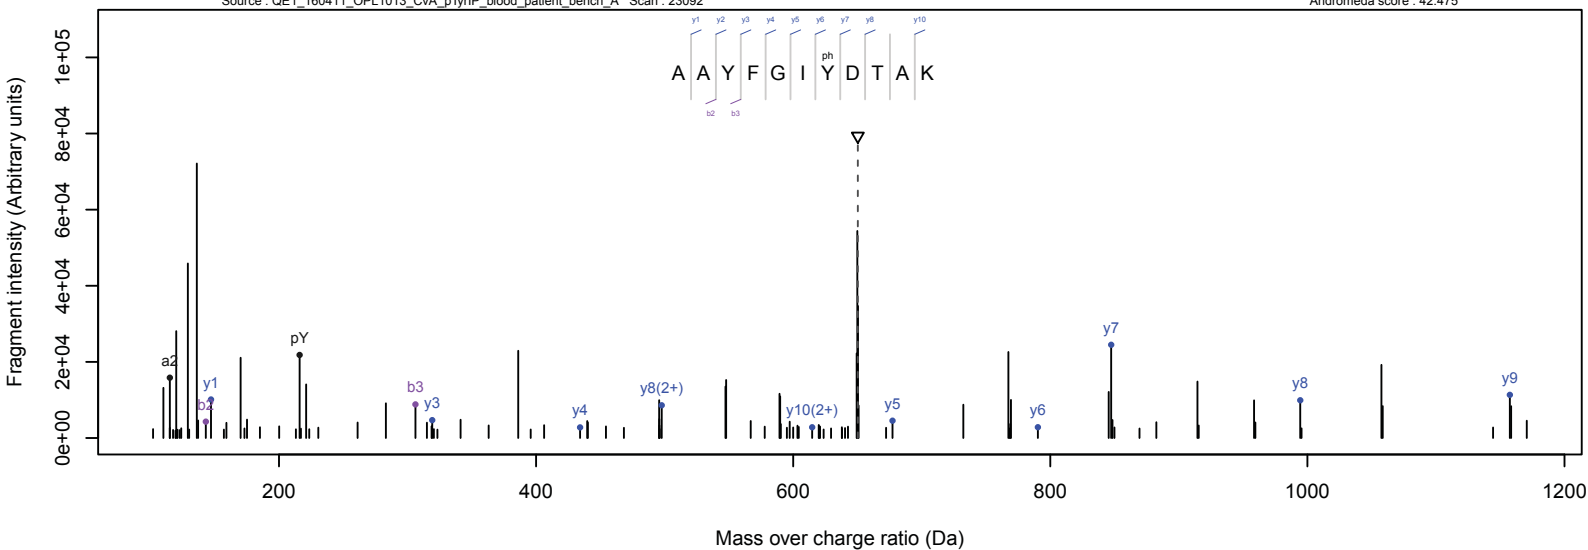

## DKLNPTPSIY(ph)LENKR-3+

Source : QE1\_160411\_OPL1013\_CvA\_pTyrIP\_blood\_patient\_bench\_A Scan : 20033

Andromeda score : 42.314

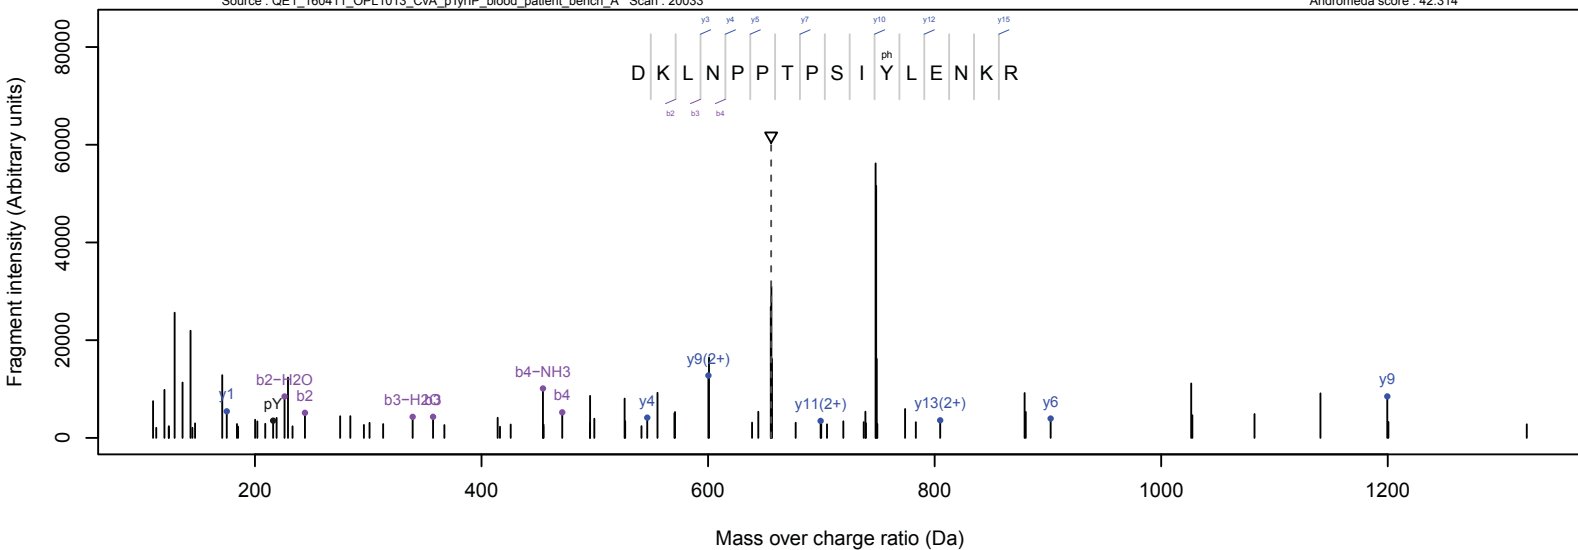

## SEATY(ph)M(ox)TM(ox)HPVWPSLR-3+

Source : QE1\_160411\_OPL1013\_CvA\_pTyrIP\_blood\_patient\_bench\_C Scan : 26454

Andromeda score : 42.314

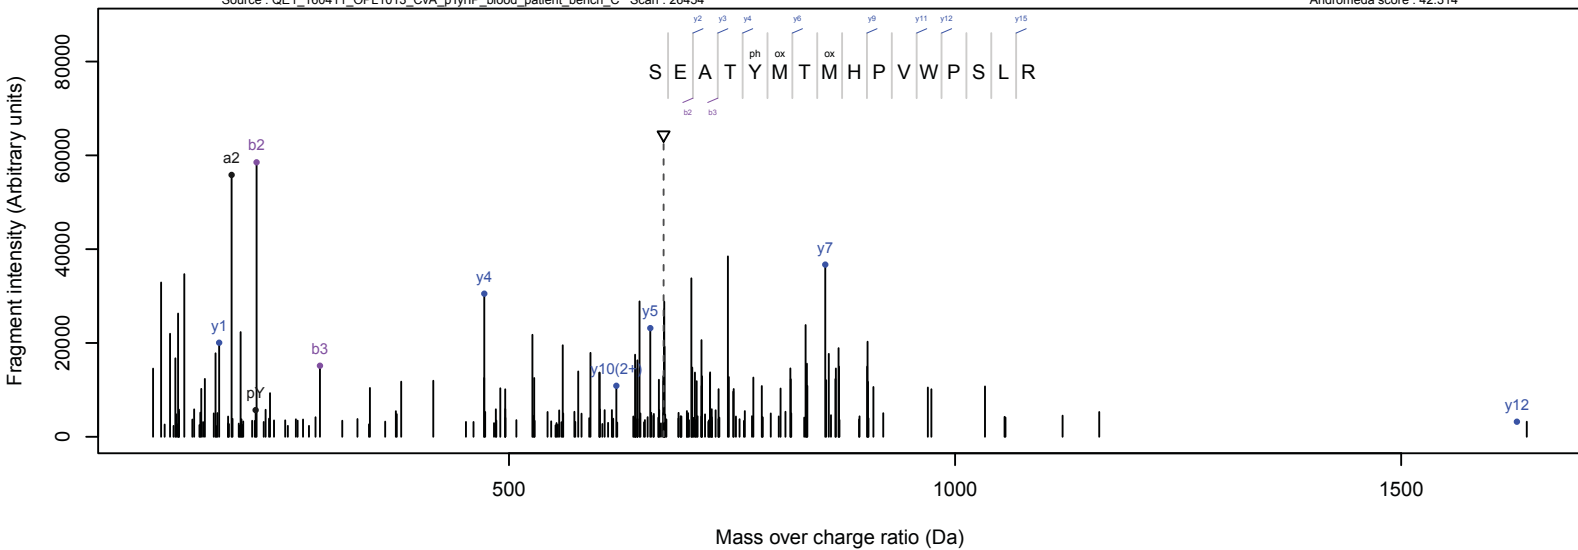

**TAQEHDKRDVPVAVYCR-4+**

Source : QE1\_160411\_OPL1013\_CvA\_pTyrIP\_blood\_patient\_bench\_B Scan : 8814

Andromeda score : 42.314

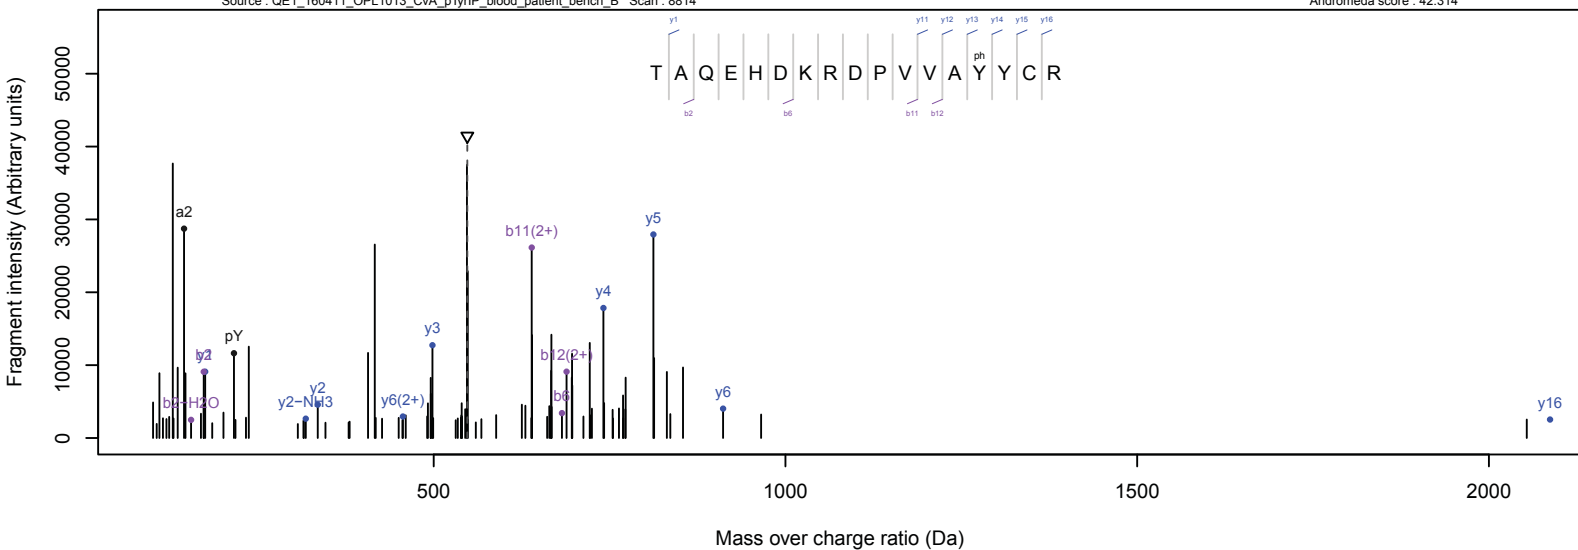

**HGM(ox)NGFFQQMIYDSSPPSR-3+**

Source : QE1\_160411\_OPL1013\_CvA\_pTyrIP\_blood\_patient\_bench\_B Scan : 25170

Andromeda score : 42.068

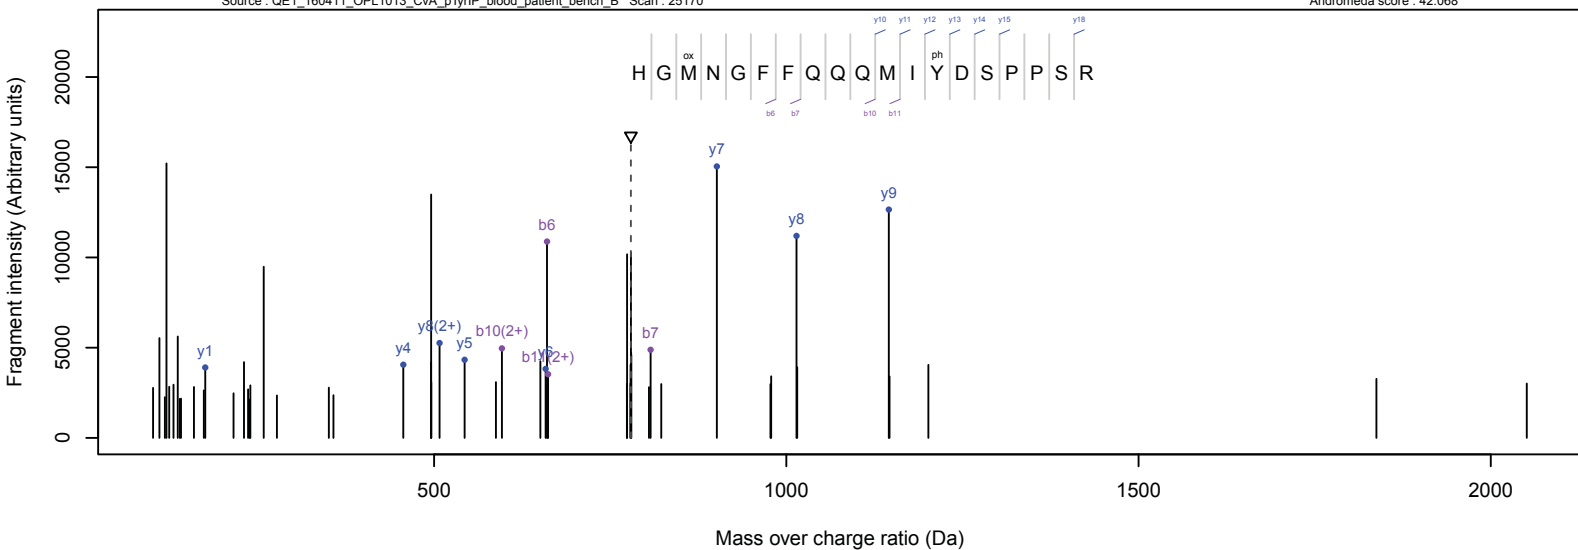

**YVLENHPGTNSNYQM(ox)HLLK-4+**

Source : QE1\_160411\_OPL1013\_CvA\_pTyrIP\_blood\_patient\_bench\_C Scan : 16258

Andromeda score : 42.059

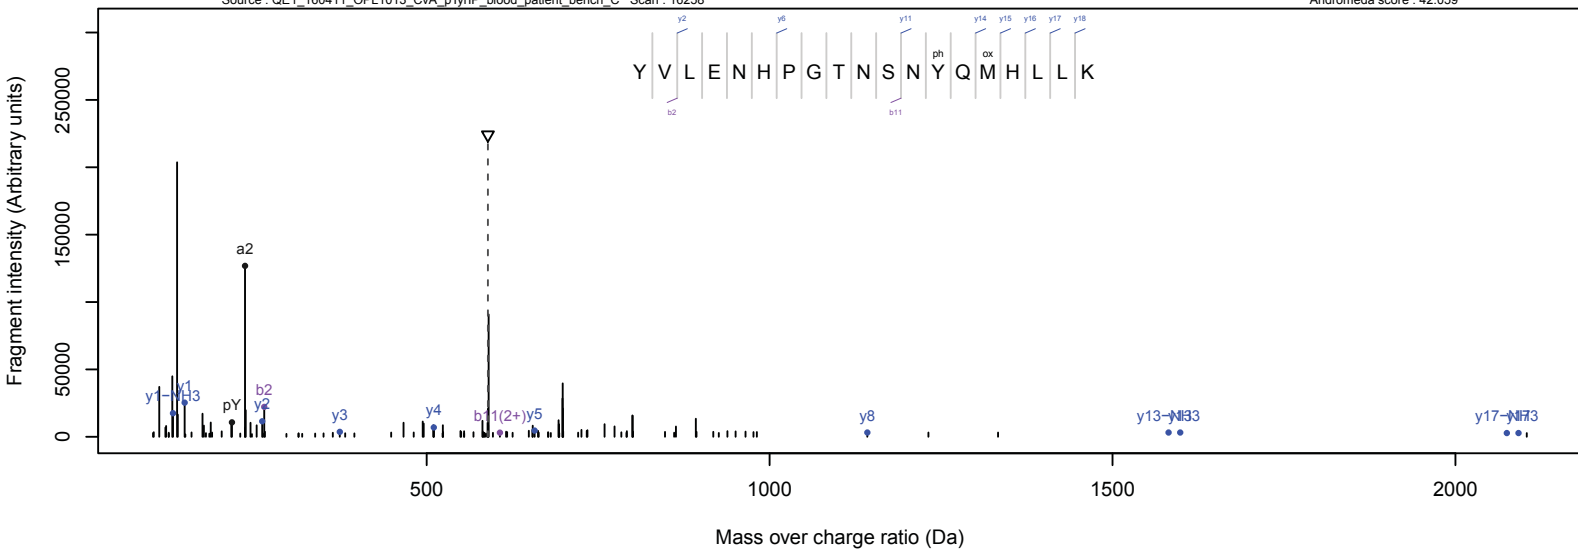

ATEDGTPYDPY(ph)KALWFER-3+

Source : QE1\_160411\_OPL1013\_CvA\_pTyrIP\_blood\_patient\_bench\_A Scan : 33398

Andromeda score : 41.988

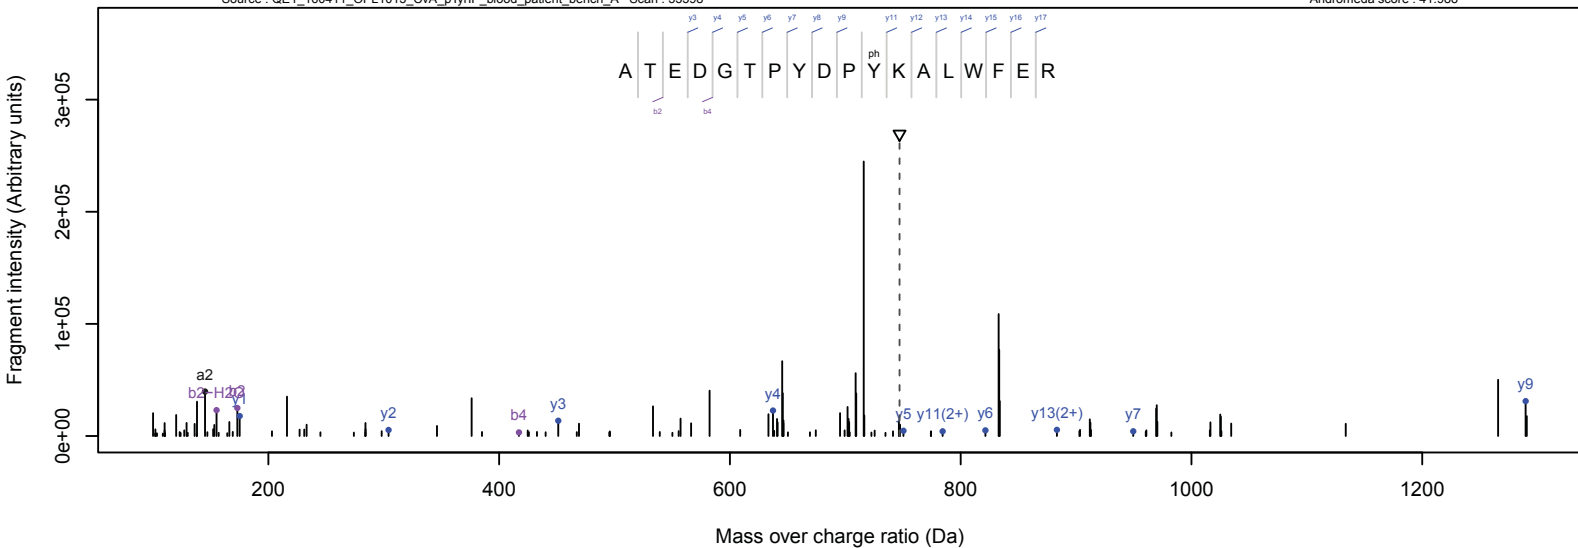

SPDEAY(ph)AIK-2+

Source : QE1\_160411\_OPL1013\_CvA\_pTyrIP\_blood\_patient\_bench\_C Scan : 8418

Andromeda score : 41.704

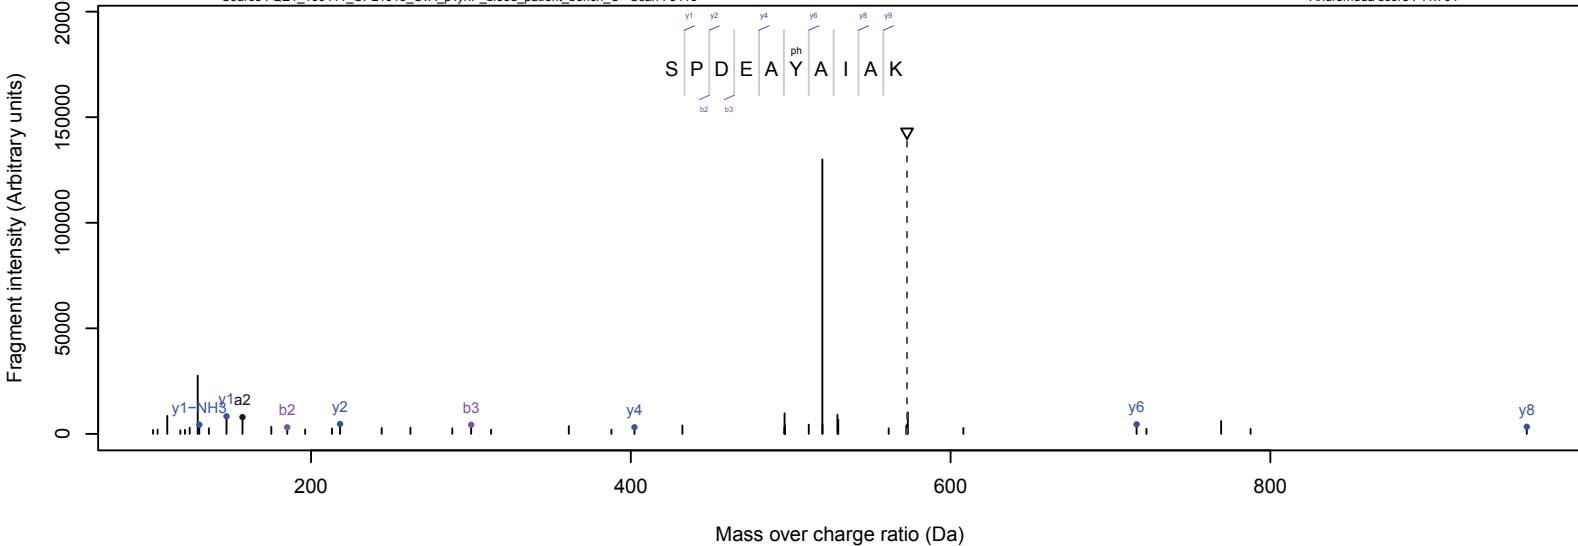

NEPYEKDGEKQY(ph)HK-4+

Source : QE1\_160411\_OPL1013\_CvA\_pTyrIP\_blood\_patient\_bench\_D Scan : 1667

Andromeda score : 41.695

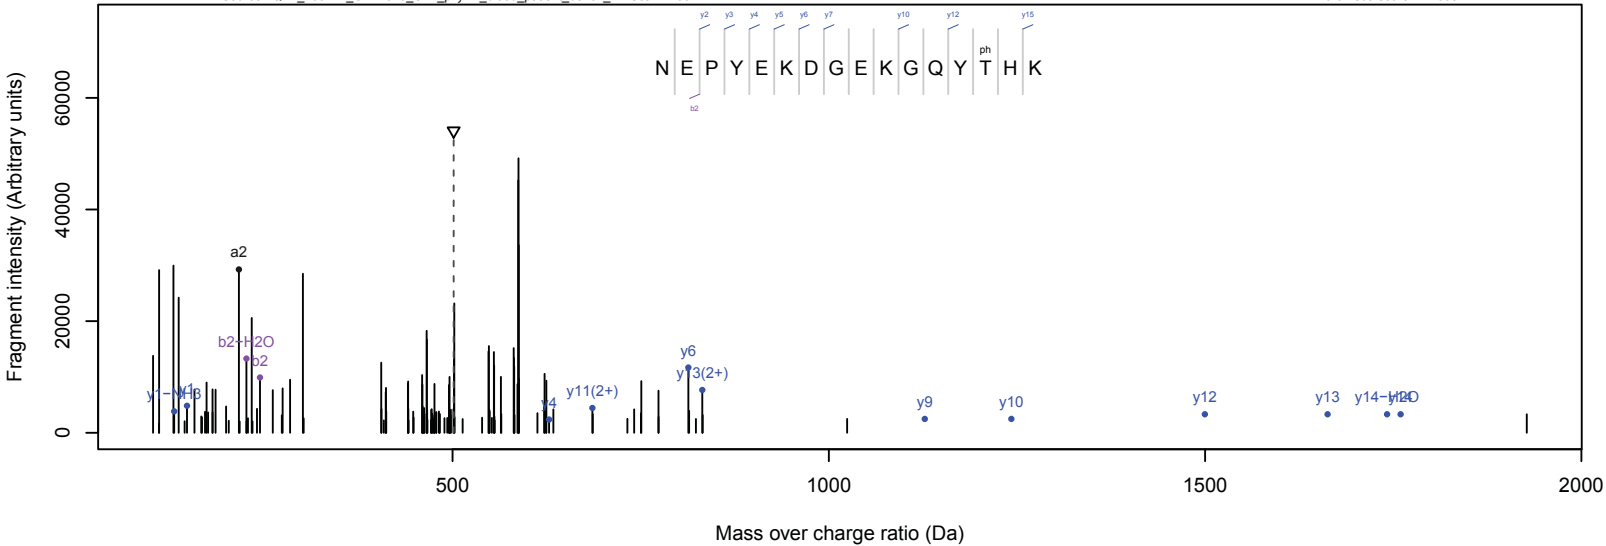

**GHALY(ph)VEPHGHGPSLSVQGLSR-4+**

Source : QE1\_160411\_OPL1013\_CvA\_pTyrIP\_blood\_patient\_bench\_D Scan : 20793

Andromeda score : 41.615

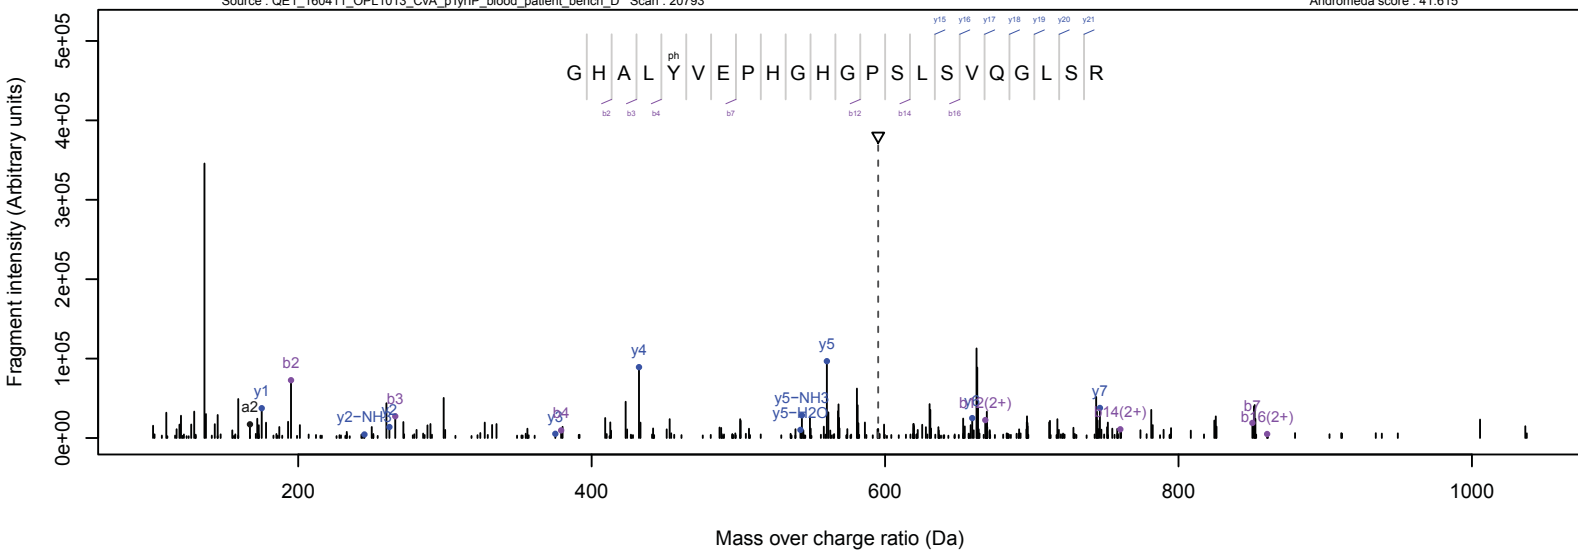

**RDPSLPY(ph)LEQYR-3+**

Source : QE1\_160411\_OPL1013\_CvA\_pTyrIP\_blood\_patient\_bench\_C Scan : 25019

Andromeda score : 41.577

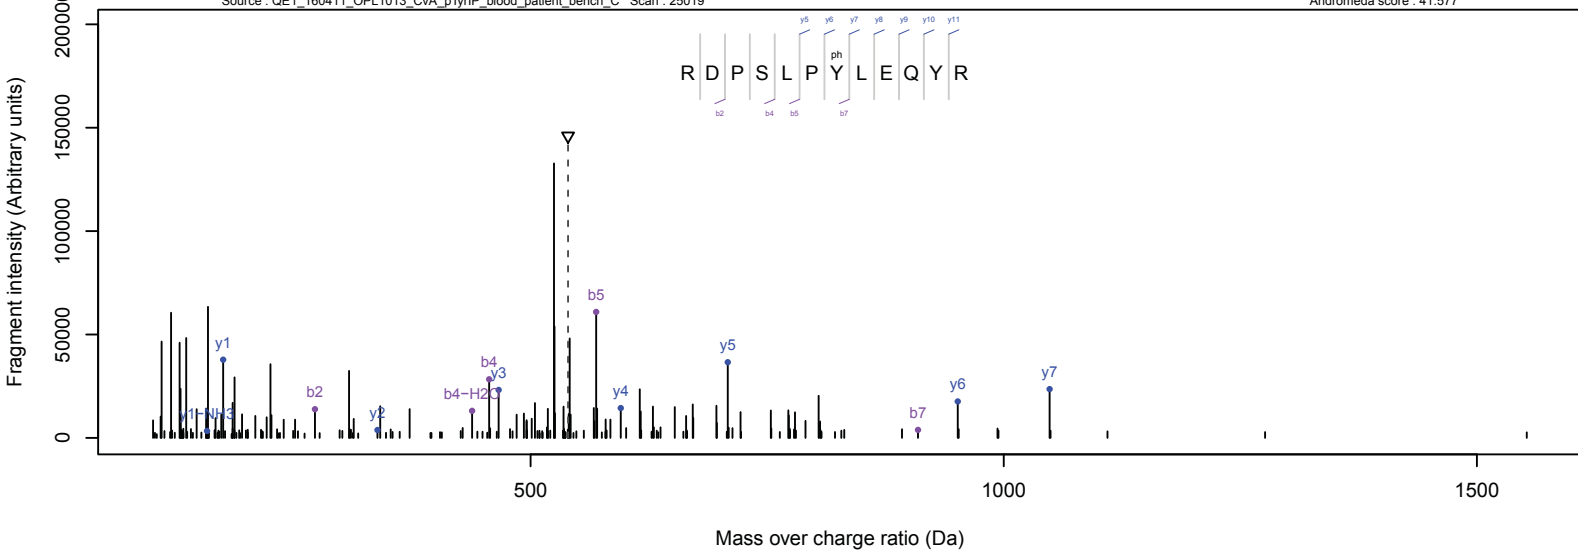

**KSEEDGKEY(ph)HFISTEEM(ox)TR-4+**

Source : QE1\_160411\_OPL1013\_CvA\_pTyrIP\_blood\_patient\_bench\_C Scan : 10289

Andromeda score : 41.53

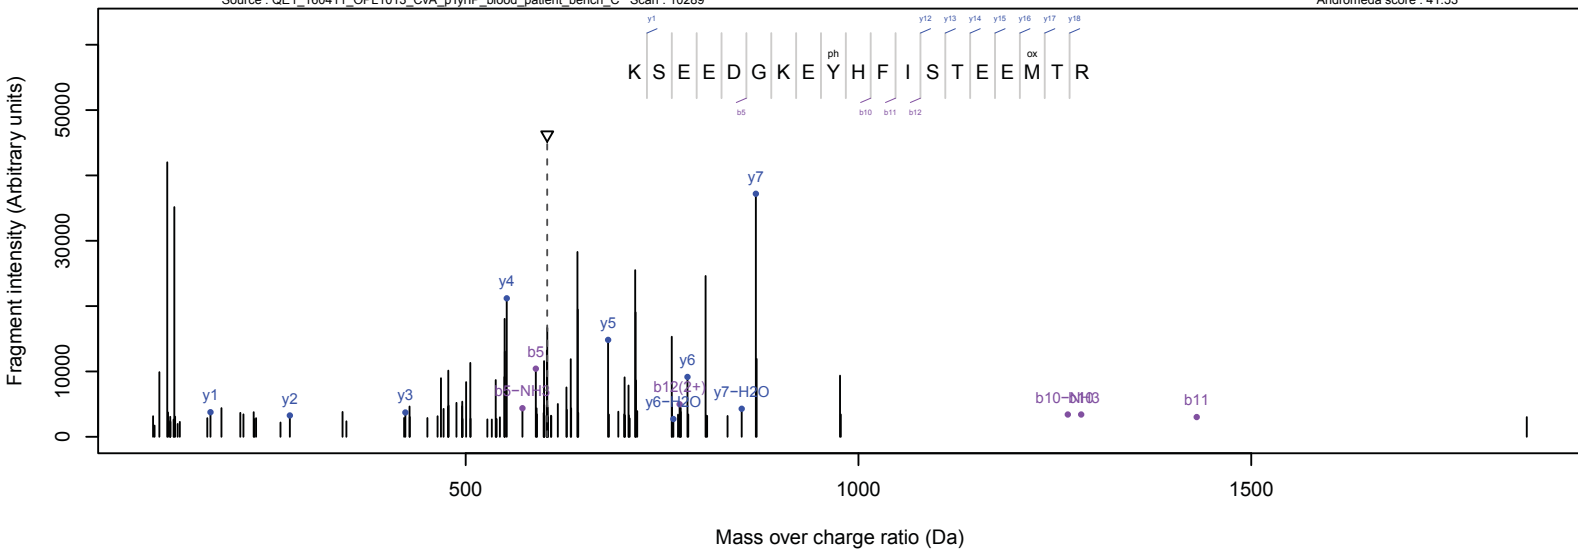

**TSESIYRPGSSIPGSPGHT(ph)IYAK-3+**

Source : QE1\_160411\_OPL1013\_CvA\_pTyrIP\_blood\_patient\_bench\_C Scan : 18867

Andromeda score : 41.446

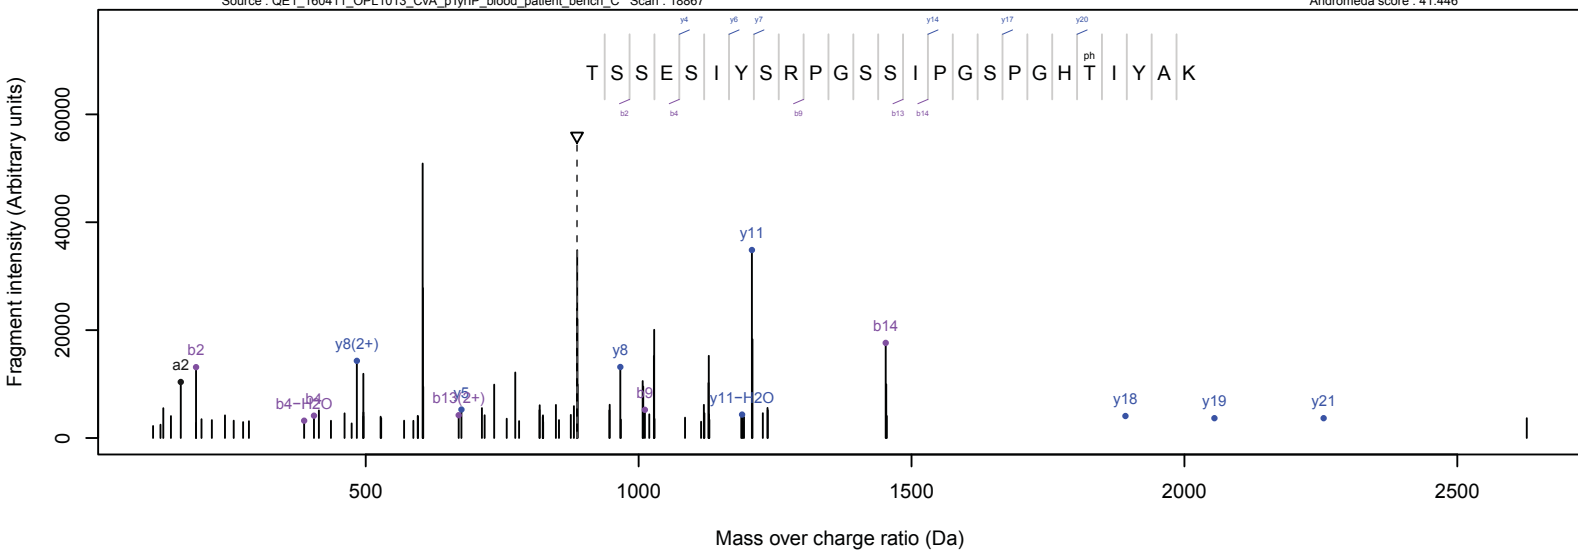

**TSGTM(ox)NNY(ph)PTWR-2+**

Source : QE1\_160411\_OPL1013\_CvA\_pTyrIP\_blood\_patient\_bench\_D Scan : 9990

Andromeda score : 41.242

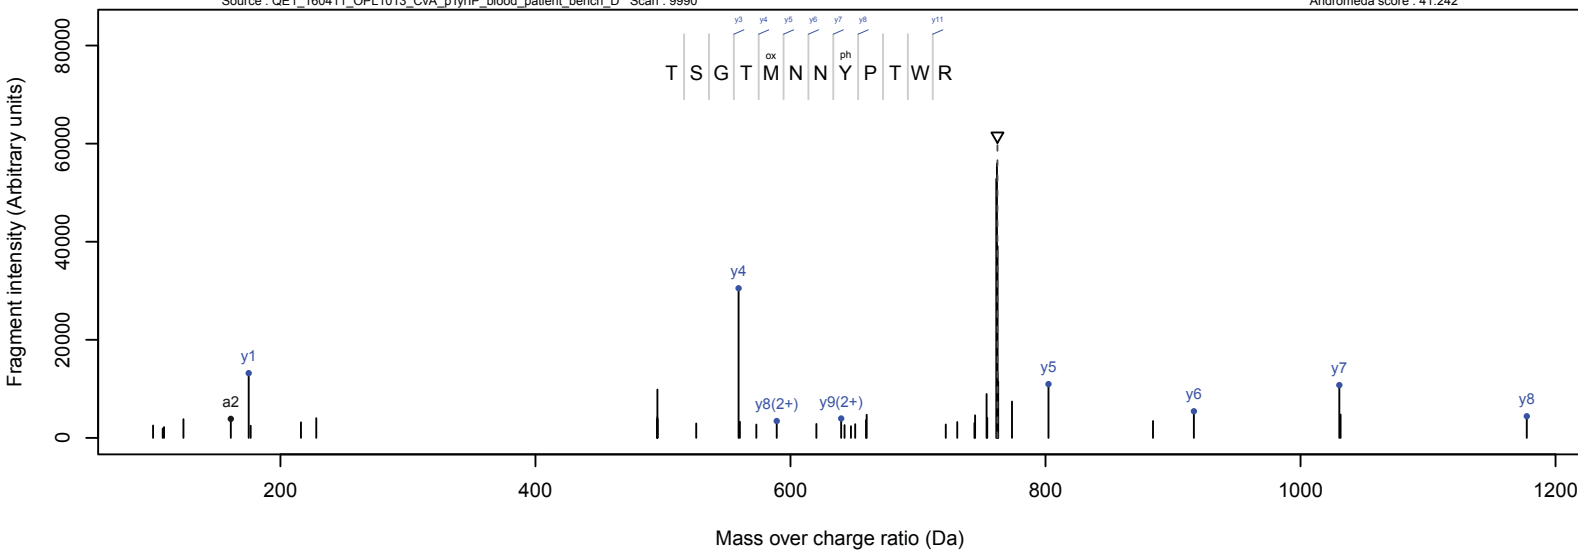

**TLSEVDY(ph)APAGPAR-2+**

Source : QE1\_160411\_OPL1013\_CvA\_pTyrIP\_blood\_patient\_bench\_C Scan : 15732

Andromeda score : 41.227

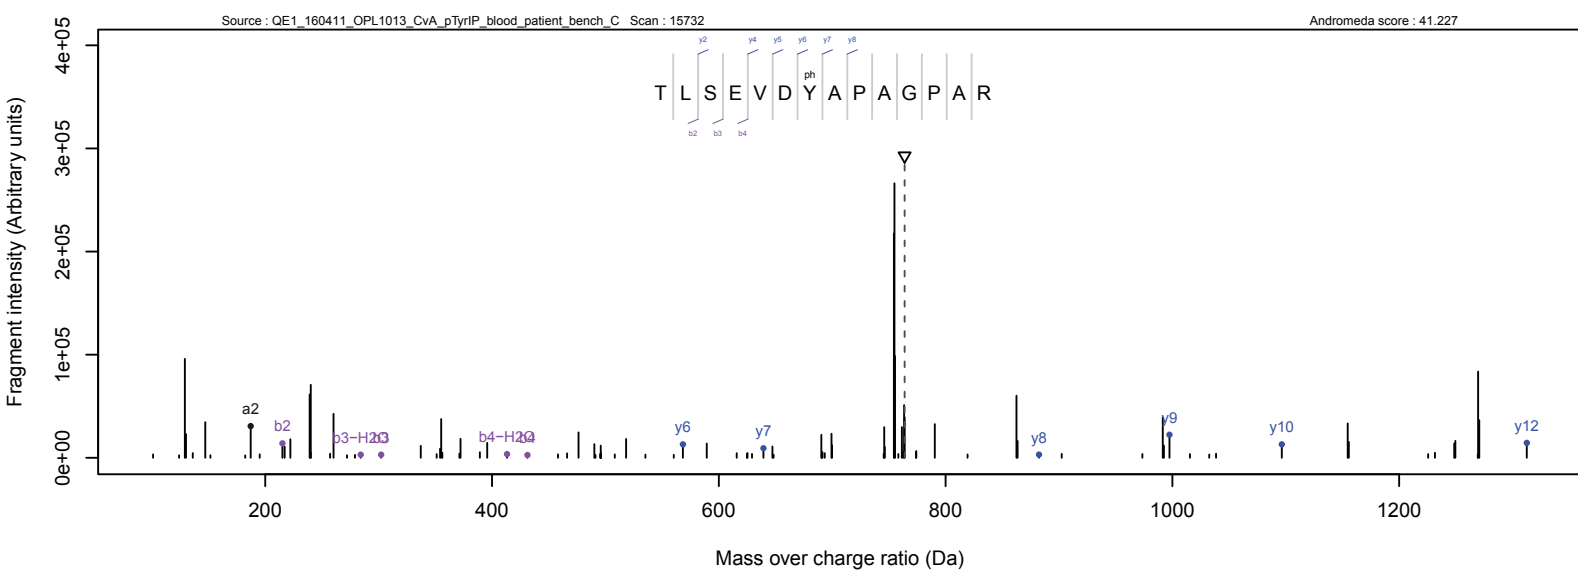

## IDYGEY(ph)M(ox)DKNNVR-3+

Source : QE1\_160411\_OPL1013\_CvA\_pTyrIP\_blood\_patient\_bench\_D Scan : 7524

Andromeda score : 41.218

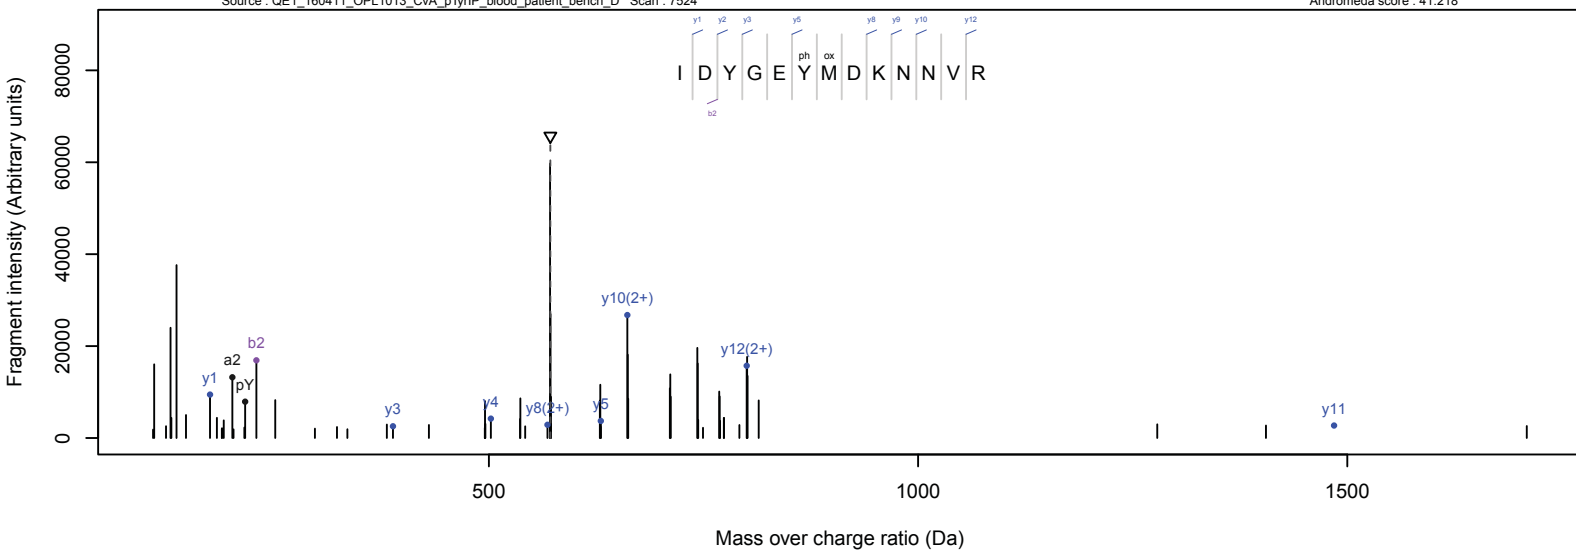

## ATFHTPFSLGQSPGCS(ph)SYTFPK-3+

Source : QE1\_160411\_OPL1013\_CvA\_pTyrIP\_blood\_patient\_bench\_D Scan : 28274

Andromeda score : 41.16

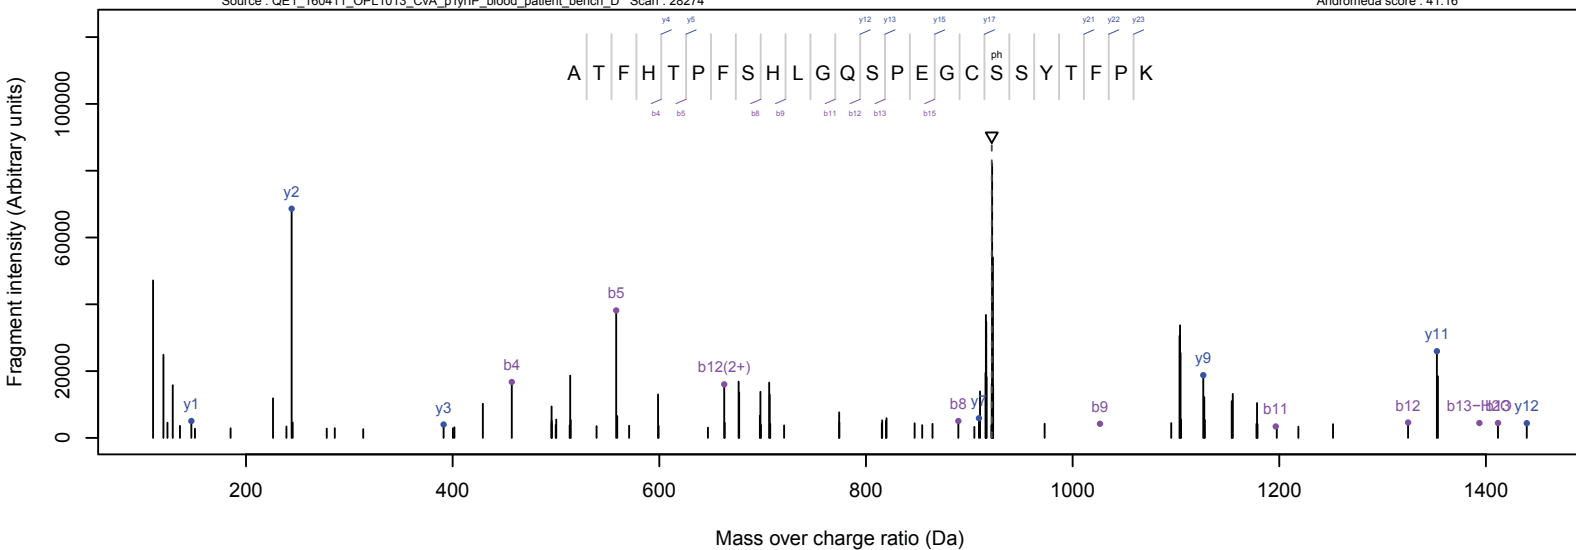

## YHGHS(ph)M(ox)SDPGVSY(ph)R-3+

Source : QE1\_160411\_OPL1013\_CvA\_pTyrIP\_blood\_patient\_bench\_C Scan : 3710

Andromeda score : 41.088

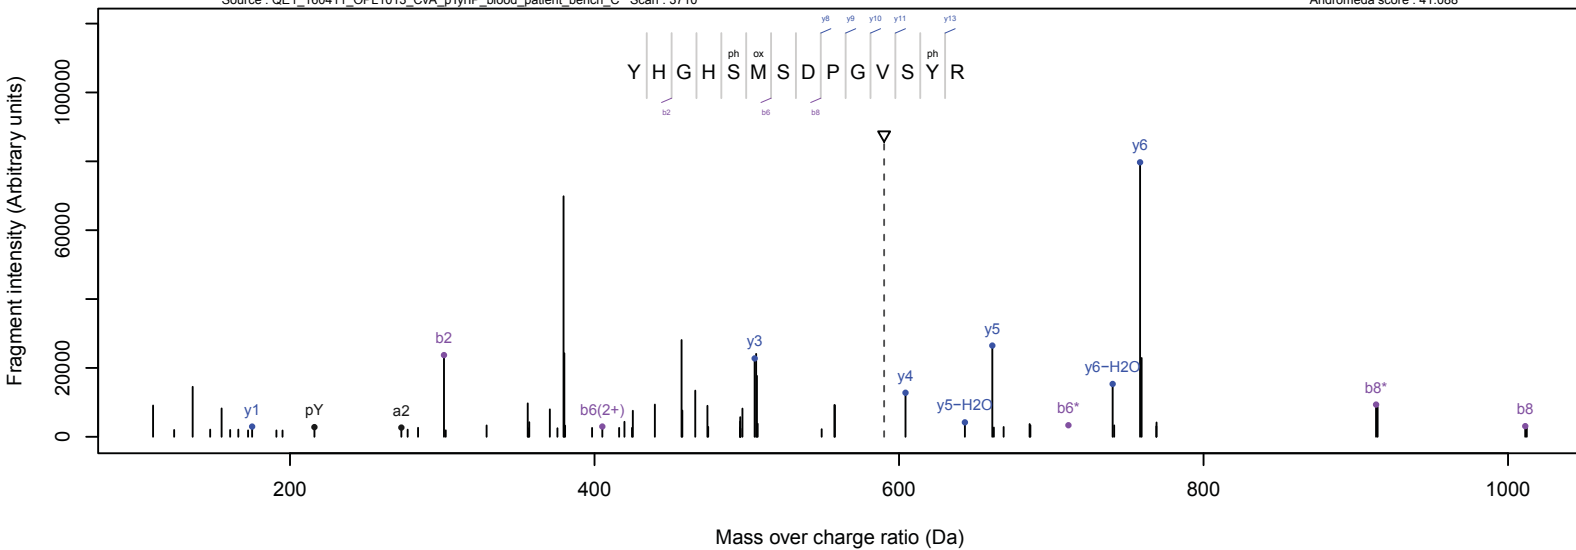



## TTLLY(ph)KLK-2+

Source: QE1\_160411\_OPL1013\_CvA\_pTyrIP\_blood\_patient\_bench\_C Scan: 18278

Andromeda score: 41.025

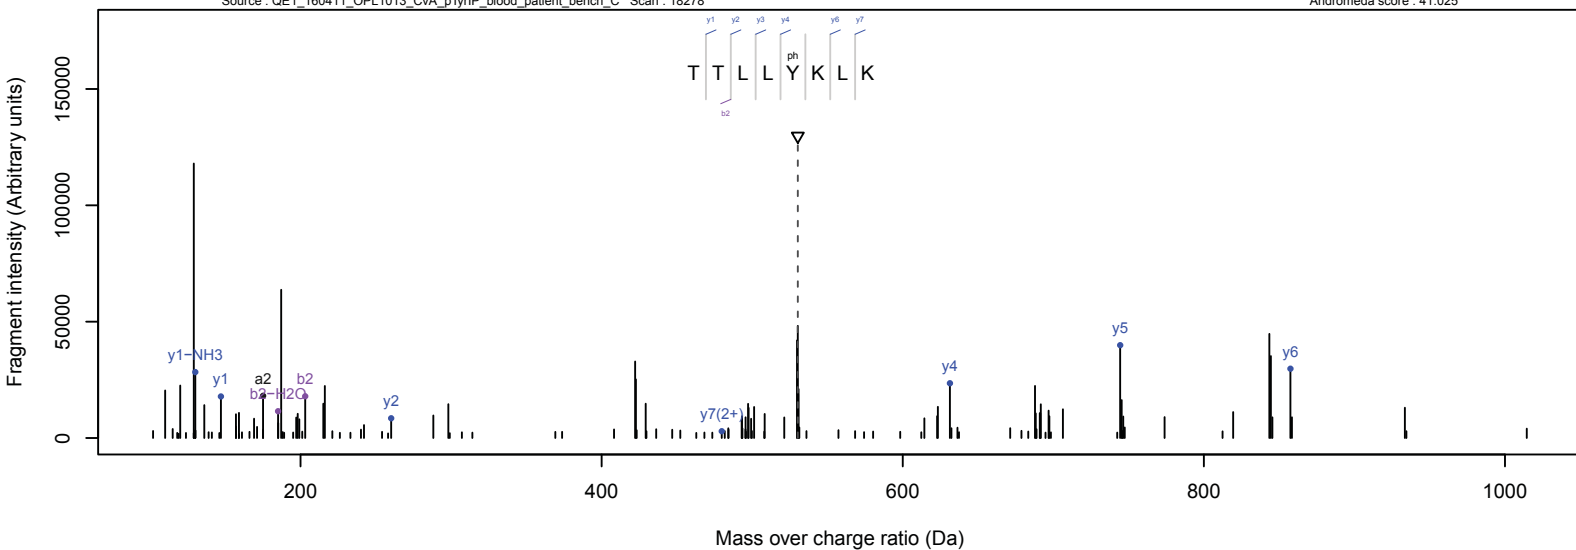

## EVHKQVSESAY(ph)EVIK-3+

Source: QE1\_160411\_OPL1013\_CvA\_pTyrIP\_blood\_patient\_bench\_D Scan: 16888

Andromeda score: 40.983

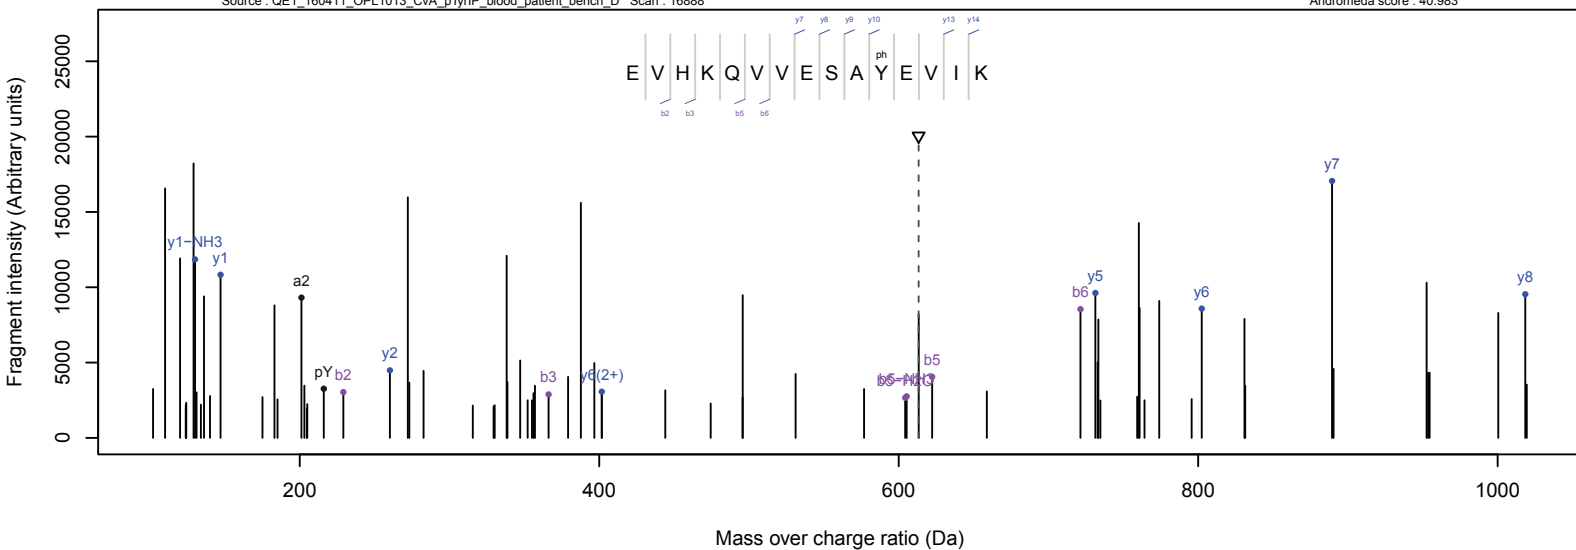

## VHQLY(ph)ETIQR-2+

Source: QE1\_160411\_OPL1013\_CvA\_pTyrIP\_blood\_patient\_bench\_D Scan: 9924

Andromeda score: 40.727

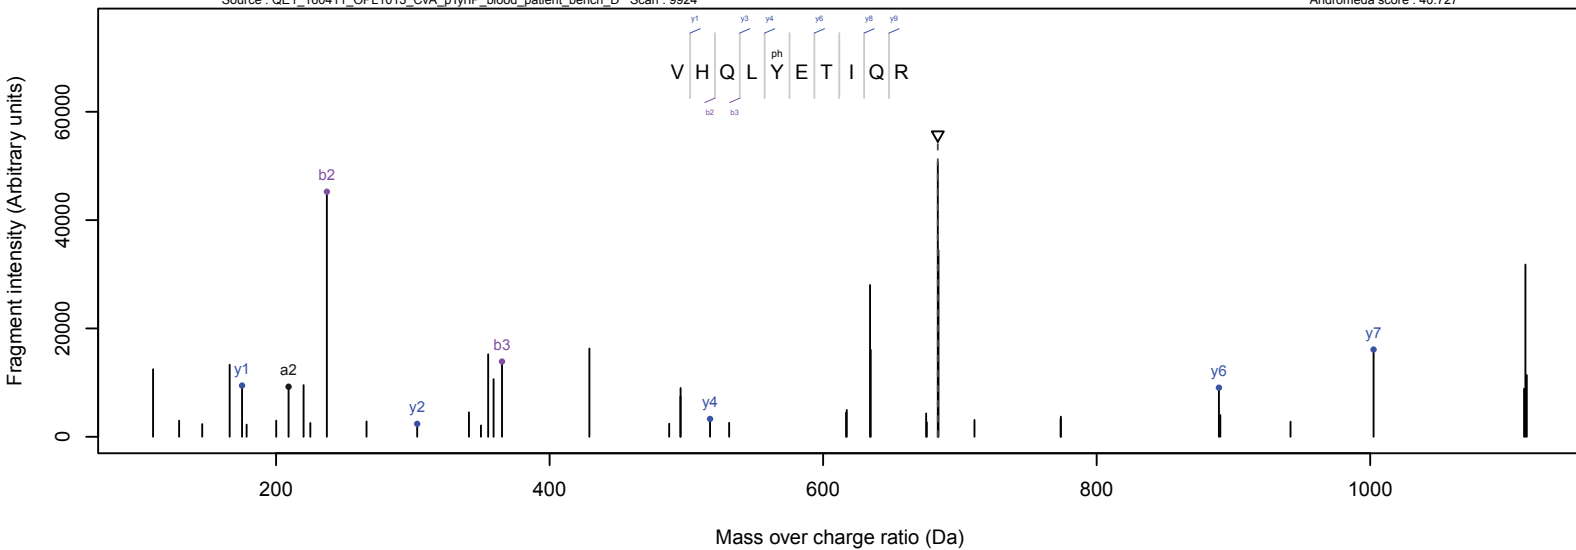

YQS(ph)FKER-2+

Source : QE1\_160411\_OPL1013\_CvA\_pTyrIP\_blood\_patient\_bench\_D Scan : 4611

Andromeda score : 40.573

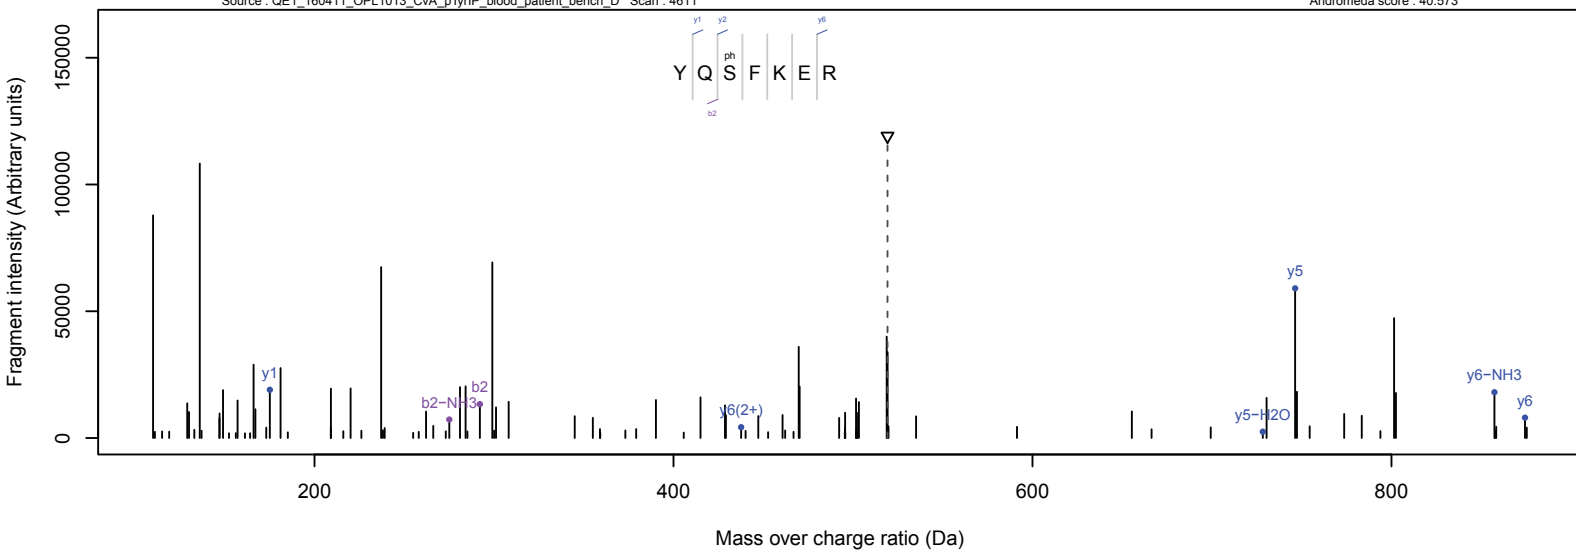

YSPIYSPDPYYASES(ph)EYWTYHGSPK-3+

Source : QE1\_160411\_OPL1013\_CvA\_pTyrIP\_blood\_patient\_bench\_D Scan : 34542

Andromeda score : 40.533

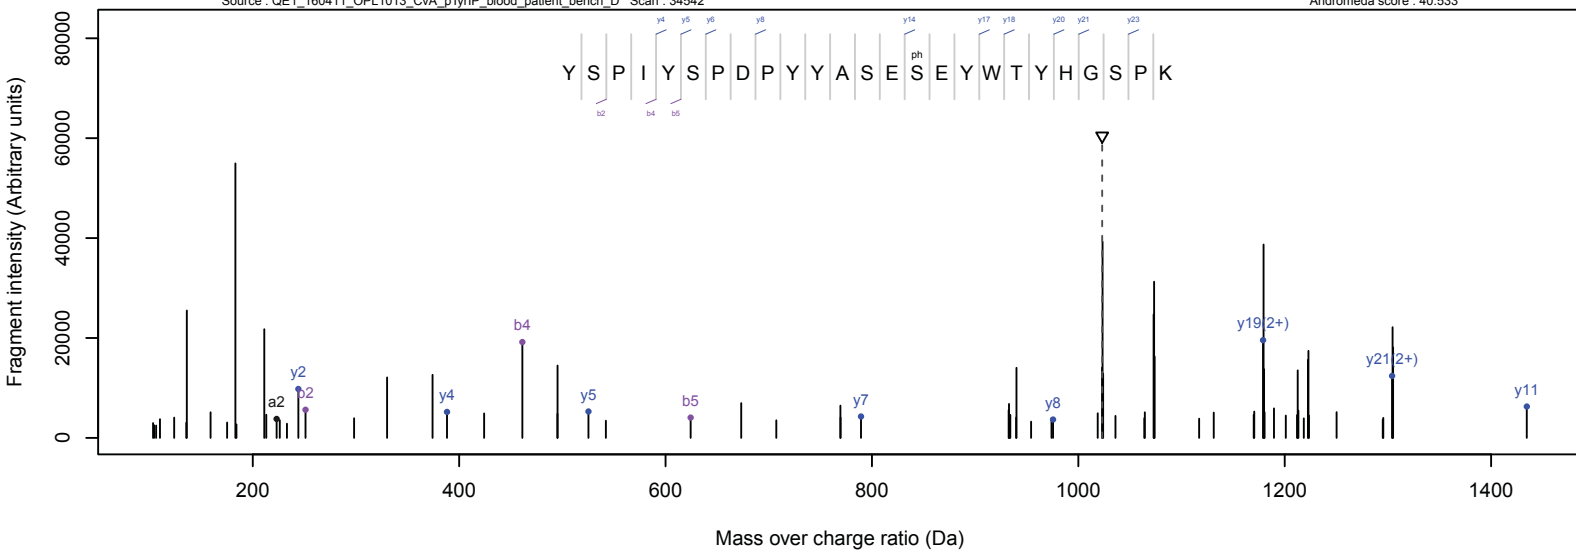

KLIY(ph)FQLHR-3+

Source : QE1\_160411\_OPL1013\_CvA\_pTyrIP\_blood\_patient\_bench\_C Scan : 24937

Andromeda score : 40.502

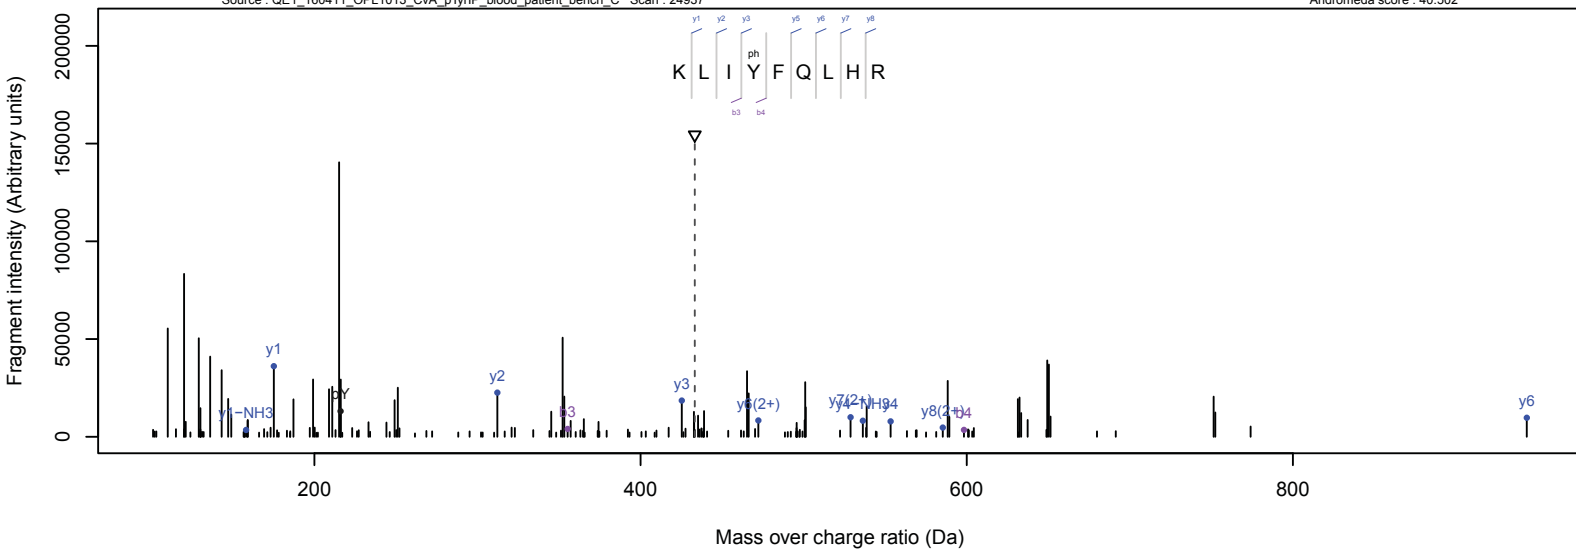

**Y(ph)RAQLLEPSK-2+**

Source : QE1\_160411\_OPL1013\_CvA\_pTyrIP\_blood\_patient\_bench\_B Scan : 9098

Andromeda score : 40.496

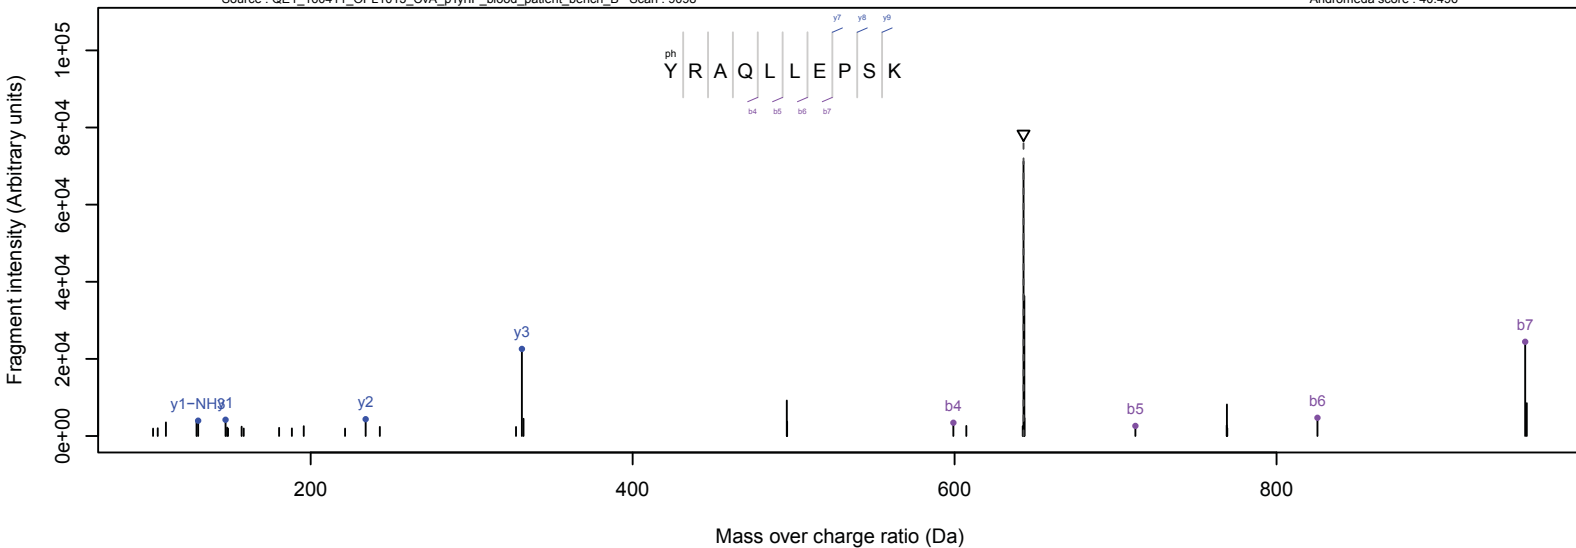

**GNNTHDNY(ph)ENVEAGPPK-3+**

Source : QE1\_160411\_OPL1013\_CvA\_pTyrIP\_blood\_patient\_bench\_C Scan : 6259

Andromeda score : 40.493

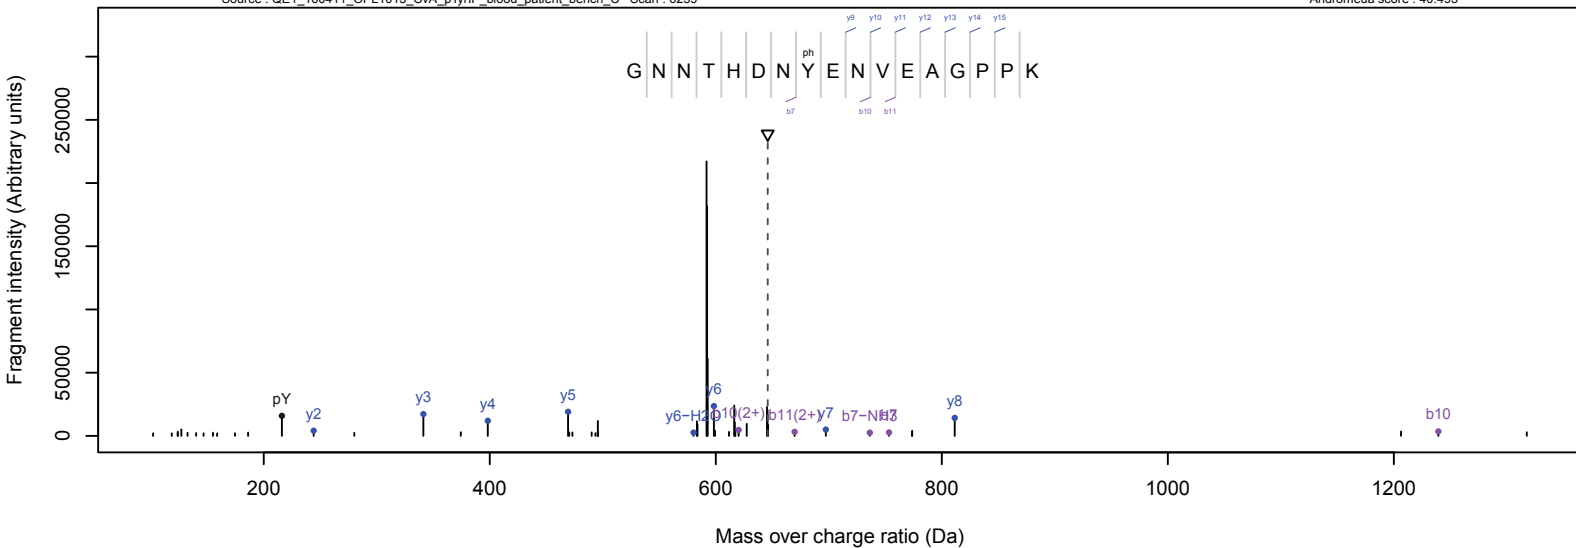

**LIVGLMRPPA(ph)CDAK-2+**

Source : QE1\_160411\_OPL1013\_CvA\_pTyrIP\_blood\_patient\_bench\_D Scan : 28747

Andromeda score : 40.278

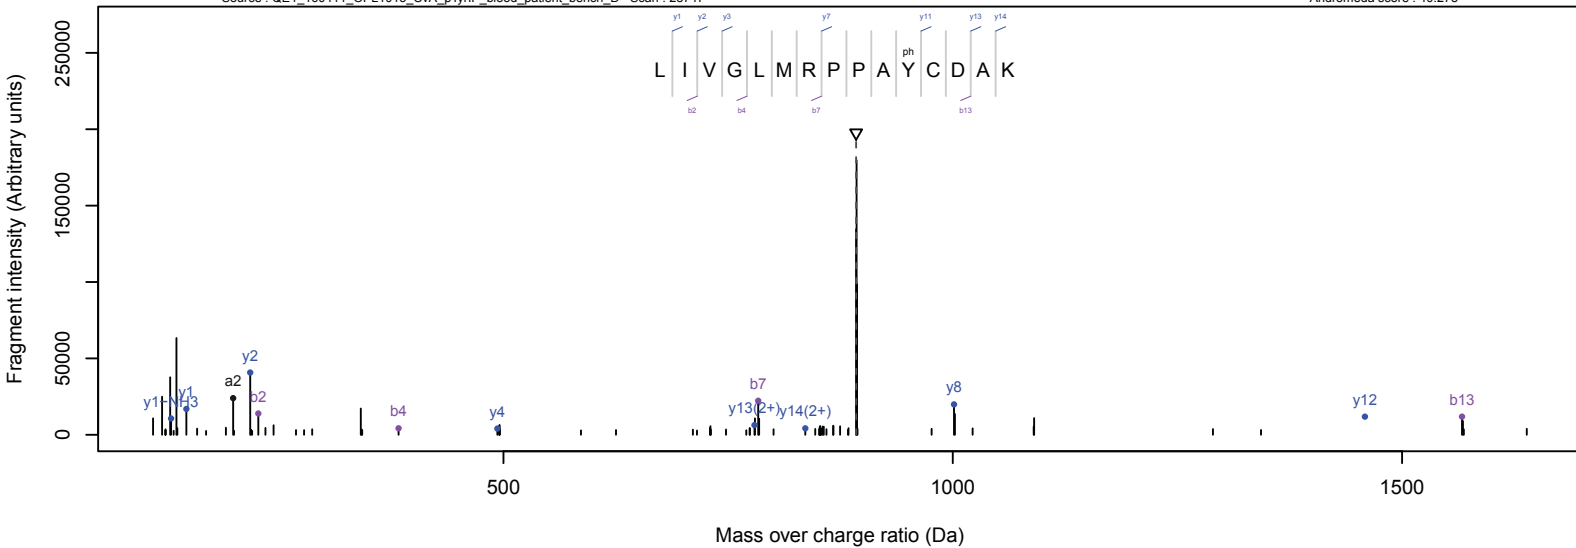

TLPEFIKGSSTYS(ph)K-3+

Source: QE1\_160411\_OPL1013\_CvA\_pTyrIP\_blood\_patient\_bench\_C Scan: 22376

Andromeda score: 40.278

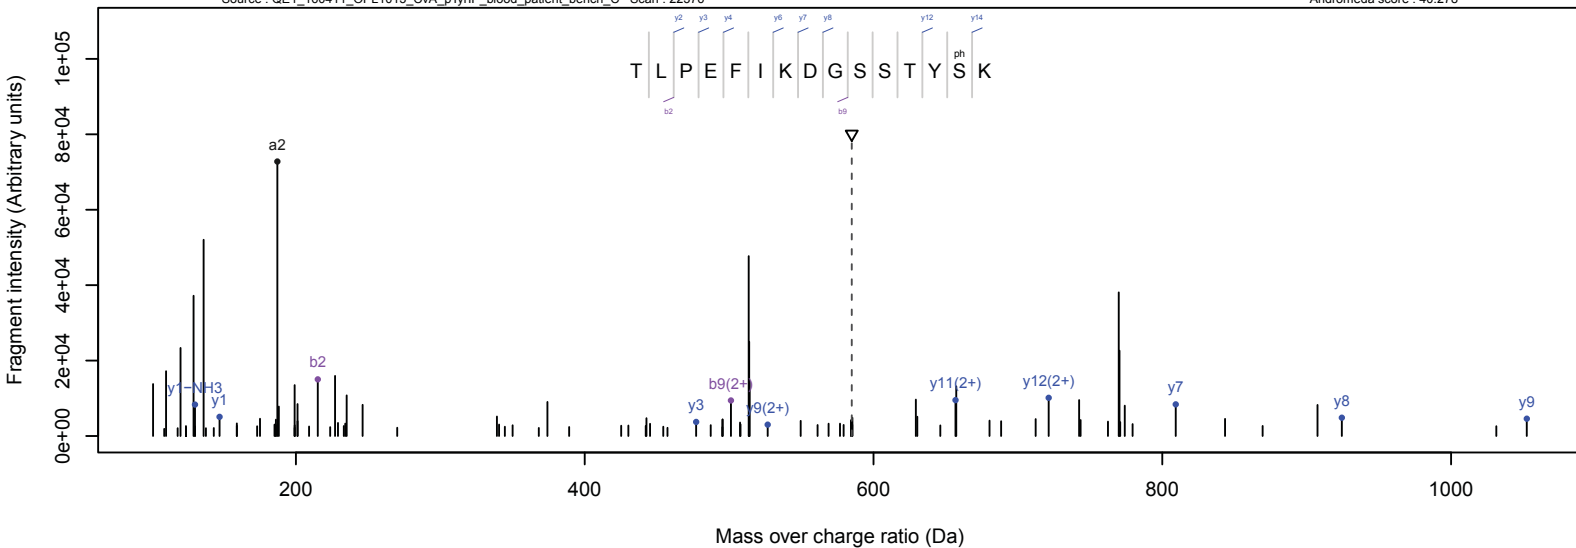

KGGS(ph)YSQAASSDSAQGS D VSLTACK-3+

Source: QE1\_160411\_OPL1013\_CvA\_pTyrIP\_blood\_patient\_bench\_D Scan: 9497

Andromeda score: 40.086

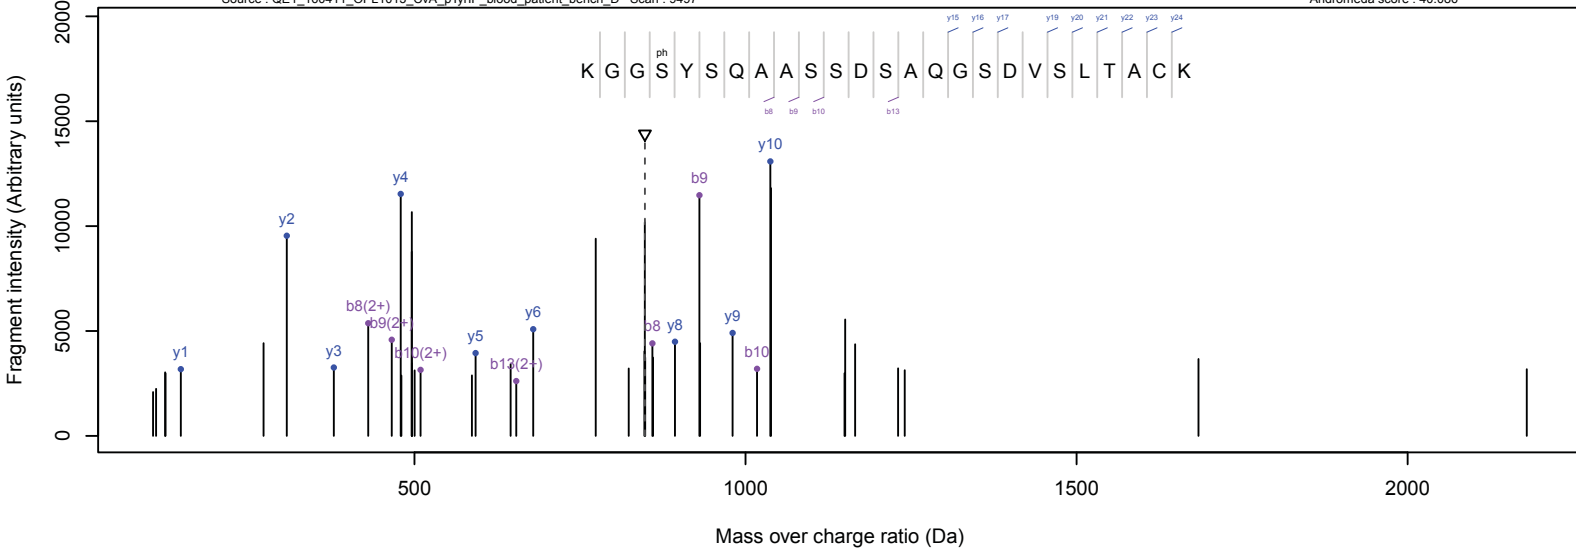

GY(ph)VPATIK-2+

Source: QE1\_160411\_OPL1013\_CvA\_pTyrIP\_blood\_patient\_bench\_D Scan: 9749

Andromeda score: 40.067

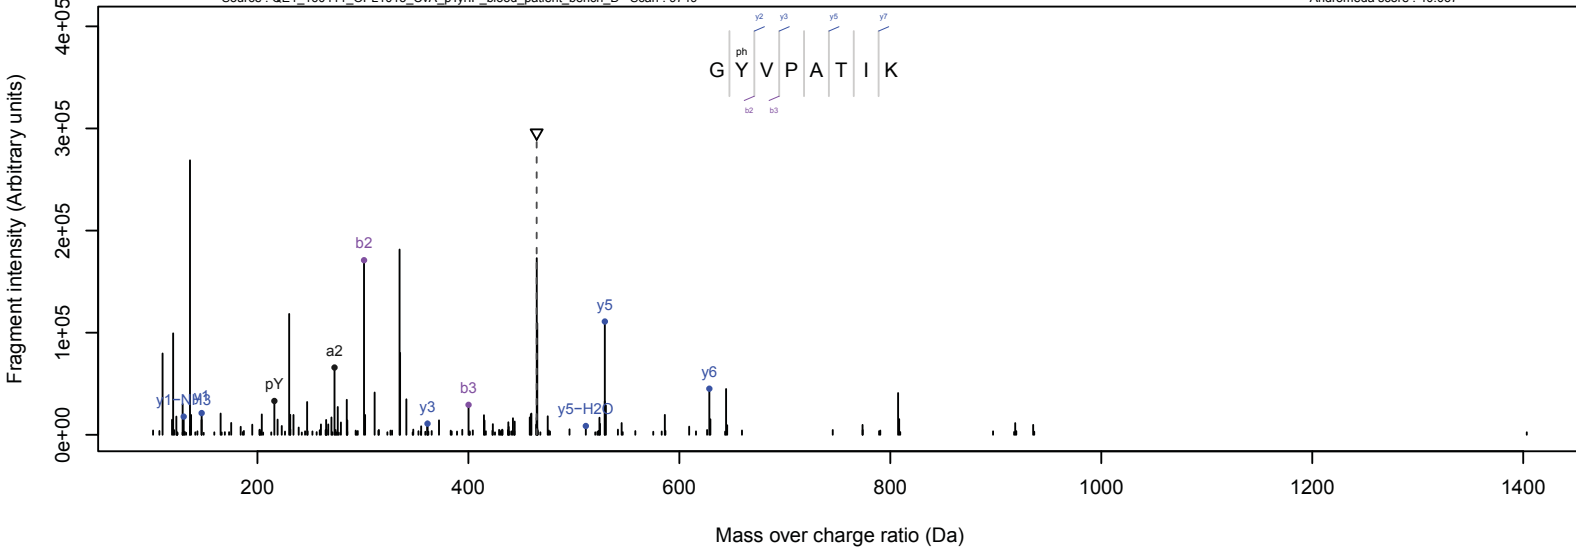

## SY(ph)VAWDR-2+

Source : QE1\_160411\_OPL1013\_CvA\_pTyrIP\_blood\_patient\_bench\_A Scan : 11808

Andromeda score : 40.067

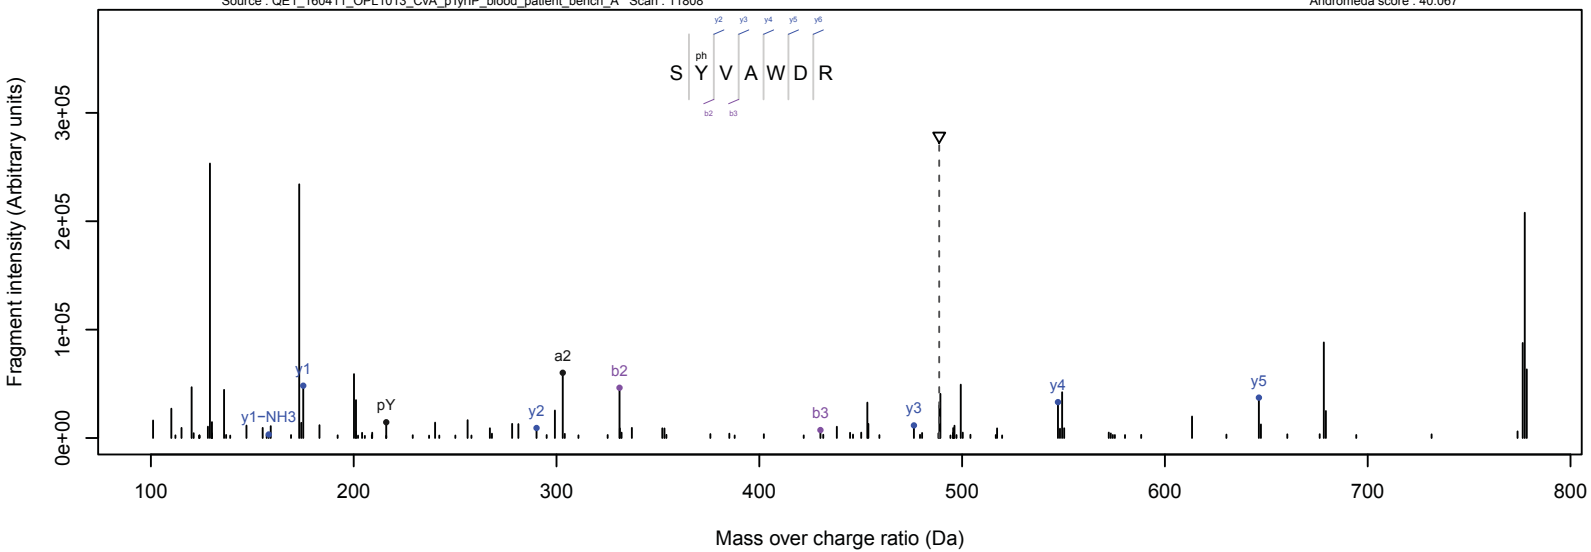

Supplement: 144954_3_supp_470454_q57xzb.pdf [file 144954_3_supp_470454_q57xzb.pdf]
